# Supplementary material for: MSC-Delivered Soluble TRAIL and Paclitaxel as Novel Combinatory Treatment for Pancreatic Adenocarcinoma
Source: PubMed Central journal article supplement — Theranostics. 2019 Jan 1;9(2):436–48. doi: 10.7150/thno.27576 (PMC6376176; doi:10.7150/thno.27576), 2019-01-01
Supplement: thnov09p0436s1.pdf [file thnov09p0436s1.pdf]

## **SUPPLEMENTARY MATERIALS AND METHODS**

### **Tissue culture**

PaTu 8988t cells (PaTu) were maintained in DMEM (Gibco, Thermo Fisher Scientific Inc., Waltham, MA, USA) integrated with 5% horse serum (Gibco), 5% FBS, 1% L-glutamine and 1% penicillin/streptomycin (all from Carlo Erba Reagents Srl, Cornaredo, Italy). CFPAC-1 cells were cultured in IMDM (Euroclone Spa, Milan, Italy) supplemented with 10% FBS, 1% penicillin/streptomycin and 2% L-glutamine (all from Carlo Erba Reagents Srl).

### **Microarray analysis**

Labelled cRNA was synthesized from 100 ng of total RNA using the Gene expression low input quick amp labelling Kit (Agilent Technologies, Palo Alto, CA, USA) in the presence of cyanine 3-CTP (Perkin-Elmer Life Sciences, Boston, MA, USA). Hybridizations were performed at 65 °C for 17 h in a rotating oven. Images at 3 µm resolution were generated by the Agilent scanner, and Feature Extraction 10.5 software (Agilent Technologies) was used to obtain the microarray raw data. RNA was hybridized on Agilent SurePrint G3 Human Gene Expression v3 8x60K Microarray Kit (#G4851C, Agilent Technologies). Microarray results were analyzed using the Qlucore Omics Explorer software (Qlucore). Percentile normalization was used. Experimental sessions data were grouped for both samples analysed and comparative analyses performed between samples.

## SUPPLEMENTARY FIGURES

### Supplementary Figure S1. Nab-Paclitaxel treatment is effective in restoring TRAIL sensitivity in resistant BXPC3 cell line

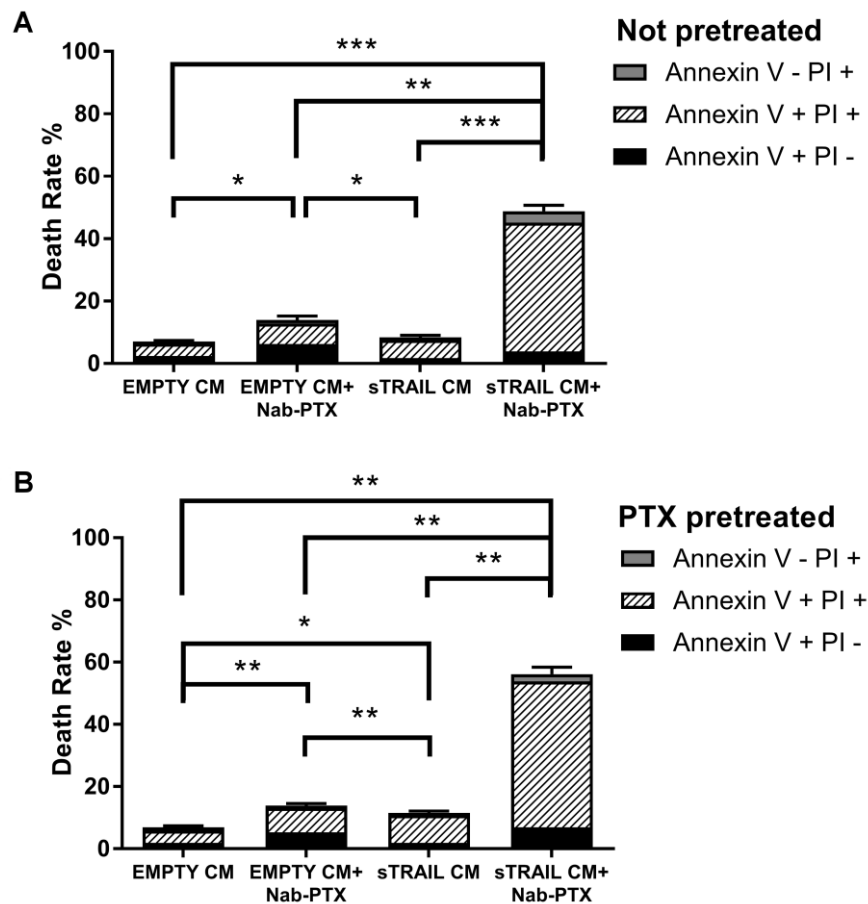

(A) *In vitro* combined treatment of sTRAIL-containing supernatant with Nab-PTX. PA clone cells were treated for 24 h with AD-MSC EMPTY derived conditioned medium (“EMPTY CM”) or AD-MSC sTRAIL derived conditioned medium (“sTRAIL CM”) or the same with 5 ng/ml PTX (“EMPTY CM+Nab-PTX” and “sTRAIL CM+Nab-PTX”). Death rate was evaluated by PI and Annexin V staining in flow cytometry. Death rate for EMPTY CM was  $7.0 \pm 0.4\%$ , for EMPTY CM+Nab-PTX was  $14.0 \pm 1.3\%$ , for sTRAIL CM was  $8.4 \pm 0.7\%$ , for sTRAIL CM+Nab-PTX was  $48.8 \pm 2.0\%$  (B) Pre-treatment strategy included a 24 h incubation with 5 ng/ml PTX for EMPTY CM+Nab-PTX and sTRAIL CM+Nab-PTX groups. The subsequent treatment was performed as in “A” for a further 24 h. Death rate for EMPTY was  $6.9 \pm 0.5\%$ , for EMPTY CM+Nab-PTX was  $13.9 \pm 0.6\%$ , for sTRAIL CM was  $11.6 \pm 0.6\%$ , for sTRAIL CM+Nab-PTX was  $56.2 \pm 2.3\%$ . All data are represented as the mean

of two independent experiments performed in triplicate. \*  $p < 0.05$ , \*\*  $p < 0.01$ , \*\*\*  $p < 0.001$  by Student's T-Test.

### Supplementary Figure S2. Nab-Paclitaxel impact on AD-MSC

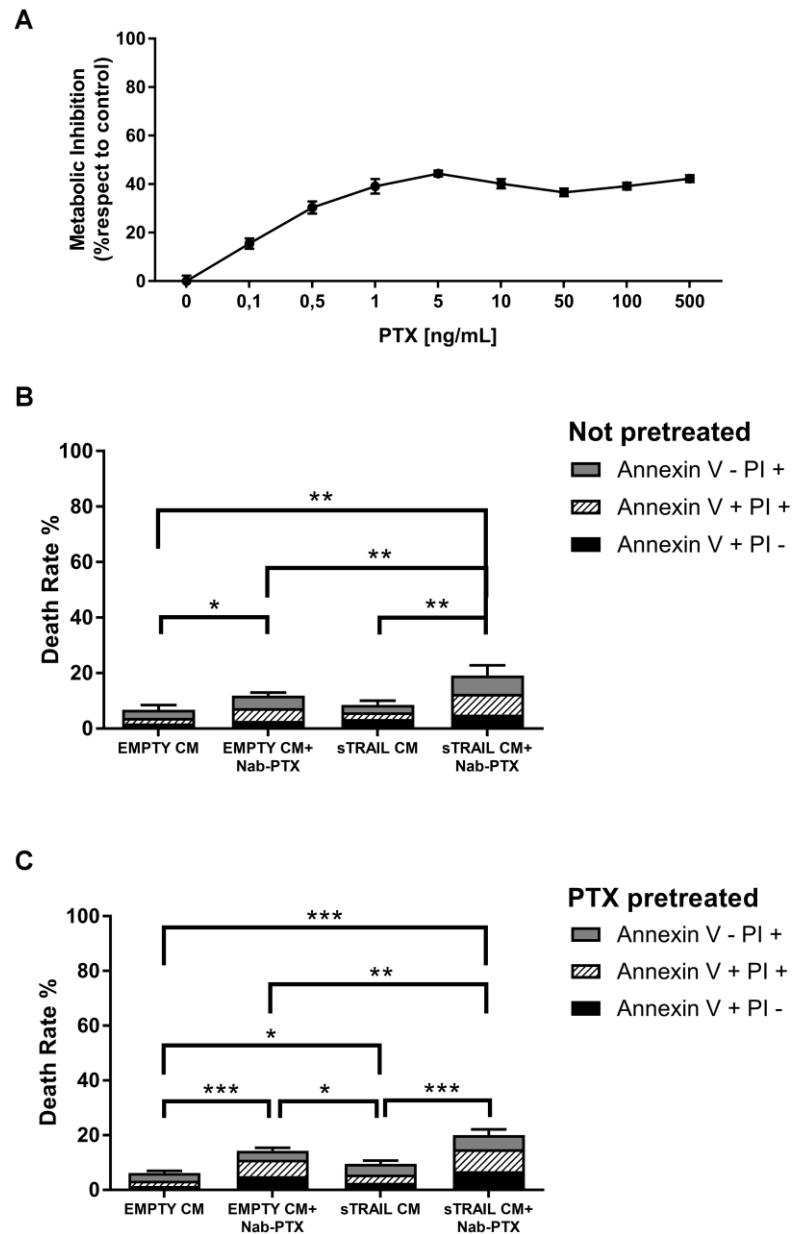

(A) Nab-PTX dose-response assay for AD-MSC EMPTY by MTS. Cells were treated with a range of concentrations of PTX for 72 h observing a reduction in metabolic activity which reaches a plateau level of 50% at the dose of 5 ng/mL. (B) *In vitro* combined treatment of sTRAIL-containing supernatant with Nab-PTX. AD-MSC EMPTY cells were treated for 24 h with AD-MSC EMPTY

derived conditioned medium (EMPTY CM) or AD-MSC sTRAIL derived conditioned medium (sTRAIL CM) or the same with 5 ng/mL PTX (EMPTY CM+Nab-PTX and sTRAIL CM+Nab-PTX). Death rate was evaluated by PI and Annexin V staining in flow cytometry. Death rate for EMPTY CM was  $6.8\pm 1.7\%$ , for EMPTY CM+Nab-PTX was  $7.4\pm 1.1\%$ , for sTRAIL CM was  $8.6\pm 1.5\%$ , for sTRAIL CM+Nab-PTX was  $19.1\pm 3.7\%$ . (C) Pre-treatment strategy included a 24 h incubation with 5 ng/ml PTX for EMPTY CM+Nab-PTX and sTRAIL CM+Nab-PTX groups. The subsequent treatment was performed as in "B" for a further 24 h. Death rate for EMPTY was  $3.4\pm 0.8\%$ , for EMPTY CM+Nab-PTX was  $14.3\pm 1.1\%$ , for sTRAIL CM was  $5.6\pm 1.1\%$ , for sTRAIL CM+Nab-PTX was  $14.9\pm 2.1\%$ . All data are represented as the mean of two independent experiments performed in triplicate. \*  $p<0.05$ , \*\*  $p<0.01$ , \*\*\*  $p<0.001$  by Student's T-Test.

**Supplementary Figure S3.** sTRAIL and PTX combinatory treatment on PaTu and CF-PAC pancreatic cancer cell lines

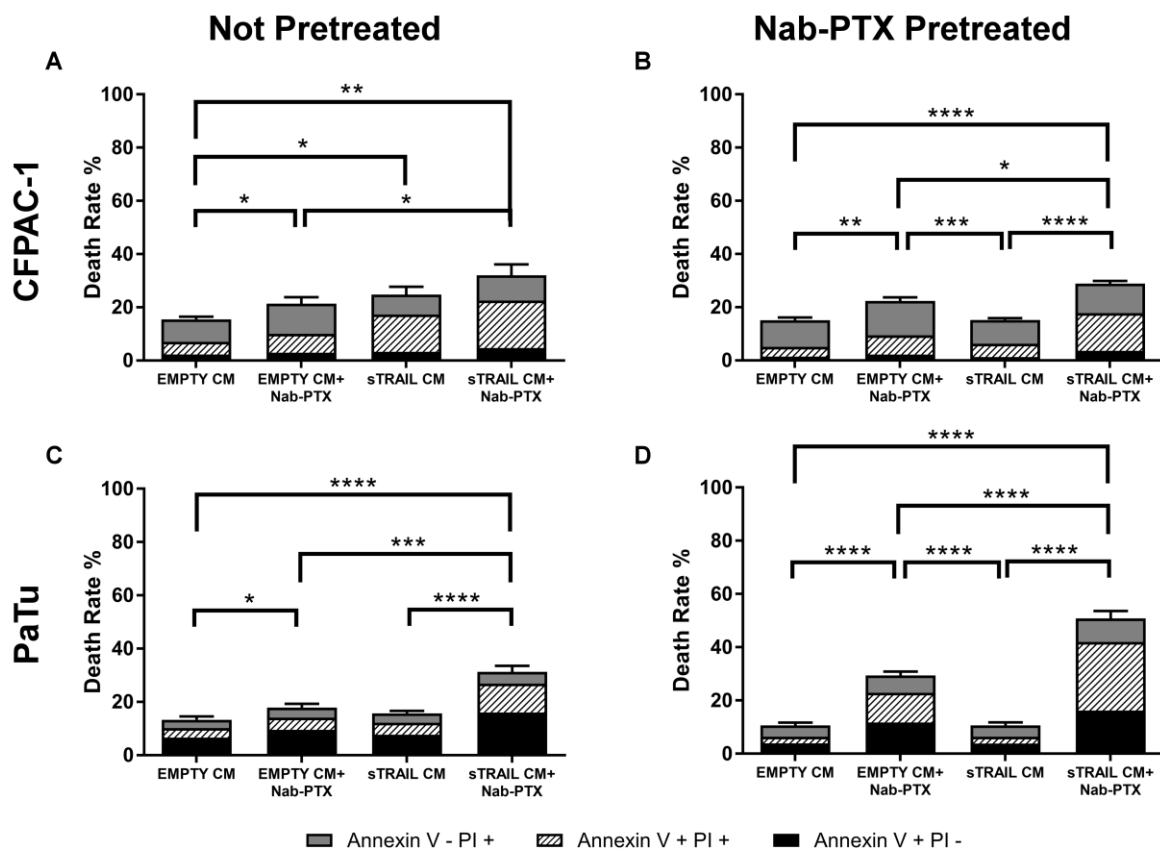

*In vitro* combined treatment of sTRAIL-containing supernatant with Nab-PTX. CFPAC-1 and PaTu cell lines have been treated for 24 h with AD-MSC EMPTY derived conditioned medium (EMPTY CM) or AD-MSC sTRAIL derived conditioned medium (sTRAIL CM) or the same with 5 ng/mL PTX (EMPTY CM+Nab-PTX and sTRAIL CM+Nab-PTX). Pre-treatment strategy included a 24 h incubation with 5 ng/ml PTX for EMPTY CM+Nab-PTX and sTRAIL CM+Nab-PTX groups. The subsequent treatment was performed as above for a further 24 h. Death rate was evaluated by PI and Annexin V staining in flow cytometry. A) in the CFPAC-1 line, sTRAIL alone induced 24.8±3.0% of death, while the combination with Nab-PTX generated a higher, although modest, cell death (32.0±4.1% versus 15.5±1.0% of CFPAC-1 basal mortality and 21.4±2.4% due to Nab-PTX). B) In the setting when 24 h of Nab-PTX pretreatment was applied we observed a 28.9±1.0% mortality rate in combination with sTRAIL and Nab-PTX, greater than the 15.2±0.9% observed with sTRAIL alone. In this setting Nab-PTX produced 22.4±1.3% death rate while basal mortality was

again  $15.2\pm 0.9\%$ . C) PaTu cells showed a higher resistance to sTRAIL alone with only  $15.7\pm 0.9\%$  cell death, while EMPTY CM-treated cells showed  $13.3\pm 1.2\%$  mortality. Treatment with Nab-PTX alone resulted in  $17.9\pm 1.4\%$  mortality while the combined treatment reached  $31.3\pm 2.3\%$  cell death. D) In the setting with 24 h of Nab-PTX pretreatment, EMPTY CM-treated PaTu cells showed  $10.6\pm 1.0\%$  death rate, almost identical to sTRAIL CM-treated cells ( $10.6\pm 1.2\%$ ). We observed an increase of in Nab-PTX death rate ( $29.4\pm 1.5\%$ ) and, most importantly, we obtained a very relevant increase in cytotoxicity with the combined treatment, reaching  $50.1\pm 2.8\%$ . All data are represented as the mean of two independent experiments performed in triplicate. \*  $p<0.05$ , \*\*  $p<0.01$ , \*\*\*  $p<0.001$ ; \*\*\*\*  $p<0.0001$  by Student's T-Test.

**Supplementary Table S1. Microarray analysis BXPC3 PA vs BXPC3 WT**

Gene expression is quantile normalized and log2 transformed

| ProbeName      | BXPC3 PA | BXPC3 WT | Fold Change | EnsemblID       | EntrezGeneID | GenbankAccession | GeneSymbol            |
|----------------|----------|----------|-------------|-----------------|--------------|------------------|-----------------------|
| A_21_P0012278  | 14,7646  | 1,47279  | 10028,44291 | ENST00000434304 | N/A          | N/A              | N/A                   |
| A_23_P321846   | 8,77103  | 1,70557  | 133,9415724 | ENST00000306117 | 3787         | NM_002251        | KCNS1                 |
| A_21_P0012304  | 7,87208  | 1,62644  | 75,87959114 | ENST00000558085 | N/A          | N/A              | N/A                   |
| A_21_P0006775  | 11,3331  | 5,50387  | 56,85557835 | ENST00000432108 | N/A          | N/A              | N/A                   |
| A_23_P28466    | 8,12938  | 2,45732  | 50,98708661 | ENST00000309931 | 164781       | NM_178821        | DAW1                  |
| A_33_P3319987  | 7,2656   | 1,71922  | 46,73333209 | N/A             | 256380       | NM_198081        | SCML4                 |
| A_22_P00000987 | 6,82282  | 1,6803   | 35,32260895 | ENST00000624974 | 439949       | N/A              | PRKCQ-AS1             |
| A_21_P0007364  | 7,83997  | 2,87767  | 31,1746185  | N/A             | N/A          | N/A              | lnc-CFL1-1            |
| A_23_P151975   | 9,63684  | 4,77168  | 29,14466674 | ENST00000558360 | 51458        | NM_016321        | RHCG                  |
| A_21_P0011496  | 8,0144   | 3,22501  | 27,65349648 | ENST00000566467 | 1066         | NM_001025195     | CES1                  |
| A_23_P35277    | 6,42687  | 1,81361  | 24,47539096 | ENST00000361539 | 57795        | NM_021165        | BRINP2                |
| A_33_P3241269  | 11,544   | 6,95703  | 24,03341906 | ENST00000421606 | 1066         | NM_001025195     | CES1                  |
| A_24_P332857   | 6,56012  | 2,05642  | 22,68552276 | ENST00000419982 | 255313       | NM_173571        | CT47A11               |
| A_23_P501933   | 7,66649  | 3,23507  | 21,57696432 | ENST00000352529 | 59285        | NM_145814        | CACNG6                |
| A_23_P111311   | 9,3036   | 4,92108  | 20,85787097 | ENST00000253332 | 9590         | NM_144497        | AKAP12                |
| A_32_P152437   | 12,4503  | 8,07776  | 20,71408229 | ENST00000402676 | 9590         | NM_005100        | AKAP12                |
| A_23_P310956   | 6,30326  | 1,957    | 20,34017237 | ENST00000310645 | 1292         | NM_058175        | COL6A2                |
| A_22_P00013600 | 5,73896  | 1,44236  | 19,65194226 | N/A             | N/A          | N/A              | lnc-RP11-521M14.2.1-1 |
| A_22_P00007266 | 5,56366  | 1,3683   | 18,32015748 | N/A             | N/A          | N/A              | lnc-GPR151-1          |
| A_33_P3231247  | 5,67756  | 1,4825   | 18,31634831 | ENST00000620151 | N/A          | N/A              | N/A                   |
| A_21_P0006146  | 6,85121  | 2,68581  | 17,94363159 | N/A             | 101927042    | XR_242550        | LOC101927042          |
| A_32_P27917    | 6,54984  | 2,41249  | 17,5981272  | N/A             | 26153        | NM_015656        | KIF26A                |
| A_22_P00019236 | 6,6211   | 2,48607  | 17,56985037 | N/A             | N/A          | N/A              | lnc-BTC-5             |
| A_22_P00022705 | 5,67905  | 1,5544   | 17,44389129 | ENST00000419614 | N/A          | N/A              | N/A                   |
| A_23_P214897   | 12,4247  | 8,36438  | 16,6831522  | ENST00000490177 | 9590         | NM_144497        | AKAP12                |
| A_33_P3232334  | 6,44176  | 2,42056  | 16,23685149 | ENST00000430461 | 100131755    | N/A              | ARMCX4                |
| A_23_P314755   | 7,91522  | 3,92878  | 15,85031932 | ENST00000290271 | 6781         | NM_003155        | STC1                  |
| A_22_P00013564 | 5,60962  | 1,62415  | 15,8396659  | ENST00000510570 | N/A          | N/A              | N/A                   |
| A_23_P104996   | 5,38764  | 1,50924  | 14,70668313 | ENST00000524877 | 7439         | NM_004183        | BEST1                 |

|                |         |         |             |                 |           |              |                |
|----------------|---------|---------|-------------|-----------------|-----------|--------------|----------------|
| A_21_P0013183  | 5,27775 | 1,44701 | 14,22877938 | N/A             | N/A       | N/A          | XLOC_I2_013302 |
| A_21_P0010131  | 5,39385 | 1,61116 | 13,76268451 | ENST00000442550 | 54088     | NR_024357    | LINC00113      |
| A_21_P0008983  | 5,51812 | 1,74015 | 13,71773133 | N/A             | N/A       | N/A          | Inc-KIAA0513-1 |
| A_33_P3265514  | 8,2033  | 4,44389 | 13,54238561 | ENST00000618007 | 7179      | NM_199261    | TPTE           |
| A_33_P3556532  | 6,68075 | 2,93867 | 13,38068436 | ENST00000587177 | 8632      | N/A          | DNAH17         |
| A_21_P0008397  | 5,18777 | 1,51073 | 12,79084792 | N/A             | N/A       | N/A          | Inc-EIF5-1     |
| A_21_P0005791  | 5,07439 | 1,42885 | 12,51459762 | N/A             | N/A       | N/A          | Inc-ANGPT2-5   |
| A_21_P0002153  | 5,69171 | 2,05244 | 12,46032679 | N/A             | N/A       | N/A          | Inc-ACP1-6     |
| A_32_P3955     | 6,54912 | 2,93579 | 12,23828927 | ENST00000348904 | 136288    | NM_001100159 | C7orf57        |
| A_21_P0009773  | 7,0078  | 3,40534 | 12,14642627 | N/A             | N/A       | N/A          | Inc-BBC3-1     |
| A_23_P51126    | 11,5452 | 8,03958 | 11,35786686 | ENST00000427077 | 9173      | NM_016232    | IL1RL1         |
| A_24_P356916   | 9,54246 | 6,03925 | 11,33890955 | ENST00000279027 | 64849     | NM_001011554 | SLC13A3        |
| A_33_P3419485  | 4,91329 | 1,44266 | 11,08571563 | N/A             | N/A       | BX106402     | N/A            |
| A_21_P0000160  | 8,81306 | 5,41536 | 10,53924781 | ENST00000273695 | 116211    | NM_138461    | TM4SF19        |
| A_24_P51909    | 7,06787 | 3,69155 | 10,38421317 | ENST00000304062 | 10815     | NM_006651    | CPLX1          |
| A_32_P219660   | 6,66152 | 3,2909  | 10,34326672 | ENST00000615379 | 30014     | NM_013453    | SPANXA1        |
| A_33_P3394727  | 7,68734 | 4,33998 | 10,17784344 | ENST00000522079 | 10656     | NM_006558    | KHDRBS3        |
| A_21_P0004566  | 6,74091 | 3,39808 | 10,14593558 | N/A             | N/A       | N/A          | Inc-ARRDC3-1   |
| A_19_P00315773 | 6,47503 | 3,13852 | 10,10158659 | ENST00000495228 | 344595    | N/A          | LINC00883      |
| A_33_P3417432  | 5,66304 | 2,33561 | 10,03820911 | N/A             | 100129098 | XM_001714893 | LOC100129098   |
| A_32_P116556   | 8,38545 | 5,11247 | 9,666408741 | ENST00000437464 | 84627     | NM_001127464 | ZNF469         |
| A_21_P0011280  | 6,65007 | 3,39863 | 9,523157546 | ENST00000229465 | 400221    | N/A          | FLJ22447       |
| A_33_P3211608  | 4,72176 | 1,47116 | 9,517614362 | ENST00000427077 | 9173      | NR_104167    | IL1RL1         |
| A_23_P75800    | 6,93197 | 3,71345 | 9,308314785 | ENST00000394836 | 5866      | NM_013401    | RAB3IL1        |
| A_21_P0000590  | 4,78931 | 1,58186 | 9,237164112 | N/A             | 9839      | NR_033258    | ZEB2           |
| A_21_P0007326  | 4,62159 | 1,41868 | 9,208141479 | N/A             | N/A       | N/A          | Inc-FANCF-1    |
| A_23_P148541   | 10,56   | 7,37736 | 9,079670857 | ENST00000328435 | 246100    | NM_139250    | CTAG1A         |
| A_33_P3347397  | 4,65236 | 1,47679 | 9,035284319 | ENST00000371962 | 154796    | NM_001113490 | AMOT           |
| A_22_P00009501 | 4,91421 | 1,74318 | 9,00689598  | ENST00000518217 | N/A       | N/A          | N/A            |
| A_33_P3407339  | 5,09912 | 1,96314 | 8,790711875 | ENST00000392500 | 387119    | NM_206921    | CEP85L         |
| A_24_P462853   | 4,53832 | 1,40392 | 8,781089798 | ENST00000431296 | 387644    | NR_026795    | LINC00202-1    |
| A_21_P0000640  | 5,48849 | 2,36742 | 8,700329259 | N/A             | 728192    | N/A          | LINC00460      |
| A_33_P3211268  | 6,8642  | 3,76144 | 8,590606561 | ENST00000527691 | 54865     | AK301232     | GPATCH4        |



|                |         |         |             |                 |           |              |                    |
|----------------|---------|---------|-------------|-----------------|-----------|--------------|--------------------|
| A_21_P0007962  | 4,96633 | 1,87484 | 8,523760164 | ENST00000439790 | 728192    | NR_034119    | LINC00460          |
| A_22_P00002184 | 5,59266 | 2,52771 | 8,368389487 | N/A             | N/A       | N/A          | lnc-BTC-5          |
| A_23_P301304   | 7,54713 | 4,49132 | 8,31554027  | ENST00000526570 | 2260      | NM_023110    | FGFR1              |
| A_23_P41344    | 12,1767 | 9,12566 | 8,2880919   | ENST00000244869 | 2069      | NM_001432    | EREG               |
| A_33_P3389704  | 4,89151 | 1,84886 | 8,240032342 | ENST00000566555 | 1066      | NM_001266    | CES1               |
| A_23_P102731   | 12,7058 | 9,66447 | 8,232496537 | ENST00000621355 | 54498     | NM_175839    | SMOX               |
| A_33_P3282634  | 7,91648 | 4,877   | 8,221946589 | ENST00000552270 | 160428    | NM_001034173 | ALDH1L2            |
| A_22_P00020093 | 9,00054 | 5,97219 | 8,158760552 | ENST00000429352 | N/A       | N/A          | N/A                |
| A_32_P140030   | 4,43952 | 1,44044 | 7,994900063 | ENST00000299162 | 121643    | NM_213596    | FOXN4              |
| A_23_P253350   | 10,5762 | 7,58439 | 7,954713661 | ENST00000315792 | 56892     | NM_020130    | C8orf4             |
| A_33_P3387548  | 6,41122 | 3,42327 | 7,933458888 | ENST00000416405 | 26080     | NR_027278    | FAM230C            |
| A_22_P00017981 | 4,60283 | 1,61772 | 7,917856935 | N/A             | N/A       | AF086361     | lnc-ZMYM2-4        |
| A_24_P256018   | 7,55459 | 4,57047 | 7,912425441 | ENST00000415338 | N/A       | XM_005245702 | N/A                |
| A_33_P3763412  | 5,95167 | 2,98236 | 7,831615846 | ENST00000457033 | 102724434 | AK097428     | LOC102724434       |
| A_33_P3293888  | 6,19959 | 3,23467 | 7,807821117 | ENST00000342251 | 2334      | NM_002025    | AFF2               |
| A_23_P369899   | 9,66374 | 6,69884 | 7,807712878 | ENST00000503771 | 25907     | NM_015444    | TMEM158            |
| A_33_P3234550  | 4,51535 | 1,55669 | 7,774015585 | ENST00000419960 | N/A       | N/A          | N/A                |
| A_21_P0002532  | 4,77753 | 1,82273 | 7,753243633 | N/A             | N/A       | N/A          | lnc-AC073043.2.1-1 |
| A_33_P3391796  | 6,48025 | 3,54556 | 7,645919442 | ENST00000332822 | 9241      | NM_005450    | NOG                |
| A_23_P161624   | 12,7107 | 9,78194 | 7,614556441 | ENST00000312562 | 8061      | NM_005438    | FOSL1              |
| A_33_P3253975  | 10,8535 | 7,92639 | 7,605852705 | ENST00000533610 | 38        | NM_000019    | ACAT1              |
| A_21_P0008993  | 4,32891 | 1,42444 | 7,487426833 | N/A             | N/A       | N/A          | lnc-JPH3-1         |
| A_33_P3318343  | 8,95105 | 6,05123 | 7,4633327   | ENST00000369585 | 30848     | NM_020994    | CTAG2              |
| A_21_P0013426  | 5,50835 | 2,61047 | 7,45330346  | ENST00000422212 | 650226    | NR_029420    | LOC650226          |
| A_23_P24515    | 14,0506 | 11,153  | 7,451857055 | ENST00000533597 | 38        | NM_000019    | ACAT1              |
| A_21_P0006873  | 4,34674 | 1,45191 | 7,437563084 | N/A             | N/A       | N/A          | lnc-MTRNR2L5-3     |
| A_21_P0003720  | 4,36051 | 1,46861 | 7,422473307 | ENST00000506195 | N/A       | N/A          | N/A                |
| A_21_P0000040  | 8,32787 | 5,44822 | 7,35971551  | N/A             | 9841      | NM_001164313 | ZBTB24             |
| A_24_P54390    | 4,36869 | 1,50536 | 7,276930339 | ENST00000407811 | 25780     | NM_170672    | RASGRP3            |
| A_23_P57474    | 7,94355 | 5,09108 | 7,22235833  | ENST00000332585 | 23762     | NM_030758    | OSBP2              |
| A_23_P42868    | 4,82469 | 1,97748 | 7,196073888 | ENST00000275525 | 3484      | NM_000596    | IGFBP1             |
| A_33_P3307535  | 4,35539 | 1,51304 | 7,171873293 | ENST00000615181 | 26080     | NR_027278    | FAM230C            |
| A_23_P372946   | 9,25333 | 6,41213 | 7,166158732 | ENST00000442633 | 116211    | NM_138461    | TM4SF19            |

|                |         |         |             |                 |           |              |                |
|----------------|---------|---------|-------------|-----------------|-----------|--------------|----------------|
| A_22_P00005343 | 12,3994 | 9,56459 | 7,134488496 | ENST00000506387 | 3755      | NM_002237    | KCNG1          |
| A_24_P355944   | 12,9866 | 10,1608 | 7,090070633 | ENST00000245323 | 1948      | NM_004093    | EFNB2          |
| A_21_P0004240  | 4,47638 | 1,65827 | 7,05237896  | N/A             | N/A       | N/A          | Inc-WDR70-3    |
| A_24_P203678   | 11,1298 | 8,31406 | 7,040803113 | ENST00000265838 | 38        | NM_000019    | ACAT1          |
| A_22_P00016474 | 4,26632 | 1,45195 | 7,034120258 | N/A             | 727677    | NR_117100    | CASC8          |
| A_23_P30122    | 4,52657 | 1,71746 | 7,008520873 | ENST00000477645 | 3558      | NM_000586    | IL2            |
| A_23_P351148   | 6,5248  | 3,72998 | 6,939443633 | ENST00000367929 | 117157    | NM_053282    | SH2D1B         |
| A_33_P3789693  | 4,42271 | 1,637   | 6,895762085 | N/A             | 158295    | BC020879     | MGC24103       |
| A_21_P0005005  | 4,56927 | 1,78392 | 6,89404158  | N/A             | 102724520 | XR_431974    | LOC102724520   |
| A_23_P137797   | 4,60794 | 1,83837 | 6,819046392 | ENST00000366574 | 6262      | NM_001035    | RYR2           |
| A_21_P0011912  | 4,39768 | 1,64032 | 6,761578102 | N/A             | N/A       | N/A          | XLOC_I2_007986 |
| A_23_P418485   | 7,84709 | 5,0974  | 6,725725972 | ENST00000393084 | 160140    | NM_152587    | C11orf65       |
| A_32_P74409    | 13,3263 | 10,5852 | 6,68579908  | ENST00000617612 | 387763    | NM_001145033 | C11orf96       |
| A_21_P0011693  | 6,43884 | 3,70108 | 6,670338612 | ENST00000592712 | 101927667 | N/A          | LINC01535      |
| A_22_P00000718 | 4,62471 | 1,88796 | 6,665670485 | N/A             | N/A       | N/A          | Inc-ADAMTS18-1 |
| A_22_P00024938 | 4,20733 | 1,47637 | 6,638972611 | N/A             | N/A       | N/A          | Inc-SERPINE2-1 |
| A_23_P156390   | 4,32841 | 1,60075 | 6,623804075 | ENST00000333010 | 9832      | NM_014790    | JAKMIP2        |
| A_21_P0013305  | 5,23344 | 2,50932 | 6,607570899 | N/A             | N/A       | N/A          | XLOC_I2_013835 |
| A_21_P0007273  | 6,42399 | 3,70007 | 6,606654959 | N/A             | N/A       | N/A          | Inc-ATM-1      |
| A_22_P00012322 | 4,30831 | 1,58592 | 6,599652215 | ENST00000517681 | N/A       | N/A          | N/A            |
| A_21_P0008528  | 4,30877 | 1,58801 | 6,592199941 | N/A             | N/A       | N/A          | Inc-JPH4-1     |
| A_21_P0006477  | 6,22606 | 3,50566 | 6,590555175 | N/A             | N/A       | N/A          | Inc-ASMT-1     |
| A_21_P0009209  | 4,46796 | 1,74828 | 6,587266874 | N/A             | N/A       | N/A          | Inc-TUSC5-1    |
| A_21_P0014214  | 11,7723 | 9,05388 | 6,581516294 | N/A             | 100507056 | NR_108049    | CCAT1          |
| A_21_P0010640  | 4,08919 | 1,37175 | 6,577047092 | N/A             | N/A       | N/A          | XLOC_I2_001037 |
| A_23_P206733   | 7,76595 | 5,07973 | 6,436248372 | ENST00000569260 | 1066      | NM_001266    | CES1           |
| A_33_P3343145  | 4,88592 | 2,21824 | 6,354065668 | ENST00000296755 | 4131      | NM_005909    | MAP1B          |
| A_22_P00004907 | 5,68495 | 3,01805 | 6,35063124  | ENST00000439790 | 728192    | NR_034119    | LINC00460      |
| A_33_P3211229  | 9,0122  | 6,34543 | 6,350059016 | ENST00000375682 | 54733     | NM_017515    | SLC35F2        |
| A_32_P108156   | 6,33025 | 3,67449 | 6,301782666 | ENST00000456917 | 114614    | NR_001458    | MIR155HG       |
| A_23_P315364   | 11,3823 | 8,73381 | 6,270106726 | ENST00000508487 | 2920      | NM_002089    | CXCL2          |
| A_22_P00010877 | 9,48129 | 6,83453 | 6,262592468 | N/A             | N/A       | N/A          | Inc-NPAT-2     |
| A_21_P0005906  | 10,8434 | 8,19684 | 6,261724348 | ENST00000521815 | N/A       | N/A          | N/A            |

|                |         |         |             |                 |           |              |                       |
|----------------|---------|---------|-------------|-----------------|-----------|--------------|-----------------------|
| A_23_P76249    | 10,4615 | 7,81504 | 6,261290334 | ENST00000252252 | 3854      | NM_005555    | KRT6B                 |
| A_19_P00803039 | 4,40456 | 1,76893 | 6,214464157 | N/A             | 100130476 | N/A          | LOC100130476          |
| A_21_P0012189  | 5,31933 | 2,68654 | 6,202242781 | N/A             | N/A       | N/A          | XLOC_I2_009159        |
| A_33_P3406904  | 4,11745 | 1,48471 | 6,202027831 | N/A             | 101928561 | XR_246464    | LOC101928561          |
| A_23_P64121    | 9,21475 | 6,58458 | 6,190989447 | ENST00000321505 | 25758     | NM_012194    | KIAA1549L             |
| A_22_P00002908 | 4,88518 | 2,25578 | 6,187686053 | N/A             | N/A       | N/A          | Inc-C4orf52-1         |
| A_22_P00010374 | 4,28    | 1,65669 | 6,161621234 | N/A             | N/A       | AK128684     | Inc-MYH13-2           |
| A_23_P326414   | 4,12671 | 1,50558 | 6,15231768  | N/A             | 441177    | NR_027284    | LINC00602             |
| A_21_P0009781  | 8,9834  | 6,36368 | 6,146307727 | ENST00000397381 | 652995    | NR_015379    | UCA1                  |
| A_22_P00000437 | 7,24427 | 4,62976 | 6,124151615 | ENST00000415399 | 101927125 | NR_120510    | ELFN1-AS1             |
| A_23_P374844   | 11,0828 | 8,47206 | 6,108169089 | ENST00000265643 | 51083     | NM_015973    | GAL                   |
| A_22_P00002970 | 4,27802 | 1,6688  | 6,10173701  | N/A             | N/A       | AK056958     | Inc-C6orf112-1        |
| A_33_P3408711  | 8,68181 | 6,07827 | 6,077761236 | ENST00000610817 | 2316      | NM_001456    | FLNA                  |
| A_23_P95851    | 6,83629 | 4,23469 | 6,06959393  | ENST00000380419 | 79861     | NM_024803    | TUBAL3                |
| A_23_P114185   | 6,49965 | 3,89846 | 6,067869255 | ENST00000471410 | 7102      | NM_004615    | TSPAN7                |
| A_23_P155596   | 5,30893 | 2,71231 | 6,048678582 | ENST00000367755 | 2328      | NM_001002294 | FMO3                  |
| A_21_P0007404  | 4,23232 | 1,63899 | 6,034900563 | N/A             | N/A       | N/A          | Inc-CADM1-3           |
| A_33_P3233608  | 5,82452 | 3,23126 | 6,034607755 | ENST00000358993 | 64663     | NM_022661    | SPANXC                |
| A_21_P0008378  | 4,4923  | 1,89939 | 6,033143928 | N/A             | N/A       | N/A          | nc-RP11-1070N10.3.1-1 |
| A_33_P3332081  | 7,86812 | 5,27543 | 6,03222399  | ENST00000355849 | 10656     | NM_006558    | KHDRBS3               |
| A_23_P203013   | 9,12266 | 6,53119 | 6,027125059 | ENST00000278612 | 4863      | NM_002519    | NPAT                  |
| A_19_P00322220 | 12,8409 | 10,2533 | 6,010979084 | ENST00000413755 | 388796    | NR_027241    | SNHG17                |
| A_33_P3271657  | 6,43186 | 3,85925 | 5,948846696 | ENST00000330710 | 84439     | NM_001127258 | HHIPL1                |
| A_33_P3289726  | 4,18097 | 1,61503 | 5,921406922 | ENST00000495602 | N/A       | XR_132569    | N/A                   |
| A_33_P3362296  | 9,25637 | 6,69094 | 5,919314045 | N/A             | 3755      | XM_006723786 | KCNG1                 |
| A_24_P391574   | 4,92394 | 2,37822 | 5,838994693 | ENST00000315571 | 143458    | AK075546     | LDLRAD3               |
| A_23_P110712   | 11,6937 | 9,15835 | 5,797174851 | ENST00000239223 | 1843      | NM_004417    | DUSP1                 |
| A_22_P00009500 | 7,6357  | 5,10387 | 5,783047692 | ENST00000517292 | N/A       | N/A          | N/A                   |
| A_21_P0010028  | 5,24151 | 2,71556 | 5,759525661 | N/A             | N/A       | N/A          | Inc-ABHD12-1          |
| A_33_P3243887  | 8,75031 | 6,229   | 5,741031614 | ENST00000264563 | 3589      | NM_000641    | IL11                  |
| A_23_P110403   | 9,57599 | 7,0598  | 5,7206933   | ENST00000514142 | 27295     | NM_014476    | PDLIM3                |
| A_33_P3319870  | 4,03975 | 1,52764 | 5,704537802 | ENST00000322805 | 26585     | NM_001191323 | GREM1                 |
| A_21_P0007726  | 8,09838 | 5,58761 | 5,699241789 | ENST00000552466 | N/A       | N/A          | N/A                   |

|                |         |         |             |                 |           |              |                |
|----------------|---------|---------|-------------|-----------------|-----------|--------------|----------------|
| A_23_P500093   | 4,16789 | 1,66746 | 5,658540545 | ENST00000391995 | 6003      | NM_002927    | RGS13          |
| A_33_P3214849  | 12,4693 | 9,96907 | 5,657756159 | ENST00000434945 | 143888    | NM_153705    | KDELC2         |
| A_23_P85209    | 4,08403 | 1,58538 | 5,651563331 | ENST00000243213 | 3598      | NM_000640    | IL13RA2        |
| A_33_P3307253  | 4,46447 | 1,96707 | 5,646668746 | ENST00000317704 | 26289     | NM_012093    | AK5            |
| A_21_P0013804  | 4,15141 | 1,65753 | 5,632908356 | N/A             | N/A       | N/A          | XLOC_I2_015661 |
| A_21_P0004422  | 4,28256 | 1,79462 | 5,609763694 | N/A             | N/A       | N/A          | Inc-ARRDC3-1   |
| A_23_P400449   | 4,12914 | 1,64957 | 5,577312081 | ENST00000302536 | 57687     | NM_020927    | VAT1L          |
| A_22_P00006201 | 8,3611  | 5,88191 | 5,575843234 | ENST00000488846 | 100287482 | NM_001195243 | SMKR1          |
| A_23_P321935   | 8,47465 | 5,99988 | 5,558786606 | ENST00000332585 | 23762     | NM_030758    | OSBP2          |
| A_23_P217468   | 4,26597 | 1,79721 | 5,535677898 | ENST00000370460 | 2334      | NM_002025    | AFF2           |
| A_21_P0005895  | 4,13396 | 1,66559 | 5,534181655 | N/A             | N/A       | N/A          | Inc-SAMD12-2   |
| A_23_P150483   | 4,11545 | 1,64895 | 5,527012977 | ENST00000534741 | 84767     | NM_032681    | TRIM51         |
| A_21_P0007169  | 4,30028 | 1,84008 | 5,502930088 | N/A             | N/A       | N/A          | Inc-MUC2-1     |
| A_22_P00009741 | 6,64526 | 4,19061 | 5,481801165 | N/A             | N/A       | N/A          | Inc-MDH1B-2    |
| A_22_P00023340 | 5,98406 | 3,53117 | 5,47511778  | N/A             | 101929268 | NR_105002    | LOC101929268   |
| A_23_P8913     | 8,94764 | 6,49825 | 5,46185116  | ENST00000285379 | 760       | NM_000067    | CA2            |
| A_23_P376557   | 7,86747 | 5,41865 | 5,459693642 | ENST00000336577 | 64386     | NM_022468    | MMP25          |
| A_21_P0008446  | 4,0505  | 1,60406 | 5,450694264 | N/A             | N/A       | N/A          | Inc-TMEM30B-3  |
| A_21_P0011691  | 6,35185 | 3,90797 | 5,441030819 | ENST00000591116 | 101927667 | NR_110720    | LINC01535      |
| A_22_P00012767 | 3,83524 | 1,39359 | 5,432627015 | N/A             | 101927688 | NR_110810    | SEPT4-AS1      |
| A_22_P00017451 | 4,02232 | 1,58137 | 5,429991727 | ENST00000556669 | N/A       | N/A          | N/A            |
| A_23_P130435   | 4,991   | 2,56099 | 5,388971661 | ENST00000596399 | 3982      | NM_030657    | LIM2           |
| A_22_P00015854 | 4,021   | 1,60301 | 5,34425927  | ENST00000428516 | N/A       | BX487629     | N/A            |
| A_23_P416581   | 3,88064 | 1,46346 | 5,341259582 | ENST00000615612 | 2781      | NM_002073    | GNAZ           |
| A_33_P3409184  | 4,07949 | 1,67225 | 5,304585414 | ENST00000444413 | N/A       | N/A          | N/A            |
| A_23_P210690   | 17,5978 | 15,1929 | 5,295988539 | ENST00000217233 | 57761     | NM_021158    | TRIB3          |
| A_21_P0004840  | 3,89882 | 1,49995 | 5,27389921  | N/A             | N/A       | N/A          | Inc-CD83-2     |
| A_33_P3217619  | 8,70897 | 6,31075 | 5,271523613 | ENST00000552466 | N/A       | N/A          | N/A            |
| A_22_P00009204 | 6,86881 | 4,47102 | 5,269952652 | ENST00000512546 | N/A       | N/A          | N/A            |
| A_22_P00024299 | 4,27646 | 1,88462 | 5,248262935 | N/A             | 221946    | NR_126168    | LOC221946      |
| A_33_P3328928  | 8,13688 | 5,74633 | 5,243572246 | ENST00000507670 | 55589     | NM_017593    | BMP2K          |
| A_22_P00007076 | 6,55253 | 4,16227 | 5,242518328 | ENST00000549888 | N/A       | BX111629     | N/A            |
| A_21_P0004119  | 5,24072 | 2,85495 | 5,226227764 | ENST00000511840 | N/A       | N/A          | N/A            |

|                |         |         |             |                 |           |           |                |
|----------------|---------|---------|-------------|-----------------|-----------|-----------|----------------|
| A_21_P0002854  | 4,30182 | 1,9189  | 5,215913701 | ENST00000465946 | N/A       | N/A       | N/A            |
| A_21_P0004980  | 5,42693 | 3,04716 | 5,204537628 | ENST00000453935 | N/A       | XR_245649 | N/A            |
| A_23_P2271     | 12,3553 | 9,97851 | 5,193798342 | ENST00000542963 | 5744      | NM_198965 | PTHLH          |
| A_33_P3211929  | 10,0776 | 7,70129 | 5,192070597 | ENST00000301459 | 283248    | NM_173587 | RCOR2          |
| A_21_P0006780  | 3,9978  | 1,62419 | 5,182362738 | N/A             | N/A       | N/A       | Inc-ANKRD1-1   |
| A_21_P0012157  | 5,31163 | 2,93953 | 5,176941444 | ENST00000427820 | N/A       | N/A       | N/A            |
| A_24_P879740   | 7,50938 | 5,13779 | 5,175111692 | ENST00000296755 | 4131      | NM_005909 | MAP1B          |
| A_32_P184394   | 4,16227 | 1,79252 | 5,168515609 | ENST00000320239 | 22797     | NM_012252 | TFEC           |
| A_33_P3218410  | 6,51979 | 4,15175 | 5,162393092 | N/A             | 472       | BC007023  | ATM            |
| A_22_P00006120 | 4,29461 | 1,92677 | 5,161677482 | ENST00000511468 | N/A       | N/A       | N/A            |
| A_19_P00320162 | 9,2295  | 6,86193 | 5,160711566 | N/A             | N/A       | DQ080207  | Inc-DNTTIP2-1  |
| A_23_P374281   | 3,91164 | 1,54622 | 5,153026458 | ENST00000296733 | 166979    | NM_152623 | CDC20B         |
| A_33_P3589722  | 9,46665 | 7,10158 | 5,151776478 | ENST00000601453 | 472       | NM_000051 | ATM            |
| A_33_P3275846  | 4,03907 | 1,67537 | 5,146886613 | ENST00000614285 | 773       | NM_023035 | CACNA1A        |
| A_22_P00015445 | 6,02969 | 3,6681  | 5,139364585 | ENST00000613502 | 100505664 | XR_109653 | LOC100505664   |
| A_23_P377291   | 8,28628 | 5,92809 | 5,127266903 | ENST00000295400 | 7039      | NM_003236 | TGFA           |
| A_33_P3284345  | 12,5901 | 10,2328 | 5,124104862 | ENST00000522569 | 3084      | NM_004495 | NRG1           |
| A_21_P0014697  | 3,83826 | 1,48387 | 5,113779661 | ENST00000582251 | 101060542 | NR_110764 | LOC101060542   |
| A_21_P0014188  | 4,4561  | 2,11262 | 5,075253907 | N/A             | 401317    | BC087859  | LOC401317      |
| A_24_P278747   | 5,83779 | 3,4963  | 5,068258117 | ENST00000261254 | 894       | NM_001759 | CCND2          |
| A_24_P922465   | 5,45197 | 3,11304 | 5,059272686 | N/A             | N/A       | N/A       | N/A            |
| A_23_P42397    | 3,9903  | 1,65193 | 5,057309248 | ENST00000369700 | 167681    | NM_153362 | PRSS35         |
| A_33_P3323520  | 8,68062 | 6,34761 | 5,038554844 | ENST00000617528 | 84437     | NM_032424 | MSANTD4        |
| A_23_P6535     | 9,08453 | 6,75338 | 5,032063054 | ENST00000395676 | 113730    | NM_138433 | KLHDC7B        |
| A_21_P0001742  | 3,98657 | 1,65811 | 5,022689183 | N/A             | N/A       | N/A       | Inc-SHE-1      |
| A_21_P0001760  | 3,86863 | 1,54295 | 5,013020035 | N/A             | N/A       | N/A       | Inc-C1orf198-2 |
| A_22_P00004785 | 9,51073 | 7,18813 | 5,002329188 | ENST00000561746 | N/A       | AK090719  | N/A            |
| A_33_P3298960  | 8,62863 | 6,30837 | 4,994222165 | ENST00000530529 | 143888    | NM_153705 | KDELC2         |
| A_23_P153855   | 5,71739 | 3,3982  | 4,990519486 | ENST00000456783 | 57615     | NM_020855 | ZNF492         |
| A_33_P3241984  | 3,90759 | 1,58879 | 4,989170594 | ENST00000538253 | 26191     | NM_015967 | PTPN22         |
| A_23_P161719   | 10,5964 | 8,28005 | 4,980705122 | ENST00000431778 | 143884    | NM_152434 | CWF19L2        |
| A_21_P0011696  | 11,7298 | 9,41564 | 4,973150185 | ENST00000590657 | 100506930 | NR_038279 | LINC00665      |
| A_23_P406782   | 3,66476 | 1,35755 | 4,94925028  | ENST00000262626 | 3249      | NM_182983 | HPN            |

|                |         |         |             |                 |           |              |                |
|----------------|---------|---------|-------------|-----------------|-----------|--------------|----------------|
| A_33_P3366141  | 4,04592 | 1,74723 | 4,920108054 | N/A             | N/A       | AK094244     | N/A            |
| A_22_P00009254 | 3,95185 | 1,65561 | 4,911759765 | ENST00000415918 | N/A       | N/A          | N/A            |
| A_22_P00002679 | 8,63678 | 6,34379 | 4,900707358 | ENST00000453568 | 101927787 | N/A          | LOC101927787   |
| A_21_P0011129  | 7,43792 | 5,14577 | 4,897854783 | ENST00000445572 | 374491    | NR_002815    | TPTE2P6        |
| A_33_P6703403  | 4,63547 | 2,3465  | 4,887070782 | ENST00000617967 | 285973    | NR_073169    | ATG9B          |
| A_22_P00002152 | 10,9719 | 8,68349 | 4,885174173 | ENST00000566876 | N/A       | N/A          | N/A            |
| A_33_P3272010  | 3,74966 | 1,46217 | 4,882059913 | N/A             | N/A       | AA496144     | N/A            |
| A_32_P351968   | 4,27776 | 1,99484 | 4,866619564 | ENST00000461570 | 3109      | NM_002118    | HLA-DMB        |
| A_32_P169505   | 3,74146 | 1,46053 | 4,859911358 | ENST00000616200 | 340533    | NM_001008537 | KIAA2022       |
| A_22_P00020773 | 3,68469 | 1,40689 | 4,849378963 | ENST00000432442 | N/A       | N/A          | N/A            |
| A_32_P204137   | 3,88047 | 1,60665 | 4,836019293 | ENST00000264318 | 2557      | NM_000809    | GABRA4         |
| A_21_P0007055  | 4,23389 | 1,96049 | 4,834611627 | N/A             | N/A       | N/A          | Inc-MAP3K8-6   |
| A_21_P0001109  | 3,94272 | 1,67011 | 4,831964984 | ENST00000429666 | N/A       | N/A          | N/A            |
| A_33_P3411260  | 4,81238 | 2,5432  | 4,820490658 | N/A             | 100288884 | AK124122     | LOC100288884   |
| A_23_P383258   | 8,32609 | 6,05834 | 4,815714953 | ENST00000489618 | 9615      | NM_004293    | GDA            |
| A_21_P0013815  | 4,42602 | 2,16069 | 4,807643766 | N/A             | N/A       | N/A          | XLOC_I2_015738 |
| A_33_P3482446  | 3,6618  | 1,39653 | 4,807443826 | ENST00000584677 | 339298    | NR_040034    | LOC339298      |
| A_24_P117410   | 8,38801 | 6,12596 | 4,796725894 | ENST00000395676 | 113730    | NM_138433    | KLHDC7B        |
| A_22_P00018925 | 3,82473 | 1,56304 | 4,795529102 | ENST00000441909 | 9034      | N/A          | CCRL2          |
| A_24_P183150   | 7,96563 | 5,70394 | 4,795529102 | ENST00000296026 | 2921      | NM_002090    | CXCL3          |
| A_21_P0013642  | 8,02309 | 5,76547 | 4,782019457 | N/A             | 101929959 | N/A          | LOC101929959   |
| A_33_P8086411  | 8,1557  | 5,90175 | 4,769870175 | ENST00000488846 | 100287482 | NM_001195243 | SMKR1          |
| A_21_P0002113  | 4,17428 | 1,92525 | 4,753631268 | ENST00000433174 | N/A       | N/A          | N/A            |
| A_22_P00007203 | 5,08962 | 2,84482 | 4,739713974 | ENST00000581816 | 406952    | NR_029487    | MIR17          |
| A_21_P0011250  | 5,84443 | 3,59981 | 4,739122654 | ENST00000556717 | 400221    | N/A          | FLJ22447       |
| A_22_P00003963 | 3,90162 | 1,65727 | 4,738235811 | N/A             | N/A       | N/A          | Inc-CHCHD8-1   |
| A_23_P19624    | 7,44066 | 5,19738 | 4,734722919 | ENST00000283147 | 654       | NM_001718    | BMP6           |
| A_22_P00000604 | 3,9006  | 1,66038 | 4,72469107  | N/A             | N/A       | N/A          | Inc-ACD-1      |
| A_24_P55295    | 9,29284 | 7,05265 | 4,724592824 | ENST00000282561 | 2697      | NM_000165    | GJA1           |
| A_21_P0014754  | 4,03136 | 1,79602 | 4,708736526 | N/A             | N/A       | N/A          | N/A            |
| A_21_P0013330  | 4,16276 | 1,92903 | 4,703484663 | N/A             | N/A       | N/A          | XLOC_I2_013877 |
| A_23_P13713    | 7,45932 | 5,22656 | 4,700323325 | ENST00000530631 | 5630      | NM_006262    | PRPH           |
| A_23_P9614     | 6,48946 | 4,25732 | 4,698303789 | ENST00000555173 | 56901     | NM_020142    | NDUFA4L2       |

|                |         |         |             |                 |           |              |                |
|----------------|---------|---------|-------------|-----------------|-----------|--------------|----------------|
| A_23_P18684    | 8,05065 | 5,82234 | 4,685847491 | ENST00000325617 | 1047      | NM_004362    | CLGN           |
| A_21_P0004421  | 4,63962 | 2,41192 | 4,683866641 | ENST00000511918 | 100505994 | NR_103548    | LUCAT1         |
| A_24_P236935   | 5,01068 | 2,78444 | 4,679128989 | ENST00000599690 | 5653      | NM_001012964 | KLK6           |
| A_21_P0005197  | 3,87764 | 1,65195 | 4,677345501 | ENST00000439027 | N/A       | N/A          | N/A            |
| A_33_P3364826  | 3,60698 | 1,38311 | 4,671448619 | ENST00000434029 | 55130     | XM_006717544 | ARMC4          |
| A_33_P3418833  | 11,1794 | 8,96191 | 4,650835782 | ENST00000341420 | 23767     | NM_198391    | FLRT3          |
| A_23_P116168   | 10,724  | 8,50933 | 4,641753788 | ENST00000301919 | 84437     | NM_032424    | MSANTD4        |
| A_21_P0008953  | 4,32866 | 2,11405 | 4,641560747 | N/A             | N/A       | N/A          | Inc-SETD6-6    |
| A_23_P310460   | 12,5535 | 10,3391 | 4,640885166 | ENST00000434837 | 266727    | NM_153487    | MDGA1          |
| A_22_P00014105 | 3,86979 | 1,65771 | 4,633428149 | ENST00000426356 | N/A       | N/A          | N/A            |
| A_22_P00008930 | 8,37513 | 6,16366 | 4,631469459 | ENST00000552856 | N/A       | N/A          | N/A            |
| A_22_P00020744 | 4,38819 | 2,18085 | 4,61822992  | N/A             | N/A       | BM714175     | Inc-DLX2-2     |
| A_33_P3236661  | 3,74947 | 1,54265 | 4,616565641 | N/A             | 5101      | BC150296     | PCDH9          |
| A_24_P254551   | 7,49546 | 5,29082 | 4,609594998 | ENST00000253401 | 23229     | NM_015185    | ARHGEF9        |
| A_24_P139665   | 3,86456 | 1,66103 | 4,60604977  | ENST00000372844 | 51440     | NM_016257    | HPCAL4         |
| A_22_P00021420 | 4,50652 | 2,3033  | 4,605060148 | ENST00000451410 | 266919    | N/A          | LINC00307      |
| A_33_P3320010  | 4,06768 | 1,86492 | 4,60359207  | ENST00000491988 | 10389     | NM_006089    | SCML2          |
| A_33_P3226995  | 4,35643 | 2,15459 | 4,600657316 | ENST00000312648 | 924       | NM_006137    | CD7            |
| A_33_P3407434  | 4,08596 | 1,88546 | 4,59638613  | ENST00000412403 | N/A       | BX117604     | N/A            |
| A_33_P3317603  | 4,70838 | 2,5079  | 4,596322411 | ENST00000526584 | 338707    | NM_178537    | B4GALNT4       |
| A_33_P3221418  | 3,71441 | 1,51404 | 4,595971972 | ENST00000370066 | 22854     | NM_001113228 | NTNG1          |
| A_23_P334282   | 8,04177 | 5,84242 | 4,592723722 | ENST00000507670 | 55589     | NM_017593    | BMP2K          |
| A_22_P00004192 | 3,80217 | 1,60333 | 4,591100458 | ENST00000551075 | N/A       | N/A          | N/A            |
| A_23_P337934   | 11,7433 | 9,54698 | 4,583088041 | ENST00000375766 | 54751     | NM_017556    | FBLIM1         |
| A_21_P0013271  | 8,56485 | 6,36882 | 4,582166874 | N/A             | 100287482 | N/A          | SMKR1          |
| A_22_P00025033 | 7,55286 | 5,35713 | 4,581214139 | ENST00000246841 | 23769     | XM_005273861 | FLRT1          |
| A_22_P00015051 | 10,1427 | 7,94747 | 4,579626686 | ENST00000584686 | 285958    | NR_003697    | SNHG15         |
| A_21_P0010836  | 3,86543 | 1,67133 | 4,576041069 | N/A             | N/A       | N/A          | XLOC_I2_001664 |
| A_33_P3389926  | 8,09063 | 5,89809 | 4,571095626 | N/A             | 653203    | XM_006726832 | FAM230A        |
| A_22_P00011217 | 5,34964 | 3,15979 | 4,562580458 | ENST00000561973 | N/A       | AF070565     | N/A            |
| A_33_P3362616  | 8,23549 | 6,04641 | 4,560145952 | ENST00000464396 | 80742     | NM_025263    | PRR3           |
| A_22_P00025213 | 3,79541 | 1,60648 | 4,559671849 | ENST00000541243 | 100873980 | NR_046559    | RERG-AS1       |
| A_23_P127533   | 15,0874 | 12,8986 | 4,559260999 | ENST00000531571 | 84259     | NM_032299    | DCUN1D5        |

|                |         |         |             |                 |           |              |                |
|----------------|---------|---------|-------------|-----------------|-----------|--------------|----------------|
| A_21_P0013549  | 3,92855 | 1,74247 | 4,550673247 | ENST00000427722 | 101929302 | NR_121586    | RFX3-AS1       |
| A_21_P0013650  | 4,33784 | 2,15196 | 4,550042434 | N/A             | N/A       | N/A          | XLOC_I2_015212 |
| A_21_P0012645  | 3,79751 | 1,6124  | 4,547614618 | N/A             | N/A       | N/A          | XLOC_I2_010989 |
| A_21_P0013746  | 4,82564 | 2,64116 | 4,545629187 | N/A             | N/A       | N/A          | XLOC_I2_015438 |
| A_21_P0004715  | 5,42342 | 3,23924 | 4,544684048 | ENST00000438217 | N/A       | N/A          | N/A            |
| A_21_P0013572  | 4,4197  | 2,23814 | 4,536438184 | N/A             | N/A       | N/A          | XLOC_I2_014820 |
| A_24_P362595   | 3,80867 | 1,6292  | 4,529871106 | ENST00000258387 | 5077      | NM_013942    | PAX3           |
| A_33_P3634554  | 3,56918 | 1,39256 | 4,520931317 | N/A             | N/A       | N/A          | N/A            |
| A_23_P29096    | 8,11225 | 5,93735 | 4,515544615 | ENST00000489319 | 5152      | NM_002606    | PDE9A          |
| A_23_P171296   | 6,49757 | 4,32334 | 4,513448044 | ENST00000491955 | 4354      | NM_002436    | MPP1           |
| A_22_P00002715 | 8,03077 | 5,85664 | 4,513135206 | ENST00000432910 | 284757    | NR_046099    | MIR646HG       |
| A_22_P00004364 | 5,11058 | 2,93703 | 4,511321176 | ENST00000614099 | N/A       | N/A          | N/A            |
| A_33_P3400152  | 5,3904  | 3,21761 | 4,508945275 | N/A             | 728558    | NR_038444    | ENTPD1-AS1     |
| A_33_P3382217  | 3,81334 | 1,64118 | 4,506976726 | ENST00000618515 | 11127     | NM_001300791 | KIF3A          |
| A_21_P0012281  | 3,91942 | 1,74915 | 4,501076235 | ENST00000425895 | N/A       | XR_430593    | N/A            |
| A_21_P0014678  | 4,39016 | 2,22302 | 4,491321508 | N/A             | 100507065 | NR_120434    | LOC100507065   |
| A_32_P161994   | 3,68922 | 1,52575 | 4,479910779 | ENST00000548054 | 255411    | NR_029448    | LINC00935      |
| A_23_P425116   | 3,75725 | 1,59646 | 4,471596467 | ENST00000613163 | 10407     | NM_016512    | SPAG11B        |
| A_21_P0010527  | 3,8254  | 1,66627 | 4,466454298 | N/A             | N/A       | N/A          | XLOC_I2_000186 |
| A_23_P315815   | 12,3703 | 10,2132 | 4,46017402  | ENST00000522569 | 3084      | NM_004495    | NRG1           |
| A_21_P0009467  | 3,75572 | 1,60025 | 4,455137628 | N/A             | N/A       | N/A          | Inc-HRH4-2     |
| A_22_P00022401 | 3,90183 | 1,74647 | 4,454797953 | ENST00000555967 | N/A       | N/A          | N/A            |
| A_21_P0004424  | 3,64626 | 1,49141 | 4,453223438 | N/A             | N/A       | N/A          | Inc-ARRDC3-1   |
| A_22_P00009768 | 3,81042 | 1,65577 | 4,452606133 | ENST00000507950 | N/A       | N/A          | N/A            |
| A_33_P3356492  | 8,86568 | 6,71185 | 4,450076077 | ENST00000451257 | 642633    | NR_108107    | FAM230B        |
| A_33_P3255229  | 8,26718 | 6,11527 | 4,444157665 | N/A             | 80854     | BC066361     | SETD7          |
| A_21_P0009537  | 4,08798 | 1,93645 | 4,442987246 | N/A             | N/A       | N/A          | Inc-CDH2-3     |
| A_21_P0003257  | 3,82087 | 1,66937 | 4,442894858 | N/A             | N/A       | N/A          | Inc-C3orf79-5  |
| A_24_P59607    | 9,21546 | 7,06522 | 4,439016281 | ENST00000391411 | 339263    | NM_001113434 | C17orf51       |
| A_22_P00021090 | 6,65153 | 4,50172 | 4,437693415 | N/A             | N/A       | N/A          | Inc-MDH1B-2    |
| A_23_P1691     | 16,0335 | 13,8866 | 4,42875135  | ENST00000315274 | 4312      | NM_002421    | MMP1           |
| A_22_P00013084 | 5,84803 | 3,70215 | 4,425621284 | N/A             | N/A       | BX648373     | Inc-RHOV-1     |
| A_24_P252996   | 5,45077 | 3,30572 | 4,423075903 | ENST00000622388 | 2352      | NM_000804    | FOLR3          |



|                |         |         |             |                 |           |              |                |
|----------------|---------|---------|-------------|-----------------|-----------|--------------|----------------|
| A_22_P00014429 | 3,58627 | 1,44213 | 4,420286866 | N/A             | N/A       | N/A          | Inc-SGSM3-1    |
| A_21_P0004423  | 5,34663 | 3,20604 | 4,409423359 | N/A             | N/A       | N/A          | Inc-ARRDC3-1   |
| A_23_P372923   | 5,96258 | 3,8223  | 4,408475983 | ENST00000440174 | 2260      | NM_001174066 | FGFR1          |
| A_22_P00016016 | 3,77903 | 1,63968 | 4,405635076 | ENST00000420594 | 102724434 | XR_426248    | LOC102724434   |
| A_22_P00010264 | 3,79153 | 1,65308 | 4,402887555 | ENST00000560760 | N/A       | N/A          | N/A            |
| A_22_P00014780 | 3,78762 | 1,64922 | 4,402734966 | N/A             | 102724163 | XR_429783    | LOC102724163   |
| A_22_P00018622 | 3,98938 | 1,85255 | 4,397946335 | N/A             | N/A       | BG183392     | Inc-LRRC53-1   |
| A_22_P00000782 | 3,71345 | 1,57765 | 4,394807578 | N/A             | N/A       | N/A          | Inc-ADI1-2     |
| A_22_P00002746 | 3,54951 | 1,41383 | 4,394442044 | N/A             | N/A       | N/A          | Inc-C21orf49-1 |
| A_33_P3400273  | 7,42377 | 5,29051 | 4,387076915 | ENST00000236147 | 6402      | NM_000655    | SELL           |
| A_24_P165205   | 4,57577 | 2,44447 | 4,381120817 | ENST00000378531 | 79906     | NM_024848    | MORN1          |
| A_19_P00800629 | 5,01567 | 2,88493 | 4,37942056  | ENST00000450063 | 100996266 | XR_158832    | LINC01510      |
| A_32_P105083   | 5,45224 | 3,3215  | 4,37942056  | ENST00000622774 | 348751    | N/A          | FTCDNL1        |
| A_22_P00008161 | 3,83567 | 1,70509 | 4,378934894 | N/A             | N/A       | N/A          | Inc-IMPAD1-1   |
| A_23_P128759   | 3,78903 | 1,65872 | 4,378115454 | ENST00000554173 | 51156     | NM_016186    | SERPINA10      |
| A_19_P00318511 | 5,16363 | 3,03387 | 4,376446699 | ENST00000423838 | N/A       | N/A          | N/A            |
| A_22_P00016678 | 3,80321 | 1,67771 | 4,363542957 | ENST00000616342 | 6881      | AL833496     | TAF10          |
| A_33_P3283964  | 3,93134 | 1,80842 | 4,355746521 | ENST00000566467 | 390732    | N/A          | CES1P2         |
| A_21_P0006837  | 3,7666  | 1,64489 | 4,352094852 | N/A             | 101928701 | XR_242733    | LOC101928701   |
| A_24_P860703   | 13,6185 | 11,4971 | 4,351159794 | ENST00000417578 | 388796    | NR_015366    | SNHG17         |
| A_21_P0000890  | 3,67493 | 1,55368 | 4,350707418 | N/A             | 100505536 | NR_040043    | ISM1-AS1       |
| A_21_P0006337  | 3,76323 | 1,64677 | 4,336286262 | N/A             | N/A       | N/A          | Inc-AGPAT2-2   |
| A_22_P00003101 | 3,73291 | 1,61741 | 4,333401764 | ENST00000521511 | N/A       | BX091769     | N/A            |
| A_21_P0011000  | 3,87737 | 1,76217 | 4,332500753 | ENST00000444123 | 101929011 | N/A          | LOC101929011   |
| A_21_P0005044  | 3,78028 | 1,66548 | 4,331299695 | N/A             | N/A       | N/A          | Inc-GPR63-3    |
| A_33_P3301219  | 7,16644 | 5,0526  | 4,328418515 | ENST00000613335 | 100132948 | NR_027421    | FAM27C         |
| A_23_P259071   | 15,6361 | 13,5241 | 4,322901608 | ENST00000395748 | 374       | NM_001657    | AREG           |
| A_21_P0010152  | 3,76739 | 1,65591 | 4,321343757 | ENST00000426418 | N/A       | N/A          | N/A            |
| A_21_P0009839  | 3,90226 | 1,79274 | 4,315476902 | N/A             | N/A       | N/A          | Inc-FAM182A-2  |
| A_23_P35995    | 9,99506 | 7,88694 | 4,311291168 | ENST00000448775 | 79827     | NM_024769    | CLMP           |
| A_22_P00001373 | 3,77079 | 1,66325 | 4,309558268 | ENST00000569737 | 101927738 | XR_247236    | LOC101927738   |
| A_23_P67432    | 6,09421 | 3,98981 | 4,300188792 | ENST00000291598 | 147949    | NM_152478    | ZNF583         |
| A_21_P0004569  | 3,47389 | 1,37017 | 4,298162418 | ENST00000607854 | 100505994 | NR_103549    | LUCAT1         |

|                |         |         |             |                 |           |              |                |
|----------------|---------|---------|-------------|-----------------|-----------|--------------|----------------|
| A_33_P3288805  | 6,67064 | 4,56927 | 4,291166858 | ENST00000394067 | 64837     | NM_001134774 | KLC2           |
| A_22_P00002440 | 4,00639 | 1,90529 | 4,290363842 | N/A             | N/A       | N/A          | Inc-C14orf79-1 |
| A_33_P3352562  | 11,2433 | 9,14253 | 4,289382583 | ENST00000389395 | 126321    | NM_174983    | MFS12          |
| A_23_P391396   | 8,47062 | 6,36995 | 4,289085276 | ENST00000368648 | 253738    | NM_001005463 | EBF3           |
| A_22_P00024519 | 3,72712 | 1,62675 | 4,288193478 | ENST00000430050 | 440390    | NR_126008    | LOC440390      |
| A_21_P0005628  | 10,9227 | 8,82405 | 4,283084084 | ENST00000500112 | 100507056 | NR_108049    | CCAT1          |
| A_33_P3214404  | 3,75819 | 1,66274 | 4,273594428 | ENST00000456611 | N/A       | N/A          | N/A            |
| A_21_P0007262  | 3,74621 | 1,65117 | 4,272380086 | N/A             | N/A       | N/A          | Inc-CCDC67-1   |
| A_33_P3326872  | 5,71654 | 3,62302 | 4,267881146 | N/A             | N/A       | N/A          | N/A            |
| A_23_P91350    | 12,8128 | 10,7199 | 4,266047413 | ENST00000379019 | 56261     | NM_019593    | GPCPD1         |
| A_21_P0004299  | 3,74892 | 1,65711 | 4,262825502 | N/A             | N/A       | N/A          | Inc-TCF7-1     |
| A_22_P00013905 | 3,75418 | 1,66292 | 4,261200691 | ENST00000434440 | N/A       | N/A          | N/A            |
| A_21_P0014645  | 5,94581 | 3,85536 | 4,258808914 | N/A             | 100009613 | NR_103835    | ANO1-AS2       |
| A_24_P42693    | 9,14918 | 7,05942 | 4,256772534 | ENST00000620614 | 57834     | NM_021187    | CYP4F11        |
| A_22_P00004636 | 6,67153 | 4,58221 | 4,255474481 | N/A             | 101927571 | NR_110782    | LOC101927571   |
| A_33_P3323298  | 12,2355 | 10,1467 | 4,253940929 | ENST00000371222 | 3725      | NM_002228    | JUN            |
| A_23_P35916    | 8,91864 | 6,83024 | 4,25276165  | ENST00000527181 | 472       | NM_000051    | ATM            |
| A_33_P3330944  | 3,59628 | 1,50848 | 4,250993344 | ENST00000507979 | N/A       | N/A          | N/A            |
| A_22_P00010619 | 4,52247 | 2,43481 | 4,250580845 | ENST00000565428 | N/A       | BC043231     | N/A            |
| A_33_P3307536  | 4,66369 | 2,57779 | 4,245398557 | ENST00000431488 | 642633    | NR_108107    | FAM230B        |
| A_21_P0005948  | 3,74869 | 1,6638  | 4,242427484 | N/A             | N/A       | N/A          | Inc-ZNF572-1   |
| A_21_P0009687  | 3,73713 | 1,65503 | 4,234231064 | ENST00000549718 | 126536    | NR_026828    | LINC00661      |
| A_22_P00009616 | 3,63756 | 1,55576 | 4,233350672 | N/A             | 100507554 | XR_425526    | LOC100507554   |
| A_21_P0006296  | 3,73635 | 1,65583 | 4,229596389 | N/A             | N/A       | N/A          | Inc-SPTLC1-1   |
| A_19_P00317647 | 6,52871 | 4,4482  | 4,229567071 | N/A             | 92249     | NR_015353    | LINC01278      |
| A_33_P3265526  | 3,85557 | 1,77649 | 4,2253768   | ENST00000403412 | 79612     | NM_001110798 | NAA16          |
| A_33_P3219572  | 10,717  | 8,63832 | 4,224205439 | N/A             | N/A       | N/A          | N/A            |
| A_33_P3286151  | 3,56514 | 1,4865  | 4,224088321 | N/A             | 100132891 | NR_033651    | LOC100132891   |
| A_33_P3247559  | 3,73934 | 1,66637 | 4,207519623 | ENST00000370017 | 163479    | NM_001144937 | FNDC7          |
| A_33_P3298099  | 7,02657 | 4,95458 | 4,204662492 | N/A             | 102725453 | XM_006710128 | LOC102725453   |
| A_33_P3333627  | 4,06879 | 1,99833 | 4,200205747 | ENST00000406205 | 221692    | NM_030948    | PHACTR1        |
| A_33_P3301286  | 12,0107 | 9,94093 | 4,198197388 | ENST00000393094 | 8065      | NM_003478    | CUL5           |
| A_23_P50368    | 9,72572 | 7,65805 | 4,1920909   | ENST00000610577 | 126014    | NM_206818    | OSCAR          |

|                |         |         |             |                 |           |              |                 |
|----------------|---------|---------|-------------|-----------------|-----------|--------------|-----------------|
| A_22_P00018205 | 5,2634  | 3,1961  | 4,191015915 | N/A             | N/A       | AK094134     | Inc-ZNF643-1    |
| A_22_P00011146 | 3,71326 | 1,64739 | 4,186863836 | N/A             | 100132111 | NR_024237    | LOC100132111    |
| A_33_P3336248  | 3,68383 | 1,61856 | 4,185122931 | N/A             | N/A       | AK127397     | N/A             |
| A_33_P3395028  | 7,60613 | 5,54117 | 4,184223746 | ENST00000465215 | 152225    | NR_026934    | LOC152225       |
| A_22_P00007806 | 3,71867 | 1,65494 | 4,180657919 | N/A             | N/A       | N/A          | Inc-HOXB1-1     |
| A_23_P384761   | 5,82594 | 3,76273 | 4,179151328 | ENST00000335135 | 2626      | NM_002052    | GATA4           |
| A_33_P3407424  | 14,7248 | 12,6622 | 4,177384674 | ENST00000249014 | 11135     | NM_152243    | CDC42EP1        |
| A_32_P200238   | 13,4909 | 11,4305 | 4,171019335 | ENST00000589333 | 652995    | NR_015379    | UCA1            |
| A_21_P0008649  | 3,84611 | 1,78657 | 4,168533704 | N/A             | N/A       | N/A          | Inc-RPLP1-1     |
| A_23_P371876   | 8,35344 | 6,29703 | 4,159499662 | ENST00000417449 | 91801     | NM_138775    | ALKBH8          |
| A_33_P3419190  | 13,9818 | 11,9255 | 4,159182528 | ENST00000395748 | 374       | NM_001657    | AREG            |
| A_21_P0013747  | 3,55763 | 1,50307 | 4,154169262 | N/A             | N/A       | N/A          | XLOC_I2_015438  |
| A_21_P0012855  | 3,71741 | 1,66432 | 4,149938625 | ENST00000432677 | 101926975 | NR_110558    | LOC101926975    |
| A_23_P156826   | 7,56252 | 5,50946 | 4,14985233  | ENST00000514824 | 84830     | NM_032744    | ADTRP           |
| A_22_P00021288 | 9,77943 | 7,72961 | 4,140543062 | ENST00000430494 | N/A       | N/A          | N/A             |
| A_33_P3410484  | 7,60079 | 5,55201 | 4,137559332 | ENST00000372121 | 64849     | NM_001193339 | SLC13A3         |
| A_21_P0010665  | 3,70798 | 1,65981 | 4,13581026  | N/A             | N/A       | N/A          | XLOC_I2_001238  |
| A_23_P202988   | 14,0016 | 11,9538 | 4,134749707 | ENST00000534152 | 60496     | NM_015423    | AASDHPPT        |
| A_23_P86731    | 10,8955 | 8,84987 | 4,128535184 | ENST00000426961 | 8187      | NM_005674    | ZNF239          |
| A_22_P00020778 | 3,50779 | 1,46506 | 4,12024464  | N/A             | N/A       | BC040634     | Inc-DPH1-1      |
| A_33_P3281695  | 3,69965 | 1,65694 | 4,120187521 | ENST00000391827 | 114548    | NM_001243133 | NLRP3           |
| A_22_P00004999 | 8,81794 | 6,77545 | 4,119559272 | N/A             | 84259     | NM_032299    | DCUN1D5         |
| A_33_P3377090  | 3,64491 | 1,60326 | 4,117161383 | ENST00000511478 | N/A       | N/A          | N/A             |
| A_33_P3223522  | 3,42825 | 1,38711 | 4,115706203 | N/A             | N/A       | XM_005276270 | Inc-SLC25A48-2  |
| A_23_P166306   | 9,24727 | 7,20683 | 4,113709734 | ENST00000617706 | 875       | NM_000071    | CBS             |
| A_33_P3262124  | 5,72534 | 3,68492 | 4,113652706 | ENST00000612971 | 64386     | NM_022468    | MMP25           |
| A_33_P3214670  | 3,91426 | 1,87458 | 4,111543236 | ENST00000290573 | 3099      | NM_000189    | HK2             |
| A_23_P418234   | 7,98049 | 5,94197 | 4,108238675 | ENST00000568954 | 23035     | NM_015020    | PHLPP2          |
| A_33_P3405936  | 3,85672 | 1,81884 | 4,106416607 | ENST00000439373 | 149281    | NM_001136107 | METTL11B        |
| A_22_P00015052 | 13,284  | 11,2466 | 4,105050585 | ENST00000584686 | 285958    | NR_003697    | SNHG15          |
| A_22_P00024608 | 3,67689 | 1,63996 | 4,103713463 | ENST00000556763 | N/A       | N/A          | N/A             |
| A_22_P00018594 | 4,92422 | 2,88769 | 4,10257583  | ENST00000473756 | N/A       | N/A          | N/A             |
| A_21_P0008909  | 3,47975 | 1,44378 | 4,100983673 | N/A             | N/A       | N/A          | Inc-CLEC19A.1-2 |

|                |         |         |             |                 |           |              |                |
|----------------|---------|---------|-------------|-----------------|-----------|--------------|----------------|
| A_33_P3237835  | 3,70713 | 1,67172 | 4,099392134 | N/A             | N/A       | N/A          | N/A            |
| A_21_P0010866  | 4,13847 | 2,10325 | 4,098852288 | ENST00000361085 | 7587      | N/A          | ZNF37A         |
| A_22_P00018159 | 3,85925 | 1,82421 | 4,098340921 | ENST00000591531 | 728485    | NM_001294306 | LOC728485      |
| A_21_P0011779  | 7,48876 | 5,45387 | 4,09791483  | ENST00000590657 | 100506930 | XR_424981    | LINC00665      |
| A_33_P3364180  | 3,58674 | 1,55503 | 4,088892121 | ENST00000285046 | 152273    | NM_152536    | FGD5           |
| A_33_P3328543  | 3,64468 | 1,6145  | 4,084558087 | N/A             | N/A       | N/A          | N/A            |
| A_22_P00018194 | 3,54556 | 1,51572 | 4,083595592 | N/A             | N/A       | N/A          | Inc-ZNF613-2   |
| A_23_P136671   | 5,88209 | 3,85247 | 4,082972923 | ENST00000622664 | 7364      | NM_001074    | UGT2B7         |
| A_23_P165783   | 7,62255 | 5,59314 | 4,082378645 | ENST00000478712 | 79083     | NM_024101    | MLPH           |
| A_23_P359897   | 11,2854 | 9,25674 | 4,080256929 | ENST00000472616 | 80853     | NM_030647    | KDM7A          |
| A_33_P3356413  | 3,59203 | 1,56445 | 4,077203596 | N/A             | N/A       | N/A          | N/A            |
| A_23_P4416     | 4,05729 | 2,03316 | 4,067465192 | ENST00000395824 | 57336     | NM_020653    | ZNF287         |
| A_23_P201181   | 3,59227 | 1,57062 | 4,060479206 | ENST00000484147 | 26191     | NM_012411    | PTPN22         |
| A_22_P00010130 | 3,94231 | 1,92158 | 4,057890682 | N/A             | N/A       | BC039378     | Inc-MRPL3-2    |
| A_23_P401361   | 8,31735 | 6,29726 | 4,056090943 | ENST00000542749 | 57605     | NM_020845    | PITPNM2        |
| A_33_P3349506  | 3,67519 | 1,6558  | 4,054123393 | ENST00000520314 | 728715    | N/A          | LOC728715      |
| A_33_P3406886  | 3,48557 | 1,4678  | 4,049573579 | ENST00000602935 | 388815    | NR_111004    | MIR99AHG       |
| A_22_P00003311 | 3,98235 | 1,96459 | 4,04954551  | N/A             | 101927604 | NR_110681    | LOC101927604   |
| A_23_P79518    | 14,7034 | 12,6866 | 4,046851752 | ENST00000263341 | 3553      | NM_000576    | IL1B           |
| A_32_P180265   | 8,41847 | 6,40343 | 4,04191785  | N/A             | N/A       | N/A          | N/A            |
| A_21_P0013277  | 3,51695 | 1,50542 | 4,032096033 | N/A             | N/A       | N/A          | XLOC_I2_013646 |
| A_22_P00010275 | 4,38054 | 2,36964 | 4,03033567  | N/A             | N/A       | N/A          | Inc-MTMR9-1    |
| A_33_P3261408  | 9,72921 | 7,71876 | 4,029078739 | N/A             | 259236    | NM_147196    | TMIE           |
| A_23_P67980    | 9,23887 | 7,22852 | 4,028799475 | ENST00000309446 | 8609      | NM_003709    | KLF7           |
| A_22_P00006642 | 3,64067 | 1,63048 | 4,028352691 | ENST00000552303 | N/A       | BI758808     | N/A            |
| A_19_P00316371 | 3,70455 | 1,69454 | 4,027850119 | N/A             | 100506178 | NR_038393    | LOC100506178   |
| A_21_P0001165  | 3,70079 | 1,69089 | 4,027543023 | N/A             | 100873974 | N/A          | KCNC4-AS1      |
| A_33_P3391126  | 12,8897 | 10,8807 | 4,025031294 | ENST00000359874 | 11005     | NM_001127698 | SPINK5         |
| A_21_P0014075  | 6,67326 | 4,66553 | 4,02148963  | N/A             | 339400    | XR_108352    | FLG-AS1        |
| A_33_P3263106  | 3,6525  | 1,64604 | 4,017951083 | ENST00000489000 | 196792    | N/A          | FAM24B         |
| A_22_P00016429 | 6,69999 | 4,69359 | 4,017783985 | ENST00000557544 | 100750246 | NR_047116    | HIF1A-AS1      |
| A_22_P00008734 | 10,885  | 8,87974 | 4,014610435 | ENST00000456953 | 388796    | NR_015366    | SNHG17         |
| A_23_P110569   | 5,39463 | 3,39229 | 4,006493122 | ENST00000282369 | 55521     | NM_018700    | TRIM36         |

|                |         |         |             |                 |           |              |                |
|----------------|---------|---------|-------------|-----------------|-----------|--------------|----------------|
| A_24_P376120   | 3,62774 | 1,62557 | 4,006021045 | ENST00000373675 | 84665     | NM_032578    | MYPN           |
| A_23_P66881    | 3,53674 | 1,53465 | 4,00579891  | ENST00000584234 | 8787      | NM_003835    | RGS9           |
| A_23_P356494   | 14,3476 | 12,3462 | 4,003883508 | ENST00000359874 | 11005     | NM_006846    | SPINK5         |
| A_23_P96291    | 11,0751 | 9,07415 | 4,002634827 | ENST00000356661 | 4100      | NM_004988    | MAGEA1         |
| A_23_P318348   | 3,66854 | 1,66971 | 3,996757386 | N/A             | 255193    | NR_033400    | CSNK1G2-AS1    |
| A_22_P00008354 | 3,65542 | 1,65695 | 3,995760188 | ENST00000608417 | 101929093 | NR_110793    | LINC01350      |
| A_33_P3420043  | 3,65997 | 1,66289 | 3,991912228 | ENST00000409664 | 80034     | NM_001172173 | CSRNP3         |
| A_22_P00001149 | 5,59289 | 3,59645 | 3,990141752 | ENST00000547851 | 100233209 | AK092995     | PCED1B-AS1     |
| A_24_P140608   | 12,8986 | 10,9052 | 3,981742708 | ENST00000230990 | 1839      | NM_001945    | HBEGF          |
| A_22_P00024463 | 4,08822 | 2,0957  | 3,979314707 | N/A             | N/A       | N/A          | Inc-ARHGAP25-1 |
| A_21_P0002413  | 3,43918 | 1,44715 | 3,977963393 | ENST00000421581 | N/A       | N/A          | N/A            |
| A_22_P00010157 | 6,59327 | 4,60233 | 3,974959056 | N/A             | N/A       | N/A          | Inc-MRPL48-1   |
| A_33_P3353051  | 15,7337 | 13,743  | 3,974297855 | ENST00000375639 | 50854     | NM_001287483 | C6orf48        |
| A_23_P303286   | 4,7561  | 2,7677  | 3,967966924 | ENST00000316073 | 126638    | NM_001122965 | RPTN           |
| A_33_P3230578  | 3,70129 | 1,71432 | 3,964035822 | N/A             | N/A       | N/A          | N/A            |
| A_21_P0000023  | 6,40423 | 4,41753 | 3,963294024 | N/A             | 55781     | NM_001159749 | RIOK2          |
| A_23_P98121    | 3,51733 | 1,53108 | 3,962058001 | ENST00000476166 | 53828     | NM_173160    | FXD4           |
| A_22_P00005119 | 7,08175 | 5,09837 | 3,954183985 | N/A             | N/A       | N/A          | Inc-DHRS9-1    |
| A_21_P0013331  | 3,65224 | 1,66953 | 3,952348054 | N/A             | N/A       | N/A          | XLOC_I2_013886 |
| A_33_P3237150  | 9,82774 | 7,84554 | 3,950951126 | ENST00000378827 | 650       | NM_001200    | BMP2           |
| A_33_P3851174  | 3,55242 | 1,57025 | 3,950868969 | ENST00000569446 | 83482     | NM_031309    | SCRT1          |
| A_21_P0013212  | 5,51201 | 3,53029 | 3,949636821 | N/A             | N/A       | N/A          | XLOC_I2_013439 |
| A_21_P0004426  | 3,63162 | 1,65159 | 3,945012851 | N/A             | N/A       | N/A          | Inc-ST8SIA4-1  |
| A_21_P0003027  | 3,78226 | 1,80365 | 3,941131808 | N/A             | 644662    | XR_171034    | LOC644662      |
| A_33_P3403773  | 10,4396 | 8,46161 | 3,939438465 | ENST00000316950 | 148266    | NM_152484    | ZNF569         |
| A_33_P3340782  | 11,2378 | 9,26189 | 3,933762888 | ENST00000398454 | 11005     | NM_001127699 | SPINK5         |
| A_33_P3304242  | 3,72373 | 1,74832 | 3,932399785 | ENST00000442556 | 27019     | NM_001281428 | DNAI1          |
| A_21_P0004781  | 3,37935 | 1,40481 | 3,930029114 | ENST00000454788 | 645434    | NR_033919    | LOC645434      |
| A_23_P157316   | 3,87331 | 1,89881 | 3,929920152 | ENST00000409607 | 135927    | NM_178829    | C7orf34        |
| A_23_P147805   | 14,0722 | 12,0983 | 3,928286084 | ENST00000457596 | 7378      | NM_001287428 | UPP1           |
| A_33_P3348569  | 3,62561 | 1,65251 | 3,926108383 | ENST00000575017 | 283189    | NM_001005284 | OR9G4          |
| A_22_P00012993 | 3,62162 | 1,6487  | 3,925618567 | ENST00000444848 | 339666    | NR_038918    | LOC339666      |
| A_24_P940115   | 8,51467 | 6,54256 | 3,92341515  | ENST00000276297 | 10395     | NM_182643    | DLC1           |

|                |         |         |             |                 |           |           |                       |
|----------------|---------|---------|-------------|-----------------|-----------|-----------|-----------------------|
| A_23_P311585   | 3,61442 | 1,64252 | 3,922844096 | ENST00000610858 | 81870     | NM_030975 | KRTAP9-9              |
| A_21_P0002852  | 7,04267 | 5,07337 | 3,915780781 | N/A             | 101928931 | NR_110702 | SEMA3B-AS1            |
| A_33_P6803725  | 12,3435 | 10,3752 | 3,913067509 | ENST00000539303 | N/A       | AK095849  | N/A                   |
| A_24_P326491   | 3,85754 | 1,89032 | 3,910139287 | ENST00000375790 | 283078    | NM_173576 | MKX                   |
| A_22_P00025794 | 3,82282 | 1,8575  | 3,904993102 | ENST00000508199 | N/A       | N/A       | N/A                   |
| A_33_P3346771  | 3,63217 | 1,66686 | 3,904966035 | ENST00000466992 | 221264    | AK124171  | AK9                   |
| A_23_P380318   | 8,88673 | 6,92216 | 3,902963579 | ENST00000545030 | 1961      | NM_001965 | EGR4                  |
| A_22_P00016018 | 4,66949 | 2,70507 | 3,9025578   | N/A             | N/A       | N/A       | Inc-TFEC-2            |
| A_21_P0001194  | 3,58784 | 1,6235  | 3,902341403 | ENST00000451439 | 284688    | NR_026957 | LINC01142             |
| A_23_P339098   | 14,2259 | 12,2617 | 3,901962736 | ENST00000525071 | 54733     | NM_017515 | SLC35F2               |
| A_21_P0007616  | 3,6043  | 1,64055 | 3,90074584  | N/A             | N/A       | N/A       | Inc-RP11-552114.1.1-1 |
| A_24_P320665   | 4,43565 | 2,47467 | 3,893263524 | ENST00000432176 | 84668     | NM_032581 | FAM126A               |
| A_33_P3216621  | 4,17681 | 2,21604 | 3,892696858 | N/A             | N/A       | N/A       | N/A                   |
| A_23_P303671   | 6,43607 | 4,4755  | 3,892157253 | ENST00000344604 | 1842      | NM_001393 | ECM2                  |
| A_33_P3349496  | 4,76659 | 2,80632 | 3,891347986 | N/A             | 51134     | XR_429106 | CEP83                 |
| A_23_P148088   | 4,17654 | 2,21659 | 3,890484953 | ENST00000492082 | 2266      | NM_000509 | FGG                   |
| A_23_P67414    | 4,13769 | 2,18105 | 3,881569179 | ENST00000221538 | 81492     | NM_030785 | RSPH6A                |
| A_22_P00014004 | 3,61107 | 1,65492 | 3,880251058 | ENST00000568143 | N/A       | BC043169  | N/A                   |
| A_23_P134835   | 3,41253 | 1,45641 | 3,880170371 | ENST00000454498 | 55790     | NM_018371 | CSGALNACT1            |
| A_23_P351467   | 3,9441  | 1,9886  | 3,878503222 | ENST00000471416 | 8418      | NR_002174 | CMAHP                 |
| A_24_P911464   | 3,60533 | 1,65081 | 3,87586951  | ENST00000409985 | 5378      | BC008410  | PMS1                  |
| A_21_P0002540  | 3,60774 | 1,65478 | 3,87168076  | N/A             | N/A       | N/A       | Inc-TNP1-1            |
| A_21_P0012978  | 4,92671 | 2,97397 | 3,871090404 | ENST00000505339 | N/A       | N/A       | N/A                   |
| A_33_P3299972  | 3,60156 | 1,64933 | 3,869722195 | N/A             | N/A       | N/A       | N/A                   |
| A_21_P0005140  | 3,7594  | 1,80933 | 3,86393279  | N/A             | N/A       | N/A       | Inc-ULBP2-1           |
| A_21_P0005734  | 3,59561 | 1,6465  | 3,861362502 | N/A             | N/A       | N/A       | Inc-RIPK2-1           |
| A_23_P435636   | 4,54573 | 2,59666 | 3,861255444 | ENST00000317060 | 199699    | NM_152654 | DAND5                 |
| A_22_P00003736 | 4,17548 | 2,22657 | 3,860827241 | ENST00000562656 | N/A       | N/A       | N/A                   |
| A_23_P17065    | 10,2797 | 8,33181 | 3,858098562 | ENST00000473642 | 6364      | NM_004591 | CCL20                 |
| A_23_P369343   | 13,6462 | 11,6991 | 3,855986498 | ENST00000599166 | 11202     | NM_144505 | KLK8                  |
| A_23_P331670   | 15,6692 | 13,7225 | 3,85491754  | ENST00000216962 | 5834      | NM_002862 | PYGB                  |
| A_22_P00009022 | 4,92698 | 2,98177 | 3,850938278 | N/A             | N/A       | BC014333  | Inc-LCE5A-2           |
| A_32_P79434    | 5,39115 | 3,44613 | 3,85043115  | ENST00000389418 | 5799      | NM_002847 | PTPRN2                |

|                |         |         |             |                 |           |              |                |
|----------------|---------|---------|-------------|-----------------|-----------|--------------|----------------|
| A_23_P17512    | 14,8312 | 12,8862 | 3,850377772 | ENST00000377452 | 92675     | NM_080820    | DTD1           |
| A_33_P3648417  | 3,59022 | 1,64594 | 3,848456659 | N/A             | 677834    | BE972465     | SNORA55        |
| A_22_P00011562 | 7,70129 | 5,75845 | 3,844617308 | N/A             | 10824     | NR_125391    | DIAPH2-AS1     |
| A_23_P309396   | 6,87278 | 4,93022 | 3,843871213 | ENST00000382483 | 94137     | NM_178857    | RP1L1          |
| A_22_P00016569 | 3,96725 | 2,02658 | 3,838838853 | N/A             | N/A       | DA380299     | Inc-TNFRSF17-2 |
| A_23_P21134    | 12,8942 | 10,9549 | 3,835195177 | ENST00000618206 | 1649      | NM_004083    | DDIT3          |
| A_23_P154849   | 3,41135 | 1,47318 | 3,832192413 | ENST00000426947 | 116448    | NM_138983    | OLIG1          |
| A_22_P00010451 | 3,94999 | 2,0136  | 3,827467162 | ENST00000563681 | 101929222 | NR_104190    | DISC1FP1       |
| A_21_P0009206  | 3,59253 | 1,65631 | 3,827016179 | ENST00000574471 | 101929552 | XR_243527    | LOC101929552   |
| A_21_P0014226  | 5,72155 | 3,78568 | 3,826087851 | N/A             | 101929467 | NR_125775    | LURAP1L-AS1    |
| A_23_P53176    | 11,2292 | 9,29454 | 3,822880226 | ENST00000393679 | 2348      | NM_016725    | FOLR1          |
| A_33_P3770642  | 3,59406 | 1,65957 | 3,822429783 | ENST00000556159 | 503519    | NR_038851    | LINC00929      |
| A_23_P150316   | 8,45121 | 6,51673 | 3,822403288 | ENST00000571244 | 4321      | NM_002426    | MMP12          |
| A_33_P3296230  | 6,10625 | 4,17178 | 3,822376793 | N/A             | N/A       | N/A          | Inc-KLHDC5-1   |
| A_21_P0005293  | 10,3534 | 8,41908 | 3,821979394 | ENST00000440034 | N/A       | N/A          | N/A            |
| A_24_P68908    | 12,376  | 10,4427 | 3,819278171 | ENST00000423298 | 344887    | N/A          | LOC344887      |
| A_33_P3385909  | 3,58347 | 1,65047 | 3,818484057 | ENST00000291535 | 53347     | NM_001243467 | UBASH3A        |
| A_22_P00001817 | 4,24284 | 2,31027 | 3,817346114 | N/A             | N/A       | AI079571     | Inc-ATP6V1D-2  |
| A_33_P3209960  | 7,61329 | 5,68127 | 3,815891101 | ENST00000441258 | 10235     | NM_153819    | RASGRP2        |
| A_22_P00015605 | 4,46899 | 2,53774 | 3,813855015 | N/A             | 101927620 | NR_110062    | LOC101927620   |
| A_22_P00007120 | 3,56976 | 1,63895 | 3,812692024 | N/A             | N/A       | BC073826     | Inc-GMDS-2     |
| A_22_P00017599 | 11,7395 | 9,80984 | 3,809654065 | ENST00000538266 | 23642     | NR_003098    | SNHG1          |
| A_22_P00024421 | 3,58809 | 1,65844 | 3,809627659 | N/A             | N/A       | N/A          | Inc-NDEL1-1    |
| A_21_P0010989  | 5,80971 | 3,88064 | 3,808096399 | N/A             | N/A       | N/A          | XLOC_I2_002433 |
| A_33_P3358277  | 3,57658 | 1,64868 | 3,805009353 | ENST00000366620 | 3775      | AK090902     | KCNK1          |
| A_23_P370588   | 4,94999 | 3,02226 | 3,804561016 | ENST00000239144 | 3218      | NM_024016    | HOXB8          |
| A_33_P3264404  | 4,51558 | 2,58879 | 3,80208293  | N/A             | 100132593 | AK098270     | LOC100132593   |
| A_23_P308042   | 3,34341 | 1,41721 | 3,80052836  | ENST00000296847 | 154386    | NM_152554    | C6orf195       |
| A_23_P141555   | 3,73564 | 1,81003 | 3,798974426 | ENST00000177694 | 30009     | NM_013351    | TBX21          |
| A_33_P3351440  | 3,56024 | 1,63528 | 3,7972632   | N/A             | N/A       | N/A          | N/A            |
| A_22_P00013971 | 4,01903 | 2,09481 | 3,795315973 | N/A             | N/A       | N/A          | Inc-RTN2-1     |
| A_33_P3421318  | 3,41838 | 1,49489 | 3,793396039 | N/A             | 644192    | NR_125738    | NR2F2-AS1      |
| A_23_P39931    | 7,28807 | 5,36545 | 3,791109166 | ENST00000413539 | 8291      | NM_003494    | DYSF           |

|                |         |         |             |                 |           |              |                |
|----------------|---------|---------|-------------|-----------------|-----------|--------------|----------------|
| A_22_P00023507 | 3,5841  | 1,66156 | 3,790898948 | ENST00000585048 | N/A       | N/A          | N/A            |
| A_23_P205867   | 7,29998 | 5,37777 | 3,790031923 | ENST00000617575 | 10002     | NM_014249    | NR2E3          |
| A_21_P0001959  | 9,65476 | 7,73282 | 3,789322686 | ENST00000430494 | N/A       | N/A          | N/A            |
| A_21_P0011563  | 3,40694 | 1,48709 | 3,783837153 | N/A             | N/A       | N/A          | XLOC_I2_005933 |
| A_22_P00015789 | 3,57704 | 1,65821 | 3,781162887 | N/A             | N/A       | AK054726     | Inc-TARBP1-4   |
| A_33_P3333054  | 10,6435 | 8,72545 | 3,779119136 | ENST00000533171 | 55638     | NM_001099744 | SYBU           |
| A_23_P398566   | 6,94707 | 5,0293  | 3,778385751 | ENST00000618101 | 8013      | NM_173200    | NR4A3          |
| A_24_P393571   | 10,3079 | 8,39017 | 3,778280994 | ENST00000545168 | 9615      | NM_004293    | GDA            |
| A_22_P00006246 | 3,52962 | 1,61306 | 3,775218117 | N/A             | N/A       | N/A          | Inc-FAM5B-2    |
| A_21_P0007223  | 9,19878 | 7,28224 | 3,775165782 | ENST00000529069 | 101927056 | NR_125395    | LOC101927056   |
| A_33_P3233378  | 8,64375 | 6,72828 | 3,772366902 | N/A             | 101060157 | XM_006709929 | LOC101060157   |
| A_21_P0010397  | 4,10169 | 2,18641 | 3,771870122 | N/A             | N/A       | N/A          | Inc-RGL4-4     |
| A_22_P00022108 | 3,54862 | 1,63345 | 3,771582542 | N/A             | 100874070 | NR_046547    | USP12-AS1      |
| A_24_P109111   | 3,43801 | 1,52306 | 3,771007448 | ENST00000361902 | 257202    | NM_182701    | GPX6           |
| A_33_P3423445  | 3,84586 | 1,93095 | 3,770902895 | N/A             | 100129543 | XM_006722596 | ZNF730         |
| A_33_P3306898  | 6,176   | 4,26262 | 3,766905915 | ENST00000321505 | 25758     | NM_012194    | KIAA1549L      |
| A_23_P122077   | 3,35704 | 1,44543 | 3,762287243 | ENST00000322348 | 51301     | NM_016591    | GCNT4          |
| A_33_P3360363  | 5,32468 | 3,4145  | 3,75855991  | ENST00000622443 | 2626      | NM_002052    | GATA4          |
| A_22_P00008012 | 7,13955 | 5,22967 | 3,757778421 | N/A             | 101928931 | NR_110702    | SEMA3B-AS1     |
| A_22_P00023568 | 4,33075 | 2,422   | 3,754836269 | N/A             | N/A       | N/A          | Inc-NUP88-1    |
| A_22_P00010301 | 3,3954  | 1,48785 | 3,751714383 | N/A             | N/A       | N/A          | Inc-MTUS2-1    |
| A_33_P3267814  | 7,06623 | 5,16174 | 3,743765316 | N/A             | 57553     | NM_001136004 | MICAL3         |
| A_22_P00020001 | 4,38138 | 2,4787  | 3,739071346 | N/A             | N/A       | BE893425     | Inc-OTUD1-1    |
| A_23_P167599   | 5,72235 | 3,82059 | 3,736687718 | ENST00000306320 | 54463     | NM_001034850 | FAM134B        |
| A_23_P141459   | 3,45861 | 1,56006 | 3,728382821 | ENST00000357424 | 2695      | NM_004123    | GIP            |
| A_33_P3234124  | 7,36474 | 5,46655 | 3,727452583 | ENST00000481917 | 151176    | NM_001291832 | FAM132B        |
| A_33_P3259929  | 3,36289 | 1,46587 | 3,724430911 | ENST00000623529 | 404216    | NR_103717    | LINC01561      |
| A_22_P00015538 | 3,93325 | 2,03632 | 3,724198576 | N/A             | N/A       | N/A          | Inc-STK32B-1   |
| A_23_P393727   | 8,02434 | 6,12984 | 3,71793101  | ENST00000412873 | 8828      | NM_201266    | NRP2           |
| A_21_P0012499  | 3,55091 | 1,65688 | 3,716719983 | N/A             | N/A       | N/A          | XLOC_I2_009867 |
| A_21_P0005055  | 3,4888  | 1,59521 | 3,715586613 | N/A             | N/A       | N/A          | Inc-SERINC1-2  |
| A_23_P47168    | 4,81022 | 2,91664 | 3,715560859 | ENST00000246841 | 23769     | NM_013280    | FLRT1          |
| A_33_P3312187  | 4,96164 | 3,06806 | 3,715560859 | N/A             | N/A       | N/A          | N/A            |



|                |         |         |             |                 |           |              |                 |
|----------------|---------|---------|-------------|-----------------|-----------|--------------|-----------------|
| A_21_P0010459  | 8,46229 | 6,56949 | 3,713552566 | ENST00000609178 | N/A       | N/A          | N/A             |
| A_32_P204980   | 3,34356 | 1,45085 | 3,71332091  | ENST00000321535 | 162517    | NM_153230    | FBXO39          |
| A_33_P3235940  | 8,1405  | 6,24916 | 3,709796371 | ENST00000376853 | 5653      | NM_001012964 | KLK6            |
| A_32_P125771   | 3,55184 | 1,66625 | 3,695040046 | ENST00000517769 | 26166     | NM_015668    | RGS22           |
| A_23_P206077   | 9,0835  | 7,20155 | 3,685729005 | ENST00000557927 | 64782     | NM_022767    | AEN             |
| A_22_P00010065 | 7,67736 | 5,79641 | 3,683175137 | N/A             | 101929467 | NR_125775    | LURAP1L-AS1     |
| A_23_P47967    | 4,38489 | 2,50528 | 3,679755729 | ENST00000261731 | 64211     | NM_022363    | LHX5            |
| A_21_P0006955  | 3,24927 | 1,36985 | 3,679271145 | N/A             | N/A       | N/A          | Inc-KLF6-3      |
| A_33_P6473174  | 4,37936 | 2,50041 | 3,67807271  | ENST00000565584 | 101929164 | NR_110746    | LOC101929164    |
| A_23_P218626   | 3,92324 | 2,04472 | 3,676976612 | ENST00000405370 | 129807    | NM_080741    | NEU4            |
| A_24_P416645   | 9,9292  | 8,05095 | 3,676288531 | ENST00000595793 | 26085     | NM_015596    | KLK13           |
| A_23_P137157   | 3,81842 | 1,94044 | 3,675600579 | ENST00000442361 | 5973      | NM_002910    | RENBP           |
| A_21_P0003941  | 4,13221 | 2,25465 | 3,674530687 | ENST00000513626 | 100505994 | N/A          | LUCAT1          |
| A_22_P00003558 | 3,9058  | 2,02941 | 3,671551916 | N/A             | 641364    | NR_038380    | SLC7A11-AS1     |
| A_21_P0007989  | 3,52307 | 1,64723 | 3,670152474 | ENST00000415620 | 104355147 | N/A          | LINC00428       |
| A_23_P133536   | 4,91442 | 3,04007 | 3,666363936 | ENST00000513623 | 133690    | NM_144647    | CAPSL           |
| A_23_P11697    | 4,32363 | 2,44983 | 3,664966471 | ENST00000522796 | 127540    | NM_145205    | HMGB4           |
| A_33_P3236846  | 4,18043 | 2,30694 | 3,664179044 | ENST00000393018 | 2840      | NM_001161415 | GPR17           |
| A_33_P3221783  | 5,0355  | 3,16269 | 3,662452376 | N/A             | 85480     | NM_033035    | TSLP            |
| A_21_P0013888  | 8,22423 | 6,35288 | 3,658747868 | ENST00000400230 | 93492     | NM_199254    | TPTE2           |
| A_22_P00002716 | 11,2401 | 9,37101 | 3,65302088  | N/A             | N/A       | N/A          | Inc-C20orf197-3 |
| A_22_P00008921 | 3,48386 | 1,61621 | 3,649376503 | ENST00000539034 | 100507066 | NR_045382    | CLIP1-AS1       |
| A_33_P3377176  | 3,52188 | 1,655   | 3,647429265 | N/A             | N/A       | N/A          | N/A             |
| A_22_P00016941 | 3,4575  | 1,59234 | 3,643083343 | N/A             | N/A       | N/A          | Inc-TSPO-1      |
| A_23_P344194   | 3,5009  | 1,63743 | 3,638818265 | ENST00000316554 | 387856    | NM_001013635 | CCDC184         |
| A_24_P64329    | 9,71101 | 7,84835 | 3,636775827 | ENST00000298630 | 282974    | NM_173575    | STK32C          |
| A_21_P0007484  | 9,83181 | 7,96992 | 3,634835313 | ENST00000547804 | 100287314 | NR_040245    | LINC00941       |
| A_33_P3252068  | 7,57388 | 5,71432 | 3,628969672 | ENST00000472616 | 80853     | NM_030647    | KDM7A           |
| A_23_P501754   | 6,91539 | 5,05622 | 3,627988795 | ENST00000579852 | 1440      | NM_000759    | CSF3            |
| A_23_P39056    | 6,9675  | 5,10871 | 3,627033323 | ENST00000597707 | 5650      | NM_005046    | KLK7            |
| A_24_P140405   | 3,52342 | 1,66609 | 3,623364641 | ENST00000286657 | 9508      | NM_014243    | ADAMTS3         |
| A_22_P00015009 | 3,48917 | 1,63278 | 3,621004576 | ENST00000568306 | N/A       | AF086421     | N/A             |
| A_33_P3229672  | 6,12227 | 4,26632 | 3,619900393 | N/A             | N/A       | N/A          | N/A             |

|                |         |         |             |                 |        |              |                |
|----------------|---------|---------|-------------|-----------------|--------|--------------|----------------|
| A_33_P3240693  | 6,00739 | 4,15202 | 3,618445394 | ENST00000567745 | 79875  | NM_001286429 | THSD4          |
| A_23_P91850    | 14,2308 | 12,3769 | 3,614760342 | ENST00000475972 | 53833  | NM_144717    | IL2ORB         |
| A_23_P25615    | 3,47814 | 1,62462 | 3,613808354 | ENST00000379881 | 54937  | NM_017826    | SOHLH2         |
| A_22_P00020004 | 4,39469 | 2,54211 | 3,611454514 | N/A             | N/A    | DB042405     | Inc-ATG16L2-4  |
| A_33_P3422298  | 5,09716 | 3,24472 | 3,611104074 | ENST00000410078 | N/A    | S77011       | N/A            |
| A_23_P149121   | 3,54005 | 1,68802 | 3,610077979 | ENST00000395201 | 9077   | NM_004675    | DIRAS3         |
| A_21_P0005827  | 3,43188 | 1,58196 | 3,604801952 | N/A             | N/A    | N/A          | Inc-PLAT-2     |
| A_23_P20443    | 3,57344 | 1,72359 | 3,60462705  | ENST00000381569 | 11178  | NM_021020    | LZTS1          |
| A_23_P71073    | 3,51567 | 1,66735 | 3,600806315 | ENST00000242261 | 7291   | NM_000474    | TWIST1         |
| A_21_P0007516  | 3,38051 | 1,53228 | 3,600581692 | N/A             | N/A    | N/A          | Inc-CD9-3      |
| A_22_P00018411 | 3,80111 | 1,95294 | 3,600431951 | ENST00000572790 | N/A    | AI753316     | N/A            |
| A_24_P11315    | 3,50566 | 1,65754 | 3,600307172 | ENST00000491700 | 56944  | NM_020190    | OLFML3         |
| A_22_P00007207 | 5,76577 | 3,91841 | 3,598411059 | ENST00000581816 | 406980 | NR_029490    | MIR19B1        |
| A_22_P00007208 | 7,99097 | 6,14434 | 3,596590733 | ENST00000581816 | 407048 | NR_029508    | MIR92A1        |
| A_33_P3420633  | 4,04665 | 2,20007 | 3,596466086 | ENST00000409413 | 146325 | NM_145270    | PRR35          |
| A_21_P0005613  | 3,45907 | 1,61278 | 3,595743224 | N/A             | N/A    | N/A          | Inc-PTPRN2-1   |
| A_21_P0009686  | 6,67523 | 4,83003 | 3,593027556 | N/A             | N/A    | N/A          | Inc-OR10H5-2   |
| A_23_P23457    | 7,70681 | 5,86345 | 3,588447963 | ENST00000441801 | 54751  | NM_001024215 | FBLIM1         |
| A_23_P39454    | 8,49377 | 6,65051 | 3,588199239 | ENST00000307635 | 80032  | NM_024967    | ZNF556         |
| A_23_P99747    | 9,31877 | 7,477   | 3,584495299 | ENST00000542671 | 8814   | NM_004196    | CDKL1          |
| A_24_P245379   | 11,5677 | 9,72656 | 3,582930353 | ENST00000457692 | 5055   | NM_002575    | SERPINB2       |
| A_23_P159956   | 10,1565 | 8,31575 | 3,58196192  | ENST00000262843 | 11043  | NM_012216    | MID2           |
| A_21_P0009703  | 3,47641 | 1,63711 | 3,57836363  | N/A             | N/A    | N/A          | Inc-VSTM2B-4   |
| A_21_P0005075  | 3,50118 | 1,66257 | 3,576652609 | N/A             | N/A    | N/A          | Inc-TMEM242-1  |
| A_23_P39315    | 6,76409 | 4,92558 | 3,576404703 | ENST00000402119 | 57834  | NM_021187    | CYP4F11        |
| A_21_P0013953  | 3,68949 | 1,85201 | 3,57385227  | ENST00000453952 | N/A    | XM_005268285 | N/A            |
| A_23_P351275   | 12,6726 | 10,836  | 3,571672994 | ENST00000416681 | 7378   | NM_001287426 | UPP1           |
| A_33_P3364854  | 3,95765 | 2,12154 | 3,570460109 | ENST00000463646 | 55503  | NM_018646    | TRPV6          |
| A_22_P00020193 | 3,60981 | 1,77398 | 3,569767218 | ENST00000418660 | N/A    | N/A          | N/A            |
| A_23_P99741    | 9,27039 | 7,43524 | 3,56808504  | ENST00000395834 | 8814   | NM_004196    | CDKL1          |
| A_19_P00318107 | 5,17645 | 3,34247 | 3,565192559 | N/A             | N/A    | N/A          | XLOC_I2_015561 |
| A_33_P3398156  | 3,42409 | 1,59074 | 3,563636041 | ENST00000381813 | 192668 | NM_001037160 | CYS1           |
| A_23_P2745     | 9,90844 | 8,07622 | 3,560845893 | ENST00000356192 | 10804  | NM_006783    | GJB6           |

|                |         |         |             |                 |           |              |                 |
|----------------|---------|---------|-------------|-----------------|-----------|--------------|-----------------|
| A_24_P33895    | 8,23685 | 6,40489 | 3,560204222 | ENST00000366983 | 467       | NM_001040619 | ATF3            |
| A_23_P13244    | 3,45734 | 1,62538 | 3,560204222 | ENST00000303039 | 219477    | NM_001005205 | OR8J1           |
| A_21_P0007829  | 10,0351 | 8,20787 | 3,548550899 | ENST00000551972 | 100287314 | NR_040245    | LINC00941       |
| A_22_P00009168 | 3,4727  | 1,64615 | 3,546878719 | N/A             | 100505795 | NR_038072    | LOC100505795    |
| A_21_P0001958  | 7,74812 | 5,92159 | 3,546829549 | ENST00000440326 | N/A       | N/A          | N/A             |
| A_33_P3313899  | 6,54256 | 4,71692 | 3,544642181 | N/A             | 728228    | N/A          | LINC01433       |
| A_21_P0011965  | 3,30061 | 1,47594 | 3,542259732 | ENST00000444030 | N/A       | N/A          | N/A             |
| A_22_P00020853 | 3,38083 | 1,55645 | 3,541547765 | N/A             | N/A       | N/A          | Inc-DBT-3       |
| A_22_P00020393 | 3,96318 | 2,13907 | 3,540885027 | N/A             | N/A       | N/A          | Inc-C1orf31-4   |
| A_23_P65618    | 14,1254 | 12,3016 | 3,540124259 | ENST00000206765 | 7051      | NM_000359    | TGM1            |
| A_22_P00018001 | 3,39058 | 1,56693 | 3,539756204 | N/A             | 440757    | NR_034167    | LINC00851       |
| A_22_P00006604 | 3,92108 | 2,09751 | 3,539559924 | ENST00000561000 | 731223    | NR_038421    | LINC01220       |
| A_21_P0005314  | 3,4752  | 1,65514 | 3,530958831 | ENST00000436600 | 100507468 | NR_108105    | LOC100507468    |
| A_23_P214727   | 3,2859  | 1,46613 | 3,530249134 | ENST00000229955 | 81491     | NM_030784    | GPR63           |
| A_21_P0000412  | 3,47686 | 1,65776 | 3,528610037 | N/A             | 767593    | NR_003208    | SNORD114-15     |
| A_22_P00019953 | 3,3334  | 1,51512 | 3,526605013 | ENST00000597752 | 101928476 | NR_125955    | LOC101928476    |
| A_19_P00322906 | 7,50344 | 5,68657 | 3,523160013 | ENST00000391411 | 339263    | NM_001113434 | C17orf51        |
| A_33_P3347147  | 5,87471 | 4,05854 | 3,52145098  | ENST00000371460 | 8464      | NM_181356    | SUPT3H          |
| A_33_P3374264  | 3,46242 | 1,64675 | 3,52023075  | N/A             | 317648    | NR_015453    | NOP14-AS1       |
| A_22_P00014874 | 3,44788 | 1,63274 | 3,518937767 | ENST00000547795 | N/A       | AA442586     | N/A             |
| A_21_P0006819  | 3,45716 | 1,64378 | 3,514647495 | N/A             | N/A       | N/A          | Inc-AKR1E2-4    |
| A_33_P3392466  | 3,98167 | 2,16838 | 3,514428247 | N/A             | N/A       | AK130729     | Inc-METTLL11A-3 |
| A_33_P3226099  | 7,95501 | 6,14278 | 3,511847018 | ENST00000331427 | 92736     | NM_178160    | OTOP2           |
| A_21_P0008524  | 3,45062 | 1,64071 | 3,50620415  | N/A             | N/A       | N/A          | Inc-VRK1-5      |
| A_22_P00000829 | 3,45802 | 1,65    | 3,501613861 | ENST00000507011 | 101928656 | N/A          | LINC01099       |
| A_23_P171336   | 9,65853 | 7,85058 | 3,501443966 | ENST00000497850 | 56000     | NM_022052    | NXF3            |
| A_23_P138194   | 10,64   | 8,83221 | 3,501055665 | ENST00000413720 | 4688      | NM_000433    | NCF2            |
| A_33_P3380642  | 4,74391 | 2,93655 | 3,500012319 | N/A             | 80144     | AK027833     | FRAS1           |
| A_23_P64913    | 3,44504 | 1,63933 | 3,496011668 | ENST00000266395 | 5149      | NM_006205    | PDE6H           |
| A_23_P31945    | 11,3444 | 9,53874 | 3,495890508 | ENST00000456383 | 90865     | NM_033439    | IL33            |
| A_23_P15348    | 13,2207 | 11,4159 | 3,493807206 | ENST00000341712 | 23164     | NM_015134    | MPRIP           |
| A_21_P0011098  | 3,61846 | 1,81375 | 3,493589257 | N/A             | N/A       | N/A          | XLOC_I2_003401  |
| A_22_P00003124 | 3,40053 | 1,59795 | 3,488435116 | ENST00000413066 | N/A       | N/A          | N/A             |

|                |         |         |             |                 |           |              |                |
|----------------|---------|---------|-------------|-----------------|-----------|--------------|----------------|
| A_21_P0012864  | 3,45082 | 1,64847 | 3,48787902  | ENST00000506862 | 101928176 | N/A          | LINC01411      |
| A_21_P0001491  | 3,44557 | 1,64407 | 3,485824654 | N/A             | N/A       | N/A          | Inc-PSMB2-1    |
| A_22_P00006964 | 6,03908 | 4,23834 | 3,483988834 | ENST00000427901 | N/A       | XR_250474    | N/A            |
| A_33_P3371089  | 8,7596  | 6,95935 | 3,482805725 | ENST00000381007 | 54557     | NM_019072    | SGTB           |
| A_32_P76720    | 6,6769  | 4,87747 | 3,480826728 | ENST00000392876 | 51559     | NM_001031701 | NT5DC3         |
| A_23_P161698   | 4,20175 | 2,40298 | 3,479234694 | ENST00000299855 | 4314      | NM_002422    | MMP3           |
| A_22_P00013438 | 3,45234 | 1,65372 | 3,478872969 | ENST00000539009 | N/A       | N/A          | N/A            |
| A_21_P0001231  | 6,66235 | 4,86378 | 3,478752403 | N/A             | 102723817 | XR_425104    | LOC102723817   |
| A_21_P0005022  | 3,6358  | 1,83766 | 3,477715704 | N/A             | 102723698 | XR_426016    | LOC102723698   |
| A_21_P0011002  | 3,66716 | 1,8691  | 3,477522863 | N/A             | 57476     | N/A          | GRAMD1B        |
| A_23_P165360   | 11,2326 | 9,43481 | 3,476872107 | ENST00000438264 | 51665     | NM_001040445 | ASB1           |
| A_33_P3614348  | 3,34799 | 1,55047 | 3,476221472 | N/A             | 728868    | AK096660     | LOC728868      |
| A_22_P00021050 | 3,45286 | 1,65627 | 3,473981328 | N/A             | 101410545 | NR_102713    | STPG2-AS1      |
| A_21_P0006756  | 3,43995 | 1,6434  | 3,47388501  | ENST00000447936 | 728218    | NR_046091    | LINC00864      |
| A_22_P00023728 | 3,91894 | 2,12291 | 3,472633121 | N/A             | 101927193 | NR_110739    | CHL1-AS1       |
| A_21_P0008173  | 3,38268 | 1,58796 | 3,469481322 | N/A             | N/A       | N/A          | Inc-PCDH20-2   |
| A_21_P0007578  | 3,44327 | 1,64899 | 3,468423345 | N/A             | N/A       | N/A          | Inc-YEATS4-1   |
| A_24_P333697   | 8,2885  | 6,49462 | 3,467461827 | ENST00000595793 | 26085     | NM_015596    | KLK13          |
| A_21_P0005904  | 5,84173 | 4,04788 | 3,467389724 | N/A             | N/A       | N/A          | Inc-FAM84B-6   |
| A_22_P00025853 | 4,08336 | 2,28983 | 3,466620717 | N/A             | N/A       | DA240949     | Inc-MOCS2-1    |
| A_33_P3413353  | 3,96891 | 2,17801 | 3,460306904 | ENST00000416620 | N/A       | N/A          | N/A            |
| A_19_P00319876 | 6,18005 | 4,3894  | 3,45970733  | ENST00000560054 | N/A       | N/A          | N/A            |
| A_22_P00004635 | 7,91429 | 6,1245  | 3,457645591 | N/A             | 101927571 | NR_110782    | LOC101927571   |
| A_22_P00024605 | 3,92517 | 2,1355  | 3,457358004 | N/A             | N/A       | DA613845     | Inc-HRASLS-3   |
| A_23_P361841   | 8,09867 | 6,31039 | 3,454028531 | ENST00000357529 | 57494     | NM_020734    | RIMKLB         |
| A_22_P00016431 | 4,74462 | 2,95663 | 3,453334298 | N/A             | 340544    | NR_038978    | MORF4L2-AS1    |
| A_23_P205789   | 10,8571 | 9,07059 | 3,449793484 | ENST00000359031 | 2553      | NM_002041    | GABPB1         |
| A_24_P68991    | 3,41712 | 1,63192 | 3,446662415 | ENST00000295886 | 4825      | NM_006168    | NKX6-1         |
| A_22_P00007182 | 6,50558 | 4,721   | 3,445181525 | ENST00000423054 | 401647    | NM_001010917 | GOLGA7B        |
| A_23_P9869     | 3,81894 | 2,03544 | 3,442603431 | ENST00000582461 | 84735     | NM_032649    | CNDP1          |
| A_33_P3214501  | 8,39868 | 6,61536 | 3,442173936 | ENST00000557927 | 64782     | NM_022767    | AEN            |
| A_21_P0012394  | 3,9603  | 2,17734 | 3,441315108 | N/A             | N/A       | N/A          | XLOC_I2_009886 |
| A_21_P0011353  | 3,25134 | 1,46876 | 3,440408799 | N/A             | N/A       | N/A          | XLOC_I2_004844 |

|                |         |         |             |                 |           |              |                  |
|----------------|---------|---------|-------------|-----------------|-----------|--------------|------------------|
| A_24_P210569   | 3,24561 | 1,46477 | 3,436261905 | ENST00000220478 | 29106     | NM_013243    | SCG3             |
| A_24_P101304   | 5,46225 | 3,68266 | 3,4332859   | ENST00000333987 | 374900    | NM_198539    | ZNF568           |
| A_23_P77630    | 12,8013 | 11,0227 | 3,430930734 | ENST00000564844 | 81631     | NM_022818    | MAP1LC3B         |
| A_21_P0000524  | 3,49507 | 1,71735 | 3,428838609 | N/A             | 285593    | NR_027109    | LOC285593        |
| A_21_P0006980  | 3,22586 | 1,44847 | 3,428054391 | N/A             | N/A       | N/A          | Inc-MPP7-1       |
| A_22_P00002406 | 3,39364 | 1,61745 | 3,425204201 | N/A             | N/A       | CB121371     | Inc-C14orf126-6  |
| A_22_P00017754 | 8,56037 | 6,78595 | 3,421004496 | N/A             | N/A       | N/A          | Inc-YIF1A-6      |
| A_21_P0001185  | 3,77028 | 1,99665 | 3,419131713 | N/A             | 102724329 | XR_425049    | LOC102724329     |
| A_32_P206050   | 4,52181 | 2,75079 | 3,412951706 | ENST00000542120 | 23329     | NM_015279    | TBC1D30          |
| A_22_P00012087 | 9,63931 | 7,86895 | 3,411390715 | N/A             | N/A       | AK094351     | Inc-PMM2-5       |
| A_23_P122531   | 16,5933 | 14,8231 | 3,411012401 | ENST00000375640 | 50854     | NM_001040437 | C6orf48          |
| A_21_P0012456  | 8,76292 | 6,9937  | 3,408696141 | ENST00000599350 | 101927056 | NR_125395    | LOC101927056     |
| A_24_P506977   | 14,274  | 12,5054 | 3,407231564 | ENST00000584327 | 285958    | NR_003697    | SNHG15           |
| A_33_P3389728  | 3,21675 | 1,4487  | 3,40593287  | ENST00000544748 | 2494      | NM_205860    | NR5A2            |
| A_22_P00018160 | 4,63232 | 2,86464 | 3,405059481 | N/A             | N/A       | XM_006723046 | Inc-ZNF569-1     |
| A_23_P151710   | 6,4621  | 4,69464 | 3,404540275 | ENST00000245457 | 5732      | NM_000956    | PTGER2           |
| A_24_P254278   | 9,5343  | 7,76712 | 3,403879582 | ENST00000379333 | 9962      | NM_203327    | SLC23A2          |
| A_22_P00005086 | 3,53756 | 1,77082 | 3,402841609 | N/A             | N/A       | N/A          | Inc-DFNA5-3      |
| A_22_P00020297 | 3,40742 | 1,64106 | 3,401945432 | N/A             | 101928279 | N/A          | LOC101928279     |
| A_21_P0014078  | 7,35616 | 5,59059 | 3,400083083 | N/A             | N/A       | CR933610     | Inc-MTX1-1       |
| A_33_P3405500  | 8,40859 | 6,64326 | 3,399517508 | ENST00000382292 | 26278     | NM_014363    | SACS             |
| A_22_P00007057 | 3,40534 | 1,6415  | 3,396008336 | N/A             | N/A       | N/A          | Inc-GLB1L2-1     |
| A_23_P358709   | 9,37101 | 7,60874 | 3,39231467  | ENST00000316418 | 57491     | NM_020731    | AHRR             |
| A_22_P00008076 | 3,41374 | 1,65169 | 3,391797407 | ENST00000414409 | N/A       | N/A          | N/A              |
| A_33_P3334428  | 3,46029 | 1,69832 | 3,391609331 | N/A             | N/A       | N/A          | N/A              |
| A_23_P139725   | 3,16841 | 1,40873 | 3,386230076 | N/A             | N/A       | U80760       | N/A              |
| A_23_P114414   | 9,6698  | 7,91039 | 3,385596404 | ENST00000371628 | 79836     | NM_001031855 | LONRF3           |
| A_23_P22134    | 5,00852 | 3,25044 | 3,382476709 | ENST00000618086 | 646       | NM_001717    | BNC1             |
| A_32_P104432   | 9,78428 | 8,02623 | 3,382406373 | ENST00000417443 | 644596    | NR_024493    | LINC00087        |
| A_24_P364296   | 6,59849 | 4,84044 | 3,382406373 | ENST00000540889 | 2054      | NM_001980    | STX2             |
| A_33_P3392192  | 13,5802 | 11,8233 | 3,379711266 | ENST00000607314 | N/A       | AF176921     | N/A              |
| A_23_P69810    | 10,6874 | 8,931   | 3,37854015  | ENST00000611707 | 84803     | NM_032717    | AGPAT9           |
| A_21_P0009477  | 3,40291 | 1,64651 | 3,37854015  | N/A             | N/A       | N/A          | Inc-AC109315.1-1 |

|                |         |         |             |                 |           |              |                  |
|----------------|---------|---------|-------------|-----------------|-----------|--------------|------------------|
| A_24_P324520   | 5,75908 | 4,00514 | 3,372784168 | ENST00000362018 | 4515      | NM_001018025 | MTCP1            |
| A_21_P0003002  | 4,22333 | 2,47036 | 3,370517229 | N/A             | N/A       | N/A          | Inc-ST3GAL6-1    |
| A_21_P0014244  | 3,40513 | 1,6522  | 3,37042378  | ENST00000434902 | 100507059 | NR_108054    | LINC00703        |
| A_21_P0010813  | 4,9994  | 3,24666 | 3,369979931 | ENST00000450890 | 101929475 | XR_242755    | LOC101929475     |
| A_23_P255896   | 5,55228 | 3,79997 | 3,368975647 | ENST00000335459 | 129293    | NM_001080824 | TRABD2A          |
| A_23_P79927    | 14,0215 | 12,2702 | 3,366617925 | ENST00000469588 | 10528     | NM_006392    | NOP56            |
| A_33_P3361067  | 3,67254 | 1,92237 | 3,363982033 | ENST00000237612 | 9429      | NM_004827    | ABCG2            |
| A_21_P0006555  | 3,66353 | 1,91348 | 3,363702236 | N/A             | N/A       | N/A          | Inc-ASMT-2       |
| A_33_P3369446  | 3,37737 | 1,62733 | 3,363678921 | N/A             | N/A       | AK123300     | Inc-AC073343.1-1 |
| A_24_P379750   | 12,8777 | 11,1286 | 3,361488001 | ENST00000540449 | 4084      | NM_002357    | MXD1             |
| A_21_P0014661  | 3,3476  | 1,59867 | 3,361091924 | N/A             | 101928057 | XR_250595    | LOC101928057     |
| A_23_P84189    | 7,75463 | 6,00681 | 3,358506917 | ENST00000578527 | 26207     | NM_181671    | PITPNC1          |
| A_24_P13230    | 12,7627 | 11,0163 | 3,355202869 | ENST00000336083 | 5870      | NM_002869    | RAB6A            |
| A_23_P337800   | 5,66939 | 3,92307 | 3,355016822 | ENST00000333625 | 282618    | NM_172140    | IFNL1            |
| A_24_P759584   | 6,05062 | 4,30452 | 3,354505246 | ENST00000556120 | 64150     | NR_002770    | DIO3OS           |
| A_33_P3293456  | 4,21096 | 2,46509 | 3,353970501 | ENST00000526021 | 2626      | NM_002052    | GATA4            |
| A_33_P3219138  | 3,82917 | 2,08379 | 3,352831545 | N/A             | N/A       | N/A          | N/A              |
| A_24_P257416   | 9,90421 | 8,15989 | 3,350369003 | ENST00000510048 | 2920      | NM_002089    | CXCL2            |
| A_23_P105251   | 3,34319 | 1,59888 | 3,35034578  | ENST00000546141 | 2735      | NM_005269    | GLI1             |
| A_33_P3718734  | 3,72694 | 1,98325 | 3,348906274 | N/A             | 729083    | NR_122070    | LOC729083        |
| A_23_P363769   | 8,94564 | 7,20308 | 3,346284249 | ENST00000423955 | 3892      | NM_002284    | KRT86            |
| A_33_P3278590  | 3,51869 | 1,77719 | 3,343826517 | ENST00000371422 | 158798    | NM_001008535 | AKAP14           |
| A_33_P3314659  | 4,35177 | 2,61029 | 3,343780162 | ENST00000282469 | 79925     | NM_144722    | SPEF2            |
| A_33_P3252191  | 5,47781 | 3,73756 | 3,340930567 | N/A             | N/A       | N/A          | N/A              |
| A_33_P3286536  | 10,406  | 8,66594 | 3,340490602 | ENST00000358752 | 2526      | NM_002033    | FUT4             |
| A_32_P225415   | 3,35562 | 1,61619 | 3,339032186 | ENST00000324675 | 148109    | NM_152481    | FAM187B          |
| A_21_P0001326  | 3,40472 | 1,66531 | 3,338985897 | N/A             | N/A       | N/A          | Inc-IFI44-2      |
| A_21_P0013822  | 3,2229  | 1,48548 | 3,334383399 | N/A             | N/A       | N/A          | XLOC_I2_015766   |
| A_21_P0005329  | 3,38345 | 1,64696 | 3,332234659 | ENST00000432702 | N/A       | N/A          | N/A              |
| A_22_P00011440 | 3,31014 | 1,57508 | 3,328933382 | N/A             | 101927862 | NR_109894    | CTB-178M22.2     |
| A_22_P00014698 | 3,48214 | 1,74727 | 3,328494998 | ENST00000577199 | N/A       | AL512742     | N/A              |
| A_22_P00019466 | 3,75358 | 2,01923 | 3,327295503 | N/A             | N/A       | BG335904     | Inc-SLC3A2-2     |
| A_33_P3415808  | 3,31301 | 1,57912 | 3,326234771 | ENST00000563993 | 102724467 | NR_120309    | LOC102724467     |

|                |         |         |             |                 |           |              |                      |
|----------------|---------|---------|-------------|-----------------|-----------|--------------|----------------------|
| A_24_P376441   | 5,8372  | 4,10336 | 3,326119495 | ENST00000366675 | 27097     | NM_001025247 | TAF5L                |
| A_24_P346725   | 3,85951 | 2,12633 | 3,324598219 | N/A             | N/A       | AK001094     | N/A                  |
| A_21_P0006803  | 7,73505 | 6,00337 | 3,321143361 | N/A             | N/A       | N/A          | Inc-EBF3-3           |
| A_33_P3318357  | 5,25551 | 3,52445 | 3,319716403 | ENST00000393100 | 91801     | NM_138775    | ALKBH8               |
| A_21_P0001736  | 3,3739  | 1,64326 | 3,318750101 | N/A             | N/A       | N/A          | Inc-VAV3-1           |
| A_23_P99275    | 3,38006 | 1,64993 | 3,317577114 | ENST00000229402 | 3820      | NM_002258    | KLRB1                |
| A_22_P00004750 | 7,68584 | 5,95574 | 3,317508127 | ENST00000449749 | N/A       | N/A          | N/A                  |
| A_22_P00004346 | 4,19404 | 2,46404 | 3,317278183 | N/A             | N/A       | N/A          | Inc-COL1A1-3         |
| A_33_P3255329  | 3,37753 | 1,64771 | 3,316864324 | ENST00000377854 | 32        | XR_429096    | ACACB                |
| A_33_P3361472  | 3,33078 | 1,60101 | 3,316749372 | ENST00000488687 | 23198     | AK124923     | PSME4                |
| A_23_P137143   | 14,7396 | 13,0112 | 3,313601243 | ENST00000620277 | 1736      | NM_001363    | DKC1                 |
| A_21_P0009486  | 3,3714  | 1,64319 | 3,313164878 | N/A             | N/A       | N/A          | Inc-WDR7-3           |
| A_21_P0013519  | 3,1613  | 1,43311 | 3,313118948 | N/A             | N/A       | N/A          | XLOC_I2_014565       |
| A_22_P00001842 | 3,35501 | 1,62686 | 3,31302709  | ENST00000507031 | N/A       | AK125489     | N/A                  |
| A_33_P3225195  | 3,12271 | 1,39472 | 3,312659684 | ENST00000399581 | 101060146 | N/A          | CHMP1B2P             |
| A_21_P0013775  | 7,92322 | 6,19584 | 3,311259322 | ENST00000431677 | 100131755 | N/A          | ARMCX4               |
| A_22_P00009023 | 9,1677  | 7,44201 | 3,307382721 | N/A             | 339400    | NR_103778    | FLG-AS1              |
| A_23_P502060   | 3,95494 | 2,22931 | 3,307245174 | ENST00000489786 | 363       | NM_001652    | AQP6                 |
| A_23_P203716   | 3,39724 | 1,67187 | 3,306649202 | ENST00000294064 | 10825     | NM_006656    | NEU3                 |
| A_23_P384044   | 6,61635 | 4,89151 | 3,305434668 | ENST00000272133 | 149111    | NM_152495    | CNIH3                |
| A_33_P3216242  | 3,35089 | 1,62626 | 3,304953561 | N/A             | N/A       | N/A          | Inc-CHADL-3          |
| A_33_P3375145  | 6,91046 | 5,18662 | 3,303144309 | N/A             | 286343    | NM_203403    | LURAP1L              |
| A_33_P3342633  | 8,02584 | 6,3045  | 3,297425353 | ENST00000280056 | 79758     | NM_001031719 | DHRS12               |
| A_21_P0014377  | 6,12559 | 4,40523 | 3,295186224 | ENST00000590750 | 728485    | NM_001294306 | LOC728485            |
| A_32_P186731   | 5,4222  | 3,70189 | 3,295072024 | ENST00000262487 | 140862    | NM_080826    | ISM1                 |
| A_33_P3342126  | 8,70185 | 6,98284 | 3,2921042   | ENST00000415738 | 56978     | NM_020226    | PRDM8                |
| A_21_P0009502  | 4,80763 | 3,08938 | 3,290370403 | N/A             | N/A       | N/A          | Inc-RP11-17M16.1.1-7 |
| A_23_P34915    | 12,6136 | 10,8962 | 3,28843237  | ENST00000613954 | 467       | NM_001040619 | ATF3                 |
| A_33_P3361711  | 3,99221 | 2,27564 | 3,286541039 | ENST00000445091 | N/A       | N/A          | N/A                  |
| A_32_P185628   | 6,043   | 4,32947 | 3,279623038 | N/A             | N/A       | N/A          | N/A                  |
| A_21_P0003971  | 3,24666 | 1,53348 | 3,278827493 | N/A             | N/A       | N/A          | Inc-ROPN1L-1         |
| A_22_P00005506 | 3,36185 | 1,64872 | 3,278713859 | ENST00000552060 | N/A       | N/A          | N/A                  |
| A_22_P00012027 | 3,17881 | 1,46627 | 3,277373281 | N/A             | N/A       | H30713       | Inc-PLEKHA3-3        |

|                |         |         |             |                 |           |              |                |
|----------------|---------|---------|-------------|-----------------|-----------|--------------|----------------|
| A_24_P382287   | 4,39398 | 2,68238 | 3,275238577 | ENST00000323011 | 1005      | NM_004361    | CDH7           |
| A_23_P37088    | 3,8535  | 2,14275 | 3,273309456 | ENST00000267502 | 145226    | NM_152443    | RDH12          |
| A_21_P0013485  | 3,37309 | 1,66238 | 3,273218702 | N/A             | N/A       | N/A          | XLOC_I2_014217 |
| A_21_P0005196  | 3,3982  | 1,68886 | 3,270111891 | ENST00000417026 | 101927902 | XR_242326    | LOC101927902   |
| A_22_P00024935 | 4,47312 | 2,76432 | 3,268888118 | ENST00000432272 | N/A       | N/A          | N/A            |
| A_33_P3736195  | 8,81059 | 7,10303 | 3,266079708 | N/A             | 399832    | BX647230     | DKFZp686M1136  |
| A_21_P0010221  | 5,96902 | 4,26169 | 3,265559058 | ENST00000622592 | N/A       | N/A          | N/A            |
| A_33_P3354256  | 7,11624 | 5,41053 | 3,261894225 | ENST00000520771 | 9788      | NM_001282971 | MTSS1          |
| A_19_P00320996 | 5,96542 | 4,25979 | 3,261713353 | ENST00000418546 | N/A       | N/A          | N/A            |
| A_22_P00009544 | 3,68908 | 1,98386 | 3,260786537 | N/A             | N/A       | N/A          | Inc-MAP1LC3C-1 |
| A_21_P0013631  | 3,9645  | 2,26137 | 3,256066128 | N/A             | N/A       | N/A          | XLOC_I2_015170 |
| A_22_P00016281 | 6,20549 | 4,50346 | 3,253584448 | N/A             | N/A       | N/A          | Inc-TMEM123-1  |
| A_23_P133408   | 6,11389 | 4,41188 | 3,253539344 | ENST00000296871 | 1437      | NM_000758    | CSF2           |
| A_33_P3424462  | 6,5437  | 4,84203 | 3,252772673 | ENST00000483271 | 163882    | NM_001139459 | CNST           |
| A_21_P0006429  | 3,65063 | 1,94937 | 3,251848398 | N/A             | N/A       | N/A          | Inc-ARL13A-1   |
| A_21_P0012190  | 3,31128 | 1,61025 | 3,251330017 | N/A             | N/A       | N/A          | XLOC_I2_009160 |
| A_21_P0006470  | 3,29982 | 1,59956 | 3,249595169 | N/A             | N/A       | N/A          | Inc-MAGEA12-1  |
| A_21_P0003746  | 3,16861 | 1,46862 | 3,248987065 | ENST00000509932 | 401134    | NR_033976    | LOC401134      |
| A_24_P929388   | 3,34399 | 1,64451 | 3,247838735 | ENST00000406027 | 92691     | NM_138390    | TMEM169        |
| A_33_P3371564  | 9,48057 | 7,78161 | 3,246668306 | ENST00000523992 | 286042    | NR_024361    | FAM86B3P       |
| A_21_P0006168  | 3,3151  | 1,61778 | 3,242979716 | N/A             | N/A       | N/A          | Inc-C9orf170-2 |
| A_33_P3324284  | 3,25701 | 1,56086 | 3,240350783 | N/A             | N/A       | N/A          | N/A            |
| A_22_P00007408 | 3,20604 | 1,51016 | 3,239744409 | N/A             | N/A       | N/A          | Inc-GRM7-1     |
| A_22_P00002075 | 3,77271 | 2,07716 | 3,239003439 | ENST00000425900 | N/A       | N/A          | N/A            |
| A_23_P166248   | 10,6244 | 8,92901 | 3,238644242 | ENST00000482533 | 1827      | NM_004414    | RCAN1          |
| A_23_P408930   | 6,6265  | 4,93127 | 3,238285085 | ENST00000529916 | 219445    | NR_027688    | OR7E5P         |
| A_23_P157117   | 6,03302 | 4,33784 | 3,238172856 | ENST00000409603 | 9586      | NM_182898    | CREB5          |
| A_22_P00007665 | 3,29749 | 1,60242 | 3,237925968 | ENST00000512833 | N/A       | N/A          | N/A            |
| A_21_P0006349  | 4,13683 | 2,44258 | 3,236086116 | N/A             | 101927042 | XR_242550    | LOC101927042   |
| A_33_P3390349  | 5,98477 | 4,29095 | 3,235121733 | N/A             | 7410      | AK124271     | VAV2           |
| A_33_P3385882  | 3,35415 | 1,66162 | 3,23223031  | N/A             | 100130083 | XR_247824    | HBCBP          |
| A_21_P0014916  | 3,10367 | 1,41117 | 3,232163099 | N/A             | N/A       | AK303376     | N/A            |
| A_23_P143512   | 7,42239 | 5,73028 | 3,231289475 | ENST00000291560 | 11077     | NM_007031    | HSF2BP         |



|                |         |         |             |                 |           |              |                |
|----------------|---------|---------|-------------|-----------------|-----------|--------------|----------------|
| A_22_P00012389 | 3,3561  | 1,66507 | 3,22887144  | N/A             | N/A       | N/A          | Inc-PRKACB-4   |
| A_22_P00003954 | 4,84123 | 3,15028 | 3,228692398 | N/A             | N/A       | N/A          | Inc-CHADL-2    |
| A_24_P924816   | 3,16949 | 1,47962 | 3,226276307 | ENST00000280871 | 114134    | NM_052885    | SLC2A13        |
| A_22_P00016445 | 3,1281  | 1,43895 | 3,224666584 | ENST00000554678 | N/A       | N/A          | N/A            |
| A_21_P0011523  | 3,14031 | 1,45193 | 3,222945963 | N/A             | N/A       | N/A          | XLOC_I2_005692 |
| A_23_P159709   | 3,47602 | 1,78808 | 3,221963164 | ENST00000518685 | 50943     | NM_014009    | FOXP3          |
| A_21_P0012401  | 3,33059 | 1,64345 | 3,220177023 | N/A             | N/A       | N/A          | XLOC_I2_009889 |
| A_22_P00024205 | 3,35224 | 1,66513 | 3,220110062 | N/A             | N/A       | N/A          | Inc-RASL11B-2  |
| A_24_P390495   | 4,45956 | 2,77304 | 3,218793445 | ENST00000006053 | 6376      | AB209037     | CX3CL1         |
| A_33_P3336148  | 3,79262 | 2,10654 | 3,217811912 | N/A             | N/A       | N/A          | N/A            |
| A_23_P211878   | 14,9367 | 13,2511 | 3,21674149  | ENST00000419752 | 2317      | NM_001457    | FLNB           |
| A_21_P0012223  | 4,13551 | 2,45039 | 3,215671424 | ENST00000418954 | N/A       | N/A          | N/A            |
| A_23_P108492   | 5,37277 | 3,68782 | 3,215292527 | ENST00000282276 | 92935     | NM_138395    | MARS2          |
| A_22_P00022597 | 3,35758 | 1,67418 | 3,211839943 | N/A             | 101928371 | NR_110236    | LOC101928371   |
| A_23_P76529    | 11,3077 | 9,62454 | 3,21130568  | ENST00000422257 | 3695      | NM_000889    | ITGB7          |
| A_21_P0011557  | 3,43954 | 1,75772 | 3,208324349 | N/A             | N/A       | N/A          | XLOC_I2_005915 |
| A_21_P0004027  | 3,32044 | 1,63877 | 3,20799079  | ENST00000503691 | N/A       | N/A          | N/A            |
| A_33_P3252939  | 8,25162 | 6,56997 | 3,207946318 | ENST00000274643 | 340156    | NM_001012418 | MYLK4          |
| A_33_P3780286  | 3,24824 | 1,56896 | 3,202680762 | N/A             | N/A       | N/A          | Inc-DAOA-4     |
| A_23_P138760   | 10,5467 | 8,86838 | 3,200550339 | ENST00000312438 | 23529     | NM_013246    | CLCF1          |
| A_23_P121851   | 10,2109 | 8,53354 | 3,198421333 | ENST00000231173 | 56121     | NM_018935    | PCDHB15        |
| A_21_P0003502  | 3,32567 | 1,65013 | 3,19438898  | ENST00000509360 | N/A       | N/A          | N/A            |
| A_23_P51699    | 11,1694 | 9,49415 | 3,193746932 | ENST00000368315 | 9181      | NM_004723    | ARHGEF2        |
| A_23_P1280     | 5,40987 | 3,73475 | 3,193459159 | ENST00000534259 | 51008     | NM_001198799 | ASCC1          |
| A_33_P3262969  | 7,05265 | 5,37885 | 3,190538626 | ENST00000461897 | 1288      | BT007228     | COL4A6         |
| A_22_P00006558 | 4,28342 | 2,60971 | 3,190339596 | ENST00000246841 | 23769     | XM_005273861 | FLRT1          |
| A_19_P00318418 | 6,75826 | 5,08564 | 3,187930108 | ENST00000481440 | 6916      | NM_001166254 | TBXAS1         |
| A_33_P3402526  | 7,49452 | 5,82202 | 3,187664954 | ENST00000538229 | 55454     | NM_018590    | CSGALNACT2     |
| A_33_P3209962  | 6,09282 | 4,42271 | 3,182388571 | ENST00000441258 | 10235     | NM_153819    | RASGRP2        |
| A_24_P380022   | 9,10548 | 7,43559 | 3,181903318 | ENST00000295822 | 56648     | NM_020390    | EIF5A2         |
| A_32_P352358   | 6,14357 | 4,4739  | 3,181418139 | ENST00000494376 | 650293    | NM_001040071 | LOC650293      |
| A_21_P0009064  | 3,3166  | 1,64733 | 3,180536185 | N/A             | N/A       | N/A          | Inc-ADAMTS18-2 |
| A_33_P3646051  | 3,33741 | 1,66828 | 3,180227558 | N/A             | N/A       | AK094324     | Inc-ZNF345-1   |

|                |         |         |             |                 |           |              |              |
|----------------|---------|---------|-------------|-----------------|-----------|--------------|--------------|
| A_33_P3370202  | 3,05022 | 1,38154 | 3,179235749 | ENST00000339051 | 344901    | NM_198184    | OSTN         |
| A_33_P3343442  | 7,44014 | 5,77186 | 3,178354399 | ENST00000382252 | 100131017 | NM_001278559 | ZNF316       |
| A_33_P3327058  | 8,32196 | 6,65408 | 3,177473295 | ENST00000313667 | 9181      | NM_001162383 | ARHGEF2      |
| A_21_P0000612  | 3,33836 | 1,67065 | 3,177098899 | ENST00000444850 | 338579    | NR_033891    | ANKRD30BP3   |
| A_21_P0003614  | 3,30415 | 1,63651 | 3,176944749 | N/A             | N/A       | N/A          | Inc-POLR2B-5 |
| A_33_P3274397  | 6,83589 | 5,16883 | 3,175667793 | ENST00000615443 | 1121      | NM_001145414 | CHM          |
| A_22_P00004925 | 4,0583  | 2,39273 | 3,172389691 | N/A             | N/A       | N/A          | Inc-DBN1-1   |
| A_22_P00006390 | 3,29298 | 1,6287  | 3,169554335 | N/A             | 100130238 | NR_024563    | LOC100130238 |
| A_24_P147461   | 8,33473 | 6,67064 | 3,169136939 | ENST00000481726 | 5271      | NM_001031848 | SERPINB8     |
| A_22_P00021162 | 4,64359 | 2,97968 | 3,168741561 | N/A             | N/A       | N/A          | Inc-STOML3-1 |
| A_23_P1602     | 11,8784 | 10,2148 | 3,168060749 | ENST00000279249 | 10435     | NM_006779    | CDC42EP2     |
| A_22_P00021042 | 3,41174 | 1,74999 | 3,164000878 | N/A             | N/A       | XM_003846298 | Inc-GABPA-4  |
| A_21_P0006838  | 3,31238 | 1,65065 | 3,163957016 | N/A             | N/A       | N/A          | Inc-ARL5B-3  |
| A_23_P118392   | 10,9699 | 9,30833 | 3,163606141 | ENST00000225688 | 51655     | NM_016084    | RASD1        |
| A_21_P0002274  | 3,11454 | 1,45339 | 3,16268528  | N/A             | N/A       | N/A          | Inc-INSIG2-1 |
| A_24_P342096   | 10,0187 | 8,35804 | 3,161611282 | ENST00000377542 | 100132948 | NR_027421    | FAM27C       |
| A_22_P00019021 | 4,57734 | 2,91686 | 3,161216843 | N/A             | N/A       | N/A          | Inc-SETDB1-1 |
| A_32_P386636   | 3,56936 | 1,90959 | 3,159661482 | ENST00000515256 | 340069    | NM_182761    | FAM170A      |
| A_21_P0001634  | 7,43256 | 5,77295 | 3,159311084 | N/A             | 102723817 | XR_425104    | LOC102723817 |
| A_22_P00023995 | 4,06652 | 2,40807 | 3,156771858 | N/A             | 104355294 | N/A          | LINC01386    |
| A_22_P00006058 | 8,64632 | 6,98887 | 3,154584509 | ENST00000433425 | 644596    | NR_024493    | LINC00087    |
| A_22_P00015811 | 3,12743 | 1,47181 | 3,150585583 | ENST00000455132 | N/A       | N/A          | N/A          |
| A_21_P0003883  | 3,57803 | 1,92265 | 3,15006151  | N/A             | N/A       | N/A          | Inc-FAM53A-1 |
| A_33_P3398822  | 5,48825 | 3,83454 | 3,146417248 | ENST00000216268 | 9889      | NM_014838    | ZBED4        |
| A_22_P00016064 | 6,82314 | 5,16954 | 3,146177355 | ENST00000560052 | 55323     | NM_001286679 | LARP6        |
| A_33_P3380597  | 3,35992 | 1,70648 | 3,145828452 | ENST00000431684 | 253143    | NM_173566    | PRR14L       |
| A_24_P785293   | 15,714  | 14,0614 | 3,143997347 | ENST00000539975 | 23642     | NR_003098    | SNHG1        |
| A_22_P00020086 | 3,9492  | 2,29717 | 3,142755418 | N/A             | N/A       | AI566006     | Inc-TOX4-1   |
| A_33_P3708413  | 10,8646 | 9,21475 | 3,138010109 | ENST00000540087 | 8076      | NM_003480    | MFAP5        |
| A_24_P307964   | 3,02157 | 1,37195 | 3,137509875 | ENST00000425225 | 402381    | NM_001012415 | SOHLH1       |
| A_24_P751074   | 9,5632  | 7,91457 | 3,135357605 | ENST00000392668 | 2113      | NM_005238    | ETS1         |
| A_21_P0011744  | 9,57711 | 7,92872 | 3,134836065 | ENST00000412740 | 100506930 | NR_038279    | LINC00665    |
| A_21_P0013699  | 4,93973 | 3,29148 | 3,134531874 | ENST00000613144 | N/A       | XR_246710    | N/A          |

|                |         |         |             |                 |           |              |                       |
|----------------|---------|---------|-------------|-----------------|-----------|--------------|-----------------------|
| A_23_P351837   | 11,4619 | 9,81387 | 3,134053918 | ENST00000460787 | 283212    | NM_001039548 | KLHL35                |
| A_22_P00017392 | 5,32811 | 3,68325 | 3,127175095 | ENST00000427794 | 149773    | NR_034147    | APCDD1L-AS1           |
| A_21_P0011754  | 3,59147 | 1,94681 | 3,126741606 | ENST00000446628 | 388550    | N/A          | CEACAM22P             |
| A_24_P280868   | 11,0445 | 9,40029 | 3,125766477 | ENST00000524893 | 653333    | NM_001137610 | FAM86B2               |
| A_23_P83818    | 6,40617 | 4,76222 | 3,125203208 | ENST00000618395 | 1289      | NM_000093    | COL5A1                |
| A_24_P142503   | 3,22747 | 1,58432 | 3,123470707 | ENST00000270570 | 55244     | NM_018242    | SLC47A1               |
| A_23_P255389   | 3,92695 | 2,28416 | 3,122691396 | ENST00000377175 | 26692     | NM_030903    | OR2W1                 |
| A_33_P3404685  | 3,38031 | 1,73902 | 3,119446356 | ENST00000498002 | N/A       | N/A          | N/A                   |
| A_23_P119040   | 7,24234 | 5,60137 | 3,118754517 | ENST00000578955 | 80000     | NM_001142966 | GREB1L                |
| A_21_P0008187  | 3,04789 | 1,40696 | 3,118668048 | N/A             | 102725429 | N/A          | LOC102725429          |
| A_21_P0007221  | 9,00534 | 7,36446 | 3,118559965 | ENST00000529069 | 101927056 | NR_125395    | LOC101927056          |
| A_19_P00322733 | 3,86243 | 2,2216  | 3,118451886 | ENST00000416381 | 100287765 | N/A          | LINC00630             |
| A_24_P188164   | 3,29336 | 1,65336 | 3,116658319 | ENST00000452236 | 114821    | NM_052923    | ZBED9                 |
| A_21_P0007472  | 3,28769 | 1,64833 | 3,115276031 | N/A             | N/A       | N/A          | Inc-RP11-680F20.4.1-2 |
| A_33_P3230526  | 8,6328  | 6,99533 | 3,111197542 | ENST00000341712 | 23164     | NM_015134    | MPRIP                 |
| A_22_P00008488 | 3,56399 | 1,92723 | 3,109666791 | ENST00000548427 | 100507377 | NR_038300    | LOC100507377          |
| A_32_P327679   | 3,06603 | 1,4293  | 3,109602128 | ENST00000244906 | 26070     | NR_026882    | DKFZP434K028          |
| A_23_P35092    | 3,16653 | 1,52981 | 3,109580574 | ENST00000270218 | 29949     | NM_153758    | IL19                  |
| A_23_P204947   | 14,121  | 12,485  | 3,108029075 | ENST00000382844 | 2706      | NM_004004    | GJB2                  |
| A_22_P00018012 | 3,28808 | 1,65363 | 3,10469167  | N/A             | N/A       | AA382715     | Inc-ZNF18-2           |
| A_22_P00015270 | 3,26235 | 1,628   | 3,104476476 | ENST00000439928 | 221178    | NM_001286792 | SPATA13               |
| A_33_P3219651  | 4,67921 | 3,04499 | 3,104196747 | ENST00000297161 | 168667    | NM_133468    | BMPER                 |
| A_22_P00016105 | 5,32094 | 3,68681 | 3,104003104 | ENST00000563709 | 10002     | NM_014249    | NR2E3                 |
| A_24_P141707   | 5,55078 | 3,9167  | 3,103895529 | ENST00000266646 | 83729     | NM_031479    | INHBE                 |
| A_33_P3383724  | 7,23039 | 5,59747 | 3,101400842 | ENST00000616332 | 391712    | NM_001012414 | TRIM61                |
| A_33_P3369535  | 3,10667 | 1,47388 | 3,10112139  | N/A             | 9223      | NM_004742    | MAGI1                 |
| A_21_P0008538  | 5,27517 | 3,64442 | 3,096739441 | ENST00000553288 | 101927780 | NR_110417    | LOC101927780          |
| A_24_P339944   | 8,37382 | 6,74462 | 3,093414158 | ENST00000331163 | 5155      | NM_002608    | PDGFB                 |
| A_24_P335620   | 14,7859 | 13,1573 | 3,092127911 | ENST00000261622 | 8140      | NM_003486    | SLC7A5                |
| A_33_P3214520  | 3,92634 | 2,29794 | 3,091699281 | ENST00000619044 | 169834    | NM_001101338 | ZNF883                |
| A_24_P194748   | 7,17855 | 5,55105 | 3,08977118  | ENST00000370249 | 10838     | NM_001080485 | ZNF275                |
| A_23_P119478   | 6,91114 | 5,28488 | 3,087116655 | ENST00000221847 | 10148     | NM_005755    | EBI3                  |
| A_21_P0013299  | 7,61594 | 5,98975 | 3,086966871 | N/A             | N/A       | N/A          | XLOC_l2_013808        |

|                |         |         |             |                 |           |              |                |
|----------------|---------|---------|-------------|-----------------|-----------|--------------|----------------|
| A_21_P0014217  | 3,27179 | 1,64579 | 3,08656035  | N/A             | N/A       | N/A          | N/A            |
| A_22_P00005620 | 3,24525 | 1,61957 | 3,085875805 | N/A             | 100287814 | NR_034037    | LINC00582      |
| A_22_P00005099 | 3,60734 | 1,98218 | 3,084763743 | ENST00000445654 | 22941     | N/A          | SHANK2         |
| A_33_P3265749  | 3,23337 | 1,60847 | 3,084207862 | ENST00000351052 | 5733      | NM_198717    | PTGER3         |
| A_33_P3260986  | 3,20739 | 1,58257 | 3,084036842 | N/A             | 100134040 | XR_252345    | LOC100134040   |
| A_22_P00018048 | 7,74952 | 6,12531 | 3,082733126 | ENST00000438239 | 10838     | NM_001080485 | ZNF275         |
| A_33_P3295154  | 5,49709 | 3,87331 | 3,081814444 | N/A             | N/A       | AK023831     | N/A            |
| A_33_P3346444  | 3,22269 | 1,59907 | 3,081472679 | ENST00000623574 | 83259     | NM_032972    | PCDH11Y        |
| A_33_P3219895  | 13,1348 | 11,5116 | 3,080575726 | ENST00000417856 | 64837     | NM_001134774 | KLC2           |
| A_33_P3354021  | 9,83427 | 8,21211 | 3,078355822 | N/A             | 644128    | NR_003572    | RPL23AP53      |
| A_22_P00017665 | 3,09312 | 1,47102 | 3,078227799 | N/A             | N/A       | N/A          | Inc-WRNIP1-1   |
| A_21_P0006490  | 3,8064  | 2,1852  | 3,0763081   | N/A             | N/A       | N/A          | Inc-ATP6AP2-6  |
| A_33_P3383075  | 3,55162 | 1,93047 | 3,076201485 | N/A             | N/A       | N/A          | N/A            |
| A_22_P00005503 | 6,73124 | 5,11013 | 3,076116196 | N/A             | N/A       | N/A          | Inc-DZIP1-3    |
| A_33_P3229467  | 6,71869 | 5,09764 | 3,075988266 | N/A             | 9263      | NM_004760    | STK17A         |
| A_22_P00012489 | 4,21293 | 2,59264 | 3,074368287 | ENST00000524047 | 101929191 | NR_120604    | LINC00001      |
| A_23_P16915    | 4,48624 | 2,86873 | 3,06844984  | ENST00000469098 | 25797     | NM_012413    | QPCT           |
| A_21_P0012569  | 6,33073 | 4,7135  | 3,06785437  | ENST00000422682 | N/A       | N/A          | N/A            |
| A_23_P420196   | 9,2282  | 7,61231 | 3,065006216 | ENST00000332029 | 8651      | NM_003745    | SOCS1          |
| A_33_P3234472  | 6,87661 | 5,26133 | 3,063710545 | ENST00000371639 | 284751    | NR_034124    | LINC01270      |
| A_24_P703830   | 7,63324 | 6,01877 | 3,06199091  | ENST00000591727 | 342977    | NM_001098622 | NANOS3         |
| A_23_P115202   | 10,8186 | 9,20492 | 3,060314665 | ENST00000271835 | 49860     | NM_016190    | CRNN           |
| A_22_P00012717 | 7,94195 | 6,32895 | 3,058872556 | ENST00000531454 | N/A       | N/A          | N/A            |
| A_32_P54503    | 8,99521 | 7,38249 | 3,058278944 | N/A             | 100134229 | NR_024451    | JHDM1D-AS1     |
| A_24_P189739   | 6,96933 | 5,35672 | 3,05804577  | ENST00000228862 | 80824     | NM_030640    | DUSP16         |
| A_21_P0000459  | 3,98735 | 2,37506 | 3,057367549 | N/A             | 100113378 | NR_003684    | SNORD119       |
| A_24_P126406   | 3,05345 | 1,44242 | 3,054698516 | ENST00000592192 | 8632      | NM_173628    | DNAH17         |
| A_21_P0010559  | 3,25823 | 1,64727 | 3,054550305 | N/A             | N/A       | N/A          | XLOC_I2_000421 |
| A_22_P00007205 | 6,24856 | 4,63909 | 3,051397226 | ENST00000581816 | 407975    | NR_027350    | MIR17HG        |
| A_33_P3578477  | 4,18576 | 2,57742 | 3,049008136 | N/A             | 641467    | NR_038381    | TSC22D1-AS1    |
| A_24_P298013   | 8,43596 | 6,82778 | 3,048670009 | ENST00000496137 | 54676     | NM_019096    | GTPBP2         |
| A_24_P194503   | 7,63973 | 6,03162 | 3,04852209  | ENST00000373542 | 5255      | NM_002637    | PHKA1          |
| A_22_P00012083 | 3,00086 | 1,39493 | 3,043919066 | N/A             | N/A       | U15426       | Inc-PMM2-1     |

|                |         |         |             |                 |           |              |                       |
|----------------|---------|---------|-------------|-----------------|-----------|--------------|-----------------------|
| A_33_P3229301  | 8,5986  | 6,99273 | 3,043792476 | ENST00000598170 | 93429     | NR_027003    | DKFZp434J0226         |
| A_23_P376704   | 3,25988 | 1,65441 | 3,042948674 | ENST00000320477 | 1149      | NM_001279    | CIDEA                 |
| A_21_P0013217  | 3,11012 | 1,50526 | 3,041662327 | N/A             | N/A       | N/A          | XLOC_I2_013448        |
| A_33_P3352906  | 4,25353 | 2,65051 | 3,037785492 | N/A             | 359822    | NR_002813    | KCNIP4-IT1            |
| A_24_P295010   | 10,869  | 9,26604 | 3,037659157 | ENST00000380698 | 5272      | NM_004155    | SERPINB9              |
| A_24_P102315   | 3,68865 | 2,08585 | 3,037322288 | ENST00000279024 | 85449     | NM_001029864 | KIAA1755              |
| A_22_P00025280 | 3,60911 | 2,00641 | 3,037111764 | ENST00000556762 | N/A       | DA455367     | N/A                   |
| A_21_P0002130  | 3,15285 | 1,55025 | 3,036901255 | ENST00000422899 | N/A       | N/A          | N/A                   |
| A_21_P0008363  | 3,93781 | 2,33524 | 3,036838105 | N/A             | N/A       | N/A          | Inc-FLRT2-2           |
| A_22_P00006329 | 3,23667 | 1,6346  | 3,0357858   | N/A             | N/A       | DB169144     | Inc-FANCC-1           |
| A_21_P0000201  | 15,1069 | 13,5056 | 3,034165962 | ENST00000410061 | 84084     | NM_032144    | RAB6C                 |
| A_23_P257803   | 3,17344 | 1,57343 | 3,031454145 | ENST00000255189 | 29958     | NM_013391    | DMGDH                 |
| A_23_P94319    | 11,3905 | 9,79142 | 3,029500618 | ENST00000320248 | 9920      | NM_014867    | KBTBD11               |
| A_33_P3258607  | 3,24276 | 1,644   | 3,028828728 | ENST00000612217 | 100506422 | NM_001004352 | LOC100506422          |
| A_21_P0007734  | 3,23775 | 1,63919 | 3,028408872 | N/A             | N/A       | N/A          | Inc-C12orf50-1        |
| A_33_P3366124  | 11,8648 | 10,2666 | 3,027653279 | ENST00000605526 | 102723508 | N/A          | KANTR                 |
| A_21_P0011972  | 6,54169 | 4,94501 | 3,024465072 | N/A             | N/A       | N/A          | XLOC_I2_008313        |
| A_22_P00020597 | 4,81684 | 3,22043 | 3,023899097 | N/A             | 101928942 | NR_125908    | LOC101928942          |
| A_21_P0005813  | 5,58862 | 3,99232 | 3,023668545 | N/A             | N/A       | N/A          | Inc-DUSP4-4           |
| A_33_P3411165  | 11,1506 | 9,55494 | 3,022327501 | ENST00000409560 | 266740    | NM_153488    | MAGEA2B               |
| A_22_P00005846 | 3,19039 | 1,5957  | 3,020296113 | ENST00000537327 | N/A       | N/A          | N/A                   |
| A_21_P0003835  | 3,11994 | 1,52567 | 3,019416967 | ENST00000510956 | 101928851 | NR_125907    | LOC101928851          |
| A_22_P00020350 | 3,14734 | 1,55329 | 3,018956564 | N/A             | N/A       | N/A          | Inc-PTGDR2-3          |
| A_21_P0000875  | 3,04907 | 1,45615 | 3,016592873 | ENST00000557399 | 100505967 | NR_039992    | LINC00645             |
| A_23_P82823    | 10,5818 | 8,99121 | 3,011724908 | ENST00000519088 | 54984     | NM_017884    | PINX1                 |
| A_21_P0004877  | 3,39704 | 1,80669 | 3,011223934 | N/A             | N/A       | N/A          | Inc-FTSJD2-1          |
| A_33_P3356776  | 8,74863 | 7,15894 | 3,009846683 | ENST00000596005 | 401647    | NM_001010917 | GOLGA7B               |
| A_23_P145711   | 4,26888 | 2,67938 | 3,009450318 | ENST00000488110 | 79783     | NM_024728    | SUGCT                 |
| A_21_P0011450  | 6,74904 | 5,15982 | 3,008866297 | ENST00000494075 | N/A       | XR_424749    | N/A                   |
| A_24_P115932   | 2,98124 | 1,39224 | 3,008407503 | ENST00000332539 | 11251     | NM_004778    | PTGDR2                |
| A_21_P0009098  | 3,53736 | 1,94866 | 3,007781987 | N/A             | N/A       | N/A          | Inc-RP11-327F22.5.1-3 |
| A_21_P0001477  | 3,24594 | 1,65746 | 3,007323358 | N/A             | N/A       | N/A          | Inc-ID3-2             |
| A_22_P00022574 | 3,37853 | 1,79069 | 3,005989563 | ENST00000500076 | 645485    | XR_242933    | LOC645485             |

|                |         |         |             |                 |           |           |              |
|----------------|---------|---------|-------------|-----------------|-----------|-----------|--------------|
| A_33_P3352223  | 3,59981 | 2,01198 | 3,005968727 | ENST00000533402 | 1465      | AK126507  | CSRP1        |
| A_23_P103765   | 3,24142 | 1,65612 | 3,000701892 | ENST00000368115 | 2205      | NM_002001 | FCER1A       |
| A_22_P00011561 | 7,50435 | 5,91926 | 3,000265139 | N/A             | N/A       | L22650    | Inc-PCDH19-1 |
| A_33_P3331996  | 3,44707 | 1,86211 | 2,99999948  | N/A             | N/A       | N/A       | N/A          |
| A_24_P186539   | 4,3778  | 2,79467 | 2,996191841 | ENST00000601256 | 30835     | NM_021155 | CD209        |
| A_23_P381746   | 4,32568 | 2,74335 | 2,99453086  | ENST00000269197 | 80816     | NM_030632 | ASXL3        |
| A_33_P3249414  | 3,56171 | 1,97961 | 2,994053498 | N/A             | 25893     | NM_015431 | TRIM58       |
| A_23_P212968   | 3,76423 | 2,18221 | 2,993887477 | ENST00000620779 | 10720     | NM_001073 | UGT2B11      |
| A_33_P3266255  | 4,30252 | 2,72125 | 2,992331478 | ENST00000374466 | 55454     | NM_018590 | CSGALNACT2   |
| A_32_P219279   | 9,17049 | 7,5893  | 2,992165553 | ENST00000613079 | 114794    | NM_052906 | ELFN2        |
| A_33_P3365441  | 3,24188 | 1,66073 | 2,992082594 | N/A             | N/A       | N/A       | N/A          |
| A_33_P3418125  | 7,40855 | 5,8281  | 2,990631178 | ENST00000266659 | 11010     | NM_006851 | GLIPR1       |
| A_33_P3404116  | 3,10297 | 1,52318 | 2,989263346 | N/A             | N/A       | N/A       | N/A          |
| A_33_P3252316  | 3,25384 | 1,67436 | 2,988621095 | ENST00000556472 | N/A       | N/A       | N/A          |
| A_21_P0001563  | 3,46944 | 1,89188 | 2,984646356 | N/A             | N/A       | N/A       | Inc-AMY1B-2  |
| A_33_P3390743  | 3,11551 | 1,53852 | 2,983467373 | ENST00000494913 | 57642     | AK098702  | COL20A1      |
| A_22_P00000098 | 5,09587 | 3,52057 | 2,97997453  | ENST00000507692 | 724102    | NR_003141 | SNHG4        |
| A_21_P0003359  | 8,05314 | 6,47906 | 2,977455611 | ENST00000507388 | N/A       | N/A       | N/A          |
| A_23_P64019    | 11,6484 | 10,0745 | 2,977084147 | ENST00000346299 | 8898      | NM_201278 | MTMR2        |
| A_33_P3258452  | 6,74625 | 5,17318 | 2,975371887 | N/A             | 57103     | NM_020375 | C12orf5      |
| A_22_P00001667 | 6,05205 | 4,47918 | 2,974959442 | ENST00000375114 | 22913     | NM_016732 | RALY         |
| A_33_P3308481  | 7,81209 | 6,23923 | 2,974938821 | N/A             | 57061     | NR_002768 | HYMAI        |
| A_22_P00006974 | 3,24446 | 1,67207 | 2,973969806 | ENST00000563613 | N/A       | N/A       | N/A          |
| A_23_P165668   | 6,97828 | 5,4063  | 2,973124752 | ENST00000498768 | 80255     | AK025657  | SLC35F5      |
| A_23_P128808   | 9,77108 | 8,19918 | 2,972959892 | ENST00000551869 | 29933     | NM_013345 | GPR132       |
| A_21_P0013823  | 5,09108 | 3,5202  | 2,970858722 | ENST00000614414 | 101060146 | NR_110646 | CHMP1B2P     |
| A_33_P3237542  | 3,0644  | 1,49373 | 2,970426313 | ENST00000398534 | 57830     | NM_021046 | KRTAP5-8     |
| A_22_P00022760 | 4,86625 | 3,29565 | 2,97028219  | N/A             | 101927604 | NR_110681 | LOC101927604 |
| A_22_P00013818 | 3,48635 | 1,91594 | 2,969891036 | ENST00000565259 | N/A       | N/A       | N/A          |
| A_33_P3311543  | 4,01046 | 2,44111 | 2,967709751 | N/A             | N/A       | AF130086  | N/A          |
| A_21_P0013840  | 2,94039 | 1,37133 | 2,967113264 | N/A             | 100507404 | NR_039991 | TMLHE-AS1    |
| A_33_P3357247  | 11,5859 | 10,0171 | 2,966578584 | ENST00000312010 | 57602     | NM_025090 | USP36        |
| A_33_P3413905  | 9,34741 | 7,77864 | 2,966516896 | ENST00000395738 | 79924     | NM_024866 | ADM2         |

|                |         |         |             |                 |           |              |                |
|----------------|---------|---------|-------------|-----------------|-----------|--------------|----------------|
| A_23_P210747   | 11,5507 | 9,98211 | 2,966146798 | ENST00000466974 | 51605     | NM_015939    | TRMT6          |
| A_21_P0012418  | 7,37763 | 5,80916 | 2,965900091 | N/A             | N/A       | N/A          | XLOC_I2_010029 |
| A_33_P3308347  | 3,27863 | 1,71141 | 2,963331447 | ENST00000257359 | 11095     | NM_007037    | ADAMTS8        |
| A_22_P00008878 | 3,00547 | 1,43855 | 2,962715304 | N/A             | N/A       | BX093681     | Inc-KLHL25-4   |
| A_24_P332218   | 3,67319 | 2,10646 | 2,962325146 | ENST00000389740 | 344758    | NM_001038705 | GPR149         |
| A_22_P00005597 | 3,98342 | 2,41681 | 2,962078757 | N/A             | N/A       | N/A          | Inc-EFR3A-3    |
| A_23_P427760   | 9,38828 | 7,82184 | 2,961729741 | ENST00000446230 | 143689    | NM_152431    | PIWIL4         |
| A_33_P3628675  | 6,57931 | 5,0129  | 2,961668154 | ENST00000448228 | 85002     | NM_001083537 | FAM86B1        |
| A_23_P40295    | 3,42205 | 1,85615 | 2,960621374 | ENST00000246070 | 24141     | NM_012261    | LAMP5          |
| A_33_P3407103  | 6,83263 | 5,26735 | 2,959349317 | ENST00000370339 | 54915     | NM_017798    | YTHDF1         |
| A_33_P3404879  | 3,1657  | 1,60047 | 2,959246755 | ENST00000464775 | 23266     | NM_001297706 | LPHN2          |
| A_22_P00006879 | 6,466   | 4,90109 | 2,958590446 | N/A             | 100505483 | NR_038926    | PRKAG2-AS1     |
| A_23_P28598    | 6,39961 | 4,83484 | 2,958303357 | ENST00000234198 | 1746      | NM_004405    | DLX2           |
| A_21_P0006636  | 3,05615 | 1,49139 | 2,958282851 | ENST00000439575 | N/A       | N/A          | N/A            |
| A_33_P3629678  | 10,0752 | 8,51113 | 2,956868327 | ENST00000618395 | 1289      | NM_000093    | COL5A1         |
| A_22_P00001271 | 5,21833 | 3,65442 | 2,956540418 | N/A             | N/A       | N/A          | Inc-ANKRD54-1  |
| A_33_P3373384  | 5,51064 | 3,94681 | 2,956376477 | ENST00000564318 | 79583     | NM_001077416 | TMEM231        |
| A_22_P00003354 | 3,73335 | 2,1724  | 2,950480657 | N/A             | N/A       | N/A          | Inc-CBLL1-1    |
| A_21_P0006413  | 3,21584 | 1,65508 | 2,95009211  | ENST00000419566 | 100133123 | NR_045260    | LINC01203      |
| A_21_P0003032  | 3,20505 | 1,64436 | 2,949948974 | N/A             | N/A       | N/A          | Inc-COPG-2     |
| A_21_P0011478  | 10,6528 | 9,09303 | 2,948068405 | ENST00000565156 | 96610     | XM_006726497 | BMS1P20        |
| A_21_P0011532  | 5,4194  | 3,86042 | 2,946454525 | N/A             | N/A       | N/A          | XLOC_I2_005714 |
| A_21_P0003606  | 7,49301 | 5,93456 | 2,94537229  | ENST00000507388 | N/A       | N/A          | N/A            |
| A_33_P3386932  | 11,846  | 10,2893 | 2,941801698 | ENST00000587161 | 196483    | NM_201400    | EEF2KMT        |
| A_23_P250302   | 2,96196 | 1,40533 | 2,941658964 | ENST00000357422 | 1232      | NM_001837    | CCR3           |
| A_21_P0014007  | 3,05369 | 1,49749 | 2,940782324 | N/A             | 101362076 | AK098413     | GVQW1          |
| A_22_P00002382 | 3,56    | 2,00414 | 2,940089351 | ENST00000547465 | 101929110 | NR_110109    | CASC18         |
| A_33_P3333156  | 9,72966 | 8,17394 | 2,939804057 | ENST00000530659 | 85016     | NM_001195005 | C11orf70       |
| A_21_P0000731  | 3,20221 | 1,64656 | 2,93966142  | ENST00000499425 | 100507632 | NR_038236    | LINC00968      |
| A_33_P3217584  | 3,96621 | 2,41128 | 2,938194701 | ENST00000615287 | 1137      | NM_000744    | CHRNA4         |
| A_21_P0008744  | 5,58258 | 4,02801 | 2,937461616 | N/A             | N/A       | N/A          | Inc-ADAM10-2   |
| A_23_P99906    | 9,83325 | 8,27899 | 2,936830495 | ENST00000304231 | 9455      | NM_199330    | HOMER2         |
| A_19_P00803864 | 3,40221 | 1,84843 | 2,935853543 | N/A             | 54491     | NM_019018    | FAM105A        |

|                |         |         |             |                 |           |              |                 |
|----------------|---------|---------|-------------|-----------------|-----------|--------------|-----------------|
| A_23_P56894    | 9,27238 | 7,71939 | 2,93424635  | ENST00000461371 | 57404     | NM_177538    | CYP20A1         |
| A_23_P119042   | 3,41905 | 1,86619 | 2,933981959 | ENST00000221978 | 4818      | NM_005601    | NKG7            |
| A_21_P0012651  | 8,01844 | 6,46572 | 2,933697258 | ENST00000512092 | 196483    | NM_201598    | EEF2KMT         |
| A_23_P33914    | 9,48587 | 7,93317 | 2,933656588 | ENST00000484614 | 54830     | NM_017681    | NUP62CL         |
| A_21_P0012768  | 5,77995 | 4,22784 | 2,932457095 | ENST00000506770 | 348926    | N/A          | FAM86EP         |
| A_24_P290013   | 9,33045 | 7,77895 | 2,931217456 | ENST00000588728 | 286042    | N/A          | FAM86B3P        |
| A_22_P00002225 | 6,08173 | 4,53098 | 2,929694028 | N/A             | N/A       | N/A          | Inc-C10orf103-2 |
| A_22_P00016019 | 8,60655 | 7,05692 | 2,927420516 | N/A             | 101928117 | XR_242334    | LOC101928117    |
| A_33_P3251896  | 8,81601 | 7,26643 | 2,927319061 | ENST00000543538 | 323       | NM_004307    | APBB2           |
| A_21_P0011081  | 10,2096 | 8,66006 | 2,9272379   | ENST00000489609 | 55199     | NM_001099653 | FAM86C1         |
| A_24_P41801    | 6,63183 | 5,08244 | 2,926933565 | ENST00000316300 | 4018      | NM_005577    | LPA             |
| A_23_P12911    | 13,0544 | 11,5056 | 2,92573682  | ENST00000304271 | 53838     | NM_022338    | C11orf24        |
| A_21_P0004451  | 4,76686 | 3,21854 | 2,924763558 | N/A             | N/A       | N/A          | Inc-PCDH1-1     |
| A_22_P00003928 | 3,15936 | 1,61143 | 2,923973021 | N/A             | N/A       | N/A          | Inc-CFC1-2      |
| A_22_P00025809 | 3,30969 | 1,76246 | 2,922554645 | N/A             | 101927418 | NR_110050    | LOC101927418    |
| A_33_P3392350  | 7,65559 | 6,10876 | 2,921744453 | N/A             | N/A       | N/A          | N/A             |
| A_24_P157926   | 9,76597 | 8,21931 | 2,921400189 | ENST00000615468 | 7128      | NM_006290    | TNFAIP3         |
| A_21_P0010434  | 3,84179 | 2,29532 | 2,921015472 | N/A             | N/A       | N/A          | Inc-MN1-2       |
| A_33_P3238315  | 13,428  | 11,8823 | 2,919456874 | ENST00000411647 | 10616     | NM_006462    | RBCK1           |
| A_23_P359870   | 7,18448 | 5,6396  | 2,917797983 | N/A             | N/A       | AJ312026     | N/A             |
| A_33_P3344454  | 4,96209 | 3,41794 | 2,916321958 | ENST00000328882 | 390648    | NM_001005326 | OR4F6           |
| A_21_P0005947  | 2,98101 | 1,43729 | 2,915452868 | N/A             | N/A       | N/A          | Inc-ZNF572-1    |
| A_24_P50972    | 3,30946 | 1,76605 | 2,914826476 | ENST00000568624 | 727832    | NM_001145004 | GOLGA6L6        |
| A_21_P0006237  | 3,56606 | 2,02343 | 2,913250987 | N/A             | N/A       | N/A          | Inc-RXRA-2      |
| A_23_P129174   | 10,2586 | 8,71669 | 2,911797445 | ENST00000561081 | 54839     | NM_017691    | LRRC49          |
| A_21_P0002953  | 3,217   | 1,67648 | 2,908993353 | N/A             | N/A       | N/A          | Inc-C3orf77-2   |
| A_21_P0010924  | 4,66553 | 3,12501 | 2,908993353 | ENST00000416398 | 253264    | NR_038223    | ZNF503-AS1      |
| A_21_P0000565  | 4,63596 | 3,09608 | 2,907703169 | ENST00000602812 | 100302692 | NR_028379    | FTX             |
| A_22_P00016411 | 3,02323 | 1,48341 | 2,907582243 | ENST00000579529 | N/A       | BX098899     | N/A             |
| A_23_P77529    | 10,4437 | 8,90424 | 2,906856796 | ENST00000545450 | 10232     | NM_005823    | MSLN            |
| A_22_P00017025 | 3,19896 | 1,6596  | 2,906655315 | N/A             | N/A       | N/A          | Inc-TTC7B-2     |
| A_33_P3279519  | 3,21381 | 1,67464 | 2,90627254  | ENST00000510543 | N/A       | N/A          | N/A             |
| A_23_P72096    | 12,8927 | 11,3538 | 2,905728682 | ENST00000263339 | 3552      | NM_000575    | IL1A            |



|                |         |         |             |                 |           |              |                    |
|----------------|---------|---------|-------------|-----------------|-----------|--------------|--------------------|
| A_21_P0002651  | 3,16691 | 1,62858 | 2,904580874 | N/A             | N/A       | N/A          | Inc-HS1BP3-1       |
| A_21_P0002531  | 3,4135  | 1,87541 | 2,904097721 | N/A             | N/A       | N/A          | Inc-AC073043.2.1-1 |
| A_23_P328259   | 8,05187 | 6,51381 | 2,904037333 | ENST00000511601 | 85462     | NM_033393    | FHDC1              |
| A_22_P00005709 | 6,57559 | 5,03759 | 2,90391656  | ENST00000567919 | N/A       | N/A          | N/A                |
| A_33_P3220182  | 3,4024  | 1,8648  | 2,903111535 | ENST00000546888 | 89870     | NM_033229    | TRIM15             |
| A_22_P00008939 | 5,70226 | 4,16536 | 2,901703278 | N/A             | N/A       | CD695774     | Inc-KRT80-3        |
| A_33_P3377911  | 5,52446 | 3,98782 | 2,901180385 | ENST00000432045 | N/A       | N/A          | N/A                |
| A_22_P00011419 | 4,39885 | 2,86233 | 2,900939082 | N/A             | 101929329 | NR_109957    | LAMP5-AS1          |
| A_21_P0012879  | 3,90327 | 2,36701 | 2,900416327 | N/A             | N/A       | N/A          | XLOC_I2_011901     |
| A_24_P312325   | 8,47501 | 6,93884 | 2,900235395 | N/A             | N/A       | AJ312027     | Inc-AF131215.3.1-1 |
| A_33_P3400552  | 3,42468 | 1,88887 | 2,899511781 | ENST00000328698 | 245911    | NM_001002035 | DEFB108B           |
| A_22_P00017345 | 3,48358 | 1,9489  | 2,897241609 | ENST00000560159 | N/A       | AK090830     | N/A                |
| A_33_P3375553  | 3,52114 | 1,98719 | 2,895775983 | ENST00000450457 | 392509    | NM_001162491 | ARL13A             |
| A_33_P3231739  | 3,3012  | 1,76735 | 2,89557527  | ENST00000354666 | 54898     | NM_017770    | ELOVL2             |
| A_19_P00803093 | 3,20581 | 1,67308 | 2,893328235 | N/A             | N/A       | N/A          | Inc-LCP2-2         |
| A_23_P500010   | 4,38306 | 2,85052 | 2,892947215 | ENST00000526824 | 43849     | NM_145894    | KLK12              |
| A_23_P334955   | 6,94177 | 5,40926 | 2,892887059 | ENST00000284486 | 83648     | NM_053279    | FAM167A            |
| A_33_P3316899  | 3,22328 | 1,69099 | 2,892445949 | ENST00000521268 | 138046    | NM_173848    | RALYL              |
| A_22_P00007514 | 3,65738 | 2,12534 | 2,89194477  | N/A             | N/A       | N/A          | Inc-H2AFJ-2        |
| A_19_P00323692 | 4,30679 | 2,77565 | 2,890141243 | ENST00000429829 | 7503      | NR_001564    | XIST               |
| A_23_P215828   | 3,39591 | 1,86537 | 2,888939517 | N/A             | 64816     | NM_022820    | CYP3A43            |
| A_22_P00000009 | 3,09403 | 1,56403 | 2,887858391 | N/A             | N/A       | AY034470     | Inc-OR51B4-2       |
| A_21_P0000290  | 7,55151 | 6,02171 | 2,887458077 | N/A             | 26806     | NR_002750    | SNORD44            |
| A_22_P00016154 | 4,11242 | 2,58275 | 2,887197902 | N/A             | 100506195 | NR_038950    | LARGE-AS1          |
| A_23_P347632   | 10,7776 | 9,24819 | 2,886677623 | ENST00000520771 | 9788      | NM_014751    | MTSS1              |
| A_21_P0011694  | 10,1464 | 8,61719 | 2,886277472 | ENST00000438770 | 101927667 | NR_110720    | LINC01535          |
| A_23_P5301     | 6,13118 | 4,6021  | 2,886017404 | ENST00000263707 | 29842     | NM_014553    | TFCP2L1            |
| A_32_P197340   | 2,90892 | 1,38002 | 2,885657348 | ENST00000409885 | 285141    | NM_001290030 | ERICH2             |
| A_23_P24176    | 8,45276 | 6,92461 | 2,884157599 | ENST00000265992 | 54619     | NM_019084    | CCNJ               |
| A_33_P3357397  | 3,07108 | 1,5431  | 2,883817764 | ENST00000422143 | N/A       | AB306246     | N/A                |
| A_24_P11061    | 14,0776 | 12,5497 | 2,883657856 | ENST00000452779 | 158511    | NM_153478    | CSAG1              |
| A_21_P0001863  | 3,41034 | 1,88249 | 2,883557918 | N/A             | N/A       | N/A          | Inc-REL-1          |
| A_33_P3357002  | 2,99366 | 1,46629 | 2,882598687 | ENST00000382137 | 387911    | NM_001007537 | C1QTNF9B           |

|                |         |         |             |                 |           |              |                      |
|----------------|---------|---------|-------------|-----------------|-----------|--------------|----------------------|
| A_22_P00009121 | 3,70409 | 2,17672 | 2,882598687 | ENST00000566562 | N/A       | BX116282     | N/A                  |
| A_22_P00023639 | 3,04102 | 1,51397 | 2,881959377 | N/A             | 100505845 | NR_102746    | ROPN1L-AS1           |
| A_21_P0007891  | 3,17407 | 1,64768 | 2,880641248 | ENST00000538041 | 101928138 | NR_120462    | LINC01486            |
| A_22_P00017174 | 3,32294 | 1,79743 | 2,87888468  | N/A             | N/A       | N/A          | Inc-UBLCP1-6         |
| A_23_P19291    | 11,6964 | 10,171  | 2,878665185 | ENST00000333628 | 7280      | NM_001069    | TUBB2A               |
| A_33_P3253605  | 2,97268 | 1,44765 | 2,877927004 | ENST00000398758 | N/A       | N/A          | N/A                  |
| A_33_P3396527  | 7,92983 | 6,40586 | 2,875813264 | ENST00000399107 | 10622     | NM_006467    | POLR3G               |
| A_22_P00009116 | 3,90245 | 2,37912 | 2,874537796 | N/A             | N/A       | N/A          | Inc-LINC00273-1      |
| A_21_P0008420  | 3,13457 | 1,61204 | 2,872944255 | N/A             | N/A       | N/A          | Inc-RALGAPA1-3       |
| A_32_P66804    | 4,65587 | 3,13412 | 2,871391404 | ENST00000389418 | 5799      | NM_002847    | PTPRN2               |
| A_23_P143029   | 3,30572 | 1,78408 | 2,87117248  | ENST00000619244 | 3237      | NM_021192    | HOXD11               |
| A_21_P0011317  | 3,50246 | 1,98184 | 2,869143249 | N/A             | N/A       | N/A          | XLOC_I2_004640       |
| A_21_P0014588  | 3,17844 | 1,65786 | 2,869063701 | N/A             | N/A       | N/A          | N/A                  |
| A_22_P00015828 | 6,65947 | 5,13946 | 2,867930375 | ENST00000438810 | 284930    | NR_122046    | LOC284930            |
| A_21_P0002290  | 3,15739 | 1,6375  | 2,867691837 | N/A             | N/A       | N/A          | Inc-GYPC-1           |
| A_23_P116741   | 6,43942 | 4,91972 | 2,867314193 | ENST00000541480 | 9271      | NM_004764    | PIWIL1               |
| A_33_P3373750  | 12,1495 | 10,6304 | 2,866121958 | N/A             | 23476     | NM_014299    | BRD4                 |
| A_21_P0007416  | 4,49246 | 2,97357 | 2,865704793 | N/A             | N/A       | N/A          | Inc-RP11-791J7.2.1-1 |
| A_33_P3697191  | 3,5907  | 2,0721  | 2,865128808 | N/A             | 552860    | BG528800     | SAMD12-AS1           |
| A_21_P0012351  | 3,15759 | 1,63937 | 2,864374244 | ENST00000621179 | 25774     | NR_003081    | GSTTP1               |
| A_33_P3420816  | 3,27218 | 1,75424 | 2,863818377 | ENST00000623927 | 2657      | NM_001492    | GDF1                 |
| A_21_P0010025  | 3,92612 | 2,40839 | 2,863401547 | N/A             | N/A       | N/A          | Inc-GGTLC1-2         |
| A_22_P00007104 | 3,80433 | 2,28665 | 2,863302311 | N/A             | N/A       | N/A          | Inc-GLS-2            |
| A_33_P3409477  | 5,79982 | 4,28256 | 2,862468863 | ENST00000284273 | 84959     | NM_032873    | UBASH3B              |
| A_21_P0012155  | 7,78551 | 6,26858 | 2,861814181 | ENST00000427691 | N/A       | N/A          | N/A                  |
| A_22_P00019017 | 3,18139 | 1,66453 | 2,861675328 | ENST00000422038 | N/A       | N/A          | N/A                  |
| A_21_P0004961  | 2,86194 | 1,34574 | 2,860366476 | N/A             | N/A       | N/A          | Inc-ARID1B-2         |
| A_33_P3626301  | 3,71412 | 2,19858 | 2,859058223 | ENST00000414296 | 554236    | NR_002833    | DPY19L2P1            |
| A_33_P3317460  | 4,12179 | 2,60646 | 2,858642086 | N/A             | N/A       | N/A          | N/A                  |
| A_33_P3342953  | 4,16739 | 2,65223 | 2,858305258 | N/A             | N/A       | N/A          | N/A                  |
| A_22_P00023709 | 3,49334 | 1,97888 | 2,856918736 | ENST00000449613 | N/A       | N/A          | N/A                  |
| A_21_P0012331  | 3,03757 | 1,52312 | 2,856898934 | ENST00000453395 | N/A       | N/A          | N/A                  |
| A_23_P11025    | 11,9897 | 10,4761 | 2,855216216 | ENST00000370268 | 7739      | NM_001178106 | ZNF185               |

|                |         |         |             |                 |           |              |                  |
|----------------|---------|---------|-------------|-----------------|-----------|--------------|------------------|
| A_22_P00011303 | 3,09259 | 1,57954 | 2,854127926 | ENST00000583267 | N/A       | N/A          | N/A              |
| A_22_P00022855 | 7,17066 | 5,65791 | 2,853534489 | N/A             | 100996437 | NR_110037    | LOC100996437     |
| A_21_P0000047  | 3,57364 | 2,0618  | 2,85173515  | ENST00000602962 | 27185     | NM_001164544 | DISC1            |
| A_23_P117782   | 13,6848 | 12,1731 | 2,851458429 | ENST00000299213 | 55323     | NM_018357    | LARP6            |
| A_21_P0001655  | 3,77256 | 2,26087 | 2,851438664 | N/A             | N/A       | N/A          | Inc-AL669831.1-4 |
| A_33_P3390939  | 6,1273  | 4,61567 | 2,851320079 | N/A             | N/A       | N/A          | N/A              |
| A_22_P00023115 | 5,36318 | 3,85267 | 2,849107387 | N/A             | 100874353 | NR_046793    | RPS6KA2-IT1      |
| A_21_P0011517  | 8,92901 | 7,41909 | 2,847942463 | ENST00000453883 | 3861      | NM_000526    | KRT14            |
| A_33_P3257428  | 2,98767 | 1,47778 | 2,847883243 | ENST00000390377 | N/A       | AB306200     | N/A              |
| A_22_P00004399 | 4,02696 | 2,51738 | 2,847271368 | N/A             | 101927233 | NR_109879    | SEMA6A-AS1       |
| A_21_P0008818  | 3,15979 | 1,65087 | 2,845969104 | N/A             | N/A       | N/A          | Inc-APBA2-2      |
| A_23_P396858   | 7,28126 | 5,77239 | 2,845870472 | ENST00000374694 | 8325      | NM_031866    | FZD8             |
| A_33_P3226832  | 16,251  | 14,7428 | 2,844549132 | ENST00000370207 | 2152      | NM_001993    | F3               |
| A_33_P3278951  | 3,89685 | 2,38865 | 2,844549132 | ENST00000322128 | 85453     | NM_033512    | TSPYL5           |
| A_22_P00003770 | 3,78801 | 2,28034 | 2,843504328 | ENST00000548740 | N/A       | N/A          | N/A              |
| A_23_P336992   | 10,083  | 8,57548 | 2,843208698 | ENST00000316495 | 90637     | NM_182491    | ZFAND2A          |
| A_19_P00319398 | 10,7931 | 9,28583 | 2,84271605  | ENST00000440542 | 100288413 | NM_024534    | ERVMER34-1       |
| A_22_P00024060 | 3,15088 | 1,64445 | 2,841061379 | ENST00000421597 | N/A       | N/A          | N/A              |
| A_22_P00006206 | 3,63832 | 2,13228 | 2,840293466 | ENST00000455796 | 100507391 | NR_037891    | LOC100507391     |
| A_21_P0006238  | 4,09797 | 2,59239 | 2,839387989 | N/A             | N/A       | N/A          | Inc-RXRA-1       |
| A_21_P0004624  | 3,65613 | 2,15133 | 2,837853275 | ENST00000440848 | N/A       | N/A          | N/A              |
| A_22_P00020160 | 5,32157 | 3,81797 | 2,835493797 | ENST00000564048 | N/A       | AK123174     | N/A              |
| A_22_P00017912 | 3,56663 | 2,06401 | 2,833568344 | N/A             | N/A       | N/A          | Inc-ZFP36L1-2    |
| A_21_P0000790  | 3,39443 | 1,89182 | 2,833548704 | N/A             | 100506801 | NR_038404    | LOC100506801     |
| A_22_P00000841 | 4,29351 | 2,79109 | 2,833175556 | N/A             | N/A       | BG533339     | Inc-AGBL4-1      |
| A_33_P3245290  | 10,3267 | 8,82433 | 2,833077367 | N/A             | 375719    | N/A          | AQP7P1           |
| A_21_P0011789  | 3,93907 | 2,4377  | 2,831114308 | N/A             | N/A       | N/A          | XLOC_I2_007176   |
| A_21_P0011711  | 4,71043 | 3,20942 | 2,830407939 | N/A             | N/A       | N/A          | XLOC_I2_006813   |
| A_22_P00015539 | 3,51784 | 2,01736 | 2,829368329 | N/A             | N/A       | N/A          | Inc-STK32C-1     |
| A_33_P3315982  | 3,39325 | 1,89341 | 2,82811346  | ENST00000599388 | 100130342 | BC114619     | SCGB2B3P         |
| A_23_P146294   | 7,98092 | 6,48136 | 2,827564629 | ENST00000262103 | 79645     | NM_024593    | EFCAB1           |
| A_23_P433218   | 8,22    | 6,72079 | 2,826878741 | ENST00000400027 | 79315     | NR_002185    | OR7E91P          |
| A_23_P429998   | 10,7012 | 9,20269 | 2,825507463 | ENST00000615753 | 2354      | NM_006732    | FOSB             |

|                |         |         |             |                 |           |              |                      |
|----------------|---------|---------|-------------|-----------------|-----------|--------------|----------------------|
| A_19_P00803441 | 3,57849 | 2,08011 | 2,825252871 | N/A             | 100499194 | NR_034130    | LOC100499194         |
| A_21_P0009895  | 3,3799  | 1,88168 | 2,824939558 | N/A             | N/A       | N/A          | Inc-FAM182B-2        |
| A_23_P359043   | 7,0955  | 5,59778 | 2,823960678 | ENST00000374530 | 11217     | NM_001004065 | AKAP2                |
| A_23_P56559    | 15,3078 | 13,8101 | 2,82392153  | ENST00000428522 | 10170     | NM_001142270 | DHRS9                |
| A_33_P3264926  | 7,87143 | 6,37375 | 2,823882382 | ENST00000554335 | 23034     | NM_015589    | SAMD4A               |
| A_21_P0000476  | 11,4636 | 9,96643 | 2,822884302 | N/A             | 100124538 | NR_003708    | SNORA70C             |
| A_23_P210425   | 9,06311 | 7,56608 | 2,822610381 | ENST00000346786 | 10398     | NM_181526    | MYL9                 |
| A_22_P00001715 | 3,68492 | 2,18799 | 2,822414739 | ENST00000413053 | N/A       | AK092802     | N/A                  |
| A_33_P3228593  | 9,22295 | 7,72611 | 2,822238673 | ENST00000465431 | N/A       | AK023344     | N/A                  |
| A_24_P185945   | 10,0768 | 8,58028 | 2,82161275  | ENST00000431963 | 4103      | NM_002362    | MAGEA4               |
| A_24_P794458   | 3,44541 | 1,94975 | 2,819931269 | ENST00000383754 | 4336      | NM_182935    | MOBP                 |
| A_22_P00020747 | 6,90571 | 5,41015 | 2,819735813 | N/A             | N/A       | BX097797     | Inc-AMIGO2-2         |
| A_33_P3357600  | 3,02995 | 1,53481 | 2,818915046 | ENST00000359518 | 10612     | NM_006458    | TRIM3                |
| A_22_P00010476 | 4,01685 | 2,52196 | 2,818426608 | N/A             | N/A       | CD244325     | Inc-NAPG-3           |
| A_22_P00016091 | 3,01687 | 1,52249 | 2,817430456 | N/A             | N/A       | N/A          | Inc-THOC1-1          |
| A_33_P3305763  | 5,92432 | 4,43215 | 2,813117864 | N/A             | N/A       | BC069683     | Inc-AF131215.4.1-1   |
| A_22_P00022588 | 2,87991 | 1,38795 | 2,812708414 | N/A             | N/A       | N/A          | Inc-TMEM30B-2        |
| A_33_P3226955  | 5,07556 | 3,58371 | 2,812493964 | N/A             | N/A       | N/A          | N/A                  |
| A_23_P377996   | 3,07182 | 1,58032 | 2,811811731 | ENST00000296615 | 285671    | NM_178532    | RNF180               |
| A_21_P0006509  | 3,07842 | 1,58697 | 2,811714283 | N/A             | N/A       | N/A          | Inc-NRK-1            |
| A_23_P29005    | 4,20318 | 2,71193 | 2,811324524 | ENST00000619120 | 64092     | NM_022136    | SAMSN1               |
| A_23_P107336   | 3,55637 | 2,06525 | 2,811071209 | ENST00000576594 | 9744      | NM_014716    | ACAP1                |
| A_24_P137897   | 12,2894 | 10,799  | 2,809668649 | ENST00000005558 | 3475      | NM_001007245 | IFRD1                |
| A_22_P00016634 | 3,10651 | 1,61616 | 2,809571275 | N/A             | N/A       | BU543472     | Inc-TOR2A-1          |
| A_33_P3295333  | 3,15784 | 1,66751 | 2,809532326 | ENST00000315330 | 51267     | NM_001297750 | CLEC1A               |
| A_21_P0010719  | 5,95574 | 4,46554 | 2,809279173 | N/A             | N/A       | N/A          | Inc-RP3-377D14.1.1-3 |
| A_21_P0004822  | 2,95625 | 1,4668  | 2,80781912  | ENST00000607519 | N/A       | N/A          | N/A                  |
| A_24_P355626   | 3,28748 | 1,79972 | 2,804531914 | ENST00000619701 | 64137     | NM_022169    | ABCG4                |
| A_23_P52207    | 9,87104 | 8,38355 | 2,804007095 | ENST00000375533 | 25805     | NM_012342    | BAMBI                |
| A_22_P00011356 | 3,06349 | 1,57675 | 2,802549782 | ENST00000442322 | 100887754 | NR_051966    | LINC00359            |
| A_32_P234145   | 4,75222 | 3,26561 | 2,802297258 | ENST00000332408 | 399694    | NM_203349    | SHC4                 |
| A_21_P0008294  | 3,32888 | 1,84237 | 2,802103024 | ENST00000508827 | 101927780 | N/A          | LOC101927780         |
| A_23_P404494   | 10,7149 | 9,22917 | 2,800588463 | ENST00000303115 | 3575      | NM_002185    | IL7R                 |

|                |         |         |             |                 |           |              |                       |
|----------------|---------|---------|-------------|-----------------|-----------|--------------|-----------------------|
| A_23_P58251    | 6,63914 | 5,15362 | 2,800180837 | ENST00000514302 | 8532      | NM_001014448 | CPZ                   |
| A_23_P149892   | 8,32483 | 6,83972 | 2,799385166 | ENST00000374466 | 55454     | NM_018590    | CSGALNACT2            |
| A_33_P3373745  | 7,4228  | 5,93773 | 2,799307551 | ENST00000595926 | 23476     | NM_014299    | BRD4                  |
| A_24_P182892   | 2,88239 | 1,39816 | 2,797678147 | ENST00000425817 | 80704     | NM_025243    | SLC19A3               |
| A_21_P0007269  | 3,01741 | 1,5339  | 2,796282269 | N/A             | 101928477 | XR_246461    | LOC101928477          |
| A_21_P0002736  | 3,09798 | 1,61461 | 2,796010929 | ENST00000424786 | N/A       | XR_425582    | N/A                   |
| A_22_P00024824 | 3,62749 | 2,14465 | 2,794983953 | N/A             | N/A       | BC034816     | Inc-SYNM-2            |
| A_21_P0011236  | 3,16055 | 1,67846 | 2,793531329 | ENST00000611785 | N/A       | N/A          | N/A                   |
| A_22_P00002197 | 3,1278  | 1,64589 | 2,793182812 | N/A             | N/A       | N/A          | Inc-BTG3-2            |
| A_21_P0006201  | 3,39265 | 1,91077 | 2,79312473  | N/A             | N/A       | N/A          | Inc-RAD23B-3          |
| A_21_P0004105  | 2,84195 | 1,36111 | 2,791111967 | ENST00000511443 | 101929454 | N/A          | LOC101929454          |
| A_22_P00012370 | 3,15104 | 1,67026 | 2,79099589  | ENST00000541949 | 101928162 | NR_120463    | LOC101928162          |
| A_24_P42039    | 2,86707 | 1,38744 | 2,78877202  | ENST00000595971 | N/A       | CR745853     | N/A                   |
| A_23_P109143   | 16,1106 | 14,6317 | 2,787361266 | ENST00000379440 | 5621      | NM_000311    | PRNP                  |
| A_23_P74914    | 9,61539 | 8,1372  | 2,785989846 | ENST00000258243 | 9816      | NM_014777    | URB2                  |
| A_24_P350589   | 3,0344  | 1,55661 | 2,785217513 | ENST00000306799 | 57484     | NM_020724    | RNF150                |
| A_23_P147826   | 8,62989 | 7,15248 | 2,784483995 | ENST00000460462 | 57826     | NM_021183    | RAP2C                 |
| A_21_P0010588  | 5,06082 | 3,5846  | 2,782188174 | N/A             | N/A       | N/A          | XLOC_I2_000706        |
| A_24_P21831    | 10,2951 | 8,81896 | 2,782033901 | ENST00000328654 | 7574      | NM_019591    | ZNF26                 |
| A_24_P232545   | 3,0854  | 1,60985 | 2,780896401 | ENST00000298251 | 220296    | NM_152722    | HEPACAM               |
| A_22_P00017915 | 8,79181 | 7,31632 | 2,78078075  | ENST00000427548 | 169834    | NM_001101338 | ZNF883                |
| A_23_P28948    | 3,2105  | 1,7351  | 2,780607281 | ENST00000201979 | 28954     | NM_014012    | REM1                  |
| A_22_P00005000 | 3,28446 | 1,80964 | 2,779489631 | N/A             | N/A       | N/A          | Inc-DDHD2-1           |
| A_33_P3310430  | 11,8553 | 10,3806 | 2,779258449 | ENST00000477247 | 653333    | NM_001137610 | FAM86B2               |
| A_22_P00020852 | 3,64046 | 2,16586 | 2,779065812 | N/A             | N/A       | N/A          | Inc-RP11-867G23.8.1-1 |
| A_24_P561341   | 3,13357 | 1,65901 | 2,778988761 | ENST00000619265 | 285016    | NM_001002919 | FAM150B               |
| A_19_P00319409 | 10,9379 | 9,4636  | 2,778487982 | ENST00000440542 | 100288413 | NM_024534    | ERVMER34-1            |
| A_21_P0005027  | 6,27838 | 4,80428 | 2,778102828 | N/A             | N/A       | N/A          | Inc-MRPS18A-1         |
| A_23_P310086   | 4,42114 | 2,94712 | 2,777948782 | ENST00000370746 | 221336    | NM_152731    | BEND6                 |
| A_19_P00317144 | 3,58131 | 2,10765 | 2,777255678 | N/A             | 101928004 | XR_241967    | LOC101928004          |
| A_33_P3216601  | 4,13746 | 2,66482 | 2,775292825 | ENST00000476844 | 2272      | NM_002012    | FHIT                  |
| A_23_P59637    | 8,98559 | 7,51439 | 2,772524098 | N/A             | 9732      | NM_014705    | DOCK4                 |
| A_33_P3222892  | 13      | 11,5288 | 2,772524098 | ENST00000393587 | 8273      | NM_019848    | SLC10A3               |

|                |         |         |             |                 |           |              |                |
|----------------|---------|---------|-------------|-----------------|-----------|--------------|----------------|
| A_21_P0008871  | 7,80952 | 6,33894 | 2,771332858 | N/A             | 645644    | NR_024492    | FLJ42627       |
| A_23_P341567   | 5,74408 | 4,27387 | 2,770622201 | ENST00000362026 | 133308    | NM_178833    | SLC9B2         |
| A_22_P00016798 | 3,93952 | 2,46951 | 2,770238138 | ENST00000556762 | N/A       | DA455367     | N/A            |
| A_23_P31721    | 8,89378 | 7,42377 | 2,770238138 | ENST00000517476 | 1875      | NM_001951    | E2F5           |
| A_22_P00020063 | 3,00842 | 1,53844 | 2,770180533 | N/A             | N/A       | N/A          | Inc-TADA2B-1   |
| A_21_P0002958  | 2,90378 | 1,43392 | 2,769950126 | N/A             | N/A       | N/A          | Inc-ARIH2-1    |
| A_23_P127760   | 3,29211 | 1,82241 | 2,769642945 | ENST00000016913 | 54860     | NM_017716    | MS4A12         |
| A_21_P0005936  | 3,43032 | 1,96132 | 2,768299432 | N/A             | N/A       | N/A          | Inc-UNC5D-1    |
| A_23_P202034   | 3,40496 | 1,93617 | 2,767896505 | ENST00000490269 | 390003    | N/A          | GUCY2GP        |
| A_22_P00020279 | 3,252   | 1,78374 | 2,766879855 | ENST00000415774 | N/A       | N/A          | N/A            |
| A_33_P3288614  | 5,9299  | 4,46193 | 2,766323733 | N/A             | 101927322 | NM_001289967 | LOC101927322   |
| A_33_P3399061  | 6,7181  | 5,25054 | 2,765537683 | ENST00000611195 | 104       | NR_027673    | ADARB1         |
| A_21_P0014859  | 3,56199 | 2,09584 | 2,762836139 | N/A             | N/A       | N/A          | N/A            |
| A_33_P3357199  | 3,83989 | 2,3742  | 2,761955356 | ENST00000389938 | 284948    | NM_198482    | SH2D6          |
| A_33_P3269740  | 10,9218 | 9,45614 | 2,761897923 | ENST00000524893 | 653333    | NM_001137610 | FAM86B2        |
| A_24_P924862   | 11,7933 | 10,328  | 2,761208824 | ENST00000319170 | 65059     | NM_213589    | RAPH1          |
| A_22_P00004208 | 4,54064 | 3,07584 | 2,760252028 | N/A             | N/A       | N/A          | Inc-CLNS1A-1   |
| A_22_P00006922 | 3,3705  | 1,90633 | 2,759046937 | ENST00000413286 | N/A       | N/A          | N/A            |
| A_22_P00012852 | 3,33452 | 1,87047 | 2,758817455 | ENST00000558297 | 729911    | NR_038997    | ANKRD34C-AS1   |
| A_23_P71170    | 4,58221 | 3,11829 | 2,758568872 | ENST00000463646 | 55503     | NM_018646    | TRPV6          |
| A_23_P171388   | 2,86233 | 1,39855 | 2,758301192 | ENST00000284856 | 9087      | NM_004202    | TMSB4Y         |
| A_21_P0011012  | 3,13412 | 1,67052 | 2,75795707  | N/A             | N/A       | N/A          | XLOC_I2_002686 |
| A_22_P00002842 | 4,32529 | 2,86179 | 2,757765909 | N/A             | N/A       | AK055026     | Inc-C3orf26-1  |
| A_21_P0006829  | 4,49181 | 3,02855 | 2,757307178 | ENST00000436383 | 100507127 | NR_038291    | LINC00707      |
| A_21_P0014517  | 5,77628 | 4,31356 | 2,756275313 | ENST00000434985 | 101930346 | XR_426076    | LOC101930346   |
| A_22_P00018716 | 3,25871 | 1,79635 | 2,755587617 | ENST00000575911 | N/A       | BF825985     | N/A            |
| A_22_P00016150 | 3,75846 | 2,29684 | 2,754174559 | N/A             | N/A       | N/A          | Inc-TIMP3-2    |
| A_23_P352799   | 5,03688 | 3,57533 | 2,754040929 | ENST00000329610 | 283869    | NM_001099456 | NPW            |
| A_33_P3282162  | 6,40915 | 4,94773 | 2,753792776 | N/A             | 191585    | NM_182832    | PLAC4          |
| A_24_P368575   | 9,25674 | 7,79619 | 2,752132634 | ENST00000295736 | 9497      | NM_003615    | SLC4A7         |
| A_24_P226116   | 7,00103 | 5,54056 | 2,751980028 | ENST00000398947 | 80155     | NM_057175    | NAA15          |
| A_21_P0003140  | 3,12289 | 1,66247 | 2,751884653 | N/A             | N/A       | N/A          | Inc-RPL24-2    |
| A_22_P00018045 | 4,69464 | 3,23452 | 2,751312475 | N/A             | 101928530 | NR_110919    | LOC101928530   |

|                |         |         |             |                 |           |              |              |
|----------------|---------|---------|-------------|-----------------|-----------|--------------|--------------|
| A_22_P00014740 | 3,02855 | 1,56859 | 2,751007361 | ENST00000513197 | N/A       | N/A          | N/A          |
| A_22_P00024648 | 6,34478 | 4,8849  | 2,750854817 | ENST00000538430 | N/A       | N/A          | N/A          |
| A_23_P345887   | 9,02907 | 7,56923 | 2,750778548 | ENST00000361060 | 2673      | NM_001244710 | GFPT1        |
| A_33_P3314574  | 4,45582 | 2,9961  | 2,750549754 | N/A             | N/A       | N/A          | N/A          |
| A_23_P374892   | 3,04288 | 1,58364 | 2,749634769 | ENST00000571348 | 51716     | NR_003276    | CES1P1       |
| A_23_P319572   | 3,72905 | 2,27001 | 2,749253616 | ENST00000367979 | 9970      | NM_001077482 | NR1I3        |
| A_19_P00316375 | 5,59805 | 4,13998 | 2,747405769 | ENST00000520332 | 90459     | N/A          | ERI1         |
| A_24_P366859   | 3,29068 | 1,83298 | 2,746701247 | ENST00000324554 | 83878     | NM_031941    | USHBP1       |
| A_33_P3513023  | 3,93858 | 2,48095 | 2,746567979 | N/A             | N/A       | AK127961     | N/A          |
| A_21_P0006610  | 4,35832 | 2,90116 | 2,745673351 | ENST00000429940 | 84856     | NR_026827    | LINC00839    |
| A_24_P65616    | 11,4287 | 9,97322 | 2,74247791  | ENST00000425690 | 5817      | NM_006505    | PVR          |
| A_22_P00021012 | 2,97899 | 1,52369 | 2,742135762 | N/A             | N/A       | N/A          | Inc-GLS-1    |
| A_23_P125837   | 9,33629 | 7,88136 | 2,741432592 | ENST00000373357 | 51260     | NM_016500    | PBDC1        |
| A_23_P358597   | 8,75739 | 7,30252 | 2,741318581 | ENST00000474760 | 64208     | NM_022361    | POPDC3       |
| A_33_P3332348  | 16,4232 | 14,9685 | 2,740995577 | N/A             | 6029      | NR_002715    | RN7SL1       |
| A_21_P0006834  | 3,85267 | 2,39818 | 2,740596624 | N/A             | N/A       | N/A          | Inc-GATA3-2  |
| A_23_P121657   | 15,6134 | 14,1596 | 2,739286188 | ENST00000002596 | 9957      | NM_005114    | HS3ST1       |
| A_22_P00011398 | 2,87962 | 1,42659 | 2,737824557 | N/A             | N/A       | N/A          | Inc-PACRGL-2 |
| A_23_P11729    | 8,36767 | 6,91576 | 2,735699941 | ENST00000417934 | 51043     | NM_001252406 | ZBTB7B       |
| A_22_P00013874 | 3,08719 | 1,63544 | 2,735396559 | N/A             | N/A       | BU561379     | Inc-RPP38-3  |
| A_21_P0014384  | 7,02572 | 5,57416 | 2,735036336 | N/A             | N/A       | N/A          | N/A          |
| A_21_P0012571  | 6,28809 | 4,83655 | 2,734998421 | ENST00000511564 | N/A       | N/A          | N/A          |
| A_23_P36939    | 8,00445 | 6,55455 | 2,731891147 | ENST00000379161 | 26747     | NM_012345    | NUFIP1       |
| A_21_P0014379  | 4,03435 | 2,5845  | 2,731796468 | N/A             | 101927720 | NR_110723    | ZNF793-AS1   |
| A_21_P0013645  | 3,33487 | 1,88614 | 2,72967653  | ENST00000625032 | N/A       | N/A          | N/A          |
| A_22_P00011229 | 3,39182 | 1,94336 | 2,729165719 | N/A             | N/A       | N/A          | Inc-OR10H1-1 |
| A_21_P0012455  | 7,6076  | 6,15981 | 2,727898565 | N/A             | 101927056 | N/A          | LOC101927056 |
| A_22_P00003557 | 7,23974 | 5,7922  | 2,727425898 | N/A             | 641364    | NR_038380    | SLC7A11-AS1  |
| A_24_P336853   | 10,1934 | 8,74614 | 2,726896607 | ENST00000263657 | 56902     | NM_020143    | PNO1         |
| A_22_P00018999 | 3,09365 | 1,64766 | 2,724497184 | N/A             | N/A       | N/A          | Inc-MYOC-2   |
| A_23_P51936    | 5,36492 | 3,91914 | 2,724100633 | ENST00000377507 | 3604      | NM_001561    | TNFRSF9      |
| A_24_P35400    | 4,01328 | 2,56781 | 2,723515353 | ENST00000422262 | 1757      | NM_007101    | SARDH        |
| A_23_P109055   | 7,95818 | 6,51297 | 2,72302457  | ENST00000372102 | 112858    | NM_033550    | TP53RK       |

|                |         |         |             |                 |           |              |                |
|----------------|---------|---------|-------------|-----------------|-----------|--------------|----------------|
| A_23_P98350    | 10,7272 | 9,28213 | 2,722760339 | ENST00000263464 | 330       | NM_001165    | BIRC3          |
| A_33_P3687198  | 9,73278 | 8,28818 | 2,721873465 | ENST00000257572 | 8739      | AK094730     | HRK            |
| A_22_P00019308 | 8,43861 | 6,9943  | 2,721326389 | N/A             | N/A       | AL832593     | Inc-C17orf89-1 |
| A_21_P0000475  | 11,4524 | 10,0086 | 2,720364556 | N/A             | 100124537 | NR_003707    | SNORA70B       |
| A_33_P3320538  | 9,47614 | 8,03276 | 2,719572714 | ENST00000463407 | 9818      | AB007870     | NUPL1          |
| A_33_P3214105  | 8,38114 | 6,93795 | 2,719214575 | ENST00000366981 | 467       | NM_001674    | ATF3           |
| A_24_P101651   | 12,6396 | 11,1974 | 2,717349248 | ENST00000361201 | 100130935 | NR_073432    | CSAG4          |
| A_23_P214011   | 7,40984 | 5,96772 | 2,71719857  | ENST00000265071 | 1004      | NM_004932    | CDH6           |
| A_21_P0002839  | 3,07992 | 1,63793 | 2,716953737 | ENST00000436060 | 285370    | N/A          | LINC00606      |
| A_23_P171117   | 10,8373 | 9,3956  | 2,716407649 | ENST00000355610 | 79710     | NM_024657    | MORC4          |
| A_22_P00022317 | 5,03267 | 3,59131 | 2,715767549 | ENST00000522130 | 4481      | XR_252382    | MSR1           |
| A_24_P176079   | 7,91    | 6,46909 | 2,714920589 | ENST00000361042 | 10810     | NM_006646    | WASF3          |
| A_22_P00010857 | 3,94373 | 2,50304 | 2,714506616 | N/A             | 100616277 | NR_039748    | MIR4522        |
| A_32_P19752    | 11,12   | 9,67968 | 2,713810531 | ENST00000398187 | 143684    | NM_144664    | FAM76B         |
| A_23_P41327    | 11,2932 | 9,85334 | 2,712945376 | ENST00000452476 | 55646     | NM_017816    | LYAR           |
| A_21_P0014771  | 8,67408 | 7,23452 | 2,712381294 | N/A             | N/A       | N/A          | N/A            |
| A_21_P0011922  | 2,96747 | 1,52796 | 2,712287291 | N/A             | N/A       | N/A          | XLOC_I2_008043 |
| A_33_P3356210  | 9,90955 | 8,47018 | 2,712024102 | ENST00000338965 | 374383    | NM_001202439 | NCR3LG1        |
| A_21_P0000060  | 5,95867 | 4,52006 | 2,710595806 | ENST00000510944 | 80144     | NM_001166133 | FRAS1          |
| A_24_P943358   | 4,43317 | 2,99468 | 2,710370355 | ENST00000265728 | 10926     | NM_006716    | DBF4           |
| A_22_P00003210 | 3,48855 | 2,05112 | 2,708379679 | ENST00000526470 | 102724496 | XR_426314    | LOC102724496   |
| A_33_P3321564  | 2,93444 | 1,49703 | 2,708342133 | N/A             | N/A       | N/A          | N/A            |
| A_24_P303091   | 9,32171 | 7,88457 | 2,707835315 | ENST00000306602 | 3627      | NM_001565    | CXCL10         |
| A_33_P3344399  | 9,07806 | 7,64094 | 2,707797777 | ENST00000436542 | 54839     | NM_001199018 | LRRC49         |
| A_33_P3356985  | 3,15567 | 1,71889 | 2,707159705 | ENST00000326513 | N/A       | AB529250     | N/A            |
| A_33_P3290898  | 3,25269 | 1,81614 | 2,706728154 | ENST00000443027 | 27151     | NM_015692    | CPAMD8         |
| A_21_P0007295  | 2,90655 | 1,47016 | 2,706427985 | ENST00000527317 | 101929473 | NR_120578    | LOC101929473   |
| A_24_P389608   | 10,3434 | 8,90736 | 2,705771481 | ENST00000277570 | 254427    | NM_153256    | PROSER2        |
| A_33_P3282683  | 3,39249 | 1,95687 | 2,704983887 | N/A             | 100130027 | AK127225     | LOC100130027   |
| A_22_P00007443 | 3,57273 | 2,13758 | 2,704102803 | ENST00000434792 | 101927472 | NR_120622    | LOC101927472   |
| A_23_P165840   | 13,602  | 12,1669 | 2,704009087 | ENST00000405333 | 4953      | NM_002539    | ODC1           |
| A_22_P00017045 | 2,8289  | 1,39421 | 2,703240743 | ENST00000522086 | 102725286 | N/A          | LOC102725286   |
| A_21_P0010854  | 13,8857 | 12,4516 | 2,70213546  | ENST00000432689 | 340811    | NR_027916    | AKR1C8P        |



|                |         |         |             |                 |           |              |              |
|----------------|---------|---------|-------------|-----------------|-----------|--------------|--------------|
| A_22_P00023611 | 3,06151 | 1,62803 | 2,700974464 | N/A             | N/A       | CN352709     | Inc-NNT-3    |
| A_21_P0011688  | 5,20777 | 3,77445 | 2,700674933 | ENST00000531821 | 730087    | N/A          | ZNF726       |
| A_23_P251705   | 6,95408 | 5,5215  | 2,699290034 | ENST00000624843 | 23229     | NM_015185    | ARHGEF9      |
| A_22_P00013322 | 2,9747  | 1,54418 | 2,695438513 | ENST00000547876 | N/A       | N/A          | N/A          |
| A_33_P3340007  | 9,14399 | 7,71396 | 2,694523184 | ENST00000435601 | 220429    | NR_003268    | CTAGE10P     |
| A_21_P0012102  | 3,19554 | 1,76558 | 2,694392448 | ENST00000608419 | 101927687 | XR_241384    | LOC101927687 |
| A_23_P329962   | 5,77451 | 4,34464 | 2,694224369 | ENST00000449896 | 256979    | NM_001030019 | SUN3         |
| A_24_P51855    | 6,40554 | 4,97604 | 2,693533484 | ENST00000495880 | 1849      | NM_001947    | DUSP7        |
| A_24_P71468    | 4,04555 | 2,61686 | 2,692021627 | ENST00000469098 | 25797     | NM_012413    | QPCT         |
| A_23_P126888   | 9,96191 | 8,53324 | 2,691984307 | ENST00000332129 | 23046     | NM_017596    | KIF21B       |
| A_21_P0012846  | 3,22166 | 1,79323 | 2,691536519 | ENST00000515596 | 102723470 | N/A          | LOC102723470 |
| A_32_P99753    | 6,92004 | 5,49191 | 2,690976888 | ENST00000503498 | 90288     | NM_207307    | EFCAB12      |
| A_23_P320113   | 14,1004 | 12,6726 | 2,690361428 | ENST00000381962 | 140809    | NM_080725    | SRXN1        |
| A_23_P1473     | 3,15142 | 1,72481 | 2,688143211 | ENST00000441259 | 5551      | NM_005041    | PRF1         |
| A_23_P131202   | 6,97268 | 5,54611 | 2,688068681 | ENST00000272937 | 55502     | NM_018645    | HES6         |
| A_33_P3287815  | 13,6412 | 12,2149 | 2,687565657 | ENST00000620315 | 9188      | NM_001256910 | DDX21        |
| A_21_P0014143  | 4,84438 | 3,41811 | 2,687509771 | ENST00000504989 | 100506791 | NR_125810    | LINC01511    |
| A_23_P13094    | 8,14319 | 6,71744 | 2,686541269 | ENST00000279441 | 4319      | NM_002425    | MMP10        |
| A_24_P80776    | 8,23802 | 6,81237 | 2,686355059 | ENST00000416247 | 221710    | NM_001135575 | SMIM13       |
| A_21_P0000499  | 2,94749 | 1,52219 | 2,685703424 | N/A             | 25826     | NR_004398    | SNORD82      |
| A_22_P00004529 | 2,91686 | 1,49228 | 2,684363415 | ENST00000438824 | N/A       | BX089370     | N/A          |
| A_22_P00023906 | 4,47768 | 3,05345 | 2,683712263 | N/A             | N/A       | BG193540     | Inc-KCTD6-3  |
| A_24_P364057   | 9,59222 | 8,16889 | 2,682038599 | ENST00000530659 | 85016     | NM_032930    | C11orf70     |
| A_23_P104762   | 12,8731 | 11,4498 | 2,681982828 | ENST00000531439 | 10413     | NM_006106    | YAP1         |
| A_21_P0000922  | 6,17225 | 4,74898 | 2,681927058 | ENST00000417805 | 101927787 | NR_125944    | LOC101927787 |
| A_22_P00009139 | 3,98281 | 2,56082 | 2,679548632 | N/A             | N/A       | N/A          | Inc-LIPC-1   |
| A_33_P3253902  | 3,70055 | 2,27876 | 2,679177193 | N/A             | N/A       | N/A          | N/A          |
| A_21_P0011732  | 5,48197 | 4,06043 | 2,678712967 | ENST00000596283 | 104472717 | NR_126448    | LINC01224    |
| A_21_P0013997  | 3,17075 | 1,74975 | 2,677710514 | ENST00000561882 | 100509620 | XM_006710130 | LOC100509620 |
| A_24_P116909   | 6,17936 | 4,75933 | 2,675910753 | ENST00000348428 | 10892     | NM_006785    | MALT1        |
| A_21_P0014434  | 5,84004 | 4,42002 | 2,675892205 | N/A             | 100506901 | XR_430537    | LOC100506901 |
| A_23_P145606   | 5,79347 | 4,37401 | 2,674853726 | ENST00000320658 | 1129      | NM_001006630 | CHRM2        |
| A_19_P00316050 | 6,83125 | 5,41194 | 2,67457563  | N/A             | N/A       | HW531573     | N/A          |

|                |         |         |             |                 |           |              |              |
|----------------|---------|---------|-------------|-----------------|-----------|--------------|--------------|
| A_33_P3271261  | 2,81937 | 1,40016 | 2,674390249 | ENST00000293973 | 4917      | NM_006181    | NTN3         |
| A_32_P205110   | 13,6107 | 12,192  | 2,673445006 | ENST00000380874 | 2296      | NM_001453    | FOXC1        |
| A_21_P0009860  | 2,97682 | 1,55827 | 2,673167057 | ENST00000416190 | 102723578 | N/A          | LINC01440    |
| A_33_P3379231  | 3,36054 | 1,942   | 2,673148528 | N/A             | N/A       | N/A          | N/A          |
| A_21_P0004695  | 2,89935 | 1,48088 | 2,673018829 | ENST00000435483 | N/A       | N/A          | N/A          |
| A_21_P0012013  | 3,06822 | 1,65019 | 2,672203723 | ENST00000471661 | N/A       | XM_006712314 | N/A          |
| A_33_P3239347  | 9,93682 | 8,51881 | 2,672166679 | ENST00000380871 | 4824      | NM_006167    | NKX3-1       |
| A_23_P394395   | 8,44841 | 7,03059 | 2,671814783 | ENST00000372980 | 57158     | NM_020433    | JPH2         |
| A_33_P3232193  | 3,27741 | 1,85977 | 2,671481451 | ENST00000394156 | 1009      | XM_005255764 | CDH11        |
| A_22_P00001690 | 3,02954 | 1,6125  | 2,670370644 | N/A             | N/A       | BG213071     | Inc-ASZ1-1   |
| A_22_P00019551 | 7,0366  | 5,6199  | 2,669741392 | N/A             | 100128494 | NR_104178    | LOC100128494 |
| A_23_P125618   | 6,54677 | 5,13016 | 2,66957485  | ENST00000535043 | 2556      | NM_000808    | GABRA3       |
| A_23_P166807   | 12,5744 | 11,1584 | 2,668446339 | ENST00000498822 | 57060     | NM_033010    | PCBP4        |
| A_23_P332789   | 2,91395 | 1,49806 | 2,668242888 | ENST00000261751 | 1143      | NM_000750    | CHRN4        |
| A_21_P0003200  | 4,10529 | 2,69021 | 2,666745226 | N/A             | N/A       | N/A          | Inc-BCL6-3   |
| A_21_P0006685  | 3,87305 | 2,45806 | 2,666578871 | ENST00000441348 | N/A       | N/A          | N/A          |
| A_21_P0012553  | 3,03618 | 1,62139 | 2,66620923  | ENST00000489012 | 647107    | N/A          | LINC01192    |
| A_33_P3353752  | 3,14568 | 1,73103 | 2,665950512 | N/A             | N/A       | N/A          | N/A          |
| A_23_P301846   | 2,92123 | 1,5067  | 2,665728774 | ENST00000331587 | 796       | NM_001033952 | CALCA        |
| A_23_P422911   | 3,45543 | 2,0412  | 2,665174509 | ENST00000620595 | 266722    | NM_153456    | HS6ST3       |
| A_33_P3309626  | 5,13053 | 3,71636 | 2,66506367  | ENST00000378898 | 170691    | AK131344     | ADAMTS17     |
| A_21_P0005694  | 3,23285 | 1,8193  | 2,663918601 | N/A             | 101929268 | N/A          | LOC101929268 |
| A_22_P00012088 | 11,7757 | 10,3626 | 2,663087811 | N/A             | N/A       | AK057657     | Inc-PMM2-6   |
| A_19_P00319561 | 4,29173 | 2,87901 | 2,662386457 | ENST00000602772 | 554203    | N/A          | JPX          |
| A_33_P3690239  | 3,54692 | 2,13615 | 2,658790308 | N/A             | 399708    | NR_038884    | LINC00701    |
| A_33_P3395783  | 2,77758 | 1,36719 | 2,658090086 | ENST00000389656 | 26074     | NM_015585    | CFAP61       |
| A_19_P00807053 | 12,9266 | 11,5163 | 2,657924271 | ENST00000554032 | 100506411 | XR_245779    | LOC100506411 |
| A_19_P00321190 | 2,97018 | 1,56079 | 2,656248276 | ENST00000521132 | N/A       | N/A          | N/A          |
| A_33_P3373259  | 3,19456 | 1,78573 | 2,655217421 | ENST00000468658 | 55799     | NM_018398    | CACNA2D3     |
| A_22_P00022719 | 4,04042 | 2,63233 | 2,653855832 | N/A             | N/A       | AK124563     | Inc-XXYLT1-1 |
| A_22_P00007124 | 3,79945 | 2,39141 | 2,653763858 | ENST00000454223 | 85441     | NM_001037335 | HELZ2        |
| A_24_P913227   | 7,26148 | 5,85361 | 2,65345117  | ENST00000394884 | 8697      | BC010944     | CDC23        |
| A_23_P408094   | 10,7699 | 9,36234 | 2,65288107  | ENST00000410000 | 4084      | NM_002357    | MXD1         |

|                |         |         |             |                 |           |              |                |
|----------------|---------|---------|-------------|-----------------|-----------|--------------|----------------|
| A_33_P3276087  | 2,90361 | 1,49617 | 2,652660418 | N/A             | N/A       | N/A          | N/A            |
| A_21_P0006305  | 3,06331 | 1,65665 | 2,651226632 | N/A             | N/A       | N/A          | Inc-OR13C4-2   |
| A_22_P00006844 | 2,93895 | 1,53242 | 2,650987743 | ENST00000421297 | N/A       | XR_242638    | N/A            |
| A_21_P0012917  | 4,15869 | 2,75291 | 2,649609958 | N/A             | N/A       | N/A          | XLOC_I2_012147 |
| A_22_P00012819 | 3,10702 | 1,70147 | 2,649187581 | N/A             | N/A       | N/A          | Inc-RARRES2-3  |
| A_22_P00007866 | 5,44906 | 4,04352 | 2,649169218 | N/A             | 100506974 | XR_111668    | LOC100506974   |
| A_23_P134008   | 8,2455  | 6,84035 | 2,648453172 | ENST00000472914 | 85015     | BC005991     | USP45          |
| A_21_P0009118  | 6,2023  | 4,79793 | 2,64702166  | N/A             | N/A       | N/A          | Inc-C16orf55-1 |
| A_33_P3287068  | 2,90848 | 1,50435 | 2,64658135  | N/A             | 100874107 | NR_046378    | MTUS2-AS1      |
| A_22_P00018258 | 8,5934  | 7,18967 | 2,645847664 | N/A             | 442319    | N/A          | ZNF727         |
| A_33_P3292994  | 2,79087 | 1,38751 | 2,645169185 | N/A             | N/A       | N/A          | N/A            |
| A_21_P0006096  | 3,07088 | 1,6676  | 2,64502251  | ENST00000445897 | N/A       | N/A          | N/A            |
| A_22_P00023335 | 3,68451 | 2,28142 | 2,644674189 | N/A             | N/A       | N/A          | Inc-CST9LP1-2  |
| A_33_P3664161  | 2,92331 | 1,52025 | 2,644619195 | ENST00000434431 | 388946    | NM_001145051 | TMEM247        |
| A_33_P3413840  | 5,04589 | 3,64303 | 2,644252598 | ENST00000505994 | 2710      | NM_001205019 | GK             |
| A_22_P00019115 | 3,05894 | 1,65639 | 2,643684474 | ENST00000551875 | N/A       | N/A          | N/A            |
| A_23_P73780    | 11,8111 | 10,4086 | 2,643592852 | ENST00000369980 | 3654      | NM_001569    | IRAK1          |
| A_23_P141894   | 7,51211 | 6,10966 | 2,643501234 | ENST00000406449 | 5817      | NM_006505    | PVR            |
| A_23_P379026   | 12,6852 | 11,2833 | 2,642493641 | ENST00000307126 | 54676     | NM_019096    | GTPBP2         |
| A_23_P98645    | 3,45524 | 2,05407 | 2,641156884 | ENST00000299441 | 8642      | NM_003737    | DCHS1          |
| A_21_P0001707  | 3,04499 | 1,64482 | 2,639326808 | N/A             | N/A       | N/A          | Inc-ADAMTSL4-1 |
| A_33_P3369029  | 3,37624 | 1,97615 | 2,639180457 | ENST00000456932 | 440300    | NR_033738    | LOC440300      |
| A_33_P3314525  | 6,28641 | 4,88702 | 2,637900229 | ENST00000444326 | 400508    | NR_026675    | CRYM-AS1       |
| A_23_P217637   | 11,7006 | 10,3023 | 2,635907968 | ENST00000372902 | 1678      | NM_004085    | TIMM8A         |
| A_33_P3346643  | 2,9978  | 1,59969 | 2,635560847 | N/A             | N/A       | N/A          | N/A            |
| A_22_P00006545 | 3,15311 | 1,75557 | 2,634519759 | N/A             | N/A       | N/A          | Inc-FKBP14-1   |
| A_23_P253561   | 13,0528 | 11,6555 | 2,634081529 | ENST00000372904 | 79183     | NM_024331    | TTPAL          |
| A_33_P3271684  | 4,17127 | 2,77422 | 2,633625117 | ENST00000377495 | 653567    | NM_001098844 | TMEM236        |
| A_32_P48244    | 4,38774 | 2,99073 | 2,633552098 | ENST00000358296 | 163227    | XM_005259783 | ZNF100         |
| A_33_P3390557  | 3,80248 | 2,4055  | 2,633497336 | ENST00000482657 | 401562    | NM_207510    | LCNL1          |
| A_33_P3234020  | 3,2063  | 1,81038 | 2,631563121 | ENST00000327987 | 9543      | NM_004884    | IGDCC3         |
| A_22_P00014966 | 3,77504 | 2,37971 | 2,630487145 | ENST00000502421 | N/A       | N/A          | N/A            |
| A_32_P405902   | 3,67347 | 2,27898 | 2,628956007 | ENST00000428301 | 54055     | NR_026755    | CYP4F29P       |

|                |         |         |             |                 |           |              |                |
|----------------|---------|---------|-------------|-----------------|-----------|--------------|----------------|
| A_23_P136870   | 13,0779 | 11,6836 | 2,628609802 | ENST00000616035 | 4105      | NM_175868    | MAGEA6         |
| A_22_P00001819 | 3,89949 | 2,50594 | 2,627243647 | ENST00000418415 | N/A       | N/A          | N/A            |
| A_33_P3378011  | 3,04753 | 1,65469 | 2,625951007 | N/A             | 100996844 | XM_003846731 | LOC100996844   |
| A_23_P105012   | 9,26714 | 7,87479 | 2,625059275 | ENST00000255695 | 54979     | NM_017878    | HRASLS2        |
| A_21_P0013800  | 5,35349 | 3,96133 | 2,624713583 | N/A             | N/A       | N/A          | XLOC_I2_015641 |
| A_33_P3283535  | 4,30929 | 2,91748 | 2,624076901 | N/A             | N/A       | N/A          | N/A            |
| A_33_P3343175  | 9,35377 | 7,96198 | 2,624040524 | ENST00000306602 | 3627      | NM_001565    | CXCL10         |
| A_22_P00011439 | 3,78106 | 2,38977 | 2,623131258 | ENST00000523742 | 102557615 | NR_108020    | CTB-7E3.1      |
| A_33_P3262927  | 8,89962 | 7,50866 | 2,622531315 | ENST00000395014 | 57060     | NM_001174100 | PCBP4          |
| A_21_P0011477  | 10,6152 | 9,22431 | 2,622404072 | ENST00000565156 | 101101776 | NR_073460    | BMS1P17        |
| A_21_P0008987  | 4,41436 | 3,02403 | 2,621386351 | N/A             | N/A       | N/A          | Inc-FOXF1-1    |
| A_21_P0012827  | 3,18122 | 1,79244 | 2,618571504 | ENST00000503577 | N/A       | N/A          | N/A            |
| A_33_P3312182  | 9,85424 | 8,46559 | 2,618335557 | ENST00000622831 | 254427    | NM_153256    | PROSER2        |
| A_23_P348183   | 5,29755 | 3,90923 | 2,617736711 | ENST00000439969 | 221416    | NM_153246    | C6orf223       |
| A_22_P00021525 | 2,94669 | 1,5588  | 2,616956602 | ENST00000509497 | N/A       | XR_244733    | N/A            |
| A_22_P00022819 | 3,55574 | 2,16821 | 2,616303667 | N/A             | N/A       | N/A          | Inc-ADAM22-2   |
| A_33_P3379680  | 2,88493 | 1,49834 | 2,614599548 | ENST00000408906 | 393046    | NM_012365    | OR2A5          |
| A_22_P00004981 | 3,46003 | 2,07359 | 2,614327716 | N/A             | N/A       | BX111218     | Inc-DCTD-3     |
| A_33_P3640690  | 3,13296 | 1,74686 | 2,61371167  | ENST00000488625 | 6935      | NM_001128128 | ZEB1           |
| A_21_P0010201  | 2,86594 | 1,47999 | 2,613439931 | N/A             | N/A       | N/A          | Inc-TMEM50B-1  |
| A_23_P401472   | 6,65908 | 5,27377 | 2,612280829 | ENST00000615928 | 1131      | NM_000740    | CHRM3          |
| A_22_P00023857 | 3,40101 | 2,0175  | 2,609023611 | N/A             | N/A       | N/A          | Inc-YPEL5-3    |
| A_22_P00005495 | 3,8223  | 2,43883 | 2,608951274 | N/A             | N/A       | N/A          | Inc-DYSF-3     |
| A_22_P00025815 | 4,12242 | 2,73906 | 2,608752359 | ENST00000518787 | N/A       | N/A          | N/A            |
| A_21_P0009358  | 3,31622 | 1,93289 | 2,608698112 | N/A             | N/A       | N/A          | Inc-SLC39A11-1 |
| A_21_P0010994  | 5,0424  | 3,65911 | 2,608625785 | N/A             | N/A       | N/A          | XLOC_I2_002441 |
| A_23_P94461    | 3,9545  | 2,57154 | 2,60802916  | ENST00000480279 | 83856     | NM_031919    | FSD1L          |
| A_33_P3384913  | 3,24407 | 1,8619  | 2,60660143  | N/A             | N/A       | N/A          | N/A            |
| A_33_P3301876  | 4,90181 | 3,52039 | 2,605246713 | N/A             | N/A       | N/A          | N/A            |
| A_23_P374782   | 11,5639 | 10,183  | 2,604307856 | ENST00000379698 | 30011     | NM_001024666 | SH3KBP1        |
| A_23_P6802     | 12,3966 | 11,0159 | 2,603946847 | ENST00000232888 | 9136      | NM_004704    | RRP9           |
| A_22_P00007322 | 2,97916 | 1,59948 | 2,602106481 | ENST00000555913 | N/A       | N/A          | N/A            |
| A_22_P00013123 | 3,03418 | 1,65457 | 2,601980229 | N/A             | N/A       | N/A          | Inc-RMI1-1     |

|                |         |         |             |                 |           |              |                      |
|----------------|---------|---------|-------------|-----------------|-----------|--------------|----------------------|
| A_22_P00003662 | 2,79781 | 1,41885 | 2,600808182 | N/A             | N/A       | N/A          | Inc-CDC25C-1         |
| A_22_P00011311 | 4,46473 | 3,08612 | 2,600177299 | N/A             | 101927027 | NR_110206    | LOC101927027         |
| A_33_P3228375  | 7,21451 | 5,83608 | 2,599852904 | ENST00000455854 | 57510     | NM_020750    | XPO5                 |
| A_21_P0007429  | 11,5278 | 10,1497 | 2,599258286 | N/A             | N/A       | N/A          | Inc-RP1-239B22.1.1-1 |
| A_22_P00019713 | 4,39624 | 3,01827 | 2,599024079 | N/A             | N/A       | N/A          | Inc-SOX13-1          |
| A_24_P59236    | 4,45739 | 3,0797  | 2,598519706 | ENST00000470719 | 389075    | NM_001007089 | RESP18               |
| A_23_P149946   | 2,93579 | 1,55851 | 2,597781337 | ENST00000459673 | 92211     | NM_033100    | CDHR1                |
| A_22_P00007605 | 6,914   | 5,53683 | 2,597583274 | N/A             | N/A       | N/A          | Inc-HEATR1-1         |
| A_33_P3422301  | 3,06218 | 1,68508 | 2,597457241 | ENST00000617094 | 56098     | NM_032406    | PCDHGC4              |
| A_21_P0013580  | 4,96758 | 3,59094 | 2,59662918  | N/A             | 102725126 | XR_432424    | LOC102725126         |
| A_24_P383523   | 8,82579 | 7,44927 | 2,596413207 | ENST00000554335 | 23034     | NM_015589    | SAMD4A               |
| A_33_P3260614  | 7,4801  | 6,10418 | 2,595333614 | ENST00000558588 | 5330      | NM_004573    | PLCB2                |
| A_33_P3282307  | 2,98236 | 1,60682 | 2,594650104 | ENST00000381305 | 105       | NM_018702    | ADARB2               |
| A_22_P00009778 | 7,24697 | 5,87226 | 2,593157799 | ENST00000584649 | N/A       | N/A          | N/A                  |
| A_22_P00011087 | 3,03791 | 1,66342 | 2,592762393 | ENST00000523538 | N/A       | N/A          | N/A                  |
| A_21_P0007020  | 3,53165 | 2,15748 | 2,592187363 | ENST00000419373 | 101927704 | NR_121651    | MIR3663HG            |
| A_22_P00019777 | 3,23749 | 1,86363 | 2,591630425 | N/A             | 101410544 | NR_102712    | RMDN2-AS1            |
| A_22_P00020148 | 5,17419 | 3,80057 | 2,59119933  | ENST00000433644 | N/A       | N/A          | N/A                  |
| A_23_P165624   | 4,32437 | 2,95123 | 2,590337353 | ENST00000460812 | 7130      | NM_007115    | TNFAIP6              |
| A_24_P115774   | 12,5824 | 11,2094 | 2,590085998 | ENST00000613397 | 329       | NM_001166    | BIRC2                |
| A_24_P406830   | 11,9189 | 10,5462 | 2,58954746  | ENST00000346299 | 8898      | NM_201278    | MTMR2                |
| A_23_P17242    | 5,4808  | 4,10822 | 2,589332077 | ENST00000489120 | 84696     | NM_032604    | ABHD1                |
| A_24_P253723   | 10,5636 | 9,19144 | 2,588578376 | ENST00000571091 | 84981     | NR_028502    | MIR22HG              |
| A_33_P3250083  | 3,04571 | 1,67427 | 2,587286827 | ENST00000413692 | 4776      | NM_001136022 | NFATC4               |
| A_23_P14351    | 2,93357 | 1,56235 | 2,586892315 | ENST00000280979 | 9472      | NM_004274    | AKAP6                |
| A_24_P252043   | 9,21124 | 7,84024 | 2,586497864 | ENST00000370651 | 7803      | NM_003463    | PTP4A1               |
| A_22_P00022409 | 2,86219 | 1,49133 | 2,586246881 | ENST00000442086 | N/A       | N/A          | N/A                  |
| A_22_P00024566 | 2,80827 | 1,43755 | 2,585995922 | N/A             | 101927698 | NR_110785    | DSCAS                |
| A_22_P00009780 | 3,34602 | 1,97566 | 2,585350711 | ENST00000553982 | 101928075 | NR_110071    | LOC101928075         |
| A_23_P345692   | 7,51993 | 6,14981 | 2,58492066  | ENST00000304920 | 53342     | NM_138284    | IL17D                |
| A_22_P00005750 | 2,82327 | 1,45348 | 2,584329457 | N/A             | N/A       | N/A          | Inc-EN1-1            |
| A_32_P133916   | 3,04542 | 1,67577 | 2,584078684 | ENST00000380672 | 54796     | NM_017637    | BNC2                 |
| A_22_P00004303 | 3,86775 | 2,49884 | 2,582753575 | ENST00000430545 | N/A       | BG432982     | N/A                  |

|                |         |         |             |                 |           |              |                |
|----------------|---------|---------|-------------|-----------------|-----------|--------------|----------------|
| A_24_P101402   | 15,7273 | 14,3586 | 2,582377654 | ENST00000421958 | 10528     | NM_006392    | NOP56          |
| A_23_P58676    | 7,53042 | 6,16198 | 2,581912305 | ENST00000265074 | 4883      | NM_001204375 | NPR3           |
| A_23_P132956   | 8,94623 | 7,57823 | 2,581124981 | ENST00000472501 | 7345      | NM_004181    | UCHL1          |
| A_33_P3420380  | 2,89419 | 1,5263  | 2,580928187 | ENST00000397146 | 80760     | NM_001001851 | ITIH5          |
| A_24_P219114   | 5,44606 | 4,07848 | 2,580373668 | ENST00000336735 | 6400      | NM_005065    | SEL1L          |
| A_33_P3231277  | 12,3823 | 11,0151 | 2,579694098 | ENST00000337138 | 3091      | NM_181054    | HIF1A          |
| A_33_P3234292  | 3,32059 | 1,95342 | 2,579640455 | ENST00000481677 | 51744     | NM_001166663 | CD244          |
| A_32_P34920    | 11,5973 | 10,2309 | 2,578264008 | ENST00000615637 | 2297      | NM_004472    | FOXD1          |
| A_23_P134851   | 3,5679  | 2,20217 | 2,577066918 | ENST00000522011 | 9046      | NM_003974    | DOK2           |
| A_22_P00008989 | 4,12711 | 2,76212 | 2,575745405 | ENST00000416349 | 100509303 | XR_112011    | LOC100509303   |
| A_21_P0013770  | 6,59695 | 5,23204 | 2,57560258  | N/A             | N/A       | N/A          | XLOC_I2_015561 |
| A_32_P113812   | 4,87065 | 3,50648 | 2,574281817 | N/A             | N/A       | N/A          | Inc-EIF2D-1    |
| A_23_P162037   | 10,6359 | 9,27206 | 2,573693047 | ENST00000472842 | 406       | NM_001030273 | ARNTL          |
| A_21_P0012868  | 4,59531 | 3,23186 | 2,572997401 | N/A             | 100128340 | XR_427818    | LOC100128340   |
| A_22_P00019451 | 3,12395 | 1,76063 | 2,572765561 | N/A             | N/A       | N/A          | Inc-FOXJ1-2    |
| A_33_P3340065  | 3,92307 | 2,56061 | 2,571232376 | N/A             | N/A       | N/A          | N/A            |
| A_22_P00015061 | 5,99236 | 4,63018 | 2,570733396 | N/A             | N/A       | N/A          | Inc-SNRPD1-3   |
| A_23_P74609    | 13,1115 | 11,7497 | 2,570056365 | ENST00000367029 | 50486     | NM_015714    | G0S2           |
| A_21_P0006472  | 4,01664 | 2,65557 | 2,568756252 | N/A             | N/A       | N/A          | Inc-FLNA-1     |
| A_23_P87310    | 4,51512 | 3,15435 | 2,568222149 | ENST00000335790 | 4004      | NM_002315    | LMO1           |
| A_22_P00002816 | 3,75556 | 2,39489 | 2,56804414  | N/A             | 200772    | NR_033841    | LOC200772      |
| A_21_P0012481  | 6,3242  | 4,96368 | 2,567777149 | ENST00000449350 | N/A       | XR_108533    | N/A            |
| A_24_P472007   | 2,83996 | 1,47964 | 2,567421204 | ENST00000252773 | 23025     | NM_001080421 | UNC13A         |
| A_21_P0000291  | 5,08508 | 3,72476 | 2,567421204 | N/A             | 26810     | NR_002751    | SNORD41        |
| A_19_P00317885 | 3,87286 | 2,51268 | 2,567172072 | ENST00000455974 | N/A       | N/A          | N/A            |
| A_23_P77304    | 4,80801 | 3,44788 | 2,567083102 | ENST00000537735 | 8120      | NM_004644    | AP3B2          |
| A_33_P3336113  | 5,15586 | 3,79589 | 2,566798419 | ENST00000309880 | 220359    | NM_145719    | TIGD3          |
| A_32_P215938   | 12,5067 | 11,147  | 2,566318089 | ENST00000291775 | 26086     | NM_001145638 | GPSM1          |
| A_22_P00017703 | 3,01127 | 1,65184 | 2,565837848 | ENST00000422481 | 80852     | NM_001080423 | GRIP2          |
| A_21_P0002789  | 3,00139 | 1,64233 | 2,565179886 | ENST00000470024 | N/A       | N/A          | N/A            |
| A_21_P0000799  | 6,36652 | 5,00818 | 2,563900012 | N/A             | 100506054 | NR_038430    | RNASEH1-AS1    |
| A_32_P67526    | 3,00735 | 1,64905 | 2,563828926 | ENST00000295220 | 200373    | NM_001271049 | CFAP221        |
| A_21_P0008216  | 9,93373 | 8,57613 | 2,56258525  | N/A             | N/A       | N/A          | Inc-ANKRD10-1  |

|                |         |         |             |                 |           |              |                |
|----------------|---------|---------|-------------|-----------------|-----------|--------------|----------------|
| A_23_P210763   | 13,6235 | 12,2661 | 2,562230025 | ENST00000254958 | 182       | NM_000214    | JAG1           |
| A_24_P237036   | 3,32102 | 1,96372 | 2,562052431 | ENST00000599359 | 8740      | NM_003807    | TNFSF14        |
| A_23_P58706    | 2,92527 | 1,56809 | 2,561839334 | ENST00000511106 | 153218    | NM_001040129 | SPINK13        |
| A_22_P00008418 | 3,40786 | 2,05139 | 2,560578875 | ENST00000427292 | N/A       | N/A          | N/A            |
| A_22_P00021369 | 2,90436 | 1,54805 | 2,560294914 | ENST00000457609 | N/A       | N/A          | N/A            |
| A_21_P0005684  | 3,22727 | 1,87144 | 2,559443218 | N/A             | N/A       | N/A          | Inc-MAK16-1    |
| A_33_P3224535  | 3,00907 | 1,65352 | 2,558946526 | ENST00000333976 | 219438    | NM_001001952 | OR5D18         |
| A_21_P0007716  | 2,88105 | 1,52561 | 2,558751424 | N/A             | N/A       | N/A          | Inc-AVPR1A-1   |
| A_23_P128993   | 2,96808 | 1,61337 | 2,55745703  | ENST00000216338 | 2999      | NM_033423    | GZMH           |
| A_22_P00010216 | 4,0609  | 2,70626 | 2,557332944 | ENST00000545750 | N/A       | BX119863     | N/A            |
| A_33_P3293164  | 3,97747 | 2,62459 | 2,554215056 | ENST00000613166 | 1113      | NM_001275    | CHGA           |
| A_33_P3413048  | 13,0999 | 11,7471 | 2,554073424 | ENST00000369682 | 55558     | NM_017514    | PLXNA3         |
| A_33_P3220406  | 3,17602 | 1,82375 | 2,553135312 | N/A             | N/A       | N/A          | N/A            |
| A_22_P00008330 | 2,93636 | 1,58436 | 2,552657538 | N/A             | 100873993 | NR_046615    | ITIH4-AS1      |
| A_22_P00017773 | 3,46457 | 2,11298 | 2,5519322   | ENST00000555428 | N/A       | BX392580     | N/A            |
| A_21_P0010290  | 3,70383 | 2,35257 | 2,551348542 | N/A             | N/A       | N/A          | Inc-SIK1-4     |
| A_21_P0009708  | 3,01222 | 1,66101 | 2,55126012  | N/A             | N/A       | N/A          | Inc-ZNF507-3   |
| A_24_P270829   | 3,78384 | 2,43266 | 2,551207069 | ENST00000611961 | 2811      | DQ890943     | GP1BA          |
| A_24_P15325    | 4,35444 | 3,00339 | 2,550977192 | N/A             | 286046    | AJ301560     | XKR6           |
| A_22_P00023551 | 2,88083 | 1,5304  | 2,549881142 | ENST00000447311 | 153910    | NR_027312    | LOC153910      |
| A_32_P11450    | 11,9266 | 10,5762 | 2,549828119 | ENST00000457640 | 9790      | NM_014753    | BMS1           |
| A_33_P3382538  | 8,72136 | 7,37097 | 2,549810445 | ENST00000332349 | 8690      | NM_003772    | JRKL           |
| A_22_P00018582 | 2,95797 | 1,60832 | 2,548502909 | N/A             | N/A       | DB071456     | Inc-CCDC102A-1 |
| A_33_P3363690  | 3,77527 | 2,42604 | 2,547761092 | N/A             | N/A       | N/A          | N/A            |
| A_21_P0005409  | 4,16999 | 2,82116 | 2,547054801 | N/A             | N/A       | N/A          | Inc-ZKSCAN1-1  |
| A_33_P3310552  | 7,81612 | 6,46732 | 2,547001837 | N/A             | 114793    | XM_005246263 | FMNL2          |
| A_33_P3262416  | 4,5638  | 3,21526 | 2,546542862 | ENST00000440392 | 89978     | NM_001141972 | DPH6           |
| A_33_P3402763  | 12,3522 | 11,0039 | 2,546119266 | ENST00000285814 | 84365     | NM_032390    | NIFK           |
| A_22_P00013879 | 3,63511 | 2,28778 | 2,544407951 | ENST00000437634 | N/A       | N/A          | N/A            |
| A_19_P00315780 | 8,88194 | 7,53512 | 2,543508649 | ENST00000523995 | 101929709 | XR_108862    | LOC101929709   |
| A_33_P3220015  | 2,94932 | 1,60266 | 2,543226581 | ENST00000390341 | N/A       | M27340       | N/A            |
| A_24_P16913    | 6,23059 | 4,88399 | 2,543120813 | ENST00000376887 | 10257     | NM_005845    | ABCC4          |
| A_33_P3333003  | 2,9433  | 1,59763 | 2,541481977 | N/A             | N/A       | N/A          | N/A            |

|                |         |         |             |                 |           |              |                     |
|----------------|---------|---------|-------------|-----------------|-----------|--------------|---------------------|
| A_22_P00022888 | 4,77013 | 3,42487 | 2,540759815 | ENST00000566904 | N/A       | N/A          | N/A                 |
| A_33_P3489737  | 9,31997 | 7,97474 | 2,540706982 | ENST00000380985 | 57486     | NM_020726    | NLN                 |
| A_22_P00022043 | 3,11483 | 1,76988 | 2,540213926 | N/A             | N/A       | N/A          | Inc-CTC-241N9.1.1-1 |
| A_22_P00014024 | 2,83904 | 1,49436 | 2,539738571 | N/A             | N/A       | N/A          | Inc-RXRG-1          |
| A_33_P3337154  | 2,71812 | 1,37361 | 2,539439318 | N/A             | 102724545 | XR_425228    | LOC102724545        |
| A_33_P3233731  | 3,69512 | 2,35067 | 2,539333708 | N/A             | N/A       | N/A          | N/A                 |
| A_33_P3248077  | 2,99194 | 1,64757 | 2,539192901 | N/A             | N/A       | N/A          | N/A                 |
| A_22_P00015034 | 2,70815 | 1,364   | 2,538805723 | N/A             | N/A       | N/A          | Inc-SMYD2-1         |
| A_24_P137461   | 2,83339 | 1,48928 | 2,538735334 | ENST00000323830 | 1370      | NM_001080513 | CPN2                |
| A_22_P00022272 | 2,7341  | 1,39026 | 2,538260254 | ENST00000504578 | N/A       | N/A          | N/A                 |
| A_33_P3251073  | 10,6241 | 9,28029 | 2,538207473 | ENST00000310991 | 339456    | NM_178545    | TMEM52              |
| A_21_P0006892  | 2,97189 | 1,62835 | 2,537732493 | N/A             | N/A       | N/A          | Inc-KIF20B-4        |
| A_33_P3345414  | 8,41386 | 7,07071 | 2,537046567 | ENST00000373626 | 6191      | N/A          | RPS4X               |
| A_33_P3222018  | 3,27544 | 1,93277 | 2,536202605 | ENST00000402326 | 11335     | NM_007276    | CBX3                |
| A_24_P411573   | 3,1322  | 1,78963 | 2,536026815 | ENST00000503807 | 4888      | NR_002713    | NPY6R               |
| A_33_P3222424  | 3,12984 | 1,7875  | 2,535622544 | ENST00000394148 | 1440      | NM_000759    | CSF3                |
| A_22_P00024139 | 2,83505 | 1,49316 | 2,534831765 | N/A             | N/A       | BC030256     | Inc-CSPP1-1         |
| A_24_P233786   | 12,6209 | 11,2793 | 2,534322283 | ENST00000367511 | 116496    | NM_052966    | FAM129A             |
| A_21_P0001349  | 2,98144 | 1,64034 | 2,533444106 | N/A             | N/A       | N/A          | Inc-RWDD3-6         |
| A_24_P104091   | 11,5323 | 10,1919 | 2,53221517  | ENST00000544096 | 220064    | NM_153451    | ORAOV1              |
| A_23_P159191   | 7,85133 | 6,51109 | 2,531934354 | ENST00000329402 | 2520      | NM_000805    | GAST                |
| A_23_P70398    | 13,3903 | 12,0501 | 2,531864155 | ENST00000518538 | 7422      | NM_001025370 | VEGFA               |
| A_23_P43684    | 3,53321 | 2,19392 | 2,530267649 | ENST00000545497 | 54796     | NM_017637    | BNC2                |
| A_19_P00322182 | 3,04716 | 1,70815 | 2,52977662  | N/A             | N/A       | N/A          | N/A                 |
| A_33_P3214516  | 3,85209 | 2,51328 | 2,529425943 | ENST00000390469 | N/A       | M21784       | N/A                 |
| A_21_P0010993  | 6,8245  | 5,48581 | 2,52921556  | N/A             | 101929174 | XR_424270    | LOC101929174        |
| A_24_P312041   | 6,82517 | 5,48656 | 2,529075314 | ENST00000417959 | 5325      | NM_006718    | PLAGL1              |
| A_21_P0013311  | 3,10112 | 1,76259 | 2,528935076 | N/A             | N/A       | N/A          | XLOC_I2_013852      |
| A_23_P413923   | 2,96135 | 1,62288 | 2,528829903 | ENST00000325870 | 63951     | NM_022160    | DMRTA1              |
| A_23_P70794    | 10,4603 | 9,12204 | 2,528461831 | ENST00000317483 | 51715     | NM_016277    | RAB23               |
| A_22_P00019514 | 3,3975  | 2,05952 | 2,527971152 | N/A             | N/A       | N/A          | Inc-HORMAD2-1       |
| A_33_P3399748  | 4,82659 | 3,4888  | 2,527638245 | N/A             | 79048     | AK127655     | SECISBP2            |
| A_23_P35045    | 6,68429 | 5,34663 | 2,527410492 | ENST00000368013 | 257106    | NM_001025598 | ARHGAP30            |



|                |         |         |             |                 |           |              |                |
|----------------|---------|---------|-------------|-----------------|-----------|--------------|----------------|
| A_33_P3232066  | 4,13376 | 2,79626 | 2,527130209 | ENST00000449509 | N/A       | N/A          | N/A            |
| A_33_P3365644  | 3,1302  | 1,79278 | 2,526990079 | N/A             | N/A       | N/A          | N/A            |
| A_23_P208208   | 6,44672 | 5,10954 | 2,526569735 | ENST00000354957 | 65251     | NM_023074    | ZNF649         |
| A_33_P3846177  | 8,00194 | 6,66539 | 2,525466667 | ENST00000552468 | 2583      | NM_001478    | B4GALNT1       |
| A_32_P225355   | 5,27186 | 3,93628 | 2,523769233 | ENST00000382395 | 132864    | NM_182485    | CPEB2          |
| A_23_P210109   | 5,69817 | 4,3626  | 2,52375174  | ENST00000001146 | 56603     | NM_019885    | CYP26B1        |
| A_33_P3375934  | 12,5906 | 11,2552 | 2,523454371 | ENST00000222553 | 10135     | NM_005746    | NAMPT          |
| A_21_P0003299  | 2,90468 | 1,56934 | 2,523349425 | N/A             | 102723877 | N/A          | LOC102723877   |
| A_22_P00009158 | 2,91731 | 1,58203 | 2,523244484 | ENST00000525320 | N/A       | N/A          | N/A            |
| A_24_P315444   | 8,04279 | 6,70778 | 2,522772304 | ENST00000414124 | N/A       | N/A          | N/A            |
| A_21_P0000592  | 10,6776 | 9,34261 | 2,522737331 | N/A             | 100379132 | NR_033335    | SNORA70G       |
| A_33_P3555937  | 3,42296 | 2,08798 | 2,522719845 | ENST00000301959 | 79689     | NM_001205315 | STEAP4         |
| A_33_P3230176  | 6,42838 | 5,09372 | 2,52216035  | ENST00000260585 | 85465     | NM_033505    | EPT1           |
| A_32_P150735   | 6,86815 | 5,53365 | 2,521880649 | N/A             | N/A       | N/A          | N/A            |
| A_33_P3393766  | 11,5218 | 10,1873 | 2,521880649 | ENST00000613024 | 100170841 | NM_001130677 | C17orf96       |
| A_22_P00004753 | 3,12237 | 1,7884  | 2,520954361 | N/A             | N/A       | AK091930     | Inc-CTSL2-2    |
| A_23_P259344   | 3,34849 | 2,01454 | 2,520919413 | ENST00000331437 | 27439     | NM_031890    | CECR6          |
| A_33_P3241393  | 2,97567 | 1,64267 | 2,51925996  | ENST00000346834 | 57835     | NM_133478    | SLC4A5         |
| A_33_P3277714  | 4,10336 | 2,7706  | 2,518840902 | N/A             | 60468     | XM_006715545 | BACH2          |
| A_23_P91390    | 16,7058 | 15,3732 | 2,51856157  | ENST00000377103 | 7056      | NM_000361    | THBD           |
| A_23_P169092   | 3,09168 | 1,75922 | 2,518317179 | ENST00000523954 | 9420      | NM_004820    | CYP7B1         |
| A_21_P0012388  | 2,874   | 1,54163 | 2,518160083 | N/A             | N/A       | N/A          | XLOC_I2_009811 |
| A_32_P326819   | 9,72409 | 8,39182 | 2,517985543 | ENST00000229214 | 11103     | NM_007043    | KRR1           |
| A_22_P00010265 | 4,31888 | 2,98678 | 2,517688854 | N/A             | 103752587 | NR_125795    | FOXC2-AS1      |
| A_21_P0010683  | 4,10285 | 2,77147 | 2,516432675 | ENST00000440200 | N/A       | N/A          | N/A            |
| A_22_P00000847 | 2,98696 | 1,65578 | 2,516083847 | N/A             | 728723    | NR_024398    | ZBED3-AS1      |
| A_21_P0013321  | 3,08686 | 1,75588 | 2,515735068 | N/A             | N/A       | N/A          | XLOC_I2_013873 |
| A_21_P0001125  | 3,28015 | 1,94925 | 2,51559557  | N/A             | N/A       | N/A          | Inc-MUTYH-1    |
| A_33_P3418294  | 6,29125 | 4,96039 | 2,515525824 | ENST00000430092 | 127602    | NM_001373    | DNAH14         |
| A_22_P00010017 | 3,23963 | 1,90879 | 2,515490951 | ENST00000542763 | N/A       | N/A          | N/A            |
| A_23_P411851   | 5,136   | 3,80587 | 2,514253296 | ENST00000334258 | 161176    | NM_152592    | SYNE3          |
| A_21_P0001077  | 9,20241 | 7,8725  | 2,513869921 | ENST00000449012 | 101927787 | N/A          | LOC101927787   |
| A_21_P0004123  | 4,84389 | 3,51398 | 2,513869921 | ENST00000506463 | 101926904 | N/A          | LINC01265      |

|                |         |         |             |                 |           |              |               |
|----------------|---------|---------|-------------|-----------------|-----------|--------------|---------------|
| A_23_P158041   | 8,89599 | 7,56645 | 2,513225285 | ENST00000624890 | 364       | NM_001170    | AQP7          |
| A_24_P112377   | 6,13179 | 4,80225 | 2,513225285 | ENST00000310532 | 64794     | NM_138620    | DDX31         |
| A_22_P00021932 | 5,62998 | 4,30048 | 2,513155605 | ENST00000440100 | N/A       | AI425063     | N/A           |
| A_24_P289139   | 8,93534 | 7,60587 | 2,513103346 | ENST00000477102 | 30011     | NM_001024666 | SH3KBP1       |
| A_33_P3313283  | 7,24806 | 5,919   | 2,512389247 | ENST00000291495 | 148113    | NM_153221    | CILP2         |
| A_21_P0012878  | 2,94474 | 1,61579 | 2,512197695 | ENST00000507800 | 79844     | NM_024786    | ZDHHC11       |
| A_21_P0001301  | 3,10279 | 1,77429 | 2,511414222 | N/A             | N/A       | N/A          | Inc-PRKAA2-7  |
| A_22_P00005439 | 3,32081 | 1,99276 | 2,510630993 | N/A             | N/A       | N/A          | Inc-DUOXA1-2  |
| A_23_P134566   | 3,96236 | 2,63443 | 2,510422173 | ENST00000315453 | 401427    | NM_001005328 | OR2A7         |
| A_22_P00009761 | 2,99568 | 1,66792 | 2,510126375 | ENST00000506059 | N/A       | N/A          | N/A           |
| A_21_P0005840  | 4,70145 | 3,37418 | 2,509273975 | ENST00000531654 | 100505532 | NR_103854    | LINC01301     |
| A_24_P392022   | 9,2921  | 7,96529 | 2,508474026 | ENST00000511564 | 196483    | NM_201400    | EEF2KMT       |
| A_32_P925529   | 3,51991 | 2,19315 | 2,508387091 | ENST00000548895 | N/A       | N/A          | N/A           |
| A_33_P3287418  | 6,6321  | 5,30559 | 2,507952458 | N/A             | N/A       | N/A          | N/A           |
| A_22_P00012565 | 4,65064 | 3,3242  | 2,507830774 | N/A             | 729291    | XR_242943    | LOC729291     |
| A_33_P3335248  | 11,1271 | 9,80085 | 2,50750052  | ENST00000461693 | 10807     | NM_001039707 | SDCCAG3       |
| A_24_P58894    | 9,93124 | 8,60517 | 2,507187687 | ENST00000447491 | N/A       | N/A          | N/A           |
| A_21_P0014746  | 7,56982 | 6,24399 | 2,506770638 | N/A             | N/A       | BC036919     | Inc-MTX1-1    |
| A_23_P123732   | 10,0014 | 8,67563 | 2,506666387 | ENST00000454393 | 414328    | NM_001001551 | IDNK          |
| A_24_P265265   | 4,69632 | 3,3712  | 2,505537273 | ENST00000366623 | 84451     | AJ311797     | KIAA1804      |
| A_33_P3381087  | 2,9774  | 1,65258 | 2,505016316 | ENST00000619238 | 128817    | NM_138283    | CSTL1         |
| A_24_P929754   | 11,6657 | 10,3409 | 2,504981589 | ENST00000250896 | 2872      | NM_199054    | MKNK2         |
| A_33_P3841621  | 7,21357 | 5,88888 | 2,504790601 | ENST00000285039 | 4645      | NM_001080467 | MYO5B         |
| A_21_P0005186  | 2,97514 | 1,65079 | 2,504200366 | N/A             | 401287    | XR_428063    | LOC401287     |
| A_22_P00006557 | 2,73998 | 1,41565 | 2,504165651 | N/A             | N/A       | BG197810     | Inc-FLRT1-1   |
| A_21_P0007937  | 3,77791 | 2,45378 | 2,503818524 | ENST00000420693 | N/A       | N/A          | N/A           |
| A_33_P3399051  | 3,4621  | 2,13797 | 2,503818524 | ENST00000332536 | 80115     | NM_025045    | BAIAP2L2      |
| A_21_P0003297  | 8,00346 | 6,67942 | 2,503662333 | N/A             | N/A       | N/A          | Inc-SLC12A8-1 |
| A_21_P0007731  | 2,97417 | 1,65026 | 2,50343674  | N/A             | N/A       | N/A          | Inc-CCDC59-4  |
| A_22_P00018995 | 2,70711 | 1,38326 | 2,503332627 | N/A             | N/A       | N/A          | Inc-EPHB3-1   |
| A_22_P00011429 | 5,84359 | 4,51977 | 2,503280572 | ENST00000576080 | 101926896 | NR_110901    | GLIS2-AS1     |
| A_21_P0000595  | 11,9733 | 10,6502 | 2,502031582 | N/A             | 100379250 | NR_033347    | SNORA70E      |
| A_22_P00014193 | 4,08359 | 2,76071 | 2,50165007  | N/A             | 104355219 | NR_126425    | LHX5-AS1      |

|                |         |         |             |                 |           |           |                |
|----------------|---------|---------|-------------|-----------------|-----------|-----------|----------------|
| A_23_P121011   | 8,36514 | 7,04267 | 2,500939226 | ENST00000514182 | 64651     | NM_033027 | CSRNP1         |
| A_23_P252928   | 13,8496 | 12,5272 | 2,500817883 | ENST00000393900 | 4111      | NM_005367 | MAGEA12        |
| A_23_P356616   | 10,2919 | 8,96952 | 2,500783215 | ENST00000435224 | 25841     | NM_145804 | ABTB2          |
| A_33_P3236213  | 3,27949 | 1,95755 | 2,50002063  | N/A             | N/A       | N/A       | N/A            |
| A_21_P0004085  | 4,93678 | 3,61488 | 2,499951316 | ENST00000507681 | N/A       | N/A       | N/A            |
| A_21_P0005174  | 3,2001  | 1,8785  | 2,49943152  | N/A             | 101927664 | XR_426098 | LOC101927664   |
| A_21_P0005220  | 3,32332 | 2,00206 | 2,498842548 | ENST00000446484 | N/A       | N/A       | N/A            |
| A_19_P00320622 | 5,48495 | 4,16415 | 2,498045925 | ENST00000450963 | 102724827 | NR_110543 | MIATNB         |
| A_32_P230828   | 15,2927 | 13,9721 | 2,497699646 | ENST00000432536 | 60674     | NR_002578 | GAS5           |
| A_33_P3339336  | 8,46024 | 7,1399  | 2,497249555 | N/A             | 653113    | N/A       | FAM86FP        |
| A_33_P3238323  | 11,6699 | 10,3498 | 2,496834159 | ENST00000621487 | 10616     | NM_031229 | RBCK1          |
| A_22_P00017679 | 2,93726 | 1,61733 | 2,496539962 | N/A             | N/A       | N/A       | Inc-WWC2-1     |
| A_21_P0004068  | 3,1077  | 1,78802 | 2,496107382 | N/A             | N/A       | N/A       | Inc-KIAA0141-1 |
| A_32_P63848    | 11,7667 | 10,4471 | 2,495968972 | ENST00000196371 | 5019      | NM_000436 | OXCT1          |
| A_21_P0010401  | 3,73876 | 2,41941 | 2,495536491 | N/A             | N/A       | N/A       | Inc-CRYBA4-1   |
| A_21_P0012395  | 3,25646 | 1,93715 | 2,495467301 | ENST00000507516 | 646300    | N/A       | COL6A4P2       |
| A_22_P00017789 | 2,82622 | 1,50713 | 2,495086791 | ENST00000497896 | N/A       | N/A       | N/A            |
| A_21_P0001400  | 2,84423 | 1,52549 | 2,494481552 | N/A             | N/A       | N/A       | Inc-SWT1-1     |
| A_23_P424878   | 8,18855 | 6,86983 | 2,494446972 | ENST00000276826 | 80728     | NM_025251 | ARHGAP39       |
| A_22_P00025615 | 3,63078 | 2,31245 | 2,493772745 | ENST00000582755 | N/A       | DB031156  | N/A            |
| A_33_P3304377  | 6,72993 | 5,41169 | 2,493617181 | ENST00000514369 | 4552      | NM_002454 | MTRR           |
| A_33_P3410026  | 2,9346  | 1,61656 | 2,493271516 | ENST00000533147 | N/A       | DC374116  | N/A            |
| A_22_P00004495 | 3,88158 | 2,56363 | 2,493115982 | ENST00000454444 | N/A       | N/A       | N/A            |
| A_19_P00319929 | 3,92021 | 2,60266 | 2,49242484  | ENST00000565936 | 101928752 | XR_245846 | LINC01043      |
| A_23_P302302   | 2,96982 | 1,65241 | 2,492182985 | ENST00000601556 | 732275    | NR_024406 | LINC00917      |
| A_22_P00002955 | 2,9514  | 1,63515 | 2,490179949 | N/A             | 100874002 | NR_046635 | OXCT1-AS1      |
| A_23_P96599    | 4,64649 | 3,33035 | 2,489990089 | ENST00000569577 | 286527    | NM_194324 | TMSB15B        |
| A_21_P0013026  | 4,61136 | 3,29608 | 2,488506232 | N/A             | N/A       | N/A       | XLOC_I2_012578 |
| A_23_P408376   | 7,40433 | 6,0891  | 2,488419988 | ENST00000369209 | 259217    | NM_025015 | HSPA12A        |
| A_23_P161563   | 12,7045 | 11,3895 | 2,488023307 | ENST00000243662 | 23682     | NM_022337 | RAB38          |
| A_23_P500614   | 9,15757 | 7,84283 | 2,48757496  | ENST00000417814 | 943       | NM_001243 | TNFRSF8        |
| A_21_P0006566  | 7,5427  | 6,22817 | 2,487212892 | N/A             | N/A       | N/A       | Inc-RAB40AL-1  |
| A_23_P356554   | 9,83365 | 8,51935 | 2,486816403 | ENST00000370693 | 9532      | NM_004282 | BAG2           |

|                |         |         |             |                 |           |              |               |
|----------------|---------|---------|-------------|-----------------|-----------|--------------|---------------|
| A_23_P125668   | 11,967  | 10,6528 | 2,486644036 | ENST00000488158 | 203427    | NM_145305    | SLC25A43      |
| A_33_P3274319  | 7,08036 | 5,76634 | 2,486333805 | ENST00000470931 | 339456    | NM_178545    | TMEM52        |
| A_22_P00022395 | 10,8196 | 9,50632 | 2,48505882  | ENST00000336095 | 11237     | BX647619     | RNF24         |
| A_19_P00316110 | 7,74163 | 6,42838 | 2,485007145 | ENST00000427188 | N/A       | XR_425284    | N/A           |
| A_32_P183609   | 10,41   | 9,09676 | 2,48498992  | ENST00000264607 | 51665     | NM_001040445 | ASB1          |
| A_22_P00013436 | 2,95781 | 1,64471 | 2,484748787 | N/A             | 101927227 | XR_243354    | LOC101927227  |
| A_22_P00011076 | 2,91143 | 1,59845 | 2,48454212  | N/A             | N/A       | N/A          | Inc-NUBPL-1   |
| A_33_P3355688  | 3,51032 | 2,19739 | 2,484456014 | N/A             | N/A       | AK124375     | Inc-SNX20-2   |
| A_23_P166051   | 12,9287 | 11,616  | 2,484059964 | ENST00000356286 | 10616     | NM_031229    | RBCK1         |
| A_23_P133438   | 9,39333 | 8,08127 | 2,482958244 | ENST00000274217 | 54491     | NM_019018    | FAM105A       |
| A_21_P0000841  | 9,64982 | 8,3379  | 2,482717308 | N/A             | 100505483 | N/A          | PRKAG2-AS1    |
| A_33_P3231814  | 8,45307 | 7,14139 | 2,482304329 | ENST00000609777 | N/A       | N/A          | N/A           |
| A_23_P309865   | 8,42662 | 7,11504 | 2,482132275 | ENST00000339249 | 203523    | NM_152695    | ZNF449        |
| A_32_P840463   | 8,71947 | 7,40794 | 2,482046252 | ENST00000478381 | 100652748 | NM_001290117 | TIMM23B       |
| A_22_P00006635 | 3,86587 | 2,5546  | 2,481598983 | N/A             | N/A       | BM906498     | Inc-FOXO4L3-4 |
| A_23_P124946   | 4,52031 | 3,20982 | 2,480257657 | ENST00000446378 | 202333    | NM_153610    | CMYA5         |
| A_33_P3279371  | 3,41631 | 2,10589 | 2,480137317 | N/A             | N/A       | N/A          | Inc-CLIC6-1   |
| A_23_P31273    | 3,1268  | 1,81645 | 2,480016983 | ENST00000356264 | 273       | NM_001635    | AMPH          |
| A_22_P00007369 | 2,71356 | 1,40421 | 2,478298562 | N/A             | 100506915 | NR_103776    | CHRM3-AS2     |
| A_23_P59950    | 12,9311 | 11,622  | 2,477869142 | ENST00000359741 | 23516     | NM_015359    | SLC39A14      |
| A_23_P32006    | 2,82905 | 1,5201  | 2,477611527 | ENST00000318763 | 286365    | NM_001004484 | OR13D1        |
| A_23_P50928    | 2,89452 | 1,58598 | 2,476907513 | ENST00000272520 | 165257    | NM_182528    | C1QL2         |
| A_22_P00007943 | 2,96392 | 1,65544 | 2,476804504 | N/A             | N/A       | N/A          | Inc-IAH1-1    |
| A_22_P00019203 | 2,85538 | 1,54696 | 2,476701499 | ENST00000568286 | N/A       | BX119496     | N/A           |
| A_22_P00015107 | 5,96949 | 4,66113 | 2,476598498 | ENST00000439046 | N/A       | N/A          | N/A           |
| A_23_P157865   | 2,77348 | 1,4658  | 2,475431453 | ENST00000350763 | 3371      | NM_002160    | TNC           |
| A_22_P00008809 | 2,79674 | 1,4895  | 2,474676599 | N/A             | N/A       | N/A          | Inc-KLF11-1   |
| A_24_P25234    | 5,42033 | 4,11312 | 2,47462514  | ENST00000443940 | 9633      | NM_001039656 | MTL5          |
| A_21_P0007076  | 3,22843 | 1,92145 | 2,474230657 | N/A             | N/A       | N/A          | Inc-ADD3-2    |
| A_23_P49181    | 3,10612 | 1,79964 | 2,473373303 | ENST00000409037 | 26231     | NM_012163    | LRRC29        |
| A_33_P3280521  | 5,65306 | 4,34674 | 2,473099012 | ENST00000361618 | 9848      | NM_021647    | MFAP3L        |
| A_21_P0008807  | 9,53722 | 8,23143 | 2,472190641 | N/A             | N/A       | N/A          | Inc-OR4M2-7   |
| A_21_P0001849  | 3,14624 | 1,84048 | 2,472139234 | ENST00000424364 | 285045    | NR_027099    | LINC00486     |

|                |         |         |             |                 |           |              |                |
|----------------|---------|---------|-------------|-----------------|-----------|--------------|----------------|
| A_22_P00011759 | 7,82999 | 6,52432 | 2,471985019 | N/A             | N/A       | N/A          | Inc-PEX7-2     |
| A_24_P238131   | 2,72125 | 1,41562 | 2,471916482 | ENST00000309558 | 26032     | NM_015551    | SUSD5          |
| A_22_P00024712 | 2,70444 | 1,39886 | 2,471830813 | ENST00000542980 | N/A       | N/A          | N/A            |
| A_21_P0009669  | 3,38704 | 2,08175 | 2,471333994 | N/A             | N/A       | N/A          | Inc-ZNF682-1   |
| A_22_P00016741 | 7,93191 | 6,62735 | 2,470083821 | N/A             | N/A       | N/A          | Inc-TRH-2      |
| A_22_P00014703 | 2,84522 | 1,54132 | 2,468954073 | ENST00000521021 | N/A       | N/A          | N/A            |
| A_22_P00016901 | 3,26875 | 1,9654  | 2,468013011 | ENST00000454600 | 101927700 | NR_110038    | LINC01524      |
| A_33_P3290303  | 8,17984 | 6,87697 | 2,467192013 | N/A             | N/A       | AK129701     | N/A            |
| A_24_P410797   | 6,11227 | 4,80952 | 2,466986806 | ENST00000393496 | 8997      | AK125979     | KALRN          |
| A_21_P0001225  | 5,58996 | 4,28735 | 2,46674742  | ENST00000433576 | N/A       | N/A          | N/A            |
| A_24_P102920   | 6,38564 | 5,08343 | 2,466063587 | ENST00000409658 | 55339     | NM_001006622 | WDR33          |
| A_33_P3361758  | 6,7881  | 5,48638 | 2,46522615  | ENST00000299338 | 196951    | NM_152647    | FAM227B        |
| A_22_P00006810 | 3,4626  | 2,16121 | 2,464662323 | N/A             | N/A       | XM_003846298 | Inc-GABPA-4    |
| A_23_P148255   | 15,0549 | 13,7536 | 2,464508574 | ENST00000595583 | 266740    | NM_153488    | MAGEA2B        |
| A_21_P0001015  | 7,0485  | 5,74747 | 2,464047385 | ENST00000617309 | N/A       | N/A          | N/A            |
| A_24_P37409    | 7,1057  | 5,80484 | 2,463757051 | ENST00000488952 | 1844      | NM_004418    | DUSP2          |
| A_21_P0011741  | 7,53842 | 6,23769 | 2,463535054 | N/A             | N/A       | N/A          | XLOC_I2_007033 |
| A_32_P194264   | 9,22763 | 7,9271  | 2,463193559 | ENST00000295304 | 494143    | NM_001008708 | CHAC2          |
| A_24_P409881   | 14,6214 | 13,3209 | 2,463142339 | ENST00000549457 | N/A       | N/A          | N/A            |
| A_22_P00021244 | 3,35684 | 2,05653 | 2,462817969 | ENST00000415883 | N/A       | N/A          | N/A            |
| A_33_P3226192  | 3,23308 | 1,93297 | 2,462476574 | ENST00000621098 | 10002     | NM_016346    | NR2E3          |
| A_23_P433798   | 6,54538 | 5,24585 | 2,461486795 | ENST00000538371 | 79883     | NM_024825    | PODNL1         |
| A_22_P00014721 | 2,7347  | 1,43552 | 2,460889707 | N/A             | N/A       | DB452883     | Inc-SLC29A4-1  |
| A_22_P00016177 | 4,53077 | 3,23168 | 2,460736193 | N/A             | 101928631 | XR_248515    | LOC101928631   |
| A_33_P3282698  | 3,36095 | 2,06193 | 2,460616801 | ENST00000492538 | 2781      | N/A          | GNAZ           |
| A_33_P3212415  | 3,06287 | 1,7642  | 2,460019924 | N/A             | N/A       | AX721058     | N/A            |
| A_23_P353744   | 10,2009 | 8,90228 | 2,459934667 | ENST00000432347 | 55132     | NM_032239    | LARP1B         |
| A_24_P374319   | 9,26405 | 7,96603 | 2,458911822 | ENST00000342983 | 57826     | NM_021183    | RAP2C          |
| A_33_P3576853  | 4,74305 | 3,44504 | 2,458894778 | N/A             | 254128    | NR_037857    | NIFK-AS1       |
| A_23_P122863   | 11,9017 | 10,6039 | 2,458536885 | ENST00000402497 | 2887      | NM_001001555 | GRB10          |
| A_23_P404481   | 6,90464 | 5,60745 | 2,457497587 | ENST00000305352 | 1901      | NM_001400    | S1PR1          |
| A_23_P416034   | 7,2982  | 6,00108 | 2,457378351 | ENST00000490453 | 55559     | NM_017518    | HAUS7          |
| A_21_P0013398  | 3,68765 | 2,39065 | 2,457173961 | ENST00000453378 | N/A       | N/A          | N/A            |

|                |         |         |             |                 |           |              |                |
|----------------|---------|---------|-------------|-----------------|-----------|--------------|----------------|
| A_21_P0007572  | 7,17923 | 5,88244 | 2,456816318 | N/A             | N/A       | N/A          | Inc-MSRB3-2    |
| A_24_P191312   | 5,84858 | 4,55229 | 2,455964998 | ENST00000480594 | 6509      | NM_003038    | SLC1A4         |
| A_21_P0012302  | 2,74664 | 1,45097 | 2,454909771 | N/A             | N/A       | N/A          | XLOC_I2_009578 |
| A_23_P58869    | 3,27701 | 1,98148 | 2,454671557 | ENST00000405166 | 442245    | NR_002932    | GSTM2P1        |
| A_23_P156632   | 3,66435 | 2,36914 | 2,454127153 | ENST00000259883 | 84547     | NM_032507    | PGBD1          |
| A_33_P3353552  | 11,8122 | 10,5172 | 2,453769955 | ENST00000442218 | 55652     | NM_017842    | SLC48A1        |
| A_21_P0014442  | 8,00884 | 6,71397 | 2,453548857 | N/A             | 100507306 | XR_251642    | LOC100507306   |
| A_19_P00321259 | 11,5789 | 10,2849 | 2,45206972  | ENST00000423943 | 100505633 | N/A          | LINC01133      |
| A_33_P3415300  | 3,47798 | 2,18416 | 2,451763803 | ENST00000393745 | 10814     | NM_006650    | CPLX2          |
| A_22_P00004305 | 2,72001 | 1,42666 | 2,4509652   | N/A             | N/A       | N/A          | Inc-CNTLN-3    |
| A_21_P0014689  | 3,10211 | 1,80881 | 2,450880257 | N/A             | 100506974 | XR_111668    | LOC100506974   |
| A_33_P3286722  | 2,70365 | 1,41038 | 2,450829293 | N/A             | 390660    | NR_045529    | ADAMTS7P1      |
| A_22_P00018892 | 3,13115 | 1,83791 | 2,45077833  | N/A             | N/A       | N/A          | Inc-IQSEC3-1   |
| A_23_P502553   | 9,88696 | 8,59379 | 2,45065942  | ENST00000305364 | 23087     | NM_171982    | TRIM35         |
| A_24_P124624   | 6,25039 | 4,95728 | 2,450557502 | ENST00000309539 | 4973      | NM_002543    | OLR1           |
| A_33_P3403018  | 6,60772 | 5,31463 | 2,450523531 | ENST00000334269 | 254910    | NM_178438    | LCE5A          |
| A_23_P86822    | 11,9    | 10,6073 | 2,449861177 | ENST00000325486 | 9702      | NM_014679    | CEP57          |
| A_33_P6805542  | 12,7101 | 11,4174 | 2,449861177 | N/A             | N/A       | BC038733     | Inc-SERPINC1-1 |
| A_21_P0002078  | 2,91515 | 1,62275 | 2,449351795 | ENST00000431897 | N/A       | N/A          | N/A            |
| A_22_P00023593 | 2,94769 | 1,65545 | 2,449080168 | N/A             | 102724919 | NR_126002    | LOC102724919   |
| A_23_P81770    | 13,8652 | 12,5731 | 2,44884252  | ENST00000370651 | 7803      | NM_003463    | PTP4A1         |
| A_23_P121064   | 7,82715 | 6,53543 | 2,44819759  | ENST00000295927 | 5806      | NM_002852    | PTX3           |
| A_22_P00018049 | 4,89133 | 3,6004  | 2,446857357 | N/A             | 100128881 | NR_036480    | VPS9D1-AS1     |
| A_24_P212565   | 9,80409 | 8,51317 | 2,446840397 | ENST00000521069 | N/A       | N/A          | N/A            |
| A_23_P106371   | 6,46696 | 5,17612 | 2,446704719 | ENST00000290438 | 342096    | NM_001038640 | GOLGA6A        |
| A_21_P0011894  | 3,25783 | 1,96716 | 2,446416428 | N/A             | N/A       | N/A          | XLOC_I2_007834 |
| A_22_P00022536 | 4,72225 | 3,43188 | 2,445907763 | N/A             | N/A       | N/A          | Inc-CLIC3-1    |
| A_23_P20392    | 7,4469  | 6,15656 | 2,445856903 | ENST00000440756 | 23362     | NM_015310    | PSD3           |
| A_21_P0006536  | 4,31455 | 3,02428 | 2,445738232 | N/A             | N/A       | N/A          | Inc-ARHGEF9-1  |
| A_33_P3342598  | 4,87747 | 3,58784 | 2,444653508 | ENST00000395578 | 5593      | NM_006259    | PRKG2          |
| A_21_P0013643  | 10,7862 | 9,497   | 2,44392498  | N/A             | 441432    | NR_026558    | AQP7P3         |
| A_22_P00018173 | 3,11218 | 1,82326 | 2,443450706 | ENST00000561778 | N/A       | BC041906     | N/A            |
| A_23_P144916   | 6,65817 | 5,36949 | 2,443044259 | ENST00000253778 | 9945      | NM_005110    | GFPT2          |

|                |         |         |             |                 |           |              |                |
|----------------|---------|---------|-------------|-----------------|-----------|--------------|----------------|
| A_33_P3309725  | 3,81526 | 2,52661 | 2,442993458 | ENST00000415205 | 388906    | N/A          | OGFRP1         |
| A_33_P3381513  | 4,31373 | 3,02511 | 2,442942657 | ENST00000492923 | 29126     | NM_014143    | CD274          |
| A_23_P143143   | 3,61936 | 2,33097 | 2,442553225 | ENST00000331129 | 3398      | NM_002166    | ID2            |
| A_21_P0001809  | 3,47205 | 2,18372 | 2,442451644 | ENST00000444079 | N/A       | N/A          | N/A            |
| A_23_P425066   | 9,72759 | 8,43927 | 2,442434715 | ENST00000398215 | 1415      | NM_000496    | CRYBB2         |
| A_22_P00001240 | 7,86213 | 6,57385 | 2,442366997 | ENST00000426283 | N/A       | BG185246     | N/A            |
| A_24_P926783   | 6,22186 | 4,93365 | 2,442248495 | ENST00000422689 | 400713    | NM_001145434 | ZNF880         |
| A_21_P0004352  | 3,16327 | 1,87511 | 2,442163855 | N/A             | N/A       | N/A          | Inc-IRX4-2     |
| A_21_P0000268  | 4,91098 | 3,62287 | 2,442079217 | ENST00000477403 | 26779     | NR_002584    | SNORA69        |
| A_22_P00010112 | 2,70232 | 1,4144  | 2,441757622 | ENST00000534640 | 494141    | N/A          | LOC494141      |
| A_23_P70818    | 3,23168 | 1,94403 | 2,44130069  | ENST00000249373 | 6608      | NM_005631    | SMO            |
| A_19_P00801821 | 13,8235 | 12,536  | 2,441046876 | ENST00000447491 | N/A       | N/A          | N/A            |
| A_33_P3378630  | 3,0797  | 1,79236 | 2,440776171 | N/A             | 100131195 | AK097743     | LOC100131195   |
| A_33_P3239185  | 11,8604 | 10,5732 | 2,440539328 | ENST00000263846 | 9066      | NM_001252065 | SYT7           |
| A_23_P380881   | 7,45191 | 6,16472 | 2,440522411 | ENST00000614878 | 124930    | NM_152345    | ANKRD13B       |
| A_24_P127691   | 6,73575 | 5,4488  | 2,440116451 | ENST00000495456 | 127602    | XM_006711735 | DNAH14         |
| A_24_P943301   | 7,96694 | 6,68008 | 2,439964233 | ENST00000292357 | 375033    | NM_001080471 | PEAR1          |
| A_33_P3293254  | 3,40141 | 2,11511 | 2,439017315 | ENST00000616132 | 26086     | NM_015597    | GPSM1          |
| A_23_P169003   | 7,4456  | 6,15945 | 2,438763738 | ENST00000519207 | 63898     | NM_022071    | SH2D4A         |
| A_22_P00004147 | 2,89155 | 1,60559 | 2,438442579 | ENST00000572466 | N/A       | N/A          | N/A            |
| A_21_P0006956  | 2,74604 | 1,46012 | 2,438374972 | N/A             | N/A       | N/A          | Inc-KLF6-7     |
| A_24_P170983   | 7,34027 | 6,05437 | 2,438341169 | ENST00000612395 | 339768    | NM_194312    | ESPNL          |
| A_33_P3355937  | 3,43843 | 2,15282 | 2,437851081 | ENST00000584120 | 284276    | NR_015417    | LINC00908      |
| A_32_P141488   | 5,45704 | 4,17154 | 2,437665211 | N/A             | N/A       | N/A          | XLOC_I2_009859 |
| A_33_P3383531  | 2,89558 | 1,61012 | 2,437597626 | N/A             | N/A       | N/A          | N/A            |
| A_33_P3303617  | 3,23205 | 1,9469  | 2,437073902 | N/A             | N/A       | AF090909     | N/A            |
| A_33_P3249274  | 2,91123 | 1,6261  | 2,437040117 | N/A             | 100127967 | NR_126005    | KRT73-AS1      |
| A_22_P00002083 | 6,23157 | 4,94647 | 2,436989441 | N/A             | 101928942 | NR_125908    | LOC101928942   |
| A_21_P0006553  | 4,95895 | 3,67399 | 2,436752965 | N/A             | N/A       | N/A          | Inc-CD99L2-2   |
| A_33_P3299416  | 8,08487 | 6,80027 | 2,436144991 | ENST00000293662 | 160622    | NM_181711    | GRASP          |
| A_21_P0014704  | 5,11803 | 3,83355 | 2,435942366 | N/A             | N/A       | N/A          | N/A            |
| A_22_P00024422 | 3,45883 | 2,17445 | 2,435773526 | N/A             | 101928047 | XR_249939    | LOC101928047   |
| A_22_P00001865 | 3,29511 | 2,0111  | 2,435148916 | ENST00000427745 | N/A       | N/A          | N/A            |

|                |         |         |             |                 |           |              |                    |
|----------------|---------|---------|-------------|-----------------|-----------|--------------|--------------------|
| A_21_P0005063  | 2,72022 | 1,43683 | 2,434102633 | N/A             | N/A       | N/A          | Inc-TXLNB-2        |
| A_21_P0005923  | 8,44468 | 7,16142 | 2,433883308 | N/A             | 100506990 | NR_040092    | LOC100506990       |
| A_33_P3306307  | 4,43769 | 3,15453 | 2,43371461  | ENST00000335552 | 353288    | NM_181539    | KRT26              |
| A_23_P5370     | 2,63233 | 1,34925 | 2,43357966  | ENST00000325926 | 56475     | NM_019845    | RPRM               |
| A_22_P00015140 | 7,56804 | 6,28497 | 2,433562792 | ENST00000584919 | 101927481 | NR_126336    | LOC101927481       |
| A_23_P410469   | 2,88012 | 1,59707 | 2,433529055 | N/A             | 197003    | NR_026897    | MGC15885           |
| A_23_P94216    | 9,58647 | 8,30443 | 2,43182599  | ENST00000526680 | 91694     | NM_152271    | LONRF1             |
| A_21_P0012150  | 3,394   | 2,11224 | 2,431354064 | ENST00000445984 | 149773    | NR_034147    | APCDD1L-AS1        |
| A_21_P0010497  | 3,16213 | 1,88079 | 2,430646347 | N/A             | 100316868 | NR_037843    | HOTTIP             |
| A_22_P00008305 | 3,43523 | 2,15405 | 2,430376794 | N/A             | N/A       | N/A          | Inc-ITGAX-1        |
| A_33_P3233135  | 8,62758 | 7,34664 | 2,429972522 | ENST00000408042 | 55614     | NM_001199866 | KIF16B             |
| A_24_P332647   | 8,73596 | 7,45546 | 2,42923153  | ENST00000326470 | 54434     | NM_001161331 | SSH1               |
| A_23_P51217    | 2,86399 | 1,5845  | 2,427531472 | ENST00000234701 | 1179      | NM_001285    | CLCA1              |
| A_33_P3275350  | 7,51439 | 6,23573 | 2,426135286 | ENST00000372398 | 23413     | NM_014286    | NCS1               |
| A_23_P153461   | 8,22645 | 6,94796 | 2,425849419 | ENST00000591608 | 64748     | NM_022737    | LPPR2              |
| A_24_P927189   | 8,81274 | 7,5344  | 2,425597211 | ENST00000285083 | 92106     | NM_138381    | OXNAD1             |
| A_22_P00008145 | 6,26988 | 4,99201 | 2,424807131 | N/A             | N/A       | N/A          | Inc-IL6-2          |
| A_23_P167298   | 4,03501 | 2,75736 | 2,424437395 | ENST00000477187 | 84103     | NM_032149    | C4orf17            |
| A_21_P0008575  | 3,47368 | 2,19639 | 2,423832493 | N/A             | N/A       | N/A          | Inc-ALDH1A3-1      |
| A_24_P128727   | 6,25816 | 4,98129 | 2,423126965 | ENST00000456741 | N/A       | AF359419     | N/A                |
| A_32_P928190   | 2,83533 | 1,55879 | 2,422572766 | ENST00000519537 | 100130964 | NR_046245    | LOC100130964       |
| A_21_P0000864  | 2,70304 | 1,42651 | 2,422555974 | ENST00000419957 | 100507489 | NR_038987    | LINC01277          |
| A_23_P347048   | 8,84627 | 7,56982 | 2,422421643 | ENST00000247225 | 81537     | NM_030791    | SGPP1              |
| A_23_P404005   | 13,5171 | 12,2407 | 2,422337689 | ENST00000621629 | 92002     | NM_152274    | FAM58A             |
| A_19_P00320047 | 5,69949 | 4,42387 | 2,421028395 | N/A             | N/A       | N/A          | Inc-AC069257.9.1-4 |
| A_33_P3398195  | 6,21768 | 4,94209 | 2,420978052 | ENST00000250366 | 284366    | NM_012315    | KLK9               |
| A_23_P397238   | 9,77754 | 8,50284 | 2,419485008 | ENST00000381719 | 2280      | NM_054014    | FKBP1A             |
| A_33_P3294302  | 3,62896 | 2,35465 | 2,418831044 | ENST00000266671 | 22822     | N/A          | PHLDA1             |
| A_33_P3362601  | 7,11127 | 5,8372  | 2,418428692 | N/A             | N/A       | N/A          | N/A                |
| A_33_P3306894  | 6,10904 | 4,8353  | 2,417875567 | ENST00000265654 | 25758     | NM_012194    | KIAA1549L          |
| A_22_P00016107 | 5,60923 | 4,33576 | 2,417423105 | N/A             | N/A       | N/A          | Inc-THSD4-4        |
| A_23_P85140    | 6,11262 | 4,83958 | 2,416702691 | ENST00000372780 | 140597    | NM_080390    | TCEAL2             |
| A_32_P230148   | 5,3722  | 4,10008 | 2,415162062 | ENST00000415530 | N/A       | N/A          | N/A                |



|                |         |         |             |                 |           |              |                      |
|----------------|---------|---------|-------------|-----------------|-----------|--------------|----------------------|
| A_33_P3257856  | 7,19851 | 5,92773 | 2,412919859 | ENST00000620116 | 115560    | NM_001258280 | ZNF501               |
| A_33_P3407414  | 8,22259 | 6,95199 | 2,412618827 | N/A             | 92249     | NR_015353    | LINC01278            |
| A_22_P00018786 | 2,97832 | 1,70783 | 2,412434881 | N/A             | N/A       | N/A          | Inc-RP1-241P17.4.1-2 |
| A_22_P00021140 | 3,07651 | 1,8061  | 2,412301111 | N/A             | 101927082 | XR_426022    | LOC101927082         |
| A_33_P3372389  | 4,26575 | 2,99568 | 2,411732671 | ENST00000466897 | 261734    | NM_015102    | NPHP4                |
| A_33_P3482249  | 4,80852 | 3,53849 | 2,411665804 | N/A             | 619427    | AL834492     | LOC619427            |
| A_23_P387000   | 5,86094 | 4,59129 | 2,411030665 | N/A             | 286046    | NM_173683    | XKR6                 |
| A_21_P0008989  | 3,33288 | 2,06324 | 2,411013953 | ENST00000569740 | 102724344 | N/A          | LOC102724344         |
| A_33_P3355708  | 4,0918  | 2,82227 | 2,410830129 | ENST00000410013 | 400258    | NM_001286400 | C14orf180            |
| A_22_P00014325 | 10,8461 | 9,57669 | 2,41062961  | ENST00000425771 | N/A       | N/A          | N/A                  |
| A_33_P3411279  | 3,06477 | 1,79555 | 2,410312156 | ENST00000489833 | 1589      | NM_001128590 | CYP21A2              |
| A_33_P3262012  | 10,496  | 9,22693 | 2,410061564 | N/A             | N/A       | N/A          | N/A                  |
| A_23_P11279    | 11,0652 | 9,79614 | 2,410044859 | ENST00000482742 | 79868     | NM_018466    | ALG13                |
| A_33_P3303577  | 9,0603  | 7,79146 | 2,409677373 | ENST00000355083 | 375346    | NM_198563    | TMEM110              |
| A_21_P0007630  | 2,78418 | 1,51588 | 2,408775601 | ENST00000547819 | N/A       | N/A          | N/A                  |
| A_23_P717      | 8,38649 | 7,11828 | 2,408625339 | ENST00000535273 | 55248     | NM_018252    | TMEM206              |
| A_33_P3355386  | 6,27515 | 5,00701 | 2,408508474 | ENST00000395385 | 163223    | NM_001001411 | ZNF676               |
| A_33_P3271470  | 8,31304 | 7,04541 | 2,407657205 | ENST00000578368 | 80000     | NM_001142966 | GREB1L               |
| A_22_P00009292 | 3,56732 | 2,29981 | 2,40745695  | ENST00000525328 | N/A       | N/A          | N/A                  |
| A_24_P224998   | 9,64878 | 8,38138 | 2,407273397 | N/A             | N/A       | N/A          | N/A                  |
| A_22_P00002173 | 3,0071  | 1,73985 | 2,407023121 | N/A             | N/A       | N/A          | Inc-BTBD10-5         |
| A_21_P0000697  | 5,75597 | 4,48884 | 2,406822919 | N/A             | 100505912 | N/A          | LOC100505912         |
| A_21_P0012776  | 6,65093 | 5,38382 | 2,406789554 | N/A             | N/A       | N/A          | XLOC_I2_011118       |
| A_23_P217319   | 7,18119 | 5,91414 | 2,40668946  | ENST00000441825 | 2258      | NM_004114    | FGF13                |
| A_21_P0012375  | 4,18168 | 2,91492 | 2,406205734 | N/A             | N/A       | N/A          | XLOC_I2_009668       |
| A_21_P0010480  | 9,63731 | 8,37075 | 2,405872186 | N/A             | N/A       | N/A          | Inc-SMC1B-3          |
| A_23_P255653   | 9,93145 | 8,66564 | 2,404621793 | ENST00000613472 | 8797      | NM_003844    | TNFRSF10A            |
| A_21_P0006428  | 2,90827 | 1,64266 | 2,404288465 | ENST00000443247 | 101928128 | N/A          | LOC101928128         |
| A_22_P00017097 | 2,69824 | 1,43298 | 2,403705252 | N/A             | N/A       | AI950358     | Inc-TYMS-4           |
| A_23_P68234    | 3,3635  | 2,09831 | 2,403588626 | ENST00000394705 | 10936     | NM_006794    | GPR75                |
| A_24_P580698   | 3,01547 | 1,7506  | 2,403055552 | N/A             | 389895    | NM_001271560 | LOC389895            |
| A_23_P50897    | 12,3071 | 11,0428 | 2,402106307 | ENST00000285814 | 84365     | NM_032390    | NIFK                 |
| A_22_P00003494 | 2,71193 | 1,44789 | 2,401673443 | ENST00000456440 | N/A       | N/A          | N/A                  |

|                |         |         |             |                 |           |              |                |
|----------------|---------|---------|-------------|-----------------|-----------|--------------|----------------|
| A_23_P348264   | 10,8548 | 9,59109 | 2,40112415  | ENST00000526075 | 137994    | NM_144652    | LETM2          |
| A_23_P46673    | 5,59747 | 4,33388 | 2,400924438 | ENST00000423476 | N/A       | DM107643     | N/A            |
| A_24_P288754   | 10,1297 | 8,8665  | 2,400275491 | ENST00000333590 | 5277      | NM_002641    | PIGA           |
| A_23_P252556   | 2,85769 | 1,59511 | 2,399244191 | ENST00000370598 | 577       | NM_001704    | BAI3           |
| A_22_P00017348 | 7,95935 | 6,69714 | 2,398628949 | N/A             | N/A       | AI088302     | Inc-USP7-1     |
| A_22_P00017538 | 3,03124 | 1,76969 | 2,397531882 | ENST00000433388 | N/A       | N/A          | N/A            |
| A_22_P00012405 | 2,74312 | 1,4817  | 2,397315852 | ENST00000548665 | N/A       | N/A          | N/A            |
| A_23_P117662   | 3,08232 | 1,82097 | 2,397199536 | ENST00000267845 | 3067      | NM_002112    | HDC            |
| A_33_P3378935  | 5,05327 | 3,79197 | 2,397116457 | N/A             | 10432     | AB209007     | RBM14          |
| A_21_P0007662  | 3,96952 | 2,70862 | 2,396451928 | N/A             | N/A       | N/A          | Inc-TMEM132C-7 |
| A_22_P00007113 | 3,35241 | 2,09158 | 2,396335654 | ENST00000569460 | N/A       | BX641171     | N/A            |
| A_21_P0000470  | 7,73144 | 6,47062 | 2,396319044 | N/A             | 100113393 | NR_003695    | SNORD12B       |
| A_33_P3334308  | 11,1522 | 9,89139 | 2,396302434 | ENST00000374888 | 158586    | NM_007157    | ZXDB           |
| A_22_P00017412 | 4,41608 | 3,15534 | 2,396186167 | ENST00000533822 | 253264    | NR_038223    | ZNF503-AS1     |
| A_22_P00015862 | 3,0452  | 1,78467 | 2,395837402 | N/A             | N/A       | N/A          | Inc-TBL1Y-3    |
| A_21_P0012767  | 7,62805 | 6,36759 | 2,395721158 | ENST00000511488 | N/A       | N/A          | N/A            |
| A_21_P0011070  | 7,9271  | 6,66769 | 2,393978175 | ENST00000540968 | 100506691 | XR_158873    | LOC100506691   |
| A_21_P0002448  | 3,54404 | 2,28467 | 2,393911801 | N/A             | N/A       | N/A          | Inc-TMEM17-1   |
| A_23_P67151    | 4,24657 | 2,98734 | 2,393679506 | ENST00000264833 | 93145     | AF131839     | OLFM2          |
| A_33_P3601802  | 3,13984 | 1,88069 | 2,393546776 | N/A             | 6218      | CD049182     | RPS17          |
| A_19_P00811430 | 3,00754 | 1,74863 | 2,393148629 | N/A             | N/A       | N/A          | Inc-SNURF-1    |
| A_23_P125078   | 6,97367 | 5,71503 | 2,392700794 | ENST00000411502 | 284129    | NM_173626    | SLC26A11       |
| A_23_P64854    | 4,11175 | 2,85349 | 2,39207065  | ENST00000252245 | 9119      | NM_004693    | KRT75          |
| A_22_P00023503 | 2,7198  | 1,46205 | 2,39122519  | N/A             | 101929415 | NR_125813    | LOC101929415   |
| A_33_P3364205  | 10,4831 | 9,22592 | 2,390280618 | ENST00000415772 | 155370    | NR_001588    | SBDSP1         |
| A_21_P0000850  | 2,69473 | 1,4376  | 2,390197779 | N/A             | 100506343 | NR_038951    | FAM212B-AS1    |
| A_33_P3383816  | 4,35084 | 3,09382 | 2,390015542 | ENST00000580048 | 400657    | NR_024484    | LINC00909      |
| A_23_P151159   | 9,81519 | 8,55831 | 2,389783625 | ENST00000312777 | 84260     | NM_032300    | TCHP           |
| A_21_P0013532  | 6,87553 | 5,61868 | 2,389733931 | N/A             | N/A       | N/A          | XL0C_I2_014098 |
| A_22_P00007296 | 2,86769 | 1,61085 | 2,389717367 | ENST00000492975 | N/A       | N/A          | N/A            |
| A_32_P230825   | 15,0608 | 13,8043 | 2,389154248 | N/A             | N/A       | N/A          | N/A            |
| A_23_P43800    | 11,6735 | 10,4171 | 2,388988651 | ENST00000569669 | 23246     | NM_015201    | BOP1           |
| A_23_P217135   | 10,9862 | 9,72995 | 2,388740275 | ENST00000370251 | 10838     | NM_001080485 | ZNF275         |

|                |         |         |             |                 |           |              |                       |
|----------------|---------|---------|-------------|-----------------|-----------|--------------|-----------------------|
| A_21_P0010754  | 3,9611  | 2,70522 | 2,388127727 | ENST00000611860 | 645354    | NR_111945    | LOC645354             |
| A_22_P00014378 | 4,54599 | 3,2905  | 2,387482238 | N/A             | N/A       | N/A          | Inc-SETDB1-1          |
| A_33_P3355454  | 3,21203 | 1,95654 | 2,387482238 | N/A             | N/A       | N/A          | Inc-ZNF133-2          |
| A_23_P124024   | 11,6426 | 10,3874 | 2,387002372 | ENST00000503112 | 84246     | NM_032286    | MED10                 |
| A_22_P00005797 | 3,30715 | 2,05224 | 2,386522602 | N/A             | N/A       | N/A          | Inc-EPCAM-3           |
| A_23_P56703    | 8,53554 | 7,2807  | 2,38640681  | ENST00000335459 | 129293    | NM_001277053 | TRABD2A               |
| A_33_P3209894  | 9,61403 | 8,35931 | 2,386208323 | ENST00000428076 | N/A       | N/A          | N/A                   |
| A_33_P3267186  | 8,54824 | 7,29388 | 2,38561296  | ENST00000428670 | 490       | NM_001682    | ATP2B1                |
| A_22_P00014029 | 2,77621 | 1,52225 | 2,384951619 | ENST00000608654 | 285286    | N/A          | LINC00877             |
| A_33_P3401342  | 2,8489  | 1,59503 | 2,384802842 | N/A             | N/A       | BC041075     | Inc-TCL1B-1           |
| A_23_P433785   | 9,34912 | 8,09536 | 2,384621017 | ENST00000552456 | 5026      | NM_002561    | P2RX5                 |
| A_33_P3300152  | 4,27541 | 3,0218  | 2,384373096 | N/A             | N/A       | AK000041     | N/A                   |
| A_22_P00020299 | 2,73007 | 1,47684 | 2,383745145 | N/A             | N/A       | N/A          | Inc-S100A13-1         |
| A_23_P126103   | 11,4305 | 10,1773 | 2,383695577 | ENST00000370938 | 1491      | NM_001902    | CTH                   |
| A_21_P0006517  | 4,34379 | 3,0906  | 2,383679054 | N/A             | N/A       | N/A          | Inc-FAM127A-1         |
| A_33_P3373573  | 3,00937 | 1,75635 | 2,38339819  | N/A             | N/A       | N/A          | Inc-UBXN4-2           |
| A_21_P0011533  | 7,32561 | 6,07282 | 2,38301825  | ENST00000536958 | N/A       | N/A          | N/A                   |
| A_33_P3223208  | 6,9306  | 5,67822 | 2,382341115 | ENST00000397807 | 51134     | NM_016122    | CEP83                 |
| A_32_P167904   | 5,16287 | 3,91062 | 2,382126454 | ENST00000402377 | 148213    | NM_138286    | ZNF681                |
| A_19_P00807411 | 4,72425 | 3,47205 | 2,382043897 | ENST00000389100 | 285671    | NM_001113561 | RNF180                |
| A_21_P0011284  | 6,29356 | 5,04155 | 2,381730208 | ENST00000556075 | 96610     | NR_027293    | BMS1P20               |
| A_22_P00025397 | 2,89253 | 1,64104 | 2,3808719   | N/A             | N/A       | BI830485     | Inc-OR1Q1-1           |
| A_22_P00003088 | 3,48751 | 2,23631 | 2,380393362 | N/A             | N/A       | N/A          | Inc-C8orf74-1         |
| A_33_P3386099  | 3,92773 | 2,67689 | 2,37979945  | ENST00000343894 | 2002      | NM_001257168 | ELK1                  |
| A_33_P3242251  | 2,68332 | 1,43257 | 2,379650995 | ENST00000412473 | N/A       | N/A          | N/A                   |
| A_23_P115726   | 5,26023 | 4,0096  | 2,379453069 | ENST00000395347 | 220963    | NM_194298    | SLC16A9               |
| A_21_P0003718  | 4,12807 | 2,87751 | 2,37933762  | N/A             | N/A       | N/A          | ic-RP11-1396O13.13.1- |
| A_33_P3242543  | 4,11862 | 2,86853 | 2,378562608 | ENST00000338702 | 4128      | NM_001270458 | MAOA                  |
| A_21_P0000641  | 7,00543 | 5,7556  | 2,378133986 | N/A             | 387723    | N/A          | LINC00959             |
| A_22_P00009392 | 2,9762  | 1,72644 | 2,378018601 | N/A             | N/A       | N/A          | Inc-LSS-1             |
| A_22_P00010927 | 4,69606 | 3,44658 | 2,377557117 | N/A             | N/A       | N/A          | Inc-NR2C1-1           |
| A_32_P132396   | 5,90237 | 4,65291 | 2,377524157 | ENST00000486431 | 100125556 | NR_024251    | FAM86JP               |
| A_33_P3360271  | 3,05997 | 1,81059 | 2,377392323 | ENST00000308618 | 344191    | NM_001080458 | EVX2                  |

|                |         |         |             |                 |           |              |              |
|----------------|---------|---------|-------------|-----------------|-----------|--------------|--------------|
| A_22_P00015128 | 4,06026 | 2,81136 | 2,376601471 | N/A             | N/A       | AW027896     | Inc-SNX33-1  |
| A_22_P00023663 | 8,01197 | 6,76308 | 2,376584998 | ENST00000300413 | 6632      | N/A          | SNRPD1       |
| A_33_P3231493  | 2,73749 | 1,48873 | 2,376370855 | ENST00000600605 | N/A       | N/A          | N/A          |
| A_19_P00321284 | 6,05799 | 4,80933 | 2,376206144 | ENST00000440496 | 100287765 | N/A          | LINC00630    |
| A_23_P384635   | 5,98165 | 4,73319 | 2,375876754 | ENST00000327532 | 199221    | NM_173543    | DZIP1L       |
| A_33_P3310744  | 3,05386 | 1,80543 | 2,37582735  | ENST00000401095 | 100287898 | NM_001242672 | TTC34        |
| A_21_P0012342  | 3,62641 | 2,37856 | 2,374872399 | ENST00000462210 | 5297      | N/A          | PI4KA        |
| A_21_P0002048  | 2,72971 | 1,48231 | 2,374131753 | ENST00000427020 | 400952    | XR_425396    | LINC01121    |
| A_21_P0014359  | 4,09841 | 2,85107 | 2,374033018 | ENST00000581944 | N/A       | BQ934520     | N/A          |
| A_22_P00007078 | 6,98317 | 5,73593 | 2,373868468 | N/A             | N/A       | DA381791     | Inc-GLIPR1-3 |
| A_21_P0000509  | 15,6305 | 14,3835 | 2,373473595 | N/A             | 100170228 | NR_024244    | SNAR-G2      |
| A_33_P3351120  | 9,28505 | 8,03812 | 2,373358436 | ENST00000525265 | 7296      | NM_001261445 | TXNRD1       |
| A_22_P00016847 | 2,91028 | 1,66353 | 2,373062339 | N/A             | N/A       | N/A          | Inc-TRPC5-1  |
| A_22_P00016017 | 8,06807 | 6,82137 | 2,372980097 | N/A             | 101928117 | XR_426247    | LOC101928117 |
| A_21_P0010773  | 8,17394 | 6,92825 | 2,371319405 | ENST00000623201 | 644316    | NR_033856    | FLJ43315     |
| A_33_P3280875  | 5,75049 | 4,50483 | 2,371270096 | ENST00000367497 | 10625     | NM_006469    | IVNS1ABP     |
| A_24_P9346     | 3,13683 | 1,89118 | 2,371253659 | ENST00000414753 | 8831      | NM_006772    | SYNGAP1      |
| A_24_P261750   | 2,68671 | 1,44112 | 2,371155044 | ENST00000266719 | 11081     | NM_007035    | KERA         |
| A_22_P00022773 | 3,23551 | 1,98992 | 2,371155044 | N/A             | N/A       | AI963919     | Inc-IL3-1    |
| A_23_P61580    | 7,84879 | 6,60342 | 2,370793488 | ENST00000377304 | 221078    | NM_182543    | NSUN6        |
| A_22_P00018121 | 4,13905 | 2,89383 | 2,370547005 | N/A             | 400710    | NR_027257    | FLJ26850     |
| A_23_P156017   | 12,7004 | 11,4554 | 2,370185542 | ENST00000265070 | 64083     | NM_022130    | GOLPH3       |
| A_33_P3328087  | 2,74906 | 1,50497 | 2,368690986 | N/A             | N/A       | AF130075     | N/A          |
| A_21_P0009157  | 3,2702  | 2,02611 | 2,368690986 | ENST00000566971 | N/A       | N/A          | N/A          |
| A_33_P3235009  | 3,3066  | 2,06278 | 2,368247727 | N/A             | 91833     | NM_001242415 | WDR20        |
| A_23_P366328   | 11,3212 | 10,0774 | 2,368214897 | ENST00000521829 | 137492    | NM_152415    | VPS37A       |
| A_23_P250231   | 4,54847 | 3,30472 | 2,368132822 | ENST00000622000 | 56311     | NM_019644    | ANKRD7       |
| A_22_P00007510 | 2,93619 | 1,69255 | 2,367952268 | ENST00000512349 | N/A       | N/A          | N/A          |
| A_23_P46238    | 4,13958 | 2,89634 | 2,367295823 | ENST00000359621 | 63036     | NM_033440    | CELA2A       |
| A_21_P0002762  | 3,06911 | 1,82602 | 2,367049703 | ENST00000498624 | N/A       | N/A          | N/A          |
| A_22_P00000108 | 2,69593 | 1,45387 | 2,365360371 | ENST00000613353 | N/A       | M18205       | N/A          |
| A_23_P3681     | 12,1283 | 10,8864 | 2,365098059 | ENST00000562435 | 81831     | NM_018092    | NETO2        |
| A_33_P3484775  | 3,482   | 2,24051 | 2,364426016 | N/A             | N/A       | N/A          | N/A          |

|                |         |         |             |                 |           |              |               |
|----------------|---------|---------|-------------|-----------------|-----------|--------------|---------------|
| A_21_P0002417  | 3,47108 | 2,22966 | 2,364311296 | N/A             | N/A       | N/A          | Inc-CAPN13-2  |
| A_21_P0000296  | 8,25835 | 7,01695 | 2,36427852  | N/A             | 26785     | NR_002913    | SNORD63       |
| A_33_P3386067  | 2,74925 | 1,50792 | 2,364163807 | ENST00000440978 | 253738    | XM_006717739 | EBF3          |
| A_24_P104119   | 8,69195 | 7,45105 | 2,363459266 | ENST00000267205 | 54509     | NM_019034    | RHOF          |
| A_21_P0013408  | 2,91805 | 1,67729 | 2,363229925 | ENST00000493400 | 100134040 | XR_252345    | LOC100134040  |
| A_22_P00005445 | 2,89854 | 1,65784 | 2,363131643 | N/A             | 100268168 | NR_026683    | LOC100268168  |
| A_33_P3359953  | 6,80751 | 5,56688 | 2,363016986 | N/A             | 100131825 | NR_037870    | CADM3-AS1     |
| A_21_P0012292  | 2,90299 | 1,66242 | 2,362918713 | ENST00000610688 | 388882    | NR_110539    | LOC388882     |
| A_21_P0006575  | 2,88993 | 1,64944 | 2,362787689 | N/A             | N/A       | N/A          | Inc-ATXN3L-3  |
| A_23_P254254   | 9,49926 | 8,25901 | 2,362394659 | ENST00000571156 | 6448      | NM_000199    | SGSH          |
| A_21_P0003639  | 2,82708 | 1,58695 | 2,362198169 | N/A             | N/A       | N/A          | Inc-UGT8-3    |
| A_23_P160200   | 6,38382 | 5,14417 | 2,361412371 | ENST00000469416 | 65243     | NM_023070    | ZFP69B        |
| A_19_P00322339 | 5,52499 | 4,28545 | 2,361232329 | ENST00000436383 | 100507127 | NR_038291    | LINC00707     |
| A_22_P00000640 | 3,14173 | 1,90229 | 2,361068667 | ENST00000439581 | 2182      | W90270       | ACSL4         |
| A_23_P125233   | 3,51215 | 2,27272 | 2,361052301 | ENST00000252456 | 1264      | NM_001299    | CNN1          |
| A_22_P00004051 | 4,21007 | 2,97111 | 2,360283245 | N/A             | N/A       | N/A          | Inc-CHST15-1  |
| A_33_P3733115  | 2,88578 | 1,64694 | 2,36008693  | N/A             | N/A       | AK124496     | N/A           |
| A_24_P915196   | 10,3023 | 9,0641  | 2,359040194 | ENST00000374049 | 203197    | NM_153045    | C9orf91       |
| A_21_P0001637  | 2,9831  | 1,74511 | 2,358696835 | N/A             | N/A       | N/A          | Inc-HIST3H3-1 |
| A_24_P389916   | 3,34282 | 2,10534 | 2,357863171 | ENST00000404995 | 2615      | NM_005512    | LRRC32        |
| A_22_P00019618 | 2,79561 | 1,55819 | 2,357765113 | ENST00000557687 | N/A       | DA749780     | N/A           |
| A_24_P941268   | 7,87774 | 6,64034 | 2,357732427 | ENST00000318636 | 11238     | NM_007220    | CA5B          |
| A_22_P00004866 | 2,73975 | 1,50246 | 2,357552666 | ENST00000522281 | N/A       | N/A          | N/A           |
| A_23_P160618   | 10,6407 | 9,40367 | 2,35712783  | ENST00000392306 | 9047      | NM_003975    | SH2D2A        |
| A_21_P0002407  | 2,66013 | 1,42321 | 2,356948115 | N/A             | N/A       | N/A          | Inc-FAM49A-1  |
| A_22_P00022366 | 4,59767 | 3,36075 | 2,356948115 | N/A             | N/A       | CD243761     | Inc-ALX4-7    |
| A_24_P305223   | 9,59459 | 8,35773 | 2,356850094 | ENST00000391403 | 64693     | NM_172241    | CTAGE1        |
| A_33_P3518572  | 9,50768 | 8,27109 | 2,356409052 | ENST00000547804 | 100287314 | NR_040245    | LINC00941     |
| A_33_P3333485  | 4,53876 | 3,30271 | 2,355527214 | N/A             | N/A       | N/A          | N/A           |
| A_33_P3240767  | 9,72063 | 8,48468 | 2,355363947 | ENST00000383817 | 63924     | NM_022094    | CIDEC         |
| A_22_P00004210 | 3,50226 | 2,26648 | 2,355086419 | N/A             | 100506462 | NR_037969    | SRD5A3-AS1    |
| A_22_P00021220 | 2,79648 | 1,56121 | 2,354254031 | N/A             | 102723642 | XR_428661    | LOC102723642  |
| A_22_P00003205 | 2,77696 | 1,542   | 2,353748214 | ENST00000476425 | 100505532 | NR_103854    | LINC01301     |

|                |         |         |             |                 |           |              |                  |
|----------------|---------|---------|-------------|-----------------|-----------|--------------|------------------|
| A_33_P3416218  | 3,59951 | 2,36525 | 2,352606445 | ENST00000414964 | 4584      | NM_005960    | MUC3A            |
| A_33_P3401980  | 2,88753 | 1,65355 | 2,352149893 | ENST00000587564 | 399473    | NR_073032    | SPRED3           |
| A_24_P484797   | 9,00141 | 7,76751 | 2,352019465 | ENST00000424471 | 152302    | NR_002786    | CIDECF           |
| A_23_P125748   | 2,73623 | 1,5027  | 2,351416333 | ENST00000488347 | 84460     | NM_001282400 | ZMAT1            |
| A_23_P134058   | 7,34595 | 6,11296 | 2,350536364 | ENST00000379278 | 54438     | NM_001242629 | GFOD1            |
| A_33_P3258127  | 3,44201 | 2,20923 | 2,350194243 | ENST00000616273 | 10846     | AY203946     | PDE10A           |
| A_22_P00008615 | 2,85213 | 1,61959 | 2,349803308 | N/A             | N/A       | BC038775     | Inc-KDM5B-1      |
| A_23_P11160    | 8,88261 | 7,65046 | 2,349168178 | ENST00000370663 | 79649     | NM_024597    | MAP7D3           |
| A_21_P0005013  | 2,88616 | 1,65461 | 2,348191389 | N/A             | N/A       | N/A          | Inc-CMAHP-1      |
| A_33_P3293773  | 6,73367 | 5,50217 | 2,348110008 | ENST00000343098 | 401024    | NM_173651    | FSIP2            |
| A_23_P36972    | 4,82273 | 3,59167 | 2,34739398  | ENST00000376335 | 7546      | NM_007129    | ZIC2             |
| A_33_P3305617  | 4,83886 | 3,60816 | 2,346808301 | ENST00000617024 | 165679    | BC130565     | SPTSSB           |
| A_22_P00017814 | 3,39075 | 2,16008 | 2,346759501 | N/A             | N/A       | N/A          | Inc-ZBTB4-2      |
| A_22_P00018593 | 4,04455 | 2,81405 | 2,346482987 | N/A             | N/A       | N/A          | Inc-TLCD1-1      |
| A_21_P0004818  | 5,03154 | 3,80157 | 2,345621122 | N/A             | N/A       | N/A          | Inc-WRNIP1-2     |
| A_23_P35912    | 15,8949 | 14,6652 | 2,345182181 | ENST00000533730 | 837       | NM_033306    | CASP4            |
| A_33_P3256680  | 6,47388 | 5,24459 | 2,344515797 | ENST00000276282 | 9258      | NM_004225    | MFHAS1           |
| A_23_P35796    | 10,0856 | 8,85634 | 2,344467045 | ENST00000164133 | 5526      | NM_006244    | PPP2R5B          |
| A_21_P0013799  | 3,464   | 2,23482 | 2,344337044 | N/A             | N/A       | N/A          | XLOC_I2_015641   |
| A_22_P00015316 | 4,64196 | 3,41295 | 2,344060815 | N/A             | N/A       | DA090619     | Inc-SPOP-1       |
| A_22_P00012089 | 7,49904 | 6,27017 | 2,343833357 | N/A             | N/A       | XM_005276020 | Inc-PMP2-1       |
| A_33_P3276703  | 10,9405 | 9,71165 | 2,343800865 | ENST00000445482 | 7425      | NM_003378    | VGF              |
| A_21_P0005558  | 2,82269 | 1,594   | 2,343540943 | N/A             | N/A       | N/A          | Inc-RAMP3-1      |
| A_21_P0009442  | 3,43622 | 2,20766 | 2,343329778 | ENST00000578664 | 100505592 | NR_110429    | LINC01540        |
| A_33_P3407235  | 4,10375 | 2,87579 | 2,342355418 | N/A             | N/A       | N/A          | N/A              |
| A_24_P186216   | 9,19904 | 7,97203 | 2,340813508 | ENST00000503396 | 23244     | NM_001100400 | PDS5A            |
| A_22_P00023254 | 2,79508 | 1,56851 | 2,340099705 | N/A             | 100873946 | NR_046653    | VAV3-AS1         |
| A_21_P0001284  | 3,76761 | 2,54112 | 2,339969946 | N/A             | N/A       | N/A          | Inc-AL591845.1-2 |
| A_21_P0010645  | 3,48934 | 2,2631  | 2,339564495 | N/A             | N/A       | N/A          | XLOC_I2_001076   |
| A_22_P00004263 | 5,858   | 4,63208 | 2,33904562  | N/A             | N/A       | N/A          | Inc-CMTM3-1      |
| A_21_P0009299  | 3,18977 | 1,96406 | 2,338705171 | N/A             | 100506974 | XR_111668    | LOC100506974     |
| A_21_P0007811  | 3,72144 | 2,49599 | 2,338283732 | N/A             | N/A       | N/A          | Inc-DDX51-5      |
| A_22_P00003016 | 3,14007 | 1,91472 | 2,33812166  | N/A             | 285954    | NR_027119    | INHBA-AS1        |

|                |         |         |             |                 |           |           |                  |
|----------------|---------|---------|-------------|-----------------|-----------|-----------|------------------|
| A_22_P00018133 | 3,33557 | 2,11067 | 2,337392476 | N/A             | N/A       | AK023961  | Inc-ZNF503-AS2-1 |
| A_21_P0005333  | 4,36806 | 3,14317 | 2,337376274 | N/A             | N/A       | N/A       | Inc-PAX4-1       |
| A_24_P18146    | 6,00019 | 4,77539 | 2,337230466 | ENST00000286485 | 23362     | NM_015310 | PSD3             |
| A_32_P415151   | 7,18346 | 5,95867 | 2,337214265 | ENST00000423258 | 253769    | NM_182552 | WDR27            |
| A_24_P88850    | 6,78175 | 5,55744 | 2,336436779 | ENST00000289104 | 22808     | NM_012219 | MRAS             |
| A_21_P0000254  | 9,40433 | 8,18021 | 2,336129095 | N/A             | 9298      | NR_002560 | SNORD31          |
| A_33_P3369631  | 11,7365 | 10,5124 | 2,336096709 | ENST00000261868 | 8669      | NM_003758 | EIF3J            |
| A_32_P193080   | 11,6716 | 10,4475 | 2,336096709 | ENST00000288670 | 114793    | NM_052905 | FMNL2            |
| A_33_P3315659  | 4,47507 | 3,252   | 2,334429468 | N/A             | N/A       | N/A       | N/A              |
| A_22_P00005566 | 2,69273 | 1,46974 | 2,334300023 | ENST00000524011 | N/A       | N/A       | N/A              |
| A_21_P0005653  | 5,39136 | 4,16838 | 2,334283843 | ENST00000417333 | 101929128 | NR_125431 | LOC101929128     |
| A_33_P3297415  | 8,95835 | 7,73539 | 2,334251484 | ENST00000483917 | 8828      | NM_201264 | NRP2             |
| A_21_P0000211  | 12,1252 | 10,9024 | 2,333992621 | ENST00000491035 | 26778     | NR_000011 | SNORA70          |
| A_22_P00003080 | 8,23384 | 7,01113 | 2,333847024 | N/A             | N/A       | AK125733  | Inc-C8orf56-1    |
| A_23_P253536   | 5,83586 | 4,61327 | 2,333652908 | ENST00000415167 | 4883      | NM_000908 | NPR3             |
| A_24_P254744   | 2,67609 | 1,4536  | 2,333491157 | ENST00000452448 | 2042      | NM_182644 | EPHA3            |
| A_23_P57658    | 7,99442 | 6,77212 | 2,333183861 | ENST00000264735 | 57110     | NM_020386 | HRASLS           |
| A_33_P3234593  | 4,1236  | 2,90154 | 2,332795756 | ENST00000401491 | 29117     | N/A       | BRD7             |
| A_23_P161918   | 13,9874 | 12,7658 | 2,332052068 | ENST00000227520 | 79080     | NM_024098 | CCDC86           |
| A_22_P00006127 | 2,82958 | 1,60828 | 2,331567182 | N/A             | N/A       | BC043379  | Inc-FAM174B-5    |
| A_22_P00013901 | 2,74727 | 1,52623 | 2,331147028 | N/A             | N/A       | N/A       | Inc-RPS24-1      |
| A_21_P0012264  | 9,4297  | 8,20871 | 2,331066238 | ENST00000382734 | 1416      | NR_033734 | CRYBB2P1         |
| A_21_P0002836  | 3,43217 | 2,21132 | 2,330840041 | ENST00000455703 | N/A       | N/A       | N/A              |
| A_22_P00000804 | 3,19012 | 1,97031 | 2,329160407 | N/A             | N/A       | N/A       | Inc-AF127577.1-3 |
| A_33_P3375077  | 4,64991 | 3,43102 | 2,327675586 | ENST00000532330 | 27154     | NM_015695 | BRPF3            |
| A_23_P202737   | 9,71496 | 8,49645 | 2,327062566 | ENST00000332349 | 8690      | NM_003772 | JRKL             |
| A_21_P0006504  | 6,70595 | 5,48772 | 2,326610971 | N/A             | 102723911 | XR_426531 | LOC102723911     |
| A_23_P49988    | 5,52174 | 4,30366 | 2,326369081 | ENST00000377726 | 85291     | NM_033062 | KRTAP4-2         |
| A_22_P00024164 | 11,7031 | 10,4852 | 2,326078846 | ENST00000559946 | N/A       | N/A       | N/A              |
| A_24_P27977    | 9,56803 | 8,3502  | 2,325965987 | ENST00000621064 | 7226      | NM_003307 | TRPM2            |
| A_23_P98147    | 2,68178 | 1,46407 | 2,325772526 | ENST00000441382 | 1369      | NM_001308 | CPN1             |
| A_23_P25194    | 10,6107 | 9,39304 | 2,325691923 | ENST00000552092 | 8739      | NM_003806 | HRK              |
| A_22_P00019003 | 3,76361 | 2,546   | 2,325611322 | N/A             | 101927868 | XR_246196 | GRK5-IT1         |

|                |         |         |             |                 |           |              |                |
|----------------|---------|---------|-------------|-----------------|-----------|--------------|----------------|
| A_21_P0000286  | 8,69759 | 7,4801  | 2,325417891 | N/A             | 26801     | NR_002745    | SNORD48        |
| A_22_P00005819 | 5,57861 | 4,36146 | 2,324869924 | N/A             | N/A       | BQ723166     | Inc-EPS8L2-1   |
| A_24_P16143    | 3,54325 | 2,32625 | 2,324628215 | ENST00000343366 | 389118    | NM_001007540 | CDHR4          |
| A_23_P5460     | 2,76658 | 1,54959 | 2,324612102 | ENST00000295727 | 54738     | NM_017521    | FEV            |
| A_21_P0009343  | 2,89299 | 1,67605 | 2,324531538 | N/A             | 103689912 | NR_125749    | TBX2-AS1       |
| A_33_P3304655  | 6,7157  | 5,49905 | 2,324064325 | ENST00000404816 | 4052      | NM_206943    | LTBP1          |
| A_33_P3286616  | 9,75489 | 8,53845 | 2,323726057 | ENST00000369973 | 3654      | NM_001569    | IRAK1          |
| A_23_P71053    | 8,78657 | 7,57019 | 2,323629418 | ENST00000464384 | 51678     | NM_016447    | MPP6           |
| A_21_P0006833  | 3,0883  | 1,87244 | 2,322792048 | N/A             | N/A       | N/A          | Inc-ITIH2-1    |
| A_21_P0009039  | 3,28693 | 2,07146 | 2,322164218 | N/A             | 102723429 | XR_424706    | LOC102723429   |
| A_33_P3409746  | 5,2676  | 4,05252 | 2,321536559 | ENST00000379011 | 100131378 | NM_001166692 | C11orf91       |
| A_22_P00003089 | 2,70772 | 1,49277 | 2,321327376 | N/A             | 101929229 | NR_125432    | LOC101929229   |
| A_33_P3279362  | 2,70921 | 1,49456 | 2,32084472  | N/A             | 642976    | NR_027021    | GRIK1-AS1      |
| A_22_P00023159 | 3,1428  | 1,92892 | 2,319606362 | N/A             | 101929106 | NR_110052    | LOC101929106   |
| A_22_P00015059 | 8,55015 | 7,33659 | 2,319091913 | ENST00000577906 | N/A       | N/A          | N/A            |
| A_24_P12690    | 2,64855 | 1,4352  | 2,318754369 | ENST00000343295 | 169355    | NM_194294    | IDO2           |
| A_21_P0009614  | 3,16926 | 1,95592 | 2,318738297 | N/A             | N/A       | N/A          | Inc-TSHZ1-1    |
| A_21_P0013367  | 3,00225 | 1,78913 | 2,318384734 | ENST00000443874 | N/A       | XR_432118    | N/A            |
| A_21_P0000370  | 9,14049 | 7,92808 | 2,317244057 | N/A             | 692075    | NR_003036    | SNORD6         |
| A_22_P00018204 | 2,66841 | 1,45613 | 2,317035262 | ENST00000547523 | N/A       | N/A          | N/A            |
| A_22_P00021340 | 3,64892 | 2,43675 | 2,316858603 | ENST00000315396 | 93233     | NM_144577    | CCDC114        |
| A_21_P0012886  | 10,5142 | 9,30244 | 2,316200268 | N/A             | N/A       | N/A          | XLOC_I2_011911 |
| A_23_P27584    | 12,622  | 11,4103 | 2,316103942 | ENST00000391771 | 91663     | NM_001020818 | MYADM          |
| A_23_P23356    | 10,3013 | 9,0897  | 2,315943408 | ENST00000366932 | 51018     | NM_016052    | RRP15          |
| A_23_P205216   | 9,65825 | 8,44736 | 2,314803932 | ENST00000394422 | 10813     | NM_006649    | UTP14A         |
| A_24_P110831   | 7,76925 | 6,55894 | 2,313873509 | ENST00000316296 | 55107     | AK097619     | ANO1           |
| A_33_P3379396  | 2,94402 | 1,73372 | 2,313857471 | ENST00000252244 | 3848      | NM_006121    | KRT1           |
| A_23_P216023   | 4,74087 | 3,53187 | 2,311773413 | ENST00000517746 | 284       | NM_001146    | ANGPT1         |
| A_22_P00019830 | 3,11345 | 1,90445 | 2,311773413 | N/A             | 80279     | NM_001278197 | CDK5RAP3       |
| A_21_P0013098  | 2,61832 | 1,40934 | 2,311741365 | ENST00000418837 | 101928304 | NR_125855    | LOC101928304   |
| A_24_P942112   | 6,04788 | 4,83905 | 2,311501021 | N/A             | 84172     | AK001678     | POLR1B         |
| A_33_P3274194  | 3,95019 | 2,7414  | 2,311436934 | ENST00000382148 | 80333     | NM_001035003 | KCNIP4         |
| A_22_P00006838 | 9,40762 | 8,19884 | 2,311420912 | N/A             | N/A       | BG196409     | Inc-GADD45A-2  |



|                |         |         |             |                 |           |              |              |
|----------------|---------|---------|-------------|-----------------|-----------|--------------|--------------|
| A_19_P00321383 | 4,25689 | 3,04828 | 2,311148562 | ENST00000447430 | N/A       | N/A          | N/A          |
| A_33_P3494748  | 9,45736 | 8,24898 | 2,310780139 | ENST00000297632 | 157378    | NM_194291    | TMEM65       |
| A_32_P35800    | 10,5969 | 9,389   | 2,310011446 | ENST00000296564 | 23379     | NM_015325    | ICE1         |
| A_21_P0005583  | 4,08614 | 2,8785  | 2,309595177 | N/A             | N/A       | N/A          | Inc-KRBA1-1  |
| A_33_P3316508  | 3,98758 | 2,78047 | 2,308746861 | ENST00000371436 | 860       | NM_001015051 | RUNX2        |
| A_23_P368779   | 6,2251  | 5,01799 | 2,308746861 | ENST00000600687 | 163071    | NM_153608    | ZNF114       |
| A_24_P101629   | 11,516  | 10,3095 | 2,307770884 | ENST00000522309 | 26071     | NM_001078172 | FAM127B      |
| A_23_P200222   | 10,9833 | 9,77712 | 2,307259061 | ENST00000306052 | 7804      | NM_033300    | LRP8         |
| A_22_P00021741 | 3,90839 | 2,70232 | 2,307083148 | N/A             | N/A       | AI208138     | Inc-INHBA-1  |
| A_22_P00008835 | 8,84906 | 7,64315 | 2,306827298 | ENST00000430033 | 100874155 | N/A          | LINC00392    |
| A_33_P3220837  | 7,0217  | 5,81605 | 2,306411603 | ENST00000373313 | 9935      | NM_005461    | MAFB         |
| A_23_P344853   | 10,7158 | 9,51032 | 2,306139843 | ENST00000407426 | 23160     | NM_015131    | WDR43        |
| A_24_P235266   | 12,7744 | 11,5692 | 2,305692308 | ENST00000403097 | 2887      | NM_001001555 | GRB10        |
| A_22_P00024176 | 2,86155 | 1,65667 | 2,305180946 | ENST00000399711 | 100996279 | NR_103715    | LINC00269    |
| A_23_P7423     | 14,4164 | 13,2119 | 2,304573851 | ENST00000513888 | 54888     | NM_017755    | NSUN2        |
| A_21_P0014029  | 2,90197 | 1,6975  | 2,304525929 | ENST00000521798 | 23514     | AF116680     | SPIDR        |
| A_21_P0009749  | 6,73194 | 5,52762 | 2,304286335 | ENST00000593292 | 7644      | N/A          | ZNF91        |
| A_22_P00016957 | 3,74519 | 2,54138 | 2,303471902 | ENST00000419347 | N/A       | N/A          | N/A          |
| A_33_P3384045  | 3,81003 | 2,60662 | 2,302833333 | N/A             | N/A       | AY176665     | Inc-NAT2-1   |
| A_33_P3354394  | 2,70214 | 1,49895 | 2,302482195 | ENST00000391618 | 386684    | NM_198698    | KRTAP12-4    |
| A_22_P00006358 | 4,56283 | 3,35992 | 2,30203537  | N/A             | N/A       | AK090760     | Inc-FARSB-1  |
| A_21_P0003472  | 2,99342 | 1,7911  | 2,301094129 | ENST00000504537 | N/A       | N/A          | N/A          |
| A_22_P00017410 | 2,79131 | 1,58926 | 2,30066352  | N/A             | 100874056 | NR_046504    | NLGN4Y-AS1   |
| A_22_P00014364 | 3,27386 | 2,07198 | 2,300392437 | N/A             | N/A       | BU568518     | Inc-SETD1B-1 |
| A_23_P36157    | 13,2057 | 12,0039 | 2,30026488  | ENST00000542347 | 54663     | NM_018093    | WDR74        |
| A_21_P0004581  | 3,21187 | 2,01015 | 2,30013733  | N/A             | N/A       | N/A          | Inc-FBXW11-2 |
| A_21_P0011402  | 4,00691 | 2,80544 | 2,299738781 | ENST00000569536 | N/A       | N/A          | N/A          |
| A_21_P0011508  | 3,87472 | 2,6737  | 2,299021567 | N/A             | 102723970 | XR_424787    | LOC102723970 |
| A_33_P3374957  | 13,1675 | 11,9674 | 2,297555959 | ENST00000617223 | 83855     | NM_031918    | KLF16        |
| A_23_P150198   | 2,65223 | 1,45214 | 2,297540034 | ENST00000530858 | 440040    | NR_027044    | LOC440040    |
| A_33_P3329922  | 2,721   | 1,52103 | 2,297348937 | ENST00000483242 | 414194    | NR_103829    | CCNYL2       |
| A_22_P00010151 | 2,78138 | 1,58145 | 2,297285242 | N/A             | N/A       | BX375149     | Inc-MRPL40-1 |
| A_19_P00802814 | 8,32859 | 7,1287  | 2,297221549 | ENST00000426753 | 729296    | NR_109916    | LOC729296    |

|                |         |         |             |                 |           |              |                |
|----------------|---------|---------|-------------|-----------------|-----------|--------------|----------------|
| A_33_P3312466  | 5,80945 | 4,60959 | 2,29717378  | ENST00000327705 | 153579    | NM_152547    | BTNL9          |
| A_24_P134195   | 8,81414 | 7,61458 | 2,296696146 | ENST00000391771 | 91663     | NM_001020818 | MYADM          |
| A_21_P0013336  | 2,64549 | 1,44686 | 2,295216111 | N/A             | N/A       | N/A          | XLOC_I2_013921 |
| A_23_P251075   | 9,46065 | 8,26215 | 2,2950093   | ENST00000464149 | 10046     | NM_005491    | MAMLD1         |
| A_33_P3248227  | 8,83068 | 7,6323  | 2,294818415 | ENST00000523328 | N/A       | M34432       | N/A            |
| A_24_P301846   | 10,4855 | 9,28719 | 2,294707072 | ENST00000467575 | 2618      | NM_175085    | GART           |
| A_22_P00019714 | 4,09368 | 2,89558 | 2,294373077 | N/A             | N/A       | CU691979     | Inc-SMG6-3     |
| A_23_P5831     | 9,11003 | 7,91193 | 2,294373077 | ENST00000419810 | 3241      | NM_134421    | HPCAL1         |
| A_23_P216225   | 5,18262 | 3,98456 | 2,294309464 | ENST00000317216 | 1960      | NM_004430    | EGR3           |
| A_33_P3368313  | 5,31251 | 4,11457 | 2,294118637 | ENST00000332374 | 4496      | NM_005951    | MT1H           |
| A_33_P3314121  | 2,98528 | 1,78761 | 2,293689333 | N/A             | N/A       | N/A          | N/A            |
| A_21_P0000153  | 7,94874 | 6,75128 | 2,293355486 | N/A             | 2908      | NM_001204265 | NR3C1          |
| A_23_P160720   | 5,93495 | 4,73778 | 2,292894539 | ENST00000478275 | 55509     | NM_018664    | BATF3          |
| A_33_P3220090  | 5,47476 | 4,27776 | 2,292624371 | ENST00000244576 | 346157    | NM_001076781 | ZNF391         |
| A_33_P3374338  | 4,29877 | 3,10234 | 2,291718748 | N/A             | N/A       | N/A          | XLOC_I2_013410 |
| A_22_P00019791 | 2,61239 | 1,41629 | 2,291194604 | ENST00000456477 | N/A       | N/A          | N/A            |
| A_22_P00021159 | 4,9539  | 3,75889 | 2,28946419  | N/A             | N/A       | N/A          | Inc-KLHDC9-1   |
| A_23_P305198   | 2,98563 | 1,791   | 2,288861234 | ENST00000450994 | 6775      | NM_003151    | STAT4          |
| A_23_P16523    | 16,3743 | 15,18   | 2,288337743 | ENST00000252809 | 9518      | NM_004864    | GDF15          |
| A_24_P683011   | 3,99336 | 2,79911 | 2,288258437 | ENST00000517562 | 100127983 | NM_001190972 | C8orf88        |
| A_33_P3405043  | 4,12091 | 2,92672 | 2,288163273 | N/A             | N/A       | N/A          | N/A            |
| A_22_P00010595 | 4,85176 | 3,65758 | 2,288147413 | N/A             | N/A       | N/A          | Inc-NDST1-1    |
| A_21_P0006377  | 4,79581 | 3,60175 | 2,287957098 | N/A             | N/A       | N/A          | Inc-LINGO2-2   |
| A_19_P00319655 | 4,53613 | 3,34228 | 2,287624085 | N/A             | 101928857 | N/A          | CTD-3080P12.3  |
| A_33_P3361182  | 9,12436 | 7,93055 | 2,287560659 | ENST00000369797 | 22984     | NM_014976    | PDCD11         |
| A_24_P56388    | 13,2145 | 12,0208 | 2,287386248 | ENST00000337138 | 3091      | NM_181054    | HIF1A          |
| A_21_P0006412  | 3,39284 | 2,20062 | 2,285040918 | ENST00000454113 | N/A       | N/A          | N/A            |
| A_21_P0011105  | 3,49907 | 2,30716 | 2,284549972 | ENST00000616042 | 100507055 | XM_006719731 | LRCOL1         |
| A_22_P00011927 | 3,42909 | 2,23734 | 2,284296621 | N/A             | N/A       | N/A          | Inc-PITRM1-3   |
| A_33_P3321382  | 6,61912 | 5,42789 | 2,283473425 | N/A             | N/A       | N/A          | N/A            |
| A_33_P3281785  | 5,39577 | 4,20482 | 2,283030289 | ENST00000380871 | 4824      | NM_006167    | NKX3-1         |
| A_24_P43810    | 8,96678 | 7,77605 | 2,282682171 | ENST00000522648 | 84985     | NM_207006    | FAM83A         |
| A_33_P3396404  | 2,9417  | 1,75104 | 2,282571417 | ENST00000378487 | 574016    | NM_001025232 | CLLU10S        |

|                |         |         |             |                 |           |              |                |
|----------------|---------|---------|-------------|-----------------|-----------|--------------|----------------|
| A_23_P142345   | 4,56773 | 3,37753 | 2,281843741 | ENST00000234347 | 5657      | NM_002777    | PRTN3          |
| A_21_P0007124  | 3,35176 | 2,16157 | 2,281827924 | ENST00000506329 | 101927495 | NR_110189    | LOC101927495   |
| A_22_P00002028 | 4,08076 | 2,89077 | 2,281511617 | N/A             | N/A       | N/A          | Inc-BEX1-1     |
| A_21_P0005468  | 3,30373 | 2,11388 | 2,281290229 | N/A             | N/A       | N/A          | Inc-RNF216-1   |
| A_21_P0013233  | 2,61629 | 1,42669 | 2,280894946 | N/A             | 285905    | N/A          | INTS4P1        |
| A_21_P0012689  | 4,29789 | 3,10834 | 2,280815897 | N/A             | N/A       | N/A          | XL0C_I2_011302 |
| A_33_P3275674  | 2,8538  | 1,66471 | 2,28008878  | ENST00000523153 | N/A       | N/A          | N/A            |
| A_24_P649747   | 12,0705 | 10,8817 | 2,2796305   | ENST00000443754 | 9790      | NM_014753    | BMS1           |
| A_22_P00019634 | 2,73848 | 1,5498  | 2,279440893 | N/A             | 101928200 | NR_120541    | MRGPRF-AS1     |
| A_23_P11262    | 14,5311 | 13,3426 | 2,279156513 | ENST00000622749 | 8263      | NM_012151    | F8A1           |
| A_33_P3382498  | 2,84714 | 1,65914 | 2,278366754 | ENST00000360844 | 100049587 | NM_001098612 | SIGLEC14       |
| A_21_P0009326  | 3,87209 | 2,68426 | 2,278098299 | N/A             | N/A       | N/A          | Inc-MEOX1-1    |
| A_22_P00008885 | 4,84903 | 3,66144 | 2,277719357 | ENST00000560651 | N/A       | XR_243223    | N/A            |
| A_24_P314451   | 6,97044 | 5,78328 | 2,277040576 | ENST00000360256 | 2157      | NM_000132    | F8             |
| A_33_P3405198  | 2,68611 | 1,49934 | 2,276425113 | ENST00000436808 | N/A       | N/A          | N/A            |
| A_24_P260443   | 4,92449 | 3,73777 | 2,276346219 | ENST00000511888 | 7060      | NM_003248    | THBS4          |
| A_22_P00025206 | 3,05253 | 1,86582 | 2,276330441 | N/A             | N/A       | BU561563     | Inc-ARHGAP10-1 |
| A_33_P3650353  | 5,55287 | 4,36631 | 2,276093778 | N/A             | 594839    | AI887274     | SNORA33        |
| A_23_P126278   | 2,62802 | 1,4416  | 2,275872916 | ENST00000484834 | 1118      | NM_003465    | CHIT1          |
| A_23_P30693    | 3,73228 | 2,5476  | 2,273129694 | ENST00000308192 | 5340      | NM_000301    | PLG            |
| A_33_P3324899  | 3,3415  | 2,1569  | 2,273003649 | N/A             | N/A       | N/A          | N/A            |
| A_21_P0000461  | 2,75575 | 1,57126 | 2,272830347 | N/A             | 100113380 | NR_003686    | SNORD125       |
| A_22_P00023095 | 2,82345 | 1,63916 | 2,272515288 | N/A             | N/A       | DB095685     | Inc-KIF15-1    |
| A_19_P00813436 | 2,94307 | 1,7588  | 2,272483785 | ENST00000501071 | 729506    | N/A          | LOC729506      |
| A_33_P3224070  | 6,74529 | 5,56114 | 2,272294772 | ENST00000514182 | 64651     | NM_033027    | CSRNP1         |
| A_21_P0001613  | 4,8068  | 3,62267 | 2,272263272 | N/A             | N/A       | N/A          | Inc-NUAK2-1    |
| A_32_P351037   | 2,76488 | 1,58091 | 2,272011284 | ENST00000410072 | 56171     | AK094515     | DNAH7          |
| A_23_P112241   | 9,59276 | 8,40888 | 2,271869553 | ENST00000541010 | 25822     | NM_012266    | DNAJB5         |
| A_23_P370162   | 7,41083 | 6,227   | 2,271790817 | ENST00000531849 | 143570    | NM_182969    | XRRA1          |
| A_21_P0000593  | 9,62454 | 8,44086 | 2,271554627 | N/A             | 100379141 | NR_033337    | SNORA70D       |
| A_33_P3296777  | 8,34464 | 7,161   | 2,271491647 | ENST00000333082 | 9491      | NM_006814    | PSMF1          |
| A_23_P125278   | 10,1093 | 8,92572 | 2,27139718  | ENST00000306621 | 6373      | NM_005409    | CXCL11         |
| A_21_P0009215  | 3,66326 | 2,47994 | 2,27098787  | N/A             | N/A       | N/A          | Inc-ALOX12-1   |

|                |         |         |             |                 |           |              |                |
|----------------|---------|---------|-------------|-----------------|-----------|--------------|----------------|
| A_21_P0002481  | 5,19716 | 4,0139  | 2,270893424 | N/A             | N/A       | N/A          | Inc-TGFBRAP1-3 |
| A_33_P3217731  | 2,66367 | 1,4807  | 2,270436991 | ENST00000376484 | 7088      | N/A          | TLE1           |
| A_24_P227211   | 7,83376 | 6,65093 | 2,270216678 | ENST00000394067 | 64837     | NM_022822    | KLC2           |
| A_22_P00001935 | 2,76113 | 1,57831 | 2,270200942 | ENST00000563190 | N/A       | N/A          | N/A            |
| A_21_P0007431  | 3,94112 | 2,75833 | 2,270153735 | N/A             | 101930264 | N/A          | LOC101930264   |
| A_23_P256581   | 9,45614 | 8,27361 | 2,269744648 | ENST00000369214 | 59336     | NM_021620    | PRDM13         |
| A_23_P252388   | 2,80397 | 1,62151 | 2,269634522 | ENST00000356031 | 79925     | NM_024867    | SPEF2          |
| A_23_P253395   | 7,3149  | 6,13283 | 2,269021061 | ENST00000617908 | 10497     | NM_006377    | UNC13B         |
| A_33_P3364864  | 11,5378 | 10,3559 | 2,268753706 | ENST00000393618 | 10135     | NM_005746    | NAMPT          |
| A_22_P00025954 | 7,0006  | 5,81874 | 2,268690804 | ENST00000431729 | 101929771 | NR_125989    | LOC101929771   |
| A_21_P0000764  | 3,48019 | 2,29861 | 2,268250537 | ENST00000452509 | 100505768 | NR_038324    | LINC01364      |
| A_21_P0011773  | 9,3784  | 8,1975  | 2,267181671 | ENST00000492393 | 65996     | XR_428866    | CENPBD1P1      |
| A_24_P937405   | 13,1729 | 11,992  | 2,267181671 | ENST00000280258 | 11098     | NM_007173    | PRSS23         |
| A_23_P146198   | 3,10938 | 1,92868 | 2,266867395 | ENST00000301645 | 1581      | NM_000780    | CYP7A1         |
| A_22_P00011766 | 3,21792 | 2,03732 | 2,266710273 | N/A             | 100507034 | NR_038284    | PITRM1-AS1     |
| A_23_P257003   | 11,4551 | 10,2747 | 2,266396062 | ENST00000376752 | 5125      | NM_006200    | PCSK5          |
| A_33_P3313552  | 3,09888 | 1,91854 | 2,266301807 | N/A             | N/A       | N/A          | N/A            |
| A_21_P0006265  | 4,31908 | 3,13878 | 2,266238973 | N/A             | N/A       | N/A          | Inc-SHB-1      |
| A_21_P0014800  | 3,43264 | 2,25241 | 2,266129017 | N/A             | 100507419 | NR_123723    | MMP25-AS1      |
| A_22_P00000277 | 2,67034 | 1,49026 | 2,265893415 | ENST00000419447 | 25812     | NR_024591    | POM121L1P      |
| A_21_P0004725  | 2,65824 | 1,47831 | 2,265657838 | ENST00000415575 | N/A       | N/A          | N/A            |
| A_22_P00018893 | 3,05535 | 1,8755  | 2,265532206 | N/A             | N/A       | N/A          | Inc-C2CD2-1    |
| A_24_P235049   | 11,9494 | 10,7697 | 2,265296666 | ENST00000611279 | 25902     | NM_015440    | MTHFD1L        |
| A_21_P0011387  | 11,8778 | 10,6981 | 2,265296666 | ENST00000560500 | N/A       | N/A          | N/A            |
| A_23_P7048     | 3,05655 | 1,87686 | 2,265280965 | ENST00000515342 | 10141     | NR_126518    | LINC01587      |
| A_24_P81965    | 8,14812 | 6,96862 | 2,264982651 | ENST00000245304 | 5911      | NM_021033    | RAP2A          |
| A_22_P00004183 | 3,49778 | 2,31853 | 2,264590194 | ENST00000523178 | N/A       | N/A          | N/A            |
| A_23_P340722   | 13,5296 | 12,3509 | 2,263727026 | ENST00000449426 | 11260     | NM_007235    | XPOT           |
| A_19_P00809382 | 4,58003 | 3,40141 | 2,263601502 | ENST00000267197 | 23067     | NM_015048    | SETD1B         |
| A_21_P0004748  | 7,73467 | 6,55611 | 2,263507364 | ENST00000424283 | N/A       | N/A          | N/A            |
| A_23_P75811    | 14,1845 | 13,0062 | 2,263099475 | ENST00000537508 | 6520      | NM_001012662 | SLC3A2         |
| A_23_P165380   | 4,19965 | 3,02157 | 2,262754396 | ENST00000304502 | 1418      | NM_014617    | CRYGA          |
| A_33_P3268005  | 8,15742 | 6,97942 | 2,262628926 | ENST00000476484 | 158293    | XM_005251736 | FAM120AOS      |

|                |         |         |             |                 |           |              |             |
|----------------|---------|---------|-------------|-----------------|-----------|--------------|-------------|
| A_23_P344037   | 9,00704 | 7,8291  | 2,262534828 | ENST00000544093 | 55743     | NM_018223    | CHFR        |
| A_21_P0003265  | 2,98456 | 1,80683 | 2,262205515 | N/A             | N/A       | N/A          | Inc-TTC14-2 |
| A_23_P377664   | 8,43428 | 7,25672 | 2,261938964 | ENST00000467448 | 57679     | NM_001135745 | ALS2        |
| A_23_P406702   | 10,8236 | 9,64633 | 2,261484331 | ENST00000236925 | 23271     | NM_203459    | CAMSAP2     |
| A_33_P6803961  | 7,60816 | 6,4312  | 2,260998445 | N/A             | 317648    | NR_015453    | NOP14-AS1   |
| A_33_P3423401  | 8,75113 | 7,57461 | 2,26030898  | ENST00000356725 | 388536    | W87749       | ZNF790      |
| A_21_P0010293  | 6,36435 | 5,18799 | 2,260058318 | N/A             | N/A       | N/A          | Inc-SIK1-4  |
| A_22_P00010659 | 2,85093 | 1,67469 | 2,259870339 | N/A             | N/A       | N/A          | Inc-NEK6-1  |
| A_23_P146066   | 7,09931 | 5,92308 | 2,259854675 | ENST00000388798 | 6674      | NM_003114    | SPAG1       |
| A_33_P3257703  | 3,98541 | 2,80941 | 2,259494429 | ENST00000421362 | 138724    | NM_203299    | C9orf131    |
| A_33_P3739260  | 5,92773 | 4,75173 | 2,259494429 | ENST00000616440 | 10486     | NM_006366    | CAP2        |
| A_23_P216052   | 10,8981 | 9,72213 | 2,259447445 | ENST00000518448 | 84985     | NM_032899    | FAM83A      |
| A_24_P321411   | 10,8869 | 9,71101 | 2,259322158 | ENST00000529901 | 5612      | NM_004705    | PRKRIR      |
| A_23_P416036   | 9,58466 | 8,40953 | 2,258132279 | ENST00000437046 | 55559     | NM_017518    | HAUS7       |
| A_23_P161634   | 12,3741 | 11,1992 | 2,257772307 | ENST00000524647 | 80198     | NM_025128    | MUS81       |
| A_22_P00006736 | 4,5554  | 3,38051 | 2,257756658 | ENST00000374720 | 23446     | NM_080546    | SLC44A1     |
| A_24_P248741   | 5,03941 | 3,86456 | 2,25769406  | ENST00000620116 | 115560    | NM_145044    | ZNF501      |
| A_33_P3271652  | 2,67813 | 1,50337 | 2,257553222 | ENST00000357223 | 84439     | NM_032425    | HHIPL1      |
| A_24_P234838   | 7,09193 | 5,91749 | 2,257052537 | ENST00000287008 | 5097      | NM_032420    | PCDH1       |
| A_23_P356330   | 10,3987 | 9,22485 | 2,256129688 | ENST00000468151 | 27351     | NM_015704    | DESI1       |
| A_33_P3215093  | 6,64221 | 5,46857 | 2,255801308 | ENST00000373502 | 53344     | NM_001039840 | CHIC1       |
| A_23_P38677    | 10,9628 | 9,78918 | 2,255770036 | ENST00000440960 | 10650     | NM_006553    | SLMO1       |
| A_33_P3219711  | 4,50709 | 3,33356 | 2,255629318 | ENST00000448413 | 285362    | XM_006713118 | SUMF1       |
| A_21_P0000077  | 4,6221  | 3,44882 | 2,255238481 | ENST00000488595 | 199221    | NM_001170538 | DZIP1L      |
| A_33_P3269373  | 2,74584 | 1,5728  | 2,254863342 | N/A             | N/A       | N/A          | N/A         |
| A_33_P3364379  | 12,305  | 11,132  | 2,254800824 | ENST00000376901 | 10897     | NM_001300861 | YIF1A       |
| A_22_P00014957 | 4,63043 | 3,45824 | 2,253535223 | N/A             | N/A       | N/A          | Inc-SLTM-3  |
| A_23_P142310   | 16,462  | 15,2902 | 2,252926113 | ENST00000250896 | 2872      | NM_017572    | MKNK2       |
| A_21_P0011451  | 4,69584 | 3,52409 | 2,252848034 | ENST00000569465 | 100507321 | NR_040023    | ERVK13-1    |
| A_23_P148047   | 13,202  | 12,0304 | 2,252613813 | ENST00000302472 | 5734      | NM_000958    | PTGER4      |
| A_33_P3282354  | 3,88436 | 2,71305 | 2,252161055 | N/A             | N/A       | N/A          | N/A         |
| A_21_P0011262  | 6,19338 | 5,02216 | 2,252020562 | ENST00000557256 | 23214     | NM_001270940 | XPO6        |
| A_33_P3253420  | 2,93082 | 1,75967 | 2,251911296 | N/A             | N/A       | N/A          | N/A         |

|                |         |         |             |                 |           |              |                |
|----------------|---------|---------|-------------|-----------------|-----------|--------------|----------------|
| A_24_P8088     | 11,1874 | 10,0168 | 2,251052961 | ENST00000379834 | 83732     | NM_153005    | RIOK1          |
| A_21_P0014427  | 9,27752 | 8,10693 | 2,251037358 | N/A             | N/A       | AK057177     | Inc-CHADL-1    |
| A_23_P58390    | 10,6089 | 9,43883 | 2,250226148 | ENST00000309733 | 132720    | NM_152400    | C4orf32        |
| A_21_P0011747  | 2,71571 | 1,5458  | 2,249976604 | ENST00000401445 | 90273     | NM_001288773 | CEACAM21       |
| A_21_P0000485  | 5,70126 | 4,53142 | 2,249867437 | N/A             | 692197    | NR_003943    | SNORD77        |
| A_23_P20683    | 11,8568 | 10,687  | 2,249805059 | ENST00000382032 | 9933      | NM_014878    | KIAA0020       |
| A_33_P3253892  | 3,05066 | 1,88097 | 2,249633526 | N/A             | N/A       | N/A          | N/A            |
| A_33_P3358183  | 3,27677 | 2,1075  | 2,248978704 | ENST00000497923 | 5737      | NM_000959    | PTGFR          |
| A_21_P0002160  | 6,03399 | 4,86476 | 2,24891635  | N/A             | N/A       | N/A          | Inc-RPS7-1     |
| A_22_P00004873 | 8,43229 | 7,26308 | 2,248885174 | N/A             | N/A       | N/A          | Inc-CYP7B1-6   |
| A_23_P204980   | 11,9693 | 10,8001 | 2,248869585 | ENST00000376747 | 55757     | NM_020121    | UGGT2          |
| A_21_P0010423  | 3,92825 | 2,75922 | 2,248604605 | N/A             | N/A       | N/A          | Inc-TBC1D22A-1 |
| A_32_P46840    | 10,976  | 9,80697 | 2,248604605 | N/A             | 729680    | AK090664     | LOC729680      |
| A_19_P00321009 | 10,7679 | 9,59917 | 2,24813707  | ENST00000443364 | 100505633 | NR_038849    | LINC01133      |
| A_33_P3402294  | 3,6156  | 2,44717 | 2,247669632 | N/A             | N/A       | N/A          | N/A            |
| A_19_P00803360 | 8,7473  | 7,57906 | 2,247373638 | ENST00000602367 | 730101    | NR_024403    | LOC730101      |
| A_22_P00002714 | 4,78508 | 3,61754 | 2,24628347  | ENST00000437035 | N/A       | N/A          | N/A            |
| A_23_P217968   | 9,64664 | 8,47925 | 2,246049931 | ENST00000405515 | 51111     | NM_016028    | SUV420H1       |
| A_32_P506854   | 2,66984 | 1,50248 | 2,246003226 | N/A             | N/A       | BX090980     | Inc-AP1S2-2    |
| A_22_P00012026 | 3,29869 | 2,13161 | 2,245567361 | N/A             | N/A       | N/A          | Inc-PLEKHA3-2  |
| A_23_P137578   | 9,84299 | 8,67594 | 2,245520667 | ENST00000366862 | 23219     | NM_015176    | FBXO28         |
| A_24_P51322    | 7,33822 | 6,17117 | 2,245520667 | ENST00000368799 | 2312      | NM_002016    | FLG            |
| A_22_P00000868 | 7,81574 | 6,64882 | 2,245318334 | N/A             | 100505942 | NR_104656    | LOC100505942   |
| A_33_P3242623  | 14,3322 | 13,1653 | 2,245287207 | ENST00000280612 | 23657     | NM_014331    | SLC7A11        |
| A_33_P3334250  | 6,56039 | 5,3935  | 2,245271644 | ENST00000512519 | N/A       | N/A          | N/A            |
| A_24_P325046   | 7,46988 | 6,303   | 2,245256081 | ENST00000322831 | 84186     | AK126219     | ZCCHC7         |
| A_21_P0001176  | 2,80567 | 1,63887 | 2,245131581 | ENST00000425109 | 101928979 | NR_125967    | LOC101928979   |
| A_21_P0000185  | 2,99214 | 1,82549 | 2,244898162 | N/A             | 100505549 | NM_001242804 | LOC100505549   |
| A_22_P00019989 | 3,92955 | 2,763   | 2,244742563 | N/A             | 100874355 | NR_046803    | ARHGFE9-IT1    |
| A_33_P3238866  | 11,3981 | 10,2317 | 2,244509185 | ENST00000456312 | 51119     | NM_016038    | SBDS           |
| A_23_P11295    | 11,8445 | 10,6785 | 2,243886961 | ENST00000369479 | 100272147 | NM_001018024 | CMC4           |
| A_33_P3222341  | 7,98015 | 6,81444 | 2,243435957 | ENST00000299954 | 26207     | NM_012417    | PITPNC1        |
| A_22_P00011213 | 3,32856 | 2,16337 | 2,242627486 | N/A             | 101929198 | NR_046726    | ATP13A4-AS1    |

|                |         |         |             |                 |           |              |                |
|----------------|---------|---------|-------------|-----------------|-----------|--------------|----------------|
| A_21_P0011016  | 13,1223 | 11,9572 | 2,242487588 | ENST00000532441 | 643733    | N/A          | LOC643733      |
| A_21_P0002217  | 3,41278 | 2,24775 | 2,242378785 | N/A             | 102724072 | XR_425401    | LOC102724072   |
| A_24_P86240    | 7,38526 | 6,22039 | 2,242130111 | ENST00000335016 | 55589     | NM_198892    | BMP2K          |
| A_23_P143535   | 8,7733  | 7,6085  | 2,242021324 | ENST00000330317 | 10785     | NM_033661    | WDR4           |
| A_21_P0013138  | 2,7576  | 1,59319 | 2,241415326 | N/A             | 101928519 | NR_110860    | LOC101928519   |
| A_22_P00002426 | 3,37292 | 2,20866 | 2,241182294 | ENST00000549515 | N/A       | BG197190     | N/A            |
| A_22_P00024618 | 2,65688 | 1,49263 | 2,241166759 | N/A             | N/A       | N/A          | Inc-COQ9-1     |
| A_23_P24031    | 3,07561 | 1,91136 | 2,241166759 | ENST00000467928 | 3195      | NM_005521    | TLX1           |
| A_33_P3354414  | 5,59314 | 4,42913 | 2,24079396  | ENST00000465297 | 316       | NM_001159    | AOX1           |
| A_33_P3705907  | 11,0787 | 9,91478 | 2,240654177 | ENST00000447172 | 85395     | NM_058190    | FAM207A        |
| A_22_P00021786 | 2,80356 | 1,63969 | 2,240576523 | ENST00000531034 | N/A       | AI150223     | N/A            |
| A_21_P0008721  | 3,30864 | 2,14533 | 2,239706984 | N/A             | N/A       | N/A          | Inc-MEIS2-4    |
| A_33_P3227793  | 9,42818 | 8,26489 | 2,239675935 | ENST00000312734 | 10669     | NM_006569    | CGREF1         |
| A_21_P0010847  | 8,62502 | 7,46186 | 2,239474129 | ENST00000435712 | 119437    | NR_044994    | CTAGE7P        |
| A_24_P299685   | 7,9182  | 6,75578 | 2,238325733 | ENST00000487038 | 10630     | NM_198389    | PDPN           |
| A_33_P3417650  | 7,24878 | 6,08647 | 2,238155075 | ENST00000391805 | 5655      | NM_002776    | KLK10          |
| A_33_P3318237  | 7,51285 | 6,35057 | 2,238108535 | ENST00000528530 | 5526      | NM_006244    | PPP2R5B        |
| A_24_P283341   | 8,19375 | 7,0316  | 2,23790687  | ENST00000358577 | 64780     | NM_022765    | MICAL1         |
| A_23_P218597   | 8,51195 | 7,34985 | 2,237829311 | ENST00000474550 | 4862      | NM_002518    | NPAS2          |
| A_32_P188825   | 2,84362 | 1,68156 | 2,237767266 | ENST00000421545 | 91646     | NM_001110822 | TDRD12         |
| A_21_P0014234  | 8,99773 | 7,83569 | 2,237736244 | N/A             | N/A       | XR_171053    | Inc-CTSL1-1    |
| A_23_P24192    | 10,138  | 8,97596 | 2,237736244 | ENST00000370992 | 23223     | NM_015179    | RRP12          |
| A_21_P0000054  | 12,6926 | 11,5308 | 2,237364016 | ENST00000432901 | 100303755 | NM_001164811 | PET117         |
| A_21_P0005069  | 4,54916 | 3,38761 | 2,236976344 | N/A             | N/A       | N/A          | Inc-ULBP3-1    |
| A_22_P00006138 | 4,01818 | 2,85667 | 2,236914323 | N/A             | N/A       | N/A          | Inc-FAM184B-1  |
| A_33_P3320678  | 2,83487 | 1,67353 | 2,236650751 | ENST00000569347 | 283971    | NM_173619    | CLEC18C        |
| A_22_P00022411 | 4,04916 | 2,88791 | 2,236511226 | ENST00000505200 | N/A       | N/A          | N/A            |
| A_21_P0013116  | 4,68301 | 3,52209 | 2,235999708 | ENST00000435757 | 80350     | N/A          | LPAL2          |
| A_21_P0006361  | 2,83293 | 1,67231 | 2,235534794 | N/A             | N/A       | N/A          | Inc-COL15A1-1  |
| A_21_P0012695  | 3,58264 | 2,42232 | 2,235069976 | N/A             | N/A       | N/A          | XLOC_I2_011350 |
| A_21_P0007914  | 2,71591 | 1,55565 | 2,234977024 | ENST00000432701 | 400128    | NR_104174    | TUSC8          |
| A_22_P00005333 | 3,14251 | 1,9823  | 2,234899566 | ENST00000439593 | 29980     | N/A          | DONSON         |
| A_23_P96688    | 6,82062 | 5,66042 | 2,234884075 | ENST00000533271 | 51111     | NM_016028    | SUV420H1       |

|                |         |         |             |                 |           |              |                 |
|----------------|---------|---------|-------------|-----------------|-----------|--------------|-----------------|
| A_21_P0013514  | 12,0385 | 10,8785 | 2,234574276 | N/A             | N/A       | N/A          | XLOC_I2_014504  |
| A_21_P0005342  | 2,58879 | 1,42888 | 2,23443488  | ENST00000442017 | N/A       | N/A          | N/A             |
| A_23_P32903    | 11,6506 | 10,4911 | 2,233799966 | ENST00000371113 | 4952      | NM_000276    | OCRL            |
| A_22_P00018111 | 5,31699 | 4,15764 | 2,233567725 | ENST00000563695 | N/A       | BC071777     | N/A             |
| A_22_P00014035 | 3,31082 | 2,15164 | 2,233304548 | N/A             | 101928034 | NR_125947    | LOC101928034    |
| A_21_P0007331  | 2,71218 | 1,55301 | 2,233289068 | N/A             | N/A       | N/A          | Inc-MPPED2-2    |
| A_21_P0013031  | 2,79489 | 1,63586 | 2,233072359 | N/A             | N/A       | N/A          | XLOC_I2_012661  |
| A_21_P0006748  | 2,92715 | 1,7682  | 2,232948535 | ENST00000432530 | N/A       | XR_428642    | N/A             |
| A_33_P3359647  | 3,15836 | 1,9996  | 2,232654479 | ENST00000615600 | 4987      | NM_182647    | OPRL1           |
| A_23_P148057   | 12,2841 | 11,1255 | 2,232406884 | ENST00000371064 | 5114      | NM_016032    | ZDHHC9          |
| A_23_P311901   | 2,74483 | 1,58635 | 2,232221205 | ENST00000327245 | 23120     | NM_025153    | ATP10B          |
| A_21_P0014749  | 7,17463 | 6,01648 | 2,231710668 | N/A             | N/A       | N/A          | N/A             |
| A_21_P0013644  | 5,20022 | 4,04249 | 2,231061063 | N/A             | 102724507 | N/A          | LOC102724507    |
| A_32_P87013    | 5,18743 | 4,02989 | 2,230767256 | ENST00000307407 | 3576      | NM_000584    | CXCL8           |
| A_23_P416821   | 2,7519  | 1,59497 | 2,229824243 | ENST00000433641 | 256130    | NM_152774    | TMEM196         |
| A_33_P3362008  | 3,13001 | 1,97311 | 2,229777876 | ENST00000376468 | 4879      | NM_002521    | NPPB            |
| A_33_P3296074  | 13,8761 | 12,7192 | 2,229777876 | ENST00000306938 | 7690      | NM_001297548 | ZNF131          |
| A_22_P00024628 | 3,28542 | 2,12854 | 2,229746965 | ENST00000366312 | N/A       | N/A          | N/A             |
| A_22_P00002191 | 2,84583 | 1,68898 | 2,229700599 | N/A             | 104355143 | NR_126385    | TXNDC12-AS1     |
| A_21_P0007026  | 3,40266 | 2,24616 | 2,229159736 | N/A             | N/A       | N/A          | Inc-C10orf120-2 |
| A_22_P00025782 | 3,17542 | 2,01937 | 2,228464533 | ENST00000412360 | N/A       | N/A          | N/A             |
| A_23_P114947   | 12,3613 | 11,2056 | 2,22792397  | ENST00000235382 | 5997      | NM_002923    | RGS2            |
| A_23_P155147   | 8,75581 | 7,6003  | 2,227630576 | ENST00000216268 | 9889      | NM_014838    | ZBED4           |
| A_33_P3344044  | 2,51613 | 1,36091 | 2,227182839 | N/A             | N/A       | N/A          | N/A             |
| A_22_P00018299 | 4,43812 | 3,2831  | 2,226874107 | N/A             | N/A       | AL564257     | Inc-ZNF827-1    |
| A_33_P3342481  | 5,92809 | 4,77333 | 2,22647282  | N/A             | N/A       | N/A          | N/A             |
| A_22_P00009315 | 2,72589 | 1,57115 | 2,226441955 | ENST00000534059 | N/A       | XR_242870    | N/A             |
| A_33_P3295710  | 3,01708 | 1,86239 | 2,226364794 | ENST00000305051 | 81127     | NM_001005486 | OR4K15          |
| A_21_P0000080  | 6,65634 | 5,50184 | 2,226071605 | ENST00000475361 | 159091    | NM_001170781 | FAM122C         |
| A_23_P338479   | 5,90102 | 4,74668 | 2,22582474  | ENST00000381577 | 29126     | NM_014143    | CD274           |
| A_32_P117464   | 7,11178 | 5,95775 | 2,225346515 | ENST00000392452 | 151963    | NM_178496    | MB21D2          |
| A_24_P160491   | 2,79363 | 1,63961 | 2,225331091 | ENST00000440303 | 348378    | AK128236     | FAM159A         |
| A_21_P0012127  | 3,72796 | 2,57399 | 2,225253968 | N/A             | N/A       | N/A          | XLOC_I2_008667  |



|                |         |         |             |                 |           |           |                |
|----------------|---------|---------|-------------|-----------------|-----------|-----------|----------------|
| A_23_P308032   | 12,1505 | 10,9973 | 2,224066615 | ENST00000397007 | 4928      | NM_005387 | NUP98          |
| A_33_P3342375  | 15,28   | 14,1273 | 2,223295946 | ENST00000598245 | 4105      | NM_175868 | MAGEA6         |
| A_21_P0004137  | 2,91556 | 1,76302 | 2,223049388 | N/A             | 101928885 | XR_241812 | LOC101928885   |
| A_33_P3219245  | 3,79812 | 2,64595 | 2,222479328 | N/A             | 100128782 | NR_023390 | LINC00476      |
| A_33_P3403708  | 5,76488 | 4,61307 | 2,221924815 | N/A             | N/A       | N/A       | N/A            |
| A_23_P332820   | 3,37526 | 2,22349 | 2,221863211 | ENST00000340057 | 3605      | NM_002190 | IL17A          |
| A_21_P0008312  | 3,21998 | 2,06884 | 2,220893174 | N/A             | N/A       | N/A       | Inc-C14orf23-3 |
| A_33_P3424636  | 3,87048 | 2,71961 | 2,220477573 | ENST00000390392 | N/A       | A25968    | N/A            |
| A_33_P3370944  | 2,67228 | 1,52148 | 2,220369837 | ENST00000334889 | 30062     | NM_013435 | RAX            |
| A_21_P0002835  | 2,82764 | 1,67692 | 2,220246717 | ENST00000451031 | N/A       | N/A       | N/A            |
| A_33_P3312534  | 2,82598 | 1,67587 | 2,219308151 | ENST00000459741 | 7109      | AL833668  | TRAPPC10       |
| A_23_P92025    | 8,06124 | 6,91114 | 2,219292768 | ENST00000336832 | 63924     | NM_022094 | CIDEC          |
| A_33_P3331446  | 2,86562 | 1,71556 | 2,219231237 | ENST00000479209 | N/A       | AK125413  | N/A            |
| A_22_P00001159 | 2,65369 | 1,50384 | 2,218908228 | ENST00000390348 | N/A       | N/A       | N/A            |
| A_24_P303480   | 10,6637 | 9,51412 | 2,218492998 | ENST00000367495 | 10981     | NM_006834 | RAB32          |
| A_21_P0005841  | 4,19244 | 3,04288 | 2,218462244 | N/A             | N/A       | N/A       | Inc-CA8-2      |
| A_32_P6221     | 7,2257  | 6,07631 | 2,218200847 | ENST00000528089 | 645332    | NR_024249 | FAM86C2P       |
| A_22_P00020237 | 2,75638 | 1,6073  | 2,217724261 | ENST00000440148 | N/A       | N/A       | N/A            |
| A_21_P0013186  | 2,84816 | 1,69965 | 2,216848224 | N/A             | N/A       | N/A       | XLOC_I2_013314 |
| A_24_P171873   | 10,2439 | 9,09561 | 2,216510198 | ENST00000513496 | 26272     | NM_012176 | FBXO4          |
| A_23_P79145    | 5,71579 | 4,56751 | 2,216494834 | ENST00000588644 | 148268    | NM_144694 | ZNF570         |
| A_33_P3239084  | 9,81592 | 8,66771 | 2,216387292 | ENST00000585436 | 196483    | NM_201400 | EEF2KMT        |
| A_23_P40347    | 14,6456 | 13,4976 | 2,216064696 | ENST00000493364 | 81502     | NM_178580 | HM13           |
| A_23_P94128    | 6,61587 | 5,46801 | 2,215849658 | ENST00000524741 | 252969    | NM_145043 | NEIL2          |
| A_33_P3251901  | 9,07909 | 7,93132 | 2,21571143  | ENST00000543538 | 323       | NM_004307 | APBB2          |
| A_33_P3235990  | 9,096   | 7,9484  | 2,215450357 | ENST00000556564 | 11099     | NM_007039 | PTPN21         |
| A_23_P314642   | 9,66623 | 8,51909 | 2,214744079 | ENST00000370978 | 55609     | NM_017666 | ZNF280C        |
| A_22_P00016022 | 3,02835 | 1,88131 | 2,21459057  | N/A             | N/A       | N/A       | Inc-TFEC-5     |
| A_22_P00021278 | 4,14646 | 2,99953 | 2,214421722 | N/A             | N/A       | N/A       | Inc-GPER-2     |
| A_22_P00003460 | 2,92974 | 1,78283 | 2,214391024 | ENST00000548368 | 100131138 | N/A       | LINC01405      |
| A_24_P49896    | 2,58767 | 1,4409  | 2,214176148 | ENST00000376217 | 220032    | NM_182833 | GDPD4          |
| A_24_P261052   | 9,22485 | 8,0782  | 2,213991986 | ENST00000221086 | 66036     | NM_015458 | MTMR9          |
| A_21_P0000380  | 5,81949 | 4,67304 | 2,213685083 | N/A             | 692109    | NR_003057 | SNORD69        |

|                |         |         |             |                 |           |              |                 |
|----------------|---------|---------|-------------|-----------------|-----------|--------------|-----------------|
| A_24_P392110   | 5,86896 | 4,72252 | 2,213669739 | ENST00000306511 | 440533    | NM_182707    | PSG8            |
| A_33_P3288700  | 10,2978 | 9,1524  | 2,212074539 | ENST00000447172 | 85395     | NM_058190    | FAM207A         |
| A_32_P15544    | 2,76056 | 1,61546 | 2,211614599 | ENST00000393140 | 145270    | NM_178013    | PRIMA1          |
| A_33_P3222045  | 10,5288 | 9,38375 | 2,211537951 | ENST00000313946 | 196483    | NM_201400    | EEF2KMT         |
| A_19_P00810227 | 4,52326 | 3,37822 | 2,211522622 | N/A             | N/A       | N/A          | Inc-C14orf118-1 |
| A_21_P0009531  | 2,6309  | 1,48669 | 2,210250672 | N/A             | N/A       | N/A          | Inc-MPPE1-1     |
| A_23_P60565    | 9,16308 | 8,01906 | 2,209959606 | ENST00000335815 | 6940      | NM_005649    | ZNF354A         |
| A_23_P205200   | 9,868   | 8,72402 | 2,209898334 | ENST00000218981 | 79758     | NM_024705    | DHRS12          |
| A_24_P12401    | 12,0589 | 10,9151 | 2,20962263  | ENST00000497139 | 7422      | NM_001025366 | VEGFA           |
| A_21_P0013574  | 11,8789 | 10,7361 | 2,208091567 | ENST00000444603 | 25902     | NM_001242767 | MTHFD1L         |
| A_33_P3283490  | 2,8176  | 1,67485 | 2,208015041 | ENST00000518834 | 102724453 | N/A          | LOC102724453    |
| A_33_P3220045  | 3,2382  | 2,09556 | 2,207846695 | N/A             | 80709     | AK126136     | AKNA            |
| A_22_P00018264 | 4,47353 | 3,33099 | 2,207693664 | N/A             | N/A       | N/A          | Inc-ZNF736-2    |
| A_33_P3408320  | 3,66144 | 2,5194  | 2,206928668 | ENST00000429504 | 10715     | NM_198207    | CERS1           |
| A_33_P3423530  | 2,54645 | 1,40492 | 2,206148646 | ENST00000482940 | 27010     | BC040555     | TPK1            |
| A_22_P00005786 | 7,3006  | 6,15921 | 2,20593457  | ENST00000437506 | N/A       | N/A          | N/A             |
| A_21_P0007497  | 8,70828 | 7,56711 | 2,205598208 | ENST00000547963 | 100506465 | NR_110026    | LINC01234       |
| A_21_P0002169  | 4,1794  | 3,03834 | 2,205430045 | N/A             | N/A       | N/A          | Inc-HPCAL1-1    |
| A_33_P3403237  | 4,70737 | 3,56644 | 2,205231325 | ENST00000380243 | 317762    | NM_001144995 | CCDC85C         |
| A_22_P00014776 | 6,26575 | 5,12486 | 2,205170184 | N/A             | 101927635 | XR_246725    | LOC101927635    |
| A_21_P0001325  | 2,77422 | 1,63333 | 2,205170184 | ENST00000436742 | 149047    | NR_027310    | MGC27382        |
| A_21_P0014894  | 7,20308 | 6,0622  | 2,205154899 | N/A             | N/A       | N/A          | N/A             |
| A_23_P354791   | 4,68604 | 3,54534 | 2,204879787 | ENST00000396087 | 89797     | NM_182964    | NAV2            |
| A_23_P427180   | 2,65571 | 1,5152  | 2,204589428 | ENST00000325643 | 286234    | NM_178828    | SPATA31E1       |
| A_23_P109133   | 7,10049 | 5,96023 | 2,204207434 | ENST00000380293 | 551       | NM_000490    | AVP             |
| A_23_P8582     | 8,55856 | 7,4185  | 2,203901888 | ENST00000432176 | 84668     | NM_032581    | FAM126A         |
| A_24_P73577    | 2,57261 | 1,43294 | 2,203306193 | ENST00000430119 | 8854      | NM_170697    | ALDH1A2         |
| A_24_P205036   | 7,06234 | 5,9237  | 2,201733722 | ENST00000395385 | 163223    | NM_001001411 | ZNF676          |
| A_23_P402952   | 9,97503 | 8,8369  | 2,200955536 | ENST00000470691 | 441294    | NM_001008747 | CTAGE15         |
| A_22_P00008065 | 2,81136 | 1,67351 | 2,200528413 | ENST00000496994 | N/A       | N/A          | N/A             |
| A_33_P3308774  | 4,58763 | 3,44989 | 2,200360638 | N/A             | N/A       | DB066855     | N/A             |
| A_21_P0012655  | 5,9317  | 4,79441 | 2,199674417 | N/A             | N/A       | N/A          | XLOC_I2_011043  |
| A_22_P00025758 | 4,02755 | 2,89056 | 2,199217055 | N/A             | N/A       | N/A          | Inc-ZNF382-1    |

|                |         |         |             |                 |           |              |              |
|----------------|---------|---------|-------------|-----------------|-----------|--------------|--------------|
| A_23_P159721   | 3,71583 | 2,57885 | 2,199201811 | ENST00000617907 | 9248      | NM_004224    | GPR50        |
| A_23_P1819     | 7,2807  | 6,14373 | 2,199186567 | ENST00000328064 | 26493     | NM_012378    | OR8B8        |
| A_23_P29773    | 8,95561 | 7,81875 | 2,199018894 | ENST00000265598 | 27074     | NM_014398    | LAMP3        |
| A_33_P3277913  | 2,96156 | 1,82471 | 2,199003652 | ENST00000392193 | 4133      | N/A          | MAP2         |
| A_23_P418413   | 13,1709 | 12,0341 | 2,198927441 | ENST00000311806 | 9943      | NM_005109    | OXSRI        |
| A_24_P200023   | 4,41574 | 3,27897 | 2,198881716 | ENST00000410023 | 3554      | NM_000877    | IL1R1        |
| A_21_P0000746  | 4,50507 | 3,36856 | 2,198485474 | ENST00000557887 | 100506874 | N/A          | LINC00933    |
| A_24_P354615   | 10,2846 | 9,14814 | 2,198409281 | ENST00000382142 | 54545     | NM_001040446 | MTMR12       |
| A_21_P0000703  | 6,96094 | 5,82452 | 2,198348329 | ENST00000491337 | 57116     | NM_001204221 | ZNF695       |
| A_33_P3226080  | 3,8329  | 2,69674 | 2,197952182 | ENST00000574081 | 388325    | NM_207103    | SCIMP        |
| A_22_P00001573 | 2,69517 | 1,55923 | 2,197617037 | ENST00000435896 | N/A       | N/A          | N/A          |
| A_24_P306720   | 9,40367 | 8,26846 | 2,19650533  | N/A             | 400236    | NR_036500    | FOXN3-AS1    |
| A_33_P3245539  | 11,5319 | 10,3971 | 2,195881193 | ENST00000316836 | 9240      | NM_006029    | PNMA1        |
| A_24_P31627    | 2,60606 | 1,47138 | 2,195698552 | ENST00000371741 | 3745      | NM_004975    | KCNB1        |
| A_33_P3358626  | 8,2916  | 7,15706 | 2,19548549  | ENST00000400466 | 6875      | NM_001293725 | TAF4B        |
| A_23_P405295   | 2,96407 | 1,82964 | 2,195318099 | ENST00000617545 | 353144    | NM_178434    | LCE3C        |
| A_33_P3265359  | 11,7607 | 10,6264 | 2,19512029  | ENST00000409160 | 55502     | NM_018645    | HES6         |
| A_22_P00016602 | 6,13761 | 5,00338 | 2,195013785 | ENST00000563563 | 9674      | NM_001162895 | KIAA0040     |
| A_33_P3390042  | 5,09203 | 3,95789 | 2,194876857 | N/A             | N/A       | XM_006717637 | Inc-VTI1A-2  |
| A_33_P3217347  | 13,3782 | 12,2446 | 2,194055469 | ENST00000374571 | 64219     | NM_145119    | PJA1         |
| A_21_P0010818  | 2,53906 | 1,40548 | 2,194025054 | ENST00000435629 | 101929520 | NR_104061    | LINC00993    |
| A_21_P0005580  | 6,5913  | 5,45799 | 2,193614481 | N/A             | 101928652 | XR_242211    | LOC101928652 |
| A_23_P159027   | 2,91184 | 1,77855 | 2,193584071 | ENST00000361524 | 25925     | NM_015461    | ZNF521       |
| A_21_P0007123  | 2,6539  | 1,5207  | 2,193447232 | ENST00000526436 | 101927120 | NR_110136    | LOC101927120 |
| A_33_P3311371  | 8,58607 | 7,45293 | 2,193356011 | ENST00000416159 | 64236     | NM_198042    | PDLIM2       |
| A_24_P97405    | 3,87676 | 2,74394 | 2,192869563 | ENST00000400880 | 9034      | NM_003965    | CCRL2        |
| A_23_P146187   | 11,8305 | 10,6977 | 2,192839164 | ENST00000320270 | 23212     | NM_015169    | RRS1         |
| A_24_P750305   | 7,34634 | 6,21358 | 2,192778366 | ENST00000445118 | 643837    | NR_047519    | LINC01128    |
| A_22_P00006813 | 2,63209 | 1,49973 | 2,192170483 | ENST00000447384 | N/A       | BC040729     | N/A          |
| A_23_P167401   | 11,2828 | 10,1505 | 2,192079316 | ENST00000354757 | 56125     | NM_018931    | PCDHB11      |
| A_23_P124427   | 7,47448 | 6,34284 | 2,191076719 | ENST00000507142 | 4750      | NM_012224    | NEK1         |
| A_22_P00017194 | 3,08325 | 1,95177 | 2,190833734 | ENST00000594461 | 338864    | NR_034024    | LINC00347    |
| A_24_P345209   | 6,85707 | 5,72563 | 2,190772992 | ENST00000367106 | 8444      | NM_001004023 | DYRK3        |

|                |         |         |             |                 |           |              |                  |
|----------------|---------|---------|-------------|-----------------|-----------|--------------|------------------|
| A_22_P00002213 | 4,04023 | 2,90892 | 2,190575592 | ENST00000414159 | 102723751 | N/A          | LOC102723751     |
| A_22_P00024301 | 3,44123 | 2,31009 | 2,190317481 | N/A             | N/A       | CV572980     | Inc-DNAJC24-1    |
| A_23_P376591   | 8,13848 | 7,00753 | 2,19002904  | ENST00000339105 | 171425    | NM_206808    | CLYBL            |
| A_21_P0000507  | 17,3527 | 16,2218 | 2,18995314  | N/A             | 100170217 | NR_024230    | SNAR-B2          |
| A_33_P3358774  | 3,06844 | 1,93761 | 2,189846886 | ENST00000612174 | 219956    | NM_001005212 | OR9Q1            |
| A_21_P0006923  | 2,75655 | 1,62583 | 2,189679925 | N/A             | N/A       | N/A          | Inc-NANOS1-2     |
| A_21_P0013571  | 4,70386 | 3,57324 | 2,189528153 | ENST00000331259 | 364       | NM_001170    | AQP7             |
| A_24_P119678   | 2,71445 | 1,58386 | 2,189482623 | N/A             | N/A       | AJ295982     | N/A              |
| A_33_P3357292  | 3,01992 | 1,88977 | 2,188814966 | ENST00000329620 | 164684    | XR_244353    | WBP2NL           |
| A_21_P0014903  | 3,95522 | 2,82524 | 2,188557062 | N/A             | N/A       | N/A          | N/A              |
| A_33_P3390474  | 2,65801 | 1,52815 | 2,188375031 | ENST00000390284 | N/A       | S65201       | N/A              |
| A_33_P3238993  | 10,3431 | 9,21332 | 2,188253685 | ENST00000409979 | 3267      | NM_001135187 | AGFG1            |
| A_33_P3227472  | 12,791  | 11,6613 | 2,188132346 | ENST00000403593 | 113675    | NM_138432    | SDSL             |
| A_23_P116523   | 3,6004  | 2,47072 | 2,188102012 | N/A             | N/A       | AF116668     | N/A              |
| A_21_P0000800  | 7,16223 | 6,03273 | 2,187829027 | N/A             | 100506054 | N/A          | RNASEH1-AS1      |
| A_32_P23624    | 6,78141 | 5,65222 | 2,187358967 | ENST00000344517 | 23456     | NM_012089    | ABCB10           |
| A_33_P3365200  | 3,19832 | 2,06928 | 2,187131554 | N/A             | N/A       | N/A          | N/A              |
| A_23_P111981   | 11,153  | 10,024  | 2,187070915 | ENST00000614491 | 66004     | AK126845     | LYNX1            |
| A_33_P3258467  | 11,3015 | 10,1726 | 2,186919324 | ENST00000333896 | 6711      | NM_178313    | SPTBN1           |
| A_24_P141736   | 8,30443 | 7,17575 | 2,186585861 | ENST00000323666 | 10988     | NM_006838    | METAP2           |
| A_23_P117602   | 5,8086  | 4,67993 | 2,186570705 | ENST00000382542 | 3002      | NM_004131    | GZMB             |
| A_22_P00004361 | 2,56082 | 1,43254 | 2,185979695 | N/A             | N/A       | N/A          | Inc-COL3A1-1     |
| A_21_P0000267  | 6,02405 | 4,8959  | 2,185782727 | N/A             | 619564    | NR_002583    | SNORD72          |
| A_22_P00018619 | 3,09873 | 1,97071 | 2,185585777 | N/A             | N/A       | N/A          | Inc-ADAL-1       |
| A_22_P00003827 | 2,87541 | 1,74761 | 2,185252517 | N/A             | 100861550 | NR_047484    | PDX1-AS1         |
| A_22_P00002775 | 9,44535 | 8,31764 | 2,185116198 | ENST00000420096 | N/A       | N/A          | N/A              |
| A_21_P0009141  | 4,69763 | 3,56997 | 2,185040469 | N/A             | 101154687 | N/A          | LINC01081        |
| A_33_P3220020  | 3,13179 | 2,00446 | 2,184540723 | ENST00000600260 | 440518    | NR_033899    | GOLGA2P9         |
| A_33_P3211628  | 10,0667 | 8,93959 | 2,184207623 | ENST00000529901 | 5612      | NM_004705    | PRKRIR           |
| A_21_P0003029  | 3,64667 | 2,51958 | 2,184177343 | N/A             | N/A       | N/A          | Inc-KBTBD12-1    |
| A_21_P0009784  | 2,76092 | 1,6339  | 2,184071369 | ENST00000590611 | N/A       | N/A          | N/A              |
| A_22_P00003953 | 6,24822 | 5,12149 | 2,183632387 | N/A             | N/A       | AK057177     | Inc-CHADL-1      |
| A_22_P00000415 | 3,33649 | 2,20988 | 2,183450765 | N/A             | N/A       | N/A          | Inc-AC068473.1-5 |

|                |         |         |             |                 |           |              |                 |
|----------------|---------|---------|-------------|-----------------|-----------|--------------|-----------------|
| A_24_P322847   | 12,4276 | 11,3011 | 2,183284292 | ENST00000355209 | 171568    | NM_001018050 | POLR3H          |
| A_33_P3256952  | 7,81184 | 6,68562 | 2,182860598 | N/A             | 112399    | NM_022073    | EGLN3           |
| A_33_P3231319  | 5,40189 | 4,27583 | 2,182618525 | N/A             | N/A       | N/A          | XLOC_I2_013192  |
| A_21_P0009304  | 2,7567  | 1,63081 | 2,182361351 | N/A             | N/A       | N/A          | Inc-TNFRSF13B-3 |
| A_21_P0010117  | 2,79626 | 1,67041 | 2,182300844 | ENST00000438287 | 284798    | N/A          | LOC284798       |
| A_23_P45294    | 11,8859 | 10,7606 | 2,181469042 | ENST00000299906 | 139231    | NM_207318    | FAM199X         |
| A_22_P00009571 | 4,47102 | 3,34572 | 2,181469042 | N/A             | N/A       | BX378454     | Inc-MAP6-1      |
| A_24_P397386   | 8,06187 | 6,93664 | 2,181363199 | ENST00000263409 | 3977      | NM_002310    | LIFR            |
| A_33_P3240687  | 3,1459  | 2,02075 | 2,181242242 | ENST00000560839 | N/A       | BM715986     | N/A             |
| A_23_P47304    | 13,6504 | 12,5255 | 2,180864294 | ENST00000456200 | 838       | NM_004347    | CASP5           |
| A_33_P3210798  | 2,71494 | 1,59017 | 2,180667787 | ENST00000532411 | 390084    | NM_001146033 | OR56A5          |
| A_23_P408768   | 7,85625 | 6,73158 | 2,18051664  | ENST00000398665 | 84444     | NM_032482    | DOT1L           |
| A_22_P00015548 | 2,89874 | 1,77427 | 2,180214377 | N/A             | N/A       | CB158968     | Inc-STK39-2     |
| A_21_P0000391  | 6,09303 | 4,96876 | 2,179912156 | N/A             | 692210    | NR_003075    | SNORD93         |
| A_33_P3354796  | 7,62773 | 6,50347 | 2,179897046 | N/A             | 645644    | NR_024492    | FLJ42627        |
| A_22_P00005658 | 7,0598  | 5,93563 | 2,179761061 | ENST00000440595 | 101926888 | NR_109885    | RALY-AS1        |
| A_33_P3281444  | 2,62242 | 1,49886 | 2,17883961  | ENST00000468879 | N/A       | DQ100647     | N/A             |
| A_33_P3397593  | 2,94109 | 1,8176  | 2,178733895 | N/A             | N/A       | N/A          | N/A             |
| A_23_P125495   | 2,81901 | 1,69589 | 2,178175199 | ENST00000370532 | 1038      | NM_004065    | CDR1            |
| A_21_P0000184  | 6,62962 | 5,50651 | 2,178160101 | ENST00000615484 | 388536    | NM_001242802 | ZNF790          |
| A_21_P0005227  | 3,11255 | 1,9895  | 2,178069516 | ENST00000440213 | 101928773 | N/A          | LINC01449       |
| A_23_P28012    | 6,29071 | 5,16854 | 2,176741365 | ENST00000601100 | 91120     | NM_033196    | ZNF682          |
| A_24_P238543   | 6,39765 | 5,27599 | 2,175972011 | ENST00000420457 | 5255      | NM_002637    | PHKA1           |
| A_21_P0013475  | 13,007  | 11,8854 | 2,175881517 | ENST00000511103 | N/A       | N/A          | N/A             |
| A_33_P3251283  | 11,2353 | 10,1138 | 2,175730702 | ENST00000314099 | 100128553 | NM_198495    | CTAGE4          |
| A_23_P61202    | 11,401  | 10,2797 | 2,175429102 | ENST00000447172 | 85395     | NM_058190    | FAM207A         |
| A_33_P3247175  | 3,17032 | 2,04921 | 2,175142622 | ENST00000508698 | 441054    | NM_001114357 | C4orf47         |
| A_22_P00002689 | 7,97877 | 6,85767 | 2,175127545 | ENST00000439156 | N/A       | N/A          | N/A             |
| A_21_P0003003  | 4,4116  | 3,29068 | 2,174856179 | ENST00000465215 | 152225    | NR_026934    | LOC152225       |
| A_24_P253251   | 12,6661 | 11,5452 | 2,174826029 | ENST00000380752 | 6541      | NM_003045    | SLC7A1          |
| A_22_P00008990 | 2,88728 | 1,76694 | 2,173982007 | N/A             | N/A       | AI200843     | Inc-LAMC2-1     |
| A_21_P0012411  | 10,9476 | 9,82746 | 2,17368065  | N/A             | 101928430 | XR_241611    | LOC101928430    |
| A_33_P3696965  | 2,98788 | 1,86797 | 2,173334141 | N/A             | N/A       | AA593742     | N/A             |

|                |         |         |             |                 |           |              |                  |
|----------------|---------|---------|-------------|-----------------|-----------|--------------|------------------|
| A_22_P00012490 | 3,48836 | 2,36856 | 2,173168439 | ENST00000518098 | 101929191 | N/A          | LINCR-0001       |
| A_21_P0013452  | 3,1053  | 1,98569 | 2,172882256 | ENST00000458082 | 100996266 | NR_120506    | LINC01510        |
| A_23_P24903    | 12,8936 | 11,7745 | 2,172114267 | ENST00000393597 | 5029      | NM_176072    | P2RY2            |
| A_22_P00002507 | 2,57399 | 1,45498 | 2,171978768 | ENST00000561523 | 101927228 | XR_253539    | LOC101927228     |
| A_33_P3565342  | 2,69455 | 1,57561 | 2,171873385 | ENST00000584531 | 400644    | NR_104164    | LINC01443        |
| A_21_P0000256  | 6,27157 | 5,15268 | 2,171798115 | N/A             | 9300      | NR_002562    | SNORD28          |
| A_21_P0012472  | 2,82847 | 1,70962 | 2,171737901 | ENST00000457449 | 101928992 | N/A          | LOC101928992     |
| A_23_P41629    | 2,75403 | 1,6353  | 2,171557268 | ENST00000274181 | 170690    | NM_139056    | ADAMTS16         |
| A_23_P28334    | 4,63837 | 3,51968 | 2,171497061 | ENST00000264260 | 8807      | NM_003853    | IL18RAP          |
| A_33_P3283196  | 9,66146 | 8,54287 | 2,171346549 | N/A             | 9169      | XM_006719692 | SCAF11           |
| A_22_P00011290 | 2,75922 | 1,64065 | 2,171316448 | ENST00000541574 | 101928346 | XR_247876    | LOC101928346     |
| A_33_P3337134  | 3,09467 | 1,9772  | 2,169661533 | ENST00000318888 | 84448     | NM_001130083 | ABLIM2           |
| A_22_P00015866 | 6,44139 | 5,32406 | 2,169450998 | ENST00000449439 | N/A       | N/A          | N/A              |
| A_21_P0003194  | 2,89134 | 1,77404 | 2,169405886 | N/A             | N/A       | N/A          | Inc-DNAJC19-4    |
| A_33_P3298861  | 7,66496 | 6,54775 | 2,169270556 | ENST00000483944 | 84561     | NM_024628    | SLC12A8          |
| A_22_P00015437 | 2,6816  | 1,56442 | 2,169225447 | N/A             | 100874083 | NR_046617    | KCNAB1-AS2       |
| A_21_P0001471  | 6,16366 | 5,04664 | 2,168984886 | N/A             | N/A       | N/A          | Inc-ZBTB17-2     |
| A_33_P3502315  | 13,4723 | 12,3553 | 2,168954818 | ENST00000478846 | 54675     | NM_019095    | CRLS1            |
| A_22_P00010336 | 3,31489 | 2,19819 | 2,168503843 | ENST00000499642 | 100505676 | NR_040434    | RRS1-AS1         |
| A_33_P3290368  | 6,4571  | 5,34057 | 2,168248332 | N/A             | 100272228 | NR_027456    | LINC00894        |
| A_33_P3265180  | 10,0624 | 8,9469  | 2,166700882 | ENST00000400206 | 102800317 | NM_001289912 | LOC400927-CSNK1E |
| A_23_P500328   | 3,34952 | 2,23551 | 2,164464292 | ENST00000371993 | 1641      | NM_000555    | DCX              |
| A_22_P00000655 | 2,70942 | 1,59547 | 2,164374276 | ENST00000510444 | 101928539 | N/A          | LOC101928539     |
| A_24_P375227   | 5,01093 | 3,89743 | 2,163699278 | N/A             | N/A       | N/A          | N/A              |
| A_24_P139208   | 8,17094 | 7,05745 | 2,16368428  | ENST00000285681 | 29761     | NM_013396    | USP25            |
| A_23_P111297   | 10,6495 | 9,53618 | 2,163429338 | ENST00000464646 | 10799     | NM_006638    | RPP40            |
| A_22_P00003917 | 2,50066 | 1,38768 | 2,162919542 | ENST00000569037 | N/A       | N/A          | N/A              |
| A_21_P0009254  | 2,61064 | 1,49808 | 2,162289961 | N/A             | N/A       | N/A          | Inc-ABI3-2       |
| A_32_P149060   | 5,97997 | 4,86769 | 2,161870342 | N/A             | 282566    | NR_024092    | LINC00515        |
| A_23_P386942   | 3,9964  | 2,88431 | 2,161585647 | ENST00000323469 | 148252    | NM_145173    | DIRAS1           |
| A_33_P3213468  | 5,13292 | 4,021   | 2,161330951 | ENST00000296657 | 651746    | NM_001164440 | ANKRD33B         |
| A_22_P00016092 | 3,20279 | 2,09105 | 2,161061306 | N/A             | N/A       | BM931494     | Inc-THOC2-1      |
| A_33_P3221084  | 4,31706 | 3,2054  | 2,160941475 | ENST00000525443 | 4054      | AK127484     | LTBP3            |

|                |         |         |             |                 |           |              |               |
|----------------|---------|---------|-------------|-----------------|-----------|--------------|---------------|
| A_33_P3622472  | 11,8061 | 10,6945 | 2,160851606 | ENST00000393710 | 8260      | NM_001256119 | NAA10         |
| A_23_P139919   | 4,19343 | 3,08198 | 2,160626949 | ENST00000303694 | 50515     | NM_018413    | CHST11        |
| A_24_P401768   | 8,1693  | 7,05785 | 2,160626949 | ENST00000317829 | 154810    | NM_130847    | AMOTL1        |
| A_23_P47226    | 15,3388 | 14,2274 | 2,160552069 | ENST00000494836 | 10897     | NM_020470    | YIF1A         |
| A_33_P3240328  | 15,7993 | 14,6881 | 2,160252574 | ENST00000265340 | 5307      | NM_002653    | PITX1         |
| A_33_P3411945  | 2,70606 | 1,59523 | 2,159698617 | ENST00000587494 | 255809    | NM_001136482 | C19orf38      |
| A_23_P256641   | 6,69314 | 5,58233 | 2,159668677 | ENST00000372101 | 23630     | NM_012282    | KCNE5         |
| A_22_P00003082 | 3,45273 | 2,34195 | 2,159623768 | N/A             | N/A       | N/A          | Inc-C8orf56-1 |
| A_22_P00009627 | 4,54125 | 3,4306  | 2,159429175 | N/A             | 101927768 | NR_125845    | LOC101927768  |
| A_33_P3230528  | 7,46756 | 6,35697 | 2,159339369 | ENST00000395807 | 23164     | N/A          | MPRIP         |
| A_22_P00011812 | 4,66443 | 3,55402 | 2,159069973 | N/A             | N/A       | N/A          | Inc-PHACTR4-2 |
| A_23_P110699   | 9,0462  | 7,93584 | 2,158995146 | ENST00000394226 | 91975     | NM_052860    | ZNF300        |
| A_33_P3212456  | 6,27694 | 5,16669 | 2,158830537 | ENST00000470878 | 6804      | NM_001165903 | STX1A         |
| A_33_P3211818  | 6,52398 | 5,41399 | 2,158441512 | ENST00000482318 | 861       | NM_001001890 | RUNX1         |
| A_21_P0014829  | 7,43363 | 6,32384 | 2,158142309 | N/A             | N/A       | N/A          | N/A           |
| A_21_P0014466  | 8,412   | 7,30223 | 2,158112391 | N/A             | 101928152 | XR_245037    | LOC101928152  |
| A_23_P42746    | 8,83798 | 7,72821 | 2,158112391 | ENST00000438382 | 653361    | NM_000265    | NCF1          |
| A_33_P3358731  | 7,55857 | 6,44881 | 2,158097432 | ENST00000376767 | 5125      | NM_006200    | PCSK5         |
| A_33_P3285761  | 4,18973 | 3,08008 | 2,157932892 | ENST00000613027 | N/A       | DB028131     | N/A           |
| A_23_P372834   | 8,64834 | 7,53881 | 2,157753407 | ENST00000311813 | 358       | NM_198098    | AQP1          |
| A_24_P365807   | 15,212  | 14,1031 | 2,156811359 | ENST00000204961 | 1947      | NM_004429    | EFNB1         |
| A_33_P3287584  | 6,21454 | 5,10601 | 2,156258285 | ENST00000615527 | 170954    | NM_133471    | PPP1R18       |
| A_32_P223173   | 6,55952 | 5,45139 | 2,155660526 | N/A             | 102725053 | XR_432412    | LOC102725053  |
| A_23_P302116   | 10,0723 | 8,96424 | 2,155555935 | ENST00000389547 | 8500      | NM_177423    | PPFIA1        |
| A_22_P00007061 | 5,97945 | 4,8717  | 2,155092809 | ENST00000528497 | N/A       | N/A          | N/A           |
| A_33_P3214988  | 7,18217 | 6,07465 | 2,154749263 | ENST00000433756 | 79645     | NM_001142857 | EFCAB1        |
| A_23_P128663   | 10,2928 | 9,18546 | 2,154480439 | ENST00000382292 | 26278     | NM_014363    | SACS          |
| A_23_P145694   | 16,1725 | 15,0655 | 2,153972752 | ENST00000394308 | 440       | NM_001673    | ASNS          |
| A_33_P3322884  | 2,65915 | 1,55215 | 2,153972752 | N/A             | N/A       | N/A          | N/A           |
| A_23_P120863   | 2,87951 | 1,77254 | 2,153927962 | ENST00000406361 | 9514      | NM_004861    | GAL3ST1       |
| A_33_P3416822  | 2,60243 | 1,49594 | 2,153211447 | ENST00000323777 | 124535    | NM_001080439 | HSF5          |
| A_22_P00012644 | 10,4388 | 9,3325  | 2,152927892 | ENST00000428814 | N/A       | N/A          | N/A           |
| A_33_P3386487  | 2,57423 | 1,46798 | 2,152853278 | N/A             | N/A       | N/A          | N/A           |

|                |         |         |             |                 |           |              |                |
|----------------|---------|---------|-------------|-----------------|-----------|--------------|----------------|
| A_22_P00009062 | 5,45332 | 4,34737 | 2,152405652 | N/A             | N/A       | N/A          | Inc-LEO1-2     |
| A_33_P3312365  | 11,0979 | 9,99207 | 2,152226627 | ENST00000590558 | 9361      | NM_004793    | LONP1          |
| A_21_P0002758  | 3,32782 | 2,22203 | 2,152166955 | ENST00000471614 | N/A       | N/A          | N/A            |
| A_33_P3304182  | 3,0029  | 1,89722 | 2,152002867 | N/A             | N/A       | N/A          | N/A            |
| A_24_P367439   | 4,99973 | 3,89428 | 2,151659814 | N/A             | N/A       | AF068294     | N/A            |
| A_22_P00018927 | 3,42649 | 2,32141 | 2,15110806  | N/A             | N/A       | N/A          | Inc-HAPLN1-2   |
| A_23_P87532    | 12,9584 | 11,8537 | 2,150541542 | ENST00000395805 | 65981     | NM_001002259 | CAPRIN2        |
| A_21_P0010975  | 3,81127 | 2,70687 | 2,150094396 | N/A             | N/A       | N/A          | XLOC_I2_002311 |
| A_21_P0014872  | 3,61464 | 2,51061 | 2,149543044 | N/A             | 100505923 | AK129697     | LOC100505923   |
| A_23_P75516    | 9,5649  | 8,46089 | 2,149513245 | ENST00000532504 | 8500      | NM_003626    | PPFIA1         |
| A_21_P0009180  | 4,58165 | 3,47814 | 2,14876841  | ENST00000591283 | 100507351 | NR_040050    | LOC100507351   |
| A_24_P360763   | 7,56547 | 6,4621  | 2,148559902 | ENST00000482633 | 1390      | NM_001881    | CREM           |
| A_33_P3274049  | 5,06363 | 3,96048 | 2,148232288 | ENST00000340561 | 55289     | BC022268     | ACOXL          |
| A_33_P3302892  | 4,70567 | 3,6026  | 2,148113168 | N/A             | 22795     | BX648241     | NID2           |
| A_21_P0013505  | 6,99851 | 5,89546 | 2,148083389 | ENST00000534291 | N/A       | XR_425687    | N/A            |
| A_21_P0006381  | 2,79443 | 1,69152 | 2,147874948 | ENST00000413352 | 102723932 | XR_426397    | LOC102723932   |
| A_33_P3347035  | 6,18344 | 5,08083 | 2,147428356 | N/A             | N/A       | BC069659     | N/A            |
| A_22_P00016468 | 5,23915 | 4,13701 | 2,146728883 | ENST00000519071 | 100270680 | NR_117102    | CASC11         |
| A_33_P3268378  | 4,19847 | 3,09648 | 2,146505694 | ENST00000527445 | 83648     | NM_053279    | FAM167A        |
| A_33_P3274422  | 4,00492 | 2,90378 | 2,145241399 | ENST00000454959 | N/A       | N/A          | N/A            |
| A_33_P3338674  | 3,66048 | 2,55942 | 2,145122445 | N/A             | 126661    | NR_033298    | CCDC163P       |
| A_22_P00010169 | 2,76071 | 1,65971 | 2,145033234 | N/A             | 100507291 | NR_121609    | LOC100507291   |
| A_33_P3278573  | 8,05634 | 6,95548 | 2,144825088 | ENST00000616812 | 79917     | NM_024859    | MAGIX          |
| A_21_P0004336  | 3,71382 | 2,61311 | 2,144602098 | N/A             | N/A       | N/A          | Inc-ERGIC1-1   |
| A_22_P00016477 | 2,94608 | 1,84548 | 2,144438587 | N/A             | N/A       | N/A          | Inc-TMEM86A-1  |
| A_21_P0005505  | 2,71924 | 1,61866 | 2,144408859 | N/A             | N/A       | N/A          | Inc-CALN1-1    |
| A_33_P3223116  | 6,47566 | 5,37514 | 2,144319677 | ENST00000342645 | 28996     | AF207702     | HIPK2          |
| A_24_P77676    | 12,8652 | 11,7647 | 2,144289951 | ENST00000297185 | 3313      | NM_004134    | HSPA9          |
| A_22_P00020442 | 2,96667 | 1,86647 | 2,143844104 | N/A             | N/A       | BC066991     | Inc-RMND5A-1   |
| A_33_P3262665  | 9,62877 | 8,52897 | 2,143249787 | ENST00000370663 | 79649     | NM_024597    | MAP7D3         |
| A_19_P00810085 | 3,23572 | 2,13601 | 2,143116088 | ENST00000419922 | 646324    | N/A          | LINC00607      |
| A_21_P0000245  | 6,83723 | 5,73773 | 2,142804157 | ENST00000561554 | 595098    | NR_002441    | SNORD18A       |
| A_21_P0004568  | 4,49022 | 3,39075 | 2,142759599 | ENST00000513626 | 100505994 | N/A          | LUCAT1         |



|                |         |         |             |                 |           |              |                 |
|----------------|---------|---------|-------------|-----------------|-----------|--------------|-----------------|
| A_19_P00316815 | 6,58046 | 5,48106 | 2,142655634 | ENST00000431616 | 100287765 | NR_038988    | LINC00630       |
| A_23_P405885   | 2,54504 | 1,44571 | 2,142551675 | ENST00000478945 | 151871    | NM_138815    | DPPA2           |
| A_33_P3227400  | 6,28719 | 5,18829 | 2,141913175 | ENST00000396625 | 1286      | NM_000092    | COL4A4          |
| A_33_P3352683  | 2,72361 | 1,62481 | 2,141764714 | ENST00000377435 | 5969      | NR_002714    | REG1P           |
| A_22_P00006012 | 4,0481  | 2,94932 | 2,141735023 | ENST00000545615 | 100533183 | NM_001204299 | ZNF664-FAM101A  |
| A_22_P00025612 | 2,78067 | 1,68214 | 2,141363921 | N/A             | 101929557 | N/A          | LINC01395       |
| A_24_P252364   | 3,09999 | 2,00166 | 2,141067085 | ENST00000351718 | 4897      | NM_001037132 | NRCAM           |
| A_23_P19778    | 5,46169 | 4,36359 | 2,140725776 | ENST00000471405 | 26266     | NM_012450    | SLC13A4         |
| A_33_P3304501  | 8,06261 | 6,96477 | 2,140340012 | ENST00000381020 | 1045      | NM_001265    | CDX2            |
| A_33_P3285769  | 13,8101 | 12,7123 | 2,14028067  | N/A             | N/A       | N/A          | N/A             |
| A_21_P0010488  | 2,47058 | 1,37283 | 2,140206495 | ENST00000381215 | 100289635 | N/A          | ZNF605          |
| A_22_P00013493 | 2,87647 | 1,77912 | 2,139613186 | ENST00000558436 | 102723481 | XR_424610    | LOC102723481    |
| A_33_P3278451  | 4,6288  | 3,53151 | 2,139524204 | ENST00000587777 | N/A       | DA717721     | N/A             |
| A_24_P166613   | 7,56117 | 6,46409 | 2,139212796 | ENST00000199448 | 54749     | NM_017549    | EPDR1           |
| A_33_P3357678  | 5,56982 | 4,47312 | 2,13864941  | ENST00000565875 | 197021    | NM_207338    | LCTL            |
| A_23_P22854    | 4,57891 | 3,48233 | 2,138471529 | ENST00000596962 | 54858     | NM_017712    | PGPEP1          |
| A_33_P3371175  | 10,2345 | 9,13793 | 2,138456707 | ENST00000613925 | 57404     | NM_177538    | CYP20A1         |
| A_22_P00025235 | 2,66463 | 1,56834 | 2,138041713 | ENST00000509666 | N/A       | N/A          | N/A             |
| A_33_P3335606  | 10,4108 | 9,31462 | 2,137878701 | N/A             | N/A       | N/A          | N/A             |
| A_33_P3587376  | 17,7719 | 16,6759 | 2,137611982 | N/A             | 100169951 | NR_024214    | SNAR-A3         |
| A_22_P00025751 | 2,74183 | 1,64598 | 2,137389742 | ENST00000437334 | N/A       | N/A          | N/A             |
| A_22_P00000445 | 2,77945 | 1,68398 | 2,136826836 | N/A             | 101928618 | NR_108089    | LOC101928618    |
| A_23_P215956   | 14,9449 | 13,8496 | 2,136575058 | ENST00000613283 | 4609      | NM_002467    | MYC             |
| A_21_P0001062  | 3,0924  | 1,99718 | 2,136456585 | ENST00000431637 | 100885798 | N/A          | LINC00210       |
| A_23_P29257    | 12,9664 | 11,8716 | 2,135834706 | ENST00000340857 | 3005      | NM_005318    | H1FO            |
| A_33_P3348744  | 13,0423 | 11,9481 | 2,134946622 | N/A             | N/A       | N/A          | N/A             |
| A_33_P3349870  | 2,72796 | 1,63416 | 2,134354771 | N/A             | 55010     | BC018903     | PARPBP          |
| A_21_P0006898  | 3,04066 | 1,94711 | 2,133984948 | N/A             | N/A       | N/A          | Inc-C10orf129-1 |
| A_21_P0008356  | 2,47908 | 1,38555 | 2,133955365 | N/A             | N/A       | N/A          | Inc-C14orf118-1 |
| A_24_P161463   | 16,9944 | 15,9009 | 2,133910991 | N/A             | 441951    | NR_003605    | ZFAS1           |
| A_33_P3344482  | 7,38432 | 6,29098 | 2,133674346 | ENST00000399304 | 10979     | NM_001135000 | FERMT2          |
| A_33_P3271038  | 3,16148 | 2,06848 | 2,133171562 | N/A             | N/A       | N/A          | N/A             |
| A_21_P0014819  | 2,65497 | 1,56219 | 2,132846294 | N/A             | N/A       | N/A          | N/A             |

|                |         |         |             |                 |           |              |                |
|----------------|---------|---------|-------------|-----------------|-----------|--------------|----------------|
| A_24_P753454   | 6,38932 | 5,29673 | 2,132565421 | N/A             | 100132273 | NR_034118    | NDUFA6-AS1     |
| A_23_P19084    | 11,6383 | 10,5458 | 2,132432389 | ENST00000355836 | 3182      | NM_004499    | HNRNPAB        |
| A_22_P00022687 | 3,62663 | 2,53436 | 2,132092455 | N/A             | 401431    | NR_027040    | ATP6V0E2-AS1   |
| A_21_P0014745  | 6,60342 | 5,51175 | 2,131205927 | N/A             | N/A       | CR933683     | N/A            |
| A_21_P0011982  | 5,29828 | 4,20668 | 2,131102523 | ENST00000419719 | 101927217 | NR_110218    | LINC01473      |
| A_33_P3414669  | 7,75962 | 6,66805 | 2,131058209 | ENST00000349225 | 51132     | NM_183353    | RLIM           |
| A_33_P3342942  | 2,53317 | 1,44211 | 2,130305002 | ENST00000409517 | 4211      | CR749827     | MEIS1          |
| A_22_P00002592 | 5,5858  | 4,49495 | 2,129994935 | N/A             | N/A       | N/A          | Inc-C19orf26-2 |
| A_23_P388900   | 11,028  | 9,93717 | 2,129965407 | ENST00000369503 | 55356     | NM_018420    | SLC22A15       |
| A_23_P16683    | 12,654  | 11,5633 | 2,129773487 | ENST00000588511 | 55621     | NM_017722    | TRMT1          |
| A_22_P00008427 | 4,20828 | 3,11766 | 2,12965539  | N/A             | N/A       | N/A          | Inc-KANK4-1    |
| A_21_P0013801  | 5,58487 | 4,49436 | 2,129493018 | N/A             | N/A       | N/A          | XLOC_I2_015641 |
| A_23_P78685    | 12,577  | 11,4865 | 2,129478258 | ENST00000588965 | 2193      | NM_004461    | FARSA          |
| A_23_P148410   | 16,0677 | 14,9772 | 2,129478258 | ENST00000359202 | 53940     | NM_031894    | FTHL17         |
| A_21_P0012352  | 2,53619 | 1,44575 | 2,129389697 | N/A             | N/A       | N/A          | XLOC_I2_009500 |
| A_22_P00004995 | 2,72714 | 1,63678 | 2,129271622 | ENST00000489016 | N/A       | N/A          | N/A            |
| A_23_P154566   | 14,158  | 13,0679 | 2,128887923 | ENST00000435864 | 84969     | NM_032883    | TOX2           |
| A_22_P00020043 | 7,96913 | 6,87925 | 2,128563309 | ENST00000557544 | 100750246 | NR_047116    | HIF1A-AS1      |
| A_21_P0010909  | 4,05979 | 2,97003 | 2,128386267 | ENST00000456581 | 387723    | N/A          | LINC00959      |
| A_21_P0001479  | 2,55214 | 1,46263 | 2,128017478 | N/A             | N/A       | N/A          | Inc-IL28RA-1   |
| A_23_P120504   | 7,54683 | 6,45733 | 2,128002728 | ENST00000381894 | 55321     | NM_018354    | TMEM74B        |
| A_23_P366394   | 6,59421 | 5,50493 | 2,127678248 | ENST00000375213 | 51776     | NM_016653    | ZAK            |
| A_32_P38645    | 3,26058 | 2,17151 | 2,127368564 | ENST00000372851 | 140730    | NM_182970    | RIMS4          |
| A_33_P3359973  | 2,70985 | 1,6209  | 2,127191622 | ENST00000436500 | N/A       | N/A          | N/A            |
| A_21_P0000450  | 5,7697  | 4,68087 | 2,127014694 | N/A             | 100033438 | NR_003340    | SNORD116-26    |
| A_22_P00011948 | 3,5285  | 2,43971 | 2,126955722 | ENST00000418836 | 388942    | NR_033996    | LOC388942      |
| A_23_P359854   | 9,48027 | 8,3915  | 2,126926236 | ENST00000369042 | 57673     | NM_001080450 | BEND3          |
| A_22_P00019499 | 2,57342 | 1,48511 | 2,126248179 | N/A             | N/A       | BU733913     | Inc-C9orf147-1 |
| A_21_P0010357  | 2,73722 | 1,64909 | 2,125982911 | ENST00000417782 | N/A       | N/A          | N/A            |
| A_23_P144020   | 2,63966 | 1,5516  | 2,12587976  | ENST00000397459 | 152330    | NM_175613    | CNTN4          |
| A_22_P00023448 | 2,6239  | 1,5361  | 2,125496672 | N/A             | 101929718 | NR_110139    | LOC101929718   |
| A_32_P69802    | 3,94451 | 2,85687 | 2,12526096  | ENST00000307378 | 6579      | NM_134431    | SLCO1A2        |
| A_22_P00004675 | 3,55837 | 2,47096 | 2,12492217  | ENST00000561756 | 283914    | NR_027080    | LINC01566      |

|                |         |         |             |                 |           |              |               |
|----------------|---------|---------|-------------|-----------------|-----------|--------------|---------------|
| A_22_P00008271 | 10,0038 | 8,91639 | 2,12492217  | ENST00000557792 | 643911    | NR_110454    | CRNDE         |
| A_23_P306346   | 4,93886 | 3,85167 | 2,12459816  | ENST00000376834 | 138199    | NM_152420    | C9orf41       |
| A_21_P0002469  | 5,85853 | 4,77146 | 2,124421448 | N/A             | N/A       | N/A          | Inc-SFTPB-1   |
| A_23_P73747    | 7,63266 | 6,54607 | 2,123714748 | ENST00000328766 | 9823      | NM_014782    | ARMCX2        |
| A_22_P00013503 | 3,2778  | 2,19138 | 2,123464515 | ENST00000538294 | 100507065 | N/A          | LOC100507065  |
| A_21_P0008103  | 3,2363  | 2,15016 | 2,12305243  | N/A             | N/A       | N/A          | Inc-GPC5-2    |
| A_23_P6119     | 11,2143 | 10,1283 | 2,122846418 | ENST00000422877 | 10483     | NM_032985    | SEC23B        |
| A_33_P3364869  | 11,9342 | 10,8482 | 2,122846418 | N/A             | 10135     | AK023341     | NAMPT         |
| A_33_P3294277  | 7,878   | 6,79202 | 2,122816989 | ENST00000221307 | 4051      | NM_000896    | CYP4F3        |
| A_22_P00010152 | 2,90767 | 1,82186 | 2,122566862 | N/A             | N/A       | AF093016     | Inc-MRPL40-2  |
| A_32_P48466    | 3,51437 | 2,4286  | 2,122508013 | ENST00000495240 | 150082    | NM_152505    | LCA5L         |
| A_23_P339818   | 10,9957 | 9,91003 | 2,122360897 | ENST00000268042 | 91947     | NM_183376    | ARRDC4        |
| A_33_P3302448  | 2,75816 | 1,67254 | 2,122287342 | N/A             | 645191    | NM_001101391 | LINGO3        |
| A_23_P14515    | 11,6233 | 10,5378 | 2,122110823 | ENST00000326303 | 122970    | NM_152331    | ACOT4         |
| A_33_P3214209  | 8,89117 | 7,80627 | 2,121228445 | ENST00000399751 | 728411    | NR_027027    | GUSBP1        |
| A_33_P3394689  | 4,36201 | 3,27718 | 2,121125525 | ENST00000379906 | 6530      | NM_001172501 | SLC6A2        |
| A_21_P0003100  | 2,55712 | 1,47239 | 2,120978505 | N/A             | N/A       | N/A          | Inc-ATP2B2-1  |
| A_21_P0001142  | 8,19575 | 7,11127 | 2,120610999 | N/A             | N/A       | N/A          | Inc-SLC44A5-4 |
| A_24_P16214    | 9,07882 | 7,99442 | 2,120493411 | ENST00000427868 | 100506930 | N/A          | LINC00665     |
| A_23_P397019   | 7,89259 | 6,80842 | 2,120155381 | ENST00000463589 | 548645    | NM_001015882 | DNAJC25       |
| A_23_P32143    | 3,95936 | 2,87541 | 2,119832098 | ENST00000374855 | 229       | NM_000035    | ALDOB         |
| A_22_P00004872 | 8,33604 | 7,25233 | 2,119479482 | N/A             | 102724623 | NR_125826    | LOC102724623  |
| A_22_P00017311 | 2,91433 | 1,83069 | 2,119376646 | ENST00000413645 | N/A       | N/A          | N/A           |
| A_22_P00000181 | 5,50886 | 4,42566 | 2,118730367 | N/A             | N/A       | N/A          | Inc-ABHD12B-3 |
| A_24_P332623   | 12,0723 | 10,9891 | 2,118730367 | ENST00000451540 | 647288    | NR_027466    | CTAGE11P      |
| A_22_P00017902 | 2,71032 | 1,62744 | 2,11826047  | ENST00000519660 | N/A       | BX119105     | N/A           |
| A_24_P213370   | 6,18307 | 5,1005  | 2,117805356 | N/A             | N/A       | AK129982     | N/A           |
| A_22_P00008918 | 4,28756 | 3,2052  | 2,117497109 | N/A             | N/A       | AL832624     | Inc-KLRG2-1   |
| A_23_P135257   | 13,2541 | 12,1719 | 2,117262284 | ENST00000457896 | 5646      | NM_002771    | PRSS3         |
| A_22_P00014101 | 2,71284 | 1,63069 | 2,117188907 | N/A             | 100131047 | NR_038401    | LOC100131047  |
| A_33_P3301351  | 4,89634 | 3,8145  | 2,116734023 | ENST00000316997 | 375316    | NM_001080504 | RBM44         |
| A_19_P00803201 | 4,59597 | 3,51437 | 2,116381923 | N/A             | 101929826 | XR_426502    | LOC101929826  |
| A_24_P898945   | 7,79801 | 6,71642 | 2,116367253 | ENST00000402563 | 125228    | NM_001098801 | FAM210A       |

|                |         |         |             |                 |           |              |                |
|----------------|---------|---------|-------------|-----------------|-----------|--------------|----------------|
| A_22_P00005480 | 3,02111 | 1,94027 | 2,115267324 | N/A             | N/A       | BX091138     | Inc-DYNLRB2-1  |
| A_33_P3291772  | 8,62342 | 7,5427  | 2,115091388 | N/A             | N/A       | N/A          | N/A            |
| A_33_P3387145  | 6,99301 | 5,91244 | 2,114871489 | ENST00000431164 | 30011     | NM_031892    | SH3KBP1        |
| A_21_P0001598  | 3,20982 | 2,1293  | 2,114798194 | N/A             | N/A       | N/A          | Inc-RGS8-2     |
| A_33_P3372924  | 4,98809 | 3,90759 | 2,114768877 | ENST00000366779 | 56997     | XM_005273202 | ADCK3          |
| A_22_P00014571 | 4,84099 | 3,76051 | 2,11473956  | N/A             | N/A       | N/A          | Inc-SLA2-1     |
| A_33_P3219750  | 7,72008 | 6,63961 | 2,114724902 | ENST00000461134 | 79183     | NM_024331    | TTPAL          |
| A_21_P0013954  | 3,31678 | 2,23668 | 2,11418262  | N/A             | N/A       | N/A          | N/A            |
| A_21_P0013283  | 6,37236 | 5,29344 | 2,112454108 | N/A             | N/A       | N/A          | XLOC_I2_013730 |
| A_33_P3386467  | 9,65112 | 8,57255 | 2,111941686 | ENST00000423888 | 118433    | NR_024530    | RPL23AP7       |
| A_23_P148484   | 10,134  | 9,05558 | 2,111722114 | ENST00000349225 | 51132     | NM_016120    | RLIM           |
| A_21_P0008900  | 2,72604 | 1,64788 | 2,111341578 | N/A             | N/A       | N/A          | Inc-PRR25-1    |
| A_22_P00005074 | 3,60622 | 2,52809 | 2,111297674 | N/A             | N/A       | N/A          | Inc-DES-1      |
| A_24_P382017   | 10,5088 | 9,43069 | 2,111268405 | ENST00000616334 | 54700     | NM_018427    | RRN3           |
| A_24_P70183    | 3,02428 | 1,9463  | 2,111078169 | ENST00000300036 | 4629      | NM_001040113 | MYH11          |
| A_21_P0005395  | 4,20795 | 3,13001 | 2,111019639 | N/A             | 102723781 | XR_428212    | LOC102723781   |
| A_23_P85171    | 12,4058 | 11,3279 | 2,11096111  | ENST00000486738 | 2010      | NM_000117    | EMD            |
| A_21_P0004425  | 2,57698 | 1,49924 | 2,110727009 | N/A             | N/A       | N/A          | Inc-FAM172A-6  |
| A_24_P16249    | 3,60116 | 2,52353 | 2,110566081 | ENST00000331425 | 90827     | NM_033273    | ZNF479         |
| A_33_P3419790  | 4,47918 | 3,40163 | 2,110449049 | ENST00000514824 | 84830     | AK123258     | ADTRP          |
| A_24_P252497   | 14,1525 | 13,0752 | 2,110083368 | ENST00000311922 | 10221     | NM_025195    | TRIB1          |
| A_32_P827528   | 10,0346 | 8,95734 | 2,110024865 | ENST00000589757 | 9294      | NM_004230    | S1PR2          |
| A_23_P254271   | 14,5611 | 13,4839 | 2,109937113 | ENST00000417736 | 84617     | AK022340     | TUBB6          |
| A_33_P3672756  | 10,4527 | 9,37551 | 2,109922488 | N/A             | 284561    | XR_110828    | LOC284561      |
| A_33_P3341224  | 6,81779 | 5,74074 | 2,10971775  | ENST00000261211 | 5128      | NM_001170464 | CDK17          |
| A_21_P0009659  | 2,71305 | 1,63617 | 2,109469166 | N/A             | N/A       | N/A          | Inc-SAFB-1     |
| A_33_P3266022  | 5,7732  | 4,69672 | 2,108884378 | N/A             | N/A       | N/A          | N/A            |
| A_32_P203528   | 9,04273 | 7,96629 | 2,108825908 | ENST00000293695 | 256126    | NM_001105578 | SYCE2          |
| A_21_P0013282  | 8,87648 | 7,80007 | 2,108782057 | N/A             | N/A       | N/A          | XLOC_I2_013730 |
| A_24_P305784   | 3,23686 | 2,16054 | 2,108650508 | ENST00000449283 | 728695    | NM_032461    | SPANXB1        |
| A_24_P69439    | 12,1127 | 11,0365 | 2,108475123 | ENST00000297578 | 81034     | NM_030780    | SLC25A32       |
| A_21_P0010449  | 10,0299 | 8,95418 | 2,107773728 | N/A             | 100506737 | XR_172388    | LOC100506737   |
| A_21_P0014606  | 7,2986  | 6,22289 | 2,107759118 | N/A             | 101929516 | NR_125979    | LOC101929516   |

|                |         |         |             |                 |           |              |                |
|----------------|---------|---------|-------------|-----------------|-----------|--------------|----------------|
| A_33_P3221034  | 2,71942 | 1,64375 | 2,107700679 | N/A             | 147670    | NM_001193628 | SMIM17         |
| A_22_P00005508 | 3,01669 | 1,94153 | 2,106955728 | N/A             | N/A       | N/A          | Inc-E2F7-3     |
| A_21_P0011302  | 2,65783 | 1,58281 | 2,106751277 | N/A             | N/A       | N/A          | XLOC_I2_004596 |
| A_22_P00009289 | 3,82326 | 2,7484  | 2,106517644 | ENST00000531511 | N/A       | N/A          | N/A            |
| A_33_P3276323  | 3,7712  | 2,69647 | 2,106327836 | N/A             | 644660    | NR_033886    | RAD21-AS1      |
| A_21_P0003267  | 2,69061 | 1,61619 | 2,105875286 | ENST00000419960 | N/A       | N/A          | N/A            |
| A_23_P257971   | 14,9818 | 13,9074 | 2,105846093 | ENST00000460124 | 1645      | NM_001353    | AKR1C1         |
| A_23_P6818     | 2,55181 | 1,47769 | 2,105437427 | ENST00000231721 | 56920     | NM_020163    | SEMA3G         |
| A_23_P88580    | 12,6163 | 11,5423 | 2,105262309 | ENST00000622429 | 10620     | NM_006465    | ARID3B         |
| A_21_P0014476  | 8,47121 | 7,39724 | 2,105218532 | N/A             | N/A       | BX647890     | N/A            |
| A_21_P0008389  | 2,92548 | 1,85153 | 2,105189348 | N/A             | N/A       | N/A          | Inc-DLK1-6     |
| A_33_P3266823  | 3,45824 | 2,38442 | 2,10499966  | ENST00000493493 | 90113     | BQ184771     | VWA5B2         |
| A_33_P3240353  | 14,5047 | 13,431  | 2,104824578 | ENST00000276833 | 55630     | NM_017767    | SLC39A4        |
| A_22_P00015211 | 2,63049 | 1,55681 | 2,104795399 | ENST00000524613 | N/A       | BG333495     | N/A            |
| A_21_P0000946  | 5,69596 | 4,62237 | 2,104664099 | ENST00000452982 | 102724539 | N/A          | LOC102724539   |
| A_33_P3421203  | 7,64244 | 6,56907 | 2,104343178 | ENST00000590591 | 286042    | N/A          | FAM86B3P       |
| A_32_P170547   | 3,05234 | 1,98064 | 2,101908693 | ENST00000617981 | 441521    | NM_001007551 | CT45A5         |
| A_33_P3311668  | 2,79741 | 1,72574 | 2,101864986 | N/A             | N/A       | AA489744     | N/A            |
| A_24_P228637   | 10,8491 | 9,77754 | 2,101704733 | ENST00000399207 | 54093     | NM_001007259 | SETD4          |
| A_22_P00023908 | 2,62372 | 1,55238 | 2,101384263 | ENST00000274643 | 340156    | NM_001012418 | MYLK4          |
| A_21_P0006885  | 4,88242 | 3,81108 | 2,101384263 | N/A             | N/A       | N/A          | Inc-FAM22B-1   |
| A_22_P00006194 | 2,70389 | 1,63255 | 2,101384263 | N/A             | N/A       | N/A          | Inc-FAM26E-1   |
| A_21_P0013220  | 3,38954 | 2,31831 | 2,101224047 | N/A             | 101929266 | XR_250204    | LOC101929266   |
| A_23_P251695   | 14,6544 | 13,5832 | 2,101180353 | ENST00000254998 | 29107     | NM_013248    | NXT1           |
| A_32_P776626   | 6,56997 | 5,4993  | 2,100408589 | ENST00000409776 | 400966    | NM_001024457 | RGPD1          |
| A_33_P3246248  | 4,06005 | 2,98958 | 2,10011743  | N/A             | 729879    | AK093187     | LOC729879      |
| A_22_P00025692 | 4,41367 | 3,34341 | 2,099811758 | ENST00000416725 | 101929637 | NR_126159    | C11orf39       |
| A_24_P168398   | 8,15638 | 7,08647 | 2,099302402 | ENST00000589262 | 7730      | NM_003451    | ZNF177         |
| A_33_P3379251  | 3,90409 | 2,8343  | 2,099127794 | ENST00000383467 | 339291    | NM_001105581 | LRRC30         |
| A_22_P00010658 | 2,56804 | 1,49832 | 2,099025946 | ENST00000605924 | N/A       | N/A          | N/A            |
| A_21_P0007095  | 2,87927 | 1,80957 | 2,098996848 | N/A             | N/A       | N/A          | Inc-KLF6-6     |
| A_21_P0002244  | 2,42997 | 1,36055 | 2,098589511 | N/A             | N/A       | N/A          | Inc-REG3G-3    |
| A_23_P362659   | 11,9841 | 10,9147 | 2,098560419 | ENST00000484513 | 4615      | NM_002468    | MYD88          |

|                |         |         |             |                 |           |              |                |
|----------------|---------|---------|-------------|-----------------|-----------|--------------|----------------|
| A_21_P0014006  | 5,76759 | 4,6988  | 2,097673294 | N/A             | 102724286 | XM_006716897 | LOC102724286   |
| A_23_P60742    | 3,06866 | 1,99999 | 2,097498821 | ENST00000563718 | 29895     | NM_013292    | MYLPF          |
| A_22_P00019584 | 4,65353 | 3,58486 | 2,097498821 | ENST00000561567 | N/A       | BM909110     | N/A            |
| A_23_P24898    | 2,85687 | 1,78917 | 2,096089036 | ENST00000357605 | 390038    | NM_001004751 | OR51D1         |
| A_33_P3241661  | 5,00134 | 3,93368 | 2,096030921 | ENST00000411839 | 388780    | NM_001287682 | LOC388780      |
| A_33_P3226109  | 3,04772 | 1,98007 | 2,096016393 | ENST00000335535 | 199834    | NM_178356    | LCE4A          |
| A_22_P00005032 | 5,69056 | 4,62316 | 2,095653212 | ENST00000542797 | N/A       | CN287821     | N/A            |
| A_24_P142118   | 10,8962 | 9,82881 | 2,095638686 | ENST00000260356 | 7057      | NM_003246    | THBS1          |
| A_23_P64058    | 6,1809  | 5,11396 | 2,094985124 | ENST00000377494 | 10235     | NM_153819    | RASGRP2        |
| A_23_P40527    | 2,6307  | 1,56383 | 2,094883478 | ENST00000621939 | 6899      | NM_080646    | TBX1           |
| A_22_P00006314 | 5,12865 | 4,06182 | 2,094825396 | N/A             | N/A       | N/A          | Inc-FAM91A1-1  |
| A_21_P0009823  | 5,74276 | 4,67652 | 2,093968878 | ENST00000415932 | 101929244 | NR_109953    | CASC20         |
| A_24_P345540   | 3,20856 | 2,14233 | 2,093954364 | ENST00000615791 | 84524     | NM_032494    | ZC3H8          |
| A_24_P384200   | 5,33178 | 4,26575 | 2,0936641   | ENST00000413691 | N/A       | N/A          | N/A            |
| A_33_P3346635  | 5,22315 | 4,15806 | 2,0923004   | N/A             | 56975     | AK125281     | FAM20C         |
| A_33_P3313779  | 6,70498 | 5,63994 | 2,092227888 | ENST00000397558 | 92558     | NM_207311    | CCDC64         |
| A_23_P165239   | 5,156   | 4,09112 | 2,091995865 | ENST00000609966 | 7757      | NM_007153    | ZNF208         |
| A_33_P3407105  | 8,01029 | 6,94564 | 2,091662378 | ENST00000370339 | 54915     | NM_017798    | YTHDF1         |
| A_33_P3260066  | 5,24276 | 4,17909 | 2,090242027 | ENST00000299694 | 146227    | NM_001178020 | BEAN1          |
| A_24_P116710   | 4,37296 | 3,30946 | 2,089995738 | ENST00000253796 | 10266     | NM_005854    | RAMP2          |
| A_23_P326142   | 8,45907 | 7,39559 | 2,089966764 | ENST00000623342 | 27099     | NR_027330    | SND1-IT1       |
| A_23_P412577   | 9,02457 | 7,96124 | 2,089749477 | ENST00000591280 | 147463    | NM_173505    | ANKRD29        |
| A_21_P0000149  | 8,74369 | 7,6804  | 2,089691538 | N/A             | 6936      | NM_001201335 | GCFC2          |
| A_33_P3363188  | 9,23379 | 8,17056 | 2,089604632 | N/A             | 644316    | N/A          | FLJ43315       |
| A_21_P0014129  | 3,34826 | 2,28534 | 2,089155675 | N/A             | 100505566 | NR_047568    | LINC00578      |
| A_23_P116840   | 12,249  | 11,1867 | 2,088258051 | ENST00000548915 | 60673     | NM_021934    | ATG101         |
| A_33_P3332625  | 6,18518 | 5,12305 | 2,088011995 | ENST00000565533 | 5542      | NM_199354    | PRB1           |
| A_19_P00324814 | 9,90874 | 8,84676 | 2,087794912 | N/A             | N/A       | N/A          | XLOC_I2_015561 |
| A_23_P65651    | 14,6063 | 13,5444 | 2,087679143 | ENST00000556645 | 7453      | NM_004184    | WARS           |
| A_22_P00002271 | 2,71377 | 1,65201 | 2,087476563 | N/A             | N/A       | N/A          | Inc-C10orf31-2 |
| A_21_P0009290  | 2,83654 | 1,77493 | 2,087259535 | ENST00000575056 | N/A       | N/A          | N/A            |
| A_23_P73835    | 9,35308 | 8,2916  | 2,087071462 | ENST00000370783 | 56180     | NM_019556    | MOSPD1         |
| A_22_P00014812 | 10,5903 | 9,52919 | 2,086536271 | ENST00000443037 | N/A       | N/A          | N/A            |

|                |         |         |             |                 |           |              |                 |
|----------------|---------|---------|-------------|-----------------|-----------|--------------|-----------------|
| A_33_P3365701  | 2,89403 | 1,83309 | 2,086290419 | N/A             | N/A       | N/A          | Inc-HERC1-1     |
| A_23_P64372    | 10,4667 | 9,40579 | 2,086247036 | ENST00000257264 | 6947      | NM_001062    | TCN1            |
| A_24_P225907   | 9,33153 | 8,27078 | 2,086015677 | ENST00000383775 | 285381    | NM_206831    | DPH3            |
| A_33_P3271455  | 2,69383 | 1,6332  | 2,085842174 | ENST00000252804 | 7837      | NM_012293    | PXDN            |
| A_33_P3222689  | 3,0646  | 2,00401 | 2,085784343 | ENST00000355016 | 286436    | NM_001164416 | H2BFM           |
| A_33_P3396562  | 3,88667 | 2,82622 | 2,085581947 | ENST00000507987 | N/A       | N/A          | N/A             |
| A_21_P0012778  | 2,67184 | 1,61162 | 2,085249482 | ENST00000510780 | N/A       | N/A          | N/A             |
| A_19_P00319553 | 3,208   | 2,14806 | 2,084844814 | ENST00000424786 | N/A       | N/A          | N/A             |
| A_33_P3385453  | 4,4482  | 3,38833 | 2,084743659 | N/A             | N/A       | N/A          | N/A             |
| A_23_P372331   | 10,0428 | 8,98305 | 2,084570262 | ENST00000434583 | 51095     | NM_182916    | TRNT1           |
| A_21_P0006975  | 2,84305 | 1,78344 | 2,084367984 | N/A             | N/A       | N/A          | Inc-DNAJC1-1    |
| A_23_P150343   | 2,5079  | 1,44857 | 2,083963486 | ENST00000525934 | 6588      | NM_003063    | SLN             |
| A_23_P256231   | 10,6854 | 9,62645 | 2,083414651 | ENST00000237281 | 84085     | NM_032145    | FBXO30          |
| A_21_P0011488  | 5,69838 | 4,63962 | 2,083140288 | N/A             | N/A       | N/A          | XLOC_I2_005553  |
| A_21_P0008336  | 2,63886 | 1,58025 | 2,082923711 | N/A             | N/A       | N/A          | Inc-C14orf166-1 |
| A_22_P00019603 | 2,43307 | 1,37464 | 2,082663848 | ENST00000515656 | N/A       | N/A          | N/A             |
| A_23_P27167    | 8,84132 | 7,78296 | 2,082562799 | ENST00000578666 | 246243    | NM_002936    | RNASEH1         |
| A_23_P88873    | 7,42441 | 6,36615 | 2,082418451 | ENST00000568107 | 8139      | NM_022041    | GAN             |
| A_23_P19619    | 10,4138 | 9,35562 | 2,082302981 | ENST00000541134 | 3096      | NM_002114    | HIVEP1          |
| A_22_P00005673 | 3,22864 | 2,17118 | 2,081264034 | N/A             | N/A       | N/A          | Inc-EIF4A3-1    |
| A_23_P251316   | 13,4659 | 12,4086 | 2,081033227 | ENST00000399050 | 1500      | NM_001331    | CTNND1          |
| A_33_P3277198  | 3,26535 | 2,20815 | 2,080888986 | ENST00000409701 | 9486      | NM_004854    | CHST10          |
| A_33_P3531979  | 11,1492 | 10,0922 | 2,080600533 | N/A             | 283352    | NR_104172    | LOC283352       |
| A_22_P00005206 | 3,09958 | 2,04284 | 2,080225605 | ENST00000555643 | N/A       | BG220086     | N/A             |
| A_24_P56281    | 11,1466 | 10,0899 | 2,080167929 | ENST00000614865 | 65981     | NM_001002259 | CAPRIN2         |
| A_33_P3292307  | 7,70407 | 6,64738 | 2,080153511 | ENST00000376804 | 29914     | NM_013319    | UBIAD1          |
| A_23_P156824   | 4,57639 | 3,51991 | 2,079850744 | ENST00000369947 | 3351      | NM_000863    | HTR1B           |
| A_22_P00020817 | 2,46723 | 1,41098 | 2,079519192 | N/A             | N/A       | N/A          | Inc-EEF1B2-3    |
| A_22_P00003996 | 6,63887 | 5,58283 | 2,079216518 | ENST00000444482 | N/A       | N/A          | N/A             |
| A_22_P00013896 | 3,30398 | 2,24833 | 2,078654524 | N/A             | 101928158 | NR_109923    | LAMA5-AS1       |
| A_33_P3237393  | 3,94862 | 2,89403 | 2,077127823 | N/A             | 7699      | NM_001300778 | ZNF140          |
| A_22_P00005036 | 2,67343 | 1,61892 | 2,077012646 | ENST00000562065 | 101929620 | XR_242539    | LINC01243       |
| A_33_P3346327  | 7,4775  | 6,42301 | 2,076983852 | ENST00000540551 | 403323    | NR_122077    | LOC403323       |

|                |         |         |             |                 |           |              |                |
|----------------|---------|---------|-------------|-----------------|-----------|--------------|----------------|
| A_21_P0012901  | 2,79201 | 1,73764 | 2,076811101 | N/A             | N/A       | N/A          | XLOC_I2_011996 |
| A_22_P00016703 | 3,66372 | 2,6094  | 2,076739125 | ENST00000430123 | N/A       | BX363383     | N/A            |
| A_24_P169343   | 10,6502 | 9,59594 | 2,076652758 | ENST00000375234 | 195827    | NM_153698    | AAED1          |
| A_21_P0006147  | 6,40821 | 5,35398 | 2,076609576 | N/A             | 101927042 | XR_242550    | LOC101927042   |
| A_21_P0010005  | 4,17295 | 3,11885 | 2,076422463 | N/A             | N/A       | N/A          | Inc-TASP1-4    |
| A_33_P3216297  | 10,1423 | 9,08823 | 2,076379285 | ENST00000415690 | 2908      | NM_001018077 | NR3C1          |
| A_33_P3274209  | 3,22043 | 2,16668 | 2,075918781 | N/A             | N/A       | N/A          | N/A            |
| A_22_P00013605 | 2,72987 | 1,67624 | 2,075746118 | ENST00000452503 | 391037    | N/A          | SKINTL         |
| A_22_P00017121 | 2,87623 | 1,82261 | 2,07573173  | N/A             | N/A       | N/A          | Inc-UBAP2-1    |
| A_21_P0000238  | 11,3199 | 10,2663 | 2,075702954 | N/A             | 26765     | NR_002433    | SNORD12C       |
| A_23_P160297   | 2,47485 | 1,42146 | 2,075400835 | ENST00000488417 | 84970     | NM_032884    | C1orf94        |
| A_33_P3224135  | 6,30928 | 5,25603 | 2,075199447 | ENST00000393389 | 338699    | NM_001300972 | ANKRD42        |
| A_21_P0000460  | 4,91668 | 3,8636  | 2,07495493  | N/A             | 100113379 | NR_003685    | SNORD121A      |
| A_32_P177024   | 11,5414 | 10,4884 | 2,074839873 | ENST00000414306 | 51119     | NM_016038    | SBDS           |
| A_24_P407235   | 7,94747 | 6,89457 | 2,074696061 | ENST00000552790 | 1407      | NM_004075    | CRY1           |
| A_33_P3239278  | 4,20872 | 3,15589 | 2,074595399 | ENST00000530162 | 390197    | NM_001004705 | OR4D10         |
| A_23_P207811   | 12,5736 | 11,5208 | 2,074552259 | ENST00000306846 | 10605     | NM_006451    | PAIP1          |
| A_33_P3665749  | 2,68292 | 1,63014 | 2,0745235   | ENST00000589921 | 148145    | NR_027318    | LINC00906      |
| A_21_P0009771  | 6,1683  | 5,11557 | 2,074451604 | N/A             | N/A       | N/A          | Inc-IGFL3-1    |
| A_33_P3243153  | 11,8664 | 10,8137 | 2,074408467 | ENST00000361060 | 2673      | NM_001244710 | GFPT1          |
| A_21_P0002341  | 2,63002 | 1,57736 | 2,074350953 | N/A             | N/A       | N/A          | Inc-CPO-1      |
| A_22_P00017854 | 2,56505 | 1,5124  | 2,074336575 | N/A             | N/A       | N/A          | Inc-ZCWPW2-1   |
| A_23_P405531   | 12,5783 | 11,5257 | 2,074264685 | ENST00000545156 | 58525     | NM_021241    | WIZ            |
| A_23_P258944   | 11,4449 | 10,3924 | 2,074120913 | ENST00000249356 | 4189      | NM_012328    | DNAJB9         |
| A_24_P226962   | 6,98861 | 5,93625 | 2,073919649 | ENST00000259335 | 23392     | NM_001080398 | KIAA0368       |
| A_21_P0000508  | 16,7536 | 15,7016 | 2,073402202 | N/A             | 100170227 | NR_024243    | SNAR-D         |
| A_22_P00004931 | 5,98768 | 4,93587 | 2,073129157 | N/A             | N/A       | N/A          | Inc-DBX1-1     |
| A_19_P00317872 | 9,32137 | 8,26978 | 2,072813045 | ENST00000521122 | N/A       | N/A          | N/A            |
| A_33_P3671729  | 2,69873 | 1,64719 | 2,072741208 | N/A             | 386671    | AK126671     | FLJ44715       |
| A_23_P214459   | 2,73394 | 1,68244 | 2,07268374  | ENST00000230381 | 5961      | NM_000322    | PRPH2          |
| A_23_P139786   | 14,5139 | 13,4626 | 2,072396425 | ENST00000257570 | 8638      | NM_003733    | OASL           |
| A_21_P0000511  | 15,9036 | 14,8526 | 2,071965527 | N/A             | 100170221 | NR_024342    | SNAR-H         |
| A_33_P3235217  | 12,8136 | 11,7627 | 2,071821914 | ENST00000372616 | 1503      | NM_001905    | CTPS1          |



|                |         |         |             |                 |           |              |                |
|----------------|---------|---------|-------------|-----------------|-----------|--------------|----------------|
| A_33_P3406714  | 2,98059 | 1,92974 | 2,071750112 | N/A             | N/A       | N/A          | XLOC_I2_015641 |
| A_22_P00023473 | 2,68751 | 1,63684 | 2,071491643 | N/A             | N/A       | N/A          | Inc-NSMAF-1    |
| A_21_P0000743  | 2,57471 | 1,52465 | 2,07061596  | N/A             | 388553    | NR_038267    | BHMG1          |
| A_24_P388252   | 7,14054 | 6,09069 | 2,070314582 | ENST00000234310 | 5534      | NM_000945    | PPP3R1         |
| A_32_P220715   | 12,8246 | 11,7749 | 2,070099338 | ENST00000556529 | 81631     | NM_022818    | MAP1LC3B       |
| A_21_P0008464  | 2,48283 | 1,43337 | 2,069754994 | N/A             | N/A       | N/A          | Inc-IRF2BPL-2  |
| A_23_P32175    | 11,1937 | 10,1445 | 2,06938202  | ENST00000559895 | 26468     | NM_014368    | LHX6           |
| A_33_P3260689  | 4,07179 | 3,02265 | 2,069295959 | ENST00000354514 | 474382    | NM_001017990 | H2AFB1         |
| A_22_P00001707 | 2,72329 | 1,67434 | 2,069023455 | ENST00000512859 | N/A       | N/A          | N/A            |
| A_32_P84242    | 8,54597 | 7,49722 | 2,068736647 | ENST00000510609 | 26049     | NM_015566    | FAM169A        |
| A_33_P3565133  | 3,47188 | 2,42319 | 2,068650613 | ENST00000419459 | 400238    | NR_033986    | LINC00642      |
| A_24_P150791   | 2,95735 | 1,90896 | 2,068220494 | ENST00000563609 | 57338     | NM_020655    | JPH3           |
| A_33_P3382296  | 2,63866 | 1,59059 | 2,067761798 | N/A             | 100129662 | NR_038405    | FGF13-AS1      |
| A_23_P21943    | 2,61106 | 1,563   | 2,067747466 | ENST00000324447 | 55511     | NM_018666    | SAGE1          |
| A_33_P3758973  | 4,851   | 3,80302 | 2,067632809 | N/A             | 57796     | AL137340     | DKFZP761C1711  |
| A_22_P00023153 | 3,40834 | 2,36046 | 2,067489496 | ENST00000521326 | N/A       | BC038731     | N/A            |
| A_22_P00021365 | 4,40142 | 3,35415 | 2,066615506 | N/A             | N/A       | N/A          | Inc-C9orf156-2 |
| A_22_P00011030 | 4,52208 | 3,47481 | 2,066615506 | N/A             | N/A       | N/A          | Inc-NT5E-1     |
| A_33_P3417358  | 2,69102 | 1,64406 | 2,066171488 | N/A             | N/A       | BC080646     | Inc-SNURF-3    |
| A_22_P00017109 | 3,05426 | 2,00777 | 2,065498482 | ENST00000569962 | N/A       | XM_005274652 | N/A            |
| A_33_P3262977  | 3,1351  | 2,0888  | 2,065226478 | ENST00000356606 | 10149     | NM_001079858 | GPR64          |
| A_23_P152906   | 5,36883 | 4,32261 | 2,065111961 | ENST00000251535 | 239       | NM_000697    | ALOX12         |
| A_33_P3321034  | 7,32032 | 6,27433 | 2,064782759 | ENST00000496550 | 91584     | NM_020911    | PLXNA4         |
| A_33_P3388482  | 7,33461 | 6,28863 | 2,064768447 | ENST00000342607 | 144404    | NM_001080825 | TMEM120B       |
| A_23_P376870   | 7,24995 | 6,20415 | 2,064510849 | ENST00000548641 | 122616    | NM_174891    | C14orf79       |
| A_24_P253003   | 5,64443 | 4,59913 | 2,063795468 | ENST00000322563 | 7481      | NM_004626    | WNT11          |
| A_22_P00025536 | 3,12656 | 2,08129 | 2,063752553 | ENST00000411436 | N/A       | N/A          | N/A            |
| A_24_P494454   | 8,96573 | 7,92051 | 2,06368103  | N/A             | 169981    | NM_001010862 | SPIN3          |
| A_21_P0000226  | 5,24865 | 4,20409 | 2,062737159 | N/A             | 319139    | NR_001276    | SNORD56B       |
| A_33_P3225760  | 2,38552 | 1,34101 | 2,062665671 | ENST00000412923 | 54510     | NM_001300828 | PCDH18         |
| A_23_P14083    | 12,8533 | 11,8089 | 2,062508407 | ENST00000429635 | 347902    | NM_181847    | AMIGO2         |
| A_22_P00008254 | 5,87508 | 4,83082 | 2,06230827  | N/A             | 100885782 | NR_047700    | MYO16-AS1      |
| A_33_P3333995  | 6,67666 | 5,63278 | 2,061765138 | ENST00000564204 | 3801      | DB072080     | KIFC3          |

|                |         |         |             |                 |           |              |               |
|----------------|---------|---------|-------------|-----------------|-----------|--------------|---------------|
| A_22_P00025166 | 5,55854 | 4,51485 | 2,061493625 | N/A             | N/A       | BU617929     | Inc-CTDSPL2-2 |
| A_23_P366936   | 14,6434 | 13,5998 | 2,061365027 | ENST00000252250 | 286887    | NM_173086    | KRT6C         |
| A_21_P0006145  | 3,27428 | 2,23073 | 2,061293586 | N/A             | N/A       | N/A          | Inc-ALDH1B1-2 |
| A_21_P0014715  | 7,69511 | 6,65186 | 2,060864997 | N/A             | N/A       | BC013229     | N/A           |
| A_21_P0011981  | 4,4081  | 3,36505 | 2,06057932  | ENST00000427108 | 101927217 | N/A          | LINC01473     |
| A_22_P00004573 | 2,89197 | 1,84894 | 2,060550755 | ENST00000434868 | N/A       | XR_430430    | N/A           |
| A_22_P00012130 | 4,30631 | 3,26394 | 2,059608315 | N/A             | 255130    | NR_034081    | IGFBP7-AS1    |
| A_21_P0003062  | 2,52837 | 1,48641 | 2,059023078 | N/A             | N/A       | N/A          | Inc-NLGN1-1   |
| A_33_P3343957  | 10,1383 | 9,09635 | 2,059008806 | ENST00000405015 | 23301     | NM_015252    | EHBP1         |
| A_23_P81590    | 2,6831  | 1,64115 | 2,059008806 | ENST00000512670 | 5145      | NM_000440    | PDE6A         |
| A_22_P00018247 | 2,58369 | 1,54196 | 2,058694847 | N/A             | N/A       | N/A          | Inc-ZNF708-1  |
| A_23_P372988   | 6,3217  | 5,28017 | 2,058409471 | ENST00000419421 | 163154    | NM_001134316 | PRR22         |
| A_23_P163087   | 12,1464 | 11,1052 | 2,057938687 | ENST00000541773 | 22795     | NM_007361    | NID2          |
| A_23_P132121   | 12,5279 | 11,487  | 2,057510795 | ENST00000270162 | 150094    | NM_173354    | SIK1          |
| A_21_P0013920  | 2,4787  | 1,43781 | 2,057496534 | N/A             | 101930441 | XM_006710237 | LOC101930441  |
| A_23_P9894     | 9,80085 | 8,76033 | 2,056968926 | ENST00000437750 | 10196     | NM_005788    | PRMT3         |
| A_21_P0010412  | 2,62777 | 1,58754 | 2,056555491 | N/A             | N/A       | N/A          | Inc-ISX-1     |
| A_24_P690924   | 12,0039 | 10,9637 | 2,056512727 | ENST00000262544 | 10483     | NM_032985    | SEC23B        |
| A_21_P0000279  | 3,15916 | 2,11917 | 2,056213401 | ENST00000565907 | 26787     | NR_002735    | SNORD61       |
| A_33_P3211432  | 9,14097 | 8,10132 | 2,05572887  | ENST00000435988 | 653361    | NM_000265    | NCF1          |
| A_21_P0009991  | 3,98322 | 2,94376 | 2,055458152 | N/A             | N/A       | N/A          | Inc-COL20A1-3 |
| A_33_P3305058  | 2,96176 | 1,92255 | 2,055102    | ENST00000451399 | 23113     | AK125228     | CUL9          |
| A_33_P3533325  | 2,92218 | 1,88299 | 2,05507351  | ENST00000269197 | 80816     | XM_005258356 | ASXL3         |
| A_24_P208567   | 8,81204 | 7,77314 | 2,054660456 | ENST00000409599 | 8809      | NM_003855    | IL18R1        |
| A_22_P00021382 | 5,79615 | 4,75732 | 2,054560765 | N/A             | N/A       | N/A          | Inc-CCDC83-1  |
| A_24_P266728   | 14,1056 | 13,0671 | 2,054090862 | ENST00000377390 | 7536      | NM_004630    | SF1           |
| A_33_P3383009  | 5,33347 | 4,29509 | 2,053920014 | N/A             | N/A       | N/A          | N/A           |
| A_21_P0008417  | 5,43079 | 4,39245 | 2,053863068 | N/A             | N/A       | N/A          | Inc-PRKD1-2   |
| A_21_P0003110  | 4,74955 | 3,71142 | 2,053564128 | N/A             | N/A       | N/A          | Inc-GLB1-1    |
| A_33_P3366120  | 14,8469 | 13,8088 | 2,053521426 | ENST00000369850 | 2316      | NM_001110556 | FLNA          |
| A_33_P3247489  | 2,57154 | 1,53368 | 2,05317984  | ENST00000301896 | 283129    | NM_001037225 | C11orf85      |
| A_22_P00009065 | 2,58812 | 1,55028 | 2,053151377 | N/A             | N/A       | N/A          | Inc-LEPRE1-1  |
| A_21_P0003742  | 2,70426 | 1,66652 | 2,053009068 | N/A             | N/A       | N/A          | Inc-IGFBP7-2  |

|                |         |         |             |                 |           |              |                |
|----------------|---------|---------|-------------|-----------------|-----------|--------------|----------------|
| A_23_P168556   | 11,7374 | 10,6999 | 2,052667568 | ENST00000222812 | 6804      | NM_004603    | STX1A          |
| A_33_P3278435  | 13,5181 | 12,4807 | 2,052525293 | ENST00000545127 | 51287     | NM_016565    | COA4           |
| A_21_P0013512  | 14,5359 | 13,4986 | 2,052383027 | ENST00000518311 | N/A       | N/A          | N/A            |
| A_22_P00001518 | 4,67015 | 3,63291 | 2,052297673 | N/A             | 101929064 | NR_110879    | LOC101929064   |
| A_24_P673786   | 9,35781 | 8,32079 | 2,051984737 | ENST00000376573 | 5305      | NM_005028    | PIP4K2A        |
| A_24_P704878   | 2,39457 | 1,35762 | 2,051885177 | N/A             | N/A       | N/A          | N/A            |
| A_33_P3286066  | 6,49263 | 5,45583 | 2,051671849 | ENST00000393925 | 90102     | NM_001134438 | PHLDB2         |
| A_21_P0011219  | 3,21906 | 2,18236 | 2,051529643 | ENST00000434100 | 101928898 | N/A          | LOC101928898   |
| A_21_P0002945  | 2,56363 | 1,52706 | 2,051344789 | N/A             | N/A       | N/A          | Inc-TTC21A-2   |
| A_21_P0001085  | 3,46656 | 2,43014 | 2,051131518 | ENST00000432961 | 100130417 | NR_026874    | LOC100130417   |
| A_24_P255986   | 2,92772 | 1,89153 | 2,050804545 | ENST00000328794 | 388333    | NM_001128076 | SPDYE4         |
| A_33_P3392560  | 3,47224 | 2,43612 | 2,050705042 | ENST00000556886 | 100506412 | NR_102701    | LINC00871      |
| A_33_P3316115  | 2,98914 | 1,95331 | 2,050292865 | N/A             | 101927102 | NR_110903    | ITFG1-AS1      |
| A_22_P00014298 | 2,65517 | 1,61948 | 2,050093913 | N/A             | 94009     | NR_027786    | SERHL          |
| A_22_P00005022 | 6,21284 | 5,17722 | 2,049994444 | N/A             | N/A       | BX099435     | Inc-DDX31-1    |
| A_33_P3254844  | 8,00822 | 6,97268 | 2,049880772 | ENST00000401731 | 1087      | NM_006890    | CEACAM7        |
| A_33_P3330353  | 7,71629 | 6,68115 | 2,049312503 | ENST00000370777 | 56180     | NM_019556    | MOSPD1         |
| A_33_P3226755  | 5,58174 | 4,5466  | 2,049312503 | N/A             | 2316      | AK125630     | FLNA           |
| A_22_P00000702 | 3,92128 | 2,88616 | 2,049284094 | N/A             | 101927671 | NR_108079    | MIR202HG       |
| A_23_P218358   | 5,66153 | 4,62687 | 2,048630788 | ENST00000574478 | 374286    | NM_001282540 | CDRT1          |
| A_23_P140876   | 2,78307 | 1,74854 | 2,048446196 | ENST00000301732 | 21        | NM_001089    | ABCA3          |
| A_21_P0005217  | 4,20755 | 3,17304 | 2,048417799 | N/A             | N/A       | N/A          | Inc-IL6-3      |
| A_21_P0013184  | 4,74814 | 3,71363 | 2,048417799 | N/A             | N/A       | N/A          | XLOC_I2_013311 |
| A_22_P00020781 | 3,35543 | 2,321   | 2,048304214 | N/A             | N/A       | N/A          | Inc-NT5E-1     |
| A_32_P128701   | 10,7049 | 9,67052 | 2,048233226 | ENST00000450251 | 54532     | NM_019050    | USP53          |
| A_33_P3210605  | 3,6954  | 2,6611  | 2,048119651 | N/A             | N/A       | N/A          | N/A            |
| A_21_P0010726  | 4,08318 | 3,04925 | 2,047594449 | N/A             | 100293748 | XR_425012    | LOC100293748   |
| A_22_P00009941 | 11,7713 | 10,7376 | 2,047268039 | ENST00000623724 | 22806     | NM_001284514 | IKZF3          |
| A_33_P3393088  | 2,7327  | 1,699   | 2,047268039 | ENST00000624615 | 100131320 | BC044241     | RAB6C-AS1      |
| A_22_P00025260 | 2,39332 | 1,35982 | 2,046984247 | N/A             | N/A       | N/A          | Inc-SPATA5-2   |
| A_22_P00004746 | 3,14419 | 2,11083 | 2,046785616 | N/A             | N/A       | N/A          | Inc-CTR9-3     |
| A_23_P202143   | 12,3489 | 11,3157 | 2,046558633 | ENST00000605788 | 9221      | NM_001284388 | NOLC1          |
| A_23_P165608   | 7,19748 | 6,16437 | 2,046430966 | ENST00000446927 | 10505     | NM_004263    | SEMA4F         |

|                |         |         |             |                 |           |              |                |
|----------------|---------|---------|-------------|-----------------|-----------|--------------|----------------|
| A_22_P00001367 | 8,20714 | 7,17431 | 2,046033831 | N/A             | 84777     | NR_119377    | DLGAP1-AS2     |
| A_23_P90172    | 11,5459 | 10,5131 | 2,045991285 | ENST00000200453 | 23645     | NM_014330    | PPP1R15A       |
| A_23_P258272   | 13,0011 | 11,9686 | 2,045565877 | ENST00000466579 | 10807     | NM_001039707 | SDCCAG3        |
| A_23_P148990   | 2,3799  | 1,34777 | 2,04504133  | ENST00000271588 | 83872     | NM_031935    | HMCN1          |
| A_33_P3390226  | 3,78598 | 2,75447 | 2,04416266  | N/A             | N/A       | N/A          | N/A            |
| A_21_P0002929  | 4,08253 | 3,0513  | 2,043765964 | N/A             | N/A       | N/A          | Inc-TSEN2-1    |
| A_23_P414281   | 3,63989 | 2,60878 | 2,043595976 | ENST00000586256 | 146562    | NM_139170    | C16orf71       |
| A_22_P00006863 | 2,93099 | 1,90006 | 2,043341019 | ENST00000557910 | N/A       | CA412304     | N/A            |
| A_33_P3307049  | 3,92794 | 2,89789 | 2,042095024 | N/A             | 100129363 | AK128478     | LOC100129363   |
| A_24_P394940   | 2,69809 | 1,66806 | 2,042066715 | ENST00000477500 | 1571      | NM_000773    | CYP2E1         |
| A_21_P0010702  | 3,14388 | 2,11417 | 2,04161382  | ENST00000454285 | N/A       | N/A          | N/A            |
| A_21_P0000679  | 9,91478 | 8,88519 | 2,04144401  | ENST00000557682 | 100507217 | NR_037601    | LINC01578      |
| A_33_P3271850  | 3,25727 | 2,22787 | 2,041175174 | ENST00000454800 | 54020     | XR_433655    | SLC37A1        |
| A_22_P00014837 | 9,44704 | 8,41774 | 2,041033695 | N/A             | N/A       | N/A          | Inc-SLC46A2-1  |
| A_24_P140666   | 2,64116 | 1,61199 | 2,040849788 | ENST00000274605 | 23138     | NM_015111    | N4BP3          |
| A_21_P0013783  | 5,68634 | 4,65719 | 2,040821496 | N/A             | N/A       | N/A          | XLOC_I2_015585 |
| A_33_P3419098  | 6,21897 | 5,18987 | 2,040750768 | ENST00000322810 | 5339      | NM_201380    | PLEC           |
| A_22_P00002362 | 2,45257 | 1,42397 | 2,04004362  | N/A             | N/A       | N/A          | Inc-C12orf45-1 |
| A_22_P00016421 | 5,81815 | 4,7896  | 2,039972919 | N/A             | N/A       | DB012195     | Inc-TMEM241-1  |
| A_21_P0000683  | 2,83735 | 1,80885 | 2,03990222  | ENST00000429807 | 100287632 | N/A          | LOC100287632   |
| A_23_P160460   | 10,4492 | 9,42076 | 2,039817384 | ENST00000367926 | 6675      | NM_003115    | UAP1           |
| A_24_P327181   | 5,1022  | 4,07391 | 2,039605311 | ENST00000246914 | 65266     | NM_032387    | WNK4           |
| A_32_P7581     | 2,69955 | 1,67152 | 2,03923777  | ENST00000614657 | 54084     | NM_144991    | TSPEAR         |
| A_33_P3389678  | 3,90946 | 2,88193 | 2,038531147 | N/A             | 56928     | NM_001077238 | SPPL2B         |
| A_24_P942630   | 7,4316  | 6,40453 | 2,037881269 | ENST00000254846 | 23135     | NM_001080424 | KDM6B          |
| A_33_P3354631  | 3,6258  | 2,59886 | 2,037697646 | N/A             | N/A       | AK127208     | N/A            |
| A_22_P00002811 | 3,07627 | 2,04935 | 2,037669398 | N/A             | N/A       | N/A          | Inc-C2orf42-3  |
| A_22_P00025959 | 7,35429 | 6,32738 | 2,037655274 | ENST00000366956 | 5784      | NM_005401    | PTPN14         |
| A_22_P00013987 | 2,67123 | 1,64438 | 2,037570532 | ENST00000584078 | N/A       | BU590303     | N/A            |
| A_21_P0010853  | 3,01929 | 1,99249 | 2,037499916 | N/A             | N/A       | N/A          | XLOC_I2_001841 |
| A_23_P155890   | 10,5355 | 9,50935 | 2,036582136 | ENST00000286794 | 84779     | NM_032693    | NAA11          |
| A_21_P0013437  | 4,99739 | 3,97147 | 2,036257482 | N/A             | N/A       | N/A          | XLOC_I2_013874 |
| A_23_P319719   | 8,06065 | 7,03474 | 2,036243368 | ENST00000317555 | 192111    | NM_138575    | PGAM5          |

|                |         |         |             |                 |           |              |              |
|----------------|---------|---------|-------------|-----------------|-----------|--------------|--------------|
| A_33_P3326989  | 6,07805 | 5,05226 | 2,036074005 | ENST00000193029 | 5891      | NM_014226    | MOK          |
| A_32_P175739   | 13,082  | 12,0572 | 2,034677298 | ENST00000290573 | 3099      | NM_000189    | HK2          |
| A_23_P119196   | 9,3457  | 8,32145 | 2,033901764 | ENST00000248071 | 10365     | NM_016270    | KLF2         |
| A_33_P3292886  | 16,8764 | 15,8522 | 2,033831276 | ENST00000330722 | 3853      | NM_005554    | KRT6A        |
| A_21_P0009303  | 2,75211 | 1,72796 | 2,03376079  | N/A             | N/A       | N/A          | Inc-ZNF287-1 |
| A_22_P00009012 | 2,70045 | 1,67633 | 2,033718499 | ENST00000424329 | 101930748 | N/A          | LINC00367    |
| A_23_P215790   | 11,1389 | 10,115  | 2,033408397 | ENST00000454757 | 1956      | NM_005228    | EGFR         |
| A_33_P3231090  | 3,48489 | 2,461   | 2,033394302 | N/A             | 6919      | BC098585     | TCEA2        |
| A_32_P72181    | 4,65747 | 3,63365 | 2,033295644 | ENST00000591469 | 647946    | NR_024391    | LINC00669    |
| A_22_P00024581 | 2,86853 | 1,84478 | 2,03319699  | ENST00000444442 | N/A       | N/A          | N/A          |
| A_23_P45304    | 8,65147 | 7,62773 | 2,033182897 | ENST00000378616 | 7504      | NM_021083    | XK           |
| A_23_P17354    | 3,03675 | 2,01316 | 2,032971514 | ENST00000438466 | 78997     | NM_024034    | GDAP1L1      |
| A_19_P00812250 | 2,53683 | 1,51336 | 2,032802423 | ENST00000342988 | 4089      | NM_005359    | SMAD4        |
| A_33_P3318627  | 3,79835 | 2,77548 | 2,03195718  | ENST00000566665 | 2903      | AK308862     | GRIN2A       |
| A_33_P3382157  | 14,9411 | 13,9183 | 2,031858591 | ENST00000532317 | 8301      | NM_007166    | PICALM       |
| A_32_P83845    | 10,1588 | 9,13602 | 2,031830424 | ENST00000337919 | 23462     | NM_001040708 | HEY1         |
| A_22_P00021552 | 5,13251 | 4,10975 | 2,031802257 | N/A             | N/A       | DA456694     | Inc-CGN-1    |
| A_22_P00020862 | 2,60452 | 1,5818  | 2,031745924 | N/A             | N/A       | BE891551     | Inc-NAPB-2   |
| A_32_P54274    | 3,54575 | 2,52312 | 2,031619181 | ENST00000304374 | 1816      | NM_000798    | DRD5         |
| A_33_P3840512  | 7,87573 | 6,85312 | 2,031591017 | ENST00000338625 | 10166     | NM_014252    | SLC25A15     |
| A_23_P117580   | 6,88741 | 5,86492 | 2,031422041 | ENST00000334696 | 957       | NM_001249    | ENTPD5       |
| A_33_P3243649  | 6,70333 | 5,68099 | 2,031210841 | N/A             | 100131831 | AK129685     | LOC100131831 |
| A_32_P26969    | 10,9329 | 9,91123 | 2,030267748 | ENST00000262109 | 157697    | NM_207332    | ERICH1       |
| A_32_P69849    | 9,61568 | 8,59422 | 2,029972242 | ENST00000333643 | 340542    | NM_001012978 | BEX5         |
| A_33_P3339143  | 3,71116 | 2,68971 | 2,029958171 | ENST00000450457 | 392509    | NM_001162491 | ARL13A       |
| A_33_P3229272  | 4,88995 | 3,86888 | 2,029423559 | ENST00000553953 | 9564      | NM_014567    | BCAR1        |
| A_33_P3294222  | 5,51893 | 4,49799 | 2,029240698 | ENST00000334583 | 146206    | NM_001013838 | RLTPR        |
| A_22_P00024371 | 5,78558 | 4,76475 | 2,029085982 | ENST00000335223 | N/A       | BC032117     | N/A          |
| A_33_P3232173  | 7,09305 | 6,07229 | 2,028987532 | ENST00000338910 | 55269     | N/A          | PSPC1        |
| A_33_P3258004  | 2,8338  | 1,81311 | 2,028889088 | ENST00000546960 | 56899     | NM_152788    | ANKS1B       |
| A_23_P51761    | 5,13136 | 4,11079 | 2,028720336 | ENST00000359610 | 81448     | NM_001005279 | OR6K2        |
| A_23_P378690   | 7,31829 | 6,29778 | 2,028635966 | ENST00000458549 | 169200    | NM_001008495 | TMEM64       |
| A_33_P3329632  | 2,69902 | 1,67867 | 2,028410995 | N/A             | 644767    | AK126788     | FLJ44838     |

|                |         |         |             |                 |           |              |              |
|----------------|---------|---------|-------------|-----------------|-----------|--------------|--------------|
| A_24_P101786   | 6,92288 | 5,90301 | 2,027736234 | ENST00000474159 | 63892     | NM_001271644 | THADA        |
| A_21_P0014153  | 3,25601 | 2,23648 | 2,027258413 | N/A             | 102724201 | NR_125875    | LOC102724201 |
| A_21_P0000294  | 8,19651 | 7,17703 | 2,027188155 | ENST00000439232 | 26776     | NR_002910    | SNORA71B     |
| A_23_P19020    | 4,44222 | 3,42296 | 2,026879048 | ENST00000509023 | 9627      | NM_005460    | SNCAIP       |
| A_22_P00009482 | 7,2841  | 6,26499 | 2,02666832  | N/A             | 100272228 | N/A          | LINC00894    |
| A_22_P00005460 | 3,85391 | 2,83487 | 2,026569988 | ENST00000518623 | 619351    | NR_026765    | LINC00589    |
| A_22_P00007204 | 7,22128 | 6,20261 | 2,026050311 | ENST00000400282 | 407975    | NR_027349    | MIR17HG      |
| A_23_P148546   | 11,8704 | 10,8518 | 2,025952009 | ENST00000393710 | 8260      | NM_003491    | NAA10        |
| A_33_P3384108  | 9,3527  | 8,3344  | 2,025530768 | ENST00000477688 | 6573      | NM_194255    | SLC19A1      |
| A_32_P66035    | 3,94187 | 2,92389 | 2,025081541 | ENST00000280734 | 144110    | NM_153347    | TMEM86A      |
| A_33_P3242234  | 12,1852 | 11,1673 | 2,02496925  | ENST00000369505 | 474383    | NM_001007523 | F8A2         |
| A_21_P0000259  | 7,2638  | 6,24614 | 2,024632413 | ENST00000537925 | 9303      | NR_002565    | SNORD25      |
| A_24_P382467   | 8,62699 | 7,60951 | 2,024379823 | ENST00000589166 | 29985     | NM_144564    | SLC39A3      |
| A_22_P00020603 | 2,53812 | 1,52067 | 2,024337727 | ENST00000561316 | N/A       | N/A          | N/A          |
| A_33_P3284045  | 3,50607 | 2,48866 | 2,024281602 | ENST00000341435 | 152110    | XR_427255    | NEK10        |
| A_33_P3358601  | 5,12048 | 4,10309 | 2,024253539 | ENST00000382123 | 402778    | NM_001170820 | IFITM10      |
| A_21_P0000451  | 5,68394 | 4,66667 | 2,024085174 | N/A             | 100033439 | NR_003341    | SNORD116-27  |
| A_23_P7056     | 8,1792  | 7,16223 | 2,023664321 | ENST00000356260 | 55153     | NM_018115    | SDAD1        |
| A_22_P00008038 | 4,99441 | 3,97747 | 2,02362224  | ENST00000514062 | 3490      | NM_001253835 | IGFBP7       |
| A_33_P3236117  | 6,69342 | 5,67648 | 2,02362224  | ENST00000483240 | N/A       | N/A          | N/A          |
| A_33_P3354399  | 2,3709  | 1,35423 | 2,023243555 | ENST00000397907 | 386683    | NM_198697    | KRTAP12-3    |
| A_33_P3259198  | 2,60954 | 1,59296 | 2,023117343 | ENST00000375353 | 348013    | NM_182614    | TMEM255B     |
| A_33_P3344423  | 2,87287 | 1,85648 | 2,02285092  | ENST00000376071 | 259197    | NM_001145467 | NCR3         |
| A_21_P0000302  | 10,985  | 9,96867 | 2,022766794 | ENST00000534079 | 654320    | NR_002920    | SNORA8       |
| A_33_P3271810  | 3,78971 | 2,77348 | 2,022626591 | ENST00000568004 | 23035     | NM_001289003 | PHLPP2       |
| A_23_P361049   | 11,8902 | 10,8741 | 2,022444342 | ENST00000392318 | 4430      | NM_012223    | MYO1B        |
| A_33_P3320888  | 6,80207 | 5,786   | 2,022402287 | ENST00000452463 | 64764     | NM_001253775 | CREB3L2      |
| A_23_P113793   | 10,4192 | 9,40332 | 2,022135958 | ENST00000317012 | 79413     | NM_024508    | ZBED2        |
| A_23_P20558    | 9,24692 | 8,23104 | 2,022135958 | ENST00000381854 | 55664     | HQ447209     | CDC37L1      |
| A_23_P256855   | 10,6918 | 9,67618 | 2,021771565 | ENST00000455854 | 57510     | NM_020750    | XPO5         |
| A_33_P3239569  | 9,67052 | 8,65498 | 2,021659457 | ENST00000370562 | 6227      | BC027976     | RPS21        |
| A_22_P00012495 | 4,38437 | 3,36894 | 2,021505319 | N/A             | N/A       | DB457315     | Inc-PSD2-1   |
| A_24_P22800    | 3,62344 | 2,60801 | 2,021505319 | ENST00000306322 | 5680      | NM_002785    | PSG11        |

|                |         |         |             |                 |           |              |              |
|----------------|---------|---------|-------------|-----------------|-----------|--------------|--------------|
| A_21_P0010750  | 7,74929 | 6,73394 | 2,021393227 | ENST00000424587 | 102725199 | BC031359     | LOC102725199 |
| A_24_P11791    | 13,9132 | 12,8979 | 2,021323172 | ENST00000334256 | 3840      | NM_002268    | KPNA4        |
| A_33_P3404824  | 8,45535 | 7,44014 | 2,021197079 | ENST00000394226 | 91975     | NM_001172831 | ZNF300       |
| A_22_P00014995 | 4,9361  | 3,92128 | 2,020650768 | N/A             | 102723385 | NR_119379    | LOC102723385 |
| A_22_P00019630 | 2,6214  | 1,60686 | 2,020258635 | N/A             | N/A       | N/A          | Inc-JAK1-3   |
| A_22_P00010423 | 2,76038 | 1,74591 | 2,020160614 | ENST00000517731 | N/A       | N/A          | N/A          |
| A_24_P276463   | 4,11523 | 3,10089 | 2,019978588 | ENST00000593346 | 100132967 | NR_027401    | FAM223A      |
| A_33_P3316790  | 2,41918 | 1,40514 | 2,019558588 | ENST00000299164 | 170689    | NM_139055    | ADAMTS15     |
| A_21_P0009468  | 3,86841 | 2,85447 | 2,019418608 | N/A             | N/A       | N/A          | Inc-HRH4-7   |
| A_33_P3416483  | 6,40093 | 5,38735 | 2,01891476  | N/A             | 284702    | NR_026778    | HNRNPU-AS1   |
| A_23_P89665    | 3,19856 | 2,18542 | 2,018299115 | ENST00000251646 | 3884      | NM_002279    | KRT33B       |
| A_33_P3749627  | 2,95175 | 1,93869 | 2,0181872   | N/A             | 57242     | AB007978     | KIAA0509     |
| A_23_P206293   | 3,37951 | 2,36646 | 2,018173211 | ENST00000564607 | 221188    | XM_006721169 | GPR114       |
| A_23_P34093    | 12,6634 | 11,6506 | 2,017823519 | ENST00000369620 | 2539      | NM_000402    | G6PD         |
| A_23_P101796   | 5,019   | 4,00666 | 2,017180243 | ENST00000600440 | 85360     | NM_033025    | SYDE1        |
| A_33_P3333787  | 3,63604 | 2,62372 | 2,017152279 | N/A             | N/A       | AF132204     | N/A          |
| A_33_P3280157  | 8,87026 | 7,85802 | 2,017040427 | ENST00000567527 | 727708    | NR_001290    | SNORD116-19  |
| A_23_P40039    | 11,5957 | 10,5837 | 2,01670491  | ENST00000393001 | 83607     | NM_031445    | AMMECR1L     |
| A_33_P3401138  | 5,27301 | 4,26102 | 2,016690931 | N/A             | N/A       | N/A          | N/A          |
| A_21_P0001262  | 2,51248 | 1,50095 | 2,016048016 | N/A             | N/A       | N/A          | Inc-UBIAD1-2 |
| A_23_P308097   | 12,1088 | 11,0975 | 2,015726636 | ENST00000518532 | 5516      | NM_001009552 | PPP2CB       |
| A_33_P3217020  | 8,11093 | 7,09966 | 2,01568472  | ENST00000428637 | 65059     | NM_203365    | RAPH1        |
| A_33_P3221009  | 4,2927  | 3,28144 | 2,015670749 | ENST00000382488 | N/A       | N/A          | N/A          |
| A_24_P49997    | 2,77124 | 1,76004 | 2,015586921 | ENST00000358571 | 345456    | NM_001029886 | PFN3         |
| A_22_P00021903 | 2,44258 | 1,43143 | 2,015517067 | ENST00000455530 | 101928540 | NR_125859    | LOC101928540 |
| A_33_P3372910  | 11,4108 | 10,3999 | 2,015167835 | N/A             | 23586     | NM_014314    | DDX58        |
| A_23_P154338   | 3,64927 | 2,63847 | 2,015028159 | ENST00000611312 | 80303     | NM_025202    | EFHD1        |
| A_23_P165355   | 10,3894 | 9,37877 | 2,014790732 | ENST00000281828 | 10056     | XM_006712170 | FARSB        |
| A_33_P3334923  | 3,49717 | 2,48683 | 2,014385775 | ENST00000605386 | 338758    | NR_028138    | LINC00936    |
| A_33_P3244784  | 2,51718 | 1,50698 | 2,014190307 | N/A             | 283463    | N/A          | MUC19        |
| A_33_P3417542  | 2,84689 | 1,83677 | 2,014078619 | ENST00000506586 | N/A       | N/A          | N/A          |
| A_32_P24585    | 6,43088 | 5,42087 | 2,01392506  | ENST00000311601 | 285590    | NM_001017995 | SH3PXD2B     |
| A_33_P3370404  | 11,3439 | 10,3339 | 2,0139111   | ENST00000436171 | 24145     | NM_015368    | PANX1        |

|                |         |         |              |                 |           |              |                |
|----------------|---------|---------|--------------|-----------------|-----------|--------------|----------------|
| A_24_P152968   | 12,9294 | 11,9195 | 2,013771511  | ENST00000477661 | 1645      | NM_001353    | AKR1C1         |
| A_23_P404678   | 8,64752 | 7,63784 | 2,01346445   | ENST00000222120 | 9545      | NM_004283    | RAB3D          |
| A_33_P3418170  | 9,60649 | 8,59703 | 2,013157435  | ENST00000379883 | 23586     | NM_014314    | DDX58          |
| A_23_P27917    | 4,90397 | 3,89454 | 2,0131115573 | ENST00000334920 | 26539     | NM_013940    | OR10H1         |
| A_33_P3366614  | 3,67114 | 2,66173 | 2,013087666  | N/A             | N/A       | N/A          | N/A            |
| A_33_P3245650  | 2,55394 | 1,5447  | 2,012850468  | ENST00000619172 | N/A       | XM_006726815 | N/A            |
| A_21_P0003012  | 2,85418 | 1,84526 | 2,012404053  | N/A             | N/A       | N/A          | Inc-GAP43-9    |
| A_24_P406006   | 8,69266 | 7,68387 | 2,012222725  | ENST00000611696 | 79888     | NM_024830    | LPCAT1         |
| A_22_P00003522 | 2,73484 | 1,7263  | 2,011874063  | ENST00000577546 | N/A       | AF420438     | N/A            |
| A_33_P3328666  | 10,2026 | 9,19408 | 2,011846173  | ENST00000310418 | 1212      | NM_007097    | CLTB           |
| A_22_P00015350 | 3,16464 | 2,15659 | 2,011190862  | N/A             | N/A       | BG199219     | Inc-SPRYD3-1   |
| A_33_P3352134  | 6,7309  | 5,72295 | 2,011051462  | ENST00000473865 | 55054     | NM_030803    | ATG16L1        |
| A_21_P0003186  | 2,86729 | 1,8595  | 2,010828441  | ENST00000471357 | 339894    | NR_034007    | LINC00880      |
| A_33_P3330473  | 7,0203  | 6,01253 | 2,010800566  | ENST00000434854 | 55285     | XR_244476    | RBM41          |
| A_33_P3288824  | 3,64251 | 2,63484 | 2,010661192  | N/A             | 83740     | NM_080720    | H2AFB3         |
| A_23_P123539   | 12,3895 | 11,3819 | 2,010563637  | ENST00000517754 | 5520      | NM_002717    | PPP2R2A        |
| A_24_P913339   | 9,79695 | 8,78944 | 2,010438215  | ENST00000429494 | 54978     | NM_017877    | SLC35F6        |
| A_22_P00017764 | 4,78533 | 3,77814 | 2,009992335  | N/A             | N/A       | AK125966     | Inc-YTHDC2-1   |
| A_23_P32253    | 12,2846 | 11,2776 | 2,009727641  | ENST00000297689 | 4783      | NM_005384    | NFIL3          |
| A_22_P00006001 | 2,48317 | 1,47619 | 2,00969978   | N/A             | N/A       | N/A          | Inc-FADD-1     |
| A_32_P809810   | 4,17909 | 3,17214 | 2,00965799   | N/A             | 100130433 | AK096255     | LOC100130433   |
| A_22_P00020423 | 2,67796 | 1,67113 | 2,009490839  | N/A             | N/A       | CN288601     | Inc-PANK3-5    |
| A_33_P3272921  | 9,25199 | 8,2455  | 2,009017318  | ENST00000263620 | 1820      | NM_005224    | ARID3A         |
| A_21_P0000881  | 2,44473 | 1,43833 | 2,008891992  | ENST00000592640 | 100631378 | NR_040015    | LOC100631378   |
| A_22_P00006479 | 5,23628 | 4,22993 | 2,008822371  | N/A             | 100506994 | NR_038282    | PTPRG-AS1      |
| A_24_P152649   | 11,2299 | 10,2237 | 2,00861352   | N/A             | 644189    | NR_033748    | LOC644189      |
| A_33_P3371775  | 2,39416 | 1,38798 | 2,008585675  | N/A             | 729187    | AK130923     | LOC729187      |
| A_21_P0007808  | 3,37197 | 2,36587 | 2,008474298  | N/A             | N/A       | N/A          | Inc-RIMBP2-2   |
| A_33_P3245679  | 9,295   | 8,28897 | 2,008376849  | N/A             | 100129940 | NM_001292023 | LOC100129940   |
| A_23_P111995   | 9,64557 | 8,63966 | 2,008209804  | ENST00000389131 | 4017      | NM_002318    | LOXL2          |
| A_21_P0012457  | 8,18826 | 7,18275 | 2,007653087  | N/A             | N/A       | N/A          | XL0C_I2_010330 |
| A_22_P00010459 | 2,77161 | 1,76612 | 2,007625255  | N/A             | N/A       | N/A          | Inc-NACC1-1    |
| A_21_P0012310  | 3,93174 | 2,92631 | 2,007541762  | N/A             | 26220     | NR_110533    | DGCR5          |



|                |         |         |             |                 |           |              |                  |
|----------------|---------|---------|-------------|-----------------|-----------|--------------|------------------|
| A_33_P3281435  | 3,49666 | 2,4914  | 2,007305217 | ENST00000471857 | N/A       | AF035035     | N/A              |
| A_23_P87082    | 8,32634 | 7,32114 | 2,007221738 | ENST00000524971 | 64221     | NM_022370    | ROBO3            |
| A_23_P7342     | 7,43936 | 6,43445 | 2,006818301 | ENST00000505092 | 7365      | NM_001075    | UGT2B10          |
| A_23_P5031     | 2,43883 | 1,43396 | 2,006762661 | ENST00000621475 | 29124     | NM_013268    | LGALS13          |
| A_22_P00012197 | 2,93867 | 1,93385 | 2,006693113 | N/A             | N/A       | N/A          | Inc-POU5F1B-4    |
| A_32_P40744    | 6,60119 | 5,59646 | 2,006567933 | N/A             | 101927085 | XM_005276020 | LOC101927085     |
| A_22_P00015087 | 2,44513 | 1,4408  | 2,006011672 | N/A             | N/A       | AF400486     | Inc-SNURF-3      |
| A_23_P413043   | 2,77525 | 1,771   | 2,005900438 | ENST00000462262 | 100379661 | NR_033368    | GRIK1-AS2        |
| A_22_P00007678 | 8,33152 | 7,32761 | 2,005427763 | ENST00000506067 | 100132077 | NR_033937    | LOC100132077     |
| A_33_P3387320  | 2,73211 | 1,72828 | 2,005316561 | N/A             | N/A       | N/A          | N/A              |
| A_33_P3268798  | 8,81764 | 7,81399 | 2,005066381 | N/A             | 134637    | NM_001286259 | ADAT2            |
| A_23_P394986   | 4,78049 | 3,77717 | 2,004607797 | ENST00000324768 | 200407    | NM_153836    | CREG2            |
| A_21_P0000938  | 2,45326 | 1,45005 | 2,004454959 | ENST00000423796 | N/A       | N/A          | N/A              |
| A_33_P3246193  | 3,50106 | 2,49801 | 2,00423267  | N/A             | 54777     | NM_001200049 | CFAP46           |
| A_23_P169039   | 12,3674 | 11,3647 | 2,003746499 | ENST00000396822 | 6591      | NM_003068    | SNAI2            |
| A_32_P107876   | 9,87055 | 8,86799 | 2,003552064 | ENST00000512123 | 80144     | NM_025074    | FRAS1            |
| A_22_P00008236 | 2,58576 | 1,58332 | 2,00338542  | ENST00000605270 | N/A       | N/A          | N/A              |
| A_23_P31686    | 9,05919 | 8,05677 | 2,003357648 | ENST00000521436 | 57805     | NM_021174    | CCAR2            |
| A_32_P2392     | 9,05831 | 8,05604 | 2,003149365 | ENST00000611771 | 23015     | NM_181077    | GOLGA8A          |
| A_33_P3356371  | 4,99861 | 3,9964  | 2,003066058 | N/A             | N/A       | AK127766     | N/A              |
| A_33_P3220643  | 12,4807 | 11,4786 | 2,002913338 | ENST00000543175 | 138428    | NM_001002913 | PTRH1            |
| A_33_P3262670  | 3,76621 | 2,76412 | 2,002899455 | N/A             | 79649     | NM_001173517 | MAP7D3           |
| A_22_P00011019 | 5,01672 | 4,01485 | 2,002594051 | N/A             | N/A       | AW262356     | Inc-NT5C-1       |
| A_22_P00008755 | 2,45397 | 1,45213 | 2,002552409 | ENST00000442956 | 339789    | NR_034135    | LINC00299        |
| A_33_P3389758  | 3,44832 | 2,44652 | 2,002496887 | N/A             | N/A       | N/A          | N/A              |
| A_23_P60079    | 3,02896 | 2,0272  | 2,002441367 | ENST00000325203 | 285       | NM_001147    | ANGPT2           |
| A_23_P251937   | 8,51645 | 7,51474 | 2,002371969 | ENST00000334035 | 80315     | NM_030627    | CPEB4            |
| A_19_P00315804 | 4,93346 | 3,93196 | 2,002080523 | N/A             | 401491    | N/A          | VLDLR-AS1        |
| A_22_P00001001 | 6,86592 | 5,86455 | 2,001900125 | N/A             | N/A       | N/A          | Inc-AL353698.1-1 |
| A_23_P257478   | 4,49203 | 3,49089 | 2,001581    | ENST00000448314 | 1589      | NM_000500    | CYP21A2          |
| A_21_P0001218  | 3,01351 | 2,01252 | 2,001372902 | ENST00000424696 | N/A       | N/A          | N/A              |
| A_33_P3231613  | 8,86359 | 7,86276 | 2,001150955 | N/A             | N/A       | XM_006724857 | Inc-CSAG1-1      |
| A_23_P379020   | 6,86727 | 5,86654 | 2,001012251 | ENST00000361928 | 114814    | NR_002328    | GNRHR2           |

|                |         |         |             |                 |           |              |                      |
|----------------|---------|---------|-------------|-----------------|-----------|--------------|----------------------|
| A_21_P0007041  | 4,7334  | 3,73291 | 2,0006794   | ENST00000583117 | 399706    | N/A          | LINC00200            |
| A_21_P0014875  | 2,48948 | 1,48903 | 2,00062393  | N/A             | N/A       | N/A          | N/A                  |
| A_23_P411761   | 3,01765 | 2,01724 | 2,000568461 | ENST00000288616 | 9478      | NM_001033677 | CABP1                |
| A_23_P130919   | 10,4608 | 9,46065 | 2,000207955 | ENST00000357066 | 126308    | NM_130807    | MOB3A                |
| A_22_P00016274 | 2,69793 | 1,69802 | 1,999875237 | N/A             | N/A       | N/A          | Inc-TMEM109-1        |
| A_21_P0001408  | 2,67584 | 1,67601 | 1,999764344 | N/A             | N/A       | N/A          | Inc-CD55-1           |
| A_33_P3331646  | 4,39187 | 3,39205 | 1,999750483 | N/A             | 101928787 | XR_243602    | LOC101928787         |
| A_24_P340696   | 3,82138 | 2,82166 | 1,999611875 | ENST00000416156 | 253190    | NM_014509    | SERHL2               |
| A_22_P00023168 | 4,44927 | 3,44959 | 1,999556435 | N/A             | N/A       | N/A          | Inc-SERAC1-3         |
| A_21_P0002517  | 2,47884 | 1,47919 | 1,999514856 | N/A             | N/A       | N/A          | Inc-STK39-1          |
| A_23_P307161   | 2,60987 | 1,61028 | 1,9994317   | N/A             | N/A       | AF118078     | N/A                  |
| A_24_P335358   | 11,9792 | 10,9798 | 1,999168396 | ENST00000322060 | 80324     | NM_025215    | PUS1                 |
| A_21_P0013114  | 3,82516 | 2,82583 | 1,999071398 | N/A             | N/A       | N/A          | XLOC_I2_013192       |
| A_33_P3318926  | 6,191   | 5,1924  | 1,998060129 | ENST00000617908 | 10497     | NM_006377    | UNC13B               |
| A_23_P85004    | 9,25009 | 8,25162 | 1,997880094 | ENST00000373054 | 1730      | NM_007309    | DIAPH2               |
| A_24_P374382   | 11,8435 | 10,8451 | 1,997783159 | N/A             | 7152      | NR_001283    | TOP1P2               |
| A_24_P602871   | 8,81109 | 7,81282 | 1,997603148 | ENST00000367474 | 389432    | NM_001030060 | SAMD5                |
| A_24_P261383   | 13,0406 | 12,0424 | 1,997506226 | ENST00000527068 | 79101     | NM_024116    | TAF1D                |
| A_24_P555510   | 8,52526 | 7,52718 | 1,997340085 | ENST00000327578 | 5108      | NM_006197    | PCM1                 |
| A_23_P106194   | 12,1662 | 11,1683 | 1,9970909   | ENST00000303562 | 2353      | NM_005252    | FOS                  |
| A_23_P203658   | 9,73237 | 8,73458 | 1,996938635 | ENST00000393346 | 8301      | NM_007166    | PICALM               |
| A_21_P0013284  | 3,89482 | 2,89722 | 1,996675659 | N/A             | N/A       | N/A          | XLOC_I2_013730       |
| A_23_P364766   | 11,5088 | 10,5112 | 1,996675659 | ENST00000334534 | 128710    | NM_001009608 | SLX4IP               |
| A_21_P0001241  | 2,68219 | 1,68462 | 1,99663414  | ENST00000441459 | 101927660 | XR_247098    | LOC101927660         |
| A_21_P0012482  | 4,13701 | 3,13966 | 1,996329692 | ENST00000449350 | N/A       | N/A          | N/A                  |
| A_32_P155460   | 11,8637 | 10,8664 | 1,996260506 | ENST00000615826 | 378825    | NR_024089    | LINC00162            |
| A_23_P331908   | 11,2288 | 10,2321 | 1,995430457 | N/A             | 101060179 | XM_003959932 | LOC101060179         |
| A_33_P3700794  | 10,892  | 9,89556 | 1,995070876 | ENST00000551117 | 4234      | NM_005371    | METTL1               |
| A_23_P346006   | 7,73539 | 6,73924 | 1,994669882 | ENST00000425574 | 9236      | NM_020739    | CCPG1                |
| A_21_P0010420  | 2,96627 | 1,97017 | 1,994600753 | N/A             | N/A       | N/A          | Inc-RP1-32 10.10.1-1 |
| A_33_P3388067  | 6,28274 | 5,28683 | 1,994338086 | ENST00000429565 | 730291    | NM_001159524 | ZNF735               |
| A_33_P3250895  | 2,96112 | 1,96564 | 1,993743755 | ENST00000408907 | 122706    | NM_001099780 | PSMB11               |
| A_22_P00003405 | 2,64271 | 1,64741 | 1,993495018 | N/A             | N/A       | N/A          | Inc-CCDC125-6        |

|                |         |         |             |                 |           |              |                  |
|----------------|---------|---------|-------------|-----------------|-----------|--------------|------------------|
| A_22_P00007779 | 2,55688 | 1,56163 | 1,99342593  | N/A             | N/A       | N/A          | Inc-HNRNPA3-1    |
| A_23_P47484    | 3,1864  | 2,19118 | 1,993384478 | ENST00000532258 | 219970    | NM_145016    | GLYATL2          |
| A_32_P38467    | 16,0175 | 15,0226 | 1,992942381 | ENST00000602483 | 100093630 | NR_003584    | SNHG8            |
| A_33_P3732854  | 3,14803 | 2,15323 | 1,992804245 | N/A             | 81439     | AY358215     | OR9H1P           |
| A_22_P00009241 | 4,23901 | 3,24428 | 1,992707556 | ENST00000552201 | 101927653 | N/A          | LOC101927653     |
| A_33_P3326892  | 5,20064 | 4,20599 | 1,99259706  | N/A             | N/A       | AK130228     | Inc-AC112512.1-1 |
| A_22_P00002465 | 5,08833 | 4,09368 | 1,99259706  | N/A             | N/A       | N/A          | Inc-C15orf42-1   |
| A_33_P3397147  | 6,71108 | 5,71654 | 1,992445138 | ENST00000389915 | 130074    | NM_001009993 | FAM168B          |
| A_19_P00321789 | 6,87451 | 5,87998 | 1,992431327 | ENST00000440246 | N/A       | N/A          | N/A              |
| A_22_P00014717 | 2,60717 | 1,61264 | 1,992431327 | N/A             | N/A       | N/A          | Inc-SLC26A11-1   |
| A_21_P0012328  | 8,2448  | 7,25034 | 1,992334656 | N/A             | N/A       | N/A          | XLOC_I2_009441   |
| A_23_P208198   | 8,96482 | 7,9706  | 1,992003248 | ENST00000588129 | 84765     | NR_024181    | ZNF577           |
| A_22_P00018017 | 6,49436 | 5,50016 | 1,991975634 | ENST00000440790 | 651302    | NR_103448    | ZNF192P1         |
| A_23_P211355   | 9,19515 | 8,20137 | 1,99139581  | ENST00000351989 | 54487     | NM_022720    | DGCR8            |
| A_33_P3341144  | 7,18275 | 6,18914 | 1,991161168 | ENST00000293288 | 581       | NM_004324    | BAX              |
| A_21_P0009950  | 9,46947 | 8,47595 | 1,991036957 | N/A             | N/A       | N/A          | Inc-SSTR4-2      |
| A_23_P79155    | 8,09339 | 7,09994 | 1,990940353 | ENST00000470071 | 2863      | NM_001508    | GPR39            |
| A_33_P3615955  | 3,99258 | 2,99914 | 1,990926553 | N/A             | N/A       | N/A          | N/A              |
| A_22_P00002317 | 5,17342 | 4,18015 | 1,990691966 | N/A             | N/A       | N/A          | Inc-C11orf44-2   |
| A_21_P0002774  | 3,13523 | 2,14208 | 1,990526392 | ENST00000482351 | N/A       | N/A          | N/A              |
| A_22_P00012518 | 3,70756 | 2,71445 | 1,990471204 | N/A             | N/A       | N/A          | Inc-PSMG1-1      |
| A_19_P00319080 | 5,338   | 4,34489 | 1,990471204 | ENST00000509460 | N/A       | N/A          | N/A              |
| A_22_P00022005 | 5,37448 | 4,38138 | 1,990457407 | N/A             | N/A       | AK124134     | Inc-B4GALT7-1    |
| A_33_P3402570  | 11,5352 | 10,5422 | 1,990319444 | ENST00000256151 | 29080     | NM_014167    | CCDC59           |
| A_33_P3246990  | 12,1222 | 11,1292 | 1,990319444 | ENST00000355640 | 331       | NM_001167    | XIAP             |
| A_23_P209987   | 10,1392 | 9,14625 | 1,990250466 | ENST00000448770 | 84172     | NM_019014    | POLR1B           |
| A_23_P77228    | 9,26189 | 8,26914 | 1,989974577 | ENST00000420329 | 64784     | NM_022769    | CRTC3            |
| A_23_P256021   | 13,4169 | 12,4242 | 1,989905611 | ENST00000484069 | 81887     | NM_031206    | LAS1L            |
| A_21_P0010057  | 4,47658 | 3,48414 | 1,989547026 | N/A             | N/A       | N/A          | Inc-FAM65C-2     |
| A_21_P0013621  | 4,47485 | 3,4827  | 1,989147142 | N/A             | N/A       | N/A          | XLOC_I2_015121   |
| A_24_P15712    | 2,3596  | 1,36748 | 1,98910578  | N/A             | 643659    | AK056971     | LOC643659        |
| A_19_P00807328 | 5,43533 | 4,44332 | 1,988954124 | N/A             | 102724209 | XR_424249    | LOC102724209     |
| A_33_P3279426  | 2,91539 | 1,92347 | 1,98883005  | ENST00000458528 | 26058     | N/A          | GIGYF2           |

|                |         |         |             |                 |           |              |                     |
|----------------|---------|---------|-------------|-----------------|-----------|--------------|---------------------|
| A_23_P203665   | 8,6044  | 7,61254 | 1,988747339 | ENST00000278544 | 55331     | NM_018367    | ACER3               |
| A_33_P3249936  | 7,08245 | 6,09103 | 1,988140894 | ENST00000482387 | 200844    | NM_198463    | C3orf67             |
| A_23_P422212   | 5,89673 | 4,90552 | 1,987851519 | ENST00000366617 | 148641    | NM_173508    | SLC35F3             |
| A_22_P00021158 | 5,10282 | 4,11195 | 1,987383097 | N/A             | N/A       | N/A          | Inc-GOLPH3-1        |
| A_33_P3338449  | 5,04989 | 4,05916 | 1,98719025  | ENST00000579457 | 124923    | NM_001174103 | SGK494              |
| A_21_P0007328  | 2,42818 | 1,43753 | 1,98708006  | N/A             | N/A       | N/A          | Inc-RP11-17A1.2.1-2 |
| A_33_P3282060  | 2,60143 | 1,61081 | 1,98703874  | ENST00000327337 | 121006    | NM_001145475 | FAM186A             |
| A_21_P0013383  | 4,01861 | 3,02801 | 1,987011194 | N/A             | 442319    | N/A          | ZNF727              |
| A_23_P66328    | 3,38811 | 2,39781 | 1,986598049 | ENST00000567001 | 348158    | NM_182617    | ACSM2B              |
| A_33_P3346628  | 4,89052 | 3,90038 | 1,986377741 | ENST00000434396 | 100131244 | NM_001190479 | ANKRD63             |
| A_23_P16834    | 5,38043 | 4,39033 | 1,986322667 | ENST00000491414 | 64838     | NM_022823    | FNDC4               |
| A_32_P116840   | 10,1617 | 9,17167 | 1,986226293 | ENST00000486333 | 4253      | NM_203356    | CTAGE5              |
| A_33_P3389898  | 2,74161 | 1,75188 | 1,985813312 | ENST00000313253 | 219986    | NM_001004706 | OR4D11              |
| A_33_P3283833  | 3,33859 | 2,34888 | 1,985785783 | ENST00000375978 | 2307      | NM_004118    | FOXS1               |
| A_21_P0013554  | 3,32951 | 2,34011 | 1,985359132 | ENST00000413145 | N/A       | N/A          | N/A                 |
| A_21_P0001945  | 3,46053 | 2,4712  | 1,985262804 | ENST00000424655 | 101927156 | N/A          | LOC101927156        |
| A_22_P00008388 | 2,42604 | 1,43674 | 1,985221522 | N/A             | N/A       | AK057311     | Inc-JMJD4-1         |
| A_24_P940803   | 10,5191 | 9,53085 | 1,983777194 | ENST00000613142 | 85465     | NM_033505    | EPT1                |
| A_23_P380298   | 8,0277  | 7,03954 | 1,983653443 | ENST00000337576 | 9762      | NM_001282533 | LZTS3               |
| A_21_P0014172  | 9,80546 | 8,81739 | 1,983529701 | N/A             | 8365      | BC010926     | HIST1H4H            |
| A_21_P0010722  | 2,36604 | 1,37828 | 1,983103534 | ENST00000445243 | N/A       | N/A          | N/A                 |
| A_22_P00001647 | 2,68369 | 1,69596 | 1,983062297 | N/A             | N/A       | N/A          | Inc-ASB4-2          |
| A_33_P3412349  | 5,2806  | 4,29289 | 1,983034806 | ENST00000228289 | 10795     | NM_152943    | ZNF268              |
| A_23_P130677   | 3,0431  | 2,05546 | 1,982938591 | ENST00000616433 | 55908     | NM_018687    | C19orf80            |
| A_33_P3374718  | 2,47934 | 1,49173 | 1,982897358 | N/A             | 220906    | NR_033805    | WAC-AS1             |
| A_22_P00010217 | 6,3131  | 5,32549 | 1,982897358 | ENST00000539116 | N/A       | N/A          | N/A                 |
| A_23_P128351   | 2,52246 | 1,53489 | 1,982842381 | ENST00000252322 | 84766     | NM_032680    | CRACR2A             |
| A_23_P106389   | 7,76255 | 6,77508 | 1,982704945 | ENST00000542748 | 8482      | NM_003612    | SEMA7A              |
| A_23_P316582   | 4,71229 | 3,72491 | 1,982581262 | ENST00000409902 | 126068    | NM_152355    | ZNF441              |
| A_23_P81131    | 3,94975 | 2,9624  | 1,982540035 | ENST00000610355 | 10699     | NM_006587    | CORIN               |
| A_22_P00004795 | 7,08288 | 6,09559 | 1,982457586 | N/A             | N/A       | BC016361     | Inc-CXCL2-1         |
| A_33_P3294415  | 3,74495 | 2,75781 | 1,982251476 | N/A             | N/A       | N/A          | N/A                 |
| A_21_P0000559  | 2,4647  | 1,47761 | 1,982182778 | ENST00000607004 | 286411    | NR_028345    | LINC00632           |

|                |         |         |             |                 |           |              |               |
|----------------|---------|---------|-------------|-----------------|-----------|--------------|---------------|
| A_23_P258814   | 10,5592 | 9,57247 | 1,981688219 | ENST00000486648 | 100132911 | NM_080750    | DPH3P1        |
| A_23_P14482    | 15,7575 | 14,7712 | 1,981097659 | ENST00000553479 | 51637     | NM_016039    | C14orf166     |
| A_22_P00025471 | 2,5892  | 1,60299 | 1,980974075 | ENST00000510444 | 101928539 | N/A          | LOC101928539  |
| A_23_P134663   | 3,84871 | 2,86253 | 1,980932882 | ENST00000309982 | 79870     | NM_024812    | BAALC         |
| A_33_P3358735  | 2,73038 | 1,74427 | 1,980836769 | ENST00000545128 | 5125      | NM_001190482 | PCSK5         |
| A_33_P3266719  | 5,16799 | 4,18202 | 1,980644557 | ENST00000394764 | 54790     | NM_017628    | TET2          |
| A_32_P24376    | 3,38874 | 2,40318 | 1,980081757 | ENST00000391418 | 730755    | NM_001165252 | KRTAP2-3      |
| A_23_P22214    | 6,90642 | 5,9211  | 1,979752387 | ENST00000454963 | 5576      | NM_004157    | PRKAR2A       |
| A_22_P00008992 | 2,51196 | 1,52714 | 1,979066376 | N/A             | N/A       | N/A          | Inc-LAMP5-1   |
| A_22_P00007481 | 5,43955 | 4,45481 | 1,978956637 | N/A             | 55853     | NR_024629    | IDI2-AS1      |
| A_21_P0006235  | 2,89615 | 1,91153 | 1,978792038 | N/A             | N/A       | N/A          | Inc-DBH-2     |
| A_33_P3216714  | 5,64118 | 4,65658 | 1,978764607 | ENST00000371069 | 9829      | NM_001256864 | DNAJC6        |
| A_33_P3322288  | 10,3301 | 9,3457  | 1,978490311 | ENST00000414162 | 64343     | NM_001134433 | AZI2          |
| A_23_P252211   | 9,67862 | 8,69437 | 1,978284614 | ENST00000510525 | 4552      | NM_024010    | MTRR          |
| A_22_P00003561 | 4,36951 | 3,38526 | 1,978284614 | N/A             | N/A       | N/A          | Inc-CCRN4L-7  |
| A_21_P0003814  | 2,89966 | 1,9156  | 1,978024095 | N/A             | N/A       | N/A          | Inc-IRF2-2    |
| A_23_P98900    | 9,62606 | 8,64206 | 1,977941833 | ENST00000614047 | 80212     | NM_025140    | CCDC92        |
| A_22_P00012196 | 4,93314 | 3,9492  | 1,977859574 | N/A             | N/A       | BF028593     | Inc-POU5F1B-3 |
| A_33_P3272429  | 2,61883 | 1,63522 | 1,977407213 | ENST00000472407 | 90693     | HY032596     | CCDC126       |
| A_22_P00001146 | 6,49191 | 5,50835 | 1,977338683 | ENST00000569025 | 283856    | NR_027078    | LOC283856     |
| A_23_P89902    | 8,58465 | 7,6011  | 1,977324977 | ENST00000587597 | 6253      | NM_005619    | RTN2          |
| A_21_P0010294  | 6,86193 | 5,87863 | 1,976982362 | ENST00000441283 | N/A       | N/A          | N/A           |
| A_33_P3415087  | 6,94887 | 5,96595 | 1,976461702 | ENST00000376088 | 1184      | NM_001127899 | CLCN5         |
| A_33_P3323448  | 6,69673 | 5,71383 | 1,976434302 | ENST00000496438 | 81502     | NM_178582    | HM13          |
| A_22_P00016378 | 2,87562 | 1,89287 | 1,976228819 | ENST00000415700 | 339822    | NR_033880    | LINC01115     |
| A_22_P00011312 | 3,96804 | 2,98542 | 1,976050751 | N/A             | N/A       | N/A          | Inc-OSBPL9-1  |
| A_32_P190151   | 4,62126 | 3,6388  | 1,975831612 | ENST00000478666 | 692099    | NR_024241    | FAM86DP       |
| A_24_P687326   | 5,93645 | 4,95407 | 1,975722052 | ENST00000453010 | 286333    | NR_024366    | FAM225A       |
| A_23_P88909    | 6,75979 | 5,77748 | 1,975626191 | ENST00000618464 | 9143      | NM_004209    | SYNGR3        |
| A_33_P3267665  | 7,89289 | 6,91077 | 1,975366022 | ENST00000262096 | 51201     | NM_016353    | ZDHHC2        |
| A_22_P00017559 | 3,23007 | 2,24812 | 1,975133269 | N/A             | 100130548 | XR_110579    | LOC100130548  |
| A_24_P169773   | 12,9785 | 11,9967 | 1,974927921 | ENST00000486333 | 100128553 | NM_198495    | CTAGE4        |
| A_33_P3244951  | 10,5396 | 9,55808 | 1,974544662 | ENST00000394553 | 5151      | NM_001243137 | PDE8A         |

|                |         |         |             |                 |           |              |                    |
|----------------|---------|---------|-------------|-----------------|-----------|--------------|--------------------|
| A_21_P0010647  | 5,65281 | 4,67137 | 1,974435173 | ENST00000357336 | 441425    | N/A          | ANKRD20A3          |
| A_33_P3283430  | 2,57794 | 1,59665 | 1,974229897 | ENST00000423870 | 80343     | NM_001271539 | SEL1L2             |
| A_22_P00015145 | 2,64973 | 1,66861 | 1,973997277 | ENST00000563639 | 101927537 | XR_245482    | LOC101927537       |
| A_24_P145066   | 7,9609  | 6,98008 | 1,973586839 | ENST00000377083 | 23095     | NM_183416    | KIF1B              |
| A_33_P3336242  | 4,10061 | 3,12014 | 1,973108102 | ENST00000530447 | 392197    | NM_001256869 | USP17L7            |
| A_21_P0010132  | 12,3667 | 11,3864 | 1,972875614 | ENST00000615826 | 378825    | NR_024089    | LINC00162          |
| A_21_P0002313  | 2,34484 | 1,36477 | 1,972561116 | N/A             | N/A       | N/A          | Inc-AC007405.7.1-1 |
| A_21_P0010625  | 3,99906 | 3,0191  | 1,972410721 | N/A             | N/A       | N/A          | XLOC_I2_000945     |
| A_24_P415624   | 7,84651 | 6,86662 | 1,972315022 | ENST00000377037 | 22877     | NM_014938    | MLXIP              |
| A_23_P14458    | 7,81378 | 6,83399 | 1,972178316 | ENST00000247194 | 112849    | NM_144581    | L3HYPDH            |
| A_33_P3253598  | 3,99053 | 3,01076 | 1,972150976 | ENST00000382963 | 352887    | NR_033667    | GYG2P1             |
| A_22_P00000994 | 8,76369 | 7,78409 | 1,971918601 | ENST00000602933 | N/A       | N/A          | N/A                |
| A_23_P386888   | 5,76138 | 4,78199 | 1,971631588 | ENST00000435757 | 4018      | NM_005577    | LPA                |
| A_22_P00000833 | 3,49239 | 2,51313 | 1,971453934 | N/A             | N/A       | N/A          | Inc-AGAP10-3       |
| A_21_P0000276  | 9,39967 | 8,42061 | 1,971180651 | N/A             | 641648    | NR_002598    | SNORD87            |
| A_22_P00011031 | 7,925   | 6,94597 | 1,971139662 | ENST00000538430 | N/A       | N/A          | N/A                |
| A_21_P0001024  | 2,98365 | 2,00463 | 1,971125999 | ENST00000430905 | N/A       | N/A          | N/A                |
| A_21_P0010056  | 2,79168 | 1,81271 | 1,971057686 | N/A             | N/A       | N/A          | nc-TMEM189-UBE2V1- |
| A_22_P00016077 | 2,9421  | 1,96326 | 1,970880084 | ENST00000419800 | 101929460 | XR_245641    | LOC101929460       |
| A_22_P00003799 | 7,17405 | 6,19528 | 1,970784459 | ENST00000555403 | N/A       | BX102825     | N/A                |
| A_23_P58788    | 3,15415 | 2,17547 | 1,970661519 | ENST00000231656 | 1044      | NM_001804    | CDX1               |
| A_22_P00011234 | 6,03429 | 5,05566 | 1,970593222 | ENST00000612524 | N/A       | N/A          | N/A                |
| A_22_P00017076 | 2,77714 | 1,79855 | 1,970538586 | ENST00000517369 | N/A       | N/A          | N/A                |
| A_21_P0001688  | 3,65954 | 2,6811  | 1,970333716 | N/A             | N/A       | N/A          | Inc-PTGFR-1        |
| A_23_P411296   | 15,6884 | 14,71   | 1,970279087 | ENST00000303004 | 1051      | NM_005194    | CEBPB              |
| A_32_P393316   | 9,42926 | 8,45121 | 1,969801153 | ENST00000405493 | 10411     | NM_001098531 | RAPGEF3            |
| A_23_P133694   | 10,1283 | 9,15044 | 1,969541751 | ENST00000371724 | 2030      | NM_001078177 | SLC29A1            |
| A_21_P0000362  | 8,72596 | 7,74812 | 1,969514448 | ENST00000529900 | 677792    | NR_003026    | SNORA1             |
| A_33_P3334102  | 11,2089 | 10,2313 | 1,969186836 | ENST00000290470 | 201176    | NM_174919    | ARHGAP27           |
| A_22_P00013173 | 2,82415 | 1,84683 | 1,96880469  | N/A             | N/A       | AK128297     | Inc-RNF135-2       |
| A_23_P205623   | 6,26017 | 5,28293 | 1,96869552  | ENST00000556027 | 80821     | NM_030637    | DDHD1              |
| A_32_P133090   | 3,69453 | 2,71748 | 1,968436264 | ENST00000610060 | N/A       | BG216262     | N/A                |
| A_23_P114084   | 4,72079 | 3,74377 | 1,968395332 | ENST00000379374 | 5251      | NM_000444    | PHEX               |

|                |         |         |             |                 |           |              |               |
|----------------|---------|---------|-------------|-----------------|-----------|--------------|---------------|
| A_33_P3336282  | 3,59763 | 2,6207  | 1,968272541 | ENST00000400466 | 6875      | NM_001293725 | TAF4B         |
| A_23_P50678    | 2,94986 | 1,97322 | 1,967876933 | ENST00000612526 | 4145      | NM_139355    | MATK          |
| A_33_P3424867  | 2,7615  | 1,78525 | 1,967345033 | ENST00000617217 | N/A       | N/A          | N/A           |
| A_33_P3335845  | 12,429  | 11,4529 | 1,967140495 | ENST00000409658 | 55339     | NM_001006622 | WDR33         |
| A_24_P51201    | 2,36471 | 1,3888  | 1,966881444 | N/A             | 8916      | BC038960     | HERC3         |
| A_23_P99614    | 5,80154 | 4,82564 | 1,96686781  | ENST00000536364 | 90135     | NM_033271    | BTBD6         |
| A_23_P74269    | 11,8891 | 10,9133 | 1,966731482 | ENST00000376957 | 6723      | NM_003132    | SRM           |
| A_22_P00022691 | 3,39808 | 2,42249 | 1,966445224 | ENST00000540875 | N/A       | N/A          | N/A           |
| A_22_P00012494 | 2,5845  | 1,60899 | 1,966336184 | N/A             | N/A       | BC013641     | Inc-PSCA-3    |
| A_22_P00005197 | 3,13316 | 2,15771 | 1,966254408 | N/A             | 100874255 | NR_046552    | RNASEH2B-AS1  |
| A_33_P3403044  | 10,6887 | 9,71329 | 1,966199893 | ENST00000306434 | 4144      | NM_005911    | MAT2A         |
| A_33_P3862375  | 7,57935 | 6,60406 | 1,966036356 | ENST00000327681 | 85015     | NM_001080481 | USP45         |
| A_32_P62090    | 4,9579  | 3,98281 | 1,965763824 | ENST00000299415 | 101927581 | NM_001282544 | CCDC182       |
| A_23_P207981   | 5,98022 | 5,00517 | 1,965709322 | ENST00000582322 | 9306      | NM_004232    | SOCS6         |
| A_33_P3387666  | 2,55962 | 1,58497 | 1,965164387 | ENST00000372847 | 81605     | NM_001265582 | URM1          |
| A_22_P00008355 | 3,70007 | 2,72547 | 1,965096281 | N/A             | N/A       | AK023543     | Inc-IWS1-1    |
| A_23_P145114   | 12,6503 | 11,6762 | 1,964415349 | ENST00000616923 | 2729      | NM_001498    | GCLC          |
| A_24_P116017   | 5,96977 | 4,99572 | 1,964347268 | ENST00000541212 | 5715      | NM_002813    | PSMD9         |
| A_22_P00009026 | 9,06272 | 8,08893 | 1,963993289 | N/A             | N/A       | N/A          | Inc-LCLAT1-2  |
| A_33_P3397743  | 3,7887  | 2,81528 | 1,963489659 | ENST00000540293 | N/A       | N/A          | N/A           |
| A_23_P70509    | 5,25867 | 4,28571 | 1,962863705 | ENST00000376483 | 79969     | NM_024909    | ATAT1         |
| A_21_P0011062  | 2,37073 | 1,39812 | 1,962387569 | ENST00000554108 | N/A       | N/A          | N/A           |
| A_19_P00810491 | 5,8351  | 4,86257 | 1,962278754 | ENST00000457669 | N/A       | N/A          | N/A           |
| A_33_P3232707  | 2,63261 | 1,66066 | 1,961490027 | N/A             | 100129223 | NR_126055    | LOC100129223  |
| A_24_P68068    | 2,54304 | 1,57132 | 1,961177343 | ENST00000607111 | N/A       | AK097770     | N/A           |
| A_22_P00015760 | 2,42333 | 1,45165 | 1,961122969 | ENST00000584547 | N/A       | CR745271     | N/A           |
| A_22_P00009895 | 3,72476 | 2,75331 | 1,960810344 | ENST00000509671 | N/A       | N/A          | N/A           |
| A_33_P3302518  | 4,58056 | 3,60926 | 1,960606485 | ENST00000269318 | 55036     | NM_001243342 | CCDC40        |
| A_23_P85188    | 10,2986 | 9,32771 | 1,960049379 | ENST00000372742 | 64860     | NM_022838    | ARMCX5        |
| A_22_P00005863 | 10,6476 | 9,67673 | 1,960022207 | ENST00000433197 | 2081      | XM_006721769 | ERN1          |
| A_33_P3369317  | 5,59082 | 4,62032 | 1,959519595 | ENST00000541010 | 25822     | NM_001135005 | DNAJB5        |
| A_21_P0005165  | 2,43412 | 1,46374 | 1,959356614 | N/A             | N/A       | N/A          | Inc-MRPS18A-2 |
| A_23_P53588    | 2,51847 | 1,5482  | 1,959207226 | ENST00000310594 | 81029     | NM_030775    | WNT5B         |

|                |         |         |             |                 |           |              |                |
|----------------|---------|---------|-------------|-----------------|-----------|--------------|----------------|
| A_22_P00021931 | 2,69733 | 1,72713 | 1,959112167 | N/A             | N/A       | AK125786     | Inc-RDH10-3    |
| A_21_P0006338  | 4,85951 | 3,88935 | 1,95905785  | N/A             | 100133077 | XR_426463    | LOC100133077   |
| A_21_P0014799  | 3,90492 | 2,93484 | 1,958949219 | N/A             | N/A       | N/A          | N/A            |
| A_21_P0003416  | 2,59686 | 1,6269  | 1,958786285 | ENST00000505586 | N/A       | N/A          | N/A            |
| A_23_P110430   | 8,69831 | 7,72856 | 1,958501183 | ENST00000382723 | 4487      | NM_002448    | MSX1           |
| A_22_P00015310 | 3,35288 | 2,38314 | 1,958487608 | N/A             | 102723590 | NR_110631    | BMP7-AS1       |
| A_22_P00006449 | 5,99581 | 5,02614 | 1,958392584 | N/A             | N/A       | BC019844     | Inc-FBXW5-1    |
| A_22_P00005934 | 3,41922 | 2,44963 | 1,958283991 | ENST00000620188 | N/A       | AL137279     | N/A            |
| A_21_P0014454  | 2,47432 | 1,50491 | 1,958039678 | N/A             | 100507600 | NR_045486    | LOC100507600   |
| A_21_P0001611  | 3,71887 | 2,74954 | 1,957931104 | N/A             | N/A       | N/A          | Inc-FMOD-2     |
| A_23_P217704   | 2,90261 | 1,93352 | 1,957605419 | ENST00000381161 | 8908      | NM_003918    | GYG2           |
| A_33_P3354181  | 8,20459 | 7,236   | 1,956927082 | ENST00000409785 | 56888     | NM_020122    | KCMF1          |
| A_22_P00016867 | 3,51661 | 2,54812 | 1,956791443 | N/A             | 84983     | NR_026661    | FAM222A-AS1    |
| A_33_P3263232  | 4,66388 | 3,6954  | 1,956777879 | ENST00000291592 | 81543     | BC064321     | LRR3           |
| A_21_P0014392  | 4,08185 | 3,114   | 1,955923575 | N/A             | N/A       | N/A          | LOC100507373   |
| A_32_P28939    | 12,1228 | 11,1551 | 1,955720224 | ENST00000429722 | 121642    | NM_001001655 | ALKBH2         |
| A_22_P00018762 | 3,22243 | 2,25488 | 1,955516894 | ENST00000524479 | N/A       | BE294561     | N/A            |
| A_33_P3257027  | 7,93921 | 6,97167 | 1,95550334  | ENST00000377614 | 2252      | NM_002009    | FGF7           |
| A_33_P3260317  | 5,7031  | 4,73572 | 1,955286479 | ENST00000487099 | 2649      | NM_033334    | NR6A1          |
| A_22_P00011224 | 2,85472 | 1,88747 | 1,955110298 | ENST00000521558 | N/A       | BY799221     | N/A            |
| A_19_P00319057 | 3,00677 | 2,03954 | 1,955083195 | N/A             | N/A       | N/A          | XLOC_I2_006673 |
| A_33_P3387106  | 2,97434 | 2,00752 | 1,954527658 | N/A             | N/A       | N/A          | N/A            |
| A_19_P00322479 | 5,84532 | 4,87854 | 1,954473468 | ENST00000414404 | 644838    | N/A          | LOC644838      |
| A_22_P00020061 | 2,83715 | 1,87078 | 1,953918104 | N/A             | 101927380 | NR_121183    | C9orf41-AS1    |
| A_24_P374427   | 5,07415 | 4,10783 | 1,953850388 | ENST00000380916 | 340481    | NM_178566    | ZDHHC21        |
| A_33_P3325723  | 4,86186 | 3,89596 | 1,953281662 | ENST00000492964 | 1123      | NM_001822    | CHN1           |
| A_24_P137434   | 13,8555 | 12,8897 | 1,953146276 | ENST00000326840 | 131566    | NM_080927    | DCBLD2         |
| A_22_P00001542 | 2,4372  | 1,47149 | 1,953024436 | N/A             | N/A       | N/A          | Inc-ARHGEF35-1 |
| A_24_P161973   | 11,1784 | 10,2128 | 1,952875531 | ENST00000487903 | 23250     | NM_015205    | ATP11A         |
| A_23_P306479   | 6,68683 | 5,72128 | 1,95280785  | N/A             | 100009676 | NR_024407    | ZBTB11-AS1     |
| A_23_P162378   | 9,29143 | 8,32609 | 1,952523619 | ENST00000397807 | 51134     | NM_016122    | CEP83          |
| A_24_P235783   | 10,85   | 9,88479 | 1,952347686 | ENST00000463343 | 7536      | D26121       | SF1            |
| A_33_P3333107  | 5,24365 | 4,2785  | 1,952266492 | ENST00000602862 | N/A       | N/A          | N/A            |



|                |         |         |             |                 |        |              |                |
|----------------|---------|---------|-------------|-----------------|--------|--------------|----------------|
| A_22_P00012004 | 7,57767 | 6,61267 | 1,952063522 | ENST00000564138 | 5336   | NM_002661    | PLCG2          |
| A_21_P0003946  | 5,08852 | 4,1236  | 1,951955279 | N/A             | N/A    | N/A          | Inc-NDUFS6-1   |
| A_33_P3283480  | 9,68037 | 8,71545 | 1,951955279 | ENST00000524463 | 1075   | NM_148170    | CTSC           |
| A_32_P3534     | 4,48372 | 3,51892 | 1,951792927 | ENST00000378919 | 145814 | NM_001167902 | PGPEP1L        |
| A_24_P127159   | 7,88654 | 6,92176 | 1,951765869 | ENST00000474858 | N/A    | M69012       | N/A            |
| A_22_P00009391 | 3,06806 | 2,10337 | 1,951644116 | N/A             | N/A    | N/A          | Inc-LSR-1      |
| A_23_P144123   | 5,0928  | 4,12828 | 1,951414157 | ENST00000311856 | 9390   | NM_004256    | SLC22A13       |
| A_33_P3398862  | 7,79146 | 6,82733 | 1,950886708 | ENST00000272233 | 388    | AK309991     | RHOB           |
| A_24_P264166   | 5,76077 | 4,79691 | 1,950521634 | ENST00000569308 | 653720 | NM_001282468 | GOLGA8M        |
| A_33_P3412188  | 2,75798 | 1,79455 | 1,949940361 | ENST00000514625 | 199990 | NM_001146310 | C1orf86        |
| A_33_P3315288  | 4,25553 | 3,29211 | 1,949926845 | ENST00000341809 | 374454 | NM_175078    | KRT77          |
| A_21_P0006240  | 4,66775 | 3,70433 | 1,949926845 | N/A             | N/A    | N/A          | Inc-OLFM1-1    |
| A_22_P00005792 | 2,91086 | 1,94755 | 1,949778177 | N/A             | N/A    | N/A          | Inc-EPB41L4B-1 |
| A_23_P217379   | 13,4381 | 12,4748 | 1,949764662 | ENST00000394872 | 1288   | NM_033641    | COL4A6         |
| A_21_P0010253  | 3,02076 | 2,05772 | 1,94941331  | N/A             | N/A    | N/A          | Inc-UMODL1-1   |
| A_21_P0014245  | 2,32784 | 1,36493 | 1,949237658 | ENST00000391437 | 399716 | XR_247499    | DKFZp667F0711  |
| A_22_P00024653 | 3,17194 | 2,20904 | 1,949224147 | N/A             | N/A    | N/A          | Inc-CPM-3      |
| A_22_P00018528 | 2,60777 | 1,64512 | 1,948886402 | N/A             | N/A    | DB064085     | Inc-DENND1B-1  |
| A_22_P00017617 | 4,85589 | 3,89328 | 1,948832368 | N/A             | N/A    | N/A          | Inc-WFIKKN2-1  |
| A_22_P00000849 | 2,83269 | 1,87017 | 1,948710797 | N/A             | N/A    | N/A          | Inc-AGGF1-3    |
| A_22_P00013819 | 3,68724 | 2,72482 | 1,948575727 | ENST00000610020 | 79871  | AK124503     | RPAP2          |
| A_24_P148026   | 4,77127 | 3,8091  | 1,948238094 | N/A             | N/A    | XM_006710074 | Inc-C1orf86-1  |
| A_33_P3389658  | 5,02533 | 4,06325 | 1,948116561 | ENST00000502484 | 5144   | NM_001165899 | PDE4D          |
| A_23_P92132    | 12,4957 | 11,5337 | 1,948008537 | ENST00000474556 | 7866   | NM_006764    | IFRD2          |
| A_23_P23839    | 10,3427 | 9,38077 | 1,947914021 | ENST00000487787 | 59352  | NM_001017403 | LGR6           |
| A_21_P0000367  | 10,9428 | 9,98088 | 1,94790052  | ENST00000529900 | 692063 | NR_003032    | SNORA32        |
| A_23_P67453    | 9,15194 | 8,19004 | 1,947873516 | ENST00000586669 | 7137   | NM_000363    | TNNI3          |
| A_33_P3414561  | 2,34382 | 1,38215 | 1,947563003 | ENST00000569307 | N/A    | N/A          | N/A            |
| A_22_P00001584 | 2,52723 | 1,5656  | 1,947509006 | N/A             | N/A    | N/A          | Inc-ARL6IP5-2  |
| A_32_P57160    | 2,50654 | 1,54493 | 1,947482008 | ENST00000618177 | 401507 | NR_026803    | FAM74A1        |
| A_22_P00001280 | 2,5476  | 1,586   | 1,947468509 | N/A             | N/A    | N/A          | Inc-ANKRD65-1  |
| A_21_P0000411  | 2,39465 | 1,43333 | 1,947090579 | N/A             | 767592 | NR_003207    | SNORD114-14    |
| A_33_P3366589  | 2,97783 | 2,0167  | 1,946834168 | ENST00000316529 | 196335 | NM_001005181 | OR56B4         |

|                |         |         |             |                 |           |              |               |
|----------------|---------|---------|-------------|-----------------|-----------|--------------|---------------|
| A_33_P3789894  | 7,01593 | 6,0549  | 1,946699228 | N/A             | 654321    | AW382724     | SNORA75       |
| A_21_P0003911  | 8,15429 | 7,19354 | 1,946321447 | N/A             | N/A       | N/A          | Inc-DCTD-1    |
| A_21_P0014792  | 3,31989 | 2,35921 | 1,946227013 | N/A             | N/A       | N/A          | N/A           |
| A_33_P3422213  | 2,46823 | 1,50761 | 1,946146074 | ENST00000341435 | 152110    | XR_427255    | NEK10         |
| A_22_P00012631 | 2,42627 | 1,46585 | 1,945876299 | N/A             | N/A       | N/A          | Inc-PTX4-1    |
| A_23_P210726   | 13,8605 | 12,9001 | 1,945849324 | ENST00000439880 | 994       | NM_021873    | CDC25B        |
| A_24_P192914   | 3,18014 | 2,21982 | 1,945741426 | ENST00000534294 | 120425    | NM_153206    | AMICA1        |
| A_22_P00006678 | 3,35051 | 2,39041 | 1,945444738 | N/A             | N/A       | N/A          | Inc-FPGT-1    |
| A_22_P00007611 | 4,37558 | 3,41556 | 1,945336863 | N/A             | N/A       | N/A          | Inc-HEATR4-1  |
| A_23_P67042    | 11,9089 | 10,949  | 1,945175061 | ENST00000588132 | 55034     | NM_017947    | MOCOS         |
| A_23_P501770   | 7,03566 | 6,07592 | 1,944959346 | ENST00000346691 | 84126     | NM_032166    | ATRIP         |
| A_33_P3259775  | 8,13035 | 7,17066 | 1,94489194  | ENST00000276440 | 80005     | NM_024940    | DOCK5         |
| A_33_P3209716  | 8,87974 | 7,92021 | 1,944676257 | ENST00000399039 | 1500      | NM_001206885 | CTNND1        |
| A_22_P00016481 | 2,8438  | 1,88436 | 1,944554945 | N/A             | N/A       | N/A          | Inc-TMEM88B-2 |
| A_21_P0002547  | 2,44184 | 1,48268 | 1,94417758  | N/A             | N/A       | N/A          | Inc-IRS1-1    |
| A_23_P61426    | 12,0031 | 11,044  | 1,944096726 | ENST00000382490 | 4482      | NM_012331    | MSRA          |
| A_23_P67271    | 8,55072 | 7,59169 | 1,9440024   | ENST00000591461 | 5585      | NM_002741    | PKN1          |
| A_23_P61268    | 10,684  | 9,72509 | 1,943840709 | ENST00000534255 | 51236     | NM_016458    | HGH1          |
| A_33_P3224800  | 7,53477 | 6,5759  | 1,943786815 | ENST00000435988 | 654816    | N/A          | NCF1B         |
| A_33_P3365117  | 7,40927 | 6,45064 | 1,943463483 | ENST00000380859 | 1645      | N/A          | AKR1C1        |
| A_32_P70135    | 12,1157 | 11,1571 | 1,94342307  | ENST00000484434 | 80209     | NM_025138    | PROSER1       |
| A_22_P00012221 | 2,58494 | 1,62643 | 1,943301837 | N/A             | N/A       | N/A          | Inc-PPFIA2-1  |
| A_23_P311010   | 5,82353 | 4,86515 | 1,943126735 | ENST00000302805 | 10251     | NM_005840    | SPRY3         |
| A_21_P0006634  | 2,59157 | 1,63329 | 1,942992053 | ENST00000437289 | N/A       | N/A          | N/A           |
| A_23_P106806   | 5,84771 | 4,88945 | 1,942965117 | ENST00000565903 | 83886     | NM_031948    | PRSS27        |
| A_33_P3311403  | 2,49116 | 1,53303 | 1,942790046 | ENST00000547195 | 10335     | NM_130385    | MRVI1         |
| A_22_P00007038 | 2,95033 | 1,99236 | 1,942574596 | N/A             | N/A       | N/A          | Inc-GJA4-1    |
| A_21_P0014737  | 2,41857 | 1,46077 | 1,942345706 | ENST00000521923 | 23414     | BG191046     | ZFPM2         |
| A_23_P62099    | 6,33005 | 5,37247 | 1,942049536 | ENST00000247452 | 51438     | NM_016249    | MAGEC2        |
| A_33_P3611762  | 9,37068 | 8,41349 | 1,941524618 | ENST00000606714 | 401264    | NR_103446    | TRAM2-AS1     |
| A_21_P0014178  | 3,59094 | 2,63384 | 1,941403503 | N/A             | N/A       | N/A          | N/A           |
| A_22_P00017106 | 2,43817 | 1,48115 | 1,941295851 | N/A             | N/A       | N/A          | Inc-U2SURP-3  |
| A_22_P00001948 | 2,33642 | 1,37947 | 1,941201661 | N/A             | 101929524 | NR_109946    | LOC101929524  |

|                |         |         |             |                 |           |           |                |
|----------------|---------|---------|-------------|-----------------|-----------|-----------|----------------|
| A_23_P53198    | 8,65264 | 7,69583 | 1,941013295 | ENST00000603363 | 84649     | NM_032564 | DGAT2          |
| A_23_P333852   | 6,21969 | 5,26293 | 1,940946026 | ENST00000373776 | 158135    | NM_194252 | TTL11          |
| A_22_P00009630 | 2,60304 | 1,64629 | 1,940932572 | N/A             | 101927768 | NR_125845 | LOC101927768   |
| A_22_P00024341 | 3,02247 | 2,06577 | 1,940865306 | ENST00000552524 | N/A       | BG401236  | N/A            |
| A_23_P144126   | 2,39103 | 1,43444 | 1,940717328 | ENST00000420570 | 26998     | NM_014375 | FETUB          |
| A_24_P114255   | 9,9299  | 8,97369 | 1,940206218 | ENST00000305997 | 129642    | NM_138799 | MBOAT2         |
| A_33_P3377045  | 9,53387 | 8,57767 | 1,94019277  | ENST00000381854 | 55664     | HQ447209  | CDC37L1        |
| A_22_P00017549 | 3,03594 | 2,08    | 1,939843143 | N/A             | N/A       | N/A       | Inc-WDR37-3    |
| A_23_P154457   | 5,36949 | 4,41367 | 1,939681798 | ENST00000538384 | 79954     | NM_024894 | NOL10          |
| A_21_P0001403  | 2,6094  | 1,65367 | 1,939560798 | N/A             | N/A       | N/A       | Inc-CDC73-1    |
| A_33_P3260787  | 3,41472 | 2,45901 | 1,939533911 | ENST00000342616 | 55680     | AK000925  | RUFY2          |
| A_21_P0011130  | 2,70323 | 1,7477  | 1,939291937 | N/A             | N/A       | N/A       | XLOC_I2_003647 |
| A_22_P00017787 | 3,54488 | 2,58948 | 1,939117197 | N/A             | N/A       | N/A       | Inc-ZBED1-1    |
| A_21_P0004870  | 2,38637 | 1,43101 | 1,939063434 | N/A             | N/A       | N/A       | Inc-GPX5-2     |
| A_23_P131020   | 10,9067 | 9,95143 | 1,938942472 | ENST00000418032 | 54815     | NM_017660 | GATAD2A        |
| A_23_P389465   | 2,73075 | 1,77557 | 1,938821519 | ENST00000545002 | 283455    | NM_173598 | KSR2           |
| A_33_P3347020  | 2,5323  | 1,5772  | 1,938714011 | N/A             | N/A       | N/A       | N/A            |
| A_21_P0014582  | 6,70467 | 5,74975 | 1,938472139 | N/A             | N/A       | N/A       | Inc-KCNMB4-1   |
| A_19_P00323413 | 11,7812 | 10,8264 | 1,938310908 | ENST00000366956 | 5784      | NM_005401 | PTPN14         |
| A_33_P3238007  | 9,44607 | 8,49189 | 1,937478096 | ENST00000507377 | 55132     | NM_178043 | LARP1B         |
| A_22_P00012814 | 3,38444 | 2,43028 | 1,937451237 | N/A             | N/A       | AK125205  | Inc-RAPH1-1    |
| A_33_P3535649  | 6,80266 | 5,84858 | 1,937343805 | ENST00000416288 | 84256     | NM_032296 | FLYWCH1        |
| A_32_P223777   | 6,54326 | 5,58919 | 1,937330376 | ENST00000381298 | 3572      | NM_002184 | IL6ST          |
| A_32_P68050    | 7,75813 | 6,80411 | 1,937263234 | ENST00000512193 | 4750      | NM_012224 | NEK1           |
| A_22_P00009210 | 2,52074 | 1,56675 | 1,937222951 | N/A             | N/A       | N/A       | Inc-LPIN2-1    |
| A_23_P16096    | 9,20129 | 8,24735 | 1,937155813 | ENST00000466025 | 56342     | NM_020230 | PPAN           |
| A_22_P00018146 | 2,36452 | 1,41058 | 1,937155813 | N/A             | N/A       | N/A       | Inc-ZNF516-4   |
| A_21_P0000249  | 5,70078 | 4,74724 | 1,936618794 | ENST00000489392 | 26820     | NR_002447 | SNORD24        |
| A_21_P0002167  | 3,48093 | 2,52754 | 1,93641745  | N/A             | N/A       | N/A       | Inc-HPCAL1-1   |
| A_23_P204782   | 6,29163 | 5,33848 | 1,936095343 | ENST00000430606 | 56890     | NM_020128 | MDM1           |
| A_22_P00024041 | 2,42176 | 1,46872 | 1,935947729 | N/A             | 101929526 | NR_109955 | LOC101929526   |
| A_22_P00015504 | 2,61029 | 1,65726 | 1,93593431  | N/A             | N/A       | N/A       | Inc-STAT3-1    |
| A_24_P187056   | 4,11967 | 3,16667 | 1,935894054 | N/A             | 100874392 | NR_046228 | ANKRD20A12P    |

|                |         |         |             |                 |           |           |                |
|----------------|---------|---------|-------------|-----------------|-----------|-----------|----------------|
| A_24_P12998    | 2,59564 | 1,64294 | 1,935491538 | ENST00000483385 | 30819     | NM_173197 | KCNIP2         |
| A_24_P364970   | 9,45089 | 8,49856 | 1,934995217 | ENST00000225296 | 56919     | NM_020162 | DHX33          |
| A_21_P0013985  | 3,03509 | 2,08285 | 1,934874509 | N/A             | 100507494 | AK090481  | LOC100507494   |
| A_23_P630      | 7,0405  | 6,08858 | 1,934445388 | ENST00000491308 | 55154     | NM_018116 | MSTO1          |
| A_21_P0013213  | 8,68694 | 7,73505 | 1,934405163 | N/A             | 442319    | N/A       | ZNF727         |
| A_33_P3257993  | 8,20065 | 7,24878 | 1,934378346 | ENST00000217740 | 54941     | NM_017831 | RNF125         |
| A_23_P107247   | 4,03722 | 3,0854  | 1,934311307 | ENST00000360761 | 8913      | NM_018896 | CACNA1G        |
| A_23_P418785   | 2,54013 | 1,58837 | 1,934230863 | ENST00000273666 | 9515      | NM_014980 | STXBPSL        |
| A_22_P00007050 | 2,50159 | 1,54988 | 1,934163829 | N/A             | N/A       | N/A       | Inc-GK-4       |
| A_33_P3335233  | 7,75883 | 6,80717 | 1,934096797 | ENST00000354624 | 80201     | NM_025130 | HKDC1          |
| A_33_P3379526  | 2,73117 | 1,77962 | 1,933949335 | N/A             | N/A       | AK127601  | N/A            |
| A_22_P00008729 | 4,17077 | 3,21929 | 1,933855501 | N/A             | N/A       | N/A       | Inc-KIAA1737-2 |
| A_21_P0010887  | 6,34206 | 5,39062 | 1,933801884 | N/A             | 101929917 | XR_252773 | LOC101929917   |
| A_33_P3334773  | 3,69115 | 2,73975 | 1,933748269 | ENST00000250003 | 4654      | NM_002478 | MYOD1          |
| A_23_P39703    | 5,68592 | 4,73457 | 1,933681251 | ENST00000263817 | 8647      | NM_003742 | ABCB11         |
| A_24_P96234    | 8,40829 | 7,45705 | 1,933533821 | ENST00000250237 | 81890     | NM_031209 | QTRT1          |
| A_19_P00317824 | 11,7101 | 10,7589 | 1,933480213 | ENST00000415215 | 554203    | N/A       | JPX            |
| A_22_P00012679 | 4,01305 | 3,06218 | 1,933038002 | N/A             | N/A       | AK125730  | Inc-QRFP-1     |
| A_23_P309803   | 12,4168 | 11,466  | 1,932944213 | ENST00000247930 | 27153     | NM_015694 | ZNF777         |
| A_21_P0010580  | 4,85639 | 3,90563 | 1,932890621 | N/A             | N/A       | N/A       | XL0C_I2_000657 |
| A_33_P3361412  | 5,84594 | 4,89526 | 1,932783441 | ENST00000369502 | 55356     | NM_018420 | SLC22A15       |
| A_21_P0004527  | 2,39736 | 1,44713 | 1,932180669 | N/A             | N/A       | N/A       | Inc-TCF7-3     |
| A_21_P0013451  | 3,70147 | 2,75149 | 1,931845877 | N/A             | 100996266 | N/A       | LINC01510      |
| A_22_P00010444 | 2,55308 | 1,60311 | 1,931832486 | N/A             | 101927623 | NR_110996 | LOC101927623   |
| A_22_P00011163 | 2,57189 | 1,62208 | 1,931618251 | N/A             | N/A       | BQ429976  | Inc-OCA2-2     |
| A_23_P105664   | 12,5971 | 11,6474 | 1,931470978 | ENST00000548126 | 29080     | NM_014167 | CCDC59         |
| A_33_P3261298  | 2,54835 | 1,59916 | 1,930788314 | ENST00000230671 | 6534      | NM_014228 | SLC6A7         |
| A_33_P3317282  | 8,6616  | 7,71248 | 1,930694634 | ENST00000368494 | 116150    | N/A       | NUS1           |
| A_23_P314811   | 3,02801 | 2,07891 | 1,930667869 | ENST00000273861 | 201780    | NM_152679 | SLC10A4        |
| A_24_P221235   | 3,08282 | 2,13374 | 1,930641104 | ENST00000524329 | N/A       | XR_246704 | N/A            |
| A_33_P3336233  | 7,48789 | 6,539   | 1,930386859 | ENST00000417913 | 8266      | NM_014235 | UBL4A          |
| A_21_P0011697  | 4,08447 | 3,13566 | 1,930279819 | N/A             | 101927667 | XR_430241 | LINC01535      |
| A_24_P917178   | 2,89738 | 1,9486  | 1,93023968  | N/A             | 284912    | BC001801  | LOC284912      |

|                |         |         |             |                 |           |              |                |
|----------------|---------|---------|-------------|-----------------|-----------|--------------|----------------|
| A_22_P00012715 | 2,91664 | 1,96806 | 1,929972111 | ENST00000533329 | N/A       | N/A          | N/A            |
| A_23_P66664    | 8,52066 | 7,57208 | 1,929972111 | ENST00000614122 | 6871      | NM_133439    | TADA2A         |
| A_22_P00014271 | 2,57676 | 1,62829 | 1,929824964 | N/A             | 100507086 | NR_038289    | DLG1-AS1       |
| A_33_P3393927  | 11,0185 | 10,0702 | 1,929597576 | ENST00000369140 | 10903     | NM_181873    | MTMR11         |
| A_22_P00000887 | 2,43135 | 1,48326 | 1,929316722 | ENST00000447848 | 101928326 | XR_245604    | LOC101928326   |
| A_23_P250212   | 13,4417 | 12,4938 | 1,929062652 | ENST00000615670 | 157285    | NM_001080826 | SGK223         |
| A_23_P41267    | 9,2541  | 8,30639 | 1,928808615 | ENST00000597991 | 401127    | NR_026854    | LOC401127      |
| A_33_P3390357  | 12,5804 | 11,6327 | 1,928795246 | ENST00000410092 | 56907     | NM_001128626 | SPIRE1         |
| A_22_P00005479 | 5,5468  | 4,59934 | 1,928474407 | N/A             | N/A       | N/A          | Inc-DYNLRB1-1  |
| A_21_P0013281  | 7,15248 | 6,20507 | 1,928407572 | N/A             | N/A       | N/A          | XLOC_I2_013730 |
| A_21_P0012392  | 6,00681 | 5,05944 | 1,928354106 | N/A             | N/A       | N/A          | XLOC_I2_009884 |
| A_33_P3283300  | 7,6634  | 6,71611 | 1,928247179 | ENST00000469758 | 63877     | N/A          | FAM204A        |
| A_23_P99771    | 14,2977 | 13,3505 | 1,928126892 | ENST00000316836 | 9240      | NM_006029    | PNMA1          |
| A_33_P3365077  | 2,90918 | 1,96204 | 1,928046705 | ENST00000320065 | 81470     | NM_001001915 | OR2G2          |
| A_32_P515971   | 2,51918 | 1,5722  | 1,92783289  | ENST00000450662 | 146779    | NM_173503    | EFCAB3         |
| A_22_P00020927 | 2,8075  | 1,86055 | 1,927792802 | N/A             | N/A       | AA211868     | Inc-RASA1-6    |
| A_19_P00810529 | 2,80045 | 1,85363 | 1,927619098 | ENST00000428914 | 114036    | NR_027267    | LINC00310      |
| A_33_P3330826  | 6,47199 | 5,5253  | 1,92744541  | ENST00000454869 | 100132077 | N/A          | LOC100132077   |
| A_23_P58953    | 11,3782 | 10,432  | 1,926790879 | ENST00000426637 | 4835      | NM_000904    | NQO2           |
| A_19_P00318375 | 3,53613 | 2,58994 | 1,926777524 | N/A             | 148696    | NR_026817    | LOC148696      |
| A_22_P00009876 | 8,16263 | 7,21667 | 1,926470374 | N/A             | N/A       | N/A          | Inc-MFAP5-1    |
| A_33_P3617655  | 3,65461 | 2,70904 | 1,925949667 | ENST00000431311 | 339442    | NR_038928    | LINC01343      |
| A_23_P56404    | 7,70658 | 6,76101 | 1,925949667 | ENST00000295206 | 2019      | NM_001426    | EN1            |
| A_33_P3293778  | 3,03066 | 2,08515 | 1,925869571 | ENST00000400374 | 386672    | NM_198687    | KRTAP10-4      |
| A_22_P00014682 | 3,12563 | 2,18017 | 1,925802826 | N/A             | N/A       | N/A          | Inc-SLC25A2-2  |
| A_21_P0005657  | 9,68073 | 8,7353  | 1,925762781 | ENST00000510244 | N/A       | N/A          | N/A            |
| A_21_P0007924  | 6,46044 | 5,51507 | 1,925682692 | N/A             | N/A       | N/A          | Inc-SGCG-1     |
| A_21_P0013453  | 6,78534 | 5,84004 | 1,92558926  | ENST00000447307 | 378805    | NR_034120    | LINC-PINT      |
| A_21_P0000492  | 13,5095 | 12,5644 | 1,925322335 | N/A             | 100126781 | NR_004384    | SNAR-F         |
| A_33_P3404844  | 3,85064 | 2,9056  | 1,925242265 | ENST00000613116 | 80725     | BC033233     | SRCIN1         |
| A_22_P00003270 | 7,23743 | 6,29243 | 1,925188886 | N/A             | N/A       | N/A          | Inc-CALM2-1    |
| A_33_P3416331  | 2,48563 | 1,54076 | 1,925015417 | ENST00000518568 | 347051    | NM_001010893 | SLC10A5        |
| A_22_P00005291 | 2,36116 | 1,41651 | 1,924721889 | N/A             | N/A       | N/A          | Inc-DNAJA4-1   |

|                |         |         |             |                 |           |              |               |
|----------------|---------|---------|-------------|-----------------|-----------|--------------|---------------|
| A_33_P3255056  | 3,25245 | 2,30824 | 1,924134968 | N/A             | N/A       | N/A          | N/A           |
| A_33_P3379775  | 7,23569 | 6,29163 | 1,923934922 | ENST00000376463 | 7088      | N/A          | TLE1          |
| A_21_P0012309  | 4,60891 | 3,66497 | 1,9237749   | N/A             | 26220     | N/A          | DGCR5         |
| A_23_P64980    | 3,91471 | 2,97093 | 1,923561558 | ENST00000343164 | 6540      | NM_016615    | SLC6A13       |
| A_19_P00316000 | 6,26834 | 5,32468 | 1,923401568 | N/A             | 378805    | NR_109851    | LINC-PINT     |
| A_21_P0013873  | 4,67763 | 3,73417 | 1,923134946 | N/A             | 101410537 | N/A          | MAGEA8-AS1    |
| A_23_P305938   | 9,19448 | 8,25107 | 1,923068297 | ENST00000370764 | 7626      | NM_007131    | ZNF75D        |
| A_33_P3243264  | 11,1335 | 10,1901 | 1,923054967 | ENST00000481053 | 728489    | NM_001080849 | DNLZ          |
| A_32_P793319   | 3,95968 | 3,01651 | 1,922748411 | N/A             | N/A       | AK098749     | N/A           |
| A_23_P128728   | 10,4923 | 9,54934 | 1,922468554 | ENST00000261783 | 384       | NM_001172    | ARG2          |
| A_33_P3343828  | 7,97348 | 7,03083 | 1,922055507 | N/A             | N/A       | AK126677     | Inc-CEMP1-1   |
| A_24_P713267   | 2,89722 | 1,95457 | 1,922055507 | ENST00000421593 | 338821    | NM_001009562 | SLCO1B7       |
| A_33_P3617190  | 2,82943 | 1,887   | 1,92176243  | N/A             | 651337    | AK124119     | LOC651337     |
| A_22_P00020765 | 2,60971 | 1,66749 | 1,921482717 | N/A             | N/A       | AK093513     | Inc-SLC2A12-4 |
| A_23_P97265    | 11,6479 | 10,7057 | 1,92145608  | ENST00000368232 | 54865     | NM_182679    | GPATCH4       |
| A_33_P3806965  | 2,53436 | 1,59217 | 1,921442761 | N/A             | 80078     | N/A          | FLJ13744      |
| A_24_P944588   | 7,47192 | 6,52983 | 1,921309582 | ENST00000601365 | 91120     | NM_033196    | ZNF682        |
| A_23_P217564   | 9,63836 | 8,69657 | 1,920910098 | ENST00000340800 | 2182      | NM_004458    | ACSL4         |
| A_33_P3641456  | 2,49497 | 1,55336 | 1,920670448 | N/A             | 642422    | AK125752     | LOC642422     |
| A_22_P00010764 | 2,33262 | 1,39109 | 1,920563946 | N/A             | 100874092 | NR_046652    | UBE2E1-AS1    |
| A_22_P00009419 | 2,37653 | 1,43527 | 1,920204547 | N/A             | N/A       | DA547612     | Inc-LYPD1-1   |
| A_22_P00013161 | 2,47341 | 1,53219 | 1,920151308 | ENST00000435953 | N/A       | N/A          | N/A           |
| A_23_P134809   | 12,2989 | 11,3577 | 1,920124689 | ENST00000521972 | 8439      | NM_003580    | NSMAF         |
| A_22_P00016432 | 2,38111 | 1,43999 | 1,920018218 | N/A             | N/A       | N/A          | Inc-TMEM35-1  |
| A_24_P78556    | 4,25619 | 3,3151  | 1,919978293 | ENST00000615708 | 11228     | NM_007211    | RASSF8        |
| A_19_P00318280 | 8,33373 | 7,39265 | 1,919964985 | N/A             | 100506860 | NR_109780    | LOC100506860  |
| A_23_P207154   | 4,49584 | 3,55486 | 1,919831907 | ENST00000558516 | 1443      | NM_022644    | CSH2          |
| A_23_P19816    | 3,98054 | 3,03965 | 1,919712146 | ENST00000405335 | 140545    | NM_030936    | RNF32         |
| A_23_P256158   | 3,63033 | 2,6895  | 1,919632309 | ENST00000330055 | 152       | NM_000683    | ADRA2C        |
| A_21_P0000242  | 8,2003  | 7,25954 | 1,91953917  | ENST00000521289 | 26795     | NR_002437    | SNORD54       |
| A_23_P65240    | 5,16927 | 4,22869 | 1,919299691 | ENST00000375820 | 1282      | NM_001845    | COL4A1        |
| A_23_P120557   | 11,2898 | 10,3493 | 1,919193265 | ENST00000337743 | 55617     | NM_017714    | TASP1         |
| A_22_P00020811 | 3,48233 | 2,54194 | 1,91904694  | ENST00000554650 | N/A       | DB457795     | N/A           |

|                |         |         |             |                 |           |              |                       |
|----------------|---------|---------|-------------|-----------------|-----------|--------------|-----------------------|
| A_23_P102582   | 15,9651 | 15,025  | 1,918661226 | ENST00000483815 | 55969     | NM_018840    | C20orf24              |
| A_23_P11214    | 11,1762 | 10,2363 | 1,918395261 | ENST00000617452 | 55922     | NM_017544    | NKRF                  |
| A_21_P0007252  | 3,55113 | 2,61153 | 1,917996383 | N/A             | N/A       | N/A          | Inc-TMEM135-2         |
| A_23_P23815    | 10,5036 | 9,56417 | 1,91777039  | ENST00000367001 | 7779      | NM_021194    | SLC30A1               |
| A_22_P00005231 | 2,32915 | 1,38989 | 1,917544422 | ENST00000442197 | N/A       | AU253022     | N/A                   |
| A_22_P00018370 | 2,47404 | 1,53494 | 1,917331772 | N/A             | N/A       | BF509012     | Inc-OSBPL9-2          |
| A_23_P356070   | 3,43581 | 2,497   | 1,916946402 | ENST00000619105 | 2324      | NM_002020    | FLT4                  |
| A_23_P52727    | 11,3275 | 10,3887 | 1,916933115 | ENST00000527559 | 89797     | NM_182964    | NAV2                  |
| A_19_P00322316 | 2,77233 | 1,83353 | 1,916933115 | ENST00000470911 | 344454    | N/A          | AOX2P                 |
| A_24_P330112   | 5,3033  | 4,36457 | 1,916840107 | ENST00000320756 | 55110     | NM_018048    | MAGOHB                |
| A_33_P3289996  | 7,45061 | 6,51207 | 1,91658768  | ENST00000369232 | 85015     | NM_001080481 | USP45                 |
| A_24_P75963    | 3,01967 | 2,08114 | 1,916574395 | ENST00000328264 | 10281     | HQ257978     | DSCR4                 |
| A_23_P115645   | 2,47728 | 1,53879 | 1,916521257 | ENST00000608830 | 10659     | NM_001025076 | CELF2                 |
| A_22_P00021305 | 2,91279 | 1,97453 | 1,916215742 | ENST00000515097 | N/A       | N/A          | N/A                   |
| A_33_P3283984  | 4,61433 | 3,67622 | 1,91601652  | ENST00000388970 | 172       | NR_003228    | AFG3L1P               |
| A_23_P153676   | 8,68098 | 7,74293 | 1,915936837 | ENST00000443826 | 7089      | NM_003260    | TLE2                  |
| A_33_P3225882  | 7,39131 | 6,45333 | 1,915843877 | ENST00000479463 | 51272     | NM_001098787 | BET1L                 |
| A_33_P3351536  | 12,006  | 11,0681 | 1,915737643 | ENST00000346049 | 2185      | NM_173174    | PTK2B                 |
| A_23_P122624   | 12,0885 | 11,1506 | 1,915737643 | ENST00000367576 | 84946     | NM_032860    | LTV1                  |
| A_21_P0007411  | 4,60161 | 3,66411 | 1,915206561 | N/A             | N/A       | N/A          | Inc-RP11-831A10.1.1-1 |
| A_24_P941322   | 5,56432 | 4,62711 | 1,914821619 | ENST00000361758 | 9444      | NM_006775    | QKI                   |
| A_21_P0002557  | 3,49201 | 2,55485 | 1,914755258 | N/A             | N/A       | N/A          | Inc-AC110619.2.1-1    |
| A_33_P3548190  | 2,60158 | 1,66479 | 1,914264254 | ENST00000594461 | 338864    | NR_034024    | LINC00347             |
| A_21_P0004459  | 4,6783  | 3,74184 | 1,913826438 | N/A             | 102546298 | N/A          | LOC102546298          |
| A_21_P0007030  | 4,5541  | 3,61781 | 1,913600936 | N/A             | N/A       | N/A          | Inc-UROS-1            |
| A_23_P217384   | 6,0628  | 5,12663 | 1,913441773 | ENST00000329235 | 8905      | NM_003916    | AP1S2                 |
| A_33_P3407445  | 6,80087 | 5,86474 | 1,913388722 | ENST00000514573 | N/A       | AK090949     | N/A                   |
| A_21_P0014371  | 2,78006 | 1,84401 | 1,913282624 | ENST00000595005 | 100506114 | XR_172297    | LOC100506114          |
| A_21_P0004555  | 2,53641 | 1,6005  | 1,913096967 | N/A             | 101926960 | NR_104636    | LOC101926960          |
| A_33_P3368203  | 3,07415 | 2,13828 | 1,913043926 | ENST00000359872 | 40        | N/A          | ASIC2                 |
| A_22_P00012737 | 2,80675 | 1,87097 | 1,912924588 | N/A             | N/A       | N/A          | Inc-RABEP2-2          |
| A_24_P28657    | 10,0047 | 9,06903 | 1,91277874  | ENST00000326225 | 25909     | NM_015446    | AHCTF1                |
| A_33_P3270800  | 4,90452 | 3,96891 | 1,912699191 | ENST00000344935 | 642843    | NM_001129885 | CPSF4L                |

|                |         |         |             |                 |           |              |               |
|----------------|---------|---------|-------------|-----------------|-----------|--------------|---------------|
| A_33_P3354607  | 2,68426 | 1,74883 | 1,912460565 | ENST00000613947 | 9560      | NM_001291470 | CCL4L2        |
| A_24_P156490   | 2,39528 | 1,46001 | 1,912248479 | ENST00000286627 | 3778      | NM_002247    | KCNMA1        |
| A_24_P944427   | 6,40979 | 5,47454 | 1,912221969 | ENST00000402198 | 55209     | NM_001292043 | SETD5         |
| A_33_P3283900  | 3,57387 | 2,63866 | 1,912168952 | N/A             | 1497      | NM_004937    | CTNS          |
| A_21_P0000363  | 10,3459 | 9,41092 | 1,911864131 | ENST00000323981 | 684959    | NR_003028    | SNORA25       |
| A_32_P214178   | 7,33587 | 6,40093 | 1,911811124 | ENST00000624872 | 284836    | NR_026960    | LINC00319     |
| A_21_P0011031  | 5,088   | 4,15309 | 1,911771369 | ENST00000513207 | 101928865 | N/A          | LOC101928865  |
| A_22_P00006422 | 4,81705 | 3,88218 | 1,911718364 | N/A             | N/A       | N/A          | Inc-FBXO31-1  |
| A_24_P101114   | 9,66189 | 8,72703 | 1,911705113 | ENST00000441024 | 23019     | NM_206999    | CNOT1         |
| A_33_P3222501  | 5,68005 | 4,7454  | 1,911426864 | ENST00000437428 | 728262    | NM_001145248 | FAM157A       |
| A_22_P00020425 | 3,69434 | 2,75997 | 1,911055928 | N/A             | N/A       | N/A          | Inc-LMTK3-1   |
| A_21_P0004449  | 2,6835  | 1,74929 | 1,910843997 | N/A             | N/A       | N/A          | Inc-HARS-1    |
| A_33_P6814977  | 2,68849 | 1,75448 | 1,910579116 | N/A             | 284900    | NR_026963    | TTC28-AS1     |
| A_23_P113613   | 12,1034 | 11,1694 | 1,910565873 | ENST00000296129 | 64866     | NM_022842    | CDCP1         |
| A_22_P00002893 | 3,62699 | 2,69329 | 1,910168623 | N/A             | N/A       | N/A          | Inc-C4orf37-2 |
| A_33_P3383205  | 4,88363 | 3,95019 | 1,909824407 | N/A             | 100131766 | AB064667     | OK/SW-CL.58   |
| A_33_P3399935  | 4,57404 | 3,64067 | 1,909731744 | ENST00000509742 | 6196      | NM_021135    | RPS6KA2       |
| A_21_P0002825  | 2,48795 | 1,55496 | 1,909228794 | N/A             | N/A       | N/A          | Inc-OPA1-2    |
| A_21_P0009618  | 5,35317 | 4,42026 | 1,909122927 | ENST00000578092 | 284276    | NR_015417    | LINC00908     |
| A_23_P1361     | 11,6034 | 10,6706 | 1,908977369 | ENST00000371221 | 5832      | NM_002860    | ALDH18A1      |
| A_23_P40805    | 2,44572 | 1,51301 | 1,908858285 | ENST00000296233 | 28999     | NM_014079    | KLF15         |
| A_22_P00019963 | 2,55591 | 1,62322 | 1,908831823 | N/A             | N/A       | N/A          | Inc-SNTG1-1   |
| A_33_P3321275  | 7,61682 | 6,68429 | 1,908620138 | ENST00000445955 | 58508     | NM_170606    | KMT2C         |
| A_24_P201171   | 7,30484 | 6,37236 | 1,908553992 | ENST00000373302 | 6812      | NM_003165    | STXBP1        |
| A_33_P3236392  | 10,7876 | 9,85512 | 1,908553992 | ENST00000368012 | 81607     | NM_030916    | PVRL4         |
| A_21_P0008110  | 4,73969 | 3,80723 | 1,908527534 | N/A             | 171425    | N/A          | CLYBL         |
| A_22_P00014362 | 3,34985 | 2,41745 | 1,908448162 | N/A             | N/A       | N/A          | Inc-SESN3-3   |
| A_21_P0000168  | 10,297  | 9,36486 | 1,908104256 | ENST00000591397 | 11016     | NM_001206682 | ATF7          |
| A_23_P67725    | 10,3216 | 9,3896  | 1,907919101 | ENST00000325327 | 84823     | NM_032737    | LMNB2         |
| A_23_P256470   | 2,88355 | 1,95163 | 1,907813307 | ENST00000407573 | 4852      | NM_000905    | NPY           |
| A_33_P3382553  | 2,54261 | 1,61101 | 1,907390187 | N/A             | N/A       | AF116661     | N/A           |
| A_21_P0000231  | 5,70023 | 4,76878 | 1,907191882 | N/A             | 347686    | NR_001294    | SNORD64       |
| A_22_P00014556 | 2,74622 | 1,8148  | 1,907152223 | ENST00000437916 | 100130502 | XR_244997    | LOC100130502  |



|                |         |         |             |                 |           |              |               |
|----------------|---------|---------|-------------|-----------------|-----------|--------------|---------------|
| A_33_P3253139  | 2,58085 | 1,64943 | 1,907152223 | ENST00000411800 | N/A       | N/A          | N/A           |
| A_33_P3318763  | 5,50459 | 4,5737  | 1,906451725 | N/A             | 101927497 | NR_110086    | LOC101927497  |
| A_23_P156289   | 9,04243 | 8,11154 | 1,906451725 | ENST00000274276 | 9180      | NM_003999    | OSMR          |
| A_21_P0013717  | 10,7544 | 9,82381 | 1,906055331 | ENST00000438342 | N/A       | XM_001716795 | N/A           |
| A_24_P272761   | 6,46909 | 5,53853 | 1,906015696 | ENST00000373624 | 57706     | NM_020946    | DENND1A       |
| A_22_P00012301 | 2,56822 | 1,63783 | 1,905791114 | N/A             | N/A       | AF403226     | Inc-PPP4R1-10 |
| A_21_P0010772  | 5,75675 | 4,82639 | 1,905751485 | N/A             | 102725076 | N/A          | LOC102725076  |
| A_23_P100292   | 14,9965 | 14,0662 | 1,905672228 | ENST00000565396 | 90850     | NM_178167    | ZNF598        |
| A_23_P154447   | 14,4047 | 13,4745 | 1,905540142 | ENST00000478508 | 51602     | NM_015934    | NOP58         |
| A_33_P3301884  | 2,4954  | 1,56522 | 1,905513726 | ENST00000535133 | 116437    | NR_026670    | LINC01257     |
| A_33_P3251289  | 12,4175 | 11,4874 | 1,905408064 | ENST00000527833 | 55829     | NM_018445    | VIMP          |
| A_33_P3218148  | 7,81845 | 6,88873 | 1,904906254 | ENST00000425232 | 65250     | NM_023073    | C5orf42       |
| A_32_P48825    | 2,39123 | 1,46192 | 1,904364975 | ENST00000354310 | 140807    | NM_080747    | KRT72         |
| A_23_P82478    | 12,2916 | 11,3626 | 1,903955817 | ENST00000356362 | 54517     | NM_019042    | PUS7          |
| A_33_P3321025  | 2,45288 | 1,52394 | 1,903876635 | ENST00000359827 | 91584     | NM_020911    | PLXNA4        |
| A_21_P0014524  | 2,443   | 1,5141  | 1,903823849 | N/A             | N/A       | N/A          | N/A           |
| A_24_P290373   | 7,45964 | 6,53092 | 1,903586331 | ENST00000521192 | 63932     | NM_022101    | CXorf56       |
| A_22_P00009434 | 3,2322  | 2,3035  | 1,903559942 | N/A             | N/A       | N/A          | Inc-LYSMD2-1  |
| A_23_P431346   | 9,32802 | 8,39935 | 1,903520359 | ENST00000319694 | 222171    | NM_175887    | PRR15         |
| A_22_P00004634 | 2,6039  | 1,67535 | 1,903362035 | ENST00000457518 | N/A       | N/A          | N/A           |
| A_22_P00017128 | 2,57173 | 1,64341 | 1,903058618 | N/A             | N/A       | N/A          | Inc-UBASH3B-2 |
| A_21_P0008225  | 2,55731 | 1,62903 | 1,903005855 | N/A             | N/A       | XM_006709970 | Inc-PCID2-1   |
| A_22_P00008681 | 10,0458 | 9,11774 | 1,902715683 | ENST00000432502 | 100506714 | NR_038956    | NUP50-AS1     |
| A_21_P0000358  | 8,53079 | 7,60294 | 1,902438742 | N/A             | 677839    | NR_003017    | SNORA71C      |
| A_23_P113825   | 9,8207  | 8,89314 | 1,902056366 | ENST00000277554 | 138151    | NM_144653    | NACC2         |
| A_22_P00016083 | 2,40493 | 1,47752 | 1,901858616 | N/A             | N/A       | N/A          | Inc-THBS4-1   |
| A_24_P417596   | 4,85892 | 3,93174 | 1,901555438 | ENST00000396958 | 114984    | NM_138439    | FLYWCH2       |
| A_22_P00008780 | 3,18228 | 2,2551  | 1,901555438 | ENST00000457340 | N/A       | N/A          | N/A           |
| A_23_P334870   | 7,48479 | 6,55803 | 1,901001934 | ENST00000336655 | 221468    | NM_145316    | TMEM217       |
| A_33_P3279620  | 11,3474 | 10,4207 | 1,900922876 | N/A             | N/A       | AK094832     | N/A           |
| A_22_P00009502 | 3,96972 | 3,04334 | 1,900501284 | ENST00000522460 | N/A       | CD696320     | N/A           |
| A_21_P0000645  | 4,21966 | 3,29336 | 1,900395901 | ENST00000427140 | 149773    | NR_034147    | APCDD1L-AS1   |
| A_33_P3423017  | 2,45165 | 1,52556 | 1,900119298 | N/A             | N/A       | N/A          | N/A           |

|                |         |         |             |                 |           |              |              |
|----------------|---------|---------|-------------|-----------------|-----------|--------------|--------------|
| A_21_P0005903  | 2,59926 | 1,67327 | 1,899987596 | ENST00000520224 | N/A       | N/A          | N/A          |
| A_23_P110345   | 10,2447 | 9,31877 | 1,899908579 | ENST00000263921 | 26511     | NM_012110    | CHIC2        |
| A_19_P00322260 | 8,42816 | 7,50237 | 1,89972422  | ENST00000504145 | 101929709 | NR_125822    | LOC101929709 |
| A_23_P204364   | 11,999  | 11,0734 | 1,899474047 | ENST00000542015 | 4839      | NM_001033714 | NOP2         |
| A_23_P100386   | 3,96936 | 3,04417 | 1,898934311 | ENST00000429149 | 146433    | NM_152456    | IL34         |
| A_33_P3382111  | 4,45097 | 3,52609 | 1,89852632  | N/A             | N/A       | N/A          | N/A          |
| A_33_P3349384  | 3,77615 | 2,85146 | 1,898276305 | N/A             | 102724074 | XR_424364    | LOC102724074 |
| A_22_P00007055 | 3,21885 | 2,2943  | 1,898092104 | ENST00000533390 | 283177    | NR_033852    | LOC283177    |
| A_22_P00007365 | 2,35542 | 1,43091 | 1,898039478 | N/A             | N/A       | N/A          | Inc-GREM2-2  |
| A_23_P100074   | 12,4843 | 11,5598 | 1,898026322 | ENST00000306730 | 57099     | NM_020371    | AVEN         |
| A_33_P3270369  | 4,10242 | 3,17799 | 1,897934232 | N/A             | N/A       | AK130406     | N/A          |
| A_22_P00001286 | 4,85718 | 3,93276 | 1,897921076 | ENST00000561968 | 400508    | NR_026675    | CRYM-AS1     |
| A_23_P148446   | 13,416  | 12,4918 | 1,89763168  | ENST00000371569 | 7319      | NM_003336    | UBE2A        |
| A_33_P3737504  | 6,03071 | 5,10656 | 1,897565914 | ENST00000489291 | 1612      | NM_004938    | DAPK1        |
| A_23_P29303    | 10,2274 | 9,3036  | 1,897105617 | ENST00000483303 | 27341     | NM_015703    | RRP7A        |
| A_33_P3292525  | 10,5575 | 9,63382 | 1,896947827 | ENST00000340305 | 199953    | NM_001010866 | TMEM201      |
| A_33_P3384312  | 2,64643 | 1,72278 | 1,896908382 | N/A             | N/A       | N/A          | N/A          |
| A_33_P3266958  | 4,72128 | 3,79783 | 1,896645432 | N/A             | N/A       | N/A          | N/A          |
| A_23_P143374   | 11,7165 | 10,7931 | 1,896579701 | ENST00000464285 | 22981     | NM_025176    | NINL         |
| A_33_P3247332  | 2,88975 | 1,96659 | 1,896264221 | N/A             | N/A       | N/A          | N/A          |
| A_33_P3398331  | 5,30278 | 4,37966 | 1,896211646 | ENST00000246186 | 10893     | NM_006690    | MMP24        |
| A_19_P00322533 | 11,2421 | 10,3191 | 1,89605393  | ENST00000560912 | 643911    | NR_110453    | CRNDE        |
| A_32_P62571    | 11,2223 | 10,2994 | 1,89592251  | ENST00000583313 | 9939      | NM_005105    | RBM8A        |
| A_23_P49041    | 8,8091  | 7,88628 | 1,895817381 | ENST00000563859 | 80021     | NM_024956    | TMEM62       |
| A_32_P319858   | 3,18203 | 2,25927 | 1,895738538 | ENST00000438936 | 284353    | NM_198478    | NKPD1        |
| A_21_P0000721  | 2,94826 | 2,0256  | 1,89560714  | N/A             | 100616530 | NR_038206    | C8orf37-AS1  |
| A_22_P00018152 | 2,48645 | 1,56387 | 1,895502028 | ENST00000582697 | N/A       | N/A          | N/A          |
| A_33_P3326568  | 3,38503 | 2,46247 | 1,895475751 | ENST00000467497 | 169792    | DQ438879     | GLIS3        |
| A_33_P3301010  | 8,73782 | 7,81574 | 1,894845211 | ENST00000588236 | 56907     | NM_001128626 | SPIRE1       |
| A_33_P3211804  | 11,3855 | 10,4636 | 1,894608812 | ENST00000482318 | 861       | NM_001001890 | RUNX1        |
| A_24_P347880   | 4,86515 | 3,94352 | 1,89425427  | ENST00000318227 | 59344     | NM_021628    | ALOXE3       |
| A_21_P0000392  | 4,54278 | 3,62119 | 1,894201751 | ENST00000483264 | 692211    | NR_003076    | SNORD98      |
| A_23_P46045    | 3,75334 | 2,83205 | 1,893807904 | ENST00000313961 | 8490      | NM_003617    | RGS5         |

|                |         |         |             |                 |        |              |                |
|----------------|---------|---------|-------------|-----------------|--------|--------------|----------------|
| A_33_P3345623  | 4,27513 | 3,35388 | 1,893755397 | ENST00000334984 | 6239   | NM_001003700 | RREB1          |
| A_23_P135722   | 7,32312 | 6,40197 | 1,893624136 | ENST00000395743 | 685    | NM_001729    | BTC            |
| A_23_P65733    | 8,22182 | 7,30085 | 1,89338789  | ENST00000356321 | 54989  | NM_014106    | ZNF770         |
| A_33_P3230723  | 5,4836  | 4,56283 | 1,893125429 | ENST00000377083 | 23095  | NM_183416    | KIF1B          |
| A_33_P3265549  | 7,69184 | 6,77108 | 1,893112307 | ENST00000485649 | 6573   | NM_001205206 | SLC19A1        |
| A_24_P39454    | 8,47957 | 7,55886 | 1,893046698 | ENST00000558357 | 54617  | NM_017553    | INO80          |
| A_23_P407684   | 11,5171 | 10,5964 | 1,893033576 | ENST00000567008 | 90850  | NM_178167    | ZNF598         |
| A_21_P0002775  | 2,65291 | 1,73234 | 1,892863004 | ENST00000494509 | N/A    | N/A          | N/A            |
| A_24_P649624   | 9,21854 | 8,29807 | 1,892731806 | ENST00000377093 | 23095  | NM_183416    | KIF1B          |
| A_22_P00021381 | 4,94742 | 4,02696 | 1,892718686 | ENST00000572848 | N/A    | C02889       | N/A            |
| A_21_P0011355  | 2,53085 | 1,6107  | 1,892312031 | ENST00000611771 | 653125 | NM_001282493 | GOLGA8K        |
| A_21_P0012261  | 2,49347 | 1,57377 | 1,89172188  | N/A             | N/A    | N/A          | XLOC_I2_009331 |
| A_24_P51061    | 10,2772 | 9,35812 | 1,890909085 | ENST00000486004 | 131566 | NM_080927    | DCBLD2         |
| A_22_P00002734 | 4,84827 | 3,92923 | 1,890856658 | N/A             | N/A    | N/A          | Inc-C20orf94-1 |
| A_21_P0006292  | 2,36046 | 1,44169 | 1,890502818 | N/A             | N/A    | N/A          | Inc-AUH-4      |
| A_21_P0004332  | 2,41171 | 1,49307 | 1,890332474 | N/A             | N/A    | N/A          | Inc-NEURL1B-4  |
| A_33_P3224780  | 3,72274 | 2,80423 | 1,890162146 | N/A             | N/A    | N/A          | N/A            |
| A_33_P3423425  | 12,4599 | 11,5414 | 1,890149044 | ENST00000356321 | 54989  | NM_014106    | ZNF770         |
| A_23_P166431   | 2,7154  | 1,79703 | 1,889978732 | ENST00000248984 | 25775  | NM_001302819 | C22orf24       |
| A_33_P3362326  | 9,62387 | 8,70556 | 1,889900132 | N/A             | 2274   | CR936682     | FHL2           |
| A_32_P7316     | 5,31219 | 4,39398 | 1,889769138 | ENST00000525528 | 627    | NM_170735    | BDNF           |
| A_23_P35791    | 12,513  | 11,595  | 1,889494082 | ENST00000528057 | 8986   | NM_003942    | RPS6KA4        |
| A_23_P256223   | 11,4064 | 10,4886 | 1,889232161 | ENST00000460509 | 7411   | AK313420     | VBP1           |
| A_33_P3298750  | 6,13094 | 5,21323 | 1,889114308 | N/A             | N/A    | BC012881     | N/A            |
| A_23_P124855   | 9,01841 | 8,101   | 1,888721518 | ENST00000534928 | 84186  | NM_032226    | ZCCHC7         |
| A_33_P3825869  | 2,59962 | 1,68224 | 1,888682244 | ENST00000399634 | 775    | NM_199460    | CACNA1C        |
| A_24_P136522   | 2,3816  | 1,46437 | 1,888485884 | N/A             | 84253  | AK095679     | GARNL3         |
| A_23_P376060   | 5,43269 | 4,51558 | 1,888328811 | ENST00000293068 | 22806  | NM_012481    | IKZF3          |
| A_23_P37892    | 11,3038 | 10,3867 | 1,888315722 | ENST00000569193 | 84706  | NM_133443    | GPT2           |
| A_33_P3231187  | 8,36657 | 7,44959 | 1,888158663 | ENST00000355640 | 331    | NM_001167    | XIAP           |
| A_33_P3283126  | 3,47064 | 2,55373 | 1,888067051 | ENST00000550197 | 92558  | XR_429121    | CCDC64         |
| A_22_P00016530 | 4,80729 | 3,89063 | 1,887739902 | ENST00000548722 | N/A    | N/A          | N/A            |
| A_33_P3221648  | 3,36597 | 2,44944 | 1,887569807 | N/A             | N/A    | N/A          | XLOC_I2_010328 |

|                |         |         |             |                 |        |              |                |
|----------------|---------|---------|-------------|-----------------|--------|--------------|----------------|
| A_23_P119789   | 9,79552 | 8,87899 | 1,887569807 | ENST00000426077 | 79134  | NM_024121    | TMEM185B       |
| A_22_P00005423 | 5,32436 | 4,40787 | 1,887517473 | ENST00000251250 | 56986  | AL122040     | DTWD1          |
| A_33_P3530314  | 10,248  | 9,33153 | 1,887491307 | ENST00000509849 | 65250  | NM_023073    | C5orf42        |
| A_23_P30464    | 12,2794 | 11,3631 | 1,887268908 | ENST00000502922 | 80758  | NM_030567    | PRR7           |
| A_21_P0013648  | 4,64894 | 3,73264 | 1,887268908 | N/A             | N/A    | N/A          | XLOC_I2_015206 |
| A_21_P0002250  | 2,68654 | 1,77026 | 1,887242745 | N/A             | N/A    | N/A          | Inc-KCMF1-1    |
| A_21_P0003325  | 2,90116 | 1,98494 | 1,887164258 | ENST00000514265 | N/A    | N/A          | N/A            |
| A_22_P00011455 | 6,40958 | 5,49348 | 1,887007295 | N/A             | N/A    | N/A          | Inc-PAPLN-1    |
| A_23_P7253     | 8,03148 | 7,11539 | 1,886994215 | ENST00000326639 | 55132  | NM_018078    | LARP1B         |
| A_24_P118196   | 7,307   | 6,39126 | 1,886536483 | ENST00000389617 | 727936 | NM_001080393 | GXYLT2         |
| A_33_P3396089  | 6,11161 | 5,1964  | 1,885843557 | ENST00000556938 | 145389 | NM_153811    | SLC38A6        |
| A_23_P211007   | 12,0183 | 11,1034 | 1,885438379 | ENST00000400202 | 8204   | NM_003489    | NRIP1          |
| A_23_P164042   | 5,29511 | 4,3803  | 1,885320763 | ENST00000433197 | 2081   | NM_001433    | ERN1           |
| A_33_P3328621  | 2,87163 | 1,95682 | 1,885320763 | ENST00000453554 | N/A    | BC036435     | N/A            |
| A_21_P0010092  | 4,62976 | 3,71511 | 1,885111685 | N/A             | N/A    | N/A          | Inc-NCOA3-9    |
| A_24_P215653   | 2,84104 | 1,92668 | 1,884732792 | ENST00000342213 | 161198 | NM_175060    | CLEC14A        |
| A_22_P00005677 | 6,62784 | 5,71356 | 1,884628283 | N/A             | N/A    | BC015455     | Inc-EIF4EBP1-1 |
| A_23_P157495   | 11,5574 | 10,6432 | 1,88452378  | ENST00000240139 | 5533   | NM_005605    | PPP3CC         |
| A_23_P340333   | 13,1821 | 12,268  | 1,884393159 | ENST00000358187 | 85450  | NM_033397    | ITPRIP         |
| A_21_P0009593  | 2,45421 | 1,54031 | 1,884131945 | ENST00000580487 | N/A    | N/A          | N/A            |
| A_22_P00012802 | 6,56327 | 5,64948 | 1,883988293 | N/A             | N/A    | BC064478     | Inc-RANBP9-1   |
| A_21_P0002439  | 2,83205 | 1,9183  | 1,883936058 | N/A             | N/A    | N/A          | Inc-PIGF-2     |
| A_33_P3307735  | 5,93876 | 5,02533 | 1,883518234 | ENST00000355520 | 4983   | NM_002547    | OPHN1          |
| A_24_P130962   | 7,39908 | 6,48591 | 1,88317882  | ENST00000352445 | 64222  | NM_022371    | TOR3A          |
| A_32_P199884   | 7,70616 | 6,79317 | 1,882943877 | ENST00000486497 | 84072  | NM_032132    | HORMAD1        |
| A_19_P00318054 | 3,9737  | 3,06072 | 1,882930826 | ENST00000462931 | N/A    | N/A          | N/A            |
| A_22_P00020353 | 5,53683 | 4,62395 | 1,882800316 | ENST00000465795 | N/A    | N/A          | N/A            |
| A_23_P341503   | 5,21746 | 4,30473 | 1,882604567 | ENST00000466204 | 339883 | NM_178339    | C3orf35        |
| A_23_P143365   | 2,41878 | 1,50609 | 1,882552371 | ENST00000376979 | 128821 | NM_080610    | CST9L          |
| A_33_P3489222  | 6,62153 | 5,709   | 1,882343601 | ENST00000506080 | 26095  | NM_001042357 | PTPN20B        |
| A_24_P331128   | 11,2547 | 10,3423 | 1,882173992 | ENST00000262958 | 2769   | NM_002068    | GNA15          |
| A_23_P258251   | 11,037  | 10,1248 | 1,881913085 | ENST00000610637 | 10495  | NM_182314    | ENOX2          |
| A_21_P0010810  | 3,01024 | 2,09819 | 1,881717429 | N/A             | N/A    | N/A          | XLOC_I2_001520 |

|                |         |         |             |                 |           |           |                |
|----------------|---------|---------|-------------|-----------------|-----------|-----------|----------------|
| A_23_P103476   | 10,3165 | 9,40462 | 1,88149571  | ENST00000376810 | 29914     | NM_013319 | UBIAD1         |
| A_23_P91829    | 9,95883 | 9,04715 | 1,881234897 | ENST00000326857 | 131566    | NM_080927 | DCBLD2         |
| A_21_P0003977  | 3,07487 | 2,16322 | 1,881195779 | N/A             | N/A       | N/A       | Inc-PRDM9-3    |
| A_23_P17345    | 6,32803 | 5,41638 | 1,881195779 | ENST00000373313 | 9935      | NM_005461 | MAFB           |
| A_33_P3334000  | 2,65661 | 1,74524 | 1,880830709 | N/A             | N/A       | N/A       | N/A            |
| A_33_P3232644  | 3,73402 | 2,82269 | 1,880778562 | ENST00000457574 | N/A       | N/A       | N/A            |
| A_33_P6571454  | 7,00256 | 6,09134 | 1,880635166 | ENST00000271417 | 387597    | N/A       | ILDR2          |
| A_33_P3374258  | 6,52432 | 5,61311 | 1,88062213  | ENST00000369506 | 4808      | AK056621  | NHLH2          |
| A_23_P167692   | 8,62292 | 7,71172 | 1,880609095 | ENST00000393362 | 5601      | NM_002752 | MAPK9          |
| A_22_P00018452 | 5,42966 | 4,51847 | 1,880596059 | ENST00000507776 | 102723906 | XR_425825 | LOC102723906   |
| A_22_P00003313 | 2,57549 | 1,66469 | 1,880087751 | N/A             | N/A       | N/A       | Inc-CAPRIN2-1  |
| A_21_P0014824  | 6,21937 | 5,30863 | 1,880009562 | N/A             | N/A       | AK293975  | N/A            |
| A_21_P0013660  | 2,66241 | 1,75169 | 1,8799835   | N/A             | N/A       | N/A       | XL0C_I2_015219 |
| A_22_P00001710 | 3,52592 | 2,61524 | 1,879931377 | N/A             | N/A       | AK125753  | Inc-ATG16L2-2  |
| A_22_P00025534 | 2,39311 | 1,48297 | 1,879227851 | ENST00000569807 | N/A       | N/A       | N/A            |
| A_33_P3249076  | 5,23398 | 4,32385 | 1,879214825 | ENST00000465608 | 112817    | AK094791  | HOGA1          |
| A_33_P3666346  | 6,15825 | 5,24865 | 1,878524589 | ENST00000420969 | 25909     | NM_015446 | AHCTF1         |
| A_21_P0005353  | 2,30653 | 1,39703 | 1,878394384 | N/A             | N/A       | N/A       | Inc-FOXK1-1    |
| A_23_P122674   | 10,9553 | 10,0458 | 1,878394384 | ENST00000379568 | 55003     | NM_017906 | PAK1IP1        |
| A_24_P13311    | 9,14652 | 8,23719 | 1,878173056 | ENST00000544112 | 121260    | NM_145648 | SLC15A4        |
| A_21_P0012177  | 2,62215 | 1,71296 | 1,877990806 | N/A             | N/A       | N/A       | XL0C_I2_009105 |
| A_33_P3815064  | 4,82639 | 3,91738 | 1,87775651  | ENST00000500215 | 283575    | NR_110554 | LOC283575      |
| A_33_P3398533  | 7,1216  | 6,21261 | 1,877730479 | ENST00000352251 | 80209     | NM_025138 | PROSER1        |
| A_21_P0012088  | 6,01289 | 5,10411 | 1,877457175 | ENST00000449075 | 100506797 | N/A       | LOC100506797   |
| A_22_P00017000 | 4,04936 | 3,14059 | 1,877444161 | ENST00000464747 | 100130691 | NR_026966 | LOC100130691   |
| A_23_P308150   | 9,32416 | 8,41546 | 1,877353069 | ENST00000330258 | 139285    | NM_152424 | AMER1          |
| A_33_P3389008  | 4,71399 | 3,80542 | 1,87718391  | ENST00000618907 | 27069     | NM_014394 | GHITM          |
| A_19_P00803960 | 8,22614 | 7,31758 | 1,877170899 | N/A             | 100499177 | NR_034075 | THAP9-AS1      |
| A_21_P0000328  | 9,24222 | 8,33373 | 1,87707982  | ENST00000530089 | 677822    | NR_002973 | SNORA40        |
| A_32_P160896   | 5,39609 | 4,48773 | 1,876910686 | ENST00000321339 | 94033     | NM_177478 | FTMT           |
| A_19_P00318409 | 11,0103 | 10,102  | 1,876832629 | ENST00000499732 | 283131    | NR_028272 | NEAT1          |
| A_33_P3305731  | 6,67029 | 5,76202 | 1,876793602 | ENST00000496509 | 22981     | NM_025176 | NINL           |
| A_22_P00013010 | 3,22631 | 2,31811 | 1,876702541 | N/A             | N/A       | N/A       | Inc-RGMA-1     |

|                |         |         |             |                 |           |              |                      |
|----------------|---------|---------|-------------|-----------------|-----------|--------------|----------------------|
| A_21_P0002195  | 2,26423 | 1,35634 | 1,876299327 | N/A             | N/A       | N/A          | Inc-TTC27-1          |
| A_21_P0011252  | 9,7805  | 8,8728  | 1,876052238 | ENST00000605130 | N/A       | N/A          | N/A                  |
| A_22_P00010032 | 3,74708 | 2,83947 | 1,875935208 | ENST00000440477 | N/A       | N/A          | N/A                  |
| A_33_P3370029  | 3,13664 | 2,22946 | 1,875376162 | ENST00000390340 | N/A       | S60780       | N/A                  |
| A_22_P00014223 | 5,4609  | 4,55373 | 1,875363163 | N/A             | 100874089 | NR_046645    | RUVBL1-AS1           |
| A_33_P3390477  | 15,0465 | 14,1394 | 1,875272172 | ENST00000307422 | 51073     | NM_146388    | MRPL4                |
| A_22_P00019607 | 7,6294  | 6,72259 | 1,874895257 | ENST00000488257 | 57060     | NM_020418    | PCBP4                |
| A_33_P3412556  | 6,98444 | 6,07767 | 1,874843274 | ENST00000458378 | N/A       | N/A          | N/A                  |
| A_23_P58280    | 13,6347 | 12,728  | 1,874752309 | ENST00000226796 | 54433     | NM_018983    | GAR1                 |
| A_23_P35082    | 10,5554 | 9,64878 | 1,874648353 | ENST00000253063 | 83667     | NM_031459    | SESN2                |
| A_33_P3251876  | 5,80659 | 4,90001 | 1,874596378 | ENST00000410040 | 8809      | NM_003855    | IL18R1               |
| A_23_P143173   | 2,48353 | 1,57699 | 1,874544403 | ENST00000360672 | 84174     | NM_032214    | SLA2                 |
| A_23_P73208    | 9,83396 | 8,92744 | 1,874518417 | ENST00000467551 | 126626    | NM_144618    | GABPB2               |
| A_24_P218265   | 13,9641 | 13,0577 | 1,874362505 | ENST00000276431 | 8795      | NM_003842    | TNFRSF10B            |
| A_21_P0008502  | 2,39698 | 1,4908  | 1,874076701 | N/A             | N/A       | N/A          | Inc-RP11-80A15.1.1-4 |
| A_33_P3393617  | 2,28534 | 1,37921 | 1,874011752 | ENST00000414265 | N/A       | N/A          | N/A                  |
| A_23_P2423     | 13,0744 | 12,1683 | 1,873972783 | ENST00000537852 | 55110     | NM_018048    | MAGOHB               |
| A_23_P334751   | 10,719  | 9,81302 | 1,873816917 | ENST00000366600 | 148789    | NM_152490    | B3GALNT2             |
| A_23_P252362   | 12,3143 | 11,4084 | 1,873713013 | ENST00000515647 | 10884     | NM_016640    | MRPS30               |
| A_21_P0000265  | 6,42987 | 5,524   | 1,873674051 | ENST00000530585 | 619562    | NR_002580    | SNORA45A             |
| A_22_P00023788 | 4,2051  | 3,29926 | 1,873635089 | ENST00000560662 | N/A       | XR_424607    | N/A                  |
| A_22_P00011361 | 7,68505 | 6,77924 | 1,873596129 | ENST00000577661 | N/A       | BC040619     | N/A                  |
| A_22_P00004946 | 2,72441 | 1,81862 | 1,873570155 | ENST00000556316 | N/A       | N/A          | N/A                  |
| A_24_P353619   | 3,74853 | 2,84285 | 1,873427308 | ENST00000374832 | 249       | NM_000478    | ALPL                 |
| A_22_P00019761 | 4,08957 | 3,18408 | 1,873180598 | N/A             | N/A       | N/A          | Inc-GIP-1            |
| A_23_P163117   | 11,1134 | 10,2081 | 1,87293392  | ENST00000304061 | 79697     | NM_024644    | C14orf169            |
| A_23_P142738   | 5,44092 | 4,53575 | 1,872765159 | ENST00000482239 | 130733    | NM_152390    | TMEM178A             |
| A_24_P855508   | 2,36941 | 1,46453 | 1,872388747 | ENST00000469914 | 389766    | NM_001276367 | C9orf153             |
| A_33_P3361681  | 13,8334 | 12,9287 | 1,872155151 | ENST00000330374 | 203547    | NM_001017980 | VMA21                |
| A_23_P68922    | 10,4727 | 9,5683  | 1,871765887 | ENST00000402631 | 85377     | NM_033386    | MICALL1              |
| A_22_P00008792 | 2,64959 | 1,74529 | 1,871636151 | N/A             | N/A       | BI769350     | Inc-KIFAP3-2         |
| A_21_P0000484  | 8,8435  | 7,93921 | 1,871623178 | N/A             | 692196    | NR_003942    | SNORD76              |
| A_33_P3220352  | 2,70111 | 1,79683 | 1,871610205 | N/A             | 285888    | NM_001103176 | CNPY1                |

|                |         |         |             |                 |           |              |                |
|----------------|---------|---------|-------------|-----------------|-----------|--------------|----------------|
| A_33_P3209386  | 9,86692 | 8,96264 | 1,871610205 | ENST00000250101 | 84817     | NM_032731    | TXNDC17        |
| A_21_P0006491  | 2,72547 | 1,82121 | 1,871584259 | N/A             | N/A       | N/A          | Inc-ATP6AP2-5  |
| A_22_P00016365 | 2,79958 | 1,89576 | 1,871013541 | ENST00000449405 | 101060385 | NR_110179    | LOC101060385   |
| A_21_P0011274  | 3,21026 | 2,30653 | 1,870896825 | N/A             | N/A       | N/A          | XLOC_I2_004546 |
| A_33_P3256425  | 2,6682  | 1,76459 | 1,870741215 | ENST00000548411 | 636       | NM_001714    | BICD1          |
| A_23_P210886   | 11,1619 | 10,2586 | 1,870339281 | ENST00000307677 | 598       | NM_138578    | BCL2L1         |
| A_33_P3239954  | 8,70041 | 7,79717 | 1,870261498 | ENST00000261601 | 9097      | NM_005151    | USP14          |
| A_33_P3269019  | 2,40886 | 1,50566 | 1,870209644 | ENST00000577956 | N/A       | AK023337     | N/A            |
| A_33_P3392907  | 2,61593 | 1,713   | 1,869859667 | N/A             | 100128001 | AK125720     | LOC100128001   |
| A_33_P3241299  | 5,12178 | 4,21894 | 1,869743023 | N/A             | 100128881 | NR_036480    | VPS9D1-AS1     |
| A_21_P0008625  | 2,65127 | 1,74849 | 1,869665264 | N/A             | N/A       | N/A          | Inc-CHAC1-1    |
| A_24_P273157   | 8,07883 | 7,17606 | 1,869652305 | ENST00000494839 | 84033     | NM_052843    | OBSCN          |
| A_33_P3281710  | 7,16805 | 6,26547 | 1,869406091 | ENST00000399093 | 79999     | NM_001291904 | LOC79999       |
| A_23_P252913   | 5,69231 | 4,7899  | 1,869185823 | ENST00000506636 | 55212     | NM_018190    | BBS7           |
| A_23_P379071   | 6,58968 | 5,68744 | 1,86896558  | ENST00000455112 | 222235    | NM_145032    | FBXL13         |
| A_21_P0008282  | 2,32012 | 1,41805 | 1,868745364 | ENST00000554211 | 101928559 | NR_110074    | LINC01467      |
| A_22_P00011856 | 6,00267 | 5,10079 | 1,86849927  | N/A             | N/A       | N/A          | Inc-PHYHD1-1   |
| A_24_P93855    | 8,3167  | 7,415   | 1,868266158 | ENST00000307972 | 116113    | NM_001012426 | FOXP4          |
| A_21_P0000514  | 6,30611 | 5,40444 | 1,868227309 | N/A             | 56663     | NR_026704    | VTRNA1-2       |
| A_23_P360316   | 10,746  | 9,84445 | 1,868071921 | ENST00000303225 | 2525      | NM_000149    | FUT3           |
| A_24_P331704   | 9,97353 | 9,07198 | 1,868071921 | ENST00000466011 | 144501    | NM_182507    | KRT80          |
| A_23_P128532   | 10,7451 | 9,84367 | 1,867916546 | ENST00000622317 | 121053    | NM_152318    | C12orf45       |
| A_23_P25698    | 4,12423 | 3,2229  | 1,867787076 | ENST00000216540 | 6554      | NM_003049    | SLC10A1        |
| A_22_P00001205 | 3,12483 | 2,22362 | 1,867631724 | N/A             | 104355294 | N/A          | LINC01386      |
| A_33_P3268310  | 2,84233 | 1,94142 | 1,867243401 | ENST00000414829 | 100288695 | NM_001205288 | LIMS3L         |
| A_21_P0011790  | 2,51519 | 1,61447 | 1,866997506 | N/A             | N/A       | N/A          | XLOC_I2_007178 |
| A_32_P515431   | 5,27212 | 4,37153 | 1,86682928  | N/A             | 100132057 | NR_111930    | LOC100132057   |
| A_21_P0012129  | 3,10746 | 2,20701 | 1,86664813  | N/A             | N/A       | N/A          | XLOC_I2_008692 |
| A_21_P0009009  | 6,17058 | 5,27042 | 1,866272948 | ENST00000596416 | N/A       | N/A          | N/A            |
| A_33_P3217490  | 10,4034 | 9,50333 | 1,866156527 | ENST00000451574 | 642633    | NR_108107    | FAM230B        |
| A_33_P3272399  | 4,75463 | 3,85463 | 1,866065983 | N/A             | 645427    | AK094407     | LOC645427      |
| A_21_P0006142  | 2,92898 | 2,02905 | 1,865975443 | N/A             | N/A       | N/A          | Inc-HRCT1-3    |
| A_21_P0002980  | 8,50175 | 7,60186 | 1,865923708 | N/A             | 100506990 | NR_040092    | LOC100506990   |

|                |         |         |             |                 |           |              |                |
|----------------|---------|---------|-------------|-----------------|-----------|--------------|----------------|
| A_22_P00017835 | 4,77584 | 3,87611 | 1,865716782 | N/A             | N/A       | XM_006716530 | Inc-ZC3H3-1    |
| A_21_P0005029  | 3,24724 | 2,3479  | 1,865212496 | N/A             | N/A       | N/A          | Inc-SUPT3H-1   |
| A_22_P00010210 | 3,14909 | 2,24978 | 1,86517371  | N/A             | N/A       | CA430892     | Inc-MSMP-1     |
| A_21_P0000282  | 8,7184  | 7,81936 | 1,864824676 | ENST00000616692 | 26793     | NR_002739    | SNORD56        |
| A_24_P573533   | 7,09386 | 6,19494 | 1,864669571 | ENST00000465014 | 220869    | NM_001024916 | CBWD5          |
| A_24_P686965   | 10,3898 | 9,49091 | 1,864630796 | ENST00000375031 | 400745    | NM_001103161 | SH2D5          |
| A_23_P136246   | 2,39837 | 1,49988 | 1,864113883 | ENST00000543208 | 170712    | NM_130902    | COX7B2         |
| A_21_P0009698  | 3,45566 | 2,55756 | 1,86361003  | N/A             | N/A       | N/A          | Inc-VSTM2B-7   |
| A_33_P3350778  | 5,87589 | 4,97783 | 1,86355836  | ENST00000308650 | 374879    | NM_198535    | ZNF699         |
| A_21_P0000677  | 3,83328 | 2,93536 | 1,863377528 | ENST00000599078 | 400680    | N/A          | LINC00664      |
| A_24_P333326   | 9,9603  | 9,06245 | 1,863287119 | ENST00000556990 | 4253      | NM_203355    | CTAGE5         |
| A_33_P3418209  | 3,92901 | 3,03124 | 1,863183799 | ENST00000376162 | 9358      | NM_004791    | ITGBL1         |
| A_33_P7618758  | 5,69537 | 4,79768 | 1,863080485 | ENST00000566582 | 100505776 | NR_038325    | LINC01541      |
| A_23_P487      | 11,9468 | 11,0492 | 1,862964264 | ENST00000475333 | 7371      | NM_012474    | UCK2           |
| A_23_P8196     | 9,71515 | 8,81764 | 1,862848049 | ENST00000369705 | 4199      | NM_002395    | ME1            |
| A_21_P0003334  | 4,46658 | 3,56918 | 1,86270602  | ENST00000510095 | N/A       | N/A          | N/A            |
| A_23_P333951   | 10,3664 | 9,46904 | 1,862654375 | ENST00000366848 | 127602    | NM_144989    | DNAH14         |
| A_24_P340066   | 13,7966 | 12,8993 | 1,862576911 | ENST00000308167 | 2000      | NM_001421    | ELF4           |
| A_24_P626951   | 6,4872  | 5,58996 | 1,862499451 | ENST00000479981 | N/A       | AF078945     | N/A            |
| A_23_P52647    | 13,7177 | 12,8205 | 1,862447812 | ENST00000359393 | 10938     | NM_006795    | EHD1           |
| A_33_P3410816  | 2,32174 | 1,42458 | 1,862396175 | ENST00000367165 | 49861     | NM_001001346 | CLDN20         |
| A_23_P145096   | 3,54514 | 2,64798 | 1,862396175 | ENST00000537365 | 7941      | NM_005084    | PLA2G7         |
| A_23_P429184   | 11,6442 | 10,7471 | 1,862318721 | ENST00000216410 | 64841     | NM_198066    | GNPNAT1        |
| A_21_P0012945  | 3,81433 | 2,91731 | 1,862215455 | N/A             | N/A       | N/A          | XLOC_I2_011627 |
| A_22_P00011875 | 4,08296 | 3,1861  | 1,86200894  | ENST00000567609 | 101927350 | NR_110775    | LINC01254      |
| A_23_P388871   | 4,26744 | 3,37078 | 1,861750829 | ENST00000539745 | 121504    | NM_175054    | HIST4H4        |
| A_32_P226009   | 8,52497 | 7,62834 | 1,861712115 | ENST00000505431 | 65250     | NM_023073    | C5orf42        |
| A_33_P3220277  | 10,9841 | 10,0875 | 1,861673403 | ENST00000610403 | 6238      | BC009700     | RRBP1          |
| A_23_P329198   | 11,5026 | 10,6061 | 1,861544366 | ENST00000307834 | 64859     | NM_001031716 | NABP1          |
| A_21_P0011579  | 2,89104 | 1,99468 | 1,861363729 | ENST00000418821 | 101928567 | NR_110839    | LOC101928567   |
| A_21_P0010060  | 2,50902 | 1,61276 | 1,861234714 | N/A             | N/A       | N/A          | Inc-CBLN4-3    |
| A_21_P0006107  | 2,4011  | 1,50502 | 1,861002508 | ENST00000444800 | 51145     | N/A          | LOC51145       |
| A_21_P0000473  | 9,59202 | 8,69599 | 1,860938012 | N/A             | 100124534 | NR_003704    | SNORA84        |



|                |         |         |             |                 |           |              |                |
|----------------|---------|---------|-------------|-----------------|-----------|--------------|----------------|
| A_33_P3376404  | 7,076   | 6,18005 | 1,860834823 | ENST00000486125 | 64743     | NM_017883    | WDR13          |
| A_33_P3417626  | 2,90675 | 2,01097 | 1,860615564 | ENST00000399775 | 375704    | NM_198573    | ENHO           |
| A_21_P0007162  | 2,85518 | 1,95947 | 1,860525289 | ENST00000366405 | N/A       | N/A          | N/A            |
| A_23_P49338    | 16,5458 | 15,6501 | 1,860512393 | ENST00000571351 | 51330     | NM_016639    | TNFRSF12A      |
| A_23_P259166   | 14,2639 | 13,3682 | 1,860512393 | ENST00000415568 | 79921     | NM_024863    | TCEAL4         |
| A_23_P71094    | 10,6594 | 9,76399 | 1,860138444 | ENST00000321407 | 79571     | NM_024523    | GCC1           |
| A_21_P0012920  | 2,32141 | 1,42606 | 1,860061084 | N/A             | N/A       | N/A          | XLOC_I2_012168 |
| A_33_P3354955  | 11,6044 | 10,7092 | 1,8598677   | ENST00000202816 | 51575     | NM_016649    | ESF1           |
| A_21_P0011331  | 4,41858 | 3,52342 | 1,859816134 | ENST00000567704 | 1464      | N/A          | CSPG4          |
| A_33_P3307836  | 2,55441 | 1,65931 | 1,859738788 | ENST00000370958 | 57554     | XM_006710782 | LRRC7          |
| A_32_P210202   | 11,3091 | 10,4141 | 1,859609885 | ENST00000416496 | 144455    | NM_203394    | E2F7           |
| A_33_P3354553  | 3,42887 | 2,5339  | 1,859571216 | N/A             | N/A       | N/A          | N/A            |
| A_23_P203819   | 12,6816 | 11,7867 | 1,859480991 | ENST00000450791 | 2802      | NM_005895    | GOLGA3         |
| A_24_P920048   | 2,82924 | 1,93438 | 1,859429436 | N/A             | 100127972 | AK092807     | LOC100127972   |
| A_33_P3813818  | 2,69044 | 1,79573 | 1,859236118 | N/A             | N/A       | AB088847     | N/A            |
| A_33_P3257013  | 2,81648 | 1,92179 | 1,859210343 | N/A             | N/A       | AK090403     | N/A            |
| A_22_P00019914 | 4,72987 | 3,83524 | 1,859133023 | N/A             | N/A       | N/A          | Inc-HCRTR1-2   |
| A_21_P0014327  | 6,56293 | 5,66842 | 1,858978391 | N/A             | 100505692 | NR_103838    | FTO-IT1        |
| A_33_P3237580  | 3,46998 | 2,57549 | 1,85895262  | N/A             | 729220    | NM_001242791 | FLJ45513       |
| A_24_P363548   | 5,98346 | 5,08913 | 1,858746467 | ENST00000336926 | 3092      | NM_005338    | HIP1           |
| A_33_P3286916  | 3,02497 | 2,13086 | 1,858463044 | ENST00000619208 | 79955     | NM_001195263 | PDZD7          |
| A_33_P3344956  | 3,25678 | 2,36278 | 1,858321349 | ENST00000587807 | 9352      | AK094926     | TXNL1          |
| A_24_P178065   | 5,87998 | 4,98601 | 1,858282706 | N/A             | 90102     | BC038806     | PHLDB2         |
| A_33_P3651948  | 3,68623 | 2,79255 | 1,857909205 | ENST00000339362 | 4756      | NM_002499    | NEO1           |
| A_33_P3775848  | 7,43761 | 6,54403 | 1,857780429 | ENST00000369449 | 1193      | NM_001289    | CLIC2          |
| A_33_P3402823  | 5,44961 | 4,55621 | 1,857548655 | ENST00000374919 | 169981    | NM_001010862 | SPIN3          |
| A_22_P00002467 | 4,75732 | 3,8642  | 1,857188175 | N/A             | N/A       | N/A          | Inc-C15orf44-1 |
| A_24_P924202   | 9,0688  | 8,1758  | 1,857033705 | ENST00000439247 | 399909    | NM_032223    | PCNXL3         |
| A_23_P50710    | 7,13925 | 6,2464  | 1,856840635 | ENST00000587671 | 8529      | NM_001082    | CYP4F2         |
| A_33_P3216694  | 3,30932 | 2,41653 | 1,856763413 | ENST00000247584 | 59269     | NM_024503    | HIVEP3         |
| A_21_P0013646  | 11,251  | 10,3583 | 1,856647585 | ENST00000443754 | N/A       | XR_428461    | N/A            |
| A_24_P158385   | 10,4975 | 9,60542 | 1,85584986  | ENST00000298585 | 116225    | NM_138462    | ZMYND19        |
| A_33_P3330428  | 3,95078 | 3,05879 | 1,85573409  | ENST00000615516 | N/A       | XR_109635    | N/A            |

|                |         |         |             |                 |           |              |                  |
|----------------|---------|---------|-------------|-----------------|-----------|--------------|------------------|
| A_33_P3351290  | 4,63651 | 3,74454 | 1,855708364 | ENST00000509591 | 51237     | AK057549     | MZB1             |
| A_33_P3397865  | 13,3636 | 12,4717 | 1,855618327 | ENST00000588981 | 7138      | NM_001291774 | TNNT1            |
| A_22_P00010611 | 2,49922 | 1,60741 | 1,855502571 | N/A             | 101928630 | NR_109908    | CTC-436P18.1     |
| A_23_P111961   | 12,1299 | 11,2381 | 1,85548971  | ENST00000360128 | 84549     | NM_032509    | MAK16            |
| A_21_P0012479  | 2,27581 | 1,38429 | 1,855129629 | ENST00000622169 | N/A       | N/A          | N/A              |
| A_33_P3217357  | 2,6655  | 1,77408 | 1,855001046 | ENST00000587320 | N/A       | N/A          | N/A              |
| A_33_P3378534  | 2,48971 | 1,59857 | 1,85464106  | N/A             | 100130627 | AK123230     | LOC100130627     |
| A_24_P201739   | 8,72264 | 7,83169 | 1,854396823 | N/A             | 10019     | NM_005475    | SH2B3            |
| A_33_P3317928  | 3,72407 | 2,83319 | 1,85430685  | ENST00000382826 | 337985    | NM_001128077 | KRTAP20-3        |
| A_22_P00007462 | 6,95478 | 6,06394 | 1,854255438 | N/A             | 101927891 | NR_110682    | PKN2-AS1         |
| A_23_P128084   | 9,47244 | 8,58162 | 1,854229733 | ENST00000452168 | 3679      | NM_002206    | ITGA7            |
| A_24_P387437   | 2,28549 | 1,39486 | 1,85398555  | ENST00000243914 | 140690    | NM_080618    | CTCFL            |
| A_33_P3310154  | 2,37573 | 1,48515 | 1,853921297 | ENST00000380219 | 390058    | NM_001004750 | OR51B6           |
| A_22_P00006313 | 2,97003 | 2,07948 | 1,853882747 | N/A             | 101926950 | NR_110902    | LINC01570        |
| A_33_P3636315  | 3,63772 | 2,74727 | 1,85375425  | N/A             | 286087    | AK091675     | LOC286087        |
| A_33_P3411357  | 6,13603 | 5,24561 | 1,853715702 | N/A             | 25786     | NR_024157    | DGCR11           |
| A_32_P377032   | 4,93287 | 4,04269 | 1,853407352 | ENST00000313064 | 151477    | NR_024079    | LINC00471        |
| A_32_P104063   | 11,0008 | 10,111  | 1,852919237 | ENST00000502066 | 643911    | NR_110453    | CRNDE            |
| A_23_P160559   | 12,3688 | 11,4791 | 1,852790807 | ENST00000470432 | 1893      | NM_004425    | ECM1             |
| A_23_P131024   | 8,14723 | 7,25754 | 1,852777964 | ENST00000392197 | 27033     | NM_014383    | ZBTB32           |
| A_33_P3420879  | 2,50265 | 1,61316 | 1,852521132 | ENST00000568856 | N/A       | BC015677     | N/A              |
| A_23_P329375   | 4,91487 | 4,02545 | 1,85243125  | ENST00000333640 | 5463      | NM_002702    | POU6F1           |
| A_22_P00014742 | 6,08858 | 5,19931 | 1,852238659 | N/A             | N/A       | BC045807     | lnc-SLC30A7-2    |
| A_23_P353667   | 3,31644 | 2,42718 | 1,85222582  | ENST00000592663 | 284424    | NR_027148    | MIR7-3HG         |
| A_22_P00004430 | 8,66122 | 7,77206 | 1,852097438 | ENST00000563286 | N/A       | AK125335     | N/A              |
| A_19_P00317871 | 9,39362 | 8,50455 | 1,851981902 | ENST00000521122 | 5820      | NR_003367    | PVT1             |
| A_33_P3398867  | 2,69692 | 1,80793 | 1,851879209 | N/A             | N/A       | AF438406     | lnc-C11orf82-1   |
| A_33_P3244906  | 2,41405 | 1,52526 | 1,851622502 | ENST00000261980 | 338917    | NM_182894    | VSX2             |
| A_33_P3216718  | 3,81403 | 2,92527 | 1,851583999 | ENST00000484151 | N/A       | N/A          | N/A              |
| A_33_P3226385  | 2,92876 | 2,04027 | 1,851237508 | N/A             | N/A       | N/A          | lnc-EFR3B-2      |
| A_21_P0008360  | 4,76573 | 3,87737 | 1,851070702 | N/A             | N/A       | N/A          | lnc-C14orf166B-3 |
| A_33_P3350913  | 4,11594 | 3,22766 | 1,850968059 | ENST00000444864 | 80746     | NM_001145395 | TSEN2            |
| A_23_P209394   | 10,1413 | 9,25306 | 1,85091674  | ENST00000461820 | 8837      | NM_001127184 | CFLAR            |

|                |         |         |             |                 |           |              |                |
|----------------|---------|---------|-------------|-----------------|-----------|--------------|----------------|
| A_33_P3265185  | 15,9512 | 15,0632 | 1,850608856 | ENST00000403904 | N/A       | N/A          | N/A            |
| A_23_P110531   | 15,8163 | 14,9284 | 1,850480586 | ENST00000256759 | 10468     | NM_013409    | FST            |
| A_21_P0013454  | 2,62329 | 1,73556 | 1,850262548 | ENST00000612253 | N/A       | N/A          | N/A            |
| A_33_P3420904  | 5,79641 | 4,90868 | 1,850262548 | ENST00000445202 | 100169851 | NM_001129883 | PATE3          |
| A_33_P6817068  | 6,11048 | 5,22293 | 1,850031711 | N/A             | 100132273 | NR_034118    | NDUFA6-AS1     |
| A_24_P50801    | 6,98734 | 6,09989 | 1,849903481 | ENST00000478054 | 8828      | NM_201264    | NRP2           |
| A_22_P00018978 | 3,15605 | 2,269   | 1,84939065  | N/A             | 100861402 | NR_045786    | CERS6-AS1      |
| A_23_P113351   | 8,37489 | 7,48789 | 1,849326556 | ENST00000418378 | 8404      | NM_004684    | SPARCL1        |
| A_21_P0001361  | 2,95211 | 2,06547 | 1,848865146 | N/A             | N/A       | N/A          | Inc-NBPF6-4    |
| A_21_P0012156  | 6,09016 | 5,20354 | 1,848839515 | ENST00000458422 | N/A       | N/A          | N/A            |
| A_23_P111088   | 4,23202 | 3,34548 | 1,848736997 | ENST00000303324 | 81697     | NM_033057    | OR2B2          |
| A_23_P83403    | 8,34754 | 7,46127 | 1,848391038 | ENST00000511496 | 22998     | NM_014988    | LIMCH1         |
| A_23_P65208    | 9,30497 | 8,41882 | 1,8482373   | ENST00000467542 | 9205      | NM_001039650 | ZMYM5          |
| A_23_P44505    | 9,35969 | 8,47356 | 1,848211678 | ENST00000535335 | 8462      | NM_003597    | KLF11          |
| A_22_P00021987 | 3,33035 | 2,44425 | 1,848173246 | ENST00000417385 | N/A       | N/A          | N/A            |
| A_23_P401774   | 2,3304  | 1,44437 | 1,848083574 | ENST00000265840 | 55531     | NM_018712    | ELMOD1         |
| A_23_P327698   | 5,9822  | 5,09647 | 1,847699316 | ENST00000296603 | 92255     | NM_001007527 | LMBRD2         |
| A_19_P00806707 | 6,2878  | 5,40215 | 1,847596861 | N/A             | N/A       | N/A          | XLOC_I2_014579 |
| A_33_P3396591  | 7,77895 | 6,89354 | 1,847289529 | ENST00000448755 | 64773     | NM_001271168 | PCED1A         |
| A_33_P3233150  | 7,9706  | 7,08533 | 1,847110275 | ENST00000254323 | 65249     | NM_023072    | ZSWIM4         |
| A_24_P76675    | 6,00512 | 5,11986 | 1,847097472 | ENST00000510306 | 9848      | NM_021647    | MFAP3L         |
| A_23_P145657   | 8,49043 | 7,6054  | 1,846803024 | ENST00000426455 | 10734     | NM_012447    | STAG3          |
| A_33_P3379512  | 5,52637 | 4,64146 | 1,846649418 | ENST00000392987 | 84449     | NM_001300912 | ZNF333         |
| A_22_P00014095 | 2,47837 | 1,59365 | 1,846406234 | N/A             | N/A       | N/A          | Inc-SASS6-1    |
| A_33_P3240773  | 4,99829 | 4,11368 | 1,846265458 | ENST00000335507 | 152302    | BC043599     | CIDCEP         |
| A_23_P420209   | 8,05604 | 7,17177 | 1,8458304   | ENST00000560585 | 9245      | NM_004751    | GCNT3          |
| A_33_P3276678  | 2,64206 | 1,75785 | 1,845753635 | ENST00000376707 | 30813     | NM_199425    | VSX1           |
| A_23_P65230    | 7,80757 | 6,92354 | 1,845523361 | ENST00000342624 | 84899     | NM_032813    | TMTC4          |
| A_23_P319133   | 11,1488 | 10,265  | 1,845229164 | ENST00000616986 | 54431     | NM_018981    | DNAJC10        |
| A_23_P205007   | 9,9127  | 9,02907 | 1,845011745 | ENST00000261574 | 3843      | NM_002271    | IPO5           |
| A_23_P254573   | 13,6007 | 12,7171 | 1,844973379 | ENST00000464253 | 27000     | NM_014377    | DNAJC2         |
| A_23_P64404    | 10,5016 | 9,61802 | 1,844947803 | ENST00000278829 | 3995      | NM_021727    | FADS3          |
| A_23_P144959   | 3,17445 | 2,29098 | 1,844807138 | ENST00000512590 | 1462      | NM_004385    | VCAN           |

|                |         |         |             |                 |           |              |                      |
|----------------|---------|---------|-------------|-----------------|-----------|--------------|----------------------|
| A_22_P00022031 | 3,15534 | 2,27196 | 1,844692056 | N/A             | 101928787 | XR_243602    | LOC101928787         |
| A_33_P3390284  | 7,53674 | 6,65343 | 1,844602553 | ENST00000611027 | 159090    | NM_001166600 | FAM122B              |
| A_22_P00001168 | 3,07144 | 2,18815 | 1,844576982 | N/A             | N/A       | N/A          | Inc-AMZ2-1           |
| A_33_P3735771  | 2,86422 | 1,98093 | 1,844576982 | N/A             | N/A       | N/A          | Inc-RP1-241P17.4.1-3 |
| A_24_P917686   | 3,15389 | 2,27067 | 1,844487485 | ENST00000404337 | N/A       | N/A          | N/A                  |
| A_21_P0001439  | 2,35414 | 1,47099 | 1,844397992 | N/A             | 101927711 | XR_247101    | LOC101927711         |
| A_22_P00015300 | 3,25583 | 2,37281 | 1,844231802 | N/A             | 101927817 | NR_110931    | LOC101927817         |
| A_23_P122924   | 10,5775 | 9,69467 | 1,843988937 | ENST00000442711 | 3624      | NM_002192    | INHBA                |
| A_33_P3228868  | 3,50418 | 2,6214  | 1,84392503  | N/A             | N/A       | N/A          | N/A                  |
| A_21_P0004430  | 2,30736 | 1,42465 | 1,843835564 | N/A             | N/A       | N/A          | Inc-TMEM232-2        |
| A_21_P0014055  | 3,95608 | 3,07351 | 1,843656646 | ENST00000532255 | 727957    | NM_001288814 | MROH1                |
| A_22_P00001465 | 7,82245 | 6,94009 | 1,843388301 | N/A             | N/A       | N/A          | Inc-AQP8-1           |
| A_22_P00003459 | 2,47228 | 1,58994 | 1,843362747 | ENST00000551161 | N/A       | AL043023     | N/A                  |
| A_21_P0014622  | 6,02491 | 5,14291 | 1,842928372 | N/A             | 101930333 | XR_250613    | LOC101930333         |
| A_21_P0009240  | 4,94924 | 4,06726 | 1,842902824 | ENST00000585387 | N/A       | N/A          | N/A                  |
| A_22_P00000477 | 2,26052 | 1,37865 | 1,842762315 | ENST00000602425 | N/A       | N/A          | N/A                  |
| A_21_P0006478  | 2,9501  | 2,06825 | 1,842736769 | N/A             | N/A       | N/A          | Inc-ASMT-5           |
| A_21_P0006852  | 2,95123 | 2,06942 | 1,842685678 | N/A             | N/A       | N/A          | Inc-ZEB1-2           |
| A_33_P3385431  | 2,68634 | 1,80456 | 1,842647361 | N/A             | N/A       | N/A          | N/A                  |
| A_33_P3333667  | 6,86457 | 5,98281 | 1,842621817 | ENST00000529926 | 143570    | NM_001270380 | XRRRA1               |
| A_21_P0009787  | 4,01209 | 3,13042 | 1,842506872 | ENST00000601776 | N/A       | N/A          | N/A                  |
| A_33_P3213863  | 2,76878 | 1,88729 | 1,842277003 | ENST00000330881 | 391002    | NM_001012276 | PRAMEF8              |
| A_23_P310274   | 13,6732 | 12,7918 | 1,842162079 | ENST00000503996 | 154754    | NR_001296    | PRSS3P2              |
| A_33_P3306624  | 2,88279 | 2,00142 | 1,842123773 | ENST00000293330 | 3060      | NM_001524    | HCRT                 |
| A_33_P3604069  | 5,24096 | 4,35964 | 1,842059931 | ENST00000469997 | N/A       | AK022393     | N/A                  |
| A_21_P0013421  | 6,92886 | 6,04757 | 1,842021627 | N/A             | N/A       | N/A          | XLOC_I2_013808       |
| A_21_P0008271  | 2,86384 | 1,98263 | 1,841919486 | ENST00000557689 | N/A       | N/A          | N/A                  |
| A_23_P125475   | 2,3465  | 1,46533 | 1,841868418 | ENST00000598523 | 55879     | NM_018558    | GABRQ                |
| A_33_P3397693  | 10,3585 | 9,47741 | 1,841766286 | ENST00000264167 | 8540      | NM_003659    | AGPS                 |
| A_33_P3421794  | 4,24046 | 3,35969 | 1,841357815 | ENST00000460681 | 9704      | NM_014681    | DHX34                |
| A_24_P191013   | 4,1836  | 3,30284 | 1,841345051 | ENST00000371904 | 1579      | NM_000778    | CYP4A11              |
| A_22_P00012305 | 2,51367 | 1,63306 | 1,841153613 | N/A             | 101927275 | NR_110771    | NDUFV2-AS1           |
| A_21_P0000926  | 4,81626 | 3,93569 | 1,841102566 | N/A             | 100130417 | N/A          | LOC100130417         |

|                |         |         |             |                 |           |              |                |
|----------------|---------|---------|-------------|-----------------|-----------|--------------|----------------|
| A_33_P3258141  | 11,5243 | 10,644  | 1,840758036 | ENST00000590930 | 1147      | NM_001278    | CHUK           |
| A_21_P0000030  | 4,70687 | 3,8266  | 1,840719759 | ENST00000476261 | 23029     | NM_001161533 | RBM34          |
| A_21_P0006500  | 6,36498 | 5,48495 | 1,840413571 | N/A             | N/A       | N/A          | Inc-FAAH2-2    |
| A_21_P0008513  | 2,98894 | 2,10892 | 1,840400814 | N/A             | 101927598 | XR_247997    | LOC101927598   |
| A_33_P3555368  | 2,28142 | 1,40154 | 1,84022223  | N/A             | 440129    | AK129597     | FLJ26086       |
| A_23_P110276   | 9,26636 | 8,38649 | 1,840209474 | N/A             | 84740     | NR_026892    | AFAP1-AS1      |
| A_24_P407930   | 11,4441 | 10,5643 | 1,840120189 | ENST00000590843 | 81929     | NM_031216    | SEH1L          |
| A_22_P00014292 | 4,81504 | 3,93527 | 1,840081925 | N/A             | N/A       | N/A          | Inc-SERAC1-2   |
| A_22_P00025863 | 2,407   | 1,52742 | 1,839839606 | N/A             | 401410    | N/A          | LOC401410      |
| A_22_P00011838 | 3,05566 | 2,17621 | 1,839673827 | N/A             | N/A       | BX114982     | Inc-PHKB-1     |
| A_33_P3294031  | 7,97474 | 7,0955  | 1,839406062 | N/A             | 10984     | N/A          | KCNQ10T1       |
| A_33_P3324655  | 7,07808 | 6,19907 | 1,83911284  | ENST00000613904 | 80185     | NM_025115    | TTI2           |
| A_23_P26854    | 4,73457 | 3,85557 | 1,839100092 | ENST00000379672 | 9912      | NM_014859    | ARHGAP44       |
| A_33_P3399433  | 15,0028 | 14,1239 | 1,83897262  | ENST00000379772 | 54976     | NM_001258430 | C20orf27       |
| A_21_P0013792  | 7,78724 | 6,90841 | 1,838883395 | ENST00000417443 | 399668    | N/A          | LINC00086      |
| A_24_P313109   | 8,9671  | 8,0885  | 1,838590256 | ENST00000239878 | 51569     | NM_016617    | UFM1           |
| A_24_P139191   | 10,3629 | 9,4845  | 1,838335391 | ENST00000621101 | 83737     | NM_031483    | ITCH           |
| A_21_P0006619  | 2,65017 | 1,77182 | 1,83827168  | N/A             | 101927381 | N/A          | LINC01163      |
| A_21_P0011878  | 3,49561 | 2,61727 | 1,838258938 | N/A             | N/A       | N/A          | XLOC_I2_007788 |
| A_21_P0001340  | 5,18613 | 4,3078  | 1,838246197 | N/A             | N/A       | N/A          | Inc-ABCD3-2    |
| A_22_P00001737 | 3,11766 | 2,23936 | 1,838207972 | ENST00000555257 | N/A       | N/A          | N/A            |
| A_21_P0004456  | 3,19581 | 2,31754 | 1,838169748 | N/A             | 102546294 | N/A          | LOC102546294   |
| A_32_P58614    | 5,60362 | 4,7254  | 1,838106043 | ENST00000263468 | 57562     | NM_020802    | KIAA1377       |
| A_33_P3303562  | 6,00953 | 5,13136 | 1,83804234  | N/A             | N/A       | N/A          | N/A            |
| A_23_P337875   | 5,07526 | 4,19709 | 1,83804234  | ENST00000508599 | 152559    | NM_001040202 | PAQR3          |
| A_22_P00024183 | 2,35777 | 1,47971 | 1,837902202 | N/A             | N/A       | N/A          | Inc-BTBD10-4   |
| A_33_P3274332  | 9,47741 | 8,59938 | 1,837863984 | ENST00000435041 | 51465     | NM_016021    | UBE2J1         |
| A_22_P00019571 | 11,0391 | 10,1611 | 1,837825767 | ENST00000216294 | 6617      | NM_003082    | SNAPC1         |
| A_22_P00016158 | 2,27218 | 1,39431 | 1,83766017  | N/A             | N/A       | N/A          | Inc-TIPIN-1    |
| A_22_P00016173 | 9,25164 | 8,37382 | 1,837596482 | ENST00000610106 | 84981     | NR_028504    | MIR22HG        |
| A_23_P11224    | 12,3988 | 11,5213 | 1,837188935 | ENST00000305963 | 93380     | NM_173470    | MMGT1          |
| A_33_P3260862  | 4,21028 | 3,33288 | 1,837061596 | ENST00000563803 | N/A       | N/A          | N/A            |
| A_33_P3233437  | 4,28433 | 3,40705 | 1,836908799 | ENST00000578241 | N/A       | N/A          | N/A            |

|                |         |         |             |                 |           |              |                |
|----------------|---------|---------|-------------|-----------------|-----------|--------------|----------------|
| A_21_P0006002  | 2,5261  | 1,64898 | 1,836705091 | ENST00000423326 | 101929582 | NR_121604    | LINC01241      |
| A_22_P00002616 | 2,31592 | 1,43882 | 1,836679629 | N/A             | N/A       | N/A          | Inc-C1orf111-1 |
| A_21_P0001021  | 2,85615 | 1,97913 | 1,836577785 | ENST00000451362 | N/A       | N/A          | N/A            |
| A_23_P417383   | 7,21134 | 6,33438 | 1,836501405 | ENST00000320256 | 151516    | NM_152792    | ASPRV1         |
| A_22_P00001342 | 11,1514 | 10,2745 | 1,836425029 | ENST00000499732 | 283131    | NR_028272    | NEAT1          |
| A_23_P257578   | 10,8297 | 9,95282 | 1,836399571 | ENST00000520427 | 10011     | NM_001035235 | SRA1           |
| A_22_P00013725 | 3,09145 | 2,21472 | 1,836208646 | ENST00000512260 | 643201    | NR_036494    | LOC643201      |
| A_33_P3405004  | 10,3626 | 9,48587 | 1,836208646 | ENST00000464756 | 152518    | NM_001278624 | NFXL1          |
| A_33_P3502037  | 8,34291 | 7,46622 | 1,836157737 | ENST00000581139 | 26973     | NM_012124    | CHORDC1        |
| A_24_P125469   | 5,73128 | 4,85482 | 1,835865033 | ENST00000623277 | 9388      | NM_006033    | LIPG           |
| A_21_P0011169  | 4,59329 | 3,71693 | 1,835737785 | N/A             | 100874164 | N/A          | LINC00417      |
| A_33_P3505551  | 2,44157 | 1,56537 | 1,835534206 | N/A             | 317702    | BC107073     | VN1R3          |
| A_21_P0001128  | 6,08425 | 5,20826 | 1,835267043 | N/A             | 102724077 | NR_126355    | LINC01389      |
| A_33_P3349576  | 4,15581 | 3,27986 | 1,83521616  | ENST00000375163 | 158427    | N/A          | TSTD2          |
| A_33_P3397155  | 2,36134 | 1,48555 | 1,835012639 | ENST00000618742 | 389610    | NM_001289973 | XKR5           |
| A_23_P423074   | 8,95968 | 8,08394 | 1,834949043 | ENST00000510609 | 26049     | NM_015566    | FAM169A        |
| A_24_P189997   | 7,65424 | 6,77856 | 1,834872732 | ENST00000331826 | 5046      | NM_138322    | PCSK6          |
| A_33_P3243093  | 4,00222 | 3,12656 | 1,834847295 | ENST00000313961 | 8490      | NM_003617    | RGS5           |
| A_23_P140928   | 9,76438 | 8,88904 | 1,834440358 | ENST00000304381 | 79905     | NM_024847    | TMC7           |
| A_33_P3362367  | 4,38586 | 3,51069 | 1,83422421  | ENST00000338850 | 10313     | N/A          | RTN3           |
| A_22_P00003083 | 4,09913 | 3,22403 | 1,834135215 | N/A             | N/A       | N/A          | Inc-C8orf56-2  |
| A_33_P6470440  | 5,66615 | 4,79113 | 1,834033511 | N/A             | 101927102 | NR_110903    | ITFG1-AS1      |
| A_23_P62907    | 11,5198 | 10,645  | 1,833753857 | ENST00000367942 | 22926     | NM_007348    | ATF6           |
| A_22_P00009337 | 9,49821 | 8,62342 | 1,833741146 | ENST00000439853 | 23507     | NM_015350    | LRRC8B         |
| A_23_P77918    | 2,63279 | 1,75807 | 1,833652174 | ENST00000360954 | 9953      | NM_006041    | HS3ST3B1       |
| A_23_P42257    | 14,4288 | 13,5541 | 1,833626755 | ENST00000376377 | 8870      | NM_003897    | IER3           |
| A_19_P00315506 | 9,55001 | 8,67532 | 1,833614045 | ENST00000423313 | 9674      | NM_001162893 | KIAA0040       |
| A_33_P3665812  | 3,8264  | 2,95175 | 1,833563207 | N/A             | N/A       | AF090921     | N/A            |
| A_24_P389415   | 2,41777 | 1,54321 | 1,833448827 | ENST00000522362 | 10687     | NM_007257    | PNMA2          |
| A_23_P24275    | 5,48333 | 4,60891 | 1,833270917 | N/A             | 55853     | NR_027709    | IDI2-AS1       |
| A_33_P3344477  | 10,2263 | 9,352   | 1,833118436 | ENST00000343279 | 10979     | NM_001134999 | FERMT2         |
| A_22_P00006388 | 2,92139 | 2,04762 | 1,832445131 | N/A             | 101928416 | NR_120467    | LOC101928416   |
| A_21_P0005822  | 5,71901 | 4,84535 | 1,832305419 | N/A             | N/A       | N/A          | Inc-TM2D2-2    |

|                |         |         |             |                 |           |              |                |
|----------------|---------|---------|-------------|-----------------|-----------|--------------|----------------|
| A_21_P0007155  | 3,86753 | 2,99389 | 1,832280018 | N/A             | N/A       | N/A          | Inc-RHOG-2     |
| A_21_P0002960  | 6,06249 | 5,18888 | 1,832241917 | ENST00000608605 | N/A       | N/A          | N/A            |
| A_22_P00013215 | 2,83571 | 1,96219 | 1,83212762  | N/A             | N/A       | N/A          | Inc-RNF40-1    |
| A_19_P00326732 | 12,0395 | 11,166  | 1,832102221 | ENST00000416247 | 221710    | NM_001135575 | SMIM13         |
| A_22_P00009188 | 2,82131 | 1,94784 | 1,832064124 | ENST00000454826 | N/A       | N/A          | N/A            |
| A_22_P00012008 | 4,38887 | 3,51545 | 1,832000631 | N/A             | N/A       | N/A          | Inc-PLCL2-1    |
| A_22_P00014070 | 6,10065 | 5,22732 | 1,831886348 | N/A             | N/A       | AA045595     | Inc-SAMD14-1   |
| A_22_P00004927 | 10,1687 | 9,29539 | 1,831860953 | N/A             | N/A       | N/A          | Inc-DBN1-2     |
| A_23_P73097    | 11,0791 | 10,2058 | 1,831848255 | ENST00000276500 | 8601      | NM_170587    | RGS20          |
| A_23_P410224   | 4,34872 | 3,47556 | 1,8316705   | ENST00000379586 | 347744    | NM_001145020 | C6orf52        |
| A_23_P14986    | 9,26752 | 8,39447 | 1,831530848 | ENST00000326152 | 3291      | NM_000196    | HSD11B2        |
| A_33_P3422810  | 3,71255 | 2,83974 | 1,831226188 | ENST00000229708 | 80329     | NM_025218    | ULBP1          |
| A_24_P291826   | 7,42007 | 6,54738 | 1,831073877 | ENST00000297239 | 94120     | NM_001009991 | SYTL3          |
| A_22_P00019994 | 4,78301 | 3,91041 | 1,830959653 | N/A             | N/A       | N/A          | Inc-ORC4-1     |
| A_33_P3248325  | 7,94804 | 7,07567 | 1,830667777 | ENST00000331393 | 57669     | NM_001184938 | EPB41L5        |
| A_23_P108342   | 7,91135 | 7,03917 | 1,830426698 | ENST00000358744 | 51276     | NM_016536    | ZNF571         |
| A_23_P398189   | 2,62094 | 1,74888 | 1,830274454 | ENST00000354673 | 152404    | NM_152538    | IGSF11         |
| A_23_P32414    | 12,5657 | 11,6937 | 1,830198336 | ENST00000394334 | 51765     | NM_016542    | STK26          |
| A_32_P174365   | 7,15342 | 6,28148 | 1,830122222 | ENST00000260926 | 23314     | NM_015265    | SATB2          |
| A_24_P943017   | 7,72923 | 6,85733 | 1,830071481 | ENST00000284382 | 204219    | NM_178842    | CERS3          |
| A_33_P3300332  | 3,73979 | 2,86791 | 1,830046111 | N/A             | 644093    | NR_120602    | HCG2040054     |
| A_33_P3271480  | 9,18974 | 8,31802 | 1,829843164 | ENST00000263857 | 90784     | NR_026984    | LOC90784       |
| A_21_P0002298  | 2,94694 | 2,07554 | 1,829437336 | N/A             | 101929231 | N/A          | LOC101929231   |
| A_33_P3301920  | 3,9535  | 3,08214 | 1,829386614 | ENST00000616326 | 373509    | NM_203494    | USP50          |
| A_33_P3467126  | 6,097   | 5,22579 | 1,829196419 | ENST00000257659 | 85865     | NM_033107    | GTPBP10        |
| A_21_P0005656  | 8,52292 | 7,65186 | 1,829006244 | N/A             | 100506990 | NR_040092    | LOC100506990   |
| A_32_P221822   | 7,36232 | 6,49136 | 1,828879471 | ENST00000366932 | 51018     | NM_016052    | RRP15          |
| A_33_P3347193  | 6,65226 | 5,7813  | 1,828879471 | ENST00000466888 | 222008    | NM_001301009 | VSTM2A         |
| A_22_P00009763 | 3,84627 | 2,97532 | 1,828866794 | ENST00000502644 | 401172    | DA372011     | FLJ33360       |
| A_24_P314337   | 3,58371 | 2,71284 | 1,828765383 | ENST00000376150 | 8712      | NM_003785    | PAGE1          |
| A_22_P00015739 | 4,56046 | 3,68973 | 1,828587927 | N/A             | 101928994 | NR_120648    | LOC101928994   |
| A_33_P3339036  | 10,8718 | 10,0011 | 1,828549903 | ENST00000619732 | 4204      | NM_001110792 | MECP2          |
| A_21_P0012047  | 2,28277 | 1,4122  | 1,828385142 | N/A             | N/A       | N/A          | XLOC_I2_007831 |

|                |         |         |             |                 |           |              |                    |
|----------------|---------|---------|-------------|-----------------|-----------|--------------|--------------------|
| A_22_P00023477 | 3,73456 | 2,86399 | 1,828385142 | N/A             | N/A       | N/A          | Inc-AC018816.3.1-4 |
| A_22_P00025780 | 2,9923  | 2,12192 | 1,828144363 | N/A             | N/A       | N/A          | Inc-PAPOLG-1       |
| A_24_P239606   | 12,9231 | 12,0528 | 1,828042992 | ENST00000592937 | 4616      | NM_015675    | GADD45B            |
| A_24_P810290   | 2,89437 | 2,02449 | 1,827510886 | ENST00000369073 | 196051    | NM_001030059 | PPAPDC1A           |
| A_32_P132317   | 2,66287 | 1,79318 | 1,827270222 | ENST00000392552 | 151556    | NM_001033045 | GPR155             |
| A_21_P0000835  | 2,74643 | 1,87714 | 1,826763666 | N/A             | 100129845 | NR_038910    | PCOLCE-AS1         |
| A_24_P398092   | 10,7342 | 9,86498 | 1,826675033 | ENST00000457811 | 5887      | NM_002874    | RAD23B             |
| A_22_P00019080 | 3,67707 | 2,80785 | 1,826675033 | N/A             | 101928253 | N/A          | LOC101928253       |
| A_23_P11237    | 9,0416  | 8,17243 | 1,826611726 | ENST00000461157 | 6872      | NM_004606    | TAF1               |
| A_23_P203829   | 9,25086 | 8,38172 | 1,826573743 | ENST00000426665 | 7556      | NM_015394    | ZNF10              |
| A_33_P3374293  | 9,1356  | 8,26655 | 1,826459799 | ENST00000240651 | 79912     | NM_024854    | PYROXD1            |
| A_24_P51375    | 7,69466 | 6,82572 | 1,826320544 | N/A             | N/A       | AF351612     | N/A                |
| A_23_P83266    | 11,457  | 10,5881 | 1,826269908 | ENST00000372642 | 2021      | NM_004435    | ENDOG              |
| A_23_P115805   | 2,40258 | 1,53376 | 1,826168641 | ENST00000303903 | 93426     | NM_001143764 | SYCE1              |
| A_21_P0000273  | 7,09966 | 6,23092 | 1,82606738  | ENST00000482103 | 619569    | NR_002590    | SNORA41            |
| A_33_P3209346  | 8,65372 | 7,78509 | 1,825928154 | ENST00000395554 | 3376      | NM_013417    | IARS               |
| A_23_P412603   | 2,99593 | 2,12758 | 1,82557381  | ENST00000217270 | 128674    | NM_144773    | PROKR2             |
| A_33_P3400758  | 8,63151 | 7,76321 | 1,825510542 | ENST00000334241 | 148254    | NM_152791    | ZNF555             |
| A_33_P3320533  | 2,96057 | 2,09232 | 1,825447276 | ENST00000486964 | 25885     | N/A          | POLR1A             |
| A_23_P26072    | 4,82124 | 3,95311 | 1,825295445 | N/A             | N/A       | AF118084     | N/A                |
| A_21_P0006342  | 3,62323 | 2,75519 | 1,825181581 | N/A             | N/A       | N/A          | Inc-DMRTA1-5       |
| A_24_P153511   | 7,80364 | 6,93575 | 1,824991823 | ENST00000261183 | 114882    | NM_020841    | OSBPL8             |
| A_22_P00007206 | 2,45065 | 1,58277 | 1,824979173 | ENST00000581816 | 406979    | NR_029489    | MIR19A             |
| A_22_P00008031 | 3,97776 | 3,11012 | 1,824675604 | ENST00000436056 | N/A       | N/A          | N/A                |
| A_23_P12199    | 6,12077 | 5,25321 | 1,824574425 | ENST00000289166 | 115572    | NM_052943    | FAM46B             |
| A_23_P78201    | 3,39458 | 2,52702 | 1,824574425 | ENST00000393989 | 3886      | NM_002280    | KRT35              |
| A_21_P0012018  | 2,63919 | 1,77194 | 1,82418241  | ENST00000431506 | N/A       | N/A          | N/A                |
| A_33_P3385671  | 3,03232 | 2,16518 | 1,824043329 | N/A             | N/A       | N/A          | N/A                |
| A_21_P0010890  | 4,3456  | 3,47851 | 1,823980113 | N/A             | N/A       | N/A          | XLOC_I2_002033     |
| A_22_P00015941 | 5,47088 | 4,60381 | 1,823954828 | N/A             | 101927104 | XR_246166    | LOC101927104       |
| A_33_P3240078  | 13,1444 | 12,2775 | 1,823739915 | N/A             | N/A       | N/A          | N/A                |
| A_21_P0000191  | 2,67146 | 1,80463 | 1,823651428 | ENST00000617049 | 5675      | NM_002782    | PSG6               |
| A_23_P215744   | 2,27001 | 1,40319 | 1,823638788 | ENST00000441556 | 83992     | NM_033427    | CTTNBP2            |



|                |         |         |             |                 |           |              |                |
|----------------|---------|---------|-------------|-----------------|-----------|--------------|----------------|
| A_22_P00014065 | 6,13866 | 5,27212 | 1,823284888 | ENST00000438154 | 101927678 | N/A          | LINC01429      |
| A_21_P0002092  | 2,36167 | 1,49514 | 1,82327225  | N/A             | N/A       | N/A          | Inc-CCDC93-1   |
| A_23_P47614    | 14,2066 | 13,3402 | 1,823107964 | ENST00000314222 | 7262      | NM_003311    | PHLDA2         |
| A_23_P128698   | 10,8669 | 10,0005 | 1,823107964 | ENST00000540649 | 10253     | NM_005842    | SPRY2          |
| A_22_P00004287 | 4,5293  | 3,66291 | 1,823095327 | ENST00000552324 | N/A       | N/A          | N/A            |
| A_24_P377499   | 10,6891 | 9,82272 | 1,823082691 | ENST00000313367 | 26031     | NM_015550    | OSBPL3         |
| A_24_P222911   | 9,73398 | 8,86768 | 1,8229816   | ENST00000425778 | 6432      | NM_001031684 | SRSF7          |
| A_23_P132444   | 14,2763 | 13,41   | 1,8229816   | ENST00000521086 | 6917      | NM_006756    | TCEA1          |
| A_33_P3220530  | 14,4596 | 13,5934 | 1,822855245 | ENST00000244020 | 6431      | NM_006275    | SRSF6          |
| A_22_P00015832 | 3,22926 | 2,36365 | 1,822109928 | ENST00000540024 | 400046    | NR_033988    | FLJ41278       |
| A_23_P99930    | 11,4037 | 10,5382 | 1,821971005 | ENST00000566524 | 54962     | NM_017858    | TIPIN          |
| A_21_P0000180  | 3,66497 | 2,79958 | 1,821832092 | ENST00000334821 | 100130348 | NM_001282448 | TMEM262        |
| A_22_P00006151 | 3,44179 | 2,57658 | 1,821604802 | N/A             | N/A       | N/A          | Inc-FAM192A-2  |
| A_33_P3221978  | 2,86577 | 2,00061 | 1,821541671 | N/A             | N/A       | N/A          | N/A            |
| A_33_P3423551  | 12,9001 | 12,0353 | 1,821087193 | ENST00000376377 | 8870      | NM_003897    | IER3           |
| A_21_P0013366  | 4,02857 | 3,16397 | 1,820834755 | ENST00000430530 | N/A       | N/A          | N/A            |
| A_32_P192615   | 11,6688 | 10,8046 | 1,820329982 | ENST00000373790 | 6872      | NM_001286074 | TAF1           |
| A_22_P00004735 | 2,65611 | 1,79194 | 1,82029213  | ENST00000466387 | 1496      | AK127226     | CTNNA2         |
| A_33_P3358938  | 8,03516 | 7,17105 | 1,820216427 | ENST00000511124 | 9575      | NM_001267843 | CLOCK          |
| A_23_P112512   | 8,69003 | 7,82614 | 1,819938879 | ENST00000242275 | 92014     | NM_033412    | SLC25A51       |
| A_22_P00001356 | 3,23265 | 2,36891 | 1,819749666 | ENST00000579113 | N/A       | DB148555     | N/A            |
| A_23_P71774    | 2,61925 | 1,75568 | 1,819535249 | ENST00000380232 | 3456      | NM_002176    | IFNB1          |
| A_33_P3284596  | 5,14743 | 4,28405 | 1,819295636 | ENST00000269586 | 390790    | NM_001143968 | ARL5C          |
| A_21_P0001190  | 4,65987 | 3,79655 | 1,819219975 | ENST00000422548 | 100505918 | N/A          | LOC100505918   |
| A_21_P0012654  | 10,6618 | 9,79852 | 1,819169536 | N/A             | 101928803 | XR_251551    | LOC101928803   |
| A_23_P170581   | 7,32798 | 6,46483 | 1,81900562  | ENST00000620195 | 197320    | XR_172185    | ZNF778         |
| A_22_P00014512 | 3,05214 | 2,18913 | 1,818829111 | N/A             | N/A       | N/A          | Inc-SHPRH-2    |
| A_33_P3346157  | 3,7551  | 2,89218 | 1,81871565  | ENST00000216468 | 283578    | NM_213601    | TMED8          |
| A_33_P3224212  | 7,02418 | 6,16128 | 1,818690437 | ENST00000264160 | 23518     | NM_001282798 | R3HDM1         |
| A_22_P00016321 | 3,0218  | 2,15911 | 1,818425726 | ENST00000532849 | N/A       | N/A          | N/A            |
| A_21_P0003054  | 2,24162 | 1,379   | 1,818337498 | N/A             | N/A       | N/A          | Inc-SERPINI1-9 |
| A_21_P0001518  | 5,48581 | 4,62334 | 1,818148451 | N/A             | N/A       | N/A          | Inc-PTGER3-2   |
| A_23_P28878    | 10,7501 | 9,88775 | 1,817997228 | ENST00000379772 | 54976     | NM_001039140 | C20orf27       |

|                |         |         |             |                 |           |              |                       |
|----------------|---------|---------|-------------|-----------------|-----------|--------------|-----------------------|
| A_21_P0009782  | 2,35737 | 1,49526 | 1,81769482  | ENST00000585520 | N/A       | N/A          | N/A                   |
| A_21_P0010318  | 2,36856 | 1,50659 | 1,817518438 | N/A             | N/A       | N/A          | Inc-AF165138.7.1-1    |
| A_21_P0009754  | 9,75519 | 8,89343 | 1,817253898 | N/A             | N/A       | N/A          | Inc-UQCRFS1-9         |
| A_22_P00025917 | 10,2563 | 9,39457 | 1,81721611  | ENST00000556072 | 100506603 | NR_104183    | LOC100506603          |
| A_33_P3235642  | 5,15811 | 4,29648 | 1,817090154 | ENST00000367164 | 5929      | NM_001193272 | RBBP5                 |
| A_23_P114259   | 2,24678 | 1,38544 | 1,816724933 | ENST00000485437 | 140456    | NM_080873    | ASB11                 |
| A_23_P100326   | 12,5756 | 11,7143 | 1,816674563 | ENST00000611875 | 8131      | NM_001039476 | NPRL3                 |
| A_32_P221748   | 5,92619 | 5,06505 | 1,816473099 | N/A             | N/A       | BX350880     | N/A                   |
| A_33_P3494109  | 3,41675 | 2,55578 | 1,816259067 | ENST00000577573 | 146795    | XR_243752    | LOC146795             |
| A_33_P3306217  | 5,33246 | 4,47178 | 1,815894013 | ENST00000376656 | 56658     | NM_172016    | TRIM39                |
| A_21_P0008296  | 2,22787 | 1,36725 | 1,815818493 | N/A             | N/A       | N/A          | Inc-RNASE10-1         |
| A_22_P00008742 | 6,6185  | 5,75795 | 1,815730391 | N/A             | 643749    | NR_034111    | TRAF3IP2-AS1          |
| A_21_P0002086  | 3,86808 | 3,00754 | 1,815717806 | ENST00000443123 | N/A       | N/A          | N/A                   |
| A_33_P3333712  | 6,53353 | 5,67357 | 1,814987988 | ENST00000392253 | 55681     | NM_017988    | SCYL2                 |
| A_21_P0006968  | 9,77841 | 8,91864 | 1,814748973 | ENST00000446372 | 207107    | NR_027082    | SFTA1P                |
| A_23_P69188    | 11,6762 | 10,8168 | 1,814283614 | ENST00000462982 | 285381    | NM_206831    | DPH3                  |
| A_22_P00001517 | 3,20032 | 2,34094 | 1,814258463 | N/A             | N/A       | N/A          | Inc-ARHGAP23-1        |
| A_23_P35148    | 8,81626 | 7,95691 | 1,814220737 | ENST00000338366 | 6884      | NM_005645    | TAF13                 |
| A_23_P88177    | 2,72573 | 1,86668 | 1,81384352  | ENST00000341228 | 145264    | NM_173850    | SERPINA12             |
| A_33_P3319542  | 4,8849  | 4,02589 | 1,81379323  | ENST00000236877 | 6543      | NM_015063    | SLC8A2                |
| A_22_P00016497 | 3,45585 | 2,59686 | 1,813768086 | N/A             | N/A       | N/A          | Inc-TMOD3-1           |
| A_23_P48550    | 15,1519 | 14,293  | 1,813654941 | ENST00000453495 | 283638    | NM_015005    | CEP170B               |
| A_22_P00010710 | 6,75481 | 5,89601 | 1,813529232 | N/A             | N/A       | N/A          | Inc-NFYB-1            |
| A_21_P0001864  | 2,85324 | 1,9945  | 1,813453811 | ENST00000416845 | N/A       | N/A          | N/A                   |
| A_23_P250948   | 8,04209 | 7,18346 | 1,813315547 | ENST00000457855 | 7862      | NM_001003694 | BRPF1                 |
| A_33_P3413997  | 4,50773 | 3,6491  | 1,813315547 | N/A             | N/A       | N/A          | N/A                   |
| A_22_P00011476 | 2,89915 | 2,04105 | 1,812649515 | ENST00000456384 | N/A       | N/A          | N/A                   |
| A_33_P3390753  | 2,80191 | 1,94387 | 1,812574131 | N/A             | N/A       | N/A          | N/A                   |
| A_23_P154708   | 3,55594 | 2,69793 | 1,81253644  | ENST00000378789 | 54363     | NM_017545    | HAO1                  |
| A_33_P3281373  | 3,57462 | 2,71666 | 1,812473623 | N/A             | N/A       | N/A          | N/A                   |
| A_22_P00013632 | 2,91915 | 2,0613  | 1,812335434 | N/A             | N/A       | AK125516     | Inc-RP11-625H11.1.1-3 |
| A_23_P111929   | 6,68992 | 5,83215 | 1,81223494  | ENST00000524027 | 51633     | NM_016023    | OTUD6B                |
| A_33_P3420496  | 4,72252 | 3,86478 | 1,812197256 | N/A             | 677832    | NR_003015    | SNORA53               |

|                |         |         |             |                 |           |              |               |
|----------------|---------|---------|-------------|-----------------|-----------|--------------|---------------|
| A_23_P41075    | 10,6666 | 9,80897 | 1,812059088 | ENST00000486107 | 84315     | NM_032355    | MON1A         |
| A_33_P3417313  | 6,58399 | 5,72639 | 1,812021408 | ENST00000447926 | 65263     | NM_023078    | PYCR1         |
| A_33_P3265872  | 6,67358 | 5,81627 | 1,811657205 | N/A             | 101927497 | NR_110086    | LOC101927497  |
| A_23_P156180   | 7,22546 | 6,3682  | 1,811594419 | ENST00000200652 | 6583      | NM_003059    | SLC22A4       |
| A_21_P0000563  | 7,47882 | 6,62176 | 1,811343296 | N/A             | 100302743 | NR_028374    | SNORA80B      |
| A_33_P3288246  | 4,98957 | 4,13258 | 1,811255411 | ENST00000302475 | 4163      | NM_001085377 | MCC           |
| A_23_P140527   | 8,2587  | 7,40175 | 1,811205193 | ENST00000396057 | 27023     | NM_012182    | FOXB1         |
| A_22_P00004125 | 5,29112 | 4,43423 | 1,811129869 | N/A             | N/A       | N/A          | Inc-CLDN14-2  |
| A_22_P00003420 | 4,29399 | 3,43712 | 1,811104762 | N/A             | N/A       | BC039475     | Inc-CCDC148-1 |
| A_19_P00800061 | 3,72862 | 2,87183 | 1,811004335 | N/A             | 100289026 | XR_424060    | LOC100289026  |
| A_33_P3395859  | 5,13961 | 4,28298 | 1,8108035   | ENST00000574814 | 147646    | NM_001193623 | C19orf84      |
| A_23_P62371    | 9,67252 | 8,81601 | 1,810652888 | ENST00000498029 | 6901      | XM_006724836 | TAZ           |
| A_23_P24294    | 2,42482 | 1,56845 | 1,810477189 | ENST00000263160 | 57084     | NM_020346    | SLC17A6       |
| A_33_P3338071  | 2,29684 | 1,44053 | 1,810401895 | N/A             | N/A       | N/A          | N/A           |
| A_23_P50674    | 5,30218 | 4,44618 | 1,810012926 | ENST00000481489 | 113177    | NM_001031735 | IZUMO4        |
| A_33_P3262694  | 11,7973 | 10,9414 | 1,80988747  | N/A             | N/A       | N/A          | N/A           |
| A_19_P00327354 | 9,4698  | 8,61395 | 1,809824745 | ENST00000419300 | 100506190 | N/A          | LINC00963     |
| A_22_P00002615 | 5,23466 | 4,37891 | 1,809699302 | N/A             | 101929305 | XR_241170    | LOC101929305  |
| A_24_P179013   | 7,9502  | 7,0946  | 1,809511153 | ENST00000428729 | N/A       | N/A          | N/A           |
| A_23_P250813   | 11,0714 | 10,2163 | 1,808884133 | ENST00000521620 | 7486      | NM_000553    | WRN           |
| A_33_P3214597  | 7,50001 | 6,64497 | 1,808808905 | ENST00000381639 | 441212    | NR_003500    | RP9P          |
| A_33_P3404970  | 2,46951 | 1,61465 | 1,808583241 | ENST00000371211 | 221391    | NM_181744    | OPN5          |
| A_23_P36226    | 11,233  | 10,3783 | 1,808382673 | ENST00000302692 | 84275     | NM_032315    | SLC25A33      |
| A_23_P51906    | 14,4147 | 13,56   | 1,808382673 | ENST00000368010 | 5202      | NM_012394    | PFDN2         |
| A_22_P00003426 | 4,01368 | 3,15898 | 1,808382673 | N/A             | N/A       | N/A          | Inc-CCDC23-1  |
| A_32_P135091   | 9,94641 | 9,09177 | 1,808307466 | ENST00000372479 | 55285     | NM_018301    | RBM41         |
| A_22_P00022318 | 5,67173 | 4,81726 | 1,808094397 | ENST00000453216 | 401264    | NR_103446    | TRAM2-AS1     |
| A_22_P00023232 | 2,50832 | 1,65396 | 1,807956542 | ENST00000449072 | N/A       | N/A          | N/A           |
| A_33_P3220827  | 10,5493 | 9,69496 | 1,807931479 | ENST00000360472 | 8682      | NM_001297576 | PEA15         |
| A_23_P81392    | 11,0239 | 10,1697 | 1,807756044 | ENST00000518204 | 23286     | NM_015238    | WWC1          |
| A_33_P3332126  | 9,05985 | 8,20578 | 1,807593156 | ENST00000409736 | 51540     | AK127520     | SCLY          |
| A_33_P3273364  | 12,5216 | 11,6678 | 1,807254897 | ENST00000592646 | 78992     | NM_024029    | YIPF2         |
| A_22_P00001666 | 2,81152 | 1,95789 | 1,807041952 | N/A             | N/A       | N/A          | Inc-ASH2L-1   |

|                |         |         |             |                 |           |              |                    |
|----------------|---------|---------|-------------|-----------------|-----------|--------------|--------------------|
| A_24_P804667   | 10,9968 | 10,1433 | 1,806879128 | ENST00000398922 | 751071    | NM_001043229 | METTL12            |
| A_22_P00002791 | 2,34689 | 1,49344 | 1,806816508 | N/A             | N/A       | N/A          | Inc-C2CD4B-1       |
| A_23_P45496    | 13,0568 | 12,2036 | 1,806503437 | ENST00000491154 | 2664      | NM_001493    | GDI1               |
| A_33_P3399380  | 2,21553 | 1,36276 | 1,805965083 | ENST00000456928 | N/A       | N/A          | N/A                |
| A_24_P137522   | 10,9    | 10,0473 | 1,80587746  | ENST00000509769 | 54532     | NM_019050    | USP53              |
| A_21_P0014781  | 9,36558 | 8,51293 | 1,805814874 | ENST00000395253 | 84792     | NM_001037163 | FAM220A            |
| A_23_P123596   | 5,5716  | 4,71908 | 1,805652161 | ENST00000321612 | 2731      | NM_000170    | GLDC               |
| A_23_P202594   | 11,681  | 10,8285 | 1,805627129 | ENST00000360003 | 79892     | NM_024834    | MCMBP              |
| A_23_P133582   | 11,7075 | 10,8555 | 1,805001455 | ENST00000360541 | 2107      | NM_004730    | ETF1               |
| A_22_P00020012 | 8,13953 | 7,28766 | 1,804838815 | ENST00000437504 | 63926     | XM_005260792 | ANKEF1             |
| A_22_P00023620 | 3,73016 | 2,87829 | 1,804838815 | N/A             | N/A       | N/A          | Inc-PLCB4-2        |
| A_21_P0010255  | 2,33097 | 1,47925 | 1,804651172 | N/A             | N/A       | N/A          | Inc-PDE9A-1        |
| A_33_P3691758  | 3,75396 | 2,9024  | 1,804451041 | ENST00000530880 | N/A       | X64985       | N/A                |
| A_22_P00000384 | 2,70841 | 1,85695 | 1,80432597  | N/A             | N/A       | N/A          | Inc-AC021218.2.1-2 |
| A_22_P00009211 | 3,77226 | 2,92088 | 1,80422592  | N/A             | N/A       | BX106498     | Inc-LPIN2-2        |
| A_22_P00023690 | 3,64144 | 2,79008 | 1,804200908 | N/A             | N/A       | N/A          | Inc-CEBPB-4        |
| A_23_P431505   | 4,7448  | 3,89344 | 1,804200908 | N/A             | N/A       | AB073660     | Inc-AF131215.2.1-1 |
| A_19_P00318600 | 8,73156 | 7,88039 | 1,803963314 | N/A             | 648987    | NR_034085    | LOC648987          |
| A_21_P0014331  | 5,20964 | 4,35851 | 1,803913299 | N/A             | 100505942 | NR_104656    | LOC100505942       |
| A_24_P49199    | 8,51841 | 7,66733 | 1,803850781 | ENST00000396399 | 342035    | NM_181789    | GLDN               |
| A_23_P40194    | 14,8688 | 14,0178 | 1,803750757 | ENST00000622530 | 55661     | NM_017895    | DDX27              |
| A_33_P3213557  | 8,05541 | 7,20442 | 1,803738254 | ENST00000453589 | 51622     | NM_015622    | CCZ1               |
| A_21_P0002657  | 2,3676  | 1,51665 | 1,803688245 | N/A             | 102723594 | XR_427017    | LOC102723594       |
| A_33_P3227079  | 3,3343  | 2,48353 | 1,803463219 | ENST00000372261 | 84814     | XM_005272231 | PPAPDC3            |
| A_22_P00003070 | 2,35085 | 1,50023 | 1,803275719 | ENST00000521257 | N/A       | N/A          | N/A                |
| A_23_P365086   | 7,87634 | 7,02572 | 1,803275719 | ENST00000378392 | 63926     | XM_005260792 | ANKEF1             |
| A_22_P00020742 | 2,42027 | 1,5698  | 1,803088238 | N/A             | 101928101 | XR_241131    | LOC101928101       |
| A_23_P102508   | 9,30615 | 8,45576 | 1,802988256 | ENST00000488743 | 8884      | NM_021095    | SLC5A6             |
| A_21_P0000885  | 2,60345 | 1,75311 | 1,802925771 | N/A             | 284408    | NR_040027    | ZNF790-AS1         |
| A_22_P00015329 | 7,64804 | 6,79772 | 1,802900777 | N/A             | N/A       | N/A          | Inc-SPPL3.1-3      |
| A_23_P48816    | 2,55108 | 1,70087 | 1,802763318 | ENST00000560767 | 9153      | NM_004212    | SLC28A2            |
| A_23_P363313   | 5,5125  | 4,66241 | 1,802613375 | ENST00000573338 | 162515    | NM_153357    | SLC16A11           |
| A_21_P0001545  | 7,29617 | 6,44646 | 1,802138636 | ENST00000435649 | 149351    | N/A          | LOC149351          |

|                |         |         |             |                 |           |              |                |
|----------------|---------|---------|-------------|-----------------|-----------|--------------|----------------|
| A_33_P3277883  | 5,37943 | 4,52976 | 1,802088671 | N/A             | 100129931 | NR_033828    | LOC100129931   |
| A_22_P00009447 | 4,46921 | 3,61963 | 1,801976254 | N/A             | N/A       | AA431138     | Inc-M6PR-1     |
| A_23_P77135    | 6,47748 | 5,6279  | 1,801976254 | ENST00000256538 | 89978     | NM_080650    | DPH6           |
| A_33_P3383271  | 2,36382 | 1,51428 | 1,801926294 | ENST00000379667 | 254786    | NM_054104    | OR6C3          |
| A_19_P00322809 | 2,60429 | 1,75484 | 1,801813887 | ENST00000598234 | 388210    | N/A          | LOC388210      |
| A_33_P3224705  | 8,83994 | 7,99053 | 1,801763931 | ENST00000391611 | 64430     | N/A          | PCNXL4         |
| A_33_P3390546  | 7,6688  | 6,81942 | 1,801726465 | N/A             | N/A       | AK130802     | N/A            |
| A_33_P3240946  | 2,64226 | 1,79307 | 1,801489197 | ENST00000366353 | 8110      | NM_001280544 | DPF3           |
| A_23_P310701   | 2,23588 | 1,38676 | 1,80140179  | N/A             | 54627     | NM_019090    | MAP10          |
| A_33_P3882264  | 5,81347 | 4,96437 | 1,801376817 | N/A             | 692159    | BC028005     | GRASPOS        |
| A_23_P80136    | 9,01338 | 8,16442 | 1,801202019 | ENST00000497547 | 8568      | NM_003683    | RRP1           |
| A_33_P3424384  | 4,38677 | 3,53793 | 1,801052206 | ENST00000403537 | 80745     | XM_005264579 | THUMPD2        |
| A_21_P0005658  | 9,86653 | 9,0177  | 1,801039722 | ENST00000514145 | N/A       | N/A          | N/A            |
| A_32_P120638   | 7,5709  | 6,72223 | 1,800839991 | ENST00000525931 | 92105     | NM_033547    | INTS4          |
| A_24_P364236   | 9,53657 | 8,68822 | 1,800440596 | ENST00000281031 | 4718      | NM_004549    | NDUFC2         |
| A_21_P0013794  | 4,35132 | 3,50312 | 1,80025341  | N/A             | N/A       | N/A          | XLOC_I2_015632 |
| A_32_P224234   | 3,80232 | 2,95418 | 1,800178542 | N/A             | 645195    | AK123450     | LOC645195      |
| A_23_P99996    | 4,67947 | 3,83135 | 1,800153586 | ENST00000532292 | 54551     | NM_019066    | MAGEL2         |
| A_23_P1320     | 2,6274  | 1,77952 | 1,799854146 | ENST00000359322 | 58529     | NM_021245    | MYOZ1          |
| A_23_P218706   | 8,43526 | 7,58738 | 1,799854146 | ENST00000612935 | 79175     | NM_024325    | ZNF343         |
| A_21_P0004778  | 4,61943 | 3,77182 | 1,799517335 | ENST00000419220 | 100507406 | N/A          | LOC100507406   |
| A_33_P3555477  | 2,38484 | 1,53727 | 1,799467442 | ENST00000432154 | N/A       | XR_251522    | N/A            |
| A_22_P00002762 | 2,27898 | 1,43145 | 1,799417551 | ENST00000436529 | 100874322 | N/A          | BACH1-IT2      |
| A_23_P138271   | 12,6693 | 11,8218 | 1,799380134 | ENST00000272217 | 127829    | NM_138795    | ARL8A          |
| A_33_P3238182  | 2,59196 | 1,74447 | 1,799367662 | ENST00000521663 | 26138     | NR_026772    | LINC00588      |
| A_22_P00002161 | 3,83157 | 2,98409 | 1,799355189 | ENST00000556542 | N/A       | N/A          | N/A            |
| A_22_P00012402 | 7,71001 | 6,86265 | 1,799205529 | N/A             | N/A       | BE568189     | Inc-PRKD1-2    |
| A_33_P3316223  | 10,544  | 9,69669 | 1,799143175 | ENST00000216294 | 6617      | NM_003082    | SNAPC1         |
| A_22_P00001696 | 2,51787 | 1,6707  | 1,798968593 | ENST00000581019 | N/A       | N/A          | N/A            |
| A_33_P3355933  | 2,7286  | 1,88149 | 1,798893778 | ENST00000614360 | 50614     | AK092825     | GALNT9         |
| A_22_P00020856 | 2,56864 | 1,72153 | 1,798893778 | ENST00000428165 | 100507143 | NR_108058    | LINC00708      |
| A_33_P3358312  | 9,98088 | 9,13378 | 1,798881309 | ENST00000615618 | 51633     | NM_016023    | OTUD6B         |
| A_22_P00000752 | 2,26795 | 1,42091 | 1,798806497 | N/A             | N/A       | BX094239     | Inc-ADCK1-1    |

|                |         |         |             |                 |           |              |                       |
|----------------|---------|---------|-------------|-----------------|-----------|--------------|-----------------------|
| A_33_P3388453  | 3,5755  | 2,7286  | 1,798631948 | ENST00000341294 | 339345    | NM_001029861 | NANOS2                |
| A_22_P00024462 | 7,56519 | 6,71835 | 1,798557147 | N/A             | 101929693 | NR_110861    | RARA-AS1              |
| A_23_P160503   | 11,5033 | 10,6565 | 1,798507281 | ENST00000472197 | 51022     | NM_016066    | GLRX2                 |
| A_21_P0009815  | 2,90413 | 2,05743 | 1,798382622 | ENST00000454749 | 29075     | AF161557     | LINC00652             |
| A_33_P3407469  | 6,267   | 5,42033 | 1,798345226 | ENST00000618182 | 57644     | NM_020884    | MYH7B                 |
| A_24_P832156   | 12,0208 | 11,1742 | 1,798257972 | ENST00000520403 | 158293    | NM_198841    | FAM120AOS             |
| A_23_P214330   | 13,9158 | 13,0692 | 1,798257972 | ENST00000468511 | 1992      | NM_030666    | SERPINB1              |
| A_21_P0014252  | 3,43086 | 2,58427 | 1,798245508 | N/A             | 101929946 | XR_424109    | LOC101929946          |
| A_22_P00019968 | 3,80766 | 2,96112 | 1,798183186 | N/A             | N/A       | AK125860     | Inc-RP11-582J16.5.1-4 |
| A_21_P0012276  | 6,95226 | 6,1059  | 1,797958847 | ENST00000338625 | 10166     | NM_014252    | SLC25A15              |
| A_33_P3437907  | 4,80428 | 3,95804 | 1,797809303 | ENST00000293443 | 284069    | NM_198475    | FAM171A2              |
| A_22_P00013500 | 2,67565 | 1,82957 | 1,797609931 | N/A             | N/A       | N/A          | Inc-RP11-366L20.2.1-1 |
| A_21_P0003635  | 2,37891 | 1,53284 | 1,797597471 | N/A             | N/A       | N/A          | Inc-OSTC-1            |
| A_33_P3523583  | 2,37551 | 1,52949 | 1,797535172 | N/A             | 642924    | NR_033858    | LINC00535             |
| A_24_P363408   | 4,76788 | 3,92192 | 1,797460416 | ENST00000368364 | 23493     | NM_012259    | HEY2                  |
| A_23_P312246   | 11,1624 | 10,3165 | 1,797385664 | ENST00000278520 | 79780     | NM_024725    | CCDC82                |
| A_33_P3397955  | 5,11108 | 4,26518 | 1,797385664 | N/A             | 319085    | NR_002808    | ITPK1-AS1             |
| A_22_P00003911 | 5,36188 | 4,51608 | 1,797261083 | ENST00000456895 | N/A       | N/A          | N/A                   |
| A_24_P322709   | 8,8037  | 7,95795 | 1,797198795 | ENST00000217381 | 6640      | NM_003098    | SNTA1                 |
| A_33_P3243519  | 5,50387 | 4,65829 | 1,796987035 | ENST00000512611 | 51735     | NM_001164387 | RAPGEF6               |
| A_21_P0005650  | 6,06347 | 5,2179  | 1,796974579 | N/A             | N/A       | N/A          | Inc-ERI1-1            |
| A_24_P75680    | 3,59339 | 2,74812 | 1,796600948 | ENST00000546663 | 9498      | NM_001258402 | SLC4A8                |
| A_23_P413760   | 6,01817 | 5,17292 | 1,796576042 | ENST00000547933 | 5026      | NM_175080    | P2RX5                 |
| A_33_P3323136  | 6,99668 | 6,15168 | 1,796264746 | ENST00000376363 | 219670    | NM_145010    | ENKUR                 |
| A_21_P0004381  | 3,89929 | 3,05473 | 1,795716996 | N/A             | 101926960 | NR_104635    | LOC101926960          |
| A_24_P235305   | 7,54117 | 6,69673 | 1,795567639 | ENST00000311212 | 51123     | NM_001042510 | ZNF706                |
| A_22_P00016439 | 2,61558 | 1,77124 | 1,795443184 | N/A             | N/A       | N/A          | Inc-TMEM5-1           |
| A_23_P104438   | 5,49558 | 4,65134 | 1,795318737 | ENST00000354393 | 84665     | NM_032578    | MYPN                  |
| A_33_P3272231  | 11,0983 | 10,2541 | 1,795268961 | ENST00000480630 | 84879     | NM_001136493 | MFSD2A                |
| A_33_P3398583  | 4,52976 | 3,6856  | 1,795219186 | ENST00000373171 | 401260    | NR_038887    | LINC00951             |
| A_22_P00012622 | 3,67074 | 2,82663 | 1,79515697  | ENST00000584262 | 101927728 | NR_110813    | LINC01476             |
| A_22_P00005760 | 3,41747 | 2,57342 | 1,795082313 | N/A             | N/A       | DB009474     | Inc-ENGASE-1          |
| A_33_P3376971  | 13,0856 | 12,2418 | 1,794771276 | ENST00000617961 | 79094     | NM_024111    | CHAC1                 |

|                |         |         |             |                 |           |              |                |
|----------------|---------|---------|-------------|-----------------|-----------|--------------|----------------|
| A_32_P6832     | 11,6914 | 10,8477 | 1,794646876 | ENST00000381647 | 285636    | NM_175921    | C5orf51        |
| A_32_P56143    | 4,34058 | 3,49705 | 1,794435416 | N/A             | N/A       | N/A          | N/A            |
| A_33_P3257165  | 2,96592 | 2,12246 | 1,794348352 | ENST00000477675 | 29799     | NM_013313    | YPEL1          |
| A_33_P3304382  | 8,65861 | 7,81548 | 1,793937962 | ENST00000396124 | 137682    | NM_152416    | NDUFAF6        |
| A_22_P00011343 | 2,99528 | 2,15256 | 1,793428215 | N/A             | N/A       | N/A          | Inc-OTUD3-1    |
| A_33_P3331451  | 6,9295  | 6,08683 | 1,79336606  | ENST00000374994 | 7046      | NM_004612    | TGFBR1         |
| A_22_P00023723 | 2,30237 | 1,45977 | 1,793279048 | ENST00000583854 | 100134391 | NM_001278587 | LOC100134391   |
| A_33_P3215134  | 9,66447 | 8,82189 | 1,793254188 | ENST00000247930 | 27153     | NM_015694    | ZNF777         |
| A_21_P0012602  | 5,67822 | 4,83571 | 1,793167181 | N/A             | N/A       | N/A          | XLOC_I2_010759 |
| A_33_P3365524  | 7,59908 | 6,75681 | 1,792868903 | ENST00000329331 | 84193     | NM_199123    | SETD3          |
| A_22_P00005881 | 4,02936 | 3,18724 | 1,792682504 | N/A             | N/A       | N/A          | Inc-ESRP2-1    |
| A_23_P163195   | 2,24812 | 1,40607 | 1,792595525 | ENST00000298119 | 145581    | NM_152447    | LRFN5          |
| A_22_P00019807 | 8,22868 | 7,38672 | 1,7924837   | ENST00000423924 | 100996557 | XR_158849    | LOC100996557   |
| A_21_P0012232  | 2,59784 | 1,75598 | 1,792359459 | ENST00000415824 | 400867    | N/A          | LOC400867      |
| A_33_P3221111  | 5,07717 | 4,23544 | 1,792197958 | ENST00000624544 | 643847    | AL832946     | PGA4           |
| A_33_P3396419  | 4,06496 | 3,22328 | 1,792135847 | ENST00000558900 | 145773    | N/A          | FAM81A         |
| A_23_P151209   | 10,2999 | 9,45842 | 1,791887421 | ENST00000228515 | 81566     | NM_030809    | CSRNP2         |
| A_22_P00021910 | 2,25241 | 1,41101 | 1,79178806  | N/A             | N/A       | N/A          | Inc-CAPN13-1   |
| A_33_P3321906  | 3,83253 | 2,99125 | 1,79163903  | ENST00000615227 | N/A       | N/A          | N/A            |
| A_33_P3228862  | 3,67929 | 2,83821 | 1,791390673 | ENST00000343709 | 100130742 | NM_001129890 | LRRC69         |
| A_33_P3365072  | 4,61159 | 3,77051 | 1,791390673 | ENST00000431011 | 448835    | NM_001128600 | LCE6A          |
| A_21_P0002534  | 2,64696 | 1,80591 | 1,791353423 | N/A             | N/A       | N/A          | Inc-INO80D-1   |
| A_33_P3215452  | 6,75885 | 5,91812 | 1,790956132 | ENST00000622602 | 100129361 | NM_001271592 | LOC100129361   |
| A_23_P258321   | 13,0062 | 12,1656 | 1,790794758 | ENST00000285298 | 51373     | NM_015969    | MRPS17         |
| A_21_P0000028  | 3,14059 | 2,30003 | 1,790745107 | N/A             | 9047      | NM_001161444 | SH2D2A         |
| A_33_P3328410  | 4,59644 | 3,75593 | 1,790683046 | ENST00000309775 | N/A       | XM_005274417 | N/A            |
| A_23_P23221    | 13,5371 | 12,6968 | 1,790422411 | ENST00000370986 | 1647      | NM_001924    | GADD45A        |
| A_23_P12113    | 8,20492 | 7,36474 | 1,790273494 | ENST00000483790 | 28982     | NM_014053    | FLVCR1         |
| A_22_P00003198 | 4,63909 | 3,79903 | 1,790124589 | ENST00000561811 | 57546     | NM_020786    | PDP2           |
| A_22_P00011514 | 2,54622 | 1,70625 | 1,790012919 | N/A             | N/A       | DB144136     | Inc-PAX8-1     |
| A_22_P00020383 | 3,65422 | 2,81427 | 1,789988105 | N/A             | N/A       | AK125753     | Inc-ATG16L2-2  |
| A_22_P00018809 | 2,46625 | 1,62632 | 1,78996329  | ENST00000506925 | N/A       | AK124670     | N/A            |
| A_24_P2361     | 3,29841 | 2,45849 | 1,789950883 | ENST00000439316 | 1187      | NM_004070    | CLCNA          |

|                |         |         |             |                 |           |              |                |
|----------------|---------|---------|-------------|-----------------|-----------|--------------|----------------|
| A_32_P52785    | 4,56574 | 3,72583 | 1,789938476 | ENST00000398904 | 23500     | NM_015345    | DAAM2          |
| A_21_P0007248  | 7,4752  | 6,63539 | 1,789814411 | N/A             | N/A       | N/A          | Inc-PCF11-1    |
| A_22_P00002339 | 4,14669 | 3,30692 | 1,789764788 | ENST00000393946 | N/A       | N/A          | N/A            |
| A_23_P144337   | 3,57633 | 2,73658 | 1,789739977 | ENST00000515616 | 25819     | NM_012118    | CCRN4L         |
| A_21_P0009747  | 4,3071  | 3,46739 | 1,789690355 | ENST00000596483 | N/A       | N/A          | N/A            |
| A_24_P315014   | 2,86011 | 2,02062 | 1,789417462 | N/A             | 139629    | XR_430517    | XAGE-4         |
| A_23_P118065   | 7,91582 | 7,07633 | 1,789417462 | ENST00000199936 | 3294      | NM_002153    | HSD17B2        |
| A_23_P65068    | 7,39796 | 6,55856 | 1,789305836 | ENST00000527879 | 493861    | NM_001008394 | EID3           |
| A_21_P0004729  | 2,73955 | 1,9002  | 1,789243824 | ENST00000491317 | 221718    | N/A          | LINC00518      |
| A_21_P0011749  | 3,36996 | 2,53066 | 1,789181815 | N/A             | N/A       | N/A          | XLOC_I2_007059 |
| A_33_P3227275  | 2,58027 | 1,74104 | 1,789095005 | ENST00000369053 | N/A       | N/A          | N/A            |
| A_33_P3316169  | 2,75882 | 1,91963 | 1,789045402 | ENST00000525199 | 100131539 | NM_001278713 | ZNF705E        |
| A_33_P3279545  | 7,31998 | 6,481   | 1,788785006 | ENST00000456517 | 10114     | NM_005734    | HIPK3          |
| A_23_P79962    | 10,349  | 9,51003 | 1,788772607 | ENST00000347364 | 8195      | NM_170784    | MKKS           |
| A_33_P3398727  | 8,8344  | 7,99546 | 1,788735411 | ENST00000447898 | 642477    | NR_122111    | LINC01296      |
| A_33_P3240333  | 13,3454 | 12,5067 | 1,78843787  | ENST00000265340 | 5307      | NM_002653    | PITX1          |
| A_24_P399980   | 4,62014 | 3,78159 | 1,788251932 | ENST00000343002 | 9843      | NM_014799    | HEPH           |
| A_23_P393034   | 12,5731 | 11,7346 | 1,788189957 | ENST00000306560 | 3038      | NM_005329    | HAS3           |
| A_32_P83098    | 2,47569 | 1,63724 | 1,788127984 | ENST00000307331 | 6338      | NM_000336    | SCNN1B         |
| A_21_P0002340  | 2,48013 | 1,64176 | 1,788028832 | N/A             | N/A       | N/A          | Inc-CPO-1      |
| A_22_P00011995 | 3,97727 | 3,139   | 1,787904899 | N/A             | N/A       | AK128046     | Inc-PLCB4-2    |
| A_19_P00802154 | 4,91737 | 4,07928 | 1,787681843 | ENST00000370754 | 667       | NM_001144769 | DST            |
| A_22_P00014533 | 4,32303 | 3,48511 | 1,787471204 | ENST00000624113 | 114038    | NR_026863    | LINC00313      |
| A_33_P3280074  | 3,7087  | 2,87081 | 1,787434034 | ENST00000527524 | 2900      | NM_001282470 | GRIK4          |
| A_21_P0008307  | 3,37403 | 2,53619 | 1,787372088 | N/A             | 102724890 | XR_424484    | LOC102724890   |
| A_22_P00002194 | 3,07056 | 2,23285 | 1,787211037 | ENST00000433008 | 100506775 | NR_117098    | LINC01353      |
| A_33_P3277973  | 2,35796 | 1,52028 | 1,787173873 | N/A             | 120425    | AK057590     | AMICA1         |
| A_22_P00011377 | 13,3219 | 12,4843 | 1,787074774 | N/A             | 5029      | NM_176072    | P2RY2          |
| A_21_P0013958  | 5,35156 | 4,51418 | 1,786802279 | ENST00000512466 | 10016     | AK128087     | PDCD6          |
| A_21_P0006584  | 6,60708 | 5,7697  | 1,786802279 | ENST00000452254 | 158801    | NR_027131    | NKAPP1         |
| A_33_P3340666  | 7,29047 | 6,4531  | 1,786789894 | ENST00000334151 | 337972    | NM_181611    | KRTAP19-5      |
| A_33_P3284508  | 10,7425 | 9,90522 | 1,786678432 | ENST00000302014 | 929       | NM_001174104 | CD14           |
| A_23_P89460    | 12,2282 | 11,3914 | 1,786084084 | ENST00000620004 | 26574     | NM_012138    | AATF           |



|                |         |         |             |                 |           |              |                  |
|----------------|---------|---------|-------------|-----------------|-----------|--------------|------------------|
| A_21_P0001331  | 2,422   | 1,58535 | 1,78589839  | N/A             | 101927871 | XR_246366    | LOC101927871     |
| A_24_P360206   | 5,65222 | 4,81571 | 1,785725094 | ENST00000529619 | 56138     | NM_018902    | PCDHA11          |
| A_23_P14302    | 8,46266 | 7,6262  | 1,785663207 | ENST00000557275 | 79686     | NR_026779    | LINC00341        |
| A_21_P0002156  | 2,99073 | 2,15428 | 1,78565083  | N/A             | N/A       | N/A          | Inc-SNTG2-4      |
| A_33_P3244279  | 5,25347 | 4,41706 | 1,785601322 | N/A             | 84061     | AF130104     | MAGT1            |
| A_33_P3266091  | 3,29129 | 2,45516 | 1,785254803 | N/A             | N/A       | N/A          | N/A              |
| A_19_P00807748 | 7,46215 | 6,62614 | 1,785106316 | ENST00000429932 | 102725166 | XR_433765    | LOC102725166     |
| A_22_P00011169 | 3,87124 | 3,03533 | 1,784982586 | ENST00000585275 | N/A       | N/A          | N/A              |
| A_32_P36313    | 9,7531  | 8,91732 | 1,78482175  | ENST00000393077 | 143187    | NM_145206    | VTI1A            |
| A_33_P3277826  | 4,25318 | 3,41767 | 1,784487753 | ENST00000391700 | 284312    | AY280370     | ZSCAN1           |
| A_23_P215778   | 9,35596 | 8,52066 | 1,78422802  | ENST00000485825 | 11062     | NM_181581    | DUS4L            |
| A_21_P0003973  | 4,46426 | 3,62911 | 1,78404252  | ENST00000505844 | N/A       | N/A          | N/A              |
| A_21_P0014329  | 11,9611 | 11,126  | 1,783980691 | ENST00000563307 | 1459      | BC053935     | CSNK2A2          |
| A_23_P208210   | 9,50145 | 8,66663 | 1,783634487 | ENST00000221315 | 9668      | NM_014650    | ZNF432           |
| A_21_P0005099  | 8,49645 | 7,66174 | 1,783498497 | ENST00000609139 | 643837    | NR_047526    | LINC01128        |
| A_33_P3462856  | 2,27616 | 1,44164 | 1,783263629 | N/A             | N/A       | AK023309     | N/A              |
| A_21_P0000462  | 3,51336 | 2,67891 | 1,783177107 | ENST00000496254 | 100113381 | NR_003687    | SNORD19B         |
| A_33_P3878772  | 9,20737 | 8,37318 | 1,782855775 | ENST00000381652 | 3717      | NM_004972    | JAK2             |
| A_23_P97394    | 12,9626 | 12,1288 | 1,782373885 | ENST00000538653 | 8412      | NM_003567    | BCAR3            |
| A_22_P00020041 | 3,05975 | 2,22628 | 1,781966234 | N/A             | N/A       | N/A          | Inc-GREM2-3      |
| A_23_P103503   | 9,10131 | 8,26792 | 1,781867424 | ENST00000621032 | 4194      | NM_002393    | MDM4             |
| A_32_P35947    | 3,05858 | 2,22526 | 1,781780969 | ENST00000443866 | 728763    | N/A          | LOC728763        |
| A_33_P3403851  | 4,64146 | 3,80844 | 1,781410497 | N/A             | N/A       | N/A          | N/A              |
| A_21_P0003719  | 8,41273 | 7,57971 | 1,781410497 | N/A             | N/A       | N/A          | Inc-SLC2A9-1     |
| A_33_P3317211  | 6,54133 | 5,70832 | 1,781398149 | ENST00000369957 | 4204      | NM_001110792 | MECP2            |
| A_21_P0004589  | 2,54721 | 1,71426 | 1,781324064 | ENST00000448744 | 387111    | NR_033376    | LINC00222        |
| A_21_P0014740  | 7,48242 | 6,64952 | 1,781262329 | N/A             | N/A       | N/A          | N/A              |
| A_22_P00007027 | 5,5253  | 4,6926  | 1,781015411 | N/A             | N/A       | N/A          | Inc-GIT1-1       |
| A_23_P383986   | 10,9168 | 10,0842 | 1,780891965 | ENST00000346248 | 51363     | NM_015892    | CHST15           |
| A_33_P3307013  | 2,45478 | 1,62223 | 1,780830245 | ENST00000522326 | 124989    | NM_001195192 | EFCAB13          |
| A_21_P0007212  | 2,22325 | 1,39079 | 1,780719154 | N/A             | N/A       | N/A          | Inc-AP000790.1-2 |
| A_21_P0009753  | 9,7405  | 8,90838 | 1,780299541 | ENST00000590677 | 148189    | N/A          | LINC00662        |
| A_24_P195286   | 4,21872 | 3,38687 | 1,77996639  | ENST00000457863 | N/A       | N/A          | N/A              |

|                |         |         |             |                 |           |              |                |
|----------------|---------|---------|-------------|-----------------|-----------|--------------|----------------|
| A_23_P436284   | 3,0982  | 2,26665 | 1,779596295 | ENST00000334287 | 123264    | NM_178859    | SLC51B         |
| A_23_P120812   | 4,46411 | 3,63266 | 1,779472947 | ENST00000330377 | 3543      | NM_020070    | IGLL1          |
| A_23_P19210    | 12,1846 | 11,3532 | 1,779411276 | ENST00000368864 | 84154     | NM_032194    | RPF2           |
| A_33_P3275968  | 9,10714 | 8,27582 | 1,779312607 | ENST00000336735 | 6400      | NM_005065    | SEL1L          |
| A_21_P0004819  | 4,84966 | 4,01841 | 1,779226277 | ENST00000532564 | 100508120 | NR_046229    | GMDS-AS1       |
| A_33_P3233947  | 9,77189 | 8,94072 | 1,779127618 | ENST00000464757 | 116228    | NM_198076    | COX20          |
| A_24_P130363   | 3,00392 | 2,17295 | 1,778880996 | ENST00000359446 | 753       | NM_181482    | LDLRAD4        |
| A_33_P3375894  | 5,60798 | 4,7771  | 1,778770027 | ENST00000429208 | N/A       | N/A          | N/A            |
| A_23_P101992   | 8,91613 | 8,08536 | 1,778634408 | ENST00000494979 | 8685      | NM_006770    | MARCO          |
| A_33_P3398965  | 5,0245  | 4,19381 | 1,778535782 | ENST00000540479 | 91860     | NM_033429    | CALML4         |
| A_21_P0010322  | 7,99388 | 7,16333 | 1,7783632   | N/A             | N/A       | N/A          | Inc-WDR4-1     |
| A_22_P00021757 | 2,26066 | 1,4302  | 1,778252264 | ENST00000455541 | N/A       | N/A          | N/A            |
| A_32_P137783   | 2,24724 | 1,41678 | 1,778252264 | ENST00000454927 | 101929926 | N/A          | LOC101929926   |
| A_22_P00016329 | 3,4306  | 2,60045 | 1,777870202 | N/A             | N/A       | N/A          | Inc-TMEM14E-2  |
| A_21_P0001644  | 3,50716 | 2,67702 | 1,777857878 | N/A             | N/A       | N/A          | Inc-TOMM20-2   |
| A_23_P305507   | 13,0626 | 12,2325 | 1,777808586 | ENST00000361337 | 7150      | NM_003286    | TOP1           |
| A_23_P84565    | 9,48615 | 8,6566  | 1,77713096  | ENST00000518039 | 661       | NM_001722    | POLR3D         |
| A_21_P0000445  | 5,86132 | 5,03203 | 1,776810717 | N/A             | 100033418 | NR_003321    | SNORD116-6     |
| A_33_P3213526  | 2,18754 | 1,35833 | 1,776712193 | N/A             | N/A       | N/A          | N/A            |
| A_33_P3304172  | 2,29967 | 1,47056 | 1,776589045 | ENST00000421673 | 4588      | AK092533     | MUC6           |
| A_21_P0000287  | 10,9933 | 10,1642 | 1,77657673  | N/A             | 26802     | NR_002746    | SNORD47        |
| A_21_P0002581  | 2,82439 | 1,99538 | 1,776465905 | N/A             | N/A       | N/A          | Inc-SLC4A1AP-1 |
| A_23_P140760   | 3,49447 | 2,66564 | 1,776244276 | ENST00000569977 | 222487    | NM_170776    | GPR97          |
| A_23_P73609    | 2,28167 | 1,4529  | 1,776170405 | ENST00000378062 | 4693      | NM_000266    | NDP            |
| A_33_P3301469  | 6,25399 | 5,42532 | 1,776047295 | ENST00000470729 | 554226    | NR_027019    | ANKRD30BL      |
| A_23_P134384   | 8,49705 | 7,66845 | 1,775961122 | ENST00000403050 | 9678      | NM_014660    | PHF14          |
| A_24_P260440   | 9,43447 | 8,6059  | 1,775924193 | ENST00000337273 | 3842      | NM_002270    | TNPO1          |
| A_23_P74716    | 9,91699 | 9,0885  | 1,775825717 | ENST00000490843 | 9191      | NM_032998    | DEDD           |
| A_24_P25346    | 12,675  | 11,8469 | 1,775345728 | ENST00000352319 | 84916     | NM_032830    | CIRH1A         |
| A_21_P0000232  | 4,32054 | 3,49252 | 1,775247285 | N/A             | 338429    | NR_001289    | SNORD109B      |
| A_21_P0000255  | 7,27566 | 6,44767 | 1,77521037  | N/A             | 9299      | NR_002561    | SNORD30        |
| A_33_P3304691  | 4,04305 | 3,21509 | 1,775173456 | ENST00000382171 | 387264    | NM_001005922 | KRTAP5-1       |
| A_23_P96165    | 7,17948 | 6,35159 | 1,775087326 | ENST00000532727 | 79703     | NM_024650    | C11orf80       |

|                |         |         |             |                 |           |              |               |
|----------------|---------|---------|-------------|-----------------|-----------|--------------|---------------|
| A_21_P0012349  | 4,37628 | 3,54839 | 1,775087326 | ENST00000456279 | 150244    | N/A          | ZDHC8P1       |
| A_22_P00022547 | 3,54717 | 2,71942 | 1,774915079 | N/A             | N/A       | CU674621     | Inc-GRID2IP-1 |
| A_23_P68529    | 14,3012 | 13,4735 | 1,774853566 | ENST00000380113 | 3704      | NM_033453    | ITPA          |
| A_21_P0006203  | 2,42938 | 1,60178 | 1,774730547 | N/A             | N/A       | N/A          | Inc-RAD23B-5  |
| A_21_P0010324  | 5,76991 | 4,94231 | 1,774730547 | N/A             | N/A       | N/A          | Inc-SIK1-4    |
| A_21_P0003339  | 2,27102 | 1,44348 | 1,774656739 | ENST00000514401 | N/A       | N/A          | N/A           |
| A_33_P3543133  | 5,38138 | 4,5541  | 1,774336942 | N/A             | 283624    | NR_038970    | LINC00641     |
| A_22_P00010749 | 2,49581 | 1,66855 | 1,774312345 | N/A             | N/A       | AK058132     | Inc-NKAIN3-2  |
| A_23_P422350   | 2,43452 | 1,60745 | 1,774078687 | ENST00000620575 | 4647      | NM_000260    | MYO7A         |
| A_33_P3322864  | 7,02262 | 6,19558 | 1,774041797 | ENST00000409160 | 55502     | NM_018645    | HES6          |
| A_23_P41424    | 11,7581 | 10,9313 | 1,7737467   | ENST00000394833 | 64116     | NM_022154    | SLC39A8       |
| A_21_P0005753  | 2,38759 | 1,56088 | 1,773636051 | N/A             | N/A       | N/A          | Inc-UTP23-2   |
| A_23_P200741   | 5,97876 | 5,15207 | 1,773611463 | ENST00000367817 | 1805      | NM_001937    | DPT           |
| A_22_P00006123 | 2,4333  | 1,60677 | 1,773414775 | ENST00000568297 | N/A       | N/A          | N/A           |
| A_24_P271527   | 14,0971 | 13,2707 | 1,773254981 | ENST00000216039 | 9929      | NM_014876    | JOSD1         |
| A_33_P3413335  | 6,92728 | 6,10089 | 1,77324269  | ENST00000618352 | N/A       | AF390550     | N/A           |
| A_33_P3319856  | 4,22282 | 3,39652 | 1,773132073 | ENST00000339284 | 387694    | NM_207372    | SH2D4B        |
| A_33_P3210916  | 4,4095  | 3,58328 | 1,773033752 | ENST00000397102 | 6396      | AK095629     | SEC13         |
| A_33_P3417318  | 5,84037 | 5,01416 | 1,773021462 | ENST00000537226 | 101060200 | N/A          | ZNF891        |
| A_33_P3280099  | 2,62616 | 1,80017 | 1,772751111 | N/A             | N/A       | N/A          | N/A           |
| A_23_P211785   | 7,82843 | 7,00256 | 1,772603663 | ENST00000396056 | 7584      | NM_003420    | ZNF35         |
| A_22_P00004506 | 2,46221 | 1,63636 | 1,77257909  | ENST00000540906 | N/A       | N/A          | N/A           |
| A_24_P712350   | 8,72799 | 7,90226 | 1,772431657 | ENST00000366553 | 1122      | NM_001821    | CHML          |
| A_24_P333019   | 9,76129 | 8,93561 | 1,77237023  | ENST00000545616 | 11237     | NM_007219    | RNF24         |
| A_22_P00008899 | 2,34446 | 1,51889 | 1,772235099 | ENST00000457513 | N/A       | N/A          | N/A           |
| A_24_P242132   | 7,91786 | 7,0923  | 1,772222815 | ENST00000527545 | 340371    | NM_178564    | NRBP2         |
| A_23_P169178   | 14,0068 | 13,1813 | 1,772149112 | ENST00000620767 | 7016      | NM_006285    | TESK1         |
| A_33_P3215864  | 8,69311 | 7,86778 | 1,771940303 | ENST00000492763 | 60343     | NM_001171134 | FAM3A         |
| A_33_P3386062  | 5,50302 | 4,67791 | 1,771670116 | ENST00000557527 | 283585    | N/A          | LOC283585     |
| A_23_P55468    | 9,57529 | 8,75031 | 1,77151048  | ENST00000613269 | 29928     | NM_013337    | TIMM22        |
| A_22_P00010330 | 2,37742 | 1,55253 | 1,771399971 | N/A             | N/A       | N/A          | Inc-MYB-2     |
| A_33_P3298173  | 3,96874 | 3,14388 | 1,771363136 | ENST00000382676 | N/A       | AY746432     | N/A           |
| A_32_P233950   | 2,70134 | 1,87652 | 1,771314024 | ENST00000370370 | 340168    | NM_001025290 | DPPA5         |

|                |         |         |             |                 |           |              |                |
|----------------|---------|---------|-------------|-----------------|-----------|--------------|----------------|
| A_23_P93302    | 6,09043 | 5,26564 | 1,771277191 | ENST00000377034 | 2550      | NM_001470    | GABBR1         |
| A_21_P0011127  | 2,29981 | 1,47505 | 1,771240358 | N/A             | N/A       | N/A          | XLOC_I2_003644 |
| A_23_P104025   | 9,91367 | 9,08904 | 1,771080761 | ENST00000462677 | 116461    | NM_052965    | TSEN15         |
| A_23_P10518    | 2,78173 | 1,95722 | 1,770933452 | ENST00000310125 | 51270     | NM_016521    | TFDP3          |
| A_22_P00025465 | 2,33342 | 1,50914 | 1,770651146 | N/A             | N/A       | N/A          | Inc-C1orf124-2 |
| A_33_P3365002  | 8,90876 | 8,08455 | 1,770565235 | ENST00000404155 | 7280      | NM_001069    | TUBB2A         |
| A_19_P00330076 | 5,84646 | 5,0224  | 1,770381156 | N/A             | N/A       | N/A          | Inc-SIK1-5     |
| A_33_P3319401  | 6,28523 | 5,46117 | 1,770381156 | ENST00000476499 | 57584     | AK074589     | ARHGAP21       |
| A_23_P27424    | 6,4922  | 5,66818 | 1,770332071 | ENST00000598213 | 147686    | NM_133460    | ZNF418         |
| A_21_P0011814  | 10,9423 | 10,1183 | 1,770307529 | N/A             | 102724689 | N/A          | LOC102724689   |
| A_22_P00018051 | 2,22409 | 1,40013 | 1,770258446 | N/A             | N/A       | N/A          | Inc-ZNF280D-1  |
| A_33_P3303850  | 3,87952 | 3,05566 | 1,770135746 | ENST00000425020 | 137492    | AL834189     | VPS37A         |
| A_22_P00018310 | 6,78429 | 5,96048 | 1,770074399 | N/A             | N/A       | AK125571     | Inc-ZNF843-2   |
| A_22_P00001309 | 2,23936 | 1,41555 | 1,770074399 | N/A             | N/A       | N/A          | Inc-ANP32A-1   |
| A_23_P433229   | 6,54051 | 5,71685 | 1,76989037  | ENST00000454243 | 9796      | NM_014759    | PHYHIP         |
| A_22_P00020358 | 2,95235 | 2,12869 | 1,76989037  | N/A             | 100874101 | NR_046690    | HDAC11-AS1     |
| A_21_P0005138  | 2,5209  | 1,69731 | 1,769804496 | ENST00000456896 | 100507477 | NR_121622    | LOC100507477   |
| A_33_P3342195  | 2,82502 | 2,00152 | 1,769694094 | N/A             | N/A       | N/A          | N/A            |
| A_33_P3338631  | 6,41955 | 5,59613 | 1,769595964 | ENST00000396997 | 4901      | NM_006177    | NRL            |
| A_33_P3327097  | 5,99265 | 5,16927 | 1,769546901 | ENST00000370387 | 8776      | N/A          | MTMR1          |
| A_22_P00019604 | 4,5392  | 3,71583 | 1,769534635 | N/A             | N/A       | N/A          | Inc-KIF16B-1   |
| A_33_P3333527  | 11,0668 | 10,2435 | 1,769448779 | ENST00000490743 | 55154     | NM_018116    | MSTO1          |
| A_33_P3442605  | 7,19819 | 6,37509 | 1,769203498 | N/A             | 389641    | NR_033928    | LOC389641      |
| A_23_P47790    | 11,6085 | 10,7855 | 1,769080871 | ENST00000257848 | 4234      | NM_005371    | METTL1         |
| A_24_P68088    | 6,26141 | 5,43869 | 1,768737559 | ENST00000478379 | 146771    | NR_002947    | TCAM1P         |
| A_22_P00021392 | 3,60669 | 2,78401 | 1,768688519 | N/A             | N/A       | N/A          | Inc-RMI1-7     |
| A_24_P928052   | 7,34003 | 6,51738 | 1,768651741 | ENST00000374867 | 8829      | NM_003873    | NRP1           |
| A_33_P3379377  | 9,60185 | 8,77927 | 1,768565928 | ENST00000550449 | 4141      | NM_004990    | MARS           |
| A_33_P3240972  | 3,84962 | 3,02716 | 1,768418829 | ENST00000567390 | 728310    | N/A          | GOLGA6L7P      |
| A_21_P0010381  | 4,88313 | 4,06072 | 1,768357541 | ENST00000423712 | N/A       | N/A          | N/A            |
| A_19_P00804020 | 9,06563 | 8,24325 | 1,768320769 | ENST00000422965 | 7088      | NM_001303104 | TLE1           |
| A_23_P127079   | 12,2078 | 11,3855 | 1,768222715 | ENST00000278070 | 23082     | NM_015062    | PPRC1          |
| A_21_P0009831  | 6,54463 | 5,72235 | 1,768198203 | ENST00000432334 | N/A       | N/A          | N/A            |

|                |         |         |             |                 |           |              |                      |
|----------------|---------|---------|-------------|-----------------|-----------|--------------|----------------------|
| A_21_P0004190  | 3,13543 | 2,31317 | 1,768173691 | N/A             | 101928115 | XR_245297    | LOC101928115         |
| A_33_P3294917  | 3,11526 | 2,2931  | 1,768051134 | ENST00000443509 | 158471    | NM_015225    | PRUNE2               |
| A_21_P0001127  | 4,22262 | 3,40053 | 1,76796535  | ENST00000444042 | N/A       | N/A          | N/A                  |
| A_33_P3318384  | 4,05767 | 3,23572 | 1,767793794 | N/A             | N/A       | N/A          | N/A                  |
| A_21_P0012971  | 8,37318 | 7,55151 | 1,767450732 | ENST00000507290 | N/A       | N/A          | N/A                  |
| A_21_P0014453  | 3,87857 | 3,05709 | 1,767217977 | N/A             | N/A       | CA771536     | Inc-MALL-1           |
| A_23_P426944   | 3,51493 | 2,69351 | 1,767144482 | ENST00000402703 | 5083      | NM_006194    | PAX9                 |
| A_24_P928510   | 7,5401  | 6,71869 | 1,767132234 | ENST00000368814 | 117145    | NM_053055    | THEM4                |
| A_33_P3262191  | 13,4691 | 12,6477 | 1,767119985 | ENST00000268720 | 27132     | NM_014427    | CPNE7                |
| A_19_P00317616 | 2,43523 | 1,61396 | 1,766960758 | ENST00000428487 | 102724861 | XR_425525    | LOC102724861         |
| A_23_P140668   | 11,2169 | 10,3957 | 1,766875027 | ENST00000558535 | 3419      | NM_005530    | IDH3A                |
| A_23_P70991    | 12,7777 | 11,9566 | 1,766752561 | ENST00000223029 | 7965      | NM_006303    | AIMP2                |
| A_33_P3388070  | 3,57904 | 2,75798 | 1,766703577 | N/A             | N/A       | DB226000     | N/A                  |
| A_22_P00012649 | 2,23084 | 1,40987 | 1,766593367 | ENST00000419028 | N/A       | DB040628     | N/A                  |
| A_22_P00005826 | 2,30003 | 1,47934 | 1,766250538 | N/A             | N/A       | AX795355     | Inc-ERAL1-3          |
| A_23_P384650   | 3,21761 | 2,39698 | 1,766177083 | ENST00000301944 | 115861    | NM_138454    | NXNL1                |
| A_22_P00022991 | 2,44963 | 1,62911 | 1,766042424 | N/A             | N/A       | AK125265     | Inc-C17orf97-2       |
| A_19_P00330308 | 5,88524 | 5,06475 | 1,766005701 | ENST00000525292 | 157381    | BX110954     | LINC00964            |
| A_33_P3230324  | 7,57585 | 6,75543 | 1,765920016 | ENST00000354371 | 10920     | NM_198189    | COPS8                |
| A_33_P3423220  | 5,15715 | 4,33679 | 1,765846575 | ENST00000562197 | 100507050 | NM_001195528 | TPBGL                |
| A_32_P790361   | 4,39975 | 3,5795  | 1,765711941 | ENST00000473524 | 7643      | NM_007138    | ZNF90                |
| A_22_P00005186 | 2,36262 | 1,54257 | 1,765467178 | ENST00000435108 | N/A       | N/A          | N/A                  |
| A_21_P0013727  | 7,90226 | 7,08245 | 1,765173508 | N/A             | 101928413 | XR_252552    | LOC101928413         |
| A_22_P00002346 | 6,60043 | 5,78065 | 1,765136802 | N/A             | N/A       | BX109613     | Inc-C11orf96-1       |
| A_33_P3213235  | 4,51673 | 3,69704 | 1,765026691 | ENST00000620128 | 339390    | NM_198492    | CLEC4G               |
| A_24_P215475   | 8,70866 | 7,8891  | 1,764867653 | ENST00000248211 | 7556      | NM_015394    | ZNF10                |
| A_22_P00013268 | 2,451   | 1,63152 | 1,76476979  | N/A             | N/A       | N/A          | Inc-RP1-241P17.4.1-2 |
| A_23_P2942     | 2,32049 | 1,50105 | 1,764720861 | ENST00000346562 | 64067     | NM_022123    | NPAS3                |
| A_22_P00007837 | 3,94161 | 3,12217 | 1,764720861 | N/A             | N/A       | N/A          | Inc-HPS4-1           |
| A_24_P315638   | 5,27913 | 4,45971 | 1,764696397 | ENST00000389832 | 116534    | NM_001039165 | MRGPRE               |
| A_21_P0011968  | 6,77657 | 5,9572  | 1,764635239 | N/A             | N/A       | N/A          | XLOC_I2_008270       |
| A_33_P3300172  | 2,64718 | 1,82782 | 1,764623007 | N/A             | 10417     | AK124606     | SPON2                |
| A_33_P3321522  | 4,00909 | 3,18977 | 1,764574082 | ENST00000409061 | 100310846 | NM_001271700 | ANKRD61              |

|                |         |         |             |                 |           |              |                 |
|----------------|---------|---------|-------------|-----------------|-----------|--------------|-----------------|
| A_22_P00011692 | 5,93204 | 5,11276 | 1,764525158 | N/A             | N/A       | AF086543     | Inc-PDHX-1      |
| A_21_P0008357  | 4,55373 | 3,73456 | 1,764390625 | N/A             | N/A       | N/A          | Inc-C14orf118-1 |
| A_23_P307544   | 8,43482 | 7,61594 | 1,764035996 | ENST00000367033 | 5362      | NM_025179    | PLXNA2          |
| A_21_P0014182  | 2,48462 | 1,66581 | 1,763950406 | N/A             | 101927354 | AK094662     | LOC101927354    |
| A_21_P0010701  | 2,52115 | 1,70245 | 1,763815917 | N/A             | N/A       | N/A          | Inc-KCNQ4-1     |
| A_23_P415401   | 9,53618 | 8,71772 | 1,763522521 | ENST00000377126 | 687       | NM_001206    | KLF9            |
| A_33_P3328284  | 6,3748  | 5,55647 | 1,763363619 | N/A             | N/A       | N/A          | N/A             |
| A_22_P00000865 | 7,13374 | 6,31544 | 1,763326951 | N/A             | 101927609 | XR_428101    | LOC101927609    |
| A_33_P3378634  | 3,33944 | 2,52115 | 1,763314729 | ENST00000506633 | 100874259 | NR_047031    | SLC25A30-AS1    |
| A_24_P371425   | 7,40526 | 6,58715 | 1,76309474  | ENST00000346691 | 84126     | NM_032166    | ATRIP           |
| A_23_P94159    | 12,9686 | 12,1505 | 1,763082519 | ENST00000350302 | 26260     | NM_183421    | FBXO25          |
| A_22_P00013007 | 2,28481 | 1,46672 | 1,763070298 | N/A             | N/A       | N/A          | Inc-RGL4-2      |
| A_21_P0009752  | 9,80861 | 8,99058 | 1,762996976 | N/A             | N/A       | N/A          | Inc-UQCRFS1-9   |
| A_21_P0011685  | 3,31346 | 2,49558 | 1,762813683 | N/A             | N/A       | N/A          | XLOC_I2_006665  |
| A_24_P477051   | 4,58796 | 3,77028 | 1,762569322 | ENST00000603814 | N/A       | N/A          | N/A             |
| A_33_P3241884  | 4,11416 | 3,29667 | 1,762337211 | ENST00000336798 | 9672      | NM_014654    | SDC3            |
| A_22_P00011495 | 2,2078  | 1,39059 | 1,761995207 | ENST00000508923 | N/A       | N/A          | N/A             |
| A_33_P3610768  | 5,20193 | 4,38489 | 1,761787595 | ENST00000611513 | N/A       | AK124265     | N/A             |
| A_33_P3319491  | 13,1401 | 12,3232 | 1,761616638 | ENST00000337198 | 51582     | NM_015878    | AZIN1           |
| A_23_P83634    | 5,40873 | 4,59185 | 1,761592217 | ENST00000319144 | 242       | NM_001139    | ALOX12B         |
| A_33_P3268532  | 6,87219 | 6,05548 | 1,761384652 | ENST00000396973 | 5106      | NM_001018073 | PCK2            |
| A_33_P3370875  | 6,22349 | 5,40691 | 1,761225942 | N/A             | N/A       | N/A          | N/A             |
| A_33_P3342967  | 3,43464 | 2,6181  | 1,761177111 | N/A             | N/A       | N/A          | Inc-ZNF131-4    |
| A_21_P0009694  | 2,56034 | 1,74384 | 1,761128282 | ENST00000598042 | 374890    | XR_109585    | LOC374890       |
| A_22_P00018907 | 2,47072 | 1,65439 | 1,760920772 | N/A             | N/A       | N/A          | Inc-YOD1-1      |
| A_23_P315843   | 7,75999 | 6,94371 | 1,760859744 | ENST00000290231 | 57727     | NM_020967    | NCOA5           |
| A_21_P0004825  | 2,73428 | 1,91821 | 1,76060345  | N/A             | N/A       | N/A          | Inc-CDYL-3      |
| A_32_P94       | 4,76765 | 3,95185 | 1,760273984 | ENST00000287585 | 375323    | NM_198560    | LHFPL4          |
| A_21_P0011952  | 4,55676 | 3,74097 | 1,760261783 | N/A             | 101927260 | XR_244828    | LOC101927260    |
| A_32_P25050    | 11,6836 | 10,8679 | 1,760151976 | ENST00000240285 | 157506    | NM_172037    | RDH10           |
| A_23_P52531    | 10,4821 | 9,66658 | 1,759932381 | ENST00000368896 | 196792    | NM_152644    | FAM24B          |
| A_23_P252855   | 13,455  | 12,6396 | 1,759786    | ENST00000506023 | 55299     | NM_018321    | BRX1            |
| A_21_P0005189  | 5,94383 | 5,12865 | 1,759517667 | ENST00000484550 | 100507642 | NR_108064    | LOC100507642    |

|                |         |         |             |                 |           |              |                |
|----------------|---------|---------|-------------|-----------------|-----------|--------------|----------------|
| A_33_P3377190  | 2,60679 | 1,79162 | 1,759505471 | N/A             | 100131662 | AK127156     | LOC100131662   |
| A_21_P0011934  | 7,5856  | 6,77044 | 1,759493275 | ENST00000448494 | 150759    | NR_103734    | LINC00342      |
| A_23_P43810    | 7,9261  | 7,11098 | 1,759444492 | ENST00000404816 | 4052      | NM_206943    | LTBP1          |
| A_23_P102351   | 4,9346  | 4,11967 | 1,759212792 | ENST00000264249 | 9486      | NM_004854    | CHST10         |
| A_23_P217297   | 7,10229 | 6,28754 | 1,758993315 | ENST00000373165 | 7552      | NM_021998    | ZNF711         |
| A_22_P00009699 | 4,01228 | 3,19773 | 1,758749484 | ENST00000426213 | N/A       | N/A          | N/A            |
| A_23_P319633   | 2,18927 | 1,37489 | 1,758542254 | ENST00000541184 | 158866    | NM_144969    | ZDHHC15        |
| A_21_P0003685  | 2,2631  | 1,44879 | 1,758456931 | N/A             | N/A       | N/A          | Inc-SPCS3-1    |
| A_24_P914495   | 8,43394 | 7,61969 | 1,7583838   | ENST00000408948 | 2011      | NM_004954    | MARK2          |
| A_21_P0004506  | 3,09382 | 2,27962 | 1,75832286  | N/A             | N/A       | N/A          | Inc-SREK1-1    |
| A_21_P0000120  | 5,48002 | 4,66583 | 1,758310673 | ENST00000567955 | 100134444 | NM_001194958 | KCNJ18         |
| A_33_P3255664  | 3,94042 | 3,12632 | 1,758200987 | ENST00000474046 | 5087      | AK093508     | PBX1           |
| A_19_P00806450 | 3,68994 | 2,87595 | 1,758066936 | N/A             | N/A       | N/A          | XLOC_I2_003234 |
| A_33_P3259253  | 4,70057 | 3,88667 | 1,757957265 | ENST00000374481 | 940       | NM_006139    | CD28           |
| A_22_P00021924 | 3,0464  | 2,23261 | 1,757823233 | ENST00000528336 | 51585     | N/A          | PCF11          |
| A_23_P44867    | 4,33549 | 3,52171 | 1,757811049 | ENST00000449493 | 258       | NM_016519    | AMBN           |
| A_23_P101737   | 9,49892 | 8,68515 | 1,757798864 | ENST00000398665 | 84444     | NM_032482    | DOT1L          |
| A_24_P822704   | 8,30919 | 7,49546 | 1,757750129 | ENST00000344458 | 130612    | NM_001005209 | TMEM198        |
| A_23_P203743   | 7,2223  | 6,40858 | 1,757737945 | ENST00000361507 | 9846      | NM_012296    | GAB2           |
| A_33_P3288017  | 9,64698 | 8,83333 | 1,757652661 | ENST00000311180 | 201626    | NM_177966    | PDE12          |
| A_22_P00001595 | 4,3692  | 3,55557 | 1,757628295 | N/A             | N/A       | N/A          | Inc-ARNTL-1    |
| A_21_P0012407  | 11,7969 | 10,9833 | 1,757591746 | ENST00000558353 | 8669      | NM_003758    | EIF3J          |
| A_21_P0013797  | 6,074   | 5,26051 | 1,757457742 | N/A             | 100272228 | N/A          | LINC00894      |
| A_21_P0000846  | 10,0756 | 9,26228 | 1,757250664 | N/A             | 100505839 | NR_038940    | SH3PXD2A-AS1   |
| A_24_P156886   | 9,60978 | 8,79652 | 1,757177583 | ENST00000331314 | 83479     | NM_001031725 | DDX59          |
| A_24_P156288   | 8,90026 | 8,08701 | 1,757165404 | ENST00000377051 | 64412     | NM_022482    | GZF1           |
| A_33_P3256785  | 13,1279 | 12,3147 | 1,757104506 | ENST00000586221 | 10498     | NM_199141    | CARM1          |
| A_32_P48615    | 8,67171 | 7,85865 | 1,756934004 | N/A             | N/A       | N/A          | N/A            |
| A_33_P3392921  | 9,29121 | 8,47824 | 1,756824404 | ENST00000533931 | 2017      | NM_001184740 | CTTN           |
| A_21_P0001174  | 2,16614 | 1,35327 | 1,756702634 | N/A             | N/A       | N/A          | Inc-PPIAL4G-7  |
| A_23_P114405   | 13,2417 | 12,429  | 1,756495645 | ENST00000441076 | 9643      | NM_012286    | MORF4L2        |
| A_33_P3349495  | 5,88953 | 5,0769  | 1,756410422 | ENST00000437686 | 252948    | NR_001552    | TTY16          |
| A_33_P3253239  | 5,88352 | 5,07097 | 1,756313028 | N/A             | N/A       | N/A          | N/A            |

|                |         |         |             |                 |           |              |                      |
|----------------|---------|---------|-------------|-----------------|-----------|--------------|----------------------|
| A_23_P22224    | 15,3769 | 14,5645 | 1,75613043  | ENST00000338825 | 1978      | NM_004095    | EIF4EBP1             |
| A_23_P62953    | 7,83783 | 7,02543 | 1,75613043  | ENST00000367897 | 5087      | NM_002585    | PBX1                 |
| A_33_P3263002  | 3,06176 | 2,24938 | 1,756106086 | ENST00000528029 | 100130348 | AK124141     | TMEM262              |
| A_23_P75609    | 8,92688 | 8,11454 | 1,756057397 | ENST00000533706 | 22897     | NM_014956    | CEP164               |
| A_22_P00016027 | 2,30475 | 1,49249 | 1,755960023 | N/A             | N/A       | BX112503     | Inc-TGFB3-1          |
| A_24_P386323   | 12,842  | 12,0298 | 1,755886996 | ENST00000373538 | 10244     | NM_005833    | RABEPK               |
| A_23_P77043    | 5,27126 | 4,4591  | 1,755838313 | ENST00000256343 | 79820     | NM_024764    | CATSPERB             |
| A_24_P49260    | 9,85334 | 9,04124 | 1,755765291 | ENST00000399002 | 55304     | NM_018327    | SPTLC3               |
| A_24_P350245   | 8,89774 | 8,08565 | 1,755753121 | ENST00000481100 | 80005     | NM_024940    | DOCK5                |
| A_33_P3238969  | 2,2781  | 1,46608 | 1,755667934 | ENST00000382349 | 390874    | NM_001080488 | ONECUT3              |
| A_21_P0014019  | 6,23923 | 5,42722 | 1,755655764 | N/A             | 3957      | AK130682     | LGALS2               |
| A_24_P288448   | 5,24752 | 4,43565 | 1,755485403 | ENST00000478553 | 9770      | BC110385     | RASSF2               |
| A_21_P0007126  | 6,80922 | 5,99749 | 1,755315058 | ENST00000511677 | N/A       | N/A          | N/A                  |
| A_24_P257971   | 9,19479 | 8,38313 | 1,755229891 | ENST00000300456 | 10999     | NM_005094    | SLC27A4              |
| A_33_P3220728  | 9,62076 | 8,8091  | 1,755229891 | ENST00000349384 | 6239      | NM_001003699 | RREB1                |
| A_21_P0013640  | 2,95082 | 2,13924 | 1,755132563 | N/A             | N/A       | N/A          | XLOC_I2_015200       |
| A_21_P0010047  | 4,12467 | 3,31325 | 1,754937924 | N/A             | N/A       | N/A          | Inc-SULF2-3          |
| A_21_P0008617  | 4,47993 | 3,66854 | 1,754901431 | N/A             | N/A       | N/A          | Inc-THBS1-2          |
| A_22_P00015303 | 4,82395 | 4,01256 | 1,754901431 | N/A             | 101929639 | NR_108110    | B4GALT1-AS1          |
| A_33_P3375002  | 5,30511 | 4,49375 | 1,75486494  | N/A             | 144481    | NR_038263    | SOCS2-AS1            |
| A_33_P3423504  | 3,42346 | 2,61218 | 1,754767632 | ENST00000400004 | 645864    | NM_001277307 | MAGEB17              |
| A_22_P00015794 | 2,64035 | 1,82919 | 1,75462168  | N/A             | N/A       | AK055171     | Inc-TARDBP-1         |
| A_22_P00013329 | 4,60939 | 3,79835 | 1,754475741 | N/A             | N/A       | BX094565     | Inc-RP11-124K4.2.1-3 |
| A_23_P156209   | 12,8644 | 12,0534 | 1,754427097 | ENST00000308683 | 90441     | NM_033414    | ZNF622               |
| A_21_P0014864  | 5,44413 | 4,63314 | 1,754414937 | N/A             | N/A       | N/A          | N/A                  |
| A_23_P322395   | 4,92191 | 4,11108 | 1,754220377 | ENST00000282326 | 284312    | NM_182572    | ZSCAN1               |
| A_22_P00011295 | 2,43591 | 1,62511 | 1,754183899 | N/A             | N/A       | N/A          | Inc-ORC3-1           |
| A_21_P0005059  | 2,16537 | 1,35457 | 1,754183899 | N/A             | N/A       | N/A          | Inc-MOXD1-1          |
| A_22_P00002629 | 2,32818 | 1,51759 | 1,753928577 | N/A             | 101929757 | XR_246325    | LOC101929757         |
| A_21_P0014807  | 2,71666 | 1,90625 | 1,753709759 | N/A             | 101928729 | XR_253640    | LOC101928729         |
| A_33_P3326285  | 17,1271 | 16,3168 | 1,753576051 | ENST00000454068 | 60674     | NR_002578    | GAS5                 |
| A_21_P0011855  | 3,92243 | 3,11218 | 1,753515277 | N/A             | 101928243 | N/A          | DARS-AS1             |
| A_33_P3217213  | 10,9908 | 10,1807 | 1,75333297  | ENST00000486828 | 9260      | NM_005451    | PDLIM7               |



|                |         |         |             |                 |           |              |              |
|----------------|---------|---------|-------------|-----------------|-----------|--------------|--------------|
| A_24_P314681   | 4,75069 | 3,94067 | 1,753235747 | ENST00000446589 | N/A       | N/A          | N/A          |
| A_21_P0012562  | 2,23422 | 1,42426 | 1,753162834 | ENST00000458224 | N/A       | XR_431672    | N/A          |
| A_22_P00014879 | 2,40013 | 1,59027 | 1,753041318 | N/A             | N/A       | N/A          | Inc-SLC6A4-3 |
| A_22_P00015995 | 5,7134  | 4,90366 | 1,75289551  | ENST00000473055 | 113419    | NM_144582    | TEX261       |
| A_21_P0014343  | 2,44111 | 1,63168 | 1,752518896 | N/A             | N/A       | N/A          | N/A          |
| A_23_P171359   | 9,68325 | 8,87386 | 1,752470307 | ENST00000371825 | 54521     | NM_019045    | WDR44        |
| A_33_P3402284  | 2,18346 | 1,3742  | 1,7523124   | ENST00000439707 | 121838    | N/A          | LINC00284    |
| A_23_P254212   | 7,55953 | 6,75027 | 1,7523124   | ENST00000373040 | 29935     | NM_013347    | RPA4         |
| A_23_P1641     | 9,84843 | 9,03926 | 1,752203089 | ENST00000533277 | 9986      | NM_005133    | RCE1         |
| A_22_P00015532 | 3,15629 | 2,34723 | 1,752069495 | N/A             | N/A       | N/A          | Inc-STK24-1  |
| A_21_P0001767  | 2,41302 | 1,60397 | 1,752057351 | N/A             | 348751    | N/A          | FTCDNL1      |
| A_23_P28057    | 14,4822 | 13,6732 | 1,75199663  | ENST00000589087 | 7064      | NM_003249    | THOP1        |
| A_33_P3351955  | 7,19043 | 6,38143 | 1,75199663  | ENST00000342916 | 1956      | NM_201282    | EGFR         |
| A_33_P3358403  | 12,9282 | 12,1193 | 1,751875195 | ENST00000481053 | 728489    | NM_001080849 | DNLZ         |
| A_21_P0001901  | 2,24268 | 1,43379 | 1,751863052 | ENST00000438897 | N/A       | N/A          | N/A          |
| A_24_P917819   | 7,8445  | 7,03566 | 1,751802338 | ENST00000452011 | 149992    | NR_026916    | ANKRD30BP2   |
| A_23_P203420   | 12,579  | 11,7706 | 1,751268147 | ENST00000278823 | 9219      | NM_004739    | MTA2         |
| A_19_P00321076 | 8,59592 | 7,78758 | 1,751195315 | ENST00000613916 | 5820      | NR_003367    | PVT1         |
| A_33_P3271930  | 7,63046 | 6,8224  | 1,750855474 | ENST00000581271 | 5831      | NM_153824    | PYCR1        |
| A_32_P497434   | 6,75786 | 5,94984 | 1,750806931 | N/A             | N/A       | AB000466     | Inc-ADD1-1   |
| A_22_P00016859 | 5,30361 | 4,49559 | 1,750806931 | N/A             | N/A       | DA498238     | Inc-TRPT1-2  |
| A_21_P0008466  | 2,37146 | 1,5635  | 1,750734118 | N/A             | N/A       | N/A          | Inc-ALKBH1-1 |
| A_22_P00001812 | 2,2503  | 1,44252 | 1,750515699 | ENST00000517994 | N/A       | DA072126     | N/A          |
| A_21_P0002686  | 2,26035 | 1,45268 | 1,750382234 | N/A             | N/A       | N/A          | Inc-ZSWIM2-7 |
| A_33_P3393796  | 11,8243 | 11,0168 | 1,750175989 | ENST00000261249 | 57570     | NM_020810    | TRMT5        |
| A_23_P78383    | 9,62665 | 8,81939 | 1,749884863 | ENST00000592682 | 29919     | NM_013326    | C18orf8      |
| A_23_P105368   | 6,67802 | 5,87078 | 1,749860604 | N/A             | N/A       | AK001057     | N/A          |
| A_21_P0008604  | 2,25155 | 1,44431 | 1,749860604 | N/A             | N/A       | N/A          | Inc-GABRA5-2 |
| A_33_P3360917  | 7,02477 | 6,21768 | 1,749678677 | ENST00000361565 | 55705     | NM_018085    | IPO9         |
| A_33_P3230414  | 5,06861 | 4,26189 | 1,749230004 | ENST00000354377 | 342132    | NM_001004309 | ZNF774       |
| A_23_P21706    | 12,8238 | 12,0173 | 1,74896328  | ENST00000372621 | 1503      | NM_001905    | CTPS1        |
| A_24_P289299   | 3,39922 | 2,59282 | 1,748842056 | ENST00000466399 | 115557    | NM_182947    | ARHGEF25     |
| A_22_P00012840 | 3,84705 | 3,04066 | 1,748829934 | N/A             | 101929423 | NR_109940    | MEF2C-AS1    |

|                |         |         |             |                 |           |              |                |
|----------------|---------|---------|-------------|-----------------|-----------|--------------|----------------|
| A_24_P225635   | 6,70277 | 5,8964  | 1,74880569  | ENST00000449105 | 92906     | XR_427000    | HNRNPLL        |
| A_22_P00012338 | 2,51346 | 1,70735 | 1,748490551 | N/A             | 728012    | NR_038384    | MCHR2-AS1      |
| A_23_P200260   | 9,75031 | 8,94427 | 1,748405716 | ENST00000462762 | 80003     | NM_014801    | PCNXL2         |
| A_33_P3318661  | 6,02827 | 5,22232 | 1,748296648 | ENST00000416496 | 144455    | NM_203394    | E2F7           |
| A_24_P182494   | 9,74456 | 8,93864 | 1,748260294 | ENST00000494642 | 11221     | NM_007207    | DUSP10         |
| A_23_P134517   | 10,2533 | 9,44738 | 1,748260294 | ENST00000395699 | 5814      | NM_033224    | PURB           |
| A_22_P00005821 | 3,76144 | 2,95565 | 1,748102767 | N/A             | N/A       | N/A          | Inc-EPST11-1   |
| A_22_P00017227 | 3,24798 | 2,44222 | 1,748066416 | N/A             | N/A       | AK311005     | Inc-ULK4-1     |
| A_33_P3241051  | 4,67993 | 3,8743  | 1,747908907 | N/A             | 170691    | NM_139057    | ADAMTS17       |
| A_21_P0001462  | 2,97986 | 2,17431 | 1,747811985 | N/A             | N/A       | N/A          | Inc-NPHP4-3    |
| A_23_P402000   | 6,59547 | 5,79008 | 1,747618157 | ENST00000356178 | 84503     | NM_032453    | ZNF527         |
| A_23_P5211     | 6,81899 | 6,01371 | 1,747484913 | ENST00000601404 | 94025     | NM_024690    | MUC16          |
| A_24_P393372   | 8,71476 | 7,90966 | 1,747266899 | ENST00000447393 | 23241     | NM_001100913 | PACS2          |
| A_33_P3389693  | 5,07845 | 4,27337 | 1,747242677 | N/A             | N/A       | XM_003846298 | Inc-GABPA-4    |
| A_33_P3273230  | 7,72507 | 6,92004 | 1,747182123 | ENST00000368987 | 84072     | NM_032132    | HORMAD1        |
| A_23_P34031    | 2,52741 | 1,72245 | 1,747097351 | ENST00000286049 | 9502      | NM_130777    | XAGE2          |
| A_24_P342086   | 7,41051 | 6,60564 | 1,746988365 | N/A             | 11060     | NM_001270455 | WWP2           |
| A_33_P3278205  | 7,03424 | 6,22938 | 1,746976256 | N/A             | 100499183 | NR_109954    | BAALC-AS1      |
| A_21_P0014323  | 3,86401 | 3,05918 | 1,746939929 | N/A             | N/A       | N/A          | Inc-BCKDK-1    |
| A_21_P0008051  | 7,36916 | 6,56436 | 1,746903603 | ENST00000441430 | N/A       | N/A          | N/A            |
| A_21_P0001367  | 3,97801 | 3,17324 | 1,746867277 | N/A             | N/A       | N/A          | Inc-WDR3-2     |
| A_23_P258310   | 2,269   | 1,4643  | 1,746782521 | ENST00000356297 | 137902    | NM_144651    | PXDNL          |
| A_33_P3326662  | 3,4165  | 2,61181 | 1,746770413 | N/A             | N/A       | AK124238     | Inc-PDGFB-2    |
| A_21_P0009728  | 3,44744 | 2,64287 | 1,746625127 | N/A             | N/A       | N/A          | Inc-CD33-1     |
| A_23_P92202    | 8,56415 | 7,75962 | 1,746576701 | ENST00000308388 | 29925     | NM_021971    | GMPPB          |
| A_33_P3211263  | 11,1292 | 10,3248 | 1,746419325 | ENST00000368232 | 54865     | NM_182679    | GPATCH4        |
| A_22_P00012642 | 3,28666 | 2,48228 | 1,746395115 | ENST00000522627 | 101927766 | NR_109891    | LOC101927766   |
| A_33_P3214665  | 6,39565 | 5,59162 | 1,745971488 | ENST00000360351 | 4133      | NM_002374    | MAP2           |
| A_22_P00008754 | 2,74024 | 1,93625 | 1,74592308  | ENST00000418358 | N/A       | N/A          | N/A            |
| A_32_P109036   | 6,31398 | 5,51006 | 1,74583837  | ENST00000355504 | 284443    | NM_001076678 | ZNF493         |
| A_21_P0011064  | 2,80616 | 2,00233 | 1,745729462 | N/A             | N/A       | N/A          | XLOC_I2_003139 |
| A_21_P0000158  | 6,85473 | 6,0509  | 1,745729462 | ENST00000482652 | 63929     | NM_001204827 | XPNPEP3        |
| A_21_P0003262  | 2,23631 | 1,4325  | 1,745705261 | N/A             | N/A       | N/A          | Inc-NAALADL2-2 |

|                |         |         |             |                 |           |              |                      |
|----------------|---------|---------|-------------|-----------------|-----------|--------------|----------------------|
| A_33_P3705884  | 10,6721 | 9,86832 | 1,745668961 | ENST00000561521 | 148189    | AK094188     | LINC00662            |
| A_22_P00016216 | 3,20564 | 2,40215 | 1,745318094 | N/A             | 654841    | NR_102371    | LOC654841            |
| A_33_P3282434  | 9,37444 | 8,571   | 1,745257607 | ENST00000538576 | 6566      | NM_001166496 | SLC16A1              |
| A_33_P3314146  | 8,62799 | 7,82467 | 1,745112447 | ENST00000333396 | 84864     | NM_001042533 | MINA                 |
| A_33_P3394978  | 6,15981 | 5,3565  | 1,745100351 | ENST00000532706 | 100128239 | NR_027276    | LOC100128239         |
| A_33_P3245243  | 3,13133 | 2,32818 | 1,744906824 | N/A             | N/A       | N/A          | N/A                  |
| A_24_P282547   | 7,62699 | 6,82388 | 1,744858445 | ENST00000251424 | 10877     | NM_006684    | CFHR4                |
| A_21_P0005794  | 8,02695 | 7,22384 | 1,744858445 | N/A             | N/A       | N/A          | Inc-PRAGMIN.1-3      |
| A_33_P3412438  | 5,47355 | 4,67065 | 1,744604481 | N/A             | N/A       | N/A          | N/A                  |
| A_21_P0011939  | 7,73765 | 6,93479 | 1,744556111 | ENST00000431244 | N/A       | N/A          | N/A                  |
| A_22_P00013746 | 2,82072 | 2,01791 | 1,74449565  | N/A             | N/A       | BG207661     | Inc-RP11-863N1.2.1-2 |
| A_21_P0011337  | 5,27938 | 4,47658 | 1,744483558 | N/A             | N/A       | N/A          | XLOC_I2_004771       |
| A_23_P60517    | 9,27105 | 8,46831 | 1,744411008 | ENST00000396366 | 2395      | NM_181425    | FXN                  |
| A_23_P42588    | 2,4292  | 1,62655 | 1,74430219  | ENST00000479556 | 55340     | NM_018384    | GIMAP5               |
| A_33_P3296807  | 6,71359 | 5,91104 | 1,744181288 | N/A             | 55869     | NM_001166419 | HDAC8                |
| A_24_P381975   | 5,40798 | 4,60549 | 1,744108751 | ENST00000570006 | 79583     | NM_001077416 | TMEM231              |
| A_33_P3258041  | 6,8759  | 6,07344 | 1,744072484 | ENST00000358966 | 9453      | NM_001037277 | GGPS1                |
| A_32_P168464   | 10,2193 | 9,41686 | 1,744048306 | ENST00000421587 | 8573      | NM_003688    | CASK                 |
| A_21_P0009048  | 2,64364 | 1,84121 | 1,744036217 | N/A             | N/A       | N/A          | Inc-TK2-5            |
| A_23_P429092   | 6,87047 | 6,06805 | 1,744024129 | ENST00000367822 | 10767     | NM_001145207 | HBS1L                |
| A_21_P0011026  | 2,59742 | 1,79511 | 1,743891159 | ENST00000529938 | 283140    | N/A          | LOC283140            |
| A_22_P00020037 | 2,79338 | 1,99115 | 1,743794459 | N/A             | N/A       | N/A          | Inc-ZPBP-1           |
| A_23_P95930    | 14,1551 | 13,3529 | 1,743758199 | ENST00000403681 | 8091      | NM_003483    | HMGA2                |
| A_24_P122137   | 10,702  | 9,89983 | 1,743721938 | ENST00000249075 | 3976      | NM_002309    | LIF                  |
| A_22_P00017729 | 4,17703 | 3,3749  | 1,743673593 | ENST00000441136 | 55857     | BC039296     | KIZ                  |
| A_22_P00010303 | 5,57311 | 4,77098 | 1,743673593 | N/A             | N/A       | N/A          | Inc-MTX1-1           |
| A_33_P3415086  | 7,41605 | 6,61401 | 1,74356482  | ENST00000442518 | N/A       | N/A          | N/A                  |
| A_22_P00016306 | 3,23452 | 2,43249 | 1,743552735 | ENST00000535247 | N/A       | N/A          | N/A                  |
| A_24_P339858   | 2,45901 | 1,65701 | 1,743516479 | N/A             | 114043    | NR_026547    | TSPEAR-AS2           |
| A_22_P00022232 | 11,992  | 11,1902 | 1,743274793 | ENST00000381750 | 10171     | NM_005772    | RCL1                 |
| A_33_P3261328  | 6,67971 | 5,87801 | 1,743153963 | ENST00000368799 | 2312      | NM_002016    | FLG                  |
| A_32_P109604   | 5,35447 | 4,55323 | 1,742598251 | ENST00000624291 | 100874392 | NR_046228    | ANKRD20A12P          |
| A_33_P3209351  | 12,7039 | 11,9027 | 1,742549936 | ENST00000375627 | 3376      | NM_013417    | IARS                 |

|                |         |         |             |                 |           |              |               |
|----------------|---------|---------|-------------|-----------------|-----------|--------------|---------------|
| A_21_P0001762  | 2,56412 | 1,76297 | 1,742489545 | ENST00000431139 | 100506929 | XR_247111    | LOC100506929  |
| A_33_P3371493  | 10,0771 | 9,27597 | 1,742465389 | ENST00000361337 | 7150      | NM_003286    | TOP1          |
| A_23_P208937   | 5,11335 | 4,31222 | 1,742465389 | ENST00000497878 | 79816     | NM_024760    | TLE6          |
| A_21_P0004856  | 4,39075 | 3,58975 | 1,742308384 | N/A             | N/A       | N/A          | Inc-GMNN-1    |
| A_22_P00008547 | 2,2551  | 1,45413 | 1,742272154 | N/A             | N/A       | N/A          | Inc-KCNMB1-3  |
| A_33_P3239579  | 2,70582 | 1,90496 | 1,742139318 | ENST00000419531 | 100131060 | NR_034014    | LINC01135     |
| A_24_P943113   | 4,41022 | 3,60957 | 1,741885749 | ENST00000295612 | 317649    | NM_173359    | EIF4E3        |
| A_33_P3245412  | 8,3379  | 7,5373  | 1,741825381 | ENST00000297994 | 158234    | NM_144964    | TRMT10B       |
| A_23_P306919   | 12,6932 | 11,8927 | 1,741704651 | ENST00000370409 | 541578    | NM_001013845 | CXorf40B      |
| A_33_P3314857  | 4,36433 | 3,56418 | 1,741282162 | ENST00000410029 | 3769      | NM_002242    | KCNJ13        |
| A_22_P00014433 | 5,15532 | 4,3552  | 1,741245953 | ENST00000509924 | 101928741 | XR_241805    | LOC101928741  |
| A_23_P401568   | 13,3789 | 12,579  | 1,740980447 | ENST00000306434 | 4144      | NM_005911    | MAT2A         |
| A_23_P128744   | 9,77679 | 8,97703 | 1,740811509 | ENST00000611804 | 623       | NM_000710    | BDKRB1        |
| A_33_P3254191  | 8,63644 | 7,83672 | 1,740763244 | ENST00000261183 | 114882    | NM_020841    | OSBPL8        |
| A_21_P0004339  | 2,24021 | 1,44068 | 1,740534004 | N/A             | N/A       | N/A          | Inc-BNIP1-3   |
| A_33_P3356816  | 2,61218 | 1,81295 | 1,740172108 | ENST00000360090 | 353132    | NM_178349    | LCE1B         |
| A_21_P0002564  | 2,50991 | 1,71068 | 1,740172108 | N/A             | N/A       | N/A          | Inc-TPO-2     |
| A_21_P0000483  | 4,71741 | 3,91819 | 1,740160046 | N/A             | 692195    | NR_003941    | SNORD75       |
| A_21_P0003979  | 6,59388 | 5,79483 | 1,739955007 | N/A             | N/A       | N/A          | Inc-C5orf17-4 |
| A_23_P78795    | 3,99758 | 3,19856 | 1,739918826 | ENST00000561204 | 56917     | NM_001009813 | MEIS3         |
| A_21_P0010093  | 4,23626 | 3,4373  | 1,739846466 | N/A             | N/A       | N/A          | Inc-NCOA3-9   |
| A_24_P402784   | 4,0748  | 3,27585 | 1,739834406 | ENST00000439524 | 10991     | NM_006841    | SLC38A3       |
| A_22_P00008336 | 3,84464 | 3,04571 | 1,739810287 | ENST00000555299 | 101929002 | XR_245809    | LOC101929002  |
| A_21_P0014380  | 7,06593 | 6,267   | 1,739810287 | ENST00000588040 | N/A       | XR_109525    | N/A           |
| A_22_P00004271 | 2,59428 | 1,79542 | 1,739725873 | N/A             | N/A       | DB205159     | Inc-CNBD1-4   |
| A_33_P3335391  | 5,42789 | 4,62906 | 1,739689697 | ENST00000345041 | 644815    | NM_001039999 | FAM83G        |
| A_23_P79911    | 12,07   | 11,2713 | 1,739532942 | ENST00000333082 | 9491      | NM_006814    | PSMF1         |
| A_33_P3298326  | 3,38066 | 2,58215 | 1,739303864 | ENST00000417547 | 2488      | NM_000510    | FSHB          |
| A_22_P00011208 | 2,75232 | 1,95421 | 1,738821694 | N/A             | N/A       | N/A          | Inc-OLR1-2    |
| A_23_P43276    | 5,38426 | 4,58615 | 1,738821694 | ENST00000412232 | 25960     | NM_032777    | GPR124        |
| A_23_P365060   | 6,16472 | 5,36663 | 1,738797589 | ENST00000369393 | 23195     | NM_014611    | MDN1          |
| A_23_P141345   | 10,6785 | 9,88044 | 1,738761432 | ENST00000398389 | 4356      | NM_001932    | MPP3          |
| A_23_P62276    | 10,595  | 9,79695 | 1,73874938  | ENST00000482407 | 79576     | NM_024528    | NKAP          |

|                |         |         |             |                 |           |              |              |
|----------------|---------|---------|-------------|-----------------|-----------|--------------|--------------|
| A_19_P00322941 | 2,61727 | 1,81924 | 1,738725276 | ENST00000518014 | 728264    | N/A          | MIR143HG     |
| A_23_P1029     | 8,55831 | 7,76029 | 1,738713224 | ENST00000490075 | 4237      | NM_017459    | MFAP2        |
| A_24_P38347    | 8,04983 | 7,25193 | 1,738568608 | ENST00000521913 | 1808      | NM_001386    | DPYSL2       |
| A_33_P3248203  | 2,95602 | 2,15819 | 1,738484254 | ENST00000592091 | 2527      | NM_002034    | FUT5         |
| A_33_P3331992  | 5,67327 | 4,8757  | 1,738170975 | N/A             | N/A       | N/A          | N/A          |
| A_33_P3239736  | 8,38385 | 7,5863  | 1,738146879 | ENST00000371822 | 54521     | NM_019045    | WDR44        |
| A_23_P502750   | 6,45408 | 5,65656 | 1,738110736 | ENST00000393412 | 4193      | NM_002392    | MDM2         |
| A_23_P327605   | 3,79878 | 3,00139 | 1,737954123 | ENST00000392607 | 84435     | NM_001083909 | GPR123       |
| A_24_P944991   | 6,26858 | 5,47138 | 1,737725253 | ENST00000513458 | 285672    | NM_173829    | SREK1IP1     |
| A_21_P0006417  | 2,46974 | 1,67269 | 1,737544588 | ENST00000423914 | N/A       | N/A          | N/A          |
| A_33_P3415092  | 8,26592 | 7,46916 | 1,737195355 | ENST00000376088 | 1184      | NM_001127899 | CLCN5        |
| A_32_P198325   | 9,57786 | 8,78118 | 1,737099027 | ENST00000460524 | 388886    | NM_207644    | LRRC75B      |
| A_21_P0012327  | 8,4336  | 7,63706 | 1,736930466 | ENST00000458623 | N/A       | N/A          | N/A          |
| A_33_P3361257  | 13,3925 | 12,596  | 1,736882308 | ENST00000613081 | 51491     | NM_016391    | NOP16        |
| A_33_P3238671  | 8,19094 | 7,39453 | 1,736773959 | ENST00000378979 | 149840    | XM_006723549 | C2orf196     |
| A_23_P20122    | 8,85517 | 8,05904 | 1,736436917 | ENST00000471652 | 56829     | NM_024625    | ZC3HAV1      |
| A_24_P237270   | 4,60647 | 3,81042 | 1,736340631 | ENST00000358654 | 135       | NM_000675    | ADORA2A      |
| A_19_P00805523 | 4,1551  | 3,35917 | 1,736196212 | ENST00000606459 | 100505738 | N/A          | MIR4458HG    |
| A_23_P203558   | 3,34685 | 2,55108 | 1,736003673 | ENST00000335295 | 3043      | NM_000518    | HBB          |
| A_22_P00023843 | 3,65587 | 2,86011 | 1,73599164  | N/A             | N/A       | AK092036     | Inc-CUBN-1   |
| A_33_P3307008  | 3,33962 | 2,54399 | 1,735835218 | N/A             | 643677    | NM_001146197 | CCDC168      |
| A_21_P0014589  | 9,0177  | 8,22227 | 1,735594597 | N/A             | 101929112 | XR_246129    | LOC101929112 |
| A_21_P0000087  | 8,34217 | 7,54683 | 1,735486328 | N/A             | 79648     | NM_001172574 | MCPH1        |
| A_23_P90311    | 12,8568 | 12,0617 | 1,735197645 | ENST00000248244 | 148022    | NM_182919    | TICAM1       |
| A_21_P0004969  | 2,84978 | 2,05471 | 1,735161563 | N/A             | 100861523 | N/A          | RPS6KA2-AS1  |
| A_23_P430842   | 2,25256 | 1,45751 | 1,735137509 | ENST00000291481 | 404037    | NM_023002    | HAPLN4       |
| A_33_P3269049  | 2,84954 | 2,05452 | 1,735101428 | ENST00000416620 | N/A       | N/A          | N/A          |
| A_33_P3255531  | 4,87986 | 4,08492 | 1,735005216 | ENST00000530210 | 100129216 | NM_001242853 | LOC100129216 |
| A_23_P108280   | 9,02845 | 8,23356 | 1,734945086 | ENST00000324632 | 66002     | NM_023944    | CYP4F12      |
| A_22_P00020983 | 2,31831 | 1,52346 | 1,734896984 | N/A             | N/A       | N/A          | Inc-SPATA9-1 |
| A_32_P486620   | 6,51536 | 5,7206  | 1,734788759 | ENST00000319338 | 283284    | NM_173588    | IGSF22       |
| A_24_P323072   | 5,34641 | 4,55168 | 1,734752685 | ENST00000380346 | 2797      | NM_178332    | GNRH2        |
| A_24_P228579   | 11,6191 | 10,8245 | 1,734596375 | ENST00000463598 | 79133     | NM_024120    | NDUFAF5      |

|               |         |         |             |                 |           |              |                |
|---------------|---------|---------|-------------|-----------------|-----------|--------------|----------------|
| A_24_P225679  | 10,3982 | 9,60366 | 1,734524237 | ENST00000305123 | 3667      | NM_005544    | IRS1           |
| A_33_P3591810 | 2,86092 | 2,06644 | 1,734452102 | ENST00000459691 | N/A       | AF119858     | N/A            |
| A_21_P0010405 | 6,13363 | 5,33916 | 1,734440079 | N/A             | 102724827 | NR_110543    | MIATNB         |
| A_23_P19004   | 11,6877 | 10,8933 | 1,734355926 | ENST00000467963 | 65980     | NM_023924    | BRD9           |
| A_21_P0011692 | 6,32265 | 5,52831 | 1,734283798 | N/A             | N/A       | N/A          | XLOC_I2_006718 |
| A_21_P0007773 | 4,51438 | 3,7202  | 1,73409147  | N/A             | N/A       | N/A          | Inc-TAOK3-7    |
| A_33_P3395675 | 6,91377 | 6,11964 | 1,734031372 | ENST00000390323 | N/A       | AB776856     | N/A            |
| A_33_P3309039 | 12,9473 | 12,1533 | 1,733875127 | ENST00000439958 | 79869     | NM_024811    | CPSF7          |
| A_21_P0008784 | 4,93365 | 4,13981 | 1,733682845 | ENST00000557545 | 400451    | XR_243234    | FAM174B        |
| A_33_P3233995 | 2,38442 | 1,59061 | 1,733646794 | N/A             | N/A       | N/A          | N/A            |
| A_33_P3381328 | 8,48142 | 7,68779 | 1,733430507 | N/A             | 158228    | NR_027294    | FAM201A        |
| A_33_P3238052 | 10,8659 | 10,0723 | 1,733394461 | ENST00000547539 | 29902     | NM_013300    | FAM216A        |
| A_33_P3275174 | 3,17961 | 2,38607 | 1,733322373 | ENST00000400156 | 100131980 | NM_001164457 | ZNF705G        |
| A_33_P3209895 | 10,3759 | 9,58243 | 1,733238274 | ENST00000428076 | 92002     | NM_001130997 | FAM58A         |
| A_21_P0009496 | 2,39897 | 1,60556 | 1,733166192 | N/A             | N/A       | N/A          | Inc-SOCS6-3    |
| A_33_P3395952 | 5,89864 | 5,10539 | 1,732973988 | ENST00000479501 | 57642     | NM_020882    | COL20A1        |
| A_23_P419714  | 11,0022 | 10,209  | 1,732913929 | ENST00000280758 | 121551    | NM_001018072 | BTBD11         |
| A_21_P0011080 | 2,7758  | 1,98271 | 1,732781806 | N/A             | N/A       | N/A          | XLOC_I2_003285 |
| A_23_P115011  | 8,44995 | 7,65691 | 1,732721753 | ENST00000369039 | 54507     | NM_019032    | ADAMTSL4       |
| A_24_P383356  | 4,1556  | 3,3627  | 1,732553617 | ENST00000240095 | 23516     | NM_015359    | SLC39A14       |
| A_21_P0002740 | 2,53012 | 1,73723 | 1,732541608 | N/A             | 100506637 | NR_109996    | PRKAR2A-AS1    |
| A_23_P120845  | 14,8383 | 14,0456 | 1,732313451 | ENST00000611155 | 7494      | NM_005080    | XBP1           |
| A_24_P148907  | 4,26931 | 3,47686 | 1,73201329  | ENST00000317605 | 10586     | NM_006439    | MAB21L2        |
| A_23_P99076   | 8,64488 | 7,85267 | 1,731725184 | ENST00000381847 | 5555      | NM_005042    | PRH2           |
| A_24_P40094   | 2,3888  | 1,59689 | 1,731365119 | ENST00000597739 | 85300     | NM_033064    | ATCAY          |
| A_33_P3343290 | 7,07846 | 6,28668 | 1,731209115 | ENST00000354300 | 160760    | NM_139283    | PPTC7          |
| A_33_P3295985 | 2,70258 | 1,91096 | 1,731017128 | N/A             | 440570    | XR_426511    | LOC440570      |
| A_33_P3219601 | 6,64126 | 5,84982 | 1,730801169 | ENST00000504405 | 27        | NM_007314    | ABL2           |
| A_23_P17481   | 2,58554 | 1,79416 | 1,730729188 | ENST00000344754 | 6614      | NM_023068    | SIGLEC1        |
| A_21_P0003886 | 6,70624 | 5,91499 | 1,730573241 | N/A             | 101928237 | XR_241657    | LOC101928237   |
| A_33_P3322283 | 8,74755 | 7,95655 | 1,730273381 | ENST00000295748 | 64343     | NM_001271650 | AZI2           |
| A_21_P0000368 | 9,52245 | 8,73156 | 1,730141459 | ENST00000529794 | 692072    | NR_003033    | SNORD5         |
| A_33_P3210418 | 2,91874 | 2,12788 | 1,730105483 | ENST00000395643 | 125206    | NM_001282417 | SLC5A10        |

|                |         |         |             |                 |           |              |                    |
|----------------|---------|---------|-------------|-----------------|-----------|--------------|--------------------|
| A_33_P3219770  | 7,20853 | 6,41784 | 1,729901628 | ENST00000367435 | 79577     | NM_024529    | CDC73              |
| A_24_P160466   | 6,59629 | 5,80615 | 1,729242261 | ENST00000303991 | 114787    | NM_052899    | GPRIN1             |
| A_33_P3358037  | 10,0303 | 9,2403  | 1,729074463 | ENST00000522306 | N/A       | N/A          | N/A                |
| A_33_P3767927  | 12,922  | 12,132  | 1,729074463 | ENST00000231509 | 2908      | NM_001018077 | NR3C1              |
| A_22_P00000704 | 3,78425 | 2,99431 | 1,729002554 | ENST00000511579 | N/A       | N/A          | N/A                |
| A_23_P114282   | 13,9831 | 13,1932 | 1,728954616 | ENST00000371315 | 28985     | NM_014060    | MCTS1              |
| A_33_P3312104  | 5,69517 | 4,90527 | 1,728954616 | ENST00000449476 | 80169     | NM_025099    | CTC1               |
| A_21_P0008239  | 2,25191 | 1,46206 | 1,728894696 | ENST00000428761 | 100885781 | NR_047699    | LINC00348          |
| A_23_P257593   | 8,96445 | 8,17461 | 1,728882713 | ENST00000314565 | 118426    | NM_058169    | LOH12CR1           |
| A_33_P3222228  | 7,85058 | 7,06075 | 1,728870729 | ENST00000592563 | 2528      | NM_000150    | FUT6               |
| A_33_P3321205  | 8,24898 | 7,45932 | 1,72866702  | ENST00000443071 | 57596     | NM_001159531 | BEGAIN             |
| A_21_P0011300  | 2,18868 | 1,39927 | 1,72836749  | N/A             | N/A       | N/A          | XLOC_I2_004595     |
| A_21_P0001193  | 2,35105 | 1,56167 | 1,72833155  | ENST00000440404 | 284688    | NR_026957    | LINC01142          |
| A_23_P28015    | 9,96949 | 9,18011 | 1,72833155  | ENST00000301475 | 148156    | AK055494     | ZNF558             |
| A_23_P92012    | 10,8706 | 10,0813 | 1,728235714 | ENST00000284995 | 80746     | NM_025265    | TSEN2              |
| A_21_P0002236  | 2,16988 | 1,38063 | 1,728175819 | ENST00000433065 | N/A       | XR_425411    | N/A                |
| A_21_P0009023  | 4,96792 | 4,17876 | 1,728068013 | N/A             | N/A       | N/A          | Inc-AC136428.1.1-2 |
| A_21_P0005519  | 4,39326 | 3,60413 | 1,728032079 | N/A             | N/A       | N/A          | Inc-TMEM130-1      |
| A_22_P00004483 | 2,53887 | 1,74988 | 1,727864398 | ENST00000443776 | N/A       | XR_241639    | N/A                |
| A_23_P121716   | 14,1699 | 13,3814 | 1,727277642 | ENST00000505805 | 306       | NM_005139    | ANXA3              |
| A_23_P116512   | 6,09453 | 5,30619 | 1,727086092 | ENST00000389693 | 79899     | NM_024841    | PRR5L              |
| A_33_P3239936  | 2,46926 | 1,68105 | 1,726930472 | N/A             | N/A       | N/A          | N/A                |
| A_21_P0012381  | 3,36335 | 2,57514 | 1,726930472 | N/A             | N/A       | N/A          | XLOC_I2_009790     |
| A_33_P3366064  | 5,39889 | 4,61078 | 1,726810775 | ENST00000279034 | 140710    | NM_199181    | SOGA1              |
| A_32_P182394   | 7,14268 | 6,35461 | 1,726762898 | ENST00000314531 | 58492     | NM_021217    | ZNF77              |
| A_22_P00012170 | 6,67716 | 5,88913 | 1,726715023 | ENST00000580867 | 101927642 | NR_110783    | LINC01444          |
| A_33_P3345210  | 6,70372 | 5,91591 | 1,726451732 | ENST00000611774 | 727910    | NM_001164407 | TLCD2              |
| A_33_P3420247  | 4,55459 | 3,76695 | 1,726248308 | N/A             | 340515    | NR_034157    | LINC01501          |
| A_23_P142289   | 9,93217 | 9,14467 | 1,726080799 | ENST00000586180 | 2767      | NM_002067    | GNA11              |
| A_23_P400310   | 2,32879 | 1,54137 | 1,725985088 | ENST00000256585 | 83998     | NM_032044    | REG4               |
| A_21_P0003295  | 2,22811 | 1,44097 | 1,725650139 | ENST00000462528 | N/A       | N/A          | N/A                |
| A_22_P00011653 | 4,54353 | 3,75651 | 1,72550661  | N/A             | 102724626 | XR_427345    | LOC102724626       |
| A_33_P3397323  | 8,47707 | 7,69005 | 1,72550661  | ENST00000357901 | 126068    | NM_152355    | ZNF441             |

|                |         |         |             |                 |           |              |                |
|----------------|---------|---------|-------------|-----------------|-----------|--------------|----------------|
| A_23_P34107    | 11,9781 | 11,1911 | 1,725482689 | ENST00000393600 | 9130      | NM_004699    | FAM50A         |
| A_22_P00010567 | 2,84796 | 2,06101 | 1,725422889 | N/A             | N/A       | N/A          | Inc-NDE1-3     |
| A_23_P77286    | 6,81268 | 6,02575 | 1,72539897  | ENST00000256544 | 79768     | NM_024713    | KATNBL1        |
| A_24_P188377   | 12,4556 | 11,6688 | 1,725243503 | ENST00000488171 | 1604      | NM_000574    | CD55           |
| A_23_P433791   | 7,37668 | 6,58993 | 1,725183712 | ENST00000295050 | 83932     | NM_001010984 | SPRTN          |
| A_21_P0013786  | 2,47361 | 1,68686 | 1,725183712 | N/A             | N/A       | N/A          | XLOC_I2_015590 |
| A_21_P0002187  | 4,33137 | 3,54465 | 1,725147838 | N/A             | N/A       | N/A          | Inc-SLC4A1AP-1 |
| A_21_P0010893  | 9,7332  | 8,94656 | 1,725052178 | ENST00000482985 | 101060691 | NR_120612    | NUTM2B-AS1     |
| A_23_P59988    | 4,73778 | 3,95119 | 1,724992393 | ENST00000382435 | 83650     | NM_054028    | SLC35G5        |
| A_23_P35309    | 8,96396 | 8,17738 | 1,724980437 | ENST00000258281 | 27097     | NM_014409    | TAF5L          |
| A_23_P87491    | 2,18574 | 1,39922 | 1,724908698 | ENST00000398189 | 319       | NM_001638    | APOF           |
| A_23_P79999    | 12,7072 | 11,9209 | 1,724645683 | ENST00000360031 | 955       | NM_001247    | ENTPD6         |
| A_21_P0014900  | 2,30694 | 1,5209  | 1,724334898 | N/A             | N/A       | N/A          | N/A            |
| A_19_P00318517 | 5,93456 | 5,14866 | 1,724167576 | ENST00000435162 | 102724827 | NR_110543    | MIATNB         |
| A_22_P00008272 | 10,656  | 9,87022 | 1,724024169 | ENST00000559432 | 643911    | NR_110453    | CRNDE          |
| A_23_P76882    | 13,8459 | 13,0602 | 1,723928572 | ENST00000556854 | 57820     | NM_182852    | CCNB1IP1       |
| A_23_P39034    | 14,6872 | 13,9015 | 1,723928572 | ENST00000344626 | 6597      | NM_003072    | SMARCA4        |
| A_24_P282210   | 13,1372 | 12,3516 | 1,723809082 | ENST00000219611 | 6650      | NM_005632    | CAPN15         |
| A_23_P18824    | 12,2379 | 11,4524 | 1,723689601 | ENST00000230859 | 11044     | NM_006999    | PAPD7          |
| A_21_P0009433  | 5,76202 | 4,97669 | 1,723486502 | N/A             | N/A       | N/A          | Inc-USP14-5    |
| A_22_P00004151 | 4,00132 | 3,21604 | 1,723426772 | ENST00000465414 | 728276    | NM_001256720 | CLEC19A        |
| A_33_P3318796  | 10,6029 | 9,81768 | 1,723355098 | ENST00000166139 | 10272     | NM_005860    | FSTL3          |
| A_33_P3594214  | 9,13519 | 8,34998 | 1,723343153 | ENST00000400303 | 10821     | NR_044999    | OR7E12P        |
| A_22_P00016255 | 4,04726 | 3,26212 | 1,723259537 | ENST00000424155 | N/A       | AL109713     | Inc-TMED3-1    |
| A_22_P00005844 | 3,90532 | 3,12038 | 1,72302066  | ENST00000553075 | N/A       | N/A          | N/A            |
| A_33_P3325231  | 3,21003 | 2,42511 | 1,722996774 | N/A             | N/A       | N/A          | XLOC_I2_001961 |
| A_21_P0000239  | 5,6194  | 4,83455 | 1,722913175 | N/A             | 594837    | NR_002434    | SNORD101       |
| A_22_P00010531 | 2,19785 | 1,41304 | 1,722865407 | N/A             | N/A       | N/A          | Inc-NCDN-1     |
| A_23_P19115    | 10,2517 | 9,46696 | 1,722781815 | ENST00000340438 | 23708     | NM_018094    | GSPT2          |
| A_23_P90804    | 10,166  | 9,38138 | 1,722638524 | ENST00000350878 | 9448      | NM_145686    | MAP4K4         |
| A_22_P00007632 | 5,78906 | 5,00449 | 1,722578823 | N/A             | 100130855 | NR_034080    | USP3-AS1       |
| A_33_P3325763  | 2,44222 | 1,6579  | 1,722280348 | ENST00000291592 | 81543     | XR_109680    | LRR3           |
| A_22_P00001488 | 2,45078 | 1,66661 | 1,722101289 | N/A             | N/A       | AK127367     | Inc-ARFGEF2-1  |



|                |         |         |             |                 |           |              |                  |
|----------------|---------|---------|-------------|-----------------|-----------|--------------|------------------|
| A_21_P0007784  | 2,27393 | 1,48989 | 1,721946118 | ENST00000541065 | 100996671 | NR_110034    | LOC100996671     |
| A_21_P0011320  | 2,71333 | 1,92932 | 1,721910312 | N/A             | N/A       | N/A          | XLOC_I2_004640   |
| A_21_P0012566  | 2,502   | 1,71818 | 1,721683555 | ENST00000508601 | 285484    | NR_037863    | LOC285484        |
| A_21_P0014433  | 2,29532 | 1,51153 | 1,721647754 | N/A             | N/A       | N/A          | N/A              |
| A_33_P3219785  | 13,0333 | 12,2496 | 1,721540355 | ENST00000356454 | 65124     | NM_023016    | SOWAHC           |
| A_23_P29384    | 9,37137 | 8,58779 | 1,721397167 | ENST00000436624 | 91392     | NM_033210    | ZNF502           |
| A_33_P3310409  | 2,62415 | 1,84057 | 1,721397167 | N/A             | N/A       | N/A          | N/A              |
| A_23_P211196   | 5,6166  | 4,8331  | 1,721301716 | ENST00000330551 | 84536     | NR_027129    | LINC01547        |
| A_33_P3270863  | 12,0134 | 11,2299 | 1,721301716 | ENST00000379416 | 7498      | NM_000379    | XDH              |
| A_22_P00021980 | 8,18686 | 7,40338 | 1,721277853 | ENST00000438659 | N/A       | N/A          | N/A              |
| A_23_P26847    | 7,83672 | 7,05332 | 1,721182408 | ENST00000245479 | 6662      | NM_000346    | SOX9             |
| A_21_P0005614  | 4,08643 | 3,30305 | 1,721158548 | ENST00000533286 | 157381    | NR_027321    | LINC00964        |
| A_22_P00022025 | 4,78633 | 4,003   | 1,721098898 | ENST00000428035 | N/A       | N/A          | N/A              |
| A_22_P00007852 | 4,75823 | 3,97493 | 1,721063109 | ENST00000578490 | N/A       | DA924359     | N/A              |
| A_33_P3319593  | 4,78818 | 4,00492 | 1,721015392 | ENST00000311635 | 79791     | NM_024735    | FBXO31           |
| A_24_P272515   | 7,86895 | 7,08595 | 1,720705261 | ENST00000435729 | N/A       | N/A          | N/A              |
| A_24_P56330    | 4,02885 | 3,24606 | 1,720454812 | ENST00000283547 | 121793    | NM_152324    | TEX29            |
| A_33_P3340565  | 8,10435 | 7,32159 | 1,720419037 | ENST00000533518 | 339105    | NM_001039503 | PRSS53           |
| A_22_P00007103 | 2,65172 | 1,86902 | 1,720347488 | N/A             | N/A       | N/A          | Inc-GLS-1        |
| A_22_P00022335 | 2,45226 | 1,66975 | 1,720120936 | N/A             | N/A       | N/A          | Inc-AC011484.1-1 |
| A_21_P0014660  | 6,95911 | 6,1767  | 1,720001711 | N/A             | N/A       | BC108692     | N/A              |
| A_23_P202392   | 10,2467 | 9,46434 | 1,719942101 | ENST00000378325 | 79723     | NM_024670    | SUV39H2          |
| A_22_P00002737 | 7,09348 | 6,31138 | 1,719632164 | N/A             | 100507459 | NR_109990    | NRSN2-AS1        |
| A_21_P0013810  | 3,03555 | 2,25359 | 1,719465298 | N/A             | N/A       | N/A          | XLOC_I2_015700   |
| A_33_P3232993  | 11,087  | 10,3051 | 1,719393789 | ENST00000408948 | 2011      | NM_001039469 | MARK2            |
| A_23_P32078    | 2,55885 | 1,777   | 1,7193342   | ENST00000376238 | 64078     | NM_022127    | SLC28A3          |
| A_22_P00017027 | 4,38752 | 3,60572 | 1,719274614 | ENST00000555413 | N/A       | XR_429395    | N/A              |
| A_21_P0011686  | 2,36964 | 1,58787 | 1,719238863 | ENST00000597761 | 100129543 | N/A          | ZNF730           |
| A_23_P2431     | 6,49046 | 5,70869 | 1,719238863 | ENST00000307637 | 719       | NM_004054    | C3AR1            |
| A_32_P198731   | 6,14079 | 5,35903 | 1,719226946 | ENST00000369800 | 54492     | NM_001142651 | NEURL1B          |
| A_21_P0011441  | 2,71173 | 1,93006 | 1,719119699 | N/A             | N/A       | N/A          | XLOC_I2_005244   |
| A_24_P605190   | 7,95534 | 7,17373 | 1,719048204 | ENST00000419445 | 5229      | NM_005023    | PGGT1B           |
| A_22_P00006623 | 3,75213 | 2,97054 | 1,719024373 | N/A             | 101928784 | NR_120339    | RORA-AS1         |

|                |         |         |             |                 |           |              |              |
|----------------|---------|---------|-------------|-----------------|-----------|--------------|--------------|
| A_23_P6786     | 9,94191 | 9,16042 | 1,718905223 | ENST00000339437 | 51095     | AK124137     | TRNT1        |
| A_21_P0014262  | 3,92675 | 3,14542 | 1,718714601 | N/A             | 100507144 | NR_120528    | LOC100507144 |
| A_21_P0009917  | 4,24529 | 3,464   | 1,718666949 | N/A             | 101927842 | XR_244203    | LOC101927842 |
| A_22_P00023624 | 4,15764 | 3,37651 | 1,718476353 | N/A             | 100873921 | NR_046649    | SYP-AS1      |
| A_33_P3351566  | 6,08278 | 5,30165 | 1,718476353 | ENST00000335148 | 55500     | NM_001039481 | ETNK1        |
| A_21_P0000240  | 8,243   | 7,46215 | 1,718142862 | N/A             | 594838    | NR_002435    | SNORD100     |
| A_22_P00024972 | 2,76705 | 1,98623 | 1,718107134 | N/A             | N/A       | N/A          | Inc-GNAT2-1  |
| A_23_P351      | 4,13578 | 3,35501 | 1,71804759  | ENST00000349460 | 2035      | NM_203342    | EPB41        |
| A_23_P120062   | 9,33797 | 8,55721 | 1,718035682 | ENST00000541687 | 6936      | NM_003203    | GCFC2        |
| A_22_P00007394 | 4,43454 | 3,65403 | 1,717737995 | ENST00000449923 | N/A       | N/A          | N/A          |
| A_22_P00021803 | 4,17583 | 3,3954  | 1,717642746 | ENST00000564363 | N/A       | CU677578     | N/A          |
| A_33_P3371683  | 2,90223 | 2,12181 | 1,71763084  | ENST00000564895 | N/A       | N/A          | N/A          |
| A_23_P103398   | 10,772  | 9,99168 | 1,717511787 | ENST00000366783 | 5664      | NM_000447    | PSEN2        |
| A_23_P417331   | 11,0886 | 10,3083 | 1,717487977 | ENST00000379565 | 6197      | NM_004586    | RPS6KA3      |
| A_32_P24140    | 2,82485 | 2,04456 | 1,717476073 | ENST00000278187 | 2620      | NM_005256    | GAS2         |
| A_22_P00024423 | 5,69354 | 4,91329 | 1,717428455 | ENST00000581626 | N/A       | AL711312     | N/A          |
| A_33_P3400258  | 4,15221 | 3,3723  | 1,717023756 | ENST00000404473 | 142827    | NM_207321    | ACSM6        |
| A_32_P222149   | 3,02128 | 2,24139 | 1,716999953 | ENST00000382124 | 100506049 | NM_001195280 | LRRC72       |
| A_33_P3360147  | 3,18912 | 2,40926 | 1,71696425  | N/A             | N/A       | N/A          | N/A          |
| A_33_P3383687  | 4,38655 | 3,60669 | 1,71696425  | N/A             | N/A       | AK123308     | N/A          |
| A_33_P3221284  | 5,38782 | 4,60815 | 1,716738144 | ENST00000206423 | 151887    | NM_199511    | CCDC80       |
| A_21_P0009847  | 2,321   | 1,54156 | 1,716464477 | ENST00000425385 | 101060004 | NR_109942    | LINC01523    |
| A_23_P90357    | 5,29378 | 4,51438 | 1,716416887 | ENST00000375190 | 6915      | NM_001060    | TBXA2R       |
| A_33_P3592015  | 9,86542 | 9,08613 | 1,716286021 | ENST00000466976 | 22927     | NM_014282    | HABP4        |
| A_22_P00019280 | 2,76512 | 1,98585 | 1,716262229 | ENST00000412811 | N/A       | N/A          | N/A          |
| A_33_P3313110  | 3,90138 | 3,12237 | 1,715952955 | ENST00000397910 | 94025     | NM_024690    | MUC16        |
| A_23_P156788   | 6,06083 | 5,28184 | 1,715929167 | ENST00000367568 | 8676      | NM_003764    | STX11        |
| A_22_P00020525 | 2,16365 | 1,38475 | 1,715822125 | N/A             | N/A       | N/A          | Inc-STYX-1   |
| A_23_P56140    | 10,1922 | 9,41345 | 1,715643737 | ENST00000615564 | 1455      | NM_001319    | CSNK1G2      |
| A_24_P269129   | 5,1407  | 4,36201 | 1,715572387 | ENST00000518214 | 79683     | NM_153746    | ZDHHC14      |
| A_23_P406591   | 3,67023 | 2,89155 | 1,715560495 | ENST00000510805 | 441046    | NR_003675    | GUSBP5       |
| A_33_P3391455  | 4,16146 | 3,38293 | 1,715382134 | ENST00000451551 | 6331      | NM_001160161 | SCN5A        |
| A_22_P00022161 | 8,32453 | 7,54612 | 1,715239459 | N/A             | 101927631 | NR_110007    | ADNP-AS1     |

|                |         |         |             |                 |           |              |                |
|----------------|---------|---------|-------------|-----------------|-----------|--------------|----------------|
| A_23_P169934   | 10,8106 | 10,0322 | 1,715227569 | ENST00000376874 | 353116    | NM_178314    | RILPL1         |
| A_33_P3324884  | 5,82911 | 5,05075 | 1,715180014 | ENST00000456101 | 64780     | NM_001286613 | MICAL1         |
| A_21_P0000394  | 8,88772 | 8,10946 | 1,715061131 | ENST00000494697 | 692213    | NR_003078    | SNORD110       |
| A_23_P416894   | 9,27706 | 8,49894 | 1,714894708 | ENST00000482866 | 54103     | NM_017439    | GSAP           |
| A_22_P00016772 | 2,13268 | 1,35466 | 1,714775845 | N/A             | N/A       | BG214856     | Inc-TRIM41-1   |
| A_23_P164237   | 11,5962 | 10,8183 | 1,71463322  | ENST00000484661 | 55813     | NM_018428    | UTP6           |
| A_23_P87902    | 11,0471 | 10,2694 | 1,714395538 | ENST00000541024 | 8798      | NM_003845    | DYRK4          |
| A_33_P3325229  | 8,101   | 7,32352 | 1,714134125 | ENST00000451781 | 389906    | NR_034031    | LOC389906      |
| A_23_P214743   | 4,13484 | 3,35739 | 1,714098481 | ENST00000262901 | 6492      | NM_005068    | SIM1           |
| A_33_P3421490  | 6,51207 | 5,73465 | 1,714062838 | ENST00000305428 | 23251     | NM_015206    | KIAA1024       |
| A_24_P935782   | 7,48569 | 6,70832 | 1,714003434 | ENST00000586602 | 7675      | NM_001008727 | ZNF121         |
| A_33_P3219745  | 3,05782 | 2,2805  | 1,713944032 | ENST00000368681 | 3608      | N/A          | ILF2           |
| A_21_P0011921  | 4,34016 | 3,56298 | 1,713777718 | N/A             | N/A       | N/A          | XLOC_I2_008040 |
| A_33_P3407256  | 7,77998 | 7,00291 | 1,713647054 | ENST00000512024 | 9319      | NM_001166260 | TRIP13         |
| A_21_P0010889  | 9,59917 | 8,8222  | 1,713528277 | N/A             | 728190    | NR_024397    | NUTM2A-AS1     |
| A_23_P72340    | 2,39545 | 1,6185  | 1,713504523 | ENST00000367126 | 553       | NM_000707    | AVPR1B         |
| A_33_P3308446  | 8,30302 | 7,52609 | 1,713480769 | ENST00000272233 | 388       | AK124398     | RHOB           |
| A_23_P431319   | 12,8659 | 12,089  | 1,713445138 | ENST00000374643 | 286451    | NM_173834    | YIPF6          |
| A_21_P0013663  | 2,32801 | 1,55127 | 1,713255122 | N/A             | N/A       | N/A          | XLOC_I2_015239 |
| A_33_P3409635  | 4,83264 | 4,05599 | 1,713148247 | N/A             | N/A       | AK021432     | N/A            |
| A_22_P00013999 | 2,35234 | 1,57573 | 1,713100749 | ENST00000518416 | N/A       | DA771936     | N/A            |
| A_33_P3259092  | 5,09031 | 4,31373 | 1,713065126 | ENST00000602526 | 2218      | NM_001079802 | FKTN           |
| A_24_P212024   | 6,37949 | 5,60315 | 1,712780173 | ENST00000453673 | N/A       | AY867113     | N/A            |
| A_33_P3334625  | 7,13462 | 6,35835 | 1,71269707  | N/A             | 401045    | AK123321     | FLJ41327       |
| A_33_P3702364  | 10,1497 | 9,37343 | 1,71269707  | ENST00000513881 | 28966     | NM_014035    | SNX24          |
| A_32_P761797   | 2,21405 | 1,43779 | 1,712685198 | N/A             | 205251    | NR_027063    | LINC00116      |
| A_21_P0005024  | 2,36701 | 1,59089 | 1,712519006 | N/A             | 101929555 | N/A          | LOC101929555   |
| A_21_P0008369  | 2,87306 | 2,09715 | 1,712269749 | N/A             | N/A       | N/A          | Inc-GPR65-1    |
| A_33_P3417990  | 9,18673 | 8,41087 | 1,712210407 | ENST00000432057 | 7444      | NM_001288837 | VRK2           |
| A_33_P3356941  | 3,04358 | 2,26779 | 1,712127332 | ENST00000478775 | N/A       | N/A          | N/A            |
| A_22_P00016606 | 2,83403 | 2,05829 | 1,712067995 | ENST00000469937 | 730338    | XR_242176    | LOC730338      |
| A_32_P196021   | 4,68651 | 3,91117 | 1,711593375 | ENST00000614567 | 2252      | N/A          | FGF7           |
| A_21_P0013835  | 2,73448 | 1,95917 | 1,711557784 | N/A             | N/A       | N/A          | XLOC_I2_015830 |

|                |         |         |             |                 |           |              |                 |
|----------------|---------|---------|-------------|-----------------|-----------|--------------|-----------------|
| A_33_P3393091  | 6,31701 | 5,54177 | 1,711474741 | N/A             | N/A       | DA197111     | N/A             |
| A_33_P3249773  | 7,44201 | 6,66685 | 1,711379839 | ENST00000366973 | 128387    | NM_001146171 | TATDN3          |
| A_22_P00012562 | 3,30675 | 2,53163 | 1,71133239  | N/A             | N/A       | N/A          | Inc-PTGS1-1     |
| A_24_P30141    | 4,50204 | 3,72694 | 1,711308666 | ENST00000359204 | 118924    | NM_145246    | FRA10AC1        |
| A_21_P0004481  | 7,03296 | 6,25816 | 1,710952846 | N/A             | N/A       | N/A          | Inc-NKD2-3      |
| A_23_P213441   | 8,8715  | 8,0968  | 1,710834256 | ENST00000296792 | 84135     | NM_032175    | UTP15           |
| A_24_P22488    | 10,0741 | 9,29961 | 1,710585244 | ENST00000354866 | 8312      | NM_003502    | AXIN1           |
| A_23_P138805   | 10,5375 | 9,76313 | 1,710442967 | ENST00000533724 | 26973     | NM_012124    | CHORDC1         |
| A_21_P0000004  | 10,6201 | 9,84601 | 1,710111035 | ENST00000426004 | 90196     | NM_001099791 | SYS1            |
| A_23_P83835    | 5,20484 | 4,43076 | 1,710099181 | ENST00000614426 | 84197     | NM_032237    | POMK            |
| A_22_P00005409 | 5,03457 | 4,26075 | 1,709791018 | N/A             | 439933    | NR_122079    | LOC439933       |
| A_24_P941336   | 11,3279 | 10,5542 | 1,709648807 | ENST00000301364 | 55720     | NM_018128    | TSR1            |
| A_23_P502747   | 8,0785  | 7,30484 | 1,709601406 | ENST00000462775 | 9462      | NM_170692    | RASAL2          |
| A_23_P167276   | 10,4886 | 9,71515 | 1,709352573 | ENST00000515853 | 152559    | NM_001040202 | PAQR3           |
| A_21_P0007087  | 2,18602 | 1,41258 | 1,709340725 | N/A             | N/A       | N/A          | Inc-C10orf137-1 |
| A_23_P143958   | 15,5129 | 14,7396 | 1,709174858 | ENST00000494771 | 200916    | NM_001099645 | RPL22L1         |
| A_22_P00009215 | 4,94549 | 4,17228 | 1,709068237 | N/A             | 100506779 | NR_038410    | BZRAP1-AS1      |
| A_33_P3393843  | 8,94825 | 8,17505 | 1,709056391 | ENST00000498819 | 79048     | NM_001282690 | SECISBP2        |
| A_19_P00316933 | 4,94899 | 4,17583 | 1,709009006 | ENST00000519241 | N/A       | N/A          | N/A             |
| A_23_P149476   | 8,98964 | 8,2167  | 1,708748415 | ENST00000447569 | 84288     | NM_032328    | EFCAB2          |
| A_24_P687582   | 6,51264 | 5,7399  | 1,708511549 | ENST00000310074 | 93624     | NM_152293    | TADA2B          |
| A_33_P3209433  | 10,6709 | 9,89829 | 1,708357603 | ENST00000531484 | 5970      | NM_021975    | RELA            |
| A_32_P120043   | 2,26332 | 1,49073 | 1,708333921 | ENST00000368599 | 254228    | NM_153711    | FAM26E          |
| A_21_P0004827  | 4,18639 | 3,414   | 1,708097112 | N/A             | N/A       | N/A          | Inc-LY86-2      |
| A_21_P0003965  | 2,18715 | 1,4148  | 1,708049754 | ENST00000511758 | N/A       | N/A          | N/A             |
| A_22_P00000261 | 5,71356 | 4,94144 | 1,707777472 | ENST00000429172 | 285141    | NM_001290031 | ERICH2          |
| A_23_P35256    | 9,89206 | 9,11997 | 1,70774196  | ENST00000334163 | N/A       | XM_005272927 | N/A             |
| A_24_P211797   | 3,08865 | 2,31666 | 1,707623592 | ENST00000411681 | 130026    | NM_001288624 | ICA1L           |
| A_19_P00319476 | 5,08194 | 4,30996 | 1,707611756 | N/A             | N/A       | N/A          | Inc-LTBP3-2     |
| A_23_P112846   | 4,52502 | 3,7531  | 1,70754074  | ENST00000492183 | 441024    | NM_001144978 | MTHFD2L         |
| A_33_P3385436  | 5,07128 | 4,29955 | 1,707315875 | ENST00000311450 | 153770    | NM_001029869 | PLAC8L1         |
| A_22_P00018080 | 2,81212 | 2,04058 | 1,70709104  | N/A             | N/A       | N/A          | Inc-ZNF362-1    |
| A_23_P130906   | 4,58636 | 3,81482 | 1,70709104  | ENST00000598265 | 83639     | NM_031451    | TEX101          |

|                |         |         |             |                 |           |              |                       |
|----------------|---------|---------|-------------|-----------------|-----------|--------------|-----------------------|
| A_32_P339640   | 9,594   | 8,82259 | 1,706937222 | ENST00000313426 | 284756    | NM_173644    | C20orf197             |
| A_23_P144896   | 12,1878 | 11,4164 | 1,706925391 | ENST00000486828 | 9260      | NM_005451    | PDLIM7                |
| A_32_P213831   | 9,56647 | 8,79511 | 1,706878065 | ENST00000435494 | 57464     | NM_020704    | STRIP2                |
| A_21_P0006969  | 9,65691 | 8,88555 | 1,706878065 | ENST00000434919 | 207107    | N/A          | SFTA1P                |
| A_23_P38959    | 2,72344 | 1,95215 | 1,706795249 | ENST00000602142 | 7409      | NM_005428    | VAV1                  |
| A_22_P00007174 | 3,45478 | 2,6835  | 1,706783419 | N/A             | 101929440 | XR_243332    | LOC101929440          |
| A_22_P00025128 | 2,39085 | 1,61993 | 1,706357573 | N/A             | N/A       | BF727457     | Inc-RP11-324D17.1.1-3 |
| A_22_P00023752 | 2,16121 | 1,39033 | 1,706310263 | N/A             | 283165    | NR_040078    | KIRREL3-AS3           |
| A_24_P245815   | 5,90471 | 5,13388 | 1,706251128 | ENST00000215906 | 57168     | NM_020437    | ASPHD2                |
| A_33_P3414157  | 5,42393 | 4,65316 | 1,706180169 | ENST00000264605 | 79083     | NM_024101    | MLPH                  |
| A_33_P3315729  | 2,16008 | 1,38957 | 1,705872712 | ENST00000435416 | 84911     | NM_032825    | ZNF382                |
| A_24_P415680   | 2,3726  | 1,60214 | 1,705813592 | ENST00000557284 | 51086     | NM_015978    | TNNI3K                |
| A_32_P112623   | 9,04749 | 8,27715 | 1,705671712 | ENST00000418795 | 100289124 | NR_103714    | FAM27E2               |
| A_33_P3360530  | 4,17061 | 3,40031 | 1,705624421 | ENST00000413322 | N/A       | N/A          | N/A                   |
| A_21_P0013819  | 5,54007 | 4,76985 | 1,705529844 | N/A             | N/A       | N/A          | XLOC_I2_015760        |
| A_33_P3343316  | 5,56805 | 4,79816 | 1,705139768 | ENST00000369838 | 83699     | NM_031469    | SH3BGR2               |
| A_21_P0008453  | 2,91298 | 2,14312 | 1,705104311 | ENST00000556646 | N/A       | N/A          | N/A                   |
| A_32_P201773   | 11,0767 | 10,3069 | 1,705033399 | ENST00000262844 | 9949      | NM_015365    | AMMECR1               |
| A_22_P00015026 | 2,52231 | 1,75251 | 1,705033399 | ENST00000574133 | N/A       | N/A          | N/A                   |
| A_23_P140848   | 10,2349 | 9,4652  | 1,70491522  | ENST00000258169 | 10200     | NM_005792    | MPHOSPH6              |
| A_24_P152635   | 12,3813 | 11,6116 | 1,70491522  | ENST00000529403 | 51075     | NM_015959    | TMX2                  |
| A_22_P00008670 | 2,22885 | 1,45956 | 1,704430768 | ENST00000536786 | N/A       | AA459240     | N/A                   |
| A_33_P6653333  | 4,03289 | 3,26376 | 1,704241751 | ENST00000486344 | 51246     | AK301191     | SHISA5                |
| A_33_P3383994  | 4,49282 | 3,72373 | 1,7041945   | ENST00000366653 | 440730    | NM_001004342 | TRIM67                |
| A_21_P0012857  | 3,38368 | 2,61472 | 1,704040943 | N/A             | N/A       | N/A          | XLOC_I2_011798        |
| A_33_P3224891  | 5,12913 | 4,3602  | 1,704005509 | N/A             | 729275    | AK129559     | LOC729275             |
| A_33_P3272563  | 5,27543 | 4,50652 | 1,703981887 | N/A             | 9397      | NM_004808    | NMT2                  |
| A_23_P360626   | 9,36899 | 8,60029 | 1,703733872 | ENST00000321560 | 201164    | NM_178836    | PLD6                  |
| A_23_P122662   | 13,4745 | 12,7058 | 1,703733872 | ENST00000612338 | 54438     | NM_018988    | GFOD1                 |
| A_19_P00329564 | 7,28734 | 6,51885 | 1,703485893 | N/A             | 100499177 | NR_034075    | THAP9-AS1             |
| A_23_P93389    | 9,41845 | 8,65027 | 1,703119895 | ENST00000607016 | 11165     | NM_006703    | NUDT3                 |
| A_33_P3233105  | 6,53092 | 5,76325 | 1,702517939 | ENST00000366809 | 4301      | NM_001207008 | MLLT4                 |
| A_23_P62133    | 7,7384  | 6,97074 | 1,702506139 | ENST00000306167 | 4534      | NM_000252    | MTM1                  |

|                |         |         |             |                 |           |              |                |
|----------------|---------|---------|-------------|-----------------|-----------|--------------|----------------|
| A_22_P00019575 | 3,14606 | 2,37841 | 1,702494338 | ENST00000522213 | N/A       | N/A          | N/A            |
| A_33_P3354713  | 3,55557 | 2,78803 | 1,702364534 | ENST00000394790 | 170384    | NM_001284194 | FUT11          |
| A_33_P3888568  | 3,49158 | 2,72417 | 1,702211142 | N/A             | 100124537 | BQ029156     | SNORA70B       |
| A_22_P00010820 | 2,40135 | 1,63399 | 1,702152149 | N/A             | N/A       | BC040181     | Inc-NMS-2      |
| A_23_P68511    | 4,52298 | 3,75572 | 1,702034169 | ENST00000381922 | 51378     | NM_015985    | ANGPT4         |
| A_21_P0007528  | 3,03343 | 2,2663  | 1,701880807 | N/A             | N/A       | N/A          | Inc-DERA-1     |
| A_33_P3546161  | 5,10411 | 4,33704 | 1,701810029 | N/A             | N/A       | BF742660     | N/A            |
| A_24_P246293   | 3,4348  | 2,66773 | 1,701810029 | ENST00000260257 | 91893     | NM_138378    | FDXACB1        |
| A_21_P0012031  | 2,53163 | 1,76456 | 1,701810029 | ENST00000416350 | N/A       | N/A          | N/A            |
| A_22_P00023943 | 4,82806 | 4,0611  | 1,701680278 | N/A             | 100874002 | NR_046635    | OXCT1-AS1      |
| A_21_P0010999  | 3,83707 | 3,07011 | 1,701680278 | N/A             | N/A       | N/A          | XLOC_I2_002477 |
| A_23_P144490   | 5,00409 | 4,23718 | 1,701621303 | ENST00000623607 | 54798     | NM_017639    | DCHS2          |
| A_22_P00023425 | 5,91308 | 5,14637 | 1,701385425 | N/A             | N/A       | N/A          | Inc-SCN8A-2    |
| A_24_P87036    | 12,0756 | 11,3091 | 1,701137787 | ENST00000530676 | 55107     | NM_018043    | ANO1           |
| A_21_P0007611  | 2,92672 | 2,16028 | 1,701067041 | N/A             | N/A       | N/A          | Inc-ELK3-1     |
| A_22_P00000616 | 2,31956 | 1,55315 | 1,701031668 | N/A             | N/A       | N/A          | Inc-ACOT9-1    |
| A_23_P146050   | 13,1645 | 12,3981 | 1,701019878 | ENST00000519338 | 79752     | NM_024699    | ZFAND1         |
| A_23_P41455    | 4,45481 | 3,68846 | 1,700960926 | ENST00000379645 | 7222      | NM_003305    | TRPC3          |
| A_23_P92727    | 12,4622 | 11,696  | 1,700784083 | ENST00000428746 | 26064     | NM_015577    | RAI14          |
| A_33_P3321303  | 3,84054 | 3,07435 | 1,700772294 | ENST00000368192 | 2117      | NM_001145312 | ETV3           |
| A_23_P97096    | 3,07811 | 2,31215 | 1,700501172 | ENST00000448911 | 26254     | NM_014359    | OPTC           |
| A_21_P0007620  | 2,20815 | 1,4422  | 1,700489385 | N/A             | N/A       | N/A          | Inc-TXNRD1-1   |
| A_23_P145569   | 5,10466 | 4,33875 | 1,700442238 | ENST00000539263 | 6580      | NM_153187    | SLC22A1        |
| A_33_P3290830  | 3,81108 | 3,0452  | 1,700406878 | ENST00000594133 | 149992    | NR_026916    | ANKRD30BP2     |
| A_22_P00005110 | 3,58715 | 2,82131 | 1,700359734 | N/A             | N/A       | AF150135     | Inc-DHRS7B-1   |
| A_22_P00022807 | 3,64023 | 2,87441 | 1,700336162 | N/A             | N/A       | N/A          | Inc-CPXM2-2    |
| A_33_P3385006  | 5,11359 | 4,3478  | 1,700300805 | ENST00000447080 | 283375    | NM_001135195 | SLC39A5        |
| A_33_P3380807  | 3,14121 | 2,37551 | 1,700194738 | ENST00000360658 | 54106     | NM_017442    | TLR9           |
| A_33_P3361741  | 10,3825 | 9,61681 | 1,700182953 | ENST00000379221 | 29103     | NM_013238    | DNAJC15        |
| A_23_P9458     | 9,5937  | 8,82801 | 1,700182953 | ENST00000442009 | 64425     | NM_022490    | POLR1E         |
| A_22_P00023802 | 4,51977 | 3,75418 | 1,700065109 | N/A             | N/A       | N/A          | Inc-SMYD3-3    |
| A_33_P3264163  | 5,6217  | 4,85611 | 1,700065109 | ENST00000400407 | 780       | NM_001202522 | DDR1           |
| A_22_P00000681 | 2,6895  | 1,92397 | 1,699994407 | ENST00000500929 | 101928725 | XR_243159    | LOC101928725   |

|                |         |         |             |                 |           |              |                |
|----------------|---------|---------|-------------|-----------------|-----------|--------------|----------------|
| A_33_P3244096  | 3,91306 | 3,14769 | 1,699805882 | ENST00000378154 | 8573      | N/A          | CASK           |
| A_23_P132874   | 14,2376 | 13,4723 | 1,699723409 | ENST00000421999 | 84319     | NM_032359    | CMSS1          |
| A_23_P401709   | 7,05497 | 6,28971 | 1,699676283 | ENST00000445603 | 149840    | XM_006723549 | C20orf196      |
| A_33_P3424132  | 3,73733 | 2,97226 | 1,699452454 | ENST00000443779 | 158376    | NR_024283    | LINC00961      |
| A_22_P00021051 | 4,05518 | 3,29035 | 1,699169765 | ENST00000521601 | 1807      | N/A          | DPYS           |
| A_33_P3242099  | 9,79061 | 9,02602 | 1,698887122 | ENST00000413307 | 23271     | NM_001297707 | CAMSAP2        |
| A_22_P00005896 | 2,82692 | 2,06236 | 1,698851795 | ENST00000534841 | 101928441 | NR_120471    | LOC101928441   |
| A_21_P0013260  | 3,18448 | 2,41993 | 1,69884002  | N/A             | N/A       | N/A          | XLOC_I2_013547 |
| A_33_P3419733  | 10,1635 | 9,39902 | 1,698757594 | ENST00000360864 | 80331     | NM_025219    | DNAJC5         |
| A_21_P0005439  | 3,42944 | 2,66496 | 1,698757594 | N/A             | N/A       | N/A          | Inc-ARHGEF5-1  |
| A_33_P3246283  | 5,01531 | 4,25084 | 1,698745819 | ENST00000571759 | 55697     | XM_005256038 | VAC14          |
| A_24_P376322   | 6,41354 | 5,64915 | 1,698651623 | ENST00000586118 | 4152      | NM_015845    | MBD1           |
| A_33_P3246528  | 3,70914 | 2,94493 | 1,698439701 | ENST00000315396 | 93233     | NM_144577    | CCDC114        |
| A_22_P00024101 | 2,3552  | 1,59135 | 1,698015937 | N/A             | N/A       | N/A          | Inc-PHOX2B-1   |
| A_23_P306987   | 12,433  | 11,6692 | 1,69795709  | ENST00000304501 | 83595     | NM_031439    | SOX7           |
| A_32_P208403   | 2,9053  | 2,14158 | 1,697862938 | ENST00000335281 | 54331     | NM_053064    | GNG2           |
| A_33_P3397520  | 5,45604 | 4,69236 | 1,697815864 | ENST00000400365 | 386685    | NM_198699    | KRTAP10-12     |
| A_33_P3415653  | 2,88375 | 2,12028 | 1,697568746 | N/A             | 100128668 | AK128046     | LOC100128668   |
| A_32_P201496   | 8,57548 | 7,81209 | 1,697474615 | ENST00000442616 | 171568    | NM_001018052 | POLR3H         |
| A_19_P00808586 | 2,37172 | 1,60839 | 1,697404021 | ENST00000502759 | 152742    | NR_033931    | LINC01085      |
| A_21_P0003825  | 2,82677 | 2,06344 | 1,697404021 | N/A             | N/A       | N/A          | Inc-CRIPAK-1   |
| A_33_P3304527  | 7,39297 | 6,63015 | 1,696804086 | ENST00000371744 | 57169     | NM_021035    | ZNFX1          |
| A_33_P3261097  | 3,52504 | 2,76256 | 1,696404247 | N/A             | N/A       | N/A          | N/A            |
| A_22_P00023133 | 3,83548 | 3,07304 | 1,696357213 | N/A             | N/A       | N/A          | Inc-C11orf55-1 |
| A_21_P0000741  | 3,77772 | 3,01531 | 1,696321939 | N/A             | 100507098 | NR_038264    | ADAMTS9-AS2    |
| A_33_P3356731  | 6,62204 | 5,85968 | 1,69626315  | ENST00000355451 | 23386     | NM_015332    | NUDCD3         |
| A_33_P3290577  | 2,21533 | 1,45305 | 1,696169092 | ENST00000395001 | 84689     | NM_001261828 | MS4A14         |
| A_21_P0013772  | 6,565   | 5,80274 | 1,696145578 | ENST00000453317 | 554203    | N/A          | JPX            |
| A_23_P120316   | 13,1701 | 12,4079 | 1,696075039 | ENST00000394053 | 10797     | NM_006636    | MTHFD2         |
| A_33_P3379571  | 7,79004 | 7,02792 | 1,695980991 | ENST00000555993 | 4293      | NM_033141    | MAP3K9         |
| A_22_P00016415 | 7,98327 | 7,22128 | 1,695828175 | ENST00000307921 | 23536     | NM_012091    | ADAT1          |
| A_21_P0000944  | 4,02842 | 3,2665  | 1,695745895 | ENST00000420522 | N/A       | N/A          | N/A            |
| A_23_P123071   | 14,8552 | 14,0933 | 1,695722387 | ENST00000498493 | 858       | NM_001233    | CAV2           |

|                |         |         |             |                 |        |              |                       |
|----------------|---------|---------|-------------|-----------------|--------|--------------|-----------------------|
| A_23_P165333   | 8,37652 | 7,61501 | 1,695264048 | ENST00000462958 | 274    | NM_139346    | BIN1                  |
| A_21_P0006227  | 3,22342 | 2,46221 | 1,694911565 | N/A             | N/A    | N/A          | Inc-STXBP1-2          |
| A_33_P3845673  | 2,38945 | 1,62825 | 1,694899817 | N/A             | 729860 | AK123661     | LOC729860             |
| A_33_P3322519  | 2,9926  | 2,2314  | 1,694899817 | ENST00000426955 | 90113  | NM_138345    | VWA5B2                |
| A_33_P3369969  | 10,921  | 10,1599 | 1,694782339 | ENST00000427980 | 342371 | NM_001137675 | ATXN1L                |
| A_33_P3291831  | 9,93085 | 9,16976 | 1,694770592 | ENST00000496302 | 55165  | NM_018131    | CEP55                 |
| A_22_P00023270 | 2,16903 | 1,40838 | 1,694253791 | ENST00000518428 | N/A    | BX098909     | N/A                   |
| A_23_P108751   | 14,2242 | 13,4637 | 1,694077646 | ENST00000358129 | 2274   | NM_001039492 | FHL2                  |
| A_24_P933492   | 9,11449 | 8,35412 | 1,693925001 | ENST00000497966 | 340481 | NM_178566    | ZDHHC21               |
| A_24_P294832   | 11,3153 | 10,555  | 1,693842813 | ENST00000370651 | 7803   | NM_003463    | PTP4A1                |
| A_23_P138574   | 7,31182 | 6,55162 | 1,693725409 | ENST00000423243 | 11101  | NM_001001976 | ATE1                  |
| A_24_P194886   | 10,9005 | 10,1403 | 1,693725409 | ENST00000405482 | 23301  | NM_015252    | EHBP1                 |
| A_22_P00004017 | 8,71772 | 7,95765 | 1,693572795 | N/A             | 389641 | NR_033928    | LOC389641             |
| A_21_P0003817  | 2,3763  | 1,61637 | 1,693408458 | N/A             | N/A    | N/A          | Inc-SORBS2-1          |
| A_32_P496893   | 2,55867 | 1,7988  | 1,693338033 | ENST00000305273 | 196913 | NM_001014830 | C14orf183             |
| A_21_P0000156  | 3,54674 | 2,78697 | 1,693220663 | ENST00000513213 | 7092   | NM_001204760 | TLL1                  |
| A_23_P215484   | 5,92    | 5,16031 | 1,693126774 | ENST00000394905 | 10344  | NM_006072    | CCL26                 |
| A_23_P98532    | 13,3228 | 12,5632 | 1,693021155 | ENST00000529480 | 25921  | NM_015457    | ZDHHC5                |
| A_22_P00007864 | 2,14614 | 1,38664 | 1,692903807 | N/A             | N/A    | BC042957     | Inc-HS3ST3A1-1        |
| A_21_P0009526  | 4,90724 | 4,14778 | 1,692856871 | N/A             | N/A    | N/A          | Inc-PIEZO2-4          |
| A_24_P288424   | 12,9983 | 12,239  | 1,692669137 | ENST00000355937 | 51012  | NM_016045    | SLMO2                 |
| A_33_P3224285  | 2,83449 | 2,07523 | 1,692622207 | N/A             | N/A    | N/A          | N/A                   |
| A_22_P00008392 | 4,99572 | 4,23668 | 1,692364115 | N/A             | N/A    | N/A          | Inc-JMJD7-PLA2G4B-2   |
| A_23_P37424    | 10,9882 | 10,2294 | 1,692082604 | ENST00000531970 | 79029  | NM_024063    | SPATA5L1              |
| A_21_P0007008  | 2,46564 | 1,70687 | 1,692047419 | N/A             | N/A    | N/A          | Inc-WAPAL-1           |
| A_33_P3280418  | 11,2122 | 10,4535 | 1,691965322 | ENST00000503990 | 389538 | NR_002822    | MGC72080              |
| A_21_P0005897  | 2,97212 | 2,21353 | 1,691836321 | N/A             | N/A    | N/A          | Inc-RP11-973F15.1.1-2 |
| A_32_P87568    | 6,6606  | 5,90203 | 1,691812868 | ENST00000366844 | 55740  | NM_001008493 | ENAH                  |
| A_23_P12874    | 12,7601 | 12,0019 | 1,691379033 | ENST00000360803 | 23560  | NM_012341    | GTPBP4                |
| A_23_P166122   | 9,56074 | 8,80259 | 1,691320416 | ENST00000377603 | 10621  | NM_006466    | POLR3F                |
| A_22_P00013618 | 7,58007 | 6,82201 | 1,691214909 | N/A             | N/A    | N/A          | Inc-RP11-582J16.5.1-3 |
| A_33_P3317103  | 3,29817 | 2,54013 | 1,691191464 | ENST00000338306 | 550631 | NM_001017437 | CCDC157               |
| A_33_P3228366  | 9,38008 | 8,62225 | 1,69094531  | ENST00000486936 | 57510  | NM_020750    | XPO5                  |



|                |         |         |             |                 |           |              |                 |
|----------------|---------|---------|-------------|-----------------|-----------|--------------|-----------------|
| A_23_P168490   | 9,30319 | 8,54537 | 1,69093359  | ENST00000311350 | 64224     | NM_022373    | HERPUD2         |
| A_23_P6381     | 6,99632 | 6,23861 | 1,690804667 | ENST00000302326 | 4330      | NM_002430    | MN1             |
| A_33_P3324781  | 5,52957 | 4,77189 | 1,690769508 | N/A             | N/A       | N/A          | N/A             |
| A_21_P0010671  | 4,27955 | 3,52188 | 1,690757789 | N/A             | 643723    | NR_038845    | LYPLAL1-AS1     |
| A_33_P3368495  | 14,0002 | 13,2427 | 1,69055857  | N/A             | N/A       | AK057067     | N/A             |
| A_23_P80773    | 12,2944 | 11,5369 | 1,69055857  | ENST00000466490 | 58477     | NM_021203    | SRPRB           |
| A_33_P3397336  | 3,4762  | 2,71886 | 1,690371092 | ENST00000396893 | 92283     | NM_153257    | ZNF461          |
| A_22_P00016809 | 3,87534 | 3,11809 | 1,690265644 | N/A             | N/A       | N/A          | Inc-TRIML2-1    |
| A_33_P3213311  | 2,20007 | 1,44296 | 1,690101628 | N/A             | N/A       | N/A          | N/A             |
| A_23_P333705   | 8,78618 | 8,02914 | 1,690019625 | ENST00000617054 | 4752      | NM_002498    | NEK3            |
| A_33_P3215028  | 10,6759 | 9,91892 | 1,689949341 | ENST00000359359 | 221477    | NM_152734    | C6orf89         |
| A_33_P3366877  | 3,24904 | 2,49247 | 1,689469142 | N/A             | 9860      | BC017961     | LRIG2           |
| A_21_P0007372  | 4,97918 | 4,22262 | 1,689457431 | N/A             | N/A       | N/A          | Inc-FCHSD2-3    |
| A_23_P258964   | 14,583  | 13,8266 | 1,689270075 | ENST00000443024 | 3376      | NM_013417    | IARS            |
| A_22_P00005327 | 3,11748 | 2,36116 | 1,689176405 | N/A             | N/A       | N/A          | Inc-DOCK4-2     |
| A_23_P77859    | 8,24194 | 7,48569 | 1,689094447 | ENST00000301599 | 92162     | NM_203411    | TMEM88          |
| A_23_P423108   | 2,21659 | 1,46041 | 1,689012494 | ENST00000368482 | 126668    | NM_182499    | TDRD10          |
| A_23_P300033   | 6,68238 | 5,92642 | 1,688754952 | ENST00000257290 | 5156      | NM_006206    | PDGFRA          |
| A_33_P3328154  | 5,1723  | 4,41636 | 1,688731541 | N/A             | 84503     | BC014325     | ZNF527          |
| A_33_P3308749  | 2,47309 | 1,71725 | 1,688614491 | ENST00000519932 | 3910      | NM_001105207 | LAMA4           |
| A_24_P281636   | 4,60024 | 3,84441 | 1,688602787 | ENST00000531233 | N/A       | AY010113     | N/A             |
| A_22_P00010367 | 5,09995 | 4,34441 | 1,68826339  | ENST00000562341 | N/A       | AK091141     | N/A             |
| A_23_P316239   | 12,9716 | 12,2162 | 1,688099568 | ENST00000393985 | 541578    | NM_001013845 | CXorf40B        |
| A_23_P203191   | 2,42219 | 1,66681 | 1,688076166 | ENST00000236850 | 335       | NM_000039    | APOA1           |
| A_33_P3238171  | 7,6105  | 6,85514 | 1,688052765 | ENST00000334554 | 29801     | NM_013373    | ZDHC8           |
| A_33_P3262635  | 3,60392 | 2,84873 | 1,687853865 | ENST00000262607 | 51816     | NM_001282225 | CECR1           |
| A_23_P253723   | 5,91104 | 5,156   | 1,687678384 | ENST00000317735 | 10692     | NM_006583    | RRH             |
| A_22_P00016557 | 6,26179 | 5,50681 | 1,687608197 | N/A             | N/A       | BE785809     | Inc-TNFRSF10B-1 |
| A_32_P78101    | 3,55468 | 2,79981 | 1,687479528 | ENST00000251296 | 84966     | NM_032880    | IGSF21          |
| A_33_P3271246  | 4,44389 | 3,68908 | 1,687409349 | ENST00000464488 | 100288842 | N/A          | LOC100288842    |
| A_23_P102694   | 4,08235 | 3,32756 | 1,687385957 | ENST00000246105 | 140881    | NM_080831    | DEFB129         |
| A_23_P137423   | 9,17977 | 8,42504 | 1,687315782 | ENST00000614243 | 93185     | NM_052868    | IGSF8           |
| A_21_P0010839  | 3,78068 | 3,02599 | 1,687269    | N/A             | N/A       | N/A          | XLOC_I2_001683  |

|                |         |         |             |                 |           |              |                |
|----------------|---------|---------|-------------|-----------------|-----------|--------------|----------------|
| A_22_P00009496 | 4,23301 | 3,47833 | 1,687257305 | N/A             | N/A       | N/A          | Inc-MAGOH-1    |
| A_22_P00006487 | 6,31039 | 5,55571 | 1,687257305 | N/A             | 100506674 | NR_109865    | LOC100506674   |
| A_33_P3298617  | 6,67441 | 5,91977 | 1,687210525 | N/A             | N/A       | N/A          | XLOC_I2_006578 |
| A_23_P43034    | 10,9661 | 10,2116 | 1,687046805 | ENST00000519261 | 55140     | NM_018091    | ELP3           |
| A_22_P00007051 | 2,39199 | 1,63754 | 1,686988337 | N/A             | N/A       | N/A          | Inc-GK-5       |
| A_22_P00021789 | 2,3684  | 1,61406 | 1,686859716 | ENST00000470532 | 100506489 | XR_108799    | LOC100506489   |
| A_21_P0007464  | 6,44555 | 5,69141 | 1,686625884 | ENST00000625158 | N/A       | N/A          | N/A            |
| A_33_P3221613  | 2,82463 | 2,07061 | 1,6864856   | N/A             | N/A       | N/A          | Inc-DLX2-4     |
| A_21_P0010489  | 7,47287 | 6,71895 | 1,686368706 | ENST00000412621 | 100289635 | NM_183238    | ZNF605         |
| A_21_P0003663  | 3,8611  | 3,10722 | 1,68632195  | N/A             | N/A       | N/A          | Inc-POU4F2-1   |
| A_33_P3300308  | 11,7589 | 11,0052 | 1,686111567 | ENST00000397709 | 84557     | NM_032514    | MAP1LC3A       |
| A_33_P3387781  | 3,58081 | 2,82725 | 1,685947954 | ENST00000422727 | 26247     | NR_002145    | OR2L1P         |
| A_23_P368718   | 6,11751 | 5,36402 | 1,685866153 | ENST00000613924 | 57213     | AF334405     | SPRYD7         |
| A_22_P00000848 | 5,5633  | 4,80981 | 1,685866153 | N/A             | 728723    | NR_024398    | ZBED3-AS1      |
| A_33_P3215363  | 3,66022 | 2,90675 | 1,685842782 | N/A             | N/A       | N/A          | N/A            |
| A_23_P33558    | 3,36935 | 2,61612 | 1,685562356 | N/A             | 729164    | XR_109936    | LOC729164      |
| A_33_P3377380  | 6,50681 | 5,75378 | 1,685328704 | N/A             | N/A       | AK093659     | Inc-PABPC4-2   |
| A_33_P3363500  | 6,09069 | 5,33771 | 1,685270296 | N/A             | N/A       | N/A          | N/A            |
| A_23_P50697    | 3,59808 | 2,84522 | 1,685130125 | ENST00000312439 | 5669      | NM_006905    | PSG1           |
| A_21_P0009584  | 2,80462 | 2,05186 | 1,685013325 | N/A             | N/A       | N/A          | Inc-ZNF516-8   |
| A_21_P0006672  | 5,15877 | 4,40608 | 1,684931569 | N/A             | N/A       | N/A          | Inc-ZNF37A-3   |
| A_33_P3369667  | 6,12596 | 5,37331 | 1,684884854 | N/A             | N/A       | N/A          | N/A            |
| A_22_P00024125 | 3,40359 | 2,65109 | 1,684709682 | N/A             | N/A       | N/A          | Inc-HHIPL1-2   |
| A_22_P00020647 | 3,75769 | 3,00524 | 1,684651295 | ENST00000539078 | N/A       | XR_424426    | N/A            |
| A_22_P00006808 | 4,77915 | 4,02672 | 1,684627941 | N/A             | N/A       | BX107972     | Inc-GABPA-3    |
| A_33_P3337599  | 9,16236 | 8,41021 | 1,684301018 | ENST00000338368 | 5591      | NM_006904    | PRKDC          |
| A_33_P3209030  | 7,03733 | 6,28523 | 1,684242646 | ENST00000458270 | 9831      | NM_001082480 | ZNF623         |
| A_33_P3283906  | 11,6798 | 10,9278 | 1,684125907 | ENST00000254941 | 51388     | NM_016101    | NIP7           |
| A_33_P3243997  | 9,69407 | 8,94215 | 1,684032522 | ENST00000404125 | 23198     | NM_014614    | PSME4          |
| A_33_P3278265  | 9,39457 | 8,64274 | 1,68392747  | ENST00000240651 | 79912     | NM_024854    | PYROXD1        |
| A_23_P428849   | 11,0208 | 10,269  | 1,683892454 | ENST00000396914 | 131474    | NM_144636    | CHCHD4         |
| A_33_P3279276  | 3,71467 | 2,9629  | 1,683857439 | ENST00000430219 | 80852     | NM_001080423 | GRIP2          |
| A_21_P0003790  | 2,37536 | 1,62376 | 1,683659033 | N/A             | N/A       | N/A          | Inc-FSTL5-2    |

|                |         |         |             |                 |           |              |                      |
|----------------|---------|---------|-------------|-----------------|-----------|--------------|----------------------|
| A_33_P3342563  | 11,274  | 10,5224 | 1,683659033 | ENST00000262483 | 83394     | NM_031220    | PITPNM3              |
| A_22_P00013247 | 4,24063 | 3,48917 | 1,683495658 | N/A             | N/A       | N/A          | Inc-ROM1-1           |
| A_23_P259413   | 12,6913 | 11,9399 | 1,683425645 | ENST00000431519 | 55573     | NM_017548    | CDV3                 |
| A_23_P154488   | 12,0121 | 11,2608 | 1,683308962 | ENST00000415374 | 87178     | NM_033109    | PNPT1                |
| A_33_P3254320  | 14,6421 | 13,8908 | 1,683308962 | ENST00000245908 | 10045     | NM_005490    | SH2D3A               |
| A_23_P325438   | 10,5698 | 9,81851 | 1,683297295 | ENST00000304658 | 23214     | NM_015171    | XPO6                 |
| A_33_P3240497  | 5,53606 | 4,78486 | 1,683192288 | N/A             | N/A       | AK095730     | N/A                  |
| A_33_P3371999  | 7,48216 | 6,73124 | 1,682865644 | ENST00000360578 | 11076     | NM_007030    | TPPP                 |
| A_21_P0002140  | 2,68928 | 1,93837 | 1,682853979 | N/A             | N/A       | N/A          | Inc-OBSL1-1          |
| A_23_P57137    | 10,8335 | 10,0826 | 1,682842315 | ENST00000379573 | 55317     | NM_018347    | AP5S1                |
| A_33_P3215744  | 2,6611  | 1,91026 | 1,682772329 | ENST00000506884 | 25859     | NR_028508    | PART1                |
| A_23_P256603   | 5,55931 | 4,80865 | 1,682562388 | ENST00000366809 | 4301      | NM_001207008 | MLLT4                |
| A_33_P3264593  | 4,56602 | 3,81546 | 1,682445766 | ENST00000247452 | 51438     | NM_016249    | MAGEC2               |
| A_22_P00014149 | 2,45705 | 1,70671 | 1,682189225 | ENST00000577329 | N/A       | XM_005257566 | N/A                  |
| A_21_P0003162  | 4,14868 | 3,39839 | 1,682130926 | N/A             | N/A       | N/A          | Inc-RABL3-1          |
| A_23_P134935   | 11,8441 | 11,0942 | 1,681676262 | ENST00000240100 | 1846      | NM_001394    | DUSP4                |
| A_21_P0001638  | 2,26354 | 1,51367 | 1,681641292 | N/A             | N/A       | N/A          | Inc-RP5-915N17.9.1-1 |
| A_32_P32391    | 9,55665 | 8,80719 | 1,681163454 | ENST00000400311 | 283491    | NR_002171    | OR7E156P             |
| A_23_P357248   | 6,08941 | 5,34003 | 1,681070233 | ENST00000421216 | 79175     | NM_024325    | ZNF343               |
| A_23_P331479   | 12,6906 | 11,9413 | 1,680977017 | ENST00000615527 | 170954    | NM_133471    | PPP1R18              |
| A_22_P00009274 | 6,21531 | 5,46605 | 1,680930412 | N/A             | N/A       | BF592769     | Inc-LRRC14-1         |
| A_23_P143902   | 2,23612 | 1,48696 | 1,680813902 | ENST00000302632 | 64805     | NM_022788    | P2RY12               |
| A_23_P145584   | 11,4168 | 10,6677 | 1,680744001 | ENST00000355621 | 7328      | NM_003344    | UBE2H                |
| A_24_P153820   | 4,24393 | 3,49485 | 1,680720701 | ENST00000288168 | N/A       | BC028351     | N/A                  |
| A_24_P243396   | 8,51113 | 7,76228 | 1,680452775 | ENST00000394269 | 6949      | NM_001008657 | TCOF1                |
| A_23_P203972   | 2,33005 | 1,58124 | 1,680406184 | ENST00000229030 | 11211     | NM_007197    | FZD10                |
| A_33_P3289248  | 2,19596 | 1,44718 | 1,680371241 | N/A             | N/A       | KJ487098     | N/A                  |
| A_21_P0014354  | 2,31245 | 1,5638  | 1,680219831 | N/A             | 101928045 | XR_243745    | LOC101928045         |
| A_23_P16354    | 3,04684 | 2,29822 | 1,680184892 | ENST00000435416 | 84911     | NM_032825    | ZNF382               |
| A_23_P117298   | 3,47774 | 2,72915 | 1,680149954 | ENST00000346342 | 2155      | NM_000131    | F7                   |
| A_21_P0000491  | 9,21651 | 8,46801 | 1,680045144 | N/A             | 100126780 | NR_004383    | SNAR-G1              |
| A_33_P3337831  | 4,33254 | 3,5841  | 1,679975275 | ENST00000366579 | 55127     | BC062442     | HEATR1               |
| A_23_P169629   | 15,073  | 14,3246 | 1,679928696 | ENST00000554467 | 6472      | NM_005412    | SHMT2                |

|                |         |         |             |                 |           |              |                |
|----------------|---------|---------|-------------|-----------------|-----------|--------------|----------------|
| A_32_P21255    | 7,48443 | 6,73609 | 1,679858832 | ENST00000261867 | 7782      | NM_013309    | SLC30A4        |
| A_32_P1173     | 10,1873 | 9,43908 | 1,679719111 | ENST00000370318 | 115004    | NM_138441    | MB21D1         |
| A_33_P3348747  | 12,9542 | 12,206  | 1,679695825 | ENST00000257189 | 1830      | NM_001944    | DSG3           |
| A_21_P0013350  | 4,17744 | 3,42928 | 1,679649255 | N/A             | N/A       | N/A          | XLOC_I2_014011 |
| A_23_P96395    | 2,9694  | 2,22189 | 1,678892666 | ENST00000362002 | 142689    | NM_130388    | ASB12          |
| A_21_P0008773  | 3,33468 | 2,5872  | 1,678857755 | N/A             | N/A       | N/A          | Inc-NTRK3-2    |
| A_21_P0012907  | 4,66113 | 3,91371 | 1,678787935 | N/A             | N/A       | N/A          | XLOC_I2_012035 |
| A_21_P0009214  | 2,13523 | 1,38784 | 1,678753026 | N/A             | N/A       | N/A          | Inc-WSCD1-1    |
| A_22_P00025675 | 3,67779 | 2,9304  | 1,678753026 | N/A             | N/A       | N/A          | Inc-VCL-1      |
| A_33_P3310929  | 2,59057 | 1,84326 | 1,678659939 | ENST00000368679 | 8038      | NM_003474    | ADAM12         |
| A_22_P00021167 | 6,26813 | 5,5209  | 1,678566856 | ENST00000541888 | N/A       | XR_111249    | N/A            |
| A_33_P3349827  | 11,0519 | 10,3048 | 1,678415609 | ENST00000490127 | 5935      | NM_006743    | RBM3           |
| A_23_P154086   | 11,6572 | 10,9102 | 1,678299274 | ENST00000439945 | 617       | NM_004328    | BCS1L          |
| A_22_P00015662 | 7,43326 | 6,68644 | 1,678089892 | N/A             | 283104    | NR_036485    | SBF2-AS1       |
| A_21_P0000987  | 2,14058 | 1,39377 | 1,67807826  | ENST00000411903 | 101927295 | NR_110677    | LINC01360      |
| A_33_P3345309  | 3,00265 | 2,25593 | 1,677973579 | ENST00000449534 | 646960    | N/A          | PRSS56         |
| A_23_P58328    | 13,88   | 13,1333 | 1,677950318 | ENST00000617524 | 11199     | NM_007193    | ANXA10         |
| A_21_P0001226  | 2,22511 | 1,47857 | 1,677764238 | ENST00000412445 | N/A       | N/A          | N/A            |
| A_24_P31003    | 8,39307 | 7,64665 | 1,677624691 | ENST00000248114 | 2671      | NM_005262    | GFER           |
| A_33_P3306818  | 2,76911 | 2,0227  | 1,677613063 | N/A             | 100130872 | AK091779     | LOC100130872   |
| A_21_P0007184  | 2,35696 | 1,61057 | 1,677589806 | N/A             | N/A       | N/A          | Inc-NAV2-1     |
| A_33_P3370615  | 4,62395 | 3,87764 | 1,677496783 | N/A             | N/A       | N/A          | N/A            |
| A_23_P326009   | 3,17385 | 2,42758 | 1,677450274 | ENST00000308031 | 57573     | NM_020813    | ZNF471         |
| A_33_P3263906  | 5,86707 | 5,12082 | 1,67742702  | ENST00000368657 | 51175     | N/A          | TUBE1          |
| A_23_P85703    | 10,6941 | 9,9479  | 1,677368885 | ENST00000618875 | 9580      | NM_005686    | SOX13          |
| A_33_P3317979  | 4,89685 | 4,15066 | 1,677357259 | ENST00000285039 | 4645      | NM_001080467 | MYO5B          |
| A_22_P00007364 | 3,49485 | 2,74882 | 1,677171244 | ENST00000437795 | 100874055 | NR_047499    | LINC00570      |
| A_22_P00020240 | 3,9323  | 3,1864  | 1,677020123 | N/A             | N/A       | DA498238     | Inc-TRPT1-2    |
| A_21_P0000629  | 11,5038 | 10,7584 | 1,676439012 | N/A             | 6301      | NR_034072    | SARS           |
| A_21_P0002150  | 4,06072 | 3,31535 | 1,676404152 | ENST00000446593 | N/A       | N/A          | N/A            |
| A_23_P76918    | 13,7843 | 13,039  | 1,676322815 | ENST00000555593 | 26520     | NM_012460    | TIMM9          |
| A_23_P58132    | 2,50317 | 1,75791 | 1,676276338 | ENST00000610353 | 399       | NM_004310    | RHOH           |
| A_23_P9152     | 11,9822 | 11,237  | 1,676206625 | ENST00000381750 | 10171     | NM_005772    | RCL1           |

|                |         |         |             |                 |           |              |                |
|----------------|---------|---------|-------------|-----------------|-----------|--------------|----------------|
| A_23_P252536   | 14,1807 | 13,4356 | 1,676090443 | ENST00000380325 | 64949     | NM_030811    | MRPS26         |
| A_33_P3245734  | 4,68762 | 3,94253 | 1,676078825 | N/A             | 340252    | NM_001130022 | ZNF680         |
| A_23_P119634   | 2,23716 | 1,49222 | 1,675904569 | ENST00000379013 | 11045     | NM_007000    | UPK1A          |
| A_22_P00022160 | 5,66069 | 4,91579 | 1,675858104 | N/A             | N/A       | N/A          | Inc-TXLNB-3    |
| A_22_P00009942 | 2,93145 | 2,18657 | 1,675834872 | N/A             | N/A       | BI464056     | Inc-MIER3-1    |
| A_22_P00000775 | 4,23284 | 3,48807 | 1,6757071   | N/A             | N/A       | N/A          | Inc-ADD3-1     |
| A_23_P37068    | 8,16442 | 7,41966 | 1,675695485 | ENST00000351691 | 7187      | NM_145725    | TRAF3          |
| A_33_P3309656  | 3,30245 | 2,55771 | 1,675672255 | N/A             | N/A       | N/A          | N/A            |
| A_32_P117812   | 4,81808 | 4,07336 | 1,675649026 | ENST00000496108 | 145748    | BX640928     | LYSMD4         |
| A_22_P00011843 | 10,446  | 9,70128 | 1,675649026 | ENST00000367311 | 23612     | BC033874     | PHLDA3         |
| A_33_P3385361  | 14,8828 | 14,1381 | 1,675625797 | ENST00000474485 | 51406     | NM_016167    | NOL7           |
| A_21_P0011752  | 5,12728 | 4,38289 | 1,675265784 | ENST00000606252 | N/A       | N/A          | N/A            |
| A_23_P169017   | 3,91062 | 3,16636 | 1,675114834 | ENST00000314357 | 55894     | NM_018661    | DEFB103B       |
| A_19_P00322236 | 5,70517 | 4,96093 | 1,675091612 | ENST00000476312 | 7678      | NM_001243740 | ZNF124         |
| A_23_P433188   | 8,76441 | 8,02019 | 1,675068391 | ENST00000377051 | 64412     | NM_022482    | GZF1           |
| A_21_P0010650  | 3,56298 | 2,81881 | 1,675010338 | N/A             | 102723382 | N/A          | LOC102723382   |
| A_22_P00016115 | 2,26765 | 1,52353 | 1,674952288 | N/A             | 100288831 | NR_103443    | SRGAP3-AS3     |
| A_21_P0011698  | 3,2828  | 2,53869 | 1,674940678 | N/A             | N/A       | N/A          | XLOC_I2_006718 |
| A_33_P3243907  | 14,9836 | 14,2395 | 1,674929068 | ENST00000433655 | 1509      | NM_001909    | CTSD           |
| A_33_P3290179  | 10,5246 | 9,7805  | 1,674929068 | ENST00000323699 | 8560      | NM_003676    | DEGS1          |
| A_21_P0014658  | 3,8196  | 3,07561 | 1,674801366 | ENST00000446964 | N/A       | N/A          | N/A            |
| A_23_P22647    | 8,42588 | 7,68202 | 1,674650458 | ENST00000252338 | 27112     | NM_015686    | FAM155B        |
| A_33_P3312658  | 5,54307 | 4,79934 | 1,674499564 | N/A             | N/A       | N/A          | N/A            |
| A_33_P3407549  | 5,37801 | 4,63429 | 1,674487957 | N/A             | 134548    | NM_175873    | SOWAHA         |
| A_23_P5163     | 9,97897 | 9,23534 | 1,6743835   | ENST00000357324 | 57130     | NM_020410    | ATP13A1        |
| A_23_P11372    | 12,7989 | 12,0554 | 1,67423263  | ENST00000298556 | 3251      | NM_000194    | HPRT1          |
| A_33_P3364508  | 9,10678 | 8,36335 | 1,674151397 | ENST00000448720 | 55262     | AK054872     | C7orf43        |
| A_33_P3261074  | 2,59906 | 1,85571 | 1,674058565 | N/A             | N/A       | N/A          | N/A            |
| A_23_P416608   | 11,7677 | 11,0244 | 1,674000548 | ENST00000371335 | 3920      | NM_013995    | LAMP2          |
| A_21_P0012883  | 2,7388  | 1,99552 | 1,673977341 | N/A             | N/A       | N/A          | XLOC_I2_011911 |
| A_23_P202810   | 11,097  | 10,3538 | 1,673884519 | ENST00000335987 | 5017      | NM_004561    | OVOL1          |
| A_33_P3329898  | 4,17345 | 3,43032 | 1,673803304 | ENST00000564158 | 57519     | N/A          | STARD9         |
| A_24_P124973   | 7,84101 | 7,09797 | 1,67369889  | ENST00000332303 | 56160     | NM_138704    | NDNL2          |

|                |         |         |             |                 |           |              |                 |
|----------------|---------|---------|-------------|-----------------|-----------|--------------|-----------------|
| A_33_P3382565  | 4,60919 | 3,86627 | 1,673559681 | ENST00000407071 | 55083     | NM_018012    | KIF26B          |
| A_21_P0002235  | 2,3308  | 1,58805 | 1,673362489 | N/A             | N/A       | N/A          | Inc-ETAA1-2     |
| A_21_P0009933  | 7,41367 | 6,67097 | 1,673304495 | N/A             | N/A       | N/A          | Inc-C20orf187-2 |
| A_19_P00316778 | 4,34361 | 3,60092 | 1,673292897 | N/A             | N/A       | N/A          | Inc-SLC35F5-4   |
| A_33_P3775007  | 10,3675 | 9,62489 | 1,673200112 | ENST00000518721 | 50807     | NM_001247996 | ASAP1           |
| A_33_P3256987  | 2,54112 | 1,79886 | 1,672794241 | N/A             | 7697      | AL834121     | ZNF138          |
| A_24_P254506   | 2,19366 | 1,45144 | 1,672747862 | ENST00000474146 | 9506      | NM_007003    | PAGE4           |
| A_23_P214565   | 3,95804 | 3,21584 | 1,672724673 | ENST00000383549 | 116511    | NM_052967    | MAS1L           |
| A_22_P00023442 | 2,63296 | 1,89083 | 1,672643513 | ENST00000607823 | N/A       | N/A          | N/A             |
| A_23_P29124    | 3,7686  | 3,02652 | 1,672585545 | ENST00000366425 | 2812      | NM_000407    | GP1BB           |
| A_22_P00009005 | 4,49954 | 3,75749 | 1,672550765 | ENST00000505133 | 100507487 | N/A          | LOC100507487    |
| A_22_P00016935 | 4,08125 | 3,33926 | 1,672481207 | ENST00000498745 | 340348    | NM_178562    | TSPAN33         |
| A_21_P0006891  | 2,22966 | 1,4877  | 1,672446429 | N/A             | N/A       | N/A          | Inc-KIF20B-1    |
| A_23_P134204   | 2,82397 | 2,08202 | 1,672434837 | ENST00000484425 | 84691     | NM_032599    | FAM71F1         |
| A_21_P0014394  | 5,25527 | 4,51334 | 1,672411652 | N/A             | N/A       | N/A          | N/A             |
| A_24_P263672   | 12,1891 | 11,4475 | 1,672029151 | ENST00000554269 | 9790      | NM_014753    | BMS1            |
| A_23_P393749   | 5,42911 | 4,68762 | 1,67190167  | ENST00000282611 | 347732    | NM_178019    | CATSPER3        |
| A_21_P0003205  | 3,83927 | 3,09781 | 1,671866904 | N/A             | N/A       | N/A          | Inc-CPN2-2      |
| A_33_P3328051  | 2,79928 | 2,05783 | 1,671855315 | N/A             | 100129961 | NR_036549    | CCNT2-AS1       |
| A_21_P0007906  | 2,25053 | 1,50909 | 1,671843727 | N/A             | 100652856 | NR_104118    | LINC00408       |
| A_23_P44155    | 4,29851 | 3,55719 | 1,671704673 | ENST00000283285 | 10225     | NM_198196    | CD96            |
| A_23_P254888   | 12,502  | 11,7607 | 1,671681498 | ENST00000322764 | 7791      | NM_003461    | ZYX             |
| A_33_P3240538  | 11,3104 | 10,5691 | 1,671681498 | ENST00000368662 | 51175     | NM_016262    | TUBE1           |
| A_24_P147242   | 2,43995 | 1,69867 | 1,671658324 | ENST00000547372 | 54715     | NM_145893    | RBFOX1          |
| A_23_P19663    | 5,69874 | 4,95746 | 1,671658324 | ENST00000367976 | 1490      | NM_001901    | CTGF            |
| A_33_P3225250  | 10,2652 | 9,52403 | 1,671530871 | ENST00000534171 | 221120    | NM_139178    | ALKBH3          |
| A_23_P51508    | 12,5183 | 11,7772 | 1,67144977  | ENST00000367943 | 11266     | NM_007240    | DUSP12          |
| A_33_P3332215  | 5,38301 | 4,64196 | 1,671391843 | ENST00000368396 | 4582      | NM_001044392 | MUC1            |
| A_21_P0011366  | 4,85675 | 4,1157  | 1,671391843 | N/A             | N/A       | N/A          | XLLOC_I2_004867 |
| A_23_P105923   | 5,33893 | 4,59795 | 1,671310748 | ENST00000510508 | 1735      | NM_001362    | DIO3            |
| A_23_P409386   | 10,6813 | 9,9406  | 1,67098641  | ENST00000320230 | 79751     | NM_024698    | SLC25A22        |
| A_23_P500364   | 10,5597 | 9,81909 | 1,670882172 | ENST00000482231 | 9275      | NM_001301061 | BCL7B           |
| A_24_P172990   | 12,6495 | 11,9089 | 1,67087059  | ENST00000569825 | 16        | NM_001605    | AARS            |

|                |         |         |             |                 |           |              |                |
|----------------|---------|---------|-------------|-----------------|-----------|--------------|----------------|
| A_21_P0013784  | 10,8125 | 10,072  | 1,670754778 | N/A             | N/A       | N/A          | XLOC_I2_015585 |
| A_33_P3299285  | 6,20441 | 5,46392 | 1,670743197 | ENST00000336830 | 127943    | NM_001002901 | FCRLB          |
| A_22_P00004209 | 4,37351 | 3,63305 | 1,670708455 | N/A             | N/A       | N/A          | Inc-CLNS1A-2   |
| A_22_P00003338 | 6,1631  | 5,4227  | 1,670638974 | ENST00000513931 | 100996485 | NM_001277348 | C5orf66        |
| A_21_P0010267  | 11,4678 | 10,7275 | 1,670523178 | N/A             | N/A       | HQ013231     | Inc-TPTE-3     |
| A_23_P410600   | 2,98177 | 2,24162 | 1,6703495   | ENST00000277517 | 91734     | NM_033261    | IDI2           |
| A_33_P3412798  | 2,19243 | 1,45229 | 1,670337922 | ENST00000425520 | 441581    | NM_001080998 | FRG2B          |
| A_32_P98927    | 8,33704 | 7,59691 | 1,670326344 | ENST00000416602 | 64940     | NR_040585    | STAG3L4        |
| A_33_P3293529  | 12,808  | 12,0681 | 1,670060075 | ENST00000530034 | N/A       | N/A          | N/A            |
| A_33_P3284472  | 7,25446 | 6,51482 | 1,669759127 | ENST00000329073 | 317781    | NM_175066    | DDX51          |
| A_22_P00006615 | 2,17975 | 1,44016 | 1,669701258 | ENST00000437696 | N/A       | N/A          | N/A            |
| A_22_P00024667 | 2,9884  | 2,2489  | 1,6695971   | N/A             | 100874095 | NR_046662    | ADIPOQ-AS1     |
| A_33_P3327956  | 9,76165 | 9,02231 | 1,669411946 | ENST00000360187 | 100289635 | NM_183238    | ZNF605         |
| A_33_P3213747  | 10,0499 | 9,31067 | 1,669284665 | ENST00000310597 | 741       | NM_014205    | ZNHIT2         |
| A_33_P3216150  | 9,1109  | 8,37174 | 1,669203673 | ENST00000535904 | 5545      | NM_002723    | PRB4           |
| A_32_P724317   | 2,48228 | 1,74342 | 1,668856608 | N/A             | N/A       | AF419291     | Inc-UCP2-1     |
| A_23_P46690    | 5,27599 | 4,53717 | 1,668810338 | ENST00000367167 | 388730    | NM_203376    | TMEM81         |
| A_23_P337899   | 3,28381 | 2,54504 | 1,668752502 | ENST00000311269 | 162333    | NM_152598    | mar-10         |
| A_33_P3225610  | 7,14961 | 6,41091 | 1,668671536 | N/A             | N/A       | AY358225     | N/A            |
| A_22_P00002753 | 3,65758 | 2,91891 | 1,668636837 | N/A             | N/A       | N/A          | Inc-C21orf62-1 |
| A_33_P3226557  | 4,04    | 3,30137 | 1,668590573 | ENST00000329447 | 389151    | NM_001013650 | PRR23B         |
| A_22_P00023174 | 3,27562 | 2,53701 | 1,668567442 | N/A             | N/A       | AI864952     | Inc-GFOD1-1    |
| A_33_P3279353  | 3,85847 | 3,11994 | 1,668474919 | ENST00000620695 | 566       | NM_001700    | AZU1           |
| A_32_P35220    | 12,6996 | 11,9611 | 1,668440225 | ENST00000441808 | 220869    | NM_001024916 | CBWD5          |
| A_21_P0007201  | 2,38607 | 1,6476  | 1,668405531 | ENST00000533358 | 51144     | XR_252883    | HSD17B12       |
| A_21_P0011294  | 4,14578 | 3,40742 | 1,668278326 | N/A             | N/A       | N/A          | XLOC_I2_004594 |
| A_22_P00022799 | 5,85745 | 5,11911 | 1,668255199 | N/A             | N/A       | N/A          | Inc-RIMS3-4    |
| A_23_P163361   | 4,87592 | 4,13769 | 1,668128006 | ENST00000268125 | 6017      | NM_000326    | RLBP1          |
| A_23_P91697    | 3,68096 | 2,94288 | 1,667954576 | ENST00000402320 | 9215      | NM_004737    | LARGE          |
| A_22_P00001063 | 3,08151 | 2,3436  | 1,667758044 | N/A             | N/A       | N/A          | Inc-ALCAM-3    |
| A_22_P00019389 | 6,05751 | 5,3196  | 1,667758044 | ENST00000519048 | N/A       | N/A          | N/A            |
| A_24_P942068   | 9,96146 | 9,22363 | 1,667665567 | ENST00000424789 | 26115     | NM_025185    | TANC2          |
| A_33_P3251940  | 2,15338 | 1,41568 | 1,667515302 | ENST00000610320 | 100131608 | NM_001282479 | PRR23D1        |

|                |         |         |             |                 |           |              |                |
|----------------|---------|---------|-------------|-----------------|-----------|--------------|----------------|
| A_33_P3502914  | 2,76239 | 2,02476 | 1,667434395 | ENST00000255890 | 150244    | NR_003950    | ZDHC8P1        |
| A_23_P62840    | 13,1886 | 12,4511 | 1,667284151 | ENST00000373044 | 79693     | NM_024640    | YRDC           |
| A_22_P00012438 | 3,71907 | 2,98162 | 1,667226368 | ENST00000564335 | 644050    | NR_104176    | LINC01529      |
| A_33_P3223739  | 3,20351 | 2,46606 | 1,667226368 | ENST00000619659 | 138883    | NM_012363    | OR1N1          |
| A_21_P0013339  | 6,91671 | 6,17936 | 1,667110809 | N/A             | N/A       | N/A          | XLOC_I2_013931 |
| A_22_P00017059 | 6,61109 | 5,87377 | 1,667076143 | ENST00000463298 | 101       | NM_001164489 | ADAM8          |
| A_33_P3409347  | 5,77748 | 5,04037 | 1,666833499 | N/A             | 28974     | NM_014047    | C19orf53       |
| A_33_P3284557  | 10,5519 | 9,81487 | 1,666741073 | ENST00000409176 | 51776     | NM_016653    | ZAK            |
| A_22_P00025527 | 2,23009 | 1,49309 | 1,666706414 | N/A             | N/A       | BC033513     | Inc-ANKRD53-1  |
| A_24_P7157     | 9,03857 | 8,30158 | 1,666694862 | ENST00000299673 | 57494     | NM_020734    | RIMKLB         |
| A_33_P3252083  | 4,86912 | 4,13221 | 1,666602443 | ENST00000398016 | 23426     | NM_021150    | GRIP1          |
| A_33_P3879161  | 2,37871 | 1,64181 | 1,666590891 | ENST00000371109 | 118788    | NM_152309    | PIK3AP1        |
| A_23_P168541   | 11,3011 | 10,5646 | 1,666128878 | ENST00000359073 | 79034     | NM_024067    | C7orf26        |
| A_33_P3285122  | 2,595   | 1,85879 | 1,665793999 | ENST00000587354 | 148103    | AK307339     | ZNF599         |
| A_22_P00016412 | 2,76378 | 2,02763 | 1,665724722 | ENST00000579367 | N/A       | N/A          | N/A            |
| A_19_P00317836 | 5,16983 | 4,43373 | 1,665666993 | ENST00000431385 | N/A       | N/A          | N/A            |
| A_22_P00023101 | 2,52275 | 1,7868  | 1,665493819 | ENST00000483023 | N/A       | N/A          | N/A            |
| A_21_P0012639  | 3,10018 | 2,36429 | 1,665424555 | N/A             | N/A       | N/A          | XLOC_I2_010963 |
| A_23_P70168    | 15,3632 | 14,6275 | 1,665205236 | ENST00000502553 | 6897      | NM_152295    | TARS           |
| A_22_P00010856 | 5,76944 | 5,03377 | 1,665170609 | N/A             | N/A       | N/A          | Inc-NOS2-2     |
| A_33_P3342862  | 5,10829 | 4,37273 | 1,665043651 | ENST00000324038 | 100533183 | NM_001204299 | ZNF664-FAM101A |
| A_22_P00013693 | 5,14389 | 4,40861 | 1,664720529 | ENST00000518854 | 100507464 | XR_108905    | LOC100507464   |
| A_33_P3372257  | 8,92262 | 8,18759 | 1,66443208  | ENST00000334082 | 9456      | NM_004272    | HOMER1         |
| A_33_P3362148  | 7,39874 | 6,66373 | 1,664409006 | N/A             | 284900    | NR_026963    | TTC28-AS1      |
| A_23_P139418   | 8,6009  | 7,86591 | 1,664385933 | ENST00000227756 | 374378    | NM_198516    | GALNT18        |
| A_33_P3273324  | 8,27465 | 7,53972 | 1,664316714 | ENST00000344085 | 400713    | AF088022     | ZNF880         |
| A_21_P0005091  | 2,22735 | 1,49255 | 1,664166751 | N/A             | N/A       | N/A          | Inc-THBS2-6    |
| A_23_P69141    | 9,75965 | 9,02497 | 1,664028335 | ENST00000481915 | 51143     | NM_016141    | DYNC1LI1       |
| A_23_P31414    | 11,3312 | 10,5969 | 1,663590095 | ENST00000422497 | 5001      | NM_002553    | ORC5           |
| A_33_P3217465  | 14,1339 | 13,3999 | 1,663244197 | ENST00000378474 | 58526     | NM_021242    | MID1IP1        |
| A_23_P150018   | 12,7453 | 12,0114 | 1,663128913 | ENST00000369583 | 1847      | NM_004419    | DUSP5          |
| A_33_P3294440  | 2,14479 | 1,4109  | 1,663117386 | ENST00000422819 | 221262    | N/A          | CCDC162P       |
| A_33_P3348011  | 8,01865 | 7,2851  | 1,662725485 | N/A             | 222699    | NR_002936    | TOB2P1         |



|                |         |         |             |                 |           |              |                       |
|----------------|---------|---------|-------------|-----------------|-----------|--------------|-----------------------|
| A_21_P0005638  | 4,79638 | 4,06285 | 1,662702435 | N/A             | N/A       | N/A          | Inc-SLC10A5-1         |
| A_33_P3412795  | 2,29398 | 1,56051 | 1,662633286 | N/A             | N/A       | N/A          | N/A                   |
| A_33_P3274080  | 5,56114 | 4,82777 | 1,662518045 | N/A             | N/A       | N/A          | N/A                   |
| A_21_P0008350  | 4,03328 | 3,29996 | 1,662460428 | N/A             | N/A       | N/A          | Inc-FUT8-2            |
| A_24_P152398   | 4,14529 | 3,41207 | 1,662345199 | ENST00000621818 | 63970     | NM_001195195 | TP53AIP1              |
| A_19_P00319917 | 5,77372 | 5,04062 | 1,662206935 | ENST00000426282 | 100506714 | NR_038956    | NUP50-AS1             |
| A_22_P00007706 | 2,60222 | 1,8692  | 1,662114765 | N/A             | N/A       | N/A          | Inc-HIVEP2-4          |
| A_33_P3389917  | 3,67735 | 2,9446  | 1,66180373  | ENST00000366577 | 4548      | NM_000254    | MTR                   |
| A_21_P0001873  | 5,24244 | 4,50972 | 1,661769174 | ENST00000423168 | 100507073 | NR_110156    | LOC100507073          |
| A_33_P3253807  | 13,0809 | 12,3483 | 1,661630957 | ENST00000284000 | 1054      | NM_001806    | CEBPG                 |
| A_21_P0001496  | 5,15207 | 4,41948 | 1,66161944  | N/A             | N/A       | N/A          | Inc-PDZK1IP1-1        |
| A_19_P00804723 | 3,69704 | 2,9646  | 1,661446687 | ENST00000440692 | 6229      | NM_001142285 | RPS24                 |
| A_23_P254797   | 4,69861 | 3,96621 | 1,661400622 | ENST00000170150 | 80341     | NM_025227    | BPIFB2                |
| A_22_P00005380 | 4,17154 | 3,43918 | 1,661354559 | ENST00000515343 | N/A       | N/A          | N/A                   |
| A_23_P322704   | 11,8068 | 11,0745 | 1,661285467 | ENST00000553955 | 283635    | NM_001079519 | FAM177A1              |
| A_21_P0003452  | 2,86502 | 2,13281 | 1,661181834 | ENST00000503085 | N/A       | N/A          | N/A                   |
| A_24_P271363   | 10,8846 | 10,1524 | 1,661170319 | ENST00000379070 | 8760      | NM_003818    | CDS2                  |
| A_22_P00000645 | 2,92591 | 2,19382 | 1,661043666 | ENST00000547762 | 102724663 | NR_120491    | LOC102724663          |
| A_33_P3334342  | 5,80015 | 5,06836 | 1,660698298 | N/A             | N/A       | N/A          | N/A                   |
| A_32_P410272   | 3,09501 | 2,36323 | 1,660686787 | ENST00000601788 | N/A       | BC066878     | N/A                   |
| A_22_P00019844 | 7,99053 | 7,25888 | 1,66053715  | N/A             | N/A       | AL832624     | Inc-KLRG2-1           |
| A_22_P00013299 | 4,6253  | 3,89366 | 1,660525641 | N/A             | N/A       | AL832705     | Inc-RP11-1105G2.3.1-4 |
| A_22_P00010470 | 2,16287 | 1,43129 | 1,660456583 | ENST00000445814 | 7503      | NR_001564    | XIST                  |
| A_19_P00802546 | 6,13484 | 5,40343 | 1,660260934 | ENST00000493442 | 139231    | NM_207318    | FAM199X               |
| A_21_P0003902  | 2,55351 | 1,82213 | 1,66022641  | N/A             | N/A       | N/A          | Inc-NR3C2-4           |
| A_23_P12866    | 9,14569 | 8,41439 | 1,660134351 | ENST00000483455 | 118672    | NM_153336    | PSTK                  |
| A_32_P93852    | 11,7445 | 11,0134 | 1,659904223 | ENST00000285908 | 91272     | NM_138369    | BOD1                  |
| A_33_P3324206  | 10,4399 | 9,70885 | 1,659846696 | ENST00000312841 | 55806     | NM_005144    | HR                    |
| A_33_P3323453  | 12,6357 | 11,9047 | 1,659789171 | ENST00000464661 | 81502     | NM_030789    | HM13                  |
| A_24_P246107   | 4,39791 | 3,66716 | 1,659501577 | ENST00000334068 | 284827    | NM_181600    | KRTAP13-4             |
| A_33_P3362321  | 11,7236 | 10,9929 | 1,659444064 | ENST00000452732 | 2274      | NM_201555    | FHL2                  |
| A_33_P3230990  | 5,38168 | 4,65115 | 1,659248535 | ENST00000360835 | 80274     | NM_173050    | SCUBE1                |
| A_22_P00016647 | 2,28358 | 1,55307 | 1,659225533 | ENST00000530039 | N/A       | CN483642     | N/A                   |

|                |         |         |             |                 |           |              |                |
|----------------|---------|---------|-------------|-----------------|-----------|--------------|----------------|
| A_21_P0000550  | 6,17117 | 5,44068 | 1,659202531 | ENST00000419458 | 100302401 | NR_027982    | RASAL2-AS1     |
| A_21_P0002574  | 3,48511 | 2,75469 | 1,659122028 | ENST00000433810 | 103752554 | NR_125783    | MYCNUT         |
| A_21_P0007796  | 5,31987 | 4,58947 | 1,659099028 | N/A             | N/A       | N/A          | Inc-SLC15A4-5  |
| A_23_P109171   | 8,49571 | 7,76539 | 1,65900703  | ENST00000536626 | 631       | NM_001195    | BFSP1          |
| A_21_P0008197  | 4,42045 | 3,69014 | 1,658995531 | N/A             | N/A       | N/A          | Inc-SLITRK6-9  |
| A_21_P0002482  | 2,11742 | 1,38717 | 1,658926537 | N/A             | N/A       | N/A          | Inc-TGFBRAP1-2 |
| A_24_P368735   | 3,58    | 2,84978 | 1,658892041 | ENST00000310389 | 285598    | NM_173664    | ARL10          |
| A_33_P3286576  | 2,38338 | 1,6532  | 1,658846047 | N/A             | N/A       | N/A          | N/A            |
| A_22_P00023498 | 6,35672 | 5,62675 | 1,658604602 | N/A             | N/A       | AK074510     | Inc-GLIPR1-4   |
| A_33_P3773261  | 3,7788  | 3,04887 | 1,658558616 | ENST00000380455 | 4835      | XR_249926    | NQO2           |
| A_23_P215634   | 2,23842 | 1,50864 | 1,658386181 | ENST00000275521 | 3486      | NM_001013398 | IGFBP3         |
| A_21_P0002545  | 2,30888 | 1,57925 | 1,658213764 | N/A             | N/A       | N/A          | Inc-EPHA4-2    |
| A_23_P13364    | 11,0148 | 10,2854 | 1,657949426 | ENST00000531242 | 4925      | NM_005013    | NUCB2          |
| A_33_P3359781  | 5,44705 | 4,71768 | 1,657914951 | ENST00000381177 | 4267      | N/A          | CD99           |
| A_22_P00011618 | 2,2663  | 1,53702 | 1,657811528 | N/A             | 100506492 | NR_038896    | DSCAM-AS1      |
| A_33_P3266923  | 7,18182 | 6,4528  | 1,657512787 | ENST00000297293 | 22853     | NM_014916    | LMTK2          |
| A_33_P3258362  | 5,43389 | 4,70495 | 1,657420877 | ENST00000482565 | 3040      | NM_000517    | HBA2           |
| A_33_P3240632  | 2,35816 | 1,62928 | 1,657351949 | ENST00000325017 | 137814    | NM_001136271 | NKX2-6         |
| A_22_P00001403 | 4,14801 | 3,41922 | 1,657248561 | N/A             | N/A       | N/A          | Inc-APBB1IP-2  |
| A_22_P00024983 | 3,78547 | 3,05669 | 1,657237074 | N/A             | 101929756 | XR_252148    | LOC101929756   |
| A_33_P3216938  | 6,73036 | 6,00161 | 1,657202613 | ENST00000527261 | 100130460 | NR_103765    | CAND1.11       |
| A_22_P00006160 | 2,71627 | 1,98756 | 1,657156666 | ENST00000423478 | 644353    | NM_001143978 | ZCCHC18        |
| A_23_P202156   | 9,07343 | 8,34492 | 1,656926951 | ENST00000189444 | 4791      | NM_001288724 | NFKB2          |
| A_33_P3267320  | 4,99238 | 4,26396 | 1,65682359  | ENST00000296292 | 91869     | NM_052859    | RFT1           |
| A_21_P0000778  | 7,51137 | 6,783   | 1,65676617  | ENST00000603027 | 100507331 | NR_038357    | ZSWIM8-AS1     |
| A_23_P346431   | 3,21872 | 2,4904  | 1,656708752 | ENST00000295910 | 131831    | NM_152394    | ERICH6         |
| A_19_P00317180 | 8,92603 | 8,19776 | 1,656651336 | ENST00000613916 | 5820      | NR_003367    | PVT1           |
| A_22_P00015880 | 8,04821 | 7,31998 | 1,656605404 | N/A             | N/A       | AK095250     | Inc-TC2N-1     |
| A_22_P00001176 | 6,39285 | 5,66467 | 1,656547991 | ENST00000553991 | N/A       | BX103447     | N/A            |
| A_33_P3297399  | 8,5256  | 7,79746 | 1,656502063 | ENST00000522493 | 54793     | NM_017634    | KCTD9          |
| A_23_P45488    | 9,86159 | 9,13351 | 1,656433172 | ENST00000475657 | 60343     | NM_021806    | FAM3A          |
| A_22_P00010716 | 6,29521 | 5,56723 | 1,656318361 | ENST00000510360 | 102724596 | N/A          | LOC102724596   |
| A_23_P97632    | 14,4579 | 13,7301 | 1,656111721 | ENST00000468487 | 2058      | NM_004446    | EPRS           |

|                |         |         |             |                 |           |              |              |
|----------------|---------|---------|-------------|-----------------|-----------|--------------|--------------|
| A_22_P00011747 | 5,137   | 4,40926 | 1,656042847 | N/A             | N/A       | N/A          | Inc-PERP-2   |
| A_33_P3395230  | 3,19478 | 2,46707 | 1,656008411 | ENST00000458685 | N/A       | N/A          | N/A          |
| A_23_P202427   | 7,94544 | 7,21775 | 1,655985454 | ENST00000354624 | 80201     | NM_025130    | HKDC1        |
| A_33_P3331080  | 5,94414 | 5,21656 | 1,655859196 | N/A             | 10802     | NM_001252231 | SEC24A       |
| A_33_P3255384  | 2,35716 | 1,62972 | 1,655698518 | ENST00000432451 | 254240    | NM_174932    | BPIFC        |
| A_24_P827      | 6,93765 | 6,21028 | 1,655618185 | ENST00000475057 | 8464      | NM_003599    | SUPT3H       |
| A_33_P3409710  | 2,16235 | 1,43502 | 1,655572282 | ENST00000466630 | 349075    | BC048108     | ZNF713       |
| A_32_P92783    | 11,1669 | 10,4396 | 1,655537856 | ENST00000394563 | 10963     | NM_006819    | STIP1        |
| A_33_P3321793  | 6,86489 | 6,13761 | 1,655514905 | N/A             | N/A       | BM973477     | N/A          |
| A_23_P82286    | 5,24216 | 4,51512 | 1,655239525 | ENST00000546292 | 7455      | NM_173059    | ZAN          |
| A_33_P3255964  | 9,07302 | 8,34598 | 1,655239525 | ENST00000420853 | 643160    | N/A          | CYMP         |
| A_23_P152235   | 9,46396 | 8,73693 | 1,655228051 | ENST00000329734 | 79191     | NM_024336    | IRX3         |
| A_22_P00012995 | 5,84893 | 5,12203 | 1,655078907 | N/A             | N/A       | BX643577     | Inc-RFPL3-3  |
| A_24_P321634   | 8,95664 | 8,2298  | 1,655010075 | ENST00000467542 | 9205      | NM_001039650 | ZMYM5        |
| A_23_P35989    | 10,4694 | 9,74265 | 1,654906834 | ENST00000530754 | 221120    | NM_139178    | ALKBH3       |
| A_21_P0007440  | 4,27314 | 3,54658 | 1,6546889   | N/A             | 102724209 | XR_424249    | LOC102724209 |
| A_33_P3356863  | 2,28292 | 1,55651 | 1,654516868 | N/A             | N/A       | AK128846     | N/A          |
| A_23_P201918   | 9,6528  | 8,9264  | 1,6545054   | ENST00000344517 | 23456     | NM_012089    | ABCB10       |
| A_33_P3214314  | 9,67618 | 8,94978 | 1,6545054   | ENST00000372088 | 54462     | NM_001284241 | CCSER2       |
| A_23_P73526    | 4,05704 | 3,33078 | 1,654344853 | ENST00000454225 | 4435      | NM_004143    | CITED1       |
| A_23_P85218    | 3,82593 | 3,09981 | 1,654184322 | ENST00000370536 | 6658      | NM_005634    | SOX3         |
| A_33_P3214884  | 11,2164 | 10,4904 | 1,654046737 | ENST00000261667 | 3839      | NM_002267    | KPNA3        |
| A_33_P3261565  | 7,4854  | 6,75943 | 1,654012342 | ENST00000359653 | 54764     | NM_017580    | ZRANB1       |
| A_24_P166663   | 13,6787 | 12,9529 | 1,653817453 | ENST00000265734 | 1021      | NM_001259    | CDK6         |
| A_23_P84202    | 6,3868  | 5,66103 | 1,653783063 | ENST00000554998 | 79446     | NM_024515    | WDR25        |
| A_21_P0014821  | 2,76554 | 2,03999 | 1,653530893 | N/A             | N/A       | N/A          | N/A          |
| A_33_P3281258  | 3,29608 | 2,57061 | 1,653439205 | ENST00000452153 | 100996813 | XR_429857    | LOC100996813 |
| A_21_P0008295  | 5,18951 | 4,46411 | 1,653358981 | ENST00000556035 | N/A       | N/A          | N/A          |
| A_33_P3343493  | 2,49737 | 1,77228 | 1,653003753 | ENST00000466282 | 2550      | NM_001470    | GABBR1       |
| A_22_P00007748 | 2,4286  | 1,70351 | 1,653003753 | ENST00000420694 | 103724387 | N/A          | LINC01058    |
| A_33_P3352148  | 5,31335 | 4,58847 | 1,652763158 | ENST00000257897 | 116986    | NM_001122772 | AGAP2        |
| A_23_P365817   | 15,0568 | 14,3322 | 1,652442418 | ENST00000309318 | 26472     | NM_138689    | PPP1R14B     |
| A_33_P3273885  | 3,21526 | 2,49072 | 1,652373697 | ENST00000477036 | N/A       | XM_005274953 | N/A          |

|                |         |         |             |                 |           |              |              |
|----------------|---------|---------|-------------|-----------------|-----------|--------------|--------------|
| A_23_P143016   | 9,8083  | 9,08386 | 1,652259167 | ENST00000412735 | 10865     | NM_212481    | ARID5A       |
| A_33_P3363100  | 5,24894 | 4,52451 | 1,652247714 | N/A             | N/A       | N/A          | N/A          |
| A_24_P288722   | 9,2214  | 8,49705 | 1,652156097 | ENST00000378166 | 8573      | NM_003688    | CASK         |
| A_23_P167168   | 5,42648 | 4,70215 | 1,652133193 | ENST00000543780 | 3512      | NM_144646    | IGJ          |
| A_22_P00016493 | 3,22481 | 2,50066 | 1,651927075 | N/A             | N/A       | DW428550     | Inc-TMEM99-2 |
| A_33_P3274696  | 14,9732 | 14,2491 | 1,651869825 | ENST00000402965 | 79581     | NM_024531    | SLC52A2      |
| A_21_P0011209  | 3,92545 | 3,20139 | 1,651824026 | ENST00000416576 | N/A       | N/A          | N/A          |
| A_24_P92367    | 12,8768 | 12,1528 | 1,65175533  | ENST00000398873 | 150223    | NM_001017964 | YDJC         |
| A_23_P133995   | 13,5869 | 12,863  | 1,651640843 | ENST00000373699 | 51645     | NM_016059    | PPIL1        |
| A_19_P00316914 | 7,56954 | 6,84602 | 1,651205865 | ENST00000441360 | N/A       | N/A          | N/A          |
| A_21_P0001856  | 5,04062 | 4,31718 | 1,651114305 | ENST00000442821 | N/A       | N/A          | N/A          |
| A_33_P3346610  | 5,46771 | 4,74443 | 1,650931201 | N/A             | N/A       | N/A          | N/A          |
| A_32_P177040   | 4,1299  | 3,4067  | 1,650839656 | ENST00000624640 | 442590    | NM_001099435 | SPDYE5       |
| A_22_P00018375 | 6,31804 | 5,59487 | 1,650805328 | N/A             | N/A       | N/A          | Inc-AVEN-1   |
| A_23_P103361   | 9,49137 | 8,76825 | 1,650748117 | ENST00000469765 | 3932      | NM_005356    | LCK          |
| A_23_P250274   | 16,4368 | 15,714  | 1,65038201  | ENST00000259324 | 56262     | NM_019594    | LRR8A        |
| A_33_P3244828  | 7,29497 | 6,57217 | 1,65038201  | N/A             | N/A       | N/A          | N/A          |
| A_23_P425104   | 9,407   | 8,68422 | 1,650359131 | ENST00000263377 | 23476     | NM_058243    | BRD4         |
| A_24_P316430   | 8,81697 | 8,09431 | 1,650221863 | ENST00000369646 | 4907      | NM_002526    | NT5E         |
| A_21_P0010842  | 4,8673  | 4,14467 | 1,650187548 | ENST00000445161 | 100506126 | NR_108045    | LINC00867    |
| A_22_P00023901 | 2,39718 | 1,67457 | 1,650164672 | N/A             | N/A       | AK057422     | Inc-STRA8-1  |
| A_33_P3383292  | 3,60505 | 2,88298 | 1,649547132 | N/A             | 100129620 | NR_033940    | LOC100129620 |
| A_21_P0011068  | 10,3208 | 9,59878 | 1,649489964 | ENST00000538790 | 100506691 | XR_424420    | LOC100506691 |
| A_23_P130398   | 2,51898 | 1,79697 | 1,64947853  | ENST00000391403 | 64693     | NM_172241    | CTAGE1       |
| A_33_P3336597  | 4,01727 | 3,29527 | 1,649467097 | ENST00000434664 | 554223    | NM_001207043 | LOC554223    |
| A_23_P9485     | 5,08364 | 4,36175 | 1,649341336 | ENST00000431067 | 5005      | NM_000608    | ORM2         |
| A_32_P387648   | 9,46434 | 8,74254 | 1,649238448 | ENST00000368799 | 2312      | NM_002016    | FLG          |
| A_21_P0014815  | 6,61671 | 5,89497 | 1,64916986  | N/A             | N/A       | BC054864     | Inc-TTR-1    |
| A_24_P37441    | 9,59731 | 8,87558 | 1,649158429 | ENST00000410055 | 5163      | NM_002610    | PDK1         |
| A_21_P0006871  | 4,54189 | 3,82025 | 1,649055552 | N/A             | 101927584 | XR_246208    | LOC101927584 |
| A_33_P3261019  | 3,53302 | 2,81152 | 1,648895535 | N/A             | 6549      | NM_003048    | SLC9A2       |
| A_24_P159948   | 10,6042 | 9,88277 | 1,648815532 | ENST00000424545 | 10139     | NM_003224    | ARFRP1       |
| A_21_P0014443  | 6,88477 | 6,16335 | 1,648804103 | N/A             | N/A       | N/A          | N/A          |

|                |         |         |             |                 |           |              |                |
|----------------|---------|---------|-------------|-----------------|-----------|--------------|----------------|
| A_22_P00006723 | 4,69717 | 3,97594 | 1,648586973 | ENST00000549261 | N/A       | DB486346     | N/A            |
| A_23_P309701   | 8,74509 | 8,02403 | 1,648392723 | ENST00000309660 | 5771      | NM_002828    | PTPN2          |
| A_24_P943997   | 7,92442 | 7,20337 | 1,648381297 | ENST00000377275 | 221079    | NM_178815    | ARL5B          |
| A_24_P786713   | 2,80376 | 2,08272 | 1,648369872 | ENST00000540219 | N/A       | N/A          | N/A            |
| A_21_P0010731  | 5,81921 | 5,09817 | 1,648369872 | ENST00000452528 | N/A       | N/A          | N/A            |
| A_24_P66679    | 6,62457 | 5,9038  | 1,648061409 | ENST00000556492 | 122830    | NM_001011713 | NAA30          |
| A_23_P414713   | 7,57268 | 6,85196 | 1,648004292 | ENST00000360465 | 84436     | NM_032423    | ZNF528         |
| A_22_P00011644 | 2,62307 | 1,90255 | 1,647775846 | ENST00000443792 | N/A       | N/A          | N/A            |
| A_23_P79122    | 11,2053 | 10,4848 | 1,647753003 | ENST00000594724 | 55850     | NM_018467    | USE1           |
| A_33_P3297155  | 6,81582 | 6,09533 | 1,647741582 | ENST00000525153 | 8487      | NM_003616    | GEMIN2         |
| A_22_P00017240 | 4,94144 | 4,22101 | 1,647673056 | N/A             | 102724800 | XR_425278    | LOC102724800   |
| A_24_P410952   | 10,1035 | 9,38309 | 1,647650214 | ENST00000360472 | 8682      | NM_003768    | PEA15          |
| A_33_P3376965  | 9,22791 | 8,50769 | 1,647433236 | ENST00000444189 | 79094     | NM_024111    | CHAC1          |
| A_33_P3802966  | 2,45598 | 1,73583 | 1,647353304 | N/A             | N/A       | N/A          | N/A            |
| A_21_P0013073  | 2,23073 | 1,51083 | 1,647067865 | N/A             | N/A       | N/A          | XLOC_l2_012929 |
| A_24_P171058   | 8,44243 | 7,72259 | 1,646999366 | ENST00000458549 | 169200    | NM_001008495 | TMEM64         |
| A_23_P3775     | 10,6999 | 9,98016 | 1,646885209 | ENST00000336111 | 55239     | NM_018233    | OGFOD1         |
| A_33_P3380056  | 7,09265 | 6,3731  | 1,646668332 | ENST00000489377 | 91283     | NM_001198807 | MSANTD3        |
| A_21_P0013428  | 2,12788 | 1,40846 | 1,646519959 | N/A             | N/A       | N/A          | Inc-ZNF680-9   |
| A_24_P376556   | 13,7804 | 13,061  | 1,646497133 | ENST00000409764 | 54205     | NM_018947    | CYCS           |
| A_33_P3271196  | 9,22069 | 8,50133 | 1,646451483 | ENST00000317829 | 154810    | NM_130847    | AMOTL1         |
| A_23_P94795    | 12,0524 | 11,3331 | 1,646383011 | ENST00000358409 | 7004      | NM_003213    | TEAD4          |
| A_33_P3393931  | 4,86285 | 4,14357 | 1,646360187 | N/A             | 619518    | NR_103541    | SSBP3-AS1      |
| A_33_P3302423  | 3,18056 | 2,46136 | 1,646268896 | ENST00000335749 | 57690     | NM_001142640 | TNRC6C         |
| A_33_P3264895  | 11,3652 | 10,646  | 1,646268896 | ENST00000420065 | 121268    | NM_001303126 | RHEBL1         |
| A_23_P90419    | 10,5508 | 9,83181 | 1,646029281 | ENST00000251203 | 80714     | NM_025245    | PBX4           |
| A_21_P0003892  | 5,04664 | 4,32776 | 1,645903782 | ENST00000507759 | N/A       | N/A          | N/A            |
| A_22_P00000218 | 2,22574 | 1,50704 | 1,645698442 | N/A             | 100128560 | NR_125367    | MYHAS          |
| A_22_P00023280 | 2,13477 | 1,41609 | 1,645675628 | N/A             | N/A       | N/A          | Inc-MRE11A-1   |
| A_23_P141092   | 5,72852 | 5,00994 | 1,645561562 | ENST00000575320 | 7023      | NM_003223    | TFAP4          |
| A_24_P246841   | 4,30048 | 3,58199 | 1,64545891  | ENST00000411689 | 9481      | NM_004277    | SLC25A27       |
| A_22_P00008786 | 5,80371 | 5,08538 | 1,645276433 | N/A             | 101927761 | XR_427771    | LOC101927761   |
| A_24_P257336   | 2,25634 | 1,53807 | 1,645208009 | ENST00000463323 | 64091     | NM_022135    | POPDC2         |

|                |         |         |             |                 |        |              |                |
|----------------|---------|---------|-------------|-----------------|--------|--------------|----------------|
| A_33_P3228435  | 4,58432 | 3,86606 | 1,645196605 | ENST00000587056 | 5348   | NM_001278717 | FXYD1          |
| A_32_P201212   | 2,26964 | 1,55138 | 1,645196605 | N/A             | 729338 | N/A          | CETN4P         |
| A_21_P0009528  | 4,83049 | 4,11242 | 1,64497995  | N/A             | N/A    | N/A          | Inc-PIEZO2-3   |
| A_33_P3398932  | 5,94197 | 5,22407 | 1,644786126 | ENST00000591416 | 4152   | N/A          | MBD1           |
| A_22_P00023569 | 7,25233 | 6,53469 | 1,644489732 | N/A             | N/A    | N/A          | Inc-FAM168A-1  |
| A_33_P3358606  | 5,21228 | 4,49477 | 1,644341555 | ENST00000415915 | 401024 | NM_173651    | FSIP2          |
| A_21_P0001196  | 4,06261 | 3,34527 | 1,644147805 | N/A             | N/A    | N/A          | Inc-SERPINC1-3 |
| A_23_P103628   | 12,2109 | 11,4936 | 1,64410222  | ENST00000366581 | 55127  | NM_018072    | HEATR1         |
| A_24_P299769   | 2,49999 | 1,78275 | 1,644033846 | ENST00000408896 | 26188  | NM_012353    | OR1C1          |
| A_24_P327815   | 10,4048 | 9,68807 | 1,643452774 | ENST00000305218 | 10963  | NM_006819    | STIP1          |
| A_24_P289471   | 10,1467 | 9,43004 | 1,643373035 | ENST00000611959 | 8635   | NM_003730    | RNASSET2       |
| A_23_P214977   | 11,9375 | 11,2209 | 1,643304691 | ENST00000459782 | 11231  | NM_007214    | SEC63          |
| A_22_P00009365 | 7,06348 | 6,34691 | 1,643270519 | ENST00000437233 | N/A    | N/A          | N/A            |
| A_33_P3357082  | 8,97762 | 8,26109 | 1,643224959 | ENST00000392604 | 79828  | NM_024770    | METTL8         |
| A_33_P3313401  | 13,7944 | 13,0779 | 1,643190789 | ENST00000409764 | 54205  | NM_018947    | CYCS           |
| A_33_P3289870  | 3,8062  | 3,08974 | 1,643145231 | N/A             | N/A    | N/A          | Inc-ASB5-1     |
| A_22_P00017127 | 2,63167 | 1,91524 | 1,643111063 | N/A             | N/A    | N/A          | Inc-UBASH3B-2  |
| A_21_P0002634  | 2,63484 | 1,91843 | 1,643088285 | N/A             | N/A    | N/A          | Inc-ASB1-1     |
| A_22_P00005621 | 4,05752 | 3,34134 | 1,642826358 | N/A             | N/A    | N/A          | Inc-EGR2-1     |
| A_33_P3377760  | 4,97372 | 4,25778 | 1,642553088 | N/A             | N/A    | DA946325     | N/A            |
| A_33_P3228807  | 5,40023 | 4,68452 | 1,642291247 | ENST00000496786 | 10290  | NM_001173476 | SPEG           |
| A_24_P416177   | 10,3291 | 9,61349 | 1,642177416 | ENST00000254235 | 113    | NM_001114    | ADCY7          |
| A_23_P43226    | 11,5747 | 10,8591 | 1,642166033 | ENST00000221200 | 54793  | NM_017634    | KCTD9          |
| A_24_P89509    | 10,9341 | 10,2185 | 1,642166033 | ENST00000453993 | 60487  | NM_001031712 | TRMT11         |
| A_33_P3359413  | 11,8101 | 11,0947 | 1,641938397 | ENST00000221566 | 6449   | NM_003021    | SGTA           |
| A_33_P3225111  | 2,88557 | 2,1702  | 1,641904254 | ENST00000622711 | 57468  | AK098371     | SLC12A5        |
| A_24_P911288   | 2,92426 | 2,20892 | 1,641870112 | N/A             | 652764 | X74861       | HPX-2          |
| A_22_P00024248 | 2,26945 | 1,55416 | 1,64181321  | ENST00000512609 | N/A    | N/A          | N/A            |
| A_33_P3357007  | 2,76212 | 2,04686 | 1,64177907  | ENST00000382141 | 387911 | NM_001007537 | C1QTNF9B       |
| A_21_P0012326  | 9,15535 | 8,44011 | 1,64175631  | ENST00000447898 | N/A    | N/A          | N/A            |
| A_21_P0002189  | 6,55037 | 5,83533 | 1,64152873  | N/A             | N/A    | N/A          | Inc-SLC4A1AP-1 |
| A_33_P3228082  | 2,33951 | 1,62456 | 1,641426329 | ENST00000254271 | 341883 | NR_075071    | LRRC9          |
| A_23_P125423   | 11,0532 | 10,3383 | 1,641369443 | ENST00000540394 | 715    | NM_001733    | C1R            |

|                |         |         |             |                 |           |              |                       |
|----------------|---------|---------|-------------|-----------------|-----------|--------------|-----------------------|
| A_22_P00017098 | 2,27332 | 1,55843 | 1,641358066 | N/A             | 100873989 | NR_049724    | GRM5-AS1              |
| A_22_P00018906 | 7,1276  | 6,41286 | 1,641187419 | N/A             | N/A       | N/A          | Inc-TOMM20L-1         |
| A_23_P41942    | 6,93391 | 6,21937 | 1,640959918 | ENST00000622335 | 10622     | NM_006467    | POLR3G                |
| A_22_P00005076 | 3,68697 | 2,97246 | 1,640925795 | ENST00000558835 | 101929743 | NR_120369    | LINC01586             |
| A_21_P0013228  | 6,98701 | 6,27255 | 1,640868926 | ENST00000525931 | 92105     | N/A          | INTS4                 |
| A_23_P257743   | 10,9397 | 10,2253 | 1,640800686 | ENST00000377707 | 6461      | NM_003028    | SHB                   |
| A_19_P00813087 | 3,05769 | 2,34335 | 1,640732448 | ENST00000413121 | 100506421 | NR_037883    | LINC01158             |
| A_33_P3260116  | 2,84121 | 2,12697 | 1,640618725 | ENST00000390460 | N/A       | AB305761     | N/A                   |
| A_22_P00010321 | 4,38409 | 3,66996 | 1,640493639 | ENST00000451108 | N/A       | N/A          | N/A                   |
| A_23_P326303   | 2,87767 | 2,16365 | 1,640368563 | ENST00000618721 | 83873     | NM_031936    | GPR61                 |
| A_24_P48791    | 10,9375 | 10,2235 | 1,640345822 | ENST00000374980 | 8894      | NM_003908    | EIF2S2                |
| A_22_P00021487 | 5,27042 | 4,55646 | 1,640300343 | ENST00000438589 | 388630    | NM_001194986 | TRABD2B               |
| A_22_P00011462 | 3,53693 | 2,82299 | 1,640277604 | N/A             | N/A       | N/A          | Inc-PAPPA-AS1-2       |
| A_33_P3388135  | 11,9326 | 11,2187 | 1,640232126 | ENST00000347364 | 8195      | NM_018848    | MKKS                  |
| A_33_P3414207  | 3,51676 | 2,80291 | 1,640175281 | N/A             | 101928578 | NR_110410    | RAP2C-AS1             |
| A_21_P0009828  | 7,21859 | 6,50491 | 1,639982022 | N/A             | N/A       | N/A          | Inc-C20orf187-2       |
| A_22_P00010504 | 7,37357 | 6,66007 | 1,63977742  | ENST00000524190 | 101929709 | NR_125822    | LOC101929709          |
| A_23_P37484    | 12,2396 | 11,5262 | 1,639663764 | ENST00000254190 | 22856     | NM_014918    | CHSY1                 |
| A_24_P73669    | 10,9147 | 10,2015 | 1,639436474 | ENST00000562794 | 2935      | NM_002094    | GSPT1                 |
| A_23_P357717   | 4,37614 | 3,66306 | 1,639300115 | ENST00000556450 | 8115      | NM_021966    | TCL1A                 |
| A_24_P151834   | 8,92934 | 8,21627 | 1,639288752 | ENST00000570934 | 51479     | BC052308     | ANKFY1                |
| A_24_P126181   | 11,0951 | 10,3821 | 1,639209215 | ENST00000537399 | 126382    | NM_176880    | NR2C2AP               |
| A_23_P154037   | 6,14209 | 5,42911 | 1,639186491 | ENST00000485106 | 316       | NM_001159    | AOX1                  |
| A_21_P0008938  | 6,07368 | 5,36084 | 1,639027431 | N/A             | N/A       | N/A          | Inc-RP11-327F22.5.1-6 |
| A_24_P196019   | 6,34407 | 5,63137 | 1,638868387 | ENST00000422823 | N/A       | N/A          | N/A                   |
| A_22_P00000382 | 3,59746 | 2,88478 | 1,638845667 | N/A             | 100127967 | NR_126005    | KRT73-AS1             |
| A_23_P56553    | 10,237  | 9,52436 | 1,63880023  | ENST00000477130 | 79828     | NM_024770    | METTL8                |
| A_33_P3349546  | 8,94947 | 8,23685 | 1,638777511 | ENST00000375255 | 80067     | NM_025000    | DCAF17                |
| A_22_P00000615 | 2,18676 | 1,47415 | 1,638766152 | N/A             | N/A       | N/A          | Inc-ACOT12-2          |
| A_23_P319808   | 7,19254 | 6,47998 | 1,638709358 | ENST00000279907 | 23074     | NM_015054    | UHRF1BP1L             |
| A_23_P118122   | 6,15259 | 5,44007 | 1,638663924 | ENST00000477143 | 8786      | NM_003834    | RGS11                 |
| A_33_P3331601  | 7,68969 | 6,97742 | 1,638379989 | ENST00000524413 | 79896     | NM_024838    | THNSL1                |
| A_21_P0014247  | 7,38219 | 6,66995 | 1,638345921 | N/A             | N/A       | AK096685     | N/A                   |

|                |         |         |             |                 |           |              |              |
|----------------|---------|---------|-------------|-----------------|-----------|--------------|--------------|
| A_22_P00025373 | 8,55666 | 7,8445  | 1,638255074 | ENST00000439156 | N/A       | N/A          | N/A          |
| A_21_P0014604  | 8,7886  | 8,07654 | 1,638141523 | N/A             | N/A       | AK022008     | Inc-ADAM30-1 |
| A_33_P3400192  | 6,46127 | 5,74923 | 1,638118813 | ENST00000425491 | 5601      | NM_001135044 | MAPK9        |
| A_33_P3256168  | 5,25207 | 4,54009 | 1,638050687 | ENST00000604751 | 401548    | NM_001012994 | SNX30        |
| A_33_P3210583  | 3,9397  | 3,22789 | 1,637857679 | ENST00000409085 | 22848     | NM_014911    | AAK1         |
| A_21_P0002840  | 4,56895 | 3,85717 | 1,637823621 | N/A             | N/A       | N/A          | Inc-XPC-1    |
| A_21_P0002782  | 3,70824 | 2,99653 | 1,637744155 | ENST00000496084 | N/A       | N/A          | N/A          |
| A_21_P0014690  | 3,9954  | 3,28381 | 1,637607937 | N/A             | N/A       | N/A          | N/A          |
| A_24_P91991    | 6,37217 | 5,66069 | 1,637483081 | ENST00000423729 | 339983    | NM_178557    | NAT8L        |
| A_21_P0000284  | 9,78584 | 9,07443 | 1,637403631 | ENST00000395788 | 26797     | NR_002742    | SNORD52      |
| A_24_P934126   | 2,31068 | 1,59933 | 1,637335535 | N/A             | 100128035 | AY358772     | LOC100128035 |
| A_33_P3349912  | 2,39166 | 1,68038 | 1,637256093 | ENST00000612677 | 401258    | NM_001257357 | RAB44        |
| A_24_P372932   | 7,72137 | 7,01025 | 1,637074526 | ENST00000420616 | 5830      | NM_000319    | PEX5         |
| A_21_P0004359  | 2,32982 | 1,6188  | 1,636961056 | N/A             | N/A       | N/A          | Inc-NSUN2-1  |
| A_33_P3240912  | 8,80556 | 8,09468 | 1,636802212 | ENST00000476168 | 84061     | NM_032121    | MAGT1        |
| A_23_P67299    | 10,6913 | 9,98049 | 1,636722796 | ENST00000294618 | 57572     | NM_020812    | DOCK6        |
| A_23_P29185    | 8,1119  | 7,40112 | 1,636688762 | ENST00000612946 | 23331     | NM_001145418 | TTC28        |
| A_24_P371758   | 13,5984 | 12,8877 | 1,636598007 | ENST00000382647 | 64979     | NM_032479    | MRPL36       |
| A_24_P309415   | 14,5774 | 13,8668 | 1,63648457  | ENST00000398136 | 114908    | NM_052932    | TMEM123      |
| A_21_P0012780  | 7,99413 | 7,28382 | 1,636155649 | ENST00000502883 | N/A       | N/A          | N/A          |
| A_21_P0008701  | 9,16438 | 8,45411 | 1,636110286 | N/A             | N/A       | N/A          | Inc-LRRK1-2  |
| A_22_P00018918 | 3,49648 | 2,78627 | 1,636042244 | ENST00000511947 | N/A       | DB034893     | N/A          |
| A_33_P3347452  | 9,64516 | 8,93502 | 1,635962864 | ENST00000510118 | 6196      | NM_021135    | RPS6KA2      |
| A_21_P0000318  | 9,78397 | 9,07384 | 1,635951525 | ENST00000602573 | 677809    | NR_002963    | SNORA24      |
| A_33_P6623568  | 5,21402 | 4,50397 | 1,635860811 | ENST00000562715 | 5073      | N/A          | PARN         |
| A_24_P368544   | 6,76974 | 6,05976 | 1,635781144 | ENST00000354883 | 115286    | NM_173471    | SLC25A26     |
| A_22_P00023924 | 4,04506 | 3,33517 | 1,635679398 | N/A             | N/A       | N/A          | Inc-OBFC2A-5 |
| A_23_P40049    | 11,1656 | 10,4559 | 1,635463997 | ENST00000264705 | 790       | NM_004341    | CAD          |
| A_21_P0000315  | 10,79   | 10,0803 | 1,635463997 | ENST00000525928 | 677805    | NR_002959    | SNORA18      |
| A_21_P0010888  | 8,36307 | 7,65346 | 1,635361974 | N/A             | 101060691 | NR_120613    | NUTM2B-AS1   |
| A_33_P3385732  | 2,38249 | 1,67304 | 1,635180617 | ENST00000332249 | 338751    | NM_001005173 | OR52L1       |
| A_24_P32215    | 5,6819  | 4,97267 | 1,634931283 | ENST00000503220 | N/A       | N/A          | N/A          |
| A_33_P3340385  | 2,45884 | 1,74967 | 1,63486329  | ENST00000357491 | 7594      | NM_001256648 | ZNF43        |



|                |         |         |             |                 |           |              |                |
|----------------|---------|---------|-------------|-----------------|-----------|--------------|----------------|
| A_23_P48997    | 6,39433 | 5,68523 | 1,634783968 | ENST00000560223 | 9051      | NM_003978    | PSTPIP1        |
| A_21_P0007270  | 5,63099 | 4,92191 | 1,634761305 | N/A             | N/A       | N/A          | Inc-DDI1-2     |
| A_21_P0012219  | 5,81165 | 5,10266 | 1,634659326 | N/A             | N/A       | N/A          | XLOC_I2_009136 |
| A_22_P00012790 | 4,72195 | 4,01305 | 1,634557354 | N/A             | N/A       | N/A          | Inc-RALGPS1-1  |
| A_32_P76156    | 7,49757 | 6,78876 | 1,634455388 | ENST00000327570 | 201965    | NM_152682    | RWDD4          |
| A_33_P3410201  | 5,3859  | 4,6771  | 1,634444059 | ENST00000529743 | N/A       | N/A          | N/A            |
| A_24_P35537    | 7,91483 | 7,20607 | 1,634398743 | ENST00000309737 | 79608     | NM_024557    | RIC3           |
| A_22_P00021011 | 4,50328 | 3,7946  | 1,634308116 | ENST00000462792 | N/A       | BF213757     | N/A            |
| A_23_P106042   | 2,46773 | 1,75907 | 1,634285459 | ENST00000553750 | 116173    | NM_001037288 | CMTM5          |
| A_21_P0000044  | 10,7208 | 10,0122 | 1,634217493 | ENST00000621434 | 256227    | NM_001164460 | STEAP1B        |
| A_24_P13715    | 5,67419 | 4,96563 | 1,634172183 | ENST00000569022 | 26263     | NM_147188    | FBXO22         |
| A_24_P341019   | 11,7212 | 11,0128 | 1,633990958 | ENST00000379276 | 29058     | NM_001009924 | TMEM230        |
| A_23_P73589    | 14,4897 | 13,7813 | 1,633990958 | ENST00000360270 | 4478      | NM_002444    | MSN            |
| A_33_P3235761  | 5,08913 | 4,38077 | 1,633945655 | N/A             | 284023    | NR_024349    | LOC284023      |
| A_22_P00008706 | 3,0311  | 2,32276 | 1,633923004 | N/A             | 100128977 | NR_024559    | MAPT-AS1       |
| A_23_P157607   | 13,9248 | 13,2165 | 1,633877702 | ENST00000517546 | 55174     | NM_018142    | INTS10         |
| A_21_P0011489  | 7,38742 | 6,67913 | 1,633866377 | N/A             | N/A       | N/A          | XLOC_I2_005553 |
| A_23_P1452     | 3,12373 | 2,41561 | 1,633673862 | ENST00000277942 | 64106     | NM_022146    | NPFFR1         |
| A_33_P3244956  | 6,87517 | 6,16721 | 1,633492692 | ENST00000309166 | 56675     | NM_020645    | NRIP3          |
| A_23_P26457    | 5,18096 | 4,47326 | 1,633198333 | ENST00000482565 | 3040      | NM_000517    | HBA2           |
| A_23_P433676   | 9,70474 | 8,99711 | 1,633119092 | ENST00000591340 | 57711     | NM_020951    | ZNF529         |
| A_33_P3305482  | 9,38562 | 8,67816 | 1,632926664 | ENST00000360403 | 8891      | NM_020365    | EIF2B3         |
| A_22_P00007533 | 2,56061 | 1,85331 | 1,632745577 | N/A             | N/A       | BC094788     | Inc-HADH-1     |
| A_33_P3209696  | 2,87579 | 2,16852 | 1,632711625 | N/A             | N/A       | N/A          | N/A            |
| A_23_P89587    | 3,15353 | 2,44631 | 1,632655041 | ENST00000290015 | 7484      | NM_003396    | WNT9B          |
| A_33_P3257678  | 11,0688 | 10,3616 | 1,632632408 | ENST00000369158 | 333932    | NM_001005464 | HIST2H3A       |
| A_21_P0012001  | 2,22017 | 1,51297 | 1,632632408 | ENST00000420187 | N/A       | N/A          | N/A            |
| A_22_P00020161 | 5,29796 | 4,59108 | 1,632270318 | N/A             | N/A       | N/A          | Inc-BAIAP2-1   |
| A_33_P3859499  | 3,91137 | 3,20455 | 1,632202435 | ENST00000547175 | 642426    | NR_046104    | LOC642426      |
| A_23_P348911   | 6,16501 | 5,4583  | 1,632077991 | N/A             | 100129726 | NR_027251    | LINC01126      |
| A_21_P0000855  | 3,02877 | 2,32214 | 1,631987492 | N/A             | 100506585 | NR_038966    | LOC100506585   |
| A_33_P3407529  | 7,59959 | 6,89318 | 1,631738645 | ENST00000446477 | 401399    | NM_001174164 | PRRT4          |
| A_23_P502627   | 5,3411  | 4,63477 | 1,631648165 | ENST00000358697 | 7789      | NM_007156    | ZXDA           |

|                |         |         |             |                 |           |              |                |
|----------------|---------|---------|-------------|-----------------|-----------|--------------|----------------|
| A_33_P3288364  | 11,3413 | 10,635  | 1,631614236 | ENST00000335360 | 124044    | NM_152339    | SPATA2L        |
| A_24_P332081   | 3,76051 | 3,05426 | 1,63155769  | ENST00000298622 | 282973    | NM_001105521 | JAKMIP3        |
| A_21_P0008111  | 2,58253 | 1,87644 | 1,631376754 | N/A             | N/A       | N/A          | Inc-DAOA-6     |
| A_33_P3651911  | 7,27284 | 6,56682 | 1,631297601 | ENST00000560295 | N/A       | AK092172     | N/A            |
| A_23_P130359   | 3,08629 | 2,38052 | 1,631014943 | ENST00000262227 | 79822     | NM_001010000 | ARHGAP28       |
| A_33_P3245178  | 5,87748 | 5,17176 | 1,630958418 | ENST00000372674 | 84707     | NM_001168399 | BEX2           |
| A_33_P3229552  | 5,06065 | 4,35497 | 1,630913198 | ENST00000248668 | 57622     | NM_020862    | LRFN1          |
| A_21_P0006484  | 2,51045 | 1,80495 | 1,630709728 | N/A             | N/A       | N/A          | Inc-CDKL5-1    |
| A_24_P808100   | 7,75552 | 7,05009 | 1,630630607 | ENST00000424799 | 28985     | NM_014060    | MCTS1          |
| A_22_P00001450 | 4,30848 | 3,60307 | 1,630608002 | ENST00000424761 | N/A       | N/A          | N/A            |
| A_33_P3395206  | 2,23117 | 1,52579 | 1,630574095 | N/A             | N/A       | N/A          | N/A            |
| A_24_P940776   | 8,98594 | 8,28058 | 1,63055149  | ENST00000358731 | 55814     | NM_018429    | BDP1           |
| A_21_P0006206  | 3,51197 | 2,80675 | 1,630393268 | N/A             | N/A       | N/A          | Inc-RAD23B-7   |
| A_21_P0013168  | 2,26852 | 1,56331 | 1,630381967 | N/A             | N/A       | N/A          | XLOC_I2_013267 |
| A_22_P00014754 | 2,16069 | 1,45557 | 1,630280262 | ENST00000424612 | N/A       | AA446035     | N/A            |
| A_33_P3290687  | 9,90277 | 9,19778 | 1,630133366 | ENST00000376946 | 64215     | NM_022365    | DNAJC1         |
| A_33_P3239744  | 3,17942 | 2,47448 | 1,63007687  | N/A             | 150051    | XR_109661    | LOC150051      |
| A_21_P0012424  | 2,17484 | 1,47007 | 1,629884802 | N/A             | N/A       | N/A          | XLOC_I2_010056 |
| A_33_P3333752  | 3,52171 | 2,81696 | 1,629862207 | ENST00000409396 | 440585    | XM_005270875 | FAM183A        |
| A_21_P0002505  | 8,57398 | 7,86924 | 1,629850909 | N/A             | N/A       | N/A          | Inc-C2orf27B-3 |
| A_23_P55107    | 9,08712 | 8,3824  | 1,629828315 | ENST00000395544 | 9706      | NM_014683    | ULK2           |
| A_33_P3369393  | 11,1941 | 10,4895 | 1,629692755 | ENST00000435988 | 653361    | NM_000265    | NCF1           |
| A_23_P13338    | 7,12527 | 6,42074 | 1,629613684 | ENST00000330574 | 80789     | NM_030628    | INTS5          |
| A_21_P0003838  | 2,67449 | 1,97005 | 1,629512027 | N/A             | N/A       | N/A          | Inc-AFM-1      |
| A_21_P0006286  | 2,916   | 2,21167 | 1,629387787 | N/A             | N/A       | N/A          | Inc-AGTPBP1-3  |
| A_22_P00018162 | 6,28971 | 5,58558 | 1,629161922 | ENST00000528090 | 157381    | BC128380     | LINC00964      |
| A_23_P250619   | 9,65449 | 8,95049 | 1,629015126 | ENST00000517432 | 79683     | NM_153746    | ZDHHC14        |
| A_22_P00008731 | 6,5232  | 5,81949 | 1,628687706 | ENST00000422519 | N/A       | AK090932     | N/A            |
| A_21_P0007357  | 3,29382 | 2,59013 | 1,628665128 | N/A             | N/A       | N/A          | Inc-FTH1-3     |
| A_24_P409230   | 3,87229 | 3,16861 | 1,628653839 | ENST00000307322 | 341276    | NM_001004460 | OR10A2         |
| A_33_P3262094  | 2,62681 | 1,92315 | 1,628631261 | ENST00000524943 | 219865    | NM_001005198 | OR8G5          |
| A_33_P3285097  | 5,02196 | 4,31836 | 1,62856353  | N/A             | N/A       | N/A          | N/A            |
| A_19_P00320555 | 7,75652 | 7,05296 | 1,628518377 | ENST00000519854 | 101929709 | XR_242401    | LOC101929709   |

|                |         |         |             |                 |           |              |                    |
|----------------|---------|---------|-------------|-----------------|-----------|--------------|--------------------|
| A_23_P169494   | 8,00235 | 7,2989  | 1,628394214 | ENST00000477456 | 5004      | NM_000607    | ORM1               |
| A_23_P426809   | 8,84555 | 8,14229 | 1,628179771 | ENST00000487682 | 9826      | NM_198236    | ARHGEF11           |
| A_33_P3251557  | 3,78684 | 3,0836  | 1,6281572   | N/A             | N/A       | N/A          | N/A                |
| A_33_P3352782  | 8,70556 | 8,00235 | 1,628123344 | ENST00000261778 | 79613     | NM_024562    | TANGO6             |
| A_21_P0008689  | 2,45439 | 1,75136 | 1,627920221 | N/A             | N/A       | N/A          | Inc-ARRDC4-4       |
| A_22_P00000474 | 2,38092 | 1,67794 | 1,627863803 | N/A             | N/A       | N/A          | Inc-AC092295.7.1-2 |
| A_24_P204238   | 3,65268 | 2,94986 | 1,627683277 | ENST00000392885 | N/A       | N/A          | N/A                |
| A_23_P358195   | 8,92572 | 8,22292 | 1,627660713 | ENST00000515341 | 643707    | NM_001267536 | GOLGA6L4           |
| A_21_P0007235  | 7,44959 | 6,74696 | 1,627468929 | N/A             | N/A       | N/A          | Inc-P2RY2-2        |
| A_21_P0002912  | 2,51574 | 1,8132  | 1,627367405 | ENST00000482559 | N/A       | N/A          | N/A                |
| A_21_P0002543  | 5,00157 | 4,29903 | 1,627367405 | N/A             | N/A       | N/A          | Inc-EPHA4-3        |
| A_21_P0013785  | 6,89483 | 6,19236 | 1,627288447 | N/A             | N/A       | N/A          | XLOC_I2_015585     |
| A_21_P0013573  | 5,44362 | 4,7412  | 1,62723205  | N/A             | 101928195 | XR_252557    | LOC101928195       |
| A_23_P422778   | 2,48544 | 1,78305 | 1,627198213 | ENST00000344462 | 3785      | NM_004518    | KCNQ2              |
| A_23_P74887    | 5,28427 | 4,5819  | 1,627175655 | ENST00000336798 | 9672      | NM_014654    | SDC3               |
| A_33_P3312301  | 4,91277 | 4,21072 | 1,626814776 | ENST00000612548 | 11113     | NM_001206999 | CIT                |
| A_21_P0000936  | 2,67385 | 1,97214 | 1,62643143  | ENST00000418557 | 101927851 | NR_125945    | LOC101927851       |
| A_24_P683861   | 4,11438 | 3,41278 | 1,626307426 | ENST00000518307 | N/A       | AB067383     | N/A                |
| A_33_P3793702  | 8,32812 | 7,6266  | 1,626217246 | ENST00000530549 | 157381    | NR_027321    | LINC00964          |
| A_24_P398147   | 8,93331 | 8,2318  | 1,626205974 | ENST00000377159 | 10529     | NM_006393    | NEBL               |
| A_33_P3876591  | 4,21756 | 3,51608 | 1,626172159 | N/A             | 677842    | CD050382     | SNORA76C           |
| A_33_P3256957  | 3,9819  | 3,28053 | 1,626048174 | N/A             | N/A       | BC040680     | N/A                |
| A_33_P3227010  | 2,81594 | 2,11459 | 1,626025632 | N/A             | N/A       | N/A          | N/A                |
| A_21_P0012186  | 4,44618 | 3,74495 | 1,625890389 | N/A             | N/A       | N/A          | XLOC_I2_009139     |
| A_23_P413815   | 10,5504 | 9,84918 | 1,625879119 | ENST00000360768 | 154807    | NM_173517    | VKORC1L1           |
| A_22_P00001076 | 3,68202 | 2,98082 | 1,62585658  | ENST00000559755 | N/A       | N/A          | N/A                |
| A_19_P00809029 | 4,81912 | 4,11803 | 1,625732619 | ENST00000471912 | 87769     | NM_001195087 | GGACT              |
| A_24_P65722    | 4,30422 | 3,60327 | 1,625574865 | ENST00000617098 | 11006     | NM_001278426 | LILRB4             |
| A_33_P3296707  | 8,34523 | 7,64429 | 1,625563597 | ENST00000391440 | 441518    | NM_001078173 | FAM127C            |
| A_23_P140190   | 2,21744 | 1,51658 | 1,625473459 | ENST00000612938 | 9834      | NR_026800    | KIAA0125           |
| A_22_P00010332 | 2,34808 | 1,6473  | 1,625383326 | N/A             | N/A       | N/A          | Inc-MYB-4          |
| A_33_P3364023  | 2,49293 | 1,79218 | 1,625349528 | ENST00000624951 | 388820    | XR_172345    | LOC388820          |
| A_21_P0005673  | 8,73018 | 8,02947 | 1,625304464 | N/A             | 389641    | NR_033928    | LOC389641          |

|                |         |         |             |                 |        |              |                      |
|----------------|---------|---------|-------------|-----------------|--------|--------------|----------------------|
| A_33_P3310377  | 2,48191 | 1,78136 | 1,625124222 | ENST00000318749 | 127623 | NM_001004492 | OR2B11               |
| A_33_P3401243  | 5,0541  | 4,3536  | 1,625067901 | ENST00000367938 | 25903  | NM_001297713 | OLFML2B              |
| A_22_P00004761 | 4,64415 | 3,94373 | 1,624977779 | N/A             | N/A    | N/A          | Inc-CTTN-1           |
| A_33_P3419912  | 6,17722 | 5,47681 | 1,624966527 | ENST00000447901 | 79017  | NM_001199815 | GGCT                 |
| A_23_P7679     | 11,37   | 10,6696 | 1,624955264 | ENST00000381843 | 9631   | NM_153485    | NUP155               |
| A_23_P54041    | 7,70098 | 7,0006  | 1,624932737 | ENST00000404535 | 79178  | NM_024328    | THTPA                |
| A_22_P00019723 | 2,79417 | 2,09391 | 1,624797585 | N/A             | N/A    | N/A          | Inc-SPTBN5-2         |
| A_22_P00019484 | 4,98848 | 4,28829 | 1,624718751 | N/A             | N/A    | N/A          | Inc-MARVELD3-1       |
| A_33_P3399943  | 4,51721 | 3,81703 | 1,624707489 | ENST00000366865 | 6196   | NM_021135    | RPS6KA2              |
| A_22_P00023378 | 2,67919 | 1,97903 | 1,624684966 | ENST00000498745 | 340348 | NM_178562    | TSPAN33              |
| A_23_P207967   | 8,91111 | 8,21113 | 1,624482272 | ENST00000256413 | 9811   | NM_014772    | CTIF                 |
| A_33_P3416767  | 9,85362 | 9,15366 | 1,624459753 | ENST00000392366 | 4097   | NM_032711    | MAFG                 |
| A_21_P0010995  | 7,25916 | 6,5592  | 1,624459753 | N/A             | N/A    | N/A          | XLOC_I2_002441       |
| A_21_P0002875  | 2,74416 | 2,04439 | 1,624245829 | N/A             | N/A    | N/A          | Inc-RP11-723O4.6.1-1 |
| A_22_P00012401 | 8,28258 | 7,58289 | 1,624155764 | N/A             | N/A    | N/A          | Inc-PRKD1-2          |
| A_22_P00020169 | 3,4827  | 2,78307 | 1,624088218 | N/A             | N/A    | N/A          | Inc-ZNF613-2         |
| A_33_P3209200  | 3,54618 | 2,84657 | 1,624065704 | ENST00000564670 | N/A    | XR_433069    | N/A                  |
| A_33_P3326914  | 8,34016 | 7,64057 | 1,62404319  | ENST00000378078 | 9827   | NM_001080496 | RGP1                 |
| A_33_P3241184  | 7,79478 | 7,09525 | 1,623975649 | N/A             | N/A    | N/A          | N/A                  |
| A_23_P255215   | 10,486  | 9,78658 | 1,623851832 | ENST00000297157 | 6100   | NM_203288    | RP9                  |
| A_23_P117694   | 3,54151 | 2,84213 | 1,62380681  | ENST00000543950 | 10391  | NM_006091    | CORO2B               |
| A_21_P0003871  | 5,72209 | 5,02274 | 1,623773044 | N/A             | N/A    | N/A          | Inc-ZFP42-7          |
| A_33_P3288104  | 3,64123 | 2,94191 | 1,623739279 | ENST00000405961 | 23500  | BC078153     | DAAM2                |
| A_22_P00016122 | 2,10179 | 1,40282 | 1,623345405 | N/A             | N/A    | N/A          | Inc-TIGD1-1          |
| A_33_P3303742  | 3,53776 | 2,83887 | 1,62325539  | ENST00000439905 | N/A    | XR_427719    | N/A                  |
| A_33_P3334162  | 7,5952  | 6,89634 | 1,623221636 | N/A             | N/A    | N/A          | N/A                  |
| A_21_P0009995  | 4,60596 | 3,90713 | 1,623187882 | N/A             | N/A    | N/A          | Inc-CSNK2A1-1        |
| A_24_P944040   | 10,5532 | 9,85448 | 1,623064125 | ENST00000470886 | 23076  | NM_015056    | RRP1B                |
| A_33_P3257457  | 6,77924 | 6,08052 | 1,623064125 | ENST00000242310 | 138474 | NM_153809    | TAF1L                |
| A_21_P0008134  | 5,524   | 4,82543 | 1,622895381 | N/A             | N/A    | N/A          | Inc-CDX2-1           |
| A_23_P67864    | 12,5119 | 11,8134 | 1,622816639 | ENST00000405392 | 109    | NM_004036    | ADCY3                |
| A_23_P363399   | 14,317  | 13,6185 | 1,622816639 | ENST00000439706 | 81539  | NM_030674    | SLC38A1              |
| A_23_P29735    | 3,65297 | 2,95462 | 1,62264792  | ENST00000296452 | 8927   | NM_003458    | BSN                  |

|                |         |         |             |                 |           |              |                 |
|----------------|---------|---------|-------------|-----------------|-----------|--------------|-----------------|
| A_23_P130194   | 15,0273 | 14,3291 | 1,622479219 | ENST00000619204 | 5831      | NM_006907    | PYCR1           |
| A_22_P00009549 | 2,93016 | 2,23208 | 1,622344271 | N/A             | N/A       | N/A          | Inc-MAP3K12-1   |
| A_21_P0014902  | 5,83483 | 5,13678 | 1,622310535 | N/A             | N/A       | N/A          | N/A             |
| A_22_P00006020 | 3,97435 | 3,27631 | 1,62229929  | N/A             | 100132273 | NR_034118    | NDUFA6-AS1      |
| A_21_P0012435  | 2,17063 | 1,4727  | 1,622175601 | ENST00000502417 | 101927565 | N/A          | LINC01267       |
| A_33_P3262156  | 5,56206 | 4,86413 | 1,622175601 | ENST00000403092 | 6546      | NM_021097    | SLC8A1          |
| A_22_P00025549 | 5,45139 | 4,7535  | 1,622130625 | N/A             | N/A       | N/A          | Inc-NEDD4L-2    |
| A_33_P3249434  | 8,29009 | 7,59225 | 1,622074407 | N/A             | 9373      | NM_001031689 | PLAA            |
| A_22_P00004185 | 2,84463 | 2,14681 | 1,622051921 | N/A             | 101927795 | NR_110275    | LOC101927795    |
| A_23_P127652   | 7,73317 | 7,0354  | 1,621995706 | ENST00000336139 | 7753      | NM_003455    | ZNF202          |
| A_22_P00023419 | 4,99801 | 4,30028 | 1,621950735 | N/A             | N/A       | N/A          | Inc-SHANK2-6    |
| A_33_P3380502  | 2,43837 | 1,74072 | 1,621860798 | ENST00000297146 | 54329     | NM_001146265 | GPR85           |
| A_23_P205900   | 2,82251 | 2,1249  | 1,621815831 | ENST00000360948 | 4916      | NM_001012338 | NTRK3           |
| A_23_P43164    | 3,91041 | 3,21283 | 1,621782106 | ENST00000531512 | 23213     | NM_015170    | SULF1           |
| A_23_P81369    | 2,33685 | 1,63935 | 1,621692178 | ENST00000517951 | 8728      | NM_033274    | ADAM19          |
| A_23_P7761     | 10,3874 | 9,69    | 1,621579775 | ENST00000510659 | 55322     | NM_018356    | C5orf22         |
| A_21_P0007711  | 2,53125 | 1,83387 | 1,621557295 | N/A             | N/A       | N/A          | Inc-STAT6-1     |
| A_22_P00015384 | 3,95566 | 3,25841 | 1,621411185 | ENST00000510964 | N/A       | N/A          | N/A             |
| A_22_P00018125 | 2,47282 | 1,77575 | 1,621208899 | N/A             | 414208    | NR_047558    | ZNF32-AS2       |
| A_22_P00021743 | 7,82063 | 7,12357 | 1,621197662 | N/A             | N/A       | BI831319     | Inc-C15orf57-1  |
| A_23_P3911     | 2,82019 | 2,1232  | 1,621119003 | ENST00000461225 | 57125     | NM_020405    | PLXDC1          |
| A_21_P0014499  | 4,13172 | 3,4348  | 1,621040348 | ENST00000443092 | 100506680 | NR_103450    | SACS-AS1        |
| A_22_P00024133 | 3,39114 | 2,69424 | 1,621017875 | N/A             | N/A       | DB025369     | Inc-RBM6-1      |
| A_23_P211207   | 10,9754 | 10,2786 | 1,620905519 | ENST00000437626 | 104       | NM_001112    | ADARB1          |
| A_33_P3357653  | 6,97881 | 6,28209 | 1,620815639 | ENST00000585853 | 56984     | AK095621     | PSMG2           |
| A_21_P0003646  | 2,16866 | 1,47211 | 1,620624662 | N/A             | 100996941 | N/A          | IL21-AS1        |
| A_23_P502371   | 10,8385 | 10,142  | 1,620568496 | ENST00000610682 | 5253      | NM_005392    | PHF2            |
| A_23_P259172   | 15,0049 | 14,3084 | 1,620568496 | ENST00000482902 | 6748      | NM_006280    | SSR4            |
| A_23_P73530    | 11,8843 | 11,1879 | 1,620456171 | ENST00000488357 | 8776      | NM_003828    | MTMR1           |
| A_22_P00009984 | 3,64442 | 2,9481  | 1,620366316 | N/A             | N/A       | N/A          | Inc-MKRN2-AS1-1 |
| A_23_P34946    | 6,56949 | 5,87323 | 1,620298928 | ENST00000491415 | 27042     | NM_014388    | DIEXF           |
| A_33_P3342260  | 4,5056  | 3,80938 | 1,620254005 | ENST00000345378 | 2645      | NM_000162    | GCK             |
| A_23_P10194    | 14,1071 | 13,4109 | 1,620231543 | ENST00000617533 | 26470     | NM_201575    | SEZ6L2          |

|                |         |         |             |                 |           |              |                |
|----------------|---------|---------|-------------|-----------------|-----------|--------------|----------------|
| A_24_P181585   | 12,7237 | 12,0275 | 1,620231543 | ENST00000225972 | 55379     | NM_018509    | LRR59          |
| A_33_P3383626  | 2,13161 | 1,43561 | 1,620006947 | ENST00000600684 | N/A       | N/A          | N/A            |
| A_33_P3327852  | 8,40668 | 7,71078 | 1,619894661 | ENST00000402554 | 81565     | NM_030808    | NDEL1          |
| A_22_P00000633 | 2,64734 | 1,95145 | 1,619883433 | N/A             | N/A       | BX090406     | Inc-ACSBG1-1   |
| A_24_P295330   | 5,1678  | 4,47197 | 1,619816065 | ENST00000375172 | 158427    | NM_139246    | TSTD2          |
| A_21_P0002360  | 2,69084 | 1,99504 | 1,619782382 | N/A             | N/A       | N/A          | Inc-CCDC140-5  |
| A_22_P00006088 | 2,09187 | 1,39614 | 1,619703792 | ENST00000513759 | 100505685 | XR_109847    | LOC100505685   |
| A_21_P0001620  | 3,64189 | 2,94624 | 1,619613979 | N/A             | N/A       | N/A          | Inc-BATF3-2    |
| A_24_P278126   | 10,3634 | 9,6678  | 1,619557848 | ENST00000396252 | 4683      | NM_002485    | NBN            |
| A_23_P37391    | 12,2238 | 11,5283 | 1,619445593 | ENST00000380243 | 317762    | NM_001144995 | CCDC85C        |
| A_33_P3230161  | 2,35897 | 1,66365 | 1,619243553 | ENST00000323661 | 2891      | NM_000826    | GRIA2          |
| A_33_P3399638  | 5,17697 | 4,48169 | 1,619198659 | ENST00000435820 | 113835    | NM_033468    | ZNF257         |
| A_23_P250564   | 8,99442 | 8,2992  | 1,619131319 | ENST00000306156 | 5581      | NM_005400    | PRKCE          |
| A_19_P00315627 | 4,53717 | 3,84207 | 1,61899665  | N/A             | 101930053 | XR_428440    | LOC101930053   |
| A_33_P3357753  | 8,03399 | 7,33891 | 1,618974206 | N/A             | 728190    | NR_024397    | NUTM2A-AS1     |
| A_24_P384755   | 6,05467 | 5,35966 | 1,618895654 | ENST00000381685 | 79954     | NM_024894    | NOL10          |
| A_22_P00022835 | 2,75125 | 2,05628 | 1,61885077  | N/A             | 101929770 | XR_242026    | LOC101929770   |
| A_33_P3342792  | 7,32761 | 6,63266 | 1,618828328 | N/A             | N/A       | N/A          | N/A            |
| A_22_P00023486 | 2,72265 | 2,02779 | 1,618727343 | ENST00000578427 | 101927150 | NR_110765    | L3MBTL4-AS1    |
| A_23_P218608   | 10,3069 | 9,61205 | 1,618716123 | ENST00000470023 | 9669      | NM_015904    | EIF5B          |
| A_21_P0013338  | 5,49854 | 4,80373 | 1,618671243 | N/A             | N/A       | N/A          | XLOC_I2_013931 |
| A_23_P93641    | 15,2417 | 14,5469 | 1,618660024 | ENST00000359579 | 57016     | NM_020299    | AKR1B10        |
| A_23_P151805   | 5,35996 | 4,66525 | 1,618559049 | ENST00000267620 | 10516     | NM_006329    | FBLN5          |
| A_33_P3401711  | 12,0659 | 11,3715 | 1,618211298 | ENST00000614341 | 124590    | NM_173477    | USH1G          |
| A_23_P15734    | 7,02992 | 6,33562 | 1,618099136 | ENST00000246662 | 3857      | NM_000226    | KRT9           |
| A_23_P65558    | 11,3577 | 10,6634 | 1,618099136 | ENST00000305386 | 4247      | NM_002408    | MGAT2          |
| A_24_P127192   | 4,28735 | 3,59311 | 1,618031843 | ENST00000454986 | N/A       | N/A          | N/A            |
| A_23_P165879   | 13,9591 | 13,2649 | 1,617986982 | ENST00000264710 | 10890     | NM_016131    | RAB10          |
| A_21_P0005990  | 4,22689 | 3,53283 | 1,617829979 | ENST00000415801 | 100506834 | NR_049794    | LOC100506834   |
| A_21_P0000762  | 4,12489 | 3,43086 | 1,617796338 | N/A             | 282763    | NR_038321    | OR51B5         |
| A_32_P142652   | 16,4445 | 15,7505 | 1,617762697 | ENST00000595905 | N/A       | AK091931     | N/A            |
| A_22_P00021899 | 2,41993 | 1,72595 | 1,61774027  | ENST00000429389 | N/A       | N/A          | N/A            |
| A_21_P0010417  | 4,40429 | 3,71051 | 1,617516019 | N/A             | N/A       | N/A          | Inc-SYNGR1-2   |

|                |         |         |             |                 |           |              |                |
|----------------|---------|---------|-------------|-----------------|-----------|--------------|----------------|
| A_33_P3322769  | 2,05285 | 1,35913 | 1,61744875  | ENST00000322013 | 81282     | NM_001005238 | OR51G2         |
| A_21_P0000018  | 5,25127 | 4,55763 | 1,617359062 | ENST00000576830 | 6462      | NM_001146281 | SHBG           |
| A_21_P0011452  | 5,03759 | 4,344   | 1,61730301  | ENST00000568395 | 100507321 | N/A          | ERVK13-1       |
| A_33_P3323481  | 8,00054 | 7,307   | 1,617246959 | ENST00000368276 | 100527963 | NM_001199662 | PMF1-BGLAP     |
| A_33_P3315510  | 4,32017 | 3,62663 | 1,617246959 | N/A             | 23294     | BC031934     | ANKS1A         |
| A_21_P0006095  | 3,45928 | 2,76574 | 1,617246959 | ENST00000457720 | 101928579 | XR_242662    | LOC101928579   |
| A_33_P3286196  | 2,94642 | 2,25298 | 1,617134864 | ENST00000398477 | 728279    | NM_033032    | KRTAP2-2       |
| A_33_P3619171  | 12,8807 | 12,1873 | 1,617090028 | ENST00000316660 | 5366      | NM_021127    | PMAIP1         |
| A_22_P00006508 | 2,4047  | 1,71134 | 1,617045193 | N/A             | 102723716 | XR_426296    | LOC102723716   |
| A_23_P215214   | 7,85995 | 7,16668 | 1,61694432  | ENST00000353442 | 64327     | NM_022458    | LMBR1          |
| A_32_P511713   | 6,22978 | 5,53658 | 1,616865867 | ENST00000316375 | 160298    | NM_173525    | C11orf42       |
| A_33_P3422802  | 8,56299 | 7,86985 | 1,616798625 | ENST00000229708 | 80329     | NM_025218    | ULBP1          |
| A_22_P00015477 | 2,85495 | 2,16185 | 1,616753799 | N/A             | N/A       | DB051383     | Inc-STAG1-2    |
| A_22_P00000431 | 2,66948 | 1,9764  | 1,616731386 | ENST00000441928 | N/A       | BG431189     | N/A            |
| A_24_P328872   | 7,78064 | 7,08766 | 1,616619326 | ENST00000280326 | 22948     | NM_012073    | CCT5           |
| A_21_P0000359  | 8,80535 | 8,11256 | 1,616406435 | N/A             | 677840    | NR_003018    | SNORA71D       |
| A_22_P00005088 | 4,98252 | 4,29005 | 1,616047944 | N/A             | N/A       | N/A          | Inc-DGAT2-1    |
| A_22_P00013894 | 5,11585 | 4,42362 | 1,615779128 | N/A             | 414765    | NR_044997    | HCG25          |
| A_21_P0012789  | 4,05533 | 3,36311 | 1,615767929 | ENST00000509983 | N/A       | N/A          | N/A            |
| A_23_P336612   | 3,39498 | 2,70278 | 1,61574553  | ENST00000286732 | 161502    | NM_173528    | C15orf26       |
| A_33_P3363153  | 12,4982 | 11,8061 | 1,615633539 | ENST00000470551 | 80331     | NM_025219    | DNAJC5         |
| A_23_P97700    | 16,9648 | 16,2728 | 1,615521555 | ENST00000582401 | 10628     | NM_006472    | TXNIP          |
| A_23_P71368    | 2,25673 | 1,56473 | 1,615521555 | ENST00000220676 | 6101      | NM_006269    | RP1            |
| A_23_P32404    | 14,1861 | 13,4942 | 1,61540958  | ENST00000558942 | 3669      | NM_002201    | ISG20          |
| A_33_P3232006  | 10,888  | 10,1961 | 1,61540958  | ENST00000369660 | 8266      | NM_014235    | UBL4A          |
| A_21_P0011066  | 2,13994 | 1,44804 | 1,61540958  | N/A             | N/A       | N/A          | XLOC_I2_003178 |
| A_33_P3660204  | 3,75651 | 3,06477 | 1,615230435 | ENST00000505663 | 340073    | NR_037895    | C5orf66-AS2    |
| A_21_P0006884  | 5,99927 | 5,30755 | 1,615208043 | N/A             | N/A       | N/A          | Inc-EIF5AL1-1  |
| A_23_P129334   | 9,63142 | 8,93995 | 1,614928173 | ENST00000565092 | 1186      | NM_001287    | CLCN7          |
| A_24_P863775   | 2,78468 | 2,09321 | 1,614928173 | ENST00000356458 | 400954    | NM_001039753 | EML6           |
| A_23_P104689   | 11,6692 | 10,9778 | 1,614849818 | ENST00000531484 | 5970      | NM_021975    | RELA           |
| A_23_P128613   | 7,39224 | 6,70091 | 1,614771467 | ENST00000484943 | 79070     | NM_024089    | KDELC1         |
| A_33_P3258324  | 6,96532 | 6,27405 | 1,614704312 | ENST00000589345 | 102724279 | NM_001302493 | LOC102724279   |

|                |         |         |             |                 |           |              |                |
|----------------|---------|---------|-------------|-----------------|-----------|--------------|----------------|
| A_21_P0001618  | 4,30001 | 3,60879 | 1,614648352 | N/A             | N/A       | N/A          | Inc-TMEM206-4  |
| A_23_P145197   | 11,5481 | 10,8569 | 1,614625968 | ENST00000372996 | 705       | NM_004053    | BYSL           |
| A_22_P00006130 | 3,15898 | 2,46788 | 1,614514055 | ENST00000527364 | N/A       | BX112034     | N/A            |
| A_33_P3217218  | 9,91565 | 9,22456 | 1,614502864 | N/A             | 55326     | NM_018361    | AGPAT5         |
| A_33_P3270384  | 15,8196 | 15,1289 | 1,614066478 | ENST00000309318 | 26472     | NM_138689    | PPP1R14B       |
| A_33_P3273444  | 12,3578 | 11,6672 | 1,613954604 | ENST00000369294 | N/A       | XM_005272927 | N/A            |
| A_23_P360874   | 12,7137 | 12,0232 | 1,613842737 | ENST00000473880 | 222229    | NM_152892    | LRWD1          |
| A_33_P3342561  | 5,0839  | 4,39351 | 1,613719692 | ENST00000262483 | 83394     | NM_031220    | PITPNM3        |
| A_33_P3294446  | 5,88114 | 5,19087 | 1,613585472 | ENST00000403668 | 79618     | NM_024567    | HMBOX1         |
| A_24_P239076   | 7,54976 | 6,85972 | 1,613328249 | ENST00000412472 | 3543      | NM_020070    | IGLL1          |
| A_33_P3227209  | 15,6226 | 14,9326 | 1,613283518 | ENST00000303305 | 5036      | NM_006191    | PA2G4          |
| A_23_P126727   | 9,99755 | 9,30763 | 1,613194061 | ENST00000377705 | 79707     | NM_024654    | NOL9           |
| A_22_P00002325 | 4,3055  | 3,6156  | 1,613171698 | N/A             | N/A       | HY019774     | Inc-C11orf58-1 |
| A_21_P0005731  | 6,1079  | 5,41807 | 1,613093428 | N/A             | N/A       | N/A          | Inc-CHMP4C-3   |
| A_22_P00025899 | 3,38142 | 2,6918  | 1,612858642 | ENST00000434973 | N/A       | AL120387     | N/A            |
| A_22_P00025868 | 2,5542  | 1,8647  | 1,612724494 | N/A             | N/A       | DB457776     | Inc-ZNF423-3   |
| A_21_P0000454  | 3,90014 | 3,21066 | 1,612702137 | N/A             | 100033821 | NR_003360    | SNORD116-29    |
| A_32_P107002   | 5,2226  | 4,53321 | 1,612601534 | ENST00000603801 | 92017     | NM_032167    | SNX29          |
| A_33_P3299634  | 5,28137 | 4,59208 | 1,612489761 | ENST00000373684 | 392390    | AB529307     | OR1L6          |
| A_23_P215175   | 11,888  | 11,1988 | 1,612389172 | ENST00000222388 | 10061     | NM_005692    | ABCF2          |
| A_22_P00012620 | 2,34288 | 1,65376 | 1,612299765 | N/A             | N/A       | AI634253     | Inc-PTPRZ1-4   |
| A_33_P3372640  | 4,81152 | 4,12242 | 1,612277414 | ENST00000537226 | 101060200 | NM_001277291 | ZNF891         |
| A_22_P00023677 | 2,61433 | 1,92536 | 1,612132139 | ENST00000556021 | N/A       | XR_433584    | N/A            |
| A_32_P163125   | 9,30951 | 8,62054 | 1,612132139 | ENST00000361781 | 259230    | NM_147156    | SGMS1          |
| A_22_P00021901 | 2,53249 | 1,84357 | 1,612076268 | N/A             | N/A       | N/A          | Inc-IFIT2-1    |
| A_21_P0008851  | 7,90745 | 7,21859 | 1,612009225 | N/A             | N/A       | N/A          | Inc-ITGA11-2   |
| A_24_P56837    | 8,41945 | 7,7309  | 1,611662881 | ENST00000293414 | 92591     | NM_080863    | ASB16          |
| A_33_P3610123  | 9,84573 | 9,15718 | 1,611662881 | ENST00000409681 | 25885     | NM_015425    | POLR1A         |
| A_24_P88031    | 9,45842 | 8,76991 | 1,611618197 | ENST00000331434 | 65265     | NM_023080    | C8orf33        |
| A_24_P67929    | 7,66207 | 6,97367 | 1,611495322 | ENST00000549574 | 54934     | NM_017822    | KANSL2         |
| A_33_P3306854  | 2,88193 | 2,19366 | 1,611350118 | ENST00000378417 | 400553    | XR_109336    | LOC400553      |
| A_23_P325676   | 7,46555 | 6,77732 | 1,611305442 | ENST00000590548 | 115950    | NM_138783    | ZNF653         |
| A_23_P130689   | 11,7335 | 11,0453 | 1,611271936 | ENST00000590700 | 84337     | NM_032377    | ELOF1          |



|                |         |         |             |                 |           |              |                  |
|----------------|---------|---------|-------------|-----------------|-----------|--------------|------------------|
| A_23_P94736    | 10,7446 | 10,0564 | 1,611271936 | ENST00000467674 | 27090     | NM_175039    | ST6GALNAC4       |
| A_23_P436353   | 10,6066 | 9,91866 | 1,610981582 | ENST00000392112 | 4301      | NM_001291964 | MLLT4            |
| A_22_P00000679 | 3,93088 | 3,24297 | 1,610948083 | N/A             | N/A       | AK090842     | Inc-ADA-1        |
| A_21_P0011662  | 2,53701 | 1,84914 | 1,610903418 | ENST00000591469 | 647946    | N/A          | LINC00669        |
| A_21_P0013316  | 2,78207 | 2,09423 | 1,610869921 | N/A             | N/A       | N/A          | XLOC_I2_013868   |
| A_21_P0011270  | 2,1852  | 1,49737 | 1,610858755 | N/A             | N/A       | N/A          | XLOC_I2_004385   |
| A_33_P3370692  | 2,12758 | 1,43983 | 1,610769433 | ENST00000498134 | N/A       | N/A          | N/A              |
| A_19_P00803685 | 11,464  | 10,7763 | 1,610713609 | ENST00000607560 | 651746    | N/A          | ANKRD33B         |
| A_22_P00023623 | 3,27323 | 2,58554 | 1,610702444 | N/A             | 101927862 | NR_109894    | CTB-178M22.2     |
| A_23_P114585   | 2,08559 | 1,39791 | 1,61069128  | ENST00000324142 | 80003     | AK021445     | PCNXL2           |
| A_21_P0009473  | 3,57742 | 2,88993 | 1,610479169 | N/A             | N/A       | N/A          | Inc-KIAA1328-1   |
| A_24_P286569   | 4,4886  | 3,8013  | 1,610267086 | ENST00000254770 | 55915     | NM_018697    | LANCL2           |
| A_21_P0013751  | 4,88945 | 4,20222 | 1,610188957 | N/A             | N/A       | N/A          | XLOC_I2_015441   |
| A_33_P3291092  | 4,77449 | 4,08731 | 1,610133153 | ENST00000349258 | 55901     | NM_199263    | THSD1            |
| A_23_P122796   | 7,64057 | 6,95345 | 1,610066191 | ENST00000318787 | 51020     | NM_016063    | HDDC2            |
| A_22_P00000803 | 2,18039 | 1,49342 | 1,609898798 | N/A             | N/A       | BI561922     | Inc-AF127577.1-2 |
| A_22_P00000578 | 6,38741 | 5,70045 | 1,609887639 | ENST00000568893 | N/A       | N/A          | N/A              |
| A_21_P0005722  | 2,71093 | 2,02399 | 1,609865321 | N/A             | 101926947 | XR_426333    | NCRNA00249       |
| A_23_P429449   | 2,10613 | 1,41922 | 1,609831846 | ENST00000268459 | 85407     | NM_033119    | NKD1             |
| A_19_P00807545 | 4,90027 | 4,21339 | 1,60979837  | ENST00000609513 | N/A       | N/A          | N/A              |
| A_23_P353125   | 6,88448 | 6,19763 | 1,609764896 | ENST00000350221 | 161835    | NM_152597    | FSIP1            |
| A_33_P3235029  | 6,46165 | 5,77491 | 1,609642162 | ENST00000555016 | N/A       | DR731407     | N/A              |
| A_32_P143000   | 5,30456 | 4,61785 | 1,609608691 | ENST00000261275 | 23359     | NM_015307    | FAM189A1         |
| A_23_P131771   | 10,9434 | 10,2569 | 1,609374412 | ENST00000474176 | 7165      | NM_199360    | TPD52L2          |
| A_22_P00017651 | 4,60666 | 3,92021 | 1,609318636 | N/A             | N/A       | N/A          | Inc-WRAP73-2     |
| A_23_P23292    | 2,31811 | 1,63166 | 1,609318636 | ENST00000470566 | 6258      | NM_006917    | RXRG             |
| A_33_P3252326  | 6,08683 | 5,40072 | 1,608939413 | ENST00000438107 | N/A       | N/A          | N/A              |
| A_33_P3212839  | 12,4446 | 11,7585 | 1,60892826  | ENST00000428976 | N/A       | N/A          | N/A              |
| A_33_P3213408  | 2,4717  | 1,7857  | 1,608816742 | ENST00000310248 | 121275    | NM_001004134 | OR10AD1          |
| A_33_P3366053  | 4,42177 | 3,73583 | 1,608749834 | ENST00000478399 | 141       | NM_001125    | ADPRH            |
| A_33_P3225378  | 3,18954 | 2,50374 | 1,608593728 | ENST00000303532 | 26533     | NM_001005465 | OR10G3           |
| A_33_P3520738  | 7,6323  | 6,94657 | 1,60851568  | ENST00000425668 | 100289650 | NR_036584    | LOC100289650     |
| A_33_P3310718  | 3,46523 | 2,77984 | 1,608136646 | N/A             | 664618    | NR_073415    | HSP90AB4P        |

|                |         |         |             |                 |           |              |                       |
|----------------|---------|---------|-------------|-----------------|-----------|--------------|-----------------------|
| A_22_P00025837 | 3,06135 | 2,37596 | 1,608136646 | N/A             | N/A       | N/A          | Inc-NSA2-1            |
| A_23_P14184    | 12,0054 | 11,3202 | 1,607924872 | ENST00000258613 | 55901     | NM_018676    | THSD1                 |
| A_21_P0006761  | 3,6681  | 2,98293 | 1,607891436 | N/A             | N/A       | N/A          | Inc-MBL2-5            |
| A_23_P90089    | 10,5876 | 9,90245 | 1,607869146 | ENST00000585420 | 2639      | NM_013976    | GCDH                  |
| A_21_P0000719  | 3,19058 | 2,50548 | 1,607813423 | ENST00000614093 | 100616530 | NR_038201    | C8orf37-AS1           |
| A_22_P00004267 | 2,30632 | 1,62122 | 1,607813423 | ENST00000520649 | N/A       | BU596066     | N/A                   |
| A_19_P00317034 | 7,10198 | 6,41689 | 1,607802278 | ENST00000515286 | N/A       | N/A          | N/A                   |
| A_33_P3273369  | 4,83234 | 4,14733 | 1,607713125 | ENST00000409212 | 23677     | NM_014521    | SH3BP4                |
| A_33_P3223172  | 2,2222  | 1,5372  | 1,607701981 | ENST00000558110 | 102724034 | XR_429583    | LOC102724034          |
| A_22_P00024660 | 6,87697 | 6,19201 | 1,607657407 | N/A             | N/A       | N/A          | Inc-HDDC2-3           |
| A_21_P0014115  | 9,87975 | 9,19479 | 1,607657407 | N/A             | N/A       | AK129526     | N/A                   |
| A_33_P3289123  | 3,04049 | 2,35558 | 1,607601691 | ENST00000416516 | 85443     | NM_033403    | DCLK3                 |
| A_24_P206343   | 3,3627  | 2,67796 | 1,60741227  | ENST00000488554 | 64005     | NM_033054    | MYO1G                 |
| A_21_P0007632  | 3,557   | 2,87244 | 1,607211732 | N/A             | N/A       | N/A          | Inc-RP11-116D17.1.1-5 |
| A_23_P22548    | 9,97135 | 9,28684 | 1,607156031 | ENST00000357749 | 1121      | NM_000390    | CHM                   |
| A_33_P3297050  | 8,86309 | 8,17879 | 1,606922109 | ENST00000238477 | 85365     | NM_033087    | ALG2                  |
| A_22_P00006571 | 6,33624 | 5,65199 | 1,606866418 | N/A             | N/A       | BX088994     | Inc-FMN1-3            |
| A_24_P40529    | 7,22948 | 6,54538 | 1,606699358 | ENST00000334398 | 55217     | NM_018196    | TMLHE                 |
| A_33_P3320301  | 15,1484 | 14,4644 | 1,606587994 | ENST00000435844 | 388789    | NR_015432    | LINC00493             |
| A_23_P362046   | 10,9517 | 10,2677 | 1,606587994 | ENST00000376019 | 93081     | NM_138779    | TEX30                 |
| A_32_P12580    | 7,85202 | 7,16805 | 1,606554586 | ENST00000356825 | 4087      | NM_001003652 | SMAD2                 |
| A_23_P22672    | 10,9119 | 10,228  | 1,606476637 | ENST00000624161 | 79868     | NM_001257231 | ALG13                 |
| A_22_P00015871 | 2,05667 | 1,37296 | 1,606265081 | ENST00000442323 | N/A       | N/A          | N/A                   |
| A_33_P3286112  | 2,36304 | 1,67934 | 1,606253948 | ENST00000590052 | N/A       | N/A          | N/A                   |
| A_33_P3362631  | 9,8188  | 9,13519 | 1,606153747 | ENST00000511493 | 60558     | NM_021927    | GUF1                  |
| A_23_P24234    | 5,50417 | 4,82071 | 1,605986761 | ENST00000372071 | 94233     | NM_001030015 | OPN4                  |
| A_21_P0001542  | 2,98217 | 2,29903 | 1,605630581 | N/A             | N/A       | N/A          | Inc-GBP5-3            |
| A_24_P373126   | 8,36879 | 7,68584 | 1,605419137 | ENST00000389749 | 115708    | NM_152307    | TRMT61A               |
| A_23_P1523     | 12,1174 | 11,4345 | 1,605363498 | ENST00000308831 | 29984     | NM_014578    | RHOD                  |
| A_33_P3233328  | 2,40856 | 1,72588 | 1,605118711 | ENST00000316650 | 120796    | NM_001001917 | OR56A1                |
| A_22_P00011905 | 5,18799 | 4,50533 | 1,60509646  | N/A             | N/A       | N/A          | Inc-PIK3R1-3          |
| A_23_P350574   | 8,88972 | 8,20714 | 1,605007457 | ENST00000495397 | 127943    | NM_001002901 | FCRLB                 |
| A_24_P357266   | 2,50396 | 1,82141 | 1,604974082 | ENST00000380289 | 2925      | NM_005314    | GRPR                  |

|                |         |         |             |                 |           |              |                |
|----------------|---------|---------|-------------|-----------------|-----------|--------------|----------------|
| A_23_P171223   | 7,68006 | 6,99764 | 1,604829466 | ENST00000320339 | 63932     | NM_022101    | CXorf56        |
| A_33_P3356711  | 9,70576 | 9,02344 | 1,604718231 | ENST00000339121 | 54556     | NM_198267    | ING3           |
| A_22_P00025475 | 2,20079 | 1,51859 | 1,60458476  | ENST00000549742 | N/A       | N/A          | N/A            |
| A_33_P3398091  | 8,22573 | 7,54356 | 1,604551394 | ENST00000453372 | 54811     | NM_001130031 | ZNF562         |
| A_33_P3212575  | 7,99546 | 7,31344 | 1,604384574 | ENST00000346199 | 4826      | NM_005386    | NNAT           |
| A_23_P398172   | 8,09914 | 7,41716 | 1,604340092 | ENST00000361499 | 57579     | NM_020819    | FAM135A        |
| A_23_P94998    | 9,49279 | 8,8109  | 1,604240011 | ENST00000302787 | 3954      | NM_012318    | LETM1          |
| A_21_P0014529  | 7,14987 | 6,46805 | 1,604162175 | N/A             | N/A       | AK097323     | N/A            |
| A_32_P219368   | 10,4484 | 9,76664 | 1,604095461 | ENST00000337387 | 9589      | NM_152858    | WTAP           |
| A_23_P208747   | 2,39586 | 1,71415 | 1,604039868 | ENST00000008938 | 8993      | NM_005091    | PGLYRP1        |
| A_23_P377629   | 2,11162 | 1,42994 | 1,604006513 | ENST00000324915 | 645961    | NM_001166137 | SPATA31C2      |
| A_21_P0005137  | 2,23029 | 1,54863 | 1,603984277 | N/A             | N/A       | N/A          | Inc-C6orf115-1 |
| A_23_P146728   | 11,2408 | 10,5592 | 1,603917571 | ENST00000319033 | 85365     | NM_033087    | ALG2           |
| A_33_P3389168  | 2,14406 | 1,46266 | 1,603695236 | ENST00000370393 | 4534      | N/A          | MTM1           |
| A_22_P00009736 | 2,31138 | 1,63001 | 1,603661888 | ENST00000556923 | 100506433 | N/A          | LINC00648      |
| A_33_P3349947  | 10,5491 | 9,86773 | 1,603661888 | ENST00000321394 | 6950      | NM_030752    | TCP1           |
| A_33_P3332474  | 3,15552 | 2,47432 | 1,603472932 | ENST00000618455 | 283767    | NM_001001413 | GOLGA6L1       |
| A_23_P44849    | 6,42154 | 5,74047 | 1,603328451 | ENST00000563955 | 253980    | NM_178863    | KCTD13         |
| A_19_P00326808 | 5,18936 | 4,50831 | 1,603306224 | N/A             | 100124700 | NR_047517    | HOTAIR         |
| A_21_P0009134  | 4,95728 | 4,27646 | 1,603050639 | N/A             | N/A       | N/A          | Inc-CLEC18B-1  |
| A_23_P92261    | 12,2121 | 11,5313 | 1,603028416 | ENST00000324557 | 9718      | NM_032331    | ECE2           |
| A_21_P0007447  | 4,33459 | 3,65379 | 1,603028416 | N/A             | N/A       | N/A          | Inc-PIWIL4-4   |
| A_21_P0008458  | 3,21572 | 2,53498 | 1,60296175  | N/A             | 102724015 | XR_424539    | LOC102724015   |
| A_33_P3239087  | 5,52055 | 4,83983 | 1,602939528 | ENST00000330148 | 157693    | NR_103537    | FAM87A         |
| A_23_P3368     | 7,39559 | 6,7149  | 1,602906196 | ENST00000618099 | 5045      | NM_002569    | FURIN          |
| A_32_P219148   | 7,05847 | 6,37781 | 1,602872865 | N/A             | N/A       | BC030211     | Inc-LONRF1-2   |
| A_21_P0006958  | 2,74763 | 2,06701 | 1,602828425 | N/A             | N/A       | N/A          | Inc-AKR1C2-3   |
| A_23_P4662     | 14,6246 | 13,944  | 1,602806205 | ENST00000164227 | 602       | NM_005178    | BCL3           |
| A_24_P129341   | 15,3101 | 14,6296 | 1,602695111 | ENST00000359579 | 57016     | NM_020299    | AKR1B10        |
| A_21_P0013414  | 6,34233 | 5,66186 | 1,602661784 | ENST00000451792 | 101927630 | N/A          | LOC101927630   |
| A_21_P0014862  | 9,57421 | 8,89378 | 1,602617349 | N/A             | N/A       | N/A          | N/A            |
| A_23_P202496   | 10,9187 | 10,2383 | 1,602584024 | ENST00000371361 | 64318     | NM_022451    | NOC3L          |
| A_24_P310756   | 10,2932 | 9,61287 | 1,602506268 | ENST00000366862 | 23219     | NM_015176    | FBXO28         |

|                |         |         |             |                 |           |              |                       |
|----------------|---------|---------|-------------|-----------------|-----------|--------------|-----------------------|
| A_23_P58529    | 12,6328 | 11,9526 | 1,602361874 | ENST00000199320 | 27292     | NM_014473    | DIMT1                 |
| A_24_P174613   | 9,30151 | 8,62137 | 1,602295235 | ENST00000263981 | 55294     | NM_033632    | FBXW7                 |
| A_21_P0008401  | 2,06426 | 1,38413 | 1,602284129 | N/A             | N/A       | N/A          | Inc-RP11-982M15.6.1-2 |
| A_24_P256692   | 6,9286  | 6,24856 | 1,602184177 | ENST00000344922 | 375056    | NM_198551    | MIA3                  |
| A_33_P3317589  | 4,89244 | 4,21242 | 1,602161966 | ENST00000290417 | 64096     | NM_145762    | GFRA4                 |
| A_23_P30223    | 9,70049 | 9,02056 | 1,602062021 | ENST00000510531 | 6715      | NM_001047    | SRD5A1                |
| A_23_P211504   | 9,81815 | 9,13823 | 1,602050916 | ENST00000409006 | 11015     | NM_016657    | KDELR3                |
| A_33_P3396972  | 4,68381 | 4,00394 | 1,601995394 | N/A             | N/A       | AK094477     | N/A                   |
| A_23_P23296    | 9,31376 | 8,63404 | 1,60182884  | ENST00000477817 | 5317      | NM_000299    | PKP1                  |
| A_23_P346390   | 2,39041 | 1,71105 | 1,601429181 | ENST00000477281 | 79742     | NM_176819    | CXorf36               |
| A_23_P15727    | 12,3836 | 11,7043 | 1,601362581 | ENST00000489591 | 60681     | NM_021939    | FKBP10                |
| A_33_P3211924  | 13,0257 | 12,3467 | 1,601029621 | ENST00000262241 | 23186     | NM_015156    | RCOR1                 |
| A_33_P3258557  | 3,63406 | 2,9551  | 1,600985232 | ENST00000622202 | 100288527 | NR_003594    | REXO1L2P              |
| A_21_P0009287  | 8,81176 | 8,13289 | 1,60088536  | N/A             | N/A       | N/A          | Inc-FSCN2-1           |
| A_21_P0010578  | 8,08618 | 7,40738 | 1,600807687 | N/A             | 101926980 | XR_431358    | LOC101926980          |
| A_33_P3216746  | 2,49861 | 1,81989 | 1,600718922 | ENST00000507625 | 23284     | NM_015236    | LPHN3                 |
| A_23_P408830   | 10,5119 | 9,83325 | 1,600641256 | ENST00000446440 | 10645     | NM_172215    | CAMKK2                |
| A_22_P00008841 | 2,0953  | 1,41668 | 1,600607972 | ENST00000426811 | N/A       | N/A          | N/A                   |
| A_33_P3360565  | 3,85463 | 3,17602 | 1,600596878 | ENST00000296600 | 133923    | AY461732     | ZNF474                |
| A_23_P373079   | 11,756  | 11,0775 | 1,600474843 | ENST00000300146 | 219988    | NM_152716    | PATL1                 |
| A_33_P3327462  | 3,51237 | 2,83403 | 1,600297354 | ENST00000511388 | 66000     | NM_023943    | TMEM108               |
| A_23_P436158   | 2,35    | 1,67171 | 1,600241893 | ENST00000357947 | 7093      | NM_012465    | TLL2                  |
| A_24_P361427   | 2,63807 | 1,95993 | 1,600075521 | ENST00000582511 | 26083     | NM_015594    | TBC1D29               |
| A_19_P00319900 | 6,63142 | 5,95331 | 1,600042249 | ENST00000509244 | N/A       | N/A          | N/A                   |
| A_24_P58337    | 18,2363 | 17,5582 | 1,600031159 | ENST00000466086 | 2495      | NM_002032    | FTH1                  |
| A_23_P115046   | 8,67132 | 7,99324 | 1,600008978 | ENST00000497010 | 8891      | NM_020365    | EIF2B3                |
| A_21_P0014518  | 7,3206  | 6,64259 | 1,599931347 | N/A             | N/A       | N/A          | N/A                   |
| A_22_P00006181 | 2,42904 | 1,75107 | 1,599886988 | N/A             | 101929756 | XR_252147    | LOC101929756          |
| A_32_P447001   | 4,14447 | 3,46656 | 1,599820452 | ENST00000570794 | 145788    | NM_001198784 | C15orf65              |
| A_21_P0004338  | 2,42299 | 1,74514 | 1,599753918 | N/A             | N/A       | N/A          | Inc-BNIP1-2           |
| A_23_P154938   | 11,9663 | 11,2885 | 1,599698476 | ENST00000263208 | 7290      | NM_003325    | HIRA                  |
| A_21_P0008042  | 2,05112 | 1,37344 | 1,599565422 | N/A             | N/A       | N/A          | Inc-USPL1-2           |
| A_33_P3542886  | 3,34585 | 2,6682  | 1,599532161 | N/A             | 100126780 | BU536871     | SNAR-G1               |

|                |         |         |             |                 |           |              |                 |
|----------------|---------|---------|-------------|-----------------|-----------|--------------|-----------------|
| A_22_P00011181 | 4,13597 | 3,45839 | 1,599454553 | N/A             | N/A       | N/A          | Inc-OGFOD1-1    |
| A_24_P206758   | 9,23784 | 8,56037 | 1,599332605 | ENST00000526702 | 29907     | NM_013306    | SNX15           |
| A_19_P00318519 | 4,67652 | 3,99906 | 1,599321519 | N/A             | N/A       | N/A          | N/A             |
| A_33_P3221753  | 2,24616 | 1,56911 | 1,598867072 | ENST00000525295 | 387601    | NM_199352    | SLC22A25        |
| A_33_P3359856  | 7,20089 | 6,52398 | 1,598711925 | ENST00000430381 | N/A       | XM_005263742 | N/A             |
| A_23_P365738   | 2,4288  | 1,75192 | 1,598678681 | ENST00000356613 | 23237     | NM_015193    | ARC             |
| A_21_P0003243  | 8,07166 | 7,39484 | 1,598612195 | N/A             | N/A       | N/A          | Inc-EPHA6-1     |
| A_21_P0000666  | 8,54537 | 7,86863 | 1,598523552 | ENST00000622602 | 100129361 | NM_001271592 | LOC100129361    |
| A_33_P3808996  | 12,0652 | 11,3885 | 1,598479232 | ENST00000552918 | 65244     | NM_023071    | SPATS2          |
| A_33_P3411328  | 2,11954 | 1,44293 | 1,598379517 | ENST00000425698 | 730227    | NR_034151    | LINC01136       |
| A_21_P0000803  | 2,27455 | 1,598   | 1,598313043 | ENST00000425974 | 100506474 | NR_038434    | LOC100506474    |
| A_23_P88209    | 12,9523 | 12,276  | 1,598036101 | ENST00000311943 | 23256     | NM_016106    | SCFD1           |
| A_24_P128442   | 8,43685 | 7,76072 | 1,597847807 | ENST00000207157 | 6913      | NM_152380    | TBX15           |
| A_21_P0010379  | 2,17583 | 1,49975 | 1,597792431 | N/A             | N/A       | N/A          | Inc-RFPL3-AS1-1 |
| A_33_P3231262  | 4,59224 | 3,91621 | 1,597737057 | N/A             | 257396    | NR_034107    | LOC257396       |
| A_33_P3628409  | 8,33325 | 7,65723 | 1,597725982 | ENST00000562038 | 150967    | NR_037701    | PKI55           |
| A_33_P3315915  | 3,82215 | 3,14624 | 1,597604166 | N/A             | N/A       | N/A          | N/A             |
| A_24_P623782   | 2,3467  | 1,67084 | 1,597548798 | ENST00000378763 | 448831    | NM_001005217 | FRG2            |
| A_21_P0014627  | 2,12854 | 1,45276 | 1,597460214 | N/A             | N/A       | AK125599     | N/A             |
| A_33_P3350710  | 5,12411 | 4,44862 | 1,597139136 | ENST00000492257 | 23233     | NM_015189    | EXOC6B          |
| A_33_P3312743  | 5,02827 | 4,35278 | 1,597139136 | ENST00000391356 | 85290     | NM_033187    | KRTAP4-3        |
| A_21_P0008754  | 4,67352 | 3,9981  | 1,597061645 | N/A             | 101929129 | XR_243176    | LOC101929129    |
| A_24_P91165    | 4,63859 | 3,96318 | 1,597050575 | ENST00000582544 | 782       | NM_199248    | CACNB1          |
| A_33_P3418798  | 4,89904 | 4,22367 | 1,597006296 | ENST00000438480 | 345222    | NM_001042690 | MSANTD1         |
| A_22_P00020641 | 2,57095 | 1,89563 | 1,596950948 | N/A             | N/A       | N/A          | Inc-KCNMB2-7    |
| A_23_P354734   | 10,0633 | 9,38798 | 1,596950948 | ENST00000617641 | 9708      | NM_032088    | PCDHGA8         |
| A_33_P3214199  | 8,48247 | 7,80716 | 1,596939879 | ENST00000591083 | 55205     | NM_018181    | ZNF532          |
| A_24_P106794   | 8,09468 | 7,4194  | 1,596906672 | ENST00000239690 | 84955     | NM_032869    | NUDCD1          |
| A_33_P3295870  | 6,75265 | 6,07747 | 1,596795987 | ENST00000344774 | 401565    | NM_001001710 | FAM166A         |
| A_33_P3381684  | 2,20421 | 1,52911 | 1,596707444 | ENST00000614923 | 7062      | NM_007113    | TCHH            |
| A_33_P3253440  | 7,16879 | 6,49398 | 1,596386518 | ENST00000487471 | 130814    | NM_152391    | PQLC3           |
| A_21_P0000886  | 3,41556 | 2,74097 | 1,5961431   | N/A             | 100288122 | NR_040031    | LDLRAD4-AS1     |
| A_23_P136986   | 9,48207 | 8,80761 | 1,595999279 | ENST00000373173 | 139322    | NM_198450    | APOOL           |

|                |         |         |             |                 |           |              |                 |
|----------------|---------|---------|-------------|-----------------|-----------|--------------|-----------------|
| A_33_P3234317  | 12,1831 | 11,5088 | 1,595822287 | ENST00000537760 | 22800     | NM_012250    | RRAS2           |
| A_23_P63459    | 12,7822 | 12,1081 | 1,595601074 | ENST00000619305 | 388753    | NM_001012985 | COA6            |
| A_21_P0011309  | 4,60984 | 3,93592 | 1,595402009 | ENST00000570209 | 390561    | N/A          | HERC2P10        |
| A_21_P0000223  | 9,63473 | 8,96086 | 1,595346718 | N/A             | 114599    | NR_000025    | SNORD15B        |
| A_22_P00006688 | 2,80806 | 2,13443 | 1,595081345 | N/A             | 101927320 | NR_121670    | ERICH3-AS1      |
| A_33_P3371954  | 7,99794 | 7,32454 | 1,594827072 | ENST00000614243 | 93185     | NM_052868    | IGSF8           |
| A_33_P3545095  | 2,18815 | 1,51484 | 1,594727584 | ENST00000615248 | 100287704 | NR_028348    | LOC100287704    |
| A_33_P3390187  | 2,5598  | 1,88649 | 1,594727584 | ENST00000424439 | 283948    | NM_001301159 | NHLRC4          |
| A_33_P3343210  | 11,2802 | 10,607  | 1,594605997 | ENST00000519973 | 51312     | NM_016612    | SLC25A37        |
| A_22_P00015280 | 2,38142 | 1,70825 | 1,594572839 | N/A             | N/A       | N/A          | Inc-SPATA19-3   |
| A_23_P107981   | 6,51482 | 5,84173 | 1,594484419 | ENST00000594274 | 6820      | NM_004605    | SULT2B1         |
| A_19_P00318780 | 4,76901 | 4,09597 | 1,594429159 | ENST00000513329 | N/A       | N/A          | N/A             |
| A_21_P0006149  | 9,7024  | 9,0294  | 1,594384953 | N/A             | N/A       | N/A          | Inc-ANKRD20A1-2 |
| A_33_P3261197  | 6,6455  | 5,97254 | 1,594340748 | ENST00000478100 | 4686      | NM_002486    | NCBP1           |
| A_33_P7472345  | 3,23084 | 2,55799 | 1,59421919  | N/A             | 100874214 | NR_046724    | TM4SF19-AS1     |
| A_23_P394917   | 7,96265 | 7,28982 | 1,59419709  | ENST00000395059 | 10847     | NM_006662    | SRCAP           |
| A_22_P00001893 | 8,26278 | 7,58997 | 1,59417499  | N/A             | N/A       | BC073932     | Inc-B4GALNT1-2  |
| A_33_P3214012  | 4,02053 | 3,34784 | 1,594042395 | ENST00000370852 | 54511     | NM_001287746 | HMGCLL1         |
| A_21_P0006940  | 2,4377  | 1,76503 | 1,594020297 | N/A             | N/A       | N/A          | Inc-GPR123-2    |
| A_24_P703462   | 6,2036  | 5,53096 | 1,593987151 | N/A             | N/A       | CD518305     | N/A             |
| A_22_P00016744 | 3,03255 | 2,36007 | 1,593810382 | ENST00000521991 | N/A       | N/A          | N/A             |
| A_23_P380998   | 9,18382 | 8,51142 | 1,593722005 | ENST00000264160 | 23518     | NM_015361    | R3HDM1          |
| A_33_P3238997  | 8,0981  | 7,4258  | 1,59361154  | ENST00000310078 | 3267      | NM_001135187 | AGFG1           |
| A_22_P00022245 | 2,31513 | 1,64286 | 1,593578402 | ENST00000539988 | N/A       | N/A          | N/A             |
| A_21_P0006213  | 4,10735 | 3,43509 | 1,593567357 | N/A             | N/A       | N/A          | Inc-C9orf91-1   |
| A_21_P0000636  | 5,20133 | 4,5291  | 1,59353422  | N/A             | 643749    | NR_034110    | TRAF3IP2-AS1    |
| A_19_P00321671 | 11,1712 | 10,499  | 1,593501083 | N/A             | N/A       | N/A          | Inc-MMRN1-2     |
| A_21_P0000831  | 6,34761 | 5,67556 | 1,593335412 | ENST00000499504 | 100506368 | NR_038905    | LOC100506368    |
| A_23_P132260   | 9,97099 | 9,29898 | 1,593291236 | ENST00000335214 | 23481     | NM_014303    | PES1            |
| A_33_P3215640  | 8,10062 | 7,42868 | 1,593213931 | ENST00000611814 | 221476    | NM_153370    | PI16            |
| A_33_P7283780  | 4,60183 | 3,92993 | 1,593169759 | N/A             | N/A       | AK126635     | Inc-CHID1-1     |
| A_23_P310931   | 3,13566 | 2,46379 | 1,59313663  | ENST00000374472 | 1269      | NM_001841    | CNR2            |
| A_22_P00007099 | 2,10337 | 1,4315  | 1,59313663  | N/A             | N/A       | N/A          | Inc-GLRX3-3     |

|                |         |         |             |                 |           |              |                 |
|----------------|---------|---------|-------------|-----------------|-----------|--------------|-----------------|
| A_23_P251268   | 4,47449 | 3,80271 | 1,593037248 | N/A             | 84657     | NR_026829    | LINC00852       |
| A_33_P3256287  | 2,52858 | 1,85691 | 1,59291579  | ENST00000455995 | N/A       | N/A          | N/A             |
| A_23_P28120    | 9,23181 | 8,56016 | 1,592893707 | ENST00000303077 | 10736     | NM_016932    | SIX2            |
| A_33_P3267502  | 10,782  | 10,1105 | 1,592728099 | ENST00000380092 | 54522     | NM_001009941 | ANKRD16         |
| A_21_P0013930  | 11,6562 | 10,9847 | 1,592728099 | ENST00000468519 | N/A       | XM_002342390 | N/A             |
| A_21_P0006912  | 5,82308 | 5,15177 | 1,592518354 | N/A             | N/A       | N/A          | Inc-SMC3-1      |
| A_24_P184555   | 15,9584 | 15,2871 | 1,592507316 | ENST00000323871 | 5829      | NM_002859    | PXN             |
| A_23_P305616   | 5,23851 | 4,56721 | 1,592507316 | ENST00000399702 | 652276    | NR_015441    | LOC652276       |
| A_32_P68504    | 7,18775 | 6,51647 | 1,592485239 | ENST00000611847 | 57683     | NM_020923    | ZDBF2           |
| A_33_P3290792  | 3,95042 | 3,27918 | 1,592441087 | ENST00000375024 | 219870    | NM_001001953 | OR10G9          |
| A_22_P00009142 | 6,18702 | 5,51584 | 1,59237486  | N/A             | 103091864 | NR_117096    | SNHG22          |
| A_33_P6817530  | 6,71167 | 6,0405  | 1,592363823 | N/A             | 400960    | NR_033872    | PCBP1-AS1       |
| A_23_P68547    | 11,7414 | 11,0704 | 1,592176198 | ENST00000378886 | 84515     | NM_182802    | MCM8            |
| A_22_P00013074 | 5,54082 | 4,86995 | 1,592032734 | N/A             | 101929237 | NR_125433    | LOC101929237    |
| A_22_P00006806 | 2,48585 | 1,81516 | 1,591834114 | N/A             | N/A       | N/A          | Inc-GABPA-1     |
| A_33_P3351765  | 7,63298 | 6,9624  | 1,591712748 | ENST00000335420 | 23008     | NM_014997    | KLHDC10         |
| A_22_P00014994 | 5,20527 | 4,5347  | 1,591701715 | N/A             | 102723385 | NR_119381    | LOC102723385    |
| A_22_P00016093 | 6,79378 | 6,12326 | 1,591646552 | ENST00000426367 | 101928402 | XR_244534    | LOC101928402    |
| A_33_P3306113  | 12,0438 | 11,3733 | 1,591624487 | ENST00000438896 | 65094     | NM_023007    | JMJD4           |
| A_23_P135219   | 2,55907 | 1,88869 | 1,591492105 | ENST00000616002 | 2844      | NM_005294    | GPR21           |
| A_23_P165148   | 12,5625 | 11,8922 | 1,591403856 | ENST00000263383 | 10994     | NM_006844    | ILVBL           |
| A_21_P0000882  | 6,32705 | 5,65678 | 1,591370764 | N/A             | 100507218 | NR_040017    | RNF157-AS1      |
| A_33_P3304688  | 5,86402 | 5,19376 | 1,591359734 | N/A             | 445341    | AF463496     | TNAP            |
| A_33_P3297587  | 2,65705 | 1,98688 | 1,591260463 | ENST00000625073 | 64433     | NR_024119    | LINC00244       |
| A_21_P0008358  | 4,7869  | 4,11688 | 1,591095025 | N/A             | N/A       | N/A          | Inc-C14orf118-1 |
| A_33_P3405763  | 5,95426 | 5,28427 | 1,591061939 | ENST00000342462 | 643853    | NM_001039770 | TMPPE           |
| A_21_P0004567  | 2,28515 | 1,61519 | 1,591028854 | N/A             | N/A       | N/A          | Inc-ARRDC3-1    |
| A_24_P176493   | 8,21852 | 7,5486  | 1,590984742 | ENST00000566488 | 23300     | NM_015251    | ATMIN           |
| A_24_P67946    | 9,45364 | 8,78377 | 1,590929604 | ENST00000415493 | 11163     | NM_199040    | NUDT4           |
| A_23_P256903   | 6,7798  | 6,10995 | 1,590907549 | N/A             | N/A       | AF086546     | N/A             |
| A_33_P3392698  | 6,77177 | 6,10196 | 1,59086344  | ENST00000335144 | 139886    | NM_001012968 | SPIN4           |
| A_23_P74581    | 13,5948 | 12,925  | 1,590852413 | N/A             | 85028     | NR_024127    | SNHG12          |
| A_33_P3365705  | 2,10468 | 1,435   | 1,590720095 | N/A             | N/A       | N/A          | Inc-HERC1-1     |

|                |         |         |             |                 |           |              |              |
|----------------|---------|---------|-------------|-----------------|-----------|--------------|--------------|
| A_21_P0008362  | 2,56448 | 1,89492 | 1,590587788 | ENST00000557195 | 101928767 | NR_110155    | LOC101928767 |
| A_33_P3314978  | 4,87038 | 4,20086 | 1,590543689 | N/A             | 100130522 | NR_028340    | PARD6G-AS1   |
| A_23_P87329    | 11,6336 | 10,9641 | 1,590521639 | ENST00000531159 | 55226     | NM_024662    | NAT10        |
| A_24_P174775   | 2,58387 | 1,91452 | 1,590356278 | ENST00000264663 | 23530     | N/A          | NNT          |
| A_23_P215525   | 12,6796 | 12,0103 | 1,590301161 | ENST00000396429 | 26031     | NM_015550    | OSBPL3       |
| A_21_P0005607  | 3,30017 | 2,6309  | 1,590268092 | N/A             | 101927473 | XR_250237    | LOC101927473 |
| A_23_P424617   | 2,31199 | 1,64275 | 1,590235024 | ENST00000340994 | 5314      | NM_170724    | PKHD1        |
| A_21_P0009557  | 3,834   | 3,16483 | 1,590157867 | N/A             | N/A       | N/A          | Inc-CXXC1-1  |
| A_21_P0005543  | 2,89634 | 2,22717 | 1,590157867 | N/A             | N/A       | N/A          | Inc-XRCC2-2  |
| A_23_P128503   | 2,0379  | 1,36883 | 1,59004765  | ENST00000229134 | 55801     | NM_018402    | IL26         |
| A_33_P3258320  | 7,31672 | 6,64768 | 1,590014586 | ENST00000585350 | 54811     | XM_005259941 | ZNF562       |
| A_33_P3259017  | 12,5399 | 11,8709 | 1,589970502 | ENST00000615564 | 1455      | NM_001319    | CSNK1G2      |
| A_24_P399942   | 8,71372 | 8,04481 | 1,589871317 | ENST00000450801 | 286410    | NM_173694    | ATP11C       |
| A_33_P3422991  | 7,9522  | 7,28341 | 1,589739081 | ENST00000526735 | 120103    | NM_001286139 | SLC36A4      |
| A_33_P3424062  | 2,11569 | 1,4469  | 1,589739081 | ENST00000295082 | 3754      | NM_002236    | KCNF1        |
| A_33_P3239298  | 4,89615 | 4,22738 | 1,589717043 | ENST00000399694 | 5625      | BC036534     | PRODH        |
| A_23_P168916   | 3,40952 | 2,74077 | 1,589695005 | ENST00000523022 | 759       | NM_001738    | CA1          |
| A_23_P143748   | 10,2926 | 9,62387 | 1,589672967 | ENST00000484711 | 23170     | NM_015140    | TTL12        |
| A_23_P253692   | 2,18542 | 1,51677 | 1,589584819 | ENST00000356606 | 10149     | NM_001079858 | GPR64        |
| A_21_P0014162  | 7,42044 | 6,75181 | 1,589562783 | N/A             | 101060264 | NR_126415    | FOXP4-AS1    |
| A_33_P3542801  | 7,65592 | 6,98734 | 1,589507694 | N/A             | 729291    | XR_242943    | LOC729291    |
| A_19_P00803675 | 2,45358 | 1,78503 | 1,589474642 | N/A             | N/A       | N/A          | N/A          |
| A_23_P45475    | 13,2243 | 12,5558 | 1,589419556 | ENST00000466414 | 2717      | NM_000169    | GLA          |
| A_33_P3419234  | 7,75129 | 7,08288 | 1,589320406 | ENST00000509153 | 26094     | NM_015604    | DCAF4        |
| A_22_P00010218 | 2,42056 | 1,75239 | 1,589056036 | ENST00000540875 | N/A       | BF978194     | N/A          |
| A_24_P75920    | 6,44735 | 5,77925 | 1,588978936 | ENST00000588464 | 126075    | NM_001080503 | CCDC159      |
| A_33_P3400248  | 2,14699 | 1,47899 | 1,5888688   | ENST00000180166 | 26281     | NM_019851    | FGF20        |
| A_33_P3388958  | 5,68162 | 5,01369 | 1,58879171  | ENST00000308342 | 254122    | NM_152760    | SNX32        |
| A_33_P3252809  | 6,93165 | 6,26381 | 1,588692599 | N/A             | N/A       | N/A          | N/A          |
| A_33_P3297245  | 12,4255 | 11,7577 | 1,588648551 | N/A             | 22800     | NM_012250    | RRAS2        |
| A_33_P3246733  | 6,62906 | 5,96132 | 1,588582483 | ENST00000174618 | 4335      | NM_020310    | MNT          |
| A_33_P3396646  | 5,75378 | 5,08623 | 1,588373284 | ENST00000429433 | 57673     | NM_001080450 | BEND3        |
| A_23_P81811    | 10,3344 | 9,66691 | 1,588307226 | ENST00000483640 | 93643     | NM_080604    | TJAP1        |



|                |         |         |             |                 |           |              |               |
|----------------|---------|---------|-------------|-----------------|-----------|--------------|---------------|
| A_23_P13934    | 3,38726 | 2,7198  | 1,588274199 | N/A             | 84983     | NR_026661    | FAM222A-AS1   |
| A_33_P3369158  | 3,7731  | 3,1057  | 1,588208146 | ENST00000405914 | 3797      | NM_002254    | KIF3C         |
| A_33_P3892710  | 4,2785  | 3,61123 | 1,58806504  | N/A             | 677807    | AL706006     | SNORA22       |
| A_19_P00809139 | 7,88887 | 7,22193 | 1,58770183  | ENST00000519655 | 101929709 | XR_242401    | LOC101929709  |
| A_22_P00012238 | 3,05192 | 2,38506 | 1,587613791 | N/A             | N/A       | N/A          | Inc-PPIE-2    |
| A_33_P3367970  | 7,20883 | 6,54198 | 1,587602787 | N/A             | N/A       | N/A          | N/A           |
| A_22_P00016783 | 5,10079 | 4,43399 | 1,587547766 | N/A             | N/A       | N/A          | Inc-TRIM44-3  |
| A_23_P151634   | 9,50253 | 8,83576 | 1,587514754 | ENST00000557394 | 11198     | NM_007192    | SUPT16H       |
| A_33_P3294669  | 8,15142 | 7,48479 | 1,587360708 | ENST00000605153 | N/A       | N/A          | N/A           |
| A_33_P3355831  | 8,03332 | 7,36674 | 1,587305695 | ENST00000416391 | 7760      | NM_004220    | ZNF213        |
| A_32_P110872   | 6,44234 | 5,77578 | 1,587283691 | ENST00000376250 | 87769     | NM_033110    | GGACT         |
| A_21_P0001921  | 3,37801 | 2,71173 | 1,586975659 | ENST00000426716 | N/A       | N/A          | N/A           |
| A_21_P0005532  | 2,54211 | 1,87587 | 1,586931659 | N/A             | N/A       | N/A          | Inc-WDR91-1   |
| A_23_P24244    | 10,1876 | 9,52143 | 1,586854662 | ENST00000328090 | 54906     | NM_017782    | FAM208B       |
| A_22_P00022826 | 8,53963 | 7,87348 | 1,586832664 | ENST00000568560 | N/A       | N/A          | N/A           |
| A_33_P3341154  | 5,21046 | 4,54437 | 1,586766671 | ENST00000404767 | 26173     | NM_001080453 | INTS1         |
| A_21_P0005141  | 3,60816 | 2,9421  | 1,586733675 | N/A             | N/A       | N/A          | Inc-ARID1B-2  |
| A_23_P47199    | 4,00462 | 3,33859 | 1,586700681 | ENST00000301891 | 55867     | NM_018484    | SLC22A11      |
| A_21_P0006597  | 4,5871  | 3,92108 | 1,586689682 | N/A             | N/A       | N/A          | Inc-AMELY-4   |
| A_21_P0002305  | 2,21308 | 1,54715 | 1,586590703 | N/A             | N/A       | N/A          | Inc-GALNT5-1  |
| A_21_P0000208  | 10,6192 | 9,95327 | 1,586590703 | N/A             | 9304      | NR_000008    | SNORD22       |
| A_22_P00005117 | 3,97003 | 3,30415 | 1,586535717 | N/A             | 440416    | XR_424802    | CCDC144NL-AS1 |
| A_24_P123245   | 9,92133 | 9,25548 | 1,586502726 | ENST00000313899 | 3184      | NM_031370    | HNRNPD        |
| A_24_P103060   | 9,59878 | 8,9331  | 1,586315791 | ENST00000409105 | 90411     | NM_139279    | MCFD2         |
| A_33_P3218178  | 3,11959 | 2,45397 | 1,58624982  | ENST00000594199 | 401612    | NM_001012755 | SLC25A53      |
| A_23_P144807   | 4,47291 | 3,80738 | 1,586150867 | ENST00000378719 | 23176     | NM_001098811 | set-08        |
| A_21_P0014021  | 4,38375 | 3,71822 | 1,586150867 | N/A             | 164714    | XM_003403494 | TTL8          |
| A_33_P3299220  | 9,84601 | 9,18058 | 1,586040927 | ENST00000369041 | 54507     | NM_025008    | ADAMTSL4      |
| A_33_P3259423  | 10,977  | 10,3116 | 1,586007947 | ENST00000358337 | 54853     | NM_017706    | WDR55         |
| A_23_P144697   | 10,5563 | 9,89106 | 1,585832063 | ENST00000513914 | 5810      | NM_002853    | RAD1          |
| A_22_P00002829 | 3,08781 | 2,42263 | 1,585766111 | N/A             | N/A       | AF086098     | Inc-C2orf72-1 |
| A_33_P3372044  | 6,21095 | 5,54585 | 1,58567818  | ENST00000345063 | 285386    | NM_198485    | TPRG1         |
| A_21_P0014946  | 2,04265 | 1,37762 | 1,585601245 | N/A             | N/A       | N/A          | N/A           |

|                |         |         |             |                 |           |              |                |
|----------------|---------|---------|-------------|-----------------|-----------|--------------|----------------|
| A_33_P3351356  | 7,79774 | 7,13275 | 1,585557283 | ENST00000398560 | 9639      | BC040474     | ARHGEF10       |
| A_23_P25974    | 7,99762 | 7,33269 | 1,585491343 | ENST00000555005 | 145567    | NM_001010854 | TTC7B          |
| A_21_P0012903  | 6,42899 | 5,7641  | 1,585447384 | ENST00000504674 | 26512     | NM_012141    | INTS6          |
| A_23_P391228   | 9,55738 | 8,89262 | 1,585304527 | ENST00000373045 | 149175    | NM_001031740 | MANEAL         |
| A_22_P00025103 | 2,84326 | 2,17855 | 1,585249586 | ENST00000425125 | N/A       | N/A          | N/A            |
| A_22_P00016601 | 7,0018  | 6,33717 | 1,585161683 | ENST00000563563 | 9674      | NM_001162893 | KIAA0040       |
| A_24_P203298   | 2,87671 | 2,21214 | 1,58509576  | ENST00000469057 | 154865    | NM_178827    | IQUB           |
| A_33_P3259817  | 7,73435 | 7,0699  | 1,584963921 | ENST00000339416 | 23348     | NM_001130048 | DOCK9          |
| A_21_P0012391  | 9,12566 | 8,4613  | 1,584865049 | ENST00000504808 | N/A       | XR_241558    | N/A            |
| A_21_P0009148  | 2,33064 | 1,66641 | 1,584722244 | ENST00000581213 | 101927122 | XR_243713    | LOC101927122   |
| A_22_P00018945 | 4,26102 | 3,59685 | 1,584656339 | N/A             | 101927053 | NR_110209    | LOC101927053   |
| A_24_P179585   | 7,40767 | 6,74351 | 1,584645355 | ENST00000611084 | 4139      | NM_018650    | MARK1          |
| A_33_P3321711  | 11,9137 | 11,2496 | 1,584579453 | ENST00000372813 | 10953     | NM_006809    | TOMM34         |
| A_21_P0011415  | 4,01936 | 3,35528 | 1,584557486 | N/A             | 101929989 | N/A          | LOC101929989   |
| A_22_P00001553 | 6,31868 | 5,65463 | 1,584524536 | N/A             | N/A       | BC039429     | Inc-ARID2-1    |
| A_22_P00025293 | 5,35548 | 4,69147 | 1,584480605 | ENST00000504957 | N/A       | N/A          | N/A            |
| A_24_P174341   | 7,8904  | 7,22648 | 1,584381763 | ENST00000419781 | 905       | NM_058241    | CCNT2          |
| A_33_P3296940  | 9,07059 | 8,40668 | 1,584370781 | ENST00000478016 | 64778     | NM_022763    | FNDC3B         |
| A_23_P100501   | 13,5768 | 12,9131 | 1,584140175 | ENST00000398595 | 3163      | NM_002134    | HMOX2          |
| A_24_P743907   | 10,796  | 10,1323 | 1,584140175 | ENST00000452533 | 10059     | NM_001278464 | DNM1L          |
| A_23_P117146   | 9,48753 | 8,82385 | 1,584118214 | ENST00000228437 | 11108     | NM_012406    | PRDM4          |
| A_33_P3424882  | 4,62316 | 3,95955 | 1,584041354 | ENST00000333235 | N/A       | N/A          | N/A            |
| A_21_P0010805  | 6,16686 | 5,50329 | 1,583997436 | N/A             | N/A       | N/A          | XLOC_I2_001483 |
| A_22_P00011021 | 3,92002 | 3,25646 | 1,583986456 | N/A             | N/A       | BC025660     | Inc-NT5C2-1    |
| A_23_P38537    | 8,3805  | 7,71717 | 1,583733951 | ENST00000301653 | 3868      | NM_005557    | KRT16          |
| A_21_P0004966  | 2,08366 | 1,42052 | 1,583525391 | N/A             | 101929142 | XR_245631    | LOC101929142   |
| A_21_P0000013  | 9,18282 | 8,5197  | 1,583503438 | N/A             | 1678      | NM_001145951 | TIMM8A         |
| A_23_P168629   | 11,9296 | 11,2665 | 1,583481487 | ENST00000481788 | 55131     | NM_018077    | RBM28          |
| A_33_P3760937  | 5,9874  | 5,32436 | 1,583415633 | N/A             | 497256    | AK094988     | LOC497256      |
| A_23_P159920   | 10,7558 | 10,0929 | 1,583261985 | ENST00000612051 | 8517      | NM_003639    | IKBKG          |
| A_23_P43197    | 11,2833 | 10,6204 | 1,583261985 | ENST00000469032 | 793       | AK315959     | CALB1          |
| A_33_P3302000  | 2,06439 | 1,40158 | 1,583163219 | N/A             | 6315      | NR_002717    | ATXN8OS        |
| A_22_P00008886 | 5,37969 | 4,71741 | 1,582581722 | N/A             | 101927418 | NR_110050    | LOC101927418   |

|                |         |         |             |                 |           |              |                |
|----------------|---------|---------|-------------|-----------------|-----------|--------------|----------------|
| A_33_P3424364  | 9,11751 | 8,45535 | 1,582450092 | ENST00000361970 | 100129792 | NM_001134848 | CCDC152        |
| A_23_P17503    | 10,6879 | 10,0259 | 1,582274602 | ENST00000354981 | 55614     | NM_024704    | KIF16B         |
| A_22_P00005942 | 4,82044 | 4,15846 | 1,582252668 | N/A             | N/A       | CR736179     | Inc-EXOC3L4-1  |
| A_19_P00322962 | 6,53843 | 5,87654 | 1,582153965 | ENST00000478405 | 169981    | NR_027139    | SPIN3          |
| A_22_P00007323 | 2,24599 | 1,58414 | 1,582110099 | ENST00000554205 | N/A       | BU852515     | N/A            |
| A_22_P00011651 | 2,08431 | 1,42249 | 1,5820772   | ENST00000414647 | N/A       | N/A          | N/A            |
| A_24_P713668   | 13,4043 | 12,7425 | 1,582055268 | ENST00000409600 | 9689      | NM_014670    | BZW1           |
| A_22_P00009399 | 4,95284 | 4,29123 | 1,581846928 | ENST00000541888 | N/A       | XR_111249    | N/A            |
| A_21_P0000616  | 3,60484 | 2,9433  | 1,581770178 | N/A             | 728377    | NR_033942    | ARHGEF34P      |
| A_22_P00000550 | 3,24213 | 2,58063 | 1,581726323 | ENST00000521317 | N/A       | BX118359     | N/A            |
| A_23_P62188    | 7,7422  | 7,08082 | 1,581594764 | ENST00000488608 | 55906     | NM_018684    | ZC4H2          |
| A_21_P0000283  | 5,00994 | 4,34872 | 1,581419369 | N/A             | 26796     | NR_002741    | SNORD53        |
| A_24_P940310   | 7,81026 | 7,14904 | 1,581419369 | ENST00000382751 | 9875      | NM_014825    | URB1           |
| A_23_P56228    | 10,8059 | 10,1448 | 1,581287836 | ENST00000203556 | 51291     | NM_016573    | GMIP           |
| A_23_P5912     | 14,8231 | 14,162  | 1,581287836 | ENST00000370339 | 54915     | NM_017798    | YTHDF1         |
| A_23_P387184   | 7,91681 | 7,25574 | 1,581254954 | ENST00000343505 | 57224     | NM_020464    | NHSL1          |
| A_21_P0000859  | 4,5831  | 3,92219 | 1,581079597 | ENST00000429060 | 100506207 | NR_038980    | LOC100506207   |
| A_23_P253602   | 2,32763 | 1,66675 | 1,58104672  | ENST00000342014 | 660       | NM_001721    | BMX            |
| A_21_P0007876  | 2,16932 | 1,50846 | 1,581024802 | N/A             | N/A       | N/A          | Inc-SLC38A2-1  |
| A_21_P0009196  | 5,36772 | 4,70687 | 1,581013843 | N/A             | 103752589 | N/A          | TMEM92-AS1     |
| A_19_P00320155 | 6,61166 | 5,95082 | 1,581002885 | N/A             | 3653      | NR_023915    | IPW            |
| A_21_P0002295  | 2,56197 | 1,90117 | 1,580959051 | N/A             | N/A       | N/A          | Inc-UBXN4-4    |
| A_23_P65189    | 2,36083 | 1,70005 | 1,580937134 | ENST00000381033 | 3651      | NM_000209    | PDX1           |
| A_21_P0008529  | 2,34176 | 1,68101 | 1,58090426  | N/A             | N/A       | N/A          | Inc-STXBP6-1   |
| A_22_P00010643 | 2,42797 | 1,76723 | 1,580893302 | ENST00000538559 | 196475    | AF429306     | RMST           |
| A_24_P371053   | 8,29671 | 7,63605 | 1,580805641 | ENST00000325795 | 94101     | NM_016467    | ORMDL1         |
| A_32_P25737    | 6,0405  | 5,37995 | 1,580685115 | ENST00000373504 | 53344     | NM_001039840 | CHIC1          |
| A_33_P3279119  | 7,46278 | 6,80227 | 1,58064129  | N/A             | N/A       | DR007930     | N/A            |
| A_33_P3260377  | 3,94209 | 3,28162 | 1,580597466 | ENST00000262207 | 83690     | NM_001286778 | CRISPLD1       |
| A_21_P0011358  | 6,19931 | 5,53885 | 1,58058651  | N/A             | N/A       | N/A          | XLOC_I2_004854 |
| A_21_P0011781  | 3,83004 | 3,16965 | 1,580509821 | ENST00000621109 | 440533    | NM_001130167 | PSG8           |
| A_19_P00813544 | 2,60766 | 1,9473  | 1,580476956 | ENST00000556684 | 283587    | NR_046094    | LINC01146      |
| A_33_P3291329  | 7,5486  | 6,88832 | 1,580389318 | ENST00000315132 | N/A       | N/A          | N/A            |

|                |         |         |             |                 |           |              |                |
|----------------|---------|---------|-------------|-----------------|-----------|--------------|----------------|
| A_23_P18598    | 10,7361 | 10,0759 | 1,580301685 | ENST00000264864 | 55300     | NM_018323    | PI4K2B         |
| A_23_P45365    | 13,3481 | 12,688  | 1,580192151 | ENST00000328300 | 1287      | NM_033380    | COL4A5         |
| A_19_P00320056 | 9,11616 | 8,45616 | 1,580082624 | N/A             | 414777    | NR_102326    | HCG18          |
| A_19_P00321697 | 5,64168 | 4,98176 | 1,579995008 | ENST00000332440 | 114038    | NR_026863    | LINC00313      |
| A_21_P0004905  | 5,91339 | 5,25347 | 1,579995008 | N/A             | N/A       | N/A          | Inc-TPBG-1     |
| A_21_P0002031  | 2,21253 | 1,55263 | 1,579973105 | ENST00000423706 | N/A       | N/A          | N/A            |
| A_22_P00024909 | 3,66884 | 3,00907 | 1,579830741 | N/A             | N/A       | N/A          | Inc-BCL3-1     |
| A_33_P3421978  | 3,72927 | 3,0695  | 1,579830741 | ENST00000377976 | 643226    | NM_001080516 | GRXCR2         |
| A_24_P487736   | 7,88327 | 7,22354 | 1,579786939 | ENST00000472158 | 256643    | NM_198279    | CXorf23        |
| A_21_P0011380  | 4,56123 | 3,90162 | 1,579655542 | N/A             | N/A       | N/A          | Inc-STOML1-1   |
| A_21_P0003115  | 2,69292 | 2,03345 | 1,579502259 | N/A             | N/A       | N/A          | Inc-PRSS42-1   |
| A_33_P3383351  | 3,42574 | 2,76641 | 1,57934899  | ENST00000464187 | 1289      | AK057231     | COL5A1         |
| A_23_P347468   | 6,30639 | 5,64728 | 1,57910817  | ENST00000537916 | 7976      | NM_017412    | FZD3           |
| A_23_P47517    | 12,4918 | 11,8327 | 1,579097224 | ENST00000301765 | 55048     | NM_017966    | VPS37C         |
| A_33_P6817603  | 10,1061 | 9,44704 | 1,579053443 | ENST00000367021 | 3664      | NM_006147    | IRF6           |
| A_19_P00321332 | 15,5184 | 14,8594 | 1,578987773 | ENST00000501122 | 283131    | NR_028272    | NEAT1          |
| A_23_P331211   | 2,28391 | 1,62492 | 1,578976829 | ENST00000300404 | 124872    | NM_153446    | B4GALNT2       |
| A_23_P254978   | 10,4904 | 9,83143 | 1,57895494  | ENST00000523888 | 83940     | NM_032026    | TATDN1         |
| A_33_P3248213  | 2,13797 | 1,47901 | 1,578943995 | ENST00000569828 | 161635    | NR_027320    | CSNK1A1P1      |
| A_21_P0005367  | 2,28089 | 1,62197 | 1,578900218 | N/A             | N/A       | N/A          | Inc-C7orf41-1  |
| A_24_P268729   | 4,17384 | 3,51493 | 1,578889274 | ENST00000448997 | 51409     | NM_016173    | HEMK1          |
| A_21_P0002337  | 2,10442 | 1,44554 | 1,578856442 | N/A             | N/A       | N/A          | Inc-NOP58-1    |
| A_22_P00022656 | 2,55665 | 1,8978  | 1,578823611 | ENST00000561977 | 101927490 | XR_244728    | LOC101927490   |
| A_24_P135406   | 9,97985 | 9,32106 | 1,578757951 | ENST00000512203 | 54793     | NM_017634    | KCTD9          |
| A_24_P132008   | 4,59129 | 3,93255 | 1,578703237 | ENST00000239243 | 4488      | NM_002449    | MSX2           |
| A_33_P3378665  | 9,57134 | 8,91266 | 1,578637582 | ENST00000340892 | 123036    | NM_152332    | TC2N           |
| A_23_P72961    | 10,4926 | 9,83396 | 1,578593813 | ENST00000372418 | 5631      | NM_002764    | PRPS1          |
| A_33_P3271350  | 6,74594 | 6,08732 | 1,578571929 | ENST00000374647 | 8518      | NM_003640    | IKBKAP         |
| A_33_P3407626  | 2,08909 | 1,43069 | 1,578331227 | N/A             | N/A       | N/A          | N/A            |
| A_33_P3406927  | 9,35669 | 8,69831 | 1,578309347 | ENST00000569517 | 83440     | NM_031284    | ADPGK          |
| A_23_P42738    | 11,1038 | 10,4455 | 1,57822183  | ENST00000616824 | 84792     | NM_001037163 | FAM220A        |
| A_21_P0012463  | 2,13601 | 1,47783 | 1,578090562 | N/A             | N/A       | N/A          | XLOC_I2_010374 |
| A_23_P99891    | 12,5075 | 11,8494 | 1,578003057 | ENST00000267984 | 59274     | NM_022566    | MESDC1         |

|                |         |         |             |                 |           |              |              |
|----------------|---------|---------|-------------|-----------------|-----------|--------------|--------------|
| A_33_P3274691  | 4,52381 | 3,86587 | 1,57782806  | ENST00000482993 | 619207    | AK126713     | SCART1       |
| A_33_P3372688  | 3,55615 | 2,89835 | 1,577674954 | ENST00000391429 | 727857    | NM_001164405 | BHLHA9       |
| A_24_P73730    | 7,64315 | 6,9855  | 1,577510929 | ENST00000219299 | 29070     | NM_014157    | CCDC113      |
| A_22_P00010763 | 8,57712 | 7,91958 | 1,577390654 | N/A             | N/A       | N/A          | Inc-NKD2-3   |
| A_32_P163458   | 3,55947 | 2,90197 | 1,57734692  | ENST00000333385 | 441272    | NM_001004351 | SPDYE3       |
| A_33_P3276153  | 7,95178 | 7,29429 | 1,577335987 | ENST00000611771 | 653073    | NM_001282472 | GOLGA8J      |
| A_33_P3374170  | 5,06254 | 4,40505 | 1,577335987 | ENST00000437690 | N/A       | N/A          | N/A          |
| A_21_P0004844  | 2,31572 | 1,65826 | 1,577303187 | N/A             | N/A       | N/A          | Inc-CD83-4   |
| A_22_P00007841 | 2,42736 | 1,77016 | 1,577018954 | N/A             | 100874218 | NR_046758    | ATP13A5-AS1  |
| A_21_P0004651  | 2,96443 | 2,30736 | 1,576876857 | N/A             | N/A       | N/A          | Inc-DAAM2-3  |
| A_22_P00014731 | 2,44131 | 1,7843  | 1,576811278 | N/A             | N/A       | N/A          | Inc-SLC2A6-1 |
| A_21_P0005250  | 2,1734  | 1,51647 | 1,576723843 | N/A             | 101927721 | XR_242321    | LOC101927721 |
| A_23_P203344   | 12,585  | 11,9281 | 1,576691056 | ENST00000316059 | 80829     | NM_053023    | ZFP91        |
| A_23_P3552     | 9,75213 | 9,09531 | 1,576603629 | ENST00000551681 | 102723428 | BC009198     | LOC102723428 |
| A_23_P101476   | 6,63497 | 5,9783  | 1,576439714 | ENST00000242804 | 79973     | NM_030824    | ZNF442       |
| A_21_P0010309  | 4,35155 | 3,6949  | 1,57641786  | ENST00000609947 | 114036    | N/A          | LINC00310    |
| A_23_P147900   | 5,92033 | 5,26368 | 1,57641786  | ENST00000403058 | 11281     | NM_007252    | POU6F2       |
| A_24_P124662   | 11,0947 | 10,4381 | 1,576363227 | ENST00000547067 | 8550      | NM_139078    | MAPKAPK5     |
| A_33_P3220025  | 2,42682 | 1,77042 | 1,576144712 | ENST00000567652 | 727832    | NM_001145004 | GOLGA6L6     |
| A_21_P0014208  | 4,68452 | 4,02818 | 1,576079163 | ENST00000518238 | N/A       | XR_108869    | N/A          |
| A_23_P394166   | 11,9077 | 11,2514 | 1,576035465 | ENST00000361272 | 29883     | NM_013354    | CNOT7        |
| A_33_P3385281  | 2,33878 | 1,68264 | 1,575860687 | ENST00000394973 | 170850    | NM_133329    | KCNG3        |
| A_24_P394075   | 2,14208 | 1,48601 | 1,575784228 | ENST00000359846 | 93034     | NM_001002006 | NT5C1B       |
| A_33_P3357591  | 5,40926 | 4,75323 | 1,575740538 | ENST00000474221 | 80162     | NM_025092    | ATHL1        |
| A_21_P0005738  | 2,13828 | 1,48238 | 1,575598556 | N/A             | N/A       | N/A          | Inc-POP1-1   |
| A_23_P312536   | 5,65769 | 5,00182 | 1,575565793 | ENST00000380009 | 153642    | NM_198150    | ARSK         |
| A_23_P308974   | 2,1355  | 1,47974 | 1,575445667 | ENST00000567476 | 57188     | NM_207517    | ADAMTSL3     |
| A_32_P221      | 3,84318 | 3,18742 | 1,575445667 | ENST00000299191 | 123970    | NM_144602    | C16orf78     |
| A_23_P64837    | 10,5856 | 9,9299  | 1,575380147 | ENST00000603864 | 57228     | NM_001031628 | SMAGP        |
| A_22_P00003540 | 3,10465 | 2,44922 | 1,575085343 | N/A             | N/A       | AK097242     | Inc-CCNJL-1  |
| A_21_P0006162  | 3,94681 | 3,29165 | 1,574790593 | N/A             | N/A       | N/A          | Inc-NTRK2-3  |
| A_23_P103104   | 5,38539 | 4,73026 | 1,574757847 | ENST00000356998 | 4242      | NM_002405    | MFNG         |
| A_33_P3527317  | 6,86755 | 6,21242 | 1,574757847 | N/A             | 148638    | AK058184     | LOC148638    |

|                |         |         |             |                 |           |              |                |
|----------------|---------|---------|-------------|-----------------|-----------|--------------|----------------|
| A_33_P3392823  | 12,3975 | 11,7424 | 1,574725101 | ENST00000594724 | 55850     | NM_018467    | USE1           |
| A_21_P0012815  | 3,35671 | 2,70174 | 1,57458321  | N/A             | 102723888 | XR_425822    | LOC102723888   |
| A_23_P14716    | 11,1803 | 10,5255 | 1,57439768  | ENST00000562621 | 83440     | NM_031284    | ADPGK          |
| A_24_P732099   | 3,34305 | 2,68827 | 1,574375855 | ENST00000454892 | 3044      | NR_001589    | HBBP1          |
| A_22_P00016565 | 4,89953 | 4,24486 | 1,574255819 | ENST00000566575 | N/A       | N/A          | N/A            |
| A_22_P00010973 | 5,79778 | 5,14315 | 1,574212172 | N/A             | N/A       | N/A          | Inc-NRIP2-2    |
| A_22_P00014714 | 2,22903 | 1,57448 | 1,574124881 | N/A             | N/A       | BM807342     | Inc-SLC25A48-3 |
| A_23_P150467   | 2,01627 | 1,3618  | 1,574037596 | ENST00000301532 | 10798     | NM_006637    | OR5I1          |
| A_23_P342185   | 8,58914 | 7,93485 | 1,573841221 | ENST00000372075 | 23063     | NM_015045    | WAPAL          |
| A_21_P0000567  | 4,00666 | 3,35241 | 1,573797585 | ENST00000446986 | 100303728 | NR_028443    | SLC25A5-AS1    |
| A_21_P0012474  | 2,15732 | 1,50309 | 1,573775768 | ENST00000449483 | N/A       | N/A          | N/A            |
| A_22_P00018895 | 6,08234 | 5,42817 | 1,573710318 | ENST00000438070 | N/A       | N/A          | N/A            |
| A_23_P16252    | 10,5889 | 9,93488 | 1,573546705 | ENST00000301420 | 3816      | NM_002257    | KLK1           |
| A_22_P00023011 | 2,10354 | 1,44953 | 1,573535798 | N/A             | 101927891 | NR_110682    | PKN2-AS1       |
| A_33_P3291325  | 5,15443 | 4,50059 | 1,573350391 | ENST00000616814 | 54617     | NM_017553    | INO80          |
| A_33_P3338423  | 5,39674 | 4,74305 | 1,573186815 | ENST00000434127 | 81848     | NM_001293289 | SPRY4          |
| A_33_P3265376  | 9,09715 | 8,44352 | 1,573121389 | ENST00000599097 | 9454      | NM_001145724 | HOMER3         |
| A_24_P21410    | 10,8346 | 10,1811 | 1,572979643 | ENST00000297990 | 65083     | NM_022917    | NOL6           |
| A_23_P79360    | 6,28312 | 5,62964 | 1,572957837 | ENST00000397206 | 115677    | NM_052946    | NOSTRIN        |
| A_19_P00321782 | 5,34181 | 4,68833 | 1,572957837 | N/A             | 378805    | NR_109851    | LINC-PINT      |
| A_33_P3839334  | 9,81623 | 9,16276 | 1,572946934 | ENST00000606994 | N/A       | AK055939     | N/A            |
| A_24_P6305     | 4,46161 | 3,80826 | 1,572816106 | ENST00000424325 | N/A       | BC018570     | N/A            |
| A_19_P00803334 | 4,52887 | 3,87555 | 1,5727834   | N/A             | N/A       | N/A          | Inc-GALNTL4-2  |
| A_23_P317082   | 4,69236 | 4,03907 | 1,572750695 | ENST00000297875 | 94122     | NM_138780    | SYTL5          |
| A_23_P152791   | 4,5408  | 3,88762 | 1,572630784 | ENST00000620436 | 9120      | NM_004694    | SLC16A6        |
| A_22_P00000605 | 2,52296 | 1,86979 | 1,572619883 | ENST00000582741 | N/A       | N/A          | N/A            |
| A_23_P10785    | 8,87386 | 8,22075 | 1,572554481 | ENST00000393077 | 143187    | NM_145206    | VTI1A          |
| A_22_P00014171 | 15,208  | 14,5549 | 1,572543581 | ENST00000508832 | 378938    | NR_002819    | MALAT1         |
| A_33_P3319022  | 2,28191 | 1,62892 | 1,572423685 | N/A             | 283420    | NM_207345    | CLEC9A         |
| A_23_P58538    | 14,2661 | 13,6132 | 1,572325595 | ENST00000427306 | 114915    | NR_015370    | EPB41L4A-AS1   |
| A_23_P318581   | 12,0627 | 11,4098 | 1,572325595 | ENST00000458385 | 57587     | NM_020827    | CFAP97         |
| A_22_P00025637 | 11,0407 | 10,3878 | 1,572325595 | ENST00000527545 | 340371    | NM_178564    | NRBP2          |
| A_32_P44534    | 2,09039 | 1,43757 | 1,572238409 | ENST00000398458 | 283471    | NM_182559    | TMPRSS12       |

|                |         |         |             |                 |           |              |                      |
|----------------|---------|---------|-------------|-----------------|-----------|--------------|----------------------|
| A_33_P3301410  | 12,5763 | 11,9235 | 1,572216614 | ENST00000316052 | 54512     | NM_019037    | EXOSC4               |
| A_33_P3405114  | 6,32384 | 5,67116 | 1,572085846 | ENST00000399775 | 375704    | NM_198573    | ENHO                 |
| A_21_P0014600  | 5,62675 | 4,97429 | 1,571846133 | N/A             | N/A       | N/A          | N/A                  |
| A_21_P0000126  | 9,69713 | 9,04473 | 1,571780763 | ENST00000566166 | 100507588 | NM_001195259 | TGFBR3L              |
| A_33_P3327076  | 3,60552 | 2,95317 | 1,57172629  | ENST00000344889 | 403239    | NM_001001824 | OR2T27               |
| A_33_P3404686  | 2,14292 | 1,4906  | 1,571693607 | N/A             | 100128262 | AK094115     | TNK2-AS1             |
| A_21_P0011346  | 3,26892 | 2,61666 | 1,571628244 | N/A             | N/A       | N/A          | XLOC_I2_004840       |
| A_21_P0009721  | 2,06577 | 1,41362 | 1,571508418 | N/A             | N/A       | N/A          | Inc-ZNF567-1         |
| A_22_P00013489 | 2,19212 | 1,54003 | 1,571443062 | N/A             | N/A       | N/A          | Inc-RP11-33N16.1.1-2 |
| A_23_P105392   | 15,494  | 14,842  | 1,571345033 | ENST00000550010 | 10576     | NM_006431    | CCT2                 |
| A_32_P136351   | 2,11224 | 1,46035 | 1,571225229 | ENST00000377084 | 114798    | NM_052910    | SLITRK1              |
| A_21_P0007684  | 3,81315 | 3,1613  | 1,571181666 | N/A             | N/A       | N/A          | Inc-VWF-2            |
| A_23_P396724   | 2,13395 | 1,48211 | 1,571170775 | ENST00000339777 | 254050    | NM_152759    | LRRC43               |
| A_33_P3283550  | 2,08239 | 1,43059 | 1,571127214 | ENST00000463881 | 100507650 | NM_001282322 | RNF212B              |
| A_23_P96497    | 3,27801 | 2,62632 | 1,571007426 | ENST00000370416 | 100506164 | NM_016153    | HSFX1                |
| A_22_P00019653 | 2,14327 | 1,49167 | 1,570909424 | N/A             | N/A       | N/A          | Inc-CDKAL1-1         |
| A_21_P0002846  | 2,44717 | 1,79561 | 1,57086587  | ENST00000456335 | N/A       | N/A          | N/A                  |
| A_33_P3424754  | 3,15368 | 2,50217 | 1,570811429 | ENST00000390294 | N/A       | KJ487209     | N/A                  |
| A_32_P420563   | 6,27433 | 5,62299 | 1,570626343 | ENST00000382363 | 200312    | NM_001017981 | RNF215               |
| A_23_P152002   | 2,29843 | 1,6471  | 1,570615457 | ENST00000267953 | 597       | NM_004049    | BCL2A1               |
| A_23_P98261    | 13,4227 | 12,7715 | 1,570473936 | ENST00000527413 | 10534     | NM_006396    | SSSCA1               |
| A_22_P00011992 | 3,70433 | 3,05318 | 1,570419509 | N/A             | N/A       | N/A          | Inc-PLAU-2           |
| A_21_P0008224  | 6,55578 | 5,90471 | 1,570332429 | ENST00000612143 | N/A       | N/A          | N/A                  |
| A_21_P0005508  | 2,08285 | 1,43181 | 1,570299775 | N/A             | N/A       | N/A          | Inc-PION-1           |
| A_21_P0002124  | 2,36891 | 1,71798 | 1,57018005  | ENST00000457756 | N/A       | N/A          | N/A                  |
| A_22_P00008847 | 5,61255 | 4,96164 | 1,570158283 | ENST00000440545 | N/A       | XR_425512    | N/A                  |
| A_21_P0007646  | 4,42727 | 3,77657 | 1,569929746 | N/A             | N/A       | N/A          | Inc-ZNF664-1         |
| A_33_P3225978  | 2,21778 | 1,56714 | 1,569864456 | ENST00000357627 | 284532    | NM_001001966 | OR14A16              |
| A_21_P0002264  | 2,21373 | 1,56309 | 1,569864456 | N/A             | N/A       | N/A          | Inc-MRPS9-1          |
| A_33_P3337252  | 2,75168 | 2,10126 | 1,569625081 | ENST00000438543 | N/A       | AK126057     | N/A                  |
| A_19_P00805339 | 2,21487 | 1,56453 | 1,569538045 | ENST00000455680 | 149351    | N/A          | LOC149351            |
| A_33_P3250015  | 6,02102 | 5,37071 | 1,569505408 | ENST00000420308 | N/A       | BM473780     | N/A                  |
| A_33_P3395146  | 10,6945 | 10,0442 | 1,569494529 | N/A             | 646762    | N/A          | LOC646762            |

|                |         |         |             |                 |           |              |                |
|----------------|---------|---------|-------------|-----------------|-----------|--------------|----------------|
| A_33_P3383381  | 2,13649 | 1,48631 | 1,569363988 | ENST00000392056 | 80309     | NM_001142644 | SPHKAP         |
| A_21_P0005061  | 3,61324 | 2,96316 | 1,569255211 | N/A             | N/A       | N/A          | Inc-OLIG3-1    |
| A_21_P0012280  | 5,21519 | 4,56514 | 1,56922258  | ENST00000457911 | 7450      | N/A          | VWF            |
| A_33_P3339625  | 2,20246 | 1,55248 | 1,569146443 | ENST00000244241 | 27189     | NM_013278    | IL17C          |
| A_22_P00006482 | 2,49978 | 1,8499  | 1,569037681 | N/A             | N/A       | N/A          | Inc-FGD3-1     |
| A_21_P0000661  | 6,89103 | 6,24117 | 1,56901593  | ENST00000507197 | 724102    | NR_036536    | SNHG4          |
| A_23_P79217    | 2,13839 | 1,48868 | 1,568852805 | ENST00000264162 | 3938      | NM_002299    | LCT            |
| A_22_P00021391 | 3,69614 | 3,04667 | 1,568591839 | N/A             | 100862692 | NR_046400    | DIP2A-IT1      |
| A_23_P385690   | 3,02303 | 2,37366 | 1,568483117 | ENST00000284523 | 89780     | NM_033131    | WNT3A          |
| A_33_P3397613  | 4,561   | 3,91164 | 1,568472245 | N/A             | N/A       | N/A          | Inc-MTX1-1     |
| A_23_P13083    | 7,35391 | 6,70467 | 1,568341788 | ENST00000281437 | 8538      | NM_003658    | BARX2          |
| A_21_P0001799  | 2,42384 | 1,77466 | 1,568276564 | N/A             | 102724675 | XR_425512    | LOC102724675   |
| A_21_P0006650  | 2,48631 | 1,83713 | 1,568276564 | ENST00000447297 | N/A       | N/A          | N/A            |
| A_21_P0007024  | 2,11584 | 1,46678 | 1,568146124 | N/A             | N/A       | N/A          | Inc-MCMBP-1    |
| A_33_P3261353  | 6,64588 | 5,99684 | 1,568124385 | ENST00000400605 | 286554    | NR_033732    | BCORP1         |
| A_33_P3251871  | 6,47257 | 5,82353 | 1,568124385 | N/A             | N/A       | N/A          | XLOC_I2_015206 |
| A_22_P00007048 | 3,42366 | 2,77464 | 1,568102647 | N/A             | N/A       | N/A          | Inc-GK-2       |
| A_33_P3263989  | 8,60751 | 7,9585  | 1,568091777 | N/A             | N/A       | N/A          | N/A            |
| A_22_P00023515 | 3,50466 | 2,85576 | 1,567972221 | N/A             | 102723953 | XR_426129    | LOC102723953   |
| A_33_P3418496  | 7,94938 | 7,3006  | 1,567841806 | N/A             | N/A       | N/A          | N/A            |
| A_33_P3387971  | 3,79513 | 3,14646 | 1,567722269 | ENST00000457336 | 400999    | XM_005275926 | FLJ42351       |
| A_22_P00025796 | 2,76641 | 2,1178  | 1,56765707  | ENST00000569766 | 4775      | NM_173165    | NFATC3         |
| A_23_P214408   | 2,23347 | 1,58505 | 1,567450627 | ENST00000366829 | 54346     | NM_018974    | UNC93A         |
| A_24_P357468   | 3,0558  | 2,40739 | 1,567439762 | ENST00000390434 | N/A       | D13077       | N/A            |
| A_24_P71373    | 9,70611 | 9,0578  | 1,567331119 | ENST00000490329 | 6548      | NM_003047    | SLC9A1         |
| A_22_P00009776 | 2,18623 | 1,53801 | 1,567233347 | ENST00000551531 | N/A       | N/A          | N/A            |
| A_21_P0000365  | 8,50707 | 7,85887 | 1,567211621 | N/A             | 692057    | NR_003030    | SNORD12        |
| A_22_P00010051 | 4,42888 | 3,78068 | 1,567211621 | N/A             | N/A       | N/A          | Inc-MOCS3-2    |
| A_33_P3352712  | 4,51319 | 3,865   | 1,567200757 | ENST00000337231 | 30850     | NM_014603    | CDR2L          |
| A_23_P20248    | 12,2646 | 11,6165 | 1,567102993 | ENST00000307102 | 5604      | NM_002755    | MAP2K1         |
| A_23_P408787   | 2,12192 | 1,47383 | 1,567092131 | ENST00000366491 | 148823    | NM_145278    | GCSAML         |
| A_33_P3253702  | 4,82977 | 4,18168 | 1,567092131 | N/A             | 85313     | NM_139126    | PPIL4          |
| A_23_P47806    | 3,58143 | 2,93336 | 1,567070407 | ENST00000257979 | 4284      | NM_012064    | MIP            |



|                |         |         |             |                 |           |              |              |
|----------------|---------|---------|-------------|-----------------|-----------|--------------|--------------|
| A_33_P3378880  | 7,67305 | 7,02504 | 1,567005236 | ENST00000377803 | 8364      | BC130558     | HIST1H4C     |
| A_33_P3304516  | 8,53589 | 7,88793 | 1,566950928 | ENST00000371744 | 57169     | NM_021035    | ZNF1         |
| A_22_P00007171 | 3,66645 | 3,01867 | 1,566755437 | N/A             | N/A       | N/A          | Inc-GNG5P2-1 |
| A_23_P212126   | 2,78026 | 2,13249 | 1,566744578 | ENST00000383788 | 8292      | NM_080538    | COLQ         |
| A_24_P802145   | 9,74118 | 9,09342 | 1,566733718 | ENST00000305123 | 3667      | NM_005544    | IRS1         |
| A_33_P3373375  | 6,62614 | 5,97848 | 1,566625124 | ENST00000468153 | 975       | NM_004356    | CD81         |
| A_22_P00016032 | 1,99756 | 1,34994 | 1,566581688 | N/A             | N/A       | N/A          | Inc-TGFBR2-1 |
| A_32_P749354   | 11,4218 | 10,7742 | 1,566559971 | ENST00000312234 | 84285     | NM_032325    | EIF1AD       |
| A_24_P285522   | 7,64576 | 6,99827 | 1,566440531 | ENST00000341681 | 8491      | NM_003618    | MAP4K3       |
| A_22_P00022287 | 5,5007  | 4,85327 | 1,566375386 | ENST00000559755 | N/A       | N/A          | N/A          |
| A_23_P153930   | 6,9937  | 6,34639 | 1,566245104 | ENST00000495775 | 92        | NM_001616    | ACVR2A       |
| A_24_P388810   | 10,7078 | 10,0606 | 1,566125689 | ENST00000520401 | 6728      | NM_003135    | SRP19        |
| A_23_P117582   | 12,8615 | 12,2144 | 1,566017137 | ENST00000267569 | 122953    | NM_130469    | JDP2         |
| A_21_P0007131  | 2,32683 | 1,67977 | 1,565973718 | ENST00000527317 | 101929473 | NR_120578    | LOC101929473 |
| A_21_P0000025  | 3,79571 | 3,14875 | 1,565865177 | ENST00000460603 | 4846      | NM_001160109 | NOS3         |
| A_23_P25433    | 9,48093 | 8,83403 | 1,565800056 | ENST00000545746 | 57102     | NM_020374    | C12orf4      |
| A_33_P3222788  | 8,29413 | 7,64734 | 1,565680674 | N/A             | 100188947 | NR_024467    | HECTD2-AS1   |
| A_24_P942030   | 6,36546 | 5,71869 | 1,565658969 | ENST00000236192 | 8674      | NM_003762    | VAMP4        |
| A_22_P00009113 | 6,55317 | 5,90643 | 1,565626413 | ENST00000507051 | 100499177 | NR_034077    | THAP9-AS1    |
| A_22_P00007929 | 2,20217 | 1,55546 | 1,565593857 | N/A             | N/A       | N/A          | Inc-HTR1B-1  |
| A_21_P0013438  | 6,16198 | 5,51527 | 1,565593857 | ENST00000429320 | N/A       | XR_252233    | N/A          |
| A_23_P393686   | 2,1812  | 1,53467 | 1,565398535 | ENST00000427263 | 157695    | NM_175075    | TDRP         |
| A_21_P0002047  | 2,21146 | 1,56514 | 1,565170691 | ENST00000423433 | N/A       | N/A          | N/A          |
| A_23_P395418   | 3,73651 | 3,09023 | 1,565127296 | ENST00000618934 | 56102     | NM_032097    | PCDHGB3      |
| A_33_P3211138  | 2,54772 | 1,90147 | 1,56509475  | ENST00000452722 | 23705     | AK131376     | CADM1        |
| A_33_P3402171  | 10,9773 | 10,3311 | 1,565040509 | ENST00000256383 | 1965      | NM_004094    | EIF2S1       |
| A_23_P46947    | 6,4732  | 5,82705 | 1,56498627  | ENST00000356713 | 26507     | NM_020348    | CNNM1        |
| A_33_P3402963  | 2,73286 | 2,08673 | 1,564964575 | ENST00000376650 | 503834    | NM_001012728 | DPRX         |
| A_33_P3235831  | 4,88882 | 4,24284 | 1,564801871 | N/A             | N/A       | N/A          | N/A          |
| A_24_P83738    | 8,61002 | 7,96416 | 1,564671719 | ENST00000361477 | 23245     | NM_198188    | ASTN2        |
| A_24_P315056   | 2,45752 | 1,81174 | 1,564584958 | ENST00000368821 | 387718    | NM_001128202 | TEX36        |
| A_23_P363406   | 8,49736 | 7,85163 | 1,564530735 | ENST00000251089 | 23357     | NM_015305    | ANGEL1       |
| A_32_P204218   | 5,7402  | 5,09463 | 1,564357232 | ENST00000415751 | 389558    | NM_205855    | FAM180A      |

|                |         |         |             |                 |           |              |                |
|----------------|---------|---------|-------------|-----------------|-----------|--------------|----------------|
| A_19_P00800229 | 4,5474  | 3,90183 | 1,564357232 | N/A             | N/A       | N/A          | Inc-IRX3-4     |
| A_33_P3370959  | 4,54222 | 3,89685 | 1,564140381 | ENST00000613186 | 696       | NM_001732    | BTN1A1         |
| A_19_P00320614 | 4,12534 | 3,47998 | 1,564129539 | N/A             | 283177    | NR_033852    | LOC283177      |
| A_33_P3408943  | 12,9382 | 12,2929 | 1,564064491 | ENST00000369077 | 79892     | NM_024834    | MCMBP          |
| A_21_P0009611  | 4,99284 | 4,3476  | 1,563999444 | ENST00000584919 | 101927481 | NR_126336    | LOC101927481   |
| A_33_P3265260  | 3,12584 | 2,48062 | 1,563977763 | N/A             | N/A       | N/A          | N/A            |
| A_33_P3544887  | 8,06915 | 7,42404 | 1,56385852  | ENST00000612946 | 23331     | NM_001145418 | TTC28          |
| A_22_P00014692 | 5,96567 | 5,32066 | 1,563750125 | N/A             | N/A       | BU942368     | Inc-SLC25A28-1 |
| A_22_P00024979 | 2,80423 | 2,1593  | 1,563663415 | ENST00000512927 | 101927041 | XR_246559    | LOC101927041   |
| A_33_P3403658  | 3,28568 | 2,64077 | 1,563641738 | N/A             | N/A       | CR749422     | Inc-FBN1-3     |
| A_21_P0002288  | 2,14922 | 1,50447 | 1,563468334 | N/A             | N/A       | N/A          | Inc-CNTNAP5-1  |
| A_33_P3228300  | 10,8451 | 10,2004 | 1,56341415  | ENST00000381750 | 10171     | NM_005772    | RCL1           |
| A_33_P3628481  | 8,95768 | 8,31304 | 1,56334913  | ENST00000223073 | 157247    | NR_046216    | MGC27345       |
| A_21_P0002397  | 2,10601 | 1,46138 | 1,563338294 | N/A             | 101929861 | N/A          | LOC101929861   |
| A_32_P160561   | 2,08633 | 1,44171 | 1,563327458 | ENST00000577609 | 220164    | NM_152721    | DOK6           |
| A_32_P222961   | 10,458  | 9,81339 | 1,563316622 | ENST00000374884 | 139886    | NM_001012968 | SPIN4          |
| A_23_P217280   | 3,53935 | 2,89475 | 1,563305786 | ENST00000427768 | 27035     | NM_007052    | NOX1           |
| A_33_P3397279  | 6,76308 | 6,11851 | 1,563273278 | ENST00000216061 | 9701      | NM_001242898 | PPP6R2         |
| A_33_P3394489  | 7,70835 | 7,06382 | 1,563229936 | N/A             | 100144603 | N/A          | CHKB-AS1       |
| A_33_P3342345  | 4,53444 | 3,88992 | 1,5632191   | N/A             | N/A       | N/A          | XLOC_I2_004817 |
| A_33_P3661631  | 9,5686  | 8,92429 | 1,562991573 | ENST00000254908 | 84105     | NM_032151    | PCBD2          |
| A_24_P111242   | 5,17292 | 4,52861 | 1,562991573 | ENST00000354193 | 258010    | NM_148893    | SVIP           |
| A_22_P00000187 | 3,51176 | 2,86751 | 1,562926571 | N/A             | 102723167 | NR_110369    | MIR133A1HG     |
| A_22_P00003346 | 5,35903 | 4,71483 | 1,562872405 | N/A             | N/A       | N/A          | Inc-CBLB-4     |
| A_23_P146997   | 8,6358  | 7,99165 | 1,562818241 | ENST00000398155 | 55787     | NM_018360    | TXLNG          |
| A_23_P201483   | 11,0488 | 10,4048 | 1,56265576  | ENST00000367103 | 9261      | NM_004759    | MAPKAPK2       |
| A_23_P13359    | 10,9942 | 10,3502 | 1,56265576  | ENST00000533048 | 10482     | NM_006362    | NXF1           |
| A_33_P3392537  | 8,04896 | 7,40499 | 1,562623266 | ENST00000544898 | 7084      | NM_004614    | TK2            |
| A_33_P3482417  | 2,28946 | 1,64573 | 1,562363337 | ENST00000437057 | 100101938 | NR_027248    | ANKRD26P3      |
| A_21_P0012199  | 2,02658 | 1,38285 | 1,562363337 | N/A             | N/A       | N/A          | XLOC_I2_009184 |
| A_23_P168788   | 13,7505 | 13,1068 | 1,562330849 | ENST00000223127 | 8985      | NM_001084    | PLOD3          |
| A_22_P00003276 | 5,44269 | 4,79909 | 1,56222256  | N/A             | N/A       | DC396132     | Inc-CALML5-1   |
| A_23_P406458   | 2,6205  | 1,97699 | 1,562125107 | N/A             | 283303    | NR_027138    | MIRGPRG-AS1    |

|                |         |         |             |                 |           |              |              |
|----------------|---------|---------|-------------|-----------------|-----------|--------------|--------------|
| A_23_P207336   | 4,95253 | 4,30906 | 1,562081796 | ENST00000591228 | 5539      | NM_002722    | PPY          |
| A_33_P3374087  | 4,09865 | 3,45524 | 1,562016832 | ENST00000409864 | 375316    | NM_001080504 | RBM44        |
| A_33_P3522525  | 12,0275 | 11,3841 | 1,562006005 | ENST00000504920 | 80273     | NM_025196    | GRPEL1       |
| A_23_P7535     | 5,18872 | 4,54536 | 1,561962698 | ENST00000231683 | 3274      | NM_022304    | HRH2         |
| A_21_P0007540  | 2,24051 | 1,59719 | 1,561919392 | N/A             | N/A       | N/A          | Inc-DNM1L-2  |
| A_24_P307014   | 14,9875 | 14,3442 | 1,561897739 | ENST00000553146 | 6046      | NM_005104    | BRD2         |
| A_33_P3382746  | 8,77292 | 8,12964 | 1,561876087 | ENST00000469765 | 3932      | NM_005356    | LCK          |
| A_33_P3352103  | 9,70962 | 9,06641 | 1,561800306 | ENST00000366927 | 127018    | NM_138794    | LYPLAL1      |
| A_22_P00003103 | 4,9394  | 4,29624 | 1,561746179 | ENST00000432783 | 158435    | NR_033838    | LOC158435    |
| A_23_P18205    | 9,92606 | 9,2831  | 1,56152969  | ENST00000461680 | 23132     | NM_015106    | RAD54L2      |
| A_22_P00011145 | 2,6334  | 1,99047 | 1,561497219 | N/A             | 101927929 | XR_241122    | LOC101927929 |
| A_23_P67424    | 7,16938 | 6,52661 | 1,561324053 | ENST00000614133 | 92283     | NM_153257    | ZNF461       |
| A_33_P3233871  | 12,0939 | 11,4512 | 1,561248299 | ENST00000253496 | 2161      | NM_000505    | F12          |
| A_21_P0000829  | 9,8294  | 9,18673 | 1,561215834 | ENST00000528156 | 100506233 | NR_038903    | RAB30-AS1    |
| A_22_P00021043 | 10,1722 | 9,52956 | 1,56118337  | N/A             | N/A       | N/A          | Inc-TCF7L2-2 |
| A_21_P0002621  | 4,27083 | 3,62822 | 1,561150906 | N/A             | 102724224 | N/A          | LINC01117    |
| A_21_P0009244  | 2,52021 | 1,87766 | 1,561085981 | N/A             | N/A       | N/A          | Inc-LRRC3C-1 |
| A_21_P0003045  | 2,12233 | 1,47981 | 1,56105352  | N/A             | N/A       | N/A          | Inc-P2RY1-3  |
| A_19_P00320603 | 4,64788 | 4,00538 | 1,561031879 | N/A             | N/A       | N/A          | Inc-SNCA-2   |
| A_22_P00018124 | 4,5803  | 3,93781 | 1,561021059 | N/A             | 414197    | NR_047557    | ZNF32-AS1    |
| A_22_P00017778 | 2,75291 | 2,11043 | 1,561010239 | N/A             | N/A       | N/A          | Inc-ZAP70-1  |
| A_23_P24960    | 11,0616 | 10,4192 | 1,56092368  | ENST00000525345 | 79731     | NM_024678    | NARS2        |
| A_22_P00024242 | 7,25293 | 6,61053 | 1,56092368  | N/A             | 100134713 | NR_024454    | NDUFB2-AS1   |
| A_22_P00001380 | 2,92402 | 2,28167 | 1,560869584 | ENST00000523413 | N/A       | N/A          | N/A          |
| A_33_P3270941  | 2,73376 | 2,09146 | 1,560815489 | ENST00000408893 | 388759    | NM_207401    | C1orf229     |
| A_23_P395464   | 2,22544 | 1,58326 | 1,560685669 | ENST00000619584 | 147948    | NM_144690    | ZNF582       |
| A_21_P0006870  | 9,64838 | 9,00622 | 1,560664034 | N/A             | N/A       | N/A          | Inc-ANTXRL-3 |
| A_23_P10559    | 8,00114 | 7,35909 | 1,560545044 | ENST00000374792 | 9625      | NM_001080395 | AATK         |
| A_21_P0006434  | 4,34909 | 3,70713 | 1,560447695 | ENST00000439434 | 100506790 | N/A          | LOC100506790 |
| A_21_P0014851  | 5,23521 | 4,59329 | 1,560404431 | N/A             | N/A       | N/A          | N/A          |
| A_23_P1615     | 10,5821 | 9,94019 | 1,560393615 | ENST00000426652 | 9158      | NM_004214    | FIBP         |
| A_21_P0012601  | 11,6623 | 11,0204 | 1,560382799 | N/A             | N/A       | N/A          | Inc-MMRN1-2  |
| A_22_P00015883 | 5,43223 | 4,79047 | 1,560231386 | N/A             | 101928221 | XR_244481    | LOC101928221 |

|                |         |         |             |                 |           |              |                |
|----------------|---------|---------|-------------|-----------------|-----------|--------------|----------------|
| A_33_P3366241  | 4,06285 | 3,42131 | 1,559993481 | ENST00000518030 | 286133    | AY337579     | SCARA5         |
| A_22_P00016217 | 3,98911 | 3,3476  | 1,559961042 | N/A             | 654841    | NR_102371    | LOC654841      |
| A_22_P00014116 | 5,34689 | 4,70542 | 1,559917791 | N/A             | N/A       | AL553290     | Inc-SCAMP5-1   |
| A_21_P0013359  | 2,48683 | 1,84543 | 1,559842105 | ENST00000436670 | 285889    | N/A          | LOC285889      |
| A_23_P214821   | 7,49224 | 6,85089 | 1,559788046 | ENST00000379375 | 1906      | NM_001955    | EDN1           |
| A_24_P241815   | 11,3759 | 10,7346 | 1,559733989 | ENST00000302754 | 3726      | NM_002229    | JUNB           |
| A_33_P3290588  | 3,36731 | 2,72604 | 1,559701556 | ENST00000581608 | 79058     | AK127159     | ASPSCR1        |
| A_23_P159335   | 2,00807 | 1,36682 | 1,559679934 | ENST00000390655 | 926       | NM_004931    | CD8B           |
| A_32_P38637    | 6,34821 | 5,70715 | 1,559474541 | ENST00000496259 | 84626     | NM_032534    | KRBA1          |
| A_23_P214907   | 10,0791 | 9,43809 | 1,559420494 | ENST00000611279 | 25902     | NM_015440    | MTHFD1L        |
| A_22_P00006478 | 5,06022 | 4,41924 | 1,559388067 | N/A             | 100506994 | NR_038281    | PTPRG-AS1      |
| A_23_P7582     | 6,92931 | 6,28837 | 1,559344833 | ENST00000522653 | 6932      | NM_003202    | TCF7           |
| A_33_P3258542  | 2,93518 | 2,29446 | 1,559107062 | ENST00000434006 | 646424    | NM_001080525 | SPINK8         |
| A_33_P3385461  | 8,14768 | 7,50702 | 1,559042222 | ENST00000399042 | 79184     | NM_024332    | BRCC3          |
| A_33_P3415663  | 8,3436  | 7,70297 | 1,559009803 | ENST00000316610 | 153364    | NM_203406    | MBLAC2         |
| A_33_P3296352  | 8,87063 | 8,23022 | 1,558772084 | ENST00000378540 | 5495      | NM_002706    | PPM1B          |
| A_21_P0004874  | 2,51126 | 1,87085 | 1,558772084 | N/A             | N/A       | N/A          | Inc-ITPR3-1    |
| A_22_P00008645 | 4,71985 | 4,07949 | 1,558718062 | N/A             | N/A       | N/A          | Inc-KIAA0087-1 |
| A_23_P154050   | 2,18105 | 1,54072 | 1,55868565  | ENST00000451080 | 65061     | NM_139158    | CDK15          |
| A_21_P0013739  | 2,15146 | 1,51119 | 1,558620828 | ENST00000605707 | 100996569 | NR_102271    | NAMA           |
| A_23_P63847    | 10,2305 | 9,59024 | 1,558610024 | ENST00000359655 | 6832      | NM_003171    | SUPV3L1        |
| A_24_P160401   | 9,88811 | 9,24793 | 1,558523599 | ENST00000425231 | 64866     | NM_178181    | CDCP1          |
| A_23_P149375   | 9,48721 | 8,84705 | 1,558501993 | ENST00000483207 | 117145    | NM_053055    | THEM4          |
| A_33_P3413667  | 2,18773 | 1,54758 | 1,55849119  | ENST00000392043 | 27        | NM_001136001 | ABL2           |
| A_23_P364324   | 6,59808 | 5,95799 | 1,558426376 | ENST00000435803 | 154664    | NM_152701    | ABCA13         |
| A_21_P0004852  | 4,38611 | 3,74621 | 1,558221148 | N/A             | N/A       | N/A          | Inc-HDGFL1-1   |
| A_33_P3423027  | 6,68115 | 6,04128 | 1,558188746 | ENST00000396997 | 4901      | NM_006177    | NRL            |
| A_33_P3224345  | 5,44658 | 4,8068  | 1,558091544 | ENST00000570209 | 390561    | N/A          | HERC2P10       |
| A_24_P220058   | 13,5453 | 12,9056 | 1,558005148 | ENST00000375571 | 22919     | NM_012325    | MAPRE1         |
| A_22_P00017737 | 2,37106 | 1,73138 | 1,557983549 | ENST00000566440 | N/A       | BC037792     | N/A            |
| A_21_P0000035  | 7,23353 | 6,59388 | 1,557951152 | ENST00000482580 | 221468    | NM_001162900 | TMEM217        |
| A_19_P00318085 | 9,17707 | 8,53754 | 1,557821571 | N/A             | 414777    | NR_024052    | HCG18          |
| A_21_P0001002  | 5,87801 | 5,23851 | 1,557789177 | ENST00000422022 | 100506392 | NR_103744    | SLC16A1-AS1    |

|                |         |         |             |                 |           |              |               |
|----------------|---------|---------|-------------|-----------------|-----------|--------------|---------------|
| A_33_P3368950  | 4,28972 | 3,65041 | 1,557584033 | ENST00000434752 | 389333    | NM_001161546 | PROB1         |
| A_21_P0013937  | 5,73487 | 5,0956  | 1,557540848 | N/A             | N/A       | N/A          | N/A           |
| A_21_P0014520  | 4,11803 | 3,4788  | 1,557497665 | N/A             | 100505475 | NR_120501    | SYNE1-AS1     |
| A_33_P3272828  | 9,00937 | 8,37019 | 1,557443687 | ENST00000231383 | 5810      | NM_002853    | RAD1          |
| A_33_P3210986  | 8,03009 | 7,39092 | 1,557432891 | ENST00000495971 | 55253     | NM_018264    | TYW1          |
| A_24_P44341    | 7,43456 | 6,79561 | 1,557195413 | ENST00000376714 | 55757     | NM_020121    | UGGT2         |
| A_21_P0013896  | 3,83378 | 3,19514 | 1,556860846 | N/A             | 83869     | N/A          | TTY14         |
| A_22_P00016361 | 5,83851 | 5,19989 | 1,556839263 | N/A             | N/A       | N/A          | Inc-TMEM179-1 |
| A_22_P00013992 | 4,84606 | 4,20755 | 1,556720564 | N/A             | N/A       | BQ943064     | Inc-RUNDC3A-1 |
| A_19_P00321598 | 2,01781 | 1,37938 | 1,556634244 | ENST00000417485 | 102724861 | N/A          | LOC102724861  |
| A_21_P0000260  | 7,38494 | 6,74658 | 1,556558717 | ENST00000581305 | 26791     | NR_002571    | SNORD58A      |
| A_24_P23411    | 8,64687 | 8,00852 | 1,556547928 | ENST00000471229 | 51566     | NM_016607    | ARMCX3        |
| A_33_P3329769  | 7,11151 | 6,47358 | 1,556094849 | ENST00000370746 | 221336    | NM_152731    | BEND6         |
| A_21_P0006474  | 4,38212 | 3,74425 | 1,556030134 | N/A             | 102723840 | XR_426496    | LOC102723840  |
| A_23_P102706   | 6,02869 | 5,39115 | 1,555674251 | ENST00000614659 | 9751      | NM_014723    | SNPH          |
| A_21_P0008137  | 2,64618 | 2,00866 | 1,555652685 | N/A             | N/A       | N/A          | Inc-KATNAL1-3 |
| A_33_P3238785  | 2,45462 | 1,81713 | 1,555620336 | N/A             | 100126270 | NR_024499    | FMR1-AS1      |
| A_23_P47464    | 2,20123 | 1,56375 | 1,555609554 | ENST00000302981 | 338675    | NM_001002925 | OR5AP2        |
| A_23_P121282   | 4,64306 | 4,00567 | 1,555512513 | ENST00000330862 | 440955    | NM_001008269 | TMEM89        |
| A_33_P3333805  | 8,80433 | 8,16702 | 1,555426259 | ENST00000376436 | 26152     | NM_001290261 | ZNF337        |
| A_33_P3389376  | 7,43898 | 6,80171 | 1,555383134 | ENST00000507825 | 4194      | NM_001278518 | MDM4          |
| A_21_P0005169  | 4,15003 | 3,51286 | 1,555275327 | N/A             | N/A       | N/A          | Inc-CRISP2-1  |
| A_22_P00015721 | 2,16647 | 1,52936 | 1,555210646 | ENST00000554436 | N/A       | XM_006720272 | N/A           |
| A_22_P00014471 | 7,3239  | 6,68683 | 1,555167527 | N/A             | N/A       | AK125463     | Inc-SHANK2-1  |
| A_21_P0014047  | 2,5092  | 1,87219 | 1,555102851 | ENST00000546746 | 720       | NM_001252204 | C4A           |
| A_21_P0013995  | 4,53404 | 3,89706 | 1,555070514 | ENST00000475182 | N/A       | AK296060     | N/A           |
| A_23_P127915   | 6,10932 | 5,47251 | 1,554887283 | ENST00000486305 | 65975     | NM_030906    | STK33         |
| A_22_P00007422 | 5,09939 | 4,46264 | 1,554822618 | N/A             | N/A       | N/A          | Inc-GRXCR1-4  |
| A_33_P3383696  | 7,26187 | 6,62514 | 1,554801064 | ENST00000312358 | 10290     | NM_005876    | SPEG          |
| A_23_P412214   | 6,23006 | 5,59341 | 1,55471485  | ENST00000571555 | 23108     | NM_015085    | RAP1GAP2      |
| A_23_P211738   | 11,674  | 11,0374 | 1,554660968 | ENST00000447368 | 7342      | NM_014517    | UBP1          |
| A_33_P3413741  | 6,46274 | 5,82616 | 1,554639416 | ENST00000316793 | 5021      | NM_000916    | OXTR          |
| A_22_P00001903 | 3,79655 | 3,16001 | 1,554596313 | N/A             | N/A       | AK124134     | Inc-B4GALT7-1 |

|                |         |         |             |                 |           |              |                |
|----------------|---------|---------|-------------|-----------------|-----------|--------------|----------------|
| A_33_P3280094  | 13,7979 | 13,1616 | 1,554337719 | ENST00000309602 | 78999     | NM_024036    | LRFN4          |
| A_33_P3267822  | 5,04438 | 4,4081  | 1,554316172 | ENST00000585038 | 57553     | NM_001122731 | MICAL3         |
| A_23_P138461   | 8,58058 | 7,94433 | 1,554283851 | ENST00000370228 | 56652     | NM_021830    | C10orf2        |
| A_21_P0003210  | 2,4055  | 1,76938 | 1,554143802 | N/A             | N/A       | N/A          | Inc-KIAA0226-3 |
| A_33_P3380992  | 14,5683 | 13,9322 | 1,554122257 | ENST00000423958 | 441282    | NM_001080538 | AKR1B15        |
| A_24_P160001   | 11,2126 | 10,5765 | 1,554122257 | ENST00000612074 | 2280      | NM_054014    | FKBP1A         |
| A_22_P00013497 | 5,33687 | 4,70087 | 1,554014538 | N/A             | 102723729 | NR_125824    | LOC102723729   |
| A_23_P47682    | 8,3507  | 7,71483 | 1,553874513 | ENST00000309166 | 56675     | NM_020645    | NRIP3          |
| A_23_P18422    | 13,3655 | 12,7298 | 1,553691423 | ENST00000264995 | 11222     | NM_007208    | MRPL3          |
| A_33_P3233165  | 4,30452 | 3,66884 | 1,553669884 | N/A             | 112942    | XM_005264120 | CFAP36         |
| A_33_P3230374  | 3,67664 | 3,04102 | 1,55360527  | ENST00000312614 | 143502    | NM_001005170 | OR52I2         |
| A_23_P148629   | 10,5682 | 9,93263 | 1,553551427 | ENST00000624250 | 9086      | NM_004681    | EIF1AY         |
| A_32_P176550   | 8,36335 | 7,7279  | 1,553422212 | ENST00000396137 | 133746    | NM_152405    | JMY            |
| A_32_P139894   | 9,04946 | 8,41413 | 1,553293007 | ENST00000502732 | 27        | NM_007314    | ABL2           |
| A_23_P131375   | 9,13859 | 8,50345 | 1,553088455 | ENST00000441908 | 130814    | NM_152391    | PQLC3          |
| A_33_P3281985  | 2,70626 | 2,07129 | 1,552905458 | ENST00000367057 | 1380      | NM_001006658 | CR2            |
| A_22_P00009039 | 2,04319 | 1,40823 | 1,552894694 | N/A             | N/A       | N/A          | Inc-LDHD-1     |
| A_33_P3287907  | 4,6472  | 4,01228 | 1,552851639 | N/A             | 728723    | NR_024398    | ZBED3-AS1      |
| A_23_P15669    | 8,91407 | 8,27931 | 1,552679432 | ENST00000575815 | 55421     | NM_001114118 | C17orf85       |
| A_24_P778836   | 11,3917 | 10,7571 | 1,552507244 | ENST00000571133 | 26156     | NM_015659    | RSL1D1         |
| A_22_P00005132 | 3,60836 | 2,97377 | 1,552496483 | ENST00000546117 | 387895    | NR_033878    | LINC00944      |
| A_21_P0010467  | 2,97332 | 2,33878 | 1,552442678 | N/A             | N/A       | N/A          | Inc-ATXN10-1   |
| A_23_P31453    | 10,0971 | 9,46265 | 1,552345835 | ENST00000297205 | 26872     | NM_012449    | STEAP1         |
| A_33_P3406449  | 9,07591 | 8,44148 | 1,552324315 | ENST00000376744 | 121260    | NM_145648    | SLC15A4        |
| A_24_P273756   | 8,64067 | 8,00628 | 1,552281276 | ENST00000392461 | 8626      | NM_003722    | TP63           |
| A_22_P00004517 | 2,10534 | 1,47097 | 1,552259757 | N/A             | N/A       | N/A          | Inc-CPXM2-2    |
| A_24_P367211   | 4,51209 | 3,87787 | 1,552098374 | ENST00000615473 | 30837     | NM_014598    | SOCS7          |
| A_24_P331830   | 4,54034 | 3,9062  | 1,552012309 | ENST00000376028 | 23254     | NM_015209    | KAZN           |
| A_32_P59811    | 4,96229 | 4,32819 | 1,551969279 | N/A             | N/A       | CU692621     | N/A            |
| A_21_P0002510  | 4,15538 | 3,52134 | 1,551904736 | N/A             | N/A       | N/A          | Inc-LRP1B-4    |
| A_33_P3392374  | 2,03448 | 1,40055 | 1,551786414 | ENST00000259750 | 84630     | NM_032538    | TTBK1          |
| A_22_P00009484 | 3,93368 | 3,29982 | 1,551711122 | N/A             | N/A       | N/A          | Inc-MAGEB1-1   |
| A_23_P310532   | 11,0775 | 10,4437 | 1,55164659  | ENST00000270502 | 90580     | NM_138358    | C19orf52       |

|                |         |         |             |                 |           |              |                    |
|----------------|---------|---------|-------------|-----------------|-----------|--------------|--------------------|
| A_23_P22625    | 10,6483 | 10,0146 | 1,551539042 | ENST00000370701 | 10479     | NM_001042537 | SLC9A6             |
| A_33_P3239101  | 8,20411 | 7,57056 | 1,551377733 | ENST00000515814 | 440295    | NM_198181    | GOLGA6L9           |
| A_33_P3229412  | 2,27598 | 1,64259 | 1,551205689 | ENST00000404547 | 10718     | NM_001010848 | NRG3               |
| A_23_P215265   | 8,73568 | 8,10265 | 1,550818661 | ENST00000496740 | 2768      | NM_007353    | GNA12              |
| A_33_P3212919  | 4,32513 | 3,69214 | 1,550775663 | N/A             | N/A       | BX092453     | N/A                |
| A_21_P0012862  | 2,18913 | 1,5562  | 1,550711117 | N/A             | N/A       | N/A          | XLOC_I2_011854     |
| A_22_P00009280 | 2,14712 | 1,51431 | 1,550582191 | N/A             | N/A       | N/A          | Inc-LRRC18-3       |
| A_24_P221485   | 8,16581 | 7,53306 | 1,550517705 | ENST00000439132 | N/A       | N/A          | N/A                |
| A_21_P0001343  | 8,66904 | 8,03664 | 1,550141593 | N/A             | N/A       | N/A          | Inc-ABCD3-1        |
| A_21_P0008388  | 2,33817 | 1,70579 | 1,550120103 | N/A             | N/A       | N/A          | Inc-DLK1-1         |
| A_22_P00005091 | 2,11665 | 1,48429 | 1,550098614 | N/A             | 26220     | NR_002733    | DGCR5              |
| A_23_P17456    | 4,79559 | 4,16331 | 1,550012661 | ENST00000262929 | 10326     | NM_006065    | SIRPB1             |
| A_19_P00321765 | 6,29098 | 5,65875 | 1,549958943 | ENST00000435966 | 100287765 | NR_038988    | LINC00630          |
| A_33_P3889862  | 2,55543 | 1,92329 | 1,549862254 | ENST00000415174 | 151475    | NR_040038    | LOC151475          |
| A_22_P00000326 | 3,21812 | 2,58598 | 1,549862254 | N/A             | N/A       | N/A          | Inc-AC012123.1.1-1 |
| A_24_P156049   | 9,03614 | 8,40406 | 1,549797799 | ENST00000440549 | 25800     | NM_012319    | SLC39A6            |
| A_21_P0006922  | 2,08542 | 1,45342 | 1,549711862 | N/A             | N/A       | N/A          | Inc-EMX2-5         |
| A_23_P59718    | 8,37878 | 7,747   | 1,549475561 | ENST00000265729 | 6717      | NM_003130    | SRI                |
| A_23_P434944   | 10,3667 | 9,73493 | 1,549464821 | ENST00000407004 | 3609      | NM_004516    | ILF3               |
| A_33_P3336968  | 8,92516 | 8,29347 | 1,549378902 | ENST00000339437 | 51095     | NM_001302946 | TRNT1              |
| A_33_P6806144  | 5,36107 | 4,72948 | 1,549271511 | N/A             | 100128782 | NR_023390    | LINC00476          |
| A_33_P3405995  | 5,71629 | 5,08489 | 1,549067489 | ENST00000397692 | 54059     | NM_058181    | YBEY               |
| A_33_P3312730  | 3,78245 | 3,15123 | 1,548874229 | ENST00000314018 | 168620    | NM_177455    | BHLHA15            |
| A_23_P310483   | 10,9596 | 10,3284 | 1,548852757 | ENST00000409586 | 541565    | NM_001013842 | C8orf58            |
| A_21_P0002638  | 4,19143 | 3,56024 | 1,548842022 | N/A             | N/A       | N/A          | Inc-TMEM18-5       |
| A_23_P211985   | 8,09271 | 7,46156 | 1,548799079 | ENST00000296088 | 54861     | NM_017719    | SNRK               |
| A_22_P00017277 | 2,80977 | 2,17871 | 1,548702463 | N/A             | N/A       | BC034802     | Inc-URB1-1         |
| A_22_P00004451 | 8,18555 | 7,55459 | 1,548595119 | ENST00000507387 | N/A       | AK307188     | N/A                |
| A_21_P0014707  | 7,7527  | 7,12179 | 1,54854145  | ENST00000606907 | N/A       | XM_006711856 | N/A                |
| A_32_P49350    | 15,5956 | 14,9647 | 1,548530716 | ENST00000458402 | N/A       | N/A          | N/A                |
| A_21_P0002568  | 2,05642 | 1,42561 | 1,548434117 | ENST00000456327 | 150622    | NR_026832    | LINC01105          |
| A_24_P141786   | 10,3716 | 9,74085 | 1,54836972  | ENST00000308664 | 488       | NM_001681    | ATP2A2             |
| A_23_P381714   | 8,64206 | 8,01146 | 1,548208742 | ENST00000321764 | 377677    | NM_198584    | CA13               |

|                |         |         |             |                 |           |              |                      |
|----------------|---------|---------|-------------|-----------------|-----------|--------------|----------------------|
| A_22_P00004732 | 2,32576 | 1,69521 | 1,548155086 | N/A             | N/A       | BG211462     | Inc-CTNNA1-2         |
| A_22_P00004697 | 3,78443 | 3,15389 | 1,548144355 | N/A             | N/A       | N/A          | nc-CTD-2517M22.16.1- |
| A_23_P77593    | 8,75082 | 8,12046 | 1,54795121  | ENST00000564512 | 55697     | NM_018052    | VAC14                |
| A_21_P0013961  | 7,21418 | 6,58399 | 1,547768818 | ENST00000615248 | N/A       | N/A          | N/A                  |
| A_33_P3300253  | 8,61225 | 7,98208 | 1,547747362 | ENST00000374218 | 26095     | NM_001042357 | PTPN20B              |
| A_22_P00025067 | 2,66532 | 2,03517 | 1,547725905 | N/A             | N/A       | N/A          | Inc-TRAPPC6B-1       |
| A_22_P00016922 | 7,72889 | 7,09876 | 1,54770445  | ENST00000550292 | 100287314 | NR_040245    | LINC00941            |
| A_22_P00012411 | 2,6443  | 2,01424 | 1,547629356 | N/A             | 103695363 | NR_125758    | FOXG1-AS1            |
| A_21_P0011708  | 6,97232 | 6,34233 | 1,547554267 | N/A             | N/A       | N/A          | XLOC_I2_006804       |
| A_23_P356565   | 12,3541 | 11,7242 | 1,547457728 | ENST00000533907 | 23378     | NM_015324    | RRP8                 |
| A_24_P9883     | 7,21775 | 6,58802 | 1,547275394 | ENST00000532090 | 91056     | NM_138368    | AP5B1                |
| A_22_P00016892 | 3,97066 | 3,34096 | 1,54724322  | ENST00000555150 | N/A       | XR_245795    | N/A                  |
| A_21_P0004149  | 2,8308  | 2,20123 | 1,547103805 | ENST00000506041 | 102546226 | N/A          | LOC102546226         |
| A_21_P0013227  | 1,98992 | 1,3604  | 1,547050188 | N/A             | N/A       | N/A          | XLOC_I2_013458       |
| A_33_P3244141  | 12,7793 | 12,1499 | 1,546921513 | ENST00000583683 | 81565     | NM_001025579 | NDEL1                |
| A_24_P7179     | 6,99994 | 6,37063 | 1,546825014 | ENST00000435722 | 23181     | NM_206890    | DIP2A                |
| A_22_P00014449 | 4,52006 | 3,89092 | 1,546642755 | N/A             | N/A       | DB521863     | Inc-SH2D7-3          |
| A_33_P3313622  | 9,33599 | 8,70689 | 1,546599873 | ENST00000581816 | 407975    | NR_027350    | MIR17HG              |
| A_21_P0011942  | 2,32493 | 1,69583 | 1,546599873 | N/A             | 285000    | N/A          | LOC285000            |
| A_32_P180971   | 11,4813 | 10,8524 | 1,546385484 | ENST00000416103 | 728323    | BC090920     | LOC728323            |
| A_21_P0004305  | 2,49279 | 1,86399 | 1,5462783   | N/A             | N/A       | N/A          | Inc-PSD2-2           |
| A_33_P3420266  | 4,70495 | 4,07618 | 1,546246147 | ENST00000402318 | 441430    | NM_001012421 | ANKRD20A2            |
| A_22_P00022841 | 6,00716 | 5,37844 | 1,546192559 | ENST00000522044 | N/A       | N/A          | N/A                  |
| A_33_P3352011  | 2,89987 | 2,27125 | 1,546085389 | N/A             | N/A       | N/A          | N/A                  |
| A_23_P343261   | 4,66652 | 4,03792 | 1,546063956 | ENST00000429480 | 148645    | NR_103534    | LINC00337            |
| A_21_P0007114  | 4,59913 | 3,97066 | 1,545924647 | N/A             | N/A       | N/A          | Inc-FGF8-1           |
| A_33_P3423335  | 2,08219 | 1,4538  | 1,545838925 | ENST00000316368 | 81392     | NM_001005276 | OR2AE1               |
| A_33_P3367780  | 2,06784 | 1,43946 | 1,545828211 | N/A             | 401498    | NM_212558    | TMEM215              |
| A_19_P00321039 | 2,04921 | 1,42106 | 1,545581788 | ENST00000435643 | N/A       | N/A          | N/A                  |
| A_24_P255218   | 8,22767 | 7,59959 | 1,545506798 | ENST00000613858 | 4644      | NM_000259    | MYO5A                |
| A_33_P3326807  | 3,22809 | 2,60004 | 1,54547466  | N/A             | 100130152 | AK127768     | LOC100130152         |
| A_22_P00004594 | 3,08669 | 2,45869 | 1,545421099 | ENST00000521016 | N/A       | N/A          | N/A                  |
| A_33_P3239512  | 6,68146 | 6,05367 | 1,545196163 | ENST00000322146 | 162962    | NM_001102657 | ZNF836               |



|                |         |         |             |                 |           |              |                       |
|----------------|---------|---------|-------------|-----------------|-----------|--------------|-----------------------|
| A_33_P3416206  | 4,43007 | 3,80232 | 1,545153321 | ENST00000573703 | 55114     | AF258580     | ARHGAP17              |
| A_22_P00002438 | 3,19792 | 2,57019 | 1,545131901 | N/A             | N/A       | N/A          | Inc-C14orf57-1        |
| A_33_P3243588  | 9,19831 | 8,57062 | 1,545089062 | ENST00000367591 | 8504      | NM_003630    | PEX3                  |
| A_23_P51376    | 4,48603 | 3,85847 | 1,544949841 | ENST00000373736 | 79570     | NM_024522    | NKAIN1                |
| A_33_P3361611  | 5,94841 | 5,32094 | 1,544853465 | ENST00000290472 | 283748    | NM_178034    | PLA2G4D               |
| A_23_P421175   | 12,2082 | 11,5808 | 1,54477851  | ENST00000612192 | 286077    | NM_198488    | FAM83H                |
| A_33_P3356587  | 5,97315 | 5,34576 | 1,544767803 | N/A             | 101929998 | XR_252344    | LOC101929998          |
| A_23_P432360   | 11,831  | 11,2037 | 1,544671438 | ENST00000567697 | 5373      | NM_000303    | PMM2                  |
| A_22_P00001870 | 5,54146 | 4,91421 | 1,544617905 | N/A             | 101929988 | XR_253363    | LOC101929988          |
| A_22_P00017071 | 7,13167 | 6,50446 | 1,54457508  | N/A             | N/A       | BU682501     | Inc-TUFM-1            |
| A_23_P134419   | 7,34879 | 6,72158 | 1,54457508  | ENST00000336517 | 7784      | NM_007155    | ZP3                   |
| A_33_P3238433  | 14,7587 | 14,1315 | 1,544564373 | ENST00000457500 | 218       | NM_001135168 | ALDH3A1               |
| A_32_P51894    | 10,0525 | 9,4253  | 1,544564373 | ENST00000444376 | 3192      | NM_031844    | HNRNPU                |
| A_23_P308603   | 12,4302 | 11,803  | 1,544564373 | ENST00000477066 | 6714      | NM_005417    | SRC                   |
| A_21_P0003689  | 2,175   | 1,54796 | 1,544393085 | N/A             | N/A       | N/A          | Inc-TRAPPC11-1        |
| A_33_P3237760  | 6,86297 | 6,23604 | 1,544275336 | N/A             | N/A       | N/A          | N/A                   |
| A_21_P0010951  | 5,98557 | 5,35872 | 1,544189705 | N/A             | 101929506 | XR_252776    | LOC101929506          |
| A_23_P32064    | 10,016  | 9,38929 | 1,544039863 | ENST00000371482 | 26012     | NM_015537    | NSMF                  |
| A_32_P741851   | 2,17461 | 1,54793 | 1,544007756 | ENST00000455971 | 112937    | NM_001080407 | GLB1L3                |
| A_23_P431252   | 4,73885 | 4,11221 | 1,543964948 | ENST00000417314 | 84541     | NM_032505    | KBTBD8                |
| A_23_P60837    | 2,29699 | 1,6705  | 1,543804427 | ENST00000359062 | 5139      | NM_000921    | PDE3A                 |
| A_22_P00009438 | 2,46247 | 1,83604 | 1,543740223 | N/A             | 102724316 | NR_110928    | SVIL-AS1              |
| A_33_P3343616  | 4,93269 | 4,30631 | 1,543686722 | ENST00000378879 | 57649     | NM_001290131 | PHF12                 |
| A_22_P00005366 | 4,9789  | 4,35259 | 1,543611824 | N/A             | N/A       | N/A          | Inc-DRD5-1            |
| A_33_P3234118  | 11,9538 | 11,3275 | 1,543601125 | ENST00000343004 | 159090    | NM_001166599 | FAM122B               |
| A_22_P00013590 | 2,24561 | 1,61956 | 1,543333662 | N/A             | N/A       | N/A          | Inc-RP11-503N18.3.1-1 |
| A_22_P00012274 | 2,58471 | 1,95885 | 1,543130421 | ENST00000569070 | N/A       | BC042560     | N/A                   |
| A_23_P33664    | 2,17921 | 1,55341 | 1,543066246 | ENST00000339841 | 64100     | NM_022142    | ELSPBP1               |
| A_23_P113701   | 11,1858 | 10,56   | 1,543066246 | ENST00000402802 | 5154      | NM_002607    | PDGFA                 |
| A_33_P3413038  | 6,78378 | 6,15804 | 1,543002073 | ENST00000472415 | 5365      | NM_001163257 | PLXNB3                |
| A_23_P41804    | 13,7693 | 13,1436 | 1,542959292 | ENST00000610777 | 85409     | NM_033120    | NKD2                  |
| A_24_P419039   | 5,96772 | 5,34208 | 1,542895124 | ENST00000373034 | 57526     | NM_020766    | PCDH19                |
| A_21_P0010120  | 3,48414 | 2,85856 | 1,542830958 | N/A             | N/A       | N/A          | Inc-STAU1-1           |

|                |         |         |             |                 |           |              |                |
|----------------|---------|---------|-------------|-----------------|-----------|--------------|----------------|
| A_33_P3374324  | 2,37947 | 1,75398 | 1,542734714 | ENST00000380211 | 390063    | NM_001005288 | OR51I1         |
| A_33_P3348239  | 2,57114 | 1,94572 | 1,542659862 | ENST00000316623 | 2200      | NM_000138    | FBN1           |
| A_24_P945181   | 5,54816 | 4,92277 | 1,542627784 | ENST00000563281 | 29890     | NM_013286    | RBM15B         |
| A_21_P0007077  | 3,8277  | 3,20241 | 1,542520861 | N/A             | N/A       | N/A          | Inc-SHOC2-1    |
| A_22_P00002397 | 3,26319 | 2,63807 | 1,542339108 | N/A             | 319085    | NR_002808    | ITPK1-AS1      |
| A_23_P152218   | 11,0204 | 10,3953 | 1,542317727 | ENST00000567228 | 1874      | NM_001950    | E2F4           |
| A_23_P422849   | 3,82731 | 3,20221 | 1,542317727 | ENST00000275461 | 222894    | NM_152898    | FERD3L         |
| A_19_P00811812 | 8,9789  | 8,35382 | 1,542296346 | ENST00000395811 | 23164     | NM_201274    | MPRIP          |
| A_23_P96478    | 2,44425 | 1,81919 | 1,542274965 | ENST00000348912 | 265       | NM_182681    | AMELX          |
| A_23_P73763    | 14,1354 | 13,5105 | 1,542103931 | ENST00000621786 | 8270      | NM_006014    | LAGE3          |
| A_24_P410389   | 5,8964  | 5,27152 | 1,542082553 | ENST00000498133 | 23786     | NM_015367    | BCL2L13        |
| A_23_P91283    | 2,89651 | 2,27179 | 1,54191154  | ENST00000360314 | 57091     | NM_020356    | CASS4          |
| A_33_P3416946  | 7,83569 | 7,21103 | 1,541847415 | ENST00000254286 | 55860     | NM_018477    | ACTR10         |
| A_22_P00006432 | 4,17178 | 3,54717 | 1,54179398  | ENST00000577621 | N/A       | EL594951     | N/A            |
| A_19_P00322968 | 10,6275 | 10,0029 | 1,541783293 | ENST00000453213 | 100506190 | NR_038955    | LINC00963      |
| A_33_P3278410  | 7,28662 | 6,66235 | 1,541430668 | ENST00000366809 | 4301      | NM_001207008 | MLLT4          |
| A_23_P162607   | 3,49526 | 2,87105 | 1,541366563 | ENST00000388887 | 55576     | NM_017564    | STAB2          |
| A_22_P00008946 | 8,81865 | 8,19456 | 1,541238361 | N/A             | N/A       | BC031978     | Inc-KRT83-1    |
| A_33_P3287203  | 6,50491 | 5,88085 | 1,541206312 | ENST00000273173 | 9389      | NM_004803    | SLC22A14       |
| A_33_P3330877  | 3,39561 | 2,77161 | 1,541142217 | N/A             | N/A       | N/A          | N/A            |
| A_23_P121215   | 2,55088 | 1,92688 | 1,541142217 | ENST00000397277 | 8536      | NM_003656    | CAMK1          |
| A_33_P3241657  | 7,85481 | 7,23105 | 1,540885861 | ENST00000477623 | 79823     | NM_024766    | CAMKMT         |
| A_22_P00000558 | 2,29015 | 1,6664  | 1,54087518  | ENST00000576859 | N/A       | AA234626     | N/A            |
| A_21_P0010513  | 2,06928 | 1,44567 | 1,54072566  | N/A             | N/A       | N/A          | XLOC_l2_000038 |
| A_24_P39211    | 9,81962 | 9,19602 | 1,540714981 | ENST00000338450 | 3621      | NM_198219    | ING1           |
| A_24_P944320   | 2,8407  | 2,21711 | 1,540704301 | ENST00000530879 | 340385    | NM_213605    | ZNF517         |
| A_23_P149084   | 2,36714 | 1,74359 | 1,540661584 | ENST00000373093 | 2899      | NM_000831    | GRIK3          |
| A_21_P0003704  | 4,90207 | 4,27871 | 1,540458696 | N/A             | N/A       | N/A          | Inc-FRG1-5     |
| A_24_P365767   | 3,5591  | 2,93599 | 1,540191778 | ENST00000378588 | 1536      | NM_000397    | CYBB           |
| A_22_P00002856 | 1,99858 | 1,3756  | 1,540052999 | N/A             | N/A       | BG210193     | Inc-C3orf32-6  |
| A_24_P389038   | 9,10438 | 8,48142 | 1,540031649 | ENST00000466751 | 9277      | NM_005452    | WDR46          |
| A_33_P3235340  | 11,4538 | 10,8309 | 1,539967602 | ENST00000476149 | 8886      | NM_006773    | DDX18          |
| A_33_P3299977  | 11,1646 | 10,5419 | 1,539754132 | ENST00000361671 | 60560     | NM_024635    | NAA35          |

|                |         |         |             |                 |           |              |                |
|----------------|---------|---------|-------------|-----------------|-----------|--------------|----------------|
| A_23_P250462   | 13,8424 | 13,2197 | 1,539754132 | ENST00000455205 | 537       | NM_001183    | ATP6AP1        |
| A_33_P3244021  | 12,302  | 11,6793 | 1,539754132 | ENST00000428216 | 57506     | NM_020746    | MAVS           |
| A_23_P214882   | 8,72438 | 8,10169 | 1,53974346  | ENST00000367233 | 54516     | NM_019041    | MTRF1L         |
| A_22_P00000421 | 4,64672 | 4,02405 | 1,539722114 | ENST00000618708 | 440993    | NR_122105    | LINC00969      |
| A_21_P0006452  | 2,66644 | 2,0438  | 1,539690097 | ENST00000454131 | N/A       | N/A          | N/A            |
| A_22_P00004345 | 2,46486 | 1,84227 | 1,539636736 | N/A             | N/A       | BC014215     | Inc-COL1A1-2   |
| A_22_P00011817 | 3,85741 | 3,23484 | 1,539615393 | N/A             | N/A       | BC040327     | Inc-PHF14-1    |
| A_22_P00013442 | 2,26171 | 1,63918 | 1,539572706 | N/A             | 101928377 | XR_245788    | LOC101928377   |
| A_33_P3258988  | 1,99868 | 1,37617 | 1,539551363 | N/A             | 2665      | AK309360     | GDI2           |
| A_22_P00005994 | 5,56273 | 4,94055 | 1,539199249 | N/A             | N/A       | N/A          | Inc-FABP3-1    |
| A_21_P0007071  | 2,82833 | 2,20618 | 1,539167242 | N/A             | N/A       | N/A          | Inc-FRAT1-1    |
| A_32_P49616    | 16,2557 | 15,6336 | 1,5391139   | ENST00000392221 | 1933      | NM_001959    | EEF1B2         |
| A_21_P0010656  | 2,11278 | 1,4907  | 1,539092563 | N/A             | N/A       | N/A          | XLOC_I2_001122 |
| A_23_P115955   | 15,3033 | 14,6813 | 1,53900722  | ENST00000541279 | 219927    | NM_181515    | MRPL21         |
| A_21_P0000557  | 2,38405 | 1,76205 | 1,53900722  | ENST00000477210 | 100302640 | NR_028303    | LINC00882      |
| A_24_P396231   | 9,16112 | 8,53917 | 1,538953883 | N/A             | 3920      | NM_002294    | LAMP2          |
| A_22_P00010880 | 7,17431 | 6,55253 | 1,538772551 | N/A             | N/A       | N/A          | Inc-NPB-3      |
| A_33_P3393971  | 9,25251 | 8,63087 | 1,538623235 | ENST00000477817 | 5317      | NM_000299    | PKP1           |
| A_33_P3691860  | 9,9978  | 9,37618 | 1,538601905 | ENST00000465128 | 159090    | NM_001166599 | FAM122B        |
| A_19_P00327415 | 4,61525 | 3,99364 | 1,538591241 | N/A             | 101927405 | XR_245566    | LOC101927405   |
| A_33_P3331345  | 8,81974 | 8,19813 | 1,538591241 | ENST00000477458 | 8446      | NM_003584    | DUSP11         |
| A_21_P0014838  | 4,04773 | 3,42624 | 1,538463269 | N/A             | N/A       | AK098835     | N/A            |
| A_21_P0014762  | 4,90078 | 4,27932 | 1,538431278 | N/A             | N/A       | CU674253     | N/A            |
| A_24_P12413    | 10,8657 | 10,2443 | 1,538367298 | ENST00000182527 | 9697      | NM_012288    | TRAM2          |
| A_33_P3272291  | 7,8291  | 7,20777 | 1,538292658 | ENST00000263126 | 1109      | NM_001818    | AKR1C4         |
| A_22_P00012377 | 6,64034 | 6,01909 | 1,538207359 | N/A             | N/A       | N/A          | Inc-PRICKLE4-1 |
| A_21_P0012373  | 1,97961 | 1,35841 | 1,53815405  | ENST00000450746 | 101928015 | XR_245199    | LOC101928015   |
| A_24_P226355   | 7,98892 | 7,36774 | 1,538132727 | ENST00000539980 | 10048     | NM_005493    | RANBP9         |
| A_23_P120921   | 7,59939 | 6,97828 | 1,538058098 | ENST00000498417 | 129138    | NM_138797    | ANKRD54        |
| A_24_P339664   | 14,0052 | 13,3841 | 1,538047437 | ENST00000246117 | 56926     | NM_020170    | NCLN           |
| A_23_P218937   | 2,12601 | 1,50495 | 1,538004794 | ENST00000611950 | 5098      | NM_032402    | PCDHGC3        |
| A_22_P00022465 | 2,19615 | 1,57514 | 1,537951492 | N/A             | N/A       | N/A          | Inc-C1orf50-1  |
| A_23_P202565   | 10,3114 | 9,69039 | 1,537951492 | ENST00000265277 | 8036      | NM_007373    | SHOC2          |

|                |         |         |             |                 |           |              |                |
|----------------|---------|---------|-------------|-----------------|-----------|--------------|----------------|
| A_23_P349463   | 8,97703 | 8,35607 | 1,537898191 | ENST00000300113 | 63928     | NM_022097    | CHP2           |
| A_33_P3340852  | 2,94288 | 2,32198 | 1,537834233 | ENST00000427543 | N/A       | S55273       | N/A            |
| A_33_P3238177  | 10,0313 | 9,41053 | 1,537695666 | ENST00000351773 | 7587      | NM_001007094 | ZNF37A         |
| A_33_P3407400  | 5,40906 | 4,78838 | 1,537599743 | ENST00000282469 | 79925     | NM_144722    | SPEF2          |
| A_32_P95462    | 4,80657 | 4,18597 | 1,537514483 | ENST00000273666 | 9515      | NM_014980    | STXBP5L        |
| A_21_P0001765  | 4,59023 | 3,96972 | 1,53741857  | ENST00000449086 | 400946    | NR_033875    | LINC00954      |
| A_23_P84952    | 9,92165 | 9,30114 | 1,53741857  | ENST00000315869 | 7030      | NM_006521    | TFE3           |
| A_23_P55515    | 9,29249 | 8,67205 | 1,537343976 | ENST00000589866 | 8731      | NM_003799    | RNMT           |
| A_19_P00317965 | 6,15501 | 5,53458 | 1,53733332  | ENST00000609220 | N/A       | N/A          | N/A            |
| A_21_P0009794  | 5,54338 | 4,92298 | 1,537301353 | N/A             | N/A       | N/A          | Inc-VN1R2-1    |
| A_21_P0014533  | 3,9887  | 3,36836 | 1,537237419 | N/A             | N/A       | N/A          | N/A            |
| A_33_P3338166  | 11,6757 | 11,0554 | 1,537194799 | ENST00000367157 | 81788     | NM_030952    | NUAK2          |
| A_23_P89101    | 4,2437  | 3,62344 | 1,537152179 | ENST00000587603 | 124404    | NM_144605    | set-12         |
| A_33_P3212394  | 2,43865 | 1,81842 | 1,537120215 | ENST00000308062 | 100288801 | NM_001124759 | FRG2C          |
| A_23_P92536    | 5,53483 | 4,91461 | 1,537109561 | ENST00000420489 | 1259      | NM_000087    | CNGA1          |
| A_24_P45005    | 13,791  | 13,1709 | 1,536981713 | ENST00000530122 | 79716     | NM_024663    | NPEPL1         |
| A_23_P28246    | 5,8447  | 5,22461 | 1,53697106  | ENST00000295738 | 151295    | NM_144712    | SLC23A3        |
| A_33_P3242778  | 4,7372  | 4,11713 | 1,536949753 | N/A             | 100129888 | AK127110     | LOC100129888   |
| A_23_P21747    | 7,04575 | 6,42571 | 1,536917793 | ENST00000293255 | 56344     | NM_019855    | CABP5          |
| A_21_P0008354  | 3,8194  | 3,19939 | 1,536885834 | N/A             | N/A       | N/A          | Inc-TTC9-1     |
| A_21_P0006339  | 2,41494 | 1,79498 | 1,536832571 | N/A             | N/A       | N/A          | Inc-SMARCA2-2  |
| A_22_P00002569 | 3,00774 | 2,38778 | 1,536832571 | N/A             | N/A       | N/A          | Inc-C17orf89-2 |
| A_22_P00001759 | 5,70794 | 5,088   | 1,536811266 | N/A             | N/A       | N/A          | Inc-ATP11B-2   |
| A_23_P128215   | 9,81657 | 9,19675 | 1,536683443 | ENST00000549206 | 8835      | NM_003877    | SOCS2          |
| A_23_P78152    | 10,2783 | 9,65853 | 1,536630186 | ENST00000573759 | 79003     | NM_024039    | MIS12          |
| A_24_P261734   | 14,1368 | 13,5171 | 1,53655563  | ENST00000398637 | 81539     | NM_030674    | SLC38A1        |
| A_24_P132787   | 10,7155 | 10,0958 | 1,53655563  | ENST00000356940 | 22931     | NM_021252    | RAB18          |
| A_19_P00806499 | 3,37329 | 2,75368 | 1,536459778 | N/A             | 100507135 | NR_045180    | SPG20-AS1      |
| A_21_P0013489  | 2,58658 | 1,96699 | 1,536438478 | ENST00000517611 | N/A       | N/A          | N/A            |
| A_19_P00318059 | 2,38778 | 1,76826 | 1,536363932 | ENST00000419695 | N/A       | N/A          | N/A            |
| A_33_P3287567  | 9,13378 | 8,51429 | 1,536331984 | ENST00000379119 | 55973     | NM_018844    | BCAP29         |
| A_33_P3336462  | 4,21417 | 3,59485 | 1,536150961 | N/A             | N/A       | AK123300     | N/A            |
| A_23_P37144    | 9,49794 | 8,87863 | 1,536140313 | ENST00000310850 | 112487    | NM_080664    | DTD2           |

|                |         |         |             |                 |           |              |                       |
|----------------|---------|---------|-------------|-----------------|-----------|--------------|-----------------------|
| A_23_P110961   | 10,3821 | 9,76284 | 1,536087076 | ENST00000621685 | 51660     | NM_016098    | MPC1                  |
| A_21_P0009955  | 6,01234 | 5,39309 | 1,536076428 | N/A             | N/A       | N/A          | Inc-NNAT-1            |
| A_21_P0014280  | 3,53266 | 2,91342 | 1,536065781 | N/A             | 100128276 | AK125272     | LOC100128276          |
| A_33_P3287477  | 4,69927 | 4,08015 | 1,53593802  | ENST00000329446 | 399814    | NM_001010912 | C10orf120             |
| A_22_P00007298 | 3,69169 | 3,07278 | 1,535714464 | ENST00000454185 | 102724220 | XR_426114    | LOC102724220          |
| A_23_P106727   | 10,3845 | 9,7656  | 1,535703819 | ENST00000611004 | 9727      | NM_014700    | RAB11FIP3             |
| A_22_P00014083 | 3,28644 | 2,66754 | 1,535703819 | N/A             | N/A       | AK123668     | Inc-SAP30-5           |
| A_21_P0008549  | 1,97387 | 1,35502 | 1,535650597 | N/A             | N/A       | N/A          | Inc-RP11-204N11.1.1-3 |
| A_23_P65870    | 11,4593 | 10,8405 | 1,535597376 | ENST00000561885 | 26263     | NM_012170    | FBXO22                |
| A_23_P98015    | 9,16852 | 8,54978 | 1,535533514 | ENST00000370472 | 51076     | NM_015960    | CUTC                  |
| A_33_P3270966  | 15,625  | 15,0065 | 1,535278091 | ENST00000402039 | N/A       | N/A          | N/A                   |
| A_24_P163405   | 10,6734 | 10,055  | 1,535171677 | ENST00000467742 | 5987      | NM_006510    | TRIM27                |
| A_23_P78608    | 3,90643 | 3,28808 | 1,535118473 | ENST00000590867 | 79958     | NM_024898    | DENND1C               |
| A_23_P2041     | 7,21953 | 6,60119 | 1,535107832 | ENST00000256186 | 84953     | NM_032867    | MICALCL               |
| A_23_P115444   | 2,00306 | 1,38473 | 1,535097192 | ENST00000404377 | 8995      | NM_005092    | TNFSF18               |
| A_24_P183292   | 10,1621 | 9,54379 | 1,535075911 | ENST00000412431 | 1452      | AF119911     | CSNK1A1               |
| A_33_P3223338  | 2,5002  | 1,88189 | 1,535075911 | ENST00000453888 | 64098     | AK307299     | PARVG                 |
| A_33_P3283136  | 10,6163 | 9,99806 | 1,53500143  | ENST00000462753 | 84928     | NM_032842    | TMEM209               |
| A_22_P00000851 | 2,94586 | 2,32763 | 1,534990791 | N/A             | N/A       | N/A          | Inc-AGGF1-3           |
| A_23_P210253   | 11,4833 | 10,8651 | 1,534958872 | ENST00000409813 | 8527      | NM_152879    | DGKD                  |
| A_21_P0009249  | 3,87103 | 3,2529  | 1,534884397 | N/A             | N/A       | N/A          | Inc-ARL4D-1           |
| A_33_P3234347  | 11,471  | 10,8529 | 1,53485248  | ENST00000372057 | 9949      | NM_001171689 | AMMECR1               |
| A_24_P117029   | 15,6501 | 15,032  | 1,53485248  | N/A             | 3949      | NM_000527    | LDLR                  |
| A_23_P70201    | 9,42359 | 8,80556 | 1,53477801  | ENST00000512392 | 1105      | NM_001270    | CHD1                  |
| A_33_P3350758  | 9,30459 | 8,68662 | 1,534714182 | ENST00000462775 | 9462      | NM_170692    | RASAL2                |
| A_33_P3289236  | 8,69221 | 8,07429 | 1,534660994 | ENST00000356967 | 3250      | NM_020995    | HPR                   |
| A_21_P0005109  | 4,1269  | 3,50899 | 1,534650357 | N/A             | N/A       | N/A          | Inc-CD83-2            |
| A_33_P3262253  | 3,65639 | 3,03854 | 1,534586534 | ENST00000402499 | 84787     | AK304562     | SUV420H2              |
| A_22_P00000322 | 5,47039 | 4,85255 | 1,534575897 | ENST00000407635 | 285191    | XR_241442    | LOC285191             |
| A_33_P3607359  | 7,01423 | 6,3965  | 1,534458896 | ENST00000368895 | 399815    | NR_027282    | LOC399815             |
| A_32_P26401    | 2,141   | 1,5233  | 1,534426988 | ENST00000451980 | 728409    | NR_024102    | LINC01548             |
| A_33_P3233891  | 10,2613 | 9,64381 | 1,534203651 | ENST00000507126 | 6731      | NM_006947    | SRP72                 |
| A_22_P00011892 | 5,56638 | 4,94899 | 1,534097312 | N/A             | N/A       | N/A          | Inc-PIGU-1            |

|                |         |         |             |                 |           |              |                 |
|----------------|---------|---------|-------------|-----------------|-----------|--------------|-----------------|
| A_33_P3392802  | 4,06964 | 3,45234 | 1,534001613 | ENST00000402170 | 9014      | N/A          | TAF1B           |
| A_23_P308632   | 3,06972 | 2,45257 | 1,533842128 | ENST00000590083 | 255057    | NM_152769    | C19orf26        |
| A_23_P5200     | 3,42267 | 2,80567 | 1,53368266  | ENST00000378910 | 4868      | NM_004646    | NPHS1           |
| A_33_P3210880  | 4,15373 | 3,53674 | 1,533672029 | N/A             | 538       | AB208828     | ATP7A           |
| A_21_P0008960  | 2,87887 | 2,26189 | 1,533661398 | N/A             | N/A       | N/A          | Inc-CA7-3       |
| A_23_P391506   | 10,8133 | 10,1964 | 1,533576357 | ENST00000367498 | 10625     | NM_006469    | IVNS1ABP        |
| A_32_P34552    | 9,42049 | 8,8037  | 1,533459432 | ENST00000519771 | 5423      | NM_002690    | POLB            |
| A_19_P00322932 | 8,90298 | 8,28628 | 1,533363772 | ENST00000608369 | 100506190 | NR_038955    | LINC00963       |
| A_21_P0000488  | 6,99764 | 6,38109 | 1,533204354 | N/A             | 692226    | NR_004379    | SNORD96B        |
| A_21_P0007823  | 5,45725 | 4,84072 | 1,533183099 | N/A             | N/A       | N/A          | Inc-EIF2S3L.1-3 |
| A_33_P3251430  | 11,5602 | 10,9437 | 1,533151218 | ENST00000318948 | 8204      | NM_003489    | NRIP1           |
| A_21_P0012948  | 3,40979 | 2,79338 | 1,533055578 | ENST00000510435 | N/A       | N/A          | N/A             |
| A_32_P206401   | 10,5084 | 9,89206 | 1,532981195 | ENST00000616829 | 169714    | NM_181701    | QSOX2           |
| A_21_P0011339  | 3,8725  | 3,25617 | 1,53297057  | N/A             | N/A       | N/A          | XLOC_I2_004772  |
| A_23_P127279   | 10,3946 | 9,77841 | 1,532821816 | ENST00000298784 | 54537     | NM_019054    | FAM35A          |
| A_21_P0014778  | 5,00291 | 4,38677 | 1,532768694 | N/A             | 100507516 | AK295906     | LOC100507516    |
| A_23_P121875   | 10,4798 | 9,86377 | 1,53265183  | ENST00000512085 | 64417     | NM_022483    | C5orf28         |
| A_33_P3222203  | 4,93022 | 4,31421 | 1,532630584 | ENST00000378661 | 165140    | NM_148962    | OXER1           |
| A_33_P3242748  | 13,7614 | 13,1454 | 1,53261996  | ENST00000612157 | 10139     | NM_001267549 | ARFRP1          |
| A_23_P23728    | 6,09248 | 5,47651 | 1,532588091 | ENST00000369146 | 9900      | NM_014849    | SV2A            |
| A_22_P00024949 | 3,48173 | 2,86577 | 1,532577468 | N/A             | N/A       | N/A          | Inc-EIF2AK4-3   |
| A_19_P00813554 | 7,28196 | 6,66608 | 1,532492486 | N/A             | 100129075 | NR_027123    | KTN1-AS1        |
| A_32_P107493   | 7,00633 | 6,39053 | 1,532407509 | ENST00000301031 | 124045    | AK056168     | SPATA33         |
| A_22_P00006076 | 2,42011 | 1,80432 | 1,532396887 | N/A             | N/A       | N/A          | Inc-FAM151A-3   |
| A_33_P3243683  | 6,11851 | 5,50276 | 1,5323544   | ENST00000389057 | 1729      | NM_005219    | DIAPH1          |
| A_22_P00013824 | 5,11762 | 4,50204 | 1,532173846 | N/A             | N/A       | BC031683     | Inc-RPGRIP1-1   |
| A_33_P3711933  | 7,18878 | 6,57323 | 1,532141986 | ENST00000529535 | 143872    | NM_152432    | ARHGAP42        |
| A_21_P0004847  | 2,16185 | 1,54638 | 1,532057028 | N/A             | N/A       | N/A          | Inc-CAP2-1      |
| A_23_P134139   | 2,04824 | 1,43278 | 1,532046409 | ENST00000368444 | 2173      | NM_001446    | FABP7           |
| A_33_P3298785  | 5,91843 | 5,30302 | 1,531993313 | ENST00000360264 | 1523      | NM_001202543 | CUX1            |
| A_33_P3264780  | 7,02689 | 6,41158 | 1,531887127 | ENST00000477290 | 1024      | NM_001260    | CDK8            |
| A_21_P0012273  | 2,30319 | 1,68792 | 1,531844655 | ENST00000612637 | 26960     | NM_015678    | NBEA            |
| A_33_P3227661  | 2,00752 | 1,39226 | 1,531834037 | ENST00000623198 | N/A       | N/A          | N/A             |

|                |         |         |             |                 |           |              |                |
|----------------|---------|---------|-------------|-----------------|-----------|--------------|----------------|
| A_23_P400066   | 11,6112 | 10,996  | 1,531770331 | ENST00000397042 | 57148     | NM_020336    | RALGAPB        |
| A_22_P00024975 | 2,07476 | 1,45965 | 1,531674777 | ENST00000585386 | 24139     | AK308580     | EML2           |
| A_21_P0011013  | 4,54459 | 3,92955 | 1,531600461 | N/A             | N/A       | N/A          | XLOC_I2_002729 |
| A_22_P00019095 | 2,12508 | 1,51012 | 1,531515534 | N/A             | N/A       | N/A          | Inc-PROM1-1    |
| A_23_P303203   | 9,38209 | 8,76714 | 1,531504918 | ENST00000397677 | 91782     | NM_152272    | CHMP7          |
| A_21_P0006548  | 11,7542 | 11,1394 | 1,531345693 | N/A             | N/A       | N/A          | Inc-FAM70A-1   |
| A_23_P63980    | 12,9338 | 12,319  | 1,531345693 | ENST00000309602 | 78999     | NM_024036    | LRFN4          |
| A_33_P3334575  | 11,6022 | 10,9874 | 1,531345693 | N/A             | N/A       | N/A          | XLOC_I2_010433 |
| A_21_P0010669  | 2,49616 | 1,8814  | 1,531303235 | N/A             | N/A       | N/A          | XLOC_I2_001302 |
| A_23_P131676   | 13,2367 | 12,622  | 1,531239552 | ENST00000272928 | 57007     | NM_020311    | ACKR3          |
| A_24_P14974    | 2,20841 | 1,59372 | 1,531228938 | ENST00000428798 | 200909    | NM_182537    | HTR3D          |
| A_21_P0012973  | 5,59162 | 4,97694 | 1,531218324 | ENST00000507435 | N/A       | N/A          | N/A            |
| A_21_P0004500  | 2,05186 | 1,43735 | 1,531037904 | N/A             | N/A       | N/A          | Inc-NIPBL-1    |
| A_23_P106887   | 13,1653 | 12,5508 | 1,531027292 | ENST00000568901 | 2521      | NM_004960    | FUS            |
| A_21_P0013866  | 7,07567 | 6,46127 | 1,530921172 | ENST00000423992 | 100302692 | NR_028379    | FTX            |
| A_22_P00000325 | 3,92565 | 3,31128 | 1,530889338 | ENST00000425668 | 100289650 | NR_036584    | LOC100289650   |
| A_21_P0001759  | 3,81608 | 3,20176 | 1,530836283 | N/A             | N/A       | N/A          | Inc-TLR5-1     |
| A_23_P216282   | 11,9381 | 11,3239 | 1,530708956 | ENST00000349830 | 9639      | NM_014629    | ARHGEF10       |
| A_24_P154948   | 12,0611 | 11,447  | 1,530602859 | ENST00000470392 | 2617      | NM_002047    | GARS           |
| A_33_P3306749  | 2,78273 | 2,16866 | 1,530571032 | ENST00000615948 | 10439     | BC000189     | OLFM1          |
| A_22_P00008094 | 2,99147 | 2,37742 | 1,530549814 | ENST00000559211 | N/A       | N/A          | N/A            |
| A_23_P8763     | 13,2929 | 12,679  | 1,530390688 | ENST00000248594 | 5782      | NM_002835    | PTPN12         |
| A_33_P3257503  | 7,42146 | 6,80782 | 1,530114908 | N/A             | 102724316 | NR_110923    | SVIL-AS1       |
| A_24_P316257   | 6,73508 | 6,12156 | 1,529987642 | ENST00000424439 | 283948    | NM_176677    | NHLRC4         |
| A_24_P158089   | 8,98933 | 8,37589 | 1,529902804 | ENST00000223095 | 5054      | NM_000602    | SERPINE1       |
| A_23_P161004   | 3,53214 | 2,91874 | 1,529860386 | ENST00000367357 | 2494      | NM_205860    | NR5A2          |
| A_33_P3259058  | 12,7338 | 12,1204 | 1,529860386 | ENST00000419065 | 389362    | NM_001128592 | PSMG4          |
| A_22_P00006607 | 12,2201 | 11,6067 | 1,529860386 | N/A             | N/A       | AK125955     | Inc-FOXA1-2    |
| A_22_P00010058 | 3,57533 | 2,96196 | 1,529828574 | N/A             | N/A       | N/A          | Inc-MON2-3     |
| A_21_P0014675  | 6,31014 | 5,69681 | 1,529786159 | ENST00000541888 | N/A       | XR_111249    | N/A            |
| A_33_P3385782  | 4,24972 | 3,63646 | 1,529711935 | ENST00000429591 | 349075    | NM_182633    | ZNF713         |
| A_22_P00005092 | 7,46951 | 6,85629 | 1,529669523 | N/A             | N/A       | XM_003846300 | Inc-DGCR6-2    |
| A_21_P0006705  | 4,2613  | 3,64814 | 1,529605907 | N/A             | N/A       | N/A          | Inc-TCF7L2-1   |

|                |         |         |             |                 |           |              |                       |
|----------------|---------|---------|-------------|-----------------|-----------|--------------|-----------------------|
| A_23_P40354    | 11,3385 | 10,7254 | 1,529542294 | ENST00000375571 | 22919     | NM_012325    | MAPRE1                |
| A_33_P3297834  | 2,55135 | 1,93828 | 1,529510488 | N/A             | N/A       | N/A          | N/A                   |
| A_21_P0000081  | 11,4259 | 10,8129 | 1,529436278 | N/A             | 79752     | NM_001170797 | ZFAND1                |
| A_22_P00002911 | 6,92461 | 6,3117  | 1,52934087  | N/A             | N/A       | N/A          | Inc-C5orf17-4         |
| A_22_P00013724 | 4,40089 | 3,78801 | 1,529309068 | N/A             | N/A       | BX090933     | Inc-RP11-817J15.3.1-2 |
| A_21_P0010614  | 3,72453 | 3,11165 | 1,529309068 | N/A             | N/A       | N/A          | XLOC_I2_000910        |
| A_23_P16652    | 9,22215 | 8,60938 | 1,529192469 | ENST00000334241 | 148254    | NM_152791    | ZNF555                |
| A_21_P0014516  | 2,22989 | 1,6172  | 1,529107675 | ENST00000411615 | 100507406 | NR_121618    | LOC100507406          |
| A_33_P3571120  | 12,3263 | 11,7137 | 1,529012287 | ENST00000591650 | 8943      | NM_001261826 | AP3D1                 |
| A_21_P0011479  | 14,9102 | 14,2977 | 1,528906308 | N/A             | N/A       | N/A          | XLOC_I2_005465        |
| A_33_P3222105  | 13,582  | 12,9695 | 1,528906308 | ENST00000379607 | 1964      | NM_001412    | EIF1AX                |
| A_23_P90062    | 12,1064 | 11,4941 | 1,528694371 | ENST00000254322 | 3337      | NM_006145    | DNAJB1                |
| A_23_P57007    | 7,18245 | 6,57024 | 1,528599009 | N/A             | N/A       | AF090938     | N/A                   |
| A_24_P142024   | 13,5714 | 12,9592 | 1,528588413 | ENST00000609024 | 29082     | NM_014169    | CHMP4A                |
| A_23_P309224   | 10,0233 | 9,41126 | 1,528418897 | ENST00000355413 | 55750     | NM_018238    | AGK                   |
| A_33_P3318746  | 9,61205 | 9,00001 | 1,528418897 | ENST00000366856 | 29097     | NM_001277200 | CNIH4                 |
| A_33_P3403936  | 2,21214 | 1,60013 | 1,528387115 | ENST00000412697 | 619189    | NM_001258031 | SERINC4               |
| A_23_P399078   | 13,5879 | 12,9759 | 1,528376521 | ENST00000266085 | 7078      | NM_000362    | TIMP3                 |
| A_23_P208009   | 12,3195 | 11,7075 | 1,528376521 | ENST00000299714 | 90701     | NM_033280    | SEC11C                |
| A_24_P321511   | 10,3562 | 9,74421 | 1,528365927 | ENST00000229314 | 51026     | NM_016072    | GOLT1B                |
| A_33_P3343305  | 5,28515 | 4,67323 | 1,528291772 | N/A             | N/A       | N/A          | N/A                   |
| A_24_P226069   | 2,31409 | 1,70222 | 1,528238806 | ENST00000259989 | 83888     | NM_031950    | FGFBP2                |
| A_23_P309973   | 7,69323 | 7,08139 | 1,528207028 | ENST00000467261 | 145376    | NM_172365    | PPP1R36               |
| A_22_P00007714 | 6,96692 | 6,35525 | 1,528026962 | N/A             | N/A       | N/A          | Inc-HLA-DMA-1         |
| A_23_P53663    | 11,0763 | 10,4647 | 1,527952824 | ENST00000548075 | 5074      | NM_002583    | PAWR                  |
| A_23_P341325   | 16,1369 | 15,5253 | 1,527952824 | ENST00000298283 | 140801    | NM_080746    | RPL10L                |
| A_22_P00023604 | 2,1293  | 1,51771 | 1,527942233 | ENST00000424837 | 102724502 | XR_425265    | LOC102724502          |
| A_23_P46844    | 12,7156 | 12,1041 | 1,527846918 | ENST00000302424 | 81603     | NM_030912    | TRIM8                 |
| A_21_P0010146  | 2,31666 | 1,70521 | 1,527793967 | ENST00000428205 | N/A       | N/A          | N/A                   |
| A_23_P215037   | 12,1533 | 11,5419 | 1,527741019 | ENST00000337387 | 9589      | NM_152858    | WTAP                  |
| A_21_P0001303  | 2,5292  | 1,91791 | 1,527624539 | N/A             | N/A       | N/A          | Inc-PRKAA2-4          |
| A_22_P00001020 | 4,9113  | 4,30001 | 1,527624539 | N/A             | N/A       | N/A          | Inc-AL391421.1-3      |
| A_33_P3389153  | 11,6448 | 11,0336 | 1,527529244 | ENST00000176763 | 6793      | NM_005990    | STK10                 |



|                |         |         |             |                 |           |              |                |
|----------------|---------|---------|-------------|-----------------|-----------|--------------|----------------|
| A_19_P00315716 | 8,17338 | 7,56222 | 1,527486892 | N/A             | 26777     | NR_002911    | SNORA71A       |
| A_33_P3346193  | 7,42404 | 6,81293 | 1,527433955 | ENST00000368530 | 7170      | NM_001043351 | TPM3           |
| A_22_P00019374 | 5,5649  | 4,9539  | 1,527317498 | N/A             | N/A       | N/A          | Inc-RDH5-1     |
| A_24_P60972    | 9,8575  | 9,24655 | 1,527264566 | ENST00000341170 | 158427    | NM_139246    | TSTD2          |
| A_23_P157593   | 3,56694 | 2,95602 | 1,527232808 | ENST00000276410 | 8973      | NM_004198    | CHRNA6         |
| A_19_P00319558 | 2,0957  | 1,48486 | 1,527148122 | ENST00000444792 | N/A       | N/A          | N/A            |
| A_33_P3344264  | 12,4228 | 11,8122 | 1,526894094 | ENST00000589085 | 56931     | NM_020175    | DUS3L          |
| A_24_P288685   | 9,0339  | 8,42336 | 1,526830594 | ENST00000371642 | 3597      | NM_001560    | IL13RA1        |
| A_21_P0010036  | 2,07224 | 1,46175 | 1,526777679 | N/A             | N/A       | N/A          | Inc-KIAA1755-5 |
| A_32_P44453    | 11,684  | 11,0738 | 1,526470808 | ENST00000444194 | 3628      | NM_002194    | INPP1          |
| A_22_P00020723 | 2,43612 | 1,82595 | 1,526439066 | ENST00000527684 | N/A       | BX098198     | N/A            |
| A_33_P3307795  | 2,69851 | 2,08849 | 1,526280368 | ENST00000243806 | 79843     | N/A          | FAM124B        |
| A_33_P3303102  | 3,86332 | 3,25331 | 1,526269788 | ENST00000349841 | 55892     | XM_005247622 | MYNN           |
| A_21_P0009094  | 2,32838 | 1,71841 | 1,526227472 | N/A             | N/A       | N/A          | Inc-IQCK-1     |
| A_21_P0011251  | 6,59762 | 5,98768 | 1,526195735 | N/A             | N/A       | N/A          | XLOC_I2_004213 |
| A_23_P145024   | 12,4072 | 11,7973 | 1,52615342  | ENST00000305988 | 154       | NM_000024    | ADRB2          |
| A_22_P00022116 | 5,78724 | 5,17742 | 1,526068795 | N/A             | N/A       | N/A          | Inc-PTPLA-2    |
| A_21_P0004384  | 2,4891  | 1,87932 | 1,526026484 | N/A             | N/A       | N/A          | Inc-CCL28-1    |
| A_33_P3414930  | 4,65258 | 4,04291 | 1,525910135 | ENST00000560933 | 101927202 | XR_244435    | LOC101927202   |
| A_23_P368645   | 11,0823 | 10,4727 | 1,525836099 | ENST00000264167 | 8540      | NM_003659    | AGPS           |
| A_21_P0006938  | 3,85579 | 3,24631 | 1,525709189 | N/A             | 101927435 | XR_242762    | LOC101927435   |
| A_33_P3294821  | 5,45799 | 4,84857 | 1,525645737 | ENST00000612102 | 133060    | NM_177998    | OTOP1          |
| A_33_P3228931  | 5,34208 | 4,73278 | 1,525518843 | ENST00000360314 | 57091     | NM_001164115 | CASS4          |
| A_33_P3395562  | 1,98834 | 1,37906 | 1,525497695 | ENST00000544837 | 400757    | NM_001276351 | C1orf141       |
| A_21_P0000684  | 12,4606 | 11,8514 | 1,525413106 | ENST00000274242 | 100506548 | NR_037665    | LOC100506548   |
| A_32_P192823   | 8,36634 | 7,75727 | 1,525275658 | ENST00000506618 | 221823    | NM_175886    | PRPS1L1        |
| A_23_P128817   | 11,8095 | 11,2005 | 1,525201653 | ENST00000559503 | 5106      | NM_004563    | PCK2           |
| A_33_P3305446  | 4,43925 | 3,83057 | 1,52486339  | ENST00000376314 | 245934    | NM_001011878 | DEFB121        |
| A_22_P00019101 | 7,44927 | 6,84065 | 1,524799974 | ENST00000451164 | 1385      | NM_134442    | CREB1          |
| A_24_P396167   | 2,07146 | 1,46303 | 1,524599174 | ENST00000307886 | 1521      | NM_001335    | CTSW           |
| A_22_P00003140 | 2,4319  | 1,82349 | 1,524578039 | ENST00000430058 | 101928337 | XR_428581    | PTCSC2         |
| A_33_P3269885  | 2,16918 | 1,56077 | 1,524578039 | ENST00000484079 | 55532     | NM_018713    | SLC30A10       |
| A_22_P00004477 | 3,6584  | 3,05001 | 1,524556904 | ENST00000502102 | 100507250 | NR_038930    | LOC100507250   |

|                |         |         |             |                 |           |              |                     |
|----------------|---------|---------|-------------|-----------------|-----------|--------------|---------------------|
| A_21_P0004367  | 2,21982 | 1,61145 | 1,524535769 | N/A             | N/A       | N/A          | Inc-CDH18-4         |
| A_23_P207213   | 13,8956 | 13,2873 | 1,5244618   | ENST00000485472 | 218       | NM_000691    | ALDH3A1             |
| A_33_P3630129  | 6,76707 | 6,15882 | 1,524408967 | N/A             | 440918    | AK128708     | FLJ46875            |
| A_33_P3246413  | 2,45784 | 1,84965 | 1,52434557  | N/A             | N/A       | N/A          | N/A                 |
| A_22_P00023330 | 2,1363  | 1,52813 | 1,524324439 | ENST00000412900 | N/A       | N/A          | N/A                 |
| A_21_P0012404  | 6,11329 | 5,5052  | 1,524239914 | ENST00000478772 | 100507274 | N/A          | LINC01210           |
| A_21_P0003779  | 2,42348 | 1,8154  | 1,524229349 | N/A             | N/A       | N/A          | Inc-INPP4B-1        |
| A_33_P3344292  | 4,10715 | 3,49907 | 1,524229349 | ENST00000554335 | 23034     | N/A          | SAMD4A              |
| A_21_P0008968  | 2,9629  | 2,35484 | 1,524208219 | N/A             | N/A       | N/A          | Inc-RP11-44L9.1.1-8 |
| A_23_P139958   | 9,80697 | 9,19904 | 1,52407088  | ENST00000477277 | 1024      | NM_001260    | CDK8                |
| A_23_P120566   | 12,5454 | 11,9375 | 1,524039188 | ENST00000246043 | 6238      | NM_001042576 | RRBP1               |
| A_21_P0014254  | 3,98108 | 3,37329 | 1,523922991 | ENST00000422642 | 645954    | NR_036438    | SVILP1              |
| A_24_P189533   | 11,3226 | 10,7149 | 1,523827926 | ENST00000278505 | 23052     | NM_015036    | ENDOD1              |
| A_33_P3327192  | 5,41889 | 4,8112  | 1,523817364 | ENST00000453179 | N/A       | DA142060     | N/A                 |
| A_23_P115872   | 11,4854 | 10,8778 | 1,523722306 | ENST00000371485 | 55165     | NM_018131    | CEP55               |
| A_33_P3242873  | 7,05575 | 6,44824 | 1,523627254 | ENST00000366868 | 51660     | NM_001270879 | MPC1                |
| A_23_P122508   | 2,50041 | 1,89292 | 1,523606133 | ENST00000414703 | 135656    | NM_080870    | DPCR1               |
| A_22_P00015682 | 2,69755 | 2,09009 | 1,52357445  | ENST00000447396 | N/A       | N/A          | N/A                 |
| A_32_P226646   | 6,37098 | 5,76355 | 1,523542769 | N/A             | 100129781 | XR_109259    | LOC100129781        |
| A_22_P00006379 | 6,97195 | 6,36466 | 1,523394931 | ENST00000606251 | N/A       | XR_425878    | N/A                 |
| A_21_P0002315  | 2,45965 | 1,85237 | 1,523384371 | N/A             | N/A       | N/A          | Inc-GORASP2-1       |
| A_19_P00317168 | 2,15659 | 1,54934 | 1,523352694 | N/A             | N/A       | N/A          | XL0C_I2_002160      |
| A_33_P3310548  | 2,76453 | 2,15732 | 1,523310458 | N/A             | 100131131 | AY358263     | LOC100131131        |
| A_24_P73389    | 9,04202 | 8,43482 | 1,523299899 | ENST00000376547 | 8428      | NM_001032296 | STK24               |
| A_33_P3325355  | 14,8155 | 14,2085 | 1,52308874  | ENST00000372813 | 10953     | NM_006809    | TOMM34              |
| A_22_P00003684 | 3,42327 | 2,81628 | 1,523078182 | N/A             | N/A       | N/A          | Inc-CDH1-1          |
| A_21_P0009057  | 6,53318 | 5,92619 | 1,523078182 | ENST00000558842 | 463       | N/A          | ZFH3                |
| A_33_P3358641  | 10,5925 | 9,98555 | 1,523035954 | ENST00000392000 | 9208      | NM_001137552 | LRRFIP1             |
| A_24_P941376   | 7,30252 | 6,69558 | 1,523025398 | ENST00000391821 | 25888     | NM_015428    | ZNF473              |
| A_23_P213385   | 13,467  | 12,8601 | 1,522983171 | ENST00000322611 | 10409     | NM_006317    | BASP1               |
| A_22_P00011934 | 5,14315 | 4,53634 | 1,522888165 | ENST00000511256 | 101927953 | NR_105050    | C5orf66-AS1         |
| A_33_P3386591  | 1,99504 | 1,38823 | 1,522888165 | ENST00000453326 | 100996648 | NM_001277423 | TCP11X2             |
| A_33_P3329339  | 5,55824 | 4,95169 | 1,522613738 | N/A             | 644990    | NR_046244    | THRB-AS1            |

|                |         |         |             |                 |           |              |              |
|----------------|---------|---------|-------------|-----------------|-----------|--------------|--------------|
| A_33_P3274754  | 3,91515 | 3,30864 | 1,522571522 | N/A             | 100131434 | NR_027455    | LINC00893    |
| A_33_P3310562  | 3,93196 | 3,32546 | 1,522560969 | N/A             | N/A       | AY927497     | N/A          |
| A_23_P125253   | 2,22362 | 1,61718 | 1,522497649 | ENST00000509803 | 9079      | XM_006713979 | LDB2         |
| A_24_P169234   | 2,92182 | 2,31548 | 1,522392121 | ENST00000451498 | 7535      | NM_001079    | ZAP70        |
| A_32_P23308    | 2,04456 | 1,43826 | 1,522349912 | N/A             | 257358    | NR_026945    | LINC01366    |
| A_21_P0013254  | 5,81083 | 5,20461 | 1,522265497 | ENST00000418395 | N/A       | N/A          | N/A          |
| A_33_P3300158  | 4,79866 | 4,19244 | 1,522265497 | N/A             | 100130078 | AK094659     | LOC100130078 |
| A_33_P3361147  | 8,12703 | 7,52082 | 1,522254946 | ENST00000371162 | N/A       | AK130707     | N/A          |
| A_33_P3234267  | 5,53658 | 4,93045 | 1,522170536 | N/A             | 100130442 | AK131364     | LOC100130442 |
| A_33_P3315263  | 4,86257 | 4,25648 | 1,522128333 | ENST00000330553 | 338785    | NM_175834    | KRT79        |
| A_33_P3258723  | 10,264  | 9,65794 | 1,522096682 | ENST00000507937 | 64777     | NM_001288794 | RMND5B       |
| A_24_P387609   | 7,6863  | 7,08036 | 1,521970083 | ENST00000375991 | 81689     | NM_030940    | ISCA1        |
| A_21_P0011853  | 6,76023 | 6,15433 | 1,521927885 | N/A             | 100507460 | N/A          | LOC100507460 |
| A_32_P26376    | 10,0143 | 9,40842 | 1,521906787 | ENST00000295588 | 56983     | NM_152305    | POGLUT1      |
| A_21_P0006542  | 1,98184 | 1,37596 | 1,521906787 | N/A             | 101928258 | XR_426540    | LOC101928258 |
| A_21_P0007706  | 5,19661 | 4,59074 | 1,521896238 | N/A             | N/A       | N/A          | Inc-ADCY6-1  |
| A_24_P48057    | 7,0943  | 6,48845 | 1,52187514  | ENST00000620085 | 10265     | NM_005853    | IRX5         |
| A_22_P00017533 | 3,7531  | 3,14734 | 1,521780204 | N/A             | N/A       | N/A          | Inc-WDR26-2  |
| A_21_P0014907  | 3,81763 | 3,21187 | 1,521780204 | N/A             | N/A       | N/A          | N/A          |
| A_33_P3312799  | 5,01229 | 4,40665 | 1,521653631 | ENST00000420308 | N/A       | N/A          | N/A          |
| A_33_P3394858  | 1,99844 | 1,39289 | 1,521558708 | ENST00000412122 | 100188953 | NR_024129    | LINC00092    |
| A_33_P3339481  | 2,8607  | 2,25529 | 1,521411062 | ENST00000370392 | 56479     | BC050689     | KCNQ5        |
| A_33_P3416882  | 6,62735 | 6,02195 | 1,521400517 | ENST00000360096 | 132946    | NM_206919    | ARL9         |
| A_33_P3242863  | 9,29635 | 8,69107 | 1,521273975 | ENST00000616989 | 56953     | NM_020201    | NT5M         |
| A_32_P486693   | 4,07414 | 3,46895 | 1,521179076 | ENST00000309166 | 56675     | NM_020645    | NRIP3        |
| A_21_P0003777  | 4,32748 | 3,7223  | 1,521168532 | N/A             | N/A       | N/A          | Inc-SETD7-1  |
| A_32_P113566   | 5,46009 | 4,85511 | 1,520957668 | ENST00000403056 | 114781    | NM_152733    | BTBD9        |
| A_33_P3260964  | 4,1603  | 3,55534 | 1,520936583 | N/A             | 731779    | NR_024441    | LINC01300    |
| A_33_P3258977  | 2,2464  | 1,64146 | 1,520915499 | ENST00000299665 | 338339    | NM_080387    | CLEC4D       |
| A_22_P00013904 | 7,9603  | 7,35538 | 1,520894415 | ENST00000510550 | 100132987 | AF086162     | LINC00856    |
| A_24_P415280   | 5,62905 | 5,02417 | 1,520852247 | ENST00000298428 | 55176     | NM_018144    | SEC61A2      |
| A_23_P26511    | 5,85378 | 5,24894 | 1,520810081 | ENST00000406256 | 79153     | NM_024307    | GDPD3        |
| A_24_P271014   | 9,07166 | 8,46684 | 1,520788998 | ENST00000582594 | 9989      | NM_001042388 | PPP4R1       |

|                |         |         |             |                 |        |              |               |
|----------------|---------|---------|-------------|-----------------|--------|--------------|---------------|
| A_33_P3354792  | 2,70522 | 2,1004  | 1,520788998 | ENST00000597278 | 441179 | XR_112948    | LOC441179     |
| A_23_P64044    | 12,1338 | 11,5292 | 1,520557107 | ENST00000540554 | 83706  | NM_178443    | FERMT3        |
| A_33_P3247629  | 7,29698 | 6,69246 | 1,520472792 | ENST00000450991 | 25977  | NM_015509    | NECAP1        |
| A_21_P0014514  | 2,56533 | 1,96082 | 1,520462253 | N/A             | N/A    | BG927974     | N/A           |
| A_22_P00004943 | 3,53908 | 2,9346  | 1,520430636 | N/A             | N/A    | N/A          | Inc-DCAF4L2-2 |
| A_24_P694820   | 3,01508 | 2,41061 | 1,520420097 | N/A             | N/A    | N/A          | Inc-ZNF236-1  |
| A_33_P3418710  | 3,42447 | 2,82001 | 1,520409558 | ENST00000357726 | 390999 | NM_001080830 | PRAMEF12      |
| A_33_P3398143  | 6,40223 | 5,79778 | 1,52039902  | N/A             | N/A    | N/A          | N/A           |
| A_21_P0012182  | 7,7398  | 7,13538 | 1,520367404 | ENST00000432875 | 284232 | NR_027995    | ANKRD20A9P    |
| A_22_P00014572 | 5,32512 | 4,72079 | 1,520272562 | N/A             | N/A    | N/A          | Inc-SLA2-2    |
| A_33_P3254756  | 10,5646 | 9,9603  | 1,520240949 | N/A             | 550112 | NR_015439    | UBA6-AS1      |
| A_21_P0001266  | 2,10589 | 1,50161 | 1,520219874 | N/A             | N/A    | N/A          | Inc-CLCNKB-3  |
| A_23_P52986    | 6,71072 | 6,10647 | 1,520188262 | ENST00000335613 | 220001 | NM_152718    | VWCE          |
| A_23_P37949    | 9,001   | 8,39685 | 1,520082894 | ENST00000573704 | 79228  | NM_024339    | THOC6         |
| A_33_P3383856  | 6,18943 | 5,58537 | 1,51998807  | ENST00000330912 | 11219  | NM_080701    | TREX2         |
| A_33_P3274763  | 2,51979 | 1,91586 | 1,519851111 | N/A             | N/A    | N/A          | N/A           |
| A_24_P272073   | 9,56387 | 8,95994 | 1,519851111 | ENST00000525280 | N/A    | N/A          | N/A           |
| A_33_P3314850  | 2,09298 | 1,48907 | 1,519830042 | ENST00000390360 | N/A    | A25966       | N/A           |
| A_21_P0013756  | 10,5221 | 9,91824 | 1,519777369 | ENST00000421897 | N/A    | N/A          | N/A           |
| A_23_P37623    | 10,7152 | 10,1114 | 1,519714165 | ENST00000432566 | 23015  | NM_181077    | GOLGA8A       |
| A_23_P1331     | 2,07628 | 1,47253 | 1,519661496 | ENST00000478219 | 1305   | NM_080801    | COL13A1       |
| A_22_P00025644 | 4,37153 | 3,76781 | 1,519629896 | N/A             | N/A    | N/A          | Inc-LEPROT-1  |
| A_23_P114774   | 11,2334 | 10,6297 | 1,51960883  | ENST00000368467 | 10654  | NM_006556    | PMVK          |
| A_33_P3280325  | 3,20818 | 2,60452 | 1,519566698 | N/A             | N/A    | N/A          | N/A           |
| A_33_P3250289  | 6,44958 | 5,84594 | 1,519545632 | ENST00000395611 | 5599   | NM_001278548 | MAPK8         |
| A_33_P3347387  | 8,73429 | 8,1307  | 1,51949297  | ENST00000603072 | N/A    | N/A          | N/A           |
| A_23_P52227    | 2,38468 | 1,78114 | 1,519440309 | ENST00000580279 | 2662   | NM_004962    | GDF10         |
| A_24_P109633   | 7,0354  | 6,43186 | 1,519440309 | ENST00000267615 | 3705   | NM_001142594 | ITPK1         |
| A_21_P0003228  | 3,58913 | 2,98563 | 1,519398182 | N/A             | N/A    | N/A          | Inc-GNAI2-1   |
| A_33_P3311145  | 2,36278 | 1,7593  | 1,519377119 | ENST00000533675 | 22897  | NM_001271933 | CEP164        |
| A_33_P3294159  | 5,64237 | 5,03892 | 1,519345524 | ENST00000368555 | 50632  | NM_015722    | CALY          |
| A_22_P00006074 | 2,40952 | 1,80613 | 1,519282338 | N/A             | N/A    | N/A          | Inc-FAM151A-1 |
| A_33_P3224803  | 6,14245 | 5,53907 | 1,519271807 | ENST00000438106 | 653361 | NM_000265    | NCF1          |

|                |         |         |             |                 |           |              |                  |
|----------------|---------|---------|-------------|-----------------|-----------|--------------|------------------|
| A_33_P3238455  | 9,33294 | 8,72967 | 1,519155973 | ENST00000483871 | 6431      | NR_034009    | SRSF6            |
| A_33_P3265965  | 8,015   | 7,41178 | 1,519103324 | ENST00000514798 | 57587     | NM_001292033 | CFAP97           |
| A_23_P428329   | 2,22558 | 1,6224  | 1,519061206 | ENST00000376504 | 256297    | NM_178161    | PTF1A            |
| A_33_P3399038  | 2,13571 | 1,53255 | 1,519040147 | N/A             | 574431    | AK057159     | C1orf147         |
| A_32_P154830   | 7,77605 | 7,1729  | 1,519029618 | ENST00000492130 | 28962     | NM_014028    | OSTM1            |
| A_21_P0013992  | 2,05881 | 1,45579 | 1,518892746 | N/A             | N/A       | N/A          | N/A              |
| A_21_P0007217  | 11,2426 | 10,64   | 1,518450628 | N/A             | N/A       | N/A          | Inc-LGALS12-2    |
| A_22_P00022770 | 4,97126 | 4,36869 | 1,518419053 | N/A             | N/A       | N/A          | Inc-AF127577.1-4 |
| A_21_P0001451  | 2,25988 | 1,65731 | 1,518419053 | N/A             | 102724425 | XR_425119    | LOC102724425     |
| A_23_P107483   | 2,72225 | 2,11975 | 1,51834538  | ENST00000291231 | 8392      | NM_012373    | OR3A3            |
| A_33_P3338440  | 4,65634 | 4,05391 | 1,518271711 | N/A             | 92017     | BC029857     | SNX29            |
| A_23_P27107    | 3,21366 | 2,61128 | 1,518219093 | ENST00000270560 | 9032      | NM_003963    | TM4SF5           |
| A_33_P3305368  | 10,228  | 9,62575 | 1,518082294 | ENST00000310532 | 64794     | NM_138620    | DDX31            |
| A_23_P217367   | 8,7522  | 8,15002 | 1,518008638 | ENST00000372246 | 115201    | NM_052936    | ATG4A            |
| A_32_P396186   | 7,49626 | 6,89416 | 1,517924464 | ENST00000299550 | 9866      | NM_014818    | TRIM66           |
| A_23_P384857   | 4,72918 | 4,12711 | 1,5178929   | ENST00000398220 | N/A       | N/A          | N/A              |
| A_32_P93036    | 6,28052 | 5,67848 | 1,517861336 | N/A             | N/A       | CU678501     | N/A              |
| A_22_P00009020 | 6,43713 | 5,8351  | 1,517850815 | N/A             | N/A       | N/A          | Inc-LCE5A-1      |
| A_23_P162449   | 11,0603 | 10,4583 | 1,517819253 | ENST00000355086 | 57522     | NM_020762    | SRGAP1           |
| A_23_P164559   | 10,3336 | 9,73168 | 1,51773509  | ENST00000361283 | 283489    | NM_032436    | CHAMP1           |
| A_23_P95764    | 12,6404 | 12,0385 | 1,517714049 | ENST00000372435 | 5631      | NM_002764    | PRPS1            |
| A_33_P3272456  | 2,37327 | 1,7714  | 1,51768249  | N/A             | N/A       | N/A          | N/A              |
| A_22_P00013665 | 4,56186 | 3,96005 | 1,517619372 | ENST00000530834 | N/A       | BX105271     | N/A              |
| A_21_P0013697  | 7,8952  | 7,29345 | 1,517556258 | ENST00000418795 | 100131997 | N/A          | FAM27E3          |
| A_23_P253177   | 13,6028 | 13,0011 | 1,517503664 | ENST00000376547 | 8428      | NM_001032296 | STK24            |
| A_23_P129903   | 13,0671 | 12,4654 | 1,517503664 | ENST00000572555 | 147166    | NM_001037330 | TRIM16L          |
| A_24_P192994   | 12,8518 | 12,2501 | 1,517503664 | ENST00000350997 | 3992      | NM_013402    | FADS1            |
| A_33_P3245575  | 7,55056 | 6,94887 | 1,517493146 | ENST00000597075 | 79709     | NM_024656    | COLGALT1         |
| A_22_P00001575 | 3,22827 | 2,62661 | 1,517461591 | N/A             | N/A       | N/A          | Inc-ARL4C-2      |
| A_32_P4595     | 2,037   | 1,43534 | 1,517461591 | ENST00000435422 | 6444      | NM_000337    | SGCD             |
| A_33_P3320743  | 2,25927 | 1,65762 | 1,517451072 | ENST00000344839 | 100131137 | NM_001128326 | BSPH1            |
| A_23_P217151   | 7,8836  | 7,28196 | 1,517440554 | ENST00000344302 | 55634     | NM_017776    | KRBOX4           |
| A_22_P00012317 | 3,64754 | 3,0459  | 1,517440554 | N/A             | N/A       | N/A          | Inc-PPRC1-1      |

|                |         |         |             |                 |           |              |                |
|----------------|---------|---------|-------------|-----------------|-----------|--------------|----------------|
| A_23_P39656    | 9,03182 | 8,43019 | 1,517430036 | ENST00000474339 | 64320     | NM_022453    | RNF25          |
| A_32_P182388   | 9,86736 | 9,26574 | 1,517419518 | ENST00000314531 | 58492     | NM_021217    | ZNF77          |
| A_33_P3419419  | 5,31463 | 4,71302 | 1,517409    | ENST00000367184 | 5287      | N/A          | PIK3C2B        |
| A_23_P101642   | 11,2837 | 10,6821 | 1,517398482 | ENST00000376350 | 5794      | NM_002842    | PTPRH          |
| A_21_P0008251  | 1,99468 | 1,39325 | 1,51721969  | N/A             | N/A       | N/A          | Inc-C13orf44-1 |
| A_23_P15182    | 11,1589 | 10,5575 | 1,517188141 | ENST00000219204 | 23568     | NM_012106    | ARL2BP         |
| A_23_P101774   | 3,95679 | 3,35543 | 1,517146076 | ENST00000222248 | 6528      | NM_000453    | SLC5A5         |
| A_21_P0005360  | 4,74843 | 4,14711 | 1,517104012 | N/A             | N/A       | N/A          | Inc-IL6-3      |
| A_21_P0000152  | 6,62843 | 6,02714 | 1,517072466 | N/A             | 960       | NM_001202557 | CD44           |
| A_24_P155502   | 5,87405 | 5,27282 | 1,517009374 | ENST00000309668 | 3626      | NM_005538    | INHBC          |
| A_23_P167269   | 11,213  | 10,6118 | 1,516977829 | ENST00000358572 | 55319     | NM_018352    | TMA16          |
| A_23_P101054   | 3,84277 | 3,24164 | 1,516904226 | ENST00000394001 | 3885      | NM_021013    | KRT34          |
| A_23_P102607   | 7,17885 | 6,57773 | 1,516893712 | ENST00000373222 | 84181     | BC039860     | CHD6           |
| A_22_P00009147 | 5,38355 | 4,78245 | 1,516872683 | N/A             | 100129940 | NR_120478    | LOC100129940   |
| A_33_P3221293  | 11,0779 | 10,4768 | 1,516872683 | ENST00000409775 | 1687      | NM_004403    | DFNA5          |
| A_33_P3423300  | 13,4626 | 12,8615 | 1,516872683 | ENST00000356861 | 30000     | NM_001136195 | TNPO2          |
| A_23_P57417    | 4,3078  | 3,70673 | 1,516841141 | ENST00000612388 | 4320      | NM_005940    | MMP11          |
| A_23_P73702    | 8,884   | 8,28297 | 1,516799086 | ENST00000374080 | 9968      | NM_005120    | MED12          |
| A_23_P131060   | 10,1097 | 9,50868 | 1,516788572 | ENST00000441682 | 11283     | NM_007253    | CYP4F8         |
| A_32_P151823   | 11,6618 | 11,061  | 1,516557291 | ENST00000521369 | N/A       | BC040619     | N/A            |
| A_33_P3265030  | 7,28945 | 6,68867 | 1,516536268 | ENST00000431044 | 2812      | NM_000407    | GP1BB          |
| A_21_P0007378  | 2,03838 | 1,4377  | 1,516431153 | ENST00000526840 | 101928944 | NR_120570    | LOC101928944   |
| A_24_P362572   | 12,7651 | 12,1645 | 1,516347066 | ENST00000409600 | 9689      | NM_014670    | BZW1           |
| A_23_P214080   | 12,614  | 12,0134 | 1,516347066 | ENST00000239938 | 1958      | NM_001964    | EGR1           |
| A_33_P3354176  | 7,52184 | 6,92128 | 1,516305025 | ENST00000371488 | 26509     | N/A          | MYOF           |
| A_33_P3362193  | 15,5395 | 14,939  | 1,516241965 | ENST00000586534 | 5886      | NM_005053    | RAD23A         |
| A_23_P315286   | 11,5918 | 10,9913 | 1,516241965 | ENST00000361574 | 91300     | NM_138774    | R3HDM4         |
| A_33_P3330958  | 2,35257 | 1,7521  | 1,516210436 | ENST00000575455 | 64359     | BC104634     | NXN            |
| A_21_P0002624  | 3,61145 | 3,01116 | 1,516021275 | N/A             | N/A       | N/A          | Inc-CPO-1      |
| A_32_P7204     | 6,22162 | 5,62138 | 1,515968735 | ENST00000288723 | 9364      | NM_004249    | RAB28          |
| A_21_P0000580  | 2,21874 | 1,61863 | 1,515832139 | ENST00000534909 | 100309464 | NR_029385    | OTX2-AS1       |
| A_22_P00006143 | 7,75614 | 7,15605 | 1,515811125 | N/A             | N/A       | AL109707     | Inc-FAM189A1-3 |
| A_22_P00001606 | 4,0746  | 3,47499 | 1,515306882 | ENST00000440769 | 729040    | XR_241838    | LOC729040      |

|                |         |         |             |                 |           |              |               |
|----------------|---------|---------|-------------|-----------------|-----------|--------------|---------------|
| A_23_P300124   | 5,00116 | 4,40166 | 1,51519135  | ENST00000406438 | 140775    | NM_144775    | SMCR8         |
| A_33_P3282005  | 7,57739 | 6,9779  | 1,515180848 | ENST00000368061 | 57216     | NM_020335    | VANGL2        |
| A_33_P3399793  | 5,0769  | 4,47741 | 1,515180848 | N/A             | N/A       | AK130290     | N/A           |
| A_21_P0006606  | 3,36388 | 2,76453 | 1,515033821 | N/A             | N/A       | N/A          | Inc-GYG2P1-1  |
| A_23_P368484   | 7,03988 | 6,44061 | 1,514949812 | ENST00000409887 | 388341    | NM_207387    | LRR75A        |
| A_24_P221414   | 5,75256 | 5,15334 | 1,514897309 | ENST00000457059 | 1780      | NM_004411    | DYNC111       |
| A_21_P0009404  | 4,71908 | 4,11989 | 1,514865807 | N/A             | N/A       | N/A          | Inc-ACCN1-1   |
| A_22_P00005389 | 3,49429 | 2,89536 | 1,514592826 | N/A             | 101927718 | NR_110788    | DSG1-AS1      |
| A_22_P00007452 | 3,42487 | 2,82598 | 1,514550833 | N/A             | N/A       | N/A          | Inc-GTDC1-2   |
| A_23_P107587   | 11,2065 | 10,6077 | 1,514456353 | ENST00000588867 | 4864      | NM_000271    | NPC1          |
| A_33_P3841368  | 9,1274  | 8,52862 | 1,514435358 | ENST00000382824 | 26260     | AK091672     | FBXO25        |
| A_33_P3359713  | 6,43637 | 5,8376  | 1,514424861 | N/A             | N/A       | CK825926     | N/A           |
| A_23_P140384   | 4,18926 | 3,5905  | 1,514414364 | ENST00000216336 | 1511      | NM_001911    | CTSG          |
| A_22_P00024841 | 10,7732 | 10,1745 | 1,514351383 | ENST00000489203 | 55968     | NM_018839    | NSFL1C        |
| A_21_P0001509  | 2,50744 | 1,90888 | 1,514204436 | ENST00000569425 | N/A       | N/A          | N/A           |
| A_23_P329772   | 12,5322 | 11,9337 | 1,514141463 | ENST00000566354 | 27183     | NM_013245    | VPS4A         |
| A_22_P00004530 | 2,17118 | 1,5727  | 1,514120473 | ENST00000530049 | N/A       | BF685947     | N/A           |
| A_24_P350683   | 5,85215 | 5,25371 | 1,514078493 | ENST00000374086 | 6548      | BC012121     | SLC9A1        |
| A_33_P3233100  | 4,4467  | 3,84828 | 1,514057504 | N/A             | N/A       | N/A          | N/A           |
| A_21_P0013748  | 5,33045 | 4,73206 | 1,51402602  | ENST00000430562 | 401577    | NR_033381    | CD99P1        |
| A_23_P104942   | 13,4619 | 12,8636 | 1,513931573 | ENST00000529403 | 51075     | NM_015959    | TMX2          |
| A_23_P11070    | 2,06609 | 1,46795 | 1,513763682 | ENST00000276077 | 84636     | NM_032553    | GPR174        |
| A_23_P41025    | 12,6428 | 12,0447 | 1,513721713 | ENST00000496254 | 26354     | NM_014366    | GNL3          |
| A_24_P166789   | 11,728  | 11,1301 | 1,513511881 | ENST00000262644 | 54928     | NM_017813    | IMPAD1        |
| A_33_P3374723  | 4,10145 | 3,50361 | 1,513448937 | ENST00000488625 | 6935      | NM_001128128 | ZEB1          |
| A_33_P3296582  | 5,41971 | 4,82201 | 1,513302078 | ENST00000315366 | 79642     | NM_024590    | ARSJ          |
| A_22_P00005473 | 2,57569 | 1,97805 | 1,513239143 | N/A             | N/A       | N/A          | Inc-DYNC111-2 |
| A_21_P0007931  | 3,09537 | 2,49774 | 1,513228654 | ENST00000455241 | 100874127 | N/A          | LINC00332     |
| A_21_P0001175  | 2,17992 | 1,58235 | 1,513165722 | N/A             | N/A       | N/A          | Inc-PPIAL4G-3 |
| A_21_P0007476  | 5,84242 | 5,24486 | 1,513155233 | ENST00000549830 | 283404    | NR_027358    | LINC00592     |
| A_21_P0006124  | 2,21288 | 1,61534 | 1,513134257 | N/A             | N/A       | N/A          | Inc-KDM4C-6   |
| A_23_P376124   | 2,00702 | 1,40955 | 1,513060841 | ENST00000308227 | 122665    | NM_138331    | RNASE8        |
| A_23_P93082    | 8,85225 | 8,25497 | 1,512861587 | ENST00000446295 | 116150    | NM_138459    | NUS1          |

|                |         |         |             |                 |           |              |               |
|----------------|---------|---------|-------------|-----------------|-----------|--------------|---------------|
| A_21_P0005600  | 3,24707 | 2,64995 | 1,512693814 | N/A             | N/A       | N/A          | Inc-C7orf11-7 |
| A_33_P3832852  | 10,0373 | 9,4402  | 1,512672844 | ENST00000391623 | 55142     | NM_018097    | HAUS2         |
| A_23_P156683   | 3,71554 | 3,11848 | 1,512630905 | ENST00000383303 | 4049      | NM_000595    | LTA           |
| A_33_P3361202  | 6,83687 | 6,23985 | 1,512588966 | ENST00000366686 | 126731    | NM_145257    | CCSAP         |
| A_24_P85181    | 10,2163 | 9,61934 | 1,512526061 | ENST00000253699 | 64145     | NM_022340    | RBSN          |
| A_22_P00003159 | 2,05743 | 1,46054 | 1,512452674 | ENST00000565882 | N/A       | BC036799     | N/A           |
| A_23_P53015    | 8,53754 | 7,94068 | 1,512421224 | ENST00000469480 | 64852     | NM_022830    | TUT1          |
| A_21_P0003717  | 2,2542  | 1,65744 | 1,512316394 | N/A             | N/A       | N/A          | Inc-ABLIM2-1  |
| A_23_P321496   | 4,89363 | 4,29689 | 1,512295429 | ENST00000471407 | 149992    | NR_026916    | ANKRD30BP2    |
| A_33_P3233649  | 8,55598 | 7,95935 | 1,512180127 | ENST00000397338 | 133686    | NM_001085411 | NADK2         |
| A_22_P00018181 | 2,18736 | 1,59118 | 1,511708527 | ENST00000513422 | N/A       | N/A          | N/A           |
| A_33_P3302354  | 6,3319  | 5,73575 | 1,511677092 | ENST00000620406 | 23523     | NM_001199281 | CABIN1        |
| A_33_P3377151  | 3,69363 | 3,09752 | 1,51163518  | ENST00000378800 | 6363      | NM_006274    | CCL19         |
| A_22_P00016624 | 2,14681 | 1,55072 | 1,511614225 | N/A             | N/A       | N/A          | Inc-TOP3A-1   |
| A_33_P3380236  | 4,84662 | 4,2506  | 1,511540883 | ENST00000423408 | N/A       | N/A          | N/A           |
| A_22_P00017709 | 6,58203 | 5,98607 | 1,511478021 | ENST00000522755 | 101929172 | NR_104677    | LOC101929172  |
| A_22_P00013270 | 2,55024 | 1,95429 | 1,511467544 | N/A             | 101927352 | NR_110384    | PLS3-AS1      |
| A_33_P3304304  | 7,49511 | 6,89923 | 1,511394209 | ENST00000394478 | 10735     | N/A          | STAG2         |
| A_33_P3237891  | 3,97459 | 3,37887 | 1,511226599 | ENST00000409922 | N/A       | N/A          | N/A           |
| A_23_P84118    | 2,09751 | 1,50194 | 1,511069482 | ENST00000507958 | 1016      | NM_004934    | CDH18         |
| A_19_P00322228 | 8,38209 | 7,78652 | 1,511069482 | ENST00000426528 | 102725166 | N/A          | LOC102725166  |
| A_33_P3397763  | 9,42426 | 8,82875 | 1,51100664  | ENST00000245817 | 8744      | NM_003811    | TNFSF9        |
| A_22_P00024513 | 2,47011 | 1,87469 | 1,510912381 | ENST00000562772 | 338694    | NR_104161    | LOC338694     |
| A_33_P3369790  | 8,23356 | 7,63817 | 1,510880963 | ENST00000585737 | 199720    | NM_152657    | GGN           |
| A_21_P0008045  | 2,18976 | 1,59449 | 1,510755297 | N/A             | N/A       | N/A          | Inc-B3GALTL-1 |
| A_24_P212531   | 7,98493 | 7,38968 | 1,510734353 | ENST00000461994 | 148789    | NM_152490    | B3GALNT2      |
| A_23_P51587    | 2,4446  | 1,84936 | 1,510723882 | ENST00000401882 | 6000      | NM_002924    | RGS7          |
| A_33_P3348719  | 3,45032 | 2,85518 | 1,51061917  | ENST00000382353 | 2254      | NM_002010    | FGF9          |
| A_22_P00016515 | 1,98064 | 1,38566 | 1,510451646 | N/A             | N/A       | N/A          | Inc-TMPRSS2-1 |
| A_33_P3283122  | 5,63486 | 5,03991 | 1,510420237 | ENST00000403733 | 80014     | NM_024949    | WWC2          |
| A_24_P2648     | 10,4955 | 9,90069 | 1,510273672 | ENST00000543945 | 5784      | NM_005401    | PTPN14        |
| A_23_P127128   | 11,5752 | 10,9804 | 1,510263204 | ENST00000376980 | 64215     | NM_022365    | DNAJC1        |
| A_22_P00011308 | 3,44353 | 2,8489  | 1,510085253 | ENST00000582300 | N/A       | CF454632     | N/A           |



|                |         |         |             |                 |           |              |                |
|----------------|---------|---------|-------------|-----------------|-----------|--------------|----------------|
| A_33_P3279959  | 2,03357 | 1,43897 | 1,510053852 | ENST00000423507 | 91584     | NM_001105543 | PLXNA4         |
| A_33_P3281741  | 4,17968 | 3,58509 | 1,510043385 | ENST00000428343 | 731220    | NM_001145664 | RFX8           |
| A_33_P3401262  | 1,98541 | 1,3909  | 1,509959653 | ENST00000396314 | 148930    | NM_001097611 | KNCN           |
| A_21_P0007442  | 2,95581 | 2,36134 | 1,509917788 | N/A             | N/A       | N/A          | Inc-FOLR3-1    |
| A_24_P176255   | 8,61525 | 8,02088 | 1,509813132 | ENST00000220429 | 2553      | NM_005254    | GABPB1         |
| A_22_P00012599 | 2,07385 | 1,47983 | 1,509446894 | ENST00000452199 | 400800    | XR_241167    | FLJ43585       |
| A_22_P00012529 | 2,84567 | 2,25172 | 1,509373657 | N/A             | N/A       | AK309770     | Inc-PSMG4-1    |
| A_21_P0009587  | 2,08457 | 1,49066 | 1,509331809 | N/A             | 101927651 | XR_245486    | LOC101927651   |
| A_21_P0003706  | 4,62687 | 4,03304 | 1,509248116 | ENST00000623933 | N/A       | XR_430626    | N/A            |
| A_24_P138784   | 2,11434 | 1,52062 | 1,509133046 | ENST00000374998 | 146664    | NM_144677    | MGAT5B         |
| A_22_P00008067 | 2,4914  | 1,8977  | 1,509112125 | ENST00000569711 | 101927876 | NR_125946    | LOC101927876   |
| A_22_P00019851 | 5,55908 | 4,96542 | 1,509070284 | N/A             | N/A       | N/A          | Inc-ATP6AP1L-2 |
| A_21_P0005949  | 9,73355 | 9,14006 | 1,508892473 | ENST00000617087 | 5820      | NR_003367    | PVT1           |
| A_21_P0000247  | 10,0485 | 9,45506 | 1,50884018  | ENST00000566039 | 595100    | NR_002443    | SNORD18C       |
| A_32_P99347    | 5,48607 | 4,89274 | 1,508725141 | ENST00000423546 | 100128385 | NR_024376    | FAM225B        |
| A_24_P918843   | 6,54229 | 5,94897 | 1,508714683 | ENST00000556839 | 253959    | NM_194301    | RALGAPA1       |
| A_24_P358321   | 5,56005 | 4,96685 | 1,508589197 | ENST00000491977 | N/A       | U21012       | N/A            |
| A_23_P385500   | 5,48394 | 4,89075 | 1,50857874  | ENST00000541206 | 115992    | NM_178841    | RNF166         |
| A_21_P0004248  | 2,41128 | 1,81821 | 1,508453266 | N/A             | N/A       | N/A          | Inc-MRPS30-4   |
| A_33_P3210667  | 2,2214  | 1,62838 | 1,508400987 | ENST00000521616 | 9892      | NM_001256717 | SNAP91         |
| A_33_P3349637  | 15,0367 | 14,4437 | 1,508380077 | ENST00000394536 | 5097      | NM_002587    | PCDH1          |
| A_33_P3388948  | 11,1526 | 10,5597 | 1,508275527 | ENST00000374232 | 401548    | NM_001012994 | SNX30          |
| A_23_P131348   | 9,26974 | 8,67702 | 1,508087357 | ENST00000530095 | 80745     | NM_025264    | THUMPD2        |
| A_24_P7143     | 8,01954 | 7,4269  | 1,508003733 | ENST00000438652 | 4430      | NM_012223    | MYO1B          |
| A_33_P3232627  | 6,76217 | 6,16957 | 1,507961923 | ENST00000410104 | N/A       | AB384543     | N/A            |
| A_23_P106859   | 13,2089 | 12,6163 | 1,507961923 | ENST00000597291 | 10328     | NM_006067    | EMC8           |
| A_23_P402610   | 7,49866 | 6,9061  | 1,507920114 | ENST00000314666 | 5198      | NM_012393    | PFAS           |
| A_22_P00025111 | 4,34737 | 3,75484 | 1,507888758 | N/A             | N/A       | AK054908     | Inc-LCN6-1     |
| A_23_P27606    | 7,52038 | 6,92788 | 1,507857403 | ENST00000263379 | 9466      | NM_004843    | IL27RA         |
| A_22_P00022264 | 2,2897  | 1,69725 | 1,507805145 | N/A             | 101928855 | NR_110852    | LOC101928855   |
| A_23_P28697    | 4,37424 | 3,78182 | 1,507773792 | ENST00000402698 | 23498     | NM_012205    | HAAO           |
| A_33_P3363445  | 2,12154 | 1,52914 | 1,507752889 | ENST00000422961 | 100506014 | XR_425355    | LOC100506014   |
| A_23_P10081    | 7,95426 | 7,36198 | 1,507627483 | ENST00000335438 | 200894    | NM_182896    | ARL13B         |

|                |         |         |             |                 |           |              |                |
|----------------|---------|---------|-------------|-----------------|-----------|--------------|----------------|
| A_24_P641130   | 9,91518 | 9,32301 | 1,507512537 | ENST00000464106 | 7916      | NM_080686    | PRRC2A         |
| A_21_P0002370  | 1,99565 | 1,4035  | 1,507491638 | N/A             | N/A       | N/A          | Inc-SP140-3    |
| A_22_P00011279 | 3,24068 | 2,64855 | 1,50747074  | ENST00000527054 | N/A       | N/A          | N/A            |
| A_33_P3365263  | 2,17163 | 1,57972 | 1,50724088  | ENST00000515154 | N/A       | N/A          | N/A            |
| A_23_P1948     | 13,7161 | 13,1242 | 1,507230433 | ENST00000532208 | 79081     | NM_024099    | LBHD1          |
| A_33_P3357658  | 9,13977 | 8,54791 | 1,507188644 | ENST00000354636 | 8091      | NM_001300919 | HMGA2          |
| A_33_P3245163  | 2,1761  | 1,58426 | 1,50716775  | N/A             | 4609      | M13930       | MYC            |
| A_23_P119763   | 3,54822 | 2,9564  | 1,507146856 | ENST00000409962 | 64240     | NM_022436    | ABCG5          |
| A_33_P3229027  | 11,4846 | 10,8929 | 1,507021501 | ENST00000520674 | 285613    | NM_173828    | RELL2          |
| A_21_P0004722  | 3,78049 | 3,18889 | 1,506917046 | ENST00000606227 | N/A       | XM_006715151 | N/A            |
| A_22_P00007948 | 4,87272 | 4,28113 | 1,5069066   | N/A             | N/A       | N/A          | Inc-IBTK-2     |
| A_24_P198820   | 8,79994 | 8,20842 | 1,506833487 | ENST00000447079 | 51755     | NM_016507    | CDK12          |
| A_23_P39561    | 11,1368 | 10,5454 | 1,506708157 | ENST00000440223 | 140739    | NM_080678    | UBE2F          |
| A_33_P3294881  | 9,75988 | 9,16852 | 1,506666383 | ENST00000611584 | 51244     | NM_016474    | CCDC174        |
| A_23_P50008    | 12,0965 | 11,5052 | 1,506603723 | ENST00000481107 | 54902     | NM_017775    | TTC19          |
| A_23_P111395   | 3,07204 | 2,48076 | 1,506582838 | ENST00000498556 | 6582      | NM_003058    | SLC22A2        |
| A_22_P00002022 | 4,98928 | 4,39815 | 1,506426203 | N/A             | 101930010 | NR_125866    | LOC101930010   |
| A_23_P86838    | 8,66564 | 8,0746  | 1,50633223  | ENST00000326402 | 120103    | NM_152313    | SLC36A4        |
| A_22_P00019856 | 2,02313 | 1,43209 | 1,50633223  | N/A             | N/A       | BG213769     | Inc-SKA2-2     |
| A_24_P289383   | 9,97624 | 9,38525 | 1,506280026 | ENST00000423902 | 55636     | NM_017780    | CHD7           |
| A_23_P353514   | 5,3001  | 4,70914 | 1,506248704 | ENST00000337339 | 10943     | NM_078628    | MSL3           |
| A_24_P360269   | 11,1571 | 10,5662 | 1,506186062 | ENST00000467705 | 8635      | NM_003730    | RNASET2        |
| A_33_P3329104  | 5,12438 | 4,53348 | 1,506186062 | N/A             | N/A       | N/A          | N/A            |
| A_21_P0011950  | 9,78077 | 9,18999 | 1,506060786 | ENST00000451884 | N/A       | N/A          | N/A            |
| A_33_P3256778  | 4,7652  | 4,17449 | 1,505987714 | ENST00000361987 | 1270      | NM_000614    | CNTF           |
| A_21_P0003822  | 2,87427 | 2,28358 | 1,505966836 | N/A             | N/A       | N/A          | Inc-FRG2-3     |
| A_22_P00004478 | 4,41339 | 3,8227  | 1,505966836 | ENST00000433116 | 100507250 | NR_038930    | LOC100507250   |
| A_33_P3260659  | 2,05733 | 1,4667  | 1,505904206 | ENST00000366474 | 26696     | NM_030904    | OR2T1          |
| A_23_P258912   | 6,91915 | 6,3286  | 1,505820703 | ENST00000520298 | 9172      | NM_003970    | MYOM2          |
| A_32_P40375    | 9,13892 | 8,5486  | 1,505580659 | ENST00000471090 | 441528    | N/A          | LOC441528      |
| A_22_P00016938 | 3,89786 | 3,30756 | 1,505559787 | ENST00000543036 | N/A       | AK095365     | N/A            |
| A_21_P0013214  | 2,22628 | 1,63606 | 1,505476304 | N/A             | N/A       | N/A          | XLOC_I2_013442 |
| A_22_P00004554 | 3,2704  | 2,6802  | 1,505455433 | N/A             | N/A       | N/A          | Inc-CRLF3-1    |

|                |         |         |             |                 |           |              |              |
|----------------|---------|---------|-------------|-----------------|-----------|--------------|--------------|
| A_23_P1083     | 3,6101  | 3,01992 | 1,505434563 | ENST00000342280 | 2701      | NM_002060    | GJA4         |
| A_22_P00009279 | 2,21724 | 1,62706 | 1,505434563 | N/A             | N/A       | BM559346     | Inc-LRRC18-2 |
| A_23_P210515   | 8,06444 | 7,47448 | 1,505205014 | ENST00000290231 | 57727     | NM_020967    | NCOA5        |
| A_21_P0006936  | 3,04699 | 2,45705 | 1,505184147 | N/A             | N/A       | N/A          | Inc-GLRX3-3  |
| A_23_P251505   | 13,56   | 12,9702 | 1,50503809  | ENST00000438747 | 55695     | NM_148956    | NSUN5        |
| A_23_P134477   | 11,9863 | 11,3966 | 1,504933773 | ENST00000397098 | 84310     | NM_032350    | C7orf50      |
| A_24_P380679   | 8,25327 | 7,66373 | 1,504766879 | ENST00000312849 | 286006    | NM_182597    | LSMEM1       |
| A_23_P164000   | 11,04   | 10,4505 | 1,504725159 | ENST00000581010 | 26168     | NM_015670    | SENP3        |
| A_33_P3289820  | 10,5103 | 9,92091 | 1,504610434 | ENST00000273221 | 9922      | NM_001134382 | IQSEC1       |
| A_33_P3417086  | 9,11914 | 8,52975 | 1,504610434 | ENST00000295461 | 152519    | NM_207330    | NIPAL1       |
| A_22_P00007973 | 2,6772  | 2,08783 | 1,504589576 | N/A             | N/A       | N/A          | Inc-IDH3B-1  |
| A_22_P00012116 | 7,32191 | 6,73257 | 1,504558289 | ENST00000541341 | 2802      | NM_001172557 | GOLGA3       |
| A_33_P3227990  | 5,82705 | 5,23783 | 1,504433148 | ENST00000397865 | 4155      | NM_001025101 | MBP          |
| A_23_P166536   | 11,1205 | 10,5313 | 1,504412293 | ENST00000457780 | 23774     | NM_014577    | BRD1         |
| A_24_P64233    | 9,21513 | 8,62602 | 1,504318446 | ENST00000377698 | 219       | NM_000692    | ALDH1B1      |
| A_22_P00010308 | 2,08313 | 1,49403 | 1,504308018 | N/A             | N/A       | BU658380     | Inc-MTX3-1   |
| A_33_P3570193  | 2,26568 | 1,67659 | 1,504297591 | ENST00000612344 | 284124    | N/A          | FLJ36000     |
| A_22_P00015287 | 4,09889 | 3,5098  | 1,504297591 | N/A             | N/A       | N/A          | Inc-SPATA9-1 |
| A_33_P3821350  | 4,59185 | 4,00276 | 1,504297591 | N/A             | 55478     | BC019830     | PRO2012      |
| A_23_P306956   | 5,65607 | 5,06703 | 1,504245457 | ENST00000424129 | 84924     | NM_032838    | ZNF566       |
| A_23_P58862    | 6,97703 | 6,388   | 1,504235031 | ENST00000515323 | 57579     | NM_020819    | FAM135A      |
| A_33_P3236035  | 2,25709 | 1,6681  | 1,504193325 | N/A             | 23081     | BC053678     | KDM4C        |
| A_33_P3387931  | 7,77144 | 7,18245 | 1,504193325 | ENST00000375576 | 401541    | NM_001012267 | CENPP        |
| A_33_P3278906  | 8,13    | 7,54117 | 1,504026514 | ENST00000395374 | 51105     | NM_198513    | PHF20L1      |
| A_23_P400378   | 4,58998 | 4,00116 | 1,504016089 | ENST00000521462 | 151306    | NM_001077191 | GPBAR1       |
| A_19_P00812554 | 6,43518 | 5,84646 | 1,503911842 | N/A             | 100499227 | NR_034160    | USP2-AS1     |
| A_33_P3213726  | 4,31659 | 3,72796 | 1,503818026 | ENST00000392156 | 92285     | NM_152279    | ZNF585B      |
| A_21_P0000820  | 4,71937 | 4,13081 | 1,503745062 | N/A             | 100506668 | NR_038854    | NRAV         |
| A_23_P53891    | 14,745  | 14,1565 | 1,503682524 | ENST00000539231 | 688       | NM_001730    | KLF5         |
| A_22_P00006458 | 5,35206 | 4,76365 | 1,503588723 | N/A             | N/A       | N/A          | Inc-FCHSD2-2 |
| A_23_P204324   | 10,7806 | 10,1922 | 1,503578301 | ENST00000546757 | 10059     | NM_012062    | DNM1L        |
| A_33_P3416414  | 10,4265 | 9,83812 | 1,503557457 | ENST00000518968 | N/A       | N/A          | N/A          |
| A_33_P3403048  | 7,82746 | 7,23936 | 1,503265673 | N/A             | N/A       | AK294208     | N/A          |

|                |         |         |             |                 |           |              |               |
|----------------|---------|---------|-------------|-----------------|-----------|--------------|---------------|
| A_33_P3212525  | 2,10564 | 1,5176  | 1,503203155 | ENST00000394455 | N/A       | AK128496     | N/A           |
| A_22_P00022667 | 2,03821 | 1,45027 | 1,503098965 | ENST00000447761 | N/A       | N/A          | N/A           |
| A_21_P0011393  | 4,05854 | 3,47064 | 1,50305729  | ENST00000507787 | 440248    | N/A          | HERC2P9       |
| A_22_P00013642 | 5,04925 | 4,46142 | 1,502984363 | ENST00000506638 | N/A       | BC032916     | N/A           |
| A_21_P0005976  | 8,0885  | 7,50072 | 1,502932275 | N/A             | N/A       | N/A          | Inc-ASAP1-1   |
| A_21_P0000280  | 8,98991 | 8,40218 | 1,502880188 | N/A             | 26788     | NR_002736    | SNORD60       |
| A_23_P17471    | 8,60129 | 8,01375 | 1,502682275 | ENST00000439542 | 64773     | NM_022760    | PCED1A        |
| A_24_P98086    | 11,5017 | 10,9142 | 1,502640612 | ENST00000491117 | 2768      | NM_007353    | GNA12         |
| A_21_P0008481  | 3,92582 | 3,33836 | 1,502598951 | N/A             | 102724640 | XR_429404    | LOC102724640  |
| A_23_P306507   | 8,83261 | 8,24518 | 1,502567705 | ENST00000311936 | 3845      | NM_033360    | KRAS          |
| A_33_P3315504  | 9,84445 | 9,25706 | 1,502526046 | ENST00000519292 | 90459     | NM_153332    | ERI1          |
| A_21_P0002206  | 5,36345 | 4,77611 | 1,502473973 | N/A             | N/A       | N/A          | Inc-PLEKHH2-2 |
| A_23_P100711   | 6,04577 | 5,45856 | 1,502338593 | ENST00000395938 | 5376      | NM_000304    | PMP22         |
| A_33_P3383561  | 3,29527 | 2,70815 | 1,502244875 | ENST00000443002 | 5435      | XR_109712    | POLR2F        |
| A_21_P0006366  | 2,15581 | 1,5688  | 1,502130339 | N/A             | N/A       | N/A          | Inc-C9orf91-1 |
| A_23_P17053    | 6,62241 | 6,03544 | 1,502088692 | ENST00000259205 | 56300     | NM_019618    | IL36G         |
| A_24_P279489   | 4,37867 | 3,79174 | 1,502047045 | ENST00000437048 | 55275     | NM_001128159 | VPS53         |
| A_23_P37718    | 4,71865 | 4,13172 | 1,502047045 | ENST00000251102 | 1258      | NM_001297    | CNGB1         |
| A_24_P390668   | 6,33861 | 5,75168 | 1,502047045 | ENST00000328118 | 752       | NM_005892    | FMNL1         |
| A_33_P3238548  | 2,45115 | 1,86423 | 1,502036634 | ENST00000408895 | 80111     | NM_025041    | C3orf36       |
| A_23_P65031    | 16,2257 | 15,6388 | 1,502015812 | ENST00000549989 | 8655      | NM_001037494 | DYNLL1        |
| A_22_P00004969 | 2,53511 | 1,94822 | 1,5020054   | ENST00000569476 | 100874187 | NR_047489    | LINC00559     |
| A_22_P00004105 | 6,23243 | 5,64561 | 1,501932524 | N/A             | N/A       | N/A          | Inc-CLASP2-1  |
| A_23_P55601    | 7,45898 | 6,87219 | 1,501901293 | ENST00000543926 | 7776      | NM_007345    | ZNF236        |
| A_23_P40657    | 7,19786 | 6,61109 | 1,501880472 | ENST00000248924 | 23464     | NM_014291    | GCAT          |
| A_22_P00006431 | 4,57525 | 3,9885  | 1,501859652 | N/A             | N/A       | N/A          | Inc-FBXO47-2  |
| A_23_P313828   | 8,11323 | 7,52648 | 1,501859652 | ENST00000299736 | 201161    | NM_181716    | CENPV         |
| A_33_P3462155  | 4,86476 | 4,27802 | 1,501849242 | N/A             | 401188    | AK091013     | LOC401188     |
| A_33_P3256888  | 5,1299  | 4,54333 | 1,501672282 | N/A             | N/A       | N/A          | N/A           |
| A_22_P00007089 | 2,15819 | 1,57166 | 1,501630647 | N/A             | N/A       | N/A          | Inc-GLRA3-1   |
| A_22_P00022494 | 5,60264 | 5,01613 | 1,50160983  | ENST00000457440 | N/A       | N/A          | N/A           |
| A_32_P17635    | 9,41602 | 8,82951 | 1,50160983  | ENST00000587424 | 10929     | NM_032102    | SRSF8         |
| A_24_P375322   | 4,29719 | 3,71071 | 1,501578606 | N/A             | 645367    | NR_003503    | GGT8P         |

|                |         |         |             |                 |           |              |                |
|----------------|---------|---------|-------------|-----------------|-----------|--------------|----------------|
| A_21_P0011915  | 12,1719 | 11,5856 | 1,501391271 | N/A             | N/A       | N/A          | XLOC_I2_008013 |
| A_24_P225604   | 11,0895 | 10,5033 | 1,501287206 | ENST00000613960 | 54431     | NM_018981    | DNAJC10        |
| A_21_P0007083  | 2,8989  | 2,31273 | 1,501255988 | N/A             | N/A       | N/A          | Inc-WDR11-1    |
| A_33_P3255509  | 9,5321  | 8,94593 | 1,501255988 | ENST00000596536 | 23149     | NM_001161357 | FCHO1          |
| A_19_P00316497 | 3,83729 | 3,25116 | 1,501214365 | ENST00000428272 | 338797    | NR_103736    | LOC338797      |
| A_23_P362893   | 11,1497 | 10,5636 | 1,501183148 | ENST00000361985 | 7003      | NM_021961    | TEAD1          |
| A_23_P209954   | 2,29374 | 1,7077  | 1,501120717 | ENST00000489980 | 10578     | NM_006433    | GNLY           |
| A_22_P00004707 | 7,26974 | 6,68382 | 1,500995862 | ENST00000557524 | N/A       | N/A          | N/A            |
| A_22_P00019331 | 3,33757 | 2,75168 | 1,50096465  | N/A             | N/A       | N/A          | Inc-OSBP-1     |
| A_23_P361584   | 9,41428 | 8,82845 | 1,500902228 | ENST00000304385 | 201799    | NM_152680    | TMEM154        |
| A_21_P0007536  | 4,49436 | 3,90856 | 1,500871018 | N/A             | N/A       | N/A          | Inc-LRMP-4     |
| A_23_P317683   | 9,61759 | 9,03182 | 1,500839809 | ENST00000291574 | 7109      | NM_003274    | TRAPPC10       |
| A_23_P126499   | 5,79945 | 5,2138  | 1,500714978 | ENST00000375599 | 79363     | NM_030907    | RSG1           |
| A_23_P134684   | 11,4806 | 10,8951 | 1,500558953 | ENST00000521516 | 79618     | NM_024567    | HMBBOX1        |
| A_19_P00318187 | 2,97532 | 2,39004 | 1,500330147 | ENST00000417485 | 102724861 | N/A          | LOC102724861   |
| A_24_P339416   | 5,12561 | 4,54034 | 1,500319747 | ENST00000582154 | 22901     | NM_014960    | ARSG           |
| A_23_P334021   | 11,4402 | 10,8551 | 1,500142968 | ENST00000356956 | 3482      | NM_000876    | IGF2R          |
| A_23_P91114    | 11,1034 | 10,5183 | 1,500142968 | ENST00000444452 | 10113     | NM_013388    | PREB           |
| A_33_P3251332  | 8,01342 | 7,42837 | 1,500090978 | ENST00000551414 | 25938     | NM_015473    | HEATR5A        |
| A_33_P3232214  | 6,2837  | 5,69874 | 1,4999974   | ENST00000586049 | N/A       | N/A          | N/A            |
| A_33_P3382910  | 7,9948  | 7,40984 | 1,4999974   | ENST00000513747 | 54826     | NM_017676    | GIN1           |
| A_22_P00010704 | 3,97239 | 3,38747 | 1,499955812 | N/A             | N/A       | N/A          | Inc-NFKBIL1-7  |
| A_24_P185709   | 10,9778 | 10,3929 | 1,499935018 | ENST00000373946 | 2036      | NM_012156    | EPB41L1        |
| A_24_P82630    | 4,85152 | 4,26662 | 1,499935018 | ENST00000320876 | 23347     | NM_015295    | SMCHD1         |
| A_22_P00018179 | 4,29672 | 3,71184 | 1,499914225 | ENST00000509010 | N/A       | N/A          | N/A            |
| A_22_P00019759 | 3,28105 | 2,69624 | 1,49984145  | N/A             | 102724050 | NR_120486    | LOC102724050   |
| A_23_P148273   | 10,3051 | 9,7203  | 1,499831054 | ENST00000610432 | 84061     | NM_032121    | MAGT1          |
| A_33_P3278330  | 2,36394 | 1,77916 | 1,499810262 | ENST00000606978 | 101927533 | N/A          | LOC101927533   |
| A_21_P0011183  | 5,85664 | 5,27186 | 1,499810262 | N/A             | N/A       | N/A          | XLOC_I2_003992 |
| A_33_P3270315  | 8,59504 | 8,01029 | 1,499779075 | N/A             | N/A       | BC009492     | N/A            |
| A_33_P3382380  | 8,86091 | 8,27617 | 1,499768679 | ENST00000368309 | 56893     | AF188240     | UBQLN4         |
| A_24_P64100    | 12,2214 | 11,6367 | 1,499727097 | ENST00000519973 | 51312     | XM_005273526 | SLC25A37       |
| A_33_P3326578  | 3,27157 | 2,68691 | 1,499685517 | ENST00000397899 | 343990    | NM_207362    | KIAA1211L      |

|                |         |         |             |                 |           |              |                |
|----------------|---------|---------|-------------|-----------------|-----------|--------------|----------------|
| A_24_P341731   | 8,54914 | 7,96462 | 1,499539993 | ENST00000397595 | N/A       | N/A          | N/A            |
| A_33_P3626360  | 4,15158 | 3,56712 | 1,499477631 | N/A             | 280665    | AF547222     | LOC280665      |
| A_32_P187617   | 7,02828 | 6,44396 | 1,499332127 | ENST00000377881 | 81550     | NM_030794    | TDRD3          |
| A_21_P0004471  | 2,05716 | 1,4729  | 1,499269773 | N/A             | N/A       | N/A          | Inc-NKX2-5-1   |
| A_23_P302672   | 4,94711 | 4,36286 | 1,499259381 | N/A             | 115265    | BC013592     | DDIT4L         |
| A_22_P00016738 | 4,55292 | 3,96874 | 1,499186638 | N/A             | 102724368 | NR_111921    | CELSR3-AS1     |
| A_24_P89457    | 8,69962 | 8,11553 | 1,499093117 | ENST00000478800 | 1026      | NM_078467    | CDKN1A         |
| A_33_P3325006  | 13,8984 | 13,3144 | 1,498999602 | ENST00000451491 | 10078     | NM_001297658 | TSSC4          |
| A_32_P177097   | 8,09945 | 7,51557 | 1,498874924 | ENST00000414706 | 79230     | NM_024341    | ZNF557         |
| A_21_P0012838  | 2,32957 | 1,74572 | 1,498843756 | N/A             | N/A       | N/A          | XLOC_I2_011692 |
| A_33_P3327822  | 6,84283 | 6,25904 | 1,498781422 | ENST00000380631 | 6450      | NM_007341    | SH3BGR         |
| A_33_P3217403  | 2,18585 | 1,60218 | 1,498656762 | N/A             | 149373    | NM_001256615 | LOC149373      |
| A_24_P126557   | 7,13037 | 6,54677 | 1,498584048 | ENST00000611074 | 125950    | NM_133452    | RAVER1         |
| A_23_P127140   | 7,18014 | 6,59657 | 1,498552887 | ENST00000369199 | 22841     | NM_014904    | RAB11FIP2      |
| A_22_P00015017 | 3,64171 | 3,0582  | 1,498490565 | N/A             | N/A       | BC030091     | Inc-SMPD2-1    |
| A_33_P3237207  | 4,83112 | 4,24763 | 1,498469791 | ENST00000463834 | 257407    | NM_001144994 | C2orf72        |
| A_21_P0010438  | 3,59934 | 3,0159  | 1,498417859 | N/A             | N/A       | N/A          | Inc-TXN2-1     |
| A_24_P637982   | 13,8615 | 13,2781 | 1,498376315 | ENST00000468084 | 127687    | NM_198446    | C1orf122       |
| A_23_P13797    | 8,74254 | 8,15919 | 1,498324386 | ENST00000261318 | 79794     | NM_024738    | C12orf49       |
| A_22_P00012421 | 2,33708 | 1,75374 | 1,498314001 | ENST00000420572 | N/A       | N/A          | N/A            |
| A_22_P00007997 | 2,16378 | 1,58076 | 1,497981701 | ENST00000605240 | N/A       | N/A          | N/A            |
| A_23_P78557    | 8,88482 | 8,30195 | 1,497825961 | ENST00000247977 | 54850     | NM_017703    | FBXL12         |
| A_19_P00318815 | 6,57157 | 5,98874 | 1,497784433 | ENST00000518765 | N/A       | XR_426301    | N/A            |
| A_33_P3417810  | 10,7224 | 10,1396 | 1,497753287 | ENST00000381685 | 79954     | NM_024894    | NOL10          |
| A_33_P3374289  | 3,63453 | 3,05177 | 1,497711761 | ENST00000588184 | 143379    | NM_144661    | C10orf82       |
| A_33_P3318564  | 5,62562 | 5,04288 | 1,497690999 | N/A             | N/A       | N/A          | Inc-LIN28B-1   |
| A_21_P0001755  | 2,58407 | 2,00134 | 1,497680618 | N/A             | N/A       | N/A          | Inc-BATF3-2    |
| A_23_P414899   | 10,0803 | 9,49765 | 1,497597571 | ENST00000534417 | 55761     | NM_018259    | TTC17          |
| A_23_P257905   | 11,4518 | 10,8692 | 1,497545669 | ENST00000379751 | 1059      | NM_001810    | CENPB          |
| A_24_P320604   | 3,48727 | 2,90468 | 1,497535289 | ENST00000392644 | 84071     | NM_032131    | ARMC2          |
| A_24_P315921   | 8,93453 | 8,35201 | 1,49746263  | N/A             | N/A       | AK093659     | Inc-PABPC4-2   |
| A_23_P218158   | 11,2614 | 10,679  | 1,49733808  | ENST00000555462 | 55671     | NM_001284280 | SMEK1          |
| A_22_P00017805 | 7,06727 | 6,48491 | 1,497296565 | N/A             | N/A       | AK097323     | Inc-ZBTB25-1   |

|                |         |         |             |                 |           |              |                 |
|----------------|---------|---------|-------------|-----------------|-----------|--------------|-----------------|
| A_23_P54517    | 10,416  | 9,83365 | 1,497286187 | ENST00000568490 | 7301      | NM_006293    | TYRO3           |
| A_24_P316005   | 7,6753  | 7,09305 | 1,497182406 | ENST00000457696 | 9910      | NM_014857    | RABGAP1L        |
| A_24_P261259   | 9,85065 | 9,26847 | 1,497109764 | ENST00000379775 | 5209      | NM_004566    | PFKFB3          |
| A_33_P3209025  | 6,26256 | 5,68039 | 1,497099387 | ENST00000618766 | 9831      | NM_001082480 | ZNF623          |
| A_33_P3219821  | 2,00166 | 1,41959 | 1,49699562  | ENST00000545751 | 56776     | NM_020066    | FMN2            |
| A_24_P48408    | 7,5606  | 6,97855 | 1,496974867 | ENST00000262173 | 8731      | NM_003799    | RNMT            |
| A_32_P138032   | 2,09778 | 1,51573 | 1,496974867 | ENST00000464238 | 10485     | NM_006365    | C1orf61         |
| A_23_P80027    | 2,21642 | 1,63439 | 1,496954115 | ENST00000375483 | 149954    | NM_182519    | BPIFB4          |
| A_33_P3363630  | 4,18899 | 3,60698 | 1,496933363 | N/A             | 100996412 | XM_005275733 | LOC100996412    |
| A_21_P0009910  | 2,42955 | 1,8476  | 1,496871108 | ENST00000414598 | N/A       | N/A          | N/A             |
| A_22_P00003184 | 1,95163 | 1,36972 | 1,496829607 | N/A             | 102725382 | XR_426446    | LOC102725382    |
| A_21_P0010167  | 2,47506 | 1,89321 | 1,496767357 | ENST00000411956 | N/A       | N/A          | N/A             |
| A_21_P0014065  | 2,51436 | 1,93264 | 1,49663249  | N/A             | N/A       | N/A          | N/A             |
| A_21_P0012905  | 2,08923 | 1,50751 | 1,49663249  | N/A             | N/A       | N/A          | XLOC_I2_012023  |
| A_33_P3372251  | 6,32444 | 5,74276 | 1,496590995 | ENST00000334082 | 9456      | N/A          | HOMER1          |
| A_21_P0007250  | 9,82858 | 9,24692 | 1,496570248 | ENST00000527627 | 100506233 | NR_038903    | RAB30-AS1       |
| A_33_P3877992  | 2,3137  | 1,73207 | 1,496539128 | N/A             | 286190    | NR_038881    | LOC286190       |
| A_23_P255104   | 10,1083 | 9,52674 | 1,496466518 | ENST00000380345 | 10184     | NM_005779    | LHFPL2          |
| A_21_P0004629  | 3,38638 | 2,80485 | 1,4964354   | N/A             | N/A       | N/A          | Inc-RREB1-3     |
| A_33_P3375790  | 4,07261 | 3,4911  | 1,496414655 | ENST00000341750 | 729974    | NM_001277397 | RFPL4AL1        |
| A_33_P3357853  | 2,50436 | 1,92285 | 1,496414655 | ENST00000274513 | 153328    | AK126812     | SLC25A48        |
| A_22_P00010734 | 6,39309 | 5,81165 | 1,49634205  | N/A             | N/A       | DA371222     | Inc-NIF3L1-1    |
| A_32_P36235    | 15,9389 | 15,3575 | 1,496300563 | ENST00000588173 | 9592      | NM_004907    | IER2            |
| A_21_P0013882  | 4,31079 | 3,7295  | 1,496186481 | N/A             | N/A       | N/A          | XLOC_I2_015894  |
| A_21_P0003569  | 4,56335 | 3,98212 | 1,496124257 | N/A             | N/A       | N/A          | Inc-DRD5-3      |
| A_21_P0001571  | 2,25565 | 1,67443 | 1,496113887 | N/A             | N/A       | N/A          | Inc-NHLH2-1     |
| A_22_P00011215 | 5,20247 | 4,62126 | 1,496103517 | ENST00000592901 | 24139     | NM_001193268 | EML2            |
| A_24_P784765   | 11,0738 | 10,4926 | 1,496093147 | N/A             | 966       | NM_203330    | CD59            |
| A_32_P121834   | 2,24855 | 1,66738 | 1,496062036 | ENST00000314534 | 132141    | NM_152397    | IQCF1           |
| A_21_P0003575  | 5,04641 | 4,46527 | 1,496030927 | ENST00000508998 | N/A       | N/A          | N/A             |
| A_22_P00016555 | 6,12984 | 5,54878 | 1,495947972 | N/A             | N/A       | N/A          | Inc-TNFRSF10A-1 |
| A_23_P28023    | 3,07823 | 2,4972  | 1,495916865 | ENST00000327462 | 26333     | NM_030901    | OR7A17          |
| A_22_P00018464 | 4,31738 | 3,73651 | 1,495750971 | N/A             | N/A       | N/A          | Inc-PIIF-1      |

|                |         |         |             |                 |           |              |              |
|----------------|---------|---------|-------------|-----------------|-----------|--------------|--------------|
| A_32_P56392    | 6,81205 | 6,23118 | 1,495750971 | ENST00000507797 | 27316     | NM_002139    | RBMX         |
| A_33_P3278475  | 11,3239 | 10,7431 | 1,495678399 | ENST00000340553 | 3344      | NM_002158    | FOXN2        |
| A_22_P00013708 | 2,08251 | 1,50175 | 1,495636931 | ENST00000458107 | N/A       | N/A          | N/A          |
| A_23_P104594   | 3,36913 | 2,7884  | 1,49560583  | ENST00000176195 | 6343      | NM_021920    | SCT          |
| A_22_P00008664 | 2,41323 | 1,83253 | 1,49557473  | ENST00000556430 | N/A       | AK127521     | N/A          |
| A_33_P3316233  | 4,33051 | 3,7499  | 1,495481434 | ENST00000295491 | 51023     | NM_016067    | MRPS18C      |
| A_33_P3341365  | 10,8622 | 10,2816 | 1,495471068 | ENST00000389902 | 54476     | NM_207111    | RNF216       |
| A_24_P882732   | 15,7373 | 15,1568 | 1,495367414 | ENST00000300992 | N/A       | DR007925     | N/A          |
| A_23_P30634    | 5,07008 | 4,48977 | 1,49517049  | ENST00000257749 | 60468     | NM_021813    | BACH2        |
| A_23_P151307   | 9,68364 | 9,10335 | 1,495149762 | ENST00000490387 | 10411     | NM_006105    | RAPGEF3      |
| A_22_P00023298 | 2,31009 | 1,72981 | 1,495139399 | ENST00000419225 | N/A       | N/A          | N/A          |
| A_23_P68717    | 14,0836 | 13,5034 | 1,495056493 | ENST00000481921 | 8624      | NM_003720    | PSMG1        |
| A_33_P3645888  | 6,21635 | 5,6363  | 1,494901057 | N/A             | 677839    | BG943532     | SNORA71C     |
| A_23_P110504   | 13,7536 | 13,1736 | 1,494849249 | ENST00000503534 | 81037     | NM_030782    | CLPTM1L      |
| A_22_P00011035 | 3,23383 | 2,6539  | 1,49477672  | N/A             | N/A       | BM564017     | Inc-NTHL1-1  |
| A_23_P125519   | 17,707  | 17,1271 | 1,494745637 | ENST00000486733 | 6191      | NM_001007    | RPS4X        |
| A_21_P0000257  | 8,04788 | 7,46803 | 1,494693834 | N/A             | 9301      | NR_002563    | SNORD27      |
| A_33_P3409625  | 14,3853 | 13,8055 | 1,494642033 | ENST00000240123 | 10174     | NM_005775    | SORBS3       |
| A_33_P3369761  | 13,2619 | 12,6823 | 1,494434846 | ENST00000396200 | 54704     | NM_001161779 | PDP1         |
| A_22_P00011487 | 7,30584 | 6,72636 | 1,494310547 | ENST00000531027 | 26873     | NM_017570    | OPLAH        |
| A_32_P43812    | 8,99413 | 8,41472 | 1,494238045 | ENST00000451288 | 23142     | NM_001040402 | DCUN1D4      |
| A_23_P4494     | 5,88451 | 5,30511 | 1,494227688 | ENST00000251081 | 1824      | NM_024422    | DSC2         |
| A_19_P00322934 | 8,84281 | 8,26341 | 1,494227688 | ENST00000608369 | 100506190 | N/A          | LINC00963    |
| A_23_P334709   | 14,4842 | 13,9048 | 1,494227688 | ENST00000455909 | 11328     | NM_007270    | FKBP9        |
| A_21_P0007205  | 3,59883 | 3,01952 | 1,494134476 | N/A             | N/A       | N/A          | Inc-PRDM11-3 |
| A_22_P00019623 | 2,20485 | 1,62554 | 1,494134476 | N/A             | N/A       | N/A          | Inc-ZPLD1-1  |
| A_23_P79426    | 11,7016 | 11,1223 | 1,494124119 | ENST00000258418 | 51719     | NM_016289    | CAB39        |
| A_33_P3272390  | 8,8724  | 8,29312 | 1,494103406 | ENST00000283195 | 5903      | NM_006267    | RANBP2       |
| A_23_P346800   | 2,47192 | 1,89267 | 1,494072338 | ENST00000337474 | 554       | NM_000054    | AVPR2        |
| A_33_P3316293  | 8,32009 | 7,74093 | 1,493979136 | ENST00000409788 | 51719     | NM_001130849 | CAB39        |
| A_33_P3357626  | 8,94108 | 8,36201 | 1,493885939 | ENST00000453852 | N/A       | N/A          | N/A          |
| A_22_P00010442 | 2,24006 | 1,66109 | 1,493782394 | N/A             | N/A       | N/A          | Inc-NAA35-1  |
| A_21_P0001632  | 2,6622  | 2,08326 | 1,493751332 | N/A             | N/A       | N/A          | Inc-NVL-3    |



|                |         |         |             |                 |           |              |                |
|----------------|---------|---------|-------------|-----------------|-----------|--------------|----------------|
| A_33_P3311170  | 10,2764 | 9,69747 | 1,493740979 | ENST00000568957 | 81893     | NR_002593    | SLC7A5P1       |
| A_33_P3281299  | 1,95743 | 1,37852 | 1,493720271 | ENST00000562220 | 56139     | NM_031859    | PCDHA10        |
| A_23_P140362   | 1,96022 | 1,38134 | 1,49368921  | ENST00000256362 | 55237     | NM_018228    | VRTN           |
| A_24_P209285   | 13,095  | 12,5162 | 1,493606385 | ENST00000053468 | 55173     | NM_018141    | MRPS10         |
| A_33_P3302115  | 8,23758 | 7,65878 | 1,493606385 | N/A             | 4076      | NM_005898    | CAPRIN1        |
| A_24_P40001    | 2,66496 | 2,08633 | 1,493430396 | ENST00000321424 | 27181     | NM_014442    | SIGLEC8        |
| A_33_P3244433  | 3,66246 | 3,08383 | 1,493430396 | ENST00000409881 | 84182     | AK090826     | FAM188B        |
| A_33_P3320953  | 9,65536 | 9,07675 | 1,493409693 | ENST00000318978 | 404217    | NM_206833    | CTXN1          |
| A_24_P115967   | 5,82388 | 5,24534 | 1,493337234 | ENST00000540717 | 747       | NM_006133    | DAGLA          |
| A_33_P3236082  | 12,7939 | 12,2154 | 1,493295831 | ENST00000440023 | 50814     | NM_001129765 | NSDHL          |
| A_23_P76774    | 2,26982 | 1,69139 | 1,493223377 | ENST00000238558 | 145258    | NM_173849    | GSC            |
| A_33_P3332749  | 5,54958 | 4,97126 | 1,493109529 | N/A             | N/A       | N/A          | N/A            |
| A_33_P3353185  | 2,02763 | 1,44936 | 1,493057783 | N/A             | 100131017 | N/A          | ZNF316         |
| A_22_P00016698 | 2,60125 | 2,02313 | 1,492902554 | N/A             | N/A       | N/A          | Inc-TRAF3IP2-1 |
| A_21_P0014809  | 11,616  | 11,0379 | 1,492881858 | ENST00000428729 | 84908     | NM_032822    | FAM136A        |
| A_33_P3413671  | 7,16703 | 6,58901 | 1,492799078 | ENST00000344730 | 27        | NM_007314    | ABL2           |
| A_23_P84596    | 2,0111  | 1,4331  | 1,492778383 | ENST00000503351 | 51237     | NM_016459    | MZB1           |
| A_21_P0007409  | 2,40195 | 1,82395 | 1,492778383 | N/A             | N/A       | N/A          | Inc-PVRL1-1    |
| A_24_P469641   | 8,96783 | 8,38988 | 1,492726648 | ENST00000429902 | 54476     | NM_207111    | RNF216         |
| A_33_P3216487  | 6,91077 | 6,33283 | 1,492716302 | N/A             | N/A       | N/A          | N/A            |
| A_23_P46095    | 9,72729 | 9,14945 | 1,492612838 | ENST00000318906 | 128061    | NM_152379    | C1orf131       |
| A_22_P00018002 | 4,32554 | 3,74774 | 1,492571455 | N/A             | N/A       | N/A          | Inc-ZNF135-1   |
| A_23_P433111   | 8,10639 | 7,52863 | 1,492530072 | ENST00000463805 | 133383    | NM_153706    | SETD9          |
| A_22_P00004277 | 2,14183 | 1,56411 | 1,492488691 | ENST00000593279 | N/A       | XR_244093    | N/A            |
| A_23_P425967   | 3,06419 | 2,48662 | 1,492333522 | ENST00000258704 | 285955    | NM_175064    | SPDYE1         |
| A_33_P3319765  | 7,20713 | 6,62962 | 1,492271459 | ENST00000490972 | 2176      | NM_001243744 | FANCC          |
| A_33_P3211473  | 12,9809 | 12,4034 | 1,492261115 | ENST00000252512 | 23039     | NM_015024    | XPO7           |
| A_21_P0011370  | 10,4979 | 9,92055 | 1,49210597  | ENST00000484716 | 23015     | NR_027409    | GOLGA8A        |
| A_22_P00016430 | 5,16108 | 4,58378 | 1,492054258 | ENST00000554254 | N/A       | N/A          | N/A            |
| A_33_P3415820  | 6,1606  | 5,58331 | 1,492043916 | ENST00000397591 | 7057      | NM_003246    | THBS1          |
| A_21_P0013900  | 2,19819 | 1,62096 | 1,491981865 | N/A             | N/A       | N/A          | XL0C_I2_015967 |
| A_33_P3314231  | 6,08348 | 5,50627 | 1,491961182 | ENST00000295728 | 1412      | NM_057093    | CRYBA2         |
| A_33_P3298206  | 6,87771 | 6,30051 | 1,491950841 | ENST00000555690 | 57718     | NM_020958    | PPP4R4         |

|                |         |         |             |                 |           |              |                |
|----------------|---------|---------|-------------|-----------------|-----------|--------------|----------------|
| A_33_P3329839  | 15,4778 | 14,9006 | 1,491950841 | ENST00000525402 | 10263     | NM_005851    | CDK2AP2        |
| A_21_P0012632  | 2,19561 | 1,61845 | 1,491909476 | N/A             | N/A       | N/A          | XL0C_I2_010936 |
| A_22_P00023755 | 5,24534 | 4,66821 | 1,491878453 | N/A             | 101929639 | NR_108108    | B4GALT1-AS1    |
| A_23_P39364    | 14,4754 | 13,8984 | 1,491744027 | ENST00000539827 | 9454      | NM_004838    | HOMER3         |
| A_24_P598406   | 11,6422 | 11,0652 | 1,491744027 | ENST00000404006 | 441191    | NR_023384    | RNF216P1       |
| A_33_P3314091  | 3,36413 | 2,78723 | 1,49164063  | ENST00000519308 | N/A       | N/A          | N/A            |
| A_23_P207089   | 3,34475 | 2,76787 | 1,491619952 | ENST00000570527 | 6462      | NM_001040    | SHBG           |
| A_22_P00004427 | 10,1433 | 9,56647 | 1,491568257 | ENST00000565802 | N/A       | AF088010     | N/A            |
| A_33_P3211666  | 7,4485  | 6,87181 | 1,491423522 | ENST00000334376 | 8809      | NM_003855    | IL18R1         |
| A_24_P237486   | 9,35109 | 8,77441 | 1,491413184 | ENST00000619732 | 4204      | NM_004992    | MECP2          |
| A_24_P132633   | 3,18547 | 2,60895 | 1,49124779  | ENST00000377311 | 169693    | NM_153237    | TMEM252        |
| A_23_P137715   | 10,9151 | 10,3386 | 1,491227117 | ENST00000367875 | 57645     | NM_017542    | POGK           |
| A_33_P3240244  | 3,86377 | 3,28727 | 1,491227117 | ENST00000454109 | 100191040 | NM_001136003 | C2CD4D         |
| A_33_P3315134  | 2,20988 | 1,63344 | 1,4911651   | ENST00000474063 | 729582    | NR_026597    | DIRC3          |
| A_19_P00317314 | 2,48701 | 1,9106  | 1,491134093 | ENST00000441389 | 147710    | NM_001205280 | IGSF23         |
| A_23_P164141   | 11,9655 | 11,3891 | 1,491123757 | ENST00000293362 | 10197     | NM_176863    | PSME3          |
| A_23_P115703   | 1,94681 | 1,37042 | 1,491113421 | ENST00000490296 | 84108     | NM_001011663 | PCGF6          |
| A_23_P5551     | 15,8889 | 15,3126 | 1,491020404 | ENST00000461347 | 4691      | NM_005381    | NCL            |
| A_22_P00002336 | 1,98026 | 1,40408 | 1,490896389 | ENST00000526305 | N/A       | N/A          | N/A            |
| A_33_P3315801  | 6,33686 | 5,76077 | 1,490803385 | ENST00000584336 | 51755     | NM_016507    | CDK12          |
| A_33_P3283525  | 2,05531 | 1,4793  | 1,49072072  | ENST00000498108 | 55740     | N/A          | ENAH           |
| A_33_P3298771  | 4,80402 | 4,22802 | 1,490710387 | ENST00000572217 | N/A       | N/A          | N/A            |
| A_33_P3340342  | 10,5186 | 9,94261 | 1,490700054 | ENST00000564247 | 123920    | NM_144601    | CMTM3          |
| A_21_P0004820  | 3,74097 | 3,16503 | 1,490648391 | N/A             | N/A       | N/A          | Inc-WRNIP1-2   |
| A_22_P00017841 | 7,64502 | 7,06908 | 1,490648391 | N/A             | 100129196 | NR_034182    | MATN1-AS1      |
| A_21_P0008284  | 2,89317 | 2,31728 | 1,49059673  | ENST00000502187 | 388011    | AK091668     | LINC01550      |
| A_33_P3418120  | 8,41791 | 7,84206 | 1,490555403 | ENST00000287996 | 64768     | NM_022755    | IPPK           |
| A_23_P45424    | 6,02374 | 5,44793 | 1,490514076 | ENST00000373829 | 26548     | NM_012278    | ITGB1BP2       |
| A_23_P31626    | 2,23814 | 1,66234 | 1,490503745 | ENST00000285402 | 4956      | NM_024410    | ODF1           |
| A_33_P3372285  | 5,26782 | 4,6921  | 1,490421096 | ENST00000376950 | 347344    | NM_007137    | ZNF81          |
| A_21_P0005649  | 2,81027 | 2,23459 | 1,490379773 | N/A             | N/A       | N/A          | Inc-ERI1-3     |
| A_21_P0013875  | 3,76033 | 3,1847  | 1,490328122 | ENST00000457163 | N/A       | N/A          | N/A            |
| A_33_P3359219  | 12,2981 | 11,7225 | 1,490297131 | ENST00000531109 | 84513     | NM_001102560 | PPAPDC1B       |

|                |         |         |             |                 |           |              |                |
|----------------|---------|---------|-------------|-----------------|-----------|--------------|----------------|
| A_33_P3267356  | 10,0019 | 9,42638 | 1,490214494 | ENST00000338435 | 2744      | NM_001256310 | GLS            |
| A_33_P3394378  | 6,97408 | 6,39863 | 1,49014219  | N/A             | N/A       | N/A          | N/A            |
| A_23_P139704   | 14,5664 | 13,9912 | 1,489883991 | ENST00000279488 | 1848      | NM_001946    | DUSP6          |
| A_24_P333532   | 5,37381 | 4,79866 | 1,489832356 | ENST00000506121 | 619351    | NR_026765    | LINC00589      |
| A_21_P0003036  | 3,24023 | 2,66512 | 1,48979105  | N/A             | N/A       | N/A          | Inc-ATP1B3-1   |
| A_22_P00002379 | 3,4911  | 2,916   | 1,489780723 | N/A             | 101928646 | NR_109975    | ARNTL2-AS1     |
| A_22_P00004238 | 7,38672 | 6,81174 | 1,489656812 | N/A             | N/A       | BC032907     | Inc-CMBL-1     |
| A_22_P00019447 | 2,78529 | 2,21031 | 1,489656812 | N/A             | N/A       | N/A          | Inc-GPR78-1    |
| A_19_P00804489 | 5,2303  | 4,65539 | 1,489584535 | N/A             | N/A       | N/A          | Inc-SNURF-1    |
| A_21_P0010959  | 3,08214 | 2,50725 | 1,489563885 | N/A             | N/A       | N/A          | XLOC_I2_002194 |
| A_33_P3356332  | 4,39447 | 3,8196  | 1,489543236 | N/A             | N/A       | N/A          | N/A            |
| A_23_P154605   | 14,6097 | 14,0349 | 1,489470964 | ENST00000467815 | 55959     | NM_018837    | SULF2          |
| A_33_P3263412  | 5,67471 | 5,09995 | 1,489429668 | N/A             | N/A       | AK130224     | N/A            |
| A_21_P0013436  | 5,61184 | 5,03713 | 1,489378049 | ENST00000442578 | N/A       | N/A          | N/A            |
| A_23_P54605    | 12,9462 | 12,3715 | 1,489367726 | ENST00000573029 | 26156     | NM_015659    | RSL1D1         |
| A_23_P209288   | 4,78873 | 4,21417 | 1,489223203 | ENST00000264414 | 8452      | NM_003590    | CUL3           |
| A_33_P3307910  | 3,25487 | 2,68043 | 1,489099339 | N/A             | N/A       | N/A          | N/A            |
| A_33_P3286011  | 4,64334 | 4,06895 | 1,489047731 | ENST00000590952 | 101927621 | N/A          | LINC01534      |
| A_21_P0009122  | 2,34599 | 1,77176 | 1,4888826   | ENST00000566628 | 388276    | N/A          | C16orf97       |
| A_23_P153941   | 5,48306 | 4,90887 | 1,48884132  | ENST00000613618 | 79823     | NM_024766    | CAMKMT         |
| A_22_P00010769 | 4,98317 | 4,40903 | 1,488789721 | ENST00000452494 | N/A       | N/A          | N/A            |
| A_33_P3363012  | 15,8339 | 15,2598 | 1,488748444 | ENST00000227524 | 27339     | NM_014502    | PRPF19         |
| A_21_P0012887  | 8,92114 | 8,3471  | 1,48868653  | ENST00000343123 | N/A       | N/A          | N/A            |
| A_22_P00003370 | 2,92505 | 2,35105 | 1,488645255 | N/A             | N/A       | N/A          | Inc-CBX2-1     |
| A_22_P00006711 | 6,33835 | 5,76444 | 1,488552392 | N/A             | N/A       | N/A          | Inc-FRMD1-3    |
| A_23_P340868   | 2,0779  | 1,50412 | 1,488418265 | ENST00000340217 | 8001      | NM_006529    | GLRA3          |
| A_23_P385322   | 6,71779 | 6,14408 | 1,488346049 | ENST00000371926 | 57559     | NM_020799    | STAMBPL1       |
| A_33_P3360773  | 11,2191 | 10,6454 | 1,488335732 | ENST00000380996 | 10078     | NM_001297658 | TSSC4          |
| A_21_P0001197  | 5,74864 | 5,17505 | 1,488222257 | ENST00000412357 | N/A       | N/A          | N/A            |
| A_21_P0007927  | 6,08632 | 5,51281 | 1,488139734 | N/A             | 100874071 | N/A          | USP12-AS2      |
| A_21_P0014385  | 10,2893 | 9,71583 | 1,488098475 | N/A             | N/A       | BC042148     | N/A            |
| A_24_P394698   | 8,89736 | 8,32394 | 1,488046902 | ENST00000422497 | 5001      | NM_181747    | ORC5           |
| A_22_P00009230 | 8,48049 | 7,90707 | 1,488046902 | ENST00000444731 | N/A       | N/A          | N/A            |

|                |         |         |             |                 |           |              |               |
|----------------|---------|---------|-------------|-----------------|-----------|--------------|---------------|
| A_33_P3362353  | 8,77404 | 8,20065 | 1,48801596  | ENST00000377039 | 369       | NM_001256197 | ARAF          |
| A_33_P3302320  | 4,98746 | 4,41407 | 1,48801596  | N/A             | 101929688 | NR_109755    | LINC01251     |
| A_23_P52806    | 9,90069 | 9,32734 | 1,487974704 | ENST00000392937 | 23621     | NM_012104    | BACE1         |
| A_32_P489662   | 2,3178  | 1,74453 | 1,487892195 | ENST00000306658 | 162605    | NM_181535    | KRT28         |
| A_33_P3259878  | 3,45136 | 2,8781  | 1,487881882 | ENST00000545894 | 1642      | N/A          | DDB1          |
| A_23_P15369    | 5,04272 | 4,46948 | 1,487861255 | ENST00000392621 | 124599    | NM_174892    | CD300LB       |
| A_23_P170186   | 12,7814 | 12,2082 | 1,487820004 | ENST00000618853 | 26873     | NM_017570    | OPLAH         |
| A_24_P84419    | 11,4059 | 10,8327 | 1,487820004 | ENST00000371851 | 7410      | NM_003371    | VAV2          |
| A_23_P44665    | 2,4459  | 1,87286 | 1,487655008 | ENST00000379907 | 203102    | NM_145004    | ADAM32        |
| A_23_P313223   | 9,50467 | 8,93174 | 1,487541585 | ENST00000294244 | 144097    | NM_138471    | C11orf84      |
| A_22_P00009844 | 4,19454 | 3,62162 | 1,487531274 | N/A             | N/A       | N/A          | lnc-METTL15-4 |
| A_21_P0004406  | 2,48116 | 1,90833 | 1,48743848  | N/A             | N/A       | N/A          | lnc-CCDC125-2 |
| A_23_P147439   | 6,74143 | 6,16861 | 1,48742817  | ENST00000570284 | 11273     | NM_017492    | ATXN2L        |
| A_33_P3222600  | 4,34538 | 3,77256 | 1,48742817  | N/A             | N/A       | N/A          | N/A           |
| A_21_P0003335  | 2,07805 | 1,5053  | 1,487356001 | ENST00000509244 | N/A       | N/A          | N/A           |
| A_24_P925040   | 10,3566 | 9,78397 | 1,487232291 | ENST00000222693 | 858       | NM_001233    | CAV2          |
| A_22_P00003574 | 4,99341 | 4,42084 | 1,48717044  | N/A             | 100874291 | NR_046762    | ALMS1-IT1     |
| A_21_P0000774  | 6,79833 | 6,22579 | 1,487139516 | ENST00000445571 | 100505826 | NR_038341    | STK4-AS1      |
| A_33_P3235282  | 5,09333 | 4,5208  | 1,487129208 | ENST00000623792 | 401561    | XR_110095    | LINC01451     |
| A_33_P3291454  | 7,1125  | 6,53999 | 1,487108592 | ENST00000333254 | 374355    | NM_198515    | CCDC172       |
| A_23_P87257    | 11,4114 | 10,8389 | 1,487098284 | ENST00000529958 | 63875     | NM_022061    | MRPL17        |
| A_33_P3394105  | 5,72883 | 5,1564  | 1,487026131 | ENST00000289805 | 124044    | NM_152339    | SPATA2L       |
| A_21_P0000253  | 7,72437 | 7,15197 | 1,48699521  | N/A             | 9297      | NR_002559    | SNORD29       |
| A_22_P00013532 | 2,09347 | 1,52111 | 1,486953982 | ENST00000523411 | N/A       | CN294310     | N/A           |
| A_32_P163147   | 8,04609 | 7,47379 | 1,486892143 | ENST00000217957 | 340547    | NM_182607    | VSIG1         |
| A_33_P3711619  | 2,208   | 1,63581 | 1,486778777 | ENST00000404626 | 100129603 | N/A          | LOC100129603  |
| A_22_P00014836 | 5,4216  | 4,84948 | 1,48670664  | N/A             | 101927963 | XR_426361    | LOC101927963  |
| A_33_P3340254  | 11,0213 | 10,4492 | 1,48668603  | ENST00000301067 | 8085      | NM_003482    | KMT2D         |
| A_23_P70409    | 11,2745 | 10,7024 | 1,48668603  | ENST00000488601 | 9533      | NM_203290    | POLR1C        |
| A_21_P0008253  | 3,29488 | 2,72282 | 1,486644811 | N/A             | N/A       | N/A          | lnc-TSC22D1-1 |
| A_33_P3351346  | 5,28776 | 4,71573 | 1,486613897 | ENST00000523711 | 9639      | BC036809     | ARHGEF10      |
| A_24_P381844   | 2,11417 | 1,54215 | 1,486603593 | ENST00000396573 | 2903      | NM_000833    | GRIN2A        |
| A_23_P106433   | 12,6714 | 12,0994 | 1,486582984 | ENST00000557266 | 91433     | NM_033544    | RCCD1         |

|                |         |         |             |                 |           |              |                |
|----------------|---------|---------|-------------|-----------------|-----------|--------------|----------------|
| A_23_P1056     | 9,79184 | 9,22007 | 1,486346007 | ENST00000493684 | 51463     | NM_016334    | GPR89B         |
| A_23_P101829   | 9,14006 | 8,56832 | 1,486315099 | ENST00000542587 | 9170      | NM_004720    | LPAR2          |
| A_22_P00007986 | 3,61045 | 3,03872 | 1,486304797 | ENST00000419357 | 401247    | XR_171562    | LINC00243      |
| A_33_P3216994  | 8,93137 | 8,35969 | 1,486253286 | ENST00000395185 | 26091     | NM_001278187 | HERC4          |
| A_23_P122375   | 8,78343 | 8,21177 | 1,486232683 | ENST00000287218 | 60685     | NM_021943    | ZFAND3         |
| A_33_P3384462  | 8,7094  | 8,13774 | 1,486232683 | ENST00000355327 | 79875     | NM_024817    | THSD4          |
| A_23_P52219    | 7,15894 | 6,58749 | 1,486016361 | ENST00000407654 | 10613     | NM_006459    | ERLIN1         |
| A_21_P0000019  | 5,80455 | 5,23313 | 1,48598546  | N/A             | 23081     | NM_001146695 | KDM4C          |
| A_32_P157965   | 13,427  | 12,8556 | 1,48596486  | ENST00000428356 | 8894      | NM_003908    | EIF2S2         |
| A_23_P79794    | 8,36405 | 7,79268 | 1,485933961 | ENST00000611732 | 60436     | NM_021809    | TGIF2          |
| A_33_P3419165  | 8,00966 | 7,4383  | 1,485923661 | ENST00000391759 | 29844     | NM_013342    | TFPT           |
| A_21_P0004432  | 1,96878 | 1,39743 | 1,485913362 | N/A             | N/A       | N/A          | Inc-SEMA6A-5   |
| A_21_P0014250  | 3,85084 | 3,27949 | 1,485913362 | N/A             | 100289455 | AK295718     | LOC100289455   |
| A_22_P00010886 | 5,44007 | 4,86883 | 1,485800071 | N/A             | N/A       | N/A          | Inc-NPDC1-1    |
| A_33_P3228837  | 5,53327 | 4,96209 | 1,485738279 | ENST00000409781 | 925       | NM_001145873 | CD8A           |
| A_23_P366983   | 2,07376 | 1,50264 | 1,485676491 | ENST00000261180 | 29953     | NM_013381    | TRHDE          |
| A_33_P3378509  | 10,4535 | 9,88246 | 1,48559411  | ENST00000307017 | 84640     | NM_001290326 | USP38          |
| A_33_P3422701  | 3,83085 | 3,25988 | 1,48552203  | N/A             | 55689     | AK090720     | YEATS2         |
| A_33_P3412418  | 2,4036  | 1,83265 | 1,485501436 | N/A             | N/A       | AK097799     | N/A            |
| A_23_P390621   | 5,85606 | 5,28515 | 1,48546025  | ENST00000503585 | 133015    | NM_145048    | PACRGL         |
| A_22_P00014757 | 2,86317 | 2,29226 | 1,48546025  | ENST00000435407 | N/A       | N/A          | N/A            |
| A_33_P3409934  | 8,82801 | 8,25712 | 1,485439657 | ENST00000262124 | 81929     | NM_001013437 | SEH1L          |
| A_22_P00010466 | 2,02234 | 1,45147 | 1,485419065 | ENST00000412439 | N/A       | D81783       | N/A            |
| A_23_P391857   | 3,8442  | 3,27345 | 1,485295516 | ENST00000505752 | 2103      | NM_004452    | ESRRB          |
| A_19_P00315584 | 7,69976 | 7,12904 | 1,485264631 | ENST00000588123 | 100130691 | NR_026966    | LOC100130691   |
| A_23_P388190   | 10,6696 | 10,0989 | 1,485244041 | ENST00000395343 | 11083     | NM_033081    | DIDO1          |
| A_22_P00014604 | 2,25277 | 1,68212 | 1,485192567 | ENST00000544251 | 101927637 | NR_120451    | LOC101927637   |
| A_21_P0013002  | 2,95335 | 2,38294 | 1,484945518 | N/A             | N/A       | N/A          | XLOC_I2_012163 |
| A_33_P3230709  | 15,195  | 14,6246 | 1,484935225 | ENST00000320785 | 10749     | NM_006612    | KIF1C          |
| A_33_P3248654  | 14,6529 | 14,0825 | 1,484935225 | ENST00000369923 | 6301      | NM_006513    | SARS           |
| A_33_P3305158  | 10,2309 | 9,66071 | 1,484719092 | ENST00000310898 | 285268    | NM_198484    | ZNF621         |
| A_22_P00017724 | 3,83595 | 3,26583 | 1,484647055 | N/A             | N/A       | N/A          | Inc-XRN1-1     |
| A_22_P00009836 | 2,167   | 1,59694 | 1,484585312 | ENST00000439184 | N/A       | N/A          | N/A            |

|                |         |         |             |                 |           |              |                |
|----------------|---------|---------|-------------|-----------------|-----------|--------------|----------------|
| A_23_P70468    | 4,62352 | 4,05347 | 1,484575021 | ENST00000244623 | 26212     | NM_012367    | OR2B6          |
| A_33_P3335366  | 3,64609 | 3,07605 | 1,484564731 | N/A             | 55534     | NM_018717    | MAML3          |
| A_32_P144920   | 8,68034 | 8,11044 | 1,484420675 | ENST00000450991 | 25977     | NM_015509    | NECAP1         |
| A_23_P46215    | 2,47813 | 1,90828 | 1,48436923  | ENST00000543729 | 80128     | NM_025058    | TRIM46         |
| A_33_P3613688  | 6,229   | 5,6593  | 1,484214905 | N/A             | 157376    | BE729513     | FER1L6-AS2     |
| A_33_P3381899  | 7,09525 | 6,52555 | 1,484214905 | ENST00000618464 | 9143      | NM_004209    | SYNGR3         |
| A_33_P3231833  | 8,35864 | 7,789   | 1,484153179 | N/A             | N/A       | N/A          | N/A            |
| A_33_P3348884  | 4,93801 | 4,36847 | 1,484050309 | ENST00000480419 | 285025    | NM_173648    | CCDC141        |
| A_22_P00001869 | 3,85717 | 3,28769 | 1,483988591 | N/A             | N/A       | N/A          | Inc-AVEN-1     |
| A_21_P0011793  | 3,57931 | 3,00991 | 1,483906303 | N/A             | N/A       | N/A          | XLOC_I2_007191 |
| A_22_P00008557 | 6,10231 | 5,53307 | 1,483741742 | N/A             | N/A       | BC031864     | Inc-KCNMB4-1   |
| A_23_P128008   | 5,16518 | 4,59597 | 1,483710888 | ENST00000445632 | 60494     | NM_021827    | CCDC81         |
| A_23_P91001    | 11,6263 | 11,0571 | 1,483700604 | ENST00000420250 | 54529     | NM_019048    | ASNSD1         |
| A_23_P142590   | 8,84205 | 8,27285 | 1,483700604 | ENST00000479400 | 80895     | NM_030768    | ILKAP          |
| A_33_P3788355  | 3,55227 | 2,9831  | 1,483669752 | N/A             | 399876    | NR_033989    | NAV2-AS4       |
| A_19_P00321670 | 7,5561  | 6,98701 | 1,483587482 | ENST00000451910 | N/A       | N/A          | N/A            |
| A_23_P340149   | 4,98475 | 4,41574 | 1,483505217 | ENST00000276123 | 7552      | NM_021998    | ZNF711         |
| A_23_P362183   | 13,0504 | 12,4814 | 1,483494934 | ENST00000353234 | 203286    | NM_173551    | ANKS6          |
| A_23_P82108    | 9,72656 | 9,15757 | 1,483484651 | ENST00000325144 | 57621     | XM_005267078 | ZBTB2          |
| A_24_P336596   | 2,798   | 2,22903 | 1,483464086 | ENST00000368765 | 4184      | NM_030663    | SMCP           |
| A_23_P8119     | 7,79462 | 7,2257  | 1,483412674 | ENST00000395064 | 221504    | NM_152735    | ZBTB9          |
| A_21_P0014637  | 7,00145 | 6,43257 | 1,483371545 | N/A             | 101927765 | NR_125962    | LOC101927765   |
| A_23_P356101   | 7,72856 | 7,15994 | 1,483104239 | ENST00000316377 | 80204     | NM_001190274 | FBXO11         |
| A_23_P168229   | 13,4591 | 12,8905 | 1,483083679 | ENST00000439343 | 81567     | NM_030810    | TXNDC5         |
| A_22_P00021860 | 1,99484 | 1,42625 | 1,483073399 | ENST00000523284 | 102724710 | NR_125827    | LOC102724710   |
| A_23_P133284   | 10,1981 | 9,62952 | 1,483063119 | ENST00000283109 | 55781     | NM_018343    | RIOK2          |
| A_33_P3221563  | 12,2543 | 11,6859 | 1,482878094 | ENST00000268314 | 79798     | NM_024742    | ARMC5          |
| A_23_P216396   | 9,4173  | 8,84906 | 1,482713647 | ENST00000467138 | 23404     | NM_014285    | EXOSC2         |
| A_21_P0011416  | 3,83648 | 3,26852 | 1,482425908 | N/A             | N/A       | N/A          | XLOC_I2_005130 |
| A_22_P00008960 | 6,43676 | 5,86896 | 1,48226151  | ENST00000554221 | 645687    | NR_026796    | LINC00520      |
| A_22_P00002062 | 2,98293 | 2,41521 | 1,482179319 | N/A             | N/A       | N/A          | Inc-BLID-1     |
| A_23_P129128   | 6,31369 | 5,74603 | 1,482117678 | ENST00000559492 | 123283    | NM_152334    | TARSL2         |
| A_21_P0012285  | 5,99872 | 5,43108 | 1,482097132 | N/A             | N/A       | N/A          | XLOC_I2_009468 |

|                |         |         |             |                 |           |              |                  |
|----------------|---------|---------|-------------|-----------------|-----------|--------------|------------------|
| A_33_P3391626  | 16,5851 | 16,0175 | 1,48205604  | ENST00000505751 | N/A       | N/A          | N/A              |
| A_21_P0013044  | 4,84072 | 4,27314 | 1,482035494 | N/A             | N/A       | N/A          | XLOC_I2_012788   |
| A_22_P00000805 | 3,7194  | 3,15189 | 1,481963587 | N/A             | N/A       | N/A          | Inc-AF127577.1-4 |
| A_33_P3297883  | 2,00024 | 1,43274 | 1,481953315 | N/A             | 100131796 | AY203937     | LOC100131796     |
| A_23_P12989    | 16,7442 | 16,1768 | 1,481850597 | ENST00000352435 | 25824     | NM_012094    | PRDX5            |
| A_22_P00022824 | 2,17685 | 1,60951 | 1,48178897  | ENST00000520780 | N/A       | N/A          | N/A              |
| A_33_P3227258  | 2,10698 | 1,53965 | 1,481778699 | ENST00000510838 | N/A       | N/A          | N/A              |
| A_24_P219474   | 2,00625 | 1,43892 | 1,481778699 | ENST00000569840 | 146664    | NM_144677    | MGAT5B           |
| A_33_P3226377  | 10,156  | 9,58869 | 1,481758158 | ENST00000381847 | 5555      | NM_005042    | PRH2             |
| A_33_P3281850  | 5,81537 | 5,24806 | 1,481758158 | ENST00000440612 | 10669     | N/A          | CGREF1           |
| A_23_P203900   | 14,6896 | 14,1223 | 1,481747887 | ENST00000415380 | 949       | NM_005505    | SCARB1           |
| A_22_P00006556 | 3,49989 | 2,93298 | 1,481347384 | ENST00000582320 | N/A       | N/A          | N/A              |
| A_33_P3218309  | 2,50097 | 1,93406 | 1,481347384 | N/A             | N/A       | N/A          | N/A              |
| A_23_P217079   | 11,5419 | 10,975  | 1,481337116 | ENST00000495270 | 8818      | NM_003863    | DPM2             |
| A_22_P00006499 | 3,04253 | 2,47569 | 1,48127551  | N/A             | 100009613 | NR_103835    | ANO1-AS2         |
| A_22_P00013109 | 7,47639 | 6,90955 | 1,48127551  | N/A             | N/A       | AK022160     | Inc-RIOK1-2      |
| A_22_P00006471 | 2,12567 | 1,55899 | 1,481111241 | ENST00000560534 | 4122      | XM_006720507 | MAN2A2           |
| A_33_P3240941  | 8,87723 | 8,31062 | 1,481039378 | ENST00000392937 | 23621     | NM_012104    | BACE1            |
| A_24_P945228   | 4,81831 | 4,25171 | 1,481029113 | ENST00000507209 | 285440    | NM_207352    | CYP4V2           |
| A_33_P3269728  | 11,4079 | 10,8413 | 1,481029113 | ENST00000460846 | 55608     | NM_001286721 | ANKRD10          |
| A_23_P27894    | 9,57669 | 9,01015 | 1,48096752  | ENST00000587802 | 9667      | NM_014649    | SAFB2            |
| A_33_P3340114  | 1,94543 | 1,37896 | 1,480895664 | N/A             | N/A       | N/A          | N/A              |
| A_23_P103631   | 15,1471 | 14,5807 | 1,480823813 | ENST00000236051 | 10969     | NM_006824    | EBNA1BP2         |
| A_22_P00009323 | 4,70542 | 4,13905 | 1,48079302  | N/A             | N/A       | N/A          | Inc-LRRC57-2     |
| A_33_P3344339  | 2,21031 | 1,64399 | 1,480741701 | ENST00000322893 | 27133     | NM_172375    | KCNH5            |
| A_23_P78170    | 10,1054 | 9,5391  | 1,480721173 | ENST00000574167 | 10514     | NM_014520    | MYBBP1A          |
| A_22_P00022446 | 2,64538 | 2,07921 | 1,480587753 | ENST00000564390 | N/A       | N/A          | N/A              |
| A_21_P0000668  | 8,42782 | 7,86177 | 1,480464606 | ENST00000602903 | 8759      | NR_036636    | ADAM1A           |
| A_21_P0004229  | 1,98688 | 1,42093 | 1,480361992 | N/A             | N/A       | N/A          | Inc-TRIO-1       |
| A_24_P92183    | 10,3542 | 9,78835 | 1,480259384 | ENST00000474208 | 80336     | NM_001124756 | PABPC1L          |
| A_24_P301186   | 6,14637 | 5,58063 | 1,480146525 | ENST00000620954 | 112840    | NM_001008726 | WDR89            |
| A_21_P0011384  | 7,14904 | 6,58334 | 1,480105487 | ENST00000559010 | 388165    | NR_003661    | UBE2Q2P1         |
| A_23_P148308   | 12,2548 | 11,6891 | 1,480105487 | ENST00000489344 | 5935      | NM_006743    | RBM3             |

|                |         |         |             |                 |           |              |                      |
|----------------|---------|---------|-------------|-----------------|-----------|--------------|----------------------|
| A_33_P3492750  | 4,39742 | 3,83176 | 1,48006445  | ENST00000436742 | 149047    | AK091757     | MGC27382             |
| A_22_P00001665 | 6,10494 | 5,53937 | 1,479972122 | N/A             | N/A       | N/A          | Inc-ASH1L-2          |
| A_21_P0009709  | 2,04105 | 1,47551 | 1,479941347 | ENST00000593038 | N/A       | N/A          | N/A                  |
| A_33_P3378772  | 4,68326 | 4,11777 | 1,479890057 | ENST00000397609 | 283742    | NM_173611    | FAM98B               |
| A_23_P162165   | 7,18616 | 6,62075 | 1,479807997 | ENST00000612612 | 65987     | NM_023930    | KCTD14               |
| A_22_P00019081 | 2,51659 | 1,95136 | 1,479623378 | ENST00000548184 | 246329    | NM_001286257 | STAC3                |
| A_24_P112087   | 6,36759 | 5,80244 | 1,479541332 | ENST00000229595 | 25842     | NM_014034    | ASF1A                |
| A_21_P0012221  | 4,41883 | 3,85371 | 1,479510566 | ENST00000344693 | 391267    | NR_027270    | ANKRD20A11P          |
| A_21_P0010700  | 5,2089  | 4,64384 | 1,479449037 | ENST00000432922 | N/A       | N/A          | N/A                  |
| A_23_P141005   | 9,11521 | 8,55015 | 1,479449037 | ENST00000290649 | 267       | NM_001144    | AMFR                 |
| A_22_P00019061 | 2,12211 | 1,55717 | 1,479325985 | N/A             | 101927051 | NR_109952    | LOC101927051         |
| A_21_P0014756  | 2,02928 | 1,46435 | 1,479315731 | N/A             | 100508227 | AK130364     | LOC100508227         |
| A_24_P217234   | 3,19751 | 2,63261 | 1,479284969 | ENST00000260649 | 6519      | NM_000341    | SLC3A1               |
| A_23_P68031    | 6,55162 | 5,98672 | 1,479284969 | ENST00000392320 | 6775      | NM_003151    | STAT4                |
| A_33_P3238390  | 6,31339 | 5,74864 | 1,479131173 | ENST00000457046 | N/A       | N/A          | N/A                  |
| A_22_P00019220 | 3,55719 | 2,9926  | 1,478967141 | ENST00000547360 | N/A       | AI221087     | N/A                  |
| A_19_P00315649 | 4,71573 | 4,15117 | 1,478936387 | N/A             | 100507165 | XR_110530    | LOC100507165         |
| A_33_P3238402  | 3,98981 | 3,42556 | 1,478618634 | N/A             | N/A       | N/A          | N/A                  |
| A_23_P75973    | 9,50108 | 8,93688 | 1,47856739  | ENST00000361756 | 55298     | NM_018320    | RNF121               |
| A_22_P00015126 | 5,62437 | 5,06022 | 1,478516148 | N/A             | N/A       | N/A          | Inc-SNX27-1          |
| A_22_P00008411 | 5,0318  | 4,46766 | 1,478505899 | ENST00000565824 | 101928737 | N/A          | LOC101928737         |
| A_24_P24444    | 5,08212 | 4,51799 | 1,478495651 | ENST00000450732 | 9941      | NM_005107    | EXOGEN               |
| A_24_P202139   | 7,92294 | 7,35882 | 1,478485403 | ENST00000564733 | 51108     | NM_016025    | METTL9               |
| A_23_P106737   | 10,2198 | 9,65569 | 1,478475155 | ENST00000418978 | 55692     | NM_201412    | LUC7L                |
| A_33_P3290780  | 2,59078 | 2,0267  | 1,478444411 | ENST00000491169 | 11009     | NM_001185156 | IL24                 |
| A_24_P305345   | 5,15334 | 4,58928 | 1,478423916 | ENST00000315599 | 30835     | NM_021155    | CD209                |
| A_23_P355311   | 4,9806  | 4,41657 | 1,478393173 | ENST00000372192 | 8643      | NM_003738    | PTCH2                |
| A_23_P102770   | 13,3776 | 12,8136 | 1,478362431 | ENST00000334982 | 51126     | NM_016100    | NAA20                |
| A_24_P75718    | 9,98794 | 9,42395 | 1,478352184 | ENST00000393579 | N/A       | N/A          | N/A                  |
| A_23_P250294   | 9,56207 | 8,99814 | 1,478290702 | ENST00000458276 | 51099     | NM_016006    | ABHD5                |
| A_22_P00013376 | 6,00142 | 5,43755 | 1,478229223 | N/A             | N/A       | XM_006722594 | Inc-RP11-17M16.1.1-1 |
| A_33_P3235262  | 6,03334 | 5,46952 | 1,478177993 | ENST00000300432 | 138429    | NM_001135219 | PIP5KL1              |
| A_23_P22119    | 13,1544 | 12,5906 | 1,478157501 | ENST00000322810 | 5339      | NM_201380    | PLEC                 |



|                |         |         |             |                 |           |              |                |
|----------------|---------|---------|-------------|-----------------|-----------|--------------|----------------|
| A_22_P00010827 | 4,67397 | 4,1102  | 1,478126764 | N/A             | N/A       | N/A          | Inc-NNT-2      |
| A_33_P3361991  | 2,98271 | 2,419   | 1,478065292 | ENST00000619330 | 135924    | NM_001001658 | OR9A2          |
| A_33_P3278490  | 1,9837  | 1,42004 | 1,478014067 | ENST00000544644 | 286238    | NM_001100111 | LOC286238      |
| A_19_P00321089 | 8,8673  | 8,30382 | 1,477829671 | ENST00000419300 | 100506190 | N/A          | LINC00963      |
| A_23_P395566   | 9,26101 | 8,69759 | 1,477768212 | ENST00000565593 | 79791     | NM_024735    | FBXO31         |
| A_21_P0008852  | 3,93549 | 3,37213 | 1,477706754 | N/A             | N/A       | N/A          | Inc-ITGA11-2   |
| A_21_P0011538  | 2,45771 | 1,89438 | 1,477676026 | N/A             | N/A       | N/A          | XL0C_I2_005731 |
| A_22_P00014555 | 4,53805 | 3,97476 | 1,477635057 | ENST00000430847 | 100130502 | N/A          | LOC100130502   |
| A_33_P3408247  | 2,50548 | 1,94223 | 1,477594089 | N/A             | 101929578 | XR_243699    | LOC101929578   |
| A_33_P3320217  | 2,26407 | 1,70083 | 1,477583847 | ENST00000338316 | 108       | NM_020546    | ADCY2          |
| A_33_P3227686  | 5,33009 | 4,76686 | 1,477573605 | ENST00000621837 | 389690    | NM_207414    | MROH5          |
| A_24_P192262   | 11,2387 | 10,6755 | 1,47754288  | ENST00000005257 | 5898      | NM_005402    | RALA           |
| A_23_P8938     | 2,01878 | 1,45566 | 1,47746095  | ENST00000518621 | 148       | NM_033304    | ADRA1A         |
| A_33_P3347132  | 10,4067 | 9,84405 | 1,476979703 | ENST00000491115 | 23404     | NM_014285    | EXOSC2         |
| A_23_P148556   | 9,03967 | 8,47707 | 1,476928515 | ENST00000218104 | 215       | NM_000033    | ABCD1          |
| A_33_P3222109  | 2,31853 | 1,75595 | 1,476908041 | ENST00000419513 | 7499      | NM_001141919 | XG             |
| A_33_P3411414  | 8,22455 | 7,66207 | 1,476805673 | ENST00000619373 | 727866    | NM_001099684 | FAM156B        |
| A_21_P0005039  | 2,31991 | 1,75745 | 1,4767852   | N/A             | N/A       | N/A          | Inc-SYNCRIP-1  |
| A_33_P3256620  | 4,31421 | 3,75177 | 1,476764728 | ENST00000538772 | N/A       | N/A          | N/A            |
| A_33_P3412035  | 7,19286 | 6,63045 | 1,47673402  | ENST00000322244 | 55236     | NM_018227    | UBA6           |
| A_33_P3282597  | 2,07129 | 1,50892 | 1,476693076 | ENST00000580025 | 85019     | XM_006722561 | TMEM241        |
| A_22_P00015502 | 5,09406 | 4,53173 | 1,476652134 | N/A             | N/A       | AI921603     | Inc-STAT1-1    |
| A_23_P136571   | 2,00371 | 1,4414  | 1,476631664 | ENST00000423786 | 81626     | NM_030933    | SHCBP1L        |
| A_23_P51397    | 11,7823 | 11,22   | 1,476621429 | ENST00000358675 | 55740     | NM_001008493 | ENAH           |
| A_33_P3270192  | 8,84314 | 8,2809  | 1,476560019 | ENST00000409401 | 129563    | AW834780     | DIS3L2         |
| A_23_P382045   | 10,6429 | 10,0807 | 1,476519081 | ENST00000367097 | 56995     | NM_020245    | TULP4          |
| A_33_P3304060  | 4,43055 | 3,86841 | 1,476457675 | ENST00000426551 | 439934    | NR_024087    | LINC00575      |
| A_33_P3382588  | 2,38002 | 1,81799 | 1,476345105 | ENST00000613114 | 7471      | NM_005430    | WNT1           |
| A_21_P0011295  | 4,45838 | 3,89637 | 1,476324639 | ENST00000429926 | N/A       | N/A          | N/A            |
| A_22_P00009756 | 3,00021 | 2,43837 | 1,476150686 | ENST00000422638 | N/A       | N/A          | N/A            |
| A_23_P213153   | 12,2882 | 11,7264 | 1,476109759 | ENST00000502762 | 9987      | NM_031372    | HNRNPDL        |
| A_23_P307502   | 3,86955 | 3,30776 | 1,476099528 | ENST00000441769 | 51198     | NR_024274    | CDKN2A-AS1     |
| A_22_P00024326 | 7,19013 | 6,62843 | 1,476007447 | ENST00000445908 | N/A       | N/A          | N/A            |

|                |         |         |             |                 |           |              |                 |
|----------------|---------|---------|-------------|-----------------|-----------|--------------|-----------------|
| A_33_P3284518  | 6,35562 | 5,79397 | 1,475956293 | ENST00000356828 | 23074     | NM_001006947 | UHRF1BP1L       |
| A_21_P0013231  | 6,11879 | 5,55719 | 1,475905141 | N/A             | N/A       | N/A          | XL0C_I2_013459  |
| A_32_P99032    | 6,33518 | 5,77372 | 1,475761925 | ENST00000504891 | 100240734 | NR_026657    | LOC100240734    |
| A_19_P00321310 | 5,15691 | 4,59548 | 1,475731238 | ENST00000531207 | 100506127 | N/A          | LOC100506127    |
| A_33_P3214635  | 7,31287 | 6,75151 | 1,475659637 | ENST00000262093 | 2235      | NM_001012515 | FECH            |
| A_22_P00001166 | 3,45251 | 2,89117 | 1,47563918  | N/A             | N/A       | DB071735     | Inc-AMZ1-1      |
| A_21_P0009509  | 4,36582 | 3,80449 | 1,475628952 | ENST00000589723 | 284240    | XR_248506    | LOC284240       |
| A_23_P103349   | 2,83821 | 2,27698 | 1,475526672 | ENST00000574641 | 10896     | NM_022375    | OCLM            |
| A_22_P00015769 | 4,70167 | 4,14047 | 1,47549599  | ENST00000446887 | N/A       | N/A          | N/A             |
| A_24_P381224   | 12,4283 | 11,8671 | 1,47549599  | ENST00000526060 | 84447     | NM_172230    | SYVN1           |
| A_22_P00014956 | 5,8849  | 5,32376 | 1,475434627 | N/A             | N/A       | AK130635     | Inc-SLTM-2      |
| A_21_P0006864  | 2,8139  | 2,25277 | 1,4754244   | N/A             | N/A       | N/A          | Inc-C10orf136-1 |
| A_23_P54223    | 9,7737  | 9,21262 | 1,475373267 | ENST00000560871 | 5875      | NM_004581    | RABGGTA         |
| A_21_P0003382  | 5,36707 | 4,80601 | 1,475352814 | ENST00000513793 | 101929448 | NR_125925    | LOC101929448    |
| A_22_P00017937 | 6,10766 | 5,54661 | 1,475342588 | ENST00000460032 | 1968      | N/A          | EIF2S3          |
| A_24_P144773   | 6,74561 | 6,18456 | 1,475342588 | ENST00000616872 | 153830    | NM_144726    | RNF145          |
| A_22_P00002532 | 3,03273 | 2,4717  | 1,475322135 | N/A             | N/A       | N/A          | Inc-C17orf51-5  |
| A_24_P96474    | 9,21829 | 8,65729 | 1,475291457 | ENST00000341255 | 84247     | NM_032287    | LDOC1L          |
| A_21_P0012742  | 1,98247 | 1,42152 | 1,475240328 | ENST00000513875 | N/A       | N/A          | N/A             |
| A_23_P255328   | 4,26545 | 3,70455 | 1,475189201 | ENST00000515013 | 56978     | NM_020226    | PRDM8           |
| A_23_P154675   | 14,9939 | 14,433  | 1,475189201 | ENST00000474384 | 6628      | NM_198216    | SNRPB           |
| A_23_P94762    | 8,35507 | 7,79418 | 1,475178976 | ENST00000322434 | 117608    | NM_058230    | ZNF354B         |
| A_21_P0011197  | 4,64559 | 4,08472 | 1,475158526 | ENST00000418741 | N/A       | N/A          | N/A             |
| A_23_P253841   | 15,445  | 14,8842 | 1,475086952 | ENST00000527328 | 3297      | NM_005526    | HSF1            |
| A_33_P3289745  | 6,14917 | 5,58839 | 1,475066504 | N/A             | 399900    | XR_247232    | LOC399900       |
| A_22_P00013924 | 5,21568 | 4,65493 | 1,475035831 | ENST00000417161 | N/A       | N/A          | N/A             |
| A_23_P55136    | 11,4612 | 10,9005 | 1,474984711 | ENST00000578849 | 29098     | NM_016492    | RANGRF          |
| A_22_P00022678 | 2,20043 | 1,63978 | 1,474933593 | N/A             | N/A       | BE710008     | Inc-PLAU-1      |
| A_23_P201445   | 11,8316 | 11,271  | 1,474882476 | ENST00000302550 | 51029     | NM_016076    | DES12           |
| A_33_P3258392  | 5,37995 | 4,81936 | 1,474872253 | ENST00000379375 | 1906      | NM_001955    | EDN1            |
| A_24_P380349   | 2,86918 | 2,30863 | 1,474831361 | ENST00000305344 | 3354      | NM_000865    | HTR1E           |
| A_21_P0001939  | 4,69496 | 4,13443 | 1,474810916 | N/A             | N/A       | N/A          | Inc-HOXD13-1    |
| A_22_P00008241 | 5,07337 | 4,51288 | 1,474770026 | ENST00000556781 | 102724190 | N/A          | LOC102724190    |

|                |         |         |             |                 |           |              |                |
|----------------|---------|---------|-------------|-----------------|-----------|--------------|----------------|
| A_22_P00017591 | 5,83139 | 5,27099 | 1,474678028 | N/A             | N/A       | N/A          | Inc-WDR7-9     |
| A_22_P00009539 | 4,28453 | 3,72431 | 1,474494049 | ENST00000550742 | N/A       | N/A          | N/A            |
| A_22_P00014011 | 2,88431 | 2,3241  | 1,474483829 | ENST00000456933 | 100996635 | NR_110622    | LOC100996635   |
| A_24_P129417   | 10,63   | 10,0698 | 1,474473609 | ENST00000471755 | 649       | NM_001199    | BMP1           |
| A_33_P3354514  | 3,87837 | 3,3182  | 1,474442948 | N/A             | 114134    | BC047507     | SLC2A13        |
| A_33_P3403361  | 11,6949 | 11,1349 | 1,474269217 | ENST00000580018 | 100287932 | NM_006327    | TIMM23         |
| A_24_P333802   | 12,3547 | 11,7947 | 1,474269217 | ENST00000610432 | 84061     | NM_032121    | MAGT1          |
| A_33_P3238484  | 4,33875 | 3,7788  | 1,474218124 | ENST00000381496 | 22982     | NM_014974    | DIP2C          |
| A_22_P00012474 | 1,99665 | 1,43676 | 1,474156814 | N/A             | N/A       | N/A          | Inc-PRR7-1     |
| A_33_P3352048  | 3,98563 | 3,42574 | 1,474156814 | N/A             | 100506376 | XR_132470    | TTL10-AS1      |
| A_19_P00318461 | 3,3023  | 2,74247 | 1,474095507 | ENST00000366424 | 101927137 | N/A          | LOC101927137   |
| A_22_P00017882 | 3,00181 | 2,442   | 1,474075072 | ENST00000418416 | N/A       | N/A          | N/A            |
| A_23_P32233    | 9,8714  | 9,31164 | 1,474023985 | ENST00000610832 | 9314      | NM_004235    | KLF4           |
| A_33_P3281572  | 2,67013 | 2,11055 | 1,473840088 | ENST00000377989 | 8418      | NR_002174    | CMAHP          |
| A_22_P00021923 | 4,92473 | 4,36519 | 1,473799225 | N/A             | N/A       | N/A          | Inc-HIATL1-5   |
| A_33_P3339212  | 12,5387 | 11,9792 | 1,473758363 | ENST00000166345 | 9319      | NM_004237    | TRIP13         |
| A_22_P00023898 | 5,23449 | 4,67512 | 1,47362557  | N/A             | N/A       | N/A          | Inc-PHYHD1-1   |
| A_21_P0007810  | 2,62964 | 2,07029 | 1,473605141 | N/A             | N/A       | N/A          | Inc-STX2-6     |
| A_23_P39237    | 13,8484 | 13,2891 | 1,473554071 | ENST00000597629 | 7538      | NM_003407    | ZFP36          |
| A_22_P00002869 | 6,83305 | 6,27376 | 1,473543857 | ENST00000568686 | N/A       | AK124776     | N/A            |
| A_21_P0013235  | 3,78307 | 3,2238  | 1,47352343  | N/A             | N/A       | N/A          | XLOC_I2_013462 |
| A_22_P00010729 | 4,82516 | 4,26597 | 1,473441722 | N/A             | 1130      | NR_102436    | LYST           |
| A_23_P397543   | 10,1271 | 9,56803 | 1,47331917  | ENST00000421767 | 285908    | NR_026873    | LINC00174      |
| A_33_P3232280  | 10,0445 | 9,4855  | 1,473247686 | ENST00000261191 | 55726     | NM_018164    | ASUN           |
| A_22_P00002956 | 2,87751 | 2,31867 | 1,473084306 | N/A             | N/A       | N/A          | Inc-C5orf52-1  |
| A_23_P104073   | 11,7071 | 11,1483 | 1,473043464 | ENST00000368712 | 6274      | NM_002960    | S100A3         |
| A_23_P170649   | 3,08612 | 2,52741 | 1,472951574 | ENST00000519697 | 157869    | NM_153225    | SBSPON         |
| A_21_P0006811  | 2,02888 | 1,47018 | 1,472941364 | N/A             | N/A       | N/A          | Inc-PFKP-9     |
| A_21_P0007236  | 6,74658 | 6,18788 | 1,472941364 | N/A             | N/A       | N/A          | Inc-P2RY6-1    |
| A_33_P3328637  | 6,0707  | 5,51201 | 1,472931155 | ENST00000413104 | 5638      | NM_001173486 | PRRG1          |
| A_22_P00019211 | 2,09009 | 1,53146 | 1,472869899 | N/A             | 100505564 | XR_158888    | LOC100505564   |
| A_22_P00014196 | 2,0333  | 1,47468 | 1,472859689 | ENST00000549266 | N/A       | N/A          | N/A            |
| A_23_P96158    | 16,5549 | 15,9963 | 1,472839271 | ENST00000493253 | 3872      | NM_000422    | KRT17          |

|                |         |         |             |                 |           |              |                  |
|----------------|---------|---------|-------------|-----------------|-----------|--------------|------------------|
| A_23_P396981   | 6,77331 | 6,21473 | 1,472818854 | ENST00000326595 | 285331    | NM_001012506 | CCDC66           |
| A_24_P171182   | 9,38929 | 8,83091 | 1,472614692 | ENST00000366812 | 64746     | NM_022735    | ACBD3            |
| A_33_P3235454  | 8,09305 | 7,53477 | 1,472512621 | ENST00000475062 | N/A       | N/A          | N/A              |
| A_23_P68669    | 3,61634 | 3,05838 | 1,472186044 | ENST00000338326 | 140578    | NM_024944    | CHODL            |
| A_33_P3215123  | 10,2915 | 9,73355 | 1,47217584  | ENST00000408927 | 5910      | NM_001100426 | RAP1GDS1         |
| A_22_P00000532 | 4,64174 | 4,08383 | 1,472135023 | N/A             | N/A       | AK130228     | Inc-AC112512.1-1 |
| A_23_P258410   | 9,15122 | 8,5934  | 1,472043189 | ENST00000285018 | 7476      | NM_004625    | WNT7A            |
| A_22_P00004849 | 5,30192 | 4,74414 | 1,472002376 | N/A             | N/A       | N/A          | Inc-CYP19A1-1    |
| A_21_P0002267  | 2,20506 | 1,64728 | 1,472002376 | N/A             | N/A       | N/A          | Inc-C2orf40-4    |
| A_33_P3349252  | 7,72821 | 7,17046 | 1,471971767 | ENST00000594169 | N/A       | AL512723     | N/A              |
| A_21_P0003119  | 4,58892 | 4,03119 | 1,471951361 | N/A             | N/A       | N/A          | Inc-RFT1-1       |
| A_22_P00023256 | 2,14887 | 1,59115 | 1,471941158 | N/A             | N/A       | N/A          | Inc-ACP1-1       |
| A_22_P00002807 | 5,65463 | 5,09696 | 1,471890146 | N/A             | N/A       | BC012788     | Inc-C2orf42-3    |
| A_24_P320880   | 6,69094 | 6,13329 | 1,471869741 | ENST00000396330 | 64089     | NM_022133    | SNX16            |
| A_22_P00001171 | 7,9857  | 7,42806 | 1,471859539 | N/A             | N/A       | N/A          | Inc-ANAPC11-2    |
| A_23_P153086   | 11,0991 | 10,5415 | 1,471818731 | ENST00000593019 | 79863     | NM_024805    | RBFA             |
| A_22_P00005914 | 5,20354 | 4,64601 | 1,471747319 | N/A             | 285943    | NR_122069    | HOXA-AS2         |
| A_32_P200237   | 7,37019 | 6,81268 | 1,471726917 | ENST00000622929 | N/A       | AJ291676     | N/A              |
| A_33_P3257155  | 5,82068 | 5,26318 | 1,471716716 | ENST00000439432 | 60682     | XM_005248760 | SMAP1            |
| A_23_P435941   | 9,31902 | 8,76153 | 1,471706514 | ENST00000533683 | 90378     | NM_138352    | SAMD1            |
| A_22_P00015245 | 2,61769 | 2,06023 | 1,471675912 | N/A             | N/A       | HY037890     | Inc-SPAG1-4      |
| A_33_P3384502  | 4,73993 | 4,18254 | 1,471604507 | ENST00000380981 | 100128946 | NR_038944    | LINC01310        |
| A_19_P00322663 | 7,57971 | 7,02233 | 1,471594307 | ENST00000514452 | N/A       | N/A          | N/A              |
| A_22_P00020670 | 2,22678 | 1,66943 | 1,471563706 | N/A             | N/A       | DA207246     | Inc-SYT13-1      |
| A_23_P410725   | 2,33857 | 1,78127 | 1,471512707 | ENST00000323169 | 126069    | NM_152356    | ZNF491           |
| A_22_P00010297 | 2,35042 | 1,79313 | 1,471502507 | ENST00000510229 | 101929284 | NR_109932    | LOC101929284     |
| A_23_P257668   | 6,50655 | 5,94926 | 1,471502507 | ENST00000476296 | 79989     | NM_024926    | TTC26            |
| A_32_P24709    | 7,12097 | 6,56369 | 1,471492307 | ENST00000372705 | 339559    | NM_198494    | ZFP69            |
| A_21_P0014677  | 8,99669 | 8,4395  | 1,471400514 | ENST00000261263 | 23011     | N/A          | RAB21            |
| A_23_P502312   | 12,8636 | 12,3065 | 1,471308726 | ENST00000242786 | 976       | NM_078481    | CD97             |
| A_21_P0003319  | 4,16901 | 3,61194 | 1,471278131 | ENST00000515329 | 100505685 | XR_171473    | LOC100505685     |
| A_33_P3234530  | 6,68794 | 6,13094 | 1,471206746 | ENST00000453341 | 8718      | NM_001039664 | TNFRSF25         |
| A_24_P786357   | 2,23756 | 1,68057 | 1,471196548 | ENST00000437751 | 389043    | NR_036499    | LINC01120        |

|                |         |         |             |                 |        |              |                |
|----------------|---------|---------|-------------|-----------------|--------|--------------|----------------|
| A_24_P203072   | 8,63056 | 8,07373 | 1,471033396 | ENST00000614628 | 9767   | NM_014735    | JADE3          |
| A_33_P3369731  | 3,55446 | 2,99765 | 1,471013004 | N/A             | N/A    | N/A          | N/A            |
| A_24_P337334   | 11,5124 | 10,9556 | 1,471002807 | ENST00000438320 | 1635   | NM_001012732 | DCTD           |
| A_23_P320887   | 10,5976 | 10,0409 | 1,470900849 | ENST00000540998 | 56882  | NM_001038707 | CDC42SE1       |
| A_33_P3210085  | 12,1793 | 11,6226 | 1,470900849 | ENST00000355029 | 10276  | NM_001047160 | NET1           |
| A_33_P3362981  | 7,92531 | 7,36882 | 1,470686759 | ENST00000301738 | 54442  | NM_018992    | KCTD5          |
| A_21_P0003596  | 5,09612 | 4,53965 | 1,470666371 | N/A             | N/A    | N/A          | Inc-DTHD1-2    |
| A_23_P94683    | 9,34074 | 8,78431 | 1,470625596 | ENST00000379540 | 4799   | NM_002504    | NFX1           |
| A_24_P229531   | 9,47897 | 8,92262 | 1,470544049 | ENST00000409510 | 64859  | NM_001031716 | NABP1          |
| A_33_P3314407  | 2,17734 | 1,62104 | 1,470493085 | ENST00000622726 | 387712 | NM_001242699 | ENO4           |
| A_21_P0000528  | 1,95071 | 1,39457 | 1,470330011 | ENST00000381489 | 414235 | NR_027152    | PRR26          |
| A_23_P83599    | 8,55093 | 7,9948  | 1,47031982  | ENST00000360274 | 5575   | NM_002735    | PRKAR1B        |
| A_33_P3239122  | 6,18208 | 5,62604 | 1,470228099 | ENST00000372550 | 10465  | AK310052     | PPIH           |
| A_33_P3332865  | 12,5574 | 12,0014 | 1,470187336 | ENST00000530122 | 79716  | NM_024663    | NPEPL1         |
| A_24_P199500   | 9,12769 | 8,5717  | 1,470177146 | ENST00000367510 | 6045   | NM_007212    | RNF2           |
| A_23_P133902   | 9,79889 | 9,24294 | 1,470136384 | ENST00000433334 | 170679 | NM_014068    | PSORS1C1       |
| A_33_P3269924  | 7,45585 | 6,89995 | 1,470085434 | ENST00000535831 | 9026   | NM_001303099 | HIP1R          |
| A_33_P3237125  | 6,07913 | 5,52339 | 1,469922406 | ENST00000498417 | 129138 | NM_138797    | ANKRD54        |
| A_22_P00016455 | 1,98742 | 1,43176 | 1,469840898 | N/A             | N/A    | BF726218     | Inc-TMEM64-2   |
| A_23_P256632   | 6,92216 | 6,36652 | 1,469820522 | ENST00000419445 | 5229   | NM_005023    | PGGT1B         |
| A_23_P251881   | 3,63365 | 3,07811 | 1,469718645 | ENST00000376073 | 259197 | NM_147130    | NCR3           |
| A_23_P162970   | 10,7057 | 10,1502 | 1,469677897 | ENST00000561199 | 79711  | NM_024658    | IPO4           |
| A_23_P36397    | 8,77237 | 8,21706 | 1,469484356 | ENST00000228606 | 1594   | NM_000785    | CYP27B1        |
| A_24_P411121   | 5,78437 | 5,22912 | 1,469423243 | ENST00000379265 | 8784   | NM_148901    | TNFRSF18       |
| A_22_P00003285 | 17,0121 | 16,4569 | 1,469372317 | ENST00000429156 | 642587 | NM_001104548 | MIR205HG       |
| A_33_P3394828  | 12,2334 | 11,6782 | 1,469372317 | ENST00000330579 | 79050  | NM_024078    | NOC4L          |
| A_22_P00022890 | 2,03044 | 1,47544 | 1,469168633 | ENST00000549470 | N/A    | N/A          | N/A            |
| A_23_P27315    | 4,18833 | 3,63345 | 1,469046436 | ENST00000308080 | 84034  | NM_032048    | EMILIN2        |
| A_22_P00002580 | 2,46076 | 1,9059  | 1,469026071 | N/A             | N/A    | BG741387     | Inc-C18orf32-1 |
| A_33_P3420889  | 3,02738 | 2,47253 | 1,469015889 | ENST00000369699 | 22986  | NM_014978    | SORCS3         |
| A_21_P0009582  | 2,03717 | 1,48235 | 1,468985342 | N/A             | N/A    | N/A          | Inc-C18orf62-2 |
| A_33_P3395472  | 2,05841 | 1,50369 | 1,468883523 | N/A             | N/A    | N/A          | N/A            |
| A_21_P0007218  | 4,90844 | 4,35378 | 1,468822435 | ENST00000463943 | 55653  | N/A          | BCAS4          |

|                |         |         |             |                 |           |              |                |
|----------------|---------|---------|-------------|-----------------|-----------|--------------|----------------|
| A_23_P44964    | 3,60572 | 3,05107 | 1,468812254 | ENST00000378116 | 221061    | NM_001010924 | FAM171A1       |
| A_21_P0001399  | 2,15196 | 1,59743 | 1,468690087 | N/A             | N/A       | N/A          | Inc-C1orf21-3  |
| A_23_P93938    | 4,62764 | 4,07313 | 1,468669726 | ENST00000460409 | 23148     | NM_001146334 | NACAD          |
| A_33_P3262575  | 13,1616 | 12,6071 | 1,468659546 | ENST00000005260 | 55971     | NM_018842    | BAIAP2L1       |
| A_24_P280113   | 13,5354 | 12,9809 | 1,468659546 | ENST00000371666 | 3597      | NM_001560    | IL13RA1        |
| A_24_P14634    | 2,98878 | 2,43435 | 1,468588288 | ENST00000334018 | 129080    | NM_133455    | EMID1          |
| A_33_P3373009  | 2,1901  | 1,63568 | 1,468578109 | N/A             | N/A       | N/A          | N/A            |
| A_23_P89755    | 10,9913 | 10,4369 | 1,46855775  | ENST00000257190 | 51444     | NM_016271    | RNF138         |
| A_22_P00008182 | 2,03389 | 1,4795  | 1,468547571 | ENST00000527770 | N/A       | N/A          | N/A            |
| A_22_P00002196 | 2,5474  | 1,99304 | 1,468517034 | ENST00000416641 | N/A       | N/A          | N/A            |
| A_22_P00019627 | 3,47998 | 2,92573 | 1,468405069 | N/A             | N/A       | AK308948     | Inc-ALCAM-2    |
| A_21_P0014563  | 3,57512 | 3,02111 | 1,468160813 | N/A             | N/A       | N/A          | N/A            |
| A_32_P141768   | 8,49412 | 7,94031 | 1,467957296 | ENST00000320285 | 56895     | NM_020133    | AGPAT4         |
| A_33_P3218118  | 7,63385 | 7,08004 | 1,467957296 | N/A             | N/A       | N/A          | N/A            |
| A_33_P3337267  | 4,57129 | 4,01751 | 1,467926771 | ENST00000356628 | 441478    | NM_001004354 | NRARP          |
| A_33_P3367251  | 3,84481 | 3,29106 | 1,467896247 | ENST00000380641 | 54875     | NM_001114395 | CNTLN          |
| A_22_P00017330 | 3,23186 | 2,67813 | 1,467875898 | ENST00000525952 | 101928921 | BI517399     | LOC101928921   |
| A_22_P00018003 | 2,01015 | 1,45654 | 1,467753808 | ENST00000440004 | 100289333 | NR_104179    | LOC100289333   |
| A_21_P0000553  | 7,14327 | 6,58968 | 1,467733461 | ENST00000614476 | 130916    | NR_028049    | MTERF4         |
| A_23_P90273    | 4,59795 | 4,04455 | 1,467540176 | ENST00000434302 | 64377     | NM_022467    | CHST8          |
| A_33_P3319640  | 7,5519  | 6,99851 | 1,467530004 | ENST00000615225 | 84717     | AB208892     | HDGFRP2        |
| A_33_P3347937  | 6,03273 | 5,47952 | 1,467346917 | ENST00000528199 | 3297      | NM_005526    | HSF1           |
| A_22_P00024629 | 3,88853 | 3,33534 | 1,467326575 | N/A             | N/A       | N/A          | Inc-CDKAL1-2   |
| A_23_P110851   | 8,08701 | 7,53382 | 1,467326575 | ENST00000310581 | 7015      | NM_198253    | TERT           |
| A_23_P115861   | 8,03849 | 7,4854  | 1,467224872 | ENST00000361807 | 220992    | NM_145312    | ZNF485         |
| A_24_P384636   | 11,6367 | 11,0837 | 1,467133344 | ENST00000589590 | 79002     | NM_024038    | C19orf43       |
| A_21_P0011554  | 2,25973 | 1,70694 | 1,466919802 | N/A             | N/A       | N/A          | XLOC_I2_005880 |
| A_24_P724040   | 11,8518 | 11,2991 | 1,466828294 | ENST00000407763 | 6629      | NM_003092    | SNRPB2         |
| A_24_P734720   | 6,60406 | 6,0516  | 1,4665843   | ENST00000596710 | 151195    | NM_152523    | CCNYL1         |
| A_22_P00025545 | 8,15002 | 7,59766 | 1,466482647 | ENST00000441006 | 100130418 | NR_015352    | CECR7          |
| A_33_P3310274  | 3,39423 | 2,84195 | 1,466401331 | N/A             | N/A       | N/A          | N/A            |
| A_24_P146892   | 11,0505 | 10,4983 | 1,466320018 | ENST00000616379 | 84876     | NM_032790    | ORAI1          |
| A_33_P3316671  | 7,76465 | 7,2125  | 1,4662692   | N/A             | N/A       | N/A          | N/A            |

|                |         |         |             |                 |           |              |               |
|----------------|---------|---------|-------------|-----------------|-----------|--------------|---------------|
| A_33_P3246007  | 12,79   | 12,2379 | 1,466218384 | ENST00000368235 | 128240    | NM_144772    | APOA1BP       |
| A_33_P3289416  | 5,43108 | 4,87911 | 1,46608627  | ENST00000395216 | 146540    | NM_152458    | ZNF785        |
| A_33_P3245289  | 4,12828 | 3,57633 | 1,466065946 | ENST00000475527 | 5793      | NM_002841    | PTPRG         |
| A_33_P3396370  | 6,14434 | 5,59239 | 1,466065946 | ENST00000229243 | 84519     | NM_032489    | ACRBP         |
| A_22_P00009515 | 5,13548 | 4,58354 | 1,466055784 | N/A             | N/A       | N/A          | Inc-MAN2C1-4  |
| A_23_P159775   | 13,2551 | 12,7032 | 1,466015137 | ENST00000486255 | 2564      | NM_004961    | GABRE         |
| A_21_P0008858  | 3,77333 | 3,22147 | 1,465974491 | N/A             | N/A       | N/A          | Inc-PEAK1.1-1 |
| A_33_P3410659  | 4,04848 | 3,49666 | 1,465933846 | ENST00000544853 | 387837    | NM_001129998 | CLEC12B       |
| A_22_P00019986 | 2,05617 | 1,50438 | 1,465903363 | N/A             | N/A       | BE542083     | Inc-PEF1-1    |
| A_22_P00023043 | 2,58292 | 2,03116 | 1,465872881 | ENST00000538528 | 100128124 | NM_001129895 | HGC6.3        |
| A_23_P90407    | 2,77984 | 2,22811 | 1,465842399 | ENST00000427043 | 23581     | NM_012114    | CASP14        |
| A_23_P127175   | 13,2184 | 12,6667 | 1,465811918 | ENST00000452767 | 56681     | NM_020150    | SAR1A         |
| A_33_P3315355  | 9,13631 | 8,58465 | 1,465771278 | ENST00000219315 | 79918     | NM_001160305 | SETD6         |
| A_33_P3215128  | 8,37544 | 7,8238  | 1,465750958 | ENST00000484749 | 200205    | NM_001010867 | IBA57         |
| A_22_P00002528 | 3,54888 | 2,99725 | 1,465740799 | ENST00000582334 | N/A       | DB040349     | N/A           |
| A_33_P3269428  | 5,08564 | 4,53404 | 1,46571032  | ENST00000470655 | N/A       | AK128125     | N/A           |
| A_22_P00003197 | 7,17046 | 6,61887 | 1,46570016  | ENST00000561475 | 57546     | NM_020786    | PDP2          |
| A_23_P205228   | 7,12453 | 6,57299 | 1,465649364 | ENST00000400366 | 540       | NM_000053    | ATP7B         |
| A_33_P3389638  | 12,6618 | 12,1104 | 1,465507143 | ENST00000416614 | 8602      | NM_001291978 | NOP14         |
| A_32_P215179   | 9,35054 | 8,79916 | 1,465486827 | ENST00000448011 | 9284      | NM_006985    | NP1PA1        |
| A_33_P3274134  | 8,5814  | 8,03009 | 1,465415723 | ENST00000451188 | 441151    | NM_001137560 | TMEM151B      |
| A_33_P3258702  | 9,42721 | 8,87592 | 1,465395408 | ENST00000449617 | 9117      | NM_001201584 | SEC22C        |
| A_21_P0010552  | 3,16764 | 2,6165  | 1,465243056 | ENST00000624291 | 441430    | NM_001012421 | ANKRD20A2     |
| A_19_P00322944 | 15,5347 | 14,9836 | 1,465202431 | ENST00000623001 | 387066    | NR_003038    | SNHG5         |
| A_21_P0014435  | 6,28463 | 5,73353 | 1,465202431 | ENST00000608079 | 100287728 | NR_103770    | LOC100287728  |
| A_21_P0010105  | 6,41389 | 5,86282 | 1,465171963 | N/A             | N/A       | N/A          | Inc-GPCPD1-1  |
| A_24_P286898   | 6,94412 | 6,39309 | 1,465131341 | ENST00000374189 | 5599      | NM_001278547 | MAPK8         |
| A_23_P91019    | 10,935  | 10,384  | 1,465100875 | ENST00000490501 | 8575      | NM_003690    | PRKRA         |
| A_23_P396867   | 8,9304  | 8,37942 | 1,465080564 | N/A             | 81502     | NM_178582    | HM13          |
| A_24_P191790   | 7,33077 | 6,7798  | 1,465070409 | ENST00000325094 | 55161     | NM_018126    | TMEM33        |
| A_33_P3385681  | 2,67486 | 2,12395 | 1,46500948  | N/A             | 100130768 | AK128224     | LOC100130768  |
| A_21_P0011433  | 14,4548 | 13,9039 | 1,464999325 | ENST00000458587 | 10134     | NM_001139457 | BCAP31        |
| A_33_P3356004  | 5,03351 | 4,48263 | 1,464979016 | N/A             | 100113386 | NR_027287    | UCKL1-AS1     |

|                |         |         |             |                 |           |              |               |
|----------------|---------|---------|-------------|-----------------|-----------|--------------|---------------|
| A_21_P0000093  | 2,99468 | 2,44382 | 1,464958707 | ENST00000493112 | 8801      | NM_001177599 | SUCLG2        |
| A_23_P102571   | 16,6104 | 16,0596 | 1,464897783 | ENST00000619497 | 56731     | NM_020062    | SLC2A4RG      |
| A_23_P88069    | 9,36373 | 8,81306 | 1,464765788 | ENST00000379589 | 10186     | NM_005780    | LHFP          |
| A_21_P0014414  | 2,81571 | 2,26514 | 1,464664262 | N/A             | N/A       | N/A          | N/A           |
| A_24_P410408   | 2,7354  | 2,18494 | 1,464552591 | ENST00000293670 | 3889      | NM_002282    | KRT83         |
| A_22_P00022304 | 4,36402 | 3,81358 | 1,464532288 | N/A             | N/A       | BX100553     | Inc-SUSD2-1   |
| A_21_P0014218  | 7,48129 | 6,93092 | 1,46446123  | ENST00000607172 | 101927067 | NR_125410    | LOC101927067  |
| A_21_P0009224  | 2,61989 | 2,0696  | 1,464380025 | N/A             | N/A       | N/A          | Inc-COX10-1   |
| A_23_P45324    | 3,44974 | 2,89951 | 1,464319125 | ENST00000372930 | 59353     | NM_021637    | TMEM35        |
| A_33_P3332166  | 4,06586 | 3,51567 | 1,464278526 | ENST00000366757 | 339501    | NM_183062    | PRSS38        |
| A_24_P200854   | 8,44626 | 7,89609 | 1,464258227 | ENST00000612779 | 3199      | NM_006735    | HOXA2         |
| A_33_P3349843  | 5,30479 | 4,75463 | 1,464248077 | N/A             | N/A       | BU171032     | N/A           |
| A_22_P00003309 | 4,05183 | 3,50169 | 1,464227779 | ENST00000357568 | 825       | NM_173087    | CAPN3         |
| A_21_P0003574  | 6,96716 | 6,4171  | 1,464146587 | N/A             | N/A       | N/A          | Inc-DRD5-10   |
| A_33_P3290800  | 9,97823 | 9,42818 | 1,464136438 | ENST00000494957 | 203522    | NM_182540    | DDX26B        |
| A_19_P00317094 | 5,44393 | 4,89388 | 1,464136438 | ENST00000430756 | N/A       | N/A          | N/A           |
| A_23_P74663    | 10,5896 | 10,0397 | 1,463984217 | ENST00000352967 | 9015      | NM_005681    | TAF1A         |
| A_32_P231086   | 8,76763 | 8,21773 | 1,463984217 | ENST00000619556 | 440295    | NM_198181    | GOLGA6L9      |
| A_33_P3359012  | 9,85141 | 9,30151 | 1,463984217 | ENST00000331588 | 1850      | NM_004420    | DUSP8         |
| A_21_P0007365  | 2,25868 | 1,70885 | 1,463913186 | N/A             | N/A       | N/A          | Inc-CABP2-1   |
| A_33_P3281151  | 11,2135 | 10,6637 | 1,463882745 | ENST00000487684 | 8880      | NM_001303433 | FUBP1         |
| A_23_P321452   | 9,85886 | 9,3092  | 1,463740695 | ENST00000334464 | 118987    | NM_173791    | PDZD8         |
| A_21_P0002495  | 1,91186 | 1,36223 | 1,463710258 | N/A             | N/A       | N/A          | Inc-SLC35F5-5 |
| A_24_P769672   | 9,43222 | 8,88261 | 1,463689967 | ENST00000549960 | 728568    | NM_001135570 | C12orf73      |
| A_23_P71904    | 11,9255 | 11,3759 | 1,463679821 | ENST00000481189 | 28989     | NM_014064    | NTMT1         |
| A_23_P116829   | 9,08646 | 8,53688 | 1,463659531 | ENST00000318066 | 7334      | NM_003348    | UBE2N         |
| A_22_P00012970 | 6,12847 | 5,57891 | 1,46363924  | N/A             | N/A       | N/A          | Inc-RELT-1    |
| A_23_P25868    | 10,6771 | 10,1276 | 1,46357837  | ENST00000556492 | 122830    | NM_001011713 | NAA30         |
| A_24_P81298    | 8,76679 | 8,21738 | 1,463487071 | ENST00000373547 | 5537      | NM_001123355 | PPP6C         |
| A_23_P141173   | 3,78182 | 3,23241 | 1,463487071 | ENST00000225275 | 4353      | NM_000250    | MPO           |
| A_23_P56380    | 13,2935 | 12,7441 | 1,463476926 | ENST00000337859 | 55854     | NM_018471    | ZC3H15        |
| A_33_P3341509  | 10,7162 | 10,1669 | 1,463375489 | ENST00000506459 | N/A       | N/A          | N/A           |
| A_33_P3223990  | 6,9918  | 6,44253 | 1,46334506  | N/A             | 7170      | NM_152263    | TPM3          |



|                |         |         |             |                 |           |              |              |
|----------------|---------|---------|-------------|-----------------|-----------|--------------|--------------|
| A_23_P165521   | 5,51507 | 4,96584 | 1,463304488 | ENST00000379213 | 6801      | NM_003162    | STRN         |
| A_21_P0005441  | 3,22022 | 2,67101 | 1,463284202 | N/A             | N/A       | N/A          | Inc-LRRC61-2 |
| A_21_P0008046  | 4,27892 | 3,72975 | 1,463243632 | ENST00000394457 | 130872    | XM_006711943 | AHSA2        |
| A_24_P406334   | 9,66721 | 9,11811 | 1,463172637 | ENST00000475789 | 26872     | NM_012449    | STEAP1       |
| A_22_P00020347 | 5,8106  | 5,26158 | 1,463091503 | ENST00000566922 | N/A       | N/A          | N/A          |
| A_21_P0010135  | 4,52861 | 3,9796  | 1,463081362 | ENST00000451618 | N/A       | N/A          | N/A          |
| A_33_P3303086  | 10,9391 | 10,3901 | 1,463071221 | ENST00000272249 | 92906     | NM_138394    | HNRNPLL      |
| A_33_P3304528  | 10,2093 | 9,66036 | 1,463010375 | ENST00000448372 | 29843     | NM_001267595 | SENP1        |
| A_33_P3413541  | 8,62225 | 8,07331 | 1,463010375 | N/A             | 379013    | NR_001575    | RNF138P1     |
| A_33_P3318993  | 4,18509 | 3,63622 | 1,462939391 | ENST00000532759 | N/A       | N/A          | N/A          |
| A_33_P3304707  | 2,64516 | 2,09635 | 1,46287855  | ENST00000620395 | N/A       | KJ423128     | N/A          |
| A_24_P397107   | 9,67968 | 9,1309  | 1,462848131 | ENST00000302506 | 993       | NM_001789    | CDC25A       |
| A_32_P217510   | 11,1579 | 10,6092 | 1,462767015 | ENST00000436347 | 84128     | NM_032168    | WDR75        |
| A_24_P645765   | 9,3914  | 8,84281 | 1,462655489 | ENST00000381271 | 57542     | NM_020782    | KLHL42       |
| A_33_P3535972  | 2,8826  | 2,33402 | 1,462645351 | ENST00000361795 | 56853     | NM_020180    | CELF4        |
| A_21_P0001124  | 7,18041 | 6,63183 | 1,462645351 | N/A             | 101929609 | XR_246317    | LOC101929609 |
| A_33_P3358019  | 5,10954 | 4,561   | 1,462604798 | N/A             | 102723804 | N/A          | LOC102723804 |
| A_22_P00009583 | 10,0294 | 9,48093 | 1,462533834 | ENST00000533004 | 100128338 | NR_033849    | FAM83H-AS1   |
| A_23_P129443   | 2,43948 | 1,89103 | 1,462513559 | ENST00000563151 | N/A       | AK000013     | N/A          |
| A_22_P00016247 | 5,29989 | 4,75145 | 1,462503422 | N/A             | N/A       | N/A          | Inc-TMCO2-1  |
| A_22_P00016676 | 2,08482 | 1,53639 | 1,462493284 | N/A             | N/A       | BX647623     | Inc-TPO-5    |
| A_21_P0009856  | 2,15942 | 1,611   | 1,462483147 | ENST00000413070 | N/A       | N/A          | N/A          |
| A_33_P3215953  | 9,60015 | 9,05182 | 1,462391916 | ENST00000474859 | 9019      | NM_024569    | MPZL1        |
| A_33_P3305840  | 13,5681 | 13,0198 | 1,462361506 | ENST00000415527 | 6432      | NM_001195446 | SRSF7        |
| A_21_P0013327  | 8,92546 | 8,37723 | 1,462290554 | ENST00000428370 | 493754    | NR_111976    | LOC493754    |
| A_33_P3409289  | 6,21801 | 5,66979 | 1,462280418 | N/A             | N/A       | N/A          | N/A          |
| A_33_P3330413  | 12,0019 | 11,4538 | 1,462158794 | N/A             | N/A       | N/A          | N/A          |
| A_22_P00015858 | 2,05081 | 1,50273 | 1,462138524 | ENST00000562617 | N/A       | N/A          | N/A          |
| A_33_P3236133  | 6,73062 | 6,18255 | 1,46212839  | ENST00000437111 | 55164     | NM_018130    | SHQ1         |
| A_33_P3366550  | 2,64141 | 2,09337 | 1,462097986 | ENST00000404616 | 101929715 | NR_110597    | LOC101929715 |
| A_22_P00025422 | 2,09701 | 1,54898 | 1,462087851 | ENST00000545750 | N/A       | N/A          | N/A          |
| A_23_P140602   | 11,7459 | 11,1979 | 1,462057448 | ENST00000561573 | 51335     | NM_001033088 | NGRN         |
| A_23_P5785     | 5,90269 | 5,35472 | 1,462027046 | ENST00000472667 | 129880    | NM_152384    | BBS5         |

|                |         |         |             |                 |           |              |                  |
|----------------|---------|---------|-------------|-----------------|-----------|--------------|------------------|
| A_32_P104746   | 8,78944 | 8,24165 | 1,461844645 | ENST00000290974 | 57732     | NM_020972    | ZFYVE28          |
| A_23_P214533   | 8,10207 | 7,55428 | 1,461844645 | ENST00000344279 | 64288     | NM_030899    | ZSCAN31          |
| A_21_P0010079  | 5,76325 | 5,21568 | 1,461621742 | N/A             | N/A       | N/A          | Inc-C20orf196-2  |
| A_23_P25003    | 12,6654 | 12,1179 | 1,461550826 | ENST00000620786 | 6249      | NM_002956    | CLIP1            |
| A_23_P115743   | 9,05308 | 8,50565 | 1,461479913 | ENST00000369183 | 63877     | NM_022063    | FAM204A          |
| A_21_P0000073  | 11,4879 | 10,9405 | 1,461449522 | ENST00000502536 | 9180      | NM_001168355 | OSMR             |
| A_21_P0014386  | 4,72572 | 4,17845 | 1,461317838 | N/A             | N/A       | N/A          | N/A              |
| A_33_P3331085  | 7,30335 | 6,75609 | 1,461307709 | ENST00000398844 | 10802     | NM_021982    | SEC24A           |
| A_24_P186346   | 9,8891  | 9,34188 | 1,461267194 | ENST00000426110 | 64682     | NM_022662    | ANAPC1           |
| A_23_P119923   | 11,834  | 11,2868 | 1,461246936 | ENST00000377075 | 26504     | NM_020184    | CNNM4            |
| A_23_P121686   | 13,5056 | 12,9584 | 1,461246936 | ENST00000358008 | 9255      | NM_004757    | AIMP1            |
| A_24_P126262   | 5,42479 | 4,87768 | 1,461155782 | ENST00000470054 | 85317     | NM_181704    | BAGE4            |
| A_22_P00020312 | 10,5115 | 9,96449 | 1,461054506 | N/A             | N/A       | N/A          | Inc-FKBP2-1      |
| A_33_P3235640  | 4,84857 | 4,30157 | 1,461044379 | ENST00000264515 | 5929      | NM_001193273 | RBBP5            |
| A_24_P50248    | 7,08533 | 6,53843 | 1,46094311  | ENST00000327669 | 642273    | NM_001077710 | FAM110C          |
| A_24_P79712    | 10,1336 | 9,58677 | 1,460872226 | ENST00000411948 | 116228    | NM_198076    | COX20            |
| A_33_P3389023  | 7,06861 | 6,52178 | 1,460872226 | ENST00000264228 | 79644     | NM_024592    | SRD5A3           |
| A_32_P22622    | 7,64349 | 7,09672 | 1,460811472 | ENST00000398071 | 8602      | NM_003703    | NOP14            |
| A_21_P0012393  | 9,35846 | 8,81176 | 1,460740594 | N/A             | N/A       | N/A          | XLOC_I2_009883   |
| A_24_P933011   | 4,12444 | 3,57779 | 1,46068997  | ENST00000383490 | 645369    | NM_001080209 | TMEM200C         |
| A_23_P333218   | 12,5664 | 12,0198 | 1,460639347 | ENST00000523215 | 57222     | NM_001031711 | ERGIC1           |
| A_33_P3284359  | 3,52609 | 2,97953 | 1,46059885  | ENST00000378963 | 190       | AW291512     | NROB1            |
| A_22_P00007155 | 4,1566  | 3,6101  | 1,460538107 | N/A             | 101927269 | NR_110075    | LOC101927269     |
| A_21_P0012287  | 3,80413 | 3,25763 | 1,460538107 | ENST00000433066 | N/A       | N/A          | N/A              |
| A_33_P3357748  | 10,5487 | 10,0022 | 1,460538107 | ENST00000513868 | 5820      | NR_003367    | PVT1             |
| A_23_P379200   | 4,06895 | 3,52247 | 1,46051786  | ENST00000335154 | 91010     | NM_175736    | FMNL3            |
| A_21_P0001656  | 4,09257 | 3,54618 | 1,460426751 | N/A             | N/A       | N/A          | Inc-AL669831.1-4 |
| A_24_P667968   | 2,71075 | 2,16437 | 1,460416628 | ENST00000573103 | 26102     | NR_026964    | DKFZP434A062     |
| A_33_P3242080  | 11,0395 | 10,4932 | 1,460335647 | ENST00000566574 | 55308     | NM_018332    | DDX19A           |
| A_21_P0008936  | 5,3139  | 4,76765 | 1,460285037 | ENST00000568607 | 101927334 | NR_110913    | LOC101927334     |
| A_21_P0000332  | 8,50242 | 7,95629 | 1,460163579 | N/A             | 677826    | NR_002977    | SNORA45B         |
| A_22_P00024355 | 3,983   | 3,43688 | 1,460153458 | N/A             | 100509894 | NR_046227    | CPB2-AS1         |
| A_22_P00009038 | 4,9338  | 4,38774 | 1,460092733 | N/A             | N/A       | N/A          | Inc-LDHC-1       |

|                |         |         |             |                 |           |              |                      |
|----------------|---------|---------|-------------|-----------------|-----------|--------------|----------------------|
| A_21_P0011638  | 2,09468 | 1,54869 | 1,460021891 | ENST00000428134 | N/A       | N/A          | N/A                  |
| A_22_P00004700 | 5,02363 | 4,47768 | 1,459981411 | N/A             | 102724301 | NR_120587    | LOC102724301         |
| A_24_P191847   | 5,22937 | 4,68347 | 1,459930812 | ENST00000515198 | 79810     | NM_024754    | PTCD2                |
| A_22_P00004711 | 3,59438 | 3,04849 | 1,459920693 | ENST00000548955 | 283387    | CD675540     | LOC283387            |
| A_24_P67189    | 4,43629 | 3,89041 | 1,459910574 | N/A             | 374768    | AK097400     | SPEM1                |
| A_21_P0002746  | 2,15748 | 1,61166 | 1,459849859 | ENST00000487097 | N/A       | N/A          | N/A                  |
| A_23_P63010    | 12,3381 | 11,7923 | 1,459829621 | ENST00000271688 | 29956     | NM_181746    | CERS2                |
| A_22_P00015351 | 7,54466 | 6,99888 | 1,459809384 | N/A             | N/A       | BC026275     | Inc-SPRYD7-1         |
| A_33_P3283400  | 10,4148 | 9,86908 | 1,459748673 | N/A             | 100507747 | XM_006709971 | LOC100507747         |
| A_33_P3415957  | 13,6744 | 13,1287 | 1,459728437 | ENST00000267869 | 2958      | NM_004492    | GTF2A2               |
| A_21_P0003887  | 5,08489 | 4,5392  | 1,459718319 | N/A             | N/A       | N/A          | Inc-STX18-1          |
| A_33_P3275600  | 3,42079 | 2,87518 | 1,459637377 | ENST00000547930 | 123745    | NM_001206670 | PLA2G4E              |
| A_33_P3400903  | 2,03067 | 1,48506 | 1,459637377 | N/A             | 27184     | NR_002227    | DISC2                |
| A_33_P3236632  | 9,08172 | 8,53614 | 1,459607025 | ENST00000475451 | 375056    | NM_198551    | MIA3                 |
| A_24_P300302   | 2,30216 | 1,75662 | 1,459566557 | ENST00000520773 | 134466    | NR_026867    | ZNF300P1             |
| A_33_P3280502  | 9,22693 | 8,68148 | 1,459475507 | N/A             | N/A       | N/A          | N/A                  |
| A_22_P00013354 | 3,4877  | 2,94227 | 1,459455275 | N/A             | N/A       | AW451725     | Inc-RP11-158I9.5.1-1 |
| A_33_P3315320  | 5,27329 | 4,72787 | 1,459445159 | ENST00000315066 | 124817    | NM_173478    | CNTD1                |
| A_24_P134392   | 9,98849 | 9,44309 | 1,459424927 | ENST00000285667 | 6782      | NM_006948    | HSPA13               |
| A_21_P0002498  | 2,77108 | 2,22574 | 1,459364232 | N/A             | N/A       | N/A          | Inc-FCP2L1-1         |
| A_23_P67829    | 10,4151 | 9,86979 | 1,459333886 | ENST00000409032 | 80146     | NM_025076    | UXS1                 |
| A_21_P0002284  | 2,01923 | 1,47397 | 1,45928331  | N/A             | N/A       | N/A          | Inc-TSN-6            |
| A_33_P3235322  | 4,32261 | 3,7774  | 1,459232736 | ENST00000473280 | 84958     | NM_032872    | SYTL1                |
| A_32_P64096    | 9,73776 | 9,19264 | 1,459141707 | ENST00000328086 | 342357    | NM_001012981 | ZKSCAN2              |
| A_23_P41159    | 7,73409 | 7,18905 | 1,459060797 | ENST00000356692 | 151987    | NM_174907    | PPP4R2               |
| A_23_P52676    | 9,44569 | 8,90066 | 1,459050684 | ENST00000529244 | 117144    | NM_053054    | CATSPER1             |
| A_33_P3255290  | 1,94262 | 1,39761 | 1,459030457 | ENST00000333010 | 9832      | NM_014790    | JAKMIP2              |
| A_23_P209778   | 10,6965 | 10,1515 | 1,459020344 | ENST00000442758 | 5433      | NM_004805    | POLR2D               |
| A_24_P126651   | 9,73568 | 9,19078 | 1,458919216 | ENST00000522397 | 6917      | NM_006756    | TCEA1                |
| A_33_P3350227  | 6,73257 | 6,18767 | 1,458919216 | ENST00000471524 | 6837      | NM_181491    | MED22                |
| A_33_P3226985  | 7,7879  | 7,24301 | 1,458909104 | ENST00000313401 | 8851      | NM_003885    | CDK5R1               |
| A_33_P3385785  | 2,88339 | 2,33857 | 1,458838319 | ENST00000368737 | 6283      | NM_005621    | S100A12              |
| A_33_P3265374  | 14,8724 | 14,3276 | 1,458818095 | ENST00000539827 | 9454      | NM_001145722 | HOMER3               |

|                |         |         |             |                 |           |              |                |
|----------------|---------|---------|-------------|-----------------|-----------|--------------|----------------|
| A_24_P367602   | 8,57284 | 8,02807 | 1,45878776  | N/A             | 574029    | NR_002834    | DUSP5P1        |
| A_23_P1998     | 4,45413 | 3,90946 | 1,458686648 | ENST00000529890 | 322       | NM_001164    | APBB1          |
| A_33_P3340154  | 6,1699  | 5,62525 | 1,458666427 | ENST00000252137 | 8220      | NM_022719    | DGCR14         |
| A_23_P128254   | 5,50972 | 4,96513 | 1,458605764 | N/A             | 10599     | NM_006446    | SLCO1B1        |
| A_22_P00021873 | 2,40807 | 1,86372 | 1,458363137 | N/A             | 101927975 | XR_246372    | LOC101927975   |
| A_23_P44643    | 8,83367 | 8,28934 | 1,45834292  | ENST00000471602 | 51434     | NM_016238    | ANAPC7         |
| A_23_P146637   | 14,3753 | 13,831  | 1,458312595 | ENST00000378892 | 10280     | NM_005866    | SIGMAR1        |
| A_22_P00012110 | 4,95821 | 4,41391 | 1,458312595 | N/A             | N/A       | N/A          | Inc-POFUT2-3   |
| A_22_P00001469 | 2,78444 | 2,24021 | 1,458241839 | N/A             | N/A       | N/A          | Inc-ARAP2-2    |
| A_23_P259127   | 10,3502 | 9,80602 | 1,458191301 | ENST00000517556 | 54845     | NM_017697    | ESRP1          |
| A_33_P3281171  | 4,43586 | 3,8918  | 1,458070017 | ENST00000621995 | 100130987 | NR_024469    | LOC100130987   |
| A_23_P5611     | 9,48793 | 8,94392 | 1,458019485 | ENST00000430328 | 55183     | NM_018151    | RIF1           |
| A_24_P311771   | 9,90245 | 9,35846 | 1,457999273 | ENST00000507465 | 51663     | NM_016107    | ZFR            |
| A_23_P113803   | 11,0386 | 10,4947 | 1,457908321 | ENST00000367411 | 11104     | NM_007044    | KATNA1         |
| A_23_P216549   | 9,36733 | 8,82358 | 1,457756747 | ENST00000361226 | 9853      | NM_014806    | RUSC2          |
| A_23_P92842    | 10,6508 | 10,1071 | 1,457706226 | ENST00000508363 | 51128     | NM_001033503 | SAR1B          |
| A_33_P3250148  | 7,16171 | 6,6182  | 1,457514262 | ENST00000361443 | 221833    | NM_198956    | SP8            |
| A_21_P0013113  | 10,2514 | 9,70789 | 1,457514262 | N/A             | N/A       | N/A          | XLOC_I2_013189 |
| A_21_P0006525  | 2,09492 | 1,55144 | 1,457483954 | ENST00000608176 | 4281      | XR_247299    | MID1           |
| A_33_P3269824  | 2,12805 | 1,58463 | 1,45742334  | ENST00000343457 | 339977    | NM_001024611 | LRRC66         |
| A_33_P3293247  | 6,90917 | 6,36575 | 1,45742334  | ENST00000616132 | 26086     | NM_015597    | GPSM1          |
| A_23_P210554   | 7,51025 | 6,96692 | 1,457332424 | ENST00000422556 | 9825      | NM_006038    | SPATA2         |
| A_24_P30314    | 14,7482 | 14,2049 | 1,45730212  | ENST00000270176 | 57410     | NM_020680    | SCYL1          |
| A_33_P3416634  | 2,20098 | 1,65769 | 1,457292019 | ENST00000399677 | 360226    | NM_001135086 | PRSS41         |
| A_22_P00016516 | 2,30585 | 1,76267 | 1,45718091  | ENST00000415820 | N/A       | N/A          | N/A            |
| A_21_P0005945  | 3,20455 | 2,66152 | 1,457029412 | ENST00000523550 | N/A       | N/A          | N/A            |
| A_22_P00021145 | 4,8757  | 4,33267 | 1,457029412 | N/A             | 101927557 | NR_110808    | LOC101927557   |
| A_22_P00009887 | 5,44172 | 4,89877 | 1,456948619 | N/A             | N/A       | EU137727     | Inc-MFSD4-1    |
| A_23_P213000   | 11,9357 | 11,3928 | 1,456898126 | ENST00000382452 | 9948      | NM_017491    | WDR1           |
| A_22_P00003167 | 2,35642 | 1,81355 | 1,456867831 | N/A             | N/A       | BU679040     | Inc-C9orf66-3  |
| A_33_P3359869  | 8,39084 | 7,84801 | 1,456827438 | N/A             | N/A       | N/A          | N/A            |
| A_23_P52298    | 13,4965 | 12,9537 | 1,456797145 | ENST00000474993 | 10360     | NM_006993    | NPM3           |
| A_22_P00008116 | 8,39685 | 7,85444 | 1,456403386 | N/A             | N/A       | N/A          | Inc-IL23A-2    |

|                |         |         |             |                 |        |              |                |
|----------------|---------|---------|-------------|-----------------|--------|--------------|----------------|
| A_33_P3377851  | 4,59092 | 4,04865 | 1,456262063 | ENST00000599531 | 57469  | NM_020709    | PNMAL2         |
| A_22_P00022412 | 5,55543 | 5,01321 | 1,456211593 | ENST00000580863 | 54941  | NM_017831    | RNF125         |
| A_24_P935009   | 8,58537 | 8,04318 | 1,456181312 | ENST00000354336 | 1399   | NM_005207    | CRKL           |
| A_24_P127748   | 4,90968 | 4,36751 | 1,456161126 | ENST00000313350 | 23122  | NM_015097    | CLASP2         |
| A_33_P3403583  | 4,67534 | 4,1332  | 1,456130846 | ENST00000378368 | N/A    | AB231740     | N/A            |
| A_22_P00017405 | 3,69818 | 3,15605 | 1,456120753 | ENST00000422160 | N/A    | N/A          | N/A            |
| A_22_P00010727 | 2,07733 | 1,53525 | 1,456070288 | ENST00000438371 | N/A    | N/A          | N/A            |
| A_22_P00013127 | 1,96751 | 1,42556 | 1,455939089 | N/A             | N/A    | N/A          | Inc-RMI1-7     |
| A_21_P0014877  | 3,85247 | 3,31058 | 1,45587854  | N/A             | N/A    | N/A          | N/A            |
| A_21_P0008206  | 4,78446 | 4,24264 | 1,455807902 | N/A             | N/A    | N/A          | Inc-GPR183-3   |
| A_21_P0010471  | 3,44272 | 2,90097 | 1,455737267 | N/A             | N/A    | N/A          | Inc-MAPK8IP2-1 |
| A_33_P3316686  | 8,04514 | 7,50344 | 1,455686816 | ENST00000369679 | 51167  | NM_016230    | CYB5R4         |
| A_33_P3231705  | 2,78665 | 2,24499 | 1,455646456 | ENST00000333952 | 342926 | NM_182609    | ZNF677         |
| A_33_P3254510  | 9,48697 | 8,94564 | 1,455313532 | ENST00000391405 | N/A    | N/A          | N/A            |
| A_32_P212897   | 2,35067 | 1,80938 | 1,455273183 | ENST00000430097 | 643406 | NR_029405    | LOC643406      |
| A_22_P00013141 | 6,70713 | 6,1659  | 1,455212661 | N/A             | N/A    | N/A          | Inc-RNASEH1-2  |
| A_23_P76684    | 10,7497 | 10,2085 | 1,455182401 | ENST00000341307 | 10313  | NM_006054    | RTN3           |
| A_22_P00008975 | 2,31449 | 1,77338 | 1,455091625 | ENST00000583840 | 400643 | N/A          | LINC00668      |
| A_32_P28402    | 7,94706 | 7,40595 | 1,455091625 | ENST00000417404 | 147172 | NR_015341    | LRRC37BP1      |
| A_33_P3278896  | 3,97947 | 3,43843 | 1,455021025 | N/A             | N/A    | N/A          | N/A            |
| A_23_P11841    | 5,55773 | 5,01672 | 1,454990769 | ENST00000341360 | 493    | NM_001684    | ATP2B4         |
| A_33_P3253528  | 5,16723 | 4,62624 | 1,454970599 | ENST00000409312 | 9477   | NM_004275    | MED20          |
| A_22_P00009808 | 2,4316  | 1,89063 | 1,454950428 | N/A             | N/A    | N/A          | Inc-MELK-1     |
| A_23_P53614    | 8,47327 | 7,93232 | 1,454930259 | ENST00000547043 | 8315   | NM_006768    | BRAP           |
| A_21_P0005759  | 2,27052 | 1,72972 | 1,454778994 | N/A             | N/A    | N/A          | Inc-FER1L6-1   |
| A_23_P131954   | 14,5506 | 14,0098 | 1,454778994 | ENST00000476648 | 27131  | NM_014426    | SNX5           |
| A_22_P00004067 | 5,93991 | 5,39916 | 1,454728577 | N/A             | N/A    | BC073817     | Inc-CHSY1-5    |
| A_33_P3412125  | 16,304  | 15,7633 | 1,45467816  | ENST00000487216 | N/A    | N/A          | N/A            |
| A_23_P116414   | 11,6131 | 11,0724 | 1,45467816  | ENST00000394613 | 11145  | NM_007069    | PLA2G16        |
| A_33_P3325330  | 3,21831 | 2,6777  | 1,454587416 | N/A             | N/A    | N/A          | N/A            |
| A_23_P213014   | 10,9181 | 10,3775 | 1,454577333 | ENST00000503280 | 56606  | NM_001001290 | SLC2A9         |
| A_24_P372048   | 12,1898 | 11,6492 | 1,454577333 | ENST00000421621 | 10652  | NM_006555    | YKT6           |
| A_22_P00005682 | 9,06483 | 8,52424 | 1,454567251 | N/A             | N/A    | AK296878     | Inc-EIF6-1     |

|                |         |         |             |                 |           |              |                       |
|----------------|---------|---------|-------------|-----------------|-----------|--------------|-----------------------|
| A_33_P3330841  | 5,7813  | 5,24072 | 1,454557169 | ENST00000458191 | 3364      | NM_004507    | HUS1                  |
| A_23_P152038   | 8,26418 | 7,72361 | 1,454547086 | ENST00000620238 | 114791    | NM_052903    | TUBGCP5               |
| A_22_P00025843 | 4,76244 | 4,22188 | 1,454537004 | N/A             | N/A       | N/A          | Inc-CHAD-5            |
| A_19_P00321147 | 4,1772  | 3,63667 | 1,454506758 | ENST00000481148 | 285286    | N/A          | LINC00877             |
| A_33_P3258953  | 6,35496 | 5,81449 | 1,454446268 | ENST00000332441 | 347918    | NR_003290    | EP400NL               |
| A_22_P00005441 | 2,05202 | 1,51163 | 1,454365619 | N/A             | N/A       | N/A          | Inc-DUPD1-2           |
| A_24_P6903     | 9,74775 | 9,20737 | 1,454355538 | ENST00000423391 | 345651    | NM_001017992 | ACTBL2                |
| A_22_P00009265 | 8,53917 | 7,99882 | 1,454325296 | N/A             | 4043      | NM_002337    | LRPAP1                |
| A_22_P00003096 | 1,95626 | 1,41596 | 1,454274894 | ENST00000523881 | N/A       | N/A          | N/A                   |
| A_33_P3357445  | 7,44487 | 6,90464 | 1,454204334 | ENST00000392872 | 6996      | NM_003211    | TDG                   |
| A_22_P00023928 | 4,11847 | 3,57826 | 1,454184174 | N/A             | N/A       | BX647685     | Inc-RP11-293M10.1.1-1 |
| A_23_P57370    | 11,096  | 10,5558 | 1,454174095 | ENST00000486462 | 27440     | NM_033070    | CECR5                 |
| A_23_P162322   | 6,65186 | 6,11194 | 1,453891894 | ENST00000301061 | 7480      | NM_003394    | WNT10B                |
| A_21_P0008815  | 4,26326 | 3,72355 | 1,45368028  | N/A             | N/A       | N/A          | Inc-C15orf2-1         |
| A_23_P51690    | 4,02634 | 3,48683 | 1,453478771 | ENST00000618120 | 57127     | NM_020407    | RHBG                  |
| A_23_P89030    | 10,184  | 9,64451 | 1,453458622 | ENST00000253461 | 100506581 | NM_001195124 | C16orf95              |
| A_22_P00024702 | 1,99744 | 1,45803 | 1,453378027 | N/A             | N/A       | CD516272     | Inc-FZD4-1            |
| A_23_P128574   | 5,82031 | 5,2809  | 1,453378027 | ENST00000412891 | 55068     | NM_017993    | ENOX1                 |
| A_22_P00009309 | 2,56678 | 2,02738 | 1,453367953 | N/A             | N/A       | N/A          | Inc-LRRC48-1          |
| A_23_P306933   | 10,7298 | 10,1905 | 1,453267217 | ENST00000354300 | 160760    | NM_139283    | PPTC7                 |
| A_22_P00006628 | 4,16802 | 3,62873 | 1,453257143 | N/A             | N/A       | BC087858     | Inc-FOXC1-2           |
| A_21_P0000909  | 5,39642 | 4,85718 | 1,453206778 | ENST00000448179 | 284600    | XR_108282    | LOC284600             |
| A_33_P3340769  | 5,84732 | 5,30811 | 1,45317656  | N/A             | 8754      | NM_003816    | ADAM9                 |
| A_33_P3209703  | 4,07686 | 3,53776 | 1,453065765 | N/A             | N/A       | N/A          | N/A                   |
| A_21_P0003496  | 2,96367 | 2,42457 | 1,453065765 | ENST00000512219 | 101927007 | NR_110660    | LINC01365             |
| A_24_P152325   | 8,52831 | 7,98923 | 1,453045621 | ENST00000487308 | N/A       | N/A          | N/A                   |
| A_21_P0012053  | 4,82586 | 4,28687 | 1,452954978 | ENST00000426839 | 388574    | NR_029406    | FLJ43681              |
| A_21_P0009603  | 2,47096 | 1,93204 | 1,452884482 | ENST00000589566 | 101927433 | XR_243834    | LINC01255             |
| A_23_P502641   | 9,07776 | 8,53886 | 1,452864341 | ENST00000449617 | 9117      | NM_032970    | SEC22C                |
| A_22_P00017079 | 4,5743  | 4,03546 | 1,45280392  | N/A             | N/A       | N/A          | Inc-TUSC5-2           |
| A_21_P0008283  | 2,63404 | 2,0953  | 1,452703222 | ENST00000568290 | 4287      | AX721190     | ATXN3                 |
| A_23_P373598   | 11,4503 | 10,9116 | 1,452662945 | ENST00000403150 | 7975      | NM_002360    | MAFK                  |
| A_23_P90933    | 4,08752 | 3,54888 | 1,452602532 | ENST00000342619 | 142679    | NM_080876    | DUSP19                |

|                |         |         |             |                 |        |              |                |
|----------------|---------|---------|-------------|-----------------|--------|--------------|----------------|
| A_21_P0014456  | 6,11964 | 5,58105 | 1,45255219  | N/A             | N/A    | N/A          | N/A            |
| A_32_P47870    | 2,27125 | 1,73276 | 1,45245151  | N/A             | N/A    | BI911851     | Inc-PDZD8-1    |
| A_23_P106174   | 8,09104 | 7,55257 | 1,452431375 | ENST00000394157 | 5663   | AJ008005     | PSEN1          |
| A_21_P0005784  | 2,05158 | 1,51339 | 1,452149512 | N/A             | N/A    | N/A          | Inc-ERICH1-2   |
| A_23_P134601   | 2,46448 | 1,9263  | 1,452139447 | ENST00000222462 | 51384  | NM_057168    | WNT16          |
| A_21_P0012717  | 2,40451 | 1,86635 | 1,452119316 | ENST00000506425 | N/A    | N/A          | N/A            |
| A_22_P00006197 | 7,83966 | 7,30158 | 1,452038796 | N/A             | N/A    | BC033764     | Inc-FAM3A-1    |
| A_22_P00001009 | 5,63687 | 5,09887 | 1,45195828  | ENST00000318245 | 729420 | N/A          | LMO7DN         |
| A_33_P3209915  | 6,5759  | 6,03797 | 1,451887832 | ENST00000340434 | 375743 | NM_001099666 | PTAR1          |
| A_23_P259521   | 10,0564 | 9,51851 | 1,451847578 | ENST00000414719 | 55255  | NM_018268    | WDR41          |
| A_33_P3357879  | 5,69292 | 5,15508 | 1,451797262 | N/A             | N/A    | N/A          | N/A            |
| A_22_P00020712 | 2,69674 | 2,15897 | 1,451726822 | ENST00000455857 | N/A    | BX111115     | N/A            |
| A_22_P00020595 | 5,87885 | 5,3411  | 1,451706697 | N/A             | N/A    | N/A          | Inc-SBF2-1     |
| A_22_P00012788 | 4,63063 | 4,09308 | 1,451505461 | N/A             | N/A    | N/A          | Inc-RALGDS-1   |
| A_24_P101800   | 5,38251 | 4,84505 | 1,451414914 | ENST00000485364 | 140688 | BC023657     | NOL4L          |
| A_33_P3390441  | 13,9625 | 13,4251 | 1,451354553 | ENST00000290158 | 3837   | NM_002265    | KPNB1          |
| A_21_P0013335  | 1,99065 | 1,45325 | 1,451354553 | N/A             | N/A    | N/A          | XLOC_I2_013910 |
| A_23_P6413     | 9,69887 | 9,16155 | 1,451274075 | ENST00000490967 | 140606 | NM_080430    | SELM           |
| A_24_P4736     | 2,57959 | 2,0423  | 1,451243897 | ENST00000325113 | 113746 | NM_053280    | ODF3           |
| A_24_P291401   | 7,83845 | 7,30118 | 1,451223779 | ENST00000422458 | 129303 | NM_001031738 | TMEM150A       |
| A_33_P3367341  | 1,97042 | 1,43316 | 1,451213719 | N/A             | N/A    | N/A          | N/A            |
| A_22_P00002539 | 7,24649 | 6,70924 | 1,45120366  | ENST00000570569 | 57048  | NM_020360    | PLSCR3         |
| A_33_P3319596  | 12,3085 | 11,7713 | 1,451153366 | ENST00000456048 | 128989 | NM_001283106 | TANGO2         |
| A_22_P00011809 | 5,46685 | 4,9298  | 1,451002495 | ENST00000443747 | N/A    | N/A          | N/A            |
| A_23_P122805   | 11,577  | 11,04   | 1,450952208 | ENST00000397622 | 84928  | NM_032842    | TMEM209        |
| A_23_P63972    | 2,31273 | 1,77583 | 1,450851639 | ENST00000514950 | 390213 | N/A          | DOC2GP         |
| A_23_P424513   | 10,5695 | 10,0326 | 1,450851639 | ENST00000539980 | 10048  | NM_005493    | RANBP9         |
| A_33_P3336273  | 5,36976 | 4,83289 | 1,45082147  | ENST00000397909 | 89795  | NM_001024383 | NAV3           |
| A_22_P00015975 | 4,94729 | 4,41046 | 1,450781245 | N/A             | N/A    | N/A          | Inc-TELO2-3    |
| A_33_P3356577  | 5,60234 | 5,06552 | 1,450771189 | ENST00000381596 | 10326  | N/A          | SIRPB1         |
| A_22_P00008594 | 1,98494 | 1,44815 | 1,450741021 | N/A             | N/A    | N/A          | Inc-KCTD6-2    |
| A_22_P00010323 | 2,24465 | 1,7079  | 1,450700799 | N/A             | N/A    | N/A          | Inc-MUTYH-1    |
| A_21_P0000379  | 4,33594 | 3,79923 | 1,450660577 | N/A             | 692108 | NR_003056    | SNORD67        |

|                |         |         |             |                 |           |              |                 |
|----------------|---------|---------|-------------|-----------------|-----------|--------------|-----------------|
| A_22_P00011381 | 1,92028 | 1,3836  | 1,450630412 | N/A             | N/A       | N/A          | Inc-P2RY4-1     |
| A_21_P0014253  | 4,31501 | 3,77836 | 1,450600247 | N/A             | 100505601 | NR_108043    | PARD3-AS1       |
| A_23_P65129    | 11,2174 | 10,6808 | 1,450549974 | ENST00000301463 | 84926     | NM_032840    | SPRYD3          |
| A_22_P00008811 | 2,56654 | 2,02999 | 1,450499703 | ENST00000557928 | 102725022 | AI912566     | LOC102725022    |
| A_33_P3390773  | 8,60058 | 8,06407 | 1,450459487 | ENST00000299550 | 9866      | NM_014818    | TRIM66          |
| A_23_P164089   | 10,5803 | 10,0438 | 1,450449433 | ENST00000394597 | 117584    | NM_001017368 | RFFL            |
| A_33_P3399713  | 2,20595 | 1,66945 | 1,450449433 | N/A             | N/A       | N/A          | N/A             |
| A_23_P433369   | 8,34321 | 7,80677 | 1,450389112 | ENST00000543095 | 25938     | NM_015473    | HEATR5A         |
| A_32_P112881   | 13,452  | 12,9156 | 1,450348899 | ENST00000374274 | 29934     | NM_001256185 | SNX12           |
| A_24_P923102   | 6,18483 | 5,64851 | 1,450268477 | ENST00000392647 | 100526832 | NM_001199290 | PHOSPHO2-KLHL23 |
| A_23_P19482    | 12,9391 | 12,4028 | 1,450248372 | ENST00000375789 | 23564     | NM_013974    | DDAH2           |
| A_24_P417460   | 2,09232 | 1,55602 | 1,450248372 | ENST00000397167 | 57713     | NM_001029880 | SFMBT2          |
| A_23_P155441   | 11,3859 | 10,8496 | 1,450248372 | ENST00000296292 | 91869     | NM_052859    | RFT1            |
| A_23_P324754   | 9,75452 | 9,21829 | 1,450178007 | ENST00000394685 | 57214     | NM_018689    | CEMIP           |
| A_24_P123720   | 7,7657  | 7,22948 | 1,450167956 | ENST00000369002 | 11231     | NM_007214    | SEC63           |
| A_33_P3332989  | 2,48208 | 1,94593 | 1,450097595 | N/A             | N/A       | N/A          | N/A             |
| A_33_P3318668  | 12,1262 | 11,5901 | 1,450047339 | ENST00000409414 | 375791    | NM_199001    | CYSRT1          |
| A_23_P300740   | 4,21472 | 3,67863 | 1,450037288 | ENST00000333383 | 256933    | NM_148896    | NPB             |
| A_23_P252306   | 17,0348 | 16,4988 | 1,449946833 | ENST00000376105 | 3397      | NM_002165    | ID1             |
| A_21_P0003172  | 2,70795 | 2,17198 | 1,449916682 | N/A             | 102723759 | XR_425634    | LOC102723759    |
| A_21_P0008421  | 3,23112 | 2,69517 | 1,449896582 | N/A             | N/A       | N/A          | Inc-MBIP-2      |
| A_33_P3357149  | 7,05692 | 6,52111 | 1,44975589  | ENST00000323387 | N/A       | XM_006717902 | N/A             |
| A_33_P3266564  | 3,89157 | 3,35578 | 1,449735793 | ENST00000382160 | 440023    | NM_001012416 | KRTAP5-6        |
| A_24_P78161    | 7,26797 | 6,73225 | 1,449665453 | ENST00000397292 | 9373      | NM_001031689 | PLAA            |
| A_22_P00018982 | 1,92819 | 1,39249 | 1,449645356 | ENST00000550309 | N/A       | AY927578     | N/A             |
| A_23_P148372   | 12,1094 | 11,5737 | 1,449645356 | ENST00000372972 | 1478      | NM_001325    | CSTF2           |
| A_23_P7791     | 8,26001 | 7,72437 | 1,449585068 | ENST00000370435 | 79627     | NM_024576    | OGFRL1          |
| A_23_P129569   | 9,19349 | 8,65795 | 1,449484594 | ENST00000261584 | 79728     | NM_024675    | PALB2           |
| A_33_P3240702  | 12,4568 | 11,9213 | 1,449444407 | ENST00000327155 | 5932      | NM_002894    | RBBP8           |
| A_21_P0012656  | 3,4287  | 2,8934  | 1,449243485 | N/A             | N/A       | N/A          | XLOC_I2_011043  |
| A_21_P0004815  | 5,86928 | 5,33402 | 1,449203304 | N/A             | 101927703 | NR_125804    | FOX CUT         |
| A_22_P00023186 | 2,77464 | 2,23959 | 1,448992372 | ENST00000412789 | N/A       | EG328425     | N/A             |
| A_23_P255153   | 10,4343 | 9,89939 | 1,448851768 | ENST00000305536 | 51634     | NM_016024    | RBMX2           |



|                |         |         |             |                 |           |              |              |
|----------------|---------|---------|-------------|-----------------|-----------|--------------|--------------|
| A_23_P85765    | 3,27828 | 2,74356 | 1,448660969 | ENST00000362061 | 779       | NM_000069    | CACNA1S      |
| A_22_P00008958 | 6,11424 | 5,57954 | 1,448640887 | ENST00000413796 | N/A       | N/A          | N/A          |
| A_23_P217666   | 17,5695 | 17,0348 | 1,448640887 | ENST00000436473 | N/A       | CR542069     | N/A          |
| A_33_P3266350  | 3,82843 | 3,29382 | 1,448550519 | N/A             | N/A       | N/A          | N/A          |
| A_23_P386420   | 9,82351 | 9,28894 | 1,448510357 | ENST00000618160 | 2967      | NM_001516    | GTF2H3       |
| A_33_P3271301  | 7,28341 | 6,74904 | 1,448309565 | ENST00000335626 | 6942      | NM_181492    | TCF20        |
| A_23_P109881   | 5,60391 | 5,06958 | 1,44826941  | ENST00000464000 | 3700      | NM_002218    | ITIH4        |
| A_33_P3287840  | 6,24183 | 5,70758 | 1,448189103 | ENST00000494250 | 8027      | NM_003473    | STAM         |
| A_23_P46470    | 13,5632 | 13,029  | 1,448138913 | ENST00000377482 | 54206     | NM_018948    | ERRFI1       |
| A_21_P0000241  | 8,34254 | 7,8084  | 1,448078688 | N/A             | 594839    | NR_002436    | SNORA33      |
| A_22_P00003244 | 9,62203 | 9,08792 | 1,448048576 | N/A             | N/A       | N/A          | Inc-CADPS-1  |
| A_23_P144999   | 8,09604 | 7,56193 | 1,448048576 | ENST00000512611 | 51735     | NM_016340    | RAPGEF6      |
| A_24_P338788   | 6,83152 | 6,29746 | 1,447998392 | ENST00000379800 | 122011    | NM_145203    | CSNK1A1L     |
| A_33_P3347932  | 15,1231 | 14,5892 | 1,447837812 | ENST00000527328 | 3297      | NM_005526    | HSF1         |
| A_33_P3278868  | 7,59792 | 7,06411 | 1,447747494 | N/A             | 25938     | BC062720     | HEATR5A      |
| A_23_P133474   | 2,95709 | 2,42333 | 1,44769732  | ENST00000614343 | 2878      | NM_002084    | GPX3         |
| A_21_P0010749  | 5,77606 | 5,24244 | 1,447556842 | ENST00000491962 | 100288069 | NR_033908    | LOC100288069 |
| A_19_P00319093 | 3,90266 | 3,36913 | 1,447466541 | ENST00000510694 | 100506465 | N/A          | LINC01234    |
| A_24_P945147   | 8,88144 | 8,34792 | 1,447456508 | ENST00000537505 | 9135      | NM_004703    | RABEP1       |
| A_19_P00322191 | 5,50718 | 4,97372 | 1,447396311 | ENST00000523759 | 100272228 | NR_027456    | LINC00894    |
| A_23_P44569    | 4,73904 | 4,20575 | 1,447225767 | ENST00000370449 | 1244      | NM_000392    | ABCC2        |
| A_23_P132760   | 2,04299 | 1,50994 | 1,446985034 | ENST00000302649 | 7200      | NM_007117    | TRH          |
| A_23_P52127    | 13,1093 | 12,5763 | 1,446934886 | ENST00000367595 | 84320     | NM_032360    | ACBD6        |
| A_33_P3421351  | 2,09874 | 1,5658  | 1,446874711 | ENST00000476050 | 80342     | NM_001287754 | TRAF3IP3     |
| A_33_P3237699  | 7,73381 | 7,20089 | 1,446854653 | ENST00000283632 | 64795     | NM_022780    | RMND5A       |
| A_23_P259328   | 9,88152 | 9,34866 | 1,446794481 | ENST00000367591 | 8504      | NM_003630    | PEX3         |
| A_21_P0010012  | 3,68426 | 3,15142 | 1,446774425 | N/A             | N/A       | N/A          | Inc-FOXA2-6  |
| A_23_P161998   | 3,0582  | 2,52546 | 1,446674145 | ENST00000527556 | 3263      | NM_000613    | HPX          |
| A_32_P182941   | 16,7304 | 16,1977 | 1,446634036 | ENST00000407940 | 6188      | NM_001005    | RPS3         |
| A_22_P00020206 | 2,46788 | 1,93532 | 1,44649366  | ENST00000547902 | N/A       | BX088918     | N/A          |
| A_33_P3317618  | 3,54534 | 3,01279 | 1,446483634 | ENST00000620175 | 6854      | NM_003178    | SYN2         |
| A_22_P00008349 | 1,9866  | 1,45415 | 1,446383375 | N/A             | N/A       | BI825590     | Inc-ITSN2-2  |
| A_24_P106681   | 15,0065 | 14,4741 | 1,446333248 | ENST00000307630 | 7532      | NM_012479    | YWHAG        |

|                |         |         |             |                 |           |              |                |
|----------------|---------|---------|-------------|-----------------|-----------|--------------|----------------|
| A_33_P3535175  | 9,20669 | 8,67442 | 1,446202926 | N/A             | N/A       | BX095413     | N/A            |
| A_23_P40693    | 8,4836  | 7,95139 | 1,446142781 | ENST00000263253 | 2033      | NM_001429    | EP300          |
| A_23_P123905   | 11,5347 | 11,0025 | 1,446132757 | ENST00000396521 | 51010     | NM_016042    | EXOSC3         |
| A_22_P00007233 | 1,96258 | 1,43047 | 1,446042546 | ENST00000502661 | N/A       | N/A          | N/A            |
| A_33_P3252594  | 7,3746  | 6,84251 | 1,446022499 | N/A             | N/A       | N/A          | N/A            |
| A_33_P3299435  | 8,70137 | 8,1693  | 1,446002453 | ENST00000312397 | 9092      | NM_005146    | SART1          |
| A_21_P0010886  | 11,0899 | 10,5579 | 1,445932295 | N/A             | N/A       | N/A          | XLOC_I2_002033 |
| A_23_P57236    | 8,29574 | 7,76378 | 1,445892205 | ENST00000469018 | 2686      | NM_178026    | GGT7           |
| A_21_P0000389  | 6,19494 | 5,66304 | 1,445832074 | N/A             | 692208    | NR_003073    | SNORD91B       |
| A_33_P3385567  | 3,23399 | 2,70214 | 1,445781966 | ENST00000472842 | 406       | AK128317     | ARNTL          |
| A_21_P0003698  | 2,33025 | 1,7984  | 1,445781966 | N/A             | N/A       | N/A          | Inc-ZFP42-2    |
| A_23_P118427   | 10,8331 | 10,3013 | 1,44573186  | ENST00000613338 | 5606      | NM_145109    | MAP2K3         |
| A_22_P00022577 | 2,14868 | 1,61688 | 1,44573186  | ENST00000371169 | N/A       | XM_003846297 | N/A            |
| A_21_P0014089  | 7,44994 | 6,91815 | 1,445721839 | N/A             | 101927027 | NR_110205    | LOC101927027   |
| A_21_P0003467  | 2,16101 | 1,62926 | 1,445681755 | ENST00000513551 | N/A       | N/A          | N/A            |
| A_33_P3336103  | 9,7181  | 9,18642 | 1,445611612 | ENST00000321385 | 84948     | NM_032862    | TIGD5          |
| A_24_P742352   | 2,3052  | 1,77352 | 1,445611612 | N/A             | 348021    | NR_026852    | LINC00442      |
| A_24_P124672   | 15,6336 | 15,102  | 1,445531453 | ENST00000548342 | 8655      | NM_001037494 | DYNLL1         |
| A_23_P79993    | 2,10664 | 1,5751  | 1,445471336 | ENST00000449810 | 10047     | NM_005492    | CST8           |
| A_19_P00316701 | 16,642  | 16,1106 | 1,445331073 | ENST00000623001 | 387066    | NR_003038    | SNHG5          |
| A_19_P00317337 | 3,61879 | 3,0874  | 1,445321055 | ENST00000434020 | 100506047 | XR_109976    | LOC100506047   |
| A_33_P3243332  | 8,78971 | 8,25835 | 1,445291001 | ENST00000529535 | 143872    | NM_152432    | ARHGAP42       |
| A_33_P3296769  | 5,22044 | 4,6891  | 1,445270965 | N/A             | N/A       | N/A          | N/A            |
| A_22_P00012190 | 4,13929 | 3,60795 | 1,445270965 | N/A             | N/A       | DB062595     | Inc-POU4F2-2   |
| A_21_P0013798  | 4,27701 | 3,74571 | 1,445230894 | N/A             | N/A       | N/A          | XLOC_I2_015641 |
| A_33_P3347241  | 3,52367 | 2,99243 | 1,44517079  | ENST00000399720 | 100874392 | NR_046228    | ANKRD20A12P    |
| A_23_P51051    | 8,69927 | 8,16806 | 1,445140739 | ENST00000411696 | 7701      | NM_001105537 | ZNF142         |
| A_23_P138849   | 10,6297 | 10,0985 | 1,445130722 | ENST00000525600 | 10524     | NM_006388    | KAT5           |
| A_33_P3275510  | 9,52143 | 8,99024 | 1,445120705 | ENST00000303142 | 149840    | XM_006723549 | C20orf196      |
| A_21_P0005431  | 3,49089 | 2,95971 | 1,445110688 | N/A             | N/A       | N/A          | Inc-MKLN1-1    |
| A_21_P0008501  | 3,4133  | 2,88225 | 1,444980476 | N/A             | N/A       | N/A          | Inc-GPR132-1   |
| A_32_P815507   | 3,92384 | 3,39284 | 1,444930398 | N/A             | 100130920 | AK093639     | LOC100130920   |
| A_23_P426021   | 12,3386 | 11,8076 | 1,444930398 | ENST00000513416 | 23231     | NM_015187    | SEL1L3         |

|                |         |         |             |                 |           |              |               |
|----------------|---------|---------|-------------|-----------------|-----------|--------------|---------------|
| A_21_P0006139  | 3,97289 | 3,44201 | 1,444810217 | N/A             | N/A       | N/A          | Inc-PRSS3-1   |
| A_23_P207537   | 11,8478 | 11,317  | 1,444730102 | ENST00000614294 | 11072     | NM_007026    | DUSP14        |
| A_23_P70748    | 13,3079 | 12,7771 | 1,444730102 | ENST00000258062 | 85021     | NM_031922    | REPS1         |
| A_33_P3240679  | 3,95169 | 3,42095 | 1,444670019 | ENST00000371842 | 8019      | N/A          | BRD3          |
| A_21_P0006510  | 5,10184 | 4,57111 | 1,444660005 | N/A             | N/A       | N/A          | Inc-PRPS1-1   |
| A_33_P3408047  | 1,99978 | 1,46918 | 1,444529834 | N/A             | N/A       | N/A          | N/A           |
| A_23_P11800    | 11,5274 | 10,9968 | 1,444529834 | ENST00000375078 | 55450     | NM_018584    | CAMK2N1       |
| A_24_P317719   | 9,31636 | 8,78582 | 1,444469759 | ENST00000525081 | 54904     | NM_017778    | WHSC1L1       |
| A_21_P0002241  | 3,62009 | 3,08957 | 1,444449734 | N/A             | 100507171 | N/A          | BOLA3-AS1     |
| A_33_P3249574  | 7,67399 | 7,14356 | 1,444359628 | N/A             | 9522      | NM_004866    | SCAMP1        |
| A_21_P0004704  | 3,64567 | 3,11526 | 1,444339605 | ENST00000452944 | N/A       | N/A          | N/A           |
| A_22_P00013913 | 4,91305 | 4,38267 | 1,444309571 | N/A             | N/A       | XR_109205    | Inc-RPS27L-2  |
| A_33_P3319161  | 9,40178 | 8,8715  | 1,444209462 | ENST00000396366 | 2395      | NM_181425    | FXN           |
| A_33_P3381183  | 3,65802 | 3,1278  | 1,444149401 | ENST00000511230 | 93556     | NR_021485    | EGFEM1P       |
| A_21_P0000236  | 10,111  | 9,58082 | 1,444109361 | ENST00000527826 | 26784     | NR_002326    | SNORA64       |
| A_32_P60606    | 2,24993 | 1,71975 | 1,444109361 | ENST00000391437 | 399716    | XR_242715    | DKFZp667F0711 |
| A_22_P00005356 | 2,15911 | 1,62896 | 1,444079332 | ENST00000561881 | N/A       | AL049277     | N/A           |
| A_33_P3262833  | 6,17548 | 5,64535 | 1,444059313 | ENST00000612805 | 390535    | NR_033350    | GOLGA8EP      |
| A_33_P3214293  | 7,09718 | 6,56707 | 1,444039294 | ENST00000234310 | 5534      | NM_000945    | PPP3R1        |
| A_24_P333663   | 9,38113 | 8,85103 | 1,444029285 | ENST00000261845 | 5597      | NM_002748    | MAPK6         |
| A_33_P3335865  | 8,31131 | 7,7813  | 1,443939204 | ENST00000345530 | 57539     | NM_001006657 | WDR35         |
| A_21_P0008786  | 6,23535 | 5,70538 | 1,44389917  | N/A             | N/A       | N/A          | Inc-RGMA-9    |
| A_23_P161152   | 9,9479  | 9,41804 | 1,443789083 | ENST00000470978 | 23590     | NM_014317    | PDSS1         |
| A_22_P00016153 | 2,36544 | 1,83559 | 1,443779075 | N/A             | N/A       | BX363751     | Inc-TIMP3-5   |
| A_21_P0010287  | 5,8281  | 5,29828 | 1,443749053 | N/A             | N/A       | N/A          | Inc-RSPH1-4   |
| A_33_P3363507  | 2,0992  | 1,56942 | 1,443709024 | N/A             | N/A       | N/A          | N/A           |
| A_23_P256047   | 8,72036 | 8,19058 | 1,443709024 | ENST00000378380 | 63926     | XM_005260792 | ANKEF1        |
| A_21_P0011029  | 6,51507 | 5,98531 | 1,44368901  | ENST00000587910 | 731275    | NR_029401    | LINC01347     |
| A_33_P3256550  | 6,0661  | 5,53638 | 1,443648983 | N/A             | 100131515 | AF190155     | MST152        |
| A_33_P3231352  | 7,03626 | 6,50655 | 1,443638977 | N/A             | N/A       | AK022088     | N/A           |
| A_23_P146798   | 12,8575 | 12,3278 | 1,44362897  | ENST00000478753 | 22928     | NM_012248    | SEPHS2        |
| A_19_P00320970 | 4,14219 | 3,61251 | 1,443608957 | ENST00000515306 | 101929696 | NR_105052    | LOC101929696  |
| A_33_P3361278  | 2,46509 | 1,93546 | 1,443558926 | ENST00000599893 | 162966    | N/A          | ZNF600        |

|                |         |         |             |                 |           |              |                |
|----------------|---------|---------|-------------|-----------------|-----------|--------------|----------------|
| A_33_P3313476  | 4,75173 | 4,22212 | 1,443538915 | ENST00000345108 | 646799    | NM_001136571 | ZAR1L          |
| A_32_P148796   | 9,20305 | 8,67345 | 1,443528909 | ENST00000399598 | 137886    | NM_001077619 | UBXN2B         |
| A_33_P3404697  | 9,79212 | 9,26256 | 1,443488886 | ENST00000483455 | 118672    | NM_153336    | PSTK           |
| A_33_P3272520  | 2,7333  | 2,20375 | 1,443478881 | ENST00000514084 | N/A       | N/A          | N/A            |
| A_33_P3232504  | 12,2531 | 11,7236 | 1,443428855 | ENST00000409414 | 375791    | NM_199001    | CYSRT1         |
| A_33_P3358905  | 4,98558 | 4,4561  | 1,443408844 | N/A             | N/A       | N/A          | N/A            |
| A_33_P3277367  | 4,34217 | 3,8127  | 1,44339884  | N/A             | N/A       | N/A          | Inc-FAM82A1-2  |
| A_24_P416660   | 11,8659 | 11,3365 | 1,443328807 | ENST00000492239 | 112812    | NM_001031734 | FDX1L          |
| A_23_P75149    | 11,8157 | 11,2863 | 1,443328807 | ENST00000355697 | 119559    | NM_213649    | SFXN4          |
| A_21_P0012609  | 6,9486  | 6,41922 | 1,443308798 | ENST00000509661 | N/A       | N/A          | N/A            |
| A_33_P3327762  | 3,66291 | 3,13357 | 1,443268782 | N/A             | N/A       | N/A          | N/A            |
| A_21_P0002718  | 2,30148 | 1,77215 | 1,443258778 | ENST00000492569 | N/A       | N/A          | N/A            |
| A_23_P62115    | 14,0432 | 13,5139 | 1,443228767 | ENST00000218388 | 7076      | NM_003254    | TIMP1          |
| A_23_P40240    | 11,5006 | 10,9714 | 1,443128733 | ENST00000217131 | 1522      | NM_001336    | CTSZ           |
| A_24_P289709   | 2,01007 | 1,48093 | 1,443068716 | ENST00000623781 | N/A       | AF116719     | N/A            |
| A_33_P3328958  | 2,05486 | 1,52574 | 1,443048711 | N/A             | N/A       | N/A          | N/A            |
| A_24_P371962   | 12,672  | 12,1429 | 1,443028707 | ENST00000619590 | 262       | NM_001634    | AMD1           |
| A_22_P00011174 | 2,55329 | 2,02424 | 1,442978696 | ENST00000522189 | N/A       | N/A          | N/A            |
| A_24_P222655   | 3,76534 | 3,2363  | 1,442968694 | ENST00000374642 | 712       | NM_015991    | C1QA           |
| A_22_P00025157 | 3,43669 | 2,90767 | 1,44294869  | ENST00000455005 | 101929683 | XR_242023    | LOC101929683   |
| A_33_P3408844  | 7,85561 | 7,32662 | 1,442918685 | ENST00000423084 | 100133091 | NR_029411    | LOC100133091   |
| A_21_P0013046  | 4,34934 | 3,82043 | 1,442838675 | N/A             | N/A       | N/A          | XLOC_I2_012802 |
| A_33_P3367017  | 9,54888 | 9,02004 | 1,44276867  | ENST00000534617 | 25855     | NM_001024957 | BRMS1          |
| A_33_P3225705  | 5,17798 | 4,64914 | 1,44276867  | ENST00000288985 | 375748    | NM_001010895 | ERCC6L2        |
| A_21_P0014103  | 6,15286 | 5,62414 | 1,442648669 | N/A             | 101929947 | XR_251219    | LOC101929947   |
| A_22_P00015816 | 4,17535 | 3,64667 | 1,442608671 | N/A             | N/A       | N/A          | Inc-TAX1BP3-1  |
| A_23_P24723    | 10,961  | 10,4324 | 1,442528678 | ENST00000545420 | 51524     | NM_016464    | TMEM138        |
| A_33_P3267263  | 10,626  | 10,0974 | 1,442528678 | N/A             | 26863     | NR_004400    | RNVU1-18       |
| A_21_P0011014  | 9,20589 | 8,67736 | 1,442458687 | ENST00000527217 | 29104     | N/A          | N6AMT1         |
| A_21_P0011945  | 16,8118 | 16,2833 | 1,442428693 | ENST00000427719 | N/A       | N/A          | N/A            |
| A_32_P42964    | 7,63748 | 7,10903 | 1,442378703 | ENST00000329309 | 389493    | NM_001145712 | NUPR1L         |
| A_33_P3277752  | 3,07605 | 2,54772 | 1,442258734 | ENST00000462692 | 200539    | NM_144994    | ANKRD23        |
| A_23_P1343     | 8,41472 | 7,88654 | 1,442108787 | ENST00000377524 | 8027      | NM_003473    | STAM           |

|                |         |         |             |                 |           |              |                |
|----------------|---------|---------|-------------|-----------------|-----------|--------------|----------------|
| A_24_P163113   | 13,7187 | 13,1906 | 1,442028822 | ENST00000431519 | 55573     | NM_017548    | CDV3           |
| A_23_P1585     | 14,6956 | 14,1675 | 1,442028822 | ENST00000406310 | 2101      | NM_004451    | ESRRA          |
| A_22_P00010921 | 2,084   | 1,55612 | 1,44180894  | N/A             | 101927730 | NR_110841    | LOC101927730   |
| A_22_P00003084 | 2,01483 | 1,48704 | 1,441718998 | N/A             | N/A       | N/A          | Inc-C8orf56-3  |
| A_33_P3281905  | 10,3131 | 9,78533 | 1,441699012 | ENST00000557075 | 100144604 | NR_021493    | LINC00930      |
| A_22_P00000219 | 2,02219 | 1,4945  | 1,441619069 | N/A             | 100128560 | NR_125367    | MYHAS          |
| A_22_P00008931 | 8,65769 | 8,13    | 1,441619069 | ENST00000548702 | N/A       | N/A          | N/A            |
| A_23_P96383    | 8,63338 | 8,10571 | 1,441599084 | ENST00000479015 | 8406      | NM_006307    | SRPX           |
| A_23_P41365    | 5,14264 | 4,61502 | 1,441549123 | ENST00000226460 | 26952     | NM_012390    | SMR3A          |
| A_21_P0012176  | 2,08143 | 1,55383 | 1,441529139 | N/A             | N/A       | N/A          | XLOC_I2_009096 |
| A_33_P3296198  | 17,5256 | 16,9981 | 1,441429224 | ENST00000418539 | 401207    | NM_001164479 | C5orf63        |
| A_23_P391764   | 5,13779 | 4,61057 | 1,441149496 | ENST00000372190 | 2889      | NM_198679    | RAPGEF1        |
| A_33_P3392525  | 11,9716 | 11,4444 | 1,441129518 | ENST00000320033 | 379       | NM_001661    | ARL4D          |
| A_23_P63343    | 3,4644  | 2,93726 | 1,441069584 | ENST00000054668 | 10911     | NM_021995    | UTS2           |
| A_23_P31376    | 5,06003 | 4,53292 | 1,441039618 | ENST00000308478 | 54674     | NM_018334    | LRRN3          |
| A_21_P0013377  | 2,13855 | 1,61157 | 1,440909773 | ENST00000457000 | 100506289 | XR_108753    | LOC100506289   |
| A_33_P3212356  | 4,03377 | 3,50682 | 1,440879811 | ENST00000496132 | 642968    | NM_001080515 | FAM163B        |
| A_24_P941930   | 8,38616 | 7,85924 | 1,440849849 | ENST00000396842 | 85403     | NM_033083    | EAF1           |
| A_21_P0012269  | 3,41012 | 2,88321 | 1,440839862 | N/A             | N/A       | N/A          | XLOC_I2_009358 |
| A_21_P0007188  | 2,09989 | 1,57303 | 1,440789927 | N/A             | N/A       | N/A          | Inc-SLC17A6-1  |
| A_22_P00010177 | 4,10195 | 3,57512 | 1,440759967 | N/A             | N/A       | N/A          | Inc-MRPS25-3   |
| A_21_P0009022  | 4,50019 | 3,97346 | 1,440660104 | N/A             | 102725458 | N/A          | LOC102725458   |
| A_24_P84340    | 2,40399 | 1,87727 | 1,440650119 | ENST00000478569 | 375449    | NM_198828    | MAST4          |
| A_22_P00016633 | 3,99624 | 3,46968 | 1,440490354 | ENST00000567904 | 102724564 | BC039325     | LOC102724564   |
| A_21_P0013963  | 3,85825 | 3,33174 | 1,440440432 | N/A             | 100507445 | AK129626     | LOC100507445   |
| A_21_P0001211  | 2,41453 | 1,88802 | 1,440440432 | N/A             | N/A       | N/A          | Inc-KCNT2-2    |
| A_24_P674924   | 9,34304 | 8,81665 | 1,440320624 | ENST00000260665 | 10128     | NM_133259    | LRPPRC         |
| A_22_P00010422 | 2,05125 | 1,52493 | 1,440250741 | N/A             | N/A       | N/A          | Inc-MYOM1-3    |
| A_23_P76841    | 13,431  | 12,9047 | 1,440230775 | ENST00000556022 | 25983     | NM_001042635 | NGDN           |
| A_33_P3218450  | 5,78703 | 5,2608  | 1,440160896 | ENST00000209728 | 990       | NM_001254    | CDC6           |
| A_23_P138655   | 3,95272 | 3,42649 | 1,440160896 | ENST00000623162 | 1592      | NM_057157    | CYP26A1        |
| A_21_P0014915  | 4,93702 | 4,41094 | 1,440011167 | N/A             | N/A       | N/A          | N/A            |
| A_33_P3253733  | 4,96093 | 4,43486 | 1,440001186 | ENST00000419160 | N/A       | BX641696     | N/A            |

|                |         |         |             |                 |           |              |              |
|----------------|---------|---------|-------------|-----------------|-----------|--------------|--------------|
| A_33_P3250669  | 2,18017 | 1,65412 | 1,439981224 | N/A             | N/A       | N/A          | N/A          |
| A_21_P0006141  | 1,99101 | 1,46502 | 1,439921338 | N/A             | N/A       | N/A          | Inc-HRCT1-2  |
| A_33_P6663603  | 6,26103 | 5,73515 | 1,439811553 | ENST00000490313 | 5558      | N/A          | PRIM2        |
| A_22_P00008743 | 4,66923 | 4,14335 | 1,439811553 | N/A             | 643749    | NR_034110    | TRAF3IP2-AS1 |
| A_24_P38951    | 11,5886 | 11,0628 | 1,439731715 | ENST00000393580 | 84957     | NM_032871    | RELT         |
| A_24_P226008   | 12,9032 | 12,3774 | 1,439731715 | ENST00000476682 | 11343     | NM_007283    | MGLL         |
| A_24_P173823   | 12,884  | 12,3583 | 1,439631924 | ENST00000540236 | 5087      | NM_002585    | PBX1         |
| A_23_P141100   | 9,7481  | 9,22256 | 1,439472273 | ENST00000566445 | 23536     | NM_012091    | ADAT1        |
| A_33_P3225096  | 6,65343 | 6,12793 | 1,439432363 | ENST00000567567 | 54893     | NM_017762    | MTMR10       |
| A_33_P3273233  | 5,89281 | 5,36735 | 1,439392454 | ENST00000538868 | 100129215 | XR_109334    | LOC100129215 |
| A_23_P254498   | 12,7619 | 12,2365 | 1,439332592 | ENST00000407006 | 29098     | NM_016492    | RANGRF       |
| A_22_P00009735 | 6,06683 | 5,54146 | 1,439302663 | ENST00000481247 | 114781    | NM_052893    | BTBD9        |
| A_33_P3380063  | 9,87334 | 9,34802 | 1,439252781 | ENST00000369041 | 54507     | NM_025008    | ADAMTSL4     |
| A_32_P226186   | 4,42459 | 3,89929 | 1,439232829 | ENST00000440172 | 57670     | NM_001164665 | KIAA1549     |
| A_22_P00024593 | 8,39017 | 7,8649  | 1,439202901 | ENST00000511256 | 101927953 | NR_105049    | C5orf66-AS1  |
| A_23_P97573    | 9,5614  | 9,03614 | 1,439192925 | ENST00000476970 | 9129      | NM_004698    | PRPF3        |
| A_23_P96041    | 11,6271 | 11,1019 | 1,439133072 | ENST00000372072 | 84187     | NM_032227    | TMEM164      |
| A_21_P0008644  | 2,48866 | 1,96351 | 1,439083197 | N/A             | N/A       | N/A          | Inc-ZNF609-4 |
| A_24_P98249    | 9,99335 | 9,46821 | 1,439073222 | ENST00000317827 | 6867      | NM_006283    | TACC1        |
| A_22_P00021521 | 2,24285 | 1,71772 | 1,439063247 | ENST00000521101 | N/A       | N/A          | N/A          |
| A_33_P3209646  | 9,69523 | 9,17011 | 1,439053272 | ENST00000298125 | 115825    | NM_052950    | WDFY2        |
| A_33_P3356792  | 7,08647 | 6,5614  | 1,439003399 | ENST00000470952 | 2686      | NM_178026    | GGT7         |
| A_23_P1552     | 9,96907 | 9,44421 | 1,438793952 | ENST00000227266 | 1075      | NM_001814    | CTSC         |
| A_24_P397247   | 10,5206 | 9,99576 | 1,438774006 | ENST00000356260 | 55153     | NM_018115    | SDAD1        |
| A_22_P00018555 | 7,66679 | 7,14207 | 1,438654337 | ENST00000316950 | 148266    | NM_152484    | ZNF569       |
| A_22_P00018086 | 3,23612 | 2,71151 | 1,438544649 | ENST00000508217 | N/A       | N/A          | N/A          |
| A_33_P3355232  | 11,2458 | 10,7212 | 1,438534678 | ENST00000519276 | 134510    | NM_145049    | UBLCP1       |
| A_22_P00021294 | 4,22993 | 3,70537 | 1,438494794 | ENST00000568007 | 6477      | BC044920     | SIAH1        |
| A_33_P3345299  | 1,98402 | 1,45946 | 1,438494794 | N/A             | N/A       | N/A          | N/A          |
| A_21_P0003919  | 5,17176 | 4,6472  | 1,438494794 | N/A             | N/A       | N/A          | Inc-FRG2-5   |
| A_23_P72387    | 8,13647 | 7,61195 | 1,438454911 | ENST00000420658 | 60312     | NM_001134647 | AFAP1        |
| A_22_P00016588 | 3,61892 | 3,09443 | 1,438425    | N/A             | N/A       | AI990958     | Inc-TNN-1    |
| A_23_P122532   | 8,82951 | 8,30507 | 1,438375148 | ENST00000366432 | 57827     | NM_021184    | C6orf47      |

|                |         |         |             |                 |           |              |                      |
|----------------|---------|---------|-------------|-----------------|-----------|--------------|----------------------|
| A_21_P0009365  | 2,28454 | 1,76022 | 1,438255513 | N/A             | 101928447 | XR_243759    | LOC101928447         |
| A_33_P3358044  | 2,19916 | 1,6749  | 1,438195699 | N/A             | 100128885 | N/A          | LOC100128885         |
| A_19_P00805840 | 7,93532 | 7,41115 | 1,438105982 | ENST00000452075 | 100129482 | NR_026777    | ZNF37BP              |
| A_24_P345679   | 8,09747 | 7,57336 | 1,438046174 | ENST00000619577 | 4291      | NM_001195432 | MLF1                 |
| A_22_P00013699 | 4,11989 | 3,5958  | 1,438026239 | N/A             | N/A       | N/A          | Inc-RP11-770G2.3.1-1 |
| A_23_P58770    | 3,74749 | 3,22342 | 1,438006304 | ENST00000231121 | 9421      | NM_004821    | HAND1                |
| A_33_P3250028  | 10,7813 | 10,2573 | 1,437936533 | ENST00000270530 | 115704    | NM_145245    | EVI5L                |
| A_21_P0004557  | 2,50673 | 1,98283 | 1,437836866 | N/A             | N/A       | N/A          | Inc-SGTB-4           |
| A_23_P258190   | 15,1111 | 14,5872 | 1,437836866 | ENST00000465351 | 231       | NM_001628    | AKR1B1               |
| A_22_P00003836 | 3,06199 | 2,53826 | 1,437667449 | ENST00000563626 | 100996425 | XR_158902    | LOC100996425         |
| A_23_P97810    | 6,92687 | 6,40315 | 1,437657483 | ENST00000614063 | N/A       | AK295786     | N/A                  |
| A_24_P273865   | 10,2298 | 9,70611 | 1,437627589 | ENST00000467535 | 9477      | NM_004275    | MED20                |
| A_33_P3529860  | 8,35773 | 7,83411 | 1,437557836 | ENST00000536437 | 84678     | NM_001005366 | KDM2B                |
| A_21_P0011716  | 3,73382 | 3,21026 | 1,437498051 | N/A             | N/A       | N/A          | XLOC_I2_006832       |
| A_32_P191084   | 12,0472 | 11,5238 | 1,437338636 | ENST00000301738 | 54442     | NM_018992    | KCTD5                |
| A_23_P313542   | 3,02674 | 2,50336 | 1,437318711 | ENST00000545304 | 6011      | NM_002929    | GRK1                 |
| A_33_P3546033  | 1,99423 | 1,47087 | 1,437298785 | ENST00000421976 | 285043    | BC033511     | LOC285043            |
| A_33_P3220565  | 8,42274 | 7,89953 | 1,437149354 | ENST00000393792 | 92181     | NM_152277    | UBTD2                |
| A_33_P3326105  | 2,66659 | 2,1434  | 1,437129431 | N/A             | 54476     | AK128551     | RNF216               |
| A_24_P197284   | 2,2425  | 1,71937 | 1,437069664 | ENST00000617264 | 285093    | NM_173821    | RTP5                 |
| A_33_P3220410  | 2,11175 | 1,58864 | 1,437049742 | N/A             | N/A       | BX107671     | N/A                  |
| A_21_P0006678  | 2,35363 | 1,83054 | 1,43702982  | ENST00000446107 | N/A       | N/A          | N/A                  |
| A_22_P00009122 | 2,07878 | 1,55571 | 1,437009899 | ENST00000567902 | N/A       | DB037643     | N/A                  |
| A_23_P13442    | 3,0462  | 2,5233  | 1,436840579 | ENST00000342902 | 9645      | NM_014632    | MICAL2               |
| A_33_P3575529  | 2,34888 | 1,82609 | 1,436731029 | N/A             | 26343     | AF309699     | OR5E1P               |
| A_33_P3278103  | 2,11869 | 1,5961  | 1,43653187  | N/A             | 101448202 | NR_103451    | LOC101448202         |
| A_33_P3832857  | 9,25854 | 8,73596 | 1,436521913 | ENST00000570178 | 55142     | NM_018097    | HAUS2                |
| A_22_P00001788 | 4,07764 | 3,55508 | 1,436501999 | N/A             | N/A       | AK096356     | Inc-ATP4B-1          |
| A_23_P105276   | 10,2522 | 9,72966 | 1,436482085 | ENST00000543758 | 7637      | NM_003428    | ZNF84                |
| A_33_P3383871  | 7,87962 | 7,3572  | 1,436362606 | ENST00000274457 | 56929     | NM_020177    | FEM1C                |
| A_23_P35293    | 11,5945 | 11,0721 | 1,436342694 | ENST00000338513 | 2709      | NM_005268    | GJB5                 |
| A_21_P0008636  | 1,94366 | 1,42131 | 1,436292915 | N/A             | N/A       | N/A          | Inc-TCF12-1          |
| A_23_P336513   | 9,54184 | 9,01956 | 1,436223228 | ENST00000285873 | 25929     | NM_015465    | GEMIN5               |

|                |         |         |             |                 |           |           |                     |
|----------------|---------|---------|-------------|-----------------|-----------|-----------|---------------------|
| A_23_P162199   | 10,1183 | 9,59614 | 1,436103771 | ENST00000354947 | 79837     | NM_024779 | PIP4K2C             |
| A_21_P0011852  | 2,8579  | 2,336   | 1,435844982 | N/A             | N/A       | N/A       | XLOC_I2_007566      |
| A_23_P122937   | 1,94711 | 1,42526 | 1,43579522  | ENST00000396040 | 9844      | NM_014800 | ELMO1               |
| A_33_P3255716  | 6,9852  | 6,46343 | 1,435715605 | ENST00000401641 | 285095    | XR_430644 | LOC285095           |
| A_21_P0005095  | 1,95051 | 1,42879 | 1,435665848 | N/A             | 102724475 | N/A       | LOC102724475        |
| A_22_P00014477 | 8,21814 | 7,69647 | 1,435616092 | N/A             | N/A       | BC023010  | Inc-SHARPIN-2       |
| A_21_P0012175  | 2,01269 | 1,49107 | 1,435566338 | N/A             | N/A       | N/A       | XLOC_I2_009050      |
| A_23_P162127   | 12,8036 | 12,282  | 1,435546437 | ENST00000260054 | 60492     | NM_021825 | CCDC90B             |
| A_23_P259707   | 2,27775 | 1,75616 | 1,435536487 | ENST00000395056 | 54886     | NM_207299 | LPPR1               |
| A_22_P00016235 | 10,1488 | 9,62734 | 1,435407138 | ENST00000471023 | 26792     | NR_002738 | SNORD57             |
| A_21_P0001561  | 3,54267 | 3,02128 | 1,435337493 | N/A             | N/A       | N/A       | Inc-OLFM3-1         |
| A_23_P64567    | 8,48398 | 7,96265 | 1,4352778   | ENST00000617237 | 51400     | NM_016147 | PPME1               |
| A_23_P156319   | 14,4345 | 13,9132 | 1,435247955 | ENST00000336314 | 23367     | NM_015315 | LARP1               |
| A_33_P3256232  | 12,7721 | 12,2508 | 1,435247955 | N/A             | 60672     | NM_021933 | MIIP                |
| A_32_P72394    | 7,29744 | 6,77619 | 1,435198214 | ENST00000456696 | 5575      | NM_002735 | PRKAR1B             |
| A_23_P63798    | 11,05   | 10,5288 | 1,435148475 | ENST00000173785 | 1316      | NM_001300 | KLF6                |
| A_32_P76035    | 7,7552  | 7,23419 | 1,434959481 | ENST00000260604 | 87178     | NM_033109 | PNPT1               |
| A_33_P3227284  | 13,0966 | 12,5756 | 1,434949535 | ENST00000373719 | 8473      | NM_181672 | OGT                 |
| A_33_P3382125  | 5,79898 | 5,27806 | 1,434869966 | ENST00000592909 | N/A       | N/A       | N/A                 |
| A_21_P0012502  | 2,1137  | 1,59281 | 1,434840129 | ENST00000474979 | N/A       | N/A       | N/A                 |
| A_23_P133227   | 11,6017 | 11,0809 | 1,434750622 | ENST00000504156 | 3035      | NM_002109 | HARS                |
| A_21_P0011218  | 3,45387 | 2,93317 | 1,434651176 | N/A             | 400110    | N/A       | ANKRD20A19P         |
| A_33_P3386429  | 5,24642 | 4,72572 | 1,434651176 | ENST00000447266 | 26054     | NM_015571 | SENP6               |
| A_23_P258071   | 12,3065 | 11,7858 | 1,434651176 | ENST00000371442 | 7737      | NM_006978 | RNF113A             |
| A_33_P3418576  | 4,90596 | 4,3854  | 1,434511964 | ENST00000367101 | 84947     | NR_073096 | SERAC1              |
| A_23_P50217    | 2,33176 | 1,81134 | 1,434372764 | ENST00000335820 | 79891     | NM_024833 | ZNF671              |
| A_33_P3311637  | 13,0279 | 12,5075 | 1,43435288  | ENST00000556486 | 23256     | NM_016106 | SCFD1               |
| A_21_P0005568  | 7,93709 | 7,41669 | 1,43435288  | N/A             | N/A       | N/A       | Inc-AC004980.12.1-1 |
| A_23_P309198   | 4,28193 | 3,76163 | 1,434253462 | ENST00000397841 | 84536     | NR_027128 | LINC01547           |
| A_22_P00002928 | 1,96436 | 1,44412 | 1,434193814 | ENST00000523745 | N/A       | N/A       | N/A                 |
| A_24_P920521   | 5,54851 | 5,02827 | 1,434193814 | ENST00000377615 | 170622    | NM_203497 | COMMD6              |
| A_32_P12327    | 5,9432  | 5,42297 | 1,434183873 | ENST00000503051 | 643783    | NR_125363 | USP46-AS1           |
| A_22_P00000952 | 8,06565 | 7,54568 | 1,43392543  | ENST00000553344 | N/A       | AY094612  | N/A                 |



|                |         |         |             |                 |           |              |                |
|----------------|---------|---------|-------------|-----------------|-----------|--------------|----------------|
| A_23_P143817   | 5,11499 | 4,59507 | 1,433875735 | ENST00000475616 | 4638      | NM_053025    | MYLK           |
| A_33_P3345132  | 6,08972 | 5,56982 | 1,433855857 | N/A             | 147660    | NM_001099694 | ZNF578         |
| A_24_P884376   | 9,33686 | 8,81697 | 1,433845919 | ENST00000609439 | N/A       | N/A          | N/A            |
| A_22_P00012676 | 4,63477 | 4,115   | 1,43372666  | ENST00000433893 | 101929542 | XR_244985    | LOC101929542   |
| A_22_P00014155 | 6,51337 | 5,99374 | 1,433587537 | ENST00000567167 | N/A       | N/A          | N/A            |
| A_21_P0009348  | 2,4926  | 1,97297 | 1,433587537 | N/A             | N/A       | N/A          | Inc-HELZ-1     |
| A_32_P4364     | 15,8609 | 15,3414 | 1,433458363 | ENST00000458587 | 10134     | NM_005745    | BCAP31         |
| A_32_P116206   | 11,0437 | 10,5242 | 1,433458363 | N/A             | 768211    | NM_001085400 | RELL1          |
| A_22_P00014280 | 3,81659 | 3,2971  | 1,433448427 | N/A             | N/A       | N/A          | Inc-SEPT11-1   |
| A_23_P131215   | 2,29731 | 1,77787 | 1,433398748 | ENST00000264376 | 1421      | NM_006891    | CRYGD          |
| A_19_P00317178 | 13,0906 | 12,5712 | 1,433359007 | ENST00000625175 | 387066    | NR_003038    | SNHG5          |
| A_33_P3251672  | 4,11484 | 3,59544 | 1,433359007 | ENST00000398207 | 20        | NM_001606    | ABCA2          |
| A_21_P0003079  | 2,26205 | 1,74266 | 1,433349072 | N/A             | N/A       | N/A          | Inc-PYDC2-1    |
| A_33_P3307660  | 9,39434 | 8,87499 | 1,433309331 | ENST00000347925 | 54758     | NM_001184854 | KLHDC4         |
| A_22_P00000597 | 2,66564 | 2,14629 | 1,433309331 | N/A             | N/A       | N/A          | Inc-ACBD6-2    |
| A_23_P353005   | 10,1142 | 9,59501 | 1,433150381 | ENST00000359704 | 154214    | NM_152553    | RNF217         |
| A_33_P3292829  | 7,97569 | 7,45663 | 1,433021247 | ENST00000550251 | 55681     | NM_017988    | SCYL2          |
| A_21_P0005320  | 7,51862 | 6,99956 | 1,433021247 | N/A             | N/A       | N/A          | Inc-EPHB4-1    |
| A_22_P00024879 | 4,27976 | 3,76076 | 1,43296165  | ENST00000511182 | N/A       | N/A          | N/A            |
| A_32_P129752   | 12,7523 | 12,2334 | 1,432862328 | ENST00000555868 | 161291    | NM_001017970 | TMEM30B        |
| A_33_P3412353  | 11,3215 | 10,8026 | 1,432862328 | ENST00000541009 | 10795     | NM_152943    | ZNF268         |
| A_23_P407565   | 2,01736 | 1,49847 | 1,432852397 | ENST00000541347 | 1524      | NM_001337    | CX3CR1         |
| A_33_P3260062  | 2,9866  | 2,46773 | 1,432832533 | ENST00000262971 | 51588     | AK022481     | PIAS4          |
| A_23_P327156   | 5,37543 | 4,85657 | 1,432822602 | N/A             | 645431    | NR_024334    | FUT8-AS1       |
| A_21_P0001988  | 2,83001 | 2,31119 | 1,432782876 | ENST00000433724 | N/A       | N/A          | N/A            |
| A_33_P3576797  | 8,58224 | 8,06351 | 1,432693497 | N/A             | 158863    | AL110203     | LOC158863      |
| A_22_P00022017 | 4,32334 | 3,80474 | 1,432564404 | N/A             | 100506801 | NR_038404    | LOC100506801   |
| A_19_P00315647 | 2,36007 | 1,84149 | 1,432544545 | N/A             | 100507165 | N/A          | LOC100507165   |
| A_22_P00002969 | 2,29143 | 1,77288 | 1,432514756 | N/A             | N/A       | N/A          | Inc-C6orf108-1 |
| A_24_P175460   | 8,47425 | 7,95572 | 1,432494897 | ENST00000389532 | 157922    | NM_015447    | CAMSAP1        |
| A_22_P00018629 | 2,08709 | 1,56862 | 1,432435323 | N/A             | N/A       | N/A          | Inc-CROCC-2    |
| A_33_P3330716  | 10,1197 | 9,60132 | 1,432345966 | ENST00000403263 | 54891     | NM_017759    | INO80D         |
| A_33_P3391656  | 10,4897 | 9,97135 | 1,432316181 | ENST00000372114 | 112858    | NM_033550    | TP53RK         |

|                |         |         |             |                 |           |              |               |
|----------------|---------|---------|-------------|-----------------|-----------|--------------|---------------|
| A_21_P0013439  | 5,94958 | 5,43136 | 1,432187122 | ENST00000412091 | N/A       | N/A          | N/A           |
| A_33_P3333820  | 10,7923 | 10,2741 | 1,432167268 | ENST00000263228 | 54926     | NM_017811    | UBE2R2        |
| A_33_P3227345  | 9,96986 | 9,4517  | 1,43212756  | ENST00000612074 | 2280      | NM_054014    | FKBP1A        |
| A_22_P00012040 | 3,93446 | 3,41631 | 1,432117634 | N/A             | N/A       | AW265493     | Inc-PLEKHB1-1 |
| A_33_P3375314  | 8,89807 | 8,38017 | 1,431869488 | ENST00000338821 | 10079     | NM_006045    | ATP9A         |
| A_33_P3369336  | 5,2255  | 4,70762 | 1,431849638 | ENST00000375497 | 2641      | NM_002054    | GCG           |
| A_33_P3229107  | 17,925  | 17,4072 | 1,431770242 | ENST00000429156 | 642587    | NM_001104548 | MIR205HG      |
| A_22_P00002232 | 2,61292 | 2,09516 | 1,431730545 | N/A             | 101930421 | XR_247467    | LOC101930421  |
| A_21_P0006460  | 4,31793 | 3,80037 | 1,431532079 | ENST00000455986 | N/A       | N/A          | N/A           |
| A_19_P00321540 | 4,42163 | 3,90409 | 1,431512234 | N/A             | N/A       | N/A          | Inc-MAGEA8-2  |
| A_33_P3339103  | 12,2372 | 11,7197 | 1,431472545 | ENST00000372389 | 9533      | NM_203290    | POLR1C        |
| A_21_P0008185  | 1,9496  | 1,43215 | 1,431422934 | N/A             | N/A       | N/A          | Inc-RNF219-2  |
| A_23_P22682    | 4,32236 | 3,80492 | 1,431413013 | ENST00000616751 | 51309     | NM_016608    | ARMCX1        |
| A_23_P325631   | 7,96416 | 7,4469  | 1,431234431 | ENST00000378536 | 6497      | NM_003036    | SKI           |
| A_23_P165130   | 11,3465 | 10,8293 | 1,431174909 | ENST00000532896 | 84769     | NM_032683    | MPV17L2       |
| A_33_P3389178  | 9,83885 | 9,32171 | 1,43111539  | ENST00000395358 | 10411     | U78169       | RAPGEF3       |
| A_19_P00812135 | 2,96316 | 2,44608 | 1,431055872 | ENST00000417705 | 100130417 | NR_026874    | LOC100130417  |
| A_21_P0013802  | 8,3164  | 7,79934 | 1,431036034 | ENST00000334398 | 55217     | N/A          | TMLHE         |
| A_33_P3213086  | 7,52333 | 7,00633 | 1,43097652  | ENST00000577614 | N/A       | N/A          | N/A           |
| A_22_P00002203 | 3,34096 | 2,82397 | 1,430966601 | N/A             | N/A       | N/A          | Inc-BTN1A1-1  |
| A_33_P3364989  | 10,3803 | 9,86339 | 1,430887254 | N/A             | 170487    | NM_001024675 | ACTL10        |
| A_33_P3427102  | 13,8736 | 13,3567 | 1,430877336 | ENST00000460450 | 150465    | NM_153712    | TTL           |
| A_21_P0010775  | 10,3498 | 9,83292 | 1,4308575   | ENST00000621564 | 79668     | NM_001178056 | PARP8         |
| A_21_P0008257  | 2,40158 | 1,88471 | 1,430847582 | N/A             | N/A       | N/A          | Inc-DIAPH3-3  |
| A_22_P00022010 | 6,03881 | 5,52202 | 1,430768241 | ENST00000293829 | 2256      | AK122636     | FGF11         |
| A_33_P3343485  | 7,53972 | 7,02299 | 1,430708738 | ENST00000479835 | 3092      | AY358103     | HIP1          |
| A_24_P200694   | 11,0064 | 10,4897 | 1,430678988 | ENST00000374656 | 6015      | NM_002931    | RING1         |
| A_33_P3359268  | 15,3549 | 14,8383 | 1,430579824 | ENST00000619543 | 10362     | NM_006339    | HMG20B        |
| A_33_P3395369  | 10,5203 | 10,0038 | 1,430480667 | ENST00000619590 | 262       | NM_001634    | AMD1          |
| A_32_P114726   | 1,99189 | 1,47542 | 1,430450922 | ENST00000544251 | 101927637 | NR_120451    | LOC101927637  |
| A_23_P205913   | 7,05077 | 6,53441 | 1,430341859 | ENST00000261892 | 9187      | NM_004727    | SLC24A1       |
| A_33_P3507562  | 3,06538 | 2,54907 | 1,430292288 | N/A             | 23642     | BM548627     | SNHG1         |
| A_33_P3292812  | 9,24972 | 8,73343 | 1,43027246  | ENST00000556663 | 55668     | NM_017972    | GPATCH2L      |

|                |         |         |             |                 |        |              |                |
|----------------|---------|---------|-------------|-----------------|--------|--------------|----------------|
| A_23_P406385   | 10,6498 | 10,1336 | 1,430183238 | ENST00000324361 | 146330 | NM_153350    | FBXL16         |
| A_33_P3415923  | 8,44562 | 7,92943 | 1,430173325 | ENST00000352151 | 91010  | NM_175736    | FMNL3          |
| A_22_P00015986 | 5,97033 | 5,45419 | 1,43012376  | ENST00000506148 | N/A    | N/A          | N/A            |
| A_32_P190303   | 1,94937 | 1,43324 | 1,430113847 | ENST00000393437 | 164832 | NM_198461    | LONRF2         |
| A_23_P748      | 12,29   | 11,7739 | 1,430084109 | ENST00000367021 | 3664   | NM_006147    | IRF6           |
| A_33_P3352449  | 10,0643 | 9,54825 | 1,430034547 | ENST00000504731 | 54516  | NM_019041    | MTRF1L         |
| A_33_P3789056  | 6,64163 | 6,12559 | 1,430024635 | N/A             | 644997 | NR_027045    | PIK3CD-AS1     |
| A_32_P87531    | 8,99814 | 8,48214 | 1,429984986 | ENST00000453375 | 127602 | NM_001145154 | DNAH14         |
| A_19_P00317451 | 3,79611 | 3,28015 | 1,429945339 | ENST00000429829 | 7503   | NR_001564    | XIST           |
| A_21_P0000545  | 1,94593 | 1,42997 | 1,429945339 | ENST00000305754 | 26343  | NR_027711    | OR5E1P         |
| A_24_P280029   | 7,93232 | 7,41637 | 1,429935428 | ENST00000451997 | 57026  | NM_020315    | PDXP           |
| A_24_P912372   | 7,55913 | 7,0432  | 1,429915605 | ENST00000530275 | 643314 | NM_015038    | KIAA0754       |
| A_21_P0001538  | 4,04638 | 3,53047 | 1,429895782 | N/A             | N/A    | N/A          | Inc-GBP5-2     |
| A_23_P126757   | 8,94501 | 8,42915 | 1,429846226 | ENST00000481797 | 65123  | NM_023015    | INTS3          |
| A_23_P253074   | 2,13775 | 1,62192 | 1,429816494 | ENST00000519884 | 55124  | NM_018068    | PIWIL2         |
| A_21_P0013365  | 2,02958 | 1,51381 | 1,429757031 | ENST00000422825 | 401303 | N/A          | ZNF815P        |
| A_22_P00011306 | 2,71462 | 2,19886 | 1,429747121 | ENST00000581648 | N/A    | N/A          | N/A            |
| A_24_P65060    | 1,96564 | 1,44994 | 1,42968766  | ENST00000329713 | 84206  | NM_032246    | MEX3B          |
| A_21_P0012406  | 2,30909 | 1,79339 | 1,42968766  | N/A             | N/A    | N/A          | XLOC_I2_009929 |
| A_23_P144627   | 8,41087 | 7,8952  | 1,429657931 | ENST00000341948 | 56123  | NM_018933    | PCDHB13        |
| A_21_P0006915  | 4,63696 | 4,12134 | 1,429608384 | N/A             | N/A    | N/A          | Inc-TCF7L2-1   |
| A_23_P65918    | 10,7939 | 10,2783 | 1,429588565 | ENST00000260386 | 3706   | NM_002220    | ITPKA          |
| A_21_P0006684  | 3,25182 | 2,73623 | 1,429578656 | ENST00000603033 | N/A    | N/A          | N/A            |
| A_21_P0001671  | 3,46165 | 2,94608 | 1,429558838 | N/A             | N/A    | N/A          | Inc-HPCA-1     |
| A_33_P3210521  | 8,36229 | 7,84675 | 1,429529112 | ENST00000435420 | 60526  | NM_021925    | C2orf43        |
| A_33_P3255075  | 1,98569 | 1,4703  | 1,429380488 | ENST00000272879 | 843    | NM_032974    | CASP10         |
| A_22_P00013475 | 2,09266 | 1,57728 | 1,429370581 | ENST00000576842 | N/A    | N/A          | N/A            |
| A_33_P3316073  | 5,76263 | 5,24728 | 1,429340858 | ENST00000398119 | 26512  | NM_012141    | INTS6          |
| A_22_P00023212 | 1,97792 | 1,46261 | 1,429301229 | ENST00000418690 | N/A    | N/A          | N/A            |
| A_23_P148463   | 10,7044 | 10,1891 | 1,429291322 | ENST00000371322 | 8450   | NM_003588    | CUL4B          |
| A_24_P213206   | 8,51042 | 7,99519 | 1,429221974 | ENST00000407656 | N/A    | CR627448     | N/A            |
| A_33_P3827035  | 4,43272 | 3,91757 | 1,429142723 | ENST00000335478 | 348840 | NR_003291    | ANKRD18DP      |
| A_33_P3318490  | 3,26503 | 2,75003 | 1,42899414  | N/A             | 23024  | BC014432     | PDZRN3         |

|                |         |         |             |                 |           |              |              |
|----------------|---------|---------|-------------|-----------------|-----------|--------------|--------------|
| A_23_P118158   | 3,52869 | 3,01371 | 1,42897433  | ENST00000473392 | 9956      | NM_006043    | HS3ST2       |
| A_21_P0009850  | 3,17483 | 2,65988 | 1,428944615 | N/A             | N/A       | N/A          | Inc-CEBPB-3  |
| A_24_P87746    | 2,09056 | 1,57582 | 1,428736632 | ENST00000615390 | 3809      | NM_012314    | KIR2DS4      |
| A_23_P96590    | 6,2207  | 5,70602 | 1,428677214 | ENST00000537097 | 9737      | NM_014710    | GPRASP1      |
| A_21_P0014827  | 2,14784 | 1,63321 | 1,428627701 | ENST00000598007 | 100287166 | XR_132674    | LOC100287166 |
| A_23_P154688   | 12,728  | 12,2134 | 1,428597993 | ENST00000474451 | 83959     | NM_032034    | SLC4A11      |
| A_33_P3843285  | 3,35156 | 2,83697 | 1,428588091 | N/A             | 151877    | XR_110023    | MAGI1-IT1    |
| A_33_P3267607  | 6,86662 | 6,35207 | 1,428548483 | N/A             | 729870    | XR_244739    | LOC729870    |
| A_23_P171237   | 8,81149 | 8,29699 | 1,428498974 | ENST00000373695 | 93953     | NM_052957    | ACRC         |
| A_21_P0008678  | 4,52554 | 4,01112 | 1,428419763 | ENST00000556519 | N/A       | N/A          | N/A          |
| A_21_P0001214  | 2,37596 | 1,86154 | 1,428419763 | ENST00000449188 | 647219    | N/A          | ASCL5        |
| A_23_P419764   | 4,62079 | 4,10639 | 1,428399961 | ENST00000324309 | 91050     | AL834257     | CCDC149      |
| A_33_P3217198  | 2,02075 | 1,50641 | 1,428340557 | ENST00000447175 | 54075     | NR_024354    | CHODL-AS1    |
| A_23_P2397     | 5,71094 | 5,19661 | 1,428330657 | ENST00000336061 | 283349    | NM_178169    | RASSF3       |
| A_22_P00009238 | 7,61528 | 7,10112 | 1,428162359 | N/A             | N/A       | BC030759     | Inc-LRIG2-3  |
| A_21_P0007377  | 2,05783 | 1,54367 | 1,428162359 | N/A             | N/A       | N/A          | Inc-ODZ4-2   |
| A_23_P102925   | 11,1687 | 10,6546 | 1,428102965 | ENST00000291576 | 5822      | NM_005049    | PWP2         |
| A_33_P3332130  | 13,9557 | 13,4417 | 1,42800398  | ENST00000535419 | 10857     | NM_001282621 | PGRMC1       |
| A_33_P3564409  | 4,09709 | 3,58311 | 1,427984183 | ENST00000481096 | N/A       | AK094541     | N/A          |
| A_22_P00003453 | 1,96338 | 1,44955 | 1,427835721 | N/A             | N/A       | N/A          | Inc-CCDC57-1 |
| A_22_P00006658 | 3,93592 | 3,42219 | 1,427736754 | ENST00000562064 | 102724344 | XR_429789    | LOC102724344 |
| A_22_P00001457 | 2,0175  | 1,5038  | 1,427707065 | ENST00000424177 | N/A       | N/A          | N/A          |
| A_24_P267293   | 6,38408 | 5,87041 | 1,427677377 | ENST00000585482 | 23098     | NM_015077    | SARM1        |
| A_22_P00016664 | 4,1342  | 3,62058 | 1,427627899 | N/A             | N/A       | AK124882     | Inc-TPCN2-5  |
| A_23_P43071    | 11,5013 | 10,9878 | 1,427509157 | ENST00000287025 | 51001     | NM_015942    | MTERF3       |
| A_22_P00010639 | 2,56552 | 2,05202 | 1,427509157 | ENST00000549896 | N/A       | N/A          | N/A          |
| A_33_P3403356  | 10,4705 | 9,957   | 1,427509157 | N/A             | N/A       | N/A          | N/A          |
| A_33_P3345534  | 16,2671 | 15,7536 | 1,427509157 | ENST00000476662 | 3861      | NM_000526    | KRT14        |
| A_23_P150903   | 7,49937 | 6,98594 | 1,427439895 | ENST00000182377 | 55711     | NM_018099    | FAR2         |
| A_33_P3366127  | 2,11114 | 1,59774 | 1,427410213 | ENST00000341750 | 729974    | NM_001277397 | RFPL4AL1     |
| A_33_P3310533  | 11,2013 | 10,6879 | 1,427410213 | ENST00000514237 | 134218    | NM_001012339 | DNAJC21      |
| A_23_P376096   | 7,30999 | 6,79662 | 1,427380531 | ENST00000621756 | 148022    | NM_182919    | TICAM1       |
| A_19_P00322673 | 2,39232 | 1,87896 | 1,427370637 | ENST00000430548 | N/A       | N/A          | N/A          |

|                |         |         |             |                 |           |              |               |
|----------------|---------|---------|-------------|-----------------|-----------|--------------|---------------|
| A_22_P00007978 | 8,73758 | 8,22423 | 1,427360744 | ENST00000441880 | 3423      | NM_000202    | IDS           |
| A_22_P00005250 | 2,95275 | 2,43948 | 1,427281596 | N/A             | 285987    | NR_015448    | DLX6-AS1      |
| A_33_P3316078  | 7,37126 | 6,85799 | 1,427281596 | ENST00000442263 | 26512     | NM_001039938 | INTS6         |
| A_33_P3273580  | 5,1834  | 4,67015 | 1,42726181  | N/A             | N/A       | AF289570     | N/A           |
| A_22_P00025345 | 2,20289 | 1,68964 | 1,42726181  | ENST00000437768 | 101929083 | N/A          | CASC6         |
| A_24_P701776   | 9,30114 | 8,78797 | 1,427182668 | ENST00000378115 | 445328    | NM_001003702 | ARHGEF35      |
| A_22_P00017349 | 5,87566 | 5,36249 | 1,427182668 | N/A             | N/A       | N/A          | Inc-USP8-1    |
| A_32_P180210   | 7,30085 | 6,78777 | 1,427093638 | ENST00000497389 | 54537     | NM_019054    | FAM35A        |
| A_22_P00002943 | 2,61181 | 2,09874 | 1,427083747 | N/A             | N/A       | N/A          | Inc-C5orf42-3 |
| A_22_P00005538 | 1,97134 | 1,45827 | 1,427083747 | N/A             | N/A       | N/A          | Inc-EDAR-6    |
| A_33_P3327617  | 1,94822 | 1,43518 | 1,427054072 | ENST00000485778 | 2213      | NM_001002274 | FCGR2B        |
| A_22_P00016609 | 5,88748 | 5,37448 | 1,427014506 | N/A             | N/A       | N/A          | Inc-TOLLIP-1  |
| A_33_P3251796  | 8,64528 | 8,13235 | 1,426945268 | ENST00000491711 | 23590     | NM_014317    | PDSS1         |
| A_22_P00012701 | 5,09372 | 4,58081 | 1,426925487 | N/A             | N/A       | N/A          | Inc-RAB1A-4   |
| A_23_P69791    | 9,51851 | 9,0057  | 1,426826583 | ENST00000309703 | 55435     | NM_018569    | AP1AR         |
| A_32_P120604   | 7,43524 | 6,92248 | 1,426777134 | N/A             | 92017     | BC029857     | SNX29         |
| A_23_P415015   | 5,46557 | 4,95284 | 1,426747465 | ENST00000419554 | 64225     | NM_022374    | ATL2          |
| A_22_P00015288 | 10,9493 | 10,4366 | 1,426717797 | N/A             | N/A       | XM_001714032 | Inc-SPATC1-1  |
| A_33_P3250128  | 7,06552 | 6,55289 | 1,426648574 | ENST00000381410 | 112574    | NM_052870    | SNX18         |
| A_24_P241318   | 10,0223 | 9,50969 | 1,426628797 | ENST00000394234 | 26094     | NM_181340    | DCAF4         |
| A_33_P3294149  | 2,08469 | 1,5721  | 1,42660902  | ENST00000467611 | 50632     | N/A          | CALY          |
| A_23_P392076   | 6,32226 | 5,80971 | 1,426569466 | ENST00000555358 | 29966     | NM_014574    | STRN3         |
| A_22_P00019127 | 2,17652 | 1,66403 | 1,426510138 | ENST00000505702 | N/A       | N/A          | N/A           |
| A_23_P10858    | 10,1505 | 9,63803 | 1,426490363 | ENST00000539605 | 23141     | NM_015114    | ANKLE2        |
| A_24_P922357   | 7,91253 | 7,40008 | 1,426470587 | ENST00000611555 | 128977    | NM_173793    | C22orf39      |
| A_33_P3372212  | 2,54151 | 2,02913 | 1,426401376 | N/A             | 653492    | L14723       | PSG10P        |
| A_23_P63816    | 8,90541 | 8,39307 | 1,426361829 | ENST00000611479 | 29982     | NM_030759    | NRBF2         |
| A_32_P379379   | 2,77483 | 2,2625  | 1,426351942 | ENST00000466157 | 285973    | NM_173681    | ATG9B         |
| A_24_P77681    | 12,5301 | 12,0178 | 1,426322282 | ENST00000447794 | 10605     | NM_006451    | PAIP1         |
| A_23_P386561   | 10,1287 | 9,61641 | 1,426312395 | ENST00000222567 | 221830    | NM_001002926 | TWISTNB       |
| A_22_P00018564 | 8,06838 | 7,5561  | 1,426302509 | ENST00000500929 | 101928725 | XR_243159    | LOC101928725  |
| A_21_P0004502  | 2,38174 | 1,86949 | 1,42627285  | N/A             | N/A       | N/A          | Inc-FBXO4-1   |
| A_24_P305467   | 9,84405 | 9,3318  | 1,42627285  | ENST00000358713 | 54815     | NM_017660    | GATAD2A       |

|                |         |         |             |                 |           |              |                       |
|----------------|---------|---------|-------------|-----------------|-----------|--------------|-----------------------|
| A_21_P0008276  | 3,35479 | 2,84254 | 1,42627285  | N/A             | 101927702 | XR_245766    | LOC101927702          |
| A_33_P3263664  | 5,36568 | 4,85354 | 1,426164106 | ENST00000334897 | 337967    | NM_181604    | KRTAP6-2              |
| A_23_P414842   | 2,01911 | 1,50708 | 1,426055371 | ENST00000260988 | 1419      | NM_005210    | CRYGB                 |
| A_33_P3294868  | 6,55217 | 6,04022 | 1,425976296 | ENST00000417443 | 399668    | N/A          | LINC00086             |
| A_33_P3281139  | 8,15956 | 7,64762 | 1,425966412 | ENST00000242848 | 23091     | XM_005266303 | ZC3H13                |
| A_23_P86751    | 2,04762 | 1,53574 | 1,425907109 | ENST00000381310 | 105       | NM_018702    | ADARB2                |
| A_22_P00013872 | 4,30949 | 3,79765 | 1,425867575 | ENST00000451677 | 10557     | N/A          | RPP38                 |
| A_33_P3390778  | 5,53853 | 5,02676 | 1,425798393 | ENST00000368382 | 80128     | NM_001256599 | TRIM46                |
| A_24_P263786   | 2,05024 | 1,53854 | 1,425729214 | ENST00000474213 | N/A       | BC022362     | N/A                   |
| A_23_P395524   | 13,2846 | 12,7729 | 1,425729214 | ENST00000412830 | 11137     | NM_007062    | PWP1                  |
| A_23_P318300   | 10,0999 | 9,58837 | 1,425561224 | ENST00000338983 | 51776     | NM_133646    | ZAK                   |
| A_22_P00012499 | 6,1913  | 5,67982 | 1,425511818 | N/A             | 654433    | NR_015377    | PAX8-AS1              |
| A_23_P204417   | 10,5391 | 10,0277 | 1,425432773 | ENST00000534935 | 55846     | NM_018463    | ITFG2                 |
| A_21_P0001750  | 2,01765 | 1,50626 | 1,425422893 | N/A             | N/A       | N/A          | Inc-UCHL5-1           |
| A_21_P0005031  | 4,65431 | 4,14306 | 1,425284576 | N/A             | N/A       | N/A          | Inc-KHDRBS2-1         |
| A_33_P3439765  | 12,1293 | 11,6181 | 1,42523518  | ENST00000251038 | 79882     | NM_024824    | ZC3H14                |
| A_23_P137484   | 2,18992 | 1,67879 | 1,425166029 | ENST00000498273 | 54596     | NM_019079    | L1TD1                 |
| A_23_P10025    | 7,78929 | 7,27819 | 1,425136394 | ENST00000437801 | 4753      | NM_006159    | NELL2                 |
| A_32_P402924   | 3,02787 | 2,51681 | 1,425096881 | N/A             | 400794    | NR_026744    | LOC400794             |
| A_22_P00020615 | 1,97676 | 1,46571 | 1,425087003 | N/A             | N/A       | DB021274     | Inc-RP11-234B24.6.1-1 |
| A_24_P942730   | 9,9432  | 9,43222 | 1,425017859 | ENST00000396976 | 146050    | NM_152455    | ZSCAN29               |
| A_21_P0002191  | 2,48607 | 1,97515 | 1,424958595 | ENST00000421976 | 285043    | NR_122048    | LOC285043             |
| A_23_P88865    | 12,9561 | 12,4453 | 1,424840076 | ENST00000566756 | 123920    | NM_144601    | CMTM3                 |
| A_24_P163920   | 7,55092 | 7,04018 | 1,424780819 | ENST00000524933 | 84188     | NM_032228    | FAR1                  |
| A_22_P00016500 | 6,49168 | 5,98104 | 1,424682065 | N/A             | N/A       | AJ617629     | Inc-TMPRSS11E-1       |
| A_23_P218807   | 9,32517 | 8,81457 | 1,424642565 | ENST00000352645 | 23264     | NM_017590    | ZC3H7B                |
| A_21_P0010698  | 2,41044 | 1,89987 | 1,42461294  | ENST00000447201 | 101928303 | N/A          | LOC101928303          |
| A_33_P3220919  | 5,55666 | 5,0461  | 1,424603066 | ENST00000324198 | 157       | NM_005160    | ADRBK2                |
| A_33_P3268338  | 10,5748 | 10,0643 | 1,424543819 | ENST00000354488 | 65992     | NM_023935    | DDRGK1                |
| A_22_P00021069 | 2,04502 | 1,53469 | 1,424375968 | N/A             | N/A       | N/A          | Inc-RIMS3-3           |
| A_33_P3262167  | 4,04571 | 3,53549 | 1,424267369 | N/A             | N/A       | N/A          | N/A                   |
| A_24_P512054   | 4,68627 | 4,17612 | 1,424198265 | ENST00000503155 | 79009     | NM_024045    | DDX50                 |
| A_23_P8139     | 6,82642 | 6,31628 | 1,424188393 | ENST00000339411 | 7629      | NM_003427    | ZNF76                 |

|                |         |         |             |                 |           |              |              |
|----------------|---------|---------|-------------|-----------------|-----------|--------------|--------------|
| A_22_P00013954 | 2,79029 | 2,28018 | 1,424158778 | N/A             | N/A       | N/A          | Inc-RTDR1-1  |
| A_33_P3254634  | 8,28754 | 7,77743 | 1,424158778 | ENST00000495004 | 10954     | NM_006810    | PDIA5        |
| A_33_P3409238  | 4,54869 | 4,03859 | 1,424148907 | ENST00000609107 | 401286    | NR_117091    | LOC401286    |
| A_32_P113508   | 10,326  | 9,81592 | 1,424129164 | ENST00000474148 | 55054     | NM_030803    | ATG16L1      |
| A_21_P0008560  | 1,98708 | 1,47727 | 1,423862663 | ENST00000558411 | N/A       | N/A          | N/A          |
| A_33_P3211404  | 5,52557 | 5,01593 | 1,423694892 | N/A             | 80028     | XM_005249853 | FBXL18       |
| A_21_P0000547  | 4,49831 | 3,9887  | 1,423665288 | N/A             | 23043     | NR_027767    | TNIK         |
| A_24_P122732   | 9,89405 | 9,38452 | 1,423586345 | ENST00000468057 | 254428    | NM_173854    | SLC41A1      |
| A_33_P3361393  | 13,0019 | 12,4924 | 1,423556743 | ENST00000379593 | 1964      | NM_001412    | EIF1AX       |
| A_21_P0004345  | 4,83785 | 4,32841 | 1,42349754  | N/A             | N/A       | N/A          | Inc-CNOT6-1  |
| A_22_P00006178 | 4,02307 | 3,51377 | 1,42335941  | ENST00000492208 | 100507642 | NR_108064    | LOC100507642 |
| A_22_P00016689 | 2,37197 | 1,8627  | 1,423329812 | N/A             | N/A       | BF850035     | Inc-TPSG1-1  |
| A_23_P326204   | 7,84283 | 7,33358 | 1,423310081 | ENST00000394686 | 166929    | NM_152621    | SGMS2        |
| A_23_P346421   | 8,00143 | 7,49224 | 1,423250888 | ENST00000591230 | 55205     | NM_018181    | ZNF532       |
| A_23_P413641   | 5,75192 | 5,24276 | 1,423221293 | ENST00000371941 | 57580     | NM_020820    | PREX1        |
| A_22_P00018349 | 7,9838  | 7,47482 | 1,423043734 | ENST00000570843 | N/A       | N/A          | N/A          |
| A_33_P3224362  | 2,40432 | 1,89538 | 1,423004279 | ENST00000468429 | 54039     | NM_020528    | PCBP3        |
| A_23_P93046    | 10,0139 | 9,50497 | 1,422994415 | ENST00000511015 | 11336     | NM_007277    | EXOC3        |
| A_23_P164826   | 12,8912 | 12,3823 | 1,422964825 | ENST00000221486 | 10535     | NM_006397    | RNASEH2A     |
| A_33_P3422133  | 12,2765 | 11,7677 | 1,422866196 | ENST00000495809 | 11033     | NM_006869    | ADAP1        |
| A_32_P479743   | 2,31027 | 1,80159 | 1,422747851 | ENST00000560853 | 414926    | NR_026764    | LINC00593    |
| A_33_P3351991  | 4,65038 | 4,14174 | 1,422708404 | N/A             | N/A       | AK127505     | N/A          |
| A_33_P3352970  | 11,3308 | 10,8223 | 1,42257035  | ENST00000256458 | 3656      | NM_001570    | IRAK2        |
| A_24_P709377   | 10,4369 | 9,92854 | 1,42243231  | N/A             | 654433    | NR_015377    | PAX8-AS1     |
| A_33_P3354723  | 2,51161 | 2,00341 | 1,422274566 | ENST00000368005 | 9191      | XM_005245598 | DEDD         |
| A_22_P00012845 | 1,94551 | 1,43731 | 1,422274566 | N/A             | 101929423 | NR_109940    | MEF2C-AS1    |
| A_22_P00021809 | 5,87631 | 5,36815 | 1,422235133 | ENST00000567167 | N/A       | N/A          | N/A          |
| A_32_P78295    | 3,13057 | 2,62242 | 1,422225275 | ENST00000373673 | 220202    | NM_145178    | ATOH7        |
| A_24_P97197    | 9,40728 | 8,89918 | 1,422175985 | ENST00000491064 | 58190     | NM_182642    | CTDSP1       |
| A_23_P63897    | 15,4651 | 14,957  | 1,422175985 | ENST00000337195 | 1488      | NM_022802    | CTBP2        |
| A_33_P3269278  | 8,27692 | 7,76892 | 1,422077411 | ENST00000618437 | 92283     | NM_153257    | ZNF461       |
| A_24_P310630   | 9,92726 | 9,4193  | 1,422037983 | ENST00000619445 | 65109     | NM_080632    | UPF3B        |
| A_23_P133596   | 13,8073 | 13,2994 | 1,421978843 | ENST00000514927 | 29102     | NM_013235    | DROSHA       |

|                |         |         |             |                 |           |              |                   |
|----------------|---------|---------|-------------|-----------------|-----------|--------------|-------------------|
| A_21_P0003013  | 1,95267 | 1,44479 | 1,42195913  | N/A             | N/A       | N/A          | Inc-C3orf30-6     |
| A_23_P2114     | 11,9505 | 11,4427 | 1,421880282 | ENST00000535872 | 55004     | NM_017907    | LAMTOR1           |
| A_23_P393713   | 8,64098 | 8,13319 | 1,421870427 | ENST00000255078 | 3508      | NM_002180    | IGHMBP2           |
| A_22_P00017997 | 7,45265 | 6,94487 | 1,421860571 | N/A             | N/A       | N/A          | Inc-ZNF131-3      |
| A_22_P00014969 | 3,6324  | 3,12464 | 1,42184086  | ENST00000505000 | 101927636 | NR_125886    | LOC101927636      |
| A_22_P00014165 | 4,79384 | 4,2861  | 1,421821149 | ENST00000417038 | N/A       | BQ082343     | N/A               |
| A_22_P00015976 | 6,05697 | 5,54926 | 1,421791584 | N/A             | N/A       | N/A          | Inc-TENC1-1       |
| A_22_P00006624 | 3,60327 | 3,09559 | 1,421762019 | N/A             | 100996876 | NR_120318    | RORA-AS2          |
| A_22_P00004071 | 2,44143 | 1,93376 | 1,421752164 | N/A             | N/A       | N/A          | Inc-CHURC1-FNTB-1 |
| A_21_P0005485  | 2,9593  | 2,45165 | 1,421732454 | N/A             | 101928077 | XR_428118    | LOC101928077      |
| A_23_P369479   | 7,88983 | 7,38219 | 1,42172226  | ENST00000322684 | 124540    | NM_170721    | MSI2              |
| A_22_P00020980 | 6,92657 | 6,41895 | 1,421702891 | N/A             | N/A       | DB046182     | Inc-C7orf45-1     |
| A_21_P0000591  | 9,43481 | 8,9272  | 1,421693036 | N/A             | 100337591 | NR_033309    | SNORA70F          |
| A_23_P434890   | 14,0349 | 13,5274 | 1,421584642 | ENST00000251973 | 29775     | NM_014550    | CARD10            |
| A_21_P0008772  | 3,6502  | 3,1428  | 1,421486108 | ENST00000570008 | 101929701 | NR_120368    | LINC01584         |
| A_23_P9603     | 12,2244 | 11,717  | 1,421486108 | ENST00000338368 | 5591      | NM_006904    | PRKDC             |
| A_33_P3243558  | 4,96287 | 4,45555 | 1,421407286 | ENST00000445101 | 643596    | NM_001190228 | RNF224            |
| A_33_P3326733  | 10,6981 | 10,1908 | 1,421387582 | ENST00000471055 | 729668    | NR_120609    | GOLGA2P6          |
| A_33_P3343812  | 6,26958 | 5,76228 | 1,421387582 | ENST00000304720 | 392390    | NM_001004453 | OR1L6             |
| A_33_P3332724  | 5,08321 | 4,57606 | 1,421239805 | ENST00000423048 | 7840      | NM_015120    | ALMS1             |
| A_23_P10497    | 9,17448 | 8,66735 | 1,421220102 | ENST00000458297 | 374868    | NM_198531    | ATP9B             |
| A_21_P0001177  | 6,70683 | 6,19987 | 1,421052643 | N/A             | N/A       | N/A          | Inc-FAM72C-2      |
| A_33_P3436935  | 5,68744 | 5,18049 | 1,421042793 | ENST00000423737 | 284930    | NR_122046    | LOC284930         |
| A_33_P3301316  | 4,95978 | 4,45297 | 1,420904901 | ENST00000497028 | 93550     | NM_001282905 | ZFAND4            |
| A_19_P00319981 | 12,7305 | 12,2238 | 1,420796566 | ENST00000436710 | 100506119 | NR_120685    | LINC01503         |
| A_23_P101093   | 9,20631 | 8,69962 | 1,420786718 | ENST00000612370 | 51226     | NM_016429    | COPZ2             |
| A_33_P3281532  | 6,93128 | 6,42461 | 1,420767022 | ENST00000592457 | 64795     | NM_022780    | RMND5A            |
| A_33_P3352268  | 3,12919 | 2,62261 | 1,420678392 | N/A             | N/A       | N/A          | N/A               |
| A_23_P377339   | 6,37459 | 5,86806 | 1,420629156 | ENST00000504371 | 132989    | NM_144645    | C4orf36           |
| A_33_P3293474  | 6,45227 | 5,94581 | 1,420560229 | ENST00000366554 | 23596     | NM_014322    | OPN3              |
| A_23_P429491   | 9,82977 | 9,32332 | 1,420550382 | ENST00000329143 | 220042    | NM_145018    | DDIAS             |
| A_24_P83922    | 3,96394 | 3,4575  | 1,420540536 | ENST00000504370 | 6631      | NM_003093    | SNRPC             |
| A_21_P0014461  | 2,11883 | 1,61256 | 1,420373156 | N/A             | 102724155 | XR_425404    | LOC102724155      |



|                |         |         |             |                 |           |              |              |
|----------------|---------|---------|-------------|-----------------|-----------|--------------|--------------|
| A_33_P3276845  | 2,221   | 1,71479 | 1,420314086 | ENST00000503184 | N/A       | N/A          | N/A          |
| A_33_P3370763  | 2,72521 | 2,21907 | 1,420245173 | ENST00000379061 | 23098     | NM_015077    | SARM1        |
| A_22_P00011316 | 8,92817 | 8,4221  | 1,420176264 | ENST00000566667 | N/A       | N/A          | N/A          |
| A_24_P299996   | 7,47839 | 6,97232 | 1,420176264 | ENST00000325599 | 55164     | NM_018130    | SHQ1         |
| A_22_P00003228 | 2,07891 | 1,57288 | 1,420136889 | ENST00000567624 | N/A       | N/A          | N/A          |
| A_24_P26177    | 7,08468 | 6,57873 | 1,420058142 | ENST00000335891 | 9730      | NM_014703    | VPRBP        |
| A_23_P64232    | 12,3409 | 11,835  | 1,420008928 | ENST00000227322 | 8882      | NM_003904    | ZPR1         |
| A_23_P94921    | 12,6449 | 12,139  | 1,420008928 | ENST00000342228 | 6575      | NM_006749    | SLC20A2      |
| A_22_P00012392 | 5,87723 | 5,37143 | 1,419910504 | N/A             | N/A       | BG196351     | Inc-PRKACG-3 |
| A_33_P3299130  | 4,76365 | 4,25794 | 1,419821928 | N/A             | N/A       | N/A          | N/A          |
| A_22_P00016203 | 4,30653 | 3,80086 | 1,419782562 | N/A             | 399806    | NR_029380    | LBX1-AS1     |
| A_33_P3400688  | 2,89765 | 2,39199 | 1,419772721 | ENST00000341459 | 283652    | NM_205850    | SLC24A5      |
| A_33_P3338121  | 15,5765 | 15,0709 | 1,419713676 | ENST00000367030 | 3914      | NM_001017402 | LAMB3        |
| A_21_P0005950  | 5,87346 | 5,36794 | 1,419634952 | N/A             | N/A       | N/A          | Inc-MYC-2    |
| A_33_P3336514  | 8,34389 | 7,83845 | 1,419556233 | ENST00000552123 | N/A       | XM_006726616 | N/A          |
| A_21_P0001938  | 1,99626 | 1,49083 | 1,419546394 | ENST00000436820 | 285084    | NR_038897    | LINC01305    |
| A_23_P214798   | 12,3934 | 11,888  | 1,419516875 | ENST00000369622 | 10492     | NM_006372    | SYNCRIP      |
| A_23_P115167   | 9,42689 | 8,9215  | 1,419507036 | ENST00000439853 | 23507     | NM_015350    | LRRC8B       |
| A_22_P00008004 | 6,05437 | 5,54899 | 1,419497197 | N/A             | 554202    | NR_027054    | MIR31HG      |
| A_23_P214139   | 9,83615 | 9,33085 | 1,419418485 | ENST00000435970 | 5980      | NM_002912    | REV3L        |
| A_33_P3341586  | 8,91763 | 8,41239 | 1,419359455 | ENST00000394817 | 64374     | NM_001037633 | SIL1         |
| A_21_P0008510  | 4,37321 | 3,86808 | 1,419251238 | N/A             | N/A       | N/A          | Inc-CTAGE5-1 |
| A_22_P00017095 | 2,39357 | 1,88848 | 1,419211888 | N/A             | N/A       | N/A          | Inc-TYMS-2   |
| A_21_P0007967  | 2,08655 | 1,58147 | 1,419202051 | ENST00000411690 | 104355146 | N/A          | LINC00396    |
| A_22_P00016024 | 5,71472 | 5,20964 | 1,419202051 | ENST00000424151 | 10282     | XM_005250109 | BET1         |
| A_33_P3269233  | 5,51636 | 5,01141 | 1,419074174 | ENST00000592972 | N/A       | N/A          | N/A          |
| A_22_P00001018 | 3,90856 | 3,40371 | 1,418975815 | N/A             | 100128292 | NR_024585    | DLG5-AS1     |
| A_22_P00015666 | 1,88834 | 1,3835  | 1,418965979 | N/A             | N/A       | DA090768     | Inc-SYCE1L-2 |
| A_23_P141917   | 8,44011 | 7,93532 | 1,418916802 | ENST00000529412 | 7297      | NM_003331    | TYK2         |
| A_23_P30264    | 7,68317 | 7,17855 | 1,418749614 | ENST00000512177 | 51194     | NM_016338    | IPO11        |
| A_32_P524904   | 1,97401 | 1,46944 | 1,418700445 | ENST00000308963 | 254439    | NM_001136485 | C11orf86     |
| A_33_P3272744  | 3,25116 | 2,74664 | 1,418651277 | ENST00000494874 | 57127     | NM_001256395 | RHBG         |
| A_22_P00022182 | 1,98386 | 1,47937 | 1,418621778 | N/A             | 100128126 | NR_038406    | STAU2-AS1    |

|                |         |         |             |                 |           |              |                    |
|----------------|---------|---------|-------------|-----------------|-----------|--------------|--------------------|
| A_33_P3288995  | 2,28892 | 1,78451 | 1,418543115 | N/A             | N/A       | N/A          | N/A                |
| A_33_P3374085  | 11,2608 | 10,7564 | 1,418533282 | ENST00000392000 | 9208      | NM_001137552 | LRRFIP1            |
| A_23_P48056    | 11,6099 | 11,1057 | 1,418336645 | ENST00000378026 | 10970     | NM_006825    | CKAP4              |
| A_33_P3210735  | 1,90879 | 1,40463 | 1,418297321 | ENST00000497933 | 219527    | NM_001005210 | LRRC55             |
| A_22_P00003661 | 4,35043 | 3,84627 | 1,418297321 | ENST00000613868 | 101929125 | NR_109859    | LOC101929125       |
| A_23_P24755    | 11,8854 | 11,3813 | 1,418238337 | ENST00000491231 | 6811      | NM_003164    | STX5               |
| A_24_P381136   | 10,2553 | 9,7513  | 1,418140036 | ENST00000528462 | 29763     | NM_016223    | PACSIN3            |
| A_24_P303815   | 8,49276 | 7,98892 | 1,417982768 | ENST00000468435 | 115426    | NM_152896    | UHRF2              |
| A_21_P0012279  | 5,85531 | 5,35156 | 1,417894312 | ENST00000457911 | N/A       | N/A          | N/A                |
| A_22_P00025529 | 5,35497 | 4,85128 | 1,417835345 | N/A             | N/A       | AL832075     | Inc-KRTAP5-6-3     |
| A_23_P45699    | 11,0581 | 10,5545 | 1,417746898 | ENST00000370768 | 8880      | NM_003902    | FUBP1              |
| A_22_P00000430 | 9,29827 | 8,79472 | 1,417697764 | ENST00000382252 | 100131017 | NM_001278559 | ZNF316             |
| A_24_P897062   | 6,05367 | 5,55014 | 1,41767811  | ENST00000355095 | 728927    | NM_001170905 | ZNF736             |
| A_21_P0006481  | 2,52215 | 2,01864 | 1,417658457 | N/A             | N/A       | N/A          | Inc-AC002365.1-1   |
| A_33_P3377719  | 4,81072 | 4,30729 | 1,417579848 | N/A             | 100129112 | AK123839     | LOC100129112       |
| A_24_P193435   | 11,9148 | 11,4114 | 1,41755037  | ENST00000613680 | 7082      | NM_003257    | TJP1               |
| A_33_P3406245  | 7,6091  | 7,1057  | 1,41755037  | ENST00000487009 | 9015      | NM_005681    | TAF1A              |
| A_24_P126682   | 6,71895 | 6,21557 | 1,417530719 | ENST00000614240 | 6607      | NM_022877    | SMN2               |
| A_23_P201979   | 8,8699  | 8,36657 | 1,417481592 | ENST00000488328 | 1390      | NM_183013    | CREM               |
| A_21_P0014581  | 2,9415  | 2,43817 | 1,417481592 | N/A             | N/A       | N/A          | N/A                |
| A_22_P00023423 | 3,99182 | 3,48855 | 1,417422642 | N/A             | N/A       | N/A          | Inc-AP000892.4.1-1 |
| A_33_P3250398  | 9,37509 | 8,87202 | 1,417226159 | ENST00000503833 | 1522      | BC025419     | CTSZ               |
| A_22_P00014982 | 5,892   | 5,38894 | 1,417216336 | N/A             | N/A       | N/A          | Inc-SMC1B-1        |
| A_21_P0014577  | 4,36472 | 3,86179 | 1,417088637 | ENST00000546977 | 100506869 | NR_126341    | LOC100506869       |
| A_21_P0002512  | 1,93947 | 1,43655 | 1,417078815 | N/A             | N/A       | N/A          | Inc-MMADHC-1       |
| A_33_P3396851  | 4,55506 | 4,05214 | 1,417078815 | N/A             | N/A       | N/A          | XLOC_I2_003285     |
| A_21_P0012267  | 3,02054 | 2,51764 | 1,41705917  | N/A             | N/A       | N/A          | XLOC_I2_009332     |
| A_23_P155487   | 3,20435 | 2,70155 | 1,41696095  | ENST00000614032 | 10991     | NM_006841    | SLC38A3            |
| A_24_P377144   | 7,2477  | 6,74497 | 1,416892201 | ENST00000307333 | 118429    | NM_058172    | ANTXR2             |
| A_23_P97423    | 9,67212 | 9,16947 | 1,416813634 | ENST00000292211 | 55585     | NM_017582    | UBE2Q1             |
| A_22_P00007049 | 6,71426 | 6,21163 | 1,416793993 | N/A             | N/A       | CU688551     | Inc-GK-3           |
| A_33_P3389573  | 4,43906 | 3,93644 | 1,416784172 | ENST00000371734 | 64170     | NM_052814    | CARD9              |
| A_22_P00014167 | 4,03665 | 3,53404 | 1,416774352 | N/A             | N/A       | BC046497     | Inc-SCRN3-3        |

|                |         |         |             |                 |           |              |                |
|----------------|---------|---------|-------------|-----------------|-----------|--------------|----------------|
| A_24_P754803   | 17,9727 | 17,4701 | 1,416764532 | ENST00000436473 | N/A       | CR542069     | N/A            |
| A_33_P3341882  | 2,42457 | 1,92197 | 1,416764532 | N/A             | N/A       | N/A          | N/A            |
| A_23_P209449   | 9,56281 | 9,0603  | 1,416676152 | ENST00000286201 | 8324      | NM_003507    | FZD7           |
| A_24_P241276   | 13,6248 | 13,1223 | 1,416666332 | ENST00000490537 | 11340     | NM_181503    | EXOSC8         |
| A_22_P00018817 | 2,10832 | 1,60582 | 1,416666332 | ENST00000543928 | 11262     | NM_001005176 | SP140          |
| A_22_P00001414 | 3,05938 | 2,55688 | 1,416666332 | N/A             | N/A       | N/A          | Inc-API5-1     |
| A_21_P0002270  | 5,54981 | 5,04732 | 1,416656513 | N/A             | N/A       | N/A          | Inc-BCL2L11-2  |
| A_21_P0010905  | 3,70168 | 3,19924 | 1,416607416 | ENST00000490269 | 390003    | N/A          | GUCY2GP        |
| A_33_P3230658  | 10,2611 | 9,75872 | 1,416548502 | ENST00000366639 | 7257      | NM_005999    | TSNAX          |
| A_21_P0000374  | 6,06805 | 5,56574 | 1,416479772 | N/A             | 692090    | NR_003046    | SNORD59B       |
| A_22_P00017760 | 4,81752 | 4,31523 | 1,416460136 | N/A             | N/A       | N/A          | Inc-YPEL5-3    |
| A_33_P3405022  | 6,71931 | 6,21704 | 1,4164405   | ENST00000370272 | 3954      | NM_012318    | LETM1          |
| A_24_P392060   | 9,51131 | 9,00904 | 1,4164405   | ENST00000341199 | 375484    | NM_198567    | SIMC1          |
| A_23_P383977   | 10,0606 | 9,55839 | 1,416381593 | ENST00000562411 | 10302     | NM_006049    | SNAPC5         |
| A_33_P3564399  | 4,99058 | 4,48838 | 1,416371775 | ENST00000582245 | 6459      | NR_033420    | SH3GL1P2       |
| A_23_P93032    | 11,9239 | 11,4218 | 1,416273603 | ENST00000255198 | 84327     | NM_032367    | ZBED3          |
| A_33_P3254101  | 4,66486 | 4,16276 | 1,416273603 | N/A             | N/A       | AK093006     | N/A            |
| A_33_P3248329  | 9,68184 | 9,17977 | 1,416244153 | ENST00000440482 | 60685     | NM_021943    | ZFAND3         |
| A_21_P0002877  | 4,44023 | 3,93821 | 1,416195071 | N/A             | N/A       | N/A          | Inc-TMCC1-1    |
| A_22_P00007411 | 7,04122 | 6,53924 | 1,416155806 | ENST00000414603 | N/A       | N/A          | N/A            |
| A_22_P00021674 | 3,65442 | 3,15248 | 1,416116542 | ENST00000568458 | N/A       | N/A          | N/A            |
| A_23_P389141   | 4,24789 | 3,74596 | 1,416106727 | ENST00000359345 | 200172    | NM_144990    | SLFNL1         |
| A_22_P00019042 | 2,52034 | 2,01852 | 1,415998758 | ENST00000429410 | 2949      | N/A          | GSTM5          |
| A_21_P0008657  | 3,98429 | 3,48253 | 1,415939869 | N/A             | N/A       | N/A          | Inc-SH2D7-5    |
| A_24_P58620    | 2,6777  | 2,17598 | 1,415900612 | ENST00000322282 | 57476     | NM_001286563 | GRAMD1B        |
| A_23_P209269   | 10,0954 | 9,5937  | 1,415880983 | ENST00000409432 | 5495      | NM_001033557 | PPM1B          |
| A_33_P3346046  | 9,23981 | 8,73817 | 1,4158221   | N/A             | N/A       | N/A          | N/A            |
| A_24_P140204   | 8,78691 | 8,28527 | 1,4158221   | ENST00000468776 | 54899     | NM_017771    | PXK            |
| A_22_P00016052 | 4,73408 | 4,23255 | 1,415714153 | ENST00000581442 | 100505592 | NR_110429    | LINC01540      |
| A_22_P00002511 | 2,16251 | 1,66111 | 1,41558659  | N/A             | N/A       | N/A          | Inc-C16orf88-1 |
| A_22_P00009296 | 6,97855 | 6,47721 | 1,415527718 | N/A             | N/A       | AF370400     | Inc-LRRC36-1   |
| A_22_P00022870 | 3,23904 | 2,73772 | 1,415508095 | N/A             | N/A       | AA605230     | Inc-NFYB-2     |
| A_33_P3331726  | 10,9973 | 10,496  | 1,415488472 | ENST00000565493 | 647979    | NR_027451    | LINC00657      |

|                |         |         |             |                 |           |              |              |
|----------------|---------|---------|-------------|-----------------|-----------|--------------|--------------|
| A_32_P142700   | 5,57038 | 5,06912 | 1,415449227 | ENST00000382821 | 150248    | NM_182520    | C22orf15     |
| A_24_P320033   | 2,21965 | 1,71844 | 1,415400172 | ENST00000264246 | 941       | NM_005191    | CD80         |
| A_21_P0000171  | 5,31862 | 4,81752 | 1,415292258 | ENST00000622330 | 3570      | NM_001206866 | IL6R         |
| A_33_P3334448  | 7,9585  | 7,4574  | 1,415292258 | ENST00000495394 | 6044      | NR_002324    | SNORA62      |
| A_21_P0002142  | 3,95468 | 3,45369 | 1,415184351 | ENST00000426904 | 348761    | N/A          | SPATA3-AS1   |
| A_21_P0005733  | 2,13145 | 1,6305  | 1,415145114 | N/A             | N/A       | N/A          | Inc-CA2-1    |
| A_22_P00007344 | 3,78199 | 3,28105 | 1,415135305 | ENST00000571243 | 84461     | NM_001005408 | NEURL4       |
| A_33_P3410279  | 7,93854 | 7,43761 | 1,415125496 | ENST00000340449 | 23348     | AK090793     | DOCK9        |
| A_33_P3281795  | 12,2929 | 11,792  | 1,41509607  | ENST00000434178 | 11343     | NM_007283    | MGLL         |
| A_24_P378788   | 7,0135  | 6,51264 | 1,415056836 | ENST00000488894 | 79939     | NM_024881    | SLC35E1      |
| A_21_P0007109  | 3,14317 | 2,64257 | 1,41480184  | N/A             | 101929574 | N/A          | LOC101929574 |
| A_23_P94296    | 3,33394 | 2,83339 | 1,414752807 | ENST00000175238 | 8756      | NM_003817    | ADAM7        |
| A_23_P372994   | 2,05546 | 1,55493 | 1,414733195 | ENST00000324382 | 132243    | NM_153833    | H1FOO        |
| A_23_P136573   | 9,16947 | 8,66904 | 1,414635136 | ENST00000461206 | 8869      | NM_003896    | ST3GAL5      |
| A_22_P00013834 | 3,21726 | 2,71686 | 1,41460572  | N/A             | N/A       | N/A          | Inc-RPL17-1  |
| A_23_P74778    | 11,3733 | 10,8731 | 1,414409628 | ENST00000369102 | 79630     | NM_024579    | C1orf54      |
| A_33_P3405349  | 6,73691 | 6,23671 | 1,414409628 | ENST00000448720 | 55262     | AK001787     | C7orf43      |
| A_22_P00016149 | 4,7907  | 4,29051 | 1,414399824 | N/A             | N/A       | N/A          | Inc-TIMP3-1  |
| A_23_P214627   | 2,05854 | 1,55836 | 1,41439002  | ENST00000459762 | 199       | NM_004847    | AIF1         |
| A_23_P393015   | 2,11012 | 1,60997 | 1,414360609 | ENST00000223167 | 93408     | NM_138403    | MYL10        |
| A_24_P313418   | 1,97311 | 1,47302 | 1,414301788 | ENST00000219235 | 6367      | NM_002990    | CCL22        |
| A_33_P3381483  | 8,26792 | 7,76785 | 1,414282182 | ENST00000253144 | 55422     | NM_001253798 | ZNF331       |
| A_21_P0008939  | 3,19807 | 2,69809 | 1,414193957 | ENST00000569993 | 101927364 | NR_110916    | LINC01571    |
| A_23_P53162    | 8,42372 | 7,92386 | 1,414076333 | ENST00000300737 | 6786      | NM_003156    | STIM1        |
| A_22_P00003674 | 3,68266 | 3,18282 | 1,41405673  | N/A             | 101929770 | XR_242026    | LOC101929770 |
| A_33_P3313421  | 10,4836 | 9,98377 | 1,414046928 | ENST00000192788 | 54887     | NM_017754    | UHRF1BP1     |
| A_23_P162279   | 10,1477 | 9,64797 | 1,413948917 | ENST00000381259 | 55297     | NM_018318    | CCDC91       |
| A_32_P42574    | 12,0554 | 11,5557 | 1,413919516 | ENST00000366663 | 84886     | NM_032800    | C1orf198     |
| A_23_P96990    | 12,4421 | 11,9426 | 1,413723518 | ENST00000469075 | 4931      | NM_002533    | NVL          |
| A_21_P0002192  | 2,74934 | 2,24993 | 1,413635328 | N/A             | 285043    | XR_244980    | LOC285043    |
| A_33_P3212665  | 4,31025 | 3,81089 | 1,413586336 | N/A             | 401233    | NR_033884    | HTATSF1P2    |
| A_23_P301476   | 6,35631 | 5,85697 | 1,41356674  | ENST00000534941 | 285315    | NM_173657    | C3orf33      |
| A_19_P00322687 | 9,0857  | 8,58649 | 1,41343937  | ENST00000443173 | 100288413 | NM_001242690 | ERVMER34-1   |

|                |         |         |             |                 |           |              |              |
|----------------|---------|---------|-------------|-----------------|-----------|--------------|--------------|
| A_33_P3284077  | 6,14695 | 5,64781 | 1,413370792 | ENST00000366678 | 55746     | NM_018230    | NUP133       |
| A_24_P314554   | 4,1964  | 3,6973  | 1,413331605 | ENST00000398377 | 84559     | NR_001555    | GOLGA2P2Y    |
| A_24_P298027   | 2,32741 | 1,82834 | 1,413302216 | ENST00000544103 | 8313      | NM_004655    | AXIN2        |
| A_21_P0003129  | 2,43571 | 1,93667 | 1,413272828 | N/A             | N/A       | N/A          | Inc-PROK2-1  |
| A_33_P3343473  | 4,89319 | 4,39424 | 1,413184666 | ENST00000534530 | 26033     | NM_207303    | ATRNL1       |
| A_22_P00019846 | 2,30945 | 1,81054 | 1,413145485 | ENST00000449977 | 196993    | NM_001102658 | CT62         |
| A_22_P00009205 | 5,71409 | 5,21519 | 1,413135689 | ENST00000450916 | 100506457 | NR_110198    | LOC100506457 |
| A_24_P295963   | 15,2719 | 14,773  | 1,413135689 | ENST00000549258 | 54407     | NM_018976    | SLC38A2      |
| A_33_P3221868  | 11,3501 | 10,8513 | 1,413037742 | ENST00000334888 | 51259     | NM_001173990 | TMEM216      |
| A_24_P356      | 4,63294 | 4,1342  | 1,412978976 | ENST00000406297 | 22848     | AB028971     | AAK1         |
| A_21_P0000251  | 9,16084 | 8,66223 | 1,41285166  | N/A             | 26783     | NR_002449    | SNORA65      |
| A_33_P3351606  | 5,98081 | 5,48223 | 1,412822281 | ENST00000524060 | 100130155 | NR_034102    | MIR124-2HG   |
| A_33_P3386572  | 5,20273 | 4,70419 | 1,412783109 | ENST00000497451 | 84871     | N/A          | AGBL4        |
| A_33_P3226565  | 4,62582 | 4,12729 | 1,412773317 | N/A             | N/A       | N/A          | N/A          |
| A_21_P0010159  | 2,14595 | 1,64745 | 1,412743939 | ENST00000453716 | 101930746 | N/A          | LINC00945    |
| A_24_P168726   | 7,54186 | 7,04349 | 1,412616644 | ENST00000361166 | 4771      | NM_181831    | NF2          |
| A_33_P3247474  | 1,9469  | 1,44855 | 1,412597061 | ENST00000309765 | 375337    | NM_001145030 | TOPAZ1       |
| A_22_P00014253 | 2,90809 | 2,40984 | 1,412499151 | ENST00000442086 | N/A       | N/A          | N/A          |
| A_23_P19369    | 7,33358 | 6,83534 | 1,41248936  | ENST00000476458 | 55604     | NM_017640    | LRRCL16A     |
| A_24_P401090   | 5,53217 | 5,03399 | 1,412430617 | ENST00000442006 | N/A       | N/A          | N/A          |
| A_19_P00805273 | 9,60758 | 9,10947 | 1,412362088 | ENST00000427142 | 10213     | NM_005805    | PSMD14       |
| A_23_P300905   | 9,55771 | 9,0596  | 1,412362088 | ENST00000374704 | 219771    | NM_145012    | CCNY         |
| A_22_P00011527 | 2,09441 | 1,5963  | 1,412362088 | ENST00000441473 | N/A       | N/A          | N/A          |
| A_22_P00018812 | 4,07291 | 3,57487 | 1,412293561 | N/A             | N/A       | N/A          | Inc-SEZ6-1   |
| A_33_P3257558  | 6,3714  | 5,87346 | 1,412195672 | ENST00000491018 | 11064     | N/A          | CNTRL        |
| A_22_P00006299 | 1,95244 | 1,45452 | 1,412176095 | N/A             | N/A       | N/A          | Inc-FAM84B-1 |
| A_22_P00020639 | 3,25429 | 2,75638 | 1,412166306 | ENST00000514103 | N/A       | N/A          | N/A          |
| A_33_P3410589  | 9,49382 | 8,99593 | 1,412146729 | ENST00000329759 | 131583    | NM_153690    | FAM43A       |
| A_23_P114445   | 5,57505 | 5,07717 | 1,412136941 | ENST00000361470 | 57692     | NM_020932    | MAGEE1       |
| A_32_P62963    | 13,8811 | 13,3833 | 1,412058638 | ENST00000580113 | 400578    | NR_029392    | KRT16P2      |
| A_32_P4626     | 9,62982 | 9,13211 | 1,411970552 | N/A             | 101928076 | XR_241970    | LOC101928076 |
| A_23_P153945   | 9,37241 | 8,87475 | 1,411921618 | ENST00000415569 | 79712     | NM_001006636 | GTDC1        |
| A_21_P0000469  | 6,25872 | 5,76108 | 1,411902044 | N/A             | 100113392 | NR_003694    | SNORD11B     |

|                |         |         |             |                 |           |              |                       |
|----------------|---------|---------|-------------|-----------------|-----------|--------------|-----------------------|
| A_22_P00023939 | 1,92567 | 1,42804 | 1,411892258 | N/A             | N/A       | N/A          | Inc-PACRGL-5          |
| A_23_P200073   | 9,69334 | 9,19571 | 1,411892258 | ENST00000246151 | 57095     | NM_020362    | PITHD1                |
| A_24_P67534    | 6,05233 | 5,55489 | 1,411706327 | ENST00000330288 | 644538    | NM_001163438 | SMIM10                |
| A_22_P00011458 | 2,75963 | 2,26228 | 1,411618263 | ENST00000416507 | N/A       | N/A          | N/A                   |
| A_33_P3286804  | 2,52376 | 2,02645 | 1,411579125 | ENST00000425752 | 196527    | NM_001142679 | ANO6                  |
| A_23_P70355    | 11,2084 | 10,7111 | 1,41156934  | ENST00000616722 | 5269      | NM_004568    | SERPINB6              |
| A_22_P00012203 | 2,23974 | 1,74244 | 1,41156934  | N/A             | 104384744 | NR_126420    | TET2-AS1              |
| A_21_P0000195  | 11,1707 | 10,6734 | 1,41156934  | ENST00000328090 | 54906     | NM_017782    | FAM208B               |
| A_33_P3342653  | 6,03134 | 5,53417 | 1,411442151 | ENST00000617732 | 80332     | NM_153202    | ADAM33                |
| A_22_P00006496 | 3,0671  | 2,57    | 1,411373669 | ENST00000533170 | N/A       | N/A          | N/A                   |
| A_22_P00010928 | 6,539   | 6,04197 | 1,41130519  | N/A             | N/A       | N/A          | Inc-NR2C2-1           |
| A_33_P3280120  | 2,17007 | 1,67313 | 1,411217151 | N/A             | N/A       | N/A          | N/A                   |
| A_33_P3550894  | 4,23604 | 3,73912 | 1,411197588 | ENST00000430265 | 2624      | NM_001145661 | GATA2                 |
| A_33_P3313302  | 8,66536 | 8,16851 | 1,411129118 | ENST00000567440 | 56965     | NM_020214    | PARP6                 |
| A_23_P91919    | 12,6261 | 12,1293 | 1,411080213 | ENST00000479209 | 27230     | NM_014445    | SERP1                 |
| A_32_P198330   | 7,95572 | 7,45898 | 1,411021529 | ENST00000513458 | 285672    | NM_173829    | SREK1IP1              |
| A_21_P0005951  | 8,46161 | 7,96497 | 1,410923727 | ENST00000522414 | N/A       | N/A          | N/A                   |
| A_21_P0006351  | 5,36593 | 4,8694  | 1,410816154 | N/A             | N/A       | N/A          | Inc-RP11-262H14.4.1-4 |
| A_22_P00006702 | 2,10383 | 1,60734 | 1,410777038 | ENST00000504057 | N/A       | N/A          | N/A                   |
| A_21_P0008083  | 5,19087 | 4,69443 | 1,410728145 | N/A             | N/A       | N/A          | Inc-UCHL3-5           |
| A_23_P362712   | 9,57178 | 9,07534 | 1,410728145 | ENST00000474130 | 83451     | NM_001301058 | ABHD11                |
| A_33_P3263287  | 3,99232 | 3,49602 | 1,410591254 | N/A             | 100129111 | AK126895     | LOC100129111          |
| A_24_P329600   | 11,8529 | 11,3566 | 1,410591254 | ENST00000533705 | 29979     | NM_013438    | UBQLN1                |
| A_23_P32054    | 6,83399 | 6,33776 | 1,410522814 | ENST00000492174 | 157922    | NM_015447    | CAMSAP1               |
| A_33_P3365432  | 4,22528 | 3,72905 | 1,410522814 | ENST00000447071 | 4689      | NM_000631    | NCF4                  |
| A_22_P00003277 | 4,16079 | 3,66457 | 1,410513037 | N/A             | 100132159 | NR_120496    | CALML3-AS1            |
| A_23_P193      | 10,3572 | 9,861   | 1,410493483 | ENST00000358527 | 64789     | NM_022774    | EXO5                  |
| A_22_P00016460 | 3,80474 | 3,30879 | 1,410249084 | ENST00000507496 | 101929470 | NR_125817    | LOC101929470          |
| A_24_P896205   | 2,37211 | 1,87628 | 1,410131788 | N/A             | 103689912 | NR_125749    | TBX2-AS1              |
| A_23_P134147   | 9,69638 | 9,20059 | 1,410092691 | ENST00000230122 | 9841      | NM_014797    | ZBTB24                |
| A_22_P00015094 | 2,62988 | 2,13421 | 1,409975408 | N/A             | N/A       | N/A          | Inc-SNW1-1            |
| A_23_P65302    | 2,8781  | 2,38249 | 1,40991677  | ENST00000283550 | 122258    | NM_145248    | SPACA7                |
| A_23_P22671    | 12,0359 | 11,5403 | 1,409906997 | ENST00000286448 | 6845      | NM_005638    | VAMP7                 |

|                |         |         |             |                 |           |              |                  |
|----------------|---------|---------|-------------|-----------------|-----------|--------------|------------------|
| A_33_P3423435  | 6,80303 | 6,30747 | 1,409867907 | ENST00000268154 | 374655    | NM_198526    | ZNF710           |
| A_21_P0001516  | 3,61251 | 3,11702 | 1,409799501 | N/A             | N/A       | N/A          | Inc-C1orf87-2    |
| A_33_P3292164  | 3,17284 | 2,67736 | 1,409789729 | ENST00000391354 | 100505724 | NM_001277332 | KRTAP9-7         |
| A_23_P161098   | 7,95394 | 7,45852 | 1,409731099 | ENST00000289703 | 2005      | NM_001973    | ELK4             |
| A_22_P00003952 | 3,15151 | 2,65611 | 1,409711556 | N/A             | N/A       | N/A          | Inc-CHAD-5       |
| A_23_P404091   | 10,8214 | 10,326  | 1,409711556 | ENST00000507562 | 134266    | NM_152407    | GRPEL2           |
| A_33_P3297907  | 3,27897 | 2,78381 | 1,409477062 | ENST00000215530 | 27006     | NM_020637    | FGF22            |
| A_21_P0000500  | 11,1346 | 10,6396 | 1,409320755 | ENST00000484998 | 692201    | NR_004399    | SNORD86          |
| A_33_P3285430  | 7,41533 | 6,92033 | 1,409320755 | ENST00000547640 | 10059     | AK123906     | DNM1L            |
| A_33_P3413188  | 7,76102 | 7,26605 | 1,409291449 | ENST00000433425 | 644596    | NR_024493    | LINC00087        |
| A_24_P419300   | 11,1238 | 10,6289 | 1,409223072 | ENST00000454935 | 25845     | NR_024158    | PP7080           |
| A_23_P350234   | 9,41564 | 8,92079 | 1,409174233 | ENST00000616924 | 389898    | NM_001012989 | UBE2NL           |
| A_33_P3304065  | 2,79911 | 2,30429 | 1,40914493  | ENST00000199280 | 359       | NM_000486    | AQP2             |
| A_22_P00024689 | 10,8055 | 10,3107 | 1,409125395 | ENST00000618227 | 378938    | NR_002819    | MALAT1           |
| A_33_P3230881  | 7,22984 | 6,73508 | 1,409086327 | ENST00000266483 | 84920     | NM_032834    | ALG10            |
| A_23_P502980   | 7,62968 | 7,13499 | 1,409017959 | ENST00000498255 | 160851    | NM_152910    | DGKH             |
| A_33_P3277378  | 4,25951 | 3,76486 | 1,408978893 | N/A             | N/A       | N/A          | N/A              |
| A_21_P0011436  | 4,86967 | 4,37517 | 1,408832406 | N/A             | N/A       | N/A          | XLOC_I2_005194   |
| A_23_P170587   | 11,7307 | 11,2362 | 1,408832406 | ENST00000471645 | 56950     | NM_020197    | SMYD2            |
| A_24_P127235   | 11,1048 | 10,6104 | 1,408734757 | ENST00000475025 | 613       | NM_004327    | BCR              |
| A_23_P354027   | 11,0086 | 10,5142 | 1,408734757 | ENST00000333751 | 147040    | NM_001002914 | KCTD11           |
| A_24_P911094   | 4,6886  | 4,19428 | 1,408656642 | ENST00000376439 | 11159     | XM_005263579 | RABL2A           |
| A_32_P171181   | 8,80259 | 8,30828 | 1,408646878 | ENST00000612520 | 100132406 | NM_001039703 | NBPF10           |
| A_32_P84728    | 5,96132 | 5,4671  | 1,408559005 | N/A             | N/A       | N/A          | N/A              |
| A_22_P00021745 | 4,32797 | 3,83378 | 1,408529715 | ENST00000432139 | N/A       | N/A          | N/A              |
| A_23_P25989    | 9,40029 | 8,90613 | 1,408500426 | ENST00000446066 | 84193     | NM_032233    | SETD3            |
| A_21_P0009110  | 7,74363 | 7,24951 | 1,408461375 | ENST00000611381 | 146198    | XM_005255805 | ZFP90            |
| A_22_P00004536 | 3,14818 | 2,65408 | 1,408441849 | ENST00000436594 | N/A       | DB197961     | N/A              |
| A_33_P3213857  | 12,4236 | 11,9296 | 1,408344227 | ENST00000621641 | 79621     | NM_001142279 | RNASEH2B         |
| A_23_P396353   | 8,96264 | 8,46874 | 1,408246611 | ENST00000476352 | 51199     | NM_020921    | NIN              |
| A_22_P00018481 | 1,87059 | 1,37671 | 1,408227089 | N/A             | N/A       | N/A          | Inc-AC096644.1-3 |
| A_21_P0009837  | 2,98033 | 2,48645 | 1,408227089 | N/A             | N/A       | N/A          | Inc-CST8-3       |
| A_33_P3280709  | 4,91221 | 4,41838 | 1,408178284 | N/A             | N/A       | N/A          | N/A              |

|                |         |         |             |                 |           |              |                |
|----------------|---------|---------|-------------|-----------------|-----------|--------------|----------------|
| A_22_P00003871 | 5,19376 | 4,70003 | 1,40808068  | ENST00000569547 | 60677     | NM_001172684 | CELF6          |
| A_24_P23034    | 10,7204 | 10,2267 | 1,4080514   | ENST00000396105 | 57169     | NM_021035    | ZNFx1          |
| A_22_P00020092 | 2,09858 | 1,60495 | 1,407983083 | N/A             | N/A       | N/A          | Inc-SLC1A2-1   |
| A_33_P3315841  | 5,20369 | 4,71008 | 1,407963564 | ENST00000505053 | N/A       | N/A          | N/A            |
| A_22_P00002435 | 5,01021 | 4,51673 | 1,4078367   | N/A             | N/A       | N/A          | Inc-C14orf49-2 |
| A_32_P137035   | 13,1053 | 12,6119 | 1,407758635 | ENST00000495323 | 5987      | NM_006510    | TRIM27         |
| A_23_P325924   | 7,64961 | 7,15624 | 1,407729362 | ENST00000401533 | 150946    | NM_001191033 | GAREML         |
| A_23_P113382   | 4,5795  | 4,08614 | 1,407719604 | ENST00000359742 | 23426     | NM_021150    | GRIP1          |
| A_24_P151727   | 13,5917 | 13,0984 | 1,40766106  | ENST00000472185 | 4841      | NM_007363    | NONO           |
| A_22_P00007067 | 4,15023 | 3,65702 | 1,407573248 | N/A             | N/A       | BG185545     | Inc-GLDN-2     |
| A_23_P2129     | 11,9572 | 11,464  | 1,407563492 | ENST00000530783 | 55863     | NM_018480    | TMEM126B       |
| A_23_P402279   | 1,96326 | 1,4701  | 1,407524466 | ENST00000341702 | 317701    | NM_173856    | VN1R2          |
| A_23_P138856   | 14,9006 | 14,4075 | 1,40746593  | ENST00000525190 | 10589     | NM_006442    | DRAP1          |
| A_21_P0001020  | 3,41055 | 2,91761 | 1,407309846 | N/A             | N/A       | N/A          | Inc-RXFP4-1    |
| A_22_P00006348 | 2,06324 | 1,57034 | 1,407270827 | ENST00000555246 | 100506412 | N/A          | LINC00871      |
| A_33_P3216337  | 13,4336 | 12,9408 | 1,407173286 | ENST00000019019 | 24140     | NM_177439    | FTSJ1          |
| A_21_P0008516  | 2,83044 | 2,33768 | 1,407134272 | N/A             | N/A       | N/A          | Inc-SIPA1L1-1  |
| A_23_P59294    | 6,18788 | 5,69517 | 1,407085505 | ENST00000379933 | 6239      | NM_001003699 | RREB1          |
| A_22_P00022260 | 3,8091  | 3,31644 | 1,40703674  | ENST00000435156 | N/A       | N/A          | N/A            |
| A_22_P00003521 | 2,62197 | 2,12947 | 1,406880703 | ENST00000577584 | N/A       | N/A          | N/A            |
| A_33_P3269548  | 2,31119 | 1,81878 | 1,40679294  | N/A             | 653399    | N/A          | GSTTP2         |
| A_21_P0011807  | 2,00545 | 1,51312 | 1,406714933 | ENST00000622311 | 645784    | N/A          | ANKRD36BP2     |
| A_23_P26062    | 1,96389 | 1,47163 | 1,40664668  | ENST00000341689 | 338949    | NM_001080462 | TMEM202        |
| A_22_P00023552 | 7,31728 | 6,82517 | 1,406500436 | N/A             | 101929021 | XR_246125    | LOC101929021   |
| A_22_P00020936 | 7,44614 | 6,95408 | 1,406451691 | N/A             | N/A       | N/A          | Inc-UNC93B1-2  |
| A_33_P3360077  | 4,72277 | 4,23071 | 1,406451691 | ENST00000609755 | N/A       | AK128206     | N/A            |
| A_33_P3357813  | 3,53453 | 3,04253 | 1,4063932   | N/A             | 3352      | M81589       | HTR1D          |
| A_33_P3343360  | 2,11968 | 1,62789 | 1,406188499 | ENST00000432775 | 401145    | NM_207491    | CCSER1         |
| A_21_P0001219  | 2,75149 | 2,25973 | 1,406159258 | ENST00000453331 | N/A       | N/A          | N/A            |
| A_22_P00007566 | 2,25578 | 1,76423 | 1,405954591 | N/A             | N/A       | N/A          | Inc-HBZ-1      |
| A_24_P417162   | 8,67374 | 8,18225 | 1,405896121 | ENST00000407597 | 6907      | NM_005647    | TBL1X          |
| A_19_P00318938 | 7,98298 | 7,49157 | 1,405818163 | ENST00000414603 | N/A       | N/A          | N/A            |
| A_33_P3390456  | 7,93884 | 7,44768 | 1,405574575 | ENST00000547254 | 10138     | NM_001190979 | YAF2           |



|                |         |         |             |                 |           |              |               |
|----------------|---------|---------|-------------|-----------------|-----------|--------------|---------------|
| A_21_P0005433  | 2,15995 | 1,66882 | 1,405545347 | N/A             | N/A       | N/A          | Inc-MKLN1-1   |
| A_23_P45831    | 10,5829 | 10,0918 | 1,40551612  | ENST00000622533 | 9557      | NM_004284    | CHD1L         |
| A_24_P940620   | 6,43542 | 5,9444  | 1,405438184 | ENST00000327026 | 284001    | XM_005256345 | CCDC57        |
| A_23_P68665    | 12,5638 | 12,0728 | 1,4054187   | ENST00000253003 | 11047     | NM_007002    | ADRM1         |
| A_22_P00013502 | 3,8289  | 3,33815 | 1,405175181 | ENST00000511935 | 100507065 | XR_110369    | LOC100507065  |
| A_23_P37569    | 8,71741 | 8,22669 | 1,405145961 | ENST00000559717 | 4122      | NM_006122    | MAN2A2        |
| A_33_P3324004  | 5,49995 | 5,00929 | 1,405087524 | ENST00000614050 | 6359      | NM_032965    | CCL15         |
| A_22_P00001898 | 2,58102 | 2,09039 | 1,405058306 | N/A             | N/A       | N/A          | Inc-B4GALT3-1 |
| A_22_P00015970 | 1,96473 | 1,47412 | 1,405038828 | N/A             | N/A       | AL833462     | Inc-TEKT3-1   |
| A_33_P3396607  | 11,0044 | 10,5138 | 1,405029089 | ENST00000506179 | 7358      | NM_003359    | UGDH          |
| A_22_P00014884 | 3,04007 | 2,54947 | 1,405029089 | N/A             | 100874278 | NR_046817    | ER13-IT1      |
| A_21_P0008774  | 2,11992 | 1,62939 | 1,404960919 | N/A             | N/A       | N/A          | Inc-DET1-2    |
| A_33_P3341189  | 11,8018 | 11,3113 | 1,404931704 | ENST00000346330 | 7319      | NM_003336    | UBE2A         |
| A_22_P00015989 | 3,37459 | 2,88413 | 1,404892751 | ENST00000514327 | N/A       | N/A          | N/A           |
| A_24_P84048    | 16,2313 | 15,741  | 1,404736952 | ENST00000487417 | N/A       | N/A          | N/A           |
| A_22_P00001663 | 4,27154 | 3,78131 | 1,404668796 | N/A             | N/A       | BC131614     | Inc-ASH1L-1   |
| A_21_P0002372  | 2,131   | 1,64077 | 1,404668796 | N/A             | N/A       | N/A          | Inc-SH3BP4-2  |
| A_33_P3337771  | 11,9585 | 11,4683 | 1,404639587 | ENST00000260129 | 96764     | NM_024831    | TGS1          |
| A_33_P3372318  | 3,88515 | 3,39498 | 1,404610378 | ENST00000490828 | 400954    | AK131467     | EML6          |
| A_21_P0008060  | 5,42087 | 4,93075 | 1,404561699 | N/A             | 100190939 | NR_024458    | TPT1-AS1      |
| A_21_P0002694  | 2,30125 | 1,81114 | 1,404551963 | N/A             | N/A       | N/A          | Inc-THAP4-1   |
| A_33_P3364661  | 7,65621 | 7,16612 | 1,404532492 | ENST00000265538 | 387       | DC392227     | RHOA          |
| A_21_P0002450  | 2,15601 | 1,66599 | 1,404464346 | N/A             | N/A       | N/A          | Inc-TMEM17-2  |
| A_23_P109420   | 11,6512 | 11,1612 | 1,404444876 | ENST00000413293 | 9790      | NM_014753    | BMS1          |
| A_33_P3212640  | 5,58436 | 5,09438 | 1,404425406 | ENST00000578207 | 388677    | NM_203458    | NOTCH2NL      |
| A_22_P00021572 | 4,77189 | 4,28193 | 1,404405937 | N/A             | N/A       | CR739627     | Inc-ZFYVE1-1  |
| A_32_P88905    | 10,3616 | 9,87166 | 1,404386468 | N/A             | N/A       | N/A          | N/A           |
| A_23_P119964   | 11,4512 | 10,9613 | 1,40434753  | ENST00000489306 | 10153     | NM_005760    | CEBPZ         |
| A_23_P407992   | 6,20113 | 5,71123 | 1,40434753  | ENST00000293925 | 57585     | NM_020825    | CRAMP1L       |
| A_19_P00316682 | 4,43076 | 3,94088 | 1,404328062 | ENST00000509530 | N/A       | N/A          | N/A           |
| A_33_P3398693  | 3,50398 | 3,01414 | 1,404289126 | ENST00000338315 | 388931    | NM_001080473 | MFSD2B        |
| A_23_P204550   | 11,6071 | 11,1173 | 1,404250192 | ENST00000360820 | 55681     | NM_017988    | SCYL2         |
| A_33_P3419970  | 9,54334 | 9,05359 | 1,404201525 | ENST00000333383 | 256933    | NM_148896    | NPB           |

|                |         |         |             |                 |           |              |                       |
|----------------|---------|---------|-------------|-----------------|-----------|--------------|-----------------------|
| A_33_P3212704  | 6,51647 | 6,02686 | 1,404065267 | N/A             | N/A       | N/A          | N/A                   |
| A_23_P216468   | 6,21557 | 5,72597 | 1,404055535 | ENST00000262352 | 6505      | NM_004170    | SLC1A1                |
| A_33_P3224660  | 6,32515 | 5,8356  | 1,404006875 | ENST00000429313 | 215       | NM_000033    | ABCD1                 |
| A_21_P0007449  | 1,92397 | 1,43447 | 1,403958217 | N/A             | N/A       | N/A          | Inc-RP11-817J15.3.1-1 |
| A_22_P00022584 | 4,8694  | 4,37995 | 1,40390956  | N/A             | 101928324 | NR_125952    | LOC101928324          |
| A_33_P3325477  | 4,866   | 4,37668 | 1,403783061 | ENST00000371368 | 115353    | XM_006710328 | LRRC42                |
| A_23_P78664    | 13,0265 | 12,5372 | 1,4037636   | ENST00000242776 | 10212     | NM_005804    | DDX39A                |
| A_32_P141262   | 11,5083 | 11,0191 | 1,403666302 | ENST00000429006 | 29883     | NM_054026    | CNOT7                 |
| A_33_P3419545  | 9,49966 | 9,0105  | 1,403627385 | ENST00000496061 | 81602     | NM_001193478 | CDADC1                |
| A_33_P3347168  | 8,69373 | 8,20459 | 1,403607926 | ENST00000407597 | 6907      | NM_005647    | TBL1X                 |
| A_33_P3396600  | 3,55296 | 3,06398 | 1,40345227  | ENST00000381759 | 23030     | NM_015015    | KDM4B                 |
| A_33_P3625172  | 2,15884 | 1,6699  | 1,403413359 | ENST00000423178 | 399821    | NR_033847    | FLJ37035              |
| A_33_P3354646  | 5,17773 | 4,68882 | 1,403384176 | ENST00000470678 | 5407      | NM_006229    | PNLIPRP1              |
| A_23_P164011   | 9,38724 | 8,89835 | 1,403364721 | ENST00000250055 | 6665      | NM_006942    | SOX15                 |
| A_23_P126008   | 9,92202 | 9,43316 | 1,403335539 | ENST00000372009 | 23139     | NM_015112    | MAST2                 |
| A_24_P386639   | 9,5984  | 9,10977 | 1,403111832 | ENST00000382762 | 51272     | NM_016526    | BET1L                 |
| A_23_P300847   | 4,16181 | 3,67319 | 1,403102106 | ENST00000555882 | 100302145 | AF469204     | MIR1247               |
| A_33_P3307207  | 1,96925 | 1,48066 | 1,40307293  | ENST00000332715 | 646625    | NM_001105577 | URAD                  |
| A_23_P253375   | 10,8692 | 10,3809 | 1,402790922 | ENST00000558836 | 1523      | NM_001913    | CUX1                  |
| A_24_P23951    | 9,92276 | 9,43447 | 1,402781199 | ENST00000511549 | 400892    | NR_037566    | BCRP2                 |
| A_32_P165933   | 3,31948 | 2,83119 | 1,402781199 | ENST00000429548 | 389123    | NM_203424    | IQCF2                 |
| A_24_P188325   | 10,3076 | 9,81936 | 1,402732583 | ENST00000416915 | 51377     | NM_015984    | UCHL5                 |
| A_24_P313186   | 10,1656 | 9,67736 | 1,402732583 | ENST00000356978 | 801       | NM_006888    | CALM1                 |
| A_23_P104116   | 15,5283 | 15,0401 | 1,402693692 | ENST00000369307 | 9939      | NM_005105    | RBM8A                 |
| A_33_P3233219  | 3,57045 | 3,08257 | 1,402382599 | ENST00000331251 | 2831      | NM_005285    | NPBWR1                |
| A_24_P232696   | 12,176  | 11,6882 | 1,402304836 | ENST00000381513 | 6602      | NM_139071    | SMARCD1               |
| A_33_P3415156  | 3,23046 | 2,74267 | 1,402295116 | N/A             | N/A       | DA938875     | N/A                   |
| A_22_P00000457 | 7,36604 | 6,87833 | 1,402217359 | ENST00000513480 | 101929768 | NR_109951    | OSMR-AS1              |
| A_23_P325654   | 2,02798 | 1,54027 | 1,402217359 | ENST00000286349 | 287015    | NM_152616    | TRIM42                |
| A_24_P393844   | 11,7978 | 11,3101 | 1,402207639 | ENST00000527319 | 1802      | NM_001384    | DPH2                  |
| A_23_P141429   | 4,78245 | 4,29485 | 1,402110449 | ENST00000419580 | 51225     | NM_016428    | ABI3                  |
| A_33_P3268060  | 1,97254 | 1,48495 | 1,402100731 | ENST00000380371 | 401667    | NM_001004748 | OR51A2                |
| A_23_P204536   | 10,2341 | 9,74652 | 1,402091012 | ENST00000448372 | 29843     | NM_001267595 | SENP1                 |

|                |         |         |             |                 |        |              |                      |
|----------------|---------|---------|-------------|-----------------|--------|--------------|----------------------|
| A_21_P0002168  | 5,60697 | 5,11942 | 1,402061857 | ENST00000547349 | N/A    | XR_241269    | N/A                  |
| A_33_P3350393  | 10,1474 | 9,65993 | 1,401984112 | ENST00000417689 | 8824   | NM_003869    | CES2                 |
| A_33_P3283971  | 10,019  | 9,53159 | 1,401925806 | ENST00000376148 | 4795   | NM_005007    | NFKBIL1              |
| A_33_P3352407  | 18,4198 | 17,9324 | 1,401916089 | ENST00000434913 | N/A    | N/A          | N/A                  |
| A_23_P34741    | 14,0307 | 13,5434 | 1,401818919 | ENST00000374266 | 51042  | NM_015871    | ZNF593               |
| A_23_P100486   | 11,911  | 11,4237 | 1,401818919 | ENST00000394975 | 79001  | NM_206824    | VKORC1               |
| A_23_P151093   | 11,5382 | 11,051  | 1,401721756 | ENST00000548490 | 51067  | NM_001040436 | YARS2                |
| A_23_P150693   | 12,0593 | 11,5722 | 1,401624599 | ENST00000317811 | 24147  | NM_014344    | FJX1                 |
| A_24_P942002   | 9,51161 | 9,02457 | 1,401566308 | ENST00000326793 | 23527  | NM_012287    | ACAP2                |
| A_33_P3224027  | 7,14463 | 6,65762 | 1,401537164 | ENST00000547545 | 114785 | NM_052897    | MBD6                 |
| A_23_P409449   | 3,98494 | 3,49797 | 1,401498305 | ENST00000334077 | 6887   | NM_005421    | TAL2                 |
| A_33_P3400309  | 2,10325 | 1,61629 | 1,401488591 | ENST00000326929 | 79747  | AK097570     | ADGB                 |
| A_23_P66432    | 7,11022 | 6,62341 | 1,401342883 | ENST00000441391 | 94015  | NM_032646    | TTYH2                |
| A_23_P152305   | 9,11376 | 8,62699 | 1,40130403  | ENST00000394156 | 1009   | NM_001797    | CDH11                |
| A_33_P3355877  | 5,25683 | 4,77013 | 1,40123604  | ENST00000508115 | 152518 | NR_103795    | NFXL1                |
| A_33_P3350823  | 7,33237 | 6,84571 | 1,40119719  | ENST00000326361 | 51193  | NM_016331    | ZNF639               |
| A_22_P00003920 | 10,9214 | 10,4348 | 1,401138917 | ENST00000568347 | 8824   | NM_003869    | CES2                 |
| A_23_P71146    | 11,5189 | 11,0323 | 1,401138917 | ENST00000470867 | 5425   | NM_006230    | POLD2                |
| A_23_P12884    | 12,7268 | 12,2402 | 1,401138917 | ENST00000392870 | 2869   | NM_005308    | GRK5                 |
| A_23_P140907   | 11,2447 | 10,7581 | 1,401138917 | ENST00000431232 | 58986  | NM_021259    | TMEM8A               |
| A_21_P0011879  | 2,18694 | 1,70039 | 1,401090358 | N/A             | N/A    | N/A          | Inc-B3GNT7-1         |
| A_33_P3287078  | 6,76548 | 6,27897 | 1,401051512 | ENST00000377051 | 64412  | NM_022482    | GZF1                 |
| A_24_P93741    | 6,86265 | 6,37616 | 1,40103209  | ENST00000296292 | 91869  | NM_052859    | RFT1                 |
| A_23_P501193   | 2,12337 | 1,63698 | 1,400934981 | ENST00000615244 | 3773   | NM_170741    | KCNJ16               |
| A_23_P24774    | 3,56283 | 3,07651 | 1,400867009 | ENST00000525022 | 6833   | NM_000352    | ABCC8                |
| A_33_P3461633  | 8,01708 | 7,53078 | 1,400847589 | ENST00000587762 | 284454 | NR_036515    | LOC284454            |
| A_23_P428827   | 10,3226 | 9,83646 | 1,400692238 | ENST00000257787 | 55122  | NM_018064    | AKIRIN2              |
| A_24_P214598   | 8,01585 | 7,52975 | 1,400653403 | ENST00000506423 | 152926 | NM_152542    | PPM1K                |
| A_32_P755542   | 11,5867 | 11,1006 | 1,400653403 | ENST00000486090 | 132001 | NM_138807    | TAMM41               |
| A_22_P00021783 | 2,04191 | 1,55589 | 1,400575737 | N/A             | N/A    | N/A          | Inc-RP11-166B2.1.1-1 |
| A_33_P3331588  | 13,9451 | 13,4591 | 1,400556321 | ENST00000474481 | 83858  | NM_031921    | ATAD3B               |
| A_33_P3243405  | 4,83681 | 4,35084 | 1,400527197 | ENST00000300098 | 11318  | NM_007264    | GPR182               |
| A_24_P333716   | 9,51677 | 9,0309  | 1,400430124 | ENST00000400602 | 64328  | NM_022459    | XPO4                 |

|                |         |         |             |                 |        |              |                       |
|----------------|---------|---------|-------------|-----------------|--------|--------------|-----------------------|
| A_21_P0014656  | 2,41192 | 1,9261  | 1,400381589 | N/A             | N/A    | N/A          | N/A                   |
| A_21_P0005828  | 3,23026 | 2,74454 | 1,400284526 | N/A             | N/A    | N/A          | Inc-RP11-350F16.2.1-2 |
| A_23_P419038   | 8,43897 | 7,95329 | 1,400245702 | ENST00000511124 | 9575   | NM_004898    | CLOCK                 |
| A_21_P0011818  | 3,89637 | 3,41071 | 1,400226291 | N/A             | N/A    | N/A          | XL0C_I2_007427        |
| A_21_P0006358  | 5,12534 | 4,63984 | 1,400071009 | N/A             | N/A    | N/A          | Inc-HIATL1-2          |
| A_33_P3328184  | 2,76324 | 2,27775 | 1,400061305 | N/A             | N/A    | N/A          | Inc-CAST-4            |
| A_33_P3337182  | 5,10539 | 4,6199  | 1,400061305 | ENST00000439955 | N/A    | N/A          | N/A                   |
| A_23_P408675   | 10,1008 | 9,61539 | 1,399983671 | ENST00000544642 | 9044   | NM_003972    | BTAf1                 |
| A_24_P216456   | 2,18641 | 1,7011  | 1,399886635 | ENST00000357246 | 440738 | NM_001004343 | MAP1LC3C              |
| A_33_P3268472  | 12,7413 | 12,256  | 1,399876932 | ENST00000393301 | 1075   | NM_001114173 | CTSC                  |
| A_21_P0004237  | 2,9882  | 2,50317 | 1,399614969 | N/A             | N/A    | N/A          | Inc-C5orf17-6         |
| A_23_P28625    | 11,5654 | 11,0804 | 1,399585866 | ENST00000467777 | 55759  | NM_018256    | WDR12                 |
| A_22_P00003706 | 2,1172  | 1,63223 | 1,399556762 | ENST00000522743 | N/A    | N/A          | N/A                   |
| A_23_P26223    | 10,3356 | 9,85065 | 1,39953736  | ENST00000395331 | 435    | NM_001024943 | ASL                   |
| A_32_P117354   | 10,9812 | 10,4963 | 1,399488857 | ENST00000512946 | 22998  | NM_014988    | LIMCH1                |
| A_21_P0010398  | 2,83847 | 2,35363 | 1,399430655 | N/A             | N/A    | N/A          | Inc-RGL4-4            |
| A_23_P45940    | 11,4669 | 10,9821 | 1,399391855 | ENST00000366514 | 64216  | NM_022366    | TFB2M                 |
| A_33_P3410409  | 13,0273 | 12,5426 | 1,39929486  | ENST00000200639 | 3920   | NM_001122606 | LAMP2                 |
| A_22_P00018755 | 1,95449 | 1,46999 | 1,39910089  | N/A             | N/A    | AW138088     | Inc-CALCOCO2-5        |
| A_33_P3286953  | 2,66773 | 2,18329 | 1,399042704 | ENST00000381052 | 11174  | NM_197941    | ADAMTS6               |
| A_23_P37283    | 7,83035 | 7,34595 | 1,399003915 | ENST00000557184 | 10668  | NM_006568    | CGRRF1                |
| A_32_P64475    | 7,13874 | 6,65435 | 1,398994218 | ENST00000272091 | 163859 | NM_152608    | SDE2                  |
| A_24_P268676   | 12,4212 | 11,9369 | 1,398906947 | ENST00000256495 | 8553   | NM_003670    | BHLHE40               |
| A_23_P147918   | 15,5227 | 15,0384 | 1,398906947 | ENST00000368703 | 140576 | NM_080388    | S100A16               |
| A_33_P3401058  | 4,67113 | 4,18689 | 1,398848769 | N/A             | N/A    | AK022140     | Inc-KIAA0825-1        |
| A_24_P9833     | 4,93733 | 4,45317 | 1,398771203 | ENST00000530656 | 56981  | NM_001256696 | PRDM11                |
| A_33_P3331437  | 6,44918 | 5,96505 | 1,398742117 | ENST00000624776 | 9849   | NM_001278524 | ZNF518A               |
| A_33_P3251093  | 10,7125 | 10,2284 | 1,398713031 | ENST00000243389 | 206358 | NM_078483    | SLC36A1               |
| A_23_P302094   | 11,8361 | 11,352  | 1,398713031 | ENST00000473689 | 92856  | NM_033416    | IMP4                  |
| A_22_P00014264 | 3,88582 | 3,4018  | 1,398635472 | ENST00000558370 | N/A    | N/A          | N/A                   |
| A_23_P45864    | 5,02299 | 4,539   | 1,398606388 | ENST00000263525 | 7143   | NM_003285    | TNR                   |
| A_22_P00001008 | 6,87795 | 6,39405 | 1,398519141 | ENST00000422847 | 439990 | NR_038464    | LINC00857             |
| A_33_P3329326  | 1,982   | 1,49819 | 1,3984319   | ENST00000374025 | 388611 | N/A          | CD164L2               |

|                |         |         |             |                 |           |              |                |
|----------------|---------|---------|-------------|-----------------|-----------|--------------|----------------|
| A_23_P391637   | 7,8238  | 7,34003 | 1,398393128 | ENST00000293970 | 57465     | NM_020705    | TBC1D24        |
| A_33_P3401813  | 4,35625 | 3,8725  | 1,398373742 | N/A             | N/A       | AK126599     | N/A            |
| A_33_P3280114  | 2,06683 | 1,58309 | 1,398364049 | N/A             | N/A       | N/A          | N/A            |
| A_23_P128624   | 14,8172 | 14,3335 | 1,398325279 | ENST00000537802 | 79587     | NM_024537    | CARS2          |
| A_33_P3316248  | 3,90797 | 3,4243  | 1,398296202 | N/A             | N/A       | N/A          | N/A            |
| A_22_P00016933 | 6,25064 | 5,76699 | 1,398276818 | ENST00000267970 | 10099     | AL109670     | TSPAN3         |
| A_21_P0002967  | 3,87263 | 3,38901 | 1,398247741 | ENST00000481004 | N/A       | N/A          | N/A            |
| A_33_P3230541  | 2,21693 | 1,73332 | 1,39823805  | N/A             | N/A       | N/A          | N/A            |
| A_33_P3357062  | 11,4345 | 10,9509 | 1,398228358 | ENST00000354291 | 57696     | NM_020936    | DDX55          |
| A_24_P215628   | 8,01542 | 7,53189 | 1,398160517 | ENST00000375403 | 55208     | NM_001014283 | DCUN1D2        |
| A_33_P3236642  | 7,15312 | 6,66961 | 1,398141134 | ENST00000470521 | 375056    | NM_198551    | MIA3           |
| A_23_P395585   | 5,19738 | 4,71399 | 1,398024845 | ENST00000318225 | 152065    | XM_005247139 | C3orf22        |
| A_23_P140698   | 9,34532 | 8,86194 | 1,398015155 | ENST00000559310 | 55192     | NM_018163    | DNAJC17        |
| A_21_P0011008  | 4,59455 | 4,11129 | 1,397898876 | N/A             | N/A       | N/A          | XLOC_I2_002651 |
| A_32_P90210    | 12,4729 | 11,9897 | 1,39784074  | ENST00000217893 | 6880      | NM_001015892 | TAF9           |
| A_33_P3849275  | 11,0336 | 10,5504 | 1,39784074  | ENST00000543669 | 2273      | NM_001159704 | FHL1           |
| A_33_P3229722  | 11,5766 | 11,0934 | 1,39784074  | ENST00000381899 | 9491      | NM_006814    | PSMF1          |
| A_22_P00004724 | 2,19579 | 1,71261 | 1,397821362 | ENST00000600103 | 100852410 | NR_046217    | ZRANB2-AS2     |
| A_23_P385217   | 13,2532 | 12,7701 | 1,397743853 | ENST00000256496 | 55207     | NM_018184    | ARL8B          |
| A_22_P00003284 | 15,7505 | 15,2674 | 1,397743853 | ENST00000603283 | 642587    | NM_001104548 | MIR205HG       |
| A_21_P0006757  | 7,8649  | 7,3819  | 1,397646972 | N/A             | N/A       | N/A          | Inc-RBP3-1     |
| A_33_P3343073  | 9,4616  | 8,97863 | 1,397617909 | ENST00000618915 | 6598      | NM_003073    | SMARCB1        |
| A_22_P00024147 | 4,11829 | 3,63534 | 1,397598534 | N/A             | N/A       | N/A          | Inc-CPPED1-3   |
| A_23_P356004   | 2,32655 | 1,84369 | 1,39751135  | ENST00000377181 | 30818     | NM_013434    | KCNIP3         |
| A_24_P38143    | 6,82121 | 6,33835 | 1,39751135  | ENST00000457866 | 54806     | NM_017651    | AHI1           |
| A_21_P0011723  | 4,97292 | 4,49022 | 1,39735637  | ENST00000589310 | N/A       | N/A          | N/A            |
| A_32_P78783    | 7,02354 | 6,54103 | 1,397172353 | ENST00000433976 | 197320    | NM_001201407 | ZNF778         |
| A_21_P0014566  | 5,15362 | 4,67113 | 1,397152984 | N/A             | N/A       | N/A          | N/A            |
| A_23_P405110   | 4,29246 | 3,81003 | 1,397094879 | ENST00000370124 | 8556      | NM_033313    | CDC14A         |
| A_33_P3299055  | 3,11112 | 2,62883 | 1,396959311 | ENST00000457909 | 90342     | NM_001293083 | FER1L5         |
| A_33_P3424516  | 2,08055 | 1,59826 | 1,396959311 | ENST00000328611 | 390059    | NM_001004756 | OR51M1         |
| A_22_P00021104 | 7,92682 | 7,44457 | 1,396920579 | N/A             | N/A       | N/A          | Inc-IL23A-2    |
| A_22_P00017389 | 2,93703 | 2,45478 | 1,396920579 | N/A             | N/A       | BU073897     | Inc-VANGL2-1   |

|                |         |         |             |                 |           |              |                |
|----------------|---------|---------|-------------|-----------------|-----------|--------------|----------------|
| A_23_P325562   | 5,29397 | 4,81172 | 1,396920579 | ENST00000620288 | 6512      | NM_006671    | SLC1A7         |
| A_24_P277934   | 2,04674 | 1,5645  | 1,396910897 | ENST00000464916 | 1278      | NM_000089    | COL1A2         |
| A_24_P134834   | 8,55721 | 8,075   | 1,396881849 | ENST00000392062 | 84236     | NM_032276    | RHBDD1         |
| A_23_P88680    | 14,0711 | 13,5891 | 1,396678532 | ENST00000256545 | 56851     | NM_020154    | EMC7           |
| A_23_P111303   | 10,8114 | 10,3295 | 1,396581725 | ENST00000367178 | 22828     | NM_014892    | SCAF8          |
| A_21_P0009000  | 3,69191 | 3,21003 | 1,396562365 | ENST00000575693 | 101929566 | XR_243337    | LOC101929566   |
| A_21_P0000755  | 2,36622 | 1,88444 | 1,396465566 | N/A             | 100507173 | N/A          | LINC01012      |
| A_23_P371824   | 13,3736 | 12,8919 | 1,396388132 | ENST00000353024 | 7286      | NM_020127    | TUFT1          |
| A_22_P00014053 | 7,2851  | 6,80344 | 1,396349416 | ENST00000264057 | 8527      | NM_152879    | DGKD           |
| A_24_P365365   | 12,4895 | 12,0079 | 1,396291345 | ENST00000611869 | 6929      | NM_003200    | TCF3           |
| A_19_P00322330 | 5,05352 | 4,57202 | 1,396194564 | ENST00000493473 | 647107    | N/A          | LINC01192      |
| A_21_P0012171  | 2,64759 | 2,16614 | 1,396146177 | N/A             | N/A       | N/A          | XLOC_I2_008991 |
| A_21_P0004065  | 1,96154 | 1,48011 | 1,396126822 | ENST00000511165 | N/A       | N/A          | N/A            |
| A_24_P108738   | 10,8389 | 10,3575 | 1,396097791 | ENST00000623402 | 91179     | NM_153334    | SCARF2         |
| A_33_P3259740  | 4,88721 | 4,40588 | 1,396030054 | ENST00000616078 | 400661    | NR_122073    | LOC400661      |
| A_19_P00315941 | 4,53741 | 4,05621 | 1,395904264 | ENST00000615212 | 440993    | NR_122105    | LINC00969      |
| A_24_P123347   | 10,7295 | 10,2484 | 1,395807511 | ENST00000425339 | 5471      | NM_002703    | PPAT           |
| A_24_P109082   | 8,94593 | 8,46491 | 1,395730113 | ENST00000258399 | 57695     | NM_020935    | USP37          |
| A_23_P216622   | 5,96649 | 5,48552 | 1,395681741 | ENST00000448551 | 2218      | NM_001079802 | FKTN           |
| A_22_P00020908 | 2,15784 | 1,67694 | 1,395614024 | N/A             | N/A       | N/A          | Inc-CDNF-1     |
| A_23_P259692   | 14,2564 | 13,7755 | 1,395614024 | ENST00000376588 | 29968     | NM_058179    | PSAT1          |
| A_22_P00006367 | 2,02004 | 1,53917 | 1,395585004 | ENST00000503037 | 102725242 | N/A          | LOC102725242   |
| A_21_P0014898  | 6,79005 | 6,30928 | 1,395488272 | N/A             | N/A       | N/A          | N/A            |
| A_32_P108826   | 7,48612 | 7,00543 | 1,395410892 | ENST00000367405 | 360023    | NM_194314    | ZBTB41         |
| A_23_P137984   | 16,6956 | 16,215  | 1,395323845 | ENST00000368809 | 6281      | NM_002966    | S100A10        |
| A_33_P3343573  | 5,64502 | 5,16444 | 1,395304501 | ENST00000588598 | N/A       | AK090438     | N/A            |
| A_24_P330633   | 2,78253 | 2,30197 | 1,395285159 | ENST00000355962 | 6898      | NM_000353    | TAT            |
| A_21_P0010651  | 4,05441 | 3,57387 | 1,395265816 | N/A             | N/A       | N/A          | XLOC_I2_001089 |
| A_32_P489130   | 6,46765 | 5,9874  | 1,394985378 | ENST00000373275 | 254065    | NM_153252    | BRWD3          |
| A_33_P3436316  | 10,2354 | 9,75519 | 1,394946701 | ENST00000497249 | 171023    | NM_001164603 | ASXL1          |
| A_33_P3280549  | 11,1996 | 10,7194 | 1,394937032 | ENST00000413921 | N/A       | N/A          | N/A            |
| A_33_P3312549  | 4,54149 | 4,06132 | 1,394908026 | ENST00000333235 | N/A       | XR_433169    | N/A            |
| A_22_P00004655 | 4,27583 | 3,79571 | 1,394859683 | ENST00000555344 | 340073    | NR_037895    | C5orf66-AS2    |

|                |         |         |             |                 |           |              |                |
|----------------|---------|---------|-------------|-----------------|-----------|--------------|----------------|
| A_21_P0013194  | 7,31698 | 6,83687 | 1,394850014 | ENST00000617826 | 729737    | NR_039983    | LOC729737      |
| A_22_P00010050 | 8,56066 | 8,08059 | 1,394811341 | N/A             | 101927631 | NR_110008    | ADNP-AS1       |
| A_24_P929441   | 2,78153 | 2,30148 | 1,394792005 | N/A             | 100996535 | XM_005275924 | LOC100996535   |
| A_21_P0006781  | 5,56746 | 5,08744 | 1,394763002 | N/A             | 100507633 | NR_108070    | TNKS2-AS1      |
| A_23_P129103   | 12,5393 | 12,0593 | 1,394743666 | ENST00000316967 | 388152    | NR_027001    | GOLGA2P7       |
| A_23_P24375    | 12,4516 | 11,9716 | 1,394743666 | ENST00000535140 | 55611     | NM_017670    | OTUB1          |
| A_23_P100517   | 9,9992  | 9,51925 | 1,394695329 | ENST00000561878 | 124491    | NM_145254    | TMEM170A       |
| A_23_P253446   | 5,42297 | 4,94311 | 1,394608326 | ENST00000305124 | 2596      | NM_002045    | GAP43          |
| A_33_P3331831  | 5,0551  | 4,57525 | 1,394598659 | ENST00000612156 | N/A       | XM_005275740 | N/A            |
| A_21_P0010948  | 2,76727 | 2,28748 | 1,394540661 | ENST00000456546 | N/A       | N/A          | N/A            |
| A_33_P3405128  | 5,0986  | 4,6189  | 1,394453668 | ENST00000409481 | N/A       | N/A          | N/A            |
| A_23_P257278   | 9,81733 | 9,33763 | 1,394453668 | ENST00000461356 | 51654     | NM_016082    | CDK5RAP1       |
| A_33_P3350863  | 3,0874  | 2,60777 | 1,39438601  | ENST00000221515 | 56729     | NM_020415    | RETN           |
| A_21_P0013301  | 2,32531 | 1,84571 | 1,394357015 | N/A             | N/A       | N/A          | XLOC_I2_013808 |
| A_33_P3292565  | 2,03209 | 1,55255 | 1,394299026 | ENST00000553765 | N/A       | AB529249     | N/A            |
| A_33_P3531828  | 10,6835 | 10,204  | 1,394260369 | ENST00000506436 | 51520     | NM_020117    | LARS           |
| A_33_P3343962  | 6,44695 | 5,96748 | 1,394231376 | N/A             | 100130373 | XR_244171    | LOC100130373   |
| A_33_P3235360  | 4,64745 | 4,16802 | 1,39419272  | N/A             | N/A       | N/A          | N/A            |
| A_33_P3420486  | 5,56775 | 5,08833 | 1,394183057 | N/A             | N/A       | AK025118     | N/A            |
| A_33_P3286041  | 11,1148 | 10,6354 | 1,394163729 | ENST00000359210 | 55718     | NM_018119    | POLR3E         |
| A_23_P57941    | 9,68737 | 9,20808 | 1,394057434 | ENST00000454079 | 10180     | NM_005777    | RBM6           |
| A_21_P0009146  | 2,93953 | 2,46026 | 1,394038108 | ENST00000511008 | 124871    | NR_034161    | FLJ40194       |
| A_23_P96501    | 1,98337 | 1,50413 | 1,39400912  | ENST00000395889 | 56159     | NM_001003811 | TEX11          |
| A_33_P3294162  | 6,78036 | 6,30116 | 1,393970471 | N/A             | 9512      | NM_004279    | PMPCB          |
| A_23_P53668    | 8,64906 | 8,1699  | 1,393931822 | ENST00000240055 | 4801      | NM_006166    | NFYB           |
| A_33_P3353170  | 6,31075 | 5,83165 | 1,393873851 | N/A             | 1213      | BC051800     | CLTC           |
| A_21_P0009816  | 4,48492 | 4,00586 | 1,393835205 | N/A             | N/A       | N/A          | Inc-FOXA2-8    |
| A_33_P3415440  | 10,073  | 9,594   | 1,393777239 | ENST00000409947 | 10746     | NM_006609    | MAP3K2         |
| A_23_P12079    | 6,25932 | 5,78048 | 1,393622672 | ENST00000489935 | 3749      | NM_001039574 | KCNC4          |
| A_21_P0012314  | 2,11511 | 1,6364  | 1,3934971   | ENST00000624001 | N/A       | N/A          | N/A            |
| A_24_P85478    | 10,4765 | 9,9978  | 1,393487441 | ENST00000563310 | 25820     | NM_005744    | ARIH1          |
| A_22_P00023259 | 2,2489  | 1,77021 | 1,393477782 | ENST00000465249 | 101929754 | NR_121661    | LOC101929754   |
| A_33_P3340404  | 9,22562 | 8,74694 | 1,393468123 | ENST00000506233 | 132320    | NM_144643    | SCLT1          |

|                |         |         |             |                 |           |              |               |
|----------------|---------|---------|-------------|-----------------|-----------|--------------|---------------|
| A_32_P743407   | 8,75186 | 8,27329 | 1,393361881 | ENST00000321919 | 84656     | NM_032569    | GLYR1         |
| A_21_P0012353  | 2,0144  | 1,53583 | 1,393361881 | ENST00000612817 | N/A       | N/A          | N/A           |
| A_33_P3325933  | 10,2644 | 9,78584 | 1,393352223 | ENST00000472742 | 10084     | NM_144495    | PQBP1         |
| A_33_P3327265  | 4,13443 | 3,65587 | 1,393352223 | ENST00000316577 | 9840      | NM_001136030 | TESPA1        |
| A_33_P3210223  | 3,85885 | 3,38031 | 1,393332907 | ENST00000375948 | 79670     | N/A          | ZCCHC6        |
| A_21_P0013885  | 9,3435  | 8,86499 | 1,393303934 | ENST00000421819 | N/A       | XR_424049    | N/A           |
| A_21_P0010155  | 7,9842  | 7,50572 | 1,393274961 | ENST00000423808 | 284825    | NR_126011    | LOC284825     |
| A_22_P00023326 | 1,92347 | 1,44499 | 1,393274961 | N/A             | N/A       | N/A          | Inc-PTPN1-1   |
| A_22_P00001117 | 2,89277 | 2,41429 | 1,393274961 | N/A             | 101929654 | XR_244692    | LOC101929654  |
| A_21_P0005899  | 2,763   | 2,28454 | 1,393255646 | ENST00000523703 | 101927588 | NR_125420    | LOC101927588  |
| A_33_P3211965  | 8,95221 | 8,47382 | 1,393188047 | ENST00000568660 | N/A       | BM674043     | N/A           |
| A_23_P157527   | 7,79418 | 7,31585 | 1,393130107 | ENST00000414626 | 85444     | NM_033402    | LRRCC1        |
| A_24_P404487   | 6,73296 | 6,25468 | 1,393081825 | ENST00000443905 | 440515    | AL136548     | ZNF506        |
| A_22_P00013314 | 3,97346 | 3,49526 | 1,393004579 | ENST00000548457 | N/A       | N/A          | N/A           |
| A_22_P00022015 | 5,91042 | 5,43223 | 1,392994923 | N/A             | N/A       | BU754164     | Inc-GPR143-1  |
| A_24_P43723    | 2,88703 | 2,40886 | 1,392975612 | ENST00000312891 | 349149    | NM_181538    | GJC3          |
| A_33_P3412695  | 6,13253 | 5,65437 | 1,392965957 | N/A             | N/A       | N/A          | N/A           |
| A_23_P424080   | 9,43374 | 8,95561 | 1,392936991 | ENST00000238831 | 84272     | NM_032312    | YIPF4         |
| A_23_P104098   | 4,43689 | 3,95881 | 1,392888717 | ENST00000367267 | 127833    | NM_177402    | SYT2          |
| A_23_P309779   | 8,5326  | 8,05457 | 1,392840444 | ENST00000513269 | 55728     | NM_018177    | N4BP2         |
| A_23_P65532    | 10,1222 | 9,64419 | 1,392821135 | ENST00000267460 | 57161     | NM_021255    | PELI2         |
| A_23_P2143     | 13,2303 | 12,7523 | 1,392811481 | ENST00000610881 | 9789      | NM_014752    | SPCS2         |
| A_24_P399694   | 11,369  | 10,8911 | 1,392714942 | ENST00000500893 | 85364     | NM_033089    | ZCCHC3        |
| A_23_P121506   | 7,94068 | 7,46278 | 1,392714942 | ENST00000513898 | 8603      | NM_003704    | FAM193A       |
| A_24_P409402   | 9,03454 | 8,55666 | 1,392695635 | ENST00000474162 | N/A       | N/A          | N/A           |
| A_21_P0013858  | 7,54612 | 7,06828 | 1,392657021 | ENST00000449645 | 55217     | N/A          | TMLHE         |
| A_19_P00315493 | 7,88136 | 7,40356 | 1,392618409 | N/A             | 145474    | NR_027046    | LOC145474     |
| A_22_P00024635 | 3,25554 | 2,77787 | 1,392492927 | N/A             | N/A       | N/A          | Inc-ZC3H12B-3 |
| A_23_P397480   | 1,91774 | 1,44018 | 1,392386759 | ENST00000467409 | 150000    | NR_003088    | ABCC13        |
| A_33_P3228499  | 8,47744 | 7,99988 | 1,392386759 | N/A             | N/A       | N/A          | N/A           |
| A_33_P3255794  | 5,05157 | 4,57404 | 1,392357806 | ENST00000536445 | 5426      | NM_006231    | POLE          |
| A_22_P00016850 | 2,81091 | 2,33342 | 1,392319202 | ENST00000558109 | 283710    | NM_001243538 | LOC283710     |
| A_33_P3234939  | 7,37292 | 6,89551 | 1,392241997 | ENST00000592292 | 10781     | NM_006631    | ZNF266        |



|                |         |         |             |                 |           |              |                  |
|----------------|---------|---------|-------------|-----------------|-----------|--------------|------------------|
| A_33_P3409392  | 12,4429 | 11,9655 | 1,392232347 | ENST00000522566 | 8323      | NM_003506    | FZD6             |
| A_24_P739582   | 4,93587 | 4,4586  | 1,3921069   | ENST00000441188 | N/A       | N/A          | N/A              |
| A_24_P69691    | 6,61267 | 6,13543 | 1,392077952 | ENST00000374633 | 219749    | NM_145011    | ZNF25            |
| A_33_P3357490  | 2,75997 | 2,28277 | 1,392039356 | ENST00000378803 | 344387    | NM_001009565 | CDKL4            |
| A_19_P00321187 | 6,09887 | 5,6217  | 1,39201041  | ENST00000556890 | 728755    | XR_110268    | LOC728755        |
| A_24_P244952   | 10,4756 | 9,99844 | 1,392000761 | ENST00000446231 | 23049     | NM_015092    | SMG1             |
| A_24_P820037   | 3,67209 | 3,19496 | 1,391971816 | ENST00000331565 | 388662    | NM_001010898 | SLC6A17          |
| A_23_P47839    | 10,2387 | 9,76165 | 1,39189463  | ENST00000238146 | 57696     | NM_020936    | DDX55            |
| A_22_P00016486 | 2,23734 | 1,76031 | 1,391875335 | ENST00000578466 | N/A       | N/A          | N/A              |
| A_23_P115223   | 13,7567 | 13,2798 | 1,39174992  | ENST00000457918 | 10456     | NM_006118    | HAX1             |
| A_24_P787897   | 2,27067 | 1,7938  | 1,391720979 | ENST00000261381 | 64131     | NM_022166    | XYLT1            |
| A_21_P0010051  | 5,58791 | 5,11108 | 1,391682393 | N/A             | N/A       | N/A          | Inc-PREX1-3      |
| A_32_P180315   | 3,89706 | 3,42027 | 1,391643808 | ENST00000529487 | 100499483 | NM_020893    | CCDC180          |
| A_21_P0000676  | 7,16029 | 6,68355 | 1,391595578 | N/A             | 400512    | N/A          | FLJ21408         |
| A_23_P122041   | 11,6587 | 11,182  | 1,391556996 | ENST00000481195 | 5515      | NM_002715    | PPP2CA           |
| A_33_P3330468  | 10,646  | 10,1694 | 1,391460544 | ENST00000372487 | 55285     | NM_001171080 | RBM41            |
| A_24_P84401    | 4,34036 | 3,86377 | 1,391450899 | ENST00000527217 | 29104     | N/A          | N6AMT1           |
| A_22_P00015864 | 8,54949 | 8,07291 | 1,391441254 | N/A             | 100129075 | NR_027123    | KTN1-AS1         |
| A_23_P142849   | 12,7547 | 12,2782 | 1,391364098 | ENST00000375734 | 390       | NM_005168    | RND3             |
| A_24_P944458   | 9,81145 | 9,33514 | 1,39118087  | ENST00000471186 | 51141     | NM_016133    | INSIG2           |
| A_33_P7280795  | 4,17993 | 3,70364 | 1,391161585 | N/A             | N/A       | AF400500     | Inc-SNURF-3      |
| A_23_P60101    | 9,28822 | 8,81204 | 1,391055518 | ENST00000330143 | 79943     | NM_030895    | ZNF696           |
| A_21_P0014261  | 8,23423 | 7,75813 | 1,390978384 | N/A             | 102723539 | XR_424215    | LOC102723539     |
| A_22_P00024772 | 4,1812  | 3,70513 | 1,390949459 | ENST00000457668 | N/A       | N/A          | N/A              |
| A_33_P3222664  | 9,21713 | 8,74108 | 1,390930177 | N/A             | N/A       | N/A          | N/A              |
| A_23_P63190    | 10,2033 | 9,72729 | 1,390891613 | ENST00000369535 | 4893      | NM_002524    | NRAS             |
| A_33_P3404336  | 6,82673 | 6,35076 | 1,390853049 | N/A             | N/A       | AK130766     | N/A              |
| A_33_P3494875  | 8,64001 | 8,16405 | 1,390843409 | N/A             | N/A       | N/A          | Inc-AC016745.1-2 |
| A_22_P00017513 | 4,6878  | 4,21198 | 1,390708447 | N/A             | N/A       | N/A          | Inc-WDFY2-1      |
| A_33_P3593546  | 13,43   | 12,9542 | 1,390689168 | ENST00000553942 | 4140      | NM_001128918 | MARK3            |
| A_33_P3255194  | 4,09546 | 3,61986 | 1,390496391 | ENST00000315022 | 114880    | NM_001201482 | OSBPL6           |
| A_33_P3358521  | 7,66772 | 7,19216 | 1,390457839 | ENST00000545243 | 57589     | NM_020829    | RIC1             |
| A_33_P3714482  | 5,47651 | 5,00096 | 1,390448201 | ENST00000468442 | 91355     | NM_001135772 | LRP5L            |

|                |         |         |             |                 |           |              |                 |
|----------------|---------|---------|-------------|-----------------|-----------|--------------|-----------------|
| A_23_P417200   | 8,8386  | 8,36307 | 1,390428925 | ENST00000254942 | 7014      | NM_005652    | TERF2           |
| A_22_P00006385 | 1,93084 | 1,45532 | 1,390419287 | N/A             | N/A       | CA396498     | Inc-FBN2-6      |
| A_33_P3274768  | 7,17522 | 6,69974 | 1,390380737 | N/A             | 100132790 | AK128756     | LOC100132790    |
| A_21_P0000163  | 6,14774 | 5,67233 | 1,390313277 | ENST00000453464 | 401934    | NM_001205252 | RNF223          |
| A_22_P00011991 | 2,21167 | 1,73638 | 1,390197639 | N/A             | N/A       | BE710008     | Inc-PLAU-1      |
| A_23_P163113   | 9,29686 | 8,82158 | 1,390188003 | ENST00000554785 | 55015     | NM_017922    | PRPF39          |
| A_23_P379794   | 8,53404 | 8,05879 | 1,390159095 | ENST00000614443 | 284098    | NM_178517    | PIGW            |
| A_22_P00006568 | 2,02343 | 1,54822 | 1,390120552 | ENST00000560363 | 100131315 | NR_109767    | LOC100131315    |
| A_33_P3303136  | 14,07   | 13,5948 | 1,390110917 | ENST00000616722 | 5269      | NM_001195291 | SERPINB6        |
| A_21_P0010871  | 7,18383 | 6,70866 | 1,390082011 | ENST00000580094 | 399761    | N/A          | BMS1P5          |
| A_33_P8975387  | 3,56342 | 3,0883  | 1,390033835 | ENST00000494761 | 101927346 | XR_245076    | LOC101927346    |
| A_24_P382026   | 8,65121 | 8,17614 | 1,389985661 | ENST00000581777 | 57409     | NM_020679    | MIF4GD          |
| A_33_P3261246  | 8,78377 | 8,3087  | 1,389985661 | ENST00000274242 | 6167      | NM_000997    | RPL37           |
| A_33_P3249185  | 10,7123 | 10,2374 | 1,389821881 | ENST00000373236 | 56681     | N/A          | SAR1A           |
| A_22_P00025117 | 4,10008 | 3,62518 | 1,389821881 | ENST00000455399 | 100873065 | N/A          | PTCHD1-AS       |
| A_33_P3396877  | 11,0352 | 10,5603 | 1,389821881 | ENST00000441850 | 10557     | NM_183005    | RPP38           |
| A_33_P3422888  | 4,86861 | 4,39376 | 1,389773715 | ENST00000409552 | 23274     | NM_001243403 | CLEC16A         |
| A_22_P00017327 | 2,61541 | 2,14058 | 1,389754448 | N/A             | N/A       | BG207573     | Inc-USP35-3     |
| A_23_P302207   | 2,24183 | 1,76704 | 1,389715917 | ENST00000457543 | 54753     | NM_017560    | ZNF853          |
| A_21_P0010970  | 3,14922 | 2,67449 | 1,389658121 | N/A             | N/A       | N/A          | XLLOC_I2_002281 |
| A_23_P258418   | 9,94948 | 9,47511 | 1,389311399 | ENST00000505186 | 79155     | NM_024309    | TNIP2           |
| A_24_P305678   | 13,3916 | 12,9173 | 1,389243991 | ENST00000320996 | 23760     | NM_012399    | PITPNB          |
| A_23_P387630   | 3,4018  | 2,92754 | 1,389205473 | ENST00000374597 | 9754      | NM_014725    | STARD8          |
| A_21_P0000482  | 10,0978 | 9,62356 | 1,389186215 | N/A             | 26774     | NR_003940    | SNORD80         |
| A_24_P66125    | 11,9659 | 11,4917 | 1,389147699 | ENST00000371160 | 10735     | NM_001042749 | STAG2           |
| A_23_P88184    | 6,82087 | 6,34671 | 1,389109184 | ENST00000298896 | 55727     | NM_018167    | BTBD7           |
| A_23_P16538    | 9,38309 | 8,90904 | 1,389003274 | ENST00000594635 | 8178      | NM_006532    | ELL             |
| A_24_P170395   | 2,19449 | 1,72048 | 1,388964763 | ENST00000332359 | N/A       | N/A          | N/A             |
| A_23_P143774   | 2,28205 | 1,80806 | 1,388945508 | ENST00000545383 | 54456     | NM_018995    | MOV10L1         |
| A_23_P89327    | 5,91948 | 5,44555 | 1,388887745 | ENST00000421016 | 57335     | NM_020652    | ZNF286A         |
| A_23_P163258   | 11,7249 | 11,251  | 1,388858864 | ENST00000566831 | 56965     | NM_020214    | PARP6           |
| A_23_P122007   | 11,0302 | 10,5563 | 1,388858864 | ENST00000510890 | 90355     | NM_033211    | C5orf30         |
| A_33_P3298349  | 3,75797 | 3,28411 | 1,388820357 | ENST00000397067 | 116969    | NM_001297668 | ART5            |

|                |         |         |             |                 |           |              |               |
|----------------|---------|---------|-------------|-----------------|-----------|--------------|---------------|
| A_21_P0014381  | 3,13926 | 2,6655  | 1,388724095 | N/A             | 1891      | BC014786     | ECH1          |
| A_33_P3333677  | 4,83425 | 4,36051 | 1,388704843 | N/A             | N/A       | N/A          | N/A           |
| A_24_P932416   | 3,84727 | 3,37365 | 1,388589339 | ENST00000408960 | 645843    | NM_001123228 | TMEM14E       |
| A_24_P309594   | 11,9177 | 11,4441 | 1,388570089 | ENST00000442892 | 55652     | NM_017842    | SLC48A1       |
| A_21_P0000147  | 10,311  | 9,83753 | 1,388444972 | ENST00000504780 | 5238      | NM_001199919 | PGM3          |
| A_21_P0000333  | 5,32549 | 4,85206 | 1,388406476 | N/A             | 677827    | NR_002978    | SNORA46       |
| A_33_P3221134  | 4,56975 | 4,09639 | 1,388339112 | N/A             | N/A       | N/A          | N/A           |
| A_33_P3385477  | 13,7894 | 13,3161 | 1,388281374 | ENST00000474481 | 83858     | NM_031921    | ATAD3B        |
| A_24_P349002   | 10,6649 | 10,1916 | 1,388281374 | ENST00000615331 | 9883      | NM_172020    | POM121        |
| A_24_P287691   | 11,1551 | 10,6818 | 1,388281374 | ENST00000398333 | 10239     | NM_005829    | AP3S2         |
| A_33_P3351180  | 2,47633 | 2,00306 | 1,388252506 | ENST00000390547 | N/A       | S55735       | N/A           |
| A_33_P3243787  | 6,9748  | 6,50163 | 1,388156283 | ENST00000399429 | 340267    | NM_001037763 | COL28A1       |
| A_33_P3259615  | 3,83774 | 3,3646  | 1,388127417 | ENST00000302783 | 143941    | NM_001080441 | TTC36         |
| A_23_P83073    | 11,4154 | 10,9423 | 1,388088931 | ENST00000428393 | 84641     | NM_032558    | HIATL1        |
| A_23_P72537    | 12,4148 | 11,9417 | 1,388088931 | ENST00000287295 | 9131      | NM_004208    | AIFM1         |
| A_33_P3304293  | 8,14932 | 7,67626 | 1,388050445 | ENST00000394477 | 10735     | NM_001042751 | STAG2         |
| A_22_P00017042 | 3,69407 | 3,2211  | 1,387963857 | ENST00000420549 | N/A       | N/A          | N/A           |
| A_21_P0002104  | 2,79762 | 2,32471 | 1,387906134 | N/A             | N/A       | N/A          | Inc-FAM168B-1 |
| A_23_P150510   | 12,476  | 12,0031 | 1,387896514 | ENST00000337672 | 219541    | NM_153450    | MED19         |
| A_23_P27947    | 11,6782 | 11,2053 | 1,387896514 | ENST00000587385 | 84306     | NM_032346    | PDCD2L        |
| A_23_P166508   | 5,62033 | 5,14743 | 1,387896514 | ENST00000424852 | 102723775 | NR_120595    | LINC01315     |
| A_23_P406521   | 1,93837 | 1,46547 | 1,387896514 | ENST00000381623 | 128646    | NM_178460    | SIRPD         |
| A_23_P16469    | 10,667  | 10,1941 | 1,387896514 | ENST00000598875 | 5329      | NM_001005377 | PLAUR         |
| A_33_P3255001  | 2,16885 | 1,69598 | 1,387867654 | ENST00000432505 | 152024    | NR_026834    | LINC00691     |
| A_22_P00025502 | 4,43186 | 3,95903 | 1,387829175 | N/A             | N/A       | N/A          | Inc-C8orf42-1 |
| A_24_P358619   | 7,5011  | 7,02828 | 1,387819555 | ENST00000397104 | 7652      | NM_001080409 | ZNF99         |
| A_24_P236799   | 11,7208 | 11,248  | 1,387800316 | ENST00000578921 | 11031     | NM_006868    | RAB31         |
| A_24_P259276   | 11,0621 | 10,5893 | 1,387800316 | ENST00000310442 | 254359    | NM_207340    | ZDHHC24       |
| A_22_P00014305 | 6,25118 | 5,77838 | 1,387800316 | N/A             | 101929212 | NR_104064    | SMIM2-AS1     |
| A_33_P3400699  | 5,90877 | 5,43608 | 1,387694505 | ENST00000339444 | 375611    | NM_206883    | SLC26A5       |
| A_33_P3248610  | 4,3023  | 3,82962 | 1,387684887 | ENST00000404843 | 55252     | NM_018263    | ASXL2         |
| A_23_P201211   | 2,27919 | 1,80652 | 1,387675268 | ENST00000461387 | 83416     | NM_031281    | FCRL5         |
| A_24_P115529   | 2,04284 | 1,57017 | 1,387675268 | N/A             | 51145     | NR_122032    | LOC51145      |

|                |         |         |             |                 |           |              |                |
|----------------|---------|---------|-------------|-----------------|-----------|--------------|----------------|
| A_23_P134395   | 12,2963 | 11,8237 | 1,387607939 | ENST00000610724 | 26608     | NM_012453    | TBL2           |
| A_22_P00014550 | 6,0509  | 5,57832 | 1,387588703 | N/A             | N/A       | N/A          | Inc-SIRT5-1    |
| A_21_P0000366  | 9,07384 | 8,60129 | 1,387559849 | N/A             | 692058    | NR_003031    | SNORD11        |
| A_21_P0005637  | 2,36323 | 1,89072 | 1,387521378 | N/A             | N/A       | N/A          | Inc-MBOAT4-2   |
| A_23_P111811   | 10,2394 | 9,76696 | 1,387454057 | ENST00000427726 | 54556     | NM_019071    | ING3           |
| A_21_P0012658  | 5,5209  | 5,0485  | 1,387415589 | N/A             | N/A       | N/A          | XLOC_I2_011048 |
| A_33_P3251640  | 4,56013 | 4,08774 | 1,387405972 | N/A             | 284440    | N/A          | LINC00663      |
| A_33_P6518002  | 7,66277 | 7,19043 | 1,387357889 | ENST00000446449 | 1385      | NM_134442    | CREB1          |
| A_23_P215198   | 11,4333 | 10,961  | 1,387319424 | ENST00000361660 | 55253     | NM_018264    | TYW1           |
| A_22_P00023963 | 2,35921 | 1,88693 | 1,387300192 | N/A             | N/A       | N/A          | Inc-CCDC90A-6  |
| A_32_P128258   | 2,39026 | 1,91798 | 1,387300192 | ENST00000611992 | 284367    | AF161341     | SIGLEC17P      |
| A_33_P3373163  | 2,53105 | 2,05881 | 1,387261728 | ENST00000482495 | N/A       | N/A          | N/A            |
| A_23_P54179    | 12,2995 | 11,8273 | 1,387223266 | ENST00000556551 | 57862     | NM_021188    | ZNF410         |
| A_33_P3292919  | 12,3652 | 11,8932 | 1,387030969 | ENST00000445265 | 6949      | NM_001135243 | TCOF1          |
| A_32_P170003   | 9,85033 | 9,3784  | 1,386963672 | ENST00000391993 | 26146     | NM_015650    | TRAF3IP1       |
| A_22_P00022122 | 2,1021  | 1,63029 | 1,386848312 | N/A             | N/A       | BG207970     | Inc-IBTK-3     |
| A_23_P28772    | 13,5724 | 13,1008 | 1,386646456 | ENST00000372712 | 55861     | NM_001048226 | DBNDD2         |
| A_23_P37942    | 3,80885 | 3,33726 | 1,386636844 | ENST00000328796 | 9074      | NM_021195    | CLDN6          |
| A_22_P00019947 | 3,87992 | 3,40834 | 1,386627233 | ENST00000512185 | N/A       | XR_251865    | N/A            |
| A_22_P00015624 | 4,03621 | 3,56464 | 1,386617622 | N/A             | 101929759 | XR_242480    | LOC101929759   |
| A_33_P3361422  | 8,15507 | 7,68352 | 1,386598399 | ENST00000494263 | 1593      | NM_000784    | CYP27A1        |
| A_23_P130743   | 2,48756 | 2,01601 | 1,386598399 | ENST00000221498 | 27120     | NM_014419    | DKKL1          |
| A_19_P00804979 | 4,47473 | 4,00318 | 1,386598399 | N/A             | 9866      | XM_006718397 | TRIM66         |
| A_23_P122815   | 11,3506 | 10,8791 | 1,386550344 | ENST00000449187 | 813       | NM_001219    | CALU           |
| A_21_P0010648  | 6,12156 | 5,65011 | 1,386502291 | N/A             | N/A       | N/A          | XLOC_I2_001086 |
| A_32_P216520   | 1,95093 | 1,47956 | 1,386425409 | ENST00000286574 | 11197     | NM_007191    | WIF1           |
| A_33_P3239839  | 11,8134 | 11,3422 | 1,386262049 | N/A             | 80028     | NM_024963    | FBXL18         |
| A_23_P103070   | 11,2767 | 10,8055 | 1,386262049 | ENST00000248975 | 7533      | NM_003405    | YWHAH          |
| A_33_P3240018  | 7,67582 | 7,20468 | 1,386204397 | ENST00000282096 | 5140      | NM_000922    | PDE3B          |
| A_23_P167040   | 12,0443 | 11,5732 | 1,386165964 | ENST00000316218 | 10954     | NM_006810    | PDIA5          |
| A_23_P363647   | 10,6312 | 10,1601 | 1,386165964 | ENST00000493637 | 203522    | NM_182540    | DDX26B         |
| A_33_P3354881  | 7,13008 | 6,65908 | 1,386069886 | N/A             | 100506753 | NR_126339    | LOC100506753   |
| A_33_P3355281  | 6,5614  | 6,09043 | 1,386041063 | ENST00000395733 | 55586     | NM_017584    | MIOX           |

|                |         |         |             |                 |           |              |                |
|----------------|---------|---------|-------------|-----------------|-----------|--------------|----------------|
| A_22_P00001570 | 3,37672 | 2,90579 | 1,386002635 | ENST00000443947 | N/A       | N/A          | N/A            |
| A_24_P818529   | 5,15664 | 4,68582 | 1,385896961 | ENST00000454281 | N/A       | Z48511       | N/A            |
| A_24_P887857   | 15,4014 | 14,9306 | 1,385877749 | ENST00000420566 | N/A       | N/A          | N/A            |
| A_23_P163955   | 11,5502 | 11,0795 | 1,38578169  | ENST00000472446 | 10400     | NM_007169    | PEMT           |
| A_22_P00006254 | 2,54965 | 2,07903 | 1,385704849 | ENST00000606385 | 9750      | NM_001286446 | FAM65B         |
| A_23_P3963     | 11,0313 | 10,5607 | 1,385685639 | ENST00000337231 | 30850     | NM_014603    | CDR2L          |
| A_22_P00006912 | 5,57337 | 5,10282 | 1,385637615 | N/A             | N/A       | N/A          | Inc-GAS2L2-1   |
| A_21_P0011816  | 5,56662 | 5,09612 | 1,385589594 | ENST00000625078 | 3321      | NM_001007237 | IGSF3          |
| A_22_P00024636 | 2,11444 | 1,64404 | 1,385493555 | N/A             | N/A       | BC067356     | Inc-PTPN23-1   |
| A_24_P274615   | 7,84359 | 7,37321 | 1,385474348 | ENST00000265138 | 57561     | NM_020801    | ARRDC3         |
| A_21_P0014790  | 4,19809 | 3,72777 | 1,385416729 | N/A             | N/A       | N/A          | N/A            |
| A_33_P3320748  | 11,4422 | 10,9719 | 1,385397523 | ENST00000343376 | 112812    | NM_001031734 | FDX1L          |
| A_33_P3225313  | 6,21581 | 5,74555 | 1,385359113 | ENST00000519721 | 157769    | NM_144963    | FAM91A1        |
| A_21_P0005681  | 1,98585 | 1,51565 | 1,385301498 | N/A             | N/A       | N/A          | Inc-WRN-4      |
| A_21_P0004696  | 13,4021 | 12,9319 | 1,385301498 | N/A             | N/A       | N/A          | Inc-TULP4-1    |
| A_33_P3247838  | 6,53294 | 6,0628  | 1,385243886 | ENST00000439326 | 284391    | NM_001136501 | ZNF844         |
| A_33_P3296372  | 11,4461 | 10,976  | 1,38520548  | ENST00000360403 | 8891      | NM_020365    | EIF2B3         |
| A_22_P00012501 | 7,1467  | 6,67666 | 1,385147872 | N/A             | 654433    | NR_015377    | PAX8-AS1       |
| A_21_P0007565  | 2,09158 | 1,62161 | 1,385080666 | ENST00000548617 | N/A       | N/A          | N/A            |
| A_22_P00001899 | 2,4059  | 1,93597 | 1,385042264 | N/A             | 100874246 | NR_046748    | ARHGAP31-AS1   |
| A_24_P40721    | 7,69045 | 7,22057 | 1,384994263 | ENST00000450297 | 55304     | NM_018327    | SPTLC3         |
| A_21_P0004402  | 7,98705 | 7,51719 | 1,384975063 | N/A             | N/A       | N/A          | Inc-C5orf43-3  |
| A_22_P00013714 | 3,85488 | 3,38503 | 1,384965463 | ENST00000558369 | 283673    | NR_026949    | EWSAT1         |
| A_23_P117683   | 13,533  | 13,0635 | 1,384629509 | ENST00000620261 | 25764     | NM_016400    | HYPK           |
| A_23_P59677    | 10,7166 | 10,2471 | 1,384629509 | ENST00000497979 | 60561     | NM_021930    | RINT1          |
| A_33_P3251841  | 5,14366 | 4,67421 | 1,384581522 | ENST00000310045 | 92126     | NM_032160    | DSEL           |
| A_22_P00013165 | 5,77398 | 5,30456 | 1,384552731 | ENST00000580863 | 54941     | NM_017831    | RNF125         |
| A_23_P111865   | 7,83932 | 7,36991 | 1,384543134 | ENST00000292450 | 7589      | NM_145914    | ZSCAN21        |
| A_33_P3260021  | 6,17019 | 5,70078 | 1,384543134 | N/A             | N/A       | N/A          | N/A            |
| A_21_P0012301  | 4,43106 | 3,96175 | 1,384447168 | ENST00000433633 | N/A       | N/A          | N/A            |
| A_33_P3403867  | 10,8227 | 10,3534 | 1,384437572 | ENST00000395814 | 56937     | NM_020182    | PMEPA1         |
| A_22_P00004833 | 2,15459 | 1,68533 | 1,384399188 | N/A             | N/A       | N/A          | Inc-CYB561D2-1 |
| A_23_P376759   | 10,3908 | 9,92165 | 1,384293636 | ENST00000272444 | 8446      | NM_003584    | DUSP11         |

|                |         |         |             |                 |           |              |                |
|----------------|---------|---------|-------------|-----------------|-----------|--------------|----------------|
| A_23_P328642   | 2,53663 | 2,06753 | 1,384245661 | ENST00000439802 | 151254    | NM_152525    | ALS2CR11       |
| A_22_P00009695 | 4,16687 | 3,69778 | 1,384236066 | ENST00000443504 | N/A       | N/A          | N/A            |
| A_21_P0006971  | 4,85231 | 4,38327 | 1,384188093 | N/A             | N/A       | N/A          | Inc-C10orf31-7 |
| A_23_P206760   | 9,79729 | 9,32827 | 1,384168905 | ENST00000566821 | 3240      | NM_005143    | HP             |
| A_33_P3251518  | 4,79413 | 4,32513 | 1,384149716 | ENST00000467298 | N/A       | AK001508     | N/A            |
| A_19_P00319095 | 16,3509 | 15,8819 | 1,384149716 | ENST00000623001 | 387066    | NR_003038    | SNHG5          |
| A_22_P00017851 | 4,98204 | 4,51319 | 1,384005811 | N/A             | N/A       | BM918748     | Inc-ZCCHC7-3   |
| A_22_P00010236 | 4,39605 | 3,92722 | 1,383986624 | ENST00000569778 | N/A       | N/A          | N/A            |
| A_33_P3349469  | 14,2429 | 13,7741 | 1,383957845 | ENST00000378755 | 55210     | NM_018188    | ATAD3A         |
| A_33_P3359748  | 7,61866 | 7,14987 | 1,383948253 | ENST00000369923 | 6301      | XM_006710813 | SARS           |
| A_33_P3226135  | 6,90711 | 6,43836 | 1,383909882 | N/A             | N/A       | N/A          | N/A            |
| A_23_P417113   | 10,3733 | 9,90461 | 1,383852328 | ENST00000287912 | 155435    | BC011923     | RBM33          |
| A_33_P3262452  | 8,24633 | 7,77782 | 1,38367968  | ENST00000399744 | 55670     | NM_001127649 | PEX26          |
| A_21_P0001406  | 2,04657 | 1,57816 | 1,383583774 | N/A             | N/A       | N/A          | Inc-BTG2-2     |
| A_21_P0012445  | 5,84701 | 5,37863 | 1,383555004 | N/A             | N/A       | N/A          | XLOC_I2_010239 |
| A_22_P00002009 | 2,44771 | 1,97941 | 1,383478285 | ENST00000428415 | 101929374 | N/A          | LOC101929374   |
| A_21_P0006323  | 4,1947  | 3,72654 | 1,383344038 | N/A             | N/A       | N/A          | Inc-TRUB2-2    |
| A_21_P0011458  | 8,21027 | 7,7422  | 1,383257743 | N/A             | N/A       | N/A          | XLOC_I2_005415 |
| A_21_P0006248  | 2,27494 | 1,80689 | 1,383238568 | N/A             | N/A       | N/A          | Inc-C9orf66-5  |
| A_33_P3273906  | 4,87434 | 4,40633 | 1,383200217 | ENST00000320891 | 390264    | NM_001004462 | OR10G4         |
| A_23_P71300    | 9,79254 | 9,32462 | 1,383113931 | ENST00000520486 | 55246     | NM_018246    | CCDC25         |
| A_19_P00316423 | 12,8673 | 12,3994 | 1,383094757 | N/A             | N/A       | AI421806     | N/A            |
| A_21_P0010154  | 6,28006 | 5,81219 | 1,383065997 | ENST00000458316 | 284825    | N/A          | LOC284825      |
| A_21_P0012526  | 3,28857 | 2,82072 | 1,383046823 | N/A             | N/A       | N/A          | Inc-MUC20-2    |
| A_33_P3264746  | 11,5149 | 11,0471 | 1,382998891 | N/A             | N/A       | N/A          | N/A            |
| A_33_P3396553  | 7,68135 | 7,21357 | 1,382979719 | N/A             | N/A       | N/A          | N/A            |
| A_23_P15202    | 10,0096 | 9,54184 | 1,382960547 | ENST00000571392 | 1723      | NM_001361    | DHODH          |
| A_21_P0009406  | 5,62525 | 5,15749 | 1,382960547 | N/A             | N/A       | N/A          | Inc-NR1D1-1    |
| A_33_P3250253  | 6,01395 | 5,54634 | 1,382816765 | N/A             | 100131150 | AK096194     | LOC100131150   |
| A_33_P3349774  | 6,15582 | 5,68821 | 1,382816765 | ENST00000279069 | 149986    | NM_144703    | LSM14B         |
| A_23_P65217    | 10,5428 | 10,0752 | 1,38280718  | ENST00000261296 | 23483     | NM_014305    | TGDS           |
| A_23_P360268   | 2,12104 | 1,6535  | 1,382749672 | N/A             | 158696    | NR_026935    | LINC00889      |
| A_23_P425324   | 2,26865 | 1,80112 | 1,382740088 | N/A             | 64396     | NR_003281    | GMCL1P1        |

|                |         |         |             |                 |           |              |                    |
|----------------|---------|---------|-------------|-----------------|-----------|--------------|--------------------|
| A_33_P3243717  | 7,08367 | 6,61614 | 1,382740088 | ENST00000395867 | 57209     | NM_021045    | ZNF248             |
| A_33_P3388865  | 5,43156 | 4,96415 | 1,382625079 | ENST00000361484 | 376132    | BC106893     | LRRC10             |
| A_23_P106741   | 14,2319 | 13,7646 | 1,382519664 | ENST00000219313 | 5713      | NM_002811    | PSMD7              |
| A_23_P304991   | 10,7816 | 10,3144 | 1,382423838 | ENST00000399120 | 3141      | NM_000411    | HLCS               |
| A_23_P14493    | 11,3247 | 10,8576 | 1,382328019 | ENST00000298292 | 55172     | NM_018139    | DNAAF2             |
| A_21_P0005534  | 5,17367 | 4,70667 | 1,382232207 | N/A             | N/A       | N/A          | Inc-MRPS33-1       |
| A_23_P44295    | 10,9414 | 10,4744 | 1,382232207 | ENST00000480013 | 23122     | NM_015097    | CLASP2             |
| A_21_P0011492  | 5,37625 | 4,9094  | 1,3820885   | N/A             | 146429    | N/A          | SLC22A31           |
| A_22_P00010305 | 7,02884 | 6,56232 | 1,3817724   | N/A             | N/A       | N/A          | Inc-MTX1-1         |
| A_33_P3353125  | 10,0849 | 9,6184  | 1,381753244 | N/A             | N/A       | BC018676     | N/A                |
| A_23_P168828   | 11,5497 | 11,0833 | 1,381657472 | ENST00000285407 | 7071      | NM_005655    | KLF10              |
| A_23_P19754    | 7,65046 | 7,18415 | 1,381571282 | ENST00000222482 | 51200     | NM_016352    | CPA4               |
| A_33_P3272080  | 9,14945 | 8,68315 | 1,381561706 | ENST00000623824 | 347148    | CV575364     | QRFP               |
| A_24_P29594    | 2,24775 | 1,78158 | 1,38143722  | ENST00000367837 | 10767     | NM_006620    | HBS1L              |
| A_32_P107617   | 5,33316 | 4,86699 | 1,38143722  | ENST00000372292 | 6441      | NM_003019    | SFTPD              |
| A_33_P3259183  | 5,30736 | 4,84123 | 1,381398919 | ENST00000338353 | 149297    | NM_001017961 | FAM78B             |
| A_21_P0011671  | 5,94026 | 5,47426 | 1,381274448 | N/A             | N/A       | N/A          | XLOC_I2_006578     |
| A_23_P208334   | 4,83156 | 4,36558 | 1,3812553   | ENST00000589073 | 5141      | NM_006202    | PDE4A              |
| A_33_P3363395  | 3,56063 | 3,09467 | 1,381236152 | ENST00000458136 | N/A       | BC018064     | N/A                |
| A_33_P3242039  | 6,69782 | 6,23243 | 1,380690541 | N/A             | N/A       | N/A          | N/A                |
| A_33_P3226105  | 5,60549 | 5,1401  | 1,380690541 | N/A             | N/A       | N/A          | N/A                |
| A_33_P3254751  | 5,93913 | 5,47382 | 1,380613982 | ENST00000483353 | 30815     | AK124217     | ST6GALNAC6         |
| A_21_P0005586  | 3,36224 | 2,89698 | 1,380566134 | N/A             | N/A       | N/A          | Inc-AC008060.7.1-3 |
| A_23_P340308   | 5,50742 | 5,04216 | 1,380566134 | ENST00000390673 | 259294    | NM_176888    | TAS2R19            |
| A_23_P86653    | 11,5047 | 11,0395 | 1,380508719 | ENST00000462445 | 5552      | NM_002727    | SRGN               |
| A_33_P3371142  | 2,90579 | 2,44062 | 1,380480013 | ENST00000416620 | N/A       | N/A          | N/A                |
| A_21_P0002027  | 1,97566 | 1,51054 | 1,38043217  | N/A             | N/A       | N/A          | Inc-LAPTM4A-1      |
| A_22_P00001996 | 2,11794 | 1,65289 | 1,380365192 | N/A             | 100873917 | NR_046623    | LPP-AS1            |
| A_33_P3257784  | 5,60493 | 5,1399  | 1,380346057 | ENST00000503030 | 26262     | NM_012171    | TSPAN17            |
| A_33_P3349325  | 7,29932 | 6,83429 | 1,380346057 | ENST00000508274 | 9364      | NM_001017979 | RAB28              |
| A_22_P00001786 | 1,97748 | 1,51246 | 1,380336489 | N/A             | N/A       | N/A          | Inc-ATP2C2-1       |
| A_33_P3245987  | 3,24382 | 2,7788  | 1,380336489 | ENST00000504759 | N/A       | N/A          | N/A                |
| A_23_P313278   | 3,63646 | 3,17145 | 1,380326921 | N/A             | 4584      | AB038784     | MUC3A              |

|                |         |         |             |                 |           |              |              |
|----------------|---------|---------|-------------|-----------------|-----------|--------------|--------------|
| A_23_P132856   | 2,28778 | 1,82285 | 1,380250382 | ENST00000328557 | 375387    | NM_198565    | NRROS        |
| A_22_P00017452 | 2,63741 | 2,17254 | 1,38019298  | ENST00000557745 | N/A       | BM807759     | N/A          |
| A_33_P3332860  | 9,61934 | 9,15453 | 1,38013558  | ENST00000359617 | 8675      | NM_001001433 | STX16        |
| A_33_P3318631  | 2,09764 | 1,63288 | 1,380087749 | ENST00000355273 | 79310     | NM_001005482 | OR5H2        |
| A_32_P76853    | 10,403  | 9,93825 | 1,380078183 | ENST00000611771 | 101059918 | NM_001282484 | GOLGA8R      |
| A_21_P0002999  | 3,00377 | 2,53906 | 1,38003992  | N/A             | N/A       | N/A          | Inc-CRYBG3-1 |
| A_21_P0009930  | 3,36957 | 2,90489 | 1,380011223 | N/A             | 102724622 | XR_425231    | LOC102724622 |
| A_24_P363278   | 4,92558 | 4,46093 | 1,379982527 | ENST00000354489 | 4117      | NM_005906    | MAK          |
| A_23_P160226   | 6,30423 | 5,83973 | 1,379839055 | ENST00000421030 | 374977    | NM_001039464 | MROH7        |
| A_23_P330419   | 4,88781 | 4,42343 | 1,379724288 | ENST00000270593 | 93650     | NM_033068    | ACPT         |
| A_22_P00010467 | 4,45268 | 3,9883  | 1,379724288 | ENST00000445161 | 100506126 | NR_108045    | LINC00867    |
| A_24_P373844   | 8,88045 | 8,41614 | 1,379657345 | ENST00000284006 | 79047     | NM_024076    | KCTD15       |
| A_33_P3296577  | 9,69215 | 9,22791 | 1,379590405 | ENST00000357304 | 84726     | NM_013318    | PRRC2B       |
| A_23_P418031   | 13,0128 | 12,5486 | 1,379552155 | ENST00000455833 | 126917    | NM_001136265 | IFFO2        |
| A_21_P0011382  | 7,76072 | 7,29663 | 1,379446974 | ENST00000354771 | 388165    | XM_006720536 | UBE2Q2P1     |
| A_22_P00011896 | 5,14577 | 4,68176 | 1,379370483 | N/A             | 100874330 | NR_046786    | LINC01014    |
| A_23_P120973   | 7,04293 | 6,57899 | 1,379303557 | ENST00000487732 | 55007     | NM_017911    | FAM118A      |
| A_33_P3235132  | 7,12051 | 6,65661 | 1,379265315 | ENST00000412149 | N/A       | AK127783     | N/A          |
| A_33_P3273409  | 12,36   | 11,8961 | 1,379265315 | ENST00000409648 | 79939     | NM_024881    | SLC35E1      |
| A_22_P00008601 | 9,55061 | 9,08673 | 1,379246195 | ENST00000452643 | 23081     | NM_001146696 | KDM4C        |
| A_33_P3304511  | 2,85129 | 2,38743 | 1,379227074 | ENST00000272452 | 27233     | NM_006588    | SULT1C4      |
| A_33_P3424467  | 8,12409 | 7,66024 | 1,379217514 | ENST00000366513 | 163882    | NM_152609    | CNST         |
| A_23_P159406   | 13,8129 | 13,3491 | 1,379169715 | ENST00000307098 | 6699      | NM_003125    | SPRR1B       |
| A_33_P3309924  | 3,64552 | 3,18174 | 1,379150596 | ENST00000519065 | 3066      | NM_001527    | HDAC2        |
| A_33_P3240234  | 2,92573 | 2,46204 | 1,379064563 | N/A             | N/A       | N/A          | N/A          |
| A_23_P131789   | 1,98263 | 1,51906 | 1,37894986  | ENST00000489102 | 671       | NM_001725    | BPI          |
| A_24_P120115   | 8,0059  | 7,54237 | 1,378911628 | ENST00000340870 | 8837      | NM_003879    | CFLAR        |
| A_19_P00813352 | 6,89038 | 6,42687 | 1,378892512 | N/A             | N/A       | N/A          | Inc-DYM-1    |
| A_23_P95923    | 8,01318 | 7,54976 | 1,378806495 | ENST00000293648 | 54811     | NM_017656    | ZNF562       |
| A_21_P0014897  | 2,75102 | 2,28762 | 1,378787381 | N/A             | N/A       | N/A          | N/A          |
| A_33_P3358898  | 3,631   | 3,16764 | 1,378749153 | ENST00000389623 | 284297    | NM_001144950 | SSC5D        |
| A_24_P418408   | 10,7737 | 10,3105 | 1,378596254 | ENST00000494111 | 375061    | NM_198552    | FAM89A       |
| A_21_P0006599  | 2,38314 | 1,91994 | 1,378596254 | N/A             | N/A       | N/A          | Inc-ZFY-2    |



|                |         |         |             |                 |           |              |                  |
|----------------|---------|---------|-------------|-----------------|-----------|--------------|------------------|
| A_23_P104109   | 8,57029 | 8,10718 | 1,378510255 | ENST00000543470 | 26750     | NM_012424    | RPS6KC1          |
| A_22_P00002797 | 1,96049 | 1,49741 | 1,37848159  | N/A             | N/A       | N/A          | Inc-C2orf40-1    |
| A_24_P340853   | 4,97474 | 4,51191 | 1,378242738 | ENST00000527262 | 84875     | NM_032789    | PARP10           |
| A_22_P00019529 | 5,50016 | 5,03735 | 1,378223632 | ENST00000427591 | 102724096 | NR_125874    | LOC102724096     |
| A_33_P6814367  | 6,5488  | 6,08608 | 1,378137656 | N/A             | 654433    | NR_047570    | PAX8-AS1         |
| A_32_P103837   | 11,7321 | 11,2694 | 1,378118551 | ENST00000617411 | 58516     | NM_021238    | FAM60A           |
| A_33_P3479066  | 4,77333 | 4,31065 | 1,378099447 | N/A             | N/A       | N/A          | N/A              |
| A_23_P209246   | 8,27208 | 7,80952 | 1,377984825 | ENST00000361492 | 2736      | NM_005270    | GLI2             |
| A_21_P0011175  | 4,92505 | 4,46253 | 1,377946619 | ENST00000345795 | 113201    | NM_138423    | CASC4            |
| A_33_P3257728  | 5,79101 | 5,32851 | 1,377927517 | ENST00000266542 | 51279     | NM_001297642 | C1RL             |
| A_23_P216596   | 8,55426 | 8,09178 | 1,377908415 | ENST00000374469 | 79987     | NM_153366    | SVEP1            |
| A_33_P3421913  | 3,53989 | 3,07747 | 1,377851111 | ENST00000621709 | 23705     | NM_001301043 | CADM1            |
| A_22_P00003497 | 6,25612 | 5,79376 | 1,377793808 | N/A             | N/A       | BG205572     | Inc-CCDC90B-1    |
| A_23_P369654   | 2,19138 | 1,72902 | 1,377793808 | ENST00000401432 | 22979     | AB023170     | EFR3B            |
| A_33_P3405904  | 8,48545 | 8,02309 | 1,377793808 | N/A             | N/A       | N/A          | N/A              |
| A_33_P3215198  | 2,30106 | 1,83871 | 1,377784258 | N/A             | 129607    | NM_001256477 | CMPK2            |
| A_22_P00002485 | 2,56612 | 2,10383 | 1,377726959 | N/A             | N/A       | AL531532     | Inc-C16orf13-2   |
| A_33_P3364696  | 10,5351 | 10,073  | 1,377545527 | ENST00000409707 | 10617     | NM_213622    | STAMBP           |
| A_21_P0001616  | 3,27257 | 2,81051 | 1,377507334 | N/A             | N/A       | N/A          | Inc-C1orf133-1   |
| A_24_P56052    | 11,3715 | 10,9095 | 1,377450046 | ENST00000389919 | 80829     | NM_053023    | ZFP91            |
| A_22_P00000429 | 5,97642 | 5,51446 | 1,377411856 | N/A             | N/A       | AK123300     | Inc-AC073343.1-1 |
| A_24_P148151   | 8,58028 | 8,11834 | 1,377392761 | ENST00000475168 | 7257      | NM_005999    | TSNAX            |
| A_22_P00004182 | 6,54563 | 6,08379 | 1,377297291 | ENST00000522769 | N/A       | BX093040     | N/A              |
| A_23_P150080   | 11,7455 | 11,2837 | 1,377259104 | ENST00000378203 | 10557     | NM_183005    | RPP38            |
| A_21_P0009260  | 1,94572 | 1,48392 | 1,377259104 | N/A             | N/A       | N/A          | Inc-PCTP-1       |
| A_23_P21734    | 11,6568 | 11,195  | 1,377259104 | ENST00000380818 | 102157402 | NM_001015891 | AK6              |
| A_21_P0004718  | 4,80147 | 4,33969 | 1,377240012 | ENST00000397717 | 4835      | NM_001290221 | NQO2             |
| A_22_P00001704 | 1,95127 | 1,48952 | 1,377211373 | N/A             | N/A       | N/A          | Inc-ATF7IP2-2    |
| A_23_P101564   | 2,32426 | 1,86259 | 1,377135006 | ENST00000222157 | 26291     | NM_019113    | FGF21            |
| A_24_P202717   | 11,6524 | 11,1908 | 1,377068189 | ENST00000586497 | 55111     | NM_018049    | PLEKHJ1          |
| A_33_P3212360  | 1,95979 | 1,49821 | 1,377049099 | N/A             | 642968    | XR_428533    | FAM163B          |
| A_33_P3211443  | 9,66747 | 9,20589 | 1,377049099 | ENST00000455305 | 23507     | NM_015350    | LRR8B            |
| A_22_P00006229 | 5,48472 | 5,0233  | 1,376896388 | ENST00000466692 | 100507054 | XR_108535    | LOC100507054     |

|                |         |         |             |                 |           |              |                      |
|----------------|---------|---------|-------------|-----------------|-----------|--------------|----------------------|
| A_21_P0012682  | 2,22831 | 1,7669  | 1,376886844 | N/A             | N/A       | N/A          | XLOC_I2_011281       |
| A_23_P169278   | 8,87931 | 8,41791 | 1,3768773   | ENST00000357081 | 23287     | NM_015239    | AGTPBP1              |
| A_21_P0000447  | 2,01562 | 1,55428 | 1,376820039 | N/A             | 100033423 | NR_003326    | SNORD116-11          |
| A_21_P0001136  | 2,59264 | 2,13131 | 1,376810495 | N/A             | N/A       | N/A          | Inc-JUN-4            |
| A_21_P0007547  | 7,72471 | 7,26339 | 1,376800952 | N/A             | 100288798 | XR_171951    | LOC100288798         |
| A_23_P151565   | 11,6777 | 11,2164 | 1,376781866 | ENST00000554259 | 253959    | NM_014990    | RALGAPA1             |
| A_22_P00006564 | 2,58354 | 2,12233 | 1,37669598  | N/A             | 100379174 | NR_072988    | MACROD2-AS1          |
| A_24_P66932    | 6,74462 | 6,28342 | 1,376686438 | ENST00000515639 | 729080    | NR_033244    | LOC729080            |
| A_23_P154806   | 15,102  | 14,6408 | 1,376686438 | ENST00000202028 | 2036      | NM_012156    | EPB41L1              |
| A_21_P0014763  | 6,42571 | 5,96455 | 1,376648268 | N/A             | N/A       | N/A          | N/A                  |
| A_33_P3383326  | 8,50901 | 8,04788 | 1,376619642 | ENST00000374430 | 1902      | NM_057159    | LPAR1                |
| A_23_P116280   | 1,9065  | 1,44539 | 1,376600558 | ENST00000448076 | 7490      | NM_024426    | WT1                  |
| A_33_P3294297  | 13,029  | 12,5679 | 1,376591016 | ENST00000567452 | 55658     | NM_194460    | RNF126               |
| A_23_P140738   | 11,9095 | 11,4485 | 1,376495602 | ENST00000327397 | 9780      | NM_001142864 | PIEZO1               |
| A_33_P3404014  | 4,83958 | 4,37867 | 1,376409734 | ENST00000371325 | 388799    | NM_001013646 | FAM209B              |
| A_23_P211957   | 12,7085 | 12,2476 | 1,376400193 | ENST00000295754 | 7048      | NM_001024847 | TGFBR2               |
| A_33_P3382513  | 13,6712 | 13,2103 | 1,376400193 | ENST00000561734 | 113000    | NM_058192    | RPUSD1               |
| A_23_P77401    | 4,81484 | 4,35395 | 1,376390653 | ENST00000433677 | 55313     | NM_018340    | CPPED1               |
| A_22_P00014438 | 2,27087 | 1,80998 | 1,376390653 | N/A             | N/A       | AA213559     | Inc-SH2B3-1          |
| A_23_P59418    | 6,74696 | 6,28609 | 1,376371572 | ENST00000223190 | 4899      | NM_005011    | NRF1                 |
| A_21_P0001460  | 2,12869 | 1,66782 | 1,376371572 | N/A             | 440556    | NR_015440    | LINC00982            |
| A_24_P223163   | 5,31514 | 4,85432 | 1,376323872 | ENST00000422287 | 92345     | NM_138386    | NAF1                 |
| A_33_P3246293  | 5,06336 | 4,60256 | 1,376304792 | ENST00000367822 | 10767     | NM_001145207 | HBS1L                |
| A_24_P323754   | 3,15204 | 2,69125 | 1,376295252 | ENST00000313031 | N/A       | AF052121     | N/A                  |
| A_21_P0011211  | 2,86667 | 2,4059  | 1,376276173 | N/A             | N/A       | N/A          | Inc-TPTE2-2          |
| A_22_P00013487 | 4,22437 | 3,76361 | 1,376266633 | N/A             | N/A       | BX402762     | Inc-RP11-334E6.3.1-2 |
| A_21_P0011296  | 4,07893 | 3,61821 | 1,376228476 | N/A             | N/A       | N/A          | XLOC_I2_004594       |
| A_21_P0014643  | 4,46229 | 4,00157 | 1,376228476 | N/A             | 100507420 | NR_121620    | LOC100507420         |
| A_23_P210939   | 15,6917 | 15,231  | 1,376209397 | ENST00000374450 | 3692      | NM_181468    | EIF6                 |
| A_22_P00005665 | 5,04497 | 4,58432 | 1,376161702 | N/A             | 101927917 | NR_120537    | TUB-AS1              |
| A_21_P0010560  | 2,80996 | 2,34933 | 1,376142625 | N/A             | N/A       | N/A          | XLOC_I2_000423       |
| A_23_P129358   | 10,0738 | 9,61319 | 1,376123547 | ENST00000422445 | 79918     | NM_024860    | SETD6                |
| A_22_P00003078 | 2,05258 | 1,59206 | 1,376037703 | N/A             | N/A       | N/A          | Inc-C8orf48-3        |

|                |         |         |             |                 |        |              |                |
|----------------|---------|---------|-------------|-----------------|--------|--------------|----------------|
| A_23_P214876   | 10,8392 | 10,3787 | 1,376018627 | ENST00000341776 | 3720   | NM_004973    | JARID2         |
| A_21_P0009819  | 3,15589 | 2,69543 | 1,375980476 | N/A             | N/A    | N/A          | Inc-VSX1-1     |
| A_33_P3398922  | 11,7191 | 11,2587 | 1,375923252 | ENST00000590208 | 4152   | NM_001204142 | MBD1           |
| A_22_P00004005 | 3,83879 | 3,3784  | 1,375913715 | N/A             | N/A    | N/A          | Inc-CHMP1A-2   |
| A_22_P00024836 | 3,0876  | 2,62722 | 1,375904178 | N/A             | N/A    | BX092012     | Inc-CSRP1-1    |
| A_23_P50276    | 4,7188  | 4,25852 | 1,375808811 | ENST00000253109 | 83854  | NM_031917    | ANGPTL6        |
| A_23_P151471   | 13,0144 | 12,5542 | 1,375732522 | ENST00000375441 | 8451   | NM_001008895 | CUL4A          |
| A_33_P3881812  | 2,41541 | 1,95526 | 1,375684844 | ENST00000520549 | 345611 | BC038539     | IRGM           |
| A_24_P105564   | 10,6634 | 10,2033 | 1,375637167 | ENST00000254101 | 5565   | NM_005399    | PRKAB2         |
| A_23_P389250   | 8,38355 | 7,92353 | 1,375560887 | ENST00000416383 | 341346 | NM_001145010 | SMCO2          |
| A_23_P382602   | 5,65437 | 5,19438 | 1,375532284 | ENST00000622552 | 607    | NM_004326    | BCL9           |
| A_21_P0011020  | 4,37891 | 3,91894 | 1,375513215 | N/A             | N/A    | N/A          | XLOC_I2_002790 |
| A_33_P3248394  | 2,59627 | 2,1363  | 1,375513215 | ENST00000484180 | 11185  | NM_001199219 | INMT           |
| A_24_P83899    | 2,41795 | 1,958   | 1,375494146 | ENST00000305447 | 2915   | NM_000842    | GRM5           |
| A_22_P00006742 | 4,10395 | 3,6442  | 1,375303476 | N/A             | N/A    | N/A          | Inc-FSIP1-1    |
| A_32_P124708   | 4,11777 | 3,65802 | 1,375303476 | ENST00000491143 | 9480   | NM_004852    | ONECUT2        |
| A_23_P104692   | 9,55346 | 9,0938  | 1,375217682 | ENST00000532970 | 246330 | NM_145065    | PELI3          |
| A_23_P92650    | 3,79972 | 3,34012 | 1,37516049  | ENST00000239451 | 83884  | NM_031947    | SLC25A2        |
| A_33_P3252598  | 2,24321 | 1,78378 | 1,374998457 | ENST00000382209 | 613210 | NM_001033018 | DEFB136        |
| A_23_P207058   | 9,85168 | 9,39232 | 1,374931744 | ENST00000330871 | 9021   | NM_003955    | SOCS3          |
| A_23_P329016   | 9,10372 | 8,64455 | 1,37475068  | ENST00000472113 | 92715  | XM_005266125 | DPH7           |
| A_24_P121406   | 3,68973 | 3,23059 | 1,374722093 | ENST00000282007 | 23091  | NM_015070    | ZC3H13         |
| A_21_P0011727  | 4,37009 | 3,91102 | 1,374655393 | N/A             | N/A    | N/A          | N/A            |
| A_33_P3326115  | 2,52991 | 2,071   | 1,374502947 | ENST00000400522 | 388795 | XM_006710086 | EFCAB8         |
| A_33_P3419334  | 9,38405 | 8,92516 | 1,374483892 | ENST00000369851 | 2773   | NM_006496    | GNAI3          |
| A_23_P47125    | 3,10396 | 2,64516 | 1,37439815  | ENST00000611603 | 120065 | NM_153444    | OR5P2          |
| A_23_P214766   | 11,8267 | 11,3679 | 1,37439815  | ENST00000012134 | 3097   | NM_006734    | HIVEP2         |
| A_23_P121222   | 8,44698 | 7,98822 | 1,374360044 | ENST00000264926 | 56852  | NM_020165    | RAD18          |
| A_23_P340131   | 8,79472 | 8,33604 | 1,374283836 | ENST00000377456 | 10279  | NM_005865    | PRSS16         |
| A_23_P203994   | 13,7028 | 13,2442 | 1,374207631 | ENST00000540962 | 5715   | NM_002813    | PSMD9          |
| A_22_P00010304 | 5,17673 | 4,71818 | 1,374160006 | N/A             | N/A    | CR933610     | Inc-MTX1-1     |
| A_33_P3367575  | 5,73593 | 5,27743 | 1,374112382 | ENST00000397520 | 56478  | NM_001164502 | EIF4ENIF1      |
| A_21_P0006778  | 4,29078 | 3,83229 | 1,374102857 | ENST00000449882 | N/A    | N/A          | N/A            |

|                |         |         |             |                 |           |              |                |
|----------------|---------|---------|-------------|-----------------|-----------|--------------|----------------|
| A_22_P00025116 | 7,94571 | 7,48727 | 1,374055235 | N/A             | 101927267 | NR_120449    | LOC101927267   |
| A_23_P165691   | 13,3035 | 12,8451 | 1,374017139 | ENST00000477232 | 10213     | NM_005805    | PSMD14         |
| A_23_P385199   | 3,81292 | 3,35461 | 1,373931426 | ENST00000319637 | 284656    | NM_173641    | EPHA10         |
| A_23_P253158   | 9,58953 | 9,13129 | 1,373864764 | ENST00000330386 | 57634     | NM_015409    | EP400          |
| A_21_P0014096  | 5,02797 | 4,56975 | 1,373845718 | N/A             | N/A       | BX102845     | N/A            |
| A_21_P0010137  | 4,58282 | 4,12467 | 1,373779061 | ENST00000434081 | 727699    | NR_033840    | LINC00163      |
| A_33_P3409277  | 4,49477 | 4,03665 | 1,373750494 | N/A             | 100128882 | XR_429794    | LOC100128882   |
| A_23_P217277   | 3,09582 | 2,6377  | 1,373750494 | ENST00000370490 | 84631     | NM_032539    | SLITRK2        |
| A_32_P226768   | 7,62583 | 7,16773 | 1,37373145  | N/A             | 101060264 | NR_126415    | FOXP4-AS1      |
| A_23_P165788   | 8,59379 | 8,13574 | 1,373683841 | ENST00000616524 | 493911    | NM_001008489 | PHOSPHO2       |
| A_33_P3355886  | 2,30409 | 1,84606 | 1,373664798 | ENST00000398992 | 255649    | XR_247225    | OOSP1          |
| A_32_P191004   | 8,14501 | 7,68705 | 1,373598149 | ENST00000238789 | 54454     | NM_017552    | ATAD2B         |
| A_22_P00021209 | 5,45166 | 4,99376 | 1,373541024 | N/A             | N/A       | DB266696     | Inc-HCRTR1-1   |
| A_23_P91293    | 12,0326 | 11,5747 | 1,373541024 | ENST00000476395 | 9217      | NM_004738    | VAPB           |
| A_19_P00322762 | 6,79437 | 6,33653 | 1,373483901 | ENST00000598190 | 55769     | AK307375     | ZNF83          |
| A_23_P311144   | 6,8446  | 6,3868  | 1,37344582  | ENST00000409529 | 165055    | NM_144978    | CCDC138        |
| A_33_P3362727  | 5,24698 | 4,78931 | 1,373322066 | N/A             | N/A       | N/A          | N/A            |
| A_33_P3359753  | 8,90424 | 8,44661 | 1,37328399  | ENST00000366687 | 126731    | NM_145257    | CCSAP          |
| A_23_P88753    | 11,6431 | 11,1855 | 1,373255433 | ENST00000007390 | 115939    | NM_001001410 | TSR3           |
| A_23_P112159   | 10,699  | 10,2415 | 1,37316025  | ENST00000519980 | 27161     | NM_012154    | AGO2           |
| A_33_P3243394  | 7,45482 | 6,99733 | 1,373150732 | ENST00000383718 | 7871      | AK124200     | SLMAP          |
| A_33_P3401394  | 3,11508 | 2,65764 | 1,373103143 | N/A             | N/A       | N/A          | N/A            |
| A_33_P3375762  | 4,60413 | 4,14669 | 1,373103143 | ENST00000522530 | 392364    | NR_040117    | LOC392364      |
| A_21_P0008433  | 4,78707 | 4,32969 | 1,373046038 | N/A             | N/A       | N/A          | Inc-MDGA2-2    |
| A_23_P86855    | 11,1928 | 10,7356 | 1,372874739 | ENST00000542359 | 28992     | NM_014067    | MACROD1        |
| A_22_P00008617 | 2,09255 | 1,63537 | 1,372855707 | ENST00000566193 | N/A       | BX648634     | N/A            |
| A_33_P3221489  | 6,90138 | 6,44428 | 1,372779582 | ENST00000359209 | 55243     | NM_018240    | KIRREL         |
| A_21_P0013708  | 10,515  | 10,0579 | 1,372779582 | ENST00000427109 | 100506119 | XR_426441    | LINC01503      |
| A_22_P00002182 | 3,54465 | 3,0876  | 1,372732006 | N/A             | 100507388 | NR_121617    | LOC100507388   |
| A_22_P00025624 | 2,77655 | 2,31956 | 1,372674917 | ENST00000242315 | 23349     | XR_242502    | KIAA1045       |
| A_21_P0013286  | 2,47688 | 2,02004 | 1,372532204 | N/A             | N/A       | N/A          | XLOC_I2_013737 |
| A_33_P3269854  | 3,88202 | 3,42537 | 1,372351456 | ENST00000436804 | N/A       | N/A          | N/A            |
| A_23_P57807    | 9,69295 | 9,23635 | 1,372303895 | ENST00000170447 | 23609     | NM_014160    | MKRN2          |

|                |         |         |             |                 |           |                   |                |
|----------------|---------|---------|-------------|-----------------|-----------|-------------------|----------------|
| A_33_P3267989  | 2,99507 | 2,53849 | 1,372284871 | ENST00000442825 | 116449    | NM_052964         | CLNK           |
| A_23_P19938    | 13,1124 | 12,6559 | 1,372208778 | ENST00000454368 | 11014     | NM_006854         | KDELR2         |
| A_22_P00005125 | 2,81859 | 2,36211 | 1,372189755 | ENST00000444436 | N/A       | N/A               | N/A            |
| A_23_P355394   | 3,75151 | 3,29511 | 1,372113667 | ENST00000306304 | 202374    | NM_145001         | STK32A         |
| A_33_P3228355  | 5,35294 | 4,89656 | 1,372094645 | ENST00000394323 | 2086      | NM_001007253      | ERV3-1         |
| A_33_P3245133  | 5,69681 | 5,24046 | 1,372066114 | N/A             | N/A       | N/A               | N/A            |
| A_33_P3336484  | 10,4812 | 10,0249 | 1,372018562 | ENST00000283050 | 100288332 | NM_001277325      | NPIPA5         |
| A_33_P3393048  | 4,98875 | 4,53247 | 1,371999542 | ENST00000390300 | N/A       | AJ249379          | N/A            |
| A_32_P22401    | 13,8139 | 13,3577 | 1,371923464 | ENST00000373148 | 55700     | NM_018067         | MAP7D1         |
| A_21_P0012869  | 5,76668 | 5,31052 | 1,371885427 | ENST00000507037 | 728554    | TCONS_I2_00022662 | LOC728554      |
| A_21_P0000390  | 3,50292 | 3,04684 | 1,371809356 | N/A             | 692209    | NR_003074         | SNORD92        |
| A_21_P0000560  | 3,08425 | 2,62819 | 1,371790339 | ENST00000476804 | 644444    | NR_028358         | TMEM30C        |
| A_21_P0011424  | 3,50648 | 3,05048 | 1,371733289 | N/A             | N/A       | N/A               | XLOC_I2_005179 |
| A_24_P103922   | 11,8025 | 11,3465 | 1,371733289 | ENST00000411419 | 1488      | NM_001329         | CTBP2          |
| A_33_P3302632  | 8,19485 | 7,73892 | 1,371666733 | N/A             | 8344      | NM_003523         | HIST1H2BE      |
| A_24_P324368   | 2,6197  | 2,16378 | 1,371657226 | ENST00000317287 | 85406     | NM_032364         | DNAJC14        |
| A_33_P3365720  | 4,46872 | 4,01281 | 1,371647718 | ENST00000514422 | 285492    | NR_040045         | LINC00955      |
| A_21_P0003360  | 3,90453 | 3,44863 | 1,371638211 | ENST00000507639 | 100506827 | N/A               | LOC100506827   |
| A_33_P3346866  | 13,3999 | 12,944  | 1,371638211 | ENST00000420613 | 54934     | NM_017822         | KANSL2         |
| A_23_P359655   | 12,9792 | 12,5233 | 1,371638211 | ENST00000539644 | 144348    | NM_152437         | ZNF664         |
| A_19_P00322966 | 5,68996 | 5,23425 | 1,371457581 | N/A             | 92249     | NR_015353         | LINC01278      |
| A_33_P3296479  | 8,94306 | 8,48737 | 1,371438568 | ENST00000474136 | 351       | NM_001204303      | APP            |
| A_21_P0005829  | 4,14174 | 3,68609 | 1,371400544 | N/A             | N/A       | N/A               | Inc-EFCAB1-4   |
| A_33_P3299170  | 13,3275 | 12,8719 | 1,371353016 | ENST00000490762 | 55692     | NM_201412         | LUC7L          |
| A_22_P00018537 | 2,05797 | 1,60237 | 1,371353016 | N/A             | N/A       | N/A               | Inc-MED9-1     |
| A_33_P3249793  | 1,94834 | 1,49279 | 1,371305489 | ENST00000341558 | 4303      | NM_005938         | FOXO4          |
| A_22_P00016276 | 4,05555 | 3,60001 | 1,371295984 | ENST00000562361 | N/A       | N/A               | N/A            |
| A_23_P57110    | 10,1519 | 9,69638 | 1,371276974 | ENST00000381944 | 113278    | NM_033409         | SLC52A3        |
| A_21_P0014479  | 12,8949 | 12,4394 | 1,371257964 | N/A             | N/A       | BC041347          | Inc-DNASE1L3-1 |
| A_33_P3333337  | 7,22157 | 6,76609 | 1,371238955 | ENST00000311191 | 23143     | NM_001164213      | LRCH1          |
| A_23_P140978   | 8,09713 | 7,64169 | 1,371200937 | ENST00000219069 | 10127     | NM_005741         | ZNF263         |
| A_22_P00011293 | 2,424   | 1,96866 | 1,371105895 | ENST00000544004 | N/A       | N/A               | N/A            |
| A_32_P58280    | 5,69626 | 5,24096 | 1,371067881 | ENST00000495132 | 54536     | NM_019053         | EXOC6          |

|                |         |         |             |                 |           |              |                |
|----------------|---------|---------|-------------|-----------------|-----------|--------------|----------------|
| A_22_P00001393 | 9,05076 | 8,59561 | 1,370925336 | ENST00000559909 | N/A       | N/A          | N/A            |
| A_23_P98571    | 6,90067 | 6,44555 | 1,370896828 | ENST00000432063 | 220004    | NM_145017    | PPP1R32        |
| A_21_P0012183  | 6,11721 | 5,66215 | 1,370839815 | ENST00000432875 | 440482    | NR_040113    | ANKRD20A5P     |
| A_21_P0008289  | 1,83886 | 1,38387 | 1,370773303 | ENST00000444357 | 101101776 | NR_073460    | BMS1P17        |
| A_33_P3390217  | 4,45501 | 4,00019 | 1,370611788 | ENST00000375922 | 164395    | XM_006723725 | TTLL9          |
| A_23_P218079   | 14,1114 | 13,6567 | 1,370497788 | ENST00000549258 | 54407     | NM_018976    | SLC38A2        |
| A_22_P00025709 | 2,7126  | 2,25795 | 1,370450291 | ENST00000474444 | N/A       | N/A          | N/A            |
| A_22_P00012124 | 3,48706 | 3,03255 | 1,370317308 | N/A             | N/A       | N/A          | Inc-POLN-1     |
| A_22_P00005257 | 1,95479 | 1,50029 | 1,37030781  | N/A             | N/A       | N/A          | Inc-DMRTA1-3   |
| A_22_P00006224 | 7,12292 | 6,66846 | 1,370269818 | N/A             | N/A       | N/A          | Inc-FAM49B-1   |
| A_22_P00021345 | 4,86395 | 4,4095  | 1,37026032  | ENST00000424941 | N/A       | N/A          | N/A            |
| A_23_P91640    | 5,92841 | 5,47399 | 1,370231826 | ENST00000215906 | 57168     | NM_020437    | ASPHD2         |
| A_33_P3232393  | 5,37572 | 4,92132 | 1,370212831 | ENST00000623531 | N/A       | XR_244448    | N/A            |
| A_33_P3380101  | 13,0552 | 12,6012 | 1,36983298  | ENST00000373148 | 55700     | NM_018067    | MAP7D1         |
| A_19_P00808794 | 2,91843 | 2,46448 | 1,369785506 | N/A             | N/A       | N/A          | XL0C_I2_008221 |
| A_22_P00009393 | 9,31067 | 8,85673 | 1,369776011 | ENST00000397708 | 8888      | NM_003906    | MCM3AP         |
| A_21_P0006497  | 4,41688 | 3,96295 | 1,369766517 | N/A             | N/A       | N/A          | Inc-FAM156B-1  |
| A_33_P3345294  | 5,42321 | 4,96931 | 1,369738034 | ENST00000368966 | 221262    | N/A          | CCDC162P       |
| A_23_P205686   | 11,6474 | 11,1937 | 1,369548161 | ENST00000394164 | 5663      | NM_000021    | PSEN1          |
| A_33_P3211223  | 3,43285 | 2,97916 | 1,369538668 | N/A             | N/A       | N/A          | N/A            |
| A_33_P3211739  | 10,9815 | 10,5279 | 1,369453234 | ENST00000616381 | 64764     | NM_194071    | CREB3L2        |
| A_21_P0012902  | 5,25021 | 4,79664 | 1,369424758 | N/A             | N/A       | N/A          | XL0C_I2_012010 |
| A_22_P00001466 | 7,93485 | 7,48129 | 1,369415265 | N/A             | N/A       | BC034958     | Inc-AQP9-1     |
| A_33_P3294153  | 2,19967 | 1,74622 | 1,369310857 | ENST00000368555 | 50632     | N/A          | CALY           |
| A_21_P0014215  | 7,143   | 6,68958 | 1,369282383 | N/A             | N/A       | N/A          | N/A            |
| A_22_P00025127 | 3,3407  | 2,88728 | 1,369282383 | ENST00000450129 | N/A       | N/A          | N/A            |
| A_24_P342944   | 2,91006 | 2,45682 | 1,369111553 | ENST00000264723 | 10675     | NM_006574    | CSPG5          |
| A_33_P3400374  | 13,8321 | 13,3789 | 1,369073594 | ENST00000427522 | 85441     | NM_001037335 | HELZ2          |
| A_21_P0013615  | 6,25239 | 5,79919 | 1,369073594 | N/A             | N/A       | N/A          | XL0C_I2_015098 |
| A_23_P319557   | 4,25012 | 3,79693 | 1,369064104 | ENST00000328344 | N/A       | AF426268     | N/A            |
| A_23_P141505   | 4,05916 | 3,60601 | 1,369026146 | ENST00000571664 | 10462     | NM_182906    | CLEC10A        |
| A_21_P0002319  | 4,74872 | 4,29557 | 1,369026146 | ENST00000443670 | 102724224 | NR_110599    | LINC01117      |
| A_23_P342600   | 6,3835  | 5,93044 | 1,368940745 | ENST00000493263 | 140901    | NM_080836    | STK35          |

|                |         |         |             |                 |           |              |              |
|----------------|---------|---------|-------------|-----------------|-----------|--------------|--------------|
| A_33_P3381044  | 2,03643 | 1,58337 | 1,368940745 | ENST00000589958 | N/A       | N/A          | N/A          |
| A_33_P3260034  | 3,51455 | 3,06151 | 1,368921767 | N/A             | N/A       | N/A          | N/A          |
| A_33_P3319572  | 5,35024 | 4,89733 | 1,36879842  | ENST00000585734 | 284418    | NM_001145402 | FAM71E2      |
| A_33_P3294424  | 4,20437 | 3,75151 | 1,368750982 | N/A             | 727799    | AK127690     | LOC727799    |
| A_33_P3269403  | 1,95575 | 1,50294 | 1,368703546 | ENST00000449804 | 2299      | NM_012188    | FOX11        |
| A_33_P3372941  | 13,6442 | 13,1914 | 1,368694059 | ENST00000557915 | 26277     | NM_012461    | TINF2        |
| A_22_P00024517 | 2,28309 | 1,83029 | 1,368694059 | N/A             | 101928093 | NM_001287812 | LOC101928093 |
| A_21_P0013805  | 11,1082 | 10,6554 | 1,368694059 | ENST00000456563 | 389906    | NR_034031    | LOC389906    |
| A_33_P3355503  | 11,1612 | 10,7084 | 1,368694059 | ENST00000320241 | 2300      | NM_005250    | FOXL1        |
| A_24_P209047   | 2,16437 | 1,71168 | 1,368589705 | ENST00000231454 | 3567      | NM_000879    | IL5          |
| A_22_P00016991 | 7,5294  | 7,07672 | 1,368580219 | N/A             | N/A       | N/A          | Inc-TTC26-2  |
| A_21_P0009352  | 3,9796  | 3,5272  | 1,368314629 | N/A             | N/A       | N/A          | Inc-ABCA5-1  |
| A_23_P136547   | 11,3426 | 10,8902 | 1,368314629 | ENST00000511666 | 54872     | NM_017733    | PIGG         |
| A_23_P131846   | 7,42733 | 6,9752  | 1,368058573 | ENST00000244050 | 6615      | NM_005985    | SNAI1        |
| A_23_P423389   | 10,1941 | 9,74204 | 1,367992196 | ENST00000486056 | 10488     | NM_006368    | CREB3        |
| A_21_P0007936  | 9,68876 | 9,23673 | 1,36796375  | N/A             | N/A       | N/A          | Inc-GTF2F2-2 |
| A_23_P16110    | 8,95863 | 8,50665 | 1,36791634  | ENST00000456448 | 26648     | NM_001079935 | OR7E24       |
| A_21_P0000224  | 7,21605 | 6,76409 | 1,367897377 | N/A             | 116937    | NR_000027    | SNORD83A     |
| A_21_P0003089  | 11,266  | 10,8141 | 1,367840489 | ENST00000343123 | 10016     | NR_073609    | PDCD6        |
| A_22_P00010069 | 6,92354 | 6,47167 | 1,367812046 | ENST00000533220 | 101927204 | NR_110184    | LOC101927204 |
| A_21_P0009652  | 3,03698 | 2,58512 | 1,367802565 | N/A             | N/A       | N/A          | Inc-ZNF526-1 |
| A_33_P3391275  | 6,53185 | 6,08002 | 1,367774123 | ENST00000416742 | 284749    | NR_026958    | LINC00494    |
| A_32_P416161   | 5,73773 | 5,28592 | 1,367755161 | ENST00000372956 | 402415    | NM_212559    | XKRX         |
| A_21_P0000151  | 1,96649 | 1,51478 | 1,367660359 | ENST00000380470 | 140456    | NM_080873    | ASB11        |
| A_33_P3375476  | 12,7493 | 12,2976 | 1,367650879 | ENST00000270583 | 54758     | NM_017566    | KLHDC4       |
| A_33_P3244194  | 6,4762  | 6,02457 | 1,367584522 | ENST00000383657 | 201562    | NM_198402    | PTPLB        |
| A_24_P576506   | 4,75407 | 4,30252 | 1,367508689 | ENST00000414069 | 503542    | NM_001012508 | SPRN         |
| A_33_P3876985  | 9,25601 | 8,8046  | 1,367375992 | ENST00000596280 | 51029     | NM_016076    | DESI2        |
| A_33_P3344564  | 4,46845 | 4,01727 | 1,367158017 | ENST00000515380 | 65250     | XR_427661    | C5orf42      |
| A_21_P0008347  | 5,32231 | 4,8712  | 1,367091684 | N/A             | N/A       | N/A          | Inc-FUT8-1   |
| A_24_P132039   | 9,23156 | 8,78055 | 1,366996927 | ENST00000394514 | 9604      | NM_004290    | RNF14        |
| A_22_P00003066 | 3,11304 | 2,6622  | 1,366835857 | ENST00000523171 | 619344    | NR_046232    | LINC01298    |
| A_23_P91590    | 14,5417 | 14,0909 | 1,36679796  | ENST00000486575 | 5902      | NM_002882    | RANBP1       |

|                |         |         |             |                 |           |              |                |
|----------------|---------|---------|-------------|-----------------|-----------|--------------|----------------|
| A_23_P250607   | 13,2119 | 12,7611 | 1,36679796  | ENST00000481823 | 5358      | NM_005032    | PLS3           |
| A_21_P0004129  | 4,73133 | 4,28054 | 1,366788486 | ENST00000504349 | N/A       | N/A          | N/A            |
| A_22_P00007511 | 2,66967 | 2,21889 | 1,366779013 | ENST00000445660 | N/A       | N/A          | N/A            |
| A_33_P3342443  | 9,36827 | 8,91763 | 1,366646386 | ENST00000424092 | 100271927 | NM_001277335 | RASA4B         |
| A_23_P60488    | 9,88086 | 9,43027 | 1,366599023 | ENST00000351030 | 4957      | NM_002540    | ODF2           |
| A_21_P0010638  | 4,48112 | 4,03063 | 1,3665043   | N/A             | N/A       | N/A          | XLOC_I2_001011 |
| A_23_P151361   | 2,68388 | 2,23347 | 1,366428527 | ENST00000400419 | 79024     | NM_024058    | SMIM2          |
| A_24_P413437   | 11,916  | 11,4656 | 1,366419056 | ENST00000373856 | 4841      | NM_007363    | NONO           |
| A_22_P00020362 | 1,9654  | 1,51501 | 1,366409585 | ENST00000443504 | N/A       | N/A          | N/A            |
| A_23_P77415    | 8,25958 | 7,80925 | 1,366352759 | ENST00000361711 | 29948     | NM_182981    | OSGIN1         |
| A_23_P5586     | 11,9387 | 11,4884 | 1,366324346 | ENST00000476969 | 10199     | NM_005791    | MPHOSPH10      |
| A_22_P00012141 | 5,18015 | 4,72987 | 1,366305405 | N/A             | N/A       | N/A          | Inc-POLR2F-1   |
| A_33_P3210099  | 7,29388 | 6,84366 | 1,366248583 | ENST00000258888 | 57538     | NM_020778    | ALPK3          |
| A_33_P3401407  | 2,07863 | 1,62842 | 1,366239113 | ENST00000587790 | 390858    | NR_024021    | OACYLP         |
| A_23_P101505   | 14,4111 | 13,9609 | 1,366229643 | ENST00000319756 | 11012     | NM_144947    | KLK11          |
| A_19_P00321360 | 3,63942 | 3,18932 | 1,366134947 | ENST00000506206 | 101927136 | NR_110840    | LOC101927136   |
| A_21_P0002403  | 1,97146 | 1,52145 | 1,366049725 | N/A             | N/A       | N/A          | Inc-NTSR2-3    |
| A_21_P0010613  | 1,92012 | 1,47013 | 1,366030788 | N/A             | N/A       | N/A          | XLOC_I2_000902 |
| A_23_P131935   | 14,4614 | 14,0115 | 1,365945573 | ENST00000217289 | 55612     | NM_017671    | FERMT1         |
| A_22_P00001133 | 5,58331 | 5,13344 | 1,36591717  | N/A             | N/A       | N/A          | Inc-ALX4-5     |
| A_21_P0014734  | 5,73515 | 5,28535 | 1,365850896 | N/A             | N/A       | N/A          | N/A            |
| A_33_P3386835  | 8,88018 | 8,43053 | 1,365708894 | ENST00000523340 | 6575      | XR_171115    | SLC20A2        |
| A_24_P854492   | 4,4207  | 3,97107 | 1,365689961 | ENST00000613780 | 440823    | NR_003491    | MIAT           |
| A_33_P3235335  | 7,11699 | 6,66736 | 1,365689961 | ENST00000351488 | 8897      | NM_021090    | MTMR3          |
| A_19_P00803997 | 5,24967 | 4,80005 | 1,365680495 | ENST00000426282 | 100506714 | N/A          | NUP50-AS1      |
| A_21_P0005559  | 2,06644 | 1,61682 | 1,365680495 | N/A             | N/A       | N/A          | Inc-RAMP3-2    |
| A_21_P0012908  | 5,13087 | 4,68127 | 1,365661562 | N/A             | N/A       | N/A          | XLOC_I2_012046 |
| A_21_P0014663  | 4,79511 | 4,3456  | 1,365576371 | ENST00000360187 | 100289635 | NM_183238    | ZNF605         |
| A_33_P3312985  | 2,39954 | 1,95009 | 1,365519579 | ENST00000600723 | 200298    | NR_103718    | LINC00528      |
| A_32_P196115   | 7,81782 | 7,36838 | 1,365510114 | ENST00000485586 | 221785    | NM_145115    | ZSCAN25        |
| A_21_P0003824  | 2,05407 | 1,60466 | 1,365481719 | N/A             | N/A       | N/A          | Inc-CRIPAK-1   |
| A_23_P390722   | 7,27629 | 6,82705 | 1,365320827 | ENST00000482587 | 163590    | NM_022347    | TOR1AIP2       |
| A_33_P3320368  | 13,1797 | 12,7305 | 1,365282973 | ENST00000587406 | 54929     | NM_017814    | TMEM161A       |



|                |         |         |             |                 |           |              |                |
|----------------|---------|---------|-------------|-----------------|-----------|--------------|----------------|
| A_23_P67913    | 8,35438 | 7,90524 | 1,365226194 | ENST00000443704 | 29926     | NM_013335    | GMPPA          |
| A_33_P3331242  | 14,1327 | 13,6836 | 1,365188342 | ENST00000520177 | 10146     | NM_005754    | G3BP1          |
| A_23_P305914   | 1,9217  | 1,47261 | 1,36517888  | ENST00000547525 | 9671      | NM_014653    | WSCD2          |
| A_24_P49447    | 9,07471 | 8,62563 | 1,365169417 | ENST00000418622 | 57589     | NM_020829    | RIC1           |
| A_22_P00018474 | 5,53365 | 5,08465 | 1,365093718 | N/A             | N/A       | N/A          | Inc-PSPC1-1    |
| A_22_P00002487 | 2,71397 | 2,26498 | 1,365084256 | N/A             | N/A       | N/A          | Inc-C16orf42-1 |
| A_21_P0009663  | 5,92899 | 5,48002 | 1,365065332 | N/A             | N/A       | N/A          | Inc-ZNF30-1    |
| A_33_P3272140  | 10,0903 | 9,64134 | 1,36505587  | ENST00000479162 | 129401    | NM_001287585 | NUP35          |
| A_24_P144303   | 2,68409 | 2,23513 | 1,36505587  | ENST00000435236 | 442459    | N/A          | XRCC6P5        |
| A_23_P61466    | 9,33567 | 8,88673 | 1,365036946 | ENST00000546182 | 283316    | NM_174941    | CD163L1        |
| A_22_P00023681 | 2,98432 | 2,53552 | 1,364904489 | N/A             | N/A       | N/A          | Inc-CCNB1IP1-2 |
| A_33_P3257755  | 10,6847 | 10,2359 | 1,364904489 | N/A             | N/A       | N/A          | N/A            |
| A_33_P3369452  | 8,87499 | 8,42622 | 1,364876107 | ENST00000399807 | 128989    | NM_001283106 | TANGO2         |
| A_22_P00000872 | 8,63177 | 8,18301 | 1,364866646 | ENST00000565929 | N/A       | N/A          | N/A            |
| A_22_P00013447 | 4,4484  | 3,99969 | 1,364819344 | N/A             | 102724966 | XR_426435    | LOC102724966   |
| A_33_P3389599  | 5,31834 | 4,86967 | 1,364781504 | ENST00000451663 | 391267    | N/A          | ANKRD20A11P    |
| A_22_P00007063 | 5,45112 | 5,00247 | 1,364762584 | ENST00000435967 | 100505938 | NR_125740    | LOC100505938   |
| A_22_P00012656 | 5,76699 | 5,31834 | 1,364762584 | N/A             | N/A       | N/A          | Inc-PYCARD-1   |
| A_33_P3287862  | 4,86319 | 4,41459 | 1,364715286 | ENST00000421395 | 101060524 | NR_111000    | LOC101060524   |
| A_22_P00005783 | 3,07069 | 2,62215 | 1,36465853  | ENST00000566847 | N/A       | BC029589     | N/A            |
| A_23_P372478   | 3,15649 | 2,70795 | 1,36465853  | ENST00000538527 | 327657    | NM_175739    | SERPINA9       |
| A_33_P3324137  | 10,8966 | 10,4481 | 1,364620694 | N/A             | 29053     | BC015320     | PRO0628        |
| A_33_P3278968  | 4,66068 | 4,21226 | 1,364545026 | ENST00000457663 | 3111      | NM_002119    | HLA-DOA        |
| A_24_P36944    | 5,06311 | 4,61475 | 1,364488277 | ENST00000502249 | 9859      | NM_014812    | CEP170         |
| A_33_P3404286  | 11,9566 | 11,5083 | 1,364431531 | ENST00000465499 | 23392     | NM_001080398 | KIAA0368       |
| A_24_P81947    | 11,4277 | 10,9794 | 1,364431531 | ENST00000420959 | 23603     | NM_014325    | CORO1C         |
| A_22_P00007758 | 2,99653 | 2,54835 | 1,364318045 | N/A             | N/A       | BG387923     | Inc-HMHB1-1    |
| A_23_P133585   | 13,3505 | 12,9024 | 1,364242394 | ENST00000615305 | 1022      | NM_001799    | CDK7           |
| A_22_P00017049 | 6,01584 | 5,56775 | 1,364232938 | N/A             | N/A       | XR_111287    | Inc-TUBA1A-1   |
| A_22_P00018216 | 2,8     | 2,35191 | 1,364232938 | N/A             | N/A       | N/A          | Inc-ZNF667-1   |
| A_33_P3251470  | 5,54718 | 5,09912 | 1,364204569 | ENST00000561876 | N/A       | N/A          | N/A            |
| A_33_P3310674  | 11,7673 | 11,3193 | 1,364147835 | ENST00000398734 | 7322      | NM_181838    | UBE2D2         |
| A_32_P193646   | 11,2139 | 10,7659 | 1,364147835 | ENST00000320676 | 27316     | NM_002139    | RBMX           |

|                |         |         |             |                 |           |              |                       |
|----------------|---------|---------|-------------|-----------------|-----------|--------------|-----------------------|
| A_24_P929369   | 10,7906 | 10,3427 | 1,364053283 | ENST00000261842 | 23431     | NM_007347    | AP4E1                 |
| A_33_P3254831  | 4,33639 | 3,88853 | 1,364015464 | N/A             | N/A       | N/A          | N/A                   |
| A_21_P0003453  | 2,07491 | 1,6271  | 1,363968191 | N/A             | N/A       | N/A          | Inc-SEL1L3-1          |
| A_24_P298420   | 10,1437 | 9,69595 | 1,363911467 | ENST00000553915 | 10419     | NM_001039619 | PRMT5                 |
| A_23_P23869    | 2,13185 | 1,68437 | 1,363656235 | ENST00000263726 | 89884     | NM_033343    | LHX4                  |
| A_23_P34757    | 8,57134 | 8,12409 | 1,363438853 | ENST00000366935 | 55105     | NM_018040    | GPATCH2               |
| A_33_P3229725  | 13,29   | 12,8429 | 1,363297101 | ENST00000395619 | 410       | NM_000487    | ARSA                  |
| A_22_P00008544 | 4,39033 | 3,94334 | 1,363193158 | N/A             | N/A       | CB216772     | Inc-KCNMB1-3          |
| A_21_P0013852  | 3,8873  | 3,44042 | 1,363089224 | ENST00000445416 | 100131755 | N/A          | ARMCX4                |
| A_22_P00002220 | 7,46074 | 7,01392 | 1,363032536 | ENST00000568571 | N/A       | N/A          | N/A                   |
| A_23_P75255    | 12,1499 | 11,7031 | 1,36301364  | ENST00000263559 | 9559      | NM_004896    | VPS26A                |
| A_22_P00020770 | 4,84173 | 4,39509 | 1,362862486 | ENST00000604660 | N/A       | N/A          | N/A                   |
| A_22_P00007355 | 2,09105 | 1,64442 | 1,362853039 | N/A             | N/A       | N/A          | Inc-GRAMD2-1          |
| A_32_P725218   | 8,90649 | 8,4599  | 1,362815253 | ENST00000333483 | 339175    | NM_181725    | METTL2A               |
| A_24_P310256   | 4,36104 | 3,91447 | 1,362796361 | ENST00000591840 | 163175    | NM_139284    | LGI4                  |
| A_33_P3309665  | 8,11454 | 7,66809 | 1,362683011 | ENST00000318833 | 124961    | NM_153018    | ZFP3                  |
| A_22_P00007316 | 4,04352 | 3,59709 | 1,362664121 | ENST00000553929 | 283587    | NR_046094    | LINC01146             |
| A_21_P0011722  | 2,64995 | 2,20357 | 1,362616895 | N/A             | N/A       | N/A          | XLOC_I2_006926        |
| A_33_P3286846  | 3,2052  | 2,75882 | 1,362616895 | ENST00000567137 | 653550    | NM_001205259 | TP53TG3C              |
| A_22_P00010533 | 2,47994 | 2,03357 | 1,36260745  | N/A             | N/A       | N/A          | Inc-NCF4-1            |
| A_22_P00008337 | 5,89909 | 5,45273 | 1,362598005 | ENST00000381340 | 3709      | NM_002223    | ITPR2                 |
| A_24_P267522   | 5,54036 | 5,09406 | 1,362541338 | ENST00000356958 | 199704    | NM_152655    | ZNF585A               |
| A_21_P0000530  | 9,14128 | 8,69512 | 1,362409122 | N/A             | 125144    | NR_045024    | LRR75A-AS1            |
| A_23_P145863   | 16,385  | 15,9389 | 1,362352462 | ENST00000467589 | 6282      | NM_005620    | S100A11               |
| A_23_P92687    | 12,4079 | 11,9618 | 1,362352462 | ENST00000230895 | 1611      | NM_004394    | DAP                   |
| A_21_P0010505  | 2,60749 | 2,16141 | 1,362333576 | ENST00000587530 | N/A       | N/A          | N/A                   |
| A_32_P138042   | 5,17907 | 4,733   | 1,362324133 | N/A             | N/A       | BX445743     | N/A                   |
| A_23_P354387   | 15,3991 | 14,9531 | 1,362258035 | ENST00000359263 | 26509     | NM_013451    | MYOF                  |
| A_22_P00003425 | 6,58901 | 6,14302 | 1,362248592 | N/A             | N/A       | N/A          | Inc-CCDC23-1          |
| A_22_P00013333 | 4,31548 | 3,86955 | 1,362191939 | N/A             | N/A       | DB148808     | Inc-RP11-148O21.2.1-2 |
| A_23_P162386   | 1,95304 | 1,50716 | 1,36214473  | ENST00000267012 | 51411     | NM_016293    | BIN2                  |
| A_22_P00022787 | 6,99075 | 6,54487 | 1,36214473  | ENST00000453135 | 101929181 | N/A          | LOC101929181          |
| A_21_P0000940  | 3,41229 | 2,96642 | 1,362135288 | ENST00000423796 | N/A       | XR_109346    | N/A                   |

|                |         |         |             |                 |           |              |                |
|----------------|---------|---------|-------------|-----------------|-----------|--------------|----------------|
| A_23_P83931    | 13,858  | 13,4122 | 1,362069199 | ENST00000355029 | 10276     | NM_001047160 | NET1           |
| A_19_P00325498 | 2,05371 | 1,60799 | 1,361993672 | N/A             | 768096    | NR_003244    | HAR1A          |
| A_21_P0011126  | 11,1908 | 10,7451 | 1,36197479  | ENST00000368494 | 116150    | NM_138459    | NUS1           |
| A_21_P0001643  | 5,40515 | 4,9595  | 1,361927589 | N/A             | N/A       | N/A          | Inc-IRF2BP2-2  |
| A_22_P00025727 | 3,36978 | 2,92426 | 1,361804872 | N/A             | N/A       | N/A          | Inc-C4orf52-1  |
| A_33_P3329664  | 2,79585 | 2,35042 | 1,361719921 | ENST00000338647 | 139735    | NM_001136273 | ZFP92          |
| A_32_P98732    | 4,80624 | 4,36104 | 1,361502848 | ENST00000259803 | 8521      | NM_003643    | GCM1           |
| A_23_P40307    | 12,197  | 11,7518 | 1,361502848 | ENST00000377943 | 6629      | NM_003092    | SNRPB2         |
| A_22_P00010319 | 5,71923 | 5,27406 | 1,361474536 | N/A             | N/A       | N/A          | Inc-MUC5B-1    |
| A_22_P00020266 | 4,72831 | 4,28317 | 1,361446226 | N/A             | N/A       | BU686915     | Inc-CCDC73-1   |
| A_22_P00001313 | 4,1364  | 3,69132 | 1,361389606 | N/A             | N/A       | AK056793     | Inc-ANP32A-3   |
| A_23_P1102     | 3,6491  | 3,20409 | 1,361323552 | ENST00000366683 | 58        | NM_001100    | ACTA1          |
| A_24_P392230   | 5,47731 | 5,0323  | 1,361323552 | ENST00000441577 | N/A       | N/A          | N/A            |
| A_23_P120899   | 4,26868 | 3,82368 | 1,361314116 | ENST00000403662 | 1439      | NM_000395    | CSF2RB         |
| A_23_P69670    | 9,15609 | 8,71111 | 1,361295245 | ENST00000320776 | 55330     | NM_018366    | BLOC1S4        |
| A_33_P3400263  | 9,04084 | 8,59592 | 1,361238631 | ENST00000220913 | 54108     | NM_017444    | CHRAC1         |
| A_21_P0013854  | 8,27861 | 7,83376 | 1,361172585 | ENST00000440604 | N/A       | N/A          | N/A            |
| A_33_P3293403  | 3,16483 | 2,72001 | 1,361144281 | ENST00000377420 | 653427    | NM_001126334 | FOXD4L5        |
| A_22_P00004064 | 2,20028 | 1,75546 | 1,361144281 | N/A             | N/A       | N/A          | Inc-CHSY1-3    |
| A_19_P00320088 | 4,46705 | 4,02232 | 1,361059371 | N/A             | N/A       | N/A          | Inc-ARHGAP26-4 |
| A_23_P60180    | 10,5705 | 10,1258 | 1,361031069 | ENST00000318560 | 25        | NM_005157    | ABL1           |
| A_22_P00015594 | 4,84924 | 4,40456 | 1,361012201 | N/A             | N/A       | N/A          | Inc-STXBP1-1   |
| A_21_P0012399  | 3,31258 | 2,86808 | 1,360842403 | N/A             | N/A       | N/A          | XLOC_I2_009887 |
| A_33_P3245389  | 10,9011 | 10,4566 | 1,360842403 | ENST00000261556 | 54916     | NM_017799    | TMEM260        |
| A_23_P91468    | 15,665  | 15,2205 | 1,360842403 | ENST00000370861 | 5688      | NM_002792    | PSMA7          |
| A_23_P3819     | 6,88561 | 6,44112 | 1,36083297  | ENST00000252799 | 65988     | NM_023931    | ZNF747         |
| A_24_P295806   | 10,4717 | 10,0273 | 1,36074808  | ENST00000528426 | 66005     | NM_023947    | CHID1          |
| A_33_P3391429  | 9,30041 | 8,85601 | 1,36074808  | ENST00000306562 | 79894     | NM_024836    | ZNF672         |
| A_23_P163458   | 11,6859 | 11,2415 | 1,36074808  | ENST00000220325 | 30844     | NM_139265    | EHD4           |
| A_21_P0011581  | 3,13966 | 2,6956  | 1,36042743  | N/A             | N/A       | N/A          | XLOC_I2_006026 |
| A_22_P00013803 | 7,87441 | 7,43038 | 1,360399141 | ENST00000608290 | N/A       | N/A          | N/A            |
| A_22_P00019311 | 8,03366 | 7,58964 | 1,360389711 | N/A             | N/A       | N/A          | Inc-MARVELD3-2 |
| A_22_P00012658 | 2,36026 | 1,91642 | 1,360219991 | N/A             | 103344926 | N/A          | LINCR-0002     |

|                |         |         |             |                 |           |              |                |
|----------------|---------|---------|-------------|-----------------|-----------|--------------|----------------|
| A_23_P57819    | 10,0011 | 9,55738 | 1,360106856 | ENST00000287652 | 9797      | NM_014760    | TATDN2         |
| A_22_P00019047 | 4,14157 | 3,69795 | 1,360012583 | N/A             | N/A       | N/A          | Inc-COG1-1     |
| A_23_P200443   | 14,229  | 13,7854 | 1,35999373  | ENST00000368445 | 6464      | NM_003029    | SHC1           |
| A_23_P401106   | 8,30195 | 7,85836 | 1,359984303 | ENST00000444035 | 5138      | NM_002599    | PDE2A          |
| A_33_P3208970  | 3,53431 | 3,09074 | 1,35996545  | ENST00000349618 | 257101    | NM_001114759 | ZNF683         |
| A_32_P207243   | 7,29592 | 6,85241 | 1,359908892 | N/A             | N/A       | AF132973     | N/A            |
| A_23_P400465   | 13,2311 | 12,7876 | 1,359899465 | ENST00000329970 | 112495    | NM_138408    | GTF3C6         |
| A_21_P0011462  | 6,01847 | 5,57505 | 1,359824059 | N/A             | N/A       | N/A          | XLOC_I2_005438 |
| A_33_P3214284  | 4,87021 | 4,42683 | 1,359786357 | N/A             | N/A       | N/A          | N/A            |
| A_32_P25273    | 16,6848 | 16,2415 | 1,359710956 | ENST00000345042 | 3329      | NM_002156    | HSPD1          |
| A_23_P143662   | 9,1534  | 8,71034 | 1,35948478  | ENST00000439502 | 23761     | NM_014338    | PISD           |
| A_23_P41380    | 11,2209 | 10,7779 | 1,359428242 | ENST00000296577 | 6059      | NM_002940    | ABCE1          |
| A_22_P00011727 | 5,2608  | 4,81786 | 1,359371706 | ENST00000448204 | N/A       | N/A          | N/A            |
| A_22_P00008897 | 1,98506 | 1,54213 | 1,359362284 | N/A             | N/A       | BX088853     | Inc-KLHL31-4   |
| A_24_P450596   | 6,98805 | 6,54512 | 1,359362284 | ENST00000591344 | 342892    | NM_001193552 | ZNF850         |
| A_19_P00320562 | 4,24681 | 3,80389 | 1,359352861 | N/A             | 101928857 | N/A          | CTD-3080P12.3  |
| A_19_P00812627 | 4,01712 | 3,57423 | 1,359324595 | N/A             | N/A       | N/A          | XLOC_I2_012335 |
| A_32_P191527   | 8,35177 | 7,90891 | 1,359296329 | ENST00000437519 | 387893    | NM_020382    | SETD8          |
| A_32_P492524   | 2,14364 | 1,70078 | 1,359296329 | N/A             | 114805    | NM_052917    | GALNT13        |
| A_33_P3321934  | 2,77824 | 2,33541 | 1,359268063 | N/A             | N/A       | N/A          | N/A            |
| A_22_P00017050 | 5,08744 | 4,6447  | 1,35918327  | N/A             | N/A       | AA218968     | Inc-TUBA1C-1   |
| A_21_P0008450  | 4,35772 | 3,91515 | 1,35902312  | N/A             | N/A       | N/A          | Inc-ATP6V1D-1  |
| A_22_P00006887 | 2,21946 | 1,77695 | 1,358966601 | N/A             | N/A       | AK094875     | Inc-GAMT-2     |
| A_23_P93973    | 4,52404 | 4,08162 | 1,358881827 | ENST00000265310 | 56302     | NM_019841    | TRPV5          |
| A_33_P3381259  | 5,99318 | 5,55078 | 1,358862989 | N/A             | N/A       | N/A          | Inc-DNAI1-1    |
| A_24_P296698   | 14,192  | 13,7496 | 1,358862989 | ENST00000395491 | 5606      | NM_145109    | MAP2K3         |
| A_23_P430161   | 9,0294  | 8,58708 | 1,35878764  | ENST00000366645 | 149371    | NM_175876    | EXOC8          |
| A_21_P0002727  | 5,53185 | 5,08962 | 1,358702877 | N/A             | N/A       | N/A          | Inc-KCNH8-1    |
| A_33_P3253931  | 4,66725 | 4,22509 | 1,358636954 | N/A             | 84678     | AB031230     | KDM2B          |
| A_22_P00000206 | 8,31986 | 7,87774 | 1,358599285 | N/A             | N/A       | N/A          | Inc-ABT1-2     |
| A_23_P313728   | 8,06765 | 7,62554 | 1,358589868 | ENST00000474985 | 25940     | NM_015475    | FAM98A         |
| A_33_P3217332  | 8,55334 | 8,11123 | 1,358589868 | ENST00000343769 | 81931     | NM_031218    | ZNF93          |
| A_23_P361569   | 10,4475 | 10,0054 | 1,358580451 | ENST00000420066 | 80255     | NM_025181    | SLC35F5        |

|                |         |         |             |                 |           |              |                |
|----------------|---------|---------|-------------|-----------------|-----------|--------------|----------------|
| A_33_P3396612  | 12,6511 | 12,209  | 1,358580451 | ENST00000567036 | 96610     | N/A          | BMS1P20        |
| A_24_P291978   | 7,96233 | 7,52038 | 1,358439204 | ENST00000622666 | 90956     | NM_052853    | ADCK2          |
| A_22_P00021134 | 3,30494 | 2,863   | 1,358429788 | ENST00000449845 | N/A       | N/A          | N/A            |
| A_21_P0013237  | 2,51061 | 2,06868 | 1,358420372 | N/A             | N/A       | N/A          | Inc-VKORC1L1-2 |
| A_22_P00010163 | 8,06531 | 7,62342 | 1,358382709 | N/A             | N/A       | AK022225     | Inc-MRPS17-1   |
| A_21_P0000007  | 4,67037 | 4,22851 | 1,358354463 | N/A             | 100170229 | NM_001145641 | SRRM5          |
| A_24_P162373   | 10,3124 | 9,87055 | 1,358345047 | ENST00000402174 | 84133     | NM_001206998 | ZNRF3          |
| A_22_P00011015 | 2,09805 | 1,65634 | 1,358213239 | N/A             | N/A       | N/A          | Inc-NSUN6-4    |
| A_23_P135730   | 9,52706 | 9,08536 | 1,358203825 | ENST00000361113 | 199692    | NM_145295    | ZNF627         |
| A_23_P19592    | 11,2809 | 10,8392 | 1,358203825 | ENST00000513973 | 5238      | NM_015599    | PGM3           |
| A_24_P213950   | 3,18159 | 2,73998 | 1,358119098 | ENST00000298251 | 220296    | NM_152722    | HEPACAM        |
| A_22_P00023094 | 2,20339 | 1,76184 | 1,358062617 | ENST00000536495 | N/A       | N/A          | N/A            |
| A_33_P3364308  | 6,00357 | 5,56206 | 1,358024964 | ENST00000563871 | 146183    | BC040551     | OTOA           |
| A_33_P3279441  | 10,8544 | 10,4129 | 1,358015551 | ENST00000415811 | 9570      | NM_001012511 | GOSR2          |
| A_33_P3232498  | 2,29822 | 1,85677 | 1,357968486 | ENST00000331664 | 388939    | NM_001029883 | C2orf71        |
| A_33_P3212072  | 3,31601 | 2,87456 | 1,357968486 | ENST00000367762 | 92344     | NM_001146039 | GORAB          |
| A_22_P00007790 | 7,39003 | 6,9486  | 1,357949661 | ENST00000489705 | 284702    | NR_026778    | HNRNPU-AS1     |
| A_22_P00008465 | 3,51006 | 3,06866 | 1,357921423 | N/A             | 100874114 | NR_046732    | CCDC13-AS1     |
| A_33_P3398927  | 10,2335 | 9,79212 | 1,357902599 | ENST00000398493 | 4152      | NM_001204151 | MBD1           |
| A_24_P216253   | 10,8873 | 10,446  | 1,357827303 | ENST00000373907 | 22839     | NM_014902    | DLGAP4         |
| A_23_P157072   | 14,4315 | 13,9902 | 1,357827303 | ENST00000475415 | 8662      | NM_001037283 | EIF3B          |
| A_24_P50753    | 11,2957 | 10,8544 | 1,357827303 | ENST00000415493 | 11163     | NM_199040    | NUDT4          |
| A_21_P0012506  | 3,00991 | 2,56864 | 1,357799068 | N/A             | N/A       | N/A          | Inc-RNF13-2    |
| A_33_P3642036  | 3,44959 | 3,00842 | 1,357704956 | N/A             | 100289333 | AK093188     | LOC100289333   |
| A_33_P3254580  | 2,70647 | 2,26534 | 1,357667313 | N/A             | N/A       | N/A          | N/A            |
| A_22_P00001617 | 7,8257  | 7,38459 | 1,357648491 | ENST00000515319 | 9189      | NM_001171135 | ZBED1          |
| A_23_P103775   | 8,63749 | 8,19651 | 1,35752616  | ENST00000370454 | 84230     | NM_032270    | LRRC8C         |
| A_23_P150249   | 12,5086 | 12,0677 | 1,357450885 | ENST00000312579 | 11007     | NM_006848    | CCDC85B        |
| A_23_P1519     | 10,2001 | 9,75928 | 1,357375614 | ENST00000526450 | 9600      | NM_004910    | PITPNM1        |
| A_22_P00017015 | 2,20958 | 1,76882 | 1,357319164 | N/A             | N/A       | N/A          | Inc-TTC35-3    |
| A_24_P413941   | 8,9137  | 8,47299 | 1,357272124 | ENST00000319974 | 205327    | NM_153689    | C2orf69        |
| A_22_P00010404 | 2,43699 | 1,9964  | 1,357159234 | N/A             | N/A       | BC037534     | Inc-MYO1D-1    |
| A_22_P00007962 | 8,88302 | 8,44243 | 1,357159234 | N/A             | N/A       | N/A          | Inc-ID1-1      |

|                |         |         |             |                 |           |              |                  |
|----------------|---------|---------|-------------|-----------------|-----------|--------------|------------------|
| A_22_P00020137 | 1,90888 | 1,4683  | 1,357149826 | N/A             | N/A       | N/A          | Inc-RALB-1       |
| A_24_P336551   | 9,2487  | 8,80812 | 1,357149826 | ENST00000490491 | 632       | NM_199173    | BGLAP            |
| A_21_P0009512  | 3,74726 | 3,30675 | 1,357083979 | N/A             | N/A       | N/A          | Inc-ENOSF1-1     |
| A_33_P3250845  | 12,8371 | 12,3966 | 1,357074572 | ENST00000398013 | 81614     | NM_001184889 | NIPA2            |
| A_32_P184367   | 17,7865 | 17,3461 | 1,35698051  | ENST00000431607 | N/A       | AK130582     | N/A              |
| A_22_P00018327 | 8,4996  | 8,05941 | 1,356783001 | N/A             | N/A       | N/A          | Inc-ZNF91-2      |
| A_23_P336663   | 1,8477  | 1,40761 | 1,356688959 | ENST00000419776 | 157724    | NM_138817    | SLC7A13          |
| A_24_P251599   | 7,46186 | 7,02198 | 1,356491493 | ENST00000397368 | 859       | NM_001234    | CAV3             |
| A_33_P3350549  | 6,17842 | 5,7386  | 1,356435079 | N/A             | N/A       | N/A          | N/A              |
| A_33_P3270451  | 10,042  | 9,60218 | 1,356435079 | ENST00000439343 | 81567     | NM_030810    | TXNDC5           |
| A_23_P52147    | 11,7325 | 11,2927 | 1,356416275 | ENST00000543662 | 6905      | NM_001079515 | TBCE             |
| A_33_P3358648  | 12,4814 | 12,0418 | 1,356228249 | ENST00000289175 | 9208      | NM_001137552 | LRRFIP1          |
| A_23_P314835   | 2,89789 | 2,45833 | 1,356190647 | ENST00000371168 | 128602    | NM_178456    | C20orf85         |
| A_22_P00018325 | 3,34458 | 2,90505 | 1,356162446 | ENST00000493502 | 23145     | N/A          | SSPO             |
| A_22_P00009316 | 5,41686 | 4,97733 | 1,356162446 | ENST00000527757 | 100507205 | NR_038309    | LOC100507205     |
| A_33_P3383762  | 5,87247 | 5,43294 | 1,356162446 | N/A             | N/A       | N/A          | N/A              |
| A_23_P209183   | 11,2894 | 10,85   | 1,356040249 | ENST00000252599 | 79709     | NM_024656    | COLGALT1         |
| A_24_P106357   | 9,77978 | 9,34039 | 1,35603085  | ENST00000506538 | 134430    | NM_139281    | WDR36            |
| A_23_P353316   | 7,19646 | 6,75714 | 1,355965056 | ENST00000361125 | 57154     | NM_020429    | SMURF1           |
| A_21_P0011578  | 15,1349 | 14,6956 | 1,355946259 | ENST00000577449 | N/A       | N/A          | N/A              |
| A_21_P0004416  | 2,75616 | 2,31689 | 1,355918063 | N/A             | 102724530 | XR_425866    | LOC102724530     |
| A_33_P3419383  | 2,05602 | 1,61679 | 1,355880469 | ENST00000284767 | 27295     | NM_014476    | PDLIM3           |
| A_22_P00000459 | 2,14943 | 1,71021 | 1,355871071 | N/A             | N/A       | N/A          | Inc-AC091435.2-1 |
| A_23_P218025   | 2,20892 | 1,76971 | 1,355861673 | ENST00000455537 | 3798      | NM_004984    | KIF5A            |
| A_33_P3358462  | 5,51359 | 5,07439 | 1,355852275 | ENST00000341310 | 2736      | NM_005270    | GLI2             |
| A_22_P00004717 | 9,66316 | 9,22397 | 1,355842877 | N/A             | N/A       | BU617929     | Inc-CTDSP2-2     |
| A_23_P80098    | 13,1982 | 12,7591 | 1,355758298 | ENST00000424203 | 2618      | NM_000819    | GART             |
| A_23_P218997   | 16,0438 | 15,6048 | 1,355664327 | ENST00000511482 | 10016     | NM_013232    | PDCD6            |
| A_33_P3305433  | 4,43158 | 3,99258 | 1,355664327 | N/A             | N/A       | BU159546     | N/A              |
| A_23_P415006   | 10,8745 | 10,4355 | 1,355664327 | ENST00000493523 | 26056     | NM_015470    | RAB11FIP5        |
| A_33_P3215797  | 6,90167 | 6,46274 | 1,355598551 | ENST00000374011 | 27245     | NM_001029882 | AHDC1            |
| A_23_P24796    | 11,0708 | 10,6321 | 1,355382454 | ENST00000265978 | 84067     | NM_032127    | FAM160A2         |
| A_33_P3411075  | 16,489  | 16,0504 | 1,355288509 | ENST00000473330 | 6624      | NM_003088    | FSCN1            |

|                |         |         |             |                 |           |              |                |
|----------------|---------|---------|-------------|-----------------|-----------|--------------|----------------|
| A_21_P0007181  | 3,66666 | 3,22809 | 1,355260327 | N/A             | N/A       | N/A          | Inc-INSC-3     |
| A_21_P0014899  | 7,63605 | 7,19748 | 1,355260327 | N/A             | N/A       | AK126805     | N/A            |
| A_23_P96633    | 5,16746 | 4,7289  | 1,355250933 | ENST00000344129 | 54967     | NM_001031705 | CT55           |
| A_24_P108863   | 7,42486 | 6,98633 | 1,355222752 | ENST00000487842 | 6322      | NM_001037540 | SCML1          |
| A_24_P300483   | 8,11004 | 7,67155 | 1,355185177 | ENST00000438029 | 79020     | NM_024054    | C7orf25        |
| A_33_P7574262  | 3,60015 | 3,16171 | 1,355138211 | N/A             | 65072     | NR_040030    | CFLAR-AS1      |
| A_22_P00000413 | 3,48299 | 3,04456 | 1,355128818 | ENST00000578030 | N/A       | N/A          | N/A            |
| A_24_P127928   | 11,6267 | 11,1883 | 1,355100639 | ENST00000358951 | 25782     | NM_012414    | RAB3GAP2       |
| A_23_P346405   | 8,70354 | 8,26523 | 1,355016106 | ENST00000605416 | 90550     | NM_138357    | MCU            |
| A_24_P143492   | 9,71065 | 9,27238 | 1,354978538 | ENST00000485049 | 55653     | NM_001010974 | BCAS4          |
| A_22_P00005472 | 2,06043 | 1,62217 | 1,354969146 | N/A             | N/A       | N/A          | Inc-DYNC111-1  |
| A_24_P262738   | 10,1309 | 9,69264 | 1,354969146 | ENST00000596582 | 79016     | NM_024050    | DDA1           |
| A_33_P3209356  | 10,8293 | 10,3912 | 1,354818883 | ENST00000308769 | 64326     | NM_022457    | RFWD2          |
| A_33_P3389779  | 4,70348 | 4,26545 | 1,354753148 | ENST00000408998 | N/A       | N/A          | N/A            |
| A_33_P3215913  | 2,3212  | 1,88318 | 1,354743758 | N/A             | N/A       | N/A          | N/A            |
| A_33_P3258191  | 13,1964 | 12,7584 | 1,354724977 | ENST00000442039 | 283951    | NM_001272051 | C16orf91       |
| A_33_P3382031  | 3,37909 | 2,94109 | 1,354724977 | ENST00000377495 | 653567    | NM_001098844 | TMEM236        |
| A_22_P00017255 | 7,22599 | 6,7881  | 1,354621689 | ENST00000439207 | N/A       | N/A          | N/A            |
| A_24_P936145   | 2,57495 | 2,13706 | 1,354621689 | ENST00000262494 | 2775      | NM_138736    | GNAO1          |
| A_33_P3407700  | 6,57835 | 6,14047 | 1,354612299 | ENST00000306480 | 201931    | NM_001100389 | TMEM192        |
| A_22_P00025715 | 8,16806 | 7,73031 | 1,354490242 | N/A             | N/A       | N/A          | Inc-PDZK1IP1-1 |
| A_22_P00010760 | 2,50336 | 2,06563 | 1,354471465 | ENST00000563424 | N/A       | N/A          | N/A            |
| A_22_P00002310 | 2,09792 | 1,66025 | 1,354415135 | N/A             | N/A       | N/A          | Inc-C11orf36-2 |
| A_33_P3225843  | 7,54748 | 7,10983 | 1,354396359 | ENST00000504487 | 91050     | NM_173463    | CCDC149        |
| A_23_P380326   | 7,53189 | 7,0943  | 1,354340032 | ENST00000336643 | 55334     | NM_018375    | SLC39A9        |
| A_33_P3216438  | 5,49191 | 5,0544  | 1,354264934 | ENST00000335496 | 374955    | NM_198546    | SPATA21        |
| A_33_P3764802  | 11,4547 | 11,0172 | 1,354255547 | ENST00000379250 | 23408     | NM_012241    | SIRT5          |
| A_23_P139099   | 4,33846 | 3,90097 | 1,35424616  | ENST00000314706 | 81328     | NM_001005275 | OR4A15         |
| A_24_P276816   | 8,82123 | 8,38385 | 1,354142908 | ENST00000528066 | 55758     | NM_018254    | RCOR3          |
| A_23_P435002   | 9,99844 | 9,56108 | 1,354124136 | ENST00000339397 | 153443    | NM_152546    | SRFBP1         |
| A_23_P80551    | 10,4868 | 10,0495 | 1,35406782  | ENST00000463888 | 100506243 | NM_001205272 | KRBOX1         |
| A_22_P00015125 | 1,96274 | 1,52544 | 1,35406782  | N/A             | N/A       | N/A          | Inc-SNX25-1    |
| A_23_P168576   | 7,96838 | 7,5311  | 1,354049049 | ENST00000615241 | 22932     | NM_152992    | POMZP3         |

|                |         |         |             |                 |           |              |                |
|----------------|---------|---------|-------------|-----------------|-----------|--------------|----------------|
| A_22_P00016298 | 4,46766 | 4,03045 | 1,353983352 | ENST00000539588 | N/A       | BI754073     | N/A            |
| A_23_P104199   | 11,7706 | 11,3334 | 1,353973967 | ENST00000494395 | 3688      | NM_133376    | ITGB1          |
| A_23_P102320   | 11,0175 | 10,5803 | 1,353973967 | ENST00000479162 | 129401    | NM_138285    | NUP35          |
| A_32_P8402     | 11,3342 | 10,897  | 1,353973967 | ENST00000434910 | 10492     | NM_006372    | SYNCRIP        |
| A_22_P00010922 | 3,19992 | 2,76278 | 1,353917658 | N/A             | N/A       | DB336226     | Inc-NQO2-5     |
| A_33_P3309526  | 3,88682 | 3,44974 | 1,353861351 | ENST00000442510 | 5788      | NM_002838    | PTPRC          |
| A_23_P304450   | 12,2637 | 11,8267 | 1,353786279 | ENST00000269216 | 2627      | NM_005257    | GATA6          |
| A_23_P137057   | 16,4052 | 15,9682 | 1,353786279 | ENST00000317881 | 292       | NM_001152    | SLC25A5        |
| A_22_P00014573 | 5,81973 | 5,38274 | 1,353776895 | N/A             | 101926987 | NR_109939    | DLGAP4-AS1     |
| A_23_P421032   | 4,83841 | 4,40142 | 1,353776895 | ENST00000320982 | 284904    | NM_174977    | SEC14L4        |
| A_24_P203689   | 7,71813 | 7,28126 | 1,353664296 | ENST00000394412 | 374654    | NM_198525    | KIF7           |
| A_23_P153797   | 4,02426 | 3,58742 | 1,353636148 | ENST00000252575 | 1463      | NM_004386    | NCAN           |
| A_22_P00002994 | 5,49225 | 5,05547 | 1,353579853 | N/A             | N/A       | N/A          | Inc-C6orf221-1 |
| A_33_P3342081  | 6,57996 | 6,14325 | 1,353514178 | ENST00000369096 | 639       | NM_001198    | PRDM1          |
| A_22_P00020866 | 4,60688 | 4,17036 | 1,353335935 | ENST00000561182 | 101928850 | XR_243165    | LOC101928850   |
| A_33_P3315698  | 2,31355 | 1,87721 | 1,353167094 | ENST00000382029 | 145447    | NM_001206673 | ABHD12B        |
| A_33_P3329176  | 3,01952 | 2,58318 | 1,353167094 | ENST00000390436 | N/A       | X70308       | N/A            |
| A_21_P0007826  | 4,25732 | 3,82102 | 1,353129577 | N/A             | N/A       | N/A          | Inc-MGST1-2    |
| A_23_P203645   | 9,36704 | 8,93075 | 1,353120198 | ENST00000527447 | 58487     | NM_001039618 | CREBZF         |
| A_21_P0011210  | 6,36911 | 5,93289 | 1,353054546 | ENST00000444553 | N/A       | N/A          | N/A            |
| A_21_P0013928  | 5,57781 | 5,14159 | 1,353054546 | N/A             | N/A       | N/A          | N/A            |
| A_21_P0009030  | 2,1947  | 1,75848 | 1,353054546 | ENST00000562818 | 388276    | NM_001242473 | C16orf97       |
| A_32_P506600   | 16,6189 | 16,1827 | 1,353035789 | ENST00000392369 | 5901      | NM_006325    | RAN            |
| A_21_P0001606  | 2,9356  | 2,49943 | 1,353007653 | ENST00000451690 | 102724954 | NR_126003    | LINC01032      |
| A_21_P0010224  | 1,9377  | 1,50154 | 1,352998275 | N/A             | N/A       | N/A          | Inc-JAM2-8     |
| A_21_P0013971  | 6,37575 | 5,93963 | 1,352960762 | ENST00000497570 | 79750     | BX104753     | ZNF385D        |
| A_23_P126836   | 4,14601 | 3,7099  | 1,352951385 | ENST00000281834 | 7292      | NM_003326    | TNFSF4         |
| A_24_P315500   | 9,78918 | 9,35308 | 1,352942007 | N/A             | 100130557 | NR_024567    | NFYC-AS1       |
| A_21_P0006253  | 4,97267 | 4,53658 | 1,352932629 | N/A             | N/A       | N/A          | Inc-PTPRD-3    |
| A_23_P55477    | 13,3546 | 12,9186 | 1,352848231 | ENST00000582124 | 136       | NM_000676    | ADORA2B        |
| A_22_P00025951 | 1,93752 | 1,50153 | 1,352838854 | N/A             | N/A       | N/A          | Inc-CSR2BP-1   |
| A_33_P3762733  | 5,91644 | 5,48047 | 1,3528201   | ENST00000262354 | 266917    | NR_040254    | D21S2088E      |
| A_22_P00014779 | 7,1853  | 6,74933 | 1,3528201   | N/A             | N/A       | N/A          | Inc-SLC38A8-1  |



|                |         |         |             |                 |           |              |               |
|----------------|---------|---------|-------------|-----------------|-----------|--------------|---------------|
| A_33_P3420068  | 9,3503  | 8,91438 | 1,352773215 | ENST00000418542 | 51125     | NM_001002296 | GOLGA7        |
| A_33_P3254048  | 2,1434  | 1,70756 | 1,352698204 | N/A             | N/A       | N/A          | N/A           |
| A_23_P412508   | 1,99459 | 1,55897 | 1,352491943 | ENST00000523914 | 255762    | NM_173806    | PDZD9         |
| A_22_P00017037 | 5,47426 | 5,03866 | 1,352473194 | ENST00000413975 | 101927587 | NR_119375    | LOC101927587  |
| A_23_P8269     | 3,95211 | 3,51661 | 1,352379451 | ENST00000275200 | 83551     | NM_053278    | TAAR8         |
| A_23_P205611   | 8,91438 | 8,47889 | 1,352370077 | ENST00000554682 | 2764      | NM_004124    | GMFB          |
| A_21_P0009613  | 3,14211 | 2,70666 | 1,352332582 | N/A             | N/A       | N/A          | Inc-TSHZ1-1   |
| A_22_P00011020 | 4,72967 | 4,29423 | 1,352323208 | N/A             | N/A       | N/A          | Inc-NT5C-2    |
| A_21_P0000206  | 7,35046 | 6,91502 | 1,352323208 | ENST00000497519 | 6083      | NR_000006    | SNORD21       |
| A_22_P00019762 | 3,63291 | 3,19751 | 1,352285714 | ENST00000420404 | N/A       | N/A          | N/A           |
| A_24_P167614   | 10,6234 | 10,188  | 1,352285714 | ENST00000504674 | 26512     | NM_012141    | INTS6         |
| A_21_P0003241  | 5,33453 | 4,89923 | 1,352191984 | N/A             | N/A       | N/A          | Inc-C3orf38-2 |
| A_23_P216556   | 10,508  | 10,0727 | 1,352191984 | ENST00000374557 | 54566     | NM_018424    | EPB41L4B      |
| A_22_P00004443 | 5,4784  | 5,04315 | 1,352145122 | N/A             | N/A       | BU561321     | Inc-COX6C-1   |
| A_21_P0009095  | 2,0807  | 1,64553 | 1,352070145 | ENST00000417476 | 102723536 | XR_424775    | LOC102723536  |
| A_22_P00025365 | 4,41924 | 3,98408 | 1,352060773 | N/A             | N/A       | N/A          | Inc-TUFM-3    |
| A_33_P3397768  | 3,0631  | 2,62802 | 1,351985801 | N/A             | 9701      | AK024148     | PPP6R2        |
| A_21_P0004882  | 2,64934 | 2,21428 | 1,351967059 | N/A             | N/A       | N/A          | Inc-UBR2-2    |
| A_21_P0014360  | 3,37181 | 2,93682 | 1,351901462 | N/A             | 101927057 | XR_243788    | LOC101927057  |
| A_22_P00017078 | 6,09482 | 5,65983 | 1,351901462 | N/A             | N/A       | N/A          | Inc-TUSC5-2   |
| A_21_P0014904  | 7,59463 | 7,15966 | 1,351882721 | N/A             | N/A       | AI686662     | N/A           |
| A_33_P3209209  | 2,22614 | 1,7912  | 1,35185461  | N/A             | N/A       | N/A          | N/A           |
| A_33_P3218955  | 6,58778 | 6,15286 | 1,351835869 | ENST00000611820 | 7403      | NM_001291415 | KDM6A         |
| A_21_P0004309  | 5,06937 | 4,6345  | 1,351789019 | N/A             | N/A       | N/A          | Inc-NDFIP1-2  |
| A_22_P00016953 | 2,27739 | 1,84255 | 1,35176091  | N/A             | N/A       | BX647332     | Inc-TSPYL6-1  |
| A_23_P75310    | 2,13015 | 1,69531 | 1,35176091  | ENST00000417247 | 58504     | NM_021226    | ARHGAP22      |
| A_23_P163278   | 9,4636  | 9,02878 | 1,35174217  | ENST00000261888 | 54956     | NM_017851    | PARP16        |
| A_22_P00002008 | 3,09185 | 2,65705 | 1,351723431 | ENST00000438026 | N/A       | N/A          | N/A           |
| A_19_P00318097 | 2,18826 | 1,75347 | 1,351714062 | ENST00000485404 | 201617    | N/A          | LINC00870     |
| A_33_P3847514  | 8,89668 | 8,46194 | 1,351667216 | ENST00000415078 | 135398    | NM_001145652 | C6orf141      |
| A_22_P00002826 | 3,64212 | 3,20739 | 1,351657847 | N/A             | N/A       | N/A          | Inc-C2orf69-3 |
| A_22_P00006179 | 5,59368 | 5,15898 | 1,35162974  | ENST00000479592 | 100507642 | NR_108065    | LOC100507642  |
| A_22_P00019043 | 3,21621 | 2,78153 | 1,351611003 | N/A             | N/A       | N/A          | Inc-TTC8-1    |

|                |         |         |             |                 |           |           |                      |
|----------------|---------|---------|-------------|-----------------|-----------|-----------|----------------------|
| A_23_P168329   | 2,62915 | 2,19449 | 1,351592266 | ENST00000259782 | 27283     | NM_014464 | TINAG                |
| A_33_P3452003  | 5,90043 | 5,46585 | 1,35151732  | N/A             | 143286    | AL049428  | LOC143286            |
| A_22_P00007461 | 8,2977  | 7,86316 | 1,351479848 | N/A             | N/A       | BP394394  | Inc-GTF2A2-2         |
| A_33_P3252281  | 6,17251 | 5,73803 | 1,351423643 | ENST00000355167 | 2070      | NM_004100 | EYA4                 |
| A_22_P00018223 | 1,95085 | 1,51639 | 1,351404908 | N/A             | N/A       | N/A       | Inc-ZNF675-1         |
| A_21_P0013188  | 2,22771 | 1,79329 | 1,35136744  | N/A             | N/A       | N/A       | XLOC_I2_013328       |
| A_33_P3394203  | 5,96505 | 5,53072 | 1,35128314  | ENST00000372417 | 25844     | N/A       | YIPF3                |
| A_24_P302249   | 1,9861  | 1,55177 | 1,35128314  | ENST00000463273 | 336       | NM_001643 | APOA2                |
| A_23_P41908    | 6,43445 | 6,00019 | 1,351217577 | ENST00000522858 | 10827     | NM_018691 | FAM114A2             |
| A_22_P00001916 | 6,33487 | 5,90066 | 1,351170748 | ENST00000574472 | N/A       | BG475240  | N/A                  |
| A_21_P0007088  | 5,96048 | 5,52637 | 1,351077095 | N/A             | N/A       | N/A       | Inc-C10orf137-1      |
| A_22_P00015030 | 4,81598 | 4,38188 | 1,35106773  | N/A             | 100874364 | NR_047505 | HOXC-AS2             |
| A_23_P23924    | 16,0751 | 15,641  | 1,35106773  | ENST00000433674 | 824       | NM_001748 | CAPN2                |
| A_33_P3275412  | 2,96683 | 2,53274 | 1,351058365 | N/A             | 574406    | AK127688  | ADAMTSL4-AS1         |
| A_21_P0002363  | 2,91761 | 2,48373 | 1,350861718 | N/A             | N/A       | N/A       | Inc-CCDC140-2        |
| A_23_P348028   | 3,01635 | 2,58253 | 1,350805539 | ENST00000259211 | 27179     | NM_014440 | IL36A                |
| A_21_P0009530  | 2,79008 | 2,35628 | 1,350786813 | N/A             | N/A       | N/A       | Inc-RP11-67704.1.1-2 |
| A_23_P52336    | 12,2307 | 11,7969 | 1,350786813 | ENST00000335350 | 219699    | NM_170744 | UNC5B                |
| A_33_P3322075  | 5,65552 | 5,22173 | 1,35077745  | N/A             | N/A       | AK055942  | N/A                  |
| A_22_P00002300 | 2,78803 | 2,35428 | 1,350739999 | ENST00000541891 | 26070     | AL117582  | DKFZP434K028         |
| A_23_P98232    | 10,0462 | 9,61248 | 1,350711911 | ENST00000526334 | 7542      | NM_006782 | ZFPL1                |
| A_21_P0011359  | 10,2159 | 9,78218 | 1,350711911 | ENST00000568033 | N/A       | XR_248093 | N/A                  |
| A_21_P0003175  | 3,52134 | 3,08781 | 1,350534037 | N/A             | N/A       | N/A       | Inc-TMCC1-4          |
| A_23_P126593   | 16,1026 | 15,6692 | 1,350412347 | ENST00000271638 | 6282      | NM_005620 | S100A11              |
| A_19_P00317504 | 4,59299 | 4,15961 | 1,350393626 | ENST00000382641 | N/A       | N/A       | N/A                  |
| A_33_P3377649  | 7,70167 | 7,26831 | 1,350374906 | ENST00000470870 | 10279     | NM_005865 | PRSS16               |
| A_22_P00023098 | 5,23287 | 4,79955 | 1,350337466 | ENST00000422638 | N/A       | N/A       | N/A                  |
| A_33_P3242416  | 5,62871 | 5,1954  | 1,350328107 | N/A             | N/A       | N/A       | N/A                  |
| A_21_P0011283  | 2,03999 | 1,60669 | 1,350318747 | ENST00000557440 | 283547    | NR_039982 | LINC00639            |
| A_21_P0004480  | 4,33576 | 3,90266 | 1,350131566 | N/A             | N/A       | N/A       | Inc-TRIM7-3          |
| A_21_P0006294  | 3,34117 | 2,90827 | 1,349944411 | N/A             | N/A       | N/A       | Inc-AUH-2            |
| A_24_P944964   | 2,06771 | 1,63484 | 1,34991634  | ENST00000401815 | 2814      | NM_004488 | GP5                  |
| A_19_P00322898 | 5,76054 | 5,3278  | 1,349794706 | ENST00000448692 | 340591    | NR_026551 | CA5BP1               |

|                |         |         |             |                 |           |              |                |
|----------------|---------|---------|-------------|-----------------|-----------|--------------|----------------|
| A_23_P21776    | 10,6949 | 10,2622 | 1,349757282 | ENST00000316634 | 10302     | AK292051     | SNAPC5         |
| A_23_P130531   | 12,5291 | 12,0965 | 1,349663727 | ENST00000588869 | 11140     | NM_007065    | CDC37          |
| A_23_P91814    | 9,49858 | 9,06602 | 1,349626307 | ENST00000273158 | 54977     | NM_017875    | SLC25A38       |
| A_22_P00013505 | 3,48611 | 3,05369 | 1,349495345 | ENST00000539653 | 100507065 | NR_120433    | LOC100507065   |
| A_19_P00319633 | 7,1733  | 6,74091 | 1,349467283 | N/A             | 100294145 | NR_037178    | LOC100294145   |
| A_22_P00012255 | 7,59867 | 7,16644 | 1,349317631 | N/A             | N/A       | N/A          | lnc-PPP1R14D-1 |
| A_33_P3296789  | 8,53193 | 8,09975 | 1,349270868 | ENST00000486704 | 55869     | NM_001166422 | HDAC8          |
| A_23_P15829    | 9,08274 | 8,65059 | 1,349242811 | ENST00000584582 | 7156      | NM_004618    | TOP3A          |
| A_22_P00018147 | 1,91232 | 1,48021 | 1,349205402 | ENST00000582231 | 101927651 | NR_110784    | LOC101927651   |
| A_21_P0012994  | 3,45839 | 3,02629 | 1,34919605  | N/A             | N/A       | N/A          | XLOC_I2_012082 |
| A_33_P3401846  | 2,78608 | 2,35414 | 1,349046428 | N/A             | N/A       | N/A          | N/A            |
| A_21_P0006268  | 5,62138 | 5,18951 | 1,348980973 | N/A             | N/A       | N/A          | lnc-FAM75A6-1  |
| A_21_P0011241  | 4,24314 | 3,81127 | 1,348980973 | N/A             | N/A       | N/A          | XLOC_I2_004180 |
| A_24_P237586   | 8,27285 | 7,84101 | 1,348952922 | ENST00000335174 | 353322    | NM_181726    | ANKRD37        |
| A_33_P3405754  | 7,4258  | 6,994   | 1,348915522 | ENST00000378223 | 9731      | BC050721     | CEP104         |
| A_21_P0007176  | 7,39033 | 6,95874 | 1,348719187 | N/A             | N/A       | N/A          | lnc-CTR9-5     |
| A_33_P3399778  | 5,06669 | 4,63511 | 1,348709838 | N/A             | N/A       | N/A          | N/A            |
| A_21_P0008990  | 2,25813 | 1,82655 | 1,348709838 | N/A             | N/A       | N/A          | lnc-MAP1LC3B-4 |
| A_33_P3346292  | 6,06416 | 5,63259 | 1,34870049  | ENST00000379225 | 55833     | AY358682     | UBAP2          |
| A_22_P00014386 | 4,56218 | 4,13062 | 1,348691141 | N/A             | N/A       | N/A          | lnc-SFI1-1     |
| A_24_P65864    | 11,1086 | 10,6771 | 1,348635052 | ENST00000470376 | 55968     | NM_016143    | NSFL1C         |
| A_23_P128940   | 9,5834  | 9,15194 | 1,34859766  | ENST00000484763 | 79609     | NM_024558    | VCPKMT         |
| A_33_P3393412  | 4,72037 | 4,28893 | 1,348578965 | ENST00000399676 | 439915    | NM_001001480 | KRTAP5-5       |
| A_24_P212860   | 7,54356 | 7,11214 | 1,34856027  | ENST00000478126 | 51531     | NM_016481    | C9orf156       |
| A_32_P99019    | 2,00765 | 1,57626 | 1,348532228 | ENST00000489034 | 158521    | NM_152578    | FMR1NB         |
| A_33_P3417670  | 4,12643 | 3,69512 | 1,348457451 | ENST00000339868 | 9187      | NM_004727    | SLC24A1        |
| A_33_P3367795  | 7,7837  | 7,35253 | 1,348326602 | ENST00000380381 | 6194      | N/A          | RPS6           |
| A_33_P3315733  | 7,36807 | 6,93705 | 1,348186421 | N/A             | 7109      | BC046241     | TRAPPC10       |
| A_19_P00316344 | 8,91498 | 8,48398 | 1,348167732 | N/A             | N/A       | N/A          | lnc-C9orf69-2  |
| A_33_P3331776  | 6,0996  | 5,66867 | 1,34810232  | N/A             | N/A       | N/A          | N/A            |
| A_22_P00004519 | 2,34464 | 1,91372 | 1,348092976 | N/A             | N/A       | N/A          | lnc-CR2-1      |
| A_22_P00019526 | 5,07973 | 4,64894 | 1,347971505 | ENST00000424177 | N/A       | N/A          | N/A            |
| A_32_P40377    | 11,3538 | 10,9231 | 1,347887417 | ENST00000471090 | 389906    | NR_034031    | LOC389906      |

|                |         |         |             |                 |           |              |                |
|----------------|---------|---------|-------------|-----------------|-----------|--------------|----------------|
| A_33_P3322909  | 9,79377 | 9,36308 | 1,347878074 | ENST00000375440 | 8451      | NM_001278513 | CUL4A          |
| A_33_P3299122  | 1,92547 | 1,49484 | 1,347822019 | ENST00000402929 | 6927      | X71347       | HNF1A          |
| A_21_P0006129  | 1,99913 | 1,5685  | 1,347822019 | N/A             | N/A       | N/A          | Inc-DMRTA1-6   |
| A_23_P16189    | 3,0865  | 2,65591 | 1,34778465  | ENST00000263431 | 5582      | NM_002739    | PRKCG          |
| A_24_P59111    | 2,53368 | 2,10313 | 1,347747282 | ENST00000619756 | 1804      | NM_001290253 | DPP6           |
| A_22_P00022083 | 2,30846 | 1,87792 | 1,34773794  | N/A             | N/A       | AW962513     | Inc-ARCN1-1    |
| A_23_P49459    | 7,00612 | 6,57559 | 1,347728598 | ENST00000564274 | 81691     | NM_030941    | LOC81691       |
| A_21_P0010923  | 2,04058 | 1,61005 | 1,347728598 | ENST00000450677 | N/A       | N/A          | N/A            |
| A_24_P64393    | 7,99946 | 7,56898 | 1,34768189  | ENST00000358935 | 54708     | NM_017824    | mar-05         |
| A_22_P00016713 | 3,7716  | 3,34117 | 1,347635184 | N/A             | N/A       | BC035759     | Inc-TRAP1-1    |
| A_21_P0005714  | 9,07415 | 8,64375 | 1,347607161 | N/A             | N/A       | N/A          | Inc-C8orf34-1  |
| A_23_P205778   | 9,23573 | 8,80535 | 1,347588479 | ENST00000559348 | 10681     | NM_016194    | GNB5           |
| A_21_P0013225  | 7,10532 | 6,67498 | 1,347551117 | N/A             | N/A       | N/A          | XL0C_I2_013458 |
| A_22_P00002041 | 7,5668  | 7,13651 | 1,347504415 | N/A             | N/A       | N/A          | Inc-BHLHE41-2  |
| A_24_P31235    | 11,8336 | 11,4034 | 1,347420356 | ENST00000573714 | 1984      | NM_001970    | EIF5A          |
| A_23_P126605   | 5,85239 | 5,4222  | 1,347411016 | ENST00000463543 | 29765     | NM_013353    | TMOD4          |
| A_33_P3389018  | 4,50275 | 4,07261 | 1,34736432  | ENST00000536946 | 390649    | NM_001001674 | OR4F15         |
| A_23_P108761   | 10,2548 | 9,82467 | 1,34735498  | ENST00000289382 | 55571     | NM_017546    | CNOT11         |
| A_23_P121196   | 11,0561 | 10,626  | 1,347326963 | ENST00000306077 | 79188     | NM_024334    | TMEM43         |
| A_21_P0011896  | 2,86643 | 2,43636 | 1,347298947 | ENST00000451070 | 102723927 | XR_425551    | LOC102723927   |
| A_33_P3342469  | 3,52226 | 3,09221 | 1,347280269 | ENST00000321252 | 219874    | NM_001005187 | OR6T1          |
| A_23_P60537    | 11,7858 | 11,3558 | 1,347233577 | ENST00000374198 | 9128      | NM_004697    | PRPF4          |
| A_23_P164999   | 11,4905 | 11,0606 | 1,347140197 | ENST00000606400 | 997       | NM_004359    | CDC34          |
| A_19_P00316035 | 3,61214 | 3,18228 | 1,347102847 | ENST00000591549 | 101927151 | XR_243976    | LOC101927151   |
| A_33_P3391387  | 5,87427 | 5,44446 | 1,347056161 | N/A             | 100268168 | NR_026682    | LOC100268168   |
| A_32_P182662   | 7,70489 | 7,27508 | 1,347056161 | ENST00000495670 | 64853     | NM_022831    | AIDA           |
| A_22_P00019699 | 3,18992 | 2,7602  | 1,34697213  | ENST00000433893 | 101929542 | XR_244985    | LOC101929542   |
| A_23_P147397   | 8,94537 | 8,51567 | 1,346953457 | ENST00000398093 | 79659     | NM_001080463 | DYNC2H1        |
| A_24_P14731    | 9,6822  | 9,25251 | 1,34694412  | ENST00000218230 | 27344     | NM_013271    | PCSK1N         |
| A_23_P39024    | 9,62272 | 9,19311 | 1,346869432 | ENST00000552700 | 84292     | NM_032332    | WDR83          |
| A_33_P3292417  | 13,5487 | 13,1191 | 1,346860096 | ENST00000358625 | 11091     | NM_017588    | WDR5           |
| A_24_P769359   | 10,9088 | 10,4792 | 1,346860096 | ENST00000535572 | 65125     | NM_001184985 | WNK1           |
| A_23_P74290    | 5,57471 | 5,14516 | 1,346813418 | ENST00000490568 | 115362    | NM_052942    | GBP5           |

|                |         |         |             |                 |           |              |                    |
|----------------|---------|---------|-------------|-----------------|-----------|--------------|--------------------|
| A_23_P121527   | 10,7235 | 10,294  | 1,346766742 | ENST00000261426 | 51088     | NM_015990    | KLHL5              |
| A_23_P255298   | 2,23531 | 1,80583 | 1,346748072 | ENST00000441594 | 57467     | NM_020707    | HHATL              |
| A_33_P3324949  | 5,48913 | 5,05972 | 1,346682729 | N/A             | 646600    | AK057462     | IGF2BP2-AS1        |
| A_33_P3247190  | 8,85601 | 8,42662 | 1,34666406  | ENST00000491136 | 200014    | NM_032449    | CC2D1B             |
| A_32_P103669   | 4,13101 | 3,70168 | 1,346608055 | ENST00000612805 | 653641    | NM_001164404 | GOLGA6C            |
| A_23_P7099     | 9,91247 | 9,48325 | 1,346505385 | ENST00000264595 | 175       | NM_000027    | AGA                |
| A_33_P3709173  | 2,35844 | 1,92922 | 1,346505385 | N/A             | 57157     | NM_001127360 | PHTF2              |
| A_21_P0008567  | 4,59682 | 4,16764 | 1,346468053 | ENST00000450324 | N/A       | N/A          | N/A                |
| A_32_P170444   | 10,1901 | 9,76095 | 1,346440054 | ENST00000265073 | 10923     | NM_006713    | SUB1               |
| A_21_P0008820  | 3,24503 | 2,81594 | 1,346384058 | N/A             | N/A       | N/A          | Inc-GOLGA8J-1      |
| A_22_P00021185 | 6,40315 | 5,97409 | 1,346356061 | N/A             | N/A       | N/A          | Inc-RFC5-1         |
| A_24_P588897   | 9,04001 | 8,61095 | 1,346356061 | ENST00000318445 | 28232     | NM_013272    | SLCO3A1            |
| A_23_P500873   | 7,73574 | 7,30672 | 1,346318733 | ENST00000587977 | 5892      | NM_133629    | RAD51D             |
| A_21_P0008383  | 1,97283 | 1,54392 | 1,346216085 | N/A             | N/A       | N/A          | Inc-VRK1-5         |
| A_23_P57059    | 13,6974 | 13,2685 | 1,346206754 | ENST00000340954 | 6780      | NM_017453    | STAU1              |
| A_33_P3297642  | 11,2685 | 10,8396 | 1,346206754 | ENST00000369172 | 63877     | NM_022063    | FAM204A            |
| A_21_P0004246  | 4,52632 | 4,09756 | 1,346076124 | N/A             | N/A       | N/A          | Inc-AC114947.1.1-2 |
| A_22_P00001780 | 2,04784 | 1,61911 | 1,346048133 | N/A             | N/A       | N/A          | Inc-ATP2A1-1       |
| A_22_P00018869 | 2,14256 | 1,71385 | 1,346029473 | N/A             | 101928943 | NR_120568    | LOC101928943       |
| A_33_P3420841  | 6,11582 | 5,68712 | 1,346020143 | ENST00000402116 | 8664      | N/A          | EIF3D              |
| A_33_P3424067  | 5,99135 | 5,56273 | 1,345945506 | ENST00000615954 | 51111     | NM_001300907 | SUV420H1           |
| A_23_P171107   | 3,78708 | 3,35868 | 1,345740275 | ENST00000376042 | 85417     | NM_033031    | CCNB3              |
| A_33_P3236591  | 9,33856 | 8,9102  | 1,345702964 | ENST00000602705 | 146206    | NM_001013838 | RLTPR              |
| A_19_P00802713 | 5,6949  | 5,26659 | 1,345656326 | N/A             | 101929580 | XR_242288    | LOC101929580       |
| A_33_P3401301  | 16,3712 | 15,9429 | 1,345646999 | ENST00000460281 | 6170      | NM_001000    | RPL39              |
| A_23_P10980    | 4,53247 | 4,10417 | 1,345646999 | ENST00000545650 | 23284     | NM_015236    | LPHN3              |
| A_23_P124486   | 8,23612 | 7,80783 | 1,345637672 | ENST00000306726 | 5780      | NM_002833    | PTPN9              |
| A_22_P00015947 | 4,14892 | 3,72067 | 1,345600363 | ENST00000455894 | 101926930 | NR_047003    | LINC00378          |
| A_33_P3406110  | 3,99519 | 3,56694 | 1,345600363 | N/A             | N/A       | N/A          | N/A                |
| A_23_P357351   | 8,63028 | 8,20211 | 1,345525749 | ENST00000550213 | 255027    | NM_173803    | MPV17L             |
| A_21_P0009510  | 2,49884 | 2,07069 | 1,345507096 | N/A             | N/A       | N/A          | Inc-KCNG2-1        |
| A_33_P3345051  | 5,05226 | 4,62416 | 1,345460466 | ENST00000610896 | 100507003 | NM_001195256 | GFY                |
| A_33_P3237250  | 3,85778 | 3,42969 | 1,34545114  | ENST00000339615 | 440307    | NR_104604    | TTLL13P            |

|                |         |         |             |                 |           |              |                |
|----------------|---------|---------|-------------|-----------------|-----------|--------------|----------------|
| A_33_P3232508  | 11,9053 | 11,4774 | 1,345273958 | ENST00000618915 | 6598      | NM_003073    | SMARCB1        |
| A_19_P00316533 | 8,02338 | 7,59548 | 1,345273958 | ENST00000613961 | 10904     | N/A          | BLCAP          |
| A_21_P0014374  | 2,546   | 2,11824 | 1,345143418 | N/A             | N/A       | N/A          | N/A            |
| A_23_P435833   | 7,72539 | 7,29768 | 1,3450968   | ENST00000487406 | 8939      | NM_003934    | FUBP3          |
| A_22_P00003351 | 3,6172  | 3,18954 | 1,345050183 | ENST00000484698 | 100302640 | N/A          | LINC00882      |
| A_33_P3218694  | 7,90642 | 7,47882 | 1,344994245 | ENST00000216832 | 5411      | NM_002687    | PNN            |
| A_23_P63067    | 15,1544 | 14,7269 | 1,344901021 | ENST00000471642 | 7818      | NM_033657    | DAP3           |
| A_33_P3293675  | 3,22308 | 2,79561 | 1,344873054 | ENST00000611005 | 10723     | NM_006598    | SLC12A7        |
| A_21_P0002867  | 2,11459 | 1,68719 | 1,344807802 | ENST00000487772 | N/A       | N/A          | N/A            |
| A_23_P144827   | 2,62722 | 2,1999  | 1,344733232 | ENST00000504595 | 23194     | NM_012304    | FBXL7          |
| A_33_P3313258  | 10,1734 | 9,74611 | 1,34470527  | ENST00000378736 | 83858     | NM_031921    | ATAD3B         |
| A_21_P0006972  | 1,9682  | 1,54094 | 1,344677308 | N/A             | N/A       | N/A          | Inc-C10orf31-6 |
| A_23_P100730   | 6,6436  | 6,21635 | 1,344667987 | ENST00000579476 | 8631      | NM_003726    | SKAP1          |
| A_33_P3269899  | 1,96591 | 1,53871 | 1,344621385 | ENST00000475774 | 8434      | NM_021111    | RECK           |
| A_23_P139396   | 14,0734 | 13,6462 | 1,344621385 | ENST00000532270 | 51501     | NM_016401    | C11orf73       |
| A_23_P104318   | 15,6626 | 15,2354 | 1,344621385 | ENST00000307365 | 54541     | NM_019058    | DDIT4          |
| A_24_P254705   | 5,80916 | 5,382   | 1,344584105 | ENST00000491337 | 57116     | NM_020394    | ZNF695         |
| A_23_P342108   | 4,80639 | 4,37936 | 1,344462951 | ENST00000292779 | 164592    | NM_152612    | CCDC116        |
| A_21_P0010297  | 2,11262 | 1,68565 | 1,344407038 | N/A             | N/A       | N/A          | Inc-ICOSLG-5   |
| A_22_P00012344 | 3,26485 | 2,83793 | 1,344360445 | ENST00000618339 | N/A       | N/A          | N/A            |
| A_33_P3221341  | 4,33319 | 3,90643 | 1,344211359 | ENST00000371681 | 143279    | NM_173497    | HECTD2         |
| A_32_P213661   | 8,56167 | 8,13497 | 1,344155456 | ENST00000470137 | 160857    | NM_144974    | CCDC122        |
| A_33_P3215768  | 10,8889 | 10,4622 | 1,344155456 | ENST00000543196 | 11226     | NM_007210    | GALNT6         |
| A_33_P3341985  | 2,0043  | 1,5776  | 1,344155456 | ENST00000321844 | 100506127 | NM_001282456 | LOC100506127   |
| A_23_P368195   | 4,62824 | 4,20157 | 1,344127505 | ENST00000286307 | 134353    | NM_173491    | LSM11          |
| A_23_P215449   | 11,3323 | 10,9057 | 1,344062289 | ENST00000339594 | 9031      | NM_032408    | BAZ1B          |
| A_23_P98605    | 15,5446 | 15,118  | 1,344062289 | ENST00000525717 | 51035     | NM_015853    | UBXN1          |
| A_33_P3292148  | 2,26514 | 1,83855 | 1,344052973 | N/A             | 729224    | XR_159398    | LOC729224      |
| A_22_P00003299 | 3,66542 | 3,23885 | 1,344034341 | ENST00000568695 | 101929224 | NR_110787    | LOC101929224   |
| A_21_P0001344  | 4,2442  | 3,81763 | 1,344034341 | N/A             | N/A       | N/A          | Inc-SLC44A3-2  |
| A_33_P3423954  | 5,12274 | 4,69632 | 1,343894606 | ENST00000269399 | 84733     | NM_032647    | CBX2           |
| A_22_P00003303 | 4,02589 | 3,59951 | 1,343857346 | N/A             | N/A       | N/A          | Inc-CAND2-1    |
| A_33_P3318624  | 5,1991  | 4,77278 | 1,343801457 | ENST00000530930 | 1488      | NM_001290214 | CTBP2          |

|                |         |         |             |                 |           |              |                |
|----------------|---------|---------|-------------|-----------------|-----------|--------------|----------------|
| A_33_P3221384  | 4,99912 | 4,57282 | 1,343782828 | N/A             | N/A       | N/A          | N/A            |
| A_23_P98057    | 9,01627 | 8,59007 | 1,343689688 | ENST00000395797 | 7580      | NM_001005368 | ZNF32          |
| A_21_P0014146  | 5,89844 | 5,47224 | 1,343689688 | N/A             | N/A       | AW274973     | Inc-RASA1-5    |
| A_21_P0000274  | 7,77314 | 7,34696 | 1,34367106  | ENST00000503170 | 619570    | NR_002591    | SNORD95        |
| A_23_P383601   | 7,62479 | 7,19889 | 1,343410304 | N/A             | 379025    | NR_029434    | PSMA3-AS1      |
| A_24_P357536   | 7,94917 | 7,52333 | 1,343354435 | ENST00000480038 | 80204     | NM_001190274 | FBXO11         |
| A_23_P256526   | 1,94874 | 1,52295 | 1,343307878 | ENST00000619534 | 7634      | NM_007136    | ZNF80          |
| A_23_P345361   | 9,63246 | 9,20669 | 1,343289256 | ENST00000619301 | 147339    | NM_145055    | C18orf25       |
| A_22_P00007546 | 2,03268 | 1,60693 | 1,343270634 | ENST00000457683 | N/A       | N/A          | N/A            |
| A_21_P0000272  | 4,78199 | 4,35625 | 1,343261324 | N/A             | 26798     | NR_002589    | SNORD51        |
| A_23_P212241   | 2,03544 | 1,60973 | 1,343233392 | ENST00000620033 | 10752     | NM_006614    | CHL1           |
| A_21_P0010689  | 4,14553 | 3,71998 | 1,343084431 | N/A             | N/A       | N/A          | XLOC_I2_000018 |
| A_23_P103877   | 2,18236 | 1,75683 | 1,343065812 | ENST00000376085 | 126755    | NM_001010847 | LRRC38         |
| A_33_P3357580  | 11,6825 | 11,2571 | 1,342944795 | ENST00000330263 | 51154     | NM_016183    | MRTO4          |
| A_21_P0008023  | 2,18202 | 1,75668 | 1,342888944 | N/A             | N/A       | N/A          | Inc-RASA3-1    |
| A_22_P00019171 | 2,85349 | 2,42818 | 1,34286102  | N/A             | N/A       | AK057158     | Inc-ENY2-1     |
| A_24_P926684   | 4,57497 | 4,1497  | 1,342823788 | ENST00000503418 | 7323      | AF116686     | UBE2D3         |
| A_33_P3287731  | 3,31535 | 2,89011 | 1,342795865 | N/A             | 23522     | AA626923     | KAT6B          |
| A_22_P00015116 | 1,94948 | 1,52424 | 1,342795865 | N/A             | N/A       | N/A          | Inc-SNX19-1    |
| A_22_P00022830 | 4,96064 | 4,53553 | 1,342674873 | N/A             | N/A       | N/A          | Inc-ROPN1B-1   |
| A_19_P00805076 | 5,42891 | 5,00383 | 1,342646953 | N/A             | 102724030 | XR_424361    | LOC102724030   |
| A_33_P3280106  | 3,67972 | 3,25466 | 1,34262834  | ENST00000277549 | 774       | NM_001243812 | CACNA1B        |
| A_24_P684186   | 10,791  | 10,366  | 1,342572503 | ENST00000622787 | 133418    | NM_198449    | EMB            |
| A_22_P00022869 | 1,94027 | 1,51536 | 1,342488751 | ENST00000418246 | 9491      | N/A          | PSMF1          |
| A_33_P3305173  | 6,85275 | 6,42789 | 1,342442225 | ENST00000479991 | 340526    | NM_001024455 | RGAG4          |
| A_23_P347508   | 10,8696 | 10,4448 | 1,342386396 | ENST00000371538 | 65260     | NM_023077    | COA7           |
| A_24_P211709   | 3,52652 | 3,10175 | 1,342358482 | ENST00000371106 | 7512      | NM_003399    | XPNPPE2        |
| A_22_P00001794 | 2,31498 | 1,89022 | 1,342349177 | N/A             | N/A       | N/A          | Inc-ATP6AP1L-1 |
| A_22_P00022871 | 5,22759 | 4,80286 | 1,342321264 | ENST00000533793 | 101928894 | NR_120565    | LOC101928894   |
| A_23_P115124   | 10,0656 | 9,64095 | 1,342246832 | ENST00000284551 | 81559     | NM_145214    | TRIM11         |
| A_22_P00016324 | 4,3803  | 3,95566 | 1,342237528 | N/A             | 101929911 | XR_251682    | LOC101929911   |
| A_21_P0010992  | 1,98218 | 1,55754 | 1,342237528 | N/A             | N/A       | N/A          | XLOC_I2_002433 |
| A_22_P00020072 | 6,58623 | 6,1616  | 1,342228225 | N/A             | N/A       | AV707226     | Inc-BAG3-1     |

|                |         |         |             |                 |           |              |                |
|----------------|---------|---------|-------------|-----------------|-----------|--------------|----------------|
| A_33_P6570838  | 9,05388 | 8,62932 | 1,342163101 | ENST00000287594 | 255027    | AF075063     | MPV17L         |
| A_21_P0008722  | 7,86096 | 7,43656 | 1,342014259 | N/A             | N/A       | N/A          | Inc-RASGRP1-5  |
| A_22_P00009725 | 1,95755 | 1,53317 | 1,341995655 | ENST00000555255 | 101927129 | NR_120323    | LINC01580      |
| A_32_P49867    | 3,90097 | 3,4766  | 1,341986353 | ENST00000622710 | 100507055 | NM_001195520 | LRCOL1         |
| A_33_P3766635  | 2,05772 | 1,63338 | 1,341958447 | ENST00000318666 | N/A       | AB529246     | N/A            |
| A_22_P00006928 | 4,01958 | 3,59529 | 1,341911939 | ENST00000569373 | N/A       | BC037164     | N/A            |
| A_21_P0012650  | 3,00613 | 2,58194 | 1,341818928 | N/A             | N/A       | N/A          | XLOC_I2_011027 |
| A_24_P197537   | 5,64389 | 5,21971 | 1,341809627 | ENST00000340978 | 8622      | NM_003719    | PDE8B          |
| A_33_P3273424  | 4,03769 | 3,61357 | 1,341753824 | ENST00000490291 | 54884     | N/A          | RETSAT         |
| A_22_P00003163 | 4,41046 | 3,98634 | 1,341753824 | N/A             | N/A       | N/A          | Inc-C9orf53-1  |
| A_23_P90099    | 15,4036 | 14,9796 | 1,341642225 | ENST00000588560 | 374882    | NM_198536    | TMEM205        |
| A_21_P0008448  | 6,75405 | 6,33005 | 1,341642225 | N/A             | 101927856 | XR_245773    | LOC101927856   |
| A_33_P3214179  | 6,27636 | 5,85239 | 1,341614327 | N/A             | N/A       | N/A          | N/A            |
| A_23_P23611    | 6,01763 | 5,59368 | 1,341595728 | ENST00000494409 | 278       | NM_001008219 | AMY1C          |
| A_22_P00009460 | 4,19872 | 3,77481 | 1,341558531 | N/A             | N/A       | N/A          | Inc-MAEA-1     |
| A_33_P3369964  | 5,11986 | 4,69606 | 1,341456247 | ENST00000569119 | 342371    | N/A          | ATXN1L         |
| A_21_P0002506  | 3,99424 | 3,57045 | 1,341446948 | N/A             | N/A       | N/A          | Inc-TMEM163-1  |
| A_21_P0010943  | 7,26905 | 6,84532 | 1,341391116 | ENST00000444438 | N/A       | XM_005269836 | N/A            |
| A_33_P3396270  | 8,52391 | 8,10019 | 1,341381863 | ENST00000223073 | 389015    | NM_001011552 | SLC9A4         |
| A_24_P100351   | 13,0709 | 12,6472 | 1,341363267 | N/A             | 54552     | NM_019067    | GNL3L          |
| A_22_P00013099 | 4,73235 | 4,30877 | 1,3412517   | ENST00000502221 | 101927710 | XR_247890    | LOC101927710   |
| A_33_P3398897  | 10,0885 | 9,66492 | 1,3412517   | ENST00000281243 | 5860      | NM_000320    | QDPR           |
| A_23_P15832    | 2,19485 | 1,77131 | 1,341214514 | ENST00000575751 | 8386      | NM_014566    | OR1D5          |
| A_33_P3295358  | 9,94418 | 9,52064 | 1,341214514 | ENST00000301455 | 51129     | NM_139314    | ANGPTL4        |
| A_33_P3322499  | 4,76387 | 4,34058 | 1,340982119 | ENST00000344893 | 401898    | NR_028594    | ZNF833P        |
| A_23_P30995    | 10,0342 | 9,61099 | 1,340907761 | ENST00000369681 | 51167     | NM_016230    | CYB5R4         |
| A_33_P3385993  | 3,96832 | 3,54514 | 1,340879878 | ENST00000375934 | 164395    | NM_001008409 | TTLL9          |
| A_22_P00007762 | 2,10195 | 1,67894 | 1,340721885 | N/A             | N/A       | N/A          | Inc-HMOX1-1    |
| A_21_P0007638  | 5,89337 | 5,47039 | 1,340694005 | ENST00000547114 | N/A       | N/A          | N/A            |
| A_33_P3423202  | 3,40724 | 2,98432 | 1,340638249 | N/A             | N/A       | N/A          | N/A            |
| A_33_P3244083  | 8,66299 | 8,2401  | 1,340610371 | ENST00000523968 | 23303     | NM_015254    | KIF13B         |
| A_33_P3272075  | 4,28113 | 3,85825 | 1,340601079 | ENST00000234961 | 4985      | NM_000911    | OPRD1          |
| A_23_P6914     | 9,89666 | 9,47392 | 1,340470992 | ENST00000296220 | 114885    | NM_022776    | OSBPL11        |



|                |         |         |             |                 |           |              |                    |
|----------------|---------|---------|-------------|-----------------|-----------|--------------|--------------------|
| A_22_P00010228 | 2,53408 | 2,11144 | 1,340378081 | ENST00000502684 | N/A       | N/A          | N/A                |
| A_32_P204381   | 11,018  | 10,5954 | 1,340340919 | ENST00000567518 | 57019     | NM_020313    | CIAPIN1            |
| A_23_P173      | 4,12894 | 3,70634 | 1,340340919 | ENST00000368078 | 844       | NM_001231    | CASQ1              |
| A_21_P0003242  | 5,04815 | 4,62558 | 1,340313047 | N/A             | N/A       | N/A          | Inc-EPHA6-1        |
| A_33_P3271410  | 6,69945 | 6,27694 | 1,340257306 | ENST00000302236 | 79725     | NM_024672    | THAP9              |
| A_23_P112801   | 14,7335 | 14,311  | 1,340248017 | ENST00000334660 | 11261     | NM_007236    | CHP1               |
| A_33_P3259028  | 5,60641 | 5,18392 | 1,340238727 | ENST00000343526 | 8805      | AK127592     | TRIM24             |
| A_21_P0006388  | 3,61663 | 3,19424 | 1,340145832 | ENST00000603487 | 101928550 | NR_121580    | SMC2-AS1           |
| A_23_P76690    | 13,1242 | 12,7019 | 1,340062232 | ENST00000606347 | 7347      | NM_006002    | UCHL3              |
| A_23_P127475   | 10,8342 | 10,4119 | 1,340062232 | ENST00000530384 | 9973      | NM_005125    | CCS                |
| A_24_P38815    | 11,0222 | 10,5999 | 1,340062232 | ENST00000299427 | 1200      | NM_000391    | TPP1               |
| A_33_P3831730  | 7,45817 | 7,03588 | 1,340052943 | N/A             | N/A       | N/A          | Inc-NDUFA4-2       |
| A_33_P3217689  | 9,97786 | 9,5556  | 1,340025078 | ENST00000396137 | 133746    | NM_152405    | JMY                |
| A_22_P00005062 | 2,8343  | 2,41209 | 1,339978637 | ENST00000522882 | N/A       | DA411236     | N/A                |
| A_23_P250002   | 8,23941 | 7,81722 | 1,339960061 | ENST00000416605 | 57531     | NM_020771    | HACE1              |
| A_23_P403521   | 9,47139 | 9,0492  | 1,339960061 | ENST00000485025 | 57002     | NM_020192    | YAE1D1             |
| A_21_P0010736  | 4,3058  | 3,88362 | 1,339950773 | ENST00000457321 | N/A       | N/A          | N/A                |
| A_21_P0013563  | 3,5795  | 3,15759 | 1,339700025 | N/A             | N/A       | N/A          | XLOC_I2_014771     |
| A_22_P00000129 | 12,2431 | 11,8212 | 1,339690739 | ENST00000619374 | 57494     | NR_123740    | RIMKLB             |
| A_33_P3279162  | 3,40309 | 2,98124 | 1,33964431  | ENST00000370040 | 653149    | NM_001143987 | NBPF6              |
| A_23_P143047   | 7,70713 | 7,28547 | 1,339467893 | ENST00000522587 | 90423     | NM_080653    | ATP6V1E2           |
| A_33_P3253249  | 18,3622 | 17,9406 | 1,339412187 | ENST00000534180 | 2495      | NM_002032    | FTH1               |
| A_23_P137427   | 12,9901 | 12,5685 | 1,339412187 | ENST00000372759 | 10269     | NM_005857    | ZMPSTE24           |
| A_21_P0002039  | 2,0423  | 1,62072 | 1,339393619 | N/A             | N/A       | N/A          | Inc-AC013480.1.1-2 |
| A_33_P3220347  | 4,70325 | 4,28172 | 1,3393472   | N/A             | 285888    | NM_001103176 | CNPY1              |
| A_23_P89824    | 8,08059 | 7,65914 | 1,339272933 | ENST00000473688 | 85019     | NM_032933    | TMEM241            |
| A_23_P76851    | 13,2873 | 12,8659 | 1,339226518 | ENST00000553915 | 10419     | NM_001039619 | PRMT5              |
| A_23_P11032    | 7,62875 | 7,20737 | 1,339207952 | ENST00000491894 | 84679     | NM_032591    | SLC9A7             |
| A_33_P3369565  | 8,16702 | 7,7457  | 1,339152258 | ENST00000397172 | 54840     | NM_001195252 | APTX               |
| A_22_P00010905 | 4,78735 | 4,36606 | 1,339124411 | N/A             | 100294362 | NR_029376    | LOC100294362       |
| A_21_P0010556  | 4,54509 | 4,1238  | 1,339124411 | N/A             | N/A       | N/A          | XLOC_I2_000416     |
| A_24_P68585    | 9,56553 | 9,14429 | 1,339078001 | ENST00000444664 | 6464      | NM_183001    | SHC1               |
| A_33_P3228445  | 3,98071 | 3,55947 | 1,339078001 | ENST00000317594 | 486       | NM_001680    | FXD2               |

|                |         |         |             |                 |           |              |                |
|----------------|---------|---------|-------------|-----------------|-----------|--------------|----------------|
| A_23_P26037    | 6,63045 | 6,2093  | 1,338994468 | ENST00000451277 | 84978     | NM_032892    | FRMD5          |
| A_33_P3372090  | 4,01919 | 3,59808 | 1,338957343 | N/A             | N/A       | N/A          | N/A            |
| A_22_P00019852 | 2,95837 | 2,53731 | 1,33891094  | N/A             | 101927200 | XR_244180    | LOC101927200   |
| A_24_P206317   | 2,52501 | 2,10396 | 1,338901659 | ENST00000461159 | 9734      | NM_058176    | HDAC9          |
| A_33_P3304865  | 3,7099  | 3,28886 | 1,338892378 | N/A             | 26046     | BC031633     | LTN1           |
| A_21_P0013117  | 7,21214 | 6,79111 | 1,338883098 | ENST00000612111 | N/A       | N/A          | N/A            |
| A_23_P171054   | 6,67097 | 6,25011 | 1,33872534  | ENST00000376983 | 2002      | NM_005229    | ELK1           |
| A_33_P3422740  | 7,87711 | 7,45629 | 1,338688223 | ENST00000424684 | N/A       | XM_006710255 | N/A            |
| A_33_P3382229  | 7,90026 | 7,47948 | 1,338651107 | ENST00000492075 | 7140      | NM_001297646 | TNNT3          |
| A_23_P166087   | 2,85308 | 2,43233 | 1,338623271 | ENST00000379376 | 9770      | NM_014737    | RASSF2         |
| A_21_P0011196  | 2,29226 | 1,87154 | 1,338595436 | ENST00000548416 | N/A       | N/A          | N/A            |
| A_33_P3256272  | 4,20961 | 3,78903 | 1,338465544 | ENST00000400372 | 386680    | NM_198694    | KRTAP10-5      |
| A_33_P3271316  | 7,39358 | 6,97304 | 1,338428434 | ENST00000322177 | 54913     | NM_017793    | RPP25          |
| A_21_P0007419  | 4,90751 | 4,48702 | 1,338382049 | N/A             | N/A       | N/A          | Inc-NFRKB-1    |
| A_33_P3385686  | 4,21602 | 3,79556 | 1,338354218 | N/A             | N/A       | N/A          | N/A            |
| A_21_P0012865  | 2,35862 | 1,93819 | 1,338326388 | N/A             | N/A       | N/A          | XLOC_I2_011870 |
| A_33_P3311621  | 4,49778 | 4,07735 | 1,338326388 | N/A             | 338739    | NR_034027    | CSTF3-AS1      |
| A_33_P3417640  | 3,07692 | 2,65661 | 1,338215074 | ENST00000156499 | 43847     | NM_022046    | KLK14          |
| A_33_P3317305  | 6,01985 | 5,5996  | 1,33815942  | ENST00000619456 | 116987    | NM_001244888 | AGAP1          |
| A_24_P409494   | 8,55044 | 8,13035 | 1,338011022 | ENST00000399781 | 23786     | NM_015367    | BCL2L13        |
| A_23_P253484   | 8,06697 | 7,64698 | 1,337918281 | ENST00000353187 | 51166     | NM_016228    | AADAT          |
| A_21_P0009031  | 2,03803 | 1,61806 | 1,337899734 | N/A             | N/A       | N/A          | Inc-TOX3-3     |
| A_22_P00004199 | 3,44813 | 3,02819 | 1,337871913 | ENST00000615716 | N/A       | N/A          | N/A            |
| A_22_P00001128 | 2,01341 | 1,5935  | 1,337844093 | ENST00000501541 | N/A       | AK093366     | N/A            |
| A_24_P283928   | 9,4702  | 9,05036 | 1,337779182 | ENST00000447747 | 79035     | NM_024068    | NABP2          |
| A_33_P3260014  | 2,17311 | 1,75327 | 1,337779182 | ENST00000329066 | 7173      | NM_175721    | TPO            |
| A_21_P0004953  | 3,80957 | 3,38974 | 1,337769909 | N/A             | N/A       | N/A          | Inc-PHACTR2-1  |
| A_33_P3289995  | 5,16242 | 4,7426  | 1,337760637 | ENST00000369232 | 85015     | N/A          | USP45          |
| A_23_P102412   | 8,46801 | 8,04821 | 1,337742091 | ENST00000234453 | 65977     | NM_019091    | PLEKHA3        |
| A_21_P0008672  | 1,98883 | 1,56906 | 1,337714274 | N/A             | N/A       | N/A          | Inc-CRTC3-1    |
| A_23_P8539     | 8,307   | 7,88724 | 1,337705002 | ENST00000482149 | 221955    | NM_139179    | DAGLB          |
| A_21_P0013047  | 5,24395 | 4,8242  | 1,33769573  | N/A             | 100289495 | N/A          | LOC100289495   |
| A_21_P0007271  | 4,59666 | 4,17703 | 1,337584468 | N/A             | N/A       | N/A          | Inc-DDI1-3     |

|                |         |         |             |                 |           |              |              |
|----------------|---------|---------|-------------|-----------------|-----------|--------------|--------------|
| A_33_P3554318  | 5,07473 | 4,65512 | 1,337565925 | ENST00000532542 | 10612     | NM_006458    | TRIM3        |
| A_33_P3356631  | 4,41838 | 3,9988  | 1,337538112 | ENST00000330236 | 7745      | NM_001278119 | ZKSCAN8      |
| A_23_P132263   | 9,18034 | 8,76082 | 1,337482486 | ENST00000330125 | 56478     | NM_019843    | EIF4ENIF1    |
| A_24_P403303   | 6,41505 | 5,99556 | 1,337454674 | ENST00000395374 | 51105     | NM_198513    | PHF20L1      |
| A_33_P3366195  | 2,76174 | 2,34235 | 1,337361972 | ENST00000527771 | 9915      | NM_014862    | ARNT2        |
| A_22_P00019251 | 1,97805 | 1,55875 | 1,337278546 | ENST00000511291 | N/A       | N/A          | N/A          |
| A_23_P217208   | 5,71123 | 5,29198 | 1,3372322   | ENST00000376529 | 7355      | NM_005660    | SLC35A2      |
| A_33_P3372237  | 10,2443 | 9,82508 | 1,337204393 | ENST00000521716 | 25879     | NM_015420    | DCAF13       |
| A_33_P3390246  | 4,99496 | 4,57577 | 1,337176587 | N/A             | N/A       | AK123701     | N/A          |
| A_21_P0012365  | 2,34505 | 1,9259  | 1,337139513 | ENST00000433639 | N/A       | N/A          | N/A          |
| A_24_P22976    | 9,66108 | 9,24193 | 1,337139513 | ENST00000593460 | 27106     | NM_001025604 | ARRDC2       |
| A_33_P3306973  | 8,06157 | 7,64244 | 1,337120977 | N/A             | N/A       | N/A          | N/A          |
| A_33_P3243878  | 11,9961 | 11,577  | 1,337093172 | ENST00000618348 | 643707    | NM_001267536 | GOLGA6L4     |
| A_21_P0003545  | 5,04713 | 4,62824 | 1,336898558 | ENST00000512036 | N/A       | N/A          | N/A          |
| A_22_P00008189 | 2,73167 | 2,31288 | 1,336805895 | N/A             | N/A       | N/A          | Inc-INSIG1-2 |
| A_24_P392958   | 9,19972 | 8,78093 | 1,336805895 | ENST00000461188 | 128637    | NM_144628    | TBC1D20      |
| A_33_P3233081  | 8,99329 | 8,57456 | 1,3367503   | ENST00000423982 | 4439      | NM_002441    | MSH5         |
| A_21_P0014870  | 9,67354 | 9,25481 | 1,3367503   | ENST00000552477 | N/A       | N/A          | N/A          |
| A_33_P3360540  | 16,0029 | 15,5842 | 1,336722503 | ENST00000538402 | 10555     | NM_006412    | AGPAT2       |
| A_21_P0000094  | 5,22579 | 4,80709 | 1,336722503 | ENST00000391796 | 945       | NM_001177608 | CD33         |
| A_24_P122050   | 12,085  | 11,6664 | 1,336629852 | ENST00000381899 | 9491      | NM_006814    | PSMF1        |
| A_21_P0005354  | 5,62498 | 5,20644 | 1,336574264 | N/A             | N/A       | N/A          | Inc-OCM-1    |
| A_22_P00024545 | 5,5724  | 5,15395 | 1,336490887 | N/A             | N/A       | N/A          | Inc-LUZP1-1  |
| A_33_P3361337  | 8,8222  | 8,40376 | 1,336481623 | ENST00000468535 | 202915    | NM_001097620 | TMEM184A     |
| A_23_P130429   | 7,6743  | 7,25604 | 1,336314885 | ENST00000584687 | 6093      | NM_005406    | ROCK1        |
| A_33_P3372844  | 14,6511 | 14,2329 | 1,33625931  | ENST00000479602 | 54606     | NM_019082    | DDX56        |
| A_23_P17490    | 13,6633 | 13,2451 | 1,33625931  | ENST00000379286 | 29058     | NM_001009924 | TMEM230      |
| A_22_P00003086 | 2,16724 | 1,74908 | 1,336222262 | N/A             | 102723322 | XR_426337    | LOC102723322 |
| A_23_P25525    | 14,3708 | 13,9527 | 1,336166691 | ENST00000439403 | 2971      | NM_002097    | GTF3A        |
| A_24_P26897    | 10,8319 | 10,4138 | 1,336166691 | ENST00000368594 | 3632      | NM_005539    | INPP5A       |
| A_23_P41066    | 11,1892 | 10,7711 | 1,336166691 | ENST00000359365 | 11186     | NM_170713    | RASSF1       |
| A_21_P0010042  | 2,56576 | 2,14769 | 1,336138907 | N/A             | 101929863 | XR_253974    | LOC101929863 |
| A_33_P3337026  | 9,94019 | 9,52245 | 1,335833315 | ENST00000568600 | N/A       | U17986       | N/A          |

|                |         |         |             |                 |           |              |                       |
|----------------|---------|---------|-------------|-----------------|-----------|--------------|-----------------------|
| A_23_P322854   | 2,94    | 2,52231 | 1,335787019 | N/A             | N/A       | BC010426     | N/A                   |
| A_22_P00005230 | 1,94766 | 1,53    | 1,335759243 | ENST00000427085 | 100507242 | XR_424548    | SNHG23                |
| A_23_P208310   | 10,7576 | 10,3401 | 1,335611111 | ENST00000309424 | 10849     | NM_012099    | CD3EAP                |
| A_24_P172768   | 10,424  | 10,0065 | 1,335611111 | ENST00000616146 | 2764      | NM_004124    | GMFB                  |
| A_32_P152696   | 11,8875 | 11,47   | 1,335611111 | N/A             | N/A       | N/A          | N/A                   |
| A_23_P345065   | 9,16694 | 8,74946 | 1,335592595 | ENST00000480357 | 51540     | NM_016510    | SCLY                  |
| A_21_P0010484  | 1,93617 | 1,51875 | 1,335537051 | N/A             | N/A       | N/A          | Inc-C22orf34-1        |
| A_33_P3326917  | 1,88462 | 1,46727 | 1,335472252 | ENST00000329363 | 440836    | NM_001014440 | ODF3B                 |
| A_24_P164731   | 10,6904 | 10,2731 | 1,335425968 | ENST00000591157 | 11018     | NM_006858    | TMED1                 |
| A_33_P3294314  | 4,02012 | 3,60282 | 1,335425968 | N/A             | N/A       | N/A          | N/A                   |
| A_33_P3215517  | 8,42983 | 8,01276 | 1,335213087 | ENST00000375433 | 55920     | NM_018715    | RCC2                  |
| A_33_P3276461  | 3,59667 | 3,17961 | 1,335203832 | N/A             | N/A       | AK096231     | N/A                   |
| A_23_P70384    | 10,3423 | 9,92526 | 1,335185322 | ENST00000229866 | 9025      | NM_003958    | RNF8                  |
| A_24_P272290   | 9,63446 | 9,21743 | 1,335176067 | ENST00000380283 | 221749    | NM_183373    | PXDC1                 |
| A_23_P91095    | 2,06312 | 1,64612 | 1,335148303 | ENST00000374481 | 940       | NM_006139    | CD28                  |
| A_21_P0008245  | 4,07153 | 3,65461 | 1,335074269 | N/A             | N/A       | N/A          | Inc-USP12-2           |
| A_22_P00013630 | 4,60711 | 4,19019 | 1,335074269 | N/A             | N/A       | DB067770     | Inc-RP11-625H11.1.1-2 |
| A_23_P82859    | 7,12225 | 6,70534 | 1,335065015 | ENST00000297438 | 734       | NM_004337    | OSGIN2                |
| A_32_P902988   | 3,1859  | 2,76911 | 1,334953972 | ENST00000373765 | 4146      | NM_002379    | MATN1                 |
| A_33_P3353672  | 10,9641 | 10,5474 | 1,334870696 | ENST00000338176 | 9364      | NM_004249    | RAB28                 |
| A_33_P3268224  | 4,47197 | 4,05533 | 1,334815181 | ENST00000274008 | 166378    | NM_145207    | SPATA5                |
| A_33_P3397733  | 2,9124  | 2,49581 | 1,334768921 | ENST00000559921 | 283726    | NM_001008226 | FAM154B               |
| A_21_P0006302  | 1,89392 | 1,47736 | 1,334741166 | N/A             | N/A       | N/A          | Inc-ALG2-3            |
| A_21_P0000216  | 9,6814  | 9,2649  | 1,334685656 | ENST00000492798 | 26813     | NR_000016    | SNORD36C              |
| A_33_P3306452  | 6,41424 | 5,99781 | 1,334620899 | ENST00000465474 | N/A       | XM_005263605 | N/A                   |
| A_33_P3876192  | 4,00712 | 3,5907  | 1,334611648 | N/A             | 28823     | BQ708343     | IGLV1-44              |
| A_22_P00017749 | 5,71771 | 5,30144 | 1,334472893 | N/A             | N/A       | N/A          | Inc-YIF1A-1           |
| A_33_P3421832  | 5,28462 | 4,86837 | 1,334454393 | N/A             | N/A       | CU677276     | N/A                   |
| A_23_P321855   | 10,6321 | 10,2159 | 1,334408145 | ENST00000375736 | 8874      | NM_003899    | ARHGEF7               |
| A_33_P3224730  | 4,92998 | 4,5138  | 1,334389646 | ENST00000623487 | 256158    | NM_001291815 | HMCN2                 |
| A_21_P0011960  | 6,80812 | 6,39205 | 1,334287908 | ENST00000449819 | 100506797 | XR_112377    | LOC100506797          |
| A_23_P165952   | 8,16101 | 7,745   | 1,334232418 | ENST00000243903 | 79913     | NM_024855    | ACTR5                 |
| A_21_P0008752  | 2,16805 | 1,75206 | 1,334213922 | N/A             | N/A       | N/A          | Inc-ITGA11-2          |

|                |         |         |             |                 |           |              |               |
|----------------|---------|---------|-------------|-----------------|-----------|--------------|---------------|
| A_33_P3338539  | 4,72349 | 4,30759 | 1,334130692 | N/A             | N/A       | N/A          | N/A           |
| A_23_P170467   | 11,655  | 11,2391 | 1,334130692 | ENST00000561381 | 9960      | NM_006537    | USP3          |
| A_22_P00015267 | 6,16616 | 5,75031 | 1,334084455 | N/A             | N/A       | CD522735     | Inc-SPARCL1-1 |
| A_21_P0013050  | 4,66241 | 4,24657 | 1,334075208 | N/A             | 102724511 | N/A          | LOC102724511  |
| A_23_P13683    | 6,59483 | 6,17906 | 1,33401048  | ENST00000300101 | 9880      | NM_014830    | ZBTB39        |
| A_21_P0009047  | 2,32155 | 1,90581 | 1,33398274  | N/A             | N/A       | N/A          | Inc-TK2-6     |
| A_22_P00000680 | 5,36996 | 4,95432 | 1,333890279 | N/A             | N/A       | N/A          | Inc-ADAL-1    |
| A_23_P167017   | 6,78913 | 6,3735  | 1,333881033 | ENST00000264231 | 64091     | NM_022135    | POPDC2        |
| A_21_P0009374  | 2,55756 | 2,14193 | 1,333881033 | N/A             | N/A       | N/A          | Inc-FAM57A-1  |
| A_21_P0014069  | 2,1527  | 1,73716 | 1,333797823 | N/A             | N/A       | N/A          | N/A           |
| A_23_P62920    | 10,8701 | 10,4546 | 1,333760843 | ENST00000538366 | 22920     | NM_014970    | KIFAP3        |
| A_22_P00004869 | 7,71248 | 7,29698 | 1,333760843 | N/A             | N/A       | N/A          | Inc-CYP7B1-3  |
| A_33_P3424826  | 3,75129 | 3,33579 | 1,333760843 | N/A             | N/A       | N/A          | N/A           |
| A_21_P0003667  | 3,08817 | 2,67268 | 1,333751598 | N/A             | N/A       | N/A          | Inc-ARFIP1-1  |
| A_33_P3310276  | 4,10783 | 3,69235 | 1,333742354 | N/A             | 55124     | XM_005273551 | PIWIL2        |
| A_33_P3370511  | 8,30983 | 7,89436 | 1,333733109 | ENST00000425501 | N/A       | AK128128     | N/A           |
| A_21_P0012376  | 9,04878 | 8,63338 | 1,333668397 | ENST00000418195 | 8487      | NM_001009183 | GEMIN2        |
| A_23_P216402   | 9,24901 | 8,83367 | 1,333612933 | ENST00000491309 | 83549     | NM_031432    | UCK1          |
| A_24_P98277    | 10,4844 | 10,0691 | 1,333575958 | ENST00000523420 | 51125     | NM_001002296 | GOLGA7        |
| A_32_P79190    | 5,15562 | 4,74041 | 1,333492767 | ENST00000399720 | 100874392 | NR_046228    | ANKRD20A12P   |
| A_21_P0007507  | 3,36872 | 2,95351 | 1,333492767 | N/A             | N/A       | N/A          | Inc-C1QL4-3   |
| A_23_P149858   | 4,74929 | 4,3341  | 1,333474281 | ENST00000370005 | 83401     | NM_152310    | ELOVL3        |
| A_24_P945293   | 7,72098 | 7,30584 | 1,333428067 | ENST00000263856 | 51652     | NM_016079    | CHMP3         |
| A_21_P0005210  | 4,81533 | 4,40024 | 1,333381855 | ENST00000447039 | 101927354 | NR_108073    | LOC101927354  |
| A_33_P3401658  | 3,44989 | 3,03485 | 1,333335644 | ENST00000593482 | 5670      | NM_031246    | PSG2          |
| A_22_P00008928 | 5,42994 | 5,01505 | 1,333197022 | N/A             | N/A       | N/A          | Inc-KRR1-1    |
| A_22_P00022810 | 9,32624 | 8,91137 | 1,33317854  | ENST00000434904 | 23509     | NM_015352    | POFUT1        |
| A_24_P116871   | 10,9099 | 10,4951 | 1,333113855 | ENST00000355491 | 10907     | AK314901     | TXNL4A        |
| A_23_P144202   | 7,49654 | 7,08175 | 1,333104615 | ENST00000483569 | 60678     | NM_021937    | EEFSEC        |
| A_23_P76034    | 8,54884 | 8,13406 | 1,333095375 | ENST00000524510 | 5818      | NM_203286    | PVRL1         |
| A_21_P0007247  | 10,1219 | 9,70714 | 1,333076894 | ENST00000526795 | 100506233 | NR_038903    | RAB30-AS1     |
| A_33_P3403102  | 2,12138 | 1,70681 | 1,332901342 | ENST00000322583 | 285800    | NM_175922    | PRR18         |
| A_22_P00016840 | 4,47132 | 4,05676 | 1,332892103 | N/A             | N/A       | DA509635     | Inc-TRMT61B-2 |

|                |         |         |             |                 |           |              |              |
|----------------|---------|---------|-------------|-----------------|-----------|--------------|--------------|
| A_21_P0001059  | 2,21428 | 1,79977 | 1,33284591  | ENST00000423842 | 101929565 | N/A          | LOC101929565 |
| A_21_P0007521  | 1,82497 | 1,41053 | 1,332781241 | N/A             | N/A       | N/A          | Inc-CLEC4D-1 |
| A_22_P00007215 | 2,51738 | 2,10297 | 1,332753527 | N/A             | N/A       | BQ435778     | Inc-GPC6-2   |
| A_23_P24709    | 11,7379 | 11,3235 | 1,332744289 | ENST00000263847 | 5007      | NM_002556    | OSBP         |
| A_33_P3324149  | 4,80164 | 4,38731 | 1,332679625 | N/A             | N/A       | N/A          | N/A          |
| A_32_P87649    | 3,45369 | 3,03938 | 1,332661151 | ENST00000468258 | 127391    | NM_001008740 | TMCO2        |
| A_33_P3393106  | 6,87181 | 6,45767 | 1,332504126 | ENST00000436829 | 80013     | NM_024948    | FAM188A      |
| A_23_P157795   | 14,3431 | 13,929  | 1,332467181 | ENST00000374594 | 8727      | NM_003798    | CTNNAL1      |
| A_21_P0006387  | 3,16503 | 2,75102 | 1,33238406  | N/A             | N/A       | N/A          | Inc-ERP44-3  |
| A_24_P399630   | 9,26666 | 8,85265 | 1,33238406  | ENST00000350356 | 5566      | NM_002730    | PRKACA       |
| A_33_P3691168  | 4,12155 | 3,70756 | 1,33236559  | ENST00000611895 | 133396    | NM_001297572 | IL31RA       |
| A_33_P3355296  | 7,8413  | 7,42733 | 1,332347119 | ENST00000467427 | 728294    | XM_006712726 | D2HGDH       |
| A_22_P00010781 | 3,91689 | 3,50292 | 1,332347119 | ENST00000368592 | 84504     | N/A          | NKX6-2       |
| A_33_P3220376  | 6,06971 | 5,65578 | 1,332310179 | N/A             | N/A       | N/A          | N/A          |
| A_22_P00022561 | 4,64624 | 4,23232 | 1,332300945 | N/A             | 100507099 | NR_103839    | FRY-AS1      |
| A_21_P0011966  | 3,52073 | 3,10687 | 1,332245537 | ENST00000428123 | 100216479 | NR_046258    | FAR2P2       |
| A_21_P0014333  | 3,99969 | 3,58584 | 1,332236303 | N/A             | N/A       | DA101410     | N/A          |
| A_24_P461497   | 7,49486 | 7,08106 | 1,332190132 | ENST00000567299 | N/A       | N/A          | N/A          |
| A_33_P3360863  | 4,81215 | 4,3984  | 1,332143962 | ENST00000610177 | 644794    | XR_242295    | LOC644794    |
| A_23_P162142   | 11,594  | 11,1803 | 1,332097794 | ENST00000527881 | 25987     | NM_015516    | TSKU         |
| A_19_P00317851 | 1,91798 | 1,5043  | 1,332079328 | ENST00000508998 | N/A       | N/A          | N/A          |
| A_24_P30206    | 10,467  | 10,0534 | 1,332005464 | ENST00000278100 | 56647     | NM_078468    | BCCIP        |
| A_23_P404667   | 12,48   | 12,0664 | 1,332005464 | ENST00000216115 | 638       | NM_001197    | BIK          |
| A_32_P129540   | 9,02662 | 8,61302 | 1,332005464 | ENST00000547904 | 728739    | NR_037629    | LOC728739    |
| A_33_P3301620  | 10,5566 | 10,143  | 1,332005464 | ENST00000469382 | 140545    | NM_001184997 | RNF32        |
| A_22_P00009312 | 1,8619  | 1,44831 | 1,331996231 | ENST00000558226 | N/A       | DB001621     | N/A          |
| A_19_P00811038 | 5,5922  | 5,17863 | 1,331977766 | ENST00000424306 | N/A       | N/A          | N/A          |
| A_22_P00022421 | 1,98924 | 1,57568 | 1,331968533 | N/A             | 554202    | NR_027054    | MIR31HG      |
| A_24_P349547   | 11,1378 | 10,7243 | 1,331913139 | ENST00000546724 | N/A       | N/A          | N/A          |
| A_22_P00010530 | 2,23568 | 1,82222 | 1,331876211 | ENST00000509000 | N/A       | N/A          | N/A          |
| A_21_P0007932  | 3,36075 | 2,9473  | 1,331866979 | ENST00000425609 | 100874159 | N/A          | LINC00400    |
| A_23_P152995   | 2,22171 | 1,80836 | 1,331774665 | ENST00000579221 | 6532      | NM_001045    | SLC6A4       |
| A_22_P00011134 | 2,39004 | 1,97676 | 1,331710048 | N/A             | 101927143 | N/A          | LOC101927143 |

|                |         |         |             |                 |           |              |                       |
|----------------|---------|---------|-------------|-----------------|-----------|--------------|-----------------------|
| A_22_P00007460 | 2,24036 | 1,82709 | 1,331700817 | N/A             | N/A       | N/A          | Inc-GTF2A2-1          |
| A_22_P00017806 | 7,69116 | 7,27789 | 1,331700817 | N/A             | N/A       | N/A          | Inc-ZBTB25-2          |
| A_33_P3237605  | 3,52279 | 3,10954 | 1,331682356 | N/A             | N/A       | N/A          | N/A                   |
| A_33_P3320718  | 9,60256 | 9,18932 | 1,331673126 | ENST00000564039 | 84326     | NR_109978    | C16orf13              |
| A_33_P3324114  | 2,08895 | 1,67571 | 1,331673126 | N/A             | 285194    | N/A          | TUSC7                 |
| A_23_P94174    | 13,7957 | 13,3825 | 1,331636204 | ENST00000260102 | 29088     | NM_014175    | MRPL15                |
| A_24_P323967   | 5,26318 | 4,84998 | 1,331636204 | ENST00000422689 | 400713    | NM_001145434 | ZNF880                |
| A_21_P0013302  | 7,16826 | 6,75514 | 1,331562365 | ENST00000413875 | N/A       | N/A          | N/A                   |
| A_33_P3396010  | 4,47261 | 4,05963 | 1,331433156 | ENST00000438221 | 177       | NM_001206966 | AGER                  |
| A_24_P103469   | 1,94617 | 1,53321 | 1,331414698 | ENST00000376092 | 7940      | NM_007161    | LST1                  |
| A_21_P0001203  | 1,89811 | 1,48527 | 1,331303959 | ENST00000436955 | 101929093 | N/A          | LINC01350             |
| A_23_P52176    | 8,31575 | 7,90291 | 1,331303959 | ENST00000340684 | 7678      | NM_003431    | ZNF124                |
| A_24_P107897   | 11,7064 | 11,2937 | 1,331174774 | ENST00000356957 | 51061     | XM_005255346 | TXNDC11               |
| A_32_P75299    | 14,5276 | 14,1149 | 1,331174774 | ENST00000544379 | 401505    | NM_001134484 | TOMM5                 |
| A_24_P119259   | 5,61409 | 5,20159 | 1,330990247 | ENST00000426663 | 8548      | NM_003666    | BLZF1                 |
| A_22_P00013645 | 1,91649 | 1,50403 | 1,330953345 | N/A             | N/A       | N/A          | Inc-RP11-650K20.3.1-1 |
| A_24_P865245   | 2,23917 | 1,82672 | 1,330944119 | ENST00000565327 | N/A       | N/A          | N/A                   |
| A_33_P3350658  | 2,22489 | 1,81252 | 1,330870318 | ENST00000367893 | 4009      | NM_177398    | LMX1A                 |
| A_21_P0007619  | 6,04078 | 5,62841 | 1,330870318 | ENST00000547554 | N/A       | N/A          | N/A                   |
| A_21_P0010220  | 8,0002  | 7,58785 | 1,330851869 | ENST00000623794 | 101930100 | XR_424058    | LOC101930100          |
| A_33_P3356877  | 1,99772 | 1,5854  | 1,330824195 | ENST00000374781 | 138803    | NM_001001961 | OR13C3                |
| A_22_P00012135 | 2,69351 | 2,2812  | 1,33081497  | ENST00000511962 | 102724598 | XR_425736    | LOC102724598          |
| A_22_P00001912 | 6,31931 | 5,90701 | 1,330805746 | ENST00000470638 | 5558      | NM_000947    | PRIM2                 |
| A_22_P00014701 | 8,01375 | 7,60145 | 1,330805746 | N/A             | N/A       | N/A          | Inc-SLC25A35-1        |
| A_22_P00015717 | 4,71433 | 4,30206 | 1,330778073 | ENST00000528445 | N/A       | N/A          | N/A                   |
| A_23_P74723    | 1,82754 | 1,41532 | 1,330731952 | ENST00000367641 | 84066     | NM_032126    | TEX35                 |
| A_21_P0007868  | 5,05464 | 4,64244 | 1,330713504 | N/A             | N/A       | N/A          | Inc-RBP5-1            |
| A_21_P0010674  | 4,98289 | 4,57077 | 1,330639716 | N/A             | 101928670 | N/A          | LOC101928670          |
| A_32_P213349   | 2,97111 | 2,55907 | 1,330565932 | N/A             | N/A       | N/A          | Inc-DPP4-1            |
| A_23_P104705   | 8,65173 | 8,23974 | 1,330519819 | ENST00000546034 | 3177      | NM_001532    | SLC29A2               |
| A_23_P162734   | 12,3476 | 11,9357 | 1,330436819 | ENST00000381570 | 6049      | NM_005977    | RNF6                  |
| A_24_P31929    | 8,40567 | 7,99388 | 1,330335382 | ENST00000449135 | 5638      | NM_000950    | PRRG1                 |
| A_23_P133739   | 3,71693 | 3,30533 | 1,330160191 | ENST00000380907 | 135458    | NM_148959    | HUS1B                 |

|                |         |         |             |                 |           |              |                       |
|----------------|---------|---------|-------------|-----------------|-----------|--------------|-----------------------|
| A_21_P0006120  | 3,05731 | 2,64574 | 1,330132532 | N/A             | N/A       | N/A          | Inc-SMARCA2-1         |
| A_33_P3323559  | 7,64533 | 7,23387 | 1,330031118 | ENST00000291554 | 1409      | NM_000394    | CRYAA                 |
| A_24_P329353   | 7,69545 | 7,2841  | 1,329929712 | ENST00000403646 | 80228     | NM_032831    | ORAI2                 |
| A_33_P3325087  | 9,69747 | 9,28617 | 1,329883621 | ENST00000540900 | 84081     | NM_032141    | NSRP1                 |
| A_21_P0011768  | 6,35746 | 5,94619 | 1,329855967 | N/A             | N/A       | N/A          | XLOC_I2_006648        |
| A_23_P356109   | 6,15011 | 5,73896 | 1,329745357 | ENST00000318724 | 222255    | NM_152749    | ATXN7L1               |
| A_24_P603890   | 14,9469 | 14,5359 | 1,329607108 | ENST00000406156 | N/A       | N/A          | N/A                   |
| A_33_P3371320  | 9,80461 | 9,39362 | 1,329597892 | ENST00000342045 | 9577      | NM_001261840 | BRE                   |
| A_23_P105028   | 10,7339 | 10,323  | 1,32951495  | ENST00000398868 | 25923     | NM_015459    | ATL3                  |
| A_22_P00024077 | 4,55095 | 4,14017 | 1,329404369 | N/A             | 102724115 | XR_426137    | LOC102724115          |
| A_21_P0003802  | 1,9473  | 1,53663 | 1,329303011 | N/A             | N/A       | N/A          | Inc-RP11-487E13.1.1-1 |
| A_23_P48803    | 2,90727 | 2,49662 | 1,329284583 | ENST00000249700 | 29767     | NM_014548    | TMOD2                 |
| A_21_P0010053  | 2,67646 | 2,26583 | 1,329266155 | N/A             | N/A       | N/A          | Inc-PREX1-2           |
| A_23_P167308   | 12,0262 | 11,6156 | 1,329238514 | ENST00000511600 | 6047      | NM_002938    | RNF4                  |
| A_24_P109069   | 7,78685 | 7,37634 | 1,329155594 | ENST00000503753 | 83849     | NM_181519    | SYT15                 |
| A_23_P134274   | 14,8875 | 14,477  | 1,329146381 | ENST00000303151 | 10248     | NM_005837    | POP7                  |
| A_33_P3246418  | 15,2354 | 14,825  | 1,329054255 | ENST00000373051 | 4188      | NM_001300804 | MDFI                  |
| A_33_P3213992  | 4,15039 | 3,74021 | 1,3288516   | N/A             | N/A       | N/A          | N/A                   |
| A_22_P00004694 | 6,30245 | 5,89229 | 1,328833178 | ENST00000534270 | 9401      | NM_004260    | RECQL4                |
| A_33_P3413404  | 2,62459 | 2,21449 | 1,328777915 | ENST00000402876 | 29780     | AK309987     | PARVB                 |
| A_24_P116378   | 10,9444 | 10,5343 | 1,328777915 | ENST00000380557 | 145781    | NM_001018090 | GCOM1                 |
| A_23_P55706    | 13,6601 | 13,2501 | 1,328685814 | ENST00000221452 | 5971      | NM_006509    | RELB                  |
| A_22_P00011556 | 4,05498 | 3,64509 | 1,328584511 | ENST00000513332 | N/A       | N/A          | N/A                   |
| A_21_P0008710  | 3,60075 | 3,19098 | 1,328474007 | N/A             | N/A       | N/A          | Inc-UBE3A-1           |
| A_22_P00005678 | 9,022   | 8,61225 | 1,32845559  | ENST00000330125 | 56478     | NM_019843    | EIF4ENIF1             |
| A_22_P00013083 | 3,17904 | 2,76931 | 1,328437174 | N/A             | N/A       | BC035239     | Inc-RHOJ-1            |
| A_23_P27180    | 10,902  | 10,4923 | 1,32840955  | ENST00000540900 | 84081     | NM_032141    | NSRP1                 |
| A_22_P00000608 | 3,00595 | 2,59627 | 1,328391135 | N/A             | N/A       | AK057259     | Inc-ACHE-1            |
| A_33_P3380932  | 8,02981 | 7,62017 | 1,328354305 | ENST00000393312 | 168850    | XM_005250181 | ZNF800                |
| A_21_P0002934  | 3,89115 | 3,48153 | 1,32833589  | N/A             | N/A       | N/A          | Inc-OXNAD1-2          |
| A_33_P3357097  | 3,98128 | 3,57167 | 1,328326682 | N/A             | 100132741 | N/A          | LOC100132741          |
| A_24_P63380    | 5,44226 | 5,03267 | 1,328308268 | ENST00000512312 | 658       | NM_001203    | BMPR1B                |
| A_23_P321892   | 4,31312 | 3,90357 | 1,32827144  | ENST00000495413 | 3273      | NM_000412    | HRG                   |



|                |         |         |             |                 |           |              |                |
|----------------|---------|---------|-------------|-----------------|-----------|--------------|----------------|
| A_33_P3326904  | 8,86338 | 8,45383 | 1,32827144  | N/A             | 441268    | AK125166     | LOC441268      |
| A_22_P00007410 | 5,8114  | 5,40189 | 1,328234613 | ENST00000414438 | N/A       | N/A          | N/A            |
| A_24_P107859   | 9,52821 | 9,11874 | 1,328197787 | ENST00000299084 | 161742    | NM_152594    | SPRED1         |
| A_22_P00017486 | 4,75762 | 4,34816 | 1,328188581 | ENST00000378821 | 643965    | NM_001146685 | TMEM88B        |
| A_24_P250650   | 12,0221 | 11,6127 | 1,328133344 | ENST00000452831 | 11159     | NM_013412    | RABL2A         |
| A_24_P48862    | 6,2711  | 5,86188 | 1,327967648 | ENST00000215730 | 9342      | NM_004782    | SNAP29         |
| A_33_P3420704  | 5,80739 | 5,39817 | 1,327967648 | N/A             | N/A       | N/A          | N/A            |
| A_23_P342053   | 8,62404 | 8,21484 | 1,327949238 | ENST00000568015 | 5930      | NM_032626    | RBBP6          |
| A_21_P0000352  | 5,70488 | 5,29569 | 1,327940034 | N/A             | 677771    | NR_003005    | SCARNA4        |
| A_22_P00024715 | 7,60498 | 7,1958  | 1,327930829 | ENST00000594597 | 57655     | NM_001136199 | GRAMD1A        |
| A_23_P85180    | 9,27009 | 8,86091 | 1,327930829 | ENST00000369982 | 8269      | NM_003492    | TMEM187        |
| A_33_P3240936  | 5,4568  | 5,04764 | 1,32791242  | ENST00000530824 | 23621     | NM_012104    | BACE1          |
| A_23_P34578    | 12,1708 | 11,7617 | 1,327857195 | ENST00000462812 | 29889     | NM_013285    | GNL2           |
| A_21_P0006601  | 2,23668 | 1,82764 | 1,327801972 | N/A             | N/A       | N/A          | Inc-TSPY10-2   |
| A_22_P00006467 | 4,44904 | 4,04    | 1,327801972 | ENST00000517482 | N/A       | N/A          | N/A            |
| A_33_P3221119  | 10,6159 | 10,2069 | 1,327765158 | ENST00000471341 | 54856     | NM_001282861 | GON4L          |
| A_23_P80353    | 7,48039 | 7,07139 | 1,327765158 | ENST00000466589 | 83746     | NM_031488    | L3MBTL2        |
| A_33_P3355739  | 2,55844 | 2,14963 | 1,327590306 | ENST00000468982 | 89766     | NM_001199528 | UMODL1         |
| A_23_P140994   | 10,3151 | 9,9063  | 1,327581104 | ENST00000568008 | 11269     | NM_007242    | DDX19B         |
| A_22_P00015894 | 3,21322 | 2,80443 | 1,327571902 | ENST00000428786 | N/A       | X16866       | N/A            |
| A_24_P497186   | 9,8929  | 9,48412 | 1,3275627   | ENST00000366609 | 359948    | NM_182972    | IRF2BP2        |
| A_33_P3625314  | 2,05353 | 1,64476 | 1,327553498 | ENST00000413356 | 440704    | NR_033922    | LOC440704      |
| A_24_P221575   | 3,57087 | 3,16213 | 1,327525892 | ENST00000509159 | 22902     | NM_001037442 | RUFY3          |
| A_23_P45345    | 13,084  | 12,6753 | 1,327489086 | ENST00000535601 | 27336     | NM_014500    | HTATSF1        |
| A_21_P0011719  | 2,08528 | 1,67666 | 1,327415476 | N/A             | N/A       | N/A          | XLOC_I2_006902 |
| A_23_P75430    | 8,34568 | 7,93709 | 1,327387874 | ENST00000298966 | 56935     | NM_020179    | SMCO4          |
| A_23_P3379     | 2,95527 | 2,54669 | 1,327378673 | ENST00000560943 | 5923      | NM_002891    | RASGRF1        |
| A_33_P3290949  | 7,93267 | 7,52419 | 1,32728667  | ENST00000487043 | 55037     | N/A          | PTCD3          |
| A_33_P3826460  | 2,0741  | 1,66563 | 1,32727747  | ENST00000505877 | N/A       | N/A          | N/A            |
| A_22_P00023164 | 1,99575 | 1,58728 | 1,32727747  | N/A             | N/A       | N/A          | Inc-AMN-1      |
| A_33_P3270360  | 5,7511  | 5,34268 | 1,32723147  | ENST00000309433 | 219959    | NM_001004458 | OR1S1          |
| A_33_P3255165  | 5,40952 | 5,00116 | 1,327176274 | N/A             | 100132116 | NR_125373    | ACTA2-AS1      |
| A_22_P00011079 | 2,48076 | 2,07241 | 1,327167074 | N/A             | N/A       | N/A          | Inc-NUCB2-1    |

|                |         |         |             |                 |           |              |                       |
|----------------|---------|---------|-------------|-----------------|-----------|--------------|-----------------------|
| A_33_P3219578  | 6,31954 | 5,91124 | 1,327121079 | N/A             | 7545      | U79264       | ZIC1                  |
| A_22_P00019062 | 2,39659 | 1,98834 | 1,327075085 | ENST00000426794 | N/A       | N/A          | N/A                   |
| A_24_P287075   | 8,3877  | 7,97949 | 1,327038291 | ENST00000433890 | 5871      | NM_004579    | MAP4K2                |
| A_21_P0009323  | 6,41455 | 6,00645 | 1,326937114 | N/A             | N/A       | N/A          | Inc-NR1D1-1           |
| A_23_P78871    | 8,66333 | 8,25532 | 1,326854338 | ENST00000430256 | 79047     | NM_024076    | KCTD15                |
| A_23_P323943   | 6,19201 | 5,78409 | 1,326771567 | ENST00000280467 | 159963    | NM_178498    | SLC5A12               |
| A_33_P3335386  | 13,0372 | 12,6293 | 1,326753174 | ENST00000388995 | 644815    | DJ031151     | FAM83G                |
| A_23_P104734   | 10,6327 | 10,2249 | 1,326661214 | ENST00000525946 | 3703      | NM_152713    | STT3A                 |
| A_33_P3264331  | 3,79093 | 3,38318 | 1,326615236 | ENST00000371116 | 27022     | NM_012183    | FOXD3                 |
| A_23_P75647    | 9,05107 | 8,64337 | 1,32656926  | ENST00000614711 | 10525     | NM_006389    | HYOU1                 |
| A_24_P827491   | 9,15273 | 8,74509 | 1,32651409  | ENST00000418595 | 5036      | NM_006191    | PA2G4                 |
| A_33_P3401841  | 6,69884 | 6,29125 | 1,326468118 | ENST00000613122 | 9150      | AK123920     | CTDP1                 |
| A_22_P00003315 | 2,33138 | 1,92383 | 1,326431341 | N/A             | N/A       | N/A          | Inc-CAPSL-1           |
| A_19_P00321568 | 8,55565 | 8,14812 | 1,326412952 | N/A             | N/A       | XR_132973    | N/A                   |
| A_21_P0000539  | 7,04167 | 6,63415 | 1,326403759 | N/A             | 388685    | NR_027468    | LINC01138             |
| A_21_P0000269  | 5,7276  | 5,32014 | 1,326348596 | ENST00000524867 | 619565    | NR_002585    | SNORA52               |
| A_21_P0000624  | 7,51787 | 7,11049 | 1,32627505  | N/A             | 6540      | NM_001243392 | SLC6A13               |
| A_33_P3363016  | 7,722   | 7,31463 | 1,326265857 | ENST00000619151 | 2972      | NM_001242790 | BRF1                  |
| A_33_P3265855  | 10,4713 | 10,064  | 1,326201507 | ENST00000517296 | 553158    | NM_181334    | PRR5-ARHGAP8          |
| A_22_P00015884 | 4,54009 | 4,1328  | 1,326192315 | N/A             | N/A       | N/A          | Inc-TCEANC2-1         |
| A_33_P3372752  | 2,41604 | 2,00875 | 1,326192315 | N/A             | 400682    | XM_003846486 | LOC400682             |
| A_22_P00024376 | 2,26498 | 1,85769 | 1,326192315 | ENST00000511867 | N/A       | N/A          | N/A                   |
| A_33_P3378865  | 4,21683 | 3,80957 | 1,326164738 | ENST00000375389 | 23196     | NM_001286724 | FAM120A               |
| A_33_P3231110  | 11,5793 | 11,1721 | 1,326109585 | ENST00000268049 | 9960      | NM_006537    | USP3                  |
| A_33_P3333455  | 10,0727 | 9,66552 | 1,326091202 | ENST00000613734 | 11117     | NM_007046    | EMILIN1               |
| A_21_P0008588  | 2,40905 | 2,00192 | 1,326045244 | N/A             | N/A       | N/A          | Inc-C15orf2-9         |
| A_22_P00013631 | 2,24978 | 1,84265 | 1,326045244 | N/A             | N/A       | DB289084     | Inc-RP11-625H11.1.1-3 |
| A_33_P3365193  | 6,04197 | 5,63486 | 1,326026861 | ENST00000330330 | 278       | NM_001008219 | AMY1C                 |
| A_21_P0007470  | 3,69888 | 3,29188 | 1,32592576  | N/A             | N/A       | N/A          | Inc-BLID-1            |
| A_22_P00009882 | 3,79045 | 3,38345 | 1,32592576  | N/A             | 114794    | NR_110512    | ELFN2                 |
| A_33_P3349693  | 7,20777 | 6,80087 | 1,325833857 | ENST00000478015 | 253558    | NM_182551    | LCLAT1                |
| A_33_P3224867  | 5,22518 | 4,81831 | 1,325806288 | ENST00000432710 | 83445     | NM_001206842 | GSG1                  |
| A_21_P0014080  | 4,56851 | 4,16164 | 1,325806288 | N/A             | 100505785 | XR_133208    | KIRREL-IT1            |

|                |         |         |             |                 |           |              |                  |
|----------------|---------|---------|-------------|-----------------|-----------|--------------|------------------|
| A_23_P313632   | 10,8102 | 10,4034 | 1,325741961 | ENST00000557164 | 2530      | NM_178155    | FUT8             |
| A_23_P8571     | 8,96294 | 8,55628 | 1,325613316 | ENST00000275560 | 136853    | NM_080744    | SSC4D            |
| A_22_P00007123 | 2,74454 | 2,33789 | 1,325604128 | ENST00000420776 | N/A       | BM729034     | N/A              |
| A_21_P0002906  | 2,93786 | 2,53125 | 1,325567375 | ENST00000449106 | 100874219 | N/A          | TMEM212-AS1      |
| A_23_P109034   | 14,8017 | 14,3951 | 1,325558187 | ENST00000372733 | 6385      | NM_002999    | SDC4             |
| A_22_P00016195 | 2,5872  | 2,18062 | 1,325539811 | ENST00000456728 | N/A       | N/A          | N/A              |
| A_33_P3384988  | 3,31559 | 2,90918 | 1,325383625 | ENST00000380860 | 64924     | NM_024055    | SLC30A5          |
| A_23_P98022    | 9,12909 | 8,72294 | 1,325144788 | ENST00000432464 | 23411     | NM_012238    | SIRT1            |
| A_32_P21474    | 7,12329 | 6,71716 | 1,325126418 | ENST00000369940 | 134728    | NM_001010844 | IRAK1BP1         |
| A_21_P0007097  | 3,45154 | 3,04542 | 1,325117233 | ENST00000466271 | 222389    | XR_428635    | BEND7            |
| A_22_P00008432 | 2,12554 | 1,71951 | 1,32503457  | ENST00000566804 | N/A       | AK026452     | N/A              |
| A_32_P220307   | 17,3606 | 16,9546 | 1,325007017 | ENST00000468844 | 6170      | NM_001000    | RPL39            |
| A_23_P154526   | 7,00819 | 6,60227 | 1,324933545 | ENST00000497306 | 2888      | NM_004490    | GRB14            |
| A_32_P221256   | 9,72283 | 9,31698 | 1,32486926  | N/A             | 403340    | NR_003682    | MGC70870         |
| A_21_P0011275  | 2,79694 | 2,39123 | 1,324740701 | ENST00000619210 | 503639    | N/A          | DUXAP10          |
| A_23_P82950    | 12,2264 | 11,8207 | 1,324731518 | ENST00000519802 | 5108      | NM_006197    | PCM1             |
| A_22_P00024701 | 5,41353 | 5,00787 | 1,324694789 | ENST00000588460 | 79157     | CU688225     | MFSD11           |
| A_21_P0001088  | 4,43645 | 4,03088 | 1,324612153 | N/A             | N/A       | N/A          | Inc-AL590822.1-1 |
| A_21_P0014278  | 2,20578 | 1,80032 | 1,32451116  | ENST00000535976 | 100507066 | NR_045382    | CLIP1-AS1        |
| A_22_P00004473 | 8,93272 | 8,52727 | 1,32450198  | N/A             | 100129917 | NR_036512    | LOC100129917     |
| A_24_P97836    | 7,56573 | 7,16029 | 1,324492799 | ENST00000380774 | 5884      | NM_002873    | RAD17            |
| A_33_P3328365  | 5,51388 | 5,10855 | 1,324391815 | N/A             | N/A       | BF355127     | Inc-C21orf90-1   |
| A_24_P83615    | 7,47948 | 7,07418 | 1,324364276 | ENST00000613500 | 22861     | NM_001033053 | NLRP1            |
| A_24_P82142    | 10,4096 | 10,0043 | 1,324364276 | ENST00000343827 | 6938      | NM_207038    | TCF12            |
| A_33_P3217393  | 7,70859 | 7,30335 | 1,324309198 | ENST00000564751 | 80381     | NM_001024736 | CD276            |
| A_23_P41818    | 11,6226 | 11,2174 | 1,324272481 | ENST00000502988 | 51663     | NM_016107    | ZFR              |
| A_22_P00020059 | 5,12384 | 4,71865 | 1,324263302 | N/A             | N/A       | DA667009     | Inc-NDUFV1-1     |
| A_21_P0005982  | 2,81965 | 2,41453 | 1,32419905  | N/A             | N/A       | N/A          | Inc-CCDC166-1    |
| A_33_P3279871  | 2,93599 | 2,53105 | 1,324033844 | ENST00000600907 | N/A       | XM_001732878 | N/A              |
| A_33_P3688511  | 1,95357 | 1,54865 | 1,324015489 | ENST00000583223 | N/A       | AK130404     | N/A              |
| A_23_P151970   | 8,88593 | 8,48119 | 1,323850307 | ENST00000306917 | 10116     | NM_015322    | FEM1B            |
| A_23_P93602    | 4,44    | 4,03527 | 1,323841131 | ENST00000329722 | 352999    | NM_001010905 | C6orf58          |
| A_22_P00017772 | 5,13806 | 4,7334  | 1,323776899 | N/A             | N/A       | AF086429     | Inc-YWHAZ-1      |

|                |         |         |             |                 |           |              |                |
|----------------|---------|---------|-------------|-----------------|-----------|--------------|----------------|
| A_23_P153360   | 11,1286 | 10,724  | 1,323721846 | ENST00000599310 | 79086     | NM_024104    | SMIM7          |
| A_33_P3473108  | 4,68176 | 4,27716 | 1,323721846 | N/A             | N/A       | Z39353       | N/A            |
| A_33_P3857239  | 14,4061 | 14,0016 | 1,323630096 | ENST00000585017 | 284116    | NR_033415    | KRT42P         |
| A_24_P775249   | 6,70534 | 6,30085 | 1,323620921 | ENST00000577806 | 400657    | NR_024484    | LINC00909      |
| A_21_P0001245  | 5,08288 | 4,67854 | 1,323483309 | ENST00000451766 | 101927851 | N/A          | LOC101927851   |
| A_33_P3333146  | 4,79138 | 4,38706 | 1,323464961 | ENST00000254695 | 23108     | NM_015085    | RAP1GAP2       |
| A_33_P3379081  | 2,00942 | 1,60515 | 1,323419094 | N/A             | N/A       | BE265920     | N/A            |
| A_24_P210829   | 9,72374 | 9,31962 | 1,323281503 | ENST00000460297 | 4833      | NM_005009    | NME4           |
| A_33_P3374903  | 4,63935 | 4,23525 | 1,323263158 | N/A             | N/A       | N/A          | N/A            |
| A_23_P407112   | 5,79067 | 5,38658 | 1,323253986 | ENST00000295213 | 132671    | NM_145263    | SPATA18        |
| A_22_P00019192 | 3,70777 | 3,30373 | 1,323208127 | N/A             | N/A       | AV706190     | Inc-ABL1-1     |
| A_33_P3371243  | 1,9645  | 1,56049 | 1,323180611 | N/A             | N/A       | N/A          | N/A            |
| A_23_P126735   | 2,0888  | 1,6849  | 1,323079728 | ENST00000423557 | 3586      | NM_000572    | IL10           |
| A_22_P00009759 | 2,28106 | 1,87734 | 1,322914662 | ENST00000515656 | N/A       | N/A          | N/A            |
| A_23_P153897   | 5,1501  | 4,74642 | 1,322877984 | ENST00000587867 | 2788      | NM_052847    | GNG7           |
| A_24_P125434   | 3,67422 | 3,27055 | 1,322868814 | ENST00000611534 | 84203     | NM_032243    | TXNDC2         |
| A_23_P372368   | 4,93181 | 4,52815 | 1,322859645 | N/A             | N/A       | AF426265     | N/A            |
| A_33_P3414422  | 10,0513 | 9,64765 | 1,322850475 | ENST00000315266 | 10243     | NM_020806    | GPHN           |
| A_23_P168726   | 2,26152 | 1,85792 | 1,32280463  | ENST00000046087 | 11055     | NM_007009    | ZBPB           |
| A_23_P165078   | 10,335  | 9,93145 | 1,322758786 | ENST00000411545 | 81926     | NM_031213    | ABHD17A        |
| A_33_P3367396  | 6,20807 | 5,80455 | 1,32273128  | ENST00000360827 | 400823    | NM_207468    | FAM177B        |
| A_21_P0011595  | 5,02956 | 4,62605 | 1,322722111 | N/A             | N/A       | N/A          | XLOC_I2_006101 |
| A_22_P00016362 | 6,15065 | 5,7472  | 1,322667102 | ENST00000554954 | N/A       | N/A          | N/A            |
| A_23_P120153   | 13,1755 | 12,7721 | 1,322621263 | ENST00000295317 | 284996    | NM_173647    | RNF149         |
| A_21_P0012603  | 2,51881 | 2,11543 | 1,322602927 | ENST00000508358 | N/A       | N/A          | N/A            |
| A_24_P402779   | 7,49678 | 7,09348 | 1,322529589 | ENST00000475782 | 10039     | NM_005485    | PARP3          |
| A_23_P101332   | 12,538  | 12,1347 | 1,322529589 | ENST00000612875 | 65095     | NM_023008    | KRI1           |
| A_33_P3284854  | 7,41883 | 7,01555 | 1,322511255 | ENST00000607822 | N/A       | N/A          | N/A            |
| A_24_P290770   | 7,18094 | 6,7777  | 1,322474588 | ENST00000459672 | 4967      | NM_001003941 | OGDH           |
| A_23_P148798   | 11,7355 | 11,3323 | 1,322437921 | ENST00000367451 | 51377     | NM_015984    | UCHL5          |
| A_23_P135966   | 10,6364 | 10,2332 | 1,322437921 | ENST00000465988 | 9016      | NM_001282197 | SLC25A14       |
| A_21_P0008203  | 3,70559 | 3,30245 | 1,322382924 | N/A             | N/A       | N/A          | Inc-UGGT2-1    |
| A_22_P00000871 | 4,58731 | 4,18418 | 1,322373758 | N/A             | N/A       | N/A          | Inc-AGRP-3     |

|                |         |         |             |                 |           |              |                  |
|----------------|---------|---------|-------------|-----------------|-----------|--------------|------------------|
| A_24_P47547    | 14,7407 | 14,3376 | 1,32234626  | ENST00000477395 | 5901      | NM_006325    | RAN              |
| A_21_P0012821  | 4,17036 | 3,76739 | 1,32222711  | N/A             | N/A       | N/A          | XLOC_I2_011426   |
| A_24_P194819   | 4,06475 | 3,6618  | 1,32220878  | N/A             | N/A       | N/A          | N/A              |
| A_24_P702813   | 9,76627 | 9,36345 | 1,322089642 | ENST00000367590 | 9213      | NM_004736    | XPR1             |
| A_33_P3213561  | 8,56137 | 8,15856 | 1,322080478 | ENST00000561636 | N/A       | N/A          | N/A              |
| A_33_P3354067  | 4,38844 | 3,98563 | 1,322080478 | ENST00000545710 | N/A       | N/A          | N/A              |
| A_23_P8380     | 10,5985 | 10,1958 | 1,321979679 | ENST00000424142 | 78996     | NM_024033    | C7orf49          |
| A_19_P00810009 | 5,70959 | 5,30704 | 1,321842237 | N/A             | N/A       | AF319524     | Inc-SNURF-1      |
| A_21_P0014201  | 5,17932 | 4,77685 | 1,32176894  | ENST00000447430 | N/A       | N/A          | N/A              |
| A_33_P3212555  | 3,15171 | 2,74925 | 1,321759779 | ENST00000394236 | 5627      | NM_000313    | PROS1            |
| A_33_P3774867  | 8,52142 | 8,11897 | 1,321750617 | N/A             | N/A       | BC094703     | Inc-AP002478.1-1 |
| A_22_P00002236 | 4,5466  | 4,14415 | 1,321750617 | N/A             | 101929328 | XR_246137    | KCNMA1-AS1       |
| A_21_P0011606  | 2,15675 | 1,75438 | 1,321677325 | N/A             | N/A       | N/A          | XLOC_I2_006166   |
| A_33_P3211078  | 10,3514 | 9,94905 | 1,321659003 | ENST00000537275 | 8091      | NM_001300918 | HMG2             |
| A_24_P77082    | 2,31233 | 1,91001 | 1,32163152  | ENST00000366555 | 8564      | NM_003679    | KMO              |
| A_33_P3250887  | 6,02195 | 5,61963 | 1,32163152  | N/A             | 644186    | NM_001123225 | SYCE3            |
| A_33_P3373541  | 6,76645 | 6,36435 | 1,321429997 | ENST00000609345 | 60528     | NM_173717    | ELAC2            |
| A_21_P0003592  | 1,96854 | 1,56649 | 1,321384201 | ENST00000512268 | N/A       | N/A          | N/A              |
| A_23_P20068    | 1,86015 | 1,45811 | 1,321375041 | ENST00000361669 | 2913      | NM_000840    | GRM3             |
| A_22_P00005824 | 3,19289 | 2,79087 | 1,321356723 | N/A             | N/A       | BX644926     | Inc-ERAL1-1      |
| A_23_P167595   | 7,73348 | 7,33147 | 1,321347565 | ENST00000265339 | 7320      | NM_003337    | UBE2B            |
| A_24_P248053   | 13,1841 | 12,7822 | 1,321246821 | ENST00000517857 | 116447    | NM_052963    | TOP1MT           |
| A_21_P0014372  | 3,6669  | 3,26503 | 1,321219346 | N/A             | 101928571 | NR_110733    | ZNF649-AS1       |
| A_33_P3328653  | 4,63623 | 4,23438 | 1,321201031 | ENST00000262738 | 9620      | NM_014246    | CELSR1           |
| A_21_P0009300  | 2,24693 | 1,84509 | 1,321191873 | N/A             | N/A       | N/A          | Inc-PMP22-2      |
| A_23_P130304   | 13,7116 | 13,3098 | 1,321155242 | ENST00000585769 | 10907     | BC080184     | TXNL4A           |
| A_21_P0013060  | 11,7504 | 11,3486 | 1,321155242 | N/A             | N/A       | N/A          | XLOC_I2_012870   |
| A_33_P3610406  | 2,29571 | 1,89392 | 1,321146084 | N/A             | 347694    | NR_028501    | ECEL1P2          |
| A_24_P127121   | 12,1377 | 11,736  | 1,32106367  | ENST00000399148 | N/A       | N/A          | N/A              |
| A_33_P3420402  | 7,88385 | 7,48216 | 1,321054513 | ENST00000518228 | 57531     | NM_020771    | HACE1            |
| A_33_P3395074  | 10,6686 | 10,267  | 1,320972104 | ENST00000570600 | 57048     | NM_020360    | PLSCR3           |
| A_23_P87742    | 7,81692 | 7,41533 | 1,320962947 | ENST00000396830 | 25900     | NM_001039670 | IFFO1            |
| A_22_P00021540 | 2,28435 | 1,88279 | 1,320935479 | N/A             | N/A       | N/A          | Inc-FAM57A-2     |

|                |         |         |             |                 |           |              |                  |
|----------------|---------|---------|-------------|-----------------|-----------|--------------|------------------|
| A_33_P3332369  | 2,39781 | 1,99626 | 1,320926323 | ENST00000376248 | 2572      | N/A          | GAD2             |
| A_22_P00013895 | 2,43904 | 2,03749 | 1,320926323 | N/A             | 104502417 | NR_126469    | MGAT3-AS1        |
| A_21_P0012956  | 3,43828 | 3,03675 | 1,320908011 | N/A             | 101926941 | NR_120664    | LOC101926941     |
| A_22_P00020832 | 3,95955 | 3,55807 | 1,320862233 | N/A             | N/A       | N/A          | Inc-TMC5-1       |
| A_22_P00017753 | 5,31277 | 4,9113  | 1,320853077 | N/A             | N/A       | N/A          | Inc-YIF1A-5      |
| A_21_P0002720  | 3,17365 | 2,77219 | 1,320843922 | ENST00000446091 | N/A       | N/A          | N/A              |
| A_22_P00019274 | 3,57068 | 3,16926 | 1,320807301 | N/A             | N/A       | BG401516     | Inc-MTERFD3-2    |
| A_21_P0014918  | 7,50378 | 7,10265 | 1,320541829 | ENST00000568097 | 100289574 | NR_109773    | HERC2P4          |
| A_33_P3410821  | 6,90669 | 6,50558 | 1,320523522 | N/A             | N/A       | N/A          | N/A              |
| A_33_P3368755  | 3,41591 | 3,01483 | 1,320496063 | ENST00000379034 | 158809    | NM_173523    | MAGEB6           |
| A_23_P256205   | 8,31919 | 7,9182  | 1,320413689 | ENST00000506113 | 22885     | NM_014945    | ABLIM3           |
| A_21_P0009166  | 5,00626 | 4,60529 | 1,320395384 | ENST00000447729 | N/A       | N/A          | N/A              |
| A_22_P00009212 | 2,04204 | 1,64112 | 1,320349623 | N/A             | N/A       | AK124874     | Inc-LPIN3-1      |
| A_23_P337201   | 12,8624 | 12,4615 | 1,320331319 | ENST00000342756 | 6731      | NM_006947    | SRP72            |
| A_33_P3383226  | 5,36152 | 4,96064 | 1,320313016 | ENST00000307395 | 2815      | NM_000174    | GP9              |
| A_21_P0001741  | 7,03774 | 6,63686 | 1,320313016 | N/A             | N/A       | N/A          | Inc-HIST2H3PS2-3 |
| A_33_P3526315  | 7,45436 | 7,0536  | 1,3202032   | N/A             | 84786     | BC005372     | MGC12488         |
| A_23_P140821   | 6,50974 | 6,10904 | 1,320148295 | ENST00000602727 | 50855     | NM_016948    | PARD6A           |
| A_33_P3388646  | 6,94088 | 6,54025 | 1,320084243 | ENST00000369252 | 3983      | NM_001003408 | ABLIM1           |
| A_33_P3240437  | 5,59187 | 5,19139 | 1,319946998 | N/A             | 642335    | AK098072     | LOC642335        |
| A_23_P50349    | 12,1799 | 11,7795 | 1,319873807 | ENST00000596758 | 9322      | NM_004240    | TRIP10           |
| A_23_P436476   | 11,3631 | 10,9628 | 1,319782323 | ENST00000495224 | 23029     | NM_015014    | RBM34            |
| A_32_P14850    | 14,9614 | 14,5611 | 1,319782323 | ENST00000429990 | 440348    | XM_005256273 | NPIPB15          |
| A_21_P0003235  | 1,91764 | 1,51743 | 1,319699994 | N/A             | N/A       | N/A          | Inc-GPR27-1      |
| A_33_P3793307  | 8,47859 | 8,0785  | 1,319590229 | ENST00000420918 | 339803    | NR_036496    | LOC339803        |
| A_21_P0002798  | 5,09647 | 4,69647 | 1,319507911 | ENST00000494887 | N/A       | N/A          | N/A              |
| A_22_P00007977 | 3,93419 | 3,53431 | 1,319398162 | N/A             | N/A       | AK310119     | Inc-IDS-1        |
| A_23_P64560    | 9,7902  | 9,39034 | 1,319379871 | ENST00000477358 | 27315     | NM_014489    | PGAP2            |
| A_33_P3339687  | 5,14914 | 4,74929 | 1,319370726 | ENST00000343381 | 79862     | NM_024804    | ZNF669           |
| A_23_P77066    | 9,71462 | 9,31496 | 1,319196979 | ENST00000584968 | 6638      | NM_022807    | SNRPN            |
| A_22_P00012847 | 4,05963 | 3,65997 | 1,319196979 | N/A             | N/A       | N/A          | Inc-RASAL1-1     |
| A_19_P00331853 | 5,65983 | 5,26023 | 1,319142116 | N/A             | 100131564 | N/A          | LOC100131564     |
| A_32_P331139   | 2,10765 | 1,70806 | 1,319132973 | ENST00000367974 | 257177    | NM_001013625 | CFAP126          |

|                |         |         |             |                 |           |              |                       |
|----------------|---------|---------|-------------|-----------------|-----------|--------------|-----------------------|
| A_21_P0009716  | 2,1572  | 1,75766 | 1,319087256 | N/A             | N/A       | N/A          | Inc-LSR-1             |
| A_24_P15043    | 9,43268 | 9,03316 | 1,319068969 | ENST00000232766 | 23276     | NM_025010    | KLHL18                |
| A_24_P329487   | 9,82095 | 9,42147 | 1,319032398 | ENST00000304916 | 157638    | NM_174911    | FAM84B                |
| A_23_P75500    | 11,5512 | 11,1518 | 1,318959257 | ENST00000530238 | 25855     | NM_001024957 | BRMS1                 |
| A_23_P136978   | 12,8212 | 12,4219 | 1,318867837 | ENST00000373004 | 27286     | NM_014467    | SRPX2                 |
| A_33_P3311235  | 3,01867 | 2,61943 | 1,318812988 | ENST00000594319 | 728780    | N/A          | ANKDD1B               |
| A_23_P78209    | 11,614  | 11,2148 | 1,318776423 | ENST00000357736 | 4097      | NM_002359    | MAFG                  |
| A_24_P340776   | 10,9159 | 10,5169 | 1,318593614 | ENST00000356023 | N/A       | AB527617     | N/A                   |
| A_21_P0007318  | 4,79691 | 4,39791 | 1,318593614 | ENST00000525154 | 440028    | NR_033972    | LOC440028             |
| A_22_P00013296 | 4,67854 | 4,27955 | 1,318584475 | N/A             | N/A       | CR737344     | Inc-RP11-1105G2.3.1-1 |
| A_21_P0007938  | 2,8661  | 2,46723 | 1,318474803 | N/A             | N/A       | N/A          | Inc-DLEU1-1           |
| A_23_P155666   | 8,58977 | 8,19094 | 1,318438247 | ENST00000513045 | 27163     | NM_001042402 | NAAA                  |
| A_23_P37545    | 13,1364 | 12,7376 | 1,318410831 | ENST00000538028 | 79719     | NM_024666    | AAGAB                 |
| A_21_P0005793  | 6,10966 | 5,71094 | 1,318337725 | N/A             | N/A       | N/A          | Inc-ANGPT2-2          |
| A_33_P3222917  | 14,1779 | 13,7792 | 1,318319449 | ENST00000318424 | 80381     | NM_001024736 | CD276                 |
| A_33_P3315715  | 4,18854 | 3,7899  | 1,318264623 | ENST00000405223 | 130271    | AK126308     | PLEKHH2               |
| A_22_P00010566 | 2,65051 | 2,25191 | 1,318228073 | N/A             | N/A       | DA304148     | Inc-NDE1-2            |
| A_23_P27013    | 10,3608 | 9,96243 | 1,318017933 | ENST00000311177 | 3219      | NM_024017    | HOXB9                 |
| A_22_P00005072 | 2,86359 | 2,46526 | 1,31798139  | N/A             | 102724196 | XR_424327    | LOC102724196          |
| A_23_P318938   | 1,99538 | 1,59705 | 1,31798139  | ENST00000381923 | 120939    | NM_153022    | TMEM52B               |
| A_21_P0000321  | 11,7959 | 11,3976 | 1,317953984 | N/A             | 677814    | NR_002967    | SNORA31               |
| A_22_P00004984 | 6,20043 | 5,80216 | 1,317926578 | N/A             | 90768     | NR_125905    | LOC90768              |
| A_21_P0000348  | 9,65022 | 9,25199 | 1,317890038 | N/A             | 677846    | NR_002996    | SNORA80A              |
| A_23_P23411    | 8,50565 | 8,10747 | 1,317844364 | ENST00000459707 | 5546      | NM_005973    | PRCC                  |
| A_21_P0007068  | 7,66373 | 7,2656  | 1,317798692 | N/A             | 101929506 | XR_252776    | LOC101929506          |
| A_33_P3303810  | 15,3153 | 14,9172 | 1,31777129  | ENST00000367313 | 3898      | NM_005558    | LAD1                  |
| A_23_P78835    | 10,4611 | 10,063  | 1,31777129  | ENST00000610935 | 126208    | NM_001002836 | ZNF787                |
| A_32_P78816    | 13,9048 | 13,5067 | 1,31777129  | ENST00000395471 | 5723      | NM_004577    | PSPH                  |
| A_24_P285768   | 9,29926 | 8,90121 | 1,31772562  | ENST00000256497 | 9695      | NM_014674    | EDEM1                 |
| A_23_P125829   | 15,5648 | 15,1668 | 1,317679952 | ENST00000476531 | 5230      | NM_000291    | PGK1                  |
| A_23_P413761   | 15,1206 | 14,7227 | 1,31758862  | ENST00000620389 | 6428      | NM_003017    | SRSF3                 |
| A_21_P0013857  | 4,70718 | 4,30929 | 1,317579487 | N/A             | N/A       | N/A          | Inc-MAGEA8-2          |
| A_21_P0000383  | 4,38794 | 3,99005 | 1,317579487 | ENST00000467175 | 692199    | NR_003065    | SNORD84               |

|                |         |         |             |                 |           |           |                    |
|----------------|---------|---------|-------------|-----------------|-----------|-----------|--------------------|
| A_21_P0005807  | 5,18186 | 4,78401 | 1,317542957 | N/A             | N/A       | N/A       | Inc-GFRA2-1        |
| A_33_P6814866  | 8,14377 | 7,74601 | 1,317460767 | N/A             | N/A       | AK127569  | Inc-GTF2F2-2       |
| A_23_P159937   | 10,3975 | 9,99977 | 1,317433371 | ENST00000253122 | 6535      | NM_005629 | SLC6A8             |
| A_21_P0008454  | 5,93519 | 5,53747 | 1,31742424  | N/A             | N/A       | N/A       | Inc-MAP3K9-1       |
| A_33_P3310706  | 5,57136 | 5,17367 | 1,317396845 | N/A             | N/A       | DB043695  | N/A                |
| A_21_P0003090  | 5,20159 | 4,80402 | 1,317287271 | N/A             | N/A       | N/A       | Inc-AC069257.9.1-5 |
| A_22_P00012113 | 5,66266 | 5,26518 | 1,317205097 | N/A             | N/A       | N/A       | Inc-POLD3-2        |
| A_22_P00011141 | 4,85327 | 4,45582 | 1,317177707 | N/A             | 101928273 | N/A       | LOC101928273       |
| A_24_P207150   | 10,3186 | 9,92133 | 1,317013378 | ENST00000232165 | 7337      | NM_130839 | UBE3A              |
| A_33_P3328973  | 3,77946 | 3,38226 | 1,316949477 | N/A             | N/A       | AK129565  | N/A                |
| A_24_P324405   | 10,8838 | 10,4868 | 1,316766922 | ENST00000330736 | 29123     | NM_013275 | ANKRD11            |
| A_33_P3325395  | 3,70315 | 3,30616 | 1,316757795 | N/A             | N/A       | AK027069  | N/A                |
| A_24_P270525   | 13,3474 | 12,9505 | 1,316675654 | ENST00000396061 | 2958      | NM_004492 | GTF2A2             |
| A_23_P166159   | 13,0958 | 12,699  | 1,316584392 | ENST00000202017 | 81572     | NM_030815 | PDRG1              |
| A_23_P27538    | 2,25777 | 1,861   | 1,316557015 | ENST00000409035 | 125972    | NM_145046 | CALR3              |
| A_22_P00013016 | 2,18221 | 1,78557 | 1,316438386 | ENST00000554261 | N/A       | XR_243240 | N/A                |
| A_22_P00009178 | 4,1115  | 3,71488 | 1,316420137 | ENST00000530228 | 340357    | NR_015383 | LOC340357          |
| A_23_P170518   | 11,8152 | 11,4187 | 1,316310644 | ENST00000269445 | 54808     | NM_017653 | DYM                |
| A_33_P3353622  | 5,52235 | 5,12585 | 1,316310644 | ENST00000353796 | 57786     | NM_021163 | RBAK               |
| A_23_P119936   | 3,19394 | 2,79762 | 1,316146423 | ENST00000305165 | 5068      | NM_138938 | REG3A              |
| A_33_P3377750  | 11,4598 | 11,0635 | 1,316128178 | ENST00000585434 | 147700    | NM_177417 | KLC3               |
| A_23_P142407   | 9,39925 | 9,00296 | 1,316119055 | ENST00000415440 | 94039     | NM_033204 | ZNF101             |
| A_23_P56213    | 5,62243 | 5,22623 | 1,316036954 | ENST00000600231 | 57655     | NM_020895 | GRAMD1A            |
| A_22_P00016905 | 8,3151  | 7,9189  | 1,316036954 | N/A             | N/A       | AK123295  | Inc-TSKU-1         |
| A_33_P3396522  | 14,4394 | 14,0432 | 1,316036954 | ENST00000531944 | 5436      | NM_002696 | POLR2G             |
| A_24_P28722    | 8,3391  | 7,94292 | 1,31601871  | ENST00000382040 | 91543     | NM_080657 | RSAD2              |
| A_23_P368558   | 10,0466 | 9,65051 | 1,315936615 | ENST00000186436 | 23505     | NM_015348 | TMEM131            |
| A_33_P3320782  | 5,59829 | 5,20222 | 1,315918372 | ENST00000538065 | 6314      | NM_000333 | ATXN7              |
| A_32_P150300   | 5,90066 | 5,50459 | 1,315918372 | N/A             | 101928370 | N/A       | LOC101928370       |
| A_23_P361381   | 5,34396 | 4,94793 | 1,315881888 | ENST00000216024 | 11144     | NM_007068 | DMC1               |
| A_21_P0014205  | 4,61475 | 4,21872 | 1,315881888 | ENST00000436944 | 114049    | AK091162  | WBSR22             |
| A_24_P6864     | 3,63345 | 3,23749 | 1,315818042 | ENST00000304105 | N/A       | N/A       | N/A                |
| A_33_P3298159  | 8,14863 | 7,7527  | 1,315790681 | ENST00000444903 | 5730      | NM_000954 | PTGDS              |



|                |         |         |             |                 |           |              |                |
|----------------|---------|---------|-------------|-----------------|-----------|--------------|----------------|
| A_33_P3280945  | 14,0495 | 13,6536 | 1,31576332  | N/A             | 8420      | NR_036473    | SNHG3          |
| A_21_P0014911  | 6,55191 | 6,15601 | 1,31576332  | N/A             | N/A       | N/A          | N/A            |
| A_22_P00013317 | 3,62972 | 3,23383 | 1,3157542   | ENST00000548488 | N/A       | AL137575     | N/A            |
| A_22_P00009671 | 1,97005 | 1,57417 | 1,31574508  | ENST00000556013 | 100886964 | NR_049735    | PTCSC3         |
| A_23_P47991    | 11,1673 | 10,7715 | 1,315672122 | ENST00000281928 | 23389     | NM_015335    | MED13L         |
| A_22_P00019134 | 5,6977  | 5,30192 | 1,315653883 | N/A             | N/A       | N/A          | Inc-CBX1-1     |
| A_21_P0014288  | 10,0263 | 9,63058 | 1,315599167 | N/A             | 100505494 | AK124233     | ANKRD10-IT1    |
| A_33_P3305418  | 6,61232 | 6,2166  | 1,315599167 | N/A             | N/A       | AK127935     | N/A            |
| A_23_P108641   | 12,3404 | 11,9447 | 1,315580929 | ENST00000460307 | 84908     | NM_032822    | FAM136A        |
| A_23_P252775   | 10,948  | 10,5523 | 1,315580929 | ENST00000479656 | 54840     | NM_175073    | APTX           |
| A_33_P3256267  | 4,77934 | 4,38375 | 1,315480625 | ENST00000377200 | 375743    | XM_005251976 | PTAR1          |
| A_24_P323997   | 5,38658 | 4,991   | 1,315471507 | ENST00000543508 | 284355    | NM_198479    | TPRX1          |
| A_33_P3214803  | 6,86946 | 6,47388 | 1,315471507 | ENST00000369215 | 59336     | NM_021620    | PRDM13         |
| A_21_P0007996  | 2,29412 | 1,89857 | 1,315444153 | N/A             | N/A       | N/A          | Inc-LECT1-1    |
| A_33_P3371514  | 8,0597  | 7,66428 | 1,315325624 | ENST00000375522 | 64768     | NM_022755    | IPPK           |
| A_22_P00024162 | 3,08403 | 2,68867 | 1,315270923 | N/A             | N/A       | N/A          | Inc-SLC3A2-1   |
| A_22_P00005193 | 6,70514 | 6,30984 | 1,315216223 | N/A             | N/A       | N/A          | Inc-DKK4-1     |
| A_22_P00005882 | 3,01574 | 2,6205  | 1,315161526 | N/A             | N/A       | N/A          | Inc-ESRP2-2    |
| A_23_P363896   | 16,1977 | 15,8026 | 1,315033908 | N/A             | 125144    | NR_027162    | LRRC75A-AS1    |
| A_33_P3278407  | 11,3642 | 10,9691 | 1,315033908 | ENST00000366809 | 4301      | NM_001207008 | MLLT4          |
| A_21_P0010029  | 5,99023 | 5,59518 | 1,314988333 | N/A             | N/A       | N/A          | Inc-FAM182B-1  |
| A_33_P3354678  | 4,65829 | 4,26326 | 1,314970104 | N/A             | 117852    | AF230412     | TRIM78P        |
| A_22_P00018383 | 2,7238  | 2,32879 | 1,314951875 | N/A             | N/A       | N/A          | Inc-SERPINB1-1 |
| A_19_P00316467 | 4,14941 | 3,75445 | 1,314906303 | ENST00000473756 | N/A       | N/A          | N/A            |
| A_33_P3317483  | 2,87685 | 2,48191 | 1,314888074 | ENST00000567119 | 752014    | NM_001048212 | CEMP1          |
| A_19_P00322886 | 5,03713 | 4,6422  | 1,31487896  | N/A             | N/A       | N/A          | Inc-SNURF-3    |
| A_33_P3406505  | 6,52555 | 6,13064 | 1,314860732 | ENST00000594635 | 8178      | NM_006532    | ELL            |
| A_22_P00025521 | 2,00517 | 1,6103  | 1,314824277 | N/A             | 101928191 | NR_125851    | LOC101928191   |
| A_22_P00007556 | 2,38921 | 1,99435 | 1,314815164 | ENST00000518922 | N/A       | N/A          | N/A            |
| A_24_P941922   | 6,8012  | 6,40647 | 1,314696692 | ENST00000428680 | 4850      | BC035590     | CNOT4          |
| A_22_P00010915 | 2,29508 | 1,9004  | 1,314651129 | ENST00000512831 | N/A       | XR_425799    | N/A            |
| A_33_P3372084  | 8,82915 | 8,43455 | 1,314578231 | ENST00000511402 | N/A       | N/A          | N/A            |
| A_22_P00006054 | 4,73751 | 4,34297 | 1,314523561 | ENST00000419813 | 100775104 | NR_046220    | KLHL7-AS1      |

|                |         |         |             |                 |           |              |                |
|----------------|---------|---------|-------------|-----------------|-----------|--------------|----------------|
| A_21_P0000874  | 4,76344 | 4,36894 | 1,314487115 | N/A             | 100507299 | NR_039990    | SMC5-AS1       |
| A_22_P00015264 | 6,24016 | 5,84567 | 1,314478003 | ENST00000622372 | 619455    | NR_037183    | SPANXA2-OT1    |
| A_22_P00015842 | 1,85422 | 1,45976 | 1,31445067  | N/A             | N/A       | N/A          | Inc-TBCCD1-1   |
| A_24_P914940   | 9,90109 | 9,50665 | 1,314432448 | ENST00000494489 | 729991    | NM_001145784 | MEF2BNB        |
| A_33_P3307068  | 5,57927 | 5,18486 | 1,314405115 | ENST00000462089 | 2801      | N/A          | GOLGA2         |
| A_33_P3254375  | 3,52487 | 3,13057 | 1,314304901 | N/A             | N/A       | N/A          | N/A            |
| A_33_P3313528  | 4,95134 | 4,55717 | 1,314186475 | N/A             | N/A       | CU693037     | N/A            |
| A_33_P3364211  | 4,48838 | 4,09427 | 1,314131821 | N/A             | 101927249 | AK126423     | PDZRN3-AS1     |
| A_24_P142095   | 11,6067 | 11,2126 | 1,314122712 | ENST00000394518 | 11214     | NM_006738    | AKAP13         |
| A_23_P355289   | 12,7701 | 12,376  | 1,314122712 | ENST00000427658 | 172       | NR_003226    | AFG3L1P        |
| A_24_P322354   | 8,60305 | 8,20899 | 1,314086277 | ENST00000616604 | 220134    | NM_001039535 | SKA1           |
| A_21_P0012131  | 3,35929 | 2,96534 | 1,313986087 | ENST00000432910 | 284757    | N/A          | MIR646HG       |
| A_33_P3215333  | 4,47689 | 4,08296 | 1,313967871 | ENST00000414705 | 4773      | NM_012340    | NFATC2         |
| A_24_P112750   | 9,13452 | 8,74063 | 1,313931441 | ENST00000548115 | 7024      | NM_005653    | TFCP2          |
| A_22_P00014722 | 6,57773 | 6,18389 | 1,313885904 | N/A             | 100507308 | NR_109982    | TARID          |
| A_22_P00015660 | 3,89767 | 3,50398 | 1,313749304 | N/A             | 101930316 | XR_247649    | LOC101930316   |
| A_24_P115507   | 2,69777 | 2,30409 | 1,313740198 | ENST00000298628 | 1757      | NM_007101    | SARDH          |
| A_24_P396197   | 11,4244 | 11,0308 | 1,313667351 | ENST00000587290 | 5589      | NM_002743    | PRKCSH         |
| A_33_P3228295  | 5,47304 | 5,07945 | 1,313658245 | ENST00000381732 | 10171     | N/A          | RCL1           |
| A_21_P0012006  | 5,26816 | 4,87462 | 1,313612718 | ENST00000445514 | 101927661 | N/A          | LOC101927661   |
| A_22_P00020732 | 1,91932 | 1,5259  | 1,313503459 | N/A             | 101929162 | NR_120474    | LOC101929162   |
| A_21_P0012496  | 2,45849 | 2,06513 | 1,313448833 | ENST00000498032 | N/A       | N/A          | N/A            |
| A_33_P3339100  | 4,4374  | 4,04405 | 1,313439729 | ENST00000263686 | 6403      | NM_003005    | SELP           |
| A_21_P0013011  | 2,053   | 1,65978 | 1,313321382 | ENST00000439891 | N/A       | N/A          | N/A            |
| A_33_P3314291  | 3,26463 | 2,87142 | 1,313312278 | N/A             | N/A       | DB307521     | N/A            |
| A_21_P0000653  | 2,8306  | 2,43742 | 1,313284969 | N/A             | 283104    | NR_036485    | SBF2-AS1       |
| A_23_P7941     | 9,43316 | 9,04001 | 1,31325766  | ENST00000485654 | 51069     | NM_015950    | MRPL2          |
| A_23_P501134   | 6,39126 | 5,99813 | 1,313239455 | ENST00000262327 | 3980      | NM_002311    | LIG3           |
| A_33_P3485760  | 3,63901 | 3,24594 | 1,31318484  | N/A             | 641451    | CD654100     | SNORA19        |
| A_22_P00004960 | 7,9006  | 7,50762 | 1,313102922 | ENST00000424886 | N/A       | N/A          | N/A            |
| A_21_P0002969  | 2,10802 | 1,71507 | 1,313075617 | N/A             | N/A       | N/A          | Inc-SLC25A26-1 |
| A_22_P00000918 | 3,13042 | 2,73749 | 1,313057414 | N/A             | N/A       | AK124440     | Inc-AKAP1-1    |
| A_33_P3292337  | 8,84166 | 8,44875 | 1,313039211 | ENST00000302418 | 3799      | NM_004521    | KIF5B          |

|                |         |         |             |                 |           |              |              |
|----------------|---------|---------|-------------|-----------------|-----------|--------------|--------------|
| A_23_P162746   | 11,1548 | 10,7619 | 1,31303011  | ENST00000298248 | 51084     | NM_015974    | CRYL1        |
| A_33_P3235117  | 6,11025 | 5,71739 | 1,312993706 | N/A             | 100133286 | NR_040084    | LOC100133286 |
| A_22_P00004601 | 3,53629 | 3,14347 | 1,312957302 | ENST00000517807 | N/A       | BC040995     | N/A          |
| A_23_P35354    | 9,24454 | 8,85186 | 1,312829898 | ENST00000370379 | 55280     | NM_018294    | CWF19L1      |
| A_22_P00001192 | 2,01081 | 1,6183  | 1,31267521  | N/A             | 641373    | NR_045006    | NRON         |
| A_23_P259955   | 5,09536 | 4,70291 | 1,312620618 | ENST00000374372 | 8200      | NM_000557    | GDF5         |
| A_22_P00019139 | 2,06654 | 1,67413 | 1,312584225 | N/A             | N/A       | AK124882     | Inc-TPCN2-5  |
| A_21_P0006809  | 3,60719 | 3,21478 | 1,312584225 | ENST00000438753 | N/A       | N/A          | N/A          |
| A_22_P00019426 | 4,57024 | 4,17788 | 1,312538735 | N/A             | N/A       | N/A          | Inc-RIC8A-1  |
| A_21_P0000172  | 6,16223 | 5,76991 | 1,312502345 | ENST00000610462 | 10675     | NM_001206945 | CSPG5        |
| A_24_P23995    | 11,7329 | 11,3406 | 1,31248415  | ENST00000305943 | 149603    | NM_001010858 | RNF187       |
| A_23_P370666   | 2,07776 | 1,68551 | 1,312438663 | ENST00000534119 | 92292     | NM_080661    | GLYATL1      |
| A_21_P0002466  | 2,14629 | 1,75414 | 1,312347695 | N/A             | N/A       | N/A          | Inc-LRRTM1-4 |
| A_23_P404108   | 9,02878 | 8,63678 | 1,312211255 | ENST00000224756 | 54462     | NM_018999    | CCSER2       |
| A_23_P68401    | 10,7113 | 10,3193 | 1,312211255 | ENST00000405275 | 56259     | NM_030877    | CTNBL1       |
| A_22_P00004897 | 2,30168 | 1,90969 | 1,312202159 | N/A             | N/A       | N/A          | Inc-DAD1-2   |
| A_23_P317796   | 5,32751 | 4,93555 | 1,312174873 | ENST00000379423 | 346606    | NM_178176    | MOGAT3       |
| A_22_P00014395 | 4,3217  | 3,92975 | 1,312165778 | N/A             | 102723346 | XR_427907    | LOC102723346 |
| A_22_P00020365 | 5,99684 | 5,60493 | 1,312129397 | N/A             | N/A       | BQ189593     | Inc-TSR1-1   |
| A_22_P00008805 | 3,78456 | 3,39265 | 1,312129397 | N/A             | 100874241 | NR_046693    | STARD13-AS   |
| A_23_P59261    | 12,6734 | 12,2815 | 1,312120302 | ENST00000535040 | 7162      | NM_006670    | TPBG         |
| A_33_P3236778  | 2,85146 | 2,45965 | 1,31203845  | N/A             | N/A       | N/A          | N/A          |
| A_23_P119141   | 12,0541 | 11,6623 | 1,312029356 | ENST00000393623 | 9817      | NM_203500    | KEAP1        |
| A_33_P3239989  | 5,09083 | 4,69904 | 1,312020262 | N/A             | N/A       | N/A          | N/A          |
| A_33_P3373991  | 4,57453 | 4,1828  | 1,311965698 | ENST00000437095 | N/A       | N/A          | N/A          |
| A_23_P254404   | 8,29088 | 7,89915 | 1,311965698 | ENST00000308527 | 257364    | NM_153271    | SNX33        |
| A_33_P3268734  | 1,74318 | 1,35147 | 1,31194751  | N/A             | 414316    | CR748640     | COL5A1-AS1   |
| A_22_P00015651 | 2,1498  | 1,7581  | 1,311938416 | ENST00000583236 | N/A       | N/A          | N/A          |
| A_33_P3236858  | 12,9529 | 12,5612 | 1,311938416 | ENST00000564176 | 7041      | NM_001042454 | TGFB111      |
| A_23_P157600   | 8,91946 | 8,52785 | 1,311856576 | ENST00000520176 | 23259     | NM_015214    | DDHD2        |
| A_23_P146134   | 2,23376 | 1,84217 | 1,31183839  | ENST00000256261 | 78986     | NM_024025    | DUSP26       |
| A_33_P3249743  | 3,40457 | 3,01314 | 1,31169291  | ENST00000561706 | N/A       | XR_424638    | N/A          |
| A_33_P3218649  | 3,18429 | 2,79294 | 1,311620177 | ENST00000316715 | 2824      | NM_001001995 | GPM6B        |

|                |         |         |             |                 |           |              |                |
|----------------|---------|---------|-------------|-----------------|-----------|--------------|----------------|
| A_23_P6963     | 8,01247 | 7,6213  | 1,311456541 | ENST00000493707 | 7324      | NM_003341    | UBE2E1         |
| A_23_P203299   | 14,0623 | 13,6712 | 1,31139291  | ENST00000531345 | 5954      | NM_002901    | RCN1           |
| A_21_P0013908  | 3,14996 | 2,75896 | 1,311302014 | N/A             | N/A       | N/A          | XLOC_I2_016079 |
| A_23_P162106   | 12,4016 | 12,0107 | 1,311211125 | ENST00000543058 | 51642     | NM_016055    | MRPL48         |
| A_22_P00015568 | 2,72835 | 2,3375  | 1,311165683 | N/A             | 100506071 | NR_038356    | LOC100506071   |
| A_23_P115838   | 6,98956 | 6,59878 | 1,311102066 | ENST00000286067 | 26148     | NM_015652    | C10orf12       |
| A_22_P00005609 | 4,04327 | 3,6525  | 1,311092978 | ENST00000420403 | N/A       | XR_113300    | N/A            |
| A_21_P0004484  | 7,5314  | 7,14082 | 1,310920321 | ENST00000507582 | 255167    | NR_024424    | LINC01018      |
| A_23_P205489   | 8,22495 | 7,8344  | 1,310893062 | ENST00000617478 | 23428     | NM_182728    | SLC7A8         |
| A_24_P330796   | 6,65279 | 6,26237 | 1,310774944 | ENST00000581761 | 54903     | NM_017777    | MKS1           |
| A_23_P256835   | 9,63803 | 9,24763 | 1,310756772 | ENST00000437733 | 51112     | NM_016030    | TRAPPC12       |
| A_19_P00317016 | 3,55357 | 3,16327 | 1,310665921 | N/A             | N/A       | N/A          | Inc-GARS-2     |
| A_33_P3648597  | 5,10628 | 4,71599 | 1,310656836 | N/A             | 283075    | AK096372     | LOC283075      |
| A_33_P3489228  | 4,16394 | 3,77374 | 1,310575076 | ENST00000417004 | 26095     | NM_015605    | PTPN20B        |
| A_33_P3218925  | 4,69557 | 4,30537 | 1,310575076 | ENST00000394621 | 261729    | NM_001244944 | STEAP2         |
| A_21_P0005115  | 4,49559 | 4,10549 | 1,310484237 | ENST00000612677 | 401258    | N/A          | RAB44          |
| A_33_P3249731  | 5,33715 | 4,94711 | 1,310429736 | N/A             | N/A       | N/A          | XLOC_I2_000001 |
| A_33_P3415895  | 9,67931 | 9,28928 | 1,310420653 | ENST00000277746 | 29982     | NM_030759    | NRBF2          |
| A_33_P3378101  | 5,11633 | 4,72631 | 1,31041157  | ENST00000371839 | 84871     | NM_032785    | AGBL4          |
| A_22_P00007601 | 8,93688 | 8,54686 | 1,31041157  | ENST00000567753 | N/A       | AL117559     | N/A            |
| A_24_P106542   | 4,14197 | 3,75196 | 1,310402487 | ENST00000368317 | 84870     | NM_032784    | RSPO3          |
| A_33_P3279501  | 4,03222 | 3,64235 | 1,310275331 | ENST00000399472 | N/A       | XM_006710150 | N/A            |
| A_22_P00008338 | 3,90696 | 3,51712 | 1,310248085 | N/A             | N/A       | N/A          | Inc-ITPR2-2    |
| A_32_P197489   | 14,0992 | 13,7094 | 1,310211757 | ENST00000621843 | 51621     | NM_015995    | KLF13          |
| A_33_P3312790  | 6,49702 | 6,10731 | 1,310130025 | ENST00000614717 | 84465     | NM_032445    | MEGF11         |
| A_22_P00017259 | 4,12867 | 3,73896 | 1,310130025 | N/A             | N/A       | AY701053     | Inc-UNG-1      |
| A_23_P85969    | 11,4242 | 11,0345 | 1,310120944 | ENST00000394583 | 284695    | NM_182976    | ZNF326         |
| A_24_P59494    | 6,26784 | 5,87828 | 1,309993815 | ENST00000228820 | 57097     | NM_020367    | PARP11         |
| A_33_P3265504  | 6,47358 | 6,08405 | 1,309966575 | ENST00000520547 | 143244    | NM_001099692 | EIF5AL1        |
| A_32_P148476   | 8,08729 | 7,69776 | 1,309966575 | ENST00000496795 | N/A       | N/A          | N/A            |
| A_24_P318939   | 8,79511 | 8,40567 | 1,309884857 | ENST00000376436 | 26152     | NM_015655    | ZNF337         |
| A_23_P255569   | 11,415  | 11,0256 | 1,30984854  | ENST00000580731 | 64118     | NM_022156    | DUS1L          |
| A_33_P3284290  | 6,66481 | 6,27542 | 1,309839461 | ENST00000306502 | 197320    | NM_001201407 | ZNF778         |

|                |         |         |             |                 |           |              |              |
|----------------|---------|---------|-------------|-----------------|-----------|--------------|--------------|
| A_23_P81087    | 9,55168 | 9,16236 | 1,309775908 | ENST00000493425 | 57117     | NM_020395    | INTS12       |
| A_33_P3394605  | 11,7986 | 11,4093 | 1,309757751 | ENST00000619543 | 10362     | NM_006339    | HMG20B       |
| A_21_P0005152  | 5,86546 | 5,47618 | 1,309739594 | N/A             | N/A       | N/A          | Inc-GMDS-3   |
| A_33_P3256391  | 10,6389 | 10,2497 | 1,309666969 | ENST00000598494 | 92359     | NM_139161    | CRB3         |
| A_21_P0008994  | 1,88212 | 1,49302 | 1,309576193 | N/A             | N/A       | N/A          | Inc-JPH3-2   |
| A_23_P2006     | 2,19949 | 1,81048 | 1,3094945   | ENST00000379936 | 1262      | NM_001037329 | CNGA4        |
| A_23_P77653    | 2,30779 | 1,91903 | 1,309267601 | ENST00000566786 | 6559      | NM_000339    | SLC12A3      |
| A_33_P3406458  | 6,82802 | 6,43942 | 1,309122407 | ENST00000304788 | 140838    | NM_152667    | NANP         |
| A_33_P3278813  | 4,49655 | 4,10802 | 1,309058889 | ENST00000594215 | N/A       | AY461701     | N/A          |
| A_33_P3231297  | 14,4969 | 14,1084 | 1,309031669 | ENST00000370509 | 8804      | NM_003851    | CREG1        |
| A_22_P00022299 | 5,6836  | 5,29511 | 1,309022595 | ENST00000416861 | N/A       | N/A          | N/A          |
| A_24_P216654   | 8,08646 | 7,69798 | 1,309013522 | ENST00000540564 | 6646      | NM_003101    | SOAT1        |
| A_22_P00009855 | 3,10439 | 2,71591 | 1,309013522 | N/A             | 283480    | NR_036486    | FGF14-IT1    |
| A_22_P00011608 | 3,7742  | 3,38573 | 1,309004448 | N/A             | 101929066 | NR_125429    | LOC101929066 |
| A_21_P0000053  | 9,39686 | 9,0084  | 1,308995375 | ENST00000542527 | 730094    | NM_001164579 | C16orf52     |
| A_33_P3393821  | 13,2629 | 12,8745 | 1,308940937 | ENST00000602298 | 715       | NM_001733    | C1R          |
| A_21_P0006424  | 3,59916 | 3,21081 | 1,308895573 | N/A             | N/A       | N/A          | Inc-FAAH2-2  |
| A_21_P0007448  | 3,87163 | 3,48329 | 1,3088865   | N/A             | N/A       | N/A          | Inc-PIWIL4-4 |
| A_21_P0007430  | 5,69567 | 5,30736 | 1,308859283 | ENST00000527059 | 494141    | N/A          | LOC494141    |
| A_22_P00004878 | 6,28085 | 5,89255 | 1,308850211 | ENST00000567540 | N/A       | N/A          | N/A          |
| A_23_P94186    | 8,35201 | 7,96376 | 1,30880485  | ENST00000359228 | 137797    | NM_205545    | LYPD2        |
| A_22_P00012953 | 4,9063  | 4,51817 | 1,308695992 | ENST00000444770 | N/A       | N/A          | N/A          |
| A_33_P3262560  | 7,1258  | 6,73769 | 1,308677849 | ENST00000585600 | 3909      | NR_130106    | LAMA3        |
| A_33_P3283206  | 3,88362 | 3,49561 | 1,308587142 | N/A             | 102723979 | N/A          | LOC102723979 |
| A_23_P135157   | 10,1706 | 9,7826  | 1,308578071 | ENST00000397292 | 9373      | NM_001031689 | PLAA         |
| A_33_P3244026  | 10,7571 | 10,3691 | 1,308578071 | ENST00000416600 | 57506     | NM_020746    | MAVS         |
| A_33_P3251193  | 3,14837 | 2,76038 | 1,308569001 | ENST00000439627 | 23236     | XM_005260681 | PLCB1        |
| A_23_P99027    | 11,9287 | 11,5408 | 1,308487371 | ENST00000351677 | 5781      | NM_002834    | PTPN11       |
| A_23_P92334    | 8,20842 | 7,82063 | 1,308387608 | ENST00000381938 | 80008     | NM_024943    | TMEM156      |
| A_24_P1919     | 7,68705 | 7,29932 | 1,308333194 | ENST00000487476 | 4763      | NM_000267    | NF1          |
| A_24_P305933   | 6,88033 | 6,49263 | 1,308305989 | ENST00000261226 | 57458     | NM_020698    | TMCC3        |
| A_33_P3361707  | 8,37623 | 7,98856 | 1,308278783 | ENST00000258149 | 4193      | NM_002392    | MDM2         |
| A_22_P00005781 | 3,16023 | 2,77261 | 1,308233443 | N/A             | N/A       | BC038752     | Inc-ENTHD1-1 |

|                |         |         |             |                 |           |              |                 |
|----------------|---------|---------|-------------|-----------------|-----------|--------------|-----------------|
| A_19_P00801088 | 3,69863 | 3,31105 | 1,308197171 | N/A             | 100874392 | NR_046228    | ANKRD20A12P     |
| A_21_P0013441  | 9,84886 | 9,46128 | 1,308197171 | ENST00000428370 | 27342     | NM_001287060 | RABGEF1         |
| A_24_P409519   | 3,6949  | 3,30734 | 1,308179036 | ENST00000358540 | 84867     | NM_006906    | PTPN5           |
| A_21_P0012253  | 10,605  | 10,2175 | 1,308124631 | ENST00000510112 | N/A       | XM_006724933 | N/A             |
| A_33_P3327687  | 4,95082 | 4,56335 | 1,30809743  | N/A             | 727993    | XR_244229    | LOC727993       |
| A_23_P32083    | 3,18096 | 2,79363 | 1,307970498 | ENST00000382082 | 169522    | NM_133497    | KCNV2           |
| A_23_P161183   | 9,75381 | 9,36656 | 1,30789797  | ENST00000471035 | 64429     | NM_022494    | ZDHC6           |
| A_33_P3293785  | 4,82367 | 4,43645 | 1,307870774 | ENST00000391620 | 386682    | NM_198696    | KRTAP10-3       |
| A_23_P64173    | 11,2466 | 10,8595 | 1,307761993 | ENST00000525374 | 114769    | NM_001017534 | CARD16          |
| A_23_P11286    | 11,7225 | 11,3354 | 1,307761993 | ENST00000316594 | 3188      | NM_019597    | HNRNPH2         |
| A_21_P0009947  | 3,75907 | 3,37197 | 1,307761993 | N/A             | N/A       | N/A          | Inc-SSTR4-4     |
| A_21_P0006570  | 5,81896 | 5,43187 | 1,307752928 | N/A             | N/A       | N/A          | Inc-PLS3-2      |
| A_22_P00011227 | 2,24231 | 1,8555  | 1,307499142 | N/A             | N/A       | DB215008     | Inc-OR10AB1P-2  |
| A_23_P343237   | 7,07672 | 6,68992 | 1,307490079 | ENST00000481918 | 90806     | NM_144567    | ANGEL2          |
| A_24_P944640   | 5,61909 | 5,23235 | 1,307435704 | ENST00000452780 | 57669     | NM_020909    | EPB41L5         |
| A_24_P218587   | 9,27597 | 8,88925 | 1,307417579 | ENST00000251871 | 9440      | NM_004268    | MED17           |
| A_33_P3211153  | 11,8116 | 11,4249 | 1,307399454 | ENST00000591653 | 124401    | NM_133450    | ANKS3           |
| A_21_P0008478  | 6,71716 | 6,33047 | 1,307390392 | N/A             | N/A       | N/A          | Inc-SERPINA12-1 |
| A_23_P4036     | 10,1592 | 9,77253 | 1,307372268 | ENST00000584379 | 55852     | NM_018469    | TEX2            |
| A_23_P323227   | 13,6536 | 13,267  | 1,307308835 | ENST00000526510 | 5499      | NM_001008709 | PPP1CA          |
| A_24_P418189   | 13,0399 | 12,6533 | 1,307308835 | ENST00000483219 | N/A       | N/A          | N/A             |
| A_22_P00001616 | 8,22292 | 7,8364  | 1,307236345 | N/A             | N/A       | N/A          | Inc-ARSD-1      |
| A_23_P23266    | 9,69079 | 9,30428 | 1,307227284 | ENST00000367808 | 8548      | U79751       | BLZF1           |
| A_21_P0000244  | 10,4542 | 10,0677 | 1,307218223 | ENST00000561775 | 595097    | NR_002440    | SNORD16         |
| A_33_P3414389  | 10,6293 | 10,2431 | 1,306946423 | ENST00000536178 | 10603     | NM_020979    | SH2B2           |
| A_33_P3273020  | 16,0621 | 15,6759 | 1,306946423 | ENST00000541388 | 2286      | NM_004470    | FKBP2           |
| A_22_P00004301 | 2,57658 | 2,19039 | 1,306937364 | ENST00000442712 | N/A       | XR_425118    | N/A             |
| A_33_P3313830  | 6,66928 | 6,28312 | 1,306910187 | ENST00000501702 | 644873    | NR_015360    | LINC01184       |
| A_21_P0007129  | 7,00507 | 6,61912 | 1,306719966 | N/A             | 101929295 | N/A          | LOC101929295    |
| A_22_P00010874 | 2,67506 | 2,28912 | 1,306710908 | ENST00000533759 | 100505504 | XR_110921    | LOC100505504    |
| A_23_P131089   | 4,48434 | 4,09841 | 1,306701851 | ENST00000330915 | 256949    | NM_198471    | KANK3           |
| A_33_P3242713  | 2,83611 | 2,45018 | 1,306701851 | N/A             | N/A       | AK022058     | N/A             |
| A_33_P3235816  | 2,25384 | 1,86792 | 1,306692793 | ENST00000436258 | N/A       | BX647611     | N/A             |

|                |         |         |             |                 |           |              |                    |
|----------------|---------|---------|-------------|-----------------|-----------|--------------|--------------------|
| A_33_P3244249  | 3,75613 | 3,37022 | 1,306683736 | ENST00000513604 | 79628     | AK127248     | SH3TC2             |
| A_23_P257956   | 13,6399 | 13,2541 | 1,30658411  | ENST00000480213 | 3608      | NM_004515    | ILF2               |
| A_33_P3224809  | 10,8037 | 10,4179 | 1,30658411  | ENST00000319363 | 23765     | NM_014339    | IL17RA             |
| A_33_P3235721  | 3,38761 | 3,00205 | 1,306366771 | ENST00000327419 | 399947    | NM_207645    | C11orf87           |
| A_21_P0009075  | 5,40573 | 5,02017 | 1,306366771 | N/A             | N/A       | N/A          | Inc-ZDHHC7-1       |
| A_32_P36942    | 8,41908 | 8,03366 | 1,306240007 | N/A             | 129450    | NM_001039693 | TYW5               |
| A_22_P00007648 | 2,67754 | 2,29246 | 1,305932201 | ENST00000441724 | 148645    | NR_103534    | LINC00337          |
| A_33_P3356035  | 3,46852 | 3,08346 | 1,305914097 | ENST00000440812 | 9887      | N/A          | SMG7               |
| A_33_P3369885  | 7,85026 | 7,46522 | 1,305895994 | ENST00000423230 | 727957    | NM_001099280 | MROH1              |
| A_21_P0009805  | 5,1454  | 4,76036 | 1,305895994 | N/A             | N/A       | N/A          | Inc-KCNN4-1        |
| A_23_P204484   | 12,2418 | 11,8568 | 1,305859787 | ENST00000229340 | 11021     | NM_006861    | RAB35              |
| A_22_P00014351 | 1,95511 | 1,57014 | 1,305832633 | N/A             | N/A       | N/A          | Inc-SERPINI1-9     |
| A_23_P53057    | 9,00244 | 8,61754 | 1,305769275 | ENST00000278319 | 7762      | NM_013250    | ZNF215             |
| A_23_P320159   | 5,02848 | 4,64359 | 1,305760224 | ENST00000490617 | 170082    | NM_001297563 | TCEANC             |
| A_21_P0007452  | 4,48684 | 4,10195 | 1,305760224 | N/A             | N/A       | N/A          | Inc-AP000679.2.1-1 |
| A_23_P114210   | 3,90434 | 3,51948 | 1,305733072 | ENST00000373200 | 5456      | NM_000307    | POU3F4             |
| A_24_P409595   | 6,08106 | 5,69626 | 1,305678769 | ENST00000574657 | 9479      | NM_005456    | MAPK8IP1           |
| A_23_P407074   | 11,9281 | 11,5434 | 1,305588269 | ENST00000408974 | 1785      | NM_001005360 | DNM2               |
| A_23_P213857   | 5,08936 | 4,70471 | 1,305543022 | ENST00000313164 | 730       | NM_000587    | C7                 |
| A_22_P00015112 | 9,86463 | 9,48    | 1,305524923 | N/A             | N/A       | N/A          | Inc-SNX17-1        |
| A_23_P35131    | 7,69872 | 7,31416 | 1,30546158  | ENST00000271628 | 10262     | NM_005850    | SF3B4              |
| A_23_P209477   | 11,3828 | 10,9983 | 1,305407289 | ENST00000472077 | 5496      | NM_177983    | PPM1G              |
| A_22_P00005073 | 2,24405 | 1,85959 | 1,305371096 | ENST00000559049 | N/A       | N/A          | N/A                |
| A_21_P0000702  | 4,39119 | 4,00691 | 1,30520824  | N/A             | 100507266 | NR_037888    | STX18-AS1          |
| A_23_P19313    | 10,1835 | 9,79922 | 1,30520824  | ENST00000392092 | 6908      | NM_003194    | TBP                |
| A_23_P84910    | 7,17177 | 6,78751 | 1,305190146 | ENST00000377073 | 7712      | NM_003446    | ZNF157             |
| A_33_P3413168  | 6,99565 | 6,61139 | 1,305190146 | N/A             | 85301     | BC007696     | COL27A1            |
| A_22_P00007453 | 2,49021 | 2,10601 | 1,305135865 | N/A             | N/A       | N/A          | Inc-GTDC1-2        |
| A_23_P258978   | 9,17635 | 8,79215 | 1,305135865 | ENST00000475407 | 2800      | NM_002077    | GOLGA1             |
| A_21_P0000200  | 9,03126 | 8,64716 | 1,305045403 | ENST00000344683 | 79648     | NM_024596    | MCPH1              |
| A_22_P00015273 | 3,72037 | 3,3363  | 1,305018266 | N/A             | N/A       | N/A          | Inc-SPATA17-2      |
| A_33_P3369258  | 8,57909 | 8,19508 | 1,304963993 | ENST00000395941 | 26127     | NM_001171888 | FGFR1OP2           |
| A_33_P3215529  | 4,1904  | 3,8064  | 1,304954948 | ENST00000413932 | 9414      | AF083893     | TJP2               |

|                |         |         |             |                 |           |              |                       |
|----------------|---------|---------|-------------|-----------------|-----------|--------------|-----------------------|
| A_33_P3272568  | 3,89201 | 3,50801 | 1,304954948 | ENST00000379331 | 10549     | N/A          | PRDX4                 |
| A_33_P3363254  | 3,61027 | 3,22631 | 1,304918767 | N/A             | N/A       | N/A          | N/A                   |
| A_23_P106675   | 10,1777 | 9,79377 | 1,304891632 | ENST00000564138 | 5336      | NM_002661    | PLCG2                 |
| A_33_P3214939  | 2,79046 | 2,40653 | 1,304891632 | N/A             | N/A       | N/A          | XLOC_I2_005020        |
| A_33_P3307775  | 7,56711 | 7,18319 | 1,304882588 | N/A             | 8562      | NM_003677    | DENR                  |
| A_21_P0011909  | 4,29051 | 3,9067  | 1,304783099 | N/A             | N/A       | N/A          | XLOC_I2_007967        |
| A_22_P00013594 | 6,24141 | 5,85772 | 1,304674575 | ENST00000532357 | N/A       | AK125355     | N/A                   |
| A_22_P00013522 | 2,13692 | 1,75325 | 1,304656488 | N/A             | N/A       | BX090410     | Inc-RP11-404P21.6.1-1 |
| A_33_P3365437  | 4,29903 | 3,91538 | 1,304638402 | ENST00000367387 | 56956     | NM_020204    | LHX9                  |
| A_22_P00007095 | 3,10954 | 2,72589 | 1,304638402 | ENST00000509999 | N/A       | N/A          | N/A                   |
| A_21_P0013816  | 5,8356  | 5,45197 | 1,304620316 | ENST00000426799 | N/A       | N/A          | N/A                   |
| A_23_P380526   | 2,08967 | 1,70613 | 1,304538932 | ENST00000475135 | 55211     | NM_018189    | DPPA4                 |
| A_23_P407206   | 5,76175 | 5,37823 | 1,304520848 | ENST00000619400 | 2055      | NM_018941    | CLN8                  |
| A_22_P00014615 | 6,19671 | 5,81322 | 1,304493721 | ENST00000538901 | 104472718 | NR_126452    | LINC00508             |
| A_23_P202773   | 10,6378 | 10,2544 | 1,304412345 | ENST00000539943 | 25858     | NM_001039496 | TEX40                 |
| A_23_P147025   | 7,09909 | 6,7157  | 1,304403304 | ENST00000257017 | 9363      | NM_004794    | RAB33A                |
| A_24_P942773   | 10,673  | 10,2897 | 1,304321933 | ENST00000295952 | 7871      | XM_005265458 | SLMAP                 |
| A_22_P00018273 | 2,81613 | 2,43284 | 1,304312892 | N/A             | 100874118 | NR_046740    | DDX26B-AS1            |
| A_33_P3363600  | 4,40588 | 4,02261 | 1,304294811 | ENST00000472048 | N/A       | N/A          | N/A                   |
| A_23_P85941    | 4,31836 | 3,9351  | 1,30428577  | ENST00000369792 | 257       | NM_006492    | ALX3                  |
| A_23_P500410   | 3,99492 | 3,6117  | 1,304249608 | ENST00000303892 | 534       | NM_130463    | ATP6V1G2              |
| A_22_P00014134 | 1,98674 | 1,60358 | 1,304195367 | N/A             | N/A       | DB295693     | Inc-SCGB3A2-1         |
| A_24_P144881   | 5,78884 | 5,40573 | 1,304150168 | ENST00000476347 | 6049      | NM_005977    | RNF6                  |
| A_21_P0013349  | 7,02392 | 6,64089 | 1,304077853 | ENST00000325888 | 2318      | NM_001458    | FLNC                  |
| A_33_P3529859  | 8,06037 | 7,67736 | 1,304059774 | ENST00000536437 | 84678     | NM_032590    | KDM2B                 |
| A_23_P43248    | 10,7621 | 10,3791 | 1,304050735 | ENST00000378164 | 6873      | NM_003184    | TAF2                  |
| A_33_P3329878  | 10,3887 | 10,0057 | 1,304050735 | ENST00000405396 | 54476     | NM_207111    | RNF216                |
| A_23_P79622    | 6,08773 | 5,70488 | 1,303915157 | ENST00000434643 | 51661     | NM_181342    | FKBP7                 |
| A_23_P254079   | 7,3788  | 6,996   | 1,303869968 | ENST00000514365 | 8987      | NM_003943    | STBD1                 |
| A_24_P92174    | 2,35191 | 1,96914 | 1,303842855 | ENST00000390597 | N/A       | DQ100868     | N/A                   |
| A_22_P00012497 | 2,00454 | 1,62178 | 1,303833818 | ENST00000517949 | 100128993 | NR_038919    | LOC100128993          |
| A_22_P00004595 | 3,14367 | 2,76092 | 1,30382478  | N/A             | N/A       | N/A          | Inc-CSGALNACT1-2      |
| A_23_P151497   | 10,1844 | 9,80165 | 1,30382478  | ENST00000389749 | 115708    | NM_152307    | TRMT61A               |



|                |         |         |             |                 |           |              |                 |
|----------------|---------|---------|-------------|-----------------|-----------|--------------|-----------------|
| A_33_P3346098  | 9,13762 | 8,75495 | 1,303752483 | ENST00000308893 | 9344      | NM_016151    | TAOK2           |
| A_33_P3333985  | 9,9824  | 9,59974 | 1,303743446 | N/A             | N/A       | N/A          | N/A             |
| A_21_P0014001  | 9,09561 | 8,71301 | 1,303689226 | N/A             | 100652772 | NR_073113    | NNT-AS1         |
| A_24_P274640   | 11,3395 | 10,9569 | 1,303689226 | ENST00000508065 | 730394    | NM_001042490 | GTF2H2C_2       |
| A_19_P00810361 | 11,1862 | 10,8037 | 1,303598864 | ENST00000515142 | N/A       | N/A          | N/A             |
| A_33_P3278318  | 5,99616 | 5,6137  | 1,303562721 | ENST00000376510 | 22921     | NM_012228    | MSRB2           |
| A_22_P00023019 | 6,29961 | 5,91719 | 1,303526579 | N/A             | N/A       | N/A          | Inc-ACSBG1-1    |
| A_33_P3217709  | 5,09965 | 4,71725 | 1,303508509 | ENST00000476797 | N/A       | AK097639     | N/A             |
| A_23_P135454   | 9,64031 | 9,25795 | 1,303472368 | ENST00000269143 | 10939     | NM_006796    | AFG3L2          |
| A_21_P0002647  | 2,27876 | 1,8964  | 1,303472368 | N/A             | N/A       | N/A          | Inc-KIDINS220-6 |
| A_23_P24485    | 7,72259 | 7,34027 | 1,303436229 | ENST00000524794 | 4798      | NM_006165    | NFRKB           |
| A_23_P84775    | 11,327  | 10,9447 | 1,303418159 | ENST00000302078 | 5356      | NM_002669    | PLRG1           |
| A_22_P00020846 | 3,79923 | 3,41694 | 1,303409125 | N/A             | N/A       | N/A          | Inc-C7orf73-1   |
| A_23_P131240   | 8,7691  | 8,38681 | 1,303409125 | ENST00000404924 | 165324    | NM_181713    | UBXN2A          |
| A_22_P00020402 | 3,57403 | 3,19182 | 1,30333685  | N/A             | N/A       | N/A          | Inc-RALGAPA2-2  |
| A_23_P105535   | 9,14891 | 8,76679 | 1,303255547 | ENST00000549591 | 282809    | NM_172240    | POC1B           |
| A_23_P259901   | 4,96489 | 4,58282 | 1,30321038  | ENST00000369915 | 8277      | NM_012253    | TKTL1           |
| A_24_P225616   | 8,02142 | 7,63942 | 1,303147149 | ENST00000360566 | 6241      | NM_001034    | RRM2            |
| A_33_P3419481  | 7,49376 | 7,11178 | 1,303129084 | ENST00000430745 | N/A       | N/A          | N/A             |
| A_22_P00011055 | 2,67969 | 2,29773 | 1,303111019 | ENST00000560439 | N/A       | N/A          | N/A             |
| A_22_P00024092 | 8,51881 | 8,13688 | 1,303083922 | ENST00000532148 | 145389    | NM_153811    | SLC38A6         |
| A_21_P0000305  | 10,7631 | 10,3812 | 1,303056825 | ENST00000264254 | 79031     | NM_024065    | PDCL3           |
| A_22_P00008143 | 6,07881 | 5,69711 | 1,302876196 | ENST00000415611 | 101927841 | XR_250155    | LOC101927841    |
| A_24_P278460   | 9,69439 | 9,31276 | 1,302812981 | ENST00000354817 | 84188     | NM_032228    | FAR1            |
| A_22_P00023347 | 7,99324 | 7,61162 | 1,302803951 | N/A             | N/A       | N/A          | Inc-C12orf49-2  |
| A_33_P3290622  | 10,1985 | 9,81688 | 1,302803951 | ENST00000374454 | 51248     | NM_016484    | PDZD11          |
| A_21_P0008664  | 5,81511 | 5,43349 | 1,302803951 | N/A             | N/A       | N/A          | Inc-WHAMM-2     |
| A_23_P146497   | 11,026  | 10,6444 | 1,30278589  | ENST00000356818 | 9858      | NM_014811    | PPP1R26         |
| A_21_P0008380  | 5,48258 | 5,10111 | 1,302668503 | ENST00000555032 | N/A       | N/A          | N/A             |
| A_33_P3365732  | 7,02504 | 6,6436  | 1,302641415 | ENST00000528882 | 85456     | NM_033396    | TNKS1BP1        |
| A_22_P00004325 | 4,39582 | 4,01441 | 1,302614327 | N/A             | 286002    | NR_028137    | SLC26A4-AS1     |
| A_33_P3842629  | 1,96954 | 1,58828 | 1,302478899 | N/A             | N/A       | N/A          | XLOC_I2_013457  |
| A_21_P0001338  | 4,51956 | 4,13833 | 1,302451815 | N/A             | N/A       | N/A          | Inc-CDC7-1      |

|                |         |         |             |                 |           |              |                |
|----------------|---------|---------|-------------|-----------------|-----------|--------------|----------------|
| A_33_P3387756  | 10,7088 | 10,3276 | 1,302424731 | ENST00000308906 | 198437    | NM_001007125 | LKAAEAR1       |
| A_21_P0013587  | 9,87022 | 9,48918 | 1,302280296 | N/A             | N/A       | N/A          | XLOC_I2_014835 |
| A_33_P3367247  | 7,52718 | 7,14615 | 1,302271269 | ENST00000380641 | 54875     | NM_001114395 | CNTLN          |
| A_23_P127446   | 13,0848 | 12,7039 | 1,302153928 | ENST00000532052 | 5977      | NM_006268    | DPF2           |
| A_19_P00316340 | 6,42045 | 6,03956 | 1,302144902 | N/A             | 100506860 | N/A          | LOC100506860   |
| A_19_P00317963 | 3,58435 | 3,20369 | 1,301937326 | N/A             | N/A       | N/A          | Inc-PERP-3     |
| A_24_P8454     | 7,79874 | 7,41809 | 1,301928301 | ENST00000505173 | 9043      | NM_001130528 | SPAG9          |
| A_23_P104464   | 11,5522 | 11,1716 | 1,301883181 | ENST00000610656 | 240       | NM_000698    | ALOX5          |
| A_21_P0012237  | 5,4563  | 5,07579 | 1,301801968 | N/A             | N/A       | N/A          | XLOC_I2_009278 |
| A_23_P86330    | 15,1392 | 14,7587 | 1,301792944 | ENST00000367577 | 51278     | NM_016545    | IER5           |
| A_32_P144596   | 8,85024 | 8,46974 | 1,301792944 | ENST00000310430 | 8658      | NM_003747    | TNKS           |
| A_33_P3371989  | 2,51313 | 2,13268 | 1,301747828 | ENST00000370901 | 3547      | NM_205833    | IGSF1          |
| A_33_P3215487  | 11,5893 | 11,2089 | 1,301702714 | ENST00000348624 | 9907      | NM_014855    | AP5Z1          |
| A_23_P164691   | 10,7335 | 10,3531 | 1,301702714 | ENST00000587992 | 3385      | NM_002162    | ICAM3          |
| A_23_P34473    | 1,94403 | 1,56372 | 1,301621512 | ENST00000262340 | 6121      | NM_000329    | RPE65          |
| A_33_P3299000  | 3,04953 | 2,66926 | 1,301585424 | ENST00000489917 | 83890     | NM_031952    | SPATA9         |
| A_23_P75083    | 7,61936 | 7,23911 | 1,30156738  | ENST00000509513 | 10771     | NM_212479    | ZMYND11        |
| A_23_P151368   | 10,4783 | 10,0981 | 1,301522272 | ENST00000382754 | 221143    | NM_174928    | N6AMT2         |
| A_33_P3399253  | 1,89132 | 1,51113 | 1,301513251 | N/A             | 102724987 | N/A          | LOC102724987   |
| A_21_P0014576  | 3,74797 | 3,36778 | 1,301513251 | N/A             | N/A       | AI830629     | N/A            |
| A_23_P146004   | 8,88437 | 8,50419 | 1,301504229 | ENST00000440859 | 79872     | NM_024814    | CBLL1          |
| A_33_P3377209  | 8,56721 | 8,18715 | 1,301395978 | ENST00000362052 | 2029      | NM_207168    | ENSA           |
| A_24_P506816   | 3,63667 | 3,25667 | 1,301341855 | ENST00000484189 | 401428    | NR_002158    | OR2A20P        |
| A_22_P00012059 | 4,50533 | 4,12534 | 1,301332835 | ENST00000564376 | 51090     | N/A          | PLLP           |
| A_23_P423864   | 14,0848 | 13,7049 | 1,301251656 | ENST00000257118 | 1912      | NM_198040    | PHC2           |
| A_23_P162766   | 10,1323 | 9,75241 | 1,301242637 | ENST00000442173 | 23348     | NM_015296    | DOCK9          |
| A_33_P3315223  | 9,95118 | 9,57134 | 1,30119754  | ENST00000314940 | 10949     | NM_006805    | HNRNPA0        |
| A_32_P195065   | 6,8708  | 6,49102 | 1,301143426 | ENST00000357877 | 10505     | NM_004263    | SEMA4F         |
| A_33_P3222524  | 3,53344 | 3,15368 | 1,301125388 | N/A             | N/A       | N/A          | N/A            |
| A_24_P169524   | 1,99927 | 1,61953 | 1,301107351 | ENST00000427283 | N/A       | N/A          | N/A            |
| A_24_P379233   | 11,6055 | 11,2258 | 1,301071277 | ENST00000373366 | 2707      | NM_024009    | GJB3           |
| A_23_P215931   | 11,2214 | 10,8417 | 1,301071277 | ENST00000321250 | 23484     | NM_015344    | LEPROTL1       |
| A_21_P0009331  | 5,75937 | 5,37969 | 1,301053241 | N/A             | 103752589 | N/A          | TMEM92-AS1     |

|                |         |         |             |                 |           |              |                  |
|----------------|---------|---------|-------------|-----------------|-----------|--------------|------------------|
| A_23_P12463    | 13,1573 | 12,7777 | 1,300981097 | ENST00000367602 | 5768      | NM_002826    | QSOX1            |
| A_33_P3705275  | 3,88992 | 3,51032 | 1,300981097 | ENST00000588648 | 147991    | NM_207325    | DPY19L3          |
| A_23_P30162    | 7,82345 | 7,44386 | 1,300972079 | ENST00000509826 | 256471    | NM_152778    | MFSD8            |
| A_33_P3283813  | 3,47537 | 3,09582 | 1,300936009 | ENST00000427715 | 169026    | NM_001172813 | SLC30A8          |
| A_21_P0014834  | 3,42725 | 3,04772 | 1,300917974 | N/A             | N/A       | N/A          | N/A              |
| A_21_P0008749  | 2,85261 | 2,47309 | 1,300908957 | N/A             | N/A       | N/A          | Inc-UBAP1L-1     |
| A_23_P409438   | 5,63518 | 5,25571 | 1,300863872 | ENST00000331982 | 282616    | NM_172138    | IFNL2            |
| A_22_P00008656 | 3,44458 | 3,06516 | 1,300818788 | ENST00000531948 | N/A       | N/A          | N/A              |
| A_33_P7491516  | 2,9117  | 2,5323  | 1,300800755 | N/A             | 100506655 | NR_039998    | LCMT1-AS2        |
| A_23_P35205    | 8,23239 | 7,85304 | 1,300755674 | ENST00000374395 | 11123     | NM_013441    | RCAN3            |
| A_21_P0003594  | 3,32683 | 2,94749 | 1,300746657 | N/A             | N/A       | N/A          | Inc-PCDH7-6      |
| A_33_P3211342  | 2,43284 | 2,05353 | 1,300719609 | N/A             | N/A       | N/A          | Inc-AC021066.1-2 |
| A_33_P3249046  | 3,97132 | 3,59203 | 1,300701578 | ENST00000336803 | 9075      | NM_001171092 | CLDN2            |
| A_24_P99046    | 7,54933 | 7,17013 | 1,300620438 | ENST00000389032 | 23012     | NM_015000    | STK38L           |
| A_21_P0007649  | 3,99834 | 3,61936 | 1,300422119 | N/A             | N/A       | N/A          | Inc-FAM101A-2    |
| A_33_P3382291  | 2,06983 | 1,69097 | 1,300313957 | N/A             | 100133957 | NR_028119    | UXT-AS1          |
| A_22_P00007647 | 3,79489 | 3,41608 | 1,300268893 | ENST00000426616 | N/A       | DA506378     | N/A              |
| A_21_P0000186  | 5,11475 | 4,73598 | 1,300232842 | N/A             | 284385    | N/A          | ZNF561-AS1       |
| A_22_P00016108 | 6,50163 | 6,12294 | 1,300160744 | N/A             | 102724814 | NR_110555    | LOC102724814     |
| A_21_P0004548  | 6,49615 | 6,11751 | 1,300115684 | N/A             | 79844     | N/A          | ZDHHC11          |
| A_33_P3406811  | 3,83665 | 3,45802 | 1,300106673 | N/A             | N/A       | N/A          | N/A              |
| A_24_P346762   | 6,61368 | 6,23505 | 1,300106673 | ENST00000378557 | 80256     | NM_025182    | FAM214B          |
| A_23_P108404   | 8,86768 | 8,48906 | 1,300097661 | ENST00000453371 | 116987    | NM_001037131 | AGAP1            |
| A_22_P00003850 | 4,16353 | 3,78492 | 1,300088649 | ENST00000421019 | 100506115 | NM_001278655 | LINC01272        |
| A_33_P3293734  | 11,8975 | 11,5189 | 1,300079638 | N/A             | N/A       | N/A          | N/A              |
| A_24_P101921   | 2,13131 | 1,75273 | 1,300061615 | N/A             | 10640     | AF118083     | EXOC5            |
| A_21_P0014871  | 12,9358 | 12,5574 | 1,299899421 | ENST00000552481 | N/A       | N/A          | N/A              |
| A_23_P353035   | 3,71282 | 3,33452 | 1,299809322 | ENST00000295666 | 3490      | NM_001553    | IGFBP7           |
| A_23_P140290   | 2,33561 | 1,95743 | 1,299701212 | ENST00000557422 | 6252      | NM_021136    | RTN1             |
| A_33_P3220738  | 1,93162 | 1,55358 | 1,299575094 | ENST00000424564 | 460       | NM_207108    | ASTN1            |
| A_32_P201979   | 6,57063 | 6,19263 | 1,299539062 | ENST00000298068 | 143279    | NM_182765    | HECTD2           |
| A_24_P144163   | 14,6393 | 14,2613 | 1,299539062 | ENST00000479057 | N/A       | N/A          | N/A              |
| A_22_P00008942 | 4,02405 | 3,64609 | 1,299503032 | ENST00000565518 | N/A       | AL117588     | N/A              |

|                |         |         |             |                 |           |              |                     |
|----------------|---------|---------|-------------|-----------------|-----------|--------------|---------------------|
| A_22_P00025269 | 1,82812 | 1,45019 | 1,29947601  | N/A             | N/A       | AA412646     | Inc-C1orf31-2       |
| A_22_P00005149 | 6,35697 | 5,97909 | 1,299430974 | N/A             | 101927978 | XR_433286    | LOC101927978        |
| A_33_P3348086  | 3,62361 | 3,24576 | 1,299403954 | N/A             | N/A       | N/A          | N/A                 |
| A_24_P310009   | 8,17119 | 7,79341 | 1,299340908 | ENST00000570827 | 124739    | NM_153210    | USP43               |
| A_33_P3287537  | 5,92252 | 5,54476 | 1,299322895 | ENST00000371720 | 23203     | AK307206     | PMPCA               |
| A_21_P0010545  | 7,50843 | 7,13069 | 1,299304883 | N/A             | 101410535 | N/A          | LAMTOR5-AS1         |
| A_21_P0005195  | 4,51651 | 4,1389  | 1,299187809 | N/A             | N/A       | N/A          | Inc-GNB2-1          |
| A_21_P0000340  | 6,76162 | 6,38408 | 1,299124773 | N/A             | 677837    | NR_002986    | SNORA60             |
| A_21_P0003187  | 2,01424 | 1,63676 | 1,299070746 | N/A             | N/A       | N/A          | Inc-ZBBX-3          |
| A_33_P3214650  | 10,6985 | 10,3211 | 1,298998712 | ENST00000452371 | 6891      | NM_001290043 | TAP2                |
| A_21_P0008645  | 1,98596 | 1,60856 | 1,298998712 | N/A             | N/A       | N/A          | Inc-AC069368.3.1-1  |
| A_33_P3348220  | 3,49797 | 3,12063 | 1,298944689 | ENST00000583646 | 64772     | NM_001042573 | ENGASE              |
| A_22_P00024620 | 3,10808 | 2,73075 | 1,298935685 | N/A             | N/A       | N/A          | Inc-CBLL1-1         |
| A_22_P00011540 | 5,86474 | 5,48742 | 1,298926682 | ENST00000504882 | N/A       | N/A          | N/A                 |
| A_32_P109794   | 10,2839 | 9,90658 | 1,298926682 | ENST00000354586 | 6815      | NM_145251    | STYX                |
| A_22_P00018341 | 7,67339 | 7,29617 | 1,29883665  | ENST00000359653 | 54764     | NM_017580    | ZRANB1              |
| A_23_P76743    | 4,17449 | 3,79732 | 1,298791637 | ENST00000550583 | 374569    | NM_001080464 | ASPG                |
| A_33_P3232458  | 9,3738  | 8,99669 | 1,298737623 | ENST00000404424 | 79745     | NM_024692    | CLIP4               |
| A_22_P00001167 | 3,9541  | 3,57704 | 1,298692613 | N/A             | 101927256 | XR_242121    | LOC101927256        |
| A_21_P0009730  | 3,26937 | 2,89235 | 1,298656606 | ENST00000593109 | 386758    | NR_037161    | ZNF582-AS1          |
| A_23_P16573    | 10,5538 | 10,1768 | 1,298638603 | ENST00000598277 | 54555     | NM_019070    | DDX49               |
| A_33_P3334205  | 4,85561 | 4,47861 | 1,298638603 | ENST00000319018 | 202915    | NM_001097620 | TMEM184A            |
| A_21_P0005710  | 1,81159 | 1,43459 | 1,298638603 | N/A             | N/A       | N/A          | Inc-NKAIN3-6        |
| A_24_P324563   | 11,8475 | 11,4706 | 1,298548591 | ENST00000592757 | 81926     | NM_031213    | ABHD17A             |
| A_22_P00014168 | 5,42588 | 5,04903 | 1,298503588 | N/A             | N/A       | AK002090     | Inc-SCRN3-3         |
| A_21_P0008930  | 2,06884 | 1,69203 | 1,298467586 | N/A             | N/A       | N/A          | Inc-RP11-22D3.1.1-3 |
| A_21_P0006718  | 2,49801 | 2,12124 | 1,298431585 | ENST00000562162 | N/A       | XR_424076    | N/A                 |
| A_23_P364625   | 2,75896 | 2,38224 | 1,298386586 | ENST00000380055 | 64922     | NM_022901    | LRRC19              |
| A_33_P3409996  | 7,32352 | 6,94685 | 1,298341588 | ENST00000401897 | 9907      | NM_014855    | AP5Z1               |
| A_21_P0009796  | 4,17274 | 3,79611 | 1,298305591 | N/A             | N/A       | N/A          | Inc-ZNF71-3         |
| A_21_P0010668  | 3,25044 | 2,87387 | 1,298251597 | N/A             | N/A       | N/A          | XLOC_I2_001288      |
| A_33_P3214422  | 4,03747 | 3,66092 | 1,298233599 | ENST00000483551 | 8125      | AK127498     | ANP32A              |
| A_23_P404965   | 8,31266 | 7,93621 | 1,298143616 | ENST00000376621 | 2794      | NM_005275    | GNL1                |

|                |         |         |             |                 |        |              |                |
|----------------|---------|---------|-------------|-----------------|--------|--------------|----------------|
| A_23_P19479    | 9,98137 | 9,60495 | 1,298116622 | ENST00000466336 | 8859   | NM_032454    | STK19          |
| A_23_P82412    | 13,7646 | 13,3882 | 1,298098626 | ENST00000457352 | 55695  | NM_148956    | NSUN5          |
| A_23_P420218   | 3,29584 | 2,91953 | 1,298017649 | ENST00000270458 | 59283  | NM_031895    | CACNG8         |
| A_24_P113686   | 10,8156 | 10,4393 | 1,298008652 | ENST00000370574 | 54680  | NM_017953    | ZNHIT6         |
| A_23_P409626   | 8,48818 | 8,1119  | 1,297990658 | ENST00000403734 | 221092 | NM_001079559 | HNRNPUL2       |
| A_23_P25445    | 4,18435 | 3,80808 | 1,297981661 | ENST00000257894 | 84070  | NM_032130    | FAM186B        |
| A_22_P00007786 | 7,49415 | 7,11793 | 1,297936677 | ENST00000555688 | 283624 | NR_038970    | LINC00641      |
| A_23_P502832   | 10,0541 | 9,67794 | 1,297882699 | ENST00000374114 | 10137  | NM_006047    | RBM12          |
| A_23_P126212   | 4,21558 | 3,83946 | 1,297846714 | ENST00000318121 | 63967  | NM_022111    | CLSPN          |
| A_22_P00007979 | 9,6321  | 9,25601 | 1,297819727 | ENST00000523759 | 3423   | NM_006123    | IDS            |
| A_21_P0013198  | 13,3378 | 12,9618 | 1,297738767 | N/A             | 8781   | BC065228     | PSPHP1         |
| A_33_P3360665  | 8,14229 | 7,76636 | 1,297675802 | ENST00000410057 | 90     | NM_001105    | ACVR1          |
| A_23_P104372   | 12,0728 | 11,6969 | 1,297648818 | ENST00000372950 | 23234  | NM_015190    | DNAJC9         |
| A_33_P3317198  | 12,4974 | 12,1215 | 1,297648818 | ENST00000340473 | 2963   | NM_004128    | GTF2F2         |
| A_22_P00011399 | 2,09072 | 1,71483 | 1,297639823 | N/A             | N/A    | N/A          | Inc-PACRGL-3   |
| A_23_P415611   | 2,41941 | 2,04363 | 1,297540887 | ENST00000512651 | 150159 | NM_139173    | SLC9B1         |
| A_23_P99942    | 9,11055 | 8,7349  | 1,297423972 | ENST00000532145 | 79705  | NM_024652    | LRRK1          |
| A_21_P0010234  | 5,07613 | 4,70057 | 1,297343037 | N/A             | N/A    | N/A          | Inc-C21orf63-2 |
| A_22_P00012475 | 3,72508 | 3,34952 | 1,297343037 | N/A             | N/A    | N/A          | Inc-PRR7-2     |
| A_22_P00014886 | 3,92147 | 3,54595 | 1,297307067 | N/A             | N/A    | N/A          | Inc-SLC7A1-2   |
| A_21_P0010721  | 6,07827 | 5,70278 | 1,297280091 | ENST00000430442 | 57234  | XR_426752    | LINC00869      |
| A_21_P0006100  | 3,00443 | 2,62898 | 1,297244123 | N/A             | N/A    | N/A          | Inc-KLF4-4     |
| A_23_P115608   | 9,32332 | 8,94792 | 1,297199165 | ENST00000486374 | 57584  | NM_020824    | ARHGAP21       |
| A_22_P00009452 | 2,15178 | 1,77638 | 1,297199165 | N/A             | N/A    | AK096995     | Inc-MAB21L2-1  |
| A_23_P59630    | 10,2224 | 9,84702 | 1,297181182 | ENST00000437568 | 5387   | BC101598     | PMS2P3         |
| A_21_P0007108  | 5,38876 | 5,01344 | 1,297127235 | N/A             | N/A    | N/A          | Inc-PCBD1-2    |
| A_33_P3418766  | 9,14171 | 8,76645 | 1,29707329  | ENST00000336078 | 55205  | NM_018181    | ZNF532         |
| A_24_P20120    | 8,66373 | 8,2885  | 1,297046318 | ENST00000412148 | 55704  | NM_018084    | CCDC88A        |
| A_21_P0014447  | 1,72509 | 1,34988 | 1,297028338 | N/A             | N/A    | N/A          | N/A            |
| A_21_P0014336  | 4,02672 | 3,65154 | 1,297001367 | N/A             | N/A    | N/A          | Inc-CA5A-4     |
| A_23_P308673   | 7,56898 | 7,19383 | 1,296974397 | ENST00000279394 | 9344   | NM_004783    | TAOK2          |
| A_32_P34116    | 10,4424 | 10,0673 | 1,296929448 | ENST00000368494 | 116150 | NM_138459    | NUS1           |
| A_33_P3380417  | 8,69622 | 8,32114 | 1,296911469 | ENST00000539591 | 253512 | NM_001286807 | SLC25A30       |

|                |         |         |             |                 |           |              |                |
|----------------|---------|---------|-------------|-----------------|-----------|--------------|----------------|
| A_33_P3348288  | 8,69991 | 8,32483 | 1,296911469 | ENST00000337910 | 9886      | NM_001242359 | RHOBTB1        |
| A_23_P384329   | 6,31102 | 5,93598 | 1,296875511 | ENST00000443035 | 10260     | NM_001144823 | DENND4A        |
| A_33_P3247403  | 8,07373 | 7,69872 | 1,296848544 | ENST00000367625 | 64222     | NM_022371    | TOR3A          |
| A_22_P00018811 | 2,53849 | 2,16353 | 1,296803599 | N/A             | N/A       | BU658380     | Inc-MTX3-1     |
| A_33_P3283599  | 6,65545 | 6,28052 | 1,296776633 | ENST00000429823 | 729171    | NR_003366    | ANKRD20A8P     |
| A_23_P127367   | 15,3755 | 15,0006 | 1,296749668 | ENST00000528087 | 57804     | NM_021173    | POLD4          |
| A_21_P0011133  | 8,49006 | 8,1152  | 1,296713715 | ENST00000440905 | 93492     | NM_199254    | TPTE2          |
| A_21_P0013342  | 4,62935 | 4,2545  | 1,296704727 | ENST00000453589 | 51622     | NM_015622    | CCZ1           |
| A_23_P137238   | 4,07391 | 3,6991  | 1,296668775 | ENST00000492117 | 8284      | NM_004653    | KDM5D          |
| A_24_P77968    | 4,86021 | 4,48541 | 1,296659787 | ENST00000325888 | 2318      | NM_001458    | FLNC           |
| A_33_P3276638  | 9,94502 | 9,57029 | 1,296596874 | ENST00000521516 | 79618     | NM_024567    | HMBOX1         |
| A_33_P3415623  | 2,05421 | 1,67956 | 1,296524978 | ENST00000525971 | 84125     | AB058704     | LRRIQ1         |
| A_22_P00016286 | 2,46587 | 2,09122 | 1,296524978 | ENST00000544711 | 101930457 | XR_247882    | LOC101930457   |
| A_23_P76799    | 11,0244 | 10,6498 | 1,296480044 | ENST00000360310 | 11177     | NM_013448    | BAZ1A          |
| A_23_P64669    | 11,8558 | 11,4813 | 1,296390182 | ENST00000543897 | 55596     | NM_017612    | ZCCHC8         |
| A_22_P00002526 | 3,96789 | 3,59339 | 1,296390182 | N/A             | N/A       | N/A          | Inc-C17orf48-1 |
| A_22_P00009372 | 3,19924 | 2,82485 | 1,296291341 | N/A             | 100874369 | NR_046768    | CACNA1C-IT2    |
| A_22_P00011011 | 4,54636 | 4,17199 | 1,296273371 | N/A             | N/A       | U80764       | Inc-NSUN6-1    |
| A_22_P00008907 | 4,74898 | 4,37473 | 1,296165554 | ENST00000507579 | N/A       | N/A          | N/A            |
| A_33_P3320283  | 4,28317 | 3,90897 | 1,296120633 | N/A             | N/A       | N/A          | N/A            |
| A_22_P00004475 | 4,52952 | 4,15538 | 1,29606673  | N/A             | 101930019 | XR_251537    | LOC101930019   |
| A_22_P00013730 | 2,50123 | 2,12714 | 1,296021813 | ENST00000559394 | N/A       | N/A          | N/A            |
| A_19_P00320792 | 9,26372 | 8,88972 | 1,295940965 | ENST00000420006 | 128439    | NR_003239    | SNHG11         |
| A_33_P3268219  | 2,18657 | 1,81266 | 1,295860123 | N/A             | N/A       | N/A          | N/A            |
| A_33_P3424010  | 2,65073 | 2,27682 | 1,295860123 | ENST00000613720 | N/A       | L10120       | N/A            |
| A_33_P3324675  | 5,52426 | 5,15037 | 1,295842159 | N/A             | N/A       | N/A          | N/A            |
| A_33_P3300867  | 5,92065 | 5,5468  | 1,295806231 | N/A             | N/A       | AK124637     | Inc-PAICS-1    |
| A_22_P00022271 | 2,07716 | 1,70336 | 1,295761322 | ENST00000553381 | 56252     | N/A          | YLPM1          |
| A_22_P00020814 | 2,09934 | 1,72554 | 1,295761322 | ENST00000527727 | N/A       | N/A          | N/A            |
| A_33_P3278664  | 5,08698 | 4,71325 | 1,295698453 | ENST00000380180 | 10611     | NM_001011515 | PDLIM5         |
| A_21_P0000487  | 4,96415 | 4,59049 | 1,295635587 | N/A             | 692225    | NR_004378    | SNORD94        |
| A_23_P98763    | 6,74933 | 6,37575 | 1,295563744 | ENST00000538413 | 220074    | NM_145309    | LRTOMT         |
| A_23_P357365   | 7,79909 | 7,42553 | 1,295545783 | ENST00000483235 | 10274     | NM_005862    | STAG1          |

|                |         |         |             |                 |           |              |                |
|----------------|---------|---------|-------------|-----------------|-----------|--------------|----------------|
| A_33_P3423791  | 4,35278 | 3,97924 | 1,295527824 | ENST00000464418 | 29841     | NM_198182    | GRHL1          |
| A_22_P00015408 | 7,82872 | 7,45518 | 1,295527824 | N/A             | N/A       | AF086477     | Inc-SRPX2-1    |
| A_23_P126349   | 1,99389 | 1,62037 | 1,295509864 | ENST00000370445 | 343472    | NM_020063    | BARHL2         |
| A_23_P167882   | 2,79146 | 2,41795 | 1,295500884 | ENST00000478427 | 112744    | NM_052872    | IL17F          |
| A_24_P673063   | 11,84   | 11,4665 | 1,295491904 | ENST00000437960 | 2171      | NM_001444    | FABP5          |
| A_23_P394545   | 7,89    | 7,51658 | 1,295420069 | ENST00000311317 | 23325     | NM_015275    | KIAA1033       |
| A_23_P97365    | 12,0198 | 11,6464 | 1,295402111 | ENST00000394593 | 55144     | NM_018103    | LRRC8D         |
| A_24_P365506   | 9,15884 | 8,78546 | 1,295384153 | ENST00000536936 | 55612     | NM_017671    | FERMT1         |
| A_32_P148824   | 9,94867 | 9,57529 | 1,295384153 | ENST00000367470 | 54953     | NM_017847    | C1orf27        |
| A_22_P00001177 | 3,69682 | 3,3235  | 1,29533028  | ENST00000554926 | N/A       | N/A          | N/A            |
| A_21_P0011577  | 12,9516 | 12,5783 | 1,295312323 | ENST00000503084 | 3842      | NM_002270    | TNPO1          |
| A_23_P43726    | 11,4865 | 11,1132 | 1,295312323 | ENST00000378460 | 23279     | NM_015231    | NUP160         |
| A_21_P0000830  | 6,68285 | 6,30956 | 1,295303345 | ENST00000530270 | 100506233 | NR_038903    | RAB30-AS1      |
| A_23_P407654   | 2,94358 | 2,57037 | 1,29523152  | ENST00000300179 | 222950    | NM_173564    | NYAP1          |
| A_21_P0011941  | 6,33744 | 5,96429 | 1,295177654 | N/A             | N/A       | N/A          | XLOC_l2_008163 |
| A_22_P00014743 | 10,1675 | 9,79437 | 1,295159699 | N/A             | 102606465 | NR_109849    | LOC102606465   |
| A_21_P0005265  | 2,29332 | 1,92028 | 1,295078906 | ENST00000445293 | N/A       | N/A          | N/A            |
| A_22_P00002372 | 2,08202 | 1,70904 | 1,295025046 | N/A             | N/A       | N/A          | Inc-C12orf61-3 |
| A_33_P6812270  | 8,20377 | 7,83083 | 1,294989141 | ENST00000551421 | 100506844 | NR_038269    | LOC100506844   |
| A_22_P00006949 | 2,13374 | 1,76093 | 1,294872456 | N/A             | 101929570 | NR_110258    | LOC101929570   |
| A_21_P0001036  | 4,13021 | 3,75769 | 1,294612196 | ENST00000458683 | 104169671 | N/A          | LINC01036      |
| A_24_P160440   | 13,7062 | 13,3337 | 1,294594249 | ENST00000430433 | 128308    | NM_181462    | MRPL55         |
| A_32_P95067    | 9,37618 | 9,00374 | 1,294540409 | ENST00000327299 | 205       | NM_001005353 | AK4            |
| A_23_P94030    | 14,8039 | 14,4315 | 1,294504518 | ENST00000222399 | 3912      | NM_002291    | LAMB1          |
| A_22_P00005771 | 6,24399 | 5,87162 | 1,294477599 | N/A             | N/A       | N/A          | Inc-ENPP1-2    |
| A_33_P3269578  | 7,73282 | 7,36047 | 1,294459654 | ENST00000296302 | 55193     | NM_018313    | PBRM1          |
| A_33_P3279526  | 7,81104 | 7,4387  | 1,294450682 | ENST00000441309 | N/A       | N/A          | N/A            |
| A_22_P00010200 | 6,46103 | 6,08885 | 1,294307131 | N/A             | 101927895 | XR_241220    | LOC101927895   |
| A_24_P285032   | 7,59169 | 7,21953 | 1,294289188 | ENST00000521702 | 3423      | NM_006123    | IDS            |
| A_23_P423891   | 8,13406 | 7,76202 | 1,294181536 | ENST00000609923 | 8034      | NM_152707    | SLC25A16       |
| A_21_P0004343  | 2,65591 | 2,28391 | 1,294145654 | ENST00000512115 | 102577424 | N/A          | LINC01574      |
| A_23_P66543    | 3,83229 | 3,46029 | 1,294145654 | ENST00000581552 | 23533     | NM_014308    | PIK3R5         |
| A_33_P3329098  | 9,35705 | 8,98525 | 1,29396626  | ENST00000621533 | 9589      | NM_004906    | WTAP           |

|                |         |         |             |                 |           |              |               |
|----------------|---------|---------|-------------|-----------------|-----------|--------------|---------------|
| A_33_P3433873  | 10,362  | 9,99037 | 1,293813795 | ENST00000613446 | 55055     | NM_001287821 | ZWILCH        |
| A_23_P100868   | 12,0088 | 11,6372 | 1,293786891 | ENST00000621344 | 80179     | NM_001033580 | MYO19         |
| A_22_P00015955 | 2,18389 | 1,81229 | 1,293786891 | N/A             | 101928295 | NR_110729    | LOC101928295  |
| A_23_P343837   | 5,03572 | 4,66414 | 1,293768955 | ENST00000453942 | 57097     | NM_020367    | PARP11        |
| A_33_P3256500  | 6,84101 | 6,46944 | 1,293759988 | ENST00000392645 | 6311      | AK095017     | ATXN2         |
| A_33_P3424489  | 4,27018 | 3,89861 | 1,293759988 | ENST00000390305 | N/A       | S73129       | N/A           |
| A_22_P00007523 | 2,959   | 2,58749 | 1,293706183 | N/A             | N/A       | N/A          | Inc-HAAO-1    |
| A_33_P3240053  | 8,41169 | 8,04025 | 1,293643413 | ENST00000388761 | 402682    | NM_001015072 | UFSP1         |
| A_24_P401739   | 10,2525 | 9,88115 | 1,293562714 | ENST00000575283 | 55114     | NM_001006634 | ARHGAP17      |
| A_33_P3381235  | 6,95935 | 6,58827 | 1,293320647 | N/A             | 100127888 | NR_024470    | SLCO4A1-AS1   |
| A_33_P3218905  | 4,22457 | 3,8535  | 1,293311682 | N/A             | 285512    | NR_002806    | FAM13A-AS1    |
| A_23_P208013   | 6,80842 | 6,43745 | 1,29322204  | ENST00000299687 | 55628     | NM_017757    | ZNF407        |
| A_24_P185036   | 9,571   | 9,20006 | 1,293195148 | ENST00000434935 | 55783     | NM_018348    | CMTR2         |
| A_21_P0004175  | 1,98698 | 1,6161  | 1,293141367 | ENST00000514240 | N/A       | N/A          | N/A           |
| A_33_P3316934  | 3,14664 | 2,7758  | 1,293105514 | ENST00000494145 | 11186     | AK310032     | RASSF1        |
| A_23_P125772   | 4,29123 | 3,92041 | 1,293087588 | ENST00000370101 | 26576     | NM_014370    | SRPK3         |
| A_33_P3343295  | 10,7553 | 10,3845 | 1,293069662 | ENST00000571227 | 79585     | NM_024535    | CORO7         |
| A_21_P0003914  | 5,39438 | 5,02363 | 1,293024848 | N/A             | N/A       | N/A          | Inc-ENPP6-1   |
| A_33_P3376644  | 6,45767 | 6,08699 | 1,292962112 | ENST00000447266 | 26054     | NM_015571    | SENP6         |
| A_22_P00024170 | 1,93715 | 1,56651 | 1,292926264 | N/A             | N/A       | N/A          | Inc-RPL36AL-1 |
| A_33_P6821973  | 4,74069 | 4,37009 | 1,292890417 | N/A             | 400960    | NR_033872    | PCBP1-AS1     |
| A_23_P104892   | 15,2691 | 14,8985 | 1,292890417 | ENST00000396525 | 1982      | NM_001418    | EIF4G2        |
| A_33_P3268464  | 7,51098 | 7,14054 | 1,292747039 | N/A             | 9526      | AK027742     | MPDU1         |
| A_24_P943393   | 15,3907 | 15,0203 | 1,292711197 | ENST00000378024 | 79026     | NM_001620    | AHNAK         |
| A_22_P00002141 | 4,16103 | 3,79066 | 1,292684316 | ENST00000420264 | N/A       | N/A          | N/A           |
| A_24_P135444   | 11,0858 | 10,7155 | 1,292621596 | ENST00000568325 | 267       | NM_001144    | AMFR          |
| A_23_P41359    | 10,7914 | 10,4212 | 1,292532001 | ENST00000507532 | 27309     | NM_014487    | ZNF330        |
| A_33_P3246663  | 2,0412  | 1,67104 | 1,292496165 | ENST00000580256 | 644139    | NM_001101387 | PIRT          |
| A_21_P0007324  | 2,96578 | 2,59564 | 1,292478247 | N/A             | 102723330 | XR_424228    | LOC102723330  |
| A_22_P00014394 | 2,9446  | 2,57446 | 1,292478247 | ENST00000442852 | N/A       | N/A          | N/A           |
| A_33_P3263417  | 8,43455 | 8,06444 | 1,292451371 | N/A             | 378805    | NR_109851    | LINC-PINT     |
| A_24_P80138    | 11,2763 | 10,9062 | 1,292442413 | ENST00000264254 | 79031     | NM_024065    | PDCL3         |
| A_22_P00000515 | 3,77098 | 3,40101 | 1,292325957 | N/A             | 400997    | NR_122074    | LOC400997     |



|                |         |         |             |                 |           |              |               |
|----------------|---------|---------|-------------|-----------------|-----------|--------------|---------------|
| A_23_P144005   | 6,62341 | 6,25344 | 1,292325957 | ENST00000415132 | 51066     | NM_015931    | SSUH2         |
| A_33_P3279193  | 2,02157 | 1,65165 | 1,292281169 | ENST00000533247 | N/A       | N/A          | N/A           |
| A_22_P00007066 | 10,7997 | 10,4298 | 1,292263255 | ENST00000559672 | N/A       | N/A          | N/A           |
| A_33_P3223648  | 7,44162 | 7,07173 | 1,292254297 | ENST00000406711 | 100505876 | NR_037879    | CEBPZOS       |
| A_32_P181103   | 9,47092 | 9,10112 | 1,292173685 | ENST00000233838 | 2677      | NM_000821    | GGCX          |
| A_33_P3328814  | 4,83484 | 4,46508 | 1,292137859 | ENST00000426838 | 26040     | NM_001130110 | SETBP1        |
| A_33_P3342569  | 3,66519 | 3,29548 | 1,292093077 | ENST00000522530 | 729159    | NM_001282301 | LOC729159     |
| A_23_P347528   | 10,8014 | 10,4317 | 1,292084121 | ENST00000257915 | 7024      | NM_005653    | TFCP2         |
| A_23_P23983    | 9,97685 | 9,60719 | 1,292048298 | ENST00000476912 | 80013     | NM_024948    | FAM188A       |
| A_33_P3398107  | 10,2792 | 9,90955 | 1,292039342 | ENST00000372727 | 90196     | NM_001197129 | SYS1          |
| A_33_P3257187  | 9,41166 | 9,04202 | 1,292030386 | ENST00000397128 | 5562      | NM_206907    | PRKAA1        |
| A_21_P0000588  | 6,83659 | 6,46696 | 1,292021431 | N/A             | 404266    | NR_110331    | HOXB-AS3      |
| A_24_P85317    | 7,13769 | 6,76807 | 1,292012475 | ENST00000420239 | 1106      | NM_001042572 | CHD2          |
| A_24_P98762    | 2,08612 | 1,71658 | 1,291940833 | ENST00000527614 | 5519      | NM_002716    | PPP2R1B       |
| A_33_P3689678  | 1,98938 | 1,62003 | 1,291770698 | N/A             | 285857    | AK097853     | LOC285857     |
| A_33_P3340105  | 7,68421 | 7,3149  | 1,291734883 | ENST00000430708 | 646201    | NR_033774    | BASP1P1       |
| A_22_P00004741 | 2,62351 | 2,2542  | 1,291734883 | N/A             | 100507178 | NR_037868    | SLFNL1-AS1    |
| A_23_P411881   | 9,13655 | 8,76742 | 1,291573728 | ENST00000615625 | 10464     | NM_006346    | PIBF1         |
| A_21_P0014122  | 4,38706 | 4,01798 | 1,291528966 | N/A             | N/A       | N/A          | N/A           |
| A_22_P00013163 | 1,9748  | 1,60572 | 1,291528966 | N/A             | N/A       | N/A          | Inc-RNF113B-2 |
| A_33_P3347161  | 7,56742 | 7,19851 | 1,291376788 | ENST00000380961 | 6907      | NM_005647    | TBL1X         |
| A_33_P3248787  | 4,20645 | 3,83758 | 1,291340983 | N/A             | N/A       | DB221055     | N/A           |
| A_24_P118247   | 9,00001 | 8,63118 | 1,29130518  | ENST00000564584 | 348180    | NM_001012762 | CTU2          |
| A_23_P63825    | 13,1848 | 12,816  | 1,291278329 | ENST00000489349 | 2805      | NM_002079    | GOT1          |
| A_23_P382199   | 12,4066 | 12,0378 | 1,291278329 | ENST00000583475 | 9218      | NM_003574    | VAPA          |
| A_23_P74895    | 2,12368 | 1,75493 | 1,291233577 | ENST00000254231 | 79727     | NM_024674    | LIN28A        |
| A_23_P62647    | 3,90038 | 3,53165 | 1,291215677 | ENST00000235739 | 6504      | NM_003037    | SLAMF1        |
| A_21_P0001654  | 2,35756 | 1,98883 | 1,291215677 | N/A             | N/A       | N/A          | Inc-HNRNPU-2  |
| A_33_P3433156  | 8,08296 | 7,71425 | 1,291197777 | ENST00000485175 | 55687     | NM_001282785 | TRMU          |
| A_21_P0000285  | 9,44894 | 9,08024 | 1,291188827 | N/A             | 26800     | NR_002744    | SNORD49A      |
| A_33_P3264771  | 1,88778 | 1,51912 | 1,291153028 | ENST00000398468 | 344022    | NM_001134462 | NOTO          |
| A_33_P3212232  | 2,57534 | 2,20678 | 1,291063536 | ENST00000361050 | 219972    | NM_001039396 | MPEG1         |
| A_22_P00012779 | 6,84602 | 6,47748 | 1,291045638 | ENST00000582435 | 101927323 | NR_110774    | PPP4R1-AS1    |

|                |         |         |             |                 |           |              |              |
|----------------|---------|---------|-------------|-----------------|-----------|--------------|--------------|
| A_24_P229234   | 3,20091 | 2,83269 | 1,290759306 | ENST00000251041 | 23026     | NM_015011    | MYO16        |
| A_32_P47701    | 15,3195 | 14,9515 | 1,29056249  | ENST00000488500 | 1915      | NM_001402    | EEF1A1       |
| A_32_P94660    | 7,96992 | 7,60221 | 1,290303097 | ENST00000398851 | 114659    | NM_052888    | LRRC37B      |
| A_19_P00810806 | 7,69262 | 7,32492 | 1,290294153 | N/A             | 101929212 | NR_104064    | SMIM2-AS1    |
| A_33_P3283350  | 4,86101 | 4,49335 | 1,290258379 | N/A             | N/A       | N/A          | N/A          |
| A_33_P3332937  | 3,89131 | 3,52367 | 1,290240493 | N/A             | 650794    | BX648740     | MIPEPP3      |
| A_21_P0008607  | 4,30138 | 3,93391 | 1,290088466 | ENST00000560056 | 100507480 | XR_109174    | LOC100507480 |
| A_22_P00012315 | 1,8353  | 1,46784 | 1,290079524 | N/A             | N/A       | N/A          | Inc-PPP6C-2  |
| A_22_P00024264 | 8,29507 | 7,92768 | 1,29001693  | N/A             | N/A       | AB000465     | Inc-ADD1-1   |
| A_22_P00004186 | 5,34603 | 4,97864 | 1,29001693  | ENST00000452787 | 100507140 | N/A          | LOC100507140 |
| A_24_P170753   | 6,82388 | 6,45652 | 1,289990106 | ENST00000443539 | 347918    | AK090610     | EP400NL      |
| A_23_P79259    | 8,90381 | 8,53645 | 1,289990106 | ENST00000409212 | 23677     | NM_014521    | SH3BP4       |
| A_24_P9090     | 10,6022 | 10,2349 | 1,289936458 | ENST00000621267 | 9987      | NM_031372    | HNRNPDL      |
| A_24_P96403    | 12,0103 | 11,6431 | 1,289847049 | ENST00000344691 | 861       | NM_001001890 | RUNX1        |
| A_23_P92642    | 10,0354 | 9,6682  | 1,289847049 | ENST00000394723 | 54882     | NM_024668    | ANKHD1       |
| A_23_P202117   | 7,63902 | 7,27185 | 1,289820228 | ENST00000490164 | 84333     | NR_046310    | PCGF5        |
| A_33_P3211327  | 5,98256 | 5,61541 | 1,289802347 | ENST00000334821 | 100130348 | AK124141     | TMEM262      |
| A_23_P39755    | 4,61178 | 4,24465 | 1,289784467 | ENST00000287590 | 93010     | NM_145236    | B3GNT7       |
| A_24_P943815   | 5,92229 | 5,55524 | 1,289712948 | ENST00000444736 | 8228      | NM_004650    | PNPLA4       |
| A_19_P00807670 | 5,37304 | 5,00603 | 1,28967719  | N/A             | 144481    | NR_038263    | SOCS2-AS1    |
| A_24_P942321   | 5,27377 | 4,9068  | 1,289641433 | ENST00000357447 | 55691     | NM_018027    | FRMD4A       |
| A_33_P3292083  | 4,03928 | 3,67232 | 1,289632494 | ENST00000530033 | 100505532 | N/A          | LINC01301    |
| A_23_P165698   | 8,97596 | 8,6091  | 1,289543107 | ENST00000258457 | 79074     | NM_024093    | C2orf49      |
| A_32_P60459    | 10,7431 | 10,3763 | 1,289489477 | ENST00000376495 | 220213    | NM_001145373 | OTUD1        |
| A_33_P3411805  | 5,67273 | 5,30593 | 1,289489477 | ENST00000412714 | N/A       | N/A          | N/A          |
| A_23_P126706   | 2,51292 | 2,14614 | 1,289471601 | ENST00000367629 | 9068      | NM_004673    | ANGPTL1      |
| A_33_P3378707  | 7,24262 | 6,8759  | 1,289417975 | N/A             | 646214    | N/A          | LOC646214    |
| A_21_P0006035  | 3,27068 | 2,90413 | 1,289266045 | ENST00000450399 | N/A       | N/A          | N/A          |
| A_24_P100517   | 10,6225 | 10,2561 | 1,289132004 | ENST00000409687 | 89958     | NM_178448    | SAPCD2       |
| A_19_P00325158 | 9,12032 | 8,75392 | 1,289132004 | ENST00000534336 | 378938    | NR_002819    | MALAT1       |
| A_23_P410040   | 1,8499  | 1,4836  | 1,289042652 | ENST00000621889 | 90134     | NM_173162    | KCNH7        |
| A_33_P3330323  | 7,29535 | 6,92906 | 1,289033717 | ENST00000219905 | 23269     | NM_001080541 | MGA          |
| A_33_P3327063  | 1,90559 | 1,53931 | 1,289024782 | ENST00000455136 | 161497    | NM_153700    | STRC         |

|                |         |         |             |                 |           |              |                |
|----------------|---------|---------|-------------|-----------------|-----------|--------------|----------------|
| A_22_P00017698 | 3,44249 | 3,07627 | 1,288971174 | ENST00000562532 | 343702    | AK123879     | XKR7           |
| A_23_P98580    | 9,56922 | 9,20305 | 1,288926502 | ENST00000523235 | 9415      | NM_004265    | FADS2          |
| A_19_P00320242 | 6,46572 | 6,0996  | 1,288881832 | N/A             | N/A       | AF319524     | Inc-SNURF-1    |
| A_32_P41496    | 10,1192 | 9,7531  | 1,288863965 | ENST00000424288 | 100132831 | N/A          | LOC100132831   |
| A_24_P372562   | 13,3833 | 13,0173 | 1,28877463  | ENST00000533507 | 114971    | NM_175732    | PTPMT1         |
| A_33_P3325262  | 11,2981 | 10,9321 | 1,28877463  | ENST00000568600 | 6535      | NM_005629    | SLC6A8         |
| A_33_P3364443  | 6,84532 | 6,47936 | 1,288738899 | ENST00000560208 | 643911    | N/A          | CRNDE          |
| A_23_P401014   | 8,83333 | 8,46741 | 1,288703168 | ENST00000570085 | 25820     | NM_005744    | ARIH1          |
| A_23_P115261   | 3,67599 | 3,31014 | 1,288640641 | ENST00000366667 | 183       | NM_000029    | AGT            |
| A_24_P159312   | 7,76416 | 7,39836 | 1,288595981 | ENST00000566454 | 9057      | NM_001076785 | SLC7A6         |
| A_21_P0005531  | 5,82259 | 5,4568  | 1,288587049 | N/A             | N/A       | N/A          | Inc-AKR1B1-1   |
| A_24_P216421   | 5,40849 | 5,04272 | 1,288569185 | ENST00000481841 | 1838      | NM_033148    | DTNB           |
| A_33_P3314974  | 6,1585  | 5,79277 | 1,288533459 | N/A             | 100130522 | NR_028339    | PARD6G-AS1     |
| A_21_P0007750  | 4,58482 | 4,21917 | 1,28846201  | N/A             | N/A       | N/A          | Inc-C12orf42-3 |
| A_23_P92994    | 10,4179 | 10,0523 | 1,288417356 | ENST00000409565 | 56947     | NM_020194    | MFF            |
| A_21_P0002520  | 2,12087 | 1,75529 | 1,288399495 | N/A             | N/A       | N/A          | Inc-TLK1-1     |
| A_21_P0013386  | 9,91123 | 9,54576 | 1,288301263 | ENST00000535943 | 92105     | NM_033547    | INTS4          |
| A_33_P3233843  | 5,39833 | 5,0329  | 1,288265544 | ENST00000522633 | 3572      | NM_001190981 | IL6ST          |
| A_32_P517715   | 4,06182 | 3,69642 | 1,288238756 | ENST00000487270 | 5890      | NM_133509    | RAD51B         |
| A_33_P3221665  | 3,54304 | 3,17777 | 1,288122679 | ENST00000422435 | 23046     | NM_001252102 | KIF21B         |
| A_33_P3330236  | 6,67239 | 6,30715 | 1,288095893 | N/A             | N/A       | N/A          | N/A            |
| A_22_P00001630 | 6,38016 | 6,01495 | 1,288069108 | ENST00000565044 | N/A       | BX538340     | N/A            |
| A_22_P00012188 | 1,95963 | 1,59446 | 1,288033396 | ENST00000435156 | N/A       | N/A          | N/A            |
| A_24_P390833   | 6,70653 | 6,34142 | 1,287979829 | ENST00000592977 | 65258     | NM_023075    | MPPE1          |
| A_23_P341443   | 13,6055 | 13,2404 | 1,287970902 | ENST00000174618 | 4335      | NM_020310    | MNT            |
| A_23_P210719   | 10,7506 | 10,3855 | 1,287970902 | ENST00000461211 | 55968     | NM_016143    | NSFL1C         |
| A_23_P307860   | 4,27908 | 3,91399 | 1,287961974 | ENST00000478865 | 136306    | NM_174959    | SVOPL          |
| A_33_P3332382  | 7,79517 | 7,43012 | 1,287926265 | N/A             | 100129406 | AK092791     | LOC100129406   |
| A_24_P397817   | 1,93339 | 1,56837 | 1,287899483 | ENST00000308868 | 3952      | NM_000230    | LEP            |
| A_23_P340376   | 2,29352 | 1,92856 | 1,287845922 | ENST00000624762 | 11223     | NM_001271733 | MST1L          |
| A_23_P401380   | 10,3683 | 10,0034 | 1,287792363 | ENST00000301180 | 57609     | NM_173602    | DIP2B          |
| A_22_P00021650 | 4,00611 | 3,64123 | 1,287774511 | N/A             | N/A       | N/A          | Inc-AEBP2-2    |
| A_19_P00812715 | 4,51418 | 4,14941 | 1,287676327 | N/A             | N/A       | N/A          | XLOC_I2_010118 |

|                |         |         |             |                 |           |              |                |
|----------------|---------|---------|-------------|-----------------|-----------|--------------|----------------|
| A_33_P3343432  | 9,62575 | 9,26101 | 1,287649551 | ENST00000471464 | 117145    | NM_053055    | THEM4          |
| A_23_P152181   | 11,3846 | 11,0199 | 1,28761385  | ENST00000563282 | 55718     | NM_018119    | POLR3E         |
| A_33_P3349334  | 11,3044 | 10,9397 | 1,28761385  | ENST00000339298 | 122809    | NM_199421    | SOCS4          |
| A_21_P0004997  | 1,83157 | 1,467   | 1,287497829 | N/A             | 101928004 | XR_241967    | LOC101928004   |
| A_22_P00010171 | 2,11975 | 1,75522 | 1,287462133 | N/A             | N/A       | N/A          | Inc-MRPS22-2   |
| A_23_P36076    | 15,6168 | 15,2523 | 1,287435361 | ENST00000293880 | 6749      | NM_003146    | SSRP1          |
| A_23_P73493    | 10,9052 | 10,5408 | 1,287346126 | ENST00000370277 | 1069      | NM_004344    | CETN2          |
| A_24_P128312   | 7,63847 | 7,27408 | 1,287337203 | ENST00000543471 | 7633      | NM_007135    | ZNF79          |
| A_22_P00007311 | 2,09172 | 1,72734 | 1,28732828  | N/A             | N/A       | BM127608     | Inc-GPR63-2    |
| A_22_P00019636 | 8,46303 | 8,09867 | 1,287310434 | N/A             | N/A       | N/A          | Inc-TMEM5-1    |
| A_24_P101561   | 8,68315 | 8,31881 | 1,287292588 | ENST00000488019 | N/A       | N/A          | N/A            |
| A_22_P00022877 | 7,15399 | 6,78968 | 1,28726582  | N/A             | N/A       | BM906553     | Inc-IL15RA-1   |
| A_22_P00020375 | 7,65375 | 7,28945 | 1,287256897 | ENST00000440790 | 651302    | NR_103448    | ZNF192P1       |
| A_33_P3212982  | 8,57572 | 8,21144 | 1,287239052 | ENST00000582986 | 9842      | NM_014798    | PLEKHM1        |
| A_21_P0006818  | 5,4502  | 5,08592 | 1,287239052 | N/A             | N/A       | N/A          | Inc-AKR1E2-5   |
| A_22_P00003944 | 5,94678 | 5,58258 | 1,287167674 | ENST00000418451 | N/A       | N/A          | N/A            |
| A_33_P3329949  | 13,3042 | 12,94   | 1,287167674 | ENST00000463788 | 310       | NM_004034    | ANXA7          |
| A_33_P3376365  | 9,73834 | 9,37414 | 1,287167674 | ENST00000377836 | 54626     | BC012091     | HES2           |
| A_22_P00003188 | 5,0497  | 4,68554 | 1,287131987 | N/A             | N/A       | N/A          | Inc-C9orf95-1  |
| A_33_P3262580  | 7,80007 | 7,43592 | 1,287123065 | ENST00000371206 | 953       | AJ133134     | ENTPD1         |
| A_23_P118607   | 9,82404 | 9,45991 | 1,287105222 | ENST00000423601 | 100885850 | NM_025267    | PTGES3L-AARSD1 |
| A_23_P103131   | 12,1169 | 11,7528 | 1,287078458 | ENST00000404569 | 54471     | NM_019008    | MIEF1          |
| A_21_P0007592  | 3,88102 | 3,51695 | 1,287051694 | N/A             | N/A       | N/A          | Inc-NAV3-1     |
| A_33_P3245278  | 5,52762 | 5,16363 | 1,286980327 | ENST00000615556 | 5793      | NM_002841    | PTPRG          |
| A_22_P00013012 | 3,62138 | 3,25742 | 1,286953565 | N/A             | N/A       | N/A          | Inc-RGMA-3     |
| A_23_P101811   | 8,25497 | 7,89104 | 1,286926804 | ENST00000344099 | 7561      | NM_021030    | ZNF14          |
| A_33_P3261862  | 2,67434 | 2,31049 | 1,286855443 | ENST00000391496 | 402317    | NM_001001802 | OR2A42         |
| A_33_P3311618  | 9,87753 | 9,51368 | 1,286855443 | ENST00000462042 | 5876      | NM_004582    | RABGGTB        |
| A_22_P00010022 | 3,8861  | 3,52226 | 1,286846524 | N/A             | 140846    | NR_109815    | FAM83C-AS1     |
| A_22_P00022008 | 2,07602 | 1,7122  | 1,286828684 | N/A             | N/A       | N/A          | Inc-C6orf228-2 |
| A_21_P0007567  | 2,00089 | 1,6371  | 1,286801926 | N/A             | N/A       | N/A          | Inc-XRCC6BP1-1 |
| A_24_P148811   | 9,35003 | 8,98627 | 1,286775168 | ENST00000322623 | 8607      | NM_003707    | RUVBL1         |
| A_23_P148984   | 9,12979 | 8,76604 | 1,286766248 | ENST00000361951 | 55157     | NM_018122    | DARS2          |

|                |         |         |             |                 |           |              |               |
|----------------|---------|---------|-------------|-----------------|-----------|--------------|---------------|
| A_33_P3262376  | 1,98774 | 1,624   | 1,286757329 | ENST00000307050 | 161725    | NM_130901    | OTUD7A        |
| A_23_P348636   | 5,91719 | 5,55345 | 1,286757329 | ENST00000322957 | 2302      | NM_001454    | FOXJ1         |
| A_33_P3560679  | 2,494   | 2,13031 | 1,286712734 | ENST00000568031 | N/A       | BC026225     | N/A           |
| A_33_P3416286  | 10,2201 | 9,85643 | 1,286694897 | ENST00000359646 | 10137     | NM_006047    | RBM12         |
| A_21_P0013773  | 7,161   | 6,79738 | 1,286650304 | ENST00000431339 | N/A       | N/A          | N/A           |
| A_33_P3336915  | 16,1939 | 15,8303 | 1,286632468 | ENST00000495111 | N/A       | AB209077     | N/A           |
| A_23_P61823    | 10,7615 | 10,3979 | 1,286632468 | ENST00000471466 | 53917     | NM_001031677 | RAB24         |
| A_33_P3317825  | 9,13723 | 8,77374 | 1,28653437  | ENST00000369535 | 4893      | NM_002524    | NRAS          |
| A_23_P414895   | 8,82875 | 8,46529 | 1,286507618 | ENST00000525135 | 55761     | NM_018259    | TTC17         |
| A_21_P0012142  | 1,84288 | 1,47948 | 1,286454115 | ENST00000472805 | 100130934 | N/A          | ZNF663P       |
| A_21_P0000933  | 3,44926 | 3,08587 | 1,286445198 | ENST00000435253 | 101928476 | NR_125954    | LOC101928476  |
| A_33_P3423984  | 2,8085  | 2,44513 | 1,286427364 | ENST00000508898 | 23022     | AK096458     | PALLD         |
| A_23_P121326   | 9,84491 | 9,48154 | 1,286427364 | ENST00000418577 | 11068     | NM_007022    | CYB561D2      |
| A_24_P244699   | 10,081  | 9,71766 | 1,286400614 | ENST00000258662 | 55270     | NM_018283    | NUDT15        |
| A_23_P120056   | 9,58175 | 9,21854 | 1,286284703 | ENST00000272430 | 6242      | NM_033046    | RTKN          |
| A_24_P269062   | 8,34144 | 7,97824 | 1,286275787 | ENST00000344120 | 81848     | NM_030964    | SPRY4         |
| A_21_P0010876  | 9,57497 | 9,21193 | 1,286133142 | ENST00000532854 | 642826    | NR_024495    | BMS1P6        |
| A_22_P00001460 | 2,31387 | 1,95085 | 1,286115313 | ENST00000546821 | 101927292 | NR_110048    | LOC101927292  |
| A_23_P4294     | 8,94037 | 8,57745 | 1,286026169 | ENST00000570486 | 7775      | NM_014519    | ZNF232        |
| A_33_P3227467  | 12,6667 | 12,3038 | 1,286008341 | ENST00000267859 | 663       | NM_004330    | BNIP2         |
| A_24_P29975    | 12,9009 | 12,538  | 1,286008341 | ENST00000465124 | 81873     | NM_030978    | ARPC5L        |
| A_21_P0008593  | 2,01649 | 1,65364 | 1,285963772 | N/A             | N/A       | N/A          | Inc-C15orf2-5 |
| A_21_P0007500  | 4,14626 | 3,78341 | 1,285963772 | N/A             | N/A       | N/A          | Inc-CD9-1     |
| A_23_P105227   | 5,50329 | 5,14046 | 1,285945945 | ENST00000323418 | 10873     | NM_001014811 | ME3           |
| A_22_P00021935 | 3,31721 | 2,95439 | 1,285937032 | ENST00000433219 | N/A       | BG181804     | N/A           |
| A_33_P3238493  | 3,67171 | 3,30897 | 1,285865726 | ENST00000423550 | 22982     | NM_014974    | DIP2C         |
| A_19_P00321223 | 5,09764 | 4,73519 | 1,285607277 | ENST00000437696 | N/A       | N/A          | N/A           |
| A_21_P0002412  | 3,29419 | 2,93193 | 1,285437976 | N/A             | N/A       | N/A          | Inc-APOB-3    |
| A_21_P0007561  | 4,46684 | 4,10458 | 1,285437976 | ENST00000566418 | N/A       | N/A          | N/A           |
| A_33_P3245623  | 4,8608  | 4,49855 | 1,285429066 | N/A             | N/A       | N/A          | N/A           |
| A_33_P3306545  | 12,9831 | 12,6209 | 1,285384517 | ENST00000534272 | 1982      | NM_001172705 | EIF4G2        |
| A_23_P373649   | 12,3695 | 12,0073 | 1,285384517 | ENST00000580018 | 100287932 | NM_006327    | TIMM23        |
| A_21_P0000217  | 5,14771 | 4,78563 | 1,285277606 | ENST00000485706 | 26814     | NR_000017    | SNORD36B      |

|                |         |         |             |                 |           |              |                |
|----------------|---------|---------|-------------|-----------------|-----------|--------------|----------------|
| A_33_P3354851  | 6,19453 | 5,83247 | 1,285259789 | ENST00000557168 | N/A       | X58768       | N/A            |
| A_33_P3422581  | 5,04732 | 4,6853  | 1,285224154 | ENST00000409835 | 51057     | NM_015910    | WDPCP          |
| A_33_P3559060  | 3,73777 | 3,37576 | 1,285215246 | ENST00000381198 | 150379    | NM_138814    | PNPLA5         |
| A_23_P64083    | 14,0691 | 13,7071 | 1,285206337 | ENST00000610523 | 10992     | NM_006842    | SF3B2          |
| A_33_P3289045  | 7,04718 | 6,68524 | 1,285152888 | ENST00000402588 | 653689    | NM_001080843 | GSTT2B         |
| A_22_P00018324 | 8,51935 | 8,15742 | 1,28514398  | ENST00000481772 | 23145     | NM_198455    | SSPO           |
| A_21_P0005676  | 2,03871 | 1,67681 | 1,285117257 | N/A             | N/A       | N/A          | Inc-EXTL3-1    |
| A_22_P00020056 | 1,9057  | 1,54388 | 1,285045997 | N/A             | N/A       | CU687031     | Inc-C11orf30-1 |
| A_23_P132027   | 10,4214 | 10,0596 | 1,285028182 | ENST00000498203 | 6676      | NM_003116    | SPAG4          |
| A_33_P3418527  | 2,15118 | 1,78938 | 1,285028182 | ENST00000309838 | 390093    | NM_001004461 | OR10A6         |
| A_21_P0013240  | 6,66539 | 6,3036  | 1,285019275 | ENST00000489094 | 9569      | NM_001199207 | GTF2IRD1       |
| A_33_P3370714  | 4,44411 | 4,08235 | 1,284992554 | ENST00000425343 | 5225      | NM_001166424 | PGC            |
| A_23_P58588    | 4,71843 | 4,35672 | 1,284948021 | ENST00000519560 | 6586      | NM_003062    | SLIT3          |
| A_23_P201647   | 9,84225 | 9,48057 | 1,284921301 | ENST00000347615 | 9887      | NM_173156    | SMG7           |
| A_21_P0011269  | 2,82524 | 2,46363 | 1,284858958 | N/A             | N/A       | N/A          | XLOC_I2_004385 |
| A_21_P0001725  | 6,7585  | 6,39689 | 1,284858958 | N/A             | N/A       | N/A          | Inc-ELOVL1-1   |
| A_24_P237389   | 10,0154 | 9,65385 | 1,284805523 | ENST00000379607 | 1964      | NM_001412    | EIF1AX         |
| A_33_P3366575  | 6,53963 | 6,17808 | 1,284805523 | ENST00000372103 | 55916     | NM_018698    | NXT2           |
| A_23_P930      | 8,91335 | 8,55181 | 1,284796618 | ENST00000476538 | 51107     | NM_001077628 | APH1A          |
| A_33_P3284888  | 4,18485 | 3,82342 | 1,284698661 | ENST00000504404 | 220107    | NM_198989    | DLEU7          |
| A_21_P0013504  | 4,89733 | 4,53592 | 1,284680851 | ENST00000524514 | 100996662 | XR_252493    | LOC100996662   |
| A_33_P3232692  | 3,56252 | 3,20113 | 1,284663042 | ENST00000294984 | 11009     | NM_001185156 | IL24           |
| A_23_P322845   | 10,8684 | 10,5071 | 1,284582903 | ENST00000424479 | 84513     | NM_001102559 | PPAPDC1B       |
| A_23_P251767   | 6,92528 | 6,56399 | 1,284573999 | ENST00000538234 | 54971     | NM_017869    | BANP           |
| A_33_P3416787  | 2,38386 | 2,02259 | 1,284556191 | ENST00000421913 | N/A       | N/A          | N/A            |
| A_23_P214603   | 12,5047 | 12,1435 | 1,284493865 | ENST00000376389 | 10211     | NM_005803    | FLOT1          |
| A_24_P219920   | 8,7144  | 8,3532  | 1,284493865 | ENST00000269856 | 55527     | NM_018708    | FEM1A          |
| A_24_P248606   | 11,7912 | 11,4301 | 1,284404834 | ENST00000357430 | 2181      | NM_004457    | ACSL3          |
| A_22_P00014724 | 4,82494 | 4,46388 | 1,284369223 | N/A             | N/A       | N/A          | Inc-SLC2A12-3  |
| A_23_P147431   | 10,7314 | 10,3704 | 1,284315809 | ENST00000519728 | 4067      | NM_002350    | LYN            |
| A_33_P3314471  | 6,76774 | 6,40674 | 1,284315809 | ENST00000474969 | 10989     | N/A          | IMMT           |
| A_21_P0005157  | 4,85611 | 4,49517 | 1,284262397 | N/A             | N/A       | N/A          | Inc-DTNBP1-2   |
| A_24_P595237   | 1,94069 | 1,57977 | 1,284244593 | ENST00000554823 | 646658    | NM_001105579 | SYNDIG1L       |

|                |         |         |             |                 |           |              |                  |
|----------------|---------|---------|-------------|-----------------|-----------|--------------|------------------|
| A_21_P0011289  | 2,90937 | 2,54854 | 1,284164481 | N/A             | N/A       | N/A          | XLOC_I2_004562   |
| A_24_P188071   | 17,0564 | 16,6956 | 1,284137777 | ENST00000552448 | 84790     | NM_032704    | TUBA1C           |
| A_33_P3219055  | 11,3334 | 10,9726 | 1,284137777 | ENST00000342683 | 145853    | NM_001143936 | C15orf61         |
| A_32_P466514   | 8,11386 | 7,75308 | 1,284119976 | ENST00000238647 | 64207     | NM_024496    | IRF2BPL          |
| A_33_P3367073  | 6,85514 | 6,49436 | 1,284119976 | N/A             | 101928991 | XM_006710027 | LOC101928991     |
| A_22_P00019841 | 2,06249 | 1,70174 | 1,284093273 | N/A             | N/A       | N/A          | Inc-AP1S2-1      |
| A_21_P0005094  | 3,57445 | 3,21381 | 1,28399537  | N/A             | N/A       | N/A          | Inc-PHF10-1      |
| A_24_P320171   | 5,41571 | 5,0551  | 1,28396867  | ENST00000513449 | 152992    | NM_152544    | TRMT44           |
| A_24_P941166   | 8,33966 | 7,97914 | 1,283888575 | ENST00000378061 | 155054    | NM_001001661 | ZNF425           |
| A_23_P147388   | 11,9408 | 11,5803 | 1,283870776 | ENST00000524189 | 23303     | NM_015254    | KIF13B           |
| A_21_P0008445  | 3,27299 | 2,91265 | 1,283728398 | N/A             | N/A       | N/A          | Inc-SIX1-1       |
| A_23_P34968    | 13,0888 | 12,7285 | 1,283692806 | ENST00000497147 | 79005     | NM_001204856 | SCNM1            |
| A_23_P68970    | 11,8212 | 11,4609 | 1,283692806 | ENST00000263245 | 26286     | NM_014570    | ARFGAP3          |
| A_23_P39799    | 6,74229 | 6,38202 | 1,283666113 | ENST00000409549 | 84695     | NM_032603    | LOXL3            |
| A_33_P6702964  | 7,01878 | 6,65853 | 1,283648318 | ENST00000413737 | 57468     | AW963483     | SLC12A5          |
| A_33_P3405434  | 4,38327 | 4,02307 | 1,283603831 | ENST00000467486 | 127731    | AK057346     | VWA5B1           |
| A_21_P0012500  | 4,24992 | 3,88972 | 1,283603831 | ENST00000514145 | N/A       | XR_241558    | N/A              |
| A_33_P3316770  | 4,6952  | 4,33501 | 1,283594933 | ENST00000463718 | 6579      | XM_005253478 | SLCO1A2          |
| A_22_P00000596 | 5,49825 | 5,13806 | 1,283594933 | ENST00000622400 | 100527964 | NR_037642    | LHX4-AS1         |
| A_32_P19840    | 11,4301 | 11,07   | 1,283514861 | N/A             | N/A       | XM_006710194 | Inc-EPHA1-1      |
| A_33_P3215838  | 3,85997 | 3,49989 | 1,283497068 | ENST00000595151 | 354       | N/A          | KLK3             |
| A_33_P3304252  | 12,0786 | 11,7186 | 1,283425898 | ENST00000432845 | 64983     | NM_031903    | MRPL32           |
| A_22_P00022263 | 8,38864 | 8,02868 | 1,283390314 | N/A             | N/A       | N/A          | Inc-AL353597.1-1 |
| A_33_P3334548  | 11,7984 | 11,4386 | 1,283247989 | ENST00000409600 | 9689      | N/A          | BZW1             |
| A_21_P0004562  | 3,36139 | 3,00164 | 1,283203516 | N/A             | N/A       | N/A          | Inc-ANKRA2-3     |
| A_33_P3338724  | 10,787  | 10,4273 | 1,283159044 | ENST00000622419 | 94059     | NM_198988    | LENG9            |
| A_22_P00017278 | 2,10948 | 1,74982 | 1,283123468 | N/A             | 101927478 | NR_110630    | LOC101927478     |
| A_23_P127721   | 5,10726 | 4,74764 | 1,283087893 | ENST00000534820 | 5024      | NM_002559    | P2RX3            |
| A_24_P659836   | 6,6666  | 6,30698 | 1,283087893 | N/A             | 644186    | NM_001123225 | SYCE3            |
| A_23_P68942    | 17,5516 | 17,1921 | 1,282981173 | ENST00000481985 | 6122      | NM_000967    | RPL3             |
| A_21_P0010133  | 2,5181  | 2,1586  | 1,282981173 | ENST00000430060 | 101927821 | NR_109958    | LINC01425        |
| A_33_P3218531  | 2,70965 | 2,35021 | 1,282927817 | N/A             | N/A       | AF119878     | Inc-C2orf65-1    |
| A_22_P00002926 | 4,73519 | 4,37581 | 1,282874462 | ENST00000514769 | N/A       | BU178338     | N/A              |

|                |         |         |             |                 |           |              |                |
|----------------|---------|---------|-------------|-----------------|-----------|--------------|----------------|
| A_23_P218375   | 10,2872 | 9,92783 | 1,28286557  | ENST00000570360 | 3682      | NM_002208    | ITGAE          |
| A_23_P74668    | 7,23387 | 6,87451 | 1,282856678 | ENST00000614859 | 93190     | NM_152290    | C1orf158       |
| A_21_P0010962  | 3,89024 | 3,5309  | 1,282838894 | N/A             | N/A       | N/A          | XLOC_I2_002204 |
| A_24_P352445   | 11,4281 | 11,0688 | 1,282803326 | ENST00000358678 | 28977     | NM_172177    | MRPL42         |
| A_33_P3213752  | 13,0042 | 12,6449 | 1,282803326 | ENST00000357886 | 51654     | NM_016408    | CDK5RAP1       |
| A_24_P154080   | 8,12769 | 7,76854 | 1,282669958 | ENST00000470394 | 1889      | NM_001397    | ECE1           |
| A_33_P3338956  | 8,20268 | 7,84359 | 1,282616614 | ENST00000455168 | 55207     | NM_018184    | ARL8B          |
| A_33_P3341424  | 8,69138 | 8,33243 | 1,282492154 | N/A             | 4651      | NM_012334    | MYO10          |
| A_33_P3378785  | 8,07023 | 7,71135 | 1,282429929 | ENST00000538190 | 387742    | AK124823     | FAM99A         |
| A_33_P3378031  | 9,64279 | 9,28391 | 1,282429929 | ENST00000355654 | 129787    | NM_152834    | TMEM18         |
| A_24_P407259   | 7,55572 | 7,19685 | 1,28242104  | ENST00000376945 | 11166     | NM_007084    | SOX21          |
| A_23_P3042     | 11,7097 | 11,3511 | 1,282181057 | ENST00000422769 | 5529      | NM_006246    | PPP2R5E        |
| A_22_P00011655 | 3,10834 | 2,74976 | 1,282163283 | ENST00000552524 | N/A       | BG401236     | N/A            |
| A_23_P259393   | 9,89139 | 9,53285 | 1,282127734 | ENST00000394752 | 51460     | NM_016329    | SFMBT1         |
| A_33_P3391220  | 3,26173 | 2,90321 | 1,28210996  | ENST00000427208 | 151234    | N/A          | SULT1C2P1      |
| A_23_P156732   | 9,72003 | 9,36158 | 1,282047753 | ENST00000480565 | 5252      | NM_024165    | PHF1           |
| A_33_P6476600  | 7,8918  | 7,53336 | 1,282038867 | ENST00000512942 | 101929128 | NR_125431    | LOC101929128   |
| A_23_P126075   | 12,6803 | 12,3219 | 1,282003322 | ENST00000366620 | 3775      | NM_002245    | KCNK1          |
| A_22_P00007822 | 5,12961 | 4,77127 | 1,281950006 | ENST00000547349 | 101929715 | NR_110597    | LOC101929715   |
| A_19_P00802464 | 5,27884 | 4,92053 | 1,281923349 | N/A             | N/A       | N/A          | Inc-WDR27-1    |
| A_23_P59877    | 12,9305 | 12,5722 | 1,281914463 | ENST00000524732 | 2171      | NM_001444    | FABP5          |
| A_32_P5251     | 10,4963 | 10,138  | 1,281914463 | ENST00000394081 | 5914      | NM_001024809 | RARA           |
| A_22_P00015661 | 6,47873 | 6,12046 | 1,281887807 | N/A             | 101930316 | XR_247649    | LOC101930316   |
| A_21_P0007174  | 4,97529 | 4,61713 | 1,281790071 | N/A             | N/A       | N/A          | Inc-CTR9-3     |
| A_23_P369456   | 9,00335 | 8,64528 | 1,281710112 | ENST00000243918 | 90196     | NM_033542    | SYS1           |
| A_21_P0001498  | 4,62648 | 4,26845 | 1,281674576 | N/A             | 102724077 | N/A          | LINC01389      |
| A_21_P0014699  | 8,21004 | 7,85202 | 1,281665692 | N/A             | 102724105 | XR_430257    | ZNF528-AS1     |
| A_23_P210379   | 12,6432 | 12,2852 | 1,281647924 | ENST00000370275 | 55738     | NM_175609    | ARFGAP1        |
| A_23_P397120   | 5,31561 | 4,95767 | 1,281594623 | ENST00000215531 | 284422    | NM_001136503 | SMIM24         |
| A_33_P3241782  | 1,84943 | 1,49154 | 1,281550207 | ENST00000403045 | 119       | NM_001617    | ADD2           |
| A_23_P129367   | 2,06496 | 1,70709 | 1,281532441 | ENST00000360716 | 84229     | NM_032269    | DRC7           |
| A_24_P55250    | 11,7477 | 11,3899 | 1,281470262 | ENST00000608532 | 51020     | NM_016063    | HDDC2          |
| A_23_P255805   | 10,9049 | 10,5471 | 1,281470262 | ENST00000528017 | 7553      | NM_003416    | ZNF7           |



|                |         |         |             |                 |           |              |                    |
|----------------|---------|---------|-------------|-----------------|-----------|--------------|--------------------|
| A_22_P00021380 | 6,37375 | 6,01613 | 1,281310388 | ENST00000366215 | 401236    | NM_001190766 | STMND1             |
| A_24_P93754    | 5,1851  | 4,82753 | 1,281265982 | ENST00000381306 | 23081     | AB018323     | KDM4C              |
| A_21_P0010228  | 9,5805  | 9,22295 | 1,28124822  | ENST00000436878 | 284825    | NR_126011    | LOC284825          |
| A_24_P314351   | 10,0083 | 9,65079 | 1,281212696 | ENST00000326624 | 10009     | NM_006777    | ZBTB33             |
| A_23_P139228   | 10,7141 | 10,3566 | 1,281203816 | ENST00000445086 | 23647     | NM_012402    | ARFIP2             |
| A_19_P00810523 | 11,2793 | 10,9218 | 1,281203816 | ENST00000512623 | 91942     | NM_174889    | NDUFAF2            |
| A_23_P103110   | 10,1994 | 9,84194 | 1,281168294 | ENST00000538320 | 23764     | NM_012323    | MAFF               |
| A_33_P3410284  | 5,74527 | 5,38782 | 1,281159413 | ENST00000472874 | 23348     | XM_006719941 | DOCK9              |
| A_22_P00007537 | 2,83143 | 2,47404 | 1,281106133 | ENST00000563631 | N/A       | N/A          | N/A                |
| A_23_P159893   | 2,78896 | 2,4316  | 1,281079493 | ENST00000372042 | 91851     | NM_145234    | CHRD1              |
| A_33_P3380098  | 8,24735 | 7,89    | 1,281070613 | ENST00000538144 | 5829      | NM_001243756 | PXN                |
| A_24_P414658   | 6,42727 | 6,06993 | 1,281061734 | ENST00000359193 | 8969      | L19778       | HIST1H2AG          |
| A_22_P00006145 | 4,86769 | 4,51038 | 1,281035095 | N/A             | N/A       | BC021142     | Inc-FAM18A-1       |
| A_23_P115215   | 12,1234 | 11,7661 | 1,281026216 | ENST00000368892 | 6944      | NM_005997    | VPS72              |
| A_33_P3303380  | 5,40607 | 5,04877 | 1,281026216 | ENST00000374768 | 56288     | XM_005252536 | PARD3              |
| A_33_P3317331  | 3,45939 | 3,10211 | 1,281008457 | N/A             | N/A       | AK129846     | N/A                |
| A_23_P36183    | 10,7672 | 10,41   | 1,280937425 | ENST00000453096 | 2965      | NM_005316    | GTF2H1             |
| A_33_P3273136  | 10,7031 | 10,3459 | 1,280937425 | ENST00000488770 | 63933     | NM_001031713 | MCUR1              |
| A_23_P423926   | 10,3191 | 9,96191 | 1,280928546 | ENST00000331758 | 26039     | NM_198935    | SS18L1             |
| A_21_P0011229  | 1,97056 | 1,61357 | 1,280750984 | ENST00000563710 | 647166    | N/A          | LINC00371          |
| A_23_P94053    | 10,3271 | 9,97021 | 1,280662212 | ENST00000359863 | 8295      | NM_003496    | TRRAP              |
| A_22_P00000258 | 5,32351 | 4,96662 | 1,280662212 | N/A             | N/A       | DA688068     | Inc-AC007405.2.1-3 |
| A_23_P150394   | 4,3195  | 3,96267 | 1,280608952 | ENST00000526014 | 53826     | NM_022003    | FXD6               |
| A_23_P46928    | 14,8707 | 14,5139 | 1,280582323 | ENST00000381075 | 5214      | NM_002627    | PFKP               |
| A_24_P402898   | 9,57392 | 9,21713 | 1,280573446 | ENST00000454497 | 54726     | NM_001102653 | OTUD4              |
| A_21_P0007549  | 4,65611 | 4,29932 | 1,280573446 | N/A             | N/A       | N/A          | Inc-FAM113B-1      |
| A_22_P00022538 | 2,00314 | 1,64637 | 1,280555694 | ENST00000455931 | N/A       | N/A          | N/A                |
| A_22_P00003567 | 1,9562  | 1,59944 | 1,280546818 | ENST00000506299 | N/A       | N/A          | N/A                |
| A_21_P0014471  | 4,94257 | 4,58583 | 1,280529066 | N/A             | 100505736 | NR_120504    | LOC100505736       |
| A_24_P204675   | 14,8614 | 14,5047 | 1,280493562 | ENST00000357370 | 100132247 | NM_001135865 | NPIPB5             |
| A_33_P3424472  | 6,92319 | 6,56649 | 1,280493562 | ENST00000265388 | 23534     | NM_012470    | TNPO3              |
| A_21_P0003404  | 6,24378 | 5,88715 | 1,280431434 | ENST00000504882 | N/A       | N/A          | N/A                |
| A_23_P314584   | 11,0593 | 10,7027 | 1,280404809 | ENST00000357955 | 7867      | NM_004635    | MAPKAPK3           |

|                |         |         |             |                 |           |              |                  |
|----------------|---------|---------|-------------|-----------------|-----------|--------------|------------------|
| A_33_P3267640  | 6,04735 | 5,69075 | 1,280404809 | ENST00000382774 | 3083      | NM_001297439 | HGFAC            |
| A_23_P425516   | 6,82938 | 6,47292 | 1,280280563 | ENST00000310032 | 26262     | NM_012171    | TSPAN17          |
| A_21_P0010329  | 4,33159 | 3,97518 | 1,280236193 | N/A             | N/A       | N/A          | Inc-CRYBA4-1     |
| A_22_P00001318 | 4,26821 | 3,9118  | 1,280236193 | ENST00000614267 | 195977    | NM_001278688 | ANTXRL           |
| A_22_P00024999 | 2,9137  | 2,55731 | 1,280218445 | N/A             | N/A       | N/A          | Inc-SHANK2-5     |
| A_33_P3265709  | 2,73832 | 2,38201 | 1,280147457 | ENST00000307832 | 134083    | NM_001001657 | OR2Y1            |
| A_24_P97770    | 6,02795 | 5,67173 | 1,2800676   | ENST00000519796 | 57222     | NM_001031711 | ERGIC1           |
| A_23_P79931    | 10,775  | 10,4188 | 1,280049854 | ENST00000446916 | 8455      | NM_139322    | ATRN             |
| A_33_P3214298  | 13,2511 | 12,8949 | 1,280049854 | ENST00000326739 | 3615      | NM_000884    | IMPDH2           |
| A_33_P3244347  | 11,0496 | 10,6934 | 1,280049854 | ENST00000393960 | 5091      | NM_001040716 | PC               |
| A_22_P00000284 | 4,92006 | 4,56403 | 1,279899028 | N/A             | N/A       | N/A          | Inc-AC009113.1-1 |
| A_21_P0007824  | 3,62302 | 3,26718 | 1,279730479 | N/A             | N/A       | N/A          | Inc-CDKN1B-1     |
| A_22_P00024094 | 5,58706 | 5,23126 | 1,279694998 | N/A             | N/A       | N/A          | Inc-BEST4-1      |
| A_24_P352952   | 2,47142 | 2,11569 | 1,279632908 | ENST00000590074 | 54757     | NM_017565    | FAM20A           |
| A_21_P0011493  | 2,27294 | 1,91732 | 1,279535345 | N/A             | N/A       | N/A          | XLOC_I2_005606   |
| A_33_P3415913  | 4,47223 | 4,11664 | 1,279508738 | ENST00000602269 | 126298    | NM_001007561 | IRGQ             |
| A_24_P79241    | 9,40656 | 9,05107 | 1,279420052 | ENST00000217173 | 22888     | NM_014948    | UBOX5            |
| A_22_P00004629 | 3,98386 | 3,6284  | 1,279393448 | N/A             | N/A       | N/A          | Inc-CSTF3-1      |
| A_24_P161293   | 13,318  | 12,9626 | 1,279340241 | N/A             | 400818    | CR936830     | NBPF9            |
| A_23_P6943     | 3,60755 | 3,25221 | 1,279287035 | ENST00000284311 | 2838      | NM_005290    | GPR15            |
| A_22_P00014164 | 7,33104 | 6,97573 | 1,279260434 | ENST00000442865 | 646762    | N/A          | LOC646762        |
| A_32_P75264    | 1,94755 | 1,59225 | 1,279251567 | ENST00000399298 | 219623    | NM_178505    | TMEM26           |
| A_33_P3315258  | 6,85196 | 6,49678 | 1,279145166 | ENST00000467213 | 9557      | NM_004284    | CHD1L            |
| A_33_P3257609  | 7,78582 | 7,43068 | 1,279109701 | ENST00000367269 | 4660      | NM_002481    | PPP1R12B         |
| A_33_P3365963  | 10,282  | 9,92688 | 1,279091969 | N/A             | N/A       | N/A          | N/A              |
| A_33_P6579294  | 6,30187 | 5,94678 | 1,279065371 | ENST00000540766 | 55250     | N/A          | ELP2             |
| A_21_P0008836  | 2,61355 | 2,25849 | 1,279038774 | N/A             | N/A       | N/A          | Inc-ZSCAN2-2     |
| A_21_P0013605  | 4,55646 | 4,20141 | 1,279029908 | ENST00000624552 | 256158    | NM_001291815 | HMCN2            |
| A_24_P124370   | 10,3233 | 9,9683  | 1,278985581 | ENST00000334956 | 55742     | NM_018222    | PARVA            |
| A_21_P0014111  | 5,91977 | 5,5649  | 1,278870338 | N/A             | 101926903 | NR_109998    | LSAMP-AS1        |
| A_22_P00016746 | 4,04424 | 3,68949 | 1,278763969 | N/A             | N/A       | AK130443     | Inc-TRIB1-3      |
| A_33_P3251821  | 7,2384  | 6,88371 | 1,278710788 | N/A             | 80006     | NR_003545    | TRAPPC13         |
| A_21_P0003771  | 3,04191 | 2,68728 | 1,278657609 | N/A             | N/A       | N/A          | Inc-PCDH18-3     |

|                |         |         |             |                 |           |              |                  |
|----------------|---------|---------|-------------|-----------------|-----------|--------------|------------------|
| A_22_P00005595 | 3,58164 | 3,22703 | 1,278639883 | ENST00000519005 | N/A       | DR156699     | N/A              |
| A_33_P3292332  | 12,6242 | 12,2696 | 1,27863102  | ENST00000302418 | 3799      | NM_004521    | KIF5B            |
| A_19_P00319376 | 6,70024 | 6,34569 | 1,278586707 | N/A             | 550112    | NR_015439    | UBA6-AS1         |
| A_22_P00000562 | 5,84982 | 5,49528 | 1,278577845 | N/A             | N/A       | AL603067     | Inc-AC127496.3-6 |
| A_33_P3358253  | 10,3961 | 10,0416 | 1,278542395 | ENST00000298229 | 3636      | NM_001567    | INPPL1           |
| A_24_P89911    | 10,8409 | 10,4864 | 1,278542395 | ENST00000373078 | 203245    | NM_197956    | NAIF1            |
| A_22_P00000174 | 5,14339 | 4,78892 | 1,278515809 | ENST00000413103 | N/A       | XR_110477    | N/A              |
| A_22_P00003640 | 5,66467 | 5,31023 | 1,278489223 | N/A             | N/A       | N/A          | Inc-CD80-1       |
| A_21_P0014879  | 3,16667 | 2,81234 | 1,278391747 | N/A             | N/A       | N/A          | Inc-TCTN3-1      |
| A_33_P3342613  | 13,6153 | 13,261  | 1,278365164 | ENST00000320602 | 29801     | NM_013373    | ZDHHC8           |
| A_23_P125408   | 8,88111 | 8,52682 | 1,278356303 | ENST00000586906 | 83475     | NM_031304    | DOHH             |
| A_33_P3379176  | 4,10222 | 3,74797 | 1,27832086  | ENST00000455505 | N/A       | AK022678     | N/A              |
| A_33_P3361267  | 4,21179 | 3,85754 | 1,27832086  | N/A             | N/A       | AK124326     | Inc-PGR-1        |
| A_22_P00007019 | 8,68915 | 8,33494 | 1,278285418 | N/A             | 102724826 | NR_126467    | ZNF337-AS1       |
| A_33_P3260782  | 2,99306 | 2,63886 | 1,278276558 | ENST00000534379 | 5897      | N/A          | RAG2             |
| A_19_P00331839 | 5,27995 | 4,92578 | 1,278249977 | N/A             | 100132356 | NR_034127    | LOC100132356     |
| A_21_P0012226  | 1,88546 | 1,53131 | 1,278232257 | ENST00000419467 | 101927843 | NR_109959    | LOC101927843     |
| A_23_P26976    | 3,86606 | 3,51197 | 1,278179098 | ENST00000258969 | 1101      | NM_001267    | CHAD             |
| A_33_P3239123  | 5,63369 | 5,27964 | 1,27814366  | ENST00000372550 | 10465     | AK309438     | PPIH             |
| A_33_P3350232  | 5,41313 | 5,05914 | 1,278090504 | N/A             | N/A       | AK127825     | N/A              |
| A_33_P3358213  | 2,28859 | 1,93464 | 1,278055068 | ENST00000619609 | 353238    | NM_207421    | PADI6            |
| A_23_P337033   | 8,95352 | 8,59971 | 1,277931051 | ENST00000266068 | 26205     | NM_012384    | GMEB2            |
| A_32_P199301   | 8,94427 | 8,59048 | 1,277913335 | ENST00000544902 | 7027      | NM_007111    | TFDP1            |
| A_33_P3305102  | 7,92639 | 7,57268 | 1,277842475 | ENST00000569977 | 222487    | NM_170776    | GPR97            |
| A_33_P3243544  | 12,4869 | 12,1333 | 1,277745048 | ENST00000418437 | 2101      | NM_001282450 | ESRRA            |
| A_23_P89056    | 11,1816 | 10,8281 | 1,277656484 | ENST00000564887 | 9688      | NM_014669    | NUP93            |
| A_33_P3294252  | 11,5397 | 11,1862 | 1,277656484 | ENST00000262053 | 466       | NM_005171    | ATF1             |
| A_33_P3395823  | 10,6579 | 10,3044 | 1,277656484 | ENST00000344425 | 3785      | NM_172109    | KCNQ2            |
| A_23_P122228   | 14,9261 | 14,5726 | 1,277656484 | ENST00000274137 | 4726      | NM_004553    | NDUFS6           |
| A_33_P3299495  | 4,39932 | 4,04592 | 1,277567927 | N/A             | N/A       | N/A          | N/A              |
| A_21_P0013782  | 4,71646 | 4,36309 | 1,277541361 | N/A             | N/A       | N/A          | XLOC_I2_015585   |
| A_23_P339079   | 9,99605 | 9,64279 | 1,277443957 | ENST00000586155 | 126231    | NM_152360    | ZNF573           |
| A_22_P00009439 | 5,03203 | 4,67878 | 1,277435103 | N/A             | N/A       | BM695980     | Inc-LYZL1-3      |

|                |         |         |             |                 |           |              |                  |
|----------------|---------|---------|-------------|-----------------|-----------|--------------|------------------|
| A_22_P00016409 | 1,78408 | 1,43116 | 1,277142937 | ENST00000414689 | 124446    | BC050051     | TMEM219          |
| A_33_P3289227  | 1,81957 | 1,46665 | 1,277142937 | ENST00000497858 | 7802      | NM_003462    | DNALI1           |
| A_21_P0005469  | 3,47731 | 3,12441 | 1,277125233 | ENST00000608770 | 101927391 | NR_110084    | LOC101927391     |
| A_33_P3384252  | 3,54595 | 3,19306 | 1,27711638  | N/A             | N/A       | N/A          | Inc-DTYMK-3      |
| A_22_P00022944 | 4,72371 | 4,37086 | 1,277080972 | N/A             | N/A       | N/A          | Inc-PBX1-2       |
| A_33_P3403598  | 6,04128 | 5,68848 | 1,277036712 | ENST00000416147 | 144404    | NM_001080825 | TMEM120B         |
| A_33_P3413958  | 7,61501 | 7,26221 | 1,277036712 | ENST00000524483 | 26628     | NR_120437    | OR7E47P          |
| A_21_P0000281  | 4,74443 | 4,39164 | 1,27702786  | N/A             | 26789     | NR_002737    | SNORD59A         |
| A_24_P60268    | 2,22851 | 1,87579 | 1,2769659   | ENST00000409093 | 80059     | NM_024993    | LRRTM4           |
| A_22_P00004029 | 2,07764 | 1,72503 | 1,27686854  | N/A             | N/A       | BE048204     | Inc-CHPF-1       |
| A_21_P0011828  | 2,34627 | 1,99368 | 1,276850839 | N/A             | N/A       | N/A          | XLOC_I2_007449   |
| A_33_P3284152  | 4,067   | 3,71441 | 1,276850839 | ENST00000407635 | 285191    | XR_241442    | LOC285191        |
| A_33_P3327567  | 2,78781 | 2,43523 | 1,276841989 | ENST00000467061 | 90407     | AK172748     | TMEM41A          |
| A_22_P00000307 | 3,98005 | 3,62749 | 1,276824288 | ENST00000457901 | N/A       | AB371490     | N/A              |
| A_22_P00008552 | 2,49321 | 2,14071 | 1,276771187 | ENST00000442937 | 100505566 | NR_047568    | LINC00578        |
| A_22_P00002624 | 1,83643 | 1,48394 | 1,276762337 | ENST00000435542 | N/A       | N/A          | N/A              |
| A_22_P00000342 | 2,30824 | 1,9558  | 1,276718089 | N/A             | N/A       | N/A          | Inc-AC015804.1-3 |
| A_24_P355267   | 10,4262 | 10,0738 | 1,276682691 | ENST00000373068 | 114789    | NM_001006641 | SLC25A25         |
| A_23_P81717    | 4,97045 | 4,61809 | 1,276647295 | ENST00000468647 | 79981     | NM_024919    | FRMD1            |
| A_33_P6501835  | 7,49157 | 7,13925 | 1,276611899 | ENST00000523747 | 101929128 | NR_125431    | LOC101929128     |
| A_33_P3252491  | 6,18886 | 5,83656 | 1,276594202 | ENST00000342691 | N/A       | N/A          | N/A              |
| A_32_P780862   | 3,08558 | 2,7333  | 1,276576504 | ENST00000397360 | 656       | NM_001720    | BMP8B            |
| A_33_P3423740  | 6,13416 | 5,7819  | 1,276558807 | ENST00000461715 | 84187     | NM_032227    | TMEM164          |
| A_33_P3409261  | 5,29161 | 4,9394  | 1,276514566 | ENST00000617069 | 100652758 | NM_001278082 | LOC100652758     |
| A_22_P00006932 | 5,02776 | 4,67555 | 1,276514566 | N/A             | N/A       | N/A          | Inc-GATAD1-2     |
| A_24_P766208   | 17,4009 | 17,0487 | 1,276505718 | ENST00000417615 | 6122      | NM_000967    | RPL3             |
| A_33_P3324333  | 9,25368 | 8,90149 | 1,27649687  | ENST00000581935 | N/A       | BC022023     | N/A              |
| A_23_P129629   | 11,7186 | 11,3665 | 1,27641724  | ENST00000566451 | 4504      | NM_005954    | MT3              |
| A_33_P3813561  | 1,97628 | 1,62423 | 1,276373004 | N/A             | 283728    | AK095617     | LOC283728        |
| A_22_P00000494 | 6,42864 | 6,07664 | 1,276328769 | N/A             | 100873924 | NR_046901    | HLX-AS1          |
| A_23_P205336   | 12,1676 | 11,8157 | 1,276240304 | ENST00000556095 | 51527     | NM_016472    | GSKIP            |
| A_23_P210869   | 3,70474 | 3,35288 | 1,276204919 | ENST00000376075 | 84701     | NM_032609    | COX4I2           |
| A_22_P00022710 | 2,14387 | 1,79207 | 1,276151844 | ENST00000544034 | N/A       | N/A          | N/A              |

|                |         |         |             |                 |           |              |                |
|----------------|---------|---------|-------------|-----------------|-----------|--------------|----------------|
| A_33_P3370305  | 4,6449  | 4,29316 | 1,276098772 | ENST00000541594 | 113277    | NM_001291586 | TMEM106A       |
| A_22_P00014326 | 10,4312 | 10,0795 | 1,276063391 | N/A             | N/A       | BC038733     | Inc-SERPINC1-1 |
| A_23_P164737   | 10,2737 | 9,92202 | 1,276045701 | ENST00000263390 | 9441      | NM_004831    | MED26          |
| A_23_P76622    | 5,49348 | 5,14185 | 1,276001478 | ENST00000446125 | 1638      | NM_001922    | DCT            |
| A_24_P942354   | 12,9858 | 12,6342 | 1,275974944 | ENST00000539476 | 5306      | NM_006224    | PITPNA         |
| A_33_P3240787  | 4,17405 | 3,82251 | 1,275921879 | N/A             | 100131910 | AK130702     | LOC100131910   |
| A_21_P0003693  | 2,08299 | 1,73149 | 1,275886504 | N/A             | N/A       | N/A          | Inc-F11-3      |
| A_22_P00005964 | 4,30345 | 3,95211 | 1,275745011 | N/A             | N/A       | XM_005273639 | Inc-EXTL3-5    |
| A_23_P30972    | 10,1929 | 9,84161 | 1,275700798 | ENST00000324723 | 10973     | NM_022091    | ASCC3          |
| A_33_P3263387  | 7,85664 | 7,50535 | 1,275700798 | ENST00000392102 | 9654      | NM_014640    | TLL4           |
| A_21_P0008730  | 2,05391 | 1,70269 | 1,275638902 | N/A             | N/A       | N/A          | Inc-EXD1-1     |
| A_21_P0010068  | 5,30651 | 4,95534 | 1,275594693 | N/A             | N/A       | N/A          | Inc-HRH3-1     |
| A_23_P101319   | 4,75091 | 4,39975 | 1,275585851 | ENST00000544719 | 26974     | NM_152354    | ZNF285         |
| A_33_P3257861  | 5,66912 | 5,31798 | 1,275568168 | ENST00000439388 | 1757      | NM_001134707 | SARDH          |
| A_33_P3223980  | 12,8067 | 12,4556 | 1,275532802 | ENST00000509409 | 7170      | NM_001043352 | TPM3           |
| A_19_P00813085 | 5,94984 | 5,59877 | 1,275506278 | N/A             | N/A       | N/A          | Inc-SNURF-1    |
| A_33_P3237859  | 2,15516 | 1,80425 | 1,275364828 | ENST00000521715 | 497634    | N/A          | LINC00293      |
| A_33_P3270009  | 2,3411  | 1,99022 | 1,275338308 | ENST00000405141 | 8648      | NM_147223    | NCOA1          |
| A_33_P3221164  | 3,12122 | 2,77037 | 1,275311788 | ENST00000521071 | 84294     | AK055279     | UTP23          |
| A_33_P3263503  | 1,98527 | 1,6345  | 1,275241072 | N/A             | 100507399 | AY358246     | HCG8           |
| A_23_P322043   | 11,7627 | 11,412  | 1,275179198 | ENST00000361813 | 23381     | NM_015327    | SMG5           |
| A_33_P3276308  | 6,39802 | 6,04735 | 1,275152682 | N/A             | 641737    | XR_252152    | FLJ44124       |
| A_33_P3408117  | 3,96432 | 3,61375 | 1,275064298 | ENST00000478296 | 100131827 | NM_001128223 | ZNF717         |
| A_24_P337657   | 7,53708 | 7,18652 | 1,27505546  | ENST00000265354 | 6722      | NM_003131    | SRF            |
| A_21_P0010592  | 6,97443 | 6,62398 | 1,274958245 | ENST00000428504 | 100288069 | NR_033908    | LOC100288069   |
| A_21_P0000207  | 7,90326 | 7,55286 | 1,27491406  | ENST00000507485 | 6189      | NM_001267699 | RPS3A          |
| A_23_P82162    | 8,1337  | 7,78331 | 1,274905223 | ENST00000258052 | 6610      | NM_003080    | SMPD2          |
| A_22_P00015831 | 2,22696 | 1,87661 | 1,274869875 | N/A             | N/A       | N/A          | Inc-TBC1D30-1  |
| A_24_P79153    | 9,02536 | 8,67505 | 1,274834529 | ENST00000472442 | 113178    | NM_079834    | SCAMP4         |
| A_23_P49975    | 14,0115 | 13,6612 | 1,274825692 | ENST00000269576 | 3858      | NM_000421    | KRT10          |
| A_23_P200936   | 9,75241 | 9,40211 | 1,274825692 | ENST00000470570 | 4548      | NM_000254    | MTR            |
| A_21_P0001715  | 3,89344 | 3,54325 | 1,274728495 | N/A             | N/A       | N/A          | Inc-GPR137B-1  |
| A_33_P3372376  | 3,30178 | 2,9516  | 1,27471966  | N/A             | N/A       | AK124259     | N/A            |

|                |         |         |             |                 |           |              |                |
|----------------|---------|---------|-------------|-----------------|-----------|--------------|----------------|
| A_24_P108301   | 7,86413 | 7,51399 | 1,274684317 | ENST00000583043 | 25914     | NM_173630    | RTTN           |
| A_33_P3362521  | 9,63871 | 9,28859 | 1,274666647 | ENST00000611584 | 51244     | NM_016474    | CCDC174        |
| A_33_P3331911  | 6,07044 | 5,72034 | 1,274648976 | N/A             | N/A       | N/A          | N/A            |
| A_23_P5976     | 7,69798 | 7,348   | 1,274542958 | ENST00000372520 | 90204     | NM_080603    | ZSWIM1         |
| A_22_P00017738 | 7,55711 | 7,20713 | 1,274542958 | N/A             | N/A       | N/A          | Inc-YBEY-1     |
| A_23_P369328   | 9,50497 | 9,15508 | 1,274463451 | ENST00000373279 | 219738    | NM_145306    | C10orf35       |
| A_33_P3631022  | 4,22127 | 3,87143 | 1,274419282 | N/A             | 100270680 | AJ315134     | CASC11         |
| A_22_P00016478 | 2,18477 | 1,83493 | 1,274419282 | N/A             | 100506540 | NR_038360    | SPTY2D1-AS1    |
| A_21_P0002544  | 2,10167 | 1,75185 | 1,274401615 | N/A             | N/A       | N/A          | Inc-EPHA4-3    |
| A_33_P3316470  | 1,8914  | 1,54159 | 1,274392781 | ENST00000408922 | 135946    | NM_001005281 | OR6B1          |
| A_22_P00006602 | 3,40705 | 3,05731 | 1,274330949 | N/A             | N/A       | N/A          | Inc-FOS-1      |
| A_23_P82674    | 10,2431 | 9,89338 | 1,274313283 | ENST00000497279 | 2631      | NM_001483    | GBAS           |
| A_33_P3417502  | 6,07664 | 5,72696 | 1,274277952 | ENST00000284523 | 89780     | NM_033131    | WNT3A          |
| A_21_P0009361  | 2,84401 | 2,49439 | 1,274224957 | N/A             | N/A       | N/A          | Inc-SDK2-5     |
| A_23_P74950    | 14,8893 | 14,5397 | 1,274207293 | ENST00000375436 | 55920     | NM_018715    | RCC2           |
| A_33_P3221793  | 5,21631 | 4,86672 | 1,274198461 | N/A             | N/A       | N/A          | N/A            |
| A_33_P3347622  | 9,93569 | 9,58611 | 1,274189629 | ENST00000511449 | 92597     | NM_001244767 | MOB1B          |
| A_23_P156708   | 6,94311 | 6,59355 | 1,274171965 | ENST00000549232 | 7148      | NM_032470    | TNXB           |
| A_21_P0012875  | 3,79008 | 3,44056 | 1,274136638 | N/A             | N/A       | N/A          | XLOC_I2_011885 |
| A_22_P00003002 | 5,68416 | 5,33478 | 1,274013001 | N/A             | N/A       | N/A          | Inc-C6orf228-2 |
| A_22_P00016780 | 7,86144 | 7,51211 | 1,273968848 | N/A             | N/A       | N/A          | Inc-TRIM41-3   |
| A_23_P43150    | 9,15992 | 8,81059 | 1,273968848 | ENST00000395571 | 11244     | NM_001017926 | ZHX1           |
| A_33_P3235204  | 6,55992 | 6,21066 | 1,273907036 | ENST00000486908 | 84173     | NM_032213    | ELMOD3         |
| A_22_P00014741 | 5,30619 | 4,95704 | 1,273809909 | N/A             | 148867    | XR_246237    | SLC30A7        |
| A_22_P00012979 | 3,4301  | 3,08097 | 1,27379225  | N/A             | N/A       | N/A          | Inc-RESP18-1   |
| A_23_P146572   | 13,2522 | 12,9032 | 1,273677475 | ENST00000371601 | 56654     | NM_015392    | NPDC1          |
| A_23_P322008   | 1,95331 | 1,60434 | 1,27365099  | ENST00000518632 | 7201      | NM_003301    | TRHR           |
| A_23_P259442   | 10,4688 | 10,12   | 1,273500918 | ENST00000402744 | 1363      | NM_001873    | CPE            |
| A_33_P3250750  | 6,54948 | 6,20076 | 1,273430302 | N/A             | N/A       | CU677518     | N/A            |
| A_22_P00015191 | 5,56941 | 5,22072 | 1,273403822 | N/A             | N/A       | N/A          | Inc-SOX13-3    |
| A_23_P150549   | 2,54424 | 2,19561 | 1,273350864 | ENST00000541699 | 643834    | NM_001079807 | PGA3           |
| A_33_P3280451  | 4,48237 | 4,13376 | 1,273333212 | N/A             | N/A       | CU675766     | N/A            |
| A_23_P12503    | 10,9669 | 10,6183 | 1,273324386 | ENST00000261396 | 55746     | NM_018230    | NUP133         |

|                |         |         |             |                 |           |              |                |
|----------------|---------|---------|-------------|-----------------|-----------|--------------|----------------|
| A_24_P217572   | 1,81707 | 1,46852 | 1,273280257 | ENST00000324300 | 1909      | NM_001957    | EDNRA          |
| A_19_P00324359 | 4,65857 | 4,31025 | 1,273077282 | N/A             | N/A       | N/A          | Inc-MYC-1      |
| A_23_P160968   | 11,2108 | 10,8625 | 1,273059633 | ENST00000493293 | 3918      | NM_018891    | LAMC2          |
| A_21_P0010685  | 3,62859 | 3,28036 | 1,272997865 | ENST00000429505 | N/A       | XR_248712    | N/A            |
| A_23_P90463    | 14,477  | 14,1288 | 1,272971394 | ENST00000591515 | 51690     | NM_016199    | LSM7           |
| A_21_P0013136  | 6,38523 | 6,03707 | 1,272936101 | ENST00000420601 | N/A       | N/A          | N/A            |
| A_24_P391604   | 5,99114 | 5,64301 | 1,272909631 | ENST00000391624 | 337968    | NM_181605    | KRTAP6-3       |
| A_21_P0013836  | 2,05686 | 1,70874 | 1,272900808 | N/A             | N/A       | N/A          | XLOC_I2_015849 |
| A_22_P00008764 | 1,87903 | 1,53092 | 1,272891985 | N/A             | N/A       | N/A          | Inc-KIF13B-2   |
| A_23_P120270   | 11,459  | 11,1109 | 1,272883162 | ENST00000409218 | 90411     | NM_139279    | MCFD2          |
| A_33_P3406651  | 3,12422 | 2,77621 | 1,272803758 | ENST00000358992 | 342933    | NM_001080456 | ZSCAN5B        |
| A_33_P3272614  | 4,41706 | 4,06919 | 1,27268025  | ENST00000401470 | 9858      | NM_014811    | PPP1R26        |
| A_33_P3366246  | 9,099   | 8,75113 | 1,27268025  | ENST00000376723 | 56886     | NM_020120    | UGGT1          |
| A_22_P00003428 | 4,29095 | 3,9431  | 1,272662607 | N/A             | 102723673 | XR_424639    | LOC102723673   |
| A_22_P00019419 | 5,85502 | 5,50718 | 1,272653786 | ENST00000523317 | N/A       | AA311918     | N/A            |
| A_23_P212545   | 12,1839 | 11,8361 | 1,272618501 | ENST00000273047 | 5868      | NM_004162    | RAB5A          |
| A_22_P00002545 | 5,47976 | 5,13217 | 1,272433271 | N/A             | N/A       | N/A          | Inc-C17orf63-3 |
| A_22_P00013157 | 4,17788 | 3,8303  | 1,272424451 | N/A             | 102724097 | NR_123731    | TTC39A-AS1     |
| A_23_P127824   | 7,86619 | 7,51862 | 1,272415631 | ENST00000381563 | 7140      | NM_001042780 | TNNT3          |
| A_23_P127793   | 9,59177 | 9,24425 | 1,272371533 | ENST00000533165 | 256364    | NM_153265    | EML3           |
| A_22_P00017487 | 5,87323 | 5,52582 | 1,272274524 | N/A             | N/A       | DA798783     | Inc-VWA3B-1    |
| A_21_P0010518  | 4,29599 | 3,94862 | 1,272239249 | ENST00000481055 | 11209     | NR_027504    | MST1P2         |
| A_33_P3286208  | 7,10983 | 6,76247 | 1,272230431 | ENST00000318317 | 122769    | NM_203467    | LRR1           |
| A_24_P923945   | 4,75853 | 4,41121 | 1,272195157 | ENST00000375218 | 23352     | AK022322     | UBR4           |
| A_23_P16157    | 14,7681 | 14,4208 | 1,272177521 | ENST00000398148 | 8570      | NM_003685    | KHSRP          |
| A_33_P3243343  | 13,9039 | 13,5566 | 1,272177521 | N/A             | N/A       | N/A          | N/A            |
| A_21_P0012284  | 5,89776 | 5,55046 | 1,272177521 | ENST00000416717 | N/A       | N/A          | N/A            |
| A_24_P321068   | 8,43651 | 8,08923 | 1,272159885 | ENST00000374212 | 1317      | NM_001859    | SLC31A1        |
| A_24_P251841   | 9,17345 | 8,82618 | 1,272151067 | ENST00000274031 | 80854     | NM_030648    | SETD7          |
| A_33_P3401571  | 6,26756 | 5,92033 | 1,272115796 | ENST00000622511 | 4583      | NM_002457    | MUC2           |
| A_24_P393838   | 11,1747 | 10,8276 | 1,272001172 | ENST00000366607 | 9804      | NM_014765    | TOMM20         |
| A_24_P339514   | 6,98834 | 6,64126 | 1,271983539 | ENST00000324071 | 1555      | NM_000767    | CYP2B6         |
| A_23_P114466   | 7,1648  | 6,81779 | 1,271921823 | ENST00000624573 | 90665     | NM_033284    | TBL1Y          |

|                |         |         |             |                 |           |              |             |
|----------------|---------|---------|-------------|-----------------|-----------|--------------|-------------|
| A_23_P216766   | 8,68349 | 8,33658 | 1,271833663 | ENST00000375991 | 81689     | NM_030940    | ISCA1       |
| A_32_P92505    | 11,1316 | 10,7847 | 1,271824848 | ENST00000379509 | 253558    | NM_182551    | LCLAT1      |
| A_23_P159688   | 6,52739 | 6,18062 | 1,27171025  | ENST00000376771 | 4943      | NM_002536    | TBC1D25     |
| A_23_P101246   | 7,58997 | 7,24336 | 1,27156922  | ENST00000600663 | 147645    | NM_001163922 | VSIG10L     |
| A_33_P3275235  | 11,8483 | 11,5017 | 1,271560406 | ENST00000555528 | 207       | NM_005163    | AKT1        |
| A_21_P0005448  | 3,5677  | 3,22131 | 1,27137533  | ENST00000454149 | N/A       | N/A          | N/A         |
| A_24_P138361   | 15,2541 | 14,9078 | 1,27129602  | ENST00000531120 | 10480     | NM_006360    | EIF3M       |
| A_21_P0000950  | 2,5057  | 2,15942 | 1,271278397 | ENST00000416696 | N/A       | N/A          | N/A         |
| A_21_P0011466  | 7,22919 | 6,88308 | 1,271128604 | ENST00000570151 | N/A       | N/A          | N/A         |
| A_23_P134078   | 10,7675 | 10,4214 | 1,271119794 | ENST00000328908 | 9425      | NM_004824    | CDYL        |
| A_33_P3415500  | 12,8459 | 12,4998 | 1,271119794 | ENST00000620511 | 7204      | XR_241714    | TRIO        |
| A_23_P3204     | 12,7687 | 12,4228 | 1,270943591 | ENST00000261845 | 5597      | NM_002748    | MAPK6       |
| A_21_P0013905  | 1,94866 | 1,60293 | 1,270793838 | ENST00000439217 | N/A       | N/A          | N/A         |
| A_33_P3247180  | 7,99134 | 7,64576 | 1,270661718 | ENST00000460370 | 200014    | NM_032449    | CC2D1B      |
| A_23_P90855    | 5,10243 | 4,75686 | 1,270652911 | ENST00000470617 | 9855      | NM_014808    | FARP2       |
| A_33_P3245620  | 8,61431 | 8,26877 | 1,270626488 | N/A             | N/A       | N/A          | N/A         |
| A_33_P3348362  | 9,09635 | 8,75082 | 1,270617681 | N/A             | 84837     | NR_027263    | ARHGAP5-AS1 |
| A_23_P4850     | 3,13751 | 2,79201 | 1,27059126  | ENST00000439556 | 90589     | NM_145233    | ZNF625      |
| A_21_P0003108  | 2,06084 | 1,71539 | 1,270547225 | N/A             | N/A       | N/A          | Inc-AZI2-1  |
| A_24_P937790   | 5,93936 | 5,594   | 1,270467967 | ENST00000533508 | 100130274 | NM_001162914 | CCDC166     |
| A_23_P53646    | 12,6106 | 12,2654 | 1,270327075 | ENST00000261182 | 4673      | NM_139207    | NAP1L1      |
| A_23_P99762    | 11,9931 | 11,6479 | 1,270327075 | ENST00000527449 | 58517     | NM_021239    | RBM25       |
| A_21_P0013867  | 6,21066 | 5,86546 | 1,270327075 | ENST00000428194 | N/A       | N/A          | N/A         |
| A_21_P0008647  | 6,87339 | 6,52835 | 1,270186199 | ENST00000559029 | 145837    | NR_026979    | LOC145837   |
| A_19_P00320927 | 4,01878 | 3,67377 | 1,270159787 | N/A             | 100292680 | N/A          | LINC00942   |
| A_24_P255654   | 13,773  | 13,428  | 1,270150983 | ENST00000550578 | N/A       | N/A          | N/A         |
| A_24_P203622   | 7,43392 | 7,08899 | 1,270089356 | ENST00000404627 | 85440     | NM_033407    | DOCK7       |
| A_33_P3777165  | 6,07592 | 5,73102 | 1,270062945 | N/A             | 152048    | BC022164     | FLJ31715    |
| A_21_P0005134  | 3,06588 | 2,721   | 1,270045339 | ENST00000457339 | 285735    | N/A          | LINC00326   |
| A_22_P00004778 | 4,01112 | 3,66626 | 1,270027732 | N/A             | N/A       | BC015826     | Inc-CTXN1-1 |
| A_22_P00010428 | 2,56432 | 2,21946 | 1,270027732 | ENST00000414065 | N/A       | N/A          | N/A         |
| A_33_P3287084  | 4,6084  | 4,26354 | 1,270027732 | N/A             | N/A       | N/A          | N/A         |
| A_22_P00017202 | 1,94997 | 1,60517 | 1,269974914 | ENST00000428569 | N/A       | N/A          | N/A         |



|                |         |         |             |                 |           |              |                       |
|----------------|---------|---------|-------------|-----------------|-----------|--------------|-----------------------|
| A_24_P162293   | 6,24214 | 5,89739 | 1,269930901 | ENST00000440394 | 23085     | NM_178040    | ERC1                  |
| A_32_P10936    | 2,31215 | 1,96742 | 1,269913296 | ENST00000382254 | 1010      | NM_004061    | CDH12                 |
| A_23_P48676    | 13,3286 | 12,9839 | 1,26988689  | ENST00000216392 | 5836      | NM_002863    | PYGL                  |
| A_33_P3216319  | 7,47779 | 7,1331  | 1,269878087 | ENST00000568020 | 23174     | NM_015144    | ZCCHC14               |
| A_32_P10396    | 8,42953 | 8,08487 | 1,269851681 | ENST00000295888 | 23001     | NM_014991    | WDFY3                 |
| A_33_P3420426  | 10,1977 | 9,85306 | 1,269834078 | N/A             | 100132724 | NR_027642    | DCAF13P3              |
| A_33_P3217559  | 5,65817 | 5,31359 | 1,269781268 | ENST00000331224 | 8788      | NM_003836    | DLK1                  |
| A_22_P00013204 | 3,92041 | 3,57587 | 1,269746062 | N/A             | N/A       | AK021576     | Inc-RNF219-3          |
| A_33_P3800734  | 1,85879 | 1,51426 | 1,269737261 | ENST00000622037 | 6263      | NM_001036    | RYR3                  |
| A_33_P3222783  | 9,33436 | 8,98991 | 1,269666854 | ENST00000371991 | 6836      | NM_001280790 | SURF4                 |
| A_21_P0005252  | 7,32087 | 6,97665 | 1,269464455 | ENST00000470135 | 340340    | N/A          | LOC340340             |
| A_21_P0007607  | 2,52881 | 2,18462 | 1,269438057 | N/A             | N/A       | N/A          | Inc-RP11-511B23.3.1-3 |
| A_23_P29330    | 9,38273 | 9,03857 | 1,26941166  | ENST00000404354 | 27127     | NM_148674    | SMC1B                 |
| A_22_P00010950 | 6,10291 | 5,75875 | 1,26941166  | N/A             | N/A       | N/A          | Inc-NR4A2-1           |
| A_32_P921149   | 2,00852 | 1,66437 | 1,269402862 | N/A             | 100129476 | XR_132697    | LOC100129476          |
| A_23_P122387   | 12,0791 | 11,735  | 1,269358868 | ENST00000372116 | 55168     | NM_018135    | MRPS18A               |
| A_33_P3265075  | 12,4342 | 12,0901 | 1,269358868 | ENST00000310571 | 80227     | NM_001267803 | PAAF1                 |
| A_23_P415633   | 7,70368 | 7,35963 | 1,269314876 | ENST00000579457 | 124923    | NM_001174103 | SGK494                |
| A_23_P212595   | 6,05921 | 5,7152  | 1,269279684 | ENST00000504652 | 9730      | NM_014703    | VPRBP                 |
| A_33_P3224371  | 10,5867 | 10,2427 | 1,269270886 | ENST00000443648 | 10084     | NM_001167989 | PQBP1                 |
| A_33_P3237784  | 15,0688 | 14,7248 | 1,269270886 | ENST00000326194 | 64840     | NM_001282167 | PORCN                 |
| A_33_P3340595  | 3,12464 | 2,78067 | 1,269244493 | N/A             | N/A       | N/A          | N/A                   |
| A_33_P3340990  | 8,49856 | 8,15463 | 1,269209302 | ENST00000300245 | 64400     | NM_001012398 | AKTIP                 |
| A_21_P0012251  | 2,7414  | 2,39749 | 1,269191707 | N/A             | N/A       | N/A          | XLOC_I2_009303        |
| A_24_P230721   | 9,92651 | 9,58275 | 1,269059754 | ENST00000558521 | 84942     | NM_032856    | WDR73                 |
| A_33_P3234168  | 13,0647 | 12,721  | 1,269006976 | ENST00000336273 | 92140     | NM_178812    | MTDH                  |
| A_23_P501634   | 5,41841 | 5,07473 | 1,268989384 | ENST00000429381 | 11120     | NM_078476    | BTN2A1                |
| A_23_P209689   | 8,25712 | 7,91351 | 1,268927814 | ENST00000616279 | 9475      | NM_004850    | ROCK2                 |
| A_23_P150238   | 11,0249 | 10,6813 | 1,268919018 | ENST00000449692 | 83638     | NM_031450    | C11orf68              |
| A_23_P161507   | 3,88762 | 3,54404 | 1,268901427 | ENST00000255087 | 9633      | NM_004923    | MTL5                  |
| A_21_P0014607  | 3,14521 | 2,8017  | 1,268839861 | N/A             | N/A       | N/A          | N/A                   |
| A_24_P472455   | 10,4768 | 10,1333 | 1,268831066 | ENST00000298316 | 382       | NM_001663    | ARF6                  |
| A_33_P3404351  | 1,99803 | 1,65455 | 1,268813477 | ENST00000390427 | N/A       | AB306024     | N/A                   |

|                |         |         |             |                 |           |              |                |
|----------------|---------|---------|-------------|-----------------|-----------|--------------|----------------|
| A_22_P00009427 | 3,81593 | 3,47249 | 1,268778298 | N/A             | 101929713 | XR_247064    | LOC101929713   |
| A_21_P0014011  | 4,79844 | 4,45501 | 1,268769504 | N/A             | N/A       | XM_005255732 | Inc-CCDC64B-1  |
| A_23_P64343    | 12,7052 | 12,3618 | 1,268743121 | ENST00000525158 | 26519     | NM_012456    | TIMM10         |
| A_33_P3376379  | 7,11286 | 6,76949 | 1,268716738 | ENST00000483271 | 163882    | NM_001139459 | CNST           |
| A_22_P00004396 | 3,9945  | 3,65125 | 1,268611214 | N/A             | N/A       | DB514891     | Inc-COLQ-1     |
| A_24_P321125   | 2,1249  | 1,78172 | 1,268549662 | ENST00000298124 | 474354    | NM_001006939 | LRRC18         |
| A_21_P0000357  | 5,80822 | 5,4651  | 1,268496906 | N/A             | 677828    | NR_003014    | SNORA47        |
| A_23_P160862   | 13,2798 | 12,9367 | 1,268479321 | ENST00000554987 | 3192      | NM_031844    | HNRNPU         |
| A_21_P0011148  | 8,1538  | 7,81072 | 1,268461736 | ENST00000400311 | N/A       | N/A          | N/A            |
| A_22_P00019960 | 8,64716 | 8,30411 | 1,268435359 | N/A             | N/A       | N/A          | Inc-CALML6-1   |
| A_23_P163580   | 5,77265 | 5,42966 | 1,268382608 | ENST00000564128 | 80152     | NM_025082    | CENPT          |
| A_24_P943781   | 2,79896 | 2,45598 | 1,268373816 | ENST00000310396 | 79974     | NM_024913    | CPED1          |
| A_24_P388570   | 9,73891 | 9,39596 | 1,268347441 | ENST00000514314 | 84864     | NM_032778    | MINA           |
| A_22_P00023041 | 2,60495 | 2,26205 | 1,268303484 | N/A             | N/A       | N/A          | Inc-ZBTB2-3    |
| A_19_P00811348 | 4,52838 | 4,18554 | 1,268250738 | N/A             | N/A       | AF400485     | Inc-SNURF-1    |
| A_23_P115519   | 4,03645 | 3,69363 | 1,268233156 | ENST00000368787 | 84648     | NM_032563    | LCE3D          |
| A_33_P3286372  | 4,46142 | 4,11862 | 1,268215575 | ENST00000381786 | 348738    | NM_182626    | C2orf48        |
| A_23_P13524    | 12,2188 | 11,876  | 1,268215575 | ENST00000528531 | 84233     | NM_032273    | TMEM126A       |
| A_23_P74359    | 11,9071 | 11,5644 | 1,268127672 | ENST00000340006 | 1465      | NM_004078    | CSRP1          |
| A_23_P130585   | 4,7891  | 4,44642 | 1,268110092 | ENST00000597251 | 117286    | NM_054113    | CIB3           |
| A_33_P3313940  | 3,66833 | 3,32567 | 1,268092513 | ENST00000450729 | N/A       | N/A          | N/A            |
| A_21_P0011135  | 15,2    | 14,8574 | 1,268039775 | ENST00000421800 | 1973      | NM_001416    | EIF4A1         |
| A_23_P31798    | 3,35947 | 3,01687 | 1,268039775 | ENST00000286479 | 10        | NM_000015    | NAT2           |
| A_23_P317800   | 11,757  | 11,4144 | 1,268039775 | ENST00000510092 | 29945     | NM_013367    | ANAPC4         |
| A_22_P00014749 | 4,28298 | 3,94042 | 1,268004618 | N/A             | 101928861 | NR_120513    | LOC101928861   |
| A_22_P00016364 | 2,73587 | 2,39332 | 1,267995829 | N/A             | N/A       | N/A          | Inc-TMEM18-1   |
| A_32_P100683   | 7,387   | 7,04447 | 1,267978251 | ENST00000612946 | 23331     | NM_001145418 | TTC28          |
| A_22_P00020960 | 5,70394 | 5,36152 | 1,267881576 | ENST00000425048 | N/A       | N/A          | N/A            |
| A_22_P00012502 | 3,90079 | 3,55837 | 1,267881576 | N/A             | N/A       | N/A          | Inc-PSD4-1     |
| A_23_P75978    | 10,5433 | 10,2009 | 1,267864    | ENST00000535477 | 81570     | NM_030813    | CLPB           |
| A_21_P0013320  | 8,98657 | 8,6442  | 1,267837636 | N/A             | N/A       | N/A          | XLOC_I2_013873 |
| A_24_P49214    | 8,28005 | 7,93772 | 1,267802484 | ENST00000428120 | 199990    | NM_001282671 | C1orf86        |
| A_33_P3253574  | 3,88182 | 3,53952 | 1,267776121 | ENST00000354597 | 390271    | NM_001005467 | OR8B3          |

|                |         |         |             |                 |           |              |                |
|----------------|---------|---------|-------------|-----------------|-----------|--------------|----------------|
| A_23_P80062    | 10,3493 | 10,007  | 1,267776121 | ENST00000252996 | 6874      | NM_003185    | TAF4           |
| A_24_P127719   | 8,14883 | 7,80653 | 1,267776121 | ENST00000333480 | 389692    | NM_201589    | MAFA           |
| A_33_P3237719  | 4,95407 | 4,61178 | 1,267767334 | N/A             | N/A       | N/A          | N/A            |
| A_32_P34876    | 6,61295 | 6,27077 | 1,267670675 | ENST00000444934 | 56964     | NM_020212    | WDR93          |
| A_23_P215435   | 6,48552 | 6,14357 | 1,267468594 | ENST00000395270 | 9883      | NM_001257190 | POM121         |
| A_22_P00007867 | 3,93044 | 3,58849 | 1,267468594 | N/A             | N/A       | N/A          | Inc-HS3ST3A1-4 |
| A_19_P00803850 | 5,85921 | 5,51729 | 1,267442238 | ENST00000587904 | 100505474 | NR_040025    | LINC01539      |
| A_23_P53736    | 12,5143 | 12,1724 | 1,267424668 | ENST00000427718 | 23014     | NM_033624    | FBXO21         |
| A_23_P143303   | 11,0585 | 10,7166 | 1,267424668 | ENST00000380445 | 64601     | NM_022575    | VPS16          |
| A_22_P00014542 | 6,14278 | 5,80089 | 1,267415883 | ENST00000443870 | N/A       | AK055335     | N/A            |
| A_21_P0001418  | 5,77077 | 5,42891 | 1,267389528 | N/A             | N/A       | N/A          | Inc-ATF3-1     |
| A_23_P105833   | 8,8369  | 8,49505 | 1,267380743 | ENST00000257336 | 54841     | NM_017693    | BIVM           |
| A_33_P3281308  | 3,18484 | 2,84305 | 1,267328035 | ENST00000427391 | 286467    | NR_026975    | FIRRE          |
| A_33_P3270639  | 4,1569  | 3,81526 | 1,267196275 | N/A             | N/A       | N/A          | N/A            |
| A_24_P18917    | 5,07875 | 4,7372  | 1,267117226 | ENST00000545827 | 64788     | NM_022773    | LMF1           |
| A_23_P81280    | 1,95654 | 1,61501 | 1,26709966  | ENST00000376841 | 153579    | NM_152547    | BTNL9          |
| A_24_P347704   | 10,1938 | 9,85231 | 1,267064529 | ENST00000264010 | 10664     | NM_006565    | CTCF           |
| A_32_P29784    | 15,1453 | 14,8039 | 1,266985488 | ENST00000330188 | 7170      | NM_001043352 | TPM3           |
| A_24_P696470   | 5,33211 | 4,99074 | 1,266959142 | ENST00000566478 | 399671    | NM_203309    | HEATR4         |
| A_33_P3222210  | 10,2321 | 9,89074 | 1,26695036  | ENST00000503096 | 81926     | NM_001130111 | ABHD17A        |
| A_21_P0011074  | 5,06733 | 4,72597 | 1,26695036  | N/A             | N/A       | N/A          | XLOC_I2_003253 |
| A_33_P3376463  | 6,93732 | 6,59601 | 1,266906452 | ENST00000475707 | 7182      | BC051670     | NR2C2          |
| A_21_P0013267  | 7,60653 | 7,26523 | 1,26689767  | ENST00000605862 | 729218    | NR_109983    | LOC729218      |
| A_33_P3256677  | 10,7421 | 10,4009 | 1,266809859 | ENST00000565945 | 112869    | NM_138414    | CCDC101        |
| A_23_P50000    | 10,8256 | 10,4844 | 1,266809859 | ENST00000570699 | 79850     | NM_024792    | FAM57A         |
| A_33_P3308862  | 6,46343 | 6,12227 | 1,266774736 | ENST00000620936 | 729262    | NM_001278495 | NUTM2B         |
| A_33_P3323463  | 6,64768 | 6,30671 | 1,266607915 | ENST00000532091 | N/A       | N/A          | N/A            |
| A_23_P203305   | 10,1207 | 9,77978 | 1,266564019 | ENST00000278200 | 196294    | XR_429208    | IMMP1L         |
| A_23_P212050   | 6,98253 | 6,64163 | 1,26654646  | ENST00000482958 | 590       | NM_000055    | BCHE           |
| A_23_P131596   | 8,61589 | 8,27505 | 1,266493787 | ENST00000258083 | 84279     | NM_032319    | PRADC1         |
| A_24_P350744   | 7,32492 | 6,98416 | 1,26642356  | ENST00000466713 | 22889     | NM_014949    | KIAA0907       |
| A_33_P3365755  | 4,36681 | 4,0261  | 1,26637967  | ENST00000367267 | 127833    | NM_001136504 | SYT2           |
| A_21_P0007813  | 2,17532 | 1,83474 | 1,266265563 | N/A             | N/A       | N/A          | Inc-POLE-3     |

|                |         |         |             |                 |           |              |                |
|----------------|---------|---------|-------------|-----------------|-----------|--------------|----------------|
| A_33_P3411313  | 2,52444 | 2,18389 | 1,266239232 | ENST00000408897 | N/A       | XM_003959967 | N/A            |
| A_23_P145134   | 8,53522 | 8,19485 | 1,266081257 | ENST00000349556 | 11116     | NM_007045    | FGFR1OP        |
| A_21_P0000498  | 5,7152  | 5,37491 | 1,266011053 | ENST00000448136 | 677850    | NR_004397    | SNORD1C        |
| A_22_P00015783 | 2,04349 | 1,70334 | 1,265888204 | ENST00000538783 | N/A       | AL037786     | N/A            |
| A_22_P00005559 | 4,56542 | 4,22528 | 1,26587943  | N/A             | N/A       | BG429116     | Inc-EEF1B2-3   |
| A_23_P378416   | 3,45672 | 3,11661 | 1,265853107 | ENST00000356942 | 2824      | NM_001001996 | GPM6B          |
| A_19_P00316202 | 7,3253  | 6,9852  | 1,265844333 | N/A             | N/A       | BC128221     | Inc-TP53INP1-1 |
| A_33_P3360675  | 9,81177 | 9,47174 | 1,265782915 | ENST00000430040 | 5575      | NM_001164761 | PRKAR1B        |
| A_22_P00017379 | 6,7747  | 6,43471 | 1,26574782  | N/A             | N/A       | DA940890     | Inc-UVRAG-2    |
| A_33_P3418055  | 4,65559 | 4,31566 | 1,265695181 | ENST00000616224 | 9310      | NM_004234    | ZNF235         |
| A_33_P3353520  | 4,68409 | 4,34418 | 1,265677634 | ENST00000601382 | 646862    | NM_001195135 | RNF225         |
| A_23_P359738   | 10,5928 | 10,2529 | 1,265668861 | ENST00000258484 | 26122     | NM_015630    | EPC2           |
| A_23_P145068   | 10,7711 | 10,4312 | 1,265668861 | ENST00000370305 | 25821     | NM_012123    | MTO1           |
| A_24_P633349   | 6,59917 | 6,25932 | 1,265624997 | N/A             | N/A       | AK056973     | Inc-ITGAL-2    |
| A_33_P3862354  | 8,52032 | 8,18059 | 1,26551973  | ENST00000472677 | 80305     | NM_025204    | TRABD          |
| A_24_P212819   | 12,5196 | 12,1799 | 1,265493415 | N/A             | N/A       | AK057884     | N/A            |
| A_33_P3322415  | 7,13432 | 6,79469 | 1,265432014 | ENST00000622871 | 57787     | NM_031417    | MARK4          |
| A_23_P56673    | 7,55404 | 7,21451 | 1,265344304 | ENST00000471577 | 83444     | NM_031288    | INO80B         |
| A_19_P00803019 | 7,31145 | 6,97195 | 1,265317992 | ENST00000552334 | N/A       | AK096584     | N/A            |
| A_21_P0001065  | 2,02999 | 1,69049 | 1,265317992 | ENST00000421147 | N/A       | N/A          | N/A            |
| A_23_P395075   | 7,70228 | 7,3628  | 1,265300451 | ENST00000542128 | 55818     | NM_018433    | KDM3A          |
| A_22_P00012154 | 4,07993 | 3,74045 | 1,265300451 | ENST00000438185 | N/A       | N/A          | N/A            |
| A_33_P3372217  | 1,96904 | 1,62956 | 1,265300451 | ENST00000401992 | 5673      | BG354573     | PSG5           |
| A_23_P140154   | 9,43883 | 9,09935 | 1,265300451 | ENST00000622205 | 26175     | NM_001098621 | TMEM251        |
| A_23_P77502    | 9,65051 | 9,31107 | 1,26526537  | ENST00000262304 | 5310      | NM_001009944 | PKD1           |
| A_33_P3339187  | 2,14233 | 1,80291 | 1,26524783  | ENST00000623702 | 100506650 | NM_001243552 | C17orf112      |
| A_24_P497226   | 9,20094 | 8,86152 | 1,26524783  | ENST00000393021 | 6198      | NM_003161    | RPS6KB1        |
| A_21_P0006744  | 1,98897 | 1,6496  | 1,265203981 | ENST00000414308 | N/A       | N/A          | N/A            |
| A_33_P3242323  | 3,61582 | 3,27653 | 1,265133825 | ENST00000366674 | 27097     | N/A          | TAF5L          |
| A_22_P00002690 | 2,37762 | 2,03838 | 1,265089979 | ENST00000423403 | 101926964 | NR_110628    | LOC101926964   |
| A_21_P0001317  | 4,42858 | 4,08936 | 1,265072442 | N/A             | 102724572 | XR_425155    | LOC102724572   |
| A_23_P380371   | 4,70889 | 4,36979 | 1,26496722  | ENST00000373935 | 253430    | NM_152230    | IPMK           |
| A_23_P112652   | 10,9513 | 10,6122 | 1,26496722  | ENST00000331889 | 25904     | NM_015442    | CNOT10         |

|                |         |         |             |                 |           |              |                  |
|----------------|---------|---------|-------------|-----------------|-----------|--------------|------------------|
| A_33_P3393836  | 11,3976 | 11,0585 | 1,26496722  | ENST00000409467 | 51251     | NM_001166118 | NT5C3A           |
| A_33_P3350748  | 18,0107 | 17,6716 | 1,26496722  | ENST00000331817 | 3855      | NM_005556    | KRT7             |
| A_33_P3233010  | 9,33118 | 8,99218 | 1,264879542 | ENST00000612483 | 3812      | NM_001242867 | KIR3DL2          |
| A_33_P3252834  | 12,4511 | 12,1121 | 1,264879542 | ENST00000367309 | 23612     | NM_012396    | PHLDA3           |
| A_23_P110005   | 9,34039 | 9,00141 | 1,264862008 | ENST00000423832 | 84276     | NM_032316    | NICN1            |
| A_22_P00001111 | 2,13816 | 1,79925 | 1,264800638 | N/A             | N/A       | BX486423     | Inc-ALKBH4-2     |
| A_33_P3405444  | 13,5858 | 13,2469 | 1,264791871 | ENST00000223023 | 8976      | NM_003941    | WASL             |
| A_22_P00006547 | 11,2283 | 10,8894 | 1,264791871 | N/A             | N/A       | N/A          | Inc-FKBP2-1      |
| A_33_P3392325  | 13,4919 | 13,153  | 1,264791871 | ENST00000360383 | 8881      | NM_001078645 | CDC16            |
| A_24_P346587   | 9,3896  | 9,05076 | 1,264739271 | ENST00000262146 | 9650      | NM_014637    | MTFR1            |
| A_33_P3319953  | 3,78131 | 3,44249 | 1,264721738 | N/A             | N/A       | N/A          | N/A              |
| A_33_P3369706  | 4,16371 | 3,82498 | 1,264642843 | ENST00000512115 | 102577424 | NR_108030    | LINC01574        |
| A_32_P194962   | 8,31406 | 7,97533 | 1,264642843 | N/A             | N/A       | BE300169     | N/A              |
| A_21_P0004831  | 2,08585 | 1,74713 | 1,264634077 | N/A             | 102724234 | XR_425966    | LOC102724234     |
| A_24_P244100   | 10,1293 | 9,79061 | 1,26460778  | ENST00000444643 | 54788     | NM_001002762 | DNAJB12          |
| A_24_P115424   | 1,91177 | 1,57317 | 1,264528892 | ENST00000398462 | 10407     | NM_016512    | SPAG11B          |
| A_32_P216602   | 10,61   | 10,2715 | 1,264441244 | N/A             | N/A       | DB229023     | Inc-NAV1-3       |
| A_23_P46606    | 10,824  | 10,4855 | 1,264441244 | ENST00000366997 | 9926      | NM_014873    | LPGAT1           |
| A_33_P3319886  | 4,96727 | 4,6288  | 1,264414951 | ENST00000601292 | 374877    | NM_198534    | C19orf45         |
| A_22_P00009118 | 2,6956  | 2,35716 | 1,264388659 | ENST00000567803 | N/A       | DB051691     | N/A              |
| A_33_P3319134  | 5,57015 | 5,2318  | 1,264309785 | N/A             | 100506191 | AF289610     | LOC100506191     |
| A_21_P0011326  | 7,32689 | 6,98861 | 1,264248442 | N/A             | N/A       | N/A          | XLOC_I2_004706   |
| A_23_P259611   | 4,09095 | 3,75269 | 1,264230915 | ENST00000476435 | 51314     | NM_016616    | NME8             |
| A_22_P00022539 | 2,13047 | 1,79224 | 1,264204627 | ENST00000547552 | N/A       | DB087247     | N/A              |
| A_21_P0005357  | 2,23182 | 1,8936  | 1,264195864 | N/A             | N/A       | N/A          | Inc-AHR-2        |
| A_22_P00025220 | 2,40607 | 2,06799 | 1,264073192 | N/A             | N/A       | N/A          | Inc-PLEKHA2-1    |
| A_22_P00010274 | 3,73206 | 3,394   | 1,264055668 | ENST00000565199 | N/A       | N/A          | N/A              |
| A_32_P75094    | 10,8877 | 10,5497 | 1,264003098 | ENST00000307864 | 84883     | NM_032797    | AIFM2            |
| A_33_P3389148  | 11,2689 | 10,931  | 1,263915487 | ENST00000586243 | 6794      | NM_000455    | STK11            |
| A_22_P00021313 | 5,50768 | 5,16983 | 1,263871684 | N/A             | N/A       | AY358191     | Inc-AC118344.1-1 |
| A_24_P356509   | 6,07747 | 5,73965 | 1,263845403 | ENST00000345365 | 5892      | NM_001142571 | RAD51D           |
| A_33_P3404739  | 7,7767  | 7,43898 | 1,263757803 | N/A             | 135398    | XM_005248851 | C6orf141         |
| A_23_P111672   | 11,1399 | 10,8022 | 1,263740284 | ENST00000358204 | 26136     | NM_152829    | TES              |

|                |         |         |             |                 |           |              |                       |
|----------------|---------|---------|-------------|-----------------|-----------|--------------|-----------------------|
| A_22_P00020023 | 10,4721 | 10,1344 | 1,263740284 | ENST00000563086 | 57546     | NM_020786    | PDP2                  |
| A_21_P0007384  | 2,74267 | 2,40508 | 1,263643932 | N/A             | N/A       | N/A          | Inc-SESN3-1           |
| A_23_P217054   | 10,3655 | 10,028  | 1,263565104 | ENST00000478453 | 79269     | NM_024345    | DCAF10                |
| A_24_P85881    | 3,01395 | 2,67646 | 1,263556346 | ENST00000447444 | 165082    | NM_153835    | GPR113                |
| A_33_P3324909  | 8,84705 | 8,50965 | 1,263477524 | ENST00000252818 | 3727      | NM_001286968 | JUND                  |
| A_24_P31421    | 5,92395 | 5,58657 | 1,263460008 | ENST00000614245 | 29998     | NM_015711    | GLTSCR1               |
| A_23_P51646    | 12,679  | 12,3417 | 1,263389949 | ENST00000372201 | 1263      | NM_004073    | PLK3                  |
| A_33_P3297297  | 2,38901 | 2,05171 | 1,263389949 | N/A             | N/A       | N/A          | N/A                   |
| A_33_P3310780  | 14,8362 | 14,4989 | 1,263389949 | ENST00000301843 | 2017      | NM_005231    | CTTN                  |
| A_33_P7699408  | 8,02807 | 7,69079 | 1,263372435 | ENST00000438428 | 101928973 | NR_125966    | LOC101928973          |
| A_33_P3281250  | 2,63556 | 2,29843 | 1,263241086 | ENST00000547918 | N/A       | AK302432     | N/A                   |
| A_23_P159382   | 9,51811 | 9,18099 | 1,26323233  | ENST00000505134 | 9871      | NM_014822    | SEC24D                |
| A_32_P4403     | 11,8297 | 11,4926 | 1,263214818 | ENST00000327827 | 29035     | NM_014117    | C16orf72              |
| A_21_P0003244  | 7,07451 | 6,73743 | 1,263197306 | N/A             | N/A       | N/A          | Inc-EPHA6-1           |
| A_21_P0002876  | 6,38612 | 6,04913 | 1,263118507 | N/A             | N/A       | N/A          | Inc-RP11-723O4.6.1-1  |
| A_24_P145009   | 6,14945 | 5,81246 | 1,263118507 | N/A             | 441208    | NR_003502    | ZNRF2P1               |
| A_33_P3333642  | 9,79922 | 9,46227 | 1,263083486 | ENST00000399003 | N/A       | AK131315     | N/A                   |
| A_21_P0011743  | 8,89289 | 8,55598 | 1,263048466 | ENST00000438368 | 100506930 | N/A          | LINC00665             |
| A_22_P00022734 | 1,74702 | 1,41014 | 1,263022202 | N/A             | N/A       | N/A          | Inc-CTD-2054N24.2.1-1 |
| A_24_P648176   | 6,95967 | 6,6228  | 1,263013448 | ENST00000556351 | 144363    | NM_001001660 | LYRM5                 |
| A_21_P0006572  | 5,40307 | 5,06621 | 1,263004693 | N/A             | 101928359 | XR_244532    | LOC101928359          |
| A_33_P3307495  | 9,32771 | 8,99087 | 1,262987184 | ENST00000574439 | 64220     | NM_001199042 | STRA6                 |
| A_33_P3315190  | 7,99732 | 7,66049 | 1,26297843  | ENST00000379612 | 9645      | NM_001282666 | MICAL2                |
| A_33_P3286422  | 7,96629 | 7,62968 | 1,26278585  | ENST00000566889 | 2175      | NM_001018112 | FANCA                 |
| A_23_P336554   | 9,34842 | 9,01189 | 1,262715828 | ENST00000422485 | 3556      | NM_134470    | IL1RAP                |
| A_33_P3225327  | 8,13915 | 7,80272 | 1,262628307 | ENST00000619199 | 79572     | NM_024524    | ATP13A3               |
| A_33_P3249674  | 1,7412  | 1,40483 | 1,262575796 | N/A             | N/A       | BC027978     | Inc-TOMM7-1           |
| A_22_P00023617 | 5,57758 | 5,24123 | 1,262558294 | N/A             | 101929769 | XR_246052    | LINC01063             |
| A_21_P0002823  | 6,09594 | 5,7596  | 1,262549542 | ENST00000438488 | 103344926 | N/A          | LINC0002              |
| A_23_P321201   | 9,06205 | 8,72572 | 1,262540791 | ENST00000529977 | 23258     | NM_015213    | DENND5A               |
| A_33_P3363082  | 6,87019 | 6,53388 | 1,262523288 | N/A             | 677775    | NR_003008    | SCARNA5               |
| A_33_P3295550  | 2,09279 | 1,75656 | 1,262453281 | ENST00000373644 | 80312     | NM_030625    | TET1                  |
| A_22_P00001620 | 4,83701 | 4,50085 | 1,262392028 | N/A             | 101928809 | NR_125906    | LOC101928809          |

|                |         |         |             |                 |           |              |               |
|----------------|---------|---------|-------------|-----------------|-----------|--------------|---------------|
| A_23_P143120   | 9,12797 | 8,79181 | 1,262392028 | ENST00000310823 | 6868      | NM_003183    | ADAM17        |
| A_33_P3300877  | 5,7386  | 5,40244 | 1,262392028 | N/A             | N/A       | N/A          | N/A           |
| A_22_P00004877 | 2,46161 | 2,12546 | 1,262383278 | N/A             | N/A       | AK125723     | Inc-CYR61-3   |
| A_23_P381577   | 5,14133 | 4,80527 | 1,262304529 | ENST00000302609 | 219749    | NM_145011    | ZNF25         |
| A_21_P0014421  | 6,30671 | 5,97065 | 1,262304529 | ENST00000480319 | N/A       | N/A          | N/A           |
| A_23_P72584    | 6,83219 | 6,49615 | 1,26228703  | ENST00000448477 | 414149    | NM_001039844 | ACBD7         |
| A_23_P318396   | 9,02753 | 8,6916  | 1,262190789 | ENST00000310513 | 10658     | NM_198700    | CELF1         |
| A_33_P3225268  | 8,80655 | 8,47062 | 1,262190789 | ENST00000367602 | 5768      | NM_001004128 | QSOX1         |
| A_23_P101461   | 12,6026 | 12,2667 | 1,262164543 | ENST00000593174 | 81576     | NM_030818    | CCDC130       |
| A_21_P0002691  | 4,03527 | 3,69946 | 1,262085807 | N/A             | N/A       | N/A          | Inc-KLF7-1    |
| A_33_P3405728  | 10,5058 | 10,17   | 1,262077059 | ENST00000340811 | 5318      | NM_004572    | PKP2          |
| A_33_P3357843  | 8,47528 | 8,13953 | 1,262033319 | ENST00000381431 | 6443      | NM_000232    | SGCB          |
| A_19_P00320846 | 6,75943 | 6,42371 | 1,262007076 | N/A             | 550112    | NR_015439    | UBA6-AS1      |
| A_33_P3212630  | 3,88885 | 3,55315 | 1,261989581 | ENST00000510875 | 55138     | NM_018088    | FAM90A1       |
| A_22_P00020428 | 5,63798 | 5,30248 | 1,261814645 | ENST00000580347 | N/A       | DB027098     | N/A           |
| A_23_P141992   | 6,14408 | 5,8086  | 1,261797152 | ENST00000581773 | 374875    | NM_198706    | HSD11B1L      |
| A_33_P3362770  | 9,423   | 9,08755 | 1,261770914 | ENST00000566038 | 54700     | NM_001301064 | RRN3          |
| A_33_P3391536  | 7,1192  | 6,78378 | 1,261744677 | N/A             | N/A       | N/A          | N/A           |
| A_22_P00002867 | 3,89009 | 3,55468 | 1,261735931 | N/A             | N/A       | N/A          | Inc-C3orf71-1 |
| A_22_P00006738 | 4,87882 | 4,54353 | 1,261630987 | ENST00000528119 | N/A       | N/A          | N/A           |
| A_22_P00011363 | 3,88707 | 3,55184 | 1,261578519 | N/A             | 100134015 | NR_038395    | UBOX5-AS1     |
| A_22_P00022747 | 5,11167 | 4,77644 | 1,261578519 | N/A             | N/A       | N/A          | Inc-MTERF-1   |
| A_21_P0006675  | 8,01222 | 7,6771  | 1,261482332 | ENST00000442526 | N/A       | N/A          | N/A           |
| A_23_P215819   | 12,0559 | 11,7208 | 1,261464844 | ENST00000416144 | 79027     | NM_024061    | ZNF655        |
| A_23_P149281   | 11,5672 | 11,2321 | 1,261464844 | ENST00000611929 | 1969      | NM_004431    | EPHA2         |
| A_33_P3246148  | 1,87652 | 1,54143 | 1,2614561   | ENST00000377171 | N/A       | N/A          | N/A           |
| A_21_P0001908  | 4,0842  | 3,74913 | 1,261438613 | ENST00000445332 | N/A       | N/A          | N/A           |
| A_33_P3242965  | 8,1497  | 7,81468 | 1,261394895 | ENST00000378785 | 219293    | NM_001039211 | ATAD3C        |
| A_23_P339954   | 15,0832 | 14,7482 | 1,261377409 | ENST00000435324 | 100507607 | NM_001287251 | NPIP89        |
| A_33_P3354965  | 3,97594 | 3,64096 | 1,261359923 | ENST00000330233 | 1396      | AB527908     | CRIP1         |
| A_24_P175612   | 7,62517 | 7,29025 | 1,261307465 | ENST00000459894 | 118980    | NM_178858    | SFXN2         |
| A_24_P916656   | 8,13265 | 7,79774 | 1,261298722 | ENST00000395326 | 27297     | NM_014478    | CRCP          |
| A_24_P84008    | 10,4252 | 10,0903 | 1,26128998  | ENST00000594613 | N/A       | AI198876     | N/A           |

|                |         |         |             |                 |           |              |              |
|----------------|---------|---------|-------------|-----------------|-----------|--------------|--------------|
| A_22_P00010628 | 7,19718 | 6,86233 | 1,261246268 | N/A             | N/A       | N/A          | Inc-NDUFS8-1 |
| A_23_P34018    | 17,4194 | 17,0847 | 1,26111514  | ENST00000468844 | 6170      | NM_001000    | RPL39        |
| A_23_P141636   | 14,7712 | 14,4366 | 1,261027729 | ENST00000576573 | 9775      | NM_014740    | EIF4A3       |
| A_32_P204676   | 12,1185 | 11,7839 | 1,261027729 | ENST00000486269 | 2171      | NM_001444    | FABP5        |
| A_33_P3404701  | 8,85916 | 8,52458 | 1,261010248 | ENST00000554293 | 6400      | NM_005065    | SEL1L        |
| A_21_P0002743  | 3,53711 | 3,20258 | 1,260966545 | ENST00000492683 | N/A       | N/A          | N/A          |
| A_22_P00022872 | 2,10931 | 1,77485 | 1,260905364 | N/A             | 101927188 | NR_126040    | LOC101927188 |
| A_33_P3222307  | 6,73394 | 6,39961 | 1,26079175  | N/A             | 100129380 | AK125520     | LOC100129380 |
| A_33_P3334826  | 5,05075 | 4,71646 | 1,260756794 | ENST00000551907 | 100335030 | NR_033267    | LOC100335030 |
| A_22_P00013596 | 2,51328 | 2,17903 | 1,260721839 | ENST00000552584 | 102724933 | NR_120492    | LOC102724933 |
| A_33_P3538279  | 9,37312 | 9,03892 | 1,260678147 | N/A             | 114224    | XR_158845    | PRO2852      |
| A_21_P0006521  | 6,48615 | 6,15195 | 1,260678147 | N/A             | 101928092 | XR_247293    | LOC101928092 |
| A_22_P00011770 | 3,80601 | 3,47188 | 1,26061698  | N/A             | N/A       | N/A          | Inc-PFKP-13  |
| A_23_P2203     | 8,77715 | 8,44304 | 1,260599504 | ENST00000537305 | 51347     | NM_016281    | TAOK3        |
| A_33_P3350643  | 5,97065 | 5,63657 | 1,260573291 | ENST00000355497 | 4010      | NM_001174146 | LMX1B        |
| A_22_P00011370 | 4,11195 | 3,77791 | 1,260538341 | ENST00000328963 | 5027      | AF086044     | P2RX7        |
| A_33_P3356255  | 7,27601 | 6,94204 | 1,26047718  | ENST00000447489 | 311       | N/A          | ANXA11       |
| A_22_P00013643 | 2,80941 | 2,47545 | 1,260468443 | N/A             | 101928785 | XR_245261    | LOC101928785 |
| A_23_P107644   | 14,7953 | 14,4614 | 1,260416023 | ENST00000300413 | 6632      | NM_006938    | SNRPD1       |
| A_33_P3250857  | 4,4098  | 4,07593 | 1,260389814 | ENST00000474863 | 64853     | BC043142     | AIDA         |
| A_22_P00015081 | 6,71034 | 6,37653 | 1,260337397 | N/A             | N/A       | AF400491     | Inc-SNURF-3  |
| A_22_P00025104 | 5,81741 | 5,4836  | 1,260337397 | ENST00000434792 | 101927472 | NR_120622    | LOC101927472 |
| A_22_P00025953 | 4,77866 | 4,44492 | 1,260276246 | N/A             | N/A       | N/A          | Inc-MSMP-1   |
| A_21_P0000319  | 4,25084 | 3,91712 | 1,260258775 | ENST00000467544 | 677812    | NR_002965    | SNORA29      |
| A_23_P398943   | 1,9709  | 1,63722 | 1,260223834 | ENST00000614838 | 90011     | NR_026716    | KIR3DX1      |
| A_33_P3252141  | 11,0449 | 10,7113 | 1,260153954 | ENST00000299608 | 54495     | NM_019022    | TMX3         |
| A_22_P00007165 | 3,41207 | 3,07858 | 1,260057876 | N/A             | 101927598 | XR_245762    | LOC101927598 |
| A_23_P36513    | 10,5279 | 10,1945 | 1,259979272 | ENST00000546531 | 5571      | NM_001206710 | PRKAG1       |
| A_21_P0002294  | 7,58496 | 7,25157 | 1,259970538 | ENST00000590687 | 7771      | N/A          | ZNF112       |
| A_23_P80382    | 9,73448 | 9,4011  | 1,259961805 | ENST00000432916 | 55615     | NM_015366    | PRR5         |
| A_23_P38567    | 10,0335 | 9,70013 | 1,259953072 | ENST00000395525 | 92521     | NM_152904    | SPECC1       |
| A_33_P3387429  | 3,06623 | 2,73286 | 1,259953072 | N/A             | N/A       | N/A          | N/A          |
| A_22_P00023931 | 6,79173 | 6,45839 | 1,259926872 | N/A             | N/A       | N/A          | Inc-MKL1-1   |



|                |         |         |             |                 |           |              |                     |
|----------------|---------|---------|-------------|-----------------|-----------|--------------|---------------------|
| A_24_P186124   | 9,62541 | 9,2921  | 1,259900673 | ENST00000391980 | 130916    | NM_182501    | MTERF4              |
| A_33_P3361925  | 4,95677 | 4,62352 | 1,259848276 | ENST00000615775 | 23133     | NM_001184898 | PHF8                |
| A_22_P00014697 | 12,5515 | 12,2183 | 1,259804614 | ENST00000616577 | 7178      | NM_001286272 | TPT1                |
| A_24_P928901   | 9,47633 | 9,14319 | 1,259752221 | ENST00000374212 | 1317      | NM_001859    | SLC31A1             |
| A_33_P3217804  | 5,462   | 5,12888 | 1,259734757 | ENST00000493088 | 157922    | N/A          | CAMSAP1             |
| A_32_P69368    | 2,12124 | 1,78817 | 1,259691099 | ENST00000396290 | 3398      | NM_002166    | ID2                 |
| A_22_P00024534 | 4,7535  | 4,42045 | 1,259673636 | N/A             | N/A       | N/A          | Inc-UBB-2           |
| A_23_P109470   | 9,26886 | 8,93591 | 1,259586325 | ENST00000484924 | 8563      | NM_001002878 | THOC5               |
| A_33_P3283231  | 7,98532 | 7,6526  | 1,259385533 | ENST00000429584 | 404281    | NM_206923    | YY2                 |
| A_23_P390190   | 10,9137 | 10,581  | 1,259368074 | ENST00000381736 | 9818      | NM_014089    | NUPL1               |
| A_21_P0007929  | 5,13344 | 4,80084 | 1,259280785 | N/A             | N/A       | N/A          | Inc-RP11-90M5.1.1-2 |
| A_22_P00004791 | 4,00538 | 3,67278 | 1,259280785 | ENST00000437014 | N/A       | N/A          | N/A                 |
| A_23_P17382    | 9,94122 | 9,60877 | 1,259149862 | ENST00000322927 | 63925     | NM_022095    | ZNF335              |
| A_23_P90223    | 7,88254 | 7,5502  | 1,25905386  | ENST00000392157 | 92285     | NM_152279    | ZNF585B             |
| A_21_P0001837  | 8,38172 | 8,04945 | 1,258992772 | ENST00000423925 | N/A       | N/A          | N/A                 |
| A_22_P00004713 | 7,35986 | 7,02765 | 1,258940413 | ENST00000546580 | 100506844 | NR_038269    | LOC100506844        |
| A_24_P915692   | 12,4296 | 12,0974 | 1,258931686 | ENST00000266671 | 22822     | NM_007350    | PHLDA1              |
| A_21_P0013670  | 6,72223 | 6,39012 | 1,258853153 | N/A             | N/A       | N/A          | XLOC_I2_015295      |
| A_32_P81357    | 11,4465 | 11,1144 | 1,258844427 | ENST00000427863 | 51011     | NM_016044    | FAHD2A              |
| A_23_P89455    | 11,5687 | 11,2366 | 1,258844427 | ENST00000502268 | 10237     | NM_005827    | SLC35B1             |
| A_33_P3222703  | 7,55122 | 7,21919 | 1,258783349 | ENST00000334075 | 10168     | NM_001024855 | ZNF197              |
| A_22_P00006815 | 2,04714 | 1,71513 | 1,258765899 | N/A             | N/A       | AF086092     | Inc-GABRA2-1        |
| A_21_P0000639  | 5,73803 | 5,40607 | 1,258722274 | N/A             | 100288123 | NR_034114    | LOC100288123        |
| A_24_P341222   | 11,088  | 10,7561 | 1,258669926 | ENST00000522137 | 389203    | NM_001145432 | SMIM20              |
| A_33_P3373985  | 9,81909 | 9,48721 | 1,258652477 | ENST00000414130 | N/A       | N/A          | N/A                 |
| A_33_P3387115  | 6,37063 | 6,03881 | 1,258600133 | N/A             | N/A       | BC021693     | N/A                 |
| A_22_P00008423 | 4,45936 | 4,1276  | 1,25854779  | N/A             | N/A       | N/A          | Inc-JUN-6           |
| A_23_P345118   | 11,4828 | 11,1511 | 1,25849545  | ENST00000373509 | 5292      | NM_002648    | PIM1                |
| A_24_P65098    | 6,37985 | 6,04838 | 1,258294831 | ENST00000307216 | 25963     | NM_001110503 | TMEM87A             |
| A_33_P3229032  | 2,99875 | 2,66728 | 1,258294831 | ENST00000250340 | 6320      | NM_002975    | CLEC11A             |
| A_33_P3263867  | 4,00276 | 3,67153 | 1,258085525 | ENST00000261826 | 5027      | NM_002562    | P2RX7               |
| A_22_P00012316 | 2,0734  | 1,74219 | 1,258068084 | N/A             | N/A       | N/A          | Inc-PPP6R2-1        |
| A_24_P283320   | 11,0598 | 10,7287 | 1,257972165 | ENST00000367378 | 5110      | NM_005389    | PCMT1               |

|                |         |         |             |                 |           |           |                |
|----------------|---------|---------|-------------|-----------------|-----------|-----------|----------------|
| A_23_P46755    | 2,33897 | 2,0079  | 1,257946006 | ENST00000581492 | 2658      | NM_016204 | GDF2           |
| A_24_P231173   | 7,17813 | 6,84708 | 1,257928568 | ENST00000275732 | 64599     | NM_022574 | GIGYF1         |
| A_22_P00018004 | 6,15405 | 5,82308 | 1,257858815 | ENST00000451691 | 100289333 | NR_104179 | LOC100289333   |
| A_21_P0008181  | 2,02748 | 1,69655 | 1,25782394  | N/A             | N/A       | N/A       | Inc-KCTD12-1   |
| A_22_P00006962 | 3,09443 | 2,7635  | 1,25782394  | ENST00000567865 | N/A       | AY353059  | N/A            |
| A_22_P00018457 | 5,97909 | 5,64817 | 1,257815222 | N/A             | N/A       | N/A       | Inc-CCDC51-1   |
| A_33_P3412847  | 6,54296 | 6,21204 | 1,257815222 | N/A             | 101927904 | XR_242707 | LOC101927904   |
| A_23_P103864   | 7,03026 | 6,69945 | 1,257719322 | ENST00000366661 | 79573     | NM_024525 | TTC13          |
| A_21_P0011132  | 2,04804 | 1,71723 | 1,257719322 | N/A             | N/A       | N/A       | XLOC_I2_003647 |
| A_33_P3276758  | 4,88427 | 4,5535  | 1,257684451 | N/A             | N/A       | N/A       | N/A            |
| A_23_P370479   | 1,89312 | 1,56239 | 1,257649581 | ENST00000375749 | 23509     | NM_015352 | POFUT1         |
| A_23_P94118    | 11,0028 | 10,6721 | 1,257623429 | ENST00000355904 | 2961      | NM_002095 | GTF2E2         |
| A_24_P298360   | 11,7688 | 11,4381 | 1,257623429 | ENST00000528516 | 4054      | NM_021070 | LTBP3          |
| A_21_P0004199  | 3,98476 | 3,65422 | 1,257483962 | N/A             | N/A       | N/A       | Inc-NDUFS6-8   |
| A_22_P00001173 | 6,42247 | 6,09195 | 1,25746653  | ENST00000554058 | 100506603 | NR_104184 | LOC100506603   |
| A_23_P431789   | 13,4405 | 13,11   | 1,257449098 | ENST00000486310 | 378       | NM_001660 | ARF4           |
| A_24_P171983   | 10,9462 | 10,6157 | 1,257449098 | ENST00000489477 | 29078     | NM_014165 | NDUF4F4        |
| A_33_P3490794  | 3,89041 | 3,56    | 1,257370656 | ENST00000556053 | 145820    | NR_027132 | LINC00924      |
| A_22_P00019362 | 3,1172  | 2,7868  | 1,257361941 | N/A             | N/A       | N/A       | Inc-NUP188-1   |
| A_33_P3344332  | 15,25   | 14,9197 | 1,25727479  | ENST00000468844 | 6170      | NM_001000 | RPL39          |
| A_21_P0011612  | 2,24305 | 1,91275 | 1,25727479  | ENST00000389840 | 8632      | N/A       | DNAH17         |
| A_33_P3310172  | 1,90938 | 1,57916 | 1,257205074 | ENST00000403963 | 1607      | NM_145695 | DGKB           |
| A_22_P00014003 | 3,19632 | 2,8661  | 1,257205074 | N/A             | N/A       | N/A       | Inc-RUNX2-2    |
| A_33_P3266010  | 13,3645 | 13,0344 | 1,257100507 | ENST00000311320 | 9610      | NM_004292 | RIN1           |
| A_21_P0008603  | 2,03732 | 1,70739 | 1,256952385 | N/A             | N/A       | N/A       | Inc-GABRA5-4   |
| A_33_P3401556  | 1,91903 | 1,58917 | 1,256891399 | ENST00000302823 | 1493      | NM_005214 | CTLA4          |
| A_33_P3395014  | 4,59836 | 4,26868 | 1,256734591 | ENST00000417074 | 55289     | BC131514  | ACOXL          |
| A_22_P00009424 | 5,14159 | 4,81196 | 1,256691037 | ENST00000565668 | N/A       | BC039537  | N/A            |
| A_23_P416751   | 4,73278 | 4,40317 | 1,256673615 | ENST00000327920 | 162963    | NM_173530 | ZNF610         |
| A_33_P3256810  | 2,22463 | 1,89503 | 1,256664905 | ENST00000463068 | 7104      | NM_004617 | TM4SF4         |
| A_23_P424316   | 10,1329 | 9,8033  | 1,256664905 | ENST00000359486 | 6942      | NM_005650 | TCF20          |
| A_21_P0011364  | 9,75807 | 9,42854 | 1,256603932 | ENST00000454486 | 100288615 | NR_036650 | WHAMMP1        |
| A_33_P3438201  | 4,67486 | 4,34538 | 1,256560383 | N/A             | N/A       | N/A       | N/A            |

|                |         |         |             |                 |           |              |                       |
|----------------|---------|---------|-------------|-----------------|-----------|--------------|-----------------------|
| A_33_P3291636  | 7,11983 | 6,79037 | 1,256542963 | ENST00000405993 | 7625      | NM_003426    | ZNF74                 |
| A_22_P00025071 | 2,27406 | 1,94463 | 1,256516834 | N/A             | N/A       | N/A          | Inc-C7orf11-6         |
| A_22_P00013619 | 2,14158 | 1,81218 | 1,256490706 | N/A             | N/A       | AK125860     | Inc-RP11-582J16.5.1-4 |
| A_33_P3228315  | 6,92788 | 6,59849 | 1,256481997 | ENST00000573754 | 79092     | NM_052819    | CARD14                |
| A_24_P631848   | 5,87654 | 5,54718 | 1,256455869 | ENST00000451828 | N/A       | BC036435     | N/A                   |
| A_21_P0010867  | 6,66297 | 6,33363 | 1,256438451 | ENST00000435805 | 100129482 | N/A          | ZNF37BP               |
| A_22_P00021840 | 4,47534 | 4,14601 | 1,256429742 | ENST00000505575 | N/A       | N/A          | N/A                   |
| A_22_P00004164 | 4,77502 | 4,44572 | 1,256403616 | N/A             | N/A       | N/A          | Inc-CLEC3A-4          |
| A_23_P205959   | 15,5477 | 15,2184 | 1,256403616 | ENST00000329841 | 220       | NM_000693    | ALDH1A3               |
| A_24_P237613   | 6,44428 | 6,11504 | 1,256351364 | ENST00000282344 | 219333    | NM_182488    | USP12                 |
| A_22_P00023870 | 5,21598 | 4,88675 | 1,256342656 | N/A             | N/A       | CD674525     | Inc-CARHSP1-1         |
| A_33_P3375496  | 5,79805 | 5,46884 | 1,25632524  | N/A             | N/A       | N/A          | N/A                   |
| A_23_P70733    | 6,26349 | 5,93431 | 1,256299115 | ENST00000367931 | 9287      | NM_001033080 | TAAR2                 |
| A_23_P27404    | 8,42022 | 8,09104 | 1,256299115 | ENST00000594295 | 284371    | NM_001136499 | ZNF841                |
| A_22_P00002476 | 5,04538 | 4,71627 | 1,256238161 | ENST00000558255 | N/A       | BX088900     | N/A                   |
| A_23_P371239   | 11,1641 | 10,835  | 1,256229453 | ENST00000539778 | 80790     | NM_198390    | CMIP                  |
| A_22_P00003135 | 5,38078 | 5,05178 | 1,256142381 | N/A             | N/A       | N/A          | Inc-C9orf147-1        |
| A_32_P34138    | 6,70742 | 6,37844 | 1,256124967 | ENST00000343959 | 643161    | NM_001146157 | FAM25A                |
| A_33_P6820294  | 7,3439  | 7,01493 | 1,256116261 | N/A             | 728730    | NR_037875    | LOC728730             |
| A_33_P3247659  | 7,66126 | 7,33237 | 1,256046609 | ENST00000307216 | 25963     | NM_001110503 | TMEM87A               |
| A_21_P0002272  | 3,26394 | 2,93505 | 1,256046609 | N/A             | N/A       | N/A          | Inc-IL37-1            |
| A_33_P3318377  | 6,16279 | 5,83391 | 1,256037903 | N/A             | N/A       | N/A          | N/A                   |
| A_23_P361469   | 9,94261 | 9,61379 | 1,255985666 | ENST00000598878 | 131965    | NM_152396    | METTL6                |
| A_33_P3380797  | 4,97669 | 4,64788 | 1,255976961 | N/A             | 2248      | NM_005247    | FGF3                  |
| A_32_P75792    | 6,34876 | 6,02004 | 1,255898611 | ENST00000330388 | 388581    | NM_001014980 | FAM132A               |
| A_22_P00004712 | 7,73688 | 7,40816 | 1,255898611 | ENST00000551421 | 100506844 | NR_038269    | LOC100506844          |
| A_23_P5903     | 7,08082 | 6,75212 | 1,255881201 | ENST00000466961 | 28231     | NM_016354    | SLCO4A1               |
| A_22_P00015003 | 5,57265 | 5,24395 | 1,255881201 | N/A             | N/A       | N/A          | Inc-SMND1-3           |
| A_23_P38015    | 14,6078 | 14,2791 | 1,255881201 | ENST00000543786 | 64319     | NM_001105079 | FBRS                  |
| A_33_P3303940  | 10,5528 | 10,2242 | 1,255794153 | ENST00000330045 | 79184     | NM_024332    | BRCC3                 |
| A_22_P00000203 | 5,78218 | 5,4536  | 1,255776744 | ENST00000575911 | N/A       | BF825985     | N/A                   |
| A_33_P6443530  | 6,10463 | 5,77606 | 1,25576804  | N/A             | 80778     | NM_001286769 | ZNF34                 |
| A_24_P174755   | 9,60688 | 9,27832 | 1,255759335 | ENST00000461013 | 6584      | NM_003060    | SLC22A5               |

|                |         |         |             |                 |           |              |                 |
|----------------|---------|---------|-------------|-----------------|-----------|--------------|-----------------|
| A_22_P00010239 | 5,70869 | 5,38019 | 1,255707111 | N/A             | N/A       | N/A          | Inc-MTA2-1      |
| A_33_P3394234  | 11,1883 | 10,8598 | 1,255707111 | ENST00000396026 | 7692      | NM_003434    | ZNF133          |
| A_22_P00025574 | 3,46097 | 3,13253 | 1,255654888 | N/A             | N/A       | N/A          | Inc-TTC33-1     |
| A_33_P3361513  | 8,61095 | 8,28258 | 1,255593965 | ENST00000442241 | 54475     | NM_001014445 | NLE1            |
| A_23_P93792    | 9,99207 | 9,66374 | 1,255559153 | ENST00000382321 | 5395      | NM_000535    | PMS2            |
| A_21_P0000542  | 3,33378 | 3,00547 | 1,255541748 | N/A             | 8418      | NR_027626    | CMAHP           |
| A_23_P211814   | 10,9222 | 10,5939 | 1,255533045 | ENST00000360240 | 4134      | NM_002375    | MAP4            |
| A_21_P0011679  | 2,3436  | 2,01539 | 1,255454723 | N/A             | N/A       | N/A          | XLOC_I2_006640  |
| A_23_P416747   | 4,11291 | 3,78473 | 1,255428617 | ENST00000531913 | 916       | NM_000733    | CD3E            |
| A_24_P419211   | 8,49133 | 8,16322 | 1,255367705 | ENST00000381801 | 9107      | NM_004685    | MTMR6           |
| A_33_P3304212  | 14,6634 | 14,3353 | 1,255359003 | ENST00000394691 | 26030     | NM_015549    | PLEKHG3         |
| A_33_P3306272  | 4,32643 | 3,99834 | 1,255350302 | ENST00000513200 | 285600    | NM_001145678 | KIAA0825        |
| A_22_P00010779 | 8,18797 | 7,85995 | 1,255289393 | ENST00000508406 | 101928978 | NR_125909    | LOC101928978    |
| A_23_P92629    | 10,9709 | 10,6429 | 1,255271991 | ENST00000545000 | 10283     | NM_005869    | CWC27           |
| A_21_P0007854  | 7,85954 | 7,53164 | 1,255184985 | N/A             | N/A       | N/A          | Inc-HNF1A-1     |
| A_33_P3267467  | 3,54203 | 3,21416 | 1,255158885 | ENST00000442560 | 5991      | N/A          | RFX3            |
| A_24_P4705     | 8,11154 | 7,7837  | 1,255132785 | ENST00000328257 | 51400     | NM_016147    | PPME1           |
| A_21_P0004585  | 4,51091 | 4,18316 | 1,255054488 | N/A             | N/A       | N/A          | Inc-BOD1-2      |
| A_22_P00013556 | 1,88331 | 1,55559 | 1,25502839  | ENST00000507341 | N/A       | N/A          | N/A             |
| A_23_P250404   | 11,3684 | 11,0407 | 1,255010992 | ENST00000533482 | 10111     | NM_005732    | RAD50           |
| A_33_P3212375  | 2,6729  | 2,34522 | 1,254993594 | N/A             | N/A       | XM_006710182 | Inc-ZNF117-1    |
| A_22_P00003699 | 4,51165 | 4,18398 | 1,254984895 | ENST00000568659 | N/A       | BX106581     | N/A             |
| A_22_P00021307 | 4,00808 | 3,68047 | 1,254932703 | ENST00000415417 | 100506126 | N/A          | LINC00867       |
| A_22_P00014840 | 4,83003 | 4,5025  | 1,254863116 | N/A             | N/A       | N/A          | Inc-SLC47A2-3   |
| A_33_P3290144  | 1,95993 | 1,63241 | 1,254854418 | ENST00000389601 | 142686    | NM_001142733 | ASB14           |
| A_33_P3416301  | 5,46884 | 5,14133 | 1,25484572  | ENST00000498701 | 1876      | NM_212540    | E2F6            |
| A_21_P0013974  | 2,03489 | 1,7076  | 1,254654381 | ENST00000529080 | 341676    | XM_003118889 | NEK5            |
| A_24_P192805   | 9,94156 | 9,61436 | 1,254576114 | ENST00000375707 | 440068    | NM_001007232 | CARD17          |
| A_33_P3213888  | 2,3241  | 1,9969  | 1,254576114 | ENST00000581115 | 643008    | NM_001162995 | SMIM5           |
| A_19_P00807614 | 5,48638 | 5,15918 | 1,254576114 | N/A             | N/A       | N/A          | Inc-WDR7-8      |
| A_23_P91015    | 9,64095 | 9,31376 | 1,254567418 | ENST00000389501 | 10322     | NM_006062    | SMYD5           |
| A_22_P00015190 | 4,94    | 4,61283 | 1,254550026 | N/A             | 101929441 | NR_123739    | LOC101929441    |
| A_21_P0010157  | 3,21551 | 2,88834 | 1,254550026 | N/A             | N/A       | N/A          | Inc-GRIK1-AS2-1 |

|                |         |         |             |                 |           |              |              |
|----------------|---------|---------|-------------|-----------------|-----------|--------------|--------------|
| A_21_P0009191  | 1,94784 | 1,62067 | 1,254550026 | N/A             | N/A       | N/A          | Inc-HOXB7-1  |
| A_33_P3251065  | 2,57742 | 2,2503  | 1,254506547 | ENST00000602090 | 26085     | AY923173     | KLK13        |
| A_33_P3335590  | 12,8253 | 12,4982 | 1,254489156 | ENST00000389347 | 146439    | NM_001103175 | CCDC64B      |
| A_24_P365025   | 11,0606 | 10,7335 | 1,254489156 | ENST00000357122 | 9043      | NM_003971    | SPAG9        |
| A_23_P106544   | 12,6366 | 12,3095 | 1,254489156 | ENST00000567593 | 56942     | NM_020188    | CMC2         |
| A_33_P3225086  | 12,3748 | 12,0477 | 1,254489156 | ENST00000378750 | 9409      | NM_057174    | PEX16        |
| A_23_P206454   | 10,2779 | 9,95085 | 1,25444568  | ENST00000314994 | 92806     | NM_145039    | CENPBD1      |
| A_21_P0008705  | 4,99624 | 4,66923 | 1,254410899 | N/A             | N/A       | N/A          | Inc-POTEB-5  |
| A_33_P3269678  | 12,0286 | 11,7016 | 1,254402205 | ENST00000409054 | 541471    | NR_015395    | MIR4435-1HG  |
| A_33_P3413927  | 7,83746 | 7,51055 | 1,254323953 | ENST00000551994 | 55591     | NM_017599    | VEZT         |
| A_33_P3256655  | 2,11677 | 1,78992 | 1,254271788 | N/A             | N/A       | N/A          | N/A          |
| A_22_P00018019 | 2,00253 | 1,67569 | 1,254263095 | ENST00000576762 | N/A       | AF098665     | N/A          |
| A_23_P208416   | 9,6682  | 9,34155 | 1,254097922 | ENST00000611092 | 79939     | NM_024881    | SLC35E1      |
| A_23_P36322    | 11,187  | 10,8604 | 1,254054459 | ENST00000298229 | 3636      | NM_001567    | INPPL1       |
| A_24_P246173   | 10,3852 | 10,0586 | 1,254054459 | ENST00000594824 | 4650      | NM_004145    | MYO9B        |
| A_24_P67806    | 7,19184 | 6,8653  | 1,254002305 | ENST00000366577 | 4548      | NM_000254    | MTR          |
| A_21_P0010776  | 8,46908 | 8,14254 | 1,254002305 | ENST00000440862 | 79668     | NM_001178056 | PARP8        |
| A_33_P3281041  | 5,50914 | 5,18262 | 1,253984921 | N/A             | N/A       | N/A          | N/A          |
| A_24_P98263    | 10,9506 | 10,6241 | 1,253967537 | ENST00000530629 | 9166      | NM_004215    | EBAG9        |
| A_23_P380724   | 11,9809 | 11,6544 | 1,253967537 | ENST00000380266 | 60493     | NM_021826    | FASTKD5      |
| A_33_P3257708  | 12,7855 | 12,4591 | 1,253880622 | ENST00000368233 | 128240    | NM_144772    | APOA1BP      |
| A_21_P0011311  | 10,3105 | 9,98417 | 1,253819785 | ENST00000624918 | N/A       | N/A          | N/A          |
| A_33_P3409649  | 2,99859 | 2,67228 | 1,253802403 | ENST00000274609 | 9509      | NM_021599    | ADAMTS2      |
| A_33_P3466016  | 7,58901 | 7,26281 | 1,253706809 | N/A             | 200830    | AK054953     | LOC200830    |
| A_21_P0011755  | 3,98687 | 3,66067 | 1,253706809 | ENST00000590022 | N/A       | N/A          | N/A          |
| A_33_P3230488  | 14,1721 | 13,8459 | 1,253706809 | ENST00000528964 | 6199      | NM_003952    | RPS6KB2      |
| A_33_P3412722  | 8,60373 | 8,27754 | 1,253698119 | ENST00000480807 | 29886     | NM_013321    | SNX8         |
| A_21_P0011465  | 9,32462 | 8,99846 | 1,253672049 | ENST00000411546 | 23049     | NM_015092    | SMG1         |
| A_33_P3400292  | 4,86837 | 4,54222 | 1,25366336  | N/A             | N/A       | N/A          | N/A          |
| A_22_P00011830 | 1,68373 | 1,35765 | 1,253602533 | N/A             | N/A       | N/A          | Inc-PHF3-2   |
| A_33_P3261953  | 4,19172 | 3,86564 | 1,253602533 | N/A             | 100996349 | NR_103470    | LOC100996349 |
| A_22_P00006435 | 4,34116 | 4,01509 | 1,253593844 | N/A             | N/A       | N/A          | Inc-FBXO7-1  |
| A_22_P00015000 | 2,82749 | 2,50143 | 1,253585154 | N/A             | N/A       | DB081557     | Inc-SMG6-4   |

|                |         |         |             |                 |           |              |                |
|----------------|---------|---------|-------------|-----------------|-----------|--------------|----------------|
| A_23_P20804    | 10,0401 | 9,71404 | 1,253585154 | ENST00000297620 | 203259    | NM_147202    | FAM219A        |
| A_23_P429082   | 7,15019 | 6,82419 | 1,25353302  | ENST00000336349 | 144108    | NM_194285    | SPTY2D1        |
| A_21_P0001427  | 1,97731 | 1,65131 | 1,25353302  | N/A             | N/A       | N/A          | Inc-CNIH3-1    |
| A_33_P3287972  | 6,45367 | 6,12767 | 1,25353302  | ENST00000452898 | 5922      | XM_006713719 | RASA2          |
| A_23_P62634    | 5,72034 | 5,39438 | 1,253498266 | ENST00000374352 | 6006      | NM_020485    | RHCE           |
| A_23_P78092    | 3,55263 | 3,22673 | 1,253446135 | ENST00000578021 | 2123      | NM_001003927 | EVI2A          |
| A_22_P00005575 | 11,6039 | 11,278  | 1,253446135 | ENST00000569087 | N/A       | N/A          | N/A            |
| A_33_P3325110  | 8,55156 | 8,22573 | 1,253385319 | ENST00000367203 | 9580      | NM_005686    | SOX13          |
| A_33_P3342430  | 16,3318 | 16,006  | 1,253359256 | ENST00000443279 | N/A       | N/A          | N/A            |
| A_32_P74579    | 2,46749 | 2,14171 | 1,253341881 | ENST00000604641 | 246176    | NM_139285    | GAS2L2         |
| A_33_P3367701  | 4,71008 | 4,38437 | 1,25328107  | ENST00000288381 | 84187     | NM_032227    | TMEM164        |
| A_24_P408424   | 14,0595 | 13,7338 | 1,253272383 | ENST00000216181 | 4627      | NM_002473    | MYH9           |
| A_21_P0012050  | 6,78939 | 6,46373 | 1,253237635 | ENST00000419394 | N/A       | XR_427580    | N/A            |
| A_33_P3341787  | 7,19613 | 6,87047 | 1,253237635 | ENST00000324799 | N/A       | AF050145     | N/A            |
| A_23_P207037   | 4,44049 | 4,11484 | 1,253228948 | ENST00000310828 | 11314     | NM_007261    | CD300A         |
| A_33_P3418516  | 5,80688 | 5,48123 | 1,253228948 | ENST00000535432 | 1871      | NM_001949    | E2F3           |
| A_24_P85619    | 4,98576 | 4,66012 | 1,253220262 | N/A             | N/A       | AF363068     | N/A            |
| A_33_P3403666  | 5,21445 | 4,88882 | 1,253211575 | N/A             | 27158     | NM_001144026 | NDOR1          |
| A_21_P0012722  | 7,3495  | 7,02392 | 1,253168143 | ENST00000501725 | N/A       | XR_425724    | N/A            |
| A_33_P3389342  | 6,52946 | 6,20389 | 1,253159456 | ENST00000467498 | 10865     | NM_212481    | ARID5A         |
| A_23_P206661   | 9,6911  | 9,36558 | 1,253116026 | ENST00000320623 | 1728      | NM_000903    | NQO1           |
| A_21_P0010723  | 3,92923 | 3,60373 | 1,253098654 | ENST00000454544 | 57234     | NR_111950    | LINC00869      |
| A_33_P3368750  | 10,4414 | 10,1159 | 1,253098654 | ENST00000340965 | 54852     | NM_001104554 | PAQR5          |
| A_33_P3296193  | 4,22851 | 3,90303 | 1,253081283 | N/A             | 100101490 | NR_003677    | MCTS2P         |
| A_23_P389391   | 9,50733 | 9,18185 | 1,253081283 | ENST00000537830 | 6560      | NM_005072    | SLC12A4        |
| A_33_P3293237  | 2,82188 | 2,49642 | 1,253063911 | N/A             | N/A       | N/A          | Inc-SULF1-3    |
| A_33_P3329462  | 6,16721 | 5,8419  | 1,252933635 | ENST00000428276 | 103689915 | N/A          | DLEU1-AS1      |
| A_22_P00025928 | 5,07046 | 4,74516 | 1,25292495  | N/A             | N/A       | AK126895     | Inc-RIC3-1     |
| A_21_P0012298  | 5,74923 | 5,42393 | 1,25292495  | N/A             | N/A       | N/A          | XLOC_I2_009539 |
| A_23_P83976    | 3,32839 | 3,00315 | 1,252872843 | ENST00000582795 | 201134    | NM_001199165 | CEP112         |
| A_19_P00317759 | 2,99323 | 2,66799 | 1,252872843 | N/A             | N/A       | N/A          | Inc-NR5A2-1    |
| A_22_P00010494 | 6,81687 | 6,49168 | 1,252829423 | ENST00000448379 | N/A       | N/A          | N/A            |
| A_32_P79492    | 2,32639 | 2,00123 | 1,252803371 | ENST00000585503 | 8629      | AK092432     | JRK            |

|                |         |         |             |                 |           |              |             |
|----------------|---------|---------|-------------|-----------------|-----------|--------------|-------------|
| A_22_P00006548 | 3,88912 | 3,56399 | 1,25277732  | N/A             | N/A       | N/A          | Inc-FKBP3-1 |
| A_23_P37514    | 12,3135 | 11,9885 | 1,252664439 | ENST00000360639 | 56905     | NM_015492    | C15orf39    |
| A_23_P34733    | 11,8954 | 11,5704 | 1,252664439 | ENST00000366560 | 2271      | NM_000143    | FH          |
| A_33_P3212112  | 10,3252 | 10,0002 | 1,252664439 | ENST00000290209 | 9990      | NM_001042496 | SLC12A6     |
| A_22_P00002332 | 5,39544 | 5,07068 | 1,252456069 | ENST00000533575 | 101928536 | N/A          | LINC01493   |
| A_33_P3222348  | 4,9298  | 4,60509 | 1,252412662 | N/A             | N/A       | AK124642     | N/A         |
| A_21_P0012563  | 2,09584 | 1,77113 | 1,252412662 | ENST00000420947 | N/A       | N/A          | N/A         |
| A_33_P3316313  | 8,722   | 8,3973  | 1,252403981 | ENST00000391980 | 130916    | NM_182501    | MTERF4      |
| A_23_P217475   | 11,3961 | 11,0714 | 1,252403981 | ENST00000490775 | 3423      | NM_006123    | IDS         |
| A_23_P311192   | 7,52082 | 7,19613 | 1,2523953   | ENST00000482632 | 10558     | NM_178324    | SPTLC1      |
| A_22_P00000315 | 2,47852 | 2,15386 | 1,252369258 | ENST00000440935 | N/A       | N/A          | N/A         |
| A_33_P3319905  | 3,32976 | 3,0051  | 1,252369258 | ENST00000334475 | 54210     | NM_018643    | TREM1       |
| A_33_P3243500  | 3,58692 | 3,26249 | 1,252169616 | ENST00000544461 | 729732    | NR_047662    | LOC729732   |
| A_33_P3369419  | 5,23091 | 4,9065  | 1,252152258 | ENST00000466224 | 54856     | NM_001282861 | GON4L       |
| A_22_P00009253 | 3,16525 | 2,84085 | 1,252143578 | ENST00000417715 | N/A       | N/A          | N/A         |
| A_22_P00015498 | 8,14653 | 7,82217 | 1,252108862 | N/A             | N/A       | N/A          | Inc-STAR4-1 |
| A_33_P3215720  | 6,34511 | 6,02079 | 1,252074147 | ENST00000393023 | 5504      | NM_001291504 | PPP1R2      |
| A_33_P3828101  | 6,10707 | 5,7828  | 1,252030754 | ENST00000395557 | 153733    | NM_152549    | CCDC112     |
| A_23_P161481   | 4,66183 | 4,33756 | 1,252030754 | ENST00000263563 | 27143     | NM_014431    | PALD1       |
| A_21_P0006287  | 3,11414 | 2,78987 | 1,252030754 | N/A             | N/A       | N/A          | Inc-CDK20-1 |
| A_23_P18372    | 11,4197 | 11,0955 | 1,251970007 | ENST00000326505 | 84002     | NM_032047    | B3GNT5      |
| A_23_P146479   | 12,1696 | 11,8454 | 1,251970007 | ENST00000371964 | 6835      | NM_017503    | SURF2       |
| A_23_P131816   | 13,7669 | 13,4427 | 1,251970007 | ENST00000372622 | 116092    | NM_052951    | DNTTIP1     |
| A_33_P3209950  | 6,3817  | 6,05751 | 1,251961329 | ENST00000377494 | 10235     | XM_006718416 | RASGRP2     |
| A_33_P3210443  | 5,94658 | 5,62243 | 1,251926617 | ENST00000556586 | 145216    | NR_038436    | LINC00637   |
| A_23_P52058    | 10,4825 | 10,1584 | 1,25188323  | ENST00000471918 | 6894      | NM_005646    | TARBP1      |
| A_33_P3242109  | 5,91014 | 5,58605 | 1,251874552 | N/A             | N/A       | BC039168     | Inc-NINJ2-2 |
| A_21_P0009027  | 2,2216  | 1,89763 | 1,251770429 | N/A             | N/A       | N/A          | Inc-SALL1-2 |
| A_33_P3306715  | 3,82342 | 3,49946 | 1,251761752 | N/A             | 647024    | NM_001164446 | C6orf132    |
| A_24_P167052   | 10,3211 | 9,99714 | 1,251761752 | ENST00000326799 | 10730     | NM_139312    | YME1L1      |
| A_33_P3219811  | 7,74675 | 7,4228  | 1,251753075 | ENST00000371623 | 5730      | N/A          | PTGDS       |
| A_23_P367899   | 5,51303 | 5,18912 | 1,25171837  | ENST00000586890 | 2057      | NM_000121    | EPOR        |
| A_24_P150068   | 4,3557  | 4,03184 | 1,251674989 | ENST00000502622 | 3359      | NM_213621    | HTR3A       |

|                |         |         |             |                 |           |              |                |
|----------------|---------|---------|-------------|-----------------|-----------|--------------|----------------|
| A_33_P3408665  | 12,4615 | 12,1377 | 1,251622935 | N/A             | N/A       | N/A          | N/A            |
| A_33_P3293768  | 4,24763 | 3,92384 | 1,251614259 | ENST00000400368 | 386674    | NM_198688    | KRTAP10-6      |
| A_22_P00009983 | 3,52941 | 3,20564 | 1,251596908 | ENST00000452219 | 101928782 | N/A          | LOC101928782   |
| A_33_P3375451  | 6,45251 | 6,12876 | 1,251579558 | ENST00000382554 | 57523     | NM_025081    | NYNRIN         |
| A_22_P00005929 | 4,43666 | 4,11291 | 1,251579558 | N/A             | N/A       | R47879       | Inc-EXO1-2     |
| A_24_P136094   | 6,62984 | 6,30611 | 1,251562207 | ENST00000389857 | 440193    | NM_001080414 | CCDC88C        |
| A_33_P3382118  | 10,3364 | 10,0127 | 1,251536182 | N/A             | N/A       | N/A          | N/A            |
| A_23_P430670   | 4,55034 | 4,22666 | 1,251518832 | ENST00000336257 | 23563     | NM_024533    | CHST5          |
| A_21_P0000337  | 3,72566 | 3,40199 | 1,251510157 | N/A             | 677834    | NR_002983    | SNORA55        |
| A_23_P427122   | 2,47448 | 2,15093 | 1,251406064 | ENST00000359918 | 116969    | NM_053017    | ART5           |
| A_23_P54728    | 11,8587 | 11,5352 | 1,251362694 | ENST00000566437 | 65990     | NM_023933    | FAM173A        |
| A_23_P55616    | 8,12885 | 7,8054  | 1,251319326 | ENST00000321925 | 6563      | NM_001146037 | SLC14A1        |
| A_24_P203502   | 8,03177 | 7,70835 | 1,251293306 | ENST00000591045 | N/A       | N/A          | N/A            |
| A_22_P00000723 | 2,11629 | 1,79288 | 1,251284633 | N/A             | N/A       | N/A          | Inc-ADAMTS18-6 |
| A_33_P3307820  | 2,0228  | 1,6994  | 1,251275959 | ENST00000539295 | 153918    | NM_001013623 | ZC2HC1B        |
| A_22_P00018101 | 6,95243 | 6,62906 | 1,25124994  | ENST00000576671 | N/A       | N/A          | N/A            |
| A_21_P0012077  | 10,0284 | 9,70518 | 1,251119852 | ENST00000409139 | N/A       | N/A          | N/A            |
| A_22_P00002298 | 2,0464  | 1,72327 | 1,251041805 | ENST00000545986 | N/A       | DA916467     | N/A            |
| A_33_P3406408  | 13,0308 | 12,7077 | 1,251015791 | ENST00000373605 | 63905     | NM_022077    | MANBAL         |
| A_33_P3292915  | 7,64211 | 7,31908 | 1,250955093 | ENST00000394269 | 6949      | NM_001008657 | TCOF1          |
| A_23_P309739   | 4,31991 | 3,99689 | 1,250946422 | ENST00000440973 | 2099      | NM_000125    | ESR1           |
| A_33_P3209162  | 4,90426 | 4,58128 | 1,250911739 | ENST00000592954 | 346       | NM_001646    | APOC4          |
| A_21_P0009803  | 3,91102 | 3,58829 | 1,250694991 | ENST00000603718 | N/A       | XR_424978    | N/A            |
| A_33_P3288574  | 2,01724 | 1,69458 | 1,250634308 | ENST00000334670 | 386678    | NM_198692    | KRTAP10-11     |
| A_23_P309950   | 3,30879 | 2,98628 | 1,250504284 | ENST00000370271 | 55719     | AL833126     | FAM178A        |
| A_22_P00010287 | 3,64509 | 3,32258 | 1,250504284 | ENST00000577879 | N/A       | N/A          | N/A            |
| A_23_P365418   | 10,023  | 9,70049 | 1,250504284 | ENST00000434415 | 100289678 | NM_001195220 | ZNF783         |
| A_33_P3217073  | 14,4001 | 14,0776 | 1,250495616 | ENST00000372134 | 27069     | NM_014394    | GHITM          |
| A_23_P156667   | 10,8576 | 10,5351 | 1,250495616 | ENST00000376511 | 5514      | NM_002714    | PPP1R10        |
| A_22_P00012242 | 2,76834 | 2,4459  | 1,250443611 | ENST00000554773 | 101927729 | XR_245767    | LOC101927729   |
| A_22_P00012575 | 2,18799 | 1,86559 | 1,250408942 | ENST00000454594 | 101928040 | N/A          | BARX1-AS1      |
| A_32_P83465    | 14,3276 | 14,0052 | 1,250408942 | ENST00000426482 | 100132406 | NM_001039703 | NBPF10         |
| A_33_P3399428  | 2,11597 | 1,7936  | 1,25038294  | ENST00000381078 | N/A       | AK125751     | N/A            |



|                |         |         |             |                 |           |              |                    |
|----------------|---------|---------|-------------|-----------------|-----------|--------------|--------------------|
| A_24_P357169   | 10,6204 | 10,2982 | 1,25023561  | ENST00000568225 | 83481     | NM_031308    | EPPK1              |
| A_22_P00008558 | 6,34182 | 6,01962 | 1,25023561  | N/A             | N/A       | BC031864     | Inc-KCNMB4-1       |
| A_24_P336417   | 11,1664 | 10,8442 | 1,25023561  | ENST00000367589 | 9213      | NM_004736    | XPR1               |
| A_23_P93431    | 13,4251 | 13,103  | 1,250148953 | ENST00000357847 | 51390     | NM_016108    | AIG1               |
| A_33_P3326025  | 8,89515 | 8,5731  | 1,250105627 | ENST00000610351 | 256949    | AY203940     | KANK3              |
| A_33_P3378689  | 10,338  | 10,016  | 1,250062303 | ENST00000480474 | 51322     | NM_016628    | WAC                |
| A_33_P3408514  | 2,42437 | 2,1024  | 1,250036309 | ENST00000379116 | 6339      | NM_001130413 | SCNN1D             |
| A_23_P140309   | 13,3063 | 12,9844 | 1,249975658 | ENST00000622254 | 93487     | NM_144578    | MAPK1IP1L          |
| A_21_P0007230  | 4,30277 | 3,98088 | 1,249966994 | N/A             | N/A       | N/A          | Inc-CCND1-1        |
| A_23_P255968   | 7,01787 | 6,69605 | 1,249906346 | ENST00000258034 | 9038      | NM_003967    | TAAR5              |
| A_33_P3418917  | 9,02381 | 8,70212 | 1,249793724 | N/A             | 284618    | NM_001039517 | RUSC1-AS1          |
| A_24_P387321   | 7,1958  | 6,87418 | 1,249733085 | ENST00000355684 | 51710     | NM_016264    | ZNF44              |
| A_22_P00021565 | 12,7364 | 12,4148 | 1,24971576  | ENST00000531523 | 677844    | N/A          | SNORA78            |
| A_23_P159255   | 8,44352 | 8,12193 | 1,249707097 | ENST00000580949 | 5797      | NM_002845    | PTPRM              |
| A_33_P3412519  | 5,46038 | 5,13885 | 1,249655125 | ENST00000399744 | 55670     | NM_001199319 | PEX26              |
| A_22_P00017736 | 5,7554  | 5,43389 | 1,249637801 | ENST00000568026 | N/A       | N/A          | N/A                |
| A_33_P3403254  | 2,83102 | 2,50952 | 1,249629139 | ENST00000547628 | 729747    | NM_001080404 | ZNF878             |
| A_24_P940086   | 2,00216 | 1,68077 | 1,249533863 | ENST00000570453 | 11248     | NM_007225    | NXPH3              |
| A_23_P300087   | 2,10921 | 1,78789 | 1,249473237 | ENST00000447106 | 387316    | NR_045612    | VN1R10P            |
| A_33_P3613358  | 6,30509 | 5,98377 | 1,249473237 | N/A             | N/A       | AK097143     | N/A                |
| A_23_P207125   | 9,14253 | 8,82123 | 1,249455916 | ENST00000302926 | 57555     | NM_020795    | NLGN2              |
| A_22_P00016506 | 1,95535 | 1,63409 | 1,249421274 | ENST00000419467 | 101927843 | NR_109959    | LOC101927843       |
| A_22_P00000330 | 3,8569  | 3,53571 | 1,249360653 | N/A             | N/A       | N/A          | Inc-AC012123.1.1-2 |
| A_32_P93996    | 5,22352 | 4,90236 | 1,249334674 | ENST00000375587 | 100128361 | NR_036505    | LOC100128361       |
| A_24_P945194   | 9,74866 | 9,42752 | 1,249317354 | ENST00000307296 | 10015     | NM_013374    | PDCD6IP            |
| A_33_P3251198  | 7,35219 | 7,03107 | 1,249300035 | ENST00000404098 | 23236     | AX721082     | PLCB1              |
| A_23_P502470   | 7,71692 | 7,39587 | 1,24923942  | ENST00000381287 | 3572      | NM_002184    | IL6ST              |
| A_33_P3407999  | 2,547   | 2,22597 | 1,249222102 | N/A             | N/A       | N/A          | N/A                |
| A_33_P3237364  | 3,26084 | 2,93981 | 1,249222102 | N/A             | N/A       | N/A          | N/A                |
| A_33_P3397785  | 5,05845 | 4,73751 | 1,249144174 | ENST00000567334 | 127833    | NM_001136504 | SYT2               |
| A_33_P3310104  | 14,6033 | 14,2824 | 1,249109541 | ENST00000382771 | 5268      | NM_002639    | SERPIN5            |
| A_22_P00000846 | 4,01751 | 3,69663 | 1,249092225 | N/A             | 728723    | NR_024398    | ZBED3-AS1          |
| A_33_P3322450  | 4,21986 | 3,89904 | 1,249040278 | ENST00000378815 | 117177    | XM_006719228 | RAB3IP             |

|                |         |         |             |                 |           |           |                      |
|----------------|---------|---------|-------------|-----------------|-----------|-----------|----------------------|
| A_22_P00017257 | 6,1245  | 5,80371 | 1,249014305 | N/A             | N/A       | DB451973  | Inc-UNC93B1-2        |
| A_23_P155900   | 1,97606 | 1,65535 | 1,248945047 | ENST00000344413 | 10886     | NM_053036 | NPFFR2               |
| A_21_P0005492  | 6,82594 | 6,50525 | 1,248927733 | N/A             | N/A       | N/A       | Inc-C7orf11-2        |
| A_33_P3291877  | 6,85839 | 6,53783 | 1,248815198 | ENST00000478761 | 57492     | NM_020732 | ARID1B               |
| A_23_P400945   | 6,84141 | 6,52085 | 1,248815198 | ENST00000326786 | 2117      | NM_005240 | ETV3                 |
| A_22_P00006983 | 2,8464  | 2,52594 | 1,24872864  | ENST00000510938 | N/A       | N/A       | N/A                  |
| A_23_P146325   | 8,57844 | 8,25805 | 1,248668052 | N/A             | 29065     | NR_002765 | ASAP1-IT1            |
| A_23_P55828    | 2,74114 | 2,42076 | 1,248659397 | ENST00000253451 | 6370      | NM_005624 | CCL25                |
| A_21_P0011623  | 6,47099 | 6,15065 | 1,248624778 | ENST00000506394 | N/A       | N/A       | N/A                  |
| A_23_P30649    | 3,77207 | 3,45173 | 1,248624778 | ENST00000237201 | 81833     | NM_030960 | SPACA1               |
| A_33_P3256480  | 7,05745 | 6,73718 | 1,248564196 | N/A             | N/A       | N/A       | N/A                  |
| A_23_P14464    | 8,7232  | 8,40294 | 1,248555541 | ENST00000554011 | 10640     | NM_006544 | EXOC5                |
| A_23_P203406   | 14,3923 | 14,0722 | 1,24841708  | ENST00000540933 | 23193     | NM_198335 | GANAB                |
| A_33_P3313680  | 1,95464 | 1,63454 | 1,24841708  | ENST00000403951 | 1607      | NM_004080 | DGKB                 |
| A_24_P130041   | 11,9439 | 11,6238 | 1,24841708  | ENST00000422722 | 1595      | NM_000786 | CYP51A1              |
| A_21_P0000250  | 10,8569 | 10,5369 | 1,248330549 | ENST00000463740 | 26815     | NR_002448 | SNORD36A             |
| A_32_P203515   | 11,3338 | 11,0139 | 1,248244024 | ENST00000437398 | 23384     | NM_015330 | SPECC1L              |
| A_22_P00003484 | 4,61839 | 4,29851 | 1,24822672  | ENST00000511243 | 100874053 | NR_047481 | JRKL-AS1             |
| A_33_P3362274  | 2,18276 | 1,86291 | 1,248200764 | ENST00000390456 | N/A       | N/A       | N/A                  |
| A_23_P82299    | 14,3458 | 14,026  | 1,248157506 | ENST00000476185 | 221908    | NM_145030 | PPP1R35              |
| A_33_P3323435  | 10,6253 | 10,3055 | 1,248157506 | ENST00000554752 | 4293      | NM_033141 | MAP3K9               |
| A_33_P3213493  | 7,34664 | 7,02689 | 1,248114248 | ENST00000316509 | 6844      | NM_014232 | VAMP2                |
| A_21_P0010069  | 4,82071 | 4,50108 | 1,248010438 | N/A             | N/A       | N/A       | Inc-RP11-93B14.6.1-4 |
| A_21_P0014801  | 10,9128 | 10,5932 | 1,247984486 | ENST00000567298 | 54758     | XR_424741 | KLHDC4               |
| A_21_P0005495  | 4,98444 | 4,66486 | 1,247967186 | N/A             | N/A       | N/A       | Inc-SUN3-1           |
| A_33_P3212350  | 4,23755 | 3,918   | 1,247941235 | N/A             | 84433     | AK097139  | CARD11               |
| A_23_P431330   | 9,4513  | 9,13175 | 1,247941235 | ENST00000324803 | 285464    | NM_175918 | CRIPAK               |
| A_33_P3323945  | 5,70758 | 5,38806 | 1,247915285 | ENST00000330106 | 51286     | NM_016564 | CEND1                |
| A_24_P633902   | 9,4652  | 9,14569 | 1,247906635 | ENST00000539368 | 27246     | NM_014455 | RNF115               |
| A_21_P0013685  | 11,8581 | 11,5386 | 1,247897985 | ENST00000437852 | N/A       | N/A       | N/A                  |
| A_21_P0000246  | 6,68644 | 6,36697 | 1,247872036 | ENST00000564647 | 595099    | NR_002442 | SNORD18B             |
| A_23_P396777   | 6,80411 | 6,48465 | 1,247863387 | ENST00000620529 | 10336     | NM_006315 | PCGF3                |
| A_21_P0014733  | 1,85072 | 1,53127 | 1,247854737 | ENST00000447529 | N/A       | AK094915  | N/A                  |

|                |         |         |             |                 |           |              |               |
|----------------|---------|---------|-------------|-----------------|-----------|--------------|---------------|
| A_23_P159539   | 9,72813 | 9,40871 | 1,247828789 | ENST00000381333 | 8623      | NM_004192    | ASMTL         |
| A_32_P44316    | 14,8346 | 14,5152 | 1,247811491 | ENST00000443590 | 1915      | NM_001402    | EEF1A1        |
| A_23_P207766   | 11,8207 | 11,5013 | 1,247811491 | ENST00000269321 | 396       | NM_004309    | ARHGDI A      |
| A_22_P00010555 | 6,9501  | 6,63075 | 1,247768246 | N/A             | N/A       | AK123156     | Inc-NCOA5-1   |
| A_22_P00003873 | 4,10758 | 3,78825 | 1,247750948 | N/A             | N/A       | AK026947     | Inc-CEMP1-5   |
| A_22_P00001384 | 2,13345 | 1,81414 | 1,247733651 | N/A             | N/A       | N/A          | Inc-AP3M1-2   |
| A_23_P4353     | 12,8818 | 12,5625 | 1,247725002 | ENST00000348811 | 26118     | NM_015626    | WSB1          |
| A_23_P18672    | 2,19153 | 1,87227 | 1,247690408 | ENST00000511446 | 57733     | NM_020973    | GBA3          |
| A_33_P3396635  | 5,76526 | 5,44606 | 1,247638519 | ENST00000376895 | 10214     | NM_021014    | SSX3          |
| A_21_P0014239  | 2,93824 | 2,61909 | 1,24759528  | N/A             | N/A       | BC042955     | Inc-C9orf30-1 |
| A_22_P00004404 | 4,08774 | 3,7686  | 1,247586633 | N/A             | N/A       | N/A          | Inc-COMMD2-1  |
| A_19_P00321473 | 10,173  | 9,85394 | 1,247517454 | N/A             | 414777    | NR_102326    | HCG18         |
| A_24_P66337    | 5,70538 | 5,38632 | 1,247517454 | ENST00000319406 | 253558    | AK095284     | LCLAT1        |
| A_23_P100022   | 2,82544 | 2,50639 | 1,247508807 | ENST00000557410 | 9899      | NM_014848    | SV2B          |
| A_22_P00004073 | 1,99368 | 1,67465 | 1,247491513 | N/A             | N/A       | N/A          | Inc-CIB1-1    |
| A_33_P3397486  | 8,74332 | 8,42435 | 1,247439632 | ENST00000522255 | 9583      | NM_004901    | ENTPD4        |
| A_22_P00007987 | 8,98876 | 8,66979 | 1,247439632 | ENST00000435023 | 101928973 | NR_125966    | LOC101928973  |
| A_33_P3388882  | 6,80959 | 6,49073 | 1,247344523 | N/A             | 100132923 | NR_027425    | FAM66D        |
| A_33_P3236646  | 10,9176 | 10,5989 | 1,247206196 | ENST00000340535 | 375056    | NM_198551    | MIA3          |
| A_33_P3879920  | 14,2778 | 13,9591 | 1,247206196 | ENST00000623385 | 202658    | NM_001199119 | TRIM39-RPP21  |
| A_22_P00010493 | 4,89021 | 4,57154 | 1,247180261 | N/A             | N/A       | N/A          | Inc-NBAS-1    |
| A_22_P00006321 | 1,93352 | 1,61493 | 1,247111105 | ENST00000458413 | N/A       | N/A          | N/A           |
| A_21_P0003558  | 4,3523  | 4,03377 | 1,24705924  | N/A             | N/A       | N/A          | Inc-CRIPAK-1  |
| A_23_P502078   | 5,51469 | 5,19616 | 1,24705924  | ENST00000329492 | 23542     | NM_012324    | MAPK8IP2      |
| A_21_P0013934  | 7,68387 | 7,36534 | 1,24705924  | N/A             | N/A       | AA778499     | N/A           |
| A_33_P3253747  | 5,44762 | 5,12913 | 1,247024664 | N/A             | 1544      | NM_000761    | CYP1A2        |
| A_23_P31240    | 3,68029 | 3,36185 | 1,246981447 | ENST00000360039 | 79690     | NM_024637    | GAL3ST4       |
| A_22_P00001307 | 4,3894  | 4,07104 | 1,246912301 | N/A             | N/A       | N/A          | Inc-ANO6-1    |
| A_33_P3404989  | 7,46622 | 7,14791 | 1,246869087 | ENST00000369163 | 8357      | NM_003536    | HIST1H3H      |
| A_21_P0004684  | 4,64384 | 4,32554 | 1,246860445 | ENST00000454262 | N/A       | N/A          | N/A           |
| A_33_P3413821  | 8,10265 | 7,78436 | 1,246851802 | ENST00000368173 | 55243     | NM_018240    | KIRREL        |
| A_33_P3247165  | 4,01441 | 3,69614 | 1,246834517 | ENST00000449977 | 196993    | NM_001102658 | CT62          |
| A_33_P3421674  | 3,73475 | 3,4165  | 1,246817233 | N/A             | N/A       | N/A          | N/A           |

|                |         |         |             |                 |           |              |               |
|----------------|---------|---------|-------------|-----------------|-----------|--------------|---------------|
| A_23_P113789   | 7,40794 | 7,08977 | 1,246748096 | ENST00000398888 | 10869     | NM_006677    | USP19         |
| A_24_P44279    | 8,17879 | 7,86065 | 1,246722171 | ENST00000455858 | 26259     | NM_153348    | FBXW8         |
| A_23_P332260   | 4,28893 | 3,97083 | 1,246687605 | ENST00000527246 | 59351     | NM_021635    | PBOV1         |
| A_32_P430695   | 4,42315 | 4,10505 | 1,246687605 | ENST00000624754 | 339883    | NM_178339    | C3orf35       |
| A_23_P351734   | 7,71777 | 7,39973 | 1,246635758 | ENST00000378156 | 261734    | NM_015102    | NPHP4         |
| A_23_P387045   | 9,41517 | 9,09715 | 1,246618476 | ENST00000378407 | 203260    | NM_174923    | CCDC107       |
| A_23_P415061   | 4,51361 | 4,19563 | 1,246583913 | ENST00000358460 | 90736     | NM_138362    | FAM104B       |
| A_23_P326157   | 3,02568 | 2,70772 | 1,246566632 | ENST00000610560 | 64090     | NM_022134    | GAL3ST2       |
| A_33_P3376449  | 4,87785 | 4,5599  | 1,246557991 | ENST00000478793 | 254887    | NM_173570    | ZDHC23        |
| A_33_P6809500  | 8,46559 | 8,14768 | 1,24652343  | ENST00000551421 | 100506844 | NR_038269    | LOC100506844  |
| A_33_P3257528  | 8,47569 | 8,15788 | 1,24643703  | ENST00000510989 | 26036     | NM_015555    | ZNF451        |
| A_33_P3338335  | 13,7338 | 13,416  | 1,246428391 | ENST00000300952 | 90007     | NM_177401    | MIDN          |
| A_33_P8915099  | 4,15242 | 3,83468 | 1,246376554 | ENST00000428222 | 101928336 | N/A          | LOC101928336  |
| A_32_P15320    | 16,4323 | 16,1146 | 1,246341998 | ENST00000415278 | 1915      | NM_001402    | EEF1A1        |
| A_33_P3239222  | 14,1458 | 13,8281 | 1,246341998 | ENST00000475415 | 8662      | NM_001037283 | EIF3B         |
| A_23_P200838   | 6,14741 | 5,82972 | 1,246333359 | ENST00000366559 | 8564      | NM_003679    | KMO           |
| A_21_P0011780  | 4,8245  | 4,50686 | 1,246290165 | ENST00000433232 | 101927621 | NR_110708    | LINC01534     |
| A_21_P0007705  | 2,02437 | 1,70683 | 1,246203782 | N/A             | N/A       | N/A          | Inc-ZNF641-1  |
| A_23_P10305    | 7,3197  | 7,00217 | 1,246195144 | ENST00000455276 | 56474     | NM_175859    | CTPS2         |
| A_33_P3284933  | 3,29652 | 2,97899 | 1,246195144 | ENST00000356897 | 246778    | NM_145659    | IL27          |
| A_24_P136758   | 9,13793 | 8,82043 | 1,24616923  | ENST00000610417 | N/A       | XM_005259029 | N/A           |
| A_21_P0011632  | 2,30539 | 1,98792 | 1,246143317 | ENST00000433051 | N/A       | N/A          | N/A           |
| A_33_P3274001  | 5,24664 | 4,92917 | 1,246143317 | N/A             | N/A       | N/A          | N/A           |
| A_24_P303874   | 13,1566 | 12,8392 | 1,246082855 | ENST00000320778 | 157927    | NM_173520    | C9orf62       |
| A_23_P134454   | 16,8207 | 16,5033 | 1,246082855 | ENST00000341049 | 857       | NM_001753    | CAV1          |
| A_33_P3229390  | 8,56112 | 8,24375 | 1,246056944 | N/A             | N/A       | N/A          | N/A           |
| A_21_P0000652  | 4,58947 | 4,27219 | 1,245979213 | ENST00000602965 | 442524    | N/A          | DPY19L2P3     |
| A_33_P3312842  | 7,39323 | 7,076   | 1,245936032 | ENST00000323037 | 223082    | NM_147128    | ZNRF2         |
| A_22_P00012818 | 2,35021 | 2,03304 | 1,245884216 | N/A             | N/A       | DA432077     | Inc-RARRES2-2 |
| A_23_P12526    | 9,80196 | 9,48482 | 1,245858309 | ENST00000391878 | 7159      | NM_005426    | TP53BP2       |
| A_23_P89431    | 2,15838 | 1,84127 | 1,245832402 | ENST00000582017 | 6347      | NM_002982    | CCL2          |
| A_24_P87490    | 10,7436 | 10,4265 | 1,245823766 | ENST00000518506 | 201158    | NM_145301    | TVP23C        |
| A_23_P36464    | 11,1931 | 10,876  | 1,245823766 | ENST00000538016 | 55726     | NM_018164    | ASUN          |

|                |         |         |             |                 |           |              |                       |
|----------------|---------|---------|-------------|-----------------|-----------|--------------|-----------------------|
| A_22_P00012909 | 2,1598  | 1,84273 | 1,245797861 | N/A             | N/A       | N/A          | Inc-RBMX-2            |
| A_23_P106661   | 6,79772 | 6,48066 | 1,245789225 | ENST00000479381 | 113540    | NM_052999    | CMTM1                 |
| A_32_P26330    | 6,64808 | 6,33105 | 1,24576332  | ENST00000417863 | 9100      | NM_005153    | USP10                 |
| A_33_P3325978  | 7,22885 | 6,91187 | 1,245720146 | N/A             | N/A       | N/A          | N/A                   |
| A_23_P13663    | 13,9224 | 13,6055 | 1,245651071 | ENST00000544921 | 58516     | NM_021238    | FAM60A                |
| A_21_P0006611  | 3,95631 | 3,63942 | 1,245642436 | N/A             | N/A       | N/A          | Inc-PFKP-11           |
| A_24_P129277   | 8,49604 | 8,1792  | 1,245599267 | ENST00000467706 | 10392     | NM_006092    | NOD1                  |
| A_22_P00018020 | 6,71611 | 6,39929 | 1,245581999 | N/A             | N/A       | N/A          | Inc-ZNF205-1          |
| A_22_P00006689 | 2,1075  | 1,79072 | 1,245547465 | N/A             | N/A       | N/A          | Inc-FPR1-1            |
| A_21_P0013688  | 2,00142 | 1,68466 | 1,245530198 | N/A             | N/A       | N/A          | XLOC_I2_015418        |
| A_33_P3238941  | 6,50617 | 6,18943 | 1,245512931 | ENST00000607974 | 253650    | NM_147195    | ANKRD18A              |
| A_21_P0007206  | 4,59351 | 4,27679 | 1,245495665 | N/A             | N/A       | N/A          | Inc-CTD-2210P24.4.1-3 |
| A_23_P118722   | 6,63686 | 6,32015 | 1,245487032 | ENST00000619926 | 432       | NM_001671    | ASGR1                 |
| A_33_P3355071  | 8,42176 | 8,10518 | 1,245374807 | ENST00000377059 | 8028      | NM_004641    | MLLT10                |
| A_33_P3284883  | 5,25158 | 4,93525 | 1,245159019 | ENST00000603061 | 79817     | NM_024761    | MOB3B                 |
| A_23_P45970    | 10,0908 | 9,77451 | 1,245124496 | ENST00000609516 | 54955     | NM_017850    | C1orf109              |
| A_23_P251593   | 17,748  | 17,4318 | 1,245046824 | ENST00000472730 | 4736      | NM_007104    | RPL10A                |
| A_33_P3240763  | 2,6468  | 2,33064 | 1,245012304 | N/A             | N/A       | BC040838     | N/A                   |
| A_33_P3330175  | 7,40112 | 7,08497 | 1,245003674 | N/A             | N/A       | N/A          | XLOC_I2_015203        |
| A_22_P00007974 | 5,87295 | 5,55695 | 1,244874235 | N/A             | N/A       | BX364425     | Inc-IDH3G-1           |
| A_22_P00017870 | 1,92581 | 1,60981 | 1,244874235 | N/A             | N/A       | N/A          | Inc-ZDHHC6-1          |
| A_23_P326844   | 7,43991 | 7,12392 | 1,244865607 | ENST00000267425 | 161424    | NM_174913    | NOP9                  |
| A_33_P3367606  | 3,51948 | 3,20351 | 1,244848349 | N/A             | 79857     | NR_026806    | FLJ13224              |
| A_32_P9842     | 12,9732 | 12,6573 | 1,24478795  | ENST00000414996 | 64419     | NM_001077526 | MTMR14                |
| A_21_P0007161  | 2,1228  | 1,80696 | 1,244736182 | ENST00000452629 | N/A       | N/A          | N/A                   |
| A_33_P3402116  | 11,47   | 11,1542 | 1,244701671 | ENST00000373204 | 26523     | NM_012199    | AGO1                  |
| A_21_P0013821  | 2,26648 | 1,95071 | 1,244675789 | ENST00000435991 | N/A       | N/A          | N/A                   |
| A_22_P00009483 | 2,9576  | 2,64183 | 1,244675789 | ENST00000370438 | N/A       | AF050146     | N/A                   |
| A_33_P3391135  | 4,15933 | 3,84357 | 1,244667161 | ENST00000376682 | 283383    | NM_198827    | GPR133                |
| A_23_P52914    | 4,69333 | 4,37759 | 1,244649907 | ENST00000314644 | 81309     | NM_001001920 | OR4C15                |
| A_33_P3282181  | 13,4356 | 13,1199 | 1,244615398 | ENST00000404127 | 393       | NM_001164741 | ARHGAP4               |
| A_19_P00315905 | 3,5096  | 3,19394 | 1,24458089  | ENST00000505997 | 102467213 | NR_104671    | LOC102467213          |
| A_22_P00012192 | 1,95555 | 1,63999 | 1,244494626 | ENST00000565538 | N/A       | AL162033     | N/A                   |

|                |         |         |             |                 |           |              |              |
|----------------|---------|---------|-------------|-----------------|-----------|--------------|--------------|
| A_22_P00020754 | 9,30995 | 8,99442 | 1,244468747 | N/A             | N/A       | AL137645     | Inc-EBPL-2   |
| A_23_P62270    | 10,0554 | 9,73988 | 1,244460121 | ENST00000404049 | 8242      | NM_004187    | KDM5C        |
| A_23_P201996   | 12,7975 | 12,4821 | 1,244356614 | ENST00000354911 | 51322     | NM_100264    | WAC          |
| A_22_P00004041 | 3,50589 | 3,19058 | 1,24427899  | N/A             | N/A       | HY003396     | Inc-CHRNA6-1 |
| A_23_P13914    | 11,0159 | 10,7007 | 1,244184122 | ENST00000539298 | 57647     | NM_032656    | DHX37        |
| A_33_P3259522  | 5,91186 | 5,5967  | 1,244149626 | ENST00000371330 | 200008    | NM_201546    | CDCP2        |
| A_23_P171270   | 4,4739  | 4,15888 | 1,244028899 | ENST00000354514 | 474381    | NM_001017991 | H2AFB2       |
| A_33_P3212650  | 12,2667 | 11,9517 | 1,244011653 | ENST00000609477 | 51020     | BC061520     | HDDC2        |
| A_24_P917866   | 8,30734 | 7,99238 | 1,243977162 | ENST00000322030 | 6418      | NM_003011    | SET          |
| A_23_P117933   | 13,2718 | 12,9569 | 1,243925428 | ENST00000564386 | 2653      | NM_004483    | GCSH         |
| A_33_P3401322  | 10,6208 | 10,3059 | 1,243925428 | ENST00000368219 | 81875     | NM_001303095 | ISG20L2      |
| A_23_P28538    | 11,4221 | 11,1072 | 1,243925428 | ENST00000464458 | 64969     | NM_031902    | MRPS5        |
| A_33_P3396831  | 7,52117 | 7,20645 | 1,243770237 | ENST00000368256 | 7203      | N/A          | CCT3         |
| A_33_P3384392  | 13,3706 | 13,0559 | 1,243752995 | ENST00000416281 | 156       | NM_001619    | ADRBK1       |
| A_23_P310972   | 3,67153 | 3,35684 | 1,243744374 | ENST00000611598 | 56104     | NM_032095    | PCDHGB1      |
| A_22_P00015062 | 2,1005  | 1,78591 | 1,243658167 | N/A             | N/A       | N/A          | Inc-SNRPD3-1 |
| A_33_P3210228  | 3,30096 | 2,98642 | 1,243615066 | ENST00000375947 | 79670     | N/A          | ZCCHC6       |
| A_24_P76740    | 9,42638 | 9,11189 | 1,243571967 | ENST00000491136 | 200014    | NM_032449    | CC2D1B       |
| A_23_P43317    | 4,97192 | 4,65747 | 1,243537488 | ENST00000253008 | 59335     | NM_021619    | PRDM12       |
| A_21_P0004252  | 4,92108 | 4,60666 | 1,24351163  | N/A             | N/A       | N/A          | Inc-SNX18-1  |
| A_33_P3274560  | 7,52472 | 7,21037 | 1,243451295 | ENST00000409456 | 80704     | N/A          | SLC19A3      |
| A_23_P26439    | 5,06389 | 4,74955 | 1,243442677 | ENST00000623401 | 79007     | NM_001042610 | DBNDD1       |
| A_22_P00005663 | 4,58354 | 4,26931 | 1,243347872 | N/A             | 102724671 | XR_424164    | LOC102724671 |
| A_21_P0002763  | 2,97953 | 2,66532 | 1,243330636 | ENST00000495228 | 344595    | N/A          | LINC00883    |
| A_21_P0007432  | 2,21907 | 1,90487 | 1,243322018 | N/A             | 101930264 | N/A          | LOC101930264 |
| A_33_P3233565  | 9,67292 | 9,35882 | 1,24323584  | ENST00000420761 | 7390      | NM_000375    | UROS         |
| A_32_P140898   | 10,876  | 10,5619 | 1,24323584  | ENST00000616844 | 3344      | NM_002158    | FOXN2        |
| A_33_P3371109  | 3,1682  | 2,85418 | 1,243166903 | N/A             | 100130597 | AK127669     | LOC100130597 |
| A_24_P345846   | 5,34543 | 5,03154 | 1,243054887 | ENST00000307333 | 118429    | NM_058172    | ANTXR2       |
| A_33_P3315239  | 5,12751 | 4,81363 | 1,243046271 | N/A             | 7553      | NM_001282796 | ZNF7         |
| A_22_P00006907 | 6,21426 | 5,90043 | 1,243003191 | ENST00000583191 | N/A       | N/A          | N/A          |
| A_33_P3419720  | 12,9164 | 12,6026 | 1,242977344 | ENST00000536378 | 4292      | NM_000249    | MLH1         |
| A_23_P206830   | 12,1556 | 11,8418 | 1,242977344 | ENST00000571178 | 51025     | NM_016069    | PAM16        |

|                |         |         |             |                 |           |              |                 |
|----------------|---------|---------|-------------|-----------------|-----------|--------------|-----------------|
| A_19_P00320536 | 7,75308 | 7,43936 | 1,24290842  | N/A             | N/A       | AK124562     | N/A             |
| A_33_P3321230  | 7,76854 | 7,45482 | 1,24290842  | ENST00000367918 | 116843    | NM_052831    | SLC18B1         |
| A_22_P00001808 | 4,35395 | 4,04023 | 1,24290842  | ENST00000523496 | N/A       | DA757715     | N/A             |
| A_24_P109554   | 7,43498 | 7,12133 | 1,242848115 | ENST00000373855 | 11064     | NM_007018    | CNTRL           |
| A_33_P3412143  | 8,49454 | 8,18094 | 1,242805042 | ENST00000529419 | 644943    | NM_001080521 | RASSF10         |
| A_33_P3317815  | 10,6212 | 10,3076 | 1,242805042 | ENST00000256078 | 3845      | NM_004985    | KRAS            |
| A_33_P3374010  | 3,16171 | 2,84816 | 1,242761971 | ENST00000357171 | 22941     | NM_012309    | SHANK2          |
| A_23_P31389    | 9,34155 | 9,02811 | 1,242667219 | ENST00000482395 | 29896     | NM_013293    | TRA2A           |
| A_22_P00022023 | 1,7146  | 1,40126 | 1,242581086 | N/A             | N/A       | AK092105     | Inc-PAPPA-AS1-1 |
| A_21_P0013986  | 9,71165 | 9,39835 | 1,242546635 | ENST00000418195 | N/A       | XR_171390    | N/A             |
| A_33_P3233764  | 5,86764 | 5,55436 | 1,24252941  | ENST00000392273 | 9113      | NM_001270519 | LATS1           |
| A_33_P3369646  | 8,21144 | 7,89822 | 1,242477736 | N/A             | N/A       | N/A          | N/A             |
| A_22_P00017886 | 7,18652 | 6,87339 | 1,242400228 | ENST00000568248 | N/A       | AL833303     | N/A             |
| A_23_P357284   | 2,17621 | 1,86321 | 1,242288282 | ENST00000323040 | 2828      | NM_005282    | GPR4            |
| A_33_P3416479  | 4,44492 | 4,13195 | 1,242262449 | ENST00000297373 | 5260      | NM_001258459 | PHKG1           |
| A_23_P135381   | 2,5724  | 2,25945 | 1,242245228 | ENST00000375281 | 389058    | NM_001003845 | SP5             |
| A_33_P3502311  | 8,38313 | 8,07023 | 1,242202176 | N/A             | 102723564 | XR_429483    | LOC102723564    |
| A_23_P154058   | 10,0492 | 9,73631 | 1,242193566 | ENST00000405940 | 8890      | NM_001034116 | EIF2B4          |
| A_23_P1145     | 9,89624 | 9,5834  | 1,242150515 | ENST00000488290 | 55149     | NM_018109    | MTPAP           |
| A_23_P156842   | 12,0816 | 11,7688 | 1,242116076 | ENST00000429723 | 9521      | NM_004280    | EEF1E1          |
| A_33_P3421476  | 3,05001 | 2,73722 | 1,242107466 | N/A             | N/A       | DA798455     | N/A             |
| A_21_P0012185  | 7,4383  | 7,12552 | 1,242098857 | ENST00000432230 | N/A       | N/A          | N/A             |
| A_33_P3346573  | 7,05389 | 6,74121 | 1,242012764 | ENST00000383736 | 4134      | NM_001134364 | MAP4            |
| A_24_P743869   | 5,06792 | 4,75529 | 1,24196972  | ENST00000448814 | 92482     | NM_001195304 | BBIP1           |
| A_22_P00001060 | 4,94594 | 4,63335 | 1,241935286 | N/A             | N/A       | N/A          | Inc-ALB-1       |
| A_22_P00024540 | 6,01206 | 5,69949 | 1,241918069 | N/A             | N/A       | N/A          | Inc-VN1R2-1     |
| A_33_P3403082  | 8,56583 | 8,25327 | 1,241909461 | ENST00000358393 | 284739    | NR_027686    | LINC00176       |
| A_24_P141227   | 3,32798 | 3,01547 | 1,24186642  | ENST00000526117 | 4010      | NM_002316    | LMX1B           |
| A_24_P250499   | 13,1017 | 12,7892 | 1,241857812 | ENST00000373433 | 58490     | NM_021215    | RPRD1B          |
| A_33_P3216237  | 13,0079 | 12,6954 | 1,241857812 | ENST00000436868 | 28969     | NM_001159767 | BZW2            |
| A_19_P00805679 | 6,90394 | 6,59161 | 1,241711486 | ENST00000476232 | 730102    | NR_037167    | LOC730102       |
| A_23_P44781    | 7,89076 | 7,57844 | 1,241702879 | ENST00000274695 | 54901     | NM_017774    | CDKAL1          |
| A_23_P59602    | 11,1019 | 10,7897 | 1,241599602 | ENST00000405785 | 54468     | NM_019005    | MIOS            |

|                |         |         |             |                 |           |              |               |
|----------------|---------|---------|-------------|-----------------|-----------|--------------|---------------|
| A_23_P126120   | 7,03504 | 6,72294 | 1,241513544 | ENST00000484920 | 91687     | NM_033319    | CENPL         |
| A_19_P00321361 | 8,89541 | 8,58333 | 1,241496333 | N/A             | 378805    | NR_109851    | LINC-PINT     |
| A_33_P3317376  | 9,54509 | 9,23303 | 1,241479122 | ENST00000396978 | 391       | NM_001665    | RHOG          |
| A_33_P3333030  | 4,97558 | 4,66369 | 1,241332841 | ENST00000369899 | 51684     | NM_001178133 | SUFU          |
| A_33_P3350728  | 5,4072  | 5,09536 | 1,24128982  | ENST00000373287 | 9855      | NM_001282984 | FARP2         |
| A_23_P165494   | 12,6066 | 12,2948 | 1,241255405 | ENST00000486498 | 26003     | NM_015530    | GORASP2       |
| A_21_P0004517  | 5,68657 | 5,37477 | 1,241255405 | N/A             | 100505894 | NR_105019    | TMEM161B-AS1  |
| A_23_P88470    | 8,65498 | 8,34321 | 1,241229594 | ENST00000313478 | 54822     | NM_017672    | TRPM7         |
| A_24_P186379   | 11,2475 | 10,9359 | 1,241083342 | ENST00000478895 | 282969    | NM_198472    | FUOM          |
| A_22_P00008160 | 2,05244 | 1,74089 | 1,241040331 | N/A             | N/A       | N/A          | Inc-IMPACT-2  |
| A_21_P0000229  | 3,79732 | 3,48584 | 1,240980116 | N/A             | 338427    | NR_001292    | SNORD108      |
| A_23_P411772   | 4,53173 | 4,22028 | 1,240954311 | ENST00000622527 | 56103     | NM_032096    | PCDHGB2       |
| A_23_P157758   | 8,21544 | 7,90407 | 1,2408855   | ENST00000540714 | 158358    | NM_001017969 | KIAA2026      |
| A_24_P7965     | 3,75484 | 3,44353 | 1,240833894 | ENST00000469486 | 2104      | NM_206594    | ESRRG         |
| A_23_P85604    | 11,5357 | 11,2244 | 1,240825293 | ENST00000486652 | 80232     | NM_025160    | WDR26         |
| A_33_P3272361  | 14,3619 | 14,0506 | 1,240825293 | ENST00000405275 | 56259     | NM_001281495 | CTNBL1        |
| A_33_P3329149  | 6,4332  | 6,12192 | 1,240808092 | ENST00000613626 | 8621      | NM_031267    | CDK13         |
| A_23_P200404   | 13,2353 | 12,9241 | 1,240739289 | ENST00000354858 | 204       | NM_001625    | AK2           |
| A_33_P3684897  | 5,7399  | 5,4287  | 1,240739289 | N/A             | 644975    | DA730659     | FLJ30064      |
| A_22_P00004446 | 2,97156 | 2,66037 | 1,240730689 | ENST00000503843 | 100505878 | NR_105017    | LOC100505878  |
| A_22_P00018016 | 1,88854 | 1,57743 | 1,24066189  | ENST00000565046 | N/A       | BC040316     | N/A           |
| A_33_P3275959  | 10,1791 | 9,868   | 1,24065329  | N/A             | 8034      | BC001407     | SLC25A16      |
| A_19_P00322058 | 1,92717 | 1,61608 | 1,240644691 | ENST00000436112 | 100507254 | NR_038981    | LINC01013     |
| A_33_P3243449  | 5,05566 | 4,74462 | 1,240601694 | ENST00000245903 | 970       | NM_001252    | CD70          |
| A_24_P83075    | 5,29418 | 4,98317 | 1,240575897 | N/A             | 102723489 | XM_006724071 | LINC00205     |
| A_24_P322474   | 11,5934 | 11,2824 | 1,240567298 | ENST00000380702 | 5141      | NM_006202    | PDE4A         |
| A_23_P69637    | 5,95331 | 5,64237 | 1,240515705 | ENST00000509620 | 54726     | NM_017493    | OTUD4         |
| A_33_P3335999  | 10,8625 | 10,5516 | 1,240481311 | ENST00000367998 | 8703      | NM_001199873 | B4GALT3       |
| A_23_P4007     | 8,12841 | 7,81753 | 1,240464115 | ENST00000250113 | 9513      | NM_004860    | FXR2          |
| A_33_P3305710  | 2,30284 | 1,992   | 1,240429722 | N/A             | N/A       | N/A          | N/A           |
| A_21_P0004206  | 2,1928  | 1,882   | 1,24039533  | N/A             | N/A       | N/A          | Inc-C5orf38-3 |
| A_22_P00025875 | 4,16857 | 3,85778 | 1,240386733 | N/A             | N/A       | N/A          | Inc-DGKE-2    |
| A_33_P3318444  | 7,58703 | 7,27629 | 1,240343745 | ENST00000399398 | 643904    | NM_001146684 | RNF222        |



|                |         |         |             |                 |           |              |                |
|----------------|---------|---------|-------------|-----------------|-----------|--------------|----------------|
| A_22_P00015215 | 3,07435 | 2,76365 | 1,240309356 | ENST00000538810 | 102606463 | NR_110132    | LINC01152      |
| A_23_P318296   | 5,94168 | 5,63099 | 1,240300759 | ENST00000396257 | 84725     | NM_032639    | PLEKHA8        |
| A_22_P00010120 | 8,14538 | 7,83469 | 1,240300759 | N/A             | 101928069 | NR_120586    | LOC101928069   |
| A_24_P309069   | 1,98516 | 1,67451 | 1,240266371 | ENST00000297537 | 2636      | NM_001098834 | GBX1           |
| A_23_P374288   | 11,8106 | 11,5    | 1,240223387 | ENST00000394114 | 22794     | NM_007359    | CASC3          |
| A_24_P206604   | 4,76444 | 4,45387 | 1,240197598 | ENST00000487989 | 5209      | NM_004566    | PFKFB3         |
| A_33_P3344801  | 4,28226 | 3,9717  | 1,240189001 | N/A             | N/A       | N/A          | N/A            |
| A_21_P0003638  | 1,65547 | 1,34498 | 1,240128828 | N/A             | N/A       | N/A          | Inc-UGT8-2     |
| A_22_P00017061 | 7,25356 | 6,94311 | 1,240094445 | ENST00000612143 | N/A       | XR_432949    | N/A            |
| A_21_P0004311  | 1,94454 | 1,6343  | 1,239913949 | N/A             | N/A       | N/A          | Inc-ARHGAP26-2 |
| A_33_P3262949  | 5,39284 | 5,08261 | 1,239905355 | ENST00000378844 | 55612     | N/A          | FERMT1         |
| A_23_P3856     | 7,6499  | 7,33967 | 1,239905355 | ENST00000393430 | 162239    | NM_153688    | ZFP1           |
| A_22_P00008280 | 2,12308 | 1,8129  | 1,239862384 | N/A             | N/A       | N/A          | Inc-ISCA2-1    |
| A_22_P00015104 | 4,53575 | 4,22558 | 1,23985379  | N/A             | N/A       | S71020       | Inc-SNX11-2    |
| A_23_P148829   | 3,44658 | 3,13644 | 1,239828008 | ENST00000378404 | 140625    | NM_080431    | ACTRT2         |
| A_33_P3346302  | 10,1448 | 9,83467 | 1,239819414 | ENST00000539807 | 55833     | NM_018449    | UBAP2          |
| A_32_P342064   | 16,8393 | 16,5292 | 1,239793633 | ENST00000534180 | 2495      | NM_002032    | FTH1           |
| A_33_P3422614  | 4,62189 | 4,31179 | 1,239793633 | ENST00000464074 | 6251      | N/A          | RSU1           |
| A_33_P3316273  | 6,27224 | 5,96227 | 1,239681921 | ENST00000613396 | 6348      | NM_002983    | CCL3           |
| A_21_P0002669  | 3,31866 | 3,0087  | 1,239673328 | N/A             | N/A       | N/A          | Inc-EIF2AK3-1  |
| A_32_P176594   | 2,29168 | 1,98174 | 1,239656143 | ENST00000483705 | 57710     | NM_020950    | KIAA1614       |
| A_24_P175909   | 13,8109 | 13,5011 | 1,239535852 | ENST00000262027 | 4141      | NM_004990    | MARS           |
| A_33_P3390202  | 5,43781 | 5,12801 | 1,239535852 | ENST00000372519 | 128497    | NM_080608    | SPATA25        |
| A_23_P255317   | 9,0641  | 8,75432 | 1,239518668 | ENST00000394514 | 9604      | NM_004290    | RNF14          |
| A_33_P3351529  | 17,8728 | 17,5631 | 1,239449937 | N/A             | N/A       | N/A          | N/A            |
| A_23_P14543    | 8,74137 | 8,4317  | 1,239424163 | ENST00000557057 | 8846      | NM_006020    | ALKBH1         |
| A_22_P00018010 | 4,40119 | 4,09155 | 1,239398391 | ENST00000613560 | 101928238 | XR_244091    | LOC101928238   |
| A_21_P0006347  | 6,43976 | 6,13019 | 1,239338256 | N/A             | N/A       | N/A          | Inc-DCAF10-2   |
| A_21_P0010073  | 3,72125 | 3,41174 | 1,239286714 | N/A             | N/A       | XM_006723787 | Inc-KCNQ2-1    |
| A_23_P20384    | 13,2726 | 12,9631 | 1,239278124 | ENST00000520286 | 27257     | NM_014462    | LSM1           |
| A_23_P98252    | 12,2476 | 11,9381 | 1,239278124 | ENST00000529254 | 402       | NM_001667    | ARL2           |
| A_33_P3303729  | 5,74376 | 5,43427 | 1,239269534 | N/A             | N/A       | N/A          | XLOC_I2_013415 |
| A_21_P0004717  | 5,28916 | 4,97969 | 1,239252355 | N/A             | N/A       | N/A          | Inc-SERPINB6-2 |

|                |         |         |             |                 |           |              |              |
|----------------|---------|---------|-------------|-----------------|-----------|--------------|--------------|
| A_22_P00008648 | 6,2213  | 5,91186 | 1,239226585 | ENST00000414005 | N/A       | AF161538     | N/A          |
| A_22_P00002559 | 5,03126 | 4,72195 | 1,239114925 | ENST00000581412 | 101928343 | XR_243757    | LOC101928343 |
| A_33_P3299854  | 10,0677 | 9,75845 | 1,239063393 | ENST00000491445 | 4686      | NM_002486    | NCBP1        |
| A_33_P3449417  | 14,2856 | 13,9764 | 1,239020451 | ENST00000569298 | 3735      | NM_001130089 | KARS         |
| A_22_P00004324 | 4,94793 | 4,6388  | 1,238960334 | N/A             | N/A       | CR627474     | Inc-COG3-2   |
| A_21_P0009389  | 4,88857 | 4,5795  | 1,238908809 | N/A             | N/A       | N/A          | Inc-TMEM98-1 |
| A_21_P0007189  | 4,70987 | 4,40089 | 1,238831524 | N/A             | N/A       | N/A          | Inc-METT15-4 |
| A_23_P171385   | 8,29633 | 7,98739 | 1,238797177 | ENST00000370800 | 84295     | NM_032335    | PHF6         |
| A_23_P74229    | 15,1595 | 14,8506 | 1,23876283  | ENST00000359297 | 83931     | NM_032017    | STK40        |
| A_33_P3503937  | 9,69561 | 9,38685 | 1,238642626 | N/A             | 284581    | AK094426     | LOC284581    |
| A_21_P0002162  | 3,98408 | 3,67539 | 1,238582528 | N/A             | N/A       | N/A          | Inc-ASAP2-5  |
| A_24_P148499   | 5,41381 | 5,10513 | 1,238573943 | ENST00000490412 | 841       | NM_033358    | CASP8        |
| A_21_P0000219  | 7,4319  | 7,12329 | 1,238513848 | ENST00000472481 | 26817     | NR_000019    | SNORD34      |
| A_33_P3247473  | 4,57838 | 4,26978 | 1,238505264 | ENST00000334160 | 337963    | NM_181624    | KRTAP23-1    |
| A_23_P103672   | 9,11811 | 8,80951 | 1,238505264 | ENST00000368223 | 10763     | NM_006617    | NES          |
| A_33_P3259801  | 11,1811 | 10,8725 | 1,238505264 | ENST00000453505 | 387521    | NM_199129    | TMEM189      |
| A_22_P00023170 | 4,04207 | 3,73357 | 1,23841942  | ENST00000508313 | 100506085 | NR_037878    | LOC100506085 |
| A_21_P0009973  | 4,61502 | 4,30653 | 1,238410836 | N/A             | N/A       | N/A          | Inc-PTPN1-2  |
| A_22_P00004882 | 3,8013  | 3,49283 | 1,238393668 | N/A             | N/A       | DA338519     | Inc-CYTH4-1  |
| A_33_P3288039  | 6,65051 | 6,34206 | 1,2383765   | ENST00000589951 | 374868    | NM_198531    | ATP9B        |
| A_24_P403459   | 5,46983 | 5,16138 | 1,2383765   | ENST00000421715 | 3441      | NM_021068    | IFNA4        |
| A_24_P379765   | 9,44087 | 9,13244 | 1,238359333 | ENST00000497054 | 55233     | NM_018221    | MOB1A        |
| A_33_P3474538  | 2,23459 | 1,9262  | 1,238324999 | N/A             | 7643      | NM_007138    | ZNF90        |
| A_33_P3351276  | 5,24046 | 4,93208 | 1,238316415 | N/A             | N/A       | N/A          | N/A          |
| A_33_P3314356  | 3,04477 | 2,73643 | 1,238282082 | ENST00000506423 | 152926    | AF351614     | PPM1K        |
| A_33_P3220723  | 9,78794 | 9,47961 | 1,238273499 | ENST00000409663 | 23240     | NM_015196    | KIAA0922     |
| A_21_P0006290  | 3,35739 | 3,04907 | 1,238264916 | N/A             | N/A       | N/A          | Inc-SEMA4D-1 |
| A_33_P3324086  | 12,3806 | 12,0723 | 1,23824775  | ENST00000488770 | 63933     | NM_001031713 | MCUR1        |
| A_32_P411592   | 11,9739 | 11,6657 | 1,238161925 | ENST00000355673 | 114785    | NM_052897    | MBD6         |
| A_22_P00004499 | 3,53472 | 3,22654 | 1,23814476  | N/A             | N/A       | N/A          | Inc-CPPED1-3 |
| A_22_P00005751 | 1,75039 | 1,44223 | 1,238127596 | N/A             | N/A       | N/A          | Inc-EN2-1    |
| A_33_P3788618  | 5,52704 | 5,21893 | 1,238084686 | ENST00000340967 | 340485    | NM_001010887 | ACER2        |
| A_23_P117506   | 11,0681 | 10,7601 | 1,237990291 | ENST00000553986 | 51635     | NM_016029    | DHRS7        |

|                |         |         |             |                 |           |              |                       |
|----------------|---------|---------|-------------|-----------------|-----------|--------------|-----------------------|
| A_19_P00320721 | 10,4554 | 10,1474 | 1,237990291 | ENST00000391947 | 4194      | NM_002393    | MDM4                  |
| A_21_P0005811  | 3,54839 | 3,24046 | 1,237930225 | N/A             | N/A       | N/A          | Inc-DUSP4-2           |
| A_24_P399083   | 7,92472 | 7,61682 | 1,237904483 | ENST00000423037 | 54957     | NM_017853    | TXNL4B                |
| A_33_P3271051  | 11,8564 | 11,5486 | 1,237818681 | ENST00000396741 | 9265      | NM_004227    | CYTH3                 |
| A_24_P232365   | 2,85958 | 2,55181 | 1,237792941 | ENST00000356785 | 54518     | NM_019043    | APBB1IP               |
| A_33_P3313532  | 6,09533 | 5,78759 | 1,237767202 | ENST00000618763 | 84210     | NM_032250    | ANKRD20A1             |
| A_24_P416131   | 14,3404 | 14,0327 | 1,237732885 | ENST00000567278 | 23406     | NM_021149    | COTL1                 |
| A_19_P00321890 | 5,68563 | 5,37801 | 1,237664252 | N/A             | 100272228 | N/A          | LINC00894             |
| A_23_P34424    | 2,25405 | 1,94644 | 1,237655673 | ENST00000506017 | 9132      | NM_004700    | KCNQ4                 |
| A_33_P3358099  | 6,63711 | 6,32953 | 1,237629937 | ENST00000392619 | 342510    | NM_181449    | CD300E                |
| A_22_P00014211 | 6,56369 | 6,25612 | 1,237621359 | N/A             | 100874007 | NR_046654    | VIPR1-AS1             |
| A_33_P3228564  | 6,65878 | 6,35136 | 1,237492687 | ENST00000312943 | 79930     | NM_001144875 | DOK3                  |
| A_24_P128205   | 10,9466 | 10,6392 | 1,237475532 | ENST00000431051 | 5707      | NM_002807    | PSMD1                 |
| A_24_P12281    | 7,18938 | 6,88208 | 1,23738976  | ENST00000556232 | 11154     | NM_007077    | AP4S1                 |
| A_24_P626850   | 6,08885 | 5,78159 | 1,237355453 | ENST00000377403 | 9563      | NM_004285    | H6PD                  |
| A_23_P121447   | 6,85154 | 6,5443  | 1,237338299 | ENST00000330368 | 84517     | NM_032487    | ACTRT3                |
| A_24_P42501    | 9,89162 | 9,58439 | 1,237329723 | ENST00000449612 | 23597     | NM_001037171 | ACOT9                 |
| A_23_P217109   | 10,4776 | 10,1704 | 1,237303994 | ENST00000259392 | 1318      | NM_001860    | SLC31A2               |
| A_23_P35609    | 9,98262 | 9,67543 | 1,237295417 | ENST00000420761 | 7390      | NM_000375    | UROS                  |
| A_22_P00001214 | 6,06483 | 5,7577  | 1,237243961 | N/A             | N/A       | BC043518     | Inc-ANKRD10-2         |
| A_23_P33856    | 11,352  | 11,0449 | 1,237218233 | ENST00000371145 | 10735     | NM_001042749 | STAG2                 |
| A_23_P15285    | 11,0862 | 10,7792 | 1,237132479 | ENST00000564107 | 79091     | NM_024109    | METTLL22              |
| A_33_P3312544  | 4,69311 | 4,38611 | 1,237132479 | ENST00000381582 | 2560      | AK296023     | GABRB1                |
| A_33_P3423590  | 5,45419 | 5,14721 | 1,237115329 | N/A             | 100129275 | AK126260     | LOC100129275          |
| A_33_P3243692  | 2,47609 | 2,16918 | 1,237055305 | ENST00000606225 | 53944     | AB042562     | CSNK1G1               |
| A_33_P3219100  | 12,8719 | 12,565  | 1,23704673  | ENST00000373605 | 63905     | NM_022077    | MANBAL                |
| A_22_P00010132 | 5,08465 | 4,77779 | 1,237012432 | N/A             | N/A       | N/A          | Inc-MRPL3-2           |
| A_22_P00013602 | 3,16801 | 2,86116 | 1,237003858 | N/A             | N/A       | BQ922675     | Inc-RP11-539E17.5.1-1 |
| A_33_P3313065  | 3,56809 | 3,26132 | 1,236935266 | ENST00000373680 | 392391    | NM_001001923 | OR5C1                 |
| A_21_P0005812  | 4,35789 | 4,05112 | 1,236935266 | N/A             | N/A       | N/A          | Inc-DUSP4-3           |
| A_24_P813147   | 10,2506 | 9,94392 | 1,236858104 | ENST00000308911 | 347688    | NM_177987    | TUBB8                 |
| A_33_P3290612  | 2,14851 | 1,84183 | 1,236858104 | N/A             | N/A       | N/A          | N/A                   |
| A_33_P3362900  | 6,25371 | 5,94713 | 1,236772375 | ENST00000611917 | 375190    | NM_001145710 | FAM228B               |

|                |         |         |             |                 |           |              |              |
|----------------|---------|---------|-------------|-----------------|-----------|--------------|--------------|
| A_33_P3225690  | 9,67794 | 9,37137 | 1,236763802 | ENST00000443185 | 9658      | NM_014643    | ZNF516       |
| A_21_P0009274  | 5,27653 | 4,97009 | 1,236652364 | N/A             | N/A       | N/A          | Inc-MFSD11-2 |
| A_24_P7202     | 5,89049 | 5,58406 | 1,236643792 | ENST00000319688 | 57498     | NM_020738    | KIDINS220    |
| A_22_P00022774 | 12,4766 | 12,1702 | 1,236618077 | ENST00000380728 | 2874      | NM_004489    | GPS2         |
| A_23_P57534    | 7,31551 | 7,00914 | 1,236592362 | ENST00000403230 | 10521     | NM_006386    | DDX17        |
| A_24_P179903   | 14,0662 | 13,7599 | 1,236532364 | ENST00000354858 | 204       | NM_001625    | AK2          |
| A_33_P3271755  | 8,82158 | 8,51531 | 1,236506651 | ENST00000359782 | 23408     | NM_031244    | SIRT5        |
| A_23_P128246   | 7,56871 | 7,26249 | 1,236463798 | ENST00000552695 | 11153     | NM_007076    | FICD         |
| A_24_P345993   | 7,77206 | 7,46587 | 1,236438087 | N/A             | 821       | NM_001746    | CANX         |
| A_21_P0001581  | 4,50997 | 4,20382 | 1,236403806 | N/A             | N/A       | N/A          | Inc-SEMA6C-2 |
| A_21_P0001689  | 5,47681 | 5,17067 | 1,236395236 | N/A             | 149047    | NR_027310    | MGC27382     |
| A_23_P13183    | 12,6976 | 12,3915 | 1,236360956 | ENST00000358681 | 2132      | NM_000401    | EXT2         |
| A_22_P00007505 | 4,18015 | 3,87408 | 1,236335247 | N/A             | N/A       | N/A          | Inc-GYPA-1   |
| A_23_P119214   | 10,6515 | 10,3455 | 1,236275261 | ENST00000595876 | 10469     | NM_006351    | TIMM44       |
| A_22_P00023251 | 2,01601 | 1,71002 | 1,236266692 | N/A             | 100652999 | NR_046221    | LOC100652999 |
| A_32_P110390   | 8,41055 | 8,10458 | 1,236249554 | ENST00000287773 | 134285    | NM_173490    | TMEM171      |
| A_32_P812268   | 2,04935 | 1,74338 | 1,236249554 | ENST00000329905 | 255022    | NM_001001412 | CALHM1       |
| A_33_P3222648  | 11,912  | 11,6061 | 1,236189572 | ENST00000499879 | 6789      | NM_006282    | STK4         |
| A_21_P0000331  | 5,51175 | 5,20588 | 1,236163866 | N/A             | 677825    | NR_002976    | SNORA44      |
| A_23_P204269   | 8,49101 | 8,18514 | 1,236163866 | ENST00000280377 | 9958      | NM_006313    | USP15        |
| A_21_P0000674  | 4,21113 | 3,90532 | 1,236112457 | ENST00000458670 | 100289473 | NR_037142    | LOC100289473 |
| A_33_P3287735  | 11,8164 | 11,5106 | 1,236103889 | ENST00000396930 | 7994      | NM_001099412 | KAT6A        |
| A_33_P3282898  | 6,67857 | 6,37279 | 1,236086753 | ENST00000378192 | 7094      | BC020881     | TLN1         |
| A_23_P406986   | 8,24128 | 7,93554 | 1,236052482 | ENST00000380492 | 158747    | NM_152581    | MOSPD2       |
| A_21_P0007949  | 1,91348 | 1,6078  | 1,236001077 | N/A             | N/A       | N/A          | Inc-SCEL-1   |
| A_23_P106016   | 2,92312 | 2,61745 | 1,235992509 | ENST00000331968 | 5587      | NM_002742    | PRKD1        |
| A_33_P3299898  | 9,71368 | 9,40801 | 1,235992509 | ENST00000580501 | 1517      | NR_033407    | CTSLP2       |
| A_33_P3316052  | 5,20725 | 4,90181 | 1,235795478 | ENST00000380319 | 11238     | N/A          | CA5B         |
| A_33_P3316348  | 6,70908 | 6,40364 | 1,235795478 | N/A             | N/A       | N/A          | N/A          |
| A_24_P288954   | 8,8665  | 8,56112 | 1,235744084 | ENST00000477945 | 402055    | NM_001013694 | SRRD         |
| A_23_P335495   | 5,76856 | 5,46325 | 1,235684127 | ENST00000487192 | 50636     | NM_001001891 | ANO7         |
| A_21_P0014571  | 2,99746 | 2,69222 | 1,235624173 | N/A             | N/A       | AK126526     | Inc-NT5DC3-1 |
| A_24_P111134   | 9,9606  | 9,65536 | 1,235624173 | ENST00000452340 | 29954     | NM_013382    | POMT2        |

|                |         |         |             |                 |           |              |                |
|----------------|---------|---------|-------------|-----------------|-----------|--------------|----------------|
| A_32_P212095   | 4,61202 | 4,30679 | 1,235615608 | ENST00000590148 | 284067    | NM_001136483 | C17orf105      |
| A_21_P0014061  | 7,06163 | 6,75646 | 1,235564221 | N/A             | 400797    | XR_241155    | LINC00083      |
| A_23_P128375   | 6,59202 | 6,28687 | 1,235547093 | ENST00000358906 | 84915     | NM_032829    | FAM222A        |
| A_23_P71316    | 10,3161 | 10,011  | 1,235504273 | ENST00000522708 | 11030     | NM_001008712 | RBPMS          |
| A_33_P3366028  | 3,62873 | 3,32375 | 1,235401511 | ENST00000217320 | 140711    | NM_080628    | TLDC2          |
| A_23_P76322    | 5,50596 | 5,20109 | 1,23530732  | ENST00000546003 | 5288      | NM_004570    | PIK3C2G        |
| A_22_P00010508 | 8,60153 | 8,29671 | 1,235264508 | ENST00000428035 | N/A       | N/A          | N/A            |
| A_33_P3375910  | 4,97077 | 4,666   | 1,235221698 | N/A             | N/A       | N/A          | N/A            |
| A_22_P00018910 | 3,72067 | 3,41591 | 1,235213136 | N/A             | N/A       | N/A          | Inc-LAMA1-5    |
| A_23_P114095   | 7,20579 | 6,90103 | 1,235213136 | ENST00000379484 | 51360     | NM_015884    | MBTPS2         |
| A_33_P3296687  | 4,79211 | 4,48747 | 1,235110398 | ENST00000007735 | 3883      | NM_004138    | KRT33A         |
| A_33_P3299525  | 8,83576 | 8,53117 | 1,235067593 | ENST00000340067 | 283219    | NM_001029859 | KCTD21         |
| A_24_P329924   | 8,44304 | 8,13848 | 1,235041911 | ENST00000375300 | 23387     | NM_025164    | SIK3           |
| A_23_P25097    | 11,0795 | 10,775  | 1,234990548 | ENST00000446587 | 84298     | NM_032338    | LLPH           |
| A_23_P96641    | 8,27109 | 7,9666  | 1,234981988 | ENST00000380668 | 5634      | NM_001039091 | PRPS2          |
| A_23_P165414   | 7,63163 | 7,32719 | 1,234939187 | ENST00000272797 | 151230    | NM_144711    | KLHL23         |
| A_22_P00019232 | 1,9772  | 1,67289 | 1,234827913 | N/A             | 102724153 | NR_110552    | LOC102724153   |
| A_23_P129188   | 9,94671 | 9,64242 | 1,234810795 | ENST00000467889 | 91860     | NM_033429    | CALML4         |
| A_21_P0014553  | 10,1041 | 9,79982 | 1,234802236 | ENST00000620237 | 503639    | BC013389     | DUXAP10        |
| A_23_P319565   | 7,49002 | 7,18574 | 1,234802236 | ENST00000374127 | 267004    | NM_170753    | PGBD3          |
| A_32_P108655   | 12,7771 | 12,4729 | 1,234733765 | ENST00000327299 | 205       | NM_001005353 | AK4            |
| A_22_P00008534 | 1,9463  | 1,64214 | 1,234699532 | ENST00000556546 | N/A       | N/A          | N/A            |
| A_21_P0005565  | 7,1189  | 6,81476 | 1,234682415 | N/A             | N/A       | N/A          | Inc-VKORC1L1-1 |
| A_33_P3287690  | 5,12681 | 4,82273 | 1,234631067 | ENST00000551483 | 4848      | AK129966     | CNOT2          |
| A_19_P00316415 | 7,17216 | 6,86815 | 1,234571164 | N/A             | N/A       | N/A          | Inc-ERP44-3    |
| A_33_P3339311  | 5,97778 | 5,67382 | 1,234528378 | ENST00000261396 | 55746     | BX387507     | NUP133         |
| A_23_P318039   | 6,72435 | 6,42045 | 1,234477037 | ENST00000542068 | 9125      | NM_005444    | RQCD1          |
| A_23_P343935   | 10,0245 | 9,72063 | 1,234451367 | ENST00000476717 | 54583     | NM_022051    | EGLN1          |
| A_32_P230196   | 6,46447 | 6,1606  | 1,234451367 | ENST00000413193 | 642517    | NM_001190810 | AGAP9          |
| A_22_P00005585 | 7,33044 | 7,02657 | 1,234451367 | ENST00000506037 | 55974     | BC069245     | SLC50A1        |
| A_23_P15101    | 6,21242 | 5,90855 | 1,234451367 | ENST00000574033 | 79838     | NM_024780    | TMC5           |
| A_23_P30050    | 9,08904 | 8,78522 | 1,234408584 | ENST00000264451 | 10463     | NM_006345    | SLC30A9        |
| A_23_P106562   | 9,00735 | 8,70354 | 1,234400028 | ENST00000568613 | 2588      | NM_000512    | GALNS          |

|                |         |         |             |                 |           |              |                      |
|----------------|---------|---------|-------------|-----------------|-----------|--------------|----------------------|
| A_23_P79942    | 12,3324 | 12,0286 | 1,234391472 | ENST00000610179 | 80025     | NM_153638    | PANK2                |
| A_23_P91552    | 2,13281 | 1,82901 | 1,234391472 | ENST00000397746 | 10841     | NM_206965    | FTCD                 |
| A_21_P0012676  | 5,27569 | 4,97192 | 1,234365804 | ENST00000505994 | 2713      | N/A          | GK3P                 |
| A_33_P3354771  | 7,66525 | 7,36152 | 1,23433158  | ENST00000591566 | 729991    | AK057161     | MEF2BNB              |
| A_33_P3415052  | 12,0974 | 11,7937 | 1,234305914 | N/A             | 348938    | NM_001172292 | NIPAL4               |
| A_21_P0011731  | 11,0492 | 10,7455 | 1,234305914 | ENST00000596989 | 388523    | NM_001267716 | ZNF728               |
| A_33_P3272808  | 4,42814 | 4,12444 | 1,234305914 | ENST00000254630 | 55037     | NM_017952    | PTCD3                |
| A_22_P00003043 | 5,83215 | 5,52854 | 1,234228916 | ENST00000436714 | N/A       | N/A          | N/A                  |
| A_33_P3401317  | 4,78563 | 4,48209 | 1,234169032 | N/A             | 641455    | NM_001145442 | POTEM                |
| A_33_P3351999  | 9,13412 | 8,83068 | 1,234083489 | N/A             | N/A       | N/A          | N/A                  |
| A_21_P0014285  | 8,50965 | 8,20621 | 1,234083489 | ENST00000550223 | 100506465 | NR_110026    | LINC01234            |
| A_23_P202345   | 8,52231 | 8,21889 | 1,234066381 | ENST00000373783 | 84890     | NM_032804    | ADO                  |
| A_22_P00010161 | 2,27714 | 1,97374 | 1,234049273 | N/A             | 101928696 | NR_121196    | LOC101928696         |
| A_21_P0001011  | 6,52983 | 6,22644 | 1,23404072  | N/A             | N/A       | N/A          | Inc-RP3-377D14.1.1-4 |
| A_33_P3329549  | 9,80506 | 9,50179 | 1,233938079 | ENST00000543786 | 64319     | NM_001105079 | FBRS                 |
| A_23_P255916   | 10,294  | 9,99075 | 1,233920973 | ENST00000484134 | 285367    | NM_173659    | RPUSD3               |
| A_21_P0006511  | 8,64173 | 8,3385  | 1,233903868 | N/A             | N/A       | N/A          | Inc-HTR2C-1          |
| A_23_P129221   | 11,6279 | 11,3247 | 1,23387821  | ENST00000561421 | 2184      | NM_000137    | FAH                  |
| A_33_P3839760  | 13,9074 | 13,6042 | 1,23387821  | ENST00000485191 | 55009     | NM_017914    | C19orf24             |
| A_24_P765552   | 2,99023 | 2,68713 | 1,233792687 | N/A             | 100128644 | AY358240     | LOC100128644         |
| A_23_P6891     | 10,4881 | 10,185  | 1,233792687 | ENST00000232905 | 10289     | NM_005875    | EIF1B                |
| A_33_P3379669  | 7,98776 | 7,68472 | 1,233741376 | ENST00000392827 | 727800    | NM_031297    | RNF208               |
| A_24_P158065   | 11,178  | 10,875  | 1,23370717  | ENST00000481407 | 257415    | NM_001040057 | FAM133B              |
| A_23_P42829    | 14,7194 | 14,4164 | 1,23370717  | ENST00000354725 | 27044     | NM_014390    | SND1                 |
| A_21_P0000934  | 2,95257 | 2,64959 | 1,233690067 | ENST00000421157 | 100996251 | NR_103777    | LOC100996251         |
| A_21_P0005919  | 4,77168 | 4,46872 | 1,233672965 | N/A             | N/A       | N/A          | Inc-FBXO25-4         |
| A_22_P00006860 | 1,98484 | 1,68188 | 1,233672965 | ENST00000380722 | 100506731 | XR_110231    | LOC100506731         |
| A_23_P148519   | 12,4481 | 12,1453 | 1,233536154 | ENST00000593751 | 29057     | NM_014138    | FAM156A              |
| A_21_P0012136  | 2,37673 | 2,07398 | 1,233493403 | N/A             | N/A       | N/A          | XL0C_I2_008755       |
| A_23_P110606   | 8,57456 | 8,27182 | 1,233484853 | ENST00000292599 | 9794      | NM_014757    | MAML1                |
| A_33_P3274618  | 7,44809 | 7,14538 | 1,233459204 | ENST00000427210 | 731275    | NR_029401    | LINC01347            |
| A_24_P203710   | 11,8593 | 11,5566 | 1,233450654 | ENST00000319725 | 8939      | NM_003934    | FUBP3                |
| A_23_P97123    | 6,59034 | 6,2878  | 1,233313868 | ENST00000604892 | 84832     | NR_026844    | ANKRD36BP1           |

|                |         |         |             |                 |           |              |                |
|----------------|---------|---------|-------------|-----------------|-----------|--------------|----------------|
| A_21_P0007187  | 2,03598 | 1,73346 | 1,233296771 | N/A             | N/A       | N/A          | Inc-ANO5-2     |
| A_21_P0014171  | 3,84256 | 3,54005 | 1,233288222 | N/A             | 81688     | XM_005249433 | C6orf62        |
| A_23_P123164   | 4,29316 | 3,99074 | 1,233211288 | ENST00000496192 | 89883     | NR_002140    | OR6W1P         |
| A_23_P390734   | 9,09531 | 8,79291 | 1,233194192 | ENST00000229395 | 26127     | NM_015633    | FGFR1OP2       |
| A_33_P3356926  | 6,69523 | 6,39285 | 1,233177097 | ENST00000513507 | 10307     | NM_133174    | APBB3          |
| A_33_P3357651  | 8,24227 | 7,94    | 1,233083075 | ENST00000618832 | 386685    | NM_198699    | KRTAP10-12     |
| A_33_P3374504  | 5,41807 | 5,11585 | 1,23304034  | ENST00000334363 | 10587     | NM_001282512 | TXNRD2         |
| A_22_P00002661 | 2,79317 | 2,49096 | 1,233031794 | ENST00000577528 | 100506985 | N/A          | LOC100506985   |
| A_22_P00000343 | 3,88747 | 3,58536 | 1,232946329 | N/A             | 101928915 | XR_242359    | LOC101928915   |
| A_33_P3315779  | 7,49346 | 7,19137 | 1,232929237 | ENST00000273960 | 55008     | NM_001165136 | HERC6          |
| A_22_P00015395 | 5,66526 | 5,36318 | 1,232920691 | ENST00000573220 | N/A       | N/A          | N/A            |
| A_21_P0013940  | 1,94506 | 1,64313 | 1,232792509 | N/A             | N/A       | AK304854     | N/A            |
| A_23_P202978   | 13,1462 | 12,8443 | 1,232766874 | ENST00000534497 | 834       | NM_033292    | CASP1          |
| A_33_P3253723  | 5,74767 | 5,4458  | 1,232741239 | ENST00000311813 | 358       | NM_198098    | AQP1           |
| A_24_P382765   | 12,277  | 11,9752 | 1,232681428 | ENST00000401959 | 4809      | NM_005008    | NHP2L1         |
| A_33_P3237403  | 8,12162 | 7,81991 | 1,232604531 | ENST00000358296 | 163227    | NM_173531    | ZNF100         |
| A_23_P104509   | 5,23871 | 4,93702 | 1,232587444 | ENST00000494792 | 9679      | NM_014661    | FAM53B         |
| A_23_P164468   | 8,88074 | 8,57909 | 1,23255327  | ENST00000262198 | 22850     | NM_014913    | ADNP2          |
| A_33_P3365845  | 6,66709 | 6,36546 | 1,232536183 | N/A             | N/A       | N/A          | N/A            |
| A_33_P3221960  | 6,72117 | 6,41955 | 1,23252764  | ENST00000264260 | 8807      | NM_003853    | IL18RAP        |
| A_21_P0007902  | 3,2971  | 2,99552 | 1,232493467 | ENST00000546180 | 101927637 | N/A          | LOC101927637   |
| A_24_P2948     | 10,212  | 9,91043 | 1,232484925 | ENST00000462780 | 23623     | NM_014328    | RUSC1          |
| A_22_P00016998 | 6,7406  | 6,43913 | 1,232399498 | ENST00000454482 | 257203    | NR_026719    | DSCR9          |
| A_23_P76159    | 10,291  | 9,98956 | 1,232373871 | ENST00000322349 | 8411      | NM_003566    | EEA1           |
| A_33_P3299754  | 7,9666  | 7,66525 | 1,232296994 | ENST00000423465 | 22931     | NM_001256412 | RAB18          |
| A_21_P0008013  | 4,29289 | 3,99159 | 1,232254287 | N/A             | N/A       | N/A          | Inc-SLITRK6-12 |
| A_24_P32692    | 1,95885 | 1,65756 | 1,232245746 | ENST00000360774 | 140803    | NM_017662    | TRPM6          |
| A_21_P0010804  | 2,2766  | 1,97536 | 1,23220304  | ENST00000420049 | N/A       | N/A          | N/A            |
| A_33_P3248024  | 5,7432  | 5,44198 | 1,232185958 | N/A             | 285033    | NR_046322    | STARD7-AS1     |
| A_33_P3252915  | 8,54978 | 8,24858 | 1,232168876 | ENST00000498828 | 9616      | NR_037702    | RNF7           |
| A_32_P101844   | 7,77864 | 7,4775  | 1,232117633 | ENST00000413087 | N/A       | N/A          | N/A            |
| A_33_P3368159  | 2,36827 | 2,06714 | 1,232109093 | ENST00000360672 | 84174     | NM_032214    | SLA2           |
| A_22_P00018819 | 2,1088  | 1,80768 | 1,232100552 | N/A             | N/A       | N/A          | Inc-SPPL3.1-1  |

|                |         |         |             |                 |           |              |                 |
|----------------|---------|---------|-------------|-----------------|-----------|--------------|-----------------|
| A_21_P0011675  | 13,8938 | 13,5927 | 1,232083472 | ENST00000431702 | N/A       | N/A          | N/A             |
| A_23_P501849   | 16,6328 | 16,3318 | 1,231998073 | ENST00000562879 | 6137      | NM_033251    | RPL13           |
| A_22_P00010004 | 4,91012 | 4,60919 | 1,231938298 | ENST00000572159 | N/A       | XR_243721    | N/A             |
| A_23_P414211   | 5,25295 | 4,95205 | 1,231912681 | ENST00000341640 | 5078      | NM_006193    | PAX4            |
| A_21_P0007029  | 4,7423  | 4,44141 | 1,231904142 | ENST00000419400 | 399821    | N/A          | FLJ37035        |
| A_22_P00012393 | 1,82842 | 1,52759 | 1,231852909 | N/A             | N/A       | N/A          | Inc-PRKAG2-1    |
| A_33_P3231086  | 4,51133 | 4,21051 | 1,231844371 | N/A             | N/A       | N/A          | N/A             |
| A_23_P76291    | 9,86773 | 9,56694 | 1,231818756 | ENST00000539179 | 11272     | NM_007244    | PRR4            |
| A_21_P0006876  | 3,77348 | 3,4727  | 1,231810217 | N/A             | N/A       | N/A          | Inc-C10orf107-1 |
| A_22_P00007733 | 4,78892 | 4,48816 | 1,231793141 | ENST00000522028 | N/A       | N/A          | N/A             |
| A_23_P70688    | 6,61435 | 6,31369 | 1,231707763 | ENST00000379953 | 9450      | NM_004271    | LY86            |
| A_23_P253932   | 11,3553 | 11,0547 | 1,231656538 | ENST00000464668 | 55179     | NM_001033030 | FAIM            |
| A_22_P00005871 | 6,36157 | 6,06098 | 1,231648001 | N/A             | N/A       | BX099285     | Inc-ESCO1-2     |
| A_23_P24215    | 7,64377 | 7,34318 | 1,231648001 | ENST00000225235 | 23232     | NM_015188    | TBC1D12         |
| A_23_P30315    | 12,9065 | 12,606  | 1,231571169 | ENST00000334421 | 81786     | NM_033342    | TRIM7           |
| A_21_P0010061  | 1,97071 | 1,67023 | 1,231554096 | N/A             | N/A       | N/A          | Inc-CBLN4-3     |
| A_23_P101342   | 8,26077 | 7,9603  | 1,23154556  | ENST00000586417 | 84971     | NM_032885    | ATG4D           |
| A_33_P3388618  | 9,75588 | 9,45543 | 1,231528487 | ENST00000576812 | 8711      | NM_001251902 | TNK1            |
| A_33_P3237413  | 10,0495 | 9,74906 | 1,231519951 | N/A             | N/A       | AK124190     | N/A             |
| A_22_P00003927 | 6,79968 | 6,49929 | 1,23147727  | N/A             | N/A       | BC015447     | Inc-CETP-1      |
| A_23_P214681   | 5,0129  | 4,71254 | 1,231451663 | ENST00000337400 | 5467      | NM_006238    | PPARD           |
| A_32_P16489    | 9,59536 | 9,295   | 1,231451663 | ENST00000467840 | 51318     | NM_145644    | MRPL35          |
| A_23_P142918   | 7,96529 | 7,66496 | 1,231426056 | ENST00000319974 | 205327    | NM_153689    | C2orf69         |
| A_21_P0004728  | 2,86464 | 2,56432 | 1,23141752  | ENST00000491317 | 221718    | NR_027793    | LINC00518       |
| A_33_P3213089  | 6,38829 | 6,08799 | 1,231400449 | ENST00000565670 | N/A       | N/A          | N/A             |
| A_21_P0004621  | 5,0215  | 4,72128 | 1,231332168 | ENST00000440168 | N/A       | N/A          | N/A             |
| A_23_P209320   | 11,1173 | 10,8171 | 1,231315098 | ENST00000254657 | 8864      | NM_022817    | PER2            |
| A_33_P3395688  | 7,09844 | 6,79833 | 1,231238287 | ENST00000380568 | 100820829 | NM_001018100 | MYZAP           |
| A_23_P87500    | 13,8971 | 13,597  | 1,231229753 | ENST00000548974 | 29095     | NM_014182    | ORMDL2          |
| A_33_P3222769  | 10,2901 | 9,99    | 1,231229753 | ENST00000301698 | 388199    | NM_001013638 | PRR25           |
| A_33_P3292896  | 7,8891  | 7,58901 | 1,231221219 | ENST00000463277 | 94097     | NM_144579    | SFXN5           |
| A_23_P334990   | 11,0639 | 10,7639 | 1,231144413 | ENST00000543473 | 64426     | NM_022491    | SUDS3           |
| A_33_P3377391  | 3,94836 | 3,64836 | 1,231144413 | ENST00000564843 | 101928611 | NR_120337    | LINC01413       |



|                |         |         |             |                 |           |              |                |
|----------------|---------|---------|-------------|-----------------|-----------|--------------|----------------|
| A_33_P3248615  | 7,61794 | 7,31795 | 1,23113588  | N/A             | N/A       | N/A          | N/A            |
| A_21_P0006931  | 1,94044 | 1,64051 | 1,231084679 | N/A             | N/A       | N/A          | Inc-GPR26-3    |
| A_24_P380919   | 13,3134 | 13,0135 | 1,23105908  | ENST00000351839 | 3190      | NM_002140    | HNRNPK         |
| A_33_P3299781  | 9,17779 | 8,87791 | 1,231042014 | ENST00000380201 | 65992     | N/A          | DDR GK1        |
| A_24_P417352   | 2,67313 | 2,37327 | 1,231024948 | ENST00000610838 | 102725284 | BX161420     | LOC102725284   |
| A_21_P0013258  | 3,78003 | 3,48019 | 1,231007883 | N/A             | N/A       | N/A          | XLOC_I2_013532 |
| A_24_P254965   | 8,81665 | 8,51684 | 1,230982285 | ENST00000412342 | 55869     | NM_018486    | HDAC8          |
| A_33_P3378412  | 2,93298 | 2,63318 | 1,230973752 | N/A             | N/A       | N/A          | N/A            |
| A_23_P91250    | 8,848   | 8,54824 | 1,230939623 | ENST00000347606 | 55713     | NM_001270497 | ZNF334         |
| A_23_P147199   | 9,41886 | 9,11914 | 1,230905495 | ENST00000465539 | 10778     | NR_024565    | ZNF271P        |
| A_22_P00021833 | 4,34297 | 4,04327 | 1,230888431 | ENST00000434663 | 2934      | AK125819     | GSN            |
| A_24_P942370   | 5,97672 | 5,67708 | 1,230837241 | ENST00000548729 | 8693      | NM_003774    | GALNT4         |
| A_33_P3287105  | 7,05812 | 6,7585  | 1,230820178 | N/A             | N/A       | N/A          | N/A            |
| A_23_P58466    | 13,4827 | 13,1831 | 1,230803115 | ENST00000380707 | 6606      | NM_000344    | SMN1           |
| A_21_P0002441  | 3,88014 | 3,58056 | 1,230786053 | N/A             | N/A       | N/A          | Inc-C2orf63-1  |
| A_24_P34155    | 6,93259 | 6,63305 | 1,230751928 | ENST00000479325 | 861       | NM_001122607 | RUNX1          |
| A_33_P3394198  | 10,0673 | 9,76777 | 1,230743397 | ENST00000373228 | 2356      | NM_001018078 | FPGS           |
| A_23_P77661    | 9,58987 | 9,29047 | 1,230632501 | ENST00000542684 | 124411    | NM_001130913 | ZNF720         |
| A_21_P0000161  | 8,30107 | 8,00169 | 1,230615441 | N/A             | 79650     | NM_001204911 | USB1           |
| A_22_P00025031 | 1,91408 | 1,61475 | 1,230572792 | ENST00000412722 | N/A       | N/A          | N/A            |
| A_22_P00007110 | 2,78863 | 2,4893  | 1,230572792 | N/A             | N/A       | N/A          | Inc-GLTP-1     |
| A_22_P00003119 | 2,8278  | 2,52858 | 1,230478969 | N/A             | 100506599 | N/A          | PPP1R26-AS1    |
| A_22_P00000102 | 14,825  | 14,5258 | 1,230461911 | ENST00000520619 | 641638    | NR_002599    | SNHG6          |
| A_33_P3324228  | 3,32165 | 3,02247 | 1,230444853 | ENST00000600892 | 732275    | N/A          | LINC00917      |
| A_22_P00011182 | 4,37063 | 4,07153 | 1,230376625 | N/A             | 102723466 | XR_424708    | LOC102723466   |
| A_33_P3279431  | 9,87926 | 9,5802  | 1,230342512 | ENST00000225724 | 9527      | NM_001007024 | GOSR1          |
| A_23_P77993    | 3,91914 | 3,62009 | 1,230333984 | ENST00000253407 | 10882     | AF095154     | C1QL1          |
| A_33_P3258712  | 7,75921 | 7,46018 | 1,230316928 | N/A             | 101928000 | XR_243583    | LOC101928000   |
| A_21_P0012576  | 2,0534  | 1,75445 | 1,230248707 | ENST00000503017 | N/A       | N/A          | N/A            |
| A_33_P3337019  | 9,83646 | 9,53761 | 1,230163435 | N/A             | 728975    | XR_247237    | LOC728975      |
| A_23_P28068    | 8,97785 | 8,67921 | 1,229984385 | ENST00000361619 | 84705     | NM_133644    | GTPBP3         |
| A_21_P0001781  | 2,0798  | 1,78116 | 1,229984385 | ENST00000435411 | 101927156 | XR_241361    | LOC101927156   |
| A_33_P3394075  | 6,23573 | 5,93711 | 1,229967334 | ENST00000368323 | 6016      | NM_006912    | RIT1           |

|                |         |         |             |                 |           |              |              |
|----------------|---------|---------|-------------|-----------------|-----------|--------------|--------------|
| A_22_P00009933 | 2,06344 | 1,76486 | 1,229933232 | ENST00000476130 | N/A       | N/A          | N/A          |
| A_24_P419177   | 5,86868 | 5,57015 | 1,229890607 | ENST00000264447 | 27332     | NM_014497    | ZNF638       |
| A_23_P68087    | 11,6767 | 11,3782 | 1,229865032 | ENST00000479093 | 471       | NM_004044    | ATIC         |
| A_22_P00009162 | 6,95129 | 6,65279 | 1,229865032 | ENST00000341547 | 4008      | NM_005358    | LMO7         |
| A_21_P0013178  | 3,96005 | 3,66162 | 1,22980536  | N/A             | 102659288 | N/A          | LOC102659288 |
| A_21_P0002442  | 2,23194 | 1,93363 | 1,229703072 | N/A             | N/A       | N/A          | Inc-FANCL-2  |
| A_22_P00011391 | 5,65417 | 5,35595 | 1,229626362 | N/A             | 728448    | NR_003929    | PPIEL        |
| A_33_P3373892  | 8,58823 | 8,29009 | 1,229558179 | ENST00000376040 | 60560     | AK056059     | NAA35        |
| A_23_P150325   | 8,57198 | 8,2739  | 1,229507044 | ENST00000303130 | 83935     | NM_032021    | TMEM133      |
| A_23_P125705   | 1,89981 | 1,60173 | 1,229507044 | ENST00000373517 | 4674      | NM_021963    | NAP1L2       |
| A_21_P0008913  | 4,31133 | 4,01328 | 1,229481477 | ENST00000567395 | N/A       | N/A          | N/A          |
| A_22_P00017888 | 6,84175 | 6,5437  | 1,229481477 | N/A             | N/A       | N/A          | Inc-ZFAT-3   |
| A_22_P00004696 | 5,44341 | 5,1454  | 1,229447389 | ENST00000617875 | 9401      | NM_004260    | RECQL4       |
| A_23_P211227   | 7,5096  | 7,21168 | 1,229370695 | ENST00000615172 | 23275     | NM_133635    | POFUT2       |
| A_24_P56689    | 8,6091  | 8,31131 | 1,229259922 | ENST00000219091 | 7755      | NM_003456    | ZNF205       |
| A_33_P3228609  | 6,54025 | 6,24252 | 1,2292088   | ENST00000444323 | 440894    | NR_046110    | LINC01123    |
| A_23_P145153   | 11,3558 | 11,0581 | 1,229183239 | ENST00000539212 | 5134      | NM_002598    | PDCD2        |
| A_22_P00022579 | 4,54715 | 4,24952 | 1,2291236   | ENST00000506911 | N/A       | N/A          | N/A          |
| A_22_P00024203 | 4,14845 | 3,85084 | 1,229106561 | N/A             | N/A       | N/A          | Inc-USP31-1  |
| A_23_P146084   | 10,3809 | 10,0833 | 1,229098042 | ENST00000221130 | 2936      | NM_000637    | GSR          |
| A_33_P3406866  | 6,4759  | 6,17842 | 1,228995812 | ENST00000404907 | 23114     | NM_001005388 | NFASC        |
| A_21_P0001037  | 5,18987 | 4,89244 | 1,228953219 | ENST00000444887 | N/A       | N/A          | N/A          |
| A_19_P00318775 | 3,15453 | 2,85714 | 1,228919146 | ENST00000553416 | 348120    | N/A          | LINC01193    |
| A_21_P0003219  | 6,91744 | 6,62008 | 1,228893592 | N/A             | N/A       | N/A          | Inc-OXNAD1-1 |
| A_23_P323783   | 9,27521 | 8,97785 | 1,228893592 | ENST00000279068 | 149986    | NM_144703    | LSM14B       |
| A_21_P0000243  | 8,28716 | 7,98992 | 1,228791379 | N/A             | 26807     | NR_002439    | SNORD43      |
| A_33_P3320079  | 7,60145 | 7,30421 | 1,228791379 | ENST00000380953 | 4781      | NM_005596    | NFIB         |
| A_21_P0014633  | 4,71153 | 4,41436 | 1,22873176  | ENST00000432038 | 100505824 | XR_111915    | LOC100505824 |
| A_21_P0010713  | 4,81437 | 4,51721 | 1,228723243 | N/A             | N/A       | N/A          | Inc-PROK1-1  |
| A_24_P365901   | 5,86521 | 5,56805 | 1,228723243 | ENST00000486685 | 340348    | NM_178562    | TSPAN33      |
| A_19_P00322599 | 8,78029 | 8,48321 | 1,22865511  | ENST00000406486 | 85379     | NM_001145206 | KIAA1671     |
| A_33_P3229472  | 4,08142 | 3,78443 | 1,228578465 | ENST00000619191 | 387273    | NM_001012710 | KRTAP5-10    |
| A_21_P0011394  | 3,0836  | 2,78665 | 1,228544402 | ENST00000524476 | 440248    | N/A          | HERC2P9      |

|                |         |         |             |                 |           |              |                |
|----------------|---------|---------|-------------|-----------------|-----------|--------------|----------------|
| A_22_P00014648 | 2,29552 | 1,99858 | 1,228535886 | N/A             | 101929330 | XR_242525    | LOC101929330   |
| A_33_P3416762  | 12,955  | 12,6581 | 1,228501824 | ENST00000618741 | 10434     | NM_006330    | LYPLA1         |
| A_21_P0008232  | 2,26607 | 1,96925 | 1,228433704 | N/A             | N/A       | N/A          | Inc-TNFRSF19-1 |
| A_24_P310616   | 10,4647 | 10,1679 | 1,228416674 | ENST00000445167 | 7355      | NM_001042498 | SLC35A2        |
| A_33_P3229177  | 13,2197 | 12,9231 | 1,228246391 | ENST00000473023 | 56655     | NM_019896    | POLE4          |
| A_22_P00012477 | 6,26524 | 5,96865 | 1,228237877 | ENST00000454232 | 401052    | NM_001008737 | LOC401052      |
| A_23_P79628    | 9,84518 | 9,54859 | 1,228237877 | ENST00000488687 | 23198     | NM_014614    | PSME4          |
| A_24_P144620   | 8,01276 | 7,71629 | 1,22813572  | ENST00000546650 | 729515    | NM_018452    | TMEM242        |
| A_33_P3291619  | 5,34776 | 5,05132 | 1,228110182 | ENST00000399868 | 399715    | NR_040079    | LOC399715      |
| A_33_P3412384  | 2,69575 | 2,39936 | 1,228067619 | ENST00000622511 | 4583      | NM_002457    | MUC2           |
| A_22_P00011835 | 4,50483 | 4,20845 | 1,228059107 | ENST00000559030 | N/A       | BX537873     | N/A            |
| A_23_P350172   | 9,99075 | 9,69439 | 1,228042083 | ENST00000299563 | 254225    | NM_001098638 | RNF169         |
| A_22_P00018579 | 7,35287 | 7,05655 | 1,228008035 | ENST00000429099 | N/A       | N/A          | N/A            |
| A_33_P3267208  | 8,34869 | 8,05241 | 1,227973987 | ENST00000303052 | 53944     | NM_022048    | CSNK1G1        |
| A_23_P13271    | 4,30071 | 4,00443 | 1,227973987 | ENST00000527486 | N/A       | N/A          | N/A            |
| A_24_P330303   | 11,9926 | 11,6964 | 1,227905896 | ENST00000557522 | 122786    | NM_001042481 | FRMD6          |
| A_23_P32785    | 8,60282 | 8,30663 | 1,227897385 | ENST00000318887 | 285237    | NM_173824    | C3orf38        |
| A_33_P3307144  | 2,75693 | 2,46076 | 1,227880363 | ENST00000487161 | 2898      | NM_021956    | GRIK2          |
| A_33_P3276784  | 5,43979 | 5,14366 | 1,227846319 | ENST00000623013 | N/A       | N/A          | N/A            |
| A_32_P516342   | 7,30672 | 7,01065 | 1,227795255 | ENST00000548383 | 341405    | NM_182608    | ANKRD33        |
| A_23_P406105   | 14,1444 | 13,8484 | 1,227735684 | ENST00000300648 | 10985     | NM_006836    | GCN1L1         |
| A_32_P69930    | 9,03768 | 8,7417  | 1,227718664 | ENST00000310085 | 257236    | NM_153376    | CCDC96         |
| A_23_P6869     | 7,9189  | 7,62292 | 1,227718664 | ENST00000266025 | 11070     | NM_007024    | TMEM115        |
| A_33_P3294509  | 15,0937 | 14,7978 | 1,227650587 | ENST00000263398 | 960       | NM_000610    | CD44           |
| A_23_P164284   | 13,5241 | 13,2283 | 1,227565495 | ENST00000397317 | 1366      | NM_001307    | CLDN7          |
| A_24_P110914   | 10,8524 | 10,5566 | 1,227565495 | N/A             | 100190939 | NR_024458    | TPT1-AS1       |
| A_21_P0013234  | 10,0267 | 9,73091 | 1,227556987 | N/A             | N/A       | N/A          | XLOC_I2_013460 |
| A_19_P00806193 | 3,00122 | 2,70543 | 1,227556987 | N/A             | N/A       | N/A          | Inc-IL6-3      |
| A_24_P826485   | 6,62374 | 6,32803 | 1,227488918 | N/A             | N/A       | AF034176     | Inc-HMGA1-3    |
| A_33_P3396891  | 12,2177 | 11,922  | 1,22748041  | ENST00000370626 | 60370     | NM_021732    | AVPI1          |
| A_33_P3839820  | 2,07644 | 1,78074 | 1,22748041  | ENST00000589708 | 101928538 | XR_243761    | LOC101928538   |
| A_33_P3282394  | 12,5012 | 12,2055 | 1,22748041  | ENST00000252674 | 4298      | NM_005934    | MLLT1          |
| A_24_P145122   | 8,48939 | 8,19375 | 1,227429362 | ENST00000367142 | 64710     | NM_022731    | NUCKS1         |

|                |         |         |             |                 |           |              |                |
|----------------|---------|---------|-------------|-----------------|-----------|--------------|----------------|
| A_33_P3248664  | 11,683  | 11,3874 | 1,22739533  | ENST00000211402 | 7407      | NM_006295    | VAR5           |
| A_33_P3359900  | 9,49198 | 9,19641 | 1,227369808 | ENST00000303221 | 133418    | NM_198449    | EMB            |
| A_21_P0012119  | 3,33906 | 3,04358 | 1,227293243 | N/A             | N/A       | N/A          | XLOC_I2_008622 |
| A_21_P0010516  | 1,9486  | 1,65327 | 1,227165645 | N/A             | N/A       | N/A          | XLOC_I2_000080 |
| A_33_P3377786  | 7,17013 | 6,87484 | 1,227131621 | N/A             | N/A       | BC031259     | N/A            |
| A_32_P12610    | 8,04756 | 7,75233 | 1,227080588 | ENST00000471343 | 1876      | NM_198256    | E2F6           |
| A_24_P15621    | 10,799  | 10,5039 | 1,226970021 | ENST00000431994 | 386757    | NR_003083    | SLC6A10P       |
| A_21_P0008254  | 5,8971  | 5,60205 | 1,226927499 | N/A             | N/A       | N/A          | Inc-LCP1-1     |
| A_33_P3243502  | 6,26046 | 5,96542 | 1,226918994 | ENST00000544461 | 729732    | NR_047662    | LOC729732      |
| A_33_P3415395  | 7,17674 | 6,8817  | 1,226918994 | ENST00000434210 | 55304     | NM_018327    | SPTLC3         |
| A_21_P0000656  | 2,44062 | 2,14561 | 1,226893481 | ENST00000585044 | 79415     | NR_036519    | C17orf62       |
| A_21_P0005785  | 7,88178 | 7,58681 | 1,226859465 | N/A             | N/A       | N/A          | Inc-ERICH1-5   |
| A_22_P00004867 | 1,99614 | 1,70123 | 1,226808443 | ENST00000523769 | N/A       | XR_113143    | N/A            |
| A_24_P194881   | 8,08968 | 7,79478 | 1,226799939 | N/A             | 85358     | NM_033517    | SHANK3         |
| A_22_P00000870 | 5,05041 | 4,75552 | 1,226791436 | N/A             | N/A       | N/A          | Inc-AGRP-3     |
| A_21_P0003249  | 2,21573 | 1,92087 | 1,226765925 | N/A             | N/A       | N/A          | Inc-MCM2-1     |
| A_24_P159036   | 17,2687 | 16,9739 | 1,226714907 | ENST00000298289 | 6166      | NM_001001    | RPL36AL        |
| A_33_P3371889  | 2,34847 | 2,05371 | 1,226680895 | ENST00000261402 | 9891      | NM_014840    | NUAK1          |
| A_33_P3343526  | 2,45148 | 2,15675 | 1,226655388 | ENST00000279791 | 390162    | NM_001004743 | OR5M9          |
| A_21_P0004507  | 4,0661  | 3,77138 | 1,226646885 | N/A             | N/A       | N/A          | Inc-PIK3R1-1   |
| A_22_P00020797 | 2,03133 | 1,73666 | 1,226604373 | N/A             | N/A       | N/A          | Inc-TMEM126B-2 |
| A_22_P00000221 | 4,24212 | 3,94747 | 1,226587369 | N/A             | 102724366 | XR_424793    | LOC102724366   |
| A_21_P0010823  | 2,28874 | 1,99411 | 1,226570365 | N/A             | N/A       | N/A          | XLOC_I2_001569 |
| A_33_P3353190  | 5,50946 | 5,21489 | 1,226519355 | N/A             | 101930611 | XR_250546    | LOC101930611   |
| A_22_P00024000 | 3,09559 | 2,80105 | 1,22649385  | ENST00000553644 | N/A       | N/A          | N/A            |
| A_23_P385034   | 10,5412 | 10,2467 | 1,226459845 | ENST00000535432 | 1871      | NM_001949    | E2F3           |
| A_21_P0009975  | 3,30329 | 3,00887 | 1,226391838 | N/A             | N/A       | N/A          | Inc-MOCS3-3    |
| A_33_P3377269  | 3,08383 | 2,78942 | 1,226383337 | N/A             | N/A       | N/A          | N/A            |
| A_21_P0007545  | 7,6213  | 7,32689 | 1,226383337 | N/A             | N/A       | N/A          | Inc-ARID2-3    |
| A_21_P0009795  | 7,23716 | 6,94278 | 1,226357835 | N/A             | N/A       | N/A          | Inc-EPN1-1     |
| A_33_P3214436  | 4,68222 | 4,38794 | 1,226272833 | ENST00000367518 | 116461    | NR_023349    | TSEN15         |
| A_23_P211806   | 12,096  | 11,8018 | 1,226204836 | ENST00000460646 | 9209      | NM_017724    | LRRFIP2        |
| A_23_P108823   | 6,20753 | 5,91339 | 1,226153841 | ENST00000315022 | 114880    | NM_032523    | OSBPL6         |

|                |         |         |             |                 |           |              |              |
|----------------|---------|---------|-------------|-----------------|-----------|--------------|--------------|
| A_21_P0000581  | 7,23329 | 6,93918 | 1,226128344 | ENST00000610690 | 728407    | NR_029388    | PARGP1       |
| A_23_P83923    | 10,586  | 10,2919 | 1,226119845 | ENST00000306562 | 79894     | NM_024836    | ZNF672       |
| A_33_P3244013  | 6,29726 | 6,00316 | 1,226119845 | ENST00000434381 | 10529     | NM_006393    | NEBL         |
| A_23_P139297   | 12,268  | 11,9739 | 1,226119845 | ENST00000299413 | 54765     | NM_017583    | TRIM44       |
| A_21_P0000039  | 8,5211  | 8,22701 | 1,226111346 | ENST00000519857 | 23259     | NM_001164234 | DDHD2        |
| A_23_P115316   | 10,304  | 10,01   | 1,22603486  | ENST00000367627 | 64222     | NM_022371    | TOR3A        |
| A_33_P3339731  | 3,27136 | 2,9774  | 1,226000868 | N/A             | 100131170 | AK098403     | LOC100131170 |
| A_33_P3279610  | 5,69791 | 5,40397 | 1,225983872 | ENST00000287490 | 1339      | NM_005205    | COX6A2       |
| A_33_P6805502  | 4,1102  | 3,81633 | 1,225924388 | ENST00000436546 | 388387    | NR_027254    | LINC00671    |
| A_22_P00010463 | 4,34318 | 4,04936 | 1,225881902 | N/A             | N/A       | N/A          | Inc-NAIF1-1  |
| A_23_P92042    | 6,25996 | 5,96619 | 1,225839416 | ENST00000443694 | 3708      | NM_002222    | ITPR1        |
| A_23_P204609   | 10,1595 | 9,86576 | 1,225813926 | ENST00000261219 | 55591     | NM_017599    | VEZT         |
| A_21_P0007622  | 2,19053 | 1,89682 | 1,225788436 | N/A             | N/A       | N/A          | Inc-ASCL4-1  |
| A_32_P16258    | 8,93995 | 8,64632 | 1,225720466 | ENST00000272427 | 23233     | XM_005264223 | EXOC6B       |
| A_23_P323563   | 11,0227 | 10,7291 | 1,225694978 | ENST00000409797 | 64857     | NM_022835    | PLEKHG2      |
| A_23_P29555    | 14,4911 | 14,1975 | 1,225694978 | ENST00000479868 | 6396      | NM_183352    | SEC13        |
| A_33_P3380346  | 7,56322 | 7,26974 | 1,225593032 | ENST00000382888 | 7468      | NM_133330    | WHSC1        |
| A_33_P3371785  | 8,16285 | 7,86954 | 1,225448623 | ENST00000315456 | 1837      | NM_001128175 | DTNA         |
| A_23_P111753   | 13,868  | 13,5747 | 1,225440129 | ENST00000432845 | 64983     | NM_031903    | MRPL32       |
| A_23_P139143   | 9,26847 | 8,97518 | 1,225431634 | ENST00000300150 | 6809      | NM_004177    | STX3         |
| A_33_P3348395  | 1,86869 | 1,57541 | 1,22542314  | N/A             | 101929469 | XM_005253817 | LOC101929469 |
| A_22_P00019728 | 1,64841 | 1,35516 | 1,225397659 | N/A             | N/A       | BG198323     | Inc-FLRT1-1  |
| A_23_P501745   | 9,15089 | 8,8577  | 1,225346697 | ENST00000447513 | 5192      | NM_153818    | PEX10        |
| A_23_P500381   | 10,068  | 9,77483 | 1,22532971  | ENST00000336152 | 3363      | NM_019859    | HTR7         |
| A_22_P00007667 | 2,81018 | 2,51704 | 1,22530423  | ENST00000502101 | N/A       | N/A          | N/A          |
| A_24_P12626    | 16,1905 | 15,8975 | 1,225185332 | ENST00000451122 | 857       | NM_001753    | CAV1         |
| A_33_P3316379  | 13,5391 | 13,2461 | 1,225185332 | N/A             | N/A       | N/A          | N/A          |
| A_32_P54544    | 14,3304 | 14,0375 | 1,225100411 | ENST00000419314 | 908       | NM_001762    | CCT6A        |
| A_23_P66421    | 11,6238 | 11,3312 | 1,224845685 | ENST00000583834 | 26151     | NM_015654    | NAT9         |
| A_22_P00022179 | 4,76068 | 4,46817 | 1,224769278 | ENST00000477754 | 9181      | N/A          | ARHGEF2      |
| A_22_P00000195 | 4,52815 | 4,2357  | 1,224718342 | N/A             | N/A       | N/A          | Inc-ABI3-1   |
| A_22_P00025138 | 5,7093  | 5,41686 | 1,224709853 | ENST00000565136 | N/A       | DB049433     | N/A          |
| A_22_P00000659 | 2,25795 | 1,96551 | 1,224709853 | N/A             | N/A       | N/A          | Inc-ACTL7B-1 |

|                |         |         |             |                 |           |              |                |
|----------------|---------|---------|-------------|-----------------|-----------|--------------|----------------|
| A_22_P00005284 | 2,26744 | 1,97501 | 1,224701364 | ENST00000418387 | N/A       | N/A          | N/A            |
| A_23_P218770   | 14,004  | 13,7116 | 1,224675898 | ENST00000249071 | 5880      | NM_002872    | RAC2           |
| A_22_P00011189 | 4,14379 | 3,85143 | 1,224641943 | N/A             | N/A       | N/A          | Inc-OIT3-2     |
| A_23_P202408   | 8,71507 | 8,42274 | 1,224616477 | ENST00000480158 | 26091     | NM_001278185 | HERC4          |
| A_33_P3392677  | 8,86872 | 8,5764  | 1,224607989 | N/A             | N/A       | N/A          | N/A            |
| A_23_P412409   | 11,6598 | 11,3675 | 1,224591012 | ENST00000338920 | 23215     | NM_015172    | PRRC2C         |
| A_32_P23795    | 11,2078 | 10,9155 | 1,224591012 | N/A             | N/A       | N/A          | XLOC_I2_010916 |
| A_21_P0000472  | 7,40008 | 7,10781 | 1,224565548 | ENST00000582588 | 100124516 | NR_003701    | SNORD58C       |
| A_32_P18824    | 13,6567 | 13,3645 | 1,224506133 | ENST00000394689 | 29117     | NM_013263    | BRD7           |
| A_33_P3309636  | 13,362  | 13,0698 | 1,224506133 | ENST00000228136 | 10944     | NM_014267    | C11orf58       |
| A_24_P20383    | 8,9009  | 8,60872 | 1,224489158 | ENST00000467289 | 10093     | NM_005718    | ARPC4          |
| A_22_P00020703 | 3,68801 | 3,39591 | 1,22442126  | N/A             | N/A       | N/A          | Inc-GPR101-1   |
| A_21_P0000335  | 6,83786 | 6,54585 | 1,224344879 | ENST00000484998 | 677831    | NR_002981    | SNORA51        |
| A_33_P3217704  | 9,0596  | 8,76763 | 1,224310933 | ENST00000378566 | 80256     | NM_025182    | FAM214B        |
| A_22_P00007557 | 3,57423 | 3,28233 | 1,224251531 | ENST00000523792 | N/A       | BC041064     | N/A            |
| A_33_P3318368  | 4,09386 | 3,80197 | 1,224243045 | ENST00000512714 | 285489    | NM_001301071 | DOK7           |
| A_21_P0009758  | 5,10871 | 4,81684 | 1,224226073 | N/A             | N/A       | N/A          | Inc-C19orf12-1 |
| A_22_P00007367 | 2,72282 | 2,43095 | 1,224226073 | ENST00000430542 | N/A       | N/A          | N/A            |
| A_22_P00011073 | 5,30248 | 5,01068 | 1,224166675 | N/A             | N/A       | N/A          | Inc-NUB1-1     |
| A_23_P71591    | 12,6489 | 12,3571 | 1,224166675 | ENST00000544867 | 55035     | NM_017948    | NOL8           |
| A_22_P00017579 | 2,86253 | 2,57076 | 1,22414122  | N/A             | N/A       | BG184928     | Inc-WDR67-1    |
| A_33_P3317752  | 5,24306 | 4,95134 | 1,224098795 | ENST00000621138 | 100132476 | NM_033061    | KRTAP4-7       |
| A_33_P3255131  | 6,90365 | 6,61195 | 1,224081825 | ENST00000304372 | 146212    | NM_001100915 | KCTD19         |
| A_21_P0000252  | 9,80783 | 9,51615 | 1,224064856 | ENST00000487034 | 606500    | NR_002450    | SNORD68        |
| A_23_P359457   | 2,96769 | 2,67609 | 1,223996981 | ENST00000570791 | 146754    | NM_001303270 | DNAH2          |
| A_33_P3318187  | 10,3446 | 10,053  | 1,223996981 | ENST00000567035 | 92806     | NM_145039    | CENPBD1        |
| A_24_P101047   | 3,7691  | 3,47756 | 1,223946078 | ENST00000370733 | 57691     | NM_020931    | KIAA1586       |
| A_33_P3228642  | 6,34787 | 6,05638 | 1,22390366  | ENST00000594993 | N/A       | XM_005258631 | N/A            |
| A_23_P59528    | 10,7584 | 10,467  | 1,223827311 | ENST00000479853 | 57001     | NM_020186    | ACN9           |
| A_22_P00005720 | 10,2801 | 9,98883 | 1,223717038 | N/A             | N/A       | N/A          | Inc-ELTD1-6    |
| A_21_P0009195  | 6,64619 | 6,35496 | 1,22368311  | N/A             | N/A       | N/A          | Inc-PHB-2      |
| A_23_P162879   | 12,6553 | 12,3641 | 1,223657664 | ENST00000489117 | 84334     | NM_032374    | APOPT1         |
| A_32_P108474   | 9,3662  | 9,07506 | 1,223606775 | ENST00000296577 | 6059      | NM_002940    | ABCE1          |

|                |         |         |             |                 |           |              |                |
|----------------|---------|---------|-------------|-----------------|-----------|--------------|----------------|
| A_33_P3375170  | 3,80449 | 3,51336 | 1,223598294 | N/A             | 100131242 | AK124483     | LOC100131242   |
| A_22_P00009529 | 3,64096 | 3,34985 | 1,223581331 | ENST00000440955 | 101927501 | NR_110387    | LOC101927501   |
| A_22_P00021287 | 2,52546 | 2,2344  | 1,223538926 | ENST00000366308 | 255654    | N/A          | LOC255654      |
| A_32_P93187    | 7,97736 | 7,6863  | 1,223538926 | ENST00000573479 | 8467      | NM_003601    | SMARCA5        |
| A_21_P0011318  | 1,94374 | 1,65269 | 1,223530445 | N/A             | N/A       | N/A          | XLOC_I2_004640 |
| A_22_P00017637 | 2,06265 | 1,77171 | 1,223437159 | ENST00000531538 | N/A       | AA444375     | N/A            |
| A_24_P98975    | 10,5002 | 10,2093 | 1,223403238 | ENST00000553251 | 88455     | NM_033121    | ANKRD13A       |
| A_23_P64785    | 8,41413 | 8,12337 | 1,223284524 | ENST00000547026 | 121274    | NM_152320    | ZNF641         |
| A_21_P0013931  | 4,11918 | 3,82843 | 1,223276045 | N/A             | N/A       | N/A          | N/A            |
| A_21_P0009475  | 5,65092 | 5,36021 | 1,223242129 | N/A             | N/A       | N/A          | Inc-KATNAL2-1  |
| A_24_P208081   | 1,86619 | 1,57548 | 1,223242129 | ENST00000375102 | 64600     | NM_022819    | PLA2G2F        |
| A_19_P00321183 | 8,30542 | 8,01473 | 1,223225172 | N/A             | N/A       | BX648855     | Inc-LRIG2-4    |
| A_23_P394605   | 8,99552 | 8,70487 | 1,223191257 | ENST00000398844 | 10802     | NM_021982    | SEC24A         |
| A_33_P3262449  | 1,98042 | 1,68981 | 1,223157343 | ENST00000566571 | 283685    | XM_002343322 | GOLGA6L2       |
| A_23_P28105    | 10,0183 | 9,72779 | 1,223072564 | ENST00000498545 | 7247      | NM_004622    | TSN            |
| A_33_P3283485  | 4,98083 | 4,69035 | 1,223047131 | N/A             | N/A       | XR_109251    | N/A            |
| A_21_P0006426  | 2,9595  | 2,66905 | 1,223021699 | N/A             | 101928345 | N/A          | PABPC1L2B-AS1  |
| A_33_P3246715  | 4,66583 | 4,37541 | 1,222996267 | ENST00000602548 | 441495    | NR_033773    | CENPVP2        |
| A_33_P3218252  | 11,9757 | 11,6853 | 1,222979313 | ENST00000381231 | 23049     | NM_015092    | SMG1           |
| A_33_P3349727  | 4,7249  | 4,43454 | 1,222945405 | N/A             | N/A       | N/A          | N/A            |
| A_22_P00022564 | 5,42122 | 5,13087 | 1,222936928 | ENST00000520603 | N/A       | BG182387     | N/A            |
| A_33_P3604591  | 5,08244 | 4,79211 | 1,222919975 | N/A             | 677844    | AI271839     | SNORA78        |
| A_23_P98282    | 9,44669 | 9,15647 | 1,222826735 | ENST00000529997 | 6712      | NM_006946    | SPTBN2         |
| A_33_P3235975  | 10,086  | 9,79582 | 1,222792832 | ENST00000514908 | 84303     | NM_032343    | CHCHD6         |
| A_21_P0002676  | 2,461   | 2,17085 | 1,222767405 | N/A             | N/A       | N/A          | Inc-MKI67IP-1  |
| A_23_P86801    | 3,96679 | 3,67664 | 1,222767405 | ENST00000352508 | 5913      | NM_032645    | RAPSN          |
| A_23_P374322   | 5,594   | 5,30388 | 1,222741978 | ENST00000441843 | 144811    | NM_153218    | LACC1          |
| A_23_P336015   | 9,27136 | 8,98127 | 1,222716552 | ENST00000327044 | 26155     | NM_015658    | NOC2L          |
| A_21_P0006774  | 2,01539 | 1,72536 | 1,222665702 | ENST00000421256 | N/A       | N/A          | N/A            |
| A_21_P0003842  | 3,48788 | 3,19792 | 1,222606379 | ENST00000508099 | 101929448 | N/A          | LOC101929448   |
| A_33_P3280681  | 6,55097 | 6,26103 | 1,222589431 | ENST00000610314 | 114823    | XM_005277062 | LENG8          |
| A_33_P3296442  | 9,59704 | 9,30722 | 1,222487743 | ENST00000554755 | N/A       | N/A          | N/A            |
| A_23_P28263    | 14,9895 | 14,6997 | 1,222470796 | ENST00000273062 | 58190     | NM_021198    | CTDSP1         |

|                |         |         |             |                 |           |              |                |
|----------------|---------|---------|-------------|-----------------|-----------|--------------|----------------|
| A_33_P3381771  | 10,3708 | 10,081  | 1,222470796 | ENST00000268719 | 79018     | NM_024052    | GID4           |
| A_22_P00018284 | 5,82756 | 5,53778 | 1,222453849 | N/A             | N/A       | N/A          | Inc-ZNF8-1     |
| A_32_P79115    | 6,62307 | 6,33333 | 1,222419955 | N/A             | N/A       | N/A          | N/A            |
| A_22_P00016297 | 7,32959 | 7,03988 | 1,222394536 | ENST00000536505 | N/A       | BI754073     | N/A            |
| A_23_P163639   | 12,2887 | 11,999  | 1,222386063 | ENST00000301030 | 29123     | NM_013275    | ANKRD11        |
| A_33_P3223121  | 6,36084 | 6,07128 | 1,222267448 | ENST00000342645 | 28996     | NM_001113239 | HIPK2          |
| A_23_P77437    | 6,6336  | 6,34407 | 1,222242032 | ENST00000566687 | 54496     | NM_019023    | PRMT7          |
| A_23_P348138   | 8,61183 | 8,32231 | 1,22223356  | ENST00000407029 | 57591     | NM_020831    | MKL1           |
| A_33_P3288754  | 13,7586 | 13,4691 | 1,222216616 | ENST00000391812 | 84798     | NM_001290149 | C19orf48       |
| A_33_P3329784  | 9,04794 | 8,75847 | 1,222191201 | ENST00000439231 | 23141     | NM_015114    | ANKLE2         |
| A_33_P3369956  | 9,59648 | 9,30703 | 1,222174258 | ENST00000382686 | 11273     | NM_148416    | ATXN2L         |
| A_23_P18384    | 8,9197  | 8,63028 | 1,222148844 | ENST00000471453 | 25852     | NM_213654    | ARMC8          |
| A_22_P00018974 | 2,10518 | 1,81576 | 1,222148844 | N/A             | N/A       | CB243907     | Inc-C12orf66-1 |
| A_23_P217015   | 11,8193 | 11,5299 | 1,222131902 | ENST00000477806 | 6418      | NM_003011    | SET            |
| A_22_P00003897 | 4,01461 | 3,72522 | 1,22212343  | N/A             | N/A       | BX361500     | Inc-CEP41-1    |
| A_33_P3245824  | 11,8171 | 11,5278 | 1,222047193 | ENST00000466449 | 80148     | NM_025078    | PQLC1          |
| A_21_P0014079  | 5,53713 | 5,24783 | 1,222047193 | ENST00000476966 | 10485     | AK095626     | C1orf61        |
| A_21_P0012458  | 5,91926 | 5,62998 | 1,222030252 | N/A             | 100506990 | NR_040092    | LOC100506990   |
| A_23_P143650   | 5,75746 | 5,46829 | 1,22193708  | ENST00000407308 | 150290    | NM_152511    | DUSP18         |
| A_33_P3281224  | 2,00901 | 1,71989 | 1,221894732 | ENST00000532644 | N/A       | N/A          | N/A            |
| A_23_P70719    | 5,6708  | 5,38168 | 1,221894732 | ENST00000618192 | 3908      | NM_000426    | LAMA2          |
| A_23_P370434   | 15,3313 | 15,0422 | 1,221877793 | ENST00000225698 | 708       | NM_001212    | C1QBP          |
| A_24_P211044   | 5,77052 | 5,48145 | 1,221852385 | ENST00000453363 | 1442      | NM_001317    | CSH1           |
| A_22_P00006959 | 2,65149 | 2,36247 | 1,221810039 | ENST00000505200 | N/A       | N/A          | N/A            |
| A_21_P0004409  | 2,58063 | 2,29168 | 1,221750758 | N/A             | N/A       | N/A          | Inc-ZNF366-3   |
| A_33_P3331193  | 2,70155 | 2,41264 | 1,221716885 | ENST00000390605 | N/A       | DQ926483     | N/A            |
| A_23_P83917    | 9,96271 | 9,67385 | 1,221674544 | ENST00000526258 | 22992     | NM_012308    | KDM2A          |
| A_24_P21447    | 9,03217 | 8,74332 | 1,221666076 | ENST00000372022 | 6838      | NM_006753    | SURF6          |
| A_33_P3281765  | 2,47752 | 2,18868 | 1,221657608 | N/A             | N/A       | N/A          | N/A            |
| A_21_P0002627  | 3,39652 | 3,1077  | 1,221640672 | N/A             | N/A       | N/A          | Inc-SPAG16-1   |
| A_22_P00023691 | 2,11288 | 1,82414 | 1,221572932 | ENST00000504799 | N/A       | N/A          | N/A            |
| A_19_P00320989 | 6,01253 | 5,72379 | 1,221572932 | N/A             | 100272228 | NR_027456    | LINC00894      |
| A_21_P0011336  | 4,67459 | 4,38586 | 1,221564465 | ENST00000617986 | 440300    | NR_033738    | LOC440300      |



|                |         |         |             |                 |           |              |                 |
|----------------|---------|---------|-------------|-----------------|-----------|--------------|-----------------|
| A_24_P74932    | 14,2872 | 13,9985 | 1,221539063 | ENST00000376322 | 5355      | NM_002668    | PLP2            |
| A_33_P3311911  | 2,10066 | 1,81198 | 1,221522129 | N/A             | N/A       | N/A          | N/A             |
| A_23_P154539   | 13,4648 | 13,1763 | 1,221369734 | ENST00000266079 | 24148     | NM_012469    | PRPF6           |
| A_22_P00016876 | 5,50681 | 5,21833 | 1,221352802 | ENST00000607312 | 400128    | NR_104174    | TUSC8           |
| A_33_P3491294  | 10,2673 | 9,97897 | 1,221225822 | ENST00000563145 | 51005     | NM_015944    | AMDHD2          |
| A_33_P3299665  | 4,98382 | 4,69557 | 1,221158105 | N/A             | 100505530 | N/A          | LOC100505530    |
| A_23_P69988    | 13,8244 | 13,5362 | 1,221115784 | ENST00000520013 | 5917      | NM_002887    | RARS            |
| A_33_P3227212  | 3,97107 | 3,68287 | 1,221115784 | N/A             | N/A       | N/A          | N/A             |
| A_33_P3208966  | 4,1157  | 3,82751 | 1,221107319 | ENST00000600605 | N/A       | AY513606     | N/A             |
| A_23_P408095   | 15,5027 | 15,2146 | 1,221031145 | ENST00000474024 | 11034     | NM_001011546 | DSTN            |
| A_22_P00006670 | 5,25442 | 4,96633 | 1,221022682 | ENST00000425554 | 102723924 | N/A          | LOC102723924    |
| A_33_P3371402  | 5,87011 | 5,58211 | 1,220946513 | ENST00000593346 | 100132967 | NR_027401    | FAM223A         |
| A_33_P3239367  | 5,67045 | 5,38251 | 1,220895736 | ENST00000366704 | 84033     | BC043916     | OBSCN           |
| A_32_P226078   | 4,84582 | 4,55792 | 1,220861886 | ENST00000321531 | 51686     | NM_016178    | OAZ3            |
| A_33_P3352772  | 1,8505  | 1,56262 | 1,220844961 | ENST00000335021 | 245910    | NM_001037668 | DEFB107A        |
| A_22_P00023852 | 1,94778 | 1,65991 | 1,220836499 | ENST00000420710 | N/A       | N/A          | N/A             |
| A_22_P00013789 | 2,1024  | 1,81457 | 1,220802651 | N/A             | N/A       | N/A          | Inc-RP1L1-4     |
| A_33_P3273664  | 5,97967 | 5,692   | 1,220667267 | ENST00000513814 | 153642    | NM_198150    | ARSK            |
| A_22_P00002719 | 3,38781 | 3,10018 | 1,220633423 | N/A             | N/A       | N/A          | Inc-C20orf202-1 |
| A_23_P212042   | 4,339   | 4,05139 | 1,220616502 | ENST00000296350 | 4241      | NM_005929    | MFI2            |
| A_24_P414376   | 12,4989 | 12,2115 | 1,220438841 | ENST00000261438 | 51274     | NM_016531    | KLF3            |
| A_24_P94054    | 11,0704 | 10,783  | 1,220438841 | ENST00000372806 | 6789      | NM_006282    | STK4            |
| A_33_P3402035  | 11,5692 | 11,2818 | 1,220438841 | ENST00000262395 | 9618      | NM_004295    | TRAF4           |
| A_24_P93206    | 3,91738 | 3,63013 | 1,220311956 | ENST00000615704 | 388021    | NM_001286390 | TMEM179         |
| A_22_P00004509 | 2,0629  | 1,77568 | 1,22028658  | N/A             | N/A       | N/A          | Inc-CPT2-4      |
| A_33_P3256282  | 5,07097 | 4,78378 | 1,220261206 | ENST00000391621 | 386679    | AB528847     | KRTAP10-2       |
| A_23_P136232   | 9,45237 | 9,16519 | 1,220252747 | ENST00000262644 | 54928     | NM_017813    | IMPAD1          |
| A_33_P3272962  | 2,08953 | 1,80242 | 1,220193542 | ENST00000334391 | 245939    | NM_001037732 | DEFB128         |
| A_33_P3294017  | 10,4045 | 10,1174 | 1,220185084 | N/A             | 3183      | NM_031314    | HNRNPC          |
| A_23_P215566   | 13,3979 | 13,1108 | 1,220185084 | ENST00000242057 | 196       | NM_001621    | AHR             |
| A_21_P0011859  | 5,15772 | 4,87065 | 1,220159711 | N/A             | N/A       | N/A          | XL0C_I2_007586  |
| A_33_P3415345  | 6,23985 | 5,9528  | 1,220142796 | ENST00000496244 | 57679     | NM_001135745 | ALS2            |
| A_23_P210643   | 12,6274 | 12,3404 | 1,22010051  | ENST00000344018 | 51497     | NM_198976    | NELFCD          |

|                |         |         |             |                 |           |              |              |
|----------------|---------|---------|-------------|-----------------|-----------|--------------|--------------|
| A_33_P3265467  | 1,67154 | 1,38461 | 1,220041312 | ENST00000374375 | N/A       | BC085019     | N/A          |
| A_24_P317835   | 11,1234 | 10,8365 | 1,220015942 | ENST00000371712 | 56623     | NM_019892    | INPP5E       |
| A_22_P00008555 | 5,66884 | 5,38228 | 1,219728455 | N/A             | N/A       | N/A          | Inc-KCNMB2-7 |
| A_21_P0008086  | 2,08417 | 1,79766 | 1,219686183 | N/A             | N/A       | N/A          | Inc-NDFIP2-2 |
| A_21_P0009566  | 2,28588 | 1,99944 | 1,219627005 | N/A             | N/A       | N/A          | Inc-RNF152-1 |
| A_22_P00009231 | 3,29687 | 3,01046 | 1,219601644 | ENST00000438818 | 101929535 | XR_242017    | LOC101929535 |
| A_33_P3399172  | 9,21034 | 8,92397 | 1,21956783  | ENST00000411545 | N/A       | N/A          | N/A          |
| A_21_P0007458  | 7,68539 | 7,39908 | 1,21951711  | N/A             | N/A       | N/A          | Inc-ZBED5-1  |
| A_22_P00012581 | 5,39743 | 5,11135 | 1,219322706 | N/A             | N/A       | N/A          | Inc-PTPN14-1 |
| A_22_P00014026 | 5,16542 | 4,87939 | 1,219280448 | ENST00000478745 | N/A       | N/A          | N/A          |
| A_23_P156156   | 11,3148 | 11,0288 | 1,219255094 | ENST00000507402 | 84240     | NM_032280    | ZCCHC9       |
| A_33_P3304883  | 3,97847 | 3,6925  | 1,219229741 | N/A             | 100131372 | XR_171616    | LOC100131372 |
| A_33_P3400547  | 11,2437 | 10,9578 | 1,219170585 | ENST00000282892 | 9412      | NM_004264    | MED21        |
| A_22_P00018132 | 7,12133 | 6,83559 | 1,219035382 | N/A             | N/A       | N/A          | Inc-ZNF503-2 |
| A_22_P00009378 | 5,21861 | 4,93287 | 1,219035382 | ENST00000522975 | N/A       | BG531614     | N/A          |
| A_23_P218282   | 9,62952 | 9,34391 | 1,218925541 | ENST00000576500 | 54925     | NM_017810    | ZSCAN32      |
| A_21_P0002333  | 3,20717 | 2,92157 | 1,218917092 | N/A             | N/A       | N/A          | Inc-OBFC2A-2 |
| A_21_P0009890  | 5,35713 | 5,07163 | 1,218832606 | ENST00000437696 | N/A       | N/A          | N/A          |
| A_33_P3407657  | 4,44126 | 4,15581 | 1,218790365 | ENST00000399577 | 23295     | NM_015246    | MGRN1        |
| A_24_P157156   | 4,8331  | 4,5477  | 1,218748126 | ENST00000494389 | 284992    | NM_001080539 | CCDC150      |
| A_21_P0006565  | 3,07922 | 2,7939  | 1,218680546 | N/A             | 102724212 | N/A          | LOC102724212 |
| A_33_P3407937  | 6,2373  | 5,95201 | 1,218655204 | ENST00000381663 | 55344     | NM_018390    | PLCXD1       |
| A_33_P3343750  | 8,19776 | 7,91253 | 1,218604523 | ENST00000585696 | 163081    | NM_001300979 | ZNF567       |
| A_32_P37592    | 10,7847 | 10,4995 | 1,218579183 | N/A             | 677769    | NR_003003    | SCARNA17     |
| A_33_P3220833  | 8,98401 | 8,69883 | 1,21856229  | ENST00000327134 | 5062      | NM_002577    | PAK2         |
| A_24_P136124   | 6,30222 | 6,0171  | 1,218511612 | ENST00000623513 | N/A       | AF258585     | N/A          |
| A_22_P00005432 | 2,56702 | 2,28191 | 1,218503166 | N/A             | N/A       | N/A          | Inc-DTYMK-1  |
| A_23_P250994   | 10,7402 | 10,4551 | 1,21849472  | ENST00000513054 | 10393     | NM_014885    | ANAPC10      |
| A_33_P3408244  | 10,8595 | 10,5745 | 1,218410264 | ENST00000432597 | 399833    | NR_033789    | SPRNP1       |
| A_23_P358995   | 12,0025 | 11,7176 | 1,218325813 | ENST00000610980 | 25998     | NM_015525    | IBTK         |
| A_32_P92399    | 11,6327 | 11,3478 | 1,218325813 | ENST00000288022 | 84342     | NM_032382    | COG8         |
| A_21_P0003095  | 3,70691 | 3,42205 | 1,218292034 | N/A             | N/A       | N/A          | Inc-FBXO45-1 |
| A_21_P0014780  | 3,5202  | 3,23536 | 1,218275145 | N/A             | N/A       | N/A          | N/A          |

|                |         |         |             |                 |           |              |                |
|----------------|---------|---------|-------------|-----------------|-----------|--------------|----------------|
| A_22_P00006917 | 4,08996 | 3,80519 | 1,218216036 | N/A             | N/A       | AA311247     | Inc-GAS6-5     |
| A_21_P0010486  | 2,27638 | 1,99174 | 1,218106268 | N/A             | N/A       | N/A          | XLOC_014484    |
| A_21_P0013456  | 7,63817 | 7,35356 | 1,218080939 | N/A             | N/A       | N/A          | XLOC_I2_014048 |
| A_21_P0014842  | 5,00765 | 4,72306 | 1,218064052 | ENST00000366454 | N/A       | AY358705     | N/A            |
| A_23_P3849     | 11,9413 | 11,6568 | 1,217988068 | ENST00000573872 | 10131     | NM_016292    | TRAP1          |
| A_24_P311604   | 8,37687 | 8,09237 | 1,217988068 | ENST00000503747 | 133015    | NM_145048    | PACRGL         |
| A_24_P152404   | 7,34064 | 7,05625 | 1,217895205 | ENST00000311122 | 79591     | BC032118     | C10orf76       |
| A_24_P52004    | 10,3867 | 10,1024 | 1,217819231 | ENST00000303538 | 23244     | NM_001100399 | PDS5A          |
| A_32_P494790   | 2,00034 | 1,71605 | 1,217810789 | ENST00000619152 | N/A       | N/A          | N/A            |
| A_23_P216017   | 8,00086 | 7,7166  | 1,217785466 | ENST00000523958 | 9583      | NM_004901    | ENTPD4         |
| A_23_P501795   | 9,95518 | 9,67094 | 1,217768584 | ENST00000614493 | 6837      | NM_133640    | MED22          |
| A_33_P3414907  | 7,27254 | 6,98834 | 1,217734821 | ENST00000367555 | 80896     | NM_001200050 | NPL            |
| A_33_P3702906  | 2,3778  | 2,0936  | 1,217734821 | N/A             | 440047    | CN273640     | LOC440047      |
| A_22_P00000827 | 2,10959 | 1,82539 | 1,217734821 | N/A             | N/A       | CR743177     | Inc-AGA-1      |
| A_33_P3409282  | 4,81303 | 4,52887 | 1,217701059 | N/A             | N/A       | N/A          | N/A            |
| A_33_P3286694  | 6,39996 | 6,11582 | 1,217684178 | ENST00000438290 | 100507533 | NR_046514    | SOX21-AS1      |
| A_22_P00008442 | 3,81776 | 3,53365 | 1,217658857 | ENST00000437721 | 102157400 | XR_424439    | LINC00384      |
| A_23_P255601   | 9,34471 | 9,06061 | 1,217650417 | ENST00000611119 | 84548     | NM_032508    | TMEM185A       |
| A_22_P00011891 | 5,07897 | 4,7949  | 1,217625097 | ENST00000424705 | 101927326 | XR_244183    | LOC101927326   |
| A_33_P3328913  | 2,97858 | 2,69455 | 1,217591337 | N/A             | N/A       | BC126309     | N/A            |
| A_32_P143880   | 9,2613  | 8,97737 | 1,217506943 | ENST00000452572 | 51072     | NM_015955    | MEMO1          |
| A_23_P23748    | 7,04976 | 6,76586 | 1,217481626 | ENST00000357672 | 22911     | NM_014969    | WDR47          |
| A_23_P500773   | 10,6468 | 10,3629 | 1,217481626 | ENST00000369320 | 6885      | NM_003188    | MAP3K7         |
| A_33_P3475737  | 9,80984 | 9,52594 | 1,217481626 | ENST00000480336 | 653121    | NM_001040441 | ZBTB8A         |
| A_24_P117954   | 9,70885 | 9,42496 | 1,217473187 | ENST00000586449 | 125476    | NM_194281    | INO80C         |
| A_24_P627306   | 11,051  | 10,7672 | 1,21739724  | ENST00000374491 | 55741     | NM_018217    | EDEM2          |
| A_24_P360529   | 6,88422 | 6,60043 | 1,217388802 | N/A             | 5150      | AF332652     | PDE7A          |
| A_33_P3382730  | 7,98822 | 7,70446 | 1,217363487 | ENST00000406525 | 23185     | NM_015155    | LARP4B         |
| A_32_P203300   | 8,59722 | 8,31351 | 1,217321297 | ENST00000450253 | 1977      | NM_001130679 | EIF4E          |
| A_33_P3368695  | 3,96771 | 3,68407 | 1,217262234 | ENST00000541682 | 84667     | NM_001165967 | HES7           |
| A_23_P40718    | 10,0196 | 9,736   | 1,217228484 | ENST00000406477 | 29780     | NM_001003828 | PARVB          |
| A_21_P0014631  | 7,28866 | 7,00507 | 1,217220047 | ENST00000610119 | 101929787 | XR_250866    | LOC101929787   |
| A_22_P00024685 | 3,4688  | 3,18523 | 1,217203173 | ENST00000440750 | N/A       | N/A          | N/A            |

|                |         |         |             |                 |           |              |               |
|----------------|---------|---------|-------------|-----------------|-----------|--------------|---------------|
| A_33_P3474319  | 12,0447 | 11,7612 | 1,217144116 | ENST00000526405 | 219855    | NM_198277    | SLC37A2       |
| A_23_P146284   | 11,6244 | 11,3409 | 1,217144116 | ENST00000265896 | 6713      | NM_003129    | SQLE          |
| A_33_P3371224  | 9,22883 | 8,94537 | 1,21711037  | ENST00000292246 | 55129     | NM_001204831 | ANO10         |
| A_33_P3779229  | 6,27579 | 5,99236 | 1,217085061 | ENST00000392993 | 256356    | NM_001039547 | GK5           |
| A_22_P00013092 | 5,47902 | 5,19562 | 1,217059752 | N/A             | N/A       | AK126895     | Inc-RIC3-1    |
| A_22_P00024586 | 6,605   | 6,3217  | 1,216975395 | ENST00000449339 | N/A       | XR_425264    | N/A           |
| A_22_P00015349 | 7,37393 | 7,09069 | 1,216924784 | N/A             | 283335    | NR_033854    | LOC283335     |
| A_33_P3423853  | 2,11208 | 1,82885 | 1,216916349 | N/A             | 253868    | NR_033263    | C20orf166-AS1 |
| A_23_P41204    | 7,82217 | 7,53905 | 1,216823567 | ENST00000340957 | 131408    | NM_144635    | FAM131A       |
| A_21_P0009544  | 6,84844 | 6,56534 | 1,216806698 | N/A             | N/A       | N/A          | Inc-INO80C-1  |
| A_21_P0010261  | 2,09733 | 1,81425 | 1,21678983  | N/A             | 102725378 | N/A          | LOC102725378  |
| A_33_P3347482  | 4,56691 | 4,28384 | 1,216781396 | ENST00000618559 | 646262    | NM_001289974 | LACTBL1       |
| A_33_P3370001  | 1,79393 | 1,51087 | 1,216772962 | ENST00000357191 | 391190    | NM_001001963 | OR2L8         |
| A_24_P338145   | 12,3571 | 12,0741 | 1,216722359 | ENST00000452248 | 30968     | NM_013442    | STOML2        |
| A_32_P137939   | 18,3052 | 18,0222 | 1,216722359 | ENST00000462494 | 60        | NM_001101    | ACTB          |
| A_33_P3280965  | 12,7011 | 12,4181 | 1,216722359 | ENST00000564014 | 735301    | NR_003142    | SNHG9         |
| A_23_P25073    | 13,9751 | 13,6923 | 1,216553697 | ENST00000538315 | 60488     | NM_021821    | MRPS35        |
| A_22_P00001180 | 2,94062 | 2,65783 | 1,216545264 | N/A             | 100507530 | NR_125386    | LOC100507530  |
| A_33_P3341442  | 3,5272  | 3,24446 | 1,216503103 | ENST00000262825 | 1439      | NM_000395    | CSF2RB        |
| A_32_P184727   | 13,9372 | 13,6545 | 1,216469375 | N/A             | 3837      | NM_002265    | KPNB1         |
| A_33_P3369146  | 5,7063  | 5,42362 | 1,216452511 | ENST00000393842 | 492       | NM_001001344 | ATP2B3        |
| A_23_P70020    | 12,8596 | 12,577  | 1,216385058 | ENST00000261813 | 5201      | NM_002622    | PFDN1         |
| A_19_P00322569 | 7,25859 | 6,97605 | 1,216334471 | ENST00000437157 | N/A       | EF609116     | N/A           |
| A_23_P319895   | 8,65904 | 8,37652 | 1,216317609 | N/A             | 23067     | NM_015048    | SETD1B        |
| A_33_P3307980  | 8,44384 | 8,16135 | 1,216292317 | N/A             | N/A       | AK131345     | Inc-FAM133B-1 |
| A_33_P3349776  | 8,93204 | 8,6496  | 1,216250164 | ENST00000361670 | 149986    | NM_144703    | LSM14B        |
| A_33_P3257140  | 7,25783 | 6,97541 | 1,216233304 | ENST00000616279 | 9475      | NM_004850    | ROCK2         |
| A_24_P107941   | 13,1664 | 12,884  | 1,216216443 | ENST00000566082 | 79650     | NM_024598    | USB1          |
| A_33_P3374559  | 7,22685 | 6,9445  | 1,216174293 | ENST00000444220 | 91316     | NR_024448    | GUSBP11       |
| A_21_P0000324  | 6,71218 | 6,42987 | 1,216140574 | ENST00000475966 | 677817    | NR_002969    | SNORA36A      |
| A_33_P3352340  | 6,35136 | 6,06908 | 1,216115285 | ENST00000398470 | 728318    | NM_001190460 | KRTAP9-1      |
| A_24_P298737   | 6,12259 | 5,84037 | 1,21606471  | N/A             | N/A       | AK090442     | N/A           |
| A_23_P214091   | 12,8286 | 12,5464 | 1,216047852 | ENST00000519891 | 10434     | NM_006330    | LYPLA1        |

|                |         |         |             |                 |           |              |               |
|----------------|---------|---------|-------------|-----------------|-----------|--------------|---------------|
| A_33_P3276222  | 9,51239 | 9,23019 | 1,216047852 | N/A             | N/A       | N/A          | N/A           |
| A_23_P86570    | 10,5765 | 10,2944 | 1,215963564 | ENST00000372919 | 310       | NM_004034    | ANXA7         |
| A_21_P0006246  | 4,47721 | 4,19512 | 1,215955136 | N/A             | N/A       | N/A          | Inc-CACNA1B-1 |
| A_33_P3230837  | 4,50371 | 4,22163 | 1,215946708 | N/A             | 677772    | NR_003006    | SCARNA6       |
| A_23_P97906    | 10,8766 | 10,5946 | 1,215879283 | ENST00000369857 | 22978     | NM_012229    | NT5C2         |
| A_21_P0008865  | 5,84147 | 5,55954 | 1,21582029  | N/A             | N/A       | N/A          | Inc-KLHL25-9  |
| A_33_P3411291  | 4,65539 | 4,37351 | 1,215778153 | ENST00000284061 | 8526      | NM_003647    | DGKE          |
| A_24_P402438   | 7,42513 | 7,14327 | 1,215761299 | ENST00000479322 | 7042      | NM_003238    | TGFB2         |
| A_23_P76761    | 10,8864 | 10,6046 | 1,215710738 | ENST00000555067 | 7443      | NM_003384    | VRK1          |
| A_33_P3283824  | 4,33095 | 4,04916 | 1,215702312 | ENST00000424970 | 64116     | NM_001135147 | SLC39A8       |
| A_24_P379693   | 7,96312 | 7,68135 | 1,215685458 | ENST00000273075 | 23549     | NM_012100    | DNPEP         |
| A_23_P113462   | 7,20243 | 6,92068 | 1,215668606 | ENST00000361961 | 55605     | NM_017641    | KIF21A        |
| A_33_P3272580  | 9,94392 | 9,66221 | 1,215634901 | ENST00000367585 | 2519      | NM_032020    | FUCA2         |
| A_23_P89199    | 12,849  | 12,5673 | 1,215626474 | ENST00000578317 | 8533      | NM_003653    | COPS3         |
| A_33_P3302861  | 5,26368 | 4,98204 | 1,215575919 | ENST00000621565 | 23322     | NM_015272    | RPGRIP1L      |
| A_24_P89971    | 11,2117 | 10,9301 | 1,215542217 | ENST00000618229 | 6836      | NM_033161    | SURF4         |
| A_22_P00007990 | 5,49905 | 5,21746 | 1,215533791 | N/A             | N/A       | N/A          | Inc-IFFO1-1   |
| A_33_P3313710  | 1,85539 | 1,57388 | 1,215466389 | N/A             | 102724724 | XM_006709941 | LOC102724724  |
| A_32_P233938   | 9,15798 | 8,87648 | 1,215457965 | ENST00000481407 | 257415    | NM_001040057 | FAM133B       |
| A_22_P00015085 | 6,33717 | 6,05575 | 1,215390567 | N/A             | N/A       | AF400497     | Inc-SNURF-3   |
| A_23_P319050   | 5,90327 | 5,62193 | 1,215323173 | ENST00000339914 | 284443    | NM_145326    | ZNF493        |
| A_23_P140256   | 14,3572 | 14,0759 | 1,215289478 | ENST00000554056 | 4860      | NM_000270    | PNP           |
| A_33_P3413732  | 7,52578 | 7,24456 | 1,21522209  | ENST00000535190 | N/A       | N/A          | N/A           |
| A_22_P00008401 | 6,01316 | 5,73197 | 1,21519682  | N/A             | N/A       | N/A          | Inc-JPH1-3    |
| A_33_P3376925  | 5,62299 | 5,34181 | 1,215188397 | ENST00000420303 | N/A       | N/A          | N/A           |
| A_33_P3393135  | 5,68776 | 5,40663 | 1,215146283 | N/A             | 8329      | BC112254     | HIST1H2AI     |
| A_33_P3265159  | 4,52272 | 4,24159 | 1,215146283 | N/A             | 26130     | BC110990     | GAPVD1        |
| A_33_P3396473  | 11,2996 | 11,0185 | 1,215121015 | ENST00000395741 | 9701      | NM_001242898 | PPP6R2        |
| A_33_P3301514  | 2,66173 | 2,38069 | 1,21507048  | ENST00000379022 | 4897      | NM_001193582 | NRCAM         |
| A_32_P66020    | 8,04696 | 7,76595 | 1,215045214 | ENST00000509141 | 92017     | NM_032167    | SNX29         |
| A_23_P81248    | 13,5151 | 13,2341 | 1,215036792 | ENST00000313368 | 6879      | NM_005642    | TAF7          |
| A_33_P3304133  | 6,76445 | 6,48348 | 1,215011526 | ENST00000339772 | 89944     | NM_138342    | GLB1L2        |
| A_22_P00004607 | 1,88649 | 1,60568 | 1,214876785 | ENST00000522330 | N/A       | N/A          | N/A           |

|                |         |         |             |                 |           |              |                 |
|----------------|---------|---------|-------------|-----------------|-----------|--------------|-----------------|
| A_33_P3429575  | 11,9914 | 11,7106 | 1,214868364 | N/A             | 643454    | BC157883     | LOC643454       |
| A_22_P00014064 | 4,44952 | 4,16881 | 1,214792579 | ENST00000577382 | N/A       | AK055411     | N/A             |
| A_21_P0003403  | 3,64683 | 3,36617 | 1,214750478 | ENST00000503009 | N/A       | N/A          | N/A             |
| A_21_P0009384  | 4,77518 | 4,49453 | 1,214742058 | N/A             | N/A       | N/A          | Inc-TP53I13-1   |
| A_24_P225719   | 10,6957 | 10,4151 | 1,214699959 | ENST00000323303 | 25843     | NM_015387    | MOB4            |
| A_33_P3416124  | 4,61668 | 4,33612 | 1,214666281 | N/A             | 100130872 | NR_024569    | LOC100130872    |
| A_32_P76627    | 14,8594 | 14,5789 | 1,214615765 | ENST00000417510 | N/A       | N/A          | N/A             |
| A_21_P0008220  | 5,19784 | 4,91737 | 1,214590508 | N/A             | N/A       | N/A          | Inc-TUBGCP3-6   |
| A_21_P0001244  | 6,41158 | 6,13118 | 1,214531577 | ENST00000451766 | 101927851 | N/A          | LOC101927851    |
| A_32_P456537   | 10,9364 | 10,656  | 1,214531577 | ENST00000414406 | 6950      | NM_030752    | TCP1            |
| A_23_P149496   | 11,4719 | 11,1915 | 1,214531577 | ENST00000373884 | 55113     | NM_018053    | XKR8            |
| A_21_P0007426  | 1,94094 | 1,66059 | 1,214489486 | N/A             | N/A       | N/A          | Inc-OR52K2-1    |
| A_23_P154507   | 12,1435 | 11,8632 | 1,214447395 | ENST00000494563 | 9270      | NM_022334    | ITGB1BP1        |
| A_33_P3235561  | 3,87633 | 3,59605 | 1,21443056  | N/A             | 832       | NM_001206541 | CAPZB           |
| A_33_P3327971  | 4,31246 | 4,03222 | 1,214396889 | N/A             | N/A       | N/A          | N/A             |
| A_23_P2661     | 13,3529 | 13,0727 | 1,214363219 | ENST00000393436 | 5908      | NM_015646    | RAP1B           |
| A_33_P3253144  | 4,89877 | 4,61864 | 1,214304299 | ENST00000357198 | 79930     | NM_024872    | DOK3            |
| A_23_P19543    | 13,7359 | 13,4558 | 1,214279049 | ENST00000373822 | 6732      | NM_003137    | SRPK1           |
| A_23_P201432   | 11,9164 | 11,6363 | 1,214279049 | ENST00000366535 | 159       | NM_001126    | ADSS            |
| A_21_P0008595  | 2,24794 | 1,96785 | 1,214270632 | N/A             | N/A       | N/A          | Inc-C15orf2-2   |
| A_21_P0000138  | 2,06401 | 1,78396 | 1,214236966 | ENST00000469230 | 10385     | NM_001197238 | BTN2A2          |
| A_32_P104000   | 10,4935 | 10,2135 | 1,214194884 | ENST00000324344 | 123879    | NM_173475    | DCUN1D3         |
| A_33_P3244640  | 5,44198 | 5,16201 | 1,214169636 | ENST00000369108 | 2869      | AF370369     | GRK5            |
| A_24_P145047   | 8,69512 | 8,41516 | 1,21416122  | ENST00000326648 | 23060     | NM_015042    | ZNF609          |
| A_23_P104741   | 3,08301 | 2,8031  | 1,214119141 | ENST00000525144 | 84623     | NM_032531    | KIRREL3         |
| A_33_P3232955  | 6,36957 | 6,08972 | 1,214068649 | ENST00000248076 | 9002      | NM_003950    | F2RL3           |
| A_33_P6805163  | 5,98975 | 5,70992 | 1,214051818 | N/A             | 317648    | NR_015453    | NOP14-AS1       |
| A_22_P00023307 | 4,45688 | 4,1772  | 1,213925597 | N/A             | N/A       | N/A          | Inc-IRF2BP2-3   |
| A_21_P0006148  | 4,38188 | 4,10222 | 1,213908769 | N/A             | N/A       | N/A          | Inc-FAM27D1.1-3 |
| A_22_P00008509 | 2,02373 | 1,74408 | 1,213900355 | ENST00000450040 | N/A       | N/A          | N/A             |
| A_22_P00017551 | 4,09526 | 3,81571 | 1,213816216 | ENST00000431150 | N/A       | N/A          | N/A             |
| A_24_P71938    | 9,46265 | 9,18316 | 1,213765736 | N/A             | 4086      | NM_005900    | SMAD1           |
| A_24_P72646    | 5,73544 | 5,45604 | 1,21369002  | N/A             | 80094     | NR_027715    | BIN3-IT1        |

|                |         |         |             |                 |           |              |               |
|----------------|---------|---------|-------------|-----------------|-----------|--------------|---------------|
| A_33_P3285354  | 9,36441 | 9,08505 | 1,21365637  | ENST00000433688 | 65998     | NM_001144936 | C11orf95      |
| A_23_P218456   | 13,2442 | 12,9649 | 1,213605896 | ENST00000590261 | 3609      | NM_012218    | ILF3          |
| A_23_P110492   | 12,2948 | 12,0156 | 1,213521778 | ENST00000274140 | 10299     | NM_005885    | mar-06        |
| A_23_P61881    | 12,7515 | 12,4723 | 1,213521778 | ENST00000449376 | 10425     | NM_006321    | ARIH2         |
| A_21_P0003741  | 3,18567 | 2,90655 | 1,213454488 | N/A             | N/A       | N/A          | Inc-PHOX2B-2  |
| A_23_P425332   | 9,64633 | 9,36733 | 1,21335356  | ENST00000304338 | 57718     | NM_058237    | PPP4R4        |
| A_23_P88781    | 12,1619 | 11,8829 | 1,21335356  | ENST00000567518 | 57019     | NM_020313    | CIAPIN1       |
| A_33_P3420020  | 5,017   | 4,73801 | 1,21334515  | ENST00000510070 | 9677      | NM_001130858 | PPIP5K1       |
| A_23_P39550    | 2,09846 | 1,81947 | 1,21334515  | ENST00000476823 | 81615     | NM_030923    | TMEM163       |
| A_23_P347059   | 8,70649 | 8,4275  | 1,21334515  | ENST00000309395 | 92597     | NM_173468    | MOB1B         |
| A_22_P00003787 | 3,35781 | 3,07883 | 1,21333674  | N/A             | N/A       | AK096618     | Inc-CDK5R1-1  |
| A_23_P317465   | 9,13928 | 8,86032 | 1,213319919 | ENST00000321437 | 51762     | NM_016530    | RAB8B         |
| A_24_P112447   | 5,78022 | 5,5013  | 1,21328628  | ENST00000370489 | 57089     | NM_020354    | ENTPD7        |
| A_23_P21063    | 1,98872 | 1,70988 | 1,213219002 | ENST00000333535 | 6331      | NM_198056    | SCN5A         |
| A_21_P0013468  | 7,82313 | 7,54432 | 1,213193775 | ENST00000588159 | 286042    | N/A          | FAM86B3P      |
| A_23_P89621    | 9,32488 | 9,0462  | 1,21308446  | ENST00000269397 | 8535      | NM_003655    | CBX4          |
| A_21_P0010949  | 9,69915 | 9,42049 | 1,213067643 | N/A             | 101060691 | NR_120611    | NUTM2B-AS1    |
| A_23_P89941    | 11,6845 | 11,4059 | 1,213017194 | ENST00000393599 | 1032      | NM_001800    | CDKN2D        |
| A_33_P3280955  | 1,94746 | 1,66886 | 1,213017194 | N/A             | 100128079 | XR_424776    | LOC100128079  |
| A_23_P31536    | 13,8361 | 13,5575 | 1,213017194 | ENST00000576834 | 6742      | NM_003143    | SSBP1         |
| A_21_P0006009  | 1,97199 | 1,69342 | 1,21299197  | N/A             | N/A       | N/A          | Inc-ALDH1B1-1 |
| A_22_P00023466 | 6,57529 | 6,29674 | 1,212975155 | N/A             | N/A       | BC043518     | Inc-ANKRD10-2 |
| A_23_P341349   | 9,46749 | 9,18899 | 1,212933117 | ENST00000494738 | 11132     | NM_023083    | CAPN10        |
| A_22_P00003353 | 3,36029 | 3,08182 | 1,212907895 | ENST00000477210 | 100302640 | NR_028303    | LINC00882     |
| A_33_P3211809  | 7,41574 | 7,13732 | 1,212865859 | ENST00000467577 | 861       | NM_001122607 | RUNX1         |
| A_23_P400515   | 5,42449 | 5,14607 | 1,212865859 | ENST00000247986 | 57576     | NM_020816    | KIF17         |
| A_32_P109522   | 10,4155 | 10,1371 | 1,212849046 | ENST00000368576 | 221302    | NM_145062    | ZUFSP         |
| A_23_P15045    | 10,1279 | 9,84958 | 1,212781793 | ENST00000569796 | 1877      | NM_004424    | E4F1          |
| A_22_P00010377 | 2,02846 | 1,75014 | 1,212781793 | ENST00000451953 | 100506527 | N/A          | LINC01007     |
| A_23_P79231    | 9,23946 | 8,96126 | 1,212680921 | ENST00000432329 | 1385      | NM_134442    | CREB1         |
| A_23_P259663   | 7,543   | 7,26482 | 1,212664109 | ENST00000326775 | 23660     | NM_014569    | ZKSCAN5       |
| A_19_P00321398 | 2,81628 | 2,53812 | 1,212647298 | ENST00000522967 | N/A       | N/A          | N/A           |
| A_33_P3295261  | 2,16683 | 1,88879 | 1,212546438 | ENST00000367288 | 25802     | NM_012134    | LMOD1         |

|                |         |         |             |                 |           |              |                |
|----------------|---------|---------|-------------|-----------------|-----------|--------------|----------------|
| A_33_P3343605  | 4,60102 | 4,32303 | 1,212504415 | N/A             | N/A       | N/A          | N/A            |
| A_22_P00013787 | 3,32584 | 3,04789 | 1,212470797 | N/A             | N/A       | AK307207     | Inc-RP1L1-2    |
| A_33_P3287716  | 4,49352 | 4,21558 | 1,212462393 | N/A             | N/A       | AK128048     | N/A            |
| A_33_P3369939  | 9,91299 | 9,63509 | 1,212428777 | ENST00000382021 | 134218    | NM_194283    | DNAJC21        |
| A_23_P77145    | 11,1438 | 10,8659 | 1,212428777 | ENST00000261890 | 8766      | NM_004663    | RAB11A         |
| A_33_P3212490  | 11,3899 | 11,112  | 1,212428777 | ENST00000393063 | 23405     | NM_001195573 | DICER1         |
| A_33_P3215803  | 4,98656 | 4,70867 | 1,212420373 | ENST00000312053 | 2015      | NM_001974    | EMR1           |
| A_33_P3372099  | 5,41218 | 5,13431 | 1,212403566 | ENST00000273990 | 115265    | NM_145244    | DDIT4L         |
| A_33_P3413227  | 6,31269 | 6,03489 | 1,212344741 | N/A             | 100132363 | AK096512     | LOC100132363   |
| A_24_P41371    | 6,72697 | 6,44918 | 1,212336337 | ENST00000588932 | 54862     | NM_017721    | CC2D1A         |
| A_21_P0005166  | 1,86169 | 1,58397 | 1,212277516 | N/A             | N/A       | N/A          | Inc-SUPT3H-1   |
| A_33_P3394599  | 11,7783 | 11,5006 | 1,21226071  | ENST00000487894 | 10362     | NM_006339    | HMG20B         |
| A_33_P3365710  | 5,11276 | 4,83509 | 1,212235502 | ENST00000568298 | 9114      | AK125522     | ATP6V0D1       |
| A_23_P123454   | 9,55907 | 9,28148 | 1,212168284 | ENST00000611621 | 79873     | NM_024815    | NUDT18         |
| A_33_P3404123  | 4,55908 | 4,28156 | 1,21210947  | ENST00000391354 | 100505724 | NM_001277332 | KRTAP9-7       |
| A_21_P0012266  | 2,85012 | 2,57261 | 1,212101069 | N/A             | N/A       | N/A          | XLOC_I2_009332 |
| A_23_P404685   | 11,6902 | 11,4127 | 1,212092667 | ENST00000335123 | 353131    | NM_178348    | LCE1A          |
| A_24_P253755   | 8,26341 | 7,98598 | 1,212033857 | ENST00000607144 | 9487      | NM_004278    | PIGL           |
| A_23_P28869    | 13,2132 | 12,9358 | 1,212008654 | ENST00000399903 | 5786      | NM_002836    | PTPRA          |
| A_23_P55873    | 10,9269 | 10,6495 | 1,212008654 | ENST00000318003 | 54862     | NM_017721    | CC2D1A         |
| A_24_P178300   | 4,88013 | 4,60283 | 1,211924647 | ENST00000408934 | 643905    | NM_001080835 | PRR21          |
| A_23_P415882   | 12,7876 | 12,5103 | 1,211924647 | ENST00000607714 | 92609     | NM_001001563 | TIMM50         |
| A_21_P0014880  | 7,41966 | 7,14239 | 1,211899446 | N/A             | N/A       | N/A          | N/A            |
| A_23_P169207   | 2,00181 | 1,72457 | 1,211874245 | ENST00000277216 | 138804    | NM_001001919 | OR13C4         |
| A_21_P0004360  | 5,97848 | 5,70126 | 1,211857445 | ENST00000503989 | 100505625 | NR_103771    | LOC100505625   |
| A_21_P0008975  | 3,04118 | 2,76397 | 1,211849045 | ENST00000563360 | 101928248 | N/A          | LINC01229      |
| A_33_P3233273  | 9,44799 | 9,1708  | 1,211832246 | ENST00000323078 | 65999     | NM_001142928 | LRR61          |
| A_33_P3228722  | 6,79662 | 6,51944 | 1,211823846 | ENST00000571618 | N/A       | AL096745     | N/A            |
| A_23_P115919   | 10,0706 | 9,79343 | 1,211815446 | ENST00000263038 | 5264      | NM_001037537 | PHYH           |
| A_33_P3368925  | 4,91819 | 4,64103 | 1,211807047 | ENST00000588831 | 79414     | N/A          | LRFN3          |
| A_24_P316234   | 4,40024 | 4,1231  | 1,211790248 | N/A             | N/A       | AK090485     | N/A            |
| A_32_P139229   | 8,46741 | 8,19031 | 1,21175665  | ENST00000321545 | 125919    | NM_213598    | ZNF543         |
| A_24_P373174   | 8,16889 | 7,8918  | 1,211748251 | ENST00000336787 | 5873      | NM_004580    | RAB27A         |



|                |         |         |             |                 |           |              |               |
|----------------|---------|---------|-------------|-----------------|-----------|--------------|---------------|
| A_33_P3651282  | 5,94062 | 5,66354 | 1,211739852 | ENST00000546204 | N/A       | DW416857     | N/A           |
| A_22_P00019867 | 7,79304 | 7,51598 | 1,211723054 | N/A             | N/A       | N/A          | Inc-GSTO2-2   |
| A_33_P3415062  | 6,10731 | 5,83025 | 1,211723054 | ENST00000406486 | 85379     | NM_001145206 | KIAA1671      |
| A_23_P36888    | 10,4086 | 10,1316 | 1,21167266  | ENST00000546455 | 91523     | NM_138371    | PCED1B        |
| A_21_P0000349  | 7,87479 | 7,59792 | 1,211563483 | N/A             | 677679    | NR_002998    | SCARNA3       |
| A_21_P0003264  | 2,65846 | 2,3816  | 1,211555085 | N/A             | 101928711 | N/A          | LOC101928711  |
| A_33_P3398667  | 5,24919 | 4,97242 | 1,211479506 | ENST00000590777 | 100101467 | NM_001166012 | ZSCAN30       |
| A_23_P420417   | 9,87453 | 9,59776 | 1,211479506 | ENST00000394933 | 116238    | NM_138463    | TLCD1         |
| A_23_P30582    | 2,03616 | 1,75943 | 1,211445917 | ENST00000507407 | 6550      | NM_004174    | SLC9A3        |
| A_33_P3277970  | 5,11844 | 4,84173 | 1,211429123 | ENST00000489078 | N/A       | XM_003960330 | N/A           |
| A_33_P3322859  | 10,3244 | 10,0477 | 1,211420726 | ENST00000409160 | 55502     | NM_018645    | HES6          |
| A_22_P00003639 | 4,49402 | 4,21736 | 1,211387139 | N/A             | N/A       | N/A          | Inc-CD63-1    |
| A_33_P3304668  | 7,19949 | 6,92288 | 1,211345156 | ENST00000225964 | 1277      | NM_000088    | COL1A1        |
| A_23_P75839    | 12,7532 | 12,4766 | 1,21133676  | ENST00000251968 | 7251      | NM_006292    | TSG101        |
| A_33_P3267250  | 3,2291  | 2,95257 | 1,211277987 | ENST00000368482 | 126668    | NM_182499    | TDRD10        |
| A_23_P213584   | 1,70433 | 1,42781 | 1,211269591 | ENST00000292432 | 3101      | NM_002115    | HK3           |
| A_23_P86917    | 13,9902 | 13,7137 | 1,211252799 | ENST00000301838 | 8772      | NM_003824    | FADD          |
| A_21_P0006578  | 6,83283 | 6,55638 | 1,211210821 | N/A             | 101927574 | XR_426524    | LINC01186     |
| A_22_P00013923 | 2,35393 | 2,07749 | 1,211202426 | ENST00000593015 | 101927755 | NR_110816    | LOC101927755  |
| A_33_P3223243  | 5,47536 | 5,1991  | 1,211051318 | ENST00000369664 | 54879     | AK301869     | ST7L          |
| A_21_P0010059  | 4,45992 | 4,18378 | 1,21095059  | N/A             | N/A       | N/A          | Inc-CYP24A1-1 |
| A_32_P42537    | 2,7073  | 2,43135 | 1,21079112  | ENST00000611003 | 100132304 | NR_120493    | LOC100132304  |
| A_33_P3254311  | 3,80976 | 3,53381 | 1,21079112  | ENST00000417977 | N/A       | KM004779     | N/A           |
| A_23_P26522    | 4,9363  | 4,66038 | 1,210765943 | ENST00000219660 | 343       | NM_001169    | AQP8          |
| A_21_P0011948  | 7,16738 | 6,89146 | 1,210765943 | ENST00000605570 | N/A       | XR_425456    | N/A           |
| A_22_P00015882 | 4,94366 | 4,66775 | 1,210757551 | N/A             | N/A       | N/A          | Inc-TCEAL4-1  |
| A_22_P00013880 | 3,95789 | 3,68202 | 1,210723982 | ENST00000413043 | N/A       | N/A          | N/A           |
| A_21_P0008092  | 2,79187 | 2,51613 | 1,210614889 | N/A             | N/A       | N/A          | Inc-NDFIP2-8  |
| A_33_P3244361  | 8,87626 | 8,60058 | 1,210564542 | N/A             | N/A       | N/A          | N/A           |
| A_22_P00011105 | 1,95546 | 1,6798  | 1,21054776  | N/A             | N/A       | N/A          | Inc-NUDT16-1  |
| A_33_P3279059  | 10,5579 | 10,2823 | 1,210497416 | ENST00000259808 | 8737      | NM_003804    | RIPK1         |
| A_33_P3418466  | 6,35907 | 6,08348 | 1,210489026 | N/A             | N/A       | N/A          | N/A           |
| A_23_P146486   | 2,37348 | 2,09792 | 1,210463855 | ENST00000374016 | 50514     | NM_017418    | dic-01        |

|                |         |         |             |                 |           |              |                |
|----------------|---------|---------|-------------|-----------------|-----------|--------------|----------------|
| A_22_P00016918 | 2,99125 | 2,71571 | 1,210447074 | N/A             | 104472714 | NR_126441    | DISC1-IT1      |
| A_22_P00024912 | 4,25274 | 3,97727 | 1,210388344 | N/A             | 102723366 | XR_424492    | LOC102723366   |
| A_33_P3277178  | 6,17419 | 5,89883 | 1,21029606  | ENST00000472850 | 23145     | AK093431     | SSPO           |
| A_22_P00004574 | 3,55315 | 3,2778  | 1,210287671 | ENST00000447149 | 101929539 | NR_110540    | LINC01422      |
| A_19_P00321977 | 7,93055 | 7,65523 | 1,210262504 | N/A             | N/A       | AF130094     | Inc-LTBP3-2    |
| A_21_P0010183  | 4,39145 | 4,11618 | 1,21022056  | ENST00000419299 | 387486    | NR_109786    | LINC00320      |
| A_24_P184388   | 8,61261 | 8,33737 | 1,210195395 | ENST00000447974 | 220074    | NM_145309    | LRTOMT         |
| A_24_P940921   | 10,5229 | 10,2477 | 1,210161842 | ENST00000224140 | 23064     | NM_015046    | SETX           |
| A_33_P3282566  | 8,21253 | 7,93738 | 1,210119901 | ENST00000335464 | 54868     | NM_017728    | TMEM104        |
| A_24_P33461    | 6,68867 | 6,41354 | 1,210103126 | ENST00000425471 | N/A       | XR_427803    | N/A            |
| A_22_P00013104 | 4,65158 | 4,37648 | 1,210077963 | N/A             | N/A       | N/A          | Inc-RIMS3-2    |
| A_23_P255827   | 8,26459 | 7,98953 | 1,210044413 | ENST00000510120 | N/A       | AF300871     | N/A            |
| A_19_P00315967 | 6,43745 | 6,16248 | 1,209968928 | ENST00000563248 | N/A       | N/A          | N/A            |
| A_33_P3399373  | 12,5595 | 12,2846 | 1,209910222 | ENST00000355552 | 131601    | NM_001136053 | TPRA1          |
| A_23_P156284   | 12,7215 | 12,4467 | 1,20982636  | ENST00000472831 | 1627      | NM_080881    | DBN1           |
| A_24_P43588    | 11,9447 | 11,6699 | 1,20982636  | ENST00000451025 | 9587      | NM_001003690 | MAD2L1BP       |
| A_21_P0008127  | 3,8492  | 3,57445 | 1,209784431 | N/A             | N/A       | N/A          | Inc-CRYL1-1    |
| A_23_P60259    | 8,63603 | 8,36136 | 1,209717349 | ENST00000374688 | 55151     | NM_018112    | TMEM38B        |
| A_22_P00002574 | 3,11144 | 2,8368  | 1,209692193 | N/A             | N/A       | BG957402     | Inc-C17orf97-4 |
| A_21_P0011482  | 4,90552 | 4,63091 | 1,209667039 | N/A             | N/A       | N/A          | XL0C_I2_005490 |
| A_23_P145146   | 12,9505 | 12,6759 | 1,209658654 | ENST00000167218 | 5134      | NM_002598    | PDCD2          |
| A_33_P3333826  | 12,6119 | 12,3373 | 1,209658654 | ENST00000426727 | 92912     | NM_173469    | UBE2Q2         |
| A_22_P00007360 | 2,7186  | 2,44401 | 1,209650269 | ENST00000422831 | N/A       | N/A          | N/A            |
| A_24_P406714   | 9,65504 | 9,38045 | 1,209650269 | ENST00000377059 | 8028      | NM_004641    | MLLT10         |
| A_22_P00011396 | 4,37517 | 4,10061 | 1,209625116 | N/A             | N/A       | AK097173     | Inc-PABPN1L-1  |
| A_19_P00318261 | 8,17544 | 7,90092 | 1,209591578 | N/A             | 677810    | NR_003016    | SNORA26        |
| A_23_P208482   | 5,2179  | 4,9434  | 1,20957481  | ENST00000394122 | 10332     | NM_001144904 | CLEC4M         |
| A_33_P3274832  | 2,03557 | 1,7611  | 1,209549658 | ENST00000536497 | 283440    | NR_033958    | LOC283440      |
| A_21_P0012316  | 8,35141 | 8,07694 | 1,209549658 | ENST00000613597 | 728229    | NM_001242313 | TMEM191B       |
| A_21_P0007368  | 4,33969 | 4,06524 | 1,20953289  | N/A             | N/A       | N/A          | Inc-NUMA1-1    |
| A_33_P3382769  | 7,19993 | 6,92552 | 1,209499355 | ENST00000561287 | N/A       | NR_024474    | N/A            |
| A_22_P00025812 | 3,04925 | 2,77501 | 1,209356842 | N/A             | 100861514 | NR_104120    | ELMO1-AS1      |
| A_24_P167984   | 10,6825 | 10,4083 | 1,209323312 | ENST00000566488 | 23300     | NM_015251    | ATMIN          |

|                |         |         |             |                 |           |              |              |
|----------------|---------|---------|-------------|-----------------|-----------|--------------|--------------|
| A_23_P117980   | 8,423   | 8,14883 | 1,209298165 | ENST00000562542 | 10300     | NM_005886    | KATNB1       |
| A_23_P414308   | 9,42752 | 9,1534  | 1,209256255 | ENST00000389169 | 201163    | NM_144606    | FLCN         |
| A_24_P915007   | 11,8698 | 11,5957 | 1,209239491 | ENST00000292431 | 112939    | NM_052876    | NACC1        |
| A_33_P3340682  | 8,55524 | 8,28116 | 1,209222728 | ENST00000289816 | 92822     | NM_001113525 | ZNF276       |
| A_33_P3280009  | 6,40254 | 6,12847 | 1,209214346 | N/A             | N/A       | N/A          | N/A          |
| A_22_P00020232 | 5,62584 | 5,35178 | 1,209205964 | N/A             | N/A       | AK058022     | Inc-APOA1-1  |
| A_22_P00020707 | 2,76685 | 2,49279 | 1,209205964 | N/A             | N/A       | BC026111     | Inc-JAG1-6   |
| A_33_P3355743  | 8,31764 | 8,04361 | 1,20918082  | ENST00000366934 | 55105     | NM_001297754 | GPATCH2      |
| A_23_P112289   | 4,45056 | 4,17654 | 1,209172438 | ENST00000395211 | 7111      | NM_003275    | TMOD1        |
| A_23_P392222   | 10,949  | 10,675  | 1,209155676 | ENST00000320188 | 375757    | NM_001040011 | SWI5         |
| A_33_P3255176  | 2,20643 | 1,93245 | 1,209138913 | ENST00000428812 | 101928303 | N/A          | LOC101928303 |
| A_22_P00023117 | 1,95438 | 1,68047 | 1,209080247 | N/A             | N/A       | N/A          | Inc-RFC2-2   |
| A_19_P00319019 | 15,9009 | 15,627  | 1,209071866 | ENST00000623001 | 387066    | NR_003038    | SNHG5        |
| A_24_P740962   | 7,47922 | 7,20544 | 1,208971303 | N/A             | N/A       | AF086551     | Inc-ZSWIM7-1 |
| A_22_P00004206 | 3,12014 | 2,8464  | 1,208937784 | ENST00000563057 | N/A       | N/A          | N/A          |
| A_32_P384562   | 3,79859 | 3,52487 | 1,208921024 | ENST00000263511 | 114819    | NR_023386    | CROCCP3      |
| A_33_P3382303  | 5,59137 | 5,31766 | 1,208912645 | ENST00000328118 | 752       | NM_005892    | FMNL1        |
| A_33_P3246175  | 4,97815 | 4,70447 | 1,208887506 | ENST00000394005 | 142827    | NM_207321    | ACSM6        |
| A_32_P124245   | 2,26689 | 1,99324 | 1,208862368 | ENST00000367734 | 167826    | NM_175747    | OLIG3        |
| A_21_P0008140  | 1,85402 | 1,58048 | 1,208770201 | N/A             | 102723392 | XR_424440    | LOC102723392 |
| A_33_P3358457  | 4,115   | 3,84149 | 1,208745065 | ENST00000438299 | 2736      | NM_005270    | GLI2         |
| A_23_P202602   | 11,6678 | 11,3943 | 1,208736687 | ENST00000369075 | 11196     | NM_007190    | SEC23IP      |
| A_33_P3285754  | 5,63278 | 5,35935 | 1,20867804  | ENST00000613027 | N/A       | N/A          | N/A          |
| A_33_P3347528  | 2,31689 | 2,04349 | 1,208652907 | ENST00000369743 | 149620    | N/A          | CHIAP2       |
| A_23_P398854   | 11,7854 | 11,512  | 1,208652907 | ENST00000515886 | 285489    | NM_173660    | DOK7         |
| A_23_P115780   | 2,93981 | 2,66644 | 1,208627774 | ENST00000372105 | 26103     | NM_015613    | LRIT1        |
| A_24_P201491   | 13,3629 | 13,0896 | 1,208569132 | ENST00000524482 | 740       | NM_004927    | MRPL49       |
| A_23_P131227   | 10,996  | 10,7228 | 1,208485363 | ENST00000317907 | 55622     | NM_017735    | TTC27        |
| A_24_P152983   | 16,1768 | 15,9036 | 1,208485363 | ENST00000445363 | N/A       | N/A          | N/A          |
| A_24_P158421   | 11,1974 | 10,9243 | 1,208401601 | ENST00000431664 | 56681     | NM_020150    | SAR1A        |
| A_23_P71830    | 6,05772 | 5,78463 | 1,208393225 | ENST00000373654 | 57684     | AB384239     | ZBTB26       |
| A_33_P3359223  | 8,25289 | 7,97981 | 1,208384849 | ENST00000620716 | 441476    | NM_001256699 | C9orf173     |
| A_21_P0008816  | 3,69752 | 3,42447 | 1,208359721 | N/A             | N/A       | N/A          | Inc-SNURF-1  |

|                |         |         |             |                 |           |              |                    |
|----------------|---------|---------|-------------|-----------------|-----------|--------------|--------------------|
| A_23_P209740   | 13,2817 | 13,0087 | 1,208317843 | ENST00000491229 | 5707      | NM_002807    | PSMD1              |
| A_33_P3222937  | 13,1469 | 12,8739 | 1,208317843 | ENST00000404032 | 54867     | NM_017727    | TMEM214            |
| A_33_P3280993  | 9,83541 | 9,56241 | 1,208317843 | N/A             | 414777    | NR_102326    | HCG18              |
| A_33_P3241771  | 5,40284 | 5,1299  | 1,208267592 | ENST00000623469 | N/A       | XR_109230    | N/A                |
| A_23_P502575   | 12,4028 | 12,1299 | 1,208234092 | ENST00000619188 | 1457      | NM_177559    | CSNK2A1            |
| A_21_P0005017  | 2,21824 | 1,94535 | 1,208225717 | N/A             | N/A       | N/A          | Inc-TRIM27-15      |
| A_23_P256716   | 9,64242 | 9,36957 | 1,208192219 | ENST00000508573 | 8467      | NM_003601    | SMARCA5            |
| A_23_P417921   | 2,8605  | 2,58767 | 1,20817547  | ENST00000296097 | 285126    | NM_173650    | DNAJC5G            |
| A_23_P359430   | 10,9665 | 10,6937 | 1,208150347 | ENST00000369227 | 25832     | NM_015383    | NBPF14             |
| A_22_P00017346 | 7,61131 | 7,33852 | 1,208141972 | N/A             | 101928000 | XR_243583    | LOC101928000       |
| A_23_P216812   | 1,69499 | 1,42227 | 1,208083354 | ENST00000380142 | 1030      | NM_004936    | CDKN2B             |
| A_24_P76666    | 7,91161 | 7,63902 | 1,2079745   | ENST00000400217 | 1457      | NM_177559    | CSNK2A1            |
| A_22_P00012600 | 7,33489 | 7,06234 | 1,207941008 | N/A             | N/A       | N/A          | Inc-PTPRCAP-1      |
| A_24_P149713   | 8,87863 | 8,60613 | 1,207899145 | ENST00000373464 | 23099     | NM_014007    | ZBTB43             |
| A_33_P3333158  | 2,24448 | 1,97199 | 1,207890772 | ENST00000368854 | 119587    | NM_198148    | CPXM2              |
| A_32_P231179   | 8,41712 | 8,14466 | 1,207865655 | ENST00000468063 | 150483    | NM_144705    | TEKT4              |
| A_21_P0007586  | 7,36047 | 7,08804 | 1,207840539 | ENST00000553247 | N/A       | N/A          | N/A                |
| A_23_P39375    | 7,50409 | 7,23169 | 1,207815423 | ENST00000300976 | 55295     | NM_018316    | KLHL26             |
| A_23_P351215   | 9,48852 | 9,21618 | 1,207765192 | ENST00000413427 | 6498      | NM_005414    | SKIL               |
| A_24_P167683   | 6,87898 | 6,60667 | 1,207740078 | ENST00000553695 | 3705      | NM_014216    | ITPK1              |
| A_24_P252130   | 10,9726 | 10,7003 | 1,207731706 | ENST00000311565 | 5467      | NM_006238    | PPARD              |
| A_24_P336113   | 8,95418 | 8,68207 | 1,207572661 | ENST00000620406 | 23523     | NM_012295    | CABIN1             |
| A_23_P257176   | 4,32099 | 4,04891 | 1,20754755  | ENST00000432095 | 83697     | NM_031467    | SLC4A9             |
| A_22_P00007003 | 9,92555 | 9,65351 | 1,20751407  | N/A             | N/A       | AL137445     | Inc-GGCT-1         |
| A_23_P62335    | 8,82296 | 8,55093 | 1,207505701 | ENST00000369439 | 55217     | NM_018196    | TMLHE              |
| A_21_P0011772  | 6,34055 | 6,0686  | 1,207438744 | ENST00000599858 | 114132    | NM_001135163 | SIGLEC11           |
| A_23_P8083     | 6,80344 | 6,53155 | 1,207388529 | ENST00000375819 | 80740     | NM_025261    | LY6G6C             |
| A_23_P98686    | 9,2436  | 8,97177 | 1,207338316 | ENST00000474221 | 80162     | NM_025092    | ATHL1              |
| A_23_P75707    | 3,33675 | 3,06493 | 1,207329948 | ENST00000610894 | 219469    | NM_001005199 | OR8H1              |
| A_33_P6819918  | 8,51531 | 8,2435  | 1,207321579 | ENST00000546580 | 100506844 | NR_038269    | LOC100506844       |
| A_23_P356152   | 5,96351 | 5,69171 | 1,207313211 | ENST00000482840 | 5599      | NM_001278547 | MAPK8              |
| A_23_P47527    | 15,4541 | 15,1823 | 1,207313211 | ENST00000545210 | 746       | NM_014206    | TMEM258            |
| A_21_P0003098  | 2,05864 | 1,78689 | 1,207271369 | N/A             | N/A       | N/A          | Inc-AC018816.3.1-6 |

|                |         |         |             |                 |           |              |                |
|----------------|---------|---------|-------------|-----------------|-----------|--------------|----------------|
| A_22_P00015727 | 3,22884 | 2,95709 | 1,207271369 | ENST00000542121 | N/A       | BI764345     | N/A            |
| A_23_P50399    | 8,1975  | 7,92577 | 1,207254633 | ENST00000591385 | 90379     | NM_138353    | DCAF15         |
| A_32_P232620   | 6,89822 | 6,6265  | 1,207246265 | N/A             | N/A       | AK023827     | Inc-PARN-3     |
| A_22_P00022647 | 4,46981 | 4,19809 | 1,207246265 | ENST00000446029 | N/A       | N/A          | N/A            |
| A_32_P80850    | 4,58144 | 4,30972 | 1,207246265 | ENST00000309791 | 7373      | NM_021110    | COL14A1        |
| A_23_P120194   | 12,664  | 12,3923 | 1,207229529 | ENST00000392349 | 94101     | NM_016467    | ORMDL1         |
| A_33_P3743508  | 11,4005 | 11,1288 | 1,207229529 | ENST00000432783 | 158435    | NR_033838    | LOC158435      |
| A_33_P3379215  | 2,00414 | 1,7325  | 1,207179323 | ENST00000511618 | N/A       | N/A          | N/A            |
| A_22_P00011709 | 6,02759 | 5,75597 | 1,207162588 | N/A             | 196047    | NR_002791    | EMX2OS         |
| A_33_P3380051  | 4,4071  | 4,13551 | 1,207137486 | ENST00000330655 | 255275    | NM_001145113 | MYADML2        |
| A_22_P00004243 | 5,49274 | 5,22124 | 1,207062183 | ENST00000563954 | N/A       | N/A          | N/A            |
| A_23_P58337    | 12,3624 | 12,0909 | 1,207062183 | ENST00000514543 | 81608     | NM_030917    | FIP1L1         |
| A_23_P74653    | 13,2378 | 12,9664 | 1,206978519 | ENST00000321265 | 10726     | NM_006600    | NUDC           |
| A_33_P3211604  | 13,0207 | 12,7493 | 1,206978519 | ENST00000393436 | 5908      | NM_015646    | RAP1B          |
| A_32_P514599   | 11,5617 | 11,2903 | 1,206978519 | ENST00000388967 | N/A       | N/A          | N/A            |
| A_33_P3384229  | 4,04228 | 3,77098 | 1,20689486  | ENST00000604758 | N/A       | N/A          | N/A            |
| A_23_P86386    | 4,92531 | 4,65403 | 1,206878129 | ENST00000343381 | 79862     | NM_024804    | ZNF669         |
| A_23_P86550    | 15,3177 | 15,0465 | 1,206811208 | ENST00000541549 | 8661      | NM_003750    | EIF3A          |
| A_33_P3235432  | 6,1874  | 5,9162  | 1,206811208 | ENST00000460133 | 64802     | NM_001297779 | NMNAT1         |
| A_24_P246518   | 2,427   | 2,15581 | 1,206802843 | ENST00000299598 | 114780    | NM_052892    | PKD1L2         |
| A_23_P90895    | 7,91078 | 7,63973 | 1,20668574  | ENST00000460299 | 129285    | NM_152994    | PPP1R21        |
| A_23_P48166    | 13,6164 | 13,3454 | 1,20664392  | ENST00000547459 | 5756      | NM_002822    | TWF1           |
| A_33_P3376434  | 9,59024 | 9,31929 | 1,206602101 | ENST00000492939 | 55209     | NM_001292043 | SETD5          |
| A_21_P0011041  | 17,9324 | 17,6615 | 1,206560284 | N/A             | N/A       | N/A          | XLOC_l2_002910 |
| A_23_P117797   | 9,68395 | 9,41306 | 1,206551921 | ENST00000249806 | 54982     | NM_017882    | CLN6           |
| A_23_P40936    | 9,36093 | 9,09004 | 1,206551921 | ENST00000478572 | 7182      | NM_003298    | NR2C2          |
| A_24_P306443   | 8,19614 | 7,92531 | 1,206501743 | ENST00000559466 | 100233156 | NR_037871    | LOC100233156   |
| A_21_P0013807  | 5,58358 | 5,31277 | 1,206485018 | ENST00000422914 | N/A       | N/A          | N/A            |
| A_33_P3300092  | 13,0938 | 12,823  | 1,206476655 | ENST00000261797 | 3340      | NM_001543    | NDST1          |
| A_33_P3333863  | 10,1798 | 9,90906 | 1,20642648  | ENST00000411858 | 51622     | NM_015622    | CCZ1           |
| A_22_P00006414 | 4,01548 | 3,74475 | 1,206418118 | N/A             | N/A       | N/A          | Inc-FBXO25-2   |
| A_23_P251548   | 9,00965 | 8,73894 | 1,206401393 | ENST00000478068 | 113419    | NM_144582    | TEX261         |
| A_22_P00015795 | 8,50387 | 8,23323 | 1,20634286  | N/A             | N/A       | BE669601     | Inc-TARDBP-2   |

|                |         |         |             |                 |           |              |                |
|----------------|---------|---------|-------------|-----------------|-----------|--------------|----------------|
| A_23_P63243    | 13,5794 | 13,3088 | 1,206309413 | ENST00000483282 | 25912     | NM_138740    | C1orf43        |
| A_24_P194508   | 9,79801 | 9,52745 | 1,206275968 | ENST00000333933 | 474343    | NM_001006683 | SPIN2B         |
| A_23_P119535   | 3,70673 | 3,43622 | 1,206234162 | ENST00000215368 | 1943      | NM_001405    | EFNA2          |
| A_33_P3293798  | 8,80334 | 8,53287 | 1,206200719 | ENST00000400375 | 386677    | NM_198691    | KRTAP10-1      |
| A_22_P00010633 | 5,5013  | 5,23091 | 1,206133835 | N/A             | N/A       | N/A          | Inc-NDUFV3-1   |
| A_22_P00013821 | 2,1008  | 1,83043 | 1,206117114 | N/A             | N/A       | N/A          | Inc-RPE-2      |
| A_22_P00024592 | 2,79603 | 2,52567 | 1,206108754 | ENST00000519123 | N/A       | N/A          | N/A            |
| A_33_P3317628  | 15,641  | 15,3707 | 1,206058594 | ENST00000331563 | 11187     | NM_007183    | PKP3           |
| A_23_P157620   | 10,4091 | 10,1388 | 1,206058594 | ENST00000436711 | 64760     | NM_022749    | FAM160B2       |
| A_22_P00021592 | 1,82609 | 1,55593 | 1,205941563 | N/A             | N/A       | N/A          | Inc-TCTEX1D1-1 |
| A_23_P123265   | 10,0382 | 9,76811 | 1,205883052 | ENST00000395436 | 25870     | NM_015411    | SUMF2          |
| A_33_P3249066  | 1,95927 | 1,6892  | 1,205866335 | N/A             | N/A       | N/A          | N/A            |
| A_32_P194312   | 1,63765 | 1,36762 | 1,205832902 | ENST00000392650 | 54549     | NM_001144952 | SDK2           |
| A_21_P0012964  | 3,69946 | 3,42944 | 1,205824544 | ENST00000504512 | 101928176 | NR_125806    | LINC01411      |
| A_23_P42695    | 14,5911 | 14,3211 | 1,205807828 | ENST00000005374 | 79017     | NM_024051    | GGCT           |
| A_19_P00318152 | 12,4748 | 12,2049 | 1,20572425  | ENST00000440918 | 128439    | NR_003239    | SNHG11         |
| A_23_P169154   | 11,8753 | 11,6055 | 1,205640679 | ENST00000339450 | 79956     | NM_024896    | ERMP1          |
| A_23_P40952    | 10,9999 | 10,7302 | 1,205557113 | ENST00000442415 | 5894      | NM_002880    | RAF1           |
| A_22_P00024789 | 6,45543 | 6,18573 | 1,205557113 | N/A             | N/A       | N/A          | Inc-ZRANB1-2   |
| A_33_P3407618  | 6,03457 | 5,76488 | 1,205548757 | N/A             | 727751    | NR_102747    | LOC727751      |
| A_23_P168551   | 3,2586  | 2,98894 | 1,205523688 | ENST00000439491 | 222962    | NM_001040661 | SLC29A4        |
| A_22_P00003999 | 4,47077 | 4,20112 | 1,205515332 | ENST00000432511 | 730227    | NR_034151    | LINC01136      |
| A_21_P0007655  | 3,07237 | 2,80274 | 1,20549862  | ENST00000545642 | 101927464 | NR_110053    | LOC101927464   |
| A_33_P3368500  | 12,0007 | 11,7311 | 1,205473553 | ENST00000471199 | 51098     | AK097603     | IFT52          |
| A_21_P0003236  | 2,08175 | 1,81215 | 1,205473553 | N/A             | N/A       | N/A          | Inc-ROBO2-4    |
| A_22_P00008028 | 4,99658 | 4,72705 | 1,205415065 | N/A             | N/A       | N/A          | Inc-IGFALS-1   |
| A_32_P83049    | 2,45942 | 2,18992 | 1,205389999 | ENST00000403714 | 22979     | NM_014971    | EFR3B          |
| A_23_P145463   | 8,40147 | 8,13197 | 1,205389999 | ENST00000379660 | 51000     | NM_015948    | SLC35B3        |
| A_23_P62588    | 4,03838 | 3,76889 | 1,205381644 | ENST00000307786 | 163688    | NM_138705    | CALML6         |
| A_21_P0007875  | 1,96832 | 1,69887 | 1,205348224 | N/A             | N/A       | N/A          | Inc-SLC38A2-1  |
| A_21_P0014480  | 6,38302 | 6,11359 | 1,205331514 | N/A             | 401068    | BC028186     | LOC401068      |
| A_23_P11843    | 6,25437 | 5,98506 | 1,205231262 | ENST00000367175 | 10446     | NM_201630    | LRRN2          |
| A_22_P00024683 | 4,9803  | 4,71099 | 1,205231262 | ENST00000556556 | N/A       | N/A          | N/A            |

|                |         |         |             |                 |           |              |                |
|----------------|---------|---------|-------------|-----------------|-----------|--------------|----------------|
| A_21_P0013313  | 3,19241 | 2,92312 | 1,205214554 | N/A             | N/A       | N/A          | XLOC_I2_013857 |
| A_22_P00023351 | 6,98284 | 6,71359 | 1,205181139 | ENST00000447206 | N/A       | N/A          | N/A            |
| A_33_P3254431  | 3,09752 | 2,82833 | 1,205131018 | N/A             | 199990    | AK054818     | C1orf86        |
| A_24_P383850   | 7,45293 | 7,18383 | 1,20505584  | ENST00000356916 | 8672      | NM_003760    | EIF4G3         |
| A_23_P209232   | 11,2735 | 11,0044 | 1,20505584  | ENST00000320081 | 79745     | NM_024692    | CLIP4          |
| A_32_P72110    | 6,00316 | 5,73413 | 1,204997372 | N/A             | 5817      | NM_006505    | PVR            |
| A_22_P00025921 | 2,07069 | 1,80167 | 1,20498902  | ENST00000447651 | N/A       | N/A          | N/A            |
| A_19_P00320570 | 6,02714 | 5,75819 | 1,204930555 | N/A             | N/A       | N/A          | Inc-UBLCP1-4   |
| A_23_P368145   | 7,8344  | 7,56547 | 1,204913851 | ENST00000498166 | 92344     | NM_152281    | GORAB          |
| A_33_P3311160  | 9,83096 | 9,56207 | 1,204880444 | N/A             | N/A       | AB385295     | N/A            |
| A_21_P0013750  | 3,96267 | 3,69384 | 1,204830335 | N/A             | N/A       | N/A          | XLOC_I2_015441 |
| A_24_P119131   | 8,65967 | 8,39084 | 1,204830335 | ENST00000449592 | 144404    | NM_001080825 | TMEM120B       |
| A_33_P3245709  | 11,2604 | 10,9916 | 1,204805282 | ENST00000461147 | 57148     | NM_020336    | RALGAPB        |
| A_23_P36753    | 11,1518 | 10,883  | 1,204805282 | ENST00000261733 | 217       | NM_000690    | ALDH2          |
| A_22_P00025168 | 3,2209  | 2,95211 | 1,204796931 | N/A             | 101928119 | XR_242649    | LOC101928119   |
| A_22_P00006131 | 2,01839 | 1,74961 | 1,20478858  | ENST00000530896 | 101928989 | NR_120571    | LOC101928989   |
| A_22_P00002672 | 3,70298 | 3,43426 | 1,204738475 | N/A             | N/A       | N/A          | Inc-C1orf31-1  |
| A_23_P435610   | 9,89708 | 9,62837 | 1,204730125 | ENST00000375208 | 23065     | NM_015047    | EMC1           |
| A_24_P200427   | 13,1521 | 12,8834 | 1,204721774 | ENST00000264221 | 10606     | NM_001079525 | PAICS          |
| A_32_P18258    | 15,0766 | 14,8079 | 1,204721774 | ENST00000319006 | 6888      | NM_006755    | TALDO1         |
| A_24_P142442   | 12,7555 | 12,4869 | 1,204638272 | ENST00000540200 | 26073     | NM_015584    | POLDIP2        |
| A_23_P57413    | 5,84119 | 5,57265 | 1,204588174 | ENST00000484588 | 9647      | NM_014634    | PPM1F          |
| A_23_P313734   | 10,4227 | 10,1542 | 1,204554776 | ENST00000531404 | 85459     | NM_033395    | CEP295         |
| A_32_P83811    | 2,89383 | 2,62535 | 1,204538077 | ENST00000424749 | 100129583 | NM_001242936 | FAM47E         |
| A_21_P0002226  | 5,55647 | 5,288   | 1,204529728 | ENST00000445738 | 339807    | NR_034023    | LOC339807      |
| A_21_P0002550  | 1,86719 | 1,59892 | 1,204362756 | N/A             | N/A       | N/A          | Inc-COL6A3-2   |
| A_24_P312189   | 9,63598 | 9,36772 | 1,204354408 | ENST00000310512 | 56257     | NM_019606    | MEPCE          |
| A_22_P00008782 | 6,0586  | 5,7904  | 1,204304322 | ENST00000434596 | N/A       | N/A          | N/A            |
| A_33_P6815667  | 7,65186 | 7,38366 | 1,204304322 | N/A             | 100505538 | NR_038991    | RBM26-AS1      |
| A_23_P54477    | 15,4802 | 15,212  | 1,204304322 | ENST00000328848 | 55505     | NM_018648    | NOP10          |
| A_33_P3247753  | 6,62869 | 6,3605  | 1,204295974 | ENST00000604411 | 9383      | NR_003255    | TSIX           |
| A_23_P371254   | 6,2705  | 6,00235 | 1,204262584 | ENST00000610639 | 259289    | NM_176884    | TAS2R43        |
| A_19_P00812701 | 3,47125 | 3,20314 | 1,204229196 | N/A             | N/A       | N/A          | N/A            |

|                |         |         |             |                 |           |              |                |
|----------------|---------|---------|-------------|-----------------|-----------|--------------|----------------|
| A_23_P356139   | 6,59355 | 6,32546 | 1,204212502 | ENST00000238961 | 55719     | NM_018121    | FAM178A        |
| A_21_P0014368  | 5,89393 | 5,62584 | 1,204212502 | ENST00000596510 | 8605      | AK124241     | PLA2G4C        |
| A_21_P0009977  | 3,44686 | 3,17881 | 1,204179114 | N/A             | N/A       | N/A          | Inc-TSHZ2-4    |
| A_23_P43557    | 7,59225 | 7,32423 | 1,204154074 | ENST00000491650 | 57706     | NM_024820    | DENND1A        |
| A_24_P58204    | 3,80698 | 3,53908 | 1,20405392  | ENST00000300773 | 282763    | NM_001005567 | OR51B5         |
| A_22_P00016715 | 1,73879 | 1,4709  | 1,204045574 | N/A             | N/A       | N/A          | Inc-TRAPPC11-2 |
| A_21_P0007170  | 5,33916 | 5,07128 | 1,204037228 | N/A             | N/A       | N/A          | Inc-OR51E1-1   |
| A_33_P3334343  | 6,89243 | 6,62457 | 1,204020537 | ENST00000570209 | 8924      | NM_004667    | HERC2          |
| A_22_P00017158 | 3,83135 | 3,56359 | 1,203937083 | ENST00000546615 | N/A       | N/A          | N/A            |
| A_33_P3345001  | 3,57969 | 3,31194 | 1,203928738 | ENST00000441217 | N/A       | N/A          | N/A            |
| A_21_P0011500  | 8,46953 | 8,20179 | 1,203920393 | ENST00000417964 | 100288069 | NR_033908    | LOC100288069   |
| A_24_P366566   | 5,26239 | 4,99466 | 1,203912048 | ENST00000354565 | 26341     | NM_001005338 | OR5H1          |
| A_33_P3374030  | 5,15898 | 4,89133 | 1,203845291 | ENST00000591705 | N/A       | AK125954     | N/A            |
| A_21_P0006943  | 1,90707 | 1,63947 | 1,20380357  | N/A             | N/A       | N/A          | Inc-ADARB2-1   |
| A_32_P212802   | 7,92051 | 7,65295 | 1,203770194 | N/A             | 101930277 | XM_005276001 | LOC101930277   |
| A_22_P00005014 | 3,2054  | 2,93786 | 1,203753506 | ENST00000442751 | 643355    | NM_001270945 | LOC643355      |
| A_33_P3288491  | 4,17633 | 3,90882 | 1,203728475 | ENST00000325995 | 340359    | NM_001081675 | KLHL38         |
| A_33_P3297217  | 8,27715 | 8,00966 | 1,203711788 | ENST00000507956 | 27163     | NM_001042402 | NAAA           |
| A_23_P75921    | 9,10189 | 8,8344  | 1,203711788 | ENST00000348124 | 7189      | NM_145803    | TRAF6          |
| A_33_P3221129  | 2,06475 | 1,7973  | 1,203678414 | ENST00000317449 | 221091    | NM_203422    | LRRN4CL        |
| A_23_P39050    | 8,30953 | 8,04209 | 1,203670071 | ENST00000341191 | 55552     | NM_001080493 | ZNF823         |
| A_33_P3400843  | 2,43435 | 2,167   | 1,203594985 | ENST00000334221 | 338761    | NM_001008223 | C1QL4          |
| A_24_P58054    | 10,147  | 9,87975 | 1,203511561 | ENST00000417961 | 23315     | NM_015266    | SLC9A8         |
| A_21_P0009647  | 2,68194 | 2,41474 | 1,203469851 | ENST00000567374 | N/A       | N/A          | N/A            |
| A_24_P282343   | 8,39651 | 8,12938 | 1,203411459 | ENST00000463994 | 6792      | NM_003159    | CDKL5          |
| A_22_P00016826 | 4,75712 | 4,49003 | 1,203378094 | N/A             | N/A       | N/A          | Inc-TRIP4-1    |
| A_22_P00011907 | 5,47508 | 5,20802 | 1,203353071 | N/A             | N/A       | N/A          | Inc-PIK3R1-5   |
| A_22_P00012829 | 6,84637 | 6,57931 | 1,203353071 | N/A             | 100505894 | NR_105019    | TMEM161B-AS1   |
| A_22_P00007299 | 6,41325 | 6,14637 | 1,203202942 | ENST00000367282 | 9283      | BC040156     | GPR37L1        |
| A_32_P154021   | 4,59862 | 4,33182 | 1,203136224 | ENST00000324000 | 51046     | NM_015879    | ST8SIA3        |
| A_21_P0000037  | 6,15548 | 5,88868 | 1,203136224 | N/A             | 9753      | NM_001163391 | ZSCAN12        |
| A_23_P500000   | 13,2469 | 12,9801 | 1,203136224 | ENST00000349847 | 8796      | NM_144777    | SCEL           |
| A_33_P3362371  | 8,45475 | 8,18797 | 1,203119545 | ENST00000543123 | 10313     | NM_001265591 | RTN3           |



|                |         |         |             |                 |           |              |                       |
|----------------|---------|---------|-------------|-----------------|-----------|--------------|-----------------------|
| A_23_P203540   | 11,7043 | 11,4376 | 1,203052832 | ENST00000257831 | 26298     | NM_012153    | EHF                   |
| A_33_P3354404  | 6,84904 | 6,58245 | 1,202961107 | ENST00000360770 | 353323    | NM_181684    | KRTAP12-2             |
| A_21_P0012984  | 4,96392 | 4,69736 | 1,202936093 | N/A             | N/A       | N/A          | Inc-FGF10-3           |
| A_23_P53345    | 10,5936 | 10,3271 | 1,202886065 | ENST00000395901 | 56938     | NM_020183    | ARNTL2                |
| A_33_P3219260  | 11,9065 | 11,6402 | 1,202719321 | ENST00000374454 | 51248     | NM_016484    | PDZD11                |
| A_22_P00010866 | 2,19345 | 1,92717 | 1,202702648 | ENST00000546412 | N/A       | CD688177     | N/A                   |
| A_22_P00002430 | 5,23585 | 4,96959 | 1,202685975 | N/A             | N/A       | BC031314     | Inc-C14orf37-1        |
| A_21_P0003361  | 2,45378 | 2,18754 | 1,202669303 | ENST00000512678 | 100506827 | XR_108545    | LOC100506827          |
| A_22_P00017002 | 3,1035  | 2,83735 | 1,202594279 | N/A             | N/A       | N/A          | Inc-TTC30B-1          |
| A_24_P336705   | 12,067  | 11,8009 | 1,202552601 | ENST00000471759 | 5876      | NM_004582    | RABGGTB               |
| A_24_P181149   | 9,14429 | 8,87821 | 1,20253593  | ENST00000393262 | 79738     | NM_024685    | BBS10                 |
| A_33_P3326382  | 3,4675  | 3,20154 | 1,20243591  | ENST00000215095 | 112755    | AK123137     | STX1B                 |
| A_22_P00007902 | 4,84305 | 4,57712 | 1,202410906 | ENST00000553270 | N/A       | CB106236     | N/A                   |
| A_23_P19517    | 12,4654 | 12,1995 | 1,202385903 | ENST00000605930 | 3710      | NM_002224    | ITPR3                 |
| A_22_P00008580 | 5,26588 | 5,00004 | 1,202335898 | ENST00000452746 | 101929247 | N/A          | LINC01231             |
| A_22_P00004665 | 2,44752 | 2,1817  | 1,20231923  | N/A             | N/A       | AK093043     | Inc-CTD-2054N24.2.1-2 |
| A_22_P00020762 | 6,0757  | 5,80991 | 1,202294229 | N/A             | N/A       | N/A          | Inc-AGAP2-2           |
| A_33_P3253596  | 8,33494 | 8,06915 | 1,202294229 | ENST00000374403 | 24137     | NM_012310    | KIF4A                 |
| A_33_P3267562  | 7,72391 | 7,45817 | 1,202252562 | ENST00000234392 | 25806     | NM_012476    | VAX2                  |
| A_23_P31489    | 9,45301 | 9,18734 | 1,202194229 | ENST00000453200 | 55665     | NM_001077664 | URGCP                 |
| A_33_P3368358  | 7,50237 | 7,23671 | 1,202185896 | ENST00000379433 | 4739      | NM_182966    | NEDD9                 |
| A_33_P3278877  | 3,27585 | 3,01024 | 1,202144232 | ENST00000473767 | 6092      | NM_001290065 | ROBO2                 |
| A_21_P0002608  | 2,88875 | 2,62329 | 1,20201925  | N/A             | N/A       | N/A          | Inc-GLI2-4            |
| A_21_P0006249  | 3,358   | 3,09259 | 1,201977591 | N/A             | 101929382 | XR_242528    | LOC101929382          |
| A_33_P3281018  | 6,5364  | 6,2711  | 1,201885949 | ENST00000417032 | 154822    | N/A          | LINC00689             |
| A_33_P3350988  | 2,28748 | 2,02219 | 1,201877618 | ENST00000398796 | 388942    | NR_033996    | LOC388942             |
| A_21_P0000205  | 6,75212 | 6,48688 | 1,201835965 | ENST00000381786 | 348738    | NM_182626    | C2orf48               |
| A_21_P0004058  | 4,31269 | 4,04746 | 1,201827634 | ENST00000509456 | N/A       | N/A          | N/A                   |
| A_23_P39356    | 4,70589 | 4,44068 | 1,201810973 | ENST00000246553 | 2864      | NM_005303    | FFAR1                 |
| A_23_P23850    | 6,03595 | 5,77077 | 1,201785983 | ENST00000371231 | 1600      | NM_021080    | DAB1                  |
| A_33_P3245168  | 4,85815 | 4,59299 | 1,201769323 | ENST00000461131 | 346653    | NM_001290254 | FAM71F2               |
| A_21_P0008469  | 2,01576 | 1,75067 | 1,201711014 | ENST00000554142 | N/A       | N/A          | N/A                   |
| A_22_P00003312 | 8,14115 | 7,87606 | 1,201711014 | ENST00000576365 | N/A       | XM_005256006 | N/A                   |

|                |         |         |             |                 |           |              |                |
|----------------|---------|---------|-------------|-----------------|-----------|--------------|----------------|
| A_22_P00012128 | 6,09507 | 5,82999 | 1,201702684 | N/A             | N/A       | N/A          | Inc-POLR1E-2   |
| A_24_P316102   | 9,32891 | 9,06384 | 1,201694355 | ENST00000430455 | 8028      | NM_001195630 | MLLT10         |
| A_22_P00011819 | 3,82121 | 3,55615 | 1,201686025 | N/A             | N/A       | N/A          | Inc-PHF14-1    |
| A_24_P943613   | 8,72163 | 8,45659 | 1,201669366 | ENST00000261439 | 23216     | NM_015173    | TBC1D1         |
| A_22_P00000104 | 9,2342  | 8,96917 | 1,201661037 | N/A             | N/A       | XM_005268519 | Inc-NDFIP1-3   |
| A_23_P165007   | 6,26425 | 5,99927 | 1,201619391 | ENST00000587287 | 115727    | NM_170604    | RASGRP4        |
| A_33_P3415617  | 6,02171 | 5,75675 | 1,201602734 | N/A             | N/A       | N/A          | N/A            |
| A_33_P3356637  | 2,2931  | 2,02816 | 1,201586076 | N/A             | N/A       | N/A          | N/A            |
| A_22_P00017574 | 3,36682 | 3,10191 | 1,20156109  | N/A             | N/A       | N/A          | Inc-WDR60-7    |
| A_22_P00019225 | 5,78852 | 5,52369 | 1,201494463 | N/A             | N/A       | N/A          | Inc-EIF3A-2    |
| A_23_P372660   | 9,25756 | 8,99283 | 1,201411185 | ENST00000394104 | 26130     | NM_015635    | GAPVD1         |
| A_23_P113634   | 11,5873 | 11,3226 | 1,201386202 | ENST00000290858 | 865       | NM_001755    | CBFB           |
| A_23_P212213   | 10,7475 | 10,4828 | 1,201386202 | ENST00000484006 | 25917     | NM_015453    | THUMPD3        |
| A_33_P3330546  | 7,04609 | 6,78141 | 1,201369548 | ENST00000513792 | 155061    | NM_152557    | ZNF746         |
| A_23_P34527    | 9,8281  | 9,56356 | 1,201252972 | ENST00000489992 | 80308     | NM_025207    | FLAD1          |
| A_21_P0010632  | 6,36247 | 6,09796 | 1,201227993 | N/A             | N/A       | N/A          | XLOC_I2_001011 |
| A_33_P3295738  | 7,17703 | 6,91252 | 1,201227993 | ENST00000562761 | 1258      | NM_001135639 | CNGB1          |
| A_21_P0000827  | 7,08434 | 6,81993 | 1,201144733 | N/A             | 100506428 | NR_038894    | CBR3-AS1       |
| A_24_P228667   | 10,8163 | 10,5519 | 1,201136407 | ENST00000443660 | 64976     | NM_003776    | MRPL40         |
| A_21_P0004813  | 4,16665 | 3,90226 | 1,201128081 | N/A             | N/A       | N/A          | Inc-IRF4-2     |
| A_24_P391431   | 7,84675 | 7,5824  | 1,20109478  | ENST00000341864 | 51616     | NM_015975    | TAF9B          |
| A_21_P0011819  | 4,24004 | 3,97573 | 1,201061479 | N/A             | N/A       | N/A          | Inc-ZNF2-1     |
| A_21_P0012679  | 7,09797 | 6,83374 | 1,200994879 | ENST00000500092 | 101927282 | N/A          | LOC101927282   |
| A_21_P0013423  | 2,00563 | 1,7414  | 1,200994879 | ENST00000433337 | N/A       | N/A          | N/A            |
| A_33_P3273148  | 12,3951 | 12,1309 | 1,200969906 | ENST00000316939 | 90480     | NM_052850    | GADD45GIP1     |
| A_23_P89550    | 8,72641 | 8,46229 | 1,200903312 | ENST00000617618 | 22861     | NM_033004    | NLRP1          |
| A_23_P68998    | 6,20689 | 5,94289 | 1,200803427 | ENST00000216075 | 55586     | NM_017584    | MIOX           |
| A_19_P00317023 | 11,2732 | 11,0093 | 1,200720197 | N/A             | N/A       | N/A          | Inc-MYC-2      |
| A_23_P204630   | 11,7942 | 11,5303 | 1,200720197 | ENST00000343702 | 59277     | NM_021229    | NTN4           |
| A_21_P0012810  | 2,00603 | 1,74215 | 1,200703552 | ENST00000510975 | N/A       | N/A          | N/A            |
| A_21_P0010553  | 6,42097 | 6,15712 | 1,200678584 | N/A             | N/A       | N/A          | XLOC_I2_000399 |
| A_23_P3193     | 10,737  | 10,4732 | 1,200636972 | ENST00000163416 | 9950      | NM_005113    | GOLGA5         |
| A_23_P372144   | 11,2231 | 10,9593 | 1,200636972 | ENST00000221899 | 58509     | NM_021231    | CACTIN         |

|                |         |         |             |                 |           |           |                |
|----------------|---------|---------|-------------|-----------------|-----------|-----------|----------------|
| A_23_P120933   | 17,3559 | 17,0921 | 1,200636972 | ENST00000337304 | 468       | NM_001675 | ATF4           |
| A_22_P00017026 | 5,14499 | 4,8812  | 1,20062865  | ENST00000567837 | N/A       | BC042991  | N/A            |
| A_33_P3269864  | 3,82059 | 3,5568  | 1,20062865  | N/A             | 284009    | NR_028335 | LOC284009      |
| A_33_P3248272  | 8,51429 | 8,25058 | 1,200562075 | ENST00000380154 | 7993      | NM_005671 | UBXN8          |
| A_21_P0008758  | 6,08647 | 5,8228  | 1,200528789 | N/A             | N/A       | N/A       | Inc-MAN2C1-3   |
| A_21_P0005540  | 4,96317 | 4,69952 | 1,200512146 | N/A             | N/A       | N/A       | Inc-ACTR3C-2   |
| A_21_P0002041  | 4,36894 | 4,10529 | 1,200512146 | N/A             | 102725386 | N/A       | LOC102725386   |
| A_21_P0008215  | 9,12886 | 8,8653  | 1,200437257 | N/A             | 101927712 | XR_243074 | LOC101927712   |
| A_22_P00013416 | 4,57305 | 4,30949 | 1,200437257 | ENST00000556773 | N/A       | BM931031  | N/A            |
| A_23_P111621   | 11,1988 | 10,9354 | 1,200304131 | ENST00000486086 | 9569      | NM_005685 | GTF2IRD1       |
| A_33_P3394517  | 8,88873 | 8,62534 | 1,200295811 | ENST00000411546 | 23049     | NM_015092 | SMG1           |
| A_33_P3230259  | 4,8957  | 4,63232 | 1,200287492 | N/A             | 23397     | NM_015341 | NCAPH          |
| A_22_P00003189 | 3,41295 | 3,14965 | 1,200220935 | N/A             | 100996348 | NR_121630 | LOC100996348   |
| A_23_P81760    | 6,5808  | 6,31755 | 1,20017934  | ENST00000540719 | 9444      | NM_006775 | QKI            |
| A_23_P353048   | 2,21107 | 1,94794 | 1,200079516 | ENST00000623373 | 23145     | NM_198455 | SSPO           |
| A_24_P318656   | 8,59096 | 8,32787 | 1,200046243 | ENST00000559488 | 3690      | NM_000212 | ITGB3          |
| A_21_P0012348  | 2,05452 | 1,79152 | 1,199971382 | ENST00000424029 | 221223    | NM_145024 | CES5A          |
| A_23_P115683   | 13,6433 | 13,3803 | 1,199971382 | ENST00000299238 | 79803     | NM_024747 | HPS6           |
| A_33_P3243957  | 5,22149 | 4,95858 | 1,199896527 | ENST00000368686 | 26097     | AK097870  | CHTOP          |
| A_33_P3239884  | 4,36175 | 4,09889 | 1,199854942 | ENST00000284894 | 4685      | NM_004540 | NCAM2          |
| A_23_P64661    | 3,32459 | 3,06176 | 1,199829992 | ENST00000430041 | 64333     | NM_032496 | ARHGAP9        |
| A_21_P0011657  | 5,49969 | 5,23688 | 1,199813359 | N/A             | N/A       | N/A       | XLOC_I2_006417 |
| A_23_P111112   | 11,6487 | 11,3859 | 1,199805043 | ENST00000542001 | 57176     | NM_020442 | VARS2          |
| A_33_P3818959  | 8,77864 | 8,51602 | 1,199655356 | ENST00000342066 | 148398    | NM_152486 | SAMD11         |
| A_33_P3342160  | 9,12862 | 8,86607 | 1,19959715  | ENST00000359933 | 55102     | NM_018036 | ATG2B          |
| A_22_P00006575 | 5,30089 | 5,03841 | 1,199538947 | N/A             | 100133991 | NR_024435 | MAP3K14-AS1    |
| A_22_P00008813 | 10,0821 | 9,81962 | 1,199538947 | N/A             | 102725022 | N/A       | LOC102725022   |
| A_32_P155091   | 15,5315 | 15,2691 | 1,199472432 | ENST00000325215 | 11273     | NM_145714 | ATXN2L         |
| A_23_P12992    | 15,9729 | 15,7105 | 1,199472432 | ENST00000537918 | 51504     | NM_016404 | TRMT112        |
| A_23_P92230    | 9,19198 | 8,92975 | 1,199331101 | ENST00000361875 | 9819      | NM_014779 | TSC22D2        |
| A_32_P25514    | 9,64945 | 9,38724 | 1,199314474 | ENST00000356592 | 2566      | NM_198904 | GABRG2         |
| A_33_P3286873  | 4,47821 | 4,21602 | 1,199297848 | ENST00000483825 | 919       | AK128376  | CD247          |
| A_21_P0003556  | 3,70657 | 3,4444  | 1,199281223 | N/A             | N/A       | N/A       | Inc-PDE6B-1    |

|                |         |         |             |                 |           |              |               |
|----------------|---------|---------|-------------|-----------------|-----------|--------------|---------------|
| A_24_P920125   | 10,0947 | 9,83255 | 1,199264597 | ENST00000468812 | 5478      | NM_021130    | PPIA          |
| A_33_P3234571  | 8,63482 | 8,37276 | 1,199189786 | ENST00000526076 | 5606      | NM_145109    | MAP2K3        |
| A_21_P0009739  | 6,27133 | 6,00928 | 1,199181474 | N/A             | N/A       | N/A          | Inc-S1PR2-1   |
| A_21_P0001706  | 4,40064 | 4,13863 | 1,199148226 | ENST00000502767 | 51177     | N/A          | PLEKHO1       |
| A_33_P3398634  | 11,3621 | 11,1001 | 1,199139914 | ENST00000445214 | 7942      | NM_001271943 | TFEB          |
| A_33_P3290532  | 2,04011 | 1,77811 | 1,199139914 | N/A             | 255480    | NR_038440    | TBX5-AS1      |
| A_24_P414256   | 13,1321 | 12,8701 | 1,199139914 | ENST00000477624 | 51372     | AK126594     | TMA7          |
| A_24_P280378   | 9,61248 | 9,35054 | 1,199090044 | ENST00000559767 | 9716      | NM_014691    | AQR           |
| A_21_P0009268  | 5,10513 | 4,84325 | 1,199040176 | N/A             | N/A       | N/A          | Inc-MAP2K6-2  |
| A_33_P3299125  | 1,98911 | 1,72726 | 1,199015243 | N/A             | N/A       | N/A          | N/A           |
| A_33_P3360426  | 8,84237 | 8,58058 | 1,198965379 | ENST00000264785 | 9948      | NM_017491    | WDR1          |
| A_33_P3569068  | 9,64381 | 9,38209 | 1,198907206 | ENST00000406869 | 8379      | NM_003550    | MAD1L1        |
| A_33_P3216357  | 4,04475 | 3,78307 | 1,198873966 | ENST00000349663 | 8242      | NM_001146702 | KDM5C         |
| A_22_P00008117 | 5,58973 | 5,32811 | 1,198824107 | N/A             | N/A       | AA505990     | Inc-IL25-1    |
| A_22_P00020323 | 1,91533 | 1,65374 | 1,198799178 | N/A             | N/A       | N/A          | Inc-ACOX3-2   |
| A_33_P3336925  | 9,88044 | 9,61897 | 1,198699469 | ENST00000511767 | 10611     | NM_001256429 | PDLIM5        |
| A_33_P3319581  | 8,85265 | 8,59122 | 1,198666235 | N/A             | 401720    | NM_001013690 | FIGNL2        |
| A_33_P3303572  | 5,82999 | 5,56856 | 1,198666235 | ENST00000525810 | 1896      | NM_001005610 | EDA           |
| A_21_P0000343  | 5,07163 | 4,81022 | 1,198649618 | N/A             | 677796    | NR_002991    | SNORA5C       |
| A_24_P36847    | 11,0318 | 10,7704 | 1,198641309 | ENST00000485081 | 1660      | NM_001357    | DHX9          |
| A_23_P157215   | 14,0786 | 13,8172 | 1,198641309 | ENST00000436868 | 28969     | NM_014038    | BZW2          |
| A_22_P00010119 | 2,33524 | 2,07385 | 1,198633001 | N/A             | N/A       | N/A          | Inc-MRP63-6   |
| A_21_P0012358  | 2,38587 | 2,12459 | 1,198541613 | ENST00000418271 | N/A       | N/A          | N/A           |
| A_22_P00018488 | 4,78026 | 4,51901 | 1,19851669  | N/A             | N/A       | DA967691     | Inc-SNX24-1   |
| A_23_P121082   | 10,6026 | 10,3414 | 1,198475154 | ENST00000429644 | 2632      | NM_000158    | GBE1          |
| A_23_P69058    | 12,7163 | 12,4551 | 1,198475154 | ENST00000536378 | 4292      | NM_000249    | MLH1          |
| A_33_P3348797  | 9,07506 | 8,81387 | 1,198466847 | ENST00000338051 | 134553    | NM_001135586 | C5orf24       |
| A_22_P00009613 | 1,93464 | 1,67347 | 1,198450232 | N/A             | 101929472 | NR_109945    | CTD-2350J17.1 |
| A_22_P00007255 | 8,5639  | 8,30276 | 1,198425312 | N/A             | N/A       | N/A          | Inc-GPR137C-1 |
| A_33_P3374643  | 12,4882 | 12,2271 | 1,198392085 | ENST00000376384 | 80227     | NM_001267803 | PAAF1         |
| A_22_P00017823 | 4,45245 | 4,19143 | 1,198325634 | N/A             | N/A       | N/A          | Inc-ZC3H12B-3 |
| A_33_P3319585  | 3,25331 | 2,9923  | 1,198317327 | N/A             | 401720    | NM_001013690 | FIGNL2        |
| A_23_P58082    | 10,8381 | 10,5771 | 1,198309021 | ENST00000439685 | 151887    | NM_199511    | CCDC80        |

|                |         |         |             |                 |        |              |              |
|----------------|---------|---------|-------------|-----------------|--------|--------------|--------------|
| A_33_P3234043  | 5,02748 | 4,76659 | 1,198217658 | ENST00000471755 | 649    | AK291620     | BMP1         |
| A_19_P00318915 | 8,94184 | 8,68098 | 1,198192742 | ENST00000522875 | N/A    | N/A          | N/A          |
| A_33_P3216448  | 5,58761 | 5,32677 | 1,198176132 | ENST00000383088 | 1302   | NM_001163771 | COL11A2      |
| A_33_P3244610  | 2,71516 | 2,45439 | 1,198117998 | ENST00000381623 | 128646 | NM_178460    | SIRPD        |
| A_33_P3239659  | 3,82865 | 3,5679  | 1,198101388 | N/A             | N/A    | N/A          | N/A          |
| A_21_P0000001  | 2,74376 | 2,48303 | 1,198084779 | ENST00000408955 | 135948 | NM_001004685 | OR2F2        |
| A_22_P00014390 | 3,3182  | 3,05749 | 1,19806817  | N/A             | N/A    | N/A          | Inc-SFN-1    |
| A_23_P49021    | 12,2508 | 11,9901 | 1,198059866 | ENST00000560569 | 80349  | NM_025234    | WDR61        |
| A_22_P00020809 | 4,42581 | 4,16514 | 1,198034953 | N/A             | 644277 | XR_110541    | LOC644277    |
| A_33_P3385656  | 5,80615 | 5,5456  | 1,197935308 | ENST00000312349 | 408263 | NM_001001343 | FNDC9        |
| A_24_P220454   | 8,88844 | 8,62799 | 1,197852276 | ENST00000360264 | 1523   | NM_181552    | CUX1         |
| A_33_P3251108  | 8,32551 | 8,06507 | 1,197843973 | ENST00000359479 | 9197   | NM_001190992 | SLC33A1      |
| A_33_P6570042  | 2,88031 | 2,61989 | 1,197827368 | ENST00000451772 | 55857  | AK296399     | KIZ          |
| A_22_P00011233 | 5,1375  | 4,8772  | 1,197727739 | N/A             | N/A    | AK057939     | Inc-OR10V1-1 |
| A_33_P3421821  | 2,54399 | 2,28372 | 1,197702833 | ENST00000448094 | 8398   | NM_001004426 | PLA2G6       |
| A_23_P3186     | 11,3768 | 11,1166 | 1,197644722 | ENST00000553865 | 8812   | NM_001099402 | CCNK         |
| A_21_P0000304  | 7,12357 | 6,86337 | 1,197644722 | N/A             | 654322 | NR_002922    | SNORA13      |
| A_21_P0012274  | 10,4196 | 10,1595 | 1,19756171  | ENST00000549484 | 642477 | NR_122112    | LINC01296    |
| A_19_P00322418 | 5,43427 | 5,17419 | 1,197545109 | ENST00000531443 | 55074  | NM_018002    | OXR1         |
| A_33_P3317937  | 4,97148 | 4,71153 | 1,197437204 | ENST00000334664 | 337975 | NM_181615    | KRTAP20-1    |
| A_22_P00016399 | 4,42343 | 4,16353 | 1,197395705 | N/A             | 80072  | NR_027262    | HEXA-AS1     |
| A_23_P143190   | 10,2178 | 9,95792 | 1,197379105 | ENST00000396863 | 4605   | NM_002466    | MYBL2        |
| A_23_P429383   | 4,14269 | 3,88289 | 1,19731271  | ENST00000249499 | 3235   | NM_014213    | HOXD9        |
| A_33_P3367087  | 4,69694 | 4,43715 | 1,197304411 | ENST00000466270 | 399818 | NM_212554    | METTL10      |
| A_21_P0012884  | 9,10005 | 8,84026 | 1,197304411 | ENST00000507841 | 728613 | NR_003713    | LOC728613    |
| A_23_P311616   | 8,41741 | 8,15767 | 1,197262917 | ENST00000397625 | 23210  | NM_015167    | JMJD6        |
| A_33_P3351062  | 4,87406 | 4,61433 | 1,197254618 | N/A             | N/A    | N/A          | N/A          |
| A_33_P3802558  | 8,27617 | 8,01645 | 1,197246319 | N/A             | N/A    | BC015643     | N/A          |
| A_23_P148121   | 11,5812 | 11,3215 | 1,197229722 | ENST00000309295 | 254102 | NM_001099409 | EHBP1L1      |
| A_21_P0006697  | 5,31433 | 5,05464 | 1,197221423 | ENST00000412362 | N/A    | N/A          | N/A          |
| A_24_P323941   | 7,5824  | 7,32272 | 1,197213125 | ENST00000371328 | 200232 | NM_001012971 | FAM209A      |
| A_32_P101860   | 8,17243 | 7,91278 | 1,19718823  | N/A             | 113277 | NM_001291586 | TMEM106A     |
| A_23_P130376   | 4,33501 | 4,07542 | 1,197138441 | ENST00000538948 | 63895  | NM_022068    | PIEZO2       |

|                |         |         |             |                 |           |              |                |
|----------------|---------|---------|-------------|-----------------|-----------|--------------|----------------|
| A_21_P0008268  | 2,44846 | 2,18889 | 1,197121845 | N/A             | N/A       | N/A          | Inc-GAS6-4     |
| A_19_P00320972 | 2,2569  | 1,99733 | 1,197121845 | ENST00000513116 | 3925      | NM_001145454 | STMN1          |
| A_22_P00012272 | 5,96748 | 5,70794 | 1,197096952 | N/A             | N/A       | N/A          | Inc-PPP1R3D-2  |
| A_21_P0012478  | 1,96716 | 1,70763 | 1,197088655 | ENST00000414309 | 647323    | N/A          | LOC647323      |
| A_23_P157465   | 9,62779 | 9,36827 | 1,197080357 | ENST00000341403 | 7993      | NM_005671    | UBXN8          |
| A_33_P3360753  | 5,62414 | 5,36468 | 1,197030573 | ENST00000370221 | 3785      | AK293727     | KCNQ2          |
| A_22_P00017739 | 4,54536 | 4,28591 | 1,197022276 | N/A             | 114044    | NR_110566    | MCM3AP-AS1     |
| A_33_P3295623  | 2,13249 | 1,87306 | 1,197005682 | N/A             | N/A       | N/A          | N/A            |
| A_23_P413193   | 9,61319 | 9,35377 | 1,196997385 | ENST00000369729 | 119392    | NM_145247    | SFR1           |
| A_24_P192197   | 11,3754 | 11,116  | 1,196980791 | ENST00000618555 | 56897     | NM_130395    | WRNIP1         |
| A_33_P3302881  | 5,39801 | 5,13861 | 1,196980791 | ENST00000407079 | 401265    | NM_001003760 | KLHL31         |
| A_33_P3396872  | 2,1004  | 1,84104 | 1,196947604 | N/A             | 79974     | NM_001105533 | CPED1          |
| A_33_P3385516  | 2,06055 | 1,80125 | 1,196897825 | ENST00000064571 | 140689    | NM_080617    | CBLN4          |
| A_24_P409250   | 2,61745 | 2,35816 | 1,196889529 | ENST00000534745 | 100500804 | AK300203     | MIR3654        |
| A_23_P207194   | 3,89723 | 3,63794 | 1,196889529 | ENST00000323322 | 2688      | NM_000515    | GH1            |
| A_22_P00015645 | 6,35777 | 6,09854 | 1,196839753 | N/A             | N/A       | N/A          | Inc-SUPT6H-3   |
| A_23_P14915    | 9,97545 | 9,71629 | 1,196781683 | ENST00000262506 | 1459      | NM_001896    | CSNK2A2        |
| A_21_P0007895  | 4,10975 | 3,85064 | 1,196740207 | ENST00000539956 | 54621     | N/A          | VSIG10         |
| A_33_P3226492  | 4,58978 | 4,33075 | 1,196673847 | N/A             | 7879      | AF119891     | RAB7A          |
| A_32_P69166    | 6,44603 | 6,18702 | 1,196657258 | ENST00000393392 | 338699    | NM_182603    | ANKRD42        |
| A_23_P217659   | 11,933  | 11,674  | 1,196648963 | ENST00000453705 | 79184     | NM_001018055 | BRCC3          |
| A_33_P3416171  | 2,68581 | 2,42682 | 1,196640669 | ENST00000554321 | 100507043 | N/A          | TUNAR          |
| A_21_P0010597  | 2,09894 | 1,83998 | 1,196615786 | N/A             | N/A       | N/A          | XLOC_I2_000738 |
| A_24_P100673   | 13,5661 | 13,3072 | 1,196566021 | ENST00000249209 | 51234     | NM_016454    | EMC4           |
| A_23_P205177   | 4,38167 | 4,12285 | 1,196499671 | ENST00000375559 | 2159      | NM_000504    | F10            |
| A_22_P00002774 | 4,29624 | 4,03747 | 1,196458204 | ENST00000415205 | 388906    | NR_036498    | OGFRP1         |
| A_22_P00007541 | 2,11043 | 1,85168 | 1,196441618 | ENST00000569178 | 101929288 | XR_244239    | LOC101929288   |
| A_23_P142560   | 5,60017 | 5,34144 | 1,196425032 | ENST00000558170 | 9839      | NM_014795    | ZEB2           |
| A_33_P3340085  | 8,37833 | 8,1197  | 1,196342105 | ENST00000339677 | 84271     | NM_178136    | POLDIP3        |
| A_22_P00018099 | 3,69985 | 3,44123 | 1,196333812 | N/A             | N/A       | N/A          | Inc-ZNF397-1   |
| A_33_P3324651  | 13,6142 | 13,3556 | 1,196317228 | ENST00000433027 | 9584      | NM_001242600 | RBM39          |
| A_21_P0002208  | 4,08719 | 3,82865 | 1,196267475 | N/A             | N/A       | N/A          | Inc-PRKCE-1    |
| A_23_P78372    | 7,45629 | 7,19786 | 1,196176268 | ENST00000621904 | 9984      | NM_005131    | THOC1          |

|                |         |         |             |                 |           |              |              |
|----------------|---------|---------|-------------|-----------------|-----------|--------------|--------------|
| A_21_P0014378  | 5,60205 | 5,34369 | 1,19611823  | ENST00000592362 | 284459    | AK056243     | HKR1         |
| A_23_P403081   | 8,30411 | 8,04575 | 1,19611823  | ENST00000506213 | 375444    | NM_198566    | C5orf34      |
| A_19_P00809423 | 5,73616 | 5,47781 | 1,19610994  | ENST00000421002 | 100874167 | N/A          | LINC00423    |
| A_33_P3594654  | 9,95392 | 9,69561 | 1,196076777 | N/A             | 79134     | NM_024121    | TMEM185B     |
| A_22_P00004640 | 3,79765 | 3,53935 | 1,196068486 | ENST00000557197 | N/A       | N/A          | N/A          |
| A_22_P00022663 | 5,91783 | 5,65954 | 1,196060196 | N/A             | N/A       | N/A          | Inc-RPL30-1  |
| A_33_P3325131  | 10,115  | 9,85676 | 1,196018744 | ENST00000503126 | 821       | NM_001746    | CANX         |
| A_23_P502336   | 1,96415 | 1,706   | 1,195944135 | ENST00000315576 | 30817     | NM_013447    | EMR2         |
| A_33_P3343845  | 7,33523 | 7,07708 | 1,195944135 | ENST00000490741 | 23492     | NM_175709    | CBX7         |
| A_21_P0013769  | 10,5138 | 10,2557 | 1,195902688 | ENST00000430422 | 2107      | NM_001256302 | ETF1         |
| A_33_P3702055  | 5,92134 | 5,66324 | 1,195902688 | ENST00000354352 | 6556      | NM_000578    | SLC11A1      |
| A_24_P20777    | 18,1569 | 17,8988 | 1,195902688 | ENST00000504562 | 6167      | NM_000997    | RPL37        |
| A_21_P0009366  | 2,40508 | 2,14699 | 1,195894398 | ENST00000570929 | N/A       | N/A          | N/A          |
| A_33_P3280044  | 14,3065 | 14,0485 | 1,195819797 | ENST00000568100 | 29123     | NM_001256182 | ANKRD11      |
| A_33_P3217028  | 11,1144 | 10,8564 | 1,195819797 | ENST00000396854 | 10548     | NM_001014842 | TM9SF1       |
| A_23_P432506   | 1,94463 | 1,68665 | 1,195803219 | N/A             | N/A       | AK054875     | Inc-GATA5-2  |
| A_22_P00001850 | 5,19108 | 4,93314 | 1,195770065 | N/A             | 100874242 | NR_046701    | PRICKLE2-AS2 |
| A_22_P00011104 | 3,26583 | 3,00789 | 1,195770065 | N/A             | 101929410 | XR_245430    | SUCLA2-AS1   |
| A_22_P00023938 | 2,18563 | 1,9277  | 1,195761777 | ENST00000520606 | N/A       | CD691743     | N/A          |
| A_23_P13344    | 17,7432 | 17,4853 | 1,195736912 | ENST00000496634 | 1937      | NM_001404    | EEF1G        |
| A_23_P31143    | 15,0203 | 14,7624 | 1,195736912 | ENST00000392482 | 7164      | NM_001003395 | TPD52L1      |
| A_33_P3538104  | 4,0889  | 3,83108 | 1,195670608 | ENST00000569713 | 283854    | XR_243451    | CASC22       |
| A_23_P368896   | 7,44523 | 7,18746 | 1,19562917  | ENST00000622259 | 29934     | NM_013346    | SNX12        |
| A_24_P240242   | 5,92487 | 5,66718 | 1,195562872 | ENST00000477765 | 4134      | NM_002375    | MAP4         |
| A_22_P00015290 | 3,58056 | 3,32294 | 1,195504864 | N/A             | N/A       | N/A          | Inc-SPCS2-1  |
| A_23_P371215   | 2,09481 | 1,83726 | 1,195446859 | ENST00000316386 | 29851     | NM_012092    | ICOS         |
| A_32_P11471    | 17,695  | 17,4375 | 1,195405429 | ENST00000526555 | 2197      | NM_001997    | FAU          |
| A_23_P109547   | 10,3579 | 10,1004 | 1,195405429 | ENST00000325301 | 54471     | NM_019008    | MIEF1        |
| A_24_P4054     | 14,9429 | 14,6854 | 1,195405429 | ENST00000488670 | 7205      | NM_003302    | TRIP6        |
| A_33_P3321533  | 5,45552 | 5,19804 | 1,195388857 | ENST00000563442 | 100507421 | N/A          | TMEM178B     |
| A_24_P340800   | 6,40519 | 6,14774 | 1,195364    | ENST00000453351 | 285268    | NM_198484    | ZNF621       |
| A_33_P3222744  | 6,83374 | 6,57632 | 1,195339144 | ENST00000620222 | 51351     | NM_015852    | ZNF117       |
| A_24_P50908    | 9,22035 | 8,96294 | 1,195330858 | ENST00000366699 | 81559     | AK074623     | TRIM11       |

|                |         |         |             |                 |           |              |                  |
|----------------|---------|---------|-------------|-----------------|-----------|--------------|------------------|
| A_22_P00002297 | 14,6609 | 14,4035 | 1,195322573 | ENST00000535297 | 746       | NM_014206    | TMEM258          |
| A_24_P143138   | 4,905   | 4,64762 | 1,195306002 | ENST00000375135 | 2245      | NM_004463    | FGD1             |
| A_33_P3420695  | 5,40125 | 5,14389 | 1,195289432 | N/A             | N/A       | N/A          | N/A              |
| A_33_P3211793  | 5,39997 | 5,14264 | 1,195264577 | ENST00000538304 | 729732    | NR_047662    | LOC729732        |
| A_22_P00014205 | 5,65705 | 5,39972 | 1,195264577 | ENST00000452867 | 100302401 | NR_027982    | RASAL2-AS1       |
| A_21_P0008024  | 3,53533 | 3,27801 | 1,195256292 | N/A             | 348021    | NR_026852    | LINC00442        |
| A_21_P0005518  | 2,02868 | 1,77137 | 1,195248007 | N/A             | N/A       | N/A          | Inc-AC092031.1-1 |
| A_23_P217609   | 18,0438 | 17,7865 | 1,195239722 | ENST00000372849 | 6173      | NM_021029    | RPL36A           |
| A_23_P45945    | 18,0005 | 17,7432 | 1,195239722 | ENST00000469308 | 10209     | NM_005801    | EIF1             |
| A_33_P3251408  | 2,16769 | 1,91045 | 1,195190015 | N/A             | N/A       | N/A          | N/A              |
| A_33_P3319943  | 10,9334 | 10,6762 | 1,195156877 | ENST00000480283 | 546       | NM_000489    | ATRX             |
| A_33_P3274069  | 11,2271 | 10,9699 | 1,195156877 | ENST00000216085 | 25807     | NM_012265    | RHBDD3           |
| A_23_P157784   | 12,613  | 12,3558 | 1,195156877 | ENST00000474848 | 84681     | NM_032593    | HINT2            |
| A_21_P0009999  | 2,3397  | 2,08251 | 1,195148593 | N/A             | N/A       | N/A          | Inc-PRNT-1       |
| A_33_P3296567  | 9,20006 | 8,94306 | 1,194991205 | ENST00000405995 | 84726     | NM_013318    | PRRC2B           |
| A_24_P322353   | 7,65494 | 7,39796 | 1,194974639 | ENST00000588801 | 9050      | NM_024430    | PSTPIP2          |
| A_21_P0014370  | 6,23861 | 5,98165 | 1,194958073 | N/A             | N/A       | BX103273     | N/A              |
| A_23_P320878   | 8,13986 | 7,8829  | 1,194958073 | ENST00000300209 | 25895     | NM_206914    | METTL21B         |
| A_24_P400997   | 9,20774 | 8,95079 | 1,19494979  | ENST00000320876 | 23347     | NM_015295    | SMCHD1           |
| A_22_P00015306 | 4,88834 | 4,63143 | 1,19491666  | N/A             | N/A       | DA214217     | Inc-SPINK9-1     |
| A_24_P363477   | 9,31962 | 9,06272 | 1,194908377 | ENST00000486040 | 29960     | NM_013393    | FTSJ2            |
| A_23_P330908   | 10,1024 | 9,84551 | 1,194900095 | ENST00000524119 | 79139     | NM_024295    | DERL1            |
| A_21_P0014351  | 7,91929 | 7,66243 | 1,194875248 | N/A             | 100506325 | NR_103856    | SP2-AS1          |
| A_33_P3346222  | 7,18813 | 6,93128 | 1,194866966 | ENST00000480223 | 4439      | NM_025259    | MSH5             |
| A_22_P00001971 | 4,35497 | 4,09819 | 1,194808992 | ENST00000429944 | 6660      | NM_001261414 | SOX5             |
| A_24_P520767   | 5,53885 | 5,28211 | 1,194775865 | ENST00000443802 | 149351    | XR_132798    | LOC149351        |
| A_33_P3339536  | 12,7832 | 12,5265 | 1,194742739 | ENST00000332050 | 2130      | NM_013986    | EWSR1            |
| A_23_P377888   | 11,0996 | 10,8429 | 1,194742739 | ENST00000621063 | 22909     | NM_014967    | FAN1             |
| A_23_P9465     | 11,8147 | 11,558  | 1,194742739 | ENST00000460181 | 2356      | NM_004957    | FPGS             |
| A_33_P3390102  | 15,8701 | 15,6134 | 1,194742739 | ENST00000393033 | 10755     | NM_005716    | GIPC1            |
| A_22_P00004933 | 5,11687 | 4,86021 | 1,194709614 | N/A             | N/A       | BU072076     | Inc-DBX1-3       |
| A_21_P0009298  | 1,98148 | 1,72484 | 1,194693052 | ENST00000581851 | 100289255 | NR_036581    | LINC00675        |
| A_22_P00020557 | 5,88038 | 5,62382 | 1,194626806 | N/A             | N/A       | N/A          | Inc-AC010536.1-1 |



|                |         |         |             |                 |           |              |                |
|----------------|---------|---------|-------------|-----------------|-----------|--------------|----------------|
| A_24_P263703   | 5,22407 | 4,96758 | 1,194568844 | N/A             | 100130609 | AF318327     | PP12708        |
| A_33_P3348234  | 6,45677 | 6,20043 | 1,194444649 | N/A             | N/A       | AK024925     | N/A            |
| A_33_P3246774  | 4,32035 | 4,06402 | 1,194436369 | N/A             | N/A       | N/A          | XLOC_I2_015848 |
| A_23_P2884     | 10,2656 | 10,0093 | 1,194411532 | ENST00000559118 | 5283      | NM_004569    | PIGH           |
| A_33_P3330099  | 10,7398 | 10,4836 | 1,194328745 | ENST00000381154 | 414       | NM_001669    | ARSD           |
| A_33_P3398065  | 10,8469 | 10,5907 | 1,194328745 | ENST00000392483 | 7164      | NM_001292026 | TPD52L1        |
| A_21_P0000757  | 3,54368 | 3,28748 | 1,194328745 | ENST00000551726 | 100507377 | NR_038300    | LOC100507377   |
| A_33_P3218584  | 12,3736 | 12,1174 | 1,194328745 | ENST00000357500 | 51367     | NM_015918    | POP5           |
| A_32_P21579    | 3,06263 | 2,80654 | 1,194237685 | ENST00000354631 | 1787      | NM_004412    | TRDMT1         |
| A_19_P00810894 | 5,41271 | 5,15664 | 1,19422113  | ENST00000573229 | 286023    | N/A          | FLJ40288       |
| A_22_P00011001 | 4,13504 | 3,87899 | 1,194204574 | N/A             | N/A       | AK055679     | Inc-NSMCE1-1   |
| A_24_P403417   | 10,0163 | 9,76025 | 1,194204574 | ENST00000481476 | 9536      | NM_004878    | PTGES          |
| A_33_P3351249  | 9,05217 | 8,79619 | 1,194146633 | ENST00000574412 | 58191     | NM_001100812 | CXCL16         |
| A_22_P00017391 | 1,92145 | 1,6655  | 1,194121801 | ENST00000582470 | N/A       | N/A          | N/A            |
| A_24_P56894    | 7,89337 | 7,63748 | 1,19407214  | ENST00000324238 | 51379     | NM_015986    | CRLF3          |
| A_24_P414712   | 7,28004 | 7,02418 | 1,19404731  | ENST00000449261 | 27154     | NM_015695    | BRPF3          |
| A_21_P0005754  | 3,17499 | 2,91915 | 1,194030757 | N/A             | N/A       | N/A          | Inc-UTP23-1    |
| A_33_P3422233  | 10,2015 | 9,94567 | 1,194022481 | ENST00000389851 | 57654     | NM_020894    | UVSSA          |
| A_21_P0002636  | 5,24561 | 4,98979 | 1,194014205 | N/A             | N/A       | N/A          | Inc-FAM150B-1  |
| A_21_P0003476  | 5,08998 | 4,83425 | 1,193939721 | ENST00000507156 | N/A       | N/A          | N/A            |
| A_21_P0014890  | 2,52404 | 2,26833 | 1,193923169 | N/A             | 100507548 | AK130852     | LOC100507548   |
| A_21_P0006686  | 3,82684 | 3,57113 | 1,193923169 | N/A             | N/A       | N/A          | Inc-FAM22B-1   |
| A_23_P476      | 12,3373 | 12,0816 | 1,193914894 | ENST00000359523 | 9019      | NM_003953    | MPZL1          |
| A_22_P00015297 | 2,81806 | 2,56244 | 1,193848691 | N/A             | N/A       | N/A          | Inc-SPG11-2    |
| A_24_P201879   | 8,04386 | 7,78825 | 1,193840416 | ENST00000521776 | 9724      | NM_021645    | UTP14C         |
| A_33_P3289356  | 11,2665 | 11,0109 | 1,193832141 | ENST00000369489 | 965       | NM_001779    | CD58           |
| A_33_P3328609  | 8,18059 | 7,925   | 1,193823866 | ENST00000426801 | 8502      | NM_003628    | PKP4           |
| A_23_P110196   | 10,2569 | 10,0014 | 1,193749393 | ENST00000502913 | 51191     | NM_016323    | HERC5          |
| A_23_P127557   | 5,75314 | 5,49767 | 1,19372457  | ENST00000531837 | 143879    | NM_198439    | KBTBD3         |
| A_22_P00013851 | 2,87727 | 2,62182 | 1,193708022 | N/A             | N/A       | N/A          | Inc-RPL38-1    |
| A_23_P142174   | 3,90472 | 3,64927 | 1,193708022 | ENST00000302177 | 3171      | NM_004497    | FOXA3          |
| A_22_P00022176 | 4,23525 | 3,97982 | 1,193691474 | ENST00000429809 | 101927889 | XR_246197    | LINC01153      |
| A_19_P00803697 | 4,87485 | 4,61943 | 1,1936832   | N/A             | N/A       | N/A          | Inc-EMX2-1     |

|                |         |         |             |                 |           |              |               |
|----------------|---------|---------|-------------|-----------------|-----------|--------------|---------------|
| A_23_P390068   | 11,4951 | 11,2397 | 1,193666652 | ENST00000215582 | 126353    | NM_173481    | MISP          |
| A_23_P61551    | 9,15835 | 8,90298 | 1,19364183  | ENST00000569466 | 10421     | NM_006110    | CD2BP2        |
| A_32_P143048   | 7,24627 | 6,99098 | 1,193575643 | ENST00000562515 | 9372      | NM_004799    | ZFYVE9        |
| A_33_P3412945  | 11,9893 | 11,7341 | 1,193501186 | ENST00000392485 | 6427      | NM_003016    | SRSF2         |
| A_21_P0001213  | 3,14875 | 2,89357 | 1,193484641 | ENST00000412162 | 100131234 | N/A          | MIR181A1HG    |
| A_23_P169503   | 7,05132 | 6,79616 | 1,193468096 | ENST00000421286 | 1056      | NM_001807    | CEL           |
| A_33_P3421907  | 5,6394  | 5,38426 | 1,193451551 | ENST00000580780 | N/A       | N/A          | N/A           |
| A_33_P3353343  | 7,13243 | 6,87733 | 1,193418462 | ENST00000576894 | 23524     | NM_016333    | SRRM2         |
| A_33_P3273063  | 7,40338 | 7,14833 | 1,193377102 | ENST00000367402 | 348995    | NM_198887    | NUP43         |
| A_23_P137848   | 12,3311 | 12,0761 | 1,193335743 | ENST00000434558 | 79590     | NM_145729    | MRPL24        |
| A_23_P12128    | 5,19885 | 4,94388 | 1,193310929 | ENST00000369517 | 7252      | NM_000549    | TSHB          |
| A_22_P00011082 | 1,84019 | 1,58524 | 1,193294386 | N/A             | N/A       | N/A          | Inc-NUDCD2-2  |
| A_33_P3322945  | 5,49014 | 5,23521 | 1,193277843 | ENST00000377185 | 387778    | NM_001008778 | SPDYC         |
| A_21_P0007909  | 1,60199 | 1,34708 | 1,193261301 | ENST00000561557 | N/A       | N/A          | N/A           |
| A_23_P139722   | 10,9619 | 10,707  | 1,19325303  | ENST00000162749 | 7132      | NM_001065    | TNFRSF1A      |
| A_23_P151907   | 7,86242 | 7,6076  | 1,193186864 | ENST00000557794 | 5046      | NM_002570    | PCSK6         |
| A_23_P153050   | 10,2723 | 10,0175 | 1,193170323 | ENST00000399138 | 54890     | NM_017758    | ALKBH5        |
| A_19_P00322662 | 2,10892 | 1,85414 | 1,193153782 | ENST00000435479 | 283673    | NR_026949    | EWSAT1        |
| A_22_P00011103 | 4,50155 | 4,24681 | 1,193120702 | N/A             | 100873965 | NR_046511    | MED4-AS1      |
| A_33_P3401701  | 3,25065 | 2,99593 | 1,193104161 | ENST00000510697 | 1909      | NM_001957    | EDNRA         |
| A_23_P136964   | 8,1973  | 7,9426  | 1,193087622 | ENST00000474584 | 6103      | NM_000328    | RPGR          |
| A_23_P77590    | 11,1067 | 10,8521 | 1,193004926 | ENST00000571759 | 55697     | NM_018052    | VAC14         |
| A_22_P00016831 | 3,24943 | 2,99489 | 1,192955311 | N/A             | N/A       | BX099579     | Inc-TRMT112-1 |
| A_22_P00024641 | 6,51738 | 6,26285 | 1,192947042 | ENST00000419060 | N/A       | AK090922     | N/A           |
| A_24_P307289   | 8,10777 | 7,85336 | 1,19284782  | ENST00000576060 | 339168    | NM_198154    | TMEM95        |
| A_33_P3289721  | 4,75042 | 4,49604 | 1,192823016 | ENST00000395906 | 374286    | NM_006382    | CDRT1         |
| A_33_P3346032  | 5,54743 | 5,29311 | 1,192773409 | N/A             | N/A       | AK124942     | Inc-GOLGA8J-2 |
| A_22_P00000786 | 2,22869 | 1,97438 | 1,192765141 | ENST00000453988 | 100129269 | NR_034126    | LINC01160     |
| A_33_P3709317  | 8,69855 | 8,44424 | 1,192765141 | N/A             | 677811    | NR_002964    | SNORA28       |
| A_33_P3308740  | 5,38482 | 5,13053 | 1,192748606 | ENST00000283195 | 5903      | NM_006267    | RANBP2        |
| A_24_P221198   | 7,21515 | 6,96094 | 1,192682468 | ENST00000398075 | 255374    | NM_203397    | MBLAC1        |
| A_21_P0013895  | 4,19898 | 3,94481 | 1,1926494   | ENST00000505047 | N/A       | N/A          | N/A           |
| A_33_P3399618  | 5,8698  | 5,61569 | 1,1925998   | ENST00000344581 | 123103    | NM_001109997 | KLHL33        |

|                |         |         |             |                 |           |              |                      |
|----------------|---------|---------|-------------|-----------------|-----------|--------------|----------------------|
| A_23_P34956    | 13,5381 | 13,284  | 1,192591534 | ENST00000468006 | 65005     | NM_031420    | MRPL9                |
| A_21_P0009825  | 2,00341 | 1,74934 | 1,192566735 | ENST00000449270 | 101929371 | N/A          | LOC101929371         |
| A_23_P416711   | 3,37349 | 3,11942 | 1,192566735 | ENST00000328299 | 256435    | NM_152996    | ST6GALNAC3           |
| A_24_P493287   | 4,82859 | 4,57453 | 1,192558468 | N/A             | N/A       | AF119855     | N/A                  |
| A_21_P0005246  | 1,77557 | 1,52153 | 1,192541936 | N/A             | N/A       | N/A          | Inc-STEAP1-1         |
| A_24_P228717   | 11,3469 | 11,0929 | 1,192508872 | ENST00000441619 | 5880      | NM_002872    | RAC2                 |
| A_22_P00012061 | 4,15888 | 3,90492 | 1,192475809 | N/A             | N/A       | AL110176     | Inc-PLOD2-2          |
| A_22_P00019254 | 4,00856 | 3,75464 | 1,192442747 | ENST00000553732 | N/A       | N/A          | N/A                  |
| A_33_P3420852  | 8,96952 | 8,71582 | 1,192260923 | ENST00000360202 | 84063     | NM_199180    | KIRREL2              |
| A_33_P3327158  | 5,31085 | 5,05717 | 1,192244395 | N/A             | 100131432 | AK127761     | LOC100131432         |
| A_22_P00012142 | 5,13885 | 4,88518 | 1,192236131 | N/A             | N/A       | N/A          | Inc-POLR2L-1         |
| A_19_P00802433 | 7,0923  | 6,83866 | 1,192211339 | N/A             | 101927171 | N/A          | LINC01564            |
| A_23_P12329    | 10,5425 | 10,2889 | 1,192178284 | ENST00000360244 | 51107     | NM_016022    | APH1A                |
| A_32_P90080    | 11,407  | 11,1534 | 1,192178284 | ENST00000323716 | 83787     | NM_031905    | ARMC10               |
| A_24_P53778    | 2,02738 | 1,77384 | 1,192128704 | ENST00000494442 | 142683    | NM_080878    | ITLN2                |
| A_24_P306726   | 16,3904 | 16,1369 | 1,192095652 | ENST00000403538 | 7178      | NM_003295    | TPT1                 |
| A_33_P3291998  | 6,45017 | 6,19671 | 1,1920626   | ENST00000495034 | 55103     | AK001106     | RALGPS2              |
| A_33_P3685297  | 3,55137 | 3,29796 | 1,192021287 | N/A             | N/A       | AJ276252     | N/A                  |
| A_23_P74391    | 8,12913 | 7,87573 | 1,192013025 | ENST00000463155 | 23596     | NM_014322    | OPN3                 |
| A_21_P0010494  | 7,7053  | 7,45191 | 1,192004763 | N/A             | N/A       | N/A          | Inc-PPIAL4G-4        |
| A_33_P3343503  | 4,51485 | 4,26148 | 1,191988238 | ENST00000554335 | 23034     | NM_001161576 | SAMD4A               |
| A_22_P00020046 | 4,11664 | 3,86332 | 1,191946928 | ENST00000502766 | 101927040 | NR_110954    | LOC101927040         |
| A_22_P00006489 | 1,92903 | 1,67572 | 1,191938666 | N/A             | N/A       | N/A          | Inc-FGF10-4          |
| A_33_P8733193  | 8,82087 | 8,56767 | 1,191847788 | ENST00000532572 | 11098     | NR_120593    | PRSS23               |
| A_24_P45476    | 7,34915 | 7,09601 | 1,191798222 | ENST00000367818 | 6375      | NM_002995    | XCL1                 |
| A_22_P00010181 | 1,96775 | 1,71461 | 1,191798222 | ENST00000511712 | N/A       | N/A          | N/A                  |
| A_33_P3364051  | 7,11312 | 6,86004 | 1,191748657 | ENST00000398793 | 8940      | NM_003935    | TOP3B                |
| A_22_P00006391 | 1,957   | 1,70396 | 1,191715615 | ENST00000591174 | 100996288 | XR_158942    | LOC100996288         |
| A_32_P722809   | 4,56351 | 4,31047 | 1,191715615 | ENST00000453166 | N/A       | BC034142     | N/A                  |
| A_21_P0008733  | 3,91351 | 3,66048 | 1,191707355 | N/A             | N/A       | N/A          | Inc-RP11-90J19.1.1-3 |
| A_21_P0003083  | 5,37863 | 5,12561 | 1,191699095 | N/A             | N/A       | N/A          | Inc-HES1-2           |
| A_33_P3254121  | 6,11527 | 5,86227 | 1,191682575 | ENST00000358165 | 8635      | AK001769     | RNASSET2             |
| A_22_P00003314 | 5,84086 | 5,58791 | 1,191641275 | N/A             | N/A       | N/A          | Inc-CAPRIN2-2        |

|                |         |         |             |                 |           |              |                |
|----------------|---------|---------|-------------|-----------------|-----------|--------------|----------------|
| A_22_P00001601 | 4,83029 | 4,57734 | 1,191641275 | N/A             | N/A       | N/A          | Inc-ARRB2-2    |
| A_22_P00017727 | 6,17752 | 5,92463 | 1,191591717 | ENST00000612654 | 55857     | NM_001163023 | KIZ            |
| A_22_P00008188 | 2,90023 | 2,64734 | 1,191591717 | ENST00000418523 | N/A       | N/A          | N/A            |
| A_21_P0010675  | 7,75494 | 7,50206 | 1,191583457 | ENST00000427210 | 731275    | NR_029401    | LINC01347      |
| A_24_P337746   | 10,0871 | 9,83427 | 1,191542161 | ENST00000437078 | 27342     | NM_014504    | RABGEF1        |
| A_22_P00011101 | 3,6812  | 3,42842 | 1,191500866 | ENST00000522464 | N/A       | N/A          | N/A            |
| A_21_P0005743  | 2,10864 | 1,85586 | 1,191500866 | N/A             | N/A       | N/A          | Inc-GRHL2-7    |
| A_23_P369987   | 9,89338 | 9,64065 | 1,191459572 | ENST00000555330 | 9870      | NM_001039479 | AREL1          |
| A_33_P3234643  | 8,70609 | 8,45343 | 1,191401764 | ENST00000434316 | 55002     | NM_017905    | TMCO3          |
| A_22_P00005066 | 2,21091 | 1,95831 | 1,191352216 | N/A             | N/A       | N/A          | Inc-DENR-1     |
| A_23_P148475   | 10,3095 | 10,0569 | 1,191352216 | ENST00000374403 | 24137     | NM_012310    | KIF4A          |
| A_23_P52402    | 10,0397 | 9,78721 | 1,191261383 | ENST00000455371 | 10531     | NM_014889    | PITRM1         |
| A_21_P0014930  | 1,94925 | 1,69683 | 1,191203584 | ENST00000417732 | 266697    | NR_024592    | POM121L4P      |
| A_23_P30983    | 6,61461 | 6,36221 | 1,191187071 | ENST00000296882 | 375519    | NM_198568    | GJB7           |
| A_32_P52206    | 8,19058 | 7,93824 | 1,191137532 | ENST00000620995 | 55253     | NM_018264    | TYW1           |
| A_24_P410100   | 2,06799 | 1,81569 | 1,191104507 | N/A             | N/A       | AF119882     | N/A            |
| A_23_P152858   | 13,7225 | 13,4702 | 1,191104507 | ENST00000496655 | 55352     | NM_018405    | COPRS          |
| A_24_P175427   | 8,26914 | 8,01688 | 1,191071483 | ENST00000441707 | 92399     | NM_199177    | MRRF           |
| A_22_P00020201 | 6,2303  | 5,97808 | 1,19103846  | N/A             | 101929765 | NR_120371    | LINC01585      |
| A_33_P3308553  | 6,43863 | 6,18642 | 1,191030204 | ENST00000441105 | N/A       | N/A          | N/A            |
| A_24_P309360   | 11,4859 | 11,2338 | 1,190939396 | ENST00000371142 | 56889     | NM_020123    | TM9SF3         |
| A_21_P0012130  | 2,17359 | 1,92151 | 1,190922886 | N/A             | N/A       | N/A          | XLOC_I2_008692 |
| A_22_P00017171 | 5,70202 | 5,44996 | 1,190906377 | N/A             | N/A       | BE393031     | Inc-UBLCP1-3   |
| A_21_P0008781  | 2,16415 | 1,91211 | 1,190889867 | ENST00000554440 | 104613533 | NR_126501    | LOC104613533   |
| A_21_P0007094  | 2,0256  | 1,77361 | 1,190848595 | N/A             | N/A       | N/A          | Inc-KLF6-1     |
| A_23_P13554    | 13,6285 | 13,3766 | 1,190774308 | ENST00000526737 | 79053     | NM_001007027 | ALG8           |
| A_23_P85453    | 2,24097 | 1,98911 | 1,190741294 | ENST00000368034 | 51744     | NM_016382    | CD244          |
| A_33_P3311646  | 10,3737 | 10,1219 | 1,190691773 | N/A             | N/A       | N/A          | N/A            |
| A_22_P00024993 | 5,28167 | 5,02993 | 1,190642255 | ENST00000416124 | 102724231 | N/A          | LOC102724231   |
| A_19_P00316225 | 4,29978 | 4,0481  | 1,190592738 | N/A             | 11170     | NM_001282714 | FAM107A        |
| A_21_P0014039  | 6,74382 | 6,4922  | 1,190543224 | ENST00000542061 | 57666     | XM_005266181 | FBRSL1         |
| A_33_P3293265  | 4,15488 | 3,90327 | 1,190534972 | ENST00000405916 | N/A       | N/A          | N/A            |
| A_22_P00012672 | 2,59707 | 2,34553 | 1,190477208 | N/A             | N/A       | N/A          | Inc-QKI-2      |

|                |         |         |             |                 |           |              |                |
|----------------|---------|---------|-------------|-----------------|-----------|--------------|----------------|
| A_33_P3268567  | 11,922  | 11,6705 | 1,190444201 | ENST00000393349 | 8440      | NM_003581    | NCK2           |
| A_32_P209208   | 6,33283 | 6,08139 | 1,190394693 | ENST00000409445 | 84698     | NM_032606    | CAPS2          |
| A_33_P3273490  | 1,71089 | 1,45953 | 1,190328686 | ENST00000379435 | N/A       | N/A          | N/A            |
| A_33_P3240263  | 9,29454 | 9,04322 | 1,190295683 | ENST00000460403 | 51371     | NM_015932    | POMP           |
| A_22_P00001115 | 2,81287 | 2,56157 | 1,190279182 | ENST00000577807 | N/A       | N/A          | N/A            |
| A_23_P375147   | 10,9737 | 10,7224 | 1,190279182 | ENST00000373670 | 54542     | AK125196     | RC3H2          |
| A_22_P00007091 | 2,72775 | 2,47648 | 1,190254431 | N/A             | N/A       | N/A          | Inc-GLRB-2     |
| A_23_P167828   | 12,4142 | 12,163  | 1,190196681 | ENST00000487832 | 51389     | NM_016104    | RWDD1          |
| A_19_P00804359 | 2,24578 | 1,99459 | 1,190188431 | N/A             | 101928292 | NR_120542    | LINC01488      |
| A_24_P62860    | 7,56153 | 7,31034 | 1,190188431 | ENST00000263904 | 10254     | NM_005843    | STAM2          |
| A_23_P20075    | 6,05638 | 5,80525 | 1,190138934 | ENST00000546276 | 29881     | NM_013389    | NPC1L1         |
| A_21_P0013818  | 5,46829 | 5,21716 | 1,190138934 | N/A             | N/A       | N/A          | XLOC_I2_015752 |
| A_21_P0001394  | 2,71421 | 2,46309 | 1,190130684 | N/A             | N/A       | N/A          | Inc-CACNA1E-1  |
| A_33_P3256510  | 4,19299 | 3,94187 | 1,190130684 | ENST00000327876 | 56660     | NM_022055    | KCNK12         |
| A_24_P36868    | 10,4738 | 10,2228 | 1,190031696 | ENST00000414423 | 80232     | NM_025160    | WDR26          |
| A_33_P3232120  | 5,35822 | 5,10726 | 1,189998702 | ENST00000371468 | N/A       | N/A          | N/A            |
| A_23_P27005    | 8,04025 | 7,78929 | 1,189998702 | ENST00000621143 | 79154     | NM_024308    | DHRS11         |
| A_21_P0014237  | 8,32231 | 8,07136 | 1,189990454 | N/A             | N/A       | BC042892     | N/A            |
| A_21_P0002582  | 3,10861 | 2,85769 | 1,189965709 | N/A             | N/A       | N/A          | Inc-SLC4A1AP-1 |
| A_21_P0014694  | 8,90689 | 8,65605 | 1,189899725 | N/A             | 101929910 | XR_433240    | LOC101929910   |
| A_19_P00322624 | 3,73823 | 3,48751 | 1,189800756 | N/A             | N/A       | N/A          | XLOC_I2_010831 |
| A_33_P3381022  | 6,08405 | 5,83335 | 1,189784262 | ENST00000489498 | 23463     | BC017037     | ICMT           |
| A_21_P0000204  | 3,03485 | 2,78418 | 1,189759521 | ENST00000334680 | 337979    | NM_181620    | KRTAP22-1      |
| A_22_P00012424 | 5,80888 | 5,55824 | 1,189734781 | N/A             | 101927071 | XR_243350    | LOC101927071   |
| A_24_P100234   | 8,56983 | 8,31919 | 1,189734781 | ENST00000397641 | 22880     | NM_014941    | MORC2          |
| A_33_P3303649  | 4,95306 | 4,70264 | 1,18955337  | ENST00000443033 | 4151      | NM_203377    | MB             |
| A_33_P3240507  | 10,5872 | 10,3368 | 1,189536879 | ENST00000377474 | 115207    | NM_138444    | KCTD12         |
| A_24_P728006   | 5,36021 | 5,10983 | 1,189520389 | N/A             | N/A       | N/A          | XLOC_I2_011874 |
| A_23_P355623   | 9,48983 | 9,23946 | 1,189512143 | ENST00000265742 | 54467     | NM_019004    | ANKIB1         |
| A_33_P3295814  | 7,36736 | 7,11699 | 1,189512143 | N/A             | N/A       | N/A          | N/A            |
| A_22_P00014753 | 3,39974 | 3,14938 | 1,189503898 | N/A             | N/A       | N/A          | Inc-SLC35E3-1  |
| A_33_P3249489  | 7,50572 | 7,25538 | 1,189487409 | ENST00000267522 | 112840    | NM_001258272 | WDR89          |
| A_33_P3372451  | 14,2128 | 13,9625 | 1,189454429 | ENST00000230431 | 10591     | NM_199184    | DNPH1          |

|                |         |         |             |                 |        |              |              |
|----------------|---------|---------|-------------|-----------------|--------|--------------|--------------|
| A_21_P0004503  | 5,99556 | 5,74527 | 1,189446185 | N/A             | 257396 | NR_034107    | LOC257396    |
| A_22_P00025115 | 7,02725 | 6,77698 | 1,189429696 | ENST00000557232 | N/A    | N/A          | N/A          |
| A_23_P416142   | 10,1399 | 9,88964 | 1,189421451 | ENST00000392382 | 1739   | NM_004087    | DLG1         |
| A_33_P3327200  | 6,3559  | 6,10564 | 1,189421451 | ENST00000341360 | 493    | NM_001001396 | ATP2B4       |
| A_21_P0002459  | 2,01864 | 1,76838 | 1,189421451 | N/A             | N/A    | N/A          | Inc-EXOC6B-1 |
| A_23_P66637    | 4,11079 | 3,86059 | 1,189371986 | ENST00000344627 | 6442   | NM_000023    | SGCA         |
| A_33_P3210909  | 11,2571 | 11,0069 | 1,189371986 | ENST00000397105 | 6396   | NM_001278946 | SEC13        |
| A_23_P48029    | 5,7556  | 5,50543 | 1,189347254 | ENST00000345999 | 50856  | NM_016184    | CLEC4A       |
| A_21_P0000347  | 10,0799 | 9,82977 | 1,189314278 | ENST00000582965 | 677842 | NR_002995    | SNORA76C     |
| A_22_P00013864 | 5,01641 | 4,76628 | 1,189314278 | ENST00000558385 | 414926 | NR_026764    | LINC00593    |
| A_21_P0013795  | 18,349  | 18,0989 | 1,189289547 | ENST00000372849 | 6173   | NM_021029    | RPL36A       |
| A_23_P19243    | 8,20211 | 7,9522  | 1,189132931 | N/A             | N/A    | AF119870     | N/A          |
| A_23_P160631   | 14,5063 | 14,2564 | 1,189124688 | ENST00000368262 | 7203   | NM_005998    | CCT3         |
| A_23_P257726   | 9,99714 | 9,74734 | 1,189042267 | ENST00000611338 | 51531  | NM_016481    | C9orf156     |
| A_33_P3362088  | 12,5508 | 12,301  | 1,189042267 | ENST00000499638 | 5025   | NM_001256796 | P2RX4        |
| A_24_P88763    | 9,87208 | 9,62241 | 1,188935129 | ENST00000264094 | 84695  | NM_032603    | LOXL3        |
| A_24_P341187   | 9,26445 | 9,01479 | 1,188926888 | ENST00000488292 | 57704  | NM_020944    | GBA2         |
| A_21_P0013984  | 9,50333 | 9,25368 | 1,188918647 | ENST00000418260 | 205    | NM_001005353 | AK4          |
| A_22_P00020229 | 5,95648 | 5,70683 | 1,188918647 | N/A             | N/A    | N/A          | Inc-DALRD3-2 |
| A_23_P107693   | 6,96036 | 6,71072 | 1,188910406 | ENST00000396150 | 54807  | NM_017652    | ZNF586       |
| A_33_P3417547  | 3,31782 | 3,06822 | 1,188877442 | N/A             | N/A    | N/A          | N/A          |
| A_24_P144377   | 12,6968 | 12,4472 | 1,188877442 | ENST00000331808 | 28955  | NM_014015    | DEXI         |
| A_33_P3313635  | 6,63539 | 6,38589 | 1,188795039 | N/A             | N/A    | BE561442     | Inc-BOLA2B-1 |
| A_23_P20494    | 15,2252 | 14,9757 | 1,188795039 | ENST00000519278 | 10397  | NM_006096    | NDRG1        |
| A_33_P3398917  | 6,35207 | 6,10262 | 1,188753839 | ENST00000379822 | 388135 | NM_001039614 | C15orf59     |
| A_33_P3238305  | 4,2179  | 3,96854 | 1,188679683 | ENST00000399926 | 56911  | NM_001286617 | MAP3K7CL     |
| A_22_P00008139 | 2,48504 | 2,23568 | 1,188679683 | ENST00000418972 | N/A    | N/A          | N/A          |
| A_24_P356373   | 8,92037 | 8,67102 | 1,188671444 | ENST00000561750 | 84264  | NM_032304    | HAGHL        |
| A_33_P3238944  | 5,10797 | 4,8587  | 1,188605531 | N/A             | N/A    | N/A          | N/A          |
| A_24_P384029   | 2,72936 | 2,48013 | 1,188572577 | ENST00000456671 | N/A    | N/A          | N/A          |
| A_33_P3319860  | 2,76968 | 2,52052 | 1,188514908 | ENST00000615885 | 25900  | NR_036467    | IFFO1        |
| A_23_P424269   | 8,38988 | 8,14084 | 1,188416054 | N/A             | 375748 | NM_020207    | ERCC6L2      |
| A_33_P3353948  | 5,82234 | 5,57337 | 1,188358394 | N/A             | N/A    | N/A          | N/A          |

|                |         |         |             |                 |           |              |                |
|----------------|---------|---------|-------------|-----------------|-----------|--------------|----------------|
| A_23_P77459    | 12,9203 | 12,6714 | 1,188300735 | ENST00000563221 | 8883      | NM_001018159 | NAE1           |
| A_21_P0013197  | 3,7899  | 3,54102 | 1,188284262 | N/A             | N/A       | N/A          | XLOC_I2_013383 |
| A_24_P382630   | 9,85643 | 9,60758 | 1,188259553 | ENST00000370823 | 26164     | NM_015666    | MTG2           |
| A_22_P00008704 | 3,02265 | 2,77383 | 1,188234844 | ENST00000567253 | N/A       | BX354304     | N/A            |
| A_33_P3251480  | 3,48432 | 3,23551 | 1,188226608 | ENST00000499666 | 8649      | NM_021970    | LAMTOR3        |
| A_23_P40072    | 11,2258 | 10,977  | 1,188218372 | ENST00000425455 | 4528      | NM_001005369 | MTIF2          |
| A_33_P3325336  | 14,5324 | 14,2837 | 1,188136013 | ENST00000395772 | N/A       | N/A          | N/A            |
| A_23_P129014   | 10,5918 | 10,3431 | 1,188136013 | ENST00000553871 | 90141     | NM_145231    | EFCAB11        |
| A_23_P112412   | 12,2302 | 11,9815 | 1,188136013 | ENST00000477648 | 54881     | NM_017746    | TEX10          |
| A_33_P3399634  | 8,51684 | 8,26814 | 1,188136013 | ENST00000529419 | 644943    | NM_001080521 | RASSF10        |
| A_22_P00009237 | 5,56178 | 5,31311 | 1,188111307 | ENST00000451149 | N/A       | N/A          | N/A            |
| A_22_P00011299 | 4,733   | 4,48434 | 1,188103072 | N/A             | 150291    | NR_026920    | MORC2-AS1      |
| A_22_P00015977 | 2,46707 | 2,21842 | 1,188094836 | N/A             | N/A       | AK126789     | Inc-TERF1-1    |
| A_22_P00005367 | 2,11917 | 1,87059 | 1,188037191 | ENST00000508998 | N/A       | N/A          | N/A            |
| A_33_P3417611  | 3,65887 | 3,41034 | 1,187996018 | ENST00000611598 | 56104     | NM_032095    | PCDHGB1        |
| A_33_P3563369  | 11,2381 | 10,9896 | 1,187971314 | N/A             | 574042    | BG987537     | SNORA10        |
| A_22_P00007805 | 5,82649 | 5,57806 | 1,187913675 | ENST00000489695 | 3205      | NM_152739    | HOXA9          |
| A_22_P00003929 | 4,95432 | 4,70589 | 1,187913675 | N/A             | N/A       | N/A          | Inc-CFH-1      |
| A_22_P00024793 | 6,44798 | 6,19959 | 1,187880739 | ENST00000308580 | 29766     | AK125687     | TMOD3          |
| A_22_P00010666 | 6,13788 | 5,88953 | 1,187847805 | N/A             | N/A       | N/A          | Inc-NEO1-1     |
| A_21_P0007970  | 4,80952 | 4,56123 | 1,187798405 | ENST00000561786 | 101928698 | NR_108094    | LINC01070      |
| A_23_P30204    | 8,37987 | 8,13163 | 1,187757239 | ENST00000289448 | 57824     | NM_021182    | HMHB1          |
| A_22_P00018269 | 5,14892 | 4,90078 | 1,187674913 | ENST00000550908 | N/A       | DB459582     | N/A            |
| A_23_P127964   | 14,6131 | 14,365  | 1,187641984 | ENST00000532709 | 5547      | NM_199418    | PRCP           |
| A_24_P229389   | 4,00318 | 3,7551  | 1,18762552  | ENST00000445000 | 401232    | NR_026855    | LINC01011      |
| A_33_P3591761  | 7,5832  | 7,33523 | 1,187534972 | ENST00000518333 | 157769    | NM_144963    | FAM91A1        |
| A_33_P3280412  | 1,79299 | 1,54508 | 1,187485585 | N/A             | N/A       | N/A          | N/A            |
| A_24_P681011   | 7,83351 | 7,5856  | 1,187485585 | ENST00000406875 | 28996     | NM_022740    | HIPK2          |
| A_23_P251660   | 11,4231 | 11,1752 | 1,187477354 | ENST00000376545 | 23        | NM_001025091 | ABCF1          |
| A_21_P0011842  | 11,7424 | 11,4945 | 1,187477354 | ENST00000446998 | 9521      | NM_001135650 | EEF1E1         |
| A_33_P3225230  | 13,2685 | 13,0207 | 1,187395047 | ENST00000248054 | 23309     | NM_015260    | SIN3B          |
| A_21_P0008475  | 2,87062 | 2,62285 | 1,187370356 | N/A             | 101930294 | N/A          | LOC101930294   |
| A_21_P0010340  | 5,415   | 5,16723 | 1,187370356 | ENST00000442403 | N/A       | N/A          | N/A            |

|                |         |         |             |                 |           |              |                    |
|----------------|---------|---------|-------------|-----------------|-----------|--------------|--------------------|
| A_24_P114339   | 6,63335 | 6,38564 | 1,187320976 | ENST00000283632 | 64795     | NM_022780    | RMND5A             |
| A_33_P3424153  | 7,62228 | 7,3746  | 1,187296286 | ENST00000445455 | N/A       | N/A          | N/A                |
| A_21_P0002523  | 2,19261 | 1,94496 | 1,187271597 | N/A             | N/A       | N/A          | Inc-KIAA1715-2     |
| A_23_P152605   | 2,75781 | 2,5102  | 1,18723868  | ENST00000301659 | 284110    | NM_178171    | GSDMA              |
| A_22_P00002954 | 2,49417 | 2,24663 | 1,187181076 | ENST00000514869 | 101929261 | XR_241733    | LOC101929261       |
| A_22_P00025404 | 11,9481 | 11,7006 | 1,187148161 | N/A             | 4046      | NM_001242932 | LSP1               |
| A_21_P0009130  | 6,99342 | 6,74594 | 1,187131703 | N/A             | N/A       | N/A          | Inc-CMTM4-1        |
| A_23_P91487    | 9,74085 | 9,49349 | 1,187032965 | ENST00000486719 | 10069     | NM_016940    | RWDD2B             |
| A_22_P00013678 | 2,08721 | 1,83986 | 1,187024737 | N/A             | N/A       | N/A          | Inc-RP11-6L6.2.1-1 |
| A_23_P345460   | 9,39269 | 9,14535 | 1,187016509 | ENST00000379344 | 25894     | NM_001129728 | PLEKHG4            |
| A_21_P0006741  | 3,1105  | 2,86317 | 1,187008281 | ENST00000446012 | 100507605 | N/A          | LINC00837          |
| A_33_P3358233  | 7,81072 | 7,56356 | 1,186868418 | ENST00000368223 | 10763     | NM_006617    | NES                |
| A_23_P59787    | 11,0272 | 10,7801 | 1,186819059 | ENST00000354926 | 51631     | NM_016019    | LUC7L2             |
| A_22_P00024765 | 2,93536 | 2,68849 | 1,186629867 | ENST00000454411 | N/A       | N/A          | N/A                |
| A_21_P0000632  | 4,05347 | 3,8066  | 1,186629867 | N/A             | 100130855 | NR_034080    | USP3-AS1           |
| A_19_P00322583 | 8,41302 | 8,1662  | 1,186588742 | ENST00000523154 | N/A       | XR_425926    | N/A                |
| A_22_P00003109 | 10,8289 | 10,5821 | 1,186572292 | N/A             | N/A       | N/A          | Inc-C9orf103-1     |
| A_23_P32861    | 10,5419 | 10,2951 | 1,186572292 | ENST00000460469 | 51068     | NM_015938    | NMD3               |
| A_22_P00009834 | 2,08188 | 1,83515 | 1,186514721 | ENST00000439014 | N/A       | N/A          | N/A                |
| A_23_P83498    | 2,28607 | 2,03935 | 1,186506497 | ENST00000290341 | 10642     | NM_006546    | IGF2BP1            |
| A_33_P3358158  | 12,8789 | 12,6322 | 1,186490048 | ENST00000382734 | 1416      | NR_033733    | CRYBB2P1           |
| A_23_P428887   | 2,03682 | 1,79014 | 1,1864736   | ENST00000379499 | 257240    | NM_153270    | KLHL34             |
| A_21_P0004551  | 4,44352 | 4,19686 | 1,186457152 | ENST00000505443 | 285577    | NR_033898    | LINC01019          |
| A_21_P0009516  | 3,23985 | 2,99323 | 1,186424257 | N/A             | N/A       | N/A          | Inc-DLGAP1-1       |
| A_33_P3395758  | 4,67304 | 4,4265  | 1,18635847  | ENST00000555826 | 122525    | NM_001017923 | C14orf28           |
| A_24_P91916    | 9,2599  | 9,01338 | 1,186342023 | ENST00000218004 | 55916     | NM_018698    | NXT2               |
| A_33_P3300635  | 11,9681 | 11,7216 | 1,186325577 | ENST00000367080 | 5208      | NM_006212    | PFKFB2             |
| A_21_P0000230  | 3,27119 | 3,02475 | 1,18627624  | ENST00000551312 | 91380     | NR_001293    | SNORD107           |
| A_32_P142028   | 14,5379 | 14,2915 | 1,18624335  | ENST00000430246 | 3183      | NM_031314    | HNRNPC             |
| A_21_P0010636  | 3,24164 | 2,99528 | 1,186210461 | N/A             | N/A       | N/A          | XLOC_I2_001011     |
| A_24_P149645   | 13,2591 | 13,0128 | 1,186161129 | ENST00000620341 | 22827     | NM_014281    | PUF60              |
| A_33_P3375269  | 3,73896 | 3,49267 | 1,186152907 | N/A             | N/A       | N/A          | N/A                |
| A_24_P367421   | 4,9107  | 4,66443 | 1,186136464 | ENST00000528049 | N/A       | N/A          | N/A                |



|                |         |         |             |                 |           |              |               |
|----------------|---------|---------|-------------|-----------------|-----------|--------------|---------------|
| A_23_P118741   | 5,6467  | 5,40043 | 1,186136464 | ENST00000308027 | 201232    | NM_201566    | SLC16A13      |
| A_33_P3415445  | 7,91396 | 7,66772 | 1,186111799 | ENST00000344908 | 10746     | NM_006609    | MAP3K2        |
| A_22_P00023495 | 4,48519 | 4,23901 | 1,186062471 | N/A             | 101927275 | NR_110771    | NDUFV2-AS1    |
| A_23_P34537    | 9,64134 | 9,39518 | 1,186046029 | ENST00000614058 | 2052      | NM_000120    | EPHX1         |
| A_23_P140050   | 9,17288 | 8,92688 | 1,185914499 | ENST00000464744 | 55578     | NM_017569    | SUPT20H       |
| A_24_P336718   | 4,8336  | 4,58763 | 1,185889839 | ENST00000367262 | 5877      | NM_002871    | RABIF         |
| A_22_P00019325 | 5,32914 | 5,08321 | 1,18585696  | N/A             | N/A       | N/A          | Inc-MAP6-1    |
| A_22_P00004030 | 3,31843 | 3,07257 | 1,185799423 | N/A             | N/A       | N/A          | Inc-CHPF2-1   |
| A_32_P309404   | 5,06043 | 4,81458 | 1,185791204 | N/A             | 6581      | AK096980     | SLC22A3       |
| A_21_P0006930  | 2,02626 | 1,78043 | 1,185774765 | N/A             | N/A       | N/A          | Inc-GPR26-4   |
| A_23_P88201    | 12,1407 | 11,8949 | 1,185750108 | ENST00000557217 | 55012     | NM_017917    | PPP2R3C       |
| A_33_P7465707  | 10,5588 | 10,3131 | 1,185667921 | ENST00000256078 | 3845      | NM_004985    | KRAS          |
| A_33_P3260016  | 11,9764 | 11,7307 | 1,185667921 | ENST00000457368 | 121441    | NM_152905    | NEDD1         |
| A_21_P0002409  | 2,00653 | 1,76084 | 1,185659703 | N/A             | N/A       | N/A          | Inc-OSR1-1    |
| A_21_P0001743  | 5,05652 | 4,81091 | 1,185593958 | N/A             | N/A       | N/A          | Inc-KCNN3-2   |
| A_24_P278299   | 11,763  | 11,5174 | 1,18558574  | ENST00000459912 | 79754     | NM_024701    | ASB13         |
| A_23_P369471   | 4,36496 | 4,11939 | 1,185561086 | ENST00000335674 | 353142    | NM_178431    | LCE3A         |
| A_24_P392151   | 2,87387 | 2,62838 | 1,185495347 | ENST00000308963 | 254439    | NM_001136485 | C11orf86      |
| A_22_P00023476 | 5,29082 | 5,04538 | 1,185454261 | N/A             | N/A       | N/A          | Inc-TELO2-2   |
| A_19_P00318013 | 12,7808 | 12,5354 | 1,185421394 | ENST00000432153 | 128439    | NR_003239    | SNHG11        |
| A_33_P3237734  | 2,74077 | 2,4954  | 1,185396744 | ENST00000506325 | 166614    | NM_001040261 | DCLK2         |
| A_21_P0006415  | 5,34992 | 5,10466 | 1,185306366 | N/A             | N/A       | N/A          | Inc-MBTPS2-1  |
| A_22_P00003007 | 3,65181 | 3,40655 | 1,185306366 | N/A             | N/A       | N/A          | Inc-C6orf70-3 |
| A_33_P3343545  | 8,51079 | 8,26555 | 1,185289934 | ENST00000313582 | 4793      | NM_002503    | NFKBIB        |
| A_33_P3229452  | 7,99198 | 7,74675 | 1,185281718 | N/A             | 401157    | AK126441     | FLJ44477      |
| A_23_P19590    | 13,8149 | 13,5697 | 1,185257071 | ENST00000367075 | 7430      | NM_003379    | EZR           |
| A_22_P00018190 | 5,00832 | 4,76316 | 1,185224209 | N/A             | N/A       | CV399373     | Inc-ZNF609-2  |
| A_23_P52373    | 9,1592  | 8,91407 | 1,185199563 | ENST00000309979 | 8509      | NM_003635    | NDST2         |
| A_22_P00019428 | 3,71636 | 3,47125 | 1,185183133 | N/A             | N/A       | DA338616     | Inc-NMNAT1-3  |
| A_24_P250535   | 10,7826 | 10,5375 | 1,185174918 | ENST00000246024 | 56255     | NM_021156    | TMX4          |
| A_23_P42335    | 13,4012 | 13,1561 | 1,185174918 | ENST00000229769 | 2178      | NM_021922    | FANCE         |
| A_22_P00009979 | 7,43038 | 7,1853  | 1,185158488 | ENST00000575792 | 100129781 | XR_109259    | LOC100129781  |
| A_22_P00005850 | 5,52898 | 5,28393 | 1,185133844 | ENST00000623764 | N/A       | N/A          | N/A           |

|                |         |         |             |                 |           |              |                  |
|----------------|---------|---------|-------------|-----------------|-----------|--------------|------------------|
| A_23_P308581   | 13,1788 | 12,9338 | 1,185092771 | ENST00000244496 | 88745     | NM_033112    | RRP36            |
| A_33_P3274478  | 6,09391 | 5,84893 | 1,185076342 | ENST00000344651 | 84747     | NM_001080533 | UNC119B          |
| A_23_P69310    | 6,78726 | 6,54229 | 1,185068128 | ENST00000400882 | 9034      | NM_003965    | CCRL2            |
| A_33_P3371910  | 8,51501 | 8,27005 | 1,185059914 | ENST00000358367 | 92906     | NM_138394    | HNRNPLL          |
| A_33_P3376541  | 4,21446 | 3,96952 | 1,185043485 | N/A             | 285033    | NR_046322    | STARD7-AS1       |
| A_24_P365972   | 1,99022 | 1,74534 | 1,184994202 | N/A             | 286359    | N/A          | LOC286359        |
| A_33_P3327818  | 8,21889 | 7,97403 | 1,184977774 | ENST00000624522 | N/A       | AL157466     | N/A              |
| A_22_P00025610 | 1,6026  | 1,35786 | 1,184879215 | N/A             | N/A       | DB052738     | Inc-SP110-1      |
| A_24_P318967   | 12,318  | 12,0733 | 1,184846363 | ENST00000398078 | 8566      | NM_003681    | PDXK             |
| A_33_P3348159  | 9,76223 | 9,51771 | 1,184698544 | ENST00000458153 | 4289      | NM_001145354 | MKLN1            |
| A_32_P130577   | 7,03379 | 6,78939 | 1,184600007 | N/A             | N/A       | BC066989     | N/A              |
| A_33_P3875570  | 1,90212 | 1,65774 | 1,184583585 | N/A             | 100628314 | BQ013595     | LOC100628314     |
| A_24_P81514    | 4,29005 | 4,04571 | 1,184550742 | ENST00000371703 | 10556     | NM_006413    | RPP30            |
| A_23_P85543    | 9,26548 | 9,02114 | 1,184550742 | ENST00000367509 | 6045      | NM_007212    | RNF2             |
| A_22_P00019293 | 2,4072  | 2,16287 | 1,184542531 | ENST00000520162 | N/A       | N/A          | N/A              |
| A_33_P3289145  | 11,044  | 10,7997 | 1,1845179   | ENST00000473228 | 10920     | NM_198189    | COPS8            |
| A_33_P3312682  | 13,3152 | 13,0709 | 1,1845179   | ENST00000170168 | 57455     | NM_020695    | REXO1            |
| A_24_P203315   | 5,14637 | 4,90207 | 1,1845179   | ENST00000531936 | 254263    | NM_182553    | CNIH2            |
| A_33_P3220818  | 10,9278 | 10,6835 | 1,1845179   | ENST00000592224 | 6294      | NM_001201338 | SAFB             |
| A_22_P00003859 | 6,72636 | 6,48212 | 1,184468638 | N/A             | N/A       | AF086337     | Inc-CELA3A-2     |
| A_24_P4334     | 6,47906 | 6,23482 | 1,184468638 | ENST00000357058 | 152006    | NM_194328    | RNF38            |
| A_33_P3209802  | 2,01097 | 1,7668  | 1,184411169 | ENST00000617752 | 81472     | NM_198074    | OR2C3            |
| A_33_P3805090  | 6,45512 | 6,21095 | 1,184411169 | ENST00000264433 | 57600     | NM_020840    | FNIP2            |
| A_23_P255257   | 10,0007 | 9,75657 | 1,18437833  | ENST00000361264 | 25853     | NM_015397    | DCAF12           |
| A_33_P3414487  | 13,432  | 13,1879 | 1,184353702 | ENST00000430270 | 114049    | NM_001202560 | WBSCR22          |
| A_33_P3349414  | 11,513  | 11,2689 | 1,184353702 | ENST00000373464 | 23099     | NM_014007    | ZBTB43           |
| A_21_P0000501  | 6,77147 | 6,52739 | 1,184337284 | ENST00000530564 | 692223    | NR_004403    | SNORD97          |
| A_33_P3418611  | 10,0146 | 9,77052 | 1,184337284 | ENST00000601693 | 100287226 | NM_001242680 | ZNF729           |
| A_23_P163647   | 15,9357 | 15,6917 | 1,184271612 | ENST00000562238 | 1632      | NM_001919    | ECI1             |
| A_23_P36825    | 9,73988 | 9,49594 | 1,18422236  | ENST00000542056 | 9052      | NM_003979    | GPRC5A           |
| A_23_P427299   | 5,18125 | 4,93733 | 1,184205944 | N/A             | 646652    | XR_427693    | LOC646652        |
| A_33_P3292060  | 5,43324 | 5,18936 | 1,184173111 | ENST00000513929 | 55422     | NM_018555    | ZNF331           |
| A_21_P0009696  | 3,11788 | 2,874   | 1,184173111 | N/A             | N/A       | N/A          | Inc-AC011467.1-1 |

|                |         |         |             |                 |           |              |               |
|----------------|---------|---------|-------------|-----------------|-----------|--------------|---------------|
| A_33_P3242632  | 2,13907 | 1,89523 | 1,184140279 | ENST00000419965 | 646743    | NR_033930    | LOC646743     |
| A_33_P3230558  | 2,18942 | 1,9456  | 1,184123864 | ENST00000380664 | 161436    | NM_183387    | EML5          |
| A_33_P3273669  | 2,16322 | 1,9194  | 1,184123864 | ENST00000406859 | 9378      | NM_004801    | NRXN1         |
| A_24_P328819   | 9,02056 | 8,77676 | 1,184107448 | ENST00000506426 | 60684     | NM_199053    | TRAPPC11      |
| A_23_P93988    | 11,7419 | 11,4981 | 1,184107448 | ENST00000056217 | 7984      | NM_005435    | ARHGEF5       |
| A_23_P376686   | 7,38249 | 7,13874 | 1,184066411 | ENST00000374993 | 56244     | NM_019602    | BTNL2         |
| A_21_P0012105  | 6,12826 | 5,88451 | 1,184066411 | ENST00000440809 | N/A       | N/A          | N/A           |
| A_33_P3732466  | 9,352   | 9,10828 | 1,184041789 | N/A             | 100506282 | XR_110899    | LOC100506282  |
| A_23_P167081   | 8,08328 | 7,83966 | 1,183959721 | ENST00000622863 | 5978      | NM_005612    | REST          |
| A_23_P357985   | 6,52628 | 6,28274 | 1,18389407  | ENST00000272454 | 729540    | NM_001037866 | RGPD6         |
| A_22_P00005233 | 6,33799 | 6,09453 | 1,183828423 | N/A             | 154449    | N/A          | LOC154449     |
| A_23_P207461   | 2,41086 | 2,16752 | 1,183729959 | ENST00000451037 | 56934     | NM_020178    | CA10          |
| A_23_P88489    | 8,79215 | 8,54884 | 1,183705344 | ENST00000321596 | 117155    | NM_172095    | CATSPER2      |
| A_33_P3338116  | 5,03592 | 4,7927  | 1,183631503 | ENST00000305544 | 3913      | NM_002292    | LAMB2         |
| A_33_P3330453  | 10,3511 | 10,1079 | 1,183615094 | ENST00000356770 | 55193     | NM_018313    | PBRM1         |
| A_23_P345942   | 11,3928 | 11,1497 | 1,183533055 | ENST00000296597 | 91942     | NM_174889    | NDUFAF2       |
| A_22_P00003251 | 2,66687 | 2,42384 | 1,183475631 | ENST00000495536 | N/A       | N/A          | N/A           |
| A_23_P215341   | 10,0882 | 9,84518 | 1,183467428 | ENST00000222803 | 55033     | NM_017946    | FKBP14        |
| A_24_P135753   | 11,0109 | 10,7679 | 1,183451022 | ENST00000383657 | 201562    | AL832532     | PTPLB         |
| A_24_P377269   | 13,9015 | 13,6585 | 1,183451022 | ENST00000617819 | 3308      | NM_002154    | HSPA4         |
| A_22_P00016253 | 4,38103 | 4,13818 | 1,183327982 | ENST00000559992 | 101928227 | N/A          | LOC101928227  |
| A_33_P3287253  | 2,0251  | 1,78227 | 1,183311578 | N/A             | 100128401 | AK124497     | LOC100128401  |
| A_23_P117727   | 9,81993 | 9,57711 | 1,183303376 | ENST00000560717 | 123263    | NM_139242    | MTFMT         |
| A_21_P0014364  | 2,74742 | 2,5046  | 1,183303376 | N/A             | N/A       | N/A          | N/A           |
| A_33_P3251685  | 8,19196 | 7,94917 | 1,18327877  | ENST00000311765 | 57546     | NM_020786    | PDP2          |
| A_21_P0001658  | 1,94644 | 1,70366 | 1,183270568 | N/A             | N/A       | N/A          | Inc-FAM213B-3 |
| A_22_P00008240 | 6,23335 | 5,99064 | 1,183213157 | ENST00000555512 | 102724190 | NR_110553    | LOC102724190  |
| A_24_P839254   | 10,6542 | 10,4115 | 1,183204956 | ENST00000295959 | 11102     | NM_001098783 | RPP14         |
| A_22_P00003974 | 7,69152 | 7,44883 | 1,183196754 | ENST00000556519 | N/A       | N/A          | N/A           |
| A_23_P63521    | 2,69366 | 2,451   | 1,183172151 | ENST00000368783 | 353140    | NM_178429    | LCE2C         |
| A_22_P00003607 | 2,38506 | 2,14244 | 1,183139347 | N/A             | N/A       | N/A          | Inc-CD302-1   |
| A_33_P3407675  | 10,7488 | 10,5062 | 1,183122945 | ENST00000367830 | 261726    | NM_001031800 | TIPRL         |
| A_23_P218086   | 11,7242 | 11,4817 | 1,18304094  | ENST00000541517 | 53373     | NM_001143819 | TPCN1         |

|                |         |         |             |                 |           |              |                |
|----------------|---------|---------|-------------|-----------------|-----------|--------------|----------------|
| A_21_P0002433  | 3,6388  | 3,39636 | 1,18299174  | N/A             | N/A       | N/A          | Inc-ZFP36L2-1  |
| A_33_P3298267  | 5,02417 | 4,78176 | 1,18296714  | N/A             | N/A       | N/A          | N/A            |
| A_23_P118306   | 13,4608 | 13,2184 | 1,182958941 | ENST00000612103 | 9093      | NM_005147    | DNAJA3         |
| A_24_P132276   | 6,07536 | 5,83303 | 1,182901545 | ENST00000369046 | 55278     | NM_018292    | QRSL1          |
| A_21_P0014786  | 5,83045 | 5,58813 | 1,182893345 | N/A             | 100507663 | AK129895     | LOC100507663   |
| A_33_P3236259  | 5,04288 | 4,80058 | 1,182876947 | ENST00000452342 | N/A       | BX398892     | N/A            |
| A_21_P0007163  | 5,6279  | 5,38561 | 1,182868748 | N/A             | N/A       | N/A          | Inc-APOA4-1    |
| A_33_P3251322  | 7,73262 | 7,49038 | 1,182827754 | ENST00000606184 | 64419     | AK128312     | MTMR14         |
| A_21_P0002654  | 4,26793 | 4,02571 | 1,182811356 | N/A             | N/A       | N/A          | Inc-TRMT61B-4  |
| A_22_P00015533 | 7,05625 | 6,81405 | 1,182794959 | ENST00000518704 | N/A       | N/A          | N/A            |
| A_23_P340318   | 16,2728 | 16,0306 | 1,182794959 | ENST00000534355 | 280636    | NM_170746    | C11orf31       |
| A_23_P48481    | 8,075   | 7,83281 | 1,182786761 | ENST00000468382 | 5890      | NM_133510    | RAD51B         |
| A_21_P0000124  | 5,37744 | 5,13526 | 1,182778562 | ENST00000468589 | 163486    | NM_001195216 | DENND1B        |
| A_24_P405298   | 10,2849 | 10,0428 | 1,182712977 | ENST00000296122 | 5500      | NM_002709    | PPP1CB         |
| A_23_P160809   | 10,9786 | 10,7365 | 1,182712977 | ENST00000468893 | 22796     | NM_007357    | COG2           |
| A_33_P3393684  | 7,60221 | 7,36013 | 1,182696581 | ENST00000368100 | 391123    | NM_001013661 | VSIG8          |
| A_22_P00002311 | 1,64173 | 1,39965 | 1,182696581 | N/A             | N/A       | N/A          | Inc-C11orf36-3 |
| A_23_P101516   | 5,97129 | 5,72935 | 1,182581817 | ENST00000477616 | 3748      | NM_004977    | KCNC3          |
| A_21_P0014257  | 4,07814 | 3,83621 | 1,18257362  | ENST00000368619 | 282974    | XR_424193    | STK32C         |
| A_23_P436138   | 7,05232 | 6,81042 | 1,182549029 | ENST00000246163 | 4149      | NM_145114    | MAX            |
| A_22_P00023250 | 4,87247 | 4,63063 | 1,18249985  | N/A             | N/A       | N/A          | Inc-NBPF3-4    |
| A_21_P0013051  | 2,32595 | 2,08417 | 1,182450672 | N/A             | 101930151 | N/A          | LOC101930151   |
| A_22_P00004086 | 4,91538 | 4,67373 | 1,182344127 | N/A             | N/A       | N/A          | Inc-CISD2-4    |
| A_19_P00804093 | 5,43755 | 5,19595 | 1,182303151 | ENST00000507096 | 91050     | NM_173463    | CCDC149        |
| A_22_P00015677 | 1,96364 | 1,72205 | 1,182294956 | N/A             | N/A       | N/A          | Inc-SYK-3      |
| A_21_P0002940  | 7,78969 | 7,54811 | 1,182286761 | ENST00000606069 | N/A       | N/A          | N/A            |
| A_24_P276102   | 5,50048 | 5,25893 | 1,182262176 | ENST00000344359 | 5933      | NM_183404    | RBL1           |
| A_23_P35820    | 14,8448 | 14,6033 | 1,182221203 | ENST00000526975 | 1072      | NM_005507    | CFL1           |
| A_33_P3309201  | 2,52754 | 2,28607 | 1,182196619 | ENST00000562840 | 100506581 | AK125749     | C16orf95       |
| A_33_P3421325  | 7,20203 | 6,96059 | 1,182172036 | ENST00000478850 | 158431    | NM_001001662 | ZNF782         |
| A_33_P3240512  | 11,2356 | 10,9942 | 1,18213926  | ENST00000377474 | 115207    | NM_138444    | KCTD12         |
| A_33_P3308101  | 8,48619 | 8,2448  | 1,182131066 | ENST00000624628 | N/A       | XR_428276    | N/A            |
| A_33_P3650224  | 4,83509 | 4,59371 | 1,182122872 | ENST00000422194 | 100132994 | NM_001145139 | CXorf49B       |

|                |         |         |             |                 |           |              |                |
|----------------|---------|---------|-------------|-----------------|-----------|--------------|----------------|
| A_33_P3316093  | 4,02498 | 3,78361 | 1,182114678 | N/A             | N/A       | N/A          | N/A            |
| A_21_P0003879  | 2,7677  | 2,52633 | 1,182114678 | ENST00000623933 | 441058    | NR_038377    | MGC39584       |
| A_33_P3421867  | 7,85267 | 7,61131 | 1,182106485 | ENST00000373401 | 266727    | AK126965     | MDGA1          |
| A_23_P257945   | 11,4756 | 11,2343 | 1,182057323 | ENST00000380762 | 3052      | NM_005333    | HCCS           |
| A_21_P0000388  | 6,07171 | 5,83045 | 1,18202455  | N/A             | 692207    | NR_003072    | SNORD91A       |
| A_22_P00005733 | 2,25067 | 2,00942 | 1,182016357 | N/A             | N/A       | BU661971     | Inc-EMILIN2-1  |
| A_24_P297480   | 3,93391 | 3,69268 | 1,181999971 | ENST00000267291 | 140432    | NM_178861    | RNF113B        |
| A_21_P0014473  | 8,26814 | 8,02695 | 1,181967199 | ENST00000458030 | N/A       | XR_245004    | N/A            |
| A_32_P176018   | 2,5194  | 2,2783  | 1,181893467 | ENST00000617065 | 81569     | NM_030812    | ACTL8          |
| A_22_P00007909 | 2,29773 | 2,05667 | 1,181860698 | N/A             | N/A       | AK128174     | Inc-HSPA4-2    |
| A_22_P00009478 | 6,30715 | 6,0661  | 1,181852506 | N/A             | N/A       | BE622226     | Inc-MAGEA4-1   |
| A_23_P83351    | 4,99376 | 4,75272 | 1,181844314 | ENST00000362057 | 25861     | NM_015404    | DFNB31         |
| A_23_P142322   | 12,416  | 12,175  | 1,181811547 | ENST00000593128 | 1153      | NM_001280    | CIRBP          |
| A_23_P397969   | 10,8092 | 10,5682 | 1,181811547 | ENST00000473637 | 3607      | NM_004514    | FOXK2          |
| A_23_P141302   | 9,89036 | 9,64945 | 1,181737824 | ENST00000454073 | 7566      | NM_144680    | ZNF18          |
| A_22_P00025001 | 1,82602 | 1,58513 | 1,181721442 | ENST00000552167 | N/A       | N/A          | N/A            |
| A_21_P0012547  | 2,36525 | 2,12442 | 1,181672296 | ENST00000484092 | N/A       | N/A          | N/A            |
| A_23_P92602    | 8,57613 | 8,33532 | 1,181655915 | ENST00000515578 | 79963     | NR_002451    | ABCA11P        |
| A_21_P0008801  | 7,15093 | 6,91013 | 1,181647724 | N/A             | N/A       | N/A          | Inc-ADAMTS17-1 |
| A_23_P138058   | 11,5803 | 11,3395 | 1,181647724 | ENST00000477976 | 26155     | NM_015658    | NOC2L          |
| A_33_P3683362  | 4,53321 | 4,29246 | 1,181606772 | N/A             | N/A       | BC035844     | Inc-RNF125-2   |
| A_22_P00013526 | 5,59646 | 5,35573 | 1,181590392 | ENST00000413833 | 100287114 | NR_034026    | LINC00421      |
| A_33_P3333648  | 5,22998 | 4,98928 | 1,181565822 | ENST00000341449 | 390064    | NM_001004754 | OR51I2         |
| A_24_P161261   | 5,10855 | 4,86787 | 1,181549442 | ENST00000432940 | 441273    | NM_001031618 | SPDYE2         |
| A_21_P0013435  | 1,97929 | 1,73866 | 1,181508493 | ENST00000416366 | 285908    | XR_432187    | LINC00174      |
| A_23_P82979    | 4,86138 | 4,62079 | 1,181475735 | ENST00000462567 | 10319     | NM_006059    | LAMC3          |
| A_22_P00010841 | 2,65426 | 2,41367 | 1,181475735 | N/A             | N/A       | N/A          | Inc-NOL11-1    |
| A_33_P3292198  | 4,0346  | 3,79413 | 1,181377467 | ENST00000375523 | 140732    | NM_080675    | SUN5           |
| A_21_P0007502  | 7,17778 | 6,93732 | 1,181369278 | ENST00000489452 | 100287569 | NR_027345    | LINC00173      |
| A_24_P336759   | 12,3632 | 12,1228 | 1,181320148 | ENST00000369026 | 4170      | NM_021960    | MCL1           |
| A_33_P3390387  | 1,7835  | 1,54311 | 1,181311959 | N/A             | N/A       | N/A          | N/A            |
| A_21_P0011503  | 4,76718 | 4,52679 | 1,181311959 | ENST00000595170 | N/A       | XM_006726629 | N/A            |
| A_23_P81121    | 11,7292 | 11,4889 | 1,181238267 | ENST00000509980 | 5393      | NM_005033    | EXOSC9         |

|                |         |         |             |                 |           |              |                 |
|----------------|---------|---------|-------------|-----------------|-----------|--------------|-----------------|
| A_33_P3333078  | 8,15702 | 7,91681 | 1,18116458  | ENST00000346085 | 57492     | NM_020732    | ARID1B          |
| A_23_P100220   | 12,1571 | 11,9169 | 1,181156393 | ENST00000473183 | 80004     | NM_024939    | ESRP2           |
| A_33_P6822486  | 8,73343 | 8,49327 | 1,181123645 | ENST00000547492 | 100506844 | NR_038269    | LOC100506844    |
| A_22_P00013494 | 4,33267 | 4,09257 | 1,181074524 | ENST00000519032 | N/A       | DB028566     | N/A             |
| A_22_P00013823 | 5,49503 | 5,25499 | 1,181025406 | N/A             | 100874211 | NR_046706    | MID1IP1-AS1     |
| A_22_P00016015 | 5,66186 | 5,42184 | 1,181009034 | N/A             | 101060264 | NR_126417    | FOXP4-AS1       |
| A_33_P3304764  | 4,92244 | 4,68243 | 1,181000847 | N/A             | N/A       | N/A          | N/A             |
| A_23_P10911    | 7,08843 | 6,84844 | 1,180984475 | ENST00000280800 | 196463    | NM_173542    | PLBD2           |
| A_21_P0002612  | 5,71703 | 5,47705 | 1,18097629  | N/A             | N/A       | N/A          | Inc-GPR39-2     |
| A_21_P0007766  | 2,48439 | 2,24448 | 1,18091899  | N/A             | N/A       | N/A          | Inc-TBX3-3      |
| A_21_P0001263  | 2,52196 | 2,28205 | 1,18091899  | N/A             | N/A       | N/A          | Inc-VPS13D-1    |
| A_24_P5550     | 8,64134 | 8,40147 | 1,180886248 | ENST00000613632 | 79142     | NM_024297    | PHF23           |
| A_33_P3612589  | 10,533  | 10,2932 | 1,180828952 | ENST00000480283 | 546       | NM_000489    | ATRX            |
| A_33_P3303355  | 7,97605 | 7,73635 | 1,180747106 | ENST00000605784 | 644353    | N/A          | ZCCHC18         |
| A_33_P3240229  | 10,2168 | 9,97718 | 1,180681634 | ENST00000262367 | 1387      | NM_004380    | CREBBP          |
| A_32_P98298    | 5,99438 | 5,75482 | 1,180632532 | ENST00000399571 | 1850      | NM_004420    | DUSP8           |
| A_21_P0013323  | 6,75128 | 6,51176 | 1,180599798 | N/A             | 101929463 | XR_426202    | LOC101929463    |
| A_23_P141315   | 10,7755 | 10,536  | 1,180583431 | ENST00000442241 | 54475     | NM_001014445 | NLE1            |
| A_24_P398130   | 7,38968 | 7,15019 | 1,180575248 | ENST00000277575 | 9712      | NM_014688    | USP6NL          |
| A_23_P254081   | 9,31537 | 9,07591 | 1,180550699 | ENST00000340169 | 11019     | NM_006859    | LIAS            |
| A_22_P00001139 | 5,01949 | 4,78009 | 1,180501603 | N/A             | 101928830 | XR_246023    | LOC101928830    |
| A_23_P57293    | 8,83475 | 8,59535 | 1,180501603 | ENST00000382751 | 9875      | NM_014825    | URB1            |
| A_33_P3367748  | 3,01339 | 2,77402 | 1,180477055 | ENST00000461118 | 1298      | BC065715     | COL9A2          |
| A_22_P00017919 | 2,87035 | 2,63113 | 1,180354325 | ENST00000509212 | N/A       | N/A          | N/A             |
| A_24_P111054   | 4,74367 | 4,50455 | 1,180272512 | ENST00000377414 | 6518      | BC035878     | SLC2A5          |
| A_23_P23646    | 4,43373 | 4,1947  | 1,180198885 | ENST00000473969 | 7391      | NM_007122    | USF1            |
| A_23_P11984    | 8,41021 | 8,17119 | 1,180190704 | ENST00000360584 | 6536      | NM_201649    | SLC6A9          |
| A_22_P00025311 | 1,65853 | 1,41955 | 1,180157983 | N/A             | N/A       | N/A          | Inc-ARSI-1      |
| A_22_P00021996 | 1,82549 | 1,58654 | 1,180133442 | N/A             | N/A       | BX090126     | Inc-AHI1-1      |
| A_23_P390726   | 2,03028 | 1,79138 | 1,180092543 | ENST00000514080 | 153657    | NM_144725    | TTC23L          |
| A_23_P259135   | 12,7123 | 12,4734 | 1,180092543 | ENST00000471897 | 23054     | NM_014071    | NCOA6           |
| A_22_P00002240 | 10,6717 | 10,4328 | 1,180092543 | N/A             | N/A       | N/A          | Inc-C10orf114-1 |
| A_33_P3351811  | 3,65821 | 3,41937 | 1,180043465 | N/A             | N/A       | N/A          | N/A             |

|                |         |         |             |                 |           |              |                |
|----------------|---------|---------|-------------|-----------------|-----------|--------------|----------------|
| A_23_P350451   | 4,95112 | 4,71229 | 1,180035286 | ENST00000613999 | 639       | NM_001198    | PRDM1          |
| A_33_P3393734  | 6,68898 | 6,45017 | 1,180018927 | ENST00000392558 | 6232      | N/A          | RPS27          |
| A_22_P00013943 | 4,27337 | 4,0346  | 1,17998621  | ENST00000436082 | N/A       | DB073256     | N/A            |
| A_24_P203407   | 6,4261  | 6,1874  | 1,179928958 | ENST00000396825 | 128486    | NM_001080472 | FITM2          |
| A_22_P00008940 | 2,04528 | 1,80658 | 1,179928958 | ENST00000564363 | N/A       | N/A          | N/A            |
| A_33_P3235925  | 11,6495 | 11,4108 | 1,179928958 | ENST00000469763 | 79706     | NM_024653    | PRKRIP1        |
| A_32_P146659   | 4,99526 | 4,7566  | 1,179896244 | N/A             | 401431    | NR_027040    | ATP6V0E2-AS1   |
| A_22_P00017775 | 3,28485 | 3,0462  | 1,179888066 | N/A             | 100507218 | NR_040017    | RNF157-AS1     |
| A_24_P75072    | 11,5834 | 11,3448 | 1,179847175 | ENST00000503306 | 23583     | NM_014311    | SMUG1          |
| A_23_P29855    | 12,4636 | 12,2251 | 1,179765397 | ENST00000514213 | 8615      | NM_003715    | USO1           |
| A_21_P0007901  | 3,7774  | 3,53892 | 1,179749042 | N/A             | N/A       | N/A          | Inc-DHX37-10   |
| A_32_P167396   | 4,97217 | 4,73369 | 1,179749042 | N/A             | 100873985 | NM_001289773 | MED14OS        |
| A_22_P00014460 | 4,26616 | 4,02774 | 1,179699979 | N/A             | 100506749 | XR_108380    | AGAP1-IT1      |
| A_33_P3315021  | 7,01493 | 6,77657 | 1,179650917 | ENST00000416673 | 118433    | N/A          | RPL23AP7       |
| A_23_P41664    | 4,65947 | 4,42114 | 1,179626387 | ENST00000334994 | 100130733 | NM_181506    | LRRC70         |
| A_33_P3238573  | 12,5224 | 12,2841 | 1,179601858 | ENST00000361217 | 9909      | NM_014856    | DENND4B        |
| A_23_P212423   | 4,25425 | 4,01597 | 1,179585505 | ENST00000207870 | 9942      | NM_005108    | XYLB           |
| A_21_P0003392  | 2,19118 | 1,95304 | 1,179471043 | ENST00000442020 | N/A       | N/A          | N/A            |
| A_23_P110445   | 10,1174 | 9,87926 | 1,179471043 | ENST00000511896 | 10307     | NM_006051    | APBB3          |
| A_33_P3266993  | 1,95485 | 1,71672 | 1,179462868 | N/A             | N/A       | AK130024     | N/A            |
| A_23_P2355     | 9,79852 | 9,5604  | 1,179454692 | ENST00000550411 | 23468     | NM_012117    | CBX5           |
| A_21_P0013455  | 4,5439  | 4,3058  | 1,179438342 | ENST00000481762 | 79970     | N/A          | ZNF767P        |
| A_33_P3314902  | 8,73218 | 8,49412 | 1,179405641 | ENST00000421745 | 57448     | NM_016252    | BIRC6          |
| A_23_P131899   | 12,6012 | 12,3632 | 1,179356592 | ENST00000360779 | 27111     | NM_080489    | SDCBP2         |
| A_22_P00020989 | 4,28783 | 4,04983 | 1,179356592 | N/A             | N/A       | DA725978     | Inc-CHTF8-2    |
| A_21_P0010303  | 7,88628 | 7,64834 | 1,179307545 | N/A             | N/A       | N/A          | Inc-C21orf67-5 |
| A_23_P145035   | 6,38469 | 6,14676 | 1,179299371 | ENST00000297792 | 221656    | NM_153042    | KDM1B          |
| A_33_P3355408  | 5,99813 | 5,76022 | 1,179283022 | N/A             | 100128126 | NR_038406    | STAU2-AS1      |
| A_22_P00003469 | 4,79328 | 4,5554  | 1,1792585   | N/A             | N/A       | N/A          | Inc-CCDC68-1   |
| A_24_P273742   | 2,75447 | 2,51659 | 1,1792585   | ENST00000256367 | 23508     | NM_015351    | TTC9           |
| A_21_P0009507  | 4,41728 | 4,1794  | 1,1792585   | N/A             | N/A       | N/A          | Inc-SALL3-2    |
| A_32_P226567   | 8,98084 | 8,74298 | 1,179242152 | ENST00000578315 | 65110     | NM_023011    | UPF3A          |
| A_22_P00009281 | 15,8026 | 15,5648 | 1,17919311  | ENST00000371542 | 389816    | NM_001013653 | LRRC26         |

|                |         |         |             |                 |           |              |                |
|----------------|---------|---------|-------------|-----------------|-----------|--------------|----------------|
| A_33_P3249509  | 9,61057 | 9,37279 | 1,179176763 | ENST00000589164 | 4782      | NM_205843    | NFIC           |
| A_23_P200096   | 8,23462 | 7,9969  | 1,179127724 | ENST00000377399 | 80176     | NM_025106    | SPSB1          |
| A_23_P251916   | 10,8327 | 10,595  | 1,179111377 | ENST00000406452 | 51115     | NM_016033    | RMDN1          |
| A_33_P3410274  | 2,20618 | 1,96854 | 1,179062341 | ENST00000421233 | N/A       | N/A          | N/A            |
| A_23_P152272   | 13,3534 | 13,1158 | 1,179029651 | ENST00000565678 | 10921     | NM_006711    | RNPS1          |
| A_24_P337419   | 4,6988  | 4,46121 | 1,179021478 | ENST00000296736 | 81789     | NM_030953    | TIGD6          |
| A_33_P3393370  | 6,76341 | 6,52589 | 1,178964273 | N/A             | N/A       | N/A          | N/A            |
| A_21_P0007574  | 1,83387 | 1,59643 | 1,178898899 | N/A             | N/A       | N/A          | Inc-CAND1-1    |
| A_23_P88710    | 13,6865 | 13,4491 | 1,178866214 | ENST00000568067 | 25963     | NM_015497    | TMEM87A        |
| A_23_P102037   | 8,77887 | 8,54147 | 1,178866214 | ENST00000263960 | 80219     | NM_025147    | COQ10B         |
| A_23_P355439   | 4,70762 | 4,47028 | 1,178817187 | ENST00000297012 | 221613    | NM_170745    | HIST1H2AA      |
| A_23_P68059    | 9,90041 | 9,66316 | 1,178743651 | ENST00000463744 | 84759     | NM_032673    | PCGF1          |
| A_21_P0010386  | 4,93104 | 4,69379 | 1,178743651 | ENST00000444890 | 100271722 | NR_027036    | LINC00899      |
| A_19_P00322333 | 5,9354  | 5,69817 | 1,17872731  | ENST00000578280 | 101059954 | XR_172435    | LOC101059954   |
| A_22_P00003932 | 7,96955 | 7,73241 | 1,17865378  | ENST00000434645 | 8837      | NM_001202519 | CFLAR          |
| A_32_P149492   | 9,09227 | 8,85517 | 1,178621101 | ENST00000369373 | 200030    | NM_183372    | NBPF11         |
| A_21_P0012069  | 1,57771 | 1,3407  | 1,178547577 | ENST00000441598 | N/A       | N/A          | N/A            |
| A_33_P3294679  | 2,07284 | 1,83586 | 1,17852307  | N/A             | 140771    | NR_024007    | SMCR5          |
| A_21_P0009600  | 2,62661 | 2,38966 | 1,178498563 | N/A             | N/A       | N/A          | Inc-NDUFV2-1   |
| A_22_P00021273 | 2,97876 | 2,74183 | 1,178482226 | N/A             | N/A       | AL117542     | Inc-MAP6-3     |
| A_21_P0000237  | 10,931  | 10,6941 | 1,178457721 | N/A             | 574042    | NR_002327    | SNORA10        |
| A_22_P00023839 | 3,12082 | 2,88395 | 1,178433215 | ENST00000538731 | 100996246 | XR_158871    | LOC100996246   |
| A_22_P00005450 | 2,41508 | 2,17836 | 1,178310698 | ENST00000434398 | 400804    | NR_024236    | C1orf140       |
| A_23_P309720   | 1,90946 | 1,67275 | 1,17830253  | ENST00000378585 | 2563      | NM_000815    | GABRD          |
| A_23_P3221     | 15,032  | 14,7953 | 1,178294363 | ENST00000568606 | 58472     | NM_021199    | SQRDL          |
| A_19_P00318243 | 6,93943 | 6,70277 | 1,178261694 | N/A             | 101928857 | N/A          | CTD-3080P12.3  |
| A_33_P3280779  | 6,6883  | 6,45165 | 1,178253527 | ENST00000372274 | 80195     | NM_001270374 | TMEM254        |
| A_33_P3232544  | 11,9452 | 11,7086 | 1,178212693 | N/A             | N/A       | N/A          | N/A            |
| A_23_P39616    | 9,42005 | 9,18347 | 1,178196359 | ENST00000464147 | 4999      | NM_006190    | ORC2           |
| A_23_P83579    | 6,74803 | 6,51146 | 1,178188193 | ENST00000533983 | 9915      | NM_014862    | ARNT2          |
| A_33_P3331237  | 6,55524 | 6,31868 | 1,178180026 | ENST00000394123 | 10146     | N/A          | G3BP1          |
| A_22_P00016650 | 5,1005  | 4,86395 | 1,17817186  | N/A             | N/A       | N/A          | Inc-TP53I11-6  |
| A_21_P0012008  | 3,61506 | 3,37853 | 1,178155527 | N/A             | N/A       | N/A          | XLOC_l2_007395 |



|                |         |         |             |                 |           |              |                |
|----------------|---------|---------|-------------|-----------------|-----------|--------------|----------------|
| A_33_P3317073  | 4,61368 | 4,37715 | 1,178155527 | ENST00000309395 | 92597     | NM_001244766 | MOB1B          |
| A_33_P3336038  | 15,7016 | 15,4651 | 1,178131028 | N/A             | N/A       | N/A          | N/A            |
| A_33_P3327444  | 5,47588 | 5,23939 | 1,178122862 | N/A             | 571       | NR_027655    | BACH1          |
| A_23_P367816   | 9,14625 | 8,9098  | 1,178090198 | N/A             | 92017     | NM_032167    | SNX29          |
| A_22_P00003150 | 2,28725 | 2,05081 | 1,178082032 | N/A             | N/A       | AL700760     | Inc-C9orf3-1   |
| A_24_P180242   | 3,85038 | 3,61396 | 1,1780657   | ENST00000467087 | 57620     | NM_020860    | STIM2          |
| A_33_P3260146  | 4,62292 | 4,38655 | 1,178024872 | ENST00000277198 | 84909     | NM_001193329 | C9orf3         |
| A_33_P3265935  | 5,46484 | 5,22859 | 1,177926891 | N/A             | N/A       | N/A          | N/A            |
| A_24_P130026   | 12,1257 | 11,8895 | 1,177886068 | ENST00000445922 | 9529      | NM_001015049 | BAG5           |
| A_24_P84021    | 6,85341 | 6,61725 | 1,17785341  | ENST00000513286 | N/A       | XM_005265789 | N/A            |
| A_33_P3291816  | 4,22713 | 3,99098 | 1,177845246 | ENST00000323319 | 53842     | NM_001111319 | CLDN22         |
| A_23_P92424    | 12,0761 | 11,84   | 1,177804426 | ENST00000254803 | 57050     | NM_020368    | UTP3           |
| A_24_P51683    | 6,48671 | 6,25064 | 1,177779934 | ENST00000302625 | 8941      | NM_003936    | CDK5R2         |
| A_21_P0011936  | 3,11327 | 2,87727 | 1,17772279  | ENST00000612359 | N/A       | XR_427131    | N/A            |
| A_21_P0007654  | 5,11609 | 4,88013 | 1,177690137 | N/A             | N/A       | N/A          | Inc-TMEM132B-2 |
| A_23_P84995    | 4,27412 | 4,03817 | 1,177681974 | ENST00000374852 | 55613     | NM_017677    | MTMR8          |
| A_33_P3271975  | 5,34516 | 5,10926 | 1,177641159 | N/A             | 100132368 | AK131565     | LOC100132368   |
| A_21_P0011654  | 12,6293 | 12,3934 | 1,177641159 | ENST00000539604 | 642799    | NM_001277324 | NPIPA2         |
| A_23_P31602    | 13,1148 | 12,8789 | 1,177641159 | ENST00000473447 | 8896      | NM_003910    | BUD31          |
| A_24_P37887    | 12,9767 | 12,7408 | 1,177641159 | ENST00000380007 | 285601    | NM_199243    | GPR150         |
| A_23_P17430    | 9,32734 | 9,09144 | 1,177641159 | ENST00000356208 | 55544     | NM_017495    | RBM38          |
| A_33_P3280606  | 6,26323 | 6,02735 | 1,177624833 | ENST00000334187 | N/A       | BX641018     | N/A            |
| A_23_P50735    | 6,8824  | 6,64652 | 1,177624833 | ENST00000459757 | 339318    | NM_001029997 | ZNF181         |
| A_33_P3351189  | 2,62507 | 2,38921 | 1,177608508 | ENST00000403226 | 100129603 | N/A          | LOC100129603   |
| A_32_P83784    | 9,93297 | 9,69713 | 1,177592183 | ENST00000303965 | 116984    | NM_015230    | ARAP2          |
| A_19_P00319525 | 8,74584 | 8,51001 | 1,177584021 | N/A             | 100130890 | NM_001195131 | TSTD3          |
| A_33_P7299171  | 10,4838 | 10,248  | 1,177559534 | ENST00000232892 | 13        | NM_001086    | AADAC          |
| A_23_P149626   | 11,0268 | 10,791  | 1,177559534 | ENST00000377732 | 57449     | NM_198681    | PLEKHG5        |
| A_23_P325075   | 9,1548  | 8,91905 | 1,177518723 | ENST00000369485 | 8732      | NM_003800    | RNGTT          |
| A_23_P301372   | 9,20559 | 8,96986 | 1,1775024   | ENST00000405303 | 202018    | NM_153365    | TAPT1          |
| A_23_P309619   | 10,5825 | 10,3468 | 1,177477914 | ENST00000358431 | 85379     | NM_001145206 | KIAA1671       |
| A_23_P74114    | 10,45   | 10,2143 | 1,177477914 | ENST00000616557 | 349075    | NM_182633    | ZNF713         |
| A_24_P312692   | 10,7655 | 10,5298 | 1,177477914 | ENST00000378852 | 8539      | NM_006595    | API5           |

|                |         |         |             |                 |           |              |                |
|----------------|---------|---------|-------------|-----------------|-----------|--------------|----------------|
| A_24_P227585   | 9,39104 | 9,15535 | 1,177469753 | ENST00000379151 | 55425     | NM_018559    | GPALPP1        |
| A_32_P18159    | 7,39384 | 7,15817 | 1,17745343  | ENST00000379380 | 90624     | NM_181705    | LYRM7          |
| A_23_P390032   | 6,6228  | 6,38717 | 1,177420784 | ENST00000427197 | 159371    | NM_153226    | SLC35G1        |
| A_21_P0010413  | 3,46121 | 3,22561 | 1,177396301 | N/A             | N/A       | N/A          | Inc-MCM5-1     |
| A_22_P00024447 | 2,02143 | 1,78597 | 1,177282051 | N/A             | N/A       | N/A          | Inc-KIAA1147-4 |
| A_24_P95439    | 9,9386  | 9,70315 | 1,177273891 | ENST00000612826 | 833       | NM_001014437 | CARS           |
| A_33_P3417620  | 5,74139 | 5,50596 | 1,17725757  | ENST00000380308 | 8233      | BC065719     | ZRSR2          |
| A_21_P0007815  | 2,85397 | 2,61854 | 1,17725757  | N/A             | N/A       | N/A          | Inc-RAD51AP1-1 |
| A_23_P37191    | 14,5758 | 14,3404 | 1,17723309  | ENST00000425762 | 5693      | NM_002797    | PSMB5          |
| A_33_P3387272  | 14,4644 | 14,229  | 1,17723309  | ENST00000455918 | 1915      | NM_001402    | EEF1A1         |
| A_22_P00001250 | 8,12576 | 7,8904  | 1,177200451 | ENST00000562996 | N/A       | XM_001127575 | N/A            |
| A_33_P3213362  | 4,98148 | 4,74615 | 1,177175972 | N/A             | 255082    | NR_026939    | CASC2          |
| A_22_P00021933 | 11,1575 | 10,9222 | 1,177151494 | ENST00000506807 | 8974      | NM_004199    | P4HA2          |
| A_21_P0013711  | 2,12053 | 1,88529 | 1,177102538 | N/A             | N/A       | N/A          | Inc-METTL11A-2 |
| A_24_P7790     | 3,3341  | 3,09888 | 1,17708622  | ENST00000330523 | 280664    | NM_172006    | WFDC10B        |
| A_23_P252106   | 11,0191 | 10,7839 | 1,177069902 | ENST00000522965 | 8767      | NM_003821    | RIPK2          |
| A_24_P185986   | 9,03574 | 8,80057 | 1,177045426 | ENST00000373379 | 139596    | NM_145052    | UPRT           |
| A_22_P00005098 | 4,10597 | 3,87083 | 1,177020951 | N/A             | N/A       | N/A          | Inc-DHCR7-1    |
| A_33_P3406836  | 1,68244 | 1,44732 | 1,177004634 | ENST00000319595 | 3355      | NM_000866    | HTR1F          |
| A_23_P345564   | 4,50802 | 4,27291 | 1,176996475 | ENST00000349451 | 4987      | NM_182647    | OPRL1          |
| A_23_P312132   | 2,1413  | 1,9062  | 1,176988317 | ENST00000571644 | 3687      | NM_000887    | ITGAX          |
| A_21_P0014717  | 5,75511 | 5,52004 | 1,176963842 | N/A             | N/A       | N/A          | N/A            |
| A_22_P00021723 | 8,91539 | 8,68034 | 1,176947526 | N/A             | 101927078 | XR_251845    | LOC101927078   |
| A_23_P31654    | 18,0548 | 17,8198 | 1,176906737 | ENST00000529920 | 6132      | NM_000973    | RPL8           |
| A_33_P3321993  | 4,57047 | 4,33549 | 1,176890422 | N/A             | N/A       | N/A          | N/A            |
| A_22_P00007372 | 3,35653 | 3,12159 | 1,176857792 | ENST00000561926 | 102725415 | AL162037     | LOC102725415   |
| A_33_P3233550  | 15,8975 | 15,6626 | 1,176825163 | ENST00000402434 | 57142     | NM_020532    | RTN4           |
| A_33_P3312877  | 10,7263 | 10,4914 | 1,176825163 | ENST00000327351 | 203260    | NM_174923    | CCDC107        |
| A_21_P0009629  | 8,12337 | 7,88847 | 1,176825163 | ENST00000591487 | 101927921 | NR_110792    | LINC01478      |
| A_24_P135579   | 9,35748 | 9,12266 | 1,176759908 | ENST00000456500 | N/A       | N/A          | N/A            |
| A_33_P3283669  | 6,84967 | 6,61488 | 1,176735438 | ENST00000545399 | 478       | NM_001256214 | ATP1A3         |
| A_21_P0014018  | 8,18415 | 7,94938 | 1,176719125 | N/A             | 100652736 | NR_103767    | LINC01311      |
| A_32_P221799   | 9,51032 | 9,27559 | 1,1766865   | N/A             | 8336      | NM_003514    | HIST1H2AM      |

|                |         |         |             |                 |           |              |              |
|----------------|---------|---------|-------------|-----------------|-----------|--------------|--------------|
| A_33_P3340718  | 9,54088 | 9,30615 | 1,1766865   | ENST00000611820 | 7403      | NM_001291415 | KDM6A        |
| A_33_P3326682  | 8,67659 | 8,44186 | 1,1766865   | ENST00000367975 | 6391      | NM_003001    | SDHC         |
| A_33_P3386716  | 12,1051 | 11,8704 | 1,176662032 | ENST00000367188 | 84919     | NM_032833    | PPP1R15B     |
| A_23_P84334    | 9,93903 | 9,70437 | 1,176629408 | ENST00000438581 | 55254     | NM_018266    | TMEM39A      |
| A_23_P42241    | 5,25571 | 5,02108 | 1,176604941 | ENST00000377154 | 81696     | NM_030876    | OR5V1        |
| A_23_P131778   | 13,0103 | 12,7757 | 1,176580475 | ENST00000373605 | 63905     | NM_022077    | MANBAL       |
| A_21_P0009054  | 3,34247 | 3,10792 | 1,176539698 | N/A             | N/A       | N/A          | Inc-PMFBP1-2 |
| A_33_P3382919  | 5,28561 | 5,05107 | 1,176531543 | N/A             | 100130587 | NR_110634    | LOC100130587 |
| A_21_P0009655  | 5,80484 | 5,57038 | 1,176466304 | ENST00000326989 | 284365    | N/A          | MGC45922     |
| A_21_P0001371  | 7,14744 | 6,91298 | 1,176466304 | ENST00000625153 | 100131827 | NM_001290209 | ZNF717       |
| A_33_P3331752  | 3,48666 | 3,25245 | 1,176262456 | ENST00000614399 | 4584      | NM_005960    | MUC3A        |
| A_24_P87763    | 14,842  | 14,6078 | 1,176254302 | ENST00000309311 | 1938      | NM_001961    | EEF2         |
| A_24_P272845   | 5,25191 | 5,01777 | 1,176205384 | ENST00000266037 | 1795      | NM_004947    | DOCK3        |
| A_23_P106720   | 9,07574 | 8,84166 | 1,176156468 | ENST00000569792 | 10607     | NM_006453    | TBL3         |
| A_19_P00800244 | 6,27185 | 6,03777 | 1,176156468 | N/A             | N/A       | N/A          | N/A          |
| A_33_P3290914  | 7,18319 | 6,94917 | 1,176107554 | ENST00000463684 | 8243      | NM_001281463 | SMC1A        |
| A_33_P3421748  | 9,38138 | 9,14736 | 1,176107554 | N/A             | 6651      | NM_001291411 | SON          |
| A_23_P380815   | 10,0932 | 9,8592  | 1,17609125  | ENST00000361983 | 26128     | NM_015634    | KIAA1279     |
| A_23_P157147   | 14,3549 | 14,121  | 1,176009733 | ENST00000396709 | 55146     | NM_018106    | ZDHHC4       |
| A_21_P0006468  | 4,44538 | 4,21152 | 1,175977127 | N/A             | N/A       | N/A          | Inc-IDS-5    |
| A_33_P3367438  | 2,12675 | 1,89303 | 1,175863015 | ENST00000554719 | 9369      | NM_004796    | NRXN3        |
| A_33_P3242304  | 4,70447 | 4,47077 | 1,175846714 | ENST00000312693 | 7142      | NM_005425    | TNP2         |
| A_33_P3318292  | 13,2661 | 13,0324 | 1,175846714 | ENST00000357214 | 6421      | NM_005066    | SFPQ         |
| A_32_P64038    | 9,91634 | 9,68266 | 1,175830414 | N/A             | 400590    | BC062632     | LOC400590    |
| A_33_P3395396  | 9,60542 | 9,37175 | 1,175822264 | ENST00000337995 | 147923    | XM_006723039 | ZNF420       |
| A_32_P89352    | 5,65488 | 5,42122 | 1,175814113 | ENST00000217246 | 140733    | NM_080676    | MACROD2      |
| A_33_P3285251  | 5,55405 | 5,3204  | 1,175805963 | ENST00000376386 | N/A       | AK310550     | N/A          |
| A_33_P3317725  | 6,86233 | 6,62869 | 1,175797813 | ENST00000399196 | 401247    | AK098012     | LINC00243    |
| A_32_P148710   | 14,4256 | 14,192  | 1,175765214 | ENST00000440986 | 1072      | NM_005507    | CFL1         |
| A_33_P3307297  | 1,89849 | 1,66492 | 1,175740765 | N/A             | 10777     | XM_005264810 | ARPP21       |
| A_24_P401645   | 6,17522 | 5,94168 | 1,175716316 | ENST00000616371 | 11154     | NM_001254728 | AP4S1        |
| A_22_P00024575 | 8,12305 | 7,88951 | 1,175716316 | N/A             | N/A       | N/A          | Inc-UMODL1-5 |
| A_33_P3210079  | 12,0321 | 11,7986 | 1,175683719 | ENST00000221494 | 8175      | NM_007165    | SF3A2        |

|                |         |         |             |                 |           |              |                |
|----------------|---------|---------|-------------|-----------------|-----------|--------------|----------------|
| A_33_P3254666  | 6,9979  | 6,76445 | 1,175642973 | N/A             | 84445     | AK097997     | LZTS2          |
| A_23_P331598   | 10,9399 | 10,7065 | 1,175602229 | ENST00000379719 | 10527     | NM_006391    | IPO7           |
| A_21_P0009565  | 3,50735 | 3,27409 | 1,175488154 | N/A             | N/A       | N/A          | Inc-RNF152-3   |
| A_33_P3278659  | 3,9988  | 3,76557 | 1,17546371  | ENST00000412872 | N/A       | AB128832     | N/A            |
| A_22_P00011858 | 3,87493 | 3,64171 | 1,175455563 | N/A             | N/A       | N/A          | Inc-PHYHIP-2   |
| A_24_P391853   | 11,8599 | 11,6267 | 1,175439268 | ENST00000392417 | N/A       | N/A          | N/A            |
| A_21_P0012807  | 2,38673 | 2,15357 | 1,175406678 | ENST00000511993 | N/A       | N/A          | N/A            |
| A_23_P205255   | 7,56608 | 7,33293 | 1,175398531 | ENST00000454394 | 91833     | NM_001242417 | WDR20          |
| A_22_P00004929 | 2,41817 | 2,18507 | 1,175357795 | N/A             | N/A       | N/A          | Inc-DBT-2      |
| A_21_P0010564  | 3,32477 | 3,09168 | 1,175349648 | N/A             | N/A       | N/A          | XLOC_I2_000471 |
| A_24_P40229    | 8,73071 | 8,49766 | 1,175317061 | ENST00000490258 | 51340     | NM_016652    | CRNKL1         |
| A_24_P214552   | 1,61917 | 1,38616 | 1,175284475 | ENST00000356020 | 23434     | NR_125802    | LINC01565      |
| A_19_P00315869 | 6,02429 | 5,7913  | 1,175268182 | N/A             | N/A       | N/A          | Inc-DET1-1     |
| A_32_P172848   | 5,35178 | 5,11882 | 1,175243743 | ENST00000505354 | 2710      | NM_000167    | GK             |
| A_22_P00016111 | 4,44101 | 4,20811 | 1,175194867 | N/A             | N/A       | N/A          | Inc-THTPA-3    |
| A_33_P3216098  | 1,75347 | 1,52057 | 1,175194867 | ENST00000609630 | 25787     | NR_024159    | DGCR9          |
| A_23_P55388    | 6,38143 | 6,14853 | 1,175194867 | ENST00000319121 | 55175     | NM_018143    | KLHL11         |
| A_33_P3213797  | 6,05548 | 5,82259 | 1,175186721 | ENST00000525254 | 10089     | NM_005714    | KCNK7          |
| A_22_P00017364 | 3,47499 | 3,24213 | 1,175162284 | ENST00000505978 | N/A       | N/A          | N/A            |
| A_23_P86975    | 2,06069 | 1,82798 | 1,175040107 | ENST00000530950 | 59082     | NM_021571    | CARD18         |
| A_24_P763243   | 18,751  | 18,5183 | 1,175031962 | ENST00000434005 | 1915      | NM_001402    | EEF1A1         |
| A_32_P84605    | 17,0847 | 16,852  | 1,175031962 | ENST00000429775 | 6228      | NM_001025    | RPS23          |
| A_23_P163027   | 11,6406 | 11,4079 | 1,175031962 | ENST00000250416 | 10038     | NM_005484    | PARP2          |
| A_21_P0014676  | 5,16614 | 4,93346 | 1,175015673 | N/A             | 26628     | NR_120438    | OR7E47P        |
| A_33_P3294504  | 3,8145  | 3,58183 | 1,175007528 | ENST00000368175 | 115350    | NM_001159397 | FCRL1          |
| A_23_P250516   | 9,29611 | 9,06349 | 1,174966806 | ENST00000591384 | 101928710 | NR_110848    | LOC101928710   |
| A_21_P0013052  | 4,99781 | 4,7652  | 1,174958662 | N/A             | N/A       | N/A          | XLOC_I2_012836 |
| A_21_P0011947  | 1,97979 | 1,74719 | 1,174950518 | N/A             | N/A       | N/A          | XLOC_I2_008200 |
| A_21_P0008817  | 1,97423 | 1,74179 | 1,174820219 | N/A             | N/A       | N/A          | Inc-SNURF-5    |
| A_33_P3248939  | 2,84482 | 2,61239 | 1,174812076 | N/A             | N/A       | N/A          | N/A            |
| A_33_P3312819  | 4,83813 | 4,60573 | 1,174787646 | N/A             | 51214     | NR_028044    | IGF2-AS        |
| A_22_P00003793 | 3,7499  | 3,51756 | 1,174738789 | N/A             | 100129175 | NR_046086    | LOC100129175   |
| A_33_P3250671  | 3,76968 | 3,53736 | 1,174722504 | ENST00000522561 | 6932      | NM_003202    | TCF7           |

|                |         |         |             |                 |           |              |                |
|----------------|---------|---------|-------------|-----------------|-----------|--------------|----------------|
| A_22_P00012248 | 6,33159 | 6,09929 | 1,174706219 | N/A             | N/A       | N/A          | Inc-PPP1R12B-1 |
| A_19_P00811048 | 5,27011 | 5,03786 | 1,174665508 | N/A             | 220930    | NR_024284    | ZEB1-AS1       |
| A_33_P3608172  | 12,8862 | 12,654  | 1,174624798 | ENST00000571697 | 2874      | NM_004489    | GPS2           |
| A_21_P0013503  | 4,05676 | 3,82473 | 1,174486394 | N/A             | 101928108 | XM_006725099 | LOC101928108   |
| A_23_P33364    | 11,639  | 11,407  | 1,174461971 | ENST00000514152 | 152503    | NM_001009555 | SH3D19         |
| A_23_P91702    | 15,5708 | 15,3388 | 1,174461971 | ENST00000405442 | 8664      | NM_003753    | EIF3D          |
| A_21_P0014684  | 8,70452 | 8,47256 | 1,174429409 | N/A             | 102725157 | XR_433225    | LOC102725157   |
| A_22_P00015489 | 4,04386 | 3,81196 | 1,174380567 | ENST00000507344 | N/A       | N/A          | N/A            |
| A_22_P00021621 | 2,45924 | 2,22751 | 1,174242192 | N/A             | N/A       | N/A          | Inc-TIPIN-1    |
| A_33_P3347392  | 7,87172 | 7,64001 | 1,174225913 | ENST00000355943 | 91137     | NM_138773    | SLC25A46       |
| A_22_P00023960 | 4,61078 | 4,37908 | 1,174217774 | N/A             | N/A       | AK097437     | Inc-BATF3-3    |
| A_33_P3398840  | 6,0152  | 5,78351 | 1,174209635 | ENST00000381218 | 9189      | NM_001171135 | ZBED1          |
| A_23_P77568    | 17,4701 | 17,2385 | 1,174136386 | ENST00000565932 | 8663      | NM_001037808 | EIF3C          |
| A_23_P80570    | 11,3543 | 11,1228 | 1,174055004 | ENST00000232892 | 13        | NM_001086    | AADAC          |
| A_21_P0013280  | 6,49329 | 6,26179 | 1,174055004 | N/A             | N/A       | N/A          | XLOC_I2_013728 |
| A_23_P422511   | 5,3363  | 5,10491 | 1,17396549  | ENST00000526898 | 283130    | NM_182556    | SLC25A45       |
| A_21_P0010649  | 5,68683 | 5,45552 | 1,173900394 | N/A             | N/A       | N/A          | XLOC_I2_001086 |
| A_23_P350555   | 5,66443 | 5,43324 | 1,173802756 | ENST00000491828 | 140290    | NM_144659    | TCP10L         |
| A_22_P00022219 | 3,75269 | 3,52153 | 1,173778347 | N/A             | 101928433 | XR_241982    | LOC101928433   |
| A_33_P3412463  | 3,48683 | 3,25568 | 1,173770211 | ENST00000369312 | 79949     | NM_001193434 | PLEKHS1        |
| A_23_P368934   | 11,1157 | 10,8846 | 1,173729532 | ENST00000434748 | 57666     | NM_001142641 | FBRSL1         |
| A_22_P00014623 | 2,86895 | 2,63789 | 1,17369699  | N/A             | N/A       | N/A          | Inc-SLC16A3-1  |
| A_21_P0007057  | 7,36674 | 7,13572 | 1,173664449 | ENST00000499986 | 399744    | NR_024497    | LINC00999      |
| A_23_P152087   | 12,0677 | 11,8367 | 1,173648178 | ENST00000338376 | 55177     | NM_018145    | RMDN3          |
| A_33_P3235390  | 10,4244 | 10,1934 | 1,173648178 | ENST00000468227 | 79876     | NM_024818    | UBA5           |
| A_33_P3396275  | 5,79156 | 5,56058 | 1,173631908 | ENST00000344320 | 643338    | NM_001130448 | C15orf62       |
| A_33_P3404047  | 5,80713 | 5,57616 | 1,173623773 | N/A             | N/A       | N/A          | N/A            |
| A_22_P00022364 | 6,6687  | 6,43773 | 1,173623773 | ENST00000466692 | 100507054 | XR_108535    | LOC100507054   |
| A_22_P00021181 | 6,91298 | 6,68206 | 1,173583099 | N/A             | 101926903 | NR_109998    | LSAMP-AS1      |
| A_22_P00004698 | 7,59661 | 7,36571 | 1,17356683  | N/A             | 100287098 | NR_109770    | LOC100287098   |
| A_24_P227069   | 9,22456 | 8,99367 | 1,173558695 | ENST00000348367 | 57678     | NM_020918    | GPAM           |
| A_33_P3277097  | 5,91414 | 5,68327 | 1,173542427 | ENST00000383417 | 79136     | NR_003673    | LY6G6E         |
| A_33_P3402474  | 10,4632 | 10,2324 | 1,173485487 | ENST00000330083 | 79969     | NM_001031722 | ATAT1          |

|                |         |         |             |                 |           |              |                |
|----------------|---------|---------|-------------|-----------------|-----------|--------------|----------------|
| A_22_P00013313 | 2,62182 | 2,39103 | 1,173477353 | N/A             | 255480    | NR_038440    | TBX5-AS1       |
| A_23_P309967   | 8,79652 | 8,56583 | 1,173396017 | ENST00000563614 | 84516     | NM_032486    | DCTN5          |
| A_24_P54131    | 6,90297 | 6,67239 | 1,173306553 | ENST00000369563 | 64858     | NM_022836    | DCLRE1B        |
| A_32_P9468     | 9,06806 | 8,83749 | 1,173298421 | N/A             | 90639     | NM_001031617 | COX19          |
| A_33_P3414507  | 2,27564 | 2,04515 | 1,173233361 | ENST00000209540 | 126370    | NM_001004713 | OR1I1          |
| A_32_P886589   | 2,16492 | 1,93445 | 1,173217097 | ENST00000408887 | 283416    | NR_121682    | LINC01465      |
| A_24_P294703   | 8,95795 | 8,72752 | 1,173184569 | ENST00000512635 | 133619    | NM_130809    | PRRC1          |
| A_33_P3262205  | 14,5989 | 14,3685 | 1,173160173 | ENST00000401607 | 8904      | NM_003915    | CPNE1          |
| A_33_P3327847  | 11,0285 | 10,7981 | 1,173160173 | ENST00000373202 | 8879      | NM_003901    | SGPL1          |
| A_22_P00025278 | 10,1079 | 9,87753 | 1,173135778 | ENST00000571067 | N/A       | CB990811     | N/A            |
| A_22_P00010823 | 3,89829 | 3,66796 | 1,173103253 | ENST00000584829 | 101927134 | NR_109877    | LINC01470      |
| A_33_P3659808  | 13,0135 | 12,7832 | 1,173078859 | ENST00000573523 | 27043     | NM_014389    | PELP1          |
| A_32_P203099   | 4,24021 | 4,01006 | 1,172956898 | ENST00000371504 | 202500    | NM_182539    | TCTE1          |
| A_33_P3241369  | 5,11557 | 4,88542 | 1,172956898 | ENST00000380433 | 114131    | NM_053049    | UCN3           |
| A_24_P233960   | 10,4171 | 10,187  | 1,172916247 | ENST00000368841 | 81609     | NM_030918    | SNX27          |
| A_22_P00007431 | 4,71627 | 4,48624 | 1,172859338 | N/A             | N/A       | BC046445     | Inc-GSDMD-3    |
| A_33_P3257714  | 11,518  | 11,288  | 1,172834949 | ENST00000296674 | 6228      | NM_001025    | RPS23          |
| A_22_P00023230 | 2,60568 | 2,37573 | 1,172794303 | ENST00000415509 | N/A       | N/A          | N/A            |
| A_22_P00007346 | 6,53417 | 6,30423 | 1,172786173 | N/A             | N/A       | N/A          | Inc-GPT2-1     |
| A_23_P77731    | 4,90822 | 4,6783  | 1,172769915 | ENST00000219599 | 1428      | NM_001888    | CRYM           |
| A_23_P337917   | 7,42168 | 7,19184 | 1,172704885 | ENST00000535575 | 8496      | NM_177444    | PPFIBP1        |
| A_23_P209519   | 7,84741 | 7,61758 | 1,172696756 | ENST00000425450 | 3300      | NM_001039550 | DNAJB2         |
| A_22_P00016354 | 10,0649 | 9,83507 | 1,172696756 | N/A             | 728730    | NR_037875    | LOC728730      |
| A_23_P382775   | 12,0634 | 11,8336 | 1,172672371 | ENST00000439096 | 27113     | NM_014417    | BBC3           |
| A_22_P00014021 | 3,10687 | 2,87708 | 1,172664243 | ENST00000435284 | 100506532 | XR_109854    | LOC100506532   |
| A_21_P0010222  | 5,98672 | 5,75702 | 1,17259109  | N/A             | N/A       | N/A          | Inc-USP25-1    |
| A_24_P188941   | 17,2241 | 16,9944 | 1,17259109  | ENST00000517671 | 4869      | NM_002520    | NPM1           |
| A_33_P3369262  | 7,37608 | 7,14645 | 1,172534197 | ENST00000538172 | 26127     | NM_015633    | FGFR1OP2       |
| A_21_P0009942  | 4,05599 | 3,8264  | 1,172501688 | N/A             | 102724734 | XR_425232    | LOC102724734   |
| A_21_P0013552  | 2,08766 | 1,85811 | 1,17246918  | N/A             | N/A       | N/A          | XLOC_I2_014697 |
| A_23_P120170   | 7,56032 | 7,33077 | 1,17246918  | ENST00000408957 | 200765    | NM_145702    | TIGD1          |
| A_33_P3417123  | 7,46522 | 7,23569 | 1,172452926 | N/A             | N/A       | N/A          | N/A            |
| A_22_P00016353 | 6,40586 | 6,17634 | 1,172444799 | N/A             | 728730    | NR_037875    | LOC728730      |

|                |         |         |             |                 |           |              |                      |
|----------------|---------|---------|-------------|-----------------|-----------|--------------|----------------------|
| A_24_P106363   | 8,17147 | 7,94195 | 1,172444799 | ENST00000512803 | 153562    | NM_001038603 | MARVELD2             |
| A_32_P2452     | 1,99514 | 1,76563 | 1,172436673 | ENST00000256062 | 83857     | NM_175861    | TMTC1                |
| A_33_P3389394  | 9,9231  | 9,6936  | 1,172428546 | N/A             | 85495     | NR_002312    | RPPH1                |
| A_33_P3301174  | 14,6296 | 14,4001 | 1,172428546 | ENST00000262225 | 10959     | NM_006815    | TMED2                |
| A_23_P115762   | 10,645  | 10,4155 | 1,172428546 | ENST00000454759 | 11319     | NM_007265    | ECD                  |
| A_19_P00806911 | 9,56241 | 9,33294 | 1,172404166 | ENST00000607016 | 11165     | N/A          | NUDT3                |
| A_33_P3269203  | 14,6258 | 14,3964 | 1,172347282 | ENST00000524558 | 871       | NM_001207014 | SERPINH1             |
| A_32_P102519   | 1,98643 | 1,75706 | 1,172322904 | ENST00000275590 | 541473    | NR_003602    | LOC541473            |
| A_23_P103690   | 10,0935 | 9,86419 | 1,17227415  | ENST00000487649 | 10712     | NM_006589    | FAM189B              |
| A_22_P00001348 | 8,6523  | 8,423   | 1,172266024 | ENST00000580082 | 339290    | NR_015389    | LINC00667            |
| A_23_P164814   | 9,50563 | 9,27638 | 1,172225397 | ENST00000346736 | 79173     | NM_024323    | C19orf57             |
| A_23_P309515   | 8,03921 | 7,80996 | 1,172225397 | ENST00000409157 | 130535    | NM_152387    | KCTD18               |
| A_24_P417007   | 7,76998 | 7,54076 | 1,172201022 | ENST00000442738 | 5435      | NM_001301129 | POLR2F               |
| A_33_P3371752  | 10,8252 | 10,596  | 1,172184772 | ENST00000371727 | 2060      | AK129853     | EPS15                |
| A_33_P3832680  | 3,3242  | 3,09501 | 1,172176647 | N/A             | 644054    | BC127791     | FAM25C               |
| A_21_P0009533  | 7,14833 | 6,91915 | 1,172168522 | N/A             | N/A       | N/A          | Inc-RP11-863N1.2.1-1 |
| A_21_P0012524  | 3,55534 | 3,3262  | 1,172136023 | ENST00000415410 | 100507391 | NR_037891    | LOC100507391         |
| A_22_P00016791 | 5,55614 | 5,32701 | 1,172127898 | N/A             | N/A       | N/A          | Inc-TRIM63-1         |
| A_33_P3681213  | 7,8054  | 7,57627 | 1,172127898 | ENST00000378511 | 9581      | NM_006036    | PREPL                |
| A_21_P0003800  | 2,02386 | 1,79474 | 1,172119774 | N/A             | N/A       | N/A          | Inc-GPM6A-2          |
| A_23_P31477    | 10,707  | 10,4779 | 1,172103525 | ENST00000460110 | 23386     | NM_015332    | NUDCD3               |
| A_22_P00014715 | 5,5646  | 5,33555 | 1,172062904 | N/A             | N/A       | N/A          | Inc-SLC25A5-1        |
| A_33_P3302245  | 5,7332  | 5,50417 | 1,172046655 | ENST00000598660 | 25789     | NM_012109    | TMEM59L              |
| A_22_P00002057 | 6,36575 | 6,13687 | 1,171924802 | ENST00000447625 | 10904     | N/A          | BLCAP                |
| A_21_P0000637  | 10,4273 | 10,1985 | 1,171859818 | N/A             | 643749    | NR_034111    | TRAF3IP2-AS1         |
| A_33_P3300740  | 4,34513 | 4,11635 | 1,171843573 | N/A             | N/A       | BI056255     | N/A                  |
| A_23_P367420   | 3,17048 | 2,9417  | 1,171843573 | ENST00000603540 | 8747      | NM_003813    | ADAM21               |
| A_32_P128310   | 5,90175 | 5,67302 | 1,171802961 | ENST00000274695 | 54901     | NM_017774    | CDKAL1               |
| A_32_P15421    | 7,58681 | 7,35811 | 1,171778594 | ENST00000426256 | 91445     | NM_152267    | RNF185               |
| A_21_P0013409  | 4,16838 | 3,9397  | 1,17176235  | ENST00000492054 | 100134040 | N/A          | LOC100134040         |
| A_23_P411162   | 7,80653 | 7,57788 | 1,171737984 | ENST00000355768 | 8864      | NM_022817    | PER2                 |
| A_23_P303155   | 6,96507 | 6,73644 | 1,17172174  | ENST00000283206 | 84910     | NM_032824    | TMEM87B              |
| A_33_P3864411  | 5,81027 | 5,58174 | 1,171640525 | ENST00000623630 | 399746    | NR_045000    | ACTR3BP5             |

|                |         |         |             |                 |           |              |                  |
|----------------|---------|---------|-------------|-----------------|-----------|--------------|------------------|
| A_32_P140706   | 8,98627 | 8,75775 | 1,171632404 | ENST00000403974 | 5395      | NM_000535    | PMS2             |
| A_21_P0012260  | 6,88832 | 6,65982 | 1,171616162 | N/A             | N/A       | N/A          | XLOC_I2_009328   |
| A_33_P3260451  | 2,67207 | 2,4436  | 1,171591799 | ENST00000526929 | 392188    | NM_001256872 | USP17L8          |
| A_33_P3313825  | 5,62646 | 5,39801 | 1,171575558 | N/A             | 7048      | XM_006713316 | TGFBR2           |
| A_33_P3265419  | 3,62287 | 3,39443 | 1,171567437 | N/A             | N/A       | N/A          | N/A              |
| A_23_P132845   | 8,6627  | 8,43428 | 1,171551196 | ENST00000430397 | 1181      | NM_004366    | CLCN2            |
| A_33_P3336240  | 2,05569 | 1,82731 | 1,171518714 | ENST00000491870 | 245912    | NR_024044    | DEFB109P1        |
| A_23_P208900   | 6,20899 | 5,98061 | 1,171518714 | ENST00000586582 | 10501     | NM_032108    | SEMA6B           |
| A_23_P46964    | 7,0198  | 6,79145 | 1,171494353 | ENST00000299163 | 55662     | NM_017902    | HIF1AN           |
| A_33_P3345608  | 6,64468 | 6,41648 | 1,171372557 | ENST00000368813 | 26098     | NM_001202438 | EDRF1            |
| A_24_P294124   | 9,78721 | 9,55907 | 1,171323842 | ENST00000313349 | 9792      | NM_014755    | SERTAD2          |
| A_19_P00322939 | 9,51925 | 9,29121 | 1,171242655 | ENST00000512617 | 5820      | NR_003367    | PVT1             |
| A_22_P00000579 | 6,09668 | 5,86868 | 1,171210181 | N/A             | N/A       | N/A          | Inc-AC136604.1-1 |
| A_24_P43092    | 8,20302 | 7,97505 | 1,171185827 | ENST00000464128 | 4735      | NM_001008491 | set-02           |
| A_33_P3647427  | 5,36735 | 5,13961 | 1,170999127 | ENST00000225587 | N/A       | X52357       | N/A              |
| A_33_P3417880  | 5,39864 | 5,17092 | 1,170982893 | ENST00000343684 | 222698    | NM_001007531 | NKAPL            |
| A_22_P00016861 | 12,4794 | 12,2517 | 1,17096666  | ENST00000483588 | 125144    | NR_045024    | LRRC75A-AS1      |
| A_24_P179351   | 17,6286 | 17,4009 | 1,17096666  | ENST00000484604 | 7178      | NM_003295    | TPT1             |
| A_23_P68884    | 12,3028 | 12,0751 | 1,17096666  | ENST00000438989 | 4733      | NM_004147    | DRG1             |
| A_19_P00316753 | 8,88227 | 8,65462 | 1,170926078 | ENST00000513868 | 5820      | NR_003367    | PVT1             |
| A_32_P216566   | 8,39119 | 8,16358 | 1,170893614 | ENST00000369689 | 134701    | NM_001009994 | RIPPLY2          |
| A_33_P3210069  | 6,08052 | 5,85292 | 1,170885498 | N/A             | N/A       | N/A          | N/A              |
| A_33_P3373329  | 4,52428 | 4,29672 | 1,170853034 | ENST00000369280 | 56165     | NM_198795    | TDRD1            |
| A_23_P45185    | 5,0027  | 4,77518 | 1,170820572 | ENST00000297904 | 2277      | NM_004469    | FIGF             |
| A_23_P46725    | 8,83931 | 8,61183 | 1,17078811  | ENST00000263062 | 80314     | NM_025209    | EPC1             |
| A_22_P00009058 | 5,33079 | 5,10334 | 1,170763765 | N/A             | N/A       | N/A          | Inc-LENG9-1      |
| A_33_P3364493  | 5,82972 | 5,60234 | 1,17070696  | N/A             | N/A       | N/A          | N/A              |
| A_21_P0007044  | 4,16536 | 3,938   | 1,170690731 | ENST00000436383 | 100507127 | NR_038291    | LINC00707        |
| A_21_P0012918  | 12,1782 | 11,9509 | 1,170642044 | N/A             | N/A       | N/A          | XLOC_I2_012150   |
| A_33_P3271965  | 4,30206 | 4,0748  | 1,170609588 | ENST00000507907 | 2911      | NM_001278067 | GRM1             |
| A_33_P3322428  | 5,53809 | 5,31085 | 1,17059336  | ENST00000592762 | 57787     | NM_001199867 | MARK4            |
| A_33_P3214027  | 4,82723 | 4,60001 | 1,170577132 | ENST00000541492 | 23384     | NM_001254732 | SPECC1L          |
| A_33_P3230269  | 8,07103 | 7,84391 | 1,170495997 | ENST00000324907 | 29841     | NM_198182    | GRHL1            |



|                |         |         |             |                 |           |              |               |
|----------------|---------|---------|-------------|-----------------|-----------|--------------|---------------|
| A_33_P3361817  | 3,73152 | 3,50442 | 1,17047977  | ENST00000412176 | N/A       | N/A          | N/A           |
| A_21_P0011510  | 4,93502 | 4,70795 | 1,170455431 | ENST00000570921 | 245       | NR_002710    | ALOX12P2      |
| A_33_P3317277  | 6,20415 | 5,9771  | 1,170439205 | ENST00000471976 | 8193      | NM_001289978 | DPF1          |
| A_23_P126540   | 1,9886  | 1,76158 | 1,170414867 | ENST00000463993 | 57413     | NM_020683    | TMIGD3        |
| A_19_P00811613 | 2,02323 | 1,79623 | 1,170398641 | N/A             | 101930048 | XR_428438    | LOC101930048  |
| A_22_P00016608 | 5,00449 | 4,77753 | 1,170366192 | ENST00000573301 | N/A       | N/A          | N/A           |
| A_22_P00002609 | 4,19061 | 3,96369 | 1,170333743 | N/A             | N/A       | N/A          | Inc-C1QTNF8-2 |
| A_23_P350074   | 11,166  | 10,9391 | 1,170317518 | ENST00000465425 | 163183    | NM_001039876 | SYNE4         |
| A_24_P34944    | 5,58511 | 5,35822 | 1,170309406 | ENST00000613314 | 26025     | NM_032094    | PCDHGA12      |
| A_23_P162846   | 16,3168 | 16,0901 | 1,170155289 | ENST00000472564 | 3916      | NM_005561    | LAMP1         |
| A_21_P0005860  | 5,52788 | 5,30119 | 1,170147178 | N/A             | N/A       | N/A          | Inc-PEX2-3    |
| A_32_P62008    | 16,7724 | 16,5458 | 1,170074183 | ENST00000472730 | 4736      | NM_007104    | RPL10A        |
| A_21_P0000540  | 3,08878 | 2,86219 | 1,170066073 | N/A             | 100286844 | NR_027500    | BCDIN3D-AS1   |
| A_23_P342138   | 3,59786 | 3,3714  | 1,169960644 | ENST00000542621 | 92949     | NM_001040272 | ADAMTSL1      |
| A_33_P3311439  | 7,15222 | 6,92579 | 1,169936315 | ENST00000395514 | 2643      | NM_001024071 | GCH1          |
| A_24_P191664   | 8,15542 | 7,92902 | 1,169911988 | ENST00000470487 | 27333     | NM_014498    | GOLIM4        |
| A_23_P109427   | 8,17708 | 7,95068 | 1,169911988 | ENST00000616938 | 2953      | NM_000854    | GSTT2         |
| A_23_P428260   | 8,76714 | 8,54075 | 1,169903878 | ENST00000394622 | 261729    | NM_152999    | STEAP2        |
| A_24_P215240   | 4,49694 | 4,27066 | 1,169814681 | ENST00000376363 | 219670    | NM_145010    | ENKUR         |
| A_23_P44724    | 12,3861 | 12,1599 | 1,169749815 | ENST00000548783 | 1466      | NM_001321    | CSRP2         |
| A_33_P3523501  | 9,57849 | 9,35233 | 1,169717383 | ENST00000598042 | 374890    | XR_109585    | LOC374890     |
| A_23_P218731   | 8,50933 | 8,28319 | 1,169701167 | ENST00000437996 | 9946      | NM_145858    | CRYZL1        |
| A_24_P307854   | 9,18316 | 8,95702 | 1,169701167 | ENST00000620087 | 80028     | NM_024963    | FBXL18        |
| A_22_P00021041 | 3,1479  | 2,92182 | 1,169652522 | N/A             | N/A       | BX097819     | Inc-EID1-2    |
| A_22_P00018862 | 2,25529 | 2,02928 | 1,169595771 | N/A             | N/A       | N/A          | Inc-HIBADH-1  |
| A_22_P00012878 | 5,57593 | 5,34992 | 1,169595771 | ENST00000566383 | 102723373 | NR_119378    | LOC102723373  |
| A_23_P253571   | 10,5946 | 10,3686 | 1,169587664 | ENST00000216252 | 84844     | NM_032758    | PHF5A         |
| A_33_P3250953  | 8,80951 | 8,58359 | 1,16952281  | ENST00000378509 | 84912     | NM_032826    | SLC35B4       |
| A_23_P321349   | 9,99891 | 9,77307 | 1,16945796  | ENST00000531581 | 113174    | NM_138421    | SAAL1         |
| A_22_P00005207 | 5,06836 | 4,84257 | 1,16941743  | ENST00000556183 | N/A       | DB457795     | N/A           |
| A_33_P3229873  | 6,34925 | 6,12354 | 1,169352586 | N/A             | 80313     | NM_001143757 | LRRC27        |
| A_22_P00015597 | 8,71669 | 8,49101 | 1,16932827  | ENST00000443556 | 134957    | NM_001127715 | STXBP5        |
| A_23_P146551   | 7,78509 | 7,55953 | 1,169231012 | ENST00000262244 | 79817     | NM_024761    | MOB3B         |

|                |         |         |             |                 |           |              |                |
|----------------|---------|---------|-------------|-----------------|-----------|--------------|----------------|
| A_22_P00017597 | 2,75057 | 2,52501 | 1,169231012 | N/A             | N/A       | BF940953     | Inc-WDR73-1    |
| A_33_P3372859  | 8,93561 | 8,71007 | 1,169214803 | ENST00000314045 | 79039     | NM_001111322 | DDX54          |
| A_21_P0010793  | 4,42743 | 4,20195 | 1,169166178 | ENST00000623180 | 100132287 | NR_028322    | LOC100132287   |
| A_22_P00010125 | 2,77965 | 2,5542  | 1,169141866 | N/A             | 101927884 | NR_110281    | LOC101927884   |
| A_21_P0007004  | 6,61978 | 6,39433 | 1,169141866 | N/A             | N/A       | N/A          | Inc-NDST2-3    |
| A_24_P144784   | 1,99999 | 1,77455 | 1,169133762 | ENST00000504307 | 373861    | NR_024193    | HILS1          |
| A_23_P259632   | 10,1916 | 9,96616 | 1,169133762 | ENST00000440632 | 83862     | NM_031925    | TMEM120A       |
| A_24_P244162   | 10,4052 | 10,1798 | 1,169101347 | ENST00000370631 | 55361     | NM_018425    | PI4K2A         |
| A_23_P212617   | 13,4805 | 13,2551 | 1,169101347 | ENST00000392396 | 7037      | NM_003234    | TFRC           |
| A_24_P401787   | 2,68867 | 2,46331 | 1,169068933 | ENST00000333850 | 121278    | NM_173353    | TPH2           |
| A_33_P3245937  | 4,91461 | 4,68929 | 1,16903652  | ENST00000413484 | N/A       | AK124574     | N/A            |
| A_21_P0003127  | 2,1178  | 1,8925  | 1,169020314 | N/A             | N/A       | N/A          | Inc-SUCLG2-1   |
| A_21_P0001902  | 2,28823 | 2,06299 | 1,168971697 | ENST00000455309 | 101928173 | XR_245039    | LOC101928173   |
| A_22_P00014809 | 3,57018 | 3,34497 | 1,168947389 | ENST00000414600 | N/A       | BG186396     | N/A            |
| A_23_P76218    | 2,07615 | 1,85095 | 1,168939287 | ENST00000546807 | 117159    | NM_053283    | DCD            |
| A_23_P311020   | 12,2922 | 12,067  | 1,168939287 | ENST00000289359 | 129531    | NM_138798    | MITD1          |
| A_19_P00802614 | 6,56436 | 6,33925 | 1,168866367 | ENST00000520327 | N/A       | N/A          | N/A            |
| A_23_P19657    | 10,5179 | 10,2928 | 1,168858265 | ENST00000239367 | 84918     | NM_032832    | LRP11          |
| A_22_P00017840 | 3,72189 | 3,4968  | 1,168850163 | N/A             | 100129196 | NR_034182    | MATN1-AS1      |
| A_33_P3249135  | 6,59458 | 6,36957 | 1,16878535  | ENST00000449802 | 65065     | NM_001114132 | NBEAL1         |
| A_33_P3298942  | 8,71877 | 8,49377 | 1,168777249 | ENST00000326831 | 23120     | AK090832     | ATP10B         |
| A_21_P0014739  | 4,77366 | 4,54869 | 1,168752945 | ENST00000438002 | N/A       | XR_426511    | N/A            |
| A_21_P0011308  | 6,49678 | 6,27185 | 1,168720541 | ENST00000560598 | 100288637 | NR_038253    | LOC100288637   |
| A_21_P0002036  | 2,34909 | 2,12417 | 1,16871244  | N/A             | 100505774 | XR_109967    | LOC100505774   |
| A_22_P00018854 | 2,04738 | 1,82247 | 1,168704339 | N/A             | 100128285 | NR_024595    | DNM1P35        |
| A_23_P42997    | 12,1488 | 11,9239 | 1,168696238 | ENST00000436336 | 10898     | NM_006693    | CPSF4          |
| A_22_P00009989 | 5,83105 | 5,60617 | 1,168680036 | N/A             | N/A       | N/A          | Inc-MLH3-1     |
| A_33_P3325653  | 2,68139 | 2,45653 | 1,168663835 | ENST00000473520 | N/A       | N/A          | N/A            |
| A_22_P00002555 | 5,23313 | 5,00832 | 1,168623333 | N/A             | N/A       | N/A          | Inc-C17orf75-2 |
| A_22_P00001818 | 1,69404 | 1,46927 | 1,168590932 | N/A             | 101929372 | NM_001288707 | LOC101929372   |
| A_23_P211417   | 1,92759 | 1,70292 | 1,168509935 | ENST00000354373 | 5988      | NM_021026    | RFPL1          |
| A_33_P3397051  | 6,39689 | 6,17225 | 1,168485636 | ENST00000366645 | 149371    | NM_175876    | EXOC8          |
| A_22_P00006839 | 4,14103 | 3,91648 | 1,168412745 | N/A             | 101927220 | NR_110671    | DEPDC1-AS1     |

|                |         |         |             |                 |           |              |                |
|----------------|---------|---------|-------------|-----------------|-----------|--------------|----------------|
| A_33_P3380405  | 7,54836 | 7,3239  | 1,168339858 | ENST00000586299 | 9267      | AK123894     | CYTH1          |
| A_33_P3363071  | 4,07336 | 3,84892 | 1,168323661 | ENST00000218436 | 347365    | NM_198510    | ITIH6          |
| A_33_P3375234  | 9,66492 | 9,44052 | 1,168291269 | ENST00000560779 | 55177     | NM_018145    | RMDN3          |
| A_33_P3257479  | 5,44297 | 5,21861 | 1,168258877 | N/A             | N/A       | N/A          | N/A            |
| A_23_P149494   | 10,7464 | 10,5221 | 1,168210292 | ENST00000481556 | 26090     | NM_015600    | ABHD12         |
| A_23_P215296   | 10,6368 | 10,4125 | 1,168210292 | ENST00000465643 | 8621      | NM_003718    | CDK13          |
| A_23_P154234   | 13,0974 | 12,8731 | 1,168210292 | ENST00000465242 | 56655     | NM_019896    | POLE4          |
| A_33_P3392000  | 9,46787 | 9,2436  | 1,168186    | ENST00000607931 | 100506190 | NR_038955    | LINC00963      |
| A_23_P323898   | 5,48106 | 5,25683 | 1,168153611 | ENST00000396827 | 9753      | NR_028077    | ZSCAN12        |
| A_33_P3402615  | 12,9695 | 12,7453 | 1,16812932  | ENST00000372310 | 6536      | NM_201649    | SLC6A9         |
| A_24_P233915   | 10,1818 | 9,95762 | 1,168113127 | ENST00000460803 | 112950    | NM_001001653 | MED8           |
| A_21_P0005606  | 4,48169 | 4,25755 | 1,16808074  | N/A             | N/A       | N/A          | Inc-SBDS-10    |
| A_23_P121825   | 8,65302 | 8,42889 | 1,168072644 | ENST00000231526 | 80006     | NM_024941    | TRAPPC13       |
| A_21_P0010476  | 4,06947 | 3,84535 | 1,168064547 | N/A             | N/A       | N/A          | Inc-RASL10A-1  |
| A_22_P00011921 | 3,28429 | 3,06019 | 1,168048355 | N/A             | N/A       | BC042965     | Inc-PIRT-3     |
| A_21_P0008700  | 4,07204 | 3,84805 | 1,167959299 | N/A             | 220       | XR_109231    | ALDH1A3        |
| A_22_P00000164 | 3,08449 | 2,8605  | 1,167959299 | N/A             | N/A       | N/A          | Inc-ABCC1-1    |
| A_23_P18213    | 4,43215 | 4,20828 | 1,167862155 | ENST00000488988 | 25981     | NM_015512    | DNAH1          |
| A_33_P3359027  | 2,64912 | 2,42526 | 1,16785406  | ENST00000551256 | 387885    | NM_001144872 | CCDC42B        |
| A_33_P3224710  | 2,24663 | 2,0228  | 1,167829775 | ENST00000393485 | 22797     | NM_012252    | TFEC           |
| A_23_P312752   | 2,42042 | 2,1966  | 1,167821681 | ENST00000233826 | 3769      | NM_002242    | KCNJ13         |
| A_33_P3398437  | 7,26675 | 7,04293 | 1,167821681 | ENST00000619521 | 23269     | AF176922     | MGA            |
| A_33_P3351388  | 5,79305 | 5,56924 | 1,167813586 | N/A             | N/A       | N/A          | N/A            |
| A_23_P13455    | 1,87918 | 1,65538 | 1,167805491 | ENST00000359350 | 119687    | NM_001004749 | OR51A7         |
| A_22_P00011060 | 3,38974 | 3,16597 | 1,167781208 | N/A             | 101929752 | XR_241271    | LOC101929752   |
| A_24_P314585   | 2,76931 | 2,54557 | 1,167756925 | ENST00000338270 | 3266      | AB093575     | ERAS           |
| A_33_P3278801  | 5,43725 | 5,21354 | 1,167732642 | N/A             | 84859     | AK128758     | LRCH3          |
| A_33_P3303474  | 3,65379 | 3,4301  | 1,167716454 | ENST00000371904 | 1579      | NM_000778    | CYP4A11        |
| A_22_P00015269 | 2,23053 | 2,00702 | 1,167570771 | N/A             | 100874200 | NR_046572    | ARHGEF3-AS1    |
| A_21_P0011648  | 4,86649 | 4,64306 | 1,167506029 | N/A             | N/A       | N/A          | XLOC_I2_006267 |
| A_33_P3215647  | 7,71717 | 7,49376 | 1,167489844 | ENST00000546455 | 91523     | NM_138371    | PCED1B         |
| A_33_P3261428  | 2,11298 | 1,88957 | 1,167489844 | N/A             | N/A       | N/A          | N/A            |
| A_21_P0002711  | 4,89496 | 4,67157 | 1,167473659 | ENST00000457079 | 401109    | NR_034088    | LINC00885      |

|                |         |         |             |                 |           |              |                |
|----------------|---------|---------|-------------|-----------------|-----------|--------------|----------------|
| A_21_P0008545  | 4,19083 | 3,96745 | 1,167465567 | N/A             | N/A       | N/A          | Inc-TTC7B-4    |
| A_21_P0012080  | 11,4174 | 11,1941 | 1,167400831 | ENST00000437561 | N/A       | N/A          | N/A            |
| A_22_P00003465 | 12,0751 | 11,8518 | 1,167400831 | N/A             | 100507419 | NR_123723    | MMP25-AS1      |
| A_33_P3396444  | 7,86924 | 7,64601 | 1,167344189 | ENST00000374313 | 22949     | AK309450     | PTGR1          |
| A_23_P27709    | 4,45033 | 4,22713 | 1,167319916 | ENST00000359342 | 114336    | NM_033378    | CGB2           |
| A_22_P00010993 | 5,26905 | 5,04589 | 1,167287551 | N/A             | N/A       | N/A          | Inc-NRXN1-2    |
| A_33_P3274179  | 1,92151 | 1,69837 | 1,167271369 | N/A             | 100133791 | AK126787     | ERV18-1        |
| A_22_P00009663 | 6,76609 | 6,54296 | 1,167263278 | ENST00000555736 | N/A       | DB214798     | N/A            |
| A_21_P0013789  | 2,19411 | 1,97104 | 1,167214734 | N/A             | N/A       | N/A          | XLOC_I2_015593 |
| A_32_P226149   | 14,1491 | 13,9261 | 1,167158102 | ENST00000353245 | 7534      | NM_145690    | YWHAZ          |
| A_24_P319374   | 1,95687 | 1,73392 | 1,167117652 | ENST00000367868 | 10223     | NM_005814    | GPA33          |
| A_33_P3291510  | 4,01509 | 3,79216 | 1,167101472 | ENST00000250823 | 9084      | NM_004679    | VCY            |
| A_21_P0007370  | 3,85449 | 3,63162 | 1,167052935 | N/A             | N/A       | N/A          | Inc-STARD10-1  |
| A_21_P0002414  | 1,66738 | 1,44457 | 1,1670044   | N/A             | 102723389 | XR_425379    | LOC102723389   |
| A_33_P3255544  | 10,6884 | 10,4656 | 1,166996311 | ENST00000519708 | 55819     | NM_001280801 | RNF130         |
| A_22_P00009293 | 5,45053 | 5,22777 | 1,166963955 | N/A             | N/A       | N/A          | Inc-LRRC32-5   |
| A_33_P3257042  | 5,69454 | 5,47191 | 1,166858806 | ENST00000591344 | 342892    | NM_001193552 | ZNF850         |
| A_24_P210513   | 7,00217 | 6,77955 | 1,166850718 | ENST00000613511 | 55727     | NM_018167    | BTBD7          |
| A_22_P00001014 | 2,37042 | 2,14784 | 1,166818366 | ENST00000358748 | 401554    | XR_108962    | FLJ46836       |
| A_22_P00011793 | 1,90287 | 1,68031 | 1,166802191 | N/A             | N/A       | N/A          | Inc-PGGT1B-2   |
| A_23_P356122   | 8,77676 | 8,55426 | 1,166753666 | ENST00000357489 | 26036     | NM_001031623 | ZNF451         |
| A_24_P161813   | 6,32599 | 6,1035  | 1,166745578 | ENST00000545779 | 441666    | NR_024380    | LOC441666      |
| A_21_P0007787  | 1,95566 | 1,73323 | 1,166697056 | N/A             | 387895    | NR_033878    | LINC00944      |
| A_22_P00017341 | 10,2834 | 10,0611 | 1,166591931 | ENST00000454756 | 100288413 | NM_001242690 | ERVMER34-1     |
| A_24_P184305   | 8,04945 | 7,82715 | 1,166591931 | ENST00000529955 | 582       | NM_024649    | BBS1           |
| A_23_P5339     | 10,6654 | 10,4431 | 1,166591931 | ENST00000424086 | 80775     | NM_030577    | TMEM177        |
| A_23_P109928   | 12,5162 | 12,2939 | 1,166591931 | ENST00000497315 | 9861      | NM_014814    | PSMD6          |
| A_33_P3767773  | 14,3084 | 14,0863 | 1,166430218 | ENST00000459947 | 23352     | NM_020765    | UBR4           |
| A_23_P501887   | 11,4187 | 11,1966 | 1,166430218 | ENST00000593432 | 1725      | NM_013406    | DHPS           |
| A_22_P00024412 | 1,89913 | 1,67706 | 1,166405963 | N/A             | N/A       | BU568718     | Inc-EHD3-3     |
| A_33_P3317387  | 3,71363 | 3,49158 | 1,166389793 | N/A             | 5611      | BC033823     | DNAJC3         |
| A_21_P0009460  | 1,95917 | 1,73712 | 1,166389793 | N/A             | N/A       | N/A          | Inc-SLMO1-1    |
| A_23_P57733    | 3,38318 | 3,16114 | 1,166381708 | ENST00000295881 | 1814      | NM_033663    | DRD3           |

|                |         |         |             |                 |           |              |               |
|----------------|---------|---------|-------------|-----------------|-----------|--------------|---------------|
| A_22_P00014220 | 6,71532 | 6,49329 | 1,166373624 | N/A             | N/A       | N/A          | Inc-SEC24C-1  |
| A_33_P3283601  | 7,69431 | 7,47232 | 1,166341285 | ENST00000433290 | 389033    | NR_026740    | LOC389033     |
| A_33_P3318606  | 1,95408 | 1,73225 | 1,166211941 | ENST00000588376 | 25759     | BC034544     | SHC2          |
| A_23_P419503   | 2,96877 | 2,747   | 1,166163441 | ENST00000389201 | 94030     | NM_001080457 | LRRC4B        |
| A_33_P3385988  | 9,46092 | 9,23919 | 1,166131108 | ENST00000266182 | N/A       | N/A          | N/A           |
| A_24_P155791   | 8,28395 | 8,06223 | 1,166123025 | ENST00000343276 | 140460    | NM_024708    | ASB7          |
| A_21_P0002175  | 4,05943 | 3,83774 | 1,166098777 | N/A             | N/A       | N/A          | Inc-TRIB2-5   |
| A_32_P4228     | 5,49074 | 5,26905 | 1,166098777 | ENST00000557899 | 728450    | NR_110635    | LINC00687     |
| A_23_P336644   | 7,85802 | 7,63635 | 1,166082611 | ENST00000609928 | 163590    | NM_145034    | TOR1AIP2      |
| A_22_P00019588 | 5,9883  | 5,76668 | 1,166042199 | ENST00000502881 | 376940    | NM_198581    | ZC3H6         |
| A_23_P163380   | 13,5502 | 13,3286 | 1,166026034 | ENST00000479961 | 10588     | NM_006441    | MTHFS         |
| A_33_P3375383  | 12,6414 | 12,4198 | 1,166026034 | ENST00000221573 | 6618      | NM_003083    | SNAPC2        |
| A_33_P3407374  | 16,4773 | 16,2557 | 1,166026034 | N/A             | N/A       | N/A          | N/A           |
| A_33_P3311245  | 5,26263 | 5,04111 | 1,165961377 | ENST00000334849 | 337974    | NM_181614    | KRTAP19-7     |
| A_33_P3370076  | 9,47667 | 9,25516 | 1,165953296 | ENST00000315869 | 7030      | NM_006521    | TFE3          |
| A_33_P3348559  | 4,34489 | 4,12339 | 1,165945214 | N/A             | N/A       | BC039440     | Inc-DUSP4-1   |
| A_22_P00005218 | 4,90366 | 4,68222 | 1,165896725 | ENST00000520714 | 55384     | NR_033359    | MEG3          |
| A_22_P00025777 | 4,95186 | 4,73049 | 1,165840156 | N/A             | N/A       | N/A          | Inc-NOM1-6    |
| A_21_P0005463  | 5,97446 | 5,75314 | 1,165799752 | N/A             | N/A       | N/A          | Inc-COX19-1   |
| A_33_P3262717  | 6,94487 | 6,72361 | 1,165751269 | ENST00000595476 | N/A       | XM_006723257 | N/A           |
| A_22_P00017135 | 1,91781 | 1,69658 | 1,165727028 | ENST00000448980 | 100874221 | NR_046876    | ZNF385D-AS2   |
| A_33_P3326817  | 9,2382  | 9,01701 | 1,165694708 | N/A             | N/A       | N/A          | N/A           |
| A_33_P3260006  | 2,69021 | 2,46908 | 1,165646229 | ENST00000472655 | 102606463 | NR_110124    | LINC01152     |
| A_21_P0002930  | 5,1964  | 4,97529 | 1,16563007  | N/A             | N/A       | N/A          | Inc-TSEN2-1   |
| A_23_P10870    | 10,372  | 10,1509 | 1,16562199  | ENST00000372586 | 22845     | NM_014908    | DOLK          |
| A_21_P0006242  | 6,16096 | 5,93991 | 1,165581593 | N/A             | N/A       | N/A          | Inc-PPP1R26-2 |
| A_23_P201342   | 15,0917 | 14,8707 | 1,165541198 | ENST00000610709 | 1855      | NM_004421    | DVL1          |
| A_23_P8497     | 3,10089 | 2,87991 | 1,16552504  | ENST00000611037 | 2692      | NM_000823    | GHRHR         |
| A_33_P3399875  | 5,82734 | 5,60641 | 1,165484647 | ENST00000375222 | 128864    | NM_080825    | C20orf144     |
| A_33_P3214432  | 10,3087 | 10,0878 | 1,165460412 | ENST00000275766 | 92092     | NM_080660    | ZC3HAV1L      |
| A_23_P83453    | 11,25   | 11,0292 | 1,165379631 | ENST00000254480 | 6599      | NM_003074    | SMARCC1       |
| A_22_P00004913 | 5,82945 | 5,6087  | 1,165339243 | ENST00000503953 | N/A       | XR_425837    | N/A           |
| A_23_P216708   | 9,14284 | 8,92212 | 1,16531501  | ENST00000376736 | 55312     | NM_018339    | RFK           |

|                |         |         |             |                 |           |              |                |
|----------------|---------|---------|-------------|-----------------|-----------|--------------|----------------|
| A_19_P00320740 | 1,97996 | 1,75933 | 1,165242317 | ENST00000505254 | 728264    | N/A          | MIR143HG       |
| A_23_P15466    | 11,1458 | 10,9252 | 1,165218086 | ENST00000255390 | 6341      | NM_004589    | SCO1           |
| A_22_P00018322 | 8,44956 | 8,22898 | 1,165201933 | ENST00000478854 | 23145     | NM_198455    | SSPO           |
| A_23_P255286   | 13,7576 | 13,5371 | 1,165137322 | ENST00000409031 | 55627     | NM_017951    | SMPD4          |
| A_24_P286079   | 10,5284 | 10,3079 | 1,165137322 | ENST00000265343 | 27125     | NM_014423    | AFF4           |
| A_21_P0008323  | 2,8414  | 2,62094 | 1,165105018 | N/A             | N/A       | N/A          | Inc-MIPOL1-2   |
| A_22_P00009383 | 6,41043 | 6,18998 | 1,165096942 | ENST00000519609 | N/A       | N/A          | N/A            |
| A_22_P00008521 | 7,19383 | 6,9734  | 1,165080791 | N/A             | N/A       | N/A          | Inc-KCNJ12-1   |
| A_33_P3262028  | 5,03377 | 4,81338 | 1,165048488 | N/A             | N/A       | N/A          | XLOC_I2_010082 |
| A_33_P3317317  | 8,17206 | 7,95178 | 1,164959661 | ENST00000616115 | 387267    | NM_001012709 | KRTAP5-4       |
| A_22_P00021169 | 3,25002 | 3,02976 | 1,164943512 | ENST00000498967 | 101927415 | NR_110049    | LOC101927415   |
| A_21_P0000041  | 1,5867  | 1,36645 | 1,164935437 | N/A             | 51735     | NM_001164390 | RAPGEF6        |
| A_21_P0004938  | 2,21842 | 1,99817 | 1,164935437 | N/A             | N/A       | N/A          | Inc-RSPO3-1    |
| A_33_P3243399  | 8,59535 | 8,37513 | 1,164911213 | ENST00000467901 | 7871      | AY358410     | SLMAP          |
| A_19_P00320274 | 7,12258 | 6,90242 | 1,164862767 | N/A             | 283050    | NR_024431    | ZMIZ1-AS1      |
| A_33_P3261803  | 4,35964 | 4,13958 | 1,164782027 | ENST00000493636 | 2166      | NM_001441    | FAAH           |
| A_19_P00810748 | 6,73609 | 6,51604 | 1,164773954 | ENST00000340510 | 349114    | NR_026999    | LINC00265      |
| A_24_P323635   | 9,77349 | 9,55346 | 1,164757807 | ENST00000462503 | N/A       | N/A          | N/A            |
| A_23_P22499    | 9,41451 | 9,19448 | 1,164757807 | ENST00000360845 | 54552     | NM_019067    | GNL3L          |
| A_33_P3407691  | 5,69332 | 5,47329 | 1,164757807 | N/A             | N/A       | N/A          | N/A            |
| A_33_P3229587  | 5,53252 | 5,31251 | 1,16474166  | N/A             | N/A       | N/A          | N/A            |
| A_22_P00004821 | 4,89758 | 4,67763 | 1,164693221 | ENST00000445759 | 100303728 | NR_028443    | SLC25A5-AS1    |
| A_24_P237753   | 8,93364 | 8,71372 | 1,164669002 | ENST00000372577 | 23511     | NM_015354    | NUP188         |
| A_21_P0012983  | 4,95169 | 4,73179 | 1,164652856 | N/A             | 100506674 | NR_109862    | LOC100506674   |
| A_23_P92093    | 9,51269 | 9,29284 | 1,164612493 | ENST00000498057 | 1951      | NM_001407    | CELSR3         |
| A_33_P3300297  | 6,36221 | 6,14245 | 1,164539843 | N/A             | N/A       | N/A          | N/A            |
| A_22_P00022528 | 2,77639 | 2,55665 | 1,164523699 | ENST00000441381 | N/A       | XR_425997    | N/A            |
| A_24_P286465   | 12,2019 | 11,9822 | 1,164491412 | ENST00000395699 | 5814      | NM_033224    | PURB           |
| A_21_P0010050  | 4,98413 | 4,76444 | 1,16448334  | N/A             | N/A       | N/A          | Inc-PREX1-4    |
| A_33_P3292596  | 5,43653 | 5,21687 | 1,164459126 | ENST00000584014 | 2064      | AB025286     | ERBB2          |
| A_24_P366082   | 9,4544  | 9,23477 | 1,164434912 | ENST00000441493 | 57553     | NM_015241    | MICAL3         |
| A_22_P00000656 | 3,76344 | 3,54384 | 1,164410699 | N/A             | N/A       | AI827283     | Inc-ACTG1-1    |
| A_23_P151506   | 13,5434 | 13,3238 | 1,164410699 | ENST00000216446 | 26499     | NM_016445    | PLEK2          |

|                |         |         |             |                 |           |              |                       |
|----------------|---------|---------|-------------|-----------------|-----------|--------------|-----------------------|
| A_33_P3239332  | 3,35578 | 3,13624 | 1,164362273 | ENST00000585639 | 284260    | NR_046454    | LINC00907             |
| A_22_P00015897 | 13,2274 | 13,0079 | 1,164329991 | ENST00000521399 | 641638    | NR_002599    | SNHG6                 |
| A_21_P0011432  | 3,28298 | 3,06349 | 1,16432192  | N/A             | N/A       | N/A          | XLOC_I2_005187        |
| A_22_P00017211 | 4,47427 | 4,25482 | 1,164289639 | N/A             | N/A       | N/A          | lnc-UEVLD-2           |
| A_33_P3328659  | 15,7105 | 15,4911 | 1,164249288 | ENST00000262738 | 9620      | NM_014246    | CELSR1                |
| A_32_P50066    | 9,06767 | 8,8483  | 1,164225078 | ENST00000311277 | 79884     | NM_001039580 | MAP9                  |
| A_22_P00008887 | 4,1336  | 3,91426 | 1,164200869 | N/A             | N/A       | N/A          | lnc-KLHL28-2          |
| A_24_P242820   | 10,5643 | 10,345  | 1,164168591 | ENST00000490104 | 7247      | NM_004622    | TSN                   |
| A_22_P00011753 | 1,97264 | 1,75353 | 1,164015283 | N/A             | 100192378 | NR_024360    | ZFHX4-AS1             |
| A_23_P17393    | 14,7358 | 14,5167 | 1,164007214 | ENST00000262982 | 1434      | NM_001316    | CSE1L                 |
| A_33_P3358307  | 8,04722 | 7,82816 | 1,163974942 | ENST00000581312 | 56957     | NM_020205    | OTUD7B                |
| A_21_P0012051  | 7,12716 | 6,90814 | 1,16394267  | ENST00000431796 | 346288    | NM_207366    | set-14                |
| A_33_P3268234  | 4,88216 | 4,66315 | 1,163934602 | ENST00000355612 | 390792    | NM_213656    | KRT39                 |
| A_24_P818268   | 6,05318 | 5,83428 | 1,16384586  | N/A             | N/A       | N/A          | N/A                   |
| A_23_P316960   | 11,6185 | 11,3996 | 1,16384586  | ENST00000533377 | 2907      | NM_000837    | GRINA                 |
| A_22_P00023023 | 9,98484 | 9,76597 | 1,163821659 | N/A             | 643977    | NR_104643    | FLJ32255              |
| A_23_P389525   | 11,9745 | 11,7557 | 1,163765191 | ENST00000471704 | 150684    | NM_152516    | COMMD1                |
| A_21_P0003757  | 5,13317 | 4,91442 | 1,163724859 | N/A             | N/A       | N/A          | lnc-ARSJ-1            |
| A_23_P218486   | 14,026  | 13,8073 | 1,163684528 | ENST00000596731 | 51398     | NM_016145    | WDR83OS               |
| A_22_P00013536 | 7,83169 | 7,61299 | 1,163684528 | N/A             | N/A       | N/A          | lnc-RP11-422N16.3.1-1 |
| A_32_P230868   | 12,7023 | 12,4836 | 1,163684528 | ENST00000422602 | 79567     | NM_024519    | FAM65A                |
| A_33_P3213377  | 10,2903 | 10,0716 | 1,163684528 | ENST00000452895 | 83943     | NM_032549    | IMMP2L                |
| A_33_P3238196  | 8,28818 | 8,06953 | 1,163644198 | ENST00000307441 | 7581      | NM_001278171 | ZNF33A                |
| A_23_P44663    | 2,4487  | 2,23009 | 1,163611936 | ENST00000553483 | 390502    | NM_006220    | SERPINA2              |
| A_23_P165574   | 8,59304 | 8,37443 | 1,163611936 | ENST00000295321 | 55677     | NM_017969    | IWS1                  |
| A_24_P222599   | 10,5219 | 10,3033 | 1,16360387  | ENST00000342085 | 5170      | NM_002613    | PDPK1                 |
| A_22_P00007528 | 6,52239 | 6,30394 | 1,163482894 | ENST00000369123 | 100113403 | NR_046407    | LINC00577             |
| A_33_P3222659  | 5,18888 | 4,97045 | 1,163466765 | N/A             | N/A       | N/A          | lnc-WDR73-5           |
| A_33_P3238626  | 5,72724 | 5,50886 | 1,163426443 | N/A             | N/A       | AK123491     | N/A                   |
| A_22_P00003498 | 6,96568 | 6,74739 | 1,163353867 | ENST00000528524 | 100506282 | XR_424261    | LOC100506282          |
| A_32_P703      | 10,3236 | 10,1054 | 1,163281295 | N/A             | 646626    | NR_045484    | LOC646626             |
| A_33_P3231878  | 11,4453 | 11,2271 | 1,163281295 | ENST00000265970 | 5286      | NM_002645    | PIK3C2A               |
| A_33_P3388016  | 11,571  | 11,3528 | 1,163281295 | ENST00000477624 | 51372     | NM_015933    | TMA7                  |

|                |         |         |             |                 |           |              |                |
|----------------|---------|---------|-------------|-----------------|-----------|--------------|----------------|
| A_24_P408457   | 7,04883 | 6,83065 | 1,163265169 | ENST00000396398 | 4668      | NM_000262    | NAGA           |
| A_33_P3241541  | 5,4651  | 5,24698 | 1,163216791 | ENST00000374710 | 83856     | NM_001145313 | FSD1L          |
| A_23_P429560   | 10,2843 | 10,0662 | 1,163200666 | ENST00000546433 | 54434     | NM_018984    | SSH1           |
| A_33_P3378654  | 6,14676 | 5,92866 | 1,163200666 | ENST00000452173 | N/A       | AK056520     | N/A            |
| A_22_P00024495 | 7,01522 | 6,79715 | 1,163176478 | ENST00000555413 | N/A       | BX096648     | N/A            |
| A_33_P3334248  | 5,57536 | 5,35744 | 1,163055546 | ENST00000484152 | 64319     | AK096322     | FBRS           |
| A_33_P3227731  | 10,7897 | 10,5718 | 1,163039423 | ENST00000412709 | N/A       | N/A          | N/A            |
| A_32_P191859   | 9,87896 | 9,66108 | 1,1630233   | ENST00000437519 | 387893    | NM_020382    | SETD8          |
| A_33_P3346108  | 4,87854 | 4,66068 | 1,163007177 | ENST00000374155 | 285180    | NM_198483    | RUFY4          |
| A_33_P3236441  | 10,0201 | 9,80228 | 1,162974932 | ENST00000396213 | 160287    | NM_144972    | LDHAL6A        |
| A_22_P00011821 | 2,04593 | 1,82812 | 1,162966871 | ENST00000422697 | 100131472 | XR_426131    | LOC100131472   |
| A_21_P0008581  | 3,85799 | 3,64023 | 1,162926566 | N/A             | N/A       | N/A          | Inc-OR4M2-7    |
| A_24_P272160   | 2,04078 | 1,82306 | 1,162894324 | N/A             | 23218     | XM_006713072 | NBEAL2         |
| A_33_P3729002  | 2,00579 | 1,78829 | 1,162717005 | N/A             | N/A       | N/A          | Inc-GRHL2-9    |
| A_23_P112201   | 10,0442 | 9,82673 | 1,162692827 | ENST00000381309 | 23081     | NM_015061    | KDM4C          |
| A_33_P6559880  | 6,31901 | 6,10158 | 1,162660591 | ENST00000539666 | 9849      | NM_001278526 | ZNF518A        |
| A_23_P317207   | 7,71396 | 7,49654 | 1,162652532 | ENST00000463678 | 127002    | NM_153340    | ATXN7L2        |
| A_23_P251303   | 11,339  | 11,1216 | 1,162636414 | ENST00000313084 | 9919      | NM_014866    | SEC16A         |
| A_24_P186943   | 6,09164 | 5,87427 | 1,162612238 | ENST00000320399 | 2006      | NM_000501    | ELN            |
| A_33_P3217427  | 4,76195 | 4,54459 | 1,162604179 | ENST00000375838 | 23341     | AK091848     | DNAJC16        |
| A_21_P0010741  | 6,4174  | 6,20017 | 1,162499423 | ENST00000426045 | N/A       | XR_425082    | N/A            |
| A_33_P3336223  | 6,75292 | 6,53572 | 1,16247525  | N/A             | N/A       | N/A          | N/A            |
| A_22_P00015919 | 3,79374 | 3,57658 | 1,162443019 | N/A             | N/A       | N/A          | Inc-TCIRG1-2   |
| A_21_P0008031  | 4,09203 | 3,87493 | 1,162394676 | N/A             | 102725491 | XR_424431    | LOC102725491   |
| A_33_P3243812  | 7,02326 | 6,80621 | 1,162354391 | ENST00000265601 | 8936      | NM_003931    | WASF1          |
| A_33_P3421515  | 13,7779 | 13,5612 | 1,162072436 | N/A             | N/A       | N/A          | N/A            |
| A_21_P0004273  | 3,68047 | 3,4638  | 1,162048272 | N/A             | N/A       | N/A          | Inc-XRCC4-1    |
| A_24_P252973   | 9,47822 | 9,26156 | 1,162040217 | ENST00000525602 | 10978     | NM_006831    | CLP1           |
| A_23_P54230    | 9,35525 | 9,13859 | 1,162040217 | ENST00000557605 | 79882     | NM_207660    | ZC3H14         |
| A_33_P3265866  | 6,64422 | 6,42758 | 1,162024108 | N/A             | N/A       | N/A          | N/A            |
| A_23_P106822   | 12,3903 | 12,1737 | 1,16199189  | ENST00000268802 | 28987     | NM_014062    | NOB1           |
| A_33_P3255647  | 8,54568 | 8,32928 | 1,161830815 | ENST00000316594 | 100529097 | NM_001199973 | RPL36A-HNRNPH2 |
| A_23_P165921   | 4,80348 | 4,5871  | 1,161814709 | ENST00000370341 | 100144596 | NR_028295    | LINC00029      |



|                |         |         |             |                 |           |           |                |
|----------------|---------|---------|-------------|-----------------|-----------|-----------|----------------|
| A_33_P3241108  | 5,9528  | 5,73643 | 1,161806656 | ENST00000473993 | 55735     | NM_018198 | DNAJC11        |
| A_22_P00011546 | 3,97573 | 3,7594  | 1,161774444 | N/A             | N/A       | BG220587  | Inc-PCDH12-1   |
| A_22_P00006934 | 5,04216 | 4,82586 | 1,161750286 | N/A             | N/A       | N/A       | Inc-GATAD2B-1  |
| A_33_P3229898  | 4,82252 | 4,60625 | 1,161726128 | ENST00000379805 | 5160      | N/A       | PDHA1          |
| A_33_P3398526  | 7,69297 | 7,47671 | 1,161718076 | ENST00000357757 | 10018     | NM_207002 | BCL2L11        |
| A_22_P00017547 | 10,1961 | 9,97985 | 1,161710023 | N/A             | 642394    | NR_033387 | ADARB2-AS1     |
| A_33_P3249716  | 7,00021 | 6,78398 | 1,161693919 | ENST00000437068 | 130733    | N/A       | TMEM178A       |
| A_24_P8075     | 9,87384 | 9,65761 | 1,161693919 | ENST00000567298 | 54758     | AY251274  | KLHDC4         |
| A_33_P3337450  | 3,68609 | 3,46998 | 1,161597296 | N/A             | 101927838 | XR_248253 | LOC101927838   |
| A_23_P340848   | 2,37494 | 2,15884 | 1,161589244 | ENST00000291294 | 5739      | NM_000960 | PTGIR          |
| A_23_P214354   | 8,52975 | 8,31371 | 1,161540936 | ENST00000230449 | 55770     | NM_018303 | EXOC2          |
| A_24_P195272   | 3,94334 | 3,72733 | 1,161516783 | ENST00000494644 | N/A       | N/A       | N/A            |
| A_33_P3247077  | 10,4999 | 10,2839 | 1,161508732 | N/A             | N/A       | N/A       | N/A            |
| A_33_P3715909  | 7,22455 | 7,00856 | 1,161500681 | N/A             | N/A       | AF264629  | N/A            |
| A_33_P3808516  | 3,58311 | 3,36718 | 1,161452377 | N/A             | N/A       | U66047    | N/A            |
| A_33_P3884230  | 6,93705 | 6,72117 | 1,161412124 | ENST00000585382 | 4784      | NM_002501 | NFIX           |
| A_22_P00013941 | 5,57718 | 5,36131 | 1,161404074 | N/A             | N/A       | BI762183  | Inc-RRP8-1     |
| A_23_P377094   | 1,90487 | 1,68905 | 1,161363824 | ENST00000619635 | 29944     | NM_013364 | PNMA3          |
| A_22_P00009881 | 4,99707 | 4,78126 | 1,161355774 | ENST00000415408 | 114794    | NM_052906 | ELFN2          |
| A_23_P380614   | 13,41   | 13,1942 | 1,161347724 | ENST00000338821 | 10079     | NM_006045 | ATP9A          |
| A_22_P00014156 | 9,17244 | 8,95664 | 1,161347724 | ENST00000562842 | N/A       | CD176148  | N/A            |
| A_22_P00022521 | 2,85667 | 2,64101 | 1,161235031 | ENST00000616668 | N/A       | N/A       | N/A            |
| A_23_P502464   | 1,91288 | 1,69723 | 1,161226982 | ENST00000313735 | 4843      | NM_000625 | NOS2           |
| A_33_P3323041  | 5,49797 | 5,28237 | 1,161186738 | ENST00000354485 | N/A       | AL832454  | N/A            |
| A_23_P76435    | 8,85064 | 8,63509 | 1,161146495 | ENST00000548171 | 283459    | NM_176818 | GATC           |
| A_33_P3377060  | 13,49   | 13,2745 | 1,161106253 | ENST00000244763 | 6745      | NM_003144 | SSR1           |
| A_23_P46131    | 6,09134 | 5,87589 | 1,161066013 | ENST00000374268 | 79927     | NM_024869 | FAM110D        |
| A_33_P3416687  | 7,39092 | 7,17551 | 1,161033822 | ENST00000582708 | 10626     | XR_248336 | TRIM16         |
| A_33_P6812640  | 3,50169 | 3,28628 | 1,161033822 | ENST00000554260 | 101929241 | NR_110165 | LOC101929241   |
| A_22_P00002736 | 17,333  | 17,1176 | 1,161025774 | N/A             | N/A       | N/A       | Inc-C20orf96-1 |
| A_33_P3381245  | 14,7171 | 14,5017 | 1,161025774 | ENST00000221784 | 9141      | NM_004708 | PDCD5          |
| A_33_P3383287  | 7,5237  | 7,30838 | 1,160961395 | N/A             | N/A       | AF068294  | N/A            |
| A_22_P00010059 | 1,82375 | 1,60843 | 1,160961395 | ENST00000562158 | N/A       | BC015772  | N/A            |

|                |         |         |             |                 |           |              |                      |
|----------------|---------|---------|-------------|-----------------|-----------|--------------|----------------------|
| A_33_P3278540  | 11,6307 | 11,4154 | 1,160945301 | ENST00000372014 | 64928     | NM_032111    | MRPL14               |
| A_33_P3214047  | 1,79187 | 1,57671 | 1,160832648 | ENST00000412929 | N/A       | N/A          | N/A                  |
| A_24_P226210   | 8,63538 | 8,42022 | 1,160832648 | ENST00000508138 | 153241    | NM_153223    | CEP120               |
| A_33_P3260572  | 8,04657 | 7,83142 | 1,160824601 | ENST00000415891 | 79745     | NM_001287528 | CLIP4                |
| A_24_P357406   | 3,31034 | 3,09519 | 1,160824601 | ENST00000382670 | 378948    | NM_001006121 | RBMY1B               |
| A_33_P3257513  | 8,30276 | 8,08764 | 1,160800463 | ENST00000409404 | 120114    | NM_001008781 | FAT3                 |
| A_23_P15654    | 11,3511 | 11,136  | 1,160784371 | ENST00000262395 | 9618      | NM_004295    | TRAF4                |
| A_21_P0000468  | 3,60892 | 3,39382 | 1,160784371 | N/A             | 100113391 | NR_003693    | SNORD126             |
| A_22_P00002484 | 6,06772 | 5,85265 | 1,160760233 | N/A             | N/A       | AV707313     | lnc-C16orf13-1       |
| A_24_P90878    | 9,13684 | 8,92177 | 1,160760233 | ENST00000381337 | 55623     | NM_017736    | THUMPD1              |
| A_23_P102965   | 10,7417 | 10,5267 | 1,160703914 | ENST00000498133 | 23786     | NM_015367    | BCL2L13              |
| A_33_P3349619  | 6,66634 | 6,45136 | 1,160687824 | ENST00000445663 | N/A       | N/A          | N/A                  |
| A_23_P382488   | 5,32066 | 5,1057  | 1,160671733 | ENST00000560349 | 90668     | NM_138360    | LRRC16B              |
| A_22_P00013529 | 3,918   | 3,70315 | 1,16058324  | N/A             | N/A       | N/A          | lnc-RP11-410N8.4.1-1 |
| A_21_P0008159  | 1,60062 | 1,38586 | 1,160510841 | N/A             | N/A       | N/A          | lnc-KIAA0226L-3      |
| A_33_P3367681  | 4,03482 | 3,82007 | 1,160502797 | N/A             | N/A       | N/A          | N/A                  |
| A_23_P3355     | 11,9472 | 11,7325 | 1,160462578 | ENST00000530292 | 5428      | NM_002693    | POLG                 |
| A_33_P3220545  | 3,25899 | 3,04435 | 1,160414317 | ENST00000515652 | 340024    | NM_001003841 | SLC6A19              |
| A_33_P3299386  | 6,48813 | 6,2735  | 1,160406273 | ENST00000457177 | 162972    | NM_001277092 | ZNF550               |
| A_23_P76731    | 9,78194 | 9,56736 | 1,160366057 | ENST00000361847 | 5891      | NM_014226    | MOK                  |
| A_22_P00020611 | 5,60168 | 5,38712 | 1,160349971 | N/A             | N/A       | N/A          | lnc-PRL-2            |
| A_21_P0005372  | 3,04216 | 2,82764 | 1,1603178   | ENST00000585952 | 100506725 | N/A          | LOC100506725         |
| A_23_P77493    | 10,2607 | 10,0462 | 1,160301715 | ENST00000315491 | 10381     | NM_006086    | TUBB3                |
| A_23_P108785   | 13,7395 | 13,5251 | 1,160221292 | ENST00000478928 | 10096     | NM_005721    | ACTR3                |
| A_24_P389517   | 13,0119 | 12,7975 | 1,160221292 | ENST00000457156 | 3190      | NM_031262    | HNRNPK               |
| A_33_P3411925  | 13,5105 | 13,2961 | 1,160221292 | ENST00000585809 | 57418     | NM_024100    | WDR18                |
| A_23_P6066     | 3,46191 | 3,24754 | 1,160197166 | ENST00000380605 | 56265     | NM_019609    | CPXM1                |
| A_32_P190416   | 7,70199 | 7,48762 | 1,160197166 | ENST00000454590 | 9053      | NM_003980    | MAP7                 |
| A_21_P0006640  | 1,97501 | 1,7607  | 1,160148915 | N/A             | N/A       | N/A          | lnc-PFKP-12          |
| A_21_P0006929  | 4,78424 | 4,57003 | 1,160068503 | N/A             | N/A       | N/A          | lnc-GPR26-4          |
| A_23_P398372   | 10,979  | 10,7648 | 1,160060462 | ENST00000561457 | 90120     | NM_001256526 | C9orf69              |
| A_22_P00004363 | 5,04037 | 4,82617 | 1,160060462 | ENST00000617298 | N/A       | XR_243071    | N/A                  |
| A_24_P82419    | 16,2415 | 16,0273 | 1,160060462 | ENST00000589417 | 440093    | NM_001013699 | H3F3C                |

|                |         |         |             |                 |           |              |                |
|----------------|---------|---------|-------------|-----------------|-----------|--------------|----------------|
| A_21_P0000910  | 9,84702 | 9,63283 | 1,160052421 | N/A             | N/A       | N/A          | Inc-MIB2-1     |
| A_33_P3280705  | 2,17721 | 1,96305 | 1,160028299 | N/A             | N/A       | N/A          | N/A            |
| A_33_P3335621  | 8,84083 | 8,62669 | 1,160012217 | ENST00000338548 | 5716      | NM_170750    | PSMD10         |
| A_23_P342668   | 11,0134 | 10,7993 | 1,159980055 | ENST00000474361 | 8227      | NM_005088    | AKAP17A        |
| A_22_P00004292 | 6,07128 | 5,85721 | 1,159955935 | N/A             | N/A       | N/A          | Inc-CNOT6-4    |
| A_21_P0011753  | 6,97167 | 6,7576  | 1,159955935 | N/A             | N/A       | N/A          | XLOC_I2_007063 |
| A_21_P0001752  | 6,49519 | 6,28121 | 1,159883575 | N/A             | N/A       | N/A          | Inc-FAIM3-1    |
| A_22_P00017190 | 4,53675 | 4,32281 | 1,159851417 | N/A             | N/A       | N/A          | Inc-UCHL3-1    |
| A_21_P0011055  | 1,79498 | 1,58107 | 1,159827298 | ENST00000458043 | 283310    | N/A          | OTOGL          |
| A_23_P24751    | 11,7641 | 11,5502 | 1,159819259 | ENST00000532583 | 283237    | NM_173810    | TTC9C          |
| A_22_P00008862 | 1,95712 | 1,74326 | 1,159787103 | N/A             | 338862    | N/A          | LINC00550      |
| A_21_P0008178  | 9,17745 | 8,9636  | 1,159779064 | N/A             | N/A       | N/A          | Inc-PCDH9-3    |
| A_33_P3345931  | 3,90202 | 3,6882  | 1,159754947 | N/A             | N/A       | N/A          | N/A            |
| A_23_P417014   | 5,91217 | 5,69838 | 1,159730831 | ENST00000452316 | 282890    | NM_001010877 | ZNF311         |
| A_22_P00011090 | 2,09556 | 1,88177 | 1,159730831 | N/A             | N/A       | N/A          | Inc-NUDT11-2   |
| A_21_P0001659  | 5,84307 | 5,62931 | 1,159706715 | N/A             | N/A       | N/A          | Inc-ACTRT2-1   |
| A_23_P94703    | 10,1642 | 9,95044 | 1,159706715 | ENST00000259339 | 27348     | NM_014506    | TOR1B          |
| A_33_P3236319  | 4,3148  | 4,10107 | 1,1596826   | N/A             | N/A       | N/A          | Inc-CBWD5-2    |
| A_21_P0009700  | 2,02779 | 1,8141  | 1,159650447 | ENST00000587998 | 102724958 | NR_110760    | LOC102724958   |
| A_33_P3398719  | 7,10436 | 6,89068 | 1,159642409 | N/A             | N/A       | N/A          | N/A            |
| A_33_P3353873  | 2,06753 | 1,85388 | 1,159618295 | N/A             | N/A       | N/A          | N/A            |
| A_33_P3499102  | 7,36416 | 7,15052 | 1,159610257 | N/A             | 8241      | AK098115     | RBM10          |
| A_32_P193322   | 11,7111 | 11,4975 | 1,159578107 | ENST00000357387 | 253260    | NM_152756    | RICTOR         |
| A_24_P942517   | 10,5973 | 10,3837 | 1,159578107 | ENST00000246024 | 56255     | NM_021156    | TMX4           |
| A_23_P80694    | 7,78652 | 7,57304 | 1,15948166  | ENST00000335754 | 93973     | NM_022899    | ACTR8          |
| A_22_P00012962 | 1,93924 | 1,72583 | 1,159425403 | N/A             | N/A       | N/A          | Inc-REG3G-2    |
| A_23_P312646   | 11,6803 | 11,4669 | 1,159417366 | ENST00000483807 | 286257    | NM_183241    | C9orf142       |
| A_24_P347488   | 14,773  | 14,5597 | 1,159337004 | ENST00000555787 | 5700      | NM_002802    | PSMC1          |
| A_23_P56288    | 7,16378 | 6,95049 | 1,159328968 | ENST00000621306 | 114823    | NM_052925    | LENG8          |
| A_22_P00022837 | 1,90122 | 1,688   | 1,159272719 | ENST00000581750 | N/A       | BX092560     | N/A            |
| A_33_P3279581  | 7,78409 | 7,5709  | 1,159248613 | ENST00000558783 | N/A       | AY358648     | N/A            |
| A_33_P3278649  | 7,91222 | 7,69904 | 1,159240577 | ENST00000355097 | 954       | NM_203468    | ENTPD2         |
| A_23_P36724    | 7,28262 | 7,06945 | 1,159232542 | ENST00000339235 | 144699    | NM_152441    | FBXL14         |

|                |         |         |             |                 |           |              |                |
|----------------|---------|---------|-------------|-----------------|-----------|--------------|----------------|
| A_23_P76078    | 8,36559 | 8,15247 | 1,159192367 | ENST00000228534 | 51561     | NM_016584    | IL23A          |
| A_33_P3280471  | 4,05162 | 3,83855 | 1,159152193 | ENST00000546748 | 2065      | NM_001982    | ERBB3          |
| A_33_P3222218  | 4,93656 | 4,72349 | 1,159152193 | ENST00000369800 | 54492     | NM_001142651 | NEURL1B        |
| A_33_P3270317  | 6,98044 | 6,76738 | 1,159144158 | ENST00000374115 | 6572      | NM_003055    | SLC18A3        |
| A_21_P0010030  | 1,92668 | 1,71363 | 1,159136124 | N/A             | N/A       | N/A          | Inc-FAM182B-5  |
| A_22_P00025334 | 4,78486 | 4,57181 | 1,159136124 | ENST00000468141 | 100134259 | NR_024452    | LINC01119      |
| A_23_P313031   | 7,29147 | 7,07846 | 1,159103986 | N/A             | 101930506 | XR_249340    | LOC101930506   |
| A_23_P109821   | 14,1687 | 13,9557 | 1,159095952 | ENST00000492103 | 10474     | NM_006354    | TADA3          |
| A_22_P00000136 | 7,78101 | 7,56804 | 1,159071849 | ENST00000496128 | 201651    | BF214111     | AADACP1        |
| A_33_P3309429  | 7,58827 | 7,37532 | 1,159055781 | ENST00000477844 | 11097     | BC039333     | NUPL2          |
| A_24_P453544   | 5,82478 | 5,61184 | 1,159047747 | N/A             | N/A       | AY239294     | N/A            |
| A_33_P3327500  | 7,45105 | 7,23819 | 1,158983478 | ENST00000388761 | 402682    | NM_001015072 | UFSP1          |
| A_21_P0013318  | 8,37174 | 8,15891 | 1,158959378 | ENST00000411872 | 27297     | NM_001142414 | CRCP           |
| A_21_P0010603  | 3,40655 | 3,19378 | 1,158911179 | ENST00000457096 | N/A       | XR_431139    | N/A            |
| A_33_P3279720  | 6,54738 | 6,33465 | 1,158879048 | ENST00000612772 | 10139     | N/A          | ARFRP1         |
| A_24_P251381   | 5,93625 | 5,72357 | 1,158838885 | ENST00000318673 | 79840     | NM_024782    | NHEJ1          |
| A_33_P3256880  | 4,13998 | 3,92745 | 1,158718404 | N/A             | 642980    | AK131413     | LOC642980      |
| A_33_P3419139  | 7,75578 | 7,54328 | 1,158694309 | ENST00000497044 | 57698     | NM_001127211 | KIAA1598       |
| A_24_P139773   | 9,90767 | 9,69523 | 1,158646122 | ENST00000431586 | 5511      | NM_138558    | PPP1R8         |
| A_24_P183094   | 12,4672 | 12,2548 | 1,158613998 | ENST00000256031 | 79572     | NM_024524    | ATP13A3        |
| A_33_P3423570  | 15,2225 | 15,0101 | 1,158613998 | ENST00000564661 | 79006     | NM_024042    | METRNL         |
| A_33_P3327491  | 6,09796 | 5,88556 | 1,158613998 | N/A             | N/A       | N/A          | N/A            |
| A_21_P0011854  | 4,33295 | 4,12065 | 1,158533691 | ENST00000614994 | N/A       | N/A          | N/A            |
| A_23_P43175    | 12,8503 | 12,638  | 1,158533691 | ENST00000397712 | 151011    | NM_144710    | set-10         |
| A_33_P3268318  | 5,04342 | 4,83112 | 1,158533691 | N/A             | N/A       | N/A          | N/A            |
| A_19_P00801867 | 4,97242 | 4,76016 | 1,158501571 | N/A             | 100129434 | NR_125368    | LOC100129434   |
| A_33_P3804778  | 2,26228 | 2,05009 | 1,158445361 | N/A             | N/A       | CD049825     | N/A            |
| A_21_P0010848  | 1,92856 | 1,71638 | 1,158437331 | N/A             | N/A       | N/A          | XLOC_I2_001800 |
| A_33_P3394933  | 8,18127 | 7,96913 | 1,158405213 | ENST00000395164 | 8974      | NM_001017973 | P4HA2          |
| A_21_P0005417  | 1,73317 | 1,52107 | 1,158373096 | N/A             | 100996249 | NR_110159    | LOC100996249   |
| A_22_P00024298 | 6,51844 | 6,30639 | 1,15833295  | ENST00000505338 | 114134    | NM_052885    | SLC2A13        |
| A_33_P3372699  | 7,06908 | 6,85707 | 1,158300835 | ENST00000320982 | 284904    | NM_174977    | SEC14L4        |
| A_24_P55148    | 9,70437 | 9,49239 | 1,158276749 | ENST00000339812 | 8970      | NM_021058    | HIST1H2BJ      |

|                |         |         |             |                 |           |              |                       |
|----------------|---------|---------|-------------|-----------------|-----------|--------------|-----------------------|
| A_23_P62336    | 1,94134 | 1,72941 | 1,158236607 | ENST00000373111 | 53336     | NM_033048    | CPXCR1                |
| A_23_P135465   | 8,93502 | 8,7232  | 1,158148299 | ENST00000326737 | 283254    | NM_173811    | HARBI1                |
| A_33_P3246083  | 11,3561 | 11,1443 | 1,158132244 | ENST00000448177 | 54995     | NM_017897    | OXSM                  |
| A_22_P00004659 | 2,33282 | 2,12104 | 1,158116189 | N/A             | N/A       | N/A          | Inc-CTD-2014B16.3.1-1 |
| A_22_P00004812 | 4,55323 | 4,34148 | 1,158092107 | ENST00000515296 | N/A       | DA232433     | N/A                   |
| A_24_P162287   | 6,98594 | 6,77422 | 1,158068025 | ENST00000461386 | 11190     | NM_007186    | CEP250                |
| A_21_P0003274  | 6,20785 | 5,99616 | 1,158043944 | N/A             | N/A       | N/A          | Inc-AC069257.9.1-6    |
| A_32_P30649    | 6,82753 | 6,61587 | 1,158019863 | ENST00000306376 | 2119      | NM_004454    | ETV5                  |
| A_23_P107465   | 5,80244 | 5,59082 | 1,157987757 | ENST00000573281 | 3881      | NM_002277    | KRT31                 |
| A_23_P406785   | 4,43786 | 4,2263  | 1,157939598 | ENST00000372478 | 375759    | NM_199350    | C9orf50               |
| A_33_P3266530  | 13,7496 | 13,5381 | 1,157891442 | ENST00000354321 | 64118     | NM_022156    | DUS1L                 |
| A_33_P3663105  | 2,42118 | 2,20973 | 1,157851313 | N/A             | 284263    | BC038429     | LOC284263             |
| A_33_P3244728  | 7,71451 | 7,50308 | 1,157835262 | ENST00000263816 | 4036      | NM_004525    | LRP2                  |
| A_33_P3382766  | 2,52312 | 2,31177 | 1,15777106  | N/A             | 100133121 | AK093358     | FAM27B                |
| A_33_P6497255  | 2,01991 | 1,80858 | 1,15775501  | N/A             | 101928264 | XR_426854    | LOC101928264          |
| A_21_P0009685  | 10,4285 | 10,2172 | 1,157730935 | ENST00000503892 | 153339    | NM_174909    | TMEM167A              |
| A_33_P3225567  | 9,99    | 9,7787  | 1,157730935 | ENST00000372936 | 79979     | NM_024917    | TRMT2B                |
| A_24_P388703   | 6,14524 | 5,93398 | 1,157698837 | N/A             | 439933    | NR_122080    | LOC439933             |
| A_33_P3350259  | 2,33489 | 2,12368 | 1,157658715 | ENST00000332386 | 199786    | NM_001098524 | FAM129C               |
| A_23_P55518    | 9,7154  | 9,50425 | 1,15761057  | ENST00000545051 | 4092      | NM_005904    | SMAD7                 |
| A_33_P3313660  | 5,17092 | 4,95978 | 1,157602546 | N/A             | 23629     | NR_002730    | BRD7P3                |
| A_21_P0000660  | 6,30051 | 6,08941 | 1,157570451 | N/A             | 100499489 | NR_036533    | LOC100499489          |
| A_19_P00801041 | 4,36979 | 4,15869 | 1,157570451 | N/A             | N/A       | N/A          | GNASAS                |
| A_22_P00012485 | 5,57954 | 5,36849 | 1,157530333 | ENST00000564160 | 100507321 | NR_040023    | ERVK13-1              |
| A_33_P3276376  | 4,37037 | 4,15933 | 1,15752231  | N/A             | N/A       | N/A          | N/A                   |
| A_24_P219266   | 9,4706  | 9,25958 | 1,157506263 | ENST00000563454 | 255252    | NM_153260    | LRRC57                |
| A_21_P0012153  | 4,89809 | 4,68708 | 1,15749824  | ENST00000603095 | N/A       | N/A          | N/A                   |
| A_21_P0000275  | 7,67849 | 7,46756 | 1,157434057 | ENST00000502890 | 619571    | NR_002592    | SNORD96A              |
| A_23_P152107   | 14,8743 | 14,6634 | 1,157409989 | ENST00000403747 | 7329      | NM_194259    | UBE2I                 |
| A_21_P0014077  | 8,99367 | 8,7828  | 1,157385921 | N/A             | 100505666 | NR_040772    | LOC100505666          |
| A_21_P0009993  | 8,75432 | 8,54349 | 1,157353832 | N/A             | 100505771 | XR_109592    | LOC100505771          |
| A_24_P326708   | 6,26381 | 6,05299 | 1,15734581  | ENST00000544817 | 9024      | NM_003957    | BRSK2                 |
| A_33_P3305325  | 2,49904 | 2,28823 | 1,157337788 | ENST00000416803 | N/A       | N/A          | N/A                   |

|                |         |         |             |                 |           |              |              |
|----------------|---------|---------|-------------|-----------------|-----------|--------------|--------------|
| A_22_P00003091 | 3,62058 | 3,40979 | 1,157321744 | N/A             | 100131726 | NR_024479    | FAM83A-AS1   |
| A_33_P3305625  | 5,54395 | 5,33316 | 1,157321744 | N/A             | N/A       | AK124509     | N/A          |
| A_22_P00000250 | 5,81627 | 5,60549 | 1,157313722 | ENST00000381977 | 284009    | NR_028335    | LOC284009    |
| A_33_P3355944  | 5,27964 | 5,0689  | 1,157281635 | ENST00000582452 | 284276    | N/A          | LINC00908    |
| A_33_P3294654  | 8,959   | 8,74828 | 1,157265592 | ENST00000375599 | 79363     | NM_030907    | RSG1         |
| A_24_P15640    | 9,6641  | 9,45338 | 1,157265592 | N/A             | N/A       | BC137009     | N/A          |
| A_33_P3289561  | 10,2924 | 10,0817 | 1,157249549 | N/A             | N/A       | N/A          | N/A          |
| A_33_P3416376  | 4,90236 | 4,69177 | 1,157161316 | N/A             | 342918    | XM_006723188 | C19orf81     |
| A_24_P583040   | 6,37279 | 6,16223 | 1,157137254 | ENST00000397861 | 339210    | NM_001085430 | C17orf67     |
| A_21_P0001535  | 2,41374 | 2,20325 | 1,157081111 | N/A             | N/A       | N/A          | Inc-GTF2B-3  |
| A_22_P00010761 | 5,27427 | 5,06389 | 1,156992891 | N/A             | N/A       | BC069188     | Inc-NKD2-2   |
| A_22_P00024677 | 7,15668 | 6,9463  | 1,156992891 | ENST00000542219 | 101927901 | N/A          | LOC101927901 |
| A_32_P169179   | 7,95294 | 7,74257 | 1,156984871 | N/A             | 55545     | NR_002307    | MSX2P1       |
| A_24_P108242   | 8,9272  | 8,71696 | 1,156880621 | N/A             | 9570      | NM_004287    | GOSR2        |
| A_24_P38754    | 5,53747 | 5,32728 | 1,156840527 | ENST00000333926 | 55847     | NM_018464    | CISD1        |
| A_23_P76969    | 11,4786 | 11,2685 | 1,156768362 | ENST00000537413 | 26037     | NM_015556    | SIPA1L1      |
| A_23_P84140    | 10,5796 | 10,3695 | 1,156768362 | ENST00000393650 | 9657      | NM_001023571 | IQCB1        |
| A_33_P3376454  | 9,09303 | 8,88302 | 1,156696201 | N/A             | 100133299 | AY358688     | LOC100133299 |
| A_23_P331943   | 11,4318 | 11,2218 | 1,156688184 | ENST00000367090 | 57583     | NM_020823    | TMEM181      |
| A_22_P00003566 | 5,4842  | 5,27427 | 1,156632062 | N/A             | N/A       | N/A          | Inc-CCT5-1   |
| A_24_P221092   | 8,65203 | 8,4421  | 1,156632062 | N/A             | N/A       | AF289615     | N/A          |
| A_33_P3326882  | 1,78797 | 1,57807 | 1,156608011 | N/A             | 100131032 | AK128135     | LOC100131032 |
| A_24_P244442   | 10,7878 | 10,578  | 1,156527844 | ENST00000537604 | 26580     | NM_032667    | BSCL2        |
| A_22_P00013644 | 1,90913 | 1,69935 | 1,156511811 | ENST00000523195 | 157693    | NR_103537    | FAM87A       |
| A_33_P3383912  | 7,37913 | 7,16938 | 1,156487762 | ENST00000412634 | 3125      | NM_022555    | HLA-DRB3     |
| A_23_P160689   | 9,28213 | 9,07238 | 1,156487762 | ENST00000485275 | 55791     | NM_018372    | LRIF1        |
| A_22_P00024831 | 2,61084 | 2,4011  | 1,156479746 | ENST00000556652 | N/A       | N/A          | N/A          |
| A_23_P126689   | 8,9019  | 8,69221 | 1,156439667 | ENST00000485277 | 27005     | NM_001014443 | USP21        |
| A_22_P00006069 | 4,10261 | 3,89302 | 1,156359511 | N/A             | N/A       | BF238994     | Inc-FAM13B-1 |
| A_23_P315571   | 1,92432 | 1,71476 | 1,156335465 | ENST00000334133 | 23180     | NM_015150    | RFTN1        |
| A_23_P94636    | 9,26782 | 9,05831 | 1,156295391 | ENST00000423239 | 54542     | NM_018835    | RC3H2        |
| A_23_P41314    | 2,03376 | 1,8243  | 1,156255317 | ENST00000403665 | 2160      | NM_000128    | F11          |
| A_21_P0005204  | 2,76537 | 2,55591 | 1,156255317 | ENST00000492208 | N/A       | N/A          | N/A          |

|                |         |         |             |                 |           |              |              |
|----------------|---------|---------|-------------|-----------------|-----------|--------------|--------------|
| A_22_P00004557 | 1,91334 | 1,70389 | 1,156247303 | N/A             | N/A       | AA626491     | Inc-CRNKL1-2 |
| A_33_P3359157  | 7,11214 | 6,9027  | 1,156239288 | ENST00000487649 | 10712     | NM_001267608 | FAM189B      |
| A_33_P3355608  | 6,61758 | 6,40821 | 1,156183188 | ENST00000356878 | 56141     | NM_031852    | PCDHA7       |
| A_33_P3364373  | 7,09672 | 6,88741 | 1,156135105 | ENST00000612541 | 440021    | NM_001004325 | KRTAP5-2     |
| A_23_P334864   | 9,09004 | 8,88074 | 1,156127091 | ENST00000286181 | 285172    | NM_173822    | FAM126B      |
| A_23_P69431    | 17,6845 | 17,4752 | 1,156127091 | ENST00000564647 | 6124      | NM_000968    | RPL4         |
| A_33_P3212402  | 1,99599 | 1,7867  | 1,156119078 | N/A             | N/A       | N/A          | Inc-ZNF479-2 |
| A_33_P6671337  | 6,24754 | 6,03825 | 1,156119078 | ENST00000423478 | 644353    | N/A          | ZCCHC18      |
| A_21_P0007907  | 4,8772  | 4,66795 | 1,156087024 | ENST00000616974 | 100506622 | NR_103810    | LINC00540    |
| A_19_P00319465 | 11,7764 | 11,5672 | 1,156046958 | ENST00000428216 | 57506     | NM_020746    | MAVS         |
| A_33_P3275826  | 16,6893 | 16,4801 | 1,156046958 | N/A             | N/A       | N/A          | N/A          |
| A_22_P00014343 | 2,03887 | 1,82969 | 1,156030931 | ENST00000496891 | 646168    | NR_033843    | LINC01330    |
| A_22_P00022194 | 1,89549 | 1,68642 | 1,155942792 | N/A             | 101927688 | NR_110810    | SEPT4-AS1    |
| A_24_P376339   | 12,3857 | 12,1767 | 1,155886707 | ENST00000408918 | 81669     | NM_001039577 | CCNL2        |
| A_23_P74981    | 7,61358 | 7,40465 | 1,155830624 | ENST00000366503 | 93474     | NM_033213    | ZNF670       |
| A_24_P294719   | 11,0168 | 10,808  | 1,155726478 | ENST00000261942 | 23197     | NM_014613    | FAF2         |
| A_23_P501805   | 7,8856  | 7,67686 | 1,155678413 | ENST00000393471 | 51601     | NM_145197    | LIPT1        |
| A_33_P3383611  | 10,2663 | 10,0576 | 1,155646372 | ENST00000612224 | 375616    | NM_199349    | KCP          |
| A_33_P3387420  | 1,93561 | 1,72696 | 1,155606321 | ENST00000371117 | 5314      | NM_138694    | PKHD1        |
| A_24_P94651    | 11,9967 | 11,7881 | 1,155566271 | ENST00000356401 | 10425     | NM_006321    | ARIH2        |
| A_33_P3305472  | 9,79437 | 9,58579 | 1,155550252 | N/A             | N/A       | AK123993     | N/A          |
| A_33_P3363655  | 6,92389 | 6,71532 | 1,155542242 | ENST00000437031 | 64682     | NM_022662    | ANAPC1       |
| A_23_P215875   | 13,1199 | 12,9114 | 1,155486176 | ENST00000518554 | 25879     | NM_015420    | DCAF13       |
| A_23_P20615    | 13,5444 | 13,3359 | 1,155486176 | ENST00000486769 | 10541     | NM_006401    | ANP32B       |
| A_23_P434289   | 3,93663 | 3,72818 | 1,155446131 | ENST00000322241 | 118442    | NM_080865    | GPR62        |
| A_23_P156620   | 7,43295 | 7,22455 | 1,155406087 | ENST00000377419 | 7738      | NM_007149    | ZNF184       |
| A_33_P3259428  | 10,0925 | 9,88411 | 1,155398078 | ENST00000511232 | 54853     | XM_005268471 | WDR55        |
| A_32_P182511   | 9,89752 | 9,68917 | 1,155366044 | ENST00000343629 | 57707     | NM_020947    | TLDC1        |
| A_23_P41395    | 1,87354 | 1,66526 | 1,155309987 | ENST00000295589 | 886       | NM_000730    | CCKAR        |
| A_19_P00813347 | 9,48    | 9,27173 | 1,155301979 | ENST00000334256 | 3840      | NM_002268    | KPNA4        |
| A_23_P25929    | 11,8729 | 11,6647 | 1,155245925 | ENST00000556668 | 8892      | NM_014239    | EIF2B2       |
| A_22_P00015589 | 10,785  | 10,5768 | 1,155245925 | ENST00000469135 | 10228     | NM_005819    | STX6         |
| A_19_P00321839 | 2,02941 | 1,82126 | 1,155205887 | N/A             | N/A       | N/A          | Inc-HSCB-2   |

|                |         |         |             |                 |           |              |                    |
|----------------|---------|---------|-------------|-----------------|-----------|--------------|--------------------|
| A_22_P00004923 | 7,65295 | 7,44487 | 1,155149838 | N/A             | N/A       | N/A          | Inc-DBH-1          |
| A_33_P3340468  | 5,63455 | 5,42648 | 1,155141831 | ENST00000403304 | 2491      | XM_005262111 | CENPI              |
| A_33_P3239790  | 4,00443 | 3,79637 | 1,155133824 | ENST00000300850 | 9726      | NM_014699    | ZNF646             |
| A_33_P3405451  | 2,05994 | 1,85189 | 1,155125817 | N/A             | 284900    | NR_026963    | TTC28-AS1          |
| A_33_P3215929  | 6,26663 | 6,0586  | 1,155109804 | ENST00000495017 | 55615     | NM_015366    | PRR5               |
| A_21_P0007286  | 3,05488 | 2,84689 | 1,155077778 | N/A             | N/A       | N/A          | Inc-AP000679.2.1-1 |
| A_24_P88775    | 5,44246 | 5,23449 | 1,155061765 | ENST00000411425 | 84874     | NM_032788    | ZNF514             |
| A_32_P206949   | 7,61458 | 7,40666 | 1,155021735 | ENST00000494919 | 200728    | NM_198276    | TMEM17             |
| A_22_P00000405 | 2,47672 | 2,26881 | 1,155013729 | N/A             | 102724508 | NR_110880    | LOC102724508       |
| A_23_P21363    | 13,8876 | 13,6797 | 1,155005723 | ENST00000257247 | 79026     | NM_024060    | AHNAK              |
| A_23_P133974   | 10,12   | 9,91212 | 1,154989711 | ENST00000374021 | 64771     | NM_024294    | C6orf106           |
| A_23_P303455   | 7,89104 | 7,68317 | 1,154981705 | ENST00000367835 | 23432     | NM_153832    | GPR161             |
| A_24_P14367    | 8,69472 | 8,48686 | 1,1549737   | ENST00000394601 | 5725      | NM_002819    | PTBP1              |
| A_22_P00001118 | 1,64591 | 1,43805 | 1,1549737   | N/A             | N/A       | CR742343     | Inc-ALPK1-1        |
| A_21_P0002987  | 1,82863 | 1,62079 | 1,154957689 | ENST00000471614 | N/A       | N/A          | N/A                |
| A_33_P3416127  | 1,9489  | 1,74108 | 1,154941678 | ENST00000262259 | 7728      | AK093799     | ZNF175             |
| A_24_P238744   | 15,025  | 14,8172 | 1,154925667 | ENST00000507366 | 641455    | NM_001145442 | POTEM              |
| A_24_P201531   | 11,6919 | 11,4841 | 1,154925667 | ENST00000614498 | 372       | NM_001655    | ARCN1              |
| A_33_P3548768  | 3,26355 | 3,0558  | 1,154885641 | N/A             | 388699    | CU449054     | LINC00302          |
| A_33_P3302390  | 6,59601 | 6,38829 | 1,154861626 | N/A             | N/A       | N/A          | N/A                |
| A_23_P142724   | 17,8988 | 17,6911 | 1,154845616 | ENST00000420712 | 6168      | NM_000998    | RPL37A             |
| A_21_P0013393  | 1,81404 | 1,60637 | 1,154821602 | ENST00000415536 | 102723946 | N/A          | LOC102723946       |
| A_22_P00010446 | 2,96339 | 2,75575 | 1,154797589 | ENST00000492981 | N/A       | N/A          | N/A                |
| A_33_P3416622  | 7,35684 | 7,14925 | 1,154757567 | N/A             | 100126693 | AK131425     | LINC00322          |
| A_22_P00013768 | 4,01346 | 3,80601 | 1,154645514 | ENST00000435412 | N/A       | N/A          | N/A                |
| A_33_P3388909  | 3,68782 | 3,48037 | 1,154645514 | N/A             | 100133077 | NR_121583    | LOC100133077       |
| A_33_P3209497  | 7,64867 | 7,44123 | 1,154637511 | ENST00000439431 | N/A       | N/A          | N/A                |
| A_33_P3216635  | 3,99858 | 3,79117 | 1,154613501 | N/A             | N/A       | N/A          | N/A                |
| A_23_P126167   | 2,16518 | 1,95779 | 1,154597495 | ENST00000618040 | 3782      | NM_002249    | KCNN3              |
| A_21_P0007066  | 6,33398 | 6,12666 | 1,154541475 | N/A             | N/A       | N/A          | Inc-SRGN-1         |
| A_33_P3376292  | 2,84674 | 2,63943 | 1,154533472 | ENST00000367355 | 554279    | NR_040064    | LINC00862          |
| A_22_P00005616 | 2,10454 | 1,89733 | 1,154453449 | N/A             | 100506495 | NR_103554    | LIFR-AS1           |
| A_33_P3272553  | 7,44592 | 7,23872 | 1,154445447 | ENST00000395698 | 29781     | NM_014551    | NCAPH2             |



|                |         |         |             |                 |           |              |                |
|----------------|---------|---------|-------------|-----------------|-----------|--------------|----------------|
| A_22_P00023730 | 4,37966 | 4,17254 | 1,154381432 | ENST00000430068 | N/A       | N/A          | N/A            |
| A_22_P00009667 | 6,56619 | 6,35907 | 1,154381432 | ENST00000427881 | N/A       | XR_244424    | N/A            |
| A_23_P302654   | 11,5471 | 11,34   | 1,154365429 | ENST00000264935 | 55722     | NM_018140    | CEP72          |
| A_33_P3333224  | 10,047  | 9,8399  | 1,154365429 | ENST00000262366 | 84662     | NM_032575    | GLIS2          |
| A_22_P00015100 | 4,25212 | 4,04506 | 1,154333424 | ENST00000430548 | N/A       | XR_426151    | N/A            |
| A_33_P3273752  | 1,9157  | 1,70868 | 1,154301419 | N/A             | N/A       | N/A          | N/A            |
| A_23_P76901    | 14,8328 | 14,6258 | 1,154285418 | ENST00000490180 | 26030     | NM_015549    | PLEKHG3        |
| A_21_P0005609  | 3,94816 | 3,74125 | 1,154213412 | N/A             | 100216545 | N/A          | KMT2E-AS1      |
| A_23_P126844   | 13,8691 | 13,6622 | 1,154205411 | ENST00000513135 | 8718      | NM_148965    | TNFRSF25       |
| A_22_P00012015 | 5,46392 | 5,25703 | 1,154197411 | N/A             | N/A       | N/A          | Inc-PLD1-2     |
| A_33_P3316572  | 2,01316 | 1,80633 | 1,15414941  | N/A             | N/A       | N/A          | N/A            |
| A_23_P17870    | 14,6115 | 14,4047 | 1,154125411 | ENST00000361684 | 25829     | NM_012264    | TMEM184B       |
| A_22_P00018950 | 7,14645 | 6,93973 | 1,154061414 | ENST00000561809 | 79583     | NM_001077416 | TMEM231        |
| A_23_P205841   | 10,2418 | 10,0351 | 1,154045416 | ENST00000356056 | 4649      | NM_006901    | MYO9A          |
| A_33_P3282522  | 1,94584 | 1,73915 | 1,154037416 | ENST00000617620 | 140687    | NM_080615    | GCNT7          |
| A_21_P0010585  | 1,71844 | 1,51175 | 1,154037416 | N/A             | N/A       | N/A          | XLOC_I2_000696 |
| A_21_P0007781  | 1,99523 | 1,78859 | 1,153997421 | N/A             | N/A       | N/A          | Inc-DHX37-7    |
| A_19_P00321511 | 15,4395 | 15,2329 | 1,153965426 | ENST00000623001 | 387066    | NR_003038    | SNHG5          |
| A_24_P80135    | 10,1665 | 9,95991 | 1,153957427 | ENST00000175756 | 26469     | NM_014369    | PTPN18         |
| A_21_P0013162  | 4,36286 | 4,15632 | 1,153917435 | N/A             | 729178    | NR_034115    | STXBP5-AS1     |
| A_33_P3323999  | 13,9734 | 13,7669 | 1,153885442 | ENST00000380817 | 6305      | NM_002972    | SBF1           |
| A_21_P0003138  | 5,79277 | 5,58631 | 1,15385345  | N/A             | N/A       | N/A          | Inc-RPL24-2    |
| A_33_P3870056  | 5,79755 | 5,59109 | 1,15385345  | ENST00000434344 | 283335    | NR_033854    | LOC283335      |
| A_22_P00022751 | 4,62958 | 4,42315 | 1,153829456 | ENST00000445070 | N/A       | N/A          | N/A            |
| A_22_P00009847 | 4,62369 | 4,41728 | 1,153813461 | N/A             | 497258    | NR_033312    | BDNF-AS        |
| A_33_P3253799  | 9,47713 | 9,27076 | 1,153781471 | ENST00000503583 | 80230     | NM_001040451 | RUFY1          |
| A_33_P3269598  | 8,18514 | 7,97877 | 1,153781471 | ENST00000479391 | 375748    | NM_020207    | ERCC6L2        |
| A_33_P3718679  | 1,94496 | 1,73861 | 1,153765476 | ENST00000563727 | 283731    | BC050067     | LOC283731      |
| A_33_P3335137  | 10,0207 | 9,81443 | 1,1537015   | ENST00000402096 | 23192     | NM_013325    | ATG4B          |
| A_22_P00025589 | 4,07848 | 3,87229 | 1,153637527 | ENST00000521725 | N/A       | DA858760     | N/A            |
| A_19_P00322925 | 5,65011 | 5,44393 | 1,15362953  | ENST00000607519 | N/A       | N/A          | N/A            |
| A_23_P391926   | 4,7254  | 4,51926 | 1,153597545 | ENST00000340736 | 22859     | NM_001008701 | LPHN1          |
| A_33_P3270197  | 4,71509 | 4,509   | 1,153557565 | ENST00000390005 | 129563    | NM_001257281 | DIS3L2         |

|                |         |         |             |                 |           |              |                    |
|----------------|---------|---------|-------------|-----------------|-----------|--------------|--------------------|
| A_23_P6980     | 8,39935 | 8,19327 | 1,15354957  | ENST00000491507 | 100131827 | NM_001290210 | ZNF717             |
| A_21_P0002352  | 4,38239 | 4,17633 | 1,153533578 | N/A             | N/A       | N/A          | Inc-AC007557.1.1-3 |
| A_32_P85539    | 6,3286  | 6,12259 | 1,1534936   | ENST00000229330 | 29915     | NM_013320    | HCFC2              |
| A_23_P46627    | 12,371  | 12,165  | 1,153485605 | ENST00000495562 | 51094     | NM_015999    | ADIPOR1            |
| A_23_P209619   | 11,6458 | 11,4398 | 1,153485605 | ENST00000378954 | 64225     | NM_022374    | ATL2               |
| A_21_P0014764  | 1,8872  | 1,68122 | 1,153469614 | N/A             | 100287664 | AY742823     | TSRM               |
| A_22_P00013960 | 2,73057 | 2,5246  | 1,153461619 | N/A             | N/A       | AK126659     | Inc-RTL1-1         |
| A_33_P3343820  | 3,99118 | 3,78529 | 1,15339766  | ENST00000370535 | 286411    | NR_028344    | LINC00632          |
| A_33_P3266484  | 1,94606 | 1,74018 | 1,153389665 | ENST00000334726 | 138805    | NM_001004485 | OR13F1             |
| A_23_P82065    | 1,94393 | 1,73809 | 1,153357687 | ENST00000369816 | 6785      | NM_022726    | ELOVL4             |
| A_32_P185637   | 2,11314 | 1,90731 | 1,153349692 | ENST00000422202 | 57642     | NM_020882    | COL20A1            |
| A_21_P0000082  | 12,2524 | 12,0466 | 1,153325709 | ENST00000293618 | 113251    | NM_199188    | LARP4              |
| A_33_P3358804  | 4,9457  | 4,73993 | 1,153301727 | N/A             | N/A       | N/A          | N/A                |
| A_23_P112162   | 11,2919 | 11,0862 | 1,153245769 | ENST00000524965 | 8694      | NM_012079    | DGAT1              |
| A_23_P140069   | 11,2524 | 11,0467 | 1,153245769 | ENST00000355619 | 26224     | NM_012158    | FBXL3              |
| A_21_P0005391  | 1,92952 | 1,72383 | 1,153237776 | N/A             | N/A       | N/A          | Inc-TPST1-1        |
| A_22_P00022552 | 1,94354 | 1,73787 | 1,153221789 | ENST00000517739 | N/A       | BG501166     | N/A                |
| A_23_P217269   | 1,90178 | 1,69612 | 1,153213795 | ENST00000412866 | 11326     | NM_007268    | VSIG4              |
| A_22_P00018347 | 6,35878 | 6,15314 | 1,153197808 | N/A             | 100507458 | NR_110900    | ZNF213-AS1         |
| A_21_P0009312  | 1,93657 | 1,73098 | 1,153157842 | N/A             | N/A       | N/A          | Inc-ACCN1-2        |
| A_24_P305662   | 8,90574 | 8,70015 | 1,153157842 | ENST00000492988 | 27037     | NM_022727    | TRMT2A             |
| A_21_P0008379  | 1,93937 | 1,73383 | 1,153117877 | N/A             | N/A       | N/A          | Inc-GLRX5-1        |
| A_23_P252981   | 7,91039 | 7,70489 | 1,153085907 | ENST00000471548 | 59272     | NM_021804    | ACE2               |
| A_33_P3297126  | 3,99567 | 3,7902  | 1,153061929 | ENST00000307180 | 203062    | NM_145003    | TSNARE1            |
| A_24_P115700   | 7,22486 | 7,01943 | 1,15302996  | ENST00000370483 | 1355      | NM_078470    | COX15              |
| A_23_P145289   | 10,3137 | 10,1083 | 1,153005984 | ENST00000462708 | 2794      | NM_005275    | GNL1               |
| A_33_P3510335  | 6,303   | 6,09764 | 1,152974016 | ENST00000574564 | 65125     | NM_213655    | WNK1               |
| A_22_P00018477 | 5,49662 | 5,29138 | 1,152878118 | N/A             | N/A       | DA084938     | Inc-THOC5-1        |
| A_21_P0005530  | 3,9118  | 3,70657 | 1,152870127 | N/A             | N/A       | N/A          | Inc-RBM28-1        |
| A_23_P10374    | 12,1057 | 11,9005 | 1,152846154 | ENST00000441731 | 22864     | NM_014925    | R3HDM2             |
| A_33_P3356170  | 1,94521 | 1,74002 | 1,152838163 | ENST00000332836 | 338321    | NM_176820    | NLRP9              |
| A_24_P85200    | 11,2556 | 11,0505 | 1,152766248 | ENST00000286523 | 91748     | NM_194278    | ELMSAN1            |
| A_22_P00007404 | 3,34033 | 3,13523 | 1,152766248 | N/A             | 100507557 | NR_038244    | LOC100507557       |

|                |         |         |             |                 |           |              |                    |
|----------------|---------|---------|-------------|-----------------|-----------|--------------|--------------------|
| A_22_P00002773 | 2,21007 | 2,00505 | 1,152702327 | N/A             | N/A       | N/A          | Inc-C22orf31-2     |
| A_33_P3345389  | 10,2961 | 10,0911 | 1,152686347 | ENST00000252032 | 25943     | NM_001009984 | C20orf194          |
| A_23_P205031   | 6,89995 | 6,69499 | 1,152654388 | ENST00000360467 | 1284      | NM_001846    | COL4A2             |
| A_21_P0011923  | 7,44236 | 7,23743 | 1,152630419 | ENST00000467687 | 51057     | N/A          | WDPCP              |
| A_23_P346265   | 7,54568 | 7,34089 | 1,152518573 | ENST00000549940 | 79158     | NM_024312    | GNPTAB             |
| A_23_P5731     | 9,94225 | 9,73747 | 1,152510584 | ENST00000470100 | 51011     | NM_016044    | FAHD2A             |
| A_21_P0011885  | 5,93598 | 5,73128 | 1,152446677 | N/A             | N/A       | N/A          | XLOC_I2_007829     |
| A_22_P00023195 | 2,68238 | 2,47769 | 1,152438689 | N/A             | 103689846 | NR_125748    | ADAMTS19-AS1       |
| A_33_P3223631  | 8,97663 | 8,77197 | 1,152414725 | ENST00000601550 | N/A       | XR_428276    | N/A                |
| A_21_P0009725  | 2,34575 | 2,1411  | 1,152406737 | N/A             | N/A       | N/A          | Inc-IGFL1-1        |
| A_21_P0002695  | 1,93969 | 1,73507 | 1,152382774 | N/A             | N/A       | N/A          | Inc-AC131097.4.1-3 |
| A_32_P16007    | 1,87883 | 1,67423 | 1,152366799 | ENST00000570157 | 102724631 | NM_207355    | POTEB3             |
| A_21_P0007505  | 6,8817  | 6,67716 | 1,152318874 | N/A             | N/A       | N/A          | Inc-MLXIP-1        |
| A_33_P6607908  | 4,41459 | 4,21007 | 1,1523029   | ENST00000539856 | 51503     | N/A          | CWC15              |
| A_23_P126241   | 11,3361 | 11,1316 | 1,152286925 | ENST00000602326 | 8672      | NM_003760    | EIF4G3             |
| A_22_P00014774 | 3,87582 | 3,67135 | 1,152262964 | ENST00000552634 | N/A       | N/A          | N/A                |
| A_22_P00016586 | 3,8856  | 3,6812  | 1,152207058 | ENST00000429834 | 101929697 | XR_246049    | LOC101929697       |
| A_24_P724153   | 6,21028 | 6,00588 | 1,152207058 | N/A             | N/A       | CU688199     | N/A                |
| A_23_P216448   | 8,71634 | 8,51195 | 1,152199071 | ENST00000397581 | 4781      | NM_005596    | NFIB               |
| A_24_P940411   | 1,94535 | 1,74096 | 1,152199071 | ENST00000398000 | 79742     | NM_176819    | CXorf36            |
| A_19_P00322743 | 5,71685 | 5,5125  | 1,152167126 | N/A             | N/A       | AK021551     | Inc-SLC30A7-2      |
| A_23_P135271   | 10,1168 | 9,91247 | 1,152151154 | ENST00000379731 | 2683      | NM_001497    | B4GALT1            |
| A_22_P00020876 | 1,93546 | 1,73118 | 1,152111224 | N/A             | 101929698 | NR_110619    | LOC101929698       |
| A_23_P250380   | 8,63209 | 8,42782 | 1,152103238 | ENST00000505907 | 23324     | NM_015274    | MAN2B2             |
| A_23_P137097   | 7,55992 | 7,35571 | 1,152055324 | ENST00000587091 | 6567      | NM_006517    | SLC16A2            |
| A_33_P3336384  | 6,55775 | 6,35358 | 1,152023383 | ENST00000368539 | 196743    | NM_207127    | PAOX               |
| A_33_P3361546  | 8,30058 | 8,09644 | 1,151999428 | ENST00000379604 | 7020      | NM_001032280 | TFAP2A             |
| A_24_P109417   | 4,44724 | 4,24314 | 1,151967488 | ENST00000294485 | 374946    | NM_198545    | DRAXIN             |
| A_21_P0013201  | 8,48974 | 8,28566 | 1,151951518 | ENST00000441896 | N/A       | N/A          | N/A                |
| A_33_P3318449  | 1,89164 | 1,6876  | 1,15191958  | ENST00000399398 | 643904    | NM_001146684 | RNF222             |
| A_24_P365954   | 8,72729 | 8,52326 | 1,151911595 | ENST00000303596 | 57215     | NM_020457    | THAP11             |
| A_33_P3345663  | 7,6274  | 7,42344 | 1,151855706 | ENST00000455978 | 129285    | NM_001193475 | PPP1R21            |
| A_33_P3280796  | 4,56141 | 4,35748 | 1,151831754 | N/A             | 4008      | XM_005266396 | LMO7               |

|                |         |         |             |                 |           |              |                      |
|----------------|---------|---------|-------------|-----------------|-----------|--------------|----------------------|
| A_22_P00019512 | 1,94189 | 1,73797 | 1,15182377  | N/A             | N/A       | N/A          | Inc-ZIC4-3           |
| A_24_P48403    | 11,2443 | 11,0404 | 1,151807802 | ENST00000314574 | 7525      | NM_005433    | YES1                 |
| A_22_P00004653 | 1,906   | 1,70213 | 1,151783851 | N/A             | N/A       | N/A          | Inc-CTC-236F12.4.1-4 |
| A_33_P3275435  | 7,74093 | 7,53708 | 1,151767884 | N/A             | 100216545 | NR_024586    | KMT2E-AS1            |
| A_21_P0008461  | 5,21773 | 5,01388 | 1,151767884 | ENST00000557581 | N/A       | N/A          | N/A                  |
| A_33_P3610771  | 1,9449  | 1,74115 | 1,151688053 | N/A             | 54848     | NM_001242729 | ARHGEF38             |
| A_24_P272310   | 4,15825 | 3,9545  | 1,151688053 | ENST00000446157 | 389125    | NM_205853    | MUSTN1               |
| A_23_P320862   | 3,86261 | 3,65887 | 1,15168007  | ENST00000288462 | 257169    | NM_152786    | C9orf43              |
| A_23_P219117   | 4,05214 | 3,84851 | 1,151592262 | ENST00000523266 | 2039      | NM_001978    | DMTN                 |
| A_24_P941708   | 7,64429 | 7,44066 | 1,151592262 | ENST00000399200 | 55680     | NM_001042417 | RUFY2                |
| A_22_P00009680 | 3,07278 | 2,86918 | 1,151568316 | ENST00000422763 | 101928687 | NR_120641    | LINC01468            |
| A_24_P418418   | 18,1111 | 17,9076 | 1,151488498 | ENST00000560612 | 6218      | NM_001021    | RPS17                |
| A_23_P92520    | 6,44366 | 6,24016 | 1,151488498 | ENST00000512835 | 23520     | NM_012403    | ANP32C               |
| A_33_P3242703  | 6,36849 | 6,16501 | 1,151472535 | ENST00000545967 | 5893      | NR_123713    | RAD52                |
| A_21_P0002793  | 1,94038 | 1,7369  | 1,151472535 | ENST00000464514 | N/A       | N/A          | N/A                  |
| A_22_P00014991 | 1,93236 | 1,72892 | 1,15144061  | N/A             | N/A       | N/A          | Inc-SMCR5-2          |
| A_33_P3235841  | 5,04903 | 4,84561 | 1,151424647 | ENST00000530038 | 440044    | NR_033396    | SLC22A20             |
| A_33_P3337144  | 6,63563 | 6,43221 | 1,151424647 | ENST00000327835 | 619279    | NM_001033723 | ZNF704               |
| A_33_P3229328  | 5,87226 | 5,66884 | 1,151424647 | ENST00000370040 | 653149    | NM_001143988 | NBPF6                |
| A_33_P3412560  | 9,38488 | 9,18148 | 1,151408685 | N/A             | N/A       | AA504818     | N/A                  |
| A_23_P151436   | 13,5011 | 13,2977 | 1,151408685 | ENST00000486410 | 29880     | NM_013338    | ALG5                 |
| A_32_P191503   | 9,5934  | 9,39002 | 1,151392724 | N/A             | 349114    | NR_026999    | LINC00265            |
| A_22_P00016147 | 6,58687 | 6,3835  | 1,151384743 | N/A             | N/A       | N/A          | Inc-TIMM9-2          |
| A_33_P3234746  | 1,89596 | 1,69266 | 1,151328879 | ENST00000557387 | N/A       | N/A          | N/A                  |
| A_21_P0011783  | 3,95252 | 3,7493  | 1,151265037 | ENST00000600193 | 284379    | N/A          | LOC284379            |
| A_23_P48327    | 1,91305 | 1,7099  | 1,151209179 | ENST00000379108 | 386618    | NM_198404    | KCTD4                |
| A_33_P3374165  | 3,8918  | 3,68865 | 1,151209179 | N/A             | N/A       | AK090994     | Inc-FBXW11-3         |
| A_33_P3272938  | 1,92087 | 1,71778 | 1,151161302 | ENST00000342905 | 58484     | NM_001302504 | NLRC4                |
| A_22_P00010214 | 6,40886 | 6,20578 | 1,151153323 | ENST00000519280 | N/A       | AA383451     | N/A                  |
| A_32_P119248   | 5,77838 | 5,57536 | 1,151105449 | ENST00000342833 | 2298      | NM_207305    | FOXD4                |
| A_33_P3352852  | 4,63114 | 4,42814 | 1,151089491 | ENST00000445369 | 9080      | NM_020982    | CLDN9                |
| A_23_P84782    | 12,2468 | 12,0438 | 1,151089491 | ENST00000612200 | 51078     | NM_015963    | THAP4                |
| A_22_P00010003 | 1,93305 | 1,73007 | 1,151073534 | N/A             | 101928553 | XR_244869    | LOC101928553         |

|                |         |         |             |                 |           |              |                   |
|----------------|---------|---------|-------------|-----------------|-----------|--------------|-------------------|
| A_32_P137980   | 1,94423 | 1,74137 | 1,150977794 | ENST00000400457 | 83259     | NM_032973    | PCDH11Y           |
| A_33_P3394272  | 1,93406 | 1,73121 | 1,150969816 | N/A             | 90632     | NR_026861    | LINC00473         |
| A_23_P142671   | 8,49483 | 8,292   | 1,150953861 | ENST00000491924 | 130557    | NM_144631    | ZNF513            |
| A_33_P3392842  | 1,93869 | 1,73586 | 1,150953861 | N/A             | 730668    | NR_027240    | LOC730668         |
| A_33_P3413962  | 13,0496 | 12,8468 | 1,150929928 | ENST00000381075 | 5214      | NM_001242339 | PFKP              |
| A_33_P3297525  | 5,73465 | 5,53185 | 1,150929928 | ENST00000454116 | N/A       | N/A          | N/A               |
| A_22_P00005979 | 5,77214 | 5,56941 | 1,150874085 | ENST00000432823 | N/A       | N/A          | N/A               |
| A_33_P3227920  | 4,98601 | 4,78328 | 1,150874085 | ENST00000461647 | 9122      | NM_004696    | SLC16A4           |
| A_33_P3403733  | 7,15369 | 6,95103 | 1,150818246 | ENST00000600179 | 729574    | NM_001282321 | FAM231A           |
| A_22_P00005947 | 2,03668 | 1,83407 | 1,150778362 | N/A             | 400541    | NR_126007    | LOC400541         |
| A_23_P84070    | 11,0032 | 10,8006 | 1,150770386 | ENST00000344442 | 51574     | NM_016648    | LARP7             |
| A_24_P134727   | 6,19423 | 5,99166 | 1,150746456 | ENST00000487519 | 7019      | NM_003201    | TFAM              |
| A_33_P3411985  | 4,8488  | 4,64624 | 1,15073848  | ENST00000402311 | N/A       | N/A          | N/A               |
| A_33_P3246438  | 5,22807 | 5,02555 | 1,150706575 | ENST00000566802 | 283922    | NR_026950    | LOC283922         |
| A_22_P00002506 | 2,68713 | 2,48462 | 1,150698599 | ENST00000573819 | N/A       | N/A          | N/A               |
| A_21_P0008075  | 1,92019 | 1,7177  | 1,150682647 | N/A             | N/A       | N/A          | Inc-AL445989.1-11 |
| A_21_P0000021  | 5,4055  | 5,20315 | 1,15057099  | ENST00000428046 | 161823    | NM_001159280 | ADAL              |
| A_33_P3318459  | 9,58506 | 9,38273 | 1,15055504  | ENST00000392245 | 7341      | NM_003352    | SUMO1             |
| A_21_P0007594  | 1,9418  | 1,73948 | 1,150547065 | N/A             | N/A       | N/A          | Inc-SYT1-2        |
| A_33_P3222761  | 3,87698 | 3,67471 | 1,15050719  | ENST00000390431 | N/A       | N/A          | N/A               |
| A_33_P3378545  | 5,63914 | 5,43691 | 1,150475292 | N/A             | N/A       | DB092099     | Inc-DIO2-3        |
| A_21_P0013558  | 14,2329 | 14,0307 | 1,150451369 | N/A             | N/A       | N/A          | XLOC_I2_014720    |
| A_23_P10458    | 1,89923 | 1,69704 | 1,150443394 | ENST00000396008 | 55267     | NM_018280    | PRR34             |
| A_23_P256694   | 7,3572  | 7,15504 | 1,150419472 | N/A             | 114044    | NR_002776    | MCM3AP-AS1        |
| A_24_P244470   | 9,04645 | 8,84432 | 1,15039555  | ENST00000615206 | 10193     | NM_194358    | RNF41             |
| A_33_P3214096  | 6,73811 | 6,53605 | 1,150339734 | ENST00000336937 | 467       | NM_001040619 | ATF3              |
| A_21_P0003411  | 3,83758 | 3,63554 | 1,150323787 | ENST00000504710 | N/A       | N/A          | N/A               |
| A_22_P00001587 | 2,04092 | 1,83892 | 1,150291893 | N/A             | N/A       | N/A          | Inc-ARMC10-1      |
| A_22_P00020070 | 1,94103 | 1,73907 | 1,150260001 | ENST00000428888 | N/A       | N44694       | N/A               |
| A_33_P3361398  | 6,17974 | 5,97778 | 1,150260001 | ENST00000382477 | 255057    | XM_006722714 | C19orf26          |
| A_33_P3349036  | 3,36894 | 3,16708 | 1,150180274 | ENST00000439488 | 100133612 | N/A          | LINC01134         |
| A_21_P0007257  | 1,9318  | 1,72997 | 1,150156357 | ENST00000577699 | N/A       | N/A          | N/A               |
| A_33_P3318436  | 1,94001 | 1,73826 | 1,15009258  | ENST00000620903 | 284100    | NR_024178    | YWHAEP7           |

|                |         |         |             |                 |           |              |                       |
|----------------|---------|---------|-------------|-----------------|-----------|--------------|-----------------------|
| A_21_P0004125  | 1,935   | 1,73326 | 1,150084608 | ENST00000512599 | N/A       | N/A          | N/A                   |
| A_33_P3238425  | 2,07749 | 1,87575 | 1,150084608 | ENST00000400906 | 155184    | NM_207420    | SLC2A7                |
| A_33_P3326627  | 1,94241 | 1,74068 | 1,150076637 | N/A             | 100130468 | AK126528     | LOC100130468          |
| A_33_P3412095  | 8,16405 | 7,96233 | 1,150068665 | ENST00000367756 | 5191      | NM_000288    | PEX7                  |
| A_33_P3286988  | 6,28668 | 6,08503 | 1,150012865 | ENST00000561392 | N/A       | BF106382     | N/A                   |
| A_33_P3303956  | 2,19498 | 1,99335 | 1,149996922 | N/A             | 100133311 | NR_038831    | HOXA-AS3              |
| A_23_P135857   | 7,15994 | 6,95832 | 1,149988951 | ENST00000303236 | 9451      | NM_004836    | EIF2AK3               |
| A_32_P47643    | 10,4873 | 10,2857 | 1,149973009 | ENST00000327669 | 642273    | NM_001077710 | FAM110C               |
| A_22_P00000127 | 1,94309 | 1,74152 | 1,149949096 | N/A             | 100885777 | NR_047686    | PCCA-AS1              |
| A_21_P0009121  | 2,00134 | 1,79981 | 1,149917213 | N/A             | N/A       | N/A          | Inc-RP11-152O14.5.1-1 |
| A_24_P940125   | 9,78881 | 9,58729 | 1,149909243 | ENST00000618123 | 57472     | NM_001303241 | CNOT6                 |
| A_23_P20225    | 7,81141 | 7,60989 | 1,149909243 | ENST00000251810 | 50484     | NM_015713    | RRM2B                 |
| A_21_P0010307  | 9,27895 | 9,07745 | 1,149893302 | ENST00000426534 | 284825    | NR_126010    | LOC284825             |
| A_33_P3279456  | 13,597  | 13,3955 | 1,149893302 | N/A             | N/A       | N/A          | N/A                   |
| A_21_P0010454  | 6,145   | 5,9435  | 1,149893302 | ENST00000444890 | 100271722 | NR_027036    | LINC00899             |
| A_21_P0010062  | 2,4883  | 2,28686 | 1,14984548  | N/A             | N/A       | N/A          | Inc-CBLN4-1           |
| A_22_P00010141 | 2,0613  | 1,85986 | 1,14984548  | N/A             | N/A       | N/A          | Inc-MRPL39-2          |
| A_21_P0007635  | 3,64323 | 3,44179 | 1,14984548  | N/A             | N/A       | N/A          | Inc-MAP1LC3B2-7       |
| A_33_P3303176  | 7,06267 | 6,86124 | 1,14983751  | ENST00000332314 | 386746    | NM_001164377 | MRGPRG                |
| A_21_P0008531  | 4,9384  | 4,73697 | 1,14983751  | N/A             | N/A       | N/A          | Inc-MBIP-2            |
| A_21_P0007075  | 1,884   | 1,68259 | 1,14982157  | N/A             | 102724439 | XR_424174    | LOC102724439          |
| A_24_P13406    | 1,85353 | 1,65214 | 1,14980563  | ENST00000324616 | 283461    | NM_001031748 | C12orf40              |
| A_22_P00010028 | 2,05434 | 1,85296 | 1,14979766  | ENST00000432438 | N/A       | N/A          | N/A                   |
| A_21_P0005847  | 1,94279 | 1,74144 | 1,149773751 | N/A             | N/A       | N/A          | Inc-CYP7B1-4          |
| A_24_P230938   | 7,20126 | 6,99994 | 1,149749842 | ENST00000370635 | 118812    | BC022054     | MORN4                 |
| A_23_P397417   | 9,9289  | 9,72759 | 1,149741873 | ENST00000565457 | 255919    | NM_153261    | CNEP1R1               |
| A_23_P433079   | 10,2494 | 10,0481 | 1,149733904 | ENST00000357606 | 85406     | NM_032364    | DNAJC14               |
| A_33_P3405103  | 8,29126 | 8,08998 | 1,149717965 | N/A             | 84256     | NM_020912    | FLYWCH1               |
| A_33_P3347658  | 5,84567 | 5,64443 | 1,149686089 | ENST00000395991 | N/A       | N/A          | N/A                   |
| A_22_P00006051 | 5,36639 | 5,16518 | 1,149662182 | ENST00000425153 | N/A       | N/A          | N/A                   |
| A_23_P69840    | 9,64919 | 9,44799 | 1,149654213 | ENST00000612662 | 113829    | NM_080670    | SLC35A4               |
| A_33_P3413325  | 1,92525 | 1,72411 | 1,149606401 | ENST00000618048 | 3778      | NM_001271520 | KCNMA1                |
| A_32_P153725   | 11,4632 | 11,2621 | 1,149574528 | ENST00000620430 | 23325     | NM_015275    | KIAA1033              |

|                |         |         |             |                 |           |              |                       |
|----------------|---------|---------|-------------|-----------------|-----------|--------------|-----------------------|
| A_33_P3394021  | 6,02004 | 5,81896 | 1,149558591 | ENST00000367258 | 59349     | NM_001303109 | KLHL12                |
| A_22_P00018257 | 5,30784 | 5,10677 | 1,149550623 | N/A             | N/A       | AK097810     | Inc-ZNF726-1          |
| A_22_P00013804 | 5,52618 | 5,32512 | 1,149542655 | ENST00000329309 | 389493    | NM_001145712 | NUPR1L                |
| A_24_P83544    | 8,95259 | 8,75156 | 1,149518751 | ENST00000439303 | N/A       | N/A          | N/A                   |
| A_22_P00006737 | 1,69513 | 1,49411 | 1,149510784 | ENST00000530249 | N/A       | N/A          | N/A                   |
| A_33_P3335840  | 6,01371 | 5,81273 | 1,149478913 | ENST00000393006 | 55339     | NM_001006623 | WDR33                 |
| A_33_P3325708  | 4,58847 | 4,38752 | 1,14945501  | ENST00000422649 | 101927801 | XR_425468    | LOC101927801          |
| A_22_P00004282 | 5,57738 | 5,37652 | 1,149383306 | ENST00000456551 | 101928079 | NR_104131    | LINC01057             |
| A_24_P100277   | 7,43722 | 7,23638 | 1,149367372 | ENST00000438270 | 1727      | NM_007326    | CYB5R3                |
| A_23_P500998   | 8,16165 | 7,9609  | 1,149295673 | ENST00000497089 | 3205      | NM_152739    | HOXA9                 |
| A_22_P00007479 | 4,06157 | 3,86084 | 1,149279741 | N/A             | N/A       | R37239       | Inc-GTPBP1-1          |
| A_33_P3286254  | 12,9427 | 12,742  | 1,149255842 | ENST00000395548 | 1176      | NM_001284    | AP3S1                 |
| A_21_P0014141  | 2,08733 | 1,88666 | 1,149231944 | N/A             | 100506475 | NR_102749    | EGFLAM-AS2            |
| A_22_P00013348 | 6,48982 | 6,28916 | 1,149223978 | ENST00000520422 | 100507420 | NR_121620    | LOC100507420          |
| A_33_P3420011  | 3,58998 | 3,38932 | 1,149223978 | ENST00000570531 | N/A       | N/A          | N/A                   |
| A_22_P00011083 | 1,94214 | 1,74149 | 1,149216013 | N/A             | N/A       | N/A          | Inc-NUDCD2-2          |
| A_19_P00321388 | 8,51224 | 8,31162 | 1,149192116 | ENST00000577773 | N/A       | N/A          | N/A                   |
| A_22_P00011172 | 2,19905 | 1,99844 | 1,14918415  | N/A             | N/A       | N/A          | Inc-ODF4-2            |
| A_23_P27627    | 11,4971 | 11,2965 | 1,149176185 | ENST00000611688 | 439       | NM_004317    | ASNA1                 |
| A_33_P3291294  | 13,6473 | 13,4467 | 1,149176185 | ENST00000220562 | 2137      | NM_001440    | EXTL3                 |
| A_21_P0006369  | 4,67212 | 4,47157 | 1,149136358 | ENST00000437707 | 100288842 | NR_027442    | LOC100288842          |
| A_24_P132624   | 2,80785 | 2,60731 | 1,149128393 | ENST00000461177 | 55335     | NM_018376    | NIPSNAP3B             |
| A_23_P102404   | 14,3183 | 14,1178 | 1,149096533 | ENST00000258091 | 10574     | NM_006429    | CCT7                  |
| A_32_P208178   | 16,8678 | 16,6673 | 1,149096533 | ENST00000389400 | 6189      | NM_001006    | RPS3A                 |
| A_33_P3262685  | 2,32214 | 2,12166 | 1,149080603 | ENST00000414583 | 25812     | N/A          | POM121L1P             |
| A_22_P00020547 | 5,17032 | 4,96989 | 1,149040779 | N/A             | N/A       | N/A          | Inc-ATF7IP2-1         |
| A_23_P12767    | 1,92922 | 1,72884 | 1,149000957 | ENST00000260682 | 1559      | NM_000771    | CYP2C9                |
| A_21_P0008925  | 3,20051 | 3,00021 | 1,148937245 | N/A             | N/A       | N/A          | Inc-CTD-2144E22.5.1-7 |
| A_23_P144453   | 14,1149 | 13,9146 | 1,148937245 | ENST00000512914 | 93621     | NM_033296    | MRFAP1                |
| A_23_P92320    | 11,0883 | 10,888  | 1,148937245 | ENST00000264883 | 53371     | NM_017426    | NUP54                 |
| A_23_P139648   | 6,05034 | 5,85019 | 1,148817794 | ENST00000240652 | 3375      | NM_000415    | IAPP                  |
| A_33_P3378614  | 1,6315  | 1,43137 | 1,148801868 | ENST00000622794 | 643763    | NR_027378    | UG0898H09             |
| A_21_P0010796  | 2,49758 | 2,2975  | 1,148762054 | ENST00000366308 | 255654    | N/A          | LOC255654             |

|                |         |         |             |                 |           |           |               |
|----------------|---------|---------|-------------|-----------------|-----------|-----------|---------------|
| A_33_P3216625  | 1,93975 | 1,73971 | 1,148730204 | N/A             | 100128482 | XR_112792 | LOC100128482  |
| A_33_P3429864  | 6,61536 | 6,41536 | 1,148698355 | ENST00000395618 | 22905     | NM_014964 | EPN2          |
| A_33_P3340757  | 7,12426 | 6,92427 | 1,148690393 | ENST00000451959 | N/A       | N/A       | N/A           |
| A_23_P110288   | 7,06048 | 6,8605  | 1,148682431 | ENST00000484843 | 79807     | NM_024751 | GSTCD         |
| A_33_P3460043  | 8,56511 | 8,36514 | 1,148674469 | N/A             | 157556    | NR_027071 | BAALC-AS2     |
| A_32_P225854   | 8,54287 | 8,34291 | 1,148666507 | ENST00000356388 | 200734    | NM_181784 | SPRED2        |
| A_23_P106633   | 12,531  | 12,3311 | 1,148618736 | ENST00000332395 | 55794     | NM_018380 | DDX28         |
| A_33_P3238623  | 4,11457 | 3,91471 | 1,14858689  | N/A             | 729723    | N/A       | DNAJC27-AS1   |
| A_21_P0011620  | 7,79644 | 7,59661 | 1,148563006 | ENST00000578883 | N/A       | N/A       | N/A           |
| A_23_P25121    | 13,3727 | 13,1729 | 1,148539123 | ENST00000256680 | 51303     | NM_016594 | FKBP11        |
| A_33_P3276604  | 1,94142 | 1,74172 | 1,148459515 | ENST00000598428 | N/A       | N/A       | N/A           |
| A_33_P3367171  | 6,55063 | 6,35099 | 1,148411753 | ENST00000451262 | 9376      | AK123243  | SLC22A8       |
| A_23_P314115   | 8,99218 | 8,79255 | 1,148403792 | ENST00000376663 | 648       | NM_005180 | BMI1          |
| A_22_P00014419 | 2,1261  | 1,92649 | 1,148387872 | ENST00000412602 | N/A       | N/A       | N/A           |
| A_33_P3261438  | 1,60885 | 1,40927 | 1,148363993 | N/A             | N/A       | N/A       | N/A           |
| A_22_P00005509 | 1,92096 | 1,7214  | 1,148348073 | N/A             | 100874012 | NR_049725 | NAV2-AS5      |
| A_21_P0014947  | 4,98176 | 4,78224 | 1,148316234 | N/A             | N/A       | AK098761  | Inc-F8A2-2    |
| A_33_P3303361  | 1,92237 | 1,72289 | 1,148284397 | N/A             | N/A       | N/A       | N/A           |
| A_22_P00022917 | 4,77836 | 4,57891 | 1,148260519 | N/A             | N/A       | N/A       | Inc-ALDH3A2-2 |
| A_33_P3424832  | 3,64776 | 3,44832 | 1,14825256  | N/A             | N/A       | N/A       | N/A           |
| A_22_P00007056 | 2,91781 | 2,71837 | 1,14825256  | ENST00000531319 | 283177    | NR_033852 | LOC283177     |
| A_33_P3658861  | 5,37143 | 5,17206 | 1,148196848 | N/A             | 677810    | AI792523  | SNORA26       |
| A_22_P00017063 | 1,9317  | 1,73238 | 1,148157055 | N/A             | 100874205 | NR_046661 | ATP11A-AS1    |
| A_24_P597190   | 5,68127 | 5,48197 | 1,148141138 | ENST00000502652 | 102724855 | NR_110562 | CTD-2151A2.1  |
| A_33_P3260362  | 1,91026 | 1,71099 | 1,148117264 | ENST00000540461 | N/A       | N/A       | N/A           |
| A_23_P304279   | 4,8112  | 4,61202 | 1,148045643 | ENST00000572438 | 1145      | NM_000080 | CHRNE         |
| A_23_P145786   | 5,75845 | 5,55931 | 1,148013812 | ENST00000313375 | 51085     | NM_032951 | MLXIPL        |
| A_24_P390070   | 13,1068 | 12,9077 | 1,147981983 | ENST00000546942 | 8683      | NM_003769 | SRSF9         |
| A_23_P103661   | 12,3225 | 12,1234 | 1,147981983 | ENST00000361140 | 55249     | NM_139118 | YY1AP1        |
| A_33_P3335629  | 11,7497 | 11,5507 | 1,147902414 | ENST00000564087 | 29100     | NM_014187 | TMEM208       |
| A_24_P943949   | 3,79783 | 3,59883 | 1,147902414 | ENST00000330947 | 23507     | NM_015350 | LRRC8B        |
| A_33_P3841819  | 8,65397 | 8,45503 | 1,147854675 | N/A             | 440944    | NR_027007 | THUMPD3-AS1   |
| A_33_P3311181  | 1,94058 | 1,74165 | 1,147846719 | ENST00000296921 | 30012     | NM_021025 | TLX3          |



|                |         |         |             |                 |           |              |                |
|----------------|---------|---------|-------------|-----------------|-----------|--------------|----------------|
| A_22_P00025243 | 7,31908 | 7,12021 | 1,147798982 | N/A             | N/A       | N/A          | Inc-SMG6-1     |
| A_21_P0010840  | 5,08343 | 4,8846  | 1,147767159 | N/A             | N/A       | N/A          | XLOC_I2_001689 |
| A_24_P101201   | 14,1793 | 13,9805 | 1,147743292 | ENST00000471856 | 2923      | NM_005313    | PDIA3          |
| A_22_P00010964 | 14,9197 | 14,7209 | 1,147743292 | ENST00000506892 | N/A       | N/A          | N/A            |
| A_33_P3223535  | 4,48579 | 4,28706 | 1,147687604 | ENST00000399091 | N/A       | AK026312     | N/A            |
| A_23_P58009    | 10,1127 | 9,91397 | 1,147687604 | ENST00000264848 | 79669     | NM_024616    | C3orf52        |
| A_21_P0009369  | 1,90339 | 1,70467 | 1,147679649 | N/A             | N/A       | N/A          | Inc-FAM195B-1  |
| A_33_P3309919  | 12,5882 | 12,3895 | 1,147663739 | ENST00000487832 | 51389     | NM_016104    | RWDD1          |
| A_23_P364478   | 8,18965 | 7,99097 | 1,147647829 | ENST00000298492 | 23172     | NM_032182    | FAM175B        |
| A_22_P00011906 | 3,89454 | 3,69588 | 1,14763192  | ENST00000515504 | N/A       | N/A          | N/A            |
| A_21_P0005453  | 3,53244 | 3,33378 | 1,14763192  | N/A             | N/A       | N/A          | Inc-NOM1-3     |
| A_33_P3267248  | 1,93828 | 1,73966 | 1,147600101 | ENST00000368482 | 126668    | NM_182499    | TDRD10         |
| A_23_P405873   | 7,10639 | 6,90779 | 1,147584192 | ENST00000461679 | 203228    | NM_145005    | C9orf72        |
| A_33_P3445805  | 13,9026 | 13,704  | 1,147584192 | ENST00000265636 | 55291     | NM_001164160 | PPP6R3         |
| A_22_P00024448 | 1,93679 | 1,7382  | 1,147576237 | ENST00000427775 | N/A       | N/A          | N/A            |
| A_22_P00015226 | 1,90633 | 1,70774 | 1,147576237 | ENST00000418620 | N/A       | N/A          | N/A            |
| A_21_P0007903  | 2,42076 | 2,2222  | 1,147552374 | N/A             | N/A       | N/A          | Inc-SLC15A4-2  |
| A_24_P342807   | 4,97102 | 4,77249 | 1,147528512 | ENST00000449777 | 55676     | NM_017964    | SLC30A6        |
| A_33_P3337318  | 4,42436 | 4,22583 | 1,147528512 | ENST00000490912 | 3181      | BX641084     | HNRNPA2B1      |
| A_33_P3214109  | 1,93903 | 1,74051 | 1,147520558 | ENST00000605100 | 121952    | NR_026965    | METTL21EP      |
| A_21_P0001788  | 1,8964  | 1,69789 | 1,147512604 | N/A             | 101927165 | XR_245005    | LOC101927165   |
| A_21_P0012858  | 1,57405 | 1,37554 | 1,147512604 | N/A             | N/A       | N/A          | XLOC_I2_011803 |
| A_23_P30363    | 11,7577 | 11,5592 | 1,14750465  | ENST00000379104 | 8974      | NM_004199    | P4HA2          |
| A_24_P816384   | 8,37143 | 8,17295 | 1,147488742 | ENST00000339094 | 388165    | NR_003661    | UBE2Q2P1       |
| A_33_P3336552  | 1,91166 | 1,71323 | 1,147448974 | N/A             | N/A       | HY006159     | N/A            |
| A_22_P00010396 | 4,36146 | 4,16306 | 1,147425114 | ENST00000511182 | N/A       | N/A          | N/A            |
| A_23_P405148   | 13,7326 | 13,5342 | 1,147425114 | ENST00000409616 | 56947     | NM_020194    | MFF            |
| A_22_P00006622 | 5,19438 | 4,99599 | 1,147417161 | N/A             | 101928784 | XR_429541    | RORA-AS1       |
| A_23_P83714    | 9,61349 | 9,41517 | 1,147361489 | ENST00000533031 | 286075    | NM_173831    | ZNF707         |
| A_22_P00021450 | 1,90517 | 1,70685 | 1,147361489 | N/A             | N/A       | N/A          | Inc-WDR26-2    |
| A_23_P24763    | 17,6135 | 17,4152 | 1,147345583 | ENST00000525828 | 6207      | NM_001017    | RPS13          |
| A_22_P00005557 | 2,10685 | 1,90856 | 1,14733763  | N/A             | N/A       | N/A          | Inc-EEF1B2-1   |
| A_21_P0008113  | 1,98105 | 1,7828  | 1,14730582  | N/A             | N/A       | N/A          | Inc-DAOA-5     |

|                |         |         |             |                 |           |              |               |
|----------------|---------|---------|-------------|-----------------|-----------|--------------|---------------|
| A_33_P3419321  | 3,61357 | 3,41535 | 1,147281963 | ENST00000377999 | 26038     | NM_015557    | CHD5          |
| A_23_P416395   | 1,87409 | 1,67597 | 1,147202442 | ENST00000265087 | 8614      | NM_003714    | STC2          |
| A_24_P365721   | 9,06091 | 8,86281 | 1,147186538 | ENST00000598581 | 11254     | NM_007231    | SLC6A14       |
| A_21_P0002630  | 1,85372 | 1,65563 | 1,147178587 | N/A             | N/A       | N/A          | Inc-CDK5R2-1  |
| A_23_P79842    | 15,619  | 15,421  | 1,147107024 | ENST00000372689 | 51604     | NM_015937    | PIGT          |
| A_24_P242036   | 9,33891 | 9,14097 | 1,147059318 | ENST00000458605 | 91695     | NR_002184    | RRP7B         |
| A_23_P413803   | 9,11406 | 8,91613 | 1,147051368 | ENST00000446329 | 134359    | NM_152408    | POC5          |
| A_22_P00023703 | 1,93257 | 1,7347  | 1,147003664 | N/A             | 100130548 | XR_110579    | LOC100130548  |
| A_23_P202769   | 10,0219 | 9,82404 | 1,146995714 | ENST00000543791 | 3338      | NM_005528    | DNAJC4        |
| A_22_P00001096 | 1,93493 | 1,73708 | 1,146987763 | ENST00000563467 | 401613    | NR_033974    | LINC00890     |
| A_21_P0007532  | 1,93794 | 1,7401  | 1,146979813 | N/A             | N/A       | N/A          | Inc-PLEKHA5-3 |
| A_22_P00022429 | 1,9262  | 1,72837 | 1,146971863 | ENST00000563031 | N/A       | N/A          | N/A           |
| A_33_P3387463  | 11,3665 | 11,1687 | 1,146948012 | N/A             | 51382     | NM_015994    | ATP6V1D       |
| A_22_P00008099 | 1,91325 | 1,71545 | 1,146948012 | N/A             | 101927031 | XR_245874    | LOC101927031  |
| A_33_P3392213  | 9,213   | 9,0152  | 1,146948012 | N/A             | N/A       | N/A          | N/A           |
| A_24_P343559   | 3,23536 | 3,03757 | 1,146940062 | ENST00000323115 | 4915      | NM_006180    | NTRK2         |
| A_33_P3271635  | 1,96351 | 1,76582 | 1,146860565 | ENST00000402095 | 3115      | NM_002121    | HLA-DPB1      |
| A_32_P31963    | 1,92265 | 1,72499 | 1,146836717 | ENST00000523617 | 101928154 | NR_108028    | LINC01485     |
| A_23_P130815   | 1,91221 | 1,71457 | 1,146820819 | ENST00000614231 | 100132285 | NM_012312    | KIR2DS2       |
| A_21_P0007306  | 1,85677 | 1,65915 | 1,146804921 | N/A             | N/A       | N/A          | Inc-GLB1L2-1  |
| A_24_P257108   | 8,19847 | 8,00086 | 1,146796972 | ENST00000441987 | 10010     | NM_133484    | TANK          |
| A_23_P43504    | 8,56953 | 8,37197 | 1,146757227 | ENST00000464520 | 20        | NM_001606    | ABCA2         |
| A_24_P66312    | 3,84749 | 3,64995 | 1,14674133  | ENST00000391617 | 353332    | NM_181686    | KRTAP12-1     |
| A_22_P00024294 | 4,53048 | 4,33295 | 1,146733382 | N/A             | N/A       | N/A          | Inc-TGS1-1    |
| A_21_P0000401  | 1,90828 | 1,71077 | 1,146717485 | N/A             | 767580    | NR_003196    | SNORD114-4    |
| A_33_P3413463  | 12,0315 | 11,834  | 1,146709536 | ENST00000547374 | 2972      | NM_001519    | BRF1          |
| A_24_P181677   | 8,26978 | 8,07232 | 1,146677743 | ENST00000474967 | 80148     | NM_025078    | PQLC1         |
| A_22_P00017038 | 6,94371 | 6,74625 | 1,146677743 | ENST00000417565 | 101927560 | NR_119374    | LOC101927560  |
| A_21_P0002308  | 2,73701 | 2,53959 | 1,146645951 | N/A             | N/A       | N/A          | Inc-GCA-3     |
| A_32_P113154   | 15,2523 | 15,0549 | 1,146630055 | N/A             | N/A       | N/A          | N/A           |
| A_33_P3227676  | 1,92706 | 1,72966 | 1,146630055 | ENST00000463834 | 257407    | NM_001144994 | C2orf72       |
| A_23_P128166   | 12,1731 | 11,9757 | 1,146630055 | ENST00000261263 | 23011     | NM_014999    | RAB21         |
| A_23_P16866    | 1,69353 | 1,49615 | 1,146614159 | ENST00000248444 | 7429      | NM_007127    | VIL1          |

|                |         |         |             |                 |           |              |                |
|----------------|---------|---------|-------------|-----------------|-----------|--------------|----------------|
| A_22_P00015393 | 3,36617 | 3,1688  | 1,146606212 | N/A             | N/A       | N/A          | Inc-SRGAP3-1   |
| A_22_P00001305 | 1,92411 | 1,72679 | 1,146566474 | ENST00000530837 | N/A       | CR736386     | N/A            |
| A_23_P157809   | 12,4436 | 12,2463 | 1,146550579 | ENST00000538962 | 22949     | NM_012212    | PTGR1          |
| A_21_P0007132  | 1,91586 | 1,71859 | 1,146526738 | N/A             | 103581031 | N/A          | CASC23         |
| A_21_P0011839  | 3,08921 | 2,89197 | 1,146502897 | N/A             | N/A       | N/A          | XLOC_I2_007478 |
| A_21_P0003324  | 1,93879 | 1,74162 | 1,146447269 | ENST00000563724 | 101927087 | NR_110838    | LOC101927087   |
| A_24_P215804   | 5,19017 | 4,99308 | 1,146383699 | ENST00000264001 | 51192     | NM_016951    | CKLF           |
| A_33_P3291821  | 1,93297 | 1,73589 | 1,146375753 | ENST00000566201 | 124149    | NR_026556    | ANKRD26P1      |
| A_23_P209538   | 8,35931 | 8,16233 | 1,146296295 | ENST00000420155 | 55683     | NM_001115016 | KANSL3         |
| A_23_P116091   | 11,4724 | 11,2755 | 1,146232732 | ENST00000541961 | 10072     | NM_130443    | DPP3           |
| A_33_P3318327  | 4,29423 | 4,09733 | 1,146232732 | N/A             | 158263    | AK056275     | FLJ31713       |
| A_23_P167559   | 11,5907 | 11,3938 | 1,146232732 | ENST00000611185 | 153830    | NM_144726    | RNF145         |
| A_21_P0010077  | 4,34173 | 4,14487 | 1,146200952 | N/A             | N/A       | N/A          | Inc-CDC25B-1   |
| A_24_P302584   | 1,88086 | 1,68403 | 1,146177118 | ENST00000322002 | 6664      | NM_003108    | SOX11          |
| A_21_P0012413  | 1,91015 | 1,71334 | 1,146161229 | N/A             | N/A       | N/A          | XLOC_I2_010011 |
| A_23_P155103   | 11,3914 | 11,1946 | 1,146153284 | ENST00000624474 | 158       | NM_000026    | ADSL           |
| A_21_P0012751  | 5,45856 | 5,26182 | 1,146105618 | ENST00000514475 | 441046    | N/A          | GUSBP5         |
| A_19_P00320828 | 5,27831 | 5,08159 | 1,14608973  | ENST00000354451 | N/A       | N/A          | N/A            |
| A_33_P3300212  | 10,8564 | 10,6597 | 1,146073842 | ENST00000397135 | 10904     | NM_001167820 | BLCAP          |
| A_21_P0000056  | 9,20204 | 9,00534 | 1,146073842 | ENST00000611268 | 440026    | NM_001165030 | TMEM41B        |
| A_24_P126417   | 10,0573 | 9,86068 | 1,146010292 | ENST00000398571 | 9736      | NM_014709    | USP34          |
| A_19_P00319372 | 7,50762 | 7,31103 | 1,145986461 | ENST00000431767 | 440993    | NR_122105    | LINC00969      |
| A_33_P3317948  | 5,53391 | 5,33738 | 1,145938802 | N/A             | 57212     | NR_033711    | TP73-AS1       |
| A_33_P3449815  | 1,89939 | 1,70288 | 1,145922916 | N/A             | 145195    | BC007749     | C14orf144      |
| A_22_P00000290 | 6,54641 | 6,34991 | 1,145914973 | N/A             | 401022    | NR_110458    | HAGLR          |
| A_23_P58102    | 12,4587 | 12,2623 | 1,145835547 | ENST00000482004 | 23016     | NM_015004    | EXOSC7         |
| A_33_P3420992  | 10,3599 | 10,1635 | 1,145835547 | ENST00000455793 | N/A       | N/A          | N/A            |
| A_24_P72394    | 5,70602 | 5,50972 | 1,145756126 | ENST00000353796 | 57786     | NM_021163    | RBAK           |
| A_23_P156739   | 13,376  | 13,1797 | 1,145756126 | ENST00000374231 | 84300     | NM_032340    | UQCC2          |
| A_23_P427502   | 7,71742 | 7,52117 | 1,145716418 | ENST00000544604 | 84133     | NM_001206998 | ZNRF3          |
| A_21_P0012476  | 4,8891  | 4,69286 | 1,145708477 | ENST00000439074 | N/A       | N/A          | N/A            |
| A_22_P00023355 | 1,9378  | 1,74159 | 1,145684653 | N/A             | N/A       | GR941711     | Inc-CXADR-1    |
| A_23_P167789   | 9,80748 | 9,61132 | 1,145644947 | ENST00000239906 | 51307     | NM_016605    | FAM53C         |

|                |         |         |             |                 |        |              |                       |
|----------------|---------|---------|-------------|-----------------|--------|--------------|-----------------------|
| A_24_P219378   | 9,28719 | 9,09106 | 1,145621124 | ENST00000343516 | 57524  | NM_020764    | CASKIN1               |
| A_33_P3390335  | 10,0584 | 9,86229 | 1,145605243 | ENST00000377921 | 6251   | NM_012425    | RSU1                  |
| A_24_P782308   | 9,0435  | 8,8474  | 1,145597302 | ENST00000382850 | 23327  | NM_001144967 | NEDD4L                |
| A_23_P30020    | 10,8075 | 10,6114 | 1,145597302 | ENST00000507961 | 81579  | NM_030821    | PLA2G12A              |
| A_33_P3489675  | 7,35356 | 7,15752 | 1,145549659 | ENST00000412433 | 23779  | NM_001198726 | ARHGAP8               |
| A_23_P101048   | 1,89479 | 1,69879 | 1,145517898 | ENST00000391587 | 83897  | NM_031959    | KRTAP3-2              |
| A_19_P00325336 | 6,87873 | 6,68285 | 1,14542262  | N/A             | N/A    | AK125301     | N/A                   |
| A_21_P0004300  | 4,76016 | 4,56431 | 1,145398802 | N/A             | N/A    | N/A          | Inc-CATSPER3-3        |
| A_24_P362193   | 1,87139 | 1,67565 | 1,145311473 | ENST00000368047 | 8832   | NM_003874    | CD84                  |
| A_22_P00001721 | 1,60637 | 1,41066 | 1,145287657 | ENST00000418091 | N/A    | N/A          | N/A                   |
| A_21_P0011303  | 12,583  | 12,3873 | 1,145279719 | N/A             | 646278 | NR_037599    | PDCD6IPP2             |
| A_23_P137504   | 5,25845 | 5,06284 | 1,145208275 | ENST00000432989 | 84614  | NM_032522    | ZBTB37                |
| A_21_P0014730  | 7,72067 | 7,52508 | 1,145192399 | N/A             | N/A    | XM_006710189 | Inc-C7orf23-1         |
| A_32_P31618    | 10,2324 | 10,0369 | 1,145120961 | ENST00000221130 | 2936   | NM_000637    | GSR                   |
| A_23_P102331   | 1,93667 | 1,7412  | 1,145097149 | ENST00000619410 | 6332   | NM_002976    | SCN7A                 |
| A_22_P00009182 | 1,93313 | 1,73767 | 1,145089211 | N/A             | 153163 | NR_051996    | MGC32805              |
| A_22_P00013371 | 2,05269 | 1,85726 | 1,1450654   | N/A             | N/A    | N/A          | Inc-RP11-178D12.1.1-1 |
| A_33_P3342295  | 14,6376 | 14,4422 | 1,14504159  | ENST00000376707 | 30813  | NM_199425    | VSX1                  |
| A_23_P49082    | 10,1973 | 10,0019 | 1,14504159  | ENST00000569898 | 10101  | NM_012225    | NUBP2                 |
| A_22_P00025748 | 5,32851 | 5,13317 | 1,14499397  | N/A             | N/A    | N/A          | Inc-HSPA4-4           |
| A_21_P0005437  | 2,00875 | 1,81345 | 1,144962224 | N/A             | N/A    | N/A          | Inc-TBXAS1-1          |
| A_24_P262127   | 5,85292 | 5,65769 | 1,144906671 | ENST00000567791 | 6236   | NM_004165    | RRAD                  |
| A_24_P313262   | 11,0151 | 10,8199 | 1,144882864 | ENST00000249822 | 10776  | NM_006628    | ARPP19                |
| A_24_P268196   | 7,90092 | 7,70575 | 1,144859057 | ENST00000377223 | 84328  | XM_005263508 | LZIC                  |
| A_22_P00018661 | 1,92421 | 1,72913 | 1,144787639 | N/A             | N/A    | N/A          | Inc-UHRF2-2           |
| A_21_P0001483  | 3,91712 | 3,72209 | 1,144747965 | N/A             | N/A    | N/A          | Inc-PAFAH2-1          |
| A_33_P3270102  | 9,47855 | 9,28357 | 1,144708291 | ENST00000586749 | 55658  | NM_194460    | RNF126                |
| A_22_P00014071 | 5,53972 | 5,34475 | 1,144700357 | ENST00000513579 | 84687  | NM_032595    | PPP1R9B               |
| A_23_P316447   | 2,0636  | 1,86869 | 1,144652751 | ENST00000496296 | 2260   | AK223126     | FGFR1                 |
| A_32_P155666   | 2,69309 | 2,49819 | 1,144644817 | ENST00000409941 | 9427   | NM_004826    | ECEL1                 |
| A_23_P34115    | 11,6539 | 11,459  | 1,144644817 | ENST00000619865 | 3421   | NM_004135    | IDH3G                 |
| A_33_P3245218  | 2,57885 | 2,38405 | 1,144565479 | ENST00000518659 | 57451  | NM_001122679 | TENM2                 |
| A_22_P00009815 | 16,5164 | 16,3216 | 1,144565479 | N/A             | N/A    | N/A          | Inc-MEPCE-1           |

|                |         |         |             |                 |           |              |              |
|----------------|---------|---------|-------------|-----------------|-----------|--------------|--------------|
| A_21_P0008426  | 1,93445 | 1,73969 | 1,144533745 | N/A             | N/A       | N/A          | Inc-FSCB-1   |
| A_23_P37231    | 1,93101 | 1,73629 | 1,144502013 | ENST00000357366 | 390439    | NM_001005503 | OR11G2       |
| A_33_P3329274  | 1,91382 | 1,71917 | 1,144446482 | ENST00000613593 | 56137     | NM_031864    | PCDHA12      |
| A_22_P00018743 | 6,63101 | 6,43637 | 1,14443855  | ENST00000589662 | N/A       | N/A          | N/A          |
| A_23_P85164    | 10,9274 | 10,7328 | 1,14440682  | ENST00000309585 | 1774      | XM_005277829 | DNASE1L1     |
| A_24_P58673    | 1,93581 | 1,74122 | 1,144398887 | ENST00000256585 | 83998     | NM_032044    | REG4         |
| A_22_P00024970 | 1,89341 | 1,69883 | 1,144390955 | ENST00000569938 | N/A       | N/A          | N/A          |
| A_23_P404575   | 1,91951 | 1,72496 | 1,144367158 | ENST00000281722 | 166863    | NM_144979    | RBM46        |
| A_32_P222460   | 2,66512 | 2,47058 | 1,144359226 | ENST00000562591 | 100130700 | NR_034018    | LOC100130700 |
| A_33_P3316884  | 3,02343 | 2,8289  | 1,144351294 | N/A             | N/A       | N/A          | N/A          |
| A_22_P00000173 | 6,52589 | 6,33138 | 1,14433543  | ENST00000418242 | 100505940 | XR_110477    | LOC100505940 |
| A_33_P3272160  | 12,9944 | 12,7999 | 1,144327498 | ENST00000371935 | 57109     | NM_020385    | REXO4        |
| A_23_P120414   | 15,1884 | 14,9939 | 1,144327498 | ENST00000372839 | 7529      | NM_003404    | YWHAB        |
| A_23_P69958    | 13,1763 | 12,9818 | 1,144327498 | ENST00000395548 | 1176      | NM_001284    | AP3S1        |
| A_23_P433855   | 1,93603 | 1,74154 | 1,144319566 | ENST00000527393 | 5999      | NM_005613    | RGS4         |
| A_33_P3278191  | 1,93438 | 1,7399  | 1,144311635 | ENST00000426911 | N/A       | N/A          | N/A          |
| A_33_P3429576  | 10,4816 | 10,2872 | 1,144248182 | ENST00000395548 | 1176      | NM_001284    | AP3S1        |
| A_33_P3420254  | 9,53126 | 9,33686 | 1,144248182 | ENST00000461576 | 54919     | NM_017802    | DNAAF5       |
| A_23_P5983     | 15,1909 | 14,9965 | 1,144248182 | ENST00000477313 | 5360      | NM_006227    | PLTP         |
| A_23_P112187   | 4,12134 | 3,92695 | 1,144240251 | ENST00000372338 | 84929     | NM_032843    | FIBCD1       |
| A_22_P00025721 | 1,93571 | 1,74134 | 1,144224388 | ENST00000473429 | 85369     | AK125054     | STRIP1       |
| A_24_P334718   | 1,91975 | 1,72542 | 1,144192664 | ENST00000334425 | 353345    | NM_181791    | GPR141       |
| A_22_P00005924 | 10,3787 | 10,1844 | 1,144168872 | N/A             | 100874323 | NR_046609    | HOXA10-AS    |
| A_22_P00017475 | 4,6484  | 4,45413 | 1,14414508  | ENST00000587859 | 102725381 | XR_424967    | LOC102725381 |
| A_22_P00010834 | 1,93264 | 1,73839 | 1,144129219 | N/A             | 100128054 | NR_033969    | PLCE1-AS1    |
| A_32_P219942   | 8,19231 | 7,99823 | 1,143994408 | ENST00000267294 | 85416     | NM_033132    | ZIC5         |
| A_21_P0009676  | 4,20157 | 4,00756 | 1,143938902 | ENST00000591622 | 1153      | N/A          | CIRBP        |
| A_33_P3274528  | 6,92763 | 6,73367 | 1,143899257 | ENST00000617985 | 389766    | N/A          | C9orf153     |
| A_22_P00015217 | 1,92825 | 1,73429 | 1,143899257 | ENST00000577573 | 146795    | XR_243752    | LOC146795    |
| A_33_P3235213  | 1,93474 | 1,74082 | 1,143867542 | ENST00000485814 | 201633    | NM_173799    | TIGIT        |
| A_33_P3228510  | 6,90103 | 6,70713 | 1,143851685 | ENST00000373945 | 2036      | NM_001258330 | EPB41L1      |
| A_24_P927474   | 11,4042 | 11,2103 | 1,143851685 | ENST00000552179 | N/A       | N/A          | N/A          |
| A_33_P3220242  | 9,03487 | 8,84103 | 1,143804114 | ENST00000333916 | 79886     | NM_001167575 | CAAP1        |

|                |         |         |             |                 |           |              |                       |
|----------------|---------|---------|-------------|-----------------|-----------|--------------|-----------------------|
| A_22_P00022767 | 1,92883 | 1,73502 | 1,14378033  | N/A             | 103752555 | NR_125784    | SPATA17-AS1           |
| A_23_P429020   | 9,00777 | 8,81414 | 1,143637633 | ENST00000392153 | 284459    | NM_181786    | HKR1                  |
| A_33_P3238895  | 5,86806 | 5,67444 | 1,143629706 | N/A             | N/A       | AF274942     | N/A                   |
| A_21_P0003752  | 1,9234  | 1,72986 | 1,143566292 | N/A             | N/A       | N/A          | Inc-TSPAN5-1          |
| A_23_P108082   | 3,97637 | 3,78285 | 1,143550438 | ENST00000078445 | 84699     | NM_032607    | CREB3L3               |
| A_23_P144071   | 13,3947 | 13,2012 | 1,143534586 | ENST00000466591 | 1294      | NM_000094    | COL7A1                |
| A_22_P00002896 | 1,96761 | 1,77414 | 1,143510807 | ENST00000510062 | 100506013 | NM_001297550 | APELA                 |
| A_21_P0008496  | 5,10445 | 4,91098 | 1,143510807 | N/A             | N/A       | N/A          | Inc-RP11-736N17.6.1-1 |
| A_21_P0008081  | 1,91495 | 1,7215  | 1,143494954 | N/A             | N/A       | N/A          | Inc-BORA-1            |
| A_24_P904903   | 9,76664 | 9,57321 | 1,143479102 | ENST00000415027 | 7919      | NM_004640    | DDX39B                |
| A_19_P00800283 | 3,08794 | 2,89452 | 1,143471176 | N/A             | N/A       | N/A          | Inc-SAA2-2            |
| A_21_P0009388  | 1,92247 | 1,72905 | 1,143471176 | N/A             | N/A       | N/A          | Inc-TMEM98-1          |
| A_33_P3297611  | 7,24078 | 7,04747 | 1,143383994 | N/A             | N/A       | AI924184     | N/A                   |
| A_33_P3427239  | 6,43058 | 6,2373  | 1,143360219 | N/A             | 100134937 | BC035129     | LOC100134937          |
| A_19_P00316675 | 2,06942 | 1,87618 | 1,143328518 | ENST00000452514 | 55384     | NR_033359    | MEG3                  |
| A_33_P3407364  | 4,1389  | 3,94574 | 1,143265121 | ENST00000473265 | 55998     | NM_032946    | NXF5                  |
| A_22_P00001838 | 1,93095 | 1,7378  | 1,143257196 | ENST00000560886 | N/A       | N/A          | N/A                   |
| A_21_P0010295  | 4,07656 | 3,88344 | 1,143233423 | N/A             | N/A       | N/A          | Inc-CSTB-1            |
| A_23_P75288    | 12,8762 | 12,6831 | 1,143217574 | ENST00000328142 | 84896     | NM_032810    | ATAD1                 |
| A_23_P4551     | 10,345  | 10,1519 | 1,143217574 | ENST00000282030 | 26040     | NM_015559    | SETBP1                |
| A_23_P128470   | 1,92913 | 1,73606 | 1,143193802 | ENST00000396507 | 160364    | NM_138337    | CLEC12A               |
| A_22_P00012752 | 7,44041 | 7,24737 | 1,14317003  | N/A             | N/A       | XM_379325    | Inc-RAD1-2            |
| A_33_P3355464  | 5,42002 | 5,22703 | 1,143130412 | ENST00000434508 | N/A       | AK126828     | N/A                   |
| A_22_P00002142 | 2,8868  | 2,69383 | 1,143114565 | ENST00000614228 | 402635    | NM_001291784 | GRIFIN                |
| A_22_P00003181 | 5,60772 | 5,41476 | 1,143106641 | N/A             | N/A       | N/A          | Inc-C9orf85-1         |
| A_23_P58002    | 8,11707 | 7,92417 | 1,143059102 | ENST00000273590 | 6988      | NM_022171    | TCTA                  |
| A_22_P00002017 | 16,7811 | 16,5882 | 1,143059102 | N/A             | N/A       | N/A          | Inc-BEGAIN-1          |
| A_21_P0002928  | 1,8355  | 1,64263 | 1,143035333 | ENST00000449023 | N/A       | XR_251320    | N/A                   |
| A_23_P303260   | 8,38138 | 8,18855 | 1,143003642 | ENST00000367941 | 8417      | NM_003569    | STX7                  |
| A_23_P202104   | 14,3951 | 14,2023 | 1,142979874 | ENST00000394579 | 10105     | NM_005729    | PPIF                  |
| A_22_P00012359 | 1,92638 | 1,73359 | 1,142971951 | ENST00000423489 | N/A       | N/A          | N/A                   |
| A_21_P0013053  | 1,93376 | 1,74098 | 1,142964029 | N/A             | N/A       | N/A          | XLOC_I2_012844        |
| A_33_P3474328  | 8,99711 | 8,80433 | 1,142964029 | ENST00000376772 | 6992      | NM_021959    | PPP1R11               |

|                |         |         |             |                 |           |              |               |
|----------------|---------|---------|-------------|-----------------|-----------|--------------|---------------|
| A_21_P0006277  | 5,12514 | 4,93237 | 1,142956106 | N/A             | N/A       | N/A          | Inc-ALDH1A1-3 |
| A_23_P254944   | 1,92482 | 1,73205 | 1,142956106 | ENST00000621513 | 2952      | NM_000853    | GSTT1         |
| A_22_P00017871 | 1,93209 | 1,73936 | 1,142924417 | N/A             | N/A       | N/A          | Inc-ZDHHC6-2  |
| A_24_P77947    | 5,97571 | 5,78299 | 1,142916495 | ENST00000476413 | 55610     | NM_024553    | CCDC132       |
| A_23_P109410   | 8,45196 | 8,25926 | 1,142900651 | ENST00000399133 | 80764     | NM_030573    | THAP7         |
| A_23_P124905   | 1,93363 | 1,74093 | 1,142900651 | ENST00000306773 | 4884      | NM_002522    | NPTX1         |
| A_23_P12477    | 8,09396 | 7,90127 | 1,142892729 | ENST00000372596 | 22955     | NM_012236    | SCMH1         |
| A_23_P133365   | 9,99635 | 9,80371 | 1,14285312  | ENST00000549332 | 10915     | NM_006706    | TCERG1        |
| A_21_P0003904  | 1,90317 | 1,71054 | 1,142845199 | N/A             | N/A       | N/A          | Inc-CTSO-1    |
| A_21_P0007783  | 2,69936 | 2,50673 | 1,142845199 | N/A             | N/A       | N/A          | Inc-DHX37-9   |
| A_22_P00002369 | 2,19886 | 2,00625 | 1,142829356 | ENST00000541885 | N/A       | N/A          | N/A           |
| A_21_P0000538  | 4,51288 | 4,32035 | 1,142765985 | N/A             | 388685    | N/A          | LINC01138     |
| A_33_P3241250  | 6,54198 | 6,34952 | 1,142710539 | ENST00000624628 | N/A       | AK128836     | N/A           |
| A_21_P0002583  | 1,92285 | 1,73043 | 1,142678857 | N/A             | N/A       | N/A          | Inc-LBH-2     |
| A_33_P3325935  | 12,6195 | 12,4271 | 1,142663016 | ENST00000376566 | 10084     | NM_001167989 | PQBP1         |
| A_23_P20255    | 11,2514 | 11,059  | 1,142663016 | ENST00000450361 | 28991     | NM_014066    | COMMD5        |
| A_23_P83234    | 6,91844 | 6,72604 | 1,142663016 | ENST00000373659 | 10773     | NM_006626    | ZBTB6         |
| A_21_P0002916  | 1,92892 | 1,73656 | 1,142631335 | ENST00000423643 | N/A       | N/A          | N/A           |
| A_33_P8979259  | 1,95136 | 1,75901 | 1,142623415 | N/A             | 101929419 | XR_252397    | LOC101929419  |
| A_23_P3212     | 9,98177 | 9,78947 | 1,142583816 | ENST00000558653 | 56986     | NM_020234    | DTWD1         |
| A_22_P00002612 | 4,877   | 4,68474 | 1,142552137 | N/A             | N/A       | AK129630     | Inc-C1QTNF9-3 |
| A_21_P0006812  | 1,9266  | 1,73443 | 1,142480863 | ENST00000438753 | N/A       | N/A          | N/A           |
| A_33_P3356106  | 3,25312 | 3,06095 | 1,142480863 | N/A             | N/A       | N/A          | N/A           |
| A_33_P3379039  | 1,9124  | 1,72029 | 1,14243335  | ENST00000390321 | 100423062 | NM_001178126 | IGLL5         |
| A_33_P3410235  | 9,08878 | 8,89668 | 1,142425431 | ENST00000558996 | 90527     | NM_001276267 | DUOXA1        |
| A_21_P0000941  | 5,62698 | 5,43488 | 1,142425431 | ENST00000453732 | N/A       | XR_241053    | N/A           |
| A_33_P3335920  | 7,77705 | 7,58496 | 1,142417512 | ENST00000367255 | 23345     | NM_182961    | SYNE1         |
| A_33_P3318791  | 1,90736 | 1,71527 | 1,142417512 | ENST00000541282 | 196475    | NR_024037    | RMST          |
| A_33_P3246580  | 1,93245 | 1,74042 | 1,142370002 | ENST00000251691 | 57221     | NM_020340    | KIAA1244      |
| A_33_P3273624  | 7,75355 | 7,56153 | 1,142362083 | ENST00000359051 | 8372      | NM_003549    | HYAL3         |
| A_22_P00011842 | 3,16079 | 2,96877 | 1,142362083 | N/A             | N/A       | AK054904     | Inc-PHKB-5    |
| A_33_P3403723  | 2,96895 | 2,77696 | 1,142338329 | ENST00000624510 | 100130301 | XM_005251126 | C8orf89       |
| A_22_P00018462 | 5,61541 | 5,42342 | 1,142338329 | ENST00000340535 | 375056    | NM_001300867 | MIA3          |

|                |         |         |             |                 |           |              |                |
|----------------|---------|---------|-------------|-----------------|-----------|--------------|----------------|
| A_33_P3464900  | 4,01006 | 3,81814 | 1,142282903 | N/A             | 85003     | XR_241567    | BFSP2-AS1      |
| A_22_P00022162 | 1,93034 | 1,73842 | 1,142282903 | N/A             | N/A       | N/A          | Inc-SLC15A3-2  |
| A_24_P364087   | 10,8513 | 10,6594 | 1,142267068 | ENST00000265965 | 26297     | NM_012139    | SERGEF         |
| A_22_P00006888 | 7,14139 | 6,94952 | 1,142243316 | ENST00000563750 | N/A       | AK098439     | N/A            |
| A_33_P3380762  | 1,92369 | 1,73183 | 1,142235398 | ENST00000425914 | 729467    | NR_027120    | HSD52          |
| A_22_P00001569 | 4,63018 | 4,43837 | 1,142195812 | N/A             | N/A       | AK026523     | Inc-ARL16-1    |
| A_33_P3405168  | 6,75681 | 6,565   | 1,142195812 | ENST00000281317 | 166785    | NM_172250    | MMAA           |
| A_23_P117599   | 12,3495 | 12,1577 | 1,142187895 | ENST00000556866 | 10598     | NM_012111    | AHSA1          |
| A_33_P3418326  | 2,90791 | 2,71611 | 1,142187895 | ENST00000610122 | 100129484 | XR_112958    | LOC100129484   |
| A_21_P0006140  | 1,93142 | 1,73963 | 1,142179978 | N/A             | 92973     | N/A          | LINC00950      |
| A_21_P0008981  | 2,71902 | 2,52723 | 1,142179978 | N/A             | N/A       | N/A          | Inc-USP10-1    |
| A_22_P00006389 | 6,05575 | 5,86402 | 1,142132477 | N/A             | 100130238 | NR_024563    | LOC100130238   |
| A_21_P0011990  | 5,18592 | 4,9942  | 1,14212456  | ENST00000445174 | 646324    | N/A          | LINC00607      |
| A_22_P00000907 | 7,86985 | 7,67814 | 1,142116644 | N/A             | N/A       | N/A          | Inc-AIPL1-2    |
| A_23_P17855    | 11,7439 | 11,5522 | 1,142108727 | ENST00000344404 | 11078     | NM_001039141 | TRIOBP         |
| A_22_P00005057 | 1,91119 | 1,71954 | 1,142069146 | N/A             | 100505588 | XR_108995    | LOC100505588   |
| A_21_P0012518  | 1,91472 | 1,72308 | 1,142061229 | ENST00000476815 | 100996490 | N/A          | LINC01206      |
| A_33_P3416583  | 5,93325 | 5,74168 | 1,142005818 | ENST00000429686 | 116985    | NM_001135190 | ARAP1          |
| A_33_P3226228  | 4,74041 | 4,5489  | 1,141958324 | N/A             | N/A       | N/A          | N/A            |
| A_21_P0009070  | 1,9156  | 1,72409 | 1,141958324 | N/A             | N/A       | N/A          | Inc-CDYL2-2    |
| A_23_P81993    | 12,511  | 12,3195 | 1,141950408 | ENST00000481533 | 221491    | NM_178508    | C6orf1         |
| A_21_P0012785  | 3,2484  | 3,05694 | 1,141918747 | N/A             | N/A       | N/A          | Inc-COL25A1-1  |
| A_23_P388331   | 3,19729 | 3,00583 | 1,141918747 | N/A             | 574       | NM_001187    | BAGE           |
| A_33_P3344648  | 5,75652 | 5,56511 | 1,141879172 | N/A             | 440461    | NR_027283    | LOC440461      |
| A_23_P4522     | 13,9693 | 13,7779 | 1,141871257 | ENST00000587807 | 9352      | NM_004786    | TXNL1          |
| A_23_P54900    | 11,7753 | 11,5839 | 1,141871257 | ENST00000396658 | 29855     | NM_001079514 | UBN1           |
| A_21_P0012167  | 4,21772 | 4,02634 | 1,141855428 | N/A             | N/A       | N/A          | XLOC_I2_008976 |
| A_33_P3416150  | 9,49313 | 9,30181 | 1,14180794  | ENST00000444527 | 100133234 | NR_027765    | SBF1P1         |
| A_33_P3410925  | 6,43413 | 6,24281 | 1,14180794  | ENST00000264834 | 10661     | NM_006563    | KLF1           |
| A_33_P3420747  | 9,50665 | 9,31537 | 1,141776283 | ENST00000161863 | 64848     | NM_022828    | YTHDC2         |
| A_23_P129659   | 8,86402 | 8,67274 | 1,141776283 | ENST00000611647 | 115509    | NM_138447    | ZNF689         |
| A_33_P3213522  | 1,93204 | 1,74078 | 1,141760455 | ENST00000438131 | 284116    | AK095281     | KRT42P         |
| A_22_P00006551 | 1,9313  | 1,74005 | 1,141752541 | N/A             | 285847    | NR_027117    | LOC285847      |



|                |         |         |             |                 |           |              |                    |
|----------------|---------|---------|-------------|-----------------|-----------|--------------|--------------------|
| A_24_P335901   | 9,30794 | 9,1167  | 1,141744627 | ENST00000592292 | 10781     | NM_006631    | ZNF266             |
| A_23_P132248   | 7,99353 | 7,8023  | 1,141736713 | ENST00000344318 | 55954     | NM_019103    | ZMAT5              |
| A_21_P0006893  | 1,62043 | 1,4292  | 1,141736713 | N/A             | N/A       | N/A          | Inc-KIF20B-5       |
| A_21_P0003538  | 1,9261  | 1,73488 | 1,141728799 | ENST00000503325 | N/A       | N/A          | N/A                |
| A_23_P410859   | 10,3406 | 10,1494 | 1,141712971 | ENST00000252744 | 57688     | NM_020928    | ZSWIM6             |
| A_33_P3243917  | 4,02714 | 3,83595 | 1,141705057 | ENST00000473737 | 29989     | NM_014581    | OBP2B              |
| A_33_P3270084  | 7,25034 | 7,05915 | 1,141705057 | N/A             | N/A       | N/A          | N/A                |
| A_32_P118372   | 7,6345  | 7,44332 | 1,141697144 | ENST00000510766 | 27152     | NM_015693    | INTU               |
| A_23_P92467    | 1,92848 | 1,7373  | 1,141697144 | ENST00000394427 | 84109     | NM_198179    | QRFPR              |
| A_21_P0008088  | 1,93006 | 1,73896 | 1,141633836 | N/A             | N/A       | N/A          | Inc-NDFIP2-3       |
| A_23_P101742   | 12,0944 | 11,9033 | 1,141633836 | ENST00000330133 | 116541    | NM_172251    | MRPL54             |
| A_22_P00025708 | 7,77043 | 7,57935 | 1,14161801  | ENST00000561544 | N/A       | N/A          | N/A                |
| A_23_P134729   | 2,92059 | 2,72954 | 1,141594271 | N/A             | 55472     | NR_027259    | RBM12B-AS1         |
| A_24_P173124   | 6,25468 | 6,06365 | 1,141578445 | ENST00000285071 | 201163    | NM_144997    | FLCN               |
| A_21_P0010451  | 5,82787 | 5,63687 | 1,141554707 | N/A             | N/A       | N/A          | Inc-C22orf26-4     |
| A_19_P00321911 | 5,52729 | 5,3363  | 1,141546794 | N/A             | 3653      | NR_023915    | IPW                |
| A_22_P00000298 | 1,93155 | 1,74058 | 1,141530969 | N/A             | N/A       | DA251445     | Inc-AC009365.3.1-4 |
| A_21_P0014785  | 5,58233 | 5,39136 | 1,141530969 | N/A             | 100507347 | NR_108061    | VIM-AS1            |
| A_33_P3386955  | 14,3353 | 14,1444 | 1,141475583 | ENST00000345084 | 64969     | NM_031902    | MRPS5              |
| A_22_P00003553 | 1,88938 | 1,69854 | 1,141428112 | ENST00000511749 | N/A       | N/A          | N/A                |
| A_33_P3263651  | 3,83454 | 3,64371 | 1,1414202   | ENST00000586582 | 10501     | NM_032108    | SEMA6B             |
| A_33_P3264505  | 9,20339 | 9,01256 | 1,1414202   | ENST00000341162 | 51077     | NM_015962    | FCF1               |
| A_33_P3318475  | 3,81681 | 3,62602 | 1,141388553 | N/A             | N/A       | N/A          | N/A                |
| A_33_P3265739  | 1,91712 | 1,72633 | 1,141388553 | ENST00000306666 | 5733      | NM_198719    | PTGER3             |
| A_23_P59547    | 12,1635 | 11,9728 | 1,141317352 | ENST00000242210 | 51251     | NM_001002009 | NT5C3A             |
| A_33_P3213551  | 12,8181 | 12,6274 | 1,141317352 | ENST00000398712 | 81858     | NM_030974    | SHARPIN            |
| A_33_P3302389  | 4,452   | 4,2613  | 1,141317352 | ENST00000581547 | 55527     | NM_018708    | FEM1A              |
| A_23_P35414    | 8,58189 | 8,39119 | 1,141317352 | ENST00000238994 | 5507      | NM_005398    | PPP1R3C            |
| A_22_P00016502 | 1,9009  | 1,71023 | 1,141293619 | N/A             | N/A       | BG221627     | Inc-TMPRSS15-10    |
| A_22_P00002993 | 1,93116 | 1,74062 | 1,141190783 | ENST00000427049 | 100507506 | NR_103764    | LOC100507506       |
| A_22_P00011040 | 1,85168 | 1,66117 | 1,141167053 | ENST00000441665 | N/A       | N/A          | N/A                |
| A_32_P95823    | 9,5556  | 9,36519 | 1,141087956 | ENST00000272638 | 23190     | NM_014607    | UBXN4              |
| A_22_P00003296 | 1,93064 | 1,74029 | 1,1410405   | N/A             | 100873948 | NR_046678    | NREP-AS1           |

|                |         |         |             |                 |           |              |              |
|----------------|---------|---------|-------------|-----------------|-----------|--------------|--------------|
| A_33_P3386506  | 15,1164 | 14,9261 | 1,141000956 | ENST00000460131 | 4795      | NM_001144961 | NFKBIL1      |
| A_23_P170733   | 11,7026 | 11,5124 | 1,14092187  | ENST00000449651 | 118429    | NM_058172    | ANTXR2       |
| A_21_P0013996  | 1,92797 | 1,73783 | 1,140874422 | ENST00000593000 | 246126    | BC035312     | TXLNKY       |
| A_33_P3319113  | 6,02598 | 5,83586 | 1,140858606 | ENST00000561920 | 55066     | NM_017990    | PDPR         |
| A_23_P215048   | 1,91136 | 1,72125 | 1,140850698 | ENST00000368281 | 9729      | NM_014702    | KIAA0408     |
| A_23_P204929   | 11,1562 | 10,9661 | 1,14084279  | ENST00000025301 | 11215     | NM_016248    | AKAP11       |
| A_22_P00010607 | 1,91362 | 1,72355 | 1,140819067 | N/A             | 102724555 | XR_426240    | LOC102724555 |
| A_33_P3230103  | 3,27524 | 3,08521 | 1,140787438 | ENST00000257575 | 84900     | NM_032814    | RNFT2        |
| A_33_P3257943  | 16,6673 | 16,4773 | 1,140763716 | ENST00000411983 | 6154      | NM_000987    | RPL26        |
| A_33_P3443165  | 14,4208 | 14,2308 | 1,140763716 | ENST00000462438 | 8480      | NM_001015885 | RAE1         |
| A_33_P3402725  | 7,77347 | 7,58348 | 1,140755809 | ENST00000392403 | 55870     | NM_018489    | ASH1L        |
| A_24_P108262   | 1,9191  | 1,72923 | 1,140660927 | ENST00000410094 | 54549     | NM_001144952 | SDK2         |
| A_33_P3281028  | 3,18267 | 2,99281 | 1,140653021 | ENST00000490428 | 140733    | NM_080676    | MACROD2      |
| A_24_P357465   | 7,12179 | 6,93197 | 1,140621396 | ENST00000374810 | 58476     | NM_021202    | TP53INP2     |
| A_23_P30338    | 11,8183 | 11,6285 | 1,140605583 | ENST00000504115 | 902       | NM_001239    | CCNH         |
| A_33_P3218491  | 3,6991  | 3,50936 | 1,140558148 | N/A             | N/A       | N/A          | N/A          |
| A_22_P00011151 | 5,01416 | 4,8245  | 1,140494904 | N/A             | N/A       | N/A          | Inc-OBFC2A-1 |
| A_24_P303097   | 6,75543 | 6,56579 | 1,140479093 | ENST00000618785 | 83891     | NM_031953    | SNX25        |
| A_21_P0005467  | 3,38184 | 3,19221 | 1,140471188 | N/A             | N/A       | N/A          | Inc-RADIL-2  |
| A_33_P3401428  | 6,3605  | 6,17089 | 1,140455378 | ENST00000451560 | 55151     | NM_018112    | TMEM38B      |
| A_24_P328231   | 7,52648 | 7,3369  | 1,140431663 | ENST00000532952 | 54973     | NM_017871    | CPSF3L       |
| A_22_P00025576 | 1,92996 | 1,74038 | 1,140431663 | N/A             | N/A       | N/A          | Inc-DHRS12-2 |
| A_33_P3483634  | 1,92554 | 1,73602 | 1,140384235 | N/A             | 285593    | NR_027108    | LOC285593    |
| A_21_P0010865  | 2,22526 | 2,03575 | 1,14037633  | ENST00000457848 | N/A       | N/A          | N/A          |
| A_23_P415541   | 1,92158 | 1,73211 | 1,140344713 | ENST00000284674 | 2849      | NM_153442    | GPR26        |
| A_23_P324482   | 1,91984 | 1,73038 | 1,140336809 | ENST00000375159 | 65267     | NM_020922    | WNK3         |
| A_22_P00008002 | 4,29026 | 4,10084 | 1,140305192 | ENST00000569618 | N/A       | BC043439     | N/A          |
| A_24_P253215   | 12,7752 | 12,5858 | 1,140289384 | ENST00000611981 | 10436     | NM_006331    | EMG1         |
| A_32_P536872   | 1,92974 | 1,74035 | 1,14028148  | ENST00000367614 | 163589    | NM_173533    | TDRD5        |
| A_33_P3329187  | 9,89106 | 9,70169 | 1,140265673 | ENST00000540357 | 1786      | NM_001130823 | DNMT1        |
| A_33_P3321871  | 1,88909 | 1,69973 | 1,140257769 | ENST00000331301 | 399923    | N/A          | FLJ42102     |
| A_33_P3364240  | 5,51943 | 5,33009 | 1,140241962 | ENST00000371768 | 5047      | NM_002571    | PAEP         |
| A_23_P28834    | 9,48653 | 9,2972  | 1,140234058 | ENST00000541461 | 116154    | NM_080672    | PHACTR3      |

|                |         |         |             |                 |           |              |                  |
|----------------|---------|---------|-------------|-----------------|-----------|--------------|------------------|
| A_22_P00001641 | 4,12397 | 3,93468 | 1,140202445 | N/A             | 283592    | NR_027004    | FAM181A-AS1      |
| A_22_P00008959 | 5,26714 | 5,07789 | 1,140170832 | ENST00000554458 | N/A       | N/A          | N/A              |
| A_22_P00024233 | 1,90465 | 1,71542 | 1,140155026 | ENST00000452624 | N/A       | N/A          | N/A              |
| A_21_P0011238  | 1,92943 | 1,74026 | 1,140107609 | N/A             | N/A       | N/A          | XLOC_I2_004157   |
| A_23_P426636   | 11,0741 | 10,885  | 1,140052292 | ENST00000378024 | 79026     | NM_001620    | AHNAK            |
| A_21_P0003833  | 1,902   | 1,7129  | 1,140052292 | N/A             | N/A       | N/A          | Inc-POLR2B-1     |
| A_33_P3266444  | 9,36196 | 9,17288 | 1,140036488 | ENST00000253686 | 64432     | NM_022497    | MRPS25           |
| A_32_P155506   | 7,18574 | 6,99668 | 1,140020684 | ENST00000425792 | 7325      | NM_152653    | UBE2E2           |
| A_22_P00018996 | 1,85934 | 1,67034 | 1,139973273 | ENST00000512838 | N/A       | DA175295     | N/A              |
| A_21_P0007712  | 5,83939 | 5,65039 | 1,139973273 | N/A             | N/A       | N/A          | Inc-STAT6-1      |
| A_24_P146670   | 11,828  | 11,639  | 1,139973273 | ENST00000369755 | 9748      | NM_014720    | SLK              |
| A_23_P32722    | 6,39503 | 6,20607 | 1,139941666 | ENST00000311764 | 79797     | NM_024741    | ZNF408           |
| A_22_P00022902 | 4,60233 | 4,41339 | 1,139925864 | N/A             | N/A       | N/A          | Inc-TSSK6-1      |
| A_21_P0010086  | 2,39852 | 2,20958 | 1,139925864 | N/A             | N/A       | N/A          | Inc-SSTR4-4      |
| A_33_P3326020  | 5,50571 | 5,31677 | 1,139925864 | ENST00000593649 | 256949    | BC066775     | KANK3            |
| A_33_P3386508  | 6,06365 | 5,87471 | 1,139925864 | N/A             | 100132273 | NR_034118    | NDUFA6-AS1       |
| A_22_P00005079 | 1,98807 | 1,79921 | 1,139862654 | N/A             | N/A       | N/A          | Inc-DEXI-2       |
| A_22_P00020803 | 5,01799 | 4,82916 | 1,139838952 | N/A             | N/A       | N/A          | Inc-CTTNBP2-1    |
| A_24_P291133   | 6,77302 | 6,58421 | 1,13982315  | ENST00000282169 | 127933    | NM_175866    | UHMK1            |
| A_23_P30024    | 12,596  | 12,4072 | 1,13981525  | ENST00000394820 | 4790      | NM_003998    | NFKB1            |
| A_22_P00000980 | 4,61057 | 4,42177 | 1,13981525  | N/A             | N/A       | N/A          | Inc-AL136219.1-1 |
| A_21_P0000806  | 1,92732 | 1,73854 | 1,139799449 | N/A             | 100128590 | NR_038441    | SLC8A1-AS1       |
| A_33_P3369991  | 1,94153 | 1,75276 | 1,139791548 | N/A             | N/A       | N/A          | N/A              |
| A_23_P116249   | 1,92179 | 1,7331  | 1,139728347 | ENST00000527524 | 2900      | NM_014619    | GRIK4            |
| A_21_P0014467  | 5,55248 | 5,36382 | 1,139704647 | N/A             | N/A       | N/A          | N/A              |
| A_22_P00025225 | 6,99929 | 6,81066 | 1,139680948 | N/A             | N/A       | N/A          | Inc-BRAT1-1      |
| A_23_P39171    | 1,88666 | 1,69804 | 1,139673048 | ENST00000357330 | 85569     | NM_033106    | GALP             |
| A_33_P3379141  | 2,78987 | 2,60125 | 1,139673048 | ENST00000406683 | 387319    | N/A          | HIST1H2APS1      |
| A_19_P00319225 | 1,92042 | 1,73181 | 1,139665148 | ENST00000520773 | 134466    | NR_026867    | ZNF300P1         |
| A_22_P00018119 | 3,12217 | 2,93357 | 1,139657249 | N/A             | 401431    | NR_027040    | ATP6V0E2-AS1     |
| A_21_P0000225  | 10,2228 | 10,0342 | 1,139657249 | ENST00000467105 | 116938    | NR_000028    | SNORD83B         |
| A_33_P3405848  | 4,5851  | 4,39651 | 1,139649349 | ENST00000497517 | 7173      | NM_175719    | TPO              |
| A_33_P3332292  | 1,92836 | 1,73982 | 1,139609853 | ENST00000556526 | 493901    | NM_001024822 | RNASE12          |

|                |         |         |             |                 |           |              |                       |
|----------------|---------|---------|-------------|-----------------|-----------|--------------|-----------------------|
| A_33_P3357516  | 1,92806 | 1,73953 | 1,139601954 | ENST00000394059 | 84068     | NM_032128    | SLC10A7               |
| A_23_P79221    | 10,1515 | 9,963   | 1,139578257 | ENST00000409283 | 90        | NM_001105    | ACVR1                 |
| A_33_P3214042  | 4,77146 | 4,5831  | 1,139467677 | N/A             | N/A       | N/A          | N/A                   |
| A_21_P0002641  | 2,11245 | 1,92411 | 1,13945188  | ENST00000445279 | 101060385 | NR_110179    | LOC101060385          |
| A_23_P122545   | 13,6086 | 13,4203 | 1,139420288 | ENST00000459932 | 7936      | NM_002904    | NELFE                 |
| A_22_P00013948 | 7,82955 | 7,64126 | 1,139412391 | N/A             | N/A       | CK903824     | Inc-RSPH1-1           |
| A_23_P230      | 9,28055 | 9,09227 | 1,139404493 | ENST00000606515 | 7268      | NM_004623    | TTC4                  |
| A_24_P88921    | 7,54046 | 7,35219 | 1,139396595 | ENST00000476581 | 7508      | NM_004628    | XPC                   |
| A_24_P404033   | 9,19704 | 9,00877 | 1,139396595 | ENST00000357484 | 348110    | NM_182616    | ARPIN                 |
| A_22_P00009646 | 1,92782 | 1,73956 | 1,139388697 | N/A             | N/A       | N/A          | Inc-MAST4-1           |
| A_33_P3318960  | 12,8059 | 12,6177 | 1,139341313 | ENST00000484894 | 5435      | NM_001301131 | POLR2F                |
| A_33_P3300591  | 1,89188 | 1,70369 | 1,139333415 | N/A             | N/A       | N/A          | N/A                   |
| A_22_P00021965 | 1,90376 | 1,71562 | 1,13929393  | ENST00000420082 | N/A       | N/A          | N/A                   |
| A_33_P3381338  | 5,85824 | 5,67012 | 1,139278136 | ENST00000546684 | 7148      | NM_019105    | TNXB                  |
| A_21_P0011826  | 1,91153 | 1,72345 | 1,139246549 | N/A             | N/A       | N/A          | XLOC_I2_007449        |
| A_33_P3238074  | 7,83309 | 7,64502 | 1,139238652 | ENST00000404569 | 54471     | NM_019008    | MIEF1                 |
| A_24_P341535   | 6,74205 | 6,55404 | 1,139191273 | ENST00000558470 | 388152    | NR_027001    | GOLGA2P7              |
| A_21_P0001992  | 4,50686 | 4,31888 | 1,139167585 | ENST00000437610 | 101927534 | XR_245057    | LOC101927534          |
| A_33_P3386566  | 1,91604 | 1,72809 | 1,139143897 | ENST00000371836 | 84871     | BC035739     | AGBL4                 |
| A_23_P78099    | 4,85543 | 4,66749 | 1,139136001 | ENST00000226218 | 7448      | NM_000638    | VTN                   |
| A_21_P0013980  | 2,63522 | 2,44731 | 1,139112313 | N/A             | N/A       | AW968932     | N/A                   |
| A_24_P137376   | 10,9798 | 10,7919 | 1,139104418 | ENST00000507194 | 27032     | NM_001001485 | ATP2C1                |
| A_22_P00005034 | 4,07618 | 3,88829 | 1,139096522 | N/A             | N/A       | N/A          | Inc-DDX54-1           |
| A_22_P00015431 | 1,89427 | 1,7064  | 1,139080731 | ENST00000539552 | N/A       | N/A          | N/A                   |
| A_24_P361158   | 10,0481 | 9,86035 | 1,138985989 | ENST00000558850 | 55778     | NM_018335    | ZNF839                |
| A_33_P3236748  | 2,25133 | 2,0636  | 1,138970199 | N/A             | N/A       | XR_111551    | N/A                   |
| A_23_P159476   | 11,8372 | 11,6495 | 1,138946515 | ENST00000459860 | 8636      | NM_003731    | SSNA1                 |
| A_21_P0010479  | 3,89664 | 3,70895 | 1,138938621 | N/A             | N/A       | N/A          | Inc-NHP2L1-1          |
| A_22_P00008149 | 1,8806  | 1,69291 | 1,138938621 | ENST00000522807 | 101927003 | NR_125389    | LOC101927003          |
| A_21_P0003690  | 1,90204 | 1,71436 | 1,138930726 | N/A             | N/A       | N/A          | Inc-RP11-701P16.2.1-1 |
| A_21_P0009458  | 1,90896 | 1,72132 | 1,138899149 | N/A             | 497259    | NR_049896    | C18orf61              |
| A_33_P3231670  | 10,0365 | 9,84886 | 1,138899149 | ENST00000392827 | 727800    | NM_031297    | RNF208                |
| A_22_P00007547 | 6,62422 | 6,43676 | 1,138757061 | N/A             | 101929147 | NR_125977    | LOC101929147          |

|                |         |         |             |                 |           |              |               |
|----------------|---------|---------|-------------|-----------------|-----------|--------------|---------------|
| A_19_P00318609 | 1,7023  | 1,51486 | 1,138741275 | ENST00000598583 | 102800447 | NR_110564    | LOC102800447  |
| A_21_P0004103  | 1,92498 | 1,73757 | 1,138717596 | ENST00000510065 | N/A       | N/A          | N/A           |
| A_24_P323104   | 14,4093 | 14,2219 | 1,138709703 | ENST00000253811 | 1729      | NM_005219    | DIAPH1        |
| A_24_P135322   | 8,1915  | 8,00413 | 1,138686024 | ENST00000374821 | 8829      | NM_001024629 | NRP1          |
| A_33_P3290082  | 5,91153 | 5,72418 | 1,138670239 | ENST00000496385 | 89781     | NM_022081    | HPS4          |
| A_33_P3300067  | 1,92677 | 1,73944 | 1,138654453 | N/A             | 100128787 | NR_038914    | LINC01349     |
| A_22_P00023505 | 1,92688 | 1,73958 | 1,138630776 | N/A             | N/A       | CA429850     | Inc-G2E3-2    |
| A_22_P00023865 | 10,5722 | 10,3849 | 1,138630776 | N/A             | N/A       | N/A          | Inc-FKBP3-3   |
| A_33_P3263533  | 1,91922 | 1,73197 | 1,138591315 | ENST00000303395 | 6323      | NM_001202435 | SCN1A         |
| A_24_P21985    | 7,50035 | 7,3132  | 1,138512396 | ENST00000162391 | 55810     | NM_018416    | FOXJ2         |
| A_22_P00007090 | 1,926   | 1,73888 | 1,138488722 | N/A             | N/A       | N/A          | Inc-GLRB-1    |
| A_21_P0002656  | 1,82076 | 1,63365 | 1,138480831 | N/A             | N/A       | N/A          | Inc-TRMT61B-1 |
| A_21_P0010543  | 1,92383 | 1,73673 | 1,138472939 | N/A             | 101060442 | N/A          | LOC101060442  |
| A_33_P3248137  | 4,85657 | 4,66949 | 1,138457157 | ENST00000373580 | 169611    | NM_182487    | OLFML2A       |
| A_21_P0005345  | 2,01548 | 1,82842 | 1,138441375 | N/A             | N/A       | N/A          | Inc-FAM20C-4  |
| A_22_P00025711 | 1,91392 | 1,7269  | 1,138409811 | ENST00000412424 | N/A       | XR_244974    | N/A           |
| A_33_P3349751  | 1,64728 | 1,46027 | 1,13840192  | ENST00000315915 | 79317     | NM_001005483 | OR4K5         |
| A_24_P147540   | 14,8948 | 14,7078 | 1,138394029 | ENST00000618550 | 80164     | NM_001190467 | PRR36         |
| A_22_P00010076 | 4,80225 | 4,61525 | 1,138394029 | ENST00000438640 | N/A       | N/A          | N/A           |
| A_23_P152420   | 9,42076 | 9,23379 | 1,138370357 | ENST00000405402 | 23199     | NM_014615    | GSE1          |
| A_22_P00004065 | 2,87183 | 2,68488 | 1,138354576 | N/A             | N/A       | R70218       | Inc-CHSY1-4   |
| A_32_P305888   | 5,4284  | 5,24151 | 1,138307234 | ENST00000323829 | 79628     | NM_024577    | SH3TC2        |
| A_23_P368909   | 7,76751 | 7,58066 | 1,138275674 | ENST00000538077 | 283487    | NR_027701    | LINC00346     |
| A_19_P00318803 | 4,00019 | 3,81334 | 1,138275674 | ENST00000424194 | 101928545 | NR_120512    | SEPT7-AS1     |
| A_33_P3396129  | 5,84418 | 5,65736 | 1,138252005 | ENST00000566611 | 10300     | AB209250     | KATNB1        |
| A_33_P3238225  | 8,10968 | 7,92294 | 1,138188888 | N/A             | N/A       | N/A          | N/A           |
| A_33_P3266165  | 16,4801 | 16,2934 | 1,138157331 | ENST00000595170 | N/A       | N/A          | N/A           |
| A_21_P0000883  | 1,9249  | 1,73822 | 1,138141553 | ENST00000455366 | 400620    | NR_040020    | LOC400620     |
| A_23_P47665    | 6,04971 | 5,86307 | 1,138109998 | ENST00000396895 | 3046      | NM_005330    | HBE1          |
| A_33_P3219641  | 8,31548 | 8,12885 | 1,138102109 | ENST00000376597 | 84131     | NM_001098802 | CEP78         |
| A_21_P0000288  | 5,98194 | 5,79534 | 1,138078443 | ENST00000461653 | 26804     | NR_002748    | SNORD45B      |
| A_23_P303238   | 1,8839  | 1,69733 | 1,138054778 | ENST00000472952 | 317705    | NM_173858    | VN1R5         |
| A_21_P0011993  | 1,90393 | 1,71737 | 1,138046889 | ENST00000425850 | N/A       | N/A          | N/A           |

|                |         |         |             |                 |           |              |                |
|----------------|---------|---------|-------------|-----------------|-----------|--------------|----------------|
| A_33_P3211634  | 3,71655 | 3,53008 | 1,137975896 | ENST00000524031 | 285755    | NM_001286361 | PPIL6          |
| A_23_P5685     | 1,91704 | 1,73057 | 1,137975896 | ENST00000389554 | 10716     | NM_006593    | TBR1           |
| A_21_P0004150  | 1,8866  | 1,70015 | 1,137960121 | ENST00000504034 | N/A       | N/A          | N/A            |
| A_32_P524614   | 5,51917 | 5,33273 | 1,137952233 | ENST00000333870 | 201243    | NM_175734    | C17orf74       |
| A_21_P0008310  | 1,85639 | 1,66996 | 1,137944345 | N/A             | N/A       | N/A          | Inc-C14orf23-2 |
| A_22_P00021876 | 5,22097 | 5,03457 | 1,137920683 | N/A             | N/A       | BX093121     | Inc-ZC3H12D-4  |
| A_21_P0004253  | 1,92441 | 1,73804 | 1,137897021 | ENST00000509844 | 100996645 | NR_120607    | LINCR-0003     |
| A_33_P3210900  | 6,23212 | 6,04577 | 1,137881246 | ENST00000397099 | 6396      | N/A          | SEC13          |
| A_33_P3605969  | 7,23419 | 7,04787 | 1,137857585 | N/A             | N/A       | BC071847     | N/A            |
| A_22_P00018033 | 3,64874 | 3,46242 | 1,137857585 | ENST00000567469 | N/A       | DA211558     | N/A            |
| A_33_P3302957  | 9,21262 | 9,0263  | 1,137857585 | ENST00000393966 | 25894     | NM_001129728 | PLEKHG4        |
| A_21_P0014389  | 13,1736 | 12,9873 | 1,137841811 | ENST00000478928 | 10096     | NM_005721    | ACTR3          |
| A_22_P00016475 | 1,89931 | 1,71304 | 1,13781815  | N/A             | 727677    | NR_024393    | CASC8          |
| A_22_P00009338 | 3,09687 | 2,9106  | 1,13781815  | N/A             | 101927975 | XR_246372    | LOC101927975   |
| A_33_P3222630  | 3,2146  | 3,02835 | 1,137802377 | ENST00000517806 | 286151    | NM_001029860 | FBXO43         |
| A_24_P412512   | 7,97706 | 7,79081 | 1,137802377 | ENST00000485005 | 51199     | NM_016350    | NIN            |
| A_24_P124558   | 6,92033 | 6,73421 | 1,137699855 | N/A             | 3224      | NM_022658    | HOXC8          |
| A_22_P00005316 | 4,28137 | 4,09526 | 1,137691969 | N/A             | N/A       | N/A          | Inc-DNASE1-3   |
| A_33_P3385488  | 16,858  | 16,6719 | 1,137684083 | ENST00000412454 | 6222      | NM_022551    | RPS18          |
| A_22_P00009349 | 5,2138  | 5,02776 | 1,137636769 | ENST00000558515 | N/A       | BU662177     | N/A            |
| A_22_P00005290 | 1,91429 | 1,72826 | 1,137628884 | N/A             | N/A       | BC038740     | Inc-DNAI1-2    |
| A_33_P3227551  | 4,72728 | 4,54125 | 1,137628884 | ENST00000509069 | 55422     | N/A          | ZNF331         |
| A_33_P3214119  | 6,81745 | 6,63142 | 1,137628884 | ENST00000528751 | N/A       | XM_006722257 | N/A            |
| A_23_P160537   | 10,5161 | 10,3301 | 1,137605228 | ENST00000374298 | 79000     | NM_024037    | AUNIP          |
| A_22_P00004789 | 1,92295 | 1,73699 | 1,137573687 | N/A             | N/A       | AK095296     | Inc-CXADR-2    |
| A_33_P3231645  | 2,42777 | 2,24183 | 1,137557917 | N/A             | N/A       | N/A          | N/A            |
| A_21_P0006260  | 1,89972 | 1,71379 | 1,137550032 | N/A             | N/A       | N/A          | Inc-DDX58-1    |
| A_23_P54816    | 16,906  | 16,7201 | 1,137526378 | ENST00000330398 | 527       | NM_001694    | ATP6VOC        |
| A_22_P00022847 | 7,37839 | 7,19254 | 1,137486955 | N/A             | N/A       | AK027183     | Inc-RNF186-1   |
| A_22_P00015020 | 3,68407 | 3,49825 | 1,137463302 | N/A             | N/A       | CN315051     | Inc-SMPD3-2    |
| A_33_P3409294  | 5,22173 | 5,03592 | 1,137455417 | ENST00000417666 | N/A       | N/A          | N/A            |
| A_23_P202720   | 12,039  | 11,8532 | 1,137447533 | ENST00000314134 | 55343     | NM_018389    | SLC35C1        |
| A_21_P0005198  | 6,64089 | 6,45512 | 1,137423881 | N/A             | N/A       | N/A          | Inc-WBSCR16-1  |

|                |         |         |             |                 |           |              |                |
|----------------|---------|---------|-------------|-----------------|-----------|--------------|----------------|
| A_33_P3210556  | 2,01685 | 1,8311  | 1,137408113 | ENST00000560282 | 388182    | NR_028139    | SPATA41        |
| A_21_P0013443  | 1,86996 | 1,68424 | 1,137384461 | ENST00000435148 | N/A       | N/A          | N/A            |
| A_33_P3335461  | 6,09103 | 5,90536 | 1,137345043 | N/A             | N/A       | AY533203     | N/A            |
| A_23_P160849   | 8,21963 | 8,03399 | 1,137321393 | ENST00000289902 | 2207      | NM_004106    | FCER1G         |
| A_22_P00003196 | 1,86082 | 1,67523 | 1,137281977 | N/A             | N/A       | N/A          | Inc-CA6-2      |
| A_24_P14902    | 1,92129 | 1,73572 | 1,137266211 | ENST00000334266 | 353164    | NM_181429    | TAS2R42        |
| A_22_P00010778 | 1,9183  | 1,73278 | 1,137226797 | ENST00000504840 | N/A       | N/A          | N/A            |
| A_23_P430902   | 7,75383 | 7,56834 | 1,13720315  | ENST00000307450 | 118812    | NM_178832    | MORN4          |
| A_33_P3272573  | 1,9247  | 1,73923 | 1,137187385 | ENST00000379349 | 10549     | XM_005274438 | PRDX4          |
| A_32_P715159   | 1,9189  | 1,73344 | 1,137179503 | ENST00000611085 | 727832    | NM_001145004 | GOLGA6L6       |
| A_21_P0013145  | 7,22712 | 7,04167 | 1,13717162  | ENST00000428896 | N/A       | N/A          | N/A            |
| A_21_P0013990  | 3,58019 | 3,39475 | 1,137163738 | N/A             | N/A       | N/A          | N/A            |
| A_33_P3317406  | 15,8819 | 15,6965 | 1,13713221  | ENST00000531250 | 4723      | NM_007103    | NDUFV1         |
| A_23_P134113   | 11,2641 | 11,0787 | 1,13713221  | ENST00000275227 | 116843    | NM_052831    | SLC18B1        |
| A_22_P00003781 | 7,82816 | 7,64281 | 1,1370928   | ENST00000588812 | 1018      | NM_001258    | CDK3           |
| A_21_P0010672  | 1,89009 | 1,70477 | 1,137069155 | N/A             | N/A       | N/A          | XLOC_I2_001310 |
| A_33_P3384825  | 12,6226 | 12,4373 | 1,137053392 | ENST00000574205 | 23399     | NM_015343    | CTDNEP1        |
| A_33_P3363245  | 10,269  | 10,0838 | 1,13697458  | ENST00000556415 | 11247     | NM_007224    | NXPH4          |
| A_23_P60472    | 11,8263 | 11,6411 | 1,13697458  | ENST00000379235 | 55833     | NM_018449    | UBAP2          |
| A_33_P3403053  | 1,91524 | 1,7301  | 1,136927296 | N/A             | N/A       | BC066990     | Inc-GUSB-5     |
| A_23_P24135    | 5,88165 | 5,69652 | 1,136919415 | ENST00000373306 | 6865      | NM_001057    | TACR2          |
| A_21_P0009273  | 1,92118 | 1,73608 | 1,136895774 | N/A             | N/A       | N/A          | Inc-CDR2L-1    |
| A_21_P0011759  | 6,50735 | 6,32226 | 1,136887894 | ENST00000602242 | 79986     | N/A          | ZNF702P        |
| A_19_P00319072 | 1,92304 | 1,738   | 1,136848493 | ENST00000607823 | N/A       | N/A          | N/A            |
| A_33_P3234809  | 5,21203 | 5,02702 | 1,136824853 | ENST00000263334 | 7849      | NM_003466    | PAX8           |
| A_21_P0000375  | 5,62012 | 5,43511 | 1,136824853 | N/A             | 692089    | NR_003047    | SNORD19        |
| A_33_P3361272  | 1,87781 | 1,69281 | 1,136816973 | N/A             | 101927894 | XR_242850    | LOC101927894   |
| A_21_P0003929  | 4,53142 | 4,34642 | 1,136816973 | ENST00000503877 | 100505811 | NR_104609    | LOC100505811   |
| A_33_P3383756  | 8,62832 | 8,44333 | 1,136809093 | ENST00000316985 | 54904     | NM_017778    | WHSC1L1        |
| A_33_P3351087  | 1,90672 | 1,72173 | 1,136809093 | ENST00000373976 | 5592      | N/A          | PRKG1          |
| A_33_P3618956  | 1,92315 | 1,73818 | 1,136793334 | ENST00000481759 | 9288      | NR_028511    | TAAR3          |
| A_33_P3328726  | 4,59703 | 4,41212 | 1,136746057 | ENST00000558821 | 80125     | NM_025055    | CCDC33         |
| A_22_P00024602 | 5,65124 | 5,46633 | 1,136746057 | N/A             | 101927437 | XR_243060    | LOC101927437   |

|                |         |         |             |                 |           |              |                |
|----------------|---------|---------|-------------|-----------------|-----------|--------------|----------------|
| A_23_P114232   | 13,9653 | 13,7804 | 1,136738178 | ENST00000379341 | 10549     | NM_006406    | PRDX4          |
| A_23_P344421   | 2,04845 | 1,86356 | 1,136730299 | ENST00000534407 | 54538     | NM_019055    | ROBO4          |
| A_21_P0013262  | 1,92079 | 1,73591 | 1,136722419 | N/A             | N/A       | N/A          | XLOC_I2_013554 |
| A_22_P00021419 | 1,92214 | 1,73726 | 1,136722419 | ENST00000426187 | N/A       | N/A          | N/A            |
| A_21_P0010557  | 6,53388 | 6,34901 | 1,13671454  | ENST00000449715 | N/A       | N/A          | N/A            |
| A_33_P3220381  | 7,0432  | 6,85839 | 1,136667267 | ENST00000399438 | 80006     | NM_001243737 | TRAPPC13       |
| A_33_P3421028  | 1,90167 | 1,71687 | 1,136659388 | ENST00000403284 | 6098      | N/A          | ROS1           |
| A_23_P405942   | 11,8906 | 11,7058 | 1,136659388 | ENST00000316157 | 23185     | NM_015155    | LARP4B         |
| A_22_P00017282 | 2,02449 | 1,83972 | 1,136635752 | N/A             | N/A       | AF447878     | Inc-USO1-2     |
| A_23_P214079   | 3,08346 | 2,89874 | 1,13659636  | ENST00000505722 | 6690      | NM_003122    | SPINK1         |
| A_32_P141724   | 11,0685 | 10,8838 | 1,136580603 | ENST00000446419 | 149951    | NM_053041    | COMMD7         |
| A_33_P3233886  | 4,57687 | 4,39217 | 1,136580603 | N/A             | N/A       | AX721312     | N/A            |
| A_22_P00002490 | 7,3628  | 7,17813 | 1,136556969 | ENST00000378611 | 123775    | NM_001100873 | C16orf46       |
| A_21_P0005995  | 4,75963 | 4,57497 | 1,136549091 | N/A             | N/A       | N/A          | Inc-DMRT2-1    |
| A_21_P0014232  | 1,90047 | 1,71582 | 1,136541213 | N/A             | N/A       | N/A          | Inc-PTGES-1    |
| A_21_P0005187  | 5,03639 | 4,85176 | 1,136525457 | N/A             | N/A       | N/A          | Inc-DLL1-4     |
| A_33_P3388855  | 8,13746 | 7,95294 | 1,136438805 | ENST00000467058 | 10128     | NM_133259    | LRPPRC         |
| A_22_P00014430 | 3,89276 | 3,70824 | 1,136438805 | N/A             | 101927257 | NR_109965    | LOC101927257   |
| A_32_P148672   | 13,1561 | 12,9716 | 1,136423051 | ENST00000402743 | 6632      | NM_006938    | SNRPD1         |
| A_23_P87827    | 11,4889 | 11,3044 | 1,136423051 | ENST00000344651 | 84747     | NM_001080533 | UNC119B        |
| A_24_P363100   | 5,38334 | 5,19885 | 1,136415174 | ENST00000508978 | 285704    | NM_001012761 | RGMB           |
| A_24_P195134   | 1,91577 | 1,73129 | 1,136407297 | ENST00000509000 | N/A       | N/A          | N/A            |
| A_33_P3402454  | 6,25641 | 6,07201 | 1,136344283 | ENST00000219322 | 3038      | NM_138612    | HAS3           |
| A_33_P3291650  | 3,25367 | 3,0693  | 1,136320653 | ENST00000390268 | N/A       | AY271360     | N/A            |
| A_33_P3258472  | 4,68087 | 4,49655 | 1,136281272 | ENST00000615901 | 6711      | NM_003128    | SPTBN1         |
| A_33_P3764744  | 1,97453 | 1,79023 | 1,13626552  | N/A             | N/A       | N/A          | N/A            |
| A_33_P3336810  | 5,71815 | 5,53391 | 1,136218265 | ENST00000334513 | 200035    | NM_001012758 | NUDT17         |
| A_33_P3234949  | 1,5776  | 1,39338 | 1,136202514 | ENST00000464741 | 2894      | NM_017551    | GRID1          |
| A_33_P3384452  | 11,6981 | 11,5139 | 1,136186763 | ENST00000375370 | 7027      | NM_007111    | TFDP1          |
| A_24_P406060   | 9,21966 | 9,03548 | 1,136171012 | ENST00000259939 | 255488    | NM_182757    | RNF144B        |
| A_21_P0010950  | 7,54394 | 7,35986 | 1,136092261 | N/A             | N/A       | N/A          | Inc-SFTPD-2    |
| A_33_P3233070  | 2,80237 | 2,61832 | 1,136068637 | N/A             | 100505564 | XR_158888    | LOC100505564   |
| A_22_P00021251 | 5,81835 | 5,63434 | 1,136037139 | ENST00000550908 | N/A       | DB459582     | N/A            |



|                |         |         |             |                 |           |              |                |
|----------------|---------|---------|-------------|-----------------|-----------|--------------|----------------|
| A_23_P143446   | 12,1204 | 11,9364 | 1,136029265 | ENST00000352957 | 54148     | NM_017446    | MRPL39         |
| A_33_P3331314  | 3,59186 | 3,40786 | 1,136029265 | ENST00000390430 | N/A       | AB305744     | N/A            |
| A_22_P00010667 | 7,35137 | 7,16738 | 1,13602139  | N/A             | N/A       | N/A          | Inc-NES-1      |
| A_22_P00020011 | 7,034   | 6,85004 | 1,135997768 | ENST00000444848 | N/A       | N/A          | N/A            |
| A_33_P3259403  | 5,17612 | 4,9922  | 1,135966272 | ENST00000380958 | 255967    | NM_175854    | PAN3           |
| A_24_P411863   | 8,89999 | 8,71609 | 1,135950524 | ENST00000334914 | 55904     | NM_182931    | KMT2E          |
| A_23_P56978    | 12,6342 | 12,4503 | 1,135950524 | ENST00000217185 | 5753      | NM_005975    | PTK6           |
| A_33_P3346102  | 10,5011 | 10,3172 | 1,135950524 | ENST00000543709 | 51347     | NM_016281    | TAOK3          |
| A_33_P3359071  | 13,2252 | 13,0413 | 1,135950524 | ENST00000620338 | 65057     | NM_001082486 | ACD            |
| A_22_P00016313 | 1,91211 | 1,72823 | 1,135934776 | ENST00000561864 | N/A       | N/A          | N/A            |
| A_22_P00009431 | 2,92442 | 2,74058 | 1,135903282 | N/A             | N/A       | N/A          | Inc-LYRM7-1    |
| A_21_P0002613  | 1,91625 | 1,73242 | 1,135895409 | N/A             | N/A       | N/A          | Inc-SPOPL-3    |
| A_23_P13073    | 10,2338 | 10,0501 | 1,135793059 | ENST00000227474 | 83480     | NM_031307    | PUS3           |
| A_33_P3396200  | 11,4398 | 11,2561 | 1,135793059 | N/A             | 101927655 | NM_001289933 | ZASP           |
| A_33_P3336287  | 4,27603 | 4,09235 | 1,135777313 | ENST00000379017 | 55176     | NM_018144    | SEC61A2        |
| A_21_P0001790  | 6,08078 | 5,8971  | 1,135777313 | ENST00000445865 | 101927438 | NR_110224    | LOC101927438   |
| A_22_P00003050 | 7,54778 | 7,36416 | 1,135730079 | ENST00000422038 | N/A       | N/A          | N/A            |
| A_32_P134290   | 8,87899 | 8,69539 | 1,135714334 | ENST00000269499 | 54877     | NM_017742    | ZCCHC2         |
| A_21_P0009936  | 1,9149  | 1,73145 | 1,135596258 | N/A             | N/A       | N/A          | Inc-SPTLC3-1   |
| A_22_P00012111 | 1,90424 | 1,7208  | 1,135588386 | N/A             | 100874088 | NR_046638    | PCYT1B-AS1     |
| A_22_P00007797 | 4,65769 | 4,47427 | 1,135572644 | N/A             | N/A       | N/A          | Inc-HOMER1-1   |
| A_23_P404162   | 5,90791 | 5,7245  | 1,135564773 | ENST00000622668 | 9734      | NM_014707    | HDAC9          |
| A_24_P234116   | 11,7483 | 11,5649 | 1,135556902 | ENST00000368926 | 54964     | NM_017860    | C1orf56        |
| A_33_P3615922  | 4,78176 | 4,59836 | 1,135556902 | ENST00000451029 | 79846     | NM_001039706 | CFAP69         |
| A_23_P65768    | 12,8919 | 12,7085 | 1,135556902 | ENST00000260443 | 51187     | NM_016304    | RSL24D1        |
| A_24_P475349   | 1,90625 | 1,72292 | 1,135501806 | ENST00000543906 | 51560     | NM_016577    | RAB6B          |
| A_23_P213255   | 11,1309 | 10,9476 | 1,135478194 | ENST00000457823 | 56916     | NM_020159    | SMARCAD1       |
| A_21_P0012507  | 7,9217  | 7,7384  | 1,135478194 | ENST00000483636 | 201651    | N/A          | AADACP1        |
| A_22_P00025048 | 1,87792 | 1,69468 | 1,135430971 | N/A             | N/A       | N/A          | Inc-ARL15-2    |
| A_21_P0009073  | 7,34521 | 7,16199 | 1,135415231 | N/A             | N/A       | N/A          | Inc-MPHOSPH6-2 |
| A_21_P0012078  | 10,365  | 10,1818 | 1,135399491 | ENST00000612724 | 541471    | NR_015395    | MIR4435-1HG    |
| A_33_P3382595  | 14,7541 | 14,5709 | 1,135399491 | N/A             | 125050    | NR_001445    | RN7SK          |
| A_33_P3344451  | 13,7291 | 13,546  | 1,135320794 | ENST00000397665 | 84326     | NM_032366    | C16orf13       |

|                |         |         |             |                 |           |              |                       |
|----------------|---------|---------|-------------|-----------------|-----------|--------------|-----------------------|
| A_22_P00009075 | 6,56579 | 6,38269 | 1,135320794 | N/A             | N/A       | N/A          | Inc-LETM2-1           |
| A_23_P8311     | 11,9876 | 11,8045 | 1,135320794 | ENST00000341060 | 51567     | NM_016614    | TDP2                  |
| A_21_P0013978  | 1,91077 | 1,72768 | 1,135312924 | N/A             | N/A       | N/A          | N/A                   |
| A_22_P00009347 | 1,89631 | 1,71325 | 1,135289317 | ENST00000560938 | N/A       | N/A          | N/A                   |
| A_22_P00001555 | 8,96191 | 8,77887 | 1,135273578 | ENST00000551021 | 100288798 | NR_125381    | LOC100288798          |
| A_22_P00000699 | 1,90509 | 1,72209 | 1,135242102 | ENST00000453816 | 200726    | NM_001102659 | LOC200726             |
| A_23_P43255    | 12,3455 | 12,1625 | 1,135242102 | ENST00000519540 | 51571     | NM_016623    | FAM49B                |
| A_23_P46936    | 4,68127 | 4,49831 | 1,135210627 | ENST00000411732 | 1959      | NM_000399    | EGR2                  |
| A_21_P0002172  | 6,85004 | 6,66709 | 1,135202758 | N/A             | N/A       | N/A          | Inc-TRIB2-3           |
| A_22_P00008407 | 10,1159 | 9,93297 | 1,135187021 | ENST00000523313 | 101805492 | NR_103848    | CASC9                 |
| A_33_P3262555  | 11,3448 | 11,1619 | 1,135163416 | ENST00000402693 | 399664    | NM_001174118 | MEX3D                 |
| A_33_P3321342  | 10,0833 | 9,90041 | 1,135155548 | ENST00000411929 | 51141     | NM_016133    | INSIG2                |
| A_33_P3413993  | 4,32666 | 4,14379 | 1,135139811 | ENST00000405496 | 710       | N/A          | SERPING1              |
| A_33_P3418726  | 8,61675 | 8,43394 | 1,135092603 | ENST00000299927 | 9640      | NM_014630    | ZNF592                |
| A_23_P152055   | 10,8153 | 10,6325 | 1,135084735 | ENST00000359445 | 79631     | NM_024580    | EFTUD1                |
| A_23_P212400   | 8,34922 | 8,1665  | 1,135021794 | ENST00000443842 | 24142     | NM_012191    | NAT6                  |
| A_23_P257583   | 3,52627 | 3,34356 | 1,135013927 | ENST00000496613 | 27147     | NM_015689    | DENND2A               |
| A_21_P0014804  | 3,88829 | 3,70559 | 1,13500606  | N/A             | N/A       | N/A          | Inc-CLEC18B-2         |
| A_33_P3262074  | 1,87876 | 1,69608 | 1,134990325 | N/A             | N/A       | N/A          | N/A                   |
| A_33_P3289976  | 15,68   | 15,4974 | 1,13492739  | N/A             | N/A       | N/A          | N/A                   |
| A_24_P71661    | 4,66341 | 4,48082 | 1,134919523 | ENST00000320954 | 10491     | NM_006371    | CRTAP                 |
| A_23_P312344   | 9,02573 | 8,84314 | 1,134919523 | ENST00000261741 | 9904      | NM_016196    | RBM19                 |
| A_22_P00025566 | 5,72998 | 5,54743 | 1,134888057 | N/A             | N/A       | N/A          | Inc-SMCR7L-1          |
| A_23_P54055    | 13,9104 | 13,7279 | 1,134848725 | ENST00000361265 | 84962     | NM_032876    | AJUBA                 |
| A_21_P0007410  | 1,97651 | 1,79408 | 1,134793664 | N/A             | N/A       | N/A          | Inc-RP11-831A10.1.1-1 |
| A_32_P174908   | 11,4967 | 11,3143 | 1,134770066 | ENST00000618527 | 23063     | NM_015045    | WAPAL                 |
| A_19_P00322711 | 9,24551 | 9,06311 | 1,134770066 | ENST00000588027 | 148189    | NR_027301    | LINC00662             |
| A_23_P135226   | 3,32703 | 3,14466 | 1,13474647  | ENST00000616791 | 138882    | NM_001004457 | OR1N2                 |
| A_24_P934563   | 9,7791  | 9,59673 | 1,13474647  | ENST00000302503 | 23788     | NM_014342    | MTCH2                 |
| A_24_P414803   | 1,91669 | 1,73438 | 1,134699278 | ENST00000357525 | 5350      | NM_002667    | PLN                   |
| A_33_P3303469  | 6,5142  | 6,3319  | 1,134691413 | N/A             | N/A       | N/A          | N/A                   |
| A_32_P52519    | 2,91342 | 2,73117 | 1,134652088 | ENST00000548889 | 146183    | NM_170664    | OTOA                  |
| A_22_P00016518 | 7,32719 | 7,14497 | 1,134628494 | N/A             | 191585    | NM_182832    | PLAC4                 |

|                |         |         |             |                 |           |              |                      |
|----------------|---------|---------|-------------|-----------------|-----------|--------------|----------------------|
| A_21_P0007454  | 1,91401 | 1,73189 | 1,13454985  | N/A             | N/A       | N/A          | Inc-RP11-168K9.2.1-2 |
| A_23_P152398   | 1,9081  | 1,72601 | 1,134526258 | ENST00000219162 | 84560     | NM_032935    | MT4                  |
| A_22_P00018948 | 1,91617 | 1,73408 | 1,134526258 | ENST00000584482 | N/A       | N/A          | N/A                  |
| A_33_P3252441  | 3,89743 | 3,71536 | 1,13451053  | N/A             | N/A       | N/A          | N/A                  |
| A_21_P0002950  | 1,90754 | 1,7255  | 1,134486939 | N/A             | N/A       | N/A          | Inc-ZNF621-1         |
| A_21_P0002312  | 1,9125  | 1,7305  | 1,134455485 | N/A             | N/A       | N/A          | Inc-UBR3-1           |
| A_21_P0009320  | 11,8869 | 11,7049 | 1,134455485 | N/A             | 101929494 | XR_424825    | LOC101929494         |
| A_21_P0005191  | 1,887   | 1,70502 | 1,134439758 | ENST00000449644 | 100506725 | N/A          | LOC100506725         |
| A_23_P143334   | 3,80519 | 3,62323 | 1,134424032 | ENST00000462552 | 140733    | BC126936     | MACROD2              |
| A_22_P00017113 | 7,54903 | 7,36712 | 1,134384716 | N/A             | N/A       | N/A          | Inc-UAP1L1-1         |
| A_33_P3269110  | 3,31581 | 3,13392 | 1,13436899  | ENST00000512983 | 2982      | NM_001130687 | GUCY1A3              |
| A_21_P0001383  | 1,90846 | 1,72658 | 1,134361128 | N/A             | N/A       | N/A          | Inc-TBX19-1          |
| A_22_P00005903 | 1,91751 | 1,73567 | 1,134329677 | ENST00000434589 | N/A       | BG221971     | N/A                  |
| A_21_P0008079  | 3,06885 | 2,88703 | 1,134313952 | N/A             | N/A       | N/A          | Inc-BORA-3           |
| A_33_P3776564  | 1,91805 | 1,73625 | 1,134298227 | ENST00000610562 | 158434    | NM_001256408 | LOC158434            |
| A_24_P168510   | 10,3144 | 10,1326 | 1,134298227 | ENST00000600372 | 79036     | NM_024069    | KXD1                 |
| A_21_P0001792  | 6,79145 | 6,60971 | 1,134251054 | N/A             | N/A       | N/A          | Inc-LRRTM4-3         |
| A_21_P0009165  | 6,28405 | 6,10231 | 1,134251054 | ENST00000444464 | N/A       | XR_424811    | N/A                  |
| A_21_P0013612  | 1,88813 | 1,70645 | 1,134203883 | ENST00000416242 | N/A       | N/A          | N/A                  |
| A_33_P3304506  | 1,91036 | 1,72874 | 1,134156713 | ENST00000493279 | N/A       | N/A          | N/A                  |
| A_21_P0008717  | 1,88299 | 1,70138 | 1,134148852 | N/A             | 102724055 | XR_424586    | LOC102724055         |
| A_32_P101031   | 5,99901 | 5,81741 | 1,134140991 | ENST00000397463 | 116372    | NM_144586    | LYPD1                |
| A_22_P00007015 | 1,8805  | 1,6989  | 1,134140991 | ENST00000564402 | N/A       | BC040568     | N/A                  |
| A_33_P3262327  | 6,94538 | 6,7638  | 1,134125268 | N/A             | N/A       | N/A          | N/A                  |
| A_32_P52018    | 1,91873 | 1,73721 | 1,134078102 | ENST00000481706 | 221692    | NM_030948    | PHACTR1              |
| A_32_P117422   | 11,4821 | 11,3006 | 1,134062381 | ENST00000414507 | 5382      | NR_022007    | PMS2P4               |
| A_24_P72750    | 11,4029 | 11,2214 | 1,134062381 | ENST00000375859 | 10927     | NM_006717    | SPIN1                |
| A_33_P3238815  | 6,38589 | 6,20441 | 1,134046659 | ENST00000417257 | 84978     | NM_001286491 | FRMD5                |
| A_23_P380951   | 6,68562 | 6,50416 | 1,134030938 | ENST00000337995 | 147923    | NM_144689    | ZNF420               |
| A_21_P0006933  | 6,13283 | 5,9514  | 1,134007357 | N/A             | N/A       | N/A          | Inc-ZRANB1-2         |
| A_22_P00006553 | 4,63171 | 4,45033 | 1,133968056 | N/A             | 101929865 | XR_253639    | LOC101929865         |
| A_22_P00017900 | 1,88998 | 1,70865 | 1,133928756 | ENST00000552840 | N/A       | N/A          | N/A                  |
| A_23_P15174    | 9,52772 | 9,3464  | 1,133920897 | ENST00000564295 | 4494      | NM_005949    | MT1F                 |

|                |         |         |             |                 |           |              |                    |
|----------------|---------|---------|-------------|-----------------|-----------|--------------|--------------------|
| A_23_P305581   | 1,89792 | 1,71661 | 1,133913037 | N/A             | 2849      | NM_153442    | GPR26              |
| A_22_P00009655 | 1,91088 | 1,72959 | 1,133897318 | N/A             | N/A       | N/A          | Inc-MAT2B-3        |
| A_22_P00025328 | 6,8541  | 6,67282 | 1,133889458 | N/A             | N/A       | N/A          | Inc-C11orf41-1     |
| A_33_P3303697  | 1,91812 | 1,73686 | 1,133873739 | ENST00000367057 | 1380      | NM_001006658 | CR2                |
| A_33_P3271885  | 4,6189  | 4,43769 | 1,133834443 | N/A             | N/A       | N/A          | N/A                |
| A_33_P3271925  | 10,8521 | 10,6709 | 1,133826584 | ENST00000371917 | 10564     | NM_006420    | ARFGEF2            |
| A_33_P3357283  | 3,7625  | 3,58131 | 1,133818725 | ENST00000437537 | N/A       | XM_006724937 | N/A                |
| A_21_P0003580  | 1,9022  | 1,72102 | 1,133810866 | N/A             | N/A       | N/A          | Inc-CD38-2         |
| A_23_P722      | 4,14467 | 3,96349 | 1,133810866 | ENST00000618516 | 6847      | NM_003176    | SYCP1              |
| A_22_P00006552 | 3,08508 | 2,90396 | 1,133763713 | N/A             | N/A       | N/A          | Inc-FKBP9-1        |
| A_21_P0014397  | 9,76473 | 9,58362 | 1,133755854 | ENST00000440595 | 101926888 | NR_109885    | RALY-AS1           |
| A_33_P3251522  | 3,38687 | 3,20581 | 1,133716562 | ENST00000395528 | 206338    | NM_173800    | AQPEP              |
| A_22_P00006973 | 1,90856 | 1,72754 | 1,133685129 | ENST00000567369 | N/A       | N/A          | N/A                |
| A_22_P00011853 | 7,98992 | 7,80892 | 1,133669413 | N/A             | N/A       | N/A          | Inc-PHTF2-1        |
| A_33_P3278200  | 5,5967  | 5,41571 | 1,133661555 | ENST00000495892 | 4600      | AK126107     | MX2                |
| A_33_P3222698  | 6,18608 | 6,00512 | 1,133637981 | ENST00000396058 | 10168     | NM_006991    | ZNF197             |
| A_24_P110242   | 1,91739 | 1,73646 | 1,133614408 | ENST00000558425 | N/A       | N/A          | N/A                |
| A_33_P3562537  | 4,61388 | 4,43295 | 1,133614408 | ENST00000340058 | 5979      | NM_020630    | RET                |
| A_24_P418637   | 8,86152 | 8,68062 | 1,133590836 | ENST00000496804 | 23499     | NM_012090    | MACF1              |
| A_33_P3216532  | 11,9721 | 11,7912 | 1,133590836 | ENST00000487222 | 2050      | NM_004444    | EPHB4              |
| A_33_P3231771  | 4,12729 | 3,94642 | 1,133567263 | N/A             | 153743    | NR_038443    | PPP1R2P3           |
| A_22_P00012465 | 2,20678 | 2,02599 | 1,133504407 | N/A             | N/A       | N/A          | Inc-PRR15L-3       |
| A_22_P00022177 | 5,28845 | 5,1077  | 1,13347298  | N/A             | N/A       | N/A          | Inc-UHRF2-1        |
| A_21_P0006604  | 1,9106  | 1,7299  | 1,133433697 | N/A             | N/A       | N/A          | Inc-RBMY1B-1       |
| A_24_P281801   | 8,89704 | 8,71634 | 1,133433697 | ENST00000419098 | 654254    | NM_001137608 | ZNF732             |
| A_23_P201628   | 11,5251 | 11,3444 | 1,133433697 | ENST00000258341 | 3915      | NM_002293    | LAMC1              |
| A_23_P101185   | 13,1493 | 12,9686 | 1,133433697 | ENST00000256854 | 4677      | NM_004539    | NARS               |
| A_22_P00021758 | 6,48845 | 6,30781 | 1,13338656  | N/A             | 642366    | NR_046243    | LOC642366          |
| A_22_P00014304 | 1,91452 | 1,73389 | 1,133378704 | N/A             | 101929215 | NR_109930    | CTD-2201118.1      |
| A_22_P00022045 | 1,90529 | 1,72473 | 1,133323714 | N/A             | N/A       | N/A          | Inc-C9orf93-2      |
| A_22_P00022704 | 1,90031 | 1,71976 | 1,133315858 | N/A             | N/A       | AK126310     | Inc-AC005481.5.1-2 |
| A_21_P0000266  | 7,40738 | 7,22685 | 1,133300147 | N/A             | 26775     | NR_002581    | SNORA72            |
| A_21_P0012220  | 8,98728 | 8,80679 | 1,133268726 | ENST00000429521 | 391267    | N/A          | ANKRD20A11P        |

|                |         |         |             |                 |           |              |               |
|----------------|---------|---------|-------------|-----------------|-----------|--------------|---------------|
| A_22_P00022676 | 1,86737 | 1,68696 | 1,133205886 | ENST00000503415 | N/A       | N/A          | N/A           |
| A_24_P309317   | 2,086   | 1,90559 | 1,133205886 | ENST00000394934 | 5660      | NM_001042465 | PSAP          |
| A_33_P3306287  | 7,65163 | 7,47127 | 1,133166612 | ENST00000263092 | 79066     | NM_024086    | METTL16       |
| A_22_P00000643 | 4,91892 | 4,73857 | 1,133158758 | N/A             | N/A       | BX641826     | Inc-ACSM5-1   |
| A_33_P6814355  | 7,7198  | 7,53946 | 1,133150904 | N/A             | 101926911 | NR_110104    | LOC101926911  |
| A_33_P3399881  | 2,59949 | 2,41918 | 1,133127341 | N/A             | N/A       | AK123930     | N/A           |
| A_21_P0006868  | 1,85507 | 1,67478 | 1,133111632 | N/A             | N/A       | N/A          | Inc-TMEM72-1  |
| A_24_P925664   | 8,32928 | 8,14907 | 1,133048801 | ENST00000462284 | 4193      | NM_002392    | MDM2          |
| A_22_P00001744 | 11,2338 | 11,0536 | 1,133040947 | N/A             | 55839     | NM_001100624 | CENPN         |
| A_23_P501010   | 13,6622 | 13,482  | 1,133040947 | ENST00000433822 | 1308      | NM_000494    | COL17A1       |
| A_23_P89780    | 13,6702 | 13,49   | 1,133040947 | ENST00000269217 | 3909      | NM_198129    | LAMA3         |
| A_21_P0012492  | 1,90874 | 1,72855 | 1,133033094 | ENST00000466089 | 255025    | NR_015400    | LINC00879     |
| A_21_P0007134  | 3,26338 | 3,08325 | 1,132985973 | ENST00000534757 | 101410541 | NR_102708    | LINC00678     |
| A_33_P3368555  | 4,83983 | 4,65971 | 1,13297812  | ENST00000394457 | 130872    | XM_006711943 | AHSA2         |
| A_23_P344392   | 7,27039 | 7,0903  | 1,13295456  | ENST00000432857 | 4968      | NM_002542    | OGG1          |
| A_22_P00001132 | 1,90777 | 1,72776 | 1,132891738 | N/A             | N/A       | AK094325     | Inc-ALX4-5    |
| A_21_P0013525  | 1,87154 | 1,69162 | 1,132821067 | N/A             | N/A       | N/A          | Inc-C8orf83-2 |
| A_33_P3244882  | 9,24793 | 9,06806 | 1,132781807 | ENST00000324350 | 192669    | NM_024852    | AGO3          |
| A_23_P422178   | 9,53949 | 9,35969 | 1,132726845 | ENST00000497616 | 8450      | NM_003588    | CUL4B         |
| A_33_P3319680  | 1,88486 | 1,70511 | 1,132687588 | ENST00000543885 | 494470    | NM_152470    | RNF165        |
| A_24_P417935   | 8,1344  | 7,95466 | 1,132679737 | N/A             | 100130776 | NR_027032    | AGAP2-AS1     |
| A_23_P152620   | 6,94745 | 6,76774 | 1,132656184 | ENST00000396542 | 8741      | NM_172088    | TNFSF13       |
| A_33_P3391132  | 1,88249 | 1,70279 | 1,132648333 | N/A             | 100129716 | NR_027435    | ARRDC3-AS1    |
| A_22_P00015501 | 5,27249 | 5,0928  | 1,132640482 | ENST00000567456 | N/A       | XR_424590    | N/A           |
| A_33_P3418566  | 1,91482 | 1,73515 | 1,132624781 | N/A             | 101515984 | NR_104138    | LINC01080     |
| A_21_P0001817  | 1,91419 | 1,73456 | 1,132593378 | ENST00000417930 | 101929531 | XR_241262    | LOC101929531  |
| A_22_P00002129 | 3,80542 | 3,6258  | 1,132585528 | ENST00000451266 | 101927619 | NR_110267    | LOC101927619  |
| A_22_P00004471 | 5,50161 | 5,32201 | 1,132569827 | ENST00000519821 | N/A       | N/A          | N/A           |
| A_33_P3364626  | 7,03107 | 6,85154 | 1,132514875 | ENST00000343105 | 100131211 | N/A          | TMEM194B      |
| A_23_P78543    | 11,2824 | 11,1029 | 1,132491326 | ENST00000250244 | 10053     | NM_005498    | AP1M2         |
| A_21_P0000364  | 3,35331 | 3,17385 | 1,132459927 | N/A             | 692053    | NR_003029    | SNORD9        |
| A_33_P3391895  | 1,91372 | 1,73433 | 1,132404981 | ENST00000368801 | 388697    | NM_001009931 | HRNR          |
| A_21_P0007361  | 3,0657  | 2,88632 | 1,132397132 | N/A             | N/A       | N/A          | Inc-TRMT112-3 |

|                |         |         |             |                 |           |              |                |
|----------------|---------|---------|-------------|-----------------|-----------|--------------|----------------|
| A_24_P930926   | 8,10406 | 7,92472 | 1,132365735 | ENST00000287322 | 9530      | NM_004874    | BAG4           |
| A_23_P163059   | 9,52403 | 9,34471 | 1,132350038 | ENST00000555740 | 64430     | NM_022495    | PCNXL4         |
| A_33_P3393573  | 11,4542 | 11,2749 | 1,13233434  | ENST00000460828 | 5110      | NM_001252053 | PCMT1          |
| A_33_P3218564  | 14,2578 | 14,0786 | 1,132255855 | N/A             | N/A       | N/A          | N/A            |
| A_23_P18119    | 2,25359 | 2,07441 | 1,132240159 | ENST00000193391 | 50939     | NM_016247    | IMPG2          |
| A_23_P425750   | 9,84664 | 9,66747 | 1,132232311 | ENST00000392336 | 93436     | NM_033415    | ARMC6          |
| A_22_P00000204 | 1,90819 | 1,72909 | 1,132177376 | N/A             | N/A       | BU928599     | Inc-ABRA-1     |
| A_22_P00005684 | 4,21837 | 4,03928 | 1,132169528 | N/A             | N/A       | N/A          | Inc-EIF6-1     |
| A_22_P00022003 | 1,91723 | 1,73815 | 1,132161681 | ENST00000423466 | N/A       | BG202600     | N/A            |
| A_22_P00006343 | 1,90991 | 1,73089 | 1,132114596 | ENST00000566976 | N/A       | BC012943     | N/A            |
| A_22_P00004919 | 3,26766 | 3,08865 | 1,132106749 | N/A             | N/A       | N/A          | Inc-DARS2-1    |
| A_33_P3224190  | 2,1455  | 1,96649 | 1,132106749 | ENST00000429970 | 222962    | NM_001040661 | SLC29A4        |
| A_33_P3381077  | 1,91194 | 1,733   | 1,13205182  | ENST00000531945 | 219873    | NM_001004474 | OR10S1         |
| A_23_P426305   | 4,47157 | 4,2927  | 1,131996894 | ENST00000308423 | 8639      | NM_003734    | AOC3           |
| A_33_P3347503  | 2,89514 | 2,71627 | 1,131996894 | N/A             | N/A       | N/A          | N/A            |
| A_22_P00014022 | 3,11031 | 2,93145 | 1,131989048 | N/A             | 400794    | NR_026744    | LOC400794      |
| A_33_P3531373  | 7,9744  | 7,79554 | 1,131989048 | ENST00000602761 | 340340    | XR_252283    | LOC340340      |
| A_22_P00006814 | 6,22758 | 6,04872 | 1,131989048 | ENST00000558372 | N/A       | N/A          | N/A            |
| A_33_P3326151  | 7,40153 | 7,22268 | 1,131981202 | N/A             | N/A       | N/A          | N/A            |
| A_22_P00007843 | 1,91461 | 1,73579 | 1,131957663 | N/A             | N/A       | DA613845     | Inc-HRASLS-3   |
| A_33_P3282988  | 4,69118 | 4,51236 | 1,131957663 | N/A             | N/A       | BQ719082     | N/A            |
| A_33_P3330811  | 6,58591 | 6,4071  | 1,131949817 | N/A             | 401466    | NM_001099670 | C8orf59        |
| A_21_P0000233  | 10,0589 | 9,8801  | 1,131941971 | N/A             | 94162     | NR_001456    | SNORD38A       |
| A_24_P392690   | 13,7206 | 13,5418 | 1,131941971 | ENST00000568553 | N/A       | N/A          | N/A            |
| A_33_P3365652  | 1,91355 | 1,7348  | 1,131902741 | ENST00000480955 | 79876     | AK310239     | UBA5           |
| A_21_P0011701  | 3,89255 | 3,71382 | 1,13188705  | N/A             | N/A       | N/A          | XLOC_I2_006780 |
| A_23_P163306   | 10,2328 | 10,0541 | 1,131863513 | ENST00000281282 | 84952     | NM_032866    | CGNL1          |
| A_21_P0006087  | 1,7295  | 1,55081 | 1,131855668 | ENST00000436671 | 101927873 | N/A          | LINC01508      |
| A_23_P97736    | 9,33474 | 9,15609 | 1,131824287 | ENST00000373253 | 23154     | NM_014284    | NCDN           |
| A_21_P0011897  | 6,2458  | 6,06717 | 1,131808596 | ENST00000388975 | 346288    | N/A          | set-14         |
| A_19_P00803499 | 7,33204 | 7,15342 | 1,131800751 | N/A             | N/A       | N/A          | N/A            |
| A_23_P204252   | 11,741  | 11,5624 | 1,131785061 | ENST00000000412 | 4074      | NM_002355    | M6PR           |
| A_33_P3263319  | 1,89819 | 1,71961 | 1,131769371 | ENST00000611473 | N/A       | AY172958     | N/A            |

|                |         |         |             |                 |           |              |                |
|----------------|---------|---------|-------------|-----------------|-----------|--------------|----------------|
| A_33_P3300142  | 3,91024 | 3,73174 | 1,131706615 | N/A             | 51479     | NM_001257999 | ANKFY1         |
| A_24_P364042   | 4,84718 | 4,66873 | 1,131667393 | ENST00000374312 | 5540      | NM_005972    | NPY4R          |
| A_21_P0007487  | 1,87495 | 1,69652 | 1,131651705 | N/A             | N/A       | N/A          | Inc-GLIPR1L1-1 |
| A_33_P3303951  | 10,0911 | 9,9127  | 1,131628173 | ENST00000487595 | 11097     | NM_007342    | NUPL2          |
| A_22_P00024960 | 3,56896 | 3,39058 | 1,131612486 | N/A             | N/A       | AK092097     | Inc-HAGHL-1    |
| A_22_P00017950 | 4,46061 | 4,28226 | 1,131588955 | ENST00000490465 | 100507461 | XR_108504    | LOC100507461   |
| A_33_P3342797  | 1,90762 | 1,7293  | 1,131565424 | N/A             | 401442    | XR_110089    | LOC401442      |
| A_21_P0012961  | 4,92948 | 4,75117 | 1,131557581 | ENST00000512007 | 255187    | NR_122044    | LOC255187      |
| A_33_P3637909  | 10,0867 | 9,90844 | 1,131518365 | ENST00000222402 | 51619     | NM_015983    | UBE2D4         |
| A_23_P62377    | 2,34771 | 2,16949 | 1,131486993 | ENST00000488994 | 139728    | NM_001039582 | PNCK           |
| A_33_P3400429  | 5,83428 | 5,65607 | 1,13147915  | ENST00000428984 | 7337      | XM_005268267 | UBE3A          |
| A_23_P204579   | 12,3251 | 12,1469 | 1,131471307 | ENST00000392872 | 6996      | NM_003211    | TDG            |
| A_21_P0005553  | 1,84301 | 1,66491 | 1,131392882 | ENST00000432866 | 100506725 | NR_108082    | LOC100506725   |
| A_21_P0012937  | 5,08722 | 4,90913 | 1,13138504  | ENST00000521412 | 729522    | N/A          | AACSP1         |
| A_22_P00011156 | 6,38495 | 6,20689 | 1,131361514 | ENST00000414394 | N/A       | N/A          | N/A            |
| A_19_P00320814 | 4,05621 | 3,87815 | 1,131361514 | ENST00000430635 | 54064     | N/A          | LINC00160      |
| A_24_P16340    | 16,4667 | 16,2887 | 1,131314463 | ENST00000448115 | N/A       | N/A          | N/A            |
| A_33_P3397568  | 10,4559 | 10,2779 | 1,131314463 | ENST00000490459 | 51072     | NM_015955    | MEMO1          |
| A_33_P3279241  | 2,07937 | 1,9014  | 1,131290938 | ENST00000503896 | 57507     | NM_020747    | ZNF608         |
| A_33_P3240392  | 12,5188 | 12,3409 | 1,131236049 | ENST00000406360 | 2309      | NM_001455    | FOXO3          |
| A_22_P00011252 | 1,90229 | 1,72441 | 1,131220367 | N/A             | N/A       | N/A          | Inc-OR2G3-1    |
| A_23_P68472    | 14,5397 | 14,3619 | 1,13115764  | ENST00000371584 | 8813      | NM_003859    | DPM1           |
| A_33_P3287562  | 11,6683 | 11,4905 | 1,13115764  | ENST00000005259 | 55973     | NM_018844    | BCAP29         |
| A_23_P14157    | 4,02736 | 3,84962 | 1,131110598 | ENST00000485031 | 22873     | NM_198968    | DZIP1          |
| A_22_P00024057 | 1,90366 | 1,72598 | 1,131063557 | N/A             | N/A       | N/A          | Inc-PACRGL-4   |
| A_19_P00800667 | 4,9942  | 4,81654 | 1,131047877 | ENST00000414407 | 100874158 | N/A          | LINC00398      |
| A_22_P00022385 | 3,49345 | 3,31581 | 1,131032198 | N/A             | N/A       | BI755909     | Inc-FNDC9-1    |
| A_33_P3408722  | 4,2545  | 4,07686 | 1,131032198 | ENST00000379084 | 203259    | NM_001184941 | FAM219A        |
| A_33_P3397579  | 8,71545 | 8,53785 | 1,131000839 | ENST00000522992 | N/A       | BC040611     | N/A            |
| A_22_P00017314 | 2,46309 | 2,28549 | 1,131000839 | ENST00000559821 | 102723344 | NR_120375    | LOC102723344   |
| A_22_P00009957 | 1,86399 | 1,6864  | 1,130993    | ENST00000460597 | N/A       | N/A          | N/A            |
| A_33_P3302696  | 7,07034 | 6,89276 | 1,13098516  | ENST00000392995 | 8493      | NM_003620    | PPM1D          |
| A_22_P00007496 | 1,91096 | 1,7334  | 1,130969482 | N/A             | N/A       | N/A          | Inc-GUSB-4     |

|                |         |         |             |                 |           |              |                     |
|----------------|---------|---------|-------------|-----------------|-----------|--------------|---------------------|
| A_22_P00009307 | 4,50455 | 4,32702 | 1,130945964 | N/A             | 57212     | NR_033712    | TP73-AS1            |
| A_33_P3420530  | 1,89903 | 1,72156 | 1,13089893  | ENST00000376261 | 2572      | NM_001134366 | GAD2                |
| A_22_P00000832 | 5,08054 | 4,90309 | 1,130883253 | ENST00000512036 | N/A       | N/A          | N/A                 |
| A_33_P3371209  | 1,91143 | 1,73401 | 1,130859737 | ENST00000507108 | 340017    | NR_026992    | LOC340017           |
| A_33_P3275873  | 1,87427 | 1,69685 | 1,130859737 | ENST00000409383 | 6439      | NM_000542    | SFTP8               |
| A_33_P3244921  | 11,5101 | 11,3327 | 1,13084406  | ENST00000431261 | 81556     | NM_001136043 | VWA9                |
| A_23_P204144   | 6,05299 | 5,87566 | 1,130789193 | ENST00000544265 | 3891      | NM_002283    | KRT85               |
| A_22_P00007741 | 4,37668 | 4,19936 | 1,130781355 | ENST00000560590 | N/A       | N/A          | N/A                 |
| A_23_P24433    | 8,92212 | 8,74481 | 1,130773517 | ENST00000527141 | 8722      | NM_003793    | CTSF                |
| A_22_P00004626 | 7,13206 | 6,95478 | 1,130750003 | ENST00000619495 | N/A       | N/A          | N/A                 |
| A_22_P00022009 | 4,45635 | 4,27908 | 1,130742165 | ENST00000552028 | N/A       | XR_111420    | N/A                 |
| A_33_P3253804  | 13,5214 | 13,3442 | 1,130687303 | ENST00000408965 | 1052      | NM_005195    | CEBPD               |
| A_22_P00003316 | 1,88802 | 1,71083 | 1,130679466 | N/A             | N/A       | DB054965     | Inc-CAPZA3-1        |
| A_22_P00023618 | 4,22946 | 4,05231 | 1,130648117 | N/A             | 100874218 | NR_046758    | ATP13A5-AS1         |
| A_22_P00022892 | 4,18064 | 4,00354 | 1,130608932 | ENST00000577573 | 146795    | XR_243752    | LOC146795           |
| A_22_P00016355 | 13,1082 | 12,9311 | 1,130608932 | N/A             | 728730    | NR_037875    | LOC728730           |
| A_24_P277349   | 11,549  | 11,372  | 1,130530567 | ENST00000505479 | 22872     | NM_001077207 | SEC31A              |
| A_24_P211206   | 11,1116 | 10,9346 | 1,130530567 | ENST00000424846 | 7170      | NM_001043352 | TPM3                |
| A_22_P00020199 | 1,94316 | 1,76623 | 1,130475715 | N/A             | N/A       | N/A          | Inc-PURG-1          |
| A_22_P00022940 | 5,41865 | 5,24173 | 1,130467879 | N/A             | N/A       | BX095802     | Inc-JMJD7-PLA2G4B-5 |
| A_23_P127150   | 11,1651 | 10,9882 | 1,130452207 | ENST00000482278 | 10844     | NM_006659    | TUBGCP2             |
| A_23_P428729   | 6,24731 | 6,07044 | 1,130428701 | ENST00000460607 | 9204      | BC007070     | ZMYM6               |
| A_23_P209430   | 6,6913  | 6,51449 | 1,130381688 | ENST00000264276 | 57679     | NM_020919    | ALS2                |
| A_23_P819      | 15,3239 | 15,1471 | 1,130373853 | ENST00000379389 | 9636      | NM_005101    | ISG15               |
| A_33_P3224055  | 5,73286 | 5,55614 | 1,130311174 | N/A             | 100132481 | AK130567     | LOC100132481        |
| A_22_P00018851 | 9,0997  | 8,92299 | 1,130303339 | ENST00000379915 | 60677     | NM_001172684 | CELF6               |
| A_33_P3419134  | 1,89022 | 1,71353 | 1,13028767  | N/A             | 57698     | CR749417     | KIAA1598            |
| A_23_P318943   | 3,7309  | 3,55423 | 1,130272001 | ENST00000366314 | 197196    | N/A          | LINC00311           |
| A_23_P90679    | 9,49455 | 9,31791 | 1,130248498 | ENST00000412769 | 55437     | NM_018571    | STRADB              |
| A_22_P00016696 | 13,7832 | 13,6066 | 1,130217161 | N/A             | N/A       | N/A          | Inc-TRA2A-1         |
| A_32_P161762   | 6,95548 | 6,77889 | 1,130209327 | ENST00000371438 | 860       | NM_001024630 | RUNX2               |
| A_21_P0005081  | 1,89352 | 1,71694 | 1,130201493 | N/A             | N/A       | N/A          | Inc-AL078585.1-3    |
| A_22_P00008088 | 6,61195 | 6,43542 | 1,130162324 | N/A             | N/A       | BM906553     | Inc-IL15RA-1        |



|                |         |         |             |                 |           |              |                |
|----------------|---------|---------|-------------|-----------------|-----------|--------------|----------------|
| A_24_P935682   | 8,09505 | 7,91857 | 1,130123156 | N/A             | 100131541 | AY358248     | LOC100131541   |
| A_21_P0007812  | 3,33197 | 3,15552 | 1,130099656 | N/A             | N/A       | N/A          | Inc-DDX51-4    |
| A_23_P144369   | 7,09483 | 6,91844 | 1,130052657 | ENST00000323061 | 266812    | NM_153757    | NAP1L5         |
| A_21_P0010694  | 3,13472 | 2,95837 | 1,130021326 | ENST00000431027 | N/A       | N/A          | N/A            |
| A_33_P3245841  | 2,13706 | 1,96071 | 1,130021326 | N/A             | N/A       | N/A          | N/A            |
| A_33_P3263625  | 3,93644 | 3,7601  | 1,130013494 | ENST00000331588 | 1850      | NM_004420    | DUSP8          |
| A_21_P0009981  | 1,90238 | 1,72604 | 1,130013494 | N/A             | N/A       | N/A          | Inc-FAM209B-1  |
| A_21_P0010663  | 9,38077 | 9,20445 | 1,129997828 | N/A             | N/A       | N/A          | XLOC_I2_001206 |
| A_23_P21495    | 4,9348  | 4,75853 | 1,129958666 | ENST00000616721 | 8857      | NM_003890    | FCGBP          |
| A_22_P00003341 | 3,04828 | 2,87202 | 1,129950834 | N/A             | N/A       | BX111651     | Inc-CAV3-1     |
| A_33_P3310751  | 4,99599 | 4,8198  | 1,12989601  | N/A             | N/A       | N/A          | N/A            |
| A_21_P0008130  | 6,98633 | 6,81015 | 1,129888178 | N/A             | N/A       | N/A          | Inc-SACS-1     |
| A_21_P0003636  | 1,88097 | 1,70485 | 1,129841188 | N/A             | N/A       | N/A          | Inc-C4orf32-1  |
| A_33_P3679277  | 3,65911 | 3,48299 | 1,129841188 | ENST00000584833 | N/A       | N/A          | N/A            |
| A_22_P00010699 | 1,9068  | 1,73074 | 1,1297942   | N/A             | N/A       | XM_006716886 | Inc-NFIB-1     |
| A_21_P0003981  | 1,83624 | 1,66029 | 1,129708061 | ENST00000514255 | 643401    | N/A          | LINC01021      |
| A_23_P205768   | 11,7116 | 11,5357 | 1,129668909 | ENST00000568196 | 10776     | NM_006628    | ARPP19         |
| A_23_P2873     | 11,5233 | 11,3474 | 1,129668909 | ENST00000557450 | 3831      | NM_182923    | KLC1           |
| A_33_P3260563  | 2,69624 | 2,52034 | 1,129668909 | ENST00000311371 | 11063     | NM_007017    | SOX30          |
| A_23_P251562   | 12,0862 | 11,9104 | 1,129590609 | ENST00000232496 | 11334     | NM_007275    | TUSC2          |
| A_21_P0009089  | 3,59292 | 3,41712 | 1,129590609 | N/A             | N/A       | N/A          | Inc-C16orf95-1 |
| A_24_P91852    | 9,72886 | 9,55309 | 1,12956712  | ENST00000378578 | 6990      | NM_006520    | DYNLT3         |
| A_21_P0006889  | 4,7896  | 4,61388 | 1,129527973 | N/A             | N/A       | N/A          | Inc-PTEN-1     |
| A_22_P00011588 | 1,90731 | 1,73165 | 1,129480998 | N/A             | N/A       | N/A          | Inc-PCDH8-3    |
| A_32_P516818   | 1,90783 | 1,7322  | 1,129457512 | ENST00000312275 | 152078    | NM_001243729 | PQLC2L         |
| A_21_P0009182  | 2,89698 | 2,7214  | 1,129418368 | ENST00000586321 | N/A       | N/A          | N/A            |
| A_22_P00019486 | 1,8252  | 1,64962 | 1,129418368 | N/A             | 101929468 | NR_125926    | LOC101929468   |
| A_33_P3237487  | 6,9624  | 6,78689 | 1,12936357  | ENST00000424895 | N/A       | AK123475     | N/A            |
| A_33_P3422777  | 1,89669 | 1,7212  | 1,129347914 | ENST00000622570 | 5555      | NM_005042    | PRH2           |
| A_21_P0009252  | 5,22703 | 5,05157 | 1,12932443  | N/A             | N/A       | N/A          | Inc-ABI3-1     |
| A_33_P3352758  | 1,90581 | 1,73041 | 1,129277464 | N/A             | 340527    | NM_001013627 | NHSL2          |
| A_33_P3210805  | 1,90385 | 1,72846 | 1,129269636 | ENST00000333743 | 2567      | NM_033223    | GABRG3         |
| A_23_P137007   | 1,89267 | 1,71732 | 1,129238327 | ENST00000244096 | 4109      | NM_001011543 | MAGEA10        |

|                |         |         |             |                 |           |              |                |
|----------------|---------|---------|-------------|-----------------|-----------|--------------|----------------|
| A_23_P257834   | 1,90099 | 1,72566 | 1,129222672 | ENST00000505649 | 213       | NM_000477    | ALB            |
| A_33_P3327108  | 10,0627 | 9,88739 | 1,129207018 | ENST00000407008 | 51701     | NM_016231    | NLK            |
| A_21_P0002667  | 2,97054 | 2,79529 | 1,129160056 | N/A             | N/A       | N/A          | Inc-ST3GAL5-1  |
| A_22_P00011014 | 5,7545  | 5,57927 | 1,129144403 | N/A             | N/A       | N/A          | Inc-NSUN6-3    |
| A_32_P404060   | 1,90496 | 1,72974 | 1,129136576 | ENST00000416742 | 284749    | NR_026958    | LINC00494      |
| A_33_P3546070  | 10,2398 | 10,0646 | 1,129120923 | ENST00000460236 | 51105     | NM_016018    | PHF20L1        |
| A_23_P141974   | 12,378  | 12,2028 | 1,129120923 | ENST00000520239 | 7171      | NM_003290    | TPM4           |
| A_23_P31335    | 11,6061 | 11,4309 | 1,129120923 | ENST00000342651 | 7559      | NM_016265    | ZNF12          |
| A_24_P162454   | 3,07257 | 2,89738 | 1,129113097 | ENST00000373521 | 645974    | NM_001042506 | PABPC1L2B      |
| A_21_P0006280  | 1,90191 | 1,72675 | 1,129089618 | N/A             | 101927329 | N/A          | LOC101927329   |
| A_22_P00003328 | 3,93698 | 3,76186 | 1,129058313 | ENST00000427824 | N/A       | BC045184     | N/A            |
| A_23_P205646   | 10,8097 | 10,6346 | 1,129042661 | ENST00000013125 | 11183     | NM_198794    | MAP4K5         |
| A_19_P00319854 | 5,15918 | 4,98413 | 1,129003532 | N/A             | 197187    | NR_024399    | SNAI3-AS1      |
| A_23_P161615   | 9,32981 | 9,1548  | 1,12897223  | ENST00000534785 | 23649     | AK307831     | POLA2          |
| A_21_P0006977  | 1,90694 | 1,73193 | 1,12897223  | N/A             | N/A       | N/A          | Inc-ABI1-2     |
| A_22_P00017108 | 12,8107 | 12,6357 | 1,128964405 | ENST00000620255 | 10436     | NM_006331    | EMG1           |
| A_33_P3364089  | 10,6622 | 10,4873 | 1,128886154 | ENST00000381545 | 28234     | NM_019844    | SLCO1B3        |
| A_33_P3777584  | 7,31252 | 7,13769 | 1,128831381 | ENST00000607742 | 84947     | NM_032861    | SERAC1         |
| A_21_P0005527  | 1,89733 | 1,7225  | 1,128831381 | N/A             | N/A       | N/A          | Inc-WASL-2     |
| A_23_P120660   | 18,9505 | 18,7758 | 1,128729668 | ENST00000343986 | 6227      | NM_001024    | RPS21          |
| A_23_P114008   | 1,90268 | 1,72803 | 1,12869055  | ENST00000304568 | 79853     | NM_024795    | TM4SF20        |
| A_23_P156807   | 8,84399 | 8,66936 | 1,128674903 | ENST00000625001 | 8837      | NM_001202519 | CFLAR          |
| A_19_P00320872 | 3,75076 | 3,57614 | 1,128667079 | N/A             | N/A       | N/A          | Inc-KIAA0020-1 |
| A_33_P3261957  | 1,89995 | 1,72533 | 1,128667079 | ENST00000410102 | 10203     | NM_005795    | CALCRL         |
| A_33_P3380567  | 12,8349 | 12,6603 | 1,128651433 | N/A             | 81858     | NM_030974    | SHARPIN        |
| A_33_P3374443  | 1,79932 | 1,62475 | 1,128627963 | ENST00000439496 | 3897      | NM_024003    | L1CAM          |
| A_22_P00025810 | 2,3742  | 2,19967 | 1,128596672 | N/A             | N/A       | N/A          | Inc-SMARCC2-1  |
| A_23_P259823   | 7,56193 | 7,38742 | 1,128581026 | ENST00000439947 | 55006     | NM_017910    | TRMT61B        |
| A_21_P0014133  | 1,87579 | 1,70133 | 1,128541913 | N/A             | 1400      | NM_001288661 | CRMP1          |
| A_22_P00020674 | 2,62261 | 2,44818 | 1,128518446 | ENST00000580234 | 6046      | N/A          | BRD2           |
| A_22_P00024088 | 3,16785 | 2,99342 | 1,128518446 | ENST00000435368 | N/A       | N/A          | N/A            |
| A_32_P122754   | 9,06245 | 8,88804 | 1,128502801 | ENST00000583159 | 91283     | NM_080655    | MSANTD3        |
| A_22_P00016476 | 1,86453 | 1,69015 | 1,128479335 | N/A             | N/A       | N/A          | Inc-TMEM85-1   |

|                |         |         |             |                 |           |              |                |
|----------------|---------|---------|-------------|-----------------|-----------|--------------|----------------|
| A_33_P3358143  | 1,8798  | 1,70543 | 1,128471513 | ENST00000374144 | 118461    | NM_001135196 | C10orf71       |
| A_23_P217712   | 6,17874 | 6,00441 | 1,128440226 | ENST00000217890 | 414       | NM_001669    | ARSD           |
| A_21_P0006591  | 1,87992 | 1,70559 | 1,128440226 | ENST00000426699 | N/A       | N/A          | N/A            |
| A_24_P380132   | 13,0158 | 12,8415 | 1,128416761 | ENST00000359707 | 9908      | NM_203505    | G3BP2          |
| A_33_P3546363  | 13,3388 | 13,1645 | 1,128416761 | N/A             | 400128    | BQ950045     | TUSC8          |
| A_23_P218841   | 12,1912 | 12,0169 | 1,128416761 | ENST00000496726 | 55768     | NM_018297    | NGLY1          |
| A_33_P3301541  | 1,98729 | 1,813   | 1,128408939 | ENST00000378725 | 29101     | N/A          | SSU72          |
| A_21_P0001697  | 1,81989 | 1,64567 | 1,12835419  | N/A             | N/A       | N/A          | Inc-PRMT6-2    |
| A_33_P3245674  | 8,60517 | 8,43095 | 1,12835419  | ENST00000601887 | 79673     | AK090893     | ZNF329         |
| A_21_P0009079  | 7,78331 | 7,6091  | 1,128346369 | N/A             | N/A       | N/A          | Inc-GINS2-1    |
| A_24_P43681    | 10,5458 | 10,3716 | 1,128338548 | ENST00000498733 | 28988     | NM_014063    | DBNL           |
| A_22_P00000677 | 4,56236 | 4,38819 | 1,128315085 | N/A             | N/A       | BE254357     | Inc-ADA-1      |
| A_22_P00006880 | 1,90277 | 1,7286  | 1,128315085 | N/A             | 644090    | XR_428270    | LOC644090      |
| A_33_P3712008  | 4,20897 | 4,03482 | 1,128299443 | N/A             | 84237     | AL512720     | DKFZp547J222   |
| A_21_P0012919  | 4,20065 | 4,02653 | 1,128275981 | N/A             | N/A       | N/A          | XL0C_I2_012162 |
| A_22_P00018421 | 3,04417 | 2,87006 | 1,12826816  | ENST00000427319 | N/A       | N/A          | N/A            |
| A_22_P00002919 | 1,87541 | 1,70131 | 1,12826034  | N/A             | N/A       | N/A          | Inc-C5orf22-3  |
| A_23_P105144   | 1,87757 | 1,70347 | 1,12826034  | ENST00000518447 | 57758     | NM_020974    | SCUBE2         |
| A_22_P00015396 | 5,9435  | 5,76944 | 1,128229058 | ENST00000573268 | 100507501 | NR_039999    | LINC01569      |
| A_24_P40978    | 9,21228 | 9,03826 | 1,128197777 | ENST00000528663 | 50626     | NM_138496    | CYHR1          |
| A_21_P0003531  | 1,83309 | 1,65918 | 1,12811176  | ENST00000503778 | N/A       | N/A          | N/A            |
| A_24_P282108   | 10,1853 | 10,0114 | 1,128103941 | ENST00000381638 | 23140     | NM_015113    | ZZEF1          |
| A_33_P3349521  | 13,8625 | 13,6886 | 1,128103941 | ENST00000520303 | 51669     | NM_016127    | SARAF          |
| A_22_P00004177 | 1,90407 | 1,7302  | 1,128080483 | N/A             | N/A       | N/A          | Inc-CLIC5-1    |
| A_22_P00025133 | 2,13539 | 1,96154 | 1,128064844 | ENST00000454307 | N/A       | N/A          | N/A            |
| A_21_P0007485  | 1,88158 | 1,70776 | 1,128041387 | ENST00000546821 | 101927292 | NR_110048    | LOC101927292   |
| A_23_P41976    | 11,0734 | 10,8996 | 1,128025749 | ENST00000296824 | 133957    | NM_145265    | CCDC127        |
| A_21_P0013726  | 2,02091 | 1,84718 | 1,127971018 | ENST00000585533 | 403323    | NR_122077    | LOC403323      |
| A_23_P367013   | 3,61914 | 3,44541 | 1,127971018 | ENST00000332690 | 338398    | NM_177437    | TAS2R60        |
| A_22_P00021468 | 5,18842 | 5,01473 | 1,127939745 | N/A             | N/A       | CU688739     | Inc-USP24-1    |
| A_33_P3335371  | 4,38077 | 4,20711 | 1,12791629  | ENST00000509479 | 55534     | NM_018717    | MAML3          |
| A_22_P00001182 | 8,15214 | 7,97851 | 1,127892836 | N/A             | 100287015 | NR_040040    | LOC100287015   |
| A_22_P00004163 | 1,89532 | 1,7217  | 1,127885018 | N/A             | 51741     | XR_243411    | WVOX           |

|                |         |         |             |                 |           |              |                     |
|----------------|---------|---------|-------------|-----------------|-----------|--------------|---------------------|
| A_23_P59836    | 10,3686 | 10,195  | 1,127869382 | ENST00000262432 | 55798     | NM_018396    | METTL2B             |
| A_22_P00017741 | 1,88367 | 1,71013 | 1,127822477 | N/A             | N/A       | N/A          | Inc-YBEY-3          |
| A_23_P105957   | 13,1879 | 13,0144 | 1,127791207 | ENST00000438964 | 87        | NM_001102    | ACTN1               |
| A_33_P3405916  | 3,9108  | 3,73733 | 1,127767756 | ENST00000539813 | 649159    | NR_038368    | LINC00273           |
| A_23_P119778   | 8,05879 | 7,88536 | 1,127736488 | ENST00000409086 | 57181     | NM_020342    | SLC39A10            |
| A_22_P00009872 | 1,90436 | 1,73094 | 1,127728671 | N/A             | N/A       | AA971236     | Inc-MFAP4-2         |
| A_33_P3347887  | 1,89857 | 1,72515 | 1,127728671 | ENST00000525114 | 221122    | NR_026681    | LOC221122           |
| A_19_P00804070 | 2,90715 | 2,73376 | 1,127705221 | N/A             | N/A       | N/A          | N/A                 |
| A_22_P00000492 | 1,82052 | 1,64714 | 1,127697404 | ENST00000413159 | N/A       | N/A          | N/A                 |
| A_22_P00022982 | 3,48329 | 3,30995 | 1,127666138 | N/A             | N/A       | BX111389     | Inc-AP000322.54.1-1 |
| A_22_P00007350 | 5,85772 | 5,68441 | 1,127642689 | N/A             | N/A       | N/A          | Inc-GPX1-1          |
| A_21_P0013674  | 7,26007 | 7,08677 | 1,127634873 | ENST00000354752 | 441459    | NM_001244752 | ANKRD18B            |
| A_19_P00320314 | 10,3752 | 10,2019 | 1,127634873 | N/A             | 643977    | N/A          | FLJ32255            |
| A_22_P00010178 | 1,89589 | 1,72259 | 1,127634873 | N/A             | N/A       | N/A          | Inc-MRPS25-4        |
| A_21_P0001091  | 2,71117 | 2,53789 | 1,127619241 | N/A             | 440556    | NR_015440    | LINC00982           |
| A_21_P0002551  | 1,89713 | 1,7239  | 1,127580161 | N/A             | N/A       | N/A          | Inc-COL6A3-1        |
| A_22_P00010751 | 15,79   | 15,6168 | 1,127556714 | ENST00000522282 | 253943    | NM_001277816 | YTHDF3              |
| A_23_P36562    | 9,40299 | 9,22987 | 1,127494191 | ENST00000552564 | 3678      | NM_002205    | ITGA5               |
| A_33_P3232828  | 12,7204 | 12,5473 | 1,12747856  | ENST00000339436 | 6428      | NM_003017    | SRSF3               |
| A_21_P0002455  | 2,04727 | 1,87421 | 1,1274473   | N/A             | N/A       | N/A          | Inc-C1D-3           |
| A_21_P0011106  | 7,1139  | 6,94088 | 1,127416041 | ENST00000616042 | 100507055 | N/A          | LRCOL1              |
| A_21_P0007035  | 1,90246 | 1,72947 | 1,127392598 | N/A             | N/A       | N/A          | Inc-TCERG1L-1       |
| A_23_P399251   | 2,10095 | 1,92797 | 1,127384783 | N/A             | 285622    | NR_003719    | NBPF22P             |
| A_33_P3366758  | 1,89881 | 1,72586 | 1,12736134  | ENST00000377602 | 338596    | NM_001004470 | ST8SIA6             |
| A_33_P3283167  | 12,3661 | 12,1932 | 1,127322269 | N/A             | N/A       | N/A          | N/A                 |
| A_24_P362540   | 10,4134 | 10,2405 | 1,127322269 | ENST00000484590 | 8853      | NM_003887    | ASAP2               |
| A_33_P3410225  | 2,73605 | 2,56316 | 1,127314455 | ENST00000424746 | N/A       | N/A          | N/A                 |
| A_33_P3412294  | 7,40816 | 7,23529 | 1,127298828 | ENST00000530353 | 54993     | NM_181877    | ZSCAN2              |
| A_22_P00005403 | 1,89682 | 1,72396 | 1,127291014 | N/A             | N/A       | BC039425     | Inc-DSG1-1          |
| A_33_P3247624  | 6,74768 | 6,57484 | 1,127275386 | ENST00000310791 | 387849    | NM_001029874 | REP15               |
| A_24_P168760   | 10,4281 | 10,2553 | 1,127244132 | ENST00000216044 | 9567      | NM_004286    | GTPBP1              |
| A_33_P3245160  | 6,34108 | 6,1683  | 1,127228505 | ENST00000571766 | N/A       | N/A          | N/A                 |
| A_22_P00001528 | 1,86041 | 1,68764 | 1,127220692 | ENST00000582033 | N/A       | N/A          | N/A                 |

|                |         |         |             |                 |           |              |              |
|----------------|---------|---------|-------------|-----------------|-----------|--------------|--------------|
| A_33_P3327375  | 2,08011 | 1,90736 | 1,127205065 | ENST00000606028 | N/A       | XM_006709942 | N/A          |
| A_21_P0008028  | 1,86442 | 1,69168 | 1,127197252 | N/A             | N/A       | N/A          | Inc-FGF9-1   |
| A_22_P00017847 | 7,81651 | 7,64377 | 1,127197252 | N/A             | 283050    | NR_015429    | ZMIZ1-AS1    |
| A_24_P365515   | 11,5334 | 11,3607 | 1,127166    | ENST00000419308 | 3170      | NM_021784    | FOXA2        |
| A_22_P00023897 | 3,76385 | 3,59115 | 1,127166    | N/A             | N/A       | N/A          | Inc-ZBTB25-4 |
| A_32_P186226   | 7,83225 | 7,6596  | 1,127126936 | ENST00000455509 | 10527     | NM_006391    | IPO7         |
| A_22_P00007684 | 1,87844 | 1,70581 | 1,127111311 | ENST00000537827 | N/A       | N/A          | N/A          |
| A_32_P174083   | 8,56221 | 8,38959 | 1,127103499 | N/A             | 54205     | NM_018947    | CYCS         |
| A_32_P93328    | 7,18415 | 7,01156 | 1,127080061 | N/A             | 100134713 | NR_024454    | NDUFB2-AS1   |
| A_21_P0013222  | 4,68347 | 4,51091 | 1,127056625 | ENST00000441415 | N/A       | XR_426197    | N/A          |
| A_21_P0013054  | 1,87439 | 1,70184 | 1,127048812 | N/A             | 102723944 | N/A          | LOC102723944 |
| A_22_P00025608 | 1,903   | 1,73046 | 1,127041    | N/A             | 100874018 | NR_048576    | EPN2-AS1     |
| A_22_P00008313 | 1,89959 | 1,72705 | 1,127041    | ENST00000418086 | N/A       | N/A          | N/A          |
| A_22_P00010998 | 5,20826 | 5,03572 | 1,127041    | N/A             | 100507266 | NR_037888    | STX18-AS1    |
| A_21_P0013297  | 1,89182 | 1,7193  | 1,127025376 | ENST00000455947 | 101928795 | N/A          | LINC01448    |
| A_22_P00006676 | 2,8491  | 2,67668 | 1,12694726  | N/A             | N/A       | AK057719     | Inc-FPGS-1   |
| A_21_P0010377  | 4,23438 | 4,06202 | 1,126900392 | N/A             | N/A       | N/A          | Inc-ZMAT5-1  |
| A_21_P0009718  | 1,87823 | 1,70589 | 1,12688477  | N/A             | N/A       | N/A          | Inc-HAUS5-2  |
| A_23_P41734    | 11,3706 | 11,1983 | 1,126853527 | ENST00000520911 | 55819     | NM_018434    | RNF130       |
| A_24_P636318   | 9,72458 | 9,5523  | 1,126837905 | ENST00000409185 | 130074    | NM_001009993 | FAM168B      |
| A_33_P3257627  | 5,35595 | 5,18369 | 1,126822284 | ENST00000367272 | N/A       | N/A          | N/A          |
| A_21_P0014639  | 1,89659 | 1,72435 | 1,126806663 | N/A             | 100507071 | XR_110863    | LOC100507071 |
| A_23_P126970   | 12,8868 | 12,7146 | 1,126775422 | ENST00000482943 | 10440     | NM_006335    | TIMM17A      |
| A_24_P101704   | 2,43028 | 2,25813 | 1,126736372 | ENST00000550066 | 4920      | NM_004560    | ROR2         |
| A_22_P00019077 | 1,90132 | 1,72918 | 1,126728562 | N/A             | N/A       | N/A          | Inc-HNRNPU-3 |
| A_21_P0000063  | 8,51602 | 8,34389 | 1,126720752 | N/A             | 29969     | NM_001166346 | MDFIC        |
| A_33_P3701139  | 8,58411 | 8,412   | 1,126705132 | N/A             | N/A       | N/A          | N/A          |
| A_33_P3317850  | 14,0825 | 13,9104 | 1,126697322 | ENST00000581220 | 8780      | NM_003831    | RIOK3        |
| A_22_P00023177 | 9,81074 | 9,63871 | 1,126642656 | N/A             | N/A       | AK025137     | Inc-VTI1A-3  |
| A_33_P3339397  | 8,47156 | 8,29955 | 1,126627038 | ENST00000403657 | 26751     | NM_001282687 | SH3YL1       |
| A_23_P29036    | 11,8847 | 11,7127 | 1,126619228 | ENST00000290219 | 3460      | NM_005534    | IFNGR2       |
| A_22_P00003672 | 12,7243 | 12,5523 | 1,126619228 | ENST00000491825 | 56882     | DA776403     | CDC42SE1     |
| A_32_P163169   | 9,74695 | 9,57497 | 1,12660361  | ENST00000430062 | 7416      | NM_003374    | VDAC1        |

|                |         |         |             |                 |           |              |              |
|----------------|---------|---------|-------------|-----------------|-----------|--------------|--------------|
| A_19_P00320954 | 7,25089 | 7,07895 | 1,126572375 | ENST00000418746 | 101929559 | N/A          | LINC00211    |
| A_23_P212508   | 1,93326 | 1,76133 | 1,126564566 | ENST00000461695 | 7018      | NM_001063    | TF           |
| A_23_P143348   | 10,4478 | 10,2759 | 1,12654114  | ENST00000483661 | 58495     | AL079276     | OVOL2        |
| A_23_P106933   | 3,1688  | 2,99692 | 1,126525523 | ENST00000520010 | 116285    | NM_052956    | ACSM1        |
| A_33_P3212989  | 1,85691 | 1,68506 | 1,126502098 | N/A             | 285987    | NR_015448    | DLX6-AS1     |
| A_33_P3288409  | 1,88619 | 1,71443 | 1,126431825 | ENST00000538664 | 143471    | NM_144662    | PSMA8        |
| A_24_P281975   | 9,56356 | 9,39182 | 1,126416209 | ENST00000299314 | 79158     | NM_024312    | GNPTAB       |
| A_33_P3252134  | 7,9484  | 7,7767  | 1,126384979 | N/A             | N/A       | N/A          | N/A          |
| A_21_P0002518  | 2,25465 | 2,08299 | 1,126353749 | N/A             | N/A       | N/A          | Inc-STK39-1  |
| A_22_P00006347 | 4,2537  | 4,08207 | 1,126330328 | ENST00000556071 | 100506412 | NR_102701    | LINC00871    |
| A_22_P00007709 | 2,10646 | 1,93484 | 1,126322521 | N/A             | N/A       | N/A          | Inc-HJURP-2  |
| A_21_P0009450  | 6,89634 | 6,72473 | 1,126314714 | N/A             | N/A       | N/A          | Inc-LRRC30-1 |
| A_33_P3374388  | 2,41758 | 2,24599 | 1,1262991   | ENST00000609510 | N/A       | AK126983     | N/A          |
| A_22_P00003533 | 3,3723  | 3,20074 | 1,126275679 | N/A             | N/A       | N/A          | Inc-CCNE2-1  |
| A_21_P0007389  | 1,88353 | 1,71198 | 1,126267872 | N/A             | N/A       | N/A          | Inc-PDGF-5   |
| A_23_P79816    | 6,37815 | 6,20661 | 1,126260066 | ENST00000332312 | 90187     | NM_052846    | EMILIN3      |
| A_33_P3376518  | 1,88509 | 1,71358 | 1,126236646 | ENST00000448198 | N/A       | N/A          | N/A          |
| A_23_P102542   | 10,2816 | 10,1101 | 1,12622884  | ENST00000238855 | 54812     | NM_203437    | AFTPH        |
| A_33_P3414789  | 5,12149 | 4,94999 | 1,12622884  | ENST00000221856 | 79187     | NM_024333    | FSD1         |
| A_33_P3316310  | 7,87348 | 7,70199 | 1,126221033 | ENST00000475860 | 130916    | NM_182501    | MTERF4       |
| A_33_P3218089  | 6,37509 | 6,2036  | 1,126221033 | ENST00000541814 | 100132463 | NM_001185149 | CLDN24       |
| A_22_P00014497 | 6,76879 | 6,59732 | 1,126205421 | N/A             | N/A       | BC035765     | Inc-SHISA9-1 |
| A_23_P307761   | 7,52759 | 7,35616 | 1,126174196 | ENST00000279101 | 81928     | NM_031215    | CABLES2      |
| A_23_P4754     | 14,1394 | 13,968  | 1,126150778 | ENST00000245816 | 8192      | NM_006012    | CLPP         |
| A_22_P00004757 | 1,55763 | 1,38623 | 1,126150778 | N/A             | N/A       | N/A          | Inc-CTS-1    |
| A_23_P105495   | 7,05785 | 6,88646 | 1,126142972 | ENST00000614274 | 50840     | NM_023922    | TAS2R14      |
| A_22_P00017382 | 1,99144 | 1,82007 | 1,126127361 | N/A             | N/A       | N/A          | Inc-UXS1-3   |
| A_19_P00320780 | 5,97481 | 5,80344 | 1,126127361 | ENST00000438867 | N/A       | N/A          | N/A          |
| A_32_P157213   | 5,77961 | 5,60824 | 1,126127361 | ENST00000606252 | N/A       | N/A          | N/A          |
| A_33_P3419808  | 2,36646 | 2,19512 | 1,126103944 | ENST00000390304 | N/A       | AF060129     | N/A          |
| A_33_P3329378  | 4,49495 | 4,32363 | 1,126088333 | ENST00000350110 | 27255     | NM_014461    | CNTN6        |
| A_33_P3310070  | 5,6593  | 5,488   | 1,126072722 | ENST00000527313 | 3607      | NM_004514    | FOXK2        |
| A_33_P3419314  | 1,84413 | 1,67286 | 1,126049306 | ENST00000377999 | 26038     | NM_015557    | CHD5         |

|                |         |         |             |                 |           |              |                |
|----------------|---------|---------|-------------|-----------------|-----------|--------------|----------------|
| A_33_P3365506  | 1,89202 | 1,72076 | 1,126041501 | ENST00000513564 | N/A       | N/A          | N/A            |
| A_21_P0003624  | 1,89576 | 1,72451 | 1,126033696 | N/A             | N/A       | N/A          | Inc-BMP2K-2    |
| A_23_P348253   | 3,1294  | 2,95818 | 1,126010281 | ENST00000317716 | 222256    | NM_152750    | CDHR3          |
| A_21_P0012533  | 2,01791 | 1,84669 | 1,126010281 | ENST00000454410 | 101927347 | N/A          | GRM7-AS3       |
| A_33_P3251421  | 4,91689 | 4,74568 | 1,126002476 | ENST00000453638 | 337977    | NM_181619    | KRTAP21-1      |
| A_24_P337239   | 1,89468 | 1,72349 | 1,125986867 | ENST00000312465 | 2250      | NM_004464    | FGF5           |
| A_19_P00316242 | 3,67232 | 3,50118 | 1,125947843 | ENST00000504068 | 101928858 | XR_427726    | LOC101928858   |
| A_24_P233014   | 1,86031 | 1,68921 | 1,125916626 | ENST00000547389 | 124602    | NM_153209    | KIF19          |
| A_33_P3215078  | 14,6914 | 14,5203 | 1,125916626 | ENST00000351328 | 1431      | NM_004077    | CS             |
| A_21_P0011249  | 1,83945 | 1,66837 | 1,125901018 | N/A             | N/A       | N/A          | XLOC_I2_004208 |
| A_24_P353300   | 8,62381 | 8,45276 | 1,125877605 | ENST00000467301 | 3985      | NM_001031801 | LIMK2          |
| A_21_P0005782  | 1,87331 | 1,70227 | 1,125869801 | N/A             | N/A       | N/A          | Inc-ERICH1-2   |
| A_33_P3503537  | 8,17614 | 8,00516 | 1,125822979 | N/A             | 285178    | AK091571     | LOC285178      |
| A_22_P00003960 | 6,72473 | 6,55376 | 1,125815175 | ENST00000409719 | N/A       | AK096990     | Inc-CHCHD5-2   |
| A_33_P3209055  | 3,75532 | 3,58435 | 1,125815175 | ENST00000624651 | N/A       | N/A          | N/A            |
| A_22_P00001084 | 1,54302 | 1,37206 | 1,125807372 | N/A             | N/A       | BI771921     | Inc-ALDH7A1-1  |
| A_23_P334263   | 8,78431 | 8,61339 | 1,125776158 | ENST00000542035 | 123228    | NM_145204    | SENP8          |
| A_33_P3284029  | 14,0456 | 13,8747 | 1,125760552 | ENST00000396192 | 1434      | NM_001316    | CSE1L          |
| A_23_P149249   | 14,1223 | 13,9514 | 1,125760552 | ENST00000492892 | 200185    | NM_173852    | KRTCAP2        |
| A_21_P0001478  | 1,89219 | 1,7213  | 1,125752749 | N/A             | N/A       | N/A          | Inc-ID3-1      |
| A_23_P342751   | 6,5031  | 6,33223 | 1,125737142 | ENST00000607822 | 101929344 | NR_120426    | LINC01198      |
| A_32_P207117   | 1,85237 | 1,68154 | 1,125705931 | ENST00000317802 | 388951    | NM_001003937 | TSPYL6         |
| A_33_P3298128  | 6,59265 | 6,42183 | 1,125698128 | N/A             | 3709      | NM_002223    | ITPR2          |
| A_33_P3387911  | 2,0654  | 1,89458 | 1,125698128 | ENST00000556703 | N/A       | N/A          | N/A            |
| A_22_P00014473 | 1,88756 | 1,71677 | 1,12567472  | N/A             | N/A       | AA405311     | Inc-SHANK2-3   |
| A_21_P0008191  | 1,86635 | 1,6956  | 1,12564351  | N/A             | N/A       | N/A          | Inc-SLITRK6-6  |
| A_22_P00010460 | 7,95139 | 7,78064 | 1,12564351  | N/A             | N/A       | N/A          | Inc-NADSYN1-1  |
| A_22_P00010535 | 1,87504 | 1,70435 | 1,125596697 | N/A             | N/A       | N/A          | Inc-NCKAP1-1   |
| A_33_P3412863  | 3,2641  | 3,09345 | 1,125565489 | ENST00000534466 | N/A       | XM_005276096 | N/A            |
| A_33_P3329958  | 1,89292 | 1,72227 | 1,125565489 | ENST00000360085 | 5697      | NM_004160    | PYY            |
| A_21_P0012953  | 1,87097 | 1,70035 | 1,125542084 | ENST00000514637 | 102723470 | N/A          | LOC102723470   |
| A_19_P00805950 | 8,02623 | 7,85561 | 1,125542084 | N/A             | 101928673 | NR_125960    | LOC101928673   |
| A_19_P00322310 | 1,89503 | 1,72443 | 1,125526481 | ENST00000504675 | 100505702 | NR_038303    | LINC01094      |

|                |         |         |             |                 |           |              |                |
|----------------|---------|---------|-------------|-----------------|-----------|--------------|----------------|
| A_21_P0006508  | 1,87628 | 1,70572 | 1,125495275 | N/A             | N/A       | N/A          | Inc-ARMCX3-2   |
| A_24_P200000   | 9,02344 | 8,85293 | 1,125456269 | ENST00000393107 | 55240     | NM_182915    | STEAP3         |
| A_24_P256037   | 16,343  | 16,1725 | 1,125448468 | ENST00000479473 | N/A       | N/A          | N/A            |
| A_22_P00013715 | 7,64601 | 7,47555 | 1,125417264 | ENST00000559914 | 283673    | N/A          | EWSAT1         |
| A_21_P0001172  | 2,10579 | 1,9354  | 1,12536266  | ENST00000450546 | N/A       | N/A          | N/A            |
| A_24_P256155   | 8,17174 | 8,00143 | 1,125300258 | N/A             | 390010    | NM_001146340 | NKX1-2         |
| A_32_P54475    | 6,64287 | 6,47257 | 1,125292458 | N/A             | N/A       | CU676483     | N/A            |
| A_33_P3276520  | 4,47861 | 4,30831 | 1,125292458 | N/A             | N/A       | AK123704     | N/A            |
| A_33_P3301980  | 1,97664 | 1,80638 | 1,125261259 | N/A             | N/A       | N/A          | N/A            |
| A_22_P00024867 | 8,76478 | 8,59454 | 1,12524566  | ENST00000450850 | N/A       | N/A          | N/A            |
| A_22_P00023388 | 1,88518 | 1,71495 | 1,12523786  | ENST00000548557 | 101929110 | NR_110109    | CASC18         |
| A_33_P3416503  | 8,73894 | 8,56871 | 1,12523786  | ENST00000534054 | 254552    | NM_181843    | NUDT8          |
| A_24_P156748   | 3,05918 | 2,88896 | 1,125230061 | ENST00000374276 | 7780      | NM_001004434 | SLC30A2        |
| A_21_P0002367  | 1,88931 | 1,71911 | 1,125214462 | N/A             | N/A       | N/A          | Inc-WDR69-1    |
| A_23_P109235   | 12,732  | 12,5618 | 1,125214462 | ENST00000493399 | 22913     | NM_016732    | RALY           |
| A_21_P0013432  | 6,69499 | 6,5248  | 1,125206662 | N/A             | N/A       | N/A          | XLOC_I2_013863 |
| A_22_P00024087 | 1,89763 | 1,72746 | 1,125191064 | ENST00000428673 | N/A       | N/A          | N/A            |
| A_33_P3230976  | 9,01666 | 8,8465  | 1,125183265 | ENST00000369110 | 5550      | NM_002726    | PREP           |
| A_22_P00005915 | 1,88887 | 1,71876 | 1,125144269 | N/A             | 100506311 | NR_038367    | HOTAIRM1       |
| A_33_P3290955  | 10,5718 | 10,4017 | 1,125136471 | ENST00000488801 | 340390    | NR_024207    | KIAA1875       |
| A_33_P3248987  | 2,26461 | 2,09451 | 1,125136471 | ENST00000548615 | 403284    | NM_001005519 | OR6C68         |
| A_22_P00000304 | 1,88012 | 1,71005 | 1,125113074 | ENST00000451476 | 100507562 | DB451623     | LOC100507562   |
| A_23_P303423   | 5,46655 | 5,29648 | 1,125113074 | ENST00000264313 | 57606     | NM_020846    | SLAIN2         |
| A_33_P3279851  | 5,32883 | 5,15877 | 1,125105276 | ENST00000616781 | 100286979 | NR_037931    | ANAPC1P1       |
| A_22_P00008715 | 1,53424 | 1,3642  | 1,125089678 | ENST00000530150 | 101409254 | NR_102423    | LINC00681      |
| A_33_P3275741  | 5,61963 | 5,44961 | 1,125074081 | ENST00000498393 | 8547      | AK309540     | FCN3           |
| A_24_P106953   | 10,3698 | 10,1998 | 1,125058485 | ENST00000497109 | 80142     | NM_025072    | PTGES2         |
| A_33_P3353742  | 1,89053 | 1,72055 | 1,125042888 | N/A             | 101929523 | XR_252136    | LOC101929523   |
| A_24_P237661   | 6,50069 | 6,33073 | 1,125027292 | ENST00000486162 | 9611      | NM_001190438 | NCOR1          |
| A_33_P3368985  | 1,88339 | 1,71344 | 1,125019494 | ENST00000611781 | 91074     | NM_052997    | ANKRD30A       |
| A_22_P00007150 | 10,9016 | 10,7317 | 1,124980504 | ENST00000610458 | 10991     | NM_006841    | SLC38A3        |
| A_22_P00013998 | 1,86807 | 1,69817 | 1,124980504 | ENST00000521199 | N/A       | N/A          | N/A            |
| A_19_P00322953 | 4,36847 | 4,19872 | 1,124863544 | ENST00000450531 | N/A       | N/A          | N/A            |



|                |         |         |             |                 |        |              |                |
|----------------|---------|---------|-------------|-----------------|--------|--------------|----------------|
| A_23_P105313   | 12,5503 | 12,3806 | 1,12482456  | ENST00000424014 | 1967   | NM_001414    | EIF2B1         |
| A_21_P0014791  | 6,09929 | 5,92959 | 1,12482456  | N/A             | N/A    | N/A          | N/A            |
| A_24_P247536   | 7,1729  | 7,00323 | 1,12480117  | ENST00000492686 | 257415 | NM_001040057 | FAM133B        |
| A_33_P3419032  | 1,89538 | 1,72579 | 1,124738799 | N/A             | 1740   | AK127150     | DLG2           |
| A_33_P3374190  | 6,12944 | 5,95986 | 1,124731003 | ENST00000368593 | 3632   | NM_005539    | INPP5A         |
| A_22_P00002303 | 3,94253 | 3,77297 | 1,124715411 | N/A             | N/A    | BC039543     | Inc-C11orf30-1 |
| A_33_P3413808  | 4,87939 | 4,70987 | 1,124684228 | ENST00000217074 | 80336  | NM_001124756 | PABPC1L        |
| A_23_P130149   | 10,3172 | 10,1477 | 1,124668637 | ENST00000518175 | 2027   | NM_001976    | ENO3           |
| A_21_P0013639  | 5,00954 | 4,84009 | 1,124629659 | N/A             | 387628 | N/A          | KGFLP1         |
| A_22_P00016106 | 4,23694 | 4,06752 | 1,124606274 | N/A             | N/A    | N/A          | Inc-THSD4-4    |
| A_21_P0006530  | 2,25341 | 2,084   | 1,124598478 | N/A             | N/A    | N/A          | Inc-RPS6KA3-2  |
| A_22_P00023458 | 2,13735 | 1,96794 | 1,124598478 | ENST00000427035 | N/A    | AK093194     | N/A            |
| A_24_P258955   | 10,6418 | 10,4724 | 1,124590683 | ENST00000360385 | 57693  | NM_020933    | ZNF317         |
| A_22_P00025102 | 2,85714 | 2,68777 | 1,124567298 | ENST00000427950 | N/A    | N/A          | N/A            |
| A_21_P0001721  | 1,92197 | 1,75268 | 1,124504941 | N/A             | N/A    | N/A          | Inc-CAMK2N1-2  |
| A_32_P108889   | 1,87366 | 1,70438 | 1,124497146 | ENST00000360631 | 9201   | NM_004734    | DCLK1          |
| A_22_P00022586 | 1,89707 | 1,7278  | 1,124489352 | N/A             | N/A    | BG199905     | Inc-BET3L-1    |
| A_22_P00021154 | 6,58535 | 6,41609 | 1,124481558 | N/A             | N/A    | N/A          | Inc-HIST4H4-2  |
| A_22_P00000818 | 1,8977  | 1,7285  | 1,124434793 | ENST00000525376 | N/A    | AF075035     | N/A            |
| A_22_P00012010 | 1,89118 | 1,72199 | 1,124426999 | N/A             | 339862 | NM_001257177 | LOC339862      |
| A_23_P4082     | 6,42649 | 6,25734 | 1,124395823 | ENST00000436961 | 10693  | NM_006584    | CCT6B          |
| A_33_P3285038  | 12,1327 | 11,9636 | 1,124356856 | ENST00000380189 | 91012  | NM_001281731 | CERS5          |
| A_22_P00011493 | 1,85296 | 1,68386 | 1,124356856 | N/A             | N/A    | BX098350     | Inc-PARP2-1    |
| A_23_P102060   | 12,1288 | 11,9597 | 1,124356856 | ENST00000491720 | 6744   | NM_006751    | SSFA2          |
| A_24_P196384   | 6,36516 | 6,19609 | 1,124333475 | ENST00000357484 | 348110 | NM_001282380 | ARPIN          |
| A_32_P89899    | 1,88614 | 1,71707 | 1,124333475 | ENST00000295452 | 2565   | NM_173536    | GABRG1         |
| A_22_P00025599 | 1,87117 | 1,70211 | 1,124325682 | N/A             | N/A    | AK127472     | Inc-ECHDC1-1   |
| A_23_P117437   | 1,89303 | 1,724   | 1,124302303 | ENST00000329715 | 64806  | NM_022789    | IL25           |
| A_19_P00317631 | 1,86602 | 1,69707 | 1,12423996  | N/A             | 400960 | NR_033872    | PCBP1-AS1      |
| A_23_P161644   | 7,57659 | 7,40767 | 1,124216582 | N/A             | 10432  | NM_006328    | RBM14          |
| A_33_P3292028  | 11,3483 | 11,1794 | 1,124200997 | ENST00000262960 | 91039  | NM_139159    | DPP9           |
| A_19_P00318761 | 5,25071 | 5,08194 | 1,124099701 | ENST00000563248 | N/A    | N/A          | N/A            |
| A_33_P3352263  | 1,88897 | 1,72021 | 1,12409191  | ENST00000309403 | 441608 | NM_001005469 | OR5B3          |

|                |         |         |             |                 |           |              |                   |
|----------------|---------|---------|-------------|-----------------|-----------|--------------|-------------------|
| A_21_P0014573  | 6,07201 | 5,90327 | 1,124076326 | N/A             | N/A       | XR_111287    | N/A               |
| A_23_P26358    | 12,0988 | 11,9301 | 1,124045161 | ENST00000522480 | 23049     | NM_015092    | SMG1              |
| A_24_P243741   | 1,89083 | 1,72213 | 1,124045161 | ENST00000398201 | 53616     | NM_021721    | ADAM22            |
| A_23_P20732    | 10,3979 | 10,2292 | 1,124045161 | ENST00000372146 | 9329      | NM_012204    | GTF3C4            |
| A_22_P00002496 | 3,73532 | 3,56663 | 1,12403737  | ENST00000567765 | N/A       | XR_248193    | N/A               |
| A_22_P00008532 | 3,79066 | 3,62197 | 1,12403737  | N/A             | N/A       | BG700082     | Inc-KCNJ9-1       |
| A_33_P3489646  | 5,03399 | 4,86536 | 1,123990623 | ENST00000227163 | 6688      | NM_001080547 | SPI1              |
| A_33_P3209096  | 10,0057 | 9,83709 | 1,123975041 | ENST00000464088 | 965       | NM_001779    | CD58              |
| A_33_P3316800  | 11,4418 | 11,2732 | 1,123967251 | ENST00000242057 | 196       | NM_001621    | AHR               |
| A_24_P15062    | 6,02659 | 5,858   | 1,12395946  | N/A             | 57474     | NM_020714    | ZNF490            |
| A_33_P3323019  | 6,51109 | 6,34255 | 1,123920507 | ENST00000451300 | N/A       | N/A          | N/A               |
| A_22_P00002697 | 5,06173 | 4,89319 | 1,123920507 | N/A             | N/A       | BX648392     | Inc-C2-2          |
| A_21_P0000711  | 4,34341 | 4,17492 | 1,123881556 | N/A             | 100506462 | NR_037969    | SRD5A3-AS1        |
| A_22_P00004189 | 1,89399 | 1,72555 | 1,123842606 | ENST00000504409 | 100507616 | XR_424398    | LOC100507616      |
| A_22_P00023317 | 1,8614  | 1,69298 | 1,123827026 | ENST00000435813 | 101928687 | NR_120641    | LINC01468         |
| A_22_P00015124 | 4,42139 | 4,25303 | 1,123780288 | N/A             | N/A       | DA967691     | Inc-SNX24-1       |
| A_33_P3370930  | 6,54851 | 6,38016 | 1,123772499 | ENST00000393559 | 3912      | N/A          | LAMB1             |
| A_22_P00020493 | 3,82498 | 3,65663 | 1,123772499 | ENST00000262160 | 4087      | N/A          | SMAD2             |
| A_33_P3255587  | 1,89651 | 1,72819 | 1,123749131 | ENST00000414562 | 144817    | NR_038433    | LINC00330         |
| A_33_P3243337  | 15,4148 | 15,2465 | 1,123733553 | ENST00000262947 | 56005     | NM_019107    | MYDGF             |
| A_22_P00020000 | 2,19802 | 2,02977 | 1,123694608 | ENST00000444210 | N/A       | N/A          | N/A               |
| A_23_P24345    | 13,5163 | 13,3481 | 1,123655664 | ENST00000354884 | 91252     | NM_152264    | SLC39A13          |
| A_33_P3334043  | 4,80084 | 4,63269 | 1,123616722 | N/A             | N/A       | N/A          | N/A               |
| A_33_P3335511  | 1,88279 | 1,71465 | 1,123608933 | ENST00000461387 | 83416     | NM_001195388 | FCRL5             |
| A_33_P3289144  | 9,88479 | 9,71671 | 1,123562205 | ENST00000473228 | N/A       | N/A          | N/A               |
| A_33_P3354569  | 10,1532 | 9,98519 | 1,123507691 | ENST00000310454 | 2820      | NM_001083112 | GPD2              |
| A_22_P00022589 | 1,89103 | 1,72302 | 1,123507691 | ENST00000451328 | N/A       | N/A          | N/A               |
| A_23_P397347   | 5,54177 | 5,37381 | 1,123468753 | ENST00000436788 | 254394    | NM_153255    | MCM9              |
| A_21_P0000942  | 4,85298 | 4,68505 | 1,123445392 | N/A             | N/A       | N/A          | Inc-RER1-1        |
| A_33_P3410206  | 15,5046 | 15,3367 | 1,123422031 | ENST00000614968 | 9605      | NM_004913    | VPS9D1            |
| A_21_P0009448  | 1,56641 | 1,39857 | 1,12337531  | N/A             | N/A       | N/A          | Inc-AP001496.1-10 |
| A_33_P3421984  | 9,95208 | 9,78428 | 1,123344164 | ENST00000467153 | 23553     | NM_012269    | HYAL4             |
| A_23_P102000   | 1,96314 | 1,79534 | 1,123344164 | ENST00000241393 | 7852      | NM_001008540 | CXCR4             |

|                |         |         |             |                 |           |              |                |
|----------------|---------|---------|-------------|-----------------|-----------|--------------|----------------|
| A_22_P00008162 | 2,16454 | 1,99678 | 1,123313018 | ENST00000520426 | N/A       | N/A          | N/A            |
| A_23_P136405   | 5,55954 | 5,39181 | 1,12328966  | ENST00000334409 | 5133      | NM_005018    | PDCD1          |
| A_33_P3324415  | 1,80806 | 1,64036 | 1,123266302 | ENST00000534734 | N/A       | JF968459     | N/A            |
| A_23_P120254   | 11,3747 | 11,207  | 1,123266302 | ENST00000419235 | 56940     | NM_020185    | DUSP22         |
| A_33_P3280784  | 7,7309  | 7,56322 | 1,12325073  | ENST00000372277 | 80195     | NM_025125    | TMEM254        |
| A_22_P00010985 | 2,20539 | 2,03771 | 1,12325073  | ENST00000439974 | 3688      | N/A          | ITGB1          |
| A_21_P0002820  | 1,85705 | 1,6894  | 1,123227373 | ENST00000417384 | N/A       | N/A          | N/A            |
| A_21_P0002497  | 6,34639 | 6,17874 | 1,123227373 | N/A             | N/A       | N/A          | Inc-C2orf76-1  |
| A_24_P383050   | 1,88307 | 1,71547 | 1,123188446 | ENST00000294445 | 148930    | NM_001097611 | KNCN           |
| A_23_P156327   | 15,7172 | 15,5496 | 1,123188446 | ENST00000504411 | 7045      | NM_000358    | TGFBI          |
| A_33_P3256355  | 6,76738 | 6,59981 | 1,12316509  | N/A             | N/A       | N/A          | N/A            |
| A_21_P0014810  | 1,86423 | 1,69666 | 1,12316509  | ENST00000485835 | N/A       | AK055358     | N/A            |
| A_21_P0009625  | 6,97742 | 6,80986 | 1,123157305 | ENST00000589930 | 100996324 | NR_110763    | LOC100996324   |
| A_22_P00005968 | 3,36561 | 3,19807 | 1,123141735 | N/A             | N/A       | N/A          | Inc-EYS-1      |
| A_21_P0008828  | 5,30119 | 5,13368 | 1,12311838  | N/A             | N/A       | N/A          | Inc-C2CD4A-5   |
| A_23_P158096   | 12,4591 | 12,2916 | 1,123110595 | ENST00000468565 | 85301     | NM_032888    | COL27A1        |
| A_33_P3262089  | 4,6698  | 4,50231 | 1,12310281  | ENST00000412796 | 26492     | NM_001291438 | OR8G2          |
| A_24_P83379    | 7,77243 | 7,60498 | 1,123071672 | ENST00000426414 | 23001     | AK092019     | WDFY3          |
| A_21_P0008050  | 1,83054 | 1,66312 | 1,123048318 | N/A             | N/A       | N/A          | Inc-UFM1-1     |
| A_21_P0004291  | 1,87174 | 1,70432 | 1,123048318 | N/A             | N/A       | N/A          | Inc-GRAMD3-1   |
| A_22_P00015646 | 4,80035 | 4,63294 | 1,123040534 | N/A             | N/A       | AK095652     | Inc-SUSD1-1    |
| A_21_P0013296  | 1,89438 | 1,727   | 1,123017181 | N/A             | N/A       | N/A          | XLOC_I2_013783 |
| A_23_P353574   | 6,68713 | 6,51979 | 1,122986045 | ENST00000493790 | 140609    | NM_133494    | NEK7           |
| A_21_P0009713  | 1,89241 | 1,72509 | 1,122970477 | N/A             | N/A       | N/A          | Inc-KCTD15-1   |
| A_21_P0012329  | 3,53549 | 3,36818 | 1,122962693 | N/A             | N/A       | N/A          | XLOC_I2_009441 |
| A_23_P97021    | 10,5622 | 10,3949 | 1,12295491  | ENST00000246314 | 192669    | NM_024852    | AGO3           |
| A_22_P00016046 | 1,87638 | 1,70913 | 1,122915992 | N/A             | N/A       | N/A          | Inc-TGFBRAP1-5 |
| A_22_P00008255 | 1,88796 | 1,72073 | 1,122900425 | N/A             | N/A       | N/A          | Inc-IRS2-3     |
| A_33_P3247372  | 6,39929 | 6,23212 | 1,122853726 | ENST00000588424 | N/A       | AK124064     | N/A            |
| A_22_P00001740 | 1,84955 | 1,6824  | 1,12283816  | ENST00000450854 | N/A       | N/A          | N/A            |
| A_21_P0010380  | 3,41694 | 3,24984 | 1,122799246 | ENST00000450365 | N/A       | N/A          | N/A            |
| A_24_P413884   | 9,58311 | 9,41602 | 1,122791463 | ENST00000233505 | 1058      | NM_001809    | CENPA          |
| A_22_P00000650 | 6,4202  | 6,25317 | 1,122744769 | N/A             | N/A       | N/A          | Inc-ACSS3-2    |

|                |         |         |             |                 |           |           |                |
|----------------|---------|---------|-------------|-----------------|-----------|-----------|----------------|
| A_33_P3348787  | 1,87766 | 1,71064 | 1,122736986 | ENST00000505736 | N/A       | N/A       | N/A            |
| A_22_P00007292 | 4,95051 | 4,78355 | 1,122690294 | N/A             | N/A       | N/A       | Inc-GPR27-1    |
| A_23_P211056   | 7,86863 | 7,70167 | 1,122690294 | ENST00000497873 | 94104     | NM_013329 | PAXBP1         |
| A_22_P00009565 | 1,8594  | 1,69246 | 1,12267473  | N/A             | N/A       | N/A       | Inc-MAP3K9-2   |
| A_33_P3252333  | 16,9787 | 16,8118 | 1,122643604 | ENST00000577988 | 26851     | NR_003271 | SNORD3B-1      |
| A_33_P3330666  | 6,40139 | 6,23454 | 1,122604696 | ENST00000501888 | 730971    | AK094096  | FLJ36777       |
| A_22_P00016718 | 9,4895  | 9,32268 | 1,122581353 | N/A             | N/A       | N/A       | Inc-TRAPPC12-3 |
| A_33_P3312030  | 9,8263  | 9,65949 | 1,122573572 | ENST00000507296 | N/A       | N/A       | N/A            |
| A_33_P7717144  | 6,7149  | 6,5481  | 1,122565791 | N/A             | N/A       | AF238323  | Inc-RNF39-4    |
| A_22_P00014525 | 1,87661 | 1,70982 | 1,12255801  | N/A             | 100874029 | NR_046728 | CFAP44-AS1     |
| A_24_P89413    | 8,19884 | 8,03213 | 1,122495764 | ENST00000376656 | 56658     | NM_021253 | TRIM39         |
| A_21_P0003043  | 1,86154 | 1,69484 | 1,122487983 | N/A             | N/A       | N/A       | Inc-MBNL1-1    |
| A_33_P3296308  | 11,3264 | 11,1597 | 1,122487983 | ENST00000382247 | 54876     | NM_017741 | DCAF16         |
| A_33_P3319900  | 6,20969 | 6,043   | 1,122480203 | N/A             | 23574     | NR_026881 | PRG1           |
| A_33_P3423185  | 1,87971 | 1,71306 | 1,122449081 | N/A             | 102725171 | XR_432995 | LOC102725171   |
| A_33_P3375657  | 3,69132 | 3,52469 | 1,122433521 | N/A             | N/A       | N/A       | N/A            |
| A_33_P3785051  | 2,84935 | 2,68272 | 1,122433521 | ENST00000486180 | 100130771 | BC062748  | EFCAB10        |
| A_33_P3257125  | 1,70322 | 1,53661 | 1,122417961 | ENST00000409678 | 147111    | NM_178493 | NOTUM          |
| A_22_P00025214 | 5,0611  | 4,89449 | 1,122417961 | ENST00000438148 | N/A       | N/A       | N/A            |
| A_21_P0002662  | 1,87896 | 1,71244 | 1,122347943 | N/A             | N/A       | N/A       | Inc-VPS54-1    |
| A_23_P107036   | 12,3306 | 12,1641 | 1,122332384 | ENST00000577419 | 8834      | NM_003876 | TMEM11         |
| A_23_P38482    | 11,0564 | 10,8899 | 1,122332384 | ENST00000320316 | 79142     | NM_024297 | PHF23          |
| A_22_P00020834 | 3,68158 | 3,51511 | 1,122309046 | ENST00000418770 | 29994     | N/A       | BAZ2B          |
| A_23_P502343   | 6,3117  | 6,14524 | 1,122301267 | ENST00000350009 | 80332     | NM_025220 | ADAM33         |
| A_24_P188800   | 4,35422 | 4,18778 | 1,122285708 | ENST00000339875 | 55016     | NM_017923 | mar-01         |
| A_21_P0014335  | 1,86321 | 1,6968  | 1,122262371 | N/A             | N/A       | AK057367  | Inc-C16orf95-1 |
| A_22_P00024452 | 3,38598 | 3,21958 | 1,122254592 | N/A             | N/A       | N/A       | Inc-AKT1-2     |
| A_21_P0006134  | 1,83685 | 1,67045 | 1,122254592 | N/A             | N/A       | N/A       | Inc-TEK-2      |
| A_33_P3226542  | 11,3166 | 11,1502 | 1,122254592 | ENST00000580533 | 26851     | NR_003271 | SNORD3B-1      |
| A_22_P00011575 | 3,00632 | 2,83996 | 1,122223477 | ENST00000514802 | N/A       | XR_427505 | N/A            |
| A_22_P00014578 | 2,09199 | 1,92567 | 1,122192363 | N/A             | 100874222 | NR_047001 | RNF219-AS1     |
| A_21_P0006534  | 1,85342 | 1,68711 | 1,122184585 | N/A             | N/A       | N/A       | Inc-FOXP3-1    |
| A_21_P0010944  | 7,3455  | 7,17923 | 1,122153472 | N/A             | N/A       | N/A       | XLOC_I2_001953 |

|                |         |         |             |                 |           |              |                    |
|----------------|---------|---------|-------------|-----------------|-----------|--------------|--------------------|
| A_32_P33083    | 7,17575 | 7,0095  | 1,122137915 | ENST00000317103 | 51480     | NM_016378    | VCX2               |
| A_22_P00025491 | 1,81126 | 1,64509 | 1,122075693 | N/A             | N/A       | CA394584     | Inc-PANK3-4        |
| A_24_P290163   | 8,3915  | 8,22535 | 1,122060137 | ENST00000337787 | 641298    | AL834164     | SMG1P1             |
| A_24_P12539    | 9,67512 | 9,50902 | 1,12202125  | ENST00000304056 | 25948     | NM_015483    | KBTBD2             |
| A_33_P3302687  | 6,53543 | 6,36933 | 1,12202125  | ENST00000458711 | 55739     | NM_001242881 | CARKD              |
| A_22_P00000440 | 1,86987 | 1,70382 | 1,121982365 | N/A             | N/A       | N/A          | Inc-AC079135.1.1-1 |
| A_22_P00014897 | 10,6354 | 10,4694 | 1,121943481 | N/A             | N/A       | N/A          | Inc-SLC7A6OS-2     |
| A_33_P3356502  | 12,3618 | 12,1958 | 1,121943481 | ENST00000272519 | 5899      | NM_002881    | RALB               |
| A_23_P165657   | 12,9618 | 12,7958 | 1,121943481 | ENST00000490674 | 6574      | NM_005415    | SLC20A1            |
| A_22_P00014553 | 1,88416 | 1,7182  | 1,121912374 | ENST00000423433 | N/A       | N/A          | N/A                |
| A_22_P00011964 | 1,87314 | 1,70721 | 1,121889045 | N/A             | N/A       | AY726584     | Inc-PKP2-1         |
| A_33_P3382236  | 6,72329 | 6,55744 | 1,121826836 | ENST00000392901 | 57698     | NM_001258299 | KIAA1598           |
| A_22_P00003227 | 1,88265 | 1,7168  | 1,121826836 | ENST00000567127 | N/A       | N/A          | N/A                |
| A_19_P00804859 | 5,39258 | 5,22677 | 1,121795733 | N/A             | 407006    | NR_029635    | MIR221             |
| A_33_P3263523  | 11,2019 | 11,0361 | 1,121787957 | ENST00000492757 | 79169     | NM_024319    | C1orf35            |
| A_23_P253221   | 11,9769 | 11,8111 | 1,121787957 | ENST00000525839 | 50649     | NM_032995    | ARHGEF4            |
| A_21_P0008427  | 1,88957 | 1,7238  | 1,12176463  | ENST00000553386 | N/A       | N/A          | N/A                |
| A_33_P3411612  | 5,43463 | 5,26886 | 1,12176463  | ENST00000593461 | 100130519 | N/A          | TMEM221            |
| A_22_P00008429 | 5,89952 | 5,73377 | 1,121749079 | N/A             | 100874028 | NR_046723    | SGOL1-AS1          |
| A_33_P3383189  | 8,8594  | 8,69373 | 1,121686878 | ENST00000394967 | 100131390 | NM_001145250 | SP9                |
| A_23_P29365    | 8,857   | 8,69138 | 1,121648004 | ENST00000477973 | 23429     | NM_012234    | RYBP               |
| A_23_P79661    | 9,79642 | 9,6308  | 1,121648004 | ENST00000376300 | 54520     | NM_019044    | CCDC93             |
| A_33_P3280461  | 8,23323 | 8,06765 | 1,121616906 | ENST00000354618 | 9967      | NM_005119    | THRAP3             |
| A_21_P0003999  | 3,42663 | 3,26106 | 1,121609131 | N/A             | 257396    | N/A          | LOC257396          |
| A_22_P00000687 | 1,88497 | 1,71947 | 1,121554712 | N/A             | N/A       | DA422316     | Inc-ADAM19-1       |
| A_33_P3235531  | 1,60759 | 1,44215 | 1,121508069 | N/A             | 912       | NM_001766    | CD1D               |
| A_21_P0002684  | 7,88101 | 7,71558 | 1,121500295 | ENST00000295549 | 375295    | N/A          | LINC01116          |
| A_21_P0001918  | 1,86589 | 1,70052 | 1,121453654 | ENST00000412593 | N/A       | N/A          | N/A                |
| A_33_P3218316  | 2,00992 | 1,84459 | 1,121422561 | ENST00000335523 | 342865    | NM_001146339 | VSTM2B             |
| A_33_P3232682  | 6,45795 | 6,29268 | 1,121375924 | N/A             | N/A       | N/A          | Inc-AFG3L2-1       |
| A_33_P3306267  | 3,43644 | 3,27119 | 1,121360378 | ENST00000481563 | 5080      | NM_000280    | PAX6               |
| A_21_P0008019  | 3,5568  | 3,39156 | 1,121352605 | N/A             | N/A       | N/A          | Inc-GPR183-3       |
| A_21_P0006318  | 3,04732 | 2,88211 | 1,121329288 | N/A             | N/A       | N/A          | Inc-DENND1A-1      |

|                |         |         |             |                 |           |              |                |
|----------------|---------|---------|-------------|-----------------|-----------|--------------|----------------|
| A_33_P3306510  | 10,6867 | 10,5215 | 1,121321515 | ENST00000262077 | 9972      | NM_001278209 | NUP153         |
| A_22_P00011185 | 4,18398 | 4,01878 | 1,121321515 | ENST00000431997 | 102724000 | N/A          | LOC102724000   |
| A_22_P00019137 | 1,94292 | 1,77775 | 1,121298198 | N/A             | 144742    | NR_024246    | LINC00934      |
| A_33_P3345314  | 4,25403 | 4,0889  | 1,12126711  | ENST00000477786 | 55734     | NM_199427    | ZFP64          |
| A_22_P00007655 | 5,61815 | 5,45303 | 1,121259338 | ENST00000562573 | N/A       | N/A          | N/A            |
| A_33_P3378531  | 17,7786 | 17,6135 | 1,121243794 | ENST00000299353 | 57412     | NM_020682    | AS3MT          |
| A_33_P3250740  | 1,88747 | 1,72239 | 1,12122825  | ENST00000441525 | 139425    | NM_001017930 | DCAF8L1        |
| A_22_P00001397 | 1,88977 | 1,72469 | 1,12122825  | N/A             | 101928937 | NR_110095    | LOC101928937   |
| A_33_P3299619  | 1,89096 | 1,72591 | 1,121204935 | ENST00000373686 | 26737     | NM_001005236 | OR1L1          |
| A_33_P3325753  | 7,20737 | 7,04233 | 1,121197164 | ENST00000406386 | 11078     | NM_001039141 | TRIOBP         |
| A_22_P00023092 | 3,91229 | 3,74726 | 1,121189392 | N/A             | N/A       | N/A          | Inc-IGFL3-3    |
| A_33_P3377744  | 1,87618 | 1,71119 | 1,121158307 | N/A             | N/A       | AK000950     | N/A            |
| A_33_P3299232  | 5,08102 | 4,91608 | 1,121119451 | ENST00000390289 | 96610     | NR_027293    | BMS1P20        |
| A_22_P00009028 | 6,41585 | 6,25091 | 1,121119451 | N/A             | 100131193 | NR_024580    | CCDC183-AS1    |
| A_22_P00009040 | 9,20999 | 9,04506 | 1,121111168 | ENST00000412797 | N/A       | XM_006710560 | N/A            |
| A_21_P0014060  | 3,81571 | 3,65078 | 1,121111168 | ENST00000484368 | 5279      | XR_426864    | PIGC           |
| A_23_P71440    | 13,1381 | 12,9732 | 1,121088367 | ENST00000405786 | 51125     | NM_001002296 | GOLGA7         |
| A_21_P0012415  | 3,99306 | 3,82822 | 1,121041744 | N/A             | N/A       | N/A          | XLOC_I2_010013 |
| A_32_P102252   | 11,4001 | 11,2353 | 1,121010662 | N/A             | N/A       | N/A          | N/A            |
| A_23_P56798    | 11,0536 | 10,8889 | 1,120932962 | ENST00000272067 | 52        | NM_004300    | ACP1           |
| A_21_P0010070  | 2,27164 | 2,10698 | 1,120901884 | N/A             | N/A       | N/A          | Inc-TCFL5-3    |
| A_23_P202520   | 15,4679 | 15,3033 | 1,120855268 | ENST00000369252 | 3983      | NM_001003408 | ABLIM1         |
| A_33_P3244424  | 6,23953 | 6,07498 | 1,120816423 | N/A             | 6635      | NM_003094    | SNRPE          |
| A_33_P3231363  | 5,64898 | 5,48444 | 1,120808654 | ENST00000424861 | 6788      | AK075229     | STK3           |
| A_33_P3217364  | 1,87721 | 1,71271 | 1,120777579 | ENST00000332857 | 727830    | NM_001083124 | SPATA31A3      |
| A_21_P0010929  | 1,83791 | 1,67341 | 1,120777579 | N/A             | N/A       | N/A          | XLOC_I2_001772 |
| A_33_P3243454  | 1,87859 | 1,71412 | 1,120754273 | ENST00000341415 | 388555    | NM_207393    | IGFL3          |
| A_24_P59735    | 1,88426 | 1,71983 | 1,1207232   | ENST00000400405 | 283514    | NM_198849    | SIAH3          |
| A_23_P500300   | 8,28971 | 8,1253  | 1,120707663 | ENST00000376688 | 89870     | NM_033229    | TRIM15         |
| A_23_P80032    | 9,61503 | 9,45062 | 1,120707663 | ENST00000343380 | 1869      | NM_005225    | E2F1           |
| A_23_P94501    | 16,2587 | 16,0943 | 1,120699895 | ENST00000376911 | 301       | NM_000700    | ANXA1          |
| A_22_P00006521 | 1,87323 | 1,70887 | 1,120668823 | N/A             | 283089    | N/A          | WDR11-AS1      |
| A_32_P478512   | 1,82628 | 1,66194 | 1,120653287 | ENST00000562624 | 26082     | NR_026771    | DKFZP434L187   |

|                |         |         |             |                 |        |              |                |
|----------------|---------|---------|-------------|-----------------|--------|--------------|----------------|
| A_33_P3366733  | 1,86754 | 1,70322 | 1,120637752 | N/A             | N/A    | DB511925     | N/A            |
| A_33_P3240258  | 15,8467 | 15,6824 | 1,120622217 | ENST00000237530 | 6185   | NM_002951    | RPN2           |
| A_23_P98167    | 10,6691 | 10,5048 | 1,120622217 | ENST00000227471 | 81622  | NM_030930    | UNC93B1        |
| A_33_P3384694  | 5,33822 | 5,17393 | 1,120614449 | ENST00000510773 | N/A    | N/A          | N/A            |
| A_33_P3280030  | 9,77483 | 9,61057 | 1,120591147 | ENST00000359204 | 118924 | NM_145246    | FRA10AC1       |
| A_23_P54447    | 6,06908 | 5,90494 | 1,120497943 | N/A             | 81698  | NR_026813    | LINC00597      |
| A_24_P15502    | 14,9796 | 14,8155 | 1,120466876 | ENST00000522529 | N/A    | N/A          | N/A            |
| A_22_P00012009 | 1,84127 | 1,67717 | 1,120466876 | ENST00000449613 | N/A    | N/A          | N/A            |
| A_22_P00009714 | 1,88377 | 1,71968 | 1,12045911  | N/A             | N/A    | AK057936     | Inc-MCF2L-1    |
| A_22_P00005837 | 1,88632 | 1,72225 | 1,120443577 | ENST00000411989 | 400866 | NR_027066    | LINC00114      |
| A_22_P00004540 | 1,86582 | 1,70176 | 1,120435811 | N/A             | N/A    | AK123984     | Inc-CREG1-3    |
| A_21_P0008633  | 1,882   | 1,71794 | 1,120435811 | N/A             | N/A    | N/A          | Inc-MAPK6-11   |
| A_33_P3296366  | 9,8259  | 9,66189 | 1,12039698  | ENST00000342480 | 50512  | NM_015720    | PODXL2         |
| A_23_P119627   | 14,6881 | 14,5241 | 1,120389214 | ENST00000502506 | 51079  | NM_015965    | NDUFA13        |
| A_22_P00017145 | 3,77011 | 3,60622 | 1,120303792 | ENST00000565563 | N/A    | BC017738     | N/A            |
| A_33_P3397835  | 1,88168 | 1,71779 | 1,120303792 | ENST00000441065 | 442247 | NM_001013734 | RFPL4B         |
| A_33_P3395947  | 4,17318 | 4,00932 | 1,120280496 | ENST00000563926 | 3566   | NM_001257407 | IL4R           |
| A_21_P0012734  | 1,86391 | 1,70008 | 1,120257201 | N/A             | N/A    | N/A          | Inc-MMRN1-2    |
| A_22_P00001157 | 2,80105 | 2,63723 | 1,120249436 | N/A             | N/A    | N/A          | Inc-AMOTL2-2   |
| A_33_P3351351  | 4,92092 | 4,75712 | 1,120233906 | ENST00000382795 | 9639   | BC040474     | ARHGEF10       |
| A_21_P0007034  | 6,57632 | 6,41256 | 1,120202847 | N/A             | N/A    | N/A          | Inc-EBF3-4     |
| A_33_P3385002  | 3,34497 | 3,18122 | 1,120195082 | ENST00000415014 | 2002   | NM_001114123 | ELK1           |
| A_24_P383901   | 13,3238 | 13,1601 | 1,12015626  | ENST00000423293 | N/A    | N/A          | N/A            |
| A_24_P228550   | 1,84843 | 1,68473 | 1,12015626  | ENST00000217133 | 81027  | NM_030773    | TUBB1          |
| A_23_P154972   | 1,88869 | 1,72505 | 1,120109675 | ENST00000620282 | 129025 | NM_080740    | ZNF280A        |
| A_23_P139388   | 9,57752 | 9,41388 | 1,120109675 | ENST00000480887 | 51773  | NM_016578    | RSF1           |
| A_33_P3316913  | 5,45303 | 5,28941 | 1,120094147 | ENST00000605179 | N/A    | N/A          | N/A            |
| A_33_P3382267  | 6,29998 | 6,13638 | 1,120078619 | ENST00000313084 | 9919   | NM_014866    | SEC16A         |
| A_21_P0013169  | 4,22163 | 4,05806 | 1,120055328 | N/A             | N/A    | N/A          | XL0C_I2_013267 |
| A_33_P3404189  | 6,70997 | 6,54641 | 1,120047565 | ENST00000532255 | 727957 | NM_032450    | MROH1          |
| A_22_P00000535 | 2,69543 | 2,53189 | 1,120032038 | ENST00000409910 | N/A    | N/A          | N/A            |
| A_33_P3556154  | 1,88444 | 1,7209  | 1,120032038 | ENST00000536422 | 283435 | XR_247884    | LOC283435      |
| A_33_P3313555  | 10,441  | 10,2775 | 1,120000984 | ENST00000471658 | 55269  | NM_001042414 | PSPC1          |

|                |         |         |             |                 |           |              |                 |
|----------------|---------|---------|-------------|-----------------|-----------|--------------|-----------------|
| A_23_P19182    | 5,0526  | 4,8891  | 1,120000984 | ENST00000378339 | 51308     | NM_016606    | REEP2           |
| A_21_P0010150  | 1,87966 | 1,71624 | 1,11993888  | ENST00000418942 | N/A       | N/A          | N/A             |
| A_22_P00023585 | 6,50347 | 6,34006 | 1,119931117 | ENST00000505627 | 101929610 | XR_242476    | LOC101929610    |
| A_22_P00002412 | 4,89829 | 4,73488 | 1,119931117 | ENST00000553613 | N/A       | N/A          | N/A             |
| A_33_P3364028  | 1,87476 | 1,71136 | 1,119923354 | ENST00000608484 | N/A       | AB529254     | N/A             |
| A_22_P00002251 | 2,81369 | 2,65032 | 1,119900066 | N/A             | N/A       | N/A          | Inc-C10orf125-1 |
| A_22_P00012286 | 3,68013 | 3,51676 | 1,119900066 | N/A             | 101930611 | XR_250546    | LOC101930611    |
| A_33_P3422947  | 1,88842 | 1,72511 | 1,119853492 | ENST00000389394 | 1768      | NM_001370    | DNAH6           |
| A_33_P3359306  | 12,9779 | 12,8146 | 1,11984573  | ENST00000552286 | 9112      | NM_004689    | MTA1            |
| A_32_P194246   | 10,4513 | 10,288  | 1,11984573  | ENST00000409790 | 23274     | NM_015226    | CLEC16A         |
| A_22_P00014860 | 9,12297 | 8,95968 | 1,119837968 | ENST00000436294 | N/A       | N/A          | N/A             |
| A_33_P3389872  | 1,88693 | 1,72366 | 1,119822444 | N/A             | 120892    | AK127729     | LRRK2           |
| A_23_P61674    | 8,13163 | 7,96838 | 1,11980692  | ENST00000611733 | 57396     | NM_020666    | CLK4            |
| A_22_P00006591 | 1,66088 | 1,49766 | 1,119783634 | ENST00000565336 | N/A       | BC041977     | N/A             |
| A_33_P3298587  | 12,7611 | 12,5979 | 1,119768111 | ENST00000438103 | 22904     | NM_014963    | SBNO2           |
| A_33_P3277679  | 3,36152 | 3,19832 | 1,119768111 | N/A             | N/A       | N/A          | N/A             |
| A_32_P75357    | 3,12352 | 2,96033 | 1,119760349 | ENST00000358095 | 57565     | BC021267     | KLHL14          |
| A_21_P0009452  | 1,59158 | 1,4284  | 1,119752588 | N/A             | N/A       | N/A          | Inc-NDUFV2-1    |
| A_33_P3397399  | 8,2536  | 8,09042 | 1,119752588 | ENST00000342558 | 5532      | NM_001289969 | PPP3CB          |
| A_22_P00015761 | 1,87952 | 1,71636 | 1,119737065 | ENST00000584566 | N/A       | N/A          | N/A             |
| A_22_P00006363 | 1,88729 | 1,72414 | 1,119729303 | ENST00000452366 | N/A       | N29049       | N/A             |
| A_21_P0007546  | 7,76968 | 7,60653 | 1,119729303 | ENST00000551021 | 100288798 | NR_125381    | LOC100288798    |
| A_24_P208737   | 7,41716 | 7,25403 | 1,119713781 | N/A             | 100126793 | NR_073566    | GHRLOS          |
| A_24_P943193   | 8,95702 | 8,79393 | 1,119682736 | ENST00000409936 | 9581      | NM_006036    | PREPL           |
| A_22_P00009458 | 1,84584 | 1,68276 | 1,119674975 | ENST00000518701 | N/A       | N/A          | N/A             |
| A_23_P375372   | 1,86857 | 1,70551 | 1,119659453 | ENST00000403106 | 2243      | NM_021871    | FGA             |
| A_33_P3441583  | 15,0505 | 14,8875 | 1,119612889 | N/A             | N/A       | BM453041     | N/A             |
| A_21_P0010596  | 9,88179 | 9,7188  | 1,119605128 | ENST00000453464 | 401934    | N/A          | RNF223          |
| A_33_P3404221  | 6,656   | 6,49303 | 1,119589607 | N/A             | N/A       | N/A          | N/A             |
| A_23_P250571   | 7,84177 | 7,67885 | 1,119550806 | ENST00000514595 | 1657      | NM_005509    | DMXL1           |
| A_33_P3417820  | 11,7908 | 11,6279 | 1,119535286 | ENST00000611699 | 79159     | NM_024313    | NOL12           |
| A_24_P234856   | 4,67137 | 4,50848 | 1,119527526 | ENST00000297156 | 819       | NM_001745    | CAMLG           |
| A_23_P138253   | 11,7749 | 11,6121 | 1,119457688 | ENST00000495554 | 26097     | NM_015607    | CHTOP           |



|                |         |         |             |                 |           |              |                       |
|----------------|---------|---------|-------------|-----------------|-----------|--------------|-----------------------|
| A_23_P152136   | 11,4103 | 11,2475 | 1,119457688 | ENST00000328514 | 64785     | NM_022770    | GIN53                 |
| A_21_P0004209  | 1,86942 | 1,70663 | 1,119449929 | N/A             | N/A       | N/A          | Inc-IRX1-4            |
| A_33_P3286036  | 2,22931 | 2,06654 | 1,11943441  | ENST00000395264 | 360200    | AB109390     | TMPRSS9               |
| A_33_P3291567  | 6,30116 | 6,1384  | 1,119426651 | ENST00000307180 | 203062    | NM_145003    | TSNARE1               |
| A_23_P65609    | 8,67532 | 8,51259 | 1,119403373 | ENST00000434192 | 2957      | NM_015859    | GTF2A1                |
| A_21_P0014772  | 1,88239 | 1,71971 | 1,119364578 | N/A             | N/A       | N/A          | N/A                   |
| A_33_P3347343  | 5,15946 | 4,99678 | 1,119364578 | ENST00000358653 | 79839     | NM_001093729 | CCDC102B              |
| A_22_P00005502 | 1,87575 | 1,71308 | 1,119356819 | N/A             | 100874194 | NR_046533    | CLDN10-AS1            |
| A_23_P159741   | 8,98264 | 8,82005 | 1,119294751 | ENST00000342274 | 54880     | NM_017745    | BCOR                  |
| A_33_P3393013  | 1,88576 | 1,72317 | 1,119294751 | ENST00000485578 | 91461     | N/A          | PKDCC                 |
| A_33_P3313685  | 2,25444 | 2,09187 | 1,119279234 | N/A             | 100131821 | AK123052     | LOC100131821          |
| A_21_P0013333  | 7,33659 | 7,17405 | 1,11925596  | ENST00000443595 | 222234    | NM_001145268 | FAM185A               |
| A_22_P00024399 | 1,85769 | 1,69517 | 1,119240443 | N/A             | N/A       | N/A          | Inc-PGBD5-2           |
| A_23_P157628   | 5,28293 | 5,12048 | 1,119186139 | ENST00000302247 | 1673      | NM_004942    | DEFB4A                |
| A_21_P0008366  | 1,86652 | 1,70409 | 1,119170624 | N/A             | N/A       | N/A          | Inc-RP11-322L20.1.1-7 |
| A_33_P3305093  | 6,80689 | 6,6445  | 1,119139594 | ENST00000403903 | 100125288 | NM_001103167 | ZGLP1                 |
| A_22_P00016060 | 3,51584 | 3,35347 | 1,11912408  | ENST00000438736 | N/A       | N/A          | N/A                   |
| A_33_P3395738  | 9,64419 | 9,48185 | 1,119100808 | N/A             | 9564      | AK127004     | BCAR1                 |
| A_33_P3554053  | 7,47232 | 7,30999 | 1,119093052 | N/A             | 751580    | BQ009527     | LINC00106             |
| A_22_P00010840 | 2,29625 | 2,13395 | 1,119069781 | N/A             | 101927272 | NR_110908    | LOC101927272          |
| A_21_P0006539  | 1,80683 | 1,64468 | 1,118953435 | N/A             | N/A       | N/A          | Inc-RLIM-1            |
| A_21_P0013100  | 7,83411 | 7,67196 | 1,118953435 | N/A             | N/A       | N/A          | XL0C_I2_013131        |
| A_21_P0003313  | 1,88131 | 1,7192  | 1,118922411 | N/A             | 730971    | N/A          | FLJ36777              |
| A_23_P252748   | 10,3308 | 10,1687 | 1,118914656 | ENST00000526601 | 7748      | NM_007152    | ZNF195                |
| A_21_P0002587  | 1,84281 | 1,68072 | 1,1189069   | N/A             | N/A       | N/A          | Inc-RASGRP3-5         |
| A_21_P0000570  | 4,3854  | 4,22333 | 1,118891389 | N/A             | 646023    | NR_028483    | ADORA2A-AS1           |
| A_33_P3226735  | 4,32385 | 4,16181 | 1,118868122 | N/A             | 7955      | NR_026876    | RNF217-AS1            |
| A_33_P3329255  | 7,59134 | 7,42933 | 1,118844856 | ENST00000398701 | 8509      | BC018681     | NDST2                 |
| A_21_P0014220  | 1,88453 | 1,72255 | 1,118821591 | ENST00000518392 | N/A       | XR_108904    | N/A                   |
| A_23_P209694   | 9,16405 | 9,00209 | 1,118806081 | ENST00000414060 | 64895     | NM_022894    | PAPOLG                |
| A_21_P0004691  | 3,24878 | 3,08686 | 1,118775061 | ENST00000434437 | N/A       | N/A          | N/A                   |
| A_21_P0000086  | 5,09837 | 4,93656 | 1,118689762 | ENST00000545875 | 2802      | NM_001172557 | GOLGA3                |
| A_23_P42507    | 9,51202 | 9,3503  | 1,118619977 | ENST00000340881 | 85313     | NM_139126    | PPIL4                 |

|                |         |         |             |                 |           |              |                |
|----------------|---------|---------|-------------|-----------------|-----------|--------------|----------------|
| A_23_P207600   | 11,3349 | 11,1732 | 1,11860447  | ENST00000469475 | 5717      | NM_002815    | PSMD11         |
| A_24_P373768   | 6,5235  | 6,36188 | 1,118542443 | ENST00000585889 | 2696      | NM_000164    | GIPR           |
| A_22_P00006436 | 1,91732 | 1,75572 | 1,118526937 | N/A             | N/A       | N/A          | Inc-FBXO7-2    |
| A_23_P69586    | 12,4155 | 12,2539 | 1,118526937 | ENST00000500085 | 2195      | NM_005245    | FAT1           |
| A_33_P3395651  | 4,06628 | 3,90472 | 1,118495925 | ENST00000611914 | 56110     | NM_032054    | PCDHGA5        |
| A_22_P00010310 | 7,00655 | 6,84499 | 1,118495925 | ENST00000534584 | 101927503 | XR_428869    | LOC101927503   |
| A_22_P00022911 | 6,35969 | 6,19814 | 1,118488172 | N/A             | N/A       | N/A          | Inc-GATAD1-2   |
| A_33_P3230090  | 10,2857 | 10,1242 | 1,118449409 | ENST00000393085 | 767558    | NM_001128619 | LUZP6          |
| A_33_P3414242  | 6,52661 | 6,36516 | 1,118410647 | ENST00000396704 | 4340      | NM_001008229 | MOG            |
| A_33_P3290235  | 6,83065 | 6,66928 | 1,118348631 | ENST00000375671 | 149950    | NR_034152    | LOC149950      |
| A_21_P0001337  | 5,1542  | 4,99284 | 1,118340879 | N/A             | N/A       | N/A          | Inc-LRRC8D-2   |
| A_33_P3306192  | 8,45576 | 8,29441 | 1,118333127 | ENST00000432196 | 390594    | NM_001101362 | KBTBD13        |
| A_21_P0011166  | 1,65722 | 1,49588 | 1,118325376 | N/A             | N/A       | N/A          | XLOC_I2_003877 |
| A_21_P0000311  | 5,15037 | 4,98906 | 1,118302121 | N/A             | 677801    | NR_002955    | SNORA14A       |
| A_23_P118516   | 11,2483 | 11,087  | 1,11829437  | ENST00000482741 | 51030     | NM_016078    | TVP23B         |
| A_23_P41246    | 10,5619 | 10,4006 | 1,11829437  | ENST00000507272 | 10227     | NM_001120    | MFS10          |
| A_23_P207507   | 12,0249 | 11,8637 | 1,118216858 | ENST00000503337 | 8714      | NM_003786    | ABCC3          |
| A_21_P0000777  | 1,84571 | 1,68451 | 1,118216858 | N/A             | 100506071 | NR_038356    | LOC100506071   |
| A_24_P912041   | 1,80074 | 1,63959 | 1,118178104 | ENST00000429771 | N/A       | N/A          | N/A            |
| A_21_P0001307  | 5,3338  | 5,17267 | 1,118162603 | N/A             | N/A       | N/A          | Inc-FGGY-6     |
| A_23_P211561   | 6,59072 | 6,42961 | 1,118147102 | ENST00000401548 | 150365    | NM_152513    | MEI1           |
| A_23_P431430   | 1,87219 | 1,71115 | 1,118092851 | ENST00000378252 | N/A       | BX281604     | N/A            |
| A_23_P87560    | 12,1313 | 11,9703 | 1,118061851 | ENST00000256015 | 694       | NM_001731    | BTG1           |
| A_33_P3261293  | 2,41712 | 2,25612 | 1,118061851 | ENST00000528188 | 27122     | NM_015881    | DKK3           |
| A_33_P3375026  | 2,40653 | 2,24561 | 1,117999854 | N/A             | N/A       | N/A          | N/A            |
| A_22_P00002802 | 6,96059 | 6,79968 | 1,117992105 | ENST00000414141 | 100133985 | NR_024444    | LOC100133985   |
| A_24_P271049   | 8,20978 | 8,04896 | 1,117922363 | ENST00000577910 | 497661    | NM_001035005 | C18orf32       |
| A_24_P227831   | 10,3638 | 10,203  | 1,117906865 | ENST00000399410 | 4363      | NM_004996    | ABCC1          |
| A_23_P211064   | 7,38889 | 7,22809 | 1,117906865 | ENST00000472588 | 94104     | NM_013329    | PAXBP1         |
| A_21_P0001543  | 1,88189 | 1,72114 | 1,117868122 | N/A             | N/A       | N/A          | Inc-BARHL2-2   |
| A_21_P0006561  | 1,88436 | 1,72364 | 1,117844877 | N/A             | N/A       | N/A          | Inc-ATP6AP2-2  |
| A_23_P120472   | 3,49311 | 3,3324  | 1,117837129 | ENST00000201031 | 7022      | NM_003222    | TFAP2C         |
| A_22_P00000614 | 4,28493 | 4,12423 | 1,117829381 | N/A             | 100131067 | NR_034123    | CKMT2-AS1      |

|                |         |         |             |                 |           |              |               |
|----------------|---------|---------|-------------|-----------------|-----------|--------------|---------------|
| A_32_P34444    | 11,1615 | 11,0008 | 1,117829381 | ENST00000257209 | 80206     | NM_025135    | FHOD3         |
| A_23_P153026   | 12,4864 | 12,3257 | 1,117829381 | ENST00000390015 | 2548      | NM_000152    | GAA           |
| A_33_P3309054  | 10,1599 | 9,9992  | 1,117829381 | N/A             | N/A       | AB209400     | N/A           |
| A_32_P68148    | 10,9896 | 10,8289 | 1,117829381 | N/A             | 148203    | NR_027130    | ZNF738        |
| A_24_P98161    | 3,90818 | 3,74749 | 1,117821633 | ENST00000394507 | 889       | NM_194455    | KRIT1         |
| A_33_P3252228  | 2,56226 | 2,40158 | 1,117813884 | ENST00000378475 | 140767    | N/A          | NRSN1         |
| A_33_P3281867  | 5,65791 | 5,49729 | 1,117767397 | ENST00000605170 | N/A       | N/A          | N/A           |
| A_33_P3424507  | 6,15775 | 5,99718 | 1,117728659 | ENST00000380383 | 256892    | NM_001004752 | OR51F1        |
| A_22_P00020501 | 7,16668 | 7,00612 | 1,117720911 | ENST00000563607 | 5261      | NM_001172432 | PHKG2         |
| A_33_P3220160  | 6,83184 | 6,67128 | 1,117720911 | N/A             | 5880      | AK096924     | RAC2          |
| A_23_P160318   | 10,9878 | 10,8273 | 1,117674427 | ENST00000488128 | 1307      | NM_001856    | COL16A1       |
| A_33_P3334895  | 5,27406 | 5,11359 | 1,117651186 | ENST00000330684 | 2903      | NM_001134407 | GRIN2A        |
| A_22_P00007596 | 3,54658 | 3,38616 | 1,117612452 | N/A             | N/A       | N/A          | Inc-HDDC3-3   |
| A_23_P217737   | 4,95509 | 4,7947  | 1,117589212 | ENST00000343533 | 538       | NM_000052    | ATP7A         |
| A_23_P133375   | 9,54698 | 9,3866  | 1,117581466 | ENST00000355943 | 91137     | NM_138773    | SLC25A46      |
| A_33_P3232643  | 1,88149 | 1,72118 | 1,117527242 | N/A             | N/A       | N/A          | N/A           |
| A_23_P123563   | 18,0853 | 17,925  | 1,117519496 | ENST00000315377 | 6194      | NM_001010    | RPS6          |
| A_24_P752208   | 5,01922 | 4,85892 | 1,117519496 | ENST00000558517 | N/A       | N/A          | N/A           |
| A_24_P93874    | 1,86699 | 1,70675 | 1,11747302  | ENST00000565306 | N/A       | BC016740     | N/A           |
| A_22_P00008971 | 2,68547 | 2,52524 | 1,117465274 | ENST00000560238 | N/A       | N/A          | N/A           |
| A_33_P3394993  | 3,74184 | 3,58164 | 1,117442038 | ENST00000529398 | 80243     | NM_025170    | PREX2         |
| A_23_P162589   | 11,6745 | 11,5143 | 1,117442038 | ENST00000229022 | 7421      | NM_001017535 | VDR           |
| A_33_P3354990  | 6,50099 | 6,34084 | 1,117403311 | ENST00000449320 | 8871      | AK296242     | SYNJ2         |
| A_33_P3322466  | 1,84349 | 1,68343 | 1,117333606 | ENST00000422916 | N/A       | N/A          | N/A           |
| A_21_P0000402  | 1,8114  | 1,65136 | 1,117318116 | N/A             | 767581    | NR_003197    | SNORD114-5    |
| A_33_P3333360  | 8,61163 | 8,45163 | 1,117287138 | ENST00000589159 | 29965     | NM_001199054 | CDIP1         |
| A_32_P70315    | 5,86654 | 5,70654 | 1,117287138 | ENST00000287814 | 7079      | NM_003256    | TIMP4         |
| A_21_P0014724  | 4,50172 | 4,34173 | 1,117279394 | N/A             | 100507336 | XR_251947    | LOC100507336  |
| A_23_P307310   | 4,44511 | 4,28515 | 1,117256161 | ENST00000352105 | 176       | NM_013227    | ACAN          |
| A_21_P0000973  | 1,83379 | 1,67384 | 1,117248417 | ENST00000445039 | N/A       | N/A          | N/A           |
| A_21_P0004951  | 5,49885 | 5,33893 | 1,117225184 | N/A             | N/A       | N/A          | Inc-AIG1-1    |
| A_21_P0006313  | 1,84526 | 1,68536 | 1,117209696 | N/A             | N/A       | N/A          | Inc-TNFSF15-2 |
| A_22_P00024791 | 7,56382 | 7,40392 | 1,117209696 | ENST00000553537 | N/A       | DA338882     | N/A           |

|                |         |         |             |                 |           |              |              |
|----------------|---------|---------|-------------|-----------------|-----------|--------------|--------------|
| A_24_P418203   | 7,41809 | 7,25821 | 1,117194209 | ENST00000443583 | 79937     | NM_033655    | CNTNAP3      |
| A_22_P00019097 | 4,57809 | 4,41822 | 1,117186465 | ENST00000519793 | N/A       | DA442494     | N/A          |
| A_22_P00024704 | 1,88002 | 1,72015 | 1,117186465 | N/A             | N/A       | N/A          | Inc-DBX1-4   |
| A_23_P112774   | 7,88457 | 7,72471 | 1,117178721 | ENST00000520105 | 11156     | NM_032611    | PTP4A3       |
| A_33_P3399181  | 8,96986 | 8,81001 | 1,117170977 | N/A             | N/A       | N/A          | N/A          |
| A_33_P3339109  | 7,12021 | 6,96036 | 1,117170977 | ENST00000512472 | 9533      | CA416988     | POLR1C       |
| A_23_P338534   | 1,85189 | 1,69209 | 1,11713226  | ENST00000244302 | 64344     | NM_022462    | HIF3A        |
| A_32_P160883   | 10,4698 | 10,31   | 1,11713226  | ENST00000508342 | 4734      | NM_198400    | NEDD4        |
| A_24_P38702    | 7,52896 | 7,36916 | 1,11713226  | ENST00000622383 | 159296    | NM_145285    | NKX2-3       |
| A_21_P0006451  | 1,87272 | 1,71294 | 1,117116773 | ENST00000433646 | N/A       | N/A          | N/A          |
| A_33_P3258782  | 4,94847 | 4,78873 | 1,117085801 | ENST00000545766 | 8905      | NM_003916    | AP1S2        |
| A_22_P00014444 | 3,18724 | 3,02753 | 1,117062572 | N/A             | N/A       | N/A          | Inc-SH2D4A-3 |
| A_21_P0002137  | 3,66578 | 3,50607 | 1,117062572 | ENST00000417096 | 102724675 | XR_425512    | LOC102724675 |
| A_33_P3344579  | 7,7813  | 7,62162 | 1,117039343 | ENST00000205402 | 1738      | NM_000108    | DLD          |
| A_23_P211126   | 9,61436 | 9,45469 | 1,117031601 | ENST00000338785 | 1859      | NM_130436    | DYRK1A       |
| A_21_P0000316  | 5,81874 | 5,65908 | 1,117023858 | N/A             | 677806    | NR_002960    | SNORA20      |
| A_19_P00322571 | 2,08849 | 1,92883 | 1,117023858 | ENST00000440347 | 440823    | NR_033319    | MIAT         |
| A_24_P184769   | 8,21931 | 8,0597  | 1,116985146 | ENST00000424963 | 91833     | NM_181291    | WDR20        |
| A_33_P3402565  | 14,3634 | 14,2038 | 1,116977403 | ENST00000418664 | 1832      | NM_004415    | DSP          |
| A_23_P429689   | 9,09409 | 8,93453 | 1,116946434 | ENST00000040738 | 259282    | NM_148894    | BOD1L1       |
| A_32_P213965   | 2,65268 | 2,49321 | 1,116876758 | ENST00000527757 | 100507205 | NR_038309    | LOC100507205 |
| A_32_P46765    | 9,76738 | 9,60794 | 1,116853533 | ENST00000550333 | 91298     | NM_001009894 | C12orf29     |
| A_24_P316019   | 4,34238 | 4,18296 | 1,116838051 | ENST00000562783 | 101059918 | NM_001282484 | GOLGA8R      |
| A_22_P00024480 | 1,97903 | 1,81962 | 1,116830309 | N/A             | 101927911 | NR_110818    | LOC101927911 |
| A_22_P00001863 | 1,86848 | 1,70907 | 1,116830309 | N/A             | 100129316 | N/A          | LOC100129316 |
| A_23_P13873    | 13,1251 | 12,9657 | 1,116822568 | ENST00000435120 | 8079      | NM_005439    | MLF2         |
| A_21_P0012428  | 1,8691  | 1,70972 | 1,116807086 | N/A             | 102723457 | N/A          | LOC102723457 |
| A_22_P00005637 | 7,06649 | 6,90711 | 1,116807086 | ENST00000434790 | N/A       | N/A          | N/A          |
| A_24_P677634   | 13,8117 | 13,6524 | 1,116745158 | ENST00000622243 | 493754    | NR_111977    | LOC493754    |
| A_22_P00004414 | 4,65013 | 4,49085 | 1,116729677 | ENST00000562524 | N/A       | AK055419     | N/A          |
| A_33_P3375869  | 1,88219 | 1,72297 | 1,116683235 | N/A             | 100128950 | AK124198     | LOC100128950 |
| A_21_P0009376  | 4,3061  | 4,14688 | 1,116683235 | N/A             | N/A       | N/A          | Inc-NLGN2-1  |
| A_33_P3388806  | 1,8925  | 1,73329 | 1,116675494 | ENST00000370899 | 100526835 | NM_001199327 | FPGT-TNNI3K  |

|                |         |         |             |                 |           |              |                       |
|----------------|---------|---------|-------------|-----------------|-----------|--------------|-----------------------|
| A_22_P00021958 | 2,86971 | 2,7105  | 1,116675494 | N/A             | N/A       | DB049326     | Inc-RP11-728F11.4.1-2 |
| A_21_P0010464  | 1,85735 | 1,69815 | 1,116667754 | ENST00000426467 | 100507657 | XR_109755    | LOC100507657          |
| A_19_P00328886 | 7,92021 | 7,76102 | 1,116660014 | N/A             | 55000     | NR_110492    | TUG1                  |
| A_22_P00019835 | 1,8814  | 1,72222 | 1,116652274 | N/A             | N/A       | N/A          | Inc-POU3F2-3          |
| A_22_P00001089 | 1,88226 | 1,72314 | 1,116605835 | N/A             | N/A       | N/A          | Inc-ALDH9A1-1         |
| A_33_P3262660  | 1,88177 | 1,72267 | 1,116590355 | ENST00000425038 | 27437     | N/A          | HSFY1P1               |
| A_33_P3277898  | 1,82186 | 1,66276 | 1,116590355 | ENST00000466888 | 222008    | NM_182546    | VSTM2A                |
| A_24_P203953   | 13,1924 | 13,0333 | 1,116590355 | N/A             | 439951    | XR_171055    | LOC439951             |
| A_22_P00019165 | 4,488   | 4,32891 | 1,116582616 | ENST00000553904 | 1112      | XM_006720352 | FOXN3                 |
| A_21_P0008371  | 1,86949 | 1,71047 | 1,11652844  | N/A             | N/A       | N/A          | Inc-GPR65-1           |
| A_23_P18292    | 17,2981 | 17,1391 | 1,116512962 | ENST00000396203 | 9045      | NM_001034996 | RPL14                 |
| A_33_P3414228  | 6,69642 | 6,53751 | 1,116443312 | N/A             | N/A       | N/A          | N/A                   |
| A_33_P3297978  | 13,0299 | 12,871  | 1,116435574 | ENST00000288235 | 4643      | NM_004998    | MYO1E                 |
| A_33_P3253169  | 1,85986 | 1,70097 | 1,116427835 | ENST00000358138 | 389649    | AK125570     | C8orf86               |
| A_33_P3319281  | 4,74516 | 4,58636 | 1,116358191 | ENST00000402430 | 50636     | BC028162     | ANO7                  |
| A_22_P00004771 | 4,65449 | 4,49584 | 1,116242127 | N/A             | N/A       | CU680705     | Inc-CTU2-2            |
| A_19_P00316820 | 6,50584 | 6,34721 | 1,116226653 | N/A             | N/A       | N/A          | Inc-WRNIP1-2          |
| A_23_P303891   | 11,2277 | 11,0691 | 1,116203442 | ENST00000607093 | 353133    | NM_178351    | LCE1C                 |
| A_22_P00020566 | 5,32126 | 5,16267 | 1,116195705 | N/A             | N/A       | N/A          | Inc-VSTM2B-1          |
| A_33_P3405888  | 4,43611 | 4,27753 | 1,116187968 | N/A             | 100133130 | AF130105     | LOC100133130          |
| A_19_P00316528 | 5,2086  | 5,0501  | 1,116126075 | ENST00000578650 | N/A       | N/A          | N/A                   |
| A_23_P67847    | 12,7114 | 12,5529 | 1,116126075 | ENST00000349752 | 79623     | NM_024572    | GALNT14               |
| A_33_P3220813  | 1,8444  | 1,68596 | 1,116079658 | ENST00000367652 | 167838    | N/A          | TXLNB                 |
| A_21_P0005916  | 5,02398 | 4,86558 | 1,116048714 | N/A             | N/A       | N/A          | Inc-TSNARE1-1         |
| A_32_P3914     | 5,60137 | 5,44297 | 1,116048714 | ENST00000242140 | 644150    | NM_001080529 | WIPF3                 |
| A_21_P0001769  | 1,56598 | 1,40758 | 1,116048714 | ENST00000420828 | N/A       | N/A          | N/A                   |
| A_24_P142228   | 18,8476 | 18,6892 | 1,116048714 | ENST00000392730 | 6137      | NM_033251    | RPL13                 |
| A_22_P00005085 | 1,86461 | 1,70623 | 1,116033242 | N/A             | N/A       | N/A          | Inc-DFNA5-2           |
| A_23_P201238   | 9,24482 | 9,08646 | 1,116017771 | ENST00000368838 | 81609     | NM_030918    | SNX27                 |
| A_22_P00004837 | 1,87714 | 1,71881 | 1,115994564 | ENST00000571890 | N/A       | DA430127     | N/A                   |
| A_22_P00004825 | 6,21835 | 6,06017 | 1,115878538 | ENST00000455931 | N/A       | N/A          | N/A                   |
| A_21_P0006507  | 1,88554 | 1,72742 | 1,115832131 | N/A             | N/A       | N/A          | Inc-ARMCX4-1          |
| A_23_P390097   | 7,66316 | 7,50505 | 1,115824396 | ENST00000380853 | 158219    | NM_152574    | TTC39B                |

|                |         |         |             |                 |           |              |               |
|----------------|---------|---------|-------------|-----------------|-----------|--------------|---------------|
| A_23_P48088    | 4,49737 | 4,33926 | 1,115824396 | ENST00000266557 | 939       | NM_001242    | CD27          |
| A_23_P99260    | 13,8256 | 13,6675 | 1,115816662 | ENST00000535095 | 10988     | NM_006838    | METAP2        |
| A_23_P38618    | 9,51335 | 9,35525 | 1,115816662 | ENST00000225609 | 9487      | NM_004278    | PIGL          |
| A_22_P00022369 | 1,96968 | 1,81159 | 1,115808928 | N/A             | N/A       | N/A          | Inc-TSC22D1-2 |
| A_33_P3305526  | 1,84636 | 1,68827 | 1,115808928 | N/A             | N/A       | N/A          | N/A           |
| A_33_P3251205  | 1,88079 | 1,72272 | 1,11579346  | ENST00000390316 | N/A       | AF194657     | N/A           |
| A_33_P3293336  | 8,125   | 7,96694 | 1,115785726 | ENST00000369236 | 2674      | NM_005264    | GFRA1         |
| A_22_P00011428 | 6,73332 | 6,57529 | 1,115762524 | N/A             | N/A       | BC013195     | Inc-PAM16-1   |
| A_23_P34176    | 10,7428 | 10,5848 | 1,115739322 | ENST00000380861 | 55841     | NM_015691    | WWC3          |
| A_23_P15876    | 1,8511  | 1,69314 | 1,115708388 | ENST00000361673 | 115701    | NM_052947    | ALPK2         |
| A_23_P87011    | 6,96477 | 6,80689 | 1,115646522 | ENST00000392951 | 6876      | NM_001001522 | TAGLN         |
| A_24_P320410   | 1,91544 | 1,7576  | 1,11561559  | ENST00000274520 | 3578      | NM_000590    | IL9           |
| A_33_P8912881  | 10,0659 | 9,90806 | 1,11561559  | ENST00000456514 | 101101772 | N/A          | LINC00601     |
| A_22_P00004398 | 4,27219 | 4,11438 | 1,115592391 | ENST00000601302 | 644100    | N/A          | ARL14EPL      |
| A_22_P00025909 | 1,87227 | 1,71446 | 1,115592391 | ENST00000515410 | 5864      | N/A          | RAB3A         |
| A_33_P3284019  | 15,2099 | 15,0521 | 1,115584659 | ENST00000373057 | 116113    | NM_001012426 | FOXP4         |
| A_21_P0011774  | 5,15749 | 4,99973 | 1,115553729 | ENST00000593461 | 100130519 | N/A          | TMEM221       |
| A_22_P00004262 | 3,94502 | 3,78734 | 1,115491871 | ENST00000425125 | N/A       | N/A          | N/A           |
| A_21_P0006117  | 3,92403 | 3,76638 | 1,115468675 | N/A             | N/A       | N/A          | Inc-DMRT2-1   |
| A_23_P125771   | 6,85972 | 6,70209 | 1,115453212 | ENST00000310441 | 3054      | NM_005334    | HCFC1         |
| A_33_P3375086  | 1,82919 | 1,67157 | 1,11544548  | N/A             | N/A       | N/A          | N/A           |
| A_33_P3315856  | 10,7788 | 10,6212 | 1,115430017 | ENST00000328771 | 9704      | NM_014681    | DHX34         |
| A_22_P00008022 | 2,67834 | 2,52074 | 1,115430017 | ENST00000523363 | N/A       | N/A          | N/A           |
| A_22_P00001539 | 1,96992 | 1,81237 | 1,115391359 | ENST00000477754 | 9181      | N/A          | ARHGEF2       |
| A_33_P3418668  | 8,17461 | 8,01708 | 1,115375897 | N/A             | 347746    | NR_022011    | PWARSN        |
| A_32_P126609   | 6,32772 | 6,17019 | 1,115375897 | ENST00000361138 | 23137     | NM_015110    | SMC5          |
| A_33_P6818008  | 6,27869 | 6,12117 | 1,115368166 | N/A             | N/A       | AK096687     | Inc-GGCT-1    |
| A_23_P48237    | 11,5925 | 11,435  | 1,115352704 | ENST00000357123 | 10445     | NM_006337    | MCRS1         |
| A_23_P30474    | 12,0779 | 11,9204 | 1,115352704 | ENST00000508730 | 55100     | NM_018034    | WDR70         |
| A_23_P257043   | 6,96206 | 6,80457 | 1,115344973 | ENST00000297596 | 2669      | NM_005261    | GEM           |
| A_22_P00014551 | 5,0726  | 4,91512 | 1,115337242 | N/A             | N/A       | N/A          | Inc-SIVA1-1   |
| A_21_P0003808  | 4,77953 | 4,6221  | 1,115298588 | N/A             | N/A       | N/A          | Inc-CLDN24-1  |
| A_23_P129856   | 5,60666 | 5,44934 | 1,115213554 | ENST00000399849 | 3090      | NM_006497    | HIC1          |

|                |         |         |             |                 |           |              |                |
|----------------|---------|---------|-------------|-----------------|-----------|--------------|----------------|
| A_21_P0001900  | 7,65765 | 7,50035 | 1,115198094 | ENST00000419650 | 104326057 | N/A          | GACAT1         |
| A_21_P0006386  | 3,42515 | 3,26785 | 1,115198094 | N/A             | N/A       | N/A          | Inc-C9orf156-1 |
| A_32_P173298   | 7,33797 | 7,18067 | 1,115198094 | ENST00000302516 | 23450     | NM_012426    | SF3B3          |
| A_21_P0004540  | 1,80147 | 1,64422 | 1,115159444 | N/A             | N/A       | N/A          | Inc-CPEB4-1    |
| A_33_P3226167  | 15,4322 | 15,275  | 1,115120797 | ENST00000373312 | 64855     | NM_022833    | FAM129B        |
| A_22_P00012078 | 4,20811 | 4,05093 | 1,115105338 | ENST00000563823 | 101927957 | NR_126330    | LINC01572      |
| A_21_P0012408  | 1,8781  | 1,72094 | 1,115089879 | ENST00000492731 | N/A       | N/A          | N/A            |
| A_33_P3742500  | 5,06536 | 4,90822 | 1,115074421 | N/A             | 642947    | BC132887     | LOC642947      |
| A_32_P187663   | 5,35672 | 5,19961 | 1,115051234 | ENST00000398612 | 169270    | NM_001042416 | ZNF596         |
| A_22_P00002361 | 5,11823 | 4,96122 | 1,114973947 | N/A             | N/A       | BG432176     | Inc-C12orf43-1 |
| A_23_P30495    | 11,3096 | 11,1526 | 1,114966219 | ENST00000287936 | 3156      | NM_000859    | HMGCR          |
| A_22_P00007192 | 1,85571 | 1,69872 | 1,11495849  | ENST00000569328 | N/A       | N/A          | N/A            |
| A_21_P0003309  | 3,71924 | 3,56226 | 1,114950762 | N/A             | 7066      | N/A          | THPO           |
| A_21_P0005324  | 5,30704 | 5,1501  | 1,11491985  | ENST00000435466 | N/A       | N/A          | N/A            |
| A_23_P44617    | 10,4063 | 10,2494 | 1,114888938 | ENST00000514478 | 22820     | NM_016128    | COPG1          |
| A_23_P26570    | 4,64601 | 4,48912 | 1,11488121  | ENST00000288025 | 146456    | NM_144676    | TMED6          |
| A_33_P3311001  | 1,85121 | 1,69433 | 1,114873482 | N/A             | N/A       | N/A          | N/A            |
| A_33_P3226680  | 2,16353 | 2,0067  | 1,114834844 | N/A             | N/A       | N/A          | N/A            |
| A_19_P00322948 | 14,3981 | 14,2413 | 1,114811662 | ENST00000520619 | 641638    | NR_002599    | SNHG6          |
| A_22_P00005038 | 3,90357 | 3,74682 | 1,114773027 | N/A             | N/A       | BX116233     | Inc-DDX60L-1   |
| A_22_P00011542 | 1,8791  | 1,72236 | 1,1147653   | ENST00000505436 | N/A       | N/A          | N/A            |
| A_24_P134235   | 6,66373 | 6,50704 | 1,114726665 | ENST00000619396 | 8570      | NM_003685    | KHSRP          |
| A_33_P3381107  | 1,89327 | 1,7366  | 1,114711212 | ENST00000361284 | 128368    | NM_001004478 | OR10Z1         |
| A_21_P0002446  | 8,26756 | 8,11093 | 1,114680306 | N/A             | N/A       | N/A          | Inc-USP34-1    |
| A_23_P435444   | 6,43471 | 6,2781  | 1,114664854 | ENST00000617050 | 56108     | NM_032087    | PCDHGA7        |
| A_23_P214666   | 17,9147 | 17,7581 | 1,114657127 | ENST00000461584 | 6222      | NM_022551    | RPS18          |
| A_23_P354894   | 9,05145 | 8,89486 | 1,114649401 | ENST00000585696 | 163081    | NM_152603    | ZNF567         |
| A_22_P00012967 | 4,49876 | 4,34217 | 1,114649401 | N/A             | 768211    | XR_427509    | RELL1          |
| A_33_P3281363  | 7,17636 | 7,0198  | 1,114626223 | N/A             | 9320      | BC037956     | TRIP12         |
| A_23_P112666   | 5,64728 | 5,49074 | 1,114610771 | ENST00000335071 | 2301      | NM_012186    | FOXE3          |
| A_23_P138541   | 14,8108 | 14,6544 | 1,114502614 | ENST00000439082 | 8644      | NM_003739    | AKR1C3         |
| A_33_P3510837  | 3,82368 | 3,66732 | 1,114471714 | N/A             | N/A       | AK096443     | N/A            |
| A_22_P00006969 | 2,45682 | 2,30055 | 1,114402191 | N/A             | 100996263 | NR_121626    | LOC100996263   |

|                |         |         |             |                 |           |           |                |
|----------------|---------|---------|-------------|-----------------|-----------|-----------|----------------|
| A_33_P3239854  | 8,35895 | 8,20268 | 1,114402191 | ENST00000399138 | 54890     | NM_017758 | ALKBH5         |
| A_33_P3239634  | 7,38858 | 7,23243 | 1,114309502 | ENST00000341376 | 4800      | NM_002505 | NFYA           |
| A_33_P3217480  | 11,6608 | 11,5047 | 1,114270884 | ENST00000563053 | 8479      | NM_003609 | HIRIP3         |
| A_22_P00021919 | 4,36231 | 4,20621 | 1,114270884 | N/A             | N/A       | N/A       | Inc-LOH12CR1-1 |
| A_23_P215406   | 14,0532 | 13,8971 | 1,114270884 | ENST00000348035 | 5879      | NM_018890 | RAC1           |
| A_21_P0004301  | 1,86162 | 1,70555 | 1,114247713 | N/A             | N/A       | N/A       | Inc-SLC25A48-2 |
| A_33_P3209506  | 3,67884 | 3,52279 | 1,114232266 | ENST00000402268 | 23498     | N/A       | HAAO           |
| A_33_P3334703  | 1,93047 | 1,77449 | 1,114178205 | N/A             | N/A       | N/A       | N/A            |
| A_21_P0008008  | 3,73357 | 3,57761 | 1,114162759 | ENST00000441617 | 642345    | N/A       | MIR4500HG      |
| A_21_P0001681  | 1,62968 | 1,47376 | 1,114131869 | N/A             | N/A       | N/A       | Inc-PRKAA2-2   |
| A_24_P280926   | 14,9024 | 14,7465 | 1,114116423 | N/A             | N/A       | N/A       | N/A            |
| A_23_P500282   | 10,3957 | 10,2398 | 1,114116423 | ENST00000320580 | 55690     | NM_018026 | PACS1          |
| A_22_P00018600 | 5,20556 | 5,0497  | 1,114085534 | N/A             | N/A       | BU661971  | Inc-EMILIN2-1  |
| A_22_P00011557 | 1,79047 | 1,63464 | 1,114062368 | ENST00000569694 | N/A       | BC071818  | N/A            |
| A_24_P376707   | 12,8562 | 12,7004 | 1,114039201 | ENST00000465180 | 3068      | NM_004494 | HDGF           |
| A_22_P00013142 | 1,87748 | 1,72176 | 1,113977428 | N/A             | N/A       | N/A       | Inc-RNASEH1-3  |
| A_24_P338648   | 10,816  | 10,6603 | 1,113961985 | ENST00000261636 | 400       | NM_001177 | ARL1           |
| A_23_P100315   | 11,9698 | 11,8141 | 1,113961985 | ENST00000439661 | 26063     | NM_020664 | DECR2          |
| A_23_P26336    | 11,9369 | 11,7812 | 1,113961985 | ENST00000571405 | 29066     | NM_014153 | ZC3H7A         |
| A_22_P00016423 | 1,86487 | 1,70918 | 1,113954263 | N/A             | N/A       | N/A       | Inc-TMEM242-2  |
| A_23_P89762    | 8,48862 | 8,33294 | 1,113946542 | ENST00000262719 | 23239     | NM_194449 | PHLPP1         |
| A_33_P3241621  | 1,87453 | 1,71886 | 1,113938821 | N/A             | 100129171 | AK131268  | LOC100129171   |
| A_33_P3424794  | 4,63673 | 4,48112 | 1,113892494 | ENST00000613970 | N/A       | AF354444  | N/A            |
| A_33_P3279004  | 1,84543 | 1,68984 | 1,113877053 | ENST00000343876 | 285025    | AK129847  | CCDC141        |
| A_24_P296587   | 1,84696 | 1,69141 | 1,11384617  | ENST00000434704 | 1747      | NM_005220 | DLX3           |
| A_21_P0010897  | 1,89449 | 1,73899 | 1,113807568 | N/A             | N/A       | N/A       | XLOC_I2_002067 |
| A_24_P148043   | 11,5292 | 11,3737 | 1,113807568 | ENST00000263733 | 9917      | NM_014864 | FAM20B         |
| A_19_P00812257 | 4,55433 | 4,39885 | 1,113792127 | ENST00000412690 | 440900    | NR_034128 | LINC01191      |
| A_32_P481377   | 4,59895 | 4,44352 | 1,113753527 | ENST00000332378 | 337880    | NM_175858 | KRTAP11-1      |
| A_22_P00007227 | 3,02226 | 2,86684 | 1,113745807 | N/A             | 101927021 | NR_110065 | LOC101927021   |
| A_21_P0014748  | 4,15398 | 3,99858 | 1,113730367 | N/A             | N/A       | N/A       | N/A            |
| A_24_P116669   | 5,9572  | 5,80181 | 1,113722647 | ENST00000591773 | 124583    | NM_138793 | CANT1          |
| A_33_P3295705  | 3,58975 | 3,43444 | 1,113660891 | N/A             | N/A       | N/A       | N/A            |



|                |         |         |             |                 |           |              |                   |
|----------------|---------|---------|-------------|-----------------|-----------|--------------|-------------------|
| A_21_P0007555  | 3,55782 | 3,40266 | 1,113545107 | N/A             | N/A       | N/A          | Inc-WNT1-3        |
| A_23_P139654   | 3,73318 | 3,57803 | 1,113537389 | ENST00000537699 | 3821      | NM_007328    | KLRC1             |
| A_23_P62351    | 12,2064 | 12,0513 | 1,113498797 | ENST00000539247 | 54470     | NM_019007    | ARMCX6            |
| A_24_P916378   | 6,22679 | 6,07171 | 1,113483361 | ENST00000410076 | 92906     | BC008217     | HNRNPLL           |
| A_24_P285501   | 6,88802 | 6,73296 | 1,113467925 | ENST00000418381 | 130507    | NM_172070    | UBR3              |
| A_21_P0008074  | 1,86211 | 1,70706 | 1,113460207 | N/A             | N/A       | N/A          | Inc-AL445989.1-10 |
| A_33_P3391167  | 8,05386 | 7,89882 | 1,113452489 | ENST00000599370 | N/A       | N/A          | N/A               |
| A_23_P326931   | 3,86226 | 3,70735 | 1,113352162 | ENST00000394865 | 118491    | NM_145170    | CFAP70            |
| A_24_P931443   | 5,05547 | 4,90058 | 1,113336727 | ENST00000535815 | 8111      | NM_003485    | GPR68             |
| A_22_P00012115 | 5,00787 | 4,85298 | 1,113336727 | N/A             | N/A       | DA794686     | Inc-POLD3-4       |
| A_21_P0002503  | 1,84725 | 1,69238 | 1,113321293 | N/A             | N/A       | N/A          | Inc-POTEF-4       |
| A_33_P3362048  | 4,65911 | 4,50425 | 1,113313576 | ENST00000395682 | N/A       | N/A          | N/A               |
| A_22_P00008507 | 1,83876 | 1,68391 | 1,113305859 | N/A             | N/A       | AA416704     | Inc-KCNG4-2       |
| A_22_P00018955 | 1,89377 | 1,73893 | 1,113298143 | N/A             | N/A       | BX089860     | Inc-SOX11-1       |
| A_22_P00008477 | 1,83939 | 1,68455 | 1,113298143 | ENST00000538202 | 100507560 | XR_109124    | LOC100507560      |
| A_23_P216568   | 11,1153 | 10,9605 | 1,113267276 | ENST00000322940 | 54942     | NM_017832    | FAM206A           |
| A_24_P944222   | 6,30698 | 6,1522  | 1,113251843 | ENST00000266712 | 160418    | NM_181783    | TMTC3             |
| A_23_P82959    | 5,48689 | 5,33211 | 1,113251843 | ENST00000377317 | 8928      | NM_003923    | FOXH1             |
| A_21_P0006691  | 1,84564 | 1,69086 | 1,113251843 | ENST00000441457 | 101929684 | N/A          | LINC01520         |
| A_24_P392925   | 4,55741 | 4,40269 | 1,113205545 | ENST00000331264 | 388323    | NM_001014985 | GLTPD2            |
| A_21_P0007678  | 1,8692  | 1,71454 | 1,113159249 | N/A             | N/A       | N/A          | Inc-EFCAB4B-3     |
| A_24_P410017   | 14,2885 | 14,1339 | 1,113112955 | ENST00000409914 | 653269    | NM_001277406 | POTEI             |
| A_23_P25913    | 8,60414 | 8,44956 | 1,113097524 | ENST00000311089 | 83544     | NM_031427    | DNAL1             |
| A_24_P349387   | 17,4072 | 17,2527 | 1,113035803 | ENST00000424565 | N/A       | N/A          | N/A               |
| A_22_P00007025 | 4,51018 | 4,3557  | 1,113020373 | N/A             | N/A       | N/A          | Inc-GIP-1         |
| A_23_P402319   | 2,46548 | 2,31102 | 1,113004943 | ENST00000318469 | 202309    | AK090960     | GAPT              |
| A_33_P3313250  | 1,89042 | 1,73597 | 1,112997228 | ENST00000368150 | 128367    | NM_001004477 | OR10X1            |
| A_21_P0011223  | 2,83947 | 2,68505 | 1,112974084 | ENST00000440160 | 100874179 | N/A          | LINC00457         |
| A_22_P00016071 | 1,87085 | 1,71643 | 1,112974084 | ENST00000558846 | N/A       | N/A          | N/A               |
| A_33_P3320403  | 5,80525 | 5,65092 | 1,112904656 | N/A             | N/A       | AK130324     | N/A               |
| A_24_P332926   | 9,35562 | 9,20129 | 1,112904656 | ENST00000337018 | 10147     | NM_014884    | SUGP2             |
| A_33_P3311979  | 9,42567 | 9,27136 | 1,112889228 | ENST00000319555 | 161882    | NM_153813    | ZFPM1             |
| A_23_P256682   | 11,9307 | 11,7764 | 1,112881514 | ENST00000374987 | 27301     | NM_014481    | APEX2             |

|                |         |         |             |                 |           |              |                |
|----------------|---------|---------|-------------|-----------------|-----------|--------------|----------------|
| A_33_P3411632  | 7,42649 | 7,27221 | 1,112866086 | ENST00000392519 | 80757     | NM_025268    | TMEM121        |
| A_21_P0014180  | 1,87458 | 1,72036 | 1,112819804 | ENST00000474396 | 115330    | XM_006715643 | GPR146         |
| A_24_P162979   | 3,61754 | 3,46334 | 1,112804377 | ENST00000272421 | 79998     | NM_024933    | ANKRD53        |
| A_22_P00000943 | 3,93683 | 3,78267 | 1,112773524 | ENST00000449457 | N/A       | N/A          | N/A            |
| A_24_P880043   | 9,49015 | 9,33599 | 1,112773524 | ENST00000543648 | 84333     | NM_032373    | PCGF5          |
| A_21_P0001562  | 1,84705 | 1,69296 | 1,112719533 | N/A             | N/A       | N/A          | Inc-AMY1B-1    |
| A_33_P3356306  | 4,47376 | 4,3197  | 1,112696395 | N/A             | 254773    | AF323919     | LYG2           |
| A_33_P3787635  | 1,87469 | 1,72067 | 1,112665545 | N/A             | 440600    | NR_036595    | LOC440600      |
| A_23_P405815   | 1,81799 | 1,66397 | 1,112665545 | ENST00000164139 | 5837      | NM_005609    | PYGM           |
| A_23_P250283   | 10,0896 | 9,93569 | 1,112580712 | ENST00000409784 | 5861      | NM_004161    | RAB1A          |
| A_33_P3220149  | 16,5081 | 16,3543 | 1,112495885 | ENST00000503050 | 9794      | AB209135     | MAML1          |
| A_33_P3242503  | 1,85021 | 1,69643 | 1,112480463 | ENST00000410046 | 22891     | NM_199451    | ZNF365         |
| A_33_P3406240  | 4,16585 | 4,01209 | 1,112465041 | ENST00000272224 | 151449    | NM_182828    | GDF7           |
| A_22_P00015321 | 1,87113 | 1,71739 | 1,112449619 | ENST00000429008 | N/A       | N/A          | N/A            |
| A_33_P3361771  | 4,62057 | 4,46684 | 1,112441908 | ENST00000367478 | 7175      | NM_003292    | TPR            |
| A_33_P3365978  | 1,84194 | 1,68822 | 1,112434197 | N/A             | 93654     | NR_002331    | ST7-AS2        |
| A_32_P435367   | 14,1288 | 13,9751 | 1,112418776 | ENST00000427779 | 5710      | NM_002810    | PSMD4          |
| A_24_P74371    | 15,0006 | 14,8469 | 1,112418776 | ENST00000372459 | 5476      | NM_000308    | CTSA           |
| A_33_P3350753  | 1,82084 | 1,66716 | 1,112403354 | ENST00000433419 | 9720      | NM_014695    | CCDC144A       |
| A_23_P18939    | 10,4119 | 10,2583 | 1,112341671 | ENST00000515800 | 5921      | NM_002890    | RASA1          |
| A_33_P3351920  | 4,00567 | 3,85209 | 1,112326251 | N/A             | N/A       | N/A          | N/A            |
| A_22_P00011425 | 1,86675 | 1,71317 | 1,112326251 | ENST00000504436 | 100861468 | N/A          | LINC00492      |
| A_33_P3297080  | 3,78948 | 3,63604 | 1,112218315 | ENST00000388718 | 388698    | NM_001014342 | FLG2           |
| A_23_P56146    | 4,20668 | 4,05327 | 1,112195188 | ENST00000555978 | 84839     | NM_032753    | RAX2           |
| A_33_P3394615  | 10,6818 | 10,5284 | 1,112187479 | ENST00000327891 | 65991     | NM_023934    | FUNDC2         |
| A_22_P00022237 | 1,85844 | 1,70506 | 1,112172061 | ENST00000366253 | N/A       | N/A          | N/A            |
| A_23_P71624    | 1,81719 | 1,66384 | 1,112148934 | ENST00000358127 | 5079      | NM_016734    | PAX5           |
| A_21_P0005358  | 1,77943 | 1,62608 | 1,112148934 | N/A             | N/A       | N/A          | Inc-IL6-4      |
| A_23_P425814   | 1,86884 | 1,71553 | 1,112118099 | ENST00000335479 | 503841    | NM_001040704 | DEFB106B       |
| A_33_P3316480  | 3,7171  | 3,5638  | 1,11211039  | ENST00000529955 | 582       | AK294962     | BBS1           |
| A_22_P00007910 | 1,8703  | 1,71702 | 1,112094973 | N/A             | N/A       | N/A          | Inc-HSPA4-3    |
| A_22_P00012094 | 3,89328 | 3,74002 | 1,112079557 | N/A             | N/A       | BC034627     | Inc-PNLIPRP1-1 |
| A_33_P3590279  | 8,76318 | 8,61002 | 1,112002476 | ENST00000461109 | N/A       | N/A          | N/A            |

|                |         |         |             |                 |           |              |                |
|----------------|---------|---------|-------------|-----------------|-----------|--------------|----------------|
| A_22_P00010450 | 3,4963  | 3,34319 | 1,111963937 | ENST00000561596 | 101929222 | NR_104190    | DISC1FP1       |
| A_23_P76705    | 8,20434 | 8,05125 | 1,111948522 | ENST00000261965 | 10426     | NM_006322    | TUBGCP3        |
| A_21_P0005387  | 1,84752 | 1,69443 | 1,111948522 | N/A             | N/A       | N/A          | Inc-ZNF727-3   |
| A_23_P59613    | 4,60361 | 4,45056 | 1,111917693 | ENST00000344575 | 8326      | NM_003508    | FZD9           |
| A_33_P3274090  | 3,80037 | 3,64733 | 1,111909986 | N/A             | N/A       | N/A          | N/A            |
| A_33_P3408683  | 1,87196 | 1,71894 | 1,111894572 | N/A             | N/A       | N/A          | N/A            |
| A_23_P58506    | 10,9572 | 10,8042 | 1,111879158 | ENST00000237853 | 22936     | NM_012081    | ELL2           |
| A_22_P00020912 | 1,84624 | 1,69325 | 1,111871451 | N/A             | 100873972 | NR_046535    | GPC6-AS1       |
| A_22_P00017244 | 5,62382 | 5,47088 | 1,111832917 | ENST00000559915 | N/A       | CF595856     | N/A            |
| A_33_P3441060  | 9,58439 | 9,43148 | 1,111809797 | ENST00000400788 | 729515    | NM_018452    | TMEM242        |
| A_22_P00011426 | 1,8755  | 1,72264 | 1,111771265 | N/A             | N/A       | N/A          | Inc-PAM-4      |
| A_23_P162087   | 13,3072 | 13,1544 | 1,111725029 | ENST00000534025 | 56674     | NM_020644    | TMEM9B         |
| A_24_P92558    | 3,52828 | 3,3755  | 1,111709617 | ENST00000414387 | 641339    | NM_001039891 | ZNF674         |
| A_21_P0004664  | 5,19294 | 5,04019 | 1,1116865   | ENST00000443221 | N/A       | N/A          | N/A            |
| A_33_P3282614  | 7,12977 | 6,97703 | 1,111678795 | ENST00000388931 | 441476    | NM_001256699 | C9orf173       |
| A_21_P0010094  | 6,0461  | 5,89337 | 1,111671089 | N/A             | N/A       | N/A          | Inc-ARFGEF2-2  |
| A_24_P255874   | 5,6233  | 5,47063 | 1,111624857 | ENST00000435665 | 80868     | NR_001317    | HCG4B          |
| A_23_P96833    | 7,38046 | 7,22782 | 1,111601742 | ENST00000368093 | 89886     | NM_033438    | SLAMF9         |
| A_21_P0012634  | 2,12546 | 1,97283 | 1,111594037 | N/A             | N/A       | N/A          | XLOC_I2_010947 |
| A_22_P00021963 | 3,93487 | 3,78226 | 1,111578627 | N/A             | N/A       | N/A          | Inc-NLRP12-2   |
| A_33_P3359724  | 5,73965 | 5,58706 | 1,111563217 | ENST00000369942 | 127003    | BG717688     | C1orf194       |
| A_22_P00012313 | 1,8725  | 1,71994 | 1,111540103 | ENST00000494761 | 101927346 | XR_245076    | LOC101927346   |
| A_22_P00023572 | 6,95376 | 6,8012  | 1,111540103 | N/A             | N/A       | AL110400     | Inc-CPT2-5     |
| A_24_P356406   | 12,2802 | 12,1277 | 1,111493876 | ENST00000397195 | 5048      | NM_000430    | PAFAH1B1       |
| A_33_P3278293  | 11,6358 | 11,4833 | 1,111493876 | ENST00000263092 | 79066     | NM_024086    | METTL16        |
| A_22_P00007928 | 1,86879 | 1,71631 | 1,111478468 | N/A             | N/A       | N/A          | Inc-HTR1A-1    |
| A_21_P0004244  | 1,89017 | 1,73771 | 1,11146306  | N/A             | N/A       | N/A          | Inc-CCDC152-1  |
| A_33_P3728698  | 7,13499 | 6,98253 | 1,11146306  | ENST00000517910 | N/A       | AK127183     | N/A            |
| A_22_P00012506 | 1,85483 | 1,70239 | 1,111447652 | N/A             | N/A       | N/A          | Inc-PSMA8-1    |
| A_22_P00003912 | 3,97083 | 3,81842 | 1,11142454  | N/A             | N/A       | N/A          | Inc-CERKL-3    |
| A_33_P3310301  | 3,41863 | 3,26622 | 1,11142454  | ENST00000618208 | 23428     | NM_012244    | SLC7A8         |
| A_22_P00016315 | 4,31065 | 4,15825 | 1,111416836 | ENST00000509760 | 440119    | NR_033834    | FZD10-AS1      |
| A_33_P3294836  | 7,03192 | 6,87954 | 1,111401429 | ENST00000494826 | 79624     | NM_024573    | C6orf211       |

|                |         |         |             |                 |           |              |                       |
|----------------|---------|---------|-------------|-----------------|-----------|--------------|-----------------------|
| A_33_P3252369  | 7,32454 | 7,17216 | 1,111401429 | ENST00000412401 | 130827    | NM_144632    | TMEM182               |
| A_33_P3273732  | 6,64004 | 6,48776 | 1,111324395 | N/A             | N/A       | N/A          | Inc-BRD3-1            |
| A_23_P215997   | 1,83127 | 1,679   | 1,111316692 | ENST00000323110 | 1585      | NM_000498    | CYP11B2               |
| A_21_P0000876  | 6,70209 | 6,54984 | 1,111301286 | N/A             | 100505894 | NR_105019    | TMEM161B-AS1          |
| A_21_P0013516  | 13,6545 | 13,5023 | 1,111262772 | ENST00000513394 | N/A       | N/A          | N/A                   |
| A_21_P0006547  | 5,05816 | 4,90596 | 1,111262772 | N/A             | N/A       | N/A          | Inc-KIAA1210-2        |
| A_22_P00010255 | 5,26951 | 5,11732 | 1,111255069 | N/A             | N/A       | N/A          | Inc-MTERFD2-1         |
| A_22_P00006000 | 1,86356 | 1,71139 | 1,111239664 | N/A             | N/A       | N/A          | Inc-FABP5-5           |
| A_33_P3353116  | 3,43782 | 3,28568 | 1,111216557 | ENST00000340624 | 6462      | NM_001289115 | SHBG                  |
| A_24_P231494   | 10,0005 | 9,84843 | 1,111162641 | ENST00000373966 | 23549     | NM_012100    | DNPEP                 |
| A_33_P3418987  | 1,86682 | 1,71477 | 1,111147237 | N/A             | 729528    | NM_001024661 | PRAMEF14              |
| A_23_P63870    | 6,47009 | 6,31804 | 1,111147237 | ENST00000372690 | 142891    | NM_144660    | SAMD8                 |
| A_21_P0006225  | 3,48977 | 3,33773 | 1,111139536 | N/A             | N/A       | N/A          | Inc-GAPVD1-2          |
| A_22_P00006187 | 10,0864 | 9,93438 | 1,111124132 | N/A             | 100874295 | NR_046783    | KCND3-IT1             |
| A_23_P127995   | 14,5699 | 14,4179 | 1,111108729 | ENST00000526009 | 1207      | NM_001293    | CLNS1A                |
| A_33_P3267330  | 4,05252 | 3,9006  | 1,111047117 | ENST00000447910 | 768097    | NR_003245    | HAR1B                 |
| A_24_P46334    | 9,45643 | 9,30459 | 1,11098551  | ENST00000338517 | 60592     | NM_032547    | SCOC                  |
| A_33_P3402188  | 3,80681 | 3,65502 | 1,110947006 | ENST00000422992 | N/A       | AF116728     | N/A                   |
| A_21_P0008522  | 2,27758 | 2,12581 | 1,110931606 | N/A             | N/A       | N/A          | nc-RP11-1070N10.3.1-1 |
| A_22_P00021689 | 1,84869 | 1,69697 | 1,110893104 | ENST00000422844 | N/A       | AA456489     | N/A                   |
| A_22_P00024400 | 1,85782 | 1,70611 | 1,110885404 | N/A             | N/A       | N/A          | Inc-CYB561-4          |
| A_33_P3392807  | 2,00589 | 1,85422 | 1,110854604 | ENST00000404869 | 9014      | N/A          | TAF1B                 |
| A_21_P0006037  | 1,84786 | 1,69628 | 1,110785308 | N/A             | N/A       | N/A          | Inc-CYLC2-1           |
| A_22_P00001283 | 4,37806 | 4,22649 | 1,110777608 | ENST00000417917 | 102724312 | NR_125994    | LOC102724312          |
| A_21_P0000248  | 6,7576  | 6,60605 | 1,11076221  | N/A             | 26782     | NR_002444    | SNORA66               |
| A_23_P359647   | 12,1958 | 12,0443 | 1,110723714 | ENST00000426654 | 10725     | NM_138714    | NFAT5                 |
| A_22_P00020951 | 1,87047 | 1,71897 | 1,110723714 | ENST00000507056 | N/A       | N/A          | N/A                   |
| A_23_P331196   | 1,86863 | 1,7172  | 1,110669823 | ENST00000321731 | 317761    | NM_174978    | C14orf39              |
| A_33_P3393655  | 1,84925 | 1,69783 | 1,110662125 | ENST00000382114 | 55203     | NM_018176    | LGI2                  |
| A_33_P3331882  | 8,49894 | 8,34754 | 1,110646728 | ENST00000321949 | 23373     | NM_001098482 | CRTC1                 |
| A_22_P00016720 | 4,62624 | 4,47485 | 1,110639029 | N/A             | N/A       | N/A          | Inc-TRAPPC4-1         |
| A_33_P3761915  | 2,11824 | 1,96685 | 1,110639029 | N/A             | 28902     | BG482625     | IGKV1D-13             |
| A_24_P245108   | 7,80627 | 7,65494 | 1,11059284  | ENST00000344836 | 7874      | NM_001286458 | USP7                  |

|                |         |         |             |                 |           |           |                 |
|----------------|---------|---------|-------------|-----------------|-----------|-----------|-----------------|
| A_33_P3322879  | 1,84375 | 1,69243 | 1,110585142 | N/A             | 102724484 | NR_120522 | LOC102724484    |
| A_24_P413988   | 12,6546 | 12,5033 | 1,110569746 | ENST00000377386 | 10618     | NM_006464 | TGOLN2          |
| A_22_P00004021 | 1,83559 | 1,68431 | 1,11055435  | N/A             | N/A       | N/A       | Inc-CHN2-1      |
| A_33_P3360204  | 8,83749 | 8,68626 | 1,110515862 | N/A             | N/A       | N/A       | XL0C_I2_006958  |
| A_22_P00020616 | 1,86971 | 1,71853 | 1,110477375 | N/A             | 100873973 | NR_046536 | GPC6-AS2        |
| A_22_P00018697 | 5,13622 | 4,9851  | 1,110431193 | N/A             | 100288123 | NR_034114 | LOC100288123    |
| A_22_P00009867 | 1,86517 | 1,71406 | 1,110423496 | N/A             | N/A       | N/A       | Inc-MEX3B-3     |
| A_33_P3397935  | 2,71556 | 2,56448 | 1,110400406 | N/A             | 100132159 | NR_120496 | CALML3-AS1      |
| A_22_P00003668 | 4,74012 | 4,58911 | 1,11034653  | N/A             | N/A       | N/A       | Inc-CDC42EP1-1  |
| A_21_P0005571  | 9,97167 | 9,8207  | 1,110315745 | N/A             | N/A       | N/A       | Inc-ZKSCAN1-1   |
| A_24_P397515   | 10,6937 | 10,5428 | 1,110261873 | ENST00000377575 | 10473     | NM_006353 | HMGNA4          |
| A_23_P22364    | 1,88987 | 1,73911 | 1,110154138 | ENST00000389336 | 2917      | NM_000844 | GRM7            |
| A_23_P42042    | 9,44833 | 9,29758 | 1,110146443 | ENST00000523075 | 57226     | NM_020466 | LYRM2           |
| A_23_P23380    | 11,0541 | 10,9034 | 1,110107969 | ENST00000497050 | 64834     | NM_022821 | ELOVL1          |
| A_33_P3424347  | 3,61488 | 3,4642  | 1,11009258  | N/A             | N/A       | N/A       | N/A             |
| A_21_P0013354  | 5,64621 | 5,49558 | 1,110054108 | ENST00000472212 | 79970     | NR_027789 | ZNF767P         |
| A_22_P00005174 | 4,46741 | 4,31684 | 1,110007943 | ENST00000429044 | 340515    | NR_034157 | LINC01501       |
| A_33_P3367196  | 1,93393 | 1,7834  | 1,109977167 | ENST00000613345 | 26047     | NM_014141 | CNTNAP2         |
| A_22_P00007839 | 1,8595  | 1,70897 | 1,109977167 | N/A             | N/A       | N/A       | Inc-HPS4-3      |
| A_22_P00015599 | 1,99085 | 1,84034 | 1,10996178  | ENST00000552425 | N/A       | N/A       | N/A             |
| A_21_P0000597  | 12,1215 | 11,971  | 1,109954086 | ENST00000413075 | 1518      | N/A       | CTSLP8          |
| A_33_P3305243  | 5,95359 | 5,8031  | 1,109946393 | ENST00000373903 | 5711      | AK001065  | PSMD5           |
| A_22_P00011315 | 7,33758 | 7,1871  | 1,109938699 | ENST00000563312 | 23417     | NM_012213 | MLYCD           |
| A_22_P00008726 | 1,8623  | 1,71188 | 1,109892539 | ENST00000458254 | N/A       | N/A       | N/A             |
| A_22_P00005884 | 1,84459 | 1,69418 | 1,109884846 | ENST00000450944 | N/A       | N/A       | N/A             |
| A_32_P453550   | 1,86647 | 1,71609 | 1,109861767 | N/A             | 100506351 | XR_108863 | LOC100506351    |
| A_33_P3304893  | 4,11713 | 3,96679 | 1,109830995 | N/A             | N/A       | CB851972  | N/A             |
| A_33_P3411035  | 1,85029 | 1,69996 | 1,109823302 | ENST00000266058 | 6585      | NM_003061 | SLIT1           |
| A_21_P0012839  | 3,5905  | 3,44017 | 1,109823302 | N/A             | N/A       | N/A       | XL0C_I2_011692  |
| A_22_P00016556 | 4,35303 | 4,20271 | 1,10981561  | N/A             | N/A       | N/A       | Inc-TNFRSF10B-1 |
| A_23_P86493    | 16,1602 | 16,0099 | 1,109800225 | ENST00000370193 | 10660     | NM_006562 | LBX1            |
| A_32_P181222   | 1,86834 | 1,71805 | 1,109792532 | ENST00000404857 | 3778      | NM_002247 | KCNMA1          |
| A_23_P16992    | 9,77451 | 9,62422 | 1,109792532 | ENST00000426248 | 8502      | NM_003628 | PKP4            |

|                |         |         |             |                 |           |              |                |
|----------------|---------|---------|-------------|-----------------|-----------|--------------|----------------|
| A_24_P145019   | 1,91297 | 1,76275 | 1,109738686 | N/A             | 100129858 | NR_033939    | SCOC-AS1       |
| A_24_P655268   | 8,87689 | 8,72671 | 1,109707918 | N/A             | 729082    | N/A          | OIP5-AS1       |
| A_33_P3479999  | 17,0737 | 16,9236 | 1,109646384 | N/A             | 494150    | BC014228     | LOC494150      |
| A_22_P00009757 | 3,4081  | 3,25804 | 1,109615619 | N/A             | N/A       | N/A          | Inc-MED10-1    |
| A_33_P3402783  | 9,99576 | 9,84573 | 1,109592545 | ENST00000439492 | N/A       | N/A          | N/A            |
| A_33_P3222362  | 1,8291  | 1,67908 | 1,109584854 | ENST00000577994 | 729950    | NR_040033    | LOC729950      |
| A_22_P00004468 | 1,84593 | 1,69591 | 1,109584854 | ENST00000523242 | N/A       | N/A          | N/A            |
| A_33_P3377346  | 1,8841  | 1,7341  | 1,109569472 | ENST00000611158 | 100132526 | NR_036481    | FGD5P1         |
| A_32_P2738     | 12,1245 | 11,9745 | 1,109569472 | ENST00000430368 | 26123     | NM_015631    | TCTN3          |
| A_23_P35977    | 1,84342 | 1,69346 | 1,109538709 | ENST00000534790 | 79849     | NM_024791    | PDZD3          |
| A_33_P3368855  | 1,80419 | 1,65424 | 1,109531018 | ENST00000377067 | 2262      | NM_004466    | GPC5           |
| A_32_P198303   | 8,43748 | 8,28754 | 1,109523327 | ENST00000536040 | 120526    | NM_181706    | DNAJC24        |
| A_23_P328237   | 6,66805 | 6,51812 | 1,109515637 | ENST00000336349 | 144108    | NM_194285    | SPTY2D1        |
| A_33_P3252279  | 2,63384 | 2,48393 | 1,109500256 | N/A             | N/A       | N/A          | N/A            |
| A_24_P11965    | 12,8052 | 12,6553 | 1,109492565 | ENST00000507420 | 93621     | NM_033296    | MRFAP1         |
| A_33_P3403831  | 2,96012 | 2,81027 | 1,109454114 | N/A             | N/A       | N/A          | XLOC_I2_015399 |
| A_22_P00018359 | 3,42842 | 3,27863 | 1,109407974 | N/A             | 101927196 | NR_110214    | LOC101927196   |
| A_24_P52887    | 1,86842 | 1,71864 | 1,109400284 | ENST00000229003 | 8909      | NM_006025    | ENDOU          |
| A_22_P00007442 | 6,85629 | 6,70653 | 1,109384905 | ENST00000429410 | 2949      | N/A          | GSTM5          |
| A_23_P123916   | 8,59971 | 8,44995 | 1,109384905 | ENST00000323301 | 90678     | NM_138361    | LRSAM1         |
| A_24_P8165     | 1,8613  | 1,71155 | 1,109377215 | ENST00000376494 | 6564      | AB001328     | SLC15A1        |
| A_22_P00014825 | 5,71607 | 5,56638 | 1,109331078 | N/A             | N/A       | N/A          | Inc-SLC43A1-1  |
| A_21_P0010149  | 1,86792 | 1,71825 | 1,1093157   | ENST00000415269 | N/A       | N/A          | N/A            |
| A_32_P190461   | 7,8822  | 7,73262 | 1,109246499 | N/A             | 101926894 | XR_427592    | LOC101926894   |
| A_21_P0011220  | 1,84606 | 1,69648 | 1,109246499 | ENST00000413501 | 101928922 | N/A          | LINC00463      |
| A_21_P0005060  | 4,38958 | 4,24004 | 1,109215745 | N/A             | N/A       | N/A          | Inc-C6orf192-1 |
| A_33_P3224105  | 13,2461 | 13,0966 | 1,109184991 | ENST00000416151 | 90417     | NM_001142761 | KNSTRN         |
| A_21_P0005466  | 2,9473  | 2,79781 | 1,109177303 | N/A             | N/A       | N/A          | Inc-RADIL-3    |
| A_33_P3249534  | 1,861   | 1,71152 | 1,109169615 | ENST00000221166 | 4741      | NM_005382    | NEFM           |
| A_22_P00011953 | 2,05037 | 1,9009  | 1,109161927 | N/A             | N/A       | AW452990     | Inc-PKLR-2     |
| A_22_P00023701 | 1,8346  | 1,68524 | 1,10907736  | N/A             | N/A       | N/A          | Inc-SLC6A4-2   |
| A_33_P3401826  | 8,03428 | 7,88498 | 1,109031236 | ENST00000478738 | 129607    | NM_207315    | CMPK2          |
| A_33_P3209581  | 7,88694 | 7,73765 | 1,109023549 | ENST00000621764 | 440073    | NM_001170738 | IQSEC3         |

|                |         |         |             |                 |           |              |                |
|----------------|---------|---------|-------------|-----------------|-----------|--------------|----------------|
| A_23_P317820   | 1,83207 | 1,68286 | 1,108962053 | ENST00000278855 | 219990    | NM_173801    | OOSP2          |
| A_23_P399864   | 1,77078 | 1,62157 | 1,108962053 | ENST00000424776 | 139804    | NM_001145346 | RBMXL3         |
| A_22_P00016600 | 6,24252 | 6,09331 | 1,108962053 | ENST00000412357 | N/A       | N/A          | N/A            |
| A_23_P144746   | 1,8504  | 1,7012  | 1,108954367 | ENST00000519564 | 285676    | NM_182594    | ZNF454         |
| A_21_P0004921  | 6,15712 | 6,00795 | 1,108931307 | N/A             | 102724646 | XR_426101    | LOC102724646   |
| A_21_P0006662  | 1,88848 | 1,73932 | 1,10892362  | ENST00000454991 | 731789    | NR_026794    | LINC00202-2    |
| A_24_P453921   | 6,51242 | 6,36334 | 1,10886213  | ENST00000417811 | 100129460 | NR_036680    | DPY19L1P1      |
| A_33_P3224795  | 7,0175  | 6,86844 | 1,108846758 | ENST00000617859 | 64376     | NM_001271840 | IKZF5          |
| A_21_P0008189  | 1,86571 | 1,71668 | 1,108823701 | N/A             | N/A       | N/A          | Inc-SLITRK1-2  |
| A_19_P00806473 | 8,6625  | 8,51355 | 1,108762216 | ENST00000443965 | N/A       | N/A          | N/A            |
| A_22_P00021769 | 1,83009 | 1,68117 | 1,10873916  | N/A             | N/A       | BF726218     | Inc-TMEM64-2   |
| A_23_P71908    | 8,36264 | 8,21372 | 1,10873916  | ENST00000610884 | 6619      | NM_001039697 | SNAPC3         |
| A_22_P00016688 | 16,5672 | 16,4183 | 1,10872379  | N/A             | N/A       | N/A          | Inc-TPSAB1-1   |
| A_21_P0000929  | 1,82595 | 1,67707 | 1,10870842  | ENST00000426428 | 339505    | NR_033887    | LINC01141      |
| A_23_P209426   | 8,57871 | 8,42983 | 1,10870842  | ENST00000332624 | 66008     | NM_015049    | TRAK2          |
| A_21_P0001617  | 3,5098  | 3,36095 | 1,108685365 | N/A             | N/A       | N/A          | Inc-KCNH1-2    |
| A_33_P3224265  | 7,18967 | 7,04086 | 1,108654626 | ENST00000479035 | N/A       | N/A          | N/A            |
| A_23_P27048    | 10,2897 | 10,1409 | 1,108646942 | ENST00000292114 | N/A       | BC033113     | N/A            |
| A_23_P360769   | 8,40526 | 8,25647 | 1,108639257 | ENST00000513921 | 4124      | NM_002372    | MAN2A1         |
| A_22_P00011225 | 7,5949  | 7,44614 | 1,108616204 | N/A             | N/A       | N/A          | Inc-OPRL1-1    |
| A_21_P0000669  | 5,80397 | 5,65524 | 1,108593151 | ENST00000558187 | 79631     | NM_024580    | EFTUD1         |
| A_21_P0013040  | 2,01978 | 1,87107 | 1,108577783 | N/A             | N/A       | N/A          | XLOC_I2_012743 |
| A_32_P27706    | 11,0866 | 10,9379 | 1,108570099 | ENST00000264167 | 8540      | NM_003659    | AGPS           |
| A_22_P00025022 | 6,29809 | 6,14945 | 1,108523996 | N/A             | N/A       | N/A          | Inc-LRRC49-2   |
| A_33_P3414964  | 5,06577 | 4,91713 | 1,108523996 | N/A             | 5802      | BC029496     | PTPRS          |
| A_33_P3317321  | 8,48686 | 8,33823 | 1,108516312 | ENST00000309983 | 7172      | NM_000367    | TPMT           |
| A_24_P91830    | 1,85672 | 1,70813 | 1,108485578 | ENST00000370503 | 139067    | NM_001009609 | SPANXN3        |
| A_33_P3227217  | 6,78658 | 6,63805 | 1,108439478 | ENST00000475409 | 677847    | NR_002989    | SNORA81        |
| A_21_P0000932  | 1,83753 | 1,68901 | 1,108431795 | N/A             | N/A       | N/A          | Inc-ALG14-5    |
| A_22_P00008807 | 3,71094 | 3,56252 | 1,108354967 | N/A             | N/A       | N/A          | Inc-KLC1-1     |
| A_23_P75063    | 1,85274 | 1,70433 | 1,108347285 | ENST00000444807 | 84332     | NM_032372    | DYDC2          |
| A_23_P209962   | 10,2789 | 10,1305 | 1,108339602 | ENST00000402989 | 79677     | NM_024624    | SMC6           |
| A_22_P00011319 | 1,83957 | 1,69117 | 1,108339602 | ENST00000443897 | 101928196 | XR_244592    | LOC101928196   |

|                |         |         |             |                 |           |              |               |
|----------------|---------|---------|-------------|-----------------|-----------|--------------|---------------|
| A_33_P3410019  | 7,06447 | 6,91607 | 1,108339602 | ENST00000581666 | N/A       | N/A          | N/A           |
| A_33_P3226367  | 1,82381 | 1,67543 | 1,108324238 | N/A             | N/A       | N/A          | Inc-CD44-1    |
| A_21_P0003307  | 1,83278 | 1,68442 | 1,108308873 | N/A             | N/A       | N/A          | Inc-DCUN1D1-1 |
| A_22_P00000694 | 1,88358 | 1,73522 | 1,108308873 | ENST00000553791 | N/A       | XR_245777    | N/A           |
| A_33_P3258699  | 6,34142 | 6,19307 | 1,108301191 | ENST00000425409 | 100288687 | NM_001293798 | DUX4          |
| A_33_P3328123  | 8,17056 | 8,02221 | 1,108301191 | ENST00000605469 | N/A       | N/A          | N/A           |
| A_23_P148737   | 3,3996  | 3,25134 | 1,108232054 | ENST00000255416 | 4608      | NM_004997    | MYBPH         |
| A_21_P0004756  | 1,8633  | 1,71504 | 1,108232054 | ENST00000453790 | N/A       | N/A          | N/A           |
| A_33_P3292279  | 1,84981 | 1,70158 | 1,108209009 | N/A             | N/A       | AF119908     | N/A           |
| A_33_P3258003  | 1,88529 | 1,7371  | 1,108178283 | ENST00000547010 | 56899     | NM_152788    | ANKS1B        |
| A_22_P00000956 | 4,49992 | 4,35177 | 1,108147558 | ENST00000441338 | N/A       | N/A          | N/A           |
| A_24_P74487    | 9,1752  | 9,02707 | 1,108132196 | ENST00000489469 | 54065     | NM_058182    | SMIM11        |
| A_33_P3363959  | 1,82901 | 1,68091 | 1,108109153 | N/A             | N/A       | N/A          | N/A           |
| A_21_P0008338  | 1,82298 | 1,67488 | 1,108109153 | N/A             | N/A       | N/A          | Inc-PELI2-3   |
| A_21_P0009938  | 1,79996 | 1,65186 | 1,108109153 | N/A             | N/A       | N/A          | Inc-SNRPB2-2  |
| A_33_P3422499  | 4,26075 | 4,11265 | 1,108109153 | ENST00000606395 | 729041    | N/A          | FAAHP1        |
| A_33_P3312039  | 9,27832 | 9,13023 | 1,108101473 | ENST00000457811 | 5887      | NM_002874    | RAD23B        |
| A_22_P00017872 | 1,86406 | 1,71598 | 1,108093792 | N/A             | N/A       | BQ276709     | Inc-ZDHH6-3   |
| A_33_P3303309  | 3,82401 | 3,67599 | 1,108047709 | N/A             | 150622    | NR_026832    | LINC01105     |
| A_23_P32308    | 1,8053  | 1,65729 | 1,108040028 | ENST00000335288 | 496       | NM_000705    | ATP4B         |
| A_22_P00019246 | 2,10728 | 1,95927 | 1,108040028 | N/A             | N/A       | N/A          | Inc-GRSF1-1   |
| A_21_P0011811  | 5,66417 | 5,51618 | 1,108024668 | ENST00000393515 | 645784    | N/A          | ANKRD36BP2    |
| A_33_P3399911  | 3,61299 | 3,46501 | 1,108016987 | N/A             | N/A       | N/A          | N/A           |
| A_21_P0010015  | 1,86559 | 1,71764 | 1,107993947 | N/A             | N/A       | N/A          | Inc-FOXA2-3   |
| A_23_P145408   | 13,0087 | 12,8608 | 1,107955548 | ENST00000002165 | 2519      | NM_032020    | FUCA2         |
| A_21_P0014036  | 2,80727 | 2,65937 | 1,107955548 | ENST00000548892 | 196446    | XM_006709961 | MYRFL         |
| A_33_P3218120  | 8,9447  | 8,7968  | 1,107955548 | ENST00000481698 | N/A       | N/A          | N/A           |
| A_24_P399009   | 6,84427 | 6,69642 | 1,107917149 | ENST00000575514 | 23644     | NM_014329    | EDC4          |
| A_33_P3384845  | 5,86019 | 5,71238 | 1,107886432 | ENST00000375730 | 23509     | NM_172236    | POFUT1        |
| A_33_P3422294  | 11,4376 | 11,2898 | 1,107878753 | N/A             | N/A       | N/A          | N/A           |
| A_33_P3231820  | 2,94968 | 2,80191 | 1,107855715 | ENST00000342380 | 431705    | NM_001002036 | ASTL          |
| A_21_P0013669  | 4,0008  | 3,85307 | 1,107824999 | N/A             | 101927993 | XR_242645    | LOC101927993  |
| A_22_P00015847 | 2,02573 | 1,87801 | 1,10781732  | N/A             | 101929529 | NR_125927    | LOC101929529  |



|                |         |         |             |                 |           |              |                |
|----------------|---------|---------|-------------|-----------------|-----------|--------------|----------------|
| A_21_P0008230  | 4,1693  | 4,02159 | 1,107809642 | N/A             | N/A       | N/A          | Inc-SGCG-5     |
| A_33_P3474175  | 16,006  | 15,8583 | 1,107801963 | N/A             | 207107    | BU601128     | SFTA1P         |
| A_33_P3383656  | 10,8555 | 10,7078 | 1,107801963 | ENST00000405954 | 285193    | NM_001033575 | DUSP28         |
| A_23_P128408   | 10,9683 | 10,8206 | 1,107801963 | ENST00000546954 | 51499     | NM_016399    | TRIAP1         |
| A_33_P3277361  | 3,42154 | 3,27386 | 1,107786606 | ENST00000405984 | 5013      | NM_001199770 | OTX1           |
| A_33_P3223093  | 6,12639 | 5,97876 | 1,107748213 | ENST00000390346 | N/A       | M27336       | N/A            |
| A_21_P0001413  | 1,83986 | 1,69223 | 1,107748213 | N/A             | N/A       | N/A          | Inc-CAMK1G-5   |
| A_23_P37870    | 13,8718 | 13,7242 | 1,107725179 | ENST00000564370 | 10273     | NM_005861    | STUB1          |
| A_22_P00017662 | 1,84134 | 1,69377 | 1,107702144 | N/A             | N/A       | N/A          | Inc-WRN-7      |
| A_21_P0010746  | 1,83695 | 1,68938 | 1,107702144 | ENST00000442726 | 102723473 | N/A          | LOC102723473   |
| A_32_P41526    | 7,70261 | 7,55504 | 1,107702144 | ENST00000621690 | 729092    | NM_001144000 | AGAP5          |
| A_23_P27367    | 10,5242 | 10,3767 | 1,1076484   | ENST00000588089 | 2531      | NM_002035    | KDSR           |
| A_21_P0004044  | 1,81962 | 1,67212 | 1,1076484   | ENST00000506330 | N/A       | N/A          | N/A            |
| A_22_P00018057 | 1,85868 | 1,71121 | 1,107625367 | ENST00000446671 | 101928475 | XR_243596    | LOC101928475   |
| A_21_P0002188  | 5,57062 | 5,42321 | 1,107579303 | N/A             | N/A       | N/A          | Inc-SLC4A1AP-1 |
| A_33_P3289848  | 7,80332 | 7,65592 | 1,107571626 | ENST00000231656 | 1044      | NM_001804    | CDX1           |
| A_23_P144264   | 9,50003 | 9,3527  | 1,107517888 | ENST00000284320 | 9868      | NM_014820    | TOMM70A        |
| A_22_P00015183 | 1,86492 | 1,7176  | 1,107510211 | ENST00000413960 | N/A       | N/A          | N/A            |
| A_23_P41470    | 12,5919 | 12,4446 | 1,107494858 | ENST00000393743 | 55601     | NM_017631    | DDX60          |
| A_22_P00006968 | 7,00323 | 6,85593 | 1,107494858 | ENST00000435163 | 100505783 | NR_038338    | OSER1-AS1      |
| A_33_P3290888  | 14,5566 | 14,4093 | 1,107494858 | ENST00000498814 | 8904      | NM_003915    | CPNE1          |
| A_21_P0000654  | 5,01045 | 4,86319 | 1,107464152 | N/A             | 646938    | N/A          | LOC646938      |
| A_23_P42288    | 8,36044 | 8,21321 | 1,107441123 | ENST00000466571 | 80737     | NM_025258    | VWA7           |
| A_33_P3343737  | 2,64338 | 2,49616 | 1,107433447 | ENST00000374663 | 10136     | NM_005747    | CELA3A         |
| A_21_P0006143  | 1,83422 | 1,687   | 1,107433447 | N/A             | N/A       | N/A          | Inc-HRCT1-3    |
| A_33_P3414202  | 8,32263 | 8,17544 | 1,107410419 | ENST00000465964 | 55796     | NM_001170704 | MBNL3          |
| A_22_P00005078 | 3,53187 | 3,38475 | 1,107356688 | N/A             | N/A       | CD699608     | Inc-DEXI-1     |
| A_33_P3384272  | 2,60328 | 2,45617 | 1,107349012 | ENST00000369494 | 476       | N/A          | ATP1A1         |
| A_23_P212458   | 11,7955 | 11,6484 | 1,107341337 | ENST00000424880 | 29927     | NM_013336    | SEC61A1        |
| A_23_P126248   | 1,87163 | 1,72456 | 1,107318311 | ENST00000375121 | 54546     | NM_019062    | RNF186         |
| A_33_P3333267  | 4,57862 | 4,43158 | 1,107295285 | ENST00000551068 | 283999    | NM_001204210 | TMEM235        |
| A_33_P3481987  | 17,9511 | 17,8041 | 1,107264584 | ENST00000571152 | 387700    | NM_213606    | SLC16A12       |
| A_21_P0007548  | 7,59548 | 7,4485  | 1,107249235 | N/A             | N/A       | N/A          | Inc-FAM113B-5  |

|                |         |         |             |                 |           |              |                |
|----------------|---------|---------|-------------|-----------------|-----------|--------------|----------------|
| A_23_P212258   | 2,21604 | 2,06908 | 1,107233885 | ENST00000447445 | 3827      | NM_000893    | KNG1           |
| A_23_P206324   | 6,98416 | 6,83723 | 1,107210861 | ENST00000219439 | 83693     | NM_031463    | HSDL1          |
| A_23_P58729    | 3,92192 | 3,77504 | 1,107172489 | ENST00000513614 | 6569      | NM_003052    | SLC34A1        |
| A_24_P825874   | 3,67555 | 3,52869 | 1,10715714  | ENST00000358087 | 653269    | NM_001277406 | POTEI          |
| A_21_P0000486  | 4,56751 | 4,4207  | 1,10711877  | N/A             | 692234    | NR_004054    | SNORD103A      |
| A_23_P75330    | 13,0112 | 12,8644 | 1,107111096 | ENST00000337970 | 3185      | NM_004966    | HNRNPF         |
| A_23_P100196   | 12,5103 | 12,3636 | 1,107034359 | ENST00000219473 | 9100      | NM_005153    | USP10          |
| A_33_P3374623  | 9,93026 | 9,78362 | 1,10698832  | ENST00000263094 | 10347     | NM_019112    | ABCA7          |
| A_33_P3412295  | 6,34084 | 6,19423 | 1,106965301 | N/A             | 645645    | AK126090     | LOC645645      |
| A_33_P3379506  | 12,2976 | 12,151  | 1,106957628 | ENST00000466880 | 129531    | NM_138798    | MITD1          |
| A_33_P3315060  | 7,27375 | 7,12716 | 1,106949955 | ENST00000495527 | N/A       | BX648271     | N/A            |
| A_21_P0011899  | 4,06805 | 3,92147 | 1,106942283 | N/A             | N/A       | N/A          | XLOC_I2_007876 |
| A_23_P4489     | 2,29487 | 2,1483  | 1,10693461  | ENST00000583169 | 81832     | NM_138966    | NETO1          |
| A_24_P82074    | 3,32122 | 3,17466 | 1,106926937 | ENST00000298875 | 53981     | NM_017437    | CPSF2          |
| A_33_P3387170  | 7,88847 | 7,74192 | 1,106919265 | N/A             | 100129196 | NR_034182    | MATN1-AS1      |
| A_33_P3320643  | 1,88594 | 1,73939 | 1,106919265 | ENST00000504263 | 118425    | NR_026555    | PCAT4          |
| A_21_P0011593  | 4,70087 | 4,55433 | 1,106911592 | ENST00000358337 | 54853     | N/A          | WDR55          |
| A_24_P576174   | 10,7601 | 10,6136 | 1,106880902 | ENST00000610213 | 55802     | NM_001290205 | DCP1A          |
| A_33_P3417281  | 9,79343 | 9,64698 | 1,106842541 | ENST00000614666 | 4585      | NM_018406    | MUC4           |
| A_23_P134914   | 1,83818 | 1,69177 | 1,106811854 | ENST00000610554 | 4062      | NM_002347    | LY6H           |
| A_33_P3390032  | 12,316  | 12,1696 | 1,106804182 | ENST00000335146 | 23265     | NM_001145297 | EXOC7          |
| A_33_P3256344  | 10,4792 | 10,3329 | 1,106727467 | N/A             | N/A       | AK128866     | N/A            |
| A_23_P313961   | 9,4424  | 9,29611 | 1,106719795 | ENST00000418431 | 10201     | NM_005793    | NME6           |
| A_33_P3274439  | 1,82773 | 1,68149 | 1,10668144  | ENST00000545630 | 102723895 | NR_120585    | LOC102723895   |
| A_33_P3390048  | 12,3769 | 12,2307 | 1,106650757 | ENST00000569957 | 283899    | NM_173618    | INO80E         |
| A_22_P00001137 | 11,6955 | 11,5493 | 1,106650757 | ENST00000534639 | 399881    | NR_033868    | HNRNPKP3       |
| A_33_P3287680  | 4,92917 | 4,78301 | 1,106620074 | ENST00000452776 | 255798    | NM_001077657 | SMCO1          |
| A_21_P0008553  | 1,84237 | 1,69623 | 1,106604733 | ENST00000568045 | N/A       | N/A          | N/A            |
| A_33_P3326275  | 4,26006 | 4,11393 | 1,106597063 | N/A             | N/A       | AK026773     | N/A            |
| A_33_P3228266  | 15,0226 | 14,8765 | 1,106574052 | ENST00000398409 | 1471      | NM_000099    | CST3           |
| A_24_P261567   | 5,49432 | 5,34826 | 1,106543372 | ENST00000443276 | 81544     | NM_030792    | GDPD5          |
| A_19_P00318404 | 7,53306 | 7,387   | 1,106543372 | ENST00000515544 | 100506035 | NR_038826    | LINC00989      |
| A_21_P0002716  | 1,8193  | 1,67325 | 1,106535702 | ENST00000490647 | 101926983 | XR_241554    | LOC101926983   |

|                |         |         |             |                 |           |              |                  |
|----------------|---------|---------|-------------|-----------------|-----------|--------------|------------------|
| A_21_P0001103  | 1,82256 | 1,67651 | 1,106535702 | ENST00000418743 | 339505    | N/A          | LINC01141        |
| A_24_P231057   | 7,07768 | 6,93165 | 1,106520362 | ENST00000511119 | 259282    | NM_148894    | BOD1L1           |
| A_23_P212475   | 15,8056 | 15,6596 | 1,106497353 | ENST00000417962 | 51246     | NM_016479    | SHISA5           |
| A_22_P00001725 | 3,67297 | 3,52697 | 1,106497353 | N/A             | 101930595 | XR_247607    | LOC101930595     |
| A_33_P3319126  | 1,88022 | 1,73423 | 1,106489683 | ENST00000508064 | 1379      | NM_175710    | CR1L             |
| A_22_P00001202 | 4,53592 | 4,38996 | 1,106466675 | N/A             | N/A       | N/A          | Inc-ANKK1-1      |
| A_22_P00008097 | 1,84814 | 1,70218 | 1,106466675 | N/A             | N/A       | BE263877     | Inc-IL17B-1      |
| A_23_P16166    | 8,33074 | 8,1848  | 1,106451336 | ENST00000414982 | 10908     | NM_006702    | PNPLA6           |
| A_22_P00006292 | 9,65157 | 9,50563 | 1,106451336 | N/A             | 222584    | NM_001010872 | FAM83B           |
| A_22_P00014575 | 6,85733 | 6,71141 | 1,106435998 | ENST00000422405 | 100505518 | NR_103853    | EDNRB-AS1        |
| A_33_P3877739  | 7,44089 | 7,29497 | 1,106435998 | N/A             | 140768    | AI821758     | SMCR2            |
| A_23_P206901   | 13,8785 | 13,7326 | 1,106420659 | ENST00000571896 | 54820     | NM_017668    | NDE1             |
| A_33_P3359160  | 11,3459 | 11,2    | 1,106420659 | ENST00000621094 | 10712     | NM_001267608 | FAM189B          |
| A_23_P216080   | 9,62837 | 9,48247 | 1,106420659 | ENST00000307602 | 84376     | NM_032410    | HOOK3            |
| A_23_P396328   | 1,86259 | 1,7167  | 1,10641299  | ENST00000381022 | 8777      | NM_003829    | MPDZ             |
| A_33_P3327723  | 2,03517 | 1,88931 | 1,106389983 | N/A             | N/A       | N/A          | N/A              |
| A_33_P3301689  | 9,36519 | 9,21936 | 1,106366977 | ENST00000361911 | 284695    | NM_182975    | ZNF326           |
| A_19_P00322023 | 7,5344  | 7,38858 | 1,106359308 | ENST00000447625 | 10904     | N/A          | BLCAP            |
| A_21_P0001139  | 2,7892  | 2,64338 | 1,106359308 | ENST00000448344 | N/A       | XR_426704    | N/A              |
| A_22_P00005668 | 1,85853 | 1,71275 | 1,106328634 | N/A             | 51352     | NR_023920    | WT1-AS           |
| A_21_P0008147  | 1,88121 | 1,73544 | 1,106320965 | N/A             | N/A       | N/A          | Inc-EPST11-3     |
| A_33_P3277579  | 4,56459 | 4,41883 | 1,106313297 | ENST00000503000 | 57732     | NM_001172657 | ZFYVE28          |
| A_24_P70002    | 9,70714 | 9,5614  | 1,10629796  | ENST00000382592 | 26524     | NM_014572    | LATS2            |
| A_21_P0006309  | 5,68963 | 5,54395 | 1,106251951 | N/A             | N/A       | N/A          | Inc-AL162389.1-1 |
| A_22_P00024097 | 1,7716  | 1,62592 | 1,106251951 | N/A             | N/A       | N/A          | Inc-BTNL8-2      |
| A_22_P00025193 | 1,85663 | 1,71096 | 1,106244283 | ENST00000560675 | N/A       | BX101575     | N/A              |
| A_33_P3216083  | 4,91352 | 4,76788 | 1,10622128  | ENST00000275233 | 257218    | NM_173082    | SHPRH            |
| A_33_P3325107  | 1,81505 | 1,66941 | 1,10622128  | ENST00000453955 | 252952    | NR_001549    | TTY19            |
| A_22_P00022540 | 1,83865 | 1,69302 | 1,106213612 | ENST00000423233 | N/A       | N/A          | N/A              |
| A_33_P3388835  | 8,95447 | 8,80886 | 1,106198277 | ENST00000595861 | 6813      | NM_001272034 | STXBP2           |
| A_23_P87664    | 10,1162 | 9,97059 | 1,106198277 | ENST00000546728 | 9733      | NM_014706    | SART3            |
| A_23_P45726    | 12,7274 | 12,5818 | 1,106190609 | ENST00000302271 | 10236     | NM_005826    | HNRNPR           |
| A_23_P161171   | 6,07694 | 5,93138 | 1,10615994  | ENST00000474434 | 56624     | NM_019893    | ASAH2            |

|                |         |         |             |                 |           |              |                |
|----------------|---------|---------|-------------|-----------------|-----------|--------------|----------------|
| A_33_P3424143  | 5,55695 | 5,41144 | 1,106121604 | N/A             | 9870      | BX248747     | AREL1          |
| A_33_P3512350  | 5,60844 | 5,46293 | 1,106121604 | ENST00000417695 | 339807    | NR_034023    | LOC339807      |
| A_33_P3343705  | 1,81733 | 1,67183 | 1,106113937 | ENST00000582835 | 442028    | NR_037597    | LOC442028      |
| A_21_P0000178  | 1,85927 | 1,71377 | 1,106113937 | N/A             | 54210     | NM_001242589 | TREM1          |
| A_23_P321860   | 1,84217 | 1,69668 | 1,10610627  | N/A             | 1756      | NM_004019    | DMD            |
| A_33_P3375688  | 1,52025 | 1,37479 | 1,106083269 | N/A             | 100129027 | NR_038876    | LOC100129027   |
| A_22_P00024006 | 5,06761 | 4,92222 | 1,106029603 | N/A             | N/A       | XM_002343116 | Inc-FAM168A-2  |
| A_22_P00015546 | 2,14424 | 1,99885 | 1,106029603 | N/A             | N/A       | N/A          | Inc-STK39-1    |
| A_21_P0003204  | 2,81881 | 2,67343 | 1,106021937 | N/A             | N/A       | N/A          | Inc-ATP13A4-2  |
| A_22_P00001847 | 7,26123 | 7,11591 | 1,105975939 | N/A             | 100874039 | NR_104326    | THOC7-AS1      |
| A_33_P3267296  | 13,3417 | 13,1964 | 1,105960607 | ENST00000547789 | 51303     | NM_016594    | FKBP11         |
| A_22_P00020795 | 1,80922 | 1,66395 | 1,10593761  | N/A             | 101927556 | XR_248213    | LOC101927556   |
| A_33_P3420078  | 7,59837 | 7,45316 | 1,105891616 | ENST00000367368 | 84918     | N/A          | LRP11          |
| A_24_P377489   | 13,1858 | 13,0406 | 1,105883951 | ENST00000468078 | 51622     | NM_015622    | CCZ1           |
| A_33_P3328426  | 11,7546 | 11,6094 | 1,105883951 | ENST00000350459 | 55129     | NM_001204831 | ANO10          |
| A_24_P55225    | 3,12159 | 2,97642 | 1,105860955 | ENST00000372163 | 221421    | NM_152732    | RSPH9          |
| A_22_P00001837 | 1,76747 | 1,62234 | 1,105830294 | ENST00000561394 | N/A       | BU567213     | N/A            |
| A_22_P00001420 | 3,51803 | 3,37292 | 1,105814964 | ENST00000530379 | 102723644 | NR_120584    | LINC01499      |
| A_24_P236445   | 10,3255 | 10,1804 | 1,105807299 | ENST00000258198 | 1783      | NM_006141    | DYNC1LI2       |
| A_33_P3298430  | 3,77401 | 3,62896 | 1,105768976 | ENST00000378116 | 221061    | NM_001010924 | FAM171A1       |
| A_21_P0002588  | 3,26852 | 3,12352 | 1,105730653 | N/A             | N/A       | N/A          | Inc-FAM82A1-1  |
| A_33_P3309501  | 7,45784 | 7,31287 | 1,105707661 | ENST00000398460 | 55384     | AK124580     | MEG3           |
| A_33_P3331233  | 1,8392  | 1,69424 | 1,105699996 | ENST00000562905 | N/A       | N/A          | N/A            |
| A_23_P38723    | 10,0813 | 9,93636 | 1,105684668 | ENST00000584897 | 23347     | NM_015295    | SMCHD1         |
| A_21_P0005072  | 1,64353 | 1,49861 | 1,10566934  | N/A             | N/A       | N/A          | Inc-NOX3-2     |
| A_33_P3386965  | 4,26237 | 4,11745 | 1,10566934  | ENST00000368090 | 93183     | NM_145167    | PIGM           |
| A_23_P152024   | 10,1273 | 9,9824  | 1,105654013 | ENST00000564216 | 1445      | NM_004383    | CSK            |
| A_21_P0001635  | 1,60613 | 1,46126 | 1,105631021 | N/A             | N/A       | N/A          | Inc-WDR26-3    |
| A_23_P71270    | 5,36084 | 5,21598 | 1,105623358 | ENST00000292401 | 563       | NM_001185    | AZGP1          |
| A_23_P421935   | 9,44768 | 9,30282 | 1,105623358 | ENST00000389384 | 56970     | NM_020218    | ATXN7L3        |
| A_33_P3264612  | 9,09788 | 8,95304 | 1,105608031 | ENST00000442692 | 219931    | NM_139075    | TPCN2          |
| A_22_P00016289 | 3,42027 | 3,27544 | 1,105600367 | ENST00000543451 | N/A       | N/A          | N/A            |
| A_21_P0011869  | 2,58275 | 2,43792 | 1,105600367 | N/A             | N/A       | N/A          | XLOC_l2_007731 |

|                |         |         |             |                 |           |              |                |
|----------------|---------|---------|-------------|-----------------|-----------|--------------|----------------|
| A_23_P129144   | 8,16068 | 8,01585 | 1,105600367 | ENST00000380568 | 100820829 | NM_001018100 | MYZAP          |
| A_19_P00319640 | 7,58439 | 7,43958 | 1,10558504  | ENST00000441036 | 150577    | N/A          | LINC01104      |
| A_22_P00018287 | 8,6431  | 8,4983  | 1,105577377 | ENST00000609864 | N/A       | BC011670     | N/A            |
| A_22_P00023356 | 10,4317 | 10,2869 | 1,105577377 | N/A             | N/A       | N/A          | Inc-C1orf222-2 |
| A_32_P72940    | 16,4569 | 16,3121 | 1,105577377 | ENST00000348462 | 11224     | NM_007209    | RPL35          |
| A_24_P109351   | 9,02166 | 8,87689 | 1,105554388 | ENST00000281496 | 23078     | NM_001009814 | VWA8           |
| A_21_P0004764  | 1,79836 | 1,65361 | 1,105539061 | N/A             | N/A       | N/A          | Inc-SNAP91-1   |
| A_23_P99424    | 10,6414 | 10,4967 | 1,105500747 | ENST00000466153 | 7174      | NM_003291    | TPP2           |
| A_22_P00011563 | 1,82569 | 1,68103 | 1,105470096 | N/A             | N/A       | N/A          | Inc-PCDH19-1   |
| A_23_P43095    | 1,81252 | 1,66794 | 1,105408798 | ENST00000518282 | 79776     | NM_024721    | ZFHX4          |
| A_22_P00016526 | 1,87532 | 1,73077 | 1,105385812 | ENST00000547094 | N/A       | N/A          | N/A            |
| A_33_P3292208  | 1,88383 | 1,73928 | 1,105385812 | ENST00000421282 | N/A       | N/A          | N/A            |
| A_33_P3306659  | 4,47887 | 4,33434 | 1,105370488 | N/A             | 728254    | AB002446     | LOC728254      |
| A_33_P3332302  | 5,25949 | 5,11499 | 1,105347503 | N/A             | 246754    | NR_027025    | MTVR2          |
| A_22_P00000331 | 1,8391  | 1,69461 | 1,105339841 | ENST00000578349 | N/A       | N/A          | N/A            |
| A_22_P00017515 | 4,49375 | 4,34934 | 1,10527855  | N/A             | N/A       | N/A          | Inc-WDFY4-1    |
| A_22_P00007190 | 1,60962 | 1,46522 | 1,105270888 | N/A             | 101927919 | N/A          | LOC101927919   |
| A_21_P0000811  | 1,81395 | 1,66956 | 1,105263227 | N/A             | 100507389 | N/A          | LOC100507389   |
| A_22_P00012147 | 1,87611 | 1,73174 | 1,105247905 | ENST00000512941 | N/A       | N/A          | N/A            |
| A_21_P0008530  | 6,68762 | 6,54326 | 1,105240244 | N/A             | N/A       | N/A          | Inc-NOVA1-1    |
| A_33_P3330384  | 5,48517 | 5,34083 | 1,105224923 | ENST00000325147 | 51272     | NM_016526    | BET1L          |
| A_23_P123096   | 8,28934 | 8,14501 | 1,105217262 | ENST00000429473 | 2792      | NM_021955    | GNGT1          |
| A_33_P3259153  | 2,02108 | 1,87677 | 1,10520194  | ENST00000448587 | 257000    | NR_027064    | TINCR          |
| A_32_P218332   | 10,4625 | 10,3182 | 1,10519428  | ENST00000542688 | 197322    | NM_174917    | ACSF3          |
| A_22_P00018976 | 3,29946 | 3,15517 | 1,105186619 | ENST00000568112 | N/A       | N/A          | N/A            |
| A_22_P00011802 | 1,84669 | 1,70242 | 1,105171298 | ENST00000428222 | 101928336 | N/A          | LOC101928336   |
| A_33_P3323699  | 6,51885 | 6,37459 | 1,105163638 | ENST00000376476 | 4878      | N/A          | NPPA           |
| A_23_P168592   | 5,39494 | 5,25071 | 1,105140657 | ENST00000410069 | 90693     | NM_138771    | CCDC126        |
| A_33_P3407062  | 3,74169 | 3,59746 | 1,105140657 | ENST00000390468 | N/A       | AB306126     | N/A            |
| A_33_P3252099  | 4,88047 | 4,73628 | 1,105110016 | ENST00000404261 | 126549    | NM_152363    | ANKLE1         |
| A_22_P00014659 | 5,43573 | 5,29161 | 1,105056397 | N/A             | N/A       | AL137356     | Inc-SLC22A12-1 |
| A_22_P00022578 | 1,85648 | 1,71237 | 1,105048737 | N/A             | N/A       | DB013410     | Inc-TMEM185B-1 |
| A_21_P0001497  | 2,95317 | 2,80907 | 1,105041078 | N/A             | N/A       | N/A          | Inc-STIL-1     |

|                |         |         |             |                 |           |              |                      |
|----------------|---------|---------|-------------|-----------------|-----------|--------------|----------------------|
| A_23_P41143    | 11,7772 | 11,6331 | 1,105041078 | ENST00000469362 | 327       | NM_001640    | APEH                 |
| A_24_P941505   | 12,8341 | 12,69   | 1,105041078 | ENST00000277165 | 23196     | NM_014612    | FAM120A              |
| A_24_P341677   | 15,9232 | 15,7791 | 1,105041078 | ENST00000459899 | N/A       | N/A          | N/A                  |
| A_22_P00006453 | 1,86119 | 1,7171  | 1,105033418 | ENST00000547006 | 101928244 | N/A          | TESC-AS1             |
| A_23_P210131   | 7,62554 | 7,48158 | 1,104933849 | ENST00000619511 | N/A       | XR_251128    | N/A                  |
| A_33_P3336302  | 1,56442 | 1,4205  | 1,104903214 | N/A             | N/A       | N/A          | N/A                  |
| A_22_P00016330 | 11,7181 | 11,5742 | 1,104887897 | N/A             | N/A       | DA554227     | Inc-TMEM151A-1       |
| A_23_P5221     | 6,37547 | 6,23157 | 1,104887897 | ENST00000598161 | 84449     | NM_032433    | ZNF333               |
| A_33_P3277784  | 1,554   | 1,4101  | 1,104887897 | ENST00000372179 | 84628     | AY358165     | NTNG2                |
| A_22_P00006809 | 1,83493 | 1,69103 | 1,104887897 | N/A             | N/A       | BG221947     | Inc-GABPA-3          |
| A_33_P3233459  | 4,86051 | 4,71667 | 1,104841947 | ENST00000485805 | 100287879 | NR_033978    | LINC00994            |
| A_22_P00001706 | 1,52033 | 1,37649 | 1,104841947 | ENST00000508366 | N/A       | XR_108587    | N/A                  |
| A_23_P97457    | 7,64281 | 7,49904 | 1,104788341 | ENST00000474863 | 64853     | NM_022831    | AIDA                 |
| A_23_P371765   | 3,46835 | 3,32459 | 1,104780683 | ENST00000291672 | 84221     | NM_032261    | SPATC1L              |
| A_22_P00016832 | 1,83078 | 1,68705 | 1,10475771  | ENST00000457725 | 102723894 | XR_424244    | LOC102723894         |
| A_22_P00004664 | 1,87677 | 1,73304 | 1,10475771  | N/A             | 102724973 | XR_433192    | LOC102724973         |
| A_23_P206369   | 13,8224 | 13,6787 | 1,104734738 | ENST00000304800 | 29100     | NM_014187    | TMEM208              |
| A_33_P3265494  | 2,3035  | 2,1598  | 1,104734738 | ENST00000339488 | 442213    | NM_001013732 | PTCHD4               |
| A_32_P157208   | 2,53826 | 2,39457 | 1,10472708  | ENST00000620326 | 101929127 | NR_121188    | PGM5P3-AS1           |
| A_23_P312174   | 9,18642 | 9,04273 | 1,10472708  | ENST00000613296 | 7840      | NM_015120    | ALMS1                |
| A_22_P00003609 | 1,79921 | 1,65554 | 1,104711766 | N/A             | N/A       | N/A          | Inc-CD38-1           |
| A_32_P216734   | 3,88032 | 3,73666 | 1,104704108 | ENST00000333385 | 441272    | NM_001004351 | SPDYE3               |
| A_33_P3495962  | 8,45383 | 8,31022 | 1,104665823 | N/A             | 26777     | BM918074     | SNORA71A             |
| A_21_P0011282  | 3,35461 | 3,21103 | 1,104642852 | ENST00000621052 | N/A       | N/A          | N/A                  |
| A_33_P3221718  | 3,70895 | 3,56539 | 1,104627539 | N/A             | 100129373 | AK127907     | LOC100129373         |
| A_21_P0003947  | 1,79157 | 1,64801 | 1,104627539 | N/A             | 101929081 | N/A          | CTD-2194D22.4        |
| A_33_P3349395  | 7,53414 | 7,39061 | 1,104604569 | N/A             | 27443     | XM_006724079 | CECR2                |
| A_21_P0001396  | 1,8476  | 1,70412 | 1,104566287 | N/A             | N/A       | N/A          | Inc-NPL-1            |
| A_23_P122947   | 7,86348 | 7,72008 | 1,104505039 | ENST00000470500 | 23080     | NM_015060    | AVL9                 |
| A_22_P00019020 | 3,11924 | 2,97587 | 1,104482071 | N/A             | N/A       | N/A          | Inc-RP11-410N8.4.1-1 |
| A_33_P3239759  | 6,27732 | 6,13397 | 1,10446676  | ENST00000321826 | 692312    | NM_001198690 | PPAN-P2RY11          |
| A_19_P00320718 | 3,87083 | 3,72751 | 1,104443793 | ENST00000598215 | 100505495 | NR_040109    | PCAT19               |
| A_33_P3422679  | 8,91732 | 8,77404 | 1,104413172 | ENST00000445951 | 317662    | NM_173348    | FAM149B1             |

|                |         |         |             |                 |           |              |                      |
|----------------|---------|---------|-------------|-----------------|-----------|--------------|----------------------|
| A_22_P00019683 | 3,87555 | 3,73228 | 1,104405517 | N/A             | N/A       | CK430929     | Inc-STX16-1          |
| A_21_P0008302  | 1,81751 | 1,6743  | 1,104359587 | N/A             | N/A       | N/A          | Inc-RP11-80A15.1.1-5 |
| A_33_P3288079  | 1,80372 | 1,66052 | 1,104351932 | N/A             | N/A       | N/A          | N/A                  |
| A_21_P0001804  | 2,70278 | 2,55962 | 1,104321314 | N/A             | 101930516 | N/A          | LOC101930516         |
| A_23_P112825   | 12,209  | 12,0659 | 1,104275387 | ENST00000380966 | 51451     | NM_016309    | LCMT1                |
| A_24_P10657    | 10,9313 | 10,7882 | 1,104275387 | ENST00000407327 | 57153     | NM_020428    | SLC44A2              |
| A_32_P217543   | 1,85726 | 1,71417 | 1,104267733 | N/A             | 102724921 | XM_006712159 | LOC102724921         |
| A_22_P00011042 | 3,53008 | 3,38704 | 1,104229462 | ENST00000578788 | N/A       | XR_248321    | N/A                  |
| A_33_P3419049  | 2,71477 | 2,57173 | 1,104229462 | ENST00000531780 | N/A       | N/A          | N/A                  |
| A_33_P3320772  | 4,99678 | 4,85378 | 1,104198847 | ENST00000244769 | 6310      | NM_000332    | ATXN1                |
| A_33_P3256105  | 6,39735 | 6,25437 | 1,10418354  | ENST00000425409 | 100288687 | NM_001293798 | DUX4                 |
| A_32_P133884   | 9,38452 | 9,24155 | 1,104175886 | ENST00000358022 | 286319    | NM_001004125 | TUSC1                |
| A_23_P82047    | 7,04689 | 6,90394 | 1,104160579 | N/A             | 134957    | NM_001127715 | STXBP5               |
| A_21_P0012795  | 1,80979 | 1,66685 | 1,104152926 | ENST00000513332 | N/A       | N/A          | N/A                  |
| A_33_P3268686  | 3,70735 | 3,56443 | 1,104137619 | ENST00000296438 | 285231    | NM_207102    | FBXW12               |
| A_22_P00024591 | 1,97953 | 1,83663 | 1,104122313 | ENST00000431646 | 101927449 | N/A          | LINC01282            |
| A_22_P00017717 | 1,55115 | 1,40826 | 1,104114659 | ENST00000509506 | N/A       | N/A          | N/A                  |
| A_24_P108779   | 6,28497 | 6,14209 | 1,104107006 | ENST00000610767 | 79734     | NM_024681    | KCTD17               |
| A_23_P41888    | 10,0273 | 9,88443 | 1,104099353 | ENST00000510991 | 85007     | NM_153373    | PHYKPL               |
| A_21_P0010627  | 1,88035 | 1,73748 | 1,104099353 | N/A             | N/A       | N/A          | XLOC_I2_000961       |
| A_21_P0003421  | 1,79252 | 1,64968 | 1,104076394 | ENST00000508265 | N/A       | N/A          | N/A                  |
| A_22_P00017979 | 1,82247 | 1,67965 | 1,104061089 | ENST00000455848 | 104355137 | N/A          | LINC01072            |
| A_22_P00020005 | 1,84936 | 1,70654 | 1,104061089 | N/A             | N/A       | N/A          | Inc-C1orf106-2       |
| A_33_P3263027  | 6,28891 | 6,1461  | 1,104053436 | N/A             | 100289120 | BE266556     | LOC100289120         |
| A_32_P783      | 17,9406 | 17,7978 | 1,104045783 | ENST00000451614 | 6168      | N/A          | RPL37A               |
| A_33_P3232086  | 1,81118 | 1,66841 | 1,104022826 | N/A             | 57126     | AJ310433     | CD177                |
| A_23_P1173     | 1,68526 | 1,54249 | 1,104022826 | ENST00000351270 | 3026      | NM_004132    | HABP2                |
| A_22_P00023206 | 5,4111  | 5,26835 | 1,104007521 | N/A             | 340544    | NR_038978    | MORF4L2-AS1          |
| A_33_P3244274  | 9,93752 | 9,79484 | 1,103953955 | N/A             | 727800    | BC016958     | RNF208               |
| A_33_P3414137  | 1,87257 | 1,73004 | 1,103839181 | N/A             | 392862    | NM_001145118 | GRID2IP              |
| A_21_P0004355  | 3,16098 | 3,01847 | 1,103823878 | ENST00000505443 | 285577    | NR_033898    | LINC01019            |
| A_24_P217330   | 7,35463 | 7,21214 | 1,103808576 | ENST00000344697 | 84892     | NM_032806    | POMGNT2              |
| A_33_P3333810  | 9,31669 | 9,1742  | 1,103808576 | ENST00000523111 | 7336      | NM_003350    | UBE2V2               |

|                |         |         |             |                 |           |              |                |
|----------------|---------|---------|-------------|-----------------|-----------|--------------|----------------|
| A_22_P00002573 | 2,60918 | 2,4667  | 1,103800925 | ENST00000574589 | 100506388 | NM_001242780 | LOC100506388   |
| A_33_P3244753  | 8,58748 | 8,44502 | 1,103785623 | ENST00000538510 | 1821      | NM_001939    | DRP2           |
| A_22_P00025394 | 1,86565 | 1,72324 | 1,10374737  | N/A             | N/A       | N/A          | Inc-ANKRD6-1   |
| A_33_P3354322  | 17,0187 | 16,8764 | 1,103663216 | ENST00000419783 | 2876      | NM_201397    | GPX1           |
| A_33_P3218188  | 12,2    | 12,0577 | 1,103663216 | ENST00000524270 | 84727     | NM_032641    | SPSB2          |
| A_33_P3217609  | 5,12611 | 4,98382 | 1,103655567 | ENST00000441162 | 25771     | NR_104292    | TBC1D22A       |
| A_22_P00005013 | 1,8785  | 1,73621 | 1,103655567 | N/A             | N/A       | N/A          | Inc-DDX20-2    |
| A_22_P00012325 | 2,18359 | 2,04133 | 1,103632617 | N/A             | N/A       | N/A          | Inc-PRB1-1     |
| A_23_P44648    | 4,19991 | 4,05767 | 1,103617317 | ENST00000352040 | 81792     | NM_030955    | ADAMTS12       |
| A_23_P419624   | 13,5077 | 13,3655 | 1,103586719 | ENST00000414542 | 10904     | NM_006698    | BLCAP          |
| A_21_P0004167  | 4,46313 | 4,32099 | 1,103540823 | N/A             | N/A       | N/A          | Inc-REEP5-1    |
| A_22_P00019153 | 1,77843 | 1,63632 | 1,103517876 | N/A             | N/A       | DT219892     | Inc-FANCF-3    |
| A_33_P3278159  | 7,84309 | 7,70098 | 1,103517876 | N/A             | N/A       | N/A          | N/A            |
| A_21_P0004468  | 11,2037 | 11,0616 | 1,103510227 | N/A             | N/A       | N/A          | Inc-FBXW11-2   |
| A_21_P0006244  | 1,83043 | 1,68838 | 1,103471983 | N/A             | 102724193 | XR_426460    | LOC102724193   |
| A_22_P00008933 | 3,90713 | 3,76509 | 1,103464334 | ENST00000549830 | 283404    | NR_027358    | LINC00592      |
| A_23_P48109    | 8,15814 | 8,0161  | 1,103464334 | ENST00000305108 | 4815      | NM_016533    | NINJ2          |
| A_21_P0000662  | 5,02085 | 4,87882 | 1,103456686 | ENST00000412425 | 100131320 | NR_036537    | RAB6C-AS1      |
| A_21_P0008329  | 5,81475 | 5,67273 | 1,103449037 | ENST00000556620 | N/A       | N/A          | N/A            |
| A_23_P110661   | 12,3722 | 12,2302 | 1,10343374  | ENST00000506750 | 23517     | NM_015360    | SKIV2L2        |
| A_23_P15123    | 10,9287 | 10,7867 | 1,10343374  | ENST00000563366 | 56061     | NM_019116    | UBFD1          |
| A_22_P00017016 | 6,00982 | 5,86784 | 1,103418443 | N/A             | N/A       | CU675878     | Inc-TTC4-1     |
| A_33_P3321263  | 1,88069 | 1,73875 | 1,10338785  | ENST00000328113 | N/A       | N/A          | N/A            |
| A_33_P3239143  | 8,76951 | 8,62758 | 1,103380202 | ENST00000425453 | 162968    | NM_198458    | ZNF497         |
| A_22_P00007770 | 3,5274  | 3,38547 | 1,103380202 | ENST00000280098 | 339745    | NM_001001664 | SPOPL          |
| A_23_P1014     | 9,73531 | 9,5934  | 1,103364906 | ENST00000610948 | 84791     | NR_026761    | LINC00467      |
| A_21_P0000426  | 1,77107 | 1,62917 | 1,103357258 | N/A             | 767610    | NR_003222    | SNORD114-29    |
| A_33_P3295917  | 1,80784 | 1,66595 | 1,103349611 | ENST00000518982 | 3574      | AB102885     | IL7            |
| A_24_P329597   | 8,92369 | 8,78184 | 1,10331902  | ENST00000533705 | 29979     | NM_013438    | UBQLN1         |
| A_33_P3294317  | 1,81447 | 1,67265 | 1,103296077 | ENST00000569362 | 101928880 | NR_110944    | LOC101928880   |
| A_33_P7455793  | 6,66685 | 6,52512 | 1,103227252 | N/A             | 100505538 | NR_038991    | RBM26-AS1      |
| A_21_P0013577  | 3,68846 | 3,54674 | 1,103219605 | N/A             | N/A       | N/A          | XLOC_I2_014830 |
| A_23_P259594   | 7,51598 | 7,37428 | 1,103204311 | ENST00000342266 | 9465      | NM_016377    | AKAP7          |



|                |         |         |             |                 |           |              |                |
|----------------|---------|---------|-------------|-----------------|-----------|--------------|----------------|
| A_22_P00017019 | 3,84402 | 3,70232 | 1,103204311 | N/A             | N/A       | N/A          | Inc-TTC40-3    |
| A_23_P151544   | 9,44485 | 9,30319 | 1,103173724 | ENST00000614817 | 57062     | NM_020414    | DDX24          |
| A_24_P297551   | 2,10396 | 1,9623  | 1,103173724 | ENST00000549379 | 338811    | NM_178539    | FAM19A2        |
| A_33_P3593715  | 1,85777 | 1,71611 | 1,103173724 | N/A             | 400866    | AY204748     | LINC00114      |
| A_22_P00006260 | 3,46564 | 3,32398 | 1,103173724 | ENST00000581192 | 400657    | N/A          | LINC00909      |
| A_21_P0005544  | 2,65883 | 2,51718 | 1,103166078 | N/A             | N/A       | N/A          | Inc-XRCC2-3    |
| A_21_P0003703  | 1,83965 | 1,698   | 1,103166078 | N/A             | N/A       | N/A          | Inc-TRIML1-5   |
| A_21_P0012649  | 4,37198 | 4,23033 | 1,103166078 | ENST00000513501 | N/A       | N/A          | N/A            |
| A_33_P3233841  | 10,389  | 10,2474 | 1,103127846 | ENST00000583149 | 3572      | NM_002184    | IL6ST          |
| A_21_P0000106  | 17,9076 | 17,766  | 1,103127846 | ENST00000604952 | 100463482 | NM_001190487 | MTRNR2L6       |
| A_33_P3266780  | 8,60872 | 8,46716 | 1,103097261 | ENST00000342480 | 50512     | NM_015720    | PODXL2         |
| A_33_P3351785  | 1,83474 | 1,6932  | 1,103081969 | N/A             | 100131599 | AK126221     | LOC100131599   |
| A_22_P00003095 | 5,11442 | 4,97292 | 1,103051385 | ENST00000523284 | 102724710 | NR_125827    | LOC102724710   |
| A_33_P3424272  | 13,8706 | 13,7291 | 1,103051385 | ENST00000575785 | 79903     | NM_001083601 | NAA60          |
| A_33_P3407742  | 8,54109 | 8,39964 | 1,103013157 | ENST00000409486 | 5495      | NM_002706    | PPM1B          |
| A_22_P00004687 | 5,18662 | 5,04517 | 1,103013157 | ENST00000504578 | N/A       | N/A          | N/A            |
| A_23_P307328   | 8,5425  | 8,40107 | 1,102997866 | ENST00000514045 | 7468      | NM_007331    | WHSC1          |
| A_21_P0006797  | 4,61549 | 4,47409 | 1,10297493  | ENST00000434988 | N/A       | N/A          | N/A            |
| A_21_P0011924  | 2,39874 | 2,25734 | 1,10297493  | N/A             | N/A       | N/A          | XLOC_I2_008047 |
| A_23_P67381    | 1,65463 | 1,51328 | 1,102936705 | ENST00000222002 | 6822      | NM_003167    | SULT2A1        |
| A_33_P3380850  | 2,52974 | 2,38845 | 1,102890836 | ENST00000428433 | 5076      | NM_003990    | PAX2           |
| A_24_P15754    | 9,98619 | 9,84491 | 1,102883191 | ENST00000448659 | 10452     | NM_006114    | TOMM40         |
| A_22_P00019111 | 2,88769 | 2,74643 | 1,102867902 | ENST00000457890 | N/A       | N/A          | N/A            |
| A_23_P305977   | 1,80397 | 1,66272 | 1,102860258 | ENST00000567662 | 196996    | NM_001012642 | GRAMD2         |
| A_32_P206104   | 1,84157 | 1,70033 | 1,102852613 | ENST00000431307 | 101929541 | NR_125983    | LOC101929541   |
| A_22_P00014650 | 3,94547 | 3,80433 | 1,102776172 | N/A             | N/A       | DR731427     | Inc-SLC1A1-3   |
| A_23_P58983    | 9,88277 | 9,74167 | 1,102745597 | ENST00000373491 | 55633     | NM_017772    | TBC1D22B       |
| A_22_P00005237 | 1,809   | 1,66795 | 1,102707379 | N/A             | N/A       | N/A          | Inc-DLL1-5     |
| A_22_P00004365 | 1,81683 | 1,67579 | 1,102699736 | N/A             | N/A       | N/A          | Inc-COL4A2-1   |
| A_22_P00013844 | 3,29148 | 3,15047 | 1,102676806 | N/A             | 102724784 | NR_120590    | LOC102724784   |
| A_22_P00022247 | 2,27793 | 2,13692 | 1,102676806 | N/A             | N/A       | N/A          | Inc-SLC7A13-2  |
| A_24_P260134   | 8,15347 | 8,01247 | 1,102669163 | ENST00000296202 | 349565    | NM_178177    | NMNAT3         |
| A_23_P153441   | 12,2578 | 12,1169 | 1,102592735 | ENST00000589915 | 29911     | NM_013312    | HOKK2          |

|                |         |         |             |                 |           |              |                |
|----------------|---------|---------|-------------|-----------------|-----------|--------------|----------------|
| A_21_P0003590  | 1,85623 | 1,71538 | 1,102554522 | N/A             | N/A       | N/A          | Inc-STIM2-3    |
| A_33_P3292495  | 4,5535  | 4,41268 | 1,102531595 | N/A             | N/A       | AK096395     | Inc-GAPDH-3    |
| A_22_P00011573 | 2,64077 | 2,49999 | 1,102501027 | ENST00000515292 | 102723778 | N/A          | LOC102723778   |
| A_24_P710999   | 1,79171 | 1,651   | 1,102447535 | ENST00000441416 | N/A       | N/A          | N/A            |
| A_21_P0012621  | 2,07307 | 1,93236 | 1,102447535 | N/A             | N/A       | N/A          | XLOC_I2_010875 |
| A_23_P402287   | 10,6386 | 10,4979 | 1,102439893 | ENST00000316334 | 222484    | NM_153371    | LNx2           |
| A_23_P254179   | 12,7846 | 12,6439 | 1,102439893 | ENST00000396032 | 23394     | NM_015339    | ADNP           |
| A_22_P00002570 | 3,92993 | 3,78924 | 1,102432252 | N/A             | N/A       | N/A          | Inc-C17orf97-1 |
| A_24_P366607   | 2,26833 | 2,12769 | 1,102394045 | ENST00000315190 | 400120    | NM_203451    | SERTM1         |
| A_23_P54576    | 8,72671 | 8,58607 | 1,102394045 | ENST00000564136 | 3801      | NM_005550    | KIFC3          |
| A_22_P00000647 | 1,87127 | 1,73064 | 1,102386404 | ENST00000550138 | 102724663 | NR_120491    | LOC102724663   |
| A_22_P00022449 | 1,83135 | 1,69072 | 1,102386404 | N/A             | N/A       | N/A          | Inc-HSPB7-1    |
| A_33_P3239527  | 1,8216  | 1,68098 | 1,102378763 | N/A             | 100128517 | AK126772     | LOC100128517   |
| A_22_P00008669 | 5,01735 | 4,87674 | 1,102371122 | ENST00000574293 | N/A       | N/A          | N/A            |
| A_23_P134614   | 10,8529 | 10,7123 | 1,102363481 | ENST00000297135 | 10466     | NM_006348    | COG5           |
| A_21_P0011831  | 8,71007 | 8,56953 | 1,102317636 | N/A             | N/A       | N/A          | XLOC_I2_007456 |
| A_21_P0014933  | 1,84834 | 1,70786 | 1,102271792 | N/A             | N/A       | N/A          | Inc-TANC1-1    |
| A_22_P00000819 | 2,26087 | 2,1204  | 1,102264152 | ENST00000583427 | N/A       | N/A          | N/A            |
| A_33_P3228612  | 1,80409 | 1,66363 | 1,102256512 | ENST00000367570 | 777       | NM_001205293 | CACNA1E        |
| A_24_P336931   | 6,15108 | 6,01063 | 1,102248872 | ENST00000461153 | 375248    | NM_001164315 | ANKRD36        |
| A_33_P3268989  | 1,87961 | 1,73919 | 1,102225951 | N/A             | N/A       | N/A          | N/A            |
| A_33_P3379436  | 17,8354 | 17,695  | 1,102210671 | ENST00000621724 | 401508    | NR_110998    | FAM74A4        |
| A_33_P3351693  | 1,87681 | 1,73649 | 1,102149553 | ENST00000531371 | 643733    | N/A          | LOC643733      |
| A_23_P60387    | 8,06472 | 7,92442 | 1,102134274 | ENST00000277541 | 4851      | NM_017617    | NOTCH1         |
| A_33_P3424861  | 9,21936 | 9,07909 | 1,102111356 | ENST00000216214 | 55007     | NM_001104595 | FAM118A        |
| A_21_P0011093  | 3,54247 | 3,40221 | 1,102103717 | N/A             | N/A       | N/A          | XLOC_I2_003335 |
| A_23_P68846    | 1,6012  | 1,46097 | 1,1020808   | ENST00000536101 | 84700     | NM_032608    | MYO18B         |
| A_33_P3268838  | 1,8719  | 1,73169 | 1,102065522 | ENST00000620212 | 64506     | NM_001288819 | CPEB1          |
| A_23_P204448   | 14,5549 | 14,4147 | 1,102057883 | ENST00000544314 | 51433     | NM_016237    | ANAPC5         |
| A_23_P97250    | 11,5633 | 11,4231 | 1,102057883 | ENST00000437809 | 54856     | NM_001282860 | GON4L          |
| A_22_P00019385 | 1,8509  | 1,7107  | 1,102057883 | N/A             | 101928408 | XR_250527    | LOC101928408   |
| A_33_P3366824  | 2,99414 | 2,85397 | 1,102034967 | ENST00000519382 | 6399      | AK310542     | TRAPPC2        |
| A_22_P00013043 | 4,6921  | 4,55196 | 1,102012051 | ENST00000437712 | N/A       | N/A          | N/A            |

|                |         |         |             |                 |           |              |               |
|----------------|---------|---------|-------------|-----------------|-----------|--------------|---------------|
| A_32_P86150    | 10,8285 | 10,6884 | 1,101981497 | ENST00000303037 | 440387    | NM_001025200 | CTRB2         |
| A_23_P213883   | 11,2056 | 11,0655 | 1,101981497 | ENST00000621733 | 25836     | NM_133433    | NIPBL         |
| A_33_P3395310  | 4,67622 | 4,53613 | 1,101973858 | N/A             | N/A       | N/A          | N/A           |
| A_22_P00021902 | 4,91942 | 4,77934 | 1,10196622  | ENST00000438113 | 101929539 | NR_110540    | LINC01422     |
| A_23_P388681   | 8,89192 | 8,75186 | 1,101950944 | ENST00000596459 | 1994      | NM_001419    | ELAVL1        |
| A_23_P114299   | 2,36067 | 2,22062 | 1,101943306 | ENST00000373691 | 2833      | NM_001504    | CXCR3         |
| A_21_P00111110 | 1,84401 | 1,70401 | 1,101905116 | ENST00000345111 | 100507206 | NR_038256    | LINC00943     |
| A_21_P0014121  | 1,52403 | 1,38403 | 1,101905116 | N/A             | N/A       | N/A          | N/A           |
| A_21_P0000489  | 11,9828 | 11,8428 | 1,101905116 | N/A             | 692227    | NR_004380    | SNORD104      |
| A_21_P0008747  | 2,8087  | 2,66877 | 1,101851652 | N/A             | N/A       | N/A          | Inc-DAPK2-1   |
| A_33_P3213910  | 5,39411 | 5,2542  | 1,101836378 | ENST00000490279 | 257106    | NM_181720    | ARHGAP30      |
| A_33_P3371144  | 11,2182 | 11,0783 | 1,10182874  | N/A             | N/A       | N/A          | N/A           |
| A_23_P310911   | 10,5638 | 10,424  | 1,10175237  | ENST00000578795 | 642       | NM_000386    | BLMH          |
| A_33_P3297621  | 10,4642 | 10,3244 | 1,10175237  | ENST00000375199 | 23065     | NM_015047    | EMC1          |
| A_24_P255845   | 5,47561 | 5,33582 | 1,101744733 | ENST00000537175 | N/A       | N/A          | N/A           |
| A_33_P3290567  | 9,87299 | 9,7332  | 1,101744733 | ENST00000299613 | 7465      | NM_003390    | WEE1          |
| A_21_P0008062  | 5,16883 | 5,02906 | 1,10172946  | N/A             | N/A       | N/A          | Inc-LRCH1-1   |
| A_33_P8802634  | 1,8246  | 1,68486 | 1,10170655  | ENST00000460744 | 10225     | DB214321     | CD96          |
| A_33_P3282384  | 6,52211 | 6,38237 | 1,10170655  | ENST00000429602 | 375484    | XM_005265909 | SIMC1         |
| A_21_P0000735  | 1,79915 | 1,65943 | 1,101691278 | ENST00000593667 | 100507629 | NR_038239    | LINC00658     |
| A_32_P78623    | 1,84183 | 1,70215 | 1,101660733 | N/A             | 401098    | XR_241645    | LOC401098     |
| A_21_P0010399  | 5,20699 | 5,06733 | 1,10164546  | N/A             | N/A       | N/A          | Inc-RGL4-3    |
| A_22_P00016042 | 1,87515 | 1,7355  | 1,101637824 | N/A             | 101927492 | NR_110227    | LOC101927492  |
| A_21_P0012508  | 7,67561 | 7,53619 | 1,101462211 | ENST00000462937 | 201651    | N/A          | AADACP1       |
| A_21_P0006202  | 4,23117 | 4,0918  | 1,101424038 | N/A             | N/A       | N/A          | Inc-RAD23B-2  |
| A_21_P0001407  | 3,63858 | 3,49923 | 1,101408769 | N/A             | N/A       | N/A          | Inc-MFSD4-2   |
| A_33_P3382041  | 1,85363 | 1,7143  | 1,1013935   | ENST00000603536 | N/A       | N/A          | N/A           |
| A_21_P0006888  | 1,84656 | 1,70724 | 1,101385866 | N/A             | N/A       | N/A          | Inc-FAM190B-1 |
| A_23_P168062   | 10,9243 | 10,785  | 1,101370598 | ENST00000376442 | 8449      | NM_003587    | DHX16         |
| A_24_P417606   | 16,7009 | 16,5617 | 1,101294259 | ENST00000450819 | N/A       | N/A          | N/A           |
| A_23_P72627    | 14,8842 | 14,745  | 1,101294259 | ENST00000329138 | 9146      | NM_004712    | HGS           |
| A_32_P203917   | 3,4642  | 3,325   | 1,101294259 | ENST00000263408 | 735       | NM_001737    | C9            |
| A_23_P150092   | 11,1511 | 11,0119 | 1,101294259 | ENST00000378614 | 22929     | NM_012247    | SEPHS1        |

|                |         |         |             |                 |           |              |                |
|----------------|---------|---------|-------------|-----------------|-----------|--------------|----------------|
| A_33_P3284004  | 2,34423 | 2,20506 | 1,101271359 | ENST00000548527 | 253724    | NR_027249    | GNN            |
| A_33_P3333560  | 4,75323 | 4,61408 | 1,101256092 | N/A             | N/A       | N/A          | N/A            |
| A_24_P269619   | 11,5683 | 11,4292 | 1,101217926 | ENST00000518725 | 1666      | NM_001359    | DECR1          |
| A_24_P74508    | 1,79647 | 1,65741 | 1,101187394 | ENST00000399813 | 83733     | AB528235     | SLC25A18       |
| A_22_P00025161 | 1,85246 | 1,71345 | 1,101149231 | N/A             | N/A       | CD690935     | Inc-ZDHH13-1   |
| A_23_P46812    | 4,4325  | 4,29351 | 1,101133966 | ENST00000614585 | 22849     | NM_014912    | CPEB3          |
| A_23_P7901     | 1,8156  | 1,67661 | 1,101133966 | ENST00000239587 | 83887     | NM_031949    | TTLL2          |
| A_23_P75820    | 1,83892 | 1,69995 | 1,101118701 | ENST00000612278 | 283238    | NM_001136506 | SLC22A24       |
| A_21_P0001374  | 8,9798  | 8,84083 | 1,101118701 | ENST00000584793 | 284565    | XR_426769    | NBPF15         |
| A_23_P328740   | 6,41922 | 6,28032 | 1,101065275 | ENST00000451794 | 93082     | NM_001285486 | NEURL3         |
| A_33_P3389286  | 17,2742 | 17,1353 | 1,101065275 | ENST00000339276 | 2810      | NM_006142    | SFN            |
| A_22_P00001439 | 1,84823 | 1,70935 | 1,101050012 | N/A             | N/A       | N/A          | Inc-APOBEC3F-1 |
| A_32_P191895   | 7,89436 | 7,75552 | 1,101019484 | N/A             | N/A       | BC045716     | N/A            |
| A_22_P00005136 | 3,39667 | 3,25783 | 1,101019484 | N/A             | N/A       | N/A          | Inc-DHX37-2    |
| A_33_P3289501  | 2,26723 | 2,12841 | 1,101004221 | ENST00000603883 | N/A       | N/A          | N/A            |
| A_21_P0012597  | 2,32891 | 2,1901  | 1,10099659  | N/A             | N/A       | N/A          | XLOC_I2_010724 |
| A_24_P191588   | 10,8442 | 10,7054 | 1,100988958 | ENST00000469224 | 211       | NM_000688    | ALAS1          |
| A_23_P30745    | 12,9173 | 12,7785 | 1,100988958 | ENST00000244711 | 4201      | NM_014623    | MEA1           |
| A_19_P00321063 | 3,41811 | 3,27933 | 1,100973695 | ENST00000504823 | 285550    | N/A          | FAM200B        |
| A_33_P3323074  | 6,67545 | 6,53674 | 1,100920277 | ENST00000366911 | 56895     | NM_020133    | AGPAT4         |
| A_23_P218751   | 11,0416 | 10,9029 | 1,100912646 | ENST00000460402 | 54584     | NM_053004    | GNB1L          |
| A_21_P0011186  | 4,42625 | 4,28756 | 1,100905015 | ENST00000606619 | 100887750 | N/A          | MRPS31P5       |
| A_33_P3313559  | 3,74913 | 3,61045 | 1,100897384 | N/A             | 94101     | AK126336     | ORMDL1         |
| A_33_P3236340  | 5,43488 | 5,2962  | 1,100897384 | ENST00000624473 | N/A       | AF289593     | N/A            |
| A_21_P0004333  | 1,85414 | 1,7155  | 1,100866861 | N/A             | N/A       | N/A          | Inc-NEURL1B-3  |
| A_22_P00025136 | 1,82015 | 1,68151 | 1,100866861 | N/A             | N/A       | AK092902     | Inc-TIGIT-1    |
| A_24_P338992   | 10,053  | 9,91437 | 1,100859231 | ENST00000315127 | 80153     | NM_025083    | EDC3           |
| A_33_P3417464  | 1,81271 | 1,6741  | 1,10084397  | N/A             | N/A       | N/A          | N/A            |
| A_33_P3421275  | 6,32205 | 6,18344 | 1,10084397  | ENST00000518699 | 157848    | NM_152568    | NKX6-3         |
| A_23_P21548    | 6,90869 | 6,77011 | 1,100821078 | ENST00000506054 | 79658     | NM_024605    | ARHGAP10       |
| A_22_P00002665 | 1,79725 | 1,6587  | 1,100798188 | ENST00000449525 | N/A       | N/A          | N/A            |
| A_33_P3242369  | 1,89827 | 1,75972 | 1,100798188 | N/A             | N/A       | AF370399     | N/A            |
| A_19_P00315691 | 3,86712 | 3,72862 | 1,100760038 | N/A             | N/A       | N/A          | Inc-MACC1-1    |

|                |         |         |             |                 |           |              |                 |
|----------------|---------|---------|-------------|-----------------|-----------|--------------|-----------------|
| A_23_P138352   | 3,96152 | 3,82303 | 1,100752408 | ENST00000256640 | 7482      | NM_004185    | WNT2B           |
| A_33_P3342076  | 6,31138 | 6,1729  | 1,100744778 | ENST00000343137 | 7799      | NM_015866    | PRDM2           |
| A_33_P3397161  | 7,76785 | 7,6294  | 1,100721889 | N/A             | 220070    | NR_073536    | SHANK2-AS3      |
| A_23_P23542    | 9,85993 | 9,7215  | 1,10070663  | ENST00000477322 | 79871     | NM_024813    | RPAP2           |
| A_24_P211849   | 1,82709 | 1,68868 | 1,100691371 | ENST00000492961 | 57057     | NM_001166220 | TBX20           |
| A_23_P252700   | 12,5865 | 12,4481 | 1,100683741 | ENST00000409975 | 25972     | NM_014044    | UNC50           |
| A_23_P136310   | 1,83827 | 1,69992 | 1,100645595 | ENST00000396292 | 80036     | NM_001007471 | TRPM3           |
| A_24_P348203   | 9,31202 | 9,17369 | 1,100630337 | ENST00000306708 | 80131     | NM_025061    | LRRRC8E         |
| A_21_P0002011  | 1,80723 | 1,66891 | 1,100622708 | ENST00000444688 | 339789    | N/A          | LINC00299       |
| A_21_P0006076  | 5,49623 | 5,35792 | 1,100615079 | N/A             | N/A       | N/A          | Inc-FAM27E1.1-1 |
| A_24_P398810   | 8,57515 | 8,43685 | 1,10060745  | ENST00000216554 | 1983      | NM_001969    | EIF5            |
| A_24_P639505   | 10,9616 | 10,8233 | 1,10060745  | ENST00000469135 | 10228     | NM_005819    | STX6            |
| A_21_P0011621  | 1,81071 | 1,67242 | 1,100599822 | N/A             | N/A       | N/A          | Inc-GGNBP2-1    |
| A_21_P0011763  | 2,30758 | 2,16932 | 1,100576936 | N/A             | N/A       | N/A          | XLOC_I2_007135  |
| A_24_P217365   | 9,53546 | 9,39721 | 1,100569307 | ENST00000412318 | 23243     | NM_015199    | ANKRD28         |
| A_33_P3213463  | 14,9515 | 14,8133 | 1,100531165 | ENST00000313468 | 4728      | NM_002496    | NDUFS8          |
| A_21_P0013768  | 6,78968 | 6,65153 | 1,100493024 | N/A             | N/A       | N/A          | XLOC_I2_015542  |
| A_22_P00007971 | 1,83019 | 1,69205 | 1,100485396 | N/A             | N/A       | AK124121     | Inc-IDE-1       |
| A_33_P3709525  | 2,10107 | 1,96294 | 1,100477768 | ENST00000531609 | 100128233 | NR_103769    | LOC100128233    |
| A_23_P359245   | 15,7742 | 15,6361 | 1,100454884 | ENST00000397752 | 4233      | NM_000245    | MET             |
| A_21_P0007975  | 1,87421 | 1,73611 | 1,100454884 | ENST00000413124 | 100874182 | AK057351     | LINC00424       |
| A_33_P3322085  | 2,35319 | 2,2151  | 1,100447257 | N/A             | 115196    | NM_001102651 | ZNF554          |
| A_33_P3383371  | 5,32649 | 5,18842 | 1,100432001 | N/A             | N/A       | N/A          | N/A             |
| A_33_P3353273  | 1,78095 | 1,64289 | 1,100424374 | ENST00000458075 | N/A       | N/A          | N/A             |
| A_33_P3374684  | 5,44478 | 5,30676 | 1,100393864 | ENST00000562068 | N/A       | N/A          | N/A             |
| A_33_P7380829  | 18,1725 | 18,0345 | 1,100378609 | ENST00000463390 | 55720     | NM_018128    | TSR1            |
| A_21_P0010802  | 4,99553 | 4,85759 | 1,100332847 | N/A             | N/A       | N/A          | XLOC_I2_001448  |
| A_32_P456318   | 1,8531  | 1,71518 | 1,100317593 | ENST00000452027 | 135295    | NM_080743    | SRSF12          |
| A_19_P00315922 | 3,0695  | 2,93168 | 1,100241328 | ENST00000325239 | 57705     | NM_020945    | WDFY4           |
| A_22_P00002607 | 1,92868 | 1,79086 | 1,100241328 | ENST00000569734 | 146336    | NR_027242    | SSTR5-AS1       |
| A_32_P51905    | 13,2218 | 13,084  | 1,100226075 | ENST00000614420 | 57179     | NM_020444    | KIAA1191        |
| A_32_P216872   | 10,0149 | 9,8771  | 1,100226075 | N/A             | 283970    | BX647358     | PDXDC2P         |
| A_21_P0010986  | 13,1287 | 12,9909 | 1,100226075 | ENST00000393668 | 7307      | NM_001025204 | U2AF1           |

|                |         |         |             |                 |        |              |                |
|----------------|---------|---------|-------------|-----------------|--------|--------------|----------------|
| A_23_P33816    | 1,84139 | 1,70363 | 1,100195571 | ENST00000303868 | 83889  | NM_001291088 | WDR87          |
| A_33_P3266195  | 1,9528  | 1,81505 | 1,100187945 | N/A             | N/A    | N/A          | N/A            |
| A_32_P224666   | 6,6612  | 6,5235  | 1,100149816 | ENST00000361183 | 830    | NM_006136    | CAPZA2         |
| A_22_P00004092 | 2,14729 | 2,00961 | 1,100134565 | N/A             | N/A    | N/A          | Inc-CIT-5      |
| A_33_P3319140  | 5,21182 | 5,07415 | 1,100126939 | ENST00000607822 | N/A    | XR_428272    | N/A            |
| A_33_P3351097  | 7,02765 | 6,89004 | 1,100081187 | ENST00000498782 | N/A    | N/A          | N/A            |
| A_32_P157945   | 15,2646 | 15,127  | 1,100073562 | ENST00000418664 | 1832   | NM_004415    | DSP            |
| A_23_P430201   | 8,40376 | 8,26621 | 1,100035437 | ENST00000555265 | 145508 | NM_152446    | CEP128         |
| A_21_P0005572  | 3,64593 | 3,50841 | 1,100012563 | N/A             | N/A    | N/A          | Inc-PIK3CG-3   |
| A_33_P3368895  | 5,26477 | 5,12728 | 1,099989689 | N/A             | N/A    | N/A          | Inc-UXS1-4     |
| A_33_P3292235  | 4,25648 | 4,11899 | 1,099989689 | ENST00000342820 | 152559 | BC031256     | PAQR3          |
| A_23_P120953   | 5,12801 | 4,99058 | 1,099943942 | ENST00000477564 | 253190 | NM_014509    | SERHL2         |
| A_21_P0014259  | 4,67816 | 4,5408  | 1,099890574 | N/A             | N/A    | N/A          | N/A            |
| A_33_P3339388  | 1,79201 | 1,65467 | 1,099875326 | N/A             | N/A    | N/A          | N/A            |
| A_33_P3306526  | 14,9306 | 14,7933 | 1,099844832 | N/A             | N/A    | N/A          | N/A            |
| A_21_P0007898  | 1,84509 | 1,7078  | 1,099837208 | N/A             | N/A    | N/A          | Inc-DHX37-9    |
| A_23_P317184   | 10,1333 | 9,99605 | 1,099806715 | ENST00000496479 | 9209   | NM_006309    | LRRFIP2        |
| A_22_P00015762 | 3,7295  | 3,59227 | 1,099791468 | N/A             | N/A    | BG210741     | Inc-TAF4B-8    |
| A_24_P389994   | 7,10614 | 6,96894 | 1,099768599 | ENST00000498806 | 65220  | NM_023018    | NADK           |
| A_33_P3319302  | 1,82943 | 1,69225 | 1,099753353 | ENST00000410083 | 2159   | AK310775     | F10            |
| A_32_P9382     | 11,2965 | 11,1594 | 1,099692372 | ENST00000377818 | 440145 | NM_001071775 | MZT1           |
| A_21_P0011562  | 7,21667 | 7,0796  | 1,099669504 | N/A             | N/A    | N/A          | XLOC_I2_005933 |
| A_21_P0005556  | 4,45436 | 4,31738 | 1,099600906 | N/A             | N/A    | N/A          | Inc-EPDR1-1    |
| A_21_P0012090  | 1,82414 | 1,68717 | 1,099593284 | ENST00000449170 | N/A    | N/A          | N/A            |
| A_23_P20101    | 3,4638  | 3,32683 | 1,099593284 | ENST00000247881 | 50832  | NM_016944    | TAS2R4         |
| A_21_P0001287  | 1,83003 | 1,69309 | 1,099570419 | N/A             | N/A    | N/A          | Inc-UTP11L-4   |
| A_21_P0014366  | 1,79334 | 1,65642 | 1,099555175 | ENST00000578367 | N/A    | XR_133157    | N/A            |
| A_21_P0014770  | 2,07441 | 1,93752 | 1,099532311 | N/A             | N/A    | N/A          | N/A            |
| A_22_P00005618 | 6,36135 | 6,22447 | 1,09952469  | ENST00000513039 | N/A    | BF670842     | N/A            |
| A_23_P111155   | 2,00073 | 1,86386 | 1,099517068 | ENST00000375527 | 221527 | NM_181842    | ZBTB12         |
| A_23_P132826   | 1,79517 | 1,65833 | 1,099494205 | ENST00000471111 | 5276   | NM_006217    | SERPINI2       |
| A_23_P17275    | 5,02274 | 4,88592 | 1,099478963 | ENST00000380809 | 51277  | NM_016544    | DNAJC27        |
| A_33_P3343577  | 1,84519 | 1,70839 | 1,099463721 | ENST00000611462 | N/A    | AB305952     | N/A            |

|                |         |         |             |                 |           |              |                |
|----------------|---------|---------|-------------|-----------------|-----------|--------------|----------------|
| A_23_P393425   | 10,5674 | 10,4306 | 1,099463721 | ENST00000453514 | 167153    | NM_173797    | PAPD4          |
| A_22_P00024118 | 1,83978 | 1,70299 | 1,0994561   | ENST00000469806 | N/A       | N/A          | N/A            |
| A_21_P0013993  | 6,06882 | 5,93204 | 1,099448479 | ENST00000478918 | 90736     | NM_138362    | FAM104B        |
| A_21_P0001714  | 1,87561 | 1,73885 | 1,099433238 | N/A             | N/A       | N/A          | Inc-KIAA1383-1 |
| A_23_P96827    | 4,42487 | 4,28812 | 1,099425617 | ENST00000255040 | 325       | NM_001639    | APCS           |
| A_32_P54242    | 5,65849 | 5,52174 | 1,099425617 | ENST00000326877 | 254251    | NM_153686    | LCORL          |
| A_23_P418373   | 12,3923 | 12,2556 | 1,099387514 | ENST00000250405 | 599       | NM_004050    | BCL2L2         |
| A_23_P92948    | 10,0416 | 9,90491 | 1,099379894 | ENST00000512635 | 133619    | NM_130809    | PRRC1          |
| A_21_P0005416  | 1,80842 | 1,67177 | 1,099349413 | N/A             | N/A       | N/A          | Inc-C7orf53-1  |
| A_33_P3351474  | 8,75252 | 8,61589 | 1,099334173 | ENST00000394961 | 56916     | NM_001128429 | SMARCAD1       |
| A_23_P8432     | 14,3211 | 14,1845 | 1,099311313 | ENST00000474823 | 10980     | NM_006833    | COPS6          |
| A_23_P94533    | 14,1637 | 14,0271 | 1,099311313 | ENST00000375894 | 1514      | NM_001912    | CTSL           |
| A_23_P88134    | 8,97863 | 8,84205 | 1,099296074 | ENST00000561468 | 51550     | NM_032630    | CINP           |
| A_21_P0011042  | 1,82405 | 1,68749 | 1,099280834 | N/A             | N/A       | N/A          | XLOC_I2_002913 |
| A_33_P3436732  | 6,08313 | 5,94658 | 1,099273215 | N/A             | 259234    | NR_027695    | DSCR10         |
| A_22_P00020786 | 1,78729 | 1,65075 | 1,099265595 | N/A             | N/A       | N/A          | Inc-TNN-2      |
| A_33_P3322724  | 9,90602 | 9,7695  | 1,099250356 | ENST00000372371 | 11128     | NM_007055    | POLR3A         |
| A_33_P3263307  | 15,1973 | 15,0608 | 1,099235117 | ENST00000455915 | 5905      | NM_001278651 | RANGAP1        |
| A_21_P0006783  | 1,79697 | 1,66048 | 1,099227498 | ENST00000422744 | N/A       | N/A          | N/A            |
| A_24_P304154   | 8,64035 | 8,50387 | 1,099219879 | ENST00000396553 | 272       | NM_001025390 | AMPD3          |
| A_23_P29769    | 9,31462 | 9,17815 | 1,09921226  | ENST00000494754 | 25937     | NM_015472    | WWTR1          |
| A_24_P34545    | 8,5348  | 8,39835 | 1,099197022 | ENST00000493261 | 84289     | NM_032329    | ING5           |
| A_33_P3217719  | 6,8224  | 6,68597 | 1,099181784 | ENST00000376472 | 7088      | NM_001303103 | TLE1           |
| A_23_P206960   | 10,987  | 10,8506 | 1,099158927 | ENST00000431431 | 6397      | NM_003003    | SEC14L1        |
| A_33_P3296766  | 1,8984  | 1,76201 | 1,099151308 | ENST00000338912 | N/A       | FJ873958     | N/A            |
| A_21_P0000520  | 5,00734 | 4,87096 | 1,099143689 | N/A             | N/A       | N/A          | N/A            |
| A_22_P00001639 | 1,85159 | 1,71525 | 1,099113215 | N/A             | N/A       | N/A          | Inc-ASB15-3    |
| A_21_P0009012  | 2,97807 | 2,84174 | 1,099105597 | N/A             | N/A       | N/A          | Inc-PARN-6     |
| A_32_P81768    | 9,95676 | 9,82045 | 1,09909036  | ENST00000509770 | 153339    | NM_174909    | TMEM167A       |
| A_32_P14610    | 12,6782 | 12,5419 | 1,099082742 | ENST00000317968 | 10611     | NM_006457    | PDLIM5         |
| A_33_P3310293  | 8,57676 | 8,44047 | 1,099075123 | ENST00000477390 | 11142     | NM_181805    | PKIG           |
| A_33_P3310455  | 1,87306 | 1,73679 | 1,099059887 | N/A             | N/A       | AK123890     | Inc-MMRN1-1    |
| A_22_P00003260 | 4,95767 | 4,82147 | 1,099006562 | N/A             | 102724341 | NR_120676    | NEURL1-AS1     |

|                |         |         |             |                 |           |              |               |
|----------------|---------|---------|-------------|-----------------|-----------|--------------|---------------|
| A_24_P398781   | 12,6518 | 12,5156 | 1,099006562 | ENST00000554026 | 112752    | NM_052873    | IFT43         |
| A_33_P3334828  | 6,57703 | 6,44088 | 1,098968474 | ENST00000317306 | 3640      | NM_001265587 | INSL3         |
| A_33_P3294217  | 9,4148  | 9,27866 | 1,098960856 | ENST00000304477 | 8433      | NM_003577    | UTF1          |
| A_33_P3210620  | 1,82615 | 1,69003 | 1,098945622 | N/A             | 100131497 | BX248745     | LOC100131497  |
| A_32_P71788    | 8,85559 | 8,71947 | 1,098945622 | ENST00000543037 | 2288      | NM_002014    | FKBP4         |
| A_23_P387071   | 9,6695  | 9,53343 | 1,098907536 | ENST00000361952 | 91603     | NM_052857    | ZNF830        |
| A_24_P848091   | 1,79318 | 1,65724 | 1,098808518 | ENST00000425633 | 158035    | NR_026679    | LINC00032     |
| A_23_P125639   | 4,48724 | 4,35132 | 1,098793286 | ENST00000304543 | 7543      | NM_003410    | ZFX           |
| A_23_P44581    | 11,6165 | 11,4806 | 1,098778053 | ENST00000610363 | 23420     | NM_014287    | NOMO1         |
| A_33_P3252181  | 8,50538 | 8,36949 | 1,098770437 | N/A             | N/A       | AK097351     | N/A           |
| A_22_P00009594 | 4,22583 | 4,08996 | 1,098755205 | ENST00000559825 | N/A       | N/A          | N/A           |
| A_23_P321261   | 4,31813 | 4,18226 | 1,098755205 | ENST00000585680 | 4200      | NM_002396    | ME2           |
| A_19_P00805812 | 6,26629 | 6,13042 | 1,098755205 | N/A             | N/A       | N/A          | Inc-UQCRFS1-9 |
| A_22_P00020069 | 3,87408 | 3,73823 | 1,098739973 | N/A             | 441733    | N/A          | PRKXP1        |
| A_23_P344125   | 3,27345 | 3,13769 | 1,098671433 | ENST00000342219 | 145501    | NM_199296    | ISM2          |
| A_21_P0004697  | 1,6372  | 1,50149 | 1,098633356 | ENST00000421161 | N/A       | N/A          | N/A           |
| A_22_P00014092 | 1,80117 | 1,66546 | 1,098633356 | ENST00000528291 | 254187    | NM_152762    | TSGA10IP      |
| A_23_P502224   | 15,587  | 15,4513 | 1,098625741 | ENST00000407332 | 1727      | NM_007326    | CYB5R3        |
| A_23_P91491    | 12,4385 | 12,3028 | 1,098625741 | ENST00000483315 | 56683     | NM_021254    | C21orf59      |
| A_33_P3315874  | 12,5205 | 12,3849 | 1,098549593 | ENST00000395745 | 22907     | NM_014966    | DHX30         |
| A_21_P0000921  | 5,31116 | 5,17558 | 1,098534364 | ENST00000431347 | 101929730 | NR_110797    | LINC01352     |
| A_21_P0000772  | 6,50948 | 6,37396 | 1,098488678 | ENST00000623343 | 100505783 | NR_038337    | OSER1-AS1     |
| A_33_P3351836  | 5,27099 | 5,13548 | 1,098481064 | ENST00000414747 | 129852    | N/A          | C2orf73       |
| A_23_P204472   | 17,8638 | 17,7283 | 1,09847345  | ENST00000471253 | 6175      | NM_053275    | RPLP0         |
| A_33_P3268313  | 6,08575 | 5,95026 | 1,098465836 | ENST00000297283 | 5224      | NM_000290    | PGAM2         |
| A_23_P333138   | 5,16567 | 5,0302  | 1,098450608 | ENST00000393630 | 23041     | NM_015026    | MON2          |
| A_21_P0010147  | 1,82981 | 1,69435 | 1,098442994 | ENST00000444130 | N/A       | N/A          | N/A           |
| A_33_P3217870  | 1,80559 | 1,67014 | 1,09843538  | ENST00000334118 | N/A       | N/A          | N/A           |
| A_22_P00008069 | 1,87377 | 1,73835 | 1,098412539 | ENST00000419826 | N/A       | N/A          | N/A           |
| A_33_P3393806  | 6,82026 | 6,68486 | 1,098397312 | ENST00000617114 | 23400     | AY987009     | ATP13A2       |
| A_22_P00002408 | 4,16972 | 4,03435 | 1,098374472 | ENST00000556528 | N/A       | N/A          | N/A           |
| A_23_P135326   | 12,9724 | 12,8371 | 1,09832118  | ENST00000479871 | 54107     | NM_017443    | POLE3         |
| A_22_P00019874 | 6,40343 | 6,26813 | 1,09832118  | N/A             | N/A       | AL555340     | Inc-NPY5R-4   |



|                |         |         |             |                 |           |              |               |
|----------------|---------|---------|-------------|-----------------|-----------|--------------|---------------|
| A_23_P139635   | 1,82559 | 1,69031 | 1,098305954 | ENST00000549215 | 1610      | NM_001917    | DAO           |
| A_33_P3299110  | 6,41609 | 6,28085 | 1,098275503 | ENST00000298815 | 143872    | NM_152432    | ARHGAP42      |
| A_22_P00019298 | 1,83766 | 1,70248 | 1,098229828 | N/A             | N/A       | N/A          | Inc-IQCG-1    |
| A_22_P00003756 | 1,87397 | 1,73882 | 1,098206991 | ENST00000512849 | N/A       | N/A          | N/A           |
| A_22_P00011712 | 5,45245 | 5,3173  | 1,098206991 | ENST00000450247 | N/A       | N/A          | N/A           |
| A_33_P3386726  | 10,7537 | 10,6186 | 1,09816893  | ENST00000368874 | 5298      | NM_001198773 | PI4KB         |
| A_22_P00018568 | 7,75233 | 7,61724 | 1,098161319 | N/A             | N/A       | HY054721     | Inc-ST7-1     |
| A_22_P00015130 | 1,82069 | 1,6856  | 1,098161319 | ENST00000425405 | N/A       | N/A          | N/A           |
| A_22_P00016243 | 2,45497 | 2,31991 | 1,098138483 | N/A             | N/A       | N/A          | Inc-TMCC1-4   |
| A_21_P0001917  | 7,02543 | 6,89038 | 1,098130871 | ENST00000446520 | N/A       | N/A          | N/A           |
| A_33_P3238058  | 6,15804 | 6,02305 | 1,098085202 | N/A             | 84931     | NR_027181    | LINC01101     |
| A_33_P3348574  | 1,79668 | 1,66178 | 1,098016702 | ENST00000571130 | 504191    | NM_001013358 | OR9G9         |
| A_23_P134814   | 9,90491 | 9,77008 | 1,097963428 | ENST00000345117 | 55145     | NM_018105    | THAP1         |
| A_23_P336854   | 17,8558 | 17,721  | 1,097940596 | ENST00000424633 | N/A       | N/A          | N/A           |
| A_23_P99917    | 12,2412 | 12,1064 | 1,097940596 | ENST00000558608 | 84942     | NM_032856    | WDR73         |
| A_32_P831181   | 8,91266 | 8,77789 | 1,097917766 | ENST00000341446 | 140707    | NM_080626    | BRI3BP        |
| A_21_P0004385  | 1,9412  | 1,80643 | 1,097917766 | N/A             | 642366    | N/A          | LOC642366     |
| A_33_P3422659  | 5,88988 | 5,75511 | 1,097917766 | N/A             | 54332     | NM_018972    | GDAP1         |
| A_23_P420326   | 3,25221 | 3,11748 | 1,097887325 | ENST00000373471 | 252995    | NM_153756    | FNDC5         |
| A_24_P272254   | 1,83414 | 1,69942 | 1,097879715 | ENST00000304355 | 389852    | NM_205856    | SPACA5        |
| A_33_P3231572  | 8,58162 | 8,44698 | 1,097818838 | N/A             | 100130456 | AK095012     | LOC100130456  |
| A_23_P167812   | 1,78847 | 1,65386 | 1,097796009 | ENST00000318204 | 221662    | NM_153020    | RBM24         |
| A_23_P43350    | 2,97175 | 2,83715 | 1,0977884   | ENST00000381477 | 2315      | NM_005511    | MLANA         |
| A_33_P3378659  | 7,12797 | 6,99342 | 1,097750354 | ENST00000610889 | 445347    | NM_001003799 | TARP          |
| A_33_P3306159  | 5,94595 | 5,8114  | 1,097750354 | ENST00000417666 | 84629     | NM_001080495 | TNRC18        |
| A_22_P00005243 | 1,78227 | 1,64773 | 1,097742745 | N/A             | N/A       | N/A          | Inc-DLX2-4    |
| A_21_P0008589  | 2,12633 | 1,99189 | 1,097666658 | N/A             | N/A       | N/A          | Inc-C15orf2-9 |
| A_22_P00023999 | 7,72742 | 7,59299 | 1,09765905  | N/A             | N/A       | U09759       | Inc-C1orf31-1 |
| A_22_P00015199 | 1,87286 | 1,73845 | 1,097643833 | N/A             | 347689    | NR_075092    | SOX2-OT       |
| A_23_P170491   | 10,783  | 10,6486 | 1,097636225 | ENST00000491060 | 10293     | NM_005879    | TRAIIP        |
| A_22_P00008497 | 1,82698 | 1,6926  | 1,097621008 | ENST00000421825 | N/A       | N/A          | N/A           |
| A_23_P351305   | 1,78963 | 1,65527 | 1,097605792 | ENST00000515384 | 219287    | NM_152704    | AMER2         |
| A_23_P169470   | 10,8405 | 10,7062 | 1,097560145 | ENST00000373264 | 1025      | NM_001261    | CDK9          |

|                |         |         |             |                 |           |              |                |
|----------------|---------|---------|-------------|-----------------|-----------|--------------|----------------|
| A_22_P00009461 | 4,08472 | 3,95042 | 1,097560145 | N/A             | N/A       | N/A          | Inc-MAEA-2     |
| A_23_P80321    | 14,6003 | 14,466  | 1,097560145 | ENST00000483713 | 5435      | NM_021974    | POLR2F         |
| A_21_P0005815  | 1,86797 | 1,7337  | 1,097537322 | N/A             | N/A       | N/A          | Inc-DUSP26-1   |
| A_23_P164958   | 3,10553 | 2,97128 | 1,097522107 | ENST00000307522 | 83987     | NM_032040    | CCDC8          |
| A_21_P0014465  | 1,82273 | 1,68849 | 1,0975145   | N/A             | 101928173 | XR_245039    | LOC101928173   |
| A_33_P3360867  | 8,95049 | 8,81626 | 1,097506892 | N/A             | N/A       | N/A          | N/A            |
| A_33_P3387164  | 1,54425 | 1,41002 | 1,097506892 | ENST00000469514 | 6954      | NM_001261820 | TCP11          |
| A_24_P276873   | 1,79958 | 1,66543 | 1,097446035 | ENST00000409395 | 57471     | DQ334271     | ERMN           |
| A_23_P73023    | 8,65059 | 8,51645 | 1,097438429 | ENST00000492180 | 23216     | NM_015173    | TBC1D1         |
| A_22_P00009443 | 1,82326 | 1,68915 | 1,097415608 | ENST00000440932 | N/A       | N/A          | N/A            |
| A_23_P208850   | 18,3166 | 18,1825 | 1,097408001 | ENST00000601390 | 6217      | NM_001020    | RPS16          |
| A_33_P3219429  | 10,6662 | 10,5321 | 1,097408001 | ENST00000369603 | 10285     | NM_005871    | SMNDC1         |
| A_21_P0014673  | 4,26396 | 4,1299  | 1,097377575 | N/A             | N/A       | N/A          | N/A            |
| A_22_P00001299 | 1,83143 | 1,69737 | 1,097377575 | ENST00000432423 | N/A       | N/A          | N/A            |
| A_21_P0009112  | 1,79778 | 1,66373 | 1,097369969 | N/A             | N/A       | N/A          | Inc-IRF8-4     |
| A_33_P3250278  | 4,23367 | 4,09966 | 1,097339544 | ENST00000307503 | 189       | NM_000030    | AGXT           |
| A_21_P0013265  | 1,84795 | 1,71403 | 1,09727109  | N/A             | N/A       | N/A          | XLOC_I2_013583 |
| A_23_P88522    | 12,8823 | 12,7484 | 1,097255879 | ENST00000394588 | 4828      | NM_021077    | NMB            |
| A_21_P0010000  | 1,83298 | 1,6991  | 1,097240668 | N/A             | N/A       | N/A          | Inc-GPCPD1-1   |
| A_23_P502808   | 6,79533 | 6,66152 | 1,097187431 | ENST00000477603 | 145270    | NM_178013    | PRIMA1         |
| A_21_P0007717  | 1,8627  | 1,72898 | 1,097118987 | N/A             | N/A       | N/A          | Inc-GRIP1-1    |
| A_22_P00011081 | 1,79555 | 1,66184 | 1,097111382 | N/A             | 101927813 | NR_109892    | HMMR-AS1       |
| A_21_P0010891  | 8,48283 | 8,34922 | 1,097035339 | N/A             | 101060691 | NR_120611    | NUTM2B-AS1     |
| A_21_P0010525  | 16,1065 | 15,9729 | 1,097027735 | N/A             | N/A       | N/A          | XLOC_I2_000123 |
| A_33_P3329652  | 10,5095 | 10,3759 | 1,097027735 | ENST00000570495 | 146198    | NM_133458    | ZFP90          |
| A_33_P3236798  | 4,40317 | 4,26961 | 1,096997319 | ENST00000217188 | 6725      | NM_080823    | SRMS           |
| A_33_P3342106  | 5,22205 | 5,08852 | 1,096974508 | ENST00000373261 | 23051     | NM_015035    | ZHX3           |
| A_23_P5654     | 6,25179 | 6,11827 | 1,096966904 | ENST00000263326 | 27178     | NM_014439    | IL37           |
| A_33_P3306339  | 1,87208 | 1,73858 | 1,096951697 | N/A             | N/A       | N/A          | N/A            |
| A_32_P132589   | 1,78319 | 1,64972 | 1,096928887 | ENST00000371528 | 440590    | NM_001004339 | ZYG11A         |
| A_22_P00018583 | 5,43407 | 5,3006  | 1,096928887 | N/A             | 145845    | N/A          | LOC145845      |
| A_21_P0002869  | 1,83536 | 1,70191 | 1,09691368  | ENST00000466155 | 151658    | N/A          | LINC00635      |
| A_33_P3268144  | 9,08478 | 8,95138 | 1,096875665 | ENST00000270649 | 80110     | NM_025040    | ZNF614         |

|                |         |         |             |                 |           |              |                 |
|----------------|---------|---------|-------------|-----------------|-----------|--------------|-----------------|
| A_23_P115375   | 14,217  | 14,0836 | 1,096875665 | ENST00000401004 | 653604    | NM_001123375 | HIST2H3D        |
| A_24_P169092   | 6,00047 | 5,86707 | 1,096875665 | ENST00000618849 | 84441     | AJ972402     | MAML2           |
| A_21_P0005703  | 7,80677 | 7,67339 | 1,096860459 | N/A             | N/A       | N/A          | Inc-RAB2A-1     |
| A_33_P3397573  | 1,78418 | 1,65084 | 1,096830048 | N/A             | N/A       | N/A          | N/A             |
| A_24_P327011   | 5,00818 | 4,87485 | 1,096822445 | ENST00000342932 | 60490     | NM_021823    | PPCDC           |
| A_33_P3267543  | 4,72329 | 4,58998 | 1,09680724  | N/A             | 8818      | BC048256     | DPM2            |
| A_33_P3286352  | 2,37971 | 2,2464  | 1,09680724  | N/A             | 219347    | NR_027428    | TMEM254-AS1     |
| A_24_P384397   | 10,0939 | 9,9606  | 1,096799638 | ENST00000615032 | 125950    | NM_133452    | RAVER1          |
| A_23_P258621   | 12,9179 | 12,7846 | 1,096799638 | ENST00000260563 | 8634      | NM_003729    | RTCA            |
| A_21_P0001989  | 5,55105 | 5,41778 | 1,096776831 | N/A             | N/A       | N/A          | Inc-TMEM18-11   |
| A_33_P3421733  | 11,5042 | 11,371  | 1,096723616 | ENST00000566866 | 8663      | NM_001199142 | EIF3C           |
| A_32_P102062   | 8,44117 | 8,30798 | 1,096716014 | ENST00000395675 | 2309      | NM_001455    | FOXO3           |
| A_23_P28042    | 4,9034  | 4,77029 | 1,096655201 | ENST00000427401 | 100129842 | NM_001159293 | ZNF737          |
| A_23_P109184   | 1,87078 | 1,73775 | 1,096594391 | ENST00000310227 | 3642      | NM_002196    | INSM1           |
| A_33_P3240757  | 4,51817 | 4,38517 | 1,096571589 | ENST00000625078 | 3321      | NM_001007237 | IGSF3           |
| A_23_P122876   | 12,5979 | 12,4649 | 1,096571589 | ENST00000344095 | 6878      | NM_005641    | TAF6            |
| A_22_P00012256 | 1,86311 | 1,73013 | 1,096556387 | ENST00000552698 | 644076    | NR_003039    | GLYCAM1         |
| A_21_P0005309  | 9,29869 | 9,16574 | 1,096533585 | ENST00000412800 | N/A       | N/A          | N/A             |
| A_33_P3263277  | 17,3204 | 17,1875 | 1,096495583 | N/A             | 1915      | M29548       | EEF1A1          |
| A_22_P00007426 | 6,09221 | 5,95932 | 1,096487982 | ENST00000518059 | 7993      | NM_001282199 | UBXN8           |
| A_21_P0006693  | 3,14681 | 3,01395 | 1,096465182 | ENST00000453889 | N/A       | N/A          | N/A             |
| A_21_P0007383  | 1,53517 | 1,40232 | 1,096457582 | N/A             | N/A       | N/A          | Inc-SESN3-1     |
| A_33_P3319896  | 1,86817 | 1,73535 | 1,096434782 | ENST00000235349 | 400735    | NM_001009611 | PRAMEF4         |
| A_21_P0004297  | 3,20369 | 3,07088 | 1,096427182 | N/A             | 100861518 | N/A          | P4HA2-AS1       |
| A_23_P422732   | 4,01774 | 3,88494 | 1,096419582 | ENST00000294664 | 126820    | NM_145172    | WDR63           |
| A_33_P3276386  | 1,84548 | 1,71269 | 1,096411982 | ENST00000594522 | N/A       | N/A          | N/A             |
| A_22_P00024672 | 13,0181 | 12,8854 | 1,096343587 | N/A             | N/A       | BC034813     | Inc-LINC00346-2 |
| A_33_P3244073  | 1,83837 | 1,70568 | 1,096335987 | N/A             | 100132146 | N/A          | LOC100132146    |
| A_22_P00005499 | 4,79534 | 4,66266 | 1,096328388 | N/A             | N/A       | N/A          | Inc-DZANK1-2    |
| A_23_P51580    | 2,50528 | 2,3726  | 1,096328388 | ENST00000369416 | 3284      | NM_000198    | HSD3B2          |
| A_24_P228875   | 1,78088 | 1,64823 | 1,096305591 | ENST00000250617 | 9459      | NM_004840    | ARHGEF6         |
| A_23_P345830   | 10,7024 | 10,5698 | 1,096267597 | ENST00000403094 | 22868     | NM_014929    | FASTKD2         |
| A_21_P0013084  | 1,78384 | 1,65129 | 1,096229603 | ENST00000404253 | N/A       | N/A          | N/A             |

|                |         |         |             |                 |           |              |                |
|----------------|---------|---------|-------------|-----------------|-----------|--------------|----------------|
| A_21_P0009551  | 8,98812 | 8,85559 | 1,096214407 | N/A             | N/A       | N/A          | Inc-RIT2-1     |
| A_23_P123193   | 8,59048 | 8,45795 | 1,096214407 | ENST00000479402 | 57180     | NM_020445    | ACTR3B         |
| A_23_P120364   | 17,3779 | 17,2454 | 1,096191612 | ENST00000370179 | 79144     | NM_024299    | PPDPF          |
| A_22_P00007065 | 1,81259 | 1,68011 | 1,096176415 | ENST00000558269 | N/A       | BX104726     | N/A            |
| A_22_P00021046 | 1,79434 | 1,66187 | 1,096168817 | ENST00000567538 | N/A       | N/A          | N/A            |
| A_22_P00001745 | 1,82126 | 1,68882 | 1,096146023 | N/A             | N/A       | N/A          | Inc-ATMIN-2    |
| A_22_P00018433 | 1,63321 | 1,5008  | 1,09612323  | ENST00000551856 | N/A       | N/A          | N/A            |
| A_33_P3300179  | 5,70832 | 5,57593 | 1,096108034 | N/A             | N/A       | N/A          | N/A            |
| A_21_P0000196  | 1,78917 | 1,65678 | 1,096108034 | N/A             | 55530     | AL359592     | SVOP           |
| A_23_P358542   | 9,2403  | 9,10793 | 1,096092839 | ENST00000301332 | 90990     | NM_145754    | KIFC2          |
| A_22_P00005519 | 1,82507 | 1,69271 | 1,096085242 | N/A             | N/A       | N/A          | Inc-EBF3-6     |
| A_21_P0010732  | 4,3341  | 4,20175 | 1,096077644 | ENST00000422062 | N/A       | N/A          | N/A            |
| A_33_P3280003  | 6,73421 | 6,60188 | 1,09606245  | ENST00000429257 | 8924      | NM_004667    | HERC2          |
| A_22_P00000672 | 1,91439 | 1,78207 | 1,096054852 | ENST00000447019 | N/A       | N/A          | N/A            |
| A_22_P00007563 | 3,68888 | 3,5566  | 1,096024464 | N/A             | N/A       | BC030152     | Inc-HBEGF-2    |
| A_24_P213161   | 9,16801 | 9,03574 | 1,096016867 | ENST00000543277 | 55655     | NM_017852    | NLRP2          |
| A_22_P00023275 | 4,75145 | 4,61919 | 1,09600927  | ENST00000449463 | N/A       | N/A          | N/A            |
| A_33_P3281066  | 1,85615 | 1,72394 | 1,095971285 | ENST00000398499 | 49854     | NM_001098402 | ZBTB21         |
| A_24_P838448   | 3,22423 | 3,09203 | 1,095963689 | ENST00000607048 | 401237    | NR_015410    | CASC15         |
| A_33_P3306616  | 12,3213 | 12,1891 | 1,095963689 | N/A             | N/A       | AK094078     | N/A            |
| A_21_P0005552  | 3,62722 | 3,49507 | 1,095925706 | N/A             | N/A       | N/A          | Inc-EVX1-5     |
| A_23_P252642   | 14,6355 | 14,5034 | 1,095887725 | ENST00000481916 | 129880    | NM_152384    | BBS5           |
| A_22_P00016528 | 3,72105 | 3,58895 | 1,095887725 | ENST00000549551 | N/A       | DN913889     | N/A            |
| A_23_P20722    | 12,543  | 12,4109 | 1,095887725 | ENST00000298532 | 6621      | NM_003086    | SNAPC4         |
| A_22_P00005768 | 5,92308 | 5,79101 | 1,095864937 | N/A             | 104266960 | N/A          | LINC01201      |
| A_22_P00025467 | 1,77921 | 1,64716 | 1,095849745 | N/A             | N/A       | AA454075     | Inc-CENPM-1    |
| A_21_P0010898  | 1,87037 | 1,73832 | 1,095849745 | N/A             | N/A       | N/A          | XLOC_I2_002069 |
| A_33_P3362178  | 1,84488 | 1,71286 | 1,095826958 | ENST00000556489 | 283571    | NM_001243007 | PROX2          |
| A_23_P252817   | 1,85558 | 1,72356 | 1,095826958 | ENST00000287641 | 6750      | NM_001048    | SST            |
| A_33_P3373885  | 1,85388 | 1,72187 | 1,095819362 | ENST00000416045 | 60560     | XM_005252128 | NAA35          |
| A_21_P0005852  | 1,78259 | 1,6506  | 1,095804171 | ENST00000521040 | 286187    | N/A          | PPP1R42        |
| A_23_P121441   | 1,78194 | 1,64996 | 1,095796575 | ENST00000339174 | 22829     | NM_014893    | NLGN4Y         |
| A_23_P218237   | 8,10458 | 7,97263 | 1,095773789 | ENST00000573538 | 3931      | NM_000229    | LCAT           |

|                |         |         |             |                 |           |              |                |
|----------------|---------|---------|-------------|-----------------|-----------|--------------|----------------|
| A_21_P0001182  | 1,82764 | 1,6957  | 1,095766194 | ENST00000449345 | N/A       | N/A          | N/A            |
| A_33_P3218872  | 3,67539 | 3,54346 | 1,095758599 | N/A             | 131965    | NM_152396    | METTL6         |
| A_21_P0006841  | 1,78146 | 1,64954 | 1,095751003 | N/A             | N/A       | N/A          | Inc-SPAG6-1    |
| A_32_P126557   | 3,23241 | 3,1005  | 1,095743408 | ENST00000622468 | 9628      | NM_001204424 | RGS6           |
| A_23_P34402    | 13,6961 | 13,5642 | 1,095735813 | ENST00000368063 | 23385     | NM_015331    | NCSTN          |
| A_23_P314086   | 13,4144 | 13,2825 | 1,095735813 | ENST00000586749 | 55658     | NM_194460    | RNF126         |
| A_23_P326296   | 9,38763 | 9,25575 | 1,095720623 | ENST00000585771 | 199746    | NM_144987    | U2AF1L4        |
| A_23_P10121    | 3,67755 | 3,54575 | 1,095659865 | ENST00000220772 | 6422      | NM_003012    | SFRP1          |
| A_23_P136077   | 1,84104 | 1,70924 | 1,095659865 | ENST00000366897 | 5071      | NM_004562    | PARK2          |
| A_21_P0009807  | 1,7793  | 1,64751 | 1,095652271 | N/A             | N/A       | N/A          | Inc-ZNF180-2   |
| A_24_P197964   | 8,4599  | 8,32812 | 1,095644676 | ENST00000341469 | 9830      | NM_014788    | TRIM14         |
| A_22_P00004881 | 1,85977 | 1,728   | 1,095637082 | N/A             | N/A       | N/A          | Inc-CYS1-3     |
| A_22_P00005815 | 1,86291 | 1,73116 | 1,095621893 | N/A             | N/A       | BU568025     | Inc-EPHB6-1    |
| A_33_P3373194  | 1,80756 | 1,67582 | 1,095614299 | N/A             | N/A       | N/A          | N/A            |
| A_32_P118586   | 11,487  | 11,3553 | 1,095583922 | ENST00000311128 | 201627    | NM_152678    | DENND6A        |
| A_23_P56810    | 10,9857 | 10,854  | 1,095583922 | ENST00000326019 | 22950     | NM_018158    | SLC4A1AP       |
| A_22_P00005221 | 1,84057 | 1,70893 | 1,095538359 | ENST00000521812 | 55384     | NR_033358    | MEG3           |
| A_21_P0012938  | 1,87068 | 1,73904 | 1,095538359 | ENST00000512035 | N/A       | N/A          | N/A            |
| A_21_P0011464  | 8,03488 | 7,90326 | 1,095523172 | N/A             | N/A       | N/A          | XLOC_I2_005438 |
| A_23_P313652   | 1,85139 | 1,71979 | 1,095507985 | ENST00000371425 | 158798    | NM_178813    | AKAP14         |
| A_32_P155776   | 14,9628 | 14,8312 | 1,095507985 | ENST00000397487 | 440915    | AY014272     | POTEKP         |
| A_22_P00017576 | 1,78603 | 1,65459 | 1,095386496 | N/A             | N/A       | N/A          | Inc-WDR63-2    |
| A_21_P0009464  | 1,86625 | 1,73484 | 1,095363718 | N/A             | N/A       | N/A          | Inc-CABLES1-1  |
| A_23_P60376    | 15,3263 | 15,195  | 1,095280204 | ENST00000224073 | 8721      | NM_153200    | EDF1           |
| A_23_P259506   | 14,7302 | 14,5989 | 1,095280204 | ENST00000261811 | 84418     | NM_032412    | CYSTM1         |
| A_33_P3211238  | 7,08702 | 6,95576 | 1,095249837 | ENST00000301770 | 220001    | NM_152718    | VWCE           |
| A_33_P3272352  | 9,77712 | 9,64592 | 1,095204288 | ENST00000397064 | N/A       | N/A          | N/A            |
| A_21_P0013263  | 1,77962 | 1,64843 | 1,095196696 | ENST00000453459 | 101928012 | N/A          | LOC101928012   |
| A_21_P0003903  | 1,82367 | 1,6925  | 1,095181514 | N/A             | 102724785 | XR_425794    | LOC102724785   |
| A_21_P0003346  | 1,81806 | 1,68692 | 1,095158741 | ENST00000512268 | N/A       | N/A          | N/A            |
| A_33_P3374299  | 1,85394 | 1,7228  | 1,095158741 | ENST00000373164 | 222643    | NM_173561    | UNC5CL         |
| A_23_P414252   | 8,76645 | 8,63538 | 1,095105604 | N/A             | 29886     | AK315670     | SNX8           |
| A_33_P3258146  | 5,55524 | 5,42417 | 1,095105604 | ENST00000619243 | 100130539 | NM_001258000 | LOC100130539   |

|                |         |         |             |                 |           |              |                      |
|----------------|---------|---------|-------------|-----------------|-----------|--------------|----------------------|
| A_33_P3400482  | 1,78597 | 1,65497 | 1,095052471 | N/A             | 728158    | XR_246201    | LOC728158            |
| A_23_P214587   | 9,97021 | 9,83922 | 1,09504488  | ENST00000327357 | 7726      | NM_003449    | TRIM26               |
| A_21_P0008503  | 1,81553 | 1,68459 | 1,09500693  | N/A             | N/A       | N/A          | Inc-RP11-80A15.1.1-5 |
| A_33_P3256334  | 7,29025 | 7,15932 | 1,09499934  | ENST00000617030 | 5544      | NM_006249    | PRB3                 |
| A_23_P108554   | 13,3892 | 13,2583 | 1,09497657  | ENST00000617198 | 1653      | NM_004939    | DDX1                 |
| A_22_P00001215 | 2,08101 | 1,95017 | 1,094931032 | N/A             | 100874226 | NR_046516    | ARHGEF7-AS1          |
| A_22_P00003926 | 1,77583 | 1,64503 | 1,094900675 | ENST00000519336 | 101929495 | AI674738     | LINC01339            |
| A_21_P0004753  | 1,8882  | 1,75741 | 1,094893086 | ENST00000454135 | N/A       | N/A          | N/A                  |
| A_22_P00002444 | 1,77241 | 1,64162 | 1,094893086 | N/A             | 101928792 | XR_429487    | LOC101928792         |
| A_22_P00022200 | 1,84111 | 1,71036 | 1,094862729 | ENST00000530492 | N/A       | BX111232     | N/A                  |
| A_21_P0004570  | 1,86707 | 1,73634 | 1,094847551 | N/A             | N/A       | N/A          | Inc-NUDT12-3         |
| A_22_P00020823 | 1,81154 | 1,68084 | 1,094824785 | ENST00000521805 | N/A       | N/A          | N/A                  |
| A_33_P3263512  | 12,4034 | 12,2727 | 1,094824785 | N/A             | N/A       | N/A          | N/A                  |
| A_23_P123853   | 3,79997 | 3,66929 | 1,094809607 | ENST00000485502 | 6363      | NM_006274    | CCL19                |
| A_21_P0009001  | 3,03089 | 2,90023 | 1,09479443  | N/A             | N/A       | N/A          | Inc-CLDN6-1          |
| A_23_P87363    | 1,7885  | 1,65788 | 1,094764076 | ENST00000250693 | 417       | NM_004314    | ART1                 |
| A_33_P3549874  | 7,23936 | 7,10876 | 1,0947489   | ENST00000559985 | 255177    | XR_243167    | LOC255177            |
| A_33_P3279708  | 8,60559 | 8,47501 | 1,094733724 | ENST00000538098 | 6066      | NR_002716    | RNU2-1               |
| A_22_P00009849 | 4,44983 | 4,3193  | 1,094695784 | ENST00000530960 | N/A       | N/A          | N/A                  |
| A_23_P160466   | 9,78462 | 9,65413 | 1,094665433 | ENST00000367804 | 10560     | NM_006996    | SLC19A2              |
| A_21_P0012448  | 5,75406 | 5,6236  | 1,09464267  | ENST00000493276 | N/A       | N/A          | N/A                  |
| A_33_P3311791  | 5,19687 | 5,06644 | 1,094619908 | ENST00000334181 | 388567    | NM_001023561 | ZNF749               |
| A_19_P00812723 | 5,0302  | 4,89979 | 1,094604733 | N/A             | N/A       | N/A          | Inc-ZADH2-1          |
| A_21_P0003109  | 1,82582 | 1,69542 | 1,094597146 | N/A             | N/A       | N/A          | Inc-GADL1-1          |
| A_22_P00002645 | 5,70278 | 5,5724  | 1,094581972 | N/A             | N/A       | N/A          | Inc-C1orf192-1       |
| A_23_P328600   | 10,3009 | 10,1706 | 1,094521277 | ENST00000550672 | 80024     | NM_024959    | SLC8B1               |
| A_23_P79161    | 13,5649 | 13,4346 | 1,094521277 | ENST00000510797 | 27166     | NM_013237    | PRELID1              |
| A_21_P0010771  | 8,88642 | 8,75615 | 1,094498517 | ENST00000624291 | 441430    | NM_001012421 | ANKRD20A2            |
| A_33_P3264940  | 1,78966 | 1,65948 | 1,094430241 | N/A             | N/A       | N/A          | N/A                  |
| A_21_P0008144  | 1,7868  | 1,65664 | 1,094415069 | N/A             | N/A       | N/A          | Inc-LHFP-3           |
| A_33_P3271187  | 4,01528 | 3,88515 | 1,094392312 | N/A             | N/A       | N/A          | N/A                  |
| A_33_P3236152  | 1,77658 | 1,64647 | 1,09437714  | N/A             | N/A       | N/A          | N/A                  |
| A_21_P0010402  | 7,42868 | 7,2986  | 1,094354383 | ENST00000449017 | 102724827 | NR_110543    | MIATNB               |

|                |         |         |             |                 |           |              |                 |
|----------------|---------|---------|-------------|-----------------|-----------|--------------|-----------------|
| A_21_P0002808  | 1,77899 | 1,64894 | 1,094331627 | ENST00000434309 | 102724550 | NR_110826    | LOC102724550    |
| A_21_P0009851  | 1,77539 | 1,64535 | 1,094324042 | ENST00000444478 | N/A       | N/A          | N/A             |
| A_24_P239017   | 10,8425 | 10,7125 | 1,094293701 | N/A             | 606551    | NR_002837    | UBE2MP1         |
| A_21_P0006322  | 1,78515 | 1,65516 | 1,094286116 | N/A             | N/A       | N/A          | Inc-TRUB2-1     |
| A_33_P3355926  | 2,12769 | 1,99772 | 1,094270946 | N/A             | 100130894 | NR_034083    | VAC14-AS1       |
| A_23_P420831   | 6,46483 | 6,33487 | 1,094263361 | ENST00000448645 | 10107     | NM_052828    | TRIM10          |
| A_24_P589855   | 1,76429 | 1,63434 | 1,094255777 | ENST00000446693 | N/A       | N/A          | N/A             |
| A_24_P89701    | 15,9199 | 15,79   | 1,094217853 | ENST00000348127 | 3614      | NM_000883    | IMPDPH1         |
| A_33_P3289222  | 11,2236 | 11,0937 | 1,094217853 | ENST00000472710 | 10489     | NM_006369    | LRRC41          |
| A_22_P00016988 | 1,86668 | 1,73682 | 1,094187515 | N/A             | N/A       | N/A          | Inc-TTC24-1     |
| A_21_P0001079  | 1,77228 | 1,64244 | 1,094172347 | N/A             | N/A       | N/A          | Inc-C1orf31-7   |
| A_23_P98631    | 9,2855  | 9,1557  | 1,09414201  | ENST00000349215 | 11234     | NM_181507    | HPS5            |
| A_24_P210675   | 7,35963 | 7,22984 | 1,094134426 | ENST00000573203 | 54820     | NM_017668    | NDE1            |
| A_23_P324319   | 1,74505 | 1,61526 | 1,094134426 | ENST00000617378 | 10407     | NM_058203    | SPAG11B         |
| A_33_P3379017  | 8,07331 | 7,94355 | 1,094111675 | ENST00000407598 | 23119     | NM_015094    | HIC2            |
| A_23_P32500    | 1,86239 | 1,73264 | 1,094104091 | ENST00000462741 | 23166     | NM_015136    | STAB1           |
| A_21_P0010098  | 5,89986 | 5,77014 | 1,09408134  | N/A             | N/A       | N/A          | Inc-C20orf166-2 |
| A_33_P3228322  | 5,56236 | 5,43269 | 1,094043423 | ENST00000404792 | 10068     | NM_173042    | IL18BP          |
| A_21_P0007001  | 1,75132 | 1,62171 | 1,093997924 | N/A             | N/A       | N/A          | Inc-RTKN2-3     |
| A_23_P150852   | 10,8473 | 10,7177 | 1,093990341 | ENST00000550515 | 23344     | NM_015292    | ESYT1           |
| A_23_P53217    | 13,3663 | 13,2367 | 1,093990341 | ENST00000327320 | 8726      | NM_152991    | EED             |
| A_33_P3332145  | 14,3246 | 14,195  | 1,093990341 | ENST00000237530 | 6185      | NM_002951    | RPN2            |
| A_21_P0001937  | 3,66092 | 3,53134 | 1,093975175 | ENST00000445613 | N/A       | N/A          | N/A             |
| A_23_P99653    | 1,8666  | 1,73705 | 1,093952427 | ENST00000390439 | N/A       | X92778       | N/A             |
| A_21_P0010072  | 1,86747 | 1,73793 | 1,093944844 | N/A             | N/A       | N/A          | Inc-YTHDF1-3    |
| A_23_P128706   | 13,9239 | 13,7944 | 1,093914514 | ENST00000360184 | 1778      | NM_001376    | DYNC1H1         |
| A_23_P211326   | 5,07207 | 4,94257 | 1,093914514 | ENST00000355219 | 27443     | NM_001290047 | CECR2           |
| A_33_P3308626  | 10,5837 | 10,4542 | 1,093914514 | ENST00000566455 | 22879     | NM_014940    | MON1B           |
| A_19_P00315603 | 11,1898 | 11,0603 | 1,093914514 | N/A             | N/A       | N/A          | XLLOC_I2_015760 |
| A_33_P3343155  | 8,18335 | 8,05386 | 1,093906931 | ENST00000286548 | 2776      | NM_002072    | GNAQ            |
| A_33_P3415625  | 1,777   | 1,64758 | 1,093853856 | ENST00000525971 | 84125     | NM_001079910 | LRRIQ1          |
| A_22_P00000251 | 10,1611 | 10,0317 | 1,093838692 | ENST00000575402 | N/A       | AK001561     | N/A             |
| A_23_P130281   | 3,24489 | 3,11551 | 1,093823528 | ENST00000381951 | 26189     | NM_012352    | OR1A2           |

|                |         |         |             |                 |           |              |                       |
|----------------|---------|---------|-------------|-----------------|-----------|--------------|-----------------------|
| A_33_P3361442  | 6,29583 | 6,16646 | 1,093815946 | ENST00000408991 | 55150     | NM_018111    | C19orf73              |
| A_33_P3314161  | 8,42061 | 8,29126 | 1,093800783 | ENST00000327791 | 10138     | NM_001190979 | YAF2                  |
| A_22_P00001901 | 2,08379 | 1,95449 | 1,093762875 | ENST00000580937 | N/A       | N/A          | N/A                   |
| A_22_P00012924 | 1,86386 | 1,7346  | 1,09373255  | N/A             | N/A       | N/A          | Inc-RCBTB2-1          |
| A_23_P363163   | 9,30244 | 9,17321 | 1,093709807 | ENST00000398392 | 8545      | NM_001008390 | CGGBP1                |
| A_21_P0012002  | 10,5091 | 10,3799 | 1,093687064 | ENST00000431359 | N/A       | N/A          | N/A                   |
| A_24_P222997   | 7,13097 | 7,0018  | 1,093664322 | ENST00000403017 | 84083     | NM_032143    | ZRANB3                |
| A_23_P39602    | 8,44424 | 8,3151  | 1,09364158  | ENST00000395856 | 8648      | NM_147233    | NCOA1                 |
| A_23_P416686   | 9,08505 | 8,95592 | 1,093633999 | ENST00000545366 | 56834     | NM_020155    | GPR137                |
| A_21_P0007445  | 1,78017 | 1,65111 | 1,093580937 | N/A             | N/A       | N/A          | Inc-RP11-201M22.1.1-2 |
| A_24_P202329   | 3,23648 | 3,10746 | 1,093550617 | ENST00000578036 | 146880    | NR_026899    | LOC146880             |
| A_21_P0001645  | 1,81381 | 1,68484 | 1,093512718 | N/A             | N/A       | N/A          | Inc-TOMM20-2          |
| A_33_P3247095  | 4,5146  | 4,38565 | 1,093497559 | N/A             | N/A       | N/A          | N/A                   |
| A_22_P00005385 | 1,82395 | 1,69502 | 1,0934824   | ENST00000509629 | N/A       | N/A          | N/A                   |
| A_33_P3296852  | 17,6328 | 17,5039 | 1,093459662 | ENST00000424415 | 729162    | XR_430504    | LOC729162             |
| A_22_P00020123 | 1,79743 | 1,66858 | 1,093421766 | ENST00000535229 | 10846     | AK090688     | PDE10A                |
| A_22_P00002211 | 3,03912 | 2,91028 | 1,093414187 | ENST00000442188 | N/A       | N/A          | N/A                   |
| A_21_P0011845  | 1,77316 | 1,64434 | 1,093399029 | ENST00000568484 | 101929926 | N/A          | LOC101929926          |
| A_21_P0011253  | 1,78766 | 1,65899 | 1,093285352 | N/A             | N/A       | N/A          | XLOC_I2_004283        |
| A_22_P00013085 | 1,81727 | 1,68864 | 1,09325504  | ENST00000422226 | 104797536 | NR_126557    | LINC01402             |
| A_23_P82128    | 17,0436 | 16,915  | 1,093232307 | ENST00000484616 | 6206      | NM_001016    | RPS12                 |
| A_23_P391778   | 10,7525 | 10,6239 | 1,093232307 | ENST00000496360 | 23499     | NM_012090    | MACF1                 |
| A_22_P00017562 | 3,65361 | 3,52504 | 1,093209574 | N/A             | 266655    | NR_015427    | LINC00094             |
| A_22_P00010048 | 1,77048 | 1,64198 | 1,093156533 | N/A             | N/A       | N/A          | Inc-MOCS2-2           |
| A_23_P380766   | 12,7634 | 12,6349 | 1,093156533 | ENST00000361246 | 9578      | NM_006035    | CDC42BPB              |
| A_21_P0005604  | 3,39382 | 3,26535 | 1,093133801 | N/A             | N/A       | N/A          | Inc-ZNF680-1          |
| A_21_P0001734  | 1,77069 | 1,64223 | 1,093126224 | N/A             | 101928436 | NM_001286997 | LOC101928436          |
| A_22_P00006797 | 1,77794 | 1,64951 | 1,093103494 | N/A             | N/A       | BC034636     | Inc-G3BP1-3           |
| A_22_P00017166 | 5,45957 | 5,33116 | 1,09308834  | N/A             | 104355139 | N/A          | LINC01397             |
| A_23_P379746   | 7,04939 | 6,92101 | 1,09306561  | ENST00000354285 | 160518    | NM_144973    | DENND5B               |
| A_21_P0012052  | 8,13105 | 8,00269 | 1,093050457 | N/A             | N/A       | N/A          | XLOC_I2_007835        |
| A_22_P00017795 | 6,79317 | 6,66481 | 1,093050457 | ENST00000533941 | N/A       | BF510029     | N/A                   |
| A_24_P16004    | 1,76964 | 1,64135 | 1,092997423 | ENST00000390271 | N/A       | N/A          | N/A                   |



|                |         |         |             |                 |           |              |                     |
|----------------|---------|---------|-------------|-----------------|-----------|--------------|---------------------|
| A_22_P00023969 | 1,79248 | 1,66423 | 1,092967119 | N/A             | N/A       | N/A          | Inc-AC013480.1.1-3  |
| A_33_P3210139  | 9,98676 | 9,85851 | 1,092967119 | ENST00000298281 | 51585     | NM_015885    | PCF11               |
| A_33_P3342096  | 7,0095  | 6,88127 | 1,092951968 | ENST00000432768 | 23051     | NM_015035    | ZHX3                |
| A_22_P00009454 | 2,84285 | 2,71462 | 1,092951968 | N/A             | 101927668 | NR_110114    | LOC101927668        |
| A_22_P00007381 | 1,82731 | 1,69912 | 1,092921665 | ENST00000521884 | N/A       | AA431609     | N/A                 |
| A_33_P3374640  | 1,83353 | 1,70539 | 1,092883788 | ENST00000594038 | 199800    | NM_001101340 | ADM5                |
| A_23_P166993   | 1,82798 | 1,69987 | 1,092861062 | ENST00000398015 | 2047      | NM_004441    | EPHB1               |
| A_33_P3281667  | 6,63393 | 6,50584 | 1,092845912 | ENST00000619138 | 728577    | NM_001201380 | CNTNAP3B            |
| A_21_P0008926  | 4,10958 | 3,9815  | 1,092838337 | N/A             | N/A       | N/A          | Inc-GPT2-1          |
| A_24_P244706   | 1,79766 | 1,66963 | 1,092800463 | ENST00000267377 | 6751      | NM_001049    | SSTR1               |
| A_22_P00002501 | 1,56211 | 1,43408 | 1,092800463 | N/A             | N/A       | N/A          | Inc-C16orf62-1      |
| A_33_P3406030  | 5,8376  | 5,70959 | 1,092785314 | ENST00000370453 | 84230     | NM_032270    | LRRC8C              |
| A_21_P0013022  | 2,06372 | 1,93571 | 1,092785314 | N/A             | 101929309 | XR_242007    | LOC101929309        |
| A_21_P0001220  | 1,57728 | 1,44932 | 1,092747441 | ENST00000439570 | N/A       | N/A          | N/A                 |
| A_22_P00013558 | 1,83069 | 1,70275 | 1,092732293 | N/A             | N/A       | N/A          | Inc-RP11-43D2.2.1-2 |
| A_33_P3416448  | 6,84571 | 6,71779 | 1,092717144 | ENST00000554565 | 55727     | NM_001002860 | BTBD7               |
| A_22_P00022657 | 1,86363 | 1,73574 | 1,092694422 | N/A             | N/A       | N/A          | Inc-C4orf21-4       |
| A_23_P114423   | 1,86187 | 1,73398 | 1,092694422 | ENST00000475448 | 9104      | NM_152869    | RGN                 |
| A_21_P0012914  | 1,76864 | 1,64083 | 1,092633832 | N/A             | N/A       | N/A          | XLOC_I2_012107      |
| A_33_P3260605  | 12,3509 | 12,2231 | 1,092626258 | ENST00000374593 | 8727      | NM_003798    | CTNNAL1             |
| A_23_P77201    | 10,2069 | 10,0791 | 1,092626258 | ENST00000566621 | 84529     | NM_032499    | C15orf41            |
| A_22_P00002520 | 1,82105 | 1,69329 | 1,092595965 | ENST00000577556 | N/A       | N/A          | N/A                 |
| A_33_P3319940  | 8,2809  | 8,15315 | 1,092588392 | ENST00000624166 | 546       | NM_000489    | ATRX                |
| A_21_P0003692  | 1,92107 | 1,79334 | 1,092573245 | N/A             | N/A       | N/A          | Inc-TLR3-1          |
| A_23_P81463    | 9,16574 | 9,03803 | 1,092558099 | ENST00000504778 | 54505     | NM_019030    | DHX29               |
| A_24_P315184   | 16,8813 | 16,7536 | 1,092550526 | ENST00000432629 | N/A       | AB209471     | N/A                 |
| A_33_P3301266  | 4,58453 | 4,45688 | 1,092512662 | ENST00000503543 | 79908     | NM_001159708 | BTNL8               |
| A_21_P0006405  | 1,8023  | 1,67467 | 1,092497516 | N/A             | N/A       | N/A          | Inc-CD40LG-1        |
| A_33_P3379801  | 8,02044 | 7,89289 | 1,092436937 | ENST00000406043 | 55172     | NM_001083908 | DNAAF2              |
| A_23_P202837   | 11,08   | 10,9525 | 1,092399077 | ENST00000227507 | 595       | NM_053056    | CCND1               |
| A_33_P3226039  | 6,13925 | 6,01176 | 1,092391505 | ENST00000393359 | 9392      | NM_004257    | TGFBRAP1            |
| A_33_P3251252  | 3,80389 | 3,67642 | 1,092376361 | N/A             | N/A       | N/A          | N/A                 |
| A_23_P119886   | 1,76823 | 1,64079 | 1,092353646 | ENST00000264717 | 2646      | NM_001486    | GCKR                |

|                |         |         |             |                 |           |              |                |
|----------------|---------|---------|-------------|-----------------|-----------|--------------|----------------|
| A_33_P3396379  | 3,058   | 2,93058 | 1,092338503 | N/A             | N/A       | N/A          | N/A            |
| A_23_P44996    | 1,8274  | 1,7     | 1,09232336  | ENST00000380200 | 795       | NM_004057    | S100G          |
| A_23_P25964    | 10,7254 | 10,598  | 1,09232336  | ENST00000261304 | 2581      | NM_000153    | GALC           |
| A_23_P415652   | 10,6175 | 10,4901 | 1,09232336  | ENST00000375011 | 79695     | NM_024642    | GALNT12        |
| A_23_P6344     | 13,5034 | 13,376  | 1,09232336  | ENST00000248958 | 23753     | NM_022044    | SDF2L1         |
| A_33_P3409493  | 2,67163 | 2,54424 | 1,092315789 | ENST00000404031 | 285095    | XR_430644    | LOC285095      |
| A_21_P0013830  | 8,57966 | 8,45227 | 1,092315789 | N/A             | N/A       | N/A          | XLOC_I2_015812 |
| A_22_P00019712 | 1,77704 | 1,64967 | 1,092300646 | ENST00000452199 | 400800    | XR_241167    | FLJ43585       |
| A_33_P3399566  | 1,7669  | 1,63953 | 1,092300646 | N/A             | 100130931 | AK128535     | LOC100130931   |
| A_24_P348861   | 1,80622 | 1,67886 | 1,092293075 | ENST00000440408 | 64595     | NR_001545    | TTY15          |
| A_21_P0009665  | 7,15966 | 7,0323  | 1,092293075 | ENST00000422045 | N/A       | N/A          | N/A            |
| A_33_P3495783  | 1,8648  | 1,73745 | 1,092285504 | ENST00000327381 | 114786    | AK126867     | XKR4           |
| A_22_P00011332 | 9,24109 | 9,11376 | 1,092270362 | N/A             | N/A       | XM_006721049 | Inc-OTOA-1     |
| A_23_P36408    | 9,94465 | 9,81733 | 1,092262791 | ENST00000543633 | 65082     | NM_022916    | VPS33A         |
| A_21_P0005666  | 1,77238 | 1,64508 | 1,092247649 | N/A             | N/A       | N/A          | Inc-INTS10-1   |
| A_33_P3341676  | 12,6672 | 12,5399 | 1,092247649 | ENST00000449277 | 4205      | NM_001171894 | MEF2A          |
| A_23_P61569    | 7,93092 | 7,80364 | 1,092232507 | ENST00000367740 | 8674      | NM_003762    | VAMP4          |
| A_21_P0014093  | 1,76713 | 1,63988 | 1,092209795 | N/A             | 101927482 | NR_110225    | LOC101927482   |
| A_22_P00006237 | 6,63769 | 6,51047 | 1,092187083 | ENST00000424313 | N/A       | BM690161     | N/A            |
| A_23_P127579   | 12,7958 | 12,6686 | 1,092171942 | ENST00000527635 | 5805      | NM_000317    | PTS            |
| A_33_P3265129  | 1,83636 | 1,70916 | 1,092171942 | N/A             | 123876    | AK091978     | ACSM2A         |
| A_21_P0005915  | 5,97808 | 5,85089 | 1,092164372 | N/A             | N/A       | N/A          | Inc-SLC45A4-1  |
| A_21_P0008468  | 3,89302 | 3,76583 | 1,092164372 | N/A             | N/A       | N/A          | Inc-SEL1L-7    |
| A_33_P3699445  | 8,80087 | 8,67374 | 1,092118951 | ENST00000594089 | N/A       | BC025792     | N/A            |
| A_22_P00012985 | 1,83726 | 1,71015 | 1,092103811 | ENST00000452207 | N/A       | N/A          | N/A            |
| A_33_P3346791  | 13,9094 | 13,7823 | 1,092096241 | ENST00000355379 | 10067     | NM_005698    | SCAMP3         |
| A_22_P00015390 | 7,90707 | 7,77998 | 1,092088672 | N/A             | N/A       | N/A          | Inc-SRGAP3-1   |
| A_24_P211558   | 6,26601 | 6,13893 | 1,092081102 | ENST00000215919 | 23598     | NM_032051    | PATZ1          |
| A_32_P151933   | 3,83176 | 3,70474 | 1,092035684 | N/A             | 2235      | NM_001012515 | FECH           |
| A_33_P3239849  | 15,8442 | 15,7172 | 1,092020546 | ENST00000620890 | 2876      | NM_201397    | GPX1           |
| A_23_P206441   | 8,53324 | 8,40624 | 1,092020546 | ENST00000389301 | 2175      | NM_000135    | FANCA          |
| A_33_P3253653  | 18,476  | 18,349  | 1,092020546 | ENST00000499418 | 151556    | NM_001033045 | GPR155         |
| A_24_P231546   | 6,11504 | 5,98808 | 1,091990269 | ENST00000490605 | 51252     | NM_016490    | FAM178B        |

|                |         |         |             |                 |           |              |                       |
|----------------|---------|---------|-------------|-----------------|-----------|--------------|-----------------------|
| A_21_P0006455  | 3,44882 | 3,32186 | 1,091990269 | N/A             | 101928345 | NR_110398    | PABPC1L2B-AS1         |
| A_23_P305692   | 6,48255 | 6,35562 | 1,091967562 | ENST00000323570 | 255520    | NM_153702    | ELMOD2                |
| A_33_P3410895  | 14,618  | 14,4911 | 1,091944855 | ENST00000421059 | 5447      | N/A          | POR                   |
| A_21_P0012999  | 1,76481 | 1,63791 | 1,091944855 | ENST00000506070 | N/A       | N/A          | N/A                   |
| A_24_P67552    | 10,4848 | 10,3579 | 1,091944855 | ENST00000603137 | N/A       | N/A          | N/A                   |
| A_22_P00001972 | 1,81565 | 1,68881 | 1,091899444 | ENST00000536729 | 6660      | NM_001261414 | SOX5                  |
| A_33_P3308153  | 6,98765 | 6,86083 | 1,091884307 | N/A             | N/A       | N/A          | N/A                   |
| A_33_P3337259  | 6,92579 | 6,79897 | 1,091884307 | ENST00000606728 | 375690    | NR_033266    | WASH5P                |
| A_22_P00012332 | 5,14211 | 5,01531 | 1,09186917  | ENST00000524410 | 101928812 | N/A          | LOC101928812          |
| A_23_P342067   | 10,5848 | 10,458  | 1,09186917  | ENST00000282169 | 127933    | NM_175866    | UHMK1                 |
| A_21_P0012132  | 1,74501 | 1,61822 | 1,091861602 | N/A             | 102724529 | N/A          | LOC102724529          |
| A_22_P00015375 | 6,5617  | 6,435   | 1,09179349  | ENST00000430650 | 400952    | N/A          | LINC01121             |
| A_22_P00013467 | 1,76106 | 1,63436 | 1,09179349  | N/A             | N/A       | BX092254     | Inc-RP11-324D17.1.1-2 |
| A_23_P405282   | 10,0662 | 9,93961 | 1,091710248 | ENST00000593632 | 284365    | NR_038359    | MGC45922              |
| A_24_P400604   | 1,83653 | 1,70997 | 1,091687547 | ENST00000623132 | 378948    | NM_001006121 | RBMY1B                |
| A_33_P3287314  | 6,55803 | 6,43149 | 1,091672413 | N/A             | N/A       | N/A          | N/A                   |
| A_22_P00024895 | 1,80172 | 1,67521 | 1,091649713 | ENST00000423593 | N/A       | N/A          | N/A                   |
| A_23_P34983    | 14,2184 | 14,0919 | 1,091642146 | ENST00000471173 | 10899     | NM_006694    | JTB                   |
| A_23_P148969   | 10,1822 | 10,0557 | 1,091642146 | ENST00000370952 | 55631     | NM_017768    | LRRC40                |
| A_23_P254863   | 3,86084 | 3,73437 | 1,091619446 | ENST00000512796 | 167359    | NM_153361    | NIM1K                 |
| A_33_P3323384  | 4,7433  | 4,6169  | 1,091566482 | ENST00000621845 | 50484     | NM_015713    | RRM2B                 |
| A_22_P00001183 | 3,70189 | 3,5755  | 1,091558915 | ENST00000519555 | N/A       | N/A          | N/A                   |
| A_33_P3345549  | 5,32494 | 5,19856 | 1,091551349 | ENST00000267436 | 79944     | NM_024884    | L2HGDH                |
| A_21_P0003809  | 5,99645 | 5,87011 | 1,091521086 | N/A             | N/A       | N/A          | Inc-CLDN24-2          |
| A_21_P0011268  | 1,83573 | 1,70945 | 1,091475691 | N/A             | N/A       | N/A          | XLOC_I2_004381        |
| A_21_P0011227  | 1,77151 | 1,64531 | 1,091415169 | ENST00000417987 | N/A       | N/A          | N/A                   |
| A_21_P0011371  | 1,86072 | 1,73452 | 1,091415169 | N/A             | N/A       | N/A          | XLOC_I2_004887        |
| A_22_P00020082 | 5,46418 | 5,338   | 1,091400039 | N/A             | N/A       | N/A          | Inc-AC090186.1-3      |
| A_33_P3229067  | 8,73302 | 8,60686 | 1,091384909 | ENST00000396980 | 8341      | NM_003520    | HIST1H2BN             |
| A_23_P160336   | 3,55858 | 3,43244 | 1,091369779 | ENST00000272134 | 10637     | NM_020997    | LEFTY1                |
| A_22_P00021885 | 1,83407 | 1,70793 | 1,091369779 | ENST00000546563 | N/A       | BX116758     | N/A                   |
| A_21_P0013137  | 1,84974 | 1,72361 | 1,091362214 | ENST00000473271 | N/A       | XR_426115    | N/A                   |
| A_21_P0006612  | 1,76344 | 1,63732 | 1,09135465  | ENST00000455199 | 101927964 | NR_120632    | LOC101927964          |

|                |         |         |             |                 |           |              |              |
|----------------|---------|---------|-------------|-----------------|-----------|--------------|--------------|
| A_21_P0003116  | 6,16932 | 6,04323 | 1,091331956 | N/A             | N/A       | N/A          | Inc-CDC25A-1 |
| A_21_P0004987  | 6,45435 | 6,32835 | 1,091263877 | N/A             | N/A       | N/A          | Inc-GMDS-4   |
| A_33_P3281930  | 11,9301 | 11,8041 | 1,091263877 | ENST00000496479 | 9209      | NM_006309    | LRRFIP2      |
| A_33_P3299599  | 15,2674 | 15,1414 | 1,091263877 | ENST00000329198 | 1482      | NM_001166175 | NKX2-5       |
| A_23_P255714   | 8,15183 | 8,02584 | 1,091256313 | ENST00000443698 | 80173     | NM_025103    | IFT74        |
| A_23_P377839   | 2,12581 | 1,99987 | 1,091218494 | ENST00000412526 | 118421    | NR_026552    | LINC00161    |
| A_22_P00002385 | 1,8486  | 1,72269 | 1,091195803 | ENST00000401043 | N/A       | N/A          | N/A          |
| A_23_P333129   | 15,5496 | 15,4237 | 1,091188239 | ENST00000425409 | N/A       | XM_006718102 | N/A          |
| A_33_P3297092  | 1,76267 | 1,63679 | 1,091173112 | ENST00000217926 | 158983    | NM_001002916 | H2BFWT       |
| A_24_P136161   | 6,19063 | 6,06483 | 1,091112606 | ENST00000317869 | 343069    | NM_001013631 | HNRNPCL1     |
| A_22_P00016248 | 8,70388 | 8,5781  | 1,09109748  | N/A             | N/A       | N/A          | Inc-TMCO3-1  |
| A_33_P3371219  | 1,76332 | 1,63758 | 1,091067229 | N/A             | 6383      | NM_002998    | SDC2         |
| A_22_P00021913 | 1,76246 | 1,63672 | 1,091067229 | ENST00000509455 | 101929034 | N/A          | LOC101929034 |
| A_24_P103686   | 8,59996 | 8,47425 | 1,091044541 | ENST00000521349 | 137964    | NM_178819    | AGPAT6       |
| A_33_P3416568  | 8,76572 | 8,64001 | 1,091044541 | N/A             | N/A       | N/A          | N/A          |
| A_21_P0007137  | 8,01906 | 7,89337 | 1,091029416 | ENST00000455671 | 101927624 | NR_120534    | LINC01150    |
| A_21_P0013898  | 6,24952 | 6,1239  | 1,09097648  | ENST00000367272 | N/A       | N/A          | N/A          |
| A_23_P115036   | 8,49164 | 8,36602 | 1,09097648  | ENST00000372339 | 9670      | NM_014652    | IPO13        |
| A_33_P3578325  | 9,92757 | 9,80196 | 1,090968918 | N/A             | 6079      | NR_000005    | SNORD15A     |
| A_24_P17722    | 11,6575 | 11,5319 | 1,090961356 | ENST00000520794 | 23061     | NM_198868    | TBC1D9B      |
| A_33_P3371819  | 5,21257 | 5,08698 | 1,090953794 | ENST00000543322 | 79810     | NM_024754    | PTCD2        |
| A_33_P3350638  | 6,32489 | 6,19931 | 1,090946233 | ENST00000563666 | 3835      | N/A          | KIF22        |
| A_23_P352389   | 4,88166 | 4,7561  | 1,090931109 | ENST00000586359 | 124783    | NM_152343    | SPATA32      |
| A_23_P33407    | 9,80122 | 9,67577 | 1,090847933 | ENST00000562136 | 8924      | NM_004667    | HERC2        |
| A_21_P0000105  | 1,77531 | 1,64986 | 1,090847933 | N/A             | 100463289 | NM_001190478 | MTRNR2L5     |
| A_33_P3338403  | 1,81017 | 1,68476 | 1,090817688 | N/A             | N/A       | N/A          | N/A          |
| A_33_P3387050  | 14,8271 | 14,7017 | 1,090810128 | ENST00000313465 | 414919    | NM_001001795 | C8orf82      |
| A_24_P706752   | 8,4421  | 8,3167  | 1,090810128 | ENST00000243501 | 81579     | NM_030821    | PLA2G12A     |
| A_22_P00000216 | 1,76077 | 1,63541 | 1,090779884 | N/A             | 101927356 | NR_110077    | LOC101927356 |
| A_33_P3246863  | 6,59298 | 6,46765 | 1,090757202 | ENST00000565356 | 54496     | AK123945     | PRMT7        |
| A_33_P3228622  | 1,78525 | 1,65992 | 1,090757202 | ENST00000342623 | 401994    | NM_001004734 | OR14I1       |
| A_33_P3306964  | 8,79007 | 8,66475 | 1,090749642 | ENST00000424051 | 5504      | NM_006241    | PPP1R2       |
| A_24_P65199    | 8,32145 | 8,19614 | 1,090742081 | ENST00000511415 | 8558      | NM_052987    | CDK10        |

|                |         |         |             |                 |           |              |              |
|----------------|---------|---------|-------------|-----------------|-----------|--------------|--------------|
| A_33_P3315554  | 10,1371 | 10,0118 | 1,090734521 | ENST00000272972 | 51281     | NM_001282771 | ANKMY1       |
| A_23_P52082    | 9,03698 | 8,91169 | 1,090726961 | ENST00000440600 | 25896     | NM_015434    | INTS7        |
| A_22_P00000976 | 3,88389 | 3,75864 | 1,09069672  | N/A             | 101929946 | XR_424109    | LOC101929946 |
| A_21_P0001751  | 1,93506 | 1,80984 | 1,090674039 | N/A             | N/A       | N/A          | Inc-FAIM3-2  |
| A_33_P3257617  | 5,44506 | 5,31987 | 1,09065136  | ENST00000356764 | 4660      | NM_001167858 | PPP1R12B     |
| A_21_P0004586  | 1,78956 | 1,66442 | 1,090613561 | N/A             | N/A       | N/A          | Inc-BOD1-2   |
| A_33_P3282624  | 1,76523 | 1,64009 | 1,090613561 | N/A             | N/A       | N/A          | N/A          |
| A_23_P101905   | 5,17206 | 5,04693 | 1,090606002 | ENST00000535453 | 10297     | NM_005883    | APC2         |
| A_21_P0008651  | 3,89861 | 3,77348 | 1,090606002 | N/A             | N/A       | N/A          | Inc-THSD4-2  |
| A_23_P161522   | 12,608  | 12,4829 | 1,090583324 | ENST00000537601 | 80194     | NM_025124    | TMEM134      |
| A_23_P158533   | 9,78014 | 9,65504 | 1,090583324 | ENST00000525904 | 10522     | NM_021008    | DEAF1        |
| A_22_P00003849 | 1,82655 | 1,70151 | 1,090537968 | N/A             | N/A       | BX339092     | Inc-CEBPB-4  |
| A_24_P70303    | 4,19593 | 4,07089 | 1,090537968 | ENST00000262138 | 27092     | NM_014405    | CACNG4       |
| A_33_P3288774  | 8,55802 | 8,433   | 1,09052285  | ENST00000367694 | 149041    | NM_001300850 | RC3H1        |
| A_21_P0010761  | 1,7623  | 1,6373  | 1,090507733 | ENST00000415842 | 101927084 | NR_119383    | LINC01359    |
| A_22_P00006075 | 1,76051 | 1,63551 | 1,090507733 | ENST00000433377 | N/A       | N/A          | N/A          |
| A_33_P3253583  | 1,7607  | 1,63577 | 1,090454822 | ENST00000624268 | 283162    | NM_001005196 | OR8B4        |
| A_23_P47579    | 2,4513  | 2,32639 | 1,090439705 | ENST00000299481 | 338323    | NM_176822    | NLRP14       |
| A_22_P00012943 | 1,95189 | 1,82698 | 1,090439705 | N/A             | N/A       | AK125786     | Inc-RDH10-3  |
| A_33_P3370163  | 4,1966  | 4,07179 | 1,090364124 | N/A             | N/A       | N/A          | N/A          |
| A_24_P664939   | 10,2112 | 10,0864 | 1,090356567 | N/A             | 7555      | NM_001127192 | CNBP         |
| A_33_P3264399  | 2,16554 | 2,04078 | 1,090326336 | N/A             | N/A       | N/A          | N/A          |
| A_32_P129862   | 1,77166 | 1,6469  | 1,090326336 | ENST00000340700 | 54207     | NM_138317    | KCNK10       |
| A_22_P00012492 | 2,3521  | 2,22735 | 1,090318778 | N/A             | N/A       | N/A          | Inc-PSCA-1   |
| A_23_P4133     | 2,45833 | 2,33363 | 1,090280992 | ENST00000452774 | 314       | NM_001158    | AOC2         |
| A_19_P00321124 | 1,53489 | 1,41021 | 1,090265877 | ENST00000435813 | 101928687 | NR_120641    | LINC01468    |
| A_33_P3323647  | 1,76297 | 1,63832 | 1,090243206 | ENST00000437645 | 284656    | AK131215     | EPHA10       |
| A_21_P0000615  | 4,85276 | 4,72811 | 1,090243206 | ENST00000429269 | 100302691 | NR_033927    | LINC00184    |
| A_24_P935881   | 11,6638 | 11,5392 | 1,090205422 | ENST00000511162 | 728492    | NM_022978    | SERF1B       |
| A_21_P0002309  | 1,78172 | 1,65713 | 1,090197865 | N/A             | N/A       | N/A          | Inc-GCA-4    |
| A_21_P0014681  | 1,83323 | 1,70864 | 1,090197865 | ENST00000561386 | 100506530 | XR_111518    | LOC100506530 |
| A_33_P3763846  | 7,58865 | 7,4641  | 1,090167639 | ENST00000622558 | 6300      | NM_001303252 | MAPK12       |
| A_33_P3246258  | 1,82172 | 1,69721 | 1,090137413 | N/A             | 25966     | AK129520     | C2CD2        |

|                |         |         |             |                 |           |              |               |
|----------------|---------|---------|-------------|-----------------|-----------|--------------|---------------|
| A_22_P00013160 | 1,79355 | 1,66915 | 1,090054298 | ENST00000437646 | N/A       | N/A          | N/A           |
| A_23_P31873    | 10,3942 | 10,2698 | 1,090054298 | ENST00000330843 | 80223     | NM_001002814 | RAB11FIP1     |
| A_33_P3381623  | 1,91316 | 1,78878 | 1,090039186 | ENST00000481449 | 151056    | NM_153021    | PLB1          |
| A_21_P0006378  | 1,89063 | 1,76628 | 1,09001652  | N/A             | N/A       | N/A          | Inc-LINGO2-2  |
| A_24_P366165   | 16,2025 | 16,0782 | 1,089978743 | ENST00000415894 | N/A       | N/A          | N/A           |
| A_23_P165984   | 7,81722 | 7,69297 | 1,089940968 | ENST00000255152 | 140831    | NM_080752    | ZSWIM3        |
| A_23_P170774   | 9,95282 | 9,82858 | 1,089933413 | ENST00000455198 | 1876      | NM_198256    | E2F6          |
| A_21_P0001978  | 3,51377 | 3,38954 | 1,089925859 | N/A             | N/A       | N/A          | Inc-ITM2C-1   |
| A_33_P3369505  | 7,42609 | 7,30188 | 1,089910749 | ENST00000373045 | 149175    | NM_001031740 | MANEAL        |
| A_23_P127385   | 5,67648 | 5,55228 | 1,089903194 | ENST00000256993 | 4607      | NM_000256    | MYBPC3        |
| A_21_P0010794  | 7,61231 | 7,48811 | 1,089903194 | ENST00000411733 | N/A       | XR_426569    | N/A           |
| A_21_P0001353  | 1,91843 | 1,79429 | 1,089857868 | N/A             | 101928334 | N/A          | LOC101928334  |
| A_22_P00000623 | 1,86065 | 1,73652 | 1,089850313 | N/A             | 101930516 | XR_249063    | LOC101930516  |
| A_22_P00009851 | 1,75893 | 1,63481 | 1,089842759 | ENST00000528132 | N/A       | AK127863     | N/A           |
| A_33_P3223825  | 4,26978 | 4,14578 | 1,089752112 | ENST00000612155 | 222183    | NM_001291831 | SRRM3         |
| A_22_P00010107 | 1,75967 | 1,6357  | 1,089729452 | N/A             | N/A       | AK130416     | Inc-MRGPRF-1  |
| A_22_P00021886 | 1,81878 | 1,69486 | 1,089691685 | ENST00000544015 | N/A       | N/A          | N/A           |
| A_23_P156809   | 11,5913 | 11,4674 | 1,089676579 | ENST00000625001 | 151194    | NM_001127395 | METTL21A      |
| A_23_P85777    | 11,3082 | 11,1843 | 1,089676579 | ENST00000469332 | 8443      | NM_014236    | GNPAT         |
| A_33_P3250223  | 1,83265 | 1,7088  | 1,089638814 | N/A             | N/A       | N/A          | N/A           |
| A_33_P3234984  | 6,04227 | 5,91843 | 1,089631262 | ENST00000361948 | 28981     | NM_031473    | IFT81         |
| A_33_P3861385  | 4,14505 | 4,02121 | 1,089631262 | N/A             | N/A       | N/A          | Inc-FOXD4L6-3 |
| A_33_P3235004  | 6,01495 | 5,89113 | 1,089616156 | ENST00000269243 | 4628      | NM_001256012 | MYH10         |
| A_23_P147729   | 8,66979 | 8,54597 | 1,089616156 | ENST00000398004 | 55508     | NM_018656    | SLC35E3       |
| A_33_P3226202  | 9,6308  | 9,50707 | 1,089548184 | ENST00000361577 | 23116     | NM_015091    | FAM179B       |
| A_21_P0008429  | 1,75888 | 1,6352  | 1,089510424 | N/A             | N/A       | N/A          | Inc-KLHL28-3  |
| A_33_P3414982  | 1,82824 | 1,70456 | 1,089510424 | ENST00000369254 | 114792    | NM_052904    | KLHL32        |
| A_22_P00012441 | 4,7902  | 4,66652 | 1,089510424 | N/A             | N/A       | N/A          | Inc-PROM1-1   |
| A_24_P409661   | 11,1169 | 10,9933 | 1,089450011 | ENST00000448345 | N/A       | N/A          | N/A           |
| A_24_P332471   | 15,7791 | 15,6555 | 1,089450011 | ENST00000437175 | N/A       | N/A          | N/A           |
| A_23_P65041    | 6,90432 | 6,78075 | 1,089427356 | ENST00000550663 | 83956     | NR_026583    | RACGAP1P      |
| A_21_P0011403  | 7,02098 | 6,89741 | 1,089427356 | ENST00000340249 | 283796    | N/A          | GOLGA8IP      |
| A_33_P3227260  | 1,81198 | 1,68844 | 1,089404703 | N/A             | N/A       | N/A          | N/A           |

|                |         |         |             |                 |           |              |                       |
|----------------|---------|---------|-------------|-----------------|-----------|--------------|-----------------------|
| A_22_P00020264 | 3,22703 | 3,1035  | 1,089397151 | N/A             | 101929577 | N/A          | LOC101929577          |
| A_24_P377277   | 11,1383 | 11,0148 | 1,089374498 | ENST00000615899 | 3308      | NM_002154    | HSPA4                 |
| A_23_P87635    | 11,4019 | 11,2784 | 1,089374498 | ENST00000549621 | 84934     | NM_032848    | RITA1                 |
| A_23_P420863   | 6,96007 | 6,83659 | 1,089359397 | ENST00000300589 | 64127     | NM_022162    | NOD2                  |
| A_21_P0003836  | 1,81345 | 1,69    | 1,089336744 | N/A             | 101927145 | XR_245248    | LOC101927145          |
| A_24_P319647   | 3,43688 | 3,31346 | 1,089314092 | ENST00000469986 | 79368     | NM_030764    | FCRL2                 |
| A_21_P0011739  | 4,98776 | 4,86435 | 1,089306542 | ENST00000328088 | 100129800 | N/A          | ZNF807                |
| A_21_P0009786  | 1,76784 | 1,64444 | 1,089298991 | ENST00000589967 | 100996681 | XR_158931    | LOC100996681          |
| A_21_P0009264  | 1,76036 | 1,63697 | 1,089291441 | N/A             | N/A       | N/A          | Inc-RGS9-1            |
| A_33_P3317797  | 4,13863 | 4,01528 | 1,08926124  | ENST00000377414 | 6518      | NM_001135585 | SLC2A5                |
| A_21_P0011376  | 18,2443 | 18,121  | 1,089223489 | N/A             | N/A       | N/A          | XLOC_I2_004940        |
| A_33_P3306103  | 2,46136 | 2,33817 | 1,089140443 | ENST00000410068 | 10203     | NM_005795    | CALCRL                |
| A_22_P00005242 | 4,06524 | 3,94209 | 1,089110247 | N/A             | N/A       | BQ944104     | Inc-DLX2-4            |
| A_33_P3338494  | 2,1593  | 2,03616 | 1,089102697 | ENST00000370126 | 8634      | N/A          | RTCA                  |
| A_24_P178423   | 13,2001 | 13,077  | 1,089072501 | ENST00000399515 | 3183      | NM_031314    | HNRNPC                |
| A_23_P102890   | 13,6585 | 13,5354 | 1,089072501 | ENST00000483977 | 64968     | NM_032476    | MRPS6                 |
| A_19_P00318255 | 1,82339 | 1,70029 | 1,089072501 | N/A             | 100861523 | N/A          | RPS6KA2-AS1           |
| A_23_P205830   | 13,0173 | 12,8942 | 1,089072501 | ENST00000261721 | 53339     | NM_025238    | BTBD1                 |
| A_33_P3231602  | 1,82885 | 1,70576 | 1,089064953 | ENST00000316950 | 148266    | NM_152484    | ZNF569                |
| A_33_P3299140  | 5,22493 | 5,10184 | 1,089064953 | ENST00000435745 | 9328      | XM_005272234 | GTF3C5                |
| A_24_P67988    | 12,737  | 12,614  | 1,088997015 | ENST00000317568 | 83786     | NM_031904    | FRMD8                 |
| A_23_P79725    | 7,36534 | 7,24234 | 1,088997015 | ENST00000488111 | 64708     | NM_022730    | COPS7B                |
| A_22_P00013616 | 7,8703  | 7,74736 | 1,088951726 | N/A             | N/A       | AK125621     | Inc-RP11-582J16.5.1-1 |
| A_22_P00005426 | 1,85002 | 1,7271  | 1,08893663  | N/A             | N/A       | N/A          | Inc-DTWD2-1           |
| A_24_P43391    | 10,4021 | 10,2792 | 1,088921534 | ENST00000509575 | 55858     | NM_018475    | TMEM165               |
| A_33_P3383606  | 11,3885 | 11,2656 | 1,088921534 | ENST00000610776 | 375616    | NM_001135914 | KCP                   |
| A_32_P539109   | 1,75026 | 1,62736 | 1,088921534 | ENST00000542375 | 128859    | NM_174897    | BPIFB6                |
| A_21_P0000870  | 5,37417 | 5,25127 | 1,088921534 | N/A             | 100533182 | NR_039978    | SEC24B-AS1            |
| A_22_P00025600 | 1,85836 | 1,73546 | 1,088921534 | N/A             | 50652     | NR_015342    | PCA3                  |
| A_33_P3881262  | 6,00235 | 5,87946 | 1,088913987 | ENST00000464465 | 1441      | NM_156039    | CSF3R                 |
| A_21_P0014388  | 4,71768 | 4,59481 | 1,088898891 | ENST00000590787 | 1785      | AK124881     | DNM2                  |
| A_23_P94103    | 2,61574 | 2,49293 | 1,088853606 | ENST00000380385 | 286133    | NM_173833    | SCARA5                |
| A_23_P152919   | 11,2    | 11,0772 | 1,088846059 | ENST00000574087 | 4927      | NM_002532    | NUP88                 |

|                |         |         |             |                 |           |              |                  |
|----------------|---------|---------|-------------|-----------------|-----------|--------------|------------------|
| A_21_P0014199  | 4,19917 | 4,07638 | 1,088838511 | ENST00000447086 | N/A       | XR_242367    | N/A              |
| A_22_P00019710 | 1,84878 | 1,72608 | 1,088770588 | N/A             | N/A       | N/A          | Inc-ADRB1-1      |
| A_21_P0009536  | 4,81002 | 4,68735 | 1,088747948 | N/A             | N/A       | N/A          | Inc-SS18-1       |
| A_21_P0009575  | 1,86005 | 1,73741 | 1,088725309 | N/A             | N/A       | N/A          | Inc-NETO1-2      |
| A_23_P134827   | 11,6469 | 11,5243 | 1,088695123 | ENST00000517496 | 9070      | NM_004674    | ASH2L            |
| A_33_P3375665  | 11,9885 | 11,8659 | 1,088695123 | ENST00000406360 | 2309      | NM_001455    | FOXO3            |
| A_24_P292020   | 13,6754 | 13,5528 | 1,088695123 | ENST00000292614 | 5439      | NM_006234    | POLR2J           |
| A_22_P00019190 | 1,77082 | 1,64825 | 1,088672485 | ENST00000578673 | N/A       | N/A          | N/A              |
| A_33_P3399788  | 8,00682 | 7,88425 | 1,088672485 | ENST00000393078 | 12        | NM_001085    | SERPINA3         |
| A_23_P136623   | 1,81828 | 1,69572 | 1,088664938 | ENST00000462833 | 111       | NM_183357    | ADCY5            |
| A_19_P00322828 | 5,89141 | 5,76886 | 1,088657392 | ENST00000613780 | 440823    | NR_003491    | MIAT             |
| A_22_P00001365 | 4,192   | 4,06947 | 1,088642301 | N/A             | N/A       | AK127422     | Inc-AP001793.1-1 |
| A_23_P1926     | 11,722  | 11,5995 | 1,088619663 | ENST00000542794 | 54949     | NM_017841    | SDHAF2           |
| A_23_P304511   | 6,31988 | 6,19738 | 1,088619663 | ENST00000261333 | 84307     | NM_032347    | ZNF397           |
| A_33_P3247205  | 7,79554 | 7,67305 | 1,088612117 | ENST00000366910 | 64757     | NM_022746    | mar-01           |
| A_21_P0000892  | 6,40489 | 6,28241 | 1,088604572 | N/A             | 100507351 | NR_040050    | LOC100507351     |
| A_23_P317347   | 8,38431 | 8,26186 | 1,088581935 | ENST00000622333 | 114799    | NM_052911    | ESCO1            |
| A_33_P3338397  | 1,85444 | 1,73201 | 1,088566844 | N/A             | 100128651 | AK127243     | LOC100128651     |
| A_23_P28652    | 12,0768 | 11,9544 | 1,088544208 | ENST00000380171 | 51374     | NM_016085    | ATRAID           |
| A_23_P158708   | 1,77811 | 1,65571 | 1,088544208 | ENST00000442544 | 1630      | NM_005215    | DCC              |
| A_22_P00025816 | 5,3006  | 5,17826 | 1,088498938 | N/A             | 100505978 | NR_038912    | LOC100505978     |
| A_22_P00012977 | 1,79573 | 1,67343 | 1,088468759 | ENST00000424689 | N/A       | N/A          | N/A              |
| A_22_P00014420 | 1,85217 | 1,72988 | 1,088461214 | N/A             | N/A       | N/A          | Inc-SGMS1-1      |
| A_23_P24676    | 3,73912 | 3,61691 | 1,088400859 | ENST00000302270 | 219417    | NM_001005204 | OR8U1            |
| A_24_P282251   | 1,79894 | 1,67673 | 1,088400859 | ENST00000622532 | 2243      | NM_021871    | FGA              |
| A_22_P00000548 | 1,82277 | 1,70059 | 1,088378226 | ENST00000452153 | 100996813 | XR_429857    | LOC100996813     |
| A_23_P301886   | 3,11095 | 2,98878 | 1,088370682 | ENST00000481185 | 6493      | NM_009586    | SIM2             |
| A_22_P00008602 | 2,78648 | 2,66436 | 1,088332963 | ENST00000443688 | N/A       | N/A          | N/A              |
| A_24_P12435    | 12,7447 | 12,6226 | 1,088317876 | ENST00000368357 | 135112    | NM_181782    | NCOA7            |
| A_33_P3318642  | 3,5611  | 3,43902 | 1,088302788 | ENST00000539976 | 4157      | N/A          | MC1R             |
| A_33_P3769406  | 9,95792 | 9,83586 | 1,088287701 | ENST00000374820 | 128869    | NM_080476    | PIGU             |
| A_23_P301877   | 9,19778 | 9,07574 | 1,088272615 | ENST00000357028 | 9442      | NM_004269    | MED27            |
| A_23_P130811   | 1,78565 | 1,66361 | 1,088272615 | ENST00000355537 | 9745      | NM_014717    | ZNF536           |



|                |         |         |             |                 |           |              |               |
|----------------|---------|---------|-------------|-----------------|-----------|--------------|---------------|
| A_22_P00024379 | 1,74736 | 1,62532 | 1,088272615 | N/A             | N/A       | N/A          | Inc-C4orf21-1 |
| A_24_P35169    | 11,2349 | 11,1129 | 1,088242442 | ENST00000287957 | 57798     | NM_021167    | GATAD1        |
| A_22_P00006633 | 1,75546 | 1,63347 | 1,088234899 | N/A             | N/A       | N/A          | Inc-FOXD3-2   |
| A_23_P1492     | 12,8375 | 12,7156 | 1,088167013 | ENST00000370626 | 60370     | NM_021732    | AVPI1         |
| A_33_P3268084  | 1,82042 | 1,69855 | 1,088144386 | ENST00000322110 | 119694    | NM_001004753 | OR51F2        |
| A_22_P00013774 | 1,80452 | 1,6827  | 1,088106674 | ENST00000521608 | 104266958 | NR_126348    | LINC01151     |
| A_33_P3393408  | 6,9943  | 6,87249 | 1,088099132 | ENST00000444498 | 26063     | NM_020664    | DECR2         |
| A_22_P00019993 | 8,25926 | 8,13746 | 1,08809159  | N/A             | N/A       | N/A          | Inc-MANSC4-3  |
| A_33_P3289466  | 5,35056 | 5,22885 | 1,088023713 | N/A             | N/A       | N/A          | N/A           |
| A_23_P215658   | 12,9186 | 12,7969 | 1,088016172 | ENST00000495973 | 9238      | NM_030900    | TBRG4         |
| A_33_P3343785  | 12,863  | 12,7413 | 1,088016172 | ENST00000377710 | 92667     | NM_052865    | MGME1         |
| A_33_P3250268  | 5,60994 | 5,48825 | 1,08800863  | ENST00000567390 | 728310    | N/A          | GOLGA6L7P     |
| A_23_P80662    | 1,75692 | 1,63524 | 1,088001089 | ENST00000306087 | 8403      | NM_004189    | SOX14         |
| A_33_P3299225  | 1,82894 | 1,70728 | 1,087986006 | N/A             | N/A       | N/A          | Inc-RARS-3    |
| A_33_P3265222  | 5,92741 | 5,8058  | 1,0879483   | ENST00000529753 | 57535     | NM_020775    | KIAA1324      |
| A_22_P00004103 | 4,64945 | 4,52785 | 1,087940759 | N/A             | N/A       | BC032902     | Inc-CKB-2     |
| A_24_P159702   | 6,01734 | 5,89576 | 1,087925677 | ENST00000251047 | 3998      | NM_005570    | LMAN1         |
| A_24_P77364    | 13,4942 | 13,3727 | 1,087865351 | ENST00000469676 | 388962    | NM_212552    | BOLA3         |
| A_33_P3413523  | 8,90802 | 8,78657 | 1,087827649 | ENST00000412976 | 10926     | NM_006716    | DBF4          |
| A_24_P84898    | 9,89556 | 9,77412 | 1,087820109 | ENST00000305885 | 2237      | NM_004111    | FEN1          |
| A_24_P280803   | 17,2174 | 17,096  | 1,087789948 | ENST00000492356 | 6227      | BC018140     | RPS21         |
| A_22_P00014166 | 3,39136 | 3,26998 | 1,087774869 | N/A             | N/A       | N/A          | Inc-SCRN3-2   |
| A_33_P3284132  | 1,65557 | 1,5342  | 1,087767329 | ENST00000368674 | 118611    | NM_001004298 | C10orf90      |
| A_21_P0002010  | 5,22885 | 5,10754 | 1,087722091 | ENST00000454043 | 339789    | N/A          | LINC00299     |
| A_21_P0007605  | 2,02495 | 1,90366 | 1,087707012 | ENST00000551571 | N/A       | N/A          | N/A           |
| A_33_P3291349  | 9,71583 | 9,59459 | 1,087669315 | ENST00000591994 | 55197     | NM_001303413 | RPRD1A        |
| A_24_P112032   | 1,80648 | 1,68527 | 1,087646698 | ENST00000453413 | 89822     | NM_031460    | KCNK17        |
| A_23_P897      | 12,0483 | 11,9271 | 1,087639159 | ENST00000359470 | 79098     | NM_023938    | C1orf116      |
| A_33_P3232294  | 7,9986  | 7,87743 | 1,087616543 | ENST00000242737 | 3709      | NM_002223    | ITPR2         |
| A_24_P365753   | 6,69918 | 6,57802 | 1,087609004 | ENST00000585790 | 158801    | NR_027131    | NKAPP1        |
| A_21_P0004979  | 1,85459 | 1,73348 | 1,087571311 | ENST00000610240 | N/A       | N/A          | N/A           |
| A_24_P270769   | 14,6717 | 14,5506 | 1,087563772 | ENST00000568784 | 55737     | NM_018206    | VPS35         |
| A_22_P00010933 | 1,84478 | 1,72368 | 1,087563772 | ENST00000502383 | N/A       | DB224121     | N/A           |

|                |         |         |             |                 |           |              |                      |
|----------------|---------|---------|-------------|-----------------|-----------|--------------|----------------------|
| A_19_P00800166 | 7,74981 | 7,62875 | 1,087533619 | ENST00000295549 | 375295    | NR_040001    | LINC01116            |
| A_32_P37495    | 1,82723 | 1,70618 | 1,087526081 | ENST00000555001 | 100506700 | NR_109999    | LOC100506700         |
| A_33_P3334185  | 5,14607 | 5,02504 | 1,087511005 | ENST00000376080 | 23287     | NM_015239    | AGTPBP1              |
| A_33_P3212716  | 9,1125  | 8,99156 | 1,087443164 | N/A             | 101929998 | N/A          | LOC101929998         |
| A_22_P00016131 | 1,76907 | 1,64816 | 1,087420552 | N/A             | 100131117 | NR_038993    | ZBTB20-AS1           |
| A_32_P47554    | 16,5731 | 16,4522 | 1,087413015 | ENST00000513345 | 3094      | NM_005340    | HINT1                |
| A_21_P0004918  | 1,85563 | 1,73474 | 1,087405477 | N/A             | N/A       | N/A          | Inc-QRSL1-2          |
| A_33_P3415678  | 4,312   | 4,19115 | 1,087375328 | N/A             | N/A       | N/A          | N/A                  |
| A_22_P00022142 | 4,84232 | 4,72148 | 1,087367791 | N/A             | N/A       | N/A          | Inc-CYR61-3          |
| A_21_P0009597  | 5,83632 | 5,7155  | 1,087352717 | ENST00000572573 | 102723376 | NR_110795    | LOC102723376         |
| A_22_P00008761 | 1,84085 | 1,72004 | 1,08734518  | ENST00000416607 | 101929551 | NR_110256    | LOC101929551         |
| A_33_P8814326  | 17,5039 | 17,3831 | 1,087337643 | ENST00000429276 | 440278    | BC052612     | CATSPER2P1           |
| A_22_P00008123 | 1,58376 | 1,46298 | 1,08732257  | N/A             | 101927693 | XR_246584    | LOC101927693         |
| A_22_P00009995 | 4,22738 | 4,10661 | 1,087315033 | N/A             | N/A       | N/A          | Inc-MLLT4-1          |
| A_21_P0012665  | 1,85494 | 1,73419 | 1,08729996  | ENST00000509098 | N/A       | N/A          | N/A                  |
| A_23_P46105    | 1,73586 | 1,61513 | 1,087284887 | ENST00000622548 | 51179     | NM_001005783 | HAO2                 |
| A_33_P3352980  | 8,7206  | 8,59996 | 1,08721706  | N/A             | N/A       | N/A          | N/A                  |
| A_22_P00013759 | 5,98439 | 5,86376 | 1,087209524 | N/A             | N/A       | N/A          | Inc-RP11-90J19.1.1-1 |
| A_23_P152353   | 9,54271 | 9,42209 | 1,087201989 | ENST00000563459 | 124454    | NM_001083614 | EARS2                |
| A_21_P0003461  | 1,78207 | 1,6615  | 1,08716431  | N/A             | N/A       | N/A          | Inc-ATP8A1-1         |
| A_33_P3287338  | 8,21449 | 8,09396 | 1,087134167 | ENST00000522633 | 3572      | NM_001190981 | IL6ST                |
| A_33_P3329916  | 18,121  | 18,0005 | 1,087111561 | ENST00000340697 | 6128      | NM_001024662 | RPL6                 |
| A_22_P00023904 | 4,2069  | 4,08643 | 1,087088956 | N/A             | N/A       | N/A          | Inc-GPR182-1         |
| A_21_P0013242  | 3,84334 | 3,72289 | 1,087073886 | N/A             | N/A       | N/A          | XLOC_I2_013484       |
| A_21_P0009356  | 1,86108 | 1,74065 | 1,087058816 | ENST00000430908 | 102723505 | NR_110876    | LOC102723505         |
| A_22_P00001752 | 1,84149 | 1,72107 | 1,087051281 | N/A             | N/A       | BC056236     | Inc-ATOH8-2          |
| A_23_P4611     | 11,8961 | 11,7757 | 1,087036211 | ENST00000263093 | 10998     | NM_012254    | SLC27A5              |
| A_21_P0013038  | 1,79752 | 1,67713 | 1,087028676 | N/A             | N/A       | N/A          | XLOC_I2_012727       |
| A_21_P0010838  | 6,36615 | 6,2458  | 1,086998538 | N/A             | N/A       | N/A          | XLOC_I2_001669       |
| A_21_P0000061  | 7,07106 | 6,95076 | 1,086960866 | ENST00000440612 | 10669     | NM_001301324 | CGREF1               |
| A_21_P0006011  | 1,75251 | 1,63221 | 1,086960866 | ENST00000622281 | N/A       | N/A          | N/A                  |
| A_23_P96369    | 3,74475 | 3,62447 | 1,086945798 | ENST00000372544 | 55086     | NM_018015    | CXorf57              |
| A_21_P0005786  | 1,80988 | 1,68962 | 1,08693073  | N/A             | N/A       | N/A          | Inc-CSMD1-9          |

|                |         |         |             |                 |           |              |                     |
|----------------|---------|---------|-------------|-----------------|-----------|--------------|---------------------|
| A_22_P00007212 | 1,75848 | 1,63825 | 1,086908128 | ENST00000434117 | N/A       | N/A          | N/A                 |
| A_33_P3326713  | 4,76599 | 4,64578 | 1,08689306  | ENST00000458257 | 84182     | NM_032222    | FAM188B             |
| A_33_P3278826  | 7,29345 | 7,1733  | 1,086847858 | ENST00000563518 | 4058      | BC045607     | LTK                 |
| A_21_P0005522  | 2,32471 | 2,20457 | 1,086840325 | N/A             | N/A       | N/A          | Inc-PPP1R3A-1       |
| A_24_P413126   | 11,7834 | 11,6633 | 1,086810192 | ENST00000265626 | 56937     | NM_020182    | PM EPA1             |
| A_24_P195476   | 11,1248 | 11,0047 | 1,086810192 | ENST00000431037 | 5395      | NM_000535    | PMS2                |
| A_21_P0001531  | 1,88924 | 1,76914 | 1,086810192 | N/A             | N/A       | N/A          | Inc-RP4-604K5.1.1-5 |
| A_33_P3294382  | 1,74313 | 1,62307 | 1,086780059 | N/A             | 440031    | XR_252866    | LOC440031           |
| A_24_P375849   | 15,9539 | 15,8339 | 1,086734863 | ENST00000461663 | N/A       | N/A          | N/A                 |
| A_33_P3219434  | 8,12193 | 8,00194 | 1,08672733  | ENST00000359316 | 54996     | NM_017898    | mar-02              |
| A_22_P00008107 | 3,80157 | 3,68158 | 1,08672733  | N/A             | N/A       | N/A          | Inc-IL1B-1          |
| A_21_P0003696  | 1,82089 | 1,70095 | 1,086689667 | N/A             | N/A       | N/A          | Inc-ZFP42-2         |
| A_23_P130020   | 11,5527 | 11,4328 | 1,086659538 | ENST00000508506 | 51096     | NM_016001    | UTP18               |
| A_21_P0010705  | 1,791   | 1,6712  | 1,08658422  | ENST00000451250 | N/A       | N/A          | N/A                 |
| A_22_P00011973 | 1,81054 | 1,69075 | 1,086576688 | ENST00000429725 | N/A       | BC040856     | N/A                 |
| A_33_P3251538  | 9,08422 | 8,96445 | 1,086561625 | ENST00000473837 | 79109     | NM_001006618 | MAPKAP1             |
| A_22_P00016296 | 1,81884 | 1,69908 | 1,086554093 | ENST00000542804 | N/A       | BX101435     | N/A                 |
| A_22_P00022068 | 1,83363 | 1,71388 | 1,086546562 | ENST00000440455 | N/A       | N/A          | N/A                 |
| A_24_P21056    | 11,4745 | 11,3548 | 1,086508906 | ENST00000521747 | 9678      | NM_014660    | PHF14               |
| A_22_P00018342 | 5,01874 | 4,89904 | 1,086508906 | N/A             | N/A       | N/A          | Inc-ZRANB1-2        |
| A_33_P3383184  | 1,75196 | 1,63227 | 1,086501375 | ENST00000394967 | 100131390 | N/A          | SP9                 |
| A_32_P461386   | 1,78462 | 1,66497 | 1,086471251 | N/A             | 339834    | XM_006713124 | CCDC36              |
| A_22_P00006264 | 9,07443 | 8,95482 | 1,086441128 | N/A             | 650669    | NR_044995    | GAS6-AS1            |
| A_33_P3346508  | 6,54487 | 6,42532 | 1,086395945 | N/A             | N/A       | N/A          | N/A                 |
| A_22_P00024795 | 5,61839 | 5,49885 | 1,086388415 | ENST00000431557 | N/A       | N/A          | N/A                 |
| A_22_P00016885 | 1,97687 | 1,85735 | 1,086373354 | N/A             | N/A       | AK130110     | Inc-TSFM-1          |
| A_24_P140391   | 12,7658 | 12,6463 | 1,086358294 | ENST00000273968 | 84992     | NM_001042616 | PIGY                |
| A_24_P332341   | 9,79302 | 9,67354 | 1,086343234 | ENST00000326391 | N/A       | BC062722     | N/A                 |
| A_23_P56604    | 3,40555 | 3,28607 | 1,086343234 | ENST00000481806 | 8808      | NM_003854    | IL1RL2              |
| A_23_P12858    | 4,94291 | 4,82343 | 1,086343234 | ENST00000456372 | 219793    | NM_152710    | TBATA               |
| A_24_P414269   | 13,4346 | 13,3152 | 1,086282996 | ENST00000397676 | 10195     | NM_005787    | ALG3                |
| A_33_P3288924  | 6,06048 | 5,9411  | 1,086267937 | N/A             | N/A       | AK098478     | N/A                 |
| A_33_P3391496  | 5,02646 | 4,9071  | 1,086252878 | N/A             | N/A       | N/A          | N/A                 |

|                |         |         |             |                 |           |              |                |
|----------------|---------|---------|-------------|-----------------|-----------|--------------|----------------|
| A_22_P00007936 | 6,29703 | 6,1777  | 1,086230291 | ENST00000509453 | N/A       | N/A          | N/A            |
| A_23_P38795    | 3,38418 | 3,26485 | 1,086230291 | ENST00000595042 | 2357      | NM_002029    | FPR1           |
| A_23_P48121    | 12,5837 | 12,4644 | 1,086207703 | ENST00000357103 | 79602     | NM_024551    | ADIPOR2        |
| A_23_P7250     | 8,72402 | 8,60472 | 1,086207703 | ENST00000295887 | 1040      | NM_001263    | CDS1           |
| A_22_P00001922 | 1,8141  | 1,69481 | 1,086200174 | ENST00000449928 | 102723883 | NR_125869    | LOC102723883   |
| A_22_P00015166 | 1,79964 | 1,68036 | 1,086192645 | N/A             | N/A       | N/A          | Inc-SORCS1-5   |
| A_33_P3393851  | 4,27066 | 4,15141 | 1,086170059 | ENST00000467702 | 491       | XM_006713180 | ATP2B2         |
| A_21_P0000235  | 8,67816 | 8,55892 | 1,08616253  | ENST00000490490 | 574040    | NR_002325    | SNORA6         |
| A_33_P3312342  | 1,73016 | 1,61094 | 1,086147473 | N/A             | N/A       | N/A          | N/A            |
| A_21_P0012070  | 6,98475 | 6,86558 | 1,086109831 | ENST00000448204 | N/A       | N/A          | N/A            |
| A_22_P00007631 | 1,85792 | 1,73879 | 1,086079718 | N/A             | N/A       | N/A          | Inc-HEPH-2     |
| A_32_P234604   | 13,3434 | 13,2243 | 1,086057133 | ENST00000225655 | 5216      | NM_005022    | PFN1           |
| A_23_P78134    | 13,2165 | 13,0974 | 1,086057133 | ENST00000248378 | 83460     | NM_001014764 | EMC6           |
| A_33_P3261373  | 1,75014 | 1,63105 | 1,086049606 | ENST00000319813 | N/A       | N/A          | N/A            |
| A_21_P0011091  | 1,7752  | 1,65615 | 1,086019494 | N/A             | N/A       | N/A          | XLOC_I2_003293 |
| A_23_P141863   | 8,63404 | 8,51501 | 1,086004439 | ENST00000596652 | 27300     | NM_014480    | ZNF544         |
| A_33_P3309231  | 16,9444 | 16,8254 | 1,085981856 | ENST00000216027 | 150274    | NM_172002    | HSCB           |
| A_33_P3383422  | 9,82304 | 9,70404 | 1,085981856 | ENST00000397075 | 10901     | NM_001282991 | DHRS4          |
| A_33_P3373165  | 3,53029 | 3,41135 | 1,085936693 | ENST00000449051 | 100288687 | NM_001293798 | DUX4           |
| A_33_P3254082  | 5,99091 | 5,87198 | 1,085929165 | ENST00000485981 | 55064     | XR_242509    | SPATA6L        |
| A_23_P17811    | 8,2974  | 8,17848 | 1,085921638 | ENST00000620251 | 23541     | NM_012429    | SEC14L2        |
| A_33_P3274129  | 1,85331 | 1,73448 | 1,085853897 | ENST00000451188 | 441151    | NM_001137560 | TMEM151B       |
| A_33_P3407230  | 5,00876 | 4,88995 | 1,085838844 | N/A             | N/A       | N/A          | N/A            |
| A_33_P3418158  | 7,23271 | 7,1139  | 1,085838844 | ENST00000373360 | 29988     | NM_001271711 | SLC2A8         |
| A_22_P00018993 | 1,81947 | 1,70067 | 1,085831318 | ENST00000509185 | 102723557 | XR_427766    | LOC102723557   |
| A_33_P3271087  | 2,14561 | 2,02684 | 1,085808739 | ENST00000528743 | 3846      | NM_005553    | KRTAP5-9       |
| A_22_P00024919 | 1,96524 | 1,84647 | 1,085808739 | N/A             | N/A       | N/A          | Inc-TRMT2A-2   |
| A_22_P00019029 | 1,82206 | 1,7033  | 1,085801212 | N/A             | N/A       | N/A          | Inc-FAM196A-1  |
| A_23_P160582   | 10,777  | 10,6583 | 1,085756056 | ENST00000496142 | 81888     | NM_031207    | HYI            |
| A_33_P3258593  | 8,69437 | 8,57572 | 1,085718427 | ENST00000612352 | 5542      | NM_005039    | PRB1           |
| A_24_P932875   | 1,81768 | 1,69906 | 1,085695851 | N/A             | N/A       | XR_112468    | N/A            |
| A_22_P00012417 | 1,74612 | 1,62751 | 1,085688325 | ENST00000427775 | N/A       | N/A          | N/A            |
| A_33_P3375673  | 16,844  | 16,7254 | 1,0856808   | ENST00000466297 | N/A       | N/A          | N/A            |

|                |         |         |             |                 |           |              |                |
|----------------|---------|---------|-------------|-----------------|-----------|--------------|----------------|
| A_24_P289795   | 4,19381 | 4,07521 | 1,0856808   | ENST00000444515 | N/A       | N/A          | N/A            |
| A_23_P56578    | 1,807   | 1,68841 | 1,085673275 | ENST00000379242 | 5212      | NM_053276    | VIT            |
| A_24_P830690   | 8,96917 | 8,85064 | 1,085628124 | ENST00000562415 | 5170      | NM_002613    | PDPK1          |
| A_21_P0001527  | 1,75327 | 1,63475 | 1,085620599 | N/A             | N/A       | N/A          | Inc-GNG5-1     |
| A_21_P0006074  | 1,8547  | 1,73618 | 1,085620599 | ENST00000621296 | N/A       | N/A          | N/A            |
| A_23_P163682   | 12,3429 | 12,2244 | 1,085605549 | ENST00000428730 | 64285     | NM_022450    | RHBDF1         |
| A_21_P0012596  | 3,01785 | 2,89935 | 1,085605549 | N/A             | 100505875 | NR_038342    | LINC01088      |
| A_33_P3412678  | 1,82261 | 1,70415 | 1,08557545  | ENST00000322246 | 245915    | NM_001037498 | DEFB112        |
| A_22_P00019500 | 1,61418 | 1,49574 | 1,085560401 | N/A             | 101927075 | NR_108034    | FGF10-AS1      |
| A_33_P3280739  | 10,2215 | 10,1031 | 1,085530303 | ENST00000497080 | 22930     | NM_001172435 | RAB3GAP1       |
| A_22_P00015917 | 4,24617 | 4,12781 | 1,085500206 | ENST00000446473 | N/A       | N/A          | N/A            |
| A_22_P00019490 | 1,80627 | 1,68794 | 1,085477634 | N/A             | N/A       | BE393031     | Inc-UBLCP1-3   |
| A_22_P00016955 | 1,85153 | 1,7332  | 1,085477634 | N/A             | N/A       | N/A          | Inc-TSPYL6-3   |
| A_33_P3401327  | 1,82222 | 1,70391 | 1,085462586 | ENST00000535880 | N/A       | X13953       | N/A            |
| A_24_P134356   | 10,6608 | 10,5425 | 1,085455062 | ENST00000378226 | 22903     | NM_014962    | BTBD3          |
| A_23_P42128    | 1,8229  | 1,70462 | 1,085440015 | ENST00000453413 | 89822     | NM_031460    | KCNK17         |
| A_23_P167328   | 1,52642 | 1,40816 | 1,085424968 | ENST00000502843 | 952       | NM_001775    | CD38           |
| A_33_P3406623  | 1,90716 | 1,78908 | 1,085289551 | ENST00000322272 | 8742      | NM_003809    | TNFSF12        |
| A_24_P694760   | 8,78055 | 8,6625  | 1,085266984 | ENST00000589028 | 23085     | NM_178040    | ERC1           |
| A_22_P00025902 | 1,75696 | 1,63894 | 1,085244416 | ENST00000515825 | N/A       | N/A          | N/A            |
| A_24_P203726   | 17,721  | 17,603  | 1,085229372 | ENST00000321418 | N/A       | N/A          | N/A            |
| A_33_P3288219  | 8,19953 | 8,08154 | 1,08522185  | N/A             | N/A       | AK127589     | N/A            |
| A_22_P00024948 | 1,84227 | 1,72431 | 1,085199283 | N/A             | N/A       | N/A          | Inc-CTIF-2     |
| A_32_P1701     | 9,85807 | 9,74018 | 1,08514663  | ENST00000611764 | 5422      | NM_016937    | POLA1          |
| A_33_P3246011  | 1,76011 | 1,64227 | 1,085109023 | N/A             | N/A       | N/A          | N/A            |
| A_21_P0012837  | 1,92221 | 1,80441 | 1,085078938 | N/A             | N/A       | N/A          | XLOC_I2_011669 |
| A_22_P00013356 | 1,79818 | 1,6804  | 1,085063895 | ENST00000521725 | N/A       | DA858760     | N/A            |
| A_21_P0005977  | 5,2925  | 5,17473 | 1,085056374 | N/A             | N/A       | N/A          | Inc-ZFAT-5     |
| A_22_P00011249 | 1,76313 | 1,64538 | 1,085041332 | N/A             | N/A       | N/A          | Inc-OR2AT4-1   |
| A_21_P0001273  | 10,0438 | 9,92606 | 1,085033811 | N/A             | N/A       | N/A          | Inc-LDLRAP1-1  |
| A_23_P431381   | 10,1114 | 9,99366 | 1,085033811 | ENST00000392522 | 283643    | NM_001134875 | C14orf80       |
| A_21_P0014692  | 3,7263  | 3,60858 | 1,08501877  | N/A             | N/A       | N/A          | N/A            |
| A_33_P3781394  | 9,54741 | 9,4297  | 1,085011249 | ENST00000421004 | 728769    | NR_105014    | SCAMP1-AS1     |

|                |         |         |             |                 |           |              |               |
|----------------|---------|---------|-------------|-----------------|-----------|--------------|---------------|
| A_33_P3326634  | 9,72181 | 9,6041  | 1,085011249 | ENST00000394299 | 2719      | NM_001164617 | GPC3          |
| A_32_P11230    | 11,288  | 11,1703 | 1,085003728 | N/A             | 399744    | NR_024497    | LINC00999     |
| A_21_P0006084  | 1,80217 | 1,68453 | 1,084958605 | N/A             | N/A       | N/A          | lnc-CDK20-3   |
| A_21_P0004013  | 1,56827 | 1,45063 | 1,084958605 | ENST00000427584 | N/A       | N/A          | N/A           |
| A_22_P00016007 | 1,7355  | 1,61788 | 1,084943565 | N/A             | N/A       | N/A          | lnc-TFB2M-1   |
| A_24_P88079    | 6,94564 | 6,82802 | 1,084943565 | ENST00000619759 | 4588      | NM_005961    | MUC6          |
| A_24_P142473   | 10,187  | 10,0694 | 1,084928524 | ENST00000570385 | 23399     | NM_015343    | CTDNEP1       |
| A_21_P0003137  | 16,6375 | 16,5199 | 1,084928524 | ENST00000600213 | 100462981 | NM_001190470 | MTRNR2L2      |
| A_23_P104413   | 15,6965 | 15,5789 | 1,084928524 | ENST00000616429 | 100288687 | NM_001293798 | DUX4          |
| A_23_P146379   | 6,58421 | 6,46663 | 1,084913484 | ENST00000259569 | 26953     | NM_012416    | RANBP6        |
| A_23_P403745   | 8,96155 | 8,84399 | 1,084898444 | ENST00000338779 | 92154     | NM_138383    | MTSS1L        |
| A_21_P0000313  | 6,49303 | 6,37547 | 1,084898444 | N/A             | 677803    | NR_002957    | SNORA15       |
| A_22_P00018617 | 6,28687 | 6,16932 | 1,084890924 | N/A             | 101927027 | NR_110204    | LOC101927027  |
| A_23_P148204   | 1,84886 | 1,73134 | 1,084868365 | ENST00000529813 | 55031     | NM_017944    | USP47         |
| A_22_P00009590 | 1,90863 | 1,79124 | 1,084770612 | ENST00000558343 | N/A       | N/A          | N/A           |
| A_22_P00024904 | 1,80425 | 1,68688 | 1,084755574 | ENST00000547515 | N/A       | DA745931     | N/A           |
| A_21_P0006271  | 1,84806 | 1,73071 | 1,084740537 | N/A             | 101927602 | XR_246689    | LOC101927602  |
| A_22_P00009986 | 1,85231 | 1,73497 | 1,084733018 | ENST00000562975 | N/A       | N/A          | N/A           |
| A_33_P3422124  | 1,74905 | 1,63173 | 1,08471798  | ENST00000339602 | 116379    | NM_181310    | IL22RA2       |
| A_21_P0010783  | 1,77182 | 1,6545  | 1,08471798  | ENST00000420760 | 400799    | N/A          | LINC01344     |
| A_23_P354547   | 6,79202 | 6,67473 | 1,084695424 | ENST00000558468 | 10379     | AK074144     | IRF9          |
| A_23_P374216   | 2,32321 | 2,20595 | 1,084672869 | ENST00000324384 | 259239    | NM_147197    | WFDC11        |
| A_23_P434347   | 5,86492 | 5,74767 | 1,084665351 | ENST00000622089 | 50618     | NM_147152    | ITSN2         |
| A_21_P0008304  | 5,41607 | 5,29883 | 1,084657832 | N/A             | N/A       | N/A          | lnc-FOXG1-6   |
| A_33_P3406661  | 7,67814 | 7,5609  | 1,084657832 | ENST00000298351 | 57156     | NM_020431    | TMEM63C       |
| A_23_P398275   | 11,1109 | 10,9937 | 1,08462776  | N/A             | 388152    | NR_027001    | GOLGA2P7      |
| A_23_P320242   | 9,87166 | 9,75452 | 1,084582652 | ENST00000394714 | 222223    | NM_152748    | KIAA1324L     |
| A_24_P50157    | 16,0478 | 15,9307 | 1,084552582 | ENST00000440335 | N/A       | N/A          | N/A           |
| A_33_P3349761  | 1,74675 | 1,62966 | 1,084545064 | N/A             | N/A       | N/A          | N/A           |
| A_24_P278192   | 7,02917 | 6,91215 | 1,084492443 | ENST00000373176 | 203       | NM_000476    | AK1           |
| A_21_P0008596  | 1,83932 | 1,7223  | 1,084492443 | N/A             | N/A       | N/A          | lnc-C15orf2-2 |
| A_22_P00010277 | 7,73058 | 7,61358 | 1,084477409 | N/A             | 285441    | N/A          | F11-AS1       |
| A_22_P00006476 | 4,6771  | 4,56013 | 1,084454858 | N/A             | 100506994 | NR_038283    | PTPRG-AS1     |

|                |         |         |             |                 |           |              |              |
|----------------|---------|---------|-------------|-----------------|-----------|--------------|--------------|
| A_23_P208847   | 10,0226 | 9,90565 | 1,084439824 | ENST00000600938 | 51548     | NM_016539    | SIRT6        |
| A_22_P00004214 | 2,62113 | 2,50418 | 1,084439824 | ENST00000458420 | 64084     | N/A          | CLSTN2       |
| A_21_P0005819  | 5,0323  | 4,91538 | 1,084417274 | ENST00000519691 | N/A       | XR_247160    | N/A          |
| A_23_P305759   | 9,23919 | 9,12232 | 1,084379692 | ENST00000577564 | 171586    | NM_138340    | ABHD3        |
| A_33_P3295228  | 6,91892 | 6,80207 | 1,084364659 | N/A             | N/A       | AY358211     | N/A          |
| A_21_P0008428  | 1,8532  | 1,73641 | 1,084319563 | ENST00000553386 | N/A       | N/A          | N/A          |
| A_24_P336137   | 3,37971 | 3,26294 | 1,084304531 | ENST00000403026 | 84645     | NM_032561    | C22orf23     |
| A_33_P3267844  | 1,78908 | 1,67233 | 1,0842895   | ENST00000300778 | 390061    | NM_001004757 | OR51Q1       |
| A_21_P0004497  | 1,75042 | 1,6337  | 1,084266953 | N/A             | N/A       | N/A          | Inc-CDH6-2   |
| A_24_P135748   | 9,98324 | 9,86653 | 1,084259437 | ENST00000326039 | 79774     | NM_024719    | GRTP1        |
| A_23_P104651   | 12,6477 | 12,531  | 1,084251922 | ENST00000275517 | 113130    | NM_080668    | CDCA5        |
| A_33_P3376681  | 1,81467 | 1,69805 | 1,0841918   | ENST00000326571 | 124274    | NM_001002911 | GPR139       |
| A_22_P00018823 | 5,10898 | 4,99238 | 1,08417677  | ENST00000512035 | N/A       | N/A          | N/A          |
| A_33_P3231677  | 6,19637 | 6,0798  | 1,084154225 | N/A             | N/A       | N/A          | N/A          |
| A_33_P3225937  | 6,27668 | 6,16013 | 1,084139195 | ENST00000431177 | 9946      | NM_145858    | CRYZL1       |
| A_33_P3373446  | 4,58396 | 4,46741 | 1,084139195 | ENST00000453638 | 647264    | XR_110127    | LOC647264    |
| A_22_P00003767 | 6,04641 | 5,9299  | 1,084109137 | N/A             | N/A       | BI830505     | Inc-CDK12-2  |
| A_22_P00013555 | 6,36027 | 6,24378 | 1,084094108 | ENST00000514619 | N/A       | N/A          | N/A          |
| A_23_P148858   | 4,15806 | 4,04158 | 1,084086594 | ENST00000366398 | N/A       | AF010144     | N/A          |
| A_21_P0014776  | 1,89212 | 1,77564 | 1,084086594 | ENST00000564832 | N/A       | AB073392     | N/A          |
| A_33_P3252479  | 9,25277 | 9,13631 | 1,084071565 | ENST00000368962 | 9869      | NM_001243491 | SETDB1       |
| A_23_P324538   | 4,68979 | 4,57337 | 1,084041509 | ENST00000335633 | 353143    | NM_178433    | LCE3B        |
| A_33_P3281036  | 11,1683 | 11,0519 | 1,084026481 | ENST00000567732 | 493812    | NR_026790    | HCG11        |
| A_23_P7896     | 8,41516 | 8,29876 | 1,084026481 | ENST00000603290 | 56940     | NM_020185    | DUSP22       |
| A_33_P3482461  | 1,81919 | 1,7028  | 1,084018967 | N/A             | 150005    | AK057475     | LOC150005    |
| A_21_P0000378  | 4,94472 | 4,82837 | 1,083988912 | N/A             | 692107    | NR_003055    | SNORD66      |
| A_33_P3260777  | 15,5842 | 15,4679 | 1,083951345 | ENST00000000233 | 381       | NM_001662    | ARF5         |
| A_23_P218111   | 5,51151 | 5,39522 | 1,083943831 | ENST00000449399 | 5265      | NM_001002236 | SERPINA1     |
| A_22_P00008600 | 1,74563 | 1,62934 | 1,083943831 | N/A             | 101927183 | XR_244434    | LOC101927183 |
| A_21_P0010331  | 5,36131 | 5,24506 | 1,083913779 | N/A             | N/A       | N/A          | Inc-NCF4-2   |
| A_33_P3296169  | 8,12964 | 8,01342 | 1,083891239 | ENST00000496441 | 83879     | NM_031942    | CDCA7        |
| A_33_P3327519  | 6,82617 | 6,70997 | 1,083876214 | N/A             | 26821     | NR_002915    | SNORA74A     |
| A_33_P3284939  | 13,4511 | 13,3349 | 1,083876214 | ENST00000371650 | 387521    | NM_199129    | TMEM189      |

|                |         |         |             |                 |           |              |                    |
|----------------|---------|---------|-------------|-----------------|-----------|--------------|--------------------|
| A_21_P0012362  | 1,64894 | 1,53275 | 1,083868701 | N/A             | N/A       | N/A          | XLOC_I2_009613     |
| A_33_P3346483  | 2,73813 | 2,62197 | 1,083846163 | ENST00000394810 | 79933     | NM_001114133 | SYNPO2L            |
| A_22_P00007246 | 3,77138 | 3,65523 | 1,08383865  | N/A             | N/A       | BG183362     | Inc-GPR126-1       |
| A_33_P3359354  | 8,40989 | 8,29375 | 1,083831137 | ENST00000428120 | 199990    | NM_001282671 | C1orf86            |
| A_33_P3415972  | 1,74828 | 1,63214 | 1,083831137 | ENST00000360388 | 222553    | NM_001029858 | SLC35F1            |
| A_24_P290751   | 1,81842 | 1,70228 | 1,083831137 | ENST00000547974 | 1840      | NM_004416    | DTX1               |
| A_21_P0006579  | 7,50994 | 7,39384 | 1,083801088 | ENST00000446884 | 101927574 | NR_110388    | LINC01186          |
| A_22_P00011990 | 3,71013 | 3,59406 | 1,083778551 | N/A             | 101929897 | XR_426309    | LOC101929897       |
| A_23_P143484   | 10,9782 | 10,8622 | 1,083725967 | ENST00000399098 | 51227     | NM_153681    | PIGP               |
| A_22_P00025095 | 1,83604 | 1,72006 | 1,083710943 | N/A             | N/A       | N/A          | Inc-GGH-1          |
| A_23_P142187   | 5,05204 | 4,9361  | 1,083680897 | ENST00000377670 | 64344     | NM_022462    | HIF3A              |
| A_23_P99186    | 7,48645 | 7,37053 | 1,083665874 | ENST00000342494 | 89910     | NM_183415    | UBE3B              |
| A_21_P0007933  | 1,8513  | 1,7354  | 1,083650851 | ENST00000423211 | 121838    | NR_026955    | LINC00284          |
| A_19_P00317171 | 1,77686 | 1,66099 | 1,083628318 | N/A             | 727677    | NR_024393    | CASC8              |
| A_33_P3317998  | 1,53011 | 1,41429 | 1,083590763 | ENST00000377906 | 643394    | NM_001040433 | SPINK9             |
| A_33_P7796746  | 18,5183 | 18,4025 | 1,083575741 | ENST00000266880 | 4796      | NM_013432    | TONSL              |
| A_24_P297888   | 1,80059 | 1,6848  | 1,08356823  | ENST00000580718 | 4507      | NM_002451    | MTAP               |
| A_23_P251927   | 9,67543 | 9,55968 | 1,083538188 | ENST00000476546 | 54927     | NM_017812    | CHCHD3             |
| A_33_P3244117  | 1,84734 | 1,73163 | 1,083508146 | ENST00000568493 | 57519     | N/A          | STARD9             |
| A_21_P0009848  | 2,15076 | 2,03507 | 1,083493126 | N/A             | N/A       | N/A          | Inc-ARFGEF2-3      |
| A_33_P3359368  | 6,67637 | 6,56071 | 1,083470595 | N/A             | 728635    | NM_001277864 | DHRS4L1            |
| A_33_P3240043  | 2,21234 | 2,09668 | 1,083470595 | N/A             | N/A       | N/A          | Inc-AC005323.1.1-1 |
| A_32_P115130   | 14,7317 | 14,6161 | 1,083425536 | ENST00000371443 | 64975     | NM_032477    | MRPL41             |
| A_33_P3303687  | 11,7891 | 11,6735 | 1,083425536 | ENST00000405257 | 5700      | NM_002802    | PSMC1              |
| A_21_P0001390  | 1,83481 | 1,71927 | 1,083380478 | N/A             | N/A       | N/A          | Inc-CEP350-1       |
| A_23_P256391   | 10,6073 | 10,4918 | 1,083350441 | ENST00000361924 | 2803      | NM_002078    | GOLGA4             |
| A_33_P3219459  | 5,41451 | 5,29902 | 1,083342932 | ENST00000378733 | 339453    | NM_001114748 | TMEM240            |
| A_33_P3399150  | 1,91821 | 1,80274 | 1,083327914 | ENST00000542515 | 220064    | XR_428953    | ORA0V1             |
| A_23_P127978   | 1,83332 | 1,71789 | 1,083297878 | ENST00000622824 | 192134    | NM_138706    | B3GNT6             |
| A_22_P00010174 | 4,96437 | 4,84903 | 1,0832303   | N/A             | 100505641 | NR_046251    | FGD5-AS1           |
| A_21_P0012738  | 3,42682 | 3,3115  | 1,083215284 | ENST00000509834 | 100507487 | NR_125882    | LOC100507487       |
| A_33_P3223577  | 2,51597 | 2,40066 | 1,083207775 | N/A             | N/A       | N/A          | N/A                |
| A_24_P321581   | 5,36689 | 5,25158 | 1,083207775 | ENST00000447411 | 55089     | NM_018018    | SLC38A4            |



|                |         |         |             |                 |           |              |                       |
|----------------|---------|---------|-------------|-----------------|-----------|--------------|-----------------------|
| A_21_P0004750  | 9,81487 | 9,69957 | 1,083200267 | N/A             | N/A       | N/A          | Inc-SUPT3H-1          |
| A_33_P3861706  | 10,4595 | 10,3442 | 1,083200267 | ENST00000568604 | 54893     | NM_017762    | MTMR10                |
| A_21_P0011230  | 1,79548 | 1,68021 | 1,083177743 | ENST00000606973 | N/A       | N/A          | N/A                   |
| A_21_P0010421  | 6,50268 | 6,38741 | 1,083177743 | N/A             | N/A       | N/A          | Inc-PPARA-2           |
| A_33_P3221568  | 9,46197 | 9,34675 | 1,083140204 | ENST00000457010 | 79798     | NM_024742    | ARMC5                 |
| A_33_P3310475  | 11,2951 | 11,1799 | 1,083125188 | ENST00000264893 | 55752     | NM_018243    | set-11                |
| A_19_P00808461 | 8,73954 | 8,62435 | 1,083117681 | ENST00000452306 | 7587      | NM_001007094 | ZNF37A                |
| A_22_P00020277 | 4,66525 | 4,55007 | 1,083110173 | N/A             | N/A       | BJ995728     | Inc-GCNT3-1           |
| A_22_P00025305 | 1,74456 | 1,62941 | 1,083087651 | ENST00000470739 | N/A       | N/A          | N/A                   |
| A_24_P340941   | 3,7202  | 3,60505 | 1,083087651 | ENST00000445374 | 100306975 | NR_036507    | NDUFAF4P1             |
| A_23_P76332    | 1,78711 | 1,67198 | 1,083072636 | ENST00000536722 | 5992      | NM_213594    | RFX4                  |
| A_23_P162782   | 11,4132 | 11,2981 | 1,083050114 | ENST00000375926 | 55082     | NM_018011    | ARGLU1                |
| A_24_P97825    | 7,48727 | 7,37224 | 1,082997566 | ENST00000518189 | 26112     | NM_015621    | CCDC69                |
| A_23_P99540    | 14,8485 | 14,7335 | 1,082975046 | ENST00000439696 | 677       | NM_004926    | ZFP36L1               |
| A_33_P3350306  | 3,54779 | 3,43285 | 1,082930007 | ENST00000354698 | 51385     | NM_016089    | ZNF589                |
| A_21_P0000014  | 5,34429 | 5,22937 | 1,082914994 | ENST00000561594 | 22909     | NM_001146096 | FAN1                  |
| A_21_P0014833  | 5,56511 | 5,4502  | 1,082907488 | N/A             | 100507209 | AK130928     | LOC100507209          |
| A_33_P3508822  | 14,4535 | 14,3386 | 1,082899982 | ENST00000359726 | 351       | NM_000484    | APP                   |
| A_33_P3325467  | 9,18516 | 9,07027 | 1,082892476 | ENST00000521580 | 113444    | NM_001164824 | SMIM12                |
| A_22_P00006212 | 4,59481 | 4,47993 | 1,08288497  | N/A             | N/A       | AK091527     | Inc-FAM43A-8          |
| A_33_P3381454  | 8,93782 | 8,82296 | 1,082869958 | ENST00000368926 | 54964     | NM_017860    | C1orf56               |
| A_33_P3334535  | 6,5291  | 6,41424 | 1,082869958 | ENST00000512248 | 54826     | NM_017676    | GIN1                  |
| A_22_P00003058 | 3,69566 | 3,58081 | 1,082862452 | ENST00000519828 | N/A       | N/A          | N/A                   |
| A_21_P0007608  | 1,74453 | 1,62979 | 1,082779891 | N/A             | N/A       | N/A          | Inc-RP11-511B23.3.1-2 |
| A_19_P00322166 | 1,74286 | 1,62814 | 1,082764881 | ENST00000514532 | 100861519 | NM_001278094 | GDNF-AS1              |
| A_23_P49646    | 11,7647 | 11,65   | 1,082749871 | ENST00000395656 | 5636      | NM_002767    | PRPSAP2               |
| A_23_P84821    | 8,35382 | 8,23915 | 1,082727356 | ENST00000515625 | 65008     | NM_020236    | MRPL1                 |
| A_21_P0006073  | 5,60315 | 5,48849 | 1,082719851 | ENST00000452923 | N/A       | N/A          | N/A                   |
| A_33_P3237644  | 3,08128 | 2,96667 | 1,082682327 | ENST00000440741 | 374786    | NM_001145053 | EFCAB5                |
| A_33_P3216133  | 3,27653 | 3,16194 | 1,082667318 | ENST00000315769 | 79698     | NM_024645    | ZMAT4                 |
| A_23_P80643    | 9,36584 | 9,25128 | 1,082644805 | ENST00000413809 | 6419      | NM_006515    | SETMAR                |
| A_23_P345674   | 1,84121 | 1,72668 | 1,082622292 | ENST00000328070 | 58491     | NM_021216    | ZNF71                 |
| A_21_P0009804  | 1,5519  | 1,43739 | 1,082607284 | ENST00000603717 | N/A       | N/A          | N/A                   |

|                |         |         |             |                 |           |              |                 |
|----------------|---------|---------|-------------|-----------------|-----------|--------------|-----------------|
| A_32_P152195   | 3,865   | 3,7505  | 1,08259978  | ENST00000333461 | 342667    | NM_198993    | STAC2           |
| A_23_P144497   | 16,8254 | 16,7109 | 1,08259978  | ENST00000515818 | 6189      | NM_001006    | RPS3A           |
| A_33_P3229288  | 6,89457 | 6,78008 | 1,082592276 | ENST00000579314 | 1636      | NM_000789    | ACE             |
| A_33_P3399718  | 9,43809 | 9,32364 | 1,082562261 | ENST00000458353 | N/A       | N/A          | N/A             |
| A_21_P0000848  | 1,7732  | 1,65875 | 1,082562261 | N/A             | 100506025 | NR_038946    | ISPD-AS1        |
| A_22_P00014955 | 7,18479 | 7,07034 | 1,082562261 | N/A             | N/A       | N/A          | Inc-SLTM-1      |
| A_23_P163711   | 7,22057 | 7,10614 | 1,082547253 | ENST00000380495 | 83723     | NM_031478    | FAM57B          |
| A_33_P3261743  | 7,71172 | 7,59729 | 1,082547253 | ENST00000525837 | 219855    | NM_001145290 | SLC37A2         |
| A_33_P3256660  | 7,40175 | 7,28734 | 1,082532246 | N/A             | N/A       | N/A          | N/A             |
| A_33_P3410836  | 11,3548 | 11,2404 | 1,082524743 | ENST00000614247 | 8360      | NM_003539    | HIST1H4D        |
| A_19_P00318284 | 7,85304 | 7,73866 | 1,082509736 | ENST00000427421 | 400955    | NR_033873    | LINCO1122       |
| A_33_P3261737  | 6,21163 | 6,0973  | 1,082472219 | ENST00000376512 | 7355      | NM_001282647 | SLC35A2         |
| A_23_P146765   | 11,2909 | 11,1766 | 1,08244971  | ENST00000303545 | 11236     | NM_007218    | RNF139          |
| A_22_P00008316 | 4,55475 | 4,44049 | 1,082419699 | N/A             | 101927034 | NR_110666    | ROR1-AS1        |
| A_21_P0010662  | 4,79047 | 4,67622 | 1,082412196 | N/A             | 100506023 | N/A          | LOC100506023    |
| A_23_P31739    | 3,10029 | 2,98606 | 1,082397191 | ENST00000265770 | 81551     | NM_030795    | STMN4           |
| A_33_P3283064  | 7,03917 | 6,92495 | 1,082389688 | N/A             | N/A       | N/A          | N/A             |
| A_22_P00017608 | 2,89077 | 2,77655 | 1,082389688 | N/A             | N/A       | CU692071     | Inc-WDR82-1     |
| A_21_P0002570  | 2,06701 | 1,9528  | 1,082382186 | N/A             | N/A       | N/A          | Inc-RNF144A-3   |
| A_22_P00005251 | 3,60601 | 3,4918  | 1,082382186 | ENST00000455247 | N/A       | N/A          | N/A             |
| A_33_P3283420  | 7,8023  | 7,68811 | 1,082367181 | ENST00000517700 | 389677    | NM_203390    | RBM12B          |
| A_33_P3214463  | 6,19363 | 6,07947 | 1,082344674 | N/A             | 145873    | NM_001039958 | MESP2           |
| A_21_P0002479  | 1,88566 | 1,77151 | 1,082337172 | N/A             | N/A       | N/A          | Inc-TGFBRAP1-11 |
| A_24_P336276   | 9,10287 | 8,98876 | 1,082307163 | ENST00000555210 | 28232     | NM_013272    | SLCO3A1         |
| A_21_P0000988  | 1,8243  | 1,71019 | 1,082307163 | ENST00000438619 | N/A       | N/A          | N/A             |
| A_21_P0000306  | 6,05669 | 5,9426  | 1,082292159 | N/A             | 677793    | NR_002950    | SNORA2A         |
| A_22_P00017757 | 1,83029 | 1,71622 | 1,082277156 | N/A             | 101929363 | XR_247046    | LOC101929363    |
| A_22_P00003517 | 1,84407 | 1,73002 | 1,082262152 | N/A             | 101927339 | XR_243795    | LOC101927339    |
| A_33_P3245665  | 3,44291 | 3,32888 | 1,082247149 | ENST00000390394 | N/A       | AY611541     | N/A             |
| A_33_P3220422  | 5,9783  | 5,86428 | 1,082239647 | ENST00000408890 | 285877    | NM_182595    | POM121L12       |
| A_22_P00004621 | 1,789   | 1,67498 | 1,082239647 | ENST00000450971 | N/A       | N/A          | N/A             |
| A_23_P207774   | 3,49139 | 3,37737 | 1,082239647 | ENST00000509603 | 8844      | NM_014238    | KSR1            |
| A_21_P0014170  | 4,6853  | 4,57129 | 1,082232146 | ENST00000607233 | 100506885 | XR_108682    | LOC100506885    |

|                |         |         |             |                 |           |              |                       |
|----------------|---------|---------|-------------|-----------------|-----------|--------------|-----------------------|
| A_19_P00807336 | 13,5274 | 13,4134 | 1,082224645 | ENST00000393779 | 5464      | NM_021129    | PPA1                  |
| A_21_P0007194  | 4,39101 | 4,27701 | 1,082224645 | N/A             | N/A       | N/A          | Inc-C11orf74-6        |
| A_22_P00025636 | 1,84334 | 1,72934 | 1,082224645 | ENST00000522173 | N/A       | N/A          | N/A                   |
| A_22_P00025438 | 1,74104 | 1,62708 | 1,082194639 | ENST00000438582 | 102724080 | XR_426403    | LOC102724080          |
| A_22_P00010040 | 7,39484 | 7,2809  | 1,082179637 | ENST00000560587 | 145783    | NR_015419    | LOC145783             |
| A_21_P0001157  | 1,7439  | 1,62997 | 1,082172136 | ENST00000438093 | 101928169 | XR_246377    | LOC101928169          |
| A_22_P00015554 | 8,28597 | 8,17206 | 1,082157134 | N/A             | N/A       | N/A          | Inc-STOM-3            |
| A_23_P166336   | 10,611  | 10,4971 | 1,082149633 | ENST00000442222 | 84222     | NR_026815    | TMEM191A              |
| A_21_P0007719  | 1,84853 | 1,73463 | 1,082149633 | N/A             | N/A       | N/A          | Inc-GRIP1-3           |
| A_21_P0011841  | 10,8088 | 10,6949 | 1,082149633 | ENST00000397193 | 5048      | NM_000430    | PAFAH1B1              |
| A_33_P3542599  | 3,9217  | 3,80788 | 1,082089628 | N/A             | 677793    | CV322587     | SNORA2A               |
| A_33_P3228340  | 3,21283 | 3,09905 | 1,082059626 | ENST00000398823 | 51626     | BC040558     | DYNC2LI1              |
| A_23_P404536   | 1,74251 | 1,62874 | 1,082052126 | ENST00000357639 | 5169      | NM_005021    | ENPP3                 |
| A_21_P0002071  | 1,81361 | 1,69985 | 1,082044626 | N/A             | N/A       | N/A          | Inc-SUCLG1-3          |
| A_33_P3372682  | 5,79672 | 5,68297 | 1,082037126 | ENST00000623117 | 150384    | NR_024009    | GTSE1-AS1             |
| A_33_P3211018  | 1,81485 | 1,70115 | 1,081999626 | N/A             | N/A       | N/A          | N/A                   |
| A_32_P133244   | 11,0128 | 10,8991 | 1,081999626 | ENST00000437198 | 5073      | NM_002582    | PARN                  |
| A_32_P134968   | 3,87713 | 3,76344 | 1,081992126 | ENST00000389722 | 6710      | NM_001024858 | SPTB                  |
| A_21_P0009192  | 7,4705  | 7,35684 | 1,081969627 | ENST00000433510 | N/A       | N/A          | N/A                   |
| A_21_P0008211  | 1,84447 | 1,73081 | 1,081969627 | N/A             | N/A       | N/A          | Inc-EFNB2-1           |
| A_22_P00016233 | 2,85904 | 2,74538 | 1,081969627 | N/A             | N/A       | N/A          | Inc-TMBIM6-1          |
| A_21_P0002937  | 1,46814 | 1,35449 | 1,081962127 | N/A             | N/A       | N/A          | Inc-UBE2E2-1          |
| A_24_P140788   | 3,84568 | 3,73206 | 1,081939628 | ENST00000373535 | 221472    | NM_173558    | FGD2                  |
| A_33_P3418218  | 2,63631 | 2,52275 | 1,081894633 | ENST00000327037 | 89866     | NM_033127    | SEC16B                |
| A_33_P3300346  | 4,92886 | 4,81533 | 1,081872136 | ENST00000438545 | 55208     | NM_001014283 | DCUN1D2               |
| A_23_P89570    | 6,98103 | 6,86755 | 1,081834642 | ENST00000592813 | 84225     | NM_032265    | ZMYND15               |
| A_24_P98047    | 1,73046 | 1,61703 | 1,081797149 | ENST00000368851 | 117247    | NM_018593    | SLC16A10              |
| A_21_P0014613  | 1,80192 | 1,68852 | 1,081774654 | N/A             | N/A       | N/A          | N/A                   |
| A_33_P3868357  | 11,9426 | 11,8292 | 1,081774654 | ENST00000507936 | N/A       | DQ323997     | N/A                   |
| A_33_P3398998  | 7,31463 | 7,20126 | 1,081752159 | ENST00000405022 | 130813    | NM_182500    | C2orf50               |
| A_21_P0007256  | 1,80537 | 1,692   | 1,081752159 | N/A             | N/A       | N/A          | Inc-RP11-201M22.1.1-1 |
| A_21_P0013032  | 1,73775 | 1,62441 | 1,081729665 | ENST00000368966 | 221262    | N/A          | CCDC162P              |
| A_33_P3402071  | 4,06232 | 3,94899 | 1,081722167 | N/A             | N/A       | N/A          | N/A                   |

|                |         |         |             |                 |           |              |               |
|----------------|---------|---------|-------------|-----------------|-----------|--------------|---------------|
| A_22_P00023053 | 4,88069 | 4,76736 | 1,081722167 | ENST00000261396 | 55746     | BX387507     | NUP133        |
| A_23_P150281   | 10,8601 | 10,7468 | 1,081699673 | ENST00000533940 | 9537      | NM_001258320 | TP53111       |
| A_19_P00326558 | 4,64444 | 4,53117 | 1,08167718  | N/A             | N/A       | N/A          | N/A           |
| A_24_P20873    | 10,444  | 10,3308 | 1,081624698 | ENST00000615353 | 8294      | NM_003495    | HIST1H4I      |
| A_22_P00024157 | 7,02859 | 6,91539 | 1,081624698 | N/A             | 102724352 | XR_424996    | LOC102724352  |
| A_23_P401675   | 11,3637 | 11,2505 | 1,081624698 | ENST00000454295 | 153562    | AK055094     | MARVELD2      |
| A_33_P3210860  | 7,89796 | 7,78479 | 1,081602207 | ENST00000359798 | 388558    | NM_001039886 | ZNF808        |
| A_33_P3251598  | 3,74283 | 3,62972 | 1,081557225 | N/A             | N/A       | N/A          | N/A           |
| A_33_P3408762  | 13,7813 | 13,6682 | 1,081549728 | ENST00000361308 | 4000      | NM_001282625 | LMNA          |
| A_22_P00022654 | 1,74108 | 1,62798 | 1,081549728 | ENST00000506917 | N/A       | N/A          | N/A           |
| A_21_P0014822  | 8,73095 | 8,61789 | 1,081519742 | N/A             | N/A       | BC061902     | N/A           |
| A_23_P335957   | 1,51295 | 1,39991 | 1,081504749 | ENST00000375371 | 80834     | NM_152232    | TAS1R2        |
| A_33_P3389942  | 14,7227 | 14,6097 | 1,081474763 | ENST00000274606 | 55651     | NM_017838    | NHP2          |
| A_33_P8915069  | 2,92293 | 2,80996 | 1,081452275 | ENST00000435311 | 101928241 | NR_110693    | LOC101928241  |
| A_23_P118289   | 10,9325 | 10,8196 | 1,081399804 | ENST00000215115 | 9274      | NM_004765    | BCL7C         |
| A_24_P286013   | 13,8524 | 13,7395 | 1,081399804 | ENST00000513231 | 3093      | NM_005339    | UBE2K         |
| A_23_P410625   | 4,88675 | 4,77393 | 1,08133984  | ENST00000375256 | 195828    | NM_153695    | ZNF367        |
| A_23_P166135   | 11,2694 | 11,1566 | 1,08132485  | ENST00000377191 | 22803     | NM_012255    | XRN2          |
| A_21_P0010314  | 1,74165 | 1,62886 | 1,081317354 | N/A             | 102724800 | XR_425278    | LOC102724800  |
| A_33_P3391803  | 6,91576 | 6,80303 | 1,081272385 | ENST00000446719 | N/A       | N/A          | N/A           |
| A_24_P169574   | 8,8016  | 8,68887 | 1,081272385 | ENST00000435487 | 649395    | NR_029404    | YWHAEP1       |
| A_23_P425073   | 9,24583 | 9,13311 | 1,08126489  | ENST00000552916 | 5939      | NM_002898    | RBMS2         |
| A_24_P363005   | 12,9702 | 12,8575 | 1,081249901 | ENST00000508474 | 7323      | NM_181886    | UBE2D3        |
| A_23_P140511   | 11,8532 | 11,7405 | 1,081249901 | ENST00000560166 | 10845     | NM_006660    | CLPX          |
| A_23_P30950    | 1,73875 | 1,62606 | 1,081242406 | ENST00000465492 | 116369    | NM_052961    | SLC26A8       |
| A_23_P124003   | 5,43869 | 5,32603 | 1,081219922 | ENST00000343948 | 22953     | NM_170683    | P2RX2         |
| A_33_P3220939  | 9,97254 | 9,85993 | 1,081182451 | ENST00000462653 | 55795     | NM_001258213 | PCID2         |
| A_24_P302695   | 12,2149 | 12,1023 | 1,081174957 | ENST00000465432 | 51263     | NM_145212    | MRPL30        |
| A_21_P0012095  | 3,06783 | 2,95527 | 1,08114498  | ENST00000437634 | N/A       | N/A          | N/A           |
| A_22_P00014762 | 3,72669 | 3,61417 | 1,081115005 | N/A             | N/A       | N/A          | Inc-SLC35F5-8 |
| A_23_P34897    | 1,84207 | 1,72955 | 1,081115005 | ENST00000423179 | N/A       | N/A          | N/A           |
| A_22_P00018803 | 1,78496 | 1,67245 | 1,081107511 | N/A             | N/A       | N/A          | Inc-RPRM-5    |
| A_22_P00010775 | 14,1511 | 14,0386 | 1,081100018 | ENST00000520375 | N/A       | XR_247144    | N/A           |

|                |         |         |             |                 |        |              |                |
|----------------|---------|---------|-------------|-----------------|--------|--------------|----------------|
| A_22_P00017696 | 2,93397 | 2,82147 | 1,081100018 | ENST00000518261 | 114786 | BM685801     | XKR4           |
| A_21_P0014269  | 1,81355 | 1,70105 | 1,081100018 | N/A             | N/A    | AK098207     | N/A            |
| A_23_P402176   | 1,81546 | 1,70301 | 1,08106255  | ENST00000539522 | 146849 | NM_144681    | CCDC42         |
| A_33_P3238606  | 1,81473 | 1,7023  | 1,081047564 | ENST00000431582 | 401577 | N/A          | CD99P1         |
| A_23_P406478   | 1,79643 | 1,684   | 1,081047564 | ENST00000525343 | 127731 | NM_001039500 | VWA5B1         |
| A_23_P74330    | 6,1384  | 6,02598 | 1,081040071 | ENST00000420691 | 79100  | NR_024160    | LINC00626      |
| A_23_P73548    | 10,1502 | 10,0378 | 1,081025084 | ENST00000376423 | 56850  | NM_020137    | GRIPAP1        |
| A_24_P332651   | 4,61113 | 4,49876 | 1,081002605 | ENST00000433548 | N/A    | XM_001727011 | N/A            |
| A_22_P00006035 | 4,01618 | 3,90386 | 1,080965141 | ENST00000550019 | N/A    | DA467900     | N/A            |
| A_22_P00015001 | 2,63362 | 2,52132 | 1,080950156 | N/A             | N/A    | N/A          | Inc-SMND1-1    |
| A_33_P3288434  | 1,81335 | 1,70108 | 1,080927678 | N/A             | N/A    | N/A          | N/A            |
| A_24_P135255   | 4,60509 | 4,49282 | 1,080927678 | ENST00000304932 | 283507 | NR_003365    | SUGT1P3        |
| A_22_P00022417 | 6,01176 | 5,89952 | 1,080905201 | N/A             | N/A    | N/A          | Inc-SFI1-1     |
| A_33_P3266990  | 1,84255 | 1,73031 | 1,080905201 | ENST00000529830 | N/A    | N/A          | N/A            |
| A_32_P104478   | 8,77927 | 8,66704 | 1,080897709 | ENST00000343958 | 55785  | NM_018351    | FGD6           |
| A_33_P3217317  | 1,74072 | 1,62852 | 1,080875233 | N/A             | N/A    | AK056731     | N/A            |
| A_23_P33154    | 8,53807 | 8,42588 | 1,080867741 | ENST00000355780 | 27067  | NM_014393    | STAU2          |
| A_21_P0007353  | 1,8471  | 1,73491 | 1,080867741 | N/A             | N/A    | N/A          | Inc-OR4C12-1   |
| A_24_P41042    | 9,16879 | 9,05663 | 1,080845265 | ENST00000549621 | 84934  | NM_032848    | RITA1          |
| A_21_P0000221  | 7,3865  | 7,27448 | 1,080740384 | ENST00000486930 | 26819  | NR_000021    | SNORD32A       |
| A_22_P00005194 | 1,77912 | 1,6671  | 1,080740384 | N/A             | N/A    | N/A          | Inc-DLAT-1     |
| A_24_P861009   | 10,2745 | 10,1625 | 1,080725402 | ENST00000341322 | 54014  | NM_001007246 | BRWD1          |
| A_22_P00013055 | 7,08677 | 6,9748  | 1,080702929 | ENST00000579474 | N/A    | N/A          | N/A            |
| A_22_P00004930 | 1,80971 | 1,69779 | 1,080665476 | N/A             | N/A    | N/A          | Inc-DBT-3      |
| A_22_P00019561 | 5,20394 | 5,09203 | 1,080657985 | ENST00000504735 | N/A    | BX102538     | N/A            |
| A_23_P211047   | 12,1445 | 12,0326 | 1,080650494 | ENST00000399921 | 571    | NM_206866    | BACH1          |
| A_21_P0013070  | 2,36506 | 2,25321 | 1,080613043 | N/A             | N/A    | N/A          | XL0C_I2_012925 |
| A_22_P00014739 | 4,39651 | 4,28471 | 1,080575592 | ENST00000527933 | N/A    | XR_424635    | N/A            |
| A_21_P0008521  | 4,1648  | 4,053   | 1,080575592 | N/A             | N/A    | N/A          | Inc-CHGA-1     |
| A_33_P3268284  | 10,3044 | 10,1926 | 1,080575592 | ENST00000445131 | 2665   | NM_001494    | GDI2           |
| A_33_P7514500  | 17,6528 | 17,541  | 1,080575592 | ENST00000458605 | 91695  | NR_002184    | RRP7B          |
| A_21_P0011808  | 8,36438 | 8,25264 | 1,080530653 | ENST00000295246 | 375248 | NM_001164315 | ANKRD36        |
| A_22_P00017056 | 5,74206 | 5,63037 | 1,080493205 | N/A             | N/A    | N/A          | Inc-TUBB-7     |

|                |         |         |             |                 |           |              |                 |
|----------------|---------|---------|-------------|-----------------|-----------|--------------|-----------------|
| A_33_P3276329  | 8,86838 | 8,75673 | 1,080463248 | N/A             | 729438    | NM_001145064 | GATSL2          |
| A_21_P0003756  | 4,37908 | 4,26744 | 1,080455759 | N/A             | N/A       | N/A          | Inc-ARSJ-1      |
| A_21_P0001302  | 1,81218 | 1,70054 | 1,080455759 | N/A             | N/A       | N/A          | Inc-PRKAA2-5    |
| A_32_P195647   | 3,27464 | 3,16307 | 1,080403336 | ENST00000328046 | 80311     | NM_030624    | KLHL15          |
| A_22_P00017838 | 1,81032 | 1,69877 | 1,080388359 | N/A             | 400748    | XR_246310    | LOC400748       |
| A_23_P154199   | 12,256  | 12,1445 | 1,080350916 | ENST00000485630 | 5510      | NM_002712    | PPP1R7          |
| A_33_P3323368  | 4,65971 | 4,54823 | 1,080335939 | ENST00000573951 | 283876    | NR_033904    | LINC00921       |
| A_22_P00023197 | 1,83175 | 1,72034 | 1,080283522 | N/A             | N/A       | AK093331     | Inc-HSPA4-1     |
| A_33_P3294392  | 12,757  | 12,6456 | 1,080276034 | ENST00000572221 | 23644     | NM_014329    | EDC4            |
| A_23_P67702    | 10,1741 | 10,0627 | 1,080276034 | ENST00000612293 | 7639      | NM_003429    | ZNF85           |
| A_21_P0008005  | 1,77624 | 1,66488 | 1,080246083 | ENST00000446391 | 100874126 | NR_046869    | LINC00331       |
| A_21_P0001492  | 1,81022 | 1,69886 | 1,080246083 | ENST00000431311 | 339442    | NR_038928    | LINC01343       |
| A_23_P47004    | 10,5273 | 10,416  | 1,080201158 | ENST00000284690 | 55760     | NM_018180    | DHX32           |
| A_33_P3351197  | 6,72361 | 6,61232 | 1,080193671 | ENST00000476224 | 389741    | NR_126046    | GLIDR           |
| A_33_P3307187  | 1,73748 | 1,62622 | 1,080171209 | ENST00000356141 | 64067     | NM_001164749 | NPAS3           |
| A_24_P398691   | 3,41186 | 3,30061 | 1,080163722 | ENST00000375898 | 84945     | NM_032859    | ABHD13          |
| A_23_P29638    | 7,91457 | 7,80332 | 1,080163722 | ENST00000294129 | 51517     | NM_184231    | NCKIPSD         |
| A_23_P212568   | 1,60616 | 1,49492 | 1,080156235 | ENST00000295756 | 50852     | NM_016388    | TRAT1           |
| A_21_P0012252  | 5,99957 | 5,88834 | 1,080148748 | ENST00000410028 | N/A       | N/A          | N/A             |
| A_21_P0008034  | 1,73767 | 1,62646 | 1,080133774 | N/A             | N/A       | N/A          | Inc-SGCG-2      |
| A_23_P23029    | 2,04133 | 1,93013 | 1,080126287 | ENST00000371265 | 7809      | NM_057176    | BSND            |
| A_23_P146644   | 16,9278 | 16,8167 | 1,080051421 | ENST00000421017 | 302       | NM_001002857 | ANXA2           |
| A_21_P0010462  | 6,9061  | 6,79502 | 1,080036448 | ENST00000473769 | 400891    | NR_110991    | LRRC74B         |
| A_21_P0004226  | 1,80603 | 1,69499 | 1,080006504 | N/A             | N/A       | N/A          | Inc-CCT5-3      |
| A_33_P3225278  | 5,72096 | 5,60994 | 1,079991532 | N/A             | N/A       | BC039705     | N/A             |
| A_21_P0011863  | 1,72184 | 1,61083 | 1,079984046 | ENST00000451774 | 401014    | NR_033870    | TEX41           |
| A_22_P00004639 | 1,80813 | 1,69716 | 1,079954103 | ENST00000554328 | N/A       | N/A          | N/A             |
| A_21_P0005478  | 1,81662 | 1,70566 | 1,079946617 | N/A             | N/A       | N/A          | Inc-HNRNPA2B1-4 |
| A_24_P286935   | 7,09069 | 6,97974 | 1,079939131 | ENST00000260746 | 403       | NM_004311    | ARL3            |
| A_22_P00014868 | 1,95027 | 1,83932 | 1,079939131 | ENST00000537961 | N/A       | N/A          | N/A             |
| A_33_P3391105  | 5,54117 | 5,43023 | 1,079931646 | ENST00000243077 | 4035      | NM_002332    | LRP1            |
| A_21_P0011009  | 1,74002 | 1,62908 | 1,079931646 | N/A             | N/A       | N/A          | XLOC_I2_002651  |
| A_22_P00001986 | 5,73197 | 5,62106 | 1,079909189 | ENST00000261837 | 10681     | N/A          | GNB5            |

|                |         |         |             |                 |           |              |                       |
|----------------|---------|---------|-------------|-----------------|-----------|--------------|-----------------------|
| A_33_P3355247  | 7,50702 | 7,39612 | 1,079901704 | ENST00000518189 | 26112     | NM_015621    | CCDC69                |
| A_24_P357386   | 2,18372 | 2,07284 | 1,079886734 | ENST00000390690 | 337960    | NM_181622    | KRTAP13-3             |
| A_21_P0001449  | 4,83455 | 4,72371 | 1,079856793 | N/A             | N/A       | N/A          | Inc-SCCPDH-1          |
| A_33_P3246699  | 1,84369 | 1,73288 | 1,079834338 | N/A             | N/A       | N/A          | N/A                   |
| A_23_P169978   | 1,80669 | 1,69594 | 1,07978943  | ENST00000505686 | 57507     | NM_020747    | ZNF608                |
| A_23_P116868   | 1,81174 | 1,70099 | 1,07978943  | ENST00000545102 | 53919     | NM_017435    | SLCO1C1               |
| A_33_P3266520  | 6,81097 | 6,70024 | 1,079774461 | ENST00000621568 | 56928     | NM_152988    | SPPL2B                |
| A_21_P0006075  | 1,80092 | 1,69021 | 1,079759493 | N/A             | 101929518 | N/A          | LOC101929518          |
| A_23_P315991   | 4,22028 | 4,10958 | 1,079752008 | ENST00000299454 | 144124    | NM_178168    | OR10A5                |
| A_33_P3420762  | 7,40889 | 7,2982  | 1,079744524 | N/A             | N/A       | N/A          | N/A                   |
| A_21_P0008160  | 1,81586 | 1,70526 | 1,079677168 | N/A             | N/A       | N/A          | Inc-SUCLA2-6          |
| A_22_P00024928 | 1,83586 | 1,72526 | 1,079677168 | ENST00000449746 | N/A       | N/A          | N/A                   |
| A_21_P0008561  | 1,81603 | 1,70548 | 1,07963975  | N/A             | 101929765 | NR_120371    | LINC01585             |
| A_24_P358591   | 4,51236 | 4,40182 | 1,079632267 | ENST00000329615 | 339778    | NM_001105519 | C2orf70               |
| A_33_P3409249  | 5,9145  | 5,80397 | 1,079624783 | N/A             | N/A       | N/A          | N/A                   |
| A_23_P133153   | 1,83705 | 1,72654 | 1,079609817 | ENST00000339673 | 1758      | NM_004407    | DMP1                  |
| A_23_P332246   | 1,80587 | 1,69537 | 1,079602333 | ENST00000306011 | 474       | NM_005172    | ATOH1                 |
| A_22_P00003798 | 1,84614 | 1,73564 | 1,079602333 | N/A             | N/A       | N/A          | Inc-CDKAL1-2          |
| A_21_P0005654  | 1,82929 | 1,71879 | 1,079602333 | N/A             | 101929248 | N/A          | LOC101929248          |
| A_23_P150286   | 13,8999 | 13,7894 | 1,079602333 | ENST00000528307 | 5682      | NM_148976    | PSMA1                 |
| A_23_P38365    | 10,203  | 10,0925 | 1,079602333 | ENST00000343388 | 11011     | NM_006852    | TLK2                  |
| A_33_P3248774  | 4,09053 | 3,98005 | 1,079587367 | N/A             | N/A       | N/A          | N/A                   |
| A_33_P3313215  | 1,76582 | 1,65534 | 1,079587367 | ENST00000372113 | 340745    | NM_001284223 | LRIT2                 |
| A_33_P3327522  | 4,69779 | 4,58731 | 1,079587367 | N/A             | N/A       | CU680799     | N/A                   |
| A_33_P3388800  | 4,74593 | 4,63547 | 1,079572401 | N/A             | N/A       | N/A          | N/A                   |
| A_22_P00014690 | 1,7351  | 1,62464 | 1,079572401 | N/A             | N/A       | N/A          | Inc-SLC25A27-1        |
| A_21_P0005563  | 1,91105 | 1,80059 | 1,079572401 | N/A             | 101929022 | XR_242268    | LOC101929022          |
| A_33_P3256490  | 1,81305 | 1,7026  | 1,079564918 | ENST00000612017 | 440590    | NM_001004339 | ZYG11A                |
| A_22_P00013523 | 5,32201 | 5,21156 | 1,079564918 | N/A             | N/A       | N/A          | Inc-RP11-404P21.6.1-2 |
| A_22_P00016667 | 1,81414 | 1,70372 | 1,079542469 | ENST00000422084 | N/A       | N/A          | N/A                   |
| A_33_P3297160  | 1,83617 | 1,72576 | 1,079534986 | ENST00000395193 | N/A       | N/A          | N/A                   |
| A_33_P3349474  | 15,6722 | 15,5618 | 1,079527504 | N/A             | N/A       | N/A          | N/A                   |
| A_23_P56736    | 6,91789 | 6,80751 | 1,079512538 | ENST00000321253 | 113457    | NM_080386    | TUBA3D                |

|                |         |         |             |                 |           |              |                |
|----------------|---------|---------|-------------|-----------------|-----------|--------------|----------------|
| A_23_P139192   | 1,80876 | 1,69841 | 1,079490091 | ENST00000294117 | 2785      | NM_012202    | GNG3           |
| A_24_P140827   | 11,6593 | 11,549  | 1,079452679 | ENST00000480010 | 5110      | NM_005389    | PCMT1          |
| A_33_P3316878  | 13,7464 | 13,6361 | 1,079452679 | ENST00000535926 | 79586     | NM_024536    | CHPF           |
| A_33_P3278053  | 1,8132  | 1,70295 | 1,079415269 | ENST00000550270 | 4604      | NM_001254723 | MYBPC1         |
| A_23_P50137    | 1,81669 | 1,70649 | 1,07937786  | ENST00000616921 | 51320     | NM_016626    | MEX3C          |
| A_33_P3209615  | 5,7577  | 5,64754 | 1,079347933 | ENST00000318329 | 728224    | NM_031960    | KRTAP4-8       |
| A_32_P183442   | 3,16036 | 3,05022 | 1,079332971 | N/A             | N/A       | N/A          | XLOC_I2_011265 |
| A_32_P217390   | 1,81086 | 1,70073 | 1,079325489 | ENST00000560327 | 145946    | NM_173499    | SPATA8         |
| A_22_P00004847 | 5,47224 | 5,36217 | 1,079280602 | ENST00000518831 | 100133669 | NR_026913    | LOC100133669   |
| A_33_P3363465  | 1,81678 | 1,70673 | 1,07926564  | N/A             | N/A       | AK125288     | Inc-NAP1L3-1   |
| A_22_P00018694 | 3,06761 | 2,9576  | 1,079235717 | ENST00000554181 | N/A       | N/A          | N/A            |
| A_23_P32913    | 12,5722 | 12,4622 | 1,079228237 | ENST00000323735 | 83787     | NM_031905    | ARMC10         |
| A_23_P96542    | 11,0635 | 10,9535 | 1,079228237 | ENST00000370361 | 203547    | NM_001017980 | VMA21          |
| A_33_P3333762  | 1,73656 | 1,62657 | 1,079220756 | ENST00000340806 | 344657    | NM_001080460 | LRRIQ4         |
| A_33_P3365047  | 5,56723 | 5,45725 | 1,079213275 | ENST00000622282 | 10741     | NM_006606    | RBBP9          |
| A_19_P00320158 | 8,14689 | 8,03693 | 1,079198314 | ENST00000564414 | 6397      | NM_001204408 | SEC14L1        |
| A_21_P0000393  | 8,35607 | 8,24611 | 1,079198314 | N/A             | 692212    | NR_003077    | SNORD99        |
| A_21_P0003057  | 1,55077 | 1,44084 | 1,079175873 | N/A             | N/A       | N/A          | Inc-SERPINI1-3 |
| A_33_P3243138  | 1,82349 | 1,71356 | 1,079175873 | ENST00000600586 | 348303    | NM_182704    | SELV           |
| A_22_P00004440 | 7,09758 | 6,98765 | 1,079175873 | N/A             | N/A       | AK097629     | Inc-COX19-2    |
| A_24_P303989   | 7,58153 | 7,47162 | 1,079160913 | ENST00000496174 | 648       | NM_005180    | BMI1           |
| A_22_P00001579 | 1,83443 | 1,72452 | 1,079160913 | ENST00000427232 | N/A       | N/A          | N/A            |
| A_24_P419276   | 5,34798 | 5,23808 | 1,079153433 | ENST00000374648 | 57209     | NM_021045    | ZNF248         |
| A_21_P0007944  | 1,80554 | 1,69566 | 1,079138473 | ENST00000431686 | 103689913 | N/A          | LINC00383      |
| A_19_P00320875 | 3,74377 | 3,6339  | 1,079130993 | ENST00000435485 | N/A       | N/A          | N/A            |
| A_32_P800179   | 1,73682 | 1,62698 | 1,079108553 | ENST00000600800 | 22900     | AK094933     | CARD8          |
| A_33_P3343206  | 7,91739 | 7,80757 | 1,079093593 | ENST00000624628 | N/A       | XR_428276    | N/A            |
| A_22_P00011668 | 5,17318 | 5,06336 | 1,079093593 | ENST00000542689 | 101928340 | NR_120466    | LINC01489      |
| A_22_P00004627 | 5,13431 | 5,0245  | 1,079086114 | N/A             | 284837    | NR_026961    | AATBC          |
| A_23_P203891   | 15,782  | 15,6722 | 1,079078634 | ENST00000356219 | 9612      | NM_006312    | NCOR2          |
| A_33_P3716108  | 1,82989 | 1,72012 | 1,079056195 | N/A             | 387055    | DA096222     | LINC00533      |
| A_23_P66038    | 5,26976 | 5,16    | 1,079048716 | ENST00000562122 | 29800     | NM_013304    | ZDHC1          |
| A_21_P0002889  | 6,1828  | 6,07306 | 1,079033757 | ENST00000482382 | N/A       | N/A          | N/A            |



|                |         |         |             |                 |           |              |              |
|----------------|---------|---------|-------------|-----------------|-----------|--------------|--------------|
| A_33_P3253460  | 8,47018 | 8,36044 | 1,079033757 | N/A             | 100130654 | AK095243     | LOC100130654 |
| A_21_P0009527  | 1,70279 | 1,59306 | 1,079026278 | N/A             | N/A       | N/A          | Inc-PIEZO2-1 |
| A_23_P205549   | 13,0593 | 12,9496 | 1,079003841 | ENST00000394606 | 4149      | NM_145113    | MAX          |
| A_33_P3329419  | 15,5419 | 15,4322 | 1,079003841 | ENST00000475805 | 1759      | NM_001288739 | DNM1         |
| A_21_P0008550  | 6,97665 | 6,86695 | 1,079003841 | N/A             | N/A       | N/A          | Inc-BCL11B-1 |
| A_23_P33045    | 17,4427 | 17,333  | 1,079003841 | ENST00000583515 | 6154      | NM_000987    | RPL26        |
| A_33_P3337415  | 6,82778 | 6,7181  | 1,078988883 | ENST00000334049 | 2774      | NM_182978    | GNAL         |
| A_24_P259922   | 10,055  | 9,94532 | 1,078988883 | ENST00000443314 | 10314     | NM_006055    | LANCL1       |
| A_33_P3326349  | 7,26249 | 7,15285 | 1,078958967 | ENST00000361813 | 23381     | NM_015327    | SMG5         |
| A_32_P153979   | 1,80282 | 1,69318 | 1,078958967 | N/A             | N/A       | N/A          | N/A          |
| A_22_P00019176 | 2,23163 | 2,12211 | 1,078869226 | N/A             | N/A       | CU691481     | Inc-RPL19-1  |
| A_23_P77455    | 14,0644 | 13,9549 | 1,078854269 | ENST00000569299 | 51647     | NM_016062    | FAM96B       |
| A_23_P212469   | 8,71696 | 8,60751 | 1,07881688  | ENST00000301825 | 956       | NM_001248    | ENTPD3       |
| A_33_P3372266  | 1,6511  | 1,54169 | 1,078786969 | ENST00000390283 | N/A       | AM184070     | N/A          |
| A_21_P0005442  | 5,31184 | 5,20247 | 1,078757059 | N/A             | N/A       | N/A          | Inc-LRRC61-2 |
| A_33_P3272165  | 9,68112 | 9,57178 | 1,078734627 | ENST00000454358 | 137682    | NM_152416    | NDUF6F6      |
| A_21_P0004216  | 1,7334  | 1,62407 | 1,07872715  | ENST00000509382 | 340094    | NR_026994    | LINC01020    |
| A_22_P00025617 | 1,81202 | 1,70271 | 1,078712196 | ENST00000415182 | N/A       | N/A          | N/A          |
| A_23_P316487   | 6,10196 | 5,99265 | 1,078712196 | ENST00000222690 | 94239     | NM_138635    | H2AFV        |
| A_24_P295379   | 12,7929 | 12,6836 | 1,078704719 | ENST00000347136 | 57720     | NM_020960    | GPR107       |
| A_23_P104641   | 12,7229 | 12,6136 | 1,078704719 | ENST00000534591 | 738       | NM_013265    | VPS51        |
| A_33_P3386297  | 5,63827 | 5,52898 | 1,078697242 | N/A             | N/A       | AF190162     | N/A          |
| A_32_P161166   | 8,9636  | 8,85432 | 1,078689765 | N/A             | N/A       | AY927536     | N/A          |
| A_33_P7626563  | 1,80943 | 1,70016 | 1,078682288 | ENST00000513157 | 101929505 | N/A          | LOC101929505 |
| A_22_P00011394 | 1,79989 | 1,69064 | 1,078667334 | N/A             | N/A       | AV751403     | Inc-PABPC4-3 |
| A_21_P0001586  | 3,08257 | 2,97332 | 1,078667334 | N/A             | N/A       | N/A          | Inc-CD1B-3   |
| A_33_P3315906  | 8,30468 | 8,19544 | 1,078659858 | ENST00000521578 | 11156     | NM_032611    | PTP4A3       |
| A_23_P47497    | 13,5642 | 13,455  | 1,078629951 | ENST00000300151 | 54948     | NM_017840    | MRPL16       |
| A_33_P3257568  | 6,53015 | 6,42097 | 1,078614998 | ENST00000373851 | 11064     | AK097636     | CNTRL        |
| A_22_P00020907 | 1,81614 | 1,70697 | 1,078607522 | N/A             | N/A       | N/A          | Inc-LINS-2   |
| A_24_P10444    | 1,73326 | 1,62409 | 1,078607522 | ENST00000376681 | 284076    | NM_173623    | TTL6         |
| A_24_P273799   | 8,49327 | 8,38412 | 1,078592569 | ENST00000301042 | 121274    | NM_152320    | ZNF641       |
| A_22_P00007649 | 1,83972 | 1,73059 | 1,078577617 | N/A             | N/A       | N/A          | Inc-HES4-1   |

|                |         |         |             |                 |           |              |              |
|----------------|---------|---------|-------------|-----------------|-----------|--------------|--------------|
| A_23_P259797   | 8,89223 | 8,78312 | 1,078562665 | ENST00000562204 | 197322    | NM_174917    | ACSF3        |
| A_23_P52639    | 16,9002 | 16,7911 | 1,078555189 | ENST00000314133 | 1351      | NM_004074    | COX8A        |
| A_32_P336776   | 1,79907 | 1,68998 | 1,078547713 | ENST00000298542 | 90167     | NM_194277    | FRMD7        |
| A_22_P00018608 | 1,73474 | 1,62566 | 1,078540237 | N/A             | 100996654 | NR_110040    | LOC100996654 |
| A_33_P3357935  | 6,99466 | 6,88561 | 1,07851781  | ENST00000440125 | 161497    | NM_153700    | STRC         |
| A_33_P3369079  | 6,89381 | 6,78478 | 1,078502858 | N/A             | 100144603 | N/A          | CHKB-AS1     |
| A_22_P00008980 | 1,79981 | 1,69078 | 1,078502858 | N/A             | N/A       | BI764560     | Inc-LAMA1-5  |
| A_21_P0006677  | 1,74408 | 1,63507 | 1,078487907 | ENST00000431737 | 100506835 | NR_038268    | LINC00840    |
| A_33_P3410874  | 1,81048 | 1,70149 | 1,078472956 | N/A             | N/A       | AI792396     | N/A          |
| A_33_P3309365  | 8,77197 | 8,66299 | 1,078465481 | ENST00000443844 | 163742    | N/A          | SLC25A3P1    |
| A_21_P0000189  | 9,90697 | 9,79801 | 1,07845053  | ENST00000370272 | 1810      | NM_001938    | DR1          |
| A_23_P136504   | 6,49825 | 6,38932 | 1,078428105 | ENST00000331299 | 89874     | NM_030631    | SLC25A21     |
| A_22_P00006494 | 1,76374 | 1,65482 | 1,07842063  | N/A             | 103752584 | NR_125790    | CCND2-AS1    |
| A_22_P00009143 | 1,74944 | 1,64053 | 1,078413155 | N/A             | N/A       | N/A          | Inc-LIX1-1   |
| A_33_P3314952  | 2,73507 | 2,62616 | 1,078413155 | ENST00000574085 | 7442      | NM_080706    | TRPV1        |
| A_22_P00003693 | 1,84357 | 1,73467 | 1,07840568  | ENST00000563754 | 101927650 | NR_110918    | LOC101927650 |
| A_23_P168443   | 9,79762 | 9,68876 | 1,07837578  | ENST00000487222 | 2050      | NM_004444    | EPHB4        |
| A_33_P3865403  | 1,80254 | 1,69368 | 1,07837578  | N/A             | N/A       | BC035163     | Inc-POLR3E-2 |
| A_33_P3878964  | 8,82759 | 8,71877 | 1,078345882 | ENST00000552527 | 80018     | NM_024953    | NAA25        |
| A_23_P338890   | 12,8796 | 12,7708 | 1,078330933 | ENST00000541713 | 5770      | NM_002827    | PTPN1        |
| A_23_P200976   | 12,1424 | 12,0336 | 1,078330933 | ENST00000372430 | 81888     | NM_001190880 | HYI          |
| A_22_P00014808 | 1,82688 | 1,71814 | 1,078286087 | ENST00000434703 | 400618    | NR_103738    | SOX9-AS1     |
| A_22_P00001885 | 2,74857 | 2,63984 | 1,078278613 | N/A             | N/A       | N/A          | Inc-B3GAT2-2 |
| A_23_P338410   | 3,13238 | 3,02367 | 1,078263665 | ENST00000326000 | 259240    | NM_147198    | WFDC9        |
| A_21_P0007183  | 1,81702 | 1,70835 | 1,07823377  | N/A             | N/A       | N/A          | Inc-NAV2-2   |
| A_21_P0013387  | 6,91432 | 6,80568 | 1,078211349 | ENST00000437494 | N/A       | N/A          | N/A          |
| A_21_P0004485  | 1,79789 | 1,68925 | 1,078211349 | N/A             | N/A       | N/A          | Inc-SRD5A1-1 |
| A_21_P0006600  | 2,01852 | 1,90991 | 1,078188928 | N/A             | N/A       | N/A          | Inc-TBL1Y-1  |
| A_22_P00008795 | 3,22766 | 3,1191  | 1,078151562 | N/A             | N/A       | BX109691     | Inc-KIFC3-1  |
| A_21_P0004845  | 1,8061  | 1,69754 | 1,078151562 | N/A             | 102724463 | XR_425971    | LOC102724463 |
| A_22_P00012778 | 2,01698 | 1,90846 | 1,078121669 | N/A             | N/A       | DB322441     | Inc-RALBP1-1 |
| A_23_P256663   | 14,3605 | 14,252  | 1,078106724 | ENST00000249041 | 8484      | NM_003614    | GALR3        |
| A_21_P0011408  | 5,51618 | 5,40771 | 1,078084305 | ENST00000565949 | 89837     | NR_026859    | ULK4P3       |

|                |         |         |             |                 |           |              |                      |
|----------------|---------|---------|-------------|-----------------|-----------|--------------|----------------------|
| A_21_P0007000  | 1,81645 | 1,70798 | 1,078084305 | N/A             | N/A       | N/A          | Inc-RHOBTB1-1        |
| A_33_P3216427  | 11,1634 | 11,055  | 1,078031998 | ENST00000273814 | 1609      | NM_001347    | DGKQ                 |
| A_33_P3366545  | 1,79712 | 1,68875 | 1,078009581 | ENST00000382528 | 401296    | XR_108728    | LOC401296            |
| A_33_P3412538  | 9,99676 | 9,88841 | 1,077994636 | ENST00000358602 | 26057     | NM_032217    | ANKRD17              |
| A_33_P3293698  | 1,96188 | 1,85353 | 1,077994636 | N/A             | N/A       | N/A          | N/A                  |
| A_33_P3368375  | 7,81548 | 7,70713 | 1,077994636 | ENST00000592197 | 8498      | NM_007322    | RANBP3               |
| A_24_P103025   | 14,1424 | 14,0341 | 1,077957277 | ENST00000303577 | 5093      | NM_006196    | PCBP1                |
| A_24_P58122    | 10,536  | 10,4277 | 1,077957277 | ENST00000294383 | 23358     | NM_015306    | USP24                |
| A_33_P6818098  | 8,51355 | 8,40526 | 1,077949805 | N/A             | N/A       | BC070376     | Inc-GTF2IRD2-1       |
| A_22_P00006716 | 6,89551 | 6,78726 | 1,077919918 | N/A             | N/A       | DR731266     | Inc-FRMD4B-2         |
| A_21_P0000749  | 4,86206 | 4,75383 | 1,077904975 | N/A             | 100506994 | NR_038281    | PTPRG-AS1            |
| A_22_P00017766 | 5,35843 | 5,25021 | 1,077897504 | ENST00000423020 | N/A       | DA103928     | N/A                  |
| A_23_P6151     | 10,6166 | 10,5084 | 1,077882561 | ENST00000246229 | 5326      | NM_002657    | PLAGL2               |
| A_22_P00016662 | 4,01022 | 3,90202 | 1,077882561 | N/A             | N/A       | AA936120     | Inc-TPCN2-3          |
| A_23_P256375   | 12,7285 | 12,6203 | 1,077882561 | ENST00000493902 | 6810      | NM_004604    | STX4                 |
| A_23_P203586   | 10,9691 | 10,8609 | 1,077882561 | ENST00000359171 | 4928      | NM_016320    | NUP98                |
| A_22_P00004326 | 2,30026 | 2,19212 | 1,077837734 | N/A             | N/A       | N/A          | Inc-COG5-2           |
| A_21_P0007455  | 1,84168 | 1,73354 | 1,077837734 | N/A             | N/A       | N/A          | Inc-RP11-168K9.2.1-1 |
| A_33_P3240340  | 9,60877 | 9,50066 | 1,077815321 | ENST00000570544 | N/A       | N/A          | N/A                  |
| A_21_P0012618  | 1,813   | 1,70492 | 1,077792909 | N/A             | N/A       | N/A          | XLOC_I2_010855       |
| A_21_P0011946  | 3,83412 | 3,72606 | 1,077777968 | N/A             | N/A       | N/A          | XLOC_I2_008200       |
| A_22_P00017598 | 1,80696 | 1,69892 | 1,077763027 | N/A             | N/A       | N/A          | Inc-WDR73-2          |
| A_32_P115375   | 5,78299 | 5,67497 | 1,077748086 | N/A             | N/A       | CU677925     | Inc-SMG6-1           |
| A_23_P122414   | 1,82241 | 1,71439 | 1,077748086 | ENST00000541991 | 2978      | NM_000409    | GUCA1A               |
| A_33_P3374253  | 5,22603 | 5,11803 | 1,077733145 | N/A             | N/A       | N/A          | N/A                  |
| A_24_P289178   | 12,4821 | 12,3741 | 1,077733145 | ENST00000284245 | 404550    | NM_206967    | C16orf74             |
| A_23_P257911   | 11,3607 | 11,2527 | 1,077733145 | ENST00000474835 | 10600     | NM_001032410 | USP16                |
| A_21_P0014112  | 1,8047  | 1,69671 | 1,077725675 | N/A             | 100506765 | NR_046230    | IGSF11-AS1           |
| A_23_P162945   | 10,0122 | 9,90421 | 1,077725675 | ENST00000216774 | 6729      | NM_003136    | SRP54                |
| A_21_P0013434  | 4,21533 | 4,10735 | 1,077718205 | ENST00000438894 | 285908    | N/A          | LINC00174            |
| A_22_P00013014 | 1,72902 | 1,62106 | 1,077703264 | N/A             | N/A       | N/A          | Inc-RGMA-5           |
| A_22_P00005016 | 1,52462 | 1,41666 | 1,077703264 | ENST00000583165 | N/A       | AK094519     | N/A                  |
| A_33_P3395191  | 1,80793 | 1,69998 | 1,077695794 | ENST00000358316 | 10242     | NM_181361    | KCNMB2               |

|                |         |         |             |                 |           |              |                |
|----------------|---------|---------|-------------|-----------------|-----------|--------------|----------------|
| A_22_P00011886 | 4,34978 | 4,24184 | 1,077688324 | ENST00000431149 | 9487      | AL832404     | PIGL           |
| A_22_P00017007 | 4,5477  | 4,43977 | 1,077680854 | ENST00000429389 | N/A       | N/A          | N/A            |
| A_21_P0007079  | 1,73234 | 1,62447 | 1,077636036 | ENST00000436430 | N/A       | XR_246191    | N/A            |
| A_33_P3360814  | 2,74247 | 2,63461 | 1,077628566 | N/A             | 58160     | NM_001085386 | NFE4           |
| A_21_P0010403  | 4,47326 | 4,3654  | 1,077628566 | ENST00000450963 | N/A       | N/A          | N/A            |
| A_22_P00020225 | 5,08003 | 4,97217 | 1,077628566 | N/A             | 100132215 | NR_027069    | LOC100132215   |
| A_33_P3378291  | 5,09492 | 4,98707 | 1,077621097 | ENST00000341280 | 400935    | NM_001001694 | IL17REL        |
| A_21_P0011448  | 7,0699  | 6,96206 | 1,077613627 | N/A             | N/A       | N/A          | XLOC_I2_005314 |
| A_21_P0011847  | 1,83577 | 1,72793 | 1,077613627 | N/A             | N/A       | N/A          | XLOC_I2_007542 |
| A_22_P00006534 | 1,8074  | 1,69957 | 1,077606158 | N/A             | N/A       | CR627366     | Inc-FH-1       |
| A_22_P00018924 | 3,24576 | 3,13795 | 1,077591219 | N/A             | 101929591 | NR_109956    | KIZ-AS1        |
| A_24_P348083   | 15,1127 | 15,0049 | 1,07758375  | N/A             | N/A       | BC093850     | N/A            |
| A_22_P00010726 | 5,85155 | 5,74376 | 1,077576281 | ENST00000443207 | N/A       | N/A          | N/A            |
| A_22_P00018082 | 1,79561 | 1,68788 | 1,077531466 | ENST00000442753 | N/A       | BU154984     | N/A            |
| A_33_P3346132  | 8,50104 | 8,39333 | 1,077516529 | ENST00000388768 | 55680     | NM_017987    | RUFY2          |
| A_21_P0008492  | 3,2831  | 3,17542 | 1,077494123 | N/A             | N/A       | N/A          | Inc-RTL1-8     |
| A_22_P00024293 | 1,77475 | 1,66707 | 1,077494123 | ENST00000515181 | 101927363 | XR_245252    | LOC101927363   |
| A_22_P00007886 | 1,7665  | 1,65884 | 1,077479186 | N/A             | 101928446 | NR_110938    | LOC101928446   |
| A_22_P00010195 | 3,54346 | 3,43581 | 1,077471717 | N/A             | 100287042 | NR_036520    | LOC100287042   |
| A_33_P3306834  | 2,18252 | 2,07491 | 1,077441844 | ENST00000615684 | 664701    | AK126842     | ZNF826P        |
| A_24_P143686   | 9,95424 | 9,84664 | 1,077434375 | ENST00000297423 | 23514     | NM_001080394 | SPIDR          |
| A_24_P177353   | 11,0475 | 10,9399 | 1,077434375 | ENST00000245838 | 57187     | NM_001081550 | THOC2          |
| A_22_P00018575 | 1,81281 | 1,70528 | 1,077382099 | N/A             | 101927164 | NR_110668    | LOC101927164   |
| A_33_P3424856  | 1,80477 | 1,69727 | 1,077359696 | N/A             | N/A       | N/A          | N/A            |
| A_33_P3383900  | 3,56226 | 3,45478 | 1,077344761 | N/A             | N/A       | N/A          | N/A            |
| A_21_P0014560  | 1,76923 | 1,66179 | 1,077314891 | N/A             | 728310    | NR_047567    | GOLGA6L7P      |
| A_22_P00016224 | 1,80511 | 1,69767 | 1,077314891 | N/A             | N/A       | N/A          | Inc-TM6SF1-2   |
| A_22_P00024428 | 4,80981 | 4,70237 | 1,077314891 | N/A             | N/A       | N/A          | Inc-FAM92A1-1  |
| A_21_P0000635  | 6,85799 | 6,75059 | 1,077285022 | N/A             | 100288346 | NR_034101    | NCAM1-AS1      |
| A_22_P00017676 | 4,18554 | 4,07814 | 1,077285022 | ENST00000581118 | N/A       | N/A          | N/A            |
| A_22_P00014711 | 1,77874 | 1,6714  | 1,07724022  | ENST00000522973 | N/A       | N/A          | N/A            |
| A_33_P3266419  | 8,80308 | 8,69577 | 1,077217819 | ENST00000617457 | 51228     | NM_016433    | GLTP           |
| A_22_P00025178 | 1,77116 | 1,66386 | 1,077210353 | ENST00000546376 | N/A       | BG764553     | N/A            |

|                |         |         |             |                 |           |              |                      |
|----------------|---------|---------|-------------|-----------------|-----------|--------------|----------------------|
| A_33_P6817520  | 1,79375 | 1,68645 | 1,077210353 | ENST00000423875 | 100133308 | NR_024472    | RSU1P2               |
| A_21_P0012860  | 1,73885 | 1,63157 | 1,077195419 | ENST00000521472 | 285626    | NR_037889    | LOC285626            |
| A_22_P00001664 | 4,03859 | 3,93134 | 1,07717302  | N/A             | 284618    | NM_001039517 | RUSC1-AS1            |
| A_23_P92786    | 11,3596 | 11,2524 | 1,077135689 | ENST00000265271 | 54439     | NM_018989    | RBM27                |
| A_21_P0010237  | 1,49978 | 1,39261 | 1,07711329  | N/A             | N/A       | N/A          | Inc-MRPS6-2          |
| A_23_P160017   | 1,81626 | 1,70909 | 1,07711329  | ENST00000253470 | 83866     | NR_001548    | TTY11                |
| A_21_P0011937  | 3,87877 | 3,7716  | 1,07711329  | N/A             | N/A       | N/A          | XLOC_I2_008140       |
| A_23_P352950   | 6,14981 | 6,04265 | 1,077105824 | ENST00000439251 | 114824    | NM_052926    | PNMA5                |
| A_21_P0006990  | 2,9909  | 2,88375 | 1,077098359 | ENST00000608660 | N/A       | N/A          | N/A                  |
| A_33_P3296427  | 1,83798 | 1,73086 | 1,077075961 | ENST00000400946 | 339535    | NR_015407    | LINC01139            |
| A_22_P00002863 | 1,77131 | 1,66421 | 1,07706103  | N/A             | N/A       | N/A          | Inc-C3orf65-1        |
| A_22_P00019421 | 1,73216 | 1,62507 | 1,077053564 | ENST00000451471 | N/A       | N/A          | N/A                  |
| A_22_P00021352 | 1,81651 | 1,70942 | 1,077053564 | ENST00000430320 | N/A       | N/A          | N/A                  |
| A_22_P00002833 | 2,01636 | 1,90928 | 1,077046099 | N/A             | N/A       | AK304146     | Inc-C2orf78-1        |
| A_22_P00004555 | 1,78271 | 1,67563 | 1,077046099 | N/A             | N/A       | N/A          | Inc-CRLF3-2          |
| A_24_P345002   | 1,77395 | 1,6669  | 1,077023702 | ENST00000375992 | 55190     | NM_018159    | NUDT11               |
| A_33_P3406843  | 1,7904  | 1,68337 | 1,077008772 | N/A             | 442132    | NR_033906    | LOC442132            |
| A_24_P287189   | 6,55894 | 6,45192 | 1,077001306 | ENST00000317204 | 54472     | NM_019009    | TOLLIP               |
| A_21_P0005730  | 1,81598 | 1,70899 | 1,076978911 | N/A             | N/A       | N/A          | Inc-FABP5-1          |
| A_22_P00025050 | 1,79828 | 1,6913  | 1,076971446 | N/A             | N/A       | N/A          | Inc-RP11-214N1.1.1-1 |
| A_22_P00016644 | 1,78352 | 1,67656 | 1,076956516 | N/A             | N/A       | N/A          | Inc-TP53BP1-1        |
| A_21_P0006333  | 1,79054 | 1,6836  | 1,076941587 | N/A             | N/A       | N/A          | Inc-QSOX2-1          |
| A_21_P0005853  | 1,79455 | 1,68761 | 1,076941587 | ENST00000524286 | 100505718 | NR_039986    | LOC100505718         |
| A_21_P0003377  | 1,80957 | 1,70265 | 1,076926657 | ENST00000504368 | 728040    | N/A          | LOC728040            |
| A_19_P00321403 | 1,78201 | 1,67513 | 1,076896799 | ENST00000478759 | 101928932 | XR_245347    | LOC101928932         |
| A_24_P9321     | 9,3325  | 9,22562 | 1,076896799 | ENST00000616365 | 8354      | NM_003533    | HIST1H3I             |
| A_22_P00015122 | 9,85716 | 9,75031 | 1,076874406 | N/A             | N/A       | BX109892     | Inc-SNX20-5          |
| A_21_P0003001  | 1,77299 | 1,66614 | 1,076874406 | N/A             | N/A       | N/A          | Inc-OR5H15-1         |
| A_33_P3345304  | 1,72705 | 1,62023 | 1,076852013 | N/A             | N/A       | N/A          | N/A                  |
| A_21_P0007407  | 9,6184  | 9,51161 | 1,07682962  | N/A             | N/A       | N/A          | Inc-RP11-158I9.5.1-2 |
| A_33_P3395502  | 1,80517 | 1,69839 | 1,076822156 | N/A             | 100129884 | AK097079     | LOC100129884         |
| A_21_P0000329  | 8,60472 | 8,49795 | 1,076814693 | N/A             | 677823    | NR_002974    | SNORA80E             |
| A_21_P0006153  | 1,78074 | 1,67399 | 1,076799765 | N/A             | N/A       | N/A          | Inc-ANXA1-2          |

|                |         |         |             |                 |        |              |                |
|----------------|---------|---------|-------------|-----------------|--------|--------------|----------------|
| A_24_P151121   | 1,77194 | 1,6652  | 1,076792301 | ENST00000596924 | N/A    | EU794585     | N/A            |
| A_33_P3380462  | 7,15052 | 7,04379 | 1,076784837 | ENST00000315033 | 54112  | NM_022049    | GPR88          |
| A_33_P3464025  | 1,79138 | 1,68467 | 1,07676991  | N/A             | 646241 | XR_241747    | LOC646241      |
| A_23_P161446   | 11,6864 | 11,5797 | 1,076762446 | ENST00000479928 | 2665   | NM_001494    | GDI2           |
| A_33_P3292699  | 3,68534 | 3,57864 | 1,076762446 | ENST00000270460 | 29924  | AY203961     | EPN1           |
| A_24_P339071   | 9,20492 | 9,09824 | 1,076747519 | ENST00000268383 | 1039   | NM_001802    | CDR2           |
| A_22_P00012139 | 7,64476 | 7,53809 | 1,076740056 | ENST00000564651 | 5432   | NM_032940    | POLR2C         |
| A_33_P3297946  | 4,85734 | 4,75069 | 1,076725129 | ENST00000560958 | 283693 | NR_036446    | ACTG1P17       |
| A_21_P0002845  | 1,78832 | 1,68168 | 1,076717666 | N/A             | N/A    | N/A          | Inc-ULK4-6     |
| A_23_P84860    | 1,78542 | 1,67881 | 1,076695277 | ENST00000394481 | 11170  | NM_007177    | FAM107A        |
| A_23_P314726   | 10,6994 | 10,5928 | 1,076687814 | ENST00000529142 | 5298   | NM_002651    | PI4KB          |
| A_23_P112982   | 1,77714 | 1,67054 | 1,076687814 | ENST00000610966 | 55530  | NM_018711    | SVOP           |
| A_33_P3309506  | 3,05302 | 2,94642 | 1,076687814 | ENST00000438614 | 645832 | NM_001080837 | SEBOX          |
| A_33_P3327479  | 11,337  | 11,2304 | 1,076687814 | N/A             | 51304  | NM_016598    | ZDHHC3         |
| A_33_P3316953  | 1,7288  | 1,62225 | 1,076650499 | ENST00000583458 | 146713 | NM_001082575 | RBFOX3         |
| A_33_P3570223  | 16,5199 | 16,4134 | 1,076613186 | N/A             | 644961 | BX648289     | ACTG1P20       |
| A_22_P00013042 | 1,79077 | 1,68427 | 1,076613186 | ENST00000521930 | N/A    | N/A          | N/A            |
| A_23_P109877   | 10,2529 | 10,1464 | 1,076613186 | ENST00000487402 | 80335  | NM_025222    | WDR82          |
| A_22_P00021942 | 1,77352 | 1,66704 | 1,076598261 | ENST00000579474 | N/A    | N/A          | N/A            |
| A_21_P0004224  | 1,72411 | 1,61766 | 1,076575874 | N/A             | N/A    | N/A          | Inc-ADCY2-1    |
| A_22_P00017643 | 1,79581 | 1,68936 | 1,076575874 | N/A             | N/A    | N/A          | Inc-WNT4-1     |
| A_21_P0014198  | 1,71713 | 1,61068 | 1,076575874 | N/A             | N/A    | N/A          | N/A            |
| A_21_P0013473  | 1,79368 | 1,68724 | 1,076568412 | N/A             | N/A    | N/A          | XLOC_I2_014183 |
| A_22_P00003695 | 1,82471 | 1,71828 | 1,07656095  | ENST00000567058 | N/A    | N/A          | N/A            |
| A_21_P0010004  | 1,79716 | 1,6908  | 1,076508716 | N/A             | N/A    | N/A          | Inc-TASP1-6    |
| A_22_P00016225 | 1,7311  | 1,62477 | 1,076486331 | N/A             | N/A    | N/A          | Inc-TM6SF1-3   |
| A_33_P3871347  | 6,49102 | 6,38469 | 1,076486331 | ENST00000405547 | 25992  | NM_001080437 | SNED1          |
| A_21_P0009631  | 1,77805 | 1,67174 | 1,076471407 | N/A             | N/A    | N/A          | Inc-TCF4-4     |
| A_22_P00007387 | 1,84066 | 1,73436 | 1,076463946 | ENST00000455598 | 340017 | NR_026992    | LOC340017      |
| A_33_P3531791  | 1,81295 | 1,70668 | 1,076441562 | N/A             | 728099 | BC036362     | LOC728099      |
| A_22_P00025212 | 1,79635 | 1,69008 | 1,076441562 | N/A             | N/A    | BG209674     | Inc-RAB18-1    |
| A_21_P0001456  | 1,81591 | 1,70966 | 1,076426639 | N/A             | N/A    | N/A          | Inc-C1orf222-1 |
| A_33_P3328061  | 5,13499 | 5,02875 | 1,076419178 | N/A             | N/A    | N/A          | N/A            |

|                |         |         |             |                 |           |              |                 |
|----------------|---------|---------|-------------|-----------------|-----------|--------------|-----------------|
| A_21_P0008958  | 1,62368 | 1,51745 | 1,076411717 | N/A             | N/A       | N/A          | Inc-CDH5-4      |
| A_22_P00006141 | 1,78781 | 1,68158 | 1,076411717 | ENST00000567616 | N/A       | BC034566     | N/A             |
| A_33_P3220670  | 3,78329 | 3,67707 | 1,076404256 | ENST00000565921 | 644649    | BX108667     | APOOP5          |
| A_21_P0010601  | 5,65385 | 5,54765 | 1,076389334 | ENST00000492631 | 9696      | NM_014675    | CROCC           |
| A_22_P00002634 | 9,16482 | 9,05863 | 1,076381873 | N/A             | N/A       | N/A          | Inc-C1orf177-1  |
| A_33_P3331307  | 4,10107 | 3,99492 | 1,07635203  | ENST00000295324 | 10602     | NM_006449    | CDC42EP3        |
| A_33_P3319880  | 1,72734 | 1,62124 | 1,076314727 | ENST00000310917 | 132884    | NM_001166136 | EVC2            |
| A_21_P0001373  | 1,76142 | 1,65532 | 1,076314727 | N/A             | N/A       | N/A          | Inc-NBPF15-2    |
| A_33_P3397061  | 2,10716 | 2,00107 | 1,076307266 | N/A             | 619434    | N/A          | LINC00051       |
| A_22_P00014191 | 8,52785 | 8,42176 | 1,076307266 | N/A             | N/A       | N/A          | Inc-SDR42E1-1   |
| A_22_P00012283 | 9,19675 | 9,09068 | 1,076292346 | ENST00000470416 | 55844     | NM_001291310 | PPP2R2D         |
| A_22_P00019670 | 4,42002 | 4,31396 | 1,076284885 | N/A             | N/A       | N/A          | Inc-HPS4-2      |
| A_22_P00008900 | 1,73129 | 1,62526 | 1,076262505 | ENST00000574739 | 101927314 | NR_110757    | LOC101927314    |
| A_21_P0002025  | 1,72526 | 1,61925 | 1,076247585 | ENST00000420130 | N/A       | N/A          | N/A             |
| A_33_P3271323  | 10,7635 | 10,6575 | 1,076240125 | ENST00000238738 | 23433     | NM_012249    | RHOQ            |
| A_22_P00020155 | 4,35748 | 4,25149 | 1,076232665 | N/A             | N/A       | BC015213     | Inc-C10orf122-2 |
| A_33_P3254136  | 1,80799 | 1,70203 | 1,076210285 | N/A             | 93035     | NM_177531    | PKHD1L1         |
| A_24_P254850   | 2,00245 | 1,89651 | 1,076195366 | ENST00000251170 | 9717      | NM_014692    | SEC14L5         |
| A_33_P3420792  | 6,73924 | 6,63335 | 1,076158069 | ENST00000350498 | 11333     | NM_014891    | PDAP1           |
| A_33_P3297150  | 1,95145 | 1,84557 | 1,076150609 | N/A             | N/A       | N/A          | N/A             |
| A_22_P00022274 | 1,80394 | 1,69807 | 1,07614315  | N/A             | 554201    | NR_038850    | CCDC148-AS1     |
| A_21_P0006752  | 1,78557 | 1,6797  | 1,07614315  | N/A             | N/A       | N/A          | Inc-ZNF32-4     |
| A_22_P00008542 | 1,72555 | 1,61969 | 1,076135691 | N/A             | N/A       | DA577677     | Inc-KCNMB1-1    |
| A_23_P119377   | 9,95585 | 9,85002 | 1,076113313 | ENST00000474049 | 9266      | NM_004228    | CYTH2           |
| A_21_P0002602  | 1,80203 | 1,69621 | 1,076105854 | N/A             | 101928427 | XR_427057    | LOC101928427    |
| A_22_P00014450 | 6,35099 | 6,24517 | 1,076105854 | N/A             | N/A       | N/A          | Inc-SH2D7-5     |
| A_22_P00020651 | 1,75981 | 1,654   | 1,076098395 | ENST00000553983 | N/A       | CU679798     | N/A             |
| A_21_P0008535  | 4,55168 | 4,44588 | 1,076090937 | N/A             | N/A       | N/A          | Inc-DLGAP5-2    |
| A_22_P00008229 | 3,01371 | 2,90791 | 1,076090937 | N/A             | 102723741 | XR_425875    | LOC102723741    |
| A_24_P191931   | 1,80242 | 1,69664 | 1,076076019 | ENST00000409700 | 56135     | NM_031882    | PCDHAC1         |
| A_22_P00003863 | 1,76566 | 1,65989 | 1,07606856  | N/A             | N/A       | N/A          | Inc-CELF4-1     |
| A_21_P0007958  | 1,78976 | 1,68401 | 1,076053643 | ENST00000443228 | 104326053 | N/A          | LINC00363       |
| A_21_P0006643  | 1,77011 | 1,6644  | 1,076023809 | ENST00000455525 | 101927946 | XR_242710    | LOC101927946    |

|                |         |         |             |                 |           |           |                |
|----------------|---------|---------|-------------|-----------------|-----------|-----------|----------------|
| A_22_P00023129 | 1,7843  | 1,67859 | 1,076023809 | ENST00000512794 | N/A       | N/A       | N/A            |
| A_33_P3247571  | 1,92055 | 1,81485 | 1,07601635  | ENST00000400898 | 10747     | NM_139208 | MASP2          |
| A_33_P3418185  | 1,81425 | 1,70857 | 1,076001434 | ENST00000615007 | 66004     | NM_177457 | LYNX1          |
| A_22_P00008340 | 1,94814 | 1,84246 | 1,076001434 | ENST00000526556 | 100653005 | XR_132518 | LOC100653005   |
| A_33_P3349025  | 1,764   | 1,65835 | 1,075979059 | N/A             | N/A       | N/A       | N/A            |
| A_33_P3359285  | 1,81893 | 1,71329 | 1,075971601 | N/A             | N/A       | N/A       | N/A            |
| A_21_P0001840  | 1,76955 | 1,66393 | 1,075956685 | ENST00000450628 | N/A       | N/A       | N/A            |
| A_21_P0009951  | 1,72125 | 1,61564 | 1,075949227 | N/A             | N/A       | N/A       | Inc-CST8-1     |
| A_22_P00004224 | 1,79602 | 1,69042 | 1,075941769 | ENST00000526936 | N/A       | N/A       | N/A            |
| A_22_P00023456 | 1,80009 | 1,69456 | 1,075889565 | N/A             | N/A       | N/A       | Inc-KDM4C-2    |
| A_33_P3842556  | 1,81533 | 1,70986 | 1,075844821 | ENST00000439701 | 10320     | NM_006060 | IKZF1          |
| A_23_P50052    | 8,65795 | 8,55248 | 1,075844821 | N/A             | 84322     | XR_109479 | C18orf12       |
| A_33_P3331426  | 5,21971 | 5,11425 | 1,075837364 | N/A             | N/A       | N/A       | XLOC_I2_008130 |
| A_33_P3276615  | 1,74934 | 1,6439  | 1,07582245  | ENST00000352371 | 80832     | NM_030643 | APOL4          |
| A_23_P103919   | 11,5856 | 11,4802 | 1,075792622 | ENST00000367998 | 8703      | NM_003779 | B4GALT3        |
| A_32_P144421   | 8,66704 | 8,56167 | 1,075770252 | ENST00000326756 | 85460     | NM_053042 | ZNF518B        |
| A_21_P0002257  | 2,64798 | 2,54261 | 1,075770252 | ENST00000610384 | N/A       | N/A       | N/A            |
| A_21_P0006043  | 1,76423 | 1,65887 | 1,075762795 | N/A             | N/A       | N/A       | Inc-DEC1-4     |
| A_21_P0005125  | 1,80304 | 1,6977  | 1,075747882 | N/A             | N/A       | N/A       | Inc-KLHL32-4   |
| A_23_P69738    | 7,20442 | 7,09909 | 1,075740426 | ENST00000505041 | 65997     | NM_023940 | RASL11B        |
| A_21_P0003471  | 1,74618 | 1,64087 | 1,075725513 | ENST00000502668 | N/A       | N/A       | N/A            |
| A_21_P0006961  | 3,00205 | 2,89675 | 1,075718056 | N/A             | N/A       | N/A       | Inc-CALML5-5   |
| A_21_P0009017  | 1,72428 | 1,61898 | 1,075718056 | N/A             | N/A       | N/A       | Inc-UMOD-1     |
| A_23_P323166   | 14,365  | 14,2597 | 1,075718056 | ENST00000574331 | 23524     | NM_016333 | SRRM2          |
| A_33_P3256920  | 9,53798 | 9,43268 | 1,075718056 | ENST00000339464 | 7477      | NM_058238 | WNT7B          |
| A_22_P00017062 | 1,79072 | 1,68547 | 1,075680776 | ENST00000413637 | 104266956 | N/A       | LINC01044      |
| A_33_P3329078  | 7,31103 | 7,20579 | 1,07567332  | ENST00000620888 | 3047      | NM_000559 | HBG1           |
| A_21_P0010019  | 6,06717 | 5,96195 | 1,075658408 | N/A             | N/A       | N/A       | Inc-FOXA2-1    |
| A_23_P503072   | 8,40751 | 8,30235 | 1,075613673 | ENST00000489442 | 56477     | NM_148672 | CCL28          |
| A_33_P3266964  | 2,48145 | 2,3763  | 1,075606218 | ENST00000355349 | 4625      | NM_000257 | MYH7           |
| A_23_P66593    | 2,12028 | 2,01514 | 1,075598762 | ENST00000253408 | 2670      | NM_002055 | GFAP           |
| A_22_P00021651 | 1,88274 | 1,7776  | 1,075598762 | N/A             | N/A       | N/A       | Inc-HNRNPAB-3  |
| A_21_P0012959  | 1,72748 | 1,62237 | 1,075576396 | ENST00000513133 | N/A       | N/A       | N/A            |



|                |         |         |             |                 |           |           |                     |
|----------------|---------|---------|-------------|-----------------|-----------|-----------|---------------------|
| A_23_P138835   | 13,023  | 12,9179 | 1,075568941 | ENST00000533129 | 823       | NM_005186 | CAPN1               |
| A_24_P8494     | 14,891  | 14,7859 | 1,075568941 | ENST00000223641 | 10952     | NM_006808 | SEC61B              |
| A_23_P104054   | 10,1784 | 10,0733 | 1,075568941 | ENST00000608151 | 51430     | NM_016227 | SUCO                |
| A_21_P0005514  | 1,72368 | 1,6186  | 1,07555403  | N/A             | N/A       | N/A       | Inc-SGCE-1          |
| A_22_P00022279 | 1,78734 | 1,68228 | 1,07553912  | ENST00000441383 | 104326057 | N/A       | GACAT1              |
| A_33_P3209070  | 1,76832 | 1,66328 | 1,07552421  | ENST00000287777 | 131377    | NM_152393 | KLHL40              |
| A_22_P00008281 | 1,77837 | 1,67336 | 1,075501845 | ENST00000554552 | N/A       | DA734962  | N/A                 |
| A_24_P178963   | 9,84732 | 9,74233 | 1,075486936 | ENST00000509439 | N/A       | N/A       | N/A                 |
| A_21_P0005529  | 1,77736 | 1,67243 | 1,075442208 | N/A             | N/A       | N/A       | Inc-RBM28-2         |
| A_33_P3764636  | 1,81237 | 1,70746 | 1,0754273   | N/A             | 340618    | NR_028083 | FAM41AY1            |
| A_24_P393461   | 11,9815 | 11,8766 | 1,075419845 | ENST00000470180 | 25912     | NM_138740 | C1orf43             |
| A_23_P122116   | 11,0413 | 10,9364 | 1,075419845 | ENST00000507900 | 51428     | NM_016222 | DDX41               |
| A_22_P00008784 | 1,72579 | 1,62092 | 1,075397483 | N/A             | N/A       | BX100611  | Inc-KIF26B-1        |
| A_21_P0001042  | 1,79291 | 1,68804 | 1,075397483 | N/A             | N/A       | N/A       | Inc-RGS18-2         |
| A_24_P184799   | 7,6011  | 7,49626 | 1,075375121 | ENST00000216361 | 1690      | NM_004086 | COCH                |
| A_21_P0007173  | 1,80318 | 1,69834 | 1,075375121 | N/A             | N/A       | N/A       | Inc-CTR9-1          |
| A_33_P3360912  | 3,84653 | 3,74169 | 1,075375121 | ENST00000543926 | 7776      | AF085243  | ZNF236              |
| A_33_P3391970  | 1,80706 | 1,70225 | 1,075352759 | N/A             | N/A       | N/A       | N/A                 |
| A_23_P105044   | 11,9597 | 11,8549 | 1,075345306 | ENST00000381519 | 6150      | NM_021134 | MRPL23              |
| A_21_P0005621  | 6,92825 | 6,82348 | 1,075322945 | ENST00000520842 | 101927815 | NR_125426 | LOC101927815        |
| A_21_P0002416  | 5,14417 | 5,03941 | 1,075315491 | N/A             | N/A       | N/A       | Inc-AC074091.13.1-1 |
| A_33_P3421418  | 6,90532 | 6,8006  | 1,075285677 | ENST00000456556 | N/A       | XR_427132 | N/A                 |
| A_22_P00003855 | 1,77967 | 1,67497 | 1,075270771 | N/A             | N/A       | AF307449  | Inc-CECR2-1         |
| A_21_P0002942  | 1,79525 | 1,6906  | 1,075233506 | N/A             | N/A       | N/A       | Inc-STAC-1          |
| A_24_P303080   | 7,68202 | 7,57739 | 1,0752186   | ENST00000296468 | 256471    | NM_152778 | MFSD8               |
| A_22_P00015093 | 1,78591 | 1,68129 | 1,075211147 | N/A             | N/A       | N/A       | Inc-SNURFL-2        |
| A_23_P128598   | 7,85924 | 7,75463 | 1,075203694 | ENST00000618094 | 7278      | NM_006001 | TUBA3C              |
| A_24_P216087   | 11,7429 | 11,6383 | 1,075196241 | ENST00000595564 | 54623     | NM_019088 | PAF1                |
| A_22_P00008493 | 3,94877 | 3,8442  | 1,075173884 | ENST00000534789 | 256236    | NR_002798 | NAPSB               |
| A_33_P3285145  | 3,5638  | 3,45928 | 1,075136622 | N/A             | 100131826 | AY358789  | LOC100131826        |
| A_23_P335428   | 12,0873 | 11,9828 | 1,075121717 | ENST00000428288 | 11112     | NM_152740 | HIBADH              |
| A_23_P207614   | 12,4394 | 12,3349 | 1,075121717 | ENST00000544884 | 9703      | NM_014680 | KIAA0100            |
| A_21_P0010408  | 1,82787 | 1,7234  | 1,075099361 | N/A             | N/A       | N/A       | Inc-CRYBA4-8        |

|                |         |         |             |                 |           |              |                |
|----------------|---------|---------|-------------|-----------------|-----------|--------------|----------------|
| A_24_P150023   | 1,80852 | 1,70406 | 1,075091909 | ENST00000328224 | 3739      | NM_002233    | KCNA4          |
| A_32_P850175   | 1,76741 | 1,66298 | 1,075069553 | ENST00000473233 | 23101     | NM_015078    | MCF2L2         |
| A_23_P304489   | 1,76536 | 1,66096 | 1,075047198 | ENST00000358295 | 25817     | NM_015381    | FAM19A5        |
| A_21_P0009319  | 12,169  | 12,0646 | 1,075047198 | N/A             | 101929494 | XR_424824    | LOC101929494   |
| A_24_P918032   | 1,76172 | 1,65733 | 1,075039746 | ENST00000621139 | 339005    | NR_003521    | WHAMMP3        |
| A_23_P49254    | 6,18855 | 6,08425 | 1,074972684 | ENST00000199708 | 3049      | NM_005331    | HBQ1           |
| A_21_P0010463  | 3,34228 | 3,23798 | 1,074972684 | N/A             | N/A       | N/A          | Inc-RGL4-4     |
| A_22_P00017726 | 10,9157 | 10,8114 | 1,074972684 | ENST00000619574 | 55857     | NM_018474    | KIZ            |
| A_21_P0013661  | 1,79416 | 1,6899  | 1,07494288  | N/A             | N/A       | N/A          | XLOC_I2_015221 |
| A_33_P3396746  | 6,05976 | 5,95553 | 1,074920527 | ENST00000479506 | 55083     | BC042481     | KIF26B         |
| A_22_P00023018 | 1,72218 | 1,61797 | 1,074905626 | N/A             | 154449    | N/A          | LOC154449      |
| A_33_P3383296  | 1,77568 | 1,67148 | 1,074898175 | ENST00000358433 | 283365    | NM_001005493 | OR6C6          |
| A_33_P3358885  | 3,89366 | 3,78948 | 1,074883274 | N/A             | 100130913 | AK128355     | LOC100130913   |
| A_33_P3279392  | 1,72588 | 1,62174 | 1,074853472 | N/A             | N/A       | N/A          | N/A            |
| A_21_P0010443  | 7,52419 | 7,42007 | 1,074838572 | N/A             | N/A       | N/A          | Inc-RPL3-1     |
| A_21_P0012872  | 2,16838 | 2,06426 | 1,074838572 | N/A             | N/A       | N/A          | XLOC_I2_011873 |
| A_24_P12904    | 7,62099 | 7,51689 | 1,074823671 | ENST00000482868 | 23731     | NM_032012    | TMEM245        |
| A_22_P00012165 | 1,78242 | 1,67833 | 1,074816221 | ENST00000420224 | 101928254 | NR_110183    | LOC101928254   |
| A_32_P192376   | 2,39976 | 2,29571 | 1,074786421 | ENST00000360971 | 5167      | NM_006208    | ENPP1          |
| A_22_P00001548 | 1,82007 | 1,71603 | 1,074778972 | ENST00000422994 | 101927802 | N/A          | LINC00368      |
| A_33_P3245606  | 2,41157 | 2,30758 | 1,074741723 | ENST00000391429 | 727857    | NM_001164405 | BHLHA9         |
| A_22_P00010581 | 1,76443 | 1,66044 | 1,074741723 | ENST00000457858 | 102724076 | N/A          | LINC01038      |
| A_23_P159110   | 8,11897 | 8,015   | 1,074726824 | ENST00000398004 | 55508     | NM_018656    | SLC35E3        |
| A_22_P00016874 | 1,80749 | 1,70353 | 1,074719375 | N/A             | N/A       | N/A          | Inc-TRUB2-3    |
| A_33_P3284473  | 1,77042 | 1,66647 | 1,074711926 | N/A             | N/A       | N/A          | Inc-ZNF454-1   |
| A_22_P00012707 | 2,09217 | 1,98822 | 1,074711926 | ENST00000506899 | N/A       | N/A          | N/A            |
| A_33_P3301075  | 1,72477 | 1,62084 | 1,074697027 | ENST00000390615 | N/A       | KJ486916     | N/A            |
| A_33_P3280750  | 2,0721  | 1,9682  | 1,07467468  | ENST00000453129 | 644672    | NM_001101389 | CLDN25         |
| A_23_P97309    | 10,4947 | 10,3908 | 1,07467468  | ENST00000400777 | 842       | NM_001229    | CASP9          |
| A_22_P00005810 | 2,60589 | 2,502   | 1,07466723  | ENST00000564251 | N/A       | BC033941     | N/A            |
| A_21_P0011484  | 1,81441 | 1,71056 | 1,074637435 | N/A             | N/A       | N/A          | XLOC_I2_005503 |
| A_33_P3218704  | 2,74394 | 2,64011 | 1,074622537 | ENST00000396036 | N/A       | AK056509     | N/A            |
| A_33_P3368900  | 4,87199 | 4,76817 | 1,074615089 | N/A             | N/A       | N/A          | N/A            |

|                |         |         |             |                 |           |              |               |
|----------------|---------|---------|-------------|-----------------|-----------|--------------|---------------|
| A_23_P119593   | 9,9471  | 9,84332 | 1,074585294 | ENST00000602233 | 79852     | NM_024794    | EPHX3         |
| A_23_P308839   | 1,77879 | 1,67501 | 1,074585294 | ENST00000422113 | 121256    | NM_133448    | TMEM132D      |
| A_21_P0003793  | 5,51226 | 5,40849 | 1,074577846 | N/A             | N/A       | N/A          | Inc-C4orf27-1 |
| A_23_P417853   | 1,79229 | 1,68854 | 1,074562949 | ENST00000317935 | 140469    | NM_138995    | MYO3B         |
| A_22_P00008358 | 1,80436 | 1,70062 | 1,074555501 | ENST00000418690 | N/A       | N/A          | N/A           |
| A_24_P930975   | 1,78874 | 1,68501 | 1,074548053 | ENST00000375352 | 100131439 | NM_001115152 | CD300LD       |
| A_24_P58187    | 9,6936  | 9,58987 | 1,074548053 | ENST00000526810 | N/A       | N/A          | N/A           |
| A_21_P0006000  | 2,78511 | 2,68139 | 1,074540604 | N/A             | N/A       | N/A          | Inc-C9orf93-1 |
| A_21_P0001295  | 1,74226 | 1,63854 | 1,074540604 | N/A             | N/A       | N/A          | Inc-ELAVL4-3  |
| A_23_P42649    | 12,3167 | 12,213  | 1,074525708 | ENST00000333432 | 5439      | NM_006234    | POLR2J        |
| A_23_P24987    | 10,0576 | 9,95392 | 1,074510812 | ENST00000549052 | 6302      | NM_005981    | TSPAN31       |
| A_21_P0014026  | 1,72972 | 1,62604 | 1,074510812 | N/A             | 100652933 | AB586693     | IGANRP        |
| A_21_P0003195  | 1,72364 | 1,61996 | 1,074510812 | N/A             | N/A       | N/A          | Inc-DCUN1D1-7 |
| A_23_P119344   | 5,56029 | 5,45663 | 1,074495917 | ENST00000311227 | 8463      | NM_003598    | TEAD2         |
| A_33_P3396139  | 1,55142 | 1,44778 | 1,074481021 | ENST00000302823 | 1493      | NM_005214    | CTLA4         |
| A_33_P3504187  | 1,73579 | 1,63215 | 1,074481021 | N/A             | 780529    | BC041859     | LOC780529     |
| A_22_P00013411 | 1,78551 | 1,68189 | 1,074466126 | ENST00000556163 | 100129345 | NR_033943    | LOC100129345  |
| A_22_P00003516 | 1,7825  | 1,67889 | 1,074458678 | N/A             | N/A       | N/A          | Inc-CCL18-1   |
| A_33_P3406047  | 3,00659 | 2,90299 | 1,07445123  | ENST00000301295 | 147945    | NM_134444    | NLRP4         |
| A_23_P348121   | 8,35718 | 8,2536  | 1,074436335 | ENST00000264716 | 2355      | NM_005253    | FOSL2         |
| A_21_P0003501  | 1,72289 | 1,61933 | 1,074421441 | ENST00000487657 | N/A       | N/A          | N/A           |
| A_21_P0005100  | 7,39612 | 7,29259 | 1,074399099 | ENST00000456943 | N/A       | N/A          | N/A           |
| A_22_P00020610 | 1,82421 | 1,72069 | 1,074391652 | N/A             | 102503427 | N/A          | LOC102503427  |
| A_33_P3542911  | 3,24472 | 3,14121 | 1,074384205 | N/A             | 100170219 | BF570948     | SNAR-C4       |
| A_24_P49687    | 17,3885 | 17,285  | 1,074376758 | ENST00000461060 | N/A       | N/A          | N/A           |
| A_23_P382065   | 1,72099 | 1,6175  | 1,074369311 | ENST00000305864 | 51705     | NM_016242    | EMCN          |
| A_22_P00017420 | 1,81974 | 1,71627 | 1,074354417 | N/A             | 100874038 | XR_245081    | CADM2-AS1     |
| A_33_P3231367  | 8,58779 | 8,48437 | 1,074317183 | ENST00000381061 | 25814     | NM_013236    | ATXN10        |
| A_33_P3402010  | 4,80907 | 4,70567 | 1,07430229  | N/A             | N/A       | AK024445     | N/A           |
| A_33_P3395798  | 1,79623 | 1,69283 | 1,07430229  | ENST00000377293 | 26074     | N/A          | CFAP61        |
| A_33_P3276303  | 1,81188 | 1,70853 | 1,074265058 | ENST00000400418 | 649264    | N/A          | CES5AP1       |
| A_21_P0005156  | 1,79339 | 1,69005 | 1,074257612 | N/A             | N/A       | N/A          | Inc-DTNBP1-2  |
| A_32_P18547    | 8,45163 | 8,3483  | 1,074250166 | ENST00000397694 | 54059     | NM_058181    | YBEY          |

|                |         |         |             |                 |        |              |                |
|----------------|---------|---------|-------------|-----------------|--------|--------------|----------------|
| A_33_P3344282  | 3,64701 | 3,54368 | 1,074250166 | N/A             | 64342  | BC038847     | HS1BP3         |
| A_23_P106481   | 14,2507 | 14,1474 | 1,074227828 | ENST00000560911 | 51234  | NM_016454    | EMC4           |
| A_24_P30567    | 10,4761 | 10,3728 | 1,074227828 | ENST00000353487 | 121665 | NM_139015    | SPPL3          |
| A_22_P00007117 | 1,81457 | 1,71128 | 1,074220382 | N/A             | 283194 | NR_033853    | LOC283194      |
| A_21_P0011455  | 1,80017 | 1,69689 | 1,074212936 | N/A             | N/A    | N/A          | XLOC_I2_005393 |
| A_21_P0003728  | 1,83663 | 1,73338 | 1,074190599 | N/A             | N/A    | N/A          | Inc-PPARGC1A-2 |
| A_21_P0011949  | 8,08094 | 7,97769 | 1,074190599 | N/A             | N/A    | N/A          | XLOC_I2_008203 |
| A_21_P0009441  | 1,81076 | 1,70753 | 1,074175707 | N/A             | N/A    | N/A          | Inc-SMCHD1-1   |
| A_33_P3248580  | 6,3805  | 6,27732 | 1,07413848  | ENST00000508108 | N/A    | N/A          | N/A            |
| A_21_P0014506  | 1,77379 | 1,67061 | 1,07413848  | N/A             | N/A    | N/A          | N/A            |
| A_21_P0013153  | 1,80781 | 1,70464 | 1,074131034 | ENST00000419061 | N/A    | XR_426087    | N/A            |
| A_33_P3389713  | 1,72457 | 1,62141 | 1,074123589 | ENST00000625024 | 219493 | NM_001004730 | OR5AR1         |
| A_33_P3331687  | 10,0104 | 9,90729 | 1,074086363 | ENST00000392944 | 26086  | NM_001145638 | GPSM1          |
| A_23_P68106    | 15,6555 | 15,5524 | 1,074078919 | ENST00000233143 | 9168   | NM_021103    | TMSB10         |
| A_33_P3236310  | 8,74548 | 8,6424  | 1,074064029 | ENST00000467773 | 135935 | NM_001080413 | NOBOX          |
| A_24_P130936   | 4,09756 | 3,9945  | 1,074049139 | ENST00000623700 | 8653   | NM_004660    | DDX3Y          |
| A_22_P00025634 | 1,77916 | 1,67613 | 1,074026805 | ENST00000537032 | N/A    | AF087996     | N/A            |
| A_22_P00003147 | 2,64659 | 2,54357 | 1,074019361 | ENST00000443163 | N/A    | N/A          | N/A            |
| A_33_P3311248  | 1,81365 | 1,71066 | 1,073997027 | ENST00000334046 | 337973 | NM_181612    | KRTAP19-6      |
| A_22_P00024479 | 2,78584 | 2,68292 | 1,073944918 | N/A             | N/A    | N/A          | Inc-TP53INP1-2 |
| A_23_P109254   | 13,7404 | 13,6375 | 1,07393003  | ENST00000465158 | 9584   | NM_184234    | RBM39          |
| A_33_P3278714  | 4,64277 | 4,53989 | 1,073915142 | N/A             | N/A    | N/A          | N/A            |
| A_22_P00002620 | 3,67094 | 3,56809 | 1,073892811 | N/A             | N/A    | N/A          | Inc-C1orf124-2 |
| A_33_P3407065  | 10,8438 | 10,741  | 1,073855593 | ENST00000407818 | 3796   | NM_001243952 | KIF2A          |
| A_23_P204847   | 14,7078 | 14,605  | 1,073855593 | ENST00000323076 | 3936   | NM_002298    | LCP1           |
| A_33_P3273767  | 4,56163 | 4,45885 | 1,073840707 | N/A             | N/A    | N/A          | N/A            |
| A_23_P210829   | 9,21683 | 9,11406 | 1,073833263 | ENST00000308824 | 55251  | NM_018257    | PCMTD2         |
| A_23_P214544   | 5,45772 | 5,35497 | 1,073818377 | ENST00000469384 | 2880   | NM_001509    | GPX5           |
| A_22_P00006403 | 1,7522  | 1,64946 | 1,073810934 | N/A             | N/A    | BX091388     | Inc-FBXL7-1    |
| A_21_P0005597  | 1,7192  | 1,61646 | 1,073810934 | N/A             | 7291   | XR_428085    | TWIST1         |
| A_33_P3247310  | 1,72272 | 1,62    | 1,073796048 | ENST00000313544 | N/A    | AB529248     | N/A            |
| A_32_P163533   | 9,63963 | 9,53692 | 1,073788605 | ENST00000471278 | 79692  | NM_001242797 | ZNF322         |
| A_33_P3257232  | 12,8099 | 12,7072 | 1,073781162 | ENST00000299424 | 6881   | NM_006284    | TAF10          |

|                |         |         |             |                 |           |              |                       |
|----------------|---------|---------|-------------|-----------------|-----------|--------------|-----------------------|
| A_33_P3215023  | 11,2362 | 11,1335 | 1,073781162 | ENST00000373685 | 221477    | NM_152734    | C6orf89               |
| A_23_P94932    | 13,9322 | 13,8295 | 1,073781162 | ENST00000428879 | 27249     | NM_015702    | MMADHC                |
| A_22_P00005898 | 1,47302 | 1,37033 | 1,073773719 | ENST00000427799 | 284573    | NR_027902    | LINC00303             |
| A_21_P0008720  | 1,79152 | 1,68884 | 1,073766276 | N/A             | N/A       | N/A          | Inc-MEIS2-6           |
| A_21_P0007294  | 1,78617 | 1,68351 | 1,073751391 | N/A             | N/A       | N/A          | Inc-RP11-688I9.2.1-3  |
| A_21_P0013029  | 1,83523 | 1,73258 | 1,073743948 | N/A             | N/A       | N/A          | XLOC_I2_012614        |
| A_24_P296070   | 10,9656 | 10,863  | 1,073706736 | ENST00000349995 | 83548     | NM_031431    | COG3                  |
| A_24_P63347    | 1,77466 | 1,67206 | 1,073706736 | N/A             | 5197      | NM_002620    | PF4V1                 |
| A_23_P211850   | 8,04141 | 7,93884 | 1,073684409 | ENST00000478253 | 57406     | NM_020676    | ABHD6                 |
| A_23_P201951   | 9,25481 | 9,15224 | 1,073684409 | ENST00000264183 | 51742     | NM_016374    | ARID4B                |
| A_23_P42331    | 14,8526 | 14,7501 | 1,073632315 | ENST00000447654 | 3159      | NM_145901    | HMGA1                 |
| A_23_P128174   | 11,0014 | 10,8989 | 1,073632315 | ENST00000378809 | 117177    | NM_175623    | RAB3IP                |
| A_23_P501435   | 11,3478 | 11,2453 | 1,073632315 | ENST00000435364 | 57325     | NM_020536    | CSRP2BP               |
| A_24_P340227   | 1,71879 | 1,61631 | 1,073617431 | ENST00000451467 | 252955    | NR_001540    | TTY23                 |
| A_33_P3295838  | 6,23397 | 6,1315  | 1,073609989 | ENST00000588434 | 78995     | NM_001171251 | C17orf53              |
| A_22_P00011936 | 2,18184 | 2,07937 | 1,073609989 | ENST00000513690 | N/A       | N/A          | N/A                   |
| A_21_P0006564  | 1,52141 | 1,41894 | 1,073609989 | ENST00000604411 | 9383      | N/A          | TSIX                  |
| A_22_P00006397 | 1,93889 | 1,83643 | 1,073602548 | N/A             | N/A       | N/A          | Inc-FBXL22-1          |
| A_22_P00012446 | 8,00628 | 7,90382 | 1,073602548 | ENST00000419851 | N/A       | XR_432541    | N/A                   |
| A_23_P137403   | 9,46024 | 9,35781 | 1,073580223 | ENST00000615587 | 10489     | NM_006369    | LRRC41                |
| A_23_P23206    | 11,4209 | 11,3185 | 1,073557899 | ENST00000376667 | 10459     | NM_006341    | MAD2L2                |
| A_21_P0008583  | 1,8129  | 1,71051 | 1,073550457 | N/A             | N/A       | N/A          | Inc-RP11-529J17.2.1-2 |
| A_21_P0001007  | 1,80543 | 1,70305 | 1,073543016 | ENST00000420059 | N/A       | N/A          | N/A                   |
| A_21_P0013724  | 1,8202  | 1,71782 | 1,073543016 | ENST00000428709 | 101927827 | NR_121564    | LOC101927827          |
| A_22_P00016285 | 2,93317 | 2,8308  | 1,073535575 | ENST00000534849 | N/A       | N/A          | N/A                   |
| A_21_P0005862  | 1,77783 | 1,67548 | 1,073520693 | N/A             | N/A       | N/A          | Inc-TPD52-1           |
| A_33_P3248008  | 4,6244  | 4,52208 | 1,07349837  | N/A             | 100652807 | XM_003403510 | LOC100652807          |
| A_33_P3221373  | 3,20671 | 3,10439 | 1,07349837  | ENST00000523862 | 102724804 | NR_125828    | LOC102724804          |
| A_21_P0000544  | 5,41015 | 5,30784 | 1,073490929 | N/A             | 84852     | NR_027646    | ATP1A1-AS1            |
| A_33_P3389837  | 10,7194 | 10,6171 | 1,073483488 | ENST00000537466 | 51184     | NM_001164372 | GPN3                  |
| A_23_P356484   | 17,7351 | 17,6328 | 1,073483488 | ENST00000494077 | 6204      | NM_001014    | RPS10                 |
| A_23_P368870   | 1,80994 | 1,70767 | 1,073461166 | ENST00000546725 | 439916    | NR_038868    | LINC00615             |
| A_33_P3221055  | 7,79591 | 7,69364 | 1,073461166 | N/A             | 101927270 | XR_432672    | LOC101927270          |

|                |         |         |             |                 |           |              |                |
|----------------|---------|---------|-------------|-----------------|-----------|--------------|----------------|
| A_24_P876408   | 9,50526 | 9,40299 | 1,073461166 | ENST00000433688 | 65998     | NM_001144936 | C11orf95       |
| A_22_P00015957 | 2,24205 | 2,13982 | 1,073431403 | N/A             | N/A       | DA110576     | Inc-TEAD4-2    |
| A_21_P0002046  | 1,79241 | 1,69018 | 1,073431403 | ENST00000456467 | 100506108 | NR_103785    | SIX3-AS1       |
| A_22_P00014679 | 1,77544 | 1,67321 | 1,073431403 | N/A             | N/A       | N/A          | Inc-SLC25A16-3 |
| A_22_P00021823 | 1,80664 | 1,70443 | 1,073416523 | N/A             | N/A       | BX361357     | Inc-PRPF18-7   |
| A_21_P0004473  | 1,83467 | 1,73247 | 1,073409082 | N/A             | N/A       | N/A          | Inc-BOD1-2     |
| A_23_P129058   | 10,5224 | 10,4202 | 1,073409082 | ENST00000560379 | 9101      | NM_005154    | USP8           |
| A_24_P662646   | 1,83242 | 1,73026 | 1,073379321 | ENST00000509403 | 100505841 | N/A          | LOC100505841   |
| A_22_P00011300 | 9,50868 | 9,40656 | 1,073349561 | N/A             | 55000     | NR_110493    | TUG1           |
| A_23_P5441     | 11,0717 | 10,9696 | 1,073334682 | ENST00000443805 | 10058     | NM_005689    | ABCB6          |
| A_24_P41149    | 8,83134 | 8,72925 | 1,073327242 | ENST00000475592 | N/A       | N/A          | N/A            |
| A_33_P3591321  | 1,78503 | 1,68294 | 1,073327242 | N/A             | N/A       | BI767459     | N/A            |
| A_33_P3293753  | 5,79696 | 5,6949  | 1,073304923 | ENST00000397911 | 386676    | NM_198690    | KRTAP10-9      |
| A_24_P387875   | 1,77987 | 1,67784 | 1,073282604 | ENST00000368089 | 3766      | NM_002241    | KCNJ10         |
| A_23_P53763    | 1,7584  | 1,65637 | 1,073282604 | ENST00000441284 | 80183     | NM_025113    | KIAA0226L      |
| A_22_P00007152 | 1,78005 | 1,67802 | 1,073282604 | ENST00000621456 | 10991     | N/A          | SLC38A3        |
| A_21_P0013348  | 6,1366  | 6,03457 | 1,073282604 | N/A             | N/A       | N/A          | XLOC_I2_014001 |
| A_33_P3225273  | 7,04379 | 6,94177 | 1,073275165 | ENST00000392029 | 5768      | NM_001004128 | QSOX1          |
| A_24_P271149   | 4,57181 | 4,46981 | 1,073260286 | ENST00000270642 | 402665    | NM_001101372 | IGLON5         |
| A_24_P681301   | 18,4642 | 18,3622 | 1,073260286 | ENST00000339647 | 7316      | NM_021009    | UBC            |
| A_33_P3308905  | 5,47191 | 5,36996 | 1,073223091 | ENST00000359793 | 285753    | NM_001271853 | CEP57L1        |
| A_33_P3361217  | 3,88141 | 3,77946 | 1,073223091 | N/A             | N/A       | N/A          | N/A            |
| A_22_P00001670 | 7,14024 | 7,0383  | 1,073215652 | ENST00000427886 | N/A       | N/A          | N/A            |
| A_23_P407583   | 1,79597 | 1,69412 | 1,073148703 | ENST00000326441 | 5178      | NM_006210    | PEG3           |
| A_21_P0014539  | 1,52839 | 1,42655 | 1,073141265 | N/A             | N/A       | N/A          | Inc-CALM1-4    |
| A_33_P3341648  | 1,78344 | 1,68161 | 1,073133826 | N/A             | 54777     | NM_001200049 | CFAP46         |
| A_32_P527371   | 1,81003 | 1,7082  | 1,073133826 | ENST00000480523 | 129049    | AB449879     | SGSM1          |
| A_33_P3345717  | 1,72292 | 1,62114 | 1,073096635 | ENST00000488120 | 1641      | NM_001195553 | DCX            |
| A_33_P3407479  | 1,74733 | 1,64556 | 1,073089197 | N/A             | N/A       | AK097337     | Inc-MORF4L1-2  |
| A_23_P1638     | 10,0326 | 9,93085 | 1,073074321 | ENST00000525754 | 83759     | NM_031492    | RBM4B          |
| A_22_P00008018 | 1,80984 | 1,70809 | 1,073074321 | ENST00000579045 | N/A       | BC082966     | N/A            |
| A_33_P3387352  | 5,29955 | 5,19784 | 1,073044569 | ENST00000411514 | N/A       | BC068238     | N/A            |
| A_23_P208373   | 4,67065 | 4,56895 | 1,073037131 | ENST00000597612 | 1555      | NM_000767    | CYP2B6         |

|                |         |         |             |                 |           |              |                |
|----------------|---------|---------|-------------|-----------------|-----------|--------------|----------------|
| A_23_P166663   | 11,1077 | 11,006  | 1,073037131 | ENST00000288266 | 26060     | NM_012096    | APPL1          |
| A_21_P0009455  | 1,44441 | 1,34274 | 1,073014818 | ENST00000591431 | 101927433 | N/A          | LINC01255      |
| A_21_P0014022  | 1,7969  | 1,69524 | 1,073007381 | N/A             | 100652835 | AB593131     | RBSG2          |
| A_33_P3264224  | 6,76188 | 6,66031 | 1,072940445 | ENST00000342711 | 55561     | NM_017525    | CDC42BPG       |
| A_22_P00010482 | 3,81482 | 3,71326 | 1,072933008 | N/A             | N/A       | N/A          | Inc-NAV1-1     |
| A_33_P3353747  | 1,83451 | 1,73295 | 1,072933008 | N/A             | N/A       | N/A          | N/A            |
| A_32_P60223    | 9,76399 | 9,66245 | 1,072918134 | ENST00000313552 | 84289     | NM_032329    | ING5           |
| A_24_P93720    | 1,72199 | 1,62047 | 1,072903261 | N/A             | 645984    | AK095436     | LOC645984      |
| A_22_P00014677 | 6,32048 | 6,21897 | 1,072895824 | ENST00000609923 | N/A       | BC023330     | N/A            |
| A_22_P00012185 | 1,71748 | 1,61598 | 1,072888387 | ENST00000416008 | N/A       | BG184951     | N/A            |
| A_22_P00013057 | 7,49038 | 7,38889 | 1,072880951 | ENST00000566297 | 284648    | NR_036490    | LOC284648      |
| A_33_P3306664  | 1,77429 | 1,67281 | 1,072873514 | N/A             | N/A       | N/A          | Inc-DET1-2     |
| A_22_P00013571 | 1,80565 | 1,7042  | 1,072851204 | ENST00000567227 | N/A       | DA740059     | N/A            |
| A_33_P3465703  | 3,01279 | 2,91143 | 1,072784278 | N/A             | 677837    | BF304636     | SNORA60        |
| A_22_P00016351 | 1,61171 | 1,51037 | 1,072769407 | ENST00000427584 | N/A       | N/A          | N/A            |
| A_22_P00020962 | 6,55744 | 6,45613 | 1,072747099 | ENST00000439050 | 100996579 | NR_110163    | LOC100996579   |
| A_32_P234827   | 11,0172 | 10,9159 | 1,072739664 | ENST00000458464 | 55156     | NM_018120    | ARMC1          |
| A_21_P0007939  | 1,72276 | 1,62147 | 1,072732228 | N/A             | N/A       | N/A          | Inc-RNASEH2B-2 |
| A_22_P00008195 | 1,53162 | 1,43034 | 1,072724792 | ENST00000381641 | 11172     | NM_007179    | INSL6          |
| A_21_P0001666  | 9,38244 | 9,28119 | 1,072702486 | N/A             | N/A       | N/A          | Inc-CDC42-1    |
| A_21_P0002246  | 1,77767 | 1,67642 | 1,072702486 | N/A             | N/A       | N/A          | Inc-CTNNA2-2   |
| A_22_P00011028 | 2,30367 | 2,20246 | 1,072672745 | N/A             | N/A       | N/A          | Inc-NT5DC3-2   |
| A_22_P00007906 | 1,78508 | 1,68388 | 1,072665309 | N/A             | N/A       | N/A          | Inc-HSPA14-1   |
| A_23_P98183    | 11,3031 | 11,2019 | 1,072665309 | ENST00000311189 | 3265      | NM_005343    | HRAS           |
| A_32_P375062   | 1,83434 | 1,73317 | 1,072643004 | ENST00000357061 | 255330    | NR_034158    | NUP210P1       |
| A_24_P366845   | 1,71633 | 1,61521 | 1,07260583  | ENST00000448036 | N/A       | N/A          | N/A            |
| A_22_P00006425 | 1,79529 | 1,6942  | 1,072583526 | ENST00000557067 | N/A       | N/A          | N/A            |
| A_24_P114617   | 9,60576 | 9,50467 | 1,072583526 | ENST00000263780 | 25978     | NM_014043    | CHMP2B         |
| A_22_P00015096 | 1,73149 | 1,63041 | 1,072576091 | N/A             | N/A       | N/A          | Inc-SNW1-3     |
| A_22_P00000891 | 5,5588  | 5,45772 | 1,072576091 | N/A             | N/A       | N/A          | Inc-AHNAK-4    |
| A_21_P0011111  | 1,82438 | 1,72333 | 1,072553788 | ENST00000503695 | N/A       | N/A          | N/A            |
| A_33_P3333975  | 12,6648 | 12,5638 | 1,072516617 | ENST00000445695 | 220869    | NM_001286835 | CBWD5          |
| A_23_P346327   | 1,72414 | 1,62314 | 1,072516617 | N/A             | 146512    | NR_026674    | FLJ30679       |

|                |         |         |             |                 |           |              |                |
|----------------|---------|---------|-------------|-----------------|-----------|--------------|----------------|
| A_23_P410017   | 6,17163 | 6,0707  | 1,072464579 | ENST00000284259 | 219899    | NM_152715    | TBCEL          |
| A_23_P419947   | 8,3532  | 8,25229 | 1,072449712 | ENST00000487838 | 4291      | NM_022443    | MLF1           |
| A_24_P156769   | 4,12555 | 4,02466 | 1,072434845 | N/A             | 4352      | NM_005373    | MPL            |
| A_21_P0014033  | 4,09308 | 3,99221 | 1,072419978 | ENST00000575066 | N/A       | N/A          | N/A            |
| A_22_P00010742 | 1,78222 | 1,6814  | 1,072382811 | N/A             | N/A       | N/A          | Inc-NIPAL4-1   |
| A_33_P3423820  | 11,9033 | 11,8025 | 1,072367945 | ENST00000262577 | 23144     | NM_015117    | ZC3H3          |
| A_23_P134744   | 8,77137 | 8,67058 | 1,072360512 | ENST00000256257 | 79845     | NM_024787    | RNF122         |
| A_32_P137920   | 1,76971 | 1,66893 | 1,072353079 | ENST00000368580 | 345895    | NM_001010892 | RSPH4A         |
| A_23_P258164   | 7,03335 | 6,93259 | 1,072338213 | ENST00000377049 | 1325      | NM_001302    | CORT           |
| A_22_P00008695 | 1,7322  | 1,63147 | 1,072315914 | N/A             | N/A       | N/A          | Inc-KIAA1147-4 |
| A_33_P3372397  | 4,52609 | 4,42536 | 1,072315914 | N/A             | N/A       | AK130111     | N/A            |
| A_21_P0008523  | 4,3654  | 4,26468 | 1,072308482 | ENST00000554522 | 101929080 | NR_110127    | LOC101929080   |
| A_33_P3362806  | 5,26539 | 5,1647  | 1,072286184 | ENST00000488361 | 56850     | BX647801     | GRIPAP1        |
| A_21_P0006581  | 1,8072  | 1,70655 | 1,072256454 | N/A             | N/A       | N/A          | Inc-RHOXF1-1   |
| A_22_P00014426 | 3,34383 | 3,24318 | 1,072256454 | N/A             | N/A       | AL833696     | Inc-SGSH-1     |
| A_21_P0004817  | 6,60374 | 6,5031  | 1,072249022 | N/A             | N/A       | N/A          | Inc-WRNIP1-2   |
| A_23_P338519   | 7,2041  | 7,10347 | 1,07224159  | ENST00000416026 | 28512     | NM_020345    | NKIRAS1        |
| A_22_P00018276 | 5,48937 | 5,38876 | 1,072226725 | N/A             | 101928733 | XR_250292    | LOC101928733   |
| A_33_P3217834  | 11,1534 | 11,0528 | 1,072219293 | ENST00000358207 | 50485     | NM_014140    | SMARCAL1       |
| A_22_P00018518 | 1,79256 | 1,69198 | 1,072204429 | ENST00000431343 | N/A       | N/A          | N/A            |
| A_21_P0000884  | 4,41135 | 4,31079 | 1,072189565 | N/A             | 100507321 | NR_040023    | ERVK13-1       |
| A_33_P3696837  | 1,70494 | 1,60438 | 1,072189565 | N/A             | 339751    | NR_033882    | MLK7-AS1       |
| A_21_P0000278  | 9,00374 | 8,9032  | 1,072174702 | ENST00000584901 | 652966    | NR_002604    | SNORD10        |
| A_33_P3211520  | 8,52617 | 8,42563 | 1,072174702 | ENST00000491439 | 116841    | NM_053052    | SNAP47         |
| A_23_P132438   | 9,3318  | 9,23127 | 1,07216727  | ENST00000309993 | 55167     | NM_018133    | MSL2           |
| A_33_P3267305  | 12,7666 | 12,6661 | 1,072144975 | ENST00000267116 | 283373    | NM_173595    | ANKRD52        |
| A_22_P00001581 | 1,71538 | 1,61489 | 1,072137544 | N/A             | N/A       | AK000957     | Inc-ARL6-1     |
| A_33_P3227703  | 5,67357 | 5,57311 | 1,07211525  | N/A             | N/A       | N/A          | N/A            |
| A_23_P217028   | 9,44394 | 9,3435  | 1,072100387 | ENST00000315480 | 10868     | NM_001008563 | USP20          |
| A_33_P3242174  | 6,81335 | 6,71292 | 1,072092956 | ENST00000331342 | 389084    | NM_206895    | C2orf82        |
| A_33_P3375435  | 6,89958 | 6,79916 | 1,072085525 | ENST00000453174 | 119385    | NM_133447    | AGAP11         |
| A_22_P00019350 | 1,82957 | 1,72916 | 1,072078093 | N/A             | N/A       | BX097857     | Inc-TMBIM4-1   |
| A_23_P39263    | 9,54576 | 9,44535 | 1,072078093 | ENST00000614108 | 126295    | NM_173480    | ZNF57          |



|                |         |         |             |                 |           |              |                |
|----------------|---------|---------|-------------|-----------------|-----------|--------------|----------------|
| A_22_P00000882 | 1,98125 | 1,88086 | 1,072063231 | ENST00000510212 | 285456    | NR_026968    | RPL34-AS1      |
| A_22_P00000353 | 1,74423 | 1,64388 | 1,072033508 | ENST00000561051 | N/A       | DA472297     | N/A            |
| A_32_P105195   | 7,78198 | 7,68163 | 1,072033508 | ENST00000452510 | 9879      | NM_014829    | DDX46          |
| A_22_P00017634 | 5,73832 | 5,63798 | 1,072026077 | N/A             | N/A       | N/A          | Inc-WNT1-1     |
| A_33_P3262138  | 9,22175 | 9,12142 | 1,072018647 | ENST00000454465 | 64682     | NM_022662    | ANAPC1         |
| A_22_P00018009 | 4,9065  | 4,80624 | 1,071966633 | N/A             | N/A       | N/A          | Inc-ZNF177-1   |
| A_23_P62173    | 1,76326 | 1,663   | 1,071966633 | ENST00000609007 | 56157     | NM_031274    | TEX13A         |
| A_23_P18246    | 5,86161 | 5,76138 | 1,071944342 | ENST00000309285 | 2829      | NM_005283    | XCR1           |
| A_33_P3268783  | 1,81229 | 1,71212 | 1,071899762 | ENST00000312371 | 155185    | NM_133463    | AMZ1           |
| A_19_P00322164 | 1,7218  | 1,62165 | 1,071884903 | ENST00000465262 | 285401    | NR_027104    | LINC00698      |
| A_22_P00010364 | 1,82964 | 1,7295  | 1,071877473 | ENST00000558792 | 101928442 | NR_120336    | LINC01491      |
| A_33_P3402329  | 7,98234 | 7,8822  | 1,071877473 | ENST00000440570 | 84848     | NR_024607    | MIR503HG       |
| A_33_P3275998  | 8,71982 | 8,61968 | 1,071877473 | ENST00000341923 | 9135      | NM_004703    | RABEP1         |
| A_33_P3328375  | 1,78283 | 1,68271 | 1,071862614 | ENST00000504425 | 83894     | NM_001300761 | TTC29          |
| A_21_P0012254  | 1,78437 | 1,68426 | 1,071855184 | N/A             | N/A       | N/A          | XLOC_l2_009313 |
| A_33_P3368835  | 1,80054 | 1,70044 | 1,071847755 | ENST00000358775 | 401040    | XR_109937    | LOC401040      |
| A_33_P3227324  | 11,1015 | 11,0014 | 1,071847755 | ENST00000264819 | 54531     | NM_017550    | MIER2          |
| A_23_P156025   | 1,73911 | 1,63904 | 1,071825467 | ENST00000382611 | 153572    | NM_033267    | IRX2           |
| A_33_P3230985  | 1,77482 | 1,67475 | 1,071825467 | N/A             | 403312    | NM_001301851 | LOC403312      |
| A_21_P0008630  | 2,43393 | 2,33387 | 1,071818037 | N/A             | N/A       | N/A          | Inc-SLC24A5-1  |
| A_22_P00007420 | 2,09604 | 1,99599 | 1,071810608 | N/A             | N/A       | BC033335     | Inc-GRXCR1-3   |
| A_21_P0008667  | 1,82141 | 1,72137 | 1,071803179 | N/A             | 102724566 | XR_424667    | LOC102724566   |
| A_23_P2501     | 1,82332 | 1,72329 | 1,07179575  | ENST00000553106 | 5053      | NM_000277    | PAH            |
| A_33_P3405946  | 13,5998 | 13,4998 | 1,071773463 | ENST00000465158 | 9584      | NM_184234    | RBM39          |
| A_22_P00015068 | 1,71432 | 1,61437 | 1,071736318 | N/A             | N/A       | BX402995     | Inc-SNTG2-3    |
| A_21_P0006646  | 1,73004 | 1,63012 | 1,071714032 | N/A             | N/A       | N/A          | Inc-ITIH2-2    |
| A_33_P3256868  | 9,87608 | 9,77619 | 1,071691747 | ENST00000541777 | 55769     | NM_001277945 | ZNF83          |
| A_33_P3268129  | 3,25921 | 3,15936 | 1,071662034 | ENST00000367356 | 554279    | EU250749     | LINC00862      |
| A_33_P3276997  | 5,58063 | 5,4808  | 1,071647178 | ENST00000434603 | 4135      | NM_207577    | MAP6           |
| A_33_P3655815  | 1,53448 | 1,43471 | 1,07160261  | N/A             | 677794    | BQ322426     | SNORA2B        |
| A_22_P00002730 | 3,94626 | 3,84653 | 1,071572899 | N/A             | N/A       | N/A          | Inc-C20orf78-4 |
| A_22_P00012037 | 8,06318 | 7,96347 | 1,071558044 | N/A             | N/A       | N/A          | Inc-PLEKHA8-1  |
| A_24_P42136    | 15,5253 | 15,4256 | 1,071550617 | ENST00000504966 | 3875      | NM_000224    | KRT18          |

|                |         |         |             |                 |           |              |                |
|----------------|---------|---------|-------------|-----------------|-----------|--------------|----------------|
| A_24_P538478   | 5,95986 | 5,86019 | 1,071528335 | ENST00000237380 | 80306     | AF321617     | MED28          |
| A_21_P0011501  | 7,59268 | 7,49301 | 1,071528335 | ENST00000624936 | 101926936 | XR_429804    | LOC101926936   |
| A_22_P00011386 | 8,07694 | 7,97736 | 1,071461491 | N/A             | N/A       | BX538252     | Inc-P4HA2-2    |
| A_22_P00001746 | 1,77342 | 1,67387 | 1,071439211 | N/A             | N/A       | N/A          | Inc-ATMIN-3    |
| A_21_P0014620  | 4,03184 | 3,9323  | 1,071431785 | N/A             | 28991     | XR_428379    | COMMD5         |
| A_33_P3331178  | 1,78692 | 1,68739 | 1,071424358 | ENST00000390604 | N/A       | N/A          | N/A            |
| A_24_P33444    | 8,86499 | 8,76547 | 1,071416931 | ENST00000431545 | 7531      | NM_006761    | YWHAE          |
| A_21_P0004685  | 1,75104 | 1,65153 | 1,071409505 | ENST00000422700 | 100507254 | N/A          | LINC01013      |
| A_22_P00021970 | 4,78378 | 4,68427 | 1,071409505 | N/A             | N/A       | N/A          | Inc-RAB9A-1    |
| A_22_P00007608 | 1,7228  | 1,62332 | 1,071387226 | N/A             | 101927000 | XR_242115    | LOC101927000   |
| A_23_P61637    | 6,22845 | 6,12903 | 1,071342669 | ENST00000546999 | 3034      | NM_002108    | HAL            |
| A_33_P3412375  | 1,83097 | 1,73157 | 1,071327817 | N/A             | N/A       | AK124996     | N/A            |
| A_22_P00023269 | 1,74784 | 1,64845 | 1,071320391 | ENST00000593670 | N/A       | DB525580     | N/A            |
| A_21_P0003407  | 1,79181 | 1,69248 | 1,071275837 | ENST00000507365 | N/A       | N/A          | N/A            |
| A_32_P163247   | 4,02379 | 3,92446 | 1,071275837 | ENST00000409511 | 925       | NM_001768    | CD8A           |
| A_21_P0001880  | 1,77638 | 1,67711 | 1,071231285 | ENST00000453951 | 101927861 | XR_245025    | LINC01293      |
| A_21_P0008408  | 1,71624 | 1,61697 | 1,071231285 | N/A             | N/A       | N/A          | Inc-NRL-3      |
| A_21_P0008555  | 1,88471 | 1,78548 | 1,071201585 | N/A             | N/A       | N/A          | Inc-C15orf48-1 |
| A_21_P0006471  | 1,59814 | 1,49891 | 1,071201585 | ENST00000620118 | N/A       | N/A          | N/A            |
| A_23_P18142    | 17,6789 | 17,5797 | 1,07117931  | ENST00000396953 | 6161      | NM_001007074 | RPL32          |
| A_21_P0012323  | 1,71814 | 1,61895 | 1,071171885 | N/A             | N/A       | N/A          | Inc-SLC5A1-1   |
| A_22_P00004070 | 1,75772 | 1,65854 | 1,07116446  | N/A             | 100506321 | NR_045122    | LOC100506321   |
| A_21_P0007317  | 1,81011 | 1,71094 | 1,071157036 | N/A             | N/A       | N/A          | Inc-SBF2-2     |
| A_23_P21316    | 5,87542 | 5,77628 | 1,071134762 | ENST00000368937 | 58497     | NM_021222    | PRUNE          |
| A_21_P0011046  | 1,71876 | 1,61968 | 1,071090215 | N/A             | N/A       | N/A          | XLOC_I2_002963 |
| A_33_P3416807  | 1,81099 | 1,71194 | 1,071067943 | N/A             | N/A       | N/A          | N/A            |
| A_24_P373333   | 9,95327 | 9,85424 | 1,071053095 | ENST00000566681 | 80011     | NM_024946    | FAM192A        |
| A_24_P56884    | 9,27292 | 9,17389 | 1,071053095 | ENST00000580868 | N/A       | AY074907     | N/A            |
| A_23_P137909   | 15,8732 | 15,7742 | 1,071030823 | ENST00000366696 | 8290      | NM_003493    | HIST3H3        |
| A_21_P0005856  | 4,9068  | 4,80783 | 1,071008552 | N/A             | N/A       | N/A          | Inc-SLCO5A1-3  |
| A_33_P3314192  | 9,77223 | 9,67326 | 1,071008552 | ENST00000402229 | 11252     | NM_001184970 | PACSIN2        |
| A_23_P102634   | 1,80591 | 1,70699 | 1,070971434 | ENST00000372670 | 140870    | NM_080827    | WFDC6          |
| A_33_P3352432  | 9,15366 | 9,05475 | 1,070964011 | ENST00000344302 | 55634     | NM_001129899 | KRBOX4         |

|                |         |         |             |                 |           |              |                |
|----------------|---------|---------|-------------|-----------------|-----------|--------------|----------------|
| A_23_P340617   | 1,83118 | 1,73229 | 1,070949164 | ENST00000296526 | 2891      | NM_000826    | GRIA2          |
| A_22_P00014735 | 1,74461 | 1,64575 | 1,070926895 | ENST00000420237 | 101929648 | XR_247061    | LOC101929648   |
| A_21_P0010383  | 1,76022 | 1,66137 | 1,070919472 | ENST00000442579 | N/A       | N/A          | N/A            |
| A_33_P3326545  | 9,09935 | 9,00054 | 1,07088978  | ENST00000402785 | 91355     | NM_182492    | LRP5L          |
| A_24_P824592   | 7,47482 | 7,37608 | 1,070837821 | ENST00000528645 | 27316     | NM_002139    | RBMX           |
| A_22_P00025479 | 1,71168 | 1,61295 | 1,070830399 | N/A             | N/A       | DB129520     | Inc-BARD1-1    |
| A_21_P0011666  | 1,79386 | 1,69513 | 1,070830399 | N/A             | N/A       | N/A          | XLOC_I2_006574 |
| A_21_P0011785  | 1,71809 | 1,61937 | 1,070822976 | N/A             | N/A       | N/A          | XLOC_I2_007167 |
| A_23_P27239    | 4,05899 | 3,9603  | 1,070800709 | ENST00000331459 | 4991      | NM_002548    | OR1D2          |
| A_22_P00000958 | 3,77836 | 3,67972 | 1,070763599 | N/A             | N/A       | N/A          | Inc-AKTIP-2    |
| A_21_P0001281  | 1,74082 | 1,64218 | 1,070763599 | N/A             | N/A       | N/A          | Inc-C1orf94-1  |
| A_21_P0000596  | 1,78401 | 1,68538 | 1,070756177 | ENST00000611530 | 338004    | NR_033375    | LINC00226      |
| A_33_P3381429  | 18,4367 | 18,3381 | 1,070733912 | ENST00000436136 | N/A       | N/A          | N/A            |
| A_21_P0008597  | 1,81433 | 1,71574 | 1,07072649  | ENST00000567647 | N/A       | XR_424580    | N/A            |
| A_33_P3404508  | 6,0973  | 5,99872 | 1,070719068 | ENST00000613750 | 27158     | NM_001144027 | NDOR1          |
| A_33_P3362453  | 1,70559 | 1,60701 | 1,070719068 | ENST00000442031 | N/A       | N/A          | N/A            |
| A_33_P3362359  | 1,7171  | 1,61854 | 1,070704225 | ENST00000390389 | N/A       | N/A          | N/A            |
| A_21_P0000372  | 4,0483  | 3,94975 | 1,070696803 | ENST00000471759 | 692085    | NR_003042    | SNORD45C       |
| A_22_P00022416 | 1,80927 | 1,71072 | 1,070696803 | N/A             | 102724548 | XR_425157    | LOC102724548   |
| A_24_P290286   | 1,75095 | 1,65242 | 1,07068196  | ENST00000532689 | 283208    | NM_182904    | P4HA3          |
| A_21_P0011639  | 1,9597  | 1,86119 | 1,070667118 | N/A             | N/A       | N/A          | XLOC_I2_006027 |
| A_33_P3270474  | 1,79425 | 1,69574 | 1,070667118 | N/A             | N/A       | N/A          | N/A            |
| A_22_P00012972 | 2,65988 | 2,56138 | 1,070659697 | N/A             | 100505758 | NR_120600    | PRMT5-AS1      |
| A_33_P3428642  | 8,73129 | 8,6328  | 1,070652275 | ENST00000615410 | 1762      | NM_004943    | DMWD           |
| A_22_P00008456 | 1,81027 | 1,71179 | 1,070644854 | ENST00000519337 | N/A       | N/A          | N/A            |
| A_33_P3349671  | 1,75493 | 1,65648 | 1,070622591 | N/A             | 101927680 | XM_005252326 | LOC101927680   |
| A_21_P0009830  | 6,77732 | 6,67889 | 1,070607749 | N/A             | N/A       | N/A          | Inc-CSRP2BP-1  |
| A_24_P89080    | 7,13138 | 7,03296 | 1,070600328 | ENST00000286648 | 1633      | NM_000788    | DCK            |
| A_32_P27479    | 1,77598 | 1,67758 | 1,070585487 | ENST00000590409 | 204801    | NM_145007    | NLRP11         |
| A_22_P00002159 | 4,29827 | 4,19991 | 1,070555804 | N/A             | N/A       | DB496135     | Inc-BRMS1L-1   |
| A_33_P3358412  | 3,05107 | 2,95275 | 1,070526122 | N/A             | 100128198 | AK125043     | LOC100128198   |
| A_22_P00000282 | 9,91824 | 9,81993 | 1,070518702 | ENST00000567888 | 100126328 | BM766675     | MIR940         |
| A_22_P00003624 | 1,58032 | 1,48201 | 1,070518702 | N/A             | N/A       | N/A          | Inc-CD46-3     |

|                |         |         |             |                 |           |              |                |
|----------------|---------|---------|-------------|-----------------|-----------|--------------|----------------|
| A_21_P0014671  | 17,3725 | 17,2742 | 1,070511282 | ENST00000525828 | 6207      | NM_001017    | RPS13          |
| A_33_P3374463  | 8,24518 | 8,14689 | 1,070503862 | ENST00000322602 | 4238      | NM_001242336 | MFAP3          |
| A_21_P0010013  | 1,78718 | 1,6889  | 1,070496442 | N/A             | N/A       | N/A          | Inc-FOXA2-5    |
| A_33_P6594257  | 1,79441 | 1,69616 | 1,070474181 | ENST00000590990 | 3868      | N/A          | KRT16          |
| A_22_P00008587 | 1,80268 | 1,70448 | 1,070437082 | N/A             | N/A       | N/A          | Inc-KCTD17-1   |
| A_23_P102937   | 11,9994 | 11,9012 | 1,070437082 | ENST00000411651 | 6612      | NM_006936    | SUMO3          |
| A_33_P3306684  | 1,82974 | 1,73154 | 1,070437082 | N/A             | N/A       | N/A          | N/A            |
| A_23_P30435    | 12,8601 | 12,7619 | 1,070437082 | ENST00000315050 | 10318     | NM_006058    | TNIP1          |
| A_22_P00014603 | 1,71568 | 1,61752 | 1,070407404 | ENST00000615029 | N/A       | N/A          | N/A            |
| A_33_P3278275  | 1,78127 | 1,68314 | 1,070385146 | ENST00000374511 | 255220    | XM_005251879 | TXNDC8         |
| A_32_P345659   | 1,80652 | 1,70842 | 1,070362888 | ENST00000421646 | 165904    | NM_194293    | XIRP1          |
| A_21_P0008837  | 1,73646 | 1,63838 | 1,070348049 | N/A             | N/A       | N/A          | Inc-AGBL1-2    |
| A_21_P0000051  | 4,06043 | 3,96236 | 1,07034063  | N/A             | 27185     | NM_001164551 | DISC1          |
| A_24_P942604   | 7,51689 | 7,41883 | 1,070333211 | ENST00000375340 | 8243      | NM_006306    | SMC1A          |
| A_21_P0012429  | 1,71979 | 1,62173 | 1,070333211 | N/A             | N/A       | N/A          | XLOC_I2_010075 |
| A_21_P0008770  | 1,71152 | 1,61348 | 1,070318374 | N/A             | N/A       | N/A          | Inc-KLHL25-7   |
| A_23_P146209   | 10,2948 | 10,1968 | 1,070288698 | ENST00000319073 | 81790     | NM_030954    | RNF170         |
| A_23_P212792   | 8,92332 | 8,82533 | 1,07028128  | ENST00000506202 | 9662      | NM_025009    | CEP135         |
| A_23_P211079   | 1,76876 | 1,67078 | 1,070273861 | ENST00000333337 | 10215     | NM_005806    | OLIG2          |
| A_21_P0000801  | 1,78254 | 1,68457 | 1,070266443 | ENST00000435062 | 100506274 | NR_038432    | LOC100506274   |
| A_22_P00025069 | 1,71647 | 1,61852 | 1,070251606 | N/A             | N/A       | N/A          | Inc-CS-1       |
| A_33_P3721983  | 17,0627 | 16,9648 | 1,070214514 | ENST00000532619 | N/A       | BC001183     | N/A            |
| A_33_P3323641  | 1,74447 | 1,64661 | 1,070184842 | N/A             | N/A       | N/A          | N/A            |
| A_21_P0005877  | 1,82481 | 1,72698 | 1,070162588 | N/A             | N/A       | N/A          | Inc-ANKRD46-1  |
| A_33_P3246970  | 1,76354 | 1,66571 | 1,070162588 | N/A             | N/A       | N/A          | N/A            |
| A_33_P3404899  | 1,79014 | 1,69233 | 1,070147753 | ENST00000498776 | 23266     | NM_012302    | LPHN2          |
| A_21_P0000395  | 3,93885 | 3,84104 | 1,070147753 | N/A             | 692214    | NR_003079    | SNORD111       |
| A_22_P00001145 | 1,72372 | 1,62594 | 1,0701255   | ENST00000565441 | 101927508 | XR_243453    | LOC101927508   |
| A_22_P00009101 | 7,22754 | 7,12977 | 1,070118082 | N/A             | N/A       | N/A          | Inc-LIFR-1     |
| A_23_P62890    | 8,18453 | 8,08677 | 1,070110665 | ENST00000370473 | 2633      | NM_002053    | GBP1           |
| A_21_P0014650  | 5,53307 | 5,43533 | 1,07009583  | N/A             | 100506282 | AL359570     | LOC100506282   |
| A_33_P3221223  | 1,71465 | 1,61693 | 1,070080996 | N/A             | N/A       | N/A          | N/A            |
| A_24_P49190    | 8,68207 | 8,58436 | 1,070073578 | ENST00000334461 | 284018    | NM_181655    | C17orf58       |

|                |         |         |             |                 |           |              |                |
|----------------|---------|---------|-------------|-----------------|-----------|--------------|----------------|
| A_33_P3216562  | 1,82112 | 1,72342 | 1,070066161 | N/A             | 100131635 | NR_034062    | LOC100131635   |
| A_22_P00023214 | 1,70197 | 1,60427 | 1,070066161 | N/A             | N/A       | N/A          | Inc-AKAP13-1   |
| A_23_P92543    | 8,74917 | 8,65147 | 1,070066161 | ENST00000388940 | 152579    | NM_152540    | SCFD2          |
| A_19_P00321636 | 5,35424 | 5,25658 | 1,070036493 | ENST00000446336 | N/A       | N/A          | N/A            |
| A_22_P00010701 | 1,71666 | 1,619   | 1,070036493 | ENST00000555024 | N/A       | N/A          | N/A            |
| A_22_P00018614 | 1,79683 | 1,69917 | 1,070036493 | N/A             | N/A       | N/A          | Inc-TIPIN-2    |
| A_23_P312863   | 13,3004 | 13,2028 | 1,069991993 | ENST00000604929 | 10383     | NM_006088    | TUBB4B         |
| A_23_P77776    | 14,3935 | 14,2959 | 1,069991993 | ENST00000582449 | 6427      | NM_003016    | SRSF2          |
| A_21_P0014322  | 1,78022 | 1,68262 | 1,069991993 | N/A             | 101928595 | XR_243378    | LOC101928595   |
| A_23_P170901   | 5,81711 | 5,71954 | 1,069969743 | ENST00000621363 | 135138    | NM_152410    | PACRG          |
| A_22_P00015471 | 6,19263 | 6,09507 | 1,069962326 | ENST00000511592 | N/A       | N/A          | N/A            |
| A_21_P0008743  | 1,80998 | 1,71242 | 1,069962326 | N/A             | N/A       | N/A          | Inc-ALDH1A2-2  |
| A_33_P3212188  | 1,70995 | 1,61244 | 1,069925245 | ENST00000253193 | 4037      | NM_002333    | LRP3           |
| A_23_P214211   | 12,9752 | 12,8777 | 1,069917829 | ENST00000493269 | 57038     | NM_020320    | RARS2          |
| A_22_P00022436 | 1,80263 | 1,70514 | 1,069910413 | ENST00000546592 | 51184     | XM_005253896 | GPN3           |
| A_33_P3237096  | 8,96086 | 8,86338 | 1,069902997 | ENST00000369081 | 22876     | NM_001243195 | INPP5F         |
| A_24_P40551    | 1,82782 | 1,73035 | 1,069895581 | ENST00000372691 | 56271     | NM_001080425 | BEX4           |
| A_21_P0011414  | 6,87954 | 6,7821  | 1,069873333 | N/A             | N/A       | N/A          | XLOC_I2_005100 |
| A_33_P3293009  | 4,85378 | 4,75634 | 1,069873333 | ENST00000370316 | 128414    | NM_152864    | NKAIN4         |
| A_33_P3247320  | 1,7325  | 1,63506 | 1,069873333 | ENST00000600751 | 326342    | NR_024075    | EMR4P          |
| A_33_P3330643  | 1,71798 | 1,62062 | 1,069814008 | ENST00000538893 | 221458    | NM_145027    | KIF6           |
| A_33_P3219146  | 4,64244 | 4,54509 | 1,069806593 | ENST00000325113 | 113746    | NM_001286136 | ODF3           |
| A_23_P47247    | 8,83718 | 8,73987 | 1,069776932 | ENST00000528107 | 55346     | NM_018393    | TCP11L1        |
| A_21_P0000765  | 1,7581  | 1,66083 | 1,069747272 | ENST00000568095 | 100505776 | NR_038325    | LINC01541      |
| A_22_P00009909 | 3,768   | 3,67074 | 1,069739857 | N/A             | N/A       | N/A          | Inc-MGAT5B-1   |
| A_21_P0009004  | 1,78753 | 1,69029 | 1,069725028 | N/A             | N/A       | N/A          | Inc-ADCY9-1    |
| A_21_P0012620  | 4,02285 | 3,92565 | 1,069695369 | ENST00000504313 | 345051    | XR_244736    | LOC345051      |
| A_21_P0008065  | 1,74308 | 1,64591 | 1,069673125 | N/A             | N/A       | N/A          | Inc-OLFM4-1    |
| A_33_P3249224  | 1,72601 | 1,62884 | 1,069673125 | ENST00000259407 | 570       | NM_001701    | BAAT           |
| A_33_P3257330  | 7,00468 | 6,90751 | 1,069673125 | ENST00000296955 | 285761    | NM_173674    | DCBLD1         |
| A_21_P0000954  | 3,68643 | 3,58927 | 1,069665711 | ENST00000435552 | N/A       | N/A          | N/A            |
| A_21_P0004929  | 1,76717 | 1,67001 | 1,069665711 | N/A             | N/A       | N/A          | Inc-NT5DC1-3   |
| A_21_P0008963  | 1,69817 | 1,60104 | 1,069643468 | N/A             | N/A       | N/A          | Inc-CDH3-2     |

|                |         |         |             |                 |           |              |                   |
|----------------|---------|---------|-------------|-----------------|-----------|--------------|-------------------|
| A_21_P0008532  | 1,78392 | 1,68679 | 1,069643468 | ENST00000553386 | N/A       | N/A          | N/A               |
| A_33_P3365010  | 8,66223 | 8,56511 | 1,069636054 | ENST00000468523 | 2005      | NM_021795    | ELK4              |
| A_22_P00002177 | 3,07011 | 2,973   | 1,06962864  | ENST00000584003 | N/A       | XR_430015    | N/A               |
| A_21_P0004842  | 1,77142 | 1,67431 | 1,06962864  | N/A             | 101928331 | N/A          | LOC101928331      |
| A_33_P3379941  | 12,0215 | 11,9244 | 1,069621226 | ENST00000613459 | 22993     | NM_014983    | HMGXB3            |
| A_23_P502425   | 13,2387 | 13,1416 | 1,069621226 | ENST00000392659 | 57129     | NM_020409    | MRPL47            |
| A_22_P00019498 | 1,72451 | 1,62746 | 1,069584156 | ENST00000532071 | N/A       | BI519980     | N/A               |
| A_22_P00014461 | 2,45002 | 2,35298 | 1,069576742 | ENST00000508847 | N/A       | N/A          | N/A               |
| A_23_P108075   | 1,8198  | 1,72276 | 1,069576742 | ENST00000590490 | 56301     | NM_019849    | SLC7A10           |
| A_23_P139965   | 3,14769 | 3,05066 | 1,069569329 | ENST00000493476 | 387923    | NM_001010897 | SERP2             |
| A_33_P3217517  | 7,73112 | 7,63413 | 1,069539674 | ENST00000408966 | 116349    | NR_126522    | EXOC3-AS1         |
| A_33_P3331376  | 7,69776 | 7,60079 | 1,069524848 | ENST00000374632 | 2048      | NM_004442    | EPHB2             |
| A_23_P65967    | 10,2411 | 10,1442 | 1,069472955 | ENST00000570101 | 55238     | NM_018231    | SLC38A7           |
| A_21_P0000894  | 4,5347  | 4,43786 | 1,069428478 | ENST00000559285 | 100506686 | NR_040055    | IQCH-AS1          |
| A_21_P0012813  | 1,73932 | 1,64249 | 1,069421065 | ENST00000511346 | N/A       | N/A          | N/A               |
| A_22_P00010744 | 1,78237 | 1,68555 | 1,069413653 | N/A             | N/A       | N/A          | Inc-NIPSNAP1-1    |
| A_21_P0009443  | 1,7382  | 1,64139 | 1,06940624  | N/A             | N/A       | N/A          | Inc-AP001496.1-12 |
| A_33_P3374589  | 7,1287  | 7,03192 | 1,069384003 | N/A             | N/A       | N/A          | N/A               |
| A_24_P865      | 6,04518 | 5,94841 | 1,06937659  | ENST00000472713 | 387119    | NM_206921    | CEP85L            |
| A_21_P0005955  | 1,70683 | 1,61011 | 1,069339529 | ENST00000520060 | N/A       | N/A          | N/A               |
| A_32_P114896   | 10,7119 | 10,6152 | 1,069324705 | ENST00000614328 | 10728     | NM_006601    | PTGES3            |
| A_21_P0001433  | 5,04136 | 4,94472 | 1,069280234 | N/A             | N/A       | N/A          | Inc-RNF187-1      |
| A_33_P3218013  | 5,08538 | 4,98875 | 1,069272822 | N/A             | N/A       | N/A          | N/A               |
| A_33_P3219286  | 4,12042 | 4,02379 | 1,069272822 | N/A             | N/A       | N/A          | N/A               |
| A_22_P00017853 | 1,80689 | 1,71027 | 1,069265411 | N/A             | N/A       | N/A          | Inc-ZCRB1-1       |
| A_23_P80940    | 9,39488 | 9,29827 | 1,069257999 | ENST00000425339 | 5471      | NM_002703    | PPAT              |
| A_23_P402765   | 1,70648 | 1,60988 | 1,069250588 | ENST00000359988 | 4892      | NM_198060    | NRAP              |
| A_23_P63390    | 1,75398 | 1,65738 | 1,069250588 | ENST00000466915 | 2210      | NM_001017986 | FCGR1B            |
| A_22_P00003585 | 1,71419 | 1,6176  | 1,069243176 | ENST00000508486 | 101928769 | NR_105001    | LOC101928769      |
| A_23_P203888   | 6,56105 | 6,46447 | 1,069235765 | ENST00000552872 | 4327      | NM_002429    | MMP19             |
| A_19_P00316557 | 1,70673 | 1,61019 | 1,06920612  | N/A             | N/A       | N/A          | Inc-SNCA-2        |
| A_33_P3242508  | 1,80893 | 1,7124  | 1,069198708 | ENST00000395255 | 22891     | NM_199450    | ZNF365            |
| A_21_P0012932  | 1,7913  | 1,69478 | 1,069191297 | N/A             | N/A       | N/A          | XLOC_I2_012323    |

|                |         |         |             |                 |           |              |                 |
|----------------|---------|---------|-------------|-----------------|-----------|--------------|-----------------|
| A_23_P112061   | 11,4975 | 11,401  | 1,069176475 | ENST00000379644 | 138050    | NM_152419    | HGSNAT          |
| A_23_P41716    | 15,9854 | 15,8889 | 1,069176475 | ENST00000508963 | 10399     | NM_006098    | GNB2L1          |
| A_24_P935491   | 1,80881 | 1,71233 | 1,069161654 | ENST00000304636 | 1281      | NM_000090    | COL3A1          |
| A_22_P00005732 | 1,75635 | 1,65987 | 1,069161654 | N/A             | N/A       | N/A          | Inc-EMILIN1-1   |
| A_21_P0010976  | 2,00152 | 1,90509 | 1,0691246   | ENST00000533230 | N/A       | N/A          | N/A             |
| A_23_P106405   | 1,70555 | 1,60913 | 1,069117189 | ENST00000331837 | 4692      | NM_002487    | NDN             |
| A_21_P0005972  | 1,713   | 1,61659 | 1,069109779 | N/A             | N/A       | N/A          | Inc-KCNV1-2     |
| A_24_P287043   | 15,7848 | 15,6884 | 1,069102368 | ENST00000616316 | 10581     | NM_006435    | IFITM2          |
| A_22_P00004377 | 2,88166 | 2,78529 | 1,069080137 | N/A             | N/A       | N/A          | Inc-COL6A2-1    |
| A_21_P0004934  | 1,79758 | 1,70128 | 1,069028266 | N/A             | N/A       | N/A          | Inc-GJA1-3      |
| A_33_P3306177  | 7,42806 | 7,33176 | 1,069028266 | ENST00000513782 | 202018    | NM_153365    | TAPT1           |
| A_23_P376449   | 10,0287 | 9,93241 | 1,069020856 | ENST00000454614 | N/A       | N/A          | N/A             |
| A_24_P406939   | 1,82492 | 1,72866 | 1,068998627 | ENST00000260276 | 64776     | AK027152     | C11orf1         |
| A_23_P88691    | 7,74257 | 7,64632 | 1,068991217 | ENST00000299565 | 1138      | NM_000745    | CHRNA5          |
| A_33_P3258846  | 7,93621 | 7,83997 | 1,068983808 | N/A             | N/A       | N/A          | N/A             |
| A_33_P3277060  | 3,38589 | 3,28967 | 1,068968988 | N/A             | N/A       | N/A          | N/A             |
| A_23_P92895    | 10,4166 | 10,3204 | 1,068954169 | ENST00000199814 | 55696     | NM_018047    | RBM22           |
| A_22_P00016564 | 4,44572 | 4,34952 | 1,068954169 | N/A             | N/A       | N/A          | Inc-TNFRSF13B-4 |
| A_33_P3405479  | 1,73589 | 1,63971 | 1,068939351 | ENST00000568934 | 403257    | NM_001005513 | OR4C45          |
| A_22_P00021892 | 1,71068 | 1,61455 | 1,068902305 | N/A             | N/A       | DB094656     | Inc-ERAP1-1     |
| A_24_P24724    | 10,7027 | 10,6066 | 1,068880078 | ENST00000436474 | N/A       | N/A          | N/A             |
| A_32_P190488   | 18,2072 | 18,1111 | 1,068880078 | ENST00000472981 | N/A       | N/A          | N/A             |
| A_24_P807031   | 7,19327 | 7,09718 | 1,068872669 | ENST00000439350 | 92270     | NM_001017971 | ATP6AP1L        |
| A_33_P3735158  | 5,19961 | 5,10354 | 1,068857851 | N/A             | 286272    | AK093004     | LOC286272       |
| A_22_P00014577 | 1,7805  | 1,68445 | 1,068843034 | N/A             | 100874222 | NR_047001    | RNF219-AS1      |
| A_24_P85511    | 4,92328 | 4,82723 | 1,068843034 | ENST00000376087 | 22852     | NM_001256053 | ANKRD26         |
| A_22_P00010732 | 1,46905 | 1,37309 | 1,068776358 | ENST00000555852 | N/A       | N/A          | N/A             |
| A_21_P0004994  | 1,79972 | 1,70377 | 1,06876895  | N/A             | N/A       | N/A          | Inc-ECI2-2      |
| A_33_P3348872  | 1,71147 | 1,61557 | 1,06873191  | ENST00000607632 | 63976     | N/A          | PRDM16          |
| A_22_P00007594 | 10,1815 | 10,0856 | 1,06873191  | N/A             | N/A       | N/A          | Inc-HDDC3-1     |
| A_21_P0008708  | 1,77515 | 1,67926 | 1,068724502 | N/A             | 102723749 | XR_429489    | LOC102723749    |
| A_24_P934387   | 1,92932 | 1,83344 | 1,068717094 | ENST00000396005 | 159963    | NM_178498    | SLC5A12         |
| A_23_P211584   | 4,75383 | 4,65796 | 1,068709686 | ENST00000607293 | 91689     | NM_033318    | SMDT1           |

|                |         |         |             |                 |           |              |                |
|----------------|---------|---------|-------------|-----------------|-----------|--------------|----------------|
| A_21_P0002660  | 1,74115 | 1,64529 | 1,068702279 | N/A             | N/A       | N/A          | Inc-SRBD1-3    |
| A_22_P00019875 | 1,75182 | 1,65597 | 1,068694871 | N/A             | N/A       | BI825590     | Inc-ITSN2-2    |
| A_22_P00019702 | 1,70927 | 1,61344 | 1,068680056 | N/A             | N/A       | N/A          | Inc-C8A-5      |
| A_33_P3307840  | 1,70642 | 1,61059 | 1,068680056 | ENST00000370958 | 57554     | AF498274     | LRRC7          |
| A_22_P00007944 | 1,73939 | 1,64357 | 1,068672648 | N/A             | 101929643 | XR_241266    | LOC101929643   |
| A_23_P2317     | 5,382   | 5,28618 | 1,068672648 | ENST00000421952 | 23109     | NM_015086    | DDN            |
| A_33_P3308686  | 7,0857  | 6,9899  | 1,068657834 | ENST00000438599 | 57545     | NM_020785    | CC2D2A         |
| A_22_P00014073 | 1,81631 | 1,72053 | 1,068643019 | N/A             | N/A       | N/A          | Inc-SAMD3-1    |
| A_33_P3377256  | 3,99383 | 3,89805 | 1,068643019 | ENST00000332965 | 388906    | NR_036498    | OGFRP1         |
| A_21_P0000403  | 1,70846 | 1,6127  | 1,068628204 | N/A             | 767582    | NR_003198    | SNORD114-6     |
| A_32_P325823   | 1,71175 | 1,616   | 1,068620797 | ENST00000453496 | 100996634 | NM_001277339 | LOC100996634   |
| A_22_P00012775 | 4,08162 | 3,98588 | 1,06861339  | N/A             | N/A       | N/A          | Inc-RALB-1     |
| A_19_P00807507 | 4,14129 | 4,04555 | 1,06861339  | N/A             | N/A       | N/A          | Inc-MRGPRF-4   |
| A_22_P00011954 | 2,72165 | 2,62594 | 1,068591169 | N/A             | N/A       | N/A          | Inc-PKMYT1-1   |
| A_23_P160742   | 9,13211 | 9,03641 | 1,068583762 | ENST00000495106 | 11146     | NM_053274    | GLMN           |
| A_21_P0013303  | 10,3791 | 10,2834 | 1,068583762 | ENST00000398921 | 641977    | NR_024271    | SEPT7P2        |
| A_24_P332816   | 1,76988 | 1,67421 | 1,068561542 | ENST00000512598 | 9699      | NM_014677    | RIMS2          |
| A_22_P00022733 | 1,79408 | 1,69843 | 1,068546729 | ENST00000412871 | N/A       | N/A          | N/A            |
| A_21_P0009239  | 1,74062 | 1,64499 | 1,068531916 | N/A             | N/A       | N/A          | Inc-TMEM132E-2 |
| A_22_P00012324 | 1,79105 | 1,69544 | 1,068517103 | ENST00000524008 | N/A       | N/A          | N/A            |
| A_22_P00023851 | 1,82306 | 1,72748 | 1,068494884 | ENST00000521498 | 101928058 | XM_006716242 | LOC101928058   |
| A_21_P0009541  | 1,71105 | 1,61548 | 1,068487478 | N/A             | 101927757 | XR_248470    | LOC101927757   |
| A_21_P0004363  | 1,78573 | 1,69019 | 1,068465259 | N/A             | N/A       | N/A          | Inc-C5orf49-2  |
| A_33_P3665346  | 1,822   | 1,72647 | 1,068457853 | ENST00000419022 | 5080      | NM_000280    | PAX6           |
| A_21_P0007347  | 5,17473 | 5,07922 | 1,068443041 | N/A             | N/A       | N/A          | Inc-TP53I11-1  |
| A_23_P34930    | 12,3423 | 12,2468 | 1,068435635 | ENST00000485021 | 10286     | NM_005872    | BCAS2          |
| A_19_P00322088 | 3,5092  | 3,41374 | 1,068406013 | ENST00000598234 | 388210    | N/A          | LOC388210      |
| A_19_P00802141 | 12,5818 | 12,4864 | 1,06836158  | ENST00000379719 | 10527     | NM_006391    | IPO7           |
| A_33_P3233700  | 4,67179 | 4,57639 | 1,06836158  | N/A             | 100128675 | NR_024561    | HPN-AS1        |
| A_33_P3335228  | 7,8972  | 7,80181 | 1,068354174 | ENST00000396294 | 145282    | NM_001195296 | MIPOL1         |
| A_21_P0011585  | 1,70663 | 1,61124 | 1,068354174 | ENST00000567574 | N/A       | N/A          | N/A            |
| A_22_P00008511 | 1,76158 | 1,66622 | 1,068331959 | ENST00000508736 | 25766     | N/A          | PRPF40B        |
| A_21_P0011898  | 8,7121  | 8,61675 | 1,068324554 | ENST00000617978 | 346288    | NM_207366    | set-14         |



|                |         |         |             |                 |           |              |               |
|----------------|---------|---------|-------------|-----------------|-----------|--------------|---------------|
| A_33_P3402838  | 1,70607 | 1,61072 | 1,068324554 | ENST00000599174 | 56936     | NM_001271507 | CCDC177       |
| A_22_P00007704 | 1,7103  | 1,61495 | 1,068324554 | ENST00000446115 | 100507489 | NR_038987    | LINC01277     |
| A_22_P00021061 | 1,79323 | 1,6979  | 1,068309744 | N/A             | 104502416 | NR_126463    | FOXP1-AS1     |
| A_23_P57199    | 5,87777 | 5,78248 | 1,068280124 | ENST00000335694 | 92086     | NM_178311    | GGTLC1        |
| A_21_P0009715  | 1,70924 | 1,61395 | 1,068280124 | N/A             | N/A       | N/A          | Inc-ZNF30-2   |
| A_23_P358564   | 1,74193 | 1,64664 | 1,068280124 | ENST00000510627 | 134187    | NM_153216    | POU5F2        |
| A_21_P0014909  | 8,40624 | 8,31098 | 1,06825791  | N/A             | N/A       | N/A          | N/A           |
| A_21_P0007039  | 5,08083 | 4,98558 | 1,068250506 | N/A             | 102725247 | XR_432662    | LOC102725247  |
| A_23_P312901   | 1,70401 | 1,60879 | 1,068228292 | ENST00000394143 | 139378    | NM_153834    | GPR112        |
| A_21_P0002685  | 1,80774 | 1,71253 | 1,068220888 | N/A             | N/A       | N/A          | Inc-PDE1A-1   |
| A_33_P3311653  | 8,35834 | 8,26314 | 1,068213484 | ENST00000507766 | 23244     | AK124569     | PDS5A         |
| A_22_P00002808 | 1,80083 | 1,70564 | 1,068206079 | N/A             | 400960    | NR_033872    | PCBP1-AS1     |
| A_23_P330301   | 1,70687 | 1,61173 | 1,068169059 | ENST00000401401 | 221938    | NM_198403    | MMD2          |
| A_33_P3342365  | 1,70452 | 1,60938 | 1,068169059 | N/A             | N/A       | BX114156     | N/A           |
| A_23_P117464   | 1,70393 | 1,60881 | 1,068154251 | ENST00000530140 | 122664    | NM_173846    | TPPP2         |
| A_22_P00007761 | 4,51115 | 4,41608 | 1,068117232 | N/A             | 100874372 | XR_425917    | ARHGAP26-IT1  |
| A_33_P3462692  | 2,47648 | 2,38142 | 1,068109829 | N/A             | 677836    | BE467637     | SNORA58       |
| A_22_P00006330 | 1,72874 | 1,63368 | 1,068109829 | ENST00000532380 | 102723378 | NR_120583    | LINC01495     |
| A_22_P00021326 | 1,70194 | 1,60689 | 1,068102425 | N/A             | 101928663 | NR_110862    | LOC101928663  |
| A_21_P0001775  | 1,93917 | 1,84413 | 1,068095022 | N/A             | 100507171 | NR_045637    | BOLA3-AS1     |
| A_22_P00012039 | 1,78311 | 1,68808 | 1,068087618 | N/A             | N/A       | N/A          | Inc-PLEKHA8-3 |
| A_33_P3365596  | 10,6341 | 10,5391 | 1,068065408 | ENST00000377026 | 63908     | NM_001283018 | NAPB          |
| A_24_P383999   | 15,1289 | 15,0339 | 1,068065408 | ENST00000474167 | 6189      | NM_001006    | RPS3A         |
| A_33_P3555009  | 11,2848 | 11,1898 | 1,068065408 | N/A             | 102724105 | NR_125345    | ZNF528-AS1    |
| A_23_P72697    | 4,76222 | 4,66725 | 1,068043198 | ENST00000622500 | 338328    | NM_178172    | GPIHBP1       |
| A_22_P00014746 | 8,58359 | 8,48862 | 1,068043198 | ENST00000392844 | 23595     | NM_012381    | ORC3          |
| A_33_P3269359  | 9,12714 | 9,03217 | 1,068043198 | ENST00000353487 | 121665    | NM_139015    | SPPL3         |
| A_22_P00016701 | 1,78808 | 1,69312 | 1,068035795 | ENST00000417794 | N/A       | R84760       | N/A           |
| A_21_P0002754  | 1,76623 | 1,67128 | 1,068028392 | ENST00000461528 | N/A       | N/A          | N/A           |
| A_33_P3214061  | 1,73712 | 1,64224 | 1,067976573 | N/A             | 729176    | NR_003954    | KATNBL1P6     |
| A_23_P304356   | 1,88736 | 1,79248 | 1,067976573 | ENST00000546910 | 23601     | NM_013252    | CLEC5A        |
| A_22_P00008227 | 1,70172 | 1,60684 | 1,067976573 | ENST00000553211 | N/A       | BI767423     | N/A           |
| A_22_P00009857 | 1,80274 | 1,70788 | 1,067961767 | N/A             | N/A       | N/A          | Inc-METTL22-2 |

|                |         |         |             |                 |           |              |                       |
|----------------|---------|---------|-------------|-----------------|-----------|--------------|-----------------------|
| A_23_P383278   | 9,23534 | 9,14049 | 1,067954365 | ENST00000220966 | 65263     | NM_023078    | PYCRL                 |
| A_33_P3312366  | 7,86452 | 7,76968 | 1,067946962 | ENST00000436282 | 8940      | NM_003935    | TOP3B                 |
| A_21_P0009887  | 1,78773 | 1,6929  | 1,06793956  | ENST00000455890 | N/A       | N/A          | N/A                   |
| A_21_P0009255  | 2,44652 | 2,35172 | 1,067917353 | N/A             | N/A       | N/A          | Inc-LUC7L3-1          |
| A_21_P0013380  | 1,72522 | 1,63042 | 1,067917353 | ENST00000418297 | N/A       | N/A          | N/A                   |
| A_21_P0010573  | 1,80298 | 1,70822 | 1,067887744 | ENST00000442684 | N/A       | N/A          | N/A                   |
| A_23_P11353    | 11,8321 | 11,7374 | 1,067843333 | ENST00000378438 | 10159     | NM_005765    | ATP6AP2               |
| A_33_P3341656  | 10,9924 | 10,8977 | 1,067843333 | ENST00000348159 | 4209      | NM_005920    | MEF2D                 |
| A_23_P8522     | 10,5922 | 10,4975 | 1,067843333 | ENST00000396668 | 54664     | NM_018374    | TMEM106B              |
| A_23_P129513   | 13,083  | 12,9883 | 1,067843333 | ENST00000441883 | 10573     | NM_006428    | MRPL28                |
| A_22_P00010162 | 3,23151 | 3,13683 | 1,06782853  | ENST00000453189 | 23234     | AK094284     | DNAJC9                |
| A_23_P160881   | 6,82419 | 6,72952 | 1,067821128 | ENST00000373888 | 27293     | NM_001009568 | SMPDL3B               |
| A_21_P0011226  | 5,57982 | 5,48517 | 1,067806325 | ENST00000451826 | 100874188 | N/A          | LINC00571             |
| A_21_P0007612  | 1,76882 | 1,6742  | 1,067784121 | N/A             | N/A       | N/A          | Inc-NEDD1-2           |
| A_21_P0007040  | 1,71831 | 1,6237  | 1,06777672  | N/A             | N/A       | N/A          | Inc-TTC40-3           |
| A_23_P77310    | 11,0942 | 10,9996 | 1,067769318 | ENST00000263805 | 64397     | NM_022473    | ZNF106                |
| A_22_P00005808 | 1,77222 | 1,67763 | 1,067761917 | ENST00000404689 | N/A       | N/A          | N/A                   |
| A_33_P3851023  | 1,73842 | 1,64383 | 1,067761917 | ENST00000554738 | 9369      | NM_004796    | NRXN3                 |
| A_21_P0009423  | 3,21743 | 3,12289 | 1,067724912 | ENST00000567801 | 100996669 | NR_103449    | LINC01544             |
| A_21_P0009437  | 1,87144 | 1,77691 | 1,067717511 | N/A             | N/A       | N/A          | Inc-ADCYAP1-1         |
| A_33_P3299705  | 13,6096 | 13,5151 | 1,067695309 | ENST00000399336 | N/A       | N/A          | N/A                   |
| A_23_P123866   | 11,076  | 10,9815 | 1,067695309 | ENST00000359544 | 51271     | NM_016525    | UBAP1                 |
| A_22_P00010378 | 1,79939 | 1,70494 | 1,067658306 | N/A             | N/A       | N/A          | Inc-MYL10-2           |
| A_33_P3321324  | 2,53141 | 2,43699 | 1,067636105 | N/A             | 642691    | AK095105     | FLJ37786              |
| A_33_P3220247  | 4,3476  | 4,25318 | 1,067636105 | ENST00000618326 | 117854    | NM_001003818 | TRIM6                 |
| A_23_P98431    | 13,4998 | 13,4054 | 1,067621304 | ENST00000537841 | 3145      | NM_000190    | HMBS                  |
| A_33_P3249877  | 6,90986 | 6,81548 | 1,067606504 | ENST00000331471 | 144453    | NM_001282614 | BEST3                 |
| A_23_P45592    | 1,70502 | 1,61064 | 1,067606504 | ENST00000426035 | 84673     | NR_001533    | TTY8                  |
| A_21_P0001512  | 1,72269 | 1,62832 | 1,067599104 | N/A             | 101930559 | N/A          | LOC101930559          |
| A_33_P3367889  | 1,71256 | 1,6182  | 1,067591704 | N/A             | 100130657 | AK126078     | LOC100130657          |
| A_22_P00013582 | 1,82313 | 1,7288  | 1,067569504 | N/A             | N/A       | N/A          | Inc-RP11-467M13.1.1-3 |
| A_32_P218228   | 7,9866  | 7,89229 | 1,067554705 | ENST00000321753 | 150368    | NM_001002034 | FAM109B               |
| A_21_P0005481  | 1,70024 | 1,60593 | 1,067554705 | N/A             | N/A       | N/A          | Inc-HNRNPA2B1-2       |

|                |         |         |             |                 |           |              |              |
|----------------|---------|---------|-------------|-----------------|-----------|--------------|--------------|
| A_22_P00004898 | 1,78037 | 1,68607 | 1,067547305 | ENST00000545498 | N/A       | AK093552     | N/A          |
| A_33_P3584591  | 1,70801 | 1,61373 | 1,067532506 | N/A             | 337875    | BQ880825     | HIST2H2BA    |
| A_22_P00017811 | 1,8978  | 1,80358 | 1,067488109 | ENST00000424181 | N/A       | N/A          | N/A          |
| A_33_P3315074  | 6,55343 | 6,45923 | 1,067473311 | N/A             | N/A       | N/A          | N/A          |
| A_33_P3379326  | 2,06193 | 1,96775 | 1,067458513 | ENST00000355282 | 4481      | NM_138715    | MSR1         |
| A_33_P3322999  | 1,70984 | 1,61568 | 1,067443715 | ENST00000398786 | 414152    | NM_001164375 | C10orf105    |
| A_22_P00019004 | 1,82036 | 1,72621 | 1,067436316 | ENST00000440858 | N/A       | N/A          | N/A          |
| A_23_P55123    | 8,11752 | 8,02338 | 1,067428917 | ENST00000261643 | 1352      | NM_001303    | COX10        |
| A_21_P0007112  | 1,6994  | 1,60526 | 1,067428917 | N/A             | N/A       | N/A          | lnc-PANK1-3  |
| A_33_P3336014  | 1,79462 | 1,70049 | 1,067421518 | ENST00000342927 | 401992    | NM_001004136 | OR2T2        |
| A_24_P91405    | 8,48468 | 8,39056 | 1,067414119 | ENST00000397732 | 163051    | NM_152601    | ZNF709       |
| A_21_P0009270  | 1,78422 | 1,6901  | 1,067414119 | ENST00000419257 | 101928205 | NR_110827    | LOC101928205 |
| A_22_P00020335 | 6,42183 | 6,32772 | 1,067406721 | N/A             | 100288181 | NR_038925    | LOC100288181 |
| A_22_P00003866 | 1,74209 | 1,64799 | 1,067399322 | N/A             | N/A       | N/A          | lnc-CELF4-4  |
| A_22_P00011154 | 1,72788 | 1,63378 | 1,067399322 | N/A             | N/A       | DB084126     | lnc-OBFC2A-4 |
| A_33_P3267435  | 1,69947 | 1,60539 | 1,067384525 | ENST00000521245 | 286135    | NR_024473    | FAM183CP     |
| A_21_P0012325  | 1,79069 | 1,69661 | 1,067384525 | ENST00000450750 | N/A       | N/A          | N/A          |
| A_21_P0014120  | 8,54034 | 8,44626 | 1,067384525 | N/A             | 100507291 | NR_121608    | LOC100507291 |
| A_23_P80839    | 9,0152  | 8,92114 | 1,067369728 | ENST00000318631 | 79929     | NM_024871    | MAP6D1       |
| A_33_P3238543  | 7,27881 | 7,18479 | 1,067340134 | N/A             | 92659     | NR_015454    | MAFG-AS1     |
| A_23_P208493   | 1,78116 | 1,68714 | 1,067340134 | ENST00000493242 | 10288     | NM_005874    | LILRB2       |
| A_21_P0005364  | 1,6976  | 1,60365 | 1,067288348 | N/A             | N/A       | N/A          | lnc-EVX1-2   |
| A_24_P336983   | 4,28366 | 4,18973 | 1,067273552 | ENST00000490786 | 92291     | NM_144575    | CAPN13       |
| A_22_P00007818 | 1,59186 | 1,49795 | 1,067258757 | ENST00000438963 | N/A       | BC040331     | N/A          |
| A_32_P123088   | 8,51385 | 8,41994 | 1,067258757 | ENST00000514548 | 100302736 | NM_001164468 | TMED7-TICAM2 |
| A_21_P0013406  | 1,71183 | 1,61795 | 1,067236564 | ENST00000424515 | 101928283 | N/A          | LOC101928283 |
| A_33_P3399474  | 4,95027 | 4,85639 | 1,067236564 | N/A             | N/A       | N/A          | N/A          |
| A_32_P92489    | 1,70342 | 1,60957 | 1,067214372 | ENST00000525539 | 114780    | NM_052892    | PKD1L2       |
| A_24_P772436   | 1,70584 | 1,61202 | 1,06719218  | N/A             | 100189589 | NR_024463    | DCTN1-AS1    |
| A_23_P201672   | 12,0079 | 11,9141 | 1,067177386 | ENST00000361735 | 51603     | NM_015935    | METTL13      |
| A_22_P00012923 | 4,96705 | 4,87325 | 1,067177386 | ENST00000454467 | 102724601 | NR_121197    | LOC102724601 |
| A_21_P0002322  | 1,7963  | 1,70251 | 1,067169989 | N/A             | N/A       | N/A          | lnc-AGPS-1   |
| A_21_P0002256  | 6,78689 | 6,69314 | 1,067140401 | N/A             | N/A       | N/A          | lnc-THNSL2-1 |

|                |         |         |             |                 |           |              |                |
|----------------|---------|---------|-------------|-----------------|-----------|--------------|----------------|
| A_22_P00025495 | 1,70848 | 1,61477 | 1,067110814 | N/A             | N/A       | N/A          | Inc-NPFFR2-1   |
| A_33_P3337242  | 9,4917  | 9,398   | 1,067103417 | ENST00000513680 | 84062     | NM_001271667 | DTNBP1         |
| A_23_P369746   | 6,62075 | 6,52714 | 1,06703685  | N/A             | N/A       | AF161372     | N/A            |
| A_21_P0012154  | 1,80365 | 1,71006 | 1,067022058 | ENST00000431181 | N/A       | N/A          | N/A            |
| A_21_P0010332  | 1,71914 | 1,62558 | 1,06699987  | ENST00000422917 | 101929350 | XR_244341    | LOC101929350   |
| A_33_P3334108  | 8,21515 | 8,12162 | 1,066977682 | ENST00000416904 | 283337    | NM_001004304 | ZNF740         |
| A_22_P00013898 | 1,70499 | 1,61148 | 1,066962891 | N/A             | N/A       | N/A          | Inc-RPS23-1    |
| A_24_P383581   | 12,6389 | 12,5454 | 1,066955495 | ENST00000309324 | 125988    | NM_205767    | C19orf70       |
| A_23_P84651    | 15,0384 | 14,9449 | 1,066955495 | ENST00000441626 | 7555      | NM_003418    | CNBP           |
| A_23_P70583    | 9,43776 | 9,34427 | 1,0669481   | ENST00000476725 | 6293      | NM_022553    | VPS52          |
| A_33_P3213892  | 1,70008 | 1,60661 | 1,066933309 | ENST00000447207 | 63977     | NM_001282934 | PRDM15         |
| A_21_P0002342  | 4,11265 | 4,01919 | 1,066925913 | N/A             | N/A       | N/A          | Inc-SPAG16-4   |
| A_23_P170050   | 1,8245  | 1,73106 | 1,066911123 | ENST00000589109 | 6014      | NM_002930    | RIT2           |
| A_23_P67103    | 1,70441 | 1,61098 | 1,066903728 | ENST00000269834 | 114026    | NM_052882    | ZIM3           |
| A_22_P00014308 | 1,69716 | 1,60373 | 1,066903728 | ENST00000554033 | N/A       | N/A          | N/A            |
| A_33_P3378061  | 1,79942 | 1,70607 | 1,066844568 | ENST00000275763 | 340351    | NM_178563    | AGBL3          |
| A_19_P00320785 | 1,70666 | 1,61335 | 1,066814989 | ENST00000431057 | N/A       | N/A          | N/A            |
| A_21_P0010458  | 3,95856 | 3,86527 | 1,0668002   | N/A             | N/A       | N/A          | Inc-C22orf34-1 |
| A_24_P22939    | 8,68515 | 8,59188 | 1,066785411 | ENST00000590440 | 339366    | NM_213604    | ADAMTSL5       |
| A_22_P00015244 | 2,87223 | 2,77898 | 1,066770622 | N/A             | N/A       | DA858050     | Inc-SPAG1-3    |
| A_21_P0003924  | 1,71677 | 1,62354 | 1,066755834 | ENST00000612030 | N/A       | N/A          | N/A            |
| A_22_P00014891 | 1,72896 | 1,63576 | 1,066733651 | ENST00000504369 | N/A       | N/A          | N/A            |
| A_22_P00009693 | 1,80583 | 1,71266 | 1,066711469 | N/A             | 102724609 | XR_425979    | LOC102724609   |
| A_22_P00010315 | 3,80723 | 3,71412 | 1,066667107 | N/A             | N/A       | AK094115     | Inc-MUC20-4    |
| A_32_P135818   | 14,4422 | 14,3491 | 1,066659713 | ENST00000487100 | 6189      | NM_001006    | RPS3A          |
| A_33_P3258546  | 5,81573 | 5,72264 | 1,06665232  | ENST00000614258 | 56143     | NM_031501    | PCDHA5         |
| A_33_P3361352  | 1,59964 | 1,50655 | 1,06665232  | N/A             | 729296    | N/A          | LOC729296      |
| A_33_P3499046  | 1,86932 | 1,77624 | 1,066644927 | N/A             | N/A       | AF130850     | N/A            |
| A_23_P131299   | 9,23235 | 9,13928 | 1,066637533 | ENST00000489197 | 130617    | NM_138802    | ZFAND2B        |
| A_22_P00000721 | 1,70605 | 1,61304 | 1,066593174 | N/A             | N/A       | BC050287     | Inc-ADAMTS18-4 |
| A_22_P00001288 | 4,53989 | 4,44692 | 1,066563602 | N/A             | N/A       | N/A          | Inc-ANKUB1-1   |
| A_24_P132950   | 9,22856 | 9,1356  | 1,066556209 | ENST00000492594 | 4676      | NM_005969    | NAP1L4         |
| A_33_P3815935  | 2,70012 | 2,60717 | 1,066548816 | N/A             | N/A       | N/A          | N/A            |

|                |         |         |             |                 |           |              |                |
|----------------|---------|---------|-------------|-----------------|-----------|--------------|----------------|
| A_23_P397468   | 1,91864 | 1,82569 | 1,066548816 | ENST00000423932 | 26476     | NM_012351    | OR10J1         |
| A_22_P00016228 | 7,32598 | 7,23303 | 1,066548816 | N/A             | N/A       | N/A          | Inc-TM9SF2-2   |
| A_33_P3367577  | 4,3111  | 4,21817 | 1,066534031 | ENST00000397520 | 56478     | DQ656044     | EIF4ENIF1      |
| A_21_P0013058  | 1,70776 | 1,61484 | 1,066526638 | N/A             | N/A       | N/A          | XLOC_I2_012847 |
| A_33_P3380126  | 4,02989 | 3,93698 | 1,066519246 | ENST00000355329 | 283385    | NM_173855    | MORN3          |
| A_21_P0005117  | 7,60186 | 7,50896 | 1,066511853 | ENST00000607287 | N/A       | N/A          | N/A            |
| A_21_P0013209  | 1,72473 | 1,63183 | 1,066511853 | ENST00000450544 | N/A       | N/A          | N/A            |
| A_21_P0012076  | 1,71991 | 1,62701 | 1,066511853 | N/A             | 102724774 | XR_425446    | LOC102724774   |
| A_21_P0008931  | 1,74305 | 1,65017 | 1,066497068 | N/A             | 102724847 | XR_424700    | LOC102724847   |
| A_24_P140569   | 1,6992  | 1,60632 | 1,066497068 | ENST00000274711 | 26045     | NM_015564    | LRRTM2         |
| A_33_P3359683  | 6,68524 | 6,59237 | 1,066489676 | ENST00000559383 | 3603      | NM_001172128 | IL16           |
| A_33_P3250865  | 1,70795 | 1,6151  | 1,066474891 | ENST00000281581 | 729665    | N/A          | CCDC175        |
| A_22_P00011531 | 1,71338 | 1,62053 | 1,066474891 | ENST00000455541 | N/A       | N/A          | N/A            |
| A_33_P3371425  | 5,35872 | 5,26588 | 1,066467499 | ENST00000494537 | 57190     | NM_020451    | SEPN1          |
| A_23_P129556   | 14,6854 | 14,5926 | 1,066437931 | ENST00000170630 | 3566      | NM_000418    | IL4R           |
| A_33_P3345831  | 1,80106 | 1,70828 | 1,066423147 | ENST00000381210 | 253017    | NM_001010874 | TECRL          |
| A_21_P0006152  | 1,73666 | 1,64394 | 1,066378797 | N/A             | N/A       | N/A          | Inc-ANXA1-1    |
| A_24_P206121   | 8,65462 | 8,56191 | 1,066371405 | ENST00000521859 | 3779      | NM_004137    | KCNMB1         |
| A_23_P91221    | 9,30181 | 9,2091  | 1,066371405 | ENST00000372889 | 11142     | NM_181805    | PKIG           |
| A_21_P0014769  | 1,78722 | 1,69451 | 1,066371405 | N/A             | N/A       | N/A          | N/A            |
| A_21_P0002618  | 1,79141 | 1,6987  | 1,066371405 | N/A             | N/A       | N/A          | Inc-CERS6-1    |
| A_21_P0006205  | 1,80441 | 1,71171 | 1,066364014 | N/A             | N/A       | N/A          | Inc-RAD23B-6   |
| A_21_P0006130  | 1,72633 | 1,63364 | 1,066356622 | N/A             | N/A       | N/A          | Inc-DMRTA1-7   |
| A_21_P0014184  | 6,83496 | 6,74229 | 1,066341839 | N/A             | N/A       | N/A          | Inc-GLCCI1-2   |
| A_33_P3362826  | 1,72342 | 1,63075 | 1,066341839 | ENST00000274361 | 256006    | N/A          | ANKRD31        |
| A_21_P0003697  | 1,69556 | 1,60289 | 1,066341839 | N/A             | N/A       | N/A          | Inc-ZFP42-2    |
| A_21_P0011943  | 1,78627 | 1,6936  | 1,066341839 | N/A             | N/A       | N/A          | XLOC_I2_008190 |
| A_22_P00010642 | 1,72927 | 1,63662 | 1,066327057 | ENST00000548886 | 196475    | NR_024037    | RMST           |
| A_21_P0007489  | 1,71202 | 1,6194  | 1,066304883 | ENST00000504409 | 100507616 | XR_110328    | LOC100507616   |
| A_23_P215060   | 15,5927 | 15,5001 | 1,066290101 | ENST00000446198 | 5420      | NM_001018111 | PODXL          |
| A_33_P3209005  | 3,84123 | 3,74869 | 1,066245757 | N/A             | 55634     | AK097159     | KRBOX4         |
| A_23_P399834   | 1,70598 | 1,61346 | 1,066230975 | ENST00000342929 | 126204    | NM_176810    | NLRP13         |
| A_21_P0007953  | 1,7011  | 1,60859 | 1,066223585 | ENST00000424926 | 100874137 | N/A          | LINC00351      |

|                |         |         |             |                 |           |              |                  |
|----------------|---------|---------|-------------|-----------------|-----------|--------------|------------------|
| A_24_P351420   | 11,0929 | 11,0004 | 1,066216194 | ENST00000424952 | 51304     | NM_016598    | ZDHC3            |
| A_33_P3280729  | 1,70897 | 1,61648 | 1,066208804 | ENST00000558583 | 729993    | NM_001145204 | SHISA9           |
| A_21_P0004435  | 1,79591 | 1,70342 | 1,066208804 | N/A             | N/A       | N/A          | Inc-PPIC-2       |
| A_24_P517901   | 9,5683  | 9,47585 | 1,066179243 | ENST00000450405 | 3178      | NM_002136    | HNRNPA1          |
| A_22_P00000914 | 1,72505 | 1,63264 | 1,066149682 | N/A             | N/A       | N/A          | Inc-AK3-1        |
| A_21_P0003961  | 1,69839 | 1,60599 | 1,066142293 | ENST00000510622 | N/A       | N/A          | N/A              |
| A_23_P158257   | 1,78167 | 1,68934 | 1,066090564 | N/A             | 26582     | NM_012148    | DUX3             |
| A_33_P3244122  | 1,72595 | 1,63362 | 1,066090564 | ENST00000294973 | 23498     | NM_012205    | HAAO             |
| A_22_P00003266 | 1,90006 | 1,80774 | 1,066083175 | ENST00000557622 | N/A       | DA107906     | N/A              |
| A_21_P0000748  | 9,21404 | 9,12173 | 1,066075785 | N/A             | 100506963 | NR_038280    | TCEB3-AS1        |
| A_21_P0006832  | 1,52951 | 1,43724 | 1,066046228 | N/A             | N/A       | N/A          | Inc-ITIH2-4      |
| A_22_P00007059 | 1,73372 | 1,64145 | 1,066046228 | ENST00000529922 | N/A       | N/A          | N/A              |
| A_21_P0008411  | 1,78459 | 1,69234 | 1,066031449 | N/A             | N/A       | N/A          | Inc-NOVA1-1      |
| A_21_P0007396  | 1,72496 | 1,63271 | 1,066031449 | N/A             | N/A       | N/A          | Inc-RDX-1        |
| A_22_P00022781 | 1,71658 | 1,62434 | 1,06602406  | ENST00000532562 | N/A       | BX115137     | N/A              |
| A_33_P3304452  | 1,69668 | 1,60446 | 1,066009282 | N/A             | N/A       | AK123156     | Inc-NCOA5-1      |
| A_33_P3379701  | 1,70386 | 1,61164 | 1,066009282 | N/A             | 55521     | BC017346     | TRIM36           |
| A_21_P0011288  | 5,13861 | 5,04641 | 1,065994504 | ENST00000556034 | 473       | NM_012102    | RERE             |
| A_23_P69493    | 13,8375 | 13,7453 | 1,065994504 | ENST00000418115 | 387       | NM_001664    | RHOA             |
| A_33_P3269380  | 5,99202 | 5,89986 | 1,065964949 | N/A             | N/A       | N/A          | N/A              |
| A_33_P3421595  | 1,70504 | 1,61291 | 1,065942783 | ENST00000303798 | 408029    | NM_214461    | C2orf27B         |
| A_22_P00004514 | 1,69699 | 1,60488 | 1,065928006 | N/A             | N/A       | BC042044     | Inc-CPVL-3       |
| A_22_P00003754 | 1,7474  | 1,6553  | 1,065920617 | ENST00000510512 | N/A       | N/A          | N/A              |
| A_32_P800799   | 1,77978 | 1,68769 | 1,065913229 | ENST00000394973 | 170850    | NM_133329    | KCNG3            |
| A_33_P3423230  | 1,70191 | 1,60983 | 1,065905841 | ENST00000373034 | 57526     | NM_001184880 | PCDH19           |
| A_22_P00005586 | 1,77982 | 1,68774 | 1,065905841 | ENST00000502287 | N/A       | N/A          | N/A              |
| A_21_P0011171  | 1,85915 | 1,76708 | 1,065898453 | N/A             | N/A       | N/A          | XLOC_I2_003886   |
| A_22_P00010917 | 1,71253 | 1,62049 | 1,065876288 | N/A             | N/A       | N/A          | Inc-NPY5R-4      |
| A_33_P3302563  | 1,75003 | 1,658   | 1,0658689   | N/A             | 100129408 | AK127916     | LOC100129408     |
| A_21_P0002465  | 1,78582 | 1,69382 | 1,065846736 | N/A             | N/A       | N/A          | Inc-REG1B-1      |
| A_21_P0007511  | 1,70426 | 1,61227 | 1,065839348 | N/A             | N/A       | N/A          | Inc-WNK1-1       |
| A_21_P0006563  | 1,69798 | 1,60601 | 1,065824573 | ENST00000617377 | 340554    | N/A          | ZC3H12B          |
| A_21_P0002472  | 1,6975  | 1,60554 | 1,065817185 | N/A             | N/A       | N/A          | Inc-AC233263.1-1 |

|                |         |         |             |                 |           |              |                |
|----------------|---------|---------|-------------|-----------------|-----------|--------------|----------------|
| A_33_P3344297  | 1,71304 | 1,62108 | 1,065817185 | N/A             | N/A       | N/A          | N/A            |
| A_24_P276888   | 7,95902 | 7,86707 | 1,065809797 | ENST00000260662 | 79172     | NM_001199803 | CENPO          |
| A_22_P00017813 | 1,74384 | 1,65189 | 1,065809797 | N/A             | N/A       | N/A          | Inc-ZBTB4-1    |
| A_22_P00010564 | 1,72452 | 1,63258 | 1,06580241  | ENST00000583827 | N/A       | DB184526     | N/A            |
| A_33_P3214844  | 1,76291 | 1,67097 | 1,06580241  | ENST00000603639 | 4703      | NM_001164507 | NEB            |
| A_33_P3423375  | 1,81389 | 1,72196 | 1,065795022 | ENST00000345043 | 340980    | NM_001005162 | OR52B6         |
| A_23_P29965    | 1,78866 | 1,69674 | 1,065787635 | ENST00000614072 | 10879     | NM_006685    | SMR3B          |
| A_23_P409553   | 7,53546 | 7,44356 | 1,06577286  | ENST00000325658 | 5494      | NM_177951    | PPM1A          |
| A_23_P205164   | 1,73812 | 1,64627 | 1,065735924 | ENST00000377208 | 5457      | NM_006237    | POU4F1         |
| A_22_P00023246 | 1,80341 | 1,71158 | 1,065721149 | N/A             | 101928700 | NR_110829    | LOC101928700   |
| A_22_P00016999 | 1,69983 | 1,60801 | 1,065713762 | N/A             | N/A       | N/A          | Inc-TTC30A-1   |
| A_21_P0004602  | 1,72255 | 1,63073 | 1,065713762 | ENST00000441184 | 100287366 | XR_110208    | OSTM1-AS1      |
| A_21_P0010528  | 1,79134 | 1,69952 | 1,065713762 | N/A             | N/A       | N/A          | XL0C_I2_000196 |
| A_33_P3226357  | 1,70033 | 1,60851 | 1,065713762 | ENST00000375123 | 2304      | NM_004473    | FOX1           |
| A_24_P350261   | 1,70887 | 1,61707 | 1,065698989 | ENST00000535352 | 100505993 | NM_001282477 | TMEM210        |
| A_33_P3340862  | 16,0708 | 15,979  | 1,065698989 | ENST00000378821 | 643965    | NM_001146685 | TMEM88B        |
| A_33_P3338011  | 8,71582 | 8,62404 | 1,065684215 | ENST00000335090 | 147657    | NM_144684    | ZNF480         |
| A_24_P67585    | 6,07259 | 5,98081 | 1,065684215 | ENST00000383698 | 389136    | NM_016206    | VGLL3          |
| A_23_P251232   | 8,21627 | 8,1245  | 1,065676828 | ENST00000331787 | 83869     | NR_001543    | TTY14          |
| A_23_P90014    | 10,0255 | 9,93373 | 1,065676828 | ENST00000598626 | 56927     | NM_001080452 | GPR108         |
| A_22_P00002914 | 1,69594 | 1,60418 | 1,065669442 | ENST00000562632 | N/A       | BC036004     | N/A            |
| A_22_P00020589 | 2,56764 | 2,47593 | 1,065632509 | N/A             | N/A       | N/A          | Inc-STYX-2     |
| A_22_P00014620 | 16,2469 | 16,1552 | 1,065625123 | ENST00000449572 | 100996702 | NR_103746    | LINC01356      |
| A_33_P3301851  | 14,3669 | 14,2752 | 1,065625123 | ENST00000309100 | 4296      | NM_002419    | MAP3K11        |
| A_33_P3377529  | 3,20314 | 3,11144 | 1,065625123 | ENST00000428284 | 3201      | NM_002141    | HOXA4          |
| A_22_P00002376 | 1,70099 | 1,6093  | 1,065617736 | N/A             | N/A       | BX089237     | Inc-C12orf66-3 |
| A_21_P0014569  | 1,71739 | 1,62574 | 1,065588191 | ENST00000553095 | N/A       | BX108644     | N/A            |
| A_33_P3867534  | 7,94395 | 7,85234 | 1,065558647 | ENST00000378694 | 55388     | NM_182751    | MCM10          |
| A_22_P00019169 | 1,70347 | 1,61189 | 1,06553649  | N/A             | N/A       | BU154835     | Inc-SIX6-1     |
| A_22_P00005486 | 1,71945 | 1,62791 | 1,065506947 | ENST00000538573 | 100507175 | DA498870     | LOC100507175   |
| A_21_P0004069  | 1,76858 | 1,67704 | 1,065506947 | ENST00000514942 | N/A       | N/A          | N/A            |
| A_22_P00007265 | 7,13275 | 7,04122 | 1,065499562 | N/A             | N/A       | N/A          | Inc-GPR15-1    |
| A_22_P00007831 | 1,70492 | 1,6134  | 1,065492176 | N/A             | N/A       | BX088963     | Inc-HPGDS-2    |

|                |         |         |             |                 |           |              |                |
|----------------|---------|---------|-------------|-----------------|-----------|--------------|----------------|
| A_22_P00004031 | 3,19077 | 3,09929 | 1,065462635 | N/A             | N/A       | N/A          | Inc-CHRA1-1    |
| A_22_P00001682 | 1,71094 | 1,61946 | 1,065462635 | N/A             | N/A       | BU178787     | Inc-ASTE1-2    |
| A_24_P194688   | 1,75515 | 1,66367 | 1,065462635 | ENST00000318063 | 286097    | NM_181723    | MICU3          |
| A_23_P146855   | 3,38456 | 3,29314 | 1,065418325 | ENST00000443721 | 758       | NM_001044370 | MPPED1         |
| A_21_P0005356  | 1,70065 | 1,60924 | 1,06541094  | N/A             | 101927524 | N/A          | MEOX2-AS1      |
| A_33_P3298850  | 1,69962 | 1,60821 | 1,06541094  | ENST00000320521 | 23539     | NM_013356    | SLC16A8        |
| A_23_P139260   | 12,3801 | 12,2887 | 1,065403555 | ENST00000449603 | 5002      | NM_183233    | SLC22A18       |
| A_21_P0004999  | 1,71674 | 1,62534 | 1,065403555 | N/A             | 102724379 | XR_425970    | LOC102724379   |
| A_23_P90997    | 5,6658  | 5,57441 | 1,06539617  | ENST00000319460 | 150677    | NM_148961    | OTOS           |
| A_33_P3277532  | 1,70788 | 1,61652 | 1,065374016 | ENST00000480883 | 10319     | NM_006059    | LAMC3          |
| A_21_P0008345  | 1,71212 | 1,62077 | 1,065366632 | N/A             | N/A       | N/A          | Inc-DAAM1-1    |
| A_22_P00002453 | 1,80909 | 1,71776 | 1,065351863 | ENST00000568541 | N/A       | N/A          | N/A            |
| A_23_P207201   | 1,81215 | 1,72083 | 1,065344478 | ENST00000349817 | 974       | NM_001039933 | CD79B          |
| A_23_P373742   | 1,70809 | 1,61678 | 1,065337094 | ENST00000332517 | 339976    | NM_178556    | TRIML1         |
| A_23_P9061     | 16,4855 | 16,3942 | 1,065329709 | ENST00000611080 | 8667      | NM_003756    | EIF3H          |
| A_24_P304449   | 9,99442 | 9,90314 | 1,065314941 | ENST00000228506 | 9761      | D63486       | MLEC           |
| A_22_P00011822 | 1,69451 | 1,60324 | 1,065307557 | ENST00000451755 | N/A       | N/A          | N/A            |
| A_22_P00002804 | 6,03003 | 5,93876 | 1,065307557 | N/A             | N/A       | AK056822     | Inc-C2orf42-3  |
| A_33_P3324695  | 1,82195 | 1,73069 | 1,065300173 | ENST00000536666 | 100506393 | NR_040098    | LOC100506393   |
| A_33_P3355703  | 2,93505 | 2,8438  | 1,065292789 | ENST00000399206 | 283551    | NR_126498    | LINC01588      |
| A_33_P3626709  | 3,58101 | 3,48977 | 1,065285405 | N/A             | 100129280 | AK126613     | LOC100129280   |
| A_21_P0013478  | 1,78884 | 1,6976  | 1,065285405 | N/A             | N/A       | N/A          | XLOC_I2_014197 |
| A_24_P238040   | 1,70154 | 1,61032 | 1,065270637 | ENST00000357482 | 9098      | BC029495     | USP6           |
| A_32_P158966   | 1,78361 | 1,6924  | 1,065263253 | ENST00000616259 | 51348     | NM_016523    | KLRF1          |
| A_33_P3363854  | 1,69748 | 1,60627 | 1,065263253 | ENST00000305754 | 26343     | AB529251     | OR5E1P         |
| A_22_P00014361 | 12,4114 | 12,3202 | 1,065255869 | ENST00000621358 | 51503     | NM_016403    | CWC15          |
| A_23_P76598    | 12,6628 | 12,5716 | 1,065255869 | ENST00000382374 | 221154    | NM_152726    | MICU2          |
| A_23_P20777    | 11,7789 | 11,6877 | 1,065255869 | ENST00000483428 | 92400     | NM_033117    | RBM18          |
| A_23_P159305   | 12,7584 | 12,6672 | 1,065255869 | ENST00000604841 | 8148      | NM_139215    | TAF15          |
| A_22_P00016636 | 1,8035  | 1,7123  | 1,065255869 | ENST00000521456 | N/A       | N/A          | N/A            |
| A_23_P39790    | 1,8552  | 1,764   | 1,065255869 | ENST00000410009 | 50489     | NM_015717    | CD207          |
| A_21_P0014828  | 1,79615 | 1,70496 | 1,065248485 | N/A             | N/A       | N/A          | N/A            |
| A_33_P3250338  | 1,78476 | 1,69357 | 1,065248485 | ENST00000614082 | 196385    | BC144575     | DNAH10         |



|                |         |         |             |                 |           |              |                |
|----------------|---------|---------|-------------|-----------------|-----------|--------------|----------------|
| A_23_P100704   | 9,96756 | 9,87638 | 1,065241101 | ENST00000570306 | 5598      | NM_139033    | MAPK7          |
| A_21_P0001049  | 1,69171 | 1,60055 | 1,065226334 | ENST00000427825 | N/A       | N/A          | N/A            |
| A_33_P3412563  | 1,71242 | 1,62126 | 1,065226334 | ENST00000433048 | 442720    | NR_003024    | EIF3IP1        |
| A_24_P31275    | 3,79243 | 3,70129 | 1,065211567 | ENST00000250111 | 482       | NM_001678    | ATP1B2         |
| A_22_P00015410 | 4,84154 | 4,75042 | 1,0651968   | N/A             | N/A       | N/A          | Inc-SRR-2      |
| A_21_P0009506  | 1,80222 | 1,71111 | 1,065189417 | N/A             | N/A       | N/A          | Inc-GALR1-1    |
| A_33_P3565067  | 1,69338 | 1,60229 | 1,06517465  | ENST00000569275 | 401613    | NR_033974    | LINC00890      |
| A_23_P124514   | 3,50625 | 3,4152  | 1,065145118 | ENST00000418306 | 1740      | NM_001364    | DLG2           |
| A_33_P3262276  | 1,70945 | 1,61841 | 1,065137735 | ENST00000326258 | 121364    | NM_001005280 | OR10A7         |
| A_23_P130836   | 7,40356 | 7,31252 | 1,065137735 | ENST00000264553 | 3004      | NM_005317    | GZMM           |
| A_23_P252276   | 3,86564 | 3,77461 | 1,065130352 | ENST00000265154 | 54848     | NM_017700    | ARHGEF38       |
| A_23_P410110   | 6,27255 | 6,18152 | 1,065130352 | ENST00000298298 | 220979    | NM_001039380 | C10orf25       |
| A_33_P3360833  | 1,706   | 1,61497 | 1,065130352 | N/A             | 132141    | BC034228     | IQCF1          |
| A_22_P00001576 | 2,61399 | 2,52296 | 1,065130352 | ENST00000444926 | N/A       | N/A          | N/A            |
| A_21_P0000043  | 1,69471 | 1,60369 | 1,065122969 | ENST00000444335 | 100288323 | NM_001164435 | KRTAP21-3      |
| A_22_P00020445 | 5,45985 | 5,36883 | 1,065122969 | N/A             | N/A       | N/A          | Inc-C8orf48-3  |
| A_22_P00022689 | 1,81713 | 1,72611 | 1,065122969 | N/A             | N/A       | N/A          | Inc-SENP6-2    |
| A_22_P00020701 | 9,91728 | 9,8263  | 1,065093438 | N/A             | N/A       | N/A          | Inc-SLC22A12-2 |
| A_33_P3248586  | 6,227   | 6,13603 | 1,065086055 | ENST00000425409 | 100288687 | NM_001293798 | DUX4           |
| A_33_P3215635  | 1,69727 | 1,6063  | 1,065086055 | ENST00000368476 | 1141      | NM_000748    | CHRNA2         |
| A_23_P82762    | 3,68242 | 3,59147 | 1,06507129  | ENST00000398612 | 169270    | NM_001042416 | ZNF596         |
| A_32_P133072   | 1,87801 | 1,78707 | 1,065063908 | ENST00000576479 | 10418     | NM_006108    | SPON1          |
| A_33_P3321796  | 5,2962  | 5,20527 | 1,065056525 | N/A             | N/A       | DB153536     | N/A            |
| A_24_P936122   | 12,925  | 12,8341 | 1,065034378 | ENST00000359617 | 8675      | NM_001001433 | STX16          |
| A_19_P00808668 | 11,8813 | 11,7904 | 1,065034378 | ENST00000296490 | 80335     | NM_025222    | WDR82          |
| A_22_P00018185 | 1,71128 | 1,62039 | 1,065026996 | ENST00000519703 | N/A       | AA215598     | N/A            |
| A_22_P00014568 | 5,00096 | 4,91012 | 1,064990086 | N/A             | N/A       | N/A          | Inc-SKIV2L2-1  |
| A_24_P940666   | 6,21511 | 6,12427 | 1,064990086 | N/A             | 5469      | NM_004774    | MED1           |
| A_22_P00022309 | 3,31325 | 3,22243 | 1,064975322 | ENST00000369572 | 63914     | BC032824     | C6orf164       |
| A_22_P00008953 | 1,70552 | 1,61471 | 1,06496794  | ENST00000382167 | 387742    | NR_026643    | FAM99A         |
| A_21_P0001458  | 1,70263 | 1,61182 | 1,06496794  | N/A             | N/A       | N/A          | Inc-MMEL1-1    |
| A_33_P3319026  | 10,302  | 10,2112 | 1,064960558 | ENST00000370798 | 26009     | NM_015534    | ZZZ3           |
| A_21_P0006014  | 1,78105 | 1,69025 | 1,064960558 | N/A             | N/A       | N/A          | Inc-CBWD3-1    |

|                |         |         |             |                 |           |              |                |
|----------------|---------|---------|-------------|-----------------|-----------|--------------|----------------|
| A_22_P00019314 | 1,76551 | 1,67471 | 1,064960558 | N/A             | N/A       | N/A          | Inc-N4BP2L2-1  |
| A_33_P3386203  | 1,72278 | 1,632   | 1,064945795 | ENST00000330500 | 127069    | NM_001004693 | OR2T10         |
| A_23_P344444   | 1,69596 | 1,60519 | 1,064938413 | ENST00000284142 | 127247    | NM_080868    | ASB17          |
| A_23_P153155   | 1,8176  | 1,72687 | 1,064908887 | ENST00000299727 | 2587      | NM_001480    | GALR1          |
| A_33_P3353485  | 1,70124 | 1,61051 | 1,064908887 | N/A             | N/A       | EG327398     | N/A            |
| A_22_P00005615 | 1,79094 | 1,70022 | 1,064901506 | ENST00000508853 | 101929745 | XR_241755    | LOC101929745   |
| A_21_P0000399  | 1,69291 | 1,6022  | 1,064894125 | N/A             | 767578    | NR_003194    | SNORD114-2     |
| A_33_P3284039  | 1,70305 | 1,61235 | 1,064886743 | N/A             | N/A       | N/A          | N/A            |
| A_22_P00015132 | 1,69077 | 1,6001  | 1,0648646   | N/A             | 100873933 | NR_046591    | DPYD-AS2       |
| A_22_P00009730 | 1,7204  | 1,62975 | 1,064849838 | N/A             | N/A       | N/A          | Inc-MCTP2-9    |
| A_21_P0012444  | 1,79449 | 1,70386 | 1,064835076 | ENST00000498432 | 285286    | N/A          | LINC00877      |
| A_21_P0000976  | 1,71426 | 1,62366 | 1,064812934 | ENST00000424357 | N/A       | N/A          | N/A            |
| A_33_P3362933  | 8,80032 | 8,70975 | 1,064790792 | ENST00000508337 | 2993      | NM_002099    | GYPA           |
| A_22_P00023054 | 1,70267 | 1,61212 | 1,064776031 | ENST00000452909 | N/A       | N/A          | N/A            |
| A_23_P170453   | 12,5091 | 12,4186 | 1,064739129 | ENST00000304710 | 1473      | NM_001900    | CST5           |
| A_21_P0006645  | 1,71369 | 1,62319 | 1,064739129 | ENST00000448835 | 101928150 | N/A          | LOC101928150   |
| A_23_P134085   | 10,1801 | 10,0896 | 1,064739129 | ENST00000607772 | 154043    | NM_173515    | CNKSR3         |
| A_23_P161338   | 13,7679 | 13,6774 | 1,064739129 | ENST00000373232 | 5464      | NM_021129    | PPA1           |
| A_33_P3227300  | 1,71587 | 1,62541 | 1,064709609 | N/A             | N/A       | N/A          | N/A            |
| A_33_P3299250  | 1,70681 | 1,61635 | 1,064709609 | ENST00000435568 | N/A       | N/A          | N/A            |
| A_19_P00321831 | 1,69103 | 1,60058 | 1,064702229 | ENST00000596718 | 400680    | AK097381     | LINC00664      |
| A_22_P00022357 | 3,70108 | 3,61063 | 1,064702229 | N/A             | N/A       | AL833420     | Inc-FAM82A2-1  |
| A_23_P133338   | 3,9883  | 3,89786 | 1,064694849 | ENST00000416365 | 54825     | NM_017675    | CDHR2          |
| A_22_P00008879 | 1,79278 | 1,70234 | 1,064694849 | N/A             | N/A       | N/A          | Inc-KLHL25-5   |
| A_22_P00022485 | 1,7131  | 1,62268 | 1,064680089 | N/A             | N/A       | N/A          | Inc-CACNG5-1   |
| A_22_P00003000 | 1,71971 | 1,62931 | 1,064665329 | N/A             | N/A       | N/A          | Inc-C6orf225-1 |
| A_21_P0011676  | 1,76774 | 1,67735 | 1,06465795  | N/A             | N/A       | N/A          | XLOC_I2_006621 |
| A_22_P00015213 | 1,71302 | 1,62266 | 1,064635811 | N/A             | 101929387 | NR_110945    | LMF1-AS1       |
| A_21_P0008169  | 1,73043 | 1,64007 | 1,064635811 | N/A             | N/A       | N/A          | Inc-DIAPH3-5   |
| A_22_P00020497 | 1,80291 | 1,71256 | 1,064628432 | N/A             | N/A       | N/A          | Inc-ZNF438-1   |
| A_24_P921327   | 1,72909 | 1,63874 | 1,064628432 | ENST00000505317 | 202018    | AF189251     | TAPT1          |
| A_23_P2920     | 6,11693 | 6,02659 | 1,064621052 | ENST00000393078 | 12        | NM_001085    | SERPINA3       |
| A_21_P0009750  | 1,78587 | 1,69556 | 1,064598914 | ENST00000595893 | 7644      | N/A          | ZNF91          |

|                |         |         |             |                 |           |           |                |
|----------------|---------|---------|-------------|-----------------|-----------|-----------|----------------|
| A_33_P3261084  | 10,956  | 10,8657 | 1,064591535 | ENST00000491065 | 3420      | NM_174855 | IDH3B          |
| A_23_P425880   | 10,9133 | 10,823  | 1,064591535 | ENST00000512070 | 7204      | NM_007118 | TRIO           |
| A_23_P14284    | 14,5872 | 14,4969 | 1,064591535 | ENST00000216456 | 10490     | NM_006370 | VTI1B          |
| A_21_P0013695  | 8,11677 | 8,02652 | 1,06455464  | N/A             | 100506710 | N/A       | EBLN3          |
| A_22_P00023485 | 1,68932 | 1,59909 | 1,064539882 | ENST00000450247 | N/A       | N/A       | N/A            |
| A_33_P3280597  | 7,38613 | 7,29592 | 1,064525124 | ENST00000244070 | N/A       | N/A       | N/A            |
| A_33_P3284646  | 12,2154 | 12,1252 | 1,064517746 | ENST00000530142 | 26233     | NM_012162 | FBXL6          |
| A_33_P3241021  | 1,70292 | 1,61273 | 1,064510367 | ENST00000416624 | 969       | AK303383  | CD69           |
| A_21_P0011874  | 5,03866 | 4,94847 | 1,064510367 | N/A             | N/A       | N/A       | XLOC_I2_007767 |
| A_33_P3262301  | 1,71266 | 1,62248 | 1,064502988 | ENST00000318197 | 89869     | NM_033123 | PLCZ1          |
| A_33_P3335506  | 1,7424  | 1,65223 | 1,06449561  | ENST00000368190 | 83416     | AF343662  | FCRL5          |
| A_23_P111724   | 1,6892  | 1,59905 | 1,064480853 | ENST00000493037 | 154661    | NM_138290 | RUNDC3B        |
| A_21_P0002098  | 1,80712 | 1,71699 | 1,064466096 | ENST00000432894 | N/A       | N/A       | N/A            |
| A_22_P00024733 | 3,50065 | 3,41055 | 1,064443962 | N/A             | N/A       | N/A       | Inc-C10orf90-3 |
| A_22_P00004166 | 1,75668 | 1,66658 | 1,064443962 | N/A             | N/A       | N/A       | Inc-CLEC4D-1   |
| A_22_P00001061 | 1,71755 | 1,62748 | 1,064421827 | N/A             | N/A       | N/A       | Inc-ALCAM-1    |
| A_22_P00011612 | 1,74398 | 1,65391 | 1,064421827 | ENST00000523810 | N/A       | N/A       | N/A            |
| A_21_P0013497  | 1,69326 | 1,60319 | 1,064421827 | N/A             | N/A       | N/A       | XLOC_I2_014245 |
| A_22_P00008531 | 1,72356 | 1,63349 | 1,064421827 | N/A             | N/A       | N/A       | Inc-KCNJ6-1    |
| A_21_P0008997  | 1,79748 | 1,70742 | 1,064414449 | N/A             | N/A       | N/A       | Inc-BANP-4     |
| A_23_P385938   | 9,398   | 9,30794 | 1,064414449 | ENST00000399613 | 255967    | NM_175854 | PAN3           |
| A_21_P0014468  | 2,80544 | 2,7154  | 1,064399693 | N/A             | N/A       | N/A       | N/A            |
| A_23_P18755    | 1,71439 | 1,62436 | 1,064392316 | ENST00000281154 | 83447     | NM_031291 | SLC25A31       |
| A_21_P0001869  | 1,69676 | 1,60675 | 1,06437756  | ENST00000414811 | 101927533 | N/A       | LOC101927533   |
| A_33_P3234482  | 1,69109 | 1,60108 | 1,06437756  | ENST00000407792 | N/A       | N/A       | N/A            |
| A_23_P251342   | 11,3053 | 11,2153 | 1,064370182 | ENST00000473886 | 2932      | NM_002093 | GSK3B          |
| A_23_P72518    | 17,3074 | 17,2174 | 1,064370182 | ENST00000326597 | 55530     | NM_018711 | SVOP           |
| A_21_P0009500  | 1,71615 | 1,62617 | 1,064355427 | N/A             | N/A       | N/A       | Inc-TIMM21-2   |
| A_21_P0010204  | 2,03116 | 1,9412  | 1,064340672 | ENST00000448579 | 400866    | N/A       | LINC00114      |
| A_22_P00006336 | 1,9969  | 1,90694 | 1,064340672 | ENST00000558754 | 254559    | NR_015411 | LINC00925      |
| A_21_P0008826  | 1,70719 | 1,61727 | 1,064311163 | N/A             | N/A       | N/A       | Inc-UNC13C-2   |
| A_21_P0000952  | 1,70258 | 1,61266 | 1,064311163 | ENST00000430540 | N/A       | N/A       | N/A            |
| A_33_P3398356  | 8,40444 | 8,31452 | 1,064311163 | ENST00000614174 | 256764    | NM_182758 | WDR72          |

|                |         |         |             |                 |           |              |                    |
|----------------|---------|---------|-------------|-----------------|-----------|--------------|--------------------|
| A_23_P257815   | 1,72144 | 1,63154 | 1,064296408 | ENST00000256447 | 4064      | NM_005582    | CD180              |
| A_33_P3305335  | 1,70174 | 1,61184 | 1,064296408 | N/A             | N/A       | N/A          | N/A                |
| A_23_P81492    | 17,541  | 17,4511 | 1,064296408 | ENST00000519690 | 6208      | NM_001025071 | RPS14              |
| A_21_P0005548  | 1,64598 | 1,55609 | 1,064289031 | N/A             | N/A       | N/A          | Inc-AC099552.4.1-3 |
| A_22_P00010137 | 1,69162 | 1,60174 | 1,064281654 | ENST00000447405 | N/A       | N/A          | N/A                |
| A_33_P3380356  | 1,77254 | 1,68267 | 1,064274277 | N/A             | 100127991 | AK126705     | LOC100127991       |
| A_22_P00001853 | 1,69244 | 1,60258 | 1,0642669   | N/A             | 101929335 | NR_110150    | ADAMTS9-AS1        |
| A_22_P00017759 | 1,75647 | 1,66664 | 1,06424477  | N/A             | N/A       | N/A          | Inc-YPEL5-2        |
| A_23_P304237   | 9,00806 | 8,91826 | 1,06422264  | ENST00000372190 | 2889      | NM_198679    | RAPGEF1            |
| A_33_P3340014  | 1,68947 | 1,59967 | 1,06422264  | ENST00000492142 | 7216      | NM_016157    | TRO                |
| A_21_P0011975  | 1,69935 | 1,60955 | 1,06422264  | ENST00000448255 | 101929378 | NR_110250    | LOC101929378       |
| A_33_P3262758  | 10,5806 | 10,4908 | 1,06422264  | ENST00000227471 | 81622     | NM_030930    | UNC93B1            |
| A_21_P0008228  | 3,23423 | 3,14444 | 1,064215263 | N/A             | 348021    | NR_026852    | LINC00442          |
| A_33_P3219950  | 1,71839 | 1,62861 | 1,064207886 | N/A             | 729658    | NR_122120    | LOC729658          |
| A_23_P84744    | 1,78467 | 1,69495 | 1,064163628 | ENST00000321489 | 54768     | NM_017558    | HYDIN              |
| A_24_P555066   | 1,69246 | 1,60275 | 1,064156252 | ENST00000389313 | 342527    | NM_198501    | SMTNL2             |
| A_33_P3229750  | 1,69533 | 1,60563 | 1,064148876 | N/A             | N/A       | N/A          | N/A                |
| A_21_P0002302  | 1,76813 | 1,67845 | 1,064134124 | N/A             | N/A       | N/A          | Inc-GPD2-3         |
| A_23_P134237   | 1,6938  | 1,60412 | 1,064134124 | ENST00000482669 | 5919      | NM_002889    | RARRES2            |
| A_32_P153812   | 1,73057 | 1,6409  | 1,064126748 | ENST00000299308 | 114795    | NM_052907    | TMEM132B           |
| A_21_P0002249  | 1,71732 | 1,62769 | 1,064097244 | N/A             | N/A       | N/A          | Inc-DNAH6-2        |
| A_22_P00006067 | 3,10256 | 3,01293 | 1,064097244 | N/A             | N/A       | N/A          | Inc-FAM135B-2      |
| A_21_P0007772  | 1,70225 | 1,61263 | 1,064089869 | N/A             | N/A       | N/A          | Inc-TAOK3-3        |
| A_22_P00011420 | 1,74897 | 1,65935 | 1,064089869 | N/A             | N/A       | N/A          | Inc-PALLD-1        |
| A_32_P181020   | 9,71234 | 9,62272 | 1,064089869 | ENST00000474587 | 1797      | NM_005510    | DXO                |
| A_22_P00013069 | 1,80212 | 1,71251 | 1,064082493 | ENST00000456119 | 400946    | N/A          | LINC00954          |
| A_21_P0014881  | 1,71574 | 1,62614 | 1,064075117 | N/A             | N/A       | N/A          | N/A                |
| A_23_P215253   | 12,4325 | 12,3429 | 1,064075117 | ENST00000507355 | 548644    | AJ277740     | POLR2J3            |
| A_24_P359067   | 4,8812  | 4,79163 | 1,064052991 | N/A             | 100130357 | NM_001242698 | LOC100130357       |
| A_21_P0000943  | 1,69628 | 1,60673 | 1,06403824  | N/A             | N/A       | N/A          | Inc-AJAP1-2        |
| A_32_P61480    | 1,77331 | 1,68377 | 1,064030865 | N/A             | 255082    | NR_026941    | CASC2              |
| A_21_P0007585  | 1,7305  | 1,64098 | 1,064016114 | ENST00000550380 | N/A       | N/A          | N/A                |
| A_24_P17719    | 8,95518 | 8,86568 | 1,064001364 | ENST00000515612 | 51088     | NM_015990    | KLHL5              |

|                |         |         |             |                 |           |              |               |
|----------------|---------|---------|-------------|-----------------|-----------|--------------|---------------|
| A_22_P00010602 | 1,68735 | 1,59785 | 1,064001364 | ENST00000600624 | 103689918 | NR_125757    | LINC01378     |
| A_33_P3233160  | 9,49493 | 9,40543 | 1,064001364 | ENST00000339012 | 112942    | NM_001282761 | CFAP36        |
| A_21_P0002692  | 4,71692 | 4,62743 | 1,063993989 | N/A             | N/A       | N/A          | Inc-EPHA4-2   |
| A_21_P0005222  | 3,72355 | 3,63406 | 1,063993989 | ENST00000446024 | N/A       | N/A          | N/A           |
| A_33_P3231727  | 1,81815 | 1,7287  | 1,063964489 | ENST00000624675 | 100132249 | AK090928     | LOC100132249  |
| A_21_P0000020  | 9,83507 | 9,74563 | 1,063957114 | ENST00000545145 | 9904      | NM_001146699 | RBM19         |
| A_21_P0003755  | 1,78217 | 1,69273 | 1,063957114 | N/A             | N/A       | N/A          | Inc-PITX2-2   |
| A_23_P166633   | 11,9276 | 11,8382 | 1,063927615 | ENST00000460797 | 3693      | NM_002213    | ITGB5         |
| A_23_P320250   | 13,3936 | 13,3042 | 1,063927615 | ENST00000618519 | 80179     | NM_025109    | MYO19         |
| A_22_P00023965 | 1,8134  | 1,72403 | 1,063905492 | N/A             | N/A       | N/A          | Inc-NDFIP2-10 |
| A_23_P312285   | 1,69906 | 1,60969 | 1,063905492 | ENST00000492344 | 245932    | NM_153289    | DEFB119       |
| A_22_P00007701 | 2,84606 | 2,7567  | 1,063898117 | N/A             | N/A       | N/A          | Inc-HIVEP1-3  |
| A_21_P0008432  | 1,68775 | 1,5984  | 1,063890743 | ENST00000555442 | N/A       | N/A          | N/A           |
| A_33_P3212959  | 1,77469 | 1,68534 | 1,063890743 | ENST00000446864 | 441525    | NM_001009613 | SPANXN4       |
| A_22_P00012940 | 1,69181 | 1,60246 | 1,063890743 | N/A             | 100874296 | XR_425096    | KCNH1-IT1     |
| A_33_P3508160  | 1,69476 | 1,60541 | 1,063890743 | N/A             | 219690    | AK055023     | LOC219690     |
| A_23_P91414    | 1,81821 | 1,72888 | 1,063875995 | ENST00000262659 | 140706    | NM_080625    | CCM2L         |
| A_21_P0008352  | 4,9717  | 4,88242 | 1,063839124 | N/A             | N/A       | N/A          | Inc-EXD2-1    |
| A_22_P00015361 | 1,77741 | 1,68813 | 1,063839124 | N/A             | N/A       | DB061137     | Inc-SPTBN5-1  |
| A_22_P00015582 | 4,89075 | 4,80147 | 1,063839124 | ENST00000535370 | N/A       | AK127893     | N/A           |
| A_24_P738168   | 2,17836 | 2,08909 | 1,06383175  | N/A             | 166752    | NM_001168235 | FREM3         |
| A_32_P20454    | 9,65208 | 9,56281 | 1,06383175  | N/A             | 1314      | NM_001098398 | COPA          |
| A_23_P92035    | 9,75071 | 9,66146 | 1,063817002 | ENST00000466826 | 55209     | NM_001292043 | SETD5         |
| A_21_P0004519  | 1,76951 | 1,68027 | 1,063809629 | N/A             | N/A       | N/A          | Inc-NR2F1-1   |
| A_33_P3364520  | 5,03665 | 4,94742 | 1,063802255 | ENST00000329122 | 337966    | NM_181602    | KRTAP6-1      |
| A_22_P00005039 | 1,68711 | 1,59789 | 1,063794881 | N/A             | N/A       | EU250754     | Inc-DEC1-1    |
| A_22_P00024159 | 1,71718 | 1,62797 | 1,063787507 | N/A             | N/A       | AK126693     | Inc-GAMT-1    |
| A_21_P0001122  | 1,81912 | 1,72992 | 1,063780134 | N/A             | N/A       | N/A          | Inc-RIMS3-5   |
| A_22_P00006541 | 1,69305 | 1,60386 | 1,06377276  | ENST00000429636 | N/A       | N/A          | N/A           |
| A_22_P00016729 | 1,72499 | 1,63582 | 1,063758013 | ENST00000497996 | 401082    | NR_109841    | LINC01205     |
| A_22_P00011480 | 1,68996 | 1,60081 | 1,063743267 | ENST00000566054 | N/A       | N/A          | N/A           |
| A_23_P254816   | 5,53547 | 5,44633 | 1,063735893 | ENST00000621005 | 6939      | NM_004609    | TCF15         |
| A_23_P420692   | 2,31425 | 2,22511 | 1,063735893 | ENST00000295706 | 8497      | XM_006711588 | PPFIA4        |

|                |         |         |             |                 |           |              |               |
|----------------|---------|---------|-------------|-----------------|-----------|--------------|---------------|
| A_33_P3290239  | 7,95259 | 7,86348 | 1,063713774 | ENST00000560572 | 90527     | NM_001276266 | DUOXA1        |
| A_21_P0009061  | 1,78813 | 1,69904 | 1,063699028 | N/A             | N/A       | N/A          | Inc-ADAT1-1   |
| A_22_P00006024 | 1,78043 | 1,69136 | 1,063684282 | ENST00000518934 | 286178    | XR_108909    | LOC286178     |
| A_21_P0011660  | 1,69233 | 1,6033  | 1,063654791 | N/A             | 9331      | N/A          | B4GALT6       |
| A_24_P303193   | 8,63367 | 8,54466 | 1,063640045 | ENST00000314940 | 10949     | BG036557     | HNRNPA0       |
| A_23_P217068   | 18,2845 | 18,1955 | 1,063632673 | ENST00000536368 | 6136      | NM_000976    | RPL12         |
| A_23_P41599    | 4,83185 | 4,74285 | 1,063632673 | ENST00000239444 | 56128     | NM_019120    | PCDHB8        |
| A_23_P71972    | 5,81373 | 5,72473 | 1,063632673 | ENST00000620008 | 51741     | NM_016373    | WVOX          |
| A_33_P3348614  | 10,2427 | 10,1537 | 1,063632673 | ENST00000457928 | 79718     | NM_024665    | TBL1XR1       |
| A_21_P0000515  | 8,79619 | 8,70723 | 1,063603183 | N/A             | 56662     | NR_026705    | VTRNA1-3      |
| A_33_P3307088  | 1,68746 | 1,5985  | 1,063603183 | N/A             | N/A       | N/A          | N/A           |
| A_24_P117138   | 9,96572 | 9,87676 | 1,063603183 | ENST00000595094 | 199777    | NM_145297    | ZNF626        |
| A_22_P00017343 | 4,9614  | 4,87247 | 1,063581066 | N/A             | N/A       | N/A          | Inc-USP47-2   |
| A_33_P3346871  | 1,71559 | 1,62666 | 1,063581066 | N/A             | N/A       | AW593215     | N/A           |
| A_23_P24922    | 9,02602 | 8,9371  | 1,063573694 | ENST00000310109 | 387787    | NM_001144869 | LIPT2         |
| A_21_P0006328  | 2,74202 | 2,65311 | 1,063566322 | N/A             | N/A       | N/A          | Inc-C9orf50-2 |
| A_22_P00014519 | 1,76507 | 1,67616 | 1,063566322 | ENST00000486767 | N/A       | N/A          | N/A           |
| A_32_P193288   | 17,1124 | 17,0235 | 1,06355895  | ENST00000456046 | 6142      | NM_000980    | RPL18A        |
| A_23_P72968    | 1,70085 | 1,61196 | 1,063551578 | ENST00000276211 | 158763    | NM_144967    | ARHGAP36      |
| A_33_P3302260  | 4,28545 | 4,1966  | 1,063522091 | ENST00000265460 | 745       | NM_013279    | MYRF          |
| A_22_P00015438 | 1,77274 | 1,6839  | 1,063514719 | ENST00000555655 | N/A       | CD247929     | N/A           |
| A_21_P0012357  | 1,68464 | 1,59581 | 1,063507347 | ENST00000444114 | N/A       | N/A          | N/A           |
| A_33_P3408203  | 9,05558 | 8,96678 | 1,063485232 | ENST00000418333 | 7039      | NM_003236    | TGFA          |
| A_32_P449380   | 3,62181 | 3,53302 | 1,063477861 | ENST00000373574 | 401551    | NM_001045476 | WDR38         |
| A_33_P3382493  | 7,56222 | 7,47343 | 1,063477861 | ENST00000360844 | 100049587 | NM_001098612 | SIGLEC14      |
| A_33_P3276630  | 1,86727 | 1,7785  | 1,063463118 | ENST00000338542 | 83657     | BC054892     | DYNLRB2       |
| A_33_P3273266  | 9,0545  | 8,96573 | 1,063463118 | ENST00000455242 | 441666    | NR_024380    | LOC441666     |
| A_33_P3218659  | 1,71694 | 1,62818 | 1,063455747 | ENST00000315947 | 390429    | NM_001004723 | OR4N2         |
| A_21_P0002240  | 1,77442 | 1,68567 | 1,063448375 | N/A             | N/A       | N/A          | Inc-DYSF-1    |
| A_21_P0003434  | 1,8121  | 1,72337 | 1,063433633 | N/A             | N/A       | N/A          | Inc-CCDC111-1 |
| A_22_P00010578 | 6,48348 | 6,39478 | 1,06341152  | N/A             | N/A       | AK002196     | Inc-NDFIP2-2  |
| A_21_P0003396  | 1,71822 | 1,62952 | 1,06341152  | ENST00000506100 | N/A       | N/A          | N/A           |
| A_22_P00017184 | 5,70683 | 5,61815 | 1,063396778 | N/A             | 101928243 | NR_110200    | DARS-AS1      |

|                |         |         |             |                 |           |              |                      |
|----------------|---------|---------|-------------|-----------------|-----------|--------------|----------------------|
| A_33_P3247599  | 6,61079 | 6,52211 | 1,063396778 | ENST00000600047 | 390980    | NM_001023563 | ZNF805               |
| A_23_P253068   | 7,05655 | 6,9679  | 1,063374665 | ENST00000483432 | 29882     | NM_013366    | ANAPC2               |
| A_33_P3382324  | 1,70477 | 1,61614 | 1,063359924 | ENST00000211076 | 23430     | NM_012217    | TPSD1                |
| A_24_P358381   | 6,94796 | 6,85934 | 1,063352553 | ENST00000326153 | 8225      | NM_012227    | GTPBP6               |
| A_33_P3320443  | 5,89601 | 5,80739 | 1,063352553 | ENST00000314537 | 104909134 | NM_001256299 | MGC57346-CRHR1       |
| A_22_P00020808 | 1,71851 | 1,6299  | 1,063345183 | N/A             | N/A       | DD431415     | Inc-GATA3-9          |
| A_32_P24581    | 16,9326 | 16,844  | 1,063337812 | ENST00000443181 | 6233      | NM_002954    | RPS27A               |
| A_21_P0008662  | 6,59878 | 6,51021 | 1,063315701 | N/A             | N/A       | N/A          | Inc-IL16-2           |
| A_23_P421306   | 8,11291 | 8,02434 | 1,063315701 | ENST00000393946 | 91683     | NM_177963    | SYT12                |
| A_21_P0005892  | 4,51743 | 4,42888 | 1,06330096  | N/A             | N/A       | N/A          | Inc-EXT1-2           |
| A_22_P00006609 | 1,68827 | 1,59974 | 1,06328622  | ENST00000422494 | 101929685 | NR_109883    | LINC01384            |
| A_33_P3423215  | 1,71603 | 1,6275  | 1,06328622  | ENST00000506884 | 25859     | NR_024617    | PART1                |
| A_33_P3389363  | 5,12203 | 5,03351 | 1,06327885  | ENST00000597507 | 284325    | XM_006723153 | C19orf54             |
| A_22_P00018423 | 10,9531 | 10,8646 | 1,06326411  | N/A             | N/A       | CK903429     | Inc-RP11-410N8.4.1-2 |
| A_32_P854438   | 1,69136 | 1,60286 | 1,06326411  | ENST00000568567 | 390705    | N/A          | LOC390705            |
| A_21_P0011656  | 9,53832 | 9,44983 | 1,06325674  | ENST00000534258 | N/A       | XR_248186    | N/A                  |
| A_23_P3592     | 8,02221 | 7,93375 | 1,06323463  | ENST00000517685 | 3299      | NM_001040667 | HSF4                 |
| A_22_P00006543 | 3,35197 | 3,26355 | 1,063205152 | ENST00000484675 | N/A       | N/A          | N/A                  |
| A_33_P3279984  | 1,68962 | 1,60122 | 1,063190412 | N/A             | N/A       | N/A          | N/A                  |
| A_21_P0012246  | 10,8859 | 10,7975 | 1,063190412 | N/A             | N/A       | N/A          | XLOC_I2_009285       |
| A_24_P295543   | 12,1473 | 12,0589 | 1,063190412 | ENST00000370372 | 282991    | NM_001001342 | BLOC1S2              |
| A_22_P00002439 | 1,6932  | 1,60482 | 1,063175674 | ENST00000555776 | N/A       | DB129663     | N/A                  |
| A_22_P00010892 | 1,79814 | 1,70976 | 1,063175674 | ENST00000505557 | N/A       | N/A          | N/A                  |
| A_21_P0003611  | 1,71292 | 1,62454 | 1,063175674 | N/A             | N/A       | N/A          | Inc-POLR2B-1         |
| A_23_P352870   | 9,52465 | 9,43627 | 1,063175674 | ENST00000587386 | 5819      | NM_002856    | PVRL2                |
| A_23_P409462   | 7,57906 | 7,49069 | 1,063168304 | ENST00000424717 | 285761    | NM_173674    | DCBLD1               |
| A_24_P44992    | 3,18076 | 3,0924  | 1,063160935 | ENST00000400371 | N/A       | AL831934     | N/A                  |
| A_23_P302550   | 1,80237 | 1,71401 | 1,063160935 | ENST00000367460 | 64407     | NM_130782    | RGS18                |
| A_22_P00018545 | 7,90681 | 7,81845 | 1,063160935 | N/A             | N/A       | N/A          | Inc-TM6SF1-2         |
| A_23_P117261   | 1,74601 | 1,65767 | 1,063146197 | ENST00000380314 | 122042    | NM_130806    | RXFP2                |
| A_23_P95213    | 4,90137 | 4,81303 | 1,063146197 | ENST00000521315 | 6440      | NM_003018    | SFTPC                |
| A_32_P923011   | 7,44332 | 7,35498 | 1,063146197 | ENST00000461467 | 645520    | NR_026818    | FAM138A              |
| A_33_P3230598  | 1,92649 | 1,83818 | 1,063124089 | ENST00000602168 | 100271846 | NM_001191055 | ERVV-2               |

|                |         |         |             |                 |           |              |                  |
|----------------|---------|---------|-------------|-----------------|-----------|--------------|------------------|
| A_23_P87575    | 6,33653 | 6,24822 | 1,063124089 | ENST00000417344 | 904       | NM_001240    | CCNT1            |
| A_22_P00023263 | 7,61015 | 7,52184 | 1,063124089 | ENST00000559428 | N/A       | DN912770     | N/A              |
| A_23_P111804   | 11,4366 | 11,3483 | 1,06311672  | ENST00000488726 | 64761     | NM_022750    | PARP12           |
| A_21_P0012265  | 6,10564 | 6,01734 | 1,06311672  | N/A             | N/A       | N/A          | XLOC_I2_009332   |
| A_33_P3324854  | 1,71805 | 1,62977 | 1,063101982 | ENST00000436022 | 79825     | NM_024768    | EFCC1            |
| A_23_P331235   | 2,64386 | 2,55563 | 1,063065139 | ENST00000334000 | 153571    | NM_178569    | C5orf38          |
| A_23_P400459   | 8,58098 | 8,49276 | 1,06305777  | ENST00000488673 | 158234    | NM_144964    | TRMT10B          |
| A_22_P00002949 | 1,69325 | 1,60506 | 1,063035665 | N/A             | N/A       | DB508818     | Inc-C5orf47-1    |
| A_33_P3237729  | 1,8148  | 1,72662 | 1,063028296 | ENST00000253754 | 8572      | NM_003687    | PDLIM4           |
| A_23_P151166   | 6,77579 | 6,68762 | 1,063020928 | ENST00000356742 | 84329     | NM_001040107 | HVCN1            |
| A_23_P373541   | 1,74122 | 1,65305 | 1,063020928 | ENST00000399271 | 1834      | NM_014208    | DSPP             |
| A_33_P3312288  | 1,78122 | 1,69305 | 1,063020928 | N/A             | N/A       | N/A          | XLOC_I2_013314   |
| A_22_P00016239 | 5,8797  | 5,79156 | 1,062998823 | N/A             | N/A       | AA315543     | Inc-TMC7-1       |
| A_33_P3357630  | 1,81497 | 1,72684 | 1,062991455 | ENST00000429849 | 728858    | NM_001080406 | C12orf71         |
| A_22_P00005488 | 1,81756 | 1,72943 | 1,062991455 | ENST00000546170 | 101927922 | NR_120456    | LINC01479        |
| A_22_P00005941 | 1,68467 | 1,59654 | 1,062991455 | N/A             | N/A       | N/A          | Inc-EXOC3-2      |
| A_21_P0011836  | 1,81789 | 1,72977 | 1,062984087 | N/A             | N/A       | N/A          | XLOC_I2_007470   |
| A_33_P3270509  | 10,1165 | 10,0284 | 1,062969351 | ENST00000380006 | 6477      | NM_003031    | SIAH1            |
| A_21_P0010048  | 4,86699 | 4,7789  | 1,062961983 | N/A             | N/A       | N/A          | Inc-SULF2-4      |
| A_33_P3364929  | 1,80032 | 1,71223 | 1,062961983 | N/A             | N/A       | N/A          | N/A              |
| A_21_P0004267  | 1,74572 | 1,65764 | 1,062954615 | N/A             | N/A       | N/A          | Inc-AGGF1-3      |
| A_22_P00000165 | 1,68391 | 1,59587 | 1,062925144 | N/A             | N/A       | AA412392     | Inc-ABCC11-1     |
| A_21_P0002573  | 4,01597 | 3,92794 | 1,062917777 | N/A             | N/A       | N/A          | Inc-HPCAL1-1     |
| A_21_P0013076  | 1,95609 | 1,86807 | 1,062910409 | N/A             | N/A       | N/A          | XLOC_I2_012940   |
| A_23_P342825   | 10,7493 | 10,6613 | 1,062895674 | ENST00000331272 | 6468      | NM_022039    | FBXW4            |
| A_21_P0002310  | 1,77755 | 1,68956 | 1,062888307 | N/A             | N/A       | N/A          | Inc-CSRNP3-3     |
| A_33_P3405980  | 1,69852 | 1,61055 | 1,062873572 | ENST00000407963 | 391365    | NM_001032377 | SULT6B1          |
| A_22_P00022329 | 1,68649 | 1,59859 | 1,062822003 | N/A             | N/A       | N/A          | Inc-AL078585.1-1 |
| A_22_P00024377 | 1,68366 | 1,59579 | 1,062799902 | N/A             | 101927693 | XR_246584    | LOC101927693     |
| A_22_P00013249 | 1,72955 | 1,64171 | 1,062777802 | N/A             | N/A       | N/A          | Inc-ROM1-3       |
| A_22_P00008839 | 5,89497 | 5,80713 | 1,062777802 | N/A             | N/A       | N/A          | Inc-KLF6-2       |
| A_33_P3259712  | 1,76657 | 1,67874 | 1,062770435 | N/A             | N/A       | AK123808     | Inc-A2M-1        |
| A_22_P00012235 | 1,68398 | 1,59622 | 1,062718871 | ENST00000514657 | 101927379 | NR_109881    | LOC101927379     |



|                |         |         |             |                 |           |              |                       |
|----------------|---------|---------|-------------|-----------------|-----------|--------------|-----------------------|
| A_21_P0010230  | 1,71917 | 1,63142 | 1,062711505 | N/A             | N/A       | N/A          | Inc-SOD1-2            |
| A_22_P00025484 | 1,76701 | 1,67927 | 1,062704138 | ENST00000414895 | N/A       | N/A          | N/A                   |
| A_21_P0000512  | 4,36377 | 4,27603 | 1,062704138 | N/A             | 100170222 | NR_024343    | SNAR-I                |
| A_21_P0004584  | 1,71141 | 1,62368 | 1,062696772 | ENST00000521128 | N/A       | N/A          | N/A                   |
| A_22_P00006382 | 1,76841 | 1,6808  | 1,062608383 | ENST00000507509 | N/A       | N/A          | N/A                   |
| A_33_P3358208  | 10,8551 | 10,7675 | 1,062601018 | ENST00000375471 | 29943     | NM_013358    | PADI1                 |
| A_23_P30784    | 7,85836 | 7,77077 | 1,062593653 | ENST00000274849 | 29777     | NM_013375    | ABT1                  |
| A_22_P00018886 | 1,68274 | 1,59515 | 1,062593653 | N/A             | N/A       | AK056048     | Inc-LMOD1-2           |
| A_21_P0008794  | 1,68473 | 1,59714 | 1,062593653 | N/A             | N/A       | N/A          | Inc-RP11-82110.1.1-10 |
| A_24_P222890   | 1,74808 | 1,6605  | 1,062586287 | ENST00000408964 | 84226     | NM_032266    | C2orf16               |
| A_21_P0005173  | 1,72407 | 1,63649 | 1,062586287 | N/A             | N/A       | N/A          | Inc-HACE1-3           |
| A_23_P81926    | 4,22053 | 4,13296 | 1,062578922 | ENST00000383530 | 170680    | NM_014069    | PSORS1C2              |
| A_33_P3250323  | 2,84735 | 2,75979 | 1,062571557 | N/A             | N/A       | N/A          | N/A                   |
| A_22_P00006999 | 5,62728 | 5,53972 | 1,062571557 | N/A             | N/A       | DJ031144     | Inc-GGCT-1            |
| A_23_P69452    | 8,3471  | 8,25958 | 1,062542096 | ENST00000260803 | 51163     | NM_016216    | DBR1                  |
| A_24_P182696   | 1,72374 | 1,63624 | 1,062527367 | ENST00000438642 | 140469    | NM_138995    | MYO3B                 |
| A_21_P0004118  | 1,69441 | 1,60691 | 1,062527367 | ENST00000507876 | 101929681 | N/A          | LOC101929681          |
| A_21_P0008831  | 1,68892 | 1,60144 | 1,062512637 | ENST00000615095 | 101929221 | N/A          | C15orf59-AS1          |
| A_33_P3393098  | 1,79961 | 1,71215 | 1,062497908 | ENST00000297001 | 100130988 | NM_001161834 | C7orf72               |
| A_22_P00003463 | 1,72156 | 1,6341  | 1,062497908 | ENST00000547607 | 100131138 | N/A          | LINC01405             |
| A_33_P3333800  | 7,75424 | 7,66679 | 1,062490543 | ENST00000397280 | 124056    | NM_172168    | NOXO1                 |
| A_33_P3423556  | 1,78933 | 1,70189 | 1,062483178 | ENST00000462622 | 1804      | AK309760     | DPP6                  |
| A_22_P00008415 | 1,73546 | 1,64806 | 1,06245372  | ENST00000543403 | N/A       | AA393706     | N/A                   |
| A_22_P00014370 | 1,69031 | 1,60291 | 1,06245372  | ENST00000565133 | N/A       | XR_424709    | N/A                   |
| A_33_P3259845  | 1,77575 | 1,68836 | 1,062446356 | ENST00000308132 | 152877    | NM_001297435 | FAM53A                |
| A_23_P397933   | 1,78451 | 1,69714 | 1,062431628 | ENST00000337774 | 5648      | NM_001879    | MASP1                 |
| A_23_P207245   | 1,75688 | 1,66951 | 1,062431628 | ENST00000338696 | 64518     | NM_031898    | TEKT3                 |
| A_23_P110266   | 2,17445 | 2,08709 | 1,062424263 | ENST00000379692 | 79625     | NM_024574    | NDNF                  |
| A_22_P00016246 | 1,73741 | 1,65005 | 1,062424263 | N/A             | N/A       | DB461617     | Inc-TMCO1-2           |
| A_21_P0012464  | 1,7986  | 1,71124 | 1,062424263 | N/A             | N/A       | N/A          | XLOC_I2_010374        |
| A_21_P0003734  | 1,80863 | 1,72127 | 1,062424263 | N/A             | N/A       | N/A          | Inc-CCKAR-5           |
| A_23_P129209   | 9,60914 | 9,52184 | 1,062380079 | ENST00000560061 | 3418      | NM_002168    | IDH2                  |
| A_32_P517749   | 11,4797 | 11,3924 | 1,062380079 | ENST00000379565 | 6197      | NM_004586    | RPS6KA3               |

|                |         |         |             |                 |           |              |                |
|----------------|---------|---------|-------------|-----------------|-----------|--------------|----------------|
| A_32_P309662   | 1,94975 | 1,86247 | 1,062365352 | ENST00000446620 | 259285    | NM_176881    | TAS2R39        |
| A_21_P0002997  | 1,52373 | 1,43645 | 1,062365352 | N/A             | N/A       | N/A          | Inc-C3orf38-2  |
| A_33_P3356341  | 7,14615 | 7,05888 | 1,062357988 | ENST00000398532 | 339287    | NM_001012241 | MSL1           |
| A_21_P0011569  | 1,79468 | 1,70744 | 1,062335897 | N/A             | N/A       | N/A          | Inc-LGALS9B-2  |
| A_21_P0008499  | 7,61195 | 7,52472 | 1,062328534 | N/A             | N/A       | N/A          | Inc-CDCA4-1    |
| A_33_P3275390  | 1,7785  | 1,69127 | 1,062328534 | N/A             | 89792     | NM_033036    | GAL3ST3        |
| A_33_P3265254  | 1,684   | 1,59678 | 1,06232117  | N/A             | N/A       | N/A          | N/A            |
| A_23_P22614    | 7,51235 | 7,42513 | 1,06232117  | ENST00000354228 | 23157     | NM_145802    | set-06         |
| A_23_P324384   | 1,86825 | 1,78105 | 1,062306443 | ENST00000624653 | 140032    | NM_001039567 | RPS4Y2         |
| A_21_P0006653  | 1,73797 | 1,65077 | 1,062306443 | ENST00000420825 | N/A       | N/A          | N/A            |
| A_33_P3210585  | 11,7161 | 11,6289 | 1,062306443 | ENST00000339092 | 22848     | NM_014911    | AAK1           |
| A_23_P138025   | 11,8141 | 11,7269 | 1,062306443 | ENST00000374135 | 54707     | NM_018066    | GPN2           |
| A_23_P503059   | 1,72076 | 1,6336  | 1,06227699  | ENST00000524560 | 53942     | NM_014361    | CNTN5          |
| A_22_P00001533 | 1,7988  | 1,71164 | 1,06227699  | N/A             | N/A       | AK092562     | Inc-ARHGAP44-1 |
| A_22_P00006361 | 3,32903 | 3,24188 | 1,062269627 | N/A             | N/A       | N/A          | Inc-FAS-2      |
| A_21_P0012853  | 1,71811 | 1,63098 | 1,062254901 | N/A             | 101926975 | XR_425919    | LOC101926975   |
| A_24_P164505   | 5,94769 | 5,8606  | 1,06222545  | ENST00000392176 | 100129396 | NR_026810    | FAM106CP       |
| A_22_P00006686 | 1,68151 | 1,59444 | 1,062210724 | ENST00000418078 | 339468    | XR_246343    | LOC339468      |
| A_21_P0006730  | 9,18606 | 9,099   | 1,062203361 | ENST00000478294 | N/A       | N/A          | N/A            |
| A_22_P00018898 | 1,68511 | 1,59807 | 1,062188636 | ENST00000509780 | 438       | AY037933     | ASMT           |
| A_33_P3594854  | 1,71652 | 1,6295  | 1,062173911 | N/A             | 9677      | BI053448     | PIIP5K1        |
| A_21_P0007628  | 1,68185 | 1,59487 | 1,062144462 | N/A             | N/A       | N/A          | Inc-SDSL-5     |
| A_21_P0011892  | 1,68127 | 1,5943  | 1,0621371   | N/A             | N/A       | N/A          | Inc-CXXC11-4   |
| A_22_P00016833 | 1,79721 | 1,71025 | 1,062129738 | N/A             | N/A       | N/A          | Inc-TRMT112-3  |
| A_22_P00016631 | 1,71361 | 1,62668 | 1,062107651 | N/A             | N/A       | N/A          | Inc-TOR1AIP2-2 |
| A_22_P00021353 | 1,68758 | 1,60065 | 1,062107651 | ENST00000527895 | 100505622 | NR_038332    | LOC100505622   |
| A_22_P00013961 | 9,47961 | 9,39269 | 1,06210029  | N/A             | N/A       | N/A          | Inc-RTL1-2     |
| A_21_P0004431  | 1,89606 | 1,80916 | 1,062085566 | N/A             | N/A       | N/A          | Inc-TMED7-1    |
| A_22_P00000621 | 4,65512 | 4,56823 | 1,062078204 | N/A             | N/A       | N/A          | Inc-ACP1-1     |
| A_21_P0006531  | 1,8334  | 1,74653 | 1,062063481 | N/A             | N/A       | N/A          | Inc-RPGR-1     |
| A_22_P00012994 | 1,79703 | 1,71017 | 1,062056119 | ENST00000452181 | N/A       | BC036751     | N/A            |
| A_24_P672240   | 1,7911  | 1,70426 | 1,062041396 | ENST00000380682 | 9758      | NM_014728    | FRMPD4         |
| A_22_P00020332 | 1,52538 | 1,43859 | 1,062004589 | ENST00000451108 | N/A       | N/A          | N/A            |

|                |         |         |             |                 |           |              |                      |
|----------------|---------|---------|-------------|-----------------|-----------|--------------|----------------------|
| A_24_P5750     | 4,66154 | 4,57477 | 1,061989866 | ENST00000597727 | 3817      | NM_005551    | KLK2                 |
| A_22_P00010938 | 2,81118 | 2,72441 | 1,061989866 | ENST00000559214 | N/A       | DB083763     | N/A                  |
| A_32_P125549   | 16,68   | 16,5933 | 1,06193834  | N/A             | N/A       | N/A          | N/A                  |
| A_21_P0007730  | 1,80869 | 1,72202 | 1,061916258 | N/A             | N/A       | N/A          | Inc-CCDC59-1         |
| A_21_P0006656  | 1,69481 | 1,60816 | 1,061901536 | ENST00000434386 | 102724039 | N/A          | LOC102724039         |
| A_21_P0013537  | 1,79313 | 1,70652 | 1,061872095 | ENST00000497773 | 255926    | N/A          | ADAM5                |
| A_21_P0001332  | 1,6854  | 1,5988  | 1,061864734 | N/A             | N/A       | N/A          | Inc-PKN2-2           |
| A_22_P00020540 | 4,40608 | 4,3195  | 1,061850014 | N/A             | N/A       | AA430309     | Inc-METTL11A-1       |
| A_24_P941038   | 1,71374 | 1,62716 | 1,061850014 | ENST00000332853 | 196740    | NM_001031746 | VSTM4                |
| A_21_P0004250  | 1,6799  | 1,59333 | 1,061842654 | N/A             | N/A       | N/A          | Inc-CTD-2203A3.1.1-1 |
| A_21_P0001391  | 1,68259 | 1,59602 | 1,061842654 | ENST00000442621 | 148756    | NR_125716    | OVAAL                |
| A_22_P00019546 | 2,73313 | 2,64659 | 1,061820573 | N/A             | N/A       | N/A          | Inc-RADIL-1          |
| A_22_P00008413 | 1,68508 | 1,59854 | 1,061820573 | ENST00000554526 | N/A       | N/A          | N/A                  |
| A_21_P0012931  | 1,71778 | 1,63126 | 1,061805854 | N/A             | N/A       | N/A          | XLOC_I2_012323       |
| A_23_P320658   | 12,5858 | 12,4993 | 1,061791134 | ENST00000368865 | 9184      | NM_004725    | BUB3                 |
| A_33_P3344046  | 1,68484 | 1,59837 | 1,061769055 | ENST00000400563 | 164380    | NR_001279    | CST13P               |
| A_23_P7562     | 1,68066 | 1,59421 | 1,061754336 | ENST00000493861 | 23305     | NM_001009185 | ACSL6                |
| A_33_P3279286  | 1,68555 | 1,59911 | 1,061746976 | ENST00000382119 | 360030    | NM_001145465 | NANOGB               |
| A_33_P3411155  | 1,73463 | 1,64821 | 1,061732257 | ENST00000511828 | 285556    | XM_001717423 | LOC285556            |
| A_22_P00012532 | 1,81569 | 1,72927 | 1,061732257 | ENST00000560446 | N/A       | N/A          | N/A                  |
| A_33_P3296696  | 1,73389 | 1,64748 | 1,061724898 | N/A             | N/A       | N/A          | N/A                  |
| A_24_P231025   | 6,81405 | 6,72765 | 1,061717539 | ENST00000342449 | 54014     | NM_033656    | BRWD1                |
| A_21_P0003669  | 1,71699 | 1,63059 | 1,061717539 | N/A             | N/A       | N/A          | Inc-TDO2-2           |
| A_22_P00001560 | 8,83221 | 8,74584 | 1,061695461 | ENST00000379887 | 25820     | AK123669     | ARIH1                |
| A_21_P0013831  | 5,97161 | 5,88524 | 1,061695461 | N/A             | N/A       | N/A          | XLOC_I2_015821       |
| A_21_P0006527  | 3,09781 | 3,01151 | 1,061643949 | N/A             | N/A       | N/A          | Inc-ATXN3L-2         |
| A_33_P3305810  | 3,55981 | 3,47352 | 1,06163659  | ENST00000297625 | 57462     | NM_020702    | KIAA1161             |
| A_33_P3321225  | 5,85892 | 5,77265 | 1,061621873 | N/A             | N/A       | N/A          | Inc-SLA2-3           |
| A_33_P3399443  | 6,5886  | 6,50234 | 1,061614514 | ENST00000502350 | 54436     | XR_241652    | SH3TC1               |
| A_21_P0002764  | 1,74256 | 1,65632 | 1,061599797 | N/A             | N/A       | N/A          | Inc-GAP43-5          |
| A_21_P0004836  | 1,78396 | 1,69775 | 1,061577722 | N/A             | N/A       | N/A          | Inc-GCNT2-3          |
| A_23_P132793   | 14,5948 | 14,5086 | 1,061570364 | ENST00000470900 | 7873      | NM_006010    | MANF                 |
| A_33_P3368208  | 1,79855 | 1,71235 | 1,061570364 | ENST00000311955 | 137735    | NM_139166    | ABRA                 |

|                |         |         |             |                 |           |              |               |
|----------------|---------|---------|-------------|-----------------|-----------|--------------|---------------|
| A_22_P00021035 | 1,70591 | 1,61971 | 1,061570364 | N/A             | N/A       | BI827305     | Inc-LRTM2-2   |
| A_22_P00023374 | 11,4899 | 11,4037 | 1,061570364 | N/A             | 100505573 | N/A          | INAFM2        |
| A_21_P0002548  | 1,68569 | 1,59951 | 1,061555647 | N/A             | N/A       | N/A          | Inc-GPR55-3   |
| A_23_P347432   | 9,71136 | 9,62519 | 1,061548289 | ENST00000610709 | 1855      | NM_004421    | DVL1          |
| A_33_P3419945  | 6,67942 | 6,59327 | 1,061533573 | N/A             | N/A       | AK130724     | N/A           |
| A_23_P20311    | 1,68109 | 1,59495 | 1,061526215 | ENST00000351513 | 1807      | NM_001385    | DPYS          |
| A_33_P3312489  | 1,79347 | 1,70733 | 1,061526215 | ENST00000409460 | N/A       | AL832635     | N/A           |
| A_24_P305938   | 9,33514 | 9,24901 | 1,061518857 | ENST00000519581 | 9366      | NR_000039    | RAB9BP1       |
| A_33_P3413795  | 8,40252 | 8,3164  | 1,061511499 | ENST00000427872 | N/A       | AV727532     | N/A           |
| A_33_P3392123  | 8,60722 | 8,5211  | 1,061511499 | N/A             | 100233209 | NR_026544    | PCED1B-AS1    |
| A_21_P0009135  | 1,78162 | 1,69551 | 1,061504142 | ENST00000562921 | 102467146 | N/A          | LOC102467146  |
| A_22_P00006248 | 1,7691  | 1,68299 | 1,061504142 | ENST00000414765 | N/A       | N/A          | N/A           |
| A_23_P100441   | 10,8175 | 10,7314 | 1,061496784 | ENST00000309137 | 80011     | NM_024946    | FAM192A       |
| A_23_P334173   | 10,3901 | 10,304  | 1,061496784 | ENST00000263636 | 4065      | NM_002349    | LY75          |
| A_23_P114144   | 9,18577 | 9,0997  | 1,061474711 | ENST00000376227 | 28952     | NM_014008    | CCDC22        |
| A_22_P00005269 | 1,68944 | 1,60337 | 1,061474711 | ENST00000561473 | N/A       | AK054776     | N/A           |
| A_23_P105973   | 1,688   | 1,60197 | 1,061445281 | ENST00000334708 | 256394    | NM_001080451 | SERPINA11     |
| A_21_P0007873  | 1,72225 | 1,63623 | 1,061437924 | N/A             | N/A       | N/A          | Inc-SLC2A13-3 |
| A_33_P3395848  | 4,69286 | 4,60688 | 1,061408495 | ENST00000600663 | 147645    | NM_001163922 | VSIG10L       |
| A_22_P00001134 | 1,79488 | 1,70892 | 1,06139378  | N/A             | N/A       | BQ435527     | Inc-ALX4-6    |
| A_24_P822931   | 1,68594 | 1,60002 | 1,061364353 | N/A             | 100329135 | NM_001195576 | TRPC5OS       |
| A_21_P0000101  | 17,6615 | 17,5756 | 1,061349639 | ENST00000600213 | 100462981 | NM_001190470 | MTRNR2L2      |
| A_22_P00014147 | 1,76826 | 1,68236 | 1,061349639 | N/A             | N/A       | N/A          | Inc-SCN2A-1   |
| A_33_P3220663  | 8,31881 | 8,23292 | 1,061342283 | ENST00000557176 | 246329    | NM_145064    | STAC3         |
| A_21_P0006038  | 1,74816 | 1,6623  | 1,061320213 | ENST00000444985 | 100996590 | NR_104145    | LINC01505     |
| A_23_P365614   | 4,57077 | 4,48492 | 1,061312856 | ENST00000437843 | 4855      | NM_004557    | NOTCH4        |
| A_33_P3368800  | 8,59661 | 8,51079 | 1,061290787 | ENST00000613714 | 149013    | NM_001278141 | NBPF12        |
| A_32_P332551   | 1,72024 | 1,63442 | 1,061290787 | ENST00000537894 | 144809    | NM_182508    | FAM216B       |
| A_32_P413094   | 1,68168 | 1,59589 | 1,061268718 | ENST00000417072 | 60439     | NR_001536    | TTY2          |
| A_22_P00006533 | 1,77691 | 1,69112 | 1,061268718 | N/A             | N/A       | DB079229     | Inc-FGL2-1    |
| A_21_P0000897  | 1,7209  | 1,63511 | 1,061268718 | N/A             | 100287616 | NR_040066    | LOXL1-AS1     |
| A_33_P3250979  | 1,7239  | 1,63813 | 1,061254006 | N/A             | N/A       | N/A          | N/A           |
| A_21_P0009912  | 1,68665 | 1,6009  | 1,061239294 | ENST00000426963 | N/A       | N/A          | N/A           |

|                |         |         |             |                 |           |              |                |
|----------------|---------|---------|-------------|-----------------|-----------|--------------|----------------|
| A_23_P157766   | 7,7585  | 7,67275 | 1,061239294 | ENST00000406861 | 55064     | NM_001039395 | SPATA6L        |
| A_23_P158297   | 1,78657 | 1,70085 | 1,061217227 | ENST00000342868 | 10917     | NM_197975    | BTNL3          |
| A_23_P258246   | 13,5251 | 13,4394 | 1,061202515 | ENST00000545894 | 1642      | NM_001923    | DDB1           |
| A_19_P00320727 | 1,70678 | 1,6211  | 1,061187804 | ENST00000505155 | 101927237 | N/A          | LOC101927237   |
| A_33_P3391285  | 1,69382 | 1,60814 | 1,061187804 | ENST00000305377 | 441639    | NM_001005243 | OR9K2          |
| A_33_P3692756  | 3,72841 | 3,64277 | 1,061158382 | N/A             | 723809    | NR_027374    | LHFPL3-AS2     |
| A_22_P00005349 | 1,72892 | 1,64329 | 1,061151027 | N/A             | N/A       | AI077571     | Inc-DPY19L2-1  |
| A_22_P00008682 | 1,67943 | 1,59382 | 1,061136316 | N/A             | 101927551 | XR_244446    | LOC101927551   |
| A_33_P3272274  | 1,73074 | 1,64514 | 1,061128961 | ENST00000393660 | 245913    | NM_001037728 | DEFB110        |
| A_33_P3404804  | 1,71737 | 1,63177 | 1,061128961 | ENST00000514892 | N/A       | N/A          | N/A            |
| A_21_P0005123  | 1,70868 | 1,6231  | 1,06111425  | N/A             | N/A       | N/A          | Inc-PM20D2-1   |
| A_21_P0002382  | 1,72202 | 1,63645 | 1,061106895 | N/A             | N/A       | N/A          | Inc-RNASEH1-1  |
| A_21_P0009099  | 1,74859 | 1,66303 | 1,06109954  | N/A             | 283854    | XR_243451    | CASC22         |
| A_21_P0010203  | 1,69064 | 1,60508 | 1,06109954  | ENST00000436845 | 102724678 | NR_110545    | LINC01423      |
| A_33_P3386621  | 1,76408 | 1,67853 | 1,061092185 | N/A             | N/A       | BC046191     | N/A            |
| A_22_P00006945 | 1,77124 | 1,68569 | 1,061092185 | N/A             | N/A       | N/A          | Inc-GBP5-5     |
| A_21_P0005770  | 1,80658 | 1,72104 | 1,061084831 | N/A             | N/A       | N/A          | Inc-KHDRBS3-10 |
| A_22_P00013897 | 6,42532 | 6,33979 | 1,061077476 | N/A             | N/A       | N/A          | Inc-RPS21-2    |
| A_21_P0010336  | 1,76704 | 1,68153 | 1,061062766 | ENST00000424852 | 102723775 | NR_120595    | LINC01315      |
| A_21_P0008404  | 10,8465 | 10,761  | 1,061055411 | ENST00000548361 | 102723354 | NR_110546    | LOC102723354   |
| A_23_P256172   | 15,0709 | 14,9854 | 1,061055411 | ENST00000496152 | 25915     | NM_199069    | NDUFAF3        |
| A_33_P3272385  | 1,6774  | 1,5919  | 1,061055411 | ENST00000408935 | 26686     | NM_001001912 | OR4E2          |
| A_23_P8664     | 10,7722 | 10,6867 | 1,061055411 | ENST00000488352 | 9988      | NM_021145    | DMTF1          |
| A_21_P0008183  | 1,78823 | 1,70277 | 1,061025993 | N/A             | N/A       | N/A          | Inc-RNF219-1   |
| A_33_P3320523  | 1,67854 | 1,59308 | 1,061025993 | ENST00000398669 | N/A       | AK128823     | N/A            |
| A_21_P0004935  | 1,74838 | 1,66293 | 1,061018639 | N/A             | N/A       | N/A          | Inc-SMPDL3A-1  |
| A_23_P113572   | 6,85379 | 6,76835 | 1,061011284 | ENST00000611258 | 930       | NM_001770    | CD19           |
| A_33_P3364761  | 1,68098 | 1,59557 | 1,060989221 | ENST00000375625 | N/A       | XR_132683    | N/A            |
| A_22_P00002047 | 4,56485 | 4,47945 | 1,060981867 | N/A             | N/A       | N/A          | Inc-BID-1      |
| A_22_P00013562 | 1,72043 | 1,63503 | 1,060981867 | ENST00000511091 | N/A       | N/A          | N/A            |
| A_24_P314515   | 1,68722 | 1,60183 | 1,060974513 | N/A             | 283460    | NR_024345    | HNF1A-AS1      |
| A_23_P357760   | 6,52714 | 6,44176 | 1,060967159 | ENST00000481340 | 414       | XM_005274516 | ARSD           |
| A_22_P00020699 | 1,71204 | 1,62669 | 1,060945097 | N/A             | N/A       | BM926533     | Inc-PPIC-1     |

|                |         |         |             |                 |           |              |                |
|----------------|---------|---------|-------------|-----------------|-----------|--------------|----------------|
| A_21_P0003465  | 1,75522 | 1,66988 | 1,060937743 | ENST00000507808 | N/A       | N/A          | N/A            |
| A_23_P22800    | 1,69234 | 1,607   | 1,060937743 | ENST00000623101 | 728137    | NM_001077697 | TSPY3          |
| A_22_P00001588 | 1,75099 | 1,66566 | 1,060930389 | N/A             | N/A       | BE166620     | Inc-ARMC6-1    |
| A_22_P00015920 | 8,4317  | 8,34638 | 1,060923036 | ENST00000553963 | N/A       | N/A          | N/A            |
| A_21_P0014492  | 8,78458 | 8,69927 | 1,060915682 | N/A             | N/A       | N/A          | N/A            |
| A_33_P3219384  | 1,70443 | 1,61913 | 1,060908328 | ENST00000419101 | 151300    | NR_024385    | LINC00608      |
| A_23_P37654    | 10,9674 | 10,8821 | 1,060908328 | ENST00000570161 | 23269     | NM_001164273 | MGA            |
| A_19_P00809558 | 12,4453 | 12,36   | 1,060908328 | ENST00000409333 | 6741      | NM_001294145 | SSB            |
| A_22_P00020879 | 1,73907 | 1,65378 | 1,060900974 | N/A             | N/A       | HY054437     | Inc-TMCO4-1    |
| A_21_P0010546  | 1,76486 | 1,67959 | 1,060886267 | N/A             | N/A       | N/A          | XLOC_I2_000354 |
| A_33_P3345821  | 1,67731 | 1,59204 | 1,060886267 | N/A             | N/A       | N/A          | N/A            |
| A_33_P3273719  | 8,2479  | 8,16263 | 1,060886267 | ENST00000370913 | 60481     | NM_001242831 | ELOVL5         |
| A_22_P00008458 | 5,73028 | 5,64502 | 1,060878914 | ENST00000522715 | N/A       | N/A          | N/A            |
| A_33_P3212849  | 1,70999 | 1,62473 | 1,060878914 | N/A             | 100506733 | NR_038973    | FAM170B-AS1    |
| A_24_P350303   | 1,77695 | 1,69171 | 1,060864207 | ENST00000483580 | 404220    | NM_001085401 | C6orf201       |
| A_23_P155463   | 6,7638  | 6,67857 | 1,060856854 | ENST00000395905 | 79442     | NM_024512    | LRRC2          |
| A_22_P00004730 | 1,67849 | 1,59328 | 1,060842147 | N/A             | N/A       | N/A          | Inc-CTIF-3     |
| A_21_P0009626  | 1,67672 | 1,59152 | 1,060834794 | N/A             | N/A       | N/A          | Inc-CDH2-1     |
| A_23_P405216   | 6,51381 | 6,42864 | 1,060812735 | ENST00000314686 | 285267    | NM_001145083 | ZNF619         |
| A_22_P00008126 | 1,85811 | 1,77294 | 1,060812735 | N/A             | N/A       | N/A          | Inc-IL32-1     |
| A_23_P435657   | 5,96195 | 5,87683 | 1,060775971 | ENST00000428767 | 200420    | NR_003683    | ALMS1P         |
| A_21_P0011273  | 1,67755 | 1,59243 | 1,060775971 | N/A             | N/A       | N/A          | XLOC_I2_004540 |
| A_22_P00001875 | 9,11997 | 9,03487 | 1,060761265 | ENST00000559390 | 100419583 | NR_125376    | LOC100419583   |
| A_24_P878388   | 14,1474 | 14,0623 | 1,060761265 | ENST00000463344 | N/A       | N/A          | N/A            |
| A_21_P0011681  | 8,4221  | 8,33704 | 1,060731855 | ENST00000344519 | N/A       | N/A          | N/A            |
| A_22_P00013002 | 6,81969 | 6,73463 | 1,060731855 | ENST00000426575 | N/A       | N/A          | N/A            |
| A_33_P3212823  | 17,0235 | 16,9385 | 1,060687741 | ENST00000451409 | 100132247 | NM_001135865 | NPIP5          |
| A_22_P00011868 | 1,69093 | 1,60595 | 1,060673037 | ENST00000442062 | N/A       | N/A          | N/A            |
| A_21_P0009071  | 1,67673 | 1,59176 | 1,060665685 | ENST00000567317 | 101928276 | NR_104665    | LINC01227      |
| A_22_P00021377 | 1,72679 | 1,64183 | 1,060658333 | N/A             | 101927803 | XR_245022    | LOC101927803   |
| A_23_P339119   | 1,79534 | 1,71039 | 1,060650981 | ENST00000548324 | 79611     | NM_024560    | ACSS3          |
| A_33_P3410060  | 1,73525 | 1,6503  | 1,060650981 | ENST00000376681 | 284076    | AL834151     | TTLL6          |
| A_22_P00000731 | 1,68135 | 1,59641 | 1,06064363  | N/A             | N/A       | N/A          | Inc-ADAMTS7-1  |

|                |         |         |             |                 |           |              |                |
|----------------|---------|---------|-------------|-----------------|-----------|--------------|----------------|
| A_22_P00012437 | 1,69097 | 1,60604 | 1,060636278 | ENST00000567313 | 644050    | NR_104176    | LINC01529      |
| A_33_P3370515  | 17,4574 | 17,3725 | 1,060614223 | N/A             | N/A       | N/A          | N/A            |
| A_32_P18493    | 15,4734 | 15,3885 | 1,060614223 | ENST00000476715 | N/A       | N/A          | N/A            |
| A_33_P3355326  | 1,80481 | 1,71991 | 1,060614223 | ENST00000377850 | 10246     | NM_001286123 | SLC17A2        |
| A_21_P0007461  | 1,69302 | 1,60812 | 1,060614223 | ENST00000529017 | 103312105 | NR_120555    | LOC103312105   |
| A_33_P3318243  | 1,67642 | 1,59154 | 1,06059952  | N/A             | N/A       | N/A          | N/A            |
| A_33_P3223487  | 1,68748 | 1,60268 | 1,060540709 | ENST00000436046 | N/A       | XM_006719749 | N/A            |
| A_33_P3372161  | 15,5732 | 15,4884 | 1,060540709 | ENST00000429552 | N/A       | N/A          | N/A            |
| A_23_P154771   | 9,46592 | 9,38113 | 1,060533358 | ENST00000486996 | 128853    | NM_080611    | DUSP15         |
| A_22_P00019631 | 1,75294 | 1,66818 | 1,060511305 | ENST00000506656 | N/A       | N/A          | N/A            |
| A_23_P37347    | 12,8481 | 12,7634 | 1,0604672   | ENST00000261531 | 22938     | NM_012245    | SNW1           |
| A_24_P135276   | 12,2271 | 12,1424 | 1,0604672   | ENST00000521713 | 84132     | NM_032172    | USP42          |
| A_33_P3369716  | 1,73359 | 1,64891 | 1,060452499 | ENST00000536112 | 100507195 | NR_120458    | LOC100507195   |
| A_33_P3233099  | 2,7647  | 2,68004 | 1,060437798 | ENST00000428230 | 50649     | NM_015320    | ARHGEF4        |
| A_22_P00002175 | 1,70275 | 1,61809 | 1,060437798 | N/A             | N/A       | Z49982       | lnc-BTBD17-2   |
| A_33_P3366659  | 1,72366 | 1,63901 | 1,060430448 | ENST00000380491 | 121273    | AY255794     | C12orf54       |
| A_23_P306655   | 6,4531  | 6,36849 | 1,060401047 | ENST00000480687 | 386724    | NM_198722    | AMIGO3         |
| A_33_P3254555  | 5,21101 | 5,1264  | 1,060401047 | ENST00000619706 | 254394    | NM_017696    | MCM9           |
| A_23_P122915   | 16,3464 | 16,2618 | 1,060393697 | ENST00000297290 | 25798     | NM_015379    | BRI3           |
| A_21_P0012250  | 7,05463 | 6,97004 | 1,060386347 | ENST00000432134 | 728229    | NM_001242313 | TMEM191B       |
| A_33_P3388883  | 4,53532 | 4,45073 | 1,060386347 | N/A             | N/A       | N/A          | N/A            |
| A_33_P3209244  | 2,79834 | 2,71377 | 1,060371647 | ENST00000550720 | N/A       | DB161231     | N/A            |
| A_22_P00014255 | 1,73264 | 1,64808 | 1,060364297 | ENST00000569381 | N/A       | AF147372     | N/A            |
| A_22_P00013538 | 1,81149 | 1,72693 | 1,060364297 | ENST00000520749 | N/A       | DB454079     | N/A            |
| A_24_P149036   | 5,33294 | 5,24838 | 1,060364297 | ENST00000398514 | 1809      | NM_001387    | DPYSL3         |
| A_33_P3250851  | 4,03159 | 3,94705 | 1,060349597 | ENST00000370082 | 85441     | NM_001037335 | HELZ2          |
| A_33_P3223467  | 9,55592 | 9,47139 | 1,060342248 | ENST00000310421 | 80124     | NM_025054    | VCPIP1         |
| A_33_P3407990  | 3,64733 | 3,56283 | 1,060320199 | N/A             | 100130193 | AK096102     | LOC100130193   |
| A_33_P3242136  | 5,1831  | 5,0986  | 1,060320199 | ENST00000489937 | 2246      | NM_001257206 | FGF1           |
| A_22_P00002907 | 1,75711 | 1,67262 | 1,060312849 | N/A             | N/A       | N/A          | lnc-C4orf51-1  |
| A_21_P0006810  | 1,71725 | 1,6328  | 1,060283451 | N/A             | N/A       | N/A          | lnc-PFKP-9     |
| A_23_P102832   | 9,92055 | 9,83615 | 1,060246705 | ENST00000397527 | 11190     | NM_007186    | CEP250         |
| A_33_P3221708  | 12,9056 | 12,8212 | 1,060246705 | N/A             | N/A       | N/A          | XLOC_l2_012371 |

|                |         |         |             |                 |           |              |                    |
|----------------|---------|---------|-------------|-----------------|-----------|--------------|--------------------|
| A_22_P00005789 | 6,75099 | 6,6666  | 1,060239356 | N/A             | N/A       | N/A          | Inc-EPB41-2        |
| A_23_P366230   | 5,71503 | 5,63067 | 1,06021731  | ENST00000253339 | 9113      | NM_004690    | LATS1              |
| A_21_P0013591  | 5,26206 | 5,17773 | 1,060195263 | ENST00000451152 | 100507540 | NR_110953    | LINC01504          |
| A_33_P3348529  | 6,44061 | 6,35631 | 1,060173217 | N/A             | N/A       | AK130848     | N/A                |
| A_21_P0013332  | 4,22007 | 4,13578 | 1,060165869 | ENST00000576332 | N/A       | N/A          | N/A                |
| A_24_P787889   | 9,68266 | 9,5984  | 1,060143823 | ENST00000612978 | 728229    | NM_001242313 | TMEM191B           |
| A_33_P3348184  | 1,77092 | 1,68668 | 1,060129127 | ENST00000377121 | 284788    | NR_027089    | LOC284788          |
| A_21_P0009393  | 1,71556 | 1,63133 | 1,060121779 | N/A             | N/A       | N/A          | Inc-RGS9-1         |
| A_33_P3343250  | 1,7512  | 1,66699 | 1,060107082 | ENST00000612892 | 2825      | NM_001261453 | GPR1               |
| A_33_P3404759  | 4,97969 | 4,89548 | 1,060107082 | N/A             | N/A       | N/A          | N/A                |
| A_23_P26254    | 11,3838 | 11,2996 | 1,060099734 | ENST00000559127 | 51103     | NM_016013    | NDUFAF1            |
| A_22_P00004040 | 1,71707 | 1,6329  | 1,06007769  | N/A             | N/A       | AK093642     | Inc-CHRNA5-1       |
| A_23_P370684   | 1,71281 | 1,62864 | 1,06007769  | ENST00000304337 | 201798    | NM_145720    | TIGD4              |
| A_22_P00007766 | 1,68238 | 1,59823 | 1,060062995 | ENST00000615743 | N/A       | N/A          | N/A                |
| A_21_P0014010  | 1,79474 | 1,7106  | 1,060055647 | N/A             | 100128285 | AF357221     | DNM1P35            |
| A_23_P140475   | 1,7938  | 1,70969 | 1,060033604 | ENST00000455873 | 79400     | NM_024505    | NOX5               |
| A_24_P218074   | 14,9326 | 14,8485 | 1,060026256 | ENST00000302017 | 168544    | NM_207336    | ZNF467             |
| A_22_P00014821 | 1,69973 | 1,61563 | 1,060026256 | N/A             | N/A       | BX091662     | Inc-SLC39A8-2      |
| A_21_P0005934  | 10,8011 | 10,717  | 1,060026256 | N/A             | N/A       | XM_005273639 | Inc-HMBOX1-1       |
| A_23_P314070   | 14,4565 | 14,3724 | 1,060026256 | ENST00000311956 | 392       | NM_004308    | ARHGAP1            |
| A_33_P3363674  | 10,5338 | 10,4497 | 1,060026256 | ENST00000372652 | 4802      | NM_001142590 | NFYC               |
| A_33_P3423718  | 1,75766 | 1,67357 | 1,060018909 | ENST00000613213 | 11173     | NM_014272    | ADAMTS7            |
| A_23_P46879    | 1,68756 | 1,60352 | 1,059982172 | ENST00000369221 | 5406      | NM_000936    | PNLIP              |
| A_21_P0009235  | 1,77263 | 1,6886  | 1,059974825 | N/A             | N/A       | N/A          | Inc-AC003101.1.1-3 |
| A_21_P0008827  | 1,68218 | 1,59817 | 1,05996013  | N/A             | N/A       | N/A          | Inc-C2CD4A-5       |
| A_33_P3355856  | 1,67387 | 1,58986 | 1,05996013  | ENST00000332043 | N/A       | AB529238     | N/A                |
| A_24_P223124   | 12,6187 | 12,5347 | 1,059952783 | ENST00000336824 | 64778     | NM_022763    | FNDC3B             |
| A_22_P00018988 | 1,67529 | 1,59133 | 1,059923396 | N/A             | 153469    | NR_038902    | JAKMIP2-AS1        |
| A_33_P3294801  | 8,10169 | 8,01775 | 1,059908702 | N/A             | N/A       | AK097991     | N/A                |
| A_19_P00810988 | 4,48311 | 4,39917 | 1,059908702 | N/A             | N/A       | N/A          | XLOC_I2_003856     |
| A_33_P3385706  | 1,76576 | 1,68183 | 1,059901355 | ENST00000450052 | 390037    | NM_001005169 | OR52I1             |
| A_33_P3419006  | 1,68286 | 1,59896 | 1,059879316 | N/A             | 2798      | NM_000406    | GNRHR              |
| A_33_P3369034  | 14,427  | 14,3431 | 1,059879316 | ENST00000566982 | 9564      | NM_001170714 | BCAR1              |



|                |         |         |             |                 |           |              |                |
|----------------|---------|---------|-------------|-----------------|-----------|--------------|----------------|
| A_22_P00011524 | 1,70039 | 1,61654 | 1,059842584 | N/A             | N/A       | N/A          | Inc-PBX1-2     |
| A_33_P3408221  | 8,96607 | 8,88227 | 1,059805853 | ENST00000534767 | 729799    | NR_026952    | SEC14L1P1      |
| A_21_P0013483  | 1,67427 | 1,59049 | 1,059791161 | ENST00000518556 | N/A       | N/A          | N/A            |
| A_23_P36865    | 9,27173 | 9,18796 | 1,059783815 | ENST00000552810 | 80184     | NM_025114    | CEP290         |
| A_21_P0013360  | 1,67669 | 1,59294 | 1,059769123 | N/A             | N/A       | N/A          | XLOC_I2_014076 |
| A_24_P183334   | 1,72947 | 1,64577 | 1,059732395 | ENST00000333811 | 133688    | NM_152404    | UGT3A1         |
| A_22_P00014908 | 1,67501 | 1,59132 | 1,05972505  | ENST00000483245 | 100507210 | XR_241571    | LOC100507210   |
| A_33_P3261636  | 1,67335 | 1,58968 | 1,059710359 | ENST00000429566 | 125963    | NM_001004456 | OR1M1          |
| A_22_P00005416 | 1,68749 | 1,60384 | 1,059695668 | N/A             | 102723727 | XR_426896    | LOC102723727   |
| A_33_P3341299  | 1,65676 | 1,57311 | 1,059695668 | ENST00000262138 | 27092     | NM_014405    | CACNG4         |
| A_23_P57277    | 4,45153 | 4,36789 | 1,059688323 | ENST00000470800 | 56911     | NM_020152    | MAP3K7CL       |
| A_23_P3502     | 9,41345 | 9,32981 | 1,059688323 | ENST00000565583 | 124245    | NM_144604    | ZC3H18         |
| A_21_P0008370  | 1,75916 | 1,67553 | 1,059680978 | ENST00000556684 | 283587    | N/A          | LINC01146      |
| A_21_P0003222  | 1,80735 | 1,72372 | 1,059680978 | N/A             | N/A       | N/A          | Inc-OXNAD1-2   |
| A_22_P00017017 | 1,67679 | 1,59317 | 1,059673633 | ENST00000423232 | 103695432 | N/A          | LINC01167      |
| A_22_P00015971 | 4,54298 | 4,45936 | 1,059673633 | N/A             | N/A       | N/A          | Inc-TEKT5-1    |
| A_21_P0012470  | 1,67423 | 1,59066 | 1,059636908 | N/A             | N/A       | N/A          | XLOC_I2_010449 |
| A_33_P3332541  | 1,58238 | 1,49881 | 1,059636908 | N/A             | N/A       | N/A          | N/A            |
| A_22_P00012413 | 1,76184 | 1,67829 | 1,059622218 | ENST00000561565 | N/A       | BC036363     | N/A            |
| A_23_P89334    | 1,77323 | 1,68971 | 1,059600184 | ENST00000252172 | 8735      | NM_003802    | MYH13          |
| A_32_P162374   | 6,6439  | 6,56039 | 1,05959284  | ENST00000300091 | 162681    | NM_173529    | C18orf54       |
| A_33_P7477170  | 1,68898 | 1,60548 | 1,059585495 | ENST00000469060 | 646168    | NR_033843    | LINC01330      |
| A_22_P00015324 | 1,766   | 1,68252 | 1,059570807 | ENST00000565664 | N/A       | BC038228     | N/A            |
| A_22_P00003909 | 8,98845 | 8,90501 | 1,059541429 | N/A             | N/A       | BG327427     | Inc-CERK-1     |
| A_21_P0014255  | 1,67543 | 1,592   | 1,059534085 | N/A             | N/A       | N/A          | N/A            |
| A_22_P00023283 | 1,64573 | 1,56232 | 1,059519397 | ENST00000451289 | 101928684 | NR_110819    | LINC01209      |
| A_21_P0011104  | 2,34948 | 2,26607 | 1,059519397 | N/A             | N/A       | N/A          | XLOC_I2_003475 |
| A_33_P3396214  | 10,623  | 10,5396 | 1,059512053 | ENST00000572045 | 79412     | NM_172229    | KREMEN2        |
| A_21_P0004201  | 1,71818 | 1,63479 | 1,059504709 | N/A             | N/A       | N/A          | Inc-C5orf38-1  |
| A_22_P00020360 | 1,75933 | 1,67596 | 1,059490021 | N/A             | N/A       | N/A          | Inc-NDUFB4-1   |
| A_21_P0003895  | 1,75125 | 1,66788 | 1,059490021 | ENST00000503232 | N/A       | N/A          | N/A            |
| A_33_P3377564  | 7,6771  | 7,59374 | 1,059482678 | ENST00000599218 | 4007      | NM_006150    | PRICKLE3       |
| A_33_P3261706  | 1,79511 | 1,71177 | 1,05946799  | N/A             | N/A       | N/A          | N/A            |

|                |         |         |             |                 |           |              |                |
|----------------|---------|---------|-------------|-----------------|-----------|--------------|----------------|
| A_32_P86905    | 6,44581 | 6,36247 | 1,05946799  | N/A             | 654466    | NR_003670    | KGFLP2         |
| A_21_P0013490  | 1,69566 | 1,61233 | 1,059460646 | N/A             | N/A       | N/A          | XLOC_I2_014217 |
| A_33_P3250840  | 10,9945 | 10,9112 | 1,059438616 | ENST00000437912 | 123606    | NM_144599    | NIPA1          |
| A_23_P106103   | 1,68325 | 1,59997 | 1,059423929 | ENST00000320636 | 9495      | NM_004857    | AKAP5          |
| A_22_P00000854 | 4,81196 | 4,72868 | 1,059423929 | N/A             | N/A       | N/A          | Inc-AGMAT-3    |
| A_22_P00016951 | 1,71986 | 1,6366  | 1,059409242 | ENST00000569849 | N/A       | AF088009     | N/A            |
| A_24_P6626     | 1,76063 | 1,6774  | 1,059387213 | ENST00000535886 | 114795    | NM_052907    | TMEM132B       |
| A_23_P45579    | 1,80858 | 1,7254  | 1,059350498 | ENST00000624294 | 159119    | NM_153716    | HSFY2          |
| A_21_P0003713  | 1,67607 | 1,59289 | 1,059350498 | N/A             | N/A       | N/A          | Inc-NOP14-1    |
| A_23_P120243   | 2,94252 | 2,85936 | 1,059335812 | ENST00000331462 | 3231      | NM_024501    | HOXD1          |
| A_21_P0014469  | 1,80885 | 1,7257  | 1,05932847  | ENST00000417609 | 100507562 | XR_109959    | LOC100507562   |
| A_22_P00025560 | 1,70649 | 1,62337 | 1,059306442 | N/A             | 100874086 | NR_046636    | PCDH9-AS3      |
| A_22_P00015442 | 1,73238 | 1,64926 | 1,059306442 | ENST00000357585 | 6752      | AF131798     | SSTR2          |
| A_24_P53282    | 10,1118 | 10,0287 | 1,059291757 | ENST00000225719 | 1362      | NM_001304    | CPD            |
| A_21_P0013427  | 1,74854 | 1,66545 | 1,059284414 | ENST00000442649 | N/A       | XR_426188    | N/A            |
| A_24_P529627   | 1,68927 | 1,60619 | 1,059277072 | ENST00000390353 | N/A       | X58809       | N/A            |
| A_33_P3334673  | 1,67465 | 1,59158 | 1,05926973  | ENST00000395466 | 9627      | NM_005460    | SNCAIP         |
| A_33_P3346073  | 1,6864  | 1,60335 | 1,059255045 | ENST00000572111 | 6345      | NM_001098814 | SRL            |
| A_22_P00000858 | 3,49027 | 3,40724 | 1,059240361 | ENST00000531701 | 100652791 | N/A          | GS1-24F4.2     |
| A_22_P00002805 | 13,375  | 13,292  | 1,059218335 | N/A             | 400960    | NR_033872    | PCBP1-AS1      |
| A_33_P3327608  | 1,79901 | 1,71602 | 1,059210993 | ENST00000490828 | 400954    | NM_001039753 | EML6           |
| A_33_P3290403  | 8,82845 | 8,74548 | 1,059196309 | ENST00000383376 | 3613      | NM_014214    | IMPA2          |
| A_21_P0004328  | 1,74129 | 1,65832 | 1,059196309 | N/A             | N/A       | N/A          | Inc-CCDC99-1   |
| A_22_P00015997 | 6,61614 | 6,53318 | 1,059188967 | ENST00000420389 | N/A       | N/A          | N/A            |
| A_33_P3408420  | 1,84557 | 1,76264 | 1,059166942 | ENST00000357362 | 161357    | NM_001113498 | MDGA2          |
| A_33_P3227029  | 1,71077 | 1,62786 | 1,059152259 | ENST00000565347 | N/A       | AL704257     | N/A            |
| A_23_P20882    | 13,9923 | 13,9094 | 1,059144918 | ENST00000374050 | 9550      | NM_004888    | ATP6V1G1       |
| A_33_P3321577  | 11,7341 | 11,6512 | 1,059144918 | ENST00000404251 | 9031      | NM_032408    | BAZ1B          |
| A_33_P3250861  | 1,70301 | 1,62012 | 1,059137576 | ENST00000370606 | 7547      | N/A          | ZIC3           |
| A_22_P00009303 | 1,74483 | 1,66197 | 1,059115552 | ENST00000582263 | N/A       | XM_005257909 | N/A            |
| A_22_P00006117 | 1,67798 | 1,59513 | 1,059108211 | ENST00000512284 | N/A       | N/A          | N/A            |
| A_33_P3209283  | 1,69877 | 1,61596 | 1,059078847 | ENST00000367469 | 23328     | N/A          | SASH1          |
| A_33_P3324181  | 1,67405 | 1,59125 | 1,059071506 | N/A             | 283112    | AK096599     | LOC283112      |

|                |         |         |             |                 |           |              |                |
|----------------|---------|---------|-------------|-----------------|-----------|--------------|----------------|
| A_22_P00016522 | 1,71345 | 1,63065 | 1,059071506 | ENST00000430079 | N/A       | N/A          | N/A            |
| A_23_P256107   | 8,29283 | 8,21004 | 1,059064165 | ENST00000507150 | 10855     | NM_006665    | HPSE           |
| A_33_P3309741  | 3,91963 | 3,83685 | 1,059056824 | ENST00000463683 | 255101    | NM_001278295 | CCDC108        |
| A_23_P306352   | 1,687   | 1,60424 | 1,059042143 | ENST00000540313 | 57529     | NM_020769    | RGAG1          |
| A_22_P00025125 | 1,98822 | 1,90548 | 1,059027461 | N/A             | N/A       | N/A          | Inc-FAM98A-1   |
| A_21_P0001108  | 1,76016 | 1,67742 | 1,059027461 | ENST00000424084 | N/A       | N/A          | N/A            |
| A_21_P0007492  | 1,794   | 1,71126 | 1,059027461 | ENST00000552639 | N/A       | N/A          | N/A            |
| A_33_P3411122  | 5,50276 | 5,42002 | 1,059027461 | N/A             | N/A       | N/A          | N/A            |
| A_21_P0005497  | 1,77311 | 1,69039 | 1,05901278  | N/A             | N/A       | N/A          | Inc-FIGNL1-1   |
| A_21_P0008665  | 1,78532 | 1,70263 | 1,058990759 | N/A             | N/A       | N/A          | Inc-FAM103A1-2 |
| A_21_P0008126  | 1,71868 | 1,63602 | 1,058968738 | N/A             | N/A       | N/A          | Inc-CDC16-1    |
| A_21_P0008412  | 1,69443 | 1,6118  | 1,058946718 | N/A             | N/A       | N/A          | Inc-NOVA1-2    |
| A_33_P3307742  | 1,7692  | 1,68659 | 1,058932038 | ENST00000419431 | 54143     | NR_038400    | LINC00308      |
| A_24_P350622   | 3,63056 | 3,54798 | 1,058910018 | ENST00000612389 | 3805      | NM_002255    | KIR2DL4        |
| A_22_P00022496 | 1,67242 | 1,58984 | 1,058910018 | N/A             | N/A       | BG191729     | Inc-COL19A1-1  |
| A_22_P00010250 | 4,45885 | 4,37628 | 1,058902678 | ENST00000415249 | N/A       | N/A          | N/A            |
| A_23_P422044   | 7,31585 | 7,23329 | 1,058895338 | ENST00000619750 | 56113     | NM_032009    | PCDHGA2        |
| A_33_P3336018  | 1,73491 | 1,65236 | 1,058887999 | N/A             | N/A       | N/A          | N/A            |
| A_21_P0002001  | 1,79124 | 1,70872 | 1,05886598  | N/A             | N/A       | N/A          | Inc-CMPK2-13   |
| A_33_P3290582  | 1,77021 | 1,68772 | 1,058843962 | ENST00000586947 | 101927433 | NR_110778    | LINC01255      |
| A_22_P00011287 | 1,67442 | 1,59194 | 1,058836622 | N/A             | N/A       | AK057554     | Inc-OR6Y1-1    |
| A_22_P00000634 | 1,67138 | 1,58895 | 1,058799927 | ENST00000562248 | 283860    | NR_024347    | LINC00304      |
| A_33_P3300032  | 1,69351 | 1,61108 | 1,058799927 | N/A             | N/A       | N/A          | N/A            |
| A_24_P320526   | 9,86256 | 9,78014 | 1,058792588 | ENST00000374023 | 64771     | NM_024294    | C6orf106       |
| A_21_P0010827  | 2,41521 | 2,33282 | 1,058770571 | N/A             | N/A       | N/A          | XLOC_I2_001591 |
| A_21_P0009044  | 3,09848 | 3,01615 | 1,058726539 | N/A             | N/A       | N/A          | Inc-CDH8-1     |
| A_21_P0000210  | 8,4613  | 8,37897 | 1,058726539 | N/A             | 26773     | NR_000010    | SNORD4A        |
| A_21_P0000121  | 1,75557 | 1,67329 | 1,058689847 | ENST00000425202 | 342918    | NM_001195076 | C19orf81       |
| A_23_P107307   | 7,04192 | 6,95967 | 1,058667832 | ENST00000545060 | 9058      | NM_003984    | SLC13A2        |
| A_23_P388921   | 1,67826 | 1,59606 | 1,058631142 | ENST00000358859 | 196477    | BC027600     | CCER1          |
| A_22_P00008586 | 1,76057 | 1,67837 | 1,058631142 | ENST00000507359 | 57528     | AK091723     | KCTD16         |
| A_21_P0001544  | 5,44731 | 5,36515 | 1,058601791 | N/A             | N/A       | N/A          | Inc-BARHL2-1   |
| A_21_P0010523  | 1,78684 | 1,70469 | 1,058594453 | N/A             | N/A       | N/A          | XLOC_I2_000116 |

|                |         |         |             |                 |           |              |                  |
|----------------|---------|---------|-------------|-----------------|-----------|--------------|------------------|
| A_22_P00000126 | 1,68375 | 1,60161 | 1,058587116 | N/A             | 102724293 | XR_424467    | LOC102724293     |
| A_22_P00014881 | 1,67212 | 1,59    | 1,058572441 | N/A             | N/A       | N/A          | Inc-SLC6A9-1     |
| A_33_P6607913  | 13,4571 | 13,375  | 1,058557766 | ENST00000542165 | 51503     | AK309042     | CWC15            |
| A_22_P00025227 | 1,78482 | 1,70273 | 1,058550429 | N/A             | N/A       | N/A          | Inc-IL3-3        |
| A_21_P0002622  | 1,75299 | 1,6709  | 1,058550429 | ENST00000472844 | 129401    | N/A          | NUP35            |
| A_22_P00017706 | 1,74419 | 1,66211 | 1,058543091 | N/A             | N/A       | N/A          | Inc-XPO5-1       |
| A_22_P00003019 | 1,67181 | 1,58976 | 1,05852108  | N/A             | N/A       | BX090472     | Inc-C7orf11-4    |
| A_22_P00005376 | 1,7572  | 1,67517 | 1,058506406 | ENST00000505494 | N/A       | N/A          | N/A              |
| A_23_P160886   | 2,97968 | 2,89765 | 1,058506406 | ENST00000333172 | 80835     | NM_138697    | TAS1R1           |
| A_21_P0005864  | 1,80456 | 1,72254 | 1,058499069 | ENST00000520155 | N/A       | N/A          | N/A              |
| A_21_P0012567  | 1,67853 | 1,59652 | 1,058491732 | N/A             | N/A       | N/A          | XLOC_I2_010555   |
| A_24_P75158    | 11,2863 | 11,2043 | 1,058484395 | ENST00000377200 | 375743    | NM_001099666 | PTAR1            |
| A_23_P75220    | 10,3971 | 10,3151 | 1,058484395 | ENST00000370495 | 81894     | NM_031212    | SLC25A28         |
| A_21_P0007064  | 1,81092 | 1,72896 | 1,058455048 | N/A             | N/A       | N/A          | Inc-C10orf107-1  |
| A_22_P00015994 | 4,34612 | 4,26417 | 1,058447711 | N/A             | 101927750 | NR_110274    | ATP6V1B1-AS1     |
| A_23_P51787    | 1,7371  | 1,65517 | 1,058433038 | ENST00000520113 | 270       | NM_000036    | AMPD1            |
| A_33_P3350164  | 1,7611  | 1,67919 | 1,058418365 | ENST00000399177 | 374864    | NM_198995    | CCDC178          |
| A_21_P0014212  | 3,7601  | 3,67819 | 1,058418365 | N/A             | N/A       | N/A          | N/A              |
| A_23_P143906   | 10,7406 | 10,6587 | 1,058411029 | ENST00000619577 | 4291      | NM_022443    | MLF1             |
| A_22_P00016857 | 1,70518 | 1,62328 | 1,058411029 | ENST00000505156 | 100859921 | NR_046215    | LINC00536        |
| A_24_P374244   | 1,7022  | 1,62031 | 1,058403693 | ENST00000376670 | 2623      | NM_002049    | GATA1            |
| A_23_P218369   | 1,71117 | 1,6293  | 1,05838902  | ENST00000622526 | 6358      | NM_032963    | CCL14            |
| A_19_P00318813 | 9,05663 | 8,97478 | 1,058374348 | ENST00000572353 | 101928738 | N/A          | LOC101928738     |
| A_21_P0009744  | 1,75907 | 1,67722 | 1,058374348 | N/A             | N/A       | N/A          | Inc-AC024563.1-2 |
| A_22_P00002535 | 2,19392 | 2,11208 | 1,058367012 | N/A             | N/A       | N/A          | Inc-C17orf58-2   |
| A_21_P0004185  | 1,67963 | 1,59779 | 1,058367012 | N/A             | N/A       | N/A          | Inc-PPP2R2B-2    |
| A_22_P00001234 | 1,78707 | 1,70523 | 1,058367012 | ENST00000436077 | N/A       | XR_424107    | N/A              |
| A_23_P402919   | 1,75053 | 1,6687  | 1,058359676 | ENST00000538312 | 169966    | NM_152630    | FAM46D           |
| A_22_P00023661 | 1,7927  | 1,71089 | 1,058345004 | ENST00000523178 | N/A       | BG613421     | N/A              |
| A_23_P8558     | 9,41388 | 9,33209 | 1,058330332 | ENST00000462381 | 83451     | NM_148912    | ABHD11           |
| A_23_P132341   | 6,72183 | 6,64004 | 1,058330332 | ENST00000402966 | 79640     | NM_001142964 | C22orf46         |
| A_22_P00023855 | 1,72012 | 1,63834 | 1,058322996 | ENST00000419326 | N/A       | N/A          | N/A              |
| A_21_P0013495  | 1,7803  | 1,69852 | 1,058322996 | ENST00000519550 | 286184    | N/A          | LINC01289        |

|                |         |         |             |                 |           |              |                |
|----------------|---------|---------|-------------|-----------------|-----------|--------------|----------------|
| A_33_P3221177  | 4,31566 | 4,23389 | 1,058315661 | ENST00000382466 | 253832    | NM_153251    | ZDHHC20        |
| A_21_P0001186  | 1,78922 | 1,7075  | 1,058278983 | ENST00000448643 | N/A       | N/A          | N/A            |
| A_21_P0000339  | 8,45659 | 8,37489 | 1,058264312 | N/A             | 677836    | NR_002985    | SNORA58        |
| A_33_P3423959  | 1,73583 | 1,65413 | 1,058264312 | ENST00000332700 | 440097    | NM_001004329 | DBX2           |
| A_21_P0001389  | 2,15256 | 2,07086 | 1,058264312 | N/A             | N/A       | N/A          | Inc-RALGPS2-1  |
| A_22_P00008144 | 6,19558 | 6,11389 | 1,058256977 | ENST00000422542 | 101927841 | XR_428109    | LOC101927841   |
| A_23_P90790    | 6,84876 | 6,76707 | 1,058256977 | ENST00000315796 | 254042    | NM_199227    | METAP1D        |
| A_22_P00024847 | 1,70059 | 1,61894 | 1,058227636 | N/A             | 102723167 | NR_110369    | MIR133A1HG     |
| A_22_P00002322 | 4,10685 | 4,02521 | 1,058220301 | N/A             | 100507401 | NR_038909    | LRP4-AS1       |
| A_24_P354724   | 1,76694 | 1,68531 | 1,058212966 | ENST00000326965 | 117289    | NM_054114    | TAGAP          |
| A_33_P3402545  | 1,79925 | 1,71762 | 1,058212966 | ENST00000494231 | 285205    | NR_015394    | LINC00636      |
| A_33_P3368339  | 6,81042 | 6,7288  | 1,058205631 | N/A             | 441457    | NM_001045477 | NUTM2G         |
| A_23_P389987   | 5,16669 | 5,08508 | 1,058198296 | ENST00000621092 | 3196      | NM_016170    | TLX2           |
| A_33_P3337604  | 1,77414 | 1,69253 | 1,058198296 | ENST00000554611 | 10858     | AB209749     | CYP46A1        |
| A_23_P61317    | 1,67029 | 1,58873 | 1,058161622 | ENST00000328895 | 200504    | NM_182536    | GKN2           |
| A_21_P0006999  | 1,67235 | 1,59082 | 1,058139619 | N/A             | N/A       | N/A          | Inc-ZWINT-3    |
| A_22_P00021538 | 5,65908 | 5,57758 | 1,058117616 | N/A             | N/A       | N/A          | Inc-OIT3-2     |
| A_33_P3257474  | 1,6706  | 1,58911 | 1,058110281 | ENST00000331090 | 283677    | NM_001042367 | REC114         |
| A_23_P364437   | 3,24297 | 3,16148 | 1,058110281 | ENST00000475158 | 64072     | NM_022124    | CDH23          |
| A_22_P00000669 | 1,69042 | 1,60895 | 1,058095613 | ENST00000561587 | N/A       | BC040595     | N/A            |
| A_22_P00022741 | 1,6901  | 1,60863 | 1,058095613 | ENST00000542064 | N/A       | BU956244     | N/A            |
| A_23_P146274   | 1,80025 | 1,71883 | 1,058058943 | ENST00000220876 | 11075     | NM_007029    | STMN2          |
| A_21_P0007121  | 1,76114 | 1,67975 | 1,058036941 | N/A             | N/A       | N/A          | Inc-EBF3-4     |
| A_33_P3353111  | 1,70315 | 1,62176 | 1,058036941 | ENST00000462588 | 6872      | NR_104393    | TAF1           |
| A_33_P3789069  | 1,67577 | 1,59439 | 1,058029608 | ENST00000502479 | 400084    | NR_034132    | LINC00939      |
| A_21_P0010481  | 5,70045 | 5,61909 | 1,05801494  | N/A             | N/A       | N/A          | Inc-C22orf26-2 |
| A_21_P0006723  | 1,67434 | 1,59298 | 1,05801494  | ENST00000426811 | N/A       | N/A          | N/A            |
| A_22_P00021234 | 1,68536 | 1,60401 | 1,058007607 | ENST00000436524 | N/A       | N/A          | N/A            |
| A_33_P3248997  | 1,6798  | 1,59848 | 1,057985606 | N/A             | N/A       | N/A          | N/A            |
| A_23_P79108    | 7,80427 | 7,723   | 1,05794894  | ENST00000531925 | 148229    | NM_138813    | ATP8B3         |
| A_23_P2616     | 1,69737 | 1,61612 | 1,057934274 | ENST00000360345 | 170482    | NM_130441    | CLEC4C         |
| A_21_P0012162  | 1,69278 | 1,61154 | 1,057926941 | ENST00000412405 | N/A       | N/A          | N/A            |
| A_21_P0004257  | 1,67174 | 1,59051 | 1,057919608 | N/A             | N/A       | N/A          | Inc-SREK1-1    |

|                |         |         |             |                 |           |              |                       |
|----------------|---------|---------|-------------|-----------------|-----------|--------------|-----------------------|
| A_33_P3299047  | 6,13064 | 6,04942 | 1,057912275 | N/A             | N/A       | N/A          | N/A                   |
| A_23_P20743    | 13,816  | 13,7348 | 1,057897609 | ENST00000374851 | 84302     | NM_032342    | TMEM246               |
| A_32_P151544   | 17,3132 | 17,232  | 1,057897609 | ENST00000388836 | 3875      | NM_000224    | KRT18                 |
| A_23_P104607   | 13,0094 | 12,9282 | 1,057897609 | ENST00000530887 | 5702      | NM_002804    | PSMC3                 |
| A_21_P0000157  | 9,52512 | 9,44394 | 1,057882944 | ENST00000442832 | 100293516 | NM_001204818 | ZNF587B               |
| A_23_P143178   | 1,67993 | 1,59878 | 1,057860946 | ENST00000217407 | 3929      | NM_004139    | LBP                   |
| A_33_P3224595  | 8,93929 | 8,85815 | 1,057853613 | ENST00000380567 | 8481      | NM_003611    | OFD1                  |
| A_22_P00022305 | 1,7973  | 1,71618 | 1,057838949 | N/A             | N/A       | N/A          | Inc-TMPRSS15-1        |
| A_33_P3239532  | 5,01613 | 4,93502 | 1,057831616 | ENST00000413658 | 7551      | NM_017715    | ZNF3                  |
| A_21_P0001075  | 1,75745 | 1,67639 | 1,057794955 | ENST00000430921 | N/A       | N/A          | N/A                   |
| A_22_P00024603 | 1,69461 | 1,61355 | 1,057794955 | N/A             | N/A       | N/A          | Inc-LARGE-3           |
| A_33_P3226380  | 7,62405 | 7,543   | 1,057787623 | ENST00000616947 | 731275    | NR_029401    | LINC01347             |
| A_21_P0006110  | 1,79194 | 1,71091 | 1,057772959 | N/A             | N/A       | N/A          | Inc-NAIF1-1           |
| A_22_P00011984 | 1,76893 | 1,6879  | 1,057772959 | ENST00000534388 | N/A       | N/A          | N/A                   |
| A_33_P3415207  | 5,83247 | 5,75145 | 1,057765627 | ENST00000616707 | 4358      | AF088036     | MPV17                 |
| A_19_P00320351 | 6,07947 | 5,99846 | 1,057758295 | ENST00000433465 | 642852    | NR_026943    | LOC642852             |
| A_21_P0005465  | 1,68451 | 1,6035  | 1,057758295 | N/A             | N/A       | N/A          | Inc-AC091801.1.1-5    |
| A_33_P3329607  | 10,0505 | 9,96949 | 1,057758295 | ENST00000311481 | 81876     | NM_030981    | RAB1B                 |
| A_21_P0013395  | 1,5775  | 1,49651 | 1,057743632 | ENST00000453194 | N/A       | N/A          | N/A                   |
| A_33_P3214446  | 9,29539 | 9,2144  | 1,057743632 | ENST00000434425 | 5983      | NM_181558    | RFC3                  |
| A_21_P0005045  | 1,85996 | 1,77899 | 1,057728969 | N/A             | N/A       | N/A          | Inc-ASCC3-1           |
| A_23_P427114   | 6,29549 | 6,21454 | 1,057714305 | ENST00000431601 | 64689     | NM_031899    | GORASP1               |
| A_22_P00020026 | 1,79207 | 1,71113 | 1,057706974 | N/A             | N/A       | BX106941     | Inc-C6orf120-1        |
| A_22_P00018358 | 6,00771 | 5,92677 | 1,057706974 | N/A             | 101927196 | NR_110214    | LOC101927196          |
| A_33_P3242909  | 4,63208 | 4,55117 | 1,05768498  | ENST00000293725 | 147837    | NM_145276    | ZNF563                |
| A_33_P3260634  | 1,70697 | 1,62607 | 1,057677648 | ENST00000378473 | 5332      | NM_001172646 | PLCB4                 |
| A_21_P0003803  | 1,70005 | 1,61917 | 1,057662986 | N/A             | N/A       | N/A          | Inc-RP11-487E13.1.1-1 |
| A_22_P00012451 | 1,69062 | 1,60975 | 1,057655655 | N/A             | N/A       | N/A          | Inc-PRPF18-6          |
| A_21_P0008782  | 1,73094 | 1,65008 | 1,057648324 | ENST00000554542 | 100144604 | NR_021493    | LINC00930             |
| A_22_P00004037 | 1,75999 | 1,67913 | 1,057648324 | N/A             | N/A       | N/A          | Inc-CHRM4-1           |
| A_33_P3412468  | 5,88586 | 5,80502 | 1,057633662 | ENST00000411689 | 9481      | NM_004277    | SLC25A27              |
| A_21_P0006851  | 1,71469 | 1,63386 | 1,057626331 | N/A             | N/A       | N/A          | Inc-LYZL1-1           |
| A_22_P00017725 | 1,66861 | 1,58779 | 1,057619    | N/A             | N/A       | BU852551     | Inc-XRN2-1            |

|                |         |         |             |                 |           |              |                 |
|----------------|---------|---------|-------------|-----------------|-----------|--------------|-----------------|
| A_23_P124733   | 8,89875 | 8,81794 | 1,057611669 | ENST00000311461 | 27235     | NM_015697    | COQ2            |
| A_23_P324994   | 8,10848 | 8,0277  | 1,057589677 | ENST00000521082 | 55975     | NM_018846    | KLHL7           |
| A_21_P0010187  | 1,74463 | 1,66389 | 1,057560355 | ENST00000441465 | N/A       | N/A          | N/A             |
| A_21_P0000042  | 1,77564 | 1,69491 | 1,057553024 | ENST00000537690 | 729665    | NM_001164399 | CCDC175         |
| A_21_P0007595  | 1,68563 | 1,6049  | 1,057553024 | ENST00000551399 | 101928420 | NR_120468    | LINC01490       |
| A_33_P3315149  | 3,03854 | 2,95781 | 1,057553024 | N/A             | 80072     | NR_027262    | HEXA-AS1        |
| A_22_P00007465 | 1,78189 | 1,70118 | 1,057538364 | N/A             | N/A       | N/A          | Inc-GTF2B-4     |
| A_33_P3417459  | 6,48688 | 6,40617 | 1,057538364 | N/A             | 100158262 | NR_023358    | SCARNA9L        |
| A_22_P00004945 | 1,5727  | 1,492   | 1,057531033 | ENST00000556182 | N/A       | AK097819     | N/A             |
| A_21_P0001943  | 1,71789 | 1,6372  | 1,057523703 | ENST00000424170 | 101927156 | N/A          | LOC101927156    |
| A_22_P00012361 | 1,76752 | 1,68684 | 1,057516373 | N/A             | N/A       | N/A          | Inc-PREX1-1     |
| A_22_P00021327 | 4,37216 | 4,29149 | 1,057509043 | N/A             | N/A       | N/A          | Inc-TMEM85-1    |
| A_22_P00014988 | 1,70966 | 1,62901 | 1,057494383 | ENST00000490320 | 401097    | NM_001168214 | C3orf80         |
| A_33_P3260342  | 1,71881 | 1,63816 | 1,057494383 | ENST00000339876 | 23114     | NM_001005388 | NFASC           |
| A_33_P3368301  | 9,11189 | 9,03126 | 1,057479723 | ENST00000505182 | 388962    | NM_212552    | BOLA3           |
| A_21_P0005643  | 1,69894 | 1,61831 | 1,057479723 | N/A             | N/A       | N/A          | Inc-DLGAP2-3    |
| A_22_P00002318 | 2,01252 | 1,9319  | 1,057472393 | N/A             | 100874281 | NR_046820    | NTM-IT          |
| A_21_P0005482  | 1,76735 | 1,68675 | 1,057457733 | N/A             | N/A       | N/A          | Inc-HNRNPA2B1-1 |
| A_33_P3312209  | 3,22362 | 3,14302 | 1,057457733 | ENST00000503531 | N/A       | N/A          | N/A             |
| A_24_P750817   | 1,68764 | 1,60706 | 1,057443074 | ENST00000441389 | 147710    | NM_001205280 | IGSF23          |
| A_33_P3268275  | 1,77016 | 1,68959 | 1,057435744 | ENST00000309296 | N/A       | N/A          | N/A             |
| A_33_P3414594  | 1,75985 | 1,67929 | 1,057428415 | ENST00000505005 | 9970      | NM_001077474 | NR1I3           |
| A_33_P3257643  | 1,92462 | 1,84407 | 1,057421085 | ENST00000409464 | 284071    | BC035159     | C17orf104       |
| A_22_P00006540 | 1,78275 | 1,7022  | 1,057421085 | ENST00000458693 | N/A       | N/A          | N/A             |
| A_33_P3279715  | 9,36234 | 9,28179 | 1,057421085 | ENST00000381373 | 115426    | NM_152896    | UHRF2           |
| A_33_P3294342  | 1,76945 | 1,68892 | 1,057406427 | N/A             | N/A       | N/A          | N/A             |
| A_33_P3264346  | 7,33967 | 7,25916 | 1,057391768 | ENST00000572086 | N/A       | N/A          | N/A             |
| A_33_P3327587  | 4,64704 | 4,56653 | 1,057391768 | N/A             | 100127904 | BC065739     | LOC100127904    |
| A_21_P0003889  | 4,73087 | 4,65038 | 1,057377109 | ENST00000504402 | 730971    | N/A          | FLJ36777        |
| A_22_P00023229 | 1,70412 | 1,62363 | 1,057377109 | ENST00000564872 | 388456    | XR_243815    | LOC388456       |
| A_22_P00012047 | 8,28145 | 8,20096 | 1,057377109 | N/A             | N/A       | AA577485     | Inc-PLEKHG6-1   |
| A_22_P00007549 | 5,74573 | 5,66526 | 1,057362451 | N/A             | 101929147 | XR_246408    | LOC101929147    |
| A_33_P3248539  | 4,72462 | 4,64415 | 1,057362451 | ENST00000372031 | 3933      | NM_001252617 | LCN1            |

|                |         |         |             |                 |           |              |                    |
|----------------|---------|---------|-------------|-----------------|-----------|--------------|--------------------|
| A_33_P3250165  | 1,78661 | 1,70615 | 1,057355122 | ENST00000411762 | 57471     | DQ334271     | ERMN               |
| A_21_P0002291  | 1,79162 | 1,71117 | 1,057347793 | N/A             | N/A       | N/A          | Inc-RAB6C-4        |
| A_22_P00019930 | 1,68047 | 1,60004 | 1,057333135 | ENST00000420548 | N/A       | N/A          | N/A                |
| A_33_P3423595  | 1,72048 | 1,64005 | 1,057333135 | N/A             | 100128529 | AK127522     | LOC100128529       |
| A_33_P3322664  | 1,80043 | 1,72002 | 1,057318478 | ENST00000318244 | N/A       | N/A          | N/A                |
| A_23_P373724   | 11,4328 | 11,3524 | 1,057311149 | ENST00000537927 | 8496      | NM_003622    | PPFIBP1            |
| A_22_P00012295 | 1,75225 | 1,67185 | 1,057311149 | N/A             | N/A       | N/A          | Inc-PPP3CA-1       |
| A_21_P0003099  | 1,76099 | 1,68062 | 1,057289163 | N/A             | N/A       | N/A          | Inc-AC018816.3.1-7 |
| A_21_P0011154  | 1,69426 | 1,6139  | 1,057281834 | N/A             | N/A       | N/A          | XLOC_I2_003810     |
| A_33_P3348629  | 1,76358 | 1,68322 | 1,057281834 | ENST00000503645 | 3346      | NM_002159    | HTN1               |
| A_33_P3237709  | 1,68601 | 1,60565 | 1,057281834 | N/A             | N/A       | AK098514     | N/A                |
| A_21_P0002880  | 1,75154 | 1,67122 | 1,057252521 | N/A             | N/A       | N/A          | Inc-RYK-1          |
| A_33_P3285965  | 1,80125 | 1,72099 | 1,057208552 | ENST00000295108 | 4760      | NM_002500    | NEUROD1            |
| A_33_P3293049  | 1,7593  | 1,67906 | 1,057193896 | ENST00000374949 | 3117      | NM_002122    | HLA-DQA1           |
| A_23_P76460    | 1,69618 | 1,61595 | 1,057186568 | ENST00000228641 | 4618      | NM_002469    | MYF6               |
| A_21_P0000218  | 7,61569 | 7,53546 | 1,057186568 | ENST00000476268 | 26816     | NR_000018    | SNORD35A           |
| A_22_P00008833 | 1,7912  | 1,71102 | 1,057149929 | ENST00000446206 | N/A       | N/A          | N/A                |
| A_33_P3339741  | 3,47705 | 3,39688 | 1,057142602 | N/A             | N/A       | N/A          | N/A                |
| A_21_P0003823  | 1,67996 | 1,59979 | 1,057142602 | N/A             | N/A       | N/A          | Inc-PDE6B-1        |
| A_21_P0014457  | 1,75955 | 1,67943 | 1,057105965 | N/A             | N/A       | N/A          | N/A                |
| A_33_P3386463  | 2,845   | 2,76488 | 1,057105965 | ENST00000560794 | N/A       | N/A          | N/A                |
| A_33_P3378920  | 13,8205 | 13,7404 | 1,05709131  | ENST00000408993 | 100526737 | NM_001198845 | RBM14-RBM4         |
| A_23_P11397    | 3,07512 | 2,99507 | 1,057054675 | ENST00000330337 | 83868     | NR_001537    | TTY13              |
| A_24_P374586   | 9,61802 | 9,53798 | 1,057047348 | ENST00000418756 | 5395      | NM_000535    | PMS2               |
| A_21_P0002507  | 1,76496 | 1,68495 | 1,057025367 | N/A             | N/A       | N/A          | Inc-CXCR4-1        |
| A_21_P0003055  | 1,723   | 1,64303 | 1,056996061 | N/A             | N/A       | N/A          | Inc-SERPINI1-9     |
| A_33_P3376838  | 1,6913  | 1,61133 | 1,056996061 | ENST00000367661 | 60676     | NM_021936    | PAPPA2             |
| A_21_P0008814  | 1,73456 | 1,65463 | 1,056966755 | N/A             | N/A       | N/A          | Inc-C15orf2-2      |
| A_33_P3330991  | 6,7727  | 6,69278 | 1,056959429 | N/A             | 100134237 | XR_248772    | LOC100134237       |
| A_33_P3403748  | 14,0748 | 13,9949 | 1,056944776 | ENST00000531323 | 790955    | NM_001085372 | UQCC3              |
| A_33_P3287263  | 12,7222 | 12,6423 | 1,056944776 | ENST00000439561 | 1315      | NM_016451    | COPB1              |
| A_22_P00019066 | 1,69275 | 1,61289 | 1,056915472 | N/A             | 201477    | NR_038895    | DLGAP1-AS3         |
| A_33_P3285602  | 1,67039 | 1,59053 | 1,056915472 | ENST00000372451 | N/A       | N/A          | N/A                |



|                |         |         |             |                 |           |              |                       |
|----------------|---------|---------|-------------|-----------------|-----------|--------------|-----------------------|
| A_21_P0003118  | 1,72111 | 1,64125 | 1,056915472 | N/A             | N/A       | N/A          | Inc-POC1A-1           |
| A_22_P00020221 | 1,68634 | 1,60652 | 1,056886168 | N/A             | N/A       | BX648926     | Inc-BTBD17-1          |
| A_21_P0011419  | 3,45986 | 3,38006 | 1,056871517 | ENST00000545970 | 5310      | NM_000296    | PKD1                  |
| A_21_P0004553  | 1,71522 | 1,63542 | 1,056871517 | N/A             | N/A       | N/A          | Inc-MARCH11-1         |
| A_21_P0009107  | 1,71196 | 1,63217 | 1,056864191 | N/A             | N/A       | N/A          | Inc-CDH5-4            |
| A_22_P00020578 | 1,66644 | 1,58667 | 1,05684954  | ENST00000515292 | 102723778 | N/A          | LOC102723778          |
| A_33_P3328882  | 1,71649 | 1,63673 | 1,056842215 | ENST00000433887 | N/A       | N/A          | N/A                   |
| A_22_P00005001 | 1,7366  | 1,65685 | 1,056834889 | N/A             | N/A       | N/A          | Inc-DDI1-1            |
| A_33_P3346538  | 5,78537 | 5,70565 | 1,056812913 | N/A             | N/A       | N/A          | Inc-WWP2-1            |
| A_24_P339560   | 1,69257 | 1,61286 | 1,056805588 | ENST00000426296 | 114132    | NM_052884    | SIGLEC11              |
| A_33_P3277323  | 15,6024 | 15,5227 | 1,056798263 | ENST00000495104 | N/A       | N/A          | N/A                   |
| A_24_P134266   | 13,5588 | 13,4791 | 1,056798263 | ENST00000618112 | 682       | NM_001728    | BSG                   |
| A_21_P0012263  | 5,0185  | 4,93886 | 1,056754313 | N/A             | N/A       | N/A          | XLOC_I2_009332        |
| A_22_P00022906 | 1,752   | 1,67236 | 1,056754313 | ENST00000423489 | N/A       | N/A          | N/A                   |
| A_32_P48134    | 1,74761 | 1,66798 | 1,056746988 | ENST00000608790 | 220115    | NR_002793    | TPTE2P3               |
| A_33_P3397298  | 9,06449 | 8,98486 | 1,056746988 | ENST00000550416 | N/A       | N/A          | N/A                   |
| A_33_P3318736  | 1,77294 | 1,69333 | 1,056732338 | N/A             | N/A       | N/A          | N/A                   |
| A_22_P00025833 | 5,55799 | 5,4784  | 1,056717689 | N/A             | N/A       | N/A          | Inc-PAX9-4            |
| A_21_P0013715  | 1,76378 | 1,6842  | 1,056710364 | ENST00000515723 | N/A       | N/A          | N/A                   |
| A_33_P3309984  | 1,73757 | 1,65806 | 1,056659094 | ENST00000260599 | 3795      | NM_000221    | KHK                   |
| A_33_P3292179  | 14,6231 | 14,5436 | 1,056651769 | ENST00000340001 | 10350     | NM_080283    | ABCA9                 |
| A_33_P3227320  | 10,067  | 9,98751 | 1,056644445 | ENST00000452157 | 166968    | NM_001297598 | MIER3                 |
| A_21_P0002797  | 2,64829 | 2,56886 | 1,056600502 | ENST00000494887 | N/A       | N/A          | N/A                   |
| A_33_P3307886  | 8,67563 | 8,5962  | 1,056600502 | ENST00000594154 | 6915      | NM_001060    | TBXA2R                |
| A_21_P0010903  | 1,71498 | 1,63556 | 1,056593178 | N/A             | N/A       | N/A          | XLOC_I2_002110        |
| A_22_P00004982 | 1,68393 | 1,60451 | 1,056593178 | N/A             | 90768     | NR_125905    | LOC90768              |
| A_22_P00004449 | 1,70744 | 1,62805 | 1,056571207 | ENST00000505348 | N/A       | N/A          | N/A                   |
| A_22_P00002541 | 2,89056 | 2,81118 | 1,056563883 | N/A             | N/A       | N/A          | Inc-C17orf62-2        |
| A_33_P3311717  | 6,39369 | 6,31432 | 1,05655656  | ENST00000551557 | 7050      | NM_173209    | TGIF1                 |
| A_33_P3234442  | 1,60856 | 1,52925 | 1,05651262  | N/A             | N/A       | N/A          | N/A                   |
| A_23_P415643   | 9,23019 | 9,15089 | 1,056505297 | ENST00000613509 | 197407    | NM_152652    | ZNF48                 |
| A_22_P00025021 | 1,66673 | 1,58744 | 1,056497974 | N/A             | N/A       | CR737344     | Inc-RP11-1105G2.3.1-1 |
| A_23_P117734   | 9,69496 | 9,61568 | 1,05649065  | ENST00000479791 | 145748    | NM_152449    | LYSMD4                |

|                |         |         |             |                 |           |              |                |
|----------------|---------|---------|-------------|-----------------|-----------|--------------|----------------|
| A_32_P157927   | 1,76546 | 1,68618 | 1,05649065  | ENST00000390243 | N/A       | S62210       | N/A            |
| A_23_P113553   | 1,71582 | 1,63655 | 1,056483327 | ENST00000355220 | 4110      | NM_001011544 | MAGEA11        |
| A_23_P411235   | 1,89321 | 1,81395 | 1,056476004 | ENST00000392620 | 146723    | NM_152460    | C17orf77       |
| A_24_P136683   | 7,27843 | 7,19917 | 1,056476004 | ENST00000380333 | 340591    | NR_026551    | CA5BP1         |
| A_23_P337424   | 8,21738 | 8,13812 | 1,056476004 | ENST00000370994 | 26135     | NM_001018067 | SERBP1         |
| A_24_P558365   | 1,74038 | 1,66115 | 1,056454036 | ENST00000360464 | 646486    | NM_001105281 | FABP12         |
| A_21_P0013728  | 11,456  | 11,3768 | 1,056432068 | ENST00000376334 | 2483      | NM_004477    | FRG1           |
| A_33_P3699565  | 1,70047 | 1,62129 | 1,056417423 | N/A             | 285422    | AL832228     | LOC285422      |
| A_24_P928217   | 7,90558 | 7,82644 | 1,056388133 | ENST00000430297 | 79137     | NM_024293    | FAM134A        |
| A_22_P00009645 | 1,72598 | 1,64685 | 1,056380811 | N/A             | N/A       | N/A          | Inc-MAST2-1    |
| A_21_P0005528  | 1,7302  | 1,6511  | 1,056358844 | N/A             | N/A       | N/A          | Inc-PAX4-1     |
| A_33_P3306983  | 15,6785 | 15,5994 | 1,056358844 | ENST00000388857 | 280636    | NM_170746    | C11orf31       |
| A_33_P3384255  | 2,19525 | 2,11616 | 1,056351522 | N/A             | N/A       | N/A          | N/A            |
| A_33_P3297244  | 4,44588 | 4,36681 | 1,056336878 | ENST00000618498 | 246176    | NM_139285    | GAS2L2         |
| A_33_P3210647  | 6,31544 | 6,23638 | 1,056329556 | ENST00000373672 | 1307      | NM_001856    | COL16A1        |
| A_33_P3224996  | 6,90025 | 6,82121 | 1,056314912 | N/A             | 100507419 | NR_123723    | MMP25-AS1      |
| A_21_P0008143  | 1,71592 | 1,63688 | 1,056314912 | N/A             | N/A       | N/A          | Inc-STOML3-2   |
| A_21_P0006114  | 1,75901 | 1,67999 | 1,056300269 | N/A             | N/A       | N/A          | Inc-C9orf104-1 |
| A_21_P0008107  | 3,53404 | 3,45505 | 1,056278304 | N/A             | 101927361 | XR_243058    | LOC101927361   |
| A_23_P102681   | 4,8897  | 4,81072 | 1,056270982 | ENST00000598340 | 79160     | NR_125359    | LOC79160       |
| A_21_P0003156  | 1,68154 | 1,60256 | 1,056270982 | ENST00000497811 | 151658    | NR_024276    | LINC00635      |
| A_21_P0003061  | 1,72934 | 1,65036 | 1,056270982 | ENST00000481679 | 254827    | N/A          | NAALADL2       |
| A_19_P00315764 | 7,49116 | 7,41219 | 1,056263661 | N/A             | 644277    | XR_110541    | LOC644277      |
| A_22_P00001360 | 1,66523 | 1,58628 | 1,056249018 | ENST00000580378 | 645355    | NR_038839    | MIR3976HG      |
| A_21_P0008435  | 3,48253 | 3,40359 | 1,056241697 | N/A             | N/A       | N/A          | Inc-NEMF-1     |
| A_22_P00000403 | 3,33792 | 3,25899 | 1,056234375 | ENST00000583416 | N/A       | N/A          | N/A            |
| A_22_P00008083 | 7,50659 | 7,42766 | 1,056234375 | N/A             | 101929761 | XR_428452    | LOC101929761   |
| A_23_P143643   | 9,34778 | 9,26886 | 1,056227054 | ENST00000397771 | 84164     | NM_032204    | ASCC2          |
| A_33_P3582789  | 1,66488 | 1,58596 | 1,056227054 | N/A             | 101927980 | NR_110899    | SLC14A2-AS1    |
| A_23_P152356   | 9,67094 | 9,59202 | 1,056227054 | ENST00000396870 | 7752      | NM_003454    | ZNF200         |
| A_22_P00002352 | 1,69576 | 1,61686 | 1,056212412 | ENST00000550506 | 101928449 | NR_110089    | LOC101928449   |
| A_23_P983      | 15,1647 | 15,0858 | 1,056212412 | ENST00000470017 | 9588      | NM_004905    | PRDX6          |
| A_21_P0003293  | 3,16397 | 3,08508 | 1,056205091 | N/A             | N/A       | N/A          | Inc-RETNLB-1   |

|                |         |         |             |                 |           |              |                |
|----------------|---------|---------|-------------|-----------------|-----------|--------------|----------------|
| A_21_P0009199  | 1,78368 | 1,70479 | 1,056205091 | ENST00000514726 | 101927274 | N/A          | LOC101927274   |
| A_22_P00001329 | 1,7694  | 1,69051 | 1,056205091 | ENST00000560503 | N/A       | CN264022     | N/A            |
| A_33_P3230409  | 1,87244 | 1,79355 | 1,056205091 | ENST00000458091 | N/A       | N/A          | N/A            |
| A_21_P0011059  | 1,78893 | 1,71009 | 1,056168486 | N/A             | N/A       | N/A          | XLOC_I2_003072 |
| A_21_P0000971  | 1,67619 | 1,59736 | 1,056161165 | ENST00000439795 | N/A       | N/A          | N/A            |
| A_33_P3312751  | 1,78059 | 1,70179 | 1,056139203 | N/A             | 729159    | NM_001282301 | LOC729159      |
| A_21_P0003670  | 1,74644 | 1,66765 | 1,056131883 | N/A             | 100505784 | XR_109853    | LOC100505784   |
| A_22_P00014871 | 1,77279 | 1,69401 | 1,056124562 | N/A             | N/A       | N/A          | Inc-SLC6A12-4  |
| A_21_P0011865  | 1,74883 | 1,67005 | 1,056124562 | N/A             | N/A       | N/A          | XLOC_I2_007595 |
| A_21_P0000107  | 9,23673 | 9,15798 | 1,056102601 | ENST00000544824 | 100288485 | NM_001190489 | MTRNR2L7       |
| A_33_P3282364  | 3,79637 | 3,71762 | 1,056102601 | N/A             | 102725343 | XR_424311    | LOC102725343   |
| A_21_P0010248  | 1,68967 | 1,61096 | 1,05607332  | N/A             | N/A       | N/A          | Inc-B3GALT5-1  |
| A_21_P0000066  | 1,76969 | 1,69101 | 1,05605136  | ENST00000425133 | 90736     | NM_001166703 | FAM104B        |
| A_22_P00008179 | 1,7341  | 1,65543 | 1,05604404  | N/A             | N/A       | N/A          | Inc-INPPL1-3   |
| A_23_P372771   | 8,19544 | 8,11677 | 1,05604404  | ENST00000566894 | 57184     | NM_020447    | FAM219B        |
| A_23_P388220   | 2,7823  | 2,70365 | 1,0560294   | ENST00000521268 | 138046    | NM_173848    | RALYL          |
| A_33_P3230478  | 5,74248 | 5,66388 | 1,055992801 | ENST00000403949 | 716       | NM_201442    | C1S            |
| A_21_P0011678  | 12,5479 | 12,4693 | 1,055992801 | ENST00000351328 | 1431      | NM_004077    | CS             |
| A_32_P221452   | 8,60215 | 8,52358 | 1,055970843 | ENST00000273375 | 285282    | NM_173825    | RABL3          |
| A_23_P84629    | 8,41614 | 8,33758 | 1,055963523 | ENST00000584838 | 5986      | NM_002917    | RFNG           |
| A_21_P0011473  | 3,38293 | 3,30437 | 1,055963523 | N/A             | N/A       | N/A          | XLOC_I2_005458 |
| A_23_P373521   | 1,87107 | 1,79256 | 1,055926927 | ENST00000503024 | 9464      | NM_021973    | HAND2          |
| A_22_P00015127 | 4,07233 | 3,99383 | 1,055919608 | N/A             | N/A       | N/A          | Inc-SNX27-2    |
| A_23_P10591    | 12,6533 | 12,5748 | 1,055919608 | ENST00000320095 | 284207    | NM_001004431 | METRNL         |
| A_21_P0008341  | 1,77499 | 1,6965  | 1,055912289 | N/A             | N/A       | N/A          | Inc-PELI2-4    |
| A_33_P3306397  | 9,59947 | 9,52099 | 1,05590497  | N/A             | 9391      | NM_004804    | CIAO1          |
| A_21_P0013357  | 1,73686 | 1,65842 | 1,055875695 | N/A             | N/A       | N/A          | XLOC_I2_014055 |
| A_22_P00016853 | 1,75568 | 1,67725 | 1,055868376 | N/A             | 103752585 | NR_125791    | RORB-AS1       |
| A_23_P51679    | 10,0296 | 9,95118 | 1,055861057 | ENST00000360595 | 4209      | NM_005920    | MEF2D          |
| A_21_P0008699  | 1,74713 | 1,66872 | 1,055853738 | N/A             | N/A       | N/A          | Inc-ALDH1A3-1  |
| A_21_P0014555  | 1,68752 | 1,60911 | 1,055853738 | ENST00000556434 | 100506446 | XR_110289    | LOC100506446   |
| A_23_P72068    | 9,90145 | 9,82304 | 1,055853738 | ENST00000530459 | 2762      | NM_001500    | GMDS           |
| A_33_P3344308  | 11,9944 | 11,916  | 1,05584642  | ENST00000476858 | 54840     | NM_001195249 | APTX           |

|                |         |         |             |                 |           |              |                       |
|----------------|---------|---------|-------------|-----------------|-----------|--------------|-----------------------|
| A_22_P00015555 | 5,45583 | 5,37744 | 1,055839101 | N/A             | 100287616 | NR_040067    | LOXL1-AS1             |
| A_22_P00000727 | 1,72722 | 1,64884 | 1,055831783 | ENST00000551279 | N/A       | N/A          | N/A                   |
| A_21_P0001035  | 1,6794  | 1,60106 | 1,055802509 | N/A             | N/A       | N/A          | Inc-HMCN1-2           |
| A_22_P00014464 | 1,79735 | 1,71901 | 1,055802509 | ENST00000517916 | N/A       | BE298022     | N/A                   |
| A_21_P0012772  | 2,1718  | 2,09347 | 1,055795191 | ENST00000514877 | N/A       | N/A          | N/A                   |
| A_33_P3276585  | 3,96295 | 3,88464 | 1,055780555 | ENST00000429045 | 80173     | NM_001099224 | IFT74                 |
| A_21_P0004132  | 1,7604  | 1,68209 | 1,055780555 | ENST00000512882 | 100506526 | N/A          | LOC100506526          |
| A_23_P60028    | 15,1568 | 15,0785 | 1,055773237 | ENST00000520242 | 6921      | NM_005648    | TCEB1                 |
| A_33_P3272527  | 8,12676 | 8,04849 | 1,055751283 | ENST00000416600 | 57506     | NM_001206491 | MAVS                  |
| A_21_P0004269  | 1,71794 | 1,63967 | 1,055751283 | N/A             | N/A       | N/A          | Inc-CMYA5-1           |
| A_22_P00021465 | 1,66477 | 1,58652 | 1,055736647 | ENST00000358748 | 401554    | XR_108962    | FLJ46836              |
| A_33_P3212316  | 4,80286 | 4,72462 | 1,055729329 | N/A             | N/A       | N/A          | N/A                   |
| A_33_P3365167  | 1,80638 | 1,72814 | 1,055729329 | ENST00000344089 | 4842      | NM_001204218 | NOS1                  |
| A_22_P00014203 | 1,70539 | 1,62718 | 1,055707376 | ENST00000441371 | 89866     | BC108267     | SEC16B                |
| A_33_P3370109  | 5,69075 | 5,61255 | 1,055700059 | ENST00000311489 | 3612      | NM_001144879 | IMPA1                 |
| A_21_P0012947  | 1,80308 | 1,72489 | 1,055692741 | ENST00000513175 | N/A       | XR_425908    | N/A                   |
| A_21_P0013196  | 5,39944 | 5,32126 | 1,055685424 | ENST00000617077 | 101928976 | N/A          | LOC101928976          |
| A_23_P252758   | 2,7706  | 2,69247 | 1,055648837 | ENST00000470850 | 3792      | NM_000420    | KEL                   |
| A_24_P740705   | 12,2049 | 12,1268 | 1,055626886 | ENST00000491966 | 91582     | NM_194326    | RPS19BP1              |
| A_33_P3241334  | 1,76666 | 1,68856 | 1,055626886 | ENST00000595404 | 5678      | AK056754     | PSG9                  |
| A_32_P192692   | 2,18293 | 2,10484 | 1,055619569 | ENST00000604624 | 3778      | NM_001014797 | KCNMA1                |
| A_22_P00001452 | 1,70654 | 1,62848 | 1,055597618 | N/A             | N/A       | N/A          | Inc-APOL1-2           |
| A_23_P58854    | 1,75943 | 1,68141 | 1,055568351 | ENST00000398754 | 7478      | NM_058244    | WNT8A                 |
| A_24_P305050   | 1,74299 | 1,66502 | 1,055531768 | ENST00000317310 | 146894    | NM_145273    | CD300LG               |
| A_22_P00009081 | 2,13938 | 2,06141 | 1,055531768 | N/A             | 101927051 | NR_109952    | LOC101927051          |
| A_21_P0012048  | 5,72418 | 5,64621 | 1,055531768 | ENST00000429456 | 102723927 | N/A          | LOC102723927          |
| A_21_P0008009  | 3,49757 | 3,41962 | 1,055517136 | ENST00000453832 | 642345    | N/A          | MIR4500HG             |
| A_22_P00006639 | 1,72608 | 1,64813 | 1,055517136 | ENST00000555350 | 100505967 | NR_039992    | LINC00645             |
| A_23_P101038   | 1,716   | 1,63807 | 1,055502503 | ENST00000411528 | 83900     | NM_031962    | KRTAP9-3              |
| A_21_P0006346  | 5,40072 | 5,32282 | 1,055480555 | N/A             | N/A       | N/A          | Inc-PRSS3-1           |
| A_21_P0002623  | 1,78492 | 1,70703 | 1,055473239 | N/A             | N/A       | N/A          | Inc-CPO-1             |
| A_24_P177531   | 1,69025 | 1,61239 | 1,055451291 | ENST00000502926 | 56120     | NR_001297    | PCDHGB8P              |
| A_21_P0007869  | 4,23498 | 4,15713 | 1,055443975 | N/A             | N/A       | N/A          | Inc-RP11-277P12.7.1-3 |

|                |         |         |             |                 |           |              |               |
|----------------|---------|---------|-------------|-----------------|-----------|--------------|---------------|
| A_33_P3385371  | 1,67861 | 1,60079 | 1,055422028 | ENST00000373518 | 645996    | NR_027291    | NAP1L6        |
| A_22_P00012167 | 4,29765 | 4,21986 | 1,055400081 | ENST00000565129 | N/A       | N/A          | N/A           |
| A_21_P0006745  | 1,73288 | 1,6551  | 1,055392766 | N/A             | N/A       | N/A          | Inc-CUL2-1    |
| A_22_P00022217 | 1,78777 | 1,70999 | 1,055392766 | ENST00000528183 | N/A       | CR745046     | N/A           |
| A_33_P3318653  | 2,93682 | 2,85904 | 1,055392766 | ENST00000383696 | 79295     | NM_001005479 | OR5H6         |
| A_22_P00015625 | 1,72574 | 1,64797 | 1,055385451 | N/A             | N/A       | BX103878     | Inc-SULF1-3   |
| A_22_P00003679 | 1,7829  | 1,70518 | 1,055348874 | ENST00000454538 | 102725521 | N/A          | LOC102725521  |
| A_21_P0000728  | 4,28281 | 4,2051  | 1,055341559 | N/A             | 100506451 | NR_038227    | RASSF8-AS1    |
| A_23_P166826   | 12,3208 | 12,2431 | 1,055334244 | ENST00000294241 | 55802     | NM_018403    | DCP1A         |
| A_33_P3316639  | 10,7111 | 10,6334 | 1,055334244 | ENST00000486404 | 51652     | NM_001193517 | CHMP3         |
| A_21_P0007977  | 3,70492 | 3,62722 | 1,055334244 | N/A             | 102723332 | N/A          | LINC00412     |
| A_21_P0005496  | 1,80098 | 1,72331 | 1,055312299 | N/A             | N/A       | N/A          | Inc-ZPBP-3    |
| A_22_P00007795 | 1,71641 | 1,63875 | 1,055304985 | N/A             | N/A       | N/A          | Inc-HNRPLL-2  |
| A_22_P00018519 | 1,7077  | 1,63004 | 1,055304985 | N/A             | N/A       | N/A          | Inc-MIS18A-3  |
| A_33_P3269109  | 2,10139 | 2,02373 | 1,055304985 | ENST00000512983 | 2982      | N/A          | GUCY1A3       |
| A_22_P00009331 | 5,2009  | 5,12326 | 1,055290355 | ENST00000565615 | 57554     | BX648061     | LRRC7         |
| A_23_P158555   | 1,727   | 1,64938 | 1,055275726 | ENST00000449082 | 6336      | NM_006514    | SCN10A        |
| A_23_P78595    | 1,6623  | 1,58469 | 1,055268411 | ENST00000401445 | 90273     | NM_033543    | CEACAM21      |
| A_21_P0010289  | 1,76396 | 1,68635 | 1,055268411 | N/A             | N/A       | N/A          | Inc-SIK1-1    |
| A_23_P26314    | 7,59044 | 7,51285 | 1,055253782 | ENST00000299237 | 57567     | NM_020807    | ZNF319        |
| A_22_P00009030 | 1,7857  | 1,70811 | 1,055253782 | ENST00000503815 | N/A       | N/A          | N/A           |
| A_33_P3343066  | 1,76914 | 1,69155 | 1,055253782 | ENST00000370296 | 5076      | NM_003988    | PAX2          |
| A_22_P00001206 | 1,80136 | 1,72378 | 1,055246468 | N/A             | 102725145 | XR_431882    | LOC102725145  |
| A_21_P0000404  | 1,71779 | 1,64022 | 1,055239153 | N/A             | 767583    | NR_003199    | SNORD114-7    |
| A_22_P00021707 | 1,76628 | 1,68873 | 1,055224525 | N/A             | N/A       | N/A          | Inc-C7orf62-2 |
| A_22_P00014606 | 4,02186 | 3,94431 | 1,055224525 | ENST00000545739 | 101927616 | NR_110057    | LOC101927616  |
| A_33_P3391517  | 5,9505  | 5,87295 | 1,055224525 | ENST00000560945 | 79856     | XM_005254677 | SNX22         |
| A_21_P0011365  | 3,86907 | 3,79153 | 1,05521721  | ENST00000564702 | N/A       | N/A          | N/A           |
| A_23_P133279   | 9,76902 | 9,69148 | 1,05521721  | N/A             | 134145    | NM_199133    | FAM173B       |
| A_21_P0004504  | 2,45533 | 2,3778  | 1,055209896 | N/A             | 101928505 | N/A          | LOC101928505  |
| A_33_P3331966  | 1,66238 | 1,58486 | 1,055202582 | ENST00000306687 | 26245     | NM_017504    | OR2M4         |
| A_33_P3250263  | 1,75616 | 1,67864 | 1,055202582 | N/A             | N/A       | N/A          | N/A           |
| A_22_P00004896 | 5,71151 | 5,634   | 1,055195268 | ENST00000557232 | N/A       | N/A          | N/A           |

|                |         |         |             |                 |           |              |                |
|----------------|---------|---------|-------------|-----------------|-----------|--------------|----------------|
| A_22_P00000777 | 1,66397 | 1,58647 | 1,055187954 | ENST00000421481 | N/A       | N/A          | N/A            |
| A_33_P3360886  | 5,39181 | 5,31433 | 1,055173326 | N/A             | N/A       | N/A          | N/A            |
| A_33_P3806721  | 8,13497 | 8,05749 | 1,055173326 | ENST00000441782 | 79831     | NM_001145348 | KDM8           |
| A_33_P3265104  | 7,20953 | 7,13206 | 1,055166012 | ENST00000451454 | 10531     | NM_001242307 | PITRM1         |
| A_21_P0009979  | 1,80153 | 1,72407 | 1,055158698 | N/A             | N/A       | N/A          | Inc-MC3R-2     |
| A_22_P00004834 | 1,97866 | 1,90122 | 1,055144071 | ENST00000562795 | N/A       | BC035679     | N/A            |
| A_23_P26294    | 15,2166 | 15,1392 | 1,055114816 | ENST00000234798 | 25823     | NM_012467    | TPSG1          |
| A_33_P3320017  | 1,79329 | 1,7159  | 1,055107503 | ENST00000616459 | 442117    | NM_001034845 | GALNTL6        |
| A_21_P0008387  | 2,64313 | 2,56576 | 1,055092876 | N/A             | N/A       | N/A          | Inc-DLK1-2     |
| A_21_P0004601  | 1,76284 | 1,68549 | 1,05507825  | N/A             | N/A       | N/A          | Inc-MANEA-3    |
| A_33_P3337742  | 7,86523 | 7,7879  | 1,055063623 | N/A             | N/A       | N/A          | N/A            |
| A_24_P161233   | 1,59579 | 1,51846 | 1,055063623 | ENST00000392363 | N/A       | N/A          | N/A            |
| A_23_P200493   | 12,8312 | 12,7539 | 1,055041684 | ENST00000338179 | 3930      | NM_002296    | LBR            |
| A_24_P80204    | 13,4447 | 13,3674 | 1,055041684 | ENST00000272462 | 7851      | NM_005434    | MALL           |
| A_23_P71889    | 7,69829 | 7,62099 | 1,055041684 | ENST00000546203 | 4957      | NM_153437    | ODF2           |
| A_33_P3354203  | 5,29673 | 5,21944 | 1,055034371 | ENST00000534263 | 4745      | AB085898     | NELL1          |
| A_33_P3243667  | 3,17214 | 3,09486 | 1,055027058 | ENST00000343776 | 339500    | NM_178549    | ZNF678         |
| A_22_P00015763 | 7,81302 | 7,73574 | 1,055027058 | ENST00000582726 | N/A       | N/A          | N/A            |
| A_21_P0002812  | 1,78063 | 1,70339 | 1,054997807 | ENST00000462382 | N/A       | N/A          | N/A            |
| A_22_P00008290 | 1,72583 | 1,64861 | 1,054983182 | ENST00000412218 | N/A       | DB443437     | N/A            |
| A_23_P79836    | 13,4189 | 13,3417 | 1,054968557 | ENST00000342374 | 10955     | NM_006811    | SERINC3        |
| A_22_P00007327 | 3,75628 | 3,6791  | 1,054953932 | N/A             | N/A       | N/A          | Inc-GPR83-1    |
| A_22_P00021845 | 3,21223 | 3,1351  | 1,05491737  | ENST00000534086 | N/A       | XM_006718601 | N/A            |
| A_21_P0014289  | 1,6908  | 1,61368 | 1,054910058 | N/A             | 101060553 | NR_120398    | LOC101060553   |
| A_33_P3287158  | 1,71841 | 1,64129 | 1,054910058 | ENST00000381092 | 57502     | NM_001282145 | NLGN4X         |
| A_21_P0013627  | 4,94311 | 4,866   | 1,054902746 | ENST00000421828 | 730098    | XR_113195    | LOC730098      |
| A_21_P0010455  | 11,1887 | 11,1116 | 1,054895434 | N/A             | N/A       | N/A          | Inc-C22orf26-5 |
| A_21_P0001162  | 1,76387 | 1,68677 | 1,054895434 | ENST00000447916 | N/A       | N/A          | N/A            |
| A_33_P3331228  | 1,66249 | 1,58548 | 1,054829629 | ENST00000390603 | N/A       | AY505570     | N/A            |
| A_32_P6344     | 1,75212 | 1,67511 | 1,054829629 | ENST00000536413 | 6416      | NM_003010    | MAP2K4         |
| A_22_P00002981 | 1,71334 | 1,63634 | 1,054822317 | N/A             | N/A       | AK126969     | Inc-C6orf125-1 |
| A_24_P167377   | 4,14047 | 4,06349 | 1,054807694 | ENST00000309675 | 121130    | NM_206899    | OR10P1         |
| A_33_P3737979  | 5,68468 | 5,60772 | 1,054793072 | N/A             | 677773    | DW407923     | SCARNA23       |

|                |         |         |             |                 |           |              |                      |
|----------------|---------|---------|-------------|-----------------|-----------|--------------|----------------------|
| A_22_P00009418 | 1,79479 | 1,71785 | 1,054778449 | N/A             | N/A       | BX508437     | Inc-LYN-1            |
| A_22_P00016352 | 1,75912 | 1,68218 | 1,054778449 | ENST00000513280 | N/A       | N/A          | N/A                  |
| A_24_P196851   | 9,67385 | 9,59704 | 1,054683408 | ENST00000314888 | 7094      | NM_006289    | TLN1                 |
| A_22_P00024913 | 1,7414  | 1,6646  | 1,054676098 | ENST00000490465 | 100507461 | XR_108504    | LOC100507461         |
| A_33_P3308764  | 3,43118 | 3,35439 | 1,054668787 | ENST00000465764 | 6258      | NR_033824    | RXRG                 |
| A_24_P179816   | 9,80371 | 9,72693 | 1,054661477 | ENST00000468044 | 11000     | NM_024330    | SLC27A3              |
| A_21_P0000733  | 1,70334 | 1,62658 | 1,054646856 | ENST00000420529 | 100507629 | NR_038239    | LINC00658            |
| A_22_P00003549 | 1,72008 | 1,64332 | 1,054646856 | N/A             | N/A       | N/A          | Inc-CCR8-1           |
| A_21_P0014312  | 13,7002 | 13,6235 | 1,054602996 | ENST00000563192 | 100507303 | XR_111621    | SNHG19               |
| A_23_P161368   | 1,68618 | 1,60948 | 1,054602996 | ENST00000479946 | 1558      | NM_000770    | CYP2C8               |
| A_24_P606538   | 1,83344 | 1,75675 | 1,054595686 | ENST00000374458 | 449520    | NR_028361    | GGNBP1               |
| A_22_P00001995 | 1,78945 | 1,71278 | 1,054581066 | ENST00000415940 | N/A       | N/A          | N/A                  |
| A_21_P0014545  | 1,75714 | 1,68051 | 1,054551827 | N/A             | 100507513 | XR_110261    | LOC100507513         |
| A_21_P0004256  | 1,75683 | 1,6802  | 1,054551827 | N/A             | N/A       | N/A          | Inc-CWC27-1          |
| A_22_P00014599 | 10,299  | 10,2224 | 1,054529899 | N/A             | N/A       | AK026896     | Inc-SLC15A1-1        |
| A_24_P307572   | 8,12641 | 8,04983 | 1,05451528  | ENST00000553025 | 88455     | NM_033121    | ANKRD13A             |
| A_21_P0012169  | 1,73732 | 1,66075 | 1,054507971 | N/A             | N/A       | N/A          | XLOC_I2_008979       |
| A_24_P363896   | 9,12535 | 9,04878 | 1,054507971 | ENST00000468565 | 85301     | NM_032888    | COL27A1              |
| A_24_P256243   | 5,92159 | 5,84503 | 1,054500661 | ENST00000476392 | 6757      | NM_175698    | SSX2                 |
| A_21_P0012117  | 1,73723 | 1,66071 | 1,054471425 | N/A             | N/A       | N/A          | XLOC_I2_008815       |
| A_23_P131990   | 4,5599  | 4,48339 | 1,054464116 | ENST00000557285 | 30813     | NM_014588    | VSX1                 |
| A_21_P0004031  | 1,67351 | 1,597   | 1,054464116 | ENST00000511323 | N/A       | N/A          | N/A                  |
| A_24_P693321   | 10,7074 | 10,6309 | 1,054456807 | ENST00000356156 | 100190986 | NR_024456    | LOC100190986         |
| A_24_P100368   | 9,23845 | 9,16196 | 1,054449498 | ENST00000432389 | 6990      | NM_006520    | DYNLT3               |
| A_24_P60845    | 5,62964 | 5,55317 | 1,05443488  | ENST00000442452 | 43        | NM_000665    | ACHE                 |
| A_32_P156373   | 3,9717  | 3,89525 | 1,054420263 | N/A             | 102725134 | XR_431880    | LOC102725134         |
| A_22_P00022674 | 4,28515 | 4,20872 | 1,054405646 | N/A             | N/A       | BC017766     | Inc-POLR1E-1         |
| A_24_P40626    | 1,71802 | 1,6416  | 1,054398337 | ENST00000318160 | 64388     | NM_022469    | GREM2                |
| A_33_P3353662  | 1,663   | 1,58658 | 1,054398337 | ENST00000382387 | 157983    | NM_152569    | C9orf66              |
| A_22_P00013760 | 1,69739 | 1,62098 | 1,054391028 | N/A             | N/A       | N/A          | Inc-RP11-90J19.1.1-2 |
| A_33_P6817399  | 7,56286 | 7,48645 | 1,054391028 | ENST00000577000 | 284185    | NR_038080    | LINC00482            |
| A_22_P00022392 | 2,00192 | 1,92554 | 1,054369103 | N/A             | N/A       | N/A          | Inc-GTDC1-3          |
| A_33_P3402257  | 4,77611 | 4,69974 | 1,054361795 | ENST00000529108 | 728588    | XM_006709948 | MS4A18               |

|                |         |         |             |                 |           |              |              |
|----------------|---------|---------|-------------|-----------------|-----------|--------------|--------------|
| A_33_P3248420  | 7,84206 | 7,7657  | 1,054354487 | ENST00000443595 | 222234    | NM_001145268 | FAM185A      |
| A_23_P167723   | 1,73567 | 1,65933 | 1,05433987  | ENST00000297158 | 26223     | NM_012159    | FBXL21       |
| A_21_P0000682  | 10,1584 | 10,0821 | 1,054310638 | ENST00000415414 | 100527964 | NR_037642    | LHX4-AS1     |
| A_22_P00021622 | 1,66386 | 1,58758 | 1,054296022 | ENST00000528480 | 102724915 | N/A          | LOC102724915 |
| A_33_P3495120  | 1,7657  | 1,68944 | 1,054281407 | N/A             | 285025    | AL832777     | CCDC141      |
| A_24_P721699   | 1,66632 | 1,59007 | 1,054274099 | N/A             | 503538    | AK027222     | A1BG-AS1     |
| A_33_P3355004  | 1,67812 | 1,60187 | 1,054274099 | N/A             | 1644      | NM_001242890 | DDC          |
| A_22_P00002024 | 1,86247 | 1,78624 | 1,054259484 | N/A             | N/A       | N/A          | Inc-BEST3-2  |
| A_23_P119698   | 12,0741 | 11,9979 | 1,054237562 | ENST00000599573 | 51293     | NM_016579    | CD320        |
| A_22_P00012261 | 1,73007 | 1,65389 | 1,054222947 | ENST00000534856 | N/A       | N/A          | N/A          |
| A_21_P0007278  | 3,41794 | 3,34177 | 1,054215639 | N/A             | N/A       | N/A          | Inc-RBM7-1   |
| A_33_P3321678  | 9,7826  | 9,70644 | 1,054208332 | ENST00000296615 | 285671    | AK090756     | RNF180       |
| A_21_P0000771  | 1,75484 | 1,67869 | 1,054201025 | N/A             | 100505715 | NR_038334    | LOC100505715 |
| A_22_P00023027 | 1,71358 | 1,63745 | 1,054186411 | N/A             | N/A       | N/A          | Inc-UTS2D-1  |
| A_23_P59616    | 7,88039 | 7,80427 | 1,054179104 | ENST00000620147 | 84163     | NM_173537    | GTF2IRD2     |
| A_23_P341275   | 11,0783 | 11,0022 | 1,05416449  | ENST00000349693 | 10940     | NM_015029    | POP1         |
| A_23_P106798   | 9,81443 | 9,73834 | 1,054157183 | ENST00000568007 | 6477      | NM_003031    | SIAH1        |
| A_22_P00005287 | 1,69887 | 1,6228  | 1,054142569 | ENST00000577346 | N/A       | AL110201     | N/A          |
| A_22_P00017661 | 1,67559 | 1,59954 | 1,054127956 | N/A             | 100856811 | NR_104156    | NRG1-IT1     |
| A_33_P3312044  | 1,76302 | 1,68698 | 1,054120649 | N/A             | N/A       | N/A          | N/A          |
| A_23_P145841   | 1,70203 | 1,626   | 1,054113343 | ENST00000307068 | 25928     | NM_015464    | SOSTDC1      |
| A_22_P00005866 | 1,7038  | 1,6278  | 1,054091423 | N/A             | N/A       | N/A          | Inc-ERP44-1  |
| A_32_P202859   | 6,13543 | 6,05944 | 1,054084117 | ENST00000335017 | 341567    | NM_181788    | H1FNT        |
| A_33_P3641714  | 9,48325 | 9,40728 | 1,054069504 | ENST00000591813 | 55337     | NM_018381    | C19orf66     |
| A_22_P00011750 | 2,92351 | 2,84754 | 1,054069504 | ENST00000510416 | 102724700 | XR_425789    | LOC102724700 |
| A_23_P42565    | 1,65976 | 1,58381 | 1,054054892 | ENST00000287907 | 3361      | NM_024012    | HTR5A        |
| A_21_P0000427  | 1,6686  | 1,59265 | 1,054054892 | N/A             | 767611    | NR_003223    | SNORD114-30  |
| A_33_P3302916  | 1,69616 | 1,62021 | 1,054054892 | ENST00000343122 | 60468     | NM_021813    | BACH2        |
| A_22_P00002187 | 2,17034 | 2,09441 | 1,05404028  | ENST00000514661 | N/A       | N/A          | N/A          |
| A_22_P00019351 | 2,84213 | 2,76622 | 1,054025668 | N/A             | N/A       | HY026858     | Inc-SCD-2    |
| A_24_P320328   | 13,1683 | 13,0924 | 1,054018362 | ENST00000511988 | 10923     | NM_006713    | SUB1         |
| A_22_P00007842 | 1,77935 | 1,70345 | 1,054018362 | N/A             | N/A       | N/A          | Inc-HRASLS-2 |
| A_22_P00012543 | 1,46368 | 1,38779 | 1,054011056 | N/A             | 101927039 | XR_242407    | LOC101927039 |



|                |         |         |             |                 |           |              |                 |
|----------------|---------|---------|-------------|-----------------|-----------|--------------|-----------------|
| A_22_P00000573 | 1,73207 | 1,65619 | 1,05400375  | N/A             | 101928440 | XR_424219    | FBXO3-AS1       |
| A_21_P0005041  | 1,75336 | 1,67748 | 1,05400375  | N/A             | N/A       | N/A          | Inc-EPHA7-2     |
| A_21_P0001712  | 1,65947 | 1,58359 | 1,05400375  | ENST00000448988 | N/A       | N/A          | N/A             |
| A_22_P00011617 | 1,66259 | 1,58671 | 1,05400375  | ENST00000553621 | N/A       | DA229407     | N/A             |
| A_33_P3273684  | 1,72515 | 1,64927 | 1,05400375  | ENST00000611589 | 9378      | NM_001135659 | NRXN1           |
| A_21_P0000141  | 7,45663 | 7,38077 | 1,053989139 | N/A             | 5936      | NM_001198844 | RBM4            |
| A_23_P216361   | 1,71119 | 1,63534 | 1,053981833 | ENST00000247781 | 7373      | NM_021110    | COL14A1         |
| A_22_P00025134 | 1,7149  | 1,63908 | 1,053959916 | N/A             | N/A       | N/A          | Inc-HECA-1      |
| A_33_P3408529  | 1,90978 | 1,83397 | 1,053952611 | N/A             | N/A       | N/A          | N/A             |
| A_23_P94301    | 11,1992 | 11,1234 | 1,053945305 | ENST00000527677 | 7264      | NM_003313    | TSTA3           |
| A_23_P373708   | 15,5618 | 15,486  | 1,053945305 | ENST00000578578 | 284085    | NR_028334    | KRT18P55        |
| A_22_P00020753 | 3,06991 | 2,99414 | 1,053923389 | N/A             | 101927917 | NR_120537    | TUB-AS1         |
| A_19_P00316156 | 4,81458 | 4,73885 | 1,053894169 | N/A             | 101928673 | NR_125960    | LOC101928673    |
| A_33_P3328254  | 1,77338 | 1,69766 | 1,053886864 | ENST00000311981 | 3568      | NM_175725    | IL5RA           |
| A_22_P00005724 | 1,75561 | 1,6799  | 1,053879559 | ENST00000514113 | N/A       | N/A          | N/A             |
| A_33_P3362372  | 1,68818 | 1,61247 | 1,053879559 | ENST00000617639 | N/A       | X57723       | N/A             |
| A_22_P00003910 | 1,65804 | 1,58238 | 1,053843035 | ENST00000456446 | N/A       | N/A          | N/A             |
| A_23_P96432    | 1,66939 | 1,59374 | 1,05383573  | ENST00000361644 | 4114      | NM_002365    | MAGEB3          |
| A_23_P427587   | 4,56514 | 4,48953 | 1,053806512 | ENST00000294312 | 9965      | NM_005117    | FGF19           |
| A_22_P00014915 | 4,00416 | 3,92855 | 1,053806512 | ENST00000519557 | 100505739 | NR_110433    | LOC100505739    |
| A_33_P3782469  | 1,67681 | 1,6012  | 1,053806512 | ENST00000302000 | 26108     | NM_015617    | PYGO1           |
| A_23_P13885    | 10,368  | 10,2924 | 1,053799208 | ENST00000396684 | 1822      | NM_001007026 | ATN1            |
| A_22_P00007653 | 1,70586 | 1,63026 | 1,053799208 | N/A             | N/A       | N/A          | Inc-HEXA-1      |
| A_22_P00013639 | 1,77526 | 1,69967 | 1,053791903 | ENST00000506897 | 101927359 | NR_125885    | LOC101927359    |
| A_24_P294982   | 9,97759 | 9,90202 | 1,053777295 | ENST00000620996 | 51534     | NM_016485    | VTA1            |
| A_22_P00005983 | 1,68097 | 1,60543 | 1,053755382 | N/A             | N/A       | N/A          | N/A             |
| A_23_P91764    | 5,24783 | 5,1723  | 1,053748078 | ENST00000291232 | 115650    | NM_052945    | TNFRSF13C       |
| A_33_P3302586  | 8,99024 | 8,91471 | 1,053748078 | ENST00000377893 | 387509    | NM_207370    | GPR153          |
| A_22_P00009420 | 1,68642 | 1,61091 | 1,05373347  | ENST00000599397 | 284348    | AK131520     | LYPD5           |
| A_23_P201086   | 11,0567 | 10,9812 | 1,053726166 | ENST00000478424 | 375       | NM_001024227 | ARF1            |
| A_22_P00002113 | 1,73225 | 1,65676 | 1,053718862 | ENST00000517733 | 101928136 | NR_108027    | LINC01484       |
| A_22_P00019563 | 1,65679 | 1,58131 | 1,053711559 | N/A             | N/A       | CB121371     | Inc-C14orf126-6 |
| A_22_P00019905 | 3,71233 | 3,63688 | 1,053689648 | ENST00000560709 | N/A       | DB036862     | N/A             |

|                |         |         |             |                 |           |              |                |
|----------------|---------|---------|-------------|-----------------|-----------|--------------|----------------|
| A_21_P0006215  | 1,54973 | 1,47429 | 1,053682344 | N/A             | N/A       | N/A          | Inc-DEC1-3     |
| A_21_P0014455  | 1,80037 | 1,72493 | 1,053682344 | N/A             | 101928243 | NR_110200    | DARS-AS1       |
| A_22_P00024107 | 1,6605  | 1,58508 | 1,053667737 | ENST00000457558 | N/A       | BG674167     | N/A            |
| A_22_P00004493 | 1,7253  | 1,6499  | 1,05365313  | ENST00000438070 | N/A       | N/A          | N/A            |
| A_22_P00006042 | 1,74047 | 1,6651  | 1,05363122  | N/A             | N/A       | AL832760     | Inc-FAM120B-1  |
| A_22_P00011660 | 1,66226 | 1,58689 | 1,05363122  | N/A             | N/A       | CR746194     | Inc-PDE4D-2    |
| A_33_P3362306  | 1,69511 | 1,61976 | 1,053616614 | N/A             | 254028    | NR_122043    | LOC254028      |
| A_33_P3415199  | 1,78335 | 1,70804 | 1,053587402 | N/A             | N/A       | AK123118     | Inc-FBRSL1-4   |
| A_33_P3217230  | 5,14516 | 5,06985 | 1,053587402 | ENST00000300619 | 7644      | NM_003430    | ZNF91          |
| A_33_P3711318  | 8,41994 | 8,34464 | 1,053580099 | N/A             | 257152    | AK001439     | LOC257152      |
| A_24_P120346   | 13,3682 | 13,2929 | 1,053580099 | ENST00000465368 | 56954     | NM_020202    | NIT2           |
| A_22_P00013810 | 4,14487 | 4,06964 | 1,05352898  | ENST00000448134 | N/A       | N/A          | N/A            |
| A_21_P0011647  | 1,72637 | 1,65116 | 1,053514375 | N/A             | N/A       | N/A          | XLOC_I2_006256 |
| A_24_P380536   | 10,7783 | 10,7031 | 1,053507073 | ENST00000506649 | 8763      | NM_006016    | CD164          |
| A_23_P350059   | 10,6422 | 10,567  | 1,053507073 | ENST00000604437 | 767846    | NR_003242    | PFN1P2         |
| A_22_P00004269 | 1,65599 | 1,58079 | 1,053507073 | N/A             | N/A       | BQ215121     | Inc-CNBD1-3    |
| A_21_P0002664  | 1,7901  | 1,7149  | 1,053507073 | N/A             | N/A       | N/A          | Inc-SERTAD2-1  |
| A_23_P150648   | 1,69915 | 1,62398 | 1,053485166 | ENST00000610870 | 55539     | NR_024627    | KCNQ1DN        |
| A_22_P00008967 | 1,7057  | 1,63056 | 1,05346326  | ENST00000592085 | 121838    | NR_026955    | LINC00284      |
| A_22_P00011475 | 1,74342 | 1,66832 | 1,053434052 | ENST00000562956 | 100505583 | NR_038932    | LINC00838      |
| A_22_P00008515 | 1,68638 | 1,61129 | 1,05342675  | ENST00000553990 | N/A       | CD694834     | N/A            |
| A_33_P3330149  | 1,70332 | 1,62823 | 1,05342675  | ENST00000379129 | 5080      | NM_000280    | PAX6           |
| A_22_P00025578 | 9,04322 | 8,96814 | 1,053419448 | N/A             | N/A       | AL137634     | Inc-UNC93B1-1  |
| A_22_P00019135 | 1,75021 | 1,67515 | 1,053404845 | N/A             | N/A       | N/A          | Inc-PTPRG-1    |
| A_24_P242609   | 10,6613 | 10,5863 | 1,053361036 | ENST00000367259 | 59349     | NM_021633    | KLHL12         |
| A_22_P00004577 | 1,70947 | 1,63447 | 1,053361036 | ENST00000449126 | N/A       | N/A          | N/A            |
| A_23_P153662   | 1,72069 | 1,64569 | 1,053361036 | ENST00000360675 | 56891     | NM_203471    | LGALS14        |
| A_33_P3352278  | 1,70353 | 1,62854 | 1,053353735 | ENST00000379426 | 100113407 | NM_001100829 | TMEM170B       |
| A_33_P7477724  | 8,1307  | 8,05572 | 1,053346433 | N/A             | N/A       | BC033973     | Inc-VAMP1-1    |
| A_21_P0005397  | 1,65538 | 1,58041 | 1,053339132 | N/A             | N/A       | N/A          | Inc-ZNF804B-2  |
| A_22_P00002421 | 1,65999 | 1,58503 | 1,053331831 | ENST00000550990 | 102724917 | N/A          | LOC102724917   |
| A_23_P383819   | 1,76517 | 1,69023 | 1,053317229 | ENST00000257566 | 6926      | NM_016569    | TBX3           |
| A_21_P0011483  | 1,65664 | 1,58174 | 1,053288025 | N/A             | N/A       | N/A          | XLOC_I2_005503 |

|                |         |         |             |                 |           |              |                  |
|----------------|---------|---------|-------------|-----------------|-----------|--------------|------------------|
| A_22_P00004420 | 1,75781 | 1,68291 | 1,053288025 | N/A             | 102724050 | NR_120487    | LOC102724050     |
| A_21_P0008679  | 1,66627 | 1,59137 | 1,053288025 | N/A             | N/A       | N/A          | Inc-CHD2-4       |
| A_33_P3388822  | 3,3235  | 3,2486  | 1,053288025 | ENST00000391958 | 353355    | NM_181756    | ZNF233           |
| A_21_P0008638  | 1,48565 | 1,41078 | 1,053266123 | N/A             | N/A       | N/A          | Inc-FOXB1-1      |
| A_23_P112173   | 1,78084 | 1,70598 | 1,053258822 | ENST00000286344 | 25769     | NM_020344    | SLC24A2          |
| A_21_P0000067  | 1,65302 | 1,57819 | 1,05323692  | ENST00000513614 | 6569      | NM_001167579 | SLC34A1          |
| A_33_P3244165  | 18,6192 | 18,5444 | 1,053215019 | N/A             | 100008589 | NR_003287    | RNA28S5          |
| A_21_P0012704  | 1,65692 | 1,58212 | 1,053215019 | N/A             | N/A       | N/A          | XLOC_I2_011423   |
| A_22_P00016013 | 1,71493 | 1,64014 | 1,053207719 | N/A             | N/A       | N/A          | Inc-TFDP2-3      |
| A_22_P00015829 | 7,49964 | 7,42486 | 1,053200419 | ENST00000426452 | 284930    | NR_122046    | LOC284930        |
| A_21_P0011940  | 1,65593 | 1,58116 | 1,053193118 | ENST00000611915 | N/A       | N/A          | N/A              |
| A_22_P00021765 | 1,69046 | 1,61571 | 1,053178518 | N/A             | N/A       | BQ429976     | Inc-OCA2-2       |
| A_33_P3246780  | 1,73405 | 1,6593  | 1,053178518 | N/A             | N/A       | N/A          | N/A              |
| A_21_P0008069  | 2,77501 | 2,70026 | 1,053178518 | N/A             | N/A       | N/A          | Inc-AL445989.1-7 |
| A_24_P313431   | 1,74546 | 1,67075 | 1,053149318 | ENST00000219197 | 869       | NM_004352    | CBLN1            |
| A_32_P207124   | 8,87558 | 8,80087 | 1,053149318 | ENST00000419982 | 255313    | NM_173571    | CT47A11          |
| A_23_P204395   | 10,9453 | 10,8706 | 1,053142018 | ENST00000316543 | 65985     | NM_023928    | AACS             |
| A_24_P347624   | 10,6057 | 10,531  | 1,053142018 | ENST00000338327 | 8926      | NM_022804    | SNURF            |
| A_21_P0012056  | 1,71661 | 1,64192 | 1,053134719 | ENST00000436187 | 101929567 | N/A          | LOC101929567     |
| A_21_P0013109  | 1,65153 | 1,57685 | 1,053127419 | N/A             | N/A       | N/A          | XLOC_I2_013153   |
| A_33_P3423450  | 1,67338 | 1,59871 | 1,053120119 | N/A             | 100130548 | XR_113265    | LOC100130548     |
| A_33_P3268466  | 7,92831 | 7,85364 | 1,053120119 | ENST00000575256 | 9526      | NM_004870    | MPDU1            |
| A_23_P154379   | 1,76683 | 1,69218 | 1,05310552  | ENST00000272425 | 9027      | NM_003960    | NAT8             |
| A_23_P100795   | 8,73664 | 8,662   | 1,05309822  | ENST00000264657 | 6774      | NM_213662    | STAT3            |
| A_23_P3177     | 1,68466 | 1,61003 | 1,053090921 | ENST00000282146 | 56659     | NM_022054    | KCNK13           |
| A_22_P00021401 | 2,31924 | 2,24465 | 1,053061723 | ENST00000553990 | N/A       | CD694834     | N/A              |
| A_24_P108291   | 8,95178 | 8,87723 | 1,053032527 | ENST00000580035 | 55364     | NM_018439    | IMPACT           |
| A_24_P348828   | 1,65808 | 1,58355 | 1,053017929 | ENST00000326539 | 149830    | NR_024267    | PRNT             |
| A_23_P436281   | 11,4706 | 11,3961 | 1,052996032 | ENST00000578186 | 554313    | NM_001034077 | HIST2H4B         |
| A_33_P3648553  | 1,6652  | 1,59072 | 1,052981435 | N/A             | 100507605 | BC028422     | LINC00837        |
| A_23_P318860   | 2,65937 | 2,58494 | 1,052944942 | ENST00000611099 | 187       | NM_005161    | APLNR            |
| A_33_P3415475  | 1,7193  | 1,64488 | 1,052937643 | ENST00000378079 | 494188    | NM_001008777 | FBXO47           |
| A_23_P369815   | 1,65408 | 1,57966 | 1,052937643 | ENST00000367721 | 356       | NM_000639    | FASLG            |

|                |         |         |             |                 |           |           |                |
|----------------|---------|---------|-------------|-----------------|-----------|-----------|----------------|
| A_33_P3272698  | 13,0698 | 12,9954 | 1,052923046 | ENST00000368107 | 54935     | NM_017823 | DUSP23         |
| A_22_P00025087 | 1,69827 | 1,62388 | 1,052915748 | N/A             | N/A       | BX091388  | Inc-FBXL7-1    |
| A_21_P0013148  | 3,96048 | 3,8861  | 1,05290845  | ENST00000418134 | 100422737 | NR_033557 | LOC100422737   |
| A_22_P00009250 | 4,65685 | 4,5825  | 1,052886556 | N/A             | N/A       | N/A       | Inc-LRP11-1    |
| A_22_P00003448 | 1,71611 | 1,64177 | 1,052879258 | ENST00000550307 | N/A       | N/A       | N/A            |
| A_32_P480177   | 1,68149 | 1,60716 | 1,05287196  | ENST00000621086 | 63923     | NM_022093 | TNN            |
| A_23_P36689    | 7,74432 | 7,67001 | 1,052857364 | ENST00000486401 | 10233     | NM_006992 | LRRC23         |
| A_21_P0008405  | 6,39529 | 6,32101 | 1,05283547  | N/A             | N/A       | N/A       | Inc-C14orf79-2 |
| A_33_P3884610  | 1,70543 | 1,63116 | 1,052828173 | N/A             | 206426    | NR_027712 | PIP5K1P1       |
| A_33_P3726064  | 1,76178 | 1,68752 | 1,052820875 | ENST00000414876 | 348761    | NR_033879 | SPATA3-AS1     |
| A_21_P0009357  | 4,02521 | 3,95097 | 1,05280628  | N/A             | N/A       | N/A       | Inc-SLC39A11-3 |
| A_23_P42514    | 13,385  | 13,3108 | 1,05277709  | ENST00000378119 | 81688     | NM_030939 | C6orf62        |
| A_23_P57118    | 1,70532 | 1,63112 | 1,05277709  | ENST00000381458 | 7053      | NM_003245 | TGM3           |
| A_21_P0010104  | 1,74821 | 1,67403 | 1,052762496 | N/A             | N/A       | N/A       | Inc-GPCPD1-1   |
| A_21_P0014519  | 1,65218 | 1,57802 | 1,052747902 | N/A             | N/A       | N/A       | N/A            |
| A_33_P3307465  | 1,70933 | 1,63518 | 1,052740605 | N/A             | 100130817 | AK123329  | LOC100130817   |
| A_22_P00003508 | 1,60565 | 1,53152 | 1,052726011 | ENST00000506878 | N/A       | N/A       | N/A            |
| A_23_P368154   | 1,77269 | 1,69858 | 1,052711417 | ENST00000490650 | 127435    | NM_153703 | PODN           |
| A_24_P57898    | 12,1347 | 12,0606 | 1,05270412  | ENST00000370346 | 128408    | NM_080606 | BHLHE23        |
| A_24_P211420   | 1,65151 | 1,57741 | 1,05270412  | ENST00000379756 | 25876     | NM_015417 | SPEF1          |
| A_33_P3367850  | 4,59108 | 4,51698 | 1,05270412  | ENST00000433765 | 1132      | NM_000741 | CHRM4          |
| A_21_P0013536  | 1,75641 | 1,68233 | 1,052689527 | N/A             | N/A       | N/A       | XLOC_I2_014182 |
| A_33_P3298552  | 9,34121 | 9,26714 | 1,05268223  | N/A             | N/A       | N/A       | N/A            |
| A_22_P00017048 | 1,65205 | 1,578   | 1,052667637 | ENST00000499752 | N/A       | XR_424204 | N/A            |
| A_22_P00019518 | 3,78638 | 3,71233 | 1,052667637 | N/A             | 101928537 | NR_110238 | LINC01494      |
| A_21_P0001829  | 1,65032 | 1,57628 | 1,05266034  | N/A             | N/A       | N/A       | Inc-DDX1-1     |
| A_21_P0004404  | 1,65971 | 1,58568 | 1,052653044 | N/A             | N/A       | N/A       | Inc-CD180-7    |
| A_21_P0001293  | 1,69648 | 1,62246 | 1,052645747 | N/A             | N/A       | N/A       | Inc-ELAVL4-1   |
| A_24_P165259   | 13,2561 | 13,1821 | 1,052631155 | ENST00000478402 | 29920     | NM_013328 | PYCR2          |
| A_21_P0008946  | 1,76392 | 1,68992 | 1,052631155 | N/A             | N/A       | N/A       | Inc-CHD9-3     |
| A_33_P3404470  | 11,3287 | 11,2547 | 1,052631155 | ENST00000525262 | 81622     | NM_030930 | UNC93B1        |
| A_23_P119448   | 7,65994 | 7,58596 | 1,052616562 | ENST00000412770 | 22870     | NM_014931 | PPP6R1         |
| A_33_P3364821  | 1,7828  | 1,70882 | 1,052616562 | ENST00000529828 | 5788      | NM_002838 | PTPRC          |

|                |         |         |             |                 |           |              |                  |
|----------------|---------|---------|-------------|-----------------|-----------|--------------|------------------|
| A_33_P3407994  | 1,78315 | 1,7092  | 1,052594674 | ENST00000569673 | 388135    | NM_001039614 | C15orf59         |
| A_33_P3404316  | 5,11528 | 5,04136 | 1,052572786 | N/A             | 399959    | NR_024430    | MIR100HG         |
| A_21_P0010425  | 1,73344 | 1,65953 | 1,05256549  | N/A             | N/A       | N/A          | Inc-FAM19A5-4    |
| A_33_P3312601  | 1,65539 | 1,58149 | 1,052558194 | ENST00000376221 | 343066    | NM_001013630 | AADA4L4          |
| A_21_P0000100  | 17,1303 | 17,0564 | 1,052558194 | ENST00000540040 | 100462977 | NM_001190452 | MTRNR2L1         |
| A_23_P77174    | 9,76056 | 9,68667 | 1,052550899 | ENST00000539642 | 9488      | NM_004855    | PIGB             |
| A_22_P00003292 | 1,64861 | 1,57473 | 1,052543603 | ENST00000423486 | 339505    | NR_033887    | LINC01141        |
| A_22_P00023848 | 1,74849 | 1,67462 | 1,052536307 | ENST00000434562 | N/A       | N/A          | N/A              |
| A_22_P00011558 | 1,67183 | 1,59796 | 1,052536307 | ENST00000504365 | 100507528 | NR_103762    | LINC00613        |
| A_21_P0004120  | 1,81862 | 1,74475 | 1,052536307 | N/A             | N/A       | N/A          | Inc-ADAMTS12-2   |
| A_22_P00003943 | 1,71237 | 1,63852 | 1,052521716 | N/A             | N/A       | N/A          | Inc-CHAC1-4      |
| A_33_P3247799  | 1,71692 | 1,64307 | 1,052521716 | ENST00000505954 | N/A       | XM_006711097 | N/A              |
| A_24_P50862    | 1,75527 | 1,68145 | 1,05249983  | ENST00000369044 | 55278     | AK022251     | QRSL1            |
| A_24_P7467     | 1,75831 | 1,68449 | 1,05249983  | ENST00000327928 | 131149    | NM_001080440 | OTOL1            |
| A_21_P0013838  | 1,71306 | 1,63926 | 1,052485239 | N/A             | N/A       | N/A          | XLOC_I2_015855   |
| A_33_P3229402  | 2,62576 | 2,55197 | 1,052477944 | ENST00000563924 | 5175      | NM_000442    | PECAM1           |
| A_32_P179998   | 1,79429 | 1,72051 | 1,052470649 | ENST00000334036 | 63947     | NM_033053    | DMRTC1           |
| A_23_P219013   | 8,44186 | 8,36808 | 1,052470649 | ENST00000244533 | 89845     | NM_033450    | ABCC10           |
| A_23_P207354   | 1,71208 | 1,63831 | 1,052463354 | ENST00000590423 | 51751     | NM_016438    | HIGD1B           |
| A_21_P0003943  | 1,75445 | 1,68068 | 1,052463354 | ENST00000506723 | 101927134 | NR_109877    | LINC01470        |
| A_22_P00004129 | 1,73059 | 1,65683 | 1,052456058 | N/A             | N/A       | N/A          | Inc-CLDN20-2     |
| A_22_P00012739 | 1,78328 | 1,70953 | 1,052448763 | N/A             | N/A       | BM683772     | Inc-RABEP2-3     |
| A_21_P0012607  | 1,75938 | 1,68563 | 1,052448763 | N/A             | N/A       | N/A          | Inc-AC110373.1-6 |
| A_23_P32279    | 1,65484 | 1,58114 | 1,052412289 | ENST00000401724 | 56033     | NM_021570    | BARX1            |
| A_23_P259555   | 1,6705  | 1,59682 | 1,0523977   | ENST00000383556 | 81797     | NM_030959    | OR12D3           |
| A_23_P42282    | 5,7596  | 5,68592 | 1,0523977   | ENST00000463249 | 721       | NM_001002029 | C4B              |
| A_21_P0010410  | 1,78305 | 1,70938 | 1,052390405 | ENST00000416995 | N/A       | N/A          | N/A              |
| A_22_P00018241 | 4,5972  | 4,52353 | 1,052390405 | ENST00000536034 | 101927905 | NR_120454    | LOC101927905     |
| A_33_P3233404  | 2,06141 | 1,98774 | 1,052390405 | ENST00000390400 | N/A       | AB305916     | N/A              |
| A_21_P0006039  | 3,46501 | 3,39136 | 1,052375816 | ENST00000411451 | 100996590 | N/A          | LINC01505        |
| A_23_P60657    | 9,54609 | 9,47244 | 1,052375816 | ENST00000492220 | 23248     | NM_015203    | RPRD2            |
| A_33_P3325952  | 3,82025 | 3,74664 | 1,052346638 | N/A             | N/A       | AK022213     | N/A              |
| A_22_P00020734 | 1,74187 | 1,66826 | 1,052346638 | ENST00000431020 | 150992    | NR_033837    | LINC00309        |

|                |         |         |             |                 |           |              |                     |
|----------------|---------|---------|-------------|-----------------|-----------|--------------|---------------------|
| A_33_P3415944  | 1,64949 | 1,57588 | 1,052346638 | ENST00000438392 | 253582    | NM_001010876 | TMEM244             |
| A_21_P0001889  | 1,6664  | 1,5928  | 1,052339344 | ENST00000453878 | N/A       | N/A          | N/A                 |
| A_24_P84873    | 11,3524 | 11,2788 | 1,052339344 | ENST00000515236 | N/A       | N/A          | N/A                 |
| A_33_P3226439  | 8,53994 | 8,46635 | 1,05233205  | N/A             | 389741    | N/A          | GLIDR               |
| A_33_P3378256  | 1,71179 | 1,63821 | 1,052324755 | N/A             | N/A       | N/A          | N/A                 |
| A_23_P136125   | 1,71064 | 1,63707 | 1,052317461 | ENST00000302068 | 2244      | NM_005141    | FGF                 |
| A_19_P00322815 | 1,65183 | 1,57827 | 1,052310167 | N/A             | 100048912 | NR_003529    | CDKN2B-AS1          |
| A_22_P00002540 | 13,3814 | 13,3079 | 1,052266404 | N/A             | N/A       | GR564636     | Inc-C17orf62-1      |
| A_24_P122524   | 10,4376 | 10,3641 | 1,052266404 | ENST00000349139 | 10885     | NM_006784    | WDR3                |
| A_23_P29225    | 13,0679 | 12,9944 | 1,052266404 | ENST00000492535 | 25793     | NM_012179    | FBXO7               |
| A_22_P00016819 | 1,74951 | 1,67603 | 1,052251816 | ENST00000513283 | N/A       | N/A          | N/A                 |
| A_21_P0008308  | 1,68386 | 1,61038 | 1,052251816 | N/A             | N/A       | N/A          | Inc-FOXG1-5         |
| A_21_P0005752  | 1,6475  | 1,57403 | 1,052244523 | N/A             | N/A       | N/A          | Inc-RP11-67H2.1.1-2 |
| A_23_P307968   | 1,64843 | 1,57502 | 1,052200762 | ENST00000398842 | 64072     | NM_052836    | CDH23               |
| A_23_P170679   | 1,69401 | 1,6206  | 1,052200762 | ENST00000396578 | 1285      | NM_000091    | COL4A3              |
| A_23_P9392     | 8,61836 | 8,54496 | 1,052193469 | ENST00000480366 | 51490     | NM_016390    | C9orf114            |
| A_21_P0001252  | 5,76022 | 5,68683 | 1,052186176 | N/A             | N/A       | N/A          | Inc-TMEM88B-4       |
| A_33_P3422968  | 1,75803 | 1,68464 | 1,052186176 | ENST00000468661 | 1768      | NM_001370    | DNAH6               |
| A_21_P0008941  | 1,66963 | 1,59626 | 1,052171589 | N/A             | N/A       | N/A          | Inc-CHD9-7          |
| A_33_P3375334  | 1,66092 | 1,58756 | 1,052164296 | ENST00000371230 | 1600      | N/A          | DAB1                |
| A_21_P0008342  | 1,65656 | 1,58321 | 1,052157003 | N/A             | N/A       | N/A          | Inc-PELI2-6         |
| A_23_P124327   | 8,72508 | 8,65173 | 1,052157003 | ENST00000347982 | 64324     | NM_022455    | NSD1                |
| A_22_P00006644 | 1,67231 | 1,599   | 1,052127832 | ENST00000548335 | 102724890 | NR_110557    | LOC102724890        |
| A_21_P0003268  | 1,72034 | 1,64704 | 1,052120539 | ENST00000478780 | N/A       | N/A          | N/A                 |
| A_24_P916614   | 13,681  | 13,6077 | 1,052120539 | ENST00000458258 | 9991      | NM_005156    | PTBP3               |
| A_21_P0007467  | 3,91606 | 3,84277 | 1,052113246 | N/A             | 102723862 | XR_428989    | LOC102723862        |
| A_22_P00016151 | 1,99833 | 1,92506 | 1,052098661 | ENST00000452505 | N/A       | N/A          | N/A                 |
| A_33_P3315519  | 1,6502  | 1,57693 | 1,052098661 | ENST00000409647 | 164832    | NM_198461    | LONRF2              |
| A_22_P00000260 | 1,64679 | 1,57353 | 1,052091368 | N/A             | 101929753 | NR_110576    | LOC101929753        |
| A_22_P00010066 | 1,73118 | 1,65792 | 1,052091368 | ENST00000452685 | N/A       | N/A          | N/A                 |
| A_23_P435407   | 5,03813 | 4,96489 | 1,052076783 | ENST00000370828 | 2239      | NM_001448    | GPC4                |
| A_33_P3332521  | 1,73041 | 1,65722 | 1,052040322 | ENST00000532566 | 56145     | NM_031497    | PCDHA3              |
| A_22_P00025306 | 3,41962 | 3,34644 | 1,052033029 | N/A             | N/A       | N/A          | Inc-DDX1-1          |

|                |         |         |             |                 |           |              |                |
|----------------|---------|---------|-------------|-----------------|-----------|--------------|----------------|
| A_21_P0002059  | 1,64663 | 1,57346 | 1,052025737 | ENST00000420724 | N/A       | N/A          | N/A            |
| A_22_P00006938 | 1,67011 | 1,59696 | 1,052011153 | ENST00000474149 | N/A       | N/A          | N/A            |
| A_32_P73452    | 5,10354 | 5,03042 | 1,051989278 | ENST00000597643 | 57719     | NM_020959    | ANO8           |
| A_21_P0007078  | 1,72227 | 1,64917 | 1,051974694 | N/A             | N/A       | N/A          | Inc-SHOC2-2    |
| A_24_P4170     | 1,65215 | 1,57906 | 1,051967402 | ENST00000518549 | 57094     | NM_020361    | CPA6           |
| A_22_P00003336 | 1,71126 | 1,63817 | 1,051967402 | ENST00000507058 | N/A       | N/A          | N/A            |
| A_19_P00801279 | 4,10904 | 4,03597 | 1,051952819 | ENST00000429601 | 4478      | XR_426530    | MSN            |
| A_22_P00020150 | 1,60406 | 1,53099 | 1,051952819 | ENST00000567966 | N/A       | N/A          | N/A            |
| A_23_P103837   | 9,86609 | 9,79302 | 1,051952819 | ENST00000475373 | 9898      | NM_001287815 | UBAP2L         |
| A_24_P401637   | 9,83778 | 9,76473 | 1,051938236 | N/A             | 100130856 | AK095727     | LOC100130856   |
| A_21_P0003302  | 3,50661 | 3,43356 | 1,051938236 | N/A             | 101928105 | XR_241597    | LOC101928105   |
| A_24_P280684   | 1,77009 | 1,69705 | 1,051930945 | ENST00000338040 | 51725     | NM_016298    | FBXO40         |
| A_22_P00022673 | 1,64946 | 1,57644 | 1,051916362 | N/A             | N/A       | N/A          | Inc-DYNLL2-2   |
| A_22_P00024353 | 1,67131 | 1,5983  | 1,05190907  | ENST00000431727 | N/A       | DB480018     | N/A            |
| A_33_P3286101  | 1,77892 | 1,70591 | 1,05190907  | N/A             | N/A       | N/A          | N/A            |
| A_33_P3288023  | 7,35253 | 7,27953 | 1,051901779 | ENST00000470006 | 51517     | NM_016453    | NCKIPSD        |
| A_21_P0001883  | 1,52321 | 1,45022 | 1,051894488 | ENST00000443419 | 101927926 | NR_110286    | LOC101927926   |
| A_21_P0005957  | 1,65577 | 1,58278 | 1,051894488 | N/A             | 101928087 | XR_250430    | LOC101928087   |
| A_21_P0013314  | 1,79539 | 1,72242 | 1,051879906 | N/A             | N/A       | N/A          | XLOC_I2_013859 |
| A_33_P3339441  | 1,75479 | 1,68185 | 1,051858033 | ENST00000456897 | 728716    | N/A          | LINC01346      |
| A_33_P3311974  | 3,6299  | 3,557   | 1,051828869 | ENST00000556489 | 283571    | NM_001243007 | PROX2          |
| A_23_P350045   | 12,699  | 12,6261 | 1,051828869 | ENST00000379638 | 7905      | NM_005669    | REEP5          |
| A_22_P00011634 | 1,71396 | 1,64108 | 1,051814288 | N/A             | N/A       | N/A          | Inc-PCYOX1L-1  |
| A_33_P3212022  | 1,6702  | 1,59733 | 1,051806998 | ENST00000343854 | 9628      | NM_001204418 | RGS6           |
| A_22_P00003667 | 1,64527 | 1,57242 | 1,051792416 | ENST00000559675 | N/A       | N/A          | N/A            |
| A_21_P0004633  | 1,67296 | 1,60014 | 1,051770545 | ENST00000412132 | N/A       | N/A          | N/A            |
| A_22_P00024688 | 1,74134 | 1,66853 | 1,051763255 | ENST00000423149 | N/A       | BC038755     | N/A            |
| A_32_P185317   | 10,8977 | 10,8249 | 1,051755965 | ENST00000480284 | 645249    | NR_038835    | MNX1-AS1       |
| A_21_P0008526  | 1,75791 | 1,68511 | 1,051755965 | N/A             | N/A       | N/A          | Inc-JPH4-1     |
| A_24_P147169   | 4,55117 | 4,47838 | 1,051748675 | ENST00000569985 | 255189    | NM_213600    | PLA2G4F        |
| A_21_P0009337  | 1,75588 | 1,68312 | 1,051726804 | N/A             | N/A       | N/A          | Inc-COIL-1     |
| A_24_P48177    | 8,74406 | 8,67132 | 1,051712224 | ENST00000342907 | 6483      | NM_006927    | ST3GAL2        |
| A_33_P3246188  | 1,73873 | 1,66601 | 1,051697645 | N/A             | 54777     | NM_001200049 | CFAP46         |

|                |         |         |             |                 |           |              |                      |
|----------------|---------|---------|-------------|-----------------|-----------|--------------|----------------------|
| A_22_P00014545 | 1,70843 | 1,63574 | 1,051675775 | N/A             | 101929010 | NR_110090    | SIRPG-AS1            |
| A_21_P0012059  | 1,79797 | 1,7253  | 1,051661196 | ENST00000458359 | N/A       | N/A          | N/A                  |
| A_21_P0001704  | 9,60163 | 9,52897 | 1,051653907 | N/A             | N/A       | N/A          | Inc-NBPF16-4         |
| A_33_P3368920  | 1,75273 | 1,68009 | 1,051639328 | N/A             | N/A       | N/A          | Inc-GPCPD1-1         |
| A_21_P0004661  | 1,70127 | 1,62867 | 1,051610171 | ENST00000421318 | N/A       | N/A          | N/A                  |
| A_24_P212443   | 5,78409 | 5,71151 | 1,051595592 | ENST00000389103 | 9690      | NM_014671    | UBE3C                |
| A_21_P0000466  | 1,73071 | 1,65815 | 1,051581014 | N/A             | 100113389 | NR_003691    | SNORD127             |
| A_22_P00024633 | 1,74026 | 1,66771 | 1,051573725 | N/A             | N/A       | BG210193     | Inc-C3orf32-6        |
| A_22_P00003804 | 8,16759 | 8,09505 | 1,051566436 | N/A             | 10984     | NR_002728    | KCNQ10T1             |
| A_22_P00003700 | 1,65248 | 1,57994 | 1,051566436 | ENST00000561657 | N/A       | N/A          | N/A                  |
| A_22_P00025431 | 1,67034 | 1,59782 | 1,051551858 | ENST00000422448 | N/A       | N/A          | N/A                  |
| A_33_P3271460  | 3,41157 | 3,33906 | 1,05154457  | ENST00000373551 | 2800      | N/A          | GOLGA1               |
| A_23_P23797    | 1,6696  | 1,5971  | 1,051537281 | ENST00000489986 | 127124    | NM_133326    | ATP6V1G3             |
| A_22_P00010648 | 1,68002 | 1,60753 | 1,051529992 | ENST00000522570 | N/A       | AA453185     | N/A                  |
| A_21_P0006499  | 5,09302 | 5,02053 | 1,051529992 | N/A             | N/A       | N/A          | Inc-KLF8-1           |
| A_32_P199901   | 1,75861 | 1,68613 | 1,051522704 | ENST00000276173 | 92129     | NM_138382    | RIPPLY1              |
| A_21_P0007519  | 1,67557 | 1,60309 | 1,051522704 | N/A             | N/A       | N/A          | Inc-PLEKHG6-2        |
| A_21_P0010883  | 1,68576 | 1,61328 | 1,051522704 | N/A             | N/A       | N/A          | XLOC_I2_001995       |
| A_23_P99080    | 4,04269 | 3,97024 | 1,051500838 | ENST00000390677 | 50838     | NM_023920    | TAS2R13              |
| A_21_P0007637  | 1,73276 | 1,66033 | 1,051486261 | N/A             | N/A       | N/A          | Inc-MAP1LC3B2-2      |
| A_23_P34546    | 8,74481 | 8,67238 | 1,051486261 | ENST00000463042 | 10806     | NM_006642    | SDCCAG8              |
| A_22_P00013762 | 1,66622 | 1,5938  | 1,051478973 | N/A             | N/A       | N/A          | Inc-RP11-90J19.1.1-4 |
| A_33_P3400171  | 6,94152 | 6,86912 | 1,051464397 | ENST00000392037 | 208       | NM_001626    | AKT2                 |
| A_33_P3239405  | 7,46875 | 7,39641 | 1,051420668 | ENST00000435310 | 252839    | NM_001288565 | TMEM9                |
| A_21_P0005975  | 3,50141 | 3,42909 | 1,051406093 | N/A             | N/A       | N/A          | Inc-FAM84B-6         |
| A_23_P164536   | 10,7414 | 10,6691 | 1,051391517 | ENST00000587328 | 5289      | NM_002647    | PIK3C3               |
| A_23_P142574   | 1,66172 | 1,58942 | 1,051391517 | ENST00000611505 | 116255    | NM_058165    | MOGAT1               |
| A_23_P38244    | 1,73915 | 1,66687 | 1,051376942 | ENST00000205948 | 350       | NM_000042    | APOH                 |
| A_22_P00009615 | 1,64984 | 1,57756 | 1,051376942 | N/A             | N/A       | N/A          | Inc-MARCH4-1         |
| A_22_P00002320 | 1,75865 | 1,68638 | 1,051369654 | N/A             | N/A       | N/A          | Inc-C11orf46-2       |
| A_33_P3258279  | 1,75606 | 1,68379 | 1,051369654 | ENST00000374784 | 50863     | NM_001144059 | NTM                  |
| A_33_P3357182  | 1,71401 | 1,64175 | 1,051362367 | ENST00000380188 | 222826    | AK097426     | FAM217A              |
| A_23_P46829    | 3,29314 | 3,2209  | 1,051347792 | ENST00000347978 | 2253      | NM_033163    | FGF8                 |



|                |         |         |             |                 |           |              |                       |
|----------------|---------|---------|-------------|-----------------|-----------|--------------|-----------------------|
| A_22_P00006876 | 1,77925 | 1,70702 | 1,051340504 | ENST00000524855 | N/A       | N/A          | N/A                   |
| A_22_P00013615 | 1,75503 | 1,6828  | 1,051340504 | ENST00000501520 | N/A       | AK091456     | N/A                   |
| A_33_P3224185  | 4,31591 | 4,2437  | 1,05132593  | ENST00000429684 | N/A       | XM_006724938 | N/A                   |
| A_32_P110243   | 17,603  | 17,5308 | 1,051318643 | N/A             | 729927    | BC071734     | RPS20P27              |
| A_23_P29204    | 11,0093 | 10,9371 | 1,051318643 | ENST00000454552 | 51537     | NM_016498    | MTFP1                 |
| A_23_P135239   | 10,9549 | 10,8827 | 1,051318643 | ENST00000376472 | 7088      | NM_005077    | TLE1                  |
| A_22_P00002838 | 1,79503 | 1,72283 | 1,051318643 | ENST00000567718 | 100996478 | XR_158986    | LOC100996478          |
| A_24_P1054     | 6,72765 | 6,65545 | 1,051318643 | ENST00000613741 | 4796      | NM_013432    | TONSL                 |
| A_32_P234935   | 13,9119 | 13,8397 | 1,051318643 | ENST00000620632 | 23435     | NM_007375    | TARDBP                |
| A_21_P0000877  | 3,10915 | 3,03698 | 1,051296781 | ENST00000555985 | 100506433 | NR_039996    | LINC00648             |
| A_22_P00006899 | 1,6433  | 1,57113 | 1,051296781 | N/A             | N/A       | N/A          | Inc-GAP43-9           |
| A_33_P3321689  | 7,52796 | 7,45585 | 1,05125306  | N/A             | N/A       | N/A          | N/A                   |
| A_33_P3796201  | 1,75622 | 1,68412 | 1,051245773 | ENST00000568256 | 94150     | NR_033371    | CDRT7                 |
| A_22_P00020800 | 1,69687 | 1,62479 | 1,0512312   | ENST00000425517 | N/A       | N/A          | N/A                   |
| A_22_P00022328 | 1,70473 | 1,63268 | 1,051209341 | N/A             | N/A       | N/A          | Inc-EFCAB4B-2         |
| A_23_P27571    | 6,56907 | 6,49702 | 1,051209341 | ENST00000595860 | 57192     | NM_020533    | MCOLN1                |
| A_22_P00015804 | 3,19161 | 3,11959 | 1,051187482 | N/A             | N/A       | N/A          | Inc-TASP1-1           |
| A_21_P0009877  | 1,72481 | 1,6528  | 1,051180195 | ENST00000449581 | 101929265 | NR_110609    | LINC01428             |
| A_33_P3313441  | 1,71013 | 1,63812 | 1,051180195 | ENST00000377689 | 647044    | XR_108945    | FAM220BP              |
| A_33_P3315303  | 9,38798 | 9,31598 | 1,051172909 | ENST00000305748 | 319101    | NM_175068    | KRT73                 |
| A_22_P00004979 | 1,64627 | 1,57427 | 1,051172909 | N/A             | N/A       | N/A          | Inc-DCTD-10           |
| A_23_P125815   | 12,1754 | 12,1034 | 1,051172909 | ENST00000377604 | 8241      | NM_005676    | RBM10                 |
| A_23_P145397   | 10,683  | 10,611  | 1,051172909 | ENST00000523985 | 892       | NM_005190    | CCNC                  |
| A_21_P0002948  | 1,6416  | 1,56961 | 1,051165623 | N/A             | N/A       | N/A          | Inc-CCR8-1            |
| A_21_P0014428  | 1,75325 | 1,68126 | 1,051165623 | N/A             | 101927372 | XR_244439    | LOC101927372          |
| A_33_P3358322  | 1,72254 | 1,65056 | 1,051158337 | N/A             | N/A       | AF086259     | Inc-RP11-680F20.6.1-1 |
| A_32_P133395   | 3,14232 | 3,07034 | 1,051158337 | N/A             | 100507500 | NR_047551    | EGFR-AS1              |
| A_22_P00014887 | 1,68529 | 1,61334 | 1,051136479 | ENST00000507220 | N/A       | N/A          | N/A                   |
| A_33_P3356007  | 1,7263  | 1,65437 | 1,051121907 | ENST00000475300 | 240       | AB208946     | ALOX5                 |
| A_23_P615      | 1,79809 | 1,72617 | 1,051114621 | ENST00000368195 | 3645      | NM_014215    | INSRR                 |
| A_33_P3215848  | 6,93918 | 6,86727 | 1,051107336 | N/A             | N/A       | BC044628     | N/A                   |
| A_33_P3315763  | 18,0345 | 17,9626 | 1,05110005  | N/A             | N/A       | N/A          | N/A                   |
| A_22_P00001005 | 1,70057 | 1,62868 | 1,051092764 | ENST00000325811 | N/A       | AK093158     | N/A                   |

|                |         |         |             |                 |           |              |                       |
|----------------|---------|---------|-------------|-----------------|-----------|--------------|-----------------------|
| A_22_P00018864 | 1,64175 | 1,5699  | 1,051063622 | ENST00000522896 | N/A       | BG215342     | N/A                   |
| A_24_P346604   | 7,90291 | 7,83106 | 1,051063622 | ENST00000358757 | 55284     | NM_001001481 | UBE2W                 |
| A_33_P3227375  | 1,75598 | 1,68416 | 1,051041766 | ENST00000366787 | 7058      | NM_003247    | THBS2                 |
| A_22_P00013543 | 1,76644 | 1,69471 | 1,050976201 | N/A             | N/A       | BE733583     | Inc-RP11-429E11.3.1-1 |
| A_21_P0009668  | 1,82213 | 1,75042 | 1,050961631 | N/A             | N/A       | N/A          | Inc-ZNF625-1          |
| A_32_P46191    | 12,8979 | 12,8262 | 1,050954347 | ENST00000456806 | 442319    | NM_001159522 | ZNF727                |
| A_21_P0008587  | 1,75136 | 1,67968 | 1,050939777 | N/A             | 101928792 | XR_429487    | LOC101928792          |
| A_32_P193583   | 1,67975 | 1,60808 | 1,050932493 | ENST00000513876 | 152756    | NM_153027    | FAM218A               |
| A_33_P3341970  | 7,78616 | 7,71451 | 1,050917924 | ENST00000306821 | 257194    | NM_173808    | NEGR1                 |
| A_19_P00315543 | 4,09448 | 4,02285 | 1,050903355 | N/A             | 100132354 | N/A          | LINC01512             |
| A_21_P0009362  | 5,16311 | 5,09149 | 1,050896071 | N/A             | N/A       | N/A          | Inc-BTBD17-4          |
| A_33_P3226425  | 9,00026 | 8,92865 | 1,050888787 | ENST00000553161 | 10961     | NM_001034025 | ERP29                 |
| A_33_P3303066  | 11,4488 | 11,3772 | 1,050881502 | ENST00000592895 | 55643     | NM_017797    | BTBD2                 |
| A_23_P213518   | 12,6983 | 12,6267 | 1,050881502 | ENST00000395813 | 831       | NM_001042440 | CAST                  |
| A_22_P00005293 | 1,7763  | 1,70471 | 1,050874218 | ENST00000456535 | N/A       | N/A          | N/A                   |
| A_33_P3318596  | 8,0746  | 8,00302 | 1,050866934 | ENST00000420450 | 25850     | NM_003419    | ZNF345                |
| A_21_P0008316  | 1,9964  | 1,92482 | 1,050866934 | N/A             | N/A       | N/A          | Inc-ARHGAP5-1         |
| A_33_P3233869  | 6,96661 | 6,89505 | 1,050852366 | ENST00000565670 | N/A       | N/A          | N/A                   |
| A_33_P3381821  | 1,71139 | 1,63984 | 1,050845082 | ENST00000398824 | 440854    | NM_001145122 | CAPN14                |
| A_21_P0000967  | 1,68091 | 1,60941 | 1,050808663 | ENST00000546128 | 1580      | N/A          | CYP4B1                |
| A_33_P3412603  | 1,71251 | 1,64102 | 1,05080138  | N/A             | N/A       | AK125205     | N/A                   |
| A_21_P0002832  | 1,64055 | 1,56908 | 1,050786813 | ENST00000426697 | N/A       | N/A          | N/A                   |
| A_33_P3525067  | 1,64022 | 1,56876 | 1,050779529 | ENST00000518418 | 285627    | NR_027110    | LOC285627             |
| A_21_P0004388  | 1,64753 | 1,57608 | 1,050772246 | N/A             | 102467081 | N/A          | LOC102467081          |
| A_33_P3370217  | 1,67592 | 1,60447 | 1,050772246 | N/A             | N/A       | N/A          | N/A                   |
| A_33_P3410445  | 1,67115 | 1,59971 | 1,050764962 | ENST00000560273 | N/A       | N/A          | N/A                   |
| A_21_P0014265  | 1,74511 | 1,67367 | 1,050764962 | N/A             | N/A       | N/A          | N/A                   |
| A_19_P00320664 | 9,2649  | 9,19349 | 1,050743113 | N/A             | 441172    | NR_033896    | FLJ46906              |
| A_33_P3316691  | 5,89172 | 5,82031 | 1,050743113 | N/A             | N/A       | N/A          | N/A                   |
| A_22_P00013569 | 1,68291 | 1,61151 | 1,050735829 | ENST00000562748 | N/A       | N/A          | N/A                   |
| A_32_P34387    | 8,64274 | 8,57134 | 1,050735829 | ENST00000553626 | 55812     | NM_018418    | SPATA7                |
| A_33_P3252093  | 14,1733 | 14,1019 | 1,050735829 | ENST00000303575 | 10972     | NM_006827    | TMED10                |
| A_21_P0000465  | 1,71828 | 1,64692 | 1,050706697 | N/A             | N/A       | N/A          | N/A                   |

|                |         |         |             |                 |           |              |                |
|----------------|---------|---------|-------------|-----------------|-----------|--------------|----------------|
| A_23_P145718   | 1,64066 | 1,5693  | 1,050706697 | ENST00000614254 | 313       | NM_001637    | AOAH           |
| A_22_P00007666 | 1,63897 | 1,56767 | 1,050663001 | ENST00000568324 | N/A       | BC047543     | N/A            |
| A_33_P3352572  | 1,64115 | 1,56985 | 1,050663001 | N/A             | N/A       | N/A          | N/A            |
| A_23_P87279    | 5,15852 | 5,08722 | 1,050663001 | ENST00000155858 | 29850     | NM_014555    | TRPM5          |
| A_22_P00025737 | 1,66748 | 1,59619 | 1,050655718 | ENST00000417715 | N/A       | N/A          | N/A            |
| A_32_P538928   | 1,63913 | 1,56784 | 1,050655718 | ENST00000308128 | 147409    | NM_177986    | DSG4           |
| A_23_P25720    | 1,68668 | 1,61539 | 1,050655718 | ENST00000298841 | 5267      | NM_006215    | SERPINA4       |
| A_33_P3240951  | 1,76459 | 1,69331 | 1,050648435 | ENST00000366353 | 8110      | NM_001280544 | DPF3           |
| A_22_P00007908 | 1,74197 | 1,67069 | 1,050648435 | N/A             | N/A       | AK093331     | Inc-HSPA4-1    |
| A_33_P3305655  | 4,41073 | 4,33948 | 1,050626588 | ENST00000554452 | 606       | NR_027992    | NBEAP1         |
| A_21_P0011379  | 1,6617  | 1,59045 | 1,050626588 | N/A             | N/A       | N/A          | XLOC_I2_004954 |
| A_22_P00024782 | 6,78342 | 6,71218 | 1,050619306 | N/A             | N/A       | N/A          | Inc-CLDN5-1    |
| A_21_P0006927  | 1,64899 | 1,57776 | 1,050612023 | N/A             | N/A       | N/A          | Inc-WDR11-3    |
| A_22_P00010061 | 1,66292 | 1,59171 | 1,050597459 | N/A             | N/A       | AF370414     | Inc-MORF4L1-2  |
| A_22_P00020124 | 1,71164 | 1,64044 | 1,050590177 | N/A             | N/A       | N/A          | Inc-CRIPT-1    |
| A_23_P117163   | 8,90838 | 8,83718 | 1,050590177 | ENST00000378302 | 55213     | NM_018191    | RCBTB1         |
| A_33_P3370855  | 1,72604 | 1,65485 | 1,050582895 | ENST00000453808 | N/A       | N/A          | N/A            |
| A_23_P402187   | 1,63795 | 1,56679 | 1,050561048 | ENST00000371117 | 5314      | NM_138694    | PKHD1          |
| A_21_P0007341  | 1,71072 | 1,63956 | 1,050561048 | ENST00000529017 | 103312105 | NR_120555    | LOC103312105   |
| A_21_P0002261  | 1,78295 | 1,71183 | 1,050531921 | N/A             | N/A       | N/A          | Inc-IL1R2-1    |
| A_21_P0011235  | 7,82467 | 7,75355 | 1,050531921 | ENST00000425483 | 100874178 | N/A          | LINC00454      |
| A_22_P00001072 | 1,75409 | 1,68301 | 1,050502795 | ENST00000558475 | N/A       | XR_109231    | N/A            |
| A_22_P00007403 | 1,64045 | 1,56937 | 1,050502795 | ENST00000543387 | 102724433 | XR_424372    | LOC102724433   |
| A_21_P0010521  | 3,14099 | 3,06991 | 1,050502795 | ENST00000481055 | 4485      | N/A          | MST1           |
| A_24_P589266   | 1,96619 | 1,89515 | 1,050473669 | ENST00000309415 | 344558    | NM_001099289 | SH3RF3         |
| A_23_P44274    | 1,74902 | 1,67798 | 1,050473669 | ENST00000302053 | 2243      | NM_000508    | FGA            |
| A_23_P149818   | 8,01055 | 7,93952 | 1,050466388 | ENST00000397053 | 26019     | NM_080599    | UPF2           |
| A_22_P00022246 | 10,55   | 10,479  | 1,050444544 | ENST00000415120 | N/A       | N/A          | N/A            |
| A_22_P00014866 | 1,66735 | 1,59635 | 1,050444544 | N/A             | N/A       | BG212515     | Inc-SLC5A9-3   |
| A_21_P0012442  | 1,67207 | 1,60107 | 1,050444544 | N/A             | N/A       | N/A          | XLOC_I2_010225 |
| A_23_P141847   | 10,9721 | 10,9011 | 1,050444544 | ENST00000253023 | 9040      | NM_003969    | UBE2M          |
| A_22_P00019196 | 1,74536 | 1,67438 | 1,050429982 | N/A             | N/A       | DB379092     | Inc-POC5-1     |
| A_21_P0012666  | 1,66815 | 1,59717 | 1,050429982 | N/A             | N/A       | N/A          | XLOC_I2_011120 |

|                |         |         |             |                 |           |           |                     |
|----------------|---------|---------|-------------|-----------------|-----------|-----------|---------------------|
| A_24_P71649    | 1,74979 | 1,67882 | 1,050422701 | ENST00000263665 | 5067      | NM_020872 | CNTN3               |
| A_22_P00015082 | 3,57587 | 3,50491 | 1,05041542  | N/A             | N/A       | BC016168  | Inc-SNURF-3         |
| A_22_P00014895 | 3,91648 | 3,84552 | 1,05041542  | N/A             | N/A       | N/A       | Inc-SLC7A6-1        |
| A_23_P116430   | 4,07046 | 3,9995  | 1,05041542  | ENST00000005226 | 10083     | NM_005709 | USH1C               |
| A_33_P3429242  | 6,66903 | 6,59808 | 1,050408139 | ENST00000499502 | 339988    | XR_249565 | LOC339988           |
| A_22_P00008286 | 1,63801 | 1,56708 | 1,050393577 | N/A             | N/A       | N/A       | Inc-ISOC1-1         |
| A_23_P90220    | 7,81875 | 7,74782 | 1,050393577 | ENST00000392157 | 199704    | NM_152655 | ZNF585A             |
| A_22_P00020474 | 1,71412 | 1,64321 | 1,050379016 | N/A             | N/A       | N/A       | Inc-EXOC3-2         |
| A_33_P3265539  | 1,7961  | 1,72519 | 1,050379016 | N/A             | N/A       | N/A       | N/A                 |
| A_21_P0000860  | 3,88494 | 3,81403 | 1,050379016 | N/A             | 100507346 | NR_038982 | LOC100507346        |
| A_22_P00022843 | 5,59559 | 5,52473 | 1,050342613 | N/A             | 100874207 | NR_046683 | ST3GAL6-AS1         |
| A_23_P115161   | 2,30617 | 2,23531 | 1,050342613 | ENST00000435307 | 2532      | NM_002036 | ACKR1               |
| A_22_P00004643 | 1,71011 | 1,63928 | 1,050320772 | N/A             | N/A       | N/A       | Inc-CTB-78H18.1.1-1 |
| A_22_P00015979 | 1,69312 | 1,62229 | 1,050320772 | N/A             | 101926908 | NR_110656 | LOC101926908        |
| A_21_P0007604  | 1,68849 | 1,61768 | 1,050306212 | ENST00000549669 | N/A       | N/A       | N/A                 |
| A_33_P3370832  | 4,7454  | 4,67459 | 1,050306212 | ENST00000481658 | 150864    | AB053315  | FAM117B             |
| A_22_P00023996 | 1,71246 | 1,64166 | 1,050298932 | N/A             | N/A       | N/A       | Inc-PRMT10-1        |
| A_24_P407323   | 8,67921 | 8,60844 | 1,050277091 | ENST00000531143 | 5494      | NM_177951 | PPM1A               |
| A_21_P0005362  | 1,68459 | 1,61382 | 1,050277091 | N/A             | N/A       | N/A       | Inc-NFE2L3-1        |
| A_22_P00025765 | 1,63739 | 1,56662 | 1,050277091 | ENST00000425678 | N/A       | DA951670  | N/A                 |
| A_23_P163216   | 1,66078 | 1,59003 | 1,050262532 | ENST00000559829 | 79895     | NM_024837 | ATP8B4              |
| A_21_P0014758  | 1,6555  | 1,58475 | 1,050262532 | N/A             | N/A       | N/A       | N/A                 |
| A_33_P3226761  | 1,64791 | 1,57718 | 1,050247972 | ENST00000340356 | 54345     | NM_018419 | SOX18               |
| A_21_P0001276  | 2,2648  | 2,19411 | 1,050218853 | N/A             | N/A       | N/A       | Inc-EPB41-1         |
| A_33_P3309734  | 1,66614 | 1,59545 | 1,050218853 | ENST00000295729 | 255101    | NM_152389 | CCDC108             |
| A_24_P128233   | 2,21711 | 2,14643 | 1,050211574 | ENST00000612060 | 6331      | NM_000335 | SCN5A               |
| A_33_P3258727  | 1,77306 | 1,7024  | 1,050197015 | N/A             | N/A       | N/A       | N/A                 |
| A_22_P00016311 | 1,65106 | 1,58043 | 1,050175177 | N/A             | N/A       | N/A       | Inc-TMEM132C-8      |
| A_21_P0009606  | 1,65359 | 1,58298 | 1,050160618 | N/A             | N/A       | N/A       | Inc-PIK3C3-2        |
| A_33_P3370424  | 9,07027 | 8,99967 | 1,050153339 | ENST00000277541 | 4851      | NM_017617 | NOTCH1              |
| A_23_P171074   | 1,70307 | 1,63247 | 1,050153339 | ENST00000469541 | 9452      | NM_004867 | ITM2A               |
| A_33_P3252221  | 1,78928 | 1,71868 | 1,050153339 | ENST00000378491 | 140767    | NM_080723 | NRSN1               |
| A_33_P3422043  | 1,64108 | 1,5705  | 1,050138781 | ENST00000455694 | 345062    | NM_183375 | PRSS48              |

|                |         |         |             |                 |           |              |                |
|----------------|---------|---------|-------------|-----------------|-----------|--------------|----------------|
| A_22_P00025449 | 1,67921 | 1,60866 | 1,050116944 | N/A             | N/A       | N/A          | Inc-ZNF135-1   |
| A_21_P0006376  | 1,64218 | 1,57163 | 1,050116944 | N/A             | 102723994 | XR_426376    | LOC102723994   |
| A_33_P3381701  | 1,63658 | 1,56605 | 1,050102387 | N/A             | N/A       | AK128824     | N/A            |
| A_23_P132718   | 14,6768 | 14,6063 | 1,050080551 | ENST00000619119 | 7869      | NM_004636    | SEMA3B         |
| A_23_P19723    | 1,65305 | 1,58255 | 1,050080551 | ENST00000370830 | 653       | NM_021073    | BMP5           |
| A_21_P0011661  | 1,77867 | 1,70817 | 1,050080551 | N/A             | N/A       | N/A          | XLOC_I2_006471 |
| A_22_P00016505 | 3,13586 | 3,06538 | 1,050065994 | ENST00000452500 | N/A       | N/A          | N/A            |
| A_23_P1904     | 1,63551 | 1,56503 | 1,050065994 | ENST00000617306 | 2206      | NM_000139    | MS4A2          |
| A_21_P0011994  | 1,63678 | 1,56632 | 1,050051437 | ENST00000441014 | 100506274 | N/A          | LOC100506274   |
| A_33_P3418426  | 1,73835 | 1,6679  | 1,050044158 | ENST00000611973 | 6519      | NM_000341    | SLC3A1         |
| A_22_P00020775 | 1,7668  | 1,69636 | 1,05003688  | N/A             | N/A       | BM804806     | Inc-KLHL25-6   |
| A_22_P00004917 | 1,77971 | 1,70927 | 1,05003688  | N/A             | 256880    | NR_125923    | LOC256880      |
| A_33_P3269024  | 1,77886 | 1,70843 | 1,050029602 | N/A             | N/A       | N45983       | N/A            |
| A_33_P3310981  | 7,37803 | 7,3076  | 1,050029602 | ENST00000610573 | 7762      | NM_013250    | ZNF215         |
| A_33_P3269636  | 5,3204  | 5,24997 | 1,050029602 | ENST00000518157 | 374897    | NM_001166034 | SBSN           |
| A_23_P422766   | 6,19987 | 6,12944 | 1,050029602 | ENST00000359332 | 122773    | NM_172193    | KLHDC1         |
| A_22_P00018937 | 1,63609 | 1,56568 | 1,050015045 | N/A             | N/A       | N/A          | Inc-KLHL25-3   |
| A_24_P20746    | 1,63798 | 1,56757 | 1,050015045 | ENST00000446965 | 51334     | NM_016644    | PRR16          |
| A_22_P00016728 | 1,63644 | 1,56603 | 1,050015045 | N/A             | N/A       | DQ275472     | Inc-TRAT1-4    |
| A_22_P00016138 | 1,75625 | 1,68587 | 1,049993211 | N/A             | N/A       | AK130337     | Inc-TIMM13-1   |
| A_33_P3309556  | 8,67594 | 8,60559 | 1,049971377 | N/A             | 5791      | NM_006504    | PTPRE          |
| A_22_P00009416 | 1,79405 | 1,72374 | 1,049942266 | ENST00000522498 | N/A       | N/A          | N/A            |
| A_21_P0006454  | 1,65051 | 1,5802  | 1,049942266 | N/A             | N/A       | N/A          | Inc-ACRC-1     |
| A_33_P3334679  | 1,66539 | 1,59509 | 1,049934989 | ENST00000395469 | 9627      | AB110790     | SNCAIP         |
| A_22_P00014817 | 1,71507 | 1,64478 | 1,049927711 | N/A             | N/A       | AL365407     | Inc-SLC39A3-1  |
| A_21_P0011969  | 1,63645 | 1,56617 | 1,049920434 | ENST00000617368 | N/A       | N/A          | N/A            |
| A_24_P42446    | 1,7212  | 1,65092 | 1,049920434 | ENST00000339382 | 29942     | XM_005273484 | PURG           |
| A_21_P0003271  | 2,17958 | 2,10931 | 1,049913156 | N/A             | N/A       | N/A          | Inc-DNAJB11-3  |
| A_23_P6422     | 1,64326 | 1,57299 | 1,049913156 | ENST00000249007 | 10738     | NM_006604    | RFPL3          |
| A_33_P3225755  | 1,46859 | 1,39832 | 1,049913156 | N/A             | 100129938 | AK127489     | LOC100129938   |
| A_33_P3284448  | 1,63996 | 1,56972 | 1,049891324 | ENST00000500394 | 441009    | NR_038857    | CPEB2-AS1      |
| A_22_P00014500 | 1,74519 | 1,67496 | 1,049884047 | ENST00000574540 | 101927287 | XR_243355    | LOC101927287   |
| A_19_P00322121 | 3,87787 | 3,80766 | 1,049869492 | ENST00000454968 | 100506190 | N/A          | LINC00963      |

|                |         |         |             |                 |           |              |                |
|----------------|---------|---------|-------------|-----------------|-----------|--------------|----------------|
| A_22_P00023533 | 1,77855 | 1,70837 | 1,049847661 | ENST00000554515 | N/A       | N/A          | N/A            |
| A_21_P0006740  | 1,46528 | 1,3951  | 1,049847661 | N/A             | 101929073 | N/A          | LOC101929073   |
| A_33_P3384730  | 1,6683  | 1,59818 | 1,049804    | ENST00000529568 | N/A       | AK293081     | N/A            |
| A_23_P93217    | 4,65493 | 4,58482 | 1,049796724 | ENST00000436107 | 10864     | NM_153320    | SLC22A7        |
| A_33_P3249125  | 1,66749 | 1,59738 | 1,049796724 | ENST00000394570 | 146862    | NM_173167    | UNC45B         |
| A_23_P253029   | 10,4381 | 10,368  | 1,049789447 | ENST00000318407 | 666       | NM_032515    | BOK            |
| A_22_P00004308 | 1,65716 | 1,58706 | 1,049789447 | ENST00000532109 | N/A       | N/A          | N/A            |
| A_33_P3589018  | 1,46851 | 1,39842 | 1,04978217  | ENST00000574864 | N/A       | N/A          | N/A            |
| A_22_P00010750 | 4,95322 | 4,88313 | 1,04978217  | ENST00000617952 | 253943    | NM_001277813 | YTHDF3         |
| A_33_P3380523  | 7,93396 | 7,86388 | 1,049774894 | ENST00000376376 | 56952     | N/A          | PRTFDC1        |
| A_33_P3229577  | 3,37158 | 3,30151 | 1,049767617 | N/A             | N/A       | N/A          | N/A            |
| A_33_P3409508  | 8,4925  | 8,42244 | 1,049760341 | ENST00000395764 | 5600      | NM_002751    | MAPK11         |
| A_22_P00004304 | 8,13812 | 8,06807 | 1,049753065 | N/A             | N/A       | N/A          | Inc-CNTLN-2    |
| A_21_P0006559  | 1,70956 | 1,63952 | 1,049745788 | N/A             | N/A       | N/A          | Inc-CYBB-1     |
| A_22_P00005181 | 1,66211 | 1,5921  | 1,04972396  | ENST00000428673 | N/A       | N/A          | N/A            |
| A_32_P184796   | 18,6892 | 18,6192 | 1,049716684 | ENST00000547173 | 6175      | NM_053275    | RPLP0          |
| A_21_P0002957  | 1,65314 | 1,58314 | 1,049716684 | N/A             | N/A       | N/A          | Inc-PTPN23-2   |
| A_22_P00021669 | 1,6802  | 1,61023 | 1,049694856 | N/A             | N/A       | BM923923     | Inc-DPH1-2     |
| A_33_P3288110  | 9,77544 | 9,70548 | 1,04968758  | ENST00000421462 | 8502      | NM_001005476 | PKP4           |
| A_22_P00013635 | 1,46876 | 1,39883 | 1,049665752 | ENST00000514293 | N/A       | N/A          | N/A            |
| A_32_P526255   | 1,72977 | 1,65984 | 1,049665752 | ENST00000457797 | 285848    | NM_001145717 | PNPLA1         |
| A_23_P83798    | 2,35428 | 2,28435 | 1,049665752 | ENST00000316824 | 8092      | NM_006982    | ALX1           |
| A_23_P108657   | 9,20445 | 9,13452 | 1,049665752 | ENST00000409990 | 151525    | NM_152528    | WDSUB1         |
| A_33_P3241582  | 17,3831 | 17,3132 | 1,049643925 | ENST00000419621 | 6210      | NM_001019    | RPS15A         |
| A_33_P3390873  | 15,1685 | 15,0986 | 1,049643925 | ENST00000464444 | N/A       | N/A          | N/A            |
| A_32_P315178   | 1,71271 | 1,64282 | 1,04963665  | ENST00000495496 | 344905    | NM_198505    | ATP13A5        |
| A_21_P0014407  | 1,67272 | 1,60283 | 1,04963665  | N/A             | N/A       | BX118153     | N/A            |
| A_21_P0011445  | 1,68517 | 1,61528 | 1,04963665  | N/A             | N/A       | N/A          | XLOC_I2_005287 |
| A_33_P3314828  | 1,6934  | 1,62352 | 1,049629374 | N/A             | N/A       | N/A          | N/A            |
| A_21_P0012134  | 1,65543 | 1,58555 | 1,049629374 | ENST00000340424 | N/A       | N/A          | N/A            |
| A_22_P00005700 | 1,69147 | 1,62163 | 1,049600273 | N/A             | N/A       | N/A          | Inc-ELF5-1     |
| A_22_P00007424 | 7,7827  | 7,71286 | 1,049600273 | ENST00000518059 | 7993      | NM_005671    | UBXN8          |
| A_33_P3213518  | 1,81311 | 1,74328 | 1,049592998 | N/A             | N/A       | N/A          | N/A            |

|                |         |         |             |                 |           |              |                    |
|----------------|---------|---------|-------------|-----------------|-----------|--------------|--------------------|
| A_23_P363331   | 1,76938 | 1,69955 | 1,049592998 | ENST00000261047 | 9626      | NM_005459    | GUCA1C             |
| A_21_P0007732  | 1,67738 | 1,60755 | 1,049592998 | N/A             | N/A       | N/A          | Inc-CCDC59-5       |
| A_33_P3412493  | 1,69612 | 1,6263  | 1,049585722 | ENST00000506319 | 339855    | BC024014     | KY                 |
| A_33_P3353210  | 1,64619 | 1,57637 | 1,049585722 | ENST00000407528 | 253559    | NM_001167674 | CADM2              |
| A_23_P20894    | 7,37252 | 7,3027  | 1,049585722 | ENST00000494249 | 79813     | NM_024757    | EHMT1              |
| A_22_P00013928 | 1,68235 | 1,61254 | 1,049578447 | N/A             | N/A       | N/A          | Inc-RRAS2-1        |
| A_32_P67623    | 9,11774 | 9,04794 | 1,049571172 | ENST00000375180 | 54954     | NM_001300788 | FAM120C            |
| A_22_P00009234 | 1,81773 | 1,74794 | 1,049563897 | N/A             | N/A       | N/A          | Inc-LRIG1-1        |
| A_33_P3391175  | 6,04353 | 5,97375 | 1,049556622 | ENST00000391625 | N/A       | AK126356     | N/A                |
| A_22_P00013809 | 1,63412 | 1,56435 | 1,049549347 | N/A             | 100129620 | NR_033940    | LOC100129620       |
| A_21_P0013705  | 1,66365 | 1,59388 | 1,049549347 | ENST00000469756 | N/A       | N/A          | N/A                |
| A_21_P0003850  | 1,6926  | 1,62284 | 1,049542072 | N/A             | N/A       | N/A          | Inc-AC110373.1-1   |
| A_22_P00012200 | 1,69495 | 1,62519 | 1,049542072 | ENST00000520171 | N/A       | N/A          | N/A                |
| A_21_P0004488  | 1,46155 | 1,3918  | 1,049534797 | N/A             | N/A       | N/A          | Inc-CCT5-3         |
| A_21_P0006962  | 1,68289 | 1,61315 | 1,049527523 | N/A             | N/A       | N/A          | Inc-PRKCQ-1        |
| A_22_P00006750 | 6,87627 | 6,80654 | 1,049520248 | ENST00000558209 | N/A       | AL134253     | N/A                |
| A_22_P00005192 | 3,13732 | 3,06761 | 1,049505698 | ENST00000526112 | N/A       | N/A          | N/A                |
| A_22_P00000438 | 1,58557 | 1,51587 | 1,049498424 | N/A             | N/A       | N/A          | Inc-AC074389.6.1-3 |
| A_23_P314222   | 11,4444 | 11,3747 | 1,049498424 | ENST00000315141 | 123169    | NM_138792    | LEO1               |
| A_22_P00011427 | 1,46007 | 1,3904  | 1,0494766   | ENST00000506058 | N/A       | N/A          | N/A                |
| A_22_P00009812 | 1,63651 | 1,56686 | 1,049462052 | ENST00000565422 | 100287718 | NM_001162435 | ANKRD66            |
| A_21_P0000849  | 1,73556 | 1,66591 | 1,049462052 | N/A             | 100506195 | NR_038949    | LARGE-AS1          |
| A_21_P0014818  | 1,63091 | 1,56128 | 1,049447503 | N/A             | 100128406 | AY371499     | AZFP               |
| A_22_P00013892 | 1,7423  | 1,67267 | 1,049447503 | N/A             | N/A       | N/A          | Inc-RPS12-1        |
| A_33_P3319155  | 10,6556 | 10,586  | 1,049425681 | ENST00000405364 | 52        | NM_001040649 | ACP1               |
| A_19_P00801042 | 11,0558 | 10,9862 | 1,049425681 | ENST00000469078 | 7643      | AK298173     | ZNF90              |
| A_33_P3294730  | 1,71483 | 1,64524 | 1,049418407 | N/A             | N/A       | N/A          | N/A                |
| A_22_P00001934 | 1,63702 | 1,56743 | 1,049418407 | N/A             | N/A       | N/A          | Inc-BANP-3         |
| A_23_P28688    | 9,38626 | 9,31669 | 1,049403859 | ENST00000238112 | 51692     | NM_016207    | CPSF3              |
| A_22_P00016568 | 1,93804 | 1,86848 | 1,049396585 | N/A             | N/A       | N/A          | Inc-TNFRSF17-1     |
| A_21_P0007779  | 1,65784 | 1,5883  | 1,049382037 | N/A             | N/A       | N/A          | Inc-DHX37-4        |
| A_22_P00021088 | 1,63807 | 1,56854 | 1,049374763 | ENST00000569726 | 101927132 | NR_110650    | LOC101927132       |
| A_33_P3238230  | 1,67455 | 1,60504 | 1,049360216 | ENST00000506396 | 1004      | AK024238     | CDH6               |

|                |         |         |             |                 |           |              |               |
|----------------|---------|---------|-------------|-----------------|-----------|--------------|---------------|
| A_21_P0006872  | 1,67856 | 1,60906 | 1,049352943 | N/A             | N/A       | N/A          | Inc-MAPK8-1   |
| A_22_P00017885 | 3,80826 | 3,73876 | 1,049352943 | ENST00000568836 | N/A       | N/A          | N/A           |
| A_23_P16139    | 8,63087 | 8,56137 | 1,049352943 | ENST00000546361 | 10523     | NM_006387    | CHERP         |
| A_22_P00001315 | 1,74692 | 1,67745 | 1,049331122 | N/A             | N/A       | N/A          | Inc-ANP32E-1  |
| A_22_P00020662 | 3,38747 | 3,318   | 1,049331122 | N/A             | N/A       | N/A          | Inc-HMBOX1-2  |
| A_21_P0001369  | 2,31639 | 2,24693 | 1,049323849 | N/A             | N/A       | N/A          | Inc-PHGDH-2   |
| A_22_P00024797 | 1,70811 | 1,63865 | 1,049323849 | N/A             | N/A       | BC043229     | Inc-C5orf43-4 |
| A_24_P46953    | 8,56625 | 8,49679 | 1,049323849 | ENST00000396596 | 23678     | NM_013257    | SGK3          |
| A_22_P00008310 | 1,65026 | 1,58083 | 1,049302029 | N/A             | 100996301 | NR_121637    | FOXD3-AS1     |
| A_22_P00013934 | 1,66137 | 1,59195 | 1,049294756 | N/A             | N/A       | BC016014     | Inc-RRM1-1    |
| A_23_P41292    | 10,3048 | 10,2354 | 1,049280209 | ENST00000514596 | 1487      | NM_001012614 | CTBP1         |
| A_21_P0007352  | 1,46242 | 1,39304 | 1,049265663 | N/A             | 101928919 | XR_242877    | LOC101928919  |
| A_33_P3397655  | 6,54775 | 6,47842 | 1,049229299 | ENST00000522122 | 11346     | NM_001166208 | SYNPO         |
| A_22_P00009437 | 7,85163 | 7,78231 | 1,049222027 | N/A             | 102724316 | NR_110929    | SVIL-AS1      |
| A_33_P3214869  | 5,96295 | 5,89364 | 1,049214754 | ENST00000327442 | 402569    | NM_001145715 | KPNA7         |
| A_23_P311050   | 1,76846 | 1,69915 | 1,049214754 | ENST00000282881 | 160492    | NM_152590    | LMNTD1        |
| A_22_P00002447 | 1,7042  | 1,63489 | 1,049214754 | ENST00000569908 | N/A       | BC037352     | N/A           |
| A_23_P303210   | 5,62474 | 5,55543 | 1,049214754 | ENST00000299157 | 121457    | NM_153687    | IKBIP         |
| A_33_P3228647  | 1,62898 | 1,5597  | 1,049192936 | ENST00000230221 | 442191    | NM_030946    | OR14J1        |
| A_22_P00022965 | 1,47825 | 1,409   | 1,049171119 | N/A             | N/A       | N/A          | Inc-NTSR2-4   |
| A_21_P0013448  | 1,47837 | 1,40914 | 1,049156575 | ENST00000447785 | 101928036 | N/A          | LOC101928036  |
| A_22_P00007436 | 4,02159 | 3,95236 | 1,049156575 | N/A             | N/A       | N/A          | Inc-GSG2-2    |
| A_24_P143076   | 6,38648 | 6,31726 | 1,049149303 | ENST00000548163 | 144717    | NM_144671    | FAM109A       |
| A_21_P0009101  | 1,67983 | 1,61062 | 1,049142031 | N/A             | N/A       | N/A          | Inc-IRX5-2    |
| A_19_P00802027 | 17,2527 | 17,1835 | 1,049134758 | N/A             | N/A       | N/A          | N/A           |
| A_22_P00002410 | 10,1229 | 10,0537 | 1,049134758 | ENST00000553758 | 22846     | NM_014909    | VASH1         |
| A_33_P3308874  | 1,63077 | 1,56157 | 1,049134758 | ENST00000465374 | 5279      | N/A          | PIGC          |
| A_22_P00000908 | 1,63317 | 1,56398 | 1,049127486 | N/A             | N/A       | N/A          | Inc-AIRE-1    |
| A_33_P3316387  | 1,6295  | 1,56031 | 1,049127486 | N/A             | 619455    | NR_037183    | SPANXA2-OT1   |
| A_23_P140630   | 6,20578 | 6,1366  | 1,049120214 | ENST00000309664 | 79748     | NM_021819    | LMAN1L        |
| A_22_P00005876 | 1,70786 | 1,6387  | 1,049105671 | N/A             | N/A       | N/A          | Inc-ESR1-2    |
| A_21_P0001278  | 2,36247 | 2,29332 | 1,049098399 | N/A             | N/A       | N/A          | Inc-PTPRU-3   |
| A_33_P3279158  | 1,73197 | 1,66282 | 1,049098399 | ENST00000545941 | 653149    | NM_001143988 | NBPF6         |



|                |         |         |             |                 |           |              |                |
|----------------|---------|---------|-------------|-----------------|-----------|--------------|----------------|
| A_21_P0009539  | 1,63617 | 1,56702 | 1,049098399 | N/A             | N/A       | N/A          | Inc-B4GALT6-2  |
| A_21_P0014130  | 1,45987 | 1,39074 | 1,049083855 | N/A             | 101928790 | NR_110059    | LOC101928790   |
| A_23_P255331   | 3,93068 | 3,86157 | 1,049069312 | ENST00000398955 | 84709     | NM_032623    | MGARP          |
| A_22_P00013409 | 1,47937 | 1,41026 | 1,049069312 | ENST00000526509 | N/A       | N/A          | N/A            |
| A_33_P3301509  | 1,46319 | 1,3941  | 1,049054769 | N/A             | N/A       | N/A          | N/A            |
| A_19_P00320966 | 9,3541  | 9,28505 | 1,049025683 | ENST00000518964 | 100130231 | N/A          | LINC00861      |
| A_33_P3418541  | 1,66579 | 1,59674 | 1,049025683 | N/A             | 72        | AK310215     | ACTG2          |
| A_21_P0002800  | 1,64762 | 1,57858 | 1,049018412 | ENST00000496891 | N/A       | N/A          | N/A            |
| A_21_P0001936  | 3,24542 | 3,17638 | 1,049018412 | ENST00000448117 | 104326193 | N/A          | DLX2-AS1       |
| A_21_P0002219  | 1,70978 | 1,64076 | 1,04900387  | N/A             | N/A       | N/A          | Inc-CCDC85A-1  |
| A_33_P3241150  | 1,4744  | 1,40541 | 1,048982057 | N/A             | N/A       | N/A          | N/A            |
| A_33_P3318148  | 1,78182 | 1,71284 | 1,048974786 | ENST00000556739 | 123041    | NM_153647    | SLC24A4        |
| A_32_P188860   | 3,94431 | 3,87534 | 1,048967515 | ENST00000296318 | 54756     | NM_017563    | IL17RD         |
| A_33_P3239864  | 6,10089 | 6,03195 | 1,048945702 | ENST00000496480 | 348094    | AK307698     | ANKDD1A        |
| A_33_P3375348  | 4,47577 | 4,40686 | 1,04892389  | N/A             | N/A       | N/A          | N/A            |
| A_33_P3411388  | 13,4067 | 13,3378 | 1,04891662  | ENST00000316333 | 340260    | NM_001080461 | UNCX           |
| A_33_P3297517  | 11,0155 | 10,9466 | 1,04891662  | ENST00000342294 | 6434      | NM_001243879 | TRA2B          |
| A_21_P0014041  | 1,69205 | 1,62316 | 1,048909349 | N/A             | 9670      | XM_003846624 | IPO13          |
| A_24_P49349    | 7,44768 | 7,3788  | 1,048902079 | ENST00000474375 | 9910      | NM_014857    | RABGAP1L       |
| A_23_P103803   | 1,46018 | 1,39131 | 1,048894808 | ENST00000473231 | 115352    | NM_052939    | FCRL3          |
| A_21_P0004084  | 4,00883 | 3,93996 | 1,048894808 | N/A             | N/A       | N/A          | Inc-CNOT6-4    |
| A_24_P45379    | 5,89364 | 5,82478 | 1,048887538 | ENST00000367679 | 27101     | NM_014412    | CACYBP         |
| A_33_P3345464  | 1,47853 | 1,40967 | 1,048887538 | ENST00000317861 | 127066    | NM_001001918 | OR14C36        |
| A_32_P96000    | 1,6837  | 1,61485 | 1,048880268 | ENST00000454449 | 440695    | NM_001004341 | ETV3L          |
| A_23_P17593    | 1,47279 | 1,40395 | 1,048872997 | ENST00000614565 | 1002      | NM_001794    | CDH4           |
| A_22_P00022709 | 1,45892 | 1,39008 | 1,048872997 | N/A             | N/A       | N/A          | Inc-PCBD1-1    |
| A_22_P00018393 | 1,68195 | 1,61311 | 1,048872997 | ENST00000427049 | 100507506 | N/A          | LOC100507506   |
| A_21_P0002635  | 1,77489 | 1,70605 | 1,048872997 | N/A             | N/A       | N/A          | Inc-CXXC11-3   |
| A_21_P0005804  | 1,62296 | 1,55413 | 1,048865727 | ENST00000521411 | N/A       | N/A          | N/A            |
| A_32_P59010    | 1,62872 | 1,55991 | 1,048851187 | ENST00000327536 | 388121    | NM_207381    | TNFAIP8L3      |
| A_23_P31921    | 11,2698 | 11,201  | 1,048843917 | ENST00000422569 | 445       | NM_000050    | ASS1           |
| A_22_P00019222 | 1,6281  | 1,55933 | 1,048822107 | ENST00000435352 | N/A       | DB100530     | N/A            |
| A_22_P00002794 | 1,65782 | 1,58905 | 1,048822107 | N/A             | N/A       | N/A          | Inc-C2orf27A-3 |

|                |         |         |             |                 |           |              |                |
|----------------|---------|---------|-------------|-----------------|-----------|--------------|----------------|
| A_32_P45168    | 9,51771 | 9,44894 | 1,048822107 | ENST00000612568 | 3572      | NM_002184    | IL6ST          |
| A_21_P0005865  | 1,48052 | 1,41176 | 1,048814837 | N/A             | N/A       | N/A          | Inc-DCAF4L2-1  |
| A_21_P0013329  | 1,75192 | 1,68316 | 1,048814837 | N/A             | N/A       | N/A          | XLOC_I2_013875 |
| A_22_P00004413 | 1,67542 | 1,60667 | 1,048807567 | N/A             | 317751    | NR_004382    | MESTIT1        |
| A_23_P140797   | 5,3552  | 5,28646 | 1,048800298 | ENST00000577390 | 1006      | NM_001796    | CDH8           |
| A_22_P00015844 | 1,75424 | 1,68553 | 1,048778489 | N/A             | N/A       | N/A          | Inc-TBCD-2     |
| A_33_P3386288  | 1,93277 | 1,86406 | 1,048778489 | ENST00000273908 | 79966     | NM_024906    | SCD5           |
| A_23_P155830   | 11,6146 | 11,5459 | 1,048771219 | ENST00000409757 | 57533     | NM_020773    | TBC1D14        |
| A_33_P3381827  | 10,5369 | 10,4682 | 1,048771219 | ENST00000618198 | 9885      | NM_001278649 | OSBPL2         |
| A_22_P00010959 | 1,68684 | 1,61815 | 1,04876395  | N/A             | N/A       | N/A          | Inc-NRBF2-1    |
| A_22_P00022798 | 1,47734 | 1,40867 | 1,048749411 | ENST00000425325 | N/A       | N/A          | N/A            |
| A_21_P0014449  | 1,71006 | 1,6414  | 1,048742141 | N/A             | 100506532 | XR_109854    | LOC100506532   |
| A_21_P0009034  | 1,47398 | 1,40532 | 1,048742141 | ENST00000561336 | 100996338 | N/A          | LOC100996338   |
| A_24_P280333   | 1,72222 | 1,65359 | 1,048720334 | ENST00000461923 | 125115    | NM_182497    | KRT40          |
| A_33_P3380086  | 6,04022 | 5,97161 | 1,048705795 | ENST00000323871 | 5829      | XR_243019    | PXN            |
| A_33_P3268853  | 1,48044 | 1,41185 | 1,048691257 | N/A             | N/A       | N/A          | Inc-IRF4-1     |
| A_23_P253791   | 3,11073 | 3,04216 | 1,048676719 | ENST00000296435 | 820       | NM_004345    | CAMP           |
| A_21_P0007491  | 1,71047 | 1,6419  | 1,048676719 | ENST00000540882 | 100862680 | NR_046392    | LINC00507      |
| A_33_P3213702  | 1,67579 | 1,60723 | 1,048669451 | ENST00000504864 | N/A       | N/A          | N/A            |
| A_33_P3816280  | 1,75374 | 1,68519 | 1,048662182 | ENST00000599486 | 146513    | NR_038438    | LOC146513      |
| A_22_P00012666 | 1,66245 | 1,5939  | 1,048662182 | ENST00000544183 | 3         | DA137179     | A2MP1          |
| A_21_P0004608  | 1,63988 | 1,57134 | 1,048654913 | ENST00000607810 | 100506885 | N/A          | LOC100506885   |
| A_33_P3292646  | 1,62926 | 1,56073 | 1,048647644 | ENST00000454679 | 340895    | NM_001142308 | MALRD1         |
| A_33_P3379751  | 1,6259  | 1,55738 | 1,048640376 | ENST00000320704 | 341799    | NM_001001968 | OR6S1          |
| A_33_P3387016  | 1,72114 | 1,65263 | 1,048633107 | N/A             | N/A       | N/A          | N/A            |
| A_33_P6820811  | 5,4969  | 5,4284  | 1,048625839 | N/A             | 401320    | NR_038889    | LOC401320      |
| A_33_P3320127  | 11,6944 | 11,6259 | 1,048625839 | ENST00000300935 | 4218      | NM_005370    | RAB8A          |
| A_19_P00320275 | 4,14285 | 4,07436 | 1,04861857  | ENST00000602830 | 286411    | NR_104228    | LINC00632      |
| A_24_P892494   | 1,63253 | 1,56405 | 1,048611302 | ENST00000501050 | 285548    | NR_015450    | LINC01096      |
| A_33_P3725324  | 1,46493 | 1,39646 | 1,048604033 | ENST00000338981 | 8287      | NM_004654    | USP9Y          |
| A_22_P00002971 | 3,77717 | 3,7087  | 1,048604033 | N/A             | N/A       | N/A          | Inc-C6orf112-2 |
| A_21_P0006877  | 1,65503 | 1,58657 | 1,048596765 | N/A             | N/A       | N/A          | Inc-REEP3-2    |
| A_19_P00315519 | 1,62284 | 1,55438 | 1,048596765 | ENST00000511417 | N/A       | N/A          | N/A            |

|                |         |         |             |                 |           |              |                |
|----------------|---------|---------|-------------|-----------------|-----------|--------------|----------------|
| A_22_P00020915 | 1,65527 | 1,58681 | 1,048596765 | ENST00000512939 | N/A       | N/A          | N/A            |
| A_21_P0013515  | 1,62021 | 1,55175 | 1,048596765 | ENST00000509729 | N/A       | N/A          | N/A            |
| A_22_P00012028 | 1,6635  | 1,59505 | 1,048589497 | N/A             | N/A       | CK001701     | Inc-PLEKHA3-4  |
| A_33_P3422822  | 8,77261 | 8,70417 | 1,048582228 | ENST00000366714 | 57165     | NM_020435    | GJC2           |
| A_21_P0012434  | 3,42602 | 3,35758 | 1,048582228 | N/A             | N/A       | N/A          | XLOC_I2_010113 |
| A_33_P3395636  | 5,58631 | 5,51788 | 1,04857496  | ENST00000449255 | N/A       | N/A          | N/A            |
| A_22_P00019952 | 1,70828 | 1,63986 | 1,048567692 | ENST00000409910 | N/A       | N/A          | N/A            |
| A_22_P00020764 | 1,4566  | 1,38818 | 1,048567692 | ENST00000440888 | N/A       | N/A          | N/A            |
| A_23_P56347    | 1,47627 | 1,40787 | 1,048553156 | ENST00000327495 | 5671      | NM_021016    | PSG3           |
| A_21_P0001076  | 1,75361 | 1,68522 | 1,048545888 | ENST00000429507 | N/A       | N/A          | N/A            |
| A_22_P00012603 | 1,61933 | 1,55094 | 1,048545888 | ENST00000437471 | N/A       | N/A          | N/A            |
| A_33_P3287073  | 1,7875  | 1,71914 | 1,048524084 | ENST00000321800 | 283982    | NR_027146    | LINC00469      |
| A_21_P0006016  | 2,33122 | 2,26288 | 1,048509549 | ENST00000429953 | N/A       | XR_252577    | N/A            |
| A_22_P00009595 | 1,62034 | 1,552   | 1,048509549 | N/A             | N/A       | BG209861     | Inc-MAPK6-6    |
| A_22_P00011615 | 1,73745 | 1,66912 | 1,048502281 | ENST00000561794 | N/A       | BX101016     | N/A            |
| A_22_P00013045 | 3,9691  | 3,90079 | 1,048487746 | ENST00000534288 | 8490      | NM_001254748 | RGS5           |
| A_21_P0001160  | 1,4727  | 1,40439 | 1,048487746 | N/A             | N/A       | N/A          | Inc-DBT-1      |
| A_23_P147450   | 13,6886 | 13,6203 | 1,048480478 | ENST00000561078 | 51324     | NM_016630    | SPG21          |
| A_22_P00024650 | 1,69366 | 1,62536 | 1,048480478 | ENST00000452787 | 100507140 | N/A          | LOC100507140   |
| A_23_P69537    | 12,6686 | 12,6003 | 1,048480478 | ENST00000264218 | 10874     | NM_006681    | NMU            |
| A_24_P391868   | 1,89692 | 1,82863 | 1,048473211 | ENST00000359546 | 10814     | NM_006650    | CPLX2          |
| A_21_P0007535  | 1,68585 | 1,61756 | 1,048473211 | N/A             | N/A       | N/A          | Inc-LRMP-4     |
| A_19_P00322911 | 1,62106 | 1,55277 | 1,048473211 | ENST00000448943 | 117581    | NM_057179    | TWIST2         |
| A_22_P00024830 | 1,78101 | 1,71273 | 1,048465943 | N/A             | N/A       | N/A          | Inc-OR6S1-1    |
| A_21_P0010757  | 1,71325 | 1,64498 | 1,048458676 | N/A             | 163720    | AY696295     | CYP4Z2P        |
| A_22_P00014345 | 1,71922 | 1,65095 | 1,048458676 | ENST00000498413 | 104310350 | N/A          | LINC01327      |
| A_21_P0000522  | 1,73634 | 1,66808 | 1,048451409 | N/A             | 285045    | N/A          | LINC00486      |
| A_33_P3293446  | 1,63355 | 1,56531 | 1,048436874 | ENST00000375377 | 57608     | NM_020848    | KIAA1462       |
| A_19_P00322096 | 7,84237 | 7,77413 | 1,048436874 | N/A             | 732253    | NR_024015    | TDRG1          |
| A_22_P00002305 | 4,60042 | 4,5322  | 1,04842234  | N/A             | 406992    | NR_029623    | MIR210         |
| A_33_P3253707  | 10,4057 | 10,3375 | 1,048407806 | ENST00000318317 | 122769    | NM_152329    | LRR1           |
| A_21_P0000923  | 1,6707  | 1,60251 | 1,048400539 | N/A             | N/A       | N/A          | Inc-C1orf31-7  |
| A_21_P0004064  | 1,62348 | 1,55529 | 1,048400539 | ENST00000506592 | N/A       | N/A          | N/A            |

|                |         |         |             |                 |           |              |                |
|----------------|---------|---------|-------------|-----------------|-----------|--------------|----------------|
| A_21_P0011255  | 1,65776 | 1,58958 | 1,048393272 | N/A             | N/A       | N/A          | XLOC_I2_004306 |
| A_22_P00016501 | 1,69368 | 1,62551 | 1,048386005 | N/A             | N/A       | N/A          | Inc-TMPRSS15-1 |
| A_23_P27207    | 1,86341 | 1,79525 | 1,048378738 | ENST00000613221 | 147199    | NM_145651    | SCGB1C1        |
| A_21_P0003206  | 1,74029 | 1,67213 | 1,048378738 | N/A             | N/A       | N/A          | Inc-CPN2-2     |
| A_22_P00011121 | 1,62149 | 1,55334 | 1,048371471 | N/A             | 101928143 | XR_245781    | LOC101928143   |
| A_21_P0011281  | 1,4688  | 1,40065 | 1,048371471 | ENST00000429368 | 100507257 | NR_047664    | MEG9           |
| A_21_P0013191  | 7,84775 | 7,7796  | 1,048371471 | N/A             | N/A       | N/A          | XLOC_I2_013330 |
| A_33_P3391100  | 1,72239 | 1,65427 | 1,048349671 | N/A             | N/A       | N/A          | N/A            |
| A_24_P66001    | 9,04046 | 8,97234 | 1,048349671 | ENST00000401406 | 29796     | NM_001003684 | UQCR10         |
| A_21_P0001257  | 1,47201 | 1,4039  | 1,048342405 | N/A             | N/A       | N/A          | Inc-DFFB-4     |
| A_21_P0002919  | 1,47662 | 1,40852 | 1,048335138 | ENST00000438156 | N/A       | N/A          | N/A            |
| A_22_P00000624 | 1,75142 | 1,68333 | 1,048327872 | ENST00000431911 | N/A       | N/A          | N/A            |
| A_21_P0005953  | 1,68831 | 1,62024 | 1,048313339 | N/A             | N/A       | N/A          | Inc-KHDRBS3-5  |
| A_22_P00006818 | 1,6184  | 1,55034 | 1,048306072 | N/A             | N/A       | N/A          | Inc-GABRA5-3   |
| A_21_P0003094  | 1,47485 | 1,40679 | 1,048306072 | ENST00000457079 | 401109    | NR_034088    | LINC00885      |
| A_23_P250694   | 1,6135  | 1,54544 | 1,048306072 | ENST00000356588 | 114960    | NM_052933    | TSGA13         |
| A_22_P00003153 | 1,46883 | 1,40077 | 1,048306072 | N/A             | N/A       | N/A          | Inc-C9orf38-1  |
| A_33_P3339006  | 1,47415 | 1,40611 | 1,04829154  | N/A             | 54088     | AI796012     | LINC00113      |
| A_23_P417891   | 4,09939 | 4,03136 | 1,048284274 | ENST00000375741 | 8874      | NM_145735    | ARHGEF7        |
| A_33_P3359428  | 1,64088 | 1,57286 | 1,048277008 | N/A             | N/A       | N/A          | N/A            |
| A_21_P0000176  | 1,61782 | 1,54983 | 1,04825521  | N/A             | 1012      | NM_001220491 | CDH13          |
| A_22_P00005754 | 1,62694 | 1,55895 | 1,04825521  | ENST00000506612 | N/A       | N/A          | N/A            |
| A_23_P39766    | 9,46485 | 9,39686 | 1,04825521  | ENST00000320717 | 2744      | NM_014905    | GLS            |
| A_33_P3319248  | 1,46405 | 1,39607 | 1,048247944 | ENST00000400156 | 100131980 | NM_001164457 | ZNF705G        |
| A_22_P00008312 | 1,46585 | 1,39788 | 1,048240678 | ENST00000455304 | 199899    | NR_038252    | LINC00466      |
| A_23_P130241   | 1,67484 | 1,60687 | 1,048240678 | ENST00000344363 | 81850     | NM_030966    | KRTAP1-3       |
| A_24_P601831   | 1,72831 | 1,66035 | 1,048233412 | ENST00000434443 | 285735    | NR_026969    | LINC00326      |
| A_22_P00008093 | 1,48136 | 1,4134  | 1,048233412 | ENST00000558153 | N/A       | BG207073     | N/A            |
| A_33_P3278911  | 9,57321 | 9,50526 | 1,048226146 | ENST00000486199 | 51105     | XM_005250942 | PHF20L1        |
| A_33_P3236071  | 1,45716 | 1,38921 | 1,048226146 | ENST00000348658 | 51266     | NM_016509    | CLEC1B         |
| A_22_P00002051 | 1,75612 | 1,68818 | 1,04821888  | ENST00000455174 | N/A       | N/A          | N/A            |
| A_23_P399116   | 1,74836 | 1,68043 | 1,048211615 | ENST00000437684 | 128025    | NM_144625    | WDR64          |
| A_21_P0005074  | 1,76638 | 1,69846 | 1,048204349 | N/A             | N/A       | N/A          | Inc-NOX3-4     |

|                |         |         |             |                 |           |              |                    |
|----------------|---------|---------|-------------|-----------------|-----------|--------------|--------------------|
| A_22_P00002449 | 1,74956 | 1,68164 | 1,048204349 | ENST00000566797 | N/A       | XR_433059    | N/A                |
| A_33_P3349455  | 6,81174 | 6,74382 | 1,048204349 | ENST00000420638 | N/A       | N/A          | N/A                |
| A_24_P162226   | 1,48073 | 1,41281 | 1,048204349 | ENST00000261655 | 23504     | NM_015347    | RIMBP2             |
| A_21_P0006071  | 7,24737 | 7,17948 | 1,048182553 | N/A             | N/A       | N/A          | Inc-NOL6-2         |
| A_23_P66858    | 1,6637  | 1,59583 | 1,048168022 | ENST00000334202 | 83902     | NM_031964    | KRTAP17-1          |
| A_33_P3304696  | 1,70521 | 1,63734 | 1,048168022 | N/A             | N/A       | AF058072     | N/A                |
| A_22_P00014811 | 1,78951 | 1,72164 | 1,048168022 | N/A             | 400618    | NR_103737    | SOX9-AS1           |
| A_24_P317874   | 9,78499 | 9,71713 | 1,048160756 | ENST00000471320 | 22944     | NM_012311    | KIN                |
| A_22_P00010871 | 1,62547 | 1,55761 | 1,048160756 | ENST00000565041 | N/A       | DA686335     | N/A                |
| A_23_P35444    | 5,05132 | 4,98347 | 1,048153491 | ENST00000616853 | 9118      | NM_032727    | INA                |
| A_21_P0013154  | 1,75206 | 1,68422 | 1,048146226 | ENST00000417483 | N/A       | N/A          | N/A                |
| A_22_P00016436 | 1,48134 | 1,41353 | 1,048124431 | N/A             | N/A       | N/A          | Inc-TMEM41B-2      |
| A_22_P00017435 | 1,47344 | 1,40567 | 1,048095371 | ENST00000620649 | N/A       | BI825853     | N/A                |
| A_21_P0014137  | 1,61326 | 1,54549 | 1,048095371 | N/A             | N/A       | XR_112627    | N/A                |
| A_21_P0012020  | 1,68126 | 1,6135  | 1,048088106 | ENST00000422238 | 101927801 | XR_427167    | LOC101927801       |
| A_21_P0002170  | 1,66996 | 1,60222 | 1,048073576 | N/A             | N/A       | N/A          | Inc-PQLC3-1        |
| A_22_P00005338 | 1,71132 | 1,64358 | 1,048073576 | ENST00000555303 | N/A       | DB337664     | N/A                |
| A_33_P3383491  | 1,71757 | 1,64984 | 1,048066312 | ENST00000328313 | 339221    | NM_178543    | ENPP7              |
| A_22_P00003817 | 1,71631 | 1,64859 | 1,048059047 | ENST00000571192 | N/A       | N/A          | N/A                |
| A_23_P147839   | 1,70163 | 1,63392 | 1,048051783 | ENST00000354839 | 2044      | NM_004439    | EPHA5              |
| A_21_P0004470  | 4,40787 | 4,34016 | 1,048051783 | N/A             | N/A       | N/A          | Inc-DUSP1-1        |
| A_33_P3235677  | 1,45944 | 1,39174 | 1,048044518 | N/A             | N/A       | N/A          | N/A                |
| A_24_P930111   | 1,66581 | 1,59811 | 1,048044518 | ENST00000446997 | 57282     | NM_022058    | SLC4A10            |
| A_21_P0008888  | 1,61679 | 1,54909 | 1,048044518 | ENST00000601556 | 732275    | NR_024406    | LINC00917          |
| A_33_P3379190  | 1,64522 | 1,57752 | 1,048044518 | ENST00000394256 | 341418    | NM_001005494 | OR6C4              |
| A_33_P3289401  | 1,47126 | 1,40358 | 1,048029989 | ENST00000380370 | 119679    | NM_001001916 | OR52J3             |
| A_33_P3388322  | 4,05477 | 3,9871  | 1,048022725 | ENST00000390298 | N/A       | AB363371     | N/A                |
| A_22_P00005963 | 5,00247 | 4,9348  | 1,048022725 | ENST00000561377 | 79618     | N/A          | HMBX1              |
| A_33_P3323892  | 1,62208 | 1,55442 | 1,048015461 | N/A             | N/A       | N/A          | N/A                |
| A_23_P36985    | 1,66066 | 1,593   | 1,048015461 | ENST00000338862 | 5100      | NM_002590    | PCDH8              |
| A_22_P00002285 | 1,71062 | 1,64296 | 1,048015461 | N/A             | N/A       | AW770842     | Inc-C10orf68-3     |
| A_21_P0002693  | 7,63635 | 7,56871 | 1,048000932 | N/A             | N/A       | N/A          | Inc-AC110619.2.1-1 |
| A_33_P3311498  | 1,61873 | 1,55109 | 1,048000932 | N/A             | 283392    | NR_026837    | TRHDE-AS1          |

|                |         |         |             |                 |           |              |                      |
|----------------|---------|---------|-------------|-----------------|-----------|--------------|----------------------|
| A_21_P0014403  | 1,70706 | 1,63943 | 1,047993668 | N/A             | N/A       | N/A          | Inc-ARFGFE2-2        |
| A_23_P200507   | 13,4976 | 13,43   | 1,047971876 | ENST00000366860 | 29097     | NM_014184    | CNIH4                |
| A_19_P00318878 | 10,5678 | 10,5002 | 1,047971876 | ENST00000566446 | N/A       | N/A          | N/A                  |
| A_21_P0008044  | 1,79236 | 1,72477 | 1,047964612 | ENST00000440633 | 440132    | NR_103813    | LINC00545            |
| A_22_P00003841 | 2,08041 | 2,01285 | 1,04794282  | N/A             | N/A       | N/A          | Inc-CEACAM18-1       |
| A_33_P3372985  | 1,61386 | 1,5463  | 1,04794282  | ENST00000567788 | 100190940 | NR_024457    | LOC100190940         |
| A_33_P3372965  | 1,62624 | 1,55868 | 1,04794282  | N/A             | N/A       | N/A          | N/A                  |
| A_22_P00020579 | 3,25667 | 3,18912 | 1,047935556 | N/A             | N/A       | XM_006712521 | Inc-FZD5-1           |
| A_33_P3242693  | 1,46273 | 1,39519 | 1,047928293 | ENST00000428570 | 55867     | NM_018484    | SLC22A11             |
| A_21_P0002283  | 1,73408 | 1,66655 | 1,047921029 | N/A             | N/A       | N/A          | Inc-TSN-5            |
| A_33_P3423565  | 1,7001  | 1,63257 | 1,047921029 | N/A             | N/A       | N/A          | N/A                  |
| A_23_P110234   | 3,75675 | 3,68922 | 1,047921029 | ENST00000505782 | 1446      | NM_001890    | CSN1S1               |
| A_33_P3416043  | 1,65984 | 1,59232 | 1,047913765 | ENST00000451403 | N/A       | N/A          | N/A                  |
| A_22_P00007738 | 1,616   | 1,54849 | 1,047906502 | ENST00000569292 | N/A       | AF508908     | N/A                  |
| A_33_P3421827  | 6,30148 | 6,23397 | 1,047906502 | ENST00000252951 | 3050      | NM_005332    | HBZ                  |
| A_24_P244410   | 11,2321 | 11,1646 | 1,047899238 | ENST00000538919 | 25906     | NM_014042    | ANAPC15              |
| A_23_P24444    | 13,1484 | 13,0809 | 1,047899238 | ENST00000355527 | 1717      | NM_001360    | DHCR7                |
| A_21_P0011142  | 14,2362 | 14,1687 | 1,047899238 | ENST00000432820 | 4673      | NM_139207    | NAP1L1               |
| A_21_P0004721  | 1,4805  | 1,41302 | 1,047884712 | ENST00000437430 | 101927888 | XR_241961    | LOC101927888         |
| A_33_P3283700  | 1,48204 | 1,41459 | 1,047862922 | N/A             | N/A       | N/A          | N/A                  |
| A_22_P00007146 | 5,38975 | 5,32231 | 1,047855658 | ENST00000566873 | 101927450 | NR_109771    | LOC101927450         |
| A_22_P00014763 | 1,45435 | 1,38692 | 1,047848395 | N/A             | 389023    | NR_036580    | DPP10-AS1            |
| A_21_P0009585  | 1,69033 | 1,6229  | 1,047848395 | N/A             | N/A       | N/A          | Inc-ZNF516-7         |
| A_21_P0002892  | 1,71329 | 1,64587 | 1,047841132 | N/A             | N/A       | N/A          | Inc-DHX36-2          |
| A_32_P31182    | 14,3036 | 14,2362 | 1,047826606 | ENST00000457119 | 6129      | NM_000971    | RPL7                 |
| A_33_P3314212  | 6,73769 | 6,67029 | 1,047826606 | ENST00000417555 | N/A       | DQ867088     | N/A                  |
| A_19_P00804740 | 5,41169 | 5,34429 | 1,047826606 | N/A             | 202020    | NR_027696    | TAPT1-AS1            |
| A_21_P0013210  | 1,48235 | 1,41497 | 1,04781208  | N/A             | N/A       | N/A          | XLOC_I2_013436       |
| A_33_P3250348  | 1,7534  | 1,68603 | 1,047804817 | ENST00000344876 | 54510     | NM_019035    | PCDH18               |
| A_32_P83803    | 1,98137 | 1,91401 | 1,047797555 | N/A             | 317751    | NR_004382    | MESTIT1              |
| A_22_P00013265 | 1,61595 | 1,54861 | 1,047783029 | N/A             | N/A       | N/A          | Inc-RP1-199H16.5.1-1 |
| A_33_P3659992  | 1,65453 | 1,5872  | 1,047775766 | ENST00000470546 | 647107    | NR_033945    | LINC01192            |
| A_22_P00012214 | 1,4705  | 1,40317 | 1,047775766 | ENST00000507666 | N/A       | N/A          | N/A                  |

|                |         |         |             |                 |           |              |                |
|----------------|---------|---------|-------------|-----------------|-----------|--------------|----------------|
| A_33_P3310784  | 1,46542 | 1,39809 | 1,047775766 | ENST00000379384 | 53346     | NM_023003    | TM6SF1         |
| A_21_P0012991  | 1,48186 | 1,41453 | 1,047775766 | ENST00000503268 | N/A       | N/A          | N/A            |
| A_32_P216635   | 1,48344 | 1,41612 | 1,047768504 | ENST00000339824 | 283455    | NM_173598    | KSR2           |
| A_22_P00002865 | 1,75276 | 1,68544 | 1,047768504 | N/A             | N/A       | DB025085     | Inc-C3orf65-3  |
| A_33_P3421530  | 1,62536 | 1,55804 | 1,047768504 | N/A             | 256158    | AK128020     | HMCN2          |
| A_22_P00018473 | 4,94027 | 4,87295 | 1,047768504 | N/A             | N/A       | N/A          | Inc-TSSC4-1    |
| A_22_P00025801 | 13,9211 | 13,8538 | 1,047753979 | ENST00000535352 | 100505993 | N/A          | TMEM210        |
| A_21_P0003872  | 1,45842 | 1,39117 | 1,047717667 | N/A             | N/A       | N/A          | Inc-ZFP42-7    |
| A_21_P0002935  | 1,76726 | 1,70003 | 1,047703143 | N/A             | 101927805 | XR_425594    | LOC101927805   |
| A_22_P00006836 | 1,62092 | 1,55371 | 1,047688619 | N/A             | N/A       | N/A          | Inc-GADD45A-1  |
| A_23_P210920   | 14,6014 | 14,5342 | 1,047681357 | ENST00000216951 | 2937      | NM_000178    | GSS            |
| A_23_P379550   | 11,7487 | 11,6815 | 1,047681357 | ENST00000478828 | 8565      | NM_003680    | YARS           |
| A_21_P0008863  | 1,61461 | 1,54741 | 1,047681357 | ENST00000559008 | 101929560 | XR_424652    | LOC101929560   |
| A_22_P00002888 | 1,61907 | 1,55187 | 1,047681357 | ENST00000508724 | N/A       | N/A          | N/A            |
| A_22_P00025185 | 1,73077 | 1,66359 | 1,047666833 | ENST00000503456 | N/A       | N/A          | N/A            |
| A_22_P00000084 | 1,63196 | 1,56479 | 1,047659571 | ENST00000454040 | 64002     | NR_002769    | PCGEM1         |
| A_21_P0007002  | 1,77427 | 1,70711 | 1,047652309 | N/A             | N/A       | N/A          | Inc-RTKN2-3    |
| A_21_P0008142  | 1,61247 | 1,54531 | 1,047652309 | N/A             | N/A       | N/A          | Inc-SOHLH2-1   |
| A_33_P3353547  | 1,71949 | 1,65234 | 1,047645047 | ENST00000609129 | 728116    | NM_001145720 | ZBTB8B         |
| A_22_P00016716 | 1,77186 | 1,70473 | 1,047630524 | N/A             | N/A       | N/A          | Inc-TRAPPC12-1 |
| A_23_P344451   | 1,62651 | 1,5594  | 1,047616001 | ENST00000299633 | 50810     | NM_016073    | HDGFRP3        |
| A_21_P0008118  | 3,38833 | 3,32122 | 1,047616001 | N/A             | N/A       | N/A          | Inc-ING1-1     |
| A_33_P3337609  | 3,76695 | 3,69985 | 1,047608739 | ENST00000411475 | N/A       | N/A          | N/A            |
| A_33_P3402983  | 1,46084 | 1,39374 | 1,047608739 | ENST00000614586 | 54768     | NM_001270974 | HYDIN          |
| A_23_P259357   | 17,6187 | 17,5516 | 1,047608739 | ENST00000343605 | 339665    | NM_001001479 | SLC35E4        |
| A_33_P3214690  | 1,68439 | 1,6173  | 1,047601478 | ENST00000401917 | 22871     | NM_014932    | NLGN1          |
| A_33_P3405870  | 1,65872 | 1,59164 | 1,047594216 | N/A             | N/A       | N/A          | N/A            |
| A_21_P0009470  | 1,6588  | 1,59173 | 1,047586955 | N/A             | N/A       | N/A          | Inc-TAF4B-3    |
| A_21_P0004839  | 4,11129 | 4,04424 | 1,047572433 | N/A             | N/A       | N/A          | Inc-PHACTR1-1  |
| A_22_P00007455 | 3,97214 | 3,9051  | 1,047565171 | N/A             | N/A       | DA733024     | Inc-GTDC1-4    |
| A_22_P00014927 | 1,46472 | 1,3977  | 1,047550649 | ENST00000445967 | N/A       | N/A          | N/A            |
| A_24_P43876    | 8,18301 | 8,116   | 1,047543388 | ENST00000376854 | 55071     | NM_017998    | C9orf40        |
| A_21_P0001678  | 1,64498 | 1,57797 | 1,047543388 | N/A             | N/A       | N/A          | Inc-DMRTB1-1   |

|                |         |         |             |                 |           |              |                 |
|----------------|---------|---------|-------------|-----------------|-----------|--------------|-----------------|
| A_33_P3264577  | 11,2048 | 11,1378 | 1,047536127 | ENST00000466110 | 1639      | NM_004082    | DCTN1           |
| A_21_P0001604  | 1,47885 | 1,41187 | 1,047521605 | N/A             | N/A       | N/A          | Inc-FAM5C-3     |
| A_21_P0003721  | 1,79115 | 1,72418 | 1,047514344 | N/A             | N/A       | N/A          | Inc-HS3ST1-1    |
| A_21_P0000665  | 1,73899 | 1,67203 | 1,047507084 | ENST00000418006 | 100271702 | NR_036546    | LINC00940       |
| A_22_P00015223 | 1,77247 | 1,70552 | 1,047499823 | N/A             | N/A       | N/A          | Inc-SP140-2     |
| A_22_P00023457 | 1,6742  | 1,60725 | 1,047499823 | N/A             | N/A       | N/A          | Inc-C10orf103-1 |
| A_23_P92120    | 1,75018 | 1,68325 | 1,047485302 | ENST00000343837 | 132203    | NM_001080537 | SNTN            |
| A_21_P0012967  | 3,95332 | 3,88642 | 1,04746352  | ENST00000412295 | N/A       | N/A          | N/A             |
| A_21_P0002373  | 1,77404 | 1,70714 | 1,04746352  | N/A             | N/A       | N/A          | Inc-COPS8-1     |
| A_22_P00021859 | 1,95731 | 1,89042 | 1,04745626  | N/A             | N/A       | N/A          | Inc-COQ10B-1    |
| A_22_P00009743 | 1,48276 | 1,41587 | 1,04745626  | ENST00000546086 | N/A       | XR_110374    | N/A             |
| A_21_P0002816  | 1,65207 | 1,58518 | 1,04745626  | N/A             | N/A       | N/A          | Inc-MAP3K13-1   |
| A_22_P00008618 | 1,48548 | 1,41861 | 1,047441739 | ENST00000400605 | 286554    | NR_002923    | BCORP1          |
| A_22_P00024508 | 1,79224 | 1,72538 | 1,047434478 | N/A             | N/A       | N/A          | Inc-WRN-3       |
| A_21_P0005305  | 1,61788 | 1,55103 | 1,047427218 | ENST00000457592 | N/A       | N/A          | N/A             |
| A_21_P0005954  | 1,74369 | 1,67684 | 1,047427218 | ENST00000519500 | 552853    | NR_126028    | NCRNA00250      |
| A_23_P101683   | 1,6699  | 1,60307 | 1,047412698 | ENST00000221804 | 1178      | NM_001828    | CLC             |
| A_22_P00014619 | 1,6537  | 1,58687 | 1,047412698 | ENST00000545999 | N/A       | N/A          | N/A             |
| A_33_P3386453  | 6,88308 | 6,81626 | 1,047405438 | ENST00000407916 | 394       | NM_001030055 | ARHGAP5         |
| A_21_P0012231  | 1,46351 | 1,3967  | 1,047398178 | ENST00000421051 | 101928107 | N/A          | LOC101928107    |
| A_22_P00007952 | 1,67867 | 1,61186 | 1,047398178 | ENST00000614137 | N/A       | AB593139     | N/A             |
| A_33_P3420267  | 1,60881 | 1,54201 | 1,047390918 | ENST00000413151 | N/A       | N/A          | N/A             |
| A_23_P139050   | 1,7632  | 1,69641 | 1,047383658 | ENST00000357438 | 283160    | NM_001002918 | OR8D2           |
| A_22_P00004383 | 1,48055 | 1,41376 | 1,047383658 | N/A             | N/A       | N/A          | Inc-COL6A3-3    |
| A_22_P00020606 | 1,64049 | 1,5737  | 1,047383658 | N/A             | N/A       | BX248745     | Inc-SNW1-4      |
| A_33_P3230886  | 1,76232 | 1,69554 | 1,047376398 | ENST00000330803 | 127077    | NM_001001964 | OR2T11          |
| A_33_P3283684  | 1,66713 | 1,60037 | 1,047361878 | ENST00000409280 | 136895    | NM_138811    | C7orf31         |
| A_21_P0005316  | 1,72819 | 1,66146 | 1,047340099 | ENST00000447198 | N/A       | N/A          | N/A             |
| A_23_P91930    | 11,1757 | 11,109  | 1,047318321 | ENST00000281273 | 79691     | NM_024638    | QTRTD1          |
| A_22_P00004875 | 1,6157  | 1,549   | 1,047318321 | ENST00000426794 | N/A       | N/A          | N/A             |
| A_22_P00008351 | 1,69191 | 1,62522 | 1,047311061 | ENST00000562817 | 100288079 | N/A          | GS1-279B7.1     |
| A_33_P3323054  | 1,61018 | 1,54351 | 1,047296543 | ENST00000554907 | N/A       | N/A          | N/A             |
| A_24_P159434   | 1,61316 | 1,54649 | 1,047296543 | ENST00000392625 | 11314     | NM_007261    | CD300A          |



|                |         |         |             |                 |           |              |                      |
|----------------|---------|---------|-------------|-----------------|-----------|--------------|----------------------|
| A_21_P0002393  | 1,46001 | 1,39334 | 1,047296543 | ENST00000592730 | 102800314 | NR_110497    | MIR7515HG            |
| A_33_P3393121  | 1,68856 | 1,62189 | 1,047296543 | ENST00000449381 | 64593     | N/A          | RBMY3AP              |
| A_21_P0005880  | 1,71091 | 1,64425 | 1,047289283 | N/A             | N/A       | N/A          | Inc-SLC25A32-2       |
| A_22_P00021332 | 1,60723 | 1,5406  | 1,047267506 | ENST00000328344 | N/A       | N/A          | N/A                  |
| A_21_P0001709  | 1,65915 | 1,59252 | 1,047267506 | ENST00000424735 | 101929120 | NR_110716    | LINC01351            |
| A_22_P00025784 | 1,70083 | 1,63421 | 1,047260247 | ENST00000525673 | N/A       | BX090602     | N/A                  |
| A_23_P123108   | 3,40163 | 3,33501 | 1,047260247 | ENST00000493453 | 10142     | AF026245     | AKAP9                |
| A_33_P3400107  | 1,7033  | 1,63669 | 1,047252988 | ENST00000443243 | 100192420 | N/A          | FLJ41941             |
| A_21_P0004988  | 1,61363 | 1,54702 | 1,047252988 | N/A             | N/A       | N/A          | Inc-GMDS-3           |
| A_22_P00017553 | 1,45575 | 1,38916 | 1,04723847  | N/A             | N/A       | N/A          | Inc-WDR4-4           |
| A_33_P3261308  | 1,68368 | 1,61709 | 1,04723847  | N/A             | N/A       | N/A          | N/A                  |
| A_23_P370544   | 5,67382 | 5,60723 | 1,04723847  | ENST00000520309 | 150709    | NM_144708    | ANKAR                |
| A_22_P00004222 | 1,68086 | 1,61428 | 1,047231211 | ENST00000529234 | N/A       | BQ057011     | N/A                  |
| A_22_P00013673 | 6,31836 | 6,25179 | 1,047223952 | N/A             | N/A       | CF129872     | Inc-RP11-688I9.2.1-1 |
| A_21_P0003225  | 1,77392 | 1,70736 | 1,047216693 | N/A             | 101928114 | N/A          | LOC101928114         |
| A_33_P3382714  | 1,61772 | 1,55117 | 1,047209435 | N/A             | 144742    | N/A          | LINC00934            |
| A_33_P3404889  | 5,6147  | 5,54816 | 1,047202176 | ENST00000370725 | N/A       | XM_006710485 | N/A                  |
| A_33_P3327086  | 1,70694 | 1,64041 | 1,047194917 | ENST00000382764 | 100533178 | NM_001282471 | PRORY                |
| A_22_P00011171 | 4,43715 | 4,37063 | 1,047187659 | N/A             | N/A       | N/A          | Inc-ODF4-2           |
| A_22_P00022708 | 1,79212 | 1,7256  | 1,047187659 | N/A             | 100506406 | N/A          | LOC100506406         |
| A_21_P0006064  | 1,46391 | 1,3974  | 1,0471804   | N/A             | N/A       | N/A          | Inc-C9orf66-6        |
| A_23_P48977    | 12,8701 | 12,8036 | 1,047173142 | ENST00000558406 | 64963     | NM_022839    | MRPS11               |
| A_23_P200056   | 10,183  | 10,1165 | 1,047173142 | ENST00000378625 | 65220     | NM_023018    | NADK                 |
| A_24_P185314   | 10,7331 | 10,6666 | 1,047173142 | ENST00000322897 | 8774      | NM_003826    | NAPG                 |
| A_21_P0003988  | 1,74967 | 1,6832  | 1,047151367 | ENST00000506429 | N/A       | N/A          | N/A                  |
| A_21_P0007402  | 1,68613 | 1,61966 | 1,047151367 | N/A             | 101928940 | N/A          | LOC101928940         |
| A_22_P00003606 | 1,67689 | 1,61043 | 1,047144108 | N/A             | N/A       | DA247417     | Inc-CD300LF-1        |
| A_33_P3258627  | 1,62515 | 1,55871 | 1,047129592 | ENST00000409162 | N/A       | N/A          | N/A                  |
| A_24_P922252   | 6,27542 | 6,20899 | 1,047122334 | N/A             | 79029     | AK022348     | SPATA5L1             |
| A_22_P00011633 | 1,77303 | 1,70661 | 1,047115076 | N/A             | N/A       | N/A          | Inc-PCYOX1-2         |
| A_21_P0000209  | 7,00407 | 6,93765 | 1,047115076 | N/A             | 26772     | NR_000009    | SNORD4B              |
| A_22_P00014802 | 4,70264 | 4,63623 | 1,047107818 | ENST00000582712 | N/A       | N/A          | N/A                  |
| A_24_P291588   | 10,5343 | 10,4679 | 1,04710056  | ENST00000313143 | 1857      | NM_004423    | DVL3                 |

|                |         |         |             |                 |           |              |               |
|----------------|---------|---------|-------------|-----------------|-----------|--------------|---------------|
| A_21_P0004079  | 1,73621 | 1,66986 | 1,047064271 | N/A             | N/A       | N/A          | Inc-FAM153A-2 |
| A_22_P00005893 | 1,7503  | 1,68395 | 1,047064271 | ENST00000537293 | N/A       | EF565103     | N/A           |
| A_22_P00001056 | 1,72966 | 1,66333 | 1,047049755 | ENST00000497397 | N/A       | XR_426474    | N/A           |
| A_23_P386973   | 1,60816 | 1,54183 | 1,047049755 | ENST00000008391 | 83741     | NM_172238    | TFAP2D        |
| A_33_P3312271  | 1,67572 | 1,6094  | 1,047042498 | N/A             | 440200    | AK021542     | FLJ41170      |
| A_21_P0008643  | 1,61716 | 1,55086 | 1,047027983 | ENST00000559821 | N/A       | N/A          | N/A           |
| A_33_P3325808  | 4,30385 | 4,23755 | 1,047027983 | ENST00000480063 | N/A       | N/A          | N/A           |
| A_22_P00000123 | 1,48623 | 1,41993 | 1,047027983 | N/A             | 102724719 | NR_120678    | LOC102724719  |
| A_23_P55174    | 8,60844 | 8,54214 | 1,047027983 | ENST00000590639 | 92579     | NM_138387    | G6PC3         |
| A_33_P3238166  | 1,45717 | 1,39088 | 1,047020725 | ENST00000252804 | 7837      | NM_012293    | PXDN          |
| A_22_P00009659 | 1,68905 | 1,62277 | 1,047013468 | ENST00000445180 | 101929406 | NR_110790    | LOC101929406  |
| A_22_P00010691 | 1,46958 | 1,40333 | 1,046991696 | ENST00000441205 | N/A       | N/A          | N/A           |
| A_22_P00005489 | 1,47358 | 1,40735 | 1,046977182 | ENST00000546170 | 101927922 | NR_120456    | LINC01479     |
| A_22_P00010835 | 1,65731 | 1,59109 | 1,046969925 | N/A             | N/A       | N/A          | Inc-NOC3L-2   |
| A_32_P50734    | 1,61919 | 1,55297 | 1,046969925 | ENST00000444001 | N/A       | BU854292     | N/A           |
| A_33_P3419831  | 1,65618 | 1,58998 | 1,046955411 | ENST00000306731 | 140834    | N/A          | C20orf62      |
| A_21_P0007696  | 1,6985  | 1,6323  | 1,046955411 | N/A             | N/A       | N/A          | Inc-ERGIC2-1  |
| A_22_P00016124 | 1,60936 | 1,54316 | 1,046955411 | N/A             | N/A       | AK091653     | Inc-TIGD1L2-2 |
| A_33_P3768196  | 1,68734 | 1,62118 | 1,046926383 | ENST00000412068 | 284551    | NR_027085    | LINC01226     |
| A_33_P3383174  | 1,73629 | 1,67013 | 1,046926383 | ENST00000572508 | N/A       | XR_247456    | N/A           |
| A_33_P3325700  | 1,7654  | 1,69925 | 1,046919127 | ENST00000555844 | 1734      | NM_001242502 | DIO2          |
| A_22_P00010501 | 1,70711 | 1,64096 | 1,046919127 | N/A             | N/A       | N/A          | Inc-NBEA-2    |
| A_23_P47110    | 1,65535 | 1,58921 | 1,04691187  | ENST00000444002 | N/A       | AF118080     | N/A           |
| A_33_P3225357  | 1,69373 | 1,62759 | 1,04691187  | ENST00000489487 | 644444    | NR_028357    | TMEM30C       |
| A_33_P3331021  | 1,61388 | 1,54775 | 1,046904613 | N/A             | 100129148 | NR_033999    | LOC100129148  |
| A_22_P00018063 | 1,60695 | 1,54084 | 1,0468901   | ENST00000431956 | N/A       | N/A          | N/A           |
| A_24_P34031    | 1,45396 | 1,38786 | 1,046882844 | ENST00000369297 | 2045      | NM_001288630 | EPHA7         |
| A_33_P3370461  | 17,4267 | 17,3606 | 1,046882844 | ENST00000497969 | N/A       | N/A          | N/A           |
| A_22_P00024632 | 1,72015 | 1,65406 | 1,046875587 | ENST00000572343 | 101929650 | XR_243528    | LOC101929650  |
| A_24_P48723    | 1,78913 | 1,72305 | 1,046868331 | ENST00000244043 | 5740      | NM_000961    | PTGIS         |
| A_22_P00016441 | 1,78443 | 1,71835 | 1,046868331 | N/A             | N/A       | N/A          | Inc-TMEM53-1  |
| A_22_P00007111 | 1,658   | 1,59192 | 1,046868331 | N/A             | N/A       | N/A          | Inc-GLUD1-1   |
| A_22_P00015723 | 1,45144 | 1,38537 | 1,046861075 | N/A             | N/A       | N/A          | Inc-SYT17-2   |

|                |         |         |             |                 |           |              |                      |
|----------------|---------|---------|-------------|-----------------|-----------|--------------|----------------------|
| A_33_P3209170  | 1,60547 | 1,5394  | 1,046861075 | ENST00000438525 | 100129239 | NM_001144064 | CXorf51A             |
| A_21_P0004878  | 1,70689 | 1,64085 | 1,046839306 | N/A             | N/A       | N/A          | Inc-FTSJD2-1         |
| A_33_P3380452  | 1,46807 | 1,40203 | 1,046839306 | ENST00000302572 | 390191    | NM_001004733 | OR5B12               |
| A_21_P0006422  | 3,56873 | 3,50271 | 1,046824794 | ENST00000366224 | N/A       | N/A          | N/A                  |
| A_33_P3229002  | 4,46368 | 4,39768 | 1,046810282 | ENST00000605587 | 146853    | NM_145272    | C17orf50             |
| A_33_P3322484  | 1,64751 | 1,58151 | 1,046810282 | ENST00000302259 | 414301    | NM_001001711 | DDI1                 |
| A_21_P0008116  | 8,14185 | 8,0759  | 1,046774003 | N/A             | N/A       | N/A          | Inc-COL4A2-3         |
| A_24_P83272    | 1,76792 | 1,70198 | 1,046766747 | ENST00000378982 | 4115      | NM_002367    | MAGEB4               |
| A_33_P3264731  | 4,56309 | 4,49715 | 1,046766747 | ENST00000595971 | 100129094 | NM_001287262 | BTNL10               |
| A_22_P00023031 | 1,75414 | 1,68825 | 1,04673047  | ENST00000481004 | N/A       | XR_427347    | N/A                  |
| A_21_P0012647  | 1,61515 | 1,54926 | 1,04673047  | N/A             | N/A       | N/A          | XLLOC_I2_011001      |
| A_21_P0002399  | 1,73944 | 1,67355 | 1,04673047  | N/A             | N/A       | N/A          | Inc-MBOAT2-1         |
| A_33_P3322211  | 1,48561 | 1,41974 | 1,046715959 | N/A             | N/A       | N/A          | N/A                  |
| A_23_P12082    | 1,64235 | 1,57648 | 1,046715959 | ENST00000369748 | 1117      | NM_001025199 | CHI3L2               |
| A_33_P3228427  | 1,72614 | 1,66027 | 1,046715959 | N/A             | N/A       | BX103560     | N/A                  |
| A_22_P00000638 | 1,46069 | 1,39483 | 1,046708704 | ENST00000515864 | 100506229 | NR_039975    | LINC01093            |
| A_33_P3277043  | 3,11864 | 3,05278 | 1,046708704 | N/A             | N/A       | N/A          | N/A                  |
| A_22_P00014321 | 1,62163 | 1,55577 | 1,046708704 | ENST00000452004 | N/A       | BX092676     | N/A                  |
| A_21_P0009635  | 1,61304 | 1,54719 | 1,046701449 | N/A             | N/A       | N/A          | Inc-RTTN-2           |
| A_22_P00019879 | 1,61122 | 1,54538 | 1,046694193 | N/A             | N/A       | N/A          | Inc-SIGLEC16-1       |
| A_22_P00012462 | 1,67346 | 1,60763 | 1,046686938 | N/A             | N/A       | N/A          | Inc-PRR15-1          |
| A_21_P0011967  | 1,48315 | 1,41732 | 1,046686938 | ENST00000436072 | 6424      | N/A          | SFRP4                |
| A_21_P0001524  | 1,65912 | 1,5933  | 1,046679683 | N/A             | N/A       | N/A          | Inc-TTLL7-1          |
| A_22_P00020849 | 1,76887 | 1,70307 | 1,046665173 | N/A             | N/A       | N/A          | Inc-RP11-93B14.6.1-5 |
| A_21_P0001040  | 1,7588  | 1,69301 | 1,046657918 | ENST00000424735 | 101929120 | NR_110716    | LINC01351            |
| A_22_P00018331 | 4,46508 | 4,39932 | 1,046636154 | N/A             | N/A       | N/A          | Inc-ZNHIT2-1         |
| A_33_P3365932  | 9,93438 | 9,86864 | 1,046621645 | ENST00000354296 | 100287171 | NM_182905    | WASH1                |
| A_21_P0013694  | 1,61745 | 1,55171 | 1,046621645 | ENST00000423138 | 158381    | N/A          | ATP8B5P              |
| A_33_P3423919  | 1,66491 | 1,59918 | 1,04661439  | ENST00000408949 | 346525    | NM_001004135 | OR2A12               |
| A_24_P178093   | 9,83922 | 9,77349 | 1,04661439  | ENST00000398242 | 10452     | NM_006114    | TOMM40               |
| A_22_P00017253 | 1,69902 | 1,6333  | 1,046607135 | ENST00000524167 | N/A       | N/A          | N/A                  |
| A_22_P00017160 | 1,74534 | 1,67963 | 1,046599881 | N/A             | N/A       | N/A          | Inc-UBFD1-1          |
| A_32_P112752   | 1,7576  | 1,69191 | 1,046585372 | N/A             | N/A       | N/A          | Inc-PRB1-1           |

|                |         |         |             |                 |           |              |                  |
|----------------|---------|---------|-------------|-----------------|-----------|--------------|------------------|
| A_33_P3233499  | 1,47964 | 1,41401 | 1,046541847 | ENST00000366822 | 26238     | NR_026773    | LINC01558        |
| A_22_P00014610 | 1,65459 | 1,58897 | 1,046534593 | ENST00000546062 | 101927592 | NR_104646    | LOC101927592     |
| A_21_P0007995  | 1,70603 | 1,64042 | 1,046527339 | ENST00000443679 | 103191607 | NR_120400    | LOC103191607     |
| A_33_P3410935  | 13,3188 | 13,2532 | 1,046520085 | ENST00000431388 | 284184    | NM_001086521 | C17orf89         |
| A_33_P3398809  | 12,2852 | 12,2196 | 1,046520085 | ENST00000489572 | 92399     | NM_138777    | MRRF             |
| A_23_P157416   | 10,6334 | 10,5678 | 1,046520085 | ENST00000337673 | 84124     | NM_032164    | ZNF394           |
| A_21_P0005349  | 1,46361 | 1,39802 | 1,046512831 | ENST00000421380 | N/A       | N/A          | N/A              |
| A_23_P21057    | 1,66312 | 1,59753 | 1,046512831 | ENST00000566517 | 1731      | NM_052838    | set-01           |
| A_23_P109614   | 1,68794 | 1,62235 | 1,046512831 | ENST00000428261 | 4336      | NM_182935    | MOBP             |
| A_33_P3300733  | 1,67001 | 1,60442 | 1,046512831 | ENST00000580773 | N/A       | N/A          | N/A              |
| A_33_P3236020  | 1,64467 | 1,57908 | 1,046512831 | ENST00000274532 | 91937     | NM_138379    | TIMD4            |
| A_24_P7584     | 6,22105 | 6,15548 | 1,046498323 | ENST00000460141 | 80741     | NM_025262    | LY6G5C           |
| A_33_P3416350  | 8,02281 | 7,95726 | 1,046483816 | ENST00000407704 | 50618     | NM_147152    | ITSN2            |
| A_21_P0005419  | 1,60973 | 1,5442  | 1,046469309 | N/A             | N/A       | N/A          | Inc-AC073348.1-3 |
| A_33_P3374076  | 1,69039 | 1,62487 | 1,046462055 | ENST00000335960 | 124925    | NM_001098635 | SEZ6             |
| A_24_P788373   | 1,45562 | 1,39011 | 1,046454801 | N/A             | 100132661 | AF130044     | LOC100132661     |
| A_22_P00013780 | 1,47943 | 1,41392 | 1,046454801 | ENST00000533984 | N/A       | N/A          | N/A              |
| A_22_P00024822 | 1,6271  | 1,56159 | 1,046454801 | ENST00000475324 | N/A       | N/A          | N/A              |
| A_33_P3364836  | 1,6721  | 1,60659 | 1,046454801 | N/A             | N/A       | N/A          | N/A              |
| A_24_P58881    | 16,9981 | 16,9326 | 1,046447548 | ENST00000422792 | N/A       | N/A          | N/A              |
| A_33_P3649715  | 1,46231 | 1,39681 | 1,046447548 | ENST00000283426 | 153478    | NM_052909    | PLEKHG4B         |
| A_33_P3409422  | 1,73716 | 1,67168 | 1,046433041 | N/A             | N/A       | DB047837     | Inc-SULF1-1      |
| A_33_P3369530  | 3,0885  | 3,02303 | 1,046425788 | ENST00000611645 | 9223      | NM_015520    | MAGI1            |
| A_22_P00024312 | 1,75072 | 1,68526 | 1,046418535 | ENST00000556016 | N/A       | N/A          | N/A              |
| A_22_P00014385 | 1,69655 | 1,63114 | 1,046382269 | N/A             | N/A       | N/A          | Inc-SF3B5-1      |
| A_23_P72527    | 1,63986 | 1,57446 | 1,046375016 | ENST00000520087 | 8749      | NM_014237    | ADAM18           |
| A_33_P3223874  | 17,0673 | 17,0019 | 1,046375016 | ENST00000440913 | N/A       | CR936824     | N/A              |
| A_21_P0005745  | 1,60854 | 1,54314 | 1,046375016 | ENST00000524287 | N/A       | N/A          | N/A              |
| A_21_P0010038  | 1,60122 | 1,53585 | 1,046353258 | N/A             | N/A       | N/A          | Inc-MAFB-1       |
| A_22_P00000142 | 1,60203 | 1,53666 | 1,046353258 | ENST00000399152 | N/A       | N/A          | N/A              |
| A_33_P3297545  | 1,78009 | 1,71472 | 1,046353258 | ENST00000390376 | N/A       | N/A          | N/A              |
| A_22_P00006359 | 1,47551 | 1,41016 | 1,046338752 | N/A             | N/A       | N/A          | Inc-FARSB-2      |
| A_21_P0005671  | 1,48264 | 1,41729 | 1,046338752 | N/A             | N/A       | N/A          | Inc-XPO7-1       |

|                |         |         |             |                 |           |              |                |
|----------------|---------|---------|-------------|-----------------|-----------|--------------|----------------|
| A_21_P0010795  | 2,92688 | 2,86155 | 1,046324247 | ENST00000435793 | N/A       | N/A          | N/A            |
| A_21_P0001397  | 4,27561 | 4,21028 | 1,046324247 | N/A             | N/A       | N/A          | Inc-TSEN15-1   |
| A_21_P0009037  | 6,55554 | 6,49021 | 1,046324247 | N/A             | N/A       | N/A          | Inc-IRX3-4     |
| A_22_P00012430 | 1,67702 | 1,61169 | 1,046324247 | ENST00000542449 | N/A       | XR_253006    | N/A            |
| A_33_P3400319  | 1,85454 | 1,78922 | 1,046316995 | ENST00000383686 | 151760    | XR_112523    | LOC151760      |
| A_32_P183598   | 1,6024  | 1,53708 | 1,046316995 | N/A             | N/A       | N/A          | N/A            |
| A_23_P214487   | 16,9385 | 16,8732 | 1,04630249  | ENST00000377803 | 8364      | NM_003542    | HIST1H4C       |
| A_23_P154801   | 10,8206 | 10,7553 | 1,04630249  | ENST00000252015 | 26133     | NM_015638    | TRPC4AP        |
| A_22_P00002836 | 1,45061 | 1,38533 | 1,046287985 | N/A             | N/A       | CB047809     | Inc-C2orf84-1  |
| A_33_P3287507  | 1,6583  | 1,59302 | 1,046287985 | N/A             | N/A       | AK310679     | N/A            |
| A_22_P00004783 | 1,75959 | 1,69431 | 1,046287985 | ENST00000439198 | N/A       | BX093647     | N/A            |
| A_33_P3395389  | 4,82617 | 4,76091 | 1,04627348  | ENST00000589461 | 147923    | NM_144689    | ZNF420         |
| A_21_P0008592  | 1,46961 | 1,40437 | 1,046258976 | N/A             | N/A       | N/A          | Inc-C15orf2-6  |
| A_21_P0000448  | 2,61686 | 2,55162 | 1,046258976 | N/A             | 100033424 | NR_003327    | SNORD116-12    |
| A_24_P116351   | 14,4457 | 14,3805 | 1,046229968 | ENST00000329967 | 10572     | NM_006427    | SIVA1          |
| A_33_P3383169  | 1,61023 | 1,54503 | 1,046229968 | ENST00000381493 | N/A       | AF447883     | N/A            |
| A_21_P0001821  | 3,83468 | 3,76949 | 1,046222716 | ENST00000478468 | N/A       | N/A          | N/A            |
| A_33_P3424122  | 1,60561 | 1,54042 | 1,046222716 | ENST00000368806 | 126637    | NM_001008536 | TCHHL1         |
| A_22_P00009045 | 1,70774 | 1,64255 | 1,046222716 | ENST00000523722 | N/A       | N/A          | N/A            |
| A_22_P00001941 | 1,74999 | 1,68483 | 1,046200961 | N/A             | N/A       | N/A          | Inc-BARHL2-3   |
| A_24_P495367   | 1,61513 | 1,54998 | 1,046193709 | ENST00000399770 | 389207    | NM_001080476 | GRXCR1         |
| A_33_P3274204  | 1,66877 | 1,60362 | 1,046193709 | N/A             | N/A       | N/A          | N/A            |
| A_21_P0002323  | 1,63329 | 1,56814 | 1,046193709 | N/A             | N/A       | N/A          | Inc-UBE2E3-3   |
| A_22_P00015849 | 3,21929 | 3,15415 | 1,046186457 | N/A             | N/A       | N/A          | Inc-TBK1-1     |
| A_33_P3330663  | 5,70654 | 5,64141 | 1,046179206 | ENST00000399730 | N/A       | N/A          | N/A            |
| A_21_P0003009  | 1,60799 | 1,54286 | 1,046179206 | N/A             | N/A       | N/A          | Inc-GAP43-1    |
| A_22_P00017575 | 7,94224 | 7,87711 | 1,046179206 | N/A             | N/A       | N/A          | Inc-WDR63-1    |
| A_33_P3278298  | 2,44898 | 2,38386 | 1,046171954 | N/A             | 64434     | AK131362     | NOM1           |
| A_33_P3331761  | 1,60578 | 1,54066 | 1,046171954 | ENST00000555099 | 283092    | NM_001001955 | OR4C13         |
| A_23_P337790   | 8,74794 | 8,68283 | 1,046164703 | ENST00000438092 | 257218    | NM_001042683 | SHPRH          |
| A_22_P00003223 | 1,61239 | 1,54728 | 1,046164703 | N/A             | N/A       | BQ186114     | Inc-CACNA2D3-3 |
| A_33_P3245011  | 13,1601 | 13,095  | 1,046157451 | ENST00000617083 | 26007     | NM_015533    | DAK            |
| A_21_P0000634  | 1,63579 | 1,5707  | 1,0461502   | N/A             | 100129046 | NR_034091    | LOC100129046   |

|                |         |         |             |                 |           |              |               |
|----------------|---------|---------|-------------|-----------------|-----------|--------------|---------------|
| A_22_P00011170 | 1,45976 | 1,39467 | 1,0461502   | N/A             | N/A       | N/A          | Inc-ODF4-2    |
| A_21_P0000601  | 1,64454 | 1,57946 | 1,046142949 | ENST00000530276 | 5897      | NM_001243786 | RAG2          |
| A_33_P3284734  | 1,70526 | 1,64019 | 1,046135697 | N/A             | 146227    | AK130753     | BEAN1         |
| A_24_P206328   | 3,25617 | 3,19114 | 1,046106693 | ENST00000396182 | 5137      | NM_005020    | PDE1C         |
| A_33_P3263423  | 6,20607 | 6,14106 | 1,046092191 | ENST00000407096 | 7100      | NM_003268    | TLR5          |
| A_33_P3276435  | 1,44972 | 1,38471 | 1,046092191 | ENST00000498523 | 27145     | NM_001300866 | FILIP1        |
| A_33_P3267463  | 1,6542  | 1,58919 | 1,046092191 | ENST00000381984 | 5991      | N/A          | RFX3          |
| A_33_P3414799  | 5,66782 | 5,60288 | 1,046041435 | ENST00000511237 | 6452      | NM_001145855 | SH3BP2        |
| A_21_P0012954  | 1,48191 | 1,41698 | 1,046034185 | ENST00000512965 | N/A       | N/A          | N/A           |
| A_23_P120744   | 9,82187 | 9,75694 | 1,046034185 | ENST00000397708 | 8888      | NM_003906    | MCM3AP        |
| A_22_P00019091 | 1,47755 | 1,41263 | 1,046026934 | N/A             | N/A       | N/A          | Inc-FAM75D1-4 |
| A_23_P201764   | 6,4958  | 6,43088 | 1,046026934 | ENST00000434391 | 79947     | NM_024887    | DHDDS         |
| A_33_P3329433  | 1,77026 | 1,70536 | 1,046012433 | N/A             | 7273      | NM_001267550 | TTN           |
| A_22_P00008387 | 1,60222 | 1,53734 | 1,045997933 | ENST00000451946 | N/A       | N/A          | N/A           |
| A_22_P00013566 | 1,73771 | 1,67284 | 1,045990682 | ENST00000557393 | N/A       | N/A          | N/A           |
| A_23_P212655   | 1,63776 | 1,5729  | 1,045983432 | ENST00000468734 | 89857     | NM_130446    | KLHL6         |
| A_21_P0009727  | 6,23267 | 6,16783 | 1,045968932 | N/A             | N/A       | N/A          | Inc-EMP3-1    |
| A_22_P00007914 | 1,60029 | 1,53546 | 1,045961682 | ENST00000504609 | 104355136 | NR_126379    | LINC01033     |
| A_21_P0004945  | 1,66367 | 1,59884 | 1,045961682 | N/A             | N/A       | N/A          | Inc-TNFAIP3-6 |
| A_33_P3225535  | 1,60163 | 1,5368  | 1,045961682 | ENST00000314902 | 391107    | NM_001004476 | OR10K2        |
| A_21_P0001961  | 1,4508  | 1,38599 | 1,045947182 | ENST00000437261 | N/A       | N/A          | N/A           |
| A_24_P62800    | 1,70806 | 1,64328 | 1,045925432 | ENST00000367156 | 55220     | NM_018203    | KLHDC8A       |
| A_21_P0002592  | 1,65734 | 1,59256 | 1,045925432 | ENST00000415396 | 101805491 | NR_103805    | LOC101805491  |
| A_33_P3266025  | 1,64637 | 1,5816  | 1,045918182 | ENST00000576956 | N/A       | N/A          | N/A           |
| A_22_P00013426 | 1,61733 | 1,55257 | 1,045910932 | ENST00000564222 | N/A       | N/A          | N/A           |
| A_21_P0008240  | 1,65485 | 1,5901  | 1,045903683 | N/A             | N/A       | N/A          | Inc-UCHL3-7   |
| A_22_P00000292 | 1,72754 | 1,66279 | 1,045903683 | ENST00000431455 | N/A       | N/A          | N/A           |
| A_21_P0004706  | 1,61762 | 1,55289 | 1,045889184 | N/A             | N/A       | N/A          | Inc-FGFR1OP-7 |
| A_33_P3349158  | 1,44913 | 1,3844  | 1,045889184 | N/A             | N/A       | N/A          | N/A           |
| A_22_P00003221 | 1,46164 | 1,39692 | 1,045881934 | ENST00000496829 | N/A       | N/A          | N/A           |
| A_33_P3257607  | 7,47555 | 7,41083 | 1,045881934 | ENST00000391959 | 4660      | NM_001197131 | PPP1R12B      |
| A_33_P3361112  | 1,59837 | 1,53366 | 1,045874685 | ENST00000272286 | 64241     | NM_022437    | ABCG8         |
| A_33_P3352283  | 1,48661 | 1,4219  | 1,045874685 | ENST00000376005 | 727684    | NM_001278501 | C1orf195      |

|                |         |         |             |                 |           |              |                       |
|----------------|---------|---------|-------------|-----------------|-----------|--------------|-----------------------|
| A_23_P77852    | 1,61105 | 1,54634 | 1,045874685 | ENST00000348931 | 124626    | NM_199321    | ZPBP2                 |
| A_33_P3390367  | 1,63969 | 1,57499 | 1,045867435 | N/A             | 91149     | NR_026995    | RAPGEF4-AS1           |
| A_21_P0002260  | 1,74664 | 1,68194 | 1,045867435 | N/A             | N/A       | N/A          | Inc-IL1R2-1           |
| A_21_P0011958  | 2,74097 | 2,67627 | 1,045867435 | N/A             | N/A       | N/A          | XLOC_I2_008221        |
| A_23_P2474     | 10,7766 | 10,7119 | 1,045867435 | ENST00000229251 | 50813     | NM_016319    | COPS7A                |
| A_32_P156851   | 1,76279 | 1,6981  | 1,045860186 | ENST00000371374 | 10231     | NM_005822    | RCAN2                 |
| A_23_P308058   | 4,33663 | 4,27196 | 1,045845687 | ENST00000333813 | 286753    | NM_172367    | TUSC5                 |
| A_23_P94403    | 1,71516 | 1,6505  | 1,045838438 | ENST00000388918 | 7306      | NM_000550    | TYRP1                 |
| A_21_P0010078  | 1,65591 | 1,59127 | 1,04582394  | ENST00000587737 | N/A       | N/A          | N/A                   |
| A_21_P0014568  | 1,59938 | 1,53474 | 1,04582394  | ENST00000504409 | 100507616 | XR_110328    | LOC100507616          |
| A_21_P0002826  | 1,70753 | 1,64291 | 1,045809442 | ENST00000457815 | N/A       | N/A          | N/A                   |
| A_22_P00012343 | 1,7115  | 1,64688 | 1,045809442 | ENST00000552154 | N/A       | N/A          | N/A                   |
| A_33_P3808371  | 10,8799 | 10,8153 | 1,045794944 | N/A             | 283911    | AL833480     | LOC283911             |
| A_23_P303181   | 10,4709 | 10,4063 | 1,045794944 | ENST00000245222 | 56848     | NM_020126    | SPHK2                 |
| A_21_P0010712  | 1,7776  | 1,71302 | 1,045780446 | ENST00000451023 | N/A       | N/A          | N/A                   |
| A_22_P00003940 | 1,68294 | 1,61837 | 1,045773197 | N/A             | N/A       | N/A          | Inc-CHAC1-2           |
| A_33_P3233546  | 1,72337 | 1,6588  | 1,045773197 | N/A             | N/A       | N/A          | N/A                   |
| A_22_P00016359 | 1,68672 | 1,62216 | 1,045765948 | N/A             | N/A       | N/A          | Inc-TMEM178-2         |
| A_33_P3394404  | 1,74235 | 1,6778  | 1,0457587   | ENST00000484104 | 10077     | NM_139022    | TSPAN32               |
| A_33_P6816152  | 8,77064 | 8,70609 | 1,0457587   | N/A             | N/A       | AK127569     | Inc-GTF2F2-2          |
| A_33_P3408305  | 9,59501 | 9,53047 | 1,045751451 | ENST00000394113 | 204219    | NM_178842    | CERS3                 |
| A_22_P00022775 | 1,6578  | 1,59326 | 1,045751451 | ENST00000418620 | N/A       | N/A          | N/A                   |
| A_33_P3423250  | 1,44911 | 1,38458 | 1,045744203 | ENST00000534062 | 388015    | NM_001134888 | RTL1                  |
| A_22_P00009499 | 1,65788 | 1,59336 | 1,045736954 | ENST00000523063 | N/A       | N/A          | N/A                   |
| A_24_P343233   | 7,15559 | 7,09108 | 1,045729706 | ENST00000421942 | 3123      | NM_002124    | HLA-DRB1              |
| A_33_P3272209  | 9,90565 | 9,84114 | 1,045729706 | ENST00000392328 | 54842     | NM_017694    | MFSD6                 |
| A_22_P00022636 | 1,95421 | 1,88971 | 1,045722457 | N/A             | 102724020 | NR_120484    | LOC102724020          |
| A_21_P0003373  | 1,62977 | 1,56527 | 1,045722457 | ENST00000503625 | N/A       | N/A          | N/A                   |
| A_22_P00013244 | 1,74995 | 1,68545 | 1,045722457 | ENST00000454489 | N/A       | N/A          | N/A                   |
| A_21_P0008864  | 1,78665 | 1,72218 | 1,045700712 | N/A             | N/A       | N/A          | Inc-RP11-210M15.2.1-1 |
| A_22_P00025620 | 1,68913 | 1,62466 | 1,045700712 | ENST00000416680 | N/A       | N/A          | N/A                   |
| A_33_P3410454  | 3,40408 | 3,33962 | 1,045693464 | ENST00000394939 | 389524    | N/A          | GTF2IRD2B             |
| A_22_P00006681 | 1,65393 | 1,58947 | 1,045693464 | ENST00000424953 | N/A       | N/A          | N/A                   |

|                |         |         |             |                 |           |              |                       |
|----------------|---------|---------|-------------|-----------------|-----------|--------------|-----------------------|
| A_32_P56397    | 1,65792 | 1,59346 | 1,045693464 | ENST00000413288 | 731789    | NR_026794    | LINC00202-2           |
| A_21_P0007255  | 1,63548 | 1,57103 | 1,045686216 | N/A             | N/A       | N/A          | Inc-RP11-201M22.1.1-4 |
| A_22_P00015391 | 6,06993 | 6,00548 | 1,045686216 | N/A             | 440944    | NR_027007    | THUMPDP3-AS1          |
| A_21_P0010281  | 1,78992 | 1,72548 | 1,045678968 | ENST00000440714 | N/A       | N/A          | N/A                   |
| A_22_P00001519 | 1,61421 | 1,54978 | 1,04567172  | N/A             | N/A       | N/A          | Inc-ARHGAP25-1        |
| A_23_P66525    | 1,47719 | 1,41277 | 1,045664472 | ENST00000284110 | 9955      | AF105376     | HS3ST3A1              |
| A_22_P00003031 | 1,62283 | 1,55841 | 1,045664472 | N/A             | N/A       | AK129890     | Inc-C7orf49-1         |
| A_24_P30194    | 9,4445  | 9,38008 | 1,045664472 | ENST00000371795 | 24138     | NM_012420    | IFIT5                 |
| A_33_P3280213  | 12,6859 | 12,6215 | 1,045649976 | ENST00000372459 | 5476      | NM_001127695 | CTSA                  |
| A_22_P00015399 | 3,22965 | 3,16525 | 1,045649976 | N/A             | N/A       | N/A          | Inc-SRP9-1            |
| A_23_P107102   | 1,75353 | 1,68913 | 1,045649976 | ENST00000268919 | 84643     | NM_032559    | KIF2B                 |
| A_22_P00012815 | 1,69458 | 1,63018 | 1,045649976 | ENST00000419860 | N/A       | N/A          | N/A                   |
| A_23_P372860   | 5,17067 | 5,10628 | 1,045642728 | ENST00000377791 | 8334      | NM_003512    | HIST1H2AC             |
| A_23_P74828    | 2,16203 | 2,09764 | 1,045642728 | ENST00000360786 | 81025     | NM_030772    | GJA9                  |
| A_22_P00003014 | 1,46035 | 1,39596 | 1,045642728 | N/A             | N/A       | AL589331     | Inc-C6orf99-2         |
| A_21_P0012659  | 2,43266 | 2,36827 | 1,045642728 | ENST00000513843 | N/A       | N/A          | N/A                   |
| A_21_P0001624  | 1,6077  | 1,54334 | 1,045620985 | N/A             | N/A       | N/A          | Inc-SLC30A10-5        |
| A_33_P3312897  | 1,59519 | 1,53087 | 1,045591994 | ENST00000433072 | N/A       | KP092458     | N/A                   |
| A_21_P0001753  | 1,65474 | 1,59042 | 1,045591994 | ENST00000608023 | N/A       | XR_425100    | N/A                   |
| A_32_P411945   | 1,66361 | 1,59929 | 1,045591994 | ENST00000321801 | 66037     | NM_033030    | BOLL                  |
| A_33_P3228988  | 17,1079 | 17,0436 | 1,045577499 | ENST00000435033 | N/A       | BC057831     | N/A                   |
| A_33_P3371450  | 1,74152 | 1,67723 | 1,045570252 | N/A             | N/A       | N/A          | N/A                   |
| A_23_P250874   | 1,9354  | 1,87113 | 1,045555757 | ENST00000431982 | 8468      | NM_003602    | FKBP6                 |
| A_22_P00002076 | 1,59809 | 1,53384 | 1,045541263 | ENST00000455299 | 101929312 | NR_110610    | LOC101929312          |
| A_23_P60962    | 6,03253 | 5,9683  | 1,045526769 | ENST00000533830 | 225689    | NM_139021    | MAPK15                |
| A_24_P833256   | 1,61135 | 1,54713 | 1,045519522 | N/A             | N/A       | N/A          | N/A                   |
| A_32_P106376   | 1,65446 | 1,59024 | 1,045519522 | ENST00000326274 | 245806    | NM_182645    | VGLL2                 |
| A_33_P3335930  | 1,59672 | 1,53251 | 1,045512275 | N/A             | 100130573 | AK127126     | LOC100130573          |
| A_24_P305570   | 12,3753 | 12,3111 | 1,045505028 | ENST00000255006 | 54453     | NM_018993    | RIN2                  |
| A_22_P00009879 | 2,73906 | 2,67486 | 1,045505028 | N/A             | N/A       | N/A          | Inc-MFN1-1            |
| A_22_P00018665 | 1,75551 | 1,69131 | 1,045505028 | N/A             | 7507      | XR_428536    | XPA                   |
| A_33_P3288357  | 1,65729 | 1,5931  | 1,045497781 | ENST00000373293 | 286207    | BC133027     | C9orf117              |
| A_33_P3265444  | 1,48899 | 1,4248  | 1,045497781 | N/A             | 729633    | NR_024072    | MRS2P2                |



|                |         |         |             |                 |           |              |                  |
|----------------|---------|---------|-------------|-----------------|-----------|--------------|------------------|
| A_33_P3272748  | 1,44798 | 1,38379 | 1,045497781 | ENST00000328444 | 338879    | NM_001012975 | RNASE10          |
| A_22_P00002431 | 1,64638 | 1,5822  | 1,045490534 | ENST00000537690 | 729665    | NM_001164399 | CCDC175          |
| A_21_P0002300  | 1,65631 | 1,59213 | 1,045490534 | N/A             | N/A       | N/A          | Inc-FMNL2-1      |
| A_21_P0005898  | 3,4958  | 3,43163 | 1,045483287 | N/A             | N/A       | N/A          | Inc-FBXO32-1     |
| A_22_P00006824 | 1,73866 | 1,67449 | 1,045483287 | N/A             | N/A       | N/A          | Inc-GABRB1-2     |
| A_33_P3419875  | 1,61204 | 1,54787 | 1,045483287 | N/A             | N/A       | N/A          | N/A              |
| A_21_P0014236  | 6,48401 | 6,41986 | 1,045468794 | ENST00000482056 | 84909     | N/A          | C9orf3           |
| A_33_P3336760  | 1,66599 | 1,60185 | 1,045461548 | ENST00000265723 | 5244      | NM_018849    | ABCB4            |
| A_22_P00023547 | 1,70396 | 1,63983 | 1,045454301 | N/A             | N/A       | N/A          | Inc-CRYBA4-7     |
| A_33_P3474250  | 8,72572 | 8,6616  | 1,045447054 | ENST00000299413 | 54765     | AK091052     | TRIM44           |
| A_23_P11744    | 14,2462 | 14,1821 | 1,045432562 | ENST00000557932 | 100287171 | NM_182905    | WASH1            |
| A_21_P0014418  | 1,61361 | 1,54952 | 1,045425315 | N/A             | N/A       | N/A          | N/A              |
| A_22_P00011880 | 1,49103 | 1,42696 | 1,045410823 | N/A             | 100628315 | NR_103486    | DNM3OS           |
| A_33_P3677814  | 1,70382 | 1,6398  | 1,045374592 | N/A             | 266811    | AF527974     | NPSA             |
| A_21_P0000419  | 1,60567 | 1,54165 | 1,045374592 | N/A             | 767600    | NR_003215    | SNORD114-22      |
| A_22_P00000513 | 1,47692 | 1,41291 | 1,045367346 | N/A             | N/A       | N/A          | Inc-AC107021.1-4 |
| A_33_P3418245  | 1,66016 | 1,59615 | 1,045367346 | ENST00000526403 | N/A       | N/A          | N/A              |
| A_33_P3257312  | 12,5081 | 12,4441 | 1,0453601   | ENST00000421419 | 23130     | NM_015104    | ATG2A            |
| A_24_P19828    | 8,59157 | 8,52757 | 1,0453601   | ENST00000495703 | 114034    | NM_025077    | TOE1             |
| A_21_P0000643  | 1,6781  | 1,6141  | 1,0453601   | N/A             | 100128098 | NR_034129    | ST8SIA6-AS1      |
| A_33_P3217933  | 1,63804 | 1,57405 | 1,045352854 | N/A             | N/A       | DB461001     | N/A              |
| A_22_P00004832 | 1,7151  | 1,65114 | 1,045331117 | N/A             | N/A       | N/A          | Inc-CYB561-6     |
| A_33_P3262541  | 2,98628 | 2,92234 | 1,045316626 | ENST00000393061 | 9719      | NM_014694    | ADAMTSL2         |
| A_21_P0006592  | 1,6391  | 1,5752  | 1,045287644 | N/A             | N/A       | N/A          | Inc-TSPY4-3      |
| A_23_P5853     | 1,60845 | 1,54455 | 1,045287644 | ENST00000476500 | 6295      | NM_000541    | SAG              |
| A_22_P00001681 | 1,49123 | 1,42734 | 1,045280399 | N/A             | N/A       | N/A          | Inc-ASTE1-1      |
| A_33_P3409225  | 1,46635 | 1,40247 | 1,045273153 | ENST00000390362 | N/A       | N/A          | N/A              |
| A_33_P3282390  | 3,7501  | 3,68623 | 1,045265908 | ENST00000374177 | 2914      | NM_000841    | GRM4             |
| A_23_P161297   | 4,57258 | 4,50871 | 1,045265908 | ENST00000490844 | 55753     | NM_018245    | OGDHL            |
| A_23_P259251   | 1,64422 | 1,58036 | 1,045258663 | ENST00000331113 | 3751      | NM_012281    | KCND2            |
| A_21_P0011100  | 1,62557 | 1,56171 | 1,045258663 | N/A             | N/A       | N/A          | XLOC_I2_003414   |
| A_22_P00012811 | 1,59936 | 1,53551 | 1,045251418 | ENST00000298542 | 90167     | NM_194277    | FRMD7            |
| A_21_P0013744  | 1,46343 | 1,39959 | 1,045244172 | ENST00000419853 | 101929116 | N/A          | LOC101929116     |

|                |         |         |             |                 |           |              |                       |
|----------------|---------|---------|-------------|-----------------|-----------|--------------|-----------------------|
| A_22_P00001988 | 1,72029 | 1,65646 | 1,045236927 | ENST00000600723 | 200298    | NR_103718    | LINC00528             |
| A_21_P0007883  | 1,74244 | 1,67861 | 1,045236927 | N/A             | N/A       | N/A          | lnc-BEST3-1           |
| A_22_P00013288 | 2,58598 | 2,52215 | 1,045236927 | N/A             | N/A       | N/A          | lnc-RP11-10A14.4.1-1  |
| A_22_P00003541 | 1,7399  | 1,67607 | 1,045236927 | N/A             | N/A       | DA504341     | lnc-CCNK-1            |
| A_32_P189781   | 6,43804 | 6,37421 | 1,045236927 | ENST00000560267 | 645687    | NR_026796    | LINC00520             |
| A_33_P3241696  | 1,71685 | 1,65303 | 1,045229682 | ENST00000509381 | 51151     | NM_001297417 | SLC45A2               |
| A_24_P166407   | 12,5244 | 12,4606 | 1,045215193 | ENST00000377745 | 8366      | NM_003544    | HIST1H4B              |
| A_21_P0002134  | 1,45609 | 1,39229 | 1,045215193 | ENST00000456031 | N/A       | N/A          | N/A                   |
| A_21_P0014054  | 1,64764 | 1,58384 | 1,045215193 | N/A             | N/A       | XM_928212    | N/A                   |
| A_21_P0006859  | 1,60506 | 1,54126 | 1,045215193 | N/A             | 102724533 | XR_424106    | LOC102724533          |
| A_22_P00013636 | 1,64773 | 1,58393 | 1,045215193 | ENST00000509628 | N/A       | N/A          | N/A                   |
| A_22_P00002166 | 13,929  | 13,8652 | 1,045215193 | ENST00000415596 | 100128071 | NM_001167676 | FAM229A               |
| A_24_P928604   | 16,1501 | 16,0863 | 1,045215193 | ENST00000401937 | N/A       | N/A          | N/A                   |
| A_22_P00007754 | 1,76361 | 1,69983 | 1,045200703 | N/A             | N/A       | N/A          | lnc-HMGB4-1           |
| A_21_P0013508  | 1,44637 | 1,38262 | 1,045178969 | N/A             | N/A       | N/A          | XLOC_l2_014424        |
| A_21_P0003120  | 1,65517 | 1,59143 | 1,045171724 | N/A             | N/A       | N/A          | lnc-RP11-884K10.5.1-1 |
| A_21_P0003958  | 1,65642 | 1,5927  | 1,045157235 | ENST00000514474 | N/A       | N/A          | N/A                   |
| A_22_P00022686 | 1,65336 | 1,58965 | 1,045149991 | N/A             | N/A       | N/A          | lnc-FANCF-2           |
| A_22_P00004550 | 1,59308 | 1,52938 | 1,045142746 | N/A             | N/A       | N/A          | lnc-CRIPT-1           |
| A_23_P135104   | 14,2274 | 14,1637 | 1,045142746 | ENST00000241600 | 51116     | NM_016034    | MRPS2                 |
| A_22_P00024126 | 1,46261 | 1,39892 | 1,045135502 | N/A             | N/A       | N/A          | lnc-DFNA5-3           |
| A_33_P3355588  | 1,46603 | 1,40235 | 1,045128258 | N/A             | N/A       | N/A          | lnc-ADI1-1            |
| A_21_P0014485  | 1,46434 | 1,40068 | 1,045113769 | N/A             | N/A       | N/A          | N/A                   |
| A_23_P371835   | 1,46819 | 1,40454 | 1,045106525 | ENST00000252997 | 140628    | NM_080473    | GATA5                 |
| A_21_P0000692  | 1,61296 | 1,54931 | 1,045106525 | N/A             | N/A       | AK092251     | lnc-PTPN14-3          |
| A_33_P3359518  | 6,80654 | 6,74289 | 1,045106525 | ENST00000401044 | 114803    | NM_001085487 | MYSM1                 |
| A_21_P0010456  | 1,70907 | 1,64543 | 1,045099281 | N/A             | N/A       | N/A          | lnc-CTA-299D3.8.1-1   |
| A_21_P0005711  | 1,70391 | 1,64028 | 1,045092037 | N/A             | N/A       | N/A          | lnc-RP11-32K4.2.1-2   |
| A_21_P0008586  | 1,73544 | 1,67181 | 1,045092037 | ENST00000565893 | N/A       | XR_424585    | N/A                   |
| A_21_P0014616  | 1,65733 | 1,5937  | 1,045092037 | N/A             | N/A       | AK093331     | N/A                   |
| A_21_P0007753  | 1,46982 | 1,4062  | 1,045084793 | N/A             | N/A       | N/A          | lnc-NUAK1-4           |
| A_21_P0012527  | 1,59821 | 1,5346  | 1,045077549 | ENST00000411596 | N/A       | N/A          | N/A                   |
| A_19_P00800114 | 10,5303 | 10,4667 | 1,045070305 | ENST00000470543 | 25994     | NM_001099668 | HIGD1A                |

|                |         |         |             |                 |           |              |                |
|----------------|---------|---------|-------------|-----------------|-----------|--------------|----------------|
| A_23_P53081    | 11,3123 | 11,2487 | 1,045070305 | ENST00000389989 | 114879    | NM_020896    | OSBPL5         |
| A_21_P0003568  | 1,46471 | 1,40114 | 1,045048574 | ENST00000512047 | 55138     | NM_018088    | FAM90A1        |
| A_21_P0001719  | 1,46527 | 1,4017  | 1,045048574 | N/A             | 100506022 | NR_104622    | LOC100506022   |
| A_33_P3209756  | 1,74444 | 1,68088 | 1,04504133  | N/A             | N/A       | N/A          | N/A            |
| A_22_P00003291 | 6,04913 | 5,98557 | 1,04504133  | ENST00000398701 | 8509      | NM_003635    | NDST2          |
| A_21_P0004532  | 1,65104 | 1,58748 | 1,04504133  | N/A             | 102546299 | NR_105065    | LOC102546299   |
| A_21_P0001308  | 2,4712  | 2,40765 | 1,045034086 | N/A             | N/A       | N/A          | Inc-FGGY-6     |
| A_22_P00017409 | 1,4877  | 1,42415 | 1,045034086 | ENST00000435111 | N/A       | N/A          | N/A            |
| A_33_P3403957  | 1,65629 | 1,59274 | 1,045034086 | N/A             | N/A       | N/A          | N/A            |
| A_21_P0004466  | 1,64808 | 1,58455 | 1,045019599 | N/A             | N/A       | N/A          | Inc-LCP2-2     |
| A_21_P0009736  | 1,65327 | 1,58974 | 1,045019599 | N/A             | N/A       | N/A          | Inc-SAFB2-2    |
| A_33_P3250695  | 1,59062 | 1,52709 | 1,045019599 | ENST00000378123 | 56140     | NM_031856    | PCDHA8         |
| A_21_P0002212  | 6,08199 | 6,01847 | 1,045012356 | N/A             | 100506235 | XR_245000    | LOC100506235   |
| A_33_P3397318  | 1,5915  | 1,52798 | 1,045012356 | ENST00000412638 | N/A       | N/A          | N/A            |
| A_22_P00003155 | 1,71835 | 1,65484 | 1,045005112 | ENST00000561981 | 23732     | N/A          | FRRS1L         |
| A_33_P3238461  | 17,5209 | 17,4574 | 1,044997869 | ENST00000398740 | N/A       | N/A          | N/A            |
| A_33_P3348494  | 12,8905 | 12,827  | 1,044997869 | ENST00000462653 | 55795     | NM_001258213 | PCID2          |
| A_23_P97584    | 12,9592 | 12,8957 | 1,044997869 | ENST00000359208 | 30836     | NM_014597    | DNTTIP2        |
| A_33_P3216059  | 1,44537 | 1,3819  | 1,044976139 | ENST00000375544 | 54829     | NM_001193335 | ASPN           |
| A_33_P3292241  | 5,68821 | 5,62474 | 1,044976139 | N/A             | N/A       | N/A          | N/A            |
| A_21_P0010089  | 1,46079 | 1,39737 | 1,044939923 | N/A             | N/A       | N/A          | Inc-NCOA3-6    |
| A_23_P5601     | 11,9798 | 11,9164 | 1,044925438 | ENST00000233668 | 1796      | NM_001381    | DOK1           |
| A_22_P00021652 | 5,62193 | 5,55854 | 1,044918195 | N/A             | 101927963 | XR_426361    | LOC101927963   |
| A_21_P0005926  | 1,59093 | 1,52754 | 1,044918195 | N/A             | N/A       | N/A          | Inc-C8orf48-1  |
| A_22_P00020528 | 1,46549 | 1,40213 | 1,044896466 | N/A             | N/A       | N/A          | Inc-C13orf30-1 |
| A_21_P0013150  | 1,46894 | 1,40559 | 1,044889224 | ENST00000427903 | 100422737 | N/A          | LOC100422737   |
| A_33_P3378684  | 1,6393  | 1,57596 | 1,044881981 | N/A             | N/A       | N/A          | N/A            |
| A_22_P00017519 | 1,46246 | 1,39913 | 1,044874739 | N/A             | N/A       | N/A          | Inc-WDPCP-2    |
| A_21_P0002431  | 1,46639 | 1,40308 | 1,044860254 | N/A             | N/A       | N/A          | Inc-THADA-4    |
| A_32_P204376   | 4,4662  | 4,40289 | 1,044860254 | ENST00000562196 | 441430    | NM_001012421 | ANKRD20A2      |
| A_33_P3286362  | 1,64488 | 1,58158 | 1,044853011 | N/A             | 100131023 | AK127441     | LOC100131023   |
| A_22_P00013293 | 1,47306 | 1,40976 | 1,044853011 | ENST00000522836 | 157273    | N/A          | LOC157273      |
| A_21_P0001043  | 1,48698 | 1,42368 | 1,044853011 | ENST00000430776 | N/A       | N/A          | N/A            |

|                |         |         |             |                 |           |              |                |
|----------------|---------|---------|-------------|-----------------|-----------|--------------|----------------|
| A_22_P00012311 | 1,46005 | 1,39675 | 1,044853011 | N/A             | 101927249 | NR_046681    | PDZRN3-AS1     |
| A_23_P122304   | 12,9569 | 12,8936 | 1,044853011 | ENST00000523334 | 3066      | NM_001527    | HDAC2          |
| A_21_P0007695  | 4,2861  | 4,22282 | 1,044838527 | N/A             | N/A       | N/A          | Inc-ERGIC2-4   |
| A_33_P3379896  | 1,45895 | 1,39567 | 1,044838527 | ENST00000377898 | 390992    | NM_001024598 | HES3           |
| A_21_P0012849  | 1,62003 | 1,55675 | 1,044838527 | N/A             | N/A       | N/A          | XLOC_I2_011744 |
| A_33_P3400278  | 1,6981  | 1,63485 | 1,0448168   | ENST00000439454 | 104355293 | N/A          | LINC00376      |
| A_21_P0004474  | 1,63484 | 1,57159 | 1,0448168   | N/A             | N/A       | N/A          | Inc-PROP1-2    |
| A_21_P0008813  | 1,60584 | 1,54259 | 1,0448168   | ENST00000566797 | N/A       | XR_433058    | N/A            |
| A_21_P0011114  | 1,64727 | 1,58402 | 1,0448168   | ENST00000550678 | 101927653 | NR_120452    | LOC101927653   |
| A_23_P354855   | 1,64748 | 1,58424 | 1,044809558 | ENST00000379984 | 6247      | NM_000330    | RS1            |
| A_21_P0002258  | 1,60275 | 1,53951 | 1,044809558 | N/A             | N/A       | N/A          | Inc-EIF5B-1    |
| A_21_P0002938  | 1,74863 | 1,6854  | 1,044802316 | N/A             | N/A       | N/A          | Inc-UBE2E2-1   |
| A_22_P00000878 | 1,64259 | 1,57936 | 1,044802316 | ENST00000470219 | N/A       | N/A          | N/A            |
| A_22_P00019965 | 1,62147 | 1,55824 | 1,044802316 | N/A             | N/A       | DB333871     | Inc-FAM196B-1  |
| A_21_P0005868  | 1,4601  | 1,39688 | 1,044795074 | N/A             | N/A       | N/A          | Inc-TMEM64-3   |
| A_33_P3219865  | 1,59256 | 1,52934 | 1,044795074 | N/A             | 400620    | BC014643     | LOC400620      |
| A_22_P00000397 | 1,46283 | 1,39961 | 1,044795074 | ENST00000564405 | N/A       | N/A          | N/A            |
| A_21_P0003901  | 1,64387 | 1,58067 | 1,04478059  | ENST00000505454 | N/A       | XR_425780    | N/A            |
| A_23_P78353    | 1,46487 | 1,40167 | 1,04478059  | ENST00000269202 | 4225      | NM_005925    | MEP1B          |
| A_21_P0010107  | 1,59993 | 1,53676 | 1,044758865 | N/A             | N/A       | N/A          | Inc-GPCPD1-1   |
| A_22_P00007467 | 1,58899 | 1,52582 | 1,044758865 | ENST00000437598 | N/A       | N/A          | N/A            |
| A_21_P0000768  | 1,59064 | 1,52748 | 1,044751623 | ENST00000507726 | 100505545 | NR_038331    | LINC01095      |
| A_21_P0014938  | 1,4715  | 1,40835 | 1,044744381 | N/A             | N/A       | N/A          | N/A            |
| A_21_P0005878  | 8,90942 | 8,84627 | 1,044744381 | ENST00000524369 | N/A       | N/A          | N/A            |
| A_22_P00009487 | 1,68774 | 1,6246  | 1,04473714  | N/A             | N/A       | N/A          | Inc-MAGEB10-2  |
| A_22_P00006073 | 1,71227 | 1,64913 | 1,04473714  | ENST00000416685 | N/A       | N/A          | N/A            |
| A_32_P49199    | 1,64168 | 1,57854 | 1,04473714  | ENST00000325455 | 5241      | NM_000926    | PGR            |
| A_23_P393758   | 9,51615 | 9,45301 | 1,04473714  | ENST00000543795 | 93343     | NM_138401    | MVB12A         |
| A_23_P148879   | 1,4677  | 1,40457 | 1,044729898 | ENST00000361216 | 477       | NM_000702    | ATP1A2         |
| A_22_P00018268 | 5,33663 | 5,2735  | 1,044729898 | N/A             | 101928824 | XR_244407    | LOC101928824   |
| A_24_P334248   | 1,64038 | 1,57725 | 1,044729898 | ENST00000469040 | 23007     | NM_014996    | PLCH1          |
| A_21_P0014648  | 1,4452  | 1,38208 | 1,044722657 | N/A             | 100506113 | XR_424266    | LOC100506113   |
| A_21_P0007249  | 7,01815 | 6,95504 | 1,044715415 | ENST00000530270 | 100506233 | N/A          | RAB30-AS1      |

|                |         |         |             |                 |           |              |                  |
|----------------|---------|---------|-------------|-----------------|-----------|--------------|------------------|
| A_23_P7101     | 12,8993 | 12,8362 | 1,044708174 | ENST00000489418 | 7884      | NM_006527    | SLBP             |
| A_21_P0003214  | 10,4339 | 10,3708 | 1,044708174 | N/A             | N/A       | N/A          | Inc-CHL1-1       |
| A_21_P0006458  | 1,47082 | 1,40778 | 1,044664727 | N/A             | 100874122 | N/A          | FRMPD3-AS1       |
| A_21_P0014240  | 3,29188 | 3,22884 | 1,044664727 | N/A             | N/A       | N/A          | N/A              |
| A_23_P306215   | 6,08732 | 6,02429 | 1,044657486 | ENST00000331243 | 151354    | NM_145175    | FAM84A           |
| A_23_P255038   | 1,65028 | 1,58726 | 1,044650245 | ENST00000344799 | 26280     | NM_017416    | IL1RAPL2         |
| A_33_P3293469  | 1,46241 | 1,39939 | 1,044650245 | N/A             | N/A       | N/A          | Inc-AC127496.3-7 |
| A_23_P351342   | 8,87533 | 8,81233 | 1,044635763 | ENST00000477849 | 23207     | NM_015164    | PLEKHM2          |
| A_21_P0013921  | 11,5136 | 11,4506 | 1,044635763 | ENST00000437956 | N/A       | XM_001722136 | N/A              |
| A_22_P00019442 | 1,45823 | 1,39523 | 1,044635763 | ENST00000508977 | N/A       | N/A          | N/A              |
| A_21_P0000650  | 11,8413 | 11,7783 | 1,044635763 | ENST00000600513 | 56242     | NM_021047    | ZNF253           |
| A_22_P00011687 | 6,17386 | 6,11087 | 1,044628522 | ENST00000508241 | N/A       | N/A          | N/A              |
| A_33_P3401459  | 1,5947  | 1,53171 | 1,044628522 | ENST00000597389 | 57731     | NM_020971    | SPTBN4           |
| A_33_P3341796  | 1,49192 | 1,42893 | 1,044628522 | ENST00000423870 | 80343     | NR_073206    | SEL1L2           |
| A_33_P3258330  | 5,82561 | 5,76263 | 1,044621281 | ENST00000532435 | 81544     | NM_030792    | GDPD5            |
| A_33_P3663974  | 6,56263 | 6,49965 | 1,044621281 | ENST00000416420 | 7068      | NM_001252634 | THRB             |
| A_21_P0008688  | 1,69099 | 1,62801 | 1,044621281 | N/A             | N/A       | N/A          | Inc-ARRDC4-5     |
| A_21_P0004745  | 1,46477 | 1,40179 | 1,044621281 | ENST00000606909 | N/A       | N/A          | N/A              |
| A_22_P00009792 | 1,46203 | 1,39906 | 1,044614041 | N/A             | N/A       | N/A          | Inc-MEGF11-1     |
| A_32_P66756    | 1,74352 | 1,68055 | 1,044614041 | ENST00000513106 | 152586    | NM_001277353 | MGAT4D           |
| A_21_P0012595  | 1,65444 | 1,59147 | 1,044614041 | N/A             | N/A       | N/A          | XLOC_I2_010724   |
| A_22_P00013589 | 1,64622 | 1,58328 | 1,044592319 | ENST00000554753 | N/A       | N/A          | N/A              |
| A_21_P0005000  | 1,74576 | 1,68284 | 1,044577838 | N/A             | N/A       | N/A          | Inc-CCDC90A-1    |
| A_22_P00017802 | 1,64416 | 1,58125 | 1,044570597 | N/A             | 102723831 | NR_125868    | LOC102723831     |
| A_22_P00017374 | 1,67696 | 1,61405 | 1,044570597 | N/A             | 101928836 | XR_244796    | LOC101928836     |
| A_23_P212383   | 10,7927 | 10,7298 | 1,044563357 | ENST00000455997 | 22908     | NM_014016    | SACM1L           |
| A_23_P258108   | 16,3216 | 16,2587 | 1,044563357 | ENST00000491923 | N/A       | N/A          | N/A              |
| A_21_P0013207  | 1,4615  | 1,3986  | 1,044563357 | N/A             | N/A       | N/A          | XLOC_I2_013434   |
| A_21_P0010043  | 1,65242 | 1,58953 | 1,044556116 | N/A             | N/A       | N/A          | Inc-WFDC8-1      |
| A_24_P268662   | 1,48949 | 1,42661 | 1,044548876 | ENST00000273359 | 55347     | NM_018394    | ABHD10           |
| A_33_P3332046  | 1,60687 | 1,54399 | 1,044548876 | N/A             | N/A       | N/A          | N/A              |
| A_21_P0010966  | 1,64381 | 1,58096 | 1,044527156 | N/A             | N/A       | N/A          | XLOC_I2_002254   |
| A_23_P393401   | 9,79406 | 9,73121 | 1,044527156 | N/A             | 283970    | NR_003610    | PDXDC2P          |

|                |         |         |             |                 |           |              |                |
|----------------|---------|---------|-------------|-----------------|-----------|--------------|----------------|
| A_22_P00022506 | 1,64129 | 1,57846 | 1,044512675 | ENST00000512563 | N/A       | N/A          | N/A            |
| A_22_P00001765 | 1,78232 | 1,71949 | 1,044512675 | N/A             | 100873941 | NR_046634    | OPA1-AS1       |
| A_22_P00005147 | 1,70882 | 1,646   | 1,044505435 | ENST00000564508 | N/A       | N/A          | N/A            |
| A_22_P00014241 | 1,46668 | 1,40387 | 1,044498196 | ENST00000557709 | N/A       | N/A          | N/A            |
| A_23_P131526   | 11,7086 | 11,6458 | 1,044490956 | ENST00000295079 | 79568     | NM_024520    | C2orf47        |
| A_22_P00012798 | 12,5337 | 12,4709 | 1,044490956 | ENST00000546264 | N/A       | N/A          | N/A            |
| A_22_P00008282 | 1,65441 | 1,59162 | 1,044483716 | N/A             | N/A       | N/A          | Inc-ISCU-1     |
| A_19_P00315625 | 1,77748 | 1,71469 | 1,044483716 | N/A             | N/A       | N/A          | Inc-MARCKS-5   |
| A_33_P3291524  | 1,58833 | 1,52554 | 1,044483716 | ENST00000332323 | 147658    | NM_001143939 | ZNF534         |
| A_23_P52430    | 1,66317 | 1,60039 | 1,044476476 | ENST00000343737 | 7479      | NM_003393    | WNT8B          |
| A_21_P0012202  | 1,49396 | 1,43118 | 1,044476476 | N/A             | N/A       | N/A          | XLOC_I2_009216 |
| A_21_P0004727  | 1,59615 | 1,5334  | 1,044454757 | ENST00000420389 | N/A       | N/A          | N/A            |
| A_22_P00021672 | 1,7012  | 1,63848 | 1,044433038 | N/A             | 101927023 | NR_110559    | LOC101927023   |
| A_21_P0008391  | 1,49019 | 1,42747 | 1,044433038 | N/A             | N/A       | N/A          | Inc-DLK1-9     |
| A_22_P00007272 | 4,1644  | 4,10169 | 1,044425799 | N/A             | 102724009 | NR_120665    | LOC102724009   |
| A_23_P321703   | 11,617  | 11,5543 | 1,04441856  | ENST00000485386 | 597       | NM_004049    | BCL2A1         |
| A_21_P0010660  | 13,2234 | 13,1607 | 1,04441856  | N/A             | N/A       | N/A          | XLOC_I2_001192 |
| A_21_P0009648  | 1,65043 | 1,58776 | 1,044396842 | N/A             | 100996665 | XR_158928    | LINC01533      |
| A_23_P113034   | 7,23169 | 7,16902 | 1,044396842 | ENST00000611306 | 83938     | NM_032024    | C10orf11       |
| A_22_P00007263 | 5,23939 | 5,17673 | 1,044389603 | ENST00000498604 | N/A       | N/A          | N/A            |
| A_32_P98739    | 1,47249 | 1,40984 | 1,044382363 | ENST00000459922 | 150084    | NM_001080444 | IGSF5          |
| A_21_P0008734  | 1,64019 | 1,57754 | 1,044382363 | N/A             | N/A       | N/A          | Inc-MYEF2-5    |
| A_23_P23303    | 8,90613 | 8,8435  | 1,044367885 | ENST00000518741 | 9156      | NM_003686    | EXO1           |
| A_33_P3615334  | 1,698   | 1,63538 | 1,044360646 | ENST00000608183 | 400799    | N/A          | LINC01344      |
| A_21_P0008565  | 1,73165 | 1,66904 | 1,044353407 | ENST00000506090 | 101929743 | NR_120369    | LINC01586      |
| A_21_P0007739  | 4,74642 | 4,68381 | 1,044353407 | ENST00000615716 | N/A       | N/A          | N/A            |
| A_22_P00021191 | 1,70918 | 1,64658 | 1,044346168 | N/A             | N/A       | N/A          | Inc-GAS2-1     |
| A_22_P00000635 | 1,49198 | 1,42938 | 1,044346168 | ENST00000321214 | 283860    | NR_024347    | LINC00304      |
| A_21_P0002871  | 1,63895 | 1,57635 | 1,044346168 | ENST00000601385 | 151658    | N/A          | LINC00635      |
| A_22_P00024770 | 1,67924 | 1,61666 | 1,044331691 | N/A             | N/A       | N/A          | Inc-ABT1-2     |
| A_23_P93772    | 4,33388 | 4,27133 | 1,044309975 | ENST00000520854 | 3202      | NM_019102    | HOXA5          |
| A_22_P00025869 | 1,47808 | 1,41553 | 1,044309975 | N/A             | N/A       | N/A          | Inc-SLC26A7-1  |
| A_33_P3407494  | 1,44396 | 1,38141 | 1,044309975 | ENST00000378788 | 259308    | NM_001141917 | FAM205A        |

|                |         |         |             |                 |           |              |                |
|----------------|---------|---------|-------------|-----------------|-----------|--------------|----------------|
| A_21_P0009671  | 1,46623 | 1,40369 | 1,044302736 | N/A             | N/A       | N/A          | Inc-ANKRD27-3  |
| A_22_P00007295 | 1,46232 | 1,3998  | 1,044288259 | N/A             | 104502416 | NR_126463    | FOXP1-AS1      |
| A_33_P3333038  | 15,1435 | 15,081  | 1,044273782 | ENST00000619580 | 5763      | NM_002824    | PTMS           |
| A_24_P60441    | 1,58592 | 1,52342 | 1,044273782 | ENST00000264956 | 2121      | NM_153717    | EVC            |
| A_21_P0002286  | 1,81065 | 1,74816 | 1,044266544 | N/A             | N/A       | N/A          | Inc-TSN-8      |
| A_33_P3232742  | 4,08207 | 4,01958 | 1,044266544 | N/A             | N/A       | N/A          | N/A            |
| A_32_P33576    | 1,48748 | 1,42501 | 1,044252068 | ENST00000265572 | 4986      | NM_000912    | OPRK1          |
| A_22_P00007869 | 1,62891 | 1,56646 | 1,044237591 | ENST00000455092 | N/A       | N/A          | N/A            |
| A_21_P0000730  | 1,66655 | 1,60411 | 1,044230353 | N/A             | 100507651 | NR_038235    | LOC100507651   |
| A_22_P00012936 | 1,70131 | 1,63889 | 1,044215877 | ENST00000559946 | N/A       | BQ431914     | N/A            |
| A_21_P0014580  | 1,65145 | 1,58903 | 1,044215877 | N/A             | 100507195 | XR_171965    | LOC100507195   |
| A_23_P407096   | 1,47167 | 1,40925 | 1,044215877 | ENST00000318442 | 167465    | NM_152625    | ZNF366         |
| A_22_P00001408 | 1,47106 | 1,40865 | 1,044208639 | N/A             | N/A       | N/A          | Inc-APC-4      |
| A_22_P00021461 | 1,64722 | 1,58481 | 1,044208639 | N/A             | 101928251 | XR_243753    | LOC101928251   |
| A_22_P00002239 | 1,63952 | 1,57716 | 1,04417245  | N/A             | 101929310 | NR_120654    | KCNMA1-AS2     |
| A_21_P0001372  | 1,61501 | 1,55266 | 1,044165213 | N/A             | N/A       | N/A          | Inc-GJA8-1     |
| A_23_P17130    | 1,46701 | 1,40467 | 1,044157975 | ENST00000450357 | 84281     | NM_001042519 | C2orf88        |
| A_33_P3212109  | 1,61524 | 1,55293 | 1,044136263 | ENST00000378450 | 51473     | NM_016356    | DCDC2          |
| A_21_P0006815  | 1,70228 | 1,63997 | 1,044136263 | N/A             | N/A       | N/A          | Inc-PFKP-16    |
| A_22_P00021319 | 6,51078 | 6,44847 | 1,044136263 | N/A             | 101929533 | XR_243697    | LOC101929533   |
| A_33_P3249439  | 12,7715 | 12,7092 | 1,044129025 | ENST00000420993 | 29781     | NM_001185011 | NCAPH2         |
| A_33_P3417865  | 14,223  | 14,1607 | 1,044129025 | ENST00000336440 | 677       | NM_004926    | ZFP36L1        |
| A_23_P75008    | 1,62648 | 1,56418 | 1,044129025 | ENST00000376261 | 2572      | NM_000818    | GAD2           |
| A_21_P0004419  | 1,60785 | 1,54555 | 1,044129025 | N/A             | N/A       | N/A          | Inc-ARRDC3-3   |
| A_33_P3410269  | 1,7378  | 1,6755  | 1,044129025 | N/A             | N/A       | N/A          | N/A            |
| A_21_P0001895  | 1,80358 | 1,74129 | 1,044121788 | ENST00000422203 | N/A       | N/A          | N/A            |
| A_23_P46356    | 3,12539 | 3,0631  | 1,044121788 | ENST00000368910 | 79626     | NM_024575    | TNFAIP8L2      |
| A_23_P412186   | 6,89354 | 6,83125 | 1,044121788 | ENST00000427606 | 286101    | NR_023392    | ZNF252P        |
| A_33_P3289835  | 9,23748 | 9,1752  | 1,044114551 | ENST00000531819 | 114883    | AB208851     | OSBPL9         |
| A_22_P00008671 | 1,46356 | 1,40129 | 1,044107314 | N/A             | N/A       | BU570742     | Inc-KIAA0528-3 |
| A_21_P0002155  | 1,64828 | 1,58602 | 1,044100076 | N/A             | N/A       | N/A          | Inc-ACP1-9     |
| A_21_P0007968  | 1,70464 | 1,64239 | 1,044092839 | ENST00000412119 | 101928616 | XR_245843    | LINC00354      |
| A_33_P3351617  | 1,74608 | 1,68383 | 1,044092839 | ENST00000376302 | 53904     | BC036079     | MYO3A          |

|                |         |         |             |                 |           |              |                    |
|----------------|---------|---------|-------------|-----------------|-----------|--------------|--------------------|
| A_22_P00006621 | 6,2232  | 6,16096 | 1,044085602 | N/A             | 101928784 | NR_120341    | RORA-AS1           |
| A_22_P00018677 | 1,63647 | 1,57425 | 1,044071128 | N/A             | N/A       | N/A          | Inc-C15orf52-2     |
| A_24_P932339   | 1,58424 | 1,52203 | 1,044063891 | ENST00000412674 | 728716    | NR_040065    | LINC01346          |
| A_32_P85330    | 4,50085 | 4,43864 | 1,044063891 | N/A             | 283687    | NR_028330    | ST20-AS1           |
| A_33_P3388147  | 1,47304 | 1,41084 | 1,044056654 | ENST00000348639 | 1136      | NM_001166694 | CHRNA3             |
| A_21_P0008285  | 1,46571 | 1,40352 | 1,044049418 | N/A             | N/A       | N/A          | Inc-RPGRIP1-2      |
| A_32_P176911   | 8,06594 | 8,00376 | 1,044042181 | ENST00000556973 | 145200    | NR_026774    | LINC00239          |
| A_22_P00010939 | 1,66008 | 1,59791 | 1,044034944 | ENST00000560586 | N/A       | N/A          | N/A                |
| A_24_P935829   | 1,44447 | 1,38231 | 1,044027707 | ENST00000518417 | 100128993 | NR_038919    | LOC100128993       |
| A_21_P0002757  | 1,45613 | 1,39397 | 1,044027707 | ENST00000482617 | 728290    | XR_245079    | LOC728290          |
| A_21_P0011650  | 1,4852  | 1,42304 | 1,044027707 | N/A             | N/A       | N/A          | XLOC_I2_006339     |
| A_33_P3338808  | 1,70417 | 1,64202 | 1,044020471 | N/A             | N/A       | N/A          | N/A                |
| A_24_P308851   | 5,15244 | 5,09031 | 1,044005998 | ENST00000617050 | 56108     | NM_032087    | PCDHGA7            |
| A_21_P0006737  | 1,58616 | 1,52403 | 1,044005998 | N/A             | N/A       | N/A          | Inc-C10orf31-6     |
| A_22_P00024322 | 1,76759 | 1,70546 | 1,044005998 | N/A             | N/A       | N/A          | Inc-GBP6-1         |
| A_21_P0009934  | 2,86333 | 2,80122 | 1,043991525 | N/A             | N/A       | N/A          | Inc-C20orf187-2    |
| A_33_P3210288  | 18,3911 | 18,329  | 1,043984288 | ENST00000318336 | 2528      | NM_000150    | FUT6               |
| A_21_P0001927  | 1,4536  | 1,3915  | 1,043984288 | ENST00000427615 | 101929282 | NR_110244    | LOC101929282       |
| A_33_P3651994  | 9,10653 | 9,04443 | 1,043984288 | N/A             | 1161      | AK022657     | ERCC8              |
| A_22_P00011626 | 1,60955 | 1,54747 | 1,043969816 | ENST00000451250 | N/A       | N/A          | N/A                |
| A_22_P00024553 | 3,53849 | 3,47641 | 1,043969816 | N/A             | N/A       | AK026273     | Inc-AC008073.6.1-1 |
| A_33_P3211558  | 1,48479 | 1,42272 | 1,04396258  | ENST00000436443 | 2066      | NM_005235    | ERBB4              |
| A_33_P3289150  | 1,63737 | 1,57531 | 1,043955343 | ENST00000380315 | 3043      | N/A          | HBB                |
| A_33_P3309670  | 1,478   | 1,41594 | 1,043955343 | N/A             | 57482     | NM_020722    | KIAA1211           |
| A_32_P944252   | 1,6418  | 1,57975 | 1,043948107 | ENST00000420149 | 474150    | NR_002177    | TTY4C              |
| A_22_P00006311 | 1,63789 | 1,57585 | 1,043940871 | ENST00000566684 | N/A       | AA383583     | N/A                |
| A_22_P00002384 | 1,48417 | 1,42213 | 1,043940871 | N/A             | N/A       | BC043372     | Inc-C13orf16-1     |
| A_21_P0002699  | 1,78632 | 1,72428 | 1,043940871 | ENST00000458099 | 253573    | NR_033844    | LOC253573          |
| A_33_P3422010  | 1,47559 | 1,41356 | 1,043933635 | ENST00000351747 | 201625    | NM_001291661 | DNAH12             |
| A_33_P3231157  | 1,66652 | 1,60449 | 1,043933635 | N/A             | 326343    | AF348999     | MT1DP              |
| A_22_P00011902 | 1,62096 | 1,55893 | 1,043933635 | ENST00000520762 | 102467655 | NR_105003    | LOC102467655       |
| A_21_P0010835  | 1,47382 | 1,41179 | 1,043933635 | N/A             | 729815    | N/A          | LOC729815          |
| A_23_P39525    | 1,59236 | 1,53034 | 1,043926399 | ENST00000389874 | 79843     | NM_024785    | FAM124B            |



|                |         |         |             |                 |           |              |                 |
|----------------|---------|---------|-------------|-----------------|-----------|--------------|-----------------|
| A_22_P00017817 | 1,44546 | 1,38344 | 1,043926399 | N/A             | N/A       | N/A          | Inc-ZBTB48-1    |
| A_33_P3414027  | 1,49523 | 1,43321 | 1,043926399 | N/A             | 727924    | NR_015416    | LOC727924       |
| A_33_P3253743  | 1,46287 | 1,40086 | 1,043919163 | ENST00000565222 | N/A       | N/A          | N/A             |
| A_21_P0011461  | 9,46696 | 9,40496 | 1,043911927 | N/A             | N/A       | N/A          | XL0C_I2_005438  |
| A_22_P00009123 | 1,6476  | 1,58561 | 1,043904692 | N/A             | N/A       | N/A          | Inc-LINC00273-8 |
| A_32_P182812   | 1,45436 | 1,39237 | 1,043904692 | ENST00000261707 | 6532      | NM_001045    | SLC6A4          |
| A_33_P3371341  | 1,61709 | 1,5551  | 1,043904692 | ENST00000606573 | 440078    | NR_026788    | FAM66C          |
| A_22_P00019545 | 1,66269 | 1,6007  | 1,043904692 | ENST00000539209 | N/A       | N/A          | N/A             |
| A_23_P109785   | 1,47414 | 1,41215 | 1,043904692 | ENST00000493757 | 8856      | NM_003889    | NR112           |
| A_24_P323545   | 7,13732 | 7,07533 | 1,043904692 | ENST00000598205 | 79784     | NM_001077186 | MYH14           |
| A_23_P45536    | 1,62832 | 1,56634 | 1,043897456 | ENST00000414978 | 4168      | NM_005369    | MCF2            |
| A_33_P3464855  | 8,86032 | 8,79836 | 1,043882984 | N/A             | 26069     | AL050097     | DKFZP586B0319   |
| A_22_P00013402 | 1,58453 | 1,52257 | 1,043882984 | ENST00000510562 | 101929412 | NR_104606    | LOC101929412    |
| A_33_P3328569  | 2,65311 | 2,59115 | 1,043882984 | N/A             | N/A       | N/A          | N/A             |
| A_21_P0013364  | 1,64402 | 1,58207 | 1,043875749 | ENST00000421890 | 645700    | N/A          | ZNF890P         |
| A_21_P0001739  | 1,47455 | 1,4126  | 1,043875749 | N/A             | 100996263 | NR_121626    | LOC100996263    |
| A_22_P00003782 | 1,46171 | 1,39977 | 1,043868513 | N/A             | N/A       | N/A          | Inc-CDK5-1      |
| A_21_P0007669  | 1,59951 | 1,53757 | 1,043868513 | N/A             | N/A       | N/A          | Inc-FZD10-3     |
| A_21_P0006348  | 1,48091 | 1,41898 | 1,043861278 | N/A             | N/A       | N/A          | Inc-FAM201A-1   |
| A_33_P3266828  | 9,99944 | 9,93752 | 1,043854042 | ENST00000377996 | 51754     | NM_016446    | TMEM8B          |
| A_33_P3243486  | 1,74434 | 1,68242 | 1,043854042 | ENST00000377697 | 444882    | NM_001002923 | IGFL4           |
| A_33_P3369245  | 5,066   | 5,00409 | 1,043846807 | N/A             | 101927645 | XM_005275697 | LOC101927645    |
| A_33_P3825454  | 1,70514 | 1,64323 | 1,043846807 | ENST00000453934 | 284898    | XR_244416    | LOC284898       |
| A_22_P00014892 | 8,27137 | 8,20948 | 1,043832336 | ENST00000521326 | N/A       | BC038731     | N/A             |
| A_23_P209700   | 1,72164 | 1,65976 | 1,043825101 | ENST00000305141 | 10316     | NM_006056    | NMUR1           |
| A_33_P3223701  | 1,46418 | 1,4023  | 1,043825101 | ENST00000351008 | 83893     | NM_031955    | SPATA16         |
| A_22_P00018231 | 1,65908 | 1,59724 | 1,04379616  | N/A             | N/A       | N/A          | Inc-ZNF680-3    |
| A_22_P00002489 | 8,54466 | 8,48283 | 1,043788925 | N/A             | N/A       | N/A          | Inc-C16orf45-1  |
| A_21_P0001587  | 1,49394 | 1,43211 | 1,043788925 | N/A             | N/A       | N/A          | Inc-CD1B-2      |
| A_33_P3237714  | 1,47713 | 1,4153  | 1,043788925 | ENST00000448948 | N/A       | N/A          | N/A             |
| A_21_P0006702  | 1,64383 | 1,58201 | 1,04378169  | N/A             | N/A       | N/A          | Inc-SORCS3-5    |
| A_33_P3307965  | 7,0536  | 6,9918  | 1,043767221 | ENST00000620146 | 126767    | NM_001103170 | AADA3L3         |
| A_24_P154006   | 16,5033 | 16,4415 | 1,043767221 | ENST00000518657 | 4715      | NM_005005    | NDUFB9          |

|                |         |         |             |                 |           |              |                |
|----------------|---------|---------|-------------|-----------------|-----------|--------------|----------------|
| A_19_P00316427 | 1,70456 | 1,64277 | 1,043759986 | N/A             | 100048912 | NR_047533    | CDKN2B-AS1     |
| A_22_P00009814 | 1,63227 | 1,57049 | 1,043752751 | N/A             | N/A       | BG719595     | Inc-MEP1B-1    |
| A_21_P0010996  | 1,59805 | 1,53628 | 1,043745516 | N/A             | N/A       | N/A          | XLOC_I2_002469 |
| A_22_P00011610 | 1,58903 | 1,52727 | 1,043738282 | ENST00000520646 | 101930275 | XR_250321    | LOC101930275   |
| A_22_P00004176 | 1,63032 | 1,56856 | 1,043738282 | N/A             | 102725160 | XR_432026    | LOC102725160   |
| A_33_P3382803  | 1,69589 | 1,63415 | 1,043723812 | ENST00000334389 | 646113    | NR_015358    | LINC00643      |
| A_33_P3381067  | 1,47507 | 1,41333 | 1,043723812 | ENST00000316770 | 219960    | NM_001004471 | OR10Q1         |
| A_24_P306469   | 8,71034 | 8,64861 | 1,043716578 | ENST00000477300 | N/A       | N/A          | N/A            |
| A_21_P0007581  | 1,72345 | 1,66172 | 1,043716578 | N/A             | N/A       | N/A          | Inc-ATXN7L3B-2 |
| A_33_P3320683  | 1,49107 | 1,42935 | 1,043709343 | ENST00000426471 | 101929520 | NR_104061    | LINC00993      |
| A_23_P370494   | 1,7225  | 1,66078 | 1,043709343 | ENST00000612073 | 56099     | NM_032101    | PCDHGB7        |
| A_21_P0011193  | 1,63419 | 1,57249 | 1,043694875 | N/A             | N/A       | N/A          | XLOC_I2_004084 |
| A_24_P381029   | 13,5934 | 13,5317 | 1,043694875 | ENST00000331244 | 10539     | NM_006541    | GLRX3          |
| A_33_P3418686  | 1,47607 | 1,41438 | 1,04368764  | ENST00000261917 | 10021     | NM_005477    | HCN4           |
| A_23_P43337    | 1,77509 | 1,71341 | 1,043680406 | ENST00000380880 | 158326    | NM_144966    | FREM1          |
| A_33_P3251868  | 1,58332 | 1,52166 | 1,043665938 | N/A             | N/A       | N/A          | N/A            |
| A_23_P325593   | 1,73376 | 1,6721  | 1,043665938 | ENST00000559137 | 145645    | NM_152448    | C15orf43       |
| A_22_P00013854 | 1,84094 | 1,7793  | 1,043651469 | N/A             | 101926926 | NR_125388    | LOC101926926   |
| A_21_P0004091  | 1,46747 | 1,40584 | 1,043644235 | ENST00000508823 | 102467075 | N/A          | LINC01017      |
| A_33_P3239794  | 1,4547  | 1,39308 | 1,043637001 | ENST00000532284 | N/A       | N/A          | N/A            |
| A_33_P3418417  | 1,65039 | 1,58877 | 1,043637001 | ENST00000410056 | 6519      | DQ023513     | SLC3A1         |
| A_19_P00809895 | 1,72684 | 1,66523 | 1,043629768 | ENST00000560778 | 100996492 | N/A          | LINC01314      |
| A_21_P0006307  | 1,64968 | 1,58807 | 1,043629768 | N/A             | N/A       | N/A          | Inc-ABCA1-1    |
| A_21_P0006400  | 1,74247 | 1,68086 | 1,043629768 | N/A             | N/A       | N/A          | Inc-QSOX2-1    |
| A_21_P0002247  | 1,65035 | 1,58875 | 1,043622534 | N/A             | N/A       | N/A          | Inc-CTNNA2-3   |
| A_22_P00005103 | 1,64092 | 1,57932 | 1,043622534 | N/A             | 283521    | NR_027048    | LINC00282      |
| A_33_P3358342  | 13,7129 | 13,6513 | 1,043622534 | ENST00000312960 | 6478      | NM_005067    | SIAH2          |
| A_21_P0002350  | 5,29311 | 5,23152 | 1,0436153   | N/A             | N/A       | N/A          | Inc-SMARCAL1-3 |
| A_33_P6815772  | 1,46366 | 1,40207 | 1,0436153   | ENST00000489670 | 401082    | NR_109842    | LINC01205      |
| A_22_P00020524 | 1,75077 | 1,68918 | 1,0436153   | ENST00000435291 | N/A       | N/A          | N/A            |
| A_33_P3262729  | 1,4415  | 1,37992 | 1,043608066 | ENST00000403437 | 4626      | NM_002472    | MYH8           |
| A_22_P00005395 | 1,69641 | 1,63483 | 1,043608066 | ENST00000523563 | N/A       | AK123921     | N/A            |
| A_21_P0002783  | 1,45427 | 1,39269 | 1,043608066 | N/A             | 102724289 | XR_431648    | LOC102724289   |

|                |         |         |             |                 |           |              |                     |
|----------------|---------|---------|-------------|-----------------|-----------|--------------|---------------------|
| A_22_P00024694 | 1,61674 | 1,55517 | 1,043600832 | N/A             | N/A       | AK093090     | Inc-FBXL14-3        |
| A_23_P42855    | 1,59292 | 1,53135 | 1,043600832 | ENST00000297203 | 219557    | NM_152706    | C7orf62             |
| A_22_P00013511 | 1,45758 | 1,39601 | 1,043600832 | ENST00000521131 | N/A       | N/A          | N/A                 |
| A_23_P24543    | 1,49291 | 1,43135 | 1,043593599 | ENST00000424269 | 120400    | NM_152315    | NXPE1               |
| A_21_P0004898  | 1,64559 | 1,58404 | 1,043586365 | N/A             | N/A       | N/A          | Inc-CD109-1         |
| A_33_P3210827  | 4,90309 | 4,84154 | 1,043586365 | ENST00000592928 | 5892      | NM_002878    | RAD51D              |
| A_21_P0006979  | 1,60899 | 1,54746 | 1,043571898 | N/A             | N/A       | N/A          | Inc-ACBD5-2         |
| A_32_P80816    | 1,47752 | 1,41599 | 1,043571898 | ENST00000614422 | 284369    | NM_173635    | SIGLECL1            |
| A_21_P0006013  | 1,5834  | 1,52187 | 1,043571898 | ENST00000617090 | N/A       | N/A          | N/A                 |
| A_21_P0008889  | 1,63697 | 1,57545 | 1,043564665 | N/A             | N/A       | N/A          | Inc-TNRC6A-1        |
| A_33_P3244713  | 1,65706 | 1,59555 | 1,043557431 | ENST00000503430 | N/A       | N/A          | N/A                 |
| A_21_P0001966  | 2,20701 | 2,1455  | 1,043557431 | N/A             | N/A       | N/A          | Inc-ATIC-6          |
| A_22_P00014613 | 1,76193 | 1,70042 | 1,043557431 | ENST00000543651 | N/A       | N/A          | N/A                 |
| A_21_P0012911  | 4,58332 | 4,52181 | 1,043557431 | N/A             | 102725009 | N/A          | LOC102725009        |
| A_33_P3223712  | 1,49578 | 1,43428 | 1,043550198 | N/A             | N/A       | N/A          | N/A                 |
| A_21_P0010734  | 3,77182 | 3,71033 | 1,043542964 | ENST00000434447 | N/A       | N/A          | N/A                 |
| A_23_P403886   | 2,87456 | 2,81307 | 1,043542964 | ENST00000278400 | 10249     | NM_005838    | GLYAT               |
| A_22_P00017918 | 1,47812 | 1,41664 | 1,043535731 | ENST00000505488 | N/A       | N/A          | N/A                 |
| A_23_P21618    | 1,46217 | 1,4007  | 1,043528498 | ENST00000263666 | 23024     | NM_015009    | PDZRN3              |
| A_22_P00013595 | 1,47703 | 1,41557 | 1,043521265 | N/A             | N/A       | N/A          | Inc-RP11-50B3.2.1-2 |
| A_21_P0003468  | 1,65176 | 1,5903  | 1,043521265 | ENST00000510941 | N/A       | N/A          | N/A                 |
| A_21_P0005263  | 1,70003 | 1,63857 | 1,043521265 | ENST00000422042 | N/A       | N/A          | N/A                 |
| A_21_P0000699  | 1,62797 | 1,56653 | 1,043506799 | N/A             | 100506421 | NR_037883    | LINC01158           |
| A_21_P0007309  | 7,33293 | 7,2715  | 1,043499566 | N/A             | N/A       | N/A          | Inc-GLB1L2-3        |
| A_22_P00000150 | 1,5145  | 1,45307 | 1,043499566 | N/A             | 101928535 | N/A          | LOC101928535        |
| A_32_P40596    | 1,73392 | 1,67249 | 1,043499566 | N/A             | 3737      | NM_001204269 | KCNA2               |
| A_19_P00321319 | 1,66293 | 1,60151 | 1,043492333 | ENST00000606723 | N/A       | N/A          | N/A                 |
| A_21_P0013292  | 14,7382 | 14,6768 | 1,043477867 | ENST00000353999 | 7458      | NM_022170    | EIF4H               |
| A_22_P00006033 | 3,81814 | 3,75675 | 1,043470634 | ENST00000547777 | N/A       | XR_245975    | N/A                 |
| A_21_P0004803  | 1,47431 | 1,41295 | 1,043448936 | ENST00000359760 | 653483    | NR_027906    | MLLT4-AS1           |
| A_33_P3406004  | 8,13878 | 8,07744 | 1,043434471 | ENST00000339195 | 54059     | NM_058181    | YBEY                |
| A_21_P0001794  | 1,61447 | 1,55313 | 1,043434471 | ENST00000421071 | 284998    | N/A          | LINC01114           |
| A_21_P0010856  | 1,58566 | 1,52432 | 1,043434471 | N/A             | N/A       | N/A          | XLOC_I2_001851      |

|                |         |         |             |                 |           |              |                       |
|----------------|---------|---------|-------------|-----------------|-----------|--------------|-----------------------|
| A_21_P0010431  | 1,67531 | 1,61398 | 1,043427238 | N/A             | N/A       | N/A          | Inc-MAPK8IP2-1        |
| A_22_P00010280 | 1,65146 | 1,59016 | 1,043405541 | N/A             | N/A       | N/A          | Inc-MTO1-1            |
| A_23_P6263     | 12,6017 | 12,5404 | 1,043405541 | ENST00000330714 | 4600      | NM_002463    | MX2                   |
| A_23_P144816   | 14,4366 | 14,3753 | 1,043405541 | ENST00000395047 | 7416      | NM_003374    | VDAC1                 |
| A_21_P0007298  | 1,91692 | 1,85563 | 1,043398309 | N/A             | N/A       | N/A          | Inc-RP11-1007G5.2.1-2 |
| A_33_P3209924  | 1,76616 | 1,70488 | 1,043391076 | N/A             | N/A       | N/A          | N/A                   |
| A_21_P0008436  | 1,80502 | 1,74374 | 1,043391076 | ENST00000556130 | 100506446 | XR_110289    | LOC100506446          |
| A_33_P3397209  | 1,60887 | 1,5476  | 1,043383844 | N/A             | N/A       | N/A          | N/A                   |
| A_21_P0001166  | 1,65008 | 1,58882 | 1,043376612 | ENST00000449303 | N/A       | N/A          | N/A                   |
| A_21_P0009046  | 1,73904 | 1,67778 | 1,043376612 | ENST00000568492 | 283867    | NR_027755    | LINC00922             |
| A_22_P00014447 | 1,78136 | 1,7201  | 1,043376612 | ENST00000566715 | N/A       | AK093573     | N/A                   |
| A_33_P3302275  | 1,64924 | 1,58799 | 1,04336938  | ENST00000370540 | 347487    | NM_001013403 | CXorf66               |
| A_33_P3326075  | 1,64967 | 1,58842 | 1,04336938  | ENST00000464755 | 1557      | NM_000769    | CYP2C19               |
| A_22_P00009694 | 1,69912 | 1,63787 | 1,04336938  | N/A             | N/A       | AL042792     | Inc-MBOAT1-5          |
| A_22_P00017942 | 1,64009 | 1,57884 | 1,04336938  | ENST00000360121 | 6693      | NM_001030288 | SPN                   |
| A_23_P117095   | 1,48025 | 1,41901 | 1,043362148 | ENST00000237837 | 8074      | NM_020638    | FGF23                 |
| A_22_P00004015 | 1,75656 | 1,69533 | 1,043354916 | N/A             | N/A       | N/A          | Inc-CHMP4C-5          |
| A_22_P00009620 | 1,44135 | 1,38012 | 1,043354916 | N/A             | N/A       | N/A          | Inc-MARCH7-2          |
| A_33_P3404346  | 1,78434 | 1,72311 | 1,043354916 | N/A             | N/A       | N/A          | N/A                   |
| A_32_P222684   | 4,16881 | 4,10758 | 1,043354916 | ENST00000407847 | 93166     | NM_001136239 | PRDM6                 |
| A_21_P0005435  | 1,61091 | 1,5497  | 1,043340452 | N/A             | N/A       | N/A          | Inc-AC015987.1-3      |
| A_21_P0009284  | 1,47429 | 1,41309 | 1,04333322  | N/A             | N/A       | N/A          | Inc-PGS1-1            |
| A_21_P0010983  | 5,00556 | 4,94437 | 1,043325988 | N/A             | N/A       | N/A          | Inc-NPAS4-1           |
| A_21_P0011810  | 1,74293 | 1,68174 | 1,043325988 | N/A             | N/A       | N/A          | XLOC_l2_007419        |
| A_21_P0000417  | 1,65223 | 1,59105 | 1,043318757 | N/A             | 767598    | NR_003213    | SNORD114-20           |
| A_21_P0004649  | 1,62399 | 1,56284 | 1,043297062 | N/A             | N/A       | N/A          | Inc-DNAH8-1           |
| A_22_P00010681 | 1,46705 | 1,4059  | 1,043297062 | ENST00000547559 | N/A       | N/A          | N/A                   |
| A_22_P00018673 | 1,6451  | 1,58399 | 1,043268136 | N/A             | N/A       | N/A          | Inc-WDR5-2            |
| A_22_P00013437 | 1,78548 | 1,72437 | 1,043268136 | ENST00000535911 | N/A       | N/A          | N/A                   |
| A_32_P18250    | 10,2267 | 10,1656 | 1,043260904 | ENST00000443452 | 388965    | NR_003663    | FUNDC2P2              |
| A_23_P369090   | 1,64529 | 1,58419 | 1,043260904 | ENST00000278979 | 128853    | XR_430334    | DUSP15                |
| A_22_P00024577 | 1,46727 | 1,40617 | 1,043260904 | ENST00000428485 | 101926924 | N/A          | LINC01375             |
| A_33_P3367731  | 1,6125  | 1,5514  | 1,043260904 | ENST00000341998 | 25769     | NM_020344    | SLC24A2               |

|                |         |         |             |                 |           |              |                    |
|----------------|---------|---------|-------------|-----------------|-----------|--------------|--------------------|
| A_22_P00021884 | 1,47897 | 1,41788 | 1,043253673 | N/A             | N/A       | N/A          | Inc-LYRM2-1        |
| A_23_P357185   | 6,34569 | 6,28463 | 1,043231979 | ENST00000315251 | 55349     | NM_018397    | CHDH               |
| A_21_P0014460  | 1,64938 | 1,58833 | 1,043224748 | N/A             | N/A       | XR_109939    | N/A                |
| A_21_P0002943  | 1,58251 | 1,52146 | 1,043224748 | N/A             | N/A       | N/A          | Inc-WDR48-1        |
| A_22_P00012826 | 1,45926 | 1,39822 | 1,043217517 | ENST00000504287 | N/A       | N/A          | N/A                |
| A_19_P00811924 | 1,63507 | 1,57406 | 1,043195824 | N/A             | N/A       | N/A          | Inc-GXYLT1-2       |
| A_21_P0008209  | 1,59326 | 1,53226 | 1,043188594 | N/A             | N/A       | N/A          | Inc-EFNB2-3        |
| A_33_P3408162  | 1,45448 | 1,39349 | 1,043181363 | N/A             | N/A       | N/A          | N/A                |
| A_22_P00017260 | 1,6065  | 1,54552 | 1,043174132 | N/A             | N/A       | AY701053     | Inc-UNG-1          |
| A_21_P0014883  | 1,63194 | 1,57097 | 1,043166901 | N/A             | 100507664 | AK130016     | LOC100507664       |
| A_23_P88278    | 1,45713 | 1,39616 | 1,043166901 | ENST00000400017 | 57096     | NM_020366    | RPGRIP1            |
| A_22_P00020100 | 1,70579 | 1,64484 | 1,04315244  | N/A             | N/A       | N/A          | Inc-EMX2-3         |
| A_21_P0008706  | 1,45146 | 1,39052 | 1,043145209 | N/A             | N/A       | N/A          | Inc-NDN-4          |
| A_21_P0011155  | 1,46183 | 1,40091 | 1,043130748 | N/A             | N/A       | N/A          | XLOC_I2_003820     |
| A_24_P929565   | 1,69583 | 1,63491 | 1,043130748 | ENST00000378479 | 400952    | NR_033831    | LINC01121          |
| A_33_P3339269  | 1,44121 | 1,3803  | 1,043123518 | ENST00000452221 | N/A       | N/A          | N/A                |
| A_23_P123402   | 1,45295 | 1,39204 | 1,043123518 | ENST00000276573 | 84675     | NM_184086    | TRIM55             |
| A_23_P168306   | 10,6625 | 10,6016 | 1,043116288 | ENST00000392589 | 8936      | NM_003931    | WASF1              |
| A_33_P3374025  | 1,59954 | 1,53864 | 1,043116288 | N/A             | 100130197 | NR_038827    | EFCAB14-AS1        |
| A_33_P3292402  | 1,67766 | 1,61676 | 1,043116288 | ENST00000468759 | 127255    | AK131476     | LRRIQ3             |
| A_24_P49220    | 1,76405 | 1,70315 | 1,043116288 | ENST00000507248 | 285456    | NR_026968    | RPL34-AS1          |
| A_22_P00017858 | 1,43862 | 1,37773 | 1,043109057 | N/A             | N/A       | BC018444     | Inc-ZDHHC13-3      |
| A_33_P3393245  | 6,6445  | 6,58362 | 1,043101827 | ENST00000457419 | 23070     | NM_015050    | CMTR1              |
| A_21_P0002473  | 1,70793 | 1,64706 | 1,043094597 | N/A             | N/A       | N/A          | Inc-ANKRD36C-2     |
| A_21_P0005242  | 1,67275 | 1,61191 | 1,043072907 | N/A             | N/A       | N/A          | Inc-AC005008.2.1-2 |
| A_23_P34637    | 3,93759 | 3,87676 | 1,043065677 | ENST00000272190 | 5972      | NM_000537    | REN                |
| A_24_P170403   | 1,7032  | 1,64237 | 1,043065677 | ENST00000409561 | 388960    | NM_001080474 | C2orf78            |
| A_21_P0005575  | 1,61695 | 1,55613 | 1,043058447 | N/A             | N/A       | N/A          | Inc-CPA4-1         |
| A_22_P00002306 | 8,0075  | 7,94668 | 1,043058447 | ENST00000534540 | 100506211 | NR_038262    | MIR210HG           |
| A_21_P0014866  | 1,49547 | 1,43466 | 1,043051217 | N/A             | 100506237 | NR_103710    | NKX2-1-AS1         |
| A_21_P0004262  | 1,68262 | 1,62182 | 1,043043987 | N/A             | N/A       | N/A          | Inc-PIK3R1-6       |
| A_23_P103703   | 1,48031 | 1,41951 | 1,043043987 | ENST00000311890 | 27129     | NM_014424    | HSPB7              |
| A_24_P405205   | 11,7998 | 11,739  | 1,043043987 | ENST00000367218 | 493       | NM_001001396 | ATP2B4             |

|                |         |         |             |                 |           |              |                |
|----------------|---------|---------|-------------|-----------------|-----------|--------------|----------------|
| A_24_P411561   | 1,74514 | 1,68435 | 1,043036757 | ENST00000307851 | 84868     | NM_032782    | HAVCR2         |
| A_33_P3396686  | 1,44968 | 1,38889 | 1,043036757 | ENST00000338150 | 285782    | NM_001170693 | CAGE1          |
| A_33_P3338220  | 1,74596 | 1,68517 | 1,043036757 | ENST00000328828 | 646892    | NM_001101404 | SH2D7          |
| A_23_P2857     | 1,69855 | 1,63776 | 1,043036757 | ENST00000242819 | 83446     | NM_031290    | CCDC70         |
| A_22_P00004904 | 1,61032 | 1,54954 | 1,043029527 | N/A             | N/A       | N/A          | Inc-DAOA-1     |
| A_33_P3279136  | 1,63445 | 1,57367 | 1,043029527 | ENST00000522622 | 286177    | NR_038874    | LOC286177      |
| A_23_P25813    | 1,64706 | 1,5863  | 1,043015068 | ENST00000326842 | 10876     | NM_006683    | EDDM3A         |
| A_22_P00020592 | 1,59795 | 1,53719 | 1,043015068 | N/A             | N/A       | N/A          | Inc-TXLNB-1    |
| A_21_P0013015  | 1,49414 | 1,43339 | 1,043007838 | N/A             | N/A       | N/A          | XLOC_I2_012397 |
| A_21_P0008883  | 1,49311 | 1,43236 | 1,043007838 | ENST00000561513 | 100505619 | NR_038233    | LINC00919      |
| A_21_P0007012  | 1,4532  | 1,39246 | 1,043000609 | N/A             | N/A       | N/A          | Inc-ANKRD1-2   |
| A_23_P201778   | 1,63332 | 1,57258 | 1,043000609 | ENST00000495688 | 5778      | NM_080588    | PTPN7          |
| A_21_P0012628  | 1,45101 | 1,3903  | 1,04297892  | N/A             | N/A       | N/A          | XLOC_I2_010908 |
| A_33_P3367894  | 1,47232 | 1,41162 | 1,042971691 | N/A             | N/A       | AK127022     | N/A            |
| A_22_P00011339 | 13,8266 | 13,7659 | 1,042971691 | ENST00000314133 | 1351      | NM_004074    | COX8A          |
| A_24_P392713   | 15,1092 | 15,0485 | 1,042971691 | ENST00000492017 | N/A       | AK124741     | N/A            |
| A_23_P212105   | 1,45787 | 1,39718 | 1,042964462 | ENST00000399444 | 1618      | NM_001351    | DAZL           |
| A_22_P00005050 | 1,63109 | 1,5704  | 1,042964462 | N/A             | 101927164 | NR_110668    | LOC101927164   |
| A_24_P247273   | 6,24891 | 6,18823 | 1,042957233 | ENST00000391480 | 102724536 | XM_006709946 | PRR33          |
| A_33_P3241521  | 1,47032 | 1,40964 | 1,042957233 | ENST00000522192 | 1879      | NM_001290360 | EBF1           |
| A_21_P0008038  | 1,46152 | 1,40084 | 1,042957233 | N/A             | N/A       | N/A          | Inc-PABPC3-1   |
| A_24_P231829   | 1,64286 | 1,58218 | 1,042957233 | ENST00000255192 | 23743     | NM_017614    | BHMT2          |
| A_21_P0004941  | 1,49348 | 1,4328  | 1,042957233 | ENST00000458028 | 100507254 | NR_038981    | LINC01013      |
| A_33_P3405213  | 4,55973 | 4,49905 | 1,042957233 | ENST00000563924 | 5175      | NM_000442    | PECAM1         |
| A_23_P383325   | 1,5797  | 1,51904 | 1,042942774 | ENST00000307588 | 256309    | NM_152775    | CCDC110        |
| A_22_P00010311 | 1,62251 | 1,56185 | 1,042942774 | N/A             | N/A       | N/A          | Inc-MUC20-1    |
| A_22_P00010380 | 1,72842 | 1,66777 | 1,042935545 | ENST00000578787 | N/A       | N/A          | N/A            |
| A_21_P0002005  | 1,47981 | 1,41916 | 1,042935545 | ENST00000591060 | 102800315 | NR_110498    | LINC01246      |
| A_22_P00014815 | 1,64176 | 1,58111 | 1,042935545 | ENST00000543512 | 102723505 | N/A          | LOC102723505   |
| A_33_P3373584  | 1,644   | 1,58335 | 1,042935545 | N/A             | N/A       | N/A          | N/A            |
| A_21_P0012290  | 1,44313 | 1,38248 | 1,042935545 | N/A             | N/A       | N/A          | XLOC_I2_009492 |
| A_22_P00006244 | 1,48059 | 1,41995 | 1,042928316 | N/A             | N/A       | N/A          | Inc-FAM59A-2   |
| A_33_P3375785  | 1,45634 | 1,3957  | 1,042928316 | ENST00000423410 | 100996630 | XR_159047    | LOC100996630   |

|                |         |         |             |                 |           |              |                  |
|----------------|---------|---------|-------------|-----------------|-----------|--------------|------------------|
| A_22_P00023062 | 4,14249 | 4,08185 | 1,042928316 | N/A             | 729867    | NR_123725    | LOC729867        |
| A_22_P00018186 | 1,68551 | 1,62489 | 1,042913858 | ENST00000520192 | N/A       | N/A          | N/A              |
| A_33_P3571901  | 1,70087 | 1,64026 | 1,042906629 | N/A             | 100287387 | XM_002342310 | LOC100287387     |
| A_21_P0012970  | 1,4911  | 1,43049 | 1,042906629 | ENST00000503113 | N/A       | N/A          | N/A              |
| A_33_P3261167  | 13,3359 | 13,2753 | 1,0428994   | N/A             | 2799      | NM_002076    | GNS              |
| A_23_P22926    | 12,4467 | 12,3861 | 1,0428994   | ENST00000378609 | 2782      | NM_002074    | GNB1             |
| A_22_P00014369 | 1,64156 | 1,58099 | 1,042877714 | ENST00000568279 | 101927580 | NR_110917    | LOC101927580     |
| A_22_P00013927 | 1,4938  | 1,43326 | 1,042856028 | N/A             | N/A       | DB061558     | Inc-RPUSD2-1     |
| A_21_P0005155  | 1,43848 | 1,37794 | 1,042856028 | N/A             | N/A       | N/A          | Inc-DTNBP1-2     |
| A_22_P00020586 | 1,43515 | 1,37461 | 1,042856028 | N/A             | 102724950 | XR_425240    | LOC102724950     |
| A_33_P3223780  | 1,48871 | 1,42818 | 1,0428488   | ENST00000498377 | 3913      | NM_002292    | LAMB2            |
| A_33_P3237894  | 1,64838 | 1,58785 | 1,0428488   | ENST00000410098 | 1124      | NM_001293081 | CHN2             |
| A_33_P3239487  | 1,61199 | 1,55147 | 1,042841571 | N/A             | 378832    | NR_028082    | COL18A1-AS1      |
| A_23_P401700   | 1,43593 | 1,37541 | 1,042841571 | ENST00000376236 | 54518     | NM_019043    | APBB1P           |
| A_21_P0002102  | 1,465   | 1,40449 | 1,042834343 | ENST00000412312 | N/A       | N/A          | N/A              |
| A_23_P30736    | 5,65632 | 5,59582 | 1,042827115 | ENST00000426644 | 3112      | NM_002120    | HLA-DOB          |
| A_22_P00000156 | 1,64031 | 1,57981 | 1,042827115 | N/A             | N/A       | N/A          | Inc-ABCA5-2      |
| A_22_P00019177 | 1,62972 | 1,56922 | 1,042827115 | N/A             | 101928118 | NR_125949    | LOC101928118     |
| A_33_P3330549  | 11,055  | 10,9945 | 1,042827115 | ENST00000590475 | 57153     | NM_020428    | SLC44A2          |
| A_32_P73151    | 1,46056 | 1,40007 | 1,042819886 | N/A             | N/A       | AK124778     | Inc-GABRB1-1     |
| A_23_P13493    | 1,46924 | 1,40876 | 1,042812658 | ENST00000396952 | 143503    | NM_152430    | OR51E1           |
| A_21_P0007391  | 1,58077 | 1,5203  | 1,04280543  | N/A             | N/A       | N/A          | Inc-PDGFD-2      |
| A_33_P3371237  | 1,68719 | 1,62673 | 1,042798202 | N/A             | 100131514 | XM_001718671 | LOC100131514     |
| A_24_P59459    | 1,47794 | 1,41748 | 1,042798202 | N/A             | 63895     | AK092226     | PIEZO2           |
| A_33_P3253857  | 5,17267 | 5,11222 | 1,042790974 | ENST00000597330 | N/A       | N/A          | N/A              |
| A_32_P205624   | 6,88873 | 6,82828 | 1,042790974 | ENST00000264554 | 25759     | NM_012435    | SHC2             |
| A_21_P0000293  | 1,62551 | 1,56507 | 1,042783745 | N/A             | 6082      | NR_002908    | SNORD20          |
| A_22_P00024567 | 1,63187 | 1,57144 | 1,042776517 | N/A             | N/A       | N/A          | Inc-AL445989.1-4 |
| A_23_P48229    | 1,73443 | 1,67401 | 1,04276929  | ENST00000382545 | 3736      | NM_000217    | KCNA1            |
| A_22_P00014674 | 1,46784 | 1,40744 | 1,042754834 | N/A             | N/A       | BX112226     | Inc-SLC24A5-2    |
| A_22_P00015423 | 1,45208 | 1,39168 | 1,042754834 | N/A             | 101927138 | XR_244177    | LOC101927138     |
| A_23_P34835    | 15,2057 | 15,1453 | 1,042754834 | ENST00000361308 | 4000      | NM_005572    | LMNA             |
| A_33_P3406873  | 7,57177 | 7,51137 | 1,042754834 | ENST00000403080 | 23114     | NM_001005389 | NFASC            |

|                |         |         |             |                 |           |              |                |
|----------------|---------|---------|-------------|-----------------|-----------|--------------|----------------|
| A_22_P00014291 | 1,58431 | 1,52393 | 1,042740378 | N/A             | N/A       | BX117128     | Inc-SERAC1-1   |
| A_22_P00013484 | 1,58134 | 1,52096 | 1,042740378 | ENST00000522857 | N/A       | N/A          | N/A            |
| A_21_P0004235  | 1,47192 | 1,41155 | 1,042733151 | N/A             | N/A       | N/A          | Inc-BASP1-4    |
| A_21_P0001930  | 1,75392 | 1,69355 | 1,042733151 | ENST00000432599 | N/A       | N/A          | N/A            |
| A_22_P00000921 | 1,49232 | 1,43196 | 1,042725923 | N/A             | N/A       | N/A          | Inc-AKAP14-1   |
| A_22_P00009656 | 1,48177 | 1,42141 | 1,042725923 | N/A             | N/A       | N/A          | Inc-MAT2B-3    |
| A_21_P0004611  | 1,47092 | 1,41056 | 1,042725923 | N/A             | 100506188 | N/A          | LOC100506188   |
| A_22_P00017126 | 1,67195 | 1,6116  | 1,042718695 | N/A             | N/A       | N/A          | Inc-UBASH3A-2  |
| A_33_P3892608  | 1,45037 | 1,39005 | 1,042697013 | ENST00000610076 | 343450    | NM_198503    | KCNT2          |
| A_33_P3328270  | 1,71263 | 1,65232 | 1,042689785 | ENST00000436881 | 389813    | NM_001080482 | C9orf172       |
| A_22_P00017571 | 1,69928 | 1,63897 | 1,042689785 | ENST00000447563 | 154822    | NR_024394    | LINC00689      |
| A_33_P3352058  | 1,49183 | 1,43153 | 1,042682558 | N/A             | N/A       | BC092495     | N/A            |
| A_22_P00010635 | 1,57097 | 1,51068 | 1,042675331 | N/A             | 101928834 | NR_120646    | LOC101928834   |
| A_22_P00022531 | 1,70548 | 1,6452  | 1,042668103 | ENST00000510879 | 101929338 | NR_109935    | CTD-2201E9.1   |
| A_21_P0007568  | 1,62975 | 1,56947 | 1,042668103 | N/A             | N/A       | N/A          | Inc-XRCC6BP1-3 |
| A_32_P228167   | 1,58353 | 1,52326 | 1,042660876 | ENST00000298699 | 160419    | NM_152589    | C12orf50       |
| A_33_P3364185  | 4,84535 | 4,78508 | 1,042660876 | ENST00000370947 | 51634     | N/A          | RBMX2          |
| A_22_P00013946 | 4,97694 | 4,91668 | 1,042653649 | N/A             | N/A       | AF447869     | Inc-RSL1D1-2   |
| A_21_P0005661  | 1,65523 | 1,59499 | 1,042639195 | N/A             | N/A       | N/A          | Inc-EFHA2-2    |
| A_22_P00001068 | 1,44942 | 1,38918 | 1,042639195 | N/A             | 101928694 | NR_120338    | LOC101928694   |
| A_22_P00011751 | 1,47395 | 1,41374 | 1,042617514 | N/A             | 100192378 | NR_024360    | ZFH4-AS1       |
| A_21_P0002538  | 1,69218 | 1,63198 | 1,042610287 | N/A             | N/A       | N/A          | Inc-IKZF2-3    |
| A_22_P00023318 | 1,57989 | 1,51969 | 1,042610287 | N/A             | N/A       | N/A          | Inc-TPX2-1     |
| A_23_P317691   | 11,3139 | 11,2537 | 1,042610287 | ENST00000510698 | 51720     | NM_016290    | UIMC1          |
| A_33_P3484806  | 4,91608 | 4,85589 | 1,042603061 | N/A             | N/A       | AK025061     | Inc-IL4R-2     |
| A_24_P218001   | 8,81001 | 8,74983 | 1,042595834 | ENST00000489672 | 10793     | NM_021148    | ZNF273         |
| A_22_P00018647 | 1,49884 | 1,43866 | 1,042595834 | ENST00000432694 | N/A       | BQ707656     | N/A            |
| A_33_P3304759  | 1,6357  | 1,57553 | 1,042588607 | N/A             | 101928569 | N/A          | LOC101928569   |
| A_22_P00009313 | 1,64656 | 1,58639 | 1,042588607 | ENST00000531210 | N/A       | CD243455     | N/A            |
| A_21_P0007926  | 1,69472 | 1,63458 | 1,042566927 | N/A             | 102723318 | N/A          | LINC01053      |
| A_33_P3339701  | 1,70075 | 1,64061 | 1,042566927 | N/A             | N/A       | N/A          | N/A            |
| A_22_P00023063 | 1,60586 | 1,54573 | 1,042559701 | ENST00000554842 | 122651    | NM_145250    | RNASE11        |
| A_21_P0013079  | 1,45572 | 1,39561 | 1,042545248 | N/A             | N/A       | N/A          | XLOC_I2_012984 |



|                |         |         |             |                 |           |              |                 |
|----------------|---------|---------|-------------|-----------------|-----------|--------------|-----------------|
| A_22_P00018385 | 2,39251 | 2,33241 | 1,042538022 | N/A             | N/A       | AK057809     | Inc-FAM13B-1    |
| A_23_P146217   | 7,36882 | 7,30873 | 1,042530795 | ENST00000287322 | 9530      | NM_004874    | BAG4            |
| A_22_P00016976 | 1,49857 | 1,43848 | 1,042530795 | ENST00000526615 | 51144     | XR_252883    | HSD17B12        |
| A_21_P0002995  | 1,6687  | 1,60861 | 1,042530795 | N/A             | 100846978 | N/A          | LINC00506       |
| A_33_P3379926  | 1,47997 | 1,41988 | 1,042530795 | ENST00000439485 | 10050     | NM_005495    | SLC17A4         |
| A_23_P61508    | 1,71415 | 1,65408 | 1,042516343 | ENST00000310169 | 55584     | NM_017581    | CHRNA9          |
| A_23_P79978    | 1,44643 | 1,38636 | 1,042516343 | ENST00000613834 | 57419     | NM_020689    | SLC24A3         |
| A_22_P00000026 | 1,66122 | 1,60115 | 1,042516343 | N/A             | 196047    | NR_002791    | EMX2OS          |
| A_32_P165974   | 1,48248 | 1,42244 | 1,042494665 | ENST00000357716 | 2917      | NM_181874    | GRM7            |
| A_22_P00008750 | 1,6741  | 1,61408 | 1,042480213 | N/A             | N/A       | XR_108388    | Inc-KIDINS220-2 |
| A_33_P3827580  | 1,74283 | 1,68281 | 1,042480213 | N/A             | 644852    | BC025398     | LOC644852       |
| A_21_P0009983  | 1,63772 | 1,57771 | 1,042472987 | ENST00000616333 | N/A       | N/A          | N/A             |
| A_22_P00009485 | 1,49529 | 1,43529 | 1,042465761 | N/A             | N/A       | N/A          | Inc-MAGEB1-2    |
| A_23_P129291   | 1,64594 | 1,58594 | 1,042465761 | ENST00000396996 | 9333      | NM_201631    | TGM5            |
| A_22_P00008644 | 1,59614 | 1,53614 | 1,042465761 | N/A             | N/A       | N/A          | Inc-KIAA0020-2  |
| A_22_P00023990 | 7,80463 | 7,74464 | 1,042458535 | N/A             | N/A       | AK026915     | Inc-PLXND1-1    |
| A_22_P00002416 | 1,90333 | 1,84334 | 1,042458535 | ENST00000557072 | N/A       | N/A          | N/A             |
| A_22_P00006234 | 1,62736 | 1,56738 | 1,042451309 | ENST00000545593 | N/A       | N/A          | N/A             |
| A_22_P00015016 | 1,5988  | 1,53882 | 1,042451309 | ENST00000532430 | N/A       | AK058146     | N/A             |
| A_24_P356130   | 8,58495 | 8,52497 | 1,042451309 | ENST00000558392 | 5607      | NM_002757    | MAP2K5          |
| A_33_P3362503  | 4,24636 | 4,18639 | 1,042444084 | ENST00000407010 | 729920    | NM_001101426 | ISPD            |
| A_33_P3221333  | 1,76448 | 1,70454 | 1,042422407 | ENST00000433944 | N/A       | N/A          | N/A             |
| A_21_P0013075  | 1,72511 | 1,66517 | 1,042422407 | N/A             | N/A       | N/A          | XLOC_I2_012932  |
| A_23_P79562    | 1,47158 | 1,41165 | 1,042415181 | ENST00000295834 | 2168      | NM_001443    | FABP1           |
| A_22_P00002434 | 1,68395 | 1,62402 | 1,042415181 | ENST00000557275 | 79686     | NR_026779    | LINC00341       |
| A_21_P0011158  | 1,44853 | 1,38861 | 1,042407956 | ENST00000608624 | 144920    | NR_120418    | LINC00343       |
| A_21_P0007366  | 1,63516 | 1,57524 | 1,042407956 | N/A             | N/A       | N/A          | Inc-ORAOV1-4    |
| A_22_P00014938 | 1,64666 | 1,58674 | 1,042407956 | ENST00000446579 | N/A       | N/A          | N/A             |
| A_21_P0002210  | 1,49821 | 1,43829 | 1,042407956 | N/A             | N/A       | N/A          | Inc-SOCS5-2     |
| A_19_P00317287 | 1,47055 | 1,41063 | 1,042407956 | N/A             | 101929194 | N/A          | LOC101929194    |
| A_33_P3353991  | 1,4396  | 1,3797  | 1,042393505 | N/A             | N/A       | N/A          | Inc-OR10AB1P-1  |
| A_33_P3775741  | 16,0367 | 15,9768 | 1,042393505 | ENST00000515866 | 132241    | NR_003111    | RPL32P3         |
| A_32_P118568   | 1,62352 | 1,56363 | 1,04238628  | N/A             | 10740     | NR_002727    | RFPL1S          |

|                |         |         |             |                 |           |              |                     |
|----------------|---------|---------|-------------|-----------------|-----------|--------------|---------------------|
| A_22_P00018344 | 7,70016 | 7,64028 | 1,042379055 | ENST00000574387 | N/A       | N/A          | N/A                 |
| A_24_P344666   | 1,45721 | 1,39734 | 1,042371829 | ENST00000378429 | 57144     | NM_020341    | PAK7                |
| A_22_P00013491 | 1,46662 | 1,40676 | 1,042364604 | N/A             | 29018     | NR_024620    | FOXN3-AS2           |
| A_21_P0001625  | 1,64063 | 1,58077 | 1,042364604 | N/A             | 102723886 | XR_426903    | LOC102723886        |
| A_21_P0000571  | 1,74359 | 1,68373 | 1,042364604 | N/A             | 646023    | NR_028484    | ADORA2A-AS1         |
| A_22_P00025350 | 1,62534 | 1,56548 | 1,042364604 | N/A             | N/A       | N/A          | Inc-ZCWPW2-1        |
| A_21_P0011973  | 1,45838 | 1,39852 | 1,042364604 | N/A             | N/A       | N/A          | XLOC_I2_008316      |
| A_22_P00016230 | 6,36466 | 6,30481 | 1,042357379 | N/A             | 101928513 | NR_110573    | CATIP-AS1           |
| A_22_P00022113 | 1,58835 | 1,5285  | 1,042357379 | ENST00000447571 | N/A       | BC007278     | N/A                 |
| A_21_P0004189  | 1,70864 | 1,64879 | 1,042357379 | ENST00000506431 | 100507267 | NR_108022    | LINC01187           |
| A_22_P00003544 | 1,67566 | 1,61582 | 1,042350154 | ENST00000429730 | N/A       | N/A          | N/A                 |
| A_33_P3823466  | 1,45268 | 1,39285 | 1,042342929 | N/A             | 157931    | AK057274     | LOC157931           |
| A_22_P00018551 | 3,54988 | 3,49006 | 1,042335704 | N/A             | N/A       | N/A          | Inc-DDX54-1         |
| A_33_P3327504  | 1,60002 | 1,5402  | 1,042335704 | ENST00000321255 | 283111    | NM_001004760 | OR51V1              |
| A_22_P00012918 | 1,74615 | 1,68634 | 1,042328479 | N/A             | N/A       | HY003700     | Inc-RBP5-2          |
| A_22_P00012843 | 1,65506 | 1,59526 | 1,042321254 | N/A             | 101929423 | NR_104031    | MEF2C-AS1           |
| A_22_P00023441 | 1,64612 | 1,58632 | 1,042321254 | ENST00000555713 | N/A       | DA126874     | N/A                 |
| A_24_P247454   | 13,9536 | 13,8938 | 1,042321254 | ENST00000395181 | N/A       | N/A          | N/A                 |
| A_22_P00001281 | 1,5887  | 1,52891 | 1,04231403  | N/A             | N/A       | N/A          | Inc-ANKRD65-2       |
| A_21_P0009802  | 1,64432 | 1,58453 | 1,04231403  | N/A             | 102723540 | XR_430234    | LOC102723540        |
| A_21_P0012987  | 1,6803  | 1,62051 | 1,04231403  | ENST00000511953 | N/A       | N/A          | N/A                 |
| A_22_P00024144 | 1,61961 | 1,55984 | 1,04229958  | N/A             | 101929315 | NR_125809    | LOC101929315        |
| A_21_P0010740  | 7,62443 | 7,56467 | 1,042292356 | ENST00000457955 | N/A       | N/A          | N/A                 |
| A_21_P0013172  | 1,64223 | 1,58247 | 1,042292356 | N/A             | N/A       | N/A          | XLOC_I2_013277      |
| A_21_P0013614  | 1,4485  | 1,38874 | 1,042292356 | N/A             | N/A       | N/A          | XLOC_I2_015098      |
| A_21_P0005929  | 1,44088 | 1,38114 | 1,042277906 | N/A             | N/A       | N/A          | Inc-SH2D4A-1        |
| A_22_P00000015 | 1,72566 | 1,66593 | 1,042270682 | N/A             | N/A       | AK054921     | Inc-RP1-177G6.2.1-2 |
| A_24_P922849   | 1,43428 | 1,37455 | 1,042270682 | ENST00000419717 | 647589    | NM_001191054 | ANHx                |
| A_22_P00025037 | 1,4683  | 1,40858 | 1,042263457 | ENST00000484675 | N/A       | N/A          | N/A                 |
| A_21_P0012614  | 1,64714 | 1,58743 | 1,042256233 | ENST00000505436 | N/A       | N/A          | N/A                 |
| A_22_P00006146 | 1,45446 | 1,39475 | 1,042256233 | ENST00000505511 | N/A       | N/A          | N/A                 |
| A_23_P4425     | 12,3958 | 12,3361 | 1,042249009 | ENST00000493401 | 2314      | NM_002018    | FLII                |
| A_22_P00017799 | 1,69309 | 1,6334  | 1,042241784 | N/A             | N/A       | N/A          | Inc-ZBTB10-3        |

|                |         |         |             |                 |           |              |                    |
|----------------|---------|---------|-------------|-----------------|-----------|--------------|--------------------|
| A_33_P3413355  | 1,6426  | 1,58292 | 1,04223456  | ENST00000533673 | 8534      | NM_003654    | CHST1              |
| A_24_P250765   | 1,59322 | 1,53356 | 1,042220112 | ENST00000401604 | 5592      | NM_006258    | PRKG1              |
| A_33_P3366833  | 1,57639 | 1,51673 | 1,042220112 | ENST00000534415 | 493860    | NM_001008391 | CCDC73             |
| A_22_P00007630 | 1,58416 | 1,52451 | 1,042212888 | N/A             | N/A       | DQ680071     | Inc-HEPH-1         |
| A_22_P00016820 | 1,74326 | 1,68362 | 1,042205664 | ENST00000505196 | N/A       | N/A          | N/A                |
| A_22_P00000317 | 1,46865 | 1,40901 | 1,042205664 | N/A             | N/A       | N/A          | Inc-AC011294.3.1-2 |
| A_22_P00025839 | 1,44955 | 1,38992 | 1,04219844  | ENST00000491909 | N/A       | N/A          | N/A                |
| A_33_P3380252  | 1,57711 | 1,51749 | 1,042191216 | N/A             | N/A       | N/A          | N/A                |
| A_22_P00008962 | 1,52292 | 1,46331 | 1,042183992 | ENST00000554196 | 645687    | BQ215860     | LINC00520          |
| A_21_P0009494  | 1,62588 | 1,56628 | 1,042176768 | N/A             | N/A       | N/A          | Inc-SOCS6-2        |
| A_23_P257936   | 1,46587 | 1,40627 | 1,042176768 | ENST00000621631 | 1527      | NM_001586    | TEX28              |
| A_33_P3277308  | 1,67622 | 1,61663 | 1,042169544 | ENST00000369547 | 148281    | NM_001270805 | SYT6               |
| A_33_P3322870  | 1,49644 | 1,43685 | 1,042169544 | ENST00000524820 | 143425    | NM_175733    | SYT9               |
| A_22_P00012842 | 1,48216 | 1,42259 | 1,042155097 | N/A             | N/A       | N/A          | Inc-RASA1-7        |
| A_21_P0001336  | 3,2665  | 3,20694 | 1,042147873 | ENST00000479252 | N/A       | XR_426721    | N/A                |
| A_23_P45811    | 1,46328 | 1,40372 | 1,042147873 | ENST00000322679 | 1733      | NM_000792    | DIO1               |
| A_33_P3351285  | 1,6399  | 1,58034 | 1,042147873 | ENST00000623536 | N/A       | AF370406     | N/A                |
| A_22_P00009404 | 1,74175 | 1,68221 | 1,042133426 | ENST00000534068 | N/A       | BX110993     | N/A                |
| A_21_P0008732  | 1,48119 | 1,42165 | 1,042133426 | N/A             | N/A       | N/A          | Inc-EPB42-1        |
| A_33_P3244543  | 1,69672 | 1,63718 | 1,042133426 | ENST00000357147 | 389320    | NM_207408    | TEX43              |
| A_22_P00001049 | 8,79255 | 8,73302 | 1,042126203 | ENST00000615421 | 200030    | NM_001101663 | NBPF11             |
| A_21_P0009599  | 1,63747 | 1,57794 | 1,042126203 | N/A             | N/A       | N/A          | Inc-NDUFV2-1       |
| A_21_P0003510  | 1,65443 | 1,5949  | 1,042126203 | ENST00000506412 | N/A       | N/A          | N/A                |
| A_23_P215331   | 2,67527 | 2,61574 | 1,042126203 | ENST00000452278 | 1395      | NM_001883    | CRHR2              |
| A_33_P3371810  | 1,59641 | 1,53689 | 1,042118979 | ENST00000453262 | N/A       | X58330       | N/A                |
| A_23_P392317   | 1,60721 | 1,5477  | 1,042111756 | ENST00000620101 | 9228      | NM_004745    | DLGAP2             |
| A_23_P24365    | 10,8741 | 10,8146 | 1,042104532 | ENST00000302755 | 54851     | NM_017704    | ANKRD49            |
| A_21_P0005025  | 1,5871  | 1,52762 | 1,042090086 | N/A             | N/A       | N/A          | Inc-TREM2-1        |
| A_22_P00009899 | 1,67206 | 1,61258 | 1,042090086 | ENST00000431897 | N/A       | N/A          | N/A                |
| A_22_P00023257 | 8,60335 | 8,54388 | 1,042082863 | N/A             | N/A       | AK125500     | Inc-IFRD2-2        |
| A_22_P00012271 | 2,81543 | 2,75596 | 1,042082863 | N/A             | N/A       | N/A          | Inc-PPP1R3D-2      |
| A_22_P00016449 | 1,45522 | 1,39575 | 1,042082863 | N/A             | N/A       | N/A          | Inc-TMEM60-2       |
| A_21_P0014579  | 1,44554 | 1,38607 | 1,042082863 | N/A             | 100507175 | XR_111307    | LOC100507175       |

|                |         |         |             |                 |           |              |                |
|----------------|---------|---------|-------------|-----------------|-----------|--------------|----------------|
| A_21_P0002354  | 1,64249 | 1,58302 | 1,042082863 | N/A             | 101928374 | XR_249308    | LOC101928374   |
| A_33_P3282185  | 1,4387  | 1,37924 | 1,042075639 | N/A             | N/A       | AK127116     | N/A            |
| A_22_P00001642 | 1,62842 | 1,56897 | 1,042068416 | N/A             | N/A       | CD698978     | Inc-ASB2-2     |
| A_22_P00009633 | 1,73423 | 1,67481 | 1,042046747 | N/A             | N/A       | N/A          | Inc-MARCKS-5   |
| A_22_P00003053 | 1,68864 | 1,62922 | 1,042046747 | ENST00000419596 | N/A       | N/A          | N/A            |
| A_23_P153616   | 1,62256 | 1,56314 | 1,042046747 | ENST00000346144 | 8174      | NM_130760    | MADCAM1        |
| A_33_P3382685  | 1,45033 | 1,39092 | 1,042039525 | N/A             | N/A       | N/A          | N/A            |
| A_23_P381203   | 8,41774 | 8,35834 | 1,042032302 | ENST00000261588 | 23247     | NM_015202    | KIAA0556       |
| A_21_P0013619  | 1,6261  | 1,5667  | 1,042032302 | N/A             | N/A       | N/A          | XLOC_I2_015098 |
| A_33_P3414477  | 1,62305 | 1,56365 | 1,042032302 | ENST00000562009 | 729739    | BC013681     | LOC729739      |
| A_23_P30091    | 1,64553 | 1,58614 | 1,042025079 | ENST00000262999 | 7350      | NM_021833    | UCP1           |
| A_22_P00023927 | 1,47862 | 1,41925 | 1,042010633 | N/A             | 101928491 | NR_110855    | LOC101928491   |
| A_22_P00025499 | 1,63436 | 1,57501 | 1,041996188 | ENST00000580984 | N/A       | N/A          | N/A            |
| A_21_P0012720  | 1,65673 | 1,5974  | 1,041981743 | ENST00000504795 | N/A       | N/A          | N/A            |
| A_22_P00007838 | 1,63642 | 1,57709 | 1,041981743 | N/A             | N/A       | N/A          | Inc-HPS4-2     |
| A_22_P00009346 | 1,624   | 1,56468 | 1,041974521 | ENST00000548619 | N/A       | N/A          | N/A            |
| A_32_P234518   | 1,48233 | 1,42301 | 1,041974521 | ENST00000374521 | 158833    | NM_001013579 | AWAT1          |
| A_32_P182299   | 1,45596 | 1,39664 | 1,041974521 | ENST00000493000 | 199920    | NM_001004303 | C1orf168       |
| A_22_P00009275 | 1,74266 | 1,68335 | 1,041967298 | N/A             | N/A       | N/A          | Inc-LRRC14B-1  |
| A_33_P3284315  | 1,64376 | 1,58445 | 1,041967298 | N/A             | N/A       | BG193489     | N/A            |
| A_33_P3313889  | 10,7144 | 10,6551 | 1,041960076 | ENST00000351698 | 1861      | NM_000113    | TOR1A          |
| A_23_P112251   | 13,0872 | 13,0279 | 1,041960076 | ENST00000374294 | 2790      | NM_001017998 | GNG10          |
| A_33_P3324730  | 1,62252 | 1,56323 | 1,041952854 | ENST00000374345 | 140873    | NM_001145350 | C20orf173      |
| A_22_P00019458 | 1,47597 | 1,41672 | 1,041923965 | ENST00000566085 | N/A       | N/A          | N/A            |
| A_21_P0004335  | 1,65165 | 1,59241 | 1,041916743 | N/A             | N/A       | N/A          | Inc-ERGIC1-2   |
| A_24_P11900    | 1,64481 | 1,58557 | 1,041916743 | ENST00000273353 | 22989     | NM_014981    | MYH15          |
| A_33_P3395723  | 1,46042 | 1,40119 | 1,041909521 | N/A             | 392452    | NR_102268    | LOC392452      |
| A_22_P00024351 | 1,73764 | 1,67842 | 1,041902299 | N/A             | N/A       | BQ720099     | Inc-TLE2-1     |
| A_23_P111402   | 1,69834 | 1,63913 | 1,041895077 | ENST00000356698 | 84870     | NM_032784    | RSPO3          |
| A_33_P3303372  | 12,2874 | 12,2282 | 1,041887855 | ENST00000374773 | 56288     | NM_001184792 | PARD3          |
| A_22_P00015859 | 1,67842 | 1,61922 | 1,041887855 | N/A             | N/A       | N/A          | Inc-TBL1XR1-8  |
| A_22_P00006006 | 5,91555 | 5,85635 | 1,041887855 | ENST00000551922 | 283332    | NR_026948    | LOC283332      |
| A_33_P3228959  | 13,6612 | 13,602  | 1,041887855 | ENST00000329819 | 65003     | NM_016050    | MRPL11         |

|                |         |         |             |                 |           |              |                 |
|----------------|---------|---------|-------------|-----------------|-----------|--------------|-----------------|
| A_22_P00000533 | 4,06726 | 4,00808 | 1,041873412 | ENST00000445534 | N/A       | N/A          | N/A             |
| A_21_P0001591  | 1,43423 | 1,37505 | 1,041873412 | N/A             | N/A       | N/A          | Inc-MPZ-1       |
| A_21_P0012419  | 1,59263 | 1,53346 | 1,04186619  | N/A             | N/A       | N/A          | XLOC_I2_010056  |
| A_22_P00003979 | 1,76264 | 1,70349 | 1,041851747 | ENST00000564331 | N/A       | N/A          | N/A             |
| A_23_P334246   | 1,64203 | 1,58289 | 1,041844525 | ENST00000529851 | 200558    | NM_173545    | APLF            |
| A_21_P0008204  | 1,74144 | 1,6823  | 1,041844525 | N/A             | N/A       | N/A          | Inc-RNF113B-1   |
| A_23_P17673    | 1,45376 | 1,39462 | 1,041844525 | ENST00000270172 | 29947     | NM_013369    | DNMT3L          |
| A_22_P00009982 | 1,57679 | 1,51765 | 1,041844525 | ENST00000415393 | 101928782 | NR_110836    | LOC101928782    |
| A_33_P3780834  | 1,57681 | 1,51767 | 1,041844525 | N/A             | 340090    | XR_241819    | LOC340090       |
| A_19_P00320924 | 1,47518 | 1,41606 | 1,041830082 | ENST00000510165 | 643401    | NR_038848    | LINC01021       |
| A_23_P20697    | 2,52661 | 2,46749 | 1,041830082 | ENST00000393060 | 9719      | NM_014694    | ADAMTSL2        |
| A_33_P3258076  | 1,62024 | 1,56113 | 1,041822861 | N/A             | 100129581 | AK125905     | LOC100129581    |
| A_22_P00004962 | 1,45021 | 1,39111 | 1,04181564  | N/A             | 100287722 | NR_125965    | AP4B1-AS1       |
| A_19_P00809335 | 1,5899  | 1,5308  | 1,04181564  | ENST00000498712 | 254778    | N/A          | C8orf46         |
| A_33_P3275280  | 1,57973 | 1,52064 | 1,041808418 | N/A             | 440742    | XR_112030    | LOC440742       |
| A_33_P3222007  | 1,65845 | 1,59936 | 1,041808418 | ENST00000259362 | 286362    | NM_001001956 | OR13C9          |
| A_22_P00015433 | 1,49982 | 1,44073 | 1,041808418 | N/A             | 100874084 | NR_046618    | KCNAB1-AS1      |
| A_33_P3409815  | 6,49492 | 6,43583 | 1,041808418 | N/A             | N/A       | N/A          | N/A             |
| A_22_P00004685 | 1,63189 | 1,57282 | 1,041793976 | ENST00000525926 | N/A       | N/A          | N/A             |
| A_22_P00022805 | 1,43977 | 1,38073 | 1,041772313 | ENST00000454367 | N/A       | N/A          | N/A             |
| A_32_P107282   | 1,59769 | 1,53866 | 1,041765092 | ENST00000376974 | 646019    | NM_001164444 | CBY3            |
| A_24_P126210   | 1,46832 | 1,4093  | 1,041757871 | ENST00000399784 | 56246     | NM_178817    | MRAP            |
| A_21_P0006710  | 1,94911 | 1,89009 | 1,041757871 | N/A             | N/A       | N/A          | Inc-SEC23IP-1   |
| A_21_P0013967  | 1,49342 | 1,4344  | 1,041757871 | ENST00000593118 | 100132174 | NR_104134    | LOC100132174    |
| A_22_P00008386 | 1,76067 | 1,70165 | 1,041757871 | N/A             | N/A       | N/A          | Inc-JMJD1C-2    |
| A_33_P3606685  | 1,43267 | 1,37367 | 1,041743429 | ENST00000551894 | 283403    | NM_001242696 | C12orf80        |
| A_22_P00000831 | 1,63834 | 1,57934 | 1,041743429 | ENST00000512527 | 101928656 | NR_108092    | LINC01099       |
| A_22_P00016078 | 1,77709 | 1,71809 | 1,041743429 | ENST00000444586 | N/A       | N/A          | N/A             |
| A_22_P00022922 | 1,61871 | 1,55972 | 1,041736208 | N/A             | N/A       | N/A          | Inc-METTTL11B-2 |
| A_33_P3313855  | 1,65727 | 1,59828 | 1,041736208 | ENST00000563557 | N/A       | AY358233     | N/A             |
| A_21_P0004558  | 1,43176 | 1,37278 | 1,041728987 | N/A             | N/A       | N/A          | Inc-SGTB-4      |
| A_33_P3378430  | 9,84918 | 9,7902  | 1,041728987 | ENST00000275820 | 64434     | NM_138400    | NOM1            |
| A_22_P00000737 | 1,48105 | 1,42208 | 1,041721767 | N/A             | N/A       | N/A          | Inc-ADAMTSL4-2  |

|                |         |         |             |                 |           |              |                  |
|----------------|---------|---------|-------------|-----------------|-----------|--------------|------------------|
| A_22_P00002626 | 5,78048 | 5,72155 | 1,041692885 | N/A             | N/A       | BC038543     | Inc-C1orf138-1   |
| A_33_P3237110  | 2,16852 | 2,10959 | 1,041692885 | ENST00000555369 | 283554    | NM_001099652 | GPR137C          |
| A_22_P00015406 | 1,64166 | 1,58273 | 1,041692885 | N/A             | N/A       | N/A          | Inc-SRPK2-4      |
| A_22_P00007819 | 1,61588 | 1,55695 | 1,041692885 | ENST00000444567 | N/A       | N/A          | N/A              |
| A_33_P3333342  | 1,62928 | 1,57036 | 1,041685664 | N/A             | 401230    | XR_425961    | FLJ46552         |
| A_33_P3406493  | 1,63582 | 1,57691 | 1,041678444 | ENST00000259455 | 9568      | NM_005458    | GABBR2           |
| A_21_P0009800  | 1,47393 | 1,41503 | 1,041671223 | N/A             | N/A       | N/A          | Inc-AC008686.1-1 |
| A_22_P00009973 | 1,77853 | 1,71965 | 1,041656783 | N/A             | N/A       | N/A          | Inc-MKKS-2       |
| A_21_P0005144  | 1,58612 | 1,52725 | 1,041649563 | N/A             | N/A       | N/A          | Inc-C6orf70-4    |
| A_21_P0001169  | 1,46676 | 1,40789 | 1,041649563 | N/A             | N/A       | N/A          | Inc-GDAP2-1      |
| A_24_P290006   | 1,62494 | 1,56608 | 1,041642343 | N/A             | 100129775 | AK094853     | LOC100129775     |
| A_22_P00010610 | 1,59421 | 1,53535 | 1,041642343 | N/A             | N/A       | BX113914     | Inc-NDUFAF2-1    |
| A_21_P0001335  | 1,5757  | 1,51685 | 1,041635122 | N/A             | N/A       | N/A          | Inc-PKN2-1       |
| A_21_P0001898  | 1,75529 | 1,69644 | 1,041635122 | ENST00000439893 | N/A       | N/A          | N/A              |
| A_33_P3519250  | 1,57446 | 1,51561 | 1,041635122 | ENST00000518676 | 284434    | NM_001290355 | NWD1             |
| A_33_P3397608  | 1,4639  | 1,40506 | 1,041627902 | N/A             | N/A       | N/A          | N/A              |
| A_22_P00022987 | 1,70853 | 1,6497  | 1,041620682 | N/A             | N/A       | N/A          | Inc-BMI1-1       |
| A_22_P00020807 | 1,48596 | 1,42713 | 1,041620682 | ENST00000438293 | 643355    | NM_001270945 | LOC643355        |
| A_21_P0000647  | 1,64003 | 1,58121 | 1,041613462 | ENST00000598736 | 400696    | NR_034156    | LGALS17A         |
| A_21_P0009247  | 1,70161 | 1,6428  | 1,041606243 | N/A             | N/A       | N/A          | Inc-TMEM99-1     |
| A_32_P539887   | 1,67292 | 1,61414 | 1,041584583 | ENST00000427509 | 103352539 | NR_121647    | LINC01410        |
| A_22_P00020295 | 1,71406 | 1,65528 | 1,041584583 | ENST00000586905 | N/A       | N/A          | N/A              |
| A_22_P00016926 | 1,5802  | 1,52143 | 1,041577363 | N/A             | N/A       | N/A          | Inc-TSPAN12-1    |
| A_33_P3358109  | 1,47387 | 1,41513 | 1,041555705 | N/A             | N/A       | N/A          | N/A              |
| A_21_P0011927  | 1,68476 | 1,62602 | 1,041555705 | N/A             | 102724482 | N/A          | LOC102724482     |
| A_22_P00008702 | 1,64212 | 1,5834  | 1,041541266 | ENST00000562049 | 100508631 | XR_244604    | LOC100508631     |
| A_32_P119197   | 7,08731 | 7,02859 | 1,041541266 | ENST00000368533 | 7170      | NM_001043352 | TPM3             |
| A_33_P3271226  | 1,48519 | 1,42648 | 1,041534046 | ENST00000303059 | 390154    | NM_001004747 | OR5T3            |
| A_22_P00002396 | 1,60943 | 1,55073 | 1,041526827 | N/A             | N/A       | N/A          | Inc-C14orf102-1  |
| A_22_P00005791 | 1,63693 | 1,57823 | 1,041526827 | ENST00000581798 | N/A       | N/A          | N/A              |
| A_24_P254177   | 10,8902 | 10,8315 | 1,041526827 | ENST00000397349 | 79086     | NM_024104    | SMIM7            |
| A_23_P114952   | 10,0915 | 10,0328 | 1,041526827 | ENST00000472411 | 252839    | NM_016456    | TMEM9            |
| A_22_P00012663 | 1,64445 | 1,58576 | 1,041519608 | N/A             | 100873986 | NR_046596    | FGF12-AS1        |

|                |         |         |             |                 |           |              |                |
|----------------|---------|---------|-------------|-----------------|-----------|--------------|----------------|
| A_21_P0008494  | 1,59585 | 1,53716 | 1,041519608 | N/A             | N/A       | N/A          | Inc-HSP90AA1-3 |
| A_33_P3403162  | 1,60482 | 1,54614 | 1,041512389 | ENST00000519171 | 6570      | NM_001142325 | SLC18A1        |
| A_21_P0001380  | 1,43575 | 1,37708 | 1,041505169 | N/A             | N/A       | N/A          | Inc-NOS1AP-1   |
| A_24_P383459   | 1,66059 | 1,60192 | 1,041505169 | ENST00000319945 | 114804    | NM_052916    | RNF157         |
| A_22_P00004671 | 1,60295 | 1,54429 | 1,04149795  | ENST00000565523 | N/A       | N/A          | N/A            |
| A_33_P3334419  | 3,52808 | 3,46944 | 1,041483512 | ENST00000556776 | 83694     | NM_031464    | RPS6KL1        |
| A_21_P0011868  | 1,44705 | 1,38842 | 1,041476293 | ENST00000427045 | 101927641 | NR_110270    | LOC101927641   |
| A_23_P143857   | 1,63286 | 1,57423 | 1,041476293 | ENST00000396641 | 116135    | NM_052953    | LRRC3B         |
| A_33_P3353230  | 1,47552 | 1,4169  | 1,041469074 | ENST00000526438 | 613211    | NM_001302695 | DEFB134        |
| A_21_P0004398  | 1,46132 | 1,4027  | 1,041469074 | N/A             | N/A       | N/A          | Inc-PLK2-2     |
| A_22_P00008133 | 1,61085 | 1,55223 | 1,041469074 | N/A             | 101927783 | XR_246588    | LOC101927783   |
| A_32_P199429   | 1,44878 | 1,39017 | 1,041461855 | ENST00000400546 | 4685      | AV727525     | NCAM2          |
| A_23_P327426   | 12,1414 | 12,0828 | 1,041454636 | ENST00000367833 | 261726    | NM_152902    | TIPRL          |
| A_21_P0004578  | 1,61944 | 1,56084 | 1,041454636 | N/A             | N/A       | N/A          | Inc-NUDCD2-5   |
| A_21_P0006254  | 1,62692 | 1,56832 | 1,041454636 | N/A             | N/A       | N/A          | Inc-PTPRD-5    |
| A_23_P149664   | 12,2221 | 12,1635 | 1,041454636 | ENST00000367242 | 653659    | NM_001079809 | TMEM183B       |
| A_24_P70117    | 8,95734 | 8,89875 | 1,041447418 | ENST00000559405 | 56986     | NM_020234    | DTWD1          |
| A_22_P00003297 | 1,64496 | 1,58637 | 1,041447418 | N/A             | 100873948 | NR_046678    | NREP-AS1       |
| A_22_P00013902 | 5,38609 | 5,32751 | 1,041440199 | N/A             | N/A       | N/A          | Inc-RPS24-2    |
| A_22_P00010946 | 1,43718 | 1,37861 | 1,04143298  | N/A             | N/A       | N/A          | Inc-NR3C2-1    |
| A_24_P59053    | 1,58384 | 1,52528 | 1,041425762 | ENST00000390387 | N/A       | X58814       | N/A            |
| A_23_P378926   | 1,7214  | 1,66285 | 1,041418543 | ENST00000620793 | 151       | NM_000682    | ADRA2B         |
| A_33_P3415888  | 1,74078 | 1,68223 | 1,041418543 | ENST00000562915 | 374739    | NM_199046    | TEPP           |
| A_33_P3392447  | 1,62098 | 1,56243 | 1,041418543 | ENST00000370580 | 8915      | NM_003921    | BCL10          |
| A_33_P3241681  | 1,63611 | 1,57757 | 1,041411324 | N/A             | 8999      | NM_003948    | CDKL2          |
| A_24_P41975    | 4,73206 | 4,67352 | 1,041411324 | ENST00000458431 | 11022     | NM_001083965 | TDRKH          |
| A_23_P2083     | 1,45731 | 1,39878 | 1,041404106 | ENST00000531618 | 56676     | NM_020646    | ASCL3          |
| A_21_P0005436  | 1,73638 | 1,67786 | 1,041396888 | N/A             | N/A       | N/A          | Inc-CHRM2-2    |
| A_32_P310335   | 1,57367 | 1,51515 | 1,041396888 | ENST00000312957 | 58494     | NM_021219    | JAM2           |
| A_21_P0006948  | 1,44454 | 1,38602 | 1,041396888 | N/A             | N/A       | N/A          | Inc-PITRM1-6   |
| A_23_P4387     | 2,45617 | 2,39766 | 1,041389669 | ENST00000264651 | 192666    | NM_019016    | KRT24          |
| A_21_P0007733  | 1,6218  | 1,56329 | 1,041389669 | N/A             | N/A       | N/A          | Inc-C12orf50-2 |
| A_33_P3235562  | 1,46266 | 1,40415 | 1,041389669 | ENST00000375142 | 832       | NM_001206540 | CAPZB          |

|                |         |         |             |                 |           |              |              |
|----------------|---------|---------|-------------|-----------------|-----------|--------------|--------------|
| A_22_P00021390 | 1,6228  | 1,56429 | 1,041389669 | N/A             | N/A       | BM285382     | Inc-IL18R1-1 |
| A_33_P3401084  | 10,0958 | 10,0373 | 1,041382451 | N/A             | N/A       | N/A          | N/A          |
| A_21_P0010191  | 1,44749 | 1,38901 | 1,041368014 | ENST00000446404 | N/A       | N/A          | N/A          |
| A_22_P00018297 | 1,43855 | 1,38009 | 1,041353578 | N/A             | N/A       | N/A          | Inc-ZNF821-1 |
| A_21_P0007118  | 1,64378 | 1,58533 | 1,04134636  | N/A             | N/A       | N/A          | Inc-CPXM2-1  |
| A_33_P3323347  | 7,07195 | 7,0135  | 1,04134636  | N/A             | 147687    | NM_001297734 | ZNF417       |
| A_21_P0007871  | 1,66428 | 1,60584 | 1,041339142 | N/A             | N/A       | N/A          | Inc-PRB1-1   |
| A_33_P3511265  | 1,77209 | 1,71366 | 1,041331924 | ENST00000473823 | 10631     | NM_006475    | POSTN        |
| A_22_P00009003 | 1,58546 | 1,52704 | 1,041324706 | ENST00000440858 | N/A       | N/A          | N/A          |
| A_33_P3394833  | 1,61475 | 1,55634 | 1,041317488 | N/A             | 401089    | NM_001040061 | FOXL2NB      |
| A_23_P125717   | 1,69531 | 1,63691 | 1,04131027  | ENST00000373079 | 4675      | NM_004538    | NAP1L3       |
| A_23_P305210   | 1,48007 | 1,42167 | 1,04131027  | ENST00000309683 | 340252    | NM_178558    | ZNF680       |
| A_23_P210091   | 12,0805 | 12,0221 | 1,04131027  | ENST00000464789 | 9913      | NM_014860    | SUPT7L       |
| A_23_P213199   | 10,1625 | 10,1041 | 1,04131027  | ENST00000455208 | 79982     | NM_001031723 | DNAJB14      |
| A_21_P0002648  | 1,57012 | 1,51173 | 1,041303052 | N/A             | 102724948 | XR_425373    | LOC102724948 |
| A_33_P3367860  | 1,72418 | 1,66579 | 1,041303052 | ENST00000306960 | 1128      | NM_000738    | CHRM1        |
| A_33_P3325643  | 4,7414  | 4,68301 | 1,041303052 | ENST00000382045 | 400941    | N/A          | LINC00487    |
| A_33_P3295690  | 4,39564 | 4,33726 | 1,041295835 | ENST00000437192 | 646174    | NM_001080524 | C16orf90     |
| A_23_P306890   | 8,54214 | 8,48377 | 1,041288617 | ENST00000585023 | 11201     | NM_007195    | POLI         |
| A_21_P0000376  | 6,16128 | 6,10291 | 1,041288617 | N/A             | 692092    | NR_003049    | SNORD32B     |
| A_33_P3711426  | 1,48313 | 1,42476 | 1,041288617 | N/A             | 100093630 | BM926530     | SNHG8        |
| A_23_P166884   | 1,71672 | 1,65836 | 1,041281399 | ENST00000232461 | 2779      | NM_000172    | GNAT1        |
| A_23_P312610   | 7,66243 | 7,60407 | 1,041281399 | N/A             | 3338      | BC010145     | DNAJC4       |
| A_21_P0004460  | 1,66704 | 1,60868 | 1,041281399 | N/A             | N/A       | N/A          | Inc-EBF1-2   |
| A_33_P3272105  | 1,44564 | 1,38729 | 1,041274182 | N/A             | 651430    | NR_046264    | FLJ38576     |
| A_21_P0005067  | 1,47868 | 1,42034 | 1,041266964 | N/A             | N/A       | N/A          | Inc-SHPRH-1  |
| A_22_P00025813 | 1,61942 | 1,56108 | 1,041266964 | ENST00000514287 | N/A       | DA333300     | N/A          |
| A_33_P3356245  | 6,88772 | 6,82938 | 1,041266964 | ENST00000196489 | 55659     | NM_017879    | ZNF416       |
| A_21_P0011233  | 1,643   | 1,58466 | 1,041266964 | N/A             | N/A       | N/A          | Inc-GPR183-1 |
| A_22_P00015951 | 1,58104 | 1,52271 | 1,041259747 | N/A             | N/A       | BC035790     | Inc-TDRD5-1  |
| A_23_P53450    | 1,44034 | 1,38203 | 1,041245312 | ENST00000257974 | 3888      | NM_033033    | KRT82        |
| A_32_P489      | 1,464   | 1,4057  | 1,041238095 | ENST00000414038 | 100132735 | NR_038399    | LOC100132735 |
| A_33_P3335614  | 1,69888 | 1,64059 | 1,041230877 | N/A             | 100128378 | NR_027331    | LINC00696    |



|                |         |         |             |                 |           |              |                |
|----------------|---------|---------|-------------|-----------------|-----------|--------------|----------------|
| A_33_P3297280  | 1,60079 | 1,5425  | 1,041230877 | N/A             | N/A       | N/A          | N/A            |
| A_22_P00005180 | 1,57452 | 1,51625 | 1,041216443 | ENST00000434418 | N/A       | N/A          | N/A            |
| A_33_P3642648  | 6,47686 | 6,4186  | 1,041209226 | N/A             | 10794     | NM_006635    | ZNF460         |
| A_23_P13548    | 1,57227 | 1,51401 | 1,041209226 | ENST00000376332 | 25884     | AF332891     | CHRDL2         |
| A_22_P00024356 | 1,7369  | 1,67866 | 1,041194792 | ENST00000437803 | N/A       | N/A          | N/A            |
| A_21_P0011673  | 1,70511 | 1,64687 | 1,041194792 | N/A             | N/A       | N/A          | XLOC_I2_006594 |
| A_23_P86540    | 1,70239 | 1,64416 | 1,041187575 | ENST00000298032 | 219681    | NM_173081    | ARMC3          |
| A_22_P00000770 | 1,67243 | 1,61421 | 1,041180358 | ENST00000579835 | N/A       | DR156097     | N/A            |
| A_24_P178819   | 1,64972 | 1,5915  | 1,041180358 | ENST00000390437 | N/A       | AY135834     | N/A            |
| A_21_P0009688  | 1,56784 | 1,50962 | 1,041180358 | N/A             | N/A       | N/A          | Inc-TPM4-2     |
| A_21_P0010744  | 18,8092 | 18,751  | 1,041165924 | ENST00000445817 | 6222      | NM_022551    | RPS18          |
| A_23_P55586    | 1,63888 | 1,58069 | 1,041158707 | ENST00000536675 | 28316     | NM_031891    | CDH20          |
| A_22_P00021132 | 1,61559 | 1,5574  | 1,041158707 | ENST00000442478 | 101930747 | N/A          | LINC00380      |
| A_21_P0009756  | 1,57732 | 1,51914 | 1,04115149  | N/A             | N/A       | N/A          | Inc-UQCRFS1-5  |
| A_24_P355057   | 1,61993 | 1,56175 | 1,04115149  | ENST00000194130 | 6561      | NM_022444    | SLC13A1        |
| A_21_P0004964  | 1,45177 | 1,39361 | 1,041137057 | N/A             | N/A       | N/A          | Inc-FNDC1-2    |
| A_24_P397435   | 1,74766 | 1,68951 | 1,04112984  | ENST00000621716 | 6531      | NM_001044    | SLC6A3         |
| A_21_P0004386  | 1,6836  | 1,62545 | 1,04112984  | N/A             | N/A       | N/A          | Inc-MOCS2-2    |
| A_22_P00003905 | 1,46611 | 1,40797 | 1,041122624 | ENST00000545912 | N/A       | N/A          | N/A            |
| A_21_P0006846  | 1,63059 | 1,57246 | 1,041115407 | N/A             | N/A       | N/A          | Inc-BAMBI-1    |
| A_21_P0000843  | 1,64053 | 1,5824  | 1,041115407 | ENST00000500695 | 100507250 | NR_038930    | LOC100507250   |
| A_19_P00321781 | 7,52863 | 7,4705  | 1,041115407 | ENST00000554129 | 100506499 | BC067360     | LOC100506499   |
| A_21_P0003310  | 1,62007 | 1,56196 | 1,041100975 | N/A             | N/A       | N/A          | Inc-CRYGS-1    |
| A_21_P0005245  | 1,61591 | 1,5578  | 1,041100975 | ENST00000448260 | N/A       | N/A          | N/A            |
| A_21_P0008635  | 1,50081 | 1,4427  | 1,041100975 | ENST00000569661 | N/A       | N/A          | N/A            |
| A_33_P3360296  | 2,01035 | 1,95225 | 1,041093758 | ENST00000622632 | 195977    | NM_001278688 | ANTXRL         |
| A_21_P0014181  | 1,61885 | 1,56075 | 1,041093758 | N/A             | 102723953 | XR_426129    | LOC102723953   |
| A_23_P403588   | 1,621   | 1,5629  | 1,041093758 | ENST00000305481 | 55031     | NM_017944    | USP47          |
| A_23_P88731    | 12,107  | 12,0489 | 1,041093758 | ENST00000525066 | 5888      | NM_002875    | RAD51          |
| A_21_P0012671  | 1,71901 | 1,66092 | 1,041086542 | N/A             | 101928987 | N/A          | LOC101928987   |
| A_22_P00016282 | 1,67571 | 1,61762 | 1,041086542 | N/A             | N/A       | BG211882     | Inc-TMEM126B-1 |
| A_23_P300600   | 1,62979 | 1,5717  | 1,041086542 | ENST00000310624 | 4744      | NM_021076    | NEFH           |
| A_22_P00015240 | 1,57115 | 1,51307 | 1,041079326 | ENST00000519566 | N/A       | N/A          | N/A            |

|                |         |         |             |                 |           |              |                |
|----------------|---------|---------|-------------|-----------------|-----------|--------------|----------------|
| A_33_P3364849  | 1,56779 | 1,50971 | 1,041079326 | ENST00000417646 | N/A       | N/A          | N/A            |
| A_21_P0007091  | 1,44777 | 1,38969 | 1,041079326 | N/A             | N/A       | N/A          | Inc-PITRM1-2   |
| A_22_P00021737 | 1,46142 | 1,40335 | 1,04107211  | ENST00000414965 | N/A       | N/A          | N/A            |
| A_21_P0007053  | 1,58637 | 1,52832 | 1,041057677 | N/A             | N/A       | N/A          | Inc-BAMBI-1    |
| A_22_P00011702 | 1,65699 | 1,59894 | 1,041057677 | N/A             | N/A       | N/A          | Inc-PDSS2-1    |
| A_33_P3354137  | 16,6623 | 16,6043 | 1,041021598 | ENST00000360240 | 4134      | NM_030885    | MAP4           |
| A_22_P00001967 | 1,48347 | 1,42548 | 1,041014382 | N/A             | N/A       | N/A          | Inc-BCAN-1     |
| A_22_P00000167 | 1,62641 | 1,56842 | 1,041014382 | N/A             | 100188954 | NR_024130    | DNMBP-AS1      |
| A_21_P0006665  | 1,76222 | 1,70423 | 1,041014382 | ENST00000450581 | N/A       | N/A          | N/A            |
| A_33_P3373348  | 1,64806 | 1,59008 | 1,041007166 | ENST00000483600 | 3899      | N/A          | AFF3           |
| A_23_P356677   | 1,4921  | 1,43412 | 1,041007166 | ENST00000539869 | 10846     | NM_001130690 | PDE10A         |
| A_33_P3250173  | 1,61539 | 1,55743 | 1,040992735 | ENST00000451172 | 654502    | NM_001042705 | IQCJ           |
| A_23_P157895   | 1,56992 | 1,51198 | 1,040978304 | ENST00000190165 | 58524     | NM_021240    | DMRT3          |
| A_22_P00005348 | 1,62825 | 1,57031 | 1,040978304 | ENST00000457405 | N/A       | N/A          | N/A            |
| A_24_P365349   | 1,78114 | 1,72321 | 1,040971088 | ENST00000391767 | 59284     | NM_031896    | CACNG7         |
| A_33_P3355468  | 1,75565 | 1,69772 | 1,040971088 | N/A             | 100128006 | NR_104607    | LOC100128006   |
| A_22_P00022497 | 1,48446 | 1,42653 | 1,040971088 | N/A             | N/A       | AK092440     | Inc-FAM129B-1  |
| A_21_P0006593  | 1,71704 | 1,65912 | 1,040963873 | ENST00000439525 | 100873964 | NR_046505    | LINC00280      |
| A_21_P0005736  | 1,5019  | 1,44398 | 1,040963873 | N/A             | N/A       | N/A          | Inc-PTDSS1-2   |
| A_32_P160563   | 1,4568  | 1,39889 | 1,040956657 | ENST00000524381 | 4978      | NM_001012393 | OPCML          |
| A_23_P31844    | 11,1264 | 11,0685 | 1,040949442 | ENST00000523482 | 526       | NM_001693    | ATP6V1B2       |
| A_22_P00015837 | 1,44984 | 1,39194 | 1,040949442 | N/A             | N/A       | BC035412     | Inc-TBC1D8-1   |
| A_23_P169409   | 14,6337 | 14,5758 | 1,040949442 | ENST00000297613 | 138716    | NM_148179    | RPP25L         |
| A_23_P392738   | 1,47058 | 1,41269 | 1,040942227 | ENST00000382510 | 57055     | NM_001005785 | DAZZ           |
| A_22_P00022383 | 1,57303 | 1,51514 | 1,040942227 | N/A             | N/A       | N/A          | Inc-HLA-DQA1-5 |
| A_21_P0004243  | 1,60431 | 1,54642 | 1,040942227 | N/A             | N/A       | N/A          | Inc-PTGER4-1   |
| A_22_P00023722 | 1,63239 | 1,5745  | 1,040942227 | ENST00000548199 | N/A       | N/A          | N/A            |
| A_24_P852756   | 1,61676 | 1,55888 | 1,040935012 | ENST00000546801 | 3118      | NM_020056    | HLA-DQA2       |
| A_23_P160004   | 1,48809 | 1,43022 | 1,040927796 | ENST00000623852 | 7404      | NM_182660    | UTY            |
| A_21_P0011096  | 1,44672 | 1,38886 | 1,040920581 | N/A             | N/A       | N/A          | XLOC_I2_003400 |
| A_23_P256821   | 1,67786 | 1,62001 | 1,040913366 | ENST00000400960 | 1378      | NM_000651    | CR1            |
| A_24_P417664   | 1,61412 | 1,55629 | 1,040898936 | ENST00000469549 | 387707    | XM_006717833 | CC2D2B         |
| A_21_P0006719  | 1,56708 | 1,50925 | 1,040898936 | ENST00000418524 | N/A       | N/A          | N/A            |

|                |         |         |             |                 |           |              |                  |
|----------------|---------|---------|-------------|-----------------|-----------|--------------|------------------|
| A_21_P0011421  | 1,64518 | 1,58735 | 1,040898936 | N/A             | N/A       | N/A          | XLOC_I2_005152   |
| A_22_P00002052 | 1,43116 | 1,37334 | 1,040891721 | N/A             | N/A       | N/A          | Inc-BIN1-3       |
| A_21_P0005064  | 1,46918 | 1,41137 | 1,040884506 | N/A             | N/A       | N/A          | Inc-CITED2-1     |
| A_21_P0006973  | 1,63629 | 1,57849 | 1,040877291 | N/A             | N/A       | N/A          | Inc-NMT2-1       |
| A_22_P00000713 | 1,5711  | 1,5133  | 1,040877291 | ENST00000503757 | 101929153 | NR_104619    | LOC101929153     |
| A_33_P3559138  | 14,0898 | 14,032  | 1,040877291 | ENST00000453784 | N/A       | AK124194     | N/A              |
| A_22_P00017955 | 1,61707 | 1,55929 | 1,040862862 | N/A             | 100861542 | NR_047483    | LINC00554        |
| A_33_P3389802  | 1,77818 | 1,7204  | 1,040862862 | ENST00000585297 | 101928235 | XR_248321    | LOC101928235     |
| A_22_P00022389 | 1,64469 | 1,58692 | 1,040855647 | ENST00000567261 | N/A       | N/A          | N/A              |
| A_21_P0004814  | 1,63006 | 1,57231 | 1,040841218 | N/A             | N/A       | N/A          | Inc-FOXF2-1      |
| A_21_P0004368  | 1,63099 | 1,57324 | 1,040841218 | N/A             | N/A       | N/A          | Inc-CDH10-2      |
| A_21_P0004127  | 1,56672 | 1,50897 | 1,040841218 | ENST00000510349 | N/A       | N/A          | N/A              |
| A_24_P74559    | 1,48376 | 1,42602 | 1,040834003 | ENST00000457992 | 27128     | NM_013385    | CYTH4            |
| A_21_P0014540  | 1,65637 | 1,59864 | 1,040826789 | N/A             | N/A       | N/A          | N/A              |
| A_33_P3210258  | 1,44369 | 1,38596 | 1,040826789 | ENST00000390345 | N/A       | N/A          | N/A              |
| A_22_P00013945 | 1,44768 | 1,38996 | 1,040819575 | ENST00000577041 | 400500    | NR_024050    | BCAR4            |
| A_33_P3389291  | 1,757   | 1,69928 | 1,040819575 | ENST00000352903 | 374618    | NM_001286449 | TEX9             |
| A_33_P3339021  | 1,5028  | 1,44509 | 1,04081236  | ENST00000463200 | 255025    | N/A          | LINC00879        |
| A_33_P3237704  | 8,6563  | 8,5986  | 1,040805146 | N/A             | N/A       | N/A          | N/A              |
| A_33_P3414922  | 1,43613 | 1,37843 | 1,040805146 | N/A             | N/A       | BC070144     | N/A              |
| A_22_P00011068 | 5,42362 | 5,36593 | 1,040797932 | N/A             | N/A       | N/A          | Inc-NUAK1-2      |
| A_33_P3365082  | 1,45273 | 1,39505 | 1,040790717 | ENST00000343414 | 391211    | NM_001013355 | OR2G6            |
| A_24_P156635   | 1,74096 | 1,68328 | 1,040790717 | ENST00000367639 | 84066     | NM_032126    | TEX35            |
| A_22_P00001015 | 1,44423 | 1,38655 | 1,040790717 | N/A             | N/A       | N/A          | Inc-AL360004.1-2 |
| A_23_P127107   | 1,44335 | 1,38569 | 1,040776289 | ENST00000368671 | 119467    | NM_152311    | CLRN3            |
| A_33_P3278013  | 1,64224 | 1,58459 | 1,040769075 | ENST00000369477 | 914       | N/A          | CD2              |
| A_21_P0007710  | 1,47621 | 1,41856 | 1,040769075 | N/A             | N/A       | N/A          | Inc-CALCOCO1-1   |
| A_33_P3385755  | 1,71056 | 1,65291 | 1,040769075 | N/A             | N/A       | N/A          | N/A              |
| A_21_P0012082  | 1,44486 | 1,38722 | 1,040761861 | ENST00000614900 | N/A       | N/A          | N/A              |
| A_22_P00004034 | 1,49687 | 1,43924 | 1,040754647 | ENST00000448365 | N/A       | AK094915     | N/A              |
| A_21_P0005423  | 1,45202 | 1,3944  | 1,040747433 | N/A             | 102724577 | XR_426238    | LOC102724577     |
| A_22_P00010496 | 1,66307 | 1,60545 | 1,040747433 | N/A             | 10408     | NR_026766    | MYCNOS           |
| A_22_P00000310 | 1,70231 | 1,64469 | 1,040747433 | ENST00000426527 | N/A       | N/A          | N/A              |

|                |         |         |             |                 |           |           |                  |
|----------------|---------|---------|-------------|-----------------|-----------|-----------|------------------|
| A_19_P00316544 | 1,569   | 1,5114  | 1,040733005 | ENST00000513273 | 102467213 | NR_104671 | LOC102467213     |
| A_33_P6433406  | 18,3742 | 18,3166 | 1,040733005 | ENST00000217185 | 5753      | NM_005975 | PTK6             |
| A_22_P00019463 | 1,61223 | 1,55464 | 1,040725791 | ENST00000418416 | N/A       | N/A       | N/A              |
| A_33_P3376872  | 1,49999 | 1,4424  | 1,040725791 | ENST00000374666 | 23436     | NM_007352 | CELA3B           |
| A_24_P42066    | 4,39351 | 4,33594 | 1,040711364 | ENST00000617623 | 2679      | NR_003267 | GGT3P            |
| A_21_P0007518  | 1,71177 | 1,6542  | 1,040711364 | N/A             | N/A       | N/A       | Inc-PLEKHG6-3    |
| A_33_P3388564  | 2,80068 | 2,74312 | 1,04070415  | ENST00000574357 | 124637    | NM_144607 | CYB5D1           |
| A_22_P00000419 | 6,24784 | 6,19028 | 1,04070415  | N/A             | 100874214 | NR_121665 | TM4SF19-AS1      |
| A_33_P3298398  | 1,45122 | 1,39368 | 1,040689723 | N/A             | N/A       | N/A       | N/A              |
| A_33_P3302777  | 1,75429 | 1,69677 | 1,040675296 | ENST00000379892 | 9201      | NM_004734 | DCLK1            |
| A_22_P00014181 | 1,64263 | 1,58511 | 1,040675296 | ENST00000444465 | 90632     | NR_026861 | LINC00473        |
| A_23_P319626   | 1,49571 | 1,43819 | 1,040675296 | ENST00000359227 | 1995      | NM_001420 | ELAVL3           |
| A_22_P00003942 | 1,5675  | 1,50998 | 1,040675296 | N/A             | N/A       | BX102427  | Inc-CHAC1-4      |
| A_22_P00008679 | 1,63714 | 1,57963 | 1,040668083 | N/A             | N/A       | N/A       | Inc-KIAA0913-2   |
| A_21_P0008847  | 1,46228 | 1,40478 | 1,04066087  | N/A             | 102724553 | XR_424631 | LOC102724553     |
| A_21_P0011886  | 1,72554 | 1,66804 | 1,04066087  | ENST00000443866 | 728763    | N/A       | LOC728763        |
| A_22_P00004200 | 1,66406 | 1,60656 | 1,04066087  | ENST00000298912 | 79789     | NM_024734 | CLMN             |
| A_22_P00025870 | 1,64746 | 1,58996 | 1,04066087  | ENST00000456938 | N/A       | BC026193  | N/A              |
| A_22_P00017498 | 15,2484 | 15,1909 | 1,04066087  | N/A             | N/A       | N/A       | Inc-VWF-2        |
| A_22_P00009775 | 1,56978 | 1,51229 | 1,040653656 | N/A             | N/A       | N/A       | Inc-MED13L-3     |
| A_22_P00014237 | 2,15702 | 2,09954 | 1,040646443 | ENST00000556144 | N/A       | N/A       | N/A              |
| A_22_P00006186 | 4,0409  | 3,98342 | 1,040646443 | N/A             | N/A       | AK092443  | Inc-FAM211A-3    |
| A_21_P0002989  | 1,46485 | 1,40738 | 1,04063923  | N/A             | N/A       | N/A       | Inc-CADM2-4      |
| A_22_P00020468 | 2,01805 | 1,9606  | 1,040624804 | N/A             | 100874068 | NR_046541 | GRTP1-AS1        |
| A_21_P0005291  | 1,50188 | 1,44443 | 1,040624804 | N/A             | N/A       | N/A       | Inc-RP9-1        |
| A_22_P00015266 | 1,48706 | 1,42961 | 1,040624804 | N/A             | N/A       | BE794381  | Inc-SPANXN4-1    |
| A_21_P0012534  | 1,65222 | 1,59479 | 1,040610378 | N/A             | 101927394 | N/A       | LOC101927394     |
| A_21_P0002028  | 1,47282 | 1,4154  | 1,040603165 | ENST00000430429 | N/A       | N/A       | N/A              |
| A_33_P3253179  | 1,57383 | 1,51641 | 1,040603165 | N/A             | N/A       | N/A       | N/A              |
| A_21_P0009607  | 1,4424  | 1,38498 | 1,040603165 | N/A             | N/A       | N/A       | Inc-WDR7-4       |
| A_22_P00000547 | 1,8501  | 1,7927  | 1,040588739 | N/A             | N/A       | N/A       | Inc-AC115618.1-1 |
| A_33_P3363290  | 1,45544 | 1,39804 | 1,040588739 | N/A             | N/A       | N/A       | N/A              |
| A_22_P00001653 | 1,47383 | 1,41644 | 1,040581526 | N/A             | 102723320 | NR_120374 | CERS3-AS1        |

|                |         |         |             |                 |           |              |                       |
|----------------|---------|---------|-------------|-----------------|-----------|--------------|-----------------------|
| A_23_P346813   | 1,62458 | 1,56719 | 1,040581526 | ENST00000518291 | 5063      | NM_002578    | PAK3                  |
| A_21_P0006298  | 1,632   | 1,57462 | 1,040574313 | N/A             | N/A       | N/A          | Inc-TSTD2-3           |
| A_21_P0009041  | 1,42797 | 1,3706  | 1,040567101 | N/A             | N/A       | N/A          | Inc-RP11-105C20.2.1-2 |
| A_21_P0012604  | 1,59391 | 1,53655 | 1,040559888 | N/A             | N/A       | N/A          | XLOC_I2_010772        |
| A_21_P0008822  | 1,62612 | 1,56878 | 1,040545463 | N/A             | 102724283 | XR_429515    | LOC102724283          |
| A_22_P00002830 | 1,57838 | 1,52104 | 1,040545463 | ENST00000491538 | 129852    | N/A          | C2orf73               |
| A_21_P0008600  | 1,61484 | 1,5575  | 1,040545463 | N/A             | N/A       | N/A          | Inc-C15orf2-2         |
| A_33_P3418681  | 1,68158 | 1,62425 | 1,040538251 | ENST00000261917 | 10021     | NM_005477    | HCN4                  |
| A_23_P210835   | 1,50396 | 1,44663 | 1,040538251 | ENST00000536311 | 4661      | NM_004535    | MYT1                  |
| A_21_P0004897  | 1,43738 | 1,38006 | 1,040531038 | N/A             | N/A       | N/A          | Inc-OGFRL1-3          |
| A_21_P0004394  | 1,44291 | 1,38559 | 1,040531038 | N/A             | N/A       | N/A          | Inc-CTC-236F12.4.1-3  |
| A_21_P0007160  | 1,80463 | 1,74733 | 1,040516613 | ENST00000511013 | 101928443 | NR_120529    | LOC101928443          |
| A_21_P0003353  | 1,58074 | 1,52344 | 1,040516613 | ENST00000512170 | N/A       | N/A          | N/A                   |
| A_33_P3303245  | 1,47566 | 1,41837 | 1,040509401 | ENST00000288135 | 3815      | NM_001093772 | KIT                   |
| A_33_P3374907  | 1,57878 | 1,5215  | 1,040502189 | ENST00000432204 | N/A       | N/A          | N/A                   |
| A_33_P3418597  | 9,56996 | 9,51269 | 1,040494977 | ENST00000618518 | 10634     | NM_152236    | GAS2L1                |
| A_21_P0001814  | 1,78027 | 1,723   | 1,040494977 | ENST00000456327 | N/A       | N/A          | N/A                   |
| A_22_P00016706 | 1,46901 | 1,41174 | 1,040494977 | N/A             | N/A       | N/A          | Inc-TRAF6-1           |
| A_22_P00000296 | 1,62414 | 1,56688 | 1,040487765 | N/A             | 100506937 | XR_108820    | LOC100506937          |
| A_22_P00000544 | 1,74346 | 1,68621 | 1,040480552 | N/A             | N/A       | N/A          | Inc-AC114947.1.1-1    |
| A_22_P00015298 | 1,4315  | 1,37426 | 1,04047334  | N/A             | N/A       | N/A          | Inc-SPG11-3           |
| A_22_P00009692 | 1,64456 | 1,58732 | 1,04047334  | ENST00000424083 | N/A       | N/A          | N/A                   |
| A_23_P119611   | 3,05089 | 2,99366 | 1,040466128 | ENST00000270310 | 53822     | NM_022006    | FXYP7                 |
| A_21_P0003544  | 1,56626 | 1,50904 | 1,040458916 | ENST00000503093 | N/A       | N/A          | N/A                   |
| A_23_P396115   | 1,78938 | 1,73216 | 1,040458916 | ENST00000376909 | 280658    | NM_173358    | SSX7                  |
| A_23_P19691    | 14,5469 | 14,4897 | 1,040444493 | ENST00000607197 | 23593     | NM_014320    | HEBP2                 |
| A_21_P0007746  | 1,46412 | 1,40692 | 1,040444493 | N/A             | N/A       | N/A          | Inc-CDK17-4           |
| A_23_P58353    | 14,4683 | 14,4111 | 1,040444493 | ENST00000352301 | 3184      | NM_031370    | HNRNP                 |
| A_22_P00001920 | 1,57406 | 1,51686 | 1,040444493 | ENST00000562989 | N/A       | BC041936     | N/A                   |
| A_23_P137948   | 12,41   | 12,3528 | 1,040444493 | ENST00000473900 | 29937     | NM_013349    | NENF                  |
| A_32_P96134    | 8,33264 | 8,27545 | 1,040437281 | ENST00000608314 | 23333     | NM_015283    | DPY19L1               |
| A_33_P3345737  | 1,65389 | 1,59671 | 1,040430069 | N/A             | 101928436 | N/A          | LOC101928436          |
| A_33_P3508541  | 1,6444  | 1,58722 | 1,040430069 | ENST00000592572 | 400622    | XR_243762    | LOC400622             |

|                |         |         |             |                 |           |              |              |
|----------------|---------|---------|-------------|-----------------|-----------|--------------|--------------|
| A_22_P00021751 | 1,47295 | 1,41578 | 1,040422858 | ENST00000445784 | N/A       | AL137642     | N/A          |
| A_22_P00002010 | 1,63427 | 1,57714 | 1,040394011 | ENST00000445908 | N/A       | N/A          | N/A          |
| A_21_P0002509  | 1,56771 | 1,51058 | 1,040394011 | N/A             | N/A       | N/A          | Inc-NXP2-2   |
| A_22_P00016697 | 1,64205 | 1,58493 | 1,0403868   | ENST00000412828 | N/A       | BX091427     | N/A          |
| A_21_P0001560  | 1,76959 | 1,71248 | 1,040379588 | N/A             | N/A       | N/A          | Inc-OLFM3-1  |
| A_22_P00012939 | 1,60994 | 1,55283 | 1,040379588 | N/A             | N/A       | N/A          | Inc-RD3-1    |
| A_23_P217120   | 10,3383 | 10,2812 | 1,040372377 | ENST00000475564 | 79813     | NM_024757    | EHMT1        |
| A_21_P0003711  | 1,60787 | 1,55077 | 1,040372377 | ENST00000382882 | N/A       | N/A          | N/A          |
| A_33_P3362143  | 7,40465 | 7,34755 | 1,040372377 | N/A             | 284900    | NR_026962    | TTC28-AS1    |
| A_22_P00023508 | 1,42815 | 1,37106 | 1,040365166 | ENST00000548215 | N/A       | N/A          | N/A          |
| A_24_P938433   | 1,45088 | 1,3938  | 1,040357955 | ENST00000492307 | N/A       | N/A          | N/A          |
| A_22_P00012466 | 3,80349 | 3,74642 | 1,040350743 | N/A             | N/A       | N/A          | Inc-PRR15L-4 |
| A_23_P94754    | 1,6175  | 1,56043 | 1,040350743 | ENST00000374044 | 9966      | NM_005118    | TNFSF15      |
| A_32_P394491   | 1,66669 | 1,60963 | 1,040343532 | N/A             | 645591    | NR_034141    | LHFPL3-AS1   |
| A_21_P0008269  | 1,56429 | 1,50723 | 1,040343532 | ENST00000514902 | 100131366 | NR_033938    | LINC00605    |
| A_21_P0000767  | 1,70483 | 1,64777 | 1,040343532 | N/A             | 100505540 | NR_038330    | SLIT1-AS1    |
| A_22_P00016945 | 1,61244 | 1,55538 | 1,040343532 | ENST00000445253 | 252954    | NR_001539    | TTY2         |
| A_22_P00001623 | 1,47823 | 1,42117 | 1,040343532 | N/A             | N/A       | N/A          | Inc-ASAH2B-4 |
| A_21_P0007701  | 1,56851 | 1,51145 | 1,040343532 | N/A             | 101930164 | XR_429125    | LOC101930164 |
| A_22_P00003456 | 1,64059 | 1,58353 | 1,040343532 | ENST00000551856 | N/A       | N/A          | N/A          |
| A_21_P0008106  | 1,67145 | 1,61441 | 1,04032911  | N/A             | N/A       | N/A          | Inc-CLDN10-1 |
| A_21_P0005715  | 1,56516 | 1,50812 | 1,04032911  | ENST00000520259 | 101926892 | NR_110653    | LOC101926892 |
| A_22_P00011703 | 1,44751 | 1,39047 | 1,04032911  | N/A             | N/A       | N/A          | Inc-PDSS2-2  |
| A_21_P0006018  | 1,68841 | 1,63137 | 1,04032911  | ENST00000422909 | N/A       | N/A          | N/A          |
| A_33_P3300858  | 1,56529 | 1,50825 | 1,04032911  | ENST00000313472 | 390152    | NM_001005201 | OR8H3        |
| A_33_P3285032  | 1,67401 | 1,61699 | 1,040314688 | ENST00000360759 | 26496     | NM_001003745 | OR10A3       |
| A_21_P0009812  | 1,7201  | 1,66309 | 1,040307477 | N/A             | N/A       | N/A          | Inc-NCOA3-7  |
| A_23_P70480    | 14,4631 | 14,4061 | 1,040300267 | N/A             | 8368      | NM_003546    | HIST1H4L     |
| A_22_P00020165 | 4,52708 | 4,47009 | 1,040293056 | N/A             | N/A       | N/A          | Inc-CTSZ-1   |
| A_33_P3227329  | 1,96939 | 1,9124  | 1,040293056 | ENST00000330258 | 139285    | NM_152424    | AMER1        |
| A_33_P3846114  | 1,76151 | 1,70452 | 1,040293056 | ENST00000448597 | 286442    | NR_038968    | LINC01281    |
| A_21_P0005018  | 1,44457 | 1,38758 | 1,040293056 | N/A             | N/A       | N/A          | Inc-OR2W1-1  |
| A_21_P0004162  | 1,58744 | 1,53046 | 1,040285845 | N/A             | N/A       | N/A          | Inc-GIN1-1   |

|                |         |         |             |                 |           |              |                  |
|----------------|---------|---------|-------------|-----------------|-----------|--------------|------------------|
| A_21_P0011425  | 1,48335 | 1,42637 | 1,040285845 | N/A             | N/A       | N/A          | XLOC_I2_005179   |
| A_21_P0013678  | 1,61619 | 1,55921 | 1,040285845 | N/A             | N/A       | N/A          | XLOC_I2_015306   |
| A_33_P3394040  | 8,99967 | 8,94269 | 1,040285845 | ENST00000405384 | 64225     | NM_022374    | ATL2             |
| A_23_P210496   | 9,95143 | 9,89445 | 1,040285845 | ENST00000372409 | 63935     | NM_022104    | PCIF1            |
| A_22_P00000942 | 1,73888 | 1,68191 | 1,040278634 | ENST00000428920 | N/A       | N/A          | N/A              |
| A_33_P3414917  | 1,6935  | 1,63653 | 1,040278634 | ENST00000623935 | N/A       | AK056229     | N/A              |
| A_22_P00003437 | 1,58901 | 1,53205 | 1,040271424 | N/A             | 100862662 | NR_046383    | ALDH1L1-AS2      |
| A_22_P00015602 | 1,67425 | 1,61729 | 1,040271424 | N/A             | N/A       | BC020420     | Inc-STXBP6-2     |
| A_21_P0010533  | 1,47147 | 1,41451 | 1,040271424 | ENST00000436262 | N/A       | N/A          | N/A              |
| A_33_P3391005  | 7,58066 | 7,5237  | 1,040271424 | ENST00000382850 | 23327     | NM_001144967 | NEDD4L           |
| A_21_P0001360  | 4,19221 | 4,13526 | 1,040264213 | N/A             | N/A       | N/A          | Inc-PRMT6-2      |
| A_33_P3303857  | 1,63352 | 1,57657 | 1,040264213 | ENST00000368055 | 114836    | NM_001184714 | SLAMF6           |
| A_21_P0012028  | 1,56346 | 1,50652 | 1,040257003 | ENST00000414256 | 401014    | N/A          | TEX41            |
| A_22_P00006434 | 1,57302 | 1,51609 | 1,040249792 | ENST00000417654 | N/A       | N/A          | N/A              |
| A_21_P0003446  | 1,65162 | 1,5947  | 1,040242582 | ENST00000504402 | 730971    | N/A          | FLJ36777         |
| A_22_P00018484 | 1,58564 | 1,52873 | 1,040235371 | N/A             | N/A       | CD673702     | Inc-AC073348.1-1 |
| A_24_P927614   | 1,5821  | 1,52519 | 1,040235371 | ENST00000524977 | N/A       | AY358247     | N/A              |
| A_21_P0014641  | 1,44025 | 1,38335 | 1,040228161 | N/A             | 101929315 | XR_426291    | LOC101929315     |
| A_23_P98565    | 1,56769 | 1,51081 | 1,04021374  | ENST00000525397 | 84689     | NM_032597    | MS4A14           |
| A_21_P0006760  | 1,69435 | 1,63748 | 1,04020653  | N/A             | 100506769 | N/A          | C10orf71-AS1     |
| A_22_P00008621 | 1,43942 | 1,38255 | 1,04020653  | N/A             | N/A       | N/A          | Inc-KDM6A-1      |
| A_21_P0001710  | 1,44787 | 1,391   | 1,04020653  | N/A             | N/A       | N/A          | Inc-NAV1-1       |
| A_24_P63019    | 1,46188 | 1,40503 | 1,04019211  | ENST00000457817 | 7850      | NM_004633    | IL1R2            |
| A_33_P3412335  | 1,62617 | 1,56932 | 1,04019211  | N/A             | 100128356 | AY423624     | LOC100128356     |
| A_33_P3402404  | 1,67879 | 1,62195 | 1,0401849   | ENST00000392770 | 55800     | NM_018400    | SCN3B            |
| A_19_P00321390 | 1,59424 | 1,5374  | 1,0401849   | ENST00000602621 | 100422737 | NR_033557    | LOC100422737     |
| A_22_P00013752 | 1,73515 | 1,67831 | 1,0401849   | ENST00000521906 | 389676    | N/A          | C8orf87          |
| A_21_P0013068  | 1,93013 | 1,87331 | 1,04017048  | N/A             | 101928743 | XR_241992    | LOC101928743     |
| A_22_P00005164 | 1,61989 | 1,56307 | 1,04017048  | ENST00000554307 | N/A       | N/A          | N/A              |
| A_22_P00009125 | 4,72148 | 4,66467 | 1,04016327  | ENST00000524012 | N/A       | XR_133485    | N/A              |
| A_21_P0003180  | 2,90006 | 2,84326 | 1,04015606  | N/A             | N/A       | N/A          | Inc-MSL2-1       |
| A_21_P0003218  | 1,60831 | 1,55151 | 1,04015606  | N/A             | N/A       | N/A          | Inc-GALNTL2-1    |
| A_23_P131365   | 13,5046 | 13,4478 | 1,04015606  | ENST00000449699 | 4719      | NM_005006    | NDUFS1           |

|                |         |         |             |                 |           |              |                    |
|----------------|---------|---------|-------------|-----------------|-----------|--------------|--------------------|
| A_22_P00019482 | 1,62765 | 1,57088 | 1,040134431 | ENST00000509416 | N/A       | N/A          | N/A                |
| A_21_P0002791  | 1,47026 | 1,41351 | 1,040120012 | ENST00000498413 | 104310350 | N/A          | LINC01327          |
| A_21_P0011299  | 6,56649 | 6,50974 | 1,040120012 | N/A             | N/A       | N/A          | XLOC_I2_004595     |
| A_33_P3357382  | 8,18377 | 8,12703 | 1,040112802 | ENST00000485040 | 23126     | BC057773     | POGZ               |
| A_23_P131875   | 1,65588 | 1,59914 | 1,040112802 | ENST00000457363 | 140731    | XM_006710087 | ANKRD60            |
| A_22_P00024959 | 1,63338 | 1,57664 | 1,040112802 | ENST00000432599 | N/A       | N/A          | N/A                |
| A_21_P0003500  | 1,65632 | 1,59959 | 1,040105593 | ENST00000506852 | N/A       | N/A          | N/A                |
| A_22_P00015756 | 1,63524 | 1,57852 | 1,040098383 | N/A             | 102725524 | XR_424911    | LOC102725524       |
| A_21_P0004059  | 1,42838 | 1,37166 | 1,040098383 | ENST00000507428 | 102546228 | NR_105042    | LOC102546228       |
| A_21_P0011023  | 1,65933 | 1,60261 | 1,040098383 | ENST00000511073 | N/A       | N/A          | N/A                |
| A_23_P2077     | 1,4402  | 1,38348 | 1,040098383 | ENST00000611380 | 256144    | NM_001004702 | OR4C3              |
| A_33_P3387656  | 1,70022 | 1,64351 | 1,040091174 | N/A             | N/A       | N/A          | N/A                |
| A_21_P0006291  | 1,7373  | 1,6806  | 1,040083965 | N/A             | 340515    | N/A          | LINC01501          |
| A_21_P0001975  | 1,44091 | 1,38421 | 1,040083965 | ENST00000431435 | N/A       | N/A          | N/A                |
| A_33_P3359483  | 1,43928 | 1,38258 | 1,040083965 | ENST00000358642 | 81050     | NM_054106    | OR5AC2             |
| A_22_P00004751 | 1,607   | 1,55031 | 1,040076755 | ENST00000504911 | N/A       | N/A          | N/A                |
| A_22_P00007535 | 1,64007 | 1,58338 | 1,040076755 | ENST00000522134 | N/A       | N/A          | N/A                |
| A_22_P00012949 | 4,59049 | 4,53381 | 1,040069546 | ENST00000534252 | N/A       | N/A          | N/A                |
| A_23_P94397    | 1,72533 | 1,66865 | 1,040069546 | ENST00000375550 | 4958      | NM_005014    | OMD                |
| A_22_P00016434 | 1,64602 | 1,58935 | 1,040062337 | N/A             | N/A       | N/A          | Inc-TMEM38B-1      |
| A_21_P0003745  | 1,60521 | 1,54855 | 1,040055128 | N/A             | N/A       | N/A          | Inc-TECRL-1        |
| A_33_P3366261  | 1,60622 | 1,54956 | 1,040055128 | N/A             | 649133    | NR_038829    | LOC649133          |
| A_33_P3401307  | 1,72359 | 1,66694 | 1,040047919 | N/A             | 643441    | NR_038846    | LOC643441          |
| A_33_P3223142  | 1,6658  | 1,60916 | 1,04004071  | N/A             | N/A       | N/A          | N/A                |
| A_23_P375419   | 1,61794 | 1,5613  | 1,04004071  | ENST00000489226 | 158248    | NM_144965    | TTC16              |
| A_21_P0010065  | 1,43345 | 1,37683 | 1,040026292 | N/A             | N/A       | N/A          | Inc-BMP7-2         |
| A_21_P0010475  | 3,88642 | 3,82981 | 1,040019083 | N/A             | N/A       | N/A          | Inc-XBP1-1         |
| A_23_P111662   | 1,42561 | 1,36901 | 1,040011874 | ENST00000258738 | 340273    | NM_178559    | ABCB5              |
| A_33_P3395081  | 1,44763 | 1,39104 | 1,040004665 | ENST00000331849 | 54988     | N/A          | ACSM5              |
| A_24_P297816   | 1,49576 | 1,43918 | 1,039997456 | ENST00000538893 | 221458    | NM_145027    | KIF6               |
| A_22_P00000328 | 1,63684 | 1,58027 | 1,039990248 | N/A             | N/A       | N/A          | Inc-AC012123.1.1-1 |
| A_22_P00009908 | 1,48016 | 1,4236  | 1,039983039 | ENST00000420184 | N/A       | BX103106     | N/A                |
| A_33_P3343552  | 5,95519 | 5,89864 | 1,039975831 | ENST00000391983 | 11132     | NM_023085    | CAPN10             |



|                |         |         |             |                 |           |              |                |
|----------------|---------|---------|-------------|-----------------|-----------|--------------|----------------|
| A_22_P00024549 | 1,42669 | 1,37014 | 1,039975831 | N/A             | N/A       | N/A          | Inc-MRPS27-2   |
| A_23_P379657   | 1,63137 | 1,57482 | 1,039975831 | ENST00000464349 | 148581    | NM_152489    | UBE2U          |
| A_22_P00024649 | 1,6579  | 1,60136 | 1,039968622 | N/A             | N/A       | N/A          | Inc-NAA50-3    |
| A_22_P00016382 | 1,43127 | 1,37473 | 1,039968622 | N/A             | N/A       | N/A          | Inc-TMEM183A-1 |
| A_22_P00005711 | 1,57125 | 1,51471 | 1,039968622 | N/A             | 101928191 | NR_125851    | LOC101928191   |
| A_21_P0010436  | 1,61116 | 1,55462 | 1,039968622 | N/A             | N/A       | N/A          | Inc-LARGE-2    |
| A_22_P00013005 | 1,56253 | 1,506   | 1,039961414 | N/A             | N/A       | N/A          | Inc-RFXAP-1    |
| A_21_P0012124  | 1,70471 | 1,64818 | 1,039961414 | N/A             | N/A       | N/A          | XLOC_I2_008624 |
| A_21_P0006281  | 1,43009 | 1,37357 | 1,039954205 | N/A             | N/A       | N/A          | Inc-GNAQ-1     |
| A_23_P111381   | 10,3817 | 10,3252 | 1,039939788 | ENST00000360666 | 9474      | NM_004849    | ATG5           |
| A_33_P3298492  | 14,8406 | 14,7841 | 1,039939788 | ENST00000550733 | 5094      | NM_005016    | PCBP2          |
| A_33_P3226420  | 1,73169 | 1,67519 | 1,039939788 | ENST00000474872 | 91543     | XM_006710126 | RSAD2          |
| A_22_P00010296 | 1,64366 | 1,58717 | 1,03993258  | ENST00000505784 | N/A       | N/A          | N/A            |
| A_22_P00007853 | 1,97031 | 1,91382 | 1,03993258  | ENST00000583794 | N/A       | DA193375     | N/A            |
| A_33_P3345108  | 5,38632 | 5,32984 | 1,039925372 | N/A             | N/A       | N/A          | N/A            |
| A_33_P3274514  | 1,72617 | 1,66969 | 1,039925372 | ENST00000390444 | N/A       | KM004839     | N/A            |
| A_24_P51118    | 1,62086 | 1,56439 | 1,039918164 | ENST00000580675 | 4507      | NM_002451    | MTAP           |
| A_22_P00013694 | 1,77827 | 1,7218  | 1,039918164 | ENST00000522408 | N/A       | N/A          | N/A            |
| A_33_P3245883  | 1,47802 | 1,42155 | 1,039918164 | ENST00000611135 | 390443    | NM_001110359 | RNASE9         |
| A_23_P167841   | 3,68746 | 3,631   | 1,039910956 | ENST00000355635 | 56479     | NM_019842    | KCNQ5          |
| A_33_P3256972  | 1,70073 | 1,64427 | 1,039910956 | ENST00000374667 | 10880     | NM_006686    | ACTL7B         |
| A_21_P0012904  | 1,51151 | 1,45505 | 1,039910956 | N/A             | 102723839 | N/A          | LOC102723839   |
| A_24_P316601   | 1,46748 | 1,41104 | 1,039896539 | ENST00000375851 | 286223    | NM_001001938 | C9orf47        |
| A_33_P3273604  | 1,48499 | 1,42855 | 1,039896539 | N/A             | N/A       | N/A          | Inc-FNBP1L-1   |
| A_24_P400130   | 1,64926 | 1,59284 | 1,039882123 | ENST00000621162 | 337878    | NM_181606    | KRTAP7-1       |
| A_23_P99515    | 1,69491 | 1,6385  | 1,039874916 | ENST00000380482 | 84935     | NM_032849    | MEDAG          |
| A_24_P303974   | 12,0149 | 11,9585 | 1,039867708 | ENST00000498747 | 8872      | NM_006023    | CDC123         |
| A_24_P400473   | 10,8065 | 10,7501 | 1,039867708 | ENST00000469537 | 9673      | NM_014655    | SLC25A44       |
| A_24_P187970   | 1,6861  | 1,62971 | 1,0398605   | ENST00000375481 | 11240     | NM_007365    | PADI2          |
| A_21_P0001896  | 1,64615 | 1,58979 | 1,039838877 | ENST00000443833 | N/A       | N/A          | N/A            |
| A_22_P00014025 | 1,60861 | 1,55225 | 1,039838877 | ENST00000570082 | N/A       | N/A          | N/A            |
| A_33_P3326962  | 1,46305 | 1,40669 | 1,039838877 | ENST00000495375 | 2168      | BX641099     | FABP1          |
| A_23_P129085   | 1,59907 | 1,54271 | 1,039838877 | ENST00000310673 | 246777    | NM_145658    | SPESP1         |

|                |         |         |             |                 |           |              |                  |
|----------------|---------|---------|-------------|-----------------|-----------|--------------|------------------|
| A_21_P0001500  | 1,43916 | 1,38282 | 1,039824462 | N/A             | N/A       | N/A          | Inc-SPATA6-1     |
| A_23_P24835    | 1,47397 | 1,41764 | 1,039817254 | ENST00000529816 | 5741      | NM_000315    | PTH              |
| A_23_P318616   | 1,62606 | 1,56974 | 1,039810047 | ENST00000543818 | 654429    | NM_001039029 | LRTM2            |
| A_33_P3275362  | 1,63885 | 1,58253 | 1,039810047 | ENST00000491993 | 405753    | BX537581     | DUOXA2           |
| A_22_P00008646 | 1,6411  | 1,58479 | 1,039802839 | N/A             | N/A       | N/A          | Inc-KIAA0087-2   |
| A_21_P0006777  | 1,64247 | 1,58616 | 1,039802839 | ENST00000428166 | N/A       | N/A          | N/A              |
| A_33_P3367565  | 11,845  | 11,7887 | 1,039795632 | N/A             | 23048     | XM_005251815 | FNBP1            |
| A_22_P00018408 | 1,57454 | 1,51824 | 1,039795632 | ENST00000446364 | N/A       | N/A          | N/A              |
| A_22_P00017081 | 1,57994 | 1,52364 | 1,039795632 | N/A             | N/A       | N/A          | Inc-TWIST1-2     |
| A_22_P00006774 | 1,6062  | 1,54991 | 1,039788425 | ENST00000557723 | N/A       | N/A          | N/A              |
| A_21_P0003006  | 1,56161 | 1,50532 | 1,039788425 | N/A             | N/A       | N/A          | Inc-CCDC54-2     |
| A_22_P00010542 | 1,72302 | 1,66673 | 1,039788425 | ENST00000521051 | N/A       | N/A          | N/A              |
| A_22_P00023913 | 1,45475 | 1,39847 | 1,039781218 | ENST00000561261 | N/A       | N/A          | N/A              |
| A_22_P00019987 | 1,44499 | 1,38872 | 1,03977401  | N/A             | 101927465 | NR_046525    | CLYBL-AS1        |
| A_21_P0007688  | 1,48319 | 1,42693 | 1,039766803 | ENST00000412084 | 100506159 | NR_104634    | LOC100506159     |
| A_24_P339429   | 1,44131 | 1,38506 | 1,039759596 | ENST00000583088 | 3768      | NM_021012    | KCNJ12           |
| A_22_P00000945 | 1,61756 | 1,56132 | 1,039752389 | N/A             | 100130880 | NM_001243523 | LOC100130880     |
| A_23_P421436   | 1,64414 | 1,58791 | 1,039745182 | ENST00000407644 | 119       | NM_017488    | ADD2             |
| A_23_P214360   | 1,44553 | 1,3893  | 1,039745182 | ENST00000380956 | 3662      | NM_002460    | IRF4             |
| A_33_P3278078  | 1,59192 | 1,53569 | 1,039745182 | N/A             | N/A       | N/A          | N/A              |
| A_22_P00021166 | 1,45017 | 1,39394 | 1,039745182 | N/A             | 100873942 | NR_046639    | PHEX-AS1         |
| A_33_P3352088  | 1,42591 | 1,36968 | 1,039745182 | ENST00000477275 | 282973    | NM_001105521 | JAKMIP3          |
| A_21_P0003739  | 1,57594 | 1,51971 | 1,039745182 | N/A             | N/A       | N/A          | Inc-AC021860.1-4 |
| A_22_P00024696 | 1,71021 | 1,65398 | 1,039745182 | N/A             | N/A       | N/A          | Inc-DTWD1-2      |
| A_23_P202053   | 1,58671 | 1,53049 | 1,039737975 | ENST00000613369 | 3698      | NM_002216    | ITIH2            |
| A_33_P3240094  | 1,58503 | 1,52881 | 1,039737975 | ENST00000409079 | 25791     | BC073962     | NGEF             |
| A_21_P0009785  | 1,63831 | 1,5821  | 1,039730768 | ENST00000588694 | 100996665 | NR_110673    | LINC01533        |
| A_22_P00005744 | 1,65323 | 1,59702 | 1,039730768 | N/A             | N/A       | N/A          | Inc-EMX2-3       |
| A_24_P204144   | 17,7913 | 17,7351 | 1,039723561 | ENST00000314255 | N/A       | N/A          | N/A              |
| A_32_P7823     | 10,0781 | 10,0219 | 1,039723561 | ENST00000622254 | 93487     | NM_144578    | MAPK1IP1L        |
| A_23_P75441    | 13,5689 | 13,5127 | 1,039723561 | ENST00000535000 | 84304     | NM_032344    | NUDT22           |
| A_22_P00008193 | 1,6094  | 1,55321 | 1,039716355 | N/A             | N/A       | N/A          | Inc-INSIG2-2     |
| A_21_P0007624  | 1,70389 | 1,6477  | 1,039716355 | N/A             | N/A       | N/A          | Inc-ISCU-1       |

|                |         |         |             |                 |           |              |                     |
|----------------|---------|---------|-------------|-----------------|-----------|--------------|---------------------|
| A_21_P0012599  | 1,60006 | 1,5439  | 1,039694735 | N/A             | N/A       | N/A          | Inc-BMP2K-1         |
| A_33_P3275651  | 1,4284  | 1,37224 | 1,039694735 | N/A             | N/A       | N/A          | N/A                 |
| A_22_P00020947 | 1,73608 | 1,67993 | 1,039687528 | N/A             | N/A       | N/A          | Inc-ZNF814-1        |
| A_21_P0003561  | 1,61966 | 1,56352 | 1,039680321 | N/A             | N/A       | N/A          | Inc-RP3-368B9.1.1-4 |
| A_22_P00022526 | 1,60725 | 1,55112 | 1,039673115 | N/A             | 340512    | NR_126029    | LOC340512           |
| A_33_P3854953  | 1,73419 | 1,67806 | 1,039673115 | ENST00000507482 | 440117    | NR_033970    | LOC440117           |
| A_24_P139943   | 9,497   | 9,44087 | 1,039673115 | ENST00000304031 | 64342     | NM_022460    | HS1BP3              |
| A_33_P3424511  | 1,59902 | 1,54291 | 1,039658702 | ENST00000380211 | 390063    | NM_001005288 | OR51I1              |
| A_21_P0003591  | 1,46443 | 1,40832 | 1,039658702 | N/A             | N/A       | N/A          | Inc-STIM2-3         |
| A_21_P0008141  | 1,59587 | 1,53976 | 1,039658702 | N/A             | N/A       | N/A          | Inc-HSPH1-6         |
| A_33_P3258239  | 1,73507 | 1,67896 | 1,039658702 | ENST00000395438 | 65217     | NM_001142770 | PCDH15              |
| A_21_P0000693  | 1,46547 | 1,40937 | 1,039651496 | N/A             | 100505918 | NR_037851    | LOC100505918        |
| A_21_P0002776  | 1,61342 | 1,55732 | 1,039651496 | ENST00000470860 | 101927866 | N/A          | LOC101927866        |
| A_22_P00009269 | 1,5728  | 1,5167  | 1,039651496 | N/A             | 100874282 | N/A          | MLIP-IT1            |
| A_33_P3315959  | 1,43967 | 1,38357 | 1,039651496 | ENST00000370658 | 51557     | NM_016571    | LGSN                |
| A_24_P160202   | 4,72306 | 4,66696 | 1,039651496 | ENST00000402472 | 56666     | NM_052839    | PANX2               |
| A_21_P0000410  | 1,47036 | 1,41426 | 1,039651496 | N/A             | 767591    | NR_003206    | SNORD114-13         |
| A_33_P3326099  | 6,47936 | 6,42326 | 1,039651496 | ENST00000319725 | 8939      | NM_003934    | FUBP3               |
| A_23_P147888   | 17,8041 | 17,748  | 1,039651496 | ENST00000321153 | 6181      | NM_001004    | RPLP2               |
| A_21_P0012055  | 1,43792 | 1,38183 | 1,03964429  | ENST00000412528 | 400941    | NR_038369    | LINC00487           |
| A_22_P00025506 | 1,43591 | 1,37983 | 1,039637083 | ENST00000534492 | N/A       | N/A          | N/A                 |
| A_21_P0006421  | 1,48611 | 1,43004 | 1,039629877 | ENST00000422047 | 101927528 | N/A          | LINC01204           |
| A_22_P00004604 | 1,6005  | 1,54443 | 1,039629877 | N/A             | N/A       | N/A          | Inc-CSMD1-8         |
| A_24_P586390   | 8,67442 | 8,61836 | 1,039622671 | ENST00000570230 | 100133331 | NR_028327    | LOC100133331        |
| A_22_P00019970 | 1,60181 | 1,54575 | 1,039622671 | N/A             | N/A       | N/A          | Inc-CORIN-2         |
| A_22_P00011555 | 1,44156 | 1,3855  | 1,039622671 | ENST00000500324 | N/A       | N/A          | N/A                 |
| A_24_P149445   | 1,50497 | 1,44892 | 1,039615465 | N/A             | 285962    | NR_015392    | WEE2-AS1            |
| A_32_P86289    | 1,46551 | 1,40947 | 1,039608259 | ENST00000396402 | 1588      | NM_031226    | CYP19A1             |
| A_23_P360990   | 1,63181 | 1,57577 | 1,039608259 | ENST00000454362 | 143241    | NM_138812    | DYDC1               |
| A_21_P0010824  | 1,70271 | 1,64667 | 1,039608259 | N/A             | N/A       | N/A          | XLOC_I2_001573      |
| A_21_P0007086  | 1,56434 | 1,50831 | 1,039601053 | N/A             | N/A       | N/A          | Inc-GPR26-3         |
| A_21_P0009019  | 1,63432 | 1,57829 | 1,039601053 | N/A             | N/A       | N/A          | Inc-USP31-3         |
| A_33_P3379916  | 8,57745 | 8,52142 | 1,039601053 | ENST00000320717 | 2744      | NM_014905    | GLS                 |

|                |         |         |             |                 |           |              |                 |
|----------------|---------|---------|-------------|-----------------|-----------|--------------|-----------------|
| A_21_P0008912  | 1,62886 | 1,57283 | 1,039601053 | N/A             | N/A       | N/A          | Inc-HS3ST2-1    |
| A_22_P00004576 | 1,43683 | 1,3808  | 1,039601053 | ENST00000427360 | N/A       | N/A          | N/A             |
| A_33_P3382606  | 3,29548 | 3,23946 | 1,039593847 | ENST00000296438 | 285231    | NM_207102    | FBXW12          |
| A_22_P00011259 | 1,5984  | 1,54238 | 1,039593847 | N/A             | N/A       | AL705479     | Inc-OR3A1-1     |
| A_33_P3232532  | 4,29648 | 4,24046 | 1,039593847 | ENST00000367512 | 80267     | NM_025191    | EDEM3           |
| A_21_P0004616  | 1,43638 | 1,38037 | 1,039586641 | N/A             | N/A       | N/A          | Inc-IL20RA-1    |
| A_21_P0011904  | 1,44234 | 1,38633 | 1,039586641 | N/A             | N/A       | N/A          | XLOC_I2_007884  |
| A_33_P3299639  | 1,61306 | 1,55708 | 1,039565024 | ENST00000304865 | 138881    | NM_001004454 | OR1L8           |
| A_21_P0002610  | 1,49732 | 1,44135 | 1,039557818 | N/A             | N/A       | N/A          | Inc-PLEKHB2-1   |
| A_33_P3240717  | 1,77192 | 1,71596 | 1,039550612 | N/A             | 100048912 | NR_003529    | CDKN2B-AS1      |
| A_24_P114142   | 1,69728 | 1,64132 | 1,039550612 | ENST00000331830 | 6900      | NM_005076    | CNTN2           |
| A_22_P00003919 | 1,59743 | 1,54147 | 1,039550612 | N/A             | N/A       | BG697942     | Inc-CES1-3      |
| A_33_P3301955  | 7,2957  | 7,23974 | 1,039550612 | ENST00000379419 | 5150      | NM_001242318 | PDE7A           |
| A_22_P00006463 | 1,64094 | 1,58499 | 1,039543407 | ENST00000526703 | N/A       | AK094117     | N/A             |
| A_22_P00007773 | 1,56262 | 1,50668 | 1,039536201 | N/A             | N/A       | N/A          | Inc-HNRNPA1-3   |
| A_23_P325122   | 1,66264 | 1,60671 | 1,039528996 | ENST00000441139 | 286554    | NR_002923    | BCORP1          |
| A_21_P0014126  | 4,30996 | 4,25403 | 1,039528996 | N/A             | N/A       | N/A          | N/A             |
| A_24_P216014   | 1,62023 | 1,56431 | 1,03952179  | ENST00000456543 | 2689      | NM_022558    | GH2             |
| A_21_P0005015  | 1,49963 | 1,44372 | 1,039514585 | N/A             | N/A       | N/A          | Inc-HIST1H2BJ-2 |
| A_23_P399156   | 3,98806 | 3,93215 | 1,039514585 | ENST00000322153 | 3594      | NM_153701    | IL12RB1         |
| A_21_P0002994  | 1,63452 | 1,57862 | 1,03950738  | N/A             | 100846978 | N/A          | LINC00506       |
| A_21_P0014251  | 1,5971  | 1,5412  | 1,03950738  | N/A             | 101929052 | NR_108069    | LINC00836       |
| A_33_P3295233  | 1,65528 | 1,59938 | 1,03950738  | ENST00000442318 | N/A       | XR_250930    | N/A             |
| A_23_P352494   | 1,56053 | 1,50463 | 1,03950738  | ENST00000371388 | 84528     | NM_032498    | RHOXF2          |
| A_22_P00000971 | 1,62798 | 1,57209 | 1,039500174 | ENST00000564697 | N/A       | BC039091     | N/A             |
| A_33_P3289121  | 1,44077 | 1,38489 | 1,039492969 | ENST00000479337 | 84417     | NM_032411    | C2orf40         |
| A_22_P00009774 | 1,62158 | 1,5657  | 1,039492969 | ENST00000546414 | N/A       | N/A          | N/A             |
| A_21_P0002663  | 1,48956 | 1,43369 | 1,039485764 | N/A             | N/A       | N/A          | Inc-PELI1-5     |
| A_22_P00009214 | 1,60251 | 1,54666 | 1,039471354 | N/A             | 100506779 | NR_038410    | BZRAP1-AS1      |
| A_21_P0011244  | 1,73893 | 1,68308 | 1,039471354 | N/A             | 102723621 | N/A          | LOC102723621    |
| A_22_P00002272 | 1,71075 | 1,65491 | 1,039464149 | N/A             | 439950    | NR_046108    | CELF2-AS2       |
| A_22_P00002590 | 1,73708 | 1,68124 | 1,039464149 | N/A             | N/A       | DR033720     | Inc-C19orf12-3  |
| A_22_P00012914 | 1,56159 | 1,50575 | 1,039464149 | ENST00000444169 | 159125    | NR_001574    | RBMY2EP         |

|                |         |         |             |                 |           |              |                |
|----------------|---------|---------|-------------|-----------------|-----------|--------------|----------------|
| A_24_P924261   | 1,47099 | 1,41516 | 1,039456944 | ENST00000542862 | 405754    | NM_207582    | ERVFRD-1       |
| A_22_P00000280 | 1,58172 | 1,52589 | 1,039456944 | ENST00000515706 | N/A       | N/A          | N/A            |
| A_33_P3255829  | 1,57536 | 1,51954 | 1,039449739 | ENST00000420610 | 25878     | NM_015419    | MXRA5          |
| A_23_P370786   | 1,72394 | 1,66813 | 1,039442534 | ENST00000366478 | 284521    | NM_175911    | OR2L13         |
| A_33_P3293321  | 1,43024 | 1,37443 | 1,039442534 | ENST00000327335 | 390327    | NM_001005499 | OR6C70         |
| A_22_P00015236 | 1,46716 | 1,41135 | 1,039442534 | N/A             | 147004    | XR_243792    | LOC147004      |
| A_23_P143845   | 12,8468 | 12,791  | 1,039435329 | ENST00000461166 | 25976     | NM_015508    | TIPARP         |
| A_22_P00012244 | 1,73783 | 1,68203 | 1,039435329 | ENST00000552996 | N/A       | DB079050     | N/A            |
| A_33_P3345041  | 1,59357 | 1,53777 | 1,039435329 | N/A             | 150538    | NR_026830    | SATB2-AS1      |
| A_24_P10214    | 1,73948 | 1,68368 | 1,039435329 | ENST00000550887 | 29091     | NM_014178    | STXBP6         |
| A_22_P00016121 | 1,73985 | 1,68406 | 1,039428124 | ENST00000508010 | N/A       | N/A          | N/A            |
| A_32_P460757   | 1,65229 | 1,5965  | 1,039428124 | ENST00000275198 | 319100    | NM_175067    | TAAR6          |
| A_21_P0005800  | 1,6021  | 1,54632 | 1,039420919 | N/A             | N/A       | N/A          | Inc-RP1L1-1    |
| A_23_P64161    | 1,65875 | 1,60297 | 1,039420919 | ENST00000334289 | 253935    | NM_178127    | ANGPTL5        |
| A_21_P0009957  | 1,60736 | 1,55158 | 1,039420919 | N/A             | N/A       | N/A          | Inc-PI3-1      |
| A_33_P3315325  | 1,60301 | 1,54724 | 1,039413715 | ENST00000520552 | 157567    | NM_001270379 | ANKRD46        |
| A_33_P3416097  | 1,62    | 1,56424 | 1,03940651  | ENST00000264870 | 2162      | NM_000129    | F13A1          |
| A_21_P0006920  | 1,4916  | 1,43588 | 1,039377692 | N/A             | N/A       | N/A          | Inc-EMX2-2     |
| A_23_P116765   | 1,55957 | 1,50386 | 1,039370488 | ENST00000301046 | 3906      | NM_002289    | LALBA          |
| A_33_P3326942  | 1,62462 | 1,56891 | 1,039370488 | N/A             | N/A       | N/A          | N/A            |
| A_21_P0005374  | 1,58627 | 1,53056 | 1,039370488 | N/A             | N/A       | N/A          | Inc-C7orf10-1  |
| A_33_P3252583  | 1,61103 | 1,55532 | 1,039370488 | ENST00000302610 | 219954    | NM_001005211 | OR9I1          |
| A_23_P163161   | 12,0617 | 12,006  | 1,039363283 | ENST00000556707 | 56948     | NM_020195    | SDR39U1        |
| A_22_P00020869 | 1,69342 | 1,63772 | 1,039363283 | ENST00000553477 | N/A       | N/A          | N/A            |
| A_22_P00016273 | 1,56686 | 1,51117 | 1,039356079 | N/A             | N/A       | AK129594     | Inc-TMEM106C-2 |
| A_23_P148389   | 1,64251 | 1,58683 | 1,039348875 | ENST00000298110 | 83550     | NM_054021    | GPR101         |
| A_22_P00012868 | 1,80062 | 1,74494 | 1,039348875 | ENST00000425541 | N/A       | N/A          | N/A            |
| A_33_P3256505  | 1,6359  | 1,58022 | 1,039348875 | ENST00000474764 | 1587      | NR_073423    | ADAM3A         |
| A_19_P00316187 | 6,68928 | 6,6336  | 1,039348875 | ENST00000468380 | 100505687 | NR_038301    | LINC00888      |
| A_33_P3403942  | 1,42363 | 1,36795 | 1,039348875 | ENST00000279028 | 128506    | NM_080721    | OCSTAMP        |
| A_23_P355510   | 1,59914 | 1,54346 | 1,039348875 | ENST00000457095 | 158787    | NM_144968    | RIBC1          |
| A_23_P13929    | 4,95704 | 4,90137 | 1,03934167  | ENST00000337508 | 83714     | NM_031474    | NRIP2          |
| A_22_P00006766 | 3,4205  | 3,36484 | 1,039334466 | ENST00000570443 | 100505530 | NR_126057    | LOC100505530   |

|                |         |         |             |                 |           |              |               |
|----------------|---------|---------|-------------|-----------------|-----------|--------------|---------------|
| A_22_P00001883 | 1,50542 | 1,44977 | 1,039327262 | N/A             | N/A       | N/A          | Inc-B3GAT2-1  |
| A_22_P00010074 | 1,64889 | 1,59324 | 1,039327262 | N/A             | 101928417 | NR_110937    | LOC101928417  |
| A_22_P00011371 | 1,46064 | 1,405   | 1,039320058 | N/A             | N/A       | N/A          | Inc-P2RX7-2   |
| A_22_P00010725 | 1,76933 | 1,71371 | 1,03930565  | ENST00000433882 | 100132677 | NR_038866    | BSN-AS2       |
| A_22_P00012744 | 1,59862 | 1,543   | 1,03930565  | ENST00000439382 | N/A       | N/A          | N/A           |
| A_23_P397937   | 1,69704 | 1,64142 | 1,03930565  | ENST00000531544 | 154075    | NM_001258275 | SAMD3         |
| A_33_P3380457  | 1,6044  | 1,54879 | 1,039298446 | ENST00000315033 | 54112     | NM_022049    | GPR88         |
| A_33_P3321919  | 1,55883 | 1,50322 | 1,039298446 | ENST00000332912 | 149643    | NM_001024601 | SPATA45       |
| A_21_P0011439  | 10,9825 | 10,9269 | 1,039291243 | ENST00000563400 | 55737     | NM_018206    | VPS35         |
| A_22_P00017055 | 1,62345 | 1,56788 | 1,039269631 | ENST00000439406 | 102723474 | N/A          | LOC102723474  |
| A_21_P0004340  | 1,45872 | 1,40315 | 1,039269631 | N/A             | N/A       | N/A          | Inc-BNIP1-4   |
| A_33_P3249654  | 1,63041 | 1,57484 | 1,039269631 | N/A             | 404665    | NR_038865    | CACTIN-AS1    |
| A_23_P147563   | 2,56945 | 2,51388 | 1,039269631 | ENST00000498165 | 151742    | NM_139245    | PPM1L         |
| A_21_P0000458  | 1,73002 | 1,67446 | 1,039262428 | N/A             | 100036565 | NR_003497    | SNORD115-28   |
| A_21_P0010738  | 1,74893 | 1,69338 | 1,039255224 | ENST00000447257 | 101929476 | XR_247051    | LOC101929476  |
| A_21_P0010568  | 1,76587 | 1,71033 | 1,03924802  | ENST00000451341 | 102724661 | N/A          | LOC102724661  |
| A_23_P415470   | 1,626   | 1,57046 | 1,03924802  | ENST00000616430 | 56100     | NM_032100    | PCDHGB6       |
| A_21_P0005727  | 1,64541 | 1,58988 | 1,039240817 | ENST00000518732 | 101926978 | NR_105006    | LINC01111     |
| A_23_P112874   | 1,63185 | 1,57633 | 1,039233614 | ENST00000377067 | 2262      | NM_004466    | GPC5          |
| A_21_P0004974  | 1,68844 | 1,63293 | 1,03922641  | N/A             | N/A       | N/A          | Inc-SMOC2-6   |
| A_21_P0002842  | 1,56956 | 1,51406 | 1,039219207 | N/A             | N/A       | XM_005265643 | Inc-NKIRAS1-3 |
| A_22_P00011859 | 1,57766 | 1,52216 | 1,039219207 | N/A             | N/A       | N/A          | Inc-PHYHIPL-1 |
| A_33_P3215059  | 10,5881 | 10,5326 | 1,039219207 | ENST00000566087 | 197370    | NM_145080    | NSMCE1        |
| A_21_P0012942  | 1,59665 | 1,54115 | 1,039219207 | ENST00000512618 | N/A       | N/A          | N/A           |
| A_33_P3417517  | 1,57633 | 1,52085 | 1,0392048   | ENST00000254900 | 10902     | NM_139199    | BRD8          |
| A_22_P00000787 | 1,57864 | 1,52316 | 1,0392048   | N/A             | N/A       | N/A          | Inc-ADRA1D-1  |
| A_32_P75581    | 1,43372 | 1,37825 | 1,039197597 | ENST00000321870 | 27319     | NM_152414    | BHLHE22       |
| A_23_P346477   | 1,59495 | 1,53948 | 1,039197597 | ENST00000391356 | 85290     | NM_033187    | KRTAP4-3      |
| A_21_P0007090  | 1,48278 | 1,42731 | 1,039197597 | N/A             | N/A       | N/A          | Inc-PITRM1-7  |
| A_22_P00007228 | 4,73572 | 4,68026 | 1,039190394 | N/A             | N/A       | N/A          | Inc-GPER-3    |
| A_24_P405705   | 1,47228 | 1,41682 | 1,039190394 | ENST00000314251 | 6514      | NM_000340    | SLC2A2        |
| A_22_P00014185 | 1,45097 | 1,39557 | 1,039147176 | ENST00000579749 | 283982    | N/A          | LINC00469     |
| A_22_P00007947 | 1,60497 | 1,54957 | 1,039147176 | ENST00000565962 | N/A       | AJ012496     | N/A           |

|                |         |         |             |                 |           |              |                  |
|----------------|---------|---------|-------------|-----------------|-----------|--------------|------------------|
| A_23_P115932   | 1,76081 | 1,70541 | 1,039147176 | ENST00000334549 | 338567    | NM_181840    | KCNK18           |
| A_32_P204989   | 1,48093 | 1,42554 | 1,039139973 | ENST00000624985 | N/A       | AF251047     | N/A              |
| A_22_P00004157 | 1,43335 | 1,37797 | 1,039132771 | ENST00000567749 | 101930452 | NR_120479    | LOC101930452     |
| A_19_P00807752 | 1,70611 | 1,65073 | 1,039132771 | ENST00000442625 | 23263     | XM_005268309 | MCF2L            |
| A_21_P0006186  | 1,59604 | 1,54069 | 1,039111163 | N/A             | 158435    | N/A          | LOC158435        |
| A_33_P3231715  | 1,60287 | 1,54752 | 1,039111163 | ENST00000532898 | 403253    | NM_001005512 | OR4A47           |
| A_32_P122793   | 8,99186 | 8,93652 | 1,03910396  | N/A             | 150291    | NR_026920    | MORC2-AS1        |
| A_33_P3506553  | 1,56732 | 1,51199 | 1,039096758 | ENST00000439392 | 246312    | NR_038871    | C21orf91-OT1     |
| A_22_P00009561 | 1,60004 | 1,54471 | 1,039096758 | ENST00000450581 | N/A       | N/A          | N/A              |
| A_21_P0006807  | 1,4642  | 1,40888 | 1,039089555 | N/A             | N/A       | N/A          | Inc-C10orf108-3  |
| A_32_P18470    | 7,27106 | 7,21574 | 1,039089555 | ENST00000372680 | 340543    | NM_001012979 | TCEAL5           |
| A_21_P0008123  | 1,63602 | 1,58071 | 1,039082353 | N/A             | 100505996 | N/A          | LINC00403        |
| A_22_P00000394 | 1,62143 | 1,56612 | 1,039082353 | N/A             | N/A       | N/A          | Inc-AC023632.1-1 |
| A_22_P00013131 | 2,75003 | 2,69473 | 1,03907515  | ENST00000554983 | N/A       | N/A          | N/A              |
| A_33_P3310864  | 5,85401 | 5,79871 | 1,03907515  | N/A             | N/A       | N/A          | N/A              |
| A_33_P3305462  | 1,6212  | 1,56593 | 1,039053544 | N/A             | N/A       | N/A          | N/A              |
| A_22_P00011097 | 1,72083 | 1,66557 | 1,039046342 | ENST00000524159 | N/A       | N/A          | N/A              |
| A_33_P3249976  | 1,65198 | 1,59672 | 1,039046342 | ENST00000312957 | 58494     | NM_021219    | JAM2             |
| A_33_P3394297  | 1,6387  | 1,58345 | 1,039039139 | ENST00000343544 | 55258     | NM_001244676 | THNSL2           |
| A_22_P00017350 | 9,55528 | 9,50003 | 1,039039139 | N/A             | 100129387 | NR_024490    | GABPB1-AS1       |
| A_22_P00017363 | 1,47757 | 1,42233 | 1,039031937 | N/A             | 101929657 | NR_110306    | LOC101929657     |
| A_21_P0012026  | 1,59657 | 1,54135 | 1,039017533 | ENST00000432608 | 401014    | N/A          | TEX41            |
| A_33_P3308964  | 1,72793 | 1,67272 | 1,039010332 | ENST00000498609 | 10842     | NM_006658    | PPP1R17          |
| A_22_P00004916 | 1,57596 | 1,52076 | 1,03900313  | N/A             | N/A       | N/A          | Inc-DAPP1-1      |
| A_21_P0000456  | 1,62882 | 1,57363 | 1,038995928 | N/A             | 100033822 | NR_003362    | SNORD115-48      |
| A_21_P0013239  | 9,32557 | 9,27039 | 1,038988726 | ENST00000403118 | N/A       | N/A          | N/A              |
| A_23_P301414   | 1,67462 | 1,61944 | 1,038988726 | ENST00000429727 | 2078      | NM_004449    | ERG              |
| A_32_P202013   | 1,47904 | 1,42386 | 1,038988726 | ENST00000522781 | 642938    | NM_001039762 | FAM196A          |
| A_22_P00017453 | 1,6352  | 1,58002 | 1,038988726 | ENST00000554445 | N/A       | DB442315     | N/A              |
| A_23_P21230    | 9,5541  | 9,49892 | 1,038988726 | ENST00000262294 | 4591      | NM_015294    | TRIM37           |
| A_22_P00009593 | 1,55771 | 1,50254 | 1,038981524 | N/A             | N/A       | N/A          | Inc-MAPK6-4      |
| A_21_P0004634  | 1,47954 | 1,42439 | 1,038967121 | ENST00000427011 | N/A       | N/A          | N/A              |
| A_21_P0003535  | 1,71622 | 1,66107 | 1,038967121 | ENST00000508977 | N/A       | N/A          | N/A              |

|                |         |         |             |                 |           |              |                 |
|----------------|---------|---------|-------------|-----------------|-----------|--------------|-----------------|
| A_24_P144439   | 1,60117 | 1,54603 | 1,03895992  | ENST00000498089 | 151651    | NM_144715    | EFHB            |
| A_23_P157022   | 9,18999 | 9,13486 | 1,038952718 | ENST00000491431 | 136051    | NM_152411    | ZNF786          |
| A_23_P30567    | 1,62434 | 1,56921 | 1,038952718 | ENST00000503763 | 1393      | NM_001882    | CRHBP           |
| A_22_P00011790 | 1,64996 | 1,59483 | 1,038952718 | N/A             | N/A       | N/A          | Inc-PGBD5-1     |
| A_33_P3540143  | 5,21284 | 5,15772 | 1,038945517 | ENST00000319363 | 23765     | NM_014339    | IL17RA          |
| A_22_P00023395 | 1,59254 | 1,53744 | 1,038931114 | ENST00000555316 | N/A       | BQ887790     | N/A             |
| A_21_P0009058  | 1,4212  | 1,3661  | 1,038931114 | N/A             | N/A       | N/A          | Inc-CLEC18B-4   |
| A_23_P170978   | 11,3932 | 11,3381 | 1,038931114 | ENST00000451251 | 55657     | NM_017865    | ZNF692          |
| A_33_P3403142  | 1,42096 | 1,36587 | 1,038923913 | ENST00000557640 | 647286    | NM_001257268 | RD3L            |
| A_33_P3349853  | 1,59878 | 1,54369 | 1,038923913 | ENST00000466902 | N/A       | N/A          | N/A             |
| A_22_P00004047 | 1,62821 | 1,57313 | 1,038916711 | ENST00000527642 | N/A       | N/A          | N/A             |
| A_22_P00010426 | 1,77675 | 1,72167 | 1,038916711 | ENST00000520024 | N/A       | N/A          | N/A             |
| A_22_P00014213 | 1,72456 | 1,66949 | 1,03890951  | ENST00000556116 | 283547    | NR_039982    | LINC00639       |
| A_22_P00009956 | 1,42299 | 1,36792 | 1,03890951  | ENST00000488861 | 101927152 | NR_110000    | LINC01212       |
| A_21_P0009989  | 1,63183 | 1,57677 | 1,038902309 | N/A             | N/A       | N/A          | Inc-C20orf166-3 |
| A_23_P27229    | 2,60857 | 2,55351 | 1,038902309 | ENST00000615845 | 51168     | NM_016239    | MYO15A          |
| A_21_P0013310  | 1,62653 | 1,57148 | 1,038895108 | N/A             | N/A       | N/A          | XLOC_l2_013849  |
| A_33_P3589033  | 1,59314 | 1,53812 | 1,038873505 | N/A             | 10824     | BE781894     | DIAPH2-AS1      |
| A_24_P281403   | 1,74915 | 1,69413 | 1,038873505 | ENST00000328188 | 119749    | NM_001004703 | OR4C46          |
| A_33_P3773200  | 1,43807 | 1,38306 | 1,038866304 | ENST00000580119 | 285766    | NR_126020    | LOC285766       |
| A_24_P371303   | 9,96375 | 9,90874 | 1,038866304 | ENST00000614531 | 23272     | NM_015224    | FAM208A         |
| A_33_P3415047  | 1,56049 | 1,50548 | 1,038866304 | N/A             | N/A       | N/A          | N/A             |
| A_22_P00004389 | 1,63105 | 1,57605 | 1,038859103 | ENST00000471993 | N/A       | N/A          | N/A             |
| A_22_P00019931 | 1,42686 | 1,37186 | 1,038859103 | N/A             | N/A       | N/A          | Inc-LOXL1-1     |
| A_33_P3270489  | 1,72333 | 1,66834 | 1,038851903 | ENST00000239374 | 80129     | NM_025059    | CCDC170         |
| A_23_P70634    | 1,74988 | 1,69489 | 1,038851903 | ENST00000258042 | 4829      | NM_002511    | NMBR            |
| A_21_P0004080  | 1,71454 | 1,65956 | 1,038844702 | ENST00000512115 | 102577424 | NR_108030    | LINC01574       |
| A_22_P00004003 | 1,59503 | 1,54007 | 1,0388303   | ENST00000442809 | 101927215 | NR_110118    | LINC01266       |
| A_23_P327910   | 1,63276 | 1,5778  | 1,0388303   | N/A             | 7547      | NM_003413    | ZIC3            |
| A_21_P0011497  | 1,59333 | 1,53837 | 1,0388303   | ENST00000554640 | 100506172 | N/A          | LINC01568       |
| A_24_P578571   | 1,50415 | 1,4492  | 1,0388231   | ENST00000340465 | 389400    | NM_207410    | GFRAL           |
| A_21_P0002665  | 1,4247  | 1,36975 | 1,0388231   | ENST00000605491 | N/A       | N/A          | N/A             |
| A_22_P00019889 | 1,61911 | 1,56416 | 1,0388231   | ENST00000423667 | N/A       | N/A          | N/A             |



|                |         |         |             |                 |           |           |                 |
|----------------|---------|---------|-------------|-----------------|-----------|-----------|-----------------|
| A_33_P3352727  | 1,44014 | 1,3852  | 1,038815899 | N/A             | 140873    | NR_026933 | C20orf173       |
| A_22_P00007718 | 1,59823 | 1,54329 | 1,038815899 | N/A             | 414764    | NR_044996 | HCG23           |
| A_22_P00011866 | 1,4554  | 1,40047 | 1,038808699 | N/A             | N/A       | BX116978  | Inc-PICALM-1    |
| A_22_P00013412 | 1,48063 | 1,42571 | 1,038801498 | ENST00000554197 | 100129345 | NR_033943 | LOC100129345    |
| A_23_P135031   | 1,43159 | 1,37668 | 1,038794298 | ENST00000561981 | 23732     | NM_014334 | FRRS1L          |
| A_22_P00013179 | 1,60337 | 1,54846 | 1,038794298 | N/A             | N/A       | AK098665  | Inc-RNF144B-1   |
| A_21_P0009564  | 1,44383 | 1,38892 | 1,038794298 | N/A             | N/A       | N/A       | Inc-MC4R-1      |
| A_21_P0005504  | 1,66891 | 1,614   | 1,038794298 | N/A             | N/A       | N/A       | Inc-SBDS-8      |
| A_21_P0004266  | 1,42578 | 1,37088 | 1,038787098 | N/A             | N/A       | N/A       | Inc-ANKDD1B-1   |
| A_22_P00022379 | 1,72538 | 1,67048 | 1,038787098 | N/A             | N/A       | N/A       | Inc-PRL-7       |
| A_33_P3229397  | 14,7523 | 14,6974 | 1,038787098 | ENST00000544079 | 10575     | NM_006430 | CCT4            |
| A_21_P0003609  | 1,59076 | 1,53587 | 1,038779897 | ENST00000511875 | N/A       | N/A       | N/A             |
| A_21_P0014097  | 1,60924 | 1,55435 | 1,038779897 | N/A             | N/A       | N/A       | N/A             |
| A_32_P65616    | 1,43361 | 1,37873 | 1,038772697 | ENST00000306482 | 5617      | NM_000948 | PRL             |
| A_23_P431139   | 1,71269 | 1,65782 | 1,038765497 | ENST00000565656 | 1504      | NM_001906 | CTRB1           |
| A_23_P10542    | 1,7299  | 1,67503 | 1,038765497 | ENST00000307358 | 94031     | NM_053044 | HTRA3           |
| A_21_P0008776  | 2,40572 | 2,35085 | 1,038765497 | N/A             | N/A       | N/A       | Inc-HAPLN3-1    |
| A_23_P951      | 1,58027 | 1,52542 | 1,038751097 | ENST00000473386 | 3080      | NM_005666 | CFHR2           |
| A_22_P00009263 | 1,44645 | 1,39161 | 1,038743897 | ENST00000429099 | N/A       | N/A       | N/A             |
| A_22_P00020084 | 1,6335  | 1,57867 | 1,038736697 | N/A             | N/A       | N/A       | Inc-MARCKS-2    |
| A_22_P00007956 | 1,44012 | 1,3853  | 1,038729497 | ENST00000423967 | N/A       | N/A       | N/A             |
| A_32_P110655   | 1,42122 | 1,36641 | 1,038722297 | ENST00000427686 | 100129515 | NR_033941 | LINC00633       |
| A_22_P00024964 | 1,59759 | 1,54278 | 1,038722297 | ENST00000523038 | N/A       | N/A       | N/A             |
| A_23_P80040    | 13,1333 | 13,0785 | 1,038715097 | ENST00000216968 | 10544     | NM_006404 | PROCR           |
| A_33_P3741835  | 1,58976 | 1,53496 | 1,038715097 | ENST00000500526 | N/A       | N/A       | N/A             |
| A_33_P3418165  | 1,56322 | 1,50842 | 1,038715097 | N/A             | N/A       | N/A       | N/A             |
| A_23_P312271   | 1,45847 | 1,40367 | 1,038715097 | ENST00000531960 | 122046    | NM_152325 | TEX26           |
| A_24_P55465    | 12,3715 | 12,3167 | 1,038715097 | ENST00000393085 | 136319    | NM_145808 | MTPN            |
| A_21_P0010873  | 1,65417 | 1,5994  | 1,038693498 | N/A             | 100996567 | N/A       | ANTXRPL1        |
| A_22_P00019154 | 1,65844 | 1,60367 | 1,038693498 | ENST00000454271 | 101928628 | N/A       | LOC101928628    |
| A_33_P3270059  | 1,58559 | 1,53082 | 1,038693498 | ENST00000306904 | 27288     | NM_014469 | RBMXL2          |
| A_21_P0007022  | 1,73815 | 1,68341 | 1,038671899 | N/A             | N/A       | N/A       | Inc-RAB11FIP2-2 |
| A_33_P3316318  | 2,59361 | 2,53887 | 1,038671899 | ENST00000513565 | 153241    | CR627324  | CEP120          |

|                |         |         |             |                 |           |              |                 |
|----------------|---------|---------|-------------|-----------------|-----------|--------------|-----------------|
| A_23_P334857   | 1,63503 | 1,58029 | 1,038671899 | ENST00000409692 | 151126    | NM_152520    | ZNF385B         |
| A_33_P3228828  | 1,64345 | 1,58872 | 1,038664699 | N/A             | N/A       | N/A          | N/A             |
| A_22_P00010755 | 1,59986 | 1,54514 | 1,0386575   | ENST00000519215 | N/A       | N/A          | N/A             |
| A_21_P0010083  | 1,48909 | 1,43438 | 1,0386503   | N/A             | N/A       | N/A          | Inc-ZNF133-1    |
| A_22_P00017336 | 1,60124 | 1,54653 | 1,0386503   | ENST00000509497 | N/A       | XR_244733    | N/A             |
| A_23_P200126   | 9,90202 | 9,84732 | 1,038643101 | ENST00000371945 | 8569      | NM_003684    | MKNK1           |
| A_21_P0013548  | 4,42507 | 4,37037 | 1,038643101 | N/A             | N/A       | N/A          | XLOC_I2_014694  |
| A_23_P132378   | 12,0572 | 12,0025 | 1,038643101 | ENST00000473624 | 9620      | NM_014246    | CELSR1          |
| A_23_P167683   | 1,70181 | 1,64712 | 1,038635902 | ENST00000515058 | 2668      | NM_000514    | GDNF            |
| A_21_P0002690  | 1,45656 | 1,40187 | 1,038635902 | N/A             | N/A       | N/A          | Inc-KLF7-1      |
| A_22_P00013547 | 1,4875  | 1,43282 | 1,038628703 | N/A             | 100874433 | NR_121669    | IQCJ-SCHIP1-AS1 |
| A_33_P3223417  | 1,45507 | 1,40039 | 1,038628703 | N/A             | 286002    | NR_028137    | SLC26A4-AS1     |
| A_33_P3281465  | 9,10112 | 9,04645 | 1,038621503 | ENST00000408041 | 8884      | NM_021095    | SLC5A6          |
| A_22_P00003115 | 1,45085 | 1,39619 | 1,038614304 | N/A             | N/A       | N/A          | Inc-C9orf107-1  |
| A_21_P0009693  | 1,58917 | 1,53453 | 1,038599906 | N/A             | N/A       | N/A          | Inc-ZNF729-1    |
| A_22_P00006460 | 1,74058 | 1,68594 | 1,038599906 | ENST00000417054 | N/A       | N/A          | N/A             |
| A_21_P0012579  | 1,59218 | 1,53755 | 1,038592707 | ENST00000503394 | N/A       | N/A          | N/A             |
| A_22_P00013848 | 1,63365 | 1,57903 | 1,038585508 | N/A             | N/A       | BF593104     | Inc-RPL30-2     |
| A_23_P414958   | 1,60458 | 1,54996 | 1,038585508 | ENST00000549217 | 10154     | NM_005761    | PLXNC1          |
| A_33_P3326802  | 1,58378 | 1,52917 | 1,038578309 | N/A             | N/A       | N/A          | N/A             |
| A_23_P316121   | 1,74622 | 1,69161 | 1,038578309 | ENST00000272641 | 11249     | NM_007226    | NXPH2           |
| A_21_P0009559  | 1,43037 | 1,37576 | 1,038578309 | ENST00000592405 | 101927229 | NR_110743    | LOC101927229    |
| A_33_P3351986  | 1,45805 | 1,40344 | 1,038578309 | ENST00000548955 | 283387    | CD675540     | LOC283387       |
| A_23_P135616   | 9,40871 | 9,3541  | 1,038578309 | ENST00000515687 | 53407     | NM_016930    | STX18           |
| A_24_P297078   | 11,0106 | 10,956  | 1,03857111  | ENST00000217456 | 57136     | NM_020531    | APMAP           |
| A_22_P00005364 | 1,7107  | 1,6561  | 1,03857111  | N/A             | 100288346 | NR_034101    | NCAM1-AS1       |
| A_23_P143569   | 10,4918 | 10,4372 | 1,03857111  | ENST00000443409 | 85359     | NM_033257    | DGCR6L          |
| A_33_P3262236  | 1,62378 | 1,56919 | 1,038563912 | ENST00000557009 | 441669    | NM_172194    | OR4Q3           |
| A_24_P170234   | 1,69298 | 1,6384  | 1,038556713 | ENST00000434824 | 378925    | NM_198085    | RNF148          |
| A_33_P3400023  | 1,69223 | 1,63765 | 1,038556713 | N/A             | N/A       | N/A          | N/A             |
| A_22_P00021057 | 5,22461 | 5,17005 | 1,038542315 | ENST00000361684 | 25829     | NM_001195072 | TMEM184B        |
| A_21_P0005777  | 1,58192 | 1,52736 | 1,038542315 | N/A             | N/A       | N/A          | Inc-BAI1-4      |
| A_22_P00002979 | 1,4248  | 1,37025 | 1,038535117 | ENST00000417244 | 653483    | N/A          | MLLT4-AS1       |

|                |         |         |             |                 |           |              |                |
|----------------|---------|---------|-------------|-----------------|-----------|--------------|----------------|
| A_33_P3330886  | 1,60422 | 1,54967 | 1,038535117 | ENST00000379665 | 403282    | NM_001005518 | OR6C65         |
| A_22_P00024099 | 1,55802 | 1,50348 | 1,038527918 | N/A             | N/A       | N/A          | Inc-CYB561-5   |
| A_21_P0009035  | 1,47728 | 1,42275 | 1,03852072  | ENST00000561591 | 101927480 | XR_243452    | LOC101927480   |
| A_22_P00008357 | 1,46781 | 1,41329 | 1,038513521 | N/A             | N/A       | N/A          | Inc-IYD-2      |
| A_24_P165864   | 1,62271 | 1,56819 | 1,038513521 | ENST00000309170 | 9934      | NM_014879    | P2RY14         |
| A_33_P3236833  | 1,43063 | 1,37612 | 1,038506323 | ENST00000381436 | 2835      | NM_005288    | GPR12          |
| A_33_P3295518  | 1,62248 | 1,56797 | 1,038506323 | ENST00000360542 | 388818    | NM_203405    | KRTAP26-1      |
| A_23_P118888   | 11,9562 | 11,9017 | 1,038499125 | ENST00000610190 | 5048      | NM_000430    | PAFAH1B1       |
| A_22_P00015345 | 1,70094 | 1,64644 | 1,038499125 | N/A             | N/A       | N/A          | Inc-SPRY2-4    |
| A_22_P00012626 | 1,42992 | 1,37543 | 1,038491926 | ENST00000529827 | 101928823 | NR_120560    | LOC101928823   |
| A_24_P124647   | 1,55503 | 1,50054 | 1,038491926 | ENST00000323346 | 246213    | NM_139319    | SLC17A8        |
| A_21_P0010933  | 1,4324  | 1,37791 | 1,038491926 | N/A             | N/A       | N/A          | XLOC_I2_001841 |
| A_22_P00000617 | 7,46702 | 7,41254 | 1,038484728 | N/A             | N/A       | N/A          | Inc-ACOT9-2    |
| A_32_P334325   | 3,75293 | 3,69845 | 1,038484728 | ENST00000536002 | 23504     | NM_015347    | RIMBP2         |
| A_33_P3348564  | 1,43777 | 1,3833  | 1,03847753  | ENST00000312153 | 390174    | NM_001005213 | OR9G1          |
| A_21_P0009043  | 1,59217 | 1,53772 | 1,038463134 | N/A             | N/A       | N/A          | Inc-CDH8-2     |
| A_33_P3275220  | 1,42957 | 1,37512 | 1,038463134 | ENST00000243300 | 203447    | NM_198465    | NRK            |
| A_22_P00010006 | 1,42034 | 1,3659  | 1,038455935 | ENST00000577089 | N/A       | N/A          | N/A            |
| A_22_P00014265 | 1,49635 | 1,44191 | 1,038455935 | ENST00000559148 | N/A       | N/A          | N/A            |
| A_21_P0006343  | 1,63264 | 1,57821 | 1,038448737 | N/A             | N/A       | N/A          | Inc-DMRTA1-7   |
| A_22_P00000708 | 1,62716 | 1,57274 | 1,03844154  | N/A             | N/A       | N/A          | Inc-ADAMTS14-1 |
| A_33_P3278689  | 1,72137 | 1,66696 | 1,038434342 | ENST00000400549 | 245930    | NM_001037731 | DEFB116        |
| A_33_P3269817  | 1,45539 | 1,40098 | 1,038434342 | ENST00000382988 | 101928697 | N/A          | LOC101928697   |
| A_22_P00007321 | 1,43076 | 1,37636 | 1,038427144 | ENST00000553487 | N/A       | AL832767     | N/A            |
| A_23_P157920   | 1,69331 | 1,63891 | 1,038427144 | ENST00000380216 | 3449      | NM_002173    | IFNA16         |
| A_33_P3567961  | 1,77087 | 1,71647 | 1,038427144 | ENST00000611331 | N/A       | AK023539     | N/A            |
| A_23_P145054   | 1,43873 | 1,38434 | 1,038419946 | ENST00000368557 | 221303    | NM_001085480 | FAM162B        |
| A_22_P00023951 | 1,6331  | 1,57871 | 1,038419946 | N/A             | N/A       | DA722162     | Inc-CHN2-3     |
| A_21_P0005677  | 1,72431 | 1,66992 | 1,038419946 | N/A             | N/A       | N/A          | Inc-LEPROTL1-3 |
| A_23_P110319   | 1,50478 | 1,45039 | 1,038419946 | ENST00000226432 | 80157     | NM_025087    | CWH43          |
| A_33_P3342051  | 1,50403 | 1,44964 | 1,038419946 | N/A             | 347411    | NM_001195522 | MPC1L          |
| A_33_P3389306  | 1,62907 | 1,57469 | 1,038412748 | N/A             | N/A       | CU692123     | Inc-AGPS-2     |
| A_21_P0014264  | 1,69415 | 1,63977 | 1,038412748 | N/A             | N/A       | N/A          | N/A            |

|                |         |         |             |                 |           |              |                |
|----------------|---------|---------|-------------|-----------------|-----------|--------------|----------------|
| A_21_P0006688  | 1,74184 | 1,68746 | 1,038412748 | ENST00000437892 | 170425    | N/A          | LINC00858      |
| A_22_P00012375 | 1,73673 | 1,68235 | 1,038412748 | N/A             | N/A       | N/A          | Inc-PRICKLE2-3 |
| A_22_P00008021 | 1,49566 | 1,44128 | 1,038412748 | ENST00000521572 | N/A       | CD709954     | N/A            |
| A_22_P00016377 | 1,48738 | 1,43301 | 1,038405551 | ENST00000427398 | 727944    | XR_109991    | LOC727944      |
| A_33_P3411372  | 1,50556 | 1,45122 | 1,038383958 | N/A             | 100131626 | NR_046369    | LOC100131626   |
| A_24_P179489   | 8,09207 | 8,03773 | 1,038383958 | ENST00000482234 | 10806     | NM_006642    | SDCCAG8        |
| A_33_P3215412  | 8,82466 | 8,77032 | 1,038383958 | ENST00000332235 | 126567    | NM_001136263 | C2CD4C         |
| A_24_P32627    | 5,88888 | 5,83455 | 1,03837676  | ENST00000513708 | 728586    | XR_159059    | LINC01183      |
| A_22_P00012404 | 1,48077 | 1,42644 | 1,03837676  | ENST00000548306 | N/A       | DA785583     | N/A            |
| A_33_P3325135  | 1,48696 | 1,43264 | 1,038369563 | ENST00000289788 | 222696    | NM_001012455 | ZSCAN23        |
| A_22_P00022413 | 1,6134  | 1,55909 | 1,038362365 | N/A             | N/A       | N/A          | Inc-ATP1A10S-4 |
| A_21_P0006843  | 1,67075 | 1,61644 | 1,038362365 | N/A             | N/A       | N/A          | Inc-MYO3A-2    |
| A_23_P389371   | 1,63022 | 1,57592 | 1,038355168 | ENST00000621697 | 117195    | NM_054031    | MRGPRX3        |
| A_22_P00001160 | 1,69023 | 1,63593 | 1,038355168 | N/A             | N/A       | AK096766     | Inc-AMPH-2     |
| A_21_P0005867  | 1,56171 | 1,50741 | 1,038355168 | N/A             | N/A       | N/A          | Inc-MMP16-1    |
| A_21_P0004615  | 1,45903 | 1,40473 | 1,038355168 | N/A             | 285762    | N/A          | LOC285762      |
| A_22_P00005735 | 1,55821 | 1,50391 | 1,038355168 | ENST00000543347 | N/A       | BG217017     | N/A            |
| A_22_P00023833 | 1,58663 | 1,53234 | 1,038347971 | N/A             | N/A       | AL080086     | Inc-ASXL1-2    |
| A_21_P0003866  | 3,91621 | 3,86196 | 1,038319182 | N/A             | 101929996 | N/A          | LOC101929996   |
| A_21_P0010745  | 1,59404 | 1,53979 | 1,038319182 | ENST00000436377 | N/A       | N/A          | N/A            |
| A_22_P00002168 | 1,61368 | 1,55943 | 1,038319182 | ENST00000531136 | N/A       | CR744189     | N/A            |
| A_22_P00002356 | 1,50916 | 1,45493 | 1,038304788 | N/A             | N/A       | N/A          | Inc-C12orf39-1 |
| A_22_P00020286 | 1,62602 | 1,57179 | 1,038304788 | ENST00000510946 | N/A       | N/A          | N/A            |
| A_21_P0012178  | 1,41974 | 1,36551 | 1,038304788 | N/A             | N/A       | N/A          | XLOC_l2_009129 |
| A_21_P0002855  | 1,60246 | 1,54825 | 1,038290394 | ENST00000472238 | N/A       | N/A          | N/A            |
| A_23_P101374   | 11,861  | 11,8068 | 1,038283197 | ENST00000310054 | 29785     | AK027605     | CYP2S1         |
| A_22_P00012978 | 1,59372 | 1,53953 | 1,038276    | ENST00000540399 | N/A       | BE041531     | N/A            |
| A_33_P3394559  | 1,58972 | 1,53553 | 1,038276    | ENST00000613225 | 440561    | NM_001010889 | PRAMEF6        |
| A_24_P352388   | 1,55967 | 1,50549 | 1,038268804 | ENST00000531899 | 53841     | NM_031264    | CDHR5          |
| A_22_P00016075 | 1,44765 | 1,39347 | 1,038268804 | ENST00000564830 | 101929504 | NR_125863    | LOC101929504   |
| A_32_P528311   | 6,49652 | 6,44234 | 1,038268804 | ENST00000335099 | 349667    | NM_178570    | RTN4RL2        |
| A_22_P00013307 | 1,65471 | 1,60053 | 1,038268804 | ENST00000518962 | 497634    | NR_027013    | LINC00293      |
| A_33_P3740020  | 1,60703 | 1,55285 | 1,038268804 | N/A             | 692053    | BE172294     | SNORD9         |

|                |         |         |             |                 |           |              |                  |
|----------------|---------|---------|-------------|-----------------|-----------|--------------|------------------|
| A_33_P3507542  | 8,37723 | 8,32306 | 1,038261607 | ENST00000536140 | 10536     | NM_014262    | LEPREL2          |
| A_22_P00025253 | 4,78145 | 4,72728 | 1,038261607 | N/A             | 102724323 | NR_120674    | LOC102724323     |
| A_23_P17663    | 1,58946 | 1,53529 | 1,038261607 | ENST00000455164 | 4599      | NM_002462    | MX1              |
| A_33_P3378171  | 1,61348 | 1,55932 | 1,03825441  | N/A             | 400940    | N/A          | LOC400940        |
| A_22_P00022107 | 1,59194 | 1,53779 | 1,038247214 | ENST00000560360 | N/A       | DA145170     | N/A              |
| A_24_P781657   | 1,58921 | 1,53509 | 1,038225624 | N/A             | N/A       | AK001132     | Inc-C10orf40-1   |
| A_23_P202245   | 1,58515 | 1,53104 | 1,038218428 | ENST00000355710 | 5979      | NM_020975    | RET              |
| A_19_P00315641 | 1,44568 | 1,39158 | 1,038211231 | ENST00000498732 | 286411    | NR_104228    | LINC00632        |
| A_33_P3419551  | 1,64149 | 1,58739 | 1,038211231 | ENST00000332650 | 26339     | NM_001004736 | OR5K1            |
| A_33_P3211959  | 1,6998  | 1,64571 | 1,038204035 | ENST00000427632 | N/A       | BC022822     | N/A              |
| A_32_P42018    | 1,44046 | 1,38639 | 1,038189643 | ENST00000529466 | 100500938 | NM_001195637 | CCDC179          |
| A_22_P00005706 | 1,43218 | 1,37811 | 1,038189643 | ENST00000506070 | N/A       | N/A          | N/A              |
| A_23_P410128   | 1,55388 | 1,49982 | 1,038182446 | ENST00000328823 | 164684    | NM_152613    | WBP2NL           |
| A_21_P0010305  | 1,62835 | 1,5743  | 1,03817525  | N/A             | N/A       | N/A          | Inc-AF127577.1-5 |
| A_33_P3274756  | 5,36249 | 5,30845 | 1,038168054 | ENST00000237163 | 23033     | NM_015018    | DOPEY1           |
| A_22_P00006584 | 1,61276 | 1,55872 | 1,038168054 | N/A             | N/A       | N/A          | Inc-FMR1NB-2     |
| A_23_P43425    | 8,37413 | 8,32009 | 1,038168054 | ENST00000376854 | 55071     | NM_017998    | C9orf40          |
| A_21_P0004200  | 1,42181 | 1,36778 | 1,038160858 | N/A             | N/A       | N/A          | Inc-C5orf38-2    |
| A_21_P0001489  | 1,49073 | 1,43672 | 1,038146466 | N/A             | N/A       | N/A          | Inc-TRIM62-1     |
| A_22_P00009511 | 1,65347 | 1,59946 | 1,038146466 | ENST00000509496 | N/A       | N/A          | N/A              |
| A_33_P3340040  | 10,1887 | 10,1347 | 1,038139271 | ENST00000276533 | 84296     | NM_032336    | GIN54            |
| A_33_P3266848  | 5,75626 | 5,70226 | 1,038139271 | ENST00000328207 | N/A       | N/A          | N/A              |
| A_23_P19348    | 7,86778 | 7,81378 | 1,038139271 | ENST00000535468 | 9820      | NM_014780    | CUL7             |
| A_21_P0004156  | 4,22869 | 4,17469 | 1,038139271 | ENST00000507491 | N/A       | N/A          | N/A              |
| A_22_P00007484 | 3,81196 | 3,75797 | 1,038132075 | N/A             | N/A       | N/A          | Inc-GTPBP8-1     |
| A_22_P00007953 | 1,61057 | 1,55658 | 1,038132075 | ENST00000577545 | 400612    | NR_126169    | LOC400612        |
| A_22_P00015929 | 8,53645 | 8,48247 | 1,038124879 | N/A             | N/A       | N/A          | Inc-TCN2-1       |
| A_33_P3326767  | 1,55847 | 1,50449 | 1,038124879 | N/A             | N/A       | XR_159010    | N/A              |
| A_21_P0004028  | 1,41721 | 1,36324 | 1,038117683 | ENST00000505109 | N/A       | N/A          | N/A              |
| A_22_P00016130 | 1,50986 | 1,4559  | 1,038110488 | N/A             | 101929734 | XR_249445    | LOC101929734     |
| A_19_P00322397 | 1,58882 | 1,53487 | 1,038103292 | ENST00000599749 | 400550    | NR_036444    | FENDRR           |
| A_22_P00015663 | 1,54902 | 1,49507 | 1,038103292 | N/A             | 101928008 | NR_120539    | LOC101928008     |
| A_21_P0013361  | 1,6987  | 1,64475 | 1,038103292 | N/A             | N/A       | N/A          | XLOC_I2_014077   |

|                |         |         |             |                 |           |              |                |
|----------------|---------|---------|-------------|-----------------|-----------|--------------|----------------|
| A_22_P00006529 | 1,57353 | 1,51958 | 1,038103292 | N/A             | N/A       | N/A          | Inc-FGGY-3     |
| A_22_P00009321 | 2,41005 | 2,3561  | 1,038103292 | N/A             | N/A       | AK128830     | Inc-LRRC56-1   |
| A_21_P0012014  | 1,60749 | 1,55354 | 1,038103292 | N/A             | N/A       | N/A          | Inc-ZAP70-2    |
| A_21_P0003181  | 1,5919  | 1,53796 | 1,038096096 | N/A             | N/A       | N/A          | Inc-STAG1-3    |
| A_22_P00004885 | 1,54943 | 1,49551 | 1,038081705 | ENST00000435878 | N/A       | N/A          | N/A            |
| A_21_P0004752  | 1,60074 | 1,54684 | 1,038067315 | ENST00000431394 | N/A       | N/A          | N/A            |
| A_33_P7718819  | 18,1312 | 18,0773 | 1,038067315 | ENST00000373457 | 23404     | NM_014285    | EXOSC2         |
| A_21_P0014052  | 1,70536 | 1,65146 | 1,038067315 | N/A             | N/A       | N/A          | N/A            |
| A_21_P0001682  | 1,69413 | 1,64024 | 1,038060119 | N/A             | N/A       | N/A          | Inc-FGGY-2     |
| A_23_P208030   | 1,75239 | 1,6985  | 1,038060119 | ENST00000255224 | 6860      | NM_020783    | SYT4           |
| A_33_P3843415  | 1,43485 | 1,38097 | 1,038052924 | N/A             | 283089    | N/A          | WDR11-AS1      |
| A_21_P0012315  | 1,43798 | 1,3841  | 1,038052924 | N/A             | N/A       | N/A          | XLOC_I2_009302 |
| A_33_P3396224  | 1,42384 | 1,36997 | 1,038045729 | ENST00000316048 | 440087    | NM_001013698 | SMCO3          |
| A_23_P368847   | 1,42988 | 1,37603 | 1,038031339 | ENST00000372643 | 140832    | NM_080753    | WFDC10A        |
| A_22_P00017362 | 1,60173 | 1,54789 | 1,038024144 | ENST00000452971 | N/A       | N/A          | N/A            |
| A_24_P319942   | 8,62104 | 8,56721 | 1,038016949 | ENST00000265044 | 6747      | NM_007107    | SSR3           |
| A_21_P0008344  | 1,45163 | 1,3978  | 1,038016949 | N/A             | N/A       | N/A          | Inc-DAAM1-2    |
| A_21_P0006116  | 1,68686 | 1,63303 | 1,038016949 | ENST00000420883 | N/A       | N/A          | N/A            |
| A_21_P0002125  | 1,7176  | 1,66377 | 1,038016949 | ENST00000456895 | N/A       | N/A          | N/A            |
| A_33_P3321055  | 6,32138 | 6,26756 | 1,038009754 | ENST00000464735 | 55504     | BC035796     | TNFRSF19       |
| A_33_P3323934  | 1,58645 | 1,53263 | 1,038009754 | ENST00000527756 | N/A       | N/A          | N/A            |
| A_24_P321766   | 1,50812 | 1,4543  | 1,038009754 | ENST00000553780 | 5104      | NM_000624    | SERPINA5       |
| A_21_P0000696  | 1,58694 | 1,53312 | 1,038009754 | N/A             | 100505893 | NR_037876    | SLIT2-IT1      |
| A_32_P142779   | 1,6161  | 1,56229 | 1,038002559 | ENST00000329196 | 162540    | NM_175882    | SPPL2C         |
| A_22_P00009877 | 1,43122 | 1,37741 | 1,038002559 | ENST00000519147 | N/A       | N/A          | N/A            |
| A_33_P3348594  | 1,55295 | 1,49914 | 1,038002559 | ENST00000312253 | 219479    | NM_001004744 | OR5R1          |
| A_24_P204244   | 14,5086 | 14,4548 | 1,037995364 | ENST00000505539 | 303       | NR_001562    | ANXA2P1        |
| A_23_P210224   | 1,61635 | 1,56256 | 1,037988169 | ENST00000614712 | 56896     | NM_020134    | DPYSL5         |
| A_22_P00006218 | 1,43148 | 1,37769 | 1,037988169 | ENST00000412652 | N/A       | N/A          | N/A            |
| A_23_P115636   | 6,22368 | 6,1699  | 1,037980974 | ENST00000495022 | 1787      | NM_004412    | TRDMT1         |
| A_22_P00000455 | 1,48481 | 1,43104 | 1,03797378  | ENST00000578936 | N/A       | N/A          | N/A            |
| A_33_P3379004  | 6,7777  | 6,72394 | 1,037966585 | N/A             | N/A       | AK130723     | N/A            |
| A_22_P00007715 | 1,622   | 1,56825 | 1,03795939  | N/A             | N/A       | N/A          | Inc-HLA-DQA1-5 |

|                |         |         |             |                 |           |              |                |
|----------------|---------|---------|-------------|-----------------|-----------|--------------|----------------|
| A_22_P00019155 | 1,59406 | 1,54032 | 1,037952196 | ENST00000473959 | 151887    | N/A          | CCDC80         |
| A_21_P0002389  | 1,54882 | 1,49509 | 1,037945001 | N/A             | N/A       | N/A          | Inc-CMPK2-5    |
| A_21_P0011190  | 1,65084 | 1,59712 | 1,037937807 | ENST00000433074 | 104355140 | N/A          | LINC00375      |
| A_23_P312150   | 1,97374 | 1,92003 | 1,037930612 | ENST00000372587 | 1907      | NM_001956    | EDN2           |
| A_22_P00012616 | 1,44283 | 1,38913 | 1,037923418 | ENST00000446053 | N/A       | N/A          | N/A            |
| A_22_P00011526 | 1,5485  | 1,4948  | 1,037923418 | N/A             | N/A       | N/A          | Inc-PBX3-2     |
| A_23_P47208    | 13,0537 | 13      | 1,037923418 | ENST00000533166 | 8815      | NM_003860    | BANF1          |
| A_33_P3262043  | 12,6456 | 12,5919 | 1,037923418 | ENST00000309032 | 572       | NM_004322    | BAD            |
| A_19_P00319184 | 1,70105 | 1,64736 | 1,037916224 | ENST00000412410 | N/A       | N/A          | N/A            |
| A_19_P00321014 | 7,42105 | 7,36736 | 1,037916224 | N/A             | N/A       | XR_110931    | N/A            |
| A_33_P3345469  | 1,42983 | 1,37614 | 1,037916224 | ENST00000414000 | 2830      | NM_001286099 | GPR6           |
| A_22_P00001734 | 1,4772  | 1,42351 | 1,037916224 | N/A             | N/A       | DB050999     | Inc-ATIC-8     |
| A_33_P3276653  | 1,61903 | 1,56535 | 1,037909029 | N/A             | 494118    | NM_001009614 | SPANXN1        |
| A_21_P0004365  | 1,50575 | 1,45208 | 1,037901835 | N/A             | N/A       | N/A          | Inc-ZNF622-1   |
| A_21_P0004950  | 1,50876 | 1,45509 | 1,037901835 | N/A             | 100507477 | XR_245610    | LOC100507477   |
| A_23_P120694   | 1,43247 | 1,3788  | 1,037901835 | ENST00000290310 | 9992      | NM_172201    | KCNE2          |
| A_22_P00003133 | 1,41732 | 1,36366 | 1,037894641 | N/A             | N/A       | N/A          | Inc-C9orf146-2 |
| A_33_P3341851  | 1,99403 | 1,94038 | 1,037887447 | ENST00000309071 | 55345     | BC044799     | ZGRF1          |
| A_21_P0004587  | 1,7354  | 1,68176 | 1,037880253 | N/A             | N/A       | XM_006710171 | Inc-ZNF354A-1  |
| A_23_P77117    | 4,78126 | 4,72763 | 1,037873059 | ENST00000565774 | 53346     | NM_023003    | TM6SF1         |
| A_22_P00007046 | 1,586   | 1,53238 | 1,037865865 | ENST00000565399 | N/A       | BX648040     | N/A            |
| A_33_P3276425  | 1,73415 | 1,68054 | 1,037858671 | ENST00000446461 | 389124    | NM_001145059 | IQCF5          |
| A_22_P00024470 | 1,61827 | 1,56466 | 1,037858671 | ENST00000533942 | N/A       | N/A          | N/A            |
| A_22_P00006734 | 4,63335 | 4,57974 | 1,037858671 | N/A             | N/A       | N/A          | Inc-FSCN2-1    |
| A_21_P0005110  | 1,69376 | 1,64016 | 1,037851477 | N/A             | N/A       | N/A          | Inc-NRSN1-3    |
| A_33_P3403693  | 1,58362 | 1,53002 | 1,037851477 | ENST00000378133 | 56147     | NM_031410    | PCDHA1         |
| A_22_P00019393 | 1,56723 | 1,51363 | 1,037851477 | N/A             | N/A       | N/A          | Inc-CRABP2-1   |
| A_33_P3365408  | 8,16233 | 8,10874 | 1,037844283 | N/A             | 283314    | NR_026947    | C1RL-AS1       |
| A_21_P0005038  | 1,51919 | 1,4656  | 1,037844283 | N/A             | N/A       | N/A          | Inc-UBE2CBP-1  |
| A_33_P3214393  | 1,48587 | 1,43231 | 1,037822702 | ENST00000390465 | N/A       | D13074       | N/A            |
| A_33_P3313597  | 2,98479 | 2,93124 | 1,037815509 | N/A             | 100128998 | XR_425258    | C20orf181      |
| A_33_P3285275  | 1,76612 | 1,71257 | 1,037815509 | ENST00000498816 | 783       | N/A          | CACNB2         |
| A_33_P3255135  | 1,7013  | 1,64775 | 1,037815509 | N/A             | 101929485 | XR_241533    | LOC101929485   |

|                |         |         |             |                 |           |              |                |
|----------------|---------|---------|-------------|-----------------|-----------|--------------|----------------|
| A_33_P3395605  | 1,42091 | 1,36736 | 1,037815509 | ENST00000392806 | 338773    | NM_181724    | TMEM119        |
| A_22_P00014875 | 1,67294 | 1,61939 | 1,037815509 | N/A             | 644714    | NR_033947    | LIMD1-AS1      |
| A_23_P256624   | 1,68504 | 1,6315  | 1,037808315 | ENST00000514278 | 54514     | NM_024415    | DDX4           |
| A_33_P3362491  | 1,41661 | 1,36307 | 1,037808315 | ENST00000334128 | 200909    | NM_001145143 | HTR3D          |
| A_22_P00000398 | 1,43153 | 1,37799 | 1,037808315 | ENST00000563923 | N/A       | N/A          | N/A            |
| A_33_P3306078  | 1,62145 | 1,56792 | 1,037801121 | ENST00000452010 | 84176     | NR_002147    | MYH16          |
| A_24_P334456   | 1,42707 | 1,37354 | 1,037801121 | ENST00000464680 | 11174     | NM_197941    | ADAMTS6        |
| A_33_P3260941  | 1,5315  | 1,47798 | 1,037793928 | ENST00000064778 | 23201     | NM_001286050 | FAM168A        |
| A_22_P00005546 | 1,50554 | 1,45202 | 1,037793928 | ENST00000510049 | N/A       | N/A          | N/A            |
| A_23_P102420   | 15,8669 | 15,8134 | 1,037779541 | ENST00000544079 | 10575     | NM_006430    | CCT4           |
| A_21_P0012103  | 1,60706 | 1,55356 | 1,037779541 | ENST00000594069 | 101927687 | XR_241384    | LOC101927687   |
| A_33_P3729375  | 1,557   | 1,50351 | 1,037772348 | N/A             | 285181    | AK093857     | LOC285181      |
| A_33_P3812027  | 1,60471 | 1,55122 | 1,037772348 | N/A             | 414300    | BC032033     | LOC414300      |
| A_22_P00004379 | 4,32618 | 4,27269 | 1,037772348 | ENST00000429512 | N/A       | N/A          | N/A            |
| A_21_P0004925  | 1,52003 | 1,46655 | 1,037765155 | N/A             | N/A       | N/A          | Inc-MARCKS-6   |
| A_22_P00005629 | 1,48287 | 1,4294  | 1,037757961 | N/A             | N/A       | BC029603     | Inc-EID1-1     |
| A_33_P3221688  | 1,64605 | 1,5926  | 1,037743575 | ENST00000418025 | N/A       | DA292495     | N/A            |
| A_24_P10884    | 1,51908 | 1,46563 | 1,037743575 | ENST00000407075 | 9402      | NM_004810    | GRAP2          |
| A_33_P3778618  | 1,7521  | 1,69866 | 1,037736382 | N/A             | 285796    | NR_028390    | PACRG-AS1      |
| A_23_P112554   | 1,55512 | 1,50169 | 1,037729189 | ENST00000375001 | 1306      | NM_001855    | COL15A1        |
| A_33_P3794213  | 1,59785 | 1,54442 | 1,037729189 | N/A             | N/A       | AJ251642     | Inc-CDKN1C-2   |
| A_23_P72817    | 1,54743 | 1,49401 | 1,037721996 | ENST00000329913 | 9573      | NM_020634    | GDF3           |
| A_33_P3788124  | 1,52074 | 1,46733 | 1,037714803 | ENST00000562501 | 791114    | NR_026646    | PWRN1          |
| A_22_P00001803 | 1,45214 | 1,39873 | 1,037714803 | N/A             | N/A       | DB452078     | Inc-ATP6VOD2-1 |
| A_24_P203765   | 4,79934 | 4,74593 | 1,037714803 | ENST00000371491 | 6512      | NM_001287596 | SLC1A7         |
| A_33_P3358799  | 12,0495 | 11,9961 | 1,03770761  | ENST00000317734 | 51006     | NM_001281460 | SLC35C2        |
| A_23_P213319   | 1,59532 | 1,54192 | 1,03770761  | ENST00000381052 | 11174     | NM_197941    | ADAMTS6        |
| A_22_P00024835 | 1,60988 | 1,55649 | 1,037700418 | ENST00000522807 | 101927003 | N/A          | LOC101927003   |
| A_33_P3308117  | 1,62543 | 1,57204 | 1,037700418 | N/A             | 101929095 | NR_125911    | LOC101929095   |
| A_22_P00017990 | 1,51168 | 1,4583  | 1,037693225 | N/A             | N/A       | N/A          | Inc-ZNF101-1   |
| A_24_P717262   | 1,63662 | 1,58324 | 1,037693225 | ENST00000600110 | N/A       | N/A          | N/A            |
| A_23_P41713    | 1,56372 | 1,51035 | 1,037686032 | ENST00000302938 | 153745    | NM_130899    | FAM71B         |
| A_33_P3490572  | 1,43768 | 1,38431 | 1,037686032 | ENST00000460624 | 148811    | NM_152491    | PM20D1         |



|                |         |         |             |                 |           |              |                      |
|----------------|---------|---------|-------------|-----------------|-----------|--------------|----------------------|
| A_22_P00004028 | 1,5998  | 1,54644 | 1,037678839 | N/A             | N/A       | AK128348     | Inc-CHP2.1-1         |
| A_21_P0014314  | 7,89401 | 7,84065 | 1,037678839 | N/A             | N/A       | N/A          | Inc-ZSCAN10-3        |
| A_33_P3416347  | 1,47554 | 1,42218 | 1,037678839 | ENST00000390396 | N/A       | M27390       | N/A                  |
| A_33_P3397840  | 1,65419 | 1,60083 | 1,037678839 | ENST00000409123 | 644150    | BC156551     | WIPF3                |
| A_33_P3261914  | 5,53505 | 5,4817  | 1,037671647 | N/A             | 102724738 | XR_426195    | LOC102724738         |
| A_22_P00004523 | 5,11911 | 5,06577 | 1,037664454 | ENST00000441272 | N/A       | N/A          | N/A                  |
| A_21_P0007498  | 1,56983 | 1,5165  | 1,037657262 | ENST00000512624 | 101927592 | NR_104646    | LOC101927592         |
| A_22_P00004115 | 1,46737 | 1,41404 | 1,037657262 | ENST00000509548 | N/A       | N/A          | N/A                  |
| A_21_P0010574  | 1,62169 | 1,56836 | 1,037657262 | N/A             | N/A       | N/A          | XLOC_I2_000604       |
| A_24_P41850    | 1,61235 | 1,55902 | 1,037657262 | ENST00000169293 | 5648      | NM_001031849 | MASP1                |
| A_22_P00012989 | 1,51499 | 1,46167 | 1,037650069 | N/A             | 100874095 | NR_046662    | ADIPOQ-AS1           |
| A_33_P3363305  | 9,80602 | 9,7527  | 1,037650069 | ENST00000511464 | N/A       | N/A          | N/A                  |
| A_23_P212608   | 1,50504 | 1,45173 | 1,037642877 | ENST00000620185 | 64084     | NM_022131    | CLSTN2               |
| A_33_P3424477  | 1,65771 | 1,6044  | 1,037642877 | ENST00000394488 | 9348      | AY358852     | NDST3                |
| A_24_P346807   | 10,7993 | 10,746  | 1,037635684 | ENST00000373700 | 26091     | NM_022079    | HERC4                |
| A_24_P43144    | 1,57927 | 1,52597 | 1,037635684 | ENST00000466790 | 50940     | NM_001077358 | PDE11A               |
| A_21_P0001354  | 1,47171 | 1,41842 | 1,037628492 | N/A             | N/A       | N/A          | Inc-S1PR1-2          |
| A_21_P0014430  | 1,58079 | 1,5275  | 1,037628492 | ENST00000625149 | 642757    | NR_122047    | TBC1D22A-AS1         |
| A_33_P3337549  | 1,43986 | 1,38658 | 1,0376213   | ENST00000443026 | 340273    | NM_001163942 | ABCB5                |
| A_22_P00013394 | 1,49208 | 1,4388  | 1,0376213   | ENST00000548344 | N/A       | BX099885     | N/A                  |
| A_33_P3390017  | 1,69639 | 1,64311 | 1,0376213   | ENST00000318578 | 400360    | NM_207445    | C15orf54             |
| A_22_P00021445 | 1,54617 | 1,49289 | 1,0376213   | N/A             | N/A       | N/A          | Inc-ALPL-1           |
| A_23_P324419   | 1,70885 | 1,65557 | 1,0376213   | ENST00000313965 | 165100    | NM_152614    | C2orf57              |
| A_23_P705      | 1,69987 | 1,64659 | 1,0376213   | ENST00000368152 | 343406    | NM_001004472 | OR10R2               |
| A_33_P3275702  | 1,47039 | 1,41712 | 1,037614108 | ENST00000209929 | 2327      | NM_001460    | FMO2                 |
| A_23_P147786   | 1,46097 | 1,4077  | 1,037614108 | ENST00000406091 | 9699      | NM_014677    | RIMS2                |
| A_23_P359746   | 1,51511 | 1,46184 | 1,037614108 | ENST00000547270 | 5726      | NM_176817    | TAS2R38              |
| A_21_P0002772  | 1,5155  | 1,46224 | 1,037606915 | ENST00000465880 | N/A       | N/A          | N/A                  |
| A_22_P00013614 | 1,58513 | 1,53187 | 1,037606915 | N/A             | N/A       | N/A          | Inc-RP11-579D7.1.1-1 |
| A_21_P0005547  | 1,49965 | 1,4464  | 1,037599723 | N/A             | N/A       | N/A          | Inc-AC099552.4.1-2   |
| A_23_P116640   | 1,51787 | 1,46462 | 1,037599723 | ENST00000328813 | 79345     | NM_033180    | OR51B2               |
| A_33_P3371260  | 1,63813 | 1,58488 | 1,037599723 | N/A             | N/A       | N/A          | N/A                  |
| A_21_P0006820  | 1,42908 | 1,37583 | 1,037599723 | N/A             | N/A       | N/A          | Inc-AKR1E2-3         |

|                |         |         |             |                 |           |              |                |
|----------------|---------|---------|-------------|-----------------|-----------|--------------|----------------|
| A_23_P339588   | 1,48202 | 1,42877 | 1,037599723 | ENST00000338313 | 117289    | NM_138810    | TAGAP          |
| A_22_P00018959 | 1,70448 | 1,65125 | 1,037585339 | N/A             | N/A       | N/A          | Inc-FMN2-1     |
| A_33_P3302577  | 1,5124  | 1,45917 | 1,037585339 | ENST00000261654 | 283383    | NM_198827    | GPR133         |
| A_21_P0014221  | 4,70291 | 4,64969 | 1,037578147 | ENST00000518854 | 100507464 | XR_108905    | LOC100507464   |
| A_22_P00014243 | 1,51965 | 1,46643 | 1,037578147 | N/A             | N/A       | N/A          | Inc-SEL1L-8    |
| A_21_P0004596  | 1,43044 | 1,37722 | 1,037578147 | ENST00000616994 | N/A       | N/A          | N/A            |
| A_33_P3376302  | 1,74089 | 1,68767 | 1,037578147 | N/A             | N/A       | DA144211     | N/A            |
| A_22_P00009786 | 1,66663 | 1,61342 | 1,037570955 | ENST00000506978 | N/A       | N/A          | N/A            |
| A_22_P00001938 | 1,58988 | 1,53668 | 1,037563763 | ENST00000435832 | N/A       | N/A          | N/A            |
| A_23_P38603    | 1,54838 | 1,49519 | 1,037556572 | ENST00000390661 | 84616     | NM_032524    | KRTAP4-4       |
| A_22_P00006281 | 1,62812 | 1,57494 | 1,03754938  | N/A             | N/A       | N/A          | Inc-FAM78A-1   |
| A_33_P3422270  | 1,46136 | 1,40818 | 1,03754938  | ENST00000529417 | N/A       | N/A          | N/A            |
| A_22_P00004987 | 1,64081 | 1,58764 | 1,037542188 | ENST00000512487 | 728081    | NR_033918    | LINC00290      |
| A_33_P3414734  | 1,51402 | 1,46085 | 1,037542188 | N/A             | N/A       | N/A          | Inc-ZNF395-2   |
| A_22_P00009943 | 1,70357 | 1,65041 | 1,037534996 | N/A             | N/A       | N/A          | Inc-MIER3-2    |
| A_21_P0013844  | 1,52225 | 1,46909 | 1,037534996 | ENST00000506270 | 280659    | N/A          | SSX8           |
| A_22_P00021223 | 1,51889 | 1,46574 | 1,037527805 | N/A             | 100628307 | NR_038355    | DIO2-AS1       |
| A_21_P0006609  | 1,51103 | 1,45789 | 1,037520613 | ENST00000412114 | 645528    | NR_026793    | LINC00264      |
| A_22_P00008655 | 1,48962 | 1,43649 | 1,037513422 | N/A             | N/A       | N/A          | Inc-KIAA0196-1 |
| A_33_P3386147  | 1,68446 | 1,63134 | 1,03750623  | N/A             | N/A       | N/A          | N/A            |
| A_22_P00022508 | 1,623   | 1,56988 | 1,03750623  | ENST00000441870 | N/A       | N/A          | N/A            |
| A_22_P00024767 | 1,4188  | 1,36569 | 1,037499039 | N/A             | N/A       | N/A          | Inc-ADAMTS18-3 |
| A_33_P3369864  | 1,46682 | 1,41371 | 1,037499039 | N/A             | N/A       | N/A          | N/A            |
| A_22_P00024074 | 1,44946 | 1,39636 | 1,037491848 | ENST00000536639 | 101927531 | XR_242968    | LOC101927531   |
| A_23_P420359   | 1,61843 | 1,56533 | 1,037491848 | ENST00000615814 | 80070     | NM_025003    | ADAMTS20       |
| A_21_P0004909  | 1,53087 | 1,47777 | 1,037491848 | N/A             | N/A       | N/A          | Inc-GJA10-7    |
| A_21_P0002972  | 1,57975 | 1,52665 | 1,037491848 | N/A             | N/A       | N/A          | Inc-MITF-3     |
| A_22_P00006063 | 1,54508 | 1,49198 | 1,037491848 | N/A             | 101927958 | XR_431549    | LOC101927958   |
| A_33_P3263955  | 1,42172 | 1,36863 | 1,037484656 | ENST00000406721 | 414332    | NM_001001712 | LCN10          |
| A_23_P54357    | 1,45853 | 1,40544 | 1,037484656 | ENST00000307144 | 92483     | NM_033195    | LDHAL6B        |
| A_33_P3373308  | 1,52122 | 1,46813 | 1,037484656 | ENST00000400982 | 440700    | NR_036683    | LOC440700      |
| A_23_P339240   | 1,44154 | 1,38846 | 1,037477465 | ENST00000447496 | 23007     | NM_014996    | PLCH1          |
| A_23_P78571    | 6,95199 | 6,89891 | 1,037477465 | ENST00000590900 | 125965    | NM_144613    | COX6B2         |

|                |         |         |             |                 |           |              |               |
|----------------|---------|---------|-------------|-----------------|-----------|--------------|---------------|
| A_22_P00009423 | 1,63147 | 1,5784  | 1,037470274 | ENST00000437118 | N/A       | N/A          | N/A           |
| A_22_P00021563 | 1,7264  | 1,67333 | 1,037470274 | ENST00000413286 | N/A       | N/A          | N/A           |
| A_33_P6814770  | 1,73089 | 1,67782 | 1,037470274 | ENST00000459923 | 646168    | NR_033843    | LINC01330     |
| A_33_P3748769  | 1,55008 | 1,49702 | 1,037463083 | ENST00000592917 | 388406    | NR_126009    | LOC388406     |
| A_23_P257307   | 1,41519 | 1,36214 | 1,037455891 | ENST00000487487 | 6906      | NM_000354    | SERPINA7      |
| A_23_P327562   | 1,69424 | 1,6412  | 1,0374487   | ENST00000367387 | 56956     | NM_020204    | LHX9          |
| A_22_P00021404 | 1,59359 | 1,54055 | 1,0374487   | ENST00000558010 | N/A       | AW962911     | N/A           |
| A_21_P0010299  | 1,41596 | 1,36293 | 1,037441509 | N/A             | N/A       | N/A          | Inc-ICOSLG-3  |
| A_33_P3234555  | 1,67761 | 1,62458 | 1,037441509 | ENST00000554862 | 101929241 | N/A          | LOC101929241  |
| A_21_P0008047  | 1,58364 | 1,53061 | 1,037441509 | N/A             | N/A       | N/A          | Inc-NBEA-4    |
| A_33_P3396858  | 1,57736 | 1,52434 | 1,037434318 | N/A             | N/A       | N/A          | Inc-PCSK1N-1  |
| A_22_P00023219 | 5,76909 | 5,71607 | 1,037434318 | ENST00000543604 | N/A       | XR_158866    | N/A           |
| A_24_P271830   | 1,58207 | 1,52906 | 1,037427127 | ENST00000313495 | 284034    | NR_034145    | LINC00670     |
| A_33_P3381490  | 1,45046 | 1,39746 | 1,037419937 | N/A             | 26257     | NM_014360    | NKX2-8        |
| A_22_P00007925 | 1,52719 | 1,47419 | 1,037419937 | N/A             | 100507064 | NR_038288    | TEX26-AS1     |
| A_23_P144639   | 10,9964 | 10,9434 | 1,037419937 | ENST00000515265 | 55374     | NM_018502    | TMCO6         |
| A_22_P00009180 | 1,41805 | 1,36506 | 1,037412746 | ENST00000512105 | N/A       | XR_246572    | N/A           |
| A_33_P3423330  | 1,48673 | 1,43374 | 1,037412746 | N/A             | 415056    | NR_024369    | CNTFR-AS1     |
| A_22_P00001088 | 1,6188  | 1,56582 | 1,037405555 | ENST00000447557 | 101928277 | XR_245602    | LOC101928277  |
| A_22_P00005326 | 1,52199 | 1,46901 | 1,037405555 | N/A             | N/A       | N/A          | Inc-DOCK4-1   |
| A_22_P00015860 | 1,41523 | 1,36226 | 1,037398364 | N/A             | N/A       | N/A          | Inc-TBL1XR1-9 |
| A_22_P00010279 | 1,50377 | 1,4508  | 1,037398364 | ENST00000532770 | N/A       | N/A          | N/A           |
| A_21_P0005825  | 1,61582 | 1,56286 | 1,037391174 | ENST00000521030 | N/A       | N/A          | N/A           |
| A_22_P00021163 | 1,51491 | 1,46196 | 1,037383983 | ENST00000417650 | N/A       | N/A          | N/A           |
| A_23_P419760   | 1,516   | 1,46307 | 1,037369602 | ENST00000433368 | 10321     | NM_006061    | CRISP3        |
| A_21_P0009638  | 1,52903 | 1,4761  | 1,037369602 | N/A             | N/A       | N/A          | Inc-FBXO15-5  |
| A_33_P3260053  | 8,91694 | 8,86402 | 1,037362411 | ENST00000372314 | 83543     | NM_001185095 | AIF1L         |
| A_21_P0014270  | 1,42702 | 1,3741  | 1,037362411 | ENST00000534653 | N/A       | BX089531     | N/A           |
| A_32_P715038   | 1,6891  | 1,63619 | 1,037355221 | N/A             | N/A       | AF251048     | N/A           |
| A_33_P3243707  | 8,74694 | 8,69404 | 1,037348031 | ENST00000209884 | 27252     | NM_014458    | KLHL20        |
| A_23_P201636   | 14,7116 | 14,6587 | 1,037348031 | ENST00000264144 | 3918      | NM_005562    | LAMC2         |
| A_21_P0008122  | 1,55019 | 1,49729 | 1,037348031 | ENST00000440860 | 101928616 | NR_120401    | LINC00354     |
| A_23_P47019    | 1,54126 | 1,48836 | 1,037348031 | ENST00000496797 | 8513      | NM_004190    | LIPF          |

|                |         |         |             |                 |           |              |                    |
|----------------|---------|---------|-------------|-----------------|-----------|--------------|--------------------|
| A_22_P00022349 | 1,55938 | 1,50648 | 1,037348031 | N/A             | N/A       | BX111358     | Inc-HMHB1-3        |
| A_21_P0010653  | 1,59478 | 1,54188 | 1,037348031 | N/A             | N/A       | N/A          | XL0C_I2_001097     |
| A_33_P3375859  | 1,6269  | 1,57401 | 1,03734084  | ENST00000439871 | 3580      | NR_002712    | CXCR2P1            |
| A_21_P0005006  | 1,5342  | 1,48131 | 1,03734084  | N/A             | N/A       | N/A          | Inc-ATXN1-2        |
| A_33_P3275610  | 1,55205 | 1,49916 | 1,03734084  | N/A             | N/A       | AK123256     | N/A                |
| A_22_P00024286 | 1,60778 | 1,55489 | 1,03734084  | N/A             | N/A       | BX117128     | Inc-SERAC1-1       |
| A_21_P0003379  | 1,62479 | 1,57191 | 1,03733365  | ENST00000507739 | N/A       | N/A          | N/A                |
| A_21_P0007483  | 1,44675 | 1,39387 | 1,03733365  | ENST00000539019 | 8082      | N/A          | SSPN               |
| A_23_P320846   | 1,58842 | 1,53555 | 1,03732646  | ENST00000382410 | 245938    | NM_153325    | DEFB125            |
| A_22_P00023067 | 1,54483 | 1,49196 | 1,03732646  | N/A             | N/A       | N/A          | Inc-KLHL25-2       |
| A_33_P3405509  | 1,54246 | 1,4896  | 1,03731927  | ENST00000602297 | 347541    | NM_001271752 | MAGEB5             |
| A_33_P3459365  | 1,69892 | 1,64607 | 1,037312079 | ENST00000471357 | 339894    | NR_034007    | LINC00880          |
| A_21_P0009281  | 1,52837 | 1,47552 | 1,037312079 | N/A             | N/A       | N/A          | Inc-TNRC6C-1       |
| A_22_P00016169 | 1,72937 | 1,67652 | 1,037312079 | ENST00000568767 | N/A       | AK095129     | N/A                |
| A_24_P148717   | 1,53158 | 1,47874 | 1,037304889 | ENST00000296140 | 1230      | NM_001295    | CCR1               |
| A_23_P19529    | 1,61129 | 1,55845 | 1,037304889 | ENST00000266003 | 4295      | NM_001040109 | MLN                |
| A_24_P217628   | 1,57673 | 1,52389 | 1,037304889 | ENST00000449207 | 56979     | NM_020227    | PRDM9              |
| A_22_P00001359 | 1,77215 | 1,71932 | 1,037297699 | N/A             | N/A       | N/A          | Inc-AP001496.1-7   |
| A_21_P0014527  | 1,41548 | 1,36266 | 1,037290509 | N/A             | N/A       | N/A          | N/A                |
| A_21_P0012581  | 1,85798 | 1,80517 | 1,037283319 | N/A             | 101928721 | XR_425724    | LOC101928721       |
| A_33_P3415668  | 1,6553  | 1,60249 | 1,037283319 | N/A             | 643923    | NR_028328    | LOC643923          |
| A_21_P0013494  | 1,665   | 1,61219 | 1,037283319 | N/A             | N/A       | N/A          | XL0C_I2_014234     |
| A_22_P00019592 | 10,9509 | 10,8981 | 1,03727613  | ENST00000462783 | 65005     | NM_001300733 | MRPL9              |
| A_21_P0004975  | 1,54442 | 1,49162 | 1,03727613  | N/A             | N/A       | N/A          | Inc-SMOC2-8        |
| A_24_P128713   | 1,58706 | 1,53426 | 1,03727613  | ENST00000328737 | 91526     | AK097086     | ANKRD44            |
| A_23_P167872   | 1,53097 | 1,47818 | 1,03726894  | ENST00000296862 | 222611    | NM_153839    | GPR111             |
| A_21_P0002652  | 1,57776 | 1,52497 | 1,03726894  | N/A             | N/A       | N/A          | Inc-AC011239.1.1-1 |
| A_24_P359246   | 1,62776 | 1,57497 | 1,03726894  | ENST00000374432 | 414260    | NR_033923    | LINC00619          |
| A_23_P167358   | 8,36983 | 8,31706 | 1,03725456  | ENST00000611882 | 80167     | NM_001039717 | C4orf29            |
| A_21_P0007994  | 3,60056 | 3,54779 | 1,03725456  | ENST00000425350 | 100129597 | N/A          | LINC00462          |
| A_33_P3280163  | 1,4408  | 1,38803 | 1,03725456  | ENST00000519497 | 441317    | NR_046343    | FAM90A7P           |
| A_22_P00006864 | 4,15422 | 4,10145 | 1,03725456  | N/A             | N/A       | AI203150     | Inc-GALM-1         |
| A_23_P257538   | 8,73458 | 8,68181 | 1,03725456  | ENST00000337227 | 10741     | NM_006606    | RBBP9              |

|                |         |         |             |                 |           |              |                 |
|----------------|---------|---------|-------------|-----------------|-----------|--------------|-----------------|
| A_21_P0002262  | 1,48898 | 1,43622 | 1,037247371 | N/A             | N/A       | N/A          | Inc-IL1R1-1     |
| A_33_P3326827  | 1,58008 | 1,52732 | 1,037247371 | N/A             | N/A       | N/A          | N/A             |
| A_22_P00000265 | 1,64823 | 1,59549 | 1,037232991 | N/A             | 101927557 | NR_110808    | LOC101927557    |
| A_22_P00014925 | 1,58245 | 1,52972 | 1,037225802 | ENST00000472120 | 101928405 | XR_241610    | LOC101928405    |
| A_24_P16326    | 1,67616 | 1,62343 | 1,037225802 | ENST00000473767 | 6092      | NM_002942    | ROBO2           |
| A_21_P0007660  | 1,74982 | 1,69709 | 1,037225802 | N/A             | N/A       | N/A          | Inc-TMEM132B-12 |
| A_21_P0003874  | 1,54637 | 1,49365 | 1,037218612 | N/A             | N/A       | N/A          | Inc-ZFP42-2     |
| A_22_P00013049 | 1,72828 | 1,67557 | 1,037211423 | N/A             | N/A       | N/A          | Inc-RGS7-2      |
| A_24_P161036   | 12,2044 | 12,1517 | 1,037204234 | ENST00000311148 | 641371    | NM_001037161 | ACOT1           |
| A_33_P3417141  | 11,2397 | 11,187  | 1,037204234 | ENST00000445755 | 115098    | NM_138442    | CCDC124         |
| A_33_P3247331  | 1,52586 | 1,47316 | 1,037204234 | ENST00000345015 | 3784      | AF003743     | KCNQ1           |
| A_33_P3417950  | 11,2005 | 11,1478 | 1,037204234 | ENST00000598597 | 10270     | NM_005858    | AKAP8           |
| A_22_P00017152 | 1,43029 | 1,3776  | 1,037197044 | N/A             | 101928731 | NR_110093    | LOC101928731    |
| A_24_P82749    | 1,41981 | 1,36713 | 1,037189855 | ENST00000595725 | 951       | NM_001774    | CD37            |
| A_22_P00001376 | 1,66304 | 1,61036 | 1,037189855 | N/A             | N/A       | N/A          | Inc-AP1G1-1     |
| A_21_P0008194  | 1,54763 | 1,49495 | 1,037189855 | N/A             | N/A       | N/A          | Inc-SLITRK6-3   |
| A_33_P3245115  | 1,58942 | 1,53675 | 1,037182666 | N/A             | N/A       | N/A          | N/A             |
| A_33_P3381177  | 1,61465 | 1,56198 | 1,037182666 | ENST00000390307 | N/A       | N/A          | N/A             |
| A_22_P00008253 | 1,42717 | 1,37451 | 1,037175477 | N/A             | N/A       | N/A          | Inc-IRS2-1      |
| A_33_P3328327  | 1,53875 | 1,48609 | 1,037175477 | N/A             | N/A       | N/A          | Inc-C8orf59-1   |
| A_22_P00004767 | 1,54201 | 1,48936 | 1,037168287 | N/A             | N/A       | N/A          | Inc-CTTNBP2-3   |
| A_22_P00010668 | 1,41584 | 1,3632  | 1,037161098 | ENST00000582571 | 400655    | NR_034133    | LOC400655       |
| A_33_P3362536  | 1,50889 | 1,45625 | 1,037161098 | N/A             | N/A       | AF119863     | N/A             |
| A_21_P0001370  | 1,45472 | 1,40209 | 1,037153909 | N/A             | N/A       | N/A          | Inc-FAM72B-4    |
| A_21_P0003158  | 1,42525 | 1,37262 | 1,037153909 | N/A             | N/A       | N/A          | Inc-RETNLB-2    |
| A_21_P0011556  | 1,44784 | 1,39521 | 1,037153909 | N/A             | N/A       | N/A          | XLOC_I2_005915  |
| A_33_P3312232  | 1,63532 | 1,5827  | 1,03714672  | ENST00000569306 | 647166    | NR_102432    | LINC00371       |
| A_33_P3273118  | 1,71989 | 1,66727 | 1,03714672  | N/A             | N/A       | N/A          | N/A             |
| A_33_P3274627  | 1,54938 | 1,49677 | 1,037139531 | ENST00000588355 | 8715      | XM_006722563 | NOL4            |
| A_33_P3383084  | 1,53608 | 1,48347 | 1,037139531 | N/A             | N/A       | N/A          | N/A             |
| A_21_P0005981  | 1,59958 | 1,54698 | 1,037132343 | N/A             | N/A       | N/A          | Inc-TSTA3-1     |
| A_23_P12272    | 11,9703 | 11,9177 | 1,037132343 | ENST00000236412 | 5511      | NM_138558    | PPP1R8          |
| A_33_P3374378  | 4,03206 | 3,97947 | 1,037125154 | ENST00000392869 | 79712     | AK126774     | GTDC1           |

|                |         |         |             |                 |           |              |                     |
|----------------|---------|---------|-------------|-----------------|-----------|--------------|---------------------|
| A_22_P00014748 | 1,63924 | 1,58665 | 1,037125154 | ENST00000453087 | N/A       | N/A          | N/A                 |
| A_33_P3283992  | 1,63442 | 1,58183 | 1,037125154 | ENST00000335820 | 79891     | NM_024833    | ZNF671              |
| A_23_P93105    | 1,57925 | 1,52667 | 1,037117965 | ENST00000402938 | 2570      | NM_002043    | GABRR2              |
| A_22_P00012865 | 1,59749 | 1,54491 | 1,037117965 | N/A             | 101928658 | XR_245255    | LOC101928658        |
| A_23_P408206   | 1,67509 | 1,62251 | 1,037117965 | ENST00000300504 | 161514    | NM_153356    | TBC1D21             |
| A_21_P0012023  | 1,57943 | 1,52685 | 1,037117965 | ENST00000431979 | 101927994 | N/A          | LINC01087           |
| A_21_P0012615  | 1,41459 | 1,36201 | 1,037117965 | N/A             | N/A       | N/A          | XLOC_I2_010843      |
| A_33_P3236724  | 1,60309 | 1,55051 | 1,037117965 | ENST00000303786 | 10887     | NM_138964    | PROKR1              |
| A_21_P0004330  | 1,53868 | 1,48611 | 1,037110776 | N/A             | N/A       | N/A          | Inc-CTB-78H18.1.1-1 |
| A_22_P00003732 | 1,62411 | 1,57155 | 1,037103588 | ENST00000563061 | N/A       | N/A          | N/A                 |
| A_24_P27234    | 1,64785 | 1,5953  | 1,037096399 | ENST00000451604 | 6660      | NM_152989    | SOX5                |
| A_33_P3406816  | 1,58495 | 1,53241 | 1,03708921  | N/A             | N/A       | DR001172     | N/A                 |
| A_21_P0005377  | 1,69177 | 1,63924 | 1,037082022 | N/A             | N/A       | N/A          | Inc-C7orf65-2       |
| A_21_P0002223  | 1,69072 | 1,63819 | 1,037082022 | ENST00000427421 | 400955    | NR_033873    | LINC01122           |
| A_23_P407472   | 1,42666 | 1,37413 | 1,037082022 | ENST00000296271 | 6010      | NM_000539    | RHO                 |
| A_21_P0002331  | 2,2959  | 2,24337 | 1,037082022 | N/A             | N/A       | N/A          | Inc-WDR75-1         |
| A_33_P3252699  | 1,64296 | 1,59044 | 1,037074833 | N/A             | N/A       | N/A          | Inc-GLIPR1L1-1      |
| A_22_P00014783 | 1,53637 | 1,48385 | 1,037074833 | N/A             | N/A       | AF088013     | Inc-SLC38A8-3       |
| A_21_P0013474  | 1,42517 | 1,37266 | 1,037067645 | ENST00000523451 | N/A       | N/A          | N/A                 |
| A_33_P3221414  | 1,50925 | 1,45674 | 1,037067645 | ENST00000370068 | 22854     | N/A          | NTNG1               |
| A_22_P00000620 | 1,54497 | 1,49246 | 1,037067645 | N/A             | N/A       | DB026626     | Inc-ACOX3-3         |
| A_23_P167497   | 3,80197 | 3,74947 | 1,037060457 | ENST00000333274 | 1946      | NM_001962    | EFNA5               |
| A_33_P3268294  | 1,42913 | 1,37665 | 1,03704608  | N/A             | N/A       | N/A          | N/A                 |
| A_21_P0004370  | 1,53555 | 1,48307 | 1,03704608  | N/A             | N/A       | N/A          | Inc-CDH9-7          |
| A_32_P221907   | 1,45218 | 1,39971 | 1,037038892 | ENST00000375007 | 10665     | NM_006781    | C6orf10             |
| A_21_P0010869  | 1,72314 | 1,67067 | 1,037038892 | ENST00000443534 | N/A       | N/A          | N/A                 |
| A_33_P3377703  | 1,7332  | 1,68074 | 1,037031703 | ENST00000602724 | 400110    | NR_073430    | ANKRD20A19P         |
| A_33_P3287997  | 3,35906 | 3,3066  | 1,037031703 | ENST00000316786 | 414318    | NM_001012715 | C9orf106            |
| A_22_P00013671 | 1,57881 | 1,52635 | 1,037031703 | ENST00000532316 | 103695364 | NR_125759    | PKNOX2-AS1          |
| A_23_P115200   | 1,60948 | 1,55702 | 1,037031703 | ENST00000448509 | 83417     | NM_031282    | FCRL4               |
| A_22_P00006811 | 1,58231 | 1,52986 | 1,037024515 | N/A             | N/A       | R18879       | Inc-GABPA-5         |
| A_24_P522864   | 1,6849  | 1,63245 | 1,037024515 | ENST00000583262 | 84815     | NR_026880    | MGC12916            |
| A_22_P00002509 | 1,60892 | 1,55647 | 1,037024515 | N/A             | N/A       | AV682647     | Inc-C16orf78-5      |

|                |         |         |             |                 |           |              |                 |
|----------------|---------|---------|-------------|-----------------|-----------|--------------|-----------------|
| A_33_P3249401  | 1,64024 | 1,58781 | 1,037010139 | ENST00000391859 | 951       | AK058093     | CD37            |
| A_21_P0003475  | 1,54704 | 1,49461 | 1,037010139 | ENST00000508825 | N/A       | N/A          | N/A             |
| A_24_P734268   | 1,57871 | 1,52629 | 1,037002951 | ENST00000424431 | 138240    | NM_001128618 | C9orf57         |
| A_22_P00019257 | 1,52992 | 1,4775  | 1,037002951 | ENST00000547569 | N/A       | N/A          | N/A             |
| A_33_P3302295  | 1,69446 | 1,64205 | 1,036995763 | ENST00000320354 | 2303      | NM_005251    | FOXC2           |
| A_33_P3214570  | 1,53199 | 1,47958 | 1,036995763 | N/A             | N/A       | N/A          | XLOC_I2_010591  |
| A_33_P3230244  | 1,58045 | 1,52805 | 1,036988575 | ENST00000537824 | 64478     | NM_033225    | CSMD1           |
| A_21_P0006965  | 1,57148 | 1,51908 | 1,036988575 | N/A             | N/A       | N/A          | Inc-C10orf31-10 |
| A_22_P00005461 | 1,43751 | 1,38512 | 1,036981388 | ENST00000549278 | N/A       | N/A          | N/A             |
| A_22_P00015571 | 1,53477 | 1,4824  | 1,036967012 | N/A             | 100874206 | NR_049771    | OSBPL10-AS1     |
| A_23_P34888    | 3,92446 | 3,87209 | 1,036967012 | ENST00000369740 | 27159     | NM_021797    | CHIA            |
| A_23_P388061   | 1,63235 | 1,57999 | 1,036959824 | ENST00000393752 | 1812      | NM_000794    | DRD1            |
| A_23_P12746    | 1,63154 | 1,57918 | 1,036959824 | ENST00000569591 | 4360      | NM_002438    | MRC1            |
| A_22_P00016731 | 1,46039 | 1,40805 | 1,036945449 | ENST00000485384 | N/A       | N/A          | N/A             |
| A_21_P0001570  | 1,53362 | 1,48129 | 1,036938262 | N/A             | N/A       | N/A          | Inc-NGF-1       |
| A_22_P00000928 | 5,03485 | 4,98252 | 1,036938262 | N/A             | 493900    | NR_073431    | TMEM9B-AS1      |
| A_21_P0006785  | 1,59377 | 1,54145 | 1,036931074 | N/A             | N/A       | N/A          | Inc-PKD2L1-1    |
| A_22_P00025895 | 1,61752 | 1,5652  | 1,036931074 | N/A             | N/A       | N/A          | Inc-AGPS-3      |
| A_22_P00014159 | 1,42377 | 1,37145 | 1,036931074 | N/A             | N/A       | N/A          | Inc-SCP2-1      |
| A_22_P00007302 | 1,62962 | 1,5773  | 1,036931074 | N/A             | 101928161 | NR_110294    | LOC101928161    |
| A_33_P3224095  | 1,4121  | 1,35978 | 1,036931074 | ENST00000482617 | 728290    | XR_245079    | LOC728290       |
| A_23_P320124   | 1,67927 | 1,62696 | 1,036923887 | ENST00000453669 | 170949    | NR_036686    | DEFT1P          |
| A_22_P00006961 | 1,57531 | 1,523   | 1,036923887 | N/A             | N/A       | N/A          | Inc-GCNT7-2     |
| A_22_P00017375 | 1,66197 | 1,60966 | 1,036923887 | N/A             | 102725193 | XR_431115    | LOC102725193    |
| A_21_P0002904  | 1,45095 | 1,39864 | 1,036923887 | ENST00000495159 | N/A       | N/A          | N/A             |
| A_33_P3268875  | 1,59412 | 1,54181 | 1,036923887 | N/A             | N/A       | AF370394     | N/A             |
| A_33_P3281990  | 1,58151 | 1,5292  | 1,036923887 | ENST00000537935 | 390079    | NM_001005168 | OR52E8          |
| A_21_P0011277  | 1,58054 | 1,52824 | 1,036916699 | ENST00000454942 | N/A       | N/A          | N/A             |
| A_32_P780817   | 1,5111  | 1,4588  | 1,036916699 | ENST00000620885 | 541466    | NM_001017417 | CT45A1          |
| A_24_P408704   | 1,49377 | 1,44147 | 1,036916699 | ENST00000524185 | 1794      | NM_004946    | DOCK2           |
| A_21_P0002073  | 9,83851 | 9,78621 | 1,036916699 | ENST00000422600 | N/A       | N/A          | N/A             |
| A_21_P0005663  | 1,59691 | 1,54462 | 1,036909512 | N/A             | N/A       | N/A          | Inc-SH2D4A-2    |
| A_21_P0005142  | 1,5171  | 1,46481 | 1,036909512 | N/A             | N/A       | N/A          | Inc-SNX9-2      |

|                |         |         |             |                 |           |              |                |
|----------------|---------|---------|-------------|-----------------|-----------|--------------|----------------|
| A_33_P3283320  | 1,59652 | 1,54423 | 1,036909512 | ENST00000302084 | 343169    | NM_001005286 | OR6F1          |
| A_23_P160902   | 1,55345 | 1,50116 | 1,036909512 | ENST00000324863 | 83953     | NM_001170631 | FCAMR          |
| A_22_P00023311 | 1,54567 | 1,49339 | 1,036902325 | N/A             | N/A       | AK125000     | Inc-TTC23-1    |
| A_21_P0004233  | 1,61478 | 1,56253 | 1,036880763 | N/A             | N/A       | N/A          | Inc-FBXL7-4    |
| A_22_P00015427 | 1,60529 | 1,55304 | 1,036880763 | N/A             | N/A       | N/A          | Inc-SSBP3-1    |
| A_21_P0011005  | 1,59145 | 1,5392  | 1,036880763 | N/A             | N/A       | N/A          | XLOC_I2_002603 |
| A_22_P00000565 | 1,77384 | 1,7216  | 1,036873576 | N/A             | 100133172 | N/A          | FAM66A         |
| A_21_P0008610  | 1,61139 | 1,55915 | 1,036873576 | N/A             | N/A       | N/A          | Inc-C15orf41-2 |
| A_21_P0006118  | 1,44259 | 1,39035 | 1,036873576 | N/A             | 102723793 | XR_426383    | LOC102723793   |
| A_33_P3382403  | 1,45806 | 1,40582 | 1,036873576 | ENST00000428649 | 727830    | NM_001083124 | SPATA31A3      |
| A_33_P3613605  | 1,42136 | 1,36914 | 1,036859202 | N/A             | N/A       | CV389518     | N/A            |
| A_32_P380675   | 1,44196 | 1,38975 | 1,036852015 | ENST00000619221 | 80852     | NM_001080423 | GRIP2          |
| A_23_P203790   | 13,6675 | 13,6153 | 1,036844828 | ENST00000546916 | 10956     | NM_006812    | OS9            |
| A_32_P57702    | 12,1005 | 12,0483 | 1,036844828 | ENST00000414815 | 641746    | NR_033245    | LOC641746      |
| A_22_P00012714 | 1,53553 | 1,48333 | 1,036844828 | N/A             | N/A       | N/A          | Inc-RAB30-1    |
| A_23_P2258     | 1,76558 | 1,71338 | 1,036844828 | ENST00000341952 | 84660     | NM_201435    | CCDC62         |
| A_33_P3370612  | 1,42925 | 1,37705 | 1,036844828 | N/A             | N/A       | N/A          | N/A            |
| A_22_P00021952 | 1,57491 | 1,52272 | 1,036837641 | N/A             | N/A       | N/A          | Inc-CPT2-6     |
| A_33_P3220302  | 1,42407 | 1,37189 | 1,036830455 | ENST00000294635 | N/A       | N/A          | N/A            |
| A_22_P00016339 | 5,61222 | 5,56005 | 1,036823268 | ENST00000504382 | N/A       | N/A          | N/A            |
| A_22_P00017272 | 1,52471 | 1,47255 | 1,036816081 | ENST00000589471 | N/A       | N/A          | N/A            |
| A_22_P00006835 | 1,63112 | 1,57897 | 1,036808895 | N/A             | 100289178 | NR_040077    | GNG12-AS1      |
| A_21_P0007658  | 1,42788 | 1,37574 | 1,036801708 | N/A             | 101927491 | XR_242966    | LOC101927491   |
| A_21_P0012642  | 1,72329 | 1,67115 | 1,036801708 | N/A             | N/A       | N/A          | XLOC_I2_010976 |
| A_33_P3268124  | 7,84423 | 7,7921  | 1,036794521 | ENST00000309495 | 55279     | NM_018293    | ZNF654         |
| A_21_P0013407  | 1,41137 | 1,35924 | 1,036794521 | ENST00000453278 | N/A       | XR_108804    | N/A            |
| A_21_P0012842  | 1,46309 | 1,41096 | 1,036794521 | N/A             | N/A       | N/A          | XLOC_I2_011704 |
| A_22_P00005507 | 1,46993 | 1,4178  | 1,036794521 | N/A             | N/A       | N/A          | Inc-E2F7-2     |
| A_33_P3216013  | 1,46684 | 1,41471 | 1,036794521 | N/A             | N/A       | N/A          | N/A            |
| A_21_P0004823  | 1,57671 | 1,52459 | 1,036787335 | N/A             | N/A       | N/A          | Inc-BPHL-2     |
| A_22_P00017673 | 1,57869 | 1,52657 | 1,036787335 | N/A             | N/A       | N/A          | Inc-WRNIP1-3   |
| A_22_P00012018 | 1,53646 | 1,48435 | 1,036780149 | N/A             | N/A       | N/A          | Inc-PLD6-1     |
| A_21_P0005913  | 1,6593  | 1,60719 | 1,036780149 | N/A             | N/A       | N/A          | Inc-ZFAT-5     |



|                |         |         |             |                 |           |              |                       |
|----------------|---------|---------|-------------|-----------------|-----------|--------------|-----------------------|
| A_22_P00012750 | 1,67281 | 1,6207  | 1,036780149 | N/A             | N/A       | N/A          | Inc-RACGAP1-2         |
| A_24_P234768   | 1,52809 | 1,47599 | 1,036772962 | ENST00000362016 | 3360      | NM_001040173 | HTR4                  |
| A_23_P356717   | 1,4122  | 1,3601  | 1,036772962 | ENST00000549493 | 56899     | NM_181670    | ANKS1B                |
| A_21_P0000614  | 1,49441 | 1,44232 | 1,036765776 | N/A             | 64735     | NR_033914    | LINC00254             |
| A_21_P0001640  | 1,56743 | 1,51535 | 1,03675859  | N/A             | N/A       | N/A          | Inc-AGT-1             |
| A_21_P0003668  | 1,55371 | 1,50165 | 1,036744217 | N/A             | N/A       | N/A          | Inc-TDO2-1            |
| A_21_P0008053  | 1,62428 | 1,57222 | 1,036744217 | N/A             | N/A       | N/A          | Inc-COG6-1            |
| A_22_P00010046 | 1,52249 | 1,47043 | 1,036744217 | N/A             | N/A       | BF772485     | Inc-MOCS1-1           |
| A_23_P328022   | 3,45966 | 3,4076  | 1,036744217 | ENST00000395643 | 125206    | NM_152351    | SLC5A10               |
| A_21_P0007665  | 1,61691 | 1,56486 | 1,036737031 | N/A             | N/A       | N/A          | Inc-TMEM132C-6        |
| A_22_P00024842 | 1,59689 | 1,54485 | 1,036729845 | N/A             | N/A       | BG171208     | Inc-FAM54A-1          |
| A_21_P0003818  | 1,64745 | 1,59541 | 1,036729845 | N/A             | N/A       | N/A          | Inc-SORBS2-2          |
| A_22_P00004354 | 1,45124 | 1,3992  | 1,036729845 | ENST00000517640 | N/A       | N/A          | N/A                   |
| A_23_P203255   | 8,49795 | 8,44592 | 1,036722659 | ENST00000424316 | 8539      | NM_006595    | API5                  |
| A_22_P00015392 | 7,63356 | 7,58153 | 1,036722659 | N/A             | N/A       | BC132680     | Inc-SRGAP3-1          |
| A_21_P0002973  | 1,54956 | 1,49753 | 1,036722659 | N/A             | N/A       | N/A          | Inc-MITF-4            |
| A_23_P421401   | 1,61898 | 1,56695 | 1,036722659 | ENST00000261799 | 5159      | NM_002609    | PDGFRB                |
| A_33_P3352827  | 1,7293  | 1,67727 | 1,036722659 | ENST00000235739 | 6504      | NM_003037    | SLAMF1                |
| A_22_P00011993 | 1,77449 | 1,72247 | 1,036715473 | N/A             | N/A       | AK302898     | Inc-PLCB1-1           |
| A_21_P0007743  | 1,4292  | 1,37718 | 1,036715473 | N/A             | N/A       | N/A          | Inc-RP11-167N24.6.1-1 |
| A_33_P3326439  | 1,43093 | 1,37891 | 1,036715473 | N/A             | N/A       | N/A          | N/A                   |
| A_33_P3358943  | 1,62439 | 1,57238 | 1,036708287 | ENST00000464585 | 2912      | NM_000839    | GRM2                  |
| A_21_P0002715  | 1,58096 | 1,52896 | 1,036701101 | ENST00000462010 | N/A       | N/A          | N/A                   |
| A_33_P3325009  | 16,7368 | 16,6848 | 1,036701101 | N/A             | 5999      | BC000737     | RGS4                  |
| A_22_P00015323 | 1,67881 | 1,62682 | 1,036693915 | N/A             | N/A       | N/A          | Inc-SPP2-1            |
| A_22_P00010811 | 5,11425 | 5,06226 | 1,036693915 | N/A             | N/A       | N/A          | Inc-NMNAT1-3          |
| A_33_P6497803  | 1,58594 | 1,53395 | 1,036693915 | ENST00000505122 | 100996694 | NR_121639    | LOC100996694          |
| A_33_P3319276  | 1,7124  | 1,66042 | 1,036686729 | ENST00000490605 | 51252     | NM_001122646 | FAM178B               |
| A_22_P00011552 | 1,64944 | 1,59746 | 1,036686729 | ENST00000512039 | N/A       | N/A          | N/A                   |
| A_23_P91636    | 1,60253 | 1,55055 | 1,036686729 | ENST00000414583 | 29774     | NR_003714    | POM121L9P             |
| A_23_P143621   | 1,48875 | 1,43678 | 1,036679544 | ENST00000215939 | 1414      | NM_001887    | CRYBB1                |
| A_24_P151106   | 1,44036 | 1,38839 | 1,036679544 | ENST00000301318 | 140612    | NM_020828    | ZFP28                 |
| A_21_P0011050  | 1,6904  | 1,63844 | 1,036672358 | N/A             | N/A       | N/A          | XLOC_I2_003052        |

|                |         |         |             |                 |           |              |                |
|----------------|---------|---------|-------------|-----------------|-----------|--------------|----------------|
| A_21_P0014190  | 4,13062 | 4,07866 | 1,036672358 | ENST00000313156 | 101927181 | NR_108066    | LOC101927181   |
| A_21_P0006552  | 1,42892 | 1,37697 | 1,036665172 | N/A             | N/A       | N/A          | Inc-RBMX-3     |
| A_24_P321709   | 1,42804 | 1,37609 | 1,036665172 | ENST00000298355 | 114088    | NM_015163    | TRIM9          |
| A_21_P0006573  | 1,59971 | 1,54777 | 1,036657987 | N/A             | 100128420 | NR_038461    | LINC00892      |
| A_23_P12554    | 1,60539 | 1,55345 | 1,036657987 | ENST00000318222 | 9033      | NM_016112    | PKD2L1         |
| A_21_P0008373  | 1,49006 | 1,43813 | 1,036650801 | N/A             | N/A       | N/A          | Inc-GPR65-2    |
| A_33_P3366739  | 1,54464 | 1,49271 | 1,036650801 | N/A             | N/A       | N/A          | N/A            |
| A_24_P302038   | 5,56058 | 5,50865 | 1,036650801 | ENST00000432043 | 9873      | NM_014824    | FCHSD2         |
| A_21_P0012565  | 1,5524  | 1,50049 | 1,03663643  | ENST00000509015 | N/A       | N/A          | N/A            |
| A_21_P0003815  | 1,43803 | 1,38612 | 1,03663643  | N/A             | N/A       | N/A          | Inc-IRF2-1     |
| A_21_P0007014  | 1,59515 | 1,54325 | 1,036629245 | N/A             | N/A       | N/A          | Inc-FGF8-1     |
| A_21_P0002318  | 1,61448 | 1,56258 | 1,036629245 | N/A             | N/A       | N/A          | Inc-MTX2-1     |
| A_22_P00019590 | 1,5733  | 1,52141 | 1,03662206  | N/A             | 101927983 | NR_120633    | EDRF1-AS1      |
| A_22_P00002103 | 1,48097 | 1,42908 | 1,03662206  | ENST00000439913 | N/A       | BC035410     | N/A            |
| A_23_P16908    | 8,06507 | 8,01318 | 1,03662206  | ENST00000620517 | 90957     | NM_198963    | DHX57          |
| A_33_P8916977  | 1,4637  | 1,41182 | 1,036614874 | N/A             | 286083    | NR_111948    | LOC286083      |
| A_33_P3589420  | 1,41034 | 1,35846 | 1,036614874 | ENST00000525984 | 387810    | NR_104155    | LOC387810      |
| A_21_P0005668  | 1,62171 | 1,56983 | 1,036614874 | ENST00000517573 | 286114    | N/A          | LOC286114      |
| A_21_P0012876  | 1,42328 | 1,37141 | 1,036607689 | N/A             | N/A       | N/A          | XLOC_I2_011885 |
| A_22_P00007881 | 3,49267 | 3,4408  | 1,036607689 | N/A             | N/A       | N/A          | Inc-HSCB-2     |
| A_33_P3532659  | 1,50735 | 1,45548 | 1,036607689 | N/A             | 102723888 | XR_425823    | LOC102723888   |
| A_21_P0011542  | 4,58378 | 4,53192 | 1,036600504 | N/A             | N/A       | N/A          | XLOC_I2_005781 |
| A_22_P00005972 | 1,44875 | 1,3969  | 1,036593319 | N/A             | N/A       | BC025670     | Inc-EZH2-3     |
| A_22_P00003289 | 1,4109  | 1,35905 | 1,036593319 | ENST00000453569 | N/A       | N/A          | N/A            |
| A_21_P0003425  | 1,70541 | 1,65357 | 1,036586134 | ENST00000502846 | N/A       | N/A          | N/A            |
| A_23_P211543   | 1,46067 | 1,40883 | 1,036586134 | ENST00000249016 | 2847      | NM_005297    | MCHR1          |
| A_22_P00004131 | 1,49196 | 1,44012 | 1,036586134 | N/A             | 101928734 | NR_126473    | WWC2-AS1       |
| A_23_P39542    | 7,93019 | 7,87836 | 1,036578949 | ENST00000498049 | 130355    | NM_001017927 | C2orf76        |
| A_33_P3212949  | 1,62475 | 1,57292 | 1,036578949 | ENST00000366943 | 7399      | NM_206933    | USH2A          |
| A_33_P3379341  | 1,52689 | 1,47507 | 1,036571764 | ENST00000622302 | 391322    | NM_001144931 | LOC391322      |
| A_21_P0001047  | 1,68984 | 1,63802 | 1,036571764 | ENST00000422480 | N/A       | N/A          | N/A            |
| A_22_P00001608 | 1,51773 | 1,46592 | 1,036564579 | ENST00000510153 | N/A       | AA534202     | N/A            |
| A_24_P131236   | 1,51928 | 1,46747 | 1,036564579 | ENST00000369146 | 9900      | NM_014849    | SV2A           |

|                |         |         |             |                 |           |              |               |
|----------------|---------|---------|-------------|-----------------|-----------|--------------|---------------|
| A_21_P0004446  | 1,5427  | 1,4909  | 1,036557394 | N/A             | N/A       | N/A          | Inc-LECT2-1   |
| A_21_P0003171  | 1,65424 | 1,60244 | 1,036557394 | N/A             | N/A       | N/A          | Inc-MGLL-1    |
| A_21_P0004038  | 1,6906  | 1,6388  | 1,036557394 | ENST00000511468 | N/A       | N/A          | N/A           |
| A_22_P00012680 | 1,52663 | 1,47483 | 1,036557394 | ENST00000424162 | N/A       | N/A          | N/A           |
| A_21_P0014286  | 1,68179 | 1,62999 | 1,036557394 | N/A             | 103625683 | NR_125725    | LINC00456     |
| A_32_P58513    | 1,4268  | 1,37501 | 1,036550209 | ENST00000389594 | 440184    | NR_024338    | LINC00238     |
| A_21_P0002179  | 1,61894 | 1,56716 | 1,036543024 | N/A             | N/A       | N/A          | Inc-KCNS3-1   |
| A_22_P00012619 | 1,5766  | 1,52482 | 1,036543024 | N/A             | N/A       | BX100251     | Inc-PTPRZ1-3  |
| A_21_P0001906  | 1,42879 | 1,37701 | 1,036543024 | ENST00000546223 | 677784    | N/A          | FAM138D       |
| A_33_P3365601  | 4,90058 | 4,8488  | 1,036543024 | ENST00000382252 | 100131017 | NM_001278559 | ZNF316        |
| A_22_P00015583 | 1,42409 | 1,37233 | 1,036528655 | ENST00000539532 | N/A       | BX641152     | N/A           |
| A_23_P384023   | 1,4233  | 1,37155 | 1,03652147  | ENST00000381971 | 169792    | NM_001042413 | GLIS3         |
| A_33_P3362267  | 1,62501 | 1,57326 | 1,03652147  | N/A             | 26222     | NR_026651    | DGCR10        |
| A_33_P3279590  | 1,47151 | 1,41977 | 1,036514285 | ENST00000375561 | 4969      | NM_033014    | OGN           |
| A_21_P0009994  | 1,55049 | 1,49876 | 1,036507101 | N/A             | N/A       | N/A          | Inc-PCMTD2-2  |
| A_21_P0002580  | 1,5737  | 1,52199 | 1,036492732 | N/A             | 729723    | NR_034113    | DNAJC27-AS1   |
| A_22_P00011923 | 1,4219  | 1,37019 | 1,036492732 | N/A             | N/A       | N/A          | Inc-PITPNC1-2 |
| A_22_P00015655 | 1,59654 | 1,54483 | 1,036492732 | ENST00000553410 | N/A       | AA442376     | N/A           |
| A_21_P0006048  | 3,85116 | 3,79945 | 1,036492732 | ENST00000565320 | N/A       | N/A          | N/A           |
| A_33_P3405193  | 1,45119 | 1,39949 | 1,036485547 | N/A             | 29035     | BC029878     | C16orf72      |
| A_33_P3259587  | 4,18296 | 4,13127 | 1,036478363 | ENST00000530891 | 54581     | NR_003654    | SCAND2P       |
| A_21_P0007369  | 1,68938 | 1,63769 | 1,036478363 | N/A             | N/A       | N/A          | Inc-PDE2A-1   |
| A_33_P3234678  | 1,60591 | 1,55423 | 1,036471179 | ENST00000621724 | 728495    | NR_026801    | FAM74A3       |
| A_24_P623768   | 1,44591 | 1,39423 | 1,036471179 | N/A             | N/A       | AF131813     | Inc-GFAP-1    |
| A_33_P3360997  | 4,21854 | 4,16687 | 1,036463995 | ENST00000333684 | 7054      | NM_199292    | TH            |
| A_21_P0014000  | 1,53953 | 1,48787 | 1,03645681  | ENST00000615373 | 3812      | NM_006737    | KIR3DL2       |
| A_22_P00010095 | 1,54598 | 1,49432 | 1,03645681  | ENST00000444796 | N/A       | N/A          | N/A           |
| A_32_P525524   | 1,68328 | 1,63163 | 1,036449626 | ENST00000439118 | 150771    | NM_178495    | ITPRIPL1      |
| A_21_P0002002  | 1,69537 | 1,64373 | 1,036442442 | ENST00000450397 | N/A       | N/A          | N/A           |
| A_24_P253780   | 4,55936 | 4,50773 | 1,036435258 | ENST00000393547 | 80174     | NM_145663    | DBF4B         |
| A_21_P0003984  | 1,41985 | 1,36824 | 1,03642089  | N/A             | N/A       | N/A          | Inc-RXFP3-1   |
| A_21_P0002983  | 1,70222 | 1,65062 | 1,036413706 | N/A             | N/A       | N/A          | Inc-ROBO2-4   |
| A_21_P0002301  | 1,54798 | 1,49638 | 1,036413706 | N/A             | N/A       | N/A          | Inc-KCNJ3-1   |

|                |         |         |             |                 |           |              |                |
|----------------|---------|---------|-------------|-----------------|-----------|--------------|----------------|
| A_23_P50357    | 13,1044 | 13,0528 | 1,036413706 | ENST00000359920 | 23370     | NM_015318    | ARHGEF18       |
| A_22_P00014084 | 1,54029 | 1,4887  | 1,036406522 | N/A             | 79804     | NR_003679    | HAND2-AS1      |
| A_22_P00014423 | 1,45953 | 1,40794 | 1,036406522 | ENST00000560700 | N/A       | DB069022     | N/A            |
| A_21_P0000165  | 1,43475 | 1,38317 | 1,036399339 | ENST00000592644 | 100507527 | NM_001278577 | THEG5          |
| A_33_P3381608  | 1,71244 | 1,66086 | 1,036399339 | ENST00000289815 | 127731    | NM_001039500 | VWA5B1         |
| A_22_P00014200 | 1,58561 | 1,53403 | 1,036399339 | N/A             | N/A       | N/A          | Inc-SEC13-1    |
| A_21_P0003130  | 1,56327 | 1,51169 | 1,036399339 | N/A             | N/A       | N/A          | Inc-ZNF717-2   |
| A_33_P3305835  | 1,73035 | 1,67878 | 1,036392155 | ENST00000403807 | 7441      | BC017922     | VPREB1         |
| A_23_P111860   | 1,50489 | 1,45333 | 1,036384971 | ENST00000473130 | 55698     | NM_018059    | RADIL          |
| A_21_P0010688  | 1,58022 | 1,52867 | 1,036377788 | N/A             | N/A       | N/A          | XLOC_I2_000018 |
| A_24_P120907   | 1,57267 | 1,52113 | 1,036370604 | ENST00000496758 | 5239      | NM_021965    | PGM5           |
| A_33_P3383356  | 1,52478 | 1,47324 | 1,036370604 | ENST00000548660 | 83468     | XM_005269171 | GLT8D2         |
| A_21_P0014593  | 1,52858 | 1,47705 | 1,03636342  | N/A             | 101926906 | NR_120614    | SLC16A12-AS1   |
| A_21_P0009870  | 1,62258 | 1,57106 | 1,036356237 | N/A             | N/A       | N/A          | Inc-COL20A1-2  |
| A_22_P00012567 | 1,40713 | 1,35561 | 1,036356237 | N/A             | 349160    | NR_046103    | LOC349160      |
| A_33_P3246523  | 2,09023 | 2,03871 | 1,036356237 | ENST00000366474 | 26696     | NM_030904    | OR2T1          |
| A_22_P00000637 | 1,53164 | 1,48013 | 1,036349053 | N/A             | 731424    | N/A          | LOC731424      |
| A_33_P3221318  | 1,44252 | 1,39102 | 1,03634187  | N/A             | N/A       | N/A          | N/A            |
| A_21_P0006952  | 1,57793 | 1,52644 | 1,036334687 | N/A             | N/A       | N/A          | Inc-KLF6-5     |
| A_33_P3289659  | 1,68862 | 1,63714 | 1,036327503 | ENST00000402629 | 5265      | BX248257     | SERPINA1       |
| A_22_P00003267 | 1,43098 | 1,37951 | 1,03632032  | N/A             | 101928909 | NR_110134    | LOC101928909   |
| A_21_P0000747  | 1,40823 | 1,35677 | 1,036313137 | N/A             | 100506895 | NR_038276    | LOC100506895   |
| A_33_P3354273  | 1,57397 | 1,52251 | 1,036313137 | ENST00000482027 | N/A       | N/A          | N/A            |
| A_22_P00023139 | 1,46915 | 1,4177  | 1,036305954 | N/A             | N/A       | N/A          | Inc-SNW1-1     |
| A_21_P0011900  | 1,62953 | 1,57809 | 1,036298771 | N/A             | N/A       | N/A          | Inc-CMPK2-6    |
| A_21_P0008035  | 1,42773 | 1,3763  | 1,036291588 | N/A             | N/A       | N/A          | Inc-TNFRSF19-5 |
| A_21_P0005851  | 1,56065 | 1,50922 | 1,036291588 | N/A             | 102724687 | XR_426327    | LOC102724687   |
| A_21_P0004731  | 1,72548 | 1,67405 | 1,036291588 | ENST00000455973 | N/A       | N/A          | N/A            |
| A_24_P166397   | 1,72814 | 1,67672 | 1,036284405 | ENST00000378214 | 9856      | NM_014809    | KIAA0319       |
| A_21_P0009391  | 1,50884 | 1,45742 | 1,036284405 | N/A             | N/A       | N/A          | Inc-TBX2-1     |
| A_21_P0008519  | 1,60484 | 1,55343 | 1,036277222 | N/A             | N/A       | XM_005276451 | Inc-KCNK13-1   |
| A_21_P0004943  | 1,43251 | 1,38111 | 1,036270039 | N/A             | N/A       | N/A          | Inc-EYA4-1     |
| A_23_P406341   | 12,3349 | 12,2835 | 1,036270039 | ENST00000491814 | 84632     | NM_001001936 | AFAP1L2        |

|                |         |         |             |                 |           |              |                       |
|----------------|---------|---------|-------------|-----------------|-----------|--------------|-----------------------|
| A_33_P3260623  | 8,7421  | 8,69071 | 1,036262856 | ENST00000279230 | 5331      | NM_000932    | PLCB3                 |
| A_23_P70643    | 1,69021 | 1,63882 | 1,036262856 | ENST00000480328 | 79747     | NM_024694    | ADGB                  |
| A_22_P00020456 | 1,58259 | 1,5312  | 1,036262856 | N/A             | N/A       | BC043562     | Inc-LRRK1-3           |
| A_33_P3271221  | 1,54591 | 1,49452 | 1,036262856 | ENST00000313033 | 390155    | NM_001004745 | OR5T1                 |
| A_21_P0009291  | 1,47425 | 1,42286 | 1,036262856 | N/A             | N/A       | N/A          | Inc-AIPL1-2           |
| A_21_P0001738  | 1,46712 | 1,41574 | 1,036255673 | N/A             | N/A       | N/A          | Inc-GDAP2-1           |
| A_21_P0005008  | 1,52379 | 1,47241 | 1,036255673 | N/A             | N/A       | N/A          | Inc-MBOAT1-3          |
| A_24_P288779   | 1,42093 | 1,36955 | 1,036255673 | ENST00000351072 | 170627    | NM_130775    | XAGE5                 |
| A_22_P00015202 | 1,41685 | 1,36548 | 1,03624849  | N/A             | N/A       | N/A          | Inc-SOX2-1            |
| A_22_P00010100 | 1,62217 | 1,57081 | 1,036241308 | N/A             | N/A       | N/A          | Inc-MRC2-1            |
| A_33_P3249958  | 1,5933  | 1,54194 | 1,036241308 | ENST00000400362 | 642852    | NR_026943    | LOC642852             |
| A_33_P3251024  | 1,57977 | 1,52843 | 1,036226942 | ENST00000274711 | 26045     | NM_015564    | LRRTM2                |
| A_21_P0007261  | 1,64696 | 1,59563 | 1,03621976  | N/A             | N/A       | N/A          | Inc-RP11-201M22.1.1-3 |
| A_21_P0000537  | 1,70288 | 1,65155 | 1,03621976  | N/A             | 84070     | NR_027450    | FAM186B               |
| A_23_P120902   | 1,68631 | 1,63498 | 1,03621976  | ENST00000215886 | 3957      | NM_006498    | LGALS2                |
| A_21_P0002121  | 1,58196 | 1,53065 | 1,036205395 | N/A             | N/A       | N/A          | Inc-AC009336.1-1      |
| A_22_P00006831 | 1,73064 | 1,67933 | 1,036205395 | N/A             | N/A       | XR_133565    | Inc-GABRE-1           |
| A_22_P00025459 | 1,69527 | 1,64396 | 1,036205395 | ENST00000518042 | N/A       | BI826934     | N/A                   |
| A_22_P00004642 | 1,6128  | 1,5615  | 1,036198213 | ENST00000557101 | N/A       | N/A          | N/A                   |
| A_21_P0014705  | 1,45154 | 1,40025 | 1,03619103  | N/A             | N/A       | AK097628     | Inc-TMEM211-1         |
| A_22_P00022109 | 1,77171 | 1,72043 | 1,036183848 | N/A             | N/A       | N/A          | Inc-C7orf62-3         |
| A_22_P00014728 | 1,48603 | 1,43475 | 1,036183848 | N/A             | N/A       | N/A          | Inc-SLC2A13-2         |
| A_33_P3378420  | 1,68813 | 1,63685 | 1,036183848 | N/A             | N/A       | DA760426     | Inc-TNPO3-1           |
| A_33_P3362498  | 9,02261 | 8,97134 | 1,036176666 | ENST00000350721 | 545       | NM_001184    | ATR                   |
| A_22_P00018595 | 1,42603 | 1,37476 | 1,036176666 | N/A             | 101928915 | XR_242359    | LOC101928915          |
| A_32_P211418   | 1,43014 | 1,37888 | 1,036169483 | ENST00000336387 | 139212    | NM_173494    | PIH1D3                |
| A_21_P0003025  | 1,63163 | 1,58038 | 1,036162301 | N/A             | N/A       | N/A          | Inc-CCDC37-4          |
| A_21_P0002033  | 1,53878 | 1,48756 | 1,036140755 | ENST00000430051 | N/A       | N/A          | N/A                   |
| A_21_P0000413  | 1,40917 | 1,35795 | 1,036140755 | N/A             | 767594    | NR_003209    | SNORD114-16           |
| A_22_P00002725 | 1,42178 | 1,37057 | 1,036133573 | N/A             | 140848    | NR_104193    | MACROD2-IT1           |
| A_24_P111147   | 1,65361 | 1,6024  | 1,036133573 | ENST00000373955 | 65217     | AL834134     | PCDH15                |
| A_23_P94412    | 1,68501 | 1,6338  | 1,036133573 | ENST00000397747 | 80380     | NM_025239    | PDCD1LG2              |
| A_21_P0004892  | 1,42052 | 1,36932 | 1,036126391 | N/A             | N/A       | N/A          | Inc-BAG2-4            |

|                |         |         |             |                 |           |              |                |
|----------------|---------|---------|-------------|-----------------|-----------|--------------|----------------|
| A_33_P3363685  | 1,56819 | 1,51699 | 1,036126391 | ENST00000307388 | 390054    | NM_001005160 | OR52A5         |
| A_22_P00025177 | 1,72002 | 1,66884 | 1,036112028 | N/A             | N/A       | N/A          | Inc-WDR16-4    |
| A_22_P00023221 | 1,5789  | 1,52772 | 1,036112028 | ENST00000446733 | N/A       | N/A          | N/A            |
| A_21_P0010544  | 1,43162 | 1,38044 | 1,036112028 | N/A             | N/A       | N/A          | XLOC_I2_000353 |
| A_21_P0010400  | 1,48747 | 1,4363  | 1,036104846 | N/A             | N/A       | N/A          | Inc-ADRBK2-1   |
| A_33_P3367356  | 1,46906 | 1,4179  | 1,036097664 | N/A             | N/A       | BC137370     | N/A            |
| A_23_P6293     | 1,75383 | 1,70267 | 1,036097664 | ENST00000473381 | 53347     | NM_018961    | UBASH3A        |
| A_24_P220855   | 1,62111 | 1,56996 | 1,036090482 | ENST00000397145 | 80760     | NM_001001851 | ITIH5          |
| A_21_P0007394  | 1,69574 | 1,64459 | 1,036090482 | N/A             | N/A       | N/A          | Inc-GUCY1A2-2  |
| A_33_P3247210  | 6,60605 | 6,5549  | 1,036090482 | N/A             | N/A       | N/A          | N/A            |
| A_22_P00019901 | 1,41521 | 1,36407 | 1,036083301 | N/A             | N/A       | AJ003458     | Inc-DSCR4-2    |
| A_21_P0006689  | 1,62014 | 1,569   | 1,036083301 | ENST00000435367 | 101929662 | NR_120670    | LOC101929662   |
| A_22_P00021016 | 1,5706  | 1,51946 | 1,036083301 | ENST00000417135 | N/A       | N/A          | N/A            |
| A_22_P00006341 | 1,64911 | 1,59798 | 1,036076119 | ENST00000435557 | N/A       | DB025156     | N/A            |
| A_23_P218126   | 8,98525 | 8,93414 | 1,036061756 | ENST00000612473 | N/A       | BC024289     | N/A            |
| A_22_P00009359 | 1,5518  | 1,50069 | 1,036061756 | ENST00000446580 | 100507201 | N/A          | LOC100507201   |
| A_23_P210176   | 13,691  | 13,6399 | 1,036054575 | ENST00000264107 | 3655      | NM_000210    | ITGA6          |
| A_21_P0008631  | 1,57072 | 1,51962 | 1,036054575 | N/A             | N/A       | N/A          | Inc-MAPK6-2    |
| A_21_P0002569  | 1,6993  | 1,6482  | 1,036054575 | N/A             | N/A       | N/A          | Inc-RNF144A-1  |
| A_22_P00001927 | 1,41777 | 1,36668 | 1,036047394 | N/A             | 388428    | NR_027255    | AATK-AS1       |
| A_22_P00004970 | 1,74636 | 1,69527 | 1,036047394 | N/A             | 100873972 | NR_046535    | GPC6-AS1       |
| A_23_P423427   | 1,84008 | 1,789   | 1,036040212 | ENST00000304698 | 165215    | NM_177454    | FAM171B        |
| A_21_P0014720  | 1,5744  | 1,52332 | 1,036040212 | ENST00000562049 | 100508631 | XR_112629    | LOC100508631   |
| A_23_P118615   | 1,49615 | 1,44507 | 1,036040212 | ENST00000430352 | 10351     | NM_007168    | ABCA8          |
| A_23_P309246   | 7,76636 | 7,71528 | 1,036040212 | ENST00000394150 | 221785    | NM_145115    | ZSCAN25        |
| A_21_P0014085  | 1,41314 | 1,36207 | 1,036033031 | N/A             | 100506299 | NR_110154    | ID2-AS1        |
| A_21_P0000568  | 1,40787 | 1,3568  | 1,036033031 | N/A             | 644649    | NR_028471    | APOOP5         |
| A_21_P0013664  | 1,58736 | 1,53629 | 1,036033031 | ENST00000423171 | 101927258 | NR_121180    | LINC01474      |
| A_33_P3324383  | 1,49405 | 1,44299 | 1,03602585  | N/A             | 401720    | NM_001013690 | FIGNL2         |
| A_21_P0003035  | 1,67589 | 1,62483 | 1,03602585  | N/A             | N/A       | N/A          | Inc-RNF7-1     |
| A_21_P0002266  | 1,63402 | 1,58296 | 1,03602585  | ENST00000451464 | N/A       | N/A          | N/A            |
| A_21_P0011974  | 1,64739 | 1,59633 | 1,03602585  | N/A             | N/A       | N/A          | XLOC_I2_008317 |
| A_33_P3504522  | 1,58469 | 1,53364 | 1,036018669 | N/A             | 388428    | NR_027255    | AATK-AS1       |

|                |         |         |             |                 |           |           |                |
|----------------|---------|---------|-------------|-----------------|-----------|-----------|----------------|
| A_22_P00019780 | 1,41916 | 1,36811 | 1,036018669 | N/A             | N/A       | AY156957  | Inc-MYOM2-2    |
| A_22_P00020988 | 3,53892 | 3,48788 | 1,036011487 | N/A             | N/A       | N/A       | Inc-RNF139-1   |
| A_33_P3221618  | 1,40728 | 1,35624 | 1,036011487 | ENST00000401957 | 9771      | AL833195  | RAPGEF5        |
| A_21_P0000408  | 1,50643 | 1,45539 | 1,036011487 | N/A             | 767589    | NR_003204 | SNORD114-11    |
| A_21_P0013959  | 1,61377 | 1,56273 | 1,036011487 | N/A             | N/A       | N/A       | N/A            |
| A_23_P12533    | 1,69134 | 1,64031 | 1,036004306 | ENST00000611781 | 91074     | NM_052997 | ANKRD30A       |
| A_24_P390909   | 1,60895 | 1,55792 | 1,036004306 | ENST00000324001 | 57716     | NM_181882 | PRX            |
| A_22_P00015834 | 1,57299 | 1,52196 | 1,036004306 | N/A             | N/A       | BG419303  | Inc-TBC1D3F-1  |
| A_21_P0002229  | 1,61847 | 1,56745 | 1,035997125 | N/A             | N/A       | N/A       | Inc-ACTR2-3    |
| A_21_P0013624  | 1,60545 | 1,55443 | 1,035997125 | ENST00000446754 | N/A       | N/A       | N/A            |
| A_33_P3420367  | 1,57025 | 1,51925 | 1,035982764 | ENST00000395703 | 125170    | N/A       | MIEF2          |
| A_21_P0014486  | 1,53089 | 1,4799  | 1,035975583 | N/A             | N/A       | AK131021  | N/A            |
| A_22_P00019082 | 1,63364 | 1,58265 | 1,035975583 | ENST00000421132 | N/A       | N/A       | N/A            |
| A_21_P0009327  | 1,40961 | 1,35863 | 1,035968402 | N/A             | N/A       | N/A       | Inc-CCDC43-1   |
| A_22_P00007231 | 1,62074 | 1,56976 | 1,035968402 | ENST00000506984 | N/A       | N/A       | N/A            |
| A_21_P0006514  | 1,599   | 1,54802 | 1,035968402 | N/A             | N/A       | N/A       | Inc-STAG2-1    |
| A_21_P0009899  | 1,44725 | 1,39628 | 1,035961221 | N/A             | N/A       | N/A       | Inc-PXMP4-1    |
| A_33_P3598466  | 1,51029 | 1,45932 | 1,035961221 | ENST00000426420 | N/A       | AY956767  | N/A            |
| A_32_P467550   | 1,60456 | 1,5536  | 1,03595404  | ENST00000535163 | N/A       | BI771000  | N/A            |
| A_21_P0007754  | 1,42552 | 1,37458 | 1,035939679 | N/A             | N/A       | N/A       | Inc-NUAK1-3    |
| A_33_P3379791  | 1,44558 | 1,39465 | 1,035932499 | ENST00000418834 | 100507477 | N/A       | LOC100507477   |
| A_33_P3358397  | 1,4199  | 1,36897 | 1,035932499 | ENST00000382114 | 55203     | NM_018176 | LGI2           |
| A_23_P23279    | 1,41058 | 1,35967 | 1,035918138 | ENST00000537350 | 92241     | NM_052862 | RCS1           |
| A_21_P0004537  | 1,49224 | 1,44133 | 1,035918138 | N/A             | N/A       | N/A       | Inc-ERGIC1-2   |
| A_22_P00009224 | 1,55724 | 1,50634 | 1,035910957 | N/A             | 100874082 | NR_046612 | HTR2A-AS1      |
| A_21_P0005616  | 1,45863 | 1,40773 | 1,035910957 | ENST00000522365 | 103352670 | NR_122034 | LINC01419      |
| A_21_P0007582  | 1,6221  | 1,5712  | 1,035910957 | N/A             | N/A       | N/A       | Inc-GLIPR1L1-3 |
| A_22_P00023979 | 1,59294 | 1,54204 | 1,035910957 | ENST00000558621 | 101927286 | NR_120324 | LOC101927286   |
| A_33_P3216605  | 1,76723 | 1,71633 | 1,035910957 | N/A             | 9725      | NM_014698 | TMEM63A        |
| A_21_P0011334  | 1,54914 | 1,49825 | 1,035903777 | ENST00000559788 | 101929690 | NR_120367 | LINC01583      |
| A_23_P259141   | 1,40646 | 1,35558 | 1,035896597 | ENST00000461547 | 81030     | NM_030776 | ZBP1           |
| A_22_P00001645 | 1,56921 | 1,51833 | 1,035896597 | ENST00000443926 | N/A       | N/A       | N/A            |
| A_22_P00005401 | 1,60762 | 1,55674 | 1,035896597 | ENST00000578039 | N/A       | N/A       | N/A            |

|                |         |         |             |                 |           |              |                  |
|----------------|---------|---------|-------------|-----------------|-----------|--------------|------------------|
| A_21_P0004982  | 1,48753 | 1,43666 | 1,035889416 | N/A             | N/A       | N/A          | Inc-EXOC2-1      |
| A_33_P3417427  | 1,48877 | 1,4379  | 1,035889416 | N/A             | N/A       | AK127982     | Inc-VIM-1        |
| A_21_P0001357  | 1,59826 | 1,54739 | 1,035889416 | N/A             | N/A       | N/A          | Inc-AMY1C-2      |
| A_22_P00020340 | 1,64845 | 1,59759 | 1,035882236 | ENST00000523748 | N/A       | N/A          | N/A              |
| A_21_P0004968  | 1,47146 | 1,42061 | 1,035875056 | N/A             | N/A       | N/A          | Inc-QKI-5        |
| A_24_P940644   | 1,43081 | 1,37996 | 1,035875056 | ENST00000266058 | 6585      | NM_003061    | SLIT1            |
| A_21_P0007113  | 1,40854 | 1,35769 | 1,035875056 | N/A             | N/A       | N/A          | Inc-PDLIM1-2     |
| A_23_P337729   | 10,0277 | 9,97685 | 1,035875056 | ENST00000238936 | 79847     | NM_024789    | TMEM180          |
| A_33_P3240210  | 1,41934 | 1,3685  | 1,035867876 | N/A             | N/A       | N/A          | N/A              |
| A_33_P3317770  | 1,42333 | 1,37249 | 1,035867876 | ENST00000368420 | 149095    | N/A          | DCST1            |
| A_23_P51311    | 1,42061 | 1,36978 | 1,035860696 | ENST00000368747 | 149018    | NM_001010857 | LELP1            |
| A_21_P0011833  | 1,47462 | 1,42379 | 1,035860696 | N/A             | 100506328 | NR_103791    | LINC01127        |
| A_21_P0007828  | 1,55568 | 1,50485 | 1,035860696 | N/A             | N/A       | N/A          | Inc-FAR2-1       |
| A_21_P0003682  | 1,54007 | 1,48924 | 1,035860696 | ENST00000507969 | 101928551 | NR_125900    | LOC101928551     |
| A_21_P0012168  | 1,6174  | 1,56657 | 1,035860696 | ENST00000427446 | 102724188 | N/A          | LOC102724188     |
| A_21_P0013181  | 6,81368 | 6,76286 | 1,035853516 | ENST00000439058 | 100506098 | XR_108746    | LOC100506098     |
| A_21_P0010190  | 1,55854 | 1,50772 | 1,035853516 | ENST00000416218 | 101927869 | N/A          | LOC101927869     |
| A_33_P3535523  | 1,41959 | 1,36877 | 1,035853516 | N/A             | 286068    | BC015720     | LOC286068        |
| A_23_P26154    | 1,57675 | 1,52593 | 1,035853516 | ENST00000430628 | 5346      | NM_002666    | PLIN1            |
| A_21_P0009250  | 3,66226 | 3,61145 | 1,035846336 | N/A             | N/A       | N/A          | Inc-ADAM11-1     |
| A_21_P0003791  | 1,50424 | 1,45344 | 1,035839156 | N/A             | N/A       | N/A          | Inc-FSTL5-1      |
| A_33_P3348194  | 6,30781 | 6,25702 | 1,035831976 | N/A             | N/A       | N/A          | N/A              |
| A_21_P0009793  | 1,50058 | 1,44979 | 1,035831976 | N/A             | N/A       | N/A          | Inc-AC010325.1-1 |
| A_21_P0004124  | 1,59483 | 1,54404 | 1,035831976 | ENST00000505050 | N/A       | N/A          | N/A              |
| A_33_P3214825  | 1,50038 | 1,4496  | 1,035824796 | N/A             | N/A       | AY358806     | N/A              |
| A_33_P3237201  | 1,43565 | 1,38487 | 1,035824796 | ENST00000393240 | 6857      | NM_001135805 | SYT1             |
| A_21_P0013174  | 1,40914 | 1,35837 | 1,035817616 | ENST00000401542 | N/A       | N/A          | XLOC_I2_013291   |
| A_23_P81058    | 1,49587 | 1,44511 | 1,035810437 | ENST00000282701 | 651       | NM_001201    | BMP3             |
| A_21_P0001735  | 1,41861 | 1,36785 | 1,035810437 | N/A             | N/A       | N/A          | Inc-AMY1B-2      |
| A_21_P0000453  | 1,4962  | 1,44545 | 1,035803257 | N/A             | 100033811 | NR_003352    | SNORD115-37      |
| A_24_P125871   | 1,41006 | 1,35932 | 1,035796077 | ENST00000352483 | 54101     | NM_020639    | RIPK4            |
| A_33_P3214334  | 1,42767 | 1,37693 | 1,035796077 | ENST00000383420 | 259215    | NM_001003693 | LY6G6F           |
| A_22_P00022857 | 1,481   | 1,43027 | 1,035788898 | N/A             | 100874063 | NR_046526    | CLYBL-AS2        |



|                |         |         |             |                 |           |              |              |
|----------------|---------|---------|-------------|-----------------|-----------|--------------|--------------|
| A_24_P227415   | 1,53487 | 1,48414 | 1,035788898 | ENST00000310002 | 64581     | NM_197954    | CLEC7A       |
| A_21_P0012714  | 1,61749 | 1,56677 | 1,035781718 | ENST00000511200 | 152742    | NR_033931    | LINC01085    |
| A_22_P00008723 | 1,65565 | 1,60493 | 1,035781718 | ENST00000422858 | N/A       | N/A          | N/A          |
| A_22_P00008154 | 1,67304 | 1,62232 | 1,035781718 | N/A             | N/A       | N/A          | Inc-ILK-2    |
| A_22_P00016251 | 1,62432 | 1,5736  | 1,035781718 | ENST00000557883 | 101928227 | N/A          | LOC101928227 |
| A_24_P147765   | 8,85471 | 8,80401 | 1,035767359 | ENST00000216187 | 80020     | NM_024955    | FOXRED2      |
| A_22_P00015835 | 1,52319 | 1,47249 | 1,035767359 | N/A             | N/A       | BG212186     | Inc-TBC1D5-1 |
| A_22_P00005383 | 1,64538 | 1,59468 | 1,035767359 | ENST00000506865 | N/A       | N/A          | N/A          |
| A_22_P00011216 | 1,53217 | 1,48149 | 1,035753001 | ENST00000506028 | 7093      | N/A          | TLL2         |
| A_22_P00022012 | 1,7223  | 1,67163 | 1,035745821 | ENST00000426519 | N/A       | BG527071     | N/A          |
| A_33_P3246268  | 1,4249  | 1,37423 | 1,035745821 | N/A             | 3239      | NM_000523    | HOXD13       |
| A_33_P3419388  | 1,48973 | 1,43906 | 1,035745821 | ENST00000514043 | 101928532 | XR_241665    | LOC101928532 |
| A_33_P3720195  | 1,56453 | 1,51386 | 1,035745821 | N/A             | 375196    | NR_028386    | LOC375196    |
| A_23_P54996    | 1,50786 | 1,45719 | 1,035745821 | ENST00000240361 | 56155     | NM_198393    | TEX14        |
| A_23_P216434   | 1,73928 | 1,68862 | 1,035738642 | ENST00000375540 | 1842      | BC036806     | ECM2         |
| A_33_P3312242  | 1,408   | 1,35735 | 1,035731463 | ENST00000315626 | 6370      | NM_005624    | CCL25        |
| A_21_P0005682  | 1,41587 | 1,36523 | 1,035724284 | N/A             | N/A       | N/A          | Inc-WRN-5    |
| A_22_P00017216 | 1,40523 | 1,3546  | 1,035717105 | N/A             | 101929979 | XR_251593    | LOC101929979 |
| A_24_P85557    | 1,69725 | 1,64663 | 1,035709926 | ENST00000303921 | 2861      | NM_005302    | GPR37        |
| A_22_P00003398 | 1,5329  | 1,48228 | 1,035709926 | N/A             | 100874377 | NR_046843    | SMIM2-IT1    |
| A_22_P00006243 | 3,9815  | 3,93088 | 1,035709926 | N/A             | N/A       | N/A          | Inc-FAM59A-1 |
| A_21_P0007279  | 1,63046 | 1,57985 | 1,035702747 | N/A             | N/A       | N/A          | Inc-FAM55B-8 |
| A_21_P0004703  | 1,70445 | 1,65384 | 1,035702747 | N/A             | N/A       | N/A          | Inc-QKI-1    |
| A_33_P3406998  | 6,45459 | 6,40398 | 1,035702747 | ENST00000462274 | 1859      | NM_130438    | DYRK1A       |
| A_22_P00014706 | 6,07465 | 6,02405 | 1,035695568 | N/A             | 101926996 | NR_110802    | RUNDC3A-AS1  |
| A_21_P0007414  | 1,56754 | 1,51694 | 1,035695568 | N/A             | N/A       | N/A          | Inc-CLMP-1   |
| A_21_P0000033  | 10,2332 | 10,1826 | 1,035695568 | ENST00000565422 | 100287718 | NM_001162435 | ANKRD66      |
| A_22_P00010891 | 13,6213 | 13,5707 | 1,035695568 | ENST00000426713 | 205251    | NR_027063    | LINC00116    |
| A_33_P3509019  | 1,50585 | 1,45528 | 1,035674032 | N/A             | N/A       | N/A          | N/A          |
| A_23_P98205    | 1,45714 | 1,40658 | 1,035666853 | ENST00000533673 | 8534      | NM_003654    | CHST1        |
| A_22_P00009185 | 1,45041 | 1,39985 | 1,035666853 | N/A             | N/A       | N/A          | Inc-LOXL1-1  |
| A_33_P3416181  | 1,55117 | 1,50061 | 1,035666853 | ENST00000557784 | N/A       | DB048201     | N/A          |
| A_23_P101671   | 1,6107  | 1,56015 | 1,035659674 | ENST00000450849 | 85300     | NM_033064    | ATCAY        |

|                |         |         |             |                 |           |              |                       |
|----------------|---------|---------|-------------|-----------------|-----------|--------------|-----------------------|
| A_22_P00004349 | 1,58499 | 1,53445 | 1,035652495 | N/A             | 100130587 | NR_110634    | LOC100130587          |
| A_23_P18342    | 1,51164 | 1,46111 | 1,035645317 | ENST00000502694 | 285220    | NM_001278300 | EPHA6                 |
| A_33_P3230663  | 1,72866 | 1,67813 | 1,035645317 | N/A             | 100130232 | AY203950     | LOC100130232          |
| A_21_P0008598  | 1,40671 | 1,35618 | 1,035645317 | ENST00000562501 | 791114    | NR_026646    | PWRN1                 |
| A_23_P401606   | 1,54064 | 1,49011 | 1,035645317 | ENST00000380138 | 10085     | NM_005711    | EDIL3                 |
| A_33_P3402551  | 1,7538  | 1,70328 | 1,035638138 | N/A             | 100101478 | N/A          | LOC100101478          |
| A_21_P0003589  | 1,49664 | 1,44612 | 1,035638138 | N/A             | N/A       | N/A          | Inc-STIM2-2           |
| A_33_P3277344  | 1,56972 | 1,51921 | 1,03563096  | ENST00000390466 | N/A       | X58740       | N/A                   |
| A_33_P3701149  | 1,53714 | 1,48663 | 1,03563096  | ENST00000416438 | 158314    | NR_027341    | LINC00475             |
| A_22_P00005992 | 1,58674 | 1,53624 | 1,035623782 | N/A             | N/A       | N/A          | Inc-FAAH2-3           |
| A_21_P0002471  | 1,46899 | 1,41851 | 1,035609425 | N/A             | N/A       | N/A          | Inc-EIF2AK3-1         |
| A_21_P0008536  | 1,40358 | 1,3531  | 1,035609425 | N/A             | N/A       | N/A          | Inc-RP11-1085N6.3.1-2 |
| A_22_P00011512 | 1,73247 | 1,68199 | 1,035609425 | N/A             | 100506675 | NR_120527    | LOC100506675          |
| A_21_P0010002  | 1,71975 | 1,66927 | 1,035609425 | N/A             | N/A       | N/A          | Inc-HAO1-2            |
| A_19_P00322835 | 1,42882 | 1,37835 | 1,035602247 | ENST00000520048 | N/A       | N/A          | N/A                   |
| A_21_P0004281  | 1,68675 | 1,63629 | 1,035595068 | N/A             | N/A       | N/A          | Inc-PAM-1             |
| A_33_P3390591  | 1,54305 | 1,49259 | 1,035595068 | ENST00000514767 | 100506272 | NR_110436    | LOC100506272          |
| A_22_P00015065 | 1,54624 | 1,49578 | 1,035595068 | N/A             | N/A       | N/A          | Inc-SNTG1-1           |
| A_22_P00025664 | 1,51821 | 1,46776 | 1,03558789  | N/A             | N/A       | N/A          | Inc-DAP-2             |
| A_23_P367071   | 4,39424 | 4,34379 | 1,03558789  | ENST00000474922 | 100131816 | NR_024062    | UBE2DNL               |
| A_33_P3337480  | 1,53226 | 1,48181 | 1,03558789  | ENST00000610508 | 440077    | NM_001004328 | ZNF705A               |
| A_23_P393955   | 1,48919 | 1,43875 | 1,035580712 | ENST00000333756 | 256646    | NM_175741    | NUTM1                 |
| A_22_P00019315 | 1,60641 | 1,55597 | 1,035580712 | ENST00000436121 | 101927342 | NR_125939    | LOC101927342          |
| A_32_P148345   | 8,00543 | 7,95501 | 1,035566356 | ENST00000421017 | 302       | NM_001002857 | ANXA2                 |
| A_32_P183367   | 1,62696 | 1,57654 | 1,035566356 | ENST00000420428 | 56853     | NM_020180    | CELF4                 |
| A_19_P00321061 | 1,56596 | 1,51555 | 1,035559178 | ENST00000500533 | 51621     | AK127052     | KLF13                 |
| A_21_P0004546  | 1,49488 | 1,44447 | 1,035559178 | N/A             | N/A       | N/A          | Inc-HNRNPAB-1         |
| A_21_P0009963  | 1,67327 | 1,62286 | 1,035559178 | N/A             | N/A       | N/A          | Inc-NCOA3-9           |
| A_21_P0004915  | 1,52716 | 1,47675 | 1,035559178 | N/A             | N/A       | N/A          | Inc-PRDM1-1           |
| A_22_P00002279 | 1,59051 | 1,5401  | 1,035559178 | ENST00000455871 | N/A       | N/A          | N/A                   |
| A_33_P3317109  | 1,41845 | 1,36804 | 1,035559178 | ENST00000378225 | 55301     | N/A          | OLAH                  |
| A_21_P0010320  | 1,49277 | 1,44237 | 1,035552    | N/A             | N/A       | N/A          | Inc-C21orf54-3        |
| A_33_P3413305  | 1,52917 | 1,47877 | 1,035552    | ENST00000366472 | 80851     | AK125138     | SH3BP5L               |

|                |         |         |             |                 |           |              |                    |
|----------------|---------|---------|-------------|-----------------|-----------|--------------|--------------------|
| A_33_P3221343  | 4,57337 | 4,52298 | 1,035544822 | ENST00000371681 | 143279    | NM_173497    | HECTD2             |
| A_23_P127352   | 1,59258 | 1,54219 | 1,035544822 | ENST00000309106 | 116512    | NM_198923    | MRGPRD             |
| A_33_P3217629  | 1,58283 | 1,53244 | 1,035544822 | N/A             | N/A       | N/A          | N/A                |
| A_21_P0002353  | 1,51699 | 1,46661 | 1,035537644 | N/A             | N/A       | N/A          | Inc-AC007557.1.1-4 |
| A_21_P0010003  | 1,47187 | 1,42149 | 1,035537644 | N/A             | N/A       | N/A          | Inc-JAG1-5         |
| A_33_P3307063  | 1,56745 | 1,51707 | 1,035537644 | N/A             | N/A       | N/A          | N/A                |
| A_23_P56913    | 1,40811 | 1,35773 | 1,035537644 | ENST00000405346 | 130106    | NM_001029881 | CIB4               |
| A_33_P3295625  | 1,52593 | 1,47556 | 1,035530467 | N/A             | 9442      | NM_001253882 | MED27              |
| A_23_P326893   | 1,57388 | 1,52351 | 1,035530467 | ENST00000591345 | 115948    | NM_145045    | CCDC151            |
| A_21_P0002560  | 1,99115 | 1,94078 | 1,035530467 | N/A             | N/A       | N/A          | Inc-AC131097.4.1-3 |
| A_22_P00007996 | 1,58866 | 1,53829 | 1,035530467 | ENST00000531076 | N/A       | N/A          | N/A                |
| A_22_P00002160 | 1,61535 | 1,56499 | 1,035523289 | ENST00000546508 | 101101773 | NR_073454    | LINC00609          |
| A_22_P00006718 | 1,66345 | 1,61309 | 1,035523289 | ENST00000557308 | N/A       | N/A          | N/A                |
| A_21_P0005181  | 1,61883 | 1,56847 | 1,035523289 | N/A             | N/A       | N/A          | Inc-AL078585.1-2   |
| A_21_P0003657  | 1,41084 | 1,36048 | 1,035523289 | N/A             | N/A       | N/A          | Inc-MGST2-1        |
| A_21_P0005986  | 1,56832 | 1,51796 | 1,035523289 | ENST00000610400 | 642929    | NR_027472    | LOC642929          |
| A_23_P164451   | 1,57042 | 1,52006 | 1,035523289 | ENST00000477081 | 6909      | NM_005994    | TBX2               |
| A_21_P0004155  | 1,41751 | 1,36716 | 1,035516111 | ENST00000503489 | N/A       | N/A          | N/A                |
| A_21_P0009139  | 1,54422 | 1,49387 | 1,035516111 | ENST00000599841 | N/A       | XR_243491    | N/A                |
| A_22_P00004899 | 1,64102 | 1,59068 | 1,035508934 | N/A             | N/A       | AK125397     | Inc-DAD1-2         |
| A_33_P3256322  | 1,57008 | 1,51974 | 1,035508934 | N/A             | N/A       | CR989582     | N/A                |
| A_22_P00005215 | 1,64215 | 1,59182 | 1,035501756 | ENST00000553623 | 283601    | N/A          | LINC00523          |
| A_33_P3274349  | 1,57516 | 1,52484 | 1,035494578 | ENST00000589847 | N/A       | N/A          | N/A                |
| A_23_P355377   | 1,40403 | 1,35371 | 1,035494578 | ENST00000616933 | 57468     | NM_020708    | SLC12A5            |
| A_23_P204801   | 1,70454 | 1,65422 | 1,035494578 | ENST00000549713 | 84102     | NM_032148    | SLC41A2            |
| A_23_P370830   | 1,64852 | 1,5982  | 1,035494578 | ENST00000359358 | 57565     | NM_020805    | KLHL14             |
| A_19_P00321849 | 1,60404 | 1,55373 | 1,035487401 | ENST00000507926 | N/A       | N/A          | N/A                |
| A_32_P787109   | 1,41837 | 1,36807 | 1,035480224 | ENST00000357504 | 401124    | NM_001170700 | DTHD1              |
| A_21_P0001311  | 1,53157 | 1,48127 | 1,035480224 | ENST00000456878 | N/A       | N/A          | N/A                |
| A_32_P64598    | 1,44311 | 1,39281 | 1,035480224 | ENST00000552320 | 101927135 | XR_245976    | LOC101927135       |
| A_24_P11575    | 1,68364 | 1,63335 | 1,035473046 | ENST00000280527 | 51232     | NM_016441    | CRIM1              |
| A_21_P0003582  | 1,53386 | 1,48357 | 1,035473046 | N/A             | N/A       | N/A          | Inc-SOD3-3         |
| A_22_P00018089 | 1,42039 | 1,3701  | 1,035473046 | N/A             | N/A       | N/A          | Inc-ZNF366-5       |

|                |         |         |             |                 |           |              |                  |
|----------------|---------|---------|-------------|-----------------|-----------|--------------|------------------|
| A_24_P489164   | 1,6336  | 1,58331 | 1,035473046 | N/A             | 100131943 | AY358202     | LOC100131943     |
| A_21_P0007614  | 1,417   | 1,36672 | 1,035465869 | N/A             | N/A       | N/A          | Inc-ASCL1-2      |
| A_32_P16053    | 1,47979 | 1,42951 | 1,035465869 | ENST00000427348 | 284801    | NR_040095    | MIR663AHG        |
| A_21_P0005371  | 1,59596 | 1,54569 | 1,035458692 | N/A             | N/A       | N/A          | Inc-BMPER-1      |
| A_22_P00005712 | 1,48721 | 1,43695 | 1,035451514 | ENST00000438797 | 89758     | N/A          | C6orf7           |
| A_24_P418152   | 1,66649 | 1,61623 | 1,035451514 | ENST00000511008 | 124871    | NR_034161    | FLJ40194         |
| A_21_P0001882  | 1,43924 | 1,38898 | 1,035451514 | ENST00000438443 | N/A       | N/A          | N/A              |
| A_21_P0013698  | 1,42129 | 1,37103 | 1,035451514 | ENST00000452826 | N/A       | N/A          | N/A              |
| A_19_P00316493 | 5,93431 | 5,88405 | 1,035451514 | ENST00000452701 | N/A       | N/A          | N/A              |
| A_32_P169114   | 1,71436 | 1,66411 | 1,035444337 | ENST00000396575 | 2903      | NM_001134407 | GRIN2A           |
| A_23_P55682    | 1,56757 | 1,51732 | 1,035444337 | ENST00000596372 | 65982     | NM_023926    | ZSCAN18          |
| A_21_P0014642  | 1,43597 | 1,38572 | 1,035444337 | ENST00000517964 | N/A       | XR_171713    | N/A              |
| A_22_P00016907 | 1,41265 | 1,3624  | 1,035444337 | ENST00000533588 | N/A       | N/A          | N/A              |
| A_23_P368794   | 2,11067 | 2,06043 | 1,03543716  | ENST00000483040 | 256536    | NM_174937    | TCERG1L          |
| A_33_P3227452  | 1,42951 | 1,37928 | 1,035429983 | N/A             | N/A       | AF204269     | N/A              |
| A_23_P408341   | 1,63327 | 1,58304 | 1,035429983 | ENST00000476365 | 128854    | NR_002781    | TSPY26P          |
| A_22_P00016990 | 1,54137 | 1,49115 | 1,035422806 | ENST00000564032 | N/A       | BC036686     | N/A              |
| A_22_P00010836 | 1,47785 | 1,42764 | 1,035415629 | N/A             | 101927049 | NR_120616    | PLCE1-AS2        |
| A_22_P00010024 | 10,7797 | 10,7295 | 1,035408452 | ENST00000428198 | 57468     | NM_001134771 | SLC12A5          |
| A_22_P00016639 | 1,46312 | 1,41292 | 1,035408452 | ENST00000510238 | 643714    | NR_033920    | CASC16           |
| A_21_P0005385  | 1,59005 | 1,53985 | 1,035408452 | N/A             | N/A       | N/A          | Inc-AC006455.1-5 |
| A_21_P0012762  | 1,72283 | 1,67263 | 1,035408452 | ENST00000505178 | N/A       | N/A          | N/A              |
| A_33_P3340615  | 1,90959 | 1,8594  | 1,035401275 | ENST00000222381 | 5444      | NM_000446    | PON1             |
| A_22_P00015024 | 5,93371 | 5,88352 | 1,035401275 | ENST00000504335 | 6525      | AK092939     | SMTN             |
| A_21_P0014260  | 1,41623 | 1,36606 | 1,035386921 | N/A             | N/A       | XR_111158    | N/A              |
| A_33_P3419399  | 2,72482 | 2,67465 | 1,035386921 | ENST00000409806 | 340152    | NM_207360    | ZC3H12D          |
| A_19_P00318790 | 2,29098 | 2,24081 | 1,035386921 | ENST00000454172 | N/A       | N/A          | N/A              |
| A_21_P0007195  | 1,69005 | 1,6399  | 1,035372568 | N/A             | N/A       | N/A          | Inc-C11orf74-7   |
| A_21_P0014574  | 1,41641 | 1,36626 | 1,035372568 | N/A             | 283463    | NM_173600    | MUC19            |
| A_22_P00017425 | 1,68103 | 1,63089 | 1,035365391 | N/A             | N/A       | BX113880     | Inc-VIM-1        |
| A_22_P00003319 | 1,56477 | 1,51463 | 1,035365391 | N/A             | N/A       | N/A          | Inc-CARD18-1     |
| A_23_P162525   | 8,9264  | 8,87626 | 1,035365391 | ENST00000261637 | 27340     | NM_014503    | UTP20            |
| A_33_P3387716  | 1,75169 | 1,70156 | 1,035358215 | ENST00000517853 | 29958     | NR_104002    | DMGDH            |

|                |         |         |             |                 |           |              |                 |
|----------------|---------|---------|-------------|-----------------|-----------|--------------|-----------------|
| A_22_P00017663 | 1,59896 | 1,54883 | 1,035358215 | N/A             | N/A       | BC037250     | Inc-WRN-7       |
| A_23_P38735    | 1,70027 | 1,65014 | 1,035358215 | ENST00000262150 | 28513     | NM_021153    | CDH19           |
| A_22_P00010012 | 1,53805 | 1,48793 | 1,035351038 | N/A             | 100874035 | XR_241603    | PLCH1-AS1       |
| A_33_P3210492  | 1,40367 | 1,35355 | 1,035351038 | ENST00000302514 | 114900    | NM_031909    | C1QTNF4         |
| A_22_P00022183 | 1,47669 | 1,42657 | 1,035351038 | N/A             | N/A       | N/A          | Inc-BOLL-1      |
| A_23_P68327    | 10,5313 | 10,4812 | 1,035336685 | ENST00000481791 | 112942    | NM_080667    | CFAP36          |
| A_22_P00014347 | 1,43964 | 1,38954 | 1,035336685 | N/A             | N/A       | N/A          | Inc-SERPINI1-7  |
| A_22_P00012007 | 1,43859 | 1,38849 | 1,035336685 | ENST00000486545 | N/A       | N/A          | N/A             |
| A_21_P0013127  | 1,56729 | 1,51719 | 1,035336685 | N/A             | N/A       | N/A          | Inc-C6orf100-3  |
| A_21_P0005538  | 1,4017  | 1,35161 | 1,035329509 | N/A             | N/A       | N/A          | Inc-ZNF777-1    |
| A_21_P0005901  | 1,65171 | 1,60163 | 1,035322333 | ENST00000518339 | N/A       | N/A          | N/A             |
| A_19_P00805218 | 1,41729 | 1,36722 | 1,035315156 | ENST00000555332 | 400456    | N/A          | LINC01197       |
| A_22_P00002866 | 1,4902  | 1,44014 | 1,03530798  | ENST00000497258 | N/A       | N/A          | N/A             |
| A_22_P00010232 | 1,83593 | 1,78587 | 1,03530798  | ENST00000507398 | N/A       | N/A          | N/A             |
| A_33_P3396159  | 9,31757 | 9,26752 | 1,035300804 | ENST00000491922 | 8030      | NM_005436    | CCDC6           |
| A_23_P14019    | 1,41174 | 1,36169 | 1,035300804 | ENST00000229304 | 339       | NM_001644    | APOBEC1         |
| A_21_P0010341  | 1,61956 | 1,56952 | 1,035293628 | ENST00000452326 | N/A       | N/A          | N/A             |
| A_33_P3356537  | 1,60429 | 1,55425 | 1,035293628 | N/A             | N/A       | N/A          | N/A             |
| A_22_P00022765 | 1,56814 | 1,5181  | 1,035293628 | N/A             | N/A       | BX090607     | Inc-GABARAPL3-3 |
| A_33_P3286571  | 1,60217 | 1,55214 | 1,035286452 | N/A             | N/A       | DB080651     | N/A             |
| A_22_P00017788 | 1,415   | 1,36497 | 1,035286452 | N/A             | 100874115 | NR_046733    | PLCXD2-AS1      |
| A_21_P0010910  | 1,40142 | 1,35139 | 1,035286452 | N/A             | N/A       | N/A          | XL0C_I2_002171  |
| A_33_P3420605  | 1,69965 | 1,64964 | 1,0352721   | ENST00000268912 | 26689     | NM_012374    | OR4D1           |
| A_22_P00004942 | 1,40282 | 1,35282 | 1,035264924 | N/A             | N/A       | BU165922     | Inc-DCAF4L2-2   |
| A_33_P3383246  | 2,61612 | 2,56612 | 1,035264924 | ENST00000356069 | 119695    | NM_001005177 | OR52R1          |
| A_23_P134650   | 12,6809 | 12,6309 | 1,035264924 | ENST00000292478 | 26024     | NM_015545    | PTCD1           |
| A_22_P00012179 | 1,52341 | 1,47342 | 1,035257748 | N/A             | N/A       | N/A          | Inc-POU3F2-3    |
| A_33_P3397127  | 1,60381 | 1,55382 | 1,035257748 | N/A             | N/A       | AB306238     | N/A             |
| A_33_P3791263  | 1,48454 | 1,43455 | 1,035257748 | ENST00000462354 | 118427    | NM_001288823 | OLFM3           |
| A_23_P128868   | 1,53037 | 1,48038 | 1,035257748 | ENST00000556246 | 440153    | NM_001013354 | OR11H12         |
| A_33_P3242753  | 1,65766 | 1,60768 | 1,035250572 | N/A             | N/A       | N/A          | N/A             |
| A_21_P0014557  | 1,80112 | 1,75115 | 1,035243396 | N/A             | N/A       | N/A          | Inc-TMX1-2      |
| A_22_P00007753 | 1,65753 | 1,60756 | 1,035243396 | ENST00000424539 | N/A       | N/A          | N/A             |

|                |         |         |             |                 |           |              |                      |
|----------------|---------|---------|-------------|-----------------|-----------|--------------|----------------------|
| A_22_P00011038 | 1,62122 | 1,57125 | 1,035243396 | ENST00000447864 | N/A       | N/A          | N/A                  |
| A_22_P00014492 | 1,58684 | 1,53687 | 1,035243396 | ENST00000439079 | N/A       | N/A          | N/A                  |
| A_21_P0013906  | 1,69    | 1,64003 | 1,035243396 | ENST00000447937 | 83869     | N/A          | TTY14                |
| A_22_P00021518 | 1,49646 | 1,4465  | 1,035236221 | N/A             | N/A       | N/A          | Inc-NR2C2-1          |
| A_21_P0010171  | 1,40883 | 1,35887 | 1,035236221 | ENST00000429512 | N/A       | N/A          | N/A                  |
| A_23_P145724   | 1,70613 | 1,65618 | 1,035229045 | ENST00000342032 | 10842     | NM_006658    | PPP1R17              |
| A_21_P0006450  | 1,48156 | 1,43162 | 1,035221869 | ENST00000448761 | 102723426 | XR_426527    | LINC01496            |
| A_21_P0010010  | 1,61654 | 1,5666  | 1,035221869 | N/A             | 101929547 | XR_244250    | LOC101929547         |
| A_32_P437004   | 1,43314 | 1,3832  | 1,035221869 | ENST00000381174 | 7499      | NM_175569    | XG                   |
| A_21_P0007877  | 1,63011 | 1,58018 | 1,035214694 | N/A             | N/A       | N/A          | Inc-FAIM2-2          |
| A_22_P00013389 | 1,44392 | 1,394   | 1,035207518 | N/A             | N/A       | AA502489     | Inc-RP11-180C1.1.1-2 |
| A_32_P361185   | 1,71005 | 1,66013 | 1,035207518 | ENST00000372912 | 118490    | NM_001024593 | MSS51                |
| A_22_P00008440 | 1,58758 | 1,53767 | 1,035200343 | N/A             | N/A       | N/A          | Inc-KATNA1-2         |
| A_24_P239177   | 11,1216 | 11,0717 | 1,035193167 | ENST00000614666 | 4585      | NM_018406    | MUC4                 |
| A_21_P0009729  | 1,5578  | 1,5079  | 1,035193167 | N/A             | N/A       | N/A          | Inc-NLRP4-1          |
| A_23_P19428    | 1,4197  | 1,36981 | 1,035185992 | ENST00000415857 | 26707     | NM_030905    | OR2J2                |
| A_23_P342585   | 1,4155  | 1,36561 | 1,035185992 | ENST00000370419 | 22999     | AB045726     | RIMS1                |
| A_33_P3230389  | 1,56455 | 1,51467 | 1,035178817 | ENST00000317037 | 390077    | NM_001005174 | OR52N2               |
| A_22_P00010478 | 2,37    | 2,32012 | 1,035178817 | N/A             | N/A       | N/A          | Inc-NARF-1           |
| A_33_P3424872  | 1,40405 | 1,35418 | 1,035171641 | ENST00000612433 | 54490     | N/A          | UGT2B28              |
| A_21_P0004391  | 1,56698 | 1,51712 | 1,035164466 | N/A             | N/A       | N/A          | Inc-CTC-236F12.4.1-1 |
| A_21_P0009583  | 1,40617 | 1,35631 | 1,035164466 | N/A             | N/A       | N/A          | Inc-ZNF516-10        |
| A_22_P00010425 | 1,56714 | 1,51728 | 1,035164466 | ENST00000520162 | N/A       | N/A          | N/A                  |
| A_22_P00002002 | 1,57489 | 1,52504 | 1,035157291 | N/A             | N/A       | N/A          | Inc-BCL9-2           |
| A_21_P0014895  | 1,74591 | 1,69606 | 1,035157291 | N/A             | N/A       | N/A          | N/A                  |
| A_23_P31725    | 1,44474 | 1,39489 | 1,035157291 | ENST00000526097 | 640       | NM_001715    | BLK                  |
| A_33_P3212954  | 1,60386 | 1,55402 | 1,035150116 | N/A             | N/A       | N/A          | N/A                  |
| A_21_P0013171  | 1,42454 | 1,3747  | 1,035150116 | ENST00000447999 | N/A       | N/A          | N/A                  |
| A_21_P0001243  | 1,56885 | 1,51902 | 1,035142941 | ENST00000442382 | N/A       | N/A          | N/A                  |
| A_33_P3338550  | 1,51645 | 1,46662 | 1,035142941 | ENST00000525429 | N/A       | N/A          | N/A                  |
| A_22_P00008267 | 1,40488 | 1,35505 | 1,035142941 | ENST00000506305 | N/A       | N/A          | N/A                  |
| A_24_P261760   | 1,40525 | 1,35543 | 1,035135766 | ENST00000356986 | 10219     | NM_005810    | KLRG1                |
| A_22_P00005897 | 1,62655 | 1,57673 | 1,035135766 | N/A             | N/A       | N/A          | Inc-ETNK1-5          |

|                |         |         |             |                 |           |              |                |
|----------------|---------|---------|-------------|-----------------|-----------|--------------|----------------|
| A_22_P00011574 | 1,5018  | 1,45198 | 1,035135766 | ENST00000514855 | N/A       | N/A          | N/A            |
| A_33_P3219095  | 1,70149 | 1,65167 | 1,035135766 | ENST00000579458 | 728606    | NR_024259    | PCAT18         |
| A_24_P179467   | 1,41014 | 1,36032 | 1,035135766 | ENST00000221742 | 6511      | NM_005071    | SLC1A6         |
| A_23_P352648   | 1,68828 | 1,63847 | 1,035128591 | ENST00000580125 | N/A       | BC008091     | N/A            |
| A_33_P3332362  | 1,70594 | 1,65613 | 1,035128591 | ENST00000529952 | 5452      | NM_001207026 | POU2F2         |
| A_22_P00000950 | 1,42893 | 1,37913 | 1,035121416 | ENST00000455525 | 101927946 | XR_242710    | LOC101927946   |
| A_22_P00017294 | 3,59131 | 3,54151 | 1,035121416 | ENST00000581677 | N/A       | AK097544     | N/A            |
| A_22_P00008956 | 1,59215 | 1,54236 | 1,035114241 | N/A             | 100505782 | NR_040111    | LOC100505782   |
| A_33_P3310039  | 1,71513 | 1,66535 | 1,035107066 | ENST00000573360 | 780776    | NM_001079512 | TVP23A         |
| A_33_P3821313  | 1,52955 | 1,47979 | 1,035092716 | ENST00000505443 | 285577    | NR_033898    | LINC01019      |
| A_21_P0008658  | 1,4525  | 1,40274 | 1,035092716 | N/A             | N/A       | N/A          | Inc-SH2D7-2    |
| A_22_P00009647 | 1,61925 | 1,56949 | 1,035092716 | ENST00000515077 | N/A       | N/A          | N/A            |
| A_22_P00003571 | 1,46576 | 1,41601 | 1,035085542 | N/A             | N/A       | N/A          | Inc-CCT5-6     |
| A_22_P00010673 | 1,65997 | 1,61022 | 1,035085542 | N/A             | N/A       | N/A          | Inc-NEURL1B-1  |
| A_22_P00009352 | 1,42146 | 1,37172 | 1,035078367 | ENST00000457989 | N/A       | N/A          | N/A            |
| A_33_P3359878  | 1,69344 | 1,64371 | 1,035071192 | N/A             | 100132014 | AK092445     | LOC100132014   |
| A_22_P00011276 | 1,41832 | 1,36859 | 1,035071192 | ENST00000528915 | N/A       | DB078115     | N/A            |
| A_33_P3225022  | 1,61489 | 1,56516 | 1,035071192 | ENST00000397748 | 10841     | NM_206965    | FTCD           |
| A_21_P0006529  | 1,41908 | 1,36935 | 1,035071192 | N/A             | N/A       | N/A          | Inc-RPS6KA3-1  |
| A_33_P3351904  | 1,51328 | 1,46356 | 1,035064018 | ENST00000616325 | 56138     | NM_031861    | PCDHA11        |
| A_33_P3408743  | 1,48185 | 1,43213 | 1,035064018 | ENST00000371790 | 387700    | NM_213606    | SLC16A12       |
| A_22_P00015251 | 7,14356 | 7,09386 | 1,035049669 | N/A             | N/A       | GD144209     | Inc-SPAG5-1    |
| A_24_P941736   | 1,40184 | 1,35215 | 1,035042495 | ENST00000258873 | 23205     | AB014531     | ACSBG1         |
| A_22_P00024600 | 1,57553 | 1,52584 | 1,035042495 | N/A             | 100873984 | NR_046582    | CHRM3-AS1      |
| A_21_P0007275  | 1,65452 | 1,60484 | 1,03503532  | N/A             | 101928774 | XR_424277    | LOC101928774   |
| A_21_P0010208  | 1,47689 | 1,42722 | 1,035028146 | ENST00000420273 | N/A       | N/A          | N/A            |
| A_21_P0011570  | 1,56537 | 1,5157  | 1,035028146 | N/A             | N/A       | N/A          | XLOC_I2_005997 |
| A_24_P88266    | 1,6576  | 1,60793 | 1,035028146 | ENST00000435016 | 5629      | NM_002763    | PROX1          |
| A_23_P2814     | 3,81217 | 3,7625  | 1,035028146 | ENST00000379826 | 4093      | NM_005905    | SMAD9          |
| A_21_P0010035  | 1,69867 | 1,64901 | 1,035020972 | N/A             | N/A       | N/A          | Inc-BLCAP-3    |
| A_22_P00012601 | 1,40867 | 1,35902 | 1,035013797 | ENST00000427161 | N/A       | N/A          | N/A            |
| A_22_P00011746 | 1,43492 | 1,38527 | 1,035013797 | ENST00000417932 | N/A       | N/A          | N/A            |
| A_33_P3251663  | 1,4446  | 1,39495 | 1,035013797 | ENST00000449024 | N/A       | XM_006711717 | N/A            |

|                |         |         |             |                 |           |              |                |
|----------------|---------|---------|-------------|-----------------|-----------|--------------|----------------|
| A_33_P3214412  | 1,48001 | 1,43037 | 1,035006623 | ENST00000319760 | 81318     | NM_001005272 | OR4A5          |
| A_21_P0008504  | 1,7132  | 1,66356 | 1,035006623 | N/A             | 102725283 | XR_424482    | LOC102725283   |
| A_23_P12392    | 1,40098 | 1,35135 | 1,034999449 | ENST00000367364 | 5788      | NR_052021    | PTPRC          |
| A_21_P0003608  | 1,65437 | 1,60474 | 1,034999449 | N/A             | N/A       | N/A          | Inc-GUF1-2     |
| A_22_P00014249 | 4,13237 | 4,08274 | 1,034999449 | ENST00000561101 | N/A       | N/A          | N/A            |
| A_33_P3293362  | 5,26735 | 5,21773 | 1,034992275 | ENST00000472269 | 64757     | NM_022746    | mar-01         |
| A_22_P00019839 | 1,49004 | 1,44042 | 1,034992275 | N/A             | N/A       | N/A          | Inc-ADCY2-4    |
| A_22_P00011904 | 1,40433 | 1,35471 | 1,034992275 | ENST00000503685 | N/A       | N/A          | N/A            |
| A_24_P220822   | 1,48864 | 1,43902 | 1,034992275 | ENST00000295268 | 285555    | NM_174952    | STPG2          |
| A_23_P21092    | 1,57637 | 1,52677 | 1,034977927 | ENST00000467817 | 794       | NM_001740    | CALB2          |
| A_21_P0008803  | 1,5736  | 1,524   | 1,034977927 | N/A             | N/A       | N/A          | Inc-CHSY1-1    |
| A_21_P0009974  | 1,58004 | 1,53044 | 1,034977927 | N/A             | N/A       | N/A          | Inc-MOCS3-2    |
| A_23_P366376   | 1,42747 | 1,37787 | 1,034977927 | ENST00000542931 | 6997      | NM_003212    | TDGF1          |
| A_21_P0011243  | 1,42699 | 1,37739 | 1,034977927 | N/A             | N/A       | N/A          | XLOC_I2_004192 |
| A_21_P0004910  | 1,58091 | 1,53132 | 1,034970753 | N/A             | N/A       | N/A          | Inc-MANEA-5    |
| A_22_P00012875 | 1,74919 | 1,6996  | 1,034970753 | N/A             | N/A       | N/A          | Inc-RBFOX1-1   |
| A_22_P00024940 | 1,56503 | 1,51544 | 1,034970753 | ENST00000556060 | N/A       | XR_424337    | N/A            |
| A_33_P3350086  | 1,56657 | 1,51698 | 1,034970753 | ENST00000318021 | 391195    | NM_001004695 | OR2T33         |
| A_22_P00004133 | 1,49941 | 1,44982 | 1,034970753 | ENST00000522661 | N/A       | N/A          | N/A            |
| A_33_P3244793  | 1,40148 | 1,3519  | 1,03496358  | ENST00000282538 | 339896    | NM_207359    | GADL1          |
| A_19_P00322291 | 1,6176  | 1,56803 | 1,034956406 | ENST00000598996 | 400550    | NR_036444    | FENDRR         |
| A_22_P00007209 | 1,42115 | 1,37159 | 1,034949232 | N/A             | N/A       | N/A          | Inc-GPC5-2     |
| A_21_P0009471  | 1,52798 | 1,47843 | 1,034942058 | N/A             | N/A       | N/A          | Inc-DSG1-4     |
| A_21_P0002499  | 1,73193 | 1,68238 | 1,034942058 | N/A             | N/A       | N/A          | Inc-MKI67IP-2  |
| A_21_P0010608  | 1,51675 | 1,46721 | 1,034934885 | N/A             | N/A       | N/A          | XLOC_I2_000866 |
| A_22_P00017238 | 1,69671 | 1,64718 | 1,034927711 | N/A             | N/A       | N/A          | Inc-UMODL1-3   |
| A_21_P0013005  | 7,74464 | 7,69511 | 1,034927711 | ENST00000512971 | 4682      | NM_001278506 | NUBP1          |
| A_21_P0003163  | 1,4312  | 1,38167 | 1,034927711 | N/A             | N/A       | N/A          | Inc-RABL3-2    |
| A_22_P00002144 | 1,65501 | 1,60549 | 1,034920537 | N/A             | N/A       | N/A          | Inc-BRCA2-1    |
| A_22_P00002975 | 1,58777 | 1,53826 | 1,034913364 | ENST00000434356 | N/A       | N/A          | N/A            |
| A_22_P00009429 | 1,86766 | 1,81815 | 1,034913364 | ENST00000458443 | N/A       | N/A          | N/A            |
| A_23_P323685   | 10,5523 | 10,5028 | 1,034906191 | ENST00000377727 | 8365      | NM_003543    | HIST1H4H       |
| A_33_P3369371  | 1,68739 | 1,63789 | 1,034906191 | ENST00000388825 | 2878      | NM_002084    | GPX3           |



|                |         |         |             |                 |           |              |                       |
|----------------|---------|---------|-------------|-----------------|-----------|--------------|-----------------------|
| A_22_P00019448 | 1,40942 | 1,35993 | 1,034899017 | ENST00000508853 | 101929745 | XR_249762    | LOC101929745          |
| A_23_P52480    | 3,97493 | 3,92545 | 1,034891844 | ENST00000285979 | 1562      | NM_000772    | CYP2C18               |
| A_21_P0014559  | 1,51116 | 1,46212 | 1,034891844 | N/A             | N/A       | N/A          | Inc-GABRB3-3          |
| A_33_P3416291  | 1,54898 | 1,4995  | 1,034891844 | ENST00000579455 | 644041    | NM_001174123 | C18orf63              |
| A_21_P0007587  | 1,58206 | 1,53258 | 1,034891844 | N/A             | N/A       | N/A          | Inc-ZDHHHC17-3        |
| A_33_P3242438  | 1,9466  | 1,89713 | 1,03488467  | ENST00000329447 | 389151    | NM_001013650 | PRR23B                |
| A_22_P00013064 | 1,56837 | 1,5189  | 1,03488467  | N/A             | N/A       | N/A          | Inc-RHD-1             |
| A_21_P0000726  | 1,42286 | 1,3734  | 1,034877497 | ENST00000441610 | 100506840 | NR_038215    | IQCF4                 |
| A_22_P00014544 | 3,61525 | 3,56579 | 1,034877497 | N/A             | 727993    | XR_244229    | LOC727993             |
| A_23_P378450   | 1,67113 | 1,62167 | 1,034877497 | ENST00000358469 | 125997    | NM_144614    | MBD3L2                |
| A_33_P3380917  | 1,41217 | 1,36271 | 1,034877497 | ENST00000504759 | N/A       | N/A          | N/A                   |
| A_23_P29057    | 1,55595 | 1,5065  | 1,034870324 | ENST00000609713 | 3763      | NM_002240    | KCNJ6                 |
| A_21_P0002410  | 1,41235 | 1,3629  | 1,034870324 | N/A             | N/A       | N/A          | Inc-HS1BP3-1          |
| A_22_P00025073 | 1,46963 | 1,42018 | 1,034870324 | ENST00000517706 | N/A       | CR739174     | N/A                   |
| A_24_P298723   | 1,60572 | 1,55627 | 1,034870324 | ENST00000622692 | 252951    | NR_001546    | TTY20                 |
| A_33_P3408643  | 1,72611 | 1,67669 | 1,034848805 | N/A             | N/A       | N/A          | N/A                   |
| A_22_P00001151 | 1,60663 | 1,55721 | 1,034848805 | ENST00000552975 | 100233209 | NR_026544    | PCED1B-AS1            |
| A_21_P0008764  | 1,56462 | 1,51521 | 1,034841632 | N/A             | N/A       | N/A          | Inc-RP11-210M15.2.1-3 |
| A_21_P0005456  | 3,25446 | 3,20505 | 1,034841632 | N/A             | N/A       | N/A          | Inc-WDR60-3           |
| A_24_P139901   | 5,30755 | 5,25816 | 1,034827286 | ENST00000409836 | 2995      | NM_002101    | GYPC                  |
| A_33_P3240098  | 1,64782 | 1,59843 | 1,034827286 | N/A             | N/A       | BC150587     | N/A                   |
| A_21_P0005287  | 1,41331 | 1,36392 | 1,034827286 | N/A             | N/A       | N/A          | Inc-DFNA5-2           |
| A_22_P00022022 | 1,40016 | 1,35077 | 1,034827286 | N/A             | N/A       | N/A          | Inc-EXTL1-1           |
| A_21_P0002279  | 1,75063 | 1,70124 | 1,034827286 | N/A             | N/A       | N/A          | Inc-GLI2-4            |
| A_21_P0005839  | 1,54594 | 1,49656 | 1,034820113 | N/A             | N/A       | N/A          | Inc-CA8-1             |
| A_22_P00002655 | 1,58623 | 1,53685 | 1,034820113 | ENST00000441033 | N/A       | N/A          | N/A                   |
| A_21_P0010082  | 1,41601 | 1,36664 | 1,03481294  | N/A             | N/A       | N/A          | Inc-SNRPB2-1          |
| A_33_P3276713  | 1,69036 | 1,641   | 1,034805767 | ENST00000453411 | 3082      | NM_001010931 | HGF                   |
| A_33_P3242119  | 1,62769 | 1,57833 | 1,034805767 | N/A             | N/A       | AK127029     | N/A                   |
| A_23_P203376   | 1,77119 | 1,72184 | 1,034798595 | N/A             | 64231     | NM_152852    | MS4A6A                |
| A_24_P404458   | 1,76503 | 1,71568 | 1,034798595 | ENST00000597889 | 27231     | NM_170678    | NMRK2                 |
| A_21_P0011422  | 1,70693 | 1,65758 | 1,034798595 | N/A             | N/A       | N/A          | XLOC_I2_005168        |
| A_22_P00021443 | 1,58897 | 1,53963 | 1,034791422 | ENST00000509370 | N/A       | N/A          | N/A                   |

|                |         |         |             |                 |           |              |                |
|----------------|---------|---------|-------------|-----------------|-----------|--------------|----------------|
| A_22_P00025407 | 1,4179  | 1,36856 | 1,034791422 | ENST00000415532 | N/A       | N/A          | N/A            |
| A_23_P38505    | 8,54388 | 8,49454 | 1,034791422 | ENST00000576153 | 58191     | NM_022059    | CXCL16         |
| A_22_P00010089 | 1,62854 | 1,57921 | 1,03478425  | N/A             | N/A       | N/A          | Inc-MPPED2-3   |
| A_22_P00008985 | 1,41955 | 1,37022 | 1,03478425  | ENST00000446322 | N/A       | BM772556     | N/A            |
| A_22_P00004039 | 1,70138 | 1,65205 | 1,03478425  | N/A             | N/A       | N/A          | Inc-CHRNA3-2   |
| A_22_P00016338 | 1,58639 | 1,53706 | 1,03478425  | ENST00000514840 | N/A       | N/A          | N/A            |
| A_22_P00016666 | 1,72542 | 1,6761  | 1,034777077 | N/A             | N/A       | BC037214     | Inc-TPGS2-1    |
| A_22_P00013237 | 1,61673 | 1,56741 | 1,034777077 | N/A             | N/A       | N/A          | Inc-ROBO2-5    |
| A_33_P3234814  | 1,54734 | 1,49803 | 1,034769904 | N/A             | N/A       | N/A          | N/A            |
| A_23_P218942   | 1,71994 | 1,67063 | 1,034769904 | ENST00000615316 | 56134     | NM_031883    | PCDHAC2        |
| A_22_P00025888 | 1,70855 | 1,65924 | 1,034769904 | ENST00000451275 | 7710      | NM_001085384 | ZNF154         |
| A_33_P3261468  | 1,56369 | 1,51439 | 1,034762732 | ENST00000361112 | 100506736 | NM_001195790 | SLFN12L        |
| A_23_P110253   | 1,60665 | 1,55736 | 1,03475556  | ENST00000288135 | 3815      | NM_000222    | KIT            |
| A_33_P3338634  | 1,64029 | 1,591   | 1,03475556  | ENST00000367019 | 255928    | NM_001256006 | SYT14          |
| A_21_P0014163  | 1,40976 | 1,36047 | 1,03475556  | N/A             | N/A       | N/A          | N/A            |
| A_22_P00005179 | 1,52399 | 1,47473 | 1,034734043 | N/A             | N/A       | N/A          | Inc-DIRC1-1    |
| A_33_P3375413  | 1,67683 | 1,62757 | 1,034734043 | N/A             | 100131719 | AK128441     | LOC100131719   |
| A_21_P0011061  | 1,56317 | 1,51391 | 1,034734043 | ENST00000554821 | N/A       | N/A          | N/A            |
| A_23_P217946   | 1,4217  | 1,37245 | 1,03472687  | ENST00000398809 | 64072     | NM_022124    | CDH23          |
| A_33_P3273399  | 8,08536 | 8,03611 | 1,03472687  | N/A             | N/A       | BU739610     | N/A            |
| A_22_P00015425 | 1,55438 | 1,50514 | 1,034719698 | N/A             | N/A       | BX116938     | Inc-SRY-2      |
| A_33_P3336715  | 1,42657 | 1,37733 | 1,034719698 | ENST00000274547 | 2561      | NM_021911    | GABRB2         |
| A_22_P00007102 | 1,48437 | 1,43513 | 1,034719698 | ENST00000553785 | 100506999 | XR_110241    | LOC100506999   |
| A_21_P0013276  | 1,67909 | 1,62985 | 1,034719698 | N/A             | N/A       | N/A          | XLOC_l2_013645 |
| A_22_P00012329 | 1,39974 | 1,35051 | 1,034712526 | N/A             | 102725390 | XR_424207    | LOC102725390   |
| A_32_P226786   | 9,22592 | 9,17669 | 1,034712526 | ENST00000418596 | 285172    | NM_173822    | FAM126B        |
| A_22_P00005405 | 1,47902 | 1,4298  | 1,034705354 | ENST00000583089 | N/A       | N/A          | N/A            |
| A_22_P00010199 | 2,37723 | 2,32801 | 1,034705354 | ENST00000438148 | N/A       | N/A          | N/A            |
| A_33_P3311795  | 1,57002 | 1,5208  | 1,034705354 | ENST00000528345 | 4602      | AJ616798     | MYB            |
| A_23_P407132   | 1,58345 | 1,53424 | 1,034698182 | ENST00000526519 | 84623     | NM_032531    | KIRREL3        |
| A_23_P4773     | 1,69049 | 1,64128 | 1,034698182 | ENST00000617636 | 10990     | NM_006840    | LILRB5         |
| A_21_P0005273  | 1,40541 | 1,3562  | 1,034698182 | ENST00000449903 | N/A       | N/A          | N/A            |
| A_22_P00000040 | 9,69264 | 9,64343 | 1,034698182 | N/A             | 100506311 | NR_038366    | HOTAIRM1       |

|                |         |         |             |                 |           |              |                      |
|----------------|---------|---------|-------------|-----------------|-----------|--------------|----------------------|
| A_21_P0010445  | 1,41252 | 1,36332 | 1,03469101  | N/A             | N/A       | N/A          | Inc-SCUBE1-1         |
| A_22_P00000230 | 1,44977 | 1,40057 | 1,03469101  | N/A             | N/A       | BC019862     | Inc-AC005609.1-2     |
| A_23_P92967    | 10,4744 | 10,4252 | 1,03469101  | ENST00000514553 | 4338      | NM_004531    | MOCS2                |
| A_23_P11507    | 10,687  | 10,6378 | 1,03469101  | ENST00000476275 | 26009     | NM_015534    | ZZZ3                 |
| A_22_P00021583 | 1,69478 | 1,6456  | 1,034676666 | N/A             | N/A       | N/A          | Inc-SMARCC2-2        |
| A_22_P00014517 | 1,40622 | 1,35705 | 1,034669495 | ENST00000442994 | 101926971 | NR_110382    | LINC01284            |
| A_22_P00021198 | 2,77261 | 2,72344 | 1,034669495 | N/A             | N/A       | BX404796     | Inc-GSDMD-2          |
| A_21_P0006844  | 1,60437 | 1,55521 | 1,034662323 | N/A             | N/A       | N/A          | Inc-MYO3A-1          |
| A_33_P3231486  | 1,56139 | 1,51223 | 1,034662323 | ENST00000595391 | N/A       | U22030       | N/A                  |
| A_21_P0010677  | 1,58057 | 1,53141 | 1,034662323 | N/A             | N/A       | N/A          | XLOC_I2_001359       |
| A_23_P210048   | 6,95832 | 6,90917 | 1,034655151 | ENST00000543185 | 9759      | NM_006037    | HDAC4                |
| A_21_P0009562  | 1,48856 | 1,43942 | 1,03464798  | ENST00000382897 | 642484    | XR_159014    | FLJ45743             |
| A_21_P0010406  | 1,73121 | 1,68208 | 1,034640808 | N/A             | N/A       | N/A          | Inc-CRYBA4-1         |
| A_22_P00024342 | 1,49861 | 1,44948 | 1,034640808 | ENST00000568279 | 101927580 | NR_110917    | LOC101927580         |
| A_23_P417173   | 1,42911 | 1,37999 | 1,034633636 | ENST00000252321 | 3741      | NM_002234    | KCNA5                |
| A_22_P00018731 | 1,61137 | 1,56225 | 1,034633636 | N/A             | N/A       | N/A          | Inc-ARL4A-2          |
| A_24_P129834   | 1,55713 | 1,50801 | 1,034633636 | ENST00000333850 | 121278    | NM_173353    | TPH2                 |
| A_21_P0003559  | 1,47656 | 1,42745 | 1,034626465 | N/A             | N/A       | N/A          | Inc-SH3BP2-1         |
| A_33_P3244872  | 10,1781 | 10,129  | 1,034619293 | ENST00000367607 | 9857      | NM_014810    | CEP350               |
| A_21_P0013358  | 1,771   | 1,7219  | 1,034619293 | N/A             | N/A       | N/A          | XLOC_I2_014057       |
| A_24_P307065   | 12,7192 | 12,6701 | 1,034619293 | ENST00000433309 | N/A       | N/A          | N/A                  |
| A_22_P00001320 | 14,9284 | 14,8793 | 1,034619293 | ENST00000622632 | 195977    | NM_001278688 | ANTXR1               |
| A_24_P135902   | 18,5444 | 18,4953 | 1,034619293 | ENST00000402069 | 6187      | NM_002952    | RPS2                 |
| A_33_P3242355  | 8,09566 | 8,04657 | 1,034612122 | ENST00000605518 | N/A       | BC027847     | N/A                  |
| A_21_P0001539  | 1,47438 | 1,42529 | 1,034612122 | N/A             | N/A       | N/A          | Inc-GBP5-2           |
| A_22_P00011123 | 1,40119 | 1,3521  | 1,034612122 | N/A             | 101928123 | XR_245780    | LOC101928123         |
| A_33_P3347872  | 1,44125 | 1,39216 | 1,034612122 | ENST00000453654 | 100128727 | AK124397     | LOC100128727         |
| A_22_P00007331 | 1,49467 | 1,44558 | 1,034612122 | ENST00000514239 | N/A       | N/A          | N/A                  |
| A_22_P00022620 | 1,6296  | 1,58052 | 1,034604951 | N/A             | N/A       | N/A          | Inc-KIAA0319L-2      |
| A_22_P00001511 | 1,63726 | 1,58819 | 1,034597779 | ENST00000566929 | 101927875 | XR_248300    | LOC101927875         |
| A_33_P3346881  | 1,41447 | 1,36541 | 1,034590608 | N/A             | N/A       | N/A          | N/A                  |
| A_22_P00013330 | 1,49286 | 1,44381 | 1,034583437 | N/A             | N/A       | BX088883     | Inc-RP11-127H5.1.1-1 |
| A_22_P00017154 | 1,56221 | 1,51316 | 1,034583437 | ENST00000568962 | N/A       | N/A          | N/A                  |

|                |         |         |             |                 |           |              |                 |
|----------------|---------|---------|-------------|-----------------|-----------|--------------|-----------------|
| A_22_P00010714 | 1,59451 | 1,54547 | 1,034576266 | N/A             | 102724596 | NR_110883    | LOC102724596    |
| A_21_P0005922  | 1,71907 | 1,67003 | 1,034576266 | N/A             | N/A       | N/A          | Inc-C8orf74-3   |
| A_21_P0009040  | 1,61191 | 1,56288 | 1,034569095 | N/A             | N/A       | N/A          | Inc-CES5A-1     |
| A_22_P00007873 | 1,55929 | 1,51026 | 1,034569095 | ENST00000435802 | N/A       | N/A          | N/A             |
| A_22_P00011813 | 1,61517 | 1,56614 | 1,034569095 | ENST00000509950 | 101927207 | NR_110805    | LOC101927207    |
| A_33_P3248957  | 1,72435 | 1,67533 | 1,034561923 | N/A             | N/A       | XR_246724    | N/A             |
| A_32_P217140   | 1,71859 | 1,66957 | 1,034561923 | ENST00000404699 | 91464     | AK025181     | ISX             |
| A_23_P423237   | 1,49777 | 1,44875 | 1,034561923 | ENST00000218867 | 6445      | NM_000231    | SGCG            |
| A_33_P3361287  | 1,58785 | 1,53884 | 1,034554752 | N/A             | N/A       | N/A          | Inc-CDYL2-6     |
| A_22_P00014480 | 1,67454 | 1,62553 | 1,034554752 | ENST00000439796 | 53358     | NM_016848    | SHC3            |
| A_22_P00006775 | 1,52734 | 1,47834 | 1,034547582 | ENST00000556291 | N/A       | N/A          | N/A             |
| A_23_P32615    | 11,4127 | 11,3637 | 1,034547582 | ENST00000539616 | 4331      | NM_002431    | MNAT1           |
| A_21_P0001019  | 1,56352 | 1,51453 | 1,034540411 | ENST00000427145 | 101928009 | N/A          | LOC101928009    |
| A_22_P00016558 | 1,62339 | 1,5744  | 1,034540411 | N/A             | N/A       | BI828027     | Inc-TNFRSF10B-2 |
| A_33_P3211862  | 1,50229 | 1,4533  | 1,034540411 | N/A             | N/A       | N/A          | N/A             |
| A_33_P3215843  | 1,55987 | 1,51089 | 1,03453324  | ENST00000601349 | 354       | NM_001030047 | KLK3            |
| A_22_P00008332 | 1,58295 | 1,53397 | 1,03453324  | ENST00000427339 | N/A       | N/A          | N/A             |
| A_33_P3235631  | 1,58062 | 1,53164 | 1,03453324  | ENST00000390244 | N/A       | JN111512     | N/A             |
| A_23_P145669   | 1,64659 | 1,59761 | 1,03453324  | ENST00000252723 | 2056      | NM_000799    | EPO             |
| A_33_P3340352  | 1,5618  | 1,51283 | 1,034526069 | ENST00000506036 | N/A       | N/A          | N/A             |
| A_23_P87104    | 1,42183 | 1,37286 | 1,034526069 | ENST00000313264 | 219464    | NM_001004746 | OR5T2           |
| A_21_P0011377  | 1,41947 | 1,37051 | 1,034518898 | N/A             | N/A       | N/A          | XLOC_I2_004950  |
| A_22_P00013534 | 1,51259 | 1,46364 | 1,034511727 | ENST00000519451 | N/A       | N/A          | N/A             |
| A_23_P100991   | 1,44213 | 1,39318 | 1,034511727 | ENST00000246646 | 8687      | NM_006771    | KRT38           |
| A_22_P00019925 | 1,56149 | 1,51254 | 1,034511727 | N/A             | N/A       | N/A          | Inc-MPPED2-3    |
| A_21_P0000432  | 1,67457 | 1,62562 | 1,034511727 | N/A             | 767564    | NR_003232    | SNORD113-4      |
| A_33_P3317670  | 1,68426 | 1,63532 | 1,034504557 | ENST00000255030 | 1401      | NM_000567    | CRP             |
| A_21_P0012432  | 1,43331 | 1,38437 | 1,034504557 | ENST00000455623 | 101927347 | N/A          | GRM7-AS3        |
| A_22_P00023820 | 1,58324 | 1,53431 | 1,034497386 | ENST00000419620 | N/A       | N/A          | N/A             |
| A_24_P264943   | 2,38621 | 2,33729 | 1,034490216 | ENST00000222271 | 1311      | NM_000095    | COMP            |
| A_22_P00021116 | 1,49167 | 1,44275 | 1,034490216 | N/A             | N/A       | AK097337     | Inc-MORF4L1-2   |
| A_24_P492083   | 1,61064 | 1,56173 | 1,034483045 | ENST00000557121 | 101929422 | XR_245820    | LOC101929422    |
| A_33_P3282454  | 1,40068 | 1,35177 | 1,034483045 | ENST00000558252 | 6557      | NM_000338    | SLC12A1         |

|                |         |         |             |                 |           |              |                 |
|----------------|---------|---------|-------------|-----------------|-----------|--------------|-----------------|
| A_21_P0007471  | 1,65178 | 1,60287 | 1,034483045 | ENST00000527533 | N/A       | N/A          | N/A             |
| A_22_P00017421 | 1,69998 | 1,65108 | 1,034475875 | N/A             | 100874037 | NR_046752    | CADM2-AS2       |
| A_22_P00024323 | 1,47095 | 1,42205 | 1,034475875 | N/A             | N/A       | N/A          | Inc-C5orf42-3   |
| A_23_P6303     | 14,9918 | 14,9429 | 1,034475875 | ENST00000624739 | 7307      | NM_001025204 | U2AF1           |
| A_22_P00007468 | 8,19004 | 8,14115 | 1,034468704 | N/A             | 100128750 | NR_046205    | RBPM5-AS1       |
| A_22_P00007028 | 1,56391 | 1,51503 | 1,034461534 | N/A             | N/A       | N/A          | Inc-GJA1-1      |
| A_22_P00006271 | 3,21305 | 3,16418 | 1,034454364 | N/A             | 103021296 | NR_110983    | LOC103021296    |
| A_22_P00011446 | 1,56891 | 1,52004 | 1,034454364 | N/A             | N/A       | N/A          | Inc-PANK3-8     |
| A_22_P00010314 | 1,41122 | 1,36236 | 1,034447193 | N/A             | N/A       | AK127609     | Inc-MUC20-3     |
| A_33_P3336427  | 1,57045 | 1,52161 | 1,034432853 | N/A             | N/A       | N/A          | N/A             |
| A_21_P0002674  | 5,49296 | 5,44413 | 1,034425683 | ENST00000457336 | 400999    | NR_033871    | FLJ42351        |
| A_21_P0013294  | 1,40838 | 1,35956 | 1,034418513 | ENST00000433356 | N/A       | N/A          | N/A             |
| A_22_P00021085 | 1,56738 | 1,51856 | 1,034418513 | N/A             | N/A       | N/A          | Inc-KLHL32-1    |
| A_22_P00016300 | 1,59416 | 1,54534 | 1,034418513 | ENST00000544419 | N/A       | BX099693     | N/A             |
| A_22_P00001609 | 1,39864 | 1,34984 | 1,034404173 | ENST00000562480 | N/A       | BC039335     | N/A             |
| A_22_P00015028 | 1,69003 | 1,64123 | 1,034404173 | ENST00000564380 | N/A       | BC030212     | N/A             |
| A_33_P3379061  | 1,42397 | 1,37517 | 1,034404173 | ENST00000375851 | 286223    | NM_001001938 | C9orf47         |
| A_21_P0002338  | 1,58879 | 1,53999 | 1,034404173 | N/A             | N/A       | N/A          | Inc-NRP2-1      |
| A_24_P167654   | 1,73919 | 1,6904  | 1,034397003 | ENST00000357887 | 6547      | NM_183002    | SLC8A3          |
| A_24_P279870   | 1,56996 | 1,52118 | 1,034389833 | ENST00000217305 | 5173      | NM_024411    | PDYN            |
| A_22_P00017809 | 1,41616 | 1,36739 | 1,034382663 | N/A             | N/A       | N/A          | Inc-ZBTB32-1    |
| A_21_P0005434  | 1,69091 | 1,64215 | 1,034375493 | ENST00000573229 | 286023    | NR_046323    | FLJ40288        |
| A_21_P0006847  | 1,537   | 1,48825 | 1,034368324 | N/A             | N/A       | N/A          | Inc-C10orf126-2 |
| A_22_P00008462 | 1,64358 | 1,59484 | 1,034361154 | N/A             | N/A       | BI827769     | Inc-KBTBD3-1    |
| A_21_P0004327  | 1,43074 | 1,382   | 1,034361154 | N/A             | N/A       | N/A          | Inc-MAT2B-3     |
| A_21_P0004577  | 1,45008 | 1,40135 | 1,034353984 | N/A             | N/A       | N/A          | Inc-EBF1-1      |
| A_21_P0002161  | 1,41471 | 1,36598 | 1,034353984 | N/A             | N/A       | N/A          | Inc-SOX11-4     |
| A_22_P00005467 | 1,48257 | 1,43385 | 1,034346815 | N/A             | 101929590 | NR_120666    | NRG3-AS1        |
| A_32_P65533    | 2,45572 | 2,407   | 1,034346815 | ENST00000409806 | 340152    | NM_207360    | ZC3H12D         |
| A_21_P0014794  | 1,70089 | 1,65218 | 1,034339645 | N/A             | N/A       | N/A          | N/A             |
| A_22_P00025861 | 1,49768 | 1,44897 | 1,034339645 | N/A             | N/A       | N/A          | Inc-EPG5-2      |
| A_21_P0002430  | 1,61206 | 1,56335 | 1,034339645 | N/A             | N/A       | N/A          | Inc-HAAO-1      |
| A_22_P00007901 | 1,74098 | 1,69227 | 1,034339645 | ENST00000557778 | N/A       | BG951912     | N/A             |

|                |         |         |             |                 |           |              |                       |
|----------------|---------|---------|-------------|-----------------|-----------|--------------|-----------------------|
| A_21_P0005687  | 1,44402 | 1,39533 | 1,034325306 | N/A             | N/A       | N/A          | Inc-RP11-150O12.5.1-1 |
| A_21_P0001501  | 1,42254 | 1,37385 | 1,034325306 | N/A             | N/A       | N/A          | Inc-DMRTA2-3          |
| A_22_P00007088 | 3,38901 | 3,34033 | 1,034318137 | N/A             | N/A       | AK098731     | Inc-GLP2R-1           |
| A_21_P0014680  | 1,6561  | 1,60742 | 1,034318137 | N/A             | N/A       | N/A          | N/A                   |
| A_22_P00010792 | 1,61571 | 1,56704 | 1,034310968 | N/A             | N/A       | N/A          | Inc-NLRC4-1           |
| A_33_P3270354  | 1,73522 | 1,68655 | 1,034310968 | ENST00000418789 | N/A       | N/A          | N/A                   |
| A_33_P3832341  | 1,58393 | 1,53527 | 1,034303798 | N/A             | 677770    | BU955376     | SCARNA22              |
| A_21_P0004056  | 1,41082 | 1,36217 | 1,034296629 | ENST00000510004 | N/A       | N/A          | N/A                   |
| A_21_P0006764  | 1,41125 | 1,3626  | 1,034296629 | ENST00000449272 | N/A       | N/A          | N/A                   |
| A_33_P6473819  | 1,5652  | 1,51656 | 1,03428946  | ENST00000427918 | 101927195 | NR_120413    | LINC00382             |
| A_22_P00010937 | 1,58799 | 1,53935 | 1,03428946  | ENST00000558885 | N/A       | N/A          | N/A                   |
| A_23_P95536    | 1,57184 | 1,52321 | 1,034282291 | ENST00000514159 | 11086     | NM_014269    | ADAM29                |
| A_33_P3220678  | 1,63416 | 1,58553 | 1,034282291 | N/A             | N/A       | N/A          | N/A                   |
| A_21_P0001071  | 1,51372 | 1,46509 | 1,034282291 | N/A             | N/A       | N/A          | Inc-COG2-1            |
| A_33_P3397165  | 1,42484 | 1,37622 | 1,034275122 | N/A             | N/A       | DB452078     | Inc-ATP6VOD2-1        |
| A_21_P0002095  | 1,54213 | 1,49351 | 1,034275122 | ENST00000432474 | N/A       | N/A          | N/A                   |
| A_21_P0003323  | 1,40964 | 1,36102 | 1,034275122 | ENST00000499082 | 101927074 | NR_104143    | LINC00682             |
| A_24_P122921   | 9,85969 | 9,81108 | 1,034267953 | ENST00000622509 | 10018     | NM_138621    | BCL2L11               |
| A_32_P491499   | 1,49487 | 1,44626 | 1,034267953 | ENST00000407635 | 285191    | XR_249328    | LOC285191             |
| A_21_P0005771  | 1,55767 | 1,50907 | 1,034260784 | N/A             | N/A       | N/A          | Inc-CHRAC1-1          |
| A_21_P0009438  | 1,41232 | 1,36372 | 1,034260784 | N/A             | N/A       | N/A          | Inc-NDC80-3           |
| A_23_P212119   | 1,77006 | 1,72147 | 1,034253615 | ENST00000339732 | 117248    | NM_054110    | GALNT15               |
| A_22_P00010492 | 1,6545  | 1,60591 | 1,034253615 | ENST00000552230 | N/A       | N/A          | N/A                   |
| A_21_P0004907  | 1,49677 | 1,44819 | 1,034246446 | N/A             | N/A       | N/A          | Inc-GJA10-5           |
| A_23_P350512   | 1,41744 | 1,36887 | 1,034239277 | ENST00000368676 | 8038      | NM_021641    | ADAM12                |
| A_22_P00008075 | 1,64821 | 1,59964 | 1,034239277 | N/A             | N/A       | CN268206     | Inc-IKZF1-2           |
| A_33_P3403560  | 1,40117 | 1,35261 | 1,034232108 | ENST00000612209 | 284546    | NM_001136508 | C1orf185              |
| A_22_P00021527 | 1,58591 | 1,53736 | 1,03422494  | ENST00000446370 | N/A       | N/A          | N/A                   |
| A_21_P0010442  | 3,5256  | 3,47705 | 1,03422494  | N/A             | N/A       | N/A          | Inc-PDGF1-1           |
| A_23_P73809    | 1,61577 | 1,56723 | 1,034217771 | ENST00000538422 | 57631     | NM_020871    | LRCH2                 |
| A_21_P0008184  | 1,53908 | 1,49055 | 1,034210602 | N/A             | N/A       | N/A          | Inc-RNF219-1          |
| A_23_P53039    | 4,13526 | 4,08673 | 1,034210602 | ENST00000280704 | 3948      | NM_002301    | LDHC                  |
| A_21_P0003994  | 1,68264 | 1,63412 | 1,034203434 | ENST00000508829 | N/A       | N/A          | N/A                   |

|                |         |         |             |                 |           |              |                  |
|----------------|---------|---------|-------------|-----------------|-----------|--------------|------------------|
| A_23_P153986   | 1,61299 | 1,56447 | 1,034203434 | ENST00000295101 | 3760      | NM_002239    | KCNJ3            |
| A_22_P00016120 | 1,41098 | 1,36246 | 1,034203434 | ENST00000511219 | N/A       | N/A          | N/A              |
| A_23_P120982   | 1,41654 | 1,36802 | 1,034203434 | ENST00000253255 | 10343     | NM_006071    | PKDREJ           |
| A_22_P00014561 | 5,05944 | 5,01093 | 1,034196265 | N/A             | N/A       | BU154835     | Inc-SIX6-1       |
| A_22_P00009049 | 1,48006 | 1,43155 | 1,034196265 | ENST00000366820 | 7044      | NM_003240    | LEFTY2           |
| A_21_P0004957  | 1,4193  | 1,3708  | 1,034189097 | N/A             | N/A       | N/A          | Inc-AL590867.1-2 |
| A_21_P0010616  | 1,62496 | 1,57646 | 1,034189097 | ENST00000563752 | N/A       | N/A          | N/A              |
| A_21_P0013507  | 1,692   | 1,6435  | 1,034189097 | ENST00000522393 | N/A       | N/A          | N/A              |
| A_22_P00015367 | 1,45735 | 1,40885 | 1,034189097 | ENST00000557521 | N/A       | N/A          | N/A              |
| A_33_P3397433  | 5,40397 | 5,35548 | 1,034181928 | N/A             | N/A       | N/A          | N/A              |
| A_23_P43369    | 1,58743 | 1,53894 | 1,034181928 | ENST00000474403 | 27240     | NM_014450    | SIT1             |
| A_22_P00018492 | 1,76365 | 1,71516 | 1,034181928 | N/A             | N/A       | N/A          | Inc-CHAD-3       |
| A_21_P0014735  | 1,48538 | 1,43689 | 1,034181928 | N/A             | N/A       | XR_113120    | N/A              |
| A_33_P3277497  | 1,72658 | 1,6781  | 1,03417476  | N/A             | 100131508 | AF130064     | LOC100131508     |
| A_22_P00021165 | 1,42826 | 1,37978 | 1,03417476  | ENST00000444158 | 101927914 | N/A          | LOC101927914     |
| A_33_P3324904  | 2,45341 | 2,40493 | 1,03417476  | N/A             | N/A       | N/A          | N/A              |
| A_24_P673333   | 1,46896 | 1,42048 | 1,03417476  | ENST00000622561 | 6007      | NM_016124    | RHD              |
| A_23_P49657    | 1,43264 | 1,38417 | 1,034167592 | ENST00000226207 | 4619      | NM_005963    | MYH1             |
| A_33_P3351879  | 1,41284 | 1,36438 | 1,034160423 | ENST00000563759 | N/A       | XM_001721827 | N/A              |
| A_33_P3301499  | 1,56027 | 1,51181 | 1,034160423 | ENST00000494582 | 677779    | NR_026767    | LINC00488        |
| A_22_P00018222 | 7,39724 | 7,34879 | 1,034153255 | ENST00000456532 | 401585    | NR_125365    | LOC401585        |
| A_22_P00023761 | 1,42966 | 1,38122 | 1,034146087 | ENST00000491567 | N/A       | CR741135     | N/A              |
| A_33_P3595369  | 1,53127 | 1,48283 | 1,034146087 | ENST00000479725 | 5995      | NM_002921    | RGR              |
| A_33_P3370454  | 1,6273  | 1,57887 | 1,034138919 | ENST00000344638 | 245911    | NM_001002035 | DEFB108B         |
| A_23_P64825    | 1,42351 | 1,37508 | 1,034138919 | ENST00000257867 | 90070     | NM_033277    | LACRT            |
| A_22_P00022731 | 1,56057 | 1,51214 | 1,034138919 | N/A             | N/A       | BC036308     | Inc-ADC-1        |
| A_21_P0002406  | 1,64571 | 1,59728 | 1,034138919 | N/A             | N/A       | N/A          | Inc-NBAS-4       |
| A_33_P3384902  | 1,56093 | 1,5125  | 1,034138919 | ENST00000327930 | 390260    | NM_001005188 | OR6X1            |
| A_21_P0012542  | 1,58605 | 1,53763 | 1,034131751 | ENST00000464271 | 285286    | NR_104116    | LINC00877        |
| A_33_P3264193  | 3,39038 | 3,34197 | 1,034124583 | ENST00000299459 | 120776    | NM_003700    | OR2D2            |
| A_21_P0009590  | 10,1355 | 10,0871 | 1,034117415 | N/A             | N/A       | N/A          | Inc-MBP-1        |
| A_23_P428382   | 10,622  | 10,5736 | 1,034117415 | ENST00000487769 | 54812     | NM_203437    | AFTPH            |
| A_21_P0005477  | 6,55455 | 6,50617 | 1,034103079 | N/A             | N/A       | N/A          | Inc-NPVF-4       |

|                |         |         |             |                 |           |              |                      |
|----------------|---------|---------|-------------|-----------------|-----------|--------------|----------------------|
| A_32_P8156     | 1,42037 | 1,37199 | 1,034103079 | ENST00000330194 | 219621    | NM_173554    | C10orf107            |
| A_21_P0004679  | 1,55214 | 1,50378 | 1,034088743 | N/A             | N/A       | N/A          | Inc-WISP3-1          |
| A_21_P0007005  | 1,43797 | 1,38961 | 1,034088743 | N/A             | N/A       | N/A          | Inc-DYDC1-2          |
| A_21_P0002103  | 1,42653 | 1,37818 | 1,034081576 | ENST00000413403 | N/A       | N/A          | N/A                  |
| A_24_P479551   | 1,57704 | 1,52869 | 1,034081576 | ENST00000399816 | 134111    | NM_001145161 | UBE2QL1              |
| A_22_P00009471 | 1,41353 | 1,36519 | 1,034074408 | N/A             | 102724950 | XR_425240    | LOC102724950         |
| A_22_P00000779 | 1,52628 | 1,47794 | 1,034074408 | N/A             | N/A       | N/A          | Inc-ADD3-3           |
| A_22_P00007138 | 1,40176 | 1,35342 | 1,034074408 | N/A             | 100505881 | NR_038346    | MAGI2-AS3            |
| A_22_P00014791 | 1,40885 | 1,36052 | 1,03406724  | ENST00000413290 | N/A       | N/A          | N/A                  |
| A_22_P00019083 | 1,65893 | 1,6106  | 1,03406724  | ENST00000569596 | 101929408 | XR_424648    | LOC101929408         |
| A_24_P6030     | 8,01985 | 7,97153 | 1,034060073 | ENST00000481710 | N/A       | XM_006723951 | N/A                  |
| A_22_P00020422 | 1,49816 | 1,44984 | 1,034060073 | ENST00000419801 | N/A       | N/A          | N/A                  |
| A_22_P00017658 | 1,70733 | 1,65902 | 1,034052905 | ENST00000524022 | N/A       | XR_247155    | N/A                  |
| A_33_P3239214  | 1,47727 | 1,42896 | 1,034052905 | ENST00000263321 | 7299      | NM_000372    | TYR                  |
| A_21_P0006088  | 1,45559 | 1,40728 | 1,034052905 | ENST00000427523 | 340515    | N/A          | LINC01501            |
| A_33_P3358104  | 1,97491 | 1,9266  | 1,034052905 | ENST00000392619 | 342510    | NM_181449    | CD300E               |
| A_23_P53557    | 12,7736 | 12,7253 | 1,034045738 | ENST00000228918 | 4055      | NM_002342    | LTBR                 |
| A_33_P3228533  | 1,75083 | 1,70253 | 1,034045738 | N/A             | N/A       | N/A          | N/A                  |
| A_23_P53288    | 15,3796 | 15,3313 | 1,034045738 | ENST00000553191 | 10330     | NM_014255    | CNPY2                |
| A_22_P00013781 | 1,41128 | 1,36299 | 1,03403857  | N/A             | 101929194 | N/A          | LOC101929194         |
| A_24_P261417   | 1,62212 | 1,57383 | 1,03403857  | ENST00000396505 | 27122     | NM_015881    | DKK3                 |
| A_21_P0000546  | 1,40721 | 1,35893 | 1,034031403 | N/A             | 100128023 | NR_027764    | DPPA2P3              |
| A_24_P943566   | 1,68688 | 1,6386  | 1,034031403 | ENST00000379350 | 221692    | AB051520     | PHACTR1              |
| A_33_P3214343  | 4,85979 | 4,81152 | 1,034024236 | N/A             | N/A       | N/A          | N/A                  |
| A_33_P3337921  | 1,61939 | 1,57112 | 1,034024236 | N/A             | 727944    | XR_109991    | LOC727944            |
| A_22_P00018935 | 1,40905 | 1,36078 | 1,034024236 | N/A             | 101930541 | XR_248776    | LOC101930541         |
| A_33_P3252695  | 1,49613 | 1,44787 | 1,034017068 | ENST00000307746 | 54360     | NM_018659    | CYTL1                |
| A_23_P311670   | 1,79663 | 1,74838 | 1,034009901 | ENST00000359253 | 256369    | NR_024184    | LINC00521            |
| A_33_P3280700  | 3,89226 | 3,84402 | 1,034002734 | ENST00000377411 | 80045     | NM_024980    | GPR157               |
| A_21_P0005381  | 1,40971 | 1,36147 | 1,034002734 | N/A             | N/A       | N/A          | Inc-POM121L12-3      |
| A_21_P0012346  | 1,63008 | 1,58184 | 1,034002734 | ENST00000411581 | N/A       | XR_426473    | N/A                  |
| A_22_P00013655 | 1,39746 | 1,34923 | 1,033995567 | N/A             | N/A       | N/A          | Inc-RP11-67704.1.1-2 |
| A_33_P3302393  | 8,65605 | 8,60783 | 1,0339884   | ENST00000258157 | 79786     | XR_243425    | KLHL36               |



|                |         |         |             |                 |           |              |                  |
|----------------|---------|---------|-------------|-----------------|-----------|--------------|------------------|
| A_33_P3275233  | 2,75469 | 2,70647 | 1,0339884   | N/A             | 100131792 | AK093561     | LOC100131792     |
| A_21_P0009767  | 1,40984 | 1,36162 | 1,0339884   | N/A             | N/A       | N/A          | Inc-AC022148.1-1 |
| A_22_P00015398 | 1,42947 | 1,38125 | 1,0339884   | N/A             | N/A       | N/A          | Inc-SRP68-1      |
| A_21_P0003292  | 1,40091 | 1,35269 | 1,0339884   | N/A             | 101929320 | XR_241526    | LOC101929320     |
| A_33_P3232871  | 1,74328 | 1,69506 | 1,0339884   | ENST00000380585 | 100288797 | NM_001167670 | TMEM239          |
| A_21_P0009677  | 1,50053 | 1,45232 | 1,033981233 | N/A             | N/A       | N/A          | Inc-TNFAIP8L1-1  |
| A_22_P00019231 | 1,60579 | 1,55759 | 1,033974066 | ENST00000454530 | N/A       | N/A          | N/A              |
| A_23_P349676   | 11,5649 | 11,5167 | 1,033974066 | ENST00000521871 | 150726    | NM_001080410 | FBXO41           |
| A_23_P80491    | 1,70097 | 1,65278 | 1,033966899 | ENST00000511956 | 5948      | NM_004164    | RBP2             |
| A_22_P00024343 | 1,42304 | 1,37486 | 1,033959732 | ENST00000423568 | N/A       | N/A          | N/A              |
| A_24_P600377   | 1,41438 | 1,3662  | 1,033959732 | ENST00000564719 | 100127206 | N/A          | KIAA1024L        |
| A_22_P00002043 | 1,56593 | 1,51775 | 1,033959732 | ENST00000544399 | N/A       | BX090893     | N/A              |
| A_22_P00021998 | 1,56679 | 1,51861 | 1,033959732 | N/A             | N/A       | CR738199     | Inc-MMP15-1      |
| A_21_P0012680  | 1,61482 | 1,56664 | 1,033959732 | N/A             | N/A       | N/A          | XLOC_I2_011272   |
| A_21_P0001554  | 1,53271 | 1,48454 | 1,033952565 | N/A             | N/A       | N/A          | Inc-DPYD-2       |
| A_22_P00001188 | 1,60985 | 1,56169 | 1,033945398 | N/A             | N/A       | N/A          | Inc-ANGPTL2-1    |
| A_33_P3245131  | 1,62292 | 1,57476 | 1,033945398 | ENST00000580869 | N/A       | N/A          | N/A              |
| A_33_P3222183  | 1,43034 | 1,38218 | 1,033945398 | ENST00000401478 | 56896     | NM_020134    | DPYSL5           |
| A_33_P3261222  | 1,39839 | 1,35025 | 1,033931065 | ENST00000180173 | 9108      | NM_004686    | MTMR7            |
| A_21_P0013028  | 1,4465  | 1,39837 | 1,033923898 | N/A             | N/A       | N/A          | XLOC_I2_012605   |
| A_21_P0014478  | 1,42942 | 1,38129 | 1,033923898 | N/A             | N/A       | N/A          | N/A              |
| A_22_P00008417 | 1,55336 | 1,50523 | 1,033923898 | ENST00000424592 | N/A       | N/A          | N/A              |
| A_22_P00022458 | 1,56457 | 1,51645 | 1,033916731 | ENST00000506392 | 101927059 | XR_246560    | LOC101927059     |
| A_33_P3237948  | 1,42776 | 1,37964 | 1,033916731 | ENST00000368806 | 126637    | NM_001008536 | TCHHL1           |
| A_21_P0003878  | 1,74708 | 1,69897 | 1,033909565 | N/A             | N/A       | N/A          | Inc-TRIML1-6     |
| A_19_P00806071 | 1,57983 | 1,53173 | 1,033902398 | ENST00000607539 | 101927533 | N/A          | LOC101927533     |
| A_22_P00022425 | 1,41008 | 1,36198 | 1,033902398 | N/A             | N/A       | N/A          | Inc-FGFBP1-1     |
| A_22_P00015484 | 1,49434 | 1,44624 | 1,033902398 | ENST00000424888 | N/A       | N/A          | N/A              |
| A_33_P3246198  | 1,46357 | 1,41548 | 1,033895232 | ENST00000329446 | 399814    | NM_001010912 | C10orf120        |
| A_22_P00018796 | 1,46041 | 1,41232 | 1,033895232 | N/A             | N/A       | BG208054     | Inc-PCM1-2       |
| A_22_P00017883 | 1,55759 | 1,5095  | 1,033895232 | N/A             | N/A       | N/A          | Inc-ZFAND2A-1    |
| A_21_P0001258  | 1,41345 | 1,36537 | 1,033888066 | ENST00000420522 | N/A       | N/A          | N/A              |
| A_21_P0014931  | 1,42301 | 1,37493 | 1,033888066 | N/A             | N/A       | N/A          | N/A              |

|                |         |         |             |                 |           |           |              |
|----------------|---------|---------|-------------|-----------------|-----------|-----------|--------------|
| A_21_P0009550  | 1,4765  | 1,42842 | 1,033888066 | N/A             | N/A       | N/A       | Inc-CELF4-6  |
| A_21_P0004049  | 1,53572 | 1,48764 | 1,033888066 | ENST00000509669 | N/A       | N/A       | N/A          |
| A_22_P00021245 | 1,44718 | 1,3991  | 1,033888066 | ENST00000519280 | N/A       | AA383451  | N/A          |
| A_32_P902957   | 1,4123  | 1,36423 | 1,033880899 | ENST00000282026 | 115761    | NM_138450 | ARL11        |
| A_23_P387656   | 1,75869 | 1,71062 | 1,033880899 | ENST00000374566 | 54566     | NM_019114 | EPB41L4B     |
| A_33_P3270295  | 1,45932 | 1,41125 | 1,033880899 | ENST00000373018 | 10817     | NM_006653 | FRS3         |
| A_21_P0006786  | 1,40813 | 1,36006 | 1,033880899 | ENST00000450669 | N/A       | N/A       | N/A          |
| A_33_P3413296  | 1,44065 | 1,39258 | 1,033880899 | ENST00000380805 | 2762      | AK057484  | GMDS         |
| A_23_P12620    | 8,71179 | 8,66373 | 1,033873733 | ENST00000371627 | 80351     | NM_025235 | TNKS2        |
| A_22_P00018263 | 1,55661 | 1,50855 | 1,033873733 | N/A             | N/A       | N/A       | Inc-ZNF736-1 |
| A_33_P3241891  | 1,50225 | 1,45419 | 1,033873733 | ENST00000377823 | 8029      | N/A       | CUBN         |
| A_22_P00021722 | 1,69107 | 1,64302 | 1,033866567 | N/A             | 100874195 | NR_109838 | DIAPH3-AS1   |
| A_21_P0011983  | 1,66033 | 1,61229 | 1,033859401 | ENST00000432711 | N/A       | N/A       | N/A          |
| A_21_P0004357  | 1,46489 | 1,41685 | 1,033859401 | N/A             | N/A       | N/A       | Inc-MED10-4  |
| A_22_P00004278 | 1,56608 | 1,51804 | 1,033859401 | N/A             | N/A       | AL710274  | Inc-CNN3-1   |
| A_24_P213478   | 1,43749 | 1,38946 | 1,033852234 | ENST00000343348 | 57556     | NM_020796 | SEMA6A       |
| A_22_P00017112 | 7,01943 | 6,97141 | 1,033845068 | ENST00000559752 | N/A       | N/A       | N/A          |
| A_23_P381351   | 2,09516 | 2,04714 | 1,033845068 | ENST00000610991 | 1442      | NM_001317 | CSH1         |
| A_21_P0006860  | 1,40699 | 1,35897 | 1,033845068 | N/A             | N/A       | N/A       | Inc-ZNF33A-4 |
| A_21_P0008465  | 1,4912  | 1,44318 | 1,033845068 | ENST00000555512 | 102724190 | XR_424532 | LOC102724190 |
| A_33_P3462955  | 1,65173 | 1,60371 | 1,033845068 | N/A             | 401490    | BC052949  | LOC401490    |
| A_21_P0002101  | 1,40042 | 1,3524  | 1,033845068 | ENST00000455174 | N/A       | N/A       | N/A          |
| A_33_P3221761  | 5,17742 | 5,1294  | 1,033845068 | ENST00000420124 | 9757      | NM_014727 | KMT2B        |
| A_22_P00024752 | 1,57091 | 1,5229  | 1,033837902 | ENST00000554725 | 100309464 | N/A       | OTX2-AS1     |
| A_21_P0000621  | 1,69285 | 1,64485 | 1,033830736 | ENST00000471719 | 100498859 | NR_034008 | LINC00881    |
| A_22_P00024055 | 1,60081 | 1,55281 | 1,033830736 | ENST00000421730 | 84668     | N/A       | FAM126A      |
| A_22_P00019559 | 1,58911 | 1,54111 | 1,033830736 | N/A             | N/A       | N/A       | Inc-CYR61-2  |
| A_21_P0007699  | 1,44116 | 1,39316 | 1,033830736 | N/A             | N/A       | N/A       | Inc-SYT10-3  |
| A_21_P0004742  | 1,44346 | 1,39546 | 1,033830736 | ENST00000456103 | N/A       | N/A       | N/A          |
| A_21_P0010586  | 1,68547 | 1,63747 | 1,033830736 | ENST00000366552 | 128025    | N/A       | WDR64        |
| A_33_P3863935  | 1,84647 | 1,79847 | 1,033830736 | ENST00000438248 | 142913    | N/A       | CFL1P1       |
| A_23_P35848    | 10,9164 | 10,8684 | 1,033830736 | ENST00000531236 | 55191     | NM_018161 | NADSYN1      |
| A_22_P00004314 | 1,63732 | 1,58933 | 1,03382357  | ENST00000435441 | N/A       | N/A       | N/A          |

|                |         |         |             |                 |           |              |              |
|----------------|---------|---------|-------------|-----------------|-----------|--------------|--------------|
| A_22_P00022090 | 1,93708 | 1,88909 | 1,03382357  | ENST00000440351 | N/A       | N/A          | N/A          |
| A_33_P3309911  | 5,82119 | 5,7732  | 1,03382357  | ENST00000621481 | 343068    | NM_001013407 | PRAMEF5      |
| A_19_P00812582 | 7,37634 | 7,32835 | 1,03382357  | N/A             | 55000     | NR_110492    | TUG1         |
| A_21_P0007789  | 1,56281 | 1,51482 | 1,03382357  | ENST00000544499 | 387895    | N/A          | LINC00944    |
| A_22_P00015422 | 1,43588 | 1,38789 | 1,03382357  | ENST00000430025 | N/A       | N/A          | N/A          |
| A_22_P00016858 | 6,29469 | 6,24671 | 1,033816404 | N/A             | N/A       | N/A          | Inc-TRPT1-1  |
| A_22_P00012753 | 6,14466 | 6,09668 | 1,033816404 | ENST00000606491 | N/A       | N/A          | N/A          |
| A_21_P0002220  | 1,40674 | 1,35877 | 1,033809239 | N/A             | 101927235 | XR_245007    | LOC101927235 |
| A_33_P3395400  | 1,58725 | 1,53928 | 1,033809239 | N/A             | 100130256 | XR_249242    | LOC100130256 |
| A_33_P3287383  | 1,41107 | 1,3631  | 1,033809239 | ENST00000366952 | 6582      | N/A          | SLC22A2      |
| A_21_P0001351  | 1,51792 | 1,46996 | 1,033802073 | N/A             | N/A       | N/A          | Inc-PTBP2-1  |
| A_21_P0006671  | 1,60107 | 1,55311 | 1,033802073 | ENST00000457804 | N/A       | N/A          | N/A          |
| A_33_P3385725  | 1,5088  | 1,46084 | 1,033802073 | ENST00000360213 | 119772    | NM_001004137 | OR52M1       |
| A_33_P3263212  | 1,56239 | 1,51443 | 1,033802073 | ENST00000310961 | 57554     | NM_020794    | LRRC7        |
| A_33_P3782612  | 1,49632 | 1,44836 | 1,033802073 | ENST00000581862 | N/A       | BC047643     | N/A          |
| A_22_P00002224 | 4,51847 | 4,47051 | 1,033802073 | N/A             | 101929145 | XR_246131    | PPP3CB-AS1   |
| A_33_P3248405  | 1,46239 | 1,41445 | 1,033787741 | N/A             | 203447    | BC108702     | NRK          |
| A_22_P00001181 | 1,42307 | 1,37514 | 1,033780576 | N/A             | 100507530 | XR_426277    | LOC100507530 |
| A_33_P3244215  | 1,46016 | 1,41223 | 1,033780576 | ENST00000374779 | 138799    | NM_001004482 | OR13C5       |
| A_21_P0002515  | 1,69802 | 1,65011 | 1,033766245 | N/A             | N/A       | N/A          | Inc-RBMS1-1  |
| A_23_P208768   | 1,6115  | 1,56359 | 1,033766245 | ENST00000355524 | 2204      | NM_002000    | FCAR         |
| A_23_P253421   | 12,5604 | 12,5125 | 1,033759079 | ENST00000464887 | 550       | NM_181575    | AUP1         |
| A_33_P3258561  | 1,549   | 1,5011  | 1,033759079 | N/A             | N/A       | N/A          | N/A          |
| A_22_P00000698 | 1,49806 | 1,45017 | 1,033751914 | N/A             | N/A       | N/A          | Inc-ADAM23-1 |
| A_33_P3362652  | 1,4156  | 1,36772 | 1,033744748 | ENST00000615035 | 403273    | NM_001005514 | OR5H14       |
| A_22_P00000983 | 1,55948 | 1,5116  | 1,033744748 | ENST00000399868 | 399715    | N/A          | LOC399715    |
| A_32_P122226   | 6,82962 | 6,78175 | 1,033737583 | ENST00000548310 | 144193    | NM_152435    | AMDHD1       |
| A_22_P00016641 | 1,56896 | 1,52109 | 1,033737583 | N/A             | N/A       | N/A          | Inc-TOX3-3   |
| A_21_P0004583  | 3,23798 | 3,19012 | 1,033730418 | N/A             | N/A       | N/A          | Inc-BOD1-1   |
| A_24_P98006    | 1,42268 | 1,37482 | 1,033730418 | ENST00000281806 | 84539     | NM_001040179 | MCHR2        |
| A_32_P405759   | 1,40421 | 1,35636 | 1,033723252 | ENST00000303045 | 169044    | NM_152888    | COL22A1      |
| A_21_P0003276  | 1,61678 | 1,56893 | 1,033723252 | N/A             | N/A       | N/A          | Inc-LRRC33-1 |
| A_33_P3422999  | 1,59864 | 1,55079 | 1,033723252 | ENST00000416929 | N/A       | N/A          | N/A          |

|                |         |         |             |                 |           |              |                       |
|----------------|---------|---------|-------------|-----------------|-----------|--------------|-----------------------|
| A_33_P3247151  | 1,40748 | 1,35964 | 1,033716087 | N/A             | 101928356 | XM_005260632 | LOC101928356          |
| A_22_P00021856 | 1,5949  | 1,54706 | 1,033716087 | ENST00000578039 | N/A       | N/A          | N/A                   |
| A_21_P0003287  | 1,40593 | 1,35809 | 1,033716087 | N/A             | N/A       | N/A          | Inc-SHQ1-1            |
| A_33_P3233368  | 1,39611 | 1,34827 | 1,033716087 | ENST00000454788 | 645434    | N/A          | LOC645434             |
| A_21_P0000795  | 1,611   | 1,56317 | 1,033708922 | N/A             | 100289211 | N/A          | LINC00624             |
| A_21_P0004372  | 1,65405 | 1,60622 | 1,033708922 | N/A             | N/A       | N/A          | Inc-DROSHA-7          |
| A_23_P34183    | 1,40784 | 1,36001 | 1,033708922 | ENST00000623874 | 353515    | NM_001002906 | XKRY2                 |
| A_33_P3352961  | 1,55034 | 1,50251 | 1,033708922 | ENST00000622654 | N/A       | N/A          | N/A                   |
| A_23_P23873    | 1,40562 | 1,3578  | 1,033701757 | ENST00000367662 | 60676     | NM_020318    | PAPPA2                |
| A_33_P3391039  | 1,66884 | 1,62102 | 1,033701757 | ENST00000502294 | 401137    | NM_214711    | PRR27                 |
| A_33_P3357332  | 4,21242 | 4,1646  | 1,033701757 | N/A             | N/A       | XR_171816    | Inc-C9orf147-1        |
| A_33_P3300117  | 5,80037 | 5,75256 | 1,033694592 | N/A             | N/A       | N/A          | N/A                   |
| A_24_P290692   | 1,61278 | 1,56497 | 1,033694592 | ENST00000416691 | 57511     | NM_001145079 | COG6                  |
| A_21_P0001778  | 1,58153 | 1,53372 | 1,033694592 | ENST00000425887 | 101926959 | XR_244897    | LOC101926959          |
| A_22_P00008381 | 1,50132 | 1,45351 | 1,033694592 | ENST00000532706 | 100128239 | NR_027276    | LOC100128239          |
| A_23_P93543    | 10,8664 | 10,8186 | 1,033687427 | ENST00000318471 | 5191      | NM_000288    | PEX7                  |
| A_23_P160025   | 12,5569 | 12,5091 | 1,033687427 | ENST00000562225 | 3428      | NM_005531    | IFI16                 |
| A_19_P00321356 | 3,51475 | 3,46695 | 1,033687427 | ENST00000457686 | 101927289 | N/A          | LINC01237             |
| A_21_P0003634  | 1,44573 | 1,39793 | 1,033687427 | N/A             | N/A       | N/A          | Inc-TET2-1            |
| A_32_P210572   | 10,1894 | 10,1416 | 1,033687427 | ENST00000542800 | 388722    | NM_001024594 | C1orf53               |
| A_22_P00006972 | 1,40287 | 1,35508 | 1,033680262 | N/A             | N/A       | N/A          | Inc-GDE1-2            |
| A_33_P3353816  | 1,4126  | 1,36481 | 1,033680262 | N/A             | 3676      | NM_000885    | ITGA4                 |
| A_33_P3310894  | 1,41176 | 1,36397 | 1,033680262 | ENST00000398486 | 125115    | NM_182497    | KRT40                 |
| A_33_P3359513  | 1,40145 | 1,35366 | 1,033680262 | ENST00000550410 | N/A       | N/A          | N/A                   |
| A_21_P0001264  | 1,47068 | 1,4229  | 1,033673097 | N/A             | N/A       | N/A          | Inc-PRDM2-1           |
| A_23_P356163   | 1,50441 | 1,45663 | 1,033673097 | ENST00000308378 | 151790    | NM_178824    | WDR49                 |
| A_21_P0004833  | 1,59696 | 1,54919 | 1,033665932 | N/A             | N/A       | N/A          | Inc-BMP6-8            |
| A_22_P00000636 | 1,40629 | 1,35852 | 1,033665932 | ENST00000510284 | N/A       | N/A          | N/A                   |
| A_21_P0007634  | 1,39646 | 1,3487  | 1,033658767 | N/A             | N/A       | N/A          | Inc-RP11-116D17.1.1-6 |
| A_24_P944741   | 1,75007 | 1,70231 | 1,033658767 | ENST00000328559 | 55805     | NM_018409    | LRP2BP                |
| A_22_P00024374 | 1,61253 | 1,56477 | 1,033658767 | ENST00000427290 | N/A       | N/A          | N/A                   |
| A_33_P3327663  | 8,42889 | 8,38114 | 1,033651603 | ENST00000342943 | 55061     | N/A          | SUSD4                 |
| A_22_P00007315 | 1,63975 | 1,59202 | 1,033637273 | ENST00000556684 | 283587    | N/A          | LINC01146             |

|                |         |         |             |                 |           |              |                |
|----------------|---------|---------|-------------|-----------------|-----------|--------------|----------------|
| A_21_P0003113  | 1,40181 | 1,35409 | 1,033630109 | N/A             | N/A       | N/A          | Inc-ULK4-4     |
| A_21_P0005850  | 1,59388 | 1,54616 | 1,033630109 | N/A             | N/A       | N/A          | Inc-CRH-1      |
| A_33_P3359864  | 1,55754 | 1,50983 | 1,033622944 | N/A             | N/A       | AK074445     | N/A            |
| A_23_P41241    | 1,65554 | 1,60783 | 1,033622944 | ENST00000296125 | 7047      | NM_003241    | TGM4           |
| A_22_P00016562 | 1,41983 | 1,37214 | 1,033608615 | ENST00000428142 | 284191    | XR_243598    | LOC284191      |
| A_22_P00013685 | 1,40832 | 1,36063 | 1,033608615 | ENST00000530572 | N/A       | CR743746     | N/A            |
| A_22_P00013145 | 1,6991  | 1,65143 | 1,033594286 | ENST00000442831 | N/A       | N/A          | N/A            |
| A_21_P0008860  | 1,68346 | 1,63579 | 1,033594286 | ENST00000558578 | 283688    | N/A          | LINC00927      |
| A_23_P2973     | 1,49271 | 1,44505 | 1,033587122 | ENST00000285600 | 79544     | NM_001004063 | OR4K1          |
| A_22_P00008699 | 1,43541 | 1,38776 | 1,033579958 | N/A             | N/A       | N/A          | Inc-KIAA1217-1 |
| A_21_P0010954  | 1,41291 | 1,36526 | 1,033579958 | ENST00000447757 | 101927549 | XR_247591    | LOC101927549   |
| A_22_P00022050 | 1,401   | 1,35335 | 1,033579958 | N/A             | 101927591 | XR_244839    | DPP10-AS3      |
| A_33_P3400217  | 5,64781 | 5,60017 | 1,033572794 | ENST00000399246 | 6521      | NM_000342    | SLC4A1         |
| A_33_P3209476  | 8,67022 | 8,62259 | 1,033565629 | ENST00000381112 | 83605     | NM_031443    | CCM2           |
| A_33_P3261710  | 1,45708 | 1,40945 | 1,033565629 | ENST00000503647 | 100130017 | NR_015446    | FTLP10         |
| A_21_P0013691  | 1,41666 | 1,36904 | 1,033558465 | ENST00000433645 | 441389    | N/A          | LINC01239      |
| A_33_P3399985  | 1,54715 | 1,49953 | 1,033558465 | ENST00000462693 | N/A       | AJ272081     | N/A            |
| A_33_P3212395  | 1,43886 | 1,39124 | 1,033558465 | ENST00000479478 | 100379220 | N/A          | TMED11P        |
| A_21_P0000434  | 1,39809 | 1,35047 | 1,033558465 | N/A             | 767566    | NR_003234    | SNORD113-6     |
| A_22_P00004057 | 1,40329 | 1,35568 | 1,033551301 | N/A             | N/A       | N/A          | Inc-CHST4-1    |
| A_22_P00017525 | 1,60206 | 1,55446 | 1,033544137 | N/A             | N/A       | N/A          | Inc-WDR16-1    |
| A_21_P0004265  | 1,41492 | 1,36732 | 1,033544137 | N/A             | N/A       | N/A          | Inc-BTF3-3     |
| A_33_P3298980  | 10,0537 | 10,0061 | 1,033544137 | N/A             | N/A       | N/A          | N/A            |
| A_33_P3235078  | 1,68043 | 1,63284 | 1,033536973 | ENST00000456946 | 51127     | NM_001134855 | TRIM17         |
| A_32_P15512    | 1,64219 | 1,59461 | 1,033529809 | ENST00000460065 | 127003    | NM_001122961 | C1orf194       |
| A_33_P3307119  | 1,58818 | 1,54062 | 1,033515482 | ENST00000322049 | 401665    | NM_001004759 | OR51T1         |
| A_21_P0002304  | 1,46506 | 1,41751 | 1,033508318 | N/A             | N/A       | N/A          | Inc-GALNT5-1   |
| A_22_P00011197 | 1,55149 | 1,50394 | 1,033508318 | ENST00000569422 | 100861552 | NR_047488    | LINC00558      |
| A_22_P00024615 | 1,67341 | 1,62586 | 1,033508318 | N/A             | N/A       | N/A          | Inc-DMRTA2-2   |
| A_21_P0001328  | 1,67866 | 1,63111 | 1,033508318 | N/A             | N/A       | N/A          | Inc-PRKACB-2   |
| A_21_P0005182  | 1,52405 | 1,4765  | 1,033508318 | N/A             | N/A       | N/A          | Inc-SDIM1-3    |
| A_23_P129458   | 9,50397 | 9,45643 | 1,033501154 | ENST00000328945 | 93517     | NM_145168    | SDR42E1        |
| A_22_P00011180 | 1,40467 | 1,35713 | 1,033501154 | ENST00000448948 | N/A       | N/A          | N/A            |

|                |         |         |             |                 |           |           |                |
|----------------|---------|---------|-------------|-----------------|-----------|-----------|----------------|
| A_32_P86067    | 1,50241 | 1,45487 | 1,033501154 | ENST00000282928 | 7545      | NM_003412 | ZIC1           |
| A_24_P334845   | 1,51465 | 1,46712 | 1,033493991 | ENST00000531764 | 157739    | NR_001578 | TDH            |
| A_23_P73837    | 1,62522 | 1,57769 | 1,033493991 | ENST00000218032 | 51311     | NM_016610 | TLR8           |
| A_33_P3291150  | 1,41644 | 1,36891 | 1,033493991 | N/A             | N/A       | N/A       | N/A            |
| A_21_P0005635  | 1,3957  | 1,34818 | 1,033486827 | ENST00000505083 | 101927845 | N/A       | LOC101927845   |
| A_24_P193244   | 1,49751 | 1,44999 | 1,033486827 | ENST00000511166 | 54937     | NM_017826 | SOHLH2         |
| A_22_P00000843 | 1,42309 | 1,37557 | 1,033486827 | ENST00000433552 | 5089      | NM_002586 | PBX2           |
| A_21_P0002625  | 1,49968 | 1,45216 | 1,033486827 | N/A             | N/A       | N/A       | Inc-SPAG16-4   |
| A_22_P00021962 | 1,41182 | 1,36431 | 1,033479663 | N/A             | N/A       | DB027399  | Inc-TAS2R1-3   |
| A_33_P3287303  | 1,40955 | 1,36204 | 1,033479663 | ENST00000342331 | 121549    | NM_203436 | ASCL4          |
| A_21_P0011160  | 1,68772 | 1,64021 | 1,033479663 | N/A             | N/A       | N/A       | XL0C_I2_003843 |
| A_21_P0009726  | 4,3683  | 4,32079 | 1,033479663 | N/A             | N/A       | N/A       | Inc-DHX34-1    |
| A_24_P206344   | 12,5776 | 12,5301 | 1,0334725   | ENST00000458143 | 155061    | NM_152557 | ZNF746         |
| A_21_P0005713  | 1,50112 | 1,45362 | 1,0334725   | N/A             | N/A       | N/A       | Inc-BHLHE22-3  |
| A_33_P3395186  | 1,40901 | 1,36151 | 1,0334725   | N/A             | N/A       | N/A       | N/A            |
| A_23_P68167    | 1,39947 | 1,35197 | 1,0334725   | ENST00000393504 | 1261      | NM_001298 | CNGA3          |
| A_22_P00011730 | 1,58511 | 1,53761 | 1,0334725   | ENST00000558120 | N/A       | DA011747  | N/A            |
| A_22_P00011485 | 1,68406 | 1,63658 | 1,033458173 | ENST00000576944 | N/A       | N/A       | N/A            |
| A_21_P0006121  | 1,51741 | 1,46993 | 1,033458173 | N/A             | N/A       | N/A       | Inc-VLDLR-2    |
| A_23_P71328    | 5,81273 | 5,76526 | 1,03345101  | ENST00000521952 | 4147      | NM_030583 | MATN2          |
| A_22_P00020759 | 1,39493 | 1,34746 | 1,03345101  | N/A             | N/A       | N/A       | Inc-PLEKHA3-5  |
| A_21_P0009335  | 1,578   | 1,53054 | 1,033443846 | N/A             | N/A       | N/A       | Inc-C17orf67-2 |
| A_21_P0001521  | 1,57415 | 1,52669 | 1,033443846 | N/A             | N/A       | N/A       | Inc-ELTD1-4    |
| A_22_P00006506 | 1,40681 | 1,35935 | 1,033443846 | N/A             | N/A       | N/A       | Inc-FGFBP1-1   |
| A_32_P314783   | 1,55711 | 1,50965 | 1,033443846 | N/A             | 100131496 | NR_024594 | LOC100131496   |
| A_21_P0013620  | 1,70962 | 1,66216 | 1,033443846 | ENST00000497195 | N/A       | N/A       | N/A            |
| A_22_P00019119 | 1,61286 | 1,56541 | 1,033436683 | N/A             | N/A       | N/A       | Inc-C5orf25-1  |
| A_21_P0004763  | 1,64743 | 1,59999 | 1,03342952  | ENST00000418567 | 102724168 | N/A       | LOC102724168   |
| A_22_P00003114 | 1,60768 | 1,56024 | 1,03342952  | N/A             | N/A       | N/A       | Inc-C9orf104-2 |
| A_23_P362736   | 1,60256 | 1,55512 | 1,03342952  | ENST00000405415 | 222967    | NM_173565 | RSPH10B        |
| A_21_P0012462  | 1,73956 | 1,69213 | 1,033422357 | N/A             | N/A       | N/A       | XL0C_I2_010370 |
| A_22_P00000010 | 1,41532 | 1,36789 | 1,033422357 | ENST00000368679 | 8038      | NM_003474 | ADAM12         |
| A_21_P0010177  | 1,45631 | 1,40889 | 1,033415194 | ENST00000430064 | N/A       | N/A       | N/A            |

|                |         |         |             |                 |           |              |                       |
|----------------|---------|---------|-------------|-----------------|-----------|--------------|-----------------------|
| A_22_P00004765 | 1,67773 | 1,63032 | 1,033408031 | N/A             | N/A       | N/A          | Inc-CTTNBP2-1         |
| A_22_P00008283 | 1,55301 | 1,5056  | 1,033408031 | N/A             | N/A       | N/A          | Inc-ISCU-1            |
| A_22_P00018406 | 1,40559 | 1,35818 | 1,033408031 | ENST00000506379 | N/A       | N/A          | N/A                   |
| A_21_P0014174  | 4,89346 | 4,84606 | 1,033400868 | N/A             | N/A       | AK096219     | Inc-PSMG4-1           |
| A_22_P00016317 | 1,70432 | 1,65692 | 1,033400868 | ENST00000505807 | 440119    | N/A          | FZD10-AS1             |
| A_21_P0010225  | 1,44937 | 1,40197 | 1,033400868 | N/A             | N/A       | N/A          | Inc-GABPA-6           |
| A_21_P0014068  | 1,68236 | 1,63496 | 1,033400868 | N/A             | N/A       | N/A          | N/A                   |
| A_22_P00004708 | 1,51457 | 1,46718 | 1,033393705 | N/A             | N/A       | N/A          | Inc-CTD-3080F16.3.1-1 |
| A_21_P0014753  | 1,40805 | 1,36066 | 1,033393705 | N/A             | N/A       | N/A          | N/A                   |
| A_22_P00003768 | 1,45946 | 1,41207 | 1,033393705 | N/A             | N/A       | AA417243     | Inc-CDK13-2           |
| A_21_P0006182  | 1,63133 | 1,58395 | 1,033386542 | N/A             | N/A       | N/A          | Inc-C9orf89-1         |
| A_33_P3304888  | 7,71078 | 7,6634  | 1,033386542 | ENST00000413270 | 84669     | NM_032582    | USP32                 |
| A_33_P3338006  | 1,5661  | 1,51873 | 1,033379379 | ENST00000415010 | N/A       | N/A          | N/A                   |
| A_22_P00012263 | 1,41148 | 1,36411 | 1,033379379 | N/A             | N/A       | DB171767     | Inc-PPP1R3A-2         |
| A_21_P0014034  | 1,56407 | 1,51671 | 1,033372216 | ENST00000540237 | 101929584 | N/A          | LOC101929584          |
| A_21_P0007321  | 9,77307 | 9,72572 | 1,033365053 | N/A             | N/A       | N/A          | Inc-SOX6-1            |
| A_33_P3467752  | 1,56126 | 1,51392 | 1,03335789  | N/A             | 54082     | NR_103707    | TSPEAR-AS1            |
| A_33_P3673544  | 1,62178 | 1,57444 | 1,03335789  | N/A             | N/A       | N/A          | N/A                   |
| A_32_P43349    | 1,73611 | 1,68878 | 1,033350728 | ENST00000556899 | 400456    | NR_034095    | LINC01197             |
| A_22_P00019397 | 1,44636 | 1,39903 | 1,033350728 | ENST00000559165 | N/A       | CR741480     | N/A                   |
| A_23_P410408   | 1,39429 | 1,34696 | 1,033350728 | ENST00000344248 | 162998    | NM_175883    | OR7D2                 |
| A_21_P0003058  | 1,57945 | 1,53212 | 1,033350728 | ENST00000481578 | 646168    | NR_033843    | LINC01330             |
| A_33_P3253578  | 1,40195 | 1,35463 | 1,033343565 | ENST00000375013 | 26595     | NM_001005468 | OR8B2                 |
| A_32_P96435    | 1,56847 | 1,52115 | 1,033343565 | ENST00000611922 | 374899    | NM_001037232 | ZNF829                |
| A_22_P00010650 | 7,02953 | 6,98222 | 1,033336403 | ENST00000563278 | N/A       | BC010081     | N/A                   |
| A_21_P0004821  | 4,3984  | 4,3511  | 1,03332924  | ENST00000530346 | 100508120 | NR_046229    | GMDS-AS1              |
| A_33_P3323979  | 3,98588 | 3,93858 | 1,03332924  | N/A             | 339874    | NR_038976    | LOC339874             |
| A_33_P3329461  | 1,67367 | 1,62638 | 1,033322078 | ENST00000603944 | N/A       | N/A          | N/A                   |
| A_32_P164593   | 1,40276 | 1,35547 | 1,033322078 | ENST00000297737 | 79698     | NM_024645    | ZMAT4                 |
| A_22_P00010746 | 1,55865 | 1,51136 | 1,033322078 | N/A             | 101927990 | NR_110844    | LOC101927990          |
| A_22_P00000896 | 1,41389 | 1,36661 | 1,033314915 | ENST00000427247 | N/A       | XR_428766    | N/A                   |
| A_22_P00016521 | 1,41495 | 1,36768 | 1,033307753 | ENST00000568788 | N/A       | AL079309     | N/A                   |
| A_33_P3335047  | 1,52236 | 1,47509 | 1,033307753 | ENST00000366485 | N/A       | AB529268     | N/A                   |

|                |         |         |             |                 |           |              |                       |
|----------------|---------|---------|-------------|-----------------|-----------|--------------|-----------------------|
| A_33_P3318272  | 1,61555 | 1,56829 | 1,033300591 | ENST00000528616 | 219487    | NM_001005245 | OR5M11                |
| A_22_P00025946 | 1,50936 | 1,4621  | 1,033300591 | N/A             | N/A       | N/A          | Inc-CIT-6             |
| A_21_P0001651  | 1,43106 | 1,38381 | 1,033293428 | N/A             | N/A       | N/A          | Inc-AKT3-1            |
| A_21_P0008076  | 1,47353 | 1,42629 | 1,033286266 | N/A             | N/A       | N/A          | Inc-AL445989.1-11     |
| A_24_P911906   | 1,41061 | 1,36337 | 1,033286266 | ENST00000377918 | 27253     | NM_001040429 | PCDH17                |
| A_23_P380901   | 1,70265 | 1,65541 | 1,033286266 | ENST00000272847 | 5746      | NM_005048    | PTH2R                 |
| A_19_P00319709 | 1,57159 | 1,52436 | 1,033279104 | ENST00000463143 | 344595    | NR_028302    | LINC00883             |
| A_33_P3330120  | 1,4041  | 1,35687 | 1,033279104 | N/A             | N/A       | N/A          | Inc-RP11-429E11.3.1-1 |
| A_33_P3265619  | 1,6049  | 1,55767 | 1,033279104 | N/A             | N/A       | DA067175     | N/A                   |
| A_33_P3315624  | 1,4059  | 1,35867 | 1,033279104 | N/A             | N/A       | N/A          | N/A                   |
| A_21_P0008512  | 1,60588 | 1,55865 | 1,033279104 | N/A             | N/A       | N/A          | Inc-FANCM-5           |
| A_33_P3385696  | 1,69937 | 1,65215 | 1,033271942 | ENST00000322641 | 390066    | NM_001005163 | OR52D1                |
| A_32_P163739   | 4,40166 | 4,35444 | 1,033271942 | ENST00000510149 | 57501     | NM_020741    | KIAA1257              |
| A_22_P00024893 | 1,55433 | 1,50712 | 1,03326478  | N/A             | N/A       | N/A          | Inc-AHNAK-4           |
| A_21_P0002285  | 1,74929 | 1,70208 | 1,03326478  | N/A             | N/A       | N/A          | Inc-TSN-7             |
| A_24_P246777   | 1,68915 | 1,64194 | 1,03326478  | ENST00000447373 | N/A       | N/A          | N/A                   |
| A_21_P0013193  | 7,97403 | 7,92682 | 1,03326478  | ENST00000416572 | 285908    | NR_026873    | LINC00174             |
| A_33_P3395289  | 1,44673 | 1,39953 | 1,033257618 | N/A             | N/A       | N/A          | N/A                   |
| A_21_P0013486  | 1,40333 | 1,35613 | 1,033257618 | ENST00000519160 | 100507651 | NR_038235    | LOC100507651          |
| A_23_P21324    | 1,41072 | 1,36352 | 1,033257618 | ENST00000612363 | 117581    | NM_001271893 | TWIST2                |
| A_21_P0001551  | 6,38237 | 6,33518 | 1,033250456 | N/A             | 102723542 | XR_426728    | LOC102723542          |
| A_21_P0007830  | 1,41153 | 1,36434 | 1,033250456 | N/A             | 283463    | N/A          | MUC19                 |
| A_22_P00001174 | 1,4168  | 1,36962 | 1,033243294 | N/A             | N/A       | BX093805     | Inc-ANGEL1-2          |
| A_21_P0009059  | 1,41762 | 1,37045 | 1,033236132 | N/A             | N/A       | N/A          | Inc-CLEC18B-3         |
| A_33_P6815152  | 1,53785 | 1,49068 | 1,033236132 | ENST00000533390 | 283177    | NR_033852    | LOC283177             |
| A_33_P3214204  | 1,5538  | 1,50664 | 1,03322897  | N/A             | 286144    | AF130048     | TRIQQ                 |
| A_22_P00016202 | 1,40705 | 1,35989 | 1,03322897  | N/A             | 399806    | NR_029380    | LBX1-AS1              |
| A_24_P281447   | 1,71532 | 1,66816 | 1,03322897  | ENST00000416086 | N/A       | N/A          | N/A                   |
| A_22_P00012667 | 1,40517 | 1,35802 | 1,033221808 | N/A             | N/A       | N/A          | Inc-PZP-4             |
| A_21_P0005869  | 6,93517 | 6,88802 | 1,033221808 | N/A             | N/A       | N/A          | Inc-TMEM64-1          |
| A_21_P0000416  | 1,39552 | 1,34838 | 1,033214647 | N/A             | 767597    | NR_003212    | SNORD114-19           |
| A_21_P0009219  | 1,60806 | 1,56093 | 1,033207485 | N/A             | N/A       | N/A          | Inc-NTN1-4            |
| A_21_P0010474  | 1,40007 | 1,35294 | 1,033207485 | N/A             | 101929416 | N/A          | LOC101929416          |



|                |         |         |             |                 |           |              |                |
|----------------|---------|---------|-------------|-----------------|-----------|--------------|----------------|
| A_21_P0008668  | 1,59776 | 1,55063 | 1,033207485 | N/A             | 102724566 | XR_424667    | LOC102724566   |
| A_33_P3224702  | 1,40898 | 1,36185 | 1,033207485 | ENST00000391611 | 64430     | BC030714     | PCNXL4         |
| A_23_P207003   | 1,59363 | 1,54651 | 1,033200323 | ENST00000412945 | 5414      | NM_004574    | set-04         |
| A_21_P0000804  | 1,40781 | 1,36069 | 1,033200323 | N/A             | 100506783 | NR_038435    | HOXD-AS2       |
| A_33_P3406806  | 3,40435 | 3,35724 | 1,033193162 | ENST00000398470 | 728318    | NM_001190460 | KRTAP9-1       |
| A_21_P0012587  | 1,64877 | 1,60166 | 1,033193162 | N/A             | N/A       | N/A          | XL0C_I2_010691 |
| A_22_P00009649 | 1,39819 | 1,35109 | 1,033186    | ENST00000568270 | 101929180 | XR_242744    | LOC101929180   |
| A_33_P3376781  | 10,4212 | 10,3741 | 1,033186    | N/A             | N/A       | N/A          | N/A            |
| A_21_P0010258  | 1,39657 | 1,34948 | 1,033178839 | N/A             | N/A       | N/A          | Inc-CRYAA-1    |
| A_19_P00318113 | 1,69598 | 1,64889 | 1,033178839 | ENST00000503299 | N/A       | N/A          | N/A            |
| A_21_P0008945  | 1,72118 | 1,67409 | 1,033178839 | N/A             | N/A       | N/A          | Inc-CHD9-4     |
| A_33_P3210775  | 1,52766 | 1,48057 | 1,033178839 | ENST00000550469 | 93432     | AK000645     | LOC93432       |
| A_21_P0001569  | 1,7045  | 1,65742 | 1,033171677 | N/A             | N/A       | N/A          | Inc-KCND3-1    |
| A_33_P3419586  | 1,41165 | 1,36457 | 1,033171677 | ENST00000354924 | 403278    | NM_001005517 | OR5K4          |
| A_23_P83012    | 1,3941  | 1,34702 | 1,033171677 | ENST00000381641 | 11172     | NM_007179    | INSL6          |
| A_22_P00019412 | 1,62808 | 1,58101 | 1,033164516 | ENST00000441033 | N/A       | N/A          | N/A            |
| A_21_P0007805  | 1,74888 | 1,70181 | 1,033164516 | ENST00000505807 | 440119    | N/A          | FZD10-AS1      |
| A_33_P3354589  | 1,40511 | 1,35805 | 1,033157355 | ENST00000615418 | 9560      | NM_001291470 | CCL4L2         |
| A_24_P751492   | 1,58735 | 1,54029 | 1,033157355 | ENST00000423537 | 392307    | NM_001012446 | FAM221B        |
| A_21_P0013397  | 1,58819 | 1,54113 | 1,033157355 | ENST00000425880 | N/A       | N/A          | N/A            |
| A_21_P0006360  | 1,40299 | 1,35594 | 1,033150193 | N/A             | N/A       | N/A          | Inc-C9orf102-1 |
| A_33_P3419910  | 5,90643 | 5,85938 | 1,033150193 | N/A             | N/A       | N/A          | N/A            |
| A_22_P00016538 | 1,4354  | 1,38836 | 1,033143032 | N/A             | N/A       | BG190814     | Inc-TMX3-1     |
| A_33_P3343967  | 1,41578 | 1,36874 | 1,033143032 | N/A             | 100131373 | AY189285     | LOC100131373   |
| A_22_P00010097 | 1,43525 | 1,38821 | 1,033143032 | ENST00000420766 | N/A       | N/A          | N/A            |
| A_33_P6517036  | 1,57568 | 1,52865 | 1,033135871 | ENST00000567109 | 1012      | BG910210     | CDH13          |
| A_21_P0004579  | 1,41187 | 1,36485 | 1,03312871  | N/A             | N/A       | N/A          | Inc-NUDCD2-6   |
| A_22_P00013856 | 1,56533 | 1,51831 | 1,03312871  | N/A             | N/A       | N/A          | Inc-RPL7-2     |
| A_22_P00017442 | 1,422   | 1,37499 | 1,033121549 | ENST00000555396 | N/A       | DB097098     | N/A            |
| A_33_P6817309  | 1,69463 | 1,64762 | 1,033121549 | N/A             | 102546299 | NR_105065    | LOC102546299   |
| A_33_P3503029  | 1,4589  | 1,41189 | 1,033121549 | ENST00000358545 | 8600      | NM_033012    | TNFSF11        |
| A_21_P0003519  | 1,40279 | 1,35579 | 1,033114388 | N/A             | N/A       | N/A          | Inc-GYPE-1     |
| A_21_P0004654  | 1,51131 | 1,46432 | 1,033107227 | ENST00000415106 | 100505985 | XR_108661    | LOC100505985   |

|                |         |         |             |                 |           |              |                       |
|----------------|---------|---------|-------------|-----------------|-----------|--------------|-----------------------|
| A_21_P0012832  | 1,69489 | 1,64791 | 1,033100066 | N/A             | N/A       | N/A          | XLOC_I2_011636        |
| A_21_P0010728  | 1,70151 | 1,65453 | 1,033100066 | ENST00000579737 | 2210      | NM_001244910 | FCGR1B                |
| A_22_P00014043 | 1,40741 | 1,36043 | 1,033100066 | ENST00000454466 | 104355286 | NR_126402    | LINC01307             |
| A_22_P00000141 | 1,60395 | 1,55698 | 1,033092905 | ENST00000515840 | 100506107 | XR_109804    | LOC100506107          |
| A_33_P3379886  | 1,72809 | 1,68112 | 1,033092905 | ENST00000614010 | 2247      | NM_002006    | FGF2                  |
| A_33_P3247072  | 1,44062 | 1,39366 | 1,033085744 | N/A             | N/A       | N/A          | N/A                   |
| A_21_P0008892  | 1,41111 | 1,36415 | 1,033085744 | N/A             | N/A       | N/A          | Inc-IL34-3            |
| A_22_P00018841 | 1,52214 | 1,47518 | 1,033085744 | N/A             | N/A       | BG217849     | Inc-PLCH1-2           |
| A_21_P0012584  | 9,5659  | 9,51894 | 1,033085744 | ENST00000510551 | 101060498 | NR_121640    | LOC101060498          |
| A_23_P43690    | 1,58124 | 1,53429 | 1,033078583 | ENST00000545497 | 54796     | NM_017637    | BNC2                  |
| A_21_P0003259  | 1,55994 | 1,51299 | 1,033078583 | N/A             | N/A       | N/A          | Inc-SERPINI1-9        |
| A_22_P00009745 | 1,68072 | 1,63377 | 1,033078583 | ENST00000542875 | 100507195 | NR_120458    | LOC100507195          |
| A_23_P77980    | 4,47945 | 4,4325  | 1,033078583 | ENST00000399246 | 6521      | NM_000342    | SLC4A1                |
| A_22_P00000465 | 1,50154 | 1,4546  | 1,033071423 | N/A             | N/A       | N/A          | Inc-AC091801.1.1-6    |
| A_21_P0014425  | 1,5914  | 1,54446 | 1,033071423 | N/A             | N/A       | CU680219     | N/A                   |
| A_22_P00003741 | 1,3993  | 1,35236 | 1,033071423 | ENST00000568699 | N/A       | BC045696     | N/A                   |
| A_21_P0012383  | 1,47637 | 1,42944 | 1,033064262 | ENST00000476880 | N/A       | N/A          | N/A                   |
| A_22_P00013464 | 1,6192  | 1,57227 | 1,033064262 | ENST00000553679 | N/A       | N/A          | N/A                   |
| A_21_P0006854  | 1,45882 | 1,41191 | 1,033049941 | N/A             | N/A       | N/A          | Inc-C10orf68-4        |
| A_21_P0008339  | 1,49648 | 1,44957 | 1,033049941 | N/A             | N/A       | N/A          | Inc-PELI2-1           |
| A_21_P0007421  | 1,4036  | 1,35669 | 1,033049941 | N/A             | N/A       | N/A          | Inc-RP11-890B15.2.1-3 |
| A_23_P42884    | 15,3732 | 15,3263 | 1,03304278  | ENST00000418740 | 64951     | NM_032014    | MRPS24                |
| A_19_P00805651 | 11,3327 | 11,2858 | 1,03304278  | N/A             | N/A       | N/A          | N/A                   |
| A_21_P0002328  | 1,43385 | 1,38695 | 1,03304278  | N/A             | N/A       | N/A          | Inc-ZNF804A-1         |
| A_22_P00007851 | 1,40514 | 1,35824 | 1,03304278  | ENST00000583558 | 729950    | NR_040033    | LOC729950             |
| A_33_P3262440  | 2,94127 | 2,89437 | 1,03304278  | N/A             | N/A       | N/A          | N/A                   |
| A_22_P00019644 | 1,58779 | 1,54089 | 1,03304278  | N/A             | 100874094 | NR_046658    | ZNF197-AS1            |
| A_33_P3336449  | 2,08865 | 2,04175 | 1,03304278  | N/A             | N/A       | N/A          | Inc-CIB4-1            |
| A_24_P15388    | 1,58477 | 1,53787 | 1,03304278  | ENST00000424969 | N/A       | XM_006710246 | N/A                   |
| A_22_P00008339 | 1,51588 | 1,46899 | 1,03303562  | N/A             | 101928554 | XR_242926    | LOC101928554          |
| A_22_P00009915 | 1,61274 | 1,56585 | 1,03303562  | ENST00000414581 | N/A       | N/A          | N/A                   |
| A_33_P3329737  | 1,69897 | 1,65208 | 1,03303562  | ENST00000390393 | N/A       | AB305972     | N/A                   |
| A_19_P00321986 | 1,49047 | 1,44358 | 1,03303562  | N/A             | 101929452 | N/A          | LOC101929452          |

|                |         |         |             |                 |           |              |                  |
|----------------|---------|---------|-------------|-----------------|-----------|--------------|------------------|
| A_21_P0002765  | 1,69387 | 1,64698 | 1,03303562  | ENST00000482766 | N/A       | N/A          | N/A              |
| A_21_P0001137  | 1,44058 | 1,39371 | 1,033021299 | ENST00000436225 | 729467    | N/A          | HSD52            |
| A_33_P3275381  | 6,74028 | 6,69342 | 1,033014139 | ENST00000433024 | 79884     | NM_001039580 | MAP9             |
| A_22_P00022034 | 1,63935 | 1,59249 | 1,033014139 | N/A             | N/A       | N/A          | lnc-NUB1-2       |
| A_33_P3851346  | 1,51417 | 1,46731 | 1,033014139 | N/A             | 283761    | NR_027074    | LINC00928        |
| A_21_P0003740  | 1,41483 | 1,36798 | 1,033006978 | N/A             | 101410542 | N/A          | UCHL1-AS1        |
| A_22_P00000237 | 1,45179 | 1,40495 | 1,032999818 | N/A             | N/A       | BX538274     | lnc-AC006035.2-3 |
| A_22_P00003812 | 1,39705 | 1,35021 | 1,032999818 | ENST00000567082 | N/A       | AK026722     | N/A              |
| A_33_P3261418  | 1,70997 | 1,66314 | 1,032992658 | N/A             | 8913      | AB012043     | CACNA1G          |
| A_21_P0006799  | 4,32819 | 4,28137 | 1,032985498 | N/A             | N/A       | N/A          | lnc-CTBP2-2      |
| A_22_P00019265 | 1,68449 | 1,63767 | 1,032985498 | ENST00000523150 | N/A       | DA245781     | N/A              |
| A_23_P87791    | 1,59132 | 1,54451 | 1,032978338 | ENST00000538526 | 32        | NM_001093    | ACACB            |
| A_21_P0004205  | 1,55819 | 1,51138 | 1,032978338 | N/A             | N/A       | N/A          | lnc-C5orf38-1    |
| A_22_P00020600 | 1,54879 | 1,50198 | 1,032978338 | N/A             | N/A       | N/A          | lnc-TTC34-4      |
| A_21_P0011406  | 12,1397 | 12,0929 | 1,032971178 | ENST00000560059 | N/A       | N/A          | N/A              |
| A_24_P873414   | 12,5097 | 12,4629 | 1,032971178 | ENST00000403716 | 55041     | NM_001267062 | PLEKHB2          |
| A_21_P0001594  | 1,47131 | 1,42452 | 1,032964018 | N/A             | N/A       | N/A          | lnc-LMX1A-3      |
| A_21_P0001473  | 1,41631 | 1,36952 | 1,032964018 | N/A             | N/A       | N/A          | lnc-RCC2-2       |
| A_21_P0001063  | 1,46768 | 1,42089 | 1,032964018 | ENST00000420347 | N/A       | N/A          | N/A              |
| A_21_P0002521  | 1,59798 | 1,5512  | 1,032956858 | N/A             | 339751    | NR_033882    | MLK7-AS1         |
| A_23_P6223     | 8,38725 | 8,34047 | 1,032956858 | ENST00000434667 | 57466     | NM_020706    | SCAF4            |
| A_22_P00012851 | 4,57003 | 4,52326 | 1,032949698 | ENST00000514050 | N/A       | XM_005263390 | N/A              |
| A_21_P0006266  | 1,45003 | 1,40326 | 1,032949698 | N/A             | N/A       | N/A          | lnc-SHB-1        |
| A_24_P359091   | 1,61937 | 1,5726  | 1,032949698 | ENST00000592873 | N/A       | AK094938     | N/A              |
| A_21_P0002714  | 1,4187  | 1,37193 | 1,032949698 | ENST00000421598 | 100132677 | NR_038866    | BSN-AS2          |
| A_22_P00013419 | 2,83188 | 2,78511 | 1,032949698 | ENST00000558244 | 283688    | NR_033833    | LINC00927        |
| A_33_P3442301  | 1,46058 | 1,41381 | 1,032949698 | N/A             | 100271836 | BG250912     | SMG1P3           |
| A_21_P0002470  | 1,69281 | 1,64605 | 1,032942538 | N/A             | N/A       | N/A          | lnc-POLR1A-1     |
| A_21_P0007818  | 1,39273 | 1,34597 | 1,032942538 | N/A             | 102723921 | XR_424312    | LOC102723921     |
| A_32_P705474   | 1,42275 | 1,376   | 1,032935378 | ENST00000607368 | 100507530 | NR_125386    | LOC100507530     |
| A_21_P0007636  | 1,73346 | 1,68672 | 1,032928218 | N/A             | N/A       | N/A          | lnc-MAP1LC3B2-6  |
| A_22_P00007885 | 1,49385 | 1,44711 | 1,032928218 | ENST00000563841 | N/A       | N/A          | N/A              |
| A_33_P3396477  | 1,5791  | 1,53236 | 1,032928218 | N/A             | N/A       | N/A          | N/A              |

|                |         |         |             |                 |           |           |                |
|----------------|---------|---------|-------------|-----------------|-----------|-----------|----------------|
| A_23_P160262   | 1,41429 | 1,36756 | 1,032921059 | ENST00000371129 | 27329     | NM_014495 | ANGPTL3        |
| A_21_P0013045  | 1,57624 | 1,52951 | 1,032921059 | N/A             | 102724087 | N/A       | LOC102724087   |
| A_22_P00025319 | 1,62464 | 1,57793 | 1,032906739 | N/A             | N/A       | N/A       | Inc-CCND2-1    |
| A_33_P3269631  | 4,84561 | 4,7989  | 1,032906739 | ENST00000495900 | 254827    | BQ890675  | NAALADL2       |
| A_21_P0013203  | 1,43042 | 1,38372 | 1,03289958  | ENST00000452234 | N/A       | XR_428191 | N/A            |
| A_21_P0002203  | 1,55084 | 1,50415 | 1,03289242  | N/A             | N/A       | N/A       | Inc-PKDC-1     |
| A_33_P3255070  | 1,58843 | 1,54175 | 1,032885261 | N/A             | N/A       | N/A       | N/A            |
| A_33_P3362291  | 1,50357 | 1,45691 | 1,032870942 | N/A             | 379034    | XR_242417 | LINC01181      |
| A_24_P372223   | 1,55366 | 1,507   | 1,032870942 | ENST00000350896 | 4481      | NM_138715 | MSR1           |
| A_21_P0009765  | 1,42742 | 1,38076 | 1,032870942 | N/A             | N/A       | N/A       | Inc-ZNF792-2   |
| A_21_P0007748  | 1,52337 | 1,47671 | 1,032870942 | N/A             | N/A       | N/A       | Inc-ARL1-2     |
| A_21_P0014191  | 1,41223 | 1,36558 | 1,032863783 | N/A             | N/A       | BF188822  | Inc-C7orf33-1  |
| A_22_P00018557 | 1,39567 | 1,34902 | 1,032863783 | ENST00000510059 | N/A       | N/A       | N/A            |
| A_32_P231568   | 8,74983 | 8,70318 | 1,032863783 | ENST00000376447 | 158158    | NM_152573 | RASEF          |
| A_33_P3392142  | 1,43819 | 1,39155 | 1,032856624 | ENST00000468877 | 6718      | AK058142  | AKR1D1         |
| A_24_P93948    | 1,39425 | 1,34761 | 1,032856624 | ENST00000455537 | 3798      | AB210045  | KIF5A          |
| A_22_P00006304 | 1,58486 | 1,53822 | 1,032856624 | ENST00000523525 | N/A       | N/A       | N/A            |
| A_21_P0009127  | 1,48585 | 1,43922 | 1,032849465 | N/A             | N/A       | N/A       | Inc-CDH11-1    |
| A_21_P0011157  | 1,55227 | 1,50564 | 1,032849465 | N/A             | N/A       | N/A       | XLOC_I2_003840 |
| A_32_P150030   | 7,90257 | 7,85594 | 1,032849465 | ENST00000392995 | 8493      | NM_003620 | PPM1D          |
| A_22_P00006852 | 1,7667  | 1,72008 | 1,032842305 | N/A             | N/A       | N/A       | Inc-GALC-1     |
| A_33_P3393689  | 1,62104 | 1,57442 | 1,032842305 | N/A             | N/A       | N/A       | N/A            |
| A_22_P00021776 | 1,39295 | 1,34633 | 1,032842305 | N/A             | 101927987 | NR_110289 | LOC101927987   |
| A_21_P0007385  | 1,43201 | 1,3854  | 1,032835146 | N/A             | N/A       | N/A       | Inc-FAM76B-2   |
| A_23_P204304   | 1,50657 | 1,45996 | 1,032835146 | ENST00000281171 | 5800      | NM_030667 | PTPRO          |
| A_22_P00020432 | 1,64587 | 1,59927 | 1,032827987 | N/A             | N/A       | N/A       | Inc-CLIC5-2    |
| A_23_P254852   | 10,0733 | 10,0267 | 1,032827987 | ENST00000272371 | 9381      | NM_194248 | OTOF           |
| A_22_P00010185 | 1,83225 | 1,78565 | 1,032827987 | ENST00000510987 | N/A       | N/A       | N/A            |
| A_22_P00010916 | 1,43065 | 1,38406 | 1,032820828 | N/A             | 101928052 | NR_125888 | LOC101928052   |
| A_21_P0004590  | 1,42462 | 1,37803 | 1,032820828 | N/A             | 221718    | N/A       | LINC00518      |
| A_33_P3212052  | 1,39667 | 1,35009 | 1,032813669 | N/A             | N/A       | N/A       | N/A            |
| A_21_P0011998  | 1,46364 | 1,41706 | 1,032813669 | N/A             | N/A       | N/A       | XLOC_I2_007186 |
| A_21_P0011916  | 1,39906 | 1,35249 | 1,03280651  | N/A             | N/A       | N/A       | XLOC_I2_008014 |

|                |         |         |             |                 |           |              |                |
|----------------|---------|---------|-------------|-----------------|-----------|--------------|----------------|
| A_23_P254025   | 1,50969 | 1,46312 | 1,03280651  | ENST00000555206 | 7539      | NM_003408    | ZFP37          |
| A_22_P00022240 | 1,59344 | 1,54688 | 1,032799352 | ENST00000446354 | N/A       | N/A          | N/A            |
| A_21_P0001434  | 1,69018 | 1,64362 | 1,032799352 | N/A             | N/A       | N/A          | Inc-GALNT2-1   |
| A_21_P0005747  | 1,42978 | 1,38323 | 1,032792193 | ENST00000523572 | N/A       | N/A          | N/A            |
| A_21_P0007856  | 4,41483 | 4,3683  | 1,032777875 | N/A             | N/A       | N/A          | Inc-ZNF664-2   |
| A_22_P00003961 | 1,68987 | 1,64334 | 1,032777875 | N/A             | 101929415 | NR_125813    | LOC101929415   |
| A_32_P888644   | 1,68865 | 1,64212 | 1,032777875 | N/A             | 153163    | NR_051996    | MGC32805       |
| A_33_P3311830  | 1,41706 | 1,37054 | 1,032770717 | ENST00000246081 | 56914     | NM_020157    | OTOR           |
| A_23_P323102   | 1,4739  | 1,42738 | 1,032770717 | ENST00000378122 | 9752      | NM_014005    | PCDHA9         |
| A_22_P00014177 | 1,39604 | 1,34953 | 1,032763558 | N/A             | N/A       | N/A          | Inc-SDF2-1     |
| A_33_P3323904  | 1,54985 | 1,50334 | 1,032763558 | N/A             | 150786    | NM_001077637 | WTH3DI         |
| A_21_P0012788  | 1,69807 | 1,65156 | 1,032763558 | ENST00000508414 | N/A       | N/A          | N/A            |
| A_23_P153383   | 16,5802 | 16,5337 | 1,0327564   | ENST00000577222 | 25873     | NM_015414    | RPL36          |
| A_22_P00011511 | 1,60789 | 1,56139 | 1,0327564   | N/A             | N/A       | N/A          | Inc-PAX6-1     |
| A_23_P66967    | 1,64641 | 1,59991 | 1,0327564   | ENST00000327228 | 1068      | U03270       | CETN1          |
| A_21_P0013396  | 1,66537 | 1,61889 | 1,032742083 | ENST00000413734 | 4624      | NM_002471    | MYH6           |
| A_21_P0001805  | 1,45402 | 1,40754 | 1,032742083 | ENST00000430529 | N/A       | N/A          | N/A            |
| A_21_P0007759  | 1,56486 | 1,51838 | 1,032742083 | N/A             | N/A       | N/A          | Inc-MYL2-2     |
| A_22_P00015304 | 1,66553 | 1,61905 | 1,032742083 | ENST00000513133 | N/A       | N/A          | N/A            |
| A_21_P0008947  | 1,64112 | 1,59465 | 1,032734924 | N/A             | N/A       | N/A          | Inc-CHD9-3     |
| A_22_P00015301 | 1,58445 | 1,53798 | 1,032734924 | N/A             | N/A       | XR_132956    | Inc-SPI1-1     |
| A_22_P00022468 | 1,42111 | 1,37466 | 1,032720608 | N/A             | 347731    | XR_246122    | LRRTM3         |
| A_22_P00003444 | 1,75311 | 1,70666 | 1,032720608 | ENST00000549532 | N/A       | N/A          | N/A            |
| A_21_P0011507  | 1,68254 | 1,63609 | 1,032720608 | N/A             | N/A       | N/A          | XLOC_I2_005602 |
| A_21_P0005550  | 1,63054 | 1,5841  | 1,032713449 | N/A             | N/A       | N/A          | Inc-MAFK-2     |
| A_23_P164773   | 1,41682 | 1,37039 | 1,032706291 | ENST00000597934 | 2208      | NM_002002    | FCER2          |
| A_22_P00000110 | 1,53969 | 1,49326 | 1,032706291 | N/A             | 100885789 | NR_104124    | IFNG-AS1       |
| A_33_P3221916  | 1,63544 | 1,58901 | 1,032706291 | N/A             | N/A       | N/A          | N/A            |
| A_33_P3397755  | 8,94215 | 8,89572 | 1,032706291 | ENST00000448439 | 79109     | NM_001006618 | MAPKAP1        |
| A_21_P0012586  | 1,51408 | 1,46766 | 1,032699133 | N/A             | N/A       | N/A          | XLOC_I2_010687 |
| A_22_P00023484 | 1,51107 | 1,46465 | 1,032699133 | N/A             | 101928834 | NR_120646    | LOC101928834   |
| A_33_P3292814  | 6,88646 | 6,84005 | 1,032691975 | N/A             | N/A       | CR747917     | N/A            |
| A_22_P00003556 | 1,39265 | 1,34624 | 1,032691975 | N/A             | 641364    | NR_038380    | SLC7A11-AS1    |

|                |         |         |             |                 |           |              |                |
|----------------|---------|---------|-------------|-----------------|-----------|--------------|----------------|
| A_33_P3409765  | 1,60648 | 1,56008 | 1,032684817 | N/A             | 8972      | XM_006716168 | MGAM           |
| A_23_P2322     | 1,7122  | 1,6658  | 1,032684817 | ENST00000532498 | 144448    | NM_001100917 | TSPAN19        |
| A_22_P00008875 | 1,39366 | 1,34726 | 1,032684817 | N/A             | N/A       | N/A          | Inc-KLHL25-11  |
| A_23_P82567    | 1,69711 | 1,65071 | 1,032684817 | ENST00000552471 | 136541    | NM_001001317 | PRSS58         |
| A_24_P100551   | 10,5957 | 10,5493 | 1,032684817 | ENST00000284637 | 57630     | NM_020870    | SH3RF1         |
| A_21_P0001269  | 1,41343 | 1,36704 | 1,032677659 | N/A             | N/A       | N/A          | Inc-UBXN10-1   |
| A_33_P3383950  | 1,40167 | 1,35529 | 1,032670501 | N/A             | 441369    | N/A          | FLJ46284       |
| A_22_P00001131 | 1,51232 | 1,46594 | 1,032670501 | N/A             | N/A       | N/A          | Inc-ALX4-5     |
| A_22_P00024763 | 1,54478 | 1,4984  | 1,032670501 | N/A             | N/A       | N/A          | Inc-UMODL1-3   |
| A_23_P87727    | 1,71776 | 1,67138 | 1,032670501 | ENST00000317658 | 93661     | NM_033328    | CAPZA3         |
| A_22_P00010194 | 1,63407 | 1,58769 | 1,032670501 | ENST00000427022 | N/A       | N/A          | N/A            |
| A_22_P00019923 | 1,56842 | 1,52205 | 1,032663343 | ENST00000440495 | N/A       | N/A          | N/A            |
| A_22_P00003834 | 1,54756 | 1,50119 | 1,032663343 | ENST00000561719 | 101928276 | NR_104666    | LINC01227      |
| A_21_P0003143  | 1,45698 | 1,41061 | 1,032663343 | N/A             | 101929514 | XR_241534    | LOC101929514   |
| A_23_P319466   | 1,65137 | 1,605   | 1,032663343 | ENST00000282018 | 57105     | NM_020377    | CYSLTR2        |
| A_33_P3210857  | 1,49847 | 1,45211 | 1,032656185 | ENST00000605542 | N/A       | N/A          | N/A            |
| A_22_P00003256 | 1,61605 | 1,56969 | 1,032656185 | N/A             | N/A       | N/A          | Inc-CALCOCO2-6 |
| A_21_P0003891  | 1,41546 | 1,3691  | 1,032656185 | N/A             | 101929048 | XR_241687    | LOC101929048   |
| A_21_P0012467  | 1,56535 | 1,51899 | 1,032656185 | ENST00000488287 | 647107    | NR_033945    | LINC01192      |
| A_24_P269432   | 9,74611 | 9,69976 | 1,032649027 | ENST00000222547 | 10282     | NM_005868    | BET1           |
| A_22_P00018435 | 1,41972 | 1,37337 | 1,032649027 | ENST00000539583 | 101928471 | NR_120472    | LOC101928471   |
| A_33_P3209130  | 1,67829 | 1,63194 | 1,032649027 | N/A             | 100128496 | CR738909     | C20orf78       |
| A_22_P00021795 | 1,40557 | 1,35922 | 1,032649027 | N/A             | 100873935 | NR_046600    | MTOR-AS1       |
| A_21_P0006065  | 1,41664 | 1,37029 | 1,032649027 | ENST00000438147 | N/A       | N/A          | N/A            |
| A_33_P3345808  | 1,41758 | 1,37124 | 1,03264187  | N/A             | N/A       | N/A          | N/A            |
| A_33_P3376021  | 1,40418 | 1,35784 | 1,03264187  | N/A             | N/A       | N/A          | N/A            |
| A_33_P3275973  | 1,55761 | 1,51127 | 1,03264187  | ENST00000602934 | 100422737 | N/A          | LOC100422737   |
| A_21_P0009525  | 1,45744 | 1,41111 | 1,032634712 | N/A             | N/A       | N/A          | Inc-PIEZO2-5   |
| A_21_P0006950  | 1,42004 | 1,37371 | 1,032634712 | N/A             | N/A       | N/A          | Inc-PITRM1-4   |
| A_22_P00003734 | 1,70969 | 1,66336 | 1,032634712 | ENST00000415422 | N/A       | N/A          | N/A            |
| A_21_P0008609  | 1,41815 | 1,37182 | 1,032634712 | N/A             | N/A       | N/A          | Inc-C15orf41-6 |
| A_23_P82651    | 1,50533 | 1,459   | 1,032634712 | ENST00000265634 | 4885      | NM_002523    | NPTX2          |
| A_21_P0007427  | 1,46335 | 1,41703 | 1,032627554 | N/A             | N/A       | N/A          | Inc-TEAD1-1    |

|                |         |         |             |                 |           |              |              |
|----------------|---------|---------|-------------|-----------------|-----------|--------------|--------------|
| A_33_P3299590  | 8,09975 | 8,05343 | 1,032627554 | ENST00000423692 | 51593     | NM_001128854 | SRRT         |
| A_22_P00001475 | 1,54827 | 1,50196 | 1,032620397 | ENST00000512581 | 101928622 | N/A          | LOC101928622 |
| A_33_P3340732  | 1,41868 | 1,37237 | 1,032620397 | ENST00000620181 | 2515      | NM_001278113 | ADAM2        |
| A_21_P0013141  | 1,58493 | 1,53862 | 1,032620397 | ENST00000448991 | N/A       | N/A          | N/A          |
| A_33_P3319937  | 14,3335 | 14,2872 | 1,032613239 | N/A             | N/A       | N/A          | N/A          |
| A_33_P3230249  | 1,76213 | 1,71584 | 1,032606082 | ENST00000523387 | 64478     | AK126936     | CSMD1        |
| A_21_P0009570  | 1,59066 | 1,54437 | 1,032606082 | ENST00000583756 | 102724913 | N/A          | LOC102724913 |
| A_33_P3248638  | 1,39793 | 1,35164 | 1,032606082 | ENST00000375851 | 286223    | NM_001001938 | C9orf47      |
| A_21_P0007245  | 1,71479 | 1,6685  | 1,032606082 | N/A             | N/A       | N/A          | Inc-USP35-10 |
| A_33_P3389852  | 4,60815 | 4,56186 | 1,032606082 | ENST00000590352 | 54828     | NM_017679    | BCAS3        |
| A_33_P3216758  | 1,39989 | 1,35362 | 1,032591767 | ENST00000587331 | 388551    | NM_001039213 | CEACAM16     |
| A_21_P0002533  | 1,76242 | 1,71615 | 1,032591767 | N/A             | N/A       | N/A          | Inc-SUMO1-3  |
| A_23_P16798    | 5,28211 | 5,23585 | 1,032584609 | ENST00000465360 | 375189    | XM_005264292 | PFN4         |
| A_21_P0001379  | 1,48175 | 1,43549 | 1,032584609 | N/A             | N/A       | N/A          | Inc-PCP4L1-1 |
| A_21_P0005560  | 1,61337 | 1,56712 | 1,032577452 | N/A             | N/A       | N/A          | Inc-ABCA13-2 |
| A_22_P00025826 | 1,53253 | 1,48629 | 1,032570295 | N/A             | N/A       | N/A          | Inc-UTS2-3   |
| A_21_P0008439  | 1,68333 | 1,63709 | 1,032570295 | N/A             | N/A       | N/A          | Inc-FERMT2-1 |
| A_33_P3393751  | 1,70893 | 1,66269 | 1,032570295 | N/A             | 102725150 | XR_431928    | LOC102725150 |
| A_22_P00010618 | 1,42478 | 1,37855 | 1,032563138 | N/A             | 101929056 | XR_241724    | LOC101929056 |
| A_22_P00002883 | 1,39097 | 1,34474 | 1,032563138 | ENST00000506068 | N/A       | N/A          | N/A          |
| A_21_P0004518  | 1,52953 | 1,4833  | 1,032563138 | N/A             | N/A       | N/A          | Inc-RASA1-3  |
| A_32_P127350   | 1,87237 | 1,82615 | 1,03255598  | ENST00000511014 | 645323    | NR_024384    | LINC00461    |
| A_21_P0005765  | 1,59624 | 1,55002 | 1,03255598  | ENST00000606279 | N/A       | N/A          | N/A          |
| A_33_P3295096  | 1,39622 | 1,35001 | 1,032548823 | N/A             | 100129703 | AF210649     | NAG20        |
| A_23_P201567   | 9,37006 | 9,32386 | 1,032541666 | ENST00000370021 | 55119     | NM_018061    | PRPF38B      |
| A_33_P3382709  | 10,158  | 10,1118 | 1,032541666 | ENST00000308330 | 23592     | NM_014319    | LEMD3        |
| A_21_P0005555  | 1,76271 | 1,71652 | 1,032534509 | ENST00000430518 | 100506725 | NR_108082    | LOC100506725 |
| A_33_P3342056  | 1,56225 | 1,51606 | 1,032534509 | ENST00000383671 | 201633    | NM_173799    | TIGIT        |
| A_23_P408249   | 1,71702 | 1,67083 | 1,032534509 | ENST00000467047 | 5105      | NM_002591    | PCK1         |
| A_23_P7503     | 1,55053 | 1,50436 | 1,032520195 | ENST00000274532 | 91937     | NM_138379    | TIMD4        |
| A_22_P00010406 | 1,48606 | 1,43992 | 1,032498725 | N/A             | 100506677 | NR_037584    | AA06         |
| A_22_P00021318 | 1,40057 | 1,35444 | 1,032491568 | N/A             | 100874251 | NR_046986    | KIRREL3-AS2  |
| A_22_P00002063 | 1,57685 | 1,53072 | 1,032491568 | N/A             | N/A       | N/A          | Inc-BLID-1   |

|                |         |         |             |                 |           |              |                  |
|----------------|---------|---------|-------------|-----------------|-----------|--------------|------------------|
| A_22_P00010481 | 1,61319 | 1,56706 | 1,032491568 | N/A             | N/A       | DB054064     | Inc-NAT9-1       |
| A_32_P55871    | 1,49104 | 1,44491 | 1,032491568 | ENST00000273390 | 89876     | NM_033364    | MAATS1           |
| A_21_P0001398  | 1,42349 | 1,37736 | 1,032491568 | N/A             | N/A       | N/A          | Inc-C1orf21-1    |
| A_21_P0011930  | 1,40735 | 1,36122 | 1,032491568 | ENST00000624935 | N/A       | N/A          | N/A              |
| A_21_P0008275  | 1,72536 | 1,67924 | 1,032484412 | ENST00000556913 | 100506446 | N/A          | LOC100506446     |
| A_22_P00011157 | 1,69709 | 1,65099 | 1,032470098 | ENST00000606314 | 64002     | NR_002769    | PCGEM1           |
| A_22_P00001871 | 1,59169 | 1,54559 | 1,032470098 | ENST00000551729 | N/A       | N/A          | N/A              |
| A_21_P0009296  | 1,44609 | 1,4     | 1,032462942 | N/A             | N/A       | N/A          | Inc-MYH13-1      |
| A_21_P0008425  | 1,70576 | 1,65967 | 1,032462942 | N/A             | N/A       | N/A          | Inc-FSCB-1       |
| A_33_P3218435  | 1,48268 | 1,4366  | 1,032455785 | N/A             | N/A       | DB073168     | Inc-KCNMB1-2     |
| A_21_P0001135  | 1,391   | 1,34492 | 1,032455785 | ENST00000451090 | N/A       | N/A          | N/A              |
| A_22_P00000566 | 1,58602 | 1,53994 | 1,032455785 | ENST00000401641 | 285095    | XR_430644    | LOC285095        |
| A_23_P129916   | 1,60883 | 1,56276 | 1,032448629 | ENST00000330255 | 201140    | NM_001220493 | DHRS7C           |
| A_33_P3253394  | 1,39581 | 1,34975 | 1,032441473 | ENST00000611304 | 3903      | NM_002287    | LAIR1            |
| A_21_P0010392  | 1,58149 | 1,53544 | 1,032434316 | N/A             | N/A       | N/A          | Inc-AC007663.1-5 |
| A_21_P0009478  | 1,71723 | 1,67118 | 1,032434316 | N/A             | N/A       | N/A          | Inc-DCC-2        |
| A_33_P3322328  | 10,0328 | 9,98676 | 1,03242716  | ENST00000371733 | 2060      | NM_001981    | EPS15            |
| A_33_P6474740  | 1,59091 | 1,54487 | 1,03242716  | ENST00000422494 | 101929685 | NR_109883    | LINC01384        |
| A_33_P3227360  | 1,4643  | 1,41826 | 1,03242716  | ENST00000409492 | 1745      | AK308842     | DLX1             |
| A_22_P00001492 | 1,39413 | 1,3481  | 1,032420004 | ENST00000425021 | 284749    | N/A          | LINC00494        |
| A_33_P3240722  | 1,67864 | 1,63262 | 1,032412848 | ENST00000425654 | 22866     | NM_014927    | CNKS2            |
| A_21_P0004893  | 1,66563 | 1,61961 | 1,032412848 | N/A             | N/A       | N/A          | Inc-PHF3-4       |
| A_32_P15958    | 1,5601  | 1,51408 | 1,032412848 | ENST00000412906 | 150142    | NR_119384    | ZNF295-AS1       |
| A_21_P0006045  | 1,55364 | 1,50763 | 1,032405692 | ENST00000450938 | 101928797 | N/A          | LOC101928797     |
| A_23_P82913    | 10,2125 | 10,1665 | 1,032398535 | ENST00000522518 | 55039     | NM_017956    | TRMT12           |
| A_22_P00007777 | 1,49483 | 1,44883 | 1,032398535 | N/A             | N/A       | N/A          | Inc-HNRNPA2B1-3  |
| A_21_P0006953  | 1,51083 | 1,46483 | 1,032398535 | N/A             | N/A       | N/A          | Inc-KLF6-5       |
| A_21_P0010567  | 1,57157 | 1,52557 | 1,032398535 | N/A             | 102724661 | N/A          | LOC102724661     |
| A_23_P127195   | 10,0712 | 10,0252 | 1,032398535 | ENST00000378572 | 8559      | NM_003675    | PRPF18           |
| A_21_P0001270  | 1,55817 | 1,51218 | 1,032391379 | N/A             | N/A       | N/A          | Inc-CDC42-1      |
| A_22_P00022920 | 1,88767 | 1,84168 | 1,032391379 | N/A             | N/A       | CF129424     | Inc-HBEGF-2      |
| A_21_P0014910  | 1,5903  | 1,54433 | 1,032377068 | ENST00000524629 | N/A       | XR_132961    | N/A              |
| A_23_P83184    | 1,5165  | 1,47053 | 1,032377068 | ENST00000341206 | 158062    | NM_198946    | LCN6             |



|                |         |         |             |                 |           |              |                |
|----------------|---------|---------|-------------|-----------------|-----------|--------------|----------------|
| A_33_P3212799  | 1,54632 | 1,50036 | 1,032369912 | ENST00000400023 | 348645    | AK126430     | C22orf34       |
| A_22_P00016012 | 1,51043 | 1,46448 | 1,032362756 | N/A             | N/A       | N/A          | Inc-TFDP2-2    |
| A_21_P0005054  | 1,6482  | 1,60225 | 1,032362756 | N/A             | N/A       | N/A          | Inc-ZUFSP-1    |
| A_33_P3412055  | 2,10126 | 2,05531 | 1,032362756 | ENST00000586929 | 147948    | NM_144690    | ZNF582         |
| A_21_P0010852  | 1,55736 | 1,51142 | 1,0323556   | N/A             | N/A       | N/A          | XLOC_I2_001826 |
| A_21_P0007018  | 1,728   | 1,68206 | 1,0323556   | N/A             | N/A       | N/A          | Inc-NRAP-2     |
| A_21_P0010058  | 1,57885 | 1,53292 | 1,032348444 | N/A             | N/A       | N/A          | Inc-NFATC2-1   |
| A_21_P0009263  | 1,69431 | 1,64838 | 1,032348444 | ENST00000478379 | 146771    | N/A          | TCAM1P         |
| A_22_P00023678 | 1,56509 | 1,51916 | 1,032348444 | ENST00000580422 | N/A       | N/A          | N/A            |
| A_33_P3310327  | 1,5816  | 1,53567 | 1,032348444 | N/A             | N/A       | N/A          | N/A            |
| A_21_P0014140  | 1,60911 | 1,56319 | 1,032341289 | N/A             | N/A       | N/A          | N/A            |
| A_23_P503064   | 1,43498 | 1,38907 | 1,032334133 | ENST00000380099 | 9365      | NM_004795    | KL             |
| A_21_P0006704  | 1,55045 | 1,50454 | 1,032334133 | ENST00000416249 | N/A       | N/A          | N/A            |
| A_22_P00013383 | 1,49829 | 1,45238 | 1,032334133 | ENST00000577258 | N/A       | N/A          | N/A            |
| A_33_P3825317  | 1,56854 | 1,52264 | 1,032326978 | ENST00000535113 | 646851    | NM_001291030 | FAM227A        |
| A_33_P3372189  | 15,6048 | 15,5589 | 1,032326978 | N/A             | N/A       | BC029410     | N/A            |
| A_33_P3285764  | 1,50198 | 1,45609 | 1,032319822 | N/A             | N/A       | N/A          | N/A            |
| A_21_P0002209  | 1,5874  | 1,54152 | 1,032312667 | ENST00000449601 | 101805491 | NR_103805    | LOC101805491   |
| A_24_P331675   | 1,44517 | 1,3993  | 1,032305511 | ENST00000620562 | 10665     | NM_006781    | C6orf10        |
| A_21_P0001435  | 1,59317 | 1,54731 | 1,032298356 | N/A             | N/A       | N/A          | Inc-C1orf124-3 |
| A_24_P82032    | 1,5046  | 1,45874 | 1,032298356 | ENST00000316754 | 57381     | NM_020663    | RHOJ           |
| A_21_P0004344  | 1,39142 | 1,34557 | 1,0322912   | ENST00000522256 | 3187      | N/A          | HNRNPH1        |
| A_21_P0002263  | 1,70206 | 1,65622 | 1,032284045 | ENST00000429464 | 150568    | N/A          | LINC01102      |
| A_22_P00025710 | 1,39043 | 1,34459 | 1,032284045 | ENST00000424980 | 102723932 | N/A          | LOC102723932   |
| A_21_P0010312  | 1,38975 | 1,34392 | 1,03227689  | N/A             | N/A       | N/A          | Inc-WRB-2      |
| A_24_P272451   | 1,51039 | 1,46456 | 1,03227689  | ENST00000571800 | 388325    | XM_005256631 | SCIMP          |
| A_22_P00018589 | 1,63781 | 1,59198 | 1,03227689  | N/A             | N/A       | N/A          | Inc-FSIP2-1    |
| A_21_P0014489  | 1,46966 | 1,42384 | 1,032269735 | N/A             | N/A       | N/A          | Inc-MAT2B-3    |
| A_23_P256572   | 1,63522 | 1,5894  | 1,032269735 | ENST00000371175 | 6005      | NM_000324    | RHAG           |
| A_33_P3310572  | 1,69454 | 1,64873 | 1,03226258  | ENST00000507870 | 285501    | NR_028342    | LINC01098      |
| A_22_P00017380 | 1,5006  | 1,45479 | 1,03226258  | ENST00000423727 | N/A       | N/A          | N/A            |
| A_22_P00012534 | 1,39455 | 1,34874 | 1,03226258  | ENST00000526458 | 494558    | NR_038833    | C9orf135-AS1   |
| A_21_P0014755  | 1,49169 | 1,44588 | 1,03226258  | N/A             | N/A       | N/A          | N/A            |

|                |         |         |             |                 |           |              |                       |
|----------------|---------|---------|-------------|-----------------|-----------|--------------|-----------------------|
| A_33_P3226142  | 1,58214 | 1,53634 | 1,032255425 | ENST00000323223 | N/A       | AK097487     | N/A                   |
| A_24_P379104   | 8,6424  | 8,59661 | 1,03224827  | ENST00000376509 | 11040     | NM_006875    | PIM2                  |
| A_24_P230563   | 1,55473 | 1,50894 | 1,03224827  | ENST00000447847 | 3559      | NM_000417    | IL2RA                 |
| A_22_P00000654 | 1,44004 | 1,39425 | 1,03224827  | ENST00000502647 | N/A       | N/A          | N/A                   |
| A_33_P3335825  | 1,53429 | 1,4885  | 1,03224827  | ENST00000483685 | 84812     | AY512961     | PLCD4                 |
| A_33_P3303594  | 1,39796 | 1,35217 | 1,03224827  | ENST00000614839 | 440560    | NM_001146344 | PRAMEF11              |
| A_21_P0010851  | 1,65364 | 1,60787 | 1,03223396  | N/A             | N/A       | N/A          | XLOC_I2_001826        |
| A_33_P3289621  | 1,69185 | 1,64609 | 1,032226805 | ENST00000499809 | 283143    | AK090602     | LINC00900             |
| A_21_P0002164  | 1,69955 | 1,65379 | 1,032226805 | N/A             | N/A       | N/A          | Inc-IAH1-2            |
| A_21_P0007395  | 1,476   | 1,43024 | 1,032226805 | N/A             | N/A       | N/A          | Inc-NPAT-1            |
| A_24_P11100    | 1,55975 | 1,51399 | 1,032226805 | ENST00000458570 | 84460     | NM_001282400 | ZMAT1                 |
| A_33_P3399480  | 1,60932 | 1,56357 | 1,03221965  | N/A             | 101928307 | XR_250014    | LOC101928307          |
| A_19_P00800522 | 1,51603 | 1,47028 | 1,03221965  | N/A             | N/A       | N/A          | Inc-VWA5A-1           |
| A_21_P0013394  | 1,65283 | 1,60708 | 1,03221965  | ENST00000438538 | 102723946 | N/A          | LOC102723946          |
| A_33_P3383601  | 1,39079 | 1,34505 | 1,032212495 | ENST00000343079 | 347148    | NM_198180    | QRFP                  |
| A_23_P302038   | 2,09668 | 2,05095 | 1,03220534  | ENST00000281321 | 5458      | NM_004575    | POU4F2                |
| A_22_P00016745 | 1,50422 | 1,45849 | 1,03220534  | ENST00000522815 | N/A       | N/A          | N/A                   |
| A_33_P3229417  | 1,44299 | 1,39727 | 1,032198186 | ENST00000602794 | 10718     | NM_001010848 | NRG3                  |
| A_33_P3320808  | 1,55643 | 1,51071 | 1,032198186 | ENST00000436115 | 374291    | XR_430138    | NDUFS7                |
| A_33_P3292018  | 1,59702 | 1,55131 | 1,032191031 | ENST00000608504 | N/A       | N/A          | N/A                   |
| A_33_P3579391  | 1,39505 | 1,34934 | 1,032191031 | N/A             | 677843    | DB361496     | SNORA77               |
| A_22_P00004666 | 1,68137 | 1,63567 | 1,032183877 | N/A             | N/A       | AK130909     | Inc-CTD-2054N24.2.1-3 |
| A_21_P0005723  | 1,51004 | 1,46434 | 1,032183877 | N/A             | N/A       | N/A          | Inc-LY96-2            |
| A_22_P00010945 | 1,54183 | 1,49613 | 1,032183877 | ENST00000340585 | N/A       | N/A          | N/A                   |
| A_23_P328145   | 1,64385 | 1,59815 | 1,032183877 | ENST00000534174 | 161142    | NM_173526    | FAM71D                |
| A_21_P0005964  | 1,3918  | 1,3461  | 1,032183877 | N/A             | N/A       | N/A          | Inc-ZMAT4-3           |
| A_21_P0009015  | 2,69329 | 2,64759 | 1,032183877 | ENST00000572479 | N/A       | N/A          | N/A                   |
| A_23_P417918   | 1,52129 | 1,47559 | 1,032183877 | ENST00000523274 | 5179      | NM_006211    | PENK                  |
| A_33_P3601202  | 1,65987 | 1,61417 | 1,032183877 | N/A             | 3453      | NR_036676    | IFNA22P               |
| A_23_P131417   | 12,5497 | 12,504  | 1,032183877 | ENST00000310931 | 3069      | NM_005336    | HDLBP                 |
| A_22_P00012075 | 1,43242 | 1,38673 | 1,032176722 | ENST00000563347 | N/A       | AI440153     | N/A                   |
| A_21_P0011266  | 6,12005 | 6,07436 | 1,032176722 | ENST00000553932 | 283547    | N/A          | LINC00639             |
| A_22_P00011828 | 1,6414  | 1,59572 | 1,032169568 | ENST00000530941 | N/A       | N/A          | N/A                   |

|                |         |         |             |                 |           |              |                       |
|----------------|---------|---------|-------------|-----------------|-----------|--------------|-----------------------|
| A_22_P00017901 | 1,69127 | 1,64559 | 1,032169568 | ENST00000548029 | N/A       | BX097731     | N/A                   |
| A_21_P0008497  | 1,40923 | 1,36355 | 1,032169568 | N/A             | N/A       | N/A          | Inc-RP11-736N17.6.1-2 |
| A_21_P0007099  | 1,56146 | 1,51579 | 1,032162413 | N/A             | N/A       | N/A          | Inc-KIAA1462-1        |
| A_33_P3316621  | 1,42556 | 1,37989 | 1,032162413 | ENST00000282701 | 651       | NM_001201    | BMP3                  |
| A_22_P00004360 | 1,54702 | 1,50135 | 1,032162413 | ENST00000546804 | N/A       | DB048950     | N/A                   |
| A_33_P3242578  | 1,60689 | 1,56123 | 1,032155259 | ENST00000380722 | 100506731 | XR_110231    | LOC100506731          |
| A_23_P354151   | 1,52175 | 1,47609 | 1,032155259 | ENST00000519402 | 3702      | NM_005546    | ITK                   |
| A_33_P3381796  | 4,91917 | 4,87352 | 1,032148104 | N/A             | N/A       | N/A          | N/A                   |
| A_21_P0010128  | 1,6456  | 1,59995 | 1,032148104 | N/A             | N/A       | N/A          | Inc-PPP1R3D-3         |
| A_23_P323243   | 1,51254 | 1,46689 | 1,032148104 | ENST00000610273 | 154197    | NM_173516    | PNLDC1                |
| A_22_P00019025 | 1,75283 | 1,70719 | 1,03214095  | ENST00000564593 | 100861553 | XR_243052    | LINC00560             |
| A_21_P0006935  | 1,54231 | 1,49668 | 1,032133796 | N/A             | N/A       | N/A          | Inc-MGMT-3            |
| A_21_P0001774  | 1,55242 | 1,50679 | 1,032133796 | N/A             | N/A       | N/A          | Inc-ACTR2-3           |
| A_23_P58169    | 1,39328 | 1,34766 | 1,032126642 | ENST00000329476 | 4887      | NM_000910    | NPY2R                 |
| A_21_P0006132  | 1,52364 | 1,47802 | 1,032126642 | N/A             | N/A       | N/A          | Inc-IFT74-4           |
| A_21_P0006111  | 1,59746 | 1,55184 | 1,032126642 | ENST00000436510 | N/A       | N/A          | N/A                   |
| A_23_P371861   | 1,45801 | 1,4124  | 1,032119488 | ENST00000620844 | 168975    | NM_173538    | CNBD1                 |
| A_33_P3382860  | 1,43502 | 1,38941 | 1,032119488 | ENST00000587250 | 8153      | NM_005440    | RND2                  |
| A_21_P0006515  | 1,58807 | 1,54246 | 1,032119488 | N/A             | 100506757 | NR_038998    | LINC00629             |
| A_33_P3335915  | 1,51861 | 1,473   | 1,032119488 | ENST00000367253 | 23345     | AL713682     | SYNE1                 |
| A_21_P0001661  | 1,56874 | 1,52314 | 1,032112334 | N/A             | 102724429 | XR_425225    | LOC102724429          |
| A_21_P0005881  | 1,50019 | 1,45459 | 1,032112334 | N/A             | N/A       | N/A          | Inc-SLC25A32-3        |
| A_21_P0013811  | 1,53871 | 1,49311 | 1,032112334 | N/A             | N/A       | N/A          | XLOC_I2_015703        |
| A_33_P3322654  | 14,4379 | 14,3923 | 1,032112334 | ENST00000481757 | 57140     | NM_018226    | RNPEPL1               |
| A_33_P3745146  | 1,42949 | 1,3839  | 1,032105179 | ENST00000541434 | 23705     | NM_001098517 | CADM1                 |
| A_21_P0003088  | 4,12019 | 4,0746  | 1,032105179 | N/A             | N/A       | N/A          | Inc-AC069257.9.1-6    |
| A_22_P00008676 | 1,51416 | 1,46858 | 1,032098025 | N/A             | N/A       | N/A          | Inc-KIAA0895-1        |
| A_33_P3233060  | 1,55543 | 1,50985 | 1,032098025 | ENST00000623993 | N/A       | AF130057     | N/A                   |
| A_32_P209960   | 1,54498 | 1,49941 | 1,032090872 | ENST00000618327 | 4261      | NM_000246    | CIITA                 |
| A_21_P0009129  | 1,55979 | 1,51422 | 1,032090872 | N/A             | 101927676 | XR_243460    | LOC101927676          |
| A_33_P3221114  | 1,50746 | 1,4619  | 1,032083718 | ENST00000409831 | 152789    | NM_144720    | JAKMIP1               |
| A_22_P00004597 | 1,50855 | 1,46299 | 1,032083718 | ENST00000519393 | N/A       | DA782209     | N/A                   |
| A_22_P00001098 | 1,42576 | 1,38021 | 1,032076564 | N/A             | N/A       | N/A          | Inc-ALG14-2           |

|                |         |         |             |                 |           |              |                      |
|----------------|---------|---------|-------------|-----------------|-----------|--------------|----------------------|
| A_33_P3285132  | 1,51532 | 1,46977 | 1,032076564 | ENST00000329285 | 148103    | NM_001007248 | ZNF599               |
| A_22_P00008804 | 1,61325 | 1,56771 | 1,03206941  | N/A             | N/A       | N/A          | Inc-KL-1             |
| A_21_P0002369  | 1,52088 | 1,47534 | 1,03206941  | N/A             | N/A       | N/A          | Inc-SP140-3          |
| A_22_P00018745 | 1,52635 | 1,48081 | 1,03206941  | ENST00000521139 | N/A       | BF305512     | N/A                  |
| A_33_P3317453  | 1,43785 | 1,39232 | 1,032062256 | N/A             | N/A       | N/A          | N/A                  |
| A_21_P0013588  | 1,52353 | 1,478   | 1,032062256 | N/A             | N/A       | N/A          | XLOC_I2_014836       |
| A_21_P0000974  | 1,44101 | 1,39548 | 1,032062256 | N/A             | N/A       | N/A          | Inc-LRRC42-1         |
| A_33_P3250566  | 1,70349 | 1,65797 | 1,032055103 | ENST00000390443 | N/A       | D13070       | N/A                  |
| A_33_P3264533  | 1,56706 | 1,52154 | 1,032055103 | N/A             | N/A       | N/A          | N/A                  |
| A_33_P3298102  | 1,40746 | 1,36194 | 1,032055103 | ENST00000560007 | N/A       | N/A          | N/A                  |
| A_21_P0011891  | 1,54375 | 1,49823 | 1,032055103 | N/A             | N/A       | N/A          | XLOC_I2_007834       |
| A_33_P3213179  | 1,51677 | 1,47126 | 1,032047949 | ENST00000284601 | 5506      | NM_002711    | PPP1R3A              |
| A_33_P3254161  | 1,62971 | 1,58421 | 1,032040795 | N/A             | N/A       | N/A          | N/A                  |
| A_33_P3360249  | 1,56488 | 1,51938 | 1,032040795 | ENST00000373705 | 3061      | NM_001525    | HCRTR1               |
| A_22_P00007750 | 1,70406 | 1,65856 | 1,032040795 | N/A             | N/A       | N/A          | Inc-HMGB2-2          |
| A_33_P3256997  | 1,59511 | 1,54961 | 1,032040795 | ENST00000398984 | 643680    | XM_005274415 | MS4A4E               |
| A_21_P0009505  | 1,49868 | 1,45318 | 1,032040795 | N/A             | N/A       | N/A          | Inc-RP11-17M16.1.1-2 |
| A_24_P221366   | 17,5631 | 17,5176 | 1,032040795 | ENST00000565420 | 6210      | NM_001019    | RPS15A               |
| A_33_P3239037  | 1,48678 | 1,4413  | 1,032026488 | ENST00000374801 | 414319    | NR_103830    | LINC00587            |
| A_33_P3326271  | 1,75922 | 1,71374 | 1,032026488 | ENST00000542196 | 392376    | NM_001004481 | OR13C2               |
| A_22_P00011745 | 1,5902  | 1,54473 | 1,032019335 | ENST00000446979 | 151171    | NR_037809    | LINC01107            |
| A_21_P0004188  | 1,69486 | 1,64939 | 1,032019335 | ENST00000509568 | N/A       | N/A          | N/A                  |
| A_33_P3223687  | 1,5303  | 1,48483 | 1,032019335 | ENST00000399653 | 492307    | NM_001007176 | C8orf22              |
| A_21_P0005376  | 1,52208 | 1,47662 | 1,032012182 | ENST00000416708 | N/A       | XR_426177    | N/A                  |
| A_33_P3417840  | 1,54177 | 1,49632 | 1,032005028 | ENST00000358463 | 388289    | NM_207385    | C16orf47             |
| A_33_P3284621  | 1,63887 | 1,59342 | 1,032005028 | ENST00000367922 | 4921      | N/A          | DDR2                 |
| A_21_P0000170  | 1,46868 | 1,42324 | 1,031997875 | ENST00000517349 | 100507341 | NM_001206847 | SMIM18               |
| A_22_P00006270 | 1,5206  | 1,47516 | 1,031997875 | N/A             | N/A       | N/A          | Inc-FAM71B-1         |
| A_23_P213893   | 1,68698 | 1,64154 | 1,031997875 | ENST00000274473 | 84466     | NM_032446    | MEGF10               |
| A_22_P00004503 | 1,6503  | 1,60486 | 1,031997875 | ENST00000548266 | N/A       | N/A          | N/A                  |
| A_33_P3240249  | 1,68591 | 1,64047 | 1,031997875 | ENST00000577087 | N/A       | AK125712     | N/A                  |
| A_21_P0012138  | 1,68036 | 1,63493 | 1,031990722 | N/A             | N/A       | N/A          | XLOC_I2_008783       |
| A_21_P0008479  | 1,39261 | 1,34718 | 1,031990722 | N/A             | N/A       | N/A          | Inc-CLMN-2           |

|                |         |         |             |                 |           |              |                |
|----------------|---------|---------|-------------|-----------------|-----------|--------------|----------------|
| A_33_P3290477  | 1,40135 | 1,35592 | 1,031990722 | ENST00000339948 | 127665    | NM_001009992 | ZNF648         |
| A_21_P0009430  | 1,55002 | 1,5046  | 1,031983569 | ENST00000578803 | 400660    | NR_120419    | LINC00683      |
| A_22_P00023561 | 1,40937 | 1,36395 | 1,031983569 | ENST00000527997 | N/A       | N/A          | N/A            |
| A_21_P0010343  | 6,39053 | 6,34511 | 1,031983569 | ENST00000450776 | 102724679 | XR_425307    | LOC102724679   |
| A_22_P00009540 | 1,6977  | 1,65229 | 1,031976415 | ENST00000552992 | N/A       | DA442292     | N/A            |
| A_22_P00002234 | 1,58447 | 1,53906 | 1,031976415 | ENST00000412695 | N/A       | N/A          | N/A            |
| A_22_P00014384 | 10,5745 | 10,5291 | 1,031969262 | ENST00000302516 | 23450     | NM_012426    | SF3B3          |
| A_33_P3327771  | 1,51288 | 1,46748 | 1,031969262 | ENST00000567334 | 127833    | NM_001136504 | SYT2           |
| A_33_P3272558  | 13,1342 | 13,0888 | 1,031969262 | N/A             | 29781     | NM_001185011 | NCAPH2         |
| A_32_P353072   | 11,0308 | 10,9854 | 1,031969262 | ENST00000396667 | 54664     | NM_018374    | TMEM106B       |
| A_21_P0009370  | 1,68422 | 1,63883 | 1,031962109 | N/A             | N/A       | N/A          | lnc-SECTM1-1   |
| A_33_P3222196  | 1,4351  | 1,38971 | 1,031962109 | N/A             | N/A       | N/A          | N/A            |
| A_33_P3250971  | 1,51341 | 1,46802 | 1,031962109 | ENST00000390621 | N/A       | Z18843       | N/A            |
| A_33_P3265301  | 5,47618 | 5,43079 | 1,031962109 | N/A             | 125111    | NM_152219    | GJD3           |
| A_33_P3351298  | 1,41039 | 1,36501 | 1,031954956 | ENST00000480591 | 1129      | AK125233     | CHRM2          |
| A_21_P0002753  | 1,70351 | 1,65813 | 1,031954956 | ENST00000484679 | N/A       | N/A          | N/A            |
| A_22_P00021160 | 1,38957 | 1,34419 | 1,031954956 | ENST00000456585 | 100505879 | N/A          | KIF25-AS1      |
| A_33_P3375736  | 1,45491 | 1,40953 | 1,031954956 | ENST00000443118 | 116966    | NM_170710    | WDR17          |
| A_33_P3247117  | 1,48693 | 1,44156 | 1,031947803 | ENST00000408967 | 9142      | NM_004709    | TMEM257        |
| A_33_P3290318  | 1,61273 | 1,56736 | 1,031947803 | N/A             | N/A       | AK127999     | N/A            |
| A_33_P3297651  | 3,60879 | 3,56342 | 1,031947803 | N/A             | 100130540 | AK125068     | LOC100130540   |
| A_22_P00003012 | 1,39401 | 1,34865 | 1,03194065  | N/A             | N/A       | N/A          | lnc-C6orf94-1  |
| A_21_P0001051  | 1,54062 | 1,49527 | 1,031933498 | ENST00000428399 | N/A       | N/A          | N/A            |
| A_23_P55917    | 5,43691 | 5,39156 | 1,031933498 | ENST00000544769 | 84258     | NM_032298    | SYT3           |
| A_22_P00002375 | 1,39421 | 1,34886 | 1,031933498 | N/A             | N/A       | N/A          | lnc-C12orf66-2 |
| A_21_P0005699  | 1,69083 | 1,64548 | 1,031933498 | ENST00000520370 | N/A       | N/A          | N/A            |
| A_21_P0005427  | 1,53058 | 1,48524 | 1,031926345 | N/A             | N/A       | N/A          | lnc-METTL2B-1  |
| A_21_P0008463  | 1,63722 | 1,59188 | 1,031926345 | N/A             | N/A       | N/A          | lnc-NPC2-1     |
| A_21_P0003102  | 1,57557 | 1,53023 | 1,031926345 | N/A             | N/A       | N/A          | lnc-TIMP4-1    |
| A_21_P0006456  | 1,53626 | 1,49092 | 1,031926345 | ENST00000433732 | 7503      | N/A          | XIST           |
| A_33_P3356022  | 1,47838 | 1,43305 | 1,031919192 | ENST00000390462 | N/A       | AB305718     | N/A            |
| A_33_P3293504  | 1,68362 | 1,63829 | 1,031919192 | N/A             | N/A       | N/A          | lnc-CNTN1-1    |
| A_33_P3310644  | 1,43946 | 1,39413 | 1,031919192 | ENST00000315683 | 122742    | NM_001004717 | OR4L1          |

|                |         |         |             |                 |           |              |                      |
|----------------|---------|---------|-------------|-----------------|-----------|--------------|----------------------|
| A_33_P3393360  | 3,06239 | 3,01708 | 1,031904887 | N/A             | 100130927 | AK124783     | LOC100130927         |
| A_22_P00010702 | 1,54863 | 1,50332 | 1,031904887 | ENST00000556448 | N/A       | BX325820     | N/A                  |
| A_21_P0001820  | 1,70198 | 1,65668 | 1,031897734 | ENST00000474561 | N/A       | N/A          | N/A                  |
| A_22_P00020204 | 1,62373 | 1,57843 | 1,031897734 | ENST00000456514 | 101101772 | N/A          | LINC00601            |
| A_33_P3376531  | 1,39194 | 1,34664 | 1,031897734 | N/A             | N/A       | N/A          | N/A                  |
| A_21_P0005298  | 1,56185 | 1,51655 | 1,031897734 | ENST00000443406 | 101928744 | N/A          | LINC01450            |
| A_21_P0001282  | 1,54782 | 1,50252 | 1,031897734 | N/A             | N/A       | N/A          | Inc-TFAP2E-1         |
| A_23_P114155   | 11,1799 | 11,1346 | 1,031897734 | ENST00000156109 | 27238     | NM_015698    | GPLOW                |
| A_22_P00012634 | 1,53749 | 1,4922  | 1,031890582 | N/A             | N/A       | HY024160     | Inc-PURG-1           |
| A_22_P00015716 | 9,67704 | 9,63175 | 1,031890582 | N/A             | N/A       | N/A          | Inc-SYT13-2          |
| A_32_P120127   | 1,52457 | 1,47928 | 1,031890582 | N/A             | 100169752 | NR_023362    | TEX36-AS1            |
| A_21_P0012585  | 1,44868 | 1,40339 | 1,031890582 | N/A             | N/A       | N/A          | XLOC_I2_010679       |
| A_22_P00018618 | 1,52014 | 1,47487 | 1,031876277 | N/A             | 102724406 | XR_426072    | LOC102724406         |
| A_24_P463891   | 1,59105 | 1,54578 | 1,031876277 | ENST00000302103 | 10690     | NM_006581    | FUT9                 |
| A_21_P0000847  | 8,26489 | 8,21963 | 1,031869124 | N/A             | 100630918 | NR_038942    | LOC100630918         |
| A_22_P00015235 | 1,67371 | 1,62846 | 1,031861972 | N/A             | 147004    | XR_243792    | LOC147004            |
| A_23_P217428   | 1,5562  | 1,51095 | 1,031861972 | ENST00000489330 | 395       | NM_013427    | ARHGAP6              |
| A_21_P0000761  | 1,57849 | 1,53325 | 1,03185482  | N/A             | 100505716 | NR_038319    | LOC100505716         |
| A_22_P00003632 | 1,44988 | 1,40464 | 1,03185482  | N/A             | N/A       | AK124172     | Inc-CD53-1           |
| A_33_P3391905  | 1,47877 | 1,43353 | 1,03185482  | N/A             | 139420    | AK131475     | SMEK3P               |
| A_21_P0005084  | 1,54586 | 1,50062 | 1,03185482  | N/A             | N/A       | N/A          | Inc-PDE10A-1         |
| A_22_P00013290 | 1,39802 | 1,35278 | 1,03185482  | N/A             | N/A       | N/A          | Inc-RP11-10A14.4.1-2 |
| A_21_P0002513  | 1,69643 | 1,6512  | 1,031847667 | N/A             | N/A       | N/A          | Inc-RND3-4           |
| A_22_P00015564 | 1,66486 | 1,61964 | 1,031840515 | N/A             | N/A       | N/A          | Inc-STRA6-1          |
| A_22_P00011456 | 1,68224 | 1,63702 | 1,031840515 | ENST00000555496 | N/A       | XM_006720348 | N/A                  |
| A_33_P3341007  | 1,6266  | 1,58139 | 1,031833363 | N/A             | N/A       | XR_158882    | N/A                  |
| A_23_P371729   | 1,61175 | 1,56655 | 1,031826211 | ENST00000621517 | 2702      | NM_005266    | GJA5                 |
| A_22_P00023176 | 1,50493 | 1,45973 | 1,031826211 | N/A             | N/A       | N/A          | Inc-STAT6-2          |
| A_21_P0003441  | 1,54885 | 1,50365 | 1,031826211 | ENST00000504165 | N/A       | N/A          | N/A                  |
| A_22_P00007713 | 1,44145 | 1,39625 | 1,031826211 | ENST00000539514 | N/A       | N/A          | N/A                  |
| A_32_P155416   | 10,1406 | 10,0954 | 1,031826211 | ENST00000495828 | 79033     | NM_024066    | ER13                 |
| A_21_P0003238  | 1,42089 | 1,37571 | 1,031811907 | N/A             | N/A       | N/A          | Inc-CADM2-3          |
| A_22_P00020197 | 1,5481  | 1,50292 | 1,031811907 | N/A             | N/A       | N/A          | Inc-ANKRD11-4        |

|                |         |         |             |                 |           |              |                    |
|----------------|---------|---------|-------------|-----------------|-----------|--------------|--------------------|
| A_22_P00009109 | 1,44348 | 1,3983  | 1,031811907 | N/A             | N/A       | DA608549     | Inc-LIMCH1-2       |
| A_22_P00012160 | 1,54101 | 1,49583 | 1,031811907 | N/A             | N/A       | AK090921     | Inc-PON1-1         |
| A_22_P00020371 | 1,39804 | 1,35286 | 1,031811907 | ENST00000612422 | 101927815 | NR_125423    | LOC101927815       |
| A_21_P0004157  | 5,48444 | 5,43927 | 1,031804755 | ENST00000515153 | N/A       | N/A          | N/A                |
| A_22_P00004966 | 1,4576  | 1,41243 | 1,031804755 | N/A             | 100874234 | NR_046578    | CACNA1C-AS4        |
| A_23_P329798   | 1,60504 | 1,55987 | 1,031804755 | ENST00000380911 | 9350      | NM_005454    | CER1               |
| A_21_P0001848  | 1,55138 | 1,50621 | 1,031804755 | N/A             | N/A       | N/A          | Inc-YPEL5-1        |
| A_22_P00024287 | 1,53381 | 1,48864 | 1,031804755 | ENST00000412221 | 101929541 | N/A          | LOC101929541       |
| A_21_P0006344  | 1,42534 | 1,38018 | 1,031797603 | N/A             | N/A       | N/A          | Inc-DMRTA1-7       |
| A_22_P00024680 | 1,48154 | 1,43638 | 1,031797603 | N/A             | N/A       | N/A          | Inc-AC007405.2.1-3 |
| A_21_P0013962  | 1,40254 | 1,35738 | 1,031797603 | N/A             | N/A       | N/A          | N/A                |
| A_22_P00003815 | 1,74035 | 1,69519 | 1,031797603 | ENST00000567401 | N/A       | AF054994     | N/A                |
| A_21_P0010113  | 1,53053 | 1,48538 | 1,031790451 | N/A             | N/A       | N/A          | Inc-FOXA2-2        |
| A_22_P00025270 | 1,60369 | 1,55854 | 1,031790451 | N/A             | N/A       | N/A          | Inc-MAPK6-4        |
| A_33_P3283262  | 1,70488 | 1,65973 | 1,031790451 | ENST00000382470 | 728373    | NM_001242326 | USP17L25           |
| A_33_P3814473  | 1,58739 | 1,54225 | 1,031783299 | N/A             | 7115      | BF248073     | TMSB4XP1           |
| A_21_P0006189  | 1,42468 | 1,37954 | 1,031783299 | N/A             | N/A       | N/A          | Inc-COL15A1-1      |
| A_33_P3394853  | 1,6814  | 1,63626 | 1,031783299 | N/A             | 100132215 | NR_027069    | LOC100132215       |
| A_21_P0005716  | 1,60027 | 1,55514 | 1,031776148 | ENST00000520273 | 389668    | N/A          | XKR9               |
| A_22_P00024328 | 1,42499 | 1,37986 | 1,031776148 | N/A             | N/A       | N/A          | Inc-PFKP-1         |
| A_33_P3408938  | 1,60183 | 1,55671 | 1,031768996 | ENST00000616858 | 79166     | NR_003061    | LILRP2             |
| A_19_P00811828 | 1,39431 | 1,34919 | 1,031768996 | ENST00000614334 | 100129842 | NM_001159293 | ZNF737             |
| A_22_P00021671 | 1,68095 | 1,63584 | 1,031761844 | ENST00000447158 | N/A       | N/A          | N/A                |
| A_24_P406601   | 1,5354  | 1,49029 | 1,031761844 | ENST00000252854 | 10439     | NM_014279    | OLFM1              |
| A_22_P00002405 | 1,68106 | 1,63595 | 1,031761844 | N/A             | N/A       | N/A          | Inc-C14orf126-5    |
| A_21_P0007982  | 1,60342 | 1,55831 | 1,031761844 | ENST00000417079 | N/A       | N/A          | N/A                |
| A_22_P00003173 | 10,0093 | 9,96419 | 1,031761844 | ENST00000557985 | 90120     | NM_001256526 | C9orf69            |
| A_33_P8914647  | 1,54713 | 1,50203 | 1,031754693 | ENST00000512517 | 101928776 | NR_110951    | LINC01258          |
| A_22_P00016125 | 1,53933 | 1,49423 | 1,031754693 | N/A             | N/A       | N/A          | Inc-TIGD2-1        |
| A_33_P3578394  | 1,53635 | 1,49125 | 1,031754693 | N/A             | 284578    | NR_027086    | LOC284578          |
| A_33_P3727762  | 15,3604 | 15,3153 | 1,031754693 | ENST00000322030 | 6418      | NM_003011    | SET                |
| A_33_P3217258  | 1,7213  | 1,67621 | 1,031747541 | ENST00000450714 | 136991    | NM_130768    | ASZ1               |
| A_21_P0008198  | 1,6073  | 1,56221 | 1,031747541 | N/A             | N/A       | N/A          | Inc-DCT-9          |

|                |         |         |             |                 |           |              |                      |
|----------------|---------|---------|-------------|-----------------|-----------|--------------|----------------------|
| A_33_P3321258  | 1,58001 | 1,53492 | 1,031747541 | N/A             | N/A       | AK098731     | Inc-GLP2R-1          |
| A_23_P53390    | 8,03213 | 7,98705 | 1,03174039  | ENST00000261266 | 5787      | NM_002837    | PTPRB                |
| A_33_P3311660  | 1,4422  | 1,39712 | 1,03174039  | N/A             | N/A       | AK128239     | N/A                  |
| A_23_P129133   | 1,72687 | 1,68179 | 1,03174039  | ENST00000354638 | 4948      | NM_000275    | OCA2                 |
| A_23_P155755   | 1,42869 | 1,38362 | 1,031733238 | ENST00000226317 | 6372      | NM_002993    | CXCL6                |
| A_21_P0014497  | 1,51401 | 1,46894 | 1,031733238 | N/A             | 101928612 | XR_245345    | LOC101928612         |
| A_33_P3329123  | 1,68587 | 1,64081 | 1,031726087 | N/A             | N/A       | N/A          | N/A                  |
| A_32_P139738   | 6,21862 | 6,17356 | 1,031726087 | ENST00000563904 | N/A       | N/A          | N/A                  |
| A_21_P0010896  | 1,57282 | 1,52777 | 1,031718935 | N/A             | 728218    | N/A          | LINC00864            |
| A_33_P3320822  | 1,67133 | 1,62628 | 1,031718935 | ENST00000614171 | N/A       | M62378       | N/A                  |
| A_22_P00011260 | 1,55418 | 1,50913 | 1,031718935 | ENST00000528000 | N/A       | N/A          | N/A                  |
| A_33_P3423315  | 1,5455  | 1,50045 | 1,031718935 | N/A             | N/A       | N/A          | N/A                  |
| A_22_P00007731 | 1,42738 | 1,38234 | 1,031711784 | N/A             | N/A       | BG199861     | Inc-HMBOX1-4         |
| A_22_P00001303 | 1,39318 | 1,34814 | 1,031711784 | ENST00000531157 | N/A       | BG218689     | N/A                  |
| A_21_P0006827  | 1,68846 | 1,64343 | 1,031704633 | N/A             | N/A       | N/A          | Inc-AL137145.1-3     |
| A_33_P3363859  | 1,48903 | 1,444   | 1,031704633 | N/A             | 100130452 | NR_034036    | LOC100130452         |
| A_22_P00008865 | 1,42602 | 1,38099 | 1,031704633 | N/A             | 100873922 | NR_046657    | ZFX-AS1              |
| A_23_P47340    | 1,51954 | 1,47451 | 1,031704633 | ENST00000321322 | 57453     | NM_020693    | DSCAML1              |
| A_23_P69699    | 1,42447 | 1,37944 | 1,031704633 | ENST00000296533 | 4886      | NM_000909    | NPY1R                |
| A_21_P0013555  | 1,5336  | 1,48858 | 1,031697482 | ENST00000428006 | N/A       | N/A          | N/A                  |
| A_21_P0010347  | 1,38815 | 1,34314 | 1,03169033  | ENST00000430483 | 440823    | N/A          | MIAT                 |
| A_33_P3378269  | 1,43078 | 1,38577 | 1,03169033  | N/A             | N/A       | N/A          | N/A                  |
| A_22_P00007725 | 1,69846 | 1,65345 | 1,03169033  | N/A             | N/A       | N/A          | Inc-HLTF-2           |
| A_23_P9319     | 8,80494 | 8,75993 | 1,03169033  | ENST00000485565 | 10927     | NM_006717    | SPIN1                |
| A_21_P0014610  | 1,39153 | 1,34653 | 1,031683179 | N/A             | N/A       | N/A          | N/A                  |
| A_23_P202071   | 1,55925 | 1,51425 | 1,031683179 | ENST00000399850 | 10659     | NM_001025077 | CEL2F2               |
| A_22_P00013488 | 1,5141  | 1,46911 | 1,031676028 | N/A             | N/A       | N/A          | Inc-RP11-33N16.1.1-1 |
| A_22_P00014466 | 1,52779 | 1,4828  | 1,031676028 | ENST00000512571 | N/A       | N/A          | N/A                  |
| A_21_P0003869  | 1,40844 | 1,36345 | 1,031676028 | N/A             | 101928810 | XR_244771    | LOC101928810         |
| A_33_P3364488  | 1,50467 | 1,45968 | 1,031676028 | ENST00000450945 | 83953     | NM_001170631 | FCAMR                |
| A_23_P3065     | 1,71273 | 1,66775 | 1,031668877 | ENST00000216445 | 55195     | NM_018168    | C14orf105            |
| A_21_P0007809  | 1,54367 | 1,49869 | 1,031668877 | N/A             | N/A       | N/A          | Inc-STX2-1           |
| A_21_P0013124  | 1,42673 | 1,38175 | 1,031668877 | N/A             | N/A       | N/A          | XLOC_l2_012397       |



|                |         |         |             |                 |           |              |               |
|----------------|---------|---------|-------------|-----------------|-----------|--------------|---------------|
| A_23_P68601    | 1,38823 | 1,34326 | 1,031661726 | ENST00000480798 | 8530      | NM_003650    | CST7          |
| A_22_P00017971 | 1,63998 | 1,59501 | 1,031661726 | ENST00000439810 | N/A       | AK091755     | N/A           |
| A_21_P0009953  | 1,68888 | 1,64392 | 1,031654575 | N/A             | N/A       | N/A          | Inc-SYNDIG1-3 |
| A_23_P123308   | 1,39462 | 1,34966 | 1,031654575 | ENST00000614835 | 56154     | NM_031271    | TEX15         |
| A_22_P00013279 | 1,68882 | 1,64387 | 1,031647425 | ENST00000567862 | N/A       | N/A          | N/A           |
| A_22_P00021211 | 1,68783 | 1,64288 | 1,031647425 | ENST00000411721 | N/A       | N/A          | N/A           |
| A_33_P3397233  | 1,52267 | 1,47772 | 1,031647425 | N/A             | 101929256 | XR_242748    | LOC101929256  |
| A_22_P00022949 | 1,39033 | 1,34539 | 1,031640274 | N/A             | N/A       | N/A          | Inc-ATAD1-1   |
| A_22_P00018450 | 1,52813 | 1,4832  | 1,031633123 | N/A             | N/A       | BX097331     | Inc-KCNJ13-1  |
| A_24_P57993    | 1,54736 | 1,50243 | 1,031633123 | N/A             | 85352     | NM_001099294 | KIAA1644      |
| A_22_P00025414 | 1,55671 | 1,51179 | 1,031625972 | ENST00000563124 | 102723308 | N/A          | LOC102723308  |
| A_22_P00010641 | 1,59442 | 1,5495  | 1,031625972 | ENST00000552238 | N/A       | N/A          | N/A           |
| A_21_P0000920  | 1,5166  | 1,47169 | 1,031618822 | N/A             | 101929120 | NR_110716    | LINC01351     |
| A_21_P0014535  | 1,59003 | 1,54512 | 1,031618822 | N/A             | 102724348 | XR_429392    | LOC102724348  |
| A_21_P0012216  | 1,52707 | 1,48216 | 1,031618822 | ENST00000625012 | N/A       | N/A          | N/A           |
| A_23_P34676    | 1,70469 | 1,65979 | 1,031611671 | ENST00000483825 | 919       | NM_198053    | CD247         |
| A_24_P80181    | 10,9613 | 10,9164 | 1,031611671 | ENST00000258439 | 55654     | NM_017849    | TMEM127       |
| A_22_P00023440 | 1,55266 | 1,50776 | 1,031611671 | ENST00000510211 | N/A       | N/A          | N/A           |
| A_24_P126060   | 11,5308 | 11,4859 | 1,031611671 | ENST00000457138 | 1654      | NM_001356    | DDX3X         |
| A_23_P121695   | 1,54045 | 1,49556 | 1,03160452  | ENST00000286758 | 10563     | NM_006419    | CXCL13        |
| A_21_P0011953  | 1,5178  | 1,47292 | 1,03159737  | ENST00000416758 | 101929127 | NR_121190    | PGM5P3-AS1    |
| A_23_P252882   | 1,56431 | 1,51943 | 1,03159737  | ENST00000304954 | 1448      | NM_005212    | CSN3          |
| A_22_P00004268 | 1,58158 | 1,5367  | 1,03159737  | N/A             | N/A       | BU945522     | Inc-CNBD1-2   |
| A_21_P0006615  | 1,43229 | 1,38741 | 1,03159737  | ENST00000604086 | N/A       | N/A          | N/A           |
| A_33_P3237000  | 1,54401 | 1,49913 | 1,03159737  | N/A             | 389396    | NM_001010904 | GLYATL3       |
| A_21_P0011584  | 1,48392 | 1,43904 | 1,03159737  | ENST00000583179 | N/A       | N/A          | N/A           |
| A_33_P3310246  | 1,60444 | 1,55957 | 1,031590219 | ENST00000380970 | 401337    | NR_038371    | LINC01446     |
| A_33_P3320408  | 1,55593 | 1,51107 | 1,031583069 | N/A             | N/A       | N/A          | N/A           |
| A_23_P41750    | 1,53032 | 1,48546 | 1,031583069 | ENST00000296739 | 84654     | NM_032567    | SPZ1          |
| A_32_P174025   | 1,60041 | 1,55556 | 1,031575919 | ENST00000600586 | 348303    | NM_182704    | SELV          |
| A_21_P0007880  | 1,61506 | 1,57021 | 1,031575919 | N/A             | 100507195 | XR_171965    | LOC100507195  |
| A_21_P0002888  | 1,4896  | 1,44475 | 1,031575919 | ENST00000474598 | N/A       | N/A          | N/A           |
| A_21_P0002136  | 1,68223 | 1,63739 | 1,031568768 | ENST00000444017 | N/A       | N/A          | N/A           |

|                |         |         |             |                 |           |              |                |
|----------------|---------|---------|-------------|-----------------|-----------|--------------|----------------|
| A_22_P00003127 | 1,42661 | 1,38177 | 1,031568768 | N/A             | N/A       | N/A          | Inc-C9orf123-6 |
| A_22_P00016888 | 1,71217 | 1,66733 | 1,031568768 | N/A             | N/A       | AK130715     | Inc-TSHB-3     |
| A_21_P0012241  | 1,65571 | 1,61087 | 1,031568768 | N/A             | 102725394 | N/A          | LOC102725394   |
| A_33_P3215232  | 1,60446 | 1,55962 | 1,031568768 | N/A             | N/A       | N/A          | N/A            |
| A_33_P3215906  | 9,17167 | 9,12684 | 1,031561618 | ENST00000612520 | 400818    | NM_001037675 | NBPF9          |
| A_22_P00018046 | 2,26583 | 2,221   | 1,031561618 | N/A             | N/A       | N/A          | Inc-ZNF266-1   |
| A_21_P0002090  | 1,39898 | 1,35415 | 1,031561618 | ENST00000424355 | N/A       | N/A          | N/A            |
| A_22_P00000316 | 1,68549 | 1,64066 | 1,031561618 | ENST00000440935 | N/A       | N/A          | N/A            |
| A_22_P00007848 | 1,43377 | 1,38894 | 1,031561618 | ENST00000583122 | N/A       | N/A          | N/A            |
| A_22_P00009503 | 1,58118 | 1,53635 | 1,031561618 | N/A             | 100874286 | NR_047475    | NRG1-IT3       |
| A_21_P0013008  | 1,68527 | 1,64045 | 1,031554468 | N/A             | N/A       | N/A          | XLOC_I2_012366 |
| A_23_P1973     | 1,49741 | 1,45259 | 1,031554468 | ENST00000339994 | 3767      | NM_000525    | KCNJ11         |
| A_21_P0008270  | 1,67824 | 1,63342 | 1,031554468 | ENST00000557246 | 101927690 | XR_245765    | LOC101927690   |
| A_22_P00011212 | 1,45641 | 1,4116  | 1,031547318 | N/A             | 101929198 | NR_121666    | ATP13A4-AS1    |
| A_33_P6820772  | 5,33507 | 5,29026 | 1,031547318 | N/A             | 282997    | NR_026932    | PDCD4-AS1      |
| A_21_P0010354  | 1,53763 | 1,49283 | 1,031540168 | ENST00000416995 | N/A       | N/A          | N/A            |
| A_33_P3211956  | 12,2259 | 12,1811 | 1,031540168 | ENST00000395042 | 10287     | NM_005873    | RGS19          |
| A_22_P00001624 | 1,49117 | 1,44638 | 1,031533017 | ENST00000604933 | 100996567 | NR_103828    | ANTXRPL1       |
| A_21_P0014841  | 1,67394 | 1,62915 | 1,031533017 | N/A             | 101929335 | NR_110150    | ADAMTS9-AS1    |
| A_33_P3384202  | 1,42596 | 1,38118 | 1,031525867 | ENST00000321355 | 338662    | NM_001005197 | OR8D4          |
| A_22_P00022639 | 1,46999 | 1,42522 | 1,031518718 | N/A             | 100506937 | XR_108820    | LOC100506937   |
| A_24_P306304   | 1,38892 | 1,34415 | 1,031518718 | ENST00000376098 | 654348    | NM_001045480 | PRAMEF16       |
| A_33_P3386237  | 3,31457 | 3,2698  | 1,031518718 | N/A             | 100132529 | NR_103851    | TAT-AS1        |
| A_22_P00003515 | 1,42187 | 1,37711 | 1,031511568 | N/A             | N/A       | N/A          | Inc-CCL13-1    |
| A_33_P3341821  | 4,02545 | 3,98071 | 1,031497268 | ENST00000302250 | 338094    | NM_176782    | FAM151A        |
| A_24_P268893   | 9,01256 | 8,96783 | 1,031490118 | ENST00000311638 | 152815    | NM_144721    | THAP6          |
| A_22_P00009382 | 1,6689  | 1,62417 | 1,031490118 | ENST00000517595 | N/A       | N/A          | N/A            |
| A_23_P212354   | 1,59671 | 1,55198 | 1,031490118 | ENST00000292301 | 729230    | NM_001123041 | CCR2           |
| A_23_P40059    | 9,26156 | 9,21683 | 1,031490118 | ENST00000342075 | 5378      | NM_000534    | PMS1           |
| A_22_P00013004 | 1,40508 | 1,36036 | 1,031482968 | N/A             | N/A       | N/A          | Inc-RFX8-1     |
| A_22_P00001448 | 4,14733 | 4,10261 | 1,031482968 | N/A             | 101928001 | NR_110822    | PRKCA-AS1      |
| A_21_P0009884  | 1,68565 | 1,64094 | 1,031475819 | ENST00000422574 | N/A       | N/A          | N/A            |
| A_21_P0014914  | 1,51685 | 1,47214 | 1,031475819 | N/A             | 100505518 | XR_133034    | EDNRB-AS1      |

|                |         |         |             |                 |           |              |                |
|----------------|---------|---------|-------------|-----------------|-----------|--------------|----------------|
| A_23_P11774    | 11,6207 | 11,576  | 1,031468669 | ENST00000488453 | 51118     | NM_016037    | UTP11L         |
| A_22_P00016837 | 5,88913 | 5,84443 | 1,031468669 | N/A             | N/A       | AK091722     | Inc-TRMT2B-1   |
| A_21_P0004342  | 1,61564 | 1,57095 | 1,03146152  | N/A             | N/A       | N/A          | Inc-FAM153B-3  |
| A_21_P0005726  | 1,5752  | 1,53051 | 1,03146152  | N/A             | N/A       | N/A          | Inc-ZFHx4-2    |
| A_22_P00004491 | 1,53061 | 1,48592 | 1,03146152  | ENST00000553029 | N/A       | N/A          | N/A            |
| A_23_P13102    | 1,53146 | 1,48678 | 1,03145437  | ENST00000494737 | 100506742 | NM_001191016 | CASP12         |
| A_21_P0005009  | 1,53099 | 1,48632 | 1,031447221 | N/A             | N/A       | N/A          | Inc-MBOAT1-3   |
| A_21_P0002955  | 1,68896 | 1,6443  | 1,031440071 | N/A             | N/A       | N/A          | Inc-LARS2-1    |
| A_21_P0014892  | 1,567   | 1,52234 | 1,031440071 | N/A             | N/A       | N/A          | N/A            |
| A_22_P00023353 | 1,53284 | 1,48818 | 1,031440071 | ENST00000584843 | N/A       | N/A          | N/A            |
| A_22_P00009353 | 1,63877 | 1,59412 | 1,031432922 | N/A             | N/A       | N/A          | Inc-LRRN3-1    |
| A_22_P00006386 | 1,68068 | 1,63603 | 1,031432922 | ENST00000537742 | N/A       | N/A          | N/A            |
| A_22_P00020640 | 1,38725 | 1,34261 | 1,031425772 | ENST00000489016 | N/A       | N/A          | N/A            |
| A_21_P0004841  | 1,60919 | 1,56455 | 1,031425772 | N/A             | N/A       | N/A          | Inc-CD83-3     |
| A_23_P361604   | 1,56247 | 1,51784 | 1,031418623 | ENST00000278779 | 100128496 | NM_001242671 | C2orf78        |
| A_22_P00025039 | 1,52547 | 1,48084 | 1,031418623 | ENST00000422271 | N/A       | N/A          | N/A            |
| A_22_P00005413 | 1,75972 | 1,7151  | 1,031411474 | N/A             | N/A       | N/A          | Inc-DTHD1-4    |
| A_19_P00319213 | 1,5912  | 1,54658 | 1,031411474 | ENST00000557155 | 100996280 | NR_102737    | LINC00911      |
| A_21_P0013033  | 1,39498 | 1,35037 | 1,031404325 | ENST00000508210 | 221262    | N/A          | CCDC162P       |
| A_21_P0005858  | 1,48762 | 1,44301 | 1,031404325 | N/A             | 102725309 | N/A          | LOC102725309   |
| A_33_P3692984  | 1,47525 | 1,43065 | 1,031397176 | ENST00000569854 | N/A       | BC035264     | N/A            |
| A_21_P0013279  | 1,43396 | 1,38936 | 1,031397176 | N/A             | N/A       | N/A          | XLOC_I2_013650 |
| A_21_P0003986  | 1,53315 | 1,48856 | 1,031390027 | ENST00000514532 | 100861519 | NM_001278094 | GDNF-AS1       |
| A_21_P0004849  | 1,50161 | 1,45702 | 1,031390027 | N/A             | N/A       | N/A          | Inc-ID4-1      |
| A_21_P0001851  | 1,38711 | 1,34254 | 1,031375729 | ENST00000453451 | N/A       | N/A          | N/A            |
| A_21_P0002316  | 1,40033 | 1,35576 | 1,031375729 | N/A             | N/A       | N/A          | Inc-DCAF17-1   |
| A_22_P00005372 | 1,67758 | 1,63301 | 1,031375729 | ENST00000514103 | N/A       | N/A          | N/A            |
| A_33_P3370325  | 1,53258 | 1,48801 | 1,031375729 | N/A             | N/A       | N/A          | N/A            |
| A_21_P0010041  | 1,412   | 1,36744 | 1,03136858  | N/A             | 101927242 | N/A          | LINC01430      |
| A_21_P0013682  | 1,525   | 1,48044 | 1,03136858  | ENST00000415302 | 101928720 | NR_121581    | LINC01509      |
| A_22_P00022074 | 1,62564 | 1,58109 | 1,031361431 | ENST00000499025 | N/A       | N/A          | N/A            |
| A_33_P3276828  | 1,64771 | 1,60317 | 1,031354282 | N/A             | N/A       | N/A          | N/A            |
| A_21_P0008973  | 1,67104 | 1,62651 | 1,031347133 | N/A             | N/A       | N/A          | Inc-NUDT7-1    |

|                |         |         |             |                 |           |              |                    |
|----------------|---------|---------|-------------|-----------------|-----------|--------------|--------------------|
| A_22_P00018291 | 1,41842 | 1,37391 | 1,031332836 | N/A             | N/A       | N/A          | Inc-ZNF804A-1      |
| A_22_P00003166 | 1,60719 | 1,56268 | 1,031332836 | N/A             | N/A       | N/A          | Inc-C9orf66-2      |
| A_19_P00808923 | 14,7803 | 14,7358 | 1,031325687 | N/A             | N/A       | N/A          | N/A                |
| A_23_P19226    | 11,6343 | 11,5898 | 1,031325687 | ENST00000359564 | 29940     | NM_013352    | DSE                |
| A_21_P0011725  | 1,73436 | 1,68987 | 1,031318539 | ENST00000597169 | N/A       | N/A          | N/A                |
| A_21_P0009954  | 1,52747 | 1,48299 | 1,03131139  | N/A             | N/A       | N/A          | Inc-BPIFA2-1       |
| A_33_P3305438  | 5,06644 | 5,02196 | 1,03131139  | N/A             | N/A       | N/A          | N/A                |
| A_21_P0003201  | 1,72493 | 1,68046 | 1,031304242 | N/A             | N/A       | N/A          | Inc-GMNC-2         |
| A_21_P0007946  | 1,68448 | 1,64001 | 1,031304242 | ENST00000434832 | N/A       | N/A          | N/A                |
| A_23_P3371     | 1,61314 | 1,56867 | 1,031304242 | ENST00000394745 | 5923      | NM_002891    | RASGRF1            |
| A_33_P3334005  | 1,55304 | 1,50858 | 1,031297093 | ENST00000357754 | 400591    | NM_207454    | C17orf102          |
| A_24_P315975   | 1,4294  | 1,38495 | 1,031289945 | ENST00000391415 | 100132386 | NM_001146041 | KRTAP4-9           |
| A_33_P3381478  | 1,68006 | 1,63561 | 1,031289945 | ENST00000395089 | 127255    | NM_001105659 | LRRIQ3             |
| A_33_P3221935  | 1,45615 | 1,4117  | 1,031289945 | N/A             | 100287477 | XM_006723533 | LOC100287477       |
| A_21_P0009520  | 1,52823 | 1,48378 | 1,031289945 | N/A             | N/A       | N/A          | Inc-PPP4R1-6       |
| A_22_P00023207 | 1,47239 | 1,42797 | 1,0312685   | N/A             | N/A       | AK123575     | Inc-RALGAPA1-1     |
| A_21_P0014865  | 1,69754 | 1,65312 | 1,0312685   | N/A             | 100288160 | AF422192     | LOC100288160       |
| A_21_P0008619  | 1,42866 | 1,38425 | 1,031261352 | ENST00000558675 | N/A       | XR_429516    | N/A                |
| A_21_P0008922  | 1,51897 | 1,47456 | 1,031261352 | N/A             | N/A       | N/A          | Inc-AC133485.1.1-2 |
| A_21_P0014169  | 1,54198 | 1,49757 | 1,031261352 | N/A             | N/A       | N/A          | N/A                |
| A_33_P3337617  | 1,59284 | 1,54843 | 1,031261352 | N/A             | N/A       | N/A          | N/A                |
| A_21_P0003221  | 1,56867 | 1,52427 | 1,031254204 | N/A             | N/A       | N/A          | Inc-OXNAD1-2       |
| A_21_P0004010  | 1,73793 | 1,69353 | 1,031254204 | ENST00000510180 | N/A       | N/A          | N/A                |
| A_21_P0012160  | 1,69992 | 1,65552 | 1,031254204 | ENST00000445589 | N/A       | N/A          | N/A                |
| A_22_P00011223 | 1,67953 | 1,63513 | 1,031254204 | ENST00000566892 | N/A       | AF131788     | N/A                |
| A_22_P00024716 | 1,5396  | 1,4952  | 1,031254204 | ENST00000507653 | N/A       | N/A          | N/A                |
| A_32_P381957   | 1,76527 | 1,72087 | 1,031254204 | ENST00000458417 | 317703    | NM_173857    | VN1R4              |
| A_33_P3325439  | 9,88739 | 9,84299 | 1,031254204 | ENST00000399973 | 10600     | NM_001001992 | USP16              |
| A_33_P3224620  | 1,67794 | 1,63355 | 1,031247055 | N/A             | 100128908 | BC153822     | LOC100128908       |
| A_21_P0000072  | 1,62604 | 1,58165 | 1,031247055 | N/A             | 151254    | NM_001168217 | ALS2CR11           |
| A_33_P3299209  | 1,48485 | 1,44046 | 1,031247055 | ENST00000504828 | N/A       | N/A          | N/A                |
| A_21_P0003048  | 1,39038 | 1,34602 | 1,031225611 | N/A             | N/A       | N/A          | Inc-MME-1          |
| A_21_P0014091  | 1,62359 | 1,57923 | 1,031225611 | N/A             | N/A       | BG218553     | N/A                |

|                |         |         |             |                 |           |              |                |
|----------------|---------|---------|-------------|-----------------|-----------|--------------|----------------|
| A_22_P00000910 | 1,67597 | 1,63161 | 1,031225611 | N/A             | N/A       | N/A          | Inc-AJAP1-2    |
| A_33_P3293411  | 1,57265 | 1,5283  | 1,031218464 | N/A             | N/A       | N/A          | Inc-MLL3-1     |
| A_22_P00023971 | 1,5074  | 1,46305 | 1,031218464 | N/A             | N/A       | N/A          | Inc-OVGP1-2    |
| A_21_P0001472  | 1,44242 | 1,39807 | 1,031218464 | N/A             | N/A       | N/A          | Inc-RCC2-1     |
| A_23_P384551   | 1,46372 | 1,41937 | 1,031218464 | N/A             | 149650    | AK056716     | FLJ32154       |
| A_21_P0002035  | 1,67621 | 1,63187 | 1,031211316 | N/A             | N/A       | N/A          | Inc-TRMT61B-1  |
| A_21_P0005817  | 1,42486 | 1,38052 | 1,031211316 | N/A             | 100507403 | XR_426301    | LOC100507403   |
| A_22_P00021564 | 1,67874 | 1,6344  | 1,031211316 | ENST00000565706 | N/A       | AA496136     | N/A            |
| A_21_P0006272  | 1,56163 | 1,5173  | 1,031204168 | N/A             | N/A       | N/A          | Inc-CBWD5-1    |
| A_21_P0006887  | 1,59017 | 1,54584 | 1,031204168 | N/A             | N/A       | N/A          | Inc-SH2D4B-2   |
| A_22_P00025019 | 1,58701 | 1,54268 | 1,031204168 | ENST00000436953 | N/A       | N/A          | N/A            |
| A_23_P28761    | 1,55579 | 1,51147 | 1,03119702  | ENST00000609795 | 3172      | NM_001030004 | HNF4A          |
| A_22_P00006192 | 7,10749 | 7,06317 | 1,03119702  | ENST00000480805 | 8512      | N/A          | MBL1P          |
| A_21_P0012126  | 1,61831 | 1,57399 | 1,03119702  | N/A             | N/A       | N/A          | XLOC_I2_008667 |
| A_21_P0008264  | 1,64933 | 1,60502 | 1,031189873 | N/A             | N/A       | N/A          | Inc-COL4A1-2   |
| A_22_P00004134 | 1,69262 | 1,64831 | 1,031189873 | ENST00000524073 | N/A       | N/A          | N/A            |
| A_24_P386375   | 1,42696 | 1,38266 | 1,031182725 | ENST00000380225 | 3452      | NM_002175    | IFNA21         |
| A_22_P00004294 | 1,54517 | 1,50087 | 1,031182725 | N/A             | N/A       | N/A          | Inc-CNOT7-1    |
| A_22_P00003612 | 1,56525 | 1,52095 | 1,031182725 | N/A             | N/A       | N/A          | Inc-CD38-2     |
| A_33_P3286958  | 1,59022 | 1,54592 | 1,031182725 | ENST00000367434 | 8707      | NM_003783    | B3GALT2        |
| A_22_P00000642 | 1,53702 | 1,49273 | 1,031175577 | N/A             | 101927882 | XR_242906    | LOC101927882   |
| A_33_P3414591  | 1,59    | 1,54571 | 1,031175577 | ENST00000354571 | 7291      | NM_000474    | TWIST1         |
| A_21_P0010246  | 1,39017 | 1,34588 | 1,031175577 | N/A             | N/A       | N/A          | Inc-WRB-2      |
| A_22_P00010606 | 1,44603 | 1,40176 | 1,031161282 | N/A             | 102724555 | NR_111922    | LOC102724555   |
| A_33_P3211356  | 1,76489 | 1,72062 | 1,031161282 | ENST00000410059 | 57628     | NM_001178037 | DPP10          |
| A_23_P25246    | 1,40603 | 1,36177 | 1,031154135 | ENST00000299178 | 552       | NM_000706    | AVPR1A         |
| A_21_P0003857  | 1,40401 | 1,35975 | 1,031154135 | N/A             | N/A       | N/A          | Inc-CLCN3-1    |
| A_23_P382682   | 1,497   | 1,45274 | 1,031154135 | ENST00000555603 | 122945    | NM_001113475 | NOXRED1        |
| A_22_P00011262 | 1,42918 | 1,38492 | 1,031154135 | ENST00000525654 | N/A       | N/A          | N/A            |
| A_22_P00009559 | 4,20086 | 4,1566  | 1,031154135 | ENST00000426067 | N/A       | N/A          | N/A            |
| A_22_P00011499 | 1,59728 | 1,55303 | 1,031146987 | ENST00000549527 | N/A       | BX092570     | N/A            |
| A_19_P00322997 | 1,53013 | 1,48588 | 1,031146987 | N/A             | 101928682 | NR_104667    | LOC101928682   |
| A_21_P0001126  | 1,52156 | 1,47732 | 1,03113984  | ENST00000416581 | 101929651 | N/A          | LINC01398      |

|                |         |         |             |                 |           |              |                   |
|----------------|---------|---------|-------------|-----------------|-----------|--------------|-------------------|
| A_21_P0008237  | 1,38569 | 1,34145 | 1,03113984  | N/A             | N/A       | N/A          | Inc-AL445989.1-19 |
| A_33_P3415265  | 1,68886 | 1,64463 | 1,031132693 | ENST00000299721 | 339302    | NM_181654    | CPLX4             |
| A_22_P00008459 | 4,31333 | 4,2691  | 1,031132693 | N/A             | 101927221 | NR_125415    | LOC101927221      |
| A_21_P0009049  | 2,1372  | 2,09298 | 1,031125546 | N/A             | N/A       | N/A          | Inc-TK2-4         |
| A_21_P0009124  | 1,60229 | 1,55807 | 1,031125546 | ENST00000566649 | 100996345 | XR_172163    | LOC100996345      |
| A_33_P3362611  | 1,5001  | 1,45588 | 1,031125546 | ENST00000370742 | 64123     | NM_022159    | ELTD1             |
| A_22_P00004616 | 1,45092 | 1,40671 | 1,031118398 | N/A             | 100506134 | NR_038983    | TTC21B-AS1        |
| A_22_P00019988 | 8,97954 | 8,93534 | 1,031111251 | N/A             | N/A       | N/A          | Inc-GTPBP1-2      |
| A_22_P00015713 | 1,5961  | 1,5519  | 1,031111251 | N/A             | N/A       | N/A          | Inc-SYT1-5        |
| A_19_P00806883 | 1,48838 | 1,44418 | 1,031111251 | ENST00000401499 | N/A       | N/A          | N/A               |
| A_21_P0007974  | 1,51461 | 1,47041 | 1,031111251 | ENST00000624644 | 100874182 | NR_047040    | LINC00424         |
| A_22_P00007856 | 1,6823  | 1,6381  | 1,031111251 | N/A             | N/A       | BM563321     | Inc-HRH4-9        |
| A_22_P00025065 | 1,38596 | 1,34176 | 1,031111251 | N/A             | N/A       | N/A          | Inc-PLCXD3-1      |
| A_21_P0011862  | 1,61876 | 1,57456 | 1,031111251 | N/A             | N/A       | N/A          | XLOC_I2_007586    |
| A_22_P00012704 | 1,70874 | 1,66455 | 1,031104104 | N/A             | 101927211 | NR_110742    | LOC101927211      |
| A_33_P3391846  | 1,6622  | 1,61801 | 1,031104104 | ENST00000378132 | 56146     | NM_031495    | PCDHA2            |
| A_22_P00015868 | 1,5105  | 1,46631 | 1,031104104 | ENST00000330469 | 9096      | XM_006715602 | TBX18             |
| A_21_P0010326  | 1,40232 | 1,35814 | 1,031096957 | N/A             | N/A       | N/A          | Inc-ICOSLG-6      |
| A_23_P129157   | 9,78756 | 9,74338 | 1,031096957 | ENST00000567393 | 79661     | NM_024608    | NEIL1             |
| A_22_P00012177 | 1,52432 | 1,48015 | 1,03108981  | N/A             | N/A       | N/A          | Inc-POU3F2-1      |
| A_33_P3357609  | 1,43027 | 1,3861  | 1,03108981  | ENST00000480037 | 81030     | NM_001160419 | ZBP1              |
| A_22_P00001622 | 1,67515 | 1,63099 | 1,031082663 | N/A             | N/A       | N/A          | Inc-ASAH2B-3      |
| A_24_P111406   | 1,72355 | 1,6794  | 1,031075516 | ENST00000256785 | 81494     | NM_030787    | CFHR5             |
| A_22_P00009903 | 1,56389 | 1,51975 | 1,031068369 | ENST00000455716 | N/A       | N/A          | N/A               |
| A_33_P3254390  | 1,4006  | 1,35646 | 1,031068369 | ENST00000466715 | 375298    | NM_001030312 | CERKL             |
| A_21_P0007390  | 1,58145 | 1,53731 | 1,031068369 | N/A             | N/A       | N/A          | Inc-PDGFD-3       |
| A_22_P00013154 | 1,52411 | 1,47997 | 1,031068369 | ENST00000421624 | N/A       | N/A          | N/A               |
| A_33_P3320708  | 1,59549 | 1,55135 | 1,031068369 | N/A             | N/A       | N/A          | N/A               |
| A_32_P310503   | 1,51344 | 1,4693  | 1,031068369 | ENST00000318104 | 391194    | NM_001004688 | OR2M2             |
| A_23_P94902    | 1,45779 | 1,41365 | 1,031068369 | ENST00000360029 | 386617    | NM_198353    | KCTD8             |
| A_23_P70746    | 6,64711 | 6,60298 | 1,031061223 | ENST00000531788 | 54806     | NM_017651    | AHI1              |
| A_22_P00005317 | 1,49594 | 1,45181 | 1,031061223 | N/A             | N/A       | BC041347     | Inc-DNASE1L3-1    |
| A_33_P3303905  | 1,52901 | 1,48488 | 1,031061223 | ENST00000316987 | 390081    | NM_001005165 | OR52E4            |

|                |         |         |             |                 |           |              |                       |
|----------------|---------|---------|-------------|-----------------|-----------|--------------|-----------------------|
| A_22_P00013593 | 1,73367 | 1,68955 | 1,031054076 | N/A             | N/A       | DB125444     | Inc-RP11-503N18.3.1-3 |
| A_33_P3369696  | 12,9193 | 12,8752 | 1,031039783 | ENST00000262962 | 55702     | NM_018074    | CCDC94                |
| A_33_P3282325  | 1,67926 | 1,63516 | 1,031039783 | ENST00000625187 | 1617      | NM_004081    | DAZ1                  |
| A_33_P3679936  | 1,39903 | 1,35493 | 1,031039783 | ENST00000607593 | 283483    | NR_051977    | LINC00551             |
| A_24_P92451    | 1,76084 | 1,71674 | 1,031039783 | ENST00000451257 | 642633    | NR_108107    | FAM230B               |
| A_21_P0005741  | 1,64181 | 1,59771 | 1,031039783 | N/A             | N/A       | N/A          | Inc-SPAG1-2           |
| A_21_P0002216  | 2,8598  | 2,81571 | 1,031032636 | N/A             | 102724063 | XR_425400    | LOC102724063          |
| A_21_P0008262  | 1,43739 | 1,39331 | 1,031025489 | N/A             | N/A       | N/A          | Inc-SLITRK6-1         |
| A_21_P0004490  | 1,53783 | 1,49375 | 1,031025489 | N/A             | 101929544 | XR_241746    | LOC101929544          |
| A_21_P0001965  | 1,64543 | 1,60135 | 1,031025489 | N/A             | N/A       | N/A          | Inc-ATIC-5            |
| A_23_P312383   | 1,60118 | 1,55711 | 1,031018343 | ENST00000505642 | 285668    | NM_173667    | C5orf64               |
| A_33_P3414574  | 9,65385 | 9,60978 | 1,031018343 | ENST00000317089 | 10294     | NM_005880    | DNAJA2                |
| A_22_P00021647 | 1,55906 | 1,51499 | 1,031018343 | N/A             | N/A       | AK096618     | Inc-CDK5R1-1          |
| A_33_P3700860  | 1,49226 | 1,4482  | 1,031011196 | N/A             | 85375     | AB051448     | KIAA1661              |
| A_21_P0013290  | 1,54805 | 1,50399 | 1,031011196 | N/A             | 646588    | N/A          | LOC646588             |
| A_23_P66530    | 1,58687 | 1,54281 | 1,031011196 | ENST00000255381 | 4622      | NM_017533    | MYH4                  |
| A_23_P70598    | 1,5989  | 1,55484 | 1,031011196 | ENST00000611141 | 6954      | NM_018679    | TCP11                 |
| A_22_P00009997 | 1,49808 | 1,45402 | 1,031011196 | ENST00000533304 | 100507584 | NR_038989    | LINC01016             |
| A_22_P00019569 | 2,93655 | 2,89253 | 1,030982611 | ENST00000611846 | 389676    | NM_001242668 | C8orf87               |
| A_21_P0006793  | 1,59384 | 1,54982 | 1,030982611 | ENST00000419373 | 101927704 | N/A          | MIR3663HG             |
| A_33_P3740427  | 1,45509 | 1,41107 | 1,030982611 | ENST00000413603 | 282980    | NR_040253    | LINC00700             |
| A_21_P0012743  | 1,43701 | 1,39299 | 1,030982611 | ENST00000508724 | N/A       | N/A          | N/A                   |
| A_21_P0007806  | 1,54331 | 1,49929 | 1,030982611 | ENST00000509760 | 440119    | NR_033834    | FZD10-AS1             |
| A_22_P00001422 | 1,52783 | 1,48383 | 1,030968319 | ENST00000524493 | N/A       | DA722649     | N/A                   |
| A_21_P0007509  | 1,69198 | 1,64798 | 1,030968319 | N/A             | 102659353 | N/A          | THRIL                 |
| A_33_P3291882  | 5,98312 | 5,93913 | 1,030961173 | N/A             | 57492     | AK025945     | ARID1B                |
| A_33_P3349030  | 1,38921 | 1,34522 | 1,030961173 | ENST00000555187 | N/A       | AK128397     | N/A                   |
| A_23_P13479    | 1,52957 | 1,48559 | 1,030954027 | ENST00000319988 | 256148    | NM_001004725 | OR4S1                 |
| A_33_P3252661  | 1,38623 | 1,34225 | 1,030954027 | ENST00000522175 | 340441    | NM_001005365 | POTEA                 |
| A_33_P3211834  | 8,19684 | 8,15286 | 1,030954027 | N/A             | 10326     | XM_006710250 | SIRPB1                |
| A_22_P00025593 | 1,52332 | 1,47935 | 1,030946881 | ENST00000452501 | N/A       | N/A          | N/A                   |
| A_33_P3430391  | 5,55138 | 5,50742 | 1,030939735 | ENST00000506021 | 389273    | XR_241740    | LOC389273             |
| A_22_P00011815 | 1,75706 | 1,7131  | 1,030939735 | N/A             | N/A       | N/A          | Inc-PHC3-1            |

|                |         |         |             |                 |           |              |                |
|----------------|---------|---------|-------------|-----------------|-----------|--------------|----------------|
| A_24_P410721   | 1,57224 | 1,52828 | 1,030939735 | ENST00000340147 | 133491    | NM_001144954 | C5orf47        |
| A_22_P00015257 | 1,56865 | 1,52469 | 1,030939735 | N/A             | N/A       | N/A          | Inc-SPAM1-3    |
| A_32_P115438   | 1,53167 | 1,48772 | 1,030932589 | ENST00000533922 | 100128239 | NR_027276    | LOC100128239   |
| A_33_P3255065  | 1,5114  | 1,46745 | 1,030932589 | N/A             | N/A       | N/A          | N/A            |
| A_22_P00003418 | 1,49383 | 1,44988 | 1,030932589 | ENST00000577569 | N/A       | N/A          | N/A            |
| A_33_P3301104  | 1,48351 | 1,4396  | 1,030904006 | ENST00000319637 | 284656    | NM_173641    | EPHA10         |
| A_33_P3392177  | 13,3556 | 13,3117 | 1,03089686  | ENST00000484572 | 53405     | NM_001256023 | CLIC5          |
| A_23_P252783   | 11,3108 | 11,2669 | 1,03089686  | ENST00000430147 | 29988     | NM_014580    | SLC2A8         |
| A_32_P162192   | 1,43538 | 1,39148 | 1,03089686  | ENST00000603633 | 338005    | NR_027457    | LINC00221      |
| A_22_P00008825 | 1,59845 | 1,55455 | 1,03089686  | N/A             | N/A       | N/A          | Inc-KLF3-1     |
| A_22_P00013452 | 1,67498 | 1,63109 | 1,030889714 | ENST00000570118 | 104266959 | NR_126349    | LINC01195      |
| A_21_P0012588  | 1,59592 | 1,55203 | 1,030889714 | N/A             | N/A       | N/A          | XLOC_I2_010701 |
| A_33_P3422712  | 7,72361 | 7,67972 | 1,030889714 | N/A             | N/A       | N/A          | N/A            |
| A_23_P49674    | 9,50066 | 9,45677 | 1,030889714 | ENST00000421050 | 22899     | NM_173728    | ARHGEF15       |
| A_21_P0003758  | 1,39331 | 1,34943 | 1,030882569 | N/A             | N/A       | N/A          | Inc-AR SJ-1    |
| A_22_P00009273 | 1,68802 | 1,64414 | 1,030882569 | N/A             | N/A       | N/A          | Inc-LRRC10-1   |
| A_33_P3343496  | 1,59204 | 1,54816 | 1,030882569 | ENST00000526538 | 390168    | NM_001004740 | OR5M1          |
| A_21_P0009811  | 1,47577 | 1,43189 | 1,030882569 | N/A             | 101929312 | N/A          | LOC101929312   |
| A_21_P0006503  | 1,57199 | 1,52811 | 1,030882569 | ENST00000617377 | 340554    | N/A          | ZC3H12B        |
| A_23_P46781    | 1,69733 | 1,65347 | 1,030868278 | ENST00000378076 | 8516      | NM_003638    | ITGA8          |
| A_22_P00005908 | 1,67449 | 1,63063 | 1,030868278 | ENST00000434098 | 101928202 | XR_241134    | LOC101928202   |
| A_22_P00021854 | 1,52417 | 1,48031 | 1,030868278 | ENST00000432359 | N/A       | N/A          | N/A            |
| A_33_P3494979  | 1,56203 | 1,51817 | 1,030868278 | N/A             | N/A       | BX648662     | Inc-SART3-1    |
| A_33_P3342305  | 1,41922 | 1,37537 | 1,030861132 | ENST00000615593 | 10351     | NM_007168    | ABCA8          |
| A_21_P0003477  | 1,51467 | 1,47084 | 1,030846842 | N/A             | N/A       | N/A          | Inc-BTC-3      |
| A_22_P00006769 | 1,54397 | 1,50014 | 1,030846842 | N/A             | N/A       | N/A          | Inc-FUCA1-1    |
| A_22_P00007276 | 1,49461 | 1,45078 | 1,030846842 | N/A             | 101927284 | NR_110754    | LOC101927284   |
| A_22_P00020829 | 1,45128 | 1,40746 | 1,030839697 | N/A             | N/A       | N/A          | Inc-ANKRD33B-1 |
| A_21_P0013917  | 1,61373 | 1,56992 | 1,030832551 | ENST00000497526 | 284958    | AK092780     | NT5DC4         |
| A_33_P3374215  | 6,92176 | 6,87795 | 1,030832551 | N/A             | N/A       | N/A          | N/A            |
| A_23_P106708   | 18,8914 | 18,8476 | 1,030825406 | ENST00000531065 | 6187      | NM_002952    | RPS2           |
| A_33_P3380742  | 13,8823 | 13,8385 | 1,030825406 | ENST00000466995 | 10245     | NM_001167947 | TIMM17B        |
| A_33_P3291748  | 1,40439 | 1,36059 | 1,030825406 | ENST00000406071 | 100506627 | NM_020869    | DCDC5          |



|                |         |         |             |                 |           |              |                |
|----------------|---------|---------|-------------|-----------------|-----------|--------------|----------------|
| A_22_P00015768 | 1,5642  | 1,5204  | 1,030825406 | N/A             | N/A       | N/A          | Inc-TAF9-1     |
| A_21_P0000437  | 1,53538 | 1,49158 | 1,030825406 | N/A             | 100033437 | NR_003294    | SNORD115-2     |
| A_22_P00023889 | 1,70953 | 1,66573 | 1,030825406 | N/A             | 103352541 | N/A          | LOC103352541   |
| A_33_P3378284  | 11,1855 | 11,1417 | 1,030825406 | ENST00000593184 | 125965    | NM_144613    | COX6B2         |
| A_23_P117082   | 12,6349 | 12,5911 | 1,030825406 | ENST00000014930 | 50865     | NM_015987    | HEBP1          |
| A_22_P00014773 | 1,52434 | 1,48055 | 1,030818261 | N/A             | N/A       | N/A          | Inc-SLC37A2-1  |
| A_22_P00008434 | 1,67711 | 1,63332 | 1,030818261 | ENST00000574365 | N/A       | N/A          | N/A            |
| A_21_P0013328  | 1,4108  | 1,36701 | 1,030818261 | N/A             | N/A       | N/A          | XLOC_I2_013873 |
| A_23_P201376   | 6,64847 | 6,60468 | 1,030818261 | ENST00000437941 | 117178    | NM_014021    | SSX2IP         |
| A_33_P3299739  | 8,62602 | 8,58224 | 1,030811116 | ENST00000372539 | 149461    | NM_001123395 | CLDN19         |
| A_22_P00015540 | 4,50136 | 4,45759 | 1,030803971 | N/A             | N/A       | N/A          | Inc-STK32C-2   |
| A_21_P0003107  | 1,5125  | 1,46874 | 1,030796826 | ENST00000451284 | 285326    | NR_034055    | LINC00692      |
| A_33_P3276217  | 1,66393 | 1,62017 | 1,030796826 | N/A             | N/A       | N/A          | N/A            |
| A_22_P00010072 | 1,43308 | 1,38934 | 1,030782536 | ENST00000563825 | N/A       | DA114384     | N/A            |
| A_23_P415791   | 1,67817 | 1,63443 | 1,030782536 | ENST00000402510 | 57481     | NM_020721    | KIAA1210       |
| A_33_P3362239  | 8,62563 | 8,58189 | 1,030782536 | N/A             | N/A       | N/A          | N/A            |
| A_21_P0008713  | 1,43416 | 1,39043 | 1,030775391 | N/A             | N/A       | N/A          | Inc-GABRB3-2   |
| A_21_P0002346  | 1,4729  | 1,42918 | 1,030768247 | N/A             | N/A       | N/A          | Inc-TMEM169-1  |
| A_22_P00016579 | 1,5614  | 1,51769 | 1,030761102 | N/A             | N/A       | N/A          | Inc-TNFRSF21-1 |
| A_22_P00010290 | 1,51817 | 1,47446 | 1,030761102 | ENST00000453639 | N/A       | N/A          | N/A            |
| A_24_P212152   | 16,2618 | 16,2181 | 1,030753957 | ENST00000281871 | 80097     | NM_025029    | MZT2B          |
| A_21_P0001631  | 1,54159 | 1,4979  | 1,030746813 | N/A             | N/A       | N/A          | Inc-TP53BP2-1  |
| A_22_P00004683 | 1,61423 | 1,57054 | 1,030746813 | ENST00000529769 | 100507384 | N/A          | LOC100507384   |
| A_21_P0000407  | 1,68308 | 1,63939 | 1,030746813 | N/A             | 767588    | NR_003203    | SNORD114-10    |
| A_21_P0004741  | 1,5458  | 1,50212 | 1,030739668 | ENST00000424868 | N/A       | N/A          | N/A            |
| A_33_P3806524  | 1,40625 | 1,36257 | 1,030739668 | ENST00000581550 | 9229      | BC040718     | DLGAP1         |
| A_22_P00000291 | 1,70623 | 1,66255 | 1,030739668 | ENST00000412153 | N/A       | N/A          | N/A            |
| A_33_P3259625  | 1,6209  | 1,57723 | 1,030732524 | ENST00000401095 | 100287898 | NM_001242672 | TTC34          |
| A_21_P0012688  | 1,59252 | 1,54885 | 1,030732524 | N/A             | N/A       | N/A          | XLOC_I2_011302 |
| A_21_P0005593  | 1,38421 | 1,34054 | 1,030732524 | N/A             | N/A       | N/A          | Inc-PDGFA-2    |
| A_33_P3337119  | 1,70336 | 1,65969 | 1,030732524 | N/A             | N/A       | N/A          | N/A            |
| A_22_P00004400 | 1,57524 | 1,53157 | 1,030732524 | N/A             | 101927233 | NR_109879    | SEMA6A-AS1     |
| A_21_P0000705  | 1,43011 | 1,38645 | 1,030725379 | N/A             | 100507524 | NR_037901    | ARHGEF26-AS1   |

|                |         |         |             |                 |           |              |                       |
|----------------|---------|---------|-------------|-----------------|-----------|--------------|-----------------------|
| A_22_P00003226 | 1,51717 | 1,47351 | 1,030725379 | N/A             | 10369     | NM_006078    | CACNG2                |
| A_21_P0001823  | 1,54288 | 1,49922 | 1,030725379 | N/A             | N/A       | N/A          | Inc-HPCAL1-2          |
| A_23_P124570   | 6,66405 | 6,62039 | 1,030725379 | ENST00000618353 | 2241      | NM_005246    | FER                   |
| A_21_P0009574  | 1,60214 | 1,55849 | 1,030718235 | ENST00000581862 | N/A       | N/A          | N/A                   |
| A_22_P00023337 | 1,5263  | 1,48265 | 1,030718235 | ENST00000436056 | N/A       | XR_426177    | N/A                   |
| A_21_P0000133  | 1,5233  | 1,47966 | 1,030711109 | ENST00000348340 | 116328    | NM_001195639 | C8orf34               |
| A_32_P346172   | 1,43459 | 1,39095 | 1,030711109 | ENST00000355868 | 126248    | NM_173479    | WDR88                 |
| A_21_P0012483  | 1,51596 | 1,47232 | 1,030711109 | N/A             | N/A       | N/A          | XLOC_I2_010511        |
| A_23_P81683    | 1,59988 | 1,55624 | 1,030711109 | ENST00000368549 | 222545    | NM_148963    | GPRC6A                |
| A_21_P0000955  | 1,5724  | 1,52876 | 1,030711109 | ENST00000423921 | N/A       | N/A          | N/A                   |
| A_33_P3321622  | 1,58681 | 1,54318 | 1,030703946 | ENST00000367561 | 353299    | AL136902     | RGSL1                 |
| A_21_P0011162  | 1,4505  | 1,40687 | 1,030703946 | N/A             | N/A       | N/A          | XLOC_I2_003843        |
| A_33_P3878681  | 1,50972 | 1,4661  | 1,030696802 | ENST00000426534 | 284825    | NR_126010    | LOC284825             |
| A_33_P3335257  | 5,38228 | 5,33867 | 1,030689657 | ENST00000309164 | 257062    | NM_152784    | CATSPERD              |
| A_23_P149042   | 10,6575 | 10,6139 | 1,030682513 | ENST00000478402 | 29920     | NM_013328    | PYCR2                 |
| A_22_P00009769 | 1,43039 | 1,38679 | 1,030682513 | ENST00000502893 | N/A       | N/A          | N/A                   |
| A_32_P144908   | 12,9909 | 12,9473 | 1,030682513 | ENST00000357002 | 9534      | NM_203282    | ZNF254                |
| A_33_P3220847  | 1,65349 | 1,6099  | 1,030675369 | N/A             | N/A       | N/A          | N/A                   |
| A_33_P3364190  | 1,67569 | 1,6321  | 1,030675369 | ENST00000366480 | 391191    | NM_001004491 | OR2AK2                |
| A_22_P00012973 | 1,38889 | 1,34531 | 1,030668225 | N/A             | 101926933 | NR_110002    | LOC101926933          |
| A_22_P00018228 | 7,55676 | 7,51318 | 1,030668225 | ENST00000450891 | N/A       | N/A          | N/A                   |
| A_21_P0005373  | 1,68062 | 1,63705 | 1,030661081 | N/A             | N/A       | N/A          | Inc-GPR141-1          |
| A_21_P0008327  | 1,39709 | 1,35352 | 1,030661081 | N/A             | N/A       | N/A          | Inc-GEMIN2-2          |
| A_22_P00013310 | 1,53775 | 1,49419 | 1,030653937 | N/A             | N/A       | N/A          | nc-RP11-116D17.1.1-10 |
| A_24_P942805   | 8,45411 | 8,41055 | 1,030653937 | ENST00000562001 | 283871    | NM_001042371 | PGP                   |
| A_21_P0009615  | 1,3921  | 1,34855 | 1,030646793 | N/A             | N/A       | N/A          | Inc-RP11-17M16.1.1-6  |
| A_21_P0003714  | 1,44825 | 1,4047  | 1,030646793 | N/A             | N/A       | N/A          | Inc-STX18-2           |
| A_23_P91954    | 1,60305 | 1,55952 | 1,030632505 | ENST00000273145 | 1238      | NM_001296    | ACKR2                 |
| A_23_P7853     | 1,56664 | 1,52311 | 1,030632505 | ENST00000533604 | 11131     | NM_007058    | CAPN11                |
| A_21_P0012377  | 1,38478 | 1,34125 | 1,030632505 | N/A             | N/A       | N/A          | XLOC_I2_009736        |
| A_22_P00021147 | 1,54113 | 1,49761 | 1,030625362 | N/A             | N/A       | LN713953     | Inc-LRRK1-4           |
| A_21_P0002986  | 1,5181  | 1,47458 | 1,030625362 | N/A             | N/A       | N/A          | Inc-ROBO2-6           |
| A_22_P00004343 | 1,56075 | 1,51724 | 1,030618218 | N/A             | N/A       | BG191729     | Inc-COL19A1-1         |

|                |         |         |             |                 |           |              |                      |
|----------------|---------|---------|-------------|-----------------|-----------|--------------|----------------------|
| A_22_P00002680 | 1,38434 | 1,34083 | 1,030618218 | N/A             | N/A       | N/A          | Inc-C1orf31-7        |
| A_21_P0009173  | 1,57235 | 1,52884 | 1,030618218 | ENST00000514468 | 101927230 | N/A          | LOC101927230         |
| A_24_P558750   | 1,38989 | 1,34638 | 1,030618218 | ENST00000369529 | 100132963 | NM_001162936 | SMIM9                |
| A_22_P00015228 | 1,54775 | 1,50424 | 1,030618218 | N/A             | 339751    | NR_033882    | MLK7-AS1             |
| A_33_P3373775  | 4,45658 | 4,41308 | 1,030611074 | N/A             | 440603    | NM_001010922 | BCL2L15              |
| A_24_P136866   | 1,69572 | 1,65222 | 1,030611074 | ENST00000417271 | 6546      | NM_021097    | SLC8A1               |
| A_33_P3259662  | 7,75208 | 7,70859 | 1,030603931 | ENST00000396161 | 7693      | NM_003435    | ZNF134               |
| A_33_P3302055  | 1,58769 | 1,54422 | 1,030589644 | N/A             | N/A       | AL833395     | Inc-C17orf80-3       |
| A_21_P0002801  | 1,60266 | 1,55919 | 1,030589644 | ENST00000484765 | 100507661 | N/A          | LOC100507661         |
| A_33_P3279505  | 1,67613 | 1,63266 | 1,030589644 | N/A             | N/A       | N/A          | N/A                  |
| A_21_P0006505  | 1,44747 | 1,40401 | 1,0305825   | N/A             | N/A       | N/A          | Inc-FOXO4-1          |
| A_21_P0007940  | 1,68714 | 1,64368 | 1,0305825   | N/A             | N/A       | N/A          | Inc-PCDH17-1         |
| A_24_P273180   | 1,62761 | 1,58416 | 1,030575357 | ENST00000548391 | 649179    | XR_425303    | PRAMENP              |
| A_21_P0005235  | 1,52513 | 1,48168 | 1,030575357 | ENST00000421500 | N/A       | N/A          | N/A                  |
| A_22_P00008326 | 1,55861 | 1,51517 | 1,030568213 | N/A             | N/A       | BX461541     | Inc-ITIH2-3          |
| A_22_P00011238 | 1,43269 | 1,38925 | 1,030568213 | ENST00000455051 | 101928496 | NR_121578    | LINC01492            |
| A_21_P0009879  | 3,23924 | 3,19581 | 1,03056107  | ENST00000428954 | N/A       | N/A          | N/A                  |
| A_24_P280706   | 9,28894 | 9,24551 | 1,03056107  | ENST00000379514 | 10910     | NM_006704    | SUGT1                |
| A_33_P3461258  | 1,48129 | 1,43787 | 1,030553927 | N/A             | 724068    | NR_073421    | DEFA11P              |
| A_22_P00006350 | 1,43639 | 1,39297 | 1,030553927 | ENST00000531749 | N/A       | N/A          | N/A                  |
| A_22_P00002881 | 1,59583 | 1,55242 | 1,030546783 | N/A             | N/A       | N/A          | Inc-C4orf21-5        |
| A_33_P3244651  | 1,55297 | 1,50956 | 1,030546783 | N/A             | N/A       | N/A          | N/A                  |
| A_21_P0004928  | 1,62583 | 1,58242 | 1,030546783 | N/A             | N/A       | N/A          | Inc-NT5DC1-4         |
| A_24_P254833   | 1,6497  | 1,60629 | 1,030546783 | ENST00000612787 | N/A       | AB360850     | N/A                  |
| A_21_P0013041  | 1,52607 | 1,48267 | 1,03053964  | N/A             | N/A       | N/A          | XLOC_I2_012745       |
| A_23_P325606   | 1,43321 | 1,38983 | 1,030525354 | ENST00000372588 | 80712     | NM_153448    | ESX1                 |
| A_21_P0011369  | 1,49563 | 1,45225 | 1,030525354 | N/A             | N/A       | N/A          | XLOC_I2_004870       |
| A_22_P00004831 | 1,39117 | 1,3478  | 1,030518211 | N/A             | N/A       | BX107063     | Inc-CYB561-5         |
| A_21_P0010466  | 1,66593 | 1,62256 | 1,030518211 | N/A             | N/A       | N/A          | Inc-PRR5-1           |
| A_21_P0005533  | 1,41302 | 1,36965 | 1,030518211 | N/A             | N/A       | N/A          | Inc-PTN-3            |
| A_22_P00016191 | 1,53761 | 1,49425 | 1,030511068 | ENST00000569913 | N/A       | N/A          | N/A                  |
| A_23_P112220   | 1,58441 | 1,54106 | 1,030503925 | ENST00000239316 | 3641      | NM_002195    | INSL4                |
| A_22_P00013754 | 1,61551 | 1,57216 | 1,030503925 | N/A             | N/A       | AW205421     | Inc-RP11-88J22.1.1-3 |

|                |         |         |             |                 |           |              |                 |
|----------------|---------|---------|-------------|-----------------|-----------|--------------|-----------------|
| A_22_P00016452 | 1,40947 | 1,36613 | 1,030496782 | ENST00000517505 | 101937451 | NR_104062    | LINC01030       |
| A_22_P00005951 | 1,65081 | 1,60747 | 1,030496782 | ENST00000612438 | 400121    | NR_040244    | LINC00547       |
| A_22_P00022645 | 4,20774 | 4,1644  | 1,030496782 | N/A             | N/A       | N/A          | Inc-EEFSEC-2    |
| A_21_P0008677  | 1,52239 | 1,47905 | 1,030496782 | N/A             | N/A       | N/A          | Inc-CHD2-2      |
| A_21_P0003844  | 1,44598 | 1,40265 | 1,030489639 | ENST00000504132 | N/A       | N/A          | N/A             |
| A_33_P3418380  | 1,53242 | 1,48909 | 1,030489639 | N/A             | N/A       | N/A          | N/A             |
| A_21_P0005679  | 1,55981 | 1,51649 | 1,030482497 | N/A             | N/A       | N/A          | Inc-WRN-1       |
| A_32_P68097    | 1,58585 | 1,54254 | 1,030475354 | ENST00000395297 | 51059     | NM_015912    | FAM135B         |
| A_23_P82775    | 1,64135 | 1,59805 | 1,030468211 | ENST00000297316 | 64321     | NM_022454    | SOX17           |
| A_22_P00022410 | 1,70208 | 1,65878 | 1,030468211 | N/A             | 100134015 | NR_038395    | UBOX5-AS1       |
| A_21_P0011712  | 16,5982 | 16,5549 | 1,030468211 | ENST00000423096 | N/A       | N/A          | N/A             |
| A_23_P118038   | 12,3367 | 12,2934 | 1,030468211 | ENST00000568396 | 10204     | NM_005796    | NUTF2           |
| A_33_P3215298  | 1,43395 | 1,39066 | 1,030461069 | ENST00000418274 | 342850    | NM_001277333 | ANKRD62         |
| A_21_P0008506  | 1,47495 | 1,43166 | 1,030461069 | N/A             | N/A       | N/A          | Inc-FOXG1-5     |
| A_21_P0013625  | 1,59127 | 1,548   | 1,030446783 | N/A             | N/A       | N/A          | XLOC_I2_015142  |
| A_33_P3621701  | 8,94792 | 8,90465 | 1,030446783 | N/A             | 284933    | BC048428     | LOC284933       |
| A_22_P00011435 | 1,64741 | 1,60415 | 1,030439641 | ENST00000428485 | 101926924 | NR_110655    | LINC01375       |
| A_22_P00004139 | 1,67782 | 1,63456 | 1,030439641 | N/A             | N/A       | N/A          | Inc-CLDN25-1    |
| A_33_P3262742  | 1,6436  | 1,60035 | 1,030432498 | ENST00000309950 | 92196     | NM_001017920 | DAPL1           |
| A_23_P48530    | 1,60969 | 1,56644 | 1,030432498 | ENST00000307169 | 84684     | NM_032594    | INSM2           |
| A_21_P0006258  | 1,67851 | 1,63526 | 1,030432498 | N/A             | N/A       | N/A          | Inc-ELAVL2-3    |
| A_22_P00015019 | 1,51435 | 1,47112 | 1,030418214 | N/A             | N/A       | DB272978     | Inc-SMPD3-1     |
| A_33_P3391370  | 1,64309 | 1,59986 | 1,030418214 | ENST00000312345 | 282770    | NM_001005491 | OR10AG1         |
| A_21_P0005016  | 1,69157 | 1,64834 | 1,030418214 | N/A             | N/A       | N/A          | Inc-HIST1H2BL-1 |
| A_21_P0012165  | 1,52316 | 1,47994 | 1,030411071 | ENST00000437920 | N/A       | N/A          | N/A             |
| A_23_P204564   | 7,28583 | 7,24262 | 1,030403929 | ENST00000437004 | 4659      | NM_002480    | PPP1R12A        |
| A_21_P0004461  | 1,63863 | 1,59543 | 1,030396787 | ENST00000518418 | 285627    | NR_027110    | LOC285627       |
| A_21_P0004111  | 1,48253 | 1,43933 | 1,030396787 | ENST00000507526 | N/A       | N/A          | N/A             |
| A_21_P0000763  | 1,59513 | 1,55193 | 1,030396787 | N/A             | 100507156 | NR_038323    | LOC100507156    |
| A_33_P3365676  | 13,3249 | 13,2817 | 1,030396787 | ENST00000261875 | 51495     | NM_016395    | PTPLAD1         |
| A_21_P0012744  | 1,5401  | 1,49691 | 1,030389645 | ENST00000500169 | N/A       | N/A          | N/A             |
| A_21_P0001474  | 1,42404 | 1,38086 | 1,030382503 | N/A             | N/A       | N/A          | Inc-CAMK2N1-2   |
| A_32_P16918    | 1,38664 | 1,34346 | 1,030382503 | ENST00000536776 | 56245     | NM_019596    | C21orf62        |

|                |         |         |             |                 |           |              |                     |
|----------------|---------|---------|-------------|-----------------|-----------|--------------|---------------------|
| A_21_P0005199  | 1,5806  | 1,53742 | 1,030382503 | ENST00000434537 | 100506527 | NR_103747    | LINC01007           |
| A_22_P00020531 | 1,65815 | 1,61499 | 1,030368219 | ENST00000436722 | N/A       | N/A          | N/A                 |
| A_33_P3381318  | 5,98698 | 5,94383 | 1,030361077 | ENST00000505231 | 729830    | NM_001109977 | FAM160A1            |
| A_21_P0009630  | 1,5168  | 1,47366 | 1,030353935 | N/A             | N/A       | N/A          | Inc-STAR6-1         |
| A_22_P00002558 | 4,30759 | 4,26445 | 1,030353935 | ENST00000577560 | 101928343 | XR_243757    | LOC101928343        |
| A_33_P3416196  | 1,48353 | 1,44039 | 1,030353935 | N/A             | N/A       | N/A          | N/A                 |
| A_21_P0001566  | 1,63577 | 1,59263 | 1,030353935 | N/A             | N/A       | N/A          | Inc-VAV3-1          |
| A_21_P0005307  | 5,16491 | 5,12178 | 1,030346793 | ENST00000441295 | N/A       | N/A          | N/A                 |
| A_22_P00010042 | 1,40858 | 1,36545 | 1,030346793 | N/A             | N/A       | N/A          | Inc-MNT-1           |
| A_22_P00025906 | 1,73721 | 1,69408 | 1,030346793 | ENST00000448672 | N/A       | N/A          | N/A                 |
| A_22_P00003248 | 1,61621 | 1,57308 | 1,030346793 | ENST00000567721 | 102723786 | XR_429763    | LOC102723786        |
| A_21_P0009858  | 1,76004 | 1,71692 | 1,030339651 | N/A             | N/A       | N/A          | Inc-PFDN4-1         |
| A_33_P3333600  | 1,50664 | 1,46353 | 1,03033251  | N/A             | N/A       | EL950728     | N/A                 |
| A_22_P00021176 | 1,61332 | 1,57022 | 1,030325368 | N/A             | N/A       | N/A          | Inc-RNASE6-1        |
| A_33_P3296220  | 1,44256 | 1,39947 | 1,030318226 | N/A             | N/A       | N/A          | N/A                 |
| A_22_P00006238 | 1,40259 | 1,3595  | 1,030318226 | ENST00000564619 | N/A       | BX537510     | N/A                 |
| A_21_P0010180  | 1,46387 | 1,42079 | 1,030311085 | ENST00000440372 | N/A       | N/A          | N/A                 |
| A_33_P3337632  | 1,65859 | 1,61551 | 1,030311085 | ENST00000503275 | 57113     | NM_020389    | TRPC7               |
| A_21_P0012755  | 1,52569 | 1,48262 | 1,030303943 | ENST00000513994 | N/A       | N/A          | N/A                 |
| A_21_P0001053  | 1,70916 | 1,6661  | 1,030296802 | ENST00000415754 | N/A       | N/A          | N/A                 |
| A_33_P3362242  | 1,4812  | 1,43814 | 1,030296802 | N/A             | N/A       | N/A          | N/A                 |
| A_33_P3313075  | 1,38354 | 1,34048 | 1,030296802 | N/A             | N/A       | N/A          | N/A                 |
| A_22_P00001735 | 1,49679 | 1,45374 | 1,03028966  | N/A             | N/A       | N/A          | Inc-ATIC-9          |
| A_21_P0008330  | 1,51771 | 1,47467 | 1,030282519 | N/A             | N/A       | N/A          | Inc-CTAGE5-1        |
| A_33_P3321085  | 1,53963 | 1,49659 | 1,030282519 | ENST00000390424 | N/A       | AB305745     | N/A                 |
| A_22_P00025919 | 1,55526 | 1,51224 | 1,030268236 | N/A             | N/A       | N/A          | Inc-COMMD1-1        |
| A_22_P00014795 | 1,60399 | 1,56097 | 1,030268236 | ENST00000569293 | N/A       | BC024025     | N/A                 |
| A_22_P00016492 | 1,43455 | 1,39153 | 1,030268236 | ENST00000582101 | N/A       | N/A          | N/A                 |
| A_21_P0008680  | 1,70295 | 1,65994 | 1,030261095 | N/A             | N/A       | N/A          | Inc-MCTP2-3         |
| A_22_P00016950 | 1,3854  | 1,3424  | 1,030253954 | N/A             | N/A       | AI040785     | Inc-TSPYL4-1        |
| A_33_P3265704  | 13,9306 | 13,8876 | 1,030253954 | ENST00000466373 | 7353      | NM_005659    | UFD1L               |
| A_21_P0003890  | 1,66595 | 1,62296 | 1,030246812 | N/A             | N/A       | N/A          | Inc-HS3ST1-1        |
| A_22_P00004647 | 1,57438 | 1,53139 | 1,030246812 | N/A             | N/A       | BX110988     | Inc-CTC-203F4.1.1-1 |

|                |         |         |             |                 |           |              |                  |
|----------------|---------|---------|-------------|-----------------|-----------|--------------|------------------|
| A_22_P00005669 | 1,69989 | 1,6569  | 1,030246812 | N/A             | 51352     | N/A          | WT1-AS           |
| A_22_P00004739 | 1,40684 | 1,36386 | 1,030239671 | ENST00000373508 | 100287792 | N/A          | LOC100287792     |
| A_21_P0011597  | 1,38449 | 1,34151 | 1,030239671 | N/A             | N/A       | N/A          | XLOC_I2_006152   |
| A_21_P0001416  | 1,51515 | 1,47218 | 1,03023253  | N/A             | N/A       | N/A          | Inc-ATF3-1       |
| A_23_P130056   | 1,54253 | 1,49956 | 1,03023253  | ENST00000615905 | 57151     | NM_020426    | LYZL6            |
| A_33_P3288047  | 1,62945 | 1,58649 | 1,030225389 | ENST00000369586 | N/A       | N/A          | N/A              |
| A_21_P0010275  | 1,71553 | 1,67257 | 1,030225389 | N/A             | N/A       | N/A          | Inc-TIAM1-1      |
| A_33_P3766667  | 1,67318 | 1,63022 | 1,030225389 | N/A             | 391110    | AK122667     | OR10R3P          |
| A_33_P3373955  | 1,60808 | 1,56512 | 1,030225389 | ENST00000367002 | 343035    | NM_183059    | RD3              |
| A_22_P00009278 | 1,43755 | 1,3946  | 1,030218248 | N/A             | N/A       | XM_006717866 | Inc-LRRC18-1     |
| A_21_P0001450  | 1,69105 | 1,6481  | 1,030218248 | N/A             | N/A       | N/A          | Inc-SCCPDH-1     |
| A_24_P21829    | 1,58125 | 1,53832 | 1,030203967 | ENST00000326192 | 283238    | NM_173586    | SLC22A24         |
| A_21_P0007380  | 1,42625 | 1,38332 | 1,030203967 | N/A             | N/A       | N/A          | Inc-FAM181B-3    |
| A_21_P0011180  | 1,43456 | 1,39165 | 1,030189685 | ENST00000457591 | N/A       | N/A          | N/A              |
| A_23_P162228   | 16,4005 | 16,3576 | 1,030182544 | ENST00000549259 | 4666      | NM_001113203 | NACA             |
| A_22_P00004994 | 1,59676 | 1,55386 | 1,030182544 | ENST00000565024 | N/A       | N/A          | N/A              |
| A_19_P00808285 | 1,41896 | 1,37607 | 1,030175404 | ENST00000435043 | 100507194 | NR_038295    | LOC100507194     |
| A_22_P00008342 | 1,62425 | 1,58136 | 1,030175404 | ENST00000447860 | 101927523 | N/A          | LOC101927523     |
| A_22_P00003455 | 1,52824 | 1,48535 | 1,030175404 | ENST00000552532 | N/A       | N/A          | N/A              |
| A_22_P00023258 | 1,47766 | 1,43477 | 1,030175404 | N/A             | N/A       | DB071059     | Inc-AL136115.1-2 |
| A_23_P91317    | 1,5527  | 1,50981 | 1,030175404 | ENST00000402452 | 642636    | NM_001136566 | RAD21L1          |
| A_22_P00006395 | 1,5437  | 1,50083 | 1,030161123 | ENST00000567096 | N/A       | N/A          | N/A              |
| A_33_P3356686  | 1,39489 | 1,35202 | 1,030161123 | ENST00000431734 | 401014    | N/A          | TEX41            |
| A_33_P3236065  | 1,49537 | 1,45253 | 1,030139701 | ENST00000348658 | 51266     | NM_016509    | CLEC1B           |
| A_22_P00001589 | 1,59545 | 1,55261 | 1,030139701 | N/A             | N/A       | AF085872     | Inc-ARMCX3-1     |
| A_22_P00004299 | 1,61811 | 1,57528 | 1,030132561 | N/A             | N/A       | N/A          | Inc-CNR1-1       |
| A_21_P0002525  | 1,51623 | 1,4734  | 1,030132561 | N/A             | N/A       | N/A          | Inc-PDE1A-1      |
| A_22_P00020970 | 1,74272 | 1,69989 | 1,030132561 | ENST00000564199 | 101927460 | NR_109887    | LOC101927460     |
| A_21_P0000972  | 1,74972 | 1,70689 | 1,030132561 | ENST00000431986 | N/A       | N/A          | N/A              |
| A_33_P3391778  | 1,55484 | 1,51201 | 1,030132561 | ENST00000522613 | 138046    | NM_001287243 | RALYL            |
| A_22_P00025522 | 1,56383 | 1,52101 | 1,03012542  | N/A             | 440508    | N/A          | CLEC4GP1         |
| A_24_P158314   | 6,22004 | 6,17722 | 1,03012542  | ENST00000463005 | 84253     | NM_032293    | GARNL3           |
| A_22_P00006565 | 1,51091 | 1,46809 | 1,03012542  | N/A             | N/A       | N/A          | Inc-FLRT3-2      |

|                |         |         |             |                 |           |              |                       |
|----------------|---------|---------|-------------|-----------------|-----------|--------------|-----------------------|
| A_22_P00011376 | 1,71158 | 1,66877 | 1,03011828  | ENST00000607964 | 2846      | NM_001278000 | LPAR4                 |
| A_22_P00020519 | 4,10581 | 4,063   | 1,03011828  | N/A             | 100506046 | N/A          | GAS5-AS1              |
| A_22_P00013744 | 1,60244 | 1,55963 | 1,03011828  | ENST00000524708 | N/A       | N/A          | N/A                   |
| A_24_P377775   | 1,4786  | 1,4358  | 1,03011114  | ENST00000460000 | 5998      | NM_017790    | RGS3                  |
| A_33_P3398392  | 1,67902 | 1,63622 | 1,03011114  | ENST00000370674 | 2273      | N/A          | FHL1                  |
| A_21_P0013013  | 1,5229  | 1,4801  | 1,03011114  | ENST00000419796 | N/A       | N/A          | N/A                   |
| A_33_P3366850  | 1,51842 | 1,47563 | 1,030104    | ENST00000390442 | N/A       | AB306031     | N/A                   |
| A_21_P0006562  | 1,73787 | 1,69508 | 1,030104    | N/A             | N/A       | N/A          | Inc-RBM10-1           |
| A_22_P00017305 | 1,43882 | 1,39604 | 1,03009686  | N/A             | N/A       | N/A          | Inc-USP20-2           |
| A_33_P3223663  | 1,54544 | 1,50266 | 1,03009686  | N/A             | N/A       | N/A          | N/A                   |
| A_19_P00805433 | 1,70763 | 1,66486 | 1,03008972  | ENST00000457217 | 101928751 | N/A          | LOC101928751          |
| A_21_P0009051  | 1,72693 | 1,68417 | 1,03008258  | N/A             | N/A       | N/A          | Inc-TK2-4             |
| A_33_P3275070  | 1,51234 | 1,46958 | 1,03008258  | N/A             | N/A       | AK091302     | N/A                   |
| A_33_P3349404  | 1,45479 | 1,41204 | 1,03007544  | ENST00000342247 | 27443     | NM_001290047 | CECR2                 |
| A_21_P0010472  | 1,69255 | 1,64981 | 1,0300683   | N/A             | N/A       | N/A          | Inc-CLDN5-1           |
| A_21_P0007671  | 1,50363 | 1,46091 | 1,03005402  | N/A             | N/A       | N/A          | Inc-GPR133-1          |
| A_33_P3225477  | 4,4954  | 4,45268 | 1,03005402  | N/A             | 731075    | BU659163     | LOC731075             |
| A_33_P3330084  | 1,44918 | 1,40646 | 1,03005402  | N/A             | N/A       | N/A          | N/A                   |
| A_22_P00006601 | 1,45132 | 1,40861 | 1,03004688  | ENST00000506309 | N/A       | N/A          | N/A                   |
| A_23_P125596   | 1,76256 | 1,71986 | 1,030039741 | ENST00000543399 | 27330     | NM_014496    | RPS6KA6               |
| A_23_P259049   | 1,52542 | 1,48272 | 1,030039741 | ENST00000505056 | 51151     | NM_016180    | SLC45A2               |
| A_33_P3242453  | 1,38425 | 1,34156 | 1,030032601 | ENST00000426185 | 285834    | NR_003948    | HCG22                 |
| A_21_P0003459  | 1,48383 | 1,44114 | 1,030032601 | ENST00000504870 | 101927074 | N/A          | LINC00682             |
| A_21_P0007266  | 1,64732 | 1,60463 | 1,030032601 | N/A             | N/A       | N/A          | Inc-ENDOD1-1          |
| A_22_P00010634 | 1,67746 | 1,63477 | 1,030032601 | N/A             | N/A       | BM678365     | Inc-NEBL-1            |
| A_21_P0002324  | 1,59635 | 1,55366 | 1,030032601 | N/A             | 101669767 | NR_104321    | SCHLAP1               |
| A_22_P00005227 | 1,4358  | 1,39311 | 1,030032601 | ENST00000556720 | 100507242 | XR_424548    | SNHG23                |
| A_33_P3419204  | 1,56031 | 1,51763 | 1,030025461 | N/A             | N/A       | N/A          | N/A                   |
| A_33_P3306619  | 1,70277 | 1,66009 | 1,030025461 | ENST00000416044 | 100131902 | NM_001128598 | KRTAP25-1             |
| A_21_P0005837  | 1,59048 | 1,5478  | 1,030025461 | N/A             | N/A       | N/A          | Inc-CYP7A1-1          |
| A_22_P00013334 | 1,38285 | 1,34017 | 1,030025461 | N/A             | N/A       | BF343950     | Inc-RP11-148O21.3.1-1 |
| A_22_P00008042 | 1,58862 | 1,54594 | 1,030025461 | ENST00000508292 | N/A       | N/A          | N/A                   |
| A_23_P53884    | 1,40187 | 1,3592  | 1,030018322 | ENST00000379919 | 4081      | NM_005584    | MAB21L1               |

|                |         |         |             |                 |           |              |                      |
|----------------|---------|---------|-------------|-----------------|-----------|--------------|----------------------|
| A_23_P140716   | 1,49375 | 1,45108 | 1,030018322 | ENST00000211076 | 23430     | NM_012217    | TPSD1                |
| A_23_P364444   | 1,51496 | 1,47229 | 1,030018322 | ENST00000462493 | 140876    | AK056792     | FAM65C               |
| A_22_P00006498 | 1,59884 | 1,55617 | 1,030018322 | ENST00000528316 | 101928443 | NR_120530    | LOC101928443         |
| A_21_P0005105  | 1,523   | 1,48034 | 1,030011182 | N/A             | N/A       | N/A          | Inc-BMP6-8           |
| A_21_P0007969  | 1,62566 | 1,58301 | 1,030004043 | ENST00000421423 | 100505996 | NR_120392    | LINC00403            |
| A_21_P0000409  | 1,43864 | 1,39599 | 1,030004043 | N/A             | 767590    | NR_003205    | SNORD114-12          |
| A_22_P00007899 | 1,51539 | 1,47275 | 1,029996903 | N/A             | N/A       | N/A          | Inc-HSP90AA1-4       |
| A_22_P00014688 | 1,49804 | 1,4554  | 1,029996903 | N/A             | 100873983 | NR_046575    | MAGI1-AS1            |
| A_33_P3308497  | 5,52291 | 5,48028 | 1,029989764 | ENST00000584747 | 729096    | NR_026592    | BMS1P4               |
| A_21_P0002899  | 1,51367 | 1,47104 | 1,029989764 | N/A             | N/A       | N/A          | Inc-RP11-432B6.3.1-1 |
| A_22_P00013338 | 1,48046 | 1,43783 | 1,029989764 | ENST00000522471 | N/A       | AK025743     | N/A                  |
| A_33_P3254335  | 1,67656 | 1,63393 | 1,029989764 | ENST00000504360 | 389206    | NM_207406    | BEND4                |
| A_22_P00009448 | 1,38273 | 1,3401  | 1,029989764 | N/A             | N/A       | N/A          | Inc-M6PR-2           |
| A_33_P3381666  | 3,83355 | 3,79093 | 1,029982625 | ENST00000428004 | 84448     | NM_001130088 | ABLIM2               |
| A_21_P0008618  | 1,41269 | 1,37007 | 1,029982625 | N/A             | N/A       | N/A          | Inc-THBS1-1          |
| A_22_P00001046 | 1,64261 | 1,6     | 1,029975485 | N/A             | N/A       | N/A          | Inc-AL591684.1-1     |
| A_22_P00023511 | 1,5174  | 1,47479 | 1,029975485 | ENST00000578490 | N/A       | DA924359     | N/A                  |
| A_33_P3283954  | 1,41101 | 1,3684  | 1,029975485 | ENST00000602826 | N/A       | N/A          | N/A                  |
| A_33_P3773168  | 1,38936 | 1,34676 | 1,029968346 | N/A             | N/A       | N/A          | Inc-EXOC2-5          |
| A_33_P3281552  | 3,43563 | 3,39303 | 1,029968346 | ENST00000378505 | 6103      | NM_001034853 | RPGR                 |
| A_23_P89123    | 11,7991 | 11,7565 | 1,029968346 | ENST00000570279 | 10428     | NM_006324    | CFDP1                |
| A_22_P00017460 | 11,7937 | 11,7511 | 1,029968346 | ENST00000422723 | N/A       | N/A          | N/A                  |
| A_21_P0007988  | 1,52736 | 1,48477 | 1,029961207 | ENST00000414161 | 101929121 | NR_126377    | LINC00437            |
| A_22_P00024920 | 1,80633 | 1,76374 | 1,029961207 | ENST00000455092 | N/A       | N/A          | N/A                  |
| A_22_P00002586 | 1,57482 | 1,53224 | 1,029954068 | ENST00000567168 | 101927606 | XR_245485    | LOC101927606         |
| A_21_P0000982  | 1,48888 | 1,4463  | 1,029954068 | ENST00000455038 | 102723938 | N/A          | LOC102723938         |
| A_23_P47148    | 1,64535 | 1,60277 | 1,029954068 | ENST00000524473 | 50507     | NM_016931    | NOX4                 |
| A_21_P0002444  | 1,38768 | 1,3451  | 1,029954068 | N/A             | N/A       | N/A          | Inc-BCL11A-2         |
| A_21_P0009948  | 1,58958 | 1,54701 | 1,029946929 | N/A             | N/A       | N/A          | Inc-SSTR4-3          |
| A_21_P0002597  | 1,58331 | 1,54074 | 1,029946929 | N/A             | N/A       | N/A          | Inc-ACTR2-3          |
| A_33_P3416231  | 8,02554 | 7,98298 | 1,02993979  | ENST00000487384 | 3205      | NM_152739    | HOXA9                |
| A_22_P00015123 | 1,51187 | 1,46932 | 1,029932651 | ENST00000569986 | 101927313 | XR_243446    | LOC101927313         |
| A_22_P00005985 | 1,50939 | 1,46685 | 1,029925512 | N/A             | N/A       | N/A          | Inc-F2RL2-2          |



|                |         |         |             |                 |           |              |                |
|----------------|---------|---------|-------------|-----------------|-----------|--------------|----------------|
| A_23_P399897   | 1,5679  | 1,52536 | 1,029925512 | ENST00000423778 | 339855    | NM_178554    | KY             |
| A_21_P0008058  | 2,50177 | 2,45924 | 1,029918373 | N/A             | N/A       | N/A          | Inc-DNAJC15-2  |
| A_33_P3280724  | 1,4005  | 1,35797 | 1,029918373 | ENST00000412501 | N/A       | N/A          | N/A            |
| A_22_P00005560 | 1,50646 | 1,46393 | 1,029918373 | N/A             | 285224    | N/A          | DNAJB8-AS1     |
| A_22_P00018087 | 1,38344 | 1,34091 | 1,029918373 | N/A             | N/A       | N/A          | Inc-ZNF366-3   |
| A_33_P3256317  | 1,38679 | 1,34426 | 1,029918373 | N/A             | 730811    | NR_024468    | MYT1L-AS1      |
| A_22_P00019326 | 1,39436 | 1,35183 | 1,029918373 | ENST00000474667 | N/A       | N/A          | N/A            |
| A_21_P0007051  | 1,56447 | 1,52195 | 1,029911234 | N/A             | N/A       | N/A          | Inc-APBB1IP-1  |
| A_22_P00017328 | 1,59342 | 1,55091 | 1,029904095 | N/A             | 101928896 | NR_120566    | LOC101928896   |
| A_21_P0005277  | 1,5751  | 1,53259 | 1,029904095 | ENST00000465755 | N/A       | N/A          | N/A            |
| A_23_P154025   | 12,1193 | 12,0768 | 1,029896957 | ENST00000409333 | 6741      | NM_003142    | SSB            |
| A_21_P0003261  | 1,40364 | 1,36114 | 1,029896957 | N/A             | N/A       | N/A          | Inc-NAALADL2-1 |
| A_21_P0010589  | 1,45977 | 1,41727 | 1,029896957 | N/A             | N/A       | N/A          | XLOC_I2_000720 |
| A_33_P3404651  | 9,48819 | 9,44569 | 1,029896957 | ENST00000484061 | 57217     | NM_001288951 | TTC7A          |
| A_21_P0008409  | 2,80907 | 2,76658 | 1,029889818 | N/A             | N/A       | N/A          | Inc-STXBP6-1   |
| A_33_P3264528  | 1,4859  | 1,44342 | 1,029882679 | N/A             | 3207      | NM_005523    | HOXA11         |
| A_21_P0003834  | 1,54225 | 1,49978 | 1,029875541 | N/A             | N/A       | N/A          | Inc-POLR2B-1   |
| A_22_P00015432 | 1,45019 | 1,40775 | 1,029854125 | N/A             | N/A       | BE408515     | Inc-SSPN-2     |
| A_22_P00000355 | 4,05391 | 4,01148 | 1,029846987 | ENST00000554412 | N/A       | N/A          | N/A            |
| A_22_P00005168 | 1,67185 | 1,62943 | 1,029839849 | N/A             | N/A       | DA320973     | Inc-DIO2-5     |
| A_21_P0003044  | 1,55563 | 1,51321 | 1,029839849 | N/A             | 102724289 | XR_431648    | LOC102724289   |
| A_33_P3340454  | 1,51643 | 1,47402 | 1,02983271  | N/A             | N/A       | N/A          | N/A            |
| A_21_P0013871  | 1,62829 | 1,58588 | 1,02983271  | N/A             | N/A       | N/A          | XLOC_I2_015828 |
| A_23_P319232   | 1,4882  | 1,4458  | 1,029825572 | ENST00000242315 | 23349     | BC041169     | KIAA1045       |
| A_22_P00010803 | 1,46804 | 1,42564 | 1,029825572 | N/A             | N/A       | AA382521     | Inc-NME1-1     |
| A_33_P3346448  | 1,58679 | 1,54439 | 1,029825572 | ENST00000373088 | 27328     | NM_032968    | PCDH11X        |
| A_23_P50872    | 13,0654 | 13,023  | 1,029825572 | ENST00000593353 | 4713      | NM_004146    | NDUFB7         |
| A_33_P3293760  | 6,50035 | 6,45795 | 1,029825572 | ENST00000334662 | 386681    | NM_198695    | KRTAP10-8      |
| A_22_P00012952 | 1,39727 | 1,3549  | 1,029804158 | N/A             | N/A       | N/A          | Inc-RECQL5-2   |
| A_21_P0003197  | 1,65996 | 1,61759 | 1,029804158 | ENST00000427914 | 253573    | NR_033844    | LOC253573      |
| A_33_P3222429  | 1,38269 | 1,34033 | 1,02979702  | ENST00000602452 | 101928601 | NM_001282136 | MEI4           |
| A_22_P00008359 | 1,41988 | 1,37753 | 1,029789882 | ENST00000448859 | 101929413 | N/A          | LOC101929413   |
| A_22_P00004054 | 1,5983  | 1,55595 | 1,029789882 | N/A             | 100885796 | NR_048544    | SLC9A9-AS1     |

|                |         |         |             |                 |           |              |              |
|----------------|---------|---------|-------------|-----------------|-----------|--------------|--------------|
| A_22_P00003335 | 1,43624 | 1,39389 | 1,029789882 | N/A             | N/A       | N/A          | Inc-CAST-4   |
| A_33_P3245095  | 1,5922  | 1,54985 | 1,029789882 | N/A             | N/A       | AK129612     | N/A          |
| A_21_P0009427  | 1,38555 | 1,34321 | 1,029782744 | ENST00000584544 | N/A       | N/A          | N/A          |
| A_33_P3400918  | 1,40463 | 1,36229 | 1,029782744 | ENST00000317586 | 27185     | NM_001164550 | DISC1        |
| A_33_P3254975  | 1,47456 | 1,43222 | 1,029782744 | ENST00000621184 | N/A       | AB306242     | N/A          |
| A_22_P00002026 | 1,5581  | 1,51577 | 1,029775606 | ENST00000411946 | N/A       | N/A          | N/A          |
| A_22_P00005443 | 4,23718 | 4,19486 | 1,029768468 | N/A             | N/A       | DB065448     | Inc-DUSP1-2  |
| A_22_P00009637 | 1,56623 | 1,52391 | 1,029768468 | N/A             | N/A       | N/A          | Inc-MARK1-4  |
| A_22_P00010008 | 1,53044 | 1,48812 | 1,029768468 | N/A             | N/A       | BG772604     | Inc-MMD-5    |
| A_21_P0014525  | 1,55013 | 1,50781 | 1,029768468 | N/A             | N/A       | BG182803     | N/A          |
| A_33_P3336347  | 1,4399  | 1,39758 | 1,029768468 | ENST00000371629 | 101928638 | N/A          | PRR31        |
| A_33_P3243028  | 2,10226 | 2,05994 | 1,029768468 | ENST00000282478 | 1834      | NM_014208    | DSPP         |
| A_33_P3266978  | 1,6724  | 1,63009 | 1,02976133  | N/A             | 642597    | NM_001145194 | C18orf42     |
| A_23_P150595   | 1,54278 | 1,50047 | 1,02976133  | ENST00000417164 | 7166      | NM_004179    | TPH1         |
| A_21_P0004249  | 1,55965 | 1,51734 | 1,02976133  | N/A             | N/A       | N/A          | Inc-PARP8-1  |
| A_22_P00010101 | 1,57229 | 1,52998 | 1,02976133  | ENST00000584542 | 101927877 | XR_248399    | LOC101927877 |
| A_32_P88262    | 1,59176 | 1,54945 | 1,02976133  | ENST00000231706 | 57709     | NM_020949    | SLC7A14      |
| A_33_P3255226  | 1,57693 | 1,53463 | 1,029754193 | ENST00000566406 | N/A       | N/A          | N/A          |
| A_22_P00005043 | 1,53525 | 1,49295 | 1,029754193 | ENST00000524361 | 100874052 | NR_051989    | LINC00534    |
| A_21_P0001405  | 1,49651 | 1,45421 | 1,029754193 | N/A             | N/A       | N/A          | Inc-NAV1-1   |
| A_21_P0003679  | 1,53277 | 1,49048 | 1,029747055 | N/A             | N/A       | N/A          | Inc-CEP44-2  |
| A_33_P3212305  | 1,56588 | 1,52359 | 1,029747055 | ENST00000522290 | 11178     | NM_021020    | LZTS1        |
| A_33_P3243600  | 1,5059  | 1,46361 | 1,029747055 | N/A             | N/A       | N/A          | N/A          |
| A_33_P3423969  | 1,40308 | 1,3608  | 1,029739917 | ENST00000306318 | 2637      | NM_001301687 | GBX2         |
| A_33_P3637366  | 1,5321  | 1,48982 | 1,029739917 | N/A             | 285547    | NR_034054    | LINC01097    |
| A_33_P3677050  | 1,67722 | 1,63495 | 1,02973278  | ENST00000452343 | 400957    | NR_033980    | LINC01185    |
| A_21_P0010490  | 1,38177 | 1,3395  | 1,02973278  | ENST00000623919 | N/A       | XR_430626    | N/A          |
| A_23_P4782     | 3,4093  | 3,36704 | 1,029725642 | ENST00000222212 | 59284     | NM_031896    | CACNG7       |
| A_21_P0002909  | 1,59726 | 1,555   | 1,029725642 | ENST00000421034 | 100505547 | N/A          | LINC01208    |
| A_33_P3363510  | 1,47705 | 1,43479 | 1,029725642 | N/A             | N/A       | AK126076     | Inc-NPHS2-1  |
| A_21_P0009633  | 1,43875 | 1,39649 | 1,029725642 | N/A             | 101927404 | XR_245477    | LOC101927404 |
| A_21_P0007344  | 1,58887 | 1,54662 | 1,029718505 | ENST00000526978 | N/A       | N/A          | N/A          |
| A_33_P3417765  | 1,4763  | 1,43406 | 1,029711367 | ENST00000400664 | 127707    | NM_152375    | KLHDC7A      |

|                |         |         |             |                 |           |              |                  |
|----------------|---------|---------|-------------|-----------------|-----------|--------------|------------------|
| A_21_P0000433  | 1,53765 | 1,49541 | 1,029711367 | N/A             | 767565    | NR_003233    | SNORD113-5       |
| A_21_P0003731  | 1,72321 | 1,68097 | 1,029711367 | N/A             | N/A       | N/A          | Inc-SEL1L3-2     |
| A_22_P00005365 | 1,53203 | 1,4898  | 1,02970423  | N/A             | 101928847 | NR_120563    | LOC101928847     |
| A_22_P00023142 | 1,60414 | 1,56191 | 1,02970423  | ENST00000426240 | N/A       | N/A          | N/A              |
| A_22_P00023483 | 1,5858  | 1,54358 | 1,029697092 | ENST00000435281 | N/A       | NR_047024    | N/A              |
| A_22_P00021797 | 1,56273 | 1,52052 | 1,029689955 | ENST00000424749 | 100129583 | NM_001136570 | FAM47E           |
| A_33_P3264416  | 1,66309 | 1,62088 | 1,029689955 | ENST00000611520 | N/A       | HM236769     | N/A              |
| A_22_P00018710 | 1,40207 | 1,35986 | 1,029689955 | ENST00000558963 | N/A       | N/A          | N/A              |
| A_22_P00009174 | 1,57231 | 1,53011 | 1,029682818 | N/A             | N/A       | BX105782     | Inc-LONP2-3      |
| A_21_P0005659  | 1,53691 | 1,49473 | 1,029668544 | N/A             | N/A       | N/A          | Inc-KIAA1456.1-1 |
| A_33_P3265404  | 1,68955 | 1,64737 | 1,029668544 | ENST00000508201 | 340094    | NR_026994    | LINC01020        |
| A_22_P00021385 | 1,62108 | 1,57891 | 1,029661406 | N/A             | N/A       | BX088853     | Inc-KLHL31-4     |
| A_22_P00009218 | 6,05258 | 6,01042 | 1,029654269 | N/A             | N/A       | N/A          | Inc-LPPR5.1-1    |
| A_22_P00010767 | 1,63568 | 1,59353 | 1,029647132 | N/A             | N/A       | N/A          | Inc-NKPD1-1      |
| A_33_P3307247  | 1,55446 | 1,51231 | 1,029647132 | ENST00000317704 | 26289     | AK090967     | AK5              |
| A_24_P940434   | 1,40861 | 1,36648 | 1,029632859 | ENST00000316124 | 100996455 | NR_073177    | LOC100996455     |
| A_33_P3343200  | 1,89458 | 1,85246 | 1,029625722 | N/A             | N/A       | N/A          | N/A              |
| A_21_P0009373  | 1,46633 | 1,42421 | 1,029625722 | N/A             | N/A       | N/A          | Inc-C17orf97-7   |
| A_21_P0001448  | 1,67157 | 1,62946 | 1,029618585 | N/A             | 102724382 | XR_425118    | LOC102724382     |
| A_22_P00021192 | 1,7172  | 1,67509 | 1,029618585 | N/A             | N/A       | N/A          | Inc-HIVEP1-3     |
| A_33_P3318646  | 15,1627 | 15,1206 | 1,029611448 | ENST00000467611 | 50632     | NM_015722    | CALY             |
| A_33_P3371509  | 1,45009 | 1,408   | 1,029604311 | ENST00000405369 | 101927722 | NR_109967    | LL22NC03-75H12.2 |
| A_22_P00000192 | 1,55792 | 1,51583 | 1,029604311 | N/A             | N/A       | N/A          | Inc-ABI1-4       |
| A_22_P00024109 | 1,52889 | 1,4868  | 1,029604311 | N/A             | 101927870 | NR_110141    | LOC101927870     |
| A_21_P0009138  | 2,72731 | 2,68522 | 1,029604311 | N/A             | 101928582 | XR_424737    | LOC101928582     |
| A_33_P3406171  | 1,40483 | 1,36274 | 1,029604311 | ENST00000373105 | 140886    | NM_080832    | PABPC5           |
| A_33_P3596355  | 1,4352  | 1,39314 | 1,029582902 | N/A             | 644242    | BG033631     | LINC00622        |
| A_33_P3230444  | 1,67497 | 1,63292 | 1,029575765 | ENST00000390639 | N/A       | BC032733     | N/A              |
| A_33_P3281478  | 4,79793 | 4,75588 | 1,029575765 | N/A             | N/A       | N/A          | N/A              |
| A_22_P00020896 | 1,7255  | 1,68346 | 1,029568629 | N/A             | N/A       | BX501106     | Inc-CRHR2-1      |
| A_21_P0010235  | 1,51885 | 1,47682 | 1,029561492 | N/A             | N/A       | N/A          | Inc-OLIG2-1      |
| A_23_P57248    | 1,57277 | 1,53074 | 1,029561492 | ENST00000246199 | 140873    | NM_001145350 | C20orf173        |
| A_22_P00022724 | 1,71968 | 1,67765 | 1,029561492 | ENST00000457448 | 101927701 | N/A          | LOC101927701     |

|                |         |         |             |                 |           |              |              |
|----------------|---------|---------|-------------|-----------------|-----------|--------------|--------------|
| A_32_P316136   | 1,67219 | 1,63016 | 1,029561492 | ENST00000613975 | 91752     | NM_194250    | ZNF804A      |
| A_22_P00006926 | 1,3819  | 1,33988 | 1,029554356 | N/A             | N/A       | DD431415     | Inc-GATA3-9  |
| A_22_P00023309 | 1,56071 | 1,51869 | 1,029554356 | N/A             | N/A       | N/A          | Inc-NDFIP2-1 |
| A_22_P00007560 | 1,58654 | 1,54453 | 1,02954722  | N/A             | 282763    | NM_001005567 | OR51B5       |
| A_23_P104224   | 1,61795 | 1,57594 | 1,02954722  | ENST00000373995 | 29974     | NM_138933    | A1CF         |
| A_22_P00008215 | 1,59594 | 1,55393 | 1,02954722  | N/A             | N/A       | DB507006     | Inc-IQCG-2   |
| A_32_P184168   | 1,59832 | 1,55631 | 1,02954722  | N/A             | 441052    | XR_244755    | LOC441052    |
| A_23_P15511    | 15,5524 | 15,5104 | 1,029540083 | ENST00000578758 | 1655      | NM_004396    | DDX5         |
| A_22_P00025510 | 1,50239 | 1,46039 | 1,029540083 | ENST00000513157 | 101929505 | N/A          | LOC101929505 |
| A_23_P201400   | 10,744  | 10,702  | 1,029540083 | ENST00000541818 | 5498      | NM_000309    | PPOX         |
| A_21_P0000701  | 1,63044 | 1,58845 | 1,029532947 | N/A             | 100287010 | NR_037885    | LOC100287010 |
| A_22_P00017859 | 1,42828 | 1,38629 | 1,029532947 | N/A             | N/A       | BM677029     | Inc-ZDHH17-1 |
| A_21_P0014757  | 1,60738 | 1,56539 | 1,029532947 | N/A             | 100506766 | AK304201     | LOC100506766 |
| A_21_P0007259  | 1,69604 | 1,65405 | 1,029532947 | ENST00000581290 | N/A       | N/A          | N/A          |
| A_21_P0003397  | 1,57805 | 1,53606 | 1,029532947 | ENST00000503950 | N/A       | N/A          | N/A          |
| A_23_P89543    | 10,0077 | 9,96572 | 1,029525811 | ENST00000361413 | 9851      | NM_014804    | KIAA0753     |
| A_21_P0014521  | 1,65095 | 1,60897 | 1,029525811 | N/A             | 729658    | XR_110196    | LOC729658    |
| A_32_P88880    | 1,59547 | 1,5535  | 1,029518675 | ENST00000433770 | N/A       | XR_247507    | N/A          |
| A_22_P00015292 | 1,47149 | 1,42953 | 1,029511539 | N/A             | N/A       | N/A          | Inc-SPCS3-2  |
| A_21_P0006255  | 1,74215 | 1,70019 | 1,029511539 | N/A             | N/A       | N/A          | Inc-PTPRD-5  |
| A_32_P115558   | 6,51761 | 6,47566 | 1,029504403 | N/A             | N/A       | N/A          | N/A          |
| A_23_P429950   | 1,52922 | 1,48728 | 1,029497267 | ENST00000262648 | 3730      | NM_000216    | KAL1         |
| A_23_P61031    | 1,47463 | 1,43269 | 1,029497267 | ENST00000465071 | 79740     | NM_024687    | ZBBX         |
| A_22_P00024843 | 1,71894 | 1,677   | 1,029497267 | N/A             | N/A       | N/A          | Inc-PAXIP1-1 |
| A_22_P00010045 | 1,44254 | 1,4006  | 1,029497267 | N/A             | 100505635 | NR_125831    | LOC100505635 |
| A_22_P00000521 | 1,58399 | 1,54206 | 1,029490131 | ENST00000583982 | 100287225 | NR_040074    | LOC100287225 |
| A_33_P3311855  | 1,60966 | 1,56773 | 1,029490131 | N/A             | N/A       | N/A          | N/A          |
| A_33_P3350378  | 1,6743  | 1,63237 | 1,029490131 | ENST00000308287 | 341116    | NM_206893    | MS4A10       |
| A_22_P00025458 | 2,1548  | 2,11288 | 1,029482995 | ENST00000543970 | N/A       | N/A          | N/A          |
| A_23_P125588   | 1,59859 | 1,55667 | 1,029482995 | ENST00000373031 | 64102     | NM_022144    | TNMD         |
| A_21_P0013902  | 1,43555 | 1,39364 | 1,029475859 | ENST00000430152 | N/A       | N/A          | N/A          |
| A_23_P385766   | 1,41904 | 1,37714 | 1,029468724 | ENST00000311620 | 257629    | NM_145865    | ANKS4B       |
| A_23_P139486   | 13,9276 | 13,8857 | 1,029468724 | ENST00000261692 | 8099      | NM_004642    | CDK2AP1      |

|                |         |         |             |                 |           |              |                     |
|----------------|---------|---------|-------------|-----------------|-----------|--------------|---------------------|
| A_22_P00013661 | 1,69758 | 1,65568 | 1,029468724 | N/A             | N/A       | N/A          | Inc-RP11-67H2.1.1-3 |
| A_23_P212706   | 12,3786 | 12,3367 | 1,029468724 | ENST00000495756 | 64422     | NM_022488    | ATG3                |
| A_22_P00022257 | 1,92536 | 1,88347 | 1,029461588 | ENST00000579775 | N/A       | N/A          | N/A                 |
| A_21_P0002857  | 1,49088 | 1,44899 | 1,029461588 | ENST00000486137 | N/A       | N/A          | N/A                 |
| A_22_P00013410 | 1,73861 | 1,69672 | 1,029461588 | ENST00000555889 | N/A       | N/A          | N/A                 |
| A_24_P251221   | 9,53085 | 9,48898 | 1,029447317 | ENST00000261461 | 5525      | NM_006243    | PPP2R5A             |
| A_33_P3291939  | 1,43774 | 1,39588 | 1,029440181 | ENST00000393504 | 1261      | NM_001298    | CNGA3               |
| A_22_P00025179 | 1,45413 | 1,41228 | 1,029433046 | N/A             | 9848      | N/A          | MFAP3L              |
| A_33_P3391419  | 1,63305 | 1,5912  | 1,029433046 | N/A             | 55084     | NM_018013    | SOBP                |
| A_33_P3781228  | 5,53778 | 5,49593 | 1,029433046 | N/A             | 101927559 | NR_125739    | CEBPB-AS1           |
| A_33_P3345974  | 1,55796 | 1,51613 | 1,029418775 | N/A             | 442454    | NR_002308    | UQCRBP1             |
| A_33_P3292844  | 8,52727 | 8,48545 | 1,029411639 | ENST00000242462 | 50674     | NM_020999    | NEUROG3             |
| A_23_P11862    | 10,4852 | 10,4434 | 1,029397369 | ENST00000413811 | 55732     | NM_018186    | C1orf112            |
| A_33_P3261610  | 10,1485 | 10,1067 | 1,029397369 | ENST00000622508 | 84265     | NM_032305    | POLR3GL             |
| A_21_P0012940  | 17,9929 | 17,9511 | 1,029397369 | ENST00000511991 | N/A       | N/A          | N/A                 |
| A_24_P347319   | 1,51507 | 1,47328 | 1,029390234 | ENST00000350228 | 3747      | NM_139136    | KCNC2               |
| A_33_P3368083  | 1,64034 | 1,59855 | 1,029390234 | ENST00000612714 | 138307    | NM_178469    | LCN8                |
| A_21_P0010409  | 1,67727 | 1,63548 | 1,029390234 | ENST00000413244 | 102724900 | XR_425318    | LOC102724900        |
| A_33_P3398609  | 1,63301 | 1,59122 | 1,029390234 | ENST00000343694 | 11317     | NM_001281448 | RBPJL               |
| A_22_P00018830 | 1,48489 | 1,44311 | 1,029383098 | N/A             | N/A       | DB067147     | Inc-PANK3-7         |
| A_22_P00013126 | 1,64162 | 1,59984 | 1,029383098 | N/A             | N/A       | BX361587     | Inc-RMI1-6          |
| A_21_P0006194  | 1,43568 | 1,39392 | 1,029368828 | N/A             | N/A       | N/A          | Inc-RNF20-2         |
| A_21_P0001699  | 1,59008 | 1,54832 | 1,029368828 | N/A             | N/A       | N/A          | Inc-UBL4B-1         |
| A_21_P0009069  | 1,71036 | 1,6686  | 1,029368828 | N/A             | 102724084 | NR_120307    | LOC102724084        |
| A_22_P00014489 | 1,38122 | 1,33946 | 1,029368828 | N/A             | N/A       | N/A          | Inc-SHF-3           |
| A_33_P3223059  | 1,4031  | 1,36134 | 1,029368828 | N/A             | N/A       | BG218723     | N/A                 |
| A_23_P205713   | 4,57224 | 4,53048 | 1,029368828 | ENST00000548369 | 29091     | NM_014178    | STXBP6              |
| A_22_P00023784 | 1,69139 | 1,64965 | 1,029354558 | N/A             | N/A       | N/A          | Inc-CCT8-1          |
| A_21_P0000796  | 1,6011  | 1,55936 | 1,029354558 | ENST00000563533 | 100288079 | N/A          | GS1-279B7.1         |
| A_23_P413157   | 1,5721  | 1,53037 | 1,029347423 | ENST00000379211 | 254158    | NM_152761    | CXorf58             |
| A_21_P0002383  | 1,60389 | 1,56216 | 1,029347423 | N/A             | N/A       | N/A          | Inc-RNASEH1-4       |
| A_21_P0009435  | 1,52899 | 1,48726 | 1,029347423 | ENST00000580756 | N/A       | N/A          | N/A                 |
| A_22_P00012159 | 1,59707 | 1,55534 | 1,029347423 | ENST00000444708 | N/A       | N/A          | N/A                 |

|                |         |         |             |                 |           |              |                |
|----------------|---------|---------|-------------|-----------------|-----------|--------------|----------------|
| A_33_P3222807  | 1,69644 | 1,65472 | 1,029340288 | ENST00000297423 | 23514     | N/A          | SPIDR          |
| A_22_P00018903 | 1,52996 | 1,48824 | 1,029340288 | ENST00000555975 | N/A       | BF530192     | N/A            |
| A_21_P0013500  | 1,56344 | 1,52173 | 1,029333154 | N/A             | N/A       | N/A          | XLOC_I2_014294 |
| A_33_P3373795  | 1,45808 | 1,41638 | 1,029326019 | N/A             | N/A       | N/A          | N/A            |
| A_24_P24770    | 1,7143  | 1,6726  | 1,029326019 | ENST00000471295 | 285335    | NM_183061    | SLC9C1         |
| A_22_P00003621 | 1,4362  | 1,39451 | 1,029318884 | N/A             | N/A       | N/A          | Inc-CD44-2     |
| A_22_P00014911 | 4,4057  | 4,36402 | 1,029311749 | N/A             | N/A       | AI384051     | Inc-SLCO2B1-3  |
| A_22_P00024169 | 1,51473 | 1,47306 | 1,029304615 | N/A             | N/A       | BC040916     | Inc-C6orf201-1 |
| A_21_P0002951  | 1,38394 | 1,34229 | 1,029290346 | N/A             | N/A       | N/A          | Inc-ZNF621-3   |
| A_32_P88635    | 8,78093 | 8,73928 | 1,029290346 | ENST00000342104 | 84224     | NM_032264    | NBPF3          |
| A_33_P3213767  | 7,2908  | 7,24916 | 1,029283211 | N/A             | 550631    | BC018040     | CCDC157        |
| A_33_P3377644  | 1,55248 | 1,51085 | 1,029276077 | N/A             | 340595    | NM_001004308 | ZCCHC16        |
| A_22_P00020766 | 1,40464 | 1,36302 | 1,029268942 | ENST00000511279 | 101927095 | XR_241669    | LOC101927095   |
| A_22_P00001357 | 1,38559 | 1,34397 | 1,029268942 | ENST00000583985 | N/A       | DB074698     | N/A            |
| A_21_P0013445  | 1,38134 | 1,33972 | 1,029268942 | ENST00000421513 | N/A       | N/A          | N/A            |
| A_22_P00015690 | 1,66096 | 1,61934 | 1,029268942 | ENST00000432834 | N/A       | N/A          | N/A            |
| A_33_P3260712  | 1,71527 | 1,67365 | 1,029268942 | ENST00000465419 | N/A       | N/A          | N/A            |
| A_32_P489986   | 1,7331  | 1,69149 | 1,029261808 | ENST00000515363 | 642987    | NM_001039763 | TMEM232        |
| A_33_P3298057  | 7,37488 | 7,33327 | 1,029261808 | ENST00000438979 | 10057     | NM_001023587 | ABCC5          |
| A_22_P00018200 | 1,69288 | 1,65127 | 1,029261808 | N/A             | N/A       | N/A          | Inc-ZNF624-1   |
| A_33_P3423626  | 1,56917 | 1,52756 | 1,029261808 | ENST00000375987 | 151121    | NR_122040    | LOC151121      |
| A_33_P3212659  | 1,58877 | 1,54717 | 1,029254674 | ENST00000376310 | 4007      | N/A          | PRICKLE3       |
| A_21_P0009968  | 1,57963 | 1,53803 | 1,029254674 | N/A             | N/A       | N/A          | Inc-ARFGEF2-2  |
| A_24_P167877   | 17,2046 | 17,163  | 1,029254674 | ENST00000451409 | 100132247 | NM_001135865 | NPIP5          |
| A_23_P422245   | 1,50562 | 1,46403 | 1,02924754  | ENST00000329378 | 285600    | NM_173665    | KIAA0825       |
| A_21_P0003813  | 1,60643 | 1,56484 | 1,02924754  | ENST00000610683 | 102723766 | NR_125933    | LOC102723766   |
| A_23_P143526   | 1,48816 | 1,44657 | 1,02924754  | ENST00000291700 | 6285      | NM_006272    | S100B          |
| A_22_P00024251 | 1,5482  | 1,50661 | 1,02924754  | N/A             | N/A       | N/A          | Inc-PAFAH1B2-1 |
| A_21_P0001610  | 5,86307 | 5,82149 | 1,029240405 | N/A             | N/A       | N/A          | Inc-FMOD-1     |
| A_33_P3393702  | 1,40644 | 1,36487 | 1,029233271 | N/A             | N/A       | N/A          | N/A            |
| A_21_P0006446  | 1,62896 | 1,5874  | 1,029226137 | ENST00000456037 | N/A       | N/A          | N/A            |
| A_33_P3285260  | 8,63313 | 8,59157 | 1,029226137 | ENST00000493883 | N/A       | XM_006710101 | N/A            |
| A_33_P3414302  | 1,67189 | 1,63034 | 1,029219003 | N/A             | N/A       | N/A          | N/A            |

|                |         |         |             |                 |           |              |                |
|----------------|---------|---------|-------------|-----------------|-----------|--------------|----------------|
| A_33_P3381836  | 2,25549 | 2,21394 | 1,029219003 | ENST00000356972 | 408187    | NM_001001325 | SPINK14        |
| A_23_P36905    | 1,71485 | 1,67331 | 1,029211869 | ENST00000218721 | 2862      | NM_001507    | MLNR           |
| A_33_P3247788  | 1,52725 | 1,48572 | 1,029204735 | N/A             | 100128063 | AK128878     | LOC100128063   |
| A_33_P3290729  | 1,51728 | 1,47575 | 1,029204735 | ENST00000328345 | 5454      | NM_005604    | POU3F2         |
| A_33_P3638471  | 1,58528 | 1,54375 | 1,029204735 | N/A             | 6981      | BC027954     | TRGV7          |
| A_33_P3390024  | 6,64652 | 6,605   | 1,029197601 | N/A             | 23265     | NM_001282314 | EXOC7          |
| A_22_P00005209 | 1,38258 | 1,34107 | 1,029190468 | ENST00000553692 | 378881    | NR_104192    | MIR381HG       |
| A_21_P0002813  | 1,49177 | 1,45026 | 1,029190468 | ENST00000473893 | N/A       | N/A          | N/A            |
| A_21_P0014752  | 1,50914 | 1,46763 | 1,029190468 | N/A             | N/A       | N/A          | N/A            |
| A_23_P83438    | 12,2939 | 12,2524 | 1,029183334 | ENST00000513342 | 65264     | NM_023079    | UBE2Z          |
| A_33_P3259725  | 1,7447  | 1,7032  | 1,029183334 | ENST00000309237 | 116931    | XM_006713487 | MED12L         |
| A_33_P3219755  | 1,45156 | 1,41006 | 1,029183334 | N/A             | 647024    | NM_001164446 | C6orf132       |
| A_21_P0004314  | 1,52972 | 1,48822 | 1,029183334 | N/A             | N/A       | N/A          | Inc-TCOF1-1    |
| A_21_P0002962  | 5,61437 | 5,57288 | 1,0291762   | N/A             | N/A       | N/A          | Inc-FLNB-1     |
| A_22_P00007114 | 1,63918 | 1,59769 | 1,0291762   | ENST00000449842 | 400799    | NR_104175    | LINC01344      |
| A_23_P211699   | 1,52427 | 1,48278 | 1,0291762   | N/A             | N/A       | N/A          | N/A            |
| A_22_P00002163 | 1,72796 | 1,68648 | 1,029169066 | N/A             | 102723418 | XR_424494    | LOC102723418   |
| A_33_P3213144  | 1,59523 | 1,55375 | 1,029169066 | ENST00000302231 | 219429    | NM_001004700 | OR4C11         |
| A_21_P0004496  | 1,48258 | 1,4411  | 1,029169066 | N/A             | N/A       | N/A          | Inc-CDH6-2     |
| A_21_P0006465  | 1,70625 | 1,66477 | 1,029169066 | N/A             | N/A       | N/A          | Inc-GPR101-1   |
| A_22_P00002135 | 1,69776 | 1,65629 | 1,029161933 | ENST00000433664 | N/A       | N/A          | N/A            |
| A_21_P0001438  | 1,55099 | 1,50952 | 1,029161933 | N/A             | N/A       | N/A          | Inc-KIAA1383-1 |
| A_21_P0003000  | 1,57473 | 1,53328 | 1,029147666 | N/A             | N/A       | N/A          | Inc-OR5AC2-1   |
| A_22_P00020173 | 1,69766 | 1,65623 | 1,029133399 | N/A             | N/A       | CA442247     | Inc-FOXJ3-1    |
| A_23_P169909   | 1,59382 | 1,5524  | 1,029126265 | ENST00000494390 | 9162      | NM_004717    | DGKI           |
| A_24_P75127    | 1,59782 | 1,55641 | 1,029119132 | ENST00000487727 | 256158    | NM_001291815 | HMCN2          |
| A_21_P0007551  | 1,56355 | 1,52214 | 1,029119132 | N/A             | N/A       | N/A          | Inc-C12orf68-1 |
| A_21_P0004146  | 1,52355 | 1,48214 | 1,029119132 | N/A             | N/A       | N/A          | Inc-ZBED3-1    |
| A_21_P0013542  | 1,55591 | 1,51451 | 1,029111999 | ENST00000523987 | N/A       | N/A          | N/A            |
| A_33_P3324934  | 1,64596 | 1,60456 | 1,029111999 | ENST00000370991 | 60437     | AF169690     | CDH26          |
| A_21_P0007685  | 1,53234 | 1,49095 | 1,029104866 | N/A             | N/A       | N/A          | Inc-A2M-1      |
| A_22_P00022154 | 1,42311 | 1,38172 | 1,029104866 | ENST00000450586 | N/A       | N/A          | N/A            |
| A_22_P00015759 | 1,53479 | 1,49341 | 1,029097732 | ENST00000583148 | N/A       | DB210687     | N/A            |

|                |         |         |             |                 |           |              |               |
|----------------|---------|---------|-------------|-----------------|-----------|--------------|---------------|
| A_22_P00020831 | 1,57577 | 1,53439 | 1,029097732 | ENST00000502861 | N/A       | N/A          | N/A           |
| A_22_P00021499 | 1,51953 | 1,47815 | 1,029097732 | ENST00000561802 | N/A       | N/A          | N/A           |
| A_22_P00017155 | 1,67946 | 1,63808 | 1,029097732 | N/A             | N/A       | N/A          | Inc-UBE2R2-1  |
| A_23_P424727   | 1,56617 | 1,5248  | 1,029090599 | ENST00000409530 | 22941     | AF141901     | SHANK2        |
| A_21_P0011954  | 1,44362 | 1,40225 | 1,029090599 | N/A             | 102725139 | XR_432428    | LOC102725139  |
| A_22_P00008457 | 1,54337 | 1,502   | 1,029090599 | ENST00000517983 | N/A       | N/A          | N/A           |
| A_24_P937317   | 1,47999 | 1,43864 | 1,029076333 | ENST00000377035 | 386653    | NM_001014336 | IL31          |
| A_22_P00003478 | 1,51169 | 1,47034 | 1,029076333 | N/A             | N/A       | N/A          | Inc-CCDC71L-1 |
| A_33_P3224882  | 1,53722 | 1,49587 | 1,029076333 | ENST00000444775 | N/A       | Z11260       | N/A           |
| A_21_P0000024  | 1,46119 | 1,41985 | 1,0290692   | ENST00000539099 | 2321      | NM_001160031 | FLT1          |
| A_21_P0008988  | 1,46025 | 1,41891 | 1,0290692   | N/A             | N/A       | N/A          | Inc-FOX1-3    |
| A_21_P0005729  | 1,54642 | 1,50508 | 1,0290692   | ENST00000519412 | N/A       | N/A          | N/A           |
| A_21_P0006198  | 1,58548 | 1,54415 | 1,029062067 | N/A             | N/A       | N/A          | Inc-SLC44A1-1 |
| A_22_P00013516 | 1,55109 | 1,50976 | 1,029062067 | ENST00000567415 | 100528021 | NM_001199760 | ST20-MTHFS    |
| A_21_P0010931  | 1,4503  | 1,40898 | 1,029054934 | ENST00000454424 | 282980    | N/A          | LINC00700     |
| A_24_P121846   | 1,54954 | 1,50822 | 1,029054934 | ENST00000599148 | 7691      | NM_003433    | ZNF132        |
| A_21_P0004287  | 1,52714 | 1,48583 | 1,029047801 | N/A             | N/A       | N/A          | Inc-LVRN.1-1  |
| A_22_P00011749 | 1,62626 | 1,58495 | 1,029047801 | ENST00000515805 | N/A       | N/A          | N/A           |
| A_33_P6817118  | 1,66225 | 1,62094 | 1,029047801 | ENST00000486824 | 23145     | NM_198455    | SSPO          |
| A_21_P0004232  | 1,50628 | 1,46498 | 1,029040669 | N/A             | 102723499 | XR_425840    | LOC102723499  |
| A_22_P00022913 | 1,68779 | 1,64649 | 1,029040669 | N/A             | N/A       | AA393510     | Inc-CYB561-3  |
| A_21_P0004055  | 1,38037 | 1,33908 | 1,029033536 | ENST00000596736 | 102467226 | NR_104999    | LOC102467226  |
| A_24_P238257   | 1,44936 | 1,40808 | 1,029026403 | ENST00000409464 | 284071    | NM_001145080 | C17orf104     |
| A_21_P0000798  | 1,70798 | 1,66671 | 1,029019271 | N/A             | 100505624 | NR_038427    | GTF3C2-AS1    |
| A_21_P0005070  | 1,43665 | 1,39538 | 1,029019271 | N/A             | N/A       | N/A          | Inc-FBXO5-1   |
| A_33_P3397496  | 1,56531 | 1,52405 | 1,029012138 | ENST00000367412 | 2165      | NM_001994    | F13B          |
| A_33_P3267799  | 1,54745 | 1,50619 | 1,029012138 | ENST00000617098 | 11006     | NM_001278426 | LILRB4        |
| A_22_P00001290 | 1,56214 | 1,52088 | 1,029012138 | ENST00000419326 | N/A       | N/A          | N/A           |
| A_22_P00007210 | 1,53874 | 1,49748 | 1,029012138 | ENST00000426840 | 101927224 | NR_120414    | LINC01049     |
| A_21_P0008082  | 1,60161 | 1,56037 | 1,028997873 | N/A             | N/A       | N/A          | Inc-KLF5-2    |
| A_21_P0005253  | 1,5923  | 1,55107 | 1,02899074  | ENST00000413406 | N/A       | N/A          | N/A           |
| A_22_P00001418 | 1,46467 | 1,42344 | 1,02899074  | ENST00000532199 | N/A       | N/A          | N/A           |
| A_33_P3299376  | 1,73183 | 1,69062 | 1,028976476 | N/A             | N/A       | N/A          | N/A           |



|                |         |         |             |                 |           |              |               |
|----------------|---------|---------|-------------|-----------------|-----------|--------------|---------------|
| A_22_P00012630 | 1,56644 | 1,52524 | 1,028969343 | N/A             | N/A       | N/A          | Inc-PTTG1-3   |
| A_23_P33723    | 1,64321 | 1,60201 | 1,028969343 | ENST00000396620 | 9332      | NM_004244    | CD163         |
| A_33_P3273000  | 10,6425 | 10,6013 | 1,028969343 | N/A             | 2185      | AK128371     | PTK2B         |
| A_22_P00005853 | 1,59137 | 1,55019 | 1,028955079 | ENST00000617093 | 286083    | NR_111948    | LOC286083     |
| A_21_P0003870  | 1,44407 | 1,40289 | 1,028955079 | N/A             | N/A       | N/A          | Inc-CYP4V2-1  |
| A_21_P0004475  | 1,66686 | 1,62569 | 1,028947947 | N/A             | N/A       | N/A          | Inc-PROP1-3   |
| A_23_P375165   | 1,56788 | 1,52671 | 1,028947947 | ENST00000333437 | 400629    | NM_207459    | TEX19         |
| A_21_P0007413  | 1,38297 | 1,34181 | 1,028940815 | N/A             | N/A       | N/A          | Inc-BLID-2    |
| A_21_P0003617  | 1,74033 | 1,69918 | 1,028933683 | N/A             | N/A       | N/A          | Inc-LPHN3-6   |
| A_21_P0013972  | 1,57068 | 1,52953 | 1,028933683 | N/A             | N/A       | N/A          | N/A           |
| A_22_P00024690 | 1,3903  | 1,34915 | 1,028933683 | ENST00000584896 | N/A       | DB117109     | N/A           |
| A_21_P0006479  | 1,54211 | 1,50097 | 1,028926551 | N/A             | N/A       | N/A          | Inc-CXorf28-1 |
| A_24_P84396    | 4,4591  | 4,41799 | 1,028905155 | ENST00000611615 | 57214     | NM_018689    | CEMIP         |
| A_33_P3278279  | 1,71171 | 1,6706  | 1,028905155 | N/A             | 255220    | NM_001286947 | TXNDC8        |
| A_23_P202587   | 10,5999 | 10,5588 | 1,028898023 | ENST00000497044 | 57698     | NM_018330    | KIAA1598      |
| A_22_P00012900 | 10,1958 | 10,1547 | 1,028898023 | N/A             | 5936      | NM_001198844 | RBM4          |
| A_22_P00016723 | 1,60667 | 1,56557 | 1,028898023 | N/A             | N/A       | N/A          | Inc-TRAPPC8-1 |
| A_23_P255876   | 1,67575 | 1,63465 | 1,028898023 | ENST00000614641 | 27019     | NM_012144    | DNAI1         |
| A_33_P3250178  | 1,68054 | 1,63945 | 1,028890891 | ENST00000397832 | 654502    | NM_001042706 | IQCJ          |
| A_22_P00010783 | 1,64202 | 1,60094 | 1,02888376  | N/A             | N/A       | N/A          | Inc-NKX6-3-2  |
| A_21_P0004489  | 1,55428 | 1,5132  | 1,02888376  | N/A             | 102723499 | XR_425840    | LOC102723499  |
| A_33_P3332150  | 1,42293 | 1,38186 | 1,028876628 | N/A             | 403314    | NM_203454    | APOBEC4       |
| A_22_P00008779 | 1,50359 | 1,46253 | 1,028869496 | N/A             | N/A       | AI205794     | Inc-KIF23-1   |
| A_22_P00014583 | 1,40203 | 1,36098 | 1,028862365 | ENST00000513023 | 100505545 | NR_038331    | LINC01095     |
| A_22_P00008687 | 1,43276 | 1,39171 | 1,028862365 | N/A             | 285962    | NR_015392    | WEE2-AS1      |
| A_22_P00018074 | 1,65352 | 1,61248 | 1,028855233 | ENST00000564417 | N/A       | U58667       | N/A           |
| A_32_P504673   | 1,54364 | 1,5026  | 1,028855233 | ENST00000624740 | 57055     | NM_001005786 | DAZZ          |
| A_22_P00005440 | 1,58992 | 1,5489  | 1,028840971 | N/A             | N/A       | N/A          | Inc-DUPD1-1   |
| A_33_P3225258  | 1,44286 | 1,40184 | 1,028840971 | ENST00000616556 | 207147    | N/A          | TRY2P         |
| A_19_P00801416 | 1,67362 | 1,6326  | 1,028840971 | N/A             | N/A       | N/A          | Inc-BBS12-1   |
| A_23_P386310   | 1,46339 | 1,42238 | 1,028833839 | ENST00000256906 | 59340     | NM_021624    | HRH4          |
| A_23_P389532   | 1,50726 | 1,46625 | 1,028833839 | ENST00000297307 | 146861    | NM_152462    | SLC35G3       |
| A_22_P00017310 | 1,62805 | 1,58704 | 1,028833839 | ENST00000602505 | 388815    | NR_027791    | MIR99AHG      |

|                |         |         |             |                 |           |              |                       |
|----------------|---------|---------|-------------|-----------------|-----------|--------------|-----------------------|
| A_21_P0002884  | 1,60113 | 1,56012 | 1,028833839 | ENST00000506934 | N/A       | N/A          | N/A                   |
| A_23_P127613   | 11,3316 | 11,2906 | 1,028826708 | ENST00000531290 | 51399     | NM_016146    | TRAPPC4               |
| A_22_P00002451 | 1,84174 | 1,80074 | 1,028826708 | N/A             | N/A       | N/A          | Inc-C15orf2-8         |
| A_21_P0000070  | 1,63786 | 1,59687 | 1,028819577 | ENST00000443369 | 3556      | NM_001167931 | IL1RAP                |
| A_22_P00000692 | 1,41207 | 1,37108 | 1,028819577 | ENST00000603540 | 8747      | NM_003813    | ADAM21                |
| A_33_P3744415  | 1,37928 | 1,33831 | 1,028805314 | ENST00000431422 | 154092    | N/A          | LINC01010             |
| A_22_P00014198 | 1,67446 | 1,6335  | 1,028798183 | N/A             | N/A       | N/A          | Inc-SEBOX-1           |
| A_33_P3208975  | 1,55764 | 1,51668 | 1,028798183 | ENST00000322101 | 119692    | NM_001004758 | OR51S1                |
| A_21_P0008876  | 1,52677 | 1,48581 | 1,028798183 | ENST00000562180 | N/A       | XR_243482    | N/A                   |
| A_33_P3236222  | 1,62553 | 1,58457 | 1,028798183 | ENST00000515381 | N/A       | N/A          | N/A                   |
| A_32_P208350   | 1,42778 | 1,38683 | 1,028791052 | ENST00000557332 | 122402    | NM_153046    | TDRD9                 |
| A_21_P0005380  | 1,53452 | 1,49357 | 1,028791052 | N/A             | N/A       | N/A          | Inc-POM121L12-4       |
| A_33_P3265239  | 1,64423 | 1,60328 | 1,028791052 | ENST00000496337 | 93432     | NM_001293626 | LOC93432              |
| A_21_P0006771  | 1,438   | 1,39705 | 1,028791052 | ENST00000445450 | 84858     | NR_120651    | ZNF503                |
| A_32_P19294    | 1,67694 | 1,636   | 1,028783921 | ENST00000441390 | 144423    | NM_144669    | GLT1D1                |
| A_33_P3290011  | 1,66545 | 1,62451 | 1,028783921 | ENST00000424859 | 375612    | NM_199000    | LHFPL3                |
| A_21_P0004761  | 1,6671  | 1,62616 | 1,028783921 | ENST00000430931 | N/A       | N/A          | N/A                   |
| A_23_P66552    | 1,51155 | 1,47062 | 1,02877679  | ENST00000158009 | 54752     | NM_017559    | FNDC8                 |
| A_21_P0010826  | 1,70211 | 1,66118 | 1,02877679  | N/A             | N/A       | N/A          | Inc-ZNF22-2           |
| A_21_P0011312  | 5,06815 | 5,02722 | 1,02877679  | ENST00000624918 | N/A       | N/A          | N/A                   |
| A_22_P00008877 | 1,57037 | 1,52946 | 1,028762528 | N/A             | N/A       | N/A          | Inc-KLHL25-3          |
| A_33_P3351371  | 1,43822 | 1,39731 | 1,028762528 | ENST00000405011 | 1588      | NM_031226    | CYP19A1               |
| A_33_P3328883  | 1,38772 | 1,34681 | 1,028762528 | ENST00000538528 | 100128124 | NM_001129895 | HGC6.3                |
| A_22_P00001251 | 1,45919 | 1,41829 | 1,028755398 | N/A             | N/A       | N/A          | Inc-ANKRD33B-1        |
| A_23_P30884    | 14,8212 | 14,7803 | 1,028755398 | ENST00000614673 | 1192      | NM_001288    | CLIC1                 |
| A_22_P00022823 | 1,69714 | 1,65625 | 1,028748267 | ENST00000432984 | N/A       | N/A          | N/A                   |
| A_22_P00004069 | 1,49914 | 1,45826 | 1,028741136 | N/A             | N/A       | DA725978     | Inc-CHTF8-2           |
| A_21_P0013707  | 1,57469 | 1,53381 | 1,028741136 | N/A             | N/A       | N/A          | Inc-GAPVD1-1          |
| A_21_P0004019  | 1,53208 | 1,4912  | 1,028741136 | N/A             | N/A       | N/A          | Inc-THBS4-2           |
| A_21_P0001691  | 1,71833 | 1,67746 | 1,028734005 | N/A             | N/A       | N/A          | Inc-IFI44-2           |
| A_21_P0005883  | 1,67652 | 1,63565 | 1,028734005 | N/A             | N/A       | N/A          | Inc-RP11-778D12.2.1-2 |
| A_33_P3345796  | 5,13388 | 5,09302 | 1,028726875 | ENST00000368979 | 8724      | BC016863     | SNX3                  |
| A_21_P0006442  | 1,41432 | 1,37347 | 1,028719744 | ENST00000391359 | N/A       | N/A          | N/A                   |

|                |         |         |             |                 |           |              |                    |
|----------------|---------|---------|-------------|-----------------|-----------|--------------|--------------------|
| A_23_P377965   | 6,3679  | 6,32705 | 1,028719744 | ENST00000581067 | 147525    | NR_026849    | LINC00526          |
| A_21_P0003343  | 1,38629 | 1,34545 | 1,028712614 | ENST00000515188 | N/A       | N/A          | N/A                |
| A_21_P0006101  | 1,55871 | 1,51787 | 1,028712614 | ENST00000453455 | N/A       | N/A          | N/A                |
| A_21_P0005702  | 1,51775 | 1,47693 | 1,028698353 | N/A             | N/A       | N/A          | Inc-RAB2A-2        |
| A_21_P0008168  | 1,65563 | 1,61482 | 1,028691222 | N/A             | N/A       | N/A          | Inc-DIAPH3-6       |
| A_32_P355943   | 1,52602 | 1,48522 | 1,028684092 | ENST00000294854 | 353299    | NM_001137669 | RGSL1              |
| A_22_P00006333 | 1,54439 | 1,5036  | 1,028676962 | N/A             | N/A       | DT219892     | Inc-FANCF-3        |
| A_22_P00025625 | 1,53426 | 1,49348 | 1,028669832 | N/A             | N/A       | DT215570     | Inc-AP000783.1.1-2 |
| A_21_P0005284  | 1,52083 | 1,48007 | 1,028655571 | ENST00000438923 | N/A       | N/A          | N/A                |
| A_33_P3538688  | 1,67473 | 1,63397 | 1,028655571 | N/A             | N/A       | N/A          | N/A                |
| A_22_P00016410 | 1,54005 | 1,4993  | 1,028648441 | N/A             | N/A       | BC033531     | Inc-TMEM22-1       |
| A_22_P00004008 | 1,38658 | 1,34583 | 1,028648441 | N/A             | 101927518 | XR_245083    | LOC101927518       |
| A_24_P124349   | 1,37917 | 1,33843 | 1,028641311 | ENST00000302251 | 80310     | NM_025208    | PDGFD              |
| A_21_P0002381  | 1,45704 | 1,41631 | 1,028634181 | N/A             | N/A       | N/A          | Inc-MYT1L-1        |
| A_33_P3252839  | 1,47273 | 1,43201 | 1,028627051 | ENST00000425474 | 646282    | NR_036679    | AZGP1P1            |
| A_22_P00015362 | 1,53356 | 1,49284 | 1,028627051 | ENST00000562063 | N/A       | N/A          | N/A                |
| A_21_P0010598  | 4,1656  | 4,12489 | 1,028619921 | ENST00000443270 | N/A       | N/A          | N/A                |
| A_23_P42897    | 1,64849 | 1,60778 | 1,028619921 | ENST00000620571 | 8972      | NM_004668    | MGAM               |
| A_33_P3283117  | 1,47332 | 1,43261 | 1,028619921 | N/A             | N/A       | N/A          | N/A                |
| A_23_P388124   | 1,6851  | 1,6444  | 1,028612792 | ENST00000308666 | 225       | NM_005164    | ABCD2              |
| A_21_P0000903  | 1,42296 | 1,38226 | 1,028612792 | N/A             | 100505782 | NR_040111    | LOC100505782       |
| A_33_P3297823  | 1,63392 | 1,59322 | 1,028612792 | N/A             | 102723802 | XR_425091    | LOC102723802       |
| A_22_P00011952 | 1,71366 | 1,67296 | 1,028612792 | ENST00000521879 | N/A       | BG182387     | N/A                |
| A_21_P0002093  | 1,70675 | 1,66606 | 1,028605662 | N/A             | 101927709 | N/A          | LOC101927709       |
| A_23_P18518    | 1,47426 | 1,43359 | 1,028591402 | ENST00000310754 | 133022    | NM_152402    | TRAM1L1            |
| A_33_P3469673  | 1,67704 | 1,63637 | 1,028591402 | N/A             | 284576    | NR_038425    | LEMD1-AS1          |
| A_23_P150979   | 8,2558  | 8,21515 | 1,028577143 | ENST00000308796 | 118430    | NM_058173    | MUCL1              |
| A_22_P00009245 | 1,6688  | 1,62816 | 1,028570014 | N/A             | N/A       | DA734982     | Inc-LRMP-2         |
| A_33_P3831099  | 1,40694 | 1,3663  | 1,028570014 | N/A             | 401433    | AK127717     | LOC401433          |
| A_23_P55286    | 1,52787 | 1,48723 | 1,028570014 | ENST00000247271 | 4974      | NM_002544    | OMG                |
| A_21_P0010717  | 1,44175 | 1,40111 | 1,028570014 | ENST00000430394 | 337875    | NR_027337    | HIST2H2BA          |
| A_21_P0003774  | 1,59268 | 1,55205 | 1,028562884 | N/A             | N/A       | N/A          | Inc-PCDH18-1       |
| A_23_P155848   | 1,54186 | 1,50124 | 1,028555755 | ENST00000285311 | 27123     | NM_014421    | DKK2               |

|                |         |         |             |                 |           |              |                       |
|----------------|---------|---------|-------------|-----------------|-----------|--------------|-----------------------|
| A_22_P00003599 | 1,63067 | 1,59005 | 1,028555755 | N/A             | N/A       | N/A          | Inc-CD226-2           |
| A_21_P0013112  | 1,51062 | 1,47001 | 1,028548625 | N/A             | N/A       | N/A          | XLOC_I2_013162        |
| A_23_P127288   | 1,70935 | 1,66875 | 1,028541496 | ENST00000379954 | 3559      | NM_000417    | IL2RA                 |
| A_21_P0014142  | 1,56333 | 1,52274 | 1,028534367 | N/A             | 100506495 | NR_103553    | LIFR-AS1              |
| A_22_P00020567 | 1,63534 | 1,59475 | 1,028534367 | N/A             | 282706    | NR_040247    | DAOA-AS1              |
| A_21_P0009707  | 1,55649 | 1,5159  | 1,028534367 | ENST00000585739 | 100996665 | NR_110675    | LINC01533             |
| A_21_P0007050  | 1,75816 | 1,71757 | 1,028534367 | N/A             | N/A       | N/A          | Inc-GPR158-2          |
| A_33_P3286864  | 1,49609 | 1,45551 | 1,028527238 | ENST00000381648 | 51761     | NM_016529    | ATP8A2                |
| A_22_P00009261 | 1,45305 | 1,41247 | 1,028527238 | N/A             | N/A       | N/A          | Inc-LRP5L-4           |
| A_21_P0000810  | 1,52832 | 1,48774 | 1,028527238 | N/A             | 100507389 | NR_038455    | LOC100507389          |
| A_33_P3285815  | 1,46834 | 1,42778 | 1,028512979 | ENST00000372665 | 140870    | N/A          | WFDC6                 |
| A_21_P0013399  | 7,20911 | 7,16855 | 1,028512979 | ENST00000429679 | 100289187 | NM_001195541 | GS1-259H13.2          |
| A_32_P19519    | 1,38266 | 1,34211 | 1,02850585  | ENST00000511465 | 728175    | N/A          | LOC728175             |
| A_21_P0010097  | 1,50483 | 1,46429 | 1,028498721 | N/A             | N/A       | N/A          | Inc-ZNF831-1          |
| A_33_P3853081  | 1,48507 | 1,44454 | 1,028491592 | N/A             | 228       | M21191       | ALDOAP2               |
| A_22_P00000982 | 1,68388 | 1,64336 | 1,028484463 | N/A             | N/A       | N/A          | Inc-AL136219.1-3      |
| A_21_P0005826  | 2,57    | 2,52948 | 1,028484463 | N/A             | N/A       | N/A          | Inc-ZMAT4-2           |
| A_33_P3279515  | 2,91044 | 2,86992 | 1,028484463 | N/A             | 729451    | XR_424503    | LOC729451             |
| A_21_P0006473  | 1,74005 | 1,69954 | 1,028477334 | N/A             | N/A       | N/A          | Inc-PLCXD1-2          |
| A_21_P0006518  | 1,55556 | 1,51505 | 1,028477334 | N/A             | 101928832 | XR_244520    | LOC101928832          |
| A_32_P489959   | 1,50472 | 1,46422 | 1,028470206 | ENST00000347077 | 339327    | NM_178544    | ZNF546                |
| A_21_P0002184  | 1,5249  | 1,48441 | 1,028463077 | N/A             | N/A       | N/A          | Inc-NCOA1-1           |
| A_33_P3386344  | 7,98923 | 7,94874 | 1,028463077 | ENST00000563513 | 2175      | NM_001018112 | FANCA                 |
| A_22_P00020490 | 1,39011 | 1,34962 | 1,028463077 | N/A             | N/A       | BG204125     | Inc-NSRP1-1           |
| A_22_P00020411 | 1,53028 | 1,48979 | 1,028463077 | N/A             | N/A       | N/A          | Inc-PINK1-1           |
| A_22_P00013003 | 1,3888  | 1,34831 | 1,028463077 | N/A             | N/A       | AL079817     | Inc-RFWD2-2           |
| A_21_P0012976  | 1,41378 | 1,37329 | 1,028463077 | N/A             | 285696    | N/A          | LOC285696             |
| A_33_P3709150  | 1,6505  | 1,61001 | 1,028463077 | ENST00000296946 | 6862      | NM_003181    | T                     |
| A_21_P0010011  | 1,46271 | 1,42223 | 1,028455948 | N/A             | N/A       | N/A          | Inc-FOXA2-7           |
| A_32_P464135   | 1,44308 | 1,40262 | 1,028441691 | ENST00000508860 | 117154    | NM_053281    | DACH2                 |
| A_21_P0006220  | 2,49247 | 2,45201 | 1,028441691 | N/A             | N/A       | N/A          | Inc-RP11-295D22.1.1-6 |
| A_33_P3406861  | 4,19736 | 4,1569  | 1,028441691 | ENST00000284776 | 8470      | NM_001270771 | SORBS2                |
| A_22_P00017315 | 1,42512 | 1,38467 | 1,028434562 | ENST00000559379 | 102723344 | NR_120375    | LOC102723344          |

|                |         |         |             |                 |           |              |                  |
|----------------|---------|---------|-------------|-----------------|-----------|--------------|------------------|
| A_23_P137573   | 1,50248 | 1,46203 | 1,028434562 | ENST00000616737 | 7044      | NM_003240    | LEFTY2           |
| A_22_P00009682 | 1,96515 | 1,9247  | 1,028434562 | N/A             | N/A       | BC039504     | Inc-MBL2-5       |
| A_21_P0012421  | 1,52936 | 1,48892 | 1,028427434 | N/A             | N/A       | N/A          | XLOC_I2_010056   |
| A_21_P0001909  | 1,44097 | 1,40053 | 1,028427434 | ENST00000437837 | N/A       | N/A          | N/A              |
| A_21_P0009445  | 1,64694 | 1,6065  | 1,028427434 | N/A             | N/A       | N/A          | Inc-AP001496.1-8 |
| A_22_P00009856 | 1,50386 | 1,46344 | 1,028413177 | ENST00000566236 | N/A       | DB514867     | N/A              |
| A_23_P201386   | 10,9257 | 10,8853 | 1,02839892  | ENST00000426972 | 23576     | NM_012137    | DDAH1            |
| A_22_P00010317 | 1,68281 | 1,64241 | 1,02839892  | ENST00000570223 | 285834    | NR_003948    | HCG22            |
| A_21_P0006341  | 1,57218 | 1,53178 | 1,02839892  | ENST00000478913 | 203238    | N/A          | CCDC171          |
| A_24_P358084   | 10,1683 | 10,1279 | 1,02839892  | ENST00000532936 | N/A       | N/A          | N/A              |
| A_21_P0001526  | 1,46922 | 1,42882 | 1,02839892  | N/A             | 101927656 | XR_246359    | LOC101927656     |
| A_22_P00001036 | 1,44381 | 1,40342 | 1,028391792 | ENST00000422527 | N/A       | N/A          | N/A              |
| A_24_P727501   | 8,37113 | 8,33074 | 1,028391792 | ENST00000530759 | N/A       | AK054718     | N/A              |
| A_33_P3297853  | 1,42727 | 1,38688 | 1,028391792 | ENST00000374088 | 80709     | NM_030767    | AKNA             |
| A_33_P3243832  | 1,62666 | 1,58627 | 1,028391792 | ENST00000409211 | 9839      | NM_014795    | ZEB2             |
| A_23_P329768   | 1,49859 | 1,45821 | 1,028384663 | ENST00000234142 | 9687      | NM_014668    | GREB1            |
| A_33_P3423210  | 1,54858 | 1,5082  | 1,028384663 | N/A             | N/A       | N/A          | N/A              |
| A_23_P344568   | 1,56173 | 1,52136 | 1,028377535 | ENST00000280057 | 220108    | NM_145019    | FAM124A          |
| A_22_P00025541 | 1,71668 | 1,67631 | 1,028377535 | ENST00000620267 | 342372    | NM_181536    | PKD1L3           |
| A_32_P225345   | 1,37913 | 1,33876 | 1,028377535 | ENST00000375618 | 399949    | NM_207430    | C11orf88         |
| A_21_P0002146  | 1,58895 | 1,54858 | 1,028377535 | ENST00000416509 | N/A       | N/A          | N/A              |
| A_33_P3310625  | 1,58944 | 1,54907 | 1,028377535 | ENST00000390467 | N/A       | AB306057     | N/A              |
| A_21_P0000414  | 1,52419 | 1,48382 | 1,028377535 | N/A             | 767595    | NR_003210    | SNORD114-17      |
| A_33_P3217700  | 1,69976 | 1,65939 | 1,028377535 | ENST00000338981 | 8287      | NM_004654    | USP9Y            |
| A_22_P00017197 | 1,67837 | 1,63801 | 1,028370407 | N/A             | 101927121 | XR_247933    | LOC101927121     |
| A_22_P00013098 | 1,50864 | 1,46828 | 1,028370407 | ENST00000542821 | N/A       | N/A          | N/A              |
| A_21_P0007831  | 1,46788 | 1,42753 | 1,028363279 | N/A             | 283463    | N/A          | MUC19            |
| A_24_P463929   | 1,37818 | 1,33783 | 1,028363279 | N/A             | 100507203 | NM_001195597 | SMLR1            |
| A_22_P00024123 | 1,47944 | 1,43911 | 1,028349023 | N/A             | N/A       | N/A          | Inc-GSN-2        |
| A_24_P403561   | 9,506   | 9,46567 | 1,028349023 | ENST00000529604 | 4038      | NM_002334    | LRP4             |
| A_21_P0001830  | 1,67315 | 1,63282 | 1,028349023 | ENST00000433810 | 103752554 | N/A          | MYCNUT           |
| A_24_P84970    | 9,4905  | 9,45018 | 1,028341895 | ENST00000505048 | N/A       | N/A          | N/A              |
| A_23_P24688    | 1,58924 | 1,54892 | 1,028341895 | ENST00000527482 | N/A       | DW009619     | N/A              |

|                |         |         |             |                 |           |              |                |
|----------------|---------|---------|-------------|-----------------|-----------|--------------|----------------|
| A_33_P3409939  | 1,52349 | 1,48317 | 1,028341895 | ENST00000398291 | 346562    | NM_001102386 | GNAT3          |
| A_33_P3244574  | 1,65889 | 1,61858 | 1,028334767 | N/A             | 100128675 | NR_024562    | HPN-AS1        |
| A_21_P0007683  | 1,56649 | 1,52618 | 1,028334767 | N/A             | N/A       | N/A          | Inc-VWF-3      |
| A_33_P3266873  | 11,2103 | 11,17   | 1,028327639 | ENST00000339569 | 339287    | NM_001012241 | MSL1           |
| A_23_P156261   | 1,79033 | 1,75003 | 1,028327639 | ENST00000462581 | 2741      | NM_000171    | GLRA1          |
| A_32_P232808   | 1,58766 | 1,54736 | 1,028327639 | ENST00000612804 | 284412    | NR_029390    | LOC284412      |
| A_22_P00022644 | 1,54941 | 1,50911 | 1,028327639 | ENST00000564561 | N/A       | N/A          | N/A            |
| A_21_P0003601  | 1,42257 | 1,38228 | 1,028320511 | N/A             | N/A       | N/A          | Inc-KLF3-4     |
| A_24_P21752    | 9,91759 | 9,87731 | 1,028313384 | ENST00000438907 | 84897     | NM_032811    | TBRG1          |
| A_22_P00001900 | 1,68644 | 1,64617 | 1,028306256 | N/A             | 100652770 | NR_045216    | DSG2-AS1       |
| A_21_P0004903  | 1,65241 | 1,61215 | 1,028299128 | N/A             | N/A       | N/A          | Inc-TPBG-3     |
| A_22_P00017378 | 1,62786 | 1,5876  | 1,028299128 | N/A             | N/A       | N/A          | Inc-UVRAG-1    |
| A_23_P351168   | 1,72696 | 1,6867  | 1,028299128 | ENST00000307221 | 150353    | NM_145174    | DNAJB7         |
| A_21_P0007234  | 1,50514 | 1,46489 | 1,028292001 | N/A             | N/A       | N/A          | Inc-P2RY2-3    |
| A_23_P83175    | 1,63563 | 1,59539 | 1,028284873 | ENST00000488436 | 401494    | NM_001010915 | PTPLAD2        |
| A_23_P166616   | 1,58614 | 1,54591 | 1,028277746 | ENST00000402260 | 185       | NM_031850    | AGTR1          |
| A_21_P0008683  | 1,53981 | 1,49958 | 1,028277746 | N/A             | N/A       | N/A          | Inc-NR2F2-8    |
| A_21_P0012592  | 1,50274 | 1,46251 | 1,028277746 | N/A             | N/A       | N/A          | XLOC_I2_010717 |
| A_22_P00023968 | 8,76082 | 8,7206  | 1,028270618 | ENST00000514043 | 101928532 | XR_241665    | LOC101928532   |
| A_21_P0005127  | 1,50719 | 1,46697 | 1,028270618 | N/A             | N/A       | N/A          | Inc-LACE1-2    |
| A_32_P111336   | 1,37835 | 1,33813 | 1,028270618 | N/A             | 101926934 | XR_242030    | LOC101926934   |
| A_23_P215051   | 11,8549 | 11,8147 | 1,028256363 | ENST00000474289 | 55862     | NM_018479    | ECHDC1         |
| A_33_P3424187  | 2,38524 | 2,34505 | 1,028249236 | ENST00000378909 | 138715    | NM_001017363 | ARID3C         |
| A_24_P158285   | 1,44929 | 1,4091  | 1,028249236 | ENST00000612124 | 1539      | AK313349     | CYLC2          |
| A_22_P00008249 | 1,60279 | 1,5626  | 1,028249236 | ENST00000601250 | 100506542 | NR_103859    | LINC01082      |
| A_22_P00016063 | 1,66319 | 1,623   | 1,028249236 | N/A             | N/A       | N/A          | Inc-THAP10-1   |
| A_23_P2052     | 1,55681 | 1,51662 | 1,028249236 | ENST00000300762 | 56547     | NM_021801    | MMP26          |
| A_22_P00017820 | 1,50904 | 1,46886 | 1,028242109 | N/A             | N/A       | N/A          | Inc-ZBTB7C-1   |
| A_21_P0004776  | 1,44301 | 1,40284 | 1,028234982 | ENST00000430672 | N/A       | N/A          | N/A            |
| A_22_P00024743 | 1,51171 | 1,47155 | 1,028227854 | N/A             | N/A       | N/A          | Inc-TBC1D30-1  |
| A_33_P3378972  | 1,38898 | 1,34882 | 1,028227854 | ENST00000404895 | 137970    | NM_080872    | UNC5D          |
| A_33_P3507270  | 1,61802 | 1,57786 | 1,028227854 | ENST00000394835 | 374786    | NM_198529    | EFCAB5         |
| A_22_P00004247 | 1,52062 | 1,48046 | 1,028227854 | ENST00000450397 | N/A       | N/A          | N/A            |

|                |         |         |             |                 |           |              |               |
|----------------|---------|---------|-------------|-----------------|-----------|--------------|---------------|
| A_21_P0012489  | 1,57019 | 1,53004 | 1,028220727 | ENST00000435651 | N/A       | N/A          | N/A           |
| A_22_P00022981 | 6,45136 | 6,41122 | 1,0282136   | ENST00000538324 | 28        | NM_020469    | ABO           |
| A_22_P00003118 | 3,50491 | 3,46477 | 1,0282136   | N/A             | 101928525 | NR_121579    | LOC101928525  |
| A_22_P00011754 | 1,60013 | 1,56    | 1,028206473 | N/A             | N/A       | BU187959     | Inc-PEX2-2    |
| A_21_P0007061  | 1,53923 | 1,49911 | 1,028199346 | N/A             | 102724768 | XR_424124    | LOC102724768  |
| A_21_P0002375  | 1,56803 | 1,52791 | 1,028199346 | ENST00000445534 | N/A       | N/A          | N/A           |
| A_23_P121806   | 11,2788 | 11,2387 | 1,028185093 | ENST00000505846 | 58478     | NM_021204    | ENOPH1        |
| A_33_P3341234  | 12,726  | 12,6859 | 1,028185093 | ENST00000355621 | 7328      | NM_003344    | UBE2H         |
| A_21_P0009958  | 1,53422 | 1,49412 | 1,028185093 | N/A             | N/A       | N/A          | Inc-PI3-1     |
| A_23_P148422   | 1,38446 | 1,34436 | 1,028185093 | ENST00000356768 | 9468      | NM_004845    | PCYT1B        |
| A_21_P0013424  | 1,67477 | 1,63468 | 1,028177966 | ENST00000412996 | N/A       | N/A          | N/A           |
| A_21_P0002451  | 1,69832 | 1,65823 | 1,028177966 | N/A             | N/A       | N/A          | Inc-TMEM17-2  |
| A_22_P00021708 | 1,66679 | 1,62671 | 1,028170839 | ENST00000533106 | N/A       | N/A          | N/A           |
| A_22_P00016372 | 1,48531 | 1,44523 | 1,028170839 | ENST00000606068 | N/A       | N/A          | N/A           |
| A_24_P110284   | 1,64177 | 1,6017  | 1,028163712 | ENST00000598153 | 497049    | NR_024372    | FLJ25758      |
| A_22_P00022580 | 1,52271 | 1,48264 | 1,028163712 | N/A             | 100129427 | NR_033845    | DDC-AS1       |
| A_22_P00012515 | 1,46071 | 1,42064 | 1,028163712 | ENST00000564455 | N/A       | N/A          | N/A           |
| A_21_P0010918  | 1,58314 | 1,54307 | 1,028163712 | ENST00000450980 | 200150    | NM_152666    | PLD5          |
| A_22_P00001989 | 2,01497 | 1,97491 | 1,028156586 | N/A             | N/A       | N/A          | Inc-BCL3-1    |
| A_22_P00003975 | 1,62324 | 1,58318 | 1,028156586 | ENST00000554318 | N/A       | DB444431     | N/A           |
| A_22_P00011799 | 1,7     | 1,65997 | 1,028135206 | N/A             | N/A       | N/A          | Inc-PGPEP1L-2 |
| A_22_P00022895 | 1,50677 | 1,46674 | 1,028135206 | ENST00000552046 | N/A       | N/A          | N/A           |
| A_33_P3270514  | 1,55629 | 1,51627 | 1,028128079 | N/A             | 79804     | NR_003679    | HAND2-AS1     |
| A_24_P401615   | 1,56889 | 1,52887 | 1,028128079 | ENST00000437300 | 343071    | NM_001039361 | PRAMEF10      |
| A_19_P00803225 | 1,55169 | 1,51168 | 1,028120953 | N/A             | N/A       | N/A          | Inc-TREML1-1  |
| A_21_P0002709  | 1,46146 | 1,42145 | 1,028120953 | ENST00000491329 | 254827    | N/A          | NAALADL2      |
| A_22_P00002035 | 1,57126 | 1,53126 | 1,028113827 | N/A             | N/A       | N/A          | Inc-BHLHE22-3 |
| A_24_P178444   | 11,9752 | 11,9352 | 1,028113827 | ENST00000526512 | N/A       | N/A          | N/A           |
| A_23_P434430   | 5,66215 | 5,62215 | 1,028113827 | ENST00000304030 | 90594     | NM_152262    | ZNF439        |
| A_22_P00011710 | 1,6709  | 1,63093 | 1,028092448 | N/A             | N/A       | N/A          | Inc-PDZD8-2   |
| A_22_P00003714 | 1,73809 | 1,69812 | 1,028092448 | ENST00000581632 | N/A       | BX108699     | N/A           |
| A_22_P00015733 | 1,44264 | 1,40267 | 1,028092448 | ENST00000443992 | 23118     | NM_001292035 | TAB2          |
| A_33_P3354424  | 1,57743 | 1,53746 | 1,028092448 | ENST00000329314 | 391712    | NM_001012414 | TRIM61        |

|                |         |         |             |                 |           |              |                      |
|----------------|---------|---------|-------------|-----------------|-----------|--------------|----------------------|
| A_22_P00004161 | 1,5839  | 1,54394 | 1,028085322 | N/A             | N/A       | N/A          | Inc-CLEC3A-1         |
| A_33_P3238820  | 1,74065 | 1,70069 | 1,028085322 | N/A             | N/A       | N/A          | XL0C_I2_006196       |
| A_21_P0005315  | 1,55482 | 1,51488 | 1,028071069 | N/A             | N/A       | N/A          | Inc-MAGI2-1          |
| A_23_P368773   | 1,43988 | 1,39994 | 1,028071069 | ENST00000301480 | 147741    | NM_152476    | ZNF560               |
| A_32_P131640   | 1,61081 | 1,57087 | 1,028071069 | ENST00000338017 | 139065    | NM_173078    | SLITRK4              |
| A_22_P00016223 | 1,52298 | 1,48305 | 1,028063943 | N/A             | N/A       | T49893       | Inc-TM6SF1-1         |
| A_22_P00012935 | 1,73181 | 1,69188 | 1,028063943 | ENST00000525133 | N/A       | N/A          | N/A                  |
| A_22_P00007551 | 1,58965 | 1,54972 | 1,028063943 | N/A             | N/A       | N/A          | Inc-HAPLN1-2         |
| A_21_P0014666  | 1,58875 | 1,54882 | 1,028063943 | N/A             | 100287329 | AK301217     | LOC100287329         |
| A_22_P00000134 | 9,39998 | 9,36005 | 1,028063943 | ENST00000485020 | N/A       | N76660       | N/A                  |
| A_21_P0006247  | 1,75304 | 1,71312 | 1,028056818 | N/A             | N/A       | N/A          | Inc-C9orf66-4        |
| A_23_P65506    | 1,59555 | 1,55563 | 1,028056818 | ENST00000389721 | 6710      | NM_000347    | SPTB                 |
| A_21_P0005428  | 1,58517 | 1,54527 | 1,028042566 | N/A             | N/A       | N/A          | Inc-RP11-305M3.3.1-1 |
| A_22_P00017229 | 1,46085 | 1,42096 | 1,02803544  | ENST00000453828 | N/A       | N/A          | N/A                  |
| A_33_P3292860  | 1,43814 | 1,39825 | 1,02803544  | ENST00000612978 | 728229    | NM_001242313 | TMEM191B             |
| A_21_P0005987  | 1,39678 | 1,3569  | 1,028028314 | ENST00000603200 | 440896    | NR_015361    | LOC440896            |
| A_22_P00024622 | 1,5413  | 1,50142 | 1,028028314 | N/A             | N/A       | N/A          | Inc-AC022532.1-1     |
| A_21_P0005411  | 1,47968 | 1,43981 | 1,028021188 | ENST00000392471 | 102724664 | N/A          | LOC102724664         |
| A_24_P39639    | 9,6196  | 9,57974 | 1,028014063 | ENST00000435634 | 118460    | NM_058219    | EXOSC6               |
| A_33_P3279311  | 1,73564 | 1,69578 | 1,028014063 | N/A             | N/A       | N/A          | Inc-C21orf54-4       |
| A_21_P0002405  | 1,38552 | 1,34566 | 1,028014063 | N/A             | N/A       | N/A          | Inc-NTSR2-5          |
| A_33_P3718699  | 1,58641 | 1,54655 | 1,028014063 | N/A             | 283737    | AK096897     | LOC283737            |
| A_22_P00013177 | 1,52791 | 1,48805 | 1,028014063 | ENST00000435062 | 100506274 | NR_038432    | LOC100506274         |
| A_24_P13285    | 1,59078 | 1,55092 | 1,028014063 | ENST00000257905 | 5502      | NM_006741    | PPP1R1A              |
| A_22_P00016513 | 1,68707 | 1,64722 | 1,028006937 | ENST00000436373 | N/A       | N/A          | N/A                  |
| A_21_P0005996  | 1,57174 | 1,53189 | 1,028006937 | ENST00000445631 | N/A       | N/A          | N/A                  |
| A_22_P00007326 | 1,57921 | 1,53937 | 1,027999812 | ENST00000411879 | N/A       | BI760116     | N/A                  |
| A_33_P3286943  | 1,58381 | 1,54397 | 1,027999812 | ENST00000551995 | N/A       | N/A          | N/A                  |
| A_22_P00002190 | 1,61526 | 1,57543 | 1,027992686 | ENST00000511174 | N/A       | N/A          | N/A                  |
| A_22_P00019330 | 1,50307 | 1,46325 | 1,027985561 | N/A             | N/A       | AK057554     | Inc-OR6Y1-1          |
| A_22_P00011640 | 6,14047 | 6,10065 | 1,027985561 | N/A             | N/A       | N/A          | Inc-PDCD1-2          |
| A_21_P0000430  | 1,72675 | 1,68694 | 1,027978435 | N/A             | 767562    | NR_003230    | SNORD113-2           |
| A_22_P00010662 | 1,44404 | 1,40423 | 1,027978435 | N/A             | N/A       | N/A          | Inc-NELL2-1          |



|                |         |         |             |                 |           |              |                  |
|----------------|---------|---------|-------------|-----------------|-----------|--------------|------------------|
| A_22_P00021225 | 1,65541 | 1,61561 | 1,02797131  | ENST00000460324 | N/A       | N/A          | N/A              |
| A_33_P3232960  | 1,48805 | 1,44825 | 1,02797131  | ENST00000544460 | 221400    | NM_001010870 | TDRD6            |
| A_22_P00013882 | 1,50389 | 1,4641  | 1,027964184 | N/A             | N/A       | N/A          | Inc-RPRM-4       |
| A_33_P3394744  | 1,51604 | 1,47626 | 1,027957059 | ENST00000412350 | 10655     | NM_006557    | DMRT2            |
| A_21_P0008756  | 1,67719 | 1,63741 | 1,027957059 | N/A             | N/A       | N/A          | Inc-C15orf59-1   |
| A_33_P3325948  | 1,54163 | 1,50185 | 1,027957059 | N/A             | N/A       | N/A          | N/A              |
| A_33_P3373707  | 8,47629 | 8,43651 | 1,027957059 | ENST00000367937 | 8417      | NM_003569    | STX7             |
| A_23_P150428   | 4,61283 | 4,57305 | 1,027957059 | ENST00000309154 | 390261    | NM_001005325 | OR6M1            |
| A_24_P273043   | 1,37873 | 1,33897 | 1,027942809 | ENST00000405027 | N/A       | N/A          | N/A              |
| A_21_P0007777  | 1,51628 | 1,47653 | 1,027935684 | N/A             | N/A       | N/A          | Inc-NCOR2-1      |
| A_21_P0003819  | 1,50206 | 1,46231 | 1,027935684 | N/A             | N/A       | N/A          | Inc-FAT1-2       |
| A_22_P00007865 | 1,59365 | 1,55391 | 1,027928558 | ENST00000440522 | N/A       | N/A          | N/A              |
| A_22_P00022447 | 1,40447 | 1,36473 | 1,027928558 | ENST00000495382 | N/A       | N/A          | N/A              |
| A_21_P0002788  | 1,54876 | 1,50902 | 1,027928558 | ENST00000490497 | 101928190 | N/A          | LINC01487        |
| A_23_P301855   | 1,67267 | 1,63297 | 1,027900059 | ENST00000498645 | 4045      | NM_002338    | LSAMP            |
| A_23_P65370    | 13,3871 | 13,3474 | 1,027900059 | ENST00000553672 | 51218     | NM_016417    | GLRX5            |
| A_33_P3313456  | 2,84774 | 2,80806 | 1,027885809 | ENST00000378653 | 645090    | NM_001098843 | CXorf30          |
| A_21_P0001074  | 1,39056 | 1,35089 | 1,027878684 | N/A             | N/A       | N/A          | Inc-DISC1-2      |
| A_33_P3352213  | 1,50223 | 1,46256 | 1,027878684 | N/A             | N/A       | N/A          | N/A              |
| A_21_P0003662  | 1,50853 | 1,46888 | 1,027864435 | N/A             | N/A       | N/A          | Inc-LSM6-1       |
| A_22_P00019418 | 1,53822 | 1,49857 | 1,027864435 | ENST00000412348 | N/A       | N/A          | N/A              |
| A_21_P0005440  | 1,56132 | 1,52168 | 1,02785731  | N/A             | N/A       | N/A          | Inc-ARHGFE5-2    |
| A_21_P0014177  | 6,95611 | 6,91647 | 1,02785731  | N/A             | 101926963 | NR_110054    | LOC101926963     |
| A_22_P00010527 | 1,58963 | 1,55    | 1,027850186 | ENST00000433101 | N/A       | N/A          | N/A              |
| A_33_P3376264  | 1,70108 | 1,66145 | 1,027850186 | ENST00000378938 | 2710      | N/A          | GK               |
| A_21_P0004811  | 1,6419  | 1,60227 | 1,027850186 | N/A             | N/A       | N/A          | Inc-AL035696.1-2 |
| A_21_P0001384  | 1,51388 | 1,47426 | 1,027843061 | ENST00000420691 | 79100     | NR_024160    | LINC00626        |
| A_22_P00001385 | 1,51012 | 1,4705  | 1,027843061 | N/A             | N/A       | N/A          | Inc-AP3S1-1      |
| A_21_P0006449  | 1,60108 | 1,56146 | 1,027843061 | ENST00000422410 | N/A       | N/A          | N/A              |
| A_23_P366098   | 1,50455 | 1,46495 | 1,027828812 | ENST00000271854 | 91181     | NM_207308    | NUP210L          |
| A_23_P371758   | 1,4381  | 1,3985  | 1,027828812 | ENST00000293502 | 121214    | NM_148897    | SDR9C7           |
| A_33_P3252073  | 1,66117 | 1,62158 | 1,027821688 | ENST00000378485 | 574028    | NM_001025233 | CLLU1            |
| A_22_P00013320 | 1,51805 | 1,47846 | 1,027821688 | ENST00000549163 | N/A       | N/A          | N/A              |

|                |         |         |             |                 |           |              |                |
|----------------|---------|---------|-------------|-----------------|-----------|--------------|----------------|
| A_23_P429363   | 1,57579 | 1,53621 | 1,027814564 | ENST00000524314 | 8822      | NM_003867    | FGF17          |
| A_23_P363365   | 4,25713 | 4,21756 | 1,02780744  | ENST00000330120 | 51289     | NM_016568    | RXFP3          |
| A_21_P0012108  | 1,70111 | 1,66154 | 1,02780744  | ENST00000438659 | N/A       | N/A          | N/A            |
| A_24_P134302   | 1,62771 | 1,58815 | 1,027800315 | ENST00000354280 | 57119     | NM_020398    | EPPIN          |
| A_33_P3241224  | 1,38326 | 1,3437  | 1,027800315 | ENST00000380222 | 3448      | NM_002172    | IFNA14         |
| A_22_P00016541 | 1,45834 | 1,41878 | 1,027800315 | ENST00000444701 | N/A       | N/A          | N/A            |
| A_33_P3543013  | 2,2904  | 2,25084 | 1,027800315 | N/A             | 219525    | AF309700     | OR5AK4P        |
| A_32_P13113    | 1,70325 | 1,6637  | 1,027793191 | ENST00000324341 | 196472    | NM_153364    | FAM71C         |
| A_22_P00016511 | 1,6127  | 1,57315 | 1,027793191 | ENST00000449840 | N/A       | N/A          | N/A            |
| A_21_P0001914  | 1,57745 | 1,5379  | 1,027793191 | ENST00000421696 | N/A       | N/A          | N/A            |
| A_21_P0001980  | 1,59173 | 1,55219 | 1,027786067 | ENST00000449362 | N/A       | N/A          | N/A            |
| A_22_P00017641 | 1,49454 | 1,45501 | 1,027778943 | N/A             | N/A       | AF400043     | Inc-WNT2-1     |
| A_22_P00022926 | 1,58783 | 1,5483  | 1,027778943 | N/A             | N/A       | BU854474     | Inc-NAIF1-2    |
| A_21_P0013274  | 1,69155 | 1,65203 | 1,027771819 | ENST00000476502 | N/A       | N/A          | N/A            |
| A_33_P3232778  | 1,50927 | 1,46975 | 1,027771819 | ENST00000540591 | 391003    | NM_001099850 | LOC391003      |
| A_22_P00008243 | 1,66276 | 1,62324 | 1,027771819 | ENST00000554043 | N/A       | N/A          | N/A            |
| A_23_P45099    | 1,42007 | 1,38056 | 1,027764695 | ENST00000374975 | 3127      | NM_002125    | HLA-DRB5       |
| A_22_P00002653 | 1,65937 | 1,61987 | 1,027757571 | N/A             | N/A       | N/A          | Inc-C1orf198-3 |
| A_19_P00316349 | 1,63028 | 1,59078 | 1,027757571 | N/A             | 101928502 | XR_243488    | LOC101928502   |
| A_23_P54088    | 1,45487 | 1,41537 | 1,027757571 | ENST00000315543 | 390436    | NM_001004715 | OR4K17         |
| A_33_P3416637  | 1,53787 | 1,49838 | 1,027750447 | ENST00000412257 | N/A       | N/A          | N/A            |
| A_22_P00000537 | 1,55798 | 1,51849 | 1,027750447 | ENST00000560683 | N/A       | N/A          | N/A            |
| A_22_P00018443 | 1,58884 | 1,54936 | 1,027743324 | N/A             | 100874102 | NR_046691    | HS6ST2-AS1     |
| A_22_P00024997 | 1,4933  | 1,45383 | 1,0277362   | N/A             | N/A       | N/A          | Inc-CLN5-1     |
| A_21_P0002224  | 1,55963 | 1,52016 | 1,0277362   | N/A             | N/A       | N/A          | Inc-B3GNT2-1   |
| A_21_P0001422  | 1,38212 | 1,34265 | 1,0277362   | N/A             | N/A       | N/A          | Inc-LYPLAL1-3  |
| A_24_P391918   | 1,50119 | 1,46173 | 1,027729076 | ENST00000284898 | 91133     | NM_173464    | L3MBTL4        |
| A_21_P0002752  | 1,44507 | 1,40562 | 1,027721953 | ENST00000461186 | N/A       | N/A          | N/A            |
| A_21_P0003291  | 1,63978 | 1,60033 | 1,027721953 | N/A             | 101929320 | XR_241526    | LOC101929320   |
| A_23_P94571    | 1,49657 | 1,45713 | 1,027714829 | ENST00000380117 | 1993      | NM_004432    | ELAVL2         |
| A_23_P126266   | 1,46659 | 1,42715 | 1,027714829 | ENST00000366903 | 3142      | NM_021958    | HLX            |
| A_33_P3242388  | 9,35939 | 9,31997 | 1,027700582 | ENST00000392391 | 54965     | NM_001166304 | PIGX           |
| A_22_P00007561 | 4,89854 | 4,85913 | 1,027693458 | N/A             | 282763    | NR_038321    | OR51B5         |

|                |         |         |             |                 |           |           |                |
|----------------|---------|---------|-------------|-----------------|-----------|-----------|----------------|
| A_33_P3407826  | 11,0264 | 10,987  | 1,027686335 | N/A             | N/A       | N/A       | N/A            |
| A_21_P0003631  | 1,51112 | 1,47172 | 1,027686335 | N/A             | N/A       | N/A       | Inc-RAP1GDS1-3 |
| A_23_P251051   | 12,8045 | 12,7651 | 1,027686335 | ENST00000361452 | 4771      | NM_181832 | NF2            |
| A_33_P3460485  | 1,69789 | 1,65849 | 1,027686335 | N/A             | 677771    | BF814437  | SCARNA4        |
| A_21_P0011729  | 1,67143 | 1,63203 | 1,027686335 | N/A             | N/A       | N/A       | XLOC_I2_006973 |
| A_21_P0009036  | 1,44652 | 1,40713 | 1,027679212 | N/A             | N/A       | N/A       | Inc-IRX3-3     |
| A_21_P0014605  | 1,52146 | 1,48209 | 1,027664965 | N/A             | N/A       | N/A       | N/A            |
| A_33_P3368388  | 1,51229 | 1,47293 | 1,027657842 | ENST00000567666 | 123872    | NM_178452 | DNAAF1         |
| A_22_P00025249 | 6,99213 | 6,95278 | 1,027650719 | N/A             | N/A       | DB453801  | Inc-CEACAM18-2 |
| A_19_P00317332 | 1,59234 | 1,55299 | 1,027650719 | ENST00000509654 | 201853    | NR_126435 | LINC00504      |
| A_22_P00025003 | 1,52893 | 1,48958 | 1,027650719 | N/A             | 101929570 | NR_110258 | LOC101929570   |
| A_21_P0004093  | 1,47016 | 1,43081 | 1,027650719 | ENST00000509057 | N/A       | N/A       | N/A            |
| A_21_P0012545  | 1,5982  | 1,55886 | 1,027643596 | ENST00000491849 | 440970    | N/A       | LINC00971      |
| A_24_P113960   | 1,39139 | 1,35205 | 1,027643596 | ENST00000235628 | 84618     | NM_032526 | NT5C1A         |
| A_24_P930756   | 1,43213 | 1,39279 | 1,027643596 | ENST00000459992 | 256380    | AK074125  | SCML4          |
| A_23_P48022    | 1,69029 | 1,65097 | 1,02762935  | ENST00000240615 | 50836     | NM_023918 | TAS2R8         |
| A_22_P00015337 | 1,56748 | 1,52817 | 1,027622227 | N/A             | 101927988 | XR_241125 | LINC01527      |
| A_24_P334378   | 1,54284 | 1,50353 | 1,027622227 | ENST00000251566 | 79799     | NM_024743 | UGT2A3         |
| A_23_P2294     | 5,93103 | 5,89172 | 1,027622227 | ENST00000440906 | 92797     | NM_033647 | HELB           |
| A_21_P0005180  | 1,58109 | 1,54179 | 1,027615104 | N/A             | N/A       | N/A       | Inc-SLC22A2-1  |
| A_23_P315212   | 1,5415  | 1,5022  | 1,027615104 | ENST00000306928 | 23620     | NM_012344 | NTSR2          |
| A_33_P3308903  | 12,0114 | 11,9721 | 1,027615104 | ENST00000506488 | 142678    | NM_080875 | MIB2           |
| A_24_P160482   | 1,57748 | 1,53819 | 1,027607981 | N/A             | 222008    | BC028404  | VSTM2A         |
| A_21_P0000962  | 1,5546  | 1,51532 | 1,027600858 | ENST00000441046 | N/A       | N/A       | N/A            |
| A_21_P0012627  | 1,71143 | 1,67215 | 1,027600858 | N/A             | N/A       | N/A       | XLOC_I2_010908 |
| A_32_P77102    | 1,4093  | 1,37003 | 1,027593735 | N/A             | 100128420 | NR_038461 | LINC00892      |
| A_22_P00018563 | 1,68174 | 1,64247 | 1,027593735 | ENST00000442323 | N/A       | N/A       | N/A            |
| A_21_P0001102  | 1,54945 | 1,51019 | 1,027586613 | ENST00000447908 | N/A       | N/A       | N/A            |
| A_22_P00018039 | 1,75653 | 1,71727 | 1,027586613 | ENST00000440148 | N/A       | N/A       | N/A            |
| A_21_P0012035  | 1,67748 | 1,63823 | 1,02757949  | ENST00000419786 | 101927406 | N/A       | LOC101927406   |
| A_22_P00011572 | 1,55858 | 1,51933 | 1,02757949  | N/A             | 100874157 | NR_047011 | LINC00395      |
| A_22_P00019935 | 1,38222 | 1,34298 | 1,027572367 | ENST00000427360 | N/A       | N/A       | N/A            |
| A_23_P71926    | 1,4372  | 1,39796 | 1,027572367 | ENST00000377276 | 5568      | NM_002732 | PRKACG         |

|                |         |         |             |                 |           |              |                       |
|----------------|---------|---------|-------------|-----------------|-----------|--------------|-----------------------|
| A_23_P58819    | 9,26019 | 9,22095 | 1,027572367 | ENST00000521759 | 64901     | AF222747     | RANBP17               |
| A_22_P00003049 | 1,53529 | 1,49606 | 1,027565245 | N/A             | N/A       | AK023382     | Inc-C8A-2             |
| A_33_P3360007  | 1,73267 | 1,69344 | 1,027565245 | N/A             | N/A       | N/A          | N/A                   |
| A_21_P0011800  | 1,563   | 1,52377 | 1,027565245 | N/A             | N/A       | N/A          | XLOC_I2_007286        |
| A_21_P0004239  | 1,55299 | 1,51378 | 1,027551    | ENST00000612030 | N/A       | N/A          | N/A                   |
| A_33_P3275615  | 1,57197 | 1,53277 | 1,027543877 | ENST00000599770 | N/A       | DA339715     | N/A                   |
| A_19_P00316694 | 1,6986  | 1,65941 | 1,027536755 | ENST00000427276 | 102216342 | NR_108096    | LINC01108             |
| A_21_P0011718  | 1,49058 | 1,45139 | 1,027536755 | ENST00000598409 | 147670    | N/A          | SMIM17                |
| A_21_P0007192  | 1,56573 | 1,52654 | 1,027536755 | N/A             | N/A       | N/A          | Inc-C11orf74-2        |
| A_21_P0003653  | 1,45658 | 1,41739 | 1,027536755 | N/A             | N/A       | N/A          | Inc-PCDH10-8          |
| A_22_P00013814 | 1,42141 | 1,38222 | 1,027536755 | N/A             | N/A       | N/A          | Inc-RP9-1             |
| A_21_P0014615  | 1,51649 | 1,4773  | 1,027536755 | N/A             | N/A       | N/A          | Inc-KIF3A-1           |
| A_33_P3418716  | 1,54649 | 1,50731 | 1,027529633 | ENST00000611312 | 80303     | NM_025202    | EFHD1                 |
| A_22_P00011207 | 1,52629 | 1,48711 | 1,027529633 | N/A             | N/A       | N/A          | Inc-OLR1-1            |
| A_23_P151637   | 1,62441 | 1,58523 | 1,027529633 | ENST00000304625 | 6036      | NM_002934    | RNASE2                |
| A_22_P00016461 | 1,41333 | 1,37417 | 1,027515388 | N/A             | N/A       | N/A          | Inc-TMEM69-1          |
| A_22_P00009449 | 1,58351 | 1,54435 | 1,027515388 | N/A             | N/A       | DB552640     | Inc-M6PR-3            |
| A_23_P253752   | 9,98417 | 9,94502 | 1,027508266 | ENST00000420702 | 113115    | NM_138419    | MTFR2                 |
| A_22_P00012776 | 1,65941 | 1,62026 | 1,027508266 | N/A             | N/A       | N/A          | Inc-RALB-2            |
| A_33_P3231562  | 1,51615 | 1,47701 | 1,027501144 | N/A             | N/A       | N/A          | N/A                   |
| A_22_P00022427 | 1,46263 | 1,42349 | 1,027501144 | ENST00000329309 | 389493    | NM_001145712 | NUPR1L                |
| A_33_P3298226  | 1,52759 | 1,48846 | 1,027494022 | ENST00000456341 | 54798     | AY354498     | DCHS2                 |
| A_22_P00003079 | 1,50848 | 1,46936 | 1,0274869   | N/A             | N/A       | BQ648975     | Inc-C8orf55-1         |
| A_33_P3280646  | 1,50329 | 1,46418 | 1,027479778 | ENST00000498619 | 846       | NM_001178065 | CASR                  |
| A_33_P3288844  | 5,73446 | 5,69537 | 1,027465534 | ENST00000368485 | 3570      | NM_000565    | IL6R                  |
| A_23_P78037    | 1,46965 | 1,43056 | 1,027465534 | ENST00000378569 | 6354      | NM_006273    | CCL7                  |
| A_33_P3821660  | 8,51768 | 8,47859 | 1,027465534 | ENST00000461992 | 55684     | NM_001173989 | RABL6                 |
| A_23_P102286   | 1,55734 | 1,51826 | 1,027458412 | ENST00000401907 | 3973      | NM_000233    | LHCGR                 |
| A_22_P00002640 | 1,53384 | 1,49476 | 1,027458412 | N/A             | N/A       | AI571034     | Inc-C1orf185-3        |
| A_21_P0005073  | 1,58535 | 1,54627 | 1,027458412 | N/A             | N/A       | N/A          | Inc-NOX3-3            |
| A_22_P00013697 | 1,51173 | 1,47265 | 1,027458412 | N/A             | N/A       | CR742730     | Inc-RP11-766F14.2.1-1 |
| A_22_P00001374 | 1,63443 | 1,59537 | 1,027444169 | ENST00000444862 | N/A       | N/A          | N/A                   |
| A_21_P0004051  | 1,58286 | 1,5438  | 1,027444169 | ENST00000509367 | 102467224 | N/A          | LOC102467224          |

|                |         |         |             |                 |           |              |                       |
|----------------|---------|---------|-------------|-----------------|-----------|--------------|-----------------------|
| A_22_P00017226 | 1,54384 | 1,50478 | 1,027444169 | ENST00000455229 | N/A       | N/A          | N/A                   |
| A_21_P0008849  | 1,48707 | 1,44801 | 1,027444169 | N/A             | N/A       | N/A          | Inc-ONECUT1-1         |
| A_21_P0007633  | 1,72087 | 1,68181 | 1,027444169 | N/A             | N/A       | N/A          | Inc-RP11-116D17.1.1-3 |
| A_22_P00018065 | 1,53344 | 1,49438 | 1,027444169 | ENST00000438454 | N/A       | N/A          | N/A                   |
| A_33_P3303945  | 1,42566 | 1,38661 | 1,027437047 | ENST00000317254 | 390072    | NM_001005175 | OR52N4                |
| A_22_P00024068 | 1,6462  | 1,60715 | 1,027437047 | N/A             | 101928590 | NR_125901    | LOC101928590          |
| A_22_P00008659 | 1,43999 | 1,40095 | 1,027429925 | ENST00000566370 | 100861554 | NR_047493    | LINC00563             |
| A_21_P0002396  | 1,42202 | 1,383   | 1,027415682 | N/A             | N/A       | N/A          | Inc-CMPK2-7           |
| A_21_P0013633  | 2,96553 | 2,92653 | 1,027401439 | N/A             | N/A       | N/A          | XLOC_I2_015174        |
| A_23_P320225   | 1,53779 | 1,49879 | 1,027401439 | ENST00000509670 | 132884    | NM_147127    | EVC2                  |
| A_24_P413669   | 6,52804 | 6,48904 | 1,027401439 | ENST00000367079 | 5208      | NM_001018053 | PFKFB2                |
| A_21_P0003805  | 1,49622 | 1,45723 | 1,027394318 | N/A             | N/A       | N/A          | Inc-DCTD-8            |
| A_23_P42931    | 1,46376 | 1,42478 | 1,027387197 | ENST00000520413 | 154790    | NM_001080511 | CLEC2L                |
| A_22_P00018597 | 1,37603 | 1,33705 | 1,027387197 | ENST00000553678 | N/A       | N/A          | N/A                   |
| A_33_P3267879  | 1,65006 | 1,6111  | 1,027372954 | ENST00000236166 | N/A       | N/A          | N/A                   |
| A_33_P3303325  | 1,82358 | 1,78462 | 1,027372954 | ENST00000487348 | N/A       | XM_003960117 | N/A                   |
| A_33_P3802116  | 1,56585 | 1,52689 | 1,027372954 | ENST00000519691 | N/A       | XR_247160    | N/A                   |
| A_21_P0000793  | 1,50173 | 1,46278 | 1,027365833 | N/A             | 100132618 | NR_038420    | ZRANB2-AS1            |
| A_21_P0004690  | 1,6856  | 1,64666 | 1,027358712 | N/A             | N/A       | N/A          | Inc-SLC35D3-1         |
| A_21_P0009875  | 1,63971 | 1,60077 | 1,027358712 | ENST00000456714 | 149837    | NR_015406    | LINC00654             |
| A_19_P00321210 | 1,70709 | 1,66815 | 1,027358712 | ENST00000492553 | 647107    | N/A          | LINC01192             |
| A_22_P00002391 | 5,87377 | 5,83483 | 1,027358712 | N/A             | 102724153 | NR_110552    | LOC102724153          |
| A_22_P00006419 | 6,37844 | 6,33951 | 1,027351591 | ENST00000520524 | N/A       | N/A          | N/A                   |
| A_22_P00025705 | 1,65911 | 1,62018 | 1,027351591 | ENST00000521511 | N/A       | BX091769     | N/A                   |
| A_33_P3295119  | 1,37745 | 1,33852 | 1,027351591 | ENST00000609812 | 147719    | NM_173506    | LYPD4                 |
| A_22_P00024991 | 1,56887 | 1,52994 | 1,027351591 | N/A             | N/A       | BG419303     | Inc-TBC1D3F-1         |
| A_33_P3336909  | 1,75582 | 1,71689 | 1,027351591 | ENST00000518709 | 728715    | XM_006719176 | LOC728715             |
| A_22_P00020535 | 1,65694 | 1,61802 | 1,02734447  | N/A             | N/A       | DB576317     | Inc-ENPP1-2           |
| A_22_P00020985 | 1,65214 | 1,61322 | 1,02734447  | ENST00000568471 | N/A       | N/A          | N/A                   |
| A_32_P56624    | 1,6957  | 1,65679 | 1,027337349 | ENST00000539556 | 339145    | NM_198491    | FAM92B                |
| A_22_P00016795 | 1,5953  | 1,55639 | 1,027337349 | ENST00000576745 | N/A       | N/A          | N/A                   |
| A_21_P0006385  | 1,5895  | 1,55061 | 1,027323107 | N/A             | N/A       | N/A          | Inc-C9orf156-2        |
| A_22_P00021182 | 1,56018 | 1,52129 | 1,027323107 | N/A             | N/A       | BX117253     | Inc-LRRC40-2          |

|                |         |         |             |                 |           |              |                    |
|----------------|---------|---------|-------------|-----------------|-----------|--------------|--------------------|
| A_22_P00005273 | 1,38983 | 1,35094 | 1,027323107 | ENST00000509669 | N/A       | N/A          | N/A                |
| A_33_P3421520  | 7,45316 | 7,41428 | 1,027315986 | ENST00000617859 | 64376     | NM_001271840 | IKZF5              |
| A_33_P3318117  | 1,53139 | 1,49251 | 1,027315986 | ENST00000336374 | 1551      | NM_000765    | CYP3A7             |
| A_22_P00022505 | 1,5943  | 1,55543 | 1,027308865 | ENST00000567925 | N/A       | DB330190     | N/A                |
| A_22_P00015018 | 1,6022  | 1,56333 | 1,027308865 | N/A             | N/A       | N/A          | Inc-SMPD2-2        |
| A_22_P00017073 | 5,99846 | 5,95959 | 1,027308865 | N/A             | N/A       | N/A          | Inc-TUFM-3         |
| A_23_P312874   | 1,47423 | 1,43536 | 1,027308865 | ENST00000506468 | 221409    | NM_145026    | SPATS1             |
| A_23_P114934   | 1,40718 | 1,36832 | 1,027301745 | ENST00000367870 | 84944     | NM_032858    | MAEL               |
| A_22_P00025646 | 1,73923 | 1,70037 | 1,027301745 | ENST00000440341 | N/A       | N/A          | N/A                |
| A_33_P3362392  | 1,73348 | 1,69463 | 1,027294624 | N/A             | N/A       | N/A          | N/A                |
| A_21_P0007059  | 1,38512 | 1,34628 | 1,027287503 | N/A             | N/A       | N/A          | Inc-ANTXRL-1       |
| A_22_P00005555 | 1,57215 | 1,53332 | 1,027280383 | N/A             | N/A       | BX104650     | Inc-EEA1-1         |
| A_22_P00025184 | 1,6551  | 1,61627 | 1,027280383 | ENST00000532849 | N/A       | AI934964     | N/A                |
| A_22_P00013753 | 1,69174 | 1,65292 | 1,027273262 | ENST00000517796 | N/A       | N/A          | N/A                |
| A_23_P351295   | 1,64614 | 1,60732 | 1,027273262 | ENST00000312719 | 222537    | NM_153612    | HS3ST5             |
| A_24_P135427   | 1,65504 | 1,61622 | 1,027273262 | N/A             | 100128398 | NR_036508    | LOC100128398       |
| A_22_P00003342 | 1,51354 | 1,47472 | 1,027273262 | ENST00000537498 | N/A       | AK055272     | N/A                |
| A_33_P3233814  | 1,53325 | 1,49443 | 1,027273262 | ENST00000316412 | 645425    | NM_001099852 | PRAMEF20           |
| A_23_P360924   | 1,53819 | 1,49938 | 1,027266142 | ENST00000286808 | 26285     | NM_012131    | CLDN17             |
| A_33_P3395753  | 1,54686 | 1,50805 | 1,027266142 | ENST00000450891 | N/A       | N/A          | N/A                |
| A_23_P92885    | 1,64887 | 1,61007 | 1,027259021 | ENST00000513675 | 133482    | NM_173488    | SLCO6A1            |
| A_19_P00317046 | 1,44495 | 1,40615 | 1,027259021 | ENST00000492522 | N/A       | N/A          | N/A                |
| A_21_P0013090  | 1,62862 | 1,58982 | 1,027259021 | ENST00000446525 | N/A       | N/A          | N/A                |
| A_22_P00011291 | 1,64032 | 1,60153 | 1,027251901 | ENST00000542064 | N/A       | BU956244     | N/A                |
| A_21_P0001014  | 1,73936 | 1,70057 | 1,027251901 | ENST00000426504 | N/A       | N/A          | N/A                |
| A_21_P0002787  | 1,56198 | 1,52319 | 1,027251901 | ENST00000463297 | N/A       | N/A          | N/A                |
| A_22_P00022371 | 1,52359 | 1,48481 | 1,02724478  | N/A             | N/A       | N/A          | Inc-AP000679.2.1-2 |
| A_32_P932089   | 1,70546 | 1,66669 | 1,02723766  | N/A             | 84054     | NR_001282    | PCDHB19P           |
| A_22_P00009099 | 1,55923 | 1,52046 | 1,02723766  | N/A             | N/A       | GR939008     | Inc-LIF-1          |
| A_21_P0002668  | 1,72764 | 1,68888 | 1,02723054  | N/A             | 101928347 | XR_245041    | LOC101928347       |
| A_23_P251151   | 1,38455 | 1,34579 | 1,02723054  | ENST00000529218 | 4745      | NM_006157    | NELL1              |
| A_22_P00010029 | 1,63098 | 1,59223 | 1,02722342  | ENST00000440255 | N/A       | N/A          | N/A                |
| A_33_P3219210  | 1,58436 | 1,54561 | 1,02722342  | N/A             | N/A       | N/A          | N/A                |

|                |         |         |             |                 |           |              |                    |
|----------------|---------|---------|-------------|-----------------|-----------|--------------|--------------------|
| A_22_P00018456 | 1,59916 | 1,56041 | 1,02722342  | ENST00000438408 | N/A       | N/A          | N/A                |
| A_22_P00008402 | 1,66897 | 1,63024 | 1,027209179 | N/A             | N/A       | N/A          | Inc-JPH1-3         |
| A_23_P75769    | 1,44183 | 1,4031  | 1,027209179 | ENST00000529991 | 51338     | NM_024021    | MS4A4A             |
| A_23_P134041   | 1,49692 | 1,45819 | 1,027209179 | ENST00000369663 | 9096      | NM_001080508 | TBX18              |
| A_22_P00024579 | 1,75438 | 1,71566 | 1,027202059 | N/A             | N/A       | N/A          | Inc-AP001496.1-7   |
| A_21_P0002287  | 1,64825 | 1,60953 | 1,027202059 | N/A             | N/A       | N/A          | Inc-CNTNAP5-5      |
| A_22_P00025452 | 1,6353  | 1,59659 | 1,027194939 | N/A             | N/A       | N/A          | Inc-SNX11-2        |
| A_22_P00025204 | 1,52546 | 1,48675 | 1,027194939 | N/A             | N/A       | N/A          | Inc-COMMD7-1       |
| A_23_P329353   | 1,53574 | 1,49704 | 1,027187819 | ENST00000481714 | 25927     | NM_015463    | CNRIP1             |
| A_33_P3273822  | 1,65189 | 1,61319 | 1,027187819 | ENST00000434234 | 80204     | N/A          | FBXO11             |
| A_33_P3468017  | 1,59245 | 1,55377 | 1,02717358  | ENST00000416774 | 254099    | NR_038869    | LINC01342          |
| A_22_P00020537 | 1,50991 | 1,47123 | 1,02717358  | ENST00000504840 | N/A       | N/A          | N/A                |
| A_22_P00025905 | 1,43968 | 1,401   | 1,02717358  | ENST00000542819 | N/A       | DA670090     | N/A                |
| A_21_P0002591  | 5,92677 | 5,8881  | 1,02716646  | N/A             | N/A       | N/A          | Inc-SIX3-3         |
| A_21_P0002425  | 1,67048 | 1,63181 | 1,02716646  | N/A             | N/A       | N/A          | Inc-ACO13480.1.1-4 |
| A_21_P0004495  | 1,64993 | 1,61126 | 1,02716646  | ENST00000565798 | N/A       | XR_249759    | N/A                |
| A_33_P3405535  | 1,64388 | 1,60521 | 1,02716646  | ENST00000508957 | 650293    | NM_001040071 | LOC650293          |
| A_24_P519672   | 1,3988  | 1,36013 | 1,02716646  | N/A             | 84789     | NR_026877    | MGC2889            |
| A_22_P00019361 | 1,60671 | 1,56805 | 1,02715934  | ENST00000507950 | N/A       | N/A          | N/A                |
| A_23_P113748   | 1,67603 | 1,63737 | 1,02715934  | ENST00000494118 | 79750     | NM_024697    | ZNF385D            |
| A_22_P00002587 | 1,54964 | 1,51099 | 1,02715222  | ENST00000562582 | 101927606 | BC016798     | LOC101927606       |
| A_22_P00006563 | 1,63992 | 1,60127 | 1,02715222  | N/A             | 100379174 | NR_037841    | MACROD2-AS1        |
| A_21_P0000415  | 1,66737 | 1,62872 | 1,02715222  | N/A             | 767596    | NR_003211    | SNORD114-18        |
| A_22_P00019574 | 1,52612 | 1,48748 | 1,027145101 | N/A             | N/A       | AL704334     | Inc-XKR9-1         |
| A_22_P00010864 | 1,44985 | 1,41122 | 1,027137981 | ENST00000549330 | 101927062 | NR_110033    | LOC101927062       |
| A_33_P3282744  | 1,56366 | 1,52503 | 1,027137981 | N/A             | N/A       | N/A          | N/A                |
| A_33_P3288234  | 1,57346 | 1,53483 | 1,027137981 | N/A             | N/A       | BX378805     | N/A                |
| A_32_P30271    | 1,37657 | 1,33795 | 1,027130862 | ENST00000381781 | 645432    | NM_001080523 | ARRDC5             |
| A_21_P0010109  | 1,61818 | 1,57956 | 1,027130862 | N/A             | N/A       | N/A          | Inc-JAG1-5         |
| A_22_P00014764 | 1,75754 | 1,71892 | 1,027130862 | N/A             | N/A       | N/A          | Inc-SLC35G1-1      |
| A_33_P3408042  | 1,58712 | 1,5485  | 1,027130862 | ENST00000374428 | 26248     | NM_205859    | OR2K2              |
| A_24_P931736   | 1,67784 | 1,63922 | 1,027130862 | N/A             | 100133106 | AY358216     | LOC100133106       |
| A_23_P416011   | 1,65079 | 1,61217 | 1,027130862 | ENST00000617378 | 10407     | NM_058203    | SPAG11B            |

|                |         |         |             |                 |           |              |                    |
|----------------|---------|---------|-------------|-----------------|-----------|--------------|--------------------|
| A_23_P47565    | 14,4864 | 14,4478 | 1,027116623 | ENST00000375710 | 3939      | NM_005566    | LDHA               |
| A_33_P3279798  | 9,73954 | 9,70094 | 1,027116623 | ENST00000557421 | 27109     | NM_015684    | ATP5S              |
| A_22_P00007834 | 1,63866 | 1,60006 | 1,027116623 | N/A             | 100873945 | NR_046648    | HLTF-AS1           |
| A_23_P65100    | 1,67177 | 1,63317 | 1,027116623 | ENST00000252318 | 26290     | NM_017417    | GALNT8             |
| A_22_P00009905 | 11,5064 | 11,4678 | 1,027116623 | N/A             | 100859930 | NR_045680    | HEIH               |
| A_22_P00009227 | 9,41768 | 9,37909 | 1,027109503 | N/A             | 100129845 | NR_038910    | PCOLCE-AS1         |
| A_22_P00023948 | 1,63977 | 1,60118 | 1,027109503 | N/A             | N/A       | N/A          | Inc-C11orf82-3     |
| A_21_P0003322  | 1,56927 | 1,53069 | 1,027102384 | ENST00000509964 | 101929123 | NR_125919    | LOC101929123       |
| A_21_P0001726  | 4,24844 | 4,20987 | 1,027095265 | N/A             | N/A       | N/A          | Inc-SLC6A9-3       |
| A_21_P0001455  | 1,68166 | 1,64309 | 1,027095265 | N/A             | N/A       | N/A          | Inc-NOC2L-2        |
| A_21_P0010473  | 1,44621 | 1,40764 | 1,027095265 | N/A             | 101929416 | XR_249026    | LOC101929416       |
| A_22_P00025239 | 1,40369 | 1,36512 | 1,027095265 | ENST00000501520 | N/A       | AK091456     | N/A                |
| A_21_P0010895  | 1,38044 | 1,34187 | 1,027095265 | N/A             | N/A       | N/A          | XL0C_I2_002049     |
| A_33_P3303319  | 1,55174 | 1,51318 | 1,027088145 | ENST00000370188 | 163404    | NM_001037317 | LPPR5              |
| A_21_P0008152  | 1,38303 | 1,34447 | 1,027088145 | N/A             | N/A       | N/A          | Inc-TSC22D1-1      |
| A_33_P3313920  | 1,43958 | 1,40103 | 1,027081026 | ENST00000612312 | 3803      | NM_014219    | KIR2DL2            |
| A_33_P3857467  | 1,49344 | 1,45489 | 1,027081026 | ENST00000436042 | 100240728 | NR_108095    | LOC100240728       |
| A_22_P00021149 | 1,51199 | 1,47344 | 1,027081026 | N/A             | N/A       | N/A          | Inc-AL450307.1-1   |
| A_23_P386964   | 1,65594 | 1,6174  | 1,027073907 | ENST00000505647 | 152940    | NM_152543    | C4orf45            |
| A_23_P256077   | 1,47911 | 1,44058 | 1,027066788 | ENST00000339042 | 63904     | NM_022076    | DUSP21             |
| A_21_P0003050  | 1,44217 | 1,40364 | 1,027066788 | N/A             | N/A       | N/A          | Inc-RP11-6F2.7.1-1 |
| A_33_P3343120  | 1,56552 | 1,527   | 1,027059669 | ENST00000268638 | 3394      | NM_002163    | IRF8               |
| A_23_P102864   | 1,46854 | 1,43002 | 1,027059669 | ENST00000284885 | 5651      | NM_002772    | TMPRSS15           |
| A_22_P00022314 | 1,51448 | 1,47597 | 1,02705255  | ENST00000454137 | 2956      | N/A          | MSH6               |
| A_33_P3335262  | 1,38208 | 1,34358 | 1,027045431 | N/A             | 257062    | AK128088     | CATSPERD           |
| A_24_P344711   | 10,6533 | 10,6148 | 1,027045431 | ENST00000398058 | 56894     | NM_020132    | AGPAT3             |
| A_21_P0011644  | 1,72378 | 1,68529 | 1,027038312 | ENST00000502517 | 55018     | N/A          | LINC00483          |
| A_21_P0008632  | 1,51441 | 1,47592 | 1,027038312 | N/A             | N/A       | N/A          | Inc-MAPK6-10       |
| A_21_P0010226  | 1,50438 | 1,46589 | 1,027038312 | N/A             | N/A       | N/A          | Inc-USP16-7        |
| A_23_P157338   | 1,43981 | 1,40132 | 1,027038312 | ENST00000340652 | 375567    | NM_198570    | VWC2               |
| A_33_P3295328  | 1,61473 | 1,57624 | 1,027038312 | ENST00000382073 | 93978     | NM_001007033 | CLEC6A             |
| A_33_P3307568  | 1,63284 | 1,59436 | 1,027031193 | ENST00000518817 | 152138    | NM_001083308 | PYDC2              |
| A_33_P3237135  | 1,58368 | 1,54521 | 1,027024074 | ENST00000219070 | 4313      | NM_004530    | MMP2               |



|                |         |         |             |                 |           |              |                |
|----------------|---------|---------|-------------|-----------------|-----------|--------------|----------------|
| A_23_P329956   | 1,535   | 1,49653 | 1,027024074 | ENST00000454918 | 130560    | NM_139073    | SPATA3         |
| A_21_P0001515  | 1,66423 | 1,62577 | 1,027016956 | N/A             | N/A       | N/A          | Inc-C1orf87-1  |
| A_21_P0002680  | 1,47832 | 1,43986 | 1,027016956 | N/A             | N/A       | N/A          | Inc-SCN1A-1    |
| A_33_P3211654  | 4,15733 | 4,11887 | 1,027016956 | N/A             | N/A       | N/A          | N/A            |
| A_22_P00006142 | 1,6522  | 1,61375 | 1,027009837 | N/A             | N/A       | N/A          | Inc-FAM189A1-2 |
| A_21_P0005076  | 3,87967 | 3,84123 | 1,027002718 | N/A             | N/A       | N/A          | Inc-SERAC1-5   |
| A_21_P0009491  | 1,70581 | 1,66737 | 1,027002718 | ENST00000592121 | N/A       | N/A          | N/A            |
| A_21_P0008590  | 1,73854 | 1,7001  | 1,027002718 | ENST00000562501 | 791114    | NR_026646    | PWRN1          |
| A_23_P50121    | 1,42916 | 1,39072 | 1,027002718 | ENST00000299766 | 4160      | NM_005912    | MC4R           |
| A_22_P00013740 | 1,49339 | 1,45496 | 1,0269956   | ENST00000559643 | N/A       | N/A          | N/A            |
| A_33_P3347465  | 9,95361 | 9,91518 | 1,0269956   | ENST00000565583 | 124245    | NM_001294340 | ZC3H18         |
| A_22_P00017331 | 1,64371 | 1,60529 | 1,026988481 | ENST00000526091 | 101928921 | XR_247699    | LOC101928921   |
| A_24_P263284   | 1,5195  | 1,48109 | 1,026981362 | ENST00000241312 | 114784    | NM_052896    | CSMD2          |
| A_21_P0008823  | 1,53246 | 1,49405 | 1,026981362 | N/A             | N/A       | N/A          | Inc-THBS1-1    |
| A_21_P0014509  | 1,41114 | 1,37274 | 1,026974244 | N/A             | N/A       | BX108475     | N/A            |
| A_33_P3294921  | 1,56893 | 1,53053 | 1,026974244 | ENST00000492157 | 158471    | NM_015225    | PRUNE2         |
| A_21_P0003071  | 1,65508 | 1,6167  | 1,026960007 | N/A             | N/A       | N/A          | Inc-EIF2B5-2   |
| A_33_P3230239  | 1,66865 | 1,63028 | 1,026952889 | ENST00000400186 | 64478     | NM_033225    | CSMD1          |
| A_22_P00011102 | 1,71687 | 1,67851 | 1,026945771 | N/A             | N/A       | BG212501     | Inc-NUDT13-1   |
| A_33_P3341289  | 1,66804 | 1,62968 | 1,026945771 | N/A             | N/A       | N/A          | N/A            |
| A_33_P3375626  | 1,61806 | 1,5797  | 1,026945771 | N/A             | N/A       | N/A          | N/A            |
| A_22_P00014416 | 1,56015 | 1,52181 | 1,026931534 | ENST00000448074 | 200132    | AK307100     | TCTEX1D1       |
| A_22_P00007575 | 1,37736 | 1,33903 | 1,026924416 | N/A             | N/A       | N/A          | Inc-HDAC2-4    |
| A_33_P3288189  | 9,36051 | 9,32218 | 1,026924416 | ENST00000379982 | 22836     | NM_014899    | RHOBTB3        |
| A_23_P106656   | 1,39213 | 1,35383 | 1,026903062 | ENST00000548332 | 766       | NM_001014435 | CA7            |
| A_21_P0001763  | 1,65433 | 1,61605 | 1,026888826 | N/A             | 100506929 | XR_247111    | LOC100506929   |
| A_24_P41706    | 1,39314 | 1,35486 | 1,026888826 | ENST00000460066 | 266553    | XM_003118558 | OFCC1          |
| A_22_P00012266 | 1,49585 | 1,45758 | 1,026881708 | ENST00000521143 | N/A       | N/A          | N/A            |
| A_24_P175563   | 1,60415 | 1,56588 | 1,026881708 | ENST00000375905 | 91452     | NM_145698    | ACBD5          |
| A_33_P3387856  | 4,85846 | 4,82019 | 1,026881708 | N/A             | 55839     | NM_001100625 | CENPN          |
| A_23_P78750    | 6,38441 | 6,34614 | 1,026881708 | ENST00000221485 | 57030     | NM_020309    | SLC17A7        |
| A_19_P00316622 | 1,69957 | 1,66131 | 1,026874591 | ENST00000583578 | 284276    | XR_424934    | LINC00908      |
| A_22_P00010192 | 1,57956 | 1,5413  | 1,026874591 | ENST00000619549 | 114036    | NR_027266    | LINC00310      |

|                |         |         |             |                 |           |              |                      |
|----------------|---------|---------|-------------|-----------------|-----------|--------------|----------------------|
| A_33_P3210653  | 1,71096 | 1,6727  | 1,026874591 | ENST00000380373 | 401666    | NM_001005329 | OR51A4               |
| A_33_P3395384  | 3,06738 | 3,02914 | 1,026860355 | ENST00000389385 | 22895     | NM_001143854 | RPH3A                |
| A_21_P0001298  | 1,48183 | 1,4436  | 1,026853238 | N/A             | N/A       | N/A          | Inc-DMRTB1-1         |
| A_22_P00015503 | 1,63947 | 1,60124 | 1,026853238 | N/A             | N/A       | N/A          | Inc-STAT1-2          |
| A_33_P3298092  | 1,75662 | 1,71839 | 1,026853238 | N/A             | 100131756 | AK096139     | LOC100131756         |
| A_33_P3421007  | 1,52113 | 1,48291 | 1,02684612  | N/A             | N/A       | N/A          | N/A                  |
| A_21_P0011025  | 1,71443 | 1,67622 | 1,026839002 | ENST00000419895 | 283140    | N/A          | LOC283140            |
| A_21_P0012305  | 1,7085  | 1,67029 | 1,026839002 | ENST00000426585 | N/A       | XR_425297    | N/A                  |
| A_21_P0007588  | 1,63207 | 1,59386 | 1,026839002 | N/A             | N/A       | N/A          | Inc-ZDHC17-5         |
| A_22_P00018949 | 1,44318 | 1,40498 | 1,026831885 | N/A             | N/A       | DA339205     | Inc-ITM2C-2          |
| A_21_P0010496  | 1,63082 | 1,59262 | 1,026831885 | ENST00000604411 | 9383      | N/A          | TSIX                 |
| A_21_P0008395  | 1,57108 | 1,53288 | 1,026831885 | N/A             | N/A       | N/A          | Inc-DIO3.1-1         |
| A_22_P00008374 | 1,46012 | 1,42192 | 1,026831885 | ENST00000441009 | 339622    | NR_046198    | LOC339622            |
| A_22_P00009802 | 2,03575 | 1,99756 | 1,026824768 | ENST00000558089 | 145845    | NR_024264    | LOC145845            |
| A_21_P0004686  | 1,5083  | 1,47012 | 1,02681765  | ENST00000412745 | 154089    | NR_027030    | LINC01312            |
| A_21_P0003907  | 1,43742 | 1,39925 | 1,026810533 | N/A             | N/A       | N/A          | Inc-RP11-171N4.2.1-1 |
| A_23_P29680    | 1,43171 | 1,39355 | 1,026803416 | ENST00000477224 | 79012     | NM_024046    | CAMKV                |
| A_22_P00013969 | 1,62084 | 1,58268 | 1,026803416 | N/A             | N/A       | HY018651     | Inc-RTN1-1           |
| A_22_P00016000 | 1,44276 | 1,4046  | 1,026803416 | N/A             | 101928124 | XR_241973    | LOC101928124         |
| A_21_P0005399  | 1,43695 | 1,3988  | 1,026796298 | N/A             | N/A       | N/A          | Inc-GATAD1-1         |
| A_21_P0010245  | 1,61693 | 1,57878 | 1,026796298 | N/A             | N/A       | N/A          | Inc-WRB-2            |
| A_21_P0008430  | 1,54098 | 1,50283 | 1,026796298 | ENST00000556405 | N/A       | XR_245755    | N/A                  |
| A_23_P322086   | 1,41775 | 1,3796  | 1,026796298 | ENST00000256969 | 80763     | NM_030572    | SPX                  |
| A_22_P00021056 | 1,44128 | 1,40313 | 1,026796298 | N/A             | N/A       | N/A          | Inc-YBEY-3           |
| A_24_P267592   | 4,41268 | 4,37454 | 1,026789181 | ENST00000262878 | 25939     | NM_015474    | SAMHD1               |
| A_33_P3264538  | 1,58652 | 1,54838 | 1,026789181 | N/A             | 10454     | NM_153497    | TAB1                 |
| A_33_P3743432  | 1,5331  | 1,49497 | 1,026782064 | ENST00000457582 | 449491    | NR_073407    | DEFA8P               |
| A_21_P0001339  | 1,40451 | 1,36638 | 1,026782064 | N/A             | N/A       | N/A          | Inc-DR1-1            |
| A_21_P0007228  | 1,49901 | 1,46088 | 1,026782064 | N/A             | N/A       | N/A          | Inc-MYE0V-3          |
| A_33_P3415596  | 1,51698 | 1,47885 | 1,026782064 | ENST00000598234 | N/A       | N/A          | N/A                  |
| A_24_P281036   | 1,58488 | 1,54676 | 1,026774947 | ENST00000397805 | 79782     | NM_024727    | LRRC31               |
| A_21_P0014196  | 1,4654  | 1,42729 | 1,02676783  | N/A             | 100506413 | NR_103806    | DOCK4-AS1            |
| A_23_P324885   | 1,62244 | 1,58434 | 1,026760713 | ENST00000445132 | 729230    | NM_001123396 | CCR2                 |

|                |         |         |             |                 |           |              |                       |
|----------------|---------|---------|-------------|-----------------|-----------|--------------|-----------------------|
| A_22_P00021841 | 1,53967 | 1,50157 | 1,026760713 | N/A             | N/A       | BX113914     | Inc-NDUFAF2-1         |
| A_21_P0010874  | 1,53368 | 1,49558 | 1,026760713 | N/A             | N/A       | N/A          | XLOC_I2_001960        |
| A_23_P7412     | 1,60151 | 1,56342 | 1,026753596 | ENST00000533815 | 79908     | NM_001040462 | BTNL8                 |
| A_23_P207675   | 8,9974  | 8,95932 | 1,026746479 | N/A             | 113026    | NM_133373    | PLCD3                 |
| A_22_P00010574 | 1,61652 | 1,57844 | 1,026746479 | ENST00000458480 | N/A       | N/A          | N/A                   |
| A_33_P3344599  | 1,53236 | 1,49428 | 1,026746479 | ENST00000377153 | 10277     | N/A          | UBE4B                 |
| A_22_P00021237 | 1,52983 | 1,49176 | 1,026739362 | N/A             | N/A       | BC043379     | Inc-FAM174B-5         |
| A_33_P3266639  | 1,65013 | 1,61206 | 1,026739362 | ENST00000341871 | 388335    | NM_001004313 | TMEM220               |
| A_33_P3356366  | 1,56969 | 1,53162 | 1,026739362 | N/A             | N/A       | N/A          | N/A                   |
| A_21_P0008859  | 1,57465 | 1,53659 | 1,026732245 | N/A             | N/A       | N/A          | Inc-RP11-210M15.2.1-3 |
| A_22_P00005547 | 1,37627 | 1,33821 | 1,026732245 | ENST00000511793 | N/A       | AI218540     | N/A                   |
| A_33_P3276301  | 1,59534 | 1,55728 | 1,026732245 | ENST00000390367 | N/A       | S60797       | N/A                   |
| A_21_P0014905  | 1,51406 | 1,476   | 1,026732245 | N/A             | N/A       | N/A          | N/A                   |
| A_21_P0001615  | 1,45546 | 1,41741 | 1,026725129 | N/A             | N/A       | N/A          | Inc-PLXNA2-1          |
| A_21_P0012334  | 1,38024 | 1,3422  | 1,026718012 | ENST00000457060 | 23783     | NR_040115    | ANKRD62P1-PARP4P3     |
| A_22_P00020837 | 1,66951 | 1,63148 | 1,026710895 | ENST00000446024 | N/A       | N/A          | N/A                   |
| A_33_P3361023  | 1,4514  | 1,41338 | 1,026703779 | ENST00000370375 | 388649    | NM_001012425 | C1orf146              |
| A_22_P00006327 | 1,71504 | 1,67702 | 1,026703779 | N/A             | N/A       | N/A          | Inc-FAN1-1            |
| A_22_P00025598 | 6,29674 | 6,25872 | 1,026703779 | ENST00000422117 | N/A       | N/A          | N/A                   |
| A_22_P00001431 | 1,62062 | 1,58261 | 1,026696662 | N/A             | N/A       | N/A          | Inc-APOB-2            |
| A_24_P299423   | 1,54931 | 1,51131 | 1,026689546 | ENST00000560241 | 3603      | BC040272     | IL16                  |
| A_22_P00023315 | 1,39052 | 1,35252 | 1,026689546 | N/A             | N/A       | N/A          | Inc-OGFOD1-1          |
| A_21_P0011664  | 1,60879 | 1,57079 | 1,026689546 | ENST00000455308 | 644669    | N/A          | LOC644669             |
| A_33_P3339865  | 5,40368 | 5,36568 | 1,026689546 | ENST00000380332 | 51806     | NM_017422    | CALML5                |
| A_33_P3343452  | 1,57908 | 1,54109 | 1,026682429 | ENST00000579292 | 374860    | NM_001145029 | ANKRD30B              |
| A_21_P0001786  | 1,46997 | 1,43198 | 1,026682429 | ENST00000413792 | 101929559 | NR_110011    | LINC00211             |
| A_22_P00011477 | 1,61028 | 1,57229 | 1,026682429 | ENST00000445300 | N/A       | N/A          | N/A                   |
| A_22_P00009066 | 1,45706 | 1,41908 | 1,026675313 | N/A             | 100874027 | NR_046722    | TPRG1-AS2             |
| A_21_P0010846  | 1,52597 | 1,48799 | 1,026675313 | N/A             | N/A       | N/A          | XLOC_I2_001774        |
| A_22_P00016797 | 1,58632 | 1,54834 | 1,026675313 | ENST00000555649 | N/A       | N/A          | N/A                   |
| A_22_P00005249 | 1,68821 | 1,65025 | 1,02666108  | N/A             | 285987    | NR_015448    | DLX6-AS1              |
| A_22_P00007793 | 1,51127 | 1,47332 | 1,026653964 | N/A             | N/A       | N/A          | Inc-HNRNPU-4          |
| A_23_P422018   | 1,47983 | 1,44188 | 1,026653964 | ENST00000328051 | 163778    | NM_173080    | SPRR4                 |

|                |         |         |             |                 |           |              |                    |
|----------------|---------|---------|-------------|-----------------|-----------|--------------|--------------------|
| A_22_P00023289 | 1,62638 | 1,58843 | 1,026653964 | ENST00000502684 | N/A       | N/A          | N/A                |
| A_23_P62741    | 1,42844 | 1,3905  | 1,026646848 | ENST00000401034 | 64123     | NM_022159    | ELTD1              |
| A_22_P00004725 | 1,59068 | 1,55274 | 1,026646848 | ENST00000583678 | 100852410 | NR_046217    | ZRANB2-AS2         |
| A_21_P0007640  | 1,66098 | 1,62305 | 1,026639732 | N/A             | N/A       | N/A          | Inc-SRRM4-2        |
| A_21_P0013509  | 1,40004 | 1,36211 | 1,026639732 | N/A             | N/A       | N/A          | XLOC_I2_014458     |
| A_22_P00018586 | 1,65945 | 1,62153 | 1,026632616 | ENST00000509423 | N/A       | N/A          | N/A                |
| A_21_P0006913  | 1,61866 | 1,58074 | 1,026632616 | N/A             | N/A       | N/A          | Inc-ADRA2A-1       |
| A_22_P00010899 | 1,39364 | 1,35572 | 1,026632616 | N/A             | N/A       | N/A          | Inc-NPPC-1         |
| A_19_P00322321 | 1,54024 | 1,50232 | 1,026632616 | ENST00000448056 | N/A       | N/A          | N/A                |
| A_21_P0007232  | 1,37722 | 1,33931 | 1,026625499 | N/A             | N/A       | N/A          | Inc-NADSYN1-2      |
| A_21_P0003191  | 1,58067 | 1,54276 | 1,026625499 | N/A             | N/A       | N/A          | Inc-TBL1XR1-6      |
| A_21_P0002211  | 1,97104 | 1,93313 | 1,026625499 | N/A             | N/A       | N/A          | Inc-AC016722.2.1-1 |
| A_22_P00007699 | 1,57687 | 1,53897 | 1,026618383 | ENST00000607445 | N/A       | N/A          | N/A                |
| A_21_P0011117  | 1,44484 | 1,40694 | 1,026618383 | N/A             | N/A       | N/A          | XLOC_I2_003610     |
| A_23_P421054   | 1,60963 | 1,57174 | 1,026611268 | ENST00000489338 | 154313    | NM_001031743 | C6orf165           |
| A_21_P0006476  | 1,53483 | 1,49694 | 1,026611268 | N/A             | N/A       | N/A          | Inc-AKAP17A-1      |
| A_33_P3328863  | 1,49139 | 1,4535  | 1,026611268 | ENST00000599531 | 57469     | NM_020709    | PNMAL2             |
| A_33_P3340109  | 1,51847 | 1,48059 | 1,026604152 | ENST00000398992 | 255649    | N/A          | OOSP1              |
| A_21_P0009227  | 1,5597  | 1,52183 | 1,026597036 | N/A             | N/A       | N/A          | Inc-MPRIP-1        |
| A_22_P00006781 | 1,6531  | 1,61524 | 1,02658992  | ENST00000451438 | N/A       | N/A          | N/A                |
| A_33_P3329686  | 1,54746 | 1,5096  | 1,02658992  | ENST00000406172 | 5413      | NM_001009939 | set-05             |
| A_23_P203445   | 8,33556 | 8,2977  | 1,02658992  | ENST00000540666 | 55293     | NM_001040697 | UEVLD              |
| A_22_P00021947 | 1,42022 | 1,38237 | 1,026582804 | N/A             | N/A       | N/A          | Inc-LRRTM1-1       |
| A_21_P0004005  | 1,60946 | 1,57161 | 1,026582804 | ENST00000504876 | 25859     | N/A          | PART1              |
| A_19_P00320881 | 1,57476 | 1,53691 | 1,026582804 | ENST00000587904 | 100505474 | NR_040025    | LINC01539          |
| A_21_P0002280  | 3,06398 | 3,02614 | 1,026575689 | N/A             | N/A       | N/A          | Inc-GLI2-3         |
| A_33_P3564487  | 1,6306  | 1,59277 | 1,026568573 | N/A             | 285878    | NR_038994    | VSTM2A-OT1         |
| A_33_P3210009  | 1,53753 | 1,4997  | 1,026568573 | ENST00000398112 | 285311    | NM_001007534 | C3orf56            |
| A_21_P0009381  | 1,55991 | 1,52208 | 1,026568573 | N/A             | N/A       | N/A          | Inc-DHRS7B-2       |
| A_33_P3335177  | 1,51695 | 1,47913 | 1,026561457 | ENST00000436072 | 6424      | NM_003014    | SFRP4              |
| A_22_P00000793 | 1,51594 | 1,47813 | 1,026554342 | N/A             | N/A       | BX096751     | Inc-ADSS-1         |
| A_22_P00010883 | 1,66099 | 1,62318 | 1,026554342 | N/A             | N/A       | N/A          | Inc-NPC1-1         |
| A_21_P0008174  | 1,62302 | 1,58521 | 1,026554342 | N/A             | N/A       | N/A          | Inc-PCDH20-4       |

|                |         |         |             |                 |           |              |                       |
|----------------|---------|---------|-------------|-----------------|-----------|--------------|-----------------------|
| A_33_P3256725  | 1,47351 | 1,4357  | 1,026554342 | ENST00000377284 | 8395      | NM_001278253 | PIP5K1B               |
| A_23_P92453    | 1,44023 | 1,40242 | 1,026554342 | ENST00000507839 | 170825    | NM_133267    | GSX2                  |
| A_22_P00013683 | 8,22898 | 8,19118 | 1,026547226 | N/A             | N/A       | BX508466     | Inc-RP11-712L6.5.1-1  |
| A_24_P219552   | 13,0801 | 13,0423 | 1,026547226 | ENST00000357480 | 4779      | NM_003204    | NFE2L1                |
| A_24_P193093   | 1,49315 | 1,45535 | 1,026547226 | ENST00000590323 | 22914     | NM_007360    | KLRK1                 |
| A_33_P3395422  | 1,68533 | 1,64753 | 1,026547226 | N/A             | N/A       | N/A          | N/A                   |
| A_22_P00019263 | 1,61302 | 1,57522 | 1,026547226 | N/A             | 259234    | NR_027695    | DSCR10                |
| A_23_P418015   | 9,89939 | 9,86159 | 1,026547226 | ENST00000413393 | 10982     | NM_014268    | MAPRE2                |
| A_23_P427645   | 1,58141 | 1,54362 | 1,026540111 | ENST00000061240 | 7092      | NM_012464    | TLL1                  |
| A_21_P0003423  | 1,58226 | 1,54448 | 1,026532995 | ENST00000512609 | N/A       | N/A          | N/A                   |
| A_22_P00006269 | 1,44056 | 1,40279 | 1,02652588  | N/A             | N/A       | N/A          | Inc-FAM71A-1          |
| A_33_P3327470  | 4,93555 | 4,89779 | 1,026518765 | N/A             | N/A       | N/A          | N/A                   |
| A_33_P3746734  | 1,45898 | 1,42122 | 1,026518765 | N/A             | 552859    | NR_038901    | LINC00251             |
| A_33_P3256765  | 1,56284 | 1,52508 | 1,026518765 | N/A             | N/A       | N/A          | Inc-STOM-2            |
| A_22_P00021753 | 1,50268 | 1,46493 | 1,026511649 | ENST00000429507 | N/A       | N/A          | N/A                   |
| A_21_P0000720  | 1,44152 | 1,40378 | 1,026504534 | N/A             | 100616530 | NR_038205    | C8orf37-AS1           |
| A_22_P00014058 | 1,64879 | 1,61105 | 1,026504534 | ENST00000569751 | N/A       | N/A          | N/A                   |
| A_21_P0009469  | 1,49579 | 1,45806 | 1,026497419 | N/A             | 100506787 | NR_110762    | LINC01543             |
| A_33_P3289482  | 1,409   | 1,37127 | 1,026497419 | N/A             | 100129697 | NM_001290330 | LOC100129697          |
| A_33_P3307663  | 1,70904 | 1,67131 | 1,026497419 | N/A             | N/A       | BX099628     | N/A                   |
| A_33_P3404829  | 1,6883  | 1,65058 | 1,026490304 | ENST00000475340 | 54777     | BC044661     | CFAP46                |
| A_33_P3421990  | 1,38964 | 1,35192 | 1,026490304 | N/A             | N/A       | N/A          | Inc-OTUD4-1           |
| A_24_P942441   | 1,54671 | 1,509   | 1,026483189 | ENST00000342183 | 9378      | NM_001135659 | NRXN1                 |
| A_24_P314786   | 1,62137 | 1,58366 | 1,026483189 | ENST00000272716 | 57282     | NM_022058    | SLC4A10               |
| A_21_P0012577  | 1,51337 | 1,47566 | 1,026483189 | N/A             | N/A       | N/A          | XLOC_I2_010602        |
| A_22_P00006720 | 1,47889 | 1,44119 | 1,026476074 | N/A             | N/A       | AK093071     | Inc-FRMPD2-1          |
| A_22_P00024840 | 1,46799 | 1,43029 | 1,026476074 | ENST00000439798 | N/A       | N/A          | N/A                   |
| A_22_P00003604 | 1,62833 | 1,59064 | 1,026468959 | N/A             | N/A       | N/A          | Inc-CD300C-1          |
| A_22_P00004684 | 1,73497 | 1,69728 | 1,026468959 | N/A             | N/A       | N/A          | Inc-CTD-2210P24.4.1-2 |
| A_21_P0014291  | 1,62698 | 1,58929 | 1,026468959 | N/A             | N/A       | N/A          | N/A                   |
| A_22_P00020631 | 1,5372  | 1,49952 | 1,026461844 | N/A             | 100188954 | NR_024130    | DNMBP-AS1             |
| A_23_P93960    | 1,48388 | 1,4462  | 1,026461844 | ENST00000452758 | 136242    | NM_001008270 | PRSS37                |
| A_21_P0011019  | 1,62738 | 1,5897  | 1,026461844 | N/A             | N/A       | N/A          | XLOC_I2_002775        |

|                |         |         |             |                 |           |              |                |
|----------------|---------|---------|-------------|-----------------|-----------|--------------|----------------|
| A_22_P00001958 | 5,64874 | 5,61107 | 1,026454729 | ENST00000418770 | 29994     | NR_110586    | BAZ2B          |
| A_21_P0011880  | 7,18067 | 7,143   | 1,026454729 | ENST00000415129 | N/A       | N/A          | N/A            |
| A_23_P208182   | 1,42619 | 1,38852 | 1,026454729 | ENST00000339313 | 89790     | NM_033130    | SIGLEC10       |
| A_23_P44264    | 1,6235  | 1,58583 | 1,026454729 | ENST00000442245 | 2018      | NM_004098    | EMX2           |
| A_33_P3493097  | 1,60843 | 1,57076 | 1,026454729 | N/A             | 648149    | AK123349     | LOC648149      |
| A_21_P0004035  | 1,52842 | 1,49075 | 1,026454729 | ENST00000509602 | N/A       | N/A          | N/A            |
| A_22_P00020048 | 1,63326 | 1,59559 | 1,026454729 | ENST00000437118 | N/A       | N/A          | N/A            |
| A_21_P0011378  | 1,47848 | 1,44082 | 1,026447614 | N/A             | N/A       | N/A          | XLOC_I2_004951 |
| A_22_P00003947 | 1,70062 | 1,66296 | 1,026447614 | ENST00000440698 | 730100    | XR_245003    | LOC730100      |
| A_22_P00006226 | 1,61766 | 1,58001 | 1,026440499 | N/A             | N/A       | N/A          | Inc-FAM50B-1   |
| A_22_P00007487 | 1,47181 | 1,43416 | 1,026440499 | ENST00000526355 | 2977      | NM_001256424 | GUCY1A2        |
| A_21_P0002467  | 1,56876 | 1,53111 | 1,026440499 | N/A             | N/A       | N/A          | Inc-SUCLG1-2   |
| A_22_P00007683 | 3,76781 | 3,73016 | 1,026440499 | ENST00000565305 | 102723640 | XR_424604    | LOC102723640   |
| A_33_P3404236  | 1,47112 | 1,43348 | 1,026433385 | ENST00000618242 | 100127889 | NM_001130446 | C10orf131      |
| A_21_P0006714  | 1,56601 | 1,52837 | 1,026433385 | ENST00000451295 | N/A       | N/A          | N/A            |
| A_22_P00002818 | 1,6755  | 1,63786 | 1,026433385 | ENST00000622970 | 101927070 | NR_126337    | LOC101927070   |
| A_23_P382240   | 1,45888 | 1,42124 | 1,026433385 | ENST00000488505 | 219623    | NM_178505    | TMEM26         |
| A_33_P3334150  | 1,50818 | 1,47055 | 1,02642627  | ENST00000425243 | N/A       | N/A          | N/A            |
| A_33_P3228603  | 1,51694 | 1,47932 | 1,026419155 | N/A             | N/A       | N/A          | N/A            |
| A_33_P3255939  | 1,40707 | 1,36945 | 1,026419155 | N/A             | N/A       | AK093351     | N/A            |
| A_22_P00007475 | 1,70685 | 1,66923 | 1,026419155 | N/A             | N/A       | N/A          | Inc-GTF2I-1    |
| A_22_P00006424 | 1,54448 | 1,50687 | 1,026412041 | ENST00000518970 | N/A       | AK091860     | N/A            |
| A_33_P3452292  | 1,60763 | 1,57002 | 1,026412041 | N/A             | N/A       | AF130090     | N/A            |
| A_22_P00016388 | 1,68021 | 1,6426  | 1,026412041 | N/A             | 100873990 | NR_046608    | HCFC1-AS1      |
| A_33_P3385441  | 1,43418 | 1,39657 | 1,026412041 | N/A             | N/A       | N/A          | N/A            |
| A_33_P3249037  | 1,57368 | 1,53608 | 1,026404926 | ENST00000370354 | 79057     | N/A          | PRRG3          |
| A_32_P41292    | 13,5847 | 13,5471 | 1,026404926 | ENST00000460044 | 7417      | NM_003375    | VDAC2          |
| A_21_P0000504  | 7,19427 | 7,15668 | 1,026397812 | N/A             | 100151684 | NR_023344    | RNU6ATAC       |
| A_22_P00021688 | 1,44358 | 1,40599 | 1,026397812 | N/A             | N/A       | BC038780     | Inc-C2orf49-2  |
| A_22_P00002505 | 1,62133 | 1,58374 | 1,026397812 | ENST00000566607 | N/A       | AK123174     | N/A            |
| A_22_P00004132 | 1,52344 | 1,48585 | 1,026397812 | ENST00000518846 | N/A       | BG719813     | N/A            |
| A_21_P0004646  | 1,58466 | 1,54708 | 1,026390697 | N/A             | N/A       | N/A          | Inc-ANKS1A-1   |
| A_21_P0009414  | 1,65878 | 1,6212  | 1,026390697 | N/A             | N/A       | N/A          | Inc-BTBD17-4   |

|                |         |         |             |                 |           |              |                |
|----------------|---------|---------|-------------|-----------------|-----------|--------------|----------------|
| A_21_P0005346  | 1,502   | 1,46443 | 1,026383583 | N/A             | N/A       | N/A          | Inc-FAM20C-7   |
| A_21_P0003028  | 1,68382 | 1,64625 | 1,026383583 | N/A             | N/A       | N/A          | Inc-CCDC37-1   |
| A_24_P103893   | 1,65071 | 1,61314 | 1,026383583 | ENST00000370546 | 60495     | NM_021828    | HPSE2          |
| A_23_P353679   | 1,52201 | 1,48444 | 1,026383583 | ENST00000392487 | 55891     | NM_018655    | LENEP          |
| A_21_P0008637  | 1,68377 | 1,6462  | 1,026383583 | N/A             | 101928611 | NR_120337    | LINC01413      |
| A_33_P3287108  | 1,49945 | 1,46188 | 1,026383583 | ENST00000321639 | 124842    | XM_006721692 | TMEM132E       |
| A_21_P0009602  | 1,71198 | 1,67442 | 1,026376469 | ENST00000587189 | 101927433 | NR_110779    | LINC01255      |
| A_22_P00014977 | 7,0213  | 6,98375 | 1,026369355 | N/A             | N/A       | N/A          | Inc-SMARCC2-3  |
| A_21_P0007186  | 1,37486 | 1,33732 | 1,02636224  | N/A             | N/A       | N/A          | Inc-NELL1-1    |
| A_21_P0011771  | 1,55717 | 1,51964 | 1,026355126 | ENST00000473762 | N/A       | N/A          | N/A            |
| A_21_P0010629  | 1,70496 | 1,66743 | 1,026355126 | N/A             | N/A       | N/A          | XL0C_I2_000961 |
| A_21_P0002755  | 1,64548 | 1,60796 | 1,026348012 | ENST00000496674 | N/A       | N/A          | N/A            |
| A_22_P00001599 | 1,62959 | 1,59207 | 1,026348012 | ENST00000529491 | N/A       | N/A          | N/A            |
| A_23_P500433   | 5,29597 | 5,25845 | 1,026348012 | ENST00000485975 | 64170     | NM_052813    | CARD9          |
| A_33_P3264740  | 1,58218 | 1,54467 | 1,026340898 | N/A             | 100132850 | AK126791     | LOC100132850   |
| A_23_P114808   | 11,2941 | 11,2566 | 1,026333784 | ENST00000478505 | 51102     | NM_001024732 | MECR           |
| A_33_P3356557  | 1,64671 | 1,60921 | 1,026333784 | ENST00000333976 | 219438    | NM_001001952 | OR5D18         |
| A_22_P00019700 | 1,45283 | 1,41534 | 1,02632667  | ENST00000414407 | 100874158 | N/A          | LINC00398      |
| A_22_P00015136 | 1,46858 | 1,43109 | 1,02632667  | N/A             | N/A       | N/A          | Inc-SOCS2-2    |
| A_22_P00003322 | 1,50964 | 1,47216 | 1,026319556 | N/A             | N/A       | N/A          | Inc-CARNS1-1   |
| A_23_P374226   | 1,54919 | 1,51171 | 1,026319556 | ENST00000298181 | 280658    | NM_173358    | SSX7           |
| A_33_P3385121  | 1,57769 | 1,54022 | 1,026312442 | N/A             | 100129322 | AK127678     | LOC100129322   |
| A_24_P273489   | 1,60526 | 1,56779 | 1,026312442 | ENST00000372150 | 387694    | NM_207372    | SH2D4B         |
| A_22_P00010334 | 1,44375 | 1,40629 | 1,026305328 | N/A             | N/A       | N/A          | Inc-MYBBP1A-1  |
| A_22_P00012368 | 1,62318 | 1,58572 | 1,026305328 | N/A             | N/A       | BX105856     | Inc-PREX2-1    |
| A_33_P3273737  | 1,5866  | 1,54914 | 1,026305328 | N/A             | 100129449 | AF130063     | LOC100129449   |
| A_33_P3370989  | 1,48795 | 1,4505  | 1,026298214 | N/A             | N/A       | AF210650     | N/A            |
| A_33_P3371553  | 1,55972 | 1,52227 | 1,026298214 | N/A             | 642757    | NR_122047    | TBC1D22A-AS1   |
| A_21_P0001890  | 1,57343 | 1,536   | 1,026283987 | ENST00000414442 | 150568    | N/A          | LINC01102      |
| A_23_P86064    | 1,54435 | 1,50692 | 1,026283987 | ENST00000468172 | 79802     | NM_024746    | HHIPL2         |
| A_23_P144549   | 1,66321 | 1,62581 | 1,026262646 | ENST00000226284 | 3381      | NM_004967    | IBSP           |
| A_33_P3722782  | 1,66192 | 1,62453 | 1,026255533 | N/A             | 220980    | NR_033842    | TMEM72-AS1     |
| A_21_P0008163  | 1,475   | 1,43762 | 1,026248419 | N/A             | N/A       | N/A          | Inc-INTS6-2    |

|                |         |         |             |                 |           |              |                |
|----------------|---------|---------|-------------|-----------------|-----------|--------------|----------------|
| A_21_P0003847  | 1,47435 | 1,43697 | 1,026248419 | N/A             | N/A       | N/A          | Inc-EGF-1      |
| A_33_P3876414  | 1,66111 | 1,62373 | 1,026248419 | N/A             | 53400     | AJ272176     | SMG6-IT1       |
| A_33_P3274313  | 1,58034 | 1,54296 | 1,026248419 | ENST00000547175 | N/A       | M20839       | N/A            |
| A_21_P0008676  | 1,38588 | 1,34851 | 1,026241306 | N/A             | 101927025 | XR_243235    | LOC101927025   |
| A_33_P3217845  | 1,61151 | 1,57415 | 1,026234193 | ENST00000396188 | 339967    | NM_182606    | TMPRSS11A      |
| A_22_P00009450 | 1,60142 | 1,56407 | 1,026227079 | N/A             | N/A       | N/A          | Inc-MAB21L1-1  |
| A_21_P0002109  | 1,4409  | 1,40355 | 1,026227079 | ENST00000432431 | N/A       | N/A          | N/A            |
| A_33_P3316088  | 1,90324 | 1,86589 | 1,026227079 | N/A             | N/A       | N/A          | Inc-BTF3L4-2   |
| A_21_P0008098  | 1,4393  | 1,40195 | 1,026227079 | N/A             | N/A       | N/A          | Inc-SLITRK5-11 |
| A_33_P3389518  | 1,44692 | 1,40958 | 1,026219966 | ENST00000370434 | 1244      | U66683       | ABCC2          |
| A_33_P3290139  | 1,61633 | 1,57899 | 1,026219966 | ENST00000451215 | 142685    | NM_001290258 | ASB15          |
| A_21_P0002233  | 1,65516 | 1,61782 | 1,026219966 | N/A             | N/A       | N/A          | Inc-MEIS1-3    |
| A_21_P0004712  | 1,56576 | 1,52842 | 1,026219966 | ENST00000413324 | 102724357 | XR_426116    | LOC102724357   |
| A_23_P92909    | 1,43669 | 1,39935 | 1,026219966 | ENST00000621437 | 404203    | NM_205841    | SPINK6         |
| A_33_P3372004  | 1,65125 | 1,61392 | 1,026212853 | ENST00000268389 | 10261     | NM_005849    | IGSF6          |
| A_21_P0008027  | 1,54154 | 1,50421 | 1,026212853 | N/A             | N/A       | N/A          | Inc-FGF9-2     |
| A_22_P00004500 | 1,57484 | 1,53753 | 1,026198627 | N/A             | N/A       | N/A          | Inc-CPPED1-4   |
| A_22_P00014275 | 1,38323 | 1,34592 | 1,026198627 | N/A             | N/A       | N/A          | Inc-SENP8-1    |
| A_23_P24997    | 14,0795 | 14,0422 | 1,026191514 | ENST00000552713 | 1019      | NM_000075    | CDK4           |
| A_32_P106933   | 3,9431  | 3,9058  | 1,026191514 | ENST00000573319 | 400500    | NR_024049    | BCAR4          |
| A_21_P0010422  | 1,51125 | 1,47395 | 1,026191514 | N/A             | N/A       | N/A          | Inc-GRAMD4-1   |
| A_23_P329740   | 17,5582 | 17,5209 | 1,026191514 | ENST00000339647 | 7316      | NM_021009    | UBC            |
| A_22_P00004082 | 1,57186 | 1,53457 | 1,026184401 | ENST00000440189 | N/A       | N/A          | N/A            |
| A_33_P3395788  | 1,54967 | 1,51238 | 1,026184401 | N/A             | N/A       | N/A          | N/A            |
| A_21_P0010607  | 1,60401 | 1,56672 | 1,026184401 | N/A             | N/A       | N/A          | XLOC_I2_000866 |
| A_33_P3305973  | 1,49853 | 1,46124 | 1,026184401 | ENST00000473404 | N/A       | N/A          | N/A            |
| A_21_P0009397  | 1,53116 | 1,49388 | 1,026177288 | ENST00000587575 | 101928674 | NR_110845    | LOC101928674   |
| A_33_P3253209  | 1,63335 | 1,59608 | 1,026170175 | ENST00000417432 | N/A       | N/A          | N/A            |
| A_22_P00016632 | 1,44108 | 1,40382 | 1,026163062 | ENST00000567486 | N/A       | XR_241158    | N/A            |
| A_21_P0006492  | 1,59684 | 1,55959 | 1,026155949 | N/A             | N/A       | N/A          | Inc-MAOA-2     |
| A_23_P312505   | 1,62514 | 1,58789 | 1,026155949 | ENST00000526139 | 7299      | NM_000372    | TYR            |
| A_22_P00003499 | 6,95703 | 6,91979 | 1,026148836 | ENST00000529607 | 100506282 | AL359570     | LOC100506282   |
| A_22_P00017011 | 1,53194 | 1,4947  | 1,026148836 | N/A             | 440556    | NR_015440    | LINC00982      |



|                |         |         |             |                 |           |           |                |
|----------------|---------|---------|-------------|-----------------|-----------|-----------|----------------|
| A_21_P0005049  | 1,37607 | 1,33883 | 1,026148836 | N/A             | N/A       | N/A       | Inc-SLC22A16-1 |
| A_21_P0000786  | 1,38016 | 1,34292 | 1,026148836 | N/A             | 100131047 | NR_038401 | LOC100131047   |
| A_33_P3363710  | 1,65025 | 1,61302 | 1,026141724 | N/A             | 100128075 | AK130927  | LOC100128075   |
| A_22_P00004370 | 1,61402 | 1,57679 | 1,026141724 | N/A             | 101928358 | NR_110652 | LOC101928358   |
| A_21_P0014192  | 7,84961 | 7,8124  | 1,026127499 | N/A             | N/A       | N/A       | N/A            |
| A_23_P150768   | 1,4857  | 1,44849 | 1,026127499 | ENST00000341411 | 11309     | NM_007256 | SLCO2B1        |
| A_23_P553      | 10,5558 | 10,5186 | 1,026120386 | ENST00000467982 | 80222     | NM_025150 | TARS2          |
| A_21_P0007165  | 1,40047 | 1,36327 | 1,026120386 | N/A             | N/A       | N/A       | Inc-ATHL1-1    |
| A_22_P00018717 | 1,387   | 1,3498  | 1,026120386 | N/A             | N/A       | N/A       | Inc-DHRS7-2    |
| A_21_P0008517  | 6,92427 | 6,88707 | 1,026120386 | N/A             | 100506476 | N/A       | LOC100506476   |
| A_22_P00007554 | 1,56878 | 1,53158 | 1,026120386 | ENST00000602324 | 102238594 | NR_108100 | SPACA6P-AS     |
| A_22_P00005670 | 1,63237 | 1,59517 | 1,026120386 | N/A             | 51352     | NR_120549 | WT1-AS         |
| A_22_P00001805 | 1,63312 | 1,59592 | 1,026120386 | ENST00000523103 | 100874051 | NR_047509 | LZTS1-AS1      |
| A_22_P00014432 | 1,71261 | 1,67542 | 1,026113273 | N/A             | N/A       | N/A       | Inc-SGTB-2     |
| A_33_P3271651  | 1,5761  | 1,53892 | 1,026106161 | ENST00000471170 | 3115      | NM_002121 | HLA-DPB1       |
| A_21_P0003855  | 1,44247 | 1,40529 | 1,026106161 | N/A             | N/A       | N/A       | Inc-FAM160A1-7 |
| A_21_P0003875  | 1,54747 | 1,51029 | 1,026106161 | N/A             | N/A       | N/A       | Inc-ZFP42-2    |
| A_24_P140057   | 1,46685 | 1,42968 | 1,026099049 | ENST00000410059 | 57628     | NM_020868 | DPP10          |
| A_21_P0004415  | 1,64012 | 1,60295 | 1,026099049 | N/A             | N/A       | N/A       | Inc-FAM169A-1  |
| A_21_P0002913  | 1,39507 | 1,35791 | 1,026091936 | N/A             | N/A       | N/A       | Inc-DCUN1D1-2  |
| A_22_P00009597 | 1,48036 | 1,4432  | 1,026091936 | N/A             | N/A       | N/A       | Inc-MAPK6-8    |
| A_22_P00014839 | 1,39145 | 1,3543  | 1,026084824 | N/A             | N/A       | N/A       | Inc-SLC47A2-1  |
| A_22_P00014630 | 1,3809  | 1,34375 | 1,026084824 | ENST00000552378 | N/A       | N/A       | N/A            |
| A_33_P8914999  | 1,5282  | 1,49106 | 1,026077712 | N/A             | 101928372 | NR_110695 | LOC101928372   |
| A_21_P0004082  | 1,60297 | 1,56584 | 1,0260706   | ENST00000521116 | 3187      | N/A       | HNRNPH1        |
| A_19_P00801407 | 1,66956 | 1,63243 | 1,0260706   | ENST00000506431 | N/A       | N/A       | N/A            |
| A_22_P00019443 | 1,57701 | 1,53989 | 1,026063487 | N/A             | N/A       | N/A       | Inc-ABI1-4     |
| A_33_P3319251  | 1,57946 | 1,54234 | 1,026063487 | ENST00000556397 | N/A       | N/A       | N/A            |
| A_21_P0006941  | 2,75045 | 2,71333 | 1,026063487 | N/A             | 102723337 | XR_424194 | LOC102723337   |
| A_21_P0009986  | 1,51097 | 1,47386 | 1,026056375 | ENST00000441660 | 100506470 | NR_109919 | LOC100506470   |
| A_22_P00008414 | 1,58052 | 1,54341 | 1,026056375 | ENST00000554526 | N/A       | N/A       | N/A            |
| A_33_P3292560  | 14,7978 | 14,7607 | 1,026049263 | ENST00000615505 | 6834      | NM_003172 | SURF1          |
| A_21_P0005789  | 1,50122 | 1,46412 | 1,026049263 | ENST00000518926 | N/A       | N/A       | N/A            |

|                |         |         |             |                 |           |              |                |
|----------------|---------|---------|-------------|-----------------|-----------|--------------|----------------|
| A_23_P17190    | 3,28233 | 3,24525 | 1,026035039 | ENST00000284669 | 10324     | NM_006063    | KLHL41         |
| A_22_P00019827 | 1,57981 | 1,54274 | 1,026027927 | N/A             | 101929614 | XR_245646    | LOC101929614   |
| A_21_P0006763  | 1,71467 | 1,67761 | 1,026020815 | ENST00000444155 | N/A       | N/A          | N/A            |
| A_22_P00016594 | 1,55936 | 1,5223  | 1,026020815 | ENST00000418591 | 102723329 | XR_425529    | LOC102723329   |
| A_22_P00016618 | 1,68153 | 1,64448 | 1,026013704 | ENST00000445278 | N/A       | N/A          | N/A            |
| A_22_P00005189 | 1,63904 | 1,60199 | 1,026013704 | ENST00000561261 | N/A       | N/A          | N/A            |
| A_33_P3329939  | 1,44813 | 1,41109 | 1,026006592 | ENST00000430626 | N/A       | N/A          | N/A            |
| A_22_P00011418 | 1,50594 | 1,46891 | 1,02599948  | N/A             | N/A       | N/A          | Inc-PAK6-1     |
| A_33_P3276818  | 1,5743  | 1,53729 | 1,025985257 | ENST00000370618 | 346007    | NM_001142800 | EYS            |
| A_22_P00008843 | 1,44339 | 1,40639 | 1,025978145 | ENST00000413993 | N/A       | N/A          | N/A            |
| A_24_P359671   | 1,38826 | 1,35127 | 1,025971034 | ENST00000294649 | 22854     | AB023193     | NTNG1          |
| A_23_P368886   | 1,56    | 1,52302 | 1,025963922 | ENST00000305031 | 337876    | NM_175856    | CHSY3          |
| A_21_P0007488  | 1,60923 | 1,57225 | 1,025963922 | ENST00000551399 | 101928420 | NR_120468    | LINC01490      |
| A_22_P00012636 | 1,52911 | 1,49213 | 1,025963922 | ENST00000564354 | N/A       | N/A          | N/A            |
| A_24_P400842   | 1,44044 | 1,40347 | 1,025956811 | ENST00000569510 | 57188     | NM_207517    | ADAMTSL3       |
| A_22_P00003055 | 1,4414  | 1,40444 | 1,0259497   | N/A             | N/A       | N/A          | Inc-C8orf17-1  |
| A_33_P3329356  | 1,60335 | 1,56639 | 1,0259497   | N/A             | N/A       | N/A          | Inc-HADH-1     |
| A_22_P00003789 | 1,62774 | 1,59079 | 1,025942588 | N/A             | N/A       | N/A          | Inc-CDK5R1-3   |
| A_21_P0007418  | 1,49801 | 1,46106 | 1,025942588 | N/A             | N/A       | N/A          | Inc-ETS1-2     |
| A_21_P0004952  | 1,56267 | 1,52572 | 1,025942588 | N/A             | N/A       | N/A          | Inc-PHACTR2-2  |
| A_22_P00005623 | 1,49048 | 1,45353 | 1,025942588 | N/A             | N/A       | N/A          | Inc-EGR3-1     |
| A_21_P0010908  | 1,62949 | 1,59254 | 1,025942588 | N/A             | N/A       | N/A          | XLOC_I2_002160 |
| A_33_P3394223  | 1,57146 | 1,53452 | 1,025935477 | N/A             | N/A       | BC087847     | N/A            |
| A_21_P0013034  | 1,63848 | 1,60155 | 1,025928366 | ENST00000368966 | 221262    | N/A          | CCDC162P       |
| A_22_P00025756 | 1,41668 | 1,37975 | 1,025928366 | ENST00000546699 | N/A       | N/A          | N/A            |
| A_21_P0006856  | 1,64737 | 1,61045 | 1,025921255 | N/A             | N/A       | N/A          | Inc-ANKRD30A-6 |
| A_21_P0013897  | 1,71388 | 1,67696 | 1,025921255 | N/A             | N/A       | N/A          | XLOC_I2_015952 |
| A_22_P00011940 | 8,03045 | 7,99353 | 1,025921255 | ENST00000541293 | N/A       | N/A          | N/A            |
| A_22_P00012460 | 1,5132  | 1,47629 | 1,025914143 | N/A             | N/A       | BC042014     | Inc-PRR11-2    |
| A_22_P00009036 | 1,64258 | 1,60567 | 1,025914143 | ENST00000511735 | N/A       | N/A          | N/A            |
| A_33_P3256695  | 9,26574 | 9,22883 | 1,025914143 | ENST00000410080 | 55660     | NM_017892    | PRPF40A        |
| A_33_P3270172  | 1,70777 | 1,67087 | 1,025907032 | N/A             | 127841    | NR_027022    | LINC00628      |
| A_21_P0000467  | 1,64079 | 1,60389 | 1,025907032 | N/A             | N/A       | N/A          | N/A            |

|                |         |         |             |                 |           |              |                  |
|----------------|---------|---------|-------------|-----------------|-----------|--------------|------------------|
| A_33_P3365582  | 1,45524 | 1,41834 | 1,025907032 | ENST00000407811 | 25780     | NM_001139488 | RASGRP3          |
| A_23_P217088   | 10,722  | 10,6851 | 1,025907032 | ENST00000550143 | 203       | NM_000476    | AK1              |
| A_22_P00012950 | 1,53135 | 1,49446 | 1,025899921 | N/A             | N/A       | BU154703     | Inc-RDX-2        |
| A_33_P3380702  | 1,45623 | 1,41934 | 1,025899921 | ENST00000333973 | 219437    | NM_001004738 | OR5L1            |
| A_21_P0002063  | 1,47684 | 1,43997 | 1,0258857   | ENST00000415448 | N/A       | N/A          | N/A              |
| A_21_P0006210  | 1,51482 | 1,47796 | 1,025878589 | N/A             | N/A       | N/A          | Inc-ACTL7A-2     |
| A_21_P0000675  | 1,54268 | 1,50582 | 1,025878589 | ENST00000528139 | 100287846 | NR_037168    | LOC100287846     |
| A_21_P0004911  | 1,45939 | 1,42254 | 1,025871478 | N/A             | N/A       | N/A          | Inc-KLHL32-4     |
| A_33_P3263202  | 1,58412 | 1,54727 | 1,025871478 | N/A             | N/A       | N/A          | N/A              |
| A_33_P3400700  | 1,58371 | 1,54686 | 1,025871478 | ENST00000356767 | 375611    | NM_206885    | SLC26A5          |
| A_24_P655849   | 1,4425  | 1,40565 | 1,025871478 | ENST00000379826 | 4093      | NM_001127217 | SMAD9            |
| A_33_P3405769  | 1,55313 | 1,51628 | 1,025871478 | ENST00000432826 | 441864    | NM_001135686 | TARM1            |
| A_21_P0003641  | 1,75427 | 1,71744 | 1,025857256 | ENST00000419264 | N/A       | N/A          | N/A              |
| A_21_P0009705  | 1,73602 | 1,6992  | 1,025850146 | N/A             | N/A       | N/A          | Inc-URI1-1       |
| A_21_P0000995  | 1,53351 | 1,4967  | 1,025843035 | N/A             | N/A       | N/A          | Inc-ABCD3-4      |
| A_19_P00802607 | 1,42272 | 1,38591 | 1,025843035 | N/A             | N/A       | N/A          | Inc-HK2-1        |
| A_23_P112341   | 10,239  | 10,2022 | 1,025835924 | ENST00000325875 | 80010     | NM_024945    | RMI1             |
| A_23_P102083   | 1,44808 | 1,41128 | 1,025835924 | ENST00000433157 | 66037     | NM_033030    | BOLL             |
| A_23_P424126   | 1,59771 | 1,56091 | 1,025835924 | ENST00000315475 | 30832     | NM_014594    | ZNF354C          |
| A_22_P00013827 | 5,62817 | 5,59137 | 1,025835924 | ENST00000427055 | 645784    | NR_015424    | ANKRD36BP2       |
| A_21_P0004464  | 1,68545 | 1,64866 | 1,025828814 | N/A             | N/A       | N/A          | Inc-PANK3-1      |
| A_21_P0013594  | 1,61133 | 1,57454 | 1,025828814 | N/A             | N/A       | N/A          | XLOC_I2_014865   |
| A_33_P3381398  | 1,51369 | 1,4769  | 1,025828814 | ENST00000277905 | 11023     | NM_199131    | VAX1             |
| A_23_P322756   | 1,47928 | 1,4425  | 1,025821703 | ENST00000373644 | 80312     | NM_030625    | TET1             |
| A_23_P7835     | 1,67628 | 1,6395  | 1,025821703 | ENST00000369303 | 2045      | NM_004440    | EPHA7            |
| A_23_P85269    | 1,50392 | 1,46714 | 1,025821703 | ENST00000615779 | 7273      | NM_133378    | TTN              |
| A_19_P00810274 | 1,75508 | 1,71831 | 1,025814593 | ENST00000420725 | 101928201 | N/A          | LOC101928201     |
| A_22_P00011245 | 1,59213 | 1,55536 | 1,025814593 | ENST00000439471 | N/A       | N/A          | N/A              |
| A_22_P00001389 | 1,68971 | 1,65295 | 1,025807483 | N/A             | N/A       | N/A          | Inc-AP3S1-5      |
| A_33_P3369894  | 1,59497 | 1,55821 | 1,025807483 | N/A             | N/A       | AK125616     | N/A              |
| A_33_P3268167  | 9,37909 | 9,34233 | 1,025807483 | N/A             | N/A       | N/A          | N/A              |
| A_33_P3270628  | 3,00887 | 2,97212 | 1,025800372 | N/A             | N/A       | BE468260     | Inc-EYA3-1       |
| A_22_P00025015 | 1,49976 | 1,46301 | 1,025800372 | N/A             | N/A       | DA528960     | Inc-AC117834.1-1 |

|                |         |         |             |                 |           |              |                     |
|----------------|---------|---------|-------------|-----------------|-----------|--------------|---------------------|
| A_33_P3301124  | 1,58905 | 1,5523  | 1,025800372 | N/A             | N/A       | N/A          | N/A                 |
| A_21_P0001532  | 1,5772  | 1,54045 | 1,025800372 | N/A             | N/A       | N/A          | Inc-RP4-604K5.1.1-5 |
| A_33_P3246829  | 9,3987  | 9,36196 | 1,025793262 | ENST00000409930 | 3557      | NM_173843    | IL1RN               |
| A_21_P0011628  | 1,42015 | 1,38341 | 1,025793262 | ENST00000455460 | 102723487 | NR_110874    | LINC01497           |
| A_21_P0001833  | 1,66052 | 1,62378 | 1,025793262 | ENST00000444804 | N/A       | N/A          | N/A                 |
| A_22_P00016097 | 1,54152 | 1,50479 | 1,025786152 | ENST00000432505 | 152024    | NR_026834    | LINC00691           |
| A_32_P320247   | 1,66794 | 1,63123 | 1,025771931 | ENST00000242994 | 58158     | NM_021191    | NEUROD4             |
| A_21_P0001285  | 1,58677 | 1,55006 | 1,025771931 | N/A             | N/A       | N/A          | Inc-UTP11L-2        |
| A_23_P142070   | 1,3763  | 1,33959 | 1,025771931 | ENST00000621731 | 26526     | NM_012466    | TSPAN16             |
| A_23_P200252   | 10,0702 | 10,0335 | 1,025764821 | ENST00000479125 | 84284     | NM_032324    | NTPCR               |
| A_23_P132004   | 1,56767 | 1,53097 | 1,025764821 | ENST00000490499 | 128861    | NM_178466    | BPIFA3              |
| A_21_P0009261  | 1,70438 | 1,66769 | 1,025757711 | N/A             | N/A       | N/A          | Inc-MSI2-2          |
| A_33_P3418846  | 1,49188 | 1,45519 | 1,025757711 | ENST00000456608 | N/A       | N/A          | N/A                 |
| A_22_P00009394 | 1,56361 | 1,52692 | 1,025757711 | ENST00000555313 | N/A       | N/A          | N/A                 |
| A_21_P0008608  | 1,57786 | 1,54118 | 1,025750601 | N/A             | N/A       | N/A          | Inc-C15orf41-6      |
| A_21_P0006842  | 1,67403 | 1,63736 | 1,025743491 | N/A             | N/A       | N/A          | Inc-KIAA1217-1      |
| A_22_P00005298 | 1,52387 | 1,4872  | 1,025743491 | ENST00000440208 | N/A       | N/A          | N/A                 |
| A_22_P00003733 | 1,57313 | 1,53646 | 1,025743491 | ENST00000561595 | N/A       | N/A          | N/A                 |
| A_21_P0003787  | 1,57816 | 1,5415  | 1,025736382 | N/A             | N/A       | N/A          | Inc-FBXW7-2         |
| A_33_P3340655  | 1,62041 | 1,58376 | 1,025729272 | ENST00000536676 | 114792    | NM_052904    | KLHL32              |
| A_22_P00005228 | 1,62438 | 1,58773 | 1,025729272 | ENST00000554369 | 100507242 | XR_429410    | SNHG23              |
| A_23_P212089   | 9,28119 | 9,24454 | 1,025729272 | ENST00000326172 | 64332     | NM_031419    | NFKBIZ              |
| A_21_P0009436  | 1,6344  | 1,59776 | 1,025722162 | N/A             | N/A       | N/A          | Inc-CETN1-1         |
| A_22_P00012444 | 1,54674 | 1,5101  | 1,025722162 | ENST00000456240 | N/A       | N/A          | N/A                 |
| A_22_P00020667 | 1,55475 | 1,51811 | 1,025722162 | N/A             | N/A       | CD244325     | Inc-NAPG-3          |
| A_22_P00002530 | 1,51665 | 1,48001 | 1,025722162 | ENST00000585243 | 101928325 | XR_243591    | LOC101928325        |
| A_22_P00001390 | 1,57699 | 1,54035 | 1,025722162 | N/A             | N/A       | BC017346     | Inc-AP3S1-6         |
| A_23_P130158   | 9,45506 | 9,41845 | 1,025700833 | ENST00000611547 | 7473      | NM_030753    | WNT3                |
| A_23_P361744   | 1,52572 | 1,48911 | 1,025700833 | ENST00000380622 | 92552     | NM_001135995 | ATXN3L              |
| A_22_P00012144 | 1,52667 | 1,49006 | 1,025700833 | N/A             | N/A       | BX116146     | Inc-POLR3E-1        |
| A_22_P00013110 | 1,48982 | 1,45322 | 1,025693723 | N/A             | N/A       | N/A          | Inc-RIOK2-1         |
| A_24_P207995   | 1,65476 | 1,61818 | 1,025679504 | ENST00000361699 | 3897      | NM_000425    | L1CAM               |
| A_21_P0007003  | 1,57372 | 1,53714 | 1,025679504 | N/A             | N/A       | N/A          | Inc-C10orf105-2     |

|                |         |         |             |                 |           |              |                       |
|----------------|---------|---------|-------------|-----------------|-----------|--------------|-----------------------|
| A_33_P3245671  | 1,37433 | 1,33775 | 1,025679504 | N/A             | 100127940 | AK090626     | LOC100127940          |
| A_21_P0004033  | 1,4646  | 1,42802 | 1,025679504 | ENST00000513812 | N/A       | N/A          | N/A                   |
| A_21_P0010610  | 1,62184 | 1,58526 | 1,025679504 | N/A             | N/A       | N/A          | XLOC_I2_000894        |
| A_21_P0004552  | 1,39389 | 1,35732 | 1,025672395 | ENST00000505443 | 285577    | NR_033898    | LINC01019             |
| A_33_P3418631  | 1,57555 | 1,53899 | 1,025665285 | ENST00000462928 | 647107    | N/A          | LINC01192             |
| A_21_P0004399  | 1,65142 | 1,61487 | 1,025658176 | N/A             | N/A       | N/A          | Inc-PLK2-1            |
| A_33_P3266739  | 1,68854 | 1,652   | 1,025651067 | ENST00000604724 | 401492    | NR_033863    | LINC01235             |
| A_33_P3240115  | 5,57367 | 5,53713 | 1,025651067 | ENST00000378719 | 23176     | NM_001098811 | set-08                |
| A_33_P3314081  | 1,54928 | 1,51275 | 1,025643957 | N/A             | N/A       | DA959652     | N/A                   |
| A_23_P96658    | 1,62513 | 1,58862 | 1,025629739 | ENST00000253320 | 246126    | NR_045128    | TXLNGY                |
| A_33_P3385081  | 1,37688 | 1,34038 | 1,02562263  | ENST00000409243 | N/A       | BX119026     | N/A                   |
| A_33_P3308468  | 1,62598 | 1,58948 | 1,02562263  | ENST00000326010 | 51733     | NM_016327    | UPB1                  |
| A_21_P0003661  | 1,65062 | 1,61412 | 1,02562263  | N/A             | N/A       | N/A          | Inc-LSM6-1            |
| A_24_P89512    | 12,1522 | 12,1157 | 1,02562263  | ENST00000527613 | 9774      | NM_014739    | BCLAF1                |
| A_21_P0005106  | 1,40408 | 1,36759 | 1,025615521 | N/A             | N/A       | N/A          | Inc-BMP6-9            |
| A_33_P3401169  | 4,75529 | 4,7188  | 1,025615521 | ENST00000331828 | N/A       | N/A          | N/A                   |
| A_22_P00013277 | 1,45328 | 1,4168  | 1,025608412 | N/A             | N/A       | N/A          | Inc-RP11-105C20.2.1-1 |
| A_21_P0001359  | 1,60997 | 1,57349 | 1,025608412 | N/A             | N/A       | N/A          | Inc-PRMT6-2           |
| A_22_P00010273 | 1,60201 | 1,56555 | 1,025594194 | ENST00000564469 | N/A       | N/A          | N/A                   |
| A_22_P00011767 | 1,45816 | 1,4217  | 1,025594194 | ENST00000431209 | N/A       | N/A          | N/A                   |
| A_21_P0006957  | 1,57592 | 1,53946 | 1,025594194 | N/A             | N/A       | N/A          | Inc-AKR1C2-3          |
| A_22_P00015788 | 1,56653 | 1,53007 | 1,025594194 | N/A             | N/A       | N/A          | Inc-TARBP1-3          |
| A_33_P3228977  | 1,4584  | 1,42195 | 1,025587085 | ENST00000382893 | 7404      | BC012581     | UTY                   |
| A_22_P00004727 | 1,55425 | 1,5178  | 1,025587085 | N/A             | N/A       | BX104750     | Inc-CTH-7             |
| A_22_P00018396 | 1,64289 | 1,60645 | 1,025579976 | N/A             | 101929227 | XR_246492    | LOC101929227          |
| A_21_P0005286  | 1,63687 | 1,60043 | 1,025579976 | ENST00000418764 | N/A       | N/A          | N/A                   |
| A_33_P3414494  | 1,60421 | 1,56777 | 1,025579976 | N/A             | N/A       | N/A          | N/A                   |
| A_22_P00022419 | 1,57668 | 1,54025 | 1,025572868 | N/A             | 100874107 | NR_046378    | MTUS2-AS1             |
| A_22_P00008082 | 1,65861 | 1,62219 | 1,025565759 | N/A             | N/A       | N/A          | Inc-IKZF2-5           |
| A_22_P00003330 | 1,40235 | 1,36593 | 1,025565759 | N/A             | 101927417 | XR_425126    | LOC101927417          |
| A_22_P00011005 | 1,53921 | 1,5028  | 1,02555865  | N/A             | N/A       | N/A          | Inc-NSRP1-1           |
| A_21_P0009272  | 1,45127 | 1,41486 | 1,02555865  | ENST00000569279 | 101928343 | XR_424867    | LOC101928343          |
| A_33_P3383836  | 1,45223 | 1,41583 | 1,025551542 | ENST00000555170 | 114088    | NM_015163    | TRIM9                 |

|                |         |         |             |                 |           |              |                |
|----------------|---------|---------|-------------|-----------------|-----------|--------------|----------------|
| A_33_P3416757  | 1,49591 | 1,45951 | 1,025551542 | ENST00000348262 | 5618      | NM_001204315 | PRLR           |
| A_33_P3275330  | 6,83906 | 6,80266 | 1,025551542 | ENST00000492768 | 65220     | NM_023018    | NADK           |
| A_24_P917833   | 13,0932 | 13,0568 | 1,025551542 | ENST00000303575 | 10972     | NM_006827    | TMED10         |
| A_21_P0011996  | 1,51218 | 1,47579 | 1,025544433 | ENST00000444955 | 100506274 | N/A          | LOC100506274   |
| A_22_P00022951 | 1,65482 | 1,61843 | 1,025544433 | N/A             | N/A       | N/A          | Inc-SLC6A9-1   |
| A_22_P00020405 | 1,68203 | 1,64564 | 1,025544433 | N/A             | N/A       | N/A          | Inc-FAM78A-3   |
| A_22_P00024884 | 1,52929 | 1,49291 | 1,025537325 | N/A             | 101928627 | NR_110412    | LOC101928627   |
| A_24_P203103   | 1,50805 | 1,47167 | 1,025537325 | ENST00000371139 | 4068      | NM_002351    | SH2D1A         |
| A_21_P0007356  | 1,6246  | 1,58823 | 1,025530216 | N/A             | N/A       | N/A          | Inc-FTH1-1     |
| A_33_P3209541  | 3,97476 | 3,93839 | 1,025530216 | ENST00000534167 | 340390    | NR_024207    | KIAA1875       |
| A_23_P91970    | 1,38348 | 1,34712 | 1,025523108 | ENST00000356517 | 344752    | NM_207365    | AADACL2        |
| A_21_P0003671  | 1,60563 | 1,56927 | 1,025523108 | N/A             | N/A       | N/A          | Inc-NPY5R-2    |
| A_21_P0002392  | 1,56712 | 1,53077 | 1,025515999 | ENST00000592229 | N/A       | N/A          | N/A            |
| A_33_P3417215  | 1,51573 | 1,47939 | 1,025508891 | ENST00000378431 | 971       | AK309268     | CD72           |
| A_21_P0005890  | 1,37288 | 1,33655 | 1,025501783 | N/A             | N/A       | N/A          | Inc-EXT1-3     |
| A_22_P00008017 | 1,65994 | 1,62361 | 1,025501783 | N/A             | N/A       | N/A          | Inc-IFT20-2    |
| A_33_P3279539  | 1,44211 | 1,40579 | 1,025494675 | ENST00000416110 | 252949    | NR_001526    | TTY17A         |
| A_24_P397613   | 1,48799 | 1,45168 | 1,025487566 | ENST00000519613 | 4988      | NM_001008504 | OPRM1          |
| A_23_P154315   | 12,0127 | 11,9764 | 1,025480458 | ENST00000258455 | 64965     | NM_182640    | MRPS9          |
| A_22_P00017074 | 3,80015 | 3,76385 | 1,025480458 | N/A             | 100874085 | NR_046633    | NUCB1-AS1      |
| A_33_P3210488  | 1,58086 | 1,54457 | 1,02547335  | ENST00000409809 | 1293      | NM_004369    | COL6A3         |
| A_33_P3338392  | 1,62219 | 1,58591 | 1,025466242 | ENST00000489661 | 63977     | NM_022115    | PRDM15         |
| A_23_P126416   | 1,58915 | 1,55287 | 1,025466242 | ENST00000372476 | 7075      | NM_005424    | TIE1           |
| A_23_P316612   | 4,37759 | 4,34132 | 1,025459134 | ENST00000312233 | 148979    | NM_147193    | GLIS1          |
| A_21_P0005888  | 1,55678 | 1,52051 | 1,025459134 | N/A             | N/A       | N/A          | Inc-EXT1-4     |
| A_21_P0007214  | 1,46453 | 1,4283  | 1,025430703 | N/A             | N/A       | N/A          | Inc-PGA3-1     |
| A_33_P3255051  | 1,51869 | 1,48246 | 1,025430703 | ENST00000448609 | N/A       | N/A          | N/A            |
| A_21_P0000422  | 1,44288 | 1,40665 | 1,025430703 | ENST00000554693 | 767606    | NR_003219    | SNORD114-26    |
| A_33_P3374633  | 1,44147 | 1,40525 | 1,025423595 | N/A             | N/A       | CB852070     | N/A            |
| A_21_P0007991  | 1,53693 | 1,50071 | 1,025423595 | N/A             | N/A       | N/A          | Inc-C13orf44-2 |
| A_33_P3335540  | 1,54351 | 1,50729 | 1,025423595 | N/A             | N/A       | N/A          | N/A            |
| A_22_P00015827 | 1,54094 | 1,50474 | 1,02540938  | ENST00000434707 | 339685    | N/A          | LOC339685      |
| A_33_P3239714  | 1,47803 | 1,44183 | 1,02540938  | N/A             | N/A       | N/A          | N/A            |

|                |         |         |             |                 |           |              |                       |
|----------------|---------|---------|-------------|-----------------|-----------|--------------|-----------------------|
| A_21_P0007081  | 2,0272  | 1,99101 | 1,025402272 | N/A             | N/A       | N/A          | Inc-EMX2-5            |
| A_33_P3370736  | 1,68455 | 1,64836 | 1,025402272 | N/A             | N/A       | AK128018     | Inc-NCOA3-1           |
| A_22_P00009907 | 1,54089 | 1,5047  | 1,025402272 | ENST00000550014 | 25834     | NM_013244    | MGAT4C                |
| A_22_P00022768 | 1,47203 | 1,43585 | 1,025395165 | ENST00000441444 | N/A       | N/A          | N/A                   |
| A_22_P00019144 | 1,69504 | 1,65886 | 1,025395165 | ENST00000454477 | 101927362 | XR_245051    | LOC101927362          |
| A_32_P55135    | 1,55171 | 1,51553 | 1,025395165 | ENST00000376919 | 6756      | NM_005635    | SSX1                  |
| A_21_P0014027  | 1,5516  | 1,51543 | 1,025388057 | N/A             | N/A       | N/A          | N/A                   |
| A_21_P0007863  | 1,62864 | 1,59247 | 1,025388057 | ENST00000545535 | 101930457 | XR_247882    | LOC101930457          |
| A_21_P0004554  | 1,48042 | 1,44427 | 1,025373843 | N/A             | N/A       | N/A          | Inc-OXCT1-1           |
| A_33_P3328990  | 1,51777 | 1,48162 | 1,025373843 | N/A             | N/A       | AK310283     | N/A                   |
| A_23_P84230    | 1,56915 | 1,533   | 1,025373843 | ENST00000306422 | 23440     | NM_032109    | OTP                   |
| A_22_P00020458 | 1,64857 | 1,61242 | 1,025373843 | N/A             | N/A       | AK093033     | Inc-AC131971.1-1      |
| A_21_P0007849  | 1,63501 | 1,59886 | 1,025373843 | N/A             | N/A       | N/A          | Inc-RP11-552114.1.1-1 |
| A_33_P3261463  | 1,56805 | 1,53191 | 1,025366735 | N/A             | 440556    | AL713743     | LINC00982             |
| A_23_P168266   | 1,473   | 1,43687 | 1,025359628 | ENST00000434551 | 134860    | NM_175057    | TAAR9                 |
| A_22_P00006279 | 1,60669 | 1,57058 | 1,025345414 | N/A             | N/A       | N/A          | Inc-FAM76B-1          |
| A_21_P0008100  | 1,53649 | 1,50038 | 1,025345414 | N/A             | N/A       | N/A          | Inc-SLITRK5-4         |
| A_22_P00004749 | 1,43487 | 1,39876 | 1,025345414 | ENST00000525758 | N/A       | BX647519     | N/A                   |
| A_22_P00003888 | 6,73463 | 6,69852 | 1,025345414 | N/A             | N/A       | N/A          | Inc-CENPV-2           |
| A_33_P3272508  | 10,2666 | 10,2305 | 1,025338306 | ENST00000309594 | 78988     | NM_024026    | MRPL57                |
| A_23_P111635   | 10,6279 | 10,5918 | 1,025338306 | ENST00000460184 | 51657     | NM_016086    | STYXL1                |
| A_24_P532864   | 1,63576 | 1,59966 | 1,025338306 | ENST00000504916 | N/A       | N/A          | N/A                   |
| A_21_P0001905  | 1,50394 | 1,46785 | 1,025331199 | N/A             | N/A       | N/A          | Inc-SLC20A1-1         |
| A_22_P00015412 | 1,6238  | 1,58771 | 1,025331199 | N/A             | N/A       | N/A          | Inc-SRRM4-1           |
| A_23_P158851   | 1,38125 | 1,34516 | 1,025331199 | ENST00000264360 | 57575     | AL157470     | PCDH10                |
| A_33_P3221423  | 1,67831 | 1,64222 | 1,025331199 | ENST00000276066 | 347517    | NM_001032726 | RAB41                 |
| A_33_P3252286  | 8,1152  | 8,07912 | 1,025324092 | ENST00000392386 | 9244      | NM_004750    | CRLF1                 |
| A_23_P344481   | 4,60381 | 4,56773 | 1,025324092 | ENST00000399169 | 219736    | NM_152709    | STOX1                 |
| A_24_P759822   | 1,59946 | 1,56338 | 1,025324092 | ENST00000497811 | 151658    | NR_024276    | LINC00635             |
| A_21_P0000062  | 1,50071 | 1,46464 | 1,025316985 | ENST00000542103 | 128977    | NM_001166242 | C22orf39              |
| A_21_P0006486  | 1,48683 | 1,45076 | 1,025316985 | N/A             | N/A       | N/A          | Inc-CXorf22-1         |
| A_21_P0014216  | 1,49994 | 1,46387 | 1,025316985 | N/A             | N/A       | CD177336     | N/A                   |
| A_23_P402778   | 1,37443 | 1,33836 | 1,025316985 | ENST00000383610 | 135644    | NM_138700    | TRIM40                |

|                |         |         |             |                 |           |              |                |
|----------------|---------|---------|-------------|-----------------|-----------|--------------|----------------|
| A_22_P00003808 | 1,61598 | 1,57991 | 1,025316985 | ENST00000435092 | N/A       | N/A          | N/A            |
| A_23_P93531    | 1,57249 | 1,53644 | 1,025302772 | ENST00000275216 | 134864    | NM_138327    | TAAR1          |
| A_22_P00006339 | 1,4539  | 1,41785 | 1,025302772 | N/A             | N/A       | BC036673     | Inc-FANCL-1    |
| A_21_P0005912  | 1,70366 | 1,66762 | 1,025295665 | N/A             | N/A       | N/A          | Inc-ZFAT-4     |
| A_21_P0013199  | 1,66722 | 1,63118 | 1,025295665 | N/A             | N/A       | N/A          | XLOC_I2_013412 |
| A_22_P00007008 | 1,54681 | 1,51077 | 1,025295665 | ENST00000423963 | N/A       | N/A          | N/A            |
| A_21_P0004009  | 1,68875 | 1,65272 | 1,025288558 | ENST00000513197 | N/A       | N/A          | N/A            |
| A_33_P3261605  | 1,5778  | 1,54177 | 1,025288558 | N/A             | N/A       | N/A          | XLOC_I2_006131 |
| A_22_P00016768 | 1,60397 | 1,56794 | 1,025288558 | N/A             | 101927078 | XR_251845    | LOC101927078   |
| A_21_P0001069  | 1,61666 | 1,58064 | 1,025281451 | N/A             | N/A       | N/A          | Inc-CNIH3-1    |
| A_22_P00011583 | 1,47212 | 1,4361  | 1,025281451 | ENST00000515181 | 101927363 | XR_245252    | LOC101927363   |
| A_22_P00023958 | 1,68233 | 1,64631 | 1,025281451 | ENST00000417542 | 102724039 | N/A          | LOC102724039   |
| A_33_P3296067  | 7,50265 | 7,46663 | 1,025281451 | ENST00000424687 | 168448    | NR_003595    | CDC14C         |
| A_33_P3356857  | 1,54369 | 1,50768 | 1,025274345 | ENST00000487440 | 64147     | AK023894     | KIF9           |
| A_33_P3360412  | 4,02212 | 3,98611 | 1,025274345 | ENST00000409439 | 9091      | NM_148920    | PIGQ           |
| A_33_P3376551  | 1,61881 | 1,5828  | 1,025274345 | ENST00000370758 | 5737      | NM_001039585 | PTGFR          |
| A_21_P0009104  | 1,52565 | 1,48965 | 1,025267238 | ENST00000562822 | N/A       | N/A          | N/A            |
| A_23_P68240    | 6,46409 | 6,42811 | 1,025253025 | ENST00000486463 | 150763    | NM_207328    | GPAT2          |
| A_23_P127663   | 7,91958 | 7,8836  | 1,025253025 | ENST00000257836 | 79056     | NM_024081    | PRRG4          |
| A_22_P00008590 | 1,67735 | 1,64137 | 1,025253025 | N/A             | 102723833 | NR_125992    | LOC102723833   |
| A_21_P0004148  | 1,48212 | 1,44615 | 1,025245918 | N/A             | N/A       | N/A          | Inc-DHFR-2     |
| A_21_P0014127  | 1,49241 | 1,45644 | 1,025245918 | N/A             | N/A       | AL359654     | N/A            |
| A_33_P3298830  | 1,38854 | 1,35257 | 1,025245918 | N/A             | 100129836 | XR_158875    | COL4A2-AS2     |
| A_21_P0007751  | 1,39252 | 1,35656 | 1,025238812 | N/A             | N/A       | N/A          | Inc-C12orf42-1 |
| A_22_P00016210 | 1,48168 | 1,44577 | 1,02520328  | N/A             | N/A       | N/A          | Inc-TM2D2-3    |
| A_22_P00004890 | 1,46331 | 1,42741 | 1,025196174 | ENST00000555378 | 102723742 | NR_110547    | LINC01500      |
| A_33_P3221059  | 1,5208  | 1,48491 | 1,025189068 | N/A             | N/A       | N/A          | N/A            |
| A_33_P3347911  | 1,44906 | 1,41317 | 1,025189068 | ENST00000344288 | 2100      | NM_001271877 | ESR2           |
| A_22_P00017031 | 1,60601 | 1,57012 | 1,025189068 | ENST00000436418 | N/A       | N/A          | N/A            |
| A_33_P3381393  | 1,65924 | 1,62336 | 1,025181962 | ENST00000369206 | 11023     | NM_001112704 | VAX1           |
| A_21_P0007807  | 1,57494 | 1,53908 | 1,02516775  | N/A             | N/A       | N/A          | Inc-RIMBP2-3   |
| A_22_P00003757 | 1,51281 | 1,47695 | 1,02516775  | ENST00000504398 | N/A       | BX956617     | N/A            |
| A_23_P60009    | 1,63961 | 1,60376 | 1,025160644 | ENST00000419625 | 312       | NM_001003954 | ANXA13         |



|                |         |         |             |                 |           |              |                |
|----------------|---------|---------|-------------|-----------------|-----------|--------------|----------------|
| A_22_P00019370 | 1,68703 | 1,65118 | 1,025160644 | N/A             | N/A       | N/A          | Inc-ARHGAP28-5 |
| A_21_P0006700  | 1,62165 | 1,5858  | 1,025160644 | ENST00000424701 | N/A       | N/A          | N/A            |
| A_24_P1255     | 5,91749 | 5,88165 | 1,025153538 | ENST00000299130 | 56647     | NM_078469    | BCCIP          |
| A_33_P3415826  | 1,57256 | 1,53672 | 1,025153538 | N/A             | N/A       | N/A          | N/A            |
| A_21_P0005778  | 1,75349 | 1,71766 | 1,025146433 | N/A             | N/A       | N/A          | Inc-RHPN1-3    |
| A_21_P0007082  | 1,44713 | 1,4113  | 1,025146433 | ENST00000431695 | N/A       | XR_246190    | N/A            |
| A_21_P0008789  | 1,5438  | 1,50797 | 1,025146433 | ENST00000616660 | N/A       | N/A          | N/A            |
| A_22_P00003565 | 1,65786 | 1,62204 | 1,025139327 | N/A             | N/A       | N/A          | Inc-CCT4-2     |
| A_22_P00005713 | 1,69286 | 1,65704 | 1,025139327 | N/A             | N/A       | N/A          | Inc-ELOVL5-1   |
| A_22_P00015237 | 1,57456 | 1,53874 | 1,025139327 | N/A             | N/A       | N/A          | Inc-SPACA3-3   |
| A_22_P00004353 | 1,58618 | 1,55036 | 1,025139327 | ENST00000519306 | N/A       | CR741371     | N/A            |
| A_33_P3313929  | 8,27005 | 8,23423 | 1,025139327 | ENST00000349984 | 1235      | NM_031409    | CCR6           |
| A_21_P0004322  | 1,65295 | 1,61714 | 1,025132221 | N/A             | N/A       | N/A          | Inc-UBLCP1-8   |
| A_22_P00016070 | 1,66786 | 1,63205 | 1,025132221 | N/A             | 101929707 | XR_253948    | LOC101929707   |
| A_21_P0004312  | 1,55402 | 1,51821 | 1,025132221 | ENST00000519898 | 728264    | N/A          | MIR143HG       |
| A_33_P3344733  | 11,5257 | 11,4899 | 1,025125116 | ENST00000552888 | 80224     | NM_025152    | NUBPL          |
| A_23_P43107    | 1,50047 | 1,46467 | 1,025125116 | ENST00000622554 | 81501     | NM_030788    | DCSTAMP        |
| A_33_P3285715  | 14,2219 | 14,1861 | 1,025125116 | ENST00000523812 | 2738      | AB209654     | GLI4           |
| A_21_P0014053  | 1,70029 | 1,66449 | 1,025125116 | N/A             | 388813    | NM_001256579 | LOC388813      |
| A_23_P163075   | 1,70358 | 1,66779 | 1,02511801  | ENST00000339762 | 341880    | NM_001206920 | SLC35F4        |
| A_21_P0003666  | 1,56119 | 1,5254  | 1,02511801  | N/A             | N/A       | N/A          | Inc-FAM160A1-3 |
| A_33_P3331746  | 1,62341 | 1,58762 | 1,02511801  | ENST00000361803 | 84620     | NM_032528    | ST6GAL2        |
| A_22_P00000724 | 1,44577 | 1,40999 | 1,025110904 | ENST00000564719 | 100127206 | N/A          | KIAA1024L      |
| A_22_P00014126 | 1,5157  | 1,47992 | 1,025110904 | N/A             | N/A       | HY026858     | Inc-SCD-2      |
| A_21_P0012531  | 1,49524 | 1,45947 | 1,025103799 | ENST00000417482 | 101927347 | N/A          | GRM7-AS3       |
| A_22_P00024467 | 1,54362 | 1,50785 | 1,025103799 | ENST00000511712 | N/A       | N/A          | N/A            |
| A_21_P0007629  | 1,64021 | 1,60444 | 1,025103799 | N/A             | N/A       | N/A          | Inc-SDSL-6     |
| A_21_P0005363  | 1,54505 | 1,50929 | 1,025096693 | N/A             | N/A       | N/A          | Inc-SNX10-1    |
| A_22_P00015120 | 1,5026  | 1,46684 | 1,025096693 | N/A             | N/A       | N/A          | Inc-SNX20-3    |
| A_21_P0013623  | 1,39515 | 1,35941 | 1,025082483 | N/A             | 101929563 | N/A          | LOC101929563   |
| A_21_P0006801  | 1,50348 | 1,46774 | 1,025082483 | ENST00000454492 | 102723646 | N/A          | LOC102723646   |
| A_21_P0009016  | 1,38357 | 1,34786 | 1,025061167 | N/A             | N/A       | N/A          | Inc-GDE1-3     |
| A_22_P00023977 | 1,58049 | 1,54478 | 1,025061167 | ENST00000446280 | N/A       | N/A          | N/A            |

|                |         |         |             |                 |           |              |                |
|----------------|---------|---------|-------------|-----------------|-----------|--------------|----------------|
| A_21_P0013632  | 1,62931 | 1,59361 | 1,025054062 | N/A             | N/A       | N/A          | XLOC_I2_015172 |
| A_22_P00009494 | 1,61186 | 1,57616 | 1,025054062 | N/A             | N/A       | N/A          | Inc-MAG11-2    |
| A_21_P0014341  | 1,59563 | 1,55994 | 1,025046957 | N/A             | N/A       | N/A          | Inc-FOXK2-1    |
| A_22_P00006303 | 1,44275 | 1,40707 | 1,025039852 | ENST00000523510 | 103164619 | NR_119373    | PCAT2          |
| A_24_P409800   | 1,71286 | 1,67719 | 1,025032747 | ENST00000512467 | 57528     | NM_020768    | KCTD16         |
| A_21_P0001414  | 1,6493  | 1,61363 | 1,025032747 | N/A             | N/A       | N/A          | Inc-CAMK1G-5   |
| A_24_P941643   | 8,11553 | 8,07986 | 1,025032747 | ENST00000612075 | 23236     | NM_182734    | PLCB1          |
| A_24_P221858   | 1,62579 | 1,59013 | 1,025025642 | ENST00000532537 | 440822    | NM_001008496 | PIWIL3         |
| A_22_P00012765 | 1,53354 | 1,49788 | 1,025025642 | N/A             | N/A       | N/A          | Inc-RAD51-1    |
| A_33_P3287399  | 1,64512 | 1,60946 | 1,025025642 | ENST00000567788 | 100190940 | AK127723     | LOC100190940   |
| A_21_P0003876  | 1,57499 | 1,53933 | 1,025025642 | ENST00000502419 | N/A       | N/A          | N/A            |
| A_33_P3368334  | 1,58998 | 1,55433 | 1,025018537 | ENST00000480682 | 115352    | XR_241065    | FCRL3          |
| A_23_P171409   | 1,53624 | 1,5006  | 1,025011432 | ENST00000253838 | 84672     | NR_001527    | TTY6           |
| A_21_P0007215  | 5,66867 | 5,63303 | 1,025011432 | N/A             | N/A       | N/A          | Inc-PPP1R32-1  |
| A_21_P0012359  | 1,48989 | 1,45425 | 1,025011432 | ENST00000423311 | 104310353 | N/A          | LINC01399      |
| A_22_P00017052 | 3,36718 | 3,33154 | 1,025011432 | N/A             | N/A       | BM015693     | Inc-TUBA1C-2   |
| A_21_P0014223  | 1,55656 | 1,52092 | 1,025011432 | N/A             | N/A       | XR_113143    | N/A            |
| A_22_P00018827 | 1,44296 | 1,40733 | 1,025004327 | N/A             | N/A       | N/A          | Inc-MIER3-2    |
| A_21_P0009340  | 1,45999 | 1,42436 | 1,025004327 | N/A             | N/A       | N/A          | Inc-PTRH2-1    |
| A_21_P0009833  | 1,55752 | 1,52189 | 1,025004327 | ENST00000431034 | N/A       | N/A          | N/A            |
| A_24_P331150   | 1,37529 | 1,33966 | 1,025004327 | ENST00000601005 | 126410    | NM_173483    | CYP4F22        |
| A_22_P00003934 | 1,49694 | 1,46132 | 1,024997222 | N/A             | N/A       | N/A          | Inc-CFTR-1     |
| A_21_P0003705  | 1,58316 | 1,54754 | 1,024997222 | N/A             | N/A       | N/A          | Inc-FRG1-4     |
| A_33_P3388533  | 1,61452 | 1,5789  | 1,024997222 | ENST00000554904 | 728755    | N/A          | LOC728755      |
| A_22_P00004213 | 1,64882 | 1,6132  | 1,024997222 | ENST00000420845 | N/A       | BQ429059     | N/A            |
| A_33_P3808435  | 1,41609 | 1,38048 | 1,024990118 | N/A             | N/A       | N/A          | N/A            |
| A_24_P680657   | 1,48632 | 1,45071 | 1,024990118 | ENST00000335185 | 493860    | NM_001008391 | CCDC73         |
| A_22_P00006741 | 1,65318 | 1,61757 | 1,024990118 | ENST00000527727 | N/A       | N/A          | N/A            |
| A_23_P415820   | 1,65469 | 1,61909 | 1,024983013 | ENST00000410104 | 23233     | AB023136     | EXOC6B         |
| A_21_P0013559  | 1,55933 | 1,52373 | 1,024983013 | ENST00000436786 | 441389    | N/A          | LINC01239      |
| A_21_P0005139  | 1,70837 | 1,67277 | 1,024983013 | N/A             | N/A       | N/A          | Inc-UTRN-1     |
| A_21_P0003266  | 4,69147 | 4,65587 | 1,024983013 | N/A             | N/A       | N/A          | Inc-CHRD-1     |
| A_21_P0000724  | 1,38228 | 1,34669 | 1,024975908 | N/A             | 100616530 | NR_038209    | C8orf37-AS1    |

|                |         |         |             |                 |           |              |                       |
|----------------|---------|---------|-------------|-----------------|-----------|--------------|-----------------------|
| A_23_P42265    | 8,23511 | 8,19953 | 1,024968804 | ENST00000375916 | 55937     | NM_019101    | APOM                  |
| A_22_P00002071 | 1,56974 | 1,53416 | 1,024968804 | N/A             | N/A       | N/A          | Inc-BMI1-1            |
| A_21_P0001026  | 1,53796 | 1,50238 | 1,024968804 | ENST00000425271 | N/A       | N/A          | N/A                   |
| A_22_P00012347 | 1,62489 | 1,58931 | 1,024968804 | ENST00000514836 | 118425    | NR_026555    | PCAT4                 |
| A_22_P00017960 | 9,22007 | 9,18451 | 1,024954595 | N/A             | N/A       | N/A          | Inc-ZKSCAN1-1         |
| A_21_P0002777  | 1,44548 | 1,40992 | 1,024954595 | ENST00000485006 | N/A       | N/A          | N/A                   |
| A_22_P00017367 | 1,45741 | 1,42185 | 1,024954595 | ENST00000592081 | N/A       | N/A          | N/A                   |
| A_22_P00020183 | 1,55097 | 1,51541 | 1,024954595 | N/A             | N/A       | N/A          | Inc-ENOPH1-1          |
| A_22_P00018904 | 1,57088 | 1,53533 | 1,02494749  | ENST00000458525 | N/A       | BC043223     | N/A                   |
| A_21_P0000198  | 1,53335 | 1,49781 | 1,024940386 | ENST00000512104 | 64799     | NM_022784    | IQCH                  |
| A_22_P00022575 | 1,56256 | 1,52702 | 1,024940386 | N/A             | N/A       | N/A          | Inc-GTDC1-1           |
| A_24_P37712    | 1,63393 | 1,59839 | 1,024940386 | ENST00000381501 | 7006      | NM_003215    | TEC                   |
| A_23_P417821   | 1,56817 | 1,53265 | 1,024926177 | ENST00000371445 | 63948     | NM_033067    | DMRTB1                |
| A_23_P50031    | 1,66048 | 1,62496 | 1,024926177 | ENST00000615105 | 4994      | NM_002550    | OR3A1                 |
| A_33_P3389261  | 7,41254 | 7,37702 | 1,024926177 | ENST00000409150 | 100131211 | NM_001142645 | TMEM194B              |
| A_21_P0000878  | 1,53111 | 1,4956  | 1,024919073 | N/A             | 100506655 | NR_039998    | LCMT1-AS2             |
| A_33_P3248035  | 4,6811  | 4,64559 | 1,024919073 | ENST00000588129 | 84765     | N/A          | ZNF577                |
| A_33_P3334275  | 1,44398 | 1,40849 | 1,024904865 | N/A             | N/A       | BU584355     | Inc-LIF-1             |
| A_21_P0005675  | 1,47699 | 1,4415  | 1,024904865 | N/A             | N/A       | N/A          | Inc-RP11-521M14.2.1-1 |
| A_24_P49267    | 1,45832 | 1,42283 | 1,024904865 | ENST00000411909 | 646282    | N/A          | AZGP1P1               |
| A_21_P0007723  | 1,62541 | 1,58992 | 1,024904865 | N/A             | N/A       | N/A          | Inc-ZFC3H1-2          |
| A_22_P00006586 | 1,51633 | 1,48085 | 1,024897761 | ENST00000457625 | N/A       | N/A          | N/A                   |
| A_21_P0011905  | 1,41398 | 1,3785  | 1,024897761 | N/A             | N/A       | N/A          | XLOC_I2_007898        |
| A_22_P00021351 | 1,40382 | 1,36835 | 1,024890657 | ENST00000455014 | 449493    | N/A          | DEFA10P               |
| A_32_P108870   | 1,62132 | 1,58585 | 1,024890657 | ENST00000256103 | 5375      | NM_002677    | PMP2                  |
| A_23_P303803   | 1,41179 | 1,37633 | 1,024883553 | ENST00000314391 | 147685    | NM_152474    | C19orf18              |
| A_23_P305877   | 5,89546 | 5,86    | 1,024883553 | ENST00000358227 | 90871     | NM_033428    | TMEM261               |
| A_23_P3574     | 9,23089 | 9,19547 | 1,024855137 | ENST00000602522 | 81577     | NM_030819    | GFOD2                 |
| A_21_P0008317  | 1,56194 | 1,52652 | 1,024855137 | N/A             | N/A       | N/A          | Inc-BRMS1L-3          |
| A_21_P0011782  | 1,66035 | 1,62494 | 1,024848034 | ENST00000455455 | 388550    | N/A          | CEACAM22P             |
| A_22_P00012643 | 1,57356 | 1,53815 | 1,024848034 | ENST00000523311 | N/A       | DB053011     | N/A                   |
| A_23_P141706   | 1,54118 | 1,50577 | 1,024848034 | ENST00000332567 | 51224     | NM_016427    | TCEB3B                |
| A_33_P3343506  | 1,37202 | 1,33663 | 1,024833826 | ENST00000312240 | 219482    | NM_001004742 | OR5M3                 |

|                |         |         |             |                 |           |              |              |
|----------------|---------|---------|-------------|-----------------|-----------|--------------|--------------|
| A_23_P139434   | 1,62751 | 1,59212 | 1,024833826 | ENST00000389362 | 653247    | NM_006248    | PRB2         |
| A_21_P0006015  | 1,48265 | 1,44728 | 1,024819619 | ENST00000419576 | N/A       | N/A          | N/A          |
| A_24_P13381    | 7,28034 | 7,24497 | 1,024819619 | ENST00000536838 | 59341     | NM_147204    | TRPV4        |
| A_22_P00004677 | 1,50074 | 1,46537 | 1,024819619 | ENST00000566449 | N/A       | N/A          | N/A          |
| A_22_P00017446 | 7,91611 | 7,88075 | 1,024812516 | N/A             | N/A       | AW021463     | Inc-VPS4A-1  |
| A_33_P3339715  | 1,48801 | 1,45266 | 1,024805412 | N/A             | 644841    | AK124544     | LOC644841    |
| A_21_P0002072  | 1,71391 | 1,67856 | 1,024805412 | N/A             | N/A       | N/A          | Inc-POLR1A-2 |
| A_23_P161135   | 1,66494 | 1,6296  | 1,024798309 | ENST00000406510 | 3953      | NM_002303    | LEPR         |
| A_21_P0002717  | 1,48378 | 1,44845 | 1,024791206 | ENST00000488425 | 101927123 | NR_110147    | LOC101927123 |
| A_21_P0007490  | 1,60745 | 1,57212 | 1,024791206 | ENST00000550185 | 101929084 | NR_110103    | LOC101929084 |
| A_33_P3363001  | 1,64282 | 1,60749 | 1,024791206 | N/A             | N/A       | DA372173     | N/A          |
| A_22_P00024713 | 1,53416 | 1,49883 | 1,024791206 | ENST00000418679 | N/A       | N/A          | N/A          |
| A_33_P3383486  | 1,69398 | 1,65866 | 1,024784102 | N/A             | N/A       | N/A          | N/A          |
| A_33_P3242338  | 1,75435 | 1,71903 | 1,024784102 | N/A             | N/A       | AK124631     | Inc-BUB1B-1  |
| A_23_P256312   | 12,4373 | 12,402  | 1,024769896 | ENST00000344206 | 4486      | NM_002447    | MST1R        |
| A_33_P3386723  | 13,631  | 13,5957 | 1,024769896 | ENST00000434946 | N/A       | N/A          | N/A          |
| A_22_P00006982 | 1,65544 | 1,62014 | 1,024769896 | N/A             | N/A       | BG214892     | Inc-GDI2-1   |
| A_21_P0004949  | 1,63593 | 1,60063 | 1,024769896 | ENST00000456896 | 100507477 | NR_121622    | LOC100507477 |
| A_33_P3316173  | 1,53628 | 1,50099 | 1,024762793 | ENST00000233826 | 3769      | NM_002242    | KCNJ13       |
| A_21_P0009946  | 1,45551 | 1,42022 | 1,024762793 | N/A             | N/A       | N/A          | Inc-SSTR4-4  |
| A_22_P00015935 | 1,51291 | 1,47762 | 1,024762793 | N/A             | N/A       | N/A          | Inc-TCTA-1   |
| A_22_P00013583 | 1,7271  | 1,69181 | 1,024762793 | N/A             | 102723692 | XR_429671    | LOC102723692 |
| A_24_P405631   | 1,669   | 1,63372 | 1,02475569  | ENST00000475839 | 55079     | NM_018008    | FEZF2        |
| A_32_P97169    | 1,37571 | 1,34043 | 1,02475569  | ENST00000377047 | 10082     | NM_005708    | GPC6         |
| A_24_P375761   | 1,6506  | 1,61532 | 1,02475569  | ENST00000440528 | N/A       | AY078383     | N/A          |
| A_22_P00016679 | 1,53207 | 1,49681 | 1,024741484 | N/A             | 100874081 | NR_125912    | FGF14-AS1    |
| A_33_P3428749  | 1,52475 | 1,48949 | 1,024741484 | N/A             | N/A       | BQ426089     | N/A          |
| A_22_P00011881 | 1,71477 | 1,67951 | 1,024741484 | N/A             | 100506142 | NR_104182    | LOC100506142 |
| A_33_P3412588  | 1,53583 | 1,50058 | 1,024734381 | ENST00000504237 | 102724809 | XR_425796    | LOC102724809 |
| A_33_P3245660  | 1,37391 | 1,33867 | 1,024727278 | N/A             | N/A       | N/A          | N/A          |
| A_23_P133036   | 1,49975 | 1,46451 | 1,024727278 | ENST00000382051 | 10568     | NM_006424    | SLC34A2      |
| A_22_P00015908 | 1,47004 | 1,43481 | 1,024720175 | ENST00000513561 | N/A       | N/A          | N/A          |
| A_33_P3420640  | 1,65285 | 1,61764 | 1,024705969 | ENST00000329328 | 390199    | NM_001004711 | OR4D9        |

|                |         |         |             |                 |           |              |                  |
|----------------|---------|---------|-------------|-----------------|-----------|--------------|------------------|
| A_33_P3265699  | 1,61357 | 1,57836 | 1,024705969 | ENST00000356526 | 403274    | NM_001005515 | OR5H15           |
| A_23_P156784   | 1,5087  | 1,47349 | 1,024705969 | ENST00000369212 | 84539     | NM_001040179 | MCHR2            |
| A_21_P0003024  | 7,32835 | 7,29315 | 1,024698867 | N/A             | 101928948 | XR_425705    | LOC101928948     |
| A_33_P3417602  | 1,54032 | 1,50512 | 1,024698867 | ENST00000433453 | 245935    | N/A          | DEFB122          |
| A_21_P0007036  | 1,51813 | 1,48293 | 1,024698867 | N/A             | N/A       | N/A          | Inc-AL450307.1-2 |
| A_22_P00002557 | 1,41808 | 1,38288 | 1,024698867 | N/A             | N/A       | DB524466     | Inc-C17orf75-4   |
| A_22_P00004153 | 1,48803 | 1,45283 | 1,024698867 | N/A             | N/A       | N/A          | Inc-CLEC1B-1     |
| A_33_P3406530  | 1,59617 | 1,56098 | 1,024691764 | ENST00000432430 | N/A       | N/A          | N/A              |
| A_23_P218002   | 1,65108 | 1,6159  | 1,024684661 | ENST00000534081 | 5553      | NM_002728    | PRG2             |
| A_22_P00018394 | 1,51185 | 1,47667 | 1,024684661 | N/A             | N/A       | N/A          | Inc-DYTN-1       |
| A_22_P00007771 | 1,60317 | 1,56799 | 1,024684661 | N/A             | N/A       | N/A          | Inc-HNRNPA1-1    |
| A_33_P3415828  | 3,61085 | 3,57568 | 1,024677559 | N/A             | N/A       | CU677870     | N/A              |
| A_33_P3390207  | 1,4701  | 1,43493 | 1,024677559 | ENST00000394394 | 132332    | NM_152399    | TMEM155          |
| A_22_P00023514 | 1,6371  | 1,60194 | 1,024670456 | ENST00000511474 | N/A       | N/A          | N/A              |
| A_23_P10172    | 1,58722 | 1,55207 | 1,024663354 | ENST00000460241 | 29122     | NM_013270    | PRSS50           |
| A_22_P00015263 | 1,6494  | 1,61425 | 1,024663354 | ENST00000412163 | 645188    | XR_109780    | LOC645188        |
| A_33_P3217168  | 1,52906 | 1,49391 | 1,024663354 | ENST00000504659 | N/A       | N/A          | N/A              |
| A_33_P3333232  | 1,49733 | 1,46219 | 1,024656251 | ENST00000621947 | 221262    | N/A          | CCDC162P         |
| A_33_P3398578  | 1,70078 | 1,66564 | 1,024656251 | N/A             | 100131208 | NR_040710    | SNAP25-AS1       |
| A_23_P120822   | 3,4865  | 3,45136 | 1,024656251 | ENST00000326010 | 51733     | NM_016327    | UPB1             |
| A_22_P00012849 | 1,55466 | 1,51953 | 1,024649149 | ENST00000427173 | 101928778 | N/A          | LOC101928778     |
| A_33_P3387458  | 1,59286 | 1,55773 | 1,024649149 | ENST00000379713 | 57713     | AK090887     | SFMBT2           |
| A_23_P161940   | 1,37229 | 1,33717 | 1,024642047 | ENST00000227918 | 4250      | NM_002411    | SCGB2A2          |
| A_32_P407293   | 1,62189 | 1,58677 | 1,024642047 | ENST00000322583 | 285800    | NM_175922    | PRR18            |
| A_22_P00016835 | 1,655   | 1,61989 | 1,024634945 | N/A             | N/A       | N/A          | Inc-TRMT2A-1     |
| A_21_P0011971  | 8,98232 | 8,94721 | 1,024634945 | ENST00000419201 | N/A       | N/A          | N/A              |
| A_23_P80362    | 14,9244 | 14,8893 | 1,024627842 | ENST00000463675 | 4809      | NM_005008    | NHP2L1           |
| A_21_P0000127  | 1,63114 | 1,59604 | 1,024627842 | ENST00000615233 | 284297    | NM_001195267 | SSC5D            |
| A_21_P0014295  | 9,03062 | 8,99552 | 1,024627842 | ENST00000567948 | 101928527 | XR_243152    | PIGBOS1          |
| A_22_P00014436 | 1,54359 | 1,5085  | 1,02462074  | N/A             | N/A       | BC068091     | Inc-SH2B2-1      |
| A_33_P3247783  | 1,64244 | 1,60736 | 1,024613638 | N/A             | N/A       | N/A          | N/A              |
| A_21_P0003064  | 1,39216 | 1,35708 | 1,024613638 | N/A             | N/A       | N/A          | Inc-NAALADL2-1   |
| A_22_P00006513 | 1,49215 | 1,45708 | 1,024606536 | ENST00000456477 | N/A       | BQ224694     | N/A              |

|                |         |         |             |                 |           |              |                       |
|----------------|---------|---------|-------------|-----------------|-----------|--------------|-----------------------|
| A_32_P3476     | 1,63175 | 1,59668 | 1,024606536 | ENST00000322329 | 388394    | NM_203400    | RPRML                 |
| A_22_P00000473 | 4,94501 | 4,90995 | 1,024599434 | N/A             | N/A       | N/A          | Inc-AC092295.7.1-1    |
| A_23_P126658   | 1,37741 | 1,34236 | 1,024592332 | ENST00000614831 | 391002    | NM_001012276 | PRAMEF8               |
| A_21_P0006959  | 1,40573 | 1,37068 | 1,024592332 | N/A             | N/A       | N/A          | Inc-CALML5-3          |
| A_21_P0002251  | 2,37614 | 2,3411  | 1,02458523  | N/A             | N/A       | N/A          | Inc-ATOH8-2           |
| A_21_P0003076  | 1,46733 | 1,43229 | 1,02458523  | N/A             | N/A       | N/A          | Inc-DNAJB11-1         |
| A_21_P0009658  | 1,43225 | 1,39721 | 1,02458523  | ENST00000587128 | 100505715 | NR_038334    | LOC100505715          |
| A_21_P0007672  | 1,55347 | 1,51844 | 1,024578128 | N/A             | N/A       | N/A          | Inc-SFSWAP-2          |
| A_21_P0007446  | 7,23452 | 7,19949 | 1,024578128 | N/A             | N/A       | N/A          | Inc-RP11-201M22.1.1-2 |
| A_23_P71598    | 1,59871 | 1,56369 | 1,024571027 | ENST00000319198 | 8777      | NM_003829    | MPDZ                  |
| A_21_P0007990  | 1,61497 | 1,57995 | 1,024571027 | ENST00000432331 | N/A       | N/A          | N/A                   |
| A_22_P00008091 | 1,75257 | 1,71755 | 1,024571027 | ENST00000559698 | N/A       | N/A          | N/A                   |
| A_22_P00018788 | 1,60502 | 1,57    | 1,024571027 | ENST00000518620 | N/A       | N/A          | N/A                   |
| A_22_P00009406 | 1,47041 | 1,4354  | 1,024563925 | N/A             | 100996447 | NR_104147    | LOC100996447          |
| A_33_P3354201  | 1,3839  | 1,3489  | 1,024556823 | ENST00000322066 | 245928    | NM_001037499 | DEFB114               |
| A_22_P00016737 | 1,5666  | 1,5316  | 1,024556823 | N/A             | N/A       | N/A          | Inc-TREML1-1          |
| A_23_P214739   | 10,3871 | 10,3521 | 1,024556823 | ENST00000229971 | 26235     | NM_012160    | FBXL4                 |
| A_22_P00006567 | 7,39587 | 7,36088 | 1,024549721 | N/A             | N/A       | BF843649     | Inc-FLYWCH2-1         |
| A_19_P00317277 | 1,53862 | 1,50363 | 1,024549721 | N/A             | 100506328 | NR_103791    | LINC01127             |
| A_21_P0001842  | 1,66813 | 1,63314 | 1,024549721 | ENST00000456119 | 400946    | NR_033875    | LINC00954             |
| A_22_P00005599 | 1,49407 | 1,45908 | 1,024549721 | ENST00000521014 | N/A       | N/A          | N/A                   |
| A_22_P00017268 | 1,52687 | 1,49188 | 1,024549721 | ENST00000589999 | 101927210 | XR_243979    | LOC101927210          |
| A_21_P0002364  | 3,18702 | 3,15204 | 1,02454262  | N/A             | N/A       | N/A          | Inc-MOGAT1-1          |
| A_33_P3389271  | 1,66629 | 1,63131 | 1,02454262  | N/A             | 101928999 | NR_109984    | IQCF5-AS1             |
| A_22_P00025081 | 2,55498 | 2,52    | 1,02454262  | N/A             | 102724434 | XR_426248    | LOC102724434          |
| A_23_P135576   | 1,56377 | 1,52879 | 1,02454262  | ENST00000612229 | 11122     | NM_133170    | PTPRT                 |
| A_33_P3305805  | 1,65413 | 1,61915 | 1,02454262  | N/A             | 101928470 | NR_121573    | TMEM246-AS1           |
| A_21_P0011642  | 1,49794 | 1,46296 | 1,02454262  | N/A             | N/A       | N/A          | Inc-CHAD-1            |
| A_33_P3248354  | 1,66557 | 1,6306  | 1,024535518 | ENST00000392991 | 10439     | NM_006334    | OLFM1                 |
| A_21_P0004886  | 1,50069 | 1,46573 | 1,024528417 | N/A             | N/A       | N/A          | Inc-ENPP4-1           |
| A_21_P0007135  | 4,26262 | 4,22766 | 1,024528417 | N/A             | N/A       | XM_005273734 | Inc-NAALADL1-1        |
| A_21_P0005512  | 1,49301 | 1,45805 | 1,024528417 | N/A             | 101927473 | N/A          | LOC101927473          |
| A_22_P00020329 | 1,38244 | 1,3475  | 1,024514214 | ENST00000503037 | 102725242 | N/A          | LOC102725242          |

|                |         |         |             |                 |           |              |                       |
|----------------|---------|---------|-------------|-----------------|-----------|--------------|-----------------------|
| A_22_P00020455 | 1,37903 | 1,34409 | 1,024514214 | ENST00000418451 | N/A       | N/A          | N/A                   |
| A_22_P00014683 | 1,43602 | 1,40108 | 1,024514214 | N/A             | N/A       | N/A          | Inc-SLC25A2-3         |
| A_33_P3400334  | 1,5431  | 1,50816 | 1,024514214 | N/A             | 100130372 | AK127532     | LOC100130372          |
| A_22_P00014727 | 1,44372 | 1,40879 | 1,024507112 | ENST00000563933 | N/A       | AK026751     | N/A                   |
| A_22_P00023710 | 1,59574 | 1,56081 | 1,024507112 | ENST00000430519 | N/A       | N/A          | N/A                   |
| A_33_P3350247  | 1,57106 | 1,53613 | 1,024507112 | N/A             | N/A       | N/A          | N/A                   |
| A_33_P3268919  | 1,54853 | 1,51361 | 1,024500011 | ENST00000372325 | 729238    | NM_001098668 | SFTPA2                |
| A_33_P3414472  | 1,76897 | 1,73405 | 1,024500011 | N/A             | N/A       | N/A          | N/A                   |
| A_23_P206510   | 13,9721 | 13,9372 | 1,024485809 | ENST00000447066 | 2734      | NM_012201    | GLG1                  |
| A_22_P00017638 | 1,46201 | 1,42711 | 1,024485809 | N/A             | N/A       | N/A          | Inc-WNT11-2           |
| A_21_P0000341  | 11,1732 | 11,1383 | 1,024485809 | N/A             | 677838    | NR_002987    | SNORA61               |
| A_22_P00025670 | 5,52202 | 5,48713 | 1,024478707 | ENST00000300087 | 84516     | NM_001199743 | DCTN5                 |
| A_21_P0005670  | 1,46416 | 1,42927 | 1,024478707 | N/A             | N/A       | N/A          | Inc-XPO7-2            |
| A_33_P7587879  | 1,53829 | 1,50343 | 1,024457404 | ENST00000419035 | 101927043 | NR_110207    | LOC101927043          |
| A_33_P3267150  | 5,01198 | 4,97713 | 1,024450303 | N/A             | N/A       | N/A          | N/A                   |
| A_21_P0010623  | 1,51567 | 1,48082 | 1,024450303 | ENST00000436350 | 101927084 | NR_119383    | LINC01359             |
| A_33_P3367939  | 1,62332 | 1,58848 | 1,024443202 | ENST00000332578 | 360200    | NM_182973    | TMPRSS9               |
| A_21_P0006176  | 1,47293 | 1,4381  | 1,024436101 | N/A             | N/A       | N/A          | Inc-GADD45G-5         |
| A_21_P0008493  | 1,61768 | 1,58286 | 1,024429001 | N/A             | N/A       | N/A          | Inc-HSP90AA1-10       |
| A_21_P0008907  | 1,37547 | 1,34065 | 1,024429001 | N/A             | N/A       | N/A          | Inc-RP11-467M13.1.1-1 |
| A_21_P0010362  | 1,53082 | 1,496   | 1,024429001 | N/A             | N/A       | N/A          | Inc-XRCC6-1           |
| A_21_P0002329  | 1,52051 | 1,48569 | 1,024429001 | N/A             | N/A       | N/A          | Inc-ZNF804A-1         |
| A_23_P420431   | 1,44069 | 1,40587 | 1,024429001 | ENST00000331428 | 150165    | NM_175878    | XKR3                  |
| A_22_P00010489 | 1,81576 | 1,78095 | 1,0244219   | ENST00000549993 | 101928207 | XR_429161    | LOC101928207          |
| A_21_P0001875  | 2,17564 | 2,14084 | 1,024414799 | ENST00000433065 | N/A       | N/A          | N/A                   |
| A_22_P00011310 | 1,55063 | 1,51585 | 1,024400598 | ENST00000565104 | N/A       | AL534569     | N/A                   |
| A_22_P00012885 | 1,44103 | 1,40625 | 1,024400598 | ENST00000520962 | N/A       | N/A          | N/A                   |
| A_21_P0006805  | 1,46969 | 1,43492 | 1,024393497 | ENST00000443633 | 101927590 | NR_120626    | LINC01166             |
| A_33_P3533377  | 1,72107 | 1,68631 | 1,024386397 | N/A             | 401983    | DA571583     | ZNF847P               |
| A_23_P312837   | 1,56825 | 1,53349 | 1,024386397 | N/A             | 84850     | NR_026663    | GLIS3-AS1             |
| A_22_P00024311 | 1,5707  | 1,53594 | 1,024386397 | ENST00000418523 | N/A       | N/A          | N/A                   |
| A_22_P00025201 | 1,56405 | 1,52931 | 1,024372196 | N/A             | 101927770 | NR_110051    | LOC101927770          |
| A_22_P00023279 | 1,39791 | 1,36317 | 1,024372196 | ENST00000580242 | N/A       | N/A          | N/A                   |

|                |         |         |             |                 |           |              |                |
|----------------|---------|---------|-------------|-----------------|-----------|--------------|----------------|
| A_33_P3370434  | 1,49797 | 1,46323 | 1,024372196 | ENST00000503568 | 104326191 | N/A          | LINC01336      |
| A_22_P00014756 | 1,51443 | 1,47969 | 1,024372196 | ENST00000446401 | 101060091 | NR_110174    | LOC101060091   |
| A_22_P00009087 | 1,40158 | 1,36685 | 1,024365095 | N/A             | N/A       | N/A          | Inc-LGALSL-2   |
| A_21_P0003059  | 1,62915 | 1,59442 | 1,024365095 | N/A             | N/A       | N/A          | Inc-SKIL-1     |
| A_22_P00013129 | 1,56952 | 1,53479 | 1,024365095 | N/A             | N/A       | BC066991     | Inc-RMND5A-1   |
| A_21_P0012670  | 1,67225 | 1,63752 | 1,024365095 | N/A             | N/A       | N/A          | XLOC_I2_011170 |
| A_22_P00025741 | 1,56702 | 1,5323  | 1,024357995 | N/A             | N/A       | N/A          | Inc-ARF5-4     |
| A_22_P00024200 | 1,47473 | 1,44001 | 1,024357995 | N/A             | N/A       | AK055853     | Inc-CASP9-3    |
| A_33_P3322348  | 1,54888 | 1,51416 | 1,024357995 | ENST00000374945 | 100996291 | NR_073178    | LOC100996291   |
| A_33_P3247325  | 1,50292 | 1,4682  | 1,024357995 | ENST00000508883 | 27039     | NM_001300921 | PKD2L2         |
| A_24_P344961   | 1,55877 | 1,52407 | 1,024343795 | ENST00000371959 | 154796    | NM_133265    | AMOT           |
| A_22_P00019401 | 1,63219 | 1,59749 | 1,024343795 | ENST00000615716 | N/A       | N/A          | N/A            |
| A_21_P0002320  | 1,37327 | 1,33858 | 1,024336694 | N/A             | N/A       | N/A          | Inc-HNRNPA3-4  |
| A_33_P3400253  | 1,44515 | 1,41048 | 1,024322494 | ENST00000327739 | 142827    | AK126134     | ACSM6          |
| A_22_P00008998 | 1,42259 | 1,38792 | 1,024322494 | ENST00000440358 | N/A       | N/A          | N/A            |
| A_33_P3733123  | 1,62823 | 1,59357 | 1,024315394 | N/A             | N/A       | N/A          | N/A            |
| A_22_P00009788 | 1,55182 | 1,51716 | 1,024315394 | ENST00000514662 | N/A       | N/A          | N/A            |
| A_22_P00014750 | 1,51835 | 1,4837  | 1,024308294 | ENST00000534128 | N/A       | BC035161     | N/A            |
| A_23_P385263   | 1,63787 | 1,60322 | 1,024308294 | ENST00000262450 | 26038     | NM_015557    | CHD5           |
| A_22_P00009456 | 1,457   | 1,42236 | 1,024301194 | N/A             | N/A       | N/A          | Inc-MACC1-1    |
| A_21_P0014084  | 1,51316 | 1,47853 | 1,024294094 | N/A             | 93463     | XR_108383    | LOC93463       |
| A_24_P933685   | 1,66024 | 1,62561 | 1,024294094 | N/A             | 643797    | XR_109223    | AGVR6190       |
| A_21_P0008300  | 1,56157 | 1,52694 | 1,024294094 | N/A             | N/A       | N/A          | Inc-DHRS2-3    |
| A_22_P00019586 | 1,47923 | 1,4446  | 1,024294094 | N/A             | 102723554 | XR_433666    | LOC102723554   |
| A_22_P00020630 | 1,60834 | 1,57372 | 1,024286994 | N/A             | N/A       | N/A          | Inc-RGS9-2     |
| A_22_P00000970 | 1,54542 | 1,5108  | 1,024286994 | N/A             | 102724152 | XR_426111    | LOC102724152   |
| A_22_P00018685 | 1,65332 | 1,61871 | 1,024279895 | ENST00000455576 | N/A       | XR_245195    | N/A            |
| A_33_P3300985  | 1,58473 | 1,55013 | 1,024272795 | ENST00000595532 | 101929344 | BC046635     | LINC01198      |
| A_23_P88776    | 1,62102 | 1,58643 | 1,024265695 | ENST00000219301 | 221191    | NM_001080492 | PRSS54         |
| A_21_P0003934  | 1,52959 | 1,49503 | 1,024244396 | N/A             | 101926960 | NR_104635    | LOC101926960   |
| A_33_P3229171  | 1,54132 | 1,50677 | 1,024237297 | ENST00000623354 | 392490    | NM_207422    | FLJ44635       |
| A_33_P3312217  | 1,53564 | 1,50109 | 1,024237297 | ENST00000510538 | N/A       | N/A          | N/A            |
| A_33_P3850104  | 1,59361 | 1,55906 | 1,024237297 | ENST00000451929 | N/A       | N/A          | N/A            |



|                |         |         |             |                 |           |              |                |
|----------------|---------|---------|-------------|-----------------|-----------|--------------|----------------|
| A_33_P3644503  | 1,61971 | 1,58517 | 1,024230198 | ENST00000412672 | 339568    | NR_027124    | LOC339568      |
| A_21_P0000429  | 1,56306 | 1,52852 | 1,024230198 | N/A             | 767561    | NR_003229    | SNORD113-1     |
| A_21_P0008372  | 1,55612 | 1,52159 | 1,024223098 | N/A             | N/A       | N/A          | Inc-GPR65-1    |
| A_22_P00018806 | 1,65429 | 1,61977 | 1,024215999 | N/A             | N/A       | N/A          | Inc-PRKD1-8    |
| A_21_P0009457  | 1,37124 | 1,33672 | 1,024215999 | N/A             | N/A       | N/A          | Inc-ANKRD62-1  |
| A_33_P3219790  | 1,46621 | 1,43171 | 1,0242018   | ENST00000417143 | N/A       | N/A          | N/A            |
| A_22_P00018109 | 1,70957 | 1,67507 | 1,0242018   | ENST00000609683 | 220929    | N/A          | ZNF438         |
| A_33_P3259560  | 4,33726 | 4,30277 | 1,024194701 | N/A             | N/A       | N/A          | N/A            |
| A_21_P0014161  | 1,38461 | 1,35013 | 1,024187602 | N/A             | 100505711 | XR_242019    | LOC100505711   |
| A_22_P00015118 | 1,40342 | 1,36894 | 1,024187602 | N/A             | 102724907 | XR_424697    | LOC102724907   |
| A_22_P00008548 | 1,62419 | 1,58972 | 1,024180503 | ENST00000450500 | N/A       | N/A          | N/A            |
| A_33_P3274642  | 1,48915 | 1,45468 | 1,024180503 | N/A             | 285175    | AK027583     | UNC80          |
| A_33_P3352038  | 1,55356 | 1,5191  | 1,024173404 | ENST00000536621 | 10071     | NM_001164462 | MUC12          |
| A_21_P0013544  | 1,64816 | 1,61371 | 1,024166305 | N/A             | 101929127 | N/A          | PGM5P3-AS1     |
| A_33_P3618434  | 1,53463 | 1,50019 | 1,024159206 | N/A             | N/A       | N/A          | N/A            |
| A_21_P0007267  | 1,679   | 1,64457 | 1,024152107 | N/A             | N/A       | N/A          | Inc-CEP57-1    |
| A_22_P00023220 | 1,64891 | 1,61448 | 1,024152107 | ENST00000551229 | N/A       | N/A          | N/A            |
| A_22_P00008721 | 1,67087 | 1,63644 | 1,024152107 | N/A             | N/A       | XM_005269673 | Inc-KIAA1598-1 |
| A_33_P3383276  | 1,62333 | 1,58891 | 1,024145008 | ENST00000322678 | 341416    | NM_054105    | OR6C2          |
| A_21_P0004710  | 1,73839 | 1,70398 | 1,024137909 | ENST00000446811 | 101929420 | NR_110870    | LOC101929420   |
| A_21_P0007213  | 2,25298 | 2,21857 | 1,024137909 | N/A             | N/A       | N/A          | Inc-MS4A8B-1   |
| A_33_P3322504  | 6,15378 | 6,11937 | 1,024137909 | N/A             | N/A       | N/A          | N/A            |
| A_21_P0007556  | 1,58748 | 1,55308 | 1,02413081  | ENST00000546821 | 101927292 | NR_110048    | LOC101927292   |
| A_23_P64792    | 11,9312 | 11,8968 | 1,02413081  | ENST00000258111 | 27345     | NM_014505    | KCNMB4         |
| A_32_P383681   | 1,47805 | 1,44366 | 1,024123712 | ENST00000494025 | 1768      | NM_001370    | DNAH6          |
| A_21_P0013275  | 1,62139 | 1,587   | 1,024123712 | N/A             | N/A       | N/A          | XLOC_I2_013636 |
| A_22_P00017057 | 1,4302  | 1,39581 | 1,024123712 | N/A             | N/A       | N/A          | Inc-TUBB2A-1   |
| A_33_P3313338  | 1,69552 | 1,66113 | 1,024123712 | ENST00000390445 | N/A       | AB305714     | N/A            |
| A_21_P0008297  | 1,58432 | 1,54994 | 1,024116613 | N/A             | N/A       | N/A          | Inc-RNASE6-2   |
| A_22_P00019347 | 1,70067 | 1,66629 | 1,024116613 | N/A             | 101928008 | NR_120539    | LOC101928008   |
| A_22_P00016627 | 1,52056 | 1,48618 | 1,024116613 | N/A             | 101927455 | NR_110812    | TMEM108-AS1    |
| A_22_P00001961 | 1,6507  | 1,61633 | 1,024109514 | ENST00000421597 | N/A       | N/A          | N/A            |
| A_22_P00021221 | 1,47308 | 1,43871 | 1,024109514 | ENST00000437466 | N/A       | N/A          | N/A            |

|                |         |         |             |                 |           |              |                      |
|----------------|---------|---------|-------------|-----------------|-----------|--------------|----------------------|
| A_23_P127781   | 1,60137 | 1,567   | 1,024109514 | ENST00000306238 | 10648     | NM_006552    | SCGB1D1              |
| A_24_P115511   | 7,34239 | 7,30803 | 1,024102416 | ENST00000373840 | 51552     | NM_016322    | RAB14                |
| A_33_P3330881  | 1,6262  | 1,59186 | 1,024088219 | ENST00000343399 | 390323    | NM_001005497 | OR6C75               |
| A_22_P00002050 | 1,64222 | 1,60789 | 1,02408112  | ENST00000567613 | N/A       | N/A          | N/A                  |
| A_22_P00002186 | 1,50731 | 1,47298 | 1,02408112  | ENST00000512310 | N/A       | N/A          | N/A                  |
| A_22_P00000549 | 1,50729 | 1,47297 | 1,024074022 | N/A             | N/A       | DA528960     | Inc-AC117834.1-1     |
| A_22_P00000758 | 1,59961 | 1,56529 | 1,024074022 | ENST00000504494 | N/A       | N/A          | N/A                  |
| A_33_P3313755  | 1,64755 | 1,61323 | 1,024074022 | ENST00000540591 | 653606    | NM_001100631 | PRAMEF22             |
| A_33_P3210146  | 1,53303 | 1,49871 | 1,024074022 | ENST00000368744 | 574414    | NM_001195571 | PRR9                 |
| A_33_P3371904  | 1,69735 | 1,66304 | 1,024066924 | ENST00000361477 | 23245     | NM_198188    | ASTN2                |
| A_22_P00013168 | 1,5684  | 1,5341  | 1,024059826 | ENST00000471176 | N/A       | N/A          | N/A                  |
| A_21_P0000813  | 1,50234 | 1,46807 | 1,024038531 | ENST00000507152 | 100506013 | NM_001297550 | APELA                |
| A_21_P0008318  | 1,59049 | 1,55622 | 1,024038531 | N/A             | N/A       | N/A          | Inc-BRMS1L-3         |
| A_33_P3287119  | 8,16036 | 8,1261  | 1,024031433 | ENST00000490605 | 51252     | NM_001122646 | FAM178B              |
| A_33_P3288624  | 1,38652 | 1,35226 | 1,024031433 | ENST00000231706 | 57709     | NM_020949    | SLC7A14              |
| A_22_P00013164 | 1,49318 | 1,45892 | 1,024031433 | ENST00000437334 | N/A       | N/A          | N/A                  |
| A_33_P3279920  | 7,14497 | 7,11071 | 1,024031433 | ENST00000477447 | 23435     | NM_007375    | TARDBP               |
| A_33_P3393175  | 6,69211 | 6,65786 | 1,024024335 | ENST00000253693 | 23473     | NM_014296    | CAPN7                |
| A_21_P0005773  | 1,45462 | 1,42037 | 1,024024335 | N/A             | N/A       | N/A          | Inc-CHRAC1-2         |
| A_21_P0008071  | 1,48813 | 1,45388 | 1,024024335 | ENST00000618134 | N/A       | N/A          | N/A                  |
| A_23_P117873   | 2,08    | 2,04576 | 1,024017237 | ENST00000557872 | 1133      | NM_012125    | CHRM5                |
| A_21_P0005057  | 1,65097 | 1,61674 | 1,024010139 | N/A             | N/A       | N/A          | Inc-HDDC2-1          |
| A_23_P95050    | 5,8285  | 5,79428 | 1,024003041 | ENST00000514499 | 27236     | NM_001025595 | ARFIP1               |
| A_22_P00010369 | 1,55413 | 1,51992 | 1,023995943 | ENST00000545202 | 102724265 | N/A          | LOC102724265         |
| A_21_P0005601  | 1,38795 | 1,35374 | 1,023995943 | N/A             | N/A       | N/A          | Inc-RP4-725G10.1.1-3 |
| A_33_P3323501  | 2,69222 | 2,65801 | 1,023995943 | ENST00000448599 | 644844    | NM_001145643 | PHGR1                |
| A_24_P168416   | 11,3938 | 11,3596 | 1,023988846 | ENST00000477555 | 7001      | NM_005809    | PRDX2                |
| A_23_P88381    | 11,0361 | 11,0019 | 1,023988846 | ENST00000555394 | 8650      | NM_001005743 | NUMB                 |
| A_21_P0000271  | 6,65661 | 6,62241 | 1,023988846 | ENST00000468362 | 619568    | NR_002588    | SNORA4               |
| A_22_P00001051 | 3,50271 | 3,46852 | 1,023981748 | N/A             | 101929721 | NR_125988    | LOC101929721         |
| A_21_P0011161  | 1,55952 | 1,52534 | 1,02397465  | ENST00000599264 | N/A       | N/A          | N/A                  |
| A_22_P00010099 | 1,46396 | 1,42978 | 1,02397465  | N/A             | N/A       | CU690027     | Inc-MRC2-1           |
| A_21_P0001061  | 1,69236 | 1,65819 | 1,023967553 | ENST00000456240 | N/A       | N/A          | N/A                  |

|                |         |         |             |                 |           |              |                |
|----------------|---------|---------|-------------|-----------------|-----------|--------------|----------------|
| A_23_P80200    | 1,61384 | 1,57968 | 1,023960455 | ENST00000473769 | 400891    | NM_001291006 | LRRC74B        |
| A_21_P0006772  | 1,72383 | 1,68967 | 1,023960455 | ENST00000455498 | N/A       | N/A          | N/A            |
| A_21_P0009580  | 1,55094 | 1,5168  | 1,02394626  | N/A             | N/A       | N/A          | Inc-FBXO15-3   |
| A_33_P3241135  | 1,37975 | 1,34562 | 1,023939163 | ENST00000472701 | 2918      | NM_000845    | GRM8           |
| A_24_P231010   | 1,44443 | 1,4103  | 1,023939163 | ENST00000419054 | 54456     | NM_018995    | MOV10L1        |
| A_22_P00023189 | 1,60793 | 1,57381 | 1,023932065 | N/A             | N/A       | N/A          | Inc-C11orf46-3 |
| A_21_P0003564  | 1,65245 | 1,61833 | 1,023932065 | N/A             | N/A       | N/A          | Inc-WFS1-1     |
| A_33_P3567967  | 13,7547 | 13,7206 | 1,023917871 | N/A             | 55338     | AK023417     | FLJ11292       |
| A_23_P11652    | 11,5995 | 11,5654 | 1,023917871 | ENST00000371146 | 7398      | NM_003368    | USP1           |
| A_33_P3303031  | 14,3197 | 14,2856 | 1,023917871 | N/A             | 643549    | BC133006     | LOC643549      |
| A_21_P0006390  | 1,62372 | 1,58963 | 1,023910773 | N/A             | N/A       | N/A          | Inc-TNFSF15-2  |
| A_23_P436369   | 1,52554 | 1,49145 | 1,023910773 | ENST00000498523 | 27145     | NM_015687    | FILIP1         |
| A_22_P00008554 | 1,68682 | 1,65273 | 1,023910773 | ENST00000425388 | 100820709 | NR_047465    | LINC00501      |
| A_23_P34307    | 9,78621 | 9,75213 | 1,023903676 | ENST00000370812 | 10026     | NM_005482    | PIGK           |
| A_21_P0013736  | 1,46655 | 1,43247 | 1,023903676 | ENST00000604258 | 100996569 | NR_102270    | NAMA           |
| A_22_P00008854 | 1,53979 | 1,50571 | 1,023903676 | N/A             | 100128325 | XR_252306    | LOC100128325   |
| A_33_P3391501  | 1,50495 | 1,47088 | 1,023896579 | ENST00000522279 | 286094    | NR_026706    | LOC286094      |
| A_21_P0011385  | 1,61396 | 1,57989 | 1,023896579 | N/A             | N/A       | N/A          | XLOC_I2_005020 |
| A_23_P253317   | 1,62031 | 1,58625 | 1,023889482 | ENST00000617554 | 29909     | NM_013308    | GPR171         |
| A_23_P71821    | 7,58118 | 7,54713 | 1,023882385 | ENST00000447726 | 5090      | NM_006195    | PBX3           |
| A_21_P0006594  | 1,54614 | 1,51209 | 1,023882385 | ENST00000457658 | 64595     | NR_001545    | TTY15          |
| A_33_P3388456  | 1,45274 | 1,4187  | 1,023875288 | ENST00000341294 | 339345    | NM_001029861 | NANOS2         |
| A_33_P3373975  | 1,51163 | 1,47759 | 1,023875288 | ENST00000396667 | 54664     | AK126686     | TMEM106B       |
| A_22_P00016368 | 1,50085 | 1,46682 | 1,023868191 | N/A             | N/A       | AA451834     | Inc-TMEM18-13  |
| A_21_P0010428  | 1,68256 | 1,64854 | 1,023861094 | N/A             | N/A       | N/A          | Inc-KLHDC7B-1  |
| A_32_P149435   | 1,57833 | 1,54431 | 1,023861094 | ENST00000379361 | 139411    | NM_173495    | PTCHD1         |
| A_23_P401691   | 1,63518 | 1,60117 | 1,023853997 | ENST00000484882 | 56896     | NM_020134    | DPYSL5         |
| A_21_P0007904  | 1,54692 | 1,51291 | 1,023853997 | N/A             | N/A       | N/A          | Inc-SLC15A4-2  |
| A_21_P0003651  | 1,56815 | 1,53414 | 1,023853997 | N/A             | 102724309 | XR_425774    | LOC102724309   |
| A_22_P00014183 | 1,53049 | 1,49648 | 1,023853997 | ENST00000584916 | N/A       | N/A          | N/A            |
| A_22_P00001708 | 1,75067 | 1,71666 | 1,023853997 | N/A             | N/A       | N/A          | Inc-ATG14-1    |
| A_33_P3369009  | 1,57288 | 1,53888 | 1,0238469   | N/A             | N/A       | N/A          | N/A            |
| A_33_P3310401  | 1,53899 | 1,505   | 1,023839804 | N/A             | N/A       | N/A          | N/A            |

|                |         |         |             |                 |           |              |                |
|----------------|---------|---------|-------------|-----------------|-----------|--------------|----------------|
| A_22_P00018348 | 6,79469 | 6,7607  | 1,023839804 | N/A             | N/A       | DB087096     | Inc-ZSCAN10-3  |
| A_21_P0003612  | 1,45594 | 1,42197 | 1,02382561  | N/A             | N/A       | N/A          | Inc-POLR2B-1   |
| A_19_P00322629 | 1,55664 | 1,52267 | 1,02382561  | ENST00000518540 | 100505718 | NR_039986    | LOC100505718   |
| A_22_P00001038 | 1,44741 | 1,41345 | 1,023818514 | ENST00000437777 | N/A       | N/A          | N/A            |
| A_21_P0007756  | 1,64525 | 1,61131 | 1,023804321 | N/A             | N/A       | N/A          | Inc-PRDM4-3    |
| A_33_P3256031  | 1,49814 | 1,4642  | 1,023804321 | ENST00000390357 | N/A       | A25970       | N/A            |
| A_33_P3369741  | 1,37921 | 1,34527 | 1,023804321 | ENST00000444900 | 283025    | NR_024340    | LINC01553      |
| A_22_P00003044 | 1,5872  | 1,55326 | 1,023804321 | ENST00000412410 | N/A       | N/A          | N/A            |
| A_21_P0008231  | 1,65077 | 1,61684 | 1,023797224 | N/A             | N/A       | N/A          | Inc-TNFRSF19-5 |
| A_22_P00010027 | 1,56411 | 1,53019 | 1,023790128 | N/A             | N/A       | N/A          | Inc-MMRN1-2    |
| A_33_P3370575  | 1,37084 | 1,33693 | 1,023783032 | ENST00000498096 | 4345      | NM_001004196 | CD200          |
| A_21_P0001785  | 1,58434 | 1,55043 | 1,023783032 | N/A             | N/A       | N/A          | Inc-ROCK2-3    |
| A_22_P00000973 | 1,46248 | 1,42857 | 1,023783032 | ENST00000618509 | N/A       | XR_109635    | N/A            |
| A_33_P3303762  | 1,44433 | 1,41042 | 1,023783032 | ENST00000610313 | 153657    | NM_144725    | TTC23L         |
| A_22_P00014647 | 1,62658 | 1,59268 | 1,023775935 | N/A             | N/A       | AK125767     | Inc-SLC19A3-1  |
| A_21_P0010039  | 1,51242 | 1,47852 | 1,023775935 | ENST00000428495 | 101927098 | XR_425242    | LOC101927098   |
| A_23_P29630    | 13,5553 | 13,5214 | 1,023775935 | ENST00000474945 | 28972     | NM_014041    | SPCS1          |
| A_33_P3256470  | 1,56591 | 1,53203 | 1,023761743 | N/A             | N/A       | N/A          | XLOC_I2_003109 |
| A_33_P3281606  | 1,51838 | 1,48452 | 1,023747551 | ENST00000263604 | 57582     | NM_001272003 | KCNT1          |
| A_21_P0007952  | 1,69101 | 1,65716 | 1,023740454 | ENST00000446314 | 100874128 | N/A          | LINC00333      |
| A_33_P3260667  | 1,43795 | 1,4041  | 1,023740454 | ENST00000328782 | 127068    | NM_001001821 | OR2T34         |
| A_22_P00009351 | 1,50093 | 1,46709 | 1,023733358 | N/A             | N/A       | N/A          | Inc-LRRK1-4    |
| A_33_P3374778  | 1,7834  | 1,74956 | 1,023733358 | N/A             | 400617    | NR_036534    | KCNJ2-AS1      |
| A_22_P00025632 | 1,56691 | 1,53307 | 1,023733358 | N/A             | N/A       | N/A          | Inc-DIO2-4     |
| A_33_P3310198  | 1,37274 | 1,33891 | 1,023726263 | N/A             | N/A       | N/A          | N/A            |
| A_33_P3326427  | 1,54784 | 1,51402 | 1,023719167 | ENST00000314721 | 81327     | NM_001005274 | OR4A16         |
| A_33_P3229042  | 1,52519 | 1,49137 | 1,023719167 | ENST00000317078 | 79473     | NM_001001913 | OR52N1         |
| A_22_P00008089 | 5,82887 | 5,79507 | 1,023704975 | N/A             | 101929655 | NR_120365    | TMC3-AS1       |
| A_22_P00011628 | 1,56307 | 1,52927 | 1,023704975 | ENST00000424357 | N/A       | N/A          | N/A            |
| A_33_P3244157  | 1,68486 | 1,65106 | 1,023704975 | N/A             | N/A       | N/A          | N/A            |
| A_32_P857658   | 18,329  | 18,2952 | 1,023704975 | ENST00000487304 | 6176      | NM_001003    | RPLP1          |
| A_22_P00017432 | 5,7838  | 5,75001 | 1,023697879 | N/A             | N/A       | N/A          | Inc-VN1R2-1    |
| A_32_P515088   | 9,47321 | 9,43943 | 1,023690783 | ENST00000406396 | 2531      | NM_002035    | KDSR           |

|                |         |         |             |                 |           |              |               |
|----------------|---------|---------|-------------|-----------------|-----------|--------------|---------------|
| A_22_P00000540 | 1,51439 | 1,48061 | 1,023690783 | ENST00000454927 | 101929926 | XR_431483    | LOC101929926  |
| A_21_P0004176  | 3,01314 | 2,97937 | 1,023683688 | N/A             | N/A       | N/A          | Inc-ZNF608-6  |
| A_22_P00002885 | 1,44509 | 1,41132 | 1,023683688 | ENST00000510034 | N/A       | N/A          | N/A           |
| A_33_P3366171  | 1,37807 | 1,34431 | 1,023676592 | ENST00000391403 | 64693     | NM_172241    | CTAGE1        |
| A_33_P3421053  | 1,64964 | 1,61588 | 1,023676592 | ENST00000333360 | 6401      | NM_000450    | SELE          |
| A_33_P3745020  | 1,56554 | 1,53179 | 1,023669497 | N/A             | 100126584 | XR_245591    | LOC100126584  |
| A_21_P0005908  | 1,38282 | 1,34907 | 1,023669497 | ENST00000518044 | 101927774 | NR_121673    | LINC00824     |
| A_33_P3212257  | 1,39564 | 1,36191 | 1,023655306 | ENST00000264790 | 22915     | NM_007351    | MMRN1         |
| A_22_P00010187 | 1,58395 | 1,55022 | 1,023655306 | ENST00000538640 | N/A       | CR740320     | N/A           |
| A_33_P3308142  | 1,37705 | 1,34334 | 1,023641115 | ENST00000560066 | 390651    | NR_046417    | OR4F13P       |
| A_21_P0003953  | 1,64065 | 1,60695 | 1,02363402  | ENST00000503188 | N/A       | N/A          | N/A           |
| A_22_P00015092 | 1,5425  | 1,5088  | 1,02363402  | N/A             | 100129662 | NR_038405    | FGF13-AS1     |
| A_23_P136916   | 11,177  | 11,1433 | 1,02363402  | ENST00000479279 | 64743     | NM_017883    | WDR13         |
| A_21_P0004498  | 1,56727 | 1,53358 | 1,023626924 | N/A             | N/A       | N/A          | Inc-CDH6-2    |
| A_33_P3469438  | 1,5841  | 1,55041 | 1,023626924 | N/A             | 401445    | AK057888     | LOC401445     |
| A_22_P00002642 | 1,55824 | 1,52455 | 1,023626924 | ENST00000582619 | N/A       | XR_250935    | N/A           |
| A_21_P0009883  | 1,37119 | 1,3375  | 1,023626924 | ENST00000456265 | 101929486 | N/A          | LOC101929486  |
| A_33_P3288904  | 7,7093  | 7,67561 | 1,023626924 | ENST00000466143 | 8874      | NM_003899    | ARHGEF7       |
| A_23_P34045    | 4,94411 | 4,91043 | 1,023619829 | ENST00000374552 | 1896      | NM_001399    | EDA           |
| A_22_P00010337 | 1,50702 | 1,47334 | 1,023619829 | N/A             | 101927200 | XR_244180    | LOC101927200  |
| A_21_P0010681  | 1,43561 | 1,40193 | 1,023619829 | ENST00000431838 | N/A       | N/A          | N/A           |
| A_24_P63136    | 1,68194 | 1,64827 | 1,023612734 | ENST00000325602 | 53829     | NM_176894    | P2RY13        |
| A_21_P0013743  | 1,42018 | 1,38652 | 1,023605639 | ENST00000426204 | N/A       | N/A          | N/A           |
| A_22_P00003247 | 2,46363 | 2,42997 | 1,023605639 | N/A             | 102725314 | N/A          | LOC102725314  |
| A_33_P3391791  | 1,55112 | 1,51747 | 1,023598544 | ENST00000485211 | 4340      | NM_206809    | MOG           |
| A_23_P74278    | 1,62728 | 1,59363 | 1,023598544 | ENST00000329654 | 5142      | NM_001037341 | PDE4B         |
| A_33_P3313366  | 1,39014 | 1,35649 | 1,023598544 | ENST00000383653 | 442184    | NM_001005226 | OR2B3         |
| A_21_P0001559  | 1,44593 | 1,4123  | 1,023584354 | N/A             | N/A       | N/A          | Inc-OLFM3-1   |
| A_24_P49106    | 1,48477 | 1,45114 | 1,023584354 | ENST00000372666 | 56849     | NM_152278    | TCEAL7        |
| A_21_P0001669  | 1,53282 | 1,4992  | 1,023577259 | N/A             | N/A       | N/A          | Inc-PTPRU-4   |
| A_22_P00012986 | 1,43189 | 1,39827 | 1,023577259 | ENST00000442716 | N/A       | N/A          | N/A           |
| A_22_P00021228 | 1,67277 | 1,63915 | 1,023577259 | ENST00000417800 | N/A       | N/A          | N/A           |
| A_21_P0004204  | 1,75217 | 1,71856 | 1,023570164 | N/A             | N/A       | N/A          | Inc-C5orf38-1 |

|                |         |         |             |                 |           |              |                |
|----------------|---------|---------|-------------|-----------------|-----------|--------------|----------------|
| A_21_P0004165  | 1,55777 | 1,52416 | 1,023570164 | N/A             | N/A       | N/A          | Inc-NUDT12-4   |
| A_22_P00017261 | 1,49425 | 1,46064 | 1,023570164 | N/A             | N/A       | AA447970     | Inc-UPF2-1     |
| A_23_P310372   | 1,64839 | 1,61478 | 1,023570164 | ENST00000276943 | 56832     | NM_020124    | IFNK           |
| A_23_P350591   | 1,64531 | 1,61171 | 1,023563069 | ENST00000380033 | 139105    | NM_153346    | BEND2          |
| A_21_P0011182  | 1,58771 | 1,55411 | 1,023563069 | ENST00000435067 | 103752581 | N/A          | LINC01055      |
| A_23_P33168    | 1,56782 | 1,53422 | 1,023563069 | ENST00000517776 | 6570      | NM_003053    | SLC18A1        |
| A_32_P103695   | 10,2706 | 10,237  | 1,023563069 | ENST00000620645 | 137392    | NM_145269    | FAM92A1        |
| A_33_P3270004  | 1,56098 | 1,52739 | 1,023555974 | N/A             | 100169890 | NR_023847    | PEG3-AS1       |
| A_22_P00014863 | 1,64183 | 1,60824 | 1,023555974 | N/A             | N/A       | N/A          | Inc-SLC5A8-2   |
| A_21_P0002345  | 1,64917 | 1,61559 | 1,02354888  | N/A             | N/A       | N/A          | Inc-ATIC-4     |
| A_23_P251031   | 1,54521 | 1,51164 | 1,023541785 | ENST00000617259 | 3596      | NM_002188    | IL13           |
| A_24_P106624   | 1,58948 | 1,55591 | 1,023541785 | ENST00000262041 | 4223      | NM_005924    | MEOX2          |
| A_21_P0004542  | 1,52931 | 1,49576 | 1,023527596 | N/A             | N/A       | N/A          | Inc-FAM153B-3  |
| A_21_P0001884  | 1,65555 | 1,622   | 1,023527596 | ENST00000439259 | 101927948 | N/A          | LOC101927948   |
| A_22_P00014831 | 1,55375 | 1,5202  | 1,023527596 | ENST00000565735 | N/A       | BC036630     | N/A            |
| A_21_P0010583  | 1,38151 | 1,34796 | 1,023527596 | N/A             | N/A       | N/A          | XLOC_I2_000691 |
| A_24_P235338   | 1,47614 | 1,4426  | 1,023520501 | ENST00000262209 | 8989      | NM_007332    | TRPA1          |
| A_21_P0003749  | 1,64194 | 1,60841 | 1,023513407 | N/A             | N/A       | N/A          | Inc-GPRIN3-1   |
| A_22_P00003716 | 1,53592 | 1,50239 | 1,023513407 | ENST00000580699 | N/A       | AK127888     | N/A            |
| A_23_P82379    | 1,39526 | 1,36173 | 1,023513407 | ENST00000356253 | 781       | NM_000722    | CACNA2D1       |
| A_32_P421816   | 1,62946 | 1,59594 | 1,023506312 | ENST00000532967 | 93034     | NM_001002006 | NT5C1B         |
| A_33_P3382924  | 4,16712 | 4,1336  | 1,023506312 | ENST00000620972 | 6678      | NM_003118    | SPARC          |
| A_21_P0006722  | 1,63293 | 1,59942 | 1,023499218 | ENST00000413993 | N/A       | N/A          | N/A            |
| A_21_P0011902  | 1,37446 | 1,34095 | 1,023499218 | ENST00000416607 | 101929551 | N/A          | LOC101929551   |
| A_22_P00023418 | 1,60535 | 1,57184 | 1,023499218 | ENST00000413244 | 102724900 | N/A          | LOC102724900   |
| A_33_P3220386  | 1,66342 | 1,62991 | 1,023499218 | ENST00000518619 | 157273    | AY203962     | LOC157273      |
| A_23_P42963    | 1,7385  | 1,70499 | 1,023499218 | ENST00000340112 | 168433    | NM_139175    | RNF133         |
| A_21_P0013546  | 1,51756 | 1,48405 | 1,023499218 | N/A             | N/A       | N/A          | XLOC_I2_014694 |
| A_21_P0009490  | 1,57225 | 1,53875 | 1,023492124 | ENST00000588794 | N/A       | N/A          | N/A            |
| A_22_P00006979 | 1,4587  | 1,4252  | 1,023492124 | ENST00000505564 | N/A       | N/A          | N/A            |
| A_22_P00012884 | 1,41508 | 1,38158 | 1,023492124 | N/A             | 100874190 | NR_046512    | SAMSN1-AS1     |
| A_21_P0014043  | 1,49464 | 1,46115 | 1,023485029 | ENST00000400522 | N/A       | N/A          | N/A            |
| A_21_P0007562  | 1,46507 | 1,43159 | 1,023477935 | N/A             | N/A       | N/A          | Inc-HOXC4-4    |

|                |         |         |             |                 |           |              |                |
|----------------|---------|---------|-------------|-----------------|-----------|--------------|----------------|
| A_33_P3211098  | 1,5071  | 1,47363 | 1,023470841 | N/A             | N/A       | N/A          | N/A            |
| A_33_P3410604  | 1,62449 | 1,59103 | 1,023463747 | ENST00000613251 | 158724    | NM_203408    | FAM47A         |
| A_21_P0006709  | 1,65457 | 1,62111 | 1,023463747 | ENST00000436975 | N/A       | XR_424165    | N/A            |
| A_22_P00016343 | 1,37811 | 1,34466 | 1,023456653 | ENST00000443971 | N/A       | N/A          | N/A            |
| A_33_P3389673  | 1,53951 | 1,50607 | 1,023449559 | ENST00000302040 | 219981    | NM_001001954 | OR5A2          |
| A_21_P0010971  | 1,60303 | 1,56959 | 1,023449559 | N/A             | N/A       | N/A          | XLOC_I2_002290 |
| A_21_P0004213  | 1,5786  | 1,54517 | 1,023442465 | N/A             | N/A       | N/A          | Inc-ADAMTS16-4 |
| A_24_P936111   | 1,45397 | 1,42055 | 1,023435371 | N/A             | 100132099 | AY358798     | LOC100132099   |
| A_22_P00023199 | 1,57311 | 1,53969 | 1,023435371 | ENST00000472120 | 101928405 | XR_241610    | LOC101928405   |
| A_33_P3284453  | 1,61684 | 1,58343 | 1,023428277 | ENST00000472335 | 387104    | NM_001012279 | SOGA3          |
| A_23_P85240    | 1,63854 | 1,60513 | 1,023428277 | ENST00000380659 | 51284     | NM_016562    | TLR7           |
| A_32_P184279   | 13,4478 | 13,4144 | 1,023421183 | ENST00000263102 | 8030      | NM_005436    | CCDC6          |
| A_23_P121144   | 1,54473 | 1,51133 | 1,023421183 | ENST00000470991 | 131375    | XM_006712968 | LYZL4          |
| A_33_P3235987  | 11,4034 | 11,37   | 1,023421183 | ENST00000451079 | 5303      | NM_006223    | PIN4           |
| A_23_P87709    | 13,4237 | 13,3903 | 1,023421183 | ENST00000240617 | 79887     | NM_024829    | PLBD1          |
| A_33_P3413558  | 1,47762 | 1,44423 | 1,023414089 | ENST00000280200 | 10666     | XM_005266642 | CD226          |
| A_22_P00000458 | 1,94252 | 1,90913 | 1,023414089 | ENST00000506463 | 101926904 | N/A          | LINC01265      |
| A_22_P00016930 | 1,75056 | 1,71718 | 1,023406995 | ENST00000426413 | N/A       | N/A          | N/A            |
| A_33_P3321317  | 1,69745 | 1,66408 | 1,023399902 | ENST00000443512 | 389158    | NM_001085420 | PLSCR5         |
| A_33_P3287233  | 1,72877 | 1,6954  | 1,023399902 | N/A             | N/A       | XM_006710260 | Inc-RHOXF2-1   |
| A_22_P00020127 | 1,45515 | 1,42178 | 1,023399902 | N/A             | 100506776 | NR_040085    | TRG-AS1        |
| A_22_P00023845 | 1,61315 | 1,57979 | 1,023392808 | ENST00000456621 | N/A       | N/A          | N/A            |
| A_21_P0011844  | 1,74727 | 1,71391 | 1,023392808 | N/A             | N/A       | N/A          | XLOC_I2_007541 |
| A_21_P0006288  | 1,46127 | 1,42791 | 1,023392808 | N/A             | N/A       | N/A          | Inc-CDK20-4    |
| A_22_P00025101 | 1,73652 | 1,70317 | 1,023385715 | ENST00000380970 | 401337    | NR_038371    | LINC01446      |
| A_21_P0006155  | 1,64702 | 1,61367 | 1,023385715 | N/A             | N/A       | N/A          | Inc-RORB-2     |
| A_21_P0013048  | 1,37505 | 1,3417  | 1,023385715 | N/A             | N/A       | N/A          | XLOC_I2_012806 |
| A_23_P352990   | 1,44782 | 1,41447 | 1,023385715 | ENST00000324988 | 246705    | NR_027246    | LINC00314      |
| A_21_P0003769  | 1,64633 | 1,61298 | 1,023385715 | N/A             | 102724210 | XR_425772    | LOC102724210   |
| A_21_P0001979  | 1,62129 | 1,58794 | 1,023385715 | ENST00000437967 | N/A       | N/A          | N/A            |
| A_21_P0003723  | 1,62204 | 1,5887  | 1,023378621 | N/A             | N/A       | N/A          | Inc-RAB28-3    |
| A_33_P3366301  | 1,62571 | 1,59238 | 1,023371528 | ENST00000552957 | 387978    | NR_026732    | LINC01551      |
| A_22_P00004672 | 1,62246 | 1,58913 | 1,023371528 | ENST00000564059 | N/A       | BC047414     | N/A            |

|                |         |         |             |                 |        |              |                |
|----------------|---------|---------|-------------|-----------------|--------|--------------|----------------|
| A_22_P00021623 | 1,49927 | 1,46596 | 1,023357341 | N/A             | N/A    | N/A          | Inc-KIAA0895-1 |
| A_22_P00019191 | 1,62487 | 1,59156 | 1,023357341 | ENST00000564381 | N/A    | N/A          | N/A            |
| A_33_P3419880  | 1,65467 | 1,62137 | 1,023350247 | ENST00000497634 | 158326 | N/A          | FREM1          |
| A_22_P00019572 | 1,52683 | 1,49353 | 1,023350247 | N/A             | 729220 | NM_001242791 | FLJ45513       |
| A_22_P00013323 | 1,61953 | 1,58623 | 1,023350247 | ENST00000563866 | N/A    | N/A          | N/A            |
| A_33_P3286312  | 1,49324 | 1,45994 | 1,023350247 | ENST00000530412 | 440041 | N/A          | TRIM51HP       |
| A_33_P3384427  | 1,54777 | 1,51448 | 1,023343154 | N/A             | N/A    | N/A          | N/A            |
| A_22_P00013094 | 1,40103 | 1,36775 | 1,023336061 | N/A             | N/A    | AK125876     | Inc-RIIAD1-1   |
| A_22_P00017481 | 1,64404 | 1,61076 | 1,023336061 | ENST00000440357 | 284798 | NR_027091    | LOC284798      |
| A_22_P00015585 | 1,68    | 1,64673 | 1,023328968 | ENST00000534120 | N/A    | N/A          | N/A            |
| A_22_P00010828 | 2,06214 | 2,02888 | 1,023321874 | N/A             | N/A    | CN352709     | Inc-NNT-3      |
| A_21_P0002918  | 1,55841 | 1,52515 | 1,023321874 | ENST00000444379 | N/A    | N/A          | N/A            |
| A_23_P151662   | 9,07675 | 9,0435  | 1,023314781 | ENST00000554709 | 4149   | NM_197957    | MAX            |
| A_33_P3278152  | 7,51658 | 7,48333 | 1,023314781 | N/A             | N/A    | N/A          | N/A            |
| A_33_P3284813  | 1,64585 | 1,6126  | 1,023314781 | ENST00000529198 | 387638 | NM_001177483 | C10orf113      |
| A_22_P00020302 | 1,51268 | 1,47944 | 1,023307688 | N/A             | N/A    | BC039357     | Inc-CALM1-6    |
| A_23_P29663    | 4,4265  | 4,39326 | 1,023307688 | ENST00000475688 | 51364  | NM_015896    | ZMYND10        |
| A_24_P548060   | 1,60033 | 1,5671  | 1,023300595 | ENST00000419499 | N/A    | AK056689     | N/A            |
| A_22_P00003380 | 1,51213 | 1,47892 | 1,023286409 | ENST00000577835 | N/A    | CR740139     | N/A            |
| A_24_P339611   | 14,2959 | 14,2627 | 1,023279317 | ENST00000221784 | 9141   | NM_004708    | PDCD5          |
| A_33_P3262495  | 11,8942 | 11,861  | 1,023279317 | ENST00000372524 | 84858  | NM_032772    | ZNF503         |
| A_22_P00017373 | 9,58729 | 9,5541  | 1,023272224 | N/A             | N/A    | BI464920     | Inc-UTS2-1     |
| A_22_P00012346 | 1,50076 | 1,46759 | 1,023258038 | N/A             | N/A    | BG184512     | Inc-PRDM4-4    |
| A_22_P00009069 | 1,64797 | 1,6148  | 1,023258038 | ENST00000524059 | 286135 | NR_024473    | FAM183CP       |
| A_33_P3250820  | 1,56439 | 1,53122 | 1,023258038 | ENST00000280481 | 341640 | NM_207361    | FREM2          |
| A_22_P00004298 | 1,73177 | 1,6986  | 1,023258038 | ENST00000429137 | N/A    | N/A          | N/A            |
| A_22_P00011281 | 1,66589 | 1,63273 | 1,023250946 | ENST00000508616 | N/A    | BC104637     | N/A            |
| A_22_P00009124 | 1,5248  | 1,49164 | 1,023250946 | ENST00000564385 | N/A    | BC016176     | N/A            |
| A_33_P3404974  | 1,63827 | 1,60512 | 1,023243853 | ENST00000244799 | 221391 | NM_181744    | OPN5           |
| A_33_P3359543  | 9,99139 | 9,95825 | 1,02323676  | N/A             | 93134  | NM_152289    | ZNF561         |
| A_21_P0010063  | 1,70564 | 1,67252 | 1,023222575 | N/A             | N/A    | N/A          | Inc-GCNT7-1    |
| A_33_P3467748  | 1,38368 | 1,35056 | 1,023222575 | N/A             | N/A    | N/A          | N/A            |
| A_22_P00002495 | 1,60837 | 1,57526 | 1,023215483 | ENST00000566641 | N/A    | N/A          | N/A            |



|                |         |         |             |                 |           |              |                  |
|----------------|---------|---------|-------------|-----------------|-----------|--------------|------------------|
| A_24_P161144   | 6,60468 | 6,57157 | 1,023215483 | ENST00000315678 | 283933    | NM_001136509 | ZNF843           |
| A_21_P0007764  | 1,53655 | 1,50345 | 1,023208391 | N/A             | N/A       | N/A          | Inc-TBX3-1       |
| A_22_P00009074 | 1,50508 | 1,47198 | 1,023208391 | ENST00000522158 | 101929450 | NR_125816    | LOC101929450     |
| A_23_P355824   | 12,7591 | 12,726  | 1,023208391 | ENST00000399577 | 23295     | NM_015246    | MGRN1            |
| A_23_P128991   | 15,3963 | 15,3632 | 1,023208391 | ENST00000556956 | 81892     | NM_031210    | SLIRP            |
| A_32_P213091   | 1,56683 | 1,53374 | 1,023201298 | ENST00000423335 | 729993    | NM_001145205 | SHISA9           |
| A_22_P00024932 | 1,50854 | 1,47546 | 1,023194206 | N/A             | 101928163 | NR_110799    | LOC101928163     |
| A_33_P3270332  | 1,73134 | 1,69827 | 1,023187114 | ENST00000373508 | 100287792 | N/A          | LOC100287792     |
| A_21_P0005489  | 1,47935 | 1,44628 | 1,023187114 | N/A             | N/A       | N/A          | Inc-HERPUD2-1    |
| A_22_P00000427 | 8,04849 | 8,01542 | 1,023187114 | N/A             | 100507171 | NR_045637    | BOLA3-AS1        |
| A_21_P0003251  | 1,37048 | 1,33742 | 1,023180022 | N/A             | N/A       | N/A          | Inc-COL6A6-1     |
| A_33_P3378680  | 1,42045 | 1,38739 | 1,023180022 | N/A             | N/A       | N/A          | N/A              |
| A_22_P00000124 | 1,4579  | 1,42484 | 1,023180022 | N/A             | N/A       | N/A          | Inc-A1CF-2       |
| A_22_P00025086 | 1,46731 | 1,43426 | 1,02317293  | ENST00000548764 | N/A       | DB020179     | N/A              |
| A_33_P3248843  | 1,63404 | 1,60099 | 1,02317293  | ENST00000409758 | N/A       | N/A          | N/A              |
| A_33_P3755126  | 1,57809 | 1,54505 | 1,023165838 | ENST00000481578 | 646168    | NR_033843    | LINC01330        |
| A_22_P00020047 | 1,44588 | 1,41284 | 1,023165838 | ENST00000415283 | N/A       | N/A          | N/A              |
| A_22_P00022829 | 1,75175 | 1,71871 | 1,023165838 | ENST00000503953 | N/A       | N/A          | N/A              |
| A_21_P0013936  | 1,51846 | 1,48542 | 1,023165838 | N/A             | 100287651 | XM_002342853 | LOC100287651     |
| A_33_P3259954  | 1,62643 | 1,5934  | 1,023158746 | N/A             | N/A       | N/A          | N/A              |
| A_22_P00006745 | 1,50101 | 1,46799 | 1,023151654 | ENST00000559570 | N/A       | N/A          | N/A              |
| A_22_P00013159 | 4,39533 | 4,36231 | 1,023151654 | ENST00000575165 | 7732      | NM_007148    | RNF112           |
| A_22_P00001610 | 1,7099  | 1,67689 | 1,023144562 | ENST00000554798 | N/A       | N/A          | N/A              |
| A_21_P0014339  | 1,5361  | 1,5031  | 1,02313747  | N/A             | N/A       | N/A          | Inc-AC009113.1-1 |
| A_24_P415150   | 1,4482  | 1,41521 | 1,023130378 | ENST00000341700 | 9630      | NM_004297    | GNA14            |
| A_22_P00005766 | 1,38429 | 1,35131 | 1,023123286 | N/A             | N/A       | N/A          | Inc-ENOSF1-2     |
| A_22_P00018514 | 1,54228 | 1,50931 | 1,023116194 | N/A             | 102724341 | NR_120675    | NEURL1-AS1       |
| A_22_P00025900 | 1,39699 | 1,36403 | 1,023109103 | ENST00000508942 | N/A       | N/A          | N/A              |
| A_21_P0014760  | 1,66251 | 1,62955 | 1,023109103 | N/A             | 100506557 | XR_132524    | LOC100506557     |
| A_21_P0011705  | 1,55538 | 1,52243 | 1,023102011 | N/A             | N/A       | N/A          | XLOC_I2_006797   |
| A_21_P0000010  | 1,64334 | 1,6104  | 1,02309492  | ENST00000542713 | 2289      | NM_001145777 | FKBP5            |
| A_33_P3362915  | 1,39177 | 1,35883 | 1,02309492  | ENST00000513677 | 2993      | NM_002099    | GYPA             |
| A_21_P0009415  | 1,49551 | 1,46259 | 1,023080737 | N/A             | N/A       | N/A          | Inc-BTBD17-4     |

|                |         |         |             |                 |           |              |                |
|----------------|---------|---------|-------------|-----------------|-----------|--------------|----------------|
| A_21_P0007664  | 1,4644  | 1,43148 | 1,023080737 | N/A             | N/A       | N/A          | Inc-TMEM132C-6 |
| A_33_P3382276  | 1,64986 | 1,61695 | 1,023073645 | ENST00000468614 | 6480      | N/A          | ST6GAL1        |
| A_23_P112429   | 18,3381 | 18,3052 | 1,023066554 | ENST00000348462 | 11224     | NM_007209    | RPL35          |
| A_32_P130265   | 11,9012 | 11,8683 | 1,023066554 | ENST00000495527 | 9877      | NM_014827    | ZC3H11A        |
| A_22_P00004276 | 1,39109 | 1,35821 | 1,023052371 | N/A             | N/A       | N/A          | Inc-CNN1-2     |
| A_33_P3316522  | 5,08778 | 5,05491 | 1,02304528  | ENST00000317676 | 245937    | NM_001037500 | DEFB124        |
| A_23_P105436   | 8,07136 | 8,03849 | 1,02304528  | ENST00000392597 | 5781      | NM_002834    | PTPN11         |
| A_21_P0010977  | 1,63763 | 1,60476 | 1,02304528  | ENST00000527482 | 92292     | NM_001220494 | GLYATL1        |
| A_24_P113572   | 1,47242 | 1,43955 | 1,02304528  | ENST00000313237 | 112885    | NM_138415    | PHF21B         |
| A_21_P0004701  | 1,37077 | 1,33791 | 1,023038189 | ENST00000448126 | N/A       | N/A          | N/A            |
| A_21_P0007771  | 1,6633  | 1,63044 | 1,023038189 | N/A             | N/A       | N/A          | Inc-TAOK3-2    |
| A_33_P3416644  | 1,43835 | 1,4055  | 1,023031098 | N/A             | N/A       | N/A          | N/A            |
| A_22_P00003925 | 1,53418 | 1,50134 | 1,023024006 | ENST00000518436 | 101929495 | NR_120601    | LINC01339      |
| A_33_P3222942  | 3,97191 | 3,93907 | 1,023024006 | N/A             | 27201     | NM_080819    | GPR78          |
| A_21_P0005460  | 1,72503 | 1,6922  | 1,023016915 | ENST00000437428 | 100996541 | NR_126161    | FAM157C        |
| A_21_P0011992  | 1,55065 | 1,51782 | 1,023016915 | ENST00000431542 | N/A       | N/A          | N/A            |
| A_21_P0001027  | 1,46798 | 1,43515 | 1,023016915 | N/A             | 101928596 | XR_250898    | LOC101928596   |
| A_21_P0008153  | 1,53241 | 1,49959 | 1,023009824 | N/A             | N/A       | N/A          | Inc-NUFIP1-1   |
| A_23_P2825     | 1,51414 | 1,48133 | 1,023002733 | ENST00000377844 | 57626     | NM_020866    | KLHL1          |
| A_33_P3335910  | 1,57339 | 1,54058 | 1,023002733 | ENST00000341594 | 23345     | NM_033071    | SYNE1          |
| A_33_P3728979  | 1,67771 | 1,64491 | 1,022995643 | ENST00000511718 | 167555    | NM_205548    | FAM151B        |
| A_24_P88800    | 10,6157 | 10,5829 | 1,022995643 | ENST00000607768 | 9167      | NM_004718    | COX7A2L        |
| A_33_P3230037  | 13,0785 | 13,0457 | 1,022995643 | N/A             | N/A       | AF336885     | N/A            |
| A_33_P3806704  | 1,69546 | 1,66268 | 1,022981461 | N/A             | N/A       | N/A          | N/A            |
| A_32_P40288    | 1,54169 | 1,50891 | 1,022981461 | ENST00000392429 | 114801    | NM_052913    | TMEM200A       |
| A_21_P0001675  | 1,69121 | 1,65845 | 1,02296728  | N/A             | N/A       | N/A          | Inc-PPIE-3     |
| A_22_P00018034 | 1,49772 | 1,46497 | 1,022960189 | N/A             | N/A       | N/A          | Inc-ZNF236-1   |
| A_21_P0005216  | 1,64184 | 1,60909 | 1,022960189 | ENST00000448898 | N/A       | N/A          | N/A            |
| A_21_P0007468  | 1,39878 | 1,36603 | 1,022960189 | N/A             | N/A       | N/A          | Inc-PDGF1-1    |
| A_21_P0000608  | 1,91266 | 1,87992 | 1,022953098 | ENST00000447470 | 644694    | N/A          | CDRT15P2       |
| A_21_P0010242  | 1,61968 | 1,58694 | 1,022953098 | N/A             | N/A       | N/A          | Inc-DYRK1A-1   |
| A_22_P00001107 | 1,40322 | 1,37048 | 1,022953098 | N/A             | 101929418 | XR_427015    | LOC101929418   |
| A_33_P3255706  | 1,66165 | 1,62891 | 1,022953098 | ENST00000368144 | 128371    | NM_001005184 | OR6K6          |

|                |         |         |             |                 |           |              |                  |
|----------------|---------|---------|-------------|-----------------|-----------|--------------|------------------|
| A_21_P0002567  | 1,67533 | 1,64261 | 1,022938917 | N/A             | N/A       | N/A          | Inc-SOX11-3      |
| A_33_P3366471  | 1,41516 | 1,38244 | 1,022938917 | N/A             | N/A       | N/A          | N/A              |
| A_33_P3223909  | 1,5595  | 1,52679 | 1,022931827 | ENST00000309415 | 344558    | NM_001099289 | SH3RF3           |
| A_21_P0006374  | 3,03016 | 2,99746 | 1,022924736 | N/A             | N/A       | N/A          | Inc-C9orf86-1    |
| A_33_P3507384  | 1,58335 | 1,55065 | 1,022924736 | ENST00000566553 | 152274    | XR_245184    | LOC152274        |
| A_21_P0002190  | 1,3992  | 1,36651 | 1,022917646 | N/A             | N/A       | N/A          | Inc-BRE-1        |
| A_21_P0012687  | 1,51543 | 1,48274 | 1,022917646 | N/A             | N/A       | N/A          | XLOC_I2_011302   |
| A_33_P3749100  | 1,48078 | 1,4481  | 1,022910556 | N/A             | 285045    | N/A          | LINC00486        |
| A_21_P0003576  | 1,53892 | 1,50625 | 1,022903465 | N/A             | N/A       | N/A          | Inc-CPEB2-8      |
| A_21_P0008015  | 1,57903 | 1,54637 | 1,022896375 | ENST00000433569 | N/A       | N/A          | N/A              |
| A_33_P3350423  | 1,62682 | 1,59416 | 1,022896375 | ENST00000375116 | 30814     | NM_014589    | PLA2G2E          |
| A_22_P00000168 | 1,52072 | 1,48807 | 1,022889285 | N/A             | N/A       | N/A          | Inc-ABCC3-1      |
| A_21_P0002868  | 1,42713 | 1,39448 | 1,022889285 | ENST00000496943 | 101929579 | N/A          | LOC101929579     |
| A_33_P3337049  | 1,59074 | 1,5581  | 1,022882195 | ENST00000443437 | 2742      | NM_001118886 | GLRA2            |
| A_21_P0005993  | 1,52482 | 1,49218 | 1,022882195 | ENST00000417850 | N/A       | N/A          | N/A              |
| A_22_P00023891 | 1,68242 | 1,64979 | 1,022875105 | ENST00000424678 | N/A       | N/A          | N/A              |
| A_21_P0001522  | 1,37531 | 1,34269 | 1,022868015 | N/A             | N/A       | N/A          | Inc-ELTD1-5      |
| A_33_P3423755  | 1,64241 | 1,60979 | 1,022868015 | ENST00000425630 | 399706    | N/A          | LINC00200        |
| A_33_P3245484  | 7,07736 | 7,04475 | 1,022860925 | N/A             | 100131000 | AK124361     | LOC100131000     |
| A_22_P00021003 | 1,7028  | 1,6702  | 1,022853835 | N/A             | N/A       | N/A          | Inc-HDAC9-2      |
| A_24_P393611   | 4,78666 | 4,75407 | 1,022846745 | ENST00000564798 | 2775      | NM_138736    | GNAO1            |
| A_33_P3412548  | 1,49258 | 1,45999 | 1,022846745 | N/A             | 100134423 | XR_112192    | LOC100134423     |
| A_22_P00004011 | 1,37423 | 1,34164 | 1,022846745 | N/A             | N/A       | N/A          | Inc-CHMP4C-2     |
| A_21_P0007358  | 1,53955 | 1,50696 | 1,022846745 | N/A             | N/A       | N/A          | Inc-AHNAK-3      |
| A_22_P00004591 | 1,46679 | 1,43421 | 1,022839655 | ENST00000565955 | N/A       | BC015716     | N/A              |
| A_22_P00021571 | 1,56401 | 1,53143 | 1,022839655 | N/A             | N/A       | N/A          | Inc-CR392000.1-1 |
| A_22_P00022078 | 1,48858 | 1,45601 | 1,022832566 | ENST00000457833 | N/A       | N/A          | N/A              |
| A_21_P0004170  | 1,6017  | 1,56913 | 1,022832566 | ENST00000504419 | 102467223 | N/A          | LOC102467223     |
| A_33_P3408269  | 1,51145 | 1,47889 | 1,022825476 | ENST00000376312 | 245934    | NM_001171832 | DEFB121          |
| A_23_P137931   | 1,63685 | 1,60429 | 1,022825476 | ENST00000241356 | 140       | NM_000677    | ADORA3           |
| A_33_P3267033  | 1,61868 | 1,58612 | 1,022825476 | N/A             | 100130169 | AK130403     | LOC100130169     |
| A_33_P3231695  | 7,90002 | 7,86747 | 1,022818386 | ENST00000592189 | 63934     | NM_022103    | ZNF667           |
| A_22_P00012055 | 7,61724 | 7,58469 | 1,022818386 | ENST00000300087 | 84516     | NM_001199743 | DCTN5            |

|                |         |         |             |                 |           |              |                       |
|----------------|---------|---------|-------------|-----------------|-----------|--------------|-----------------------|
| A_21_P0002174  | 1,52335 | 1,49081 | 1,022811297 | N/A             | N/A       | N/A          | Inc-TRIB2-4           |
| A_32_P795513   | 1,64355 | 1,61103 | 1,022797118 | ENST00000420581 | 56203     | AK057852     | LMOD3                 |
| A_22_P00007525 | 1,5133  | 1,48078 | 1,022797118 | N/A             | N/A       | BQ654366     | Inc-HABP4-2           |
| A_21_P0004947  | 1,44715 | 1,41463 | 1,022797118 | N/A             | N/A       | N/A          | Inc-TNFAIP3-5         |
| A_22_P00002931 | 1,52963 | 1,49712 | 1,022790028 | N/A             | N/A       | BX113371     | Inc-C5orf35-1         |
| A_21_P0001841  | 1,54081 | 1,5083  | 1,022790028 | ENST00000432822 | N/A       | N/A          | N/A                   |
| A_33_P3276450  | 1,64669 | 1,61418 | 1,022790028 | ENST00000447830 | 375686    | NM_198572    | SPATC1                |
| A_22_P00001392 | 1,66379 | 1,63129 | 1,022782939 | N/A             | N/A       | BG193821     | Inc-AP4E1-1           |
| A_22_P00014562 | 1,38786 | 1,35536 | 1,022782939 | N/A             | N/A       | N/A          | Inc-SKA2-1            |
| A_21_P0010988  | 1,53122 | 1,49873 | 1,022775849 | N/A             | N/A       | N/A          | XLOC_I2_002423        |
| A_23_P32805    | 1,68112 | 1,64864 | 1,02276876  | ENST00000464741 | 2894      | NM_017551    | GRID1                 |
| A_22_P00001839 | 1,66606 | 1,63358 | 1,02276876  | N/A             | N/A       | N/A          | Inc-ATR-1             |
| A_21_P0010111  | 1,56479 | 1,53232 | 1,022761671 | N/A             | N/A       | N/A          | Inc-FOXA2-3           |
| A_22_P00004460 | 1,63793 | 1,60547 | 1,022754582 | ENST00000511200 | 152742    | NR_033931    | LINC01085             |
| A_22_P00013308 | 1,53639 | 1,50396 | 1,022733314 | N/A             | N/A       | BJ989483     | Inc-RP11-115C10.1.1-1 |
| A_21_P0001008  | 1,48201 | 1,44958 | 1,022733314 | ENST00000417218 | N/A       | N/A          | N/A                   |
| A_33_P3421808  | 1,68625 | 1,65382 | 1,022733314 | N/A             | N/A       | N/A          | N/A                   |
| A_24_P315862   | 5,99407 | 5,96165 | 1,022726225 | ENST00000612474 | N/A       | S73508       | N/A                   |
| A_33_P3318069  | 4,33119 | 4,29877 | 1,022726225 | N/A             | N/A       | N/A          | N/A                   |
| A_19_P00316257 | 1,53613 | 1,50371 | 1,022726225 | N/A             | 101927668 | N/A          | LOC101927668          |
| A_33_P6820146  | 1,37163 | 1,33923 | 1,022712047 | ENST00000477518 | 23145     | NM_198455    | SSPO                  |
| A_21_P0008321  | 1,55486 | 1,52246 | 1,022712047 | N/A             | 101927291 | XR_245754    | LOC101927291          |
| A_21_P0005717  | 1,66203 | 1,62963 | 1,022712047 | N/A             | 102724772 | XR_426328    | LOC102724772          |
| A_22_P00007318 | 1,40635 | 1,37396 | 1,022704958 | ENST00000556673 | 283587    | N/A          | LINC01146             |
| A_22_P00011119 | 1,45365 | 1,42126 | 1,022704958 | N/A             | N/A       | N/A          | Inc-NUFIP2-1          |
| A_23_P105524   | 1,45056 | 1,41817 | 1,022704958 | ENST00000539875 | 89869     | NM_033123    | PLCZ1                 |
| A_21_P0003654  | 1,58787 | 1,55549 | 1,02269787  | N/A             | N/A       | N/A          | Inc-CCRN4L-8          |
| A_22_P00015289 | 4,33003 | 4,29765 | 1,02269787  | N/A             | 100861402 | NR_045786    | CERS6-AS1             |
| A_22_P00012236 | 1,50918 | 1,4768  | 1,02269787  | ENST00000508992 | 101927379 | NR_109881    | LOC101927379          |
| A_21_P0013493  | 1,63843 | 1,60607 | 1,022683692 | ENST00000519714 | 101929488 | N/A          | LOC101929488          |
| A_21_P0014266  | 1,68499 | 1,65264 | 1,022676603 | N/A             | N/A       | XR_132956    | N/A                   |
| A_33_P3400678  | 1,61196 | 1,57962 | 1,022669515 | ENST00000394256 | 341418    | NM_001005494 | OR6C4                 |
| A_22_P00014639 | 4,00037 | 3,96804 | 1,022662426 | N/A             | N/A       | N/A          | Inc-SLC17A9-1         |

|                |         |         |             |                 |           |              |                      |
|----------------|---------|---------|-------------|-----------------|-----------|--------------|----------------------|
| A_21_P0012532  | 1,52702 | 1,49469 | 1,022662426 | ENST00000424366 | 101927347 | N/A          | GRM7-AS3             |
| A_23_P16953    | 1,5264  | 1,49407 | 1,022662426 | ENST00000258400 | 3357      | NM_000867    | HTR2B                |
| A_33_P3238529  | 1,51811 | 1,48579 | 1,022655338 | N/A             | N/A       | N/A          | N/A                  |
| A_33_P3225128  | 1,50975 | 1,47743 | 1,022655338 | N/A             | N/A       | N/A          | N/A                  |
| A_21_P0013879  | 1,47919 | 1,44688 | 1,022648249 | ENST00000430079 | N/A       | N/A          | N/A                  |
| A_22_P00015027 | 1,54578 | 1,51347 | 1,022648249 | ENST00000551732 | N/A       | N/A          | N/A                  |
| A_21_P0003417  | 1,59441 | 1,56211 | 1,022641161 | ENST00000513617 | N/A       | N/A          | N/A                  |
| A_23_P157027   | 1,52216 | 1,48986 | 1,022641161 | ENST00000407838 | 222008    | NM_182546    | VSTM2A               |
| A_23_P97853    | 9,57062 | 9,53832 | 1,022641161 | ENST00000613758 | 80195     | NM_025125    | TMEM254              |
| A_23_P14564    | 1,42055 | 1,38826 | 1,022634072 | ENST00000267549 | 8477      | NM_003608    | GPR65                |
| A_21_P0004321  | 1,53485 | 1,50256 | 1,022634072 | N/A             | N/A       | N/A          | Inc-UBLCP1-8         |
| A_22_P00017897 | 1,69942 | 1,66713 | 1,022634072 | N/A             | 283392    | NR_026836    | TRHDE-AS1            |
| A_33_P3222529  | 1,66435 | 1,63207 | 1,022626984 | N/A             | N/A       | N/A          | N/A                  |
| A_22_P00005328 | 1,57233 | 1,54005 | 1,022626984 | ENST00000425352 | N/A       | N/A          | N/A                  |
| A_21_P0014647  | 1,6346  | 1,60233 | 1,022619896 | N/A             | N/A       | N/A          | N/A                  |
| A_22_P00023242 | 1,43518 | 1,40291 | 1,022619896 | N/A             | N/A       | CR745401     | Inc-SNW1-2           |
| A_21_P0012699  | 1,56734 | 1,53508 | 1,022612808 | N/A             | N/A       | N/A          | XLOC_I2_011407       |
| A_33_P3404360  | 1,57017 | 1,53792 | 1,022605719 | ENST00000432501 | N/A       | N/A          | N/A                  |
| A_23_P101434   | 1,73106 | 1,69881 | 1,022605719 | ENST00000345770 | 91662     | NM_001277126 | NLRP12               |
| A_21_P0011516  | 1,52099 | 1,48875 | 1,022598631 | N/A             | N/A       | N/A          | XLOC_I2_005683       |
| A_22_P00014506 | 1,69723 | 1,665   | 1,022591543 | ENST00000420865 | N/A       | N/A          | N/A                  |
| A_21_P0008303  | 1,69238 | 1,66016 | 1,022584455 | N/A             | N/A       | N/A          | Inc-RP11-80A15.1.1-5 |
| A_33_P3251562  | 1,61098 | 1,57876 | 1,022584455 | ENST00000401068 | 284654    | NM_001038633 | RSPO1                |
| A_22_P00004010 | 1,64041 | 1,60819 | 1,022584455 | ENST00000533523 | 29082     | NM_014169    | CHMP4A               |
| A_21_P0010193  | 1,47715 | 1,44493 | 1,022584455 | N/A             | N/A       | N/A          | Inc-MRPL39-4         |
| A_33_P3363470  | 1,72997 | 1,69776 | 1,022577367 | ENST00000508169 | 344875    | N/A          | COL6A4P1             |
| A_21_P0014189  | 1,63368 | 1,60147 | 1,022577367 | N/A             | N/A       | N/A          | N/A                  |
| A_33_P3375775  | 1,62943 | 1,59722 | 1,022577367 | ENST00000569740 | 102724344 | XR_424739    | LOC102724344         |
| A_22_P00006897 | 2,77445 | 2,74225 | 1,022570279 | N/A             | 100506724 | NR_121607    | LINC00901            |
| A_21_P0004890  | 1,6726  | 1,6404  | 1,022570279 | N/A             | 102724327 | XR_427954    | LOC102724327         |
| A_24_P320254   | 13,6764 | 13,6442 | 1,022570279 | ENST00000510678 | 3187      | NM_005520    | HNRNP1               |
| A_21_P0007231  | 1,63931 | 1,60713 | 1,022556103 | N/A             | N/A       | N/A          | Inc-ANO1-2           |
| A_21_P0005610  | 1,651   | 1,61883 | 1,022549016 | N/A             | N/A       | N/A          | Inc-TSPAN12-2        |

|                |         |         |             |                 |           |           |                |
|----------------|---------|---------|-------------|-----------------|-----------|-----------|----------------|
| A_21_P0012611  | 3,36704 | 3,33487 | 1,022549016 | N/A             | N/A       | N/A       | XLOC_I2_010831 |
| A_21_P0005146  | 1,68009 | 1,64793 | 1,022541928 | N/A             | N/A       | N/A       | Inc-FAM120B-6  |
| A_21_P0006308  | 1,45649 | 1,42433 | 1,022541928 | N/A             | N/A       | N/A       | Inc-KLF4-2     |
| A_22_P00009785 | 1,44028 | 1,40813 | 1,02253484  | ENST00000513805 | 645323    | NR_015436 | LINC00461      |
| A_21_P0001729  | 1,55209 | 1,51994 | 1,02253484  | N/A             | N/A       | N/A       | Inc-DMRTA2-1   |
| A_21_P0006945  | 1,51525 | 1,4831  | 1,02253484  | ENST00000439973 | N/A       | N/A       | N/A            |
| A_22_P00007833 | 1,50519 | 1,47304 | 1,02253484  | ENST00000440614 | N/A       | N/A       | N/A            |
| A_23_P130333   | 1,53397 | 1,50182 | 1,02253484  | ENST00000237014 | 7276      | NM_000371 | TTR            |
| A_33_P3290853  | 1,38537 | 1,35322 | 1,02253484  | ENST00000471935 | N/A       | X58796    | N/A            |
| A_23_P130961   | 1,53346 | 1,50132 | 1,022527753 | ENST00000263621 | 1991      | NM_001972 | ELANE          |
| A_33_P3294861  | 1,63201 | 1,59988 | 1,022520665 | N/A             | 401044    | AK098031  | FLJ40712       |
| A_21_P0005608  | 1,48685 | 1,45472 | 1,022520665 | N/A             | 101927525 | XR_242314 | LOC101927525   |
| A_21_P0003880  | 1,49595 | 1,46382 | 1,022520665 | N/A             | N/A       | N/A       | Inc-FRG1-4     |
| A_21_P0008843  | 1,62026 | 1,58813 | 1,022520665 | N/A             | N/A       | N/A       | Inc-NDN-3      |
| A_33_P3679876  | 1,50114 | 1,46903 | 1,02250649  | N/A             | 340037    | NR_038915 | PRR7-AS1       |
| A_23_P49448    | 12,521  | 12,4889 | 1,022499402 | ENST00000219368 | 79152     | NM_024306 | FA2H           |
| A_22_P00007897 | 10,5512 | 10,5191 | 1,022499402 | N/A             | N/A       | N/A       | Inc-HSP90AA1-2 |
| A_22_P00020285 | 1,6237  | 1,5916  | 1,022499402 | N/A             | N/A       | N/A       | Inc-PSMA2-2    |
| A_22_P00018660 | 1,7506  | 1,71851 | 1,022492315 | N/A             | N/A       | N/A       | Inc-ZBTB10-3   |
| A_24_P401491   | 1,62063 | 1,58854 | 1,022492315 | ENST00000477017 | 254956    | NM_198469 | MORN5          |
| A_21_P0012025  | 1,56856 | 1,53647 | 1,022492315 | ENST00000413525 | 101928455 | N/A       | LINC01412      |
| A_22_P00010608 | 1,47051 | 1,43845 | 1,022471053 | N/A             | N/A       | N/A       | Inc-NDUFA5-1   |
| A_22_P00024754 | 1,5606  | 1,52855 | 1,022463966 | ENST00000518302 | N/A       | AI077482  | N/A            |
| A_21_P0007583  | 1,50834 | 1,4763  | 1,022456879 | N/A             | N/A       | N/A       | Inc-GLIPR1-2   |
| A_33_P3238579  | 1,56288 | 1,53084 | 1,022456879 | ENST00000611787 | N/A       | KF751595  | N/A            |
| A_33_P3357163  | 1,72489 | 1,69285 | 1,022456879 | N/A             | 728448    | NR_003929 | PPIEL          |
| A_23_P151820   | 1,51592 | 1,48388 | 1,022456879 | ENST00000620541 | 79890     | NM_024832 | RIN3           |
| A_21_P0004493  | 1,46159 | 1,42956 | 1,022449792 | N/A             | N/A       | N/A       | Inc-C5orf17-5  |
| A_33_P3394175  | 1,60654 | 1,57452 | 1,022442705 | ENST00000390363 | N/A       | AB306151  | N/A            |
| A_33_P3297375  | 1,65276 | 1,62074 | 1,022442705 | ENST00000358859 | 196477    | BC026075  | CCER1          |
| A_22_P00007366 | 1,74427 | 1,71225 | 1,022442705 | N/A             | N/A       | N/A       | Inc-GREM2-3    |
| A_21_P0002426  | 1,56165 | 1,52963 | 1,022442705 | N/A             | N/A       | N/A       | Inc-KCNG3-1    |
| A_24_P458252   | 1,405   | 1,37298 | 1,022442705 | ENST00000437884 | N/A       | N/A       | N/A            |

|                |         |         |             |                 |           |              |                    |
|----------------|---------|---------|-------------|-----------------|-----------|--------------|--------------------|
| A_21_P0012364  | 1,54802 | 1,516   | 1,022442705 | N/A             | N/A       | N/A          | XLOC_I2_009613     |
| A_22_P00013581 | 1,64118 | 1,60917 | 1,022435618 | ENST00000556617 | 100874185 | NR_051990    | FRMD6-AS2          |
| A_22_P00010814 | 1,69112 | 1,65911 | 1,022435618 | ENST00000563865 | N/A       | N/A          | N/A                |
| A_24_P261724   | 12,816  | 12,784  | 1,022428531 | ENST00000543757 | 9921      | NM_014868    | RNF10              |
| A_33_P8996504  | 1,51433 | 1,48233 | 1,022428531 | N/A             | 102724973 | XR_433192    | LOC102724973       |
| A_21_P0004932  | 1,5194  | 1,4874  | 1,022428531 | N/A             | N/A       | N/A          | Inc-GJA1-2         |
| A_23_P400716   | 1,46541 | 1,43342 | 1,022421444 | ENST00000304760 | 126669    | NM_001010846 | SHE                |
| A_21_P0002075  | 1,53132 | 1,49935 | 1,02240727  | ENST00000622970 | 101927070 | NR_126337    | LOC101927070       |
| A_24_P256654   | 8,61494 | 8,58298 | 1,022400183 | ENST00000421685 | 401588    | NR_015378    | ZNF674-AS1         |
| A_22_P00003374 | 1,59982 | 1,56786 | 1,022400183 | N/A             | 100874530 | NR_104187    | APOBEC3B-AS1       |
| A_22_P00003409 | 1,36962 | 1,33767 | 1,022393097 | ENST00000507733 | N/A       | N/A          | N/A                |
| A_21_P0002811  | 1,49881 | 1,46686 | 1,022393097 | ENST00000488262 | 100505609 | XR_108518    | LOC100505609       |
| A_22_P00024485 | 1,47774 | 1,44579 | 1,022393097 | ENST00000511603 | N/A       | N/A          | N/A                |
| A_22_P00016619 | 1,39662 | 1,36468 | 1,02238601  | ENST00000423153 | N/A       | N/A          | N/A                |
| A_23_P324605   | 1,6332  | 1,60126 | 1,02238601  | ENST00000389394 | 1768      | NM_001370    | DNAH6              |
| A_33_P3364631  | 1,56153 | 1,52959 | 1,02238601  | N/A             | N/A       | N/A          | Inc-NCKAP1L-1      |
| A_22_P00012548 | 1,39281 | 1,36087 | 1,02238601  | N/A             | N/A       | N/A          | Inc-PTGDR2-1       |
| A_21_P0002915  | 1,63967 | 1,60774 | 1,022378923 | ENST00000441169 | 253573    | N/A          | LOC253573          |
| A_33_P3314352  | 1,66086 | 1,62894 | 1,022371837 | N/A             | N/A       | N/A          | N/A                |
| A_21_P0013133  | 1,44306 | 1,41114 | 1,022371837 | ENST00000435946 | 101928516 | N/A          | LOC101928516       |
| A_22_P00002921 | 1,69854 | 1,66663 | 1,02236475  | N/A             | N/A       | N/A          | Inc-C5orf25-2      |
| A_33_P3369581  | 12,3219 | 12,29   | 1,022357664 | ENST00000589674 | 8666      | NM_003755    | EIF3G              |
| A_22_P00010247 | 1,61406 | 1,58216 | 1,022357664 | N/A             | 101927543 | NR_125419    | LOC101927543       |
| A_22_P00014421 | 1,556   | 1,52411 | 1,022350577 | ENST00000508555 | N/A       | N/A          | N/A                |
| A_22_P00016403 | 1,37403 | 1,34215 | 1,022343491 | N/A             | N/A       | N/A          | Inc-TMEM206-3      |
| A_21_P0003464  | 1,47623 | 1,44435 | 1,022343491 | ENST00000512898 | N/A       | N/A          | N/A                |
| A_33_P3314623  | 1,6272  | 1,59532 | 1,022343491 | N/A             | N/A       | N/A          | N/A                |
| A_33_P3307147  | 1,57377 | 1,5419  | 1,022336405 | ENST00000369138 | 2898      | NM_001166247 | GRIK2              |
| A_23_P115246   | 4,28687 | 4,25501 | 1,022329318 | ENST00000270879 | 8547      | NM_003665    | FCN3               |
| A_22_P00011818 | 1,46927 | 1,43742 | 1,022322232 | N/A             | N/A       | N/A          | Inc-PHF14-1        |
| A_22_P00012209 | 1,47472 | 1,44288 | 1,022315146 | N/A             | N/A       | N/A          | Inc-PPAPDC3-1      |
| A_21_P0003862  | 1,44437 | 1,41254 | 1,02230806  | N/A             | 101928439 | XR_244759    | LOC101928439       |
| A_21_P0002577  | 1,49346 | 1,46164 | 1,022300974 | N/A             | N/A       | N/A          | Inc-AC010872.2.1-1 |

|                |         |         |             |                 |           |              |                      |
|----------------|---------|---------|-------------|-----------------|-----------|--------------|----------------------|
| A_22_P00016672 | 1,66189 | 1,63008 | 1,022293888 | N/A             | N/A       | N/A          | Inc-TPO-1            |
| A_22_P00017951 | 1,52346 | 1,49165 | 1,022293888 | N/A             | N/A       | N/A          | Inc-ZIC2-1           |
| A_33_P3304282  | 16,4938 | 16,462  | 1,022286802 | ENST00000563390 | 6210      | NM_001019    | RPS15A               |
| A_23_P355405   | 1,53678 | 1,50499 | 1,022279716 | ENST00000471618 | 85445     | NM_138994    | CNTNAP4              |
| A_24_P194670   | 1,52748 | 1,49569 | 1,022279716 | ENST00000376992 | 164380    | NR_001279    | CST13P               |
| A_21_P0007200  | 1,43582 | 1,40403 | 1,022279716 | N/A             | N/A       | N/A          | Inc-API5-2           |
| A_22_P00006758 | 1,37837 | 1,34659 | 1,02227263  | N/A             | N/A       | N/A          | Inc-FTCD-1           |
| A_33_P3363650  | 1,54529 | 1,51352 | 1,022265544 | N/A             | N/A       | N/A          | N/A                  |
| A_33_P3290162  | 4,09155 | 4,05979 | 1,022258458 | ENST00000409749 | 401036    | NM_212556    | ASB18                |
| A_33_P3259750  | 1,39066 | 1,3589  | 1,022258458 | N/A             | N/A       | N/A          | N/A                  |
| A_24_P300253   | 1,63205 | 1,60029 | 1,022258458 | ENST00000290431 | 27039     | NM_014386    | PKD2L2               |
| A_22_P00000600 | 8,116   | 8,08424 | 1,022258458 | ENST00000566930 | 101927239 | NR_110748    | LOC101927239         |
| A_21_P0006003  | 1,68836 | 1,65661 | 1,022251373 | N/A             | N/A       | N/A          | Inc-ANKRD18B-2       |
| A_21_P0003317  | 1,38279 | 1,35105 | 1,022244287 | ENST00000510956 | 101928851 | N/A          | LOC101928851         |
| A_24_P113131   | 2,80888 | 2,77714 | 1,022244287 | ENST00000268893 | 9256      | NM_004758    | BZRAP1               |
| A_33_P3270996  | 1,48423 | 1,4525  | 1,022237201 | ENST00000354905 | 131920    | NM_207316    | TMEM207              |
| A_21_P0013496  | 1,37088 | 1,33916 | 1,022230116 | N/A             | N/A       | N/A          | XLOC_I2_014234       |
| A_23_P145006   | 7,86954 | 7,83783 | 1,02222303  | ENST00000507160 | 117156    | NM_054023    | SCGB3A2              |
| A_22_P00003148 | 1,5221  | 1,4904  | 1,022215945 | N/A             | N/A       | N/A          | Inc-C9orf170-4       |
| A_33_P3353692  | 7,66174 | 7,63004 | 1,022215945 | ENST00000463027 | 4627      | NM_002473    | MYH9                 |
| A_33_P3252635  | 9,43569 | 9,40399 | 1,022215945 | ENST00000595187 | 9534      | NM_001278665 | ZNF254               |
| A_33_P3256858  | 12,8362 | 12,8045 | 1,022215945 | ENST00000334656 | 283643    | NM_001134875 | C14orf80             |
| A_21_P0002735  | 1,51854 | 1,48688 | 1,022187603 | ENST00000424786 | N/A       | XR_249390    | N/A                  |
| A_33_P3886737  | 1,45006 | 1,41841 | 1,022180518 | N/A             | N/A       | BX648586     | Inc-WDR27-1          |
| A_22_P00001343 | 1,51576 | 1,48411 | 1,022180518 | ENST00000525757 | 102724910 | N/A          | LOC102724910         |
| A_24_P3415     | 1,74159 | 1,70995 | 1,022173433 | ENST00000335585 | 5522      | NM_020416    | PPP2R2C              |
| A_22_P00001184 | 2,83162 | 2,8     | 1,022159263 | ENST00000523090 | N/A       | CN287759     | N/A                  |
| A_23_P98410    | 2,83927 | 2,80766 | 1,022152178 | ENST00000392883 | 917       | NM_000073    | CD3G                 |
| A_22_P00024435 | 1,50116 | 1,46956 | 1,022145093 | ENST00000557070 | N/A       | DB281755     | N/A                  |
| A_33_P3413394  | 2,70687 | 2,67527 | 1,022145093 | ENST00000421794 | 353174    | BC110596     | ZACN                 |
| A_23_P345175   | 1,48936 | 1,45778 | 1,022130923 | ENST00000308208 | 160762    | NM_152591    | CCDC63               |
| A_21_P0007453  | 1,63734 | 1,60576 | 1,022130923 | N/A             | N/A       | N/A          | Inc-RP11-168K9.2.1-2 |
| A_22_P00004781 | 1,37522 | 1,34365 | 1,022123838 | N/A             | N/A       | N/A          | Inc-CUL2-1           |



|                |         |         |             |                 |           |              |                     |
|----------------|---------|---------|-------------|-----------------|-----------|--------------|---------------------|
| A_21_P0014868  | 1,52882 | 1,49725 | 1,022123838 | N/A             | 100508046 | NR_110505    | LOC100508046        |
| A_24_P166126   | 1,4468  | 1,41523 | 1,022123838 | ENST00000307128 | 51778     | NM_016599    | MYOZ2               |
| A_21_P0011272  | 1,62049 | 1,58893 | 1,022116753 | N/A             | N/A       | N/A          | XLOC_I2_004537      |
| A_33_P3285779  | 1,49078 | 1,45923 | 1,022109668 | ENST00000505518 | 340113    | NR_033832    | LOC340113           |
| A_22_P00003476 | 1,50444 | 1,47289 | 1,022109668 | N/A             | N/A       | N/A          | Inc-CCDC71L-1       |
| A_21_P0009461  | 4,45124 | 4,4197  | 1,022102584 | N/A             | N/A       | N/A          | Inc-SEH1L-1         |
| A_22_P00016028 | 1,47259 | 1,44105 | 1,022102584 | N/A             | N/A       | N/A          | Inc-TGFB3-2         |
| A_23_P67661    | 1,69015 | 1,65861 | 1,022102584 | ENST00000292907 | 1346      | AK312091     | COX7A1              |
| A_21_P0007175  | 1,55177 | 1,52023 | 1,022102584 | N/A             | N/A       | N/A          | Inc-CTR9-4          |
| A_21_P0011786  | 1,52185 | 1,49031 | 1,022102584 | N/A             | N/A       | N/A          | XLOC_I2_007167      |
| A_32_P85999    | 1,54388 | 1,51234 | 1,022102584 | ENST00000566620 | 1012      | NM_001257    | CDH13               |
| A_22_P00013560 | 1,37944 | 1,34791 | 1,022095499 | N/A             | N/A       | N/A          | Inc-RP11-43D2.2.1-4 |
| A_33_P3423506  | 1,58872 | 1,55719 | 1,022095499 | ENST00000389586 | 120406    | NM_182495    | NXPE2               |
| A_21_P0012817  | 1,52052 | 1,489   | 1,022088414 | ENST00000515660 | 100506272 | N/A          | LOC100506272        |
| A_22_P00000695 | 1,50373 | 1,47221 | 1,022088414 | N/A             | 102723885 | NR_120517    | LOC102723885        |
| A_33_P3282241  | 1,4529  | 1,42139 | 1,02208133  | ENST00000378396 | 390144    | NM_001005496 | OR5D16              |
| A_24_P131646   | 1,65357 | 1,62206 | 1,02208133  | ENST00000292327 | 4634      | NM_000258    | MYL3                |
| A_33_P3402225  | 1,49597 | 1,46446 | 1,02208133  | ENST00000512082 | N/A       | N/A          | N/A                 |
| A_21_P0012733  | 1,50687 | 1,47537 | 1,022074245 | N/A             | N/A       | N/A          | Inc-MMRN1-2         |
| A_21_P0010001  | 1,44873 | 1,41724 | 1,022067161 | N/A             | N/A       | N/A          | Inc-HAO1-2          |
| A_23_P133386   | 1,67802 | 1,64653 | 1,022067161 | ENST00000265080 | 5924      | NM_006909    | RASGRF2             |
| A_32_P225659   | 1,39825 | 1,36676 | 1,022067161 | ENST00000340524 | 257313    | NM_198152    | UTS2B               |
| A_21_P0000965  | 1,6832  | 1,65171 | 1,022067161 | N/A             | N/A       | N/A          | Inc-AL591845.1-2    |
| A_22_P00024131 | 1,49251 | 1,46103 | 1,022060076 | ENST00000446579 | N/A       | N/A          | N/A                 |
| A_21_P0001347  | 1,38118 | 1,34971 | 1,022052992 | N/A             | N/A       | N/A          | Inc-RWDD3-1         |
| A_33_P3497352  | 1,53958 | 1,50811 | 1,022052992 | ENST00000393125 | 2893      | NM_001077244 | GRIA4               |
| A_21_P0014869  | 1,62232 | 1,59085 | 1,022052992 | N/A             | N/A       | N/A          | Inc-GLIPR1L1-2      |
| A_24_P350397   | 1,37476 | 1,3433  | 1,022045908 | ENST00000528909 | 3283      | NM_000862    | HSD3B1              |
| A_24_P792124   | 1,59736 | 1,56591 | 1,022038823 | ENST00000303354 | 6335      | NM_002977    | SCN9A               |
| A_21_P0012617  | 1,57916 | 1,54771 | 1,022038823 | ENST00000502757 | 100874047 | N/A          | LINC00499           |
| A_22_P00025109 | 1,50929 | 1,47786 | 1,022024655 | N/A             | 101929452 | N/A          | LOC101929452        |
| A_21_P0009204  | 1,55927 | 1,52785 | 1,022017571 | ENST00000576738 | 101928766 | NR_110850    | LOC101928766        |
| A_33_P3340224  | 4,6891  | 4,65769 | 1,022010487 | N/A             | 100128081 | NR_034097    | JAZF1-AS1           |

|                |         |         |             |                 |           |           |                |
|----------------|---------|---------|-------------|-----------------|-----------|-----------|----------------|
| A_23_P110764   | 1,54414 | 1,51273 | 1,022010487 | ENST00000421631 | 9499      | NM_006790 | MYOT           |
| A_22_P00003440 | 1,36897 | 1,33757 | 1,022003403 | N/A             | N/A       | N/A       | Inc-CCDC38-2   |
| A_33_P3335905  | 1,72826 | 1,69687 | 1,021996319 | N/A             | N/A       | N/A       | N/A            |
| A_22_P00025180 | 1,40392 | 1,37255 | 1,021982151 | N/A             | N/A       | N/A       | Inc-KCTD3-3    |
| A_22_P00016328 | 1,54772 | 1,51635 | 1,021982151 | N/A             | N/A       | N/A       | Inc-TMEM14E-1  |
| A_22_P00008920 | 1,421   | 1,38964 | 1,021975067 | ENST00000416581 | 101929651 | N/A       | LINC01398      |
| A_21_P0003658  | 6,75181 | 6,72046 | 1,021967984 | N/A             | N/A       | N/A       | Inc-USP38-1    |
| A_22_P00023674 | 1,64962 | 1,61827 | 1,021967984 | N/A             | 102725384 | XR_425923 | LOC102725384   |
| A_21_P0014307  | 1,71188 | 1,68053 | 1,021967984 | ENST00000619114 | N/A       | XR_109236 | N/A            |
| A_32_P11096    | 1,70115 | 1,6698  | 1,021967984 | ENST00000339534 | 389874    | NM_203303 | ZCCHC13        |
| A_33_P3277253  | 1,48104 | 1,4497  | 1,0219609   | ENST00000376830 | 138199    | N/A       | C9orf41        |
| A_22_P00016099 | 1,5304  | 1,49907 | 1,021953816 | N/A             | N/A       | N/A       | Inc-THRSP-2    |
| A_21_P0005834  | 1,70286 | 1,67154 | 1,021946733 | N/A             | N/A       | N/A       | Inc-PENK-2     |
| A_22_P00003603 | 1,48607 | 1,45475 | 1,021946733 | N/A             | N/A       | N/A       | Inc-CD2AP-2    |
| A_22_P00009575 | 1,67666 | 1,64534 | 1,021946733 | N/A             | N/A       | N/A       | Inc-MAP6-4     |
| A_22_P00015629 | 1,4293  | 1,39799 | 1,021939649 | ENST00000556021 | N/A       | XR_433584 | N/A            |
| A_22_P00017730 | 3,38205 | 3,35074 | 1,021939649 | N/A             | N/A       | N/A       | Inc-XRN2-3     |
| A_24_P182122   | 12,4181 | 12,3868 | 1,021932566 | ENST00000361390 | 4535      | BC061915  | ND1            |
| A_21_P0008021  | 1,64685 | 1,61555 | 1,021932566 | N/A             | 101928730 | N/A       | LOC101928730   |
| A_22_P00019978 | 1,59353 | 1,56223 | 1,021932566 | ENST00000435828 | N/A       | N/A       | N/A            |
| A_21_P0001976  | 1,56651 | 1,53523 | 1,021918399 | N/A             | N/A       | N/A       | Inc-ITM2C-1    |
| A_21_P0014496  | 9,30833 | 9,27706 | 1,021911315 | N/A             | 101927752 | XR_245324 | LOC101927752   |
| A_22_P00019098 | 1,65155 | 1,62029 | 1,021904232 | ENST00000464673 | 102724195 | XR_427424 | LOC102724195   |
| A_21_P0004785  | 1,53137 | 1,50012 | 1,021897149 | ENST00000419168 | 101928661 | N/A       | LOC101928661   |
| A_33_P3228617  | 1,69333 | 1,66209 | 1,021890065 | ENST00000405855 | 338645    | AY358386  | LUZP2          |
| A_21_P0008646  | 1,49281 | 1,46157 | 1,021890065 | N/A             | N/A       | N/A       | Inc-SLC24A1-1  |
| A_23_P321388   | 9,13311 | 9,10189 | 1,021875899 | ENST00000235150 | 127544    | NM_153341 | RNF19B         |
| A_22_P00006755 | 1,52064 | 1,48942 | 1,021875899 | ENST00000507389 | N/A       | N/A       | N/A            |
| A_21_P0012122  | 1,52651 | 1,49529 | 1,021875899 | ENST00000432633 | 100505663 | NR_109936 | LINC01370      |
| A_21_P0004565  | 1,48893 | 1,45771 | 1,021875899 | N/A             | N/A       | N/A       | Inc-MEF2C-3    |
| A_32_P160045   | 1,70317 | 1,67195 | 1,021875899 | ENST00000282670 | 200132    | NM_152665 | TCTEX1D1       |
| A_24_P349117   | 8,27789 | 8,24667 | 1,021875899 | ENST00000376351 | 57512     | NM_020752 | GPR158         |
| A_22_P00021029 | 1,56475 | 1,53354 | 1,021868816 | N/A             | N/A       | N/A       | Inc-C15orf44-1 |

|                |         |         |             |                 |           |              |              |
|----------------|---------|---------|-------------|-----------------|-----------|--------------|--------------|
| A_33_P3313095  | 1,54066 | 1,50945 | 1,021868816 | N/A             | N/A       | N/A          | N/A          |
| A_21_P0010351  | 1,62801 | 1,5968  | 1,021868816 | ENST00000449126 | N/A       | N/A          | N/A          |
| A_23_P58647    | 13,0577 | 13,0265 | 1,021861733 | ENST00000540387 | 1495      | NM_001903    | CTNNA1       |
| A_23_P351913   | 1,47509 | 1,44389 | 1,021861733 | ENST00000378858 | 164312    | NM_152611    | LRRN4        |
| A_24_P227927   | 1,83503 | 1,80383 | 1,021861733 | ENST00000564089 | 50615     | NM_181078    | IL21R        |
| A_23_P54861    | 1,63729 | 1,60611 | 1,021847567 | ENST00000566387 | 8755      | NR_002224    | ADAM6        |
| A_21_P0005984  | 1,78519 | 1,75401 | 1,021847567 | ENST00000445997 | 100130954 | NR_034016    | LINC01502    |
| A_33_P3285470  | 4,89218 | 4,86101 | 1,021840484 | ENST00000521208 | 575       | NM_001702    | BAI1         |
| A_21_P0003605  | 1,61976 | 1,5886  | 1,021833401 | N/A             | N/A       | N/A          | Inc-SHISA3-1 |
| A_23_P38634    | 1,63386 | 1,6027  | 1,021833401 | ENST00000328890 | 8390      | NM_003555    | OR1G1        |
| A_21_P0014691  | 3,57193 | 3,5408  | 1,021812153 | N/A             | 100287808 | XR_253668    | LOC100287808 |
| A_21_P0004645  | 1,73438 | 1,70325 | 1,021812153 | ENST00000451317 | 100653005 | N/A          | LOC100653005 |
| A_22_P00005696 | 1,60319 | 1,57206 | 1,021812153 | ENST00000506416 | N/A       | N/A          | N/A          |
| A_21_P0003894  | 1,56108 | 1,52996 | 1,021805071 | ENST00000508563 | N/A       | N/A          | N/A          |
| A_21_P0003643  | 1,74698 | 1,71587 | 1,021797988 | N/A             | N/A       | N/A          | Inc-SYNPO2-1 |
| A_22_P00012384 | 1,39237 | 1,36126 | 1,021797988 | ENST00000455010 | N/A       | N/A          | N/A          |
| A_22_P00024876 | 1,64704 | 1,61593 | 1,021797988 | ENST00000425137 | N/A       | N/A          | N/A          |
| A_24_P41939    | 1,62545 | 1,59434 | 1,021797988 | ENST00000344739 | N/A       | N/A          | N/A          |
| A_21_P0004607  | 2,61047 | 2,57936 | 1,021797988 | ENST00000606622 | N/A       | N/A          | N/A          |
| A_22_P00024368 | 1,64252 | 1,61141 | 1,021797988 | ENST00000546865 | N/A       | BX646043     | N/A          |
| A_23_P61171    | 1,55289 | 1,52179 | 1,021790905 | ENST00000316249 | 26251     | NM_012283    | KCNG2        |
| A_21_P0008976  | 1,37309 | 1,34199 | 1,021790905 | ENST00000569164 | 101928248 | N/A          | LINC01229    |
| A_33_P3218664  | 1,55343 | 1,52233 | 1,021790905 | ENST00000333629 | 390437    | NM_001004724 | OR4N5        |
| A_23_P337867   | 1,65117 | 1,62007 | 1,021790905 | ENST00000408916 | 259287    | NM_176883    | TAS2R41      |
| A_32_P145867   | 4,94952 | 4,91842 | 1,021790905 | ENST00000416608 | 4951      | NM_006188    | OCM2         |
| A_33_P3247639  | 1,53897 | 1,50788 | 1,021783823 | ENST00000425181 | N/A       | XM_005275748 | N/A          |
| A_22_P00011740 | 1,50117 | 1,47008 | 1,021783823 | ENST00000518943 | 100507632 | NR_038236    | LINC00968    |
| A_23_P48414    | 1,38546 | 1,35438 | 1,02177674  | ENST00000255465 | 8900      | NM_003914    | CCNA1        |
| A_22_P00022466 | 1,50842 | 1,47734 | 1,02177674  | ENST00000533496 | N/A       | DA453004     | N/A          |
| A_33_P3271325  | 1,55    | 1,51893 | 1,021769658 | N/A             | 168741    | AF348410     | PER4         |
| A_21_P0008739  | 1,59484 | 1,56379 | 1,021755493 | N/A             | N/A       | N/A          | Inc-MYEF2-3  |
| A_21_P0000085  | 3,34664 | 3,31559 | 1,021755493 | N/A             | 131870    | NM_001171906 | NUDT16       |
| A_21_P0010020  | 1,47133 | 1,4403  | 1,021741329 | N/A             | N/A       | N/A          | Inc-THBD-1   |

|                |         |         |             |                 |           |              |                      |
|----------------|---------|---------|-------------|-----------------|-----------|--------------|----------------------|
| A_24_P76649    | 1,59306 | 1,56203 | 1,021741329 | ENST00000333209 | 285513    | NM_198281    | GPRIN3               |
| A_22_P00020676 | 1,67913 | 1,64811 | 1,021734247 | ENST00000522087 | N/A       | N/A          | N/A                  |
| A_22_P00025914 | 1,57631 | 1,54529 | 1,021734247 | ENST00000561559 | N/A       | XM_005264677 | N/A                  |
| A_33_P3361901  | 1,37233 | 1,34131 | 1,021734247 | N/A             | 7799      | AK123605     | PRDM2                |
| A_22_P00004681 | 1,56794 | 1,53693 | 1,021727165 | N/A             | N/A       | N/A          | Inc-CTD-2203A3.1.1-2 |
| A_21_P0008196  | 1,42336 | 1,39235 | 1,021727165 | N/A             | N/A       | N/A          | Inc-SLITRK6-1        |
| A_33_P3335522  | 1,48246 | 1,45146 | 1,021720083 | ENST00000481082 | 83416     | NM_001195388 | FCRL5                |
| A_21_P0011449  | 1,36904 | 1,33805 | 1,021713001 | N/A             | N/A       | N/A          | XLOC_I2_005341       |
| A_22_P00001947 | 1,56226 | 1,53128 | 1,021705919 | ENST00000504935 | N/A       | BG720754     | N/A                  |
| A_33_P3253299  | 1,47512 | 1,44414 | 1,021705919 | ENST00000526812 | 390167    | NM_001004741 | OR5M10               |
| A_33_P3371215  | 1,64274 | 1,61177 | 1,021698837 | N/A             | N/A       | N/A          | N/A                  |
| A_33_P3415310  | 1,49715 | 1,46618 | 1,021698837 | ENST00000509261 | N/A       | N/A          | N/A                  |
| A_22_P00015848 | 1,38489 | 1,35392 | 1,021698837 | N/A             | 101929529 | NR_125927    | LOC101929529         |
| A_21_P0010447  | 1,46044 | 1,42947 | 1,021698837 | ENST00000609206 | N/A       | N/A          | N/A                  |
| A_22_P00018913 | 1,45043 | 1,41947 | 1,021691755 | N/A             | N/A       | N/A          | Inc-C11orf46-1       |
| A_22_P00009524 | 1,49379 | 1,46283 | 1,021691755 | N/A             | N/A       | BC020387     | Inc-MANSC4-2         |
| A_33_P3340629  | 1,49113 | 1,46018 | 1,021684673 | N/A             | N/A       | DA380926     | N/A                  |
| A_23_P427516   | 1,62757 | 1,59663 | 1,021677591 | ENST00000328087 | 50616     | NM_020525    | IL22                 |
| A_23_P208143   | 8,94887 | 8,91793 | 1,021677591 | ENST00000330501 | 84307     | NM_001135178 | ZNF397               |
| A_22_P00012902 | 1,55932 | 1,52839 | 1,02167051  | ENST00000447078 | N/A       | DB090595     | N/A                  |
| A_24_P177948   | 1,80768 | 1,77675 | 1,02167051  | ENST00000458672 | 283417    | NM_173812    | DPY19L2              |
| A_22_P00023860 | 1,55615 | 1,52522 | 1,02167051  | N/A             | 100874081 | NR_125912    | FGF14-AS1            |
| A_24_P113287   | 1,4872  | 1,45627 | 1,02167051  | ENST00000614049 | 7772      | NM_014518    | ZNF229               |
| A_32_P155364   | 16,3576 | 16,3267 | 1,021649265 | ENST00000352983 | 6129      | N/A          | RPL7                 |
| A_23_P432610   | 10,265  | 10,2341 | 1,021649265 | ENST00000262384 | 9683      | NM_153029    | N4BP1                |
| A_21_P0010904  | 1,54427 | 1,51337 | 1,021649265 | N/A             | N/A       | N/A          | XLOC_I2_002110       |
| A_33_P3380693  | 15,797  | 15,7661 | 1,021649265 | ENST00000527418 | 8751      | NM_207197    | ADAM15               |
| A_33_P3328619  | 16,7109 | 16,68   | 1,021649265 | N/A             | N/A       | N/A          | N/A                  |
| A_22_P00000944 | 1,66071 | 1,62982 | 1,021642183 | ENST00000413567 | N/A       | N/A          | N/A                  |
| A_22_P00002454 | 1,55959 | 1,52871 | 1,021635102 | ENST00000561964 | N/A       | N/A          | N/A                  |
| A_22_P00008966 | 1,39642 | 1,36554 | 1,021635102 | ENST00000563503 | N/A       | AF086140     | N/A                  |
| A_22_P00008881 | 1,60755 | 1,57668 | 1,021628021 | ENST00000562495 | N/A       | N/A          | N/A                  |
| A_22_P00013649 | 1,61258 | 1,58172 | 1,021620939 | ENST00000522354 | N/A       | N/A          | N/A                  |

|                |         |         |             |                 |           |              |                  |
|----------------|---------|---------|-------------|-----------------|-----------|--------------|------------------|
| A_33_P3413483  | 8,4503  | 8,41945 | 1,021613858 | ENST00000267814 | 6652      | AK090738     | SORD             |
| A_33_P3300147  | 1,65478 | 1,62393 | 1,021613858 | ENST00000375941 | 401535    | NM_001001709 | C9orf170         |
| A_33_P3234546  | 2,5897  | 2,55885 | 1,021613858 | ENST00000390655 | 926       | N/A          | CD8B             |
| A_22_P00006150 | 1,60675 | 1,5759  | 1,021613858 | N/A             | N/A       | N/A          | Inc-FAM192A-1    |
| A_21_P0009610  | 1,61797 | 1,58712 | 1,021613858 | N/A             | N/A       | N/A          | Inc-WDR7-2       |
| A_33_P3390172  | 1,72409 | 1,69326 | 1,021599695 | ENST00000520193 | 27299     | NM_001145271 | ADAMDEC1         |
| A_21_P0008259  | 1,51486 | 1,48403 | 1,021599695 | N/A             | N/A       | N/A          | Inc-AL355390.1-2 |
| A_24_P203308   | 1,54959 | 1,51876 | 1,021599695 | ENST00000275764 | 346673    | NM_182489    | STRA8            |
| A_22_P00022717 | 1,69283 | 1,66203 | 1,021578452 | ENST00000439198 | N/A       | BX093647     | N/A              |
| A_21_P0014105  | 1,52131 | 1,49051 | 1,021578452 | N/A             | 101927206 | XR_425550    | LOC101927206     |
| A_21_P0014062  | 1,51647 | 1,48567 | 1,021578452 | ENST00000423879 | N/A       | XR_108315    | N/A              |
| A_22_P00009553 | 1,59097 | 1,56018 | 1,021571371 | N/A             | N/A       | AK092342     | Inc-MAP3K3-1     |
| A_33_P3283038  | 1,62763 | 1,59684 | 1,021571371 | N/A             | 100129427 | NR_033845    | DDC-AS1          |
| A_21_P0007343  | 1,50388 | 1,4731  | 1,02156429  | N/A             | N/A       | N/A          | Inc-LRRC4C-4     |
| A_21_P0008200  | 1,55103 | 1,52026 | 1,021557209 | N/A             | N/A       | N/A          | Inc-TGDS-1       |
| A_23_P86301    | 1,52042 | 1,48966 | 1,021550128 | ENST00000366942 | 7399      | NM_007123    | USH2A            |
| A_33_P3421338  | 3,9351  | 3,90434 | 1,021550128 | ENST00000590129 | 146909    | NM_001265577 | KIF18B           |
| A_22_P00011258 | 1,63959 | 1,60883 | 1,021550128 | ENST00000593792 | N/A       | N/A          | N/A              |
| A_33_P3349255  | 1,37762 | 1,34686 | 1,021550128 | ENST00000438111 | N/A       | N/A          | N/A              |
| A_33_P3397599  | 1,46739 | 1,43663 | 1,021550128 | ENST00000430421 | 79168     | NR_104098    | LILRA6           |
| A_22_P00009845 | 1,41226 | 1,38151 | 1,021543047 | N/A             | N/A       | N/A          | Inc-METTL15-4    |
| A_33_P3226780  | 1,53374 | 1,50299 | 1,021543047 | ENST00000426107 | N/A       | N/A          | N/A              |
| A_23_P331049   | 1,53912 | 1,50838 | 1,021535967 | ENST00000338492 | 10570     | NM_006426    | DPYSL4           |
| A_21_P0014856  | 1,53928 | 1,50854 | 1,021535967 | N/A             | N/A       | CR737597     | N/A              |
| A_33_P3464749  | 1,44266 | 1,41195 | 1,021514725 | N/A             | 253044    | NR_045123    | LINGO1-AS1       |
| A_21_P0003445  | 1,48145 | 1,45074 | 1,021514725 | ENST00000511928 | N/A       | N/A          | N/A              |
| A_22_P00004402 | 1,48767 | 1,45696 | 1,021514725 | ENST00000511418 | N/A       | N/A          | N/A              |
| A_33_P3419711  | 1,63093 | 1,60022 | 1,021514725 | N/A             | N/A       | N/A          | N/A              |
| A_23_P57547    | 10,6179 | 10,5872 | 1,021507644 | ENST00000491545 | 10478     | NM_006358    | SLC25A17         |
| A_33_P3273679  | 1,38667 | 1,35597 | 1,021507644 | N/A             | 9378      | BC046631     | NRXN1            |
| A_33_P3255314  | 1,59459 | 1,56389 | 1,021507644 | ENST00000562769 | 400533    | NR_033985    | FLJ26245         |
| A_22_P00002359 | 1,55849 | 1,52779 | 1,021507644 | ENST00000552251 | N/A       | XR_246028    | N/A              |
| A_22_P00009117 | 1,48293 | 1,45223 | 1,021507644 | ENST00000568121 | N/A       | XR_110136    | N/A              |

|                |         |         |             |                 |           |              |                 |
|----------------|---------|---------|-------------|-----------------|-----------|--------------|-----------------|
| A_21_P0005989  | 1,39226 | 1,36157 | 1,021500564 | ENST00000562922 | N/A       | N/A          | N/A             |
| A_21_P0006916  | 1,43607 | 1,40538 | 1,021500564 | N/A             | N/A       | N/A          | Inc-HABP2-1     |
| A_22_P00006041 | 1,53666 | 1,50598 | 1,021493483 | N/A             | N/A       | N/A          | Inc-FAM120AOS-2 |
| A_21_P0010930  | 1,60977 | 1,5791  | 1,021486403 | ENST00000438372 | 282980    | N/A          | LINC00700       |
| A_22_P00004165 | 1,71356 | 1,68289 | 1,021486403 | N/A             | N/A       | N/A          | Inc-CLEC3A-5    |
| A_33_P3423440  | 7,32114 | 7,29047 | 1,021486403 | ENST00000316491 | 124411    | NM_001130913 | ZNF720          |
| A_22_P00019193 | 1,55559 | 1,52494 | 1,021472242 | ENST00000496217 | N/A       | N/A          | N/A             |
| A_23_P11390    | 5,40156 | 5,37092 | 1,021465162 | ENST00000250823 | 9084      | NM_004679    | VCY             |
| A_22_P00005831 | 1,52879 | 1,49816 | 1,021458081 | ENST00000472238 | N/A       | N/A          | N/A             |
| A_21_P0000521  | 1,57333 | 1,5427  | 1,021458081 | N/A             | 100271832 | N/A          | LOC100271832    |
| A_21_P0005194  | 1,61608 | 1,58546 | 1,021451001 | ENST00000450977 | 101927378 | N/A          | LOC101927378    |
| A_22_P00005224 | 1,44723 | 1,41661 | 1,021451001 | ENST00000556475 | 79104     | XR_424550    | MEG8            |
| A_23_P99442    | 1,6618  | 1,63119 | 1,021443921 | ENST00000380987 | 2322      | NM_004119    | FLT3            |
| A_22_P00023808 | 1,53402 | 1,50341 | 1,021443921 | N/A             | N/A       | N/A          | Inc-BBOX1-1     |
| A_22_P00005849 | 6,67282 | 6,64221 | 1,021443921 | ENST00000521718 | N/A       | XR_426282    | N/A             |
| A_21_P0004389  | 1,55743 | 1,52683 | 1,021436841 | N/A             | N/A       | N/A          | Inc-SLC38A9-2   |
| A_23_P23829    | 1,67806 | 1,64746 | 1,021436841 | ENST00000356522 | 947       | NM_001773    | CD34            |
| A_21_P0011837  | 1,67992 | 1,64932 | 1,021436841 | N/A             | 102725293 | N/A          | LOC102725293    |
| A_23_P27306    | 1,67436 | 1,64376 | 1,021436841 | ENST00000582147 | 81035     | NM_130386    | COLEC12         |
| A_23_P95736    | 11,6296 | 11,599  | 1,021436841 | ENST00000618549 | 353088    | NM_001001415 | ZNF429          |
| A_33_P3245489  | 13,7483 | 13,7177 | 1,021436841 | ENST00000395467 | 339366    | NM_213604    | ADAMTSL5        |
| A_23_P153320   | 11,6712 | 11,6406 | 1,021436841 | ENST00000264832 | 3383      | NM_000201    | ICAM1           |
| A_33_P3214076  | 1,65799 | 1,6274  | 1,021429761 | N/A             | N/A       | N/A          | N/A             |
| A_21_P0011989  | 1,5739  | 1,54331 | 1,021429761 | N/A             | N/A       | N/A          | XLOC_l2_008416  |
| A_22_P00012554 | 1,61212 | 1,58153 | 1,021429761 | ENST00000508437 | N/A       | N/A          | N/A             |
| A_24_P136029   | 1,62402 | 1,59344 | 1,021422681 | ENST00000559723 | 6557      | NM_000338    | SLC12A1         |
| A_22_P00022020 | 1,46852 | 1,43795 | 1,021415601 | N/A             | N/A       | N/A          | Inc-NTSR2-2     |
| A_22_P00005286 | 1,5704  | 1,53983 | 1,021415601 | N/A             | 101929425 | XR_249980    | LOC101929425    |
| A_22_P00023732 | 1,60447 | 1,5739  | 1,021415601 | N/A             | 101929272 | XR_244976    | LOC101929272    |
| A_22_P00023882 | 1,45665 | 1,42609 | 1,021408521 | N/A             | 101928140 | NR_125849    | LOC101928140    |
| A_33_P3364801  | 1,74553 | 1,71498 | 1,021401441 | N/A             | N/A       | XM_379325    | N/A             |
| A_23_P403488   | 1,53143 | 1,50089 | 1,021394362 | ENST00000612291 | 338322    | NM_176821    | NLRP10          |
| A_21_P0006512  | 1,62818 | 1,59765 | 1,021387282 | N/A             | N/A       | N/A          | Inc-UBE2A-1     |

|                |         |         |             |                 |           |              |                       |
|----------------|---------|---------|-------------|-----------------|-----------|--------------|-----------------------|
| A_22_P00016733 | 1,64277 | 1,61225 | 1,021380202 | N/A             | N/A       | N/A          | Inc-TRDMT1-2          |
| A_21_P0011861  | 1,54265 | 1,51213 | 1,021380202 | ENST00000595686 | 401014    | N/A          | TEX41                 |
| A_22_P00017810 | 1,55263 | 1,52212 | 1,021373122 | ENST00000392197 | 27033     | NM_014383    | ZBTB32                |
| A_22_P00001352 | 1,68645 | 1,65594 | 1,021373122 | N/A             | N/A       | N/A          | Inc-APO01496.1-11     |
| A_21_P0008286  | 1,52241 | 1,4919  | 1,021373122 | ENST00000421617 | N/A       | N/A          | N/A                   |
| A_23_P45025    | 7,6804  | 7,6499  | 1,021366043 | ENST00000395166 | 5602      | NM_138980    | MAPK10                |
| A_21_P0010277  | 1,62082 | 1,59032 | 1,021366043 | N/A             | N/A       | N/A          | Inc-RUNX1-1           |
| A_22_P00022071 | 1,65886 | 1,62837 | 1,021358963 | N/A             | 100506675 | NR_120526    | LOC100506675          |
| A_33_P3350828  | 8,68446 | 8,65397 | 1,021358963 | ENST00000248070 | 58513     | NM_021235    | EPS15L1               |
| A_22_P00002029 | 1,39977 | 1,36929 | 1,021351884 | N/A             | N/A       | N/A          | Inc-BFSP1-1           |
| A_23_P435874   | 1,45682 | 1,42634 | 1,021351884 | ENST00000332857 | 727830    | NM_001083124 | SPATA31A3             |
| A_23_P336565   | 8,66842 | 8,63794 | 1,021351884 | ENST00000413034 | 222234    | NM_001145268 | FAM185A               |
| A_22_P00000972 | 1,36985 | 1,33937 | 1,021351884 | ENST00000451328 | N/A       | N/A          | N/A                   |
| A_22_P00016523 | 1,66893 | 1,63845 | 1,021351884 | ENST00000550279 | N/A       | N/A          | N/A                   |
| A_21_P0014937  | 1,55523 | 1,52475 | 1,021351884 | N/A             | 101928656 | NR_108092    | LINC01099             |
| A_22_P00001208 | 2,13332 | 2,10284 | 1,021351884 | N/A             | N/A       | N/A          | Inc-ANKRA2-4          |
| A_23_P75663    | 1,47648 | 1,44601 | 1,021344804 | ENST00000307033 | 219875    | NM_001001965 | OR4D5                 |
| A_22_P00009599 | 1,68755 | 1,65708 | 1,021344804 | N/A             | N/A       | N/A          | Inc-MAPK6-9           |
| A_33_P3328782  | 1,4659  | 1,43544 | 1,021337725 | ENST00000562624 | 26082     | NR_026771    | DKFZP434L187          |
| A_22_P00013239 | 1,60367 | 1,57321 | 1,021337725 | N/A             | N/A       | BG189013     | Inc-ROBO3-1           |
| A_22_P00004143 | 1,49505 | 1,4646  | 1,021330646 | ENST00000451410 | 266919    | N/A          | LINC00307             |
| A_22_P00013285 | 1,56335 | 1,5329  | 1,021330646 | N/A             | N/A       | N/A          | Inc-RP11-1085N6.3.1-1 |
| A_33_P3226085  | 1,58178 | 1,55133 | 1,021330646 | ENST00000390315 | N/A       | AF063703     | N/A                   |
| A_33_P3392320  | 1,53794 | 1,50749 | 1,021330646 | ENST00000450363 | 55117     | NM_018057    | SLC6A15               |
| A_22_P00007884 | 1,57305 | 1,54261 | 1,021323566 | ENST00000503666 | N/A       | N/A          | N/A                   |
| A_33_P3451458  | 1,75188 | 1,72144 | 1,021323566 | N/A             | 101926947 | AA861243     | NCRNA00249            |
| A_22_P00011663 | 1,38288 | 1,35244 | 1,021323566 | N/A             | N/A       | N/A          | Inc-PDE5A-2           |
| A_23_P342934   | 8,0759  | 8,04547 | 1,021316487 | ENST00000317509 | 7090      | NM_005078    | TLE3                  |
| A_21_P0010233  | 1,63473 | 1,60431 | 1,021309408 | N/A             | N/A       | N/A          | Inc-C21orf63-2        |
| A_23_P164068   | 1,53215 | 1,50173 | 1,021309408 | ENST00000262442 | 1770      | NM_001372    | DNAH9                 |
| A_21_P0012083  | 1,52375 | 1,49333 | 1,021309408 | ENST00000446595 | 103344932 | NR_121185    | PGM5P4-AS1            |
| A_21_P0013091  | 1,55851 | 1,52809 | 1,021309408 | N/A             | N/A       | N/A          | XLOC_I2_013116        |
| A_22_P00018795 | 2,22302 | 2,19261 | 1,021302329 | N/A             | N/A       | N/A          | Inc-MANSC4-1          |

|                |         |         |             |                 |           |              |                   |
|----------------|---------|---------|-------------|-----------------|-----------|--------------|-------------------|
| A_21_P0009474  | 1,63695 | 1,60654 | 1,021302329 | N/A             | N/A       | N/A          | Inc-SETBP1-1      |
| A_21_P0006418  | 1,55277 | 1,52236 | 1,021302329 | ENST00000445233 | N/A       | N/A          | N/A               |
| A_33_P3233436  | 1,5483  | 1,51789 | 1,021302329 | ENST00000598713 | 84968     | NM_032882    | PNMA6A            |
| A_22_P00005025 | 1,5649  | 1,53449 | 1,021302329 | N/A             | N/A       | N/A          | Inc-DDX49-1       |
| A_24_P488202   | 1,63448 | 1,60409 | 1,021288171 | N/A             | N/A       | BX247957     | Inc-ESR2-1        |
| A_21_P0004178  | 1,44758 | 1,41719 | 1,021288171 | ENST00000503145 | N/A       | N/A          | N/A               |
| A_33_P3345086  | 1,72051 | 1,69013 | 1,021281092 | ENST00000239347 | 3444      | NM_021057    | IFNA7             |
| A_22_P00009919 | 1,56543 | 1,53505 | 1,021281092 | ENST00000539266 | N/A       | N/A          | N/A               |
| A_21_P0002253  | 3,55927 | 3,52889 | 1,021281092 | ENST00000455121 | 101928113 | NR_110569    | ST3GAL5-AS1       |
| A_21_P0008077  | 1,63397 | 1,6036  | 1,021274013 | N/A             | N/A       | N/A          | Inc-AL445989.1-18 |
| A_22_P00001770 | 1,69117 | 1,6608  | 1,021274013 | N/A             | N/A       | N/A          | Inc-ATP1A1OS-1    |
| A_21_P0006695  | 6,09195 | 6,06159 | 1,021266934 | N/A             | N/A       | N/A          | Inc-RPP30-6       |
| A_22_P00013862 | 1,52371 | 1,49335 | 1,021266934 | ENST00000560655 | 104472713 | NR_126438    | PCAT29            |
| A_21_P0008759  | 5,2542  | 5,22385 | 1,021259855 | ENST00000569819 | 79834     | NM_024776    | PEAK1             |
| A_22_P00010678 | 1,54134 | 1,511   | 1,021252776 | ENST00000449835 | N/A       | N/A          | N/A               |
| A_22_P00019565 | 1,63145 | 1,60113 | 1,021238619 | ENST00000445932 | N/A       | N/A          | N/A               |
| A_23_P136116   | 1,63142 | 1,6011  | 1,021238619 | ENST00000342526 | 392636    | NM_001004320 | AGMO              |
| A_22_P00010989 | 1,53989 | 1,50958 | 1,02123154  | N/A             | N/A       | N/A          | Inc-NRSN1-2       |
| A_33_P3420680  | 1,68884 | 1,65853 | 1,02123154  | ENST00000314744 | 4762      | NM_006161    | NEUROG1           |
| A_23_P90601    | 11,4715 | 11,4412 | 1,021224461 | ENST00000393110 | 55240     | NM_182915    | STEAP3            |
| A_22_P00020376 | 1,44934 | 1,41904 | 1,021224461 | ENST00000527054 | N/A       | BU561024     | N/A               |
| A_33_P3379816  | 1,54487 | 1,51457 | 1,021224461 | ENST00000419482 | 150572    | NM_198274    | SMYD1             |
| A_22_P00003976 | 1,54079 | 1,5105  | 1,021217383 | ENST00000373384 | N/A       | N/A          | N/A               |
| A_21_P0009021  | 1,49514 | 1,46485 | 1,021217383 | N/A             | N/A       | N/A          | Inc-TP53TG3-7     |
| A_24_P370156   | 9,22256 | 9,19227 | 1,021217383 | ENST00000466794 | 4125      | NM_000528    | MAN2B1            |
| A_21_P0000871  | 1,52876 | 1,49849 | 1,021203226 | ENST00000518035 | 100505659 | NR_039979    | LINC00967         |
| A_22_P00000592 | 1,5058  | 1,47554 | 1,021196147 | N/A             | N/A       | N/A          | Inc-ACACB-1       |
| A_33_P3246703  | 1,4477  | 1,41744 | 1,021196147 | ENST00000588550 | N/A       | AK095132     | N/A               |
| A_33_P3320648  | 1,40331 | 1,37306 | 1,021189069 | N/A             | N/A       | DA581137     | N/A               |
| A_32_P235159   | 9,40496 | 9,37472 | 1,021181991 | ENST00000438684 | 151507    | NR_024322    | MSL3P1            |
| A_22_P00009521 | 1,46986 | 1,43962 | 1,021181991 | ENST00000452624 | N/A       | N/A          | N/A               |
| A_23_P259003   | 1,51359 | 1,48335 | 1,021181991 | ENST00000467460 | 51555     | NM_016559    | PEX5L             |
| A_32_P210872   | 1,62876 | 1,59852 | 1,021181991 | ENST00000408930 | 641654    | NM_001037558 | HEPN1             |



|                |         |         |             |                 |           |              |                    |
|----------------|---------|---------|-------------|-----------------|-----------|--------------|--------------------|
| A_21_P0008893  | 1,4936  | 1,46337 | 1,021174912 | ENST00000501068 | N/A       | N/A          | N/A                |
| A_22_P00019377 | 1,53358 | 1,50335 | 1,021174912 | N/A             | N/A       | AL832764     | Inc-TRIM32-1       |
| A_23_P93524    | 1,58596 | 1,55573 | 1,021174912 | ENST00000437477 | 154075    | NM_001017373 | SAMD3              |
| A_22_P00016192 | 1,49401 | 1,4638  | 1,021160756 | ENST00000561701 | 102724938 | XR_424618    | LOC102724938       |
| A_33_P3257367  | 10,2565 | 10,2263 | 1,021153678 | ENST00000358465 | 51592     | NM_015906    | TRIM33             |
| A_21_P0004588  | 1,5215  | 1,4913  | 1,021153678 | N/A             | N/A       | N/A          | Inc-ZFP62-1        |
| A_21_P0011342  | 1,52276 | 1,49256 | 1,021153678 | N/A             | N/A       | N/A          | XLOC_I2_004817     |
| A_22_P00017771 | 1,5575  | 1,52734 | 1,021125366 | ENST00000474667 | N/A       | N/A          | N/A                |
| A_23_P411353   | 1,37014 | 1,33999 | 1,021118288 | ENST00000321110 | 203430    | NM_152694    | ZCCHC5             |
| A_21_P0006217  | 1,65902 | 1,62888 | 1,021111121 | N/A             | N/A       | N/A          | Inc-TLR4-3         |
| A_33_P3362562  | 6,85767 | 6,82753 | 1,021111121 | ENST00000577881 | 6198      | NM_001272043 | RPS6KB1            |
| A_21_P0014450  | 1,39755 | 1,36742 | 1,021104132 | ENST00000624770 | 100188917 | XR_250562    | ESP33              |
| A_22_P00010490 | 1,50909 | 1,47897 | 1,021097055 | ENST00000552736 | N/A       | N/A          | N/A                |
| A_22_P00013347 | 1,55675 | 1,52663 | 1,021097055 | ENST00000520431 | N/A       | N/A          | N/A                |
| A_24_P508103   | 1,42956 | 1,39944 | 1,021097055 | ENST00000424873 | 440905    | NR_026758    | FAR2P1             |
| A_21_P0005595  | 1,71746 | 1,68734 | 1,021097055 | N/A             | N/A       | N/A          | Inc-AC091801.1.1-5 |
| A_21_P0006839  | 1,51364 | 1,48353 | 1,021089977 | N/A             | N/A       | N/A          | Inc-PLXDC2-1       |
| A_22_P00022626 | 1,59212 | 1,56205 | 1,021061667 | N/A             | N/A       | BX104849     | Inc-STAR4-2        |
| A_21_P0006099  | 1,45039 | 1,42032 | 1,021061667 | ENST00000446206 | N/A       | N/A          | N/A                |
| A_21_P0002275  | 1,62055 | 1,59048 | 1,021061667 | N/A             | N/A       | N/A          | Inc-INSIG2-1       |
| A_22_P00003696 | 1,60129 | 1,57123 | 1,021054589 | ENST00000565901 | N/A       | DN604327     | N/A                |
| A_21_P0004769  | 1,7454  | 1,71534 | 1,021054589 | N/A             | N/A       | N/A          | Inc-ATG5-1         |
| A_22_P00004388 | 1,45794 | 1,42788 | 1,021054589 | ENST00000462011 | N/A       | AK093118     | N/A                |
| A_33_P3245110  | 1,4731  | 1,44304 | 1,021054589 | ENST00000518264 | N/A       | N/A          | N/A                |
| A_19_P00320440 | 6,30984 | 6,27979 | 1,021047512 | ENST00000586248 | 148189    | N/A          | LINC00662          |
| A_33_P3296119  | 1,40789 | 1,37785 | 1,021040435 | ENST00000486683 | 728591    | NM_001198908 | CCDC169            |
| A_23_P327499   | 1,59499 | 1,56495 | 1,021040435 | ENST00000371968 | 340596    | NM_178175    | LHFPL1             |
| A_21_P0003192  | 1,56809 | 1,53805 | 1,021040435 | N/A             | N/A       | N/A          | Inc-MRPL47-1       |
| A_22_P00025355 | 1,62755 | 1,59751 | 1,021040435 | N/A             | N/A       | N/A          | Inc-RHD-1          |
| A_21_P0012622  | 1,68868 | 1,65864 | 1,021040435 | ENST00000509370 | N/A       | N/A          | N/A                |
| A_23_P19852    | 9,50825 | 9,47822 | 1,021033357 | ENST00000623361 | 23288     | NM_152558    | IQCE               |
| A_21_P0012852  | 1,53942 | 1,50939 | 1,021033357 | N/A             | N/A       | N/A          | XLOC_I2_011798     |
| A_22_P00016283 | 1,44796 | 1,41793 | 1,021033357 | N/A             | N/A       | N/A          | Inc-TMEM126B-2     |

|                |         |         |             |                 |           |              |                       |
|----------------|---------|---------|-------------|-----------------|-----------|--------------|-----------------------|
| A_21_P0009571  | 1,53729 | 1,50726 | 1,021033357 | ENST00000580323 | 102724913 | N/A          | LOC102724913          |
| A_33_P3314559  | 1,50137 | 1,47135 | 1,02102628  | ENST00000282878 | 115827    | NM_138453    | RAB3C                 |
| A_21_P0014679  | 1,63314 | 1,60312 | 1,02102628  | N/A             | 100507099 | NR_103839    | FRY-AS1               |
| A_21_P0010345  | 1,74686 | 1,71685 | 1,021019203 | N/A             | N/A       | N/A          | Inc-RGL4-2            |
| A_23_P4254     | 1,50399 | 1,47398 | 1,021019203 | ENST00000225387 | 1411      | NM_005208    | CRYBA1                |
| A_21_P0011720  | 1,47909 | 1,44908 | 1,021019203 | N/A             | N/A       | N/A          | XLOC_I2_006905        |
| A_21_P0005274  | 1,53603 | 1,50602 | 1,021019203 | N/A             | N/A       | N/A          | Inc-AC006372.1-1      |
| A_22_P00010044 | 1,37482 | 1,34481 | 1,021019203 | N/A             | N/A       | N/A          | Inc-MNX1-2            |
| A_22_P00016954 | 5,44314 | 5,41313 | 1,021019203 | N/A             | N/A       | N/A          | Inc-TSPYL6-2          |
| A_22_P00009723 | 1,59184 | 1,56183 | 1,021019203 | ENST00000560391 | N/A       | N/A          | N/A                   |
| A_33_P3286157  | 4,22784 | 4,19783 | 1,021019203 | ENST00000497869 | 7293      | NM_003327    | TNFRSF4               |
| A_22_P00003631 | 1,56169 | 1,53169 | 1,021012126 | ENST00000536495 | N/A       | N/A          | N/A                   |
| A_24_P187774   | 1,54867 | 1,51867 | 1,021012126 | ENST00000374461 | 79987     | BC030816     | SVEP1                 |
| A_21_P0000102  | 15,84   | 15,81   | 1,021012126 | ENST00000604882 | 100462981 | NM_001190470 | MTRNR2L2              |
| A_24_P402855   | 1,46592 | 1,43593 | 1,021005049 | ENST00000514338 | 58503     | NM_021225    | PROL1                 |
| A_21_P0009072  | 1,50698 | 1,47699 | 1,021005049 | N/A             | N/A       | N/A          | Inc-CDYL2-4           |
| A_22_P00021398 | 1,46429 | 1,43431 | 1,020997972 | N/A             | N/A       | N/A          | Inc-RP11-380D23.1.1-1 |
| A_33_P3381963  | 1,50339 | 1,47341 | 1,020997972 | N/A             | N/A       | AF130108     | N/A                   |
| A_23_P58489    | 9,03732 | 9,00735 | 1,020990895 | ENST00000507036 | 79072     | NM_024091    | FASTKD3               |
| A_22_P00000327 | 1,48274 | 1,45278 | 1,020983818 | N/A             | N/A       | N/A          | Inc-AC012123.1.1-1    |
| A_22_P00006338 | 1,62388 | 1,59393 | 1,020976741 | N/A             | N/A       | N/A          | Inc-FANCI-3           |
| A_22_P00018022 | 8,44736 | 8,41741 | 1,020976741 | ENST00000577324 | 7756      | NM_001032293 | ZNF207                |
| A_33_P3234764  | 4,1328  | 4,10285 | 1,020976741 | N/A             | N/A       | AK130920     | N/A                   |
| A_22_P00024827 | 1,66134 | 1,6314  | 1,020969664 | ENST00000447256 | 100873976 | NR_046555    | CNTN4-AS2             |
| A_22_P00011847 | 1,58994 | 1,56001 | 1,020962587 | N/A             | N/A       | AA062935     | Inc-PHOX2A-1          |
| A_33_P3242064  | 1,49878 | 1,46885 | 1,020962587 | ENST00000312298 | 282775    | NM_001005492 | OR5J2                 |
| A_22_P00021302 | 1,46382 | 1,4339  | 1,02095551  | ENST00000430064 | N/A       | N/A          | N/A                   |
| A_22_P00011974 | 1,52026 | 1,49034 | 1,02095551  | ENST00000569873 | N/A       | BC043219     | N/A                   |
| A_33_P3209135  | 1,59602 | 1,5661  | 1,02095551  | N/A             | N/A       | N/A          | N/A                   |
| A_23_P151294   | 1,53581 | 1,5059  | 1,020948434 | ENST00000229135 | 3458      | NM_000619    | IFNG                  |
| A_19_P00325604 | 5,56144 | 5,53154 | 1,020941357 | ENST00000553704 | 100885779 | NR_048536    | LINC-ROR              |
| A_33_P3342420  | 1,48625 | 1,45635 | 1,020941357 | N/A             | N/A       | N/A          | N/A                   |
| A_21_P0006317  | 1,44801 | 1,41812 | 1,02093428  | N/A             | N/A       | N/A          | Inc-DBC1-1            |

|                |         |         |             |                 |           |              |                 |
|----------------|---------|---------|-------------|-----------------|-----------|--------------|-----------------|
| A_21_P0007698  | 1,52671 | 1,49683 | 1,020927204 | N/A             | N/A       | N/A          | Inc-H3F3C-1     |
| A_21_P0002480  | 1,42465 | 1,39477 | 1,020927204 | N/A             | N/A       | N/A          | Inc-TGFBRAP1-11 |
| A_23_P365149   | 9,7499  | 9,72003 | 1,020920127 | ENST00000567530 | 10295     | NM_005881    | BCKDK           |
| A_22_P00010738 | 1,63014 | 1,60027 | 1,020920127 | ENST00000541881 | N/A       | N/A          | N/A             |
| A_33_P3338873  | 1,69995 | 1,67009 | 1,020913051 | N/A             | N/A       | N/A          | N/A             |
| A_33_P3274084  | 1,41795 | 1,38809 | 1,020913051 | ENST00000269051 | 162494    | NM_138328    | RHBDL3          |
| A_24_P361408   | 1,67968 | 1,64982 | 1,020913051 | ENST00000376681 | 284076    | NM_173623    | TTLL6           |
| A_21_P0005425  | 1,38832 | 1,35849 | 1,020891822 | N/A             | N/A       | N/A          | Inc-ARF5-5      |
| A_22_P00009798 | 1,64001 | 1,61018 | 1,020891822 | ENST00000433396 | 100507073 | NR_110156    | LOC100507073    |
| A_21_P0007180  | 1,37894 | 1,34911 | 1,020891822 | ENST00000532242 | 102724957 | NM_001293172 | LOC102724957    |
| A_23_P423462   | 1,51177 | 1,48195 | 1,020884746 | ENST00000323355 | 221241    | NR_027245    | LINC00305       |
| A_22_P00010009 | 1,63079 | 1,60097 | 1,020884746 | ENST00000462531 | 101928190 | NR_125399    | LINC01487       |
| A_22_P00006185 | 1,36965 | 1,33983 | 1,020884746 | N/A             | N/A       | AK126996     | Inc-FAM211A-2   |
| A_22_P00004409 | 1,55274 | 1,52292 | 1,020884746 | ENST00000565815 | N/A       | BC034981     | N/A             |
| A_22_P00023303 | 1,58893 | 1,55913 | 1,020870593 | ENST00000529314 | N/A       | BC040333     | N/A             |
| A_33_P3885084  | 1,54243 | 1,51263 | 1,020870593 | N/A             | 147004    | XR_243792    | LOC147004       |
| A_22_P00016453 | 1,47946 | 1,44966 | 1,020870593 | ENST00000521975 | N/A       | XR_426341    | N/A             |
| A_23_P63219    | 10,3812 | 10,3514 | 1,020870593 | ENST00000368863 | 23126     | NM_015100    | POGZ            |
| A_21_P0003507  | 1,55334 | 1,52355 | 1,020863517 | ENST00000511916 | N/A       | N/A          | N/A             |
| A_21_P0012797  | 1,41626 | 1,38648 | 1,020856441 | ENST00000514600 | 641365    | N/A          | LINC00616       |
| A_22_P00021857 | 1,49128 | 1,4615  | 1,020856441 | N/A             | N/A       | N/A          | Inc-GRAMD2-1    |
| A_33_P3322460  | 3,44098 | 3,4112  | 1,020856441 | N/A             | N/A       | N/A          | N/A             |
| A_33_P3351150  | 1,53213 | 1,50236 | 1,020849365 | ENST00000383408 | 63895     | NM_022068    | PIEZO2          |
| A_23_P317760   | 1,65322 | 1,62345 | 1,020849365 | ENST00000380188 | 222826    | NM_173563    | FAM217A         |
| A_21_P0011202  | 1,49636 | 1,46659 | 1,020849365 | ENST00000431656 | N/A       | N/A          | N/A             |
| A_19_P00807046 | 8,06223 | 8,03246 | 1,020849365 | N/A             | N/A       | N/A          | Inc-ST3GAL1-1   |
| A_23_P126582   | 1,73618 | 1,70642 | 1,020842289 | ENST00000261448 | 845       | NM_001232    | CASQ2           |
| A_33_P3412300  | 1,64644 | 1,61668 | 1,020842289 | N/A             | N/A       | N/A          | Inc-HJURP-1     |
| A_32_P84373    | 1,52136 | 1,4916  | 1,020842289 | ENST00000620373 | 202134    | NM_001265615 | FAM153B         |
| A_21_P0006513  | 1,45135 | 1,42161 | 1,020828137 | N/A             | N/A       | N/A          | Inc-AKAP14-1    |
| A_22_P00006266 | 1,44857 | 1,41883 | 1,020828137 | ENST00000449453 | N/A       | N/A          | N/A             |
| A_23_P340188   | 5,41427 | 5,38455 | 1,020813986 | ENST00000370785 | 159091    | NM_138819    | FAM122C         |
| A_22_P00007423 | 1,55945 | 1,52974 | 1,02080691  | N/A             | N/A       | N/A          | Inc-GRXCR1-5    |

|                |         |         |             |                 |           |              |                  |
|----------------|---------|---------|-------------|-----------------|-----------|--------------|------------------|
| A_22_P00015368 | 1,51613 | 1,48642 | 1,02080691  | ENST00000497285 | N/A       | N/A          | N/A              |
| A_33_P3424257  | 14,6652 | 14,6355 | 1,020799834 | ENST00000616174 | 80218     | NM_025146    | NAA50            |
| A_22_P00011728 | 1,6159  | 1,58621 | 1,020792759 | ENST00000424119 | N/A       | N/A          | N/A              |
| A_21_P0009032  | 1,62837 | 1,59869 | 1,020785683 | ENST00000563844 | 643714    | N/A          | CASC16           |
| A_21_P0005591  | 1,63247 | 1,60279 | 1,020785683 | N/A             | N/A       | N/A          | Inc-WDR60-5      |
| A_24_P252794   | 8,6496  | 8,61993 | 1,020778608 | ENST00000537177 | 8453      | NM_003591    | CUL2             |
| A_21_P0012159  | 1,50799 | 1,47832 | 1,020778608 | ENST00000422352 | 100507629 | NR_038239    | LINC00658        |
| A_21_P0013829  | 1,49905 | 1,46939 | 1,020771532 | N/A             | N/A       | N/A          | XLOC_I2_015804   |
| A_22_P00003653 | 1,45342 | 1,42377 | 1,020764457 | N/A             | N/A       | N/A          | Inc-CD93-3       |
| A_33_P3376419  | 1,62057 | 1,59093 | 1,020757381 | N/A             | N/A       | N/A          | Inc-ST6GALNAC5-1 |
| A_33_P3289960  | 1,58255 | 1,55291 | 1,020757381 | ENST00000368974 | 387111    | NR_033376    | LINC00222        |
| A_22_P00019535 | 1,60442 | 1,57479 | 1,020750306 | N/A             | 100129175 | NR_046086    | LOC100129175     |
| A_22_P00000241 | 1,66389 | 1,63427 | 1,020743231 | ENST00000579378 | N/A       | N/A          | N/A              |
| A_21_P0005078  | 3,82451 | 3,79489 | 1,020743231 | N/A             | N/A       | N/A          | Inc-SOD2-2       |
| A_22_P00023736 | 1,44171 | 1,4121  | 1,020736155 | N/A             | 101928333 | NR_110194    | LOC101928333     |
| A_21_P0014885  | 7,67921 | 7,64961 | 1,02072908  | N/A             | 100506257 | AK295076     | LOC100506257     |
| A_33_P3423854  | 1,37765 | 1,34805 | 1,02072908  | ENST00000543257 | 732       | NM_001278543 | C8B              |
| A_33_P3680462  | 1,44531 | 1,41571 | 1,02072908  | N/A             | 339539    | N/A          | LOC339539        |
| A_23_P362637   | 10,5321 | 10,5025 | 1,02072908  | ENST00000372899 | 23304     | NM_015255    | UBR2             |
| A_21_P0009081  | 1,46316 | 1,43356 | 1,02072908  | N/A             | N/A       | N/A          | Inc-AC092327.1-4 |
| A_21_P0002152  | 1,65491 | 1,62531 | 1,02072908  | N/A             | N/A       | N/A          | Inc-ACP1-3       |
| A_21_P0009418  | 1,38437 | 1,35478 | 1,020722005 | N/A             | N/A       | N/A          | Inc-SRSF2-1      |
| A_24_P646172   | 1,62128 | 1,59169 | 1,020722005 | ENST00000565959 | N/A       | AL109783     | N/A              |
| A_21_P0011977  | 1,64243 | 1,61285 | 1,02071493  | N/A             | N/A       | N/A          | XLOC_I2_008343   |
| A_24_P931964   | 1,51899 | 1,48943 | 1,02070078  | N/A             | 100128816 | AY358109     | LOC100128816     |
| A_24_P181295   | 1,52166 | 1,4921  | 1,02070078  | ENST00000334342 | 145407    | NM_001001872 | C14orf37         |
| A_33_P3416398  | 1,42339 | 1,39383 | 1,02070078  | N/A             | 100129894 | AK094373     | LOC100129894     |
| A_24_P69053    | 1,6662  | 1,63664 | 1,02070078  | ENST00000511685 | 55714     | NM_001080477 | TENM3            |
| A_21_P0004505  | 1,58212 | 1,55259 | 1,020679555 | N/A             | N/A       | N/A          | Inc-C5orf64-1    |
| A_21_P0004544  | 1,58292 | 1,55339 | 1,020679555 | N/A             | N/A       | N/A          | Inc-FAM153C-2    |
| A_21_P0000582  | 1,68267 | 1,65316 | 1,020665406 | ENST00000590889 | 100134317 | NR_029389    | LOC100134317     |
| A_22_P00019688 | 1,5107  | 1,48119 | 1,020665406 | ENST00000581541 | N/A       | N/A          | N/A              |
| A_22_P00023902 | 1,58099 | 1,55149 | 1,020658331 | N/A             | N/A       | BC029842     | Inc-SLC14A2-1    |

|                |         |         |             |                 |           |              |                |
|----------------|---------|---------|-------------|-----------------|-----------|--------------|----------------|
| A_19_P00322188 | 1,68657 | 1,65709 | 1,020644182 | ENST00000520929 | 100507651 | NR_038235    | LOC100507651   |
| A_21_P0008554  | 1,4876  | 1,45812 | 1,020644182 | ENST00000558081 | 101928227 | XR_424596    | LOC101928227   |
| A_21_P0013097  | 1,62956 | 1,60008 | 1,020644182 | N/A             | N/A       | N/A          | XLOC_I2_013125 |
| A_32_P138628   | 1,54834 | 1,51887 | 1,020637107 | N/A             | 284933    | NR_038917    | LOC284933      |
| A_22_P00017332 | 1,37195 | 1,34248 | 1,020637107 | ENST00000527440 | N/A       | N/A          | N/A            |
| A_21_P0000009  | 1,48457 | 1,45511 | 1,020630033 | ENST00000539523 | 160492    | NM_001145729 | LMNTD1         |
| A_21_P0005500  | 1,50384 | 1,47438 | 1,020630033 | N/A             | N/A       | N/A          | Inc-SBDS-1     |
| A_22_P00016312 | 1,59195 | 1,56249 | 1,020630033 | ENST00000567788 | 100190940 | NR_024457    | LOC100190940   |
| A_22_P00008775 | 1,4826  | 1,45314 | 1,020630033 | N/A             | N/A       | N/A          | Inc-KIF20B-3   |
| A_21_P0003744  | 1,57812 | 1,54867 | 1,020622958 | N/A             | N/A       | N/A          | Inc-TECRL-3    |
| A_22_P00013229 | 1,6138  | 1,58438 | 1,020601735 | N/A             | N/A       | N/A          | Inc-ROBO1-2    |
| A_33_P3230995  | 1,5447  | 1,51528 | 1,020601735 | N/A             | 100996348 | NR_121630    | LOC100996348   |
| A_21_P0006993  | 1,38086 | 1,35144 | 1,020601735 | N/A             | N/A       | N/A          | Inc-GDF10-3    |
| A_33_P3371247  | 1,39383 | 1,36442 | 1,020594661 | ENST00000529936 | N/A       | N/A          | N/A            |
| A_33_P3231447  | 11,8389 | 11,8095 | 1,020587587 | ENST00000409532 | 3655      | NM_000210    | ITGA6          |
| A_23_P114349   | 1,38114 | 1,35174 | 1,020587587 | ENST00000346279 | 170626    | NM_130776    | XAGE3          |
| A_21_P0010016  | 1,52659 | 1,49719 | 1,020587587 | ENST00000564492 | 140828    | NR_001558    | LINC00261      |
| A_23_P82693    | 17,0921 | 17,0627 | 1,020587587 | ENST00000523636 | 26986     | NM_002568    | PABPC1         |
| A_21_P0006436  | 1,52637 | 1,49698 | 1,020580513 | ENST00000424539 | N/A       | N/A          | N/A            |
| A_23_P165201   | 1,54196 | 1,51257 | 1,020580513 | ENST00000587695 | 58510     | NM_021232    | PRODH2         |
| A_24_P96897    | 1,57182 | 1,54243 | 1,020580513 | ENST00000369547 | 148281    | NM_205848    | SYT6           |
| A_33_P3332180  | 1,67148 | 1,6421  | 1,020573439 | ENST00000584701 | 5949      | NM_002900    | RBP3           |
| A_33_P3276868  | 1,65887 | 1,62949 | 1,020573439 | N/A             | N/A       | N/A          | N/A            |
| A_23_P386364   | 1,47985 | 1,45048 | 1,020566365 | ENST00000373177 | 139324    | NM_144657    | HDX            |
| A_24_P314583   | 1,56414 | 1,53477 | 1,020566365 | ENST00000367207 | 284573    | NR_027902    | LINC00303      |
| A_24_P248185   | 1,51656 | 1,48721 | 1,020552217 | ENST00000534837 | 196500    | NM_153685    | PIANP          |
| A_33_P3226665  | 5,37652 | 5,34717 | 1,020552217 | ENST00000601958 | 79744     | NM_001291745 | ZNF419         |
| A_21_P0012317  | 1,68351 | 1,65419 | 1,020530995 | ENST00000416615 | 642633    | NR_108107    | FAM230B        |
| A_24_P6449     | 1,60466 | 1,57534 | 1,020530995 | ENST00000487910 | 344658    | HQ258252     | SAMD7          |
| A_23_P65629    | 1,4557  | 1,42639 | 1,020523921 | ENST00000319231 | 54207     | NM_021161    | KCNK10         |
| A_21_P0000822  | 1,6154  | 1,58609 | 1,020523921 | N/A             | 286189    | NR_038877    | LOC286189      |
| A_22_P00024056 | 1,43316 | 1,40385 | 1,020523921 | ENST00000512628 | N/A       | N/A          | N/A            |
| A_23_P151179   | 8,33884 | 8,30953 | 1,020523921 | ENST00000445832 | 64897     | NM_022895    | C12orf43       |

|                |         |         |             |                 |           |              |                       |
|----------------|---------|---------|-------------|-----------------|-----------|--------------|-----------------------|
| A_24_P393740   | 10,3772 | 10,3479 | 1,020516848 | ENST00000351578 | 2533      | NM_001465    | FYB                   |
| A_21_P0004967  | 1,56834 | 1,53904 | 1,020516848 | N/A             | N/A       | N/A          | Inc-QKI-2             |
| A_22_P00009624 | 1,61011 | 1,58081 | 1,020516848 | N/A             | N/A       | N/A          | Inc-MARCKS-3          |
| A_22_P00024963 | 1,44909 | 1,41979 | 1,020516848 | N/A             | 101928809 | NR_125906    | LOC101928809          |
| A_21_P0009982  | 1,59551 | 1,56621 | 1,020516848 | ENST00000458293 | N/A       | N/A          | N/A                   |
| A_22_P00002015 | 1,78001 | 1,75072 | 1,020509774 | N/A             | N/A       | AJ011602     | Inc-BDNF-2            |
| A_21_P0008313  | 1,65724 | 1,62795 | 1,020509774 | N/A             | N/A       | N/A          | Inc-C14orf23-4        |
| A_22_P00009335 | 1,55051 | 1,52122 | 1,020509774 | ENST00000457239 | N/A       | N/A          | N/A                   |
| A_22_P00012691 | 1,54022 | 1,51093 | 1,020509774 | ENST00000575236 | N/A       | N/A          | N/A                   |
| A_23_P368805   | 1,55756 | 1,52827 | 1,020509774 | ENST00000619531 | 11148     | NM_007072    | HHLA2                 |
| A_22_P00023500 | 6,23793 | 6,20866 | 1,020495627 | ENST00000548010 | 101927324 | NR_120618    | LINC01475             |
| A_22_P00014488 | 1,52887 | 1,49961 | 1,020488553 | N/A             | 101928414 | XR_424636    | LOC101928414          |
| A_22_P00002309 | 1,41056 | 1,38131 | 1,02048148  | N/A             | N/A       | N/A          | Inc-C11orf36-1        |
| A_33_P3403169  | 1,66178 | 1,63253 | 1,02048148  | N/A             | N/A       | N/A          | N/A                   |
| A_33_P3629585  | 1,51381 | 1,48457 | 1,020474406 | N/A             | 677830    | BF356984     | SNORA76A              |
| A_21_P0008566  | 1,45134 | 1,4221  | 1,020474406 | ENST00000451579 | N/A       | N/A          | N/A                   |
| A_23_P24948    | 1,61352 | 1,58429 | 1,020467333 | ENST00000310128 | 10008     | NM_005472    | KCNE3                 |
| A_22_P00015381 | 1,72308 | 1,69387 | 1,020453187 | ENST00000507628 | 255167    | NR_024423    | LINC01018             |
| A_22_P00012166 | 1,74723 | 1,71802 | 1,020453187 | ENST00000500487 | 102723461 | XR_430579    | LOC102723461          |
| A_22_P00021597 | 1,50419 | 1,47498 | 1,020453187 | ENST00000583161 | N/A       | N/A          | N/A                   |
| A_22_P00002249 | 1,62965 | 1,60045 | 1,020446113 | ENST00000531977 | 399821    | N/A          | FLJ37035              |
| A_22_P00007407 | 1,40284 | 1,37364 | 1,020446113 | ENST00000606195 | N/A       | N/A          | N/A                   |
| A_23_P34597    | 10,863  | 10,8338 | 1,020446113 | ENST00000461985 | 978       | NM_001785    | CDA                   |
| A_23_P109964   | 1,71215 | 1,68296 | 1,02043904  | ENST00000261058 | 84692     | NM_032600    | CCDC54                |
| A_22_P00002140 | 1,46314 | 1,43395 | 1,02043904  | ENST00000420169 | 317716    | NR_026760    | BPIFA4P               |
| A_21_P0003990  | 1,50704 | 1,47785 | 1,02043904  | ENST00000511734 | N/A       | N/A          | N/A                   |
| A_23_P161968   | 4,00354 | 3,97435 | 1,02043904  | ENST00000332793 | 387775    | NM_001039752 | SLC22A10              |
| A_32_P113114   | 8,39182 | 8,36264 | 1,020431967 | ENST00000302851 | 93134     | NM_152289    | ZNF561                |
| A_21_P0003081  | 1,55373 | 1,52457 | 1,020417821 | N/A             | 102724877 | XR_425636    | LOC102724877          |
| A_21_P0004072  | 5,59877 | 5,56961 | 1,020417821 | ENST00000507391 | N/A       | N/A          | N/A                   |
| A_21_P0000840  | 5,825   | 5,79584 | 1,020417821 | N/A             | 100506649 | NR_038924    | PXN-AS1               |
| A_21_P0007610  | 1,42693 | 1,39777 | 1,020417821 | N/A             | N/A       | N/A          | Inc-RP11-511B23.3.1-1 |
| A_22_P00020802 | 1,58935 | 1,56019 | 1,020417821 | ENST00000541258 | 101927694 | NR_104648    | LOC101927694          |

|                |         |         |             |                 |           |              |                  |
|----------------|---------|---------|-------------|-----------------|-----------|--------------|------------------|
| A_23_P4443     | 1,53551 | 1,50636 | 1,020410748 | ENST00000240335 | 9496      | NM_018488    | TBX4             |
| A_33_P3346972  | 1,49757 | 1,46843 | 1,020403675 | ENST00000390371 | N/A       | X57606       | N/A              |
| A_21_P0010615  | 1,72073 | 1,69159 | 1,020403675 | ENST00000431943 | N/A       | N/A          | N/A              |
| A_22_P00016380 | 1,62746 | 1,59832 | 1,020403675 | ENST00000435291 | N/A       | N/A          | N/A              |
| A_23_P164897   | 1,52227 | 1,49315 | 1,020389529 | ENST00000221444 | 3743      | NM_031886    | KCNA7            |
| A_21_P0013390  | 1,37214 | 1,34303 | 1,020382457 | ENST00000444032 | N/A       | N/A          | N/A              |
| A_21_P0012802  | 1,54561 | 1,51652 | 1,020368311 | ENST00000513106 | 152586    | N/A          | MGAT4D           |
| A_22_P00007850 | 1,4973  | 1,46822 | 1,020361239 | N/A             | N/A       | N/A          | Inc-HRH4-3       |
| A_33_P3290610  | 1,49836 | 1,46928 | 1,020361239 | N/A             | N/A       | N/A          | N/A              |
| A_33_P3244317  | 8,25264 | 8,22357 | 1,020354166 | ENST00000261758 | 23184     | NM_015154    | MESDC2           |
| A_21_P0001342  | 1,48993 | 1,46087 | 1,020347093 | N/A             | N/A       | N/A          | Inc-ABCD3-2      |
| A_21_P0009549  | 1,64199 | 1,61293 | 1,020347093 | N/A             | N/A       | N/A          | Inc-CELF4-5      |
| A_23_P144394   | 1,59366 | 1,5646  | 1,020347093 | ENST00000353151 | 1447      | NM_001891    | CSN2             |
| A_21_P0007408  | 1,5402  | 1,51115 | 1,020340021 | N/A             | N/A       | N/A          | Inc-HYOU1-1      |
| A_22_P00018912 | 1,50139 | 1,47234 | 1,020340021 | ENST00000518330 | 101927908 | XR_245289    | LOC101927908     |
| A_22_P00002230 | 8,33243 | 8,30339 | 1,020332948 | N/A             | 101928781 | NR_120643    | TMEM26-AS1       |
| A_21_P0009207  | 1,62328 | 1,59424 | 1,020332948 | N/A             | N/A       | N/A          | Inc-C17orf97-8   |
| A_33_P3368991  | 1,72586 | 1,69682 | 1,020332948 | ENST00000336559 | 4359      | NM_000530    | MPZ              |
| A_21_P0012256  | 1,50264 | 1,47361 | 1,020325876 | ENST00000512987 | N/A       | N/A          | N/A              |
| A_23_P427747   | 1,64468 | 1,61566 | 1,020318804 | ENST00000536235 | 130951    | NM_138804    | M1AP             |
| A_23_P327551   | 1,48736 | 1,45834 | 1,020318804 | ENST00000512332 | 131034    | NM_130808    | CPNE4            |
| A_21_P0002598  | 1,6226  | 1,59359 | 1,020311731 | N/A             | N/A       | N/A          | Inc-ETAA1-4      |
| A_19_P00319752 | 1,53736 | 1,50836 | 1,020304659 | ENST00000512458 | N/A       | N/A          | N/A              |
| A_33_P3266390  | 1,4562  | 1,4272  | 1,020304659 | ENST00000338602 | 9154      | NM_201651    | SLC28A1          |
| A_22_P00020076 | 1,65738 | 1,6284  | 1,020290515 | N/A             | N/A       | DB081831     | Inc-INO80D-2     |
| A_32_P125338   | 1,51361 | 1,48463 | 1,020290515 | ENST00000332947 | 163933    | NM_207334    | FAM43B           |
| A_33_P3329038  | 1,40738 | 1,3784  | 1,020290515 | N/A             | N/A       | N/A          | N/A              |
| A_21_P0006822  | 1,41822 | 1,38927 | 1,020269299 | N/A             | N/A       | N/A          | Inc-AL137145.1-1 |
| A_33_P3396776  | 1,48138 | 1,45243 | 1,020269299 | ENST00000379007 | 154907    | NM_001024607 | C7orf66          |
| A_33_P3320817  | 1,65678 | 1,62784 | 1,020262227 | ENST00000371763 | 360203    | NM_182974    | GLT6D1           |
| A_21_P0007861  | 1,74494 | 1,716   | 1,020262227 | ENST00000542804 | N/A       | N/A          | N/A              |
| A_21_P0009853  | 1,60774 | 1,57881 | 1,020255155 | ENST00000457853 | 284751    | N/A          | LINC01270        |
| A_24_P136182   | 17,1026 | 17,0737 | 1,02023394  | ENST00000423464 | 256355    | NR_026676    | RPS2P32          |

|                |         |         |             |                 |           |              |                |
|----------------|---------|---------|-------------|-----------------|-----------|--------------|----------------|
| A_22_P00002456 | 1,6057  | 1,57681 | 1,020226868 | ENST00000555864 | N/A       | N/A          | N/A            |
| A_33_P3358815  | 1,4845  | 1,45562 | 1,020219796 | ENST00000613448 | 414325    | NM_001081551 | DEFB103A       |
| A_23_P307563   | 1,67252 | 1,64365 | 1,020212725 | ENST00000360013 | 8997      | NM_001024660 | KALRN          |
| A_21_P0001259  | 2,84444 | 2,81557 | 1,020212725 | N/A             | N/A       | N/A          | Inc-AJAP1-1    |
| A_22_P00016358 | 1,63026 | 1,60139 | 1,020212725 | N/A             | 100128590 | NR_038441    | SLC8A1-AS1     |
| A_22_P00010312 | 1,87596 | 1,8471  | 1,020205653 | N/A             | N/A       | N/A          | Inc-MUC20-2    |
| A_22_P00004490 | 1,44953 | 1,42068 | 1,020198582 | ENST00000549364 | N/A       | N/A          | N/A            |
| A_21_P0001440  | 1,44982 | 1,421   | 1,020177367 | N/A             | N/A       | N/A          | Inc-NTPCR-1    |
| A_21_P0010963  | 1,4571  | 1,42828 | 1,020177367 | N/A             | N/A       | N/A          | XLOC_I2_002207 |
| A_22_P00013970 | 1,50878 | 1,47996 | 1,020177367 | ENST00000556936 | 729665    | NM_001164399 | CCDC175        |
| A_21_P0010940  | 1,60927 | 1,58045 | 1,020177367 | ENST00000452667 | 150159    | NM_001100874 | SLC9B1         |
| A_21_P0006257  | 1,53734 | 1,50853 | 1,020170296 | N/A             | N/A       | N/A          | Inc-FAM154A-1  |
| A_23_P36795    | 1,62447 | 1,59566 | 1,020170296 | ENST00000393240 | 6857      | NM_005639    | SYT1           |
| A_23_P19650    | 1,43909 | 1,41028 | 1,020170296 | ENST00000431366 | 7432      | NM_003381    | VIP            |
| A_22_P00008705 | 1,61322 | 1,58441 | 1,020170296 | N/A             | N/A       | BX100322     | Inc-KIAA1267-1 |
| A_33_P3234580  | 13,548  | 13,5192 | 1,020163225 | ENST00000372394 | 445       | NM_000050    | ASS1           |
| A_22_P00022286 | 1,61682 | 1,58802 | 1,020163225 | N/A             | N/A       | N/A          | Inc-SCPEP1-2   |
| A_33_P3363799  | 1,52085 | 1,49205 | 1,020163225 | ENST00000615285 | 4684      | NM_001242607 | NCAM1          |
| A_23_P258002   | 8,71269 | 8,68389 | 1,020163225 | ENST00000504169 | 55602     | NM_017632    | CDKN2AIP       |
| A_22_P00018968 | 11,3006 | 11,2718 | 1,020163225 | N/A             | N/A       | AK129594     | Inc-TMEM106C-2 |
| A_24_P250227   | 8,87821 | 8,84941 | 1,020163225 | ENST00000246672 | 9572      | NM_021724    | NR1D1          |
| A_21_P0005201  | 1,56073 | 1,53194 | 1,020156154 | ENST00000470677 | 101928211 | NR_110180    | LOC101928211   |
| A_33_P3362937  | 1,59223 | 1,56344 | 1,020156154 | N/A             | N/A       | N/A          | N/A            |
| A_22_P00011459 | 1,50607 | 1,47728 | 1,020156154 | N/A             | 100128505 | NR_033973    | ASTN2-AS1      |
| A_21_P0005742  | 1,55442 | 1,52563 | 1,020156154 | N/A             | N/A       | N/A          | Inc-SPAG1-3    |
| A_21_P0011788  | 1,64804 | 1,61927 | 1,020142011 | N/A             | N/A       | N/A          | XLOC_I2_007167 |
| A_21_P0005001  | 1,38971 | 1,36094 | 1,020142011 | N/A             | N/A       | N/A          | Inc-CCDC90A-3  |
| A_33_P3331172  | 1,45884 | 1,43007 | 1,020142011 | ENST00000390628 | N/A       | EF407827     | N/A            |
| A_21_P0003166  | 1,6749  | 1,64614 | 1,02013494  | N/A             | N/A       | N/A          | Inc-KLF15-2    |
| A_21_P0012829  | 1,46743 | 1,43868 | 1,020127869 | N/A             | N/A       | N/A          | XLOC_I2_011603 |
| A_21_P0006251  | 1,65857 | 1,62983 | 1,020120798 | N/A             | N/A       | N/A          | Inc-C9orf123-1 |
| A_33_P3281730  | 1,55829 | 1,52955 | 1,020120798 | ENST00000485309 | 11328     | BC127737     | FKBP9          |
| A_23_P63681    | 9,60339 | 9,57465 | 1,020120798 | ENST00000496903 | 3416      | NM_004969    | IDE            |



|                |         |         |             |                 |           |              |                |
|----------------|---------|---------|-------------|-----------------|-----------|--------------|----------------|
| A_33_P3723448  | 1,82875 | 1,80002 | 1,020113727 | ENST00000395688 | 419       | NM_001130017 | ART3           |
| A_21_P0004320  | 1,60106 | 1,57235 | 1,020099586 | ENST00000522704 | N/A       | N/A          | N/A            |
| A_33_P3236517  | 1,54503 | 1,51633 | 1,020092515 | ENST00000419302 | 132954    | NM_152401    | PDCL2          |
| A_21_P0007208  | 1,37954 | 1,35085 | 1,020085444 | ENST00000532307 | 100507384 | NR_047569    | LOC100507384   |
| A_33_P3340180  | 6,20326 | 6,17459 | 1,020071303 | ENST00000488768 | 9677      | NM_001190214 | PIIP5K1        |
| A_21_P0002492  | 7,71101 | 7,68235 | 1,020064232 | ENST00000457336 | 400999    | XM_005275926 | FLJ42351       |
| A_33_P3230369  | 1,62286 | 1,5942  | 1,020064232 | N/A             | N/A       | N/A          | N/A            |
| A_21_P0003856  | 1,45638 | 1,42773 | 1,020057162 | N/A             | N/A       | N/A          | Inc-CPE-1      |
| A_21_P0011555  | 1,50185 | 1,4732  | 1,020057162 | N/A             | N/A       | N/A          | XLOC_I2_005892 |
| A_22_P00011248 | 1,48943 | 1,46079 | 1,020050091 | N/A             | N/A       | BI830485     | Inc-OR1Q1-1    |
| A_21_P0014507  | 1,37003 | 1,3414  | 1,020043021 | N/A             | N/A       | N/A          | N/A            |
| A_22_P00001498 | 1,53251 | 1,50388 | 1,020043021 | N/A             | N/A       | N/A          | Inc-ARHGAP10-3 |
| A_23_P27528    | 1,49628 | 1,46767 | 1,02002888  | ENST00000598264 | 1549      | NM_000764    | CYP2A7         |
| A_22_P00015388 | 4,98492 | 4,95632 | 1,02002181  | N/A             | N/A       | AK128398     | Inc-SRGAP3-1   |
| A_23_P389907   | 11,7769 | 11,7483 | 1,02002181  | ENST00000482777 | 6311      | NM_002973    | ATXN2          |
| A_24_P32766    | 14,5597 | 14,5311 | 1,02002181  | N/A             | N/A       | N/A          | N/A            |
| A_21_P0008351  | 1,54855 | 1,51996 | 1,02001474  | N/A             | N/A       | N/A          | Inc-FUT8-2     |
| A_33_P3329108  | 1,4993  | 1,47071 | 1,02001474  | ENST00000380172 | 4507      | NM_002451    | MTAP           |
| A_22_P00024708 | 1,69837 | 1,66978 | 1,02001474  | N/A             | N/A       | DB536005     | Inc-SRD5A3-2   |
| A_21_P0014515  | 1,51035 | 1,48178 | 1,020000599 | N/A             | 101928461 | NR_125858    | LOC101928461   |
| A_23_P57910    | 1,44215 | 1,41358 | 1,020000599 | ENST00000296142 | 83597     | NM_031440    | RTP3           |
| A_33_P3221040  | 1,68327 | 1,65471 | 1,019993529 | N/A             | N/A       | N/A          | N/A            |
| A_21_P0007621  | 1,62531 | 1,59676 | 1,019986459 | N/A             | N/A       | N/A          | Inc-TXNRD1-3   |
| A_21_P0007291  | 1,52863 | 1,50008 | 1,019986459 | N/A             | N/A       | N/A          | Inc-GRAMD1B-2  |
| A_22_P00021976 | 1,40293 | 1,37438 | 1,019986459 | N/A             | N/A       | N/A          | Inc-TIMP3-4    |
| A_22_P00000840 | 1,45535 | 1,4268  | 1,019986459 | ENST00000560153 | 145978    | N/A          | LINC00052      |
| A_33_P3329028  | 1,42569 | 1,39715 | 1,019979389 | ENST00000584929 | 340811    | NR_027916    | AKR1C8P        |
| A_33_P3249329  | 1,67523 | 1,64669 | 1,019979389 | N/A             | 729020    | NM_001143909 | RPEL1          |
| A_33_P3485440  | 1,65174 | 1,6232  | 1,019979389 | ENST00000533625 | 319089    | BC038110     | TTC6           |
| A_22_P00011430 | 1,6366  | 1,60806 | 1,019979389 | ENST00000527684 | N/A       | BX098198     | N/A            |
| A_23_P55270    | 1,40529 | 1,37676 | 1,019972319 | ENST00000614828 | 6362      | NM_002988    | CCL18          |
| A_19_P00802297 | 1,49973 | 1,47121 | 1,019965249 | ENST00000462531 | 101928190 | NR_125399    | LINC01487      |
| A_21_P0010631  | 1,5745  | 1,54598 | 1,019965249 | N/A             | N/A       | N/A          | XLOC_I2_000986 |

|                |         |         |             |                 |           |              |               |
|----------------|---------|---------|-------------|-----------------|-----------|--------------|---------------|
| A_33_P3279969  | 1,6292  | 1,60068 | 1,019965249 | ENST00000378539 | 91584     | NM_181775    | PLXNA4        |
| A_23_P18152    | 1,36877 | 1,34026 | 1,01995818  | ENST00000467702 | 491       | NM_001001331 | ATP2B2        |
| A_33_P3373771  | 1,52536 | 1,49687 | 1,01994404  | N/A             | N/A       | N/A          | Inc-FCGR3B-2  |
| A_22_P00011979 | 1,44925 | 1,42076 | 1,01994404  | ENST00000438738 | N/A       | BI827742     | N/A           |
| A_22_P00018366 | 4,21652 | 4,18803 | 1,01994404  | N/A             | N/A       | C04987       | Inc-ZWINT-5   |
| A_21_P0003207  | 1,50898 | 1,4805  | 1,01993697  | N/A             | N/A       | N/A          | Inc-LSG1-2    |
| A_23_P213228   | 1,63345 | 1,60497 | 1,01993697  | ENST00000226382 | 8929      | NM_003924    | PHOX2B        |
| A_21_P0004284  | 1,86299 | 1,83451 | 1,01993697  | N/A             | 101927041 | XR_246559    | LOC101927041  |
| A_21_P0003326  | 1,54512 | 1,51664 | 1,01993697  | ENST00000509096 | N/A       | N/A          | N/A           |
| A_22_P00001446 | 4,50425 | 4,47577 | 1,01993697  | ENST00000539222 | N/A       | DA259379     | N/A           |
| A_22_P00011155 | 1,55086 | 1,52239 | 1,019929901 | N/A             | N/A       | N/A          | Inc-OBFC2A-5  |
| A_21_P0003521  | 1,52657 | 1,4981  | 1,019929901 | ENST00000504394 | N/A       | N/A          | N/A           |
| A_21_P0000464  | 1,59918 | 1,57072 | 1,019922831 | N/A             | 100113384 | NR_003689    | SNORD123      |
| A_23_P500464   | 1,5615  | 1,53305 | 1,019915762 | ENST00000380518 | 1280      | NM_001844    | COL2A1        |
| A_23_P48964    | 8,74657 | 8,71812 | 1,019915762 | ENST00000574755 | 26276     | NM_018668    | VPS33B        |
| A_33_P3253264  | 9,49594 | 9,46749 | 1,019915762 | ENST00000466813 | 3104      | NM_005341    | ZBTB48        |
| A_33_P3280631  | 1,53067 | 1,50223 | 1,019908692 | ENST00000379946 | 390078    | NM_001005167 | OR52E6        |
| A_22_P00003447 | 1,59909 | 1,57065 | 1,019908692 | ENST00000547004 | N/A       | N/A          | N/A           |
| A_33_P3217278  | 1,4283  | 1,39989 | 1,019887484 | N/A             | 100129316 | N/A          | LOC100129316  |
| A_23_P147845   | 11,9544 | 11,926  | 1,019880415 | ENST00000570001 | 23042     | NM_015027    | PDXDC1        |
| A_21_P0002449  | 1,48244 | 1,45405 | 1,019873345 | N/A             | N/A       | N/A          | Inc-TMEM17-2  |
| A_33_P3424302  | 1,61697 | 1,58858 | 1,019873345 | ENST00000279058 | 391253    | NM_178455    | SPINT4        |
| A_22_P00023625 | 1,52459 | 1,4962  | 1,019873345 | N/A             | N/A       | N/A          | Inc-GLYATL2-1 |
| A_22_P00008785 | 1,58794 | 1,55955 | 1,019873345 | N/A             | 101928089 | XR_247114    | LOC101928089  |
| A_21_P0007819  | 1,518   | 1,48962 | 1,019866276 | N/A             | N/A       | N/A          | Inc-CLEC2D-5  |
| A_32_P29118    | 1,48716 | 1,45878 | 1,019866276 | ENST00000284136 | 223117    | NM_152754    | SEMA3D        |
| A_22_P00016822 | 1,62529 | 1,59691 | 1,019866276 | ENST00000513051 | N/A       | N/A          | N/A           |
| A_33_P3402654  | 1,38195 | 1,35358 | 1,019859207 | ENST00000623985 | 646113    | NR_015358    | LINC00643     |
| A_23_P29608    | 1,57714 | 1,54878 | 1,019852138 | ENST00000446461 | 389124    | NM_001145059 | IQCF5         |
| A_23_P316637   | 1,57999 | 1,55164 | 1,019845069 | ENST00000370527 | 128826    | NM_178463    | MIR1-1HG      |
| A_21_P0010247  | 1,55196 | 1,52361 | 1,019845069 | N/A             | N/A       | N/A          | Inc-WRB-1     |
| A_22_P00020880 | 1,52856 | 1,50021 | 1,019845069 | N/A             | 100874014 | NR_046672    | NAV2-AS2      |
| A_22_P00008261 | 4,82019 | 4,79186 | 1,019830931 | ENST00000560688 | N/A       | N/A          | N/A           |

|                |         |         |             |                 |           |              |               |
|----------------|---------|---------|-------------|-----------------|-----------|--------------|---------------|
| A_33_P3312384  | 1,49409 | 1,46576 | 1,019830931 | ENST00000445461 | 388815    | NR_027790    | MIR99AHG      |
| A_21_P0002687  | 1,61822 | 1,5899  | 1,019823862 | N/A             | N/A       | N/A          | Inc-ZSWIM2-7  |
| A_24_P335202   | 1,46337 | 1,43505 | 1,019823862 | ENST00000534276 | 25884     | XM_005273884 | CHRDL2        |
| A_21_P0004378  | 1,6922  | 1,66388 | 1,019823862 | N/A             | N/A       | N/A          | Inc-C5orf42-1 |
| A_32_P77098    | 1,61114 | 1,58283 | 1,019816793 | ENST00000420504 | 399474    | NM_001003682 | TMEM200B      |
| A_22_P00016162 | 1,73625 | 1,70795 | 1,019809724 | ENST00000561728 | 101927726 | NR_109960    | BEAN1-AS1     |
| A_33_P3381117  | 6,15656 | 6,12826 | 1,019809724 | N/A             | 100128563 | AK129545     | LOC100128563  |
| A_22_P00003470 | 1,51668 | 1,48838 | 1,019809724 | N/A             | N/A       | AK130693     | Inc-CCDC68-2  |
| A_21_P0007851  | 1,59581 | 1,56752 | 1,019802656 | ENST00000548368 | 100131138 | N/A          | LINC01405     |
| A_22_P00007062 | 1,52777 | 1,49948 | 1,019802656 | N/A             | N/A       | N/A          | Inc-GLCCI1-1  |
| A_23_P363203   | 1,54466 | 1,51637 | 1,019802656 | ENST00000483087 | 27004     | NR_028288    | TCL6          |
| A_21_P0001994  | 1,6373  | 1,60902 | 1,019795587 | ENST00000453880 | 100505964 | NR_037881    | LINC01304     |
| A_22_P00001461 | 1,96219 | 1,93393 | 1,01978145  | ENST00000547443 | N/A       | N/A          | N/A           |
| A_24_P13001    | 1,64343 | 1,61517 | 1,01978145  | ENST00000369701 | 22986     | NM_014978    | SORCS3        |
| A_21_P0003460  | 1,46845 | 1,4402  | 1,019774381 | ENST00000510772 | N/A       | N/A          | N/A           |
| A_21_P0006392  | 1,53974 | 1,51149 | 1,019774381 | ENST00000450292 | N/A       | N/A          | N/A           |
| A_33_P3381443  | 1,74529 | 1,71704 | 1,019774381 | N/A             | N/A       | N/A          | N/A           |
| A_33_P3318145  | 1,54565 | 1,5174  | 1,019774381 | ENST00000510718 | N/A       | N/A          | N/A           |
| A_23_P4696     | 5,0864  | 5,05816 | 1,019767313 | ENST00000393796 | 692312    | NM_001040664 | PPAN-P2RY11   |
| A_21_P0009678  | 1,53265 | 1,50441 | 1,019767313 | N/A             | N/A       | N/A          | Inc-TRIP10-1  |
| A_23_P80508    | 1,65668 | 1,62844 | 1,019767313 | ENST00000613069 | 57047     | NM_020359    | PLSCR2        |
| A_33_P3250680  | 1,52035 | 1,49212 | 1,019760244 | ENST00000370629 | 959       | NM_000074    | CD40LG        |
| A_23_P214208   | 1,6727  | 1,64447 | 1,019760244 | ENST00000369499 | 1268      | NM_033181    | CNR1          |
| A_22_P00002790 | 1,68145 | 1,65322 | 1,019760244 | N/A             | N/A       | N/A          | Inc-C2CD4A-8  |
| A_23_P25176    | 1,45912 | 1,43089 | 1,019760244 | ENST00000552726 | 6910      | NM_000192    | TBX5          |
| A_22_P00014428 | 2,04472 | 2,01649 | 1,019760244 | N/A             | N/A       | N/A          | Inc-SGSM2-1   |
| A_21_P0013731  | 1,69377 | 1,66555 | 1,019753176 | ENST00000449235 | 101927258 | NR_121120    | LINC01474     |
| A_33_P3418803  | 1,60751 | 1,5793  | 1,019746107 | ENST00000505599 | 345222    | XR_241649    | MSANTD1       |
| A_22_P00009103 | 1,5535  | 1,5253  | 1,019739039 | N/A             | 100506475 | NR_102750    | EGFLAM-AS2    |
| A_21_P0004346  | 1,52991 | 1,50171 | 1,019739039 | N/A             | N/A       | N/A          | Inc-BTNL8-1   |
| A_23_P63289    | 13,2961 | 13,2679 | 1,019739039 | ENST00000378726 | 29101     | NM_014188    | SSU72         |
| A_21_P0000182  | 2,9961  | 2,96791 | 1,019731971 | N/A             | 100507462 | NM_001242740 | LOC100507462  |
| A_22_P00010005 | 1,54254 | 1,51435 | 1,019731971 | ENST00000576751 | N/A       | N/A          | N/A           |

|                |         |         |             |                 |           |              |                 |
|----------------|---------|---------|-------------|-----------------|-----------|--------------|-----------------|
| A_22_P00004545 | 1,65512 | 1,62694 | 1,019724903 | N/A             | N/A       | N/A          | Inc-CRH-4       |
| A_33_P3228677  | 1,46535 | 1,43718 | 1,019717834 | ENST00000611807 | N/A       | N/A          | N/A             |
| A_23_P419641   | 1,72187 | 1,69371 | 1,019710766 | ENST00000249749 | 54567     | NM_019074    | DLL4            |
| A_22_P00015695 | 1,89277 | 1,86461 | 1,019710766 | N/A             | N/A       | N/A          | Inc-SYNE1-1     |
| A_33_P3316178  | 1,39889 | 1,37074 | 1,019703698 | N/A             | N/A       | N/A          | N/A             |
| A_21_P0010130  | 1,6807  | 1,65256 | 1,01969663  | N/A             | N/A       | N/A          | Inc-BHLHE23-1   |
| A_23_P16275    | 1,62216 | 1,59402 | 1,01969663  | ENST00000358830 | 60385     | NM_021733    | TSKS            |
| A_33_P3249589  | 1,51514 | 1,487   | 1,01969663  | ENST00000358510 | 53335     | NM_022893    | BCL11A          |
| A_22_P00017740 | 4,89274 | 4,8646  | 1,01969663  | N/A             | 114044    | NR_110565    | MCM3AP-AS1      |
| A_21_P0013458  | 1,50694 | 1,47881 | 1,019689562 | ENST00000453187 | 103724390 | NR_125776    | LINC01287       |
| A_22_P00001262 | 1,49737 | 1,46924 | 1,019689562 | N/A             | N/A       | N/A          | Inc-ANKRD42-3   |
| A_21_P0008343  | 1,6487  | 1,62057 | 1,019689562 | N/A             | N/A       | N/A          | Inc-C14orf101-3 |
| A_33_P3229487  | 1,53683 | 1,5087  | 1,019689562 | ENST00000320048 | 390113    | NM_001004726 | OR4X1           |
| A_24_P297526   | 1,37017 | 1,34205 | 1,019682494 | ENST00000381585 | 130813    | AK057872     | C2orf50         |
| A_22_P00011987 | 1,63342 | 1,60531 | 1,019675426 | N/A             | N/A       | AK058085     | Inc-PLAT-1      |
| A_24_P145216   | 1,55004 | 1,52193 | 1,019675426 | N/A             | 100291323 | BC030635     | LOC100291323    |
| A_33_P3406196  | 1,51943 | 1,49132 | 1,019675426 | ENST00000344825 | 3824      | NM_002262    | KLRD1           |
| A_22_P00010520 | 1,58081 | 1,5527  | 1,019675426 | ENST00000524772 | N/A       | N/A          | N/A             |
| A_23_P142994   | 9,32827 | 9,30016 | 1,019675426 | ENST00000616198 | 129831    | NM_152945    | RBM45           |
| A_21_P0001305  | 1,37429 | 1,34619 | 1,019668359 | ENST00000451914 | N/A       | N/A          | N/A             |
| A_33_P3305758  | 12,5612 | 12,5331 | 1,019668359 | ENST00000415012 | 822       | NM_001256140 | CAPG            |
| A_21_P0013611  | 1,5569  | 1,52882 | 1,019654223 | N/A             | N/A       | N/A          | XLOC_I2_015090  |
| A_33_P3242614  | 5,18369 | 5,15562 | 1,019647155 | N/A             | 606724    | NR_002454    | LOC606724       |
| A_21_P0003583  | 1,73966 | 1,7116  | 1,019640088 | N/A             | N/A       | N/A          | Inc-SOD3-1      |
| A_22_P00016240 | 1,45769 | 1,42963 | 1,019640088 | N/A             | N/A       | AA928980     | Inc-TMC7-2      |
| A_33_P3334798  | 1,77061 | 1,74256 | 1,01963302  | ENST00000617088 | 195977    | NM_001278688 | ANTXR1          |
| A_21_P0008386  | 1,48469 | 1,45665 | 1,019625953 | N/A             | N/A       | N/A          | Inc-WDR25-2     |
| A_21_P0003312  | 1,46653 | 1,4385  | 1,019618885 | N/A             | N/A       | N/A          | Inc-CEP19-1     |
| A_21_P0014176  | 1,53077 | 1,50274 | 1,019618885 | N/A             | N/A       | XR_132856    | N/A             |
| A_21_P0000673  | 1,48742 | 1,45939 | 1,019618885 | ENST00000412638 | 401983    | NR_036753    | ZNF847P         |
| A_22_P00008851 | 1,7155  | 1,68748 | 1,019611818 | N/A             | N/A       | AK124126     | Inc-KLF9-1      |
| A_23_P383227   | 1,51261 | 1,48459 | 1,019611818 | ENST00000368698 | 6271      | NM_006271    | S100A1          |
| A_24_P289043   | 1,44974 | 1,42172 | 1,019611818 | ENST00000397777 | N/A       | N/A          | N/A             |

|                |         |         |             |                 |           |              |                      |
|----------------|---------|---------|-------------|-----------------|-----------|--------------|----------------------|
| A_24_P250507   | 1,66184 | 1,63382 | 1,019611818 | ENST00000305479 | 164237    | NM_172005    | WFDC13               |
| A_21_P0002464  | 1,64341 | 1,6154  | 1,01960475  | N/A             | N/A       | N/A          | Inc-REG1B-2          |
| A_23_P166848   | 1,49326 | 1,46525 | 1,01960475  | ENST00000426532 | 4057      | NM_002343    | LTF                  |
| A_33_P3315724  | 1,43374 | 1,40573 | 1,01960475  | N/A             | N/A       | N/A          | N/A                  |
| A_22_P00016707 | 1,64336 | 1,61535 | 1,01960475  | N/A             | N/A       | N/A          | Inc-TRAFD1-1         |
| A_22_P00010495 | 1,45983 | 1,43183 | 1,019597683 | ENST00000416173 | N/A       | N/A          | N/A                  |
| A_21_P0003767  | 1,67392 | 1,64592 | 1,019597683 | N/A             | 102724176 | XR_425771    | LOC102724176         |
| A_22_P00007829 | 5,67444 | 5,64644 | 1,019597683 | ENST00000515178 | N/A       | N/A          | N/A                  |
| A_33_P3288832  | 1,62661 | 1,59862 | 1,019590616 | ENST00000303991 | 114787    | NM_052899    | GPRIN1               |
| A_33_P3328317  | 1,527   | 1,49901 | 1,019590616 | ENST00000271417 | 387597    | NM_199351    | ILDR2                |
| A_23_P79968    | 1,38387 | 1,35588 | 1,019590616 | ENST00000262545 | 5126      | NM_002594    | PCSK2                |
| A_21_P0013945  | 1,65226 | 1,62428 | 1,019583548 | ENST00000435655 | 653125    | XM_006725562 | GOLGA8K              |
| A_24_P350759   | 1,50632 | 1,47835 | 1,019576481 | ENST00000395753 | 6506      | NM_004171    | SLC1A2               |
| A_22_P00003036 | 1,53744 | 1,50948 | 1,019569414 | ENST00000471553 | N/A       | N/A          | N/A                  |
| A_23_P64879    | 1,64121 | 1,61325 | 1,019569414 | ENST00000240662 | 3764      | NM_004982    | KCNJ8                |
| A_22_P00002696 | 1,6343  | 1,60634 | 1,019569414 | ENST00000433734 | N/A       | N/A          | N/A                  |
| A_23_P110299   | 1,59848 | 1,57052 | 1,019569414 | ENST00000304883 | 6870      | NM_001059    | TACR3                |
| A_22_P00002429 | 1,50994 | 1,48199 | 1,019562347 | N/A             | N/A       | N/A          | Inc-C14orf28-1       |
| A_22_P00013648 | 1,47899 | 1,45104 | 1,019562347 | N/A             | N/A       | BX118971     | Inc-RP11-664D7.4.1-1 |
| A_32_P229132   | 1,51916 | 1,49123 | 1,019548213 | ENST00000496950 | 56776     | NM_020066    | FMN2                 |
| A_21_P0012214  | 1,65989 | 1,63196 | 1,019548213 | N/A             | N/A       | N/A          | Inc-BACH1-1          |
| A_19_P00315725 | 1,5477  | 1,51979 | 1,019534079 | ENST00000418134 | 100422737 | N/A          | LOC100422737         |
| A_21_P0012678  | 1,507   | 1,47909 | 1,019534079 | ENST00000432407 | N/A       | N/A          | N/A                  |
| A_22_P00009805 | 1,63928 | 1,61137 | 1,019534079 | ENST00000561054 | N/A       | N/A          | N/A                  |
| A_33_P3232203  | 1,38197 | 1,35406 | 1,019534079 | ENST00000412969 | N/A       | BX641043     | N/A                  |
| A_22_P00010853 | 1,63666 | 1,60876 | 1,019527012 | N/A             | N/A       | N/A          | Inc-NOP56-1          |
| A_21_P0004850  | 1,45548 | 1,42759 | 1,019519946 | N/A             | N/A       | N/A          | Inc-E2F3-1           |
| A_23_P411806   | 8,80401 | 8,77613 | 1,019512879 | ENST00000374724 | 23446     | NM_080546    | SLC44A1              |
| A_23_P89155    | 9,23635 | 9,20848 | 1,019505812 | ENST00000569284 | 1018      | NM_001258    | CDK3                 |
| A_33_P3297310  | 1,50222 | 1,47435 | 1,019505812 | N/A             | N/A       | N/A          | N/A                  |
| A_22_P00008187 | 9,30078 | 9,27292 | 1,019498745 | ENST00000530418 | N/A       | N/A          | N/A                  |
| A_21_P0008788  | 1,59979 | 1,57194 | 1,019491679 | ENST00000614853 | 400456    | N/A          | LINC01197            |
| A_21_P0006964  | 1,53084 | 1,503   | 1,019484612 | N/A             | N/A       | N/A          | Inc-SFMBT2-2         |

|                |         |         |             |                 |           |              |              |
|----------------|---------|---------|-------------|-----------------|-----------|--------------|--------------|
| A_21_P0012590  | 1,6827  | 1,65487 | 1,019477546 | ENST00000509763 | 7364      | N/A          | UGT2B7       |
| A_23_P145644   | 1,54907 | 1,52126 | 1,019463413 | ENST00000444124 | 1644      | NM_000790    | DDC          |
| A_21_P0000816  | 1,48958 | 1,46177 | 1,019463413 | ENST00000566533 | 645355    | NR_038839    | MIR3976HG    |
| A_23_P57020    | 1,62955 | 1,60176 | 1,01944928  | ENST00000373003 | 149699    | NM_001008901 | GTSF1L       |
| A_22_P00008999 | 2,81427 | 2,78648 | 1,01944928  | ENST00000450365 | N/A       | N/A          | N/A          |
| A_33_P3325851  | 2,59764 | 2,56985 | 1,01944928  | ENST00000425215 | N/A       | N/A          | N/A          |
| A_33_P3368822  | 1,63741 | 1,60962 | 1,01944928  | N/A             | N/A       | N/A          | N/A          |
| A_21_P0007103  | 1,58479 | 1,557   | 1,01944928  | N/A             | N/A       | N/A          | Inc-MBL2-2   |
| A_21_P0003084  | 1,4272  | 1,39942 | 1,019442214 | N/A             | N/A       | N/A          | Inc-HES1-1   |
| A_23_P430728   | 1,59056 | 1,56279 | 1,019435148 | ENST00000262623 | 495       | NM_000704    | ATP4A        |
| A_22_P00017867 | 1,73761 | 1,70984 | 1,019435148 | ENST00000513892 | N/A       | AK123312     | N/A          |
| A_21_P0005086  | 1,65828 | 1,63052 | 1,019428082 | N/A             | N/A       | N/A          | Inc-T-1      |
| A_22_P00009025 | 1,53772 | 1,50996 | 1,019428082 | N/A             | N/A       | N/A          | Inc-LCLAT1-1 |
| A_21_P0005221  | 1,49203 | 1,46427 | 1,019428082 | ENST00000432866 | 100506725 | NR_108082    | LOC100506725 |
| A_21_P0008686  | 1,60376 | 1,57601 | 1,019421015 | ENST00000619812 | N/A       | N/A          | N/A          |
| A_22_P00005482 | 1,47301 | 1,44527 | 1,019413949 | ENST00000563397 | N/A       | N/A          | N/A          |
| A_21_P0002238  | 1,57952 | 1,5518  | 1,019399817 | N/A             | N/A       | N/A          | Inc-PLEK-1   |
| A_33_P3287238  | 1,68767 | 1,65996 | 1,019392752 | N/A             | N/A       | N/A          | N/A          |
| A_33_P3398677  | 1,75535 | 1,72764 | 1,019392752 | N/A             | N/A       | N/A          | Inc-OXT-1    |
| A_33_P3394786  | 13,13   | 13,1023 | 1,019385686 | ENST00000588193 | N/A       | N/A          | N/A          |
| A_33_P3265624  | 4,78838 | 4,76068 | 1,019385686 | N/A             | N/A       | N/A          | N/A          |
| A_22_P00020481 | 1,48225 | 1,45455 | 1,019385686 | N/A             | N/A       | N/A          | Inc-NDFIP2-4 |
| A_23_P349966   | 1,52544 | 1,49774 | 1,019385686 | ENST00000339375 | 222865    | NM_152913    | TMEM130      |
| A_32_P224522   | 10,2258 | 10,1981 | 1,019385686 | ENST00000301454 | 79085     | NM_024103    | SLC25A23     |
| A_23_P60727    | 1,48291 | 1,45522 | 1,01937862  | ENST00000404857 | 3778      | NM_002247    | KCNMA1       |
| A_21_P0004403  | 1,65625 | 1,62856 | 1,01937862  | ENST00000508486 | 101928769 | NR_105001    | LOC101928769 |
| A_33_P3318771  | 1,80523 | 1,77755 | 1,019371554 | ENST00000396372 | 796       | NM_001033952 | CALCA        |
| A_22_P00011353 | 1,54318 | 1,5155  | 1,019371554 | ENST00000534505 | N/A       | N/A          | N/A          |
| A_32_P8546     | 1,40544 | 1,37777 | 1,019364488 | ENST00000455853 | 90632     | NR_026860    | LINC00473    |
| A_21_P0010510  | 3,96652 | 3,93885 | 1,019364488 | ENST00000442673 | 100133612 | N/A          | LINC01134    |
| A_22_P00002133 | 1,65521 | 1,62755 | 1,019357423 | N/A             | 6315      | NR_002717    | ATXN8OS      |
| A_21_P0011750  | 1,5964  | 1,56874 | 1,019357423 | ENST00000455211 | N/A       | N/A          | N/A          |
| A_22_P00006235 | 1,73845 | 1,7108  | 1,019350357 | ENST00000535704 | N/A       | BG205064     | N/A          |

|                |         |         |             |                 |           |              |                       |
|----------------|---------|---------|-------------|-----------------|-----------|--------------|-----------------------|
| A_22_P00023121 | 4,20038 | 4,17274 | 1,019343291 | N/A             | N/A       | XM_006721356 | Inc-RP11-327F22.5.1-4 |
| A_23_P167061   | 1,63595 | 1,60831 | 1,019343291 | ENST00000286719 | 5470      | NM_006239    | PPEF2                 |
| A_21_P0001744  | 1,51105 | 1,48342 | 1,019336226 | N/A             | N/A       | N/A          | Inc-CRABP2-1          |
| A_33_P3214239  | 2,05937 | 2,03174 | 1,019336226 | N/A             | 149775    | N/A          | GNAS-AS1              |
| A_21_P0011801  | 1,53866 | 1,51103 | 1,019336226 | N/A             | N/A       | N/A          | XLOC_I2_007286        |
| A_22_P00015424 | 5,37844 | 5,35082 | 1,01932916  | N/A             | 101927159 | NR_110004    | LOC101927159          |
| A_33_P3221828  | 6,22874 | 6,20113 | 1,019322095 | ENST00000505276 | N/A       | AK056228     | N/A                   |
| A_23_P60248    | 16,7644 | 16,7368 | 1,01931503  | ENST00000487892 | 7295      | NM_003329    | TXN                   |
| A_33_P3265314  | 1,54514 | 1,51756 | 1,019300899 | ENST00000609661 | 643365    | XR_246655    | LINC00452             |
| A_22_P00006427 | 1,70052 | 1,67294 | 1,019300899 | ENST00000453135 | 101929181 | N/A          | LOC101929181          |
| A_22_P00020891 | 1,54622 | 1,51864 | 1,019300899 | ENST00000505409 | N/A       | N/A          | N/A                   |
| A_21_P0012660  | 1,63308 | 1,60551 | 1,019293834 | N/A             | N/A       | N/A          | XLOC_I2_011095        |
| A_21_P0004135  | 1,40692 | 1,37935 | 1,019293834 | N/A             | N/A       | N/A          | Inc-CCDC125-7         |
| A_21_P0002163  | 1,55604 | 1,52848 | 1,019286769 | N/A             | 101929643 | XR_241266    | LOC101929643          |
| A_22_P00015598 | 1,59557 | 1,56801 | 1,019286769 | ENST00000359838 | N/A       | N/A          | N/A                   |
| A_23_P352932   | 1,44958 | 1,42202 | 1,019286769 | ENST00000612154 | 114815    | NM_052918    | SORCS1                |
| A_21_P0014092  | 1,45185 | 1,42429 | 1,019286769 | N/A             | N/A       | BG201242     | N/A                   |
| A_21_P0003956  | 1,49934 | 1,47179 | 1,019279704 | ENST00000507599 | 340094    | NR_026994    | LINC01020             |
| A_22_P00013326 | 1,57718 | 1,54964 | 1,019272638 | ENST00000486508 | N/A       | BU852190     | N/A                   |
| A_21_P0013593  | 1,44828 | 1,42074 | 1,019272638 | N/A             | N/A       | N/A          | XLOC_I2_014853        |
| A_22_P00020105 | 1,62288 | 1,59534 | 1,019272638 | ENST00000545923 | 102724629 | XR_424340    | LOC102724629          |
| A_33_P3357337  | 5,96429 | 5,93677 | 1,019258508 | N/A             | 892       | BC026272     | CCNC                  |
| A_33_P3252781  | 1,56719 | 1,53967 | 1,019258508 | ENST00000372263 | 219348    | NM_001012973 | PLAC9                 |
| A_23_P337278   | 1,57101 | 1,54349 | 1,019258508 | ENST00000295729 | 255101    | NM_152389    | CCDC108               |
| A_21_P0012558  | 1,54923 | 1,52172 | 1,019251443 | ENST00000439115 | N/A       | N/A          | N/A                   |
| A_22_P00003449 | 1,5742  | 1,54669 | 1,019251443 | N/A             | N/A       | N/A          | Inc-CCDC53-2          |
| A_33_P3379456  | 11,3409 | 11,3134 | 1,019244379 | ENST00000356150 | 26751     | NM_001282687 | SH3YL1                |
| A_21_P0009087  | 1,60495 | 1,57745 | 1,019244379 | N/A             | N/A       | N/A          | Inc-C16orf95.1-1      |
| A_21_P0004901  | 1,62939 | 1,60189 | 1,019244379 | N/A             | N/A       | N/A          | Inc-MYO6-3            |
| A_24_P406814   | 11,1737 | 11,1462 | 1,019244379 | ENST00000337318 | 9679      | NM_014661    | FAM53B                |
| A_23_P131723   | 13,3409 | 13,3134 | 1,019244379 | ENST00000381844 | 10971     | NM_006826    | YWHAQ                 |
| A_23_P159676   | 1,56375 | 1,53626 | 1,019237314 | ENST00000619509 | 50945     | NM_016954    | TBX22                 |
| A_21_P0008052  | 3,00807 | 2,98059 | 1,019230249 | N/A             | N/A       | N/A          | Inc-NHLRC3-1          |

|                |         |         |             |                 |           |           |               |
|----------------|---------|---------|-------------|-----------------|-----------|-----------|---------------|
| A_21_P0012843  | 1,43948 | 1,412   | 1,019230249 | ENST00000514186 | N/A       | N/A       | N/A           |
| A_22_P00000371 | 1,46678 | 1,4393  | 1,019230249 | ENST00000443087 | N/A       | N/A       | N/A           |
| A_33_P3215288  | 5,35792 | 5,33045 | 1,019223184 | N/A             | 284757    | AK128288  | MIR646HG      |
| A_21_P0003768  | 1,55129 | 1,52384 | 1,019209055 | N/A             | N/A       | N/A       | Inc-ANKRD50-5 |
| A_22_P00025831 | 1,6833  | 1,65585 | 1,019209055 | N/A             | N/A       | BC048201  | Inc-RBM11-2   |
| A_23_P430168   | 1,55354 | 1,5261  | 1,01920199  | ENST00000484561 | 130026    | AB053316  | ICA1L         |
| A_32_P150645   | 1,548   | 1,52056 | 1,01920199  | N/A             | N/A       | M78233    | N/A           |
| A_22_P00011348 | 1,6002  | 1,57277 | 1,019194926 | ENST00000554149 | N/A       | N/A       | N/A           |
| A_21_P0008472  | 1,65379 | 1,62636 | 1,019194926 | N/A             | N/A       | N/A       | Inc-GALC-5    |
| A_22_P00007708 | 1,55192 | 1,52449 | 1,019194926 | N/A             | N/A       | N/A       | Inc-HJURP-1   |
| A_33_P3341731  | 7,40307 | 7,37564 | 1,019194926 | N/A             | N/A       | N/A       | N/A           |
| A_21_P0008750  | 4,65182 | 4,6244  | 1,019187861 | N/A             | N/A       | N/A       | Inc-CILP-1    |
| A_22_P00004972 | 1,49786 | 1,47045 | 1,019180797 | N/A             | 100873969 | NR_049775 | GPC5-AS1      |
| A_22_P00006400 | 1,51958 | 1,49217 | 1,019180797 | ENST00000501916 | 441009    | NR_038857 | CPEB2-AS1     |
| A_23_P141770   | 11,1474 | 11,12   | 1,019173732 | ENST00000580224 | 8774      | NM_003826 | NAPG          |
| A_33_P3285570  | 1,58569 | 1,55829 | 1,019173732 | N/A             | N/A       | DA194689  | N/A           |
| A_21_P0000446  | 1,50485 | 1,47745 | 1,019173732 | N/A             | 100033422 | NR_003325 | SNORD116-10   |
| A_21_P0002377  | 1,53994 | 1,51255 | 1,019166668 | ENST00000407635 | 285191    | XR_241442 | LOC285191     |
| A_21_P0003820  | 1,61852 | 1,59113 | 1,019166668 | N/A             | N/A       | N/A       | Inc-TRIML2-6  |
| A_21_P0002905  | 1,5765  | 1,54911 | 1,019166668 | ENST00000470523 | N/A       | N/A       | N/A           |
| A_22_P00025755 | 1,62366 | 1,59628 | 1,019159604 | N/A             | N/A       | BC041947  | Inc-SPAM1-2   |
| A_21_P0006218  | 1,71185 | 1,68448 | 1,01915254  | N/A             | N/A       | N/A       | Inc-TLR4-4    |
| A_24_P66605    | 1,54771 | 1,52035 | 1,019145475 | ENST00000370490 | 84631     | NM_032539 | SLITRK2       |
| A_33_P3276062  | 1,73982 | 1,71246 | 1,019145475 | N/A             | N/A       | N/A       | N/A           |
| A_33_P3379776  | 1,39047 | 1,36313 | 1,019131347 | N/A             | N/A       | N/A       | N/A           |
| A_22_P00018876 | 1,51336 | 1,48603 | 1,019124283 | N/A             | N/A       | N/A       | Inc-FNDC9-2   |
| A_23_P79488    | 1,54281 | 1,51548 | 1,019124283 | ENST00000394754 | 286749    | NM_172311 | STON1-GTF2A1L |
| A_23_P424689   | 1,56264 | 1,53531 | 1,019124283 | ENST00000303922 | N/A       | BC026077  | N/A           |
| A_21_P0009641  | 1,6078  | 1,58049 | 1,019110155 | ENST00000575722 | N/A       | N/A       | N/A           |
| A_22_P00016471 | 1,66875 | 1,64144 | 1,019110155 | ENST00000523173 | 101927774 | NR_121673 | LINC00824     |
| A_33_P3339611  | 1,60469 | 1,57738 | 1,019110155 | N/A             | N/A       | N/A       | N/A           |
| A_33_P3243857  | 11,0019 | 10,9746 | 1,019103091 | ENST00000396136 | 102       | NM_001110 | ADAM10        |
| A_23_P144656   | 1,50258 | 1,47529 | 1,019096027 | ENST00000502921 | 1008      | NM_006727 | CDH10         |



|                |         |         |             |                 |           |              |                |
|----------------|---------|---------|-------------|-----------------|-----------|--------------|----------------|
| A_24_P131222   | 9,71839 | 9,6911  | 1,019096027 | ENST00000341676 | 23400     | NM_022089    | ATP13A2        |
| A_21_P0003916  | 1,63513 | 1,60785 | 1,019088963 | N/A             | N/A       | N/A          | Inc-IRF2-1     |
| A_22_P00002446 | 1,63198 | 1,60471 | 1,0190819   | ENST00000568019 | N/A       | N/A          | N/A            |
| A_21_P0014630  | 1,57176 | 1,5445  | 1,019074836 | N/A             | N/A       | N/A          | N/A            |
| A_21_P0000159  | 1,60348 | 1,57622 | 1,019074836 | ENST00000617745 | 374900    | NM_001204838 | ZNF568         |
| A_22_P00002292 | 1,51238 | 1,48513 | 1,019067772 | ENST00000456514 | 101101772 | N/A          | LINC00601      |
| A_22_P00001050 | 7,07229 | 7,04504 | 1,019067772 | ENST00000583271 | 728841    | NM_001037501 | NBPF8          |
| A_21_P0000123  | 1,65943 | 1,63219 | 1,019060709 | N/A             | 100507096 | NM_001195138 | GIMD1          |
| A_21_P0013103  | 1,61648 | 1,58924 | 1,019060709 | N/A             | N/A       | N/A          | XLOC_I2_013149 |
| A_22_P00011505 | 1,58111 | 1,55388 | 1,019053645 | ENST00000624367 | 101929625 | NR_109880    | LOC101929625   |
| A_23_P141624   | 1,62273 | 1,59551 | 1,019046582 | ENST00000306271 | 81851     | NM_030967    | KRTAP1-1       |
| A_21_P0014523  | 1,51986 | 1,49264 | 1,019046582 | N/A             | N/A       | N/A          | N/A            |
| A_21_P0011830  | 1,68046 | 1,65325 | 1,019039518 | N/A             | N/A       | N/A          | XLOC_I2_007452 |
| A_21_P0010249  | 1,54698 | 1,51978 | 1,019032455 | N/A             | N/A       | N/A          | Inc-MX1-1      |
| A_33_P3295071  | 1,65813 | 1,63094 | 1,019025391 | ENST00000604293 | N/A       | N/A          | N/A            |
| A_24_P376760   | 1,51765 | 1,49046 | 1,019025391 | ENST00000476083 | 765       | NM_001215    | CA6            |
| A_22_P00016275 | 1,42794 | 1,40075 | 1,019025391 | ENST00000562516 | N/A       | BG201995     | N/A            |
| A_33_P3392927  | 1,6328  | 1,60561 | 1,019025391 | ENST00000529003 | N/A       | AB529253     | N/A            |
| A_21_P0012662  | 1,50337 | 1,47618 | 1,019025391 | N/A             | N/A       | N/A          | XLOC_I2_011098 |
| A_22_P00003584 | 1,48839 | 1,46121 | 1,019018328 | ENST00000506819 | N/A       | DA851375     | N/A            |
| A_21_P0001670  | 1,65764 | 1,63046 | 1,019018328 | N/A             | N/A       | N/A          | Inc-ZCCHC17-1  |
| A_33_P3288384  | 7,65523 | 7,62805 | 1,019018328 | ENST00000529524 | 5682      | NM_001143937 | PSMA1          |
| A_33_P3237482  | 1,61573 | 1,58856 | 1,019011265 | ENST00000394362 | 221458    | NM_145027    | KIF6           |
| A_21_P0006054  | 1,4932  | 1,46603 | 1,019011265 | ENST00000454034 | N/A       | N/A          | N/A            |
| A_22_P00009492 | 1,36795 | 1,34078 | 1,019011265 | N/A             | N/A       | DA753755     | Inc-MAGEL2-1   |
| A_33_P3391097  | 3,28162 | 3,25446 | 1,019004202 | N/A             | 27434     | AK092801     | POLM           |
| A_33_P3345344  | 1,68401 | 1,65686 | 1,018997138 | ENST00000374139 | 644168    | N/A          | DRGX           |
| A_23_P40856    | 1,45051 | 1,42336 | 1,018997138 | ENST00000493075 | 57408     | BC074741     | LRTM1          |
| A_33_P3250394  | 5,29138 | 5,26424 | 1,018990075 | ENST00000451043 | 7221      | N/A          | TRPC2          |
| A_33_P3246153  | 1,45663 | 1,42949 | 1,018990075 | ENST00000527448 | N/A       | N/A          | N/A            |
| A_33_P3626739  | 1,60174 | 1,5746  | 1,018990075 | N/A             | N/A       | AK094379     | N/A            |
| A_19_P00808726 | 1,49938 | 1,47226 | 1,018975949 | N/A             | N/A       | N/A          | N/A            |
| A_21_P0007598  | 1,60493 | 1,57782 | 1,018968886 | N/A             | N/A       | N/A          | Inc-TMTC3-2    |

|                |         |         |             |                 |           |           |              |
|----------------|---------|---------|-------------|-----------------|-----------|-----------|--------------|
| A_22_P00014424 | 1,3922  | 1,36509 | 1,018968886 | ENST00000558852 | N/A       | N/A       | N/A          |
| A_24_P370471   | 7,78231 | 7,7552  | 1,018968886 | ENST00000504770 | 83734     | NM_031482 | ATG10        |
| A_22_P00012841 | 1,65308 | 1,62598 | 1,018961823 | N/A             | N/A       | N/A       | Inc-RASA1-7  |
| A_22_P00009290 | 1,45557 | 1,42847 | 1,018961823 | ENST00000532413 | N/A       | N/A       | N/A          |
| A_33_P3414037  | 1,50322 | 1,47612 | 1,018961823 | N/A             | 101929574 | NR_120661 | LOC101929574 |
| A_22_P00007262 | 1,46456 | 1,43749 | 1,018940635 | N/A             | N/A       | BM685492  | Inc-GPR146-1 |
| A_33_P3322949  | 1,56249 | 1,53542 | 1,018940635 | ENST00000441152 | 414235    | NR_027151 | PRR26        |
| A_22_P00018148 | 1,66841 | 1,64134 | 1,018940635 | ENST00000578035 | N/A       | N/A       | N/A          |
| A_21_P0000234  | 9,98291 | 9,95585 | 1,018933572 | ENST00000484599 | 94163     | NR_001457 | SNORD38B     |
| A_21_P0005003  | 1,60322 | 1,57617 | 1,018926509 | N/A             | N/A       | N/A       | Inc-DTNBP1-4 |
| A_33_P3262366  | 1,46325 | 1,4362  | 1,018926509 | N/A             | N/A       | N/A       | N/A          |
| A_33_P3252524  | 1,55978 | 1,53273 | 1,018926509 | ENST00000367520 | 23127     | NM_015101 | COLGALT2     |
| A_22_P00017119 | 1,63119 | 1,60414 | 1,018926509 | N/A             | N/A       | N/A       | Inc-UBAP1-1  |
| A_33_P3392829  | 1,62176 | 1,59472 | 1,018919447 | ENST00000612395 | 339768    | NM_194312 | ESPNL        |
| A_21_P0008176  | 1,55175 | 1,52471 | 1,018919447 | N/A             | N/A       | N/A       | Inc-PCDH20-8 |
| A_33_P3325165  | 1,64577 | 1,61873 | 1,018919447 | ENST00000519203 | N/A       | BC140052  | N/A          |
| A_22_P00005146 | 1,59432 | 1,56729 | 1,018912384 | N/A             | N/A       | N/A       | Inc-DHX38-1  |
| A_21_P0005249  | 1,63123 | 1,60421 | 1,018905322 | N/A             | N/A       | N/A       | Inc-ASB4-3   |
| A_22_P00007878 | 1,52224 | 1,49523 | 1,018898259 | N/A             | 284900    | NR_026963 | TTC28-AS1    |
| A_33_P3353921  | 1,64152 | 1,61452 | 1,018891197 | ENST00000489214 | 10578     | AK310057  | GNLY         |
| A_33_P3328837  | 16,885  | 16,858  | 1,018891197 | ENST00000589047 | N/A       | N/A       | N/A          |
| A_21_P0008948  | 1,52181 | 1,49483 | 1,018877072 | ENST00000565229 | N/A       | N/A       | N/A          |
| A_24_P652502   | 1,56522 | 1,53824 | 1,018877072 | ENST00000390426 | N/A       | Y15200    | N/A          |
| A_22_P00012374 | 1,61837 | 1,5914  | 1,01887001  | ENST00000485805 | 100287879 | NR_033978 | LINC00994    |
| A_33_P3299942  | 1,47798 | 1,45101 | 1,01887001  | ENST00000584500 | N/A       | N/A       | N/A          |
| A_33_P3306063  | 1,45211 | 1,42514 | 1,01887001  | N/A             | N/A       | N/A       | N/A          |
| A_21_P0010214  | 1,59991 | 1,57296 | 1,018855885 | ENST00000411694 | 101928576 | XR_244329 | LOC101928576 |
| A_22_P00009658 | 1,53567 | 1,50872 | 1,018855885 | ENST00000427319 | N/A       | N/A       | N/A          |
| A_22_P00011228 | 1,66457 | 1,63763 | 1,018848823 | ENST00000542992 | N/A       | N/A       | N/A          |
| A_32_P71571    | 1,54038 | 1,51345 | 1,018841761 | ENST00000295569 | 151647    | NM_182522 | FAM19A4      |
| A_21_P0012098  | 1,48926 | 1,46234 | 1,018834699 | ENST00000430460 | N/A       | N/A       | N/A          |
| A_21_P0014263  | 1,62151 | 1,59459 | 1,018834699 | N/A             | N/A       | N/A       | N/A          |
| A_22_P00004592 | 1,6847  | 1,65778 | 1,018834699 | ENST00000453347 | N/A       | N/A       | N/A          |

|                |         |         |             |                 |           |              |              |
|----------------|---------|---------|-------------|-----------------|-----------|--------------|--------------|
| A_33_P3346348  | 5,97011 | 5,9432  | 1,018827637 | ENST00000327098 | 93594     | NM_001145088 | TBC1D31      |
| A_22_P00019001 | 1,51859 | 1,49169 | 1,018820575 | N/A             | N/A       | N/A          | Inc-FPGS-2   |
| A_33_P3302756  | 1,63565 | 1,60875 | 1,018820575 | ENST00000366160 | N/A       | AY662656     | N/A          |
| A_21_P0004429  | 1,61528 | 1,5884  | 1,018806451 | N/A             | N/A       | N/A          | Inc-EFNA5-3  |
| A_22_P00017517 | 1,62195 | 1,59507 | 1,018806451 | N/A             | 100506733 | NR_038973    | FAM170B-AS1  |
| A_33_P3270252  | 1,64471 | 1,61784 | 1,018799389 | ENST00000623530 | 347169    | NM_001004450 | OR1B1        |
| A_22_P00003051 | 1,53675 | 1,50989 | 1,018792328 | N/A             | 101926890 | NR_104365    | DAB1-AS1     |
| A_22_P00011775 | 1,39834 | 1,37149 | 1,018785266 | ENST00000421077 | N/A       | N/A          | N/A          |
| A_23_P18123    | 1,44159 | 1,41474 | 1,018785266 | ENST00000361589 | 22871     | NM_014932    | NLGN1        |
| A_21_P0008222  | 1,69115 | 1,66431 | 1,018778204 | N/A             | 101928730 | NR_120422    | LOC101928730 |
| A_33_P3222354  | 1,54563 | 1,51879 | 1,018778204 | N/A             | N/A       | N/A          | N/A          |
| A_23_P374919   | 1,55788 | 1,53105 | 1,018771143 | ENST00000337428 | 149499    | NM_144702    | LRRRC71      |
| A_21_P0009845  | 1,45189 | 1,42506 | 1,018771143 | ENST00000431915 | N/A       | N/A          | N/A          |
| A_33_P3406563  | 1,49942 | 1,47259 | 1,018771143 | N/A             | 647012    | NR_033658    | YY1P2        |
| A_23_P334798   | 1,59626 | 1,56944 | 1,018764081 | ENST00000296144 | 79442     | NM_024512    | LRRRC2       |
| A_23_P329573   | 9,27206 | 9,24524 | 1,018764081 | ENST00000302347 | 3689      | NM_000211    | ITGB2        |
| A_21_P0013066  | 1,65701 | 1,6302  | 1,01875702  | ENST00000562221 | 101928603 | NM_001282492 | C6orf229     |
| A_21_P0002703  | 1,54156 | 1,51476 | 1,018749958 | ENST00000483525 | 101927152 | NR_110000    | LINC01212    |
| A_33_P3257574  | 1,52229 | 1,49549 | 1,018749958 | N/A             | 101928958 | XR_241872    | LOC101928958 |
| A_21_P0000057  | 1,61579 | 1,58899 | 1,018749958 | ENST00000581175 | 8787      | NM_001165933 | RGS9         |
| A_33_P6616798  | 1,53034 | 1,50354 | 1,018749958 | ENST00000478310 | 26266     | NM_012450    | SLC13A4      |
| A_33_P3237854  | 1,40816 | 1,38138 | 1,018735835 | N/A             | 497634    | N/A          | LINC00293    |
| A_21_P0004926  | 1,40873 | 1,38195 | 1,018735835 | N/A             | 285759    | NR_027060    | FLJ34503     |
| A_21_P0011735  | 1,62051 | 1,59377 | 1,01870759  | ENST00000592347 | 100420587 | N/A          | LOC100420587 |
| A_21_P0004533  | 1,42745 | 1,40072 | 1,018700529 | N/A             | N/A       | N/A          | Inc-MAT2B-3  |
| A_21_P0001692  | 1,6231  | 1,59637 | 1,018700529 | ENST00000418041 | 101927412 | NR_125941    | LOC101927412 |
| A_22_P00004651 | 1,66025 | 1,63352 | 1,018700529 | ENST00000611197 | 101928448 | NM_001287053 | LOC101928448 |
| A_22_P00005998 | 1,49145 | 1,46472 | 1,018700529 | ENST00000519107 | N/A       | N/A          | N/A          |
| A_21_P0001070  | 1,46495 | 1,43822 | 1,018700529 | ENST00000445339 | 101927532 | XR_247092    | LOC101927532 |
| A_22_P00001312 | 1,54573 | 1,51901 | 1,018693468 | N/A             | N/A       | N/A          | Inc-ANP32A-2 |
| A_21_P0006574  | 1,65005 | 1,62333 | 1,018693468 | N/A             | 101928832 | XR_244520    | LOC101928832 |
| A_22_P00020499 | 1,56752 | 1,54081 | 1,018686407 | N/A             | N/A       | N/A          | Inc-HCN4-1   |
| A_23_P50990    | 6,84005 | 6,81335 | 1,018679346 | ENST00000260662 | 79172     | NM_024322    | CENPO        |

|                |         |         |             |                 |           |              |                |
|----------------|---------|---------|-------------|-----------------|-----------|--------------|----------------|
| A_22_P00007872 | 1,36661 | 1,33992 | 1,018672285 | ENST00000438522 | N/A       | N/A          | N/A            |
| A_22_P00007955 | 1,68894 | 1,66225 | 1,018672285 | ENST00000411436 | N/A       | N/A          | N/A            |
| A_22_P00007964 | 1,55955 | 1,53286 | 1,018672285 | ENST00000442864 | N/A       | N/A          | N/A            |
| A_33_P3807006  | 1,54404 | 1,51736 | 1,018665224 | N/A             | N/A       | AF279773     | Inc-PTN-2      |
| A_23_P311632   | 1,53279 | 1,50611 | 1,018665224 | ENST00000312165 | 171389    | NM_138329    | NLRP6          |
| A_33_P3232557  | 6,15921 | 6,13253 | 1,018665224 | ENST00000373347 | 58512     | NM_001080418 | DLGAP3         |
| A_33_P3410123  | 1,4057  | 1,37903 | 1,018658164 | ENST00000378592 | 85452     | XM_006710997 | CFAP74         |
| A_21_P0013529  | 1,4546  | 1,42793 | 1,018658164 | N/A             | N/A       | N/A          | XLOC_I2_014664 |
| A_21_P0008326  | 1,49173 | 1,46507 | 1,018651103 | ENST00000555636 | 102723503 | XR_424495    | LOC102723503   |
| A_22_P00010536 | 1,49907 | 1,47242 | 1,018644042 | N/A             | N/A       | N/A          | Inc-NCKAP1-1   |
| A_22_P00025294 | 1,57807 | 1,55142 | 1,018644042 | ENST00000549660 | N/A       | N/A          | N/A            |
| A_33_P3297360  | 1,54325 | 1,5166  | 1,018644042 | N/A             | N/A       | N/A          | N/A            |
| A_21_P0011313  | 1,57462 | 1,54798 | 1,018636981 | N/A             | N/A       | N/A          | XLOC_I2_004611 |
| A_22_P00014632 | 1,43687 | 1,41023 | 1,018636981 | N/A             | N/A       | N/A          | Inc-SLC16A8-1  |
| A_21_P0012924  | 1,54018 | 1,51354 | 1,018636981 | N/A             | N/A       | N/A          | XLOC_I2_012187 |
| A_21_P0002438  | 1,55411 | 1,52747 | 1,018636981 | N/A             | N/A       | N/A          | Inc-PIGF-3     |
| A_33_P3570218  | 1,65426 | 1,62763 | 1,018629921 | N/A             | 339926    | NR_038990    | EHHADH-AS1     |
| A_23_P146849   | 1,41876 | 1,39213 | 1,018629921 | ENST00000620457 | 321       | NM_005503    | APBA2          |
| A_22_P00022061 | 1,66947 | 1,64285 | 1,01862286  | N/A             | N/A       | BG184928     | Inc-WDR67-1    |
| A_23_P164596   | 1,57844 | 1,55182 | 1,01862286  | ENST00000291707 | 89858     | NM_053003    | SIGLEC12       |
| A_22_P00008210 | 1,61307 | 1,58645 | 1,01862286  | ENST00000601762 | 10160     | XR_172015    | FARP1          |
| A_21_P0002456  | 1,49473 | 1,46811 | 1,01862286  | N/A             | N/A       | N/A          | Inc-GKN2-1     |
| A_33_P3401247  | 1,60409 | 1,57748 | 1,0186158   | ENST00000421630 | 100129924 | NM_001242750 | LOC100129924   |
| A_33_P3283944  | 3,94663 | 3,92002 | 1,0186158   | N/A             | N/A       | N/A          | N/A            |
| A_22_P00008398 | 1,55684 | 1,53025 | 1,018601679 | N/A             | N/A       | N/A          | Inc-JOSD1-1    |
| A_22_P00009998 | 1,50947 | 1,48289 | 1,018594618 | ENST00000525912 | 100507584 | AL043098     | LINC01016      |
| A_33_P3336944  | 1,6293  | 1,60272 | 1,018594618 | ENST00000328655 | 203074    | NM_198464    | PRSS55         |
| A_22_P00023201 | 1,38517 | 1,35859 | 1,018594618 | ENST00000507401 | 6323      | N/A          | SCN1A          |
| A_21_P0005802  | 1,61433 | 1,58777 | 1,018580498 | N/A             | N/A       | N/A          | Inc-FGF20-2    |
| A_22_P00010417 | 2,2314  | 2,20485 | 1,018573437 | ENST00000577863 | 284034    | N/A          | LINC00670      |
| A_22_P00012772 | 5,50242 | 5,47588 | 1,018566377 | N/A             | N/A       | CU690729     | Inc-RAI1-1     |
| A_22_P00011018 | 1,4942  | 1,46768 | 1,018552257 | N/A             | N/A       | N/A          | Inc-NSUN7-1    |
| A_23_P31124    | 1,68312 | 1,6566  | 1,018552257 | ENST00000467045 | 81578     | NM_030820    | COL21A1        |

|                |         |         |             |                 |           |              |                |
|----------------|---------|---------|-------------|-----------------|-----------|--------------|----------------|
| A_33_P3280905  | 1,37821 | 1,35169 | 1,018552257 | ENST00000461229 | N/A       | N/A          | N/A            |
| A_22_P00005513 | 1,38311 | 1,35661 | 1,018538137 | ENST00000520386 | N/A       | BX113303     | N/A            |
| A_24_P205252   | 1,50175 | 1,47525 | 1,018538137 | ENST00000611933 | 220965    | NM_001001971 | FAM13C         |
| A_21_P0004074  | 1,64913 | 1,62264 | 1,018531077 | ENST00000503317 | N/A       | N/A          | N/A            |
| A_22_P00006319 | 1,45579 | 1,42932 | 1,018516957 | N/A             | N/A       | N/A          | Inc-FAM92B-3   |
| A_21_P0010468  | 1,45473 | 1,42826 | 1,018516957 | N/A             | N/A       | N/A          | Inc-FAM19A5-2  |
| A_22_P00015711 | 1,55706 | 1,53059 | 1,018516957 | ENST00000551032 | N/A       | CX163995     | N/A            |
| A_21_P0008933  | 1,49493 | 1,46847 | 1,018509898 | ENST00000567899 | N/A       | N/A          | N/A            |
| A_21_P0002991  | 1,45106 | 1,4246  | 1,018509898 | N/A             | N/A       | N/A          | Inc-CADM2-3    |
| A_21_P0002824  | 1,65366 | 1,6272  | 1,018509898 | ENST00000452657 | N/A       | N/A          | N/A            |
| A_22_P00023576 | 1,50449 | 1,47803 | 1,018509898 | ENST00000521055 | N/A       | CV393458     | N/A            |
| A_22_P00025642 | 1,46129 | 1,43485 | 1,018495778 | ENST00000413960 | N/A       | N/A          | N/A            |
| A_22_P00019067 | 1,50679 | 1,48035 | 1,018495778 | N/A             | 100874090 | NR_046647    | SLC6A1-AS1     |
| A_21_P0004798  | 1,56394 | 1,53751 | 1,018488718 | N/A             | N/A       | N/A          | Inc-SOD2-1     |
| A_22_P00020113 | 1,51521 | 1,48878 | 1,018488718 | N/A             | N/A       | BC047599     | Inc-FAM69C-1   |
| A_21_P0012062  | 2,34964 | 2,32321 | 1,018488718 | ENST00000414796 | N/A       | N/A          | N/A            |
| A_23_P250251   | 1,60454 | 1,57812 | 1,018481659 | ENST00000380206 | 3440      | NM_000605    | IFNA2          |
| A_21_P0006367  | 1,52205 | 1,49563 | 1,018481659 | N/A             | N/A       | N/A          | Inc-TLR4-3     |
| A_33_P3780505  | 1,6673  | 1,64088 | 1,018481659 | N/A             | 326343    | NR_003658    | MT1DP          |
| A_33_P3312774  | 1,53807 | 1,51166 | 1,018474599 | N/A             | N/A       | N/A          | N/A            |
| A_23_P169460   | 1,67799 | 1,6516  | 1,01846048  | ENST00000539465 | 22844     | NM_014907    | FRMPD1         |
| A_19_P00802137 | 1,57244 | 1,54606 | 1,018453421 | N/A             | N/A       | N/A          | XLOC_I2_000864 |
| A_22_P00015720 | 2,93742 | 2,91106 | 1,018439302 | ENST00000553426 | 646113    | AW958746     | LINC00643      |
| A_23_P258748   | 1,53395 | 1,50759 | 1,018439302 | ENST00000264387 | 56918     | NM_020161    | C2orf83        |
| A_23_P99253    | 1,55253 | 1,52617 | 1,018439302 | ENST00000261203 | 8825      | NM_004664    | LIN7A          |
| A_22_P00000238 | 1,51732 | 1,49096 | 1,018439302 | ENST00000445093 | N/A       | N/A          | N/A            |
| A_33_P3441031  | 1,42418 | 1,39783 | 1,018432243 | N/A             | 387895    | BC038732     | LINC00944      |
| A_22_P00025878 | 1,41348 | 1,38713 | 1,018432243 | N/A             | N/A       | BG181997     | Inc-GNS-2      |
| A_22_P00006988 | 1,51204 | 1,4857  | 1,018425184 | N/A             | N/A       | DB517201     | Inc-GDPD5-2    |
| A_21_P0012623  | 1,6009  | 1,57458 | 1,018411066 | N/A             | N/A       | N/A          | XLOC_I2_010880 |
| A_23_P24493    | 1,52723 | 1,50092 | 1,018404006 | ENST00000528662 | 4317      | NM_002424    | MMP8           |
| A_33_P3211488  | 1,63899 | 1,61268 | 1,018404006 | ENST00000368145 | 391114    | NM_001005327 | OR6K3          |
| A_23_P103276   | 7,87282 | 7,84651 | 1,018404006 | ENST00000371614 | 112970    | NM_138417    | KTI12          |

|                |         |         |             |                 |           |              |                    |
|----------------|---------|---------|-------------|-----------------|-----------|--------------|--------------------|
| A_33_P3384260  | 12,3417 | 12,3154 | 1,018396947 | ENST00000546500 | 3178      | XR_245923    | HNRNPA1            |
| A_33_P3231357  | 1,57754 | 1,55125 | 1,018389888 | ENST00000234371 | 84634     | NM_032551    | KISS1R             |
| A_21_P0007681  | 1,76975 | 1,74346 | 1,018389888 | N/A             | N/A       | N/A          | Inc-PARP11-3       |
| A_21_P0007510  | 1,58657 | 1,56029 | 1,01838283  | N/A             | N/A       | N/A          | Inc-CHFR-1         |
| A_21_P0005707  | 1,66384 | 1,63756 | 1,01838283  | ENST00000520862 | 101929628 | XR_426320    | LOC101929628       |
| A_24_P164664   | 1,70717 | 1,6809  | 1,018375771 | ENST00000594480 | 148003    | NM_001190441 | LGALS16            |
| A_33_P3279167  | 1,49719 | 1,47092 | 1,018375771 | N/A             | 343505    | NM_001047980 | NBPF7              |
| A_19_P00319028 | 1,50776 | 1,48149 | 1,018375771 | ENST00000484091 | 731220    | NM_001145664 | RFX8               |
| A_21_P0010470  | 5,03098 | 5,00471 | 1,018375771 | N/A             | N/A       | N/A          | Inc-MAPK8IP2-1     |
| A_23_P96611    | 1,50516 | 1,4789  | 1,018368712 | ENST00000371921 | 51213     | NM_016383    | LUZP4              |
| A_22_P00008505 | 1,57563 | 1,54938 | 1,018361653 | N/A             | N/A       | N/A          | Inc-KCNG3-2        |
| A_24_P494943   | 1,54221 | 1,51596 | 1,018361653 | ENST00000441942 | 100128682 | NR_040046    | LINC01531          |
| A_21_P0009226  | 1,62079 | 1,59454 | 1,018361653 | N/A             | N/A       | N/A          | Inc-AC104024.2.1-1 |
| A_21_P0002565  | 1,52938 | 1,50313 | 1,018361653 | N/A             | N/A       | N/A          | Inc-TPO-4          |
| A_22_P00024185 | 1,45243 | 1,42619 | 1,018354594 | ENST00000551387 | N/A       | N/A          | N/A                |
| A_22_P00004596 | 1,40639 | 1,38016 | 1,018347536 | ENST00000517984 | 101927815 | NR_125426    | LOC101927815       |
| A_21_P0013144  | 6,45901 | 6,43278 | 1,018347536 | ENST00000607807 | N/A       | N/A          | N/A                |
| A_21_P0011820  | 1,50481 | 1,47858 | 1,018347536 | N/A             | N/A       | N/A          | XLOC_I2_007435     |
| A_21_P0005457  | 1,43326 | 1,40705 | 1,018333419 | N/A             | N/A       | N/A          | Inc-WDR60-3        |
| A_33_P3420347  | 1,67052 | 1,64432 | 1,01832636  | N/A             | N/A       | N/A          | N/A                |
| A_23_P123256   | 11,2579 | 11,2317 | 1,01832636  | ENST00000512074 | 11333     | NM_014891    | PDAP1              |
| A_33_P3248052  | 1,57028 | 1,54409 | 1,018319302 | ENST00000297967 | 22829     | NM_001164238 | NLGN4Y             |
| A_33_P3219537  | 1,50409 | 1,4779  | 1,018319302 | N/A             | 388910    | NR_028409    | LINC00207          |
| A_21_P0002922  | 1,54058 | 1,51441 | 1,018305185 | ENST00000422271 | N/A       | N/A          | N/A                |
| A_24_P408603   | 1,65343 | 1,62726 | 1,018305185 | ENST00000369454 | 116442    | NM_171998    | RAB39B             |
| A_22_P00023615 | 1,66546 | 1,6393  | 1,018298126 | N/A             | 100873947 | NR_046669    | LMLN-AS1           |
| A_21_P0009286  | 1,62407 | 1,59792 | 1,018291068 | N/A             | 102723961 | XR_424879    | LOC102723961       |
| A_22_P00005875 | 1,49313 | 1,46698 | 1,018291068 | N/A             | 100505475 | NR_120501    | SYNE1-AS1          |
| A_21_P0003280  | 1,61905 | 1,59292 | 1,018276952 | N/A             | N/A       | N/A          | Inc-DPH3-1         |
| A_21_P0012909  | 1,68522 | 1,65909 | 1,018276952 | N/A             | N/A       | N/A          | XLOC_I2_012071     |
| A_21_P0005641  | 1,5243  | 1,49818 | 1,018269894 | N/A             | N/A       | N/A          | Inc-FBXO25-5       |
| A_21_P0002132  | 1,58165 | 1,55554 | 1,018262835 | ENST00000443261 | 101927619 | N/A          | LOC101927619       |
| A_23_P36624    | 1,59779 | 1,57168 | 1,018262835 | ENST00000240687 | 50837     | NM_023919    | TAS2R7             |

|                |         |         |             |                 |           |           |                       |
|----------------|---------|---------|-------------|-----------------|-----------|-----------|-----------------------|
| A_24_P414371   | 11,2492 | 11,2231 | 1,018255777 | ENST00000394854 | 5530      | NM_000944 | PPP3CA                |
| A_22_P00011867 | 1,48947 | 1,46339 | 1,018241662 | ENST00000530126 | N/A       | DW442486  | N/A                   |
| A_21_P0003202  | 1,60839 | 1,58231 | 1,018241662 | N/A             | N/A       | N/A       | Inc-GMNC-1            |
| A_21_P0003610  | 1,66988 | 1,64381 | 1,018234604 | N/A             | N/A       | N/A       | Inc-SRD5A3-1          |
| A_22_P00016753 | 1,62481 | 1,59874 | 1,018234604 | ENST00000434509 | N/A       | N/A       | N/A                   |
| A_21_P0014814  | 1,53312 | 1,50706 | 1,018227546 | N/A             | N/A       | N/A       | N/A                   |
| A_22_P00004144 | 1,63085 | 1,6048  | 1,018220488 | N/A             | N/A       | DA728743  | Inc-CLEC14A-1         |
| A_21_P0014511  | 4,51064 | 4,48459 | 1,018220488 | ENST00000562391 | 100506070 | NR_103445 | RBFADN                |
| A_24_P187799   | 1,9823  | 1,95626 | 1,01821343  | ENST00000428526 | 79974     | NM_024913 | CPED1                 |
| A_22_P00025481 | 1,67407 | 1,64803 | 1,01821343  | N/A             | N/A       | N/A       | Inc-C20orf196-1       |
| A_21_P0001577  | 1,55198 | 1,52595 | 1,018206373 | N/A             | N/A       | N/A       | Inc-GJA5-1            |
| A_33_P3233040  | 1,37951 | 1,35348 | 1,018206373 | ENST00000382749 | 89778     | NM_080475 | SERPINB11             |
| A_21_P0002536  | 1,50182 | 1,4758  | 1,018199315 | N/A             | N/A       | N/A       | Inc-IKZF2-1           |
| A_33_P3397473  | 1,73995 | 1,71393 | 1,018199315 | N/A             | N/A       | N/A       | N/A                   |
| A_21_P0003688  | 1,54296 | 1,51695 | 1,018192257 | N/A             | N/A       | N/A       | Inc-RP11-389E17.1.1-3 |
| A_33_P3252989  | 12,1359 | 12,1099 | 1,0181852   | ENST00000492395 | 23053     | NM_015037 | ZSWIM8                |
| A_32_P179138   | 1,51412 | 1,48813 | 1,018178142 | N/A             | 2982      | NM_000856 | GUCY1A3               |
| A_22_P00003689 | 1,45116 | 1,42517 | 1,018178142 | ENST00000505040 | N/A       | N/A       | N/A                   |
| A_22_P00007433 | 1,61668 | 1,5907  | 1,018171085 | N/A             | 100128079 | XR_424776 | LOC100128079          |
| A_32_P478023   | 1,60595 | 1,57997 | 1,018171085 | ENST00000525148 | 266743    | NM_178864 | NPAS4                 |
| A_33_P3294533  | 1,47975 | 1,45378 | 1,018164027 | ENST00000321728 | 5579      | NM_002738 | PRKCB                 |
| A_33_P3397383  | 1,69164 | 1,66568 | 1,01815697  | ENST00000507931 | 166979    | BC037547  | CDC20B                |
| A_22_P00019035 | 1,4992  | 1,47326 | 1,018142856 | N/A             | N/A       | BX113107  | Inc-PTPRU-1           |
| A_33_P3391542  | 1,57918 | 1,55324 | 1,018142856 | ENST00000480924 | N/A       | N/A       | N/A                   |
| A_33_P3209651  | 1,53659 | 1,51065 | 1,018142856 | ENST00000325239 | 57705     | NM_020945 | WDFY4                 |
| A_22_P00013463 | 1,43447 | 1,40854 | 1,018135798 | ENST00000555990 | N/A       | BX119121  | N/A                   |
| A_33_P3332018  | 1,5096  | 1,48368 | 1,018128741 | ENST00000248598 | 10875     | NM_006682 | FGL2                  |
| A_33_P3279820  | 4,92277 | 4,89685 | 1,018128741 | ENST00000419532 | N/A       | N/A       | N/A                   |
| A_33_P3351681  | 1,62991 | 1,60399 | 1,018128741 | ENST00000298050 | 159989    | NM_181645 | CCDC67                |
| A_33_P3385842  | 5,16    | 5,13408 | 1,018128741 | ENST00000435402 | 79741     | NM_145023 | CCDC7                 |
| A_21_P0005450  | 1,53569 | 1,50977 | 1,018128741 | N/A             | N/A       | N/A       | Inc-AC021218.2.1-1    |
| A_33_P3329587  | 1,5356  | 1,50969 | 1,018121684 | N/A             | N/A       | N/A       | N/A                   |
| A_21_P0001708  | 8,15856 | 8,13265 | 1,018121684 | N/A             | N/A       | N/A       | Inc-HMCN1-2           |

|                |         |         |             |                 |           |              |                |
|----------------|---------|---------|-------------|-----------------|-----------|--------------|----------------|
| A_33_P3322353  | 11,8423 | 11,8164 | 1,018114627 | ENST00000426421 | 830       | NM_006136    | CAPZA2         |
| A_33_P3378556  | 1,71501 | 1,68912 | 1,01810757  | ENST00000403665 | 2160      | NM_000128    | F11            |
| A_23_P304171   | 9,82881 | 9,80293 | 1,018100513 | N/A             | 9711      | NM_001145642 | KIAA0226       |
| A_21_P0008226  | 1,49133 | 1,46545 | 1,018100513 | N/A             | N/A       | N/A          | Inc-GAS6-2     |
| A_33_P3212302  | 1,65131 | 1,62543 | 1,018100513 | ENST00000616228 | 11178     | NM_021020    | LZTS1          |
| A_21_P0001444  | 1,46952 | 1,44364 | 1,018100513 | N/A             | N/A       | N/A          | Inc-EXO1-1     |
| A_33_P3379556  | 1,52428 | 1,49842 | 1,018086399 | ENST00000374144 | 118461    | NM_001135196 | C10orf71       |
| A_33_P3269166  | 1,60149 | 1,57563 | 1,018086399 | ENST00000467264 | 259232    | N/A          | NALCN          |
| A_33_P3732688  | 1,43971 | 1,41386 | 1,018079342 | N/A             | 646034    | AK125175     | LOC646034      |
| A_22_P00006331 | 1,68131 | 1,65548 | 1,018065229 | ENST00000532380 | 102723378 | NR_120583    | LINC01495      |
| A_33_P3397545  | 1,43101 | 1,4052  | 1,018051116 | ENST00000382208 | 613209    | NM_001033017 | DEFB135        |
| A_21_P0010958  | 1,36863 | 1,34282 | 1,018051116 | ENST00000455414 | N/A       | N/A          | N/A            |
| A_23_P402787   | 10,7704 | 10,7446 | 1,018044059 | ENST00000588691 | 124402    | NM_145253    | UBALD1         |
| A_22_P00016785 | 7,10347 | 7,07768 | 1,018037003 | ENST00000518412 | 100505659 | NR_039979    | LINC00967      |
| A_22_P00009310 | 1,61229 | 1,5865  | 1,018037003 | ENST00000558429 | N/A       | N/A          | N/A            |
| A_33_P3238802  | 1,5498  | 1,52402 | 1,018029946 | N/A             | N/A       | N/A          | N/A            |
| A_23_P251259   | 8,00852 | 7,98275 | 1,01802289  | ENST00000459745 | 2968      | NM_001517    | GTF2H4         |
| A_21_P0002486  | 1,64818 | 1,62241 | 1,01802289  | N/A             | N/A       | N/A          | Inc-ST6GAL2-4  |
| A_22_P00003430 | 8,38472 | 8,35895 | 1,01802289  | N/A             | N/A       | CB994296     | Inc-CCDC33-2   |
| A_22_P00019975 | 1,60513 | 1,57938 | 1,018008777 | N/A             | N/A       | N/A          | Inc-IL17B-1    |
| A_32_P308595   | 1,67122 | 1,64547 | 1,018008777 | ENST00000272643 | 80731     | NM_001080427 | THSD7B         |
| A_23_P405161   | 1,61791 | 1,59218 | 1,017994665 | ENST00000307003 | 202865    | JF432437     | C7orf33        |
| A_21_P0004278  | 1,45685 | 1,43113 | 1,017987608 | ENST00000511323 | N/A       | N/A          | N/A            |
| A_22_P00010908 | 1,62657 | 1,60086 | 1,017980552 | ENST00000562268 | N/A       | BC046494     | N/A            |
| A_21_P0012488  | 1,62532 | 1,59961 | 1,017980552 | ENST00000425894 | N/A       | N/A          | N/A            |
| A_22_P00003622 | 1,48583 | 1,46014 | 1,01796644  | N/A             | N/A       | N/A          | Inc-CD46-1     |
| A_21_P0008235  | 1,4105  | 1,38481 | 1,01796644  | N/A             | N/A       | N/A          | Inc-KIAA1704-1 |
| A_33_P3495234  | 1,6339  | 1,60823 | 1,017952328 | N/A             | 55354     | AJ276510     | ORF1           |
| A_33_P3320752  | 1,59202 | 1,56636 | 1,017945272 | N/A             | N/A       | AF090901     | N/A            |
| A_23_P168368   | 1,67478 | 1,64915 | 1,017924105 | ENST00000623971 | 80099     | NM_025031    | C7orf69        |
| A_22_P00022983 | 1,68581 | 1,66018 | 1,017924105 | ENST00000411785 | N/A       | N/A          | N/A            |
| A_33_P3308332  | 4,11635 | 4,09072 | 1,017924105 | ENST00000426191 | 58473     | NM_021200    | PLEKHB1        |
| A_23_P4179     | 1,49162 | 1,466   | 1,017917049 | N/A             | N/A       | N/A          | Inc-ANKRD40-1  |



|                |         |         |             |                 |        |              |                 |
|----------------|---------|---------|-------------|-----------------|--------|--------------|-----------------|
| A_22_P00020568 | 1,53108 | 1,50546 | 1,017917049 | ENST00000435108 | N/A    | N/A          | N/A             |
| A_23_P154855   | 1,66675 | 1,64114 | 1,017909994 | ENST00000416357 | 3753   | NM_000219    | KCNE1           |
| A_33_P3531857  | 13,7271 | 13,7015 | 1,017902938 | ENST00000537273 | 1615   | NM_001349    | DARS            |
| A_33_P3255782  | 16,5337 | 16,5081 | 1,017902938 | ENST00000471205 | N/A    | N/A          | N/A             |
| A_32_P51084    | 13,4203 | 13,3947 | 1,017902938 | ENST00000477620 | 23165  | NM_015135    | NUP205          |
| A_23_P98974    | 1,59243 | 1,56683 | 1,017902938 | ENST00000540815 | 8549   | NM_003667    | LGR5            |
| A_22_P00022550 | 1,40584 | 1,38024 | 1,017902938 | N/A             | N/A    | N/A          | Inc-TDRD9-AS1-1 |
| A_23_P139547   | 14,1767 | 14,1511 | 1,017902938 | ENST00000301071 | 7846   | NM_006009    | TUBA1A          |
| A_33_P3344633  | 1,40179 | 1,3762  | 1,017895882 | N/A             | N/A    | BX648590     | N/A             |
| A_33_P3314386  | 9,82508 | 9,79949 | 1,017895882 | ENST00000606911 | 26092  | NM_001267578 | TOR1AIP1        |
| A_22_P00004996 | 1,62135 | 1,59577 | 1,017888827 | ENST00000496220 | 401103 | NR_040105    | FLJ46066        |
| A_33_P3275495  | 4,39509 | 4,36951 | 1,017888827 | ENST00000412427 | 400743 | XR_108366    | LOC400743       |
| A_33_P3351840  | 3,51892 | 3,49334 | 1,017888827 | ENST00000511921 | N/A    | N/A          | N/A             |
| A_22_P00009740 | 1,64294 | 1,61737 | 1,017881772 | ENST00000561915 | N/A    | BC033975     | N/A             |
| A_33_P3223602  | 1,72846 | 1,7029  | 1,017874716 | ENST00000509231 | 340562 | NM_001012980 | SATL1           |
| A_22_P00006396 | 1,41371 | 1,38815 | 1,017874716 | N/A             | N/A    | DB310788     | Inc-FBXL17-1    |
| A_33_P3320082  | 6,03707 | 6,01152 | 1,017867661 | ENST00000622520 | 4781   | NM_005596    | NFIB            |
| A_21_P0011167  | 1,63705 | 1,6115  | 1,017867661 | N/A             | N/A    | N/A          | XLOC_I2_003877  |
| A_33_P3419577  | 1,61025 | 1,58472 | 1,01785355  | ENST00000402452 | 642636 | NM_001136566 | RAD21L1         |
| A_21_P0002447  | 1,37374 | 1,34822 | 1,017846495 | N/A             | N/A    | N/A          | Inc-FAM161A-1   |
| A_23_P108221   | 3,48538 | 3,45986 | 1,017846495 | ENST00000585580 | 83983  | NM_032037    | TSSK6           |
| A_23_P141651   | 8,1862  | 8,16068 | 1,017846495 | ENST00000582565 | 9611   | NM_006311    | NCOR1           |
| A_21_P0006897  | 1,46881 | 1,4433  | 1,01783944  | N/A             | N/A    | N/A          | Inc-PLCE1-1     |
| A_21_P0010103  | 1,69587 | 1,67037 | 1,017832385 | N/A             | N/A    | N/A          | Inc-PRNT-1      |
| A_33_P3345683  | 1,5051  | 1,4796  | 1,017832385 | ENST00000306842 | 219858 | NM_001005195 | OR8B12          |
| A_22_P00008257 | 1,67505 | 1,64956 | 1,01782533  | N/A             | N/A    | N/A          | Inc-IRX1-2      |
| A_22_P00025453 | 5,25893 | 5,23344 | 1,01782533  | N/A             | N/A    | N/A          | Inc-TIGIT-6     |
| A_24_P99066    | 1,4466  | 1,42113 | 1,01781122  | ENST00000255326 | 56163  | NM_031277    | RNF17           |
| A_32_P426044   | 1,51902 | 1,49355 | 1,01781122  | ENST00000613251 | 158724 | NM_203408    | FAM47A          |
| A_22_P00001233 | 1,40826 | 1,38279 | 1,01781122  | ENST00000590053 | N/A    | XR_243985    | N/A             |
| A_21_P0012405  | 2,57076 | 2,54529 | 1,01781122  | N/A             | N/A    | N/A          | XLOC_I2_009929  |
| A_33_P3289701  | 1,40093 | 1,37547 | 1,017804165 | ENST00000317996 | 127064 | NM_001004692 | OR2T12          |
| A_33_P3306232  | 1,56468 | 1,53923 | 1,01779711  | ENST00000373519 | 340529 | NM_001012977 | PABPC1L2A       |

|                |         |         |             |                 |           |              |              |
|----------------|---------|---------|-------------|-----------------|-----------|--------------|--------------|
| A_22_P00006827 | 1,49986 | 1,47442 | 1,017790055 | ENST00000522274 | N/A       | CD675724     | N/A          |
| A_23_P2543     | 1,47516 | 1,44974 | 1,017775946 | ENST00000261726 | 23316     | NM_015267    | CUX2         |
| A_21_P0004187  | 1,62376 | 1,59834 | 1,017775946 | ENST00000584829 | 101927134 | N/A          | LINC01470    |
| A_22_P00014936 | 1,6681  | 1,64269 | 1,017768891 | ENST00000424165 | N/A       | N/A          | N/A          |
| A_33_P3385716  | 1,65201 | 1,62661 | 1,017761836 | ENST00000307632 | 390036    | NM_001005171 | OR52K1       |
| A_33_P3213432  | 12,8006 | 12,7752 | 1,017761836 | ENST00000313754 | 83787     | NM_031905    | ARMC10       |
| A_21_P0003974  | 1,61561 | 1,59022 | 1,017754782 | ENST00000505844 | N/A       | XR_241746    | N/A          |
| A_32_P485915   | 1,52262 | 1,49723 | 1,017754782 | ENST00000466087 | 284525    | NM_178527    | SLC9C2       |
| A_33_P3334404  | 1,61015 | 1,58477 | 1,017747727 | N/A             | 765       | JF432775     | CA6          |
| A_22_P00017023 | 1,65036 | 1,62499 | 1,017740673 | N/A             | N/A       | AK056799     | Inc-TTC7A-1  |
| A_22_P00023726 | 1,54722 | 1,52185 | 1,017740673 | ENST00000547882 | N/A       | BX118462     | N/A          |
| A_21_P0011199  | 1,58043 | 1,55506 | 1,017740673 | ENST00000453309 | N/A       | N/A          | N/A          |
| A_33_P3236137  | 1,71027 | 1,68492 | 1,017726564 | ENST00000309900 | 54768     | NM_001270974 | HYDIN        |
| A_22_P00017167 | 1,42213 | 1,39678 | 1,017726564 | ENST00000590046 | N/A       | N/A          | N/A          |
| A_33_P3402694  | 1,54339 | 1,51805 | 1,01771951  | ENST00000495504 | 9515      | NM_014980    | STXBP5L      |
| A_22_P00022745 | 7,89609 | 7,87075 | 1,01771951  | N/A             | N/A       | N/A          | Inc-LRGUK-1  |
| A_21_P0004145  | 1,55895 | 1,53362 | 1,017712456 | ENST00000507781 | 104310351 | N/A          | LINC01331    |
| A_21_P0011099  | 1,58071 | 1,5554  | 1,017698347 | ENST00000541353 | N/A       | N/A          | N/A          |
| A_33_P3312147  | 1,53926 | 1,51395 | 1,017698347 | N/A             | N/A       | N/A          | N/A          |
| A_33_P3380076  | 1,89032 | 1,86501 | 1,017698347 | N/A             | N/A       | N/A          | N/A          |
| A_24_P400044   | 1,6317  | 1,60639 | 1,017698347 | ENST00000376006 | 170685    | NM_153183    | NUDT10       |
| A_22_P00005336 | 6,27285 | 6,24754 | 1,017698347 | N/A             | N/A       | N/A          | Inc-DPCD-1   |
| A_21_P0006590  | 1,69418 | 1,66888 | 1,017691293 | ENST00000425031 | 100873962 | N/A          | LINC00278    |
| A_22_P00013274 | 1,64036 | 1,61506 | 1,017691293 | N/A             | 101929517 | NR_120581    | LOC101929517 |
| A_21_P0007600  | 1,58781 | 1,56251 | 1,017691293 | N/A             | N/A       | N/A          | Inc-TMTC3-5  |
| A_23_P152066   | 10,4255 | 10,4002 | 1,017691293 | ENST00000290650 | 197131    | NM_174916    | UBR1         |
| A_22_P00006287 | 5,67789 | 5,6526  | 1,017684239 | N/A             | 285154    | NR_027252    | CYP1B1-AS1   |
| A_22_P00013733 | 1,65991 | 1,63462 | 1,017684239 | ENST00000561121 | N/A       | N/A          | N/A          |
| A_22_P00014513 | 1,59659 | 1,5713  | 1,017684239 | N/A             | N/A       | AK091594     | Inc-SHPRH-2  |
| A_33_P3287610  | 1,51664 | 1,49135 | 1,017684239 | ENST00000390313 | N/A       | DQ098743     | N/A          |
| A_23_P37736    | 1,51906 | 1,49379 | 1,017670131 | ENST00000053243 | 608       | NM_001192    | TNFRSF17     |
| A_22_P00019943 | 1,65562 | 1,63036 | 1,017663077 | N/A             | N/A       | N/A          | Inc-HECW2-1  |
| A_33_P3364263  | 4,83289 | 4,80763 | 1,017663077 | ENST00000484150 | 81606     | NM_030915    | LBH          |

|                |         |         |             |                 |           |              |                |
|----------------|---------|---------|-------------|-----------------|-----------|--------------|----------------|
| A_21_P0009231  | 1,45812 | 1,43286 | 1,017663077 | N/A             | N/A       | N/A          | Inc-WSB1-2     |
| A_22_P00023003 | 1,62126 | 1,596   | 1,017663077 | N/A             | 728805    | XR_244198    | LOC728805      |
| A_23_P212196   | 9,04124 | 9,01598 | 1,017663077 | ENST00000449570 | 4968      | NM_016828    | OGG1           |
| A_33_P6805926  | 1,51769 | 1,49245 | 1,017648969 | ENST00000509473 | 100144602 | NR_034138    | EPHA5-AS1      |
| A_33_P3228892  | 1,45651 | 1,43127 | 1,017648969 | N/A             | 100130370 | AL162045     | LOC100130370   |
| A_22_P00024033 | 1,51494 | 1,4897  | 1,017648969 | ENST00000457672 | N/A       | N/A          | N/A            |
| A_22_P00007577 | 1,60424 | 1,57901 | 1,017641916 | N/A             | N/A       | BC033353     | Inc-HDAC4-1    |
| A_33_P3234515  | 1,62671 | 1,60149 | 1,017634862 | ENST00000581571 | 400643    | NR_034100    | LINC00668      |
| A_22_P00008523 | 1,61463 | 1,58944 | 1,017613701 | N/A             | N/A       | BX396015     | Inc-KCNJ12-4   |
| A_33_P3235177  | 1,53455 | 1,50936 | 1,017613701 | ENST00000409262 | 200424    | NM_001287491 | TET3           |
| A_33_P3339885  | 1,50121 | 1,47602 | 1,017613701 | N/A             | N/A       | CR746068     | N/A            |
| A_22_P00024833 | 7,8211  | 7,79591 | 1,017613701 | N/A             | N/A       | N/A          | Inc-CNTLN-2    |
| A_21_P0004282  | 1,7401  | 1,71493 | 1,017599594 | N/A             | N/A       | N/A          | Inc-MAN2A1-3   |
| A_21_P0004319  | 1,67723 | 1,65207 | 1,01759254  | N/A             | N/A       | N/A          | Inc-LSM11-7    |
| A_21_P0005737  | 1,45969 | 1,43453 | 1,01759254  | N/A             | N/A       | N/A          | Inc-SDC2-1     |
| A_22_P00012748 | 1,60691 | 1,58176 | 1,017585487 | N/A             | N/A       | N/A          | Inc-RAC3-1     |
| A_22_P00018345 | 6,77074 | 6,74561 | 1,01757138  | N/A             | 81854     | NR_024166    | ZNF205-AS1     |
| A_22_P00001700 | 1,60115 | 1,57603 | 1,017564327 | N/A             | N/A       | N/A          | Inc-ATF7IP-1   |
| A_22_P00007516 | 1,54791 | 1,52279 | 1,017564327 | N/A             | N/A       | N/A          | Inc-H2AFY2-1   |
| A_23_P346953   | 1,37241 | 1,34731 | 1,017550221 | ENST00000406247 | 1607      | NM_145695    | DGKB           |
| A_22_P00005541 | 1,59942 | 1,57432 | 1,017550221 | N/A             | N/A       | BG773262     | Inc-EDC3-1     |
| A_22_P00024664 | 1,65866 | 1,63356 | 1,017550221 | N/A             | N/A       | N/A          | Inc-LRRC1-5    |
| A_21_P0008218  | 1,5412  | 1,5161  | 1,017550221 | N/A             | N/A       | N/A          | Inc-TUBGCP3-7  |
| A_33_P3303900  | 1,51992 | 1,49482 | 1,017550221 | ENST00000623472 | 143496    | NM_001005161 | OR52B4         |
| A_33_P3394769  | 13,8507 | 13,8256 | 1,017550221 | ENST00000339996 | 389827    | NM_001080483 | TMEM8C         |
| A_21_P0011548  | 1,57628 | 1,55119 | 1,017543168 | N/A             | N/A       | N/A          | XLOC_I2_005869 |
| A_33_P3257392  | 1,48394 | 1,45886 | 1,017536115 | ENST00000441776 | N/A       | N/A          | N/A            |
| A_21_P0002631  | 1,59843 | 1,57335 | 1,017536115 | ENST00000432733 | 151300    | N/A          | LINC00608      |
| A_21_P0011846  | 1,48601 | 1,46094 | 1,017529062 | ENST00000454927 | 101929926 | N/A          | LOC101929926   |
| A_23_P216610   | 9,65922 | 9,63415 | 1,017529062 | ENST00000374270 | 64420     | NM_022486    | SUSD1          |
| A_21_P0009216  | 1,86431 | 1,83925 | 1,017522009 | N/A             | N/A       | N/A          | Inc-PFAS-1     |
| A_19_P00321230 | 7,61969 | 7,59463 | 1,017522009 | N/A             | 202181    | NR_026921    | LOC202181      |
| A_21_P0013405  | 1,56869 | 1,54364 | 1,017514956 | N/A             | N/A       | N/A          | Inc-SPAM1-2    |

|                |         |         |             |                 |           |              |                |
|----------------|---------|---------|-------------|-----------------|-----------|--------------|----------------|
| A_22_P00006256 | 1,533   | 1,50795 | 1,017514956 | N/A             | N/A       | AK125862     | Inc-FAM65C-1   |
| A_24_P324674   | 1,49293 | 1,46788 | 1,017514956 | ENST00000392203 | 4063      | NM_002348    | LY9            |
| A_33_P3227876  | 1,49624 | 1,4712  | 1,017507903 | ENST00000540591 | 391003    | NM_001099850 | LOC391003      |
| A_24_P786388   | 1,4513  | 1,42627 | 1,01750085  | ENST00000611853 | 378807    | NM_198137    | CATSPER4       |
| A_23_P74547    | 1,64905 | 1,62404 | 1,017486745 | ENST00000464329 | 963       | NM_001040033 | CD53           |
| A_33_P3343045  | 1,38241 | 1,35741 | 1,017479692 | N/A             | 51063     | AK125276     | CALHM2         |
| A_33_P3269528  | 4,13339 | 4,1084  | 1,017472639 | N/A             | N/A       | N/A          | N/A            |
| A_33_P3307945  | 1,59894 | 1,57395 | 1,017472639 | ENST00000409515 | 100652824 | NM_001277372 | KIAA2012       |
| A_21_P0013211  | 1,51266 | 1,48767 | 1,017472639 | N/A             | N/A       | N/A          | XLOC_I2_013437 |
| A_21_P0007428  | 1,60783 | 1,58285 | 1,017465587 | ENST00000530418 | N/A       | N/A          | N/A            |
| A_22_P00014140 | 1,49879 | 1,47381 | 1,017465587 | ENST00000503542 | N/A       | N/A          | N/A            |
| A_21_P0004655  | 1,65269 | 1,62774 | 1,01744443  | ENST00000426547 | N/A       | N/A          | N/A            |
| A_24_P62505    | 1,61661 | 1,59167 | 1,017437377 | ENST00000361927 | 23127     | NM_015101    | COLGALT2       |
| A_22_P00006121 | 1,63366 | 1,60873 | 1,017430325 | N/A             | N/A       | N/A          | Inc-FAM174A-1  |
| A_33_P3373243  | 1,66505 | 1,64012 | 1,017430325 | ENST00000319817 | 162137    | XR_110135    | LOC162137      |
| A_24_P945059   | 1,37371 | 1,34878 | 1,017430325 | ENST00000367245 | 80177     | NM_025107    | MYCT1          |
| A_22_P00003780 | 7,29429 | 7,26936 | 1,017430325 | N/A             | N/A       | BQ082177     | Inc-CDK2AP1-1  |
| A_21_P0008735  | 1,5292  | 1,50428 | 1,017423273 | ENST00000561238 | 101928442 | XR_243148    | LINC01491      |
| A_33_P3242798  | 9,70789 | 9,68298 | 1,01741622  | ENST00000233072 | 1373      | NM_001875    | CPS1           |
| A_23_P398449   | 1,72884 | 1,70393 | 1,01741622  | ENST00000448644 | 55350     | NM_001291703 | VNN3           |
| A_33_P3417745  | 14,3419 | 14,317  | 1,017409168 | ENST00000268182 | 8826      | NM_003870    | IQGAP1         |
| A_21_P0002171  | 1,64901 | 1,62411 | 1,017409168 | N/A             | N/A       | N/A          | Inc-GREB1-3    |
| A_22_P00004963 | 1,51724 | 1,49234 | 1,017409168 | N/A             | 100287722 | NR_125965    | AP4B1-AS1      |
| A_23_P421423   | 15,8522 | 15,8273 | 1,017409168 | ENST00000560869 | 7127      | NM_006291    | TNFAIP2        |
| A_22_P00025105 | 1,66399 | 1,6391  | 1,017402116 | N/A             | N/A       | BU568025     | Inc-EPHB6-1    |
| A_22_P00010201 | 1,64524 | 1,62035 | 1,017402116 | ENST00000533106 | N/A       | N/A          | N/A            |
| A_22_P00013087 | 1,49125 | 1,46637 | 1,017395064 | N/A             | N/A       | XM_006710260 | Inc-RHOXF2-1   |
| A_22_P00007310 | 1,64988 | 1,62501 | 1,017388012 | N/A             | N/A       | AK055697     | Inc-GPR63-1    |
| A_33_P6473699  | 1,61425 | 1,58938 | 1,017388012 | N/A             | 101928694 | NR_120338    | LOC101928694   |
| A_33_P3328390  | 1,46438 | 1,43951 | 1,017388012 | ENST00000314040 | N/A       | AK091913     | N/A            |
| A_33_P3393650  | 7,40632 | 7,38145 | 1,017388012 | ENST00000538677 | 54477     | NM_019012    | PLEKHA5        |
| A_22_P00017869 | 1,36606 | 1,3412  | 1,01738096  | N/A             | N/A       | AK092317     | Inc-ZDHHC5-1   |
| A_22_P00003441 | 1,62241 | 1,59755 | 1,01738096  | ENST00000472596 | N/A       | XR_425656    | N/A            |

|                |         |         |             |                 |           |              |                |
|----------------|---------|---------|-------------|-----------------|-----------|--------------|----------------|
| A_24_P144346   | 1,63065 | 1,60579 | 1,01738096  | ENST00000426099 | N/A       | XM_006726634 | N/A            |
| A_21_P0006862  | 1,49854 | 1,4737  | 1,017366856 | N/A             | N/A       | N/A          | Inc-ZNF487P-1  |
| A_21_P0001355  | 1,46455 | 1,43971 | 1,017366856 | N/A             | 101928334 | XR_425182    | LOC101928334   |
| A_33_P3366025  | 1,50625 | 1,48142 | 1,017359804 | ENST00000378786 | 389715    | N/A          | FAM205BP       |
| A_22_P00007012 | 1,62067 | 1,59585 | 1,017352753 | ENST00000457224 | N/A       | N/A          | N/A            |
| A_24_P272352   | 9,08931 | 9,06449 | 1,017352753 | ENST00000521432 | N/A       | N/A          | N/A            |
| A_33_P3230498  | 1,54547 | 1,52065 | 1,017352753 | N/A             | N/A       | AK130931     | N/A            |
| A_21_P0013447  | 1,58508 | 1,56027 | 1,017345701 | N/A             | N/A       | N/A          | XLOC_I2_013932 |
| A_24_P193582   | 10,5363 | 10,5115 | 1,017338649 | ENST00000567999 | 54849     | NM_017702    | DEF8           |
| A_33_P3303785  | 1,67956 | 1,65476 | 1,017338649 | ENST00000396482 | 10777     | NM_001025069 | ARPP21         |
| A_33_P3787904  | 16,4098 | 16,385  | 1,017338649 | ENST00000523599 | 100506679 | NR_125362    | LOC100506679   |
| A_21_P0006715  | 1,466   | 1,44121 | 1,017331598 | ENST00000449693 | 283038    | N/A          | LOC283038      |
| A_23_P142205   | 1,67329 | 1,64852 | 1,017317495 | ENST00000439534 | 11027     | NM_006866    | LILRA2         |
| A_21_P0004032  | 1,65003 | 1,62529 | 1,01729634  | ENST00000512237 | N/A       | N/A          | N/A            |
| A_21_P0000046  | 1,67014 | 1,6454  | 1,01729634  | N/A             | 7694      | NM_001164527 | ZNF135         |
| A_33_P3306252  | 1,48463 | 1,45991 | 1,017282238 | N/A             | N/A       | N/A          | Inc-PIEZO2-7   |
| A_32_P190049   | 9,71766 | 9,69295 | 1,017275186 | ENST00000295628 | 116064    | NM_001099678 | LRRC58         |
| A_22_P00003092 | 1,49495 | 1,47024 | 1,017275186 | ENST00000518861 | N/A       | N/A          | N/A            |
| A_24_P122403   | 10,3055 | 10,2808 | 1,017268135 | ENST00000613537 | 6924      | NM_003198    | TCEB3          |
| A_24_P639665   | 1,47116 | 1,44648 | 1,017254033 | ENST00000430766 | 101929407 | NR_121599    | PTPRD-AS1      |
| A_21_P0008002  | 1,6421  | 1,61743 | 1,017246982 | ENST00000452852 | N/A       | N/A          | N/A            |
| A_21_P0010151  | 1,62538 | 1,60072 | 1,017239931 | ENST00000426609 | N/A       | N/A          | N/A            |
| A_22_P00015171 | 1,57458 | 1,54993 | 1,01723288  | ENST00000449761 | N/A       | N/A          | N/A            |
| A_21_P0011513  | 1,61737 | 1,59272 | 1,01723288  | N/A             | N/A       | N/A          | XLOC_I2_005667 |
| A_23_P123488   | 1,71194 | 1,6873  | 1,017225829 | ENST00000276594 | 63978     | NM_024504    | PRDM14         |
| A_23_P158938   | 8,53688 | 8,51224 | 1,017225829 | ENST00000372745 | 26985     | NM_207012    | AP3M1          |
| A_22_P00024826 | 1,66492 | 1,64029 | 1,017218778 | N/A             | N/A       | AK128348     | Inc-CHP2.1-1   |
| A_22_P00025145 | 1,52789 | 1,50326 | 1,017218778 | N/A             | 101927521 | XR_433469    | LOC101927521   |
| A_24_P38276    | 8,20621 | 8,18159 | 1,017211727 | ENST00000287934 | 8321      | NM_003505    | FZD1           |
| A_21_P0013860  | 1,3858  | 1,36118 | 1,017211727 | ENST00000436019 | N/A       | N/A          | N/A            |
| A_21_P0009068  | 1,65606 | 1,63145 | 1,017204677 | N/A             | N/A       | N/A          | Inc-CDYL2-5    |
| A_24_P129632   | 10,8588 | 10,8342 | 1,017197626 | ENST00000614211 | 9231      | NM_004747    | DLG5           |
| A_21_P0009088  | 1,59811 | 1,57351 | 1,017197626 | N/A             | N/A       | N/A          | Inc-C16orf95-2 |

|                |         |         |             |                 |           |              |                |
|----------------|---------|---------|-------------|-----------------|-----------|--------------|----------------|
| A_22_P00005232 | 1,6899  | 1,6653  | 1,017197626 | ENST00000423708 | N/A       | N/A          | N/A            |
| A_23_P62642    | 6,13687 | 6,11227 | 1,017197626 | ENST00000475911 | 25790     | NM_012337    | CFAP45         |
| A_23_P94591    | 15,1315 | 15,1069 | 1,017197626 | ENST00000465017 | 85014     | NM_032928    | TMEM141        |
| A_24_P400507   | 5,46356 | 5,43897 | 1,017190575 | ENST00000496647 | 285203    | NM_173654    | EOGT           |
| A_23_P33868    | 1,61499 | 1,5904  | 1,017190575 | ENST00000435339 | 2846      | NM_005296    | LPAR4          |
| A_21_P0002941  | 1,73467 | 1,71011 | 1,017169424 | N/A             | 101927995 | XR_249394    | LOC101927995   |
| A_22_P00024857 | 6,47998 | 6,45543 | 1,017162373 | ENST00000607353 | 100288798 | N/A          | LOC100288798   |
| A_23_P86315    | 1,55031 | 1,52577 | 1,017155323 | ENST00000357836 | 148738    | NM_213653    | HFE2           |
| A_21_P0003700  | 1,5442  | 1,51967 | 1,017148272 | ENST00000513313 | 401164    | N/A          | LINC01060      |
| A_21_P0010937  | 1,53504 | 1,51052 | 1,017141222 | ENST00000446557 | N/A       | N/A          | N/A            |
| A_24_P942493   | 2,16172 | 2,1372  | 1,017141222 | ENST00000317744 | 23302     | NM_015253    | WSCD1          |
| A_22_P00012482 | 7,74782 | 7,7233  | 1,017141222 | ENST00000531827 | 100506368 | NR_038905    | LOC100506368   |
| A_21_P0005660  | 1,57959 | 1,55508 | 1,017134172 | N/A             | N/A       | N/A          | Inc-C8orf48-1  |
| A_22_P00006089 | 1,73013 | 1,70562 | 1,017134172 | N/A             | N/A       | N/A          | Inc-FAM160A1-5 |
| A_33_P3608620  | 1,45501 | 1,4305  | 1,017134172 | ENST00000327908 | 345193    | NM_198506    | LRIT3          |
| A_33_P3226479  | 1,61686 | 1,59236 | 1,017127122 | N/A             | 100337616 | N/A          | CSN1S2BP       |
| A_22_P00008207 | 1,733   | 1,7085  | 1,017127122 | N/A             | N/A       | N/A          | Inc-INTS9-1    |
| A_21_P0008165  | 1,5713  | 1,54681 | 1,017120071 | N/A             | N/A       | N/A          | Inc-PCDH8-1    |
| A_22_P00000607 | 1,36645 | 1,34196 | 1,017120071 | ENST00000568063 | N/A       | AK123856     | N/A            |
| A_22_P00005053 | 1,61215 | 1,58766 | 1,017120071 | ENST00000556978 | N/A       | AA989421     | N/A            |
| A_33_P3316147  | 1,40597 | 1,38148 | 1,017120071 | ENST00000405102 | 441308    | NM_001005504 | OR4F21         |
| A_33_P3421664  | 1,62065 | 1,59617 | 1,017113021 | ENST00000444136 | 163589    | NM_001199085 | TDRD5          |
| A_23_P80817    | 1,71379 | 1,68932 | 1,017105971 | ENST00000478951 | 29114     | NM_013259    | TAGLN3         |
| A_33_P3260530  | 1,55692 | 1,53246 | 1,017098921 | N/A             | 163782    | NM_181712    | KANK4          |
| A_22_P00020470 | 1,58837 | 1,56391 | 1,017098921 | ENST00000540595 | N/A       | N/A          | N/A            |
| A_22_P00005352 | 1,36785 | 1,34339 | 1,017098921 | N/A             | N/A       | N/A          | Inc-DPY30-2    |
| A_21_P0004896  | 1,67438 | 1,64994 | 1,017084821 | N/A             | N/A       | N/A          | Inc-BAI3-2     |
| A_21_P0008210  | 1,72242 | 1,69798 | 1,017084821 | N/A             | N/A       | N/A          | Inc-EFNB2-2    |
| A_21_P0002408  | 1,5901  | 1,56566 | 1,017084821 | N/A             | N/A       | N/A          | Inc-RDH14-2    |
| A_21_P0000455  | 1,43483 | 1,41039 | 1,017084821 | N/A             | 100033820 | NR_003361    | SNORD116-28    |
| A_22_P00011255 | 1,49691 | 1,47248 | 1,017077771 | N/A             | 100507362 | NR_037181    | LINC01015      |
| A_21_P0003370  | 1,5119  | 1,48747 | 1,017077771 | ENST00000509782 | N/A       | N/A          | N/A            |
| A_33_P3352867  | 1,50816 | 1,48374 | 1,017070722 | ENST00000378126 | 56142     | NM_031848    | PCDHA6         |

|                |         |         |             |                 |           |              |                |
|----------------|---------|---------|-------------|-----------------|-----------|--------------|----------------|
| A_22_P00017908 | 1,62173 | 1,59731 | 1,017070722 | ENST00000563098 | N/A       | N/A          | N/A            |
| A_21_P0012936  | 1,60384 | 1,57943 | 1,017063672 | N/A             | N/A       | N/A          | XLOC_I2_012323 |
| A_24_P263956   | 10,1215 | 10,0971 | 1,017056622 | ENST00000519948 | 552889    | NM_001136262 | ATXN7L3B       |
| A_22_P00015222 | 1,5594  | 1,535   | 1,017056622 | ENST00000441657 | N/A       | XR_241423    | N/A            |
| A_24_P153587   | 1,49517 | 1,47077 | 1,017056622 | N/A             | N/A       | AK091161     | N/A            |
| A_22_P00008308 | 14,0327 | 14,0083 | 1,017056622 | N/A             | 100996301 | NR_121635    | FOXD3-AS1      |
| A_22_P00012365 | 1,4894  | 1,465   | 1,017056622 | ENST00000446280 | N/A       | N/A          | N/A            |
| A_23_P72770    | 1,57887 | 1,55448 | 1,017049573 | ENST00000393091 | 84101     | NM_032147    | USP44          |
| A_22_P00022296 | 1,59733 | 1,57295 | 1,017042523 | N/A             | N/A       | N/A          | Inc-TMEM74-1   |
| A_23_P147465   | 3,37022 | 3,34585 | 1,017035473 | ENST00000479615 | 5071      | NM_004562    | PARK2          |
| A_22_P00012109 | 1,60017 | 1,57581 | 1,017028424 | ENST00000416722 | 388830    | N/A          | LINC00316      |
| A_32_P140139   | 1,61663 | 1,59227 | 1,017028424 | ENST00000264870 | 2162      | NM_000129    | F13A1          |
| A_22_P00011827 | 1,44354 | 1,41919 | 1,017021374 | N/A             | N/A       | N/A          | Inc-PHF20L1-2  |
| A_24_P924611   | 1,53894 | 1,51461 | 1,017007275 | N/A             | 326342    | AY181245     | EMR4P          |
| A_24_P229871   | 6,01011 | 5,98578 | 1,017007275 | ENST00000321800 | 283982    | BC101214     | LINC00469      |
| A_33_P3292259  | 1,44699 | 1,42266 | 1,017007275 | ENST00000509798 | 729307    | XR_244723    | LOC729307      |
| A_19_P00319347 | 1,55291 | 1,52858 | 1,017007275 | ENST00000442316 | N/A       | N/A          | N/A            |
| A_22_P00015798 | 1,61835 | 1,59404 | 1,016993177 | N/A             | N/A       | N/A          | Inc-TAS2R1-1   |
| A_33_P3359858  | 1,45702 | 1,43272 | 1,016986128 | N/A             | 400997    | NR_122074    | LOC400997      |
| A_23_P45396    | 13,1607 | 13,1364 | 1,016986128 | ENST00000375298 | 3028      | NM_004493    | HSD17B10       |
| A_22_P00007289 | 1,60523 | 1,58094 | 1,016979078 | N/A             | N/A       | N/A          | Inc-GPR26-4    |
| A_22_P00008627 | 1,52532 | 1,50103 | 1,016979078 | ENST00000524070 | 286094    | NR_026706    | LOC286094      |
| A_33_P3219835  | 1,60979 | 1,58551 | 1,016972029 | ENST00000413718 | 54090     | NR_024367    | LINC00111      |
| A_21_P0003314  | 1,61909 | 1,59481 | 1,016972029 | ENST00000426551 | 439934    | NR_024087    | LINC00575      |
| A_21_P0010441  | 1,5655  | 1,54122 | 1,016972029 | N/A             | N/A       | N/A          | Inc-KCNJ4-1    |
| A_32_P187571   | 1,545   | 1,52072 | 1,016972029 | ENST00000278947 | 6327      | NM_004588    | SCN2B          |
| A_21_P0008186  | 1,66766 | 1,64338 | 1,016972029 | N/A             | N/A       | N/A          | Inc-RBM26-1    |
| A_21_P0009710  | 1,37455 | 1,35028 | 1,01696498  | N/A             | N/A       | N/A          | Inc-ZNF507-1   |
| A_22_P00018288 | 1,43137 | 1,4071  | 1,01696498  | ENST00000423518 | 2918      | N/A          | GRM8           |
| A_21_P0003429  | 1,48112 | 1,45685 | 1,01696498  | ENST00000507838 | 101928151 | N/A          | LINC01179      |
| A_24_P926631   | 1,60512 | 1,58086 | 1,016957931 | ENST00000449981 | 1769      | NM_001206927 | DNAH8          |
| A_21_P0004225  | 1,5705  | 1,54624 | 1,016957931 | N/A             | N/A       | N/A          | Inc-MTRR-4     |
| A_33_P6815803  | 1,59095 | 1,56669 | 1,016957931 | ENST00000531319 | 283177    | NR_033852    | LOC283177      |

|                |         |         |             |                 |           |              |                      |
|----------------|---------|---------|-------------|-----------------|-----------|--------------|----------------------|
| A_23_P501319   | 1,53405 | 1,50979 | 1,016957931 | ENST00000428113 | 51666     | NM_016116    | ASB4                 |
| A_21_P0003350  | 1,41392 | 1,38967 | 1,016950882 | ENST00000514737 | N/A       | N/A          | N/A                  |
| A_22_P00004759 | 1,46764 | 1,44339 | 1,016950882 | N/A             | N/A       | N/A          | Inc-CTSZ-3           |
| A_21_P0002898  | 1,63619 | 1,61194 | 1,016950882 | ENST00000498241 | N/A       | N/A          | N/A                  |
| A_22_P00001611 | 1,66681 | 1,64256 | 1,016950882 | ENST00000557499 | N/A       | BE895011     | N/A                  |
| A_24_P840042   | 1,50365 | 1,47941 | 1,016943833 | N/A             | 646113    | NR_015358    | LINC00643            |
| A_33_P3286357  | 1,64231 | 1,61807 | 1,016943833 | ENST00000495689 | N/A       | N/A          | N/A                  |
| A_21_P0005855  | 1,51606 | 1,49182 | 1,016943833 | N/A             | N/A       | N/A          | Inc-RP11-664D7.4.1-3 |
| A_21_P0007752  | 1,39715 | 1,37292 | 1,016936784 | N/A             | N/A       | N/A          | Inc-APPL2-2          |
| A_22_P00025885 | 1,57657 | 1,55234 | 1,016936784 | ENST00000548329 | N/A       | N/A          | N/A                  |
| A_33_P3220475  | 7,69401 | 7,66978 | 1,016936784 | ENST00000367602 | 200058    | NR_026900    | FLJ23867             |
| A_22_P00007005 | 1,64859 | 1,62438 | 1,016922687 | N/A             | N/A       | N/A          | Inc-GGH-1            |
| A_22_P00004452 | 1,65254 | 1,62833 | 1,016922687 | ENST00000511602 | N/A       | N/A          | N/A                  |
| A_21_P0000861  | 1,53978 | 1,51558 | 1,016915638 | N/A             | 100506134 | NR_038983    | TTC21B-AS1           |
| A_22_P00001241 | 1,52803 | 1,50383 | 1,016915638 | ENST00000581351 | N/A       | BX104831     | N/A                  |
| A_24_P190472   | 15,081  | 15,0568 | 1,016915638 | ENST00000338380 | 6590      | NM_003064    | SLPI                 |
| A_23_P363936   | 8,53886 | 8,51467 | 1,016908589 | ENST00000296464 | 22824     | NM_014278    | HSPA4L               |
| A_21_P0001583  | 1,53727 | 1,51309 | 1,016901541 | N/A             | N/A       | N/A          | Inc-GPATCH4-1        |
| A_21_P0005920  | 1,71023 | 1,68605 | 1,016901541 | ENST00000522989 | N/A       | N/A          | N/A                  |
| A_21_P0010953  | 1,69567 | 1,6715  | 1,016894492 | ENST00000454178 | 101929624 | NR_120667    | LINC01519            |
| A_33_P3362068  | 6,86558 | 6,84141 | 1,016894492 | N/A             | N/A       | N/A          | N/A                  |
| A_23_P13195    | 1,62622 | 1,60206 | 1,016887443 | ENST00000341493 | 26494     | NM_001002905 | OR8G1                |
| A_24_P342632   | 1,51021 | 1,48607 | 1,016873347 | ENST00000344720 | 26289     | NM_174858    | AK5                  |
| A_24_P33446    | 1,49284 | 1,4687  | 1,016873347 | N/A             | 338651    | NR_021489    | KRTAP5-AS1           |
| A_22_P00014121 | 1,61841 | 1,59427 | 1,016873347 | N/A             | N/A       | BG387304     | Inc-SCAPER-1         |
| A_22_P00003301 | 1,65184 | 1,62771 | 1,016866298 | ENST00000414210 | 100505887 | NR_104620    | LOC100505887         |
| A_22_P00007170 | 1,62554 | 1,60142 | 1,01685925  | N/A             | N/A       | BC042527     | Inc-GNG5-4           |
| A_22_P00010127 | 1,47846 | 1,45436 | 1,016845153 | N/A             | N/A       | N/A          | Inc-MRPL19-3         |
| A_22_P00017411 | 1,65231 | 1,62821 | 1,016845153 | ENST00000530606 | 253264    | NR_038226    | ZNF503-AS1           |
| A_21_P0004154  | 1,39932 | 1,37522 | 1,016845153 | ENST00000513779 | N/A       | N/A          | N/A                  |
| A_22_P00005154 | 1,40326 | 1,37917 | 1,016838105 | N/A             | N/A       | N/A          | Inc-DIAPH1-1         |
| A_22_P00007370 | 1,48139 | 1,45731 | 1,016831057 | N/A             | 100506915 | NR_103776    | CHRM3-AS2            |
| A_33_P3311648  | 1,48088 | 1,4568  | 1,016831057 | N/A             | N/A       | N/A          | N/A                  |



|                |         |         |             |                 |           |              |                |
|----------------|---------|---------|-------------|-----------------|-----------|--------------|----------------|
| A_33_P3219939  | 1,68051 | 1,65644 | 1,016824009 | ENST00000377833 | 8029      | NM_001081    | CUBN           |
| A_33_P3333050  | 8,14907 | 8,125   | 1,016824009 | ENST00000223073 | 389015    | NM_001011552 | SLC9A4         |
| A_22_P00016305 | 1,51673 | 1,49267 | 1,016816961 | ENST00000536342 | 400087    | NR_033987    | FLJ37505       |
| A_21_P0001255  | 3,73615 | 3,71209 | 1,016816961 | N/A             | N/A       | N/A          | Inc-TNFRSF14-1 |
| A_21_P0013019  | 1,5918  | 1,56775 | 1,016809913 | N/A             | N/A       | N/A          | XLOC_I2_012432 |
| A_33_P3290354  | 1,50933 | 1,48529 | 1,016802865 | ENST00000480856 | 84624     | NM_032532    | FNDC1          |
| A_33_P3792641  | 1,53222 | 1,50818 | 1,016802865 | N/A             | 100144595 | NM_001256368 | LOC100144595   |
| A_33_P3215113  | 1,42496 | 1,40093 | 1,016795817 | ENST00000460721 | 23641     | NM_012317    | LDOC1          |
| A_22_P00015179 | 1,61087 | 1,58684 | 1,016795817 | ENST00000561786 | 101928698 | NR_108094    | LINC01070      |
| A_22_P00008343 | 1,46465 | 1,44062 | 1,016795817 | N/A             | 100505890 | NR_104028    | SORCS3-AS1     |
| A_33_P3363660  | 1,70872 | 1,6847  | 1,016788769 | N/A             | N/A       | N/A          | N/A            |
| A_33_P3378790  | 1,59319 | 1,56917 | 1,016788769 | ENST00000395987 | 55259     | NM_001082972 | CASC1          |
| A_21_P0003829  | 1,54988 | 1,52586 | 1,016788769 | ENST00000510420 | N/A       | N/A          | N/A            |
| A_33_P6472709  | 4,26845 | 4,24443 | 1,016788769 | N/A             | 100874300 | NR_046796    | SYNJ2-IT1      |
| A_21_P0003128  | 1,49849 | 1,47448 | 1,016781721 | N/A             | N/A       | N/A          | Inc-FOXP1-1    |
| A_21_P0007580  | 1,61227 | 1,58826 | 1,016781721 | N/A             | N/A       | N/A          | Inc-TRHDE-1    |
| A_32_P141923   | 15,5555 | 15,5315 | 1,016774673 | ENST00000521764 | 342538    | NM_199290    | NACA2          |
| A_24_P372625   | 10,2702 | 10,2462 | 1,016774673 | ENST00000534281 | 50862     | NM_016422    | RNF141         |
| A_22_P00003326 | 1,51446 | 1,49047 | 1,016767626 | ENST00000538641 | 102723895 | NR_120585    | LOC102723895   |
| A_21_P0004477  | 1,52253 | 1,49854 | 1,016767626 | N/A             | N/A       | N/A          | Inc-MGAT1-2    |
| A_23_P68978    | 1,46126 | 1,43727 | 1,016767626 | ENST00000477145 | 64800     | NM_022785    | EFCAB6         |
| A_33_P3274599  | 2,28416 | 2,26017 | 1,016767626 | ENST00000507796 | 100124412 | NR_026819    | FAM138E        |
| A_33_P3285585  | 1,39304 | 1,36907 | 1,01675353  | ENST00000414816 | 400511    | NR_122072    | LINC01567      |
| A_21_P0008414  | 1,62322 | 1,59925 | 1,01675353  | ENST00000549013 | N/A       | N/A          | N/A            |
| A_22_P00015966 | 1,74149 | 1,71752 | 1,01675353  | ENST00000579561 | N/A       | BF510650     | N/A            |
| A_22_P00015654 | 1,65038 | 1,62641 | 1,01675353  | ENST00000555947 | 101926928 | DA040952     | LOC101926928   |
| A_23_P304016   | 5,43897 | 5,415   | 1,01675353  | ENST00000619764 | N/A       | BC006438     | N/A            |
| A_24_P229638   | 1,60345 | 1,57949 | 1,016746483 | ENST00000496009 | 286207    | NM_001012502 | C9orf117       |
| A_22_P00022331 | 1,52338 | 1,49942 | 1,016746483 | N/A             | N/A       | BG218223     | Inc-FAM9C-2    |
| A_22_P00005567 | 1,60863 | 1,58467 | 1,016746483 | ENST00000521359 | N/A       | N/A          | N/A            |
| A_33_P3378136  | 1,41648 | 1,39252 | 1,016746483 | ENST00000335605 | 219436    | NM_001004735 | OR5D14         |
| A_22_P00018836 | 1,68483 | 1,66088 | 1,016739435 | N/A             | N/A       | DB516635     | Inc-SH3RF2-1   |
| A_33_P3353757  | 1,36506 | 1,34111 | 1,016739435 | N/A             | N/A       | N/A          | N/A            |

|                |         |         |             |                 |           |              |                |
|----------------|---------|---------|-------------|-----------------|-----------|--------------|----------------|
| A_21_P0002771  | 1,42208 | 1,39814 | 1,016732388 | N/A             | 100507389 | NR_038455    | LOC100507389   |
| A_22_P00015925 | 1,48588 | 1,46194 | 1,016732388 | ENST00000460130 | 27004     | BX161462     | TCL6           |
| A_21_P0008834  | 1,42722 | 1,40329 | 1,01672534  | N/A             | N/A       | N/A          | Inc-PML-2      |
| A_33_P3233304  | 1,64313 | 1,6192  | 1,01672534  | ENST00000610772 | 339766    | N/A          | MROH2A         |
| A_21_P0002143  | 1,65817 | 1,63424 | 1,01672534  | ENST00000418330 | 348761    | NR_033879    | SPATA3-AS1     |
| A_23_P323801   | 1,63688 | 1,61296 | 1,016718293 | ENST00000330891 | 144453    | NM_032735    | BEST3          |
| A_23_P209799   | 1,6841  | 1,66019 | 1,016711246 | ENST00000494959 | 4648      | NM_001080527 | MYO7B          |
| A_33_P3251647  | 1,38719 | 1,36329 | 1,016704198 | N/A             | 100113383 | AK126016     | PCBP3-OT1      |
| A_21_P0014685  | 1,51658 | 1,49269 | 1,016697151 | ENST00000335616 | 388282    | NM_001278081 | LOC388282      |
| A_33_P3391721  | 1,5419  | 1,51801 | 1,016697151 | N/A             | N/A       | BF997934     | Inc-CALCOCO2-7 |
| A_21_P0004916  | 1,63528 | 1,61139 | 1,016697151 | N/A             | N/A       | N/A          | Inc-PRDM1-2    |
| A_22_P00006236 | 6,58715 | 6,56327 | 1,016690104 | ENST00000543182 | N/A       | N/A          | N/A            |
| A_23_P28224    | 1,61298 | 1,5891  | 1,016690104 | ENST00000303395 | 6323      | NM_006920    | SCN1A          |
| A_22_P00008213 | 1,49255 | 1,46868 | 1,016683057 | N/A             | 101928999 | NR_109984    | IQCF5-AS1      |
| A_21_P0009003  | 1,61915 | 1,59528 | 1,016683057 | N/A             | N/A       | N/A          | Inc-ADCY9-1    |
| A_22_P00020529 | 1,62153 | 1,59766 | 1,016683057 | ENST00000450551 | N/A       | N/A          | N/A            |
| A_33_P3850216  | 1,47377 | 1,44991 | 1,01667601  | ENST00000353317 | 84675     | NM_033058    | TRIM55         |
| A_22_P00013956 | 1,47815 | 1,45429 | 1,01667601  | N/A             | N/A       | N/A          | Inc-RTKN2-1    |
| A_22_P00010037 | 1,73163 | 1,70777 | 1,01667601  | ENST00000555871 | N/A       | N/A          | N/A            |
| A_33_P3290959  | 1,64083 | 1,617   | 1,016654869 | N/A             | N/A       | N/A          | Inc-POLR2B-1   |
| A_32_P865708   | 1,66915 | 1,64533 | 1,016647822 | ENST00000368894 | 118670    | NM_001029888 | FAM24A         |
| A_21_P0003150  | 1,57486 | 1,55104 | 1,016647822 | N/A             | N/A       | N/A          | Inc-CBLB-7     |
| A_21_P0003751  | 1,58386 | 1,56004 | 1,016647822 | N/A             | N/A       | N/A          | Inc-SNCA-1     |
| A_21_P0007342  | 1,52016 | 1,49635 | 1,016640775 | N/A             | N/A       | N/A          | Inc-LRRC4C-5   |
| A_33_P3218741  | 13,8006 | 13,7768 | 1,016633728 | N/A             | N/A       | N/A          | N/A            |
| A_33_P3314515  | 1,44378 | 1,41998 | 1,016633728 | N/A             | 348808    | NR_002811    | NPHP3-AS1      |
| A_33_P3257523  | 6,7607  | 6,73691 | 1,016626681 | ENST00000370708 | 26036     | NM_001257273 | ZNF451         |
| A_32_P169574   | 6,9679  | 6,94412 | 1,016619635 | ENST00000484499 | 55593     | NM_017602    | OTUD5          |
| A_24_P57047    | 1,48382 | 1,46004 | 1,016619635 | ENST00000356433 | 10683     | NM_203486    | DLL3           |
| A_21_P0011178  | 1,63754 | 1,61377 | 1,016612588 | N/A             | N/A       | N/A          | XLOC_I2_003897 |
| A_22_P00009707 | 4,05112 | 4,02736 | 1,016605541 | N/A             | N/A       | N/A          | Inc-MBTPS2-1   |
| A_22_P00024951 | 6,23183 | 6,20807 | 1,016605541 | N/A             | 727993    | XR_244229    | LOC727993      |
| A_22_P00012794 | 1,47226 | 1,4485  | 1,016605541 | ENST00000523678 | N/A       | N/A          | N/A            |

|                |         |         |             |                 |           |              |                       |
|----------------|---------|---------|-------------|-----------------|-----------|--------------|-----------------------|
| A_22_P00011831 | 1,45468 | 1,43093 | 1,016598495 | N/A             | N/A       | N/A          | Inc-PHF3-3            |
| A_21_P0004956  | 1,48068 | 1,45693 | 1,016598495 | N/A             | N/A       | N/A          | Inc-PPP1R14C-1        |
| A_33_P3345881  | 1,60153 | 1,57778 | 1,016598495 | N/A             | N/A       | N/A          | N/A                   |
| A_21_P0010822  | 1,45625 | 1,43251 | 1,016591448 | ENST00000423162 | 100129055 | N/A          | LOC100129055          |
| A_21_P0004173  | 1,61242 | 1,58868 | 1,016591448 | ENST00000515704 | 101927280 | N/A          | LOC101927280          |
| A_33_P3263198  | 1,51273 | 1,48899 | 1,016591448 | N/A             | N/A       | N/A          | N/A                   |
| A_23_P332713   | 1,6299  | 1,60616 | 1,016591448 | ENST00000262961 | 23217     | NM_015174    | ZFR2                  |
| A_33_P3249349  | 6,93419 | 6,91046 | 1,016584402 | ENST00000406503 | 23532     | N/A          | PRAME                 |
| A_21_P0008470  | 1,53668 | 1,51295 | 1,016584402 | N/A             | N/A       | N/A          | Inc-SEL1L-9           |
| A_21_P0009701  | 1,59463 | 1,57091 | 1,016577356 | ENST00000587998 | 102724958 | NR_110760    | LOC102724958          |
| A_32_P154380   | 4,97604 | 4,95233 | 1,016570309 | N/A             | N/A       | N/A          | Inc-SLC25A2-1         |
| A_23_P23783    | 1,42421 | 1,4005  | 1,016570309 | ENST00000614688 | 4653      | NM_000261    | MYOC                  |
| A_22_P00014638 | 1,61629 | 1,59258 | 1,016570309 | ENST00000531858 | N/A       | N/A          | N/A                   |
| A_33_P3372466  | 12,2451 | 12,2214 | 1,016563263 | ENST00000601461 | 9524      | NM_138501    | TECR                  |
| A_21_P0012497  | 1,58253 | 1,55883 | 1,016563263 | N/A             | N/A       | N/A          | Inc-GAP43-6           |
| A_23_P383031   | 4,04405 | 4,02036 | 1,016556217 | ENST00000371586 | 200014    | NM_032449    | CC2D1B                |
| A_22_P00004111 | 1,54381 | 1,52014 | 1,016542124 | N/A             | N/A       | N/A          | Inc-CLCN3-2           |
| A_24_P20369    | 1,55167 | 1,52801 | 1,016535078 | ENST00000456124 | 54716     | NM_020208    | SLC6A20               |
| A_24_P650396   | 1,43772 | 1,41407 | 1,016528032 | ENST00000375026 | 338661    | NM_001013743 | TMEM225               |
| A_22_P00022513 | 1,49799 | 1,47436 | 1,01651394  | N/A             | N/A       | DA715917     | Inc-ST3GAL6-1         |
| A_22_P00025351 | 1,60625 | 1,58263 | 1,016506894 | ENST00000440802 | N/A       | N/A          | N/A                   |
| A_23_P142606   | 1,45857 | 1,43496 | 1,016499848 | ENST00000282141 | 1420      | NM_020989    | CRYGC                 |
| A_33_P3377399  | 5,60745 | 5,58384 | 1,016499848 | N/A             | N/A       | N/A          | Inc-RP11-778D12.2.1-4 |
| A_33_P3273723  | 1,66994 | 1,64633 | 1,016499848 | N/A             | N/A       | AK129540     | N/A                   |
| A_21_P0002988  | 1,70044 | 1,67683 | 1,016499848 | N/A             | N/A       | N/A          | Inc-CADM2-5           |
| A_33_P3402495  | 6,87105 | 6,84746 | 1,016485757 | N/A             | N/A       | N/A          | N/A                   |
| A_33_P3502547  | 1,72943 | 1,70584 | 1,016485757 | N/A             | N/A       | BU955595     | N/A                   |
| A_33_P3249345  | 1,4533  | 1,42971 | 1,016485757 | ENST00000403441 | 23532     | NM_001291719 | PRAME                 |
| A_21_P0011136  | 1,60548 | 1,58189 | 1,016485757 | N/A             | N/A       | N/A          | XLOC_I2_003666        |
| A_21_P0007277  | 1,46349 | 1,4399  | 1,016485757 | N/A             | N/A       | N/A          | Inc-HTR3A-1           |
| A_33_P3374343  | 1,6229  | 1,59932 | 1,016478711 | ENST00000537095 | 440119    | N/A          | FZD10-AS1             |
| A_22_P00009911 | 3,63131 | 3,60774 | 1,016471665 | ENST00000428273 | N/A       | N/A          | N/A                   |
| A_23_P9711     | 1,57757 | 1,554   | 1,016471665 | ENST00000331351 | 9951      | NM_006040    | HS3ST4                |

|                |         |         |             |                 |           |              |                     |
|----------------|---------|---------|-------------|-----------------|-----------|--------------|---------------------|
| A_22_P00007500 | 1,57049 | 1,54692 | 1,016471665 | N/A             | N/A       | CR738670     | Inc-GXYLT1-2        |
| A_21_P0007858  | 1,52584 | 1,5023  | 1,016450529 | N/A             | N/A       | N/A          | Inc-TMEM132B-3      |
| A_23_P74068    | 1,51271 | 1,48917 | 1,016450529 | ENST00000263187 | 4438      | NM_002440    | MSH4                |
| A_23_P76234    | 1,72484 | 1,7013  | 1,016450529 | ENST00000549324 | 22895     | NM_001143854 | RPH3A               |
| A_21_P0012354  | 1,48551 | 1,46198 | 1,016443483 | ENST00000411511 | N/A       | N/A          | N/A                 |
| A_33_P3289386  | 1,59113 | 1,5676  | 1,016443483 | N/A             | N/A       | AK126601     | N/A                 |
| A_23_P111487   | 8,25424 | 8,23071 | 1,016443483 | ENST00000445337 | 51593     | NM_001128853 | SRRT                |
| A_33_P3361229  | 1,66806 | 1,64454 | 1,016436438 | ENST00000409461 | 144715    | NM_001286536 | RAD9B               |
| A_22_P00001795 | 1,53971 | 1,51619 | 1,016436438 | N/A             | N/A       | N/A          | Inc-ATP6AP1L-2      |
| A_22_P00006816 | 1,55573 | 1,53222 | 1,016429392 | N/A             | N/A       | CR749394     | Inc-GABRA5-1        |
| A_22_P00006803 | 1,64661 | 1,62311 | 1,016422347 | N/A             | N/A       | N/A          | Inc-GABARAPL3-2     |
| A_22_P00012400 | 1,57502 | 1,55154 | 1,016408257 | ENST00000548124 | N/A       | N/A          | N/A                 |
| A_21_P0009364  | 1,65439 | 1,63091 | 1,016408257 | N/A             | N/A       | N/A          | Inc-CD300C-2        |
| A_22_P00021342 | 1,37039 | 1,34691 | 1,016408257 | ENST00000449928 | 102723883 | NR_125869    | LOC102723883        |
| A_21_P0005795  | 1,61623 | 1,59276 | 1,016401211 | N/A             | N/A       | N/A          | Inc-MFHAS1-2        |
| A_23_P89727    | 5,66551 | 5,64205 | 1,016394166 | ENST00000075430 | 9150      | NM_048368    | CTDP1               |
| A_22_P00013255 | 5,74555 | 5,72209 | 1,016394166 | N/A             | N/A       | N/A          | Inc-ROPN1L-2        |
| A_33_P3732844  | 1,49558 | 1,47212 | 1,016394166 | ENST00000473595 | 101243545 | NR_102265    | LOC101243545        |
| A_19_P00810982 | 7,14207 | 7,11863 | 1,016380076 | N/A             | N/A       | N/A          | Inc-MACROD1-1       |
| A_23_P26184    | 9,47432 | 9,45089 | 1,016373031 | ENST00000268148 | 55070     | NM_017996    | DET1                |
| A_33_P3367636  | 1,53261 | 1,50918 | 1,016373031 | ENST00000370367 | 154288    | NM_001017361 | KHDC3L              |
| A_22_P00001937 | 1,59622 | 1,57279 | 1,016373031 | N/A             | N/A       | N/A          | Inc-BARHL1-1        |
| A_33_P3313948  | 1,53621 | 1,51278 | 1,016373031 | N/A             | 8462      | XM_005246179 | KLF11               |
| A_21_P0009111  | 1,50822 | 1,48479 | 1,016373031 | N/A             | N/A       | N/A          | Inc-RP11-44L9.1.1-7 |
| A_33_P3269919  | 1,51736 | 1,49394 | 1,016365986 | ENST00000367759 | 80133     | NM_025063    | MROH9               |
| A_33_P3322784  | 1,50066 | 1,47724 | 1,016365986 | ENST00000304053 | 4915      | NM_001018065 | NTRK2               |
| A_33_P3219942  | 1,55782 | 1,53441 | 1,016358941 | ENST00000557313 | 2009      | NM_001008707 | EML1                |
| A_33_P3350575  | 3,40609 | 3,38268 | 1,016358941 | ENST00000254627 | 729330    | NM_001080399 | OC90                |
| A_33_P3220612  | 12,2208 | 12,1974 | 1,016351897 | ENST00000449319 | 23625     | NM_001098784 | FAM89B              |
| A_33_P3381206  | 1,52762 | 1,50422 | 1,016351897 | ENST00000390318 | N/A       | AM184015     | N/A                 |
| A_22_P00005427 | 1,60801 | 1,58461 | 1,016351897 | N/A             | N/A       | BC036311     | Inc-DTWD2-1         |
| A_22_P00005761 | 1,55658 | 1,53319 | 1,016344852 | N/A             | 100128811 | NR_027333    | GPR158-AS1          |
| A_33_P3264790  | 1,51541 | 1,49203 | 1,016337807 | N/A             | 219770    | BC035898     | GJD4                |

|                |         |         |             |                 |           |              |               |
|----------------|---------|---------|-------------|-----------------|-----------|--------------|---------------|
| A_21_P0007204  | 1,5337  | 1,51032 | 1,016337807 | ENST00000524565 | 101928812 | NR_120557    | LOC101928812  |
| A_24_P408767   | 1,50759 | 1,48421 | 1,016337807 | ENST00000429665 | 339906    | NM_182702    | PRSS42        |
| A_33_P3294598  | 1,44703 | 1,42366 | 1,016330762 | ENST00000618019 | 57575     | AK314377     | PCDH10        |
| A_21_P0007538  | 1,46257 | 1,4392  | 1,016330762 | N/A             | N/A       | N/A          | Inc-FAR2-1    |
| A_21_P0011631  | 1,62423 | 1,60088 | 1,016316673 | ENST00000440522 | N/A       | N/A          | N/A           |
| A_22_P00022660 | 1,45553 | 1,43218 | 1,016316673 | N/A             | 100874241 | NR_046693    | STARD13-AS    |
| A_22_P00006855 | 1,47268 | 1,44934 | 1,016309629 | ENST00000554305 | N/A       | BQ218096     | N/A           |
| A_33_P3316440  | 1,61688 | 1,59355 | 1,016302584 | N/A             | N/A       | AB020701     | N/A           |
| A_33_P3348348  | 1,64005 | 1,61673 | 1,01629554  | ENST00000379071 | 646480    | NM_001080526 | FABP9         |
| A_22_P00011346 | 4,89923 | 4,87592 | 1,016288495 | N/A             | N/A       | N/A          | Inc-OTUD7B-1  |
| A_33_P3335124  | 17,1742 | 17,1509 | 1,016281451 | ENST00000468126 | 6187      | NM_002952    | RPS2          |
| A_33_P3358363  | 1,51133 | 1,48803 | 1,016281451 | ENST00000375511 | 494197    | NM_001009616 | SPANXN5       |
| A_22_P00009580 | 1,50251 | 1,47921 | 1,016281451 | N/A             | N/A       | N/A          | Inc-MAP9-2    |
| A_22_P00010583 | 1,5536  | 1,5303  | 1,016281451 | N/A             | N/A       | N/A          | Inc-NDFIP2-7  |
| A_21_P0012037  | 1,61644 | 1,59314 | 1,016281451 | ENST00000453035 | 101927641 | NR_110270    | LOC101927641  |
| A_21_P0005414  | 1,72773 | 1,70445 | 1,016267362 | N/A             | N/A       | N/A          | Inc-PIK3CG-1  |
| A_21_P0004499  | 1,47966 | 1,45638 | 1,016267362 | N/A             | N/A       | N/A          | Inc-CDH6-2    |
| A_21_P0004160  | 1,68129 | 1,65804 | 1,01624623  | ENST00000505908 | N/A       | N/A          | N/A           |
| A_21_P0010100  | 1,50757 | 1,48433 | 1,016239186 | N/A             | N/A       | N/A          | Inc-BIRC7-1   |
| A_21_P0002299  | 1,60268 | 1,57945 | 1,016232142 | N/A             | N/A       | N/A          | Inc-LYPD6-3   |
| A_22_P00008001 | 1,51553 | 1,4923  | 1,016232142 | ENST00000545704 | N/A       | N/A          | N/A           |
| A_33_P3317005  | 1,39486 | 1,37163 | 1,016232142 | ENST00000483487 | 6556      | NM_000578    | SLC11A1       |
| A_23_P434416   | 1,46596 | 1,44273 | 1,016232142 | N/A             | 6656      | NM_005986    | SOX1          |
| A_21_P0012706  | 1,7177  | 1,69448 | 1,016225098 | N/A             | 101930035 | N/A          | LOC101930035  |
| A_22_P00020561 | 1,39316 | 1,36994 | 1,016225098 | ENST00000530350 | N/A       | N/A          | N/A           |
| A_33_P3393504  | 1,69544 | 1,67223 | 1,016218054 | ENST00000329256 | 338324    | AY189119     | S100A7A       |
| A_21_P0003106  | 1,41418 | 1,39097 | 1,016218054 | N/A             | N/A       | N/A          | Inc-NKIRAS1-3 |
| A_23_P411814   | 12,3483 | 12,3251 | 1,01621101  | ENST00000361564 | 58505     | NM_021227    | OSTC          |
| A_24_P12059    | 1,492   | 1,4688  | 1,01621101  | ENST00000360771 | 2993      | NM_002099    | GYPA          |
| A_23_P13772    | 1,51378 | 1,49058 | 1,01621101  | ENST00000613550 | 6926      | NM_016569    | TBX3          |
| A_32_P58074    | 15,5678 | 15,5446 | 1,01621101  | ENST00000484430 | 6189      | NM_001006    | RPS3A         |
| A_22_P00016866 | 2,95418 | 2,93099 | 1,016203966 | N/A             | N/A       | N/A          | Inc-TRPV3-1   |
| A_22_P00011901 | 1,43227 | 1,40908 | 1,016203966 | N/A             | N/A       | N/A          | Inc-PIK3CG-4  |

|                |         |         |             |                 |           |              |                     |
|----------------|---------|---------|-------------|-----------------|-----------|--------------|---------------------|
| A_33_P3376546  | 1,50165 | 1,47848 | 1,016189879 | N/A             | 5737      | NM_001039585 | PTGFR               |
| A_22_P00008385 | 1,52308 | 1,49991 | 1,016189879 | N/A             | N/A       | N/A          | Inc-JMJD1C-1        |
| A_21_P0009007  | 6,1191  | 6,09594 | 1,016182835 | ENST00000571970 | 100507501 | NR_039999    | LINC01569           |
| A_21_P0012149  | 3,79327 | 3,77011 | 1,016182835 | N/A             | N/A       | N/A          | Inc-WFDC2-1         |
| A_21_P0004501  | 1,57899 | 1,55583 | 1,016182835 | ENST00000514532 | 100861519 | NR_103442    | GDNF-AS1            |
| A_21_P0000111  | 1,36719 | 1,34403 | 1,016182835 | ENST00000535540 | 100431172 | NM_001190765 | KLRF2               |
| A_21_P0003053  | 1,50349 | 1,48033 | 1,016182835 | N/A             | N/A       | N/A          | Inc-OTOL1-4         |
| A_21_P0010227  | 1,56775 | 1,54459 | 1,016182835 | N/A             | N/A       | N/A          | Inc-USP16-7         |
| A_22_P00021599 | 1,6461  | 1,62294 | 1,016182835 | N/A             | 101515984 | N/A          | LINC01080           |
| A_21_P0004535  | 1,49668 | 1,47353 | 1,016175791 | N/A             | N/A       | N/A          | Inc-CTB-78H18.1.1-1 |
| A_21_P0006713  | 1,66782 | 1,64467 | 1,016175791 | ENST00000448671 | N/A       | N/A          | N/A                 |
| A_24_P413920   | 6,17326 | 6,15011 | 1,016175791 | ENST00000497769 | 151354    | NM_145175    | FAM84A              |
| A_23_P311713   | 1,59923 | 1,5761  | 1,016161704 | ENST00000368585 | 54777     | BC146900     | CFAP46              |
| A_33_P3341519  | 1,40126 | 1,37814 | 1,016154661 | N/A             | 100130507 | AK055470     | LOC100130507        |
| A_22_P00016416 | 1,58953 | 1,56641 | 1,016154661 | ENST00000507627 | N/A       | N/A          | N/A                 |
| A_24_P333857   | 1,65256 | 1,62945 | 1,016147617 | ENST00000237247 | 84251     | NM_032291    | SGIP1               |
| A_33_P3319810  | 1,61922 | 1,59612 | 1,016140574 | ENST00000423981 | 205147    | NM_152698    | AMER3               |
| A_23_P380309   | 1,46395 | 1,44085 | 1,016140574 | ENST00000321600 | 284254    | NM_173629    | DYNAP               |
| A_33_P3307103  | 1,66561 | 1,64251 | 1,016140574 | ENST00000556639 | N/A       | BX247991     | N/A                 |
| A_33_P3319785  | 1,38874 | 1,36565 | 1,016133531 | N/A             | N/A       | N/A          | N/A                 |
| A_22_P00007434 | 1,65022 | 1,62714 | 1,016126487 | N/A             | 100128079 | XR_248301    | LOC100128079        |
| A_23_P500892   | 1,73677 | 1,71369 | 1,016126487 | ENST00000305253 | 7275      | NM_003320    | TUB                 |
| A_33_P3283679  | 1,52522 | 1,50215 | 1,016119444 | N/A             | 100129717 | AK296186     | LOC100129717        |
| A_22_P00017936 | 1,54476 | 1,52169 | 1,016119444 | ENST00000514225 | N/A       | N/A          | N/A                 |
| A_22_P00019741 | 1,39873 | 1,37567 | 1,016112401 | N/A             | N/A       | AL042792     | Inc-MBOAT1-5        |
| A_19_P00317563 | 1,65073 | 1,62767 | 1,016112401 | ENST00000618608 | N/A       | N/A          | N/A                 |
| A_22_P00007094 | 1,49278 | 1,46972 | 1,016112401 | ENST00000510753 | N/A       | N/A          | N/A                 |
| A_33_P3364463  | 1,54647 | 1,52341 | 1,016112401 | ENST00000523367 | 286183    | NM_173688    | NKAIN3              |
| A_23_P11081    | 1,51309 | 1,49004 | 1,016105358 | ENST00000376064 | 8852      | NM_003886    | AKAP4               |
| A_21_P0001356  | 1,82622 | 1,80318 | 1,016098315 | N/A             | N/A       | N/A          | Inc-RNPC3-3         |
| A_23_P216429   | 1,70817 | 1,68513 | 1,016098315 | ENST00000375544 | 54829     | NM_017680    | ASPN                |
| A_22_P00023596 | 1,49554 | 1,47251 | 1,016091272 | ENST00000437088 | N/A       | N/A          | N/A                 |
| A_22_P00006227 | 1,60365 | 1,58062 | 1,016091272 | N/A             | 101927867 | XR_241960    | LOC101927867        |

|                |         |         |             |                 |           |              |                    |
|----------------|---------|---------|-------------|-----------------|-----------|--------------|--------------------|
| A_21_P0003504  | 1,3912  | 1,36817 | 1,016091272 | ENST00000509166 | N/A       | N/A          | N/A                |
| A_23_P301360   | 8,98203 | 8,959   | 1,016091272 | ENST00000319286 | 137209    | NM_152412    | ZNF572             |
| A_21_P0012449  | 1,72196 | 1,69894 | 1,016084229 | ENST00000484892 | 440970    | N/A          | LINC00971          |
| A_23_P217570   | 1,40999 | 1,38698 | 1,016077186 | ENST00000324068 | 827       | NM_014289    | CAPN6              |
| A_23_P253052   | 12,536  | 12,513  | 1,016070143 | ENST00000613030 | 83692     | NM_031462    | CD99L2             |
| A_33_P3376116  | 4,99005 | 4,96705 | 1,016070143 | ENST00000423327 | 147841    | NM_182513    | SPC24              |
| A_23_P391844   | 1,52517 | 1,50218 | 1,0160631   | ENST00000297866 | 170063    | NM_152632    | CXorf22            |
| A_22_P00017826 | 1,67565 | 1,65267 | 1,016056057 | N/A             | N/A       | N/A          | Inc-ZC3H12D-1      |
| A_22_P00023290 | 1,58069 | 1,55771 | 1,016056057 | N/A             | 101927620 | NR_110062    | LOC101927620       |
| A_23_P375922   | 1,45048 | 1,42751 | 1,016049015 | N/A             | 1310      | NM_001858    | COL19A1            |
| A_21_P0009649  | 1,51318 | 1,49021 | 1,016049015 | ENST00000601776 | N/A       | N/A          | N/A                |
| A_33_P3368879  | 1,65622 | 1,63326 | 1,016041972 | ENST00000616739 | 25802     | NM_012134    | LMOD1              |
| A_33_P3227736  | 1,61439 | 1,59145 | 1,016027887 | ENST00000477984 | 401253    | NR_027908    | LINC00336          |
| A_22_P00003097 | 1,5638  | 1,54086 | 1,016027887 | N/A             | N/A       | N/A          | Inc-C8orf85-1      |
| A_21_P0011045  | 1,5043  | 1,48136 | 1,016027887 | N/A             | N/A       | N/A          | XLOC_l2_002952     |
| A_24_P263653   | 1,52579 | 1,50285 | 1,016027887 | ENST00000520836 | 1794      | NM_004946    | DOCK2              |
| A_22_P00015401 | 9,28148 | 9,25854 | 1,016027887 | N/A             | 100216545 | NR_024586    | KMT2E-AS1          |
| A_21_P0001129  | 1,6139  | 1,59097 | 1,016020844 | ENST00000455238 | N/A       | N/A          | N/A                |
| A_21_P0008711  | 1,42545 | 1,40254 | 1,016006759 | N/A             | N/A       | N/A          | Inc-ATP10A-2       |
| A_33_P3342938  | 1,66934 | 1,64643 | 1,016006759 | ENST00000409622 | 4211      | AK098174     | MEIS1              |
| A_23_P169993   | 1,61754 | 1,59463 | 1,016006759 | ENST00000286355 | 114       | NM_001115    | ADCY8              |
| A_33_P3281537  | 1,64794 | 1,62503 | 1,016006759 | N/A             | 11000     | XM_005244852 | SLC27A3            |
| A_24_P97931    | 14,0375 | 14,0146 | 1,015999717 | ENST00000493079 | 1460      | NM_001320    | CSNK2B             |
| A_33_P3287661  | 12,3345 | 12,3116 | 1,015999717 | N/A             | N/A       | AK126997     | Inc-C16orf42-2     |
| A_24_P123833   | 1,53173 | 1,50884 | 1,015992674 | ENST00000307792 | 9723      | NM_012431    | SEMA3E             |
| A_21_P0004283  | 1,52604 | 1,50315 | 1,015992674 | N/A             | N/A       | N/A          | Inc-AC011366.3.1-1 |
| A_22_P00019937 | 1,69273 | 1,66984 | 1,015992674 | ENST00000532680 | N/A       | N/A          | N/A                |
| A_22_P00008348 | 1,53742 | 1,51454 | 1,015985632 | N/A             | N/A       | DB072849     | Inc-ITSN2-1        |
| A_33_P3391390  | 1,65969 | 1,63681 | 1,015985632 | N/A             | N/A       | N/A          | N/A                |
| A_24_P132813   | 1,55471 | 1,53185 | 1,015971548 | ENST00000419479 | 93377     | NM_001040103 | OPALIN             |
| A_21_P0006768  | 1,63024 | 1,60738 | 1,015971548 | ENST00000425902 | N/A       | XR_252755    | N/A                |
| A_21_P0014741  | 1,66909 | 1,64623 | 1,015971548 | N/A             | N/A       | N/A          | N/A                |
| A_22_P00015683 | 1,5506  | 1,52775 | 1,015964506 | ENST00000421232 | 9215      | DA935254     | LARGE              |

|                |         |         |             |                 |           |              |                |
|----------------|---------|---------|-------------|-----------------|-----------|--------------|----------------|
| A_22_P00015806 | 1,677   | 1,65415 | 1,015964506 | N/A             | N/A       | N/A          | Inc-TASP1-3    |
| A_21_P0004318  | 1,72855 | 1,7057  | 1,015964506 | N/A             | N/A       | N/A          | Inc-LSM11-5    |
| A_33_P3394793  | 1,61371 | 1,59086 | 1,015964506 | ENST00000611186 | 56241     | NM_019601    | SUSD2          |
| A_22_P00016467 | 1,64087 | 1,61804 | 1,015950421 | N/A             | N/A       | N/A          | Inc-TMEM74B-1  |
| A_21_P0008612  | 1,69872 | 1,67589 | 1,015950421 | N/A             | N/A       | N/A          | Inc-TMCO5A-1   |
| A_22_P00006004 | 1,49086 | 1,46804 | 1,015943379 | ENST00000570087 | N/A       | N/A          | N/A            |
| A_22_P00000864 | 1,53321 | 1,51039 | 1,015943379 | N/A             | N/A       | BX094187     | Inc-AGPS-3     |
| A_22_P00023310 | 1,60371 | 1,5809  | 1,015936337 | N/A             | N/A       | N/A          | Inc-LRRC30-2   |
| A_21_P0011864  | 1,64501 | 1,62221 | 1,015929296 | N/A             | N/A       | N/A          | XLOC_I2_007595 |
| A_33_P3313323  | 1,73488 | 1,71208 | 1,015929296 | N/A             | N/A       | N/A          | N/A            |
| A_24_P241057   | 1,57153 | 1,54874 | 1,015922254 | ENST00000545205 | 51475     | NM_016366    | CABP2          |
| A_21_P0001274  | 1,60897 | 1,58618 | 1,015922254 | N/A             | 101928391 | XR_241232    | LOC101928391   |
| A_21_P0009609  | 1,6124  | 1,58961 | 1,015922254 | ENST00000254442 | 23335     | N/A          | WDR7           |
| A_32_P129419   | 6,10383 | 6,08106 | 1,01590817  | ENST00000558181 | 79664     | NM_024611    | ICE2           |
| A_22_P00008211 | 1,4965  | 1,47374 | 1,015901128 | ENST00000551202 | N/A       | N/A          | N/A            |
| A_21_P0014224  | 1,66685 | 1,64409 | 1,015901128 | N/A             | 101929759 | XR_242480    | LOC101929759   |
| A_24_P181672   | 7,69364 | 7,67089 | 1,015894087 | ENST00000571394 | 146712    | NM_001009905 | B3GNTL1        |
| A_21_P0000564  | 1,65234 | 1,62959 | 1,015894087 | N/A             | N/A       | N/A          | N/A            |
| A_22_P00022611 | 3,76208 | 3,73934 | 1,015887045 | N/A             | N/A       | N/A          | Inc-NBAS-1     |
| A_22_P00013980 | 1,53171 | 1,50898 | 1,015880004 | ENST00000433965 | 100422737 | N/A          | LOC100422737   |
| A_21_P0003933  | 1,48921 | 1,46648 | 1,015880004 | N/A             | 100506688 | NR_104614    | LOC100506688   |
| A_23_P12849    | 8,89262 | 8,8699  | 1,015872962 | ENST00000485290 | 84893     | NM_178150    | FBXO18         |
| A_21_P0004666  | 1,53263 | 1,50991 | 1,015872962 | ENST00000420766 | N/A       | N/A          | N/A            |
| A_21_P0003020  | 1,62999 | 1,60728 | 1,015865921 | N/A             | N/A       | N/A          | Inc-SEC22A-1   |
| A_23_P16006    | 10,4983 | 10,4756 | 1,015858879 | ENST00000338230 | 162966    | NM_198457    | ZNF600         |
| A_23_P90980    | 1,5693  | 1,5466  | 1,015858879 | ENST00000233840 | 4759      | NM_005383    | NEU2           |
| A_22_P00015592 | 5,19804 | 5,17534 | 1,015858879 | N/A             | N/A       | N/A          | Inc-STX8-2     |
| A_21_P0000258  | 12,137  | 12,1143 | 1,015858879 | N/A             | 9302      | NR_002564    | SNORD26        |
| A_23_P204355   | 10,7648 | 10,7421 | 1,015858879 | ENST00000361959 | 171017    | NM_001135734 | ZNF384         |
| A_23_P210164   | 1,51975 | 1,49706 | 1,015851838 | ENST00000450510 | 3234      | NM_019558    | HOXD8          |
| A_33_P3738849  | 1,64649 | 1,6238  | 1,015851838 | ENST00000456403 | 147093    | NR_038442    | LINC00974      |
| A_33_P3218910  | 1,61219 | 1,5895  | 1,015851838 | N/A             | N/A       | N/A          | N/A            |
| A_21_P0004096  | 1,67054 | 1,64785 | 1,015851838 | ENST00000514788 | 100505625 | NR_103771    | LOC100505625   |



|                |         |         |             |                 |           |              |                |
|----------------|---------|---------|-------------|-----------------|-----------|--------------|----------------|
| A_33_P3246063  | 1,48835 | 1,46567 | 1,015844796 | N/A             | N/A       | N/A          | N/A            |
| A_21_P0014830  | 2,00718 | 1,98452 | 1,015830714 | ENST00000504335 | 6525      | AK092487     | SMTN           |
| A_21_P0005705  | 1,53238 | 1,50975 | 1,015809591 | N/A             | N/A       | N/A          | Inc-CLVS1-3    |
| A_21_P0003391  | 1,51555 | 1,49293 | 1,015802549 | ENST00000448804 | N/A       | N/A          | N/A            |
| A_23_P390209   | 1,472   | 1,44938 | 1,015802549 | ENST00000390593 | N/A       | S75894       | N/A            |
| A_24_P832426   | 7,65346 | 7,63084 | 1,015802549 | ENST00000343307 | 145173    | NM_194318    | B3GALTL        |
| A_21_P0005866  | 1,61323 | 1,59062 | 1,015795509 | N/A             | N/A       | N/A          | Inc-MMP16-1    |
| A_22_P00003190 | 3,20297 | 3,18036 | 1,015795509 | N/A             | 100996348 | NR_121633    | LOC100996348   |
| A_33_P3215282  | 1,59479 | 1,57218 | 1,015795509 | ENST00000259750 | 84630     | NM_032538    | TTBK1          |
| A_21_P0004572  | 1,51093 | 1,48833 | 1,015788468 | N/A             | N/A       | N/A          | Inc-DTWD2-3    |
| A_22_P00005188 | 1,39886 | 1,37627 | 1,015781427 | ENST00000446145 | N/A       | N/A          | N/A            |
| A_33_P3413344  | 1,68978 | 1,66719 | 1,015781427 | ENST00000502609 | N/A       | N/A          | N/A            |
| A_33_P3307363  | 1,62275 | 1,60017 | 1,015774386 | ENST00000370728 | 23266     | NM_001297705 | LPHN2          |
| A_22_P00024240 | 6,07229 | 6,04971 | 1,015774386 | N/A             | N/A       | AK057719     | Inc-FPGS-1     |
| A_21_P0011506  | 1,69685 | 1,67429 | 1,015760304 | ENST00000501259 | 283856    | N/A          | LOC283856      |
| A_22_P00013158 | 1,64438 | 1,62184 | 1,015746223 | N/A             | N/A       | N/A          | Inc-RNF111-1   |
| A_24_P182254   | 1,6532  | 1,63067 | 1,015739182 | ENST00000383036 | 266       | NM_001143    | AMELY          |
| A_33_P3209185  | 1,60661 | 1,58408 | 1,015739182 | N/A             | N/A       | N/A          | N/A            |
| A_33_P6472878  | 1,5849  | 1,56237 | 1,015739182 | N/A             | 100874198 | NR_046567    | SHANK2-AS1     |
| A_24_P255483   | 1,59867 | 1,57614 | 1,015739182 | ENST00000509603 | 8844      | NM_014238    | KSR1           |
| A_22_P00018556 | 5,36794 | 5,34543 | 1,015725101 | N/A             | N/A       | N/A          | Inc-AAAS-1     |
| A_22_P00018885 | 1,61101 | 1,58851 | 1,015718061 | N/A             | 101929384 | NR_120475    | LOC101929384   |
| A_21_P0007268  | 1,49588 | 1,47338 | 1,015718061 | ENST00000527528 | N/A       | N/A          | N/A            |
| A_23_P20704    | 1,52153 | 1,49903 | 1,015718061 | ENST00000357374 | 3446      | NM_002171    | IFNA10         |
| A_24_P935103   | 9,30215 | 9,27966 | 1,015711021 | ENST00000294016 | 115       | NM_001116    | ADCY9          |
| A_33_P3252003  | 1,59143 | 1,56894 | 1,015711021 | ENST00000392664 | 3758      | NM_153767    | KCNJ1          |
| A_24_P399230   | 1,38676 | 1,36427 | 1,015711021 | ENST00000311378 | 124857    | NM_175575    | WFIKKN2        |
| A_21_P0003480  | 1,51026 | 1,48778 | 1,01570398  | ENST00000510744 | N/A       | N/A          | N/A            |
| A_21_P0011030  | 1,65585 | 1,63337 | 1,01570398  | N/A             | N/A       | N/A          | XLOC_I2_002709 |
| A_23_P76374    | 1,60543 | 1,58295 | 1,01570398  | ENST00000392924 | 50511     | NM_153694    | SYCP3          |
| A_21_P0014702  | 6,64952 | 6,62705 | 1,01569694  | N/A             | 102724791 | XR_426874    | LOC102724791   |
| A_23_P13486    | 1,6715  | 1,64903 | 1,01569694  | ENST00000326053 | 56673     | NM_020643    | C11orf16       |
| A_22_P00011179 | 1,47777 | 1,4553  | 1,01569694  | ENST00000431369 | N/A       | N/A          | N/A            |

|                |         |         |             |                 |           |              |                |
|----------------|---------|---------|-------------|-----------------|-----------|--------------|----------------|
| A_33_P3310709  | 1,55843 | 1,53597 | 1,0156899   | ENST00000307002 | N/A       | AB529275     | N/A            |
| A_24_P314477   | 1,60776 | 1,5853  | 1,0156899   | ENST00000473006 | 347733    | NM_178012    | TUBB2B         |
| A_22_P00006730 | 1,45168 | 1,42923 | 1,015682859 | ENST00000555362 | N/A       | N/A          | N/A            |
| A_22_P00006231 | 1,45519 | 1,43276 | 1,015668779 | N/A             | 644135    | XR_110175    | LOC644135      |
| A_21_P0001609  | 1,64494 | 1,62252 | 1,015661739 | N/A             | N/A       | N/A          | Inc-PHLDA3-2   |
| A_21_P0003152  | 1,46098 | 1,43857 | 1,015654699 | N/A             | N/A       | N/A          | Inc-CBLB-7     |
| A_24_P45451    | 1,60875 | 1,58634 | 1,015654699 | ENST00000368057 | 114836    | NM_052931    | SLAMF6         |
| A_23_P113523   | 12,7354 | 12,713  | 1,015647659 | ENST00000326153 | 8225      | NM_012227    | GTPBP6         |
| A_22_P00015839 | 1,60144 | 1,57904 | 1,015647659 | N/A             | 101927142 | NR_110213    | LOC101927142   |
| A_24_P160225   | 1,36691 | 1,34453 | 1,015633579 | ENST00000377934 | 79742     | NM_024689    | CXorf36        |
| A_22_P00019396 | 1,59796 | 1,57558 | 1,015633579 | N/A             | N/A       | BG213039     | Inc-RPS27A-1   |
| A_22_P00013737 | 1,57819 | 1,55581 | 1,015633579 | ENST00000560195 | 101927332 | NR_120325    | LINC01582      |
| A_24_P358305   | 8,22729 | 8,20492 | 1,01562654  | ENST00000520239 | N/A       | N/A          | N/A            |
| A_22_P00019261 | 1,64104 | 1,61868 | 1,0156195   | ENST00000439745 | N/A       | N/A          | N/A            |
| A_21_P0000381  | 5,53638 | 5,51402 | 1,0156195   | N/A             | 692110    | NR_003058    | SNORD70        |
| A_21_P0010658  | 1,60708 | 1,58473 | 1,01561246  | ENST00000449287 | 83416     | NM_001195388 | FCRL5          |
| A_22_P00022119 | 1,51175 | 1,4894  | 1,01561246  | N/A             | N/A       | N/A          | Inc-KCTD3-1    |
| A_22_P00020171 | 1,668   | 1,64566 | 1,01560542  | N/A             | 104355219 | NR_126425    | LHX5-AS1       |
| A_33_P3213392  | 6,06652 | 6,04419 | 1,015598381 | ENST00000375713 | N/A       | N/A          | N/A            |
| A_21_P0014475  | 1,52665 | 1,50433 | 1,015591341 | N/A             | N/A       | XM_005264776 | Inc-C3orf38-2  |
| A_22_P00025210 | 1,41894 | 1,39662 | 1,015591341 | ENST00000515805 | N/A       | N/A          | N/A            |
| A_24_P252945   | 1,51946 | 1,49715 | 1,015584302 | ENST00000292174 | 643       | NM_032966    | CXCR5          |
| A_23_P7727     | 1,4524  | 1,43009 | 1,015584302 | ENST00000274341 | 1404      | NM_001884    | HAPLN1         |
| A_21_P0003781  | 1,46346 | 1,44116 | 1,015577262 | N/A             | N/A       | N/A          | Inc-ZNF827-7   |
| A_22_P00021483 | 1,46972 | 1,44742 | 1,015577262 | N/A             | N/A       | N/A          | Inc-FKBP3-2    |
| A_33_P3223964  | 1,59247 | 1,57019 | 1,015563183 | ENST00000428055 | N/A       | AF533986     | N/A            |
| A_33_P3269539  | 1,52342 | 1,50114 | 1,015563183 | ENST00000397763 | 1292      | NM_058174    | COL6A2         |
| A_21_P0004609  | 1,48522 | 1,46294 | 1,015563183 | N/A             | N/A       | N/A          | Inc-MRPS18A-2  |
| A_21_P0006282  | 1,49275 | 1,47047 | 1,015563183 | ENST00000566873 | 101927450 | NR_109771    | LOC101927450   |
| A_22_P00000249 | 1,47741 | 1,45513 | 1,015563183 | ENST00000444158 | 101927914 | N/A          | LOC101927914   |
| A_22_P00009131 | 1,64237 | 1,6201  | 1,015556144 | ENST00000581212 | 56651     | NR_023925    | LINC00470      |
| A_22_P00014040 | 1,48406 | 1,46179 | 1,015556144 | N/A             | N/A       | AF075087     | Inc-S1PR1-1    |
| A_21_P0011247  | 1,39601 | 1,37374 | 1,015556144 | N/A             | N/A       | N/A          | XLOC_I2_004208 |

|                |         |         |             |                 |           |              |                |
|----------------|---------|---------|-------------|-----------------|-----------|--------------|----------------|
| A_33_P3311210  | 1,67067 | 1,64841 | 1,015549105 | ENST00000343035 | 390259    | NM_001098169 | BSX            |
| A_21_P0011248  | 1,56136 | 1,5391  | 1,015549105 | ENST00000254271 | 341883    | NR_075071    | LRRRC9         |
| A_22_P00016170 | 6,71976 | 6,69751 | 1,015542066 | ENST00000560076 | 55802     | NM_001290207 | DCP1A          |
| A_21_P0010114  | 1,53469 | 1,51244 | 1,015542066 | N/A             | N/A       | N/A          | Inc-THBD-1     |
| A_32_P5568     | 1,596   | 1,57375 | 1,015542066 | N/A             | 101929154 | N/A          | LOC101929154   |
| A_22_P00018799 | 1,57723 | 1,55498 | 1,015542066 | ENST00000602179 | 284348    | AK131520     | LYPD5          |
| A_33_P3358005  | 1,58689 | 1,56464 | 1,015542066 | ENST00000590427 | 102725407 | XR_108436    | LOC102725407   |
| A_24_P336510   | 1,55164 | 1,5294  | 1,015535026 | ENST00000480960 | 3078      | NM_002113    | CFHR1          |
| A_22_P00010441 | 1,64803 | 1,62579 | 1,015535026 | N/A             | N/A       | N/A          | Inc-NAA30-2    |
| A_23_P216307   | 1,62114 | 1,5989  | 1,015535026 | ENST00000422361 | 862       | NM_004349    | RUNX1T1        |
| A_33_P3419885  | 1,36772 | 1,34551 | 1,015513909 | ENST00000253362 | 140683    | NM_080574    | BPIFA2         |
| A_23_P58877    | 10,3438 | 10,3216 | 1,01550687  | ENST00000535237 | 57120     | NM_020399    | GOPC           |
| A_21_P0012433  | 1,68761 | 1,66541 | 1,01550687  | ENST00000452244 | 101927347 | N/A          | GRM7-AS3       |
| A_21_P0004829  | 1,42382 | 1,40165 | 1,015485754 | N/A             | N/A       | N/A          | Inc-LY86-5     |
| A_22_P00006450 | 1,47218 | 1,45001 | 1,015485754 | ENST00000504957 | N/A       | N/A          | N/A            |
| A_22_P00005355 | 1,50768 | 1,48551 | 1,015485754 | ENST00000602672 | N/A       | N/A          | N/A            |
| A_21_P0007479  | 1,70865 | 1,68649 | 1,015478715 | ENST00000547179 | 283432    | NR_033855    | LINC00485      |
| A_22_P00002474 | 1,58979 | 1,56764 | 1,015471676 | ENST00000560203 | N/A       | N/A          | N/A            |
| A_24_P940365   | 1,50375 | 1,4816  | 1,015471676 | ENST00000409122 | 284071    | NM_001145080 | C17orf104      |
| A_21_P0006197  | 1,51054 | 1,48839 | 1,015471676 | N/A             | N/A       | N/A          | Inc-SMC2-1     |
| A_21_P0006119  | 1,63337 | 1,61122 | 1,015471676 | N/A             | 102723803 | N/A          | LOC102723803   |
| A_21_P0005562  | 1,50401 | 1,48188 | 1,015457599 | N/A             | N/A       | N/A          | Inc-SUMF2-1    |
| A_22_P00010981 | 1,55222 | 1,53009 | 1,015457599 | ENST00000559615 | N/A       | BX161431     | N/A            |
| A_21_P0001215  | 1,66968 | 1,64755 | 1,015457599 | N/A             | N/A       | N/A          | Inc-C1orf186-2 |
| A_33_P3317508  | 1,5294  | 1,50728 | 1,01545056  | ENST00000309926 | 344561    | NM_207364    | GPR148         |
| A_23_P11201    | 1,54849 | 1,52637 | 1,01545056  | ENST00000620846 | 2857      | NM_001097579 | GPR34          |
| A_22_P00011913 | 3,93349 | 3,91137 | 1,01545056  | N/A             | N/A       | CR749652     | Inc-PINK1-2    |
| A_33_P3319486  | 1,60072 | 1,5786  | 1,01545056  | N/A             | N/A       | N/A          | N/A            |
| A_21_P0009911  | 1,51252 | 1,49042 | 1,015436483 | ENST00000416237 | N/A       | N/A          | N/A            |
| A_21_P0006252  | 1,37685 | 1,35475 | 1,015436483 | N/A             | N/A       | N/A          | Inc-C9orf123-2 |
| A_21_P0012230  | 1,57987 | 1,55777 | 1,015436483 | ENST00000452028 | N/A       | N/A          | N/A            |
| A_22_P00021625 | 1,50683 | 1,48473 | 1,015436483 | ENST00000504244 | N/A       | N/A          | N/A            |
| A_21_P0005966  | 1,45915 | 1,43707 | 1,015422406 | N/A             | N/A       | N/A          | Inc-PENK-1     |

|                |         |         |             |                 |           |              |                |
|----------------|---------|---------|-------------|-----------------|-----------|--------------|----------------|
| A_22_P00003554 | 1,4917  | 1,46963 | 1,015415368 | ENST00000515860 | N/A       | N/A          | N/A            |
| A_22_P00021543 | 1,36587 | 1,3438  | 1,015415368 | ENST00000544515 | N/A       | DA157340     | N/A            |
| A_21_P0010939  | 1,41185 | 1,38978 | 1,015415368 | ENST00000296422 | 150159    | NM_139173    | SLC9B1         |
| A_21_P0011748  | 1,65384 | 1,63179 | 1,015401291 | ENST00000434624 | N/A       | N/A          | N/A            |
| A_19_P00804922 | 4,25149 | 4,22946 | 1,015387215 | N/A             | N/A       | N/A          | Inc-OSTC-2     |
| A_21_P0003174  | 1,452   | 1,42999 | 1,015373139 | N/A             | N/A       | N/A          | Inc-TMCC1-4    |
| A_33_P3218699  | 1,61431 | 1,5923  | 1,015373139 | ENST00000374412 | 130752    | NM_001039845 | MDH1B          |
| A_23_P106505   | 9,98956 | 9,96756 | 1,015366101 | ENST00000305641 | 9836      | NM_014793    | LCMT2          |
| A_33_P3316602  | 1,60766 | 1,58566 | 1,015366101 | ENST00000562818 | 388276    | NM_001242473 | C16orf97       |
| A_21_P0007543  | 1,52706 | 1,50506 | 1,015366101 | N/A             | N/A       | N/A          | Inc-PPHLN1-3   |
| A_21_P0002767  | 1,51386 | 1,49186 | 1,015366101 | ENST00000512435 | N/A       | XR_171034    | N/A            |
| A_22_P00017873 | 1,49788 | 1,47588 | 1,015366101 | N/A             | N/A       | BM699518     | Inc-ZDHHC6-4   |
| A_22_P00008180 | 1,3944  | 1,37241 | 1,015359063 | N/A             | N/A       | N/A          | Inc-INPPL1-4   |
| A_24_P168581   | 1,55617 | 1,53418 | 1,015359063 | ENST00000481768 | 2778      | NM_001077490 | GNAS           |
| A_33_P3317925  | 1,45617 | 1,43418 | 1,015359063 | ENST00000382828 | 100151643 | NR_023342    | KRTAP20-4      |
| A_33_P3410351  | 1,5579  | 1,53592 | 1,015352025 | ENST00000476040 | 2946      | NM_000848    | GSTM2          |
| A_23_P146539   | 1,39311 | 1,37113 | 1,015352025 | ENST00000380205 | 3445      | NM_002170    | IFNA8          |
| A_22_P00007923 | 1,48117 | 1,45919 | 1,015352025 | N/A             | N/A       | BG211230     | Inc-HSPH1-3    |
| A_21_P0001584  | 1,63134 | 1,60936 | 1,015352025 | N/A             | N/A       | N/A          | Inc-ARHGEF11-1 |
| A_22_P00020356 | 1,59225 | 1,57028 | 1,015344987 | ENST00000553487 | N/A       | AL832767     | N/A            |
| A_22_P00023837 | 1,59393 | 1,57197 | 1,015337949 | N/A             | 339468    | N/A          | LOC339468      |
| A_21_P0009106  | 1,56207 | 1,54013 | 1,015323874 | N/A             | N/A       | N/A          | Inc-MT1A-1     |
| A_24_P827037   | 1,47365 | 1,45171 | 1,015323874 | ENST00000347624 | 131578    | NM_130830    | LRRC15         |
| A_33_P3235900  | 1,49832 | 1,47639 | 1,015316836 | N/A             | 100129520 | NM_001195272 | LOC100129520   |
| A_24_P304423   | 1,46249 | 1,44056 | 1,015316836 | ENST00000307046 | 3479      | NM_000618    | IGF1           |
| A_22_P00023759 | 1,59792 | 1,57599 | 1,015316836 | ENST00000583497 | N/A       | N/A          | N/A            |
| A_33_P3212709  | 1,46561 | 1,44369 | 1,015309799 | ENST00000421257 | N/A       | N/A          | N/A            |
| A_33_P3221408  | 1,72153 | 1,69962 | 1,015302761 | ENST00000370071 | 22854     | NM_001113226 | NTNG1          |
| A_24_P45620    | 1,61078 | 1,58887 | 1,015302761 | ENST00000054668 | 10911     | NM_021995    | UTS2           |
| A_22_P00002663 | 1,48033 | 1,45842 | 1,015302761 | N/A             | N/A       | N/A          | Inc-C1orf204-1 |
| A_21_P0005598  | 1,47788 | 1,45598 | 1,015295723 | N/A             | 100506236 | XR_108752    | LOC100506236   |
| A_21_P0012681  | 1,60941 | 1,58751 | 1,015295723 | ENST00000505874 | 641365    | NR_037866    | LINC00616      |
| A_23_P216712   | 1,54188 | 1,51998 | 1,015295723 | ENST00000360774 | 140803    | NM_017662    | TRPM6          |

|                |         |         |             |                 |           |              |               |
|----------------|---------|---------|-------------|-----------------|-----------|--------------|---------------|
| A_33_P3248152  | 1,59678 | 1,57489 | 1,015288686 | ENST00000485564 | 270       | NM_000036    | AMPD1         |
| A_33_P3302191  | 1,48172 | 1,45983 | 1,015288686 | ENST00000373735 | 29119     | NM_013266    | CTNNA3        |
| A_21_P0009279  | 1,60176 | 1,57987 | 1,015288686 | N/A             | N/A       | N/A          | Inc-SEPT9-3   |
| A_33_P3350420  | 1,60307 | 1,58118 | 1,015288686 | ENST00000509231 | 340562    | NM_001012980 | SATL1         |
| A_23_P16022    | 1,50092 | 1,47904 | 1,015281649 | ENST00000282308 | 10172     | NM_005773    | ZNF256        |
| A_24_P838483   | 1,60971 | 1,58783 | 1,015281649 | ENST00000397833 | 338809    | NM_001037671 | C12orf74      |
| A_22_P00016464 | 1,37791 | 1,35603 | 1,015281649 | N/A             | N/A       | BG214420     | Inc-TMEM71-1  |
| A_33_P3422253  | 1,50948 | 1,4876  | 1,015281649 | N/A             | 102724233 | XR_425408    | LOC102724233  |
| A_33_P3418952  | 1,50566 | 1,48379 | 1,015274611 | N/A             | 158866    | NM_001146257 | ZDHC15        |
| A_21_P0005766  | 1,62206 | 1,6002  | 1,015267574 | N/A             | N/A       | N/A          | Inc-KHDRBS3-5 |
| A_23_P414352   | 1,60632 | 1,58447 | 1,015260537 | ENST00000370624 | 439927    | NR_027379    | LINC01555     |
| A_22_P00005631 | 1,48429 | 1,46244 | 1,015260537 | N/A             | N/A       | N/A          | Inc-EID1-3    |
| A_22_P00018353 | 1,70311 | 1,68127 | 1,015253499 | N/A             | N/A       | N/A          | Inc-ZSWIM2-1  |
| A_22_P00014934 | 1,4117  | 1,38986 | 1,015253499 | ENST00000430214 | N/A       | DA988876     | N/A           |
| A_21_P0008875  | 1,41629 | 1,39446 | 1,015246462 | ENST00000624327 | N/A       | N/A          | N/A           |
| A_23_P64070    | 3,3744  | 3,35259 | 1,015232388 | ENST00000526898 | 283130    | NM_182556    | SLC25A45      |
| A_22_P00018077 | 5,72357 | 5,70176 | 1,015232388 | ENST00000568976 | N/A       | AF146695     | N/A           |
| A_22_P00024493 | 1,47626 | 1,45446 | 1,015225351 | ENST00000439878 | N/A       | N/A          | N/A           |
| A_23_P77779    | 17,8494 | 17,8276 | 1,015225351 | ENST00000225430 | 6143      | NM_000981    | RPL19         |
| A_33_P3264419  | 11,6519 | 11,6301 | 1,015225351 | ENST00000539294 | 253943    | NM_001277813 | YTHDF3        |
| A_33_P3308147  | 1,67198 | 1,6502  | 1,015211277 | N/A             | N/A       | N/A          | N/A           |
| A_23_P420281   | 1,4411  | 1,41932 | 1,015211277 | ENST00000303531 | 5579      | NM_002738    | PRKCB         |
| A_33_P3348079  | 1,60756 | 1,58579 | 1,01520424  | N/A             | N/A       | N/A          | N/A           |
| A_33_P3362005  | 1,49373 | 1,47196 | 1,01520424  | ENST00000548136 | 130075    | NM_001001656 | OR9A4         |
| A_21_P0000309  | 5,52982 | 5,50805 | 1,01520424  | N/A             | 677799    | NR_002953    | SNORA11       |
| A_22_P00008871 | 3,05749 | 3,03573 | 1,015197203 | N/A             | 101929679 | NR_120366    | LOC101929679  |
| A_33_P3365760  | 1,67601 | 1,65426 | 1,015190167 | ENST00000396225 | 26228     | NM_012108    | STAP1         |
| A_21_P0004351  | 1,48709 | 1,46535 | 1,01518313  | N/A             | N/A       | N/A          | Inc-SLC12A7-3 |
| A_33_P3270104  | 1,50142 | 1,47968 | 1,01518313  | ENST00000368596 | 221301    | NM_001256887 | FAM26D        |
| A_33_P3419696  | 1,62225 | 1,60051 | 1,01518313  | ENST00000614010 | 2247      | NM_002006    | FGF2          |
| A_23_P108546   | 1,48728 | 1,46554 | 1,01518313  | ENST00000444841 | 5969      | NR_002714    | REG1P         |
| A_22_P00021311 | 1,787   | 1,76527 | 1,015176093 | N/A             | N/A       | N/A          | Inc-WISP3-3   |
| A_24_P791669   | 1,51129 | 1,48956 | 1,015176093 | ENST00000444149 | 345462    | NM_001136116 | ZNF879        |

|                |         |         |             |                 |           |              |                       |
|----------------|---------|---------|-------------|-----------------|-----------|--------------|-----------------------|
| A_21_P0007437  | 8,85971 | 8,83798 | 1,015176093 | ENST00000506329 | 101927495 | NR_110189    | LOC101927495          |
| A_22_P00013474 | 6,55429 | 6,53256 | 1,015176093 | ENST00000570245 | 102724940 | N/A          | LOC102724940          |
| A_33_P3386746  | 1,49084 | 1,46913 | 1,01516202  | ENST00000454679 | 340895    | NM_001142308 | MALRD1                |
| A_22_P00007604 | 1,36363 | 1,34192 | 1,01516202  | N/A             | N/A       | N/A          | Inc-HDLBP-1           |
| A_21_P0013208  | 1,51816 | 1,49646 | 1,015154983 | N/A             | N/A       | N/A          | XLOC_I2_013436        |
| A_21_P0010967  | 1,58518 | 1,56348 | 1,015154983 | ENST00000513853 | N/A       | N/A          | N/A                   |
| A_22_P00019639 | 5,6377  | 5,616   | 1,015154983 | N/A             | 100507308 | NR_109982    | TARID                 |
| A_23_P141194   | 13,7082 | 13,6865 | 1,015154983 | ENST00000301585 | 3396      | NM_001545    | ICT1                  |
| A_22_P00016143 | 1,58025 | 1,55856 | 1,015147947 | N/A             | N/A       | AA431122     | Inc-TIMM9-1           |
| A_21_P0003369  | 1,60742 | 1,58573 | 1,015147947 | ENST00000508135 | N/A       | N/A          | N/A                   |
| A_22_P00021511 | 1,60474 | 1,58306 | 1,01514091  | ENST00000518261 | 114786    | N/A          | XKR4                  |
| A_21_P0004364  | 1,49617 | 1,47449 | 1,01514091  | N/A             | N/A       | N/A          | Inc-DNAH5-2           |
| A_23_P119835   | 1,49812 | 1,47644 | 1,01514091  | ENST00000404025 | 58484     | NM_021209    | NLRC4                 |
| A_23_P68219    | 1,4478  | 1,42613 | 1,015133874 | ENST00000360870 | 7273      | NM_133379    | TTN                   |
| A_33_P3872074  | 1,64198 | 1,62032 | 1,015126838 | N/A             | N/A       | BC034958     | Inc-AQP9-1            |
| A_24_P943370   | 1,49739 | 1,47573 | 1,015126838 | ENST00000619375 | 2543      | NM_001040663 | GAGE1                 |
| A_22_P00023017 | 1,63255 | 1,61089 | 1,015126838 | N/A             | N/A       | N/A          | Inc-C5orf49-1         |
| A_21_P0009181  | 1,64379 | 1,62214 | 1,015119801 | ENST00000591283 | 100507351 | NR_040050    | LOC100507351          |
| A_33_P3370449  | 1,38821 | 1,36657 | 1,015112765 | ENST00000307599 | 137362    | NM_152413    | GOT1L1                |
| A_33_P3293511  | 1,51138 | 1,48975 | 1,015105729 | ENST00000496839 | 84960     | NM_001039374 | CCDC183               |
| A_23_P361405   | 8,90273 | 8,88111 | 1,015098693 | ENST00000336307 | 8372      | NM_003549    | HYAL3                 |
| A_33_P3329448  | 1,6087  | 1,58708 | 1,015098693 | N/A             | 730198    | N/A          | MEIS1-AS3             |
| A_23_P136589   | 1,60135 | 1,57973 | 1,015098693 | ENST00000362005 | 676       | NM_207189    | BRDT                  |
| A_21_P0008315  | 1,51399 | 1,49238 | 1,015091657 | N/A             | N/A       | N/A          | Inc-RP11-187E13.1.1-1 |
| A_21_P0006524  | 1,47925 | 1,45765 | 1,015084621 | ENST00000440430 | N/A       | N/A          | N/A                   |
| A_22_P00021762 | 1,50737 | 1,48577 | 1,015084621 | ENST00000507145 | 100874047 | N/A          | LINC00499             |
| A_22_P00002827 | 1,60517 | 1,58357 | 1,015084621 | N/A             | N/A       | N/A          | Inc-C2orf69-4         |
| A_21_P0008985  | 1,71417 | 1,69257 | 1,015084621 | N/A             | N/A       | N/A          | Inc-IRF8-2            |
| A_21_P0009230  | 1,53976 | 1,51816 | 1,015084621 | N/A             | N/A       | N/A          | Inc-KCNJ12-5          |
| A_33_P3335645  | 1,55308 | 1,53148 | 1,015084621 | N/A             | N/A       | N/A          | N/A                   |
| A_23_P169887   | 11,9603 | 11,9387 | 1,015084621 | ENST00000359541 | 2976      | NM_001521    | GTF3C2                |
| A_33_P3521643  | 13,2807 | 13,2591 | 1,015084621 | ENST00000591938 | 54776     | NM_001271618 | PPP1R12C              |
| A_21_P0008777  | 1,57326 | 1,55167 | 1,015077585 | N/A             | N/A       | N/A          | Inc-POLG-1            |

|                |         |         |             |                 |           |              |                |
|----------------|---------|---------|-------------|-----------------|-----------|--------------|----------------|
| A_22_P00011966 | 1,64457 | 1,62298 | 1,015077585 | N/A             | N/A       | N/A          | Inc-PKP4-2     |
| A_22_P00015569 | 1,60873 | 1,58715 | 1,015070549 | N/A             | N/A       | N/A          | Inc-STRN3-1    |
| A_22_P00020143 | 1,40262 | 1,38106 | 1,015056477 | N/A             | N/A       | N/A          | Inc-OIT3-1     |
| A_21_P0002366  | 1,37609 | 1,35453 | 1,015056477 | N/A             | N/A       | N/A          | Inc-MRPL44-1   |
| A_23_P55020    | 1,52644 | 1,50489 | 1,015049441 | ENST00000326165 | 146722    | NM_139018    | CD300LF        |
| A_23_P320216   | 1,41698 | 1,39543 | 1,015049441 | ENST00000375478 | 54827     | NM_001077639 | NXPE4          |
| A_21_P0004991  | 1,6454  | 1,62386 | 1,015042405 | N/A             | N/A       | N/A          | Inc-PXDC1-2    |
| A_21_P0003982  | 1,45727 | 1,43573 | 1,015042405 | ENST00000507693 | 340113    | NR_033832    | LOC340113      |
| A_33_P3229943  | 1,52473 | 1,50319 | 1,015042405 | ENST00000435682 | 645949    | NR_038837    | LOC645949      |
| A_33_P3285420  | 1,56764 | 1,54611 | 1,01503537  | ENST00000508201 | 340094    | NR_026994    | LINC01020      |
| A_22_P00008791 | 1,55561 | 1,53408 | 1,01503537  | N/A             | 101928650 | NR_125958    | LOC101928650   |
| A_21_P0013173  | 1,70661 | 1,6851  | 1,015021298 | N/A             | N/A       | N/A          | XLOC_I2_013282 |
| A_22_P00002420 | 1,61289 | 1,59139 | 1,015014263 | ENST00000548775 | 102724917 | CF593422     | LOC102724917   |
| A_24_P332230   | 11,3057 | 11,2842 | 1,015014263 | ENST00000505216 | 51574     | NM_016648    | LARP7          |
| A_23_P211445   | 12,5694 | 12,5479 | 1,015014263 | ENST00000333611 | 3985      | NM_016733    | LIMK2          |
| A_32_P35512    | 12,8029 | 12,7814 | 1,015014263 | ENST00000420252 | 6741      | NM_003142    | SSB            |
| A_32_P70203    | 1,49115 | 1,46966 | 1,015007227 | ENST00000446136 | 284593    | NR_027055    | FAM41C         |
| A_24_P209171   | 7,63942 | 7,61794 | 1,015000192 | ENST00000369838 | 83699     | NM_031469    | SH3BGRL2       |
| A_21_P0014044  | 1,64589 | 1,62444 | 1,014979086 | N/A             | N/A       | N/A          | Inc-BMP7-1     |
| A_22_P00013869 | 1,62733 | 1,60588 | 1,014979086 | ENST00000425365 | N/A       | N/A          | N/A            |
| A_33_P3209806  | 1,48262 | 1,46117 | 1,014979086 | ENST00000617752 | 81472     | NM_198074    | OR2C3          |
| A_22_P00002618 | 5,35966 | 5,33822 | 1,01497205  | N/A             | N/A       | N/A          | Inc-C1orf123-1 |
| A_33_P3283271  | 1,61901 | 1,59757 | 1,01497205  | ENST00000454719 | 100130849 | NR_038450    | LOC100130849   |
| A_33_P3363732  | 1,72236 | 1,70094 | 1,01495798  | ENST00000327157 | 58531     | NM_021247    | PRM3           |
| A_33_P3395595  | 1,52443 | 1,50302 | 1,014950945 | ENST00000395963 | 10803     | NM_001256369 | CCR9           |
| A_21_P0002422  | 1,52288 | 1,50147 | 1,014950945 | ENST00000413792 | 101929559 | NR_110011    | LINC00211      |
| A_21_P0006179  | 1,67223 | 1,65082 | 1,014950945 | N/A             | N/A       | N/A          | Inc-SYK-1      |
| A_33_P3748694  | 1,57854 | 1,55713 | 1,014950945 | N/A             | 285819    | NR_038992    | LOC285819      |
| A_21_P0005283  | 1,4531  | 1,43169 | 1,014950945 | ENST00000456809 | N/A       | N/A          | N/A            |
| A_23_P44166    | 12,4219 | 12,4005 | 1,01494391  | ENST00000578273 | 51181     | NM_016286    | DCXR           |
| A_33_P3267769  | 1,57558 | 1,55418 | 1,01494391  | ENST00000320002 | 81469     | NM_001001914 | OR2G3          |
| A_33_P3270267  | 1,59852 | 1,57712 | 1,01494391  | ENST00000442027 | 645030    | NR_104180    | NFIA-AS1       |
| A_23_P207940   | 11,8014 | 11,78   | 1,01494391  | N/A             | N/A       | AK091525     | N/A            |

|                |         |         |             |                 |           |              |                |
|----------------|---------|---------|-------------|-----------------|-----------|--------------|----------------|
| A_23_P170378   | 1,48125 | 1,45987 | 1,01492984  | ENST00000423102 | 5369      | NR_003921    | PMCHL1         |
| A_33_P3376493  | 1,57995 | 1,55858 | 1,014922805 | ENST00000371906 | 186       | NM_000686    | AGTR2          |
| A_33_P3308476  | 1,46606 | 1,4447  | 1,01491577  | ENST00000444565 | 94026     | NM_033482    | POM121L2       |
| A_22_P00013135 | 1,42276 | 1,40142 | 1,0149017   | ENST00000413502 | N/A       | DB043555     | N/A            |
| A_22_P00011713 | 1,38861 | 1,36728 | 1,014894666 | N/A             | N/A       | N/A          | Inc-PDZD9-1    |
| A_33_P3420386  | 1,551   | 1,52969 | 1,014880596 | N/A             | N/A       | N/A          | N/A            |
| A_33_P3364278  | 1,48553 | 1,46424 | 1,014866527 | ENST00000602462 | N/A       | N/A          | N/A            |
| A_21_P0006588  | 1,5694  | 1,54812 | 1,014859493 | ENST00000444263 | 100873962 | N/A          | LINC00278      |
| A_33_P3412838  | 1,54628 | 1,525   | 1,014859493 | ENST00000557312 | 348120    | NR_040094    | LINC01193      |
| A_33_P3357421  | 3,09418 | 3,07291 | 1,014852458 | ENST00000568091 | N/A       | XM_005275767 | N/A            |
| A_21_P0012403  | 1,51503 | 1,49377 | 1,014845424 | N/A             | N/A       | N/A          | XLOC_I2_009899 |
| A_21_P0000104  | 1,60358 | 1,58233 | 1,014838389 | ENST00000399974 | 100463285 | NM_001190476 | MTRNR2L4       |
| A_21_P0011145  | 1,51304 | 1,49179 | 1,014838389 | N/A             | N/A       | N/A          | XLOC_I2_003737 |
| A_22_P00015765 | 1,55872 | 1,53749 | 1,014824321 | ENST00000435973 | 101927504 | XR_247091    | LOC101927504   |
| A_21_P0003481  | 1,56219 | 1,54096 | 1,014824321 | ENST00000513871 | N/A       | N/A          | N/A            |
| A_33_P3268892  | 1,54841 | 1,52719 | 1,014817287 | ENST00000326524 | 2668      | NM_001190468 | GDNF           |
| A_21_P0007593  | 1,57095 | 1,54973 | 1,014817287 | ENST00000548963 | N/A       | N/A          | N/A            |
| A_21_P0013845  | 1,56424 | 1,54302 | 1,014817287 | ENST00000446028 | N/A       | N/A          | N/A            |
| A_24_P21044    | 12,6526 | 12,6314 | 1,014803218 | ENST00000252329 | 84262     | NM_032302    | PSMG3          |
| A_33_P3216372  | 10,2189 | 10,1977 | 1,014803218 | ENST00000504477 | 10788     | NM_006633    | IQGAP2         |
| A_22_P00018035 | 1,64392 | 1,62273 | 1,014796184 | N/A             | N/A       | AL565086     | Inc-ZNF236-1   |
| A_21_P0002420  | 1,47253 | 1,45134 | 1,014796184 | N/A             | 101929477 | XR_244982    | LOC101929477   |
| A_33_P3801477  | 1,47941 | 1,45823 | 1,01478915  | N/A             | 677819    | AW835571     | SNORA37        |
| A_21_P0000985  | 1,5036  | 1,48242 | 1,01478915  | ENST00000415686 | 101927295 | N/A          | LINC01360      |
| A_33_P3311200  | 1,50713 | 1,48596 | 1,014782116 | ENST00000380229 | 3467      | NM_002177    | IFNW1          |
| A_33_P3311820  | 1,94898 | 1,92782 | 1,014775082 | N/A             | 400535    | AK128747     | FLJ44674       |
| A_33_P3314521  | 1,6103  | 1,58915 | 1,014768049 | ENST00000540952 | 646851    | XM_006724294 | FAM227A        |
| A_22_P00025080 | 1,47709 | 1,45594 | 1,014768049 | N/A             | N/A       | N/A          | Inc-ENPP2-1    |
| A_22_P00020419 | 1,60679 | 1,58564 | 1,014768049 | ENST00000438566 | N/A       | N/A          | N/A            |
| A_23_P432005   | 2,03293 | 2,01178 | 1,014768049 | ENST00000303254 | 200523    | NM_152670    | TEX37          |
| A_21_P0014706  | 1,4922  | 1,47107 | 1,014753981 | N/A             | 101060385 | XR_112271    | LOC101060385   |
| A_21_P0003498  | 1,60277 | 1,58167 | 1,01473288  | ENST00000507299 | N/A       | N/A          | N/A            |
| A_33_P3414187  | 1,58635 | 1,56525 | 1,01473288  | ENST00000329773 | 117194    | BC063450     | MRGPRX2        |



|                |         |         |             |                 |           |           |                |
|----------------|---------|---------|-------------|-----------------|-----------|-----------|----------------|
| A_33_P3229012  | 5,56961 | 5,54851 | 1,01473288  | N/A             | N/A       | N/A       | N/A            |
| A_21_P0002292  | 1,40385 | 1,38276 | 1,014725846 | ENST00000325390 | 440905    | N/A       | FAR2P1         |
| A_21_P0013771  | 9,66071 | 9,63963 | 1,014718813 | N/A             | N/A       | N/A       | XLOC_I2_015561 |
| A_21_P0000872  | 1,60168 | 1,5806  | 1,014718813 | N/A             | 100506050 | N/A       | LINC01005      |
| A_33_P3227047  | 1,62503 | 1,60395 | 1,014718813 | ENST00000570227 | N/A       | N/A       | N/A            |
| A_22_P00010914 | 1,4099  | 1,38883 | 1,01471178  | N/A             | 101928081 | XR_244745 | LOC101928081   |
| A_23_P75283    | 5,80991 | 5,78884 | 1,01471178  | ENST00000615669 | 5950      | NM_006744 | RBP4           |
| A_22_P00007552 | 1,55784 | 1,53678 | 1,014704746 | ENST00000561358 | N/A       | N/A       | N/A            |
| A_22_P00005753 | 1,73663 | 1,71559 | 1,014690679 | ENST00000507781 | 104310351 | N/A       | LINC01331      |
| A_33_P6467512  | 1,62988 | 1,60885 | 1,014683646 | N/A             | 100507171 | NR_045634 | BOLA3-AS1      |
| A_21_P0002418  | 1,51875 | 1,49772 | 1,014683646 | N/A             | N/A       | N/A       | Inc-CAPN13-2   |
| A_23_P323272   | 1,47021 | 1,44918 | 1,014683646 | ENST00000272223 | 130497    | NM_145260 | OSR1           |
| A_22_P00002331 | 1,95831 | 1,93729 | 1,014676613 | ENST00000530102 | 101928536 | N/A       | LINC01493      |
| A_33_P3303865  | 8,72967 | 8,70866 | 1,01466958  | ENST00000477084 | 54954     | NM_198456 | FAM120C        |
| A_33_P3381613  | 3,36484 | 3,34383 | 1,01466958  | N/A             | N/A       | N/A       | N/A            |
| A_22_P00024753 | 1,59111 | 1,5701  | 1,01466958  | N/A             | 100873977 | NR_046556 | RBMS3-AS1      |
| A_22_P00006417 | 1,53348 | 1,51248 | 1,014662547 | ENST00000522989 | N/A       | N/A       | N/A            |
| A_32_P32413    | 9,14814 | 9,12714 | 1,014662547 | ENST00000282030 | 26040     | NM_015559 | SETBP1         |
| A_33_P3299829  | 13,5832 | 13,5622 | 1,014662547 | ENST00000215587 | 5434      | NM_002695 | POLR2E         |
| A_21_P0000425  | 1,49412 | 1,47313 | 1,014655514 | N/A             | 767609    | NR_003221 | SNORD114-28    |
| A_33_P3543288  | 1,52486 | 1,50389 | 1,014641447 | ENST00000441895 | 440446    | NR_122104 | LOC440446      |
| A_21_P0009746  | 1,60291 | 1,58194 | 1,014641447 | N/A             | N/A       | N/A       | Inc-ZNF724P-2  |
| A_24_P202522   | 1,4464  | 1,42543 | 1,014641447 | ENST00000383168 | 361       | NM_001650 | AQP4           |
| A_24_P349039   | 3,31965 | 3,29869 | 1,014634415 | ENST00000264245 | 57514     | NM_020754 | ARHGAP31       |
| A_22_P00004961 | 1,52796 | 1,50702 | 1,014620349 | N/A             | N/A       | N/A       | Inc-DCLK3-2    |
| A_22_P00005838 | 1,64229 | 1,62135 | 1,014620349 | ENST00000440379 | 400867    | N/A       | LOC400867      |
| A_21_P0000863  | 1,39322 | 1,37229 | 1,014613316 | N/A             | 100507470 | NR_038986 | GRID1-AS1      |
| A_22_P00007450 | 1,6321  | 1,61118 | 1,014606283 | N/A             | 100873939 | NR_046622 | LNK1-AS1       |
| A_33_P3263217  | 1,5928  | 1,57188 | 1,014606283 | ENST00000249363 | 64101     | NM_022143 | LRRC4          |
| A_24_P304311   | 1,59457 | 1,57365 | 1,014606283 | ENST00000451262 | 9376      | NM_004254 | SLC22A8        |
| A_33_P3287967  | 1,77952 | 1,75861 | 1,014599251 | ENST00000394537 | 287       | NM_001148 | ANK2           |
| A_21_P0012624  | 1,48098 | 1,46007 | 1,014599251 | N/A             | N/A       | N/A       | XLOC_I2_010880 |
| A_21_P0011314  | 11,5532 | 11,5323 | 1,014592218 | N/A             | 100505573 | N/A       | INAFM2         |

|                |         |         |             |                 |           |              |                     |
|----------------|---------|---------|-------------|-----------------|-----------|--------------|---------------------|
| A_21_P0000873  | 1,48862 | 1,46772 | 1,014592218 | N/A             | 100506050 | NR_039987    | LINC01005           |
| A_22_P00008906 | 1,50266 | 1,48177 | 1,014585185 | N/A             | N/A       | N/A          | Inc-KLHL36-2        |
| A_21_P0008449  | 1,36704 | 1,34615 | 1,014585185 | N/A             | N/A       | N/A          | Inc-MAX-2           |
| A_23_P30358    | 1,70746 | 1,68657 | 1,014585185 | ENST00000274710 | 84249     | NM_032289    | PSD2                |
| A_22_P00009002 | 1,60604 | 1,58515 | 1,014585185 | ENST00000423712 | N/A       | N/A          | N/A                 |
| A_23_P205348   | 1,48206 | 1,46119 | 1,01457112  | ENST00000467865 | 27004     | NR_028288    | TCL6                |
| A_33_P3405491  | 3,75177 | 3,7309  | 1,01457112  | N/A             | 387535    | AY465895     | HCRP1               |
| A_22_P00006312 | 1,62298 | 1,60212 | 1,014564088 | N/A             | 101926950 | XR_253491    | LINC01570           |
| A_22_P00004575 | 1,39387 | 1,37302 | 1,014557055 | ENST00000430468 | N/A       | N/A          | N/A                 |
| A_22_P00005069 | 1,60312 | 1,58228 | 1,014550023 | ENST00000439878 | N/A       | N/A          | N/A                 |
| A_24_P299355   | 2,1085  | 2,08766 | 1,014550023 | ENST00000344415 | 400581    | NM_001129778 | GRAPL               |
| A_22_P00009304 | 2,77017 | 2,74934 | 1,014542991 | N/A             | N/A       | N/A          | Inc-LRRC40-1        |
| A_22_P00008003 | 1,4778  | 1,45698 | 1,014535959 | N/A             | N/A       | N/A          | Inc-IFNAR2-1        |
| A_21_P0008702  | 1,59007 | 1,56925 | 1,014535959 | N/A             | N/A       | N/A          | Inc-LRRK1-3         |
| A_21_P0003034  | 1,59956 | 1,57874 | 1,014535959 | N/A             | N/A       | N/A          | Inc-UBA5-1          |
| A_22_P00004273 | 1,49583 | 1,47502 | 1,014528926 | N/A             | N/A       | N/A          | Inc-CNIH-1          |
| A_22_P00004983 | 1,60326 | 1,58245 | 1,014528926 | N/A             | 90768     | XR_244768    | LOC90768            |
| A_33_P3226600  | 14,7749 | 14,7541 | 1,014521894 | ENST00000355091 | 8733      | NM_003801    | GPAA1               |
| A_24_P289648   | 1,37141 | 1,35061 | 1,014521894 | ENST00000352392 | 3077      | NM_139011    | HFE                 |
| A_21_P0004414  | 1,44475 | 1,42395 | 1,014521894 | N/A             | N/A       | N/A          | Inc-ENC1-3          |
| A_21_P0003254  | 1,49452 | 1,47372 | 1,014521894 | N/A             | N/A       | N/A          | Inc-P2RY1-3         |
| A_22_P00014579 | 1,45644 | 1,43565 | 1,014514862 | N/A             | N/A       | N/A          | Inc-SLAMF7-1        |
| A_22_P00001598 | 9,71926 | 9,69848 | 1,01450783  | ENST00000530792 | N/A       | N/A          | N/A                 |
| A_22_P00025364 | 1,72803 | 1,70726 | 1,014500798 | N/A             | N/A       | N/A          | Inc-MBOAT1-4        |
| A_21_P0005938  | 1,53319 | 1,51242 | 1,014500798 | N/A             | N/A       | N/A          | Inc-RP11-32K4.2.1-2 |
| A_22_P00016773 | 1,59763 | 1,57689 | 1,014479702 | N/A             | N/A       | N/A          | Inc-TRIM41-1        |
| A_19_P00321414 | 1,57856 | 1,55782 | 1,014479702 | ENST00000515769 | 285419    | NR_027106    | LINC01091           |
| A_21_P0001488  | 1,49958 | 1,47884 | 1,014479702 | N/A             | N/A       | N/A          | Inc-FABP3-2         |
| A_33_P3702350  | 1,5828  | 1,56207 | 1,014472671 | ENST00000621134 | 339822    | NR_033880    | LINC01115           |
| A_22_P00019746 | 1,95852 | 1,9378  | 1,014465639 | N/A             | N/A       | N/A          | Inc-KIAA0564-1      |
| A_21_P0009156  | 1,6089  | 1,58818 | 1,014465639 | ENST00000569074 | 101928165 | NR_104152    | CASC17              |
| A_21_P0004650  | 1,36457 | 1,34385 | 1,014465639 | N/A             | N/A       | N/A          | Inc-DAAM2-3         |
| A_22_P00023132 | 1,61477 | 1,59406 | 1,014458607 | ENST00000436932 | 101927692 | NR_120628    | LOC101927692        |

|                |         |         |             |                 |           |              |                       |
|----------------|---------|---------|-------------|-----------------|-----------|--------------|-----------------------|
| A_33_P3222469  | 1,60212 | 1,58141 | 1,014458607 | ENST00000315693 | 390433    | NM_001004714 | OR4K13                |
| A_23_P166333   | 11,6603 | 11,6396 | 1,014451575 | ENST00000263202 | 7353      | NM_005659    | UFD1L                 |
| A_21_P0006031  | 1,55917 | 1,53849 | 1,014437512 | ENST00000443771 | 101928014 | N/A          | LOC101928014          |
| A_33_P3423650  | 1,64396 | 1,62329 | 1,014430481 | N/A             | N/A       | DB033244     | N/A                   |
| A_33_P3250745  | 1,49028 | 1,46961 | 1,014430481 | ENST00000441525 | 139425    | NM_001017930 | DCAF8L1               |
| A_22_P00021837 | 1,39102 | 1,37036 | 1,014423449 | N/A             | N/A       | BM923864     | Inc-AGMAT-2           |
| A_21_P0008792  | 1,47992 | 1,45928 | 1,014409386 | N/A             | N/A       | N/A          | Inc-RP11-82110.1.1-12 |
| A_21_P0007984  | 1,57968 | 1,55904 | 1,014409386 | ENST00000416261 | N/A       | N/A          | N/A                   |
| A_21_P0007457  | 1,60451 | 1,58388 | 1,014402355 | N/A             | N/A       | N/A          | Inc-NLRP10-1          |
| A_22_P00016160 | 1,59881 | 1,57818 | 1,014402355 | ENST00000421447 | N/A       | BX114071     | N/A                   |
| A_21_P0010382  | 5,70252 | 5,6819  | 1,014395324 | ENST00000440858 | N/A       | N/A          | N/A                   |
| A_33_P3285540  | 1,72992 | 1,70931 | 1,014388293 | ENST00000413119 | 7122      | NM_001130861 | CLDN5                 |
| A_22_P00021157 | 1,45459 | 1,43398 | 1,014388293 | N/A             | N/A       | N/A          | Inc-SSTR2-1           |
| A_23_P118633   | 10,5044 | 10,4838 | 1,014381261 | ENST00000504334 | 64847     | NM_022827    | SPATA20               |
| A_23_P393163   | 1,40457 | 1,38397 | 1,014381261 | ENST00000409273 | 129446    | NM_152381    | XIRP2                 |
| A_21_P0008016  | 1,50151 | 1,48091 | 1,014381261 | N/A             | N/A       | N/A          | Inc-ABCC4-1           |
| A_32_P797019   | 1,60194 | 1,58134 | 1,014381261 | ENST00000532531 | N/A       | XR_158947    | N/A                   |
| A_21_P0001426  | 3,45451 | 3,43392 | 1,01437423  | N/A             | N/A       | N/A          | Inc-DISP1-3           |
| A_21_P0006067  | 1,46031 | 1,43973 | 1,014367199 | ENST00000437471 | N/A       | N/A          | N/A                   |
| A_21_P0014655  | 1,52169 | 1,50112 | 1,014360168 | N/A             | 101927828 | NR_108085    | OVOL1-AS1             |
| A_24_P357726   | 4,08936 | 4,06879 | 1,014360168 | ENST00000478387 | 440533    | NM_182707    | PSG8                  |
| A_23_P134340   | 1,66356 | 1,643   | 1,014353137 | ENST00000611245 | 63974     | NM_022728    | NEUROD6               |
| A_33_P3243524  | 1,57616 | 1,55561 | 1,014346106 | N/A             | 51735     | NM_001164389 | RAPGEF6               |
| A_33_P3278571  | 1,51048 | 1,48993 | 1,014346106 | ENST00000616812 | 79917     | XR_430508    | MAGIX                 |
| A_24_P333635   | 1,60623 | 1,58569 | 1,014339075 | ENST00000370640 | 414157    | NM_001009997 | C10orf62              |
| A_24_P498652   | 1,4854  | 1,46486 | 1,014339075 | ENST00000382545 | 3736      | NM_000217    | KCNA1                 |
| A_22_P00022666 | 1,41594 | 1,39541 | 1,014332044 | N/A             | N/A       | GD258169     | Inc-H2AFJ-1           |
| A_22_P00021779 | 7,80925 | 7,78872 | 1,014332044 | N/A             | N/A       | N/A          | Inc-C16orf42-1        |
| A_22_P00003229 | 5,47757 | 5,45704 | 1,014332044 | N/A             | N/A       | N/A          | Inc-CACNG5-1          |
| A_23_P24469    | 1,55259 | 1,53208 | 1,014317983 | ENST00000533783 | 8048      | NM_003476    | CSRP3                 |
| A_21_P0012703  | 4,48773 | 4,46723 | 1,014310952 | N/A             | N/A       | N/A          | XLOC_l2_011415        |
| A_24_P204011   | 1,66612 | 1,64562 | 1,014310952 | ENST00000531539 | 283150    | NM_181721    | FOXR1                 |
| A_33_P3343531  | 1,6193  | 1,59881 | 1,014303922 | ENST00000327216 | 219484    | NM_001005282 | OR5M8                 |

|                |         |         |             |                 |           |              |                  |
|----------------|---------|---------|-------------|-----------------|-----------|--------------|------------------|
| A_21_P0009005  | 1,50334 | 1,48287 | 1,01428986  | N/A             | N/A       | N/A          | Inc-SRL-1        |
| A_22_P00004112 | 1,4205  | 1,40004 | 1,01428283  | N/A             | N/A       | AW966219     | Inc-CLCN3-3      |
| A_33_P3416707  | 5,99718 | 5,97672 | 1,01428283  | N/A             | N/A       | N/A          | N/A              |
| A_24_P91832    | 1,53792 | 1,51746 | 1,01428283  | ENST00000218008 | 23439     | NM_012069    | ATP1B4           |
| A_21_P0001092  | 4,18947 | 4,16901 | 1,01428283  | N/A             | N/A       | N/A          | Inc-TTC34-3      |
| A_21_P0000167  | 1,51454 | 1,49409 | 1,0142758   | ENST00000473866 | 114815    | NM_001206571 | SORCS1           |
| A_21_P0001260  | 1,5079  | 1,48745 | 1,0142758   | N/A             | N/A       | N/A          | Inc-KCNAB2-2     |
| A_22_P00020239 | 1,4091  | 1,38866 | 1,014268769 | N/A             | N/A       | N/A          | Inc-AJAP1-3      |
| A_33_P3210483  | 1,58101 | 1,56057 | 1,014268769 | N/A             | 642696    | XR_109256    | LOC642696        |
| A_21_P0012544  | 1,51671 | 1,49628 | 1,014261739 | ENST00000482721 | 440970    | N/A          | LINC00971        |
| A_21_P0004930  | 1,3841  | 1,36369 | 1,014247678 | N/A             | N/A       | N/A          | Inc-ASF1A-2      |
| A_22_P00005518 | 1,52595 | 1,50556 | 1,014233618 | N/A             | N/A       | N/A          | Inc-EBF3-5       |
| A_21_P0013374  | 1,57092 | 1,55053 | 1,014233618 | ENST00000453564 | 101927769 | N/A          | LOC101927769     |
| A_33_P3384000  | 1,60127 | 1,58088 | 1,014233618 | ENST00000389967 | 57194     | XM_005268261 | ATP10A           |
| A_21_P0005281  | 1,51635 | 1,49597 | 1,014226588 | ENST00000437145 | N/A       | N/A          | N/A              |
| A_22_P00024497 | 1,60286 | 1,58249 | 1,014219558 | N/A             | N/A       | N/A          | Inc-PRPF18-5     |
| A_21_P0008894  | 1,51914 | 1,49878 | 1,014212528 | ENST00000566092 | 101928708 | NR_110939    | LOC101928708     |
| A_21_P0009063  | 1,51453 | 1,49417 | 1,014212528 | N/A             | N/A       | N/A          | Inc-AC025287.1-2 |
| A_22_P00019819 | 1,91854 | 1,89819 | 1,014205498 | ENST00000508366 | N/A       | XR_108587    | N/A              |
| A_22_P00023531 | 1,56323 | 1,54288 | 1,014205498 | ENST00000510203 | N/A       | N/A          | N/A              |
| A_21_P0007765  | 1,55315 | 1,53282 | 1,014191438 | N/A             | N/A       | N/A          | Inc-TBX3-2       |
| A_21_P0013994  | 3,31761 | 3,29728 | 1,014191438 | N/A             | N/A       | N/A          | N/A              |
| A_21_P0011736  | 1,501   | 1,48068 | 1,014184408 | N/A             | N/A       | N/A          | XLOC_I2_006994   |
| A_21_P0001946  | 1,60045 | 1,58014 | 1,014177378 | N/A             | N/A       | N/A          | Inc-ITGA4-1      |
| A_22_P00001868 | 1,64323 | 1,62292 | 1,014177378 | ENST00000447158 | N/A       | N/A          | N/A              |
| A_33_P3212729  | 1,60187 | 1,58156 | 1,014177378 | ENST00000402685 | 29951     | NM_001164595 | PDZRN4           |
| A_33_P3236516  | 1,64499 | 1,62469 | 1,014170349 | ENST00000419302 | N/A       | N/A          | N/A              |
| A_22_P00009972 | 1,52274 | 1,50244 | 1,014170349 | ENST00000347364 | 8195      | N/A          | MKKS             |
| A_22_P00008869 | 1,6925  | 1,67221 | 1,014163319 | N/A             | N/A       | BX093343     | Inc-KLHL22-1     |
| A_22_P00009931 | 1,39344 | 1,37315 | 1,014163319 | ENST00000430364 | 101929111 | N/A          | LINC01149        |
| A_33_P3276805  | 1,47879 | 1,45851 | 1,014156289 | N/A             | N/A       | N/A          | N/A              |
| A_33_P3290450  | 1,52444 | 1,50417 | 1,01414926  | ENST00000390303 | N/A       | N/A          | N/A              |
| A_23_P14174    | 6,40197 | 6,3817  | 1,01414926  | ENST00000486502 | 10673     | NM_006573    | TNFSF13B         |

|                |         |         |             |                 |           |              |                  |
|----------------|---------|---------|-------------|-----------------|-----------|--------------|------------------|
| A_22_P00017522 | 1,5992  | 1,57894 | 1,01414223  | N/A             | N/A       | N/A          | Inc-WDR11-2      |
| A_21_P0011512  | 1,54307 | 1,52281 | 1,01414223  | ENST00000445035 | N/A       | N/A          | N/A              |
| A_21_P0009643  | 1,57423 | 1,55398 | 1,014135201 | ENST00000589921 | 148145    | NR_027318    | LINC00906        |
| A_22_P00008268 | 1,5985  | 1,57825 | 1,014135201 | ENST00000562614 | 100996345 | XR_172163    | LOC100996345     |
| A_21_P0004054  | 1,49743 | 1,47719 | 1,014128171 | ENST00000511422 | N/A       | N/A          | N/A              |
| A_33_P3343790  | 1,59888 | 1,57864 | 1,014128171 | ENST00000355784 | 391189    | NM_001001959 | OR11L1           |
| A_21_P0005961  | 1,56041 | 1,54018 | 1,014121142 | ENST00000518589 | 101929167 | XR_246640    | LOC101929167     |
| A_33_P3220979  | 1,47077 | 1,45054 | 1,014121142 | N/A             | N/A       | N/A          | N/A              |
| A_21_P0012589  | 1,57501 | 1,55478 | 1,014121142 | ENST00000505681 | N/A       | N/A          | N/A              |
| A_24_P808522   | 15,2619 | 15,2417 | 1,014100054 | ENST00000401695 | 6208      | NM_005617    | RPS14            |
| A_21_P0012736  | 1,47969 | 1,45949 | 1,014100054 | N/A             | N/A       | N/A          | Inc-AC110373.1-6 |
| A_21_P0008280  | 1,51996 | 1,49976 | 1,014100054 | ENST00000557526 | 102724190 | NR_110553    | LOC102724190     |
| A_21_P0001519  | 1,64801 | 1,62782 | 1,014093025 | N/A             | N/A       | N/A          | Inc-ELTD1-2      |
| A_21_P0009159  | 1,52563 | 1,50544 | 1,014093025 | ENST00000436469 | N/A       | N/A          | N/A              |
| A_21_P0014342  | 1,54694 | 1,52675 | 1,014093025 | N/A             | 101927839 | NR_110888    | LOC101927839     |
| A_22_P00001726 | 1,61659 | 1,5964  | 1,014093025 | ENST00000448086 | N/A       | N/A          | N/A              |
| A_21_P0002553  | 1,59705 | 1,57687 | 1,014085996 | ENST00000455228 | 401039    | NR_034162    | FLJ43879         |
| A_22_P00003402 | 1,5067  | 1,48654 | 1,014071938 | ENST00000505371 | 101928885 | XR_249792    | LOC101928885     |
| A_22_P00002878 | 1,52508 | 1,50493 | 1,014064909 | ENST00000505632 | N/A       | N/A          | N/A              |
| A_22_P00005551 | 1,54701 | 1,52687 | 1,01405788  | ENST00000452933 | 101927176 | NR_108076    | LINC01069        |
| A_22_P00022298 | 1,52351 | 1,50339 | 1,014043822 | N/A             | N/A       | DB043402     | Inc-ATP6V1C2-2   |
| A_22_P00015782 | 3,39636 | 3,37624 | 1,014043822 | ENST00000545276 | N/A       | N/A          | N/A              |
| A_22_P00013453 | 1,62782 | 1,6077  | 1,014043822 | ENST00000568030 | 104355218 | NR_126397    | LINC01177        |
| A_22_P00021034 | 1,70767 | 1,68755 | 1,014043822 | N/A             | N/A       | N/A          | Inc-TGM5-1       |
| A_33_P3353295  | 1,68357 | 1,66345 | 1,014043822 | ENST00000298231 | 401       | NM_005169    | PHOX2A           |
| A_33_P3366412  | 1,59712 | 1,57701 | 1,014036793 | N/A             | N/A       | N/A          | N/A              |
| A_21_P0012684  | 1,38863 | 1,36852 | 1,014036793 | N/A             | N/A       | N/A          | XLOC_I2_011289   |
| A_33_P3415037  | 14,0759 | 14,0558 | 1,014029765 | ENST00000313132 | 7417      | NM_001184783 | VDAC2            |
| A_33_P3408172  | 1,53533 | 1,51523 | 1,014029765 | ENST00000344941 | 729025    | NM_001170798 | SLC15A5          |
| A_23_P381172   | 1,49369 | 1,4736  | 1,014022736 | ENST00000339944 | 56246     | NM_206898    | MRAP             |
| A_22_P00019662 | 5,6087  | 5,58862 | 1,014015707 | N/A             | N/A       | N/A          | Inc-ORAOV1-2     |
| A_21_P0012740  | 1,5092  | 1,48913 | 1,014008679 | ENST00000513851 | 100507487 | N/A          | LOC100507487     |
| A_19_P00807783 | 1,48461 | 1,46455 | 1,01400165  | ENST00000437881 | N/A       | N/A          | N/A              |

|                |         |         |             |                 |           |              |                |
|----------------|---------|---------|-------------|-----------------|-----------|--------------|----------------|
| A_23_P34644    | 1,37385 | 1,35379 | 1,01400165  | ENST00000428605 | 2213      | NM_004001    | FCGR2B         |
| A_23_P36120    | 1,65578 | 1,63572 | 1,01400165  | ENST00000530179 | 64231     | NM_022349    | MS4A6A         |
| A_23_P157109   | 3,43497 | 3,41492 | 1,013994622 | ENST00000304166 | 117       | NM_001118    | ADCYAP1R1      |
| A_33_P3360122  | 1,53803 | 1,51798 | 1,013994622 | N/A             | 283592    | NR_027004    | FAM181A-AS1    |
| A_23_P125303   | 1,65868 | 1,63863 | 1,013994622 | ENST00000370904 | 3547      | NM_001555    | IGSF1          |
| A_22_P00013017 | 1,37537 | 1,35533 | 1,013987593 | ENST00000556447 | N/A       | XR_429613    | N/A            |
| A_22_P00010381 | 1,66746 | 1,64743 | 1,013980565 | ENST00000548329 | N/A       | N/A          | N/A            |
| A_22_P00015895 | 1,59807 | 1,57805 | 1,013973536 | ENST00000456347 | 154089    | NR_027030    | LINC01312      |
| A_22_P00003474 | 1,51194 | 1,49192 | 1,013973536 | N/A             | N/A       | N/A          | Inc-CCDC7-3    |
| A_22_P00025590 | 1,48924 | 1,46922 | 1,013973536 | N/A             | N/A       | BX097573     | Inc-CPPED1-2   |
| A_33_P3322259  | 1,72959 | 1,70957 | 1,013973536 | ENST00000622923 | 100289087 | NM_001282469 | TSPY10         |
| A_22_P00012479 | 1,58143 | 1,56142 | 1,013966508 | ENST00000413005 | N/A       | N/A          | N/A            |
| A_23_P69012    | 1,59337 | 1,57337 | 1,01395948  | ENST00000326306 | 1237      | NM_005201    | CCR8           |
| A_32_P37867    | 1,53288 | 1,51288 | 1,01395948  | N/A             | 85352     | NM_001099294 | KIAA1644       |
| A_33_P3421243  | 1,60851 | 1,58852 | 1,013952452 | ENST00000508838 | 174       | NM_001134    | AFP            |
| A_22_P00005183 | 1,45348 | 1,4335  | 1,013945423 | N/A             | N/A       | N/A          | Inc-DISC1-3    |
| A_22_P00025303 | 1,59925 | 1,57927 | 1,013945423 | N/A             | N/A       | N/A          | Inc-MYL2-3     |
| A_22_P00018590 | 1,60055 | 1,58057 | 1,013945423 | ENST00000517796 | N/A       | N/A          | N/A            |
| A_21_P0005393  | 1,59154 | 1,57157 | 1,013938395 | N/A             | N/A       | N/A          | Inc-AUTS2-1    |
| A_33_P3323238  | 1,54206 | 1,5221  | 1,013931367 | ENST00000620089 | 27098     | NM_001289036 | CLUL1          |
| A_22_P00004608 | 1,47316 | 1,4532  | 1,013931367 | ENST00000519506 | 101927487 | NR_125418    | LOC101927487   |
| A_21_P0002200  | 1,51512 | 1,49517 | 1,013924339 | N/A             | N/A       | N/A          | Inc-QPCT-3     |
| A_33_P3237005  | 1,59761 | 1,57766 | 1,013924339 | N/A             | 594840    | NR_002438    | ZFAT-AS1       |
| A_22_P00018972 | 1,49556 | 1,47561 | 1,013924339 | ENST00000513573 | 102725105 | N/A          | LOC102725105   |
| A_21_P0001999  | 1,63718 | 1,61724 | 1,013917311 | N/A             | N/A       | N/A          | Inc-CMPK2-13   |
| A_22_P00016653 | 1,62398 | 1,60404 | 1,013917311 | N/A             | N/A       | N/A          | Inc-TP53I13-3  |
| A_33_P3272479  | 6,33925 | 6,31931 | 1,013917311 | ENST00000520180 | 10361     | NM_001286681 | NPM2           |
| A_22_P00023517 | 1,52497 | 1,50504 | 1,013910283 | ENST00000478814 | N/A       | N/A          | N/A            |
| A_21_P0013001  | 1,63567 | 1,61575 | 1,013903255 | ENST00000508339 | 285708    | NR_103753    | LINC00491      |
| A_23_P253597   | 3,22461 | 3,20469 | 1,013903255 | ENST00000291592 | 81543     | AB464607     | LRRC3          |
| A_23_P400505   | 1,57936 | 1,55945 | 1,013896228 | ENST00000382071 | 338872    | NM_178540    | C1QTNF9        |
| A_21_P0011258  | 5,37197 | 5,35206 | 1,013896228 | N/A             | N/A       | N/A          | XLOC_I2_004315 |
| A_21_P0004983  | 1,51478 | 1,49488 | 1,0138892   | N/A             | N/A       | N/A          | Inc-EXOC2-5    |

|                |         |         |             |                 |           |              |                       |
|----------------|---------|---------|-------------|-----------------|-----------|--------------|-----------------------|
| A_23_P29394    | 1,5886  | 1,56871 | 1,013882172 | ENST00000437904 | 84239     | NM_032279    | ATP13A4               |
| A_33_P3338379  | 1,59135 | 1,57146 | 1,013882172 | N/A             | N/A       | N/A          | N/A                   |
| A_33_P3369016  | 4,08015 | 4,06026 | 1,013882172 | N/A             | 101060085 | XM_003960901 | LOC101060085          |
| A_21_P0010367  | 4,54366 | 4,52381 | 1,013854062 | ENST00000449941 | N/A       | N/A          | N/A                   |
| A_21_P0004880  | 1,43143 | 1,41158 | 1,013854062 | N/A             | N/A       | N/A          | Inc-DAAM2-2           |
| A_22_P00021880 | 1,59682 | 1,57697 | 1,013854062 | ENST00000517318 | N/A       | BM688379     | N/A                   |
| A_33_P3332329  | 1,50487 | 1,48502 | 1,013854062 | ENST00000526452 | 84767     | NM_032681    | TRIM51                |
| A_22_P00011304 | 1,49132 | 1,47147 | 1,013854062 | N/A             | N/A       | BG182938     | Inc-OSBPL1A-2         |
| A_22_P00008036 | 1,50867 | 1,48884 | 1,013840007 | ENST00000578280 | 101059954 | N/A          | LOC101059954          |
| A_22_P00001287 | 1,66214 | 1,64231 | 1,013840007 | N/A             | N/A       | BX109601     | Inc-ANKS6-1           |
| A_21_P0002701  | 1,58848 | 1,56865 | 1,013840007 | ENST00000429949 | 100996597 | NR_103843    | LINC00690             |
| A_21_P0001272  | 1,51978 | 1,49997 | 1,013825952 | N/A             | N/A       | N/A          | Inc-PNRC2-1           |
| A_33_P3279640  | 13,9609 | 13,9411 | 1,013818925 | ENST00000251287 | 610       | NM_001194    | HCN2                  |
| A_22_P00025797 | 1,72437 | 1,70458 | 1,013811898 | N/A             | N/A       | N/A          | Inc-PCDH20-7          |
| A_24_P280664   | 1,51587 | 1,49609 | 1,01380487  | ENST00000294671 | 388646    | NM_207398    | GBP7                  |
| A_22_P00009885 | 1,50417 | 1,48439 | 1,01380487  | N/A             | N/A       | N/A          | Inc-MFSD2A-1          |
| A_24_P286951   | 1,55416 | 1,53438 | 1,01380487  | ENST00000369312 | 79949     | NM_024889    | PLEKHS1               |
| A_21_P0006001  | 1,59037 | 1,5706  | 1,013797843 | ENST00000423440 | N/A       | N/A          | N/A                   |
| A_22_P00002644 | 1,47633 | 1,45656 | 1,013797843 | N/A             | N/A       | N/A          | Inc-C1orf191-1        |
| A_33_P3258732  | 1,52785 | 1,50809 | 1,013790816 | N/A             | N/A       | N/A          | N/A                   |
| A_22_P00017763 | 4,48288 | 4,46313 | 1,013783789 | N/A             | N/A       | AK125966     | Inc-YTHDC2-1          |
| A_21_P0007639  | 1,59757 | 1,57784 | 1,013769735 | N/A             | N/A       | N/A          | Inc-RNFT2-3           |
| A_22_P00023704 | 1,3626  | 1,34288 | 1,013762708 | ENST00000521504 | N/A       | N/A          | N/A                   |
| A_24_P936014   | 1,45693 | 1,43722 | 1,013755682 | N/A             | 26077     | NR_026889    | DKFZP434H168          |
| A_33_P3309031  | 1,47342 | 1,45371 | 1,013755682 | ENST00000503159 | N/A       | N/A          | N/A                   |
| A_33_P3390758  | 13,4879 | 13,4682 | 1,013748655 | ENST00000453788 | 3312      | NM_153201    | HSPA8                 |
| A_22_P00019599 | 1,54411 | 1,52443 | 1,013734601 | ENST00000419800 | 101929460 | XR_245641    | LOC101929460          |
| A_21_P0005757  | 1,52096 | 1,50129 | 1,013727575 | N/A             | N/A       | N/A          | Inc-RP11-785H20.1.1-1 |
| A_22_P00019355 | 1,52126 | 1,50159 | 1,013727575 | N/A             | 101928445 | NR_110560    | LOC101928445          |
| A_32_P123514   | 1,63299 | 1,61332 | 1,013727575 | ENST00000421491 | 132430    | NM_001114734 | PABPC4L               |
| A_22_P00020024 | 1,38954 | 1,36988 | 1,013720548 | N/A             | 100885780 | NR_047698    | VWC2L-IT1             |
| A_33_P3420500  | 1,49002 | 1,47036 | 1,013720548 | N/A             | 253832    | BC034944     | ZDHHC20               |
| A_21_P0006694  | 1,59188 | 1,57224 | 1,013706495 | ENST00000414903 | N/A       | N/A          | N/A                   |

|                |         |         |             |                 |           |              |                |
|----------------|---------|---------|-------------|-----------------|-----------|--------------|----------------|
| A_21_P0011987  | 1,66671 | 1,64707 | 1,013706495 | N/A             | N/A       | N/A          | XLOC_I2_008409 |
| A_21_P0011988  | 1,49702 | 1,47739 | 1,013699469 | N/A             | N/A       | N/A          | XLOC_I2_008409 |
| A_23_P430181   | 9,83212 | 9,81249 | 1,013699469 | ENST00000394807 | 79842     | NM_024784    | ZBTB3          |
| A_21_P0000449  | 1,61202 | 1,5924  | 1,013692442 | N/A             | 100033425 | NR_003328    | SNORD116-13    |
| A_21_P0001421  | 1,66513 | 1,64551 | 1,013692442 | N/A             | N/A       | N/A          | Inc-LYPLAL1-3  |
| A_22_P00007836 | 1,60065 | 1,58104 | 1,013685416 | N/A             | N/A       | N/A          | Inc-HPS3-3     |
| A_23_P53267    | 12,3588 | 12,3392 | 1,013678389 | ENST00000532695 | 65117     | NM_023012    | RSRC2          |
| A_23_P418597   | 10,1945 | 10,1749 | 1,013678389 | ENST00000427750 | 85456     | NM_033396    | TNKS1BP1       |
| A_33_P3215043  | 1,61355 | 1,59395 | 1,013678389 | N/A             | 341208    | NM_001098672 | HEPHL1         |
| A_23_P333038   | 1,4583  | 1,4387  | 1,013678389 | ENST00000357060 | 80217     | NM_025145    | CFAP43         |
| A_33_P3406923  | 1,46629 | 1,4467  | 1,013671363 | ENST00000451818 | N/A       | N/A          | N/A            |
| A_22_P00009225 | 1,58459 | 1,56501 | 1,013664337 | N/A             | 100874082 | NR_046612    | HTR2A-AS1      |
| A_22_P00008425 | 1,56338 | 1,54381 | 1,013657311 | ENST00000291478 | 8997      | XM_006713810 | KALRN          |
| A_21_P0014125  | 1,59296 | 1,57339 | 1,013657311 | N/A             | N/A       | BG190648     | Inc-MYNN-1     |
| A_33_P3371204  | 1,69772 | 1,67815 | 1,013657311 | N/A             | N/A       | BX098631     | N/A            |
| A_23_P91278    | 1,67286 | 1,65329 | 1,013657311 | ENST00000414705 | 4773      | NM_173091    | NFATC2         |
| A_23_P215980   | 7,25157 | 7,232   | 1,013657311 | ENST00000421249 | 25962     | NM_183009    | KIAA1429       |
| A_23_P328709   | 1,47196 | 1,4524  | 1,013650285 | ENST00000327047 | 7401      | NM_174878    | CLRN1          |
| A_33_P3230364  | 1,5939  | 1,57434 | 1,013650285 | ENST00000321522 | 119678    | NM_001005164 | OR5E2          |
| A_33_P3364249  | 1,65708 | 1,63753 | 1,013643259 | N/A             | N/A       | N/A          | Inc-LBH-1      |
| A_21_P0001684  | 1,59521 | 1,57567 | 1,013636233 | N/A             | N/A       | N/A          | Inc-IL12RB2-2  |
| A_23_P339117   | 1,59768 | 1,57814 | 1,013636233 | ENST00000523211 | 286183    | NM_173688    | NKAIN3         |
| A_21_P0013055  | 1,51383 | 1,4943  | 1,013629207 | N/A             | 102723958 | N/A          | LOC102723958   |
| A_33_P3229818  | 1,42705 | 1,40752 | 1,013629207 | ENST00000247219 | 387332    | NM_199047    | TBPL2          |
| A_19_P00804924 | 1,52107 | 1,50155 | 1,013622181 | N/A             | N/A       | N/A          | N/A            |
| A_22_P00018503 | 1,67084 | 1,65133 | 1,013615155 | N/A             | N/A       | N/A          | Inc-NLRP12-1   |
| A_23_P57222    | 1,66432 | 1,64481 | 1,013615155 | ENST00000375494 | 359710    | HQ258440     | BPIFB3         |
| A_23_P429601   | 1,37464 | 1,35513 | 1,013615155 | ENST00000426341 | 168391    | NM_145292    | GALNTL5        |
| A_23_P141306   | 1,37652 | 1,35701 | 1,013615155 | ENST00000262441 | 9340      | NM_004246    | GLP2R          |
| A_22_P00005392 | 1,52139 | 1,50188 | 1,013615155 | ENST00000583580 | N/A       | N/A          | N/A            |
| A_22_P00002199 | 1,56716 | 1,54765 | 1,013615155 | ENST00000444868 | N/A       | N/A          | N/A            |
| A_33_P3328352  | 1,58129 | 1,5618  | 1,013601103 | ENST00000400552 | 245929    | NM_001037730 | DEFB115        |
| A_22_P00003438 | 1,69664 | 1,67715 | 1,013601103 | N/A             | N/A       | N/A          | Inc-CCDC38-1   |



|                |         |         |             |                 |           |              |                       |
|----------------|---------|---------|-------------|-----------------|-----------|--------------|-----------------------|
| A_22_P00013852 | 8,01146 | 7,99198 | 1,013594078 | ENST00000584660 | 400620    | NR_040020    | LOC400620             |
| A_22_P00008199 | 1,70095 | 1,68147 | 1,013594078 | ENST00000519803 | N/A       | N/A          | N/A                   |
| A_21_P0005588  | 1,51246 | 1,49298 | 1,013594078 | N/A             | N/A       | N/A          | Inc-AC006372.1-1      |
| A_22_P00011951 | 1,47956 | 1,46008 | 1,013594078 | N/A             | N/A       | AK056954     | Inc-PKIA-1            |
| A_22_P00000684 | 2,1885  | 2,16903 | 1,013587052 | N/A             | 101410540 | NR_102707    | FANK1-AS1             |
| A_22_P00008209 | 1,43692 | 1,41747 | 1,013573001 | ENST00000562575 | N/A       | N/A          | N/A                   |
| A_22_P00020608 | 1,65639 | 1,63695 | 1,013565975 | N/A             | N/A       | BG184476     | Inc-LETM2-2           |
| A_24_P932646   | 1,50897 | 1,48954 | 1,01355895  | N/A             | N/A       | AY358123     | Inc-CYS1-3            |
| A_22_P00008796 | 1,3978  | 1,37837 | 1,01355895  | N/A             | N/A       | N/A          | Inc-KIN-1             |
| A_24_P175783   | 5,12098 | 5,10156 | 1,013551924 | N/A             | 23365     | NM_015313    | ARHGEF12              |
| A_21_P0002379  | 1,55651 | 1,5371  | 1,013544899 | N/A             | N/A       | N/A          | Inc-TMEM18-7          |
| A_33_P3409458  | 1,65047 | 1,63106 | 1,013544899 | N/A             | N/A       | N/A          | N/A                   |
| A_21_P0010548  | 1,58247 | 1,56306 | 1,013544899 | ENST00000456752 | 149620    | N/A          | CHIAP2                |
| A_23_P15619    | 1,47619 | 1,45678 | 1,013544899 | ENST00000290294 | 84366     | NM_032391    | PRAC1                 |
| A_22_P00023536 | 1,43906 | 1,41966 | 1,013537874 | ENST00000548691 | N/A       | N/A          | N/A                   |
| A_21_P0005700  | 1,55534 | 1,53595 | 1,013530848 | N/A             | N/A       | N/A          | Inc-FAM110B-1         |
| A_21_P0012580  | 1,56314 | 1,54377 | 1,013516798 | ENST00000513211 | 102723828 | N/A          | LOC102723828          |
| A_33_P3285992  | 1,54261 | 1,52324 | 1,013516798 | N/A             | 79001     | AK125618     | VKORC1                |
| A_33_P3248429  | 1,50256 | 1,48319 | 1,013516798 | ENST00000366796 | 168002    | NM_001286351 | DACT2                 |
| A_21_P0005686  | 1,59505 | 1,5757  | 1,013502748 | N/A             | N/A       | N/A          | Inc-UNC5D-1           |
| A_21_P0014942  | 1,48641 | 1,46707 | 1,013495723 | ENST00000563054 | 100653233 | XR_426189    | LOC100653233          |
| A_21_P0009318  | 1,48671 | 1,46737 | 1,013495723 | N/A             | N/A       | N/A          | nc-RP11-1407015.2.1-1 |
| A_21_P0001555  | 1,57689 | 1,55756 | 1,013488698 | N/A             | N/A       | N/A          | Inc-FRRS1-2           |
| A_21_P0013018  | 1,67692 | 1,6576  | 1,013481673 | N/A             | N/A       | N/A          | XLOC_I2_012418        |
| A_33_P3223318  | 1,455   | 1,43568 | 1,013481673 | ENST00000329621 | 337879    | NM_175857    | KRTAP8-1              |
| A_23_P368691   | 1,57862 | 1,5593  | 1,013481673 | ENST00000261201 | 10060     | NM_005691    | ABCC9                 |
| A_24_P944973   | 1,65164 | 1,63233 | 1,013474648 | ENST00000370618 | 346007    | NM_198283    | EYS                   |
| A_21_P0006034  | 1,53535 | 1,51604 | 1,013474648 | ENST00000420204 | N/A       | N/A          | N/A                   |
| A_22_P00021248 | 1,63756 | 1,61825 | 1,013474648 | ENST00000553464 | N/A       | N/A          | N/A                   |
| A_23_P355067   | 11,5342 | 11,5149 | 1,013467623 | ENST00000367881 | 54499     | NM_019026    | TMCO1                 |
| A_21_P0009269  | 1,52143 | 1,50213 | 1,013467623 | N/A             | N/A       | N/A          | Inc-KCNJ2-1           |
| A_21_P0005690  | 1,59509 | 1,57579 | 1,013467623 | N/A             | N/A       | N/A          | Inc-IDO2-1            |
| A_22_P00015791 | 10,466  | 10,4467 | 1,013467623 | N/A             | N/A       | AA775737     | Inc-TARBP2-1          |

|                |         |         |             |                 |           |              |                |
|----------------|---------|---------|-------------|-----------------|-----------|--------------|----------------|
| A_22_P00006825 | 1,83998 | 1,82069 | 1,013460598 | N/A             | N/A       | BG196864     | Inc-GABRB2-1   |
| A_21_P0013226  | 1,48193 | 1,46265 | 1,013453573 | N/A             | 285905    | N/A          | INTS4P1        |
| A_22_P00014914 | 1,72905 | 1,70978 | 1,013446549 | ENST00000260126 | 81796     | AK022971     | SLCO5A1        |
| A_33_P3378161  | 1,66421 | 1,64494 | 1,013446549 | N/A             | 100131066 | AK126015     | LOC100131066   |
| A_21_P0003684  | 1,52934 | 1,51008 | 1,013439524 | N/A             | N/A       | N/A          | Inc-ADAM29-1   |
| A_22_P00000676 | 7,7457  | 7,72644 | 1,013439524 | ENST00000458030 | N/A       | N/A          | N/A            |
| A_22_P00011085 | 1,59637 | 1,57711 | 1,013439524 | ENST00000517722 | N/A       | N/A          | N/A            |
| A_33_P3221483  | 1,57991 | 1,56065 | 1,013439524 | ENST00000530808 | N/A       | AB529257     | N/A            |
| A_22_P00000703 | 5,89809 | 5,87885 | 1,013425475 | N/A             | N/A       | N/A          | Inc-ADAM8-2    |
| A_22_P00012974 | 1,51716 | 1,49792 | 1,013425475 | N/A             | N/A       | N/A          | Inc-REM2-2     |
| A_33_P3345036  | 1,67061 | 1,65137 | 1,013425475 | ENST00000395826 | 5443      | NM_001035256 | POMC           |
| A_21_P0009543  | 1,47059 | 1,45137 | 1,013411426 | N/A             | N/A       | N/A          | Inc-ZSCAN30-1  |
| A_33_P3355747  | 1,5101  | 1,49088 | 1,013411426 | N/A             | N/A       | N/A          | N/A            |
| A_33_P3408152  | 1,59178 | 1,57256 | 1,013411426 | ENST00000310624 | 4744      | NM_021076    | NEFH           |
| A_24_P283591   | 1,41562 | 1,3964  | 1,013411426 | ENST00000297913 | 158131    | NM_012364    | OR1Q1          |
| A_22_P00007780 | 5,97347 | 5,95426 | 1,013404401 | N/A             | N/A       | N/A          | Inc-HNRNPA3-2  |
| A_23_P350001   | 1,61311 | 1,59391 | 1,013397377 | ENST00000282249 | 2977      | NM_000855    | GUCY1A2        |
| A_33_P3377549  | 1,56527 | 1,54608 | 1,013390353 | ENST00000392133 | 7520      | XM_005246837 | XRCC5          |
| A_21_P0010832  | 1,64311 | 1,62392 | 1,013390353 | N/A             | N/A       | N/A          | XLOC_I2_001640 |
| A_22_P00024290 | 1,59274 | 1,57356 | 1,013383329 | ENST00000545400 | 101928441 | NR_120471    | LOC101928441   |
| A_33_P3390656  | 1,52145 | 1,50229 | 1,01336928  | ENST00000543479 | 23305     | NM_001009185 | ACSL6          |
| A_23_P422667   | 1,47905 | 1,45989 | 1,01336928  | ENST00000366698 | 51127     | NM_016102    | TRIM17         |
| A_23_P114983   | 1,54356 | 1,5244  | 1,01336928  | ENST00000374272 | 84676     | NM_032588    | TRIM63         |
| A_21_P0009731  | 1,51921 | 1,50006 | 1,013362256 | N/A             | N/A       | N/A          | Inc-ZNF583-1   |
| A_21_P0014688  | 1,59298 | 1,57386 | 1,013341184 | N/A             | 100288162 | NR_103772    | LOC100288162   |
| A_22_P00022118 | 1,51236 | 1,49324 | 1,013341184 | ENST00000502680 | N/A       | N/A          | N/A            |
| A_22_P00020181 | 1,49013 | 1,47101 | 1,013341184 | N/A             | N/A       | N/A          | Inc-CCDC102B-8 |
| A_22_P00014626 | 1,64815 | 1,62904 | 1,01333416  | N/A             | N/A       | N/A          | Inc-SLC16A3-4  |
| A_22_P00023393 | 1,38362 | 1,36451 | 1,01333416  | ENST00000553822 | N/A       | N/A          | N/A            |
| A_23_P157926   | 9,51538 | 9,49627 | 1,01333416  | ENST00000308675 | 158038    | NM_152570    | LINGO2         |
| A_22_P00004442 | 1,46938 | 1,45028 | 1,013327136 | ENST00000536933 | N/A       | N/A          | N/A            |
| A_21_P0011027  | 1,57622 | 1,55715 | 1,013306065 | ENST00000439483 | 101929011 | N/A          | LOC101929011   |
| A_33_P3363161  | 1,4998  | 1,48073 | 1,013306065 | N/A             | N/A       | N/A          | N/A            |

|                |         |         |             |                 |           |           |                 |
|----------------|---------|---------|-------------|-----------------|-----------|-----------|-----------------|
| A_22_P00004089 | 1,41801 | 1,39894 | 1,013306065 | N/A             | 144742    | N/A       | LINC00934       |
| A_22_P00017384 | 1,46813 | 1,44906 | 1,013306065 | ENST00000574178 | N/A       | AK125886  | N/A             |
| A_23_P133712   | 3,15222 | 3,13316 | 1,013299041 | ENST00000480804 | 51302     | NM_016593 | CYP39A1         |
| A_22_P00011384 | 1,43951 | 1,42045 | 1,013299041 | ENST00000457890 | N/A       | N/A       | N/A             |
| A_24_P142269   | 8,0389  | 8,01985 | 1,013292018 | ENST00000279392 | 8479      | NM_003609 | HIRIP3          |
| A_22_P00014317 | 1,5047  | 1,48565 | 1,013292018 | N/A             | N/A       | N/A       | Inc-SERPINB6-1  |
| A_21_P0001629  | 1,65139 | 1,63235 | 1,013284994 | N/A             | 102724046 | XR_425101 | LOC102724046    |
| A_21_P0007462  | 1,5718  | 1,55278 | 1,013270947 | N/A             | N/A       | N/A       | Inc-CPSF7-1     |
| A_23_P105465   | 1,67959 | 1,66057 | 1,013270947 | ENST00000550402 | 1240      | NM_004072 | CMKLR1          |
| A_33_P3857091  | 3,82787 | 3,80885 | 1,013270947 | ENST00000522604 | 286114    | NR_033894 | LOC286114       |
| A_24_P49427    | 1,59369 | 1,57467 | 1,013270947 | ENST00000272907 | 57624     | NM_020864 | NYAP2           |
| A_23_P38649    | 1,50795 | 1,48893 | 1,013270947 | ENST00000327606 | 4158      | NM_000529 | MC2R            |
| A_21_P0004973  | 1,3683  | 1,34929 | 1,013263924 | N/A             | N/A       | N/A       | Inc-SMOC2-5     |
| A_33_P3222549  | 1,46891 | 1,4499  | 1,013263924 | ENST00000437648 | N/A       | N/A       | N/A             |
| A_21_P0009882  | 1,52961 | 1,5106  | 1,013263924 | ENST00000442389 | N/A       | N/A       | N/A             |
| A_22_P00019381 | 1,50976 | 1,49076 | 1,0132569   | ENST00000504436 | 100861468 | N/A       | LINC00492       |
| A_23_P318646   | 16,8483 | 16,8293 | 1,0132569   | ENST00000492704 | 6204      | NM_001014 | RPS10           |
| A_21_P0006267  | 1,5937  | 1,57471 | 1,013249877 | N/A             | N/A       | N/A       | Inc-ANKRD20A3-1 |
| A_21_P0002296  | 1,59454 | 1,57555 | 1,013249877 | N/A             | N/A       | N/A       | Inc-SPOPL-3     |
| A_33_P3589819  | 7,29464 | 7,27566 | 1,013242854 | N/A             | 102724827 | AK026502  | MIATNB          |
| A_22_P00006251 | 1,3662  | 1,34723 | 1,01323583  | N/A             | N/A       | N/A       | Inc-FAM63B-1    |
| A_32_P116606   | 1,59905 | 1,58008 | 1,01323583  | ENST00000274382 | 167410    | NM_153234 | LIX1            |
| A_22_P00015452 | 1,68553 | 1,66656 | 1,01323583  | ENST00000561511 | N/A       | Y11918    | N/A             |
| A_21_P0003414  | 1,70016 | 1,68119 | 1,01323583  | ENST00000504874 | N/A       | N/A       | N/A             |
| A_23_P390665   | 1,48416 | 1,4652  | 1,013228807 | ENST00000299840 | 146177    | NM_173615 | VWA3A           |
| A_22_P00014814 | 1,52739 | 1,50844 | 1,013221784 | ENST00000424417 | 102723517 | NR_110877 | LOC102723517    |
| A_33_P3383471  | 1,48419 | 1,46524 | 1,013221784 | ENST00000547431 | 5502      | AK123969  | PPP1R1A         |
| A_21_P0000649  | 1,59262 | 1,57368 | 1,013214761 | N/A             | 219525    | NR_036445 | OR5AK4P         |
| A_22_P00001785 | 1,48223 | 1,4633  | 1,013207738 | ENST00000446370 | N/A       | N/A       | N/A             |
| A_22_P00002069 | 1,54878 | 1,52988 | 1,013186669 | N/A             | N/A       | N/A       | Inc-BLZF1-1     |
| A_22_P00006110 | 1,47749 | 1,45859 | 1,013186669 | N/A             | N/A       | N/A       | Inc-FAM172A-1   |
| A_22_P00012803 | 1,53105 | 1,51216 | 1,013179646 | ENST00000544089 | N/A       | BX090918  | N/A             |
| A_22_P00021556 | 1,6388  | 1,61991 | 1,013179646 | ENST00000557475 | N/A       | N/A       | N/A             |

|                |         |         |             |                 |           |           |                 |
|----------------|---------|---------|-------------|-----------------|-----------|-----------|-----------------|
| A_22_P00011323 | 1,64319 | 1,6243  | 1,013179646 | N/A             | N/A       | N/A       | Inc-OSR2-2      |
| A_21_P0000517  | 1,59133 | 1,57244 | 1,013179646 | N/A             | 140464    | NR_027070 | PISRT1          |
| A_22_P00013622 | 1,59324 | 1,57436 | 1,013172623 | ENST00000567777 | N/A       | BX090790  | N/A             |
| A_21_P0009937  | 1,4887  | 1,46982 | 1,013172623 | N/A             | N/A       | N/A       | Inc-SPTLC3-1    |
| A_21_P0004089  | 1,5938  | 1,57493 | 1,013165601 | ENST00000511698 | N/A       | N/A       | N/A             |
| A_33_P3318220  | 1,43353 | 1,41466 | 1,013165601 | ENST00000375454 | 128861    | NM_178466 | BPIFA3          |
| A_22_P00019899 | 1,38732 | 1,36846 | 1,013158578 | N/A             | N/A       | N/A       | Inc-KLLN-1      |
| A_21_P0004908  | 1,71308 | 1,69422 | 1,013158578 | N/A             | N/A       | N/A       | Inc-GJA10-6     |
| A_32_P437041   | 1,48497 | 1,46611 | 1,013158578 | ENST00000295131 | 151112    | NM_182521 | ZSWIM2          |
| A_21_P0012626  | 4,59573 | 4,57687 | 1,013158578 | ENST00000507055 | N/A       | N/A       | N/A             |
| A_23_P8820     | 1,67043 | 1,65158 | 1,013151555 | ENST00000518669 | 2167      | NM_001442 | FABP4           |
| A_21_P0002460  | 1,57292 | 1,55407 | 1,013151555 | N/A             | N/A       | N/A       | Inc-RAB11FIP5-1 |
| A_21_P0007663  | 1,49501 | 1,47616 | 1,013151555 | N/A             | N/A       | N/A       | Inc-TMEM132C-6  |
| A_33_P3889634  | 1,62307 | 1,60422 | 1,013151555 | ENST00000454676 | 284798    | NR_027091 | LOC284798       |
| A_24_P374445   | 1,56348 | 1,54464 | 1,013144533 | ENST00000331493 | 124989    | NM_152347 | EFCAB13         |
| A_22_P00020271 | 1,4538  | 1,43498 | 1,013130488 | N/A             | N/A       | BX117727  | Inc-BTC-4       |
| A_33_P3400578  | 1,50351 | 1,48469 | 1,013130488 | ENST00000226067 | 3131      | NM_002126 | HLF             |
| A_22_P00019380 | 1,64014 | 1,62133 | 1,013123465 | ENST00000508970 | 1496      | N/A       | CTNNA2          |
| A_23_P49155    | 14,019  | 14,0002 | 1,013116443 | ENST00000429102 | 1001      | NM_001793 | CDH3            |
| A_21_P0004138  | 1,45455 | 1,43575 | 1,013116443 | ENST00000504280 | 101928885 | N/A       | LOC101928885    |
| A_22_P00017326 | 1,38175 | 1,36296 | 1,01310942  | N/A             | N/A       | N/A       | Inc-USP35-2     |
| A_33_P3255459  | 1,56033 | 1,54154 | 1,01310942  | ENST00000508619 | 100133461 | NR_034136 | LOC100133461    |
| A_21_P0011388  | 1,50552 | 1,48673 | 1,01310942  | N/A             | N/A       | N/A       | XLOC_I2_005074  |
| A_24_P120462   | 1,48952 | 1,47073 | 1,01310942  | ENST00000265104 | 1767      | NM_001369 | DNAH5           |
| A_23_P416238   | 1,54892 | 1,53014 | 1,013102398 | ENST00000532756 | 245802    | NM_139249 | MS4A6E          |
| A_21_P0005755  | 1,52618 | 1,5074  | 1,013102398 | N/A             | N/A       | N/A       | Inc-UTP23-1     |
| A_21_P0006824  | 1,48631 | 1,46753 | 1,013102398 | ENST00000607982 | 439949    | N/A       | PRKCQ-AS1       |
| A_22_P00001474 | 1,51881 | 1,50004 | 1,013095376 | ENST00000505018 | 101928622 | NR_125902 | LOC101928622    |
| A_21_P0005655  | 1,58984 | 1,57108 | 1,013088353 | N/A             | N/A       | N/A       | Inc-GATA4-1     |
| A_22_P00001405 | 1,70251 | 1,68375 | 1,013088353 | N/A             | 101410542 | NR_102709 | UCHL1-AS1       |
| A_21_P0001928  | 1,37514 | 1,35639 | 1,013081331 | N/A             | N/A       | N/A       | Inc-TNFAIP6-1   |
| A_21_P0009100  | 1,40449 | 1,38574 | 1,013081331 | ENST00000564361 | N/A       | N/A       | N/A             |
| A_22_P00018460 | 1,57565 | 1,5569  | 1,013081331 | ENST00000513718 | N/A       | N/A       | N/A             |

|                |         |         |             |                 |           |              |                |
|----------------|---------|---------|-------------|-----------------|-----------|--------------|----------------|
| A_21_P0002659  | 1,59281 | 1,57409 | 1,013060265 | N/A             | N/A       | N/A          | Inc-KCNG3-1    |
| A_21_P0004657  | 1,51936 | 1,50064 | 1,013060265 | ENST00000622616 | 101927293 | XR_242044    | LOC101927293   |
| A_22_P00020875 | 1,52272 | 1,50401 | 1,013053243 | ENST00000517722 | N/A       | N/A          | N/A            |
| A_23_P130259   | 1,45285 | 1,43414 | 1,013053243 | ENST00000254854 | 3000      | NM_000180    | GUCY2D         |
| A_24_P138022   | 11,6051 | 11,5864 | 1,013046221 | ENST00000427765 | 23196     | NM_014612    | FAM120A        |
| A_33_P3312529  | 1,46047 | 1,44178 | 1,013039199 | ENST00000612034 | 390539    | NR_028067    | OR4N3P         |
| A_21_P0000907  | 1,61443 | 1,59574 | 1,013039199 | ENST00000423197 | 284661    | NR_027088    | LOC284661      |
| A_21_P0000032  | 1,46805 | 1,44937 | 1,013032178 | ENST00000525704 | 84623     | NM_001161707 | KIRREL3        |
| A_23_P87036    | 1,56792 | 1,54924 | 1,013032178 | ENST00000357780 | 337       | NM_000482    | APOA4          |
| A_22_P00009598 | 1,67095 | 1,65227 | 1,013032178 | N/A             | N/A       | N/A          | Inc-MAPK6-9    |
| A_32_P49309    | 1,36512 | 1,34645 | 1,013025156 | ENST00000610511 | 83876     | NM_031939    | MRO            |
| A_32_P225816   | 1,63225 | 1,61359 | 1,013018134 | ENST00000270722 | 63976     | NM_022114    | PRDM16         |
| A_21_P0003597  | 1,5891  | 1,57045 | 1,013011112 | ENST00000562049 | 100508631 | XR_251566    | LOC100508631   |
| A_21_P0012034  | 1,66733 | 1,64869 | 1,013004091 | ENST00000450848 | 101927406 | NR_110222    | LOC101927406   |
| A_21_P0001627  | 1,60611 | 1,58747 | 1,013004091 | N/A             | N/A       | N/A          | Inc-DUSP10-2   |
| A_32_P302205   | 1,54536 | 1,52673 | 1,012997069 | ENST00000264382 | 6476      | NM_001041    | SI             |
| A_32_P737629   | 1,47895 | 1,46033 | 1,012990048 | ENST00000276770 | 246122    | NR_001534    | TTY7           |
| A_33_P3406413  | 1,57315 | 1,55453 | 1,012990048 | N/A             | N/A       | N/A          | N/A            |
| A_21_P0006858  | 1,60917 | 1,59056 | 1,012983026 | N/A             | N/A       | N/A          | Inc-ANKRD30A-5 |
| A_24_P941441   | 10,3176 | 10,299  | 1,012976005 | ENST00000439174 | 10672     | NM_006572    | GNA13          |
| A_21_P0013732  | 1,56959 | 1,55099 | 1,012976005 | ENST00000424473 | N/A       | N/A          | N/A            |
| A_33_P3274678  | 1,59472 | 1,57612 | 1,012976005 | ENST00000390611 | N/A       | GQ232939     | N/A            |
| A_24_P212074   | 1,64939 | 1,63079 | 1,012976005 | ENST00000267273 | 196541    | NM_001010977 | METTL21C       |
| A_33_P3241989  | 1,55055 | 1,53196 | 1,012968983 | ENST00000426923 | 51316     | NM_001130715 | PLAC8          |
| A_24_P262321   | 4,87638 | 4,8578  | 1,012961962 | ENST00000481756 | 100533496 | NM_001204478 | TVP23C-CDRT4   |
| A_23_P22444    | 5,24173 | 5,22315 | 1,012961962 | ENST00000247153 | 5199      | NM_002621    | CFP            |
| A_21_P0012951  | 1,58421 | 1,56564 | 1,012954941 | ENST00000515596 | 102723470 | XR_425887    | LOC102723470   |
| A_33_P3369058  | 1,45566 | 1,4371  | 1,012947919 | ENST00000298910 | 120892    | NM_198578    | LRRK2          |
| A_22_P00009545 | 6,02627 | 6,00771 | 1,012947919 | ENST00000585228 | N/A       | N/A          | N/A            |
| A_33_P3403714  | 1,60233 | 1,58378 | 1,012940898 | N/A             | 400710    | NR_027257    | FLJ26850       |
| A_22_P00021199 | 1,58695 | 1,5684  | 1,012940898 | ENST00000411605 | 100551499 | N/A          | LINC00159      |
| A_21_P0005046  | 1,55455 | 1,53603 | 1,012919835 | N/A             | N/A       | N/A          | Inc-HACE1-4    |
| A_22_P00025718 | 1,51851 | 1,49999 | 1,012919835 | ENST00000502809 | N/A       | N/A          | N/A            |

|                |         |         |             |                 |           |              |                |
|----------------|---------|---------|-------------|-----------------|-----------|--------------|----------------|
| A_23_P140074   | 2,43542 | 2,4169  | 1,012919835 | ENST00000375547 | 8858      | NM_003891    | PROZ           |
| A_23_P383679   | 1,74278 | 1,72426 | 1,012919835 | ENST00000378856 | 54768     | NM_001270974 | HYDIN          |
| A_21_P0004323  | 1,57538 | 1,55687 | 1,012912814 | N/A             | N/A       | N/A          | Inc-GABRA6-1   |
| A_22_P00002477 | 1,53746 | 1,51895 | 1,012912814 | ENST00000560259 | N/A       | N/A          | N/A            |
| A_24_P106910   | 6,33248 | 6,31398 | 1,012905793 | ENST00000375290 | 5727      | NM_001083602 | PTCH1          |
| A_33_P3329908  | 1,43632 | 1,41782 | 1,012905793 | ENST00000438745 | N/A       | N/A          | N/A            |
| A_21_P0006687  | 1,41046 | 1,39197 | 1,012898772 | ENST00000416657 | N/A       | N/A          | N/A            |
| A_22_P00012846 | 1,51509 | 1,49661 | 1,012891751 | N/A             | 104355150 | N/A          | LINC01054      |
| A_22_P00000442 | 1,38527 | 1,3668  | 1,01288473  | ENST00000507782 | N/A       | N/A          | N/A            |
| A_23_P380240   | 1,60258 | 1,58412 | 1,01287771  | ENST00000244336 | 1088      | NM_001816    | CEACAM8        |
| A_22_P00005329 | 1,58986 | 1,5714  | 1,01287771  | N/A             | N/A       | N/A          | Inc-DOCK8-1    |
| A_21_P0008842  | 1,6661  | 1,64764 | 1,01287771  | N/A             | N/A       | N/A          | Inc-POTEB-5    |
| A_22_P00001857 | 1,36154 | 1,34309 | 1,012870689 | ENST00000549140 | N/A       | N/A          | N/A            |
| A_24_P102650   | 1,66447 | 1,64602 | 1,012870689 | ENST00000529681 | 727897    | NM_002458    | MUC5B          |
| A_33_P3260263  | 1,58801 | 1,56956 | 1,012870689 | N/A             | N/A       | N/A          | N/A            |
| A_22_P00005481 | 1,51488 | 1,49644 | 1,012863668 | ENST00000566030 | N/A       | N/A          | N/A            |
| A_22_P00018846 | 1,58088 | 1,56247 | 1,012842607 | ENST00000583416 | N/A       | N/A          | N/A            |
| A_21_P0004021  | 1,45465 | 1,43624 | 1,012842607 | N/A             | N/A       | N/A          | Inc-COX7C-1    |
| A_22_P00005699 | 1,57308 | 1,55469 | 1,012828566 | ENST00000506232 | N/A       | N/A          | N/A            |
| A_23_P24083    | 1,4062  | 1,38781 | 1,012828566 | ENST00000579578 | 5408      | NM_005396    | PNLIPRP2       |
| A_22_P00001676 | 1,61741 | 1,59902 | 1,012828566 | N/A             | N/A       | DB052641     | Inc-ASPH-3     |
| A_23_P167121   | 1,52994 | 1,51156 | 1,012821545 | ENST00000510233 | 2555      | NM_000807    | GABRA2         |
| A_21_P0004307  | 1,5904  | 1,57202 | 1,012821545 | N/A             | N/A       | N/A          | Inc-C5orf32-1  |
| A_22_P00002245 | 1,63608 | 1,6177  | 1,012821545 | N/A             | 100505540 | NR_038330    | SLIT1-AS1      |
| A_21_P0008474  | 1,57442 | 1,55604 | 1,012821545 | N/A             | N/A       | N/A          | Inc-KCNK10-1   |
| A_22_P00005270 | 1,59139 | 1,57302 | 1,012814525 | ENST00000503320 | 102467225 | N/A          | LOC102467225   |
| A_21_P0013287  | 1,53178 | 1,51341 | 1,012814525 | N/A             | N/A       | N/A          | XLOC_I2_013741 |
| A_23_P412476   | 2,91823 | 2,89987 | 1,012807505 | ENST00000263834 | 9687      | NM_148903    | GREB1          |
| A_19_P00810229 | 1,58583 | 1,56748 | 1,012800484 | N/A             | N/A       | N/A          | Inc-TYW5-2     |
| A_21_P0011813  | 9,81387 | 9,79552 | 1,012800484 | ENST00000567067 | 85013     | NM_032927    | TMEM128        |
| A_21_P0002282  | 1,54209 | 1,52375 | 1,012793464 | N/A             | N/A       | N/A          | Inc-GLI2-2     |
| A_22_P00002370 | 1,55831 | 1,53997 | 1,012793464 | N/A             | 101927719 | XR_245995    | LOC101927719   |
| A_21_P0008605  | 1,47275 | 1,45441 | 1,012793464 | N/A             | N/A       | N/A          | Inc-RYR3-1     |

|                |         |         |             |                 |           |              |                      |
|----------------|---------|---------|-------------|-----------------|-----------|--------------|----------------------|
| A_33_P3424496  | 1,4886  | 1,47026 | 1,012793464 | N/A             | N/A       | N/A          | Inc-STK32C-1         |
| A_22_P00008072 | 1,51565 | 1,49732 | 1,012786444 | N/A             | N/A       | N/A          | Inc-IKBIP-1          |
| A_22_P00024501 | 1,47737 | 1,45905 | 1,012779424 | ENST00000435574 | 100506795 | N/A          | LINC01354            |
| A_33_P3262510  | 1,70726 | 1,68894 | 1,012779424 | ENST00000404190 | 643414    | NM_001080518 | LIPK                 |
| A_23_P146885   | 13,4952 | 13,4769 | 1,012765384 | ENST00000313135 | 2837      | NM_018949    | UTS2R                |
| A_32_P146113   | 1,48782 | 1,46954 | 1,012751344 | ENST00000471400 | 221481    | NM_145028    | ARMC12               |
| A_33_P3327123  | 1,47169 | 1,45341 | 1,012751344 | N/A             | N/A       | N/A          | Inc-RP11-124K4.2.1-2 |
| A_33_P3388888  | 1,55998 | 1,54171 | 1,012744324 | N/A             | N/A       | N/A          | N/A                  |
| A_23_P20139    | 1,56501 | 1,54674 | 1,012744324 | ENST00000247879 | 50831     | NM_016943    | TAS2R3               |
| A_33_P3255597  | 1,45417 | 1,43591 | 1,012737305 | N/A             | N/A       | N/A          | N/A                  |
| A_33_P3334615  | 1,48714 | 1,46889 | 1,012730285 | ENST00000329903 | 1260      | NM_005140    | CNGA2                |
| A_22_P00002957 | 1,48149 | 1,46326 | 1,012716246 | N/A             | 101928033 | NR_109899    | CTD-2270F17.1        |
| A_22_P00004740 | 1,52179 | 1,50356 | 1,012716246 | ENST00000502209 | N/A       | N/A          | N/A                  |
| A_24_P255233   | 1,66997 | 1,65174 | 1,012716246 | ENST00000587694 | 100190938 | NR_024462    | RAMP2-AS1            |
| A_21_P0005894  | 1,51561 | 1,49739 | 1,012709226 | N/A             | N/A       | N/A          | Inc-SAMD12-1         |
| A_23_P49376    | 1,54731 | 1,5291  | 1,012702206 | ENST00000379780 | 1071      | NM_000078    | CETP                 |
| A_24_P239176   | 11,988  | 11,9698 | 1,012695187 | ENST00000614666 | 4585      | NM_018406    | MUC4                 |
| A_32_P182439   | 10,9593 | 10,9411 | 1,012695187 | ENST00000263681 | 10714     | NM_006591    | POLD3                |
| A_21_P0012529  | 1,56342 | 1,54523 | 1,012688168 | ENST00000458713 | 101927347 | NR_110123    | GRM7-AS3             |
| A_33_P3390793  | 1,46087 | 1,44268 | 1,012688168 | ENST00000379618 | 55521     | NM_001017397 | TRIM36               |
| A_21_P0007319  | 1,54025 | 1,52207 | 1,012681148 | N/A             | N/A       | N/A          | Inc-GALNTL4-1        |
| A_33_P3375819  | 1,60541 | 1,58725 | 1,012667109 | ENST00000578152 | 100287225 | NR_040075    | LOC100287225         |
| A_23_P257962   | 1,55807 | 1,53992 | 1,01266009  | ENST00000473811 | 2902      | NM_007327    | GRIN1                |
| A_23_P9075     | 1,70557 | 1,68743 | 1,012653071 | ENST00000307599 | 137362    | NM_152413    | GOT1L1               |
| A_33_P3241831  | 1,51544 | 1,4973  | 1,012653071 | ENST00000285879 | 9947      | NM_005462    | MAGEC1               |
| A_22_P00022622 | 1,56631 | 1,54818 | 1,012646052 | ENST00000425900 | N/A       | N/A          | N/A                  |
| A_22_P00004016 | 1,53009 | 1,51196 | 1,012646052 | ENST00000524359 | 101927141 | XR_242493    | LOC101927141         |
| A_33_P3326984  | 1,57505 | 1,55692 | 1,012646052 | ENST00000520252 | 5891      | N/A          | MOK                  |
| A_21_P0001148  | 1,42807 | 1,40994 | 1,012646052 | ENST00000437598 | N/A       | N/A          | N/A                  |
| A_21_P0001552  | 1,46276 | 1,44463 | 1,012646052 | N/A             | N/A       | N/A          | Inc-ALG14-3          |
| A_21_P0006821  | 1,50548 | 1,48736 | 1,012639033 | N/A             | N/A       | N/A          | Inc-PFKFB3-1         |
| A_21_P0011645  | 1,58726 | 1,56915 | 1,012632014 | ENST00000419688 | 55018     | NR_073199    | LINC00483            |
| A_19_P00806702 | 1,50023 | 1,48212 | 1,012632014 | N/A             | N/A       | N/A          | Inc-RLIM-3           |

|                |         |         |             |                 |           |                |                       |
|----------------|---------|---------|-------------|-----------------|-----------|----------------|-----------------------|
| A_33_P3226835  | 1,54358 | 1,52547 | 1,012632014 | ENST00000392917 | 80122     | NM_025052      | MAP3K19               |
| A_24_P941188   | 7,12485 | 7,10674 | 1,012632014 | ENST00000375120 | 23252     | NM_015207      | OTUD3                 |
| A_33_P3886938  | 1,50354 | 1,48544 | 1,012624995 | N/A             | 100093698 | NR_046087      | GS1-600G8.3           |
| A_21_P0005071  | 1,51619 | 1,49812 | 1,012603938 | N/A             | N/A       | N/A            | Inc-IPCEF1-1          |
| A_33_P3346267  | 1,36824 | 1,35017 | 1,012603938 | ENST00000328886 | 388364    | NM_206832      | TMIGD1                |
| A_32_P472875   | 3,96216 | 3,9441  | 1,012596919 | ENST00000567234 | N/A       | AK000246       | N/A                   |
| A_22_P00022344 | 1,46409 | 1,44603 | 1,012596919 | N/A             | N/A       | N/A            | Inc-DLC1-1            |
| A_21_P0010033  | 1,66986 | 1,6518  | 1,012596919 | N/A             | N/A       | N/A            | Inc-PLAGL2-2          |
| A_22_P00002582 | 1,67633 | 1,65828 | 1,0125899   | ENST00000579278 | N/A       | N/A            | N/A                   |
| A_33_P3671734  | 1,49459 | 1,47656 | 1,012575863 | N/A             | 386671    | BM925662       | FLJ44715              |
| A_23_P319027   | 1,46049 | 1,44247 | 1,012568844 | ENST00000395891 | 23072     | NM_015052      | HECW1                 |
| A_22_P00002007 | 1,42741 | 1,40939 | 1,012568844 | ENST00000429281 | 286442    | NR_038968      | LINC01281             |
| A_21_P0002214  | 1,65203 | 1,63402 | 1,012561826 | N/A             | N/A       | N/A            | Inc-CHAC2-2           |
| A_24_P83183    | 9,68522 | 9,66721 | 1,012561826 | ENST00000463820 | 7469      | NM_005663      | NELFA                 |
| A_22_P00023737 | 1,67365 | 1,65565 | 1,012554807 | ENST00000553921 | 101928791 | NR_110121      | LOC101928791          |
| A_21_P0012179  | 1,55641 | 1,53841 | 1,012554807 | N/A             | N/A       | N/A            | XLOC_I2_009134        |
| A_21_P0012459  | 1,48942 | 1,47142 | 1,012554807 | N/A             | N/A       | N/A            | XLOC_I2_010338        |
| A_22_P00005825 | 1,78612 | 1,76813 | 1,012547789 | N/A             | N/A       | N/A            | Inc-ERAL1-2           |
| A_21_P0003489  | 1,50153 | 1,48355 | 1,01254077  | N/A             | N/A       | N/A            | Inc-PPA2-2            |
| A_21_P0005159  | 1,48465 | 1,46668 | 1,012533752 | N/A             | 100874531 | N/A            | LINC00581             |
| A_21_P0011672  | 1,41841 | 1,40044 | 1,012533752 | N/A             | N/A       | N/A            | XLOC_I2_006578        |
| A_21_P0008937  | 1,45511 | 1,43714 | 1,012533752 | N/A             | N/A       | N/A            | Inc-RP11-327F22.5.1-5 |
| A_33_P3369133  | 1,38872 | 1,37077 | 1,012519715 | N/A             | 102723367 | XM_006711705   | LOC102723367          |
| A_24_P268685   | 1,48379 | 1,46584 | 1,012519715 | ENST00000287766 | 6529      | NM_003042      | SLC6A1                |
| A_22_P00022099 | 1,57949 | 1,56155 | 1,012512697 | ENST00000452813 | N/A       | N/A            | N/A                   |
| A_21_P0011472  | 1,45627 | 1,43835 | 1,012498661 | N/A             | N/A       | N/A            | XLOC_I2_005457        |
| A_21_P0005359  | 1,5822  | 1,56428 | 1,012498661 | N/A             | 100506178 | NR_038393      | LOC100506178          |
| A_32_P70056    | 1,58931 | 1,57139 | 1,012498661 | N/A             | 642864    | NR_049777      | SPATA42               |
| A_24_P59220    | 13,2103 | 13,1924 | 1,012484625 | ENST00000409914 | 728378    | NM_001099771   | POTEF                 |
| A_23_P28279    | 10,0409 | 10,023  | 1,012484625 | ENST00000289228 | 10120     | NM_005735      | ACTR1B                |
| A_22_P00021093 | 1,43087 | 1,41297 | 1,012484625 | N/A             | N/A       | BC018444       | Inc-ZDHHC13-3         |
| A_33_P3287403  | 1,5854  | 1,5675  | 1,012484625 | ENST00000545549 | N/A       | TCONS_00002717 | N/A                   |
| A_33_P3282230  | 1,62415 | 1,60625 | 1,012484625 | ENST00000604921 | 100129669 | N/A            | IZUMO3                |



|                |         |         |             |                 |           |              |                      |
|----------------|---------|---------|-------------|-----------------|-----------|--------------|----------------------|
| A_21_P0000457  | 1,57823 | 1,56033 | 1,012484625 | N/A             | 100036564 | NR_003496    | SNORD115-27          |
| A_23_P70387    | 1,58856 | 1,57068 | 1,012470589 | ENST00000244669 | 10930     | NM_006789    | APOBEC2              |
| A_24_P370172   | 1,58551 | 1,56763 | 1,012470589 | ENST00000446712 | 353514    | NM_181879    | LILRA5               |
| A_21_P0011653  | 1,55698 | 1,53912 | 1,012456553 | N/A             | N/A       | N/A          | XLOC_I2_006399       |
| A_23_P106362   | 1,51579 | 1,49794 | 1,012449535 | ENST00000219919 | 366       | NM_020980    | AQP9                 |
| A_21_P0001565  | 1,39533 | 1,37748 | 1,012449535 | N/A             | N/A       | N/A          | Inc-VAV3-1           |
| A_21_P0013955  | 1,39135 | 1,37351 | 1,012442518 | N/A             | N/A       | XM_006710125 | Inc-TMEM18-12        |
| A_23_P49862    | 1,54257 | 1,52473 | 1,012442518 | ENST00000576742 | 162514    | NM_145068    | TRPV3                |
| A_33_P3349597  | 9,50798 | 9,49015 | 1,0124355   | N/A             | N/A       | N/A          | N/A                  |
| A_21_P0004395  | 1,58982 | 1,57199 | 1,0124355   | N/A             | N/A       | N/A          | Inc-CTC-236F12.4.1-3 |
| A_33_P3248948  | 1,53152 | 1,51369 | 1,0124355   | N/A             | N/A       | N/A          | N/A                  |
| A_22_P00025960 | 1,65382 | 1,63599 | 1,0124355   | N/A             | N/A       | N/A          | Inc-IFT140-2         |
| A_21_P0003864  | 1,5876  | 1,56978 | 1,012428482 | N/A             | 101928439 | XR_425808    | LOC101928439         |
| A_33_P3292196  | 1,58789 | 1,57008 | 1,012421465 | ENST00000538162 | 84968     | NM_032882    | PNMA6A               |
| A_22_P00010176 | 1,57052 | 1,55272 | 1,012414447 | ENST00000566553 | 152274    | XR_245184    | LOC152274            |
| A_22_P00003059 | 1,42402 | 1,40622 | 1,012414447 | ENST00000518222 | N/A       | N/A          | N/A                  |
| A_23_P635      | 11,3235 | 11,3057 | 1,012414447 | ENST00000368273 | 11243     | NM_007221    | PMF1                 |
| A_22_P00000479 | 1,58289 | 1,56509 | 1,012414447 | N/A             | N/A       | N/A          | Inc-AC092327.1-2     |
| A_23_P59888    | 8,43053 | 8,41273 | 1,012414447 | ENST00000419462 | 83955     | NR_002182    | NACAP1               |
| A_22_P00022595 | 1,63552 | 1,61774 | 1,012400412 | N/A             | N/A       | N/A          | Inc-EFR3A-3          |
| A_22_P00016137 | 1,51749 | 1,49971 | 1,012400412 | N/A             | N/A       | N/A          | Inc-TIMD4-1          |
| A_22_P00013790 | 1,5476  | 1,52983 | 1,012393395 | ENST00000517675 | 157627    | NR_024281    | LINC00599            |
| A_22_P00022242 | 1,56906 | 1,55129 | 1,012393395 | N/A             | N/A       | AK092991     | Inc-AL020996.1-2     |
| A_21_P0006880  | 1,3967  | 1,37894 | 1,012386377 | N/A             | N/A       | N/A          | Inc-SGPL1-3          |
| A_21_P0003104  | 1,59109 | 1,57333 | 1,012386377 | N/A             | N/A       | N/A          | Inc-XPC-4            |
| A_33_P3211727  | 1,57139 | 1,55364 | 1,01237936  | ENST00000270824 | 55194     | NM_018166    | EVA1B                |
| A_22_P00012408 | 1,44222 | 1,42447 | 1,01237936  | ENST00000552028 | N/A       | XR_111420    | N/A                  |
| A_33_P3384695  | 1,58961 | 1,57186 | 1,01237936  | N/A             | 83988     | AB209015     | NCALD                |
| A_22_P00015518 | 1,55913 | 1,54139 | 1,012372343 | N/A             | N/A       | BC039682     | Inc-STEAP1B-1        |
| A_21_P0004004  | 1,51016 | 1,49243 | 1,012365326 | ENST00000513392 | 100996645 | N/A          | LINCR-0003           |
| A_21_P0014367  | 1,62154 | 1,60381 | 1,012365326 | N/A             | N/A       | XR_133155    | N/A                  |
| A_22_P00023645 | 1,51804 | 1,50032 | 1,012358309 | ENST00000455716 | N/A       | N/A          | N/A                  |
| A_22_P00015808 | 1,54493 | 1,52721 | 1,012358309 | ENST00000602702 | 102606466 | NR_109872    | LOC102606466         |

|                |         |         |             |                 |           |              |                |
|----------------|---------|---------|-------------|-----------------|-----------|--------------|----------------|
| A_23_P93169    | 1,413   | 1,39529 | 1,012351291 | ENST00000370657 | 51557     | NM_016571    | LGSN           |
| A_21_P0007136  | 1,66575 | 1,64804 | 1,012351291 | ENST00000514294 | 283143    | AK307308     | LINC00900      |
| A_22_P00018025 | 1,50232 | 1,48461 | 1,012351291 | N/A             | N/A       | AK056432     | Inc-ZNF217-2   |
| A_33_P3332337  | 1,4817  | 1,464   | 1,012344274 | ENST00000534129 | 2346      | NM_001193472 | FOLH1          |
| A_33_P3369098  | 1,4039  | 1,3862  | 1,012344274 | ENST00000223167 | 93408     | NM_138403    | MYL10          |
| A_33_P3209772  | 1,73383 | 1,71613 | 1,012344274 | ENST00000377208 | 5457      | NM_006237    | POU4F1         |
| A_22_P00025224 | 10,0022 | 9,98451 | 1,012337257 | ENST00000553982 | 10001     | NM_001284211 | MED6           |
| A_22_P00014567 | 1,56409 | 1,54641 | 1,01233024  | N/A             | 101928583 | XR_241615    | LOC101928583   |
| A_21_P0002721  | 1,48991 | 1,47224 | 1,012323223 | ENST00000440867 | 102723448 | NR_110824    | LOC102723448   |
| A_33_P3349746  | 1,50433 | 1,48666 | 1,012323223 | ENST00000298642 | 390431    | NM_001005501 | OR4K2          |
| A_23_P51479    | 1,505   | 1,48734 | 1,012316207 | ENST00000304526 | 10022     | NM_005478    | INSL5          |
| A_24_P202632   | 1,66437 | 1,64671 | 1,012316207 | ENST00000602114 | 55554     | NM_017509    | KLK15          |
| A_21_P0011083  | 1,76249 | 1,74483 | 1,012316207 | N/A             | N/A       | N/A          | XL0C_I2_003292 |
| A_22_P00021930 | 1,49991 | 1,48226 | 1,01230919  | ENST00000465347 | N/A       | N/A          | N/A            |
| A_21_P0000439  | 1,63511 | 1,61746 | 1,01230919  | N/A             | 100033440 | NR_003295    | SNORD115-3     |
| A_22_P00012102 | 1,50636 | 1,48871 | 1,01230919  | N/A             | N/A       | BX509710     | Inc-PNRC2-3    |
| A_32_P148745   | 9,25548 | 9,23784 | 1,012302173 | ENST00000452576 | 221806    | NM_001135924 | VWDE           |
| A_21_P0005226  | 1,57349 | 1,55585 | 1,012302173 | N/A             | N/A       | N/A          | Inc-ANLN-4     |
| A_23_P145978   | 1,59082 | 1,57319 | 1,012295156 | ENST00000262178 | 7434      | NM_003382    | VIPR2          |
| A_21_P0006165  | 1,61074 | 1,59312 | 1,01228814  | N/A             | N/A       | N/A          | Inc-NTRK2-4    |
| A_22_P00019469 | 1,42012 | 1,40251 | 1,012281123 | N/A             | N/A       | N/A          | Inc-ANKRD35-1  |
| A_22_P00024262 | 2,9304  | 2,91279 | 1,012281123 | ENST00000607802 | 63930     | NR_033370    | LOC63930       |
| A_24_P287766   | 1,45601 | 1,4384  | 1,012281123 | ENST00000497206 | 94160     | NM_033226    | ABCC12         |
| A_21_P0004636  | 5,09149 | 5,07388 | 1,012281123 | ENST00000451285 | 101928406 | XR_241981    | LOC101928406   |
| A_23_P56529    | 11,8292 | 11,8116 | 1,012274106 | ENST00000489767 | 14        | NM_001087    | AAMP           |
| A_23_P149926   | 1,36874 | 1,35114 | 1,012274106 | ENST00000263126 | 1109      | NM_001818    | AKR1C4         |
| A_24_P125335   | 1,55919 | 1,5416  | 1,01226709  | ENST00000225844 | 6357      | NM_005408    | CCL13          |
| A_21_P0007337  | 1,47818 | 1,4606  | 1,012260073 | N/A             | N/A       | N/A          | Inc-LMO2-2     |
| A_21_P0004699  | 1,50774 | 1,49016 | 1,012260073 | ENST00000429657 | 102724053 | N/A          | LOC102724053   |
| A_21_P0009667  | 1,36226 | 1,34469 | 1,012253057 | ENST00000587218 | 101928886 | N/A          | LOC101928886   |
| A_22_P00019019 | 1,48613 | 1,46856 | 1,012253057 | N/A             | N/A       | N/A          | Inc-HMHB1-1    |
| A_22_P00003987 | 1,53301 | 1,51546 | 1,012239024 | ENST00000566439 | 102467079 | NR_104655    | LOC102467079   |
| A_22_P00008063 | 1,53597 | 1,51842 | 1,012239024 | ENST00000476460 | N/A       | N/A          | N/A            |

|                |         |         |             |                 |           |              |                       |
|----------------|---------|---------|-------------|-----------------|-----------|--------------|-----------------------|
| A_21_P0000752  | 1,58708 | 1,56954 | 1,012232008 | N/A             | 100507064 | NR_038288    | TEX26-AS1             |
| A_22_P00006268 | 1,55893 | 1,54141 | 1,012217976 | ENST00000426859 | 643365    | NM_001278674 | LINC00452             |
| A_33_P3251801  | 1,56646 | 1,54895 | 1,012210959 | ENST00000393039 | 346689    | NM_198508    | KLRG2                 |
| A_21_P0007283  | 1,61519 | 1,59768 | 1,012210959 | N/A             | N/A       | N/A          | Inc-CTD-2523D13.1.1-4 |
| A_21_P0013300  | 10,3006 | 10,2831 | 1,012203943 | ENST00000455017 | N/A       | N/A          | N/A                   |
| A_33_P3230350  | 11,8418 | 11,8243 | 1,012203943 | ENST00000394673 | 7756      | NM_001098507 | ZNF207                |
| A_23_P162861   | 1,47318 | 1,45568 | 1,012203943 | ENST00000400389 | 647174    | NM_001101320 | SERPINE3              |
| A_22_P00010124 | 2,88478 | 2,86729 | 1,012196927 | N/A             | N/A       | N/A          | Inc-MRPL16-1          |
| A_22_P00004779 | 1,58414 | 1,56665 | 1,012196927 | ENST00000506670 | 728586    | N/A          | LINC01183             |
| A_21_P0004799  | 1,51339 | 1,49591 | 1,012189911 | N/A             | N/A       | N/A          | Inc-LPA-2             |
| A_23_P118675   | 1,51075 | 1,49328 | 1,012182895 | ENST00000239174 | 3211      | NM_002144    | HOXB1                 |
| A_21_P0012016  | 1,64868 | 1,63121 | 1,012182895 | ENST00000456999 | N/A       | N/A          | N/A                   |
| A_22_P00021911 | 5,00701 | 4,98957 | 1,012161848 | N/A             | N/A       | N/A          | Inc-BRF1-2            |
| A_33_P3318781  | 1,45318 | 1,43577 | 1,012140801 | N/A             | N/A       | N/A          | N/A                   |
| A_33_P3585924  | 1,59528 | 1,57788 | 1,012133785 | ENST00000440494 | 339529    | NR_033883    | LOC339529             |
| A_21_P0014667  | 1,54386 | 1,52646 | 1,012133785 | N/A             | N/A       | N/A          | N/A                   |
| A_33_P3372488  | 1,45355 | 1,43615 | 1,012133785 | ENST00000371209 | 26123     | BC061582     | TCTN3                 |
| A_21_P0001442  | 1,61991 | 1,60253 | 1,012119754 | N/A             | N/A       | N/A          | Inc-GPR137B-2         |
| A_21_P0000396  | 1,58625 | 1,56887 | 1,012119754 | N/A             | 692215    | NR_003080    | SNORD112              |
| A_22_P00017743 | 1,58048 | 1,56311 | 1,012112739 | N/A             | N/A       | N/A          | Inc-YBX2-1            |
| A_22_P00015736 | 1,58828 | 1,57092 | 1,012105723 | N/A             | N/A       | N/A          | Inc-TACC2-2           |
| A_33_P3268478  | 1,65773 | 1,64038 | 1,012098708 | N/A             | 387712    | XM_006717835 | ENO4                  |
| A_23_P60339    | 8,40953 | 8,39219 | 1,012091693 | ENST00000314700 | 84267     | NM_032307    | C9orf64               |
| A_22_P00019271 | 8,31841 | 8,30107 | 1,012091693 | ENST00000506255 | 100507091 | NR_038290    | LOC100507091          |
| A_22_P00002844 | 1,51123 | 1,4939  | 1,012084677 | N/A             | N/A       | N/A          | Inc-C3orf30-2         |
| A_21_P0006995  | 1,58309 | 1,56578 | 1,012070647 | N/A             | 100506769 | NR_108038    | C10orf71-AS1          |
| A_23_P105066   | 10,8429 | 10,8256 | 1,012063632 | ENST00000530016 | 3611      | NM_001014795 | ILK                   |
| A_24_P818010   | 10,7003 | 10,683  | 1,012063632 | N/A             | 729737    | NR_039983    | LOC729737             |
| A_22_P00004682 | 1,5191  | 1,5018  | 1,012063632 | ENST00000532307 | 100507384 | NR_047569    | LOC100507384          |
| A_24_P38290    | 1,49299 | 1,4757  | 1,012056617 | ENST00000350485 | 6863      | NM_003182    | TAC1                  |
| A_22_P00003626 | 1,57381 | 1,55653 | 1,012049602 | ENST00000475362 | 151658    | NR_024276    | LINC00635             |
| A_22_P00014093 | 1,57706 | 1,55978 | 1,012049602 | N/A             | 102723562 | NR_120483    | LINC01498             |
| A_22_P00024236 | 1,37978 | 1,3625  | 1,012049602 | N/A             | N/A       | AK127156     | Inc-MRPS5-2           |

|                |         |         |             |                 |           |              |                      |
|----------------|---------|---------|-------------|-----------------|-----------|--------------|----------------------|
| A_22_P00003324 | 1,48807 | 1,47079 | 1,012049602 | ENST00000437466 | N/A       | N/A          | N/A                  |
| A_33_P3383975  | 1,51572 | 1,49844 | 1,012049602 | ENST00000522186 | N/A       | N/A          | N/A                  |
| A_22_P00008321 | 1,63808 | 1,62082 | 1,012035572 | N/A             | 100874041 | NR_046756    | MACC1-AS1            |
| A_21_P0004828  | 1,72443 | 1,70717 | 1,012035572 | N/A             | N/A       | N/A          | Inc-LY86-1           |
| A_22_P00002581 | 1,55061 | 1,53335 | 1,012035572 | ENST00000581170 | N/A       | AK292743     | N/A                  |
| A_24_P231026   | 1,58357 | 1,56631 | 1,012035572 | ENST00000354534 | 6334      | NM_014191    | SCN8A                |
| A_22_P00013490 | 1,38417 | 1,36691 | 1,012035572 | N/A             | 101928817 | XR_245804    | LOC101928817         |
| A_22_P00018690 | 1,67057 | 1,65332 | 1,012028557 | ENST00000513926 | N/A       | N/A          | N/A                  |
| A_21_P0005513  | 1,65876 | 1,64152 | 1,012021542 | N/A             | N/A       | N/A          | Inc-SGCE-1           |
| A_22_P00021665 | 1,52846 | 1,51125 | 1,012000498 | N/A             | N/A       | N/A          | Inc-BRMS1L-4         |
| A_33_P3460460  | 8,20871 | 8,1915  | 1,012000498 | N/A             | 91370     | BC008289     | MGC20647             |
| A_21_P0003695  | 1,48299 | 1,46578 | 1,012000498 | N/A             | N/A       | N/A          | Inc-ZFP42-4          |
| A_33_P3402313  | 1,51745 | 1,50027 | 1,011979454 | ENST00000295269 | 389015    | NM_001011552 | SLC9A4               |
| A_21_P0010880  | 5,20461 | 5,18743 | 1,011979454 | N/A             | N/A       | N/A          | XLOC_I2_001972       |
| A_22_P00023411 | 1,50689 | 1,48972 | 1,01197244  | N/A             | N/A       | N/A          | Inc-MYNN-1           |
| A_21_P0012192  | 1,71605 | 1,69888 | 1,01197244  | N/A             | N/A       | N/A          | XLOC_I2_009172       |
| A_21_P0010008  | 1,5161  | 1,49893 | 1,01197244  | N/A             | N/A       | N/A          | Inc-DZANK1-3         |
| A_32_P54037    | 1,55631 | 1,53915 | 1,011965425 | ENST00000344280 | 120935    | NM_182496    | CCDC38               |
| A_21_P0007822  | 1,56304 | 1,54588 | 1,011965425 | N/A             | N/A       | N/A          | Inc-EIF2S3L-1-2      |
| A_21_P0006849  | 1,64106 | 1,6239  | 1,011965425 | N/A             | N/A       | N/A          | Inc-LYZL1-4          |
| A_23_P60718    | 7,79746 | 7,78031 | 1,011958411 | ENST00000330817 | 79087     | NM_024105    | ALG12                |
| A_24_P927041   | 1,58277 | 1,56562 | 1,011958411 | ENST00000305817 | 23627     | NM_012409    | PRND                 |
| A_23_P9565     | 1,53322 | 1,51608 | 1,011951397 | ENST00000305626 | 83452     | NM_031296    | RAB33B               |
| A_33_P3285444  | 1,39394 | 1,3768  | 1,011951397 | ENST00000276602 | 7013      | NM_017489    | TERF1                |
| A_33_P3374394  | 1,54353 | 1,5264  | 1,011944382 | ENST00000461266 | 55898     | NM_001039675 | UNC45A               |
| A_22_P00013432 | 1,40794 | 1,39082 | 1,011937368 | N/A             | N/A       | N/A          | Inc-RP11-257K9.7.1-2 |
| A_33_P3312784  | 1,81059 | 1,79347 | 1,011937368 | N/A             | N/A       | N/A          | N/A                  |
| A_23_P64919    | 1,52173 | 1,50462 | 1,011930354 | ENST00000229002 | 79785     | NM_024730    | RERGL                |
| A_33_P3278635  | 1,52377 | 1,50666 | 1,011930354 | ENST00000374510 | 255220    | NM_001003936 | TXNDC8               |
| A_23_P26994    | 1,4458  | 1,42869 | 1,011930354 | ENST00000515635 | 2793      | NM_031498    | GNGT2                |
| A_21_P0006607  | 1,62725 | 1,61015 | 1,01192334  | N/A             | N/A       | N/A          | Inc-KDM5D-4          |
| A_33_P3382086  | 11,8621 | 11,845  | 1,01192334  | ENST00000615744 | 84331     | NM_138418    | FAM195A              |
| A_24_P298545   | 10,8974 | 10,8803 | 1,01192334  | ENST00000620639 | 113835    | NM_033468    | ZNF257               |

|                |         |         |             |                 |           |              |                |
|----------------|---------|---------|-------------|-----------------|-----------|--------------|----------------|
| A_21_P0011195  | 1,67384 | 1,65675 | 1,011916326 | ENST00000610194 | 100874178 | XR_246656    | LINC00454      |
| A_33_P3509233  | 1,36059 | 1,34351 | 1,011909312 | ENST00000468646 | 285286    | NR_104116    | LINC00877      |
| A_33_P3354464  | 5,93773 | 5,92065 | 1,011909312 | ENST00000566530 | 4016      | NM_005576    | LOXL1          |
| A_22_P00000185 | 1,49228 | 1,4752  | 1,011909312 | ENST00000565938 | N/A       | XR_424667    | N/A            |
| A_24_P49371    | 8,93006 | 8,91299 | 1,011902298 | ENST00000502889 | 54969     | NM_017867    | C4orf27        |
| A_22_P00012662 | 1,59125 | 1,5742  | 1,01188827  | N/A             | N/A       | N/A          | Inc-PYDC2-4    |
| A_22_P00020431 | 1,63819 | 1,62116 | 1,011874242 | ENST00000521224 | N/A       | N/A          | N/A            |
| A_21_P0005584  | 1,50831 | 1,49128 | 1,011874242 | ENST00000477392 | 285972    | NR_034033    | LINC00996      |
| A_22_P00008304 | 4,96368 | 4,94666 | 1,011867228 | N/A             | N/A       | BC073814     | Inc-ITGAL-3    |
| A_22_P00024365 | 1,52391 | 1,50689 | 1,011867228 | N/A             | N/A       | DA734982     | Inc-LRMP-2     |
| A_23_P258483   | 1,48567 | 1,46866 | 1,011860215 | ENST00000434982 | 79722     | NM_024669    | ANKRD55        |
| A_21_P0012753  | 3,02475 | 3,00774 | 1,011860215 | N/A             | N/A       | N/A          | XLOC_I2_010888 |
| A_24_P396720   | 11,2937 | 11,2767 | 1,011853201 | ENST00000358506 | 5500      | NM_002709    | PPP1CB         |
| A_23_P255884   | 13,8414 | 13,8244 | 1,011853201 | ENST00000449733 | 2934      | NM_198252    | GSN            |
| A_24_P344976   | 1,5285  | 1,51151 | 1,011846187 | ENST00000374495 | 407       | NM_004312    | ARR3           |
| A_32_P157391   | 1,37782 | 1,36084 | 1,011839174 | ENST00000529567 | 219595    | NM_153696    | FOLH1B         |
| A_22_P00002879 | 1,47707 | 1,4601  | 1,01183216  | N/A             | 102723896 | XR_425759    | LOC102723896   |
| A_33_P3220137  | 1,57997 | 1,56302 | 1,011818133 | ENST00000371968 | 340596    | NM_178175    | LHFPL1         |
| A_33_P3230822  | 1,58484 | 1,5679  | 1,01181112  | ENST00000593323 | 646508    | N/A          | FAM90A27P      |
| A_21_P0005998  | 1,5667  | 1,54976 | 1,01181112  | ENST00000429581 | 101929428 | N/A          | PTPRD-AS2      |
| A_22_P00006283 | 1,59698 | 1,58006 | 1,011797094 | N/A             | N/A       | N/A          | Inc-FAM78A-3   |
| A_21_P0001392  | 1,47594 | 1,45903 | 1,01179008  | ENST00000442621 | 148756    | NR_125716    | OVAAL          |
| A_33_P3329428  | 1,58873 | 1,57182 | 1,01179008  | ENST00000360870 | 7273      | NM_133379    | TTN            |
| A_33_P3287760  | 1,50743 | 1,49053 | 1,011783067 | ENST00000395809 | 221002    | NM_001282862 | RASGEF1A       |
| A_33_P3212764  | 1,57712 | 1,56022 | 1,011783067 | N/A             | 647662    | AK097358     | FLJ40039       |
| A_33_P3404814  | 1,65191 | 1,63501 | 1,011783067 | ENST00000262493 | 2775      | NM_020988    | GNAO1          |
| A_24_P764690   | 2,77383 | 2,75693 | 1,011783067 | ENST00000544044 | N/A       | XR_424689    | N/A            |
| A_33_P3408949  | 1,4907  | 1,47382 | 1,011769041 | ENST00000335730 | 125336    | AK127869     | LOXHD1         |
| A_22_P00014410 | 1,58261 | 1,56573 | 1,011769041 | ENST00000443092 | 100506680 | NR_103450    | SACS-AS1       |
| A_23_P168909   | 1,55886 | 1,54198 | 1,011769041 | ENST00000407775 | 23414     | NM_012082    | ZFPM2          |
| A_22_P00020842 | 1,58107 | 1,5642  | 1,011762028 | N/A             | N/A       | N/A          | Inc-SEPHS2-2   |
| A_22_P00021582 | 1,45345 | 1,43658 | 1,011762028 | N/A             | N/A       | DB038929     | Inc-TMEM114-4  |
| A_22_P00002536 | 6,89204 | 6,87517 | 1,011762028 | ENST00000579629 | N/A       | N/A          | N/A            |

|                |         |         |             |                 |           |              |                       |
|----------------|---------|---------|-------------|-----------------|-----------|--------------|-----------------------|
| A_33_P3410232  | 1,48424 | 1,4674  | 1,011740989 | N/A             | 79136     | NR_024541    | LY6G6E                |
| A_22_P00012025 | 1,63268 | 1,61584 | 1,011740989 | N/A             | 100506866 | NR_038271    | TTN-AS1               |
| A_22_P00024249 | 1,51198 | 1,49515 | 1,011733976 | N/A             | N/A       | N/A          | Inc-LRRC38-2          |
| A_22_P00019437 | 1,41901 | 1,40218 | 1,011733976 | ENST00000453774 | 102723646 | N/A          | LOC102723646          |
| A_33_P3263293  | 1,51349 | 1,49666 | 1,011733976 | N/A             | N/A       | N/A          | N/A                   |
| A_33_P3222822  | 1,58568 | 1,56885 | 1,011733976 | ENST00000493858 | 401388    | NM_001201450 | C7orf76               |
| A_24_P13831    | 1,64461 | 1,62778 | 1,011733976 | ENST00000610485 | 124460    | NM_182854    | SNX20                 |
| A_21_P0011222  | 1,65774 | 1,64092 | 1,011726964 | N/A             | 101928922 | N/A          | LINC00463             |
| A_21_P0008584  | 1,66957 | 1,65276 | 1,011719951 | N/A             | N/A       | N/A          | Inc-MKRN3-1           |
| A_21_P0004738  | 1,57962 | 1,56281 | 1,011719951 | N/A             | N/A       | N/A          | Inc-PRL-4             |
| A_22_P00025771 | 1,45505 | 1,43824 | 1,011719951 | ENST00000451707 | N/A       | N/A          | N/A                   |
| A_21_P0007993  | 1,48886 | 1,47205 | 1,011719951 | ENST00000452288 | N/A       | N/A          | N/A                   |
| A_24_P374564   | 1,66535 | 1,64855 | 1,011712938 | N/A             | N/A       | N/A          | N/A                   |
| A_22_P00000697 | 1,62141 | 1,60461 | 1,011712938 | N/A             | N/A       | N/A          | Inc-ADAM22-3          |
| A_33_P3356846  | 5,15177 | 5,13499 | 1,011698913 | ENST00000512528 | 345778    | NM_001010891 | MTX3                  |
| A_23_P59051    | 1,53187 | 1,51509 | 1,011698913 | ENST00000377850 | 10246     | NM_005835    | SLC17A2               |
| A_24_P99639    | 4,14915 | 4,13237 | 1,011698913 | ENST00000268766 | 284086    | NM_178170    | NEK8                  |
| A_22_P00010977 | 1,48663 | 1,46986 | 1,0116919   | N/A             | N/A       | N/A          | Inc-NRIP2-7           |
| A_22_P00015619 | 1,58273 | 1,56596 | 1,0116919   | ENST00000437290 | N/A       | N/A          | N/A                   |
| A_23_P146783   | 1,4939  | 1,47713 | 1,0116919   | ENST00000618972 | 4703      | NM_004543    | NEB                   |
| A_22_P00013688 | 1,49034 | 1,47358 | 1,011684888 | N/A             | N/A       | N/A          | Inc-RP11-728F11.4.1-1 |
| A_22_P00004805 | 1,48366 | 1,4669  | 1,011684888 | N/A             | N/A       | N/A          | Inc-CXXC11-1          |
| A_22_P00018390 | 1,58429 | 1,56754 | 1,011677875 | N/A             | N/A       | N/A          | Inc-AP1S2-2           |
| A_22_P00018917 | 1,50021 | 1,48346 | 1,011677875 | ENST00000437772 | N/A       | N/A          | N/A                   |
| A_33_P3250939  | 1,58533 | 1,56858 | 1,011677875 | ENST00000282878 | 115827    | NM_138453    | RAB3C                 |
| A_33_P3308706  | 5,23688 | 5,22014 | 1,011670863 | ENST00000525257 | 55031     | NM_001282659 | USP47                 |
| A_33_P3390924  | 1,58228 | 1,56554 | 1,011670863 | N/A             | N/A       | AK093262     | Inc-MRPL32-1          |
| A_21_P0008263  | 1,55634 | 1,5396  | 1,011670863 | N/A             | 102724113 | XR_429271    | LOC102724113          |
| A_22_P00009111 | 1,48122 | 1,46449 | 1,011663851 | N/A             | N/A       | CD242461     | Inc-LIN28B-2          |
| A_22_P00025440 | 1,3742  | 1,35748 | 1,011656838 | N/A             | 100852408 | NR_046219    | EGFLAM-AS4            |
| A_22_P00014732 | 1,63882 | 1,6221  | 1,011656838 | N/A             | N/A       | BC015376     | Inc-SLC30A1-1         |
| A_23_P258689   | 11,0231 | 11,0064 | 1,011642814 | ENST00000297440 | 54919     | NM_017802    | DNAAF5                |
| A_23_P64448    | 1,58497 | 1,56827 | 1,011642814 | ENST00000332601 | 8590      | NM_003696    | OR6A2                 |

|                |         |         |             |                 |           |              |                |
|----------------|---------|---------|-------------|-----------------|-----------|--------------|----------------|
| A_23_P133722   | 1,58127 | 1,56457 | 1,011642814 | ENST00000505118 | 167       | NM_001131    | CRISP1         |
| A_33_P3358049  | 1,51397 | 1,49727 | 1,011642814 | ENST00000415846 | 342618    | NM_001129820 | SLFN14         |
| A_23_P141549   | 17,0019 | 16,9852 | 1,011642814 | ENST00000406376 | 6201      | NM_001011    | RPS7           |
| A_21_P0005871  | 1,49781 | 1,48112 | 1,011635802 | N/A             | N/A       | N/A          | Inc-TMEM55A-3  |
| A_24_P27513    | 1,39703 | 1,38035 | 1,01162879  | ENST00000478060 | 85445     | NM_033401    | CNTNAP4        |
| A_22_P00016180 | 1,55368 | 1,537   | 1,01162879  | N/A             | N/A       | N/A          | Inc-TLE3-3     |
| A_22_P00018826 | 1,60913 | 1,59245 | 1,01162879  | N/A             | 100874097 | NR_046668    | UBE2Q1-AS1     |
| A_22_P00003209 | 1,6173  | 1,60062 | 1,01162879  | N/A             | N/A       | N/A          | Inc-CA8-4      |
| A_22_P00018834 | 1,69484 | 1,67817 | 1,011621778 | N/A             | 503569    | NR_033932    | RGMB-AS1       |
| A_24_P709476   | 1,5038  | 1,48714 | 1,011614766 | ENST00000447380 | 150568    | NR_015399    | LINC01102      |
| A_22_P00001675 | 1,40495 | 1,38829 | 1,011614766 | N/A             | N/A       | N/A          | Inc-ASPH-2     |
| A_21_P0006963  | 1,48311 | 1,46645 | 1,011614766 | N/A             | N/A       | N/A          | Inc-PRKCQ-2    |
| A_22_P00006728 | 1,46053 | 1,44387 | 1,011614766 | ENST00000557506 | N/A       | N/A          | N/A            |
| A_24_P93633    | 4,62103 | 4,60438 | 1,011607754 | ENST00000380424 | 55667     | AK000627     | DENND4C        |
| A_21_P0008033  | 1,60554 | 1,58889 | 1,011607754 | N/A             | N/A       | N/A          | Inc-SGCG-3     |
| A_24_P86868    | 9,99168 | 9,97503 | 1,011607754 | ENST00000464099 | 399818    | NM_212554    | METTLL10       |
| A_33_P3328274  | 1,50036 | 1,48372 | 1,011600742 | N/A             | N/A       | N/A          | N/A            |
| A_22_P00001806 | 1,58481 | 1,56817 | 1,011600742 | N/A             | N/A       | N/A          | Inc-ATP6V1B2-2 |
| A_33_P3355580  | 2,58427 | 2,56764 | 1,01159373  | ENST00000354530 | 392360    | NR_027917    | CTSL3P         |
| A_24_P101642   | 1,47369 | 1,45706 | 1,01159373  | ENST00000570121 | N/A       | N/A          | N/A            |
| A_22_P00001991 | 1,58285 | 1,56623 | 1,011586718 | ENST00000413056 | N/A       | N/A          | N/A            |
| A_33_P3213707  | 1,58002 | 1,5634  | 1,011586718 | ENST00000397747 | 80380     | NM_025239    | PDCD1LG2       |
| A_33_P3368044  | 1,53475 | 1,51814 | 1,011579706 | ENST00000296824 | 133957    | AK126844     | CCDC127        |
| A_23_P135499   | 12,1081 | 12,0915 | 1,011572695 | ENST00000374379 | 25932     | NM_013943    | CLIC4          |
| A_24_P925799   | 1,50522 | 1,48862 | 1,011572695 | ENST00000390369 | N/A       | X04931       | N/A            |
| A_24_P191833   | 10,2019 | 10,1853 | 1,011572695 | ENST00000284041 | 140890    | NM_139168    | SREK1          |
| A_23_P409951   | 17,8894 | 17,8728 | 1,011572695 | ENST00000592727 | 4946      | NM_004152    | OAZ1           |
| A_22_P00009737 | 1,49154 | 1,47495 | 1,011565683 | ENST00000553747 | 100506433 | NR_039996    | LINC00648      |
| A_21_P0012863  | 1,55899 | 1,5424  | 1,011565683 | ENST00000511707 | 101928176 | N/A          | LINC01411      |
| A_19_P00316846 | 1,50911 | 1,49253 | 1,011558671 | N/A             | N/A       | N/A          | Inc-AKR1C2-4   |
| A_22_P00018054 | 4,44068 | 4,42412 | 1,011544648 | N/A             | N/A       | BX482559     | Inc-ZNF286A-3  |
| A_22_P00005655 | 1,37407 | 1,35751 | 1,011544648 | ENST00000451556 | N/A       | AA421413     | N/A            |
| A_23_P15639    | 9,46303 | 9,44648 | 1,011537637 | ENST00000583221 | 64149     | NM_022344    | C17orf75       |

|                |         |         |             |                 |           |              |                |
|----------------|---------|---------|-------------|-----------------|-----------|--------------|----------------|
| A_22_P00018165 | 1,51686 | 1,50031 | 1,011537637 | ENST00000587395 | 100631378 | NR_040015    | LOC100631378   |
| A_21_P0008333  | 5,51127 | 5,49473 | 1,011530625 | N/A             | N/A       | N/A          | Inc-ABHD12B-4  |
| A_22_P00011336 | 1,45799 | 1,44145 | 1,011530625 | ENST00000477099 | N/A       | N/A          | N/A            |
| A_22_P00013931 | 1,57794 | 1,5614  | 1,011530625 | ENST00000423568 | N/A       | N/A          | N/A            |
| A_21_P0011170  | 1,66328 | 1,64674 | 1,011530625 | ENST00000444553 | N/A       | N/A          | N/A            |
| A_21_P0012172  | 1,50592 | 1,48938 | 1,011530625 | N/A             | N/A       | N/A          | XL0C_I2_008996 |
| A_21_P0006736  | 1,54446 | 1,52793 | 1,011523614 | N/A             | N/A       | N/A          | Inc-C10orf31-8 |
| A_22_P00018587 | 1,52775 | 1,51123 | 1,011516603 | N/A             | N/A       | N/A          | Inc-FAM126B-2  |
| A_22_P00006025 | 1,49361 | 1,47709 | 1,011516603 | ENST00000520881 | N/A       | DA874789     | N/A            |
| A_22_P00024217 | 4,24952 | 4,23301 | 1,011509591 | N/A             | N/A       | AK055524     | Inc-AP3M1-1    |
| A_22_P00012121 | 1,37579 | 1,35928 | 1,011509591 | N/A             | N/A       | AV761168     | Inc-POLE3-1    |
| A_22_P00006981 | 1,3604  | 1,34389 | 1,011509591 | ENST00000447260 | 101928271 | XR_244595    | LOC101928271   |
| A_33_P3417582  | 1,53935 | 1,52284 | 1,011509591 | N/A             | N/A       | N/A          | N/A            |
| A_23_P386411   | 10,0579 | 10,0414 | 1,01150258  | ENST00000307720 | 5481      | NM_005038    | PPID           |
| A_22_P00003941 | 1,45906 | 1,44256 | 1,01150258  | N/A             | N/A       | N/A          | Inc-CHAC1-3    |
| A_33_P3378491  | 1,46234 | 1,44585 | 1,011495569 | ENST00000390373 | N/A       | AY124781     | N/A            |
| A_33_P3424848  | 1,37258 | 1,3561  | 1,011488558 | N/A             | 339059    | NR_120387    | LOC339059      |
| A_22_P00008273 | 1,56001 | 1,54353 | 1,011488558 | ENST00000558156 | N/A       | XM_001719300 | N/A            |
| A_23_P112327   | 1,51356 | 1,49708 | 1,011488558 | ENST00000619164 | 29991     | NM_014582    | OBP2A          |
| A_23_P300056   | 4,19783 | 4,18136 | 1,011481547 | ENST00000315554 | 998       | NM_044472    | CDC42          |
| A_21_P0010946  | 1,6287  | 1,61223 | 1,011481547 | ENST00000604933 | 100996567 | NR_103828    | ANTXRLP1       |
| A_22_P00007032 | 1,42786 | 1,4114  | 1,011474536 | N/A             | N/A       | N/A          | Inc-GJA10-2    |
| A_21_P0001297  | 1,6963  | 1,67986 | 1,011460514 | N/A             | N/A       | N/A          | Inc-CPT2-1     |
| A_22_P00007380 | 1,51493 | 1,49851 | 1,011446492 | ENST00000518090 | N/A       | N/A          | N/A            |
| A_22_P00018224 | 1,42793 | 1,41151 | 1,011446492 | N/A             | N/A       | N/A          | Inc-ZNF676-1   |
| A_24_P141688   | 10,691  | 10,6746 | 1,011432471 | ENST00000447282 | 5094      | NM_005016    | PCBP2          |
| A_21_P0001836  | 1,50089 | 1,4845  | 1,01142546  | N/A             | N/A       | N/A          | Inc-MYCN-6     |
| A_22_P00011441 | 1,55281 | 1,53642 | 1,01142546  | N/A             | N/A       | N/A          | Inc-PANK3-3    |
| A_22_P00015467 | 1,46244 | 1,44605 | 1,01142546  | N/A             | N/A       | N/A          | Inc-ST7L-1     |
| A_21_P0002601  | 1,67357 | 1,65718 | 1,01142546  | N/A             | N/A       | N/A          | Inc-ATOH8-2    |
| A_21_P0009144  | 1,73229 | 1,71592 | 1,011411439 | N/A             | N/A       | N/A          | Inc-MTHFSD-5   |
| A_22_P00021787 | 5,48992 | 5,47355 | 1,011411439 | ENST00000441338 | N/A       | N/A          | N/A            |
| A_21_P0003165  | 1,68825 | 1,67189 | 1,011404428 | N/A             | N/A       | N/A          | Inc-KLF15-2    |



|                |         |         |             |                 |           |              |                       |
|----------------|---------|---------|-------------|-----------------|-----------|--------------|-----------------------|
| A_22_P00023538 | 1,57788 | 1,56153 | 1,011397418 | ENST00000560296 | N/A       | DA957648     | N/A                   |
| A_33_P3253852  | 1,3682  | 1,35186 | 1,011390407 | N/A             | N/A       | AK128083     | Inc-ACSL1-3           |
| A_21_P0000048  | 1,48255 | 1,46621 | 1,011390407 | N/A             | 27185     | NM_001164542 | DISC1                 |
| A_22_P00021235 | 1,5548  | 1,53846 | 1,011390407 | ENST00000565771 | N/A       | BX113191     | N/A                   |
| A_21_P0004523  | 1,51283 | 1,4965  | 1,011383397 | N/A             | N/A       | N/A          | Inc-C5orf30-2         |
| A_33_P3287897  | 1,55076 | 1,53443 | 1,011383397 | N/A             | N/A       | N/A          | N/A                   |
| A_21_P0009105  | 1,40335 | 1,38703 | 1,011376386 | ENST00000564102 | N/A       | N/A          | N/A                   |
| A_22_P00013362 | 1,54839 | 1,53207 | 1,011376386 | ENST00000548194 | N/A       | CR745651     | N/A                   |
| A_24_P910667   | 1,61293 | 1,59661 | 1,011376386 | ENST00000623925 | N/A       | AF220235     | N/A                   |
| A_22_P00021678 | 1,56279 | 1,54647 | 1,011376386 | N/A             | N/A       | N/A          | Inc-KCNG3-2           |
| A_33_P3335458  | 1,48158 | 1,46527 | 1,011369376 | ENST00000418428 | N/A       | N/A          | N/A                   |
| A_21_P0001728  | 1,57444 | 1,55814 | 1,011362366 | N/A             | N/A       | N/A          | Inc-DMRTA2-3          |
| A_32_P50522    | 12,1577 | 12,1414 | 1,011362366 | ENST00000618612 | 2280      | NM_000801    | FKBP1A                |
| A_33_P3380682  | 7,72412 | 7,70783 | 1,011355356 | ENST00000367871 | 9519      | NM_001253676 | TBPL1                 |
| A_33_P3300430  | 1,66771 | 1,65142 | 1,011355356 | ENST00000270509 | 84467     | NM_032447    | FBN3                  |
| A_32_P499005   | 1,46763 | 1,45135 | 1,011348346 | ENST00000610688 | 388882    | NR_110539    | LOC388882             |
| A_33_P3284212  | 1,70213 | 1,68585 | 1,011348346 | ENST00000314556 | 89882     | NM_001001874 | TPD52L3               |
| A_33_P3399228  | 1,5405  | 1,52423 | 1,011341335 | ENST00000355300 | 84894     | NM_001301191 | LINGO1                |
| A_21_P0011077  | 1,62636 | 1,61009 | 1,011341335 | ENST00000536518 | 101929584 | NR_120477    | LOC101929584          |
| A_22_P00023890 | 1,56693 | 1,55067 | 1,011334325 | N/A             | N/A       | N/A          | Inc-P2RX3-1           |
| A_22_P00011395 | 1,38248 | 1,36622 | 1,011334325 | ENST00000418369 | N/A       | N/A          | N/A                   |
| A_21_P0012848  | 1,50958 | 1,49332 | 1,011334325 | N/A             | N/A       | N/A          | XLOC_I2_011744        |
| A_21_P0007728  | 1,50602 | 1,48977 | 1,011327315 | N/A             | N/A       | N/A          | Inc-E2F7-2            |
| A_22_P00025911 | 1,6141  | 1,59786 | 1,011320305 | ENST00000449673 | N/A       | N/A          | N/A                   |
| A_33_P3304081  | 7,48104 | 7,4648  | 1,011320305 | ENST00000489727 | N/A       | N/A          | N/A                   |
| A_23_P361495   | 1,57375 | 1,55752 | 1,011313295 | ENST00000456903 | 11016     | NM_006856    | ATF7                  |
| A_22_P00008200 | 1,57279 | 1,55656 | 1,011313295 | N/A             | N/A       | N/A          | Inc-INTS12-1          |
| A_22_P00019227 | 1,61887 | 1,60264 | 1,011313295 | ENST00000434176 | N/A       | N/A          | N/A                   |
| A_33_P3389771  | 1,62197 | 1,60574 | 1,011313295 | ENST00000400578 | 378948    | NM_001006121 | RBMY1B                |
| A_22_P00010256 | 1,66832 | 1,6521  | 1,011306286 | N/A             | N/A       | N/A          | Inc-MTERFD2-2         |
| A_32_P224525   | 1,49448 | 1,47826 | 1,011306286 | ENST00000506143 | 131873    | NM_001102608 | COL6A6                |
| A_22_P00004787 | 5,57288 | 5,55666 | 1,011306286 | N/A             | 440952    | NR_033965    | EIF1B-AS1             |
| A_21_P0007631  | 1,44285 | 1,42664 | 1,011299276 | N/A             | N/A       | N/A          | Inc-RP11-116D17.1.1-8 |

|                |         |         |             |                 |           |              |                       |
|----------------|---------|---------|-------------|-----------------|-----------|--------------|-----------------------|
| A_33_P3365985  | 10,4685 | 10,4523 | 1,011292266 | ENST00000624051 | N/A       | XR_428277    | N/A                   |
| A_33_P3391955  | 1,50604 | 1,48984 | 1,011292266 | ENST00000503243 | 101929762 | NR_125931    | LOC101929762          |
| A_22_P00009869 | 1,36938 | 1,35318 | 1,011292266 | ENST00000582700 | N/A       | N/A          | N/A                   |
| A_21_P0004350  | 1,72823 | 1,71204 | 1,011285256 | N/A             | N/A       | N/A          | Inc-SLC12A7-1         |
| A_23_P331063   | 1,4868  | 1,47061 | 1,011285256 | ENST00000304801 | 5232      | NM_138733    | PGK2                  |
| A_23_P24457    | 1,58257 | 1,56638 | 1,011285256 | ENST00000530763 | 57689     | NM_020929    | LRRC4C                |
| A_33_P3283030  | 1,4564  | 1,44023 | 1,011271237 | ENST00000391353 | 100533177 | NM_001257309 | KRTAP29-1             |
| A_33_P3363271  | 1,43471 | 1,41854 | 1,011271237 | ENST00000377329 | 783       | NM_000724    | CACNB2                |
| A_33_P3321007  | 1,76118 | 1,74501 | 1,011271237 | N/A             | 401463    | NR_015374    | LOC401463             |
| A_21_P0009518  | 1,64688 | 1,63071 | 1,011271237 | N/A             | N/A       | N/A          | Inc-LAMA1-4           |
| A_33_P3223923  | 9,07534 | 9,05919 | 1,011257218 | ENST00000300289 | 2923      | NM_005313    | PDIA3                 |
| A_22_P00022504 | 1,65683 | 1,64068 | 1,011257218 | N/A             | 100127967 | NR_126005    | KRT73-AS1             |
| A_33_P3344521  | 1,57378 | 1,55764 | 1,011250208 | N/A             | N/A       | N/A          | N/A                   |
| A_33_P3409544  | 1,5254  | 1,50927 | 1,011243199 | N/A             | N/A       | N/A          | N/A                   |
| A_23_P167250   | 1,58607 | 1,56994 | 1,011243199 | ENST00000264497 | 59067     | NM_021803    | IL21                  |
| A_33_P3455790  | 1,58014 | 1,56401 | 1,011243199 | ENST00000414116 | 401312    | NR_122075    | LOC401312             |
| A_24_P917759   | 1,57738 | 1,56126 | 1,01123619  | N/A             | N/A       | N/A          | Inc-THUMPD1-1         |
| A_23_P385843   | 1,51166 | 1,49554 | 1,01123619  | ENST00000382388 | 140850    | NM_139074    | DEFB127               |
| A_22_P00019085 | 4,7196  | 4,70348 | 1,01123619  | N/A             | N/A       | N/A          | Inc-CLCNKB-2          |
| A_21_P0005783  | 1,56862 | 1,5525  | 1,01123619  | N/A             | N/A       | N/A          | Inc-ERICH1-2          |
| A_21_P0003761  | 1,52721 | 1,5111  | 1,01122918  | N/A             | N/A       | N/A          | Inc-RP11-455G16.1.1-1 |
| A_21_P0010756  | 1,47128 | 1,45517 | 1,01122918  | ENST00000505841 | 199974    | NM_178134    | CYP4Z1                |
| A_24_P196117   | 12,8174 | 12,8013 | 1,011222171 | ENST00000607778 | 404672    | NM_207118    | GTF2H5                |
| A_21_P0011437  | 1,3797  | 1,3636  | 1,011222171 | N/A             | N/A       | N/A          | XLOC_I2_005197        |
| A_23_P80242    | 1,56669 | 1,5506  | 1,011215162 | ENST00000494013 | 23544     | NM_021115    | SEZ6L                 |
| A_23_P410115   | 1,64974 | 1,63366 | 1,011208153 | ENST00000325157 | 150350    | NM_152512    | ENTHD1                |
| A_21_P0006558  | 1,50712 | 1,49104 | 1,011208153 | N/A             | N/A       | N/A          | Inc-CXorf22-1         |
| A_22_P00003835 | 2,66436 | 2,64829 | 1,011201143 | N/A             | N/A       | N/A          | Inc-CDYL2-3           |
| A_23_P164405   | 1,59044 | 1,57438 | 1,011194134 | ENST00000394015 | 85294     | NM_033184    | KRTAP2-4              |
| A_33_P3259447  | 1,58304 | 1,56698 | 1,011194134 | ENST00000567226 | 645752    | NR_027024    | LOC645752             |
| A_19_P00322354 | 1,47121 | 1,45515 | 1,011194134 | N/A             | 100505881 | NR_038343    | MAGI2-AS3             |
| A_21_P0013325  | 7,70575 | 7,68969 | 1,011194134 | N/A             | N/A       | N/A          | XLOC_I2_013873        |
| A_33_P3293396  | 6,00548 | 5,98944 | 1,011180116 | ENST00000368820 | 339398    | NM_001004432 | LINGO4                |

|                |         |         |             |                 |           |              |                     |
|----------------|---------|---------|-------------|-----------------|-----------|--------------|---------------------|
| A_32_P901770   | 1,66828 | 1,65226 | 1,011166098 | ENST00000270691 | 83715     | NM_031475    | ESPN                |
| A_22_P00018217 | 1,56292 | 1,5469  | 1,011166098 | N/A             | N/A       | AK090676     | Inc-ZNF667-2        |
| A_21_P0005952  | 1,7714  | 1,75539 | 1,01115909  | N/A             | N/A       | N/A          | Inc-MYC-2           |
| A_33_P3329128  | 1,73086 | 1,71485 | 1,01115909  | N/A             | 729930    | NR_077244    | LOC729930           |
| A_22_P00025162 | 4,13195 | 4,11594 | 1,01115909  | ENST00000456553 | 256643    | NM_198279    | CXorf23             |
| A_33_P3331491  | 10,7867 | 10,7707 | 1,011152081 | ENST00000568641 | 728392    | NM_001162371 | LOC728392           |
| A_21_P0013488  | 1,43032 | 1,41432 | 1,011152081 | N/A             | N/A       | N/A          | XLOC_I2_014217      |
| A_22_P00009175 | 1,61214 | 1,59614 | 1,011152081 | ENST00000565055 | N/A       | N/A          | N/A                 |
| A_22_P00019973 | 1,64784 | 1,63185 | 1,011145072 | ENST00000568714 | N/A       | N/A          | N/A                 |
| A_23_P334892   | 7,9969  | 7,98092 | 1,011138063 | ENST00000396568 | 284114    | NM_178518    | TMEM102             |
| A_33_P3390342  | 6,39898 | 6,38302 | 1,011124046 | N/A             | 100131257 | NR_034022    | LOC100131257        |
| A_24_P100613   | 1,46664 | 1,45068 | 1,011124046 | ENST00000579014 | 284217    | NM_005559    | LAMA1               |
| A_22_P00017878 | 1,57891 | 1,56295 | 1,011124046 | N/A             | N/A       | N/A          | Inc-ZEB2-1          |
| A_22_P00019252 | 1,5779  | 1,56194 | 1,011124046 | ENST00000546710 | N/A       | BF211919     | N/A                 |
| A_23_P206684   | 9,38179 | 9,36584 | 1,011117038 | ENST00000359154 | 11060     | NM_199424    | WWP2                |
| A_33_P3213665  | 1,57697 | 1,56102 | 1,011117038 | ENST00000500381 | 728084    | N/A          | LOC728084           |
| A_22_P00018728 | 1,64547 | 1,62953 | 1,011110029 | N/A             | 101928817 | XR_245804    | LOC101928817        |
| A_21_P0004198  | 1,57858 | 1,56264 | 1,011110029 | N/A             | N/A       | N/A          | Inc-NDUFS6-7        |
| A_22_P00013799 | 1,54084 | 1,5249  | 1,011110029 | N/A             | N/A       | N/A          | Inc-RP4-604K5.1.1-1 |
| A_33_P3293958  | 1,45725 | 1,44131 | 1,011110029 | N/A             | N/A       | BC131577     | N/A                 |
| A_21_P0009345  | 1,5108  | 1,49487 | 1,011103021 | ENST00000580942 | 400612    | NR_126169    | LOC400612           |
| A_21_P0002278  | 1,57567 | 1,55974 | 1,011103021 | N/A             | N/A       | N/A          | Inc-GLI2-4          |
| A_33_P3403392  | 6,7591  | 6,74318 | 1,011096012 | ENST00000538851 | 65985     | NM_023928    | AACS                |
| A_24_P145529   | 1,49509 | 1,47917 | 1,011096012 | N/A             | 163720    | AK097373     | CYP4Z2P             |
| A_21_P0008171  | 1,55287 | 1,53695 | 1,011096012 | N/A             | N/A       | N/A          | Inc-DIAPH3-1        |
| A_22_P00020909 | 1,55962 | 1,5437  | 1,011096012 | N/A             | 102724484 | NR_120522    | LOC102724484        |
| A_33_P3329013  | 1,57914 | 1,56322 | 1,011096012 | ENST00000357585 | 6752      | NM_001050    | SSTR2               |
| A_33_P3471466  | 1,42482 | 1,40891 | 1,011089004 | ENST00000460005 | 145497    | NM_194287    | LRRC74A             |
| A_21_P0004452  | 1,53644 | 1,52054 | 1,011081996 | N/A             | 102723929 | XR_425920    | LOC102723929        |
| A_22_P00007512 | 1,66843 | 1,65254 | 1,011074987 | N/A             | 102723866 | XR_424351    | LOC102723866        |
| A_33_P3497502  | 1,56638 | 1,55049 | 1,011074987 | N/A             | 283475    | AL833568     | LOC283475           |
| A_22_P00022439 | 1,56763 | 1,55174 | 1,011074987 | ENST00000330469 | 9096      | BC040697     | TBX18               |
| A_33_P3316394  | 7,13685 | 7,12097 | 1,011067979 | ENST00000354197 | 79744     | NM_001098491 | ZNF419              |

|                |         |         |             |                 |           |           |                |
|----------------|---------|---------|-------------|-----------------|-----------|-----------|----------------|
| A_33_P3264974  | 1,67005 | 1,65417 | 1,011067979 | ENST00000382007 | N/A       | N/A       | N/A            |
| A_22_P00010136 | 1,52551 | 1,50964 | 1,011060971 | ENST00000448063 | N/A       | N/A       | N/A            |
| A_22_P00006924 | 1,54865 | 1,53279 | 1,011053963 | ENST00000456526 | N/A       | N/A       | N/A            |
| A_21_P0014713  | 1,53439 | 1,51854 | 1,011046955 | N/A             | N/A       | N/A       | N/A            |
| A_23_P430271   | 1,63126 | 1,61542 | 1,011039947 | ENST00000368614 | 80313     | NM_030626 | LRRRC27        |
| A_24_P935986   | 1,66953 | 1,65369 | 1,011039947 | ENST00000261192 | 586       | NM_005504 | BCAT1          |
| A_22_P00009628 | 1,57784 | 1,562   | 1,011039947 | N/A             | N/A       | DA294692  | Inc-MARCKS-5   |
| A_33_P3293903  | 1,58523 | 1,5694  | 1,011032939 | ENST00000370458 | 2334      | X95463    | AFF2           |
| A_21_P0004560  | 1,39747 | 1,38164 | 1,011032939 | N/A             | N/A       | N/A       | Inc-ZNF366-2   |
| A_22_P00016463 | 1,51451 | 1,49868 | 1,011032939 | ENST00000534723 | N/A       | N/A       | N/A            |
| A_21_P0010595  | 8,77163 | 8,75581 | 1,011025931 | ENST00000414742 | 26260     | NM_183420 | FBXO25         |
| A_33_P3706494  | 1,51115 | 1,49534 | 1,011018923 | ENST00000589376 | 284294    | NR_033881 | LOC284294      |
| A_21_P0005751  | 1,5755  | 1,55969 | 1,011018923 | ENST00000522390 | N/A       | N/A       | N/A            |
| A_21_P0002614  | 6,66961 | 6,6538  | 1,011018923 | N/A             | N/A       | N/A       | Inc-LYPD6-1    |
| A_21_P0011185  | 6,06098 | 6,04518 | 1,011011915 | N/A             | N/A       | N/A       | XLOC_I2_003992 |
| A_21_P0011733  | 1,36151 | 1,34571 | 1,011011915 | N/A             | 100505851 | XR_109588 | LOC100505851   |
| A_22_P00009806 | 1,50506 | 1,48926 | 1,011011915 | ENST00000558262 | N/A       | BM558120  | N/A            |
| A_23_P112397   | 11,7779 | 11,7621 | 1,011011915 | ENST00000483559 | 54461     | NM_018998 | FBXW5          |
| A_33_P3323847  | 12,7401 | 12,7243 | 1,011011915 | ENST00000617875 | 9401      | NM_004260 | RECQL4         |
| A_21_P0012382  | 1,4807  | 1,46491 | 1,011004907 | ENST00000462219 | 255025    | N/A       | LINC00879      |
| A_22_P00014902 | 1,56507 | 1,54928 | 1,011004907 | N/A             | N/A       | BM285387  | Inc-SLC9A4-1   |
| A_22_P00015697 | 1,52402 | 1,50823 | 1,011004907 | N/A             | N/A       | N/A       | Inc-SYNGR1-1   |
| A_19_P00320354 | 1,40852 | 1,39273 | 1,011004907 | N/A             | N/A       | N/A       | XLOC_I2_013542 |
| A_33_P3412320  | 1,57972 | 1,56394 | 1,0109979   | N/A             | 100128164 | NR_024409 | LOC100128164   |
| A_33_P3288725  | 3,58183 | 3,56606 | 1,010990892 | N/A             | N/A       | CU678159  | N/A            |
| A_23_P131263   | 1,65303 | 1,63726 | 1,010990892 | ENST00000359962 | 58538     | NM_033066 | MPP4           |
| A_21_P0001510  | 1,49899 | 1,48323 | 1,010983884 | N/A             | N/A       | N/A       | Inc-PPAP2B-1   |
| A_21_P0006616  | 1,53196 | 1,51621 | 1,010976877 | ENST00000451929 | 283033    | NR_033846 | LINC00841      |
| A_33_P3394471  | 1,65873 | 1,64298 | 1,010976877 | ENST00000390425 | N/A       | N/A       | N/A            |
| A_21_P0011438  | 7,36712 | 7,35137 | 1,010976877 | N/A             | N/A       | N/A       | XLOC_I2_005198 |
| A_21_P0003220  | 1,53657 | 1,52083 | 1,010969869 | ENST00000429949 | 100996597 | NR_103843 | LINC00690      |
| A_21_P0004510  | 1,53751 | 1,52177 | 1,010969869 | N/A             | N/A       | N/A       | Inc-HEXB-1     |
| A_22_P00003560 | 1,64196 | 1,62624 | 1,010955854 | ENST00000506420 | N/A       | N/A       | N/A            |

|                |         |         |             |                 |           |              |                |
|----------------|---------|---------|-------------|-----------------|-----------|--------------|----------------|
| A_22_P00019655 | 1,64085 | 1,62513 | 1,010955854 | N/A             | N/A       | N/A          | Inc-GRM6-1     |
| A_33_P3301897  | 1,41712 | 1,4014  | 1,010955854 | ENST00000390373 | N/A       | AY124781     | N/A            |
| A_21_P0014315  | 1,71598 | 1,70027 | 1,010948847 | N/A             | N/A       | N/A          | N/A            |
| A_33_P3230668  | 1,57448 | 1,55877 | 1,010948847 | N/A             | 100131232 | AK090761     | LOC100131232   |
| A_21_P0002970  | 1,6651  | 1,6494  | 1,01094184  | ENST00000482677 | 101927111 | NR_109992    | SUCLG2-AS1     |
| A_23_P167159   | 1,59425 | 1,57856 | 1,010934832 | ENST00000512188 | 11341     | NM_007281    | SCRG1          |
| A_21_P0008195  | 1,6384  | 1,62271 | 1,010934832 | N/A             | N/A       | N/A          | Inc-SLITRK6-2  |
| A_21_P0010575  | 9,09451 | 9,07882 | 1,010934832 | ENST00000420335 | N/A       | N/A          | N/A            |
| A_22_P00024874 | 1,48127 | 1,46558 | 1,010934832 | ENST00000432251 | N/A       | N/A          | N/A            |
| A_33_P3282359  | 3,45505 | 3,43938 | 1,010920818 | N/A             | 284232    | NR_027995    | ANKRD20A9P     |
| A_22_P00003717 | 1,48421 | 1,46854 | 1,010920818 | ENST00000580699 | N/A       | N/A          | N/A            |
| A_33_P3331125  | 1,57677 | 1,56112 | 1,010906804 | N/A             | 154091    | NM_145176    | SLC2A12        |
| A_22_P00010055 | 1,52203 | 1,50639 | 1,010899797 | N/A             | 100775107 | NR_045388    | RBM5-AS1       |
| A_33_P3481674  | 1,66855 | 1,65293 | 1,010885783 | ENST00000441885 | 388336    | NM_207386    | SHISA6         |
| A_22_P00019423 | 1,57614 | 1,56053 | 1,010878776 | ENST00000438677 | 252950    | NR_001550    | TTY18          |
| A_22_P00021956 | 1,63817 | 1,62258 | 1,010864762 | ENST00000511453 | N/A       | N/A          | N/A            |
| A_22_P00021082 | 1,51404 | 1,49846 | 1,010857755 | N/A             | N/A       | N/A          | Inc-ADAMTS18-5 |
| A_24_P281439   | 1,5762  | 1,56063 | 1,010850749 | ENST00000328570 | 401993    | NM_001004697 | OR2T5          |
| A_33_P3336397  | 1,52974 | 1,51417 | 1,010850749 | N/A             | 100506688 | NR_104614    | LOC100506688   |
| A_23_P141665   | 1,56398 | 1,54841 | 1,010850749 | ENST00000304094 | 8383      | NM_014565    | OR1A1          |
| A_22_P00020904 | 1,54459 | 1,52903 | 1,010843742 | N/A             | N/A       | N/A          | Inc-ATP6V1E2-4 |
| A_22_P00016585 | 1,55339 | 1,53783 | 1,010843742 | ENST00000436974 | N/A       | N/A          | N/A            |
| A_23_P301021   | 1,56051 | 1,54495 | 1,010843742 | ENST00000361833 | 460       | NM_004319    | ASTN1          |
| A_22_P00007109 | 1,37554 | 1,35998 | 1,010843742 | N/A             | N/A       | N/A          | Inc-GLT6D1-1   |
| A_22_P00018719 | 1,51422 | 1,49866 | 1,010843742 | ENST00000426609 | N/A       | N/A          | N/A            |
| A_19_P00316164 | 1,51962 | 1,50407 | 1,010836735 | ENST00000514368 | 101928858 | XR_425858    | LOC101928858   |
| A_23_P138328   | 1,67894 | 1,66339 | 1,010836735 | ENST00000460624 | 148811    | NM_152491    | PM20D1         |
| A_22_P00014792 | 1,45542 | 1,43988 | 1,010829729 | N/A             | N/A       | N/A          | Inc-SLC39A10-3 |
| A_22_P00012390 | 1,65143 | 1,6359  | 1,010822722 | N/A             | 101927069 | NR_110647    | LOC101927069   |
| A_33_P3748410  | 1,50236 | 1,48683 | 1,010822722 | N/A             | 654841    | NR_102371    | LOC654841      |
| A_22_P00007626 | 1,57541 | 1,55989 | 1,010815716 | N/A             | N/A       | N/A          | Inc-HELZ-2     |
| A_21_P0014541  | 1,54519 | 1,52967 | 1,010815716 | N/A             | N/A       | N/A          | N/A            |
| A_21_P0003474  | 1,65325 | 1,63774 | 1,010808709 | N/A             | N/A       | N/A          | Inc-TECRL-2    |

|                |         |         |             |                 |           |              |              |
|----------------|---------|---------|-------------|-----------------|-----------|--------------|--------------|
| A_24_P161355   | 16,1146 | 16,0991 | 1,010801703 | ENST00000456185 | N/A       | N/A          | N/A          |
| A_33_P3230738  | 17,479  | 17,4635 | 1,010801703 | N/A             | N/A       | N/A          | N/A          |
| A_33_P3379454  | 5,98642 | 5,97093 | 1,010794697 | ENST00000616255 | 29128     | NM_001290050 | UHRF1        |
| A_22_P00021491 | 1,37576 | 1,36028 | 1,01078769  | N/A             | 100874084 | NR_046618    | KCNAB1-AS1   |
| A_22_P00004019 | 8,91063 | 8,89515 | 1,01078769  | N/A             | N/A       | N/A          | Inc-CHMP7-2  |
| A_33_P3412013  | 1,39232 | 1,37685 | 1,010780684 | ENST00000536054 | 652972    | NR_034087    | LRRC37A5P    |
| A_23_P419411   | 1,49137 | 1,4759  | 1,010780684 | ENST00000623916 | N/A       | AF119886     | N/A          |
| A_21_P0005390  | 1,49489 | 1,47943 | 1,010773678 | N/A             | N/A       | N/A          | Inc-ZNF138-1 |
| A_33_P3273802  | 1,45423 | 1,43878 | 1,010766672 | N/A             | N/A       | N/A          | N/A          |
| A_33_P3393667  | 1,46802 | 1,45257 | 1,010766672 | ENST00000542354 | N/A       | AB305689     | N/A          |
| A_21_P0007627  | 1,63724 | 1,6218  | 1,010759666 | N/A             | N/A       | N/A          | Inc-SDSL-1   |
| A_21_P0009904  | 1,45405 | 1,43862 | 1,01075266  | ENST00000428999 | 101927457 | NR_110027    | LINC01522    |
| A_22_P00024419 | 2,89033 | 2,87491 | 1,010745654 | N/A             | N/A       | N/A          | Inc-SZT2-2   |
| A_23_P10647    | 1,3893  | 1,37388 | 1,010745654 | ENST00000307746 | 54360     | NM_018659    | CYTL1        |
| A_33_P3227696  | 2,83793 | 2,82251 | 1,010745654 | ENST00000564704 | 6553      | AK091748     | SLC9A5       |
| A_19_P00316719 | 1,71155 | 1,69613 | 1,010745654 | ENST00000451392 | 646324    | N/A          | LINC00607    |
| A_21_P0005501  | 1,67321 | 1,6578  | 1,010738648 | N/A             | N/A       | N/A          | Inc-SBDS-1   |
| A_22_P00016816 | 1,51867 | 1,50327 | 1,010731642 | ENST00000508799 | N/A       | N/A          | N/A          |
| A_33_P6469777  | 14,7209 | 14,7055 | 1,010731642 | N/A             | 84973     | NR_024542    | SNHG7        |
| A_21_P0012163  | 1,56944 | 1,55405 | 1,010724636 | ENST00000478164 | 728882    | N/A          | FAM182B      |
| A_23_P88262    | 1,55645 | 1,54107 | 1,01071763  | ENST00000390448 | N/A       | S60789       | N/A          |
| A_23_P54736    | 5,22293 | 5,20755 | 1,01071763  | ENST00000248150 | 51764     | NM_016541    | GNG13        |
| A_33_P3319967  | 1,62997 | 1,6146  | 1,010710625 | ENST00000356962 | 383       | NM_001244438 | ARG1         |
| A_33_P3385471  | 1,59374 | 1,57838 | 1,010703619 | ENST00000446524 | 403253    | NM_001005512 | OR4A47       |
| A_33_P3209566  | 1,51158 | 1,49624 | 1,010689608 | N/A             | N/A       | N/A          | N/A          |
| A_32_P465742   | 1,41638 | 1,40106 | 1,010675597 | ENST00000541509 | 8395      | NM_003558    | PIP5K1B      |
| A_21_P0006701  | 1,45526 | 1,43995 | 1,010668591 | ENST00000452286 | N/A       | N/A          | N/A          |
| A_33_P3468614  | 1,59162 | 1,57631 | 1,010668591 | ENST00000580017 | N/A       | AK057304     | N/A          |
| A_33_P3342917  | 9,15508 | 9,13977 | 1,010668591 | ENST00000225777 | 9144      | NM_004710    | SYNGR2       |
| A_33_P3359923  | 1,47913 | 1,46383 | 1,010661586 | ENST00000457514 | 399968    | NM_001144874 | PATE4        |
| A_33_P3413945  | 1,57635 | 1,56106 | 1,01065458  | N/A             | N/A       | N/A          | N/A          |
| A_21_P0000551  | 2,86028 | 2,845   | 1,010647575 | ENST00000432330 | 100294720 | NR_027994    | NHEG1        |
| A_21_P0003533  | 1,52623 | 1,51097 | 1,010633565 | ENST00000514134 | N/A       | N/A          | N/A          |

|                |         |         |             |                 |           |              |                 |
|----------------|---------|---------|-------------|-----------------|-----------|--------------|-----------------|
| A_33_P3264910  | 1,50801 | 1,49275 | 1,010633565 | ENST00000368592 | 84504     | NM_177400    | NKX6-2          |
| A_21_P0000586  | 6,60945 | 6,59421 | 1,010619554 | N/A             | 286495    | NR_030737    | TTC3P1          |
| A_21_P0009052  | 1,69296 | 1,67773 | 1,010612549 | N/A             | N/A       | N/A          | Inc-TK2-3       |
| A_21_P0002926  | 1,45573 | 1,44051 | 1,010605544 | N/A             | N/A       | N/A          | Inc-CHL1-2      |
| A_32_P159334   | 1,71344 | 1,69822 | 1,010605544 | ENST00000444129 | 5965      | NM_002907    | RECQL           |
| A_22_P00005492 | 1,50668 | 1,49147 | 1,010598539 | N/A             | N/A       | N/A          | Inc-DYRK2-4     |
| A_24_P358146   | 3,2652  | 3,25002 | 1,010577525 | ENST00000382990 | N/A       | N/A          | N/A             |
| A_33_P3249314  | 1,58751 | 1,57233 | 1,010577525 | ENST00000457166 | 729156    | NR_003934    | GTF2IRD1P1      |
| A_22_P00010349 | 1,48181 | 1,46664 | 1,01057052  | ENST00000519048 | N/A       | N/A          | N/A             |
| A_32_P208823   | 1,60627 | 1,59111 | 1,010563515 | ENST00000315392 | 57125     | NM_020405    | PLXDC1          |
| A_22_P00002255 | 1,50838 | 1,49322 | 1,010563515 | N/A             | N/A       | N/A          | Inc-C10orf131-1 |
| A_21_P0006787  | 1,56112 | 1,54596 | 1,010563515 | ENST00000458489 | N/A       | N/A          | N/A             |
| A_22_P00021136 | 1,45495 | 1,4398  | 1,010556511 | N/A             | N/A       | N/A          | Inc-KCNMA1-2    |
| A_33_P3335571  | 6,33562 | 6,32048 | 1,010549506 | N/A             | 100133315 | NR_029192    | LOC100133315    |
| A_21_P0010370  | 5,64275 | 5,62761 | 1,010549506 | ENST00000458154 | N/A       | N/A          | N/A             |
| A_23_P340822   | 1,47229 | 1,45716 | 1,010542501 | ENST00000448307 | 257062    | NM_152784    | CATSPERD        |
| A_22_P00004233 | 1,52582 | 1,5107  | 1,010535497 | N/A             | N/A       | N/A          | Inc-CLVS2-3     |
| A_33_P3857217  | 1,58321 | 1,56811 | 1,010521488 | N/A             | 286189    | AK092549     | LOC286189       |
| A_23_P66872    | 11,558  | 11,5429 | 1,010521488 | ENST00000319004 | 50628     | NM_015721    | GEMIN4          |
| A_21_P0002974  | 1,66757 | 1,65248 | 1,010514484 | N/A             | N/A       | N/A          | Inc-MITF-4      |
| A_21_P0006895  | 1,52286 | 1,50777 | 1,010514484 | N/A             | N/A       | N/A          | Inc-PCGF5-1     |
| A_21_P0003537  | 1,36355 | 1,34847 | 1,010507479 | ENST00000502956 | N/A       | N/A          | N/A             |
| A_21_P0012128  | 1,49205 | 1,47697 | 1,010507479 | N/A             | N/A       | N/A          | XLOC_I2_008667  |
| A_33_P3327657  | 1,52891 | 1,51383 | 1,010507479 | ENST00000342943 | 55061     | N/A          | SUSD4           |
| A_22_P00004964 | 1,50874 | 1,49367 | 1,010500475 | N/A             | N/A       | N/A          | Inc-DCLRE1B-2   |
| A_23_P87860    | 1,53224 | 1,51717 | 1,010500475 | ENST00000228644 | 4617      | NM_005593    | MYF5            |
| A_22_P00025855 | 1,39002 | 1,37496 | 1,010493471 | N/A             | N/A       | N/A          | Inc-AMMECR1-1   |
| A_21_P0000968  | 1,46711 | 1,45206 | 1,010486467 | N/A             | 100874253 | NR_047498    | LINC00853       |
| A_21_P0010820  | 1,58919 | 1,57414 | 1,010486467 | ENST00000406795 | N/A       | N/A          | N/A             |
| A_21_P0001187  | 1,54655 | 1,5315  | 1,010486467 | ENST00000414590 | 387597    | N/A          | ILDR2           |
| A_21_P0008738  | 1,50568 | 1,49063 | 1,010486467 | N/A             | 102724553 | XR_424631    | LOC102724553    |
| A_24_P766716   | 1,48852 | 1,47347 | 1,010486467 | ENST00000312143 | 1240      | NM_001142343 | CMKLR1          |
| A_21_P0012539  | 1,37383 | 1,35879 | 1,010479463 | N/A             | N/A       | N/A          | XLOC_I2_010226  |

|                |         |         |             |                 |           |              |                 |
|----------------|---------|---------|-------------|-----------------|-----------|--------------|-----------------|
| A_22_P00015328 | 1,59487 | 1,57983 | 1,010479463 | N/A             | N/A       | N/A          | Inc-SPPL3.1-2   |
| A_21_P0003470  | 1,52251 | 1,50747 | 1,010479463 | ENST00000514707 | N/A       | N/A          | N/A             |
| A_22_P00012223 | 1,58845 | 1,57341 | 1,010479463 | ENST00000546982 | N/A       | DB020179     | N/A             |
| A_21_P0000555  | 1,4674  | 1,45236 | 1,010479463 | ENST00000595299 | 359806    | NR_028270    | PCNAP1          |
| A_33_P3395843  | 1,5424  | 1,52738 | 1,010465454 | N/A             | N/A       | N/A          | N/A             |
| A_21_P0001791  | 1,56235 | 1,54733 | 1,010465454 | ENST00000433133 | 644838    | NR_038844    | LOC644838       |
| A_33_P3264514  | 1,56357 | 1,54857 | 1,010451446 | ENST00000397648 | 6285      | N/A          | S100B           |
| A_21_P0003598  | 1,37193 | 1,35696 | 1,010430435 | ENST00000506010 | N/A       | N/A          | N/A             |
| A_22_P00003275 | 1,64927 | 1,63432 | 1,010416428 | ENST00000502156 | 101929076 | N/A          | LOC101929076    |
| A_33_P3371185  | 1,48627 | 1,47133 | 1,010409424 | N/A             | N/A       | N/A          | N/A             |
| A_33_P3744736  | 1,55836 | 1,54343 | 1,01040242  | N/A             | 646736    | N/A          | LOC646736       |
| A_23_P81103    | 1,65159 | 1,63666 | 1,01040242  | ENST00000274063 | 6423      | NM_003013    | SFRP2           |
| A_22_P00008092 | 1,47165 | 1,45672 | 1,01040242  | ENST00000558086 | N/A       | N/A          | N/A             |
| A_21_P0007146  | 1,4789  | 1,46398 | 1,010395417 | N/A             | N/A       | N/A          | Inc-NDUFV1-2    |
| A_33_P3398951  | 1,58796 | 1,57305 | 1,010388413 | ENST00000390452 | N/A       | AM408129     | N/A             |
| A_21_P0014031  | 6,88509 | 6,87019 | 1,01038141  | ENST00000621329 | 4137      | NM_001123066 | MAPT            |
| A_22_P00016561 | 1,6051  | 1,5902  | 1,01038141  | ENST00000522187 | N/A       | BX113090     | N/A             |
| A_33_P3326165  | 1,57782 | 1,56292 | 1,01038141  | ENST00000397270 | 723961    | NM_001042376 | INS-IGF2        |
| A_22_P00023158 | 1,70645 | 1,69157 | 1,010367403 | N/A             | N/A       | AA682775     | Inc-RBMXL3-1    |
| A_22_P00014236 | 1,54271 | 1,52783 | 1,010367403 | ENST00000556819 | N/A       | N/A          | N/A             |
| A_22_P00010912 | 1,4732  | 1,45832 | 1,010367403 | N/A             | N/A       | N/A          | Inc-NPY2R-1     |
| A_21_P0006720  | 1,57534 | 1,56046 | 1,010367403 | ENST00000418295 | 399708    | N/A          | LINC00701       |
| A_32_P133005   | 1,62561 | 1,61074 | 1,0103604   | ENST00000242323 | 79269     | NM_024345    | DCAF10          |
| A_33_P3394170  | 1,62917 | 1,61433 | 1,01033939  | ENST00000428520 | 254312    | NR_015413    | LINC00710       |
| A_33_P3331220  | 1,49511 | 1,48027 | 1,01033939  | ENST00000390617 | N/A       | Z46771       | N/A             |
| A_33_P3238611  | 1,50584 | 1,49101 | 1,010332387 | N/A             | N/A       | N/A          | N/A             |
| A_32_P88231    | 1,47711 | 1,46228 | 1,010332387 | ENST00000426475 | 285141    | NM_001290031 | ERICH2          |
| A_21_P0000078  | 1,47616 | 1,46134 | 1,010325384 | ENST00000573128 | 84690     | NM_001170699 | SPATA22         |
| A_21_P0011901  | 1,87644 | 1,86162 | 1,010325384 | N/A             | N/A       | N/A          | XLLOC_I2_007880 |
| A_21_P0007172  | 1,49256 | 1,47775 | 1,010318381 | N/A             | N/A       | N/A          | Inc-ADM-1       |
| A_22_P00015758 | 1,68583 | 1,67102 | 1,010318381 | N/A             | 147429    | NR_026908    | AQP4-AS1        |
| A_23_P153524   | 6,85241 | 6,8376  | 1,010318381 | ENST00000408991 | 55150     | NM_018111    | C19orf73        |
| A_22_P00000611 | 1,56961 | 1,5548  | 1,010318381 | N/A             | N/A       | AK055876     | Inc-ACOT1-3     |



|                |         |         |             |                 |           |              |                      |
|----------------|---------|---------|-------------|-----------------|-----------|--------------|----------------------|
| A_21_P0012783  | 1,57825 | 1,56346 | 1,010304375 | ENST00000515127 | N/A       | N/A          | N/A                  |
| A_21_P0007625  | 1,54455 | 1,52977 | 1,010297372 | N/A             | N/A       | N/A          | Inc-CCDC63-2         |
| A_22_P00014566 | 1,42195 | 1,40718 | 1,010290369 | ENST00000466291 | N/A       | N/A          | N/A                  |
| A_33_P3414192  | 1,43534 | 1,42057 | 1,010290369 | ENST00000452214 | 114815    | NM_001206572 | SORCS1               |
| A_33_P3422747  | 6,96639 | 6,95163 | 1,010283366 | ENST00000409307 | 129563    | NM_152383    | DIS3L2               |
| A_33_P3335057  | 1,42436 | 1,40961 | 1,010276364 | N/A             | 504189    | NM_001013356 | OR8U8                |
| A_33_P3279388  | 1,35916 | 1,34442 | 1,010269361 | N/A             | N/A       | N/A          | N/A                  |
| A_21_P0012011  | 5,31897 | 5,30424 | 1,010262358 | ENST00000454490 | 645784    | N/A          | ANKRD36BP2           |
| A_21_P0003935  | 1,49698 | 1,48225 | 1,010262358 | N/A             | N/A       | N/A          | Inc-C5orf43-3        |
| A_33_P3325847  | 1,3769  | 1,36219 | 1,010248353 | ENST00000541359 | N/A       | N/A          | N/A                  |
| A_33_P3338036  | 1,65981 | 1,6451  | 1,010248353 | ENST00000330619 | 388566    | NM_001001668 | ZNF470               |
| A_21_P0003738  | 1,40615 | 1,39145 | 1,010241351 | N/A             | N/A       | N/A          | Inc-AC021860.1-5     |
| A_21_P0014413  | 1,57846 | 1,56377 | 1,010234348 | N/A             | N/A       | N/A          | N/A                  |
| A_21_P0012583  | 8,01126 | 7,99658 | 1,010227346 | N/A             | N/A       | N/A          | XLOC_I2_010636       |
| A_21_P0006663  | 1,37186 | 1,35718 | 1,010227346 | ENST00000456082 | 101929218 | NR_120652    | LINC01517            |
| A_21_P0007100  | 1,45751 | 1,44283 | 1,010227346 | N/A             | N/A       | N/A          | Inc-ZNF32-2          |
| A_33_P3401179  | 1,52057 | 1,50592 | 1,010206339 | N/A             | N/A       | N/A          | N/A                  |
| A_21_P0014249  | 1,6398  | 1,62515 | 1,010206339 | N/A             | N/A       | N/A          | N/A                  |
| A_33_P3364433  | 5,67617 | 5,66153 | 1,010199337 | ENST00000415850 | 91        | NM_020328    | ACVR1B               |
| A_22_P00008927 | 1,56946 | 1,55482 | 1,010199337 | ENST00000623644 | N/A       | N/A          | N/A                  |
| A_33_P3620488  | 6,46828 | 6,45367 | 1,010178331 | ENST00000492088 | 57828     | NM_021185    | CATSPERG             |
| A_33_P3566559  | 1,57923 | 1,56462 | 1,010178331 | N/A             | 285224    | NR_037890    | DNAJB8-AS1           |
| A_33_P3703637  | 1,57932 | 1,56471 | 1,010178331 | N/A             | N/A       | N/A          | Inc-ZNF717-1         |
| A_22_P00005265 | 1,57979 | 1,56518 | 1,010178331 | N/A             | N/A       | N/A          | Inc-DMRTA2-2         |
| A_21_P0003188  | 1,35922 | 1,34462 | 1,010171329 | N/A             | N/A       | N/A          | Inc-ZBBX-2           |
| A_24_P261470   | 1,51904 | 1,50444 | 1,010171329 | ENST00000475737 | 9379      | NM_138732    | NRXN2                |
| A_22_P00018363 | 1,51808 | 1,50349 | 1,010164327 | N/A             | N/A       | XM_006718922 | Inc-ZW10-1           |
| A_22_P00014076 | 1,57252 | 1,55794 | 1,010157325 | N/A             | N/A       | N/A          | Inc-SAP18-1          |
| A_33_P3244168  | 1,53837 | 1,52379 | 1,010157325 | N/A             | N/A       | N/A          | N/A                  |
| A_21_P0012892  | 2,97357 | 2,959   | 1,010150323 | N/A             | N/A       | N/A          | XLOC_I2_011954       |
| A_21_P0009532  | 1,42729 | 1,41272 | 1,010150323 | N/A             | N/A       | N/A          | Inc-RP11-863N1.2.1-5 |
| A_22_P00024054 | 1,60551 | 1,59095 | 1,010143321 | N/A             | N/A       | DB053892     | Inc-CCL2-7           |
| A_21_P0004958  | 1,4436  | 1,42905 | 1,010136319 | N/A             | N/A       | N/A          | Inc-CLDN20-1         |

|                |         |         |             |                 |           |              |                |
|----------------|---------|---------|-------------|-----------------|-----------|--------------|----------------|
| A_22_P00004854 | 1,36887 | 1,35433 | 1,010129318 | N/A             | N/A       | BG183796     | Inc-CYP2J2-1   |
| A_22_P00004045 | 1,63266 | 1,61813 | 1,010122316 | ENST00000532068 | N/A       | BU176067     | N/A            |
| A_23_P97402    | 1,58235 | 1,56782 | 1,010122316 | ENST00000009105 | 57172     | NM_020439    | CAMK1G         |
| A_33_P3587772  | 1,50685 | 1,49232 | 1,010122316 | ENST00000588074 | 400654    | NR_033983    | LINC01538      |
| A_22_P00011888 | 1,53443 | 1,5199  | 1,010122316 | ENST00000368089 | 3766      | NM_002241    | KCNJ10         |
| A_22_P00000214 | 2,72417 | 2,70965 | 1,010115314 | ENST00000378526 | 3980      | AK294910     | LIG3           |
| A_33_P3364358  | 1,41151 | 1,39699 | 1,010115314 | N/A             | N/A       | N/A          | N/A            |
| A_22_P00007399 | 1,63157 | 1,61705 | 1,010115314 | ENST00000569215 | N/A       | BC036623     | N/A            |
| A_33_P3320563  | 1,66882 | 1,65431 | 1,010108313 | ENST00000303227 | 392465    | NM_001080489 | GLOD5          |
| A_22_P00001777 | 1,52465 | 1,51014 | 1,010108313 | N/A             | N/A       | N/A          | Inc-ATP1B3-1   |
| A_21_P0006817  | 1,53017 | 1,51567 | 1,010101311 | N/A             | N/A       | N/A          | Inc-AKR1E2-5   |
| A_32_P126311   | 11,1597 | 11,1452 | 1,010101311 | ENST00000508124 | 153129    | NM_173514    | SLC38A9        |
| A_22_P00005124 | 9,59673 | 9,58224 | 1,01009431  | N/A             | 100505681 | NR_038452    | NAPA-AS1       |
| A_22_P00004444 | 1,77    | 1,75551 | 1,01009431  | N/A             | 102723824 | NR_110584    | LOC102723824   |
| A_33_P3282733  | 1,46589 | 1,4514  | 1,01009431  | N/A             | 100131395 | XR_110093    | LOC100131395   |
| A_33_P3380383  | 1,54048 | 1,52599 | 1,01009431  | ENST00000537858 | 497189    | NM_001099221 | TIFAB          |
| A_33_P3253792  | 1,83807 | 1,82358 | 1,01009431  | ENST00000342995 | 340602    | NM_203407    | CXorf67        |
| A_33_P3328312  | 2,03146 | 2,01698 | 1,010087308 | ENST00000560968 | 6927      | NM_000545    | HNF1A          |
| A_22_P00002373 | 1,60126 | 1,58679 | 1,010080307 | N/A             | N/A       | N/A          | Inc-C12orf62-1 |
| A_22_P00023733 | 1,46253 | 1,44807 | 1,010073306 | N/A             | N/A       | N/A          | Inc-ILK-3      |
| A_24_P376379   | 1,46836 | 1,4539  | 1,010073306 | ENST00000397645 | 647323    | NR_033944    | LOC647323      |
| A_23_P326020   | 1,72247 | 1,70801 | 1,010073306 | ENST00000455883 | 114788    | NM_198123    | CSMD3          |
| A_23_P72651    | 1,57411 | 1,55965 | 1,010073306 | ENST00000618155 | 641700    | NM_001077693 | ECSCR          |
| A_22_P00015927 | 8,81939 | 8,80494 | 1,010066305 | N/A             | N/A       | N/A          | Inc-TCL1B-2    |
| A_23_P250136   | 1,62884 | 1,61439 | 1,010066305 | ENST00000369138 | 2898      | NM_175768    | GRIK2          |
| A_23_P368067   | 3,08097 | 3,06653 | 1,010059303 | ENST00000374899 | 6891      | NM_018833    | TAP2           |
| A_21_P0006431  | 1,57514 | 1,56071 | 1,010052302 | ENST00000412422 | 101928287 | XR_244529    | LINC01285      |
| A_22_P00016126 | 1,5726  | 1,55817 | 1,010052302 | N/A             | N/A       | DB086908     | Inc-TIGD3-1    |
| A_21_P0002843  | 1,58169 | 1,56727 | 1,010045301 | ENST00000435884 | N/A       | N/A          | N/A            |
| A_33_P3358069  | 12,6472 | 12,6328 | 1,010031299 | ENST00000479376 | 3420      | NM_174855    | IDH3B          |
| A_21_P0003014  | 1,50369 | 1,48929 | 1,010031299 | N/A             | N/A       | N/A          | Inc-C3orf30-5  |
| A_21_P0010319  | 1,67007 | 1,65567 | 1,010031299 | N/A             | N/A       | N/A          | Inc-CYYR1-1    |
| A_21_P0001981  | 1,54924 | 1,53485 | 1,010024298 | ENST00000413385 | N/A       | N/A          | N/A            |

|                |         |         |             |                 |           |              |                |
|----------------|---------|---------|-------------|-----------------|-----------|--------------|----------------|
| A_19_P00318537 | 2,63828 | 2,6239  | 1,010017297 | N/A             | N/A       | N/A          | Inc-BTBD10-3   |
| A_19_P00320251 | 1,36087 | 1,34649 | 1,010017297 | ENST00000507802 | 100505702 | NR_038308    | LINC01094      |
| A_33_P3268089  | 2,86278 | 2,84842 | 1,010003295 | ENST00000341449 | 390064    | NM_001004754 | OR51I2         |
| A_21_P0010911  | 1,53944 | 1,52509 | 1,009996295 | N/A             | N/A       | N/A          | XLOC_I2_002171 |
| A_21_P0013319  | 1,56245 | 1,5481  | 1,009996295 | N/A             | N/A       | N/A          | XLOC_I2_013873 |
| A_21_P0014404  | 1,55727 | 1,54293 | 1,009989294 | ENST00000422459 | 100506115 | NM_001278655 | LINC01272      |
| A_22_P00017674 | 5,28683 | 5,27249 | 1,009989294 | ENST00000578929 | N/A       | N/A          | N/A            |
| A_21_P0012204  | 5,21917 | 5,20484 | 1,009982293 | N/A             | N/A       | N/A          | XLOC_I2_009219 |
| A_21_P0006541  | 1,50858 | 1,49427 | 1,009968292 | N/A             | N/A       | N/A          | Inc-GLA-1      |
| A_23_P205567   | 11,8932 | 11,8789 | 1,009961291 | ENST00000556245 | 5583      | NM_006255    | PRKCH          |
| A_22_P00008596 | 1,63915 | 1,62485 | 1,009961291 | N/A             | 101929238 | NR_110820    | C3orf67-AS1    |
| A_33_P3423270  | 10,4288 | 10,4145 | 1,009961291 | ENST00000435218 | 55287     | NM_001284406 | TMEM40         |
| A_21_P0014693  | 3,60452 | 3,59022 | 1,009961291 | N/A             | N/A       | BC011742     | Inc-PRR11-1    |
| A_21_P0002615  | 1,49053 | 1,47623 | 1,009961291 | ENST00000427615 | 101929282 | NR_110244    | LOC101929282   |
| A_33_P3372526  | 9,56957 | 9,55528 | 1,009954291 | ENST00000432911 | 130752    | NR_104261    | MDH1B          |
| A_33_P3363480  | 1,57617 | 1,56188 | 1,009954291 | ENST00000484779 | 729159    | NM_001282301 | LOC729159      |
| A_23_P253451   | 1,57065 | 1,55636 | 1,009954291 | ENST00000231706 | 57709     | NM_020949    | SLC7A14        |
| A_21_P0011367  | 1,64077 | 1,62648 | 1,009954291 | N/A             | N/A       | N/A          | XLOC_I2_004870 |
| A_32_P60635    | 1,64733 | 1,63305 | 1,00994729  | ENST00000542198 | 643037    | N/A          | C11orf97       |
| A_21_P0009682  | 1,52694 | 1,51266 | 1,00994729  | N/A             | N/A       | N/A          | Inc-CNN1-1     |
| A_33_P3369398  | 1,56894 | 1,55466 | 1,00994729  | N/A             | N/A       | N/A          | N/A            |
| A_22_P00016919 | 1,57588 | 1,56161 | 1,00994029  | N/A             | 101929626 | NR_125987    | LOC101929626   |
| A_33_P3389773  | 2,37366 | 2,35939 | 1,00994029  | ENST00000427545 | N/A       | N/A          | N/A            |
| A_22_P00007740 | 1,48448 | 1,47021 | 1,00994029  | ENST00000561283 | 101929457 | XR_253414    | LOC101929457   |
| A_33_P3352382  | 1,3818  | 1,36754 | 1,00993329  | ENST00000356962 | 383       | NM_001244438 | ARG1           |
| A_23_P123704   | 1,41445 | 1,40019 | 1,00993329  | ENST00000374014 | 58483     | NR_024032    | LINC00474      |
| A_22_P00021431 | 1,64712 | 1,63286 | 1,00993329  | ENST00000436594 | N/A       | DB197961     | N/A            |
| A_22_P00024020 | 1,57696 | 1,56271 | 1,009926289 | N/A             | N/A       | N/A          | Inc-ADM-2      |
| A_22_P00004060 | 1,52311 | 1,50887 | 1,009919289 | N/A             | N/A       | N/A          | Inc-CHST6-1    |
| A_33_P3243278  | 1,49913 | 1,48489 | 1,009919289 | N/A             | 100505504 | XR_428947    | LOC100505504   |
| A_24_P170439   | 1,48666 | 1,47243 | 1,009912289 | ENST00000457327 | 340206    | NR_027256    | TREML3P        |
| A_21_P0007196  | 1,4913  | 1,47707 | 1,009912289 | N/A             | N/A       | N/A          | Inc-API5-5     |
| A_33_P3694209  | 1,51548 | 1,50126 | 1,009905289 | N/A             | 149684    | AK055854     | LOC149684      |

|                |         |         |             |                 |           |           |                 |
|----------------|---------|---------|-------------|-----------------|-----------|-----------|-----------------|
| A_22_P00008476 | 1,72888 | 1,71467 | 1,009898289 | ENST00000528553 | N/A       | BX103737  | N/A             |
| A_23_P413634   | 7,22809 | 7,21389 | 1,009891289 | ENST00000500161 | 79673     | NM_024620 | ZNF329          |
| A_32_P410753   | 1,57216 | 1,55796 | 1,009891289 | ENST00000313548 | 286464    | NM_173695 | CHDC2           |
| A_33_P3272145  | 1,69054 | 1,67634 | 1,009891289 | ENST00000525221 | N/A       | AB529232  | N/A             |
| A_21_P0010071  | 2,62484 | 2,61064 | 1,009891289 | N/A             | N/A       | N/A       | Inc-TCFL5-2     |
| A_22_P00001468 | 1,46598 | 1,45179 | 1,009884289 | ENST00000503225 | 116984    | XR_244603 | ARAP2           |
| A_21_P0007405  | 1,46113 | 1,44694 | 1,009884289 | N/A             | N/A       | N/A       | Inc-CADM1-4     |
| A_33_P3312990  | 1,56636 | 1,55217 | 1,009884289 | N/A             | N/A       | N/A       | Inc-MARCKS-5    |
| A_22_P00015696 | 2,09657 | 2,08239 | 1,009877289 | ENST00000553983 | N/A       | CU679798  | N/A             |
| A_21_P0003976  | 1,57561 | 1,56144 | 1,009870289 | ENST00000504998 | 102723526 | N/A       | LOC102723526    |
| A_21_P0008850  | 3,31433 | 3,30017 | 1,009863289 | N/A             | 102723493 | XR_424608 | LOC102723493    |
| A_21_P0006614  | 1,47376 | 1,45961 | 1,009856289 | ENST00000429539 | 101928298 | N/A       | LOC101928298    |
| A_22_P00022894 | 3,74545 | 3,73131 | 1,009849289 | ENST00000466206 | N/A       | N/A       | N/A             |
| A_24_P365679   | 1,37567 | 1,36154 | 1,00984229  | ENST00000357802 | 91695     | AK074492  | RRP7B           |
| A_21_P0004867  | 1,44119 | 1,42707 | 1,00983529  | N/A             | N/A       | N/A       | Inc-HIST1H2AG-1 |
| A_21_P0001657  | 1,71613 | 1,70201 | 1,00983529  | N/A             | N/A       | N/A       | Inc-TNFRSF14-1  |
| A_21_P0000913  | 1,47852 | 1,4644  | 1,00983529  | ENST00000424725 | 101926944 | NR_110627 | LOC101926944    |
| A_23_P136936   | 1,52633 | 1,51221 | 1,00983529  | ENST00000263233 | 6855      | NM_003179 | SYP             |
| A_33_P3384628  | 1,57528 | 1,56117 | 1,00982829  | N/A             | N/A       | N/A       | XLOC_I2_009136  |
| A_23_P417974   | 5,17826 | 5,16417 | 1,009814291 | ENST00000528638 | 282679    | NM_173039 | AQP11           |
| A_33_P3293386  | 1,46981 | 1,45573 | 1,009807292 | ENST00000487251 | 55227     | AK021896  | LRRC1           |
| A_21_P0006734  | 1,64485 | 1,63077 | 1,009807292 | ENST00000419836 | N/A       | N/A       | N/A             |
| A_33_P3327336  | 1,48922 | 1,47514 | 1,009807292 | ENST00000502859 | N/A       | N/A       | N/A             |
| A_33_P3349661  | 1,49723 | 1,48315 | 1,009807292 | ENST00000617020 | 5101      | NM_203487 | PCDH9           |
| A_22_P00020029 | 1,60314 | 1,58907 | 1,009800292 | N/A             | N/A       | N/A       | Inc-SUSD4-1     |
| A_22_P00011788 | 1,552   | 1,53794 | 1,009793293 | N/A             | N/A       | N/A       | Inc-PGAM1-1     |
| A_21_P0011443  | 1,47679 | 1,46273 | 1,009793293 | N/A             | N/A       | N/A       | XLOC_I2_005246  |
| A_22_P00001727 | 1,72981 | 1,71576 | 1,009786294 | N/A             | N/A       | N/A       | Inc-ATIC-2      |
| A_33_P3293307  | 4,80198 | 4,78793 | 1,009786294 | N/A             | N/A       | N/A       | N/A             |
| A_22_P00011109 | 1,50723 | 1,4932  | 1,009772295 | ENST00000439565 | N/A       | N/A       | N/A             |
| A_22_P00018980 | 1,48546 | 1,47145 | 1,009758297 | N/A             | 102724452 | XR_424663 | LOC102724452    |
| A_33_P3314481  | 1,36716 | 1,35315 | 1,009758297 | ENST00000390447 | N/A       | AB305728  | N/A             |
| A_21_P0006163  | 1,4227  | 1,4087  | 1,009751298 | N/A             | N/A       | N/A       | Inc-NTRK2-2     |

|                |         |         |             |                 |           |              |                 |
|----------------|---------|---------|-------------|-----------------|-----------|--------------|-----------------|
| A_33_P3238285  | 1,45327 | 1,43928 | 1,009744299 | N/A             | 8551      | NR_002725    | INE2            |
| A_33_P3224050  | 1,62511 | 1,61112 | 1,009744299 | N/A             | N/A       | N/A          | N/A             |
| A_22_P00010884 | 1,48242 | 1,46845 | 1,009730301 | ENST00000556370 | N/A       | N/A          | N/A             |
| A_23_P379601   | 1,50129 | 1,48732 | 1,009730301 | ENST00000368088 | 3765      | NM_004983    | KCNJ9           |
| A_33_P3408678  | 1,36497 | 1,351   | 1,009730301 | N/A             | N/A       | N/A          | N/A             |
| A_33_P3407299  | 7,76378 | 7,74981 | 1,009730301 | ENST00000436748 | 81611     | NM_030920    | ANP32E          |
| A_21_P0004238  | 1,63273 | 1,61877 | 1,009723302 | N/A             | N/A       | N/A          | Inc-CDH6-2      |
| A_33_P3395314  | 1,66719 | 1,65323 | 1,009723302 | N/A             | N/A       | N/A          | N/A             |
| A_33_P3423563  | 1,35883 | 1,34487 | 1,009723302 | N/A             | N/A       | N/A          | N/A             |
| A_23_P111947   | 1,50397 | 1,49002 | 1,009716303 | ENST00000027335 | 1015      | NM_004063    | CDH17           |
| A_33_P3275653  | 1,50763 | 1,49369 | 1,009709304 | ENST00000530858 | 2915      | NM_000842    | GRM5            |
| A_33_P3299580  | 1,49201 | 1,47807 | 1,009709304 | ENST00000407970 | 223075    | NM_001257967 | CCDC129         |
| A_23_P351203   | 1,4516  | 1,43766 | 1,009709304 | ENST00000489237 | 267012    | NM_172370    | DAOA            |
| A_21_P0004294  | 1,46761 | 1,45367 | 1,009709304 | N/A             | N/A       | N/A          | Inc-LYRM7-2     |
| A_21_P0006750  | 1,66949 | 1,65555 | 1,009709304 | ENST00000423349 | 102724264 | N/A          | LOC102724264    |
| A_23_P257503   | 9,71201 | 9,69808 | 1,009702305 | ENST00000443617 | 8925      | NM_003922    | HERC1           |
| A_33_P3320415  | 1,67045 | 1,65652 | 1,009702305 | N/A             | N/A       | N/A          | N/A             |
| A_33_P3357232  | 1,47245 | 1,45853 | 1,009695307 | N/A             | N/A       | N/A          | N/A             |
| A_33_P3287770  | 12,9924 | 12,9785 | 1,009681309 | ENST00000262319 | 9894      | NM_016111    | TELO2           |
| A_33_P3284253  | 1,65648 | 1,64258 | 1,009681309 | ENST00000382965 | 8908      | NM_001184703 | GYG2            |
| A_33_P3372094  | 1,46755 | 1,45365 | 1,009681309 | ENST00000479155 | 3996      | NM_004140    | LLGL1           |
| A_23_P36658    | 14,782  | 14,7681 | 1,009681309 | ENST00000539708 | 4257      | NM_145791    | MGST1           |
| A_22_P00009400 | 1,37843 | 1,36454 | 1,009674311 | N/A             | 102724297 | NR_125406    | LOC102724297    |
| A_21_P0008873  | 1,56134 | 1,54745 | 1,009674311 | ENST00000564810 | 729264    | NM_001243722 | TP53TG3D        |
| A_21_P0001228  | 1,46444 | 1,45056 | 1,009667312 | ENST00000455363 | N/A       | N/A          | N/A             |
| A_21_P0001648  | 1,67269 | 1,65882 | 1,009660314 | N/A             | N/A       | N/A          | Inc-GREM2-8     |
| A_23_P215735   | 8,89314 | 8,87931 | 1,009632321 | ENST00000443979 | 7982      | NM_018412    | ST7             |
| A_22_P00017455 | 1,65236 | 1,63855 | 1,009618324 | ENST00000554260 | 101929241 | NR_110166    | LOC101929241    |
| A_23_P385790   | 1,5793  | 1,5655  | 1,009611326 | ENST00000438997 | 171484    | NM_174901    | FAM9C           |
| A_21_P0005874  | 1,45605 | 1,44225 | 1,009611326 | N/A             | N/A       | N/A          | Inc-C8orf37-1   |
| A_21_P0004868  | 8,04361 | 8,02981 | 1,009611326 | N/A             | N/A       | N/A          | Inc-HIST1H2AI-2 |
| A_33_P3250944  | 1,58201 | 1,56822 | 1,009604328 | ENST00000368525 | 388701    | NM_001010979 | C1orf189        |
| A_33_P3234521  | 4,90479 | 4,891   | 1,009604328 | ENST00000564909 | 115752    | AK123202     | DIS3L           |

|                |         |         |             |                 |           |              |                |
|----------------|---------|---------|-------------|-----------------|-----------|--------------|----------------|
| A_21_P0010264  | 2,78381 | 2,77002 | 1,009604328 | N/A             | N/A       | N/A          | Inc-COL18A1-2  |
| A_23_P29110    | 1,57295 | 1,55917 | 1,00959733  | ENST00000359963 | 150160    | NM_014406    | CCT8L2         |
| A_22_P00004980 | 1,49367 | 1,47989 | 1,00959733  | N/A             | N/A       | N/A          | Inc-DCTD-2     |
| A_33_P3521965  | 1,39832 | 1,38455 | 1,009590332 | N/A             | N/A       | N/A          | N/A            |
| A_22_P00007164 | 1,71298 | 1,69922 | 1,009583334 | N/A             | 101929409 | XR_243331    | LOC101929409   |
| A_23_P341700   | 7,26221 | 7,24845 | 1,009583334 | ENST00000375495 | 83744     | NM_001007101 | ZNF484         |
| A_22_P00007286 | 1,59553 | 1,58178 | 1,009576336 | N/A             | N/A       | N/A          | Inc-GPR26-1    |
| A_21_P0001815  | 1,4775  | 1,46376 | 1,009569338 | ENST00000431188 | N/A       | N/A          | N/A            |
| A_21_P0010327  | 1,4963  | 1,48257 | 1,009562341 | N/A             | N/A       | N/A          | Inc-ICOSLG-5   |
| A_21_P0012612  | 1,44082 | 1,42709 | 1,009562341 | ENST00000507099 | N/A       | N/A          | N/A            |
| A_22_P00010758 | 1,56859 | 1,55486 | 1,009562341 | ENST00000523265 | N/A       | BM726127     | N/A            |
| A_21_P0011798  | 1,36438 | 1,35066 | 1,009555343 | N/A             | N/A       | N/A          | XLOC_I2_007274 |
| A_33_P3294725  | 1,52065 | 1,50694 | 1,009548345 | ENST00000329312 | 1538      | NM_021118    | CYLC1          |
| A_21_P0003051  | 1,64647 | 1,63276 | 1,009548345 | N/A             | N/A       | N/A          | Inc-MFSD1-1    |
| A_21_P0004677  | 1,53074 | 1,51703 | 1,009548345 | ENST00000430898 | 387111    | N/A          | LINC00222      |
| A_21_P0004573  | 1,37315 | 1,35945 | 1,009541348 | N/A             | N/A       | N/A          | Inc-ALDH7A1-3  |
| A_24_P295465   | 1,49997 | 1,48627 | 1,009541348 | ENST00000361320 | 347731    | NM_178011    | LRRTM3         |
| A_21_P0002055  | 1,51923 | 1,50554 | 1,00953435  | N/A             | N/A       | N/A          | Inc-TMEM17-2   |
| A_21_P0012225  | 1,57155 | 1,55787 | 1,009527352 | ENST00000420255 | 101927843 | NR_109959    | LOC101927843   |
| A_22_P00006611 | 1,57151 | 1,55784 | 1,009520355 | ENST00000420070 | 140828    | N/A          | LINC00261      |
| A_23_P259621   | 6,14581 | 6,13215 | 1,009513358 | ENST00000460943 | 7462      | NM_032464    | LAT2           |
| A_21_P0004230  | 1,47298 | 1,45933 | 1,00950636  | N/A             | N/A       | N/A          | Inc-FAM105B-2  |
| A_21_P0004511  | 1,50218 | 1,48854 | 1,009499363 | N/A             | N/A       | N/A          | Inc-HEXB-1     |
| A_24_P186114   | 1,45322 | 1,43958 | 1,009499363 | ENST00000421353 | 252953    | NR_001535    | TTY21          |
| A_33_P3405966  | 5,63434 | 5,6207  | 1,009499363 | ENST00000372362 | 6487      | NM_174963    | ST3GAL3        |
| A_33_P3281613  | 8,79393 | 8,78029 | 1,009499363 | N/A             | 57582     | AK123276     | KCNT1          |
| A_33_P3323887  | 1,49403 | 1,4804  | 1,009492365 | ENST00000558436 | 102723481 | XR_424610    | LOC102723481   |
| A_21_P0012187  | 1,35897 | 1,34534 | 1,009492365 | ENST00000449602 | N/A       | N/A          | N/A            |
| A_33_P3318002  | 1,57605 | 1,56242 | 1,009492365 | ENST00000618834 | 56144     | NM_031500    | PCDHA4         |
| A_21_P0013714  | 7,69211 | 7,67849 | 1,009485368 | ENST00000492533 | N/A       | N/A          | N/A            |
| A_22_P00018455 | 1,50128 | 1,48766 | 1,009485368 | N/A             | N/A       | BC021736     | Inc-C11orf88-1 |
| A_33_P3330712  | 1,67519 | 1,66158 | 1,009478371 | ENST00000532521 | 646813    | NR_024504    | LOC646813      |
| A_21_P0004087  | 1,40939 | 1,39579 | 1,009471374 | N/A             | N/A       | N/A          | Inc-OR4F3-1    |

|                |         |         |             |                 |           |              |                |
|----------------|---------|---------|-------------|-----------------|-----------|--------------|----------------|
| A_21_P0007718  | 1,46344 | 1,44985 | 1,009464377 | ENST00000538008 | 102724421 | NR_120490    | LOC102724421   |
| A_23_P137586   | 8,95138 | 8,93782 | 1,009443386 | ENST00000294409 | 10691     | NM_006582    | GMEB1          |
| A_22_P00015463 | 1,84078 | 1,82723 | 1,009436389 | ENST00000434540 | N/A       | N/A          | N/A            |
| A_33_P3572454  | 1,49819 | 1,48465 | 1,009429392 | N/A             | 283692    | NR_046096    | CPEB1-AS1      |
| A_21_P0010748  | 7,13806 | 7,12453 | 1,009422395 | ENST00000413839 | 346288    | NM_207366    | set-14         |
| A_21_P0003664  | 1,71377 | 1,70024 | 1,009422395 | N/A             | N/A       | N/A          | Inc-ARHGAP10-2 |
| A_21_P0004688  | 1,52318 | 1,50967 | 1,009408402 | N/A             | N/A       | N/A          | Inc-MYB-3      |
| A_23_P154522   | 8,71143 | 8,69792 | 1,009408402 | ENST00000472767 | 57504     | NM_020744    | MTA3           |
| A_33_P3358779  | 1,7287  | 1,71522 | 1,009387412 | ENST00000311591 | 219957    | NM_001005283 | OR9Q2          |
| A_22_P00022153 | 1,66868 | 1,65521 | 1,009380415 | N/A             | 101927256 | XR_242121    | LOC101927256   |
| A_24_P71973    | 1,63249 | 1,61903 | 1,009373419 | ENST00000263923 | 3791      | NM_002253    | KDR            |
| A_32_P423691   | 1,47568 | 1,46222 | 1,009373419 | ENST00000537425 | 149685    | NM_001018082 | ADIG           |
| A_32_P145233   | 1,49842 | 1,48497 | 1,009366423 | ENST00000553046 | N/A       | BX094715     | N/A            |
| A_22_P00025188 | 1,61724 | 1,60379 | 1,009366423 | ENST00000512831 | N/A       | N/A          | N/A            |
| A_21_P0005620  | 1,59355 | 1,58011 | 1,009359426 | ENST00000520842 | 101927815 | NR_125426    | LOC101927815   |
| A_22_P00015800 | 1,48401 | 1,47059 | 1,009345434 | ENST00000606744 | 285692    | NR_027112    | LOC285692      |
| A_33_P3275893  | 1,55212 | 1,5387  | 1,009345434 | ENST00000399363 | 644070    | XM_006710028 | LOC644070      |
| A_33_P3282252  | 6,43773 | 6,42435 | 1,009317449 | N/A             | N/A       | N/A          | N/A            |
| A_22_P00023328 | 1,45771 | 1,44433 | 1,009317449 | N/A             | 101929602 | NR_121605    | IFT74-AS1      |
| A_22_P00005339 | 1,41913 | 1,40576 | 1,009310453 | N/A             | N/A       | BC040634     | Inc-DPH1-1     |
| A_22_P00012143 | 1,52449 | 1,51112 | 1,009310453 | ENST00000455498 | N/A       | N/A          | N/A            |
| A_22_P00023955 | 1,65583 | 1,64246 | 1,009310453 | ENST00000419860 | N/A       | N/A          | N/A            |
| A_33_P3298955  | 1,66647 | 1,6531  | 1,009310453 | N/A             | N/A       | N/A          | N/A            |
| A_22_P00008473 | 1,47241 | 1,45906 | 1,009296461 | ENST00000566942 | 3738      | NR_109846    | KCNA3          |
| A_21_P0005077  | 1,52134 | 1,50799 | 1,009296461 | N/A             | N/A       | N/A          | Inc-SOD2-3     |
| A_22_P00019435 | 1,57079 | 1,55745 | 1,009289465 | ENST00000417989 | N/A       | N/A          | N/A            |
| A_33_P3248097  | 1,5773  | 1,56396 | 1,009289465 | N/A             | N/A       | N/A          | Inc-QKI-3      |
| A_22_P00025006 | 1,53337 | 1,52003 | 1,009289465 | N/A             | N/A       | BX112089     | Inc-SHISA9-4   |
| A_21_P0001846  | 1,36191 | 1,34858 | 1,009282469 | N/A             | N/A       | N/A          | Inc-EFR3B-3    |
| A_21_P0006261  | 1,49484 | 1,48152 | 1,009275473 | N/A             | N/A       | N/A          | Inc-TAF1L-2    |
| A_21_P0002529  | 1,65514 | 1,64184 | 1,009261482 | N/A             | N/A       | N/A          | Inc-SDPR-1     |
| A_19_P00318091 | 1,546   | 1,53271 | 1,009254486 | N/A             | N/A       | N/A          | Inc-SNX10-2    |
| A_22_P00003216 | 1,60434 | 1,59107 | 1,009240495 | ENST00000587451 | N/A       | XR_109571    | N/A            |

|                |         |         |             |                 |           |              |                 |
|----------------|---------|---------|-------------|-----------------|-----------|--------------|-----------------|
| A_23_P347777   | 1,48572 | 1,47245 | 1,009240495 | ENST00000543878 | 221711    | NM_001040274 | SYCP2L          |
| A_23_P323196   | 1,36084 | 1,34758 | 1,0092335   | ENST00000612756 | 259283    | NR_027042    | MDS2            |
| A_23_P402123   | 1,66274 | 1,64948 | 1,0092335   | ENST00000514078 | 50834     | NM_019599    | TAS2R1          |
| A_33_P3252974  | 1,55909 | 1,54583 | 1,0092335   | ENST00000246104 | 85508     | NM_033129    | SCRT2           |
| A_33_P3242688  | 1,66577 | 1,65252 | 1,009226504 | ENST00000414224 | N/A       | N/A          | N/A             |
| A_22_P00012929 | 6,3036  | 6,29035 | 1,009226504 | N/A             | 100507118 | NR_051984    | PRC1-AS1        |
| A_23_P165727   | 1,63889 | 1,62564 | 1,009226504 | ENST00000260950 | 2660      | NM_005259    | MSTN            |
| A_33_P3220748  | 1,68271 | 1,66947 | 1,009219509 | N/A             | N/A       | N/A          | N/A             |
| A_23_P1863     | 1,53834 | 1,52511 | 1,009212514 | ENST00000326855 | 390181    | NM_001005323 | OR5AK2          |
| A_33_P3209214  | 5,43294 | 5,41971 | 1,009212514 | ENST00000417666 | 84629     | NM_001080495 | TNRC18          |
| A_24_P367410   | 1,46269 | 1,44946 | 1,009212514 | ENST00000598523 | 55879     | NM_018558    | GABRQ           |
| A_22_P00006043 | 1,57756 | 1,56434 | 1,009205518 | ENST00000438622 | 401289    | NR_104177    | FLJ38122        |
| A_22_P00018120 | 1,63681 | 1,62359 | 1,009205518 | ENST00000566155 | N/A       | XR_424743    | N/A             |
| A_33_P3259228  | 1,63465 | 1,62145 | 1,009191528 | ENST00000434692 | 642943    | NR_111003    | LOC642943       |
| A_21_P0000012  | 1,49304 | 1,47985 | 1,009184533 | ENST00000424808 | 9650      | NM_001145839 | MTFR1           |
| A_21_P0006398  | 1,57328 | 1,5601  | 1,009177538 | N/A             | N/A       | N/A          | Inc-BRD3-2      |
| A_22_P00006625 | 1,70822 | 1,69504 | 1,009177538 | N/A             | N/A       | BX117241     | Inc-FOXB1-5     |
| A_21_P0003593  | 1,37622 | 1,36304 | 1,009177538 | N/A             | N/A       | N/A          | Inc-PCDH7-6     |
| A_22_P00025876 | 1,45415 | 1,44099 | 1,009163547 | ENST00000558246 | N/A       | N/A          | N/A             |
| A_21_P0011884  | 1,56512 | 1,55196 | 1,009163547 | ENST00000443866 | N/A       | N/A          | XL0C_I2_007828  |
| A_21_P0003097  | 1,50788 | 1,49475 | 1,009142563 | N/A             | 100996539 | N/A          | ITPR1-AS1       |
| A_23_P85265    | 1,49689 | 1,48376 | 1,009142563 | ENST00000623823 | 6736      | NM_003140    | SRY             |
| A_22_P00008335 | 1,63388 | 1,62075 | 1,009142563 | N/A             | N/A       | N/A          | Inc-ITPA-1      |
| A_22_P00000924 | 1,64484 | 1,63172 | 1,009135568 | ENST00000527518 | 101929549 | NR_110112    | LOC101929549    |
| A_23_P91035    | 1,45336 | 1,44025 | 1,009128573 | ENST00000317802 | 388951    | NM_001003937 | TSPYL6          |
| A_21_P0001386  | 1,57666 | 1,56355 | 1,009128573 | N/A             | N/A       | N/A          | Inc-PRRC2C-1    |
| A_22_P00025399 | 1,52245 | 1,50935 | 1,009121578 | N/A             | N/A       | N/A          | Inc-FAM120AOS-2 |
| A_21_P0004366  | 1,57085 | 1,55775 | 1,009121578 | N/A             | N/A       | N/A          | Inc-MYO10-3     |
| A_22_P00021642 | 1,56541 | 1,55232 | 1,009114584 | ENST00000435444 | N/A       | N/A          | N/A             |
| A_21_P0006823  | 1,47778 | 1,46469 | 1,009114584 | ENST00000414894 | 439949    | N/A          | PRKCQ-AS1       |
| A_22_P00022515 | 1,45864 | 1,44556 | 1,009107589 | N/A             | N/A       | N/A          | Inc-NKX6-3-2    |
| A_21_P0014653  | 1,56688 | 1,5538  | 1,009107589 | ENST00000524942 | 100507521 | XR_110911    | LOC100507521    |
| A_22_P00001413 | 1,47007 | 1,457   | 1,009100595 | N/A             | N/A       | N/A          | Inc-APEX1-1     |



|                |         |         |             |                 |           |              |                |
|----------------|---------|---------|-------------|-----------------|-----------|--------------|----------------|
| A_21_P0005398  | 1,48452 | 1,47146 | 1,0090936   | N/A             | N/A       | N/A          | Inc-FZD1-1     |
| A_24_P193600   | 6,40674 | 6,39369 | 1,009086606 | ENST00000571936 | 7727      | NM_003450    | ZNF174         |
| A_22_P00013021 | 1,64269 | 1,62965 | 1,009079611 | ENST00000556357 | 101927112 | NR_120320    | LINC01581      |
| A_22_P00025557 | 1,56911 | 1,55607 | 1,009079611 | N/A             | N/A       | N/A          | Inc-DDI1-1     |
| A_22_P00014734 | 1,5676  | 1,55457 | 1,009072617 | ENST00000441790 | N/A       | XR_425089    | N/A            |
| A_22_P00025076 | 1,56251 | 1,54948 | 1,009072617 | ENST00000496829 | N/A       | N/A          | N/A            |
| A_24_P229025   | 1,41204 | 1,39901 | 1,009072617 | N/A             | 2892      | NM_001256743 | GRIA3          |
| A_21_P0002725  | 1,57493 | 1,5619  | 1,009072617 | ENST00000428171 | N/A       | N/A          | N/A            |
| A_22_P00021644 | 2,07696 | 2,06393 | 1,009072617 | N/A             | N/A       | N/A          | Inc-GAS2L2-1   |
| A_22_P00023844 | 1,53587 | 1,52286 | 1,009058628 | N/A             | N/A       | N/A          | Inc-ESRP2-1    |
| A_23_P117992   | 11,0432 | 11,0302 | 1,009051634 | ENST00000565631 | 9914      | NM_014861    | ATP2C2         |
| A_21_P0003622  | 1,45503 | 1,44203 | 1,009051634 | ENST00000512043 | 441025    | NR_033964    | LOC441025      |
| A_21_P0005068  | 1,56731 | 1,55431 | 1,009051634 | N/A             | N/A       | N/A          | Inc-ZC3H12D-5  |
| A_33_P3355599  | 1,50823 | 1,49524 | 1,00904464  | ENST00000231137 | 56129     | NM_018940    | PCDHB7         |
| A_22_P00018933 | 1,48984 | 1,47685 | 1,00904464  | ENST00000427042 | N/A       | N/A          | N/A            |
| A_21_P0013762  | 1,51691 | 1,50392 | 1,00904464  | N/A             | N/A       | N/A          | XLOC_I2_015512 |
| A_22_P00015734 | 1,48787 | 1,47489 | 1,009037646 | N/A             | N/A       | N/A          | Inc-TAB3-1     |
| A_33_P3319201  | 1,36846 | 1,3555  | 1,009023657 | N/A             | 101927133 | XR_425728    | LOC101927133   |
| A_33_P3384871  | 9,91675 | 9,90379 | 1,009023657 | ENST00000367241 | 26271     | NM_001142522 | FBXO5          |
| A_32_P206479   | 1,64903 | 1,63608 | 1,009016663 | ENST00000371030 | 128611    | NM_178457    | ZNF831         |
| A_22_P00020774 | 3,7493  | 3,73635 | 1,009016663 | ENST00000441365 | 84504     | N/A          | NKX6-2         |
| A_22_P00018630 | 1,37989 | 1,36695 | 1,009009669 | ENST00000552532 | N/A       | N/A          | N/A            |
| A_22_P00013026 | 1,66773 | 1,6548  | 1,009002676 | N/A             | N/A       | N/A          | Inc-RGPD3-2    |
| A_21_P0006706  | 1,54874 | 1,53581 | 1,009002676 | ENST00000433085 | 102724589 | N/A          | LOC102724589   |
| A_21_P0010960  | 1,76985 | 1,75692 | 1,009002676 | N/A             | N/A       | N/A          | XLOC_I2_002204 |
| A_22_P00010094 | 1,46602 | 1,4531  | 1,008995682 | N/A             | N/A       | N/A          | Inc-MRAP-1     |
| A_21_P0007729  | 1,56976 | 1,55684 | 1,008995682 | N/A             | N/A       | N/A          | Inc-PAWR-5     |
| A_24_P375599   | 17,1353 | 17,1224 | 1,008981694 | ENST00000464118 | N/A       | N/A          | N/A            |
| A_23_P120942   | 16,1552 | 16,1423 | 1,008981694 | ENST00000359308 | 2547      | NM_001469    | XRCC6          |
| A_22_P00019256 | 1,62844 | 1,61554 | 1,008981694 | ENST00000424343 | N/A       | N/A          | N/A            |
| A_21_P0005325  | 1,54491 | 1,53201 | 1,008981694 | ENST00000471672 | N/A       | N/A          | N/A            |
| A_24_P58529    | 14,5581 | 14,5452 | 1,008981694 | ENST00000530835 | 84790     | NM_032704    | TUBA1C         |
| A_33_P3373654  | 3,33815 | 3,32526 | 1,0089747   | N/A             | N/A       | N/A          | XLOC_I2_003649 |

|                |         |         |             |                 |           |              |                    |
|----------------|---------|---------|-------------|-----------------|-----------|--------------|--------------------|
| A_33_P3414939  | 1,5552  | 1,54231 | 1,0089747   | ENST00000479109 | N/A       | N/A          | N/A                |
| A_23_P114314   | 1,56403 | 1,55115 | 1,008967707 | ENST00000373514 | 1046      | NM_005193    | CDX4               |
| A_33_P8983845  | 1,57254 | 1,55967 | 1,008960713 | N/A             | 284191    | N/A          | LOC284191          |
| A_22_P00019769 | 1,66573 | 1,65287 | 1,00895372  | N/A             | N/A       | AA393627     | Inc-CRNKL1-3       |
| A_22_P00016956 | 1,6676  | 1,65474 | 1,00895372  | N/A             | N/A       | BQ189593     | Inc-TSR1-1         |
| A_33_P3266920  | 1,46033 | 1,44747 | 1,00895372  | N/A             | 100131303 | NM_001282442 | LOC100131303       |
| A_19_P00316007 | 1,57652 | 1,56366 | 1,00895372  | ENST00000416842 | N/A       | N/A          | N/A                |
| A_32_P105381   | 1,39374 | 1,3809  | 1,008939733 | ENST00000329357 | 170062    | NM_152631    | FAM47B             |
| A_21_P0009624  | 1,41421 | 1,40138 | 1,008932739 | N/A             | N/A       | N/A          | Inc-AP002414.1.1-1 |
| A_24_P265832   | 1,47671 | 1,4639  | 1,008918753 | ENST00000362032 | 56670     | NM_033050    | SUCNR1             |
| A_22_P00006680 | 1,49118 | 1,47837 | 1,008918753 | ENST00000436262 | N/A       | N/A          | N/A                |
| A_21_P0004463  | 1,57399 | 1,56119 | 1,008911759 | N/A             | N/A       | N/A          | Inc-PANK3-12       |
| A_22_P00008278 | 1,51081 | 1,49801 | 1,008911759 | ENST00000560487 | N/A       | N/A          | N/A                |
| A_21_P0006284  | 1,62852 | 1,61573 | 1,008904766 | ENST00000413352 | 102723932 | N/A          | LOC102723932       |
| A_23_P141142   | 1,41453 | 1,40174 | 1,008904766 | ENST00000524722 | 84074     | XM_005257728 | QRICH2             |
| A_21_P0012510  | 1,47511 | 1,46232 | 1,008904766 | ENST00000494915 | 103695433 | N/A          | LINC01322          |
| A_21_P0005154  | 1,63152 | 1,61874 | 1,008897773 | N/A             | N/A       | N/A          | Inc-ECI2-2         |
| A_32_P234926   | 1,68769 | 1,67492 | 1,00889078  | ENST00000545418 | 140836    | NM_001014977 | BANF2              |
| A_21_P0005623  | 1,56309 | 1,55032 | 1,00889078  | ENST00000519981 | 101929528 | NR_105005    | LOC101929528       |
| A_21_P0001795  | 1,7254  | 1,71263 | 1,00889078  | ENST00000424321 | 284998    | AK090794     | LINC01114          |
| A_23_P161331   | 1,61631 | 1,60354 | 1,00889078  | ENST00000320301 | 65217     | NM_033056    | PCDH15             |
| A_21_P0003987  | 1,56665 | 1,55389 | 1,008883787 | ENST00000503870 | N/A       | N/A          | N/A                |
| A_22_P00002498 | 1,52556 | 1,51281 | 1,008876794 | N/A             | N/A       | N/A          | Inc-C16orf58-5     |
| A_33_P3343873  | 1,45792 | 1,44517 | 1,008876794 | N/A             | 55423     | AK124224     | SIRPG              |
| A_22_P00020555 | 1,59488 | 1,58214 | 1,008869801 | N/A             | N/A       | N/A          | Inc-THBS4-1        |
| A_33_P3337131  | 3,13812 | 3,12539 | 1,008862808 | N/A             | 648691    | NR_027426    | LL22NC03-63E9.3    |
| A_33_P3331856  | 1,57341 | 1,56068 | 1,008862808 | ENST00000396184 | 5137      | AK126467     | PDE1C              |
| A_24_P50818    | 6,19394 | 6,18121 | 1,008862808 | ENST00000409364 | 9330      | NM_001206774 | GTF3C3             |
| A_21_P0004373  | 1,57778 | 1,56505 | 1,008862808 | N/A             | 101929681 | N/A          | LOC101929681       |
| A_33_P3216316  | 4,56073 | 4,54803 | 1,008841829 | ENST00000617715 | 90933     | NM_201627    | TRIM41             |
| A_21_P0014490  | 1,65904 | 1,64634 | 1,008841829 | N/A             | 728095    | NR_109897    | LOC728095          |
| A_21_P0004196  | 1,62778 | 1,61508 | 1,008841829 | N/A             | N/A       | N/A          | Inc-NDUFS6-5       |
| A_33_P3409984  | 1,55748 | 1,5448  | 1,008827844 | ENST00000378803 | 344387    | NM_001009565 | CDKL4              |

|                |         |         |             |                 |           |              |                |
|----------------|---------|---------|-------------|-----------------|-----------|--------------|----------------|
| A_21_P0000549  | 1,53544 | 1,52276 | 1,008827844 | ENST00000446690 | 344875    | NR_027927    | COL6A4P1       |
| A_19_P00317507 | 1,63399 | 1,62132 | 1,008820851 | N/A             | 100505881 | NR_038344    | MAGI2-AS3      |
| A_21_P0014058  | 1,46378 | 1,45112 | 1,008813859 | ENST00000461759 | 4259      | AK000073     | MGST3          |
| A_23_P17548    | 1,56167 | 1,54902 | 1,008806866 | ENST00000253381 | 117285    | NM_054112    | DEFB118        |
| A_21_P0005685  | 1,56055 | 1,54791 | 1,008799874 | ENST00000519189 | 103689844 | NR_125746    | LINC01288      |
| A_22_P00003615 | 1,36001 | 1,34737 | 1,008799874 | N/A             | N/A       | N/A          | Inc-CD38-3     |
| A_21_P0000008  | 1,5759  | 1,56327 | 1,008792881 | ENST00000417307 | 399697    | NM_001145668 | CTXN2          |
| A_22_P00003755 | 1,70815 | 1,69552 | 1,008792881 | ENST00000512939 | N/A       | N/A          | N/A            |
| A_23_P94647    | 1,5056  | 1,49299 | 1,008778896 | ENST00000304820 | 26735     | NM_001005234 | OR1L3          |
| A_24_P275199   | 1,46703 | 1,45443 | 1,008771904 | ENST00000265969 | 3746      | NM_001112741 | KCNC1          |
| A_33_P3504218  | 1,45425 | 1,44166 | 1,008764912 | ENST00000430078 | 401281    | XR_426103    | FLJ27255       |
| A_21_P0010547  | 3,66996 | 3,65738 | 1,00875792  | ENST00000456220 | N/A       | N/A          | N/A            |
| A_22_P00003688 | 1,66469 | 1,65211 | 1,00875792  | ENST00000507600 | N/A       | N/A          | N/A            |
| A_21_P0000826  | 1,46643 | 1,45385 | 1,00875792  | N/A             | 100506385 | N/A          | LINC01426      |
| A_21_P0013255  | 1,64068 | 1,6281  | 1,00875792  | N/A             | N/A       | N/A          | XLOC_l2_013513 |
| A_22_P00004938 | 1,42326 | 1,41069 | 1,008750928 | ENST00000562917 | N/A       | BX641143     | N/A            |
| A_24_P348265   | 1,5699  | 1,55734 | 1,008743935 | ENST00000614052 | 2204      | NM_133271    | FCAR           |
| A_33_P3290874  | 1,49536 | 1,48284 | 1,008715967 | ENST00000332238 | 390649    | NM_001001674 | OR4F15         |
| A_21_P0014802  | 1,6716  | 1,65908 | 1,008715967 | ENST00000568444 | 54758     | AW504969     | KLHDC4         |
| A_21_P0007494  | 1,53661 | 1,52409 | 1,008715967 | N/A             | 101928002 | N/A          | LOC101928002   |
| A_24_P251950   | 1,46824 | 1,45572 | 1,008715967 | ENST00000504685 | 167127    | NM_174914    | UGT3A2         |
| A_22_P00002061 | 1,36293 | 1,35042 | 1,008708976 | N/A             | N/A       | AK123947     | Inc-BLID-1     |
| A_24_P205994   | 1,54192 | 1,52942 | 1,008701984 | ENST00000413830 | 255324    | NM_001270989 | EPGN           |
| A_32_P50924    | 15,5152 | 15,5027 | 1,008701984 | ENST00000504082 | 144983    | NM_001011724 | HNRNPA1L2      |
| A_22_P00002845 | 1,63838 | 1,6259  | 1,008688    | ENST00000482766 | N/A       | N/A          | N/A            |
| A_22_P00006080 | 1,4995  | 1,48702 | 1,008688    | ENST00000511650 | N/A       | N/A          | N/A            |
| A_21_P0004420  | 3,02976 | 3,01729 | 1,008681009 | N/A             | N/A       | N/A          | Inc-ARRDC3-1   |
| A_22_P00011884 | 1,66502 | 1,65255 | 1,008681009 | N/A             | N/A       | N/A          | Inc-PIGK-1     |
| A_22_P00015836 | 1,64154 | 1,62907 | 1,008681009 | ENST00000457945 | 101928309 | XR_241978    | LOC101928309   |
| A_22_P00002121 | 1,49234 | 1,47987 | 1,008681009 | ENST00000508202 | N/A       | CR627405     | N/A            |
| A_23_P333022   | 1,55674 | 1,54427 | 1,008681009 | N/A             | 222659    | NM_152990    | PXT1           |
| A_23_P109286   | 1,71223 | 1,69977 | 1,008674017 | ENST00000309434 | 2897      | NM_000830    | GRIK1          |
| A_23_P47181    | 2,68827 | 2,67584 | 1,008653042 | ENST00000279168 | 170589    | NM_130769    | GPHA2          |

|                |         |         |             |                 |           |              |                 |
|----------------|---------|---------|-------------|-----------------|-----------|--------------|-----------------|
| A_33_P3364582  | 8,66505 | 8,65264 | 1,00863906  | ENST00000404514 | 7148      | NM_019105    | TNXB            |
| A_33_P3261640  | 1,63673 | 1,62432 | 1,00863906  | N/A             | N/A       | N/A          | N/A             |
| A_22_P00023210 | 1,48913 | 1,47673 | 1,008632068 | N/A             | N/A       | BG189013     | Inc-ROBO3-1     |
| A_24_P63078    | 1,49749 | 1,48509 | 1,008632068 | ENST00000437365 | 80122     | NM_025052    | MAP3K19         |
| A_23_P318432   | 1,37773 | 1,36533 | 1,008632068 | ENST00000289672 | 168507    | NM_138295    | PKD1L1          |
| A_23_P304897   | 10,5471 | 10,5347 | 1,008632068 | ENST00000554311 | 624       | NM_000623    | BDKRB2          |
| A_21_P0001173  | 1,41002 | 1,39763 | 1,008625077 | N/A             | N/A       | N/A          | Inc-PPIAL4G-10  |
| A_23_P407142   | 9,22363 | 9,21124 | 1,008625077 | ENST00000302291 | 7798      | NM_033631    | LUZP1           |
| A_23_P306867   | 1,57417 | 1,56178 | 1,008625077 | ENST00000338488 | 8013      | NM_173199    | NR4A3           |
| A_22_P00004786 | 1,61405 | 1,60168 | 1,008611095 | N/A             | N/A       | N/A          | Inc-CX3CR1-1    |
| A_22_P00019983 | 1,63439 | 1,62202 | 1,008611095 | ENST00000413339 | N/A       | N/A          | N/A             |
| A_33_P3390386  | 1,71363 | 1,70127 | 1,008604103 | ENST00000478829 | 11189     | NM_001172649 | CELF3           |
| A_33_P3221378  | 1,63941 | 1,62705 | 1,008604103 | ENST00000522767 | 102724804 | NR_125828    | LOC102724804    |
| A_22_P00022471 | 8,82259 | 8,81023 | 1,008604103 | ENST00000511054 | N/A       | N/A          | N/A             |
| A_33_P3254590  | 1,53436 | 1,52201 | 1,008597112 | ENST00000511537 | 399881    | NR_033868    | HNRNPKP3        |
| A_22_P00015752 | 1,39876 | 1,38641 | 1,008597112 | ENST00000413291 | N/A       | N/A          | N/A             |
| A_21_P0011071  | 1,46062 | 1,44828 | 1,008590121 | ENST00000535118 | 100507206 | NR_038256    | LINC00943       |
| A_21_P0008413  | 1,49893 | 1,4866  | 1,00858313  | N/A             | N/A       | N/A          | Inc-NOVA1-3     |
| A_33_P3568387  | 4,61257 | 4,60024 | 1,00858313  | ENST00000325885 | 51666     | NM_016116    | ASB4            |
| A_21_P0009462  | 1,39607 | 1,38375 | 1,008576139 | N/A             | N/A       | N/A          | Inc-ANKRD30B-3  |
| A_22_P00011665 | 1,52484 | 1,51252 | 1,008576139 | N/A             | N/A       | N/A          | Inc-PDE6B-1     |
| A_22_P00008640 | 1,48081 | 1,4685  | 1,008569149 | ENST00000521090 | N/A       | N/A          | N/A             |
| A_22_P00015774 | 1,49916 | 1,48685 | 1,008569149 | ENST00000584958 | N/A       | N/A          | N/A             |
| A_33_P3320241  | 1,4736  | 1,46129 | 1,008569149 | N/A             | N/A       | N/A          | N/A             |
| A_21_P0011224  | 1,56084 | 1,54853 | 1,008569149 | ENST00000428706 | 100874179 | N/A          | LINC00457       |
| A_21_P0012691  | 1,48011 | 1,46781 | 1,008562158 | N/A             | N/A       | N/A          | XLOC_I2_011309  |
| A_21_P0007659  | 1,70523 | 1,69294 | 1,008555167 | N/A             | N/A       | N/A          | Inc-TMEM132B-10 |
| A_33_P3403549  | 6,20866 | 6,19637 | 1,008555167 | ENST00000565457 | 255919    | NM_153261    | CNEP1R1         |
| A_22_P00018106 | 1,51196 | 1,49968 | 1,008548176 | ENST00000599078 | 400680    | N/A          | LINC00664       |
| A_22_P00021427 | 1,56325 | 1,55097 | 1,008548176 | N/A             | 100874211 | NR_046706    | MID1IP1-AS1     |
| A_33_P3392052  | 1,47297 | 1,46069 | 1,008548176 | ENST00000318315 | 389336    | NM_206966    | C5orf46         |
| A_23_P373619   | 1,57829 | 1,56601 | 1,008548176 | ENST00000413851 | 282617    | NM_172139    | IFNL3           |
| A_22_P00019817 | 1,60716 | 1,59488 | 1,008548176 | ENST00000615029 | N/A       | N/A          | N/A             |

|                |         |         |             |                 |           |              |                    |
|----------------|---------|---------|-------------|-----------------|-----------|--------------|--------------------|
| A_33_P3271276  | 1,77327 | 1,76099 | 1,008548176 | ENST00000599214 | 5673      | NM_001130014 | PSG5               |
| A_33_P3765708  | 1,40725 | 1,39498 | 1,008541185 | ENST00000451284 | 285326    | NR_034055    | LINC00692          |
| A_21_P0008573  | 1,6302  | 1,61794 | 1,008534195 | N/A             | N/A       | N/A          | Inc-WHAMM-1        |
| A_22_P00021213 | 1,52704 | 1,5148  | 1,008520214 | N/A             | N/A       | N/A          | Inc-AC079135.1.1-1 |
| A_22_P00001410 | 1,45965 | 1,44741 | 1,008520214 | N/A             | N/A       | N/A          | Inc-APC-5          |
| A_33_P3292138  | 1,46776 | 1,45554 | 1,008506233 | ENST00000624407 | 101929465 | N/A          | LOC101929465       |
| A_22_P00017526 | 1,46502 | 1,4528  | 1,008506233 | N/A             | N/A       | N/A          | Inc-WDR16-2        |
| A_22_P00017164 | 1,48621 | 1,474   | 1,008499242 | ENST00000585222 | N/A       | AL832444     | N/A                |
| A_21_P0003286  | 5,38894 | 5,37674 | 1,008492252 | N/A             | N/A       | N/A          | Inc-ADAMTS9-3      |
| A_23_P8561     | 11,4841 | 11,4719 | 1,008492252 | ENST00000454791 | 57414     | NM_001040457 | RHBDD2             |
| A_22_P00001261 | 1,4298  | 1,41762 | 1,008478271 | N/A             | N/A       | BX089732     | Inc-ANKRD42-3      |
| A_33_P3354326  | 1,55875 | 1,54657 | 1,008478271 | N/A             | N/A       | N/A          | Inc-SMARCAL1-4     |
| A_22_P00009092 | 1,3608  | 1,34862 | 1,008478271 | ENST00000415513 | 101927902 | XR_242326    | LOC101927902       |
| A_22_P00000451 | 1,50674 | 1,49458 | 1,008464291 | ENST00000521188 | N/A       | BX116221     | N/A                |
| A_23_P39881    | 1,72576 | 1,71361 | 1,008457301 | ENST00000397485 | 100132708 | NR_023391    | CYP4F30P           |
| A_22_P00014829 | 1,3684  | 1,35627 | 1,008443321 | N/A             | N/A       | AK055631     | Inc-SLC44A5-1      |
| A_19_P00800927 | 1,38203 | 1,36991 | 1,008436331 | N/A             | N/A       | N/A          | Inc-SLC25A30-1     |
| A_33_P3375889  | 1,55156 | 1,53944 | 1,008436331 | N/A             | N/A       | N/A          | N/A                |
| A_21_P0003308  | 8,21589 | 8,20377 | 1,008436331 | N/A             | N/A       | N/A          | Inc-MCCC1-1        |
| A_33_P3239282  | 1,5387  | 1,52659 | 1,008429341 | ENST00000316361 | 3737      | NM_004974    | KCNA2              |
| A_23_P210619   | 13,3088 | 13,2967 | 1,008422351 | ENST00000023939 | 51507     | NM_016407    | RTFDC1             |
| A_21_P0012484  | 3,01805 | 3,00595 | 1,008422351 | N/A             | N/A       | N/A          | XL0C_I2_010511     |
| A_21_P0009605  | 1,52416 | 1,51206 | 1,008422351 | N/A             | N/A       | N/A          | Inc-PIK3C3-2       |
| A_32_P197561   | 1,45333 | 1,44123 | 1,008422351 | ENST00000313708 | 1879      | NM_001290360 | EBF1               |
| A_23_P128094   | 5,83278 | 5,82068 | 1,008422351 | ENST00000542678 | 23457     | NM_019625    | ABCB9              |
| A_21_P0007862  | 1,55508 | 1,54298 | 1,008422351 | N/A             | N/A       | N/A          | Inc-TMEM132B-4     |
| A_22_P00001328 | 1,53372 | 1,52163 | 1,008415361 | N/A             | 439941    | NR_040044    | FER1L6-AS1         |
| A_32_P161751   | 1,56297 | 1,55088 | 1,008415361 | ENST00000447433 | 285150    | NR_040080    | FLJ33534           |
| A_33_P3703501  | 9,17321 | 9,16112 | 1,008415361 | ENST00000520647 | 55568     | NM_198321    | GALNT10            |
| A_22_P00013788 | 1,64478 | 1,6327  | 1,008408371 | ENST00000520494 | N/A       | N/A          | N/A                |
| A_22_P00012668 | 1,50203 | 1,48996 | 1,008401382 | N/A             | 101929143 | N/A          | LOC101929143       |
| A_22_P00009650 | 1,67037 | 1,6583  | 1,008401382 | ENST00000522426 | N/A       | N/A          | N/A                |
| A_22_P00013315 | 1,56786 | 1,55579 | 1,008401382 | ENST00000550378 | N/A       | AI025159     | N/A                |

|                |         |         |             |                 |           |              |               |
|----------------|---------|---------|-------------|-----------------|-----------|--------------|---------------|
| A_33_P3393200  | 1,38495 | 1,37288 | 1,008401382 | ENST00000267260 | 84530     | NM_194286    | SRRM4         |
| A_33_P3788420  | 1,36211 | 1,35005 | 1,008394392 | ENST00000606738 | 388630    | NM_001194986 | TRABD2B       |
| A_33_P3300237  | 1,49549 | 1,48344 | 1,008387402 | N/A             | 100188954 | NR_024130    | DNMBP-AS1     |
| A_22_P00010837 | 1,48142 | 1,46938 | 1,008380413 | N/A             | 101927049 | NR_120615    | PLCE1-AS2     |
| A_24_P133905   | 1,61548 | 1,60345 | 1,008373423 | ENST00000610342 | 6368      | NM_005064    | CCL23         |
| A_21_P0001200  | 1,49031 | 1,47829 | 1,008366434 | ENST00000442108 | N/A       | N/A          | N/A           |
| A_33_P3402076  | 6,81797 | 6,80595 | 1,008366434 | ENST00000544271 | 572       | AK309150     | BAD           |
| A_21_P0002990  | 1,4979  | 1,4859  | 1,008352455 | N/A             | N/A       | N/A          | Inc-CADM2-3   |
| A_32_P114003   | 1,46288 | 1,45088 | 1,008352455 | N/A             | 100192378 | NR_024360    | ZFH4-AS1      |
| A_23_P141479   | 10,0586 | 10,0466 | 1,008352455 | ENST00000314616 | 6830      | NM_003170    | SUPT6H        |
| A_33_P3278303  | 9,17119 | 9,1592  | 1,008345466 | N/A             | N/A       | N/A          | N/A           |
| A_22_P00014062 | 4,79664 | 4,78466 | 1,008338476 | ENST00000581634 | N/A       | N/A          | N/A           |
| A_22_P00001502 | 1,47111 | 1,45915 | 1,008324498 | N/A             | 100303491 | NR_040248    | ZEB2-AS1      |
| A_22_P00011077 | 1,67118 | 1,65923 | 1,008317509 | N/A             | 101927124 | NR_110045    | LOC101927124  |
| A_21_P0007274  | 1,66641 | 1,65446 | 1,008317509 | N/A             | N/A       | N/A          | Inc-ZC3H12C-1 |
| A_23_P16630    | 1,45532 | 1,44337 | 1,008317509 | N/A             | 26659     | NM_017506    | OR7A5         |
| A_23_P216376   | 3,79283 | 3,78089 | 1,00831052  | ENST00000320005 | 54714     | NM_019098    | CNGB3         |
| A_21_P0010175  | 1,64998 | 1,63804 | 1,00831052  | ENST00000433588 | N/A       | N/A          | N/A           |
| A_22_P00009130 | 1,47153 | 1,45959 | 1,00831052  | ENST00000580336 | 102723882 | XR_132644    | LOC102723882  |
| A_23_P161458   | 1,66765 | 1,65572 | 1,008303531 | ENST00000378217 | 55301     | NM_001039702 | OLAH          |
| A_23_P82523    | 1,38131 | 1,36938 | 1,008303531 | ENST00000475929 | 5243      | NM_000927    | ABCB1         |
| A_33_P3311740  | 5,3488  | 5,33687 | 1,008303531 | ENST00000558586 | 342132    | NM_001004309 | ZNF774        |
| A_33_P3325497  | 1,54895 | 1,53704 | 1,008289553 | N/A             | 387758    | NM_203371    | FIBIN         |
| A_21_P0009257  | 1,48646 | 1,47455 | 1,008289553 | N/A             | N/A       | N/A          | Inc-HLF-1     |
| A_23_P386442   | 1,56229 | 1,55039 | 1,008282564 | N/A             | 9808      | NR_022006    | KIAA0087      |
| A_23_P137896   | 2,3358  | 2,3239  | 1,008282564 | ENST00000327582 | 64064     | NM_022120    | OXCT2         |
| A_21_P0007240  | 2,14009 | 2,1282  | 1,008275575 | N/A             | N/A       | N/A          | Inc-USP35-1   |
| A_22_P00007238 | 1,70297 | 1,69109 | 1,008268586 | N/A             | N/A       | N/A          | Inc-GPR101-1  |
| A_22_P00015709 | 1,50956 | 1,49768 | 1,008268586 | ENST00000546563 | N/A       | BX116758     | N/A           |
| A_33_P3283974  | 1,99896 | 1,98708 | 1,008268586 | ENST00000461291 | 399829    | NR_046231    | LINC01168     |
| A_33_P3348224  | 1,42139 | 1,40951 | 1,008268586 | ENST00000437871 | 730005    | NM_001193336 | SEC14L6       |
| A_22_P00008037 | 3,42761 | 3,41574 | 1,008261597 | N/A             | 101928232 | N/A          | LINC01280     |
| A_21_P0011617  | 1,48317 | 1,4713  | 1,008261597 | ENST00000454535 | N/A       | N/A          | N/A           |

|                |         |         |             |                 |           |              |                |
|----------------|---------|---------|-------------|-----------------|-----------|--------------|----------------|
| A_23_P329835   | 1,55804 | 1,54617 | 1,008261597 | ENST00000545955 | 7404      | NM_007125    | UTY            |
| A_33_P3316485  | 1,49685 | 1,48499 | 1,008254609 | ENST00000402115 | 100129603 | XR_242122    | LOC100129603   |
| A_22_P00005686 | 1,55597 | 1,54411 | 1,008254609 | N/A             | N/A       | BC131511     | Inc-ELAC2-2    |
| A_21_P0001687  | 1,56024 | 1,54839 | 1,00824762  | ENST00000415686 | 101927295 | N/A          | LINC01360      |
| A_22_P00021612 | 1,50465 | 1,49281 | 1,008240631 | N/A             | N/A       | N/A          | Inc-ZNF791-2   |
| A_24_P81900    | 1,6412  | 1,62937 | 1,008233643 | ENST00000486749 | 6515      | NM_006931    | SLC2A3         |
| A_21_P0013039  | 1,40426 | 1,39244 | 1,008226654 | N/A             | N/A       | N/A          | XLOC_I2_012741 |
| A_32_P449652   | 1,56514 | 1,55332 | 1,008226654 | N/A             | N/A       | N/A          | N/A            |
| A_22_P00011932 | 1,71947 | 1,70766 | 1,008219666 | N/A             | N/A       | N/A          | Inc-PITRM1-7   |
| A_21_P0011976  | 1,67213 | 1,66032 | 1,008219666 | ENST00000442456 | N/A       | N/A          | N/A            |
| A_24_P10226    | 1,54525 | 1,53344 | 1,008219666 | ENST00000389425 | 80031     | NM_024966    | SEMA6D         |
| A_33_P3348937  | 1,54616 | 1,53436 | 1,008212677 | N/A             | 400207    | AK124214     | FLJ42220       |
| A_21_P0012402  | 1,66609 | 1,65429 | 1,008212677 | ENST00000469216 | 100507274 | N/A          | LINC01210      |
| A_33_P3283266  | 1,5619  | 1,5501  | 1,008212677 | ENST00000615763 | N/A       | XR_430070    | N/A            |
| A_23_P111737   | 1,54171 | 1,52991 | 1,008212677 | ENST00000242249 | 10268     | NM_005856    | RAMP3          |
| A_33_P3709327  | 1,45851 | 1,44672 | 1,008205689 | ENST00000509473 | 100144602 | NR_034138    | EPHA5-AS1      |
| A_21_P0001318  | 1,37596 | 1,36417 | 1,008205689 | N/A             | N/A       | N/A          | Inc-FPGT-6     |
| A_33_P3359801  | 1,54584 | 1,53405 | 1,008205689 | ENST00000351817 | 644524    | NM_033176    | NKX2-4         |
| A_22_P00013957 | 1,51583 | 1,50405 | 1,008198701 | N/A             | 283045    | NR_104162    | LOC283045      |
| A_22_P00011113 | 1,52896 | 1,51721 | 1,008177736 | ENST00000416401 | N/A       | N/A          | N/A            |
| A_23_P255126   | 1,49037 | 1,47862 | 1,008177736 | ENST00000369575 | 139716    | NM_080612    | GAB3           |
| A_22_P00005675 | 1,46569 | 1,45394 | 1,008177736 | N/A             | N/A       | N/A          | Inc-EIF4E1B-1  |
| A_33_P3267627  | 1,62562 | 1,61388 | 1,008170748 | ENST00000398718 | 245927    | NM_001037729 | DEFB113        |
| A_21_P0004998  | 1,51625 | 1,50451 | 1,008170748 | N/A             | 101928004 | XR_241966    | LOC101928004   |
| A_21_P0003133  | 1,66512 | 1,65338 | 1,008170748 | N/A             | N/A       | N/A          | Inc-GBE1-5     |
| A_33_P3378962  | 1,61787 | 1,60613 | 1,008170748 | N/A             | 644135    | XR_426083    | LOC644135      |
| A_23_P67569    | 1,66416 | 1,65243 | 1,00816376  | ENST00000359894 | 79948     | NM_024888    | LPPR3          |
| A_21_P0003912  | 1,5712  | 1,55948 | 1,008156772 | N/A             | N/A       | N/A          | Inc-C4orf38-2  |
| A_21_P0012922  | 1,53007 | 1,51835 | 1,008156772 | ENST00000512693 | 285638    | XR_251840    | LOC285638      |
| A_23_P315589   | 9,52919 | 9,51748 | 1,008149784 | ENST00000488038 | 23313     | NM_015264    | KIAA0930       |
| A_33_P3387901  | 7,69904 | 7,68734 | 1,008142796 | ENST00000580151 | 60386     | NM_001126121 | SLC25A19       |
| A_23_P95165    | 10,6798 | 10,6681 | 1,008142796 | ENST00000560089 | 10509     | NM_020210    | SEMA4B         |
| A_21_P0006707  | 1,41619 | 1,40451 | 1,00812882  | ENST00000445647 | N/A       | N/A          | N/A            |

|                |         |         |             |                 |           |              |                |
|----------------|---------|---------|-------------|-----------------|-----------|--------------|----------------|
| A_33_P3213695  | 5,51527 | 5,50359 | 1,00812882  | ENST00000470410 | 81617     | NM_001079670 | CAB39L         |
| A_33_P3249394  | 1,63779 | 1,62612 | 1,008121832 | ENST00000347598 | 775       | NM_001129827 | CACNA1C        |
| A_23_P20544    | 1,55921 | 1,54756 | 1,008107857 | ENST00000344545 | 89882     | NM_033516    | TPD52L3        |
| A_22_P00000771 | 3,20241 | 3,19077 | 1,008100869 | ENST00000583163 | N/A       | BC040589     | N/A            |
| A_33_P3415410  | 4,13081 | 4,11918 | 1,008093881 | ENST00000375274 | 5727      | NM_001083602 | PTCH1          |
| A_33_P3340956  | 1,46934 | 1,45773 | 1,008079906 | N/A             | N/A       | N/A          | N/A            |
| A_33_P3338937  | 1,68797 | 1,67636 | 1,008079906 | N/A             | N/A       | N/A          | N/A            |
| A_21_P0012731  | 1,65884 | 1,64725 | 1,008065932 | N/A             | N/A       | N/A          | Inc-BMP2K-1    |
| A_21_P0006621  | 1,54407 | 1,53249 | 1,008058944 | N/A             | 100132159 | NR_120496    | CALML3-AS1     |
| A_23_P145159   | 1,56801 | 1,55643 | 1,008058944 | ENST00000359357 | 1769      | NM_001206927 | DNAH8          |
| A_21_P0009426  | 1,66339 | 1,65181 | 1,008058944 | ENST00000589125 | 101927229 | N/A          | LOC101927229   |
| A_22_P00003877 | 1,51876 | 1,50719 | 1,008051957 | N/A             | N/A       | N/A          | Inc-CENPJ-1    |
| A_21_P0010566  | 1,62814 | 1,61658 | 1,00804497  | ENST00000434461 | N/A       | N/A          | N/A            |
| A_24_P664850   | 1,4071  | 1,39554 | 1,00804497  | ENST00000268164 | 8128      | NM_006011    | ST8SIA2        |
| A_33_P3266646  | 1,41407 | 1,40252 | 1,008037982 | ENST00000533107 | 148229    | NM_138813    | ATP8B3         |
| A_21_P0001006  | 1,55653 | 1,54498 | 1,008037982 | ENST00000442182 | 104355292 | N/A          | LINC01525      |
| A_23_P325700   | 1,7095  | 1,69796 | 1,008030995 | ENST00000614533 | 283080    | NM_001278522 | C10orf126      |
| A_21_P0007238  | 1,57134 | 1,55981 | 1,008024008 | N/A             | N/A       | N/A          | Inc-TSKU-2     |
| A_22_P00012114 | 1,55695 | 1,54542 | 1,008024008 | N/A             | N/A       | N/A          | Inc-POLD3-3    |
| A_22_P00002351 | 1,49659 | 1,48507 | 1,008017021 | ENST00000548575 | N/A       | AL133569     | N/A            |
| A_33_P3407266  | 6,94597 | 6,93446 | 1,008010034 | ENST00000372146 | 9329      | NM_012204    | GTF3C4         |
| A_22_P00016062 | 1,71461 | 1,70311 | 1,008003047 | ENST00000457457 | N/A       | XR_425391    | N/A            |
| A_23_P87545    | 16,7686 | 16,7571 | 1,008003047 | ENST00000531688 | 10410     | NM_021034    | IFITM3         |
| A_23_P30900    | 1,51223 | 1,50074 | 1,00799606  | ENST00000552745 | 3118      | BC008585     | HLA-DQA2       |
| A_22_P00014913 | 1,5588  | 1,54734 | 1,0079751   | N/A             | N/A       | N/A          | Inc-SLCO4A1-1  |
| A_33_P3352877  | 1,4467  | 1,43525 | 1,007968113 | ENST00000451493 | 23111     | NM_015087    | SPG20          |
| A_33_P3277298  | 1,47673 | 1,46528 | 1,007968113 | ENST00000610222 | 148281    | NM_001270805 | SYT6           |
| A_21_P0005012  | 1,4947  | 1,48325 | 1,007968113 | N/A             | 100874531 | N/A          | LINC00581      |
| A_33_P3226550  | 1,4904  | 1,47895 | 1,007968113 | ENST00000547697 | 9498      | AK128321     | SLC4A8         |
| A_22_P00014340 | 1,55278 | 1,54134 | 1,007961126 | ENST00000463642 | N/A       | N/A          | N/A            |
| A_23_P159316   | 1,63177 | 1,62034 | 1,00795414  | ENST00000302334 | 8419      | NM_003571    | BFSP2          |
| A_21_P0002921  | 1,52115 | 1,50972 | 1,00795414  | ENST00000432908 | 100505920 | N/A          | LOC100505920   |
| A_21_P0010622  | 1,52234 | 1,51091 | 1,00795414  | N/A             | N/A       | N/A          | XLOC_I2_000941 |



|                |         |         |             |                 |           |              |                |
|----------------|---------|---------|-------------|-----------------|-----------|--------------|----------------|
| A_22_P00021469 | 1,52409 | 1,51269 | 1,00793318  | N/A             | N/A       | N/A          | Inc-THOC1-1    |
| A_23_P388301   | 1,53781 | 1,52642 | 1,007926194 | ENST00000330495 | 253143    | BC040859     | PRR14L         |
| A_21_P0008853  | 1,61948 | 1,6081  | 1,007919207 | N/A             | N/A       | N/A          | Inc-HEXA-3     |
| A_33_P3276107  | 1,45577 | 1,44439 | 1,007919207 | N/A             | 101928426 | XM_005262504 | LOC101928426   |
| A_33_P3387591  | 1,65372 | 1,64235 | 1,007912221 | ENST00000509790 | N/A       | N/A          | N/A            |
| A_21_P0000819  | 1,79023 | 1,77886 | 1,007912221 | ENST00000557672 | 503519    | NR_038852    | LINC00929      |
| A_22_P00008977 | 1,48825 | 1,47689 | 1,007905235 | N/A             | N/A       | N/A          | Inc-LAMA1-2    |
| A_22_P00021774 | 1,50034 | 1,48898 | 1,007905235 | N/A             | N/A       | AK126901     | Inc-WDR45L-3   |
| A_21_P0001866  | 1,51969 | 1,50834 | 1,007898248 | ENST00000445738 | 339807    | NR_034023    | LOC339807      |
| A_33_P3525263  | 1,71638 | 1,70504 | 1,007891262 | ENST00000541459 | 144568    | NM_144670    | A2ML1          |
| A_21_P0003497  | 5,28592 | 5,27459 | 1,007884276 | ENST00000512219 | 101927007 | XR_425767    | LINC01365      |
| A_21_P0001229  | 1,49534 | 1,48401 | 1,007884276 | N/A             | N/A       | N/A          | Inc-NVL-1      |
| A_21_P0010391  | 1,41116 | 1,40028 | 1,00787729  | N/A             | N/A       | N/A          | Inc-PEX26-1    |
| A_21_P0009927  | 1,53071 | 1,5194  | 1,007870304 | N/A             | N/A       | N/A          | Inc-STK35-2    |
| A_22_P00013990 | 1,46672 | 1,45542 | 1,007863318 | ENST00000520163 | N/A       | N/A          | N/A            |
| A_24_P296274   | 1,52389 | 1,51259 | 1,007863318 | ENST00000560153 | 145978    | NR_026869    | LINC00052      |
| A_24_P664995   | 11,5742 | 11,5629 | 1,007863318 | ENST00000209875 | 23468     | NM_001127322 | CBX5           |
| A_22_P00008891 | 1,55879 | 1,5475  | 1,007856332 | ENST00000419013 | N/A       | N/A          | N/A            |
| A_22_P00005545 | 1,45739 | 1,4461  | 1,007856332 | ENST00000446516 | N/A       | BC008471     | N/A            |
| A_21_P0003532  | 1,44511 | 1,43383 | 1,007849346 | N/A             | 101928131 | N/A          | LOC101928131   |
| A_23_P10062    | 1,49783 | 1,48656 | 1,00784236  | ENST00000552808 | 25834     | NM_013244    | MGAT4C         |
| A_22_P00010142 | 1,6133  | 1,60203 | 1,00784236  | ENST00000419694 | N/A       | N/A          | N/A            |
| A_23_P399217   | 1,55255 | 1,54128 | 1,00784236  | ENST00000328375 | 120066    | NM_153445    | OR5P3          |
| A_22_P00001423 | 1,47366 | 1,46239 | 1,00784236  | N/A             | N/A       | N/A          | Inc-APIP-1     |
| A_33_P3235876  | 1,63676 | 1,62549 | 1,00784236  | ENST00000390632 | N/A       | AF017464     | N/A            |
| A_21_P0007965  | 1,62966 | 1,6184  | 1,007835374 | ENST00000439008 | 104326054 | N/A          | LINC00399      |
| A_23_P326080   | 1,36789 | 1,35666 | 1,007814417 | ENST00000297435 | 1669      | NM_001925    | DEFA4          |
| A_21_P0001312  | 1,63572 | 1,62449 | 1,007814417 | N/A             | N/A       | N/A          | Inc-HOOK1-3    |
| A_22_P00014685 | 7,90382 | 7,89259 | 1,007814417 | N/A             | N/A       | N/A          | Inc-SLC25A21-1 |
| A_33_P3239112  | 4,89979 | 4,88857 | 1,007807432 | ENST00000375290 | 5727      | AB214500     | PTCH1          |
| A_22_P00013510 | 1,54015 | 1,52893 | 1,007807432 | ENST00000523602 | N/A       | N/A          | N/A            |
| A_22_P00010360 | 1,62874 | 1,61754 | 1,007793461 | ENST00000560623 | N/A       | CD242622     | N/A            |
| A_21_P0013868  | 1,53    | 1,51881 | 1,007786475 | ENST00000431706 | N/A       | N/A          | N/A            |

|                |         |         |             |                 |           |              |                 |
|----------------|---------|---------|-------------|-----------------|-----------|--------------|-----------------|
| A_21_P0007860  | 1,50902 | 1,49783 | 1,007786475 | N/A             | N/A       | N/A          | Inc-TMEM132B-4  |
| A_21_P0002014  | 1,43904 | 1,42786 | 1,00777949  | ENST00000430897 | N/A       | N/A          | N/A             |
| A_22_P00021210 | 1,49387 | 1,48269 | 1,00777949  | N/A             | 101928988 | NR_120344    | LOC101928988    |
| A_33_P3365815  | 1,39279 | 1,38161 | 1,00777949  | N/A             | 729866    | AK057458     | LOC729866       |
| A_24_P285055   | 1,55215 | 1,54098 | 1,007772504 | ENST00000362095 | 83259     | NM_032972    | PCDH11Y         |
| A_24_P271696   | 1,55131 | 1,54015 | 1,007765519 | ENST00000518075 | 653220    | NM_001097594 | XAGE1B          |
| A_22_P00024812 | 1,5507  | 1,53958 | 1,007737578 | N/A             | N/A       | BQ082424     | Inc-LOX-3       |
| A_22_P00018277 | 1,54143 | 1,53032 | 1,007730593 | ENST00000568729 | N/A       | AL832552     | N/A             |
| A_23_P361333   | 1,67245 | 1,66134 | 1,007730593 | ENST00000435614 | 84077     | NM_032137    | C3orf20         |
| A_21_P0009868  | 1,45467 | 1,44356 | 1,007730593 | N/A             | N/A       | N/A          | Inc-C20orf197-2 |
| A_21_P0010742  | 4,66795 | 4,65685 | 1,007723608 | ENST00000439440 | N/A       | N/A          | N/A             |
| A_22_P00006987 | 1,5523  | 1,54124 | 1,007695668 | N/A             | N/A       | N/A          | Inc-GDPD5-1     |
| A_22_P00020424 | 1,49443 | 1,48337 | 1,007695668 | N/A             | N/A       | BX103274     | Inc-PBX1-1      |
| A_21_P0009742  | 2,67412 | 2,66306 | 1,007695668 | N/A             | N/A       | N/A          | Inc-PGLYRP2-1   |
| A_21_P0012885  | 5,32701 | 5,31595 | 1,007695668 | ENST00000522848 | N/A       | N/A          | N/A             |
| A_32_P228775   | 8,72545 | 8,7144  | 1,007688684 | ENST00000470976 | 151987    | NM_174907    | PPP4R2          |
| A_23_P419786   | 1,47642 | 1,46538 | 1,007681699 | ENST00000358582 | 163115    | NM_152605    | ZNF781          |
| A_22_P00015218 | 1,70802 | 1,69699 | 1,007674714 | ENST00000577281 | N/A       | N/A          | N/A             |
| A_33_P3398386  | 1,63983 | 1,6288  | 1,007674714 | ENST00000444490 | 1842      | NM_001197296 | ECM2            |
| A_21_P0002068  | 1,55639 | 1,54536 | 1,007674714 | ENST00000450290 | N/A       | N/A          | N/A             |
| A_21_P0008346  | 1,54173 | 1,53071 | 1,00766773  | N/A             | N/A       | N/A          | Inc-MNAT1-2     |
| A_24_P813550   | 1,36376 | 1,35274 | 1,00766773  | ENST00000390616 | N/A       | XM_006724899 | N/A             |
| A_22_P00003072 | 1,38231 | 1,3713  | 1,007660745 | ENST00000518722 | N/A       | N/A          | N/A             |
| A_33_P3371633  | 1,46301 | 1,452   | 1,007660745 | ENST00000369701 | 22986     | NM_014978    | SORCS3          |
| A_33_P6822108  | 1,36501 | 1,35401 | 1,00765376  | N/A             | 102723439 | NR_120673    | LOC102723439    |
| A_33_P3367726  | 1,50681 | 1,49581 | 1,00765376  | ENST00000605735 | 643486    | NR_003539    | BRDTP1          |
| A_23_P156471   | 11,3134 | 11,3024 | 1,00765376  | ENST00000371477 | 988       | NM_001253    | CDC5L           |
| A_33_P3382830  | 1,56897 | 1,55798 | 1,007646776 | ENST00000423208 | 643623    | NR_038906    | LOC643623       |
| A_33_P3792370  | 1,55382 | 1,54284 | 1,007639791 | N/A             | 285375    | NR_027103    | LINC00620       |
| A_21_P0010884  | 1,45315 | 1,44217 | 1,007639791 | ENST00000594536 | 100507027 | NR_038200    | LINC00948       |
| A_21_P0009572  | 1,57036 | 1,55938 | 1,007639791 | N/A             | N/A       | N/A          | Inc-NETO1-1     |
| A_22_P00004020 | 1,77276 | 1,76178 | 1,007639791 | ENST00000416004 | N/A       | N/A          | N/A             |
| A_21_P0001314  | 1,38501 | 1,37403 | 1,007639791 | N/A             | N/A       | N/A          | Inc-INADL-1     |

|                |         |         |             |                 |           |              |                |
|----------------|---------|---------|-------------|-----------------|-----------|--------------|----------------|
| A_33_P3331791  | 9,46227 | 9,4513  | 1,007632807 | N/A             | N/A       | N/A          | N/A            |
| A_33_P3367836  | 1,4665  | 1,45553 | 1,007632807 | N/A             | N/A       | N/A          | XLOC_I2_013648 |
| A_33_P3410121  | 1,39124 | 1,38027 | 1,007632807 | ENST00000378592 | 85452     | AK127388     | CFAP74         |
| A_33_P3303444  | 1,5189  | 1,50794 | 1,007625823 | ENST00000226355 | 173       | NM_001133    | AFM            |
| A_23_P108564   | 1,55324 | 1,54228 | 1,007625823 | ENST00000392690 | 8708      | NM_020981    | B3GALT1        |
| A_24_P97374    | 1,53349 | 1,52253 | 1,007625823 | ENST00000449599 | 8320      | NM_005442    | EOMES          |
| A_21_P0001695  | 1,5634  | 1,55244 | 1,007625823 | N/A             | N/A       | N/A          | Inc-PTBP2-1    |
| A_22_P00005144 | 1,55187 | 1,54091 | 1,007625823 | ENST00000541769 | 100996671 | NR_110035    | LOC100996671   |
| A_21_P0013429  | 1,42341 | 1,41245 | 1,007625823 | ENST00000426550 | N/A       | N/A          | N/A            |
| A_33_P3358432  | 1,36842 | 1,35746 | 1,007625823 | N/A             | 100507073 | AK023375     | LOC100507073   |
| A_21_P0009439  | 1,65386 | 1,64292 | 1,007611854 | N/A             | N/A       | N/A          | Inc-NDC80-2    |
| A_32_P73796    | 1,62981 | 1,61887 | 1,007611854 | ENST00000308249 | 22843     | NM_014906    | PPM1E          |
| A_22_P00011492 | 1,46928 | 1,45836 | 1,007597886 | N/A             | N/A       | AY944074     | Inc-PARP16-1   |
| A_21_P0002297  | 1,35833 | 1,34742 | 1,007590902 | N/A             | N/A       | N/A          | Inc-SPOPL-3    |
| A_33_P3303752  | 1,62901 | 1,61811 | 1,007583918 | N/A             | N/A       | N/A          | N/A            |
| A_21_P0013754  | 1,55395 | 1,54305 | 1,007583918 | N/A             | N/A       | N/A          | XLOC_I2_015453 |
| A_22_P00003865 | 1,61712 | 1,60623 | 1,007576934 | N/A             | N/A       | N/A          | Inc-CELF4-3    |
| A_33_P3406405  | 1,49581 | 1,48493 | 1,00756995  | N/A             | N/A       | N/A          | N/A            |
| A_22_P00011188 | 1,66453 | 1,65366 | 1,007562966 | N/A             | N/A       | N/A          | Inc-OIT3-1     |
| A_23_P144512   | 1,63029 | 1,61942 | 1,007562966 | ENST00000358842 | 2712      | NM_033214    | GK2            |
| A_23_P205428   | 1,5082  | 1,49735 | 1,007548998 | ENST00000313071 | 2290      | NM_005249    | FOXG1          |
| A_22_P00019224 | 1,72127 | 1,71043 | 1,007542014 | N/A             | N/A       | DA155990     | Inc-ZSWIM2-1   |
| A_22_P00014294 | 1,48471 | 1,47387 | 1,007542014 | N/A             | N/A       | N/A          | Inc-SERAC1-4   |
| A_21_P0014779  | 1,5379  | 1,52707 | 1,007535031 | ENST00000494753 | 123       | AK094196     | PLIN2          |
| A_23_P115842   | 10,9829 | 10,9721 | 1,00751408  | ENST00000540210 | 55749     | NM_018237    | CCAR1          |
| A_21_P0012686  | 1,36369 | 1,35289 | 1,00751408  | ENST00000503593 | N/A       | N/A          | N/A            |
| A_23_P162336   | 12,7376 | 12,7268 | 1,00751408  | ENST00000551434 | 4848      | NM_014515    | CNOT2          |
| A_33_P3252612  | 18,2657 | 18,2549 | 1,00751408  | ENST00000308919 | 54905     | NM_017781    | CYP2W1         |
| A_22_P00003208 | 1,51505 | 1,50426 | 1,007507096 | ENST00000534117 | 100505532 | N/A          | LINC01301      |
| A_23_P58046    | 1,53884 | 1,52806 | 1,007500113 | ENST00000236709 | 51146     | NM_016161    | A4GNT          |
| A_21_P0007438  | 1,48609 | 1,47531 | 1,007500113 | N/A             | N/A       | N/A          | Inc-LGALS12-2  |
| A_21_P0004169  | 1,49155 | 1,48077 | 1,007500113 | N/A             | 101927190 | N/A          | LOC101927190   |
| A_33_P3290677  | 1,42731 | 1,41654 | 1,007493129 | ENST00000338875 | 391723    | NM_001300781 | HELT           |

|                |         |         |             |                 |           |              |                    |
|----------------|---------|---------|-------------|-----------------|-----------|--------------|--------------------|
| A_22_P00010237 | 1,51598 | 1,50521 | 1,007493129 | N/A             | N/A       | BC037791     | lnc-MT1G-2         |
| A_33_P3222253  | 1,52109 | 1,51033 | 1,007486146 | ENST00000225371 | 8288      | NM_000502    | EPX                |
| A_23_P9496     | 1,39554 | 1,38478 | 1,007486146 | ENST00000619587 | 8022      | NM_014564    | LHX3               |
| A_21_P0009862  | 1,47123 | 1,46047 | 1,007486146 | ENST00000434176 | N/A       | N/A          | N/A                |
| A_22_P00010419 | 1,54467 | 1,53392 | 1,007479162 | N/A             | N/A       | N/A          | lnc-MYOF-1         |
| A_21_P0004234  | 1,47198 | 1,46123 | 1,007479162 | N/A             | N/A       | N/A          | lnc-BASP1-3        |
| A_33_P3411021  | 1,49083 | 1,48008 | 1,007479162 | N/A             | 6585      | BC028105     | SLIT1              |
| A_22_P00005259 | 1,53295 | 1,52221 | 1,007472179 | N/A             | N/A       | N/A          | lnc-DMRTA1-5       |
| A_22_P00021309 | 1,36013 | 1,34939 | 1,007472179 | N/A             | N/A       | XM_005251920 | lnc-OR1J2-1        |
| A_22_P00021995 | 1,63901 | 1,62827 | 1,007472179 | ENST00000415655 | N/A       | N/A          | N/A                |
| A_33_P3313596  | 9,35147 | 9,34074 | 1,007465196 | ENST00000401096 | 728642    | NM_033529    | CDK11A             |
| A_21_P0009454  | 1,54993 | 1,53921 | 1,007458213 | N/A             | N/A       | N/A          | lnc-SLC35G4-3      |
| A_21_P0003168  | 3,0364  | 3,02568 | 1,007458213 | ENST00000461398 | 101927149 | XR_241560    | LINC01471          |
| A_21_P0007190  | 1,55125 | 1,54053 | 1,007458213 | ENST00000532947 | N/A       | N/A          | N/A                |
| A_23_P40515    | 1,45317 | 1,44245 | 1,007458213 | ENST00000399635 | 23617     | NM_053006    | TSSK2              |
| A_22_P00017084 | 1,71043 | 1,69971 | 1,007458213 | N/A             | N/A       | N/A          | lnc-TXLNB-1        |
| A_33_P3398697  | 13,1895 | 13,1788 | 1,007444246 | ENST00000404072 | 9463      | NM_012407    | PICK1              |
| A_33_P3280927  | 10,6554 | 10,6447 | 1,007444246 | N/A             | 84973     | NR_024542    | SNHG7              |
| A_33_P3279765  | 6,03102 | 6,02032 | 1,007444246 | ENST00000395663 | 514       | N/A          | ATP5E              |
| A_23_P250035   | 12,265  | 12,2543 | 1,007444246 | ENST00000505555 | 6389      | NM_004168    | SDHA               |
| A_21_P0005296  | 1,49182 | 1,48113 | 1,007437263 | ENST00000441150 | N/A       | N/A          | N/A                |
| A_22_P00003417 | 1,40013 | 1,38944 | 1,007437263 | ENST00000453706 | N/A       | N/A          | N/A                |
| A_21_P0007441  | 3,13338 | 3,12271 | 1,007423297 | N/A             | N/A       | N/A          | lnc-ANO1-1         |
| A_22_P00015038 | 1,67833 | 1,66766 | 1,007423297 | ENST00000458004 | N/A       | N/A          | N/A                |
| A_22_P00010196 | 1,66971 | 1,65904 | 1,007423297 | N/A             | N/A       | N/A          | lnc-MRPS7-2        |
| A_22_P00010358 | 1,70355 | 1,69288 | 1,007423297 | N/A             | N/A       | N/A          | lnc-MYCT1-1        |
| A_33_P3317163  | 1,70668 | 1,69601 | 1,007423297 | ENST00000393655 | 7021      | NM_003221    | TFAP2B             |
| A_23_P257091   | 9,94093 | 9,93026 | 1,007423297 | ENST00000530491 | 8021      | NM_005085    | NUP214             |
| A_21_P0009256  | 1,71961 | 1,70895 | 1,007416315 | N/A             | N/A       | N/A          | lnc-AC102948.1.1-1 |
| A_23_P414312   | 1,49703 | 1,48639 | 1,007402349 | ENST00000304613 | 85442     | NM_152643    | KNDC1              |
| A_21_P0007647  | 1,95457 | 1,94393 | 1,007402349 | N/A             | N/A       | N/A          | lnc-ZNF664-2       |
| A_21_P0006654  | 1,45622 | 1,4456  | 1,007388383 | N/A             | N/A       | N/A          | lnc-CELF2-2        |
| A_22_P00003396 | 1,54987 | 1,53926 | 1,007381401 | N/A             | N/A       | N/A          | lnc-CCDC117-1      |

|                |         |         |             |                 |           |              |                  |
|----------------|---------|---------|-------------|-----------------|-----------|--------------|------------------|
| A_33_P3384775  | 1,63143 | 1,62086 | 1,007353471 | ENST00000398497 | 49854     | AB190374     | ZBTB21           |
| A_21_P0000902  | 1,54754 | 1,53697 | 1,007353471 | N/A             | 100287559 | NR_040107    | ADPGK-AS1        |
| A_33_P3320022  | 1,63758 | 1,62702 | 1,007346488 | ENST00000506823 | 442117    | NM_001034845 | GALNTL6          |
| A_21_P0014452  | 1,37221 | 1,36165 | 1,007346488 | N/A             | N/A       | AK130262     | N/A              |
| A_21_P0007045  | 1,48368 | 1,47312 | 1,007346488 | N/A             | N/A       | N/A          | Inc-GATA3-1      |
| A_19_P00315959 | 1,58521 | 1,57465 | 1,007346488 | N/A             | N/A       | N/A          | Inc-NR2F1-1      |
| A_21_P0010254  | 1,61998 | 1,60943 | 1,007339506 | N/A             | N/A       | N/A          | Inc-UMODL1-1     |
| A_23_P373109   | 1,49273 | 1,48218 | 1,007339506 | ENST00000431078 | 129684    | NM_130773    | CNTNAP5          |
| A_33_P3318092  | 1,50954 | 1,49899 | 1,007339506 | ENST00000284602 | 5506      | NM_002711    | PPP1R3A          |
| A_22_P00025202 | 1,51828 | 1,50774 | 1,007332524 | N/A             | 101928386 | NR_110237    | LOC101928386     |
| A_21_P0013400  | 1,49212 | 1,48158 | 1,007332524 | ENST00000440208 | N/A       | N/A          | N/A              |
| A_22_P00011714 | 1,4667  | 1,45617 | 1,007325541 | N/A             | N/A       | N/A          | Inc-PDZD9-1      |
| A_21_P0008927  | 1,54869 | 1,53817 | 1,007318559 | ENST00000562980 | N/A       | N/A          | N/A              |
| A_23_P171397   | 1,46533 | 1,45481 | 1,007318559 | ENST00000439108 | 378948    | NM_001006121 | RBM1B            |
| A_22_P00014470 | 1,49672 | 1,4862  | 1,007318559 | N/A             | N/A       | BC037883     | Inc-SH3TC2-1     |
| A_21_P0000277  | 5,07812 | 5,06761 | 1,007311577 | N/A             | 26812     | NR_002602    | SNORD37          |
| A_33_P6753187  | 1,56799 | 1,55748 | 1,007311577 | ENST00000427055 | 645784    | NR_015424    | ANKRD36BP2       |
| A_21_P0005164  | 1,39353 | 1,38303 | 1,007304595 | N/A             | N/A       | N/A          | Inc-UNC5CL-1     |
| A_23_P42802    | 13,5308 | 13,5203 | 1,007304595 | ENST00000286091 | 9601      | NM_004911    | PDIA4            |
| A_24_P902728   | 8,86449 | 8,854   | 1,007297613 | ENST00000389645 | 4076      | NM_203364    | CAPRIN1          |
| A_23_P118842   | 1,81038 | 1,79989 | 1,007297613 | ENST00000361883 | 83895     | NM_031957    | KRTAP1-5         |
| A_33_P3281181  | 1,66444 | 1,65395 | 1,007297613 | ENST00000510550 | 100132987 | AK294518     | LINC00856        |
| A_21_P0003645  | 2,73231 | 2,72182 | 1,007297613 | N/A             | N/A       | N/A          | Inc-AC079341.1-2 |
| A_22_P00025505 | 1,51577 | 1,50528 | 1,007297613 | ENST00000415019 | N/A       | N/A          | N/A              |
| A_22_P00004792 | 1,7238  | 1,71332 | 1,007290631 | ENST00000456722 | N/A       | N/A          | N/A              |
| A_22_P00025054 | 1,671   | 1,66055 | 1,007269685 | N/A             | 101928174 | NR_120329    | LOC101928174     |
| A_22_P00011254 | 1,54825 | 1,53781 | 1,007262703 | ENST00000436804 | N/A       | N/A          | N/A              |
| A_32_P104772   | 1,67582 | 1,66539 | 1,007255721 | N/A             | N/A       | N/A          | XLOC_I2_015179   |
| A_33_P3269862  | 1,49068 | 1,48025 | 1,007255721 | ENST00000420841 | N/A       | N/A          | N/A              |
| A_21_P0004042  | 1,55017 | 1,53974 | 1,007255721 | ENST00000501405 | N/A       | N/A          | N/A              |
| A_33_P3210399  | 6,49358 | 6,48315 | 1,007255721 | ENST00000415427 | 6563      | NM_001146037 | SLC14A1          |
| A_24_P940275   | 1,63556 | 1,62514 | 1,007248739 | ENST00000616992 | 9758      | NM_014728    | FRMPD4           |
| A_22_P00006608 | 1,47855 | 1,46814 | 1,007241758 | N/A             | N/A       | N/A          | Inc-FOXA1-3      |

|                |         |         |             |                 |           |              |                    |
|----------------|---------|---------|-------------|-----------------|-----------|--------------|--------------------|
| A_33_P3216664  | 5,50865 | 5,49825 | 1,007234776 | ENST00000470346 | 151174    | NR_026925    | LOC151174          |
| A_33_P3366156  | 1,53457 | 1,52417 | 1,007234776 | ENST00000489917 | 83890     | NM_031952    | SPATA9             |
| A_21_P0002578  | 1,56435 | 1,55395 | 1,007234776 | N/A             | N/A       | N/A          | Inc-AC010872.2.1-5 |
| A_33_P3397443  | 13,0924 | 13,082  | 1,007234776 | ENST00000574680 | 9088      | NM_182687    | PKMYT1             |
| A_33_P3261132  | 2,19315 | 2,18276 | 1,007227795 | ENST00000422857 | 360155    | NR_001560    | CYCSP52            |
| A_22_P00013501 | 1,5253  | 1,51491 | 1,007227795 | ENST00000539653 | 100507065 | NR_120431    | LOC100507065       |
| A_21_P0008923  | 1,56046 | 1,55008 | 1,007220813 | N/A             | 102724505 | XR_424692    | LOC102724505       |
| A_22_P00007922 | 1,48529 | 1,47491 | 1,007220813 | ENST00000415283 | N/A       | N/A          | N/A                |
| A_21_P0008978  | 1,72465 | 1,71428 | 1,007213831 | ENST00000568751 | 101928248 | NR_104660    | LINC01229          |
| A_33_P3297606  | 1,66207 | 1,65173 | 1,007192887 | ENST00000463633 | 57047     | N/A          | PLSCR2             |
| A_23_P5968     | 1,51967 | 1,50933 | 1,007192887 | ENST00000372769 | 6407      | NM_003008    | SEMG2              |
| A_23_P392476   | 1,5501  | 1,53978 | 1,007178925 | ENST00000424296 | 221264    | NM_001145128 | AK9                |
| A_21_P0003331  | 2,30383 | 2,29352 | 1,007171944 | ENST00000602641 | N/A       | XR_428480    | N/A                |
| A_24_P282383   | 1,46652 | 1,45622 | 1,007164962 | ENST00000355349 | 4625      | NM_000257    | MYH7               |
| A_33_P3221438  | 9,39518 | 9,38488 | 1,007164962 | ENST00000310380 | 152002    | NM_152531    | XXYL1              |
| A_23_P9402     | 1,45341 | 1,44313 | 1,007151    | ENST00000610543 | 1271      | NM_147164    | CNTFR              |
| A_33_P3257910  | 1,4908  | 1,48052 | 1,007151    | ENST00000326474 | 401097    | NM_001168214 | C3orf80            |
| A_23_P136413   | 8,47356 | 8,4633  | 1,007137038 | ENST00000360564 | 4326      | NM_016155    | MMP17              |
| A_33_P3451508  | 1,49222 | 1,48196 | 1,007137038 | ENST00000446592 | N/A       | BC070152     | N/A                |
| A_23_P140342   | 1,71099 | 1,70075 | 1,007123076 | ENST00000340446 | 84075     | NM_032135    | FSCB               |
| A_21_P0012191  | 1,46949 | 1,45925 | 1,007123076 | N/A             | N/A       | N/A          | XLOC_I2_009163     |
| A_22_P00018511 | 1,68495 | 1,67473 | 1,007109115 | N/A             | N/A       | N/A          | Inc-ANLN-1         |
| A_33_P3375279  | 1,51263 | 1,50241 | 1,007109115 | N/A             | 100128264 | NR_038945    | HTR5A-AS1          |
| A_21_P0004538  | 1,3855  | 1,37529 | 1,007102134 | ENST00000518260 | N/A       | N/A          | N/A                |
| A_21_P0011234  | 1,48513 | 1,47493 | 1,007095153 | ENST00000610194 | 100874178 | XR_246656    | LINC00454          |
| A_22_P00008331 | 1,57646 | 1,56626 | 1,007095153 | N/A             | N/A       | N/A          | Inc-ITK-1          |
| A_21_P0004197  | 1,47101 | 1,46081 | 1,007095153 | N/A             | N/A       | N/A          | Inc-NDUFS6-5       |
| A_22_P00005577 | 1,5106  | 1,5004  | 1,007095153 | ENST00000451034 | 101927165 | XR_245005    | LOC101927165       |
| A_23_P21990    | 1,55067 | 1,54047 | 1,007095153 | ENST00000353963 | 9963      | NM_152685    | SLC23A1            |
| A_21_P0011978  | 1,5454  | 1,5352  | 1,007095153 | N/A             | N/A       | N/A          | XLOC_I2_008343     |
| A_22_P00007676 | 3,01827 | 3,00807 | 1,007095153 | N/A             | N/A       | N/A          | Inc-HIATL1-6       |
| A_23_P311087   | 10,1631 | 10,1529 | 1,007095153 | ENST00000367352 | 23528     | NM_012482    | ZNF281             |
| A_22_P00005455 | 1,49519 | 1,485   | 1,007088173 | ENST00000518178 | N/A       | N/A          | N/A                |

|                |         |         |             |                 |           |              |                |
|----------------|---------|---------|-------------|-----------------|-----------|--------------|----------------|
| A_21_P0003957  | 1,48008 | 1,4699  | 1,007081192 | ENST00000514474 | N/A       | N/A          | N/A            |
| A_22_P00011545 | 1,53619 | 1,52602 | 1,007074212 | ENST00000508605 | 102724735 | N/A          | LOC102724735   |
| A_24_P323131   | 1,48681 | 1,47664 | 1,007074212 | ENST00000250776 | 50858     | NR_001538    | TTY1           |
| A_24_P16833    | 1,54451 | 1,53434 | 1,007074212 | ENST00000528921 | 120114    | NM_001008781 | FAT3           |
| A_21_P0009741  | 1,66826 | 1,6581  | 1,007067231 | N/A             | N/A       | N/A          | Inc-DDX39A-2   |
| A_22_P00001593 | 1,54883 | 1,53868 | 1,007060251 | ENST00000360035 | 55999     | NR_002216    | NXF4           |
| A_33_P3376661  | 1,66816 | 1,65802 | 1,00705327  | ENST00000439464 | 375940    | N/A          | DMBT1P1        |
| A_22_P00010881 | 1,55708 | 1,54694 | 1,00705327  | N/A             | N/A       | DR761951     | Inc-NPBWR1-1   |
| A_19_P00317822 | 1,47428 | 1,46414 | 1,00705327  | N/A             | N/A       | N/A          | Inc-RASA1-7    |
| A_21_P0010426  | 1,49948 | 1,48934 | 1,00705327  | N/A             | N/A       | N/A          | Inc-FAM19A5-2  |
| A_23_P51565    | 4,25248 | 4,24235 | 1,00704629  | ENST00000556362 | 7135      | NM_003281    | TNNI1          |
| A_21_P0013681  | 1,61248 | 1,60235 | 1,00704629  | N/A             | N/A       | N/A          | XLOC_I2_015322 |
| A_32_P370026   | 1,45585 | 1,44573 | 1,00703931  | ENST00000590072 | N/A       | N/A          | N/A            |
| A_33_P3225101  | 1,42165 | 1,41153 | 1,00703931  | N/A             | N/A       | BX097452     | N/A            |
| A_33_P3304092  | 1,56675 | 1,55664 | 1,00703233  | N/A             | N/A       | N/A          | N/A            |
| A_23_P75097    | 16,8732 | 16,8631 | 1,007025349 | ENST00000370215 | 79955     | NM_024895    | PDZD7          |
| A_33_P3214035  | 1,62202 | 1,61192 | 1,007025349 | ENST00000436735 | 135       | NM_001278497 | ADORA2A        |
| A_21_P0001942  | 1,67347 | 1,66337 | 1,007025349 | ENST00000419129 | N/A       | N/A          | N/A            |
| A_33_P3833478  | 1,48211 | 1,47201 | 1,007025349 | N/A             | 160824    | BC036697     | SP3P           |
| A_21_P0005617  | 6,68206 | 6,67197 | 1,007018369 | ENST00000517910 | N/A       | N/A          | N/A            |
| A_33_P3375513  | 1,48846 | 1,47838 | 1,007011389 | N/A             | N/A       | N/A          | N/A            |
| A_21_P0008866  | 1,56242 | 1,55236 | 1,006997429 | N/A             | N/A       | N/A          | Inc-KLHL25-8   |
| A_21_P0011040  | 1,49328 | 1,48322 | 1,006997429 | N/A             | N/A       | N/A          | XLOC_I2_002894 |
| A_22_P00022044 | 1,45803 | 1,44798 | 1,006990449 | ENST00000511749 | N/A       | N/A          | N/A            |
| A_22_P00018601 | 1,72403 | 1,71399 | 1,006983469 | N/A             | 100873970 | NR_120382    | GPC5-AS2       |
| A_24_P931201   | 1,48035 | 1,47032 | 1,006976489 | N/A             | 100130071 | AY358179     | LOC100130071   |
| A_22_P00007116 | 2,29002 | 2,28    | 1,00696951  | N/A             | N/A       | N/A          | Inc-GLYATL2-1  |
| A_24_P353289   | 12,7032 | 12,6932 | 1,00695555  | ENST00000490922 | 83606     | NM_031444    | GUCD1          |
| A_22_P00020551 | 1,48866 | 1,47866 | 1,00695555  | ENST00000430815 | 246312    | BF056119     | C21orf91-OT1   |
| A_33_P3298460  | 1,70147 | 1,69147 | 1,00695555  | ENST00000375497 | 2641      | NM_002054    | GCG            |
| A_22_P00021423 | 1,47971 | 1,46971 | 1,00695555  | N/A             | N/A       | N/A          | Inc-TRAPPC11-2 |
| A_23_P151264   | 1,48281 | 1,47282 | 1,00694857  | ENST00000609686 | 2904      | NM_000834    | GRIN2B         |
| A_33_P3379906  | 1,54758 | 1,53759 | 1,00694857  | ENST00000315519 | 122748    | NM_001004480 | OR11H6         |

|                |         |         |             |                 |           |              |                 |
|----------------|---------|---------|-------------|-----------------|-----------|--------------|-----------------|
| A_21_P0010833  | 1,3977  | 1,38772 | 1,006941591 | ENST00000526759 | 253264    | NR_038223    | ZNF503-AS1      |
| A_33_P3257182  | 1,4839  | 1,47393 | 1,006934611 | ENST00000597498 | 4606      | NM_004533    | MYBPC2          |
| A_33_P3255924  | 1,84499 | 1,83503 | 1,006927632 | ENST00000527145 | 390110    | NM_001031854 | ACCSL           |
| A_22_P00011244 | 4,26999 | 4,26006 | 1,006906693 | ENST00000575487 | N/A       | N/A          | N/A             |
| A_21_P0010027  | 1,56319 | 1,55327 | 1,006899714 | N/A             | N/A       | N/A          | Inc-C20orf3-2   |
| A_33_P3315470  | 1,42074 | 1,41082 | 1,006899714 | ENST00000505626 | 255167    | NR_024424    | LINC01018       |
| A_22_P00018623 | 1,71102 | 1,70111 | 1,006892735 | N/A             | N/A       | DA192300     | Inc-TRIO-2      |
| A_21_P0001628  | 1,48996 | 1,48006 | 1,006885756 | N/A             | N/A       | N/A          | Inc-TAF1A-1     |
| A_22_P00011298 | 1,66858 | 1,65868 | 1,006885756 | ENST00000533552 | N/A       | N/A          | N/A             |
| A_22_P00003279 | 1,5593  | 1,54943 | 1,006864818 | N/A             | N/A       | N/A          | Inc-CALML5-4    |
| A_23_P33961    | 2,0167  | 2,00685 | 1,00685086  | ENST00000370648 | 680       | NM_001727    | BRS3            |
| A_33_P3283744  | 4,96662 | 4,95677 | 1,00685086  | ENST00000624675 | 100132249 | XR_158980    | LOC100132249    |
| A_22_P00010907 | 1,49021 | 1,48036 | 1,00685086  | ENST00000414127 | N/A       | N/A          | N/A             |
| A_21_P0009479  | 1,35656 | 1,34672 | 1,006843881 | ENST00000579506 | 102724651 | N/A          | LOC102724651    |
| A_22_P00005795 | 1,49469 | 1,48485 | 1,006843881 | ENST00000444361 | N/A       | N/A          | N/A             |
| A_23_P63777    | 1,45335 | 1,44351 | 1,006843881 | ENST00000334011 | 170392    | NM_152635    | OIT3            |
| A_22_P00011220 | 1,41803 | 1,40821 | 1,006829924 | N/A             | 100507470 | NR_038986    | GRID1-AS1       |
| A_21_P0008384  | 1,58634 | 1,57652 | 1,006829924 | N/A             | N/A       | N/A          | Inc-C14orf177-4 |
| A_24_P50437    | 12,989  | 12,9792 | 1,006815966 | ENST00000472161 | N/A       | BC065737     | N/A             |
| A_33_P3299540  | 1,62471 | 1,61491 | 1,006815966 | N/A             | 341277    | BC160173     | OVCH2           |
| A_23_P112260   | 11,5864 | 11,5766 | 1,006815966 | ENST00000374293 | 2790      | NM_001017998 | GNG10           |
| A_22_P00013916 | 1,56954 | 1,55975 | 1,006808987 | ENST00000557062 | N/A       | N/A          | N/A             |
| A_33_P3865962  | 2,31085 | 2,30106 | 1,006808987 | N/A             | 440714    | BG215431     | C1orf143        |
| A_22_P00013839 | 4,27196 | 4,26218 | 1,006802009 | N/A             | N/A       | AA766173     | Inc-RPL24-1     |
| A_22_P00002610 | 1,75448 | 1,7447  | 1,006802009 | ENST00000563837 | 64788     | NR_036442    | LMF1            |
| A_21_P0006625  | 1,53219 | 1,52241 | 1,006802009 | N/A             | N/A       | N/A          | Inc-JMJD1C-2    |
| A_21_P0005300  | 1,68878 | 1,67902 | 1,006788052 | N/A             | N/A       | N/A          | Inc-PSMA2-1     |
| A_23_P78849    | 3,04869 | 3,03893 | 1,006788052 | ENST00000592956 | 6861      | NM_003180    | SYT5            |
| A_24_P255471   | 1,54658 | 1,53683 | 1,006781073 | ENST00000532592 | 143425    | NM_175733    | SYT9            |
| A_22_P00006619 | 1,65856 | 1,64881 | 1,006781073 | ENST00000420928 | 101929663 | N/A          | LINC01427       |
| A_22_P00009415 | 1,53212 | 1,52237 | 1,006781073 | ENST00000519323 | N/A       | BC022402     | N/A             |
| A_33_P3264424  | 7,70297 | 7,69323 | 1,006774095 | N/A             | N/A       | N/A          | N/A             |
| A_21_P0011835  | 1,50809 | 1,49836 | 1,006767116 | N/A             | N/A       | N/A          | XLOC_I2_007468  |



|                |         |         |             |                 |           |              |                      |
|----------------|---------|---------|-------------|-----------------|-----------|--------------|----------------------|
| A_21_P0011961  | 1,48476 | 1,47503 | 1,006767116 | N/A             | N/A       | N/A          | XLOC_I2_008226       |
| A_21_P0007069  | 1,4684  | 1,45869 | 1,00675316  | N/A             | N/A       | N/A          | Inc-KIF20B-4         |
| A_21_P0012477  | 7,25574 | 7,24604 | 1,006746181 | N/A             | N/A       | N/A          | XLOC_I2_010493       |
| A_21_P0005420  | 1,47847 | 1,46878 | 1,006739203 | N/A             | N/A       | N/A          | Inc-TE5-1            |
| A_33_P3224331  | 1,4112  | 1,40152 | 1,006732225 | ENST00000336079 | 8653      | NM_004660    | DDX3Y                |
| A_21_P0008972  | 1,46695 | 1,45727 | 1,006732225 | N/A             | N/A       | N/A          | Inc-RP11-58C22.1.1-3 |
| A_23_P97465    | 1,45227 | 1,44259 | 1,006732225 | ENST00000240189 | 65122     | NM_023014    | PRAMEF2              |
| A_23_P251868   | 1,56286 | 1,55318 | 1,006732225 | ENST00000432335 | 83864     | NR_001530    | TTTY9A               |
| A_21_P0013597  | 1,51089 | 1,50122 | 1,006725247 | N/A             | N/A       | N/A          | XLOC_I2_015003       |
| A_21_P0013216  | 1,40652 | 1,39685 | 1,006725247 | ENST00000434932 | N/A       | N/A          | N/A                  |
| A_33_P3328292  | 8,62435 | 8,61468 | 1,006725247 | ENST00000246229 | 5326      | NM_002657    | PLAGL2               |
| A_23_P203391   | 8,80845 | 8,79881 | 1,006704313 | ENST00000525708 | 80150     | NM_001083926 | ASRGL1               |
| A_19_P00325887 | 4,74976 | 4,74012 | 1,006704313 | N/A             | N/A       | N/A          | Inc-STX18-1          |
| A_22_P00022491 | 1,52646 | 1,51683 | 1,006697335 | N/A             | N/A       | N/A          | Inc-MID1IP1-2        |
| A_21_P0001504  | 4,35201 | 4,34238 | 1,006697335 | N/A             | N/A       | N/A          | Inc-FAF1-1           |
| A_22_P00015421 | 1,48977 | 1,48016 | 1,006683379 | ENST00000413004 | N/A       | BG117612     | N/A                  |
| A_23_P327462   | 1,50462 | 1,49501 | 1,006683379 | ENST00000332958 | 222546    | NM_173560    | RFX6                 |
| A_21_P0012509  | 1,52673 | 1,51713 | 1,006676401 | ENST00000498616 | N/A       | N/A          | N/A                  |
| A_23_P30175    | 11,9195 | 11,9099 | 1,006676401 | ENST00000380943 | 55914     | NM_018695    | ERBB2IP              |
| A_24_P3461     | 7,98598 | 7,97639 | 1,006669424 | ENST00000447135 | N/A       | BC172311     | N/A                  |
| A_21_P0004524  | 1,51065 | 1,50107 | 1,006662446 | N/A             | N/A       | N/A          | Inc-LVRN.1-1         |
| A_33_P3304948  | 1,53606 | 1,52649 | 1,006655468 | ENST00000562532 | 343702    | NM_001011718 | XKR7                 |
| A_22_P00008007 | 1,47084 | 1,46127 | 1,006655468 | N/A             | N/A       | N/A          | Inc-IFNG-3           |
| A_21_P0014941  | 1,54606 | 1,53649 | 1,006655468 | N/A             | 100505705 | AK129633     | SDIM1                |
| A_21_P0012760  | 1,69517 | 1,68561 | 1,006648491 | ENST00000511746 | N/A       | XR_244772    | N/A                  |
| A_33_P3393679  | 1,51183 | 1,50227 | 1,006648491 | ENST00000530957 | 22997     | NM_001277285 | IGSF9B               |
| A_21_P0012092  | 1,534   | 1,52444 | 1,006648491 | ENST00000419362 | N/A       | N/A          | N/A                  |
| A_23_P348227   | 1,67418 | 1,66462 | 1,006648491 | ENST00000506786 | 7694      | NM_003436    | ZNF135               |
| A_21_P0006314  | 1,54527 | 1,53572 | 1,006641513 | N/A             | N/A       | N/A          | Inc-TNC-3            |
| A_24_P161764   | 1,55431 | 1,54476 | 1,006641513 | ENST00000390595 | N/A       | L04336       | N/A                  |
| A_33_P3262600  | 1,53817 | 1,52863 | 1,006634536 | N/A             | N/A       | N/A          | N/A                  |
| A_33_P3266898  | 9,67577 | 9,66623 | 1,006634536 | ENST00000434452 | 1825      | NM_001941    | DSC3                 |
| A_22_P00011741 | 1,54341 | 1,53388 | 1,006627558 | N/A             | 101929398 | XR_242466    | LOC101929398         |

|                |         |         |             |                 |           |              |                |
|----------------|---------|---------|-------------|-----------------|-----------|--------------|----------------|
| A_22_P00019640 | 8,49995 | 8,49043 | 1,006620581 | ENST00000436280 | 11321     | NM_007266    | GPN1           |
| A_24_P179244   | 1,55715 | 1,54763 | 1,006620581 | N/A             | N/A       | AK092594     | Inc-RPS27L-2   |
| A_33_P3218380  | 1,3661  | 1,35659 | 1,006613604 | ENST00000355909 | 100129345 | NR_033943    | LOC100129345   |
| A_21_P0003436  | 1,62017 | 1,61066 | 1,006613604 | ENST00000515222 | N/A       | N/A          | N/A            |
| A_24_P29277    | 10,3475 | 10,338  | 1,006606626 | ENST00000380494 | 10087     | NM_001130105 | COL4A3BP       |
| A_22_P00002455 | 1,56113 | 1,55163 | 1,006606626 | N/A             | N/A       | AK097712     | Inc-C15orf32-1 |
| A_24_P186944   | 16,6561 | 16,6466 | 1,006606626 | ENST00000439124 | N/A       | N/A          | N/A            |
| A_23_P394972   | 1,51528 | 1,5058  | 1,006592672 | ENST00000614657 | 54084     | NM_144991    | TSPEAR         |
| A_23_P1912     | 1,41096 | 1,40148 | 1,006592672 | ENST00000620319 | 22917     | NM_207341    | ZP1            |
| A_22_P00015402 | 6,31755 | 6,30809 | 1,006578718 | N/A             | 100216545 | NR_024586    | KMT2E-AS1      |
| A_33_P3361831  | 1,50706 | 1,4976  | 1,006578718 | ENST00000308062 | 100288801 | NM_001124759 | FRG2C          |
| A_22_P00014472 | 1,41358 | 1,40412 | 1,006578718 | N/A             | N/A       | N/A          | Inc-SHANK2-2   |
| A_22_P00015610 | 1,54603 | 1,53657 | 1,006578718 | N/A             | N/A       | N/A          | Inc-STYXL1-1   |
| A_33_P3482534  | 1,54495 | 1,53549 | 1,006578718 | N/A             | 613266    | BC043571     | LOC613266      |
| A_32_P107644   | 1,54934 | 1,53988 | 1,006578718 | ENST00000413670 | N/A       | AK092728     | N/A            |
| A_21_P0004433  | 1,54418 | 1,53472 | 1,006578718 | N/A             | N/A       | N/A          | Inc-DTWD2-3    |
| A_22_P00013849 | 3,66626 | 3,6568  | 1,006578718 | N/A             | N/A       | N/A          | Inc-RPL31-1    |
| A_33_P3338066  | 1,54457 | 1,53512 | 1,006571741 | ENST00000444705 | 91156     | NM_001164586 | IGFN1          |
| A_21_P0003686  | 1,45251 | 1,44306 | 1,006571741 | N/A             | N/A       | N/A          | Inc-NEIL3-1    |
| A_21_P0013467  | 1,49109 | 1,48165 | 1,006564764 | ENST00000525829 | 440078    | NR_026788    | FAM66C         |
| A_21_P0006224  | 1,67254 | 1,66311 | 1,006557787 | N/A             | N/A       | N/A          | Inc-LHX2-1     |
| A_23_P121459   | 1,4866  | 1,47717 | 1,006557787 | ENST00000204615 | 7066      | NM_000460    | THPO           |
| A_21_P0003687  | 1,67503 | 1,66561 | 1,00655081  | N/A             | N/A       | N/A          | Inc-NEIL3-3    |
| A_22_P00014102 | 1,51747 | 1,50806 | 1,006543833 | N/A             | N/A       | N/A          | Inc-SAYS1-1    |
| A_21_P0004922  | 1,51203 | 1,50262 | 1,006543833 | N/A             | N/A       | N/A          | Inc-RFPL4B-2   |
| A_33_P7363082  | 12,4876 | 12,4782 | 1,006536856 | ENST00000542907 | 51503     | NM_016403    | CWC15          |
| A_23_P432947   | 1,4245  | 1,4151  | 1,006536856 | ENST00000300177 | 26585     | NM_013372    | GREM1          |
| A_33_P3343182  | 1,36655 | 1,35715 | 1,006536856 | ENST00000254653 | 79781     | NM_024726    | IQCA1          |
| A_33_P3260125  | 1,57074 | 1,56134 | 1,006536856 | ENST00000344642 | 401944    | NM_001013693 | LDLRAD2        |
| A_22_P00014729 | 1,66242 | 1,65302 | 1,006536856 | N/A             | N/A       | N/A          | Inc-SLC2A13-3  |
| A_22_P00009937 | 1,7108  | 1,7014  | 1,006536856 | ENST00000432359 | N/A       | N/A          | N/A            |
| A_33_P3226460  | 1,36329 | 1,35389 | 1,006536856 | N/A             | N/A       | N/A          | N/A            |
| A_22_P00011003 | 3,54284 | 3,53344 | 1,006536856 | N/A             | N/A       | N/A          | Inc-NSMCE1-3   |

|                |         |         |             |                 |           |           |                  |
|----------------|---------|---------|-------------|-----------------|-----------|-----------|------------------|
| A_23_P410700   | 1,52752 | 1,51813 | 1,006529879 | ENST00000299578 | 123775    | NM_152337 | C16orf46         |
| A_21_P0013376  | 1,47987 | 1,47048 | 1,006529879 | ENST00000420774 | N/A       | N/A       | N/A              |
| A_24_P238510   | 1,55943 | 1,55004 | 1,006529879 | ENST00000449911 | N/A       | N/A       | N/A              |
| A_23_P407840   | 1,60274 | 1,59337 | 1,006515926 | ENST00000297267 | 84624     | NM_032532 | FNDC1            |
| A_23_P254989   | 1,54555 | 1,53619 | 1,006508949 | ENST00000262839 | 7224      | NM_012471 | TRPC5            |
| A_22_P00010537 | 1,52946 | 1,52012 | 1,006494996 | N/A             | 102724050 | NR_120487 | LOC102724050     |
| A_24_P942904   | 1,4678  | 1,45846 | 1,006494996 | ENST00000297161 | 168667    | NM_133468 | BMPER            |
| A_33_P3209391  | 1,70054 | 1,69121 | 1,00648802  | N/A             | N/A       | AK096012  | Inc-FGFR1OP-6    |
| A_21_P0005683  | 1,48199 | 1,47266 | 1,00648802  | N/A             | N/A       | N/A       | Inc-WRN-6        |
| A_22_P00021396 | 1,53332 | 1,52399 | 1,00648802  | ENST00000517681 | N/A       | N/A       | N/A              |
| A_24_P89891    | 5,12018 | 5,11086 | 1,006481043 | ENST00000373887 | 7185      | NM_005658 | TRAF1            |
| A_21_P0005630  | 1,70218 | 1,69286 | 1,006481043 | ENST00000520206 | 101927774 | NR_121672 | LINC00824        |
| A_33_P3330074  | 5,04111 | 5,0318  | 1,006474067 | ENST00000451043 | 7221      | N/A       | TRPC2            |
| A_22_P00016898 | 11,7916 | 11,7823 | 1,006467091 | ENST00000425279 | N/A       | N/A       | N/A              |
| A_32_P57057    | 10,7062 | 10,6969 | 1,006467091 | ENST00000546718 | 9958      | NM_006313 | USP15            |
| A_33_P3413020  | 1,66664 | 1,65734 | 1,006467091 | ENST00000439329 | 1361      | NM_001872 | CPB2             |
| A_22_P00022811 | 1,36485 | 1,35555 | 1,006467091 | ENST00000440074 | N/A       | N/A       | N/A              |
| A_23_P350698   | 4,1362  | 4,1269  | 1,006467091 | ENST00000318698 | 162282    | NM_153228 | ANKFN1           |
| A_33_P3678883  | 15,8583 | 15,849  | 1,006467091 | N/A             | 85368     | AB051441  | KIAA1654         |
| A_23_P428485   | 1,47498 | 1,46569 | 1,006460114 | ENST00000344657 | 80309     | NM_030623 | SPHKAP           |
| A_22_P00008438 | 4,80257 | 4,79328 | 1,006460114 | N/A             | N/A       | N/A       | Inc-KAT8-1       |
| A_33_P3244623  | 1,52977 | 1,52048 | 1,006460114 | N/A             | 376844    | NR_001580 | SDC4P            |
| A_32_P232411   | 1,54003 | 1,53076 | 1,006446162 | ENST00000294484 | 57540     | NM_020780 | PTCHD2           |
| A_21_P0004037  | 1,57954 | 1,57029 | 1,00643221  | ENST00000502324 | N/A       | N/A       | N/A              |
| A_23_P39223    | 7,62834 | 7,61909 | 1,00643221  | ENST00000397061 | 7549      | NM_021088 | ZNF2             |
| A_21_P0012125  | 1,67429 | 1,66505 | 1,006425234 | N/A             | N/A       | N/A       | XLOC_I2_008632   |
| A_32_P385667   | 1,71452 | 1,7053  | 1,006411282 | ENST00000614159 | 139422    | NM_182506 | MAGEB10          |
| A_21_P0003134  | 1,58408 | 1,57486 | 1,006411282 | N/A             | N/A       | N/A       | Inc-GBE1-6       |
| A_22_P00003056 | 1,54076 | 1,53155 | 1,006404306 | ENST00000521793 | N/A       | N/A       | N/A              |
| A_24_P173746   | 6,65114 | 6,64193 | 1,006404306 | ENST00000478871 | 55103     | NM_152663 | RALGPS2          |
| A_21_P0006830  | 1,54135 | 1,53215 | 1,00639733  | N/A             | N/A       | N/A       | Inc-AL137145.1-6 |
| A_22_P00010039 | 1,40492 | 1,39572 | 1,00639733  | ENST00000564401 | N/A       | AK094529  | N/A              |
| A_22_P00024886 | 1,48396 | 1,47477 | 1,006390354 | N/A             | N/A       | N/A       | Inc-SOX30-1      |

|                |         |         |             |                 |           |              |                      |
|----------------|---------|---------|-------------|-----------------|-----------|--------------|----------------------|
| A_23_P41541    | 7,35644 | 7,34725 | 1,006390354 | ENST00000511687 | 90826     | NM_138364    | PRMT9                |
| A_33_P3405204  | 1,5394  | 1,53021 | 1,006390354 | ENST00000559225 | 729911    | NR_038997    | ANKRD34C-AS1         |
| A_33_P3390521  | 8,09178 | 8,0826  | 1,006383379 | ENST00000506271 | 65264     | NM_023079    | UBE2Z                |
| A_33_P3388527  | 7,60407 | 7,5949  | 1,006376403 | N/A             | N/A       | N/A          | N/A                  |
| A_21_P0012784  | 1,70671 | 1,69755 | 1,006369427 | ENST00000507153 | 100507096 | N/A          | GIMD1                |
| A_21_P0001607  | 1,60957 | 1,60041 | 1,006369427 | N/A             | N/A       | N/A          | Inc-UCHL5-1          |
| A_23_P345725   | 1,46714 | 1,45799 | 1,006362452 | ENST00000306324 | 3233      | NM_014621    | HOXD4                |
| A_33_P3409904  | 6,60015 | 6,591   | 1,006362452 | ENST00000236192 | 8674      | NM_003762    | VAMP4                |
| A_21_P0007737  | 1,6285  | 1,61936 | 1,006355476 | N/A             | N/A       | N/A          | Inc-C12orf12-2       |
| A_22_P00025561 | 1,46913 | 1,46    | 1,006348501 | N/A             | N/A       | N/A          | Inc-ARFGAP2-1        |
| A_22_P00023697 | 2,94191 | 2,93279 | 1,006341525 | ENST00000451905 | 730338    | XR_242176    | LOC730338            |
| A_23_P126031   | 4,66821 | 4,65911 | 1,006327574 | ENST00000334857 | 127385    | NM_001004469 | OR10J5               |
| A_33_P3221680  | 17,3012 | 17,2921 | 1,006327574 | N/A             | 6234      | NM_001031    | RPS28                |
| A_33_P3311056  | 15,4565 | 15,4474 | 1,006327574 | ENST00000354559 | 6389      | NM_004168    | SDHA                 |
| A_33_P3323687  | 1,41927 | 1,41018 | 1,006320599 | N/A             | N/A       | N/A          | N/A                  |
| A_21_P0009142  | 1,39963 | 1,39056 | 1,006306649 | N/A             | N/A       | N/A          | Inc-MTHFSD-3         |
| A_22_P00013653 | 1,7106  | 1,70154 | 1,006299673 | N/A             | N/A       | AI732624     | Inc-RP11-677C1.2.1-1 |
| A_22_P00022801 | 1,35677 | 1,34772 | 1,006292698 | ENST00000517695 | N/A       | N/A          | N/A                  |
| A_21_P0013466  | 1,49207 | 1,48303 | 1,006285723 | N/A             | 619343    | N/A          | ERICH1-AS1           |
| A_21_P0006363  | 1,48764 | 1,4786  | 1,006285723 | N/A             | N/A       | N/A          | Inc-RAD23B-1         |
| A_24_P97342    | 1,37351 | 1,36447 | 1,006285723 | ENST00000353065 | 60675     | NM_021935    | PROK2                |
| A_24_P323598   | 8,38017 | 8,37113 | 1,006285723 | ENST00000305188 | 157570    | NM_001017420 | ESCO2                |
| A_23_P118234   | 1,48323 | 1,4742  | 1,006278748 | ENST00000541580 | 221223    | NM_145024    | CES5A                |
| A_22_P00006119 | 1,55607 | 1,54704 | 1,006278748 | ENST00000566945 | N/A       | N/A          | N/A                  |
| A_33_P3318971  | 1,54872 | 1,53971 | 1,006264798 | ENST00000357721 | 254013    | AL832339     | METTL20              |
| A_33_P3397530  | 1,47835 | 1,46934 | 1,006264798 | ENST00000302124 | 120586    | NM_001003750 | OR8I2                |
| A_33_P3263569  | 1,5916  | 1,58259 | 1,006264798 | ENST00000474186 | 254268    | NM_152763    | AKNAD1               |
| A_33_P3258767  | 1,63471 | 1,62571 | 1,006257823 | ENST00000584361 | 100130480 | NR_120518    | LINC01387            |
| A_33_P3379581  | 1,66343 | 1,65443 | 1,006257823 | ENST00000372903 | 23304     | NM_001184801 | UBR2                 |
| A_23_P422240   | 1,53687 | 1,52789 | 1,006243874 | ENST00000290868 | 131669    | NM_144639    | UROC1                |
| A_33_P3254535  | 1,40189 | 1,39291 | 1,006243874 | N/A             | 100130642 | AK124249     | LOC100130642         |
| A_23_P108734   | 1,54194 | 1,53297 | 1,006236899 | ENST00000471711 | 55821     | NM_018436    | ALLC                 |
| A_23_P156402   | 1,72349 | 1,71452 | 1,006236899 | ENST00000506657 | 8382      | NM_003551    | NME5                 |

|                |         |         |             |                 |           |              |                |
|----------------|---------|---------|-------------|-----------------|-----------|--------------|----------------|
| A_21_P0005959  | 1,47062 | 1,46166 | 1,006229924 | N/A             | N/A       | N/A          | Inc-DEFB104B-1 |
| A_32_P34046    | 1,48322 | 1,47428 | 1,006215975 | ENST00000370425 | 164045    | NM_001017975 | HFM1           |
| A_21_P0012606  | 1,61154 | 1,6026  | 1,006215975 | ENST00000505122 | 100996694 | NR_121639    | LOC100996694   |
| A_21_P0005849  | 1,45216 | 1,44325 | 1,006195052 | N/A             | N/A       | N/A          | Inc-CRH-4      |
| A_33_P3222598  | 1,41036 | 1,40145 | 1,006195052 | ENST00000442212 | N/A       | N/A          | N/A            |
| A_33_P3376527  | 4,37473 | 4,36582 | 1,006195052 | ENST00000409046 | 9486      | NM_004854    | CHST10         |
| A_22_P00015035 | 1,55554 | 1,54664 | 1,006188077 | ENST00000366308 | 255654    | NR_040002    | LOC255654      |
| A_33_P3371305  | 1,53021 | 1,52131 | 1,006188077 | N/A             | 644090    | XR_428270    | LOC644090      |
| A_23_P394064   | 15,4237 | 15,4148 | 1,006188077 | ENST00000357037 | 284119    | NM_012232    | PTRF           |
| A_21_P0001387  | 1,48305 | 1,47417 | 1,006174129 | N/A             | 101930532 | XR_248664    | LOC101930532   |
| A_33_P3360072  | 1,45554 | 1,44666 | 1,006174129 | ENST00000296604 | 202151    | NM_001161429 | RANBP3L        |
| A_21_P0007833  | 1,53549 | 1,52662 | 1,006167155 | N/A             | 283463    | N/A          | MUC19          |
| A_22_P00020261 | 1,7129  | 1,70403 | 1,006167155 | ENST00000438824 | N/A       | BX089370     | N/A            |
| A_33_P3251916  | 1,5371  | 1,52823 | 1,006167155 | N/A             | N/A       | N/A          | N/A            |
| A_22_P00017898 | 1,53499 | 1,52612 | 1,006167155 | N/A             | N/A       | DA538518     | Inc-ZFC3H1-6   |
| A_21_P0006543  | 1,54965 | 1,54079 | 1,00616018  | N/A             | N/A       | N/A          | Inc-RAB40A-1   |
| A_22_P00005396 | 1,66634 | 1,65748 | 1,00616018  | N/A             | 100874006 | XR_254031    | TTC3-AS1       |
| A_32_P3066     | 1,53189 | 1,52304 | 1,006153206 | ENST00000340783 | N/A       | N/A          | N/A            |
| A_22_P00021777 | 1,53629 | 1,52744 | 1,006153206 | N/A             | N/A       | BG201704     | Inc-CCDC7-4    |
| A_21_P0004434  | 1,66484 | 1,65599 | 1,006153206 | N/A             | N/A       | N/A          | Inc-DTWD2-3    |
| A_23_P126584   | 1,7208  | 1,71196 | 1,006146232 | ENST00000368174 | 922       | NM_005894    | CD5L           |
| A_33_P3274034  | 1,46692 | 1,45808 | 1,006146232 | ENST00000316024 | 55135     | AK056669     | WRAP53         |
| A_21_P0009363  | 1,62427 | 1,61544 | 1,006139258 | N/A             | N/A       | N/A          | Inc-BTBD17-4   |
| A_22_P00002963 | 1,5611  | 1,55227 | 1,006139258 | ENST00000511474 | N/A       | N/A          | N/A            |
| A_21_P0010301  | 1,54204 | 1,53322 | 1,006132284 | N/A             | N/A       | N/A          | Inc-TSPEAR-1   |
| A_32_P512061   | 8,4851  | 8,47629 | 1,00612531  | ENST00000575568 | 2630      | NR_002188    | GBAP1          |
| A_22_P00000837 | 1,35634 | 1,34754 | 1,006118336 | ENST00000560803 | N/A       | N/A          | N/A            |
| A_33_P3226675  | 1,56175 | 1,55295 | 1,006118336 | N/A             | N/A       | N/A          | N/A            |
| A_21_P0006660  | 1,52256 | 1,51376 | 1,006118336 | ENST00000436140 | 101929025 | N/A          | LINC01516      |
| A_22_P00006323 | 1,54664 | 1,53785 | 1,006111362 | N/A             | N/A       | DA955982     | Inc-FAM98B-2   |
| A_22_P00008426 | 1,38566 | 1,37688 | 1,006104389 | N/A             | 100873940 | NR_046629    | MYLK-AS2       |
| A_24_P347378   | 1,45209 | 1,44333 | 1,006090441 | ENST00000617770 | 241       | NM_001629    | ALOX5AP        |
| A_21_P0014945  | 5,59613 | 5,58738 | 1,006083467 | N/A             | 100288687 | XR_431831    | DUX4           |

|                |         |         |             |                 |           |              |                       |
|----------------|---------|---------|-------------|-----------------|-----------|--------------|-----------------------|
| A_21_P0011802  | 7,05915 | 7,0504  | 1,006083467 | ENST00000454137 | 2956      | N/A          | MSH6                  |
| A_22_P00010791 | 1,52455 | 1,51581 | 1,006076494 | N/A             | N/A       | AK097755     | Inc-NLK-2             |
| A_33_P3421985  | 1,54978 | 1,54104 | 1,006076494 | ENST00000404100 | N/A       | N/A          | N/A                   |
| A_33_P3336257  | 1,53286 | 1,52413 | 1,00606952  | ENST00000302006 | 79192     | NM_024337    | IRX1                  |
| A_21_P0003810  | 1,56029 | 1,55156 | 1,00606952  | N/A             | N/A       | N/A          | Inc-CLDN24-3          |
| A_33_P3213982  | 1,49795 | 1,48922 | 1,00606952  | ENST00000377981 | 392309    | NM_001004487 | OR13J1                |
| A_21_P0007534  | 1,50087 | 1,49215 | 1,006062547 | N/A             | N/A       | N/A          | Inc-AEBP2-4           |
| A_22_P00020634 | 1,47651 | 1,46779 | 1,006062547 | ENST00000420845 | N/A       | BQ429059     | N/A                   |
| A_23_P156218   | 1,50648 | 1,49777 | 1,006055573 | ENST00000231009 | 3003      | NM_002104    | GZMK                  |
| A_24_P410086   | 11,6897 | 11,681  | 1,0060486   | ENST00000270061 | 170463    | NM_032627    | SSBP4                 |
| A_22_P00020581 | 1,67097 | 1,66228 | 1,006041626 | ENST00000547033 | N/A       | BG210412     | N/A                   |
| A_33_P3375358  | 3,2096  | 3,20091 | 1,006041626 | ENST00000366834 | 2853      | NM_005299    | GPR31                 |
| A_22_P00022858 | 1,54086 | 1,53217 | 1,006041626 | ENST00000583629 | N/A       | DA957234     | N/A                   |
| A_22_P00001933 | 1,67511 | 1,66643 | 1,006034653 | ENST00000569362 | 101928880 | NR_110944    | LOC101928880          |
| A_21_P0002491  | 1,7936  | 1,78492 | 1,006034653 | N/A             | N/A       | N/A          | Inc-AC108938.5.1-3    |
| A_21_P0009102  | 1,48272 | 1,47405 | 1,00602768  | N/A             | N/A       | N/A          | Inc-MMP2-1            |
| A_22_P00016176 | 1,55405 | 1,5454  | 1,006013733 | ENST00000448475 | N/A       | N/A          | N/A                   |
| A_33_P3852239  | 1,58018 | 1,57153 | 1,006013733 | ENST00000506388 | 440034    | NR_033971    | DKFZp686K1684         |
| A_24_P118052   | 1,66042 | 1,65178 | 1,00600676  | ENST00000390680 | 93492     | NM_199254    | TPTE2                 |
| A_33_P3240552  | 1,70766 | 1,69902 | 1,00600676  | ENST00000509355 | 5144      | AK307363     | PDE4D                 |
| A_21_P0007911  | 1,39731 | 1,38868 | 1,005999787 | N/A             | 101927195 | N/A          | LINC00382             |
| A_22_P00013101 | 1,37145 | 1,36283 | 1,005992814 | N/A             | N/A       | N/A          | Inc-RIMKLB-2          |
| A_21_P0012431  | 1,51864 | 1,51002 | 1,005992814 | ENST00000445675 | 101927347 | N/A          | GRM7-AS3              |
| A_22_P00010359 | 1,5377  | 1,52908 | 1,005992814 | N/A             | N/A       | BG193822     | Inc-MYCT1-2           |
| A_21_P0003900  | 1,51767 | 1,50905 | 1,005992814 | N/A             | N/A       | N/A          | Inc-RP11-455G16.1.1-1 |
| A_24_P373885   | 8,7968  | 8,78819 | 1,005985841 | ENST00000592872 | 148223    | NM_152482    | C19orf25              |
| A_24_P398064   | 10,3612 | 10,3526 | 1,005978868 | ENST00000378078 | 9827      | D87447       | RGP1                  |
| A_21_P0006721  | 1,45344 | 1,44484 | 1,005978868 | ENST00000413993 | N/A       | N/A          | N/A                   |
| A_23_P432352   | 1,71235 | 1,70375 | 1,005978868 | ENST00000371894 | 203413    | NM_001017978 | CT83                  |
| A_21_P0005430  | 1,53297 | 1,52438 | 1,005971895 | N/A             | N/A       | N/A          | Inc-MEST-1            |
| A_22_P00000628 | 1,70234 | 1,69376 | 1,005964923 | ENST00000454477 | 101927362 | XR_245051    | LOC101927362          |
| A_22_P00008561 | 1,51345 | 1,50487 | 1,005964923 | ENST00000515643 | 3782      | NM_001204087 | KCNN3                 |
| A_33_P3374970  | 1,66103 | 1,65245 | 1,005964923 | ENST00000605881 | 399939    | NM_001206627 | TRIM49D1              |

|                |         |         |             |                 |           |           |                |
|----------------|---------|---------|-------------|-----------------|-----------|-----------|----------------|
| A_24_P68819    | 8,56191 | 8,55334 | 1,00595795  | ENST00000431614 | 129285    | NM_152994 | PPP1R21        |
| A_33_P3222391  | 1,61334 | 1,60478 | 1,005950977 | ENST00000398326 | 11259     | NM_182909 | FILIP1L        |
| A_21_P0009546  | 1,45984 | 1,45128 | 1,005950977 | N/A             | N/A       | N/A       | Inc-CELF4-2    |
| A_23_P146946   | 3,74237 | 3,73382 | 1,005944004 | ENST00000312134 | 1474      | NM_001323 | CST6           |
| A_21_P0011297  | 7,17733 | 7,16879 | 1,005937032 | N/A             | N/A       | N/A       | XLOC_I2_004594 |
| A_22_P00012579 | 1,53815 | 1,52961 | 1,005937032 | N/A             | 100506175 | NR_111906 | LOC100506175   |
| A_22_P00000815 | 1,51227 | 1,50373 | 1,005937032 | ENST00000454128 | N/A       | N/A       | N/A            |
| A_33_P3279861  | 1,46538 | 1,45684 | 1,005937032 | N/A             | N/A       | AF194718  | N/A            |
| A_33_P3345653  | 1,48218 | 1,47365 | 1,005930059 | ENST00000588838 | 148231    | NR_024335 | LINC00905      |
| A_22_P00024535 | 1,46303 | 1,4545  | 1,005930059 | ENST00000581798 | N/A       | N/A       | N/A            |
| A_22_P00010075 | 1,52925 | 1,52074 | 1,005916114 | N/A             | N/A       | N/A       | Inc-MPHOSPH8-1 |
| A_22_P00000961 | 1,72311 | 1,7146  | 1,005916114 | ENST00000314040 | N/A       | AK091913  | N/A            |
| A_33_P3346526  | 1,67333 | 1,66482 | 1,005916114 | N/A             | N/A       | N/A       | N/A            |
| A_22_P00009369 | 1,55133 | 1,54282 | 1,005916114 | N/A             | 790952    | NR_027122 | ESRG           |
| A_33_P3259443  | 1,51979 | 1,51129 | 1,005909142 | N/A             | 441728    | XR_109175 | LOC441728      |
| A_22_P00021590 | 1,55057 | 1,54209 | 1,005895197 | N/A             | N/A       | BC035412  | Inc-TBC1D8-1   |
| A_22_P00011737 | 1,50426 | 1,49579 | 1,005888224 | ENST00000523724 | N/A       | DB045418  | N/A            |
| A_22_P00016221 | 1,54106 | 1,53261 | 1,00587428  | N/A             | N/A       | N/A       | Inc-TM6SF1-1   |
| A_33_P3869455  | 6,33776 | 6,32932 | 1,005867308 | N/A             | 724066    | DQ641254  | ATXN8          |
| A_19_P00321953 | 1,50766 | 1,49925 | 1,005846392 | ENST00000422294 | 388948    | NR_034099 | LINC01118      |
| A_21_P0014936  | 1,48688 | 1,47847 | 1,005846392 | N/A             | N/A       | N/A       | N/A            |
| A_22_P00025652 | 5,6371  | 5,62871 | 1,005832448 | N/A             | 100288846 | NR_038935 | LOC100288846   |
| A_22_P00023805 | 1,48027 | 1,47189 | 1,005825476 | ENST00000557953 | N/A       | N/A       | N/A            |
| A_22_P00011175 | 1,45183 | 1,44346 | 1,005818504 | ENST00000526851 | N/A       | BX106901  | N/A            |
| A_22_P00020348 | 1,63891 | 1,63054 | 1,005818504 | N/A             | N/A       | BX088949  | Inc-BOD1-4     |
| A_21_P0011164  | 1,66687 | 1,65851 | 1,005811532 | N/A             | N/A       | N/A       | XLOC_I2_003868 |
| A_21_P0005080  | 1,40587 | 1,39752 | 1,005804561 | N/A             | 401282    | N/A       | DKFZp451B082   |
| A_22_P00000306 | 1,41092 | 1,40257 | 1,005804561 | ENST00000435237 | N/A       | N/A       | N/A            |
| A_24_P634768   | 1,60909 | 1,60074 | 1,005804561 | ENST00000612064 | 401081    | NR_033977 | FLJ22763       |
| A_22_P00000145 | 1,52764 | 1,5193  | 1,005797589 | ENST00000558025 | 100506686 | NR_040051 | IQCH-AS1       |
| A_22_P00010529 | 1,48642 | 1,47808 | 1,005797589 | ENST00000562653 | N/A       | BC035211  | N/A            |
| A_22_P00007277 | 1,65979 | 1,65145 | 1,005797589 | ENST00000563184 | N/A       | AF339811  | N/A            |
| A_21_P0012808  | 1,36972 | 1,3614  | 1,005783646 | ENST00000508106 | N/A       | N/A       | N/A            |

|                |         |         |             |                 |           |              |                |
|----------------|---------|---------|-------------|-----------------|-----------|--------------|----------------|
| A_22_P00021488 | 1,6608  | 1,65249 | 1,005776674 | N/A             | N/A       | N/A          | Inc-ASB3-2     |
| A_33_P3315600  | 13,0356 | 13,0273 | 1,005769703 | ENST00000623799 | 7528      | NM_003403    | YY1            |
| A_22_P00002327 | 2,65764 | 2,64934 | 1,005769703 | N/A             | N/A       | AA642078     | Inc-C11orf71-2 |
| A_32_P109704   | 10,7969 | 10,7886 | 1,005769703 | ENST00000535236 | 6433      | NM_004592    | SFSWAP         |
| A_33_P3350967  | 2,50952 | 2,50123 | 1,005762731 | N/A             | 728342    | N/A          | LINC00992      |
| A_21_P0010450  | 3,34712 | 3,33883 | 1,005762731 | N/A             | N/A       | N/A          | Inc-SMC1B-4    |
| A_21_P0014156  | 1,66145 | 1,65318 | 1,005748788 | N/A             | N/A       | N/A          | N/A            |
| A_21_P0005042  | 1,68936 | 1,68109 | 1,005748788 | N/A             | N/A       | N/A          | Inc-EPHA7-4    |
| A_33_P3281995  | 1,70242 | 1,69415 | 1,005748788 | N/A             | 100507236 | XR_247149    | LOC100507236   |
| A_33_P3249305  | 3,56997 | 3,56171 | 1,005741817 | ENST00000496527 | 8646      | NM_003741    | CHRD           |
| A_33_P3274930  | 1,6828  | 1,67454 | 1,005741817 | N/A             | N/A       | N/A          | N/A            |
| A_33_P3418421  | 1,47073 | 1,46248 | 1,005734846 | ENST00000409229 | 6519      | DQ023516     | SLC3A1         |
| A_33_P3412061  | 1,52869 | 1,52044 | 1,005734846 | N/A             | N/A       | N/A          | N/A            |
| A_22_P00008769 | 1,53092 | 1,52268 | 1,005727875 | N/A             | N/A       | N/A          | Inc-KIF16B-4   |
| A_21_P0013381  | 1,41415 | 1,40593 | 1,005713932 | ENST00000424036 | N/A       | N/A          | N/A            |
| A_33_P3250974  | 1,48986 | 1,48164 | 1,005713932 | ENST00000498560 | N/A       | N/A          | N/A            |
| A_22_P00004625 | 1,61729 | 1,60907 | 1,005713932 | ENST00000564051 | N/A       | AL137625     | N/A            |
| A_33_P3408837  | 5,86    | 5,85179 | 1,005706961 | N/A             | 101927479 | XR_241209    | LOC101927479   |
| A_22_P00007405 | 1,49573 | 1,48752 | 1,005706961 | ENST00000422448 | N/A       | N/A          | N/A            |
| A_23_P14193    | 10,0089 | 10,0007 | 1,00569999  | ENST00000380071 | 5983      | NM_002915    | RFC3           |
| A_22_P00008873 | 1,4669  | 1,4587  | 1,00569999  | N/A             | 727915    | NR_046012    | AGBL1-AS1      |
| A_33_P3247392  | 8,42532 | 8,41712 | 1,00569999  | ENST00000381646 | 7179      | NM_199261    | TPTE           |
| A_22_P00002585 | 1,50536 | 1,49717 | 1,005693019 | ENST00000581971 | N/A       | N/A          | N/A            |
| A_22_P00020480 | 1,55285 | 1,54466 | 1,005693019 | ENST00000553346 | N/A       | N/A          | N/A            |
| A_22_P00015167 | 1,65923 | 1,65104 | 1,005693019 | ENST00000450054 | N/A       | N/A          | N/A            |
| A_33_P3345678  | 1,68709 | 1,6789  | 1,005693019 | ENST00000414817 | N/A       | N/A          | N/A            |
| A_32_P223059   | 1,53249 | 1,5243  | 1,005693019 | ENST00000481265 | 50651     | NM_001080397 | SLC45A1        |
| A_21_P0006172  | 1,69227 | 1,6841  | 1,005679078 | N/A             | N/A       | N/A          | Inc-C9orf170-1 |
| A_23_P114862   | 1,509   | 1,50085 | 1,005665136 | ENST00000376819 | 10218     | NM_021146    | ANGPTL7        |
| A_24_P230540   | 1,61096 | 1,60282 | 1,005658165 | ENST00000454487 | 285498    | NM_194439    | RNF212         |
| A_21_P0004143  | 1,42529 | 1,41716 | 1,005651195 | ENST00000507890 | 102503429 | N/A          | LINC01335      |
| A_21_P0013837  | 1,61508 | 1,60697 | 1,005637253 | N/A             | N/A       | N/A          | Inc-CLIC2-1    |
| A_21_P0002453  | 1,49106 | 1,48295 | 1,005637253 | N/A             | N/A       | N/A          | Inc-RAB1A-3    |



|                |         |         |             |                 |           |              |                |
|----------------|---------|---------|-------------|-----------------|-----------|--------------|----------------|
| A_23_P33809    | 12,638  | 12,6299 | 1,005630283 | ENST00000403490 | 55272     | NM_018285    | IMP3           |
| A_23_P149189   | 1,53431 | 1,52621 | 1,005630283 | ENST00000366570 | 57829     | NM_021186    | ZP4            |
| A_21_P0014160  | 1,66479 | 1,65671 | 1,005616342 | N/A             | 102725454 | XR_426051    | LOC102725454   |
| A_23_P55504    | 1,66272 | 1,65465 | 1,005609372 | ENST00000408891 | 4995      | NM_002551    | OR3A2          |
| A_23_P323761   | 1,64214 | 1,63407 | 1,005609372 | ENST00000460314 | 80342     | NM_025228    | TRAF3IP3       |
| A_23_P93295    | 1,53268 | 1,52462 | 1,005602401 | ENST00000377140 | 26529     | NM_013936    | OR12D2         |
| A_21_P0003385  | 1,51476 | 1,50671 | 1,005595431 | ENST00000515649 | N/A       | N/A          | N/A            |
| A_21_P0005085  | 1,47145 | 1,46341 | 1,005588461 | N/A             | N/A       | N/A          | Inc-SDIM1-1    |
| A_21_P0003993  | 1,53364 | 1,5256  | 1,005588461 | ENST00000508437 | N/A       | N/A          | N/A            |
| A_33_P3311493  | 1,47701 | 1,46897 | 1,005588461 | N/A             | 283392    | NR_026836    | TRHDE-AS1      |
| A_33_P3249736  | 1,63653 | 1,6285  | 1,005581491 | ENST00000570077 | N/A       | AK096042     | N/A            |
| A_33_P3233754  | 1,50931 | 1,50128 | 1,005581491 | ENST00000512439 | 7710      | NM_001085384 | ZNF154         |
| A_23_P251647   | 6,79078 | 6,78275 | 1,005581491 | ENST00000511684 | 317671    | NM_173362    | RFESD          |
| A_22_P00006083 | 1,52221 | 1,51419 | 1,005574521 | ENST00000399711 | 100996279 | NR_103715    | LINC00269      |
| A_22_P00011326 | 1,46448 | 1,45646 | 1,005574521 | N/A             | N/A       | N/A          | Inc-OST4-2     |
| A_33_P3331391  | 1,47493 | 1,46692 | 1,00556755  | N/A             | N/A       | N/A          | N/A            |
| A_33_P3348509  | 4,37454 | 4,36653 | 1,00556755  | N/A             | N/A       | N/A          | N/A            |
| A_33_P3220167  | 1,66247 | 1,65447 | 1,00556058  | N/A             | 101929637 | AK127362     | C11orf39       |
| A_33_P3219475  | 6,76586 | 6,75786 | 1,00556058  | ENST00000374879 | 100526694 | NM_001198812 | MSANTD3-TMEFF1 |
| A_23_P118749   | 11,92   | 11,912  | 1,00556058  | ENST00000573547 | 51009     | NM_016041    | DERL2          |
| A_33_P3313070  | 1,63883 | 1,63085 | 1,00554664  | N/A             | N/A       | N/A          | N/A            |
| A_22_P00007349 | 4,37175 | 4,36377 | 1,00554664  | N/A             | N/A       | AF085999     | Inc-GPT2-4     |
| A_22_P00006544 | 1,72259 | 1,71463 | 1,005532701 | N/A             | N/A       | N/A          | Inc-FITM2-1    |
| A_22_P00008650 | 1,71643 | 1,70848 | 1,005525731 | ENST00000620337 | 338005    | NR_027457    | LINC00221      |
| A_23_P116473   | 1,71927 | 1,71132 | 1,005525731 | N/A             | N/A       | AF116611     | N/A            |
| A_21_P0000916  | 1,48644 | 1,4785  | 1,005518761 | ENST00000438885 | 101928995 | NR_125969    | LOC101928995   |
| A_33_P3340199  | 1,45204 | 1,4441  | 1,005518761 | ENST00000506386 | N/A       | N/A          | N/A            |
| A_21_P0005133  | 1,46608 | 1,45815 | 1,005511791 | ENST00000447481 | 100507254 | N/A          | LINC01013      |
| A_23_P110462   | 1,55358 | 1,54565 | 1,005511791 | ENST00000306549 | 29930     | NM_013340    | PCDHB1         |
| A_22_P00009927 | 1,67041 | 1,66249 | 1,005504822 | ENST00000585185 | N/A       | XR_424917    | N/A            |
| A_21_P0002371  | 1,60311 | 1,59519 | 1,005504822 | N/A             | N/A       | N/A          | Inc-SH3BP4-3   |
| A_21_P0005089  | 1,50413 | 1,49622 | 1,005497852 | N/A             | N/A       | N/A          | Inc-THBS2-8    |
| A_33_P3257590  | 1,47496 | 1,46705 | 1,005497852 | N/A             | N/A       | AK172763     | N/A            |

|                |         |         |             |                 |           |              |                      |
|----------------|---------|---------|-------------|-----------------|-----------|--------------|----------------------|
| A_21_P0013266  | 7,38554 | 7,37763 | 1,005497852 | ENST00000605862 | 101928451 | XR_242346    | LOC101928451         |
| A_22_P00004395 | 1,55147 | 1,54356 | 1,005497852 | ENST00000579492 | N/A       | N/A          | N/A                  |
| A_23_P118462   | 13,704  | 13,6961 | 1,005490883 | ENST00000572684 | 124641    | NM_080822    | OVCA2                |
| A_33_P3388491  | 18,3821 | 18,3742 | 1,005490883 | ENST00000375153 | 54896     | NM_001040125 | PQLC2                |
| A_33_P3811233  | 1,53019 | 1,52229 | 1,005490883 | N/A             | 574538    | NR_033859    | LOC574538            |
| A_32_P429687   | 1,55469 | 1,54679 | 1,005490883 | ENST00000322122 | 493829    | NM_001008274 | TRIM72               |
| A_33_P3335042  | 10,4682 | 10,4603 | 1,005490883 | ENST00000529261 | 51144     | NM_016142    | HSD17B12             |
| A_21_P0000295  | 10,267  | 10,2591 | 1,005490883 | ENST00000396527 | 26781     | NR_002912    | SNORA67              |
| A_32_P231446   | 10,6859 | 10,678  | 1,005490883 | ENST00000369558 | 204851    | NM_198268    | HIPK1                |
| A_33_P3405571  | 1,52945 | 1,52156 | 1,005483913 | N/A             | N/A       | N/A          | N/A                  |
| A_22_P00023992 | 1,51831 | 1,51043 | 1,005476944 | N/A             | N/A       | BC069025     | Inc-RP11-27909.4.1-1 |
| A_24_P160070   | 1,53767 | 1,52979 | 1,005476944 | ENST00000270112 | 30811     | NM_014586    | HUNK                 |
| A_22_P00001671 | 1,39495 | 1,38707 | 1,005476944 | ENST00000453953 | N/A       | N/A          | N/A                  |
| A_21_P0012512  | 1,47958 | 1,47174 | 1,005449066 | ENST00000496247 | N/A       | N/A          | N/A                  |
| A_33_P3341568  | 7,64169 | 7,63385 | 1,005449066 | N/A             | N/A       | N/A          | N/A                  |
| A_22_P00013993 | 1,55705 | 1,54923 | 1,005435128 | N/A             | N/A       | N/A          | Inc-RUNDC3B-1        |
| A_33_P3312436  | 1,47618 | 1,46836 | 1,005435128 | N/A             | N/A       | N/A          | N/A                  |
| A_21_P0001997  | 1,47338 | 1,46557 | 1,005428159 | ENST00000432314 | 727982    | NR_034134    | LINC01249            |
| A_23_P143734   | 5,77161 | 5,7638  | 1,005428159 | ENST00000615454 | 1565      | NM_000106    | CYP2D6               |
| A_21_P0013086  | 1,46519 | 1,45739 | 1,00542119  | N/A             | 101928307 | NR_125872    | LOC101928307         |
| A_33_P3378925  | 10,0603 | 10,0525 | 1,00542119  | ENST00000310137 | 10432     | NM_006328    | RBM14                |
| A_33_P3237379  | 1,53039 | 1,5226  | 1,005414221 | ENST00000379472 | 3746      | NM_004976    | KCNC1                |
| A_22_P00007074 | 1,35579 | 1,348   | 1,005414221 | ENST00000432984 | N/A       | N/A          | N/A                  |
| A_23_P76312    | 1,45229 | 1,44451 | 1,005407252 | ENST00000261170 | 2984      | NM_004963    | GUCY2C               |
| A_32_P404549   | 1,47053 | 1,46275 | 1,005407252 | ENST00000442201 | 339829    | NM_181426    | CCDC39               |
| A_32_P210031   | 1,51068 | 1,5029  | 1,005407252 | ENST00000425320 | N/A       | XR_246543    | N/A                  |
| A_23_P207632   | 1,52515 | 1,51738 | 1,005400283 | ENST00000397041 | 489       | NM_174953    | ATP2A3               |
| A_33_P3286980  | 1,53002 | 1,52226 | 1,005393314 | ENST00000530484 | 401447    | NM_001256873 | USP17L1              |
| A_22_P00004622 | 1,59995 | 1,5922  | 1,005386345 | N/A             | N/A       | N/A          | Inc-CST7-2           |
| A_33_P3368034  | 1,46403 | 1,45629 | 1,005379376 | N/A             | N/A       | N/A          | N/A                  |
| A_33_P3230166  | 1,52284 | 1,51511 | 1,005372408 | ENST00000251127 | 259232    | NM_052867    | NALCN                |
| A_21_P0011629  | 1,46517 | 1,45744 | 1,005372408 | N/A             | 100996295 | N/A          | DNAH17-AS1           |
| A_22_P00007225 | 1,36548 | 1,35776 | 1,005365439 | N/A             | N/A       | CA426844     | Inc-GPER-1           |

|                |         |         |             |                 |           |              |                      |
|----------------|---------|---------|-------------|-----------------|-----------|--------------|----------------------|
| A_33_P3261143  | 1,50031 | 1,4926  | 1,00535847  | N/A             | 728773    | NR_026904    | PABPC1P2             |
| A_24_P319113   | 1,59045 | 1,58274 | 1,00535847  | ENST00000539695 | 5027      | NM_002562    | P2RX7                |
| A_32_P162004   | 16,889  | 16,8813 | 1,005351502 | ENST00000481681 | 6159      | NM_000992    | RPL29                |
| A_21_P0009699  | 1,72062 | 1,71292 | 1,005351502 | ENST00000587850 | N/A       | N/A          | N/A                  |
| A_23_P308483   | 1,45773 | 1,45003 | 1,005351502 | ENST00000470101 | 389840    | NM_001001671 | MAP3K15              |
| A_21_P0002176  | 1,50371 | 1,49602 | 1,005344533 | ENST00000476839 | 101926966 | N/A          | LOC101926966         |
| A_33_P3369944  | 1,46911 | 1,46142 | 1,005344533 | ENST00000530196 | 8747      | NM_003813    | ADAM21               |
| A_21_P0008068  | 1,49851 | 1,49084 | 1,005330596 | ENST00000622486 | N/A       | N/A          | N/A                  |
| A_22_P00002531 | 1,71983 | 1,71217 | 1,005323628 | ENST00000580507 | N/A       | AK098724     | N/A                  |
| A_21_P0008048  | 1,54708 | 1,53942 | 1,005323628 | N/A             | N/A       | N/A          | Inc-NBEA-3           |
| A_22_P00021909 | 1,50451 | 1,49685 | 1,005323628 | N/A             | N/A       | BX094565     | Inc-RP11-124K4.2.1-3 |
| A_23_P61498    | 3,11432 | 3,10667 | 1,005316659 | ENST00000332411 | 51350     | NM_015848    | KRT76                |
| A_33_P3578399  | 1,45954 | 1,45189 | 1,005316659 | N/A             | N/A       | BG428231     | N/A                  |
| A_24_P941759   | 5,61782 | 5,61017 | 1,005316659 | ENST00000206595 | 55632     | NM_017769    | G2E3                 |
| A_23_P429425   | 1,47223 | 1,46458 | 1,005316659 | ENST00000409087 | 84620     | NM_032528    | ST6GAL2              |
| A_22_P00014558 | 1,47769 | 1,47005 | 1,005309691 | ENST00000425325 | N/A       | N/A          | N/A                  |
| A_21_P0011704  | 1,37152 | 1,36389 | 1,005302723 | N/A             | N/A       | N/A          | XLOC_I2_006794       |
| A_23_P151895   | 2,17392 | 2,16629 | 1,005302723 | ENST00000261883 | 8483      | NM_003613    | CILP                 |
| A_21_P0009024  | 1,53376 | 1,52614 | 1,005295755 | N/A             | N/A       | N/A          | Inc-LINC00273-4      |
| A_22_P00025088 | 1,47892 | 1,47131 | 1,005288787 | ENST00000522598 | N/A       | N/A          | N/A                  |
| A_21_P0005561  | 1,38607 | 1,37847 | 1,005281818 | N/A             | N/A       | N/A          | Inc-POM121L12-1      |
| A_21_P0013152  | 1,60178 | 1,59418 | 1,005281818 | ENST00000430296 | N/A       | N/A          | N/A                  |
| A_24_P382253   | 10,2065 | 10,1989 | 1,005281818 | ENST00000357384 | 55197     | NM_018170    | RPRD1A               |
| A_22_P00006087 | 1,51637 | 1,50878 | 1,00527485  | ENST00000507949 | N/A       | N/A          | N/A                  |
| A_21_P0003224  | 1,44551 | 1,43792 | 1,00527485  | N/A             | N/A       | N/A          | Inc-OXSM-1           |
| A_32_P92281    | 7,4147  | 7,40712 | 1,005267882 | ENST00000447643 | 100132832 | NR_028058    | PMS2P9               |
| A_21_P0004347  | 1,47451 | 1,46693 | 1,005267882 | N/A             | N/A       | N/A          | Inc-CCDC127-2        |
| A_22_P00004816 | 1,4535  | 1,44593 | 1,005260914 | ENST00000567273 | N/A       | CD652837     | N/A                  |
| A_23_P54612    | 1,65297 | 1,64541 | 1,005253947 | ENST00000563093 | 123872    | NM_178452    | DNAAF1               |
| A_33_P3285277  | 1,71111 | 1,70357 | 1,005240011 | ENST00000498816 | 783       | NM_001167945 | CACNB2               |
| A_22_P00001754 | 1,6754  | 1,66786 | 1,005240011 | N/A             | N/A       | N/A          | Inc-ATP10A-2         |
| A_22_P00020028 | 1,47821 | 1,47068 | 1,005233043 | N/A             | N/A       | N/A          | Inc-HIC1-1           |
| A_23_P30294    | 1,66625 | 1,65873 | 1,005226075 | ENST00000250535 | 1036      | NM_001801    | CDO1                 |

|                |         |         |             |                 |           |              |                |
|----------------|---------|---------|-------------|-----------------|-----------|--------------|----------------|
| A_22_P00010692 | 1,70156 | 1,69404 | 1,005226075 | ENST00000452002 | N/A       | N/A          | N/A            |
| A_21_P0014123  | 1,52503 | 1,51752 | 1,005219108 | N/A             | 440982    | AK054937     | LOC440982      |
| A_33_P3382856  | 1,50941 | 1,50192 | 1,005205172 | ENST00000456569 | 1634      | NM_133507    | DCN            |
| A_21_P0002178  | 1,45234 | 1,44486 | 1,005198205 | N/A             | N/A       | N/A          | Inc-VSNL1-1    |
| A_21_P0012763  | 3,1567  | 3,14922 | 1,005198205 | ENST00000513681 | 101928971 | N/A          | LINC01262      |
| A_21_P0006502  | 1,47582 | 1,46834 | 1,005198205 | N/A             | N/A       | N/A          | Inc-ZC3H12B-2  |
| A_22_P00003350 | 1,68424 | 1,67676 | 1,005198205 | N/A             | 101929534 | XR_425616    | LOC101929534   |
| A_33_P3348919  | 1,44885 | 1,44137 | 1,005198205 | ENST00000400085 | 100132396 | NM_001193630 | ZNF705B        |
| A_23_P97677    | 2,43095 | 2,42348 | 1,005191237 | ENST00000477320 | 4146      | NM_002379    | MATN1          |
| A_33_P3218455  | 1,67965 | 1,67219 | 1,00518427  | N/A             | 729047    | BC039368     | LOC729047      |
| A_21_P0007606  | 1,39935 | 1,3919  | 1,005177303 | N/A             | N/A       | N/A          | Inc-C12orf74-1 |
| A_21_P0009237  | 1,70363 | 1,69618 | 1,005177303 | ENST00000583224 | N/A       | N/A          | N/A            |
| A_22_P00016767 | 1,4761  | 1,46865 | 1,005177303 | ENST00000509718 | N/A       | N/A          | N/A            |
| A_22_P00004733 | 1,50846 | 1,50101 | 1,005177303 | N/A             | N/A       | N/A          | Inc-CTNNA1-2   |
| A_21_P0006489  | 1,56359 | 1,55615 | 1,005170335 | N/A             | N/A       | N/A          | Inc-MID1IP1-3  |
| A_21_P0002677  | 1,53689 | 1,52945 | 1,005170335 | N/A             | N/A       | N/A          | Inc-MKI67IP-1  |
| A_21_P0000442  | 1,6805  | 1,67306 | 1,005170335 | N/A             | 100033444 | NR_003299    | SNORD115-7     |
| A_22_P00003273 | 1,65836 | 1,65093 | 1,005163368 | N/A             | 100506068 | NR_040041    | DACT3-AS1      |
| A_21_P0001757  | 1,52692 | 1,5195  | 1,005156401 | N/A             | N/A       | N/A          | Inc-BATF3-2    |
| A_21_P0010440  | 1,51347 | 1,50605 | 1,005156401 | N/A             | N/A       | N/A          | Inc-MFNG-1     |
| A_22_P00002119 | 1,67707 | 1,66966 | 1,005149434 | N/A             | N/A       | N/A          | Inc-BOD1-3     |
| A_21_P0013712  | 1,47185 | 1,46444 | 1,005149434 | N/A             | N/A       | N/A          | Inc-PAEP-2     |
| A_22_P00014543 | 1,51136 | 1,50397 | 1,005135499 | N/A             | N/A       | N/A          | Inc-SIRPA-1    |
| A_22_P00019270 | 1,51796 | 1,51057 | 1,005135499 | ENST00000578740 | N/A       | N/A          | N/A            |
| A_33_P3252534  | 1,51006 | 1,50268 | 1,005128532 | ENST00000354915 | 3050      | NM_005332    | HBZ            |
| A_22_P00016764 | 1,55144 | 1,54406 | 1,005128532 | N/A             | N/A       | AK097822     | Inc-TRIM32-1   |
| A_33_P3220872  | 1,49436 | 1,48698 | 1,005128532 | ENST00000455595 | 1720      | NR_033423    | LOC1720        |
| A_22_P00001155 | 1,53244 | 1,52506 | 1,005128532 | ENST00000468762 | N/A       | N/A          | N/A            |
| A_21_P0007852  | 1,5497  | 1,54233 | 1,005121565 | N/A             | N/A       | N/A          | Inc-HNF1A-1    |
| A_21_P0012631  | 1,48995 | 1,48258 | 1,005121565 | N/A             | N/A       | N/A          | XLOC_I2_010933 |
| A_21_P0013562  | 7,3027  | 7,29535 | 1,005107631 | N/A             | 100506710 | N/A          | EBLN3          |
| A_22_P00001275 | 1,45266 | 1,44531 | 1,005107631 | N/A             | N/A       | DB334010     | Inc-ANKRD56-3  |
| A_21_P0002008  | 1,54104 | 1,5337  | 1,005100665 | ENST00000456681 | 339788    | N/A          | LINC00298      |

|                |         |         |             |                 |           |           |                      |
|----------------|---------|---------|-------------|-----------------|-----------|-----------|----------------------|
| A_22_P00010372 | 1,36257 | 1,35524 | 1,005093698 | ENST00000548705 | 101928420 | NR_120468 | LINC01490            |
| A_21_P0003007  | 1,47142 | 1,46409 | 1,005093698 | N/A             | 102723430 | XR_425614 | LOC102723430         |
| A_22_P00001876 | 1,53826 | 1,53094 | 1,005086731 | ENST00000447056 | N/A       | N/A       | N/A                  |
| A_21_P0012805  | 1,4956  | 1,48829 | 1,005079764 | ENST00000505848 | 100505545 | NR_038331 | LINC01095            |
| A_23_P308722   | 1,59566 | 1,58835 | 1,005079764 | ENST00000288710 | 92749     | NM_145038 | DRC1                 |
| A_21_P0008606  | 1,47548 | 1,46817 | 1,005079764 | N/A             | N/A       | N/A       | Inc-AC114546.1-4     |
| A_21_P0003959  | 1,67409 | 1,66679 | 1,005072798 | ENST00000506093 | N/A       | N/A       | N/A                  |
| A_21_P0004948  | 1,48107 | 1,47377 | 1,005072798 | N/A             | N/A       | N/A       | Inc-TNFAIP3-3        |
| A_22_P00006014 | 1,67891 | 1,67161 | 1,005072798 | N/A             | N/A       | CU687043  | Inc-FAM101B-1        |
| A_22_P00025579 | 1,45158 | 1,44429 | 1,005065831 | ENST00000509602 | N/A       | N/A       | N/A                  |
| A_21_P0011242  | 1,48364 | 1,47635 | 1,005065831 | N/A             | 101927483 | XR_424499 | LOC101927483         |
| A_21_P0010444  | 4,61567 | 4,6084  | 1,005051898 | N/A             | N/A       | N/A       | Inc-NFAM1-1          |
| A_23_P414519   | 1,64562 | 1,63836 | 1,005044932 | ENST00000495850 | 51299     | NM_016588 | NRN1                 |
| A_22_P00002086 | 1,66038 | 1,65314 | 1,005030999 | ENST00000436530 | N/A       | N/A       | N/A                  |
| A_21_P0009487  | 1,36975 | 1,36253 | 1,005017066 | ENST00000590797 | N/A       | N/A       | N/A                  |
| A_23_P80503    | 1,36451 | 1,35729 | 1,005017066 | ENST00000466906 | 6091      | NM_133631 | ROBO1                |
| A_23_P355517   | 1,54611 | 1,5389  | 1,0050101   | ENST00000394810 | 79933     | NM_024875 | SYNPO2L              |
| A_24_P63522    | 10,7972 | 10,79   | 1,005003134 | ENST00000325110 | 3157      | NM_002130 | HMGCS1               |
| A_23_P70127    | 12,1545 | 12,1473 | 1,005003134 | ENST00000513799 | 54732     | NM_017510 | TMED9                |
| A_33_P3400302  | 2,0267  | 2,01952 | 1,004989202 | ENST00000438677 | 252950    | NR_001550 | TTY18                |
| A_22_P00010465 | 1,49046 | 1,48328 | 1,004989202 | ENST00000436722 | 100874161 | NR_047015 | LINC00411            |
| A_33_P3262038  | 1,53441 | 1,52723 | 1,004989202 | ENST00000591780 | N/A       | AL359580  | N/A                  |
| A_22_P00025849 | 1,63636 | 1,62919 | 1,004982236 | ENST00000573270 | N/A       | BC043554  | N/A                  |
| A_21_P0008248  | 1,69925 | 1,69208 | 1,004982236 | ENST00000420210 | N/A       | N/A       | N/A                  |
| A_22_P00019617 | 1,70409 | 1,69693 | 1,00497527  | ENST00000449188 | 647219    | N/A       | ASCL5                |
| A_21_P0011481  | 1,47677 | 1,46965 | 1,004947406 | N/A             | N/A       | N/A       | XLOC_I2_005489       |
| A_21_P0004393  | 1,55268 | 1,54557 | 1,00494044  | N/A             | N/A       | N/A       | Inc-CTC-236F12.4.1-2 |
| A_33_P3298251  | 4,30537 | 4,29827 | 1,004933475 | N/A             | N/A       | N/A       | N/A                  |
| A_33_P3744376  | 1,45635 | 1,44925 | 1,004933475 | N/A             | N/A       | N/A       | N/A                  |
| A_33_P3353502  | 1,53632 | 1,52922 | 1,004933475 | ENST00000414679 | 5332      | NM_182797 | PLCB4                |
| A_22_P00025358 | 1,67203 | 1,66494 | 1,004926509 | N/A             | N/A       | N/A       | Inc-SYCP3-2          |
| A_23_P21120    | 1,54961 | 1,54253 | 1,004919543 | ENST00000324817 | 9282      | AB006651  | MED14                |
| A_33_P3334630  | 1,66268 | 1,6556  | 1,004919543 | ENST00000612423 | 5354      | M54927    | PLP1                 |

|                |         |         |             |                 |           |              |                |
|----------------|---------|---------|-------------|-----------------|-----------|--------------|----------------|
| A_33_P3344334  | 1,49653 | 1,48945 | 1,004919543 | ENST00000322893 | 27133     | NM_172375    | KCNH5          |
| A_21_P0005732  | 1,55293 | 1,54586 | 1,004912578 | N/A             | N/A       | N/A          | Inc-CA2-2      |
| A_22_P00006003 | 4,40237 | 4,39533 | 1,004891682 | N/A             | N/A       | N/A          | Inc-FAH-1      |
| A_21_P0008906  | 1,62029 | 1,61326 | 1,004884716 | ENST00000571619 | 101927287 | N/A          | LOC101927287   |
| A_24_P350228   | 7,80087 | 7,79384 | 1,004884716 | ENST00000380298 | 63027     | NM_021945    | SLC22A23       |
| A_24_P91985    | 1,35536 | 1,34835 | 1,004870786 | ENST00000443118 | 116966    | NM_170710    | WDR17          |
| A_24_P381962   | 10,7792 | 10,7722 | 1,00486382  | ENST00000299980 | 164       | NM_001030007 | AP1G1          |
| A_22_P00010397 | 1,6862  | 1,67921 | 1,004856855 | ENST00000505158 | 401177    | NR_033975    | LOC401177      |
| A_21_P0003633  | 1,67636 | 1,66939 | 1,004842925 | N/A             | N/A       | N/A          | Inc-RAP1GDS1-3 |
| A_21_P0014570  | 1,49666 | 1,48969 | 1,004842925 | N/A             | N/A       | BG194190     | Inc-SYCP3-2    |
| A_21_P0002954  | 1,5226  | 1,51563 | 1,004842925 | N/A             | 100506319 | XR_110051    | LOC100506319   |
| A_21_P0007575  | 1,61927 | 1,61231 | 1,00483596  | N/A             | N/A       | N/A          | Inc-DYRK2-2    |
| A_23_P128362   | 1,66289 | 1,65593 | 1,00483596  | ENST00000550270 | 4604      | NM_206819    | MYBPC1         |
| A_24_P236235   | 1,40934 | 1,40239 | 1,004828995 | ENST00000330753 | 23768     | NM_013231    | FLRT2          |
| A_33_P3339246  | 1,5574  | 1,55045 | 1,004828995 | ENST00000607240 | 431707    | NM_001001933 | LHX8           |
| A_21_P0009573  | 1,47028 | 1,46335 | 1,004815065 | ENST00000584544 | 400655    | NR_034133    | LOC400655      |
| A_24_P201367   | 1,67661 | 1,66968 | 1,004815065 | ENST00000372066 | 11155     | NM_001171611 | LDB3           |
| A_22_P00005628 | 1,37861 | 1,37168 | 1,004815065 | ENST00000527135 | N/A       | DB220327     | N/A            |
| A_21_P0001204  | 1,52161 | 1,51469 | 1,0048081   | ENST00000432976 | N/A       | N/A          | N/A            |
| A_22_P00003583 | 1,39692 | 1,39002 | 1,004794171 | ENST00000508512 | N/A       | XR_249795    | N/A            |
| A_21_P0011149  | 8,35652 | 8,34963 | 1,004787206 | N/A             | N/A       | N/A          | XLOC_I2_003758 |
| A_23_P138262   | 1,35583 | 1,34894 | 1,004787206 | ENST00000375448 | 23569     | NM_012387    | PADI4          |
| A_33_P3232269  | 1,48403 | 1,47715 | 1,004780242 | N/A             | 100131077 | AB064670     | OK/SW-CL.36    |
| A_33_P3377994  | 5,83075 | 5,82388 | 1,004773277 | ENST00000246914 | 65266     | NM_032387    | WNK4           |
| A_21_P0003811  | 1,54588 | 1,53901 | 1,004773277 | N/A             | N/A       | N/A          | Inc-ENPP6-2    |
| A_33_P3368945  | 1,48162 | 1,47475 | 1,004773277 | N/A             | 389332    | NR_024418    | LOC389332      |
| A_33_P3341524  | 3,69384 | 3,68697 | 1,004773277 | ENST00000616370 | N/A       | BC004960     | N/A            |
| A_23_P125505   | 1,45385 | 1,44699 | 1,004766313 | ENST00000349874 | 5475      | NM_006240    | PPEF1          |
| A_21_P0011494  | 5,23716 | 5,2303  | 1,004766313 | N/A             | N/A       | N/A          | XLOC_I2_005606 |
| A_21_P0007715  | 6,50234 | 6,49552 | 1,004738455 | N/A             | N/A       | N/A          | Inc-CTDSP2-4   |
| A_23_P355455   | 8,40484 | 8,39803 | 1,004731491 | ENST00000253692 | 9779      | NM_014744    | TBC1D5         |
| A_22_P00020313 | 1,51221 | 1,5054  | 1,004731491 | N/A             | 100130880 | NM_001243523 | LOC100130880   |
| A_33_P3291484  | 1,51285 | 1,50604 | 1,004731491 | ENST00000231461 | 7903      | NM_005668    | ST8SIA4        |

|                |         |         |             |                 |           |              |                   |
|----------------|---------|---------|-------------|-----------------|-----------|--------------|-------------------|
| A_24_P97145    | 7,69942 | 7,69262 | 1,004724526 | ENST00000473731 | 57498     | NM_020738    | KIDINS220         |
| A_23_P47904    | 1,60158 | 1,59478 | 1,004724526 | ENST00000552188 | 85478     | NM_033124    | CCDC65            |
| A_21_P0014446  | 1,55104 | 1,54425 | 1,004717562 | ENST00000296575 | 64399     | AK124396     | HHIP              |
| A_21_P0006062  | 2,75736 | 2,75057 | 1,004717562 | N/A             | N/A       | N/A          | Inc-PPP1R26-1     |
| A_21_P0009604  | 1,66336 | 1,65658 | 1,004710598 | N/A             | 101927879 | XR_243871    | LOC101927879      |
| A_21_P0013347  | 1,47324 | 1,46646 | 1,004710598 | ENST00000456062 | N/A       | N/A          | N/A               |
| A_33_P3356762  | 1,67778 | 1,671   | 1,004710598 | ENST00000399044 | 256223    | N/A          | CDRT15L2          |
| A_24_P276576   | 1,45923 | 1,45245 | 1,004710598 | ENST00000367950 | 84824     | NM_032738    | FCRLA             |
| A_22_P00014225 | 1,47602 | 1,46925 | 1,004703634 | ENST00000418679 | N/A       | N/A          | N/A               |
| A_22_P00015903 | 1,36807 | 1,36131 | 1,00469667  | ENST00000382897 | 642484    | XR_159014    | FLJ45743          |
| A_21_P0001382  | 1,46212 | 1,45537 | 1,004689706 | N/A             | N/A       | N/A          | Inc-UCK2-3        |
| A_33_P3249768  | 1,61209 | 1,60535 | 1,004682742 | ENST00000611977 | 139189    | NM_001013742 | DGKK              |
| A_33_P3390411  | 1,55163 | 1,54489 | 1,004682742 | ENST00000218099 | 2158      | NM_000133    | F9                |
| A_21_P0009449  | 1,45383 | 1,44709 | 1,004682742 | N/A             | N/A       | N/A          | Inc-AP001496.1-10 |
| A_33_P3409259  | 1,54719 | 1,54048 | 1,00466185  | N/A             | N/A       | AF190748     | N/A               |
| A_23_P218412   | 11,0966 | 11,0899 | 1,004654887 | ENST00000572148 | 9552      | NM_004890    | SPAG7             |
| A_24_P379727   | 10,7759 | 10,7692 | 1,004654887 | ENST00000489052 | 84269     | XM_005263824 | CHCHD5            |
| A_33_P3373014  | 1,50521 | 1,49853 | 1,004640959 | N/A             | N/A       | N/A          | N/A               |
| A_21_P0011067  | 1,58553 | 1,57885 | 1,004640959 | N/A             | 102723723 | N/A          | LOC102723723      |
| A_22_P00001811 | 1,49066 | 1,48398 | 1,004640959 | ENST00000523035 | N/A       | N/A          | N/A               |
| A_22_P00006500 | 3,95058 | 3,94391 | 1,004633996 | N/A             | N/A       | N/A          | Inc-FGF3-4        |
| A_21_P0011237  | 1,5489  | 1,54223 | 1,004633996 | ENST00000621052 | 101927994 | NR_108087    | LINC01087         |
| A_22_P00015738 | 2,44037 | 2,43371 | 1,004627032 | N/A             | N/A       | N/A          | Inc-TACR2-1       |
| A_32_P191441   | 1,67977 | 1,67311 | 1,004627032 | ENST00000284694 | 118611    | NM_001004298 | C10orf90          |
| A_22_P00005574 | 1,7064  | 1,69976 | 1,004613105 | N/A             | N/A       | N/A          | Inc-EFCAB5-2      |
| A_21_P0002747  | 1,63173 | 1,62509 | 1,004613105 | ENST00000498247 | N/A       | N/A          | N/A               |
| A_21_P0012257  | 1,67464 | 1,668   | 1,004613105 | N/A             | N/A       | N/A          | XLOC_I2_009320    |
| A_23_P212800   | 1,51738 | 1,51075 | 1,004606142 | ENST00000503413 | 2250      | NM_004464    | FGF5              |
| A_22_P00001067 | 1,4714  | 1,46479 | 1,004592215 | N/A             | N/A       | N/A          | Inc-ALDH1A1-5     |
| A_21_P0006875  | 1,35505 | 1,34844 | 1,004592215 | N/A             | N/A       | N/A          | Inc-C10orf107-1   |
| A_24_P280328   | 1,35618 | 1,34958 | 1,004585252 | ENST00000417334 | 114760    | NR_001524    | TTY3              |
| A_19_P00809682 | 14,1833 | 14,1767 | 1,004585252 | N/A             | N/A       | N/A          | Inc-FAM105B-1     |
| A_23_P142125   | 4,94521 | 4,93863 | 1,004571325 | ENST00000252825 | 3270      | NM_002152    | HRC               |

|                |         |         |             |                 |           |              |                      |
|----------------|---------|---------|-------------|-----------------|-----------|--------------|----------------------|
| A_24_P153831   | 1,46514 | 1,45857 | 1,004564362 | N/A             | 29119     | NM_001291133 | CTNNA3               |
| A_32_P848863   | 1,68141 | 1,67484 | 1,004564362 | ENST00000457478 | 101927554 | NR_110228    | LINC01250            |
| A_33_P3274006  | 1,48829 | 1,48172 | 1,004564362 | N/A             | N/A       | N/A          | N/A                  |
| A_21_P0003798  | 1,80938 | 1,80282 | 1,004557399 | N/A             | N/A       | N/A          | Inc-HAND2-2          |
| A_22_P00001400 | 1,44371 | 1,43716 | 1,004550436 | ENST00000624238 | 100885775 | NR_047671    | BANCR                |
| A_21_P0007920  | 1,53259 | 1,52604 | 1,004550436 | N/A             | N/A       | N/A          | Inc-RP11-408E5.4.1-5 |
| A_33_P3325097  | 1,69779 | 1,69124 | 1,004550436 | ENST00000548594 | N/A       | N/A          | N/A                  |
| A_24_P86246    | 1,36672 | 1,36017 | 1,004550436 | ENST00000296682 | 56979     | NM_020227    | PRDM9                |
| A_22_P00009305 | 1,67517 | 1,66863 | 1,004543473 | N/A             | N/A       | BX117253     | Inc-LRRC40-2         |
| A_22_P00021536 | 1,49186 | 1,48533 | 1,00453651  | N/A             | N/A       | N36093       | Inc-FAN1-1           |
| A_21_P0011524  | 1,49391 | 1,48738 | 1,00453651  | N/A             | 101060602 | N/A          | LOC101060602         |
| A_22_P00003951 | 1,51639 | 1,50986 | 1,00453651  | N/A             | 253962    | NR_038439    | CACNA1G-AS1          |
| A_24_P309802   | 1,49239 | 1,48587 | 1,004529547 | ENST00000326783 | 64184     | NM_022360    | EDDM3B               |
| A_22_P00017205 | 1,38397 | 1,37745 | 1,004529547 | N/A             | N/A       | N/A          | Inc-UCK2-2           |
| A_21_P0006466  | 1,43196 | 1,42545 | 1,004522584 | ENST00000455153 | 101928833 | XR_244544    | LOC101928833         |
| A_22_P00002916 | 1,69886 | 1,69236 | 1,004515622 | ENST00000505775 | 643401    | NR_038848    | LINC01021            |
| A_32_P414791   | 1,53849 | 1,53199 | 1,004515622 | ENST00000511885 | 353497    | NM_181808    | POLN                 |
| A_33_P3229357  | 4,66873 | 4,66224 | 1,004508659 | ENST00000415836 | N/A       | N/A          | N/A                  |
| A_22_P00018900 | 1,6679  | 1,66142 | 1,004501696 | N/A             | 100873932 | NR_046590    | DPYD-AS1             |
| A_23_P415411   | 2,02196 | 2,01548 | 1,004501696 | N/A             | 8367      | NM_003545    | HIST1H4E             |
| A_22_P00009892 | 1,46956 | 1,46309 | 1,004494733 | N/A             | N/A       | N/A          | Inc-MFSD8-1          |
| A_22_P00019539 | 1,69682 | 1,69036 | 1,004487771 | N/A             | N/A       | N/A          | Inc-AC092295.7.1-2   |
| A_22_P00006437 | 1,52438 | 1,51792 | 1,004487771 | ENST00000504167 | N/A       | N/A          | N/A                  |
| A_33_P3382222  | 1,67221 | 1,66575 | 1,004487771 | ENST00000369123 | 100113403 | NR_046407    | LINC00577            |
| A_23_P347610   | 1,45941 | 1,45297 | 1,004473846 | ENST00000339252 | 26762     | NM_012206    | HAVCR1               |
| A_22_P00004459 | 1,45874 | 1,4523  | 1,004473846 | ENST00000514339 | N/A       | N/A          | N/A                  |
| A_33_P3409467  | 1,50083 | 1,49441 | 1,004459921 | ENST00000400723 | 2642      | NM_000160    | GCGR                 |
| A_21_P0011151  | 1,46383 | 1,45741 | 1,004459921 | ENST00000438327 | 100874175 | NR_047028    | LINC00446            |
| A_33_P3262704  | 1,67284 | 1,66644 | 1,004445996 | N/A             | N/A       | N/A          | N/A                  |
| A_24_P100016   | 6,45867 | 6,45227 | 1,004445996 | ENST00000335117 | 90649     | NM_052852    | ZNF486               |
| A_21_P0009896  | 1,71937 | 1,71298 | 1,004439034 | ENST00000448580 | N/A       | N/A          | N/A                  |
| A_22_P00019301 | 1,60022 | 1,59384 | 1,004432072 | N/A             | 644248    | NR_045481    | SNCA-AS1             |
| A_22_P00016020 | 1,4658  | 1,45944 | 1,004418147 | ENST00000470532 | 100506489 | XR_108799    | LOC100506489         |



|                |         |         |             |                 |           |              |                       |
|----------------|---------|---------|-------------|-----------------|-----------|--------------|-----------------------|
| A_22_P00011088 | 1,54215 | 1,53579 | 1,004418147 | ENST00000521341 | N/A       | AK128023     | N/A                   |
| A_24_P167496   | 1,67596 | 1,6696  | 1,004418147 | ENST00000344862 | 83448     | NM_031292    | PUS7L                 |
| A_22_P00008910 | 1,64707 | 1,64073 | 1,004404223 | N/A             | N/A       | N/A          | Inc-KLLN-1            |
| A_21_P0003415  | 1,67729 | 1,67095 | 1,004404223 | ENST00000505781 | N/A       | N/A          | N/A                   |
| A_33_P3315824  | 4,34952 | 4,34318 | 1,004404223 | N/A             | N/A       | N/A          | N/A                   |
| A_33_P3354731  | 1,67869 | 1,67235 | 1,004404223 | N/A             | N/A       | N/A          | N/A                   |
| A_22_P00012158 | 1,66559 | 1,65926 | 1,004397261 | N/A             | N/A       | AK309862     | Inc-POMP-1            |
| A_22_P00003572 | 1,4511  | 1,44477 | 1,004397261 | ENST00000579327 | N/A       | N/A          | N/A                   |
| A_23_P408473   | 9,77821 | 9,77189 | 1,004390299 | ENST00000528919 | 727957    | NM_032450    | MROH1                 |
| A_22_P00009859 | 1,5077  | 1,50139 | 1,004383338 | ENST00000566208 | N/A       | AL117506     | N/A                   |
| A_22_P00015322 | 1,59815 | 1,59184 | 1,004383338 | ENST00000421326 | N/A       | N/A          | N/A                   |
| A_23_P211572   | 1,57112 | 1,56482 | 1,004376376 | ENST00000396426 | 55964     | NM_145733    | set-03                |
| A_24_P653603   | 13,9488 | 13,9425 | 1,004376376 | ENST00000431388 | 284184    | NM_001086521 | C17orf89              |
| A_22_P00012140 | 4,00103 | 3,99474 | 1,004369414 | ENST00000608713 | 5435      | NM_001301130 | POLR2F                |
| A_21_P0002585  | 1,37099 | 1,3647  | 1,004369414 | N/A             | N/A       | N/A          | Inc-EHD3-1            |
| A_24_P329424   | 1,50728 | 1,501   | 1,004362452 | ENST00000292427 | 1584      | NM_000497    | CYP11B1               |
| A_33_P3252685  | 1,69551 | 1,68923 | 1,004362452 | N/A             | N/A       | N/A          | N/A                   |
| A_22_P00012483 | 1,65778 | 1,65151 | 1,004355491 | ENST00000532979 | N/A       | XR_424259    | N/A                   |
| A_21_P0004207  | 1,70372 | 1,69745 | 1,004355491 | N/A             | N/A       | N/A          | Inc-C5orf38-3         |
| A_21_P0012141  | 1,65957 | 1,6533  | 1,004355491 | N/A             | N/A       | N/A          | XLOC_I2_008841        |
| A_24_P101812   | 1,47381 | 1,46755 | 1,004348529 | ENST00000548943 | N/A       | N/A          | N/A                   |
| A_33_P3288125  | 1,5259  | 1,51965 | 1,004341567 | ENST00000582581 | 284395    | NR_040029    | LOC284395             |
| A_21_P0000644  | 1,53481 | 1,52856 | 1,004341567 | ENST00000581011 | 400655    | NR_034133    | LOC400655             |
| A_33_P3755781  | 1,45452 | 1,44827 | 1,004341567 | ENST00000438226 | 130951    | NM_001281295 | M1AP                  |
| A_21_P0005688  | 1,50304 | 1,49679 | 1,004341567 | N/A             | N/A       | N/A          | Inc-RP11-150O12.5.1-2 |
| A_21_P0005667  | 1,49419 | 1,48795 | 1,004334606 | N/A             | N/A       | N/A          | Inc-ATP6V1B2-5        |
| A_33_P3331652  | 9,10222 | 9,096   | 1,004320683 | ENST00000558200 | 51016     | XR_245688    | EMC9                  |
| A_22_P00017281 | 1,47109 | 1,46487 | 1,004320683 | N/A             | N/A       | N/A          | Inc-USO1-1            |
| A_22_P00019527 | 1,45667 | 1,45046 | 1,004313721 | ENST00000380990 | 400932    | NR_033377    | LINC00898             |
| A_33_P3408782  | 1,71542 | 1,70922 | 1,00430676  | ENST00000506349 | 285220    | NM_001080448 | EPHA6                 |
| A_33_P3357303  | 1,50622 | 1,50002 | 1,00430676  | ENST00000344514 | 390148    | NM_001001960 | OR5W2                 |
| A_21_P0008467  | 1,48542 | 1,47923 | 1,004299799 | N/A             | N/A       | N/A          | Inc-SEL1L-3           |
| A_33_P3415748  | 1,47234 | 1,46616 | 1,004292838 | N/A             | 100129072 | AK123881     | LOC100129072          |

|                |         |         |             |                 |           |              |                     |
|----------------|---------|---------|-------------|-----------------|-----------|--------------|---------------------|
| A_21_P0006161  | 1,63378 | 1,62761 | 1,004285876 | N/A             | N/A       | N/A          | Inc-RMI1-3          |
| A_23_P63371    | 1,67934 | 1,67318 | 1,004278915 | ENST00000294339 | 6886      | NM_003189    | TAL1                |
| A_23_P9340     | 3,24318 | 3,23703 | 1,004271954 | ENST00000263610 | 56751     | NM_020064    | BARHL1              |
| A_22_P00020790 | 1,49267 | 1,48652 | 1,004271954 | ENST00000514966 | N/A       | N/A          | N/A                 |
| A_22_P00013561 | 1,46984 | 1,4637  | 1,004264993 | N/A             | N/A       | N/A          | Inc-RP11-43D2.2.1-5 |
| A_21_P0013165  | 1,70783 | 1,70171 | 1,004251071 | ENST00000335388 | 80350     | N/A          | LPAL2               |
| A_33_P3270147  | 4,01798 | 4,01186 | 1,004251071 | N/A             | N/A       | N/A          | XLOC_I2_001687      |
| A_24_P382401   | 5,82149 | 5,81537 | 1,004251071 | ENST00000343325 | 163049    | NM_153358    | ZNF791              |
| A_22_P00002905 | 1,65847 | 1,65237 | 1,004237149 | ENST00000513718 | N/A       | N/A          | N/A                 |
| A_33_P3399840  | 12,6701 | 12,664  | 1,004237149 | ENST00000490193 | 10713     | NM_006590    | USP39               |
| A_33_P3251860  | 1,47561 | 1,46952 | 1,004230188 | N/A             | N/A       | AF130091     | N/A                 |
| A_21_P0008614  | 1,69883 | 1,69275 | 1,004223228 | N/A             | N/A       | N/A          | Inc-TMCO5A-1        |
| A_21_P0003355  | 1,67687 | 1,6708  | 1,004216267 | ENST00000515422 | N/A       | N/A          | N/A                 |
| A_22_P00002777 | 1,51087 | 1,50481 | 1,004209306 | N/A             | N/A       | N/A          | Inc-C22orf34-2      |
| A_21_P0003469  | 1,56922 | 1,56316 | 1,004209306 | ENST00000512911 | N/A       | N/A          | N/A                 |
| A_21_P0008771  | 1,65652 | 1,65046 | 1,004209306 | N/A             | N/A       | N/A          | Inc-KLHL25-8        |
| A_22_P00013765 | 1,79659 | 1,79054 | 1,004202346 | ENST00000435044 | N/A       | N/A          | N/A                 |
| A_22_P00016793 | 1,68011 | 1,67407 | 1,004195385 | ENST00000513771 | 102577426 | N/A          | LOC102577426        |
| A_22_P00002290 | 1,4522  | 1,44616 | 1,004195385 | N/A             | N/A       | N/A          | Inc-C10orf71-2      |
| A_21_P0004285  | 1,49076 | 1,48476 | 1,004167543 | N/A             | N/A       | N/A          | Inc-AP3S1-3         |
| A_22_P00010204 | 1,53901 | 1,53301 | 1,004167543 | ENST00000517848 | N/A       | BX110060     | N/A                 |
| A_21_P0008020  | 1,49656 | 1,49056 | 1,004167543 | ENST00000418660 | N/A       | N/A          | N/A                 |
| A_24_P237511   | 1,59089 | 1,5849  | 1,004160583 | ENST00000361365 | 9086      | NM_004681    | EIF1AY              |
| A_21_P0007346  | 1,36981 | 1,36382 | 1,004160583 | N/A             | N/A       | N/A          | Inc-ALX4-2          |
| A_33_P3234222  | 6,60227 | 6,59629 | 1,004153623 | ENST00000373161 | 222642    | NM_001010873 | TSPO2               |
| A_21_P0008904  | 1,58281 | 1,57683 | 1,004153623 | N/A             | N/A       | N/A          | Inc-C16orf72-4      |
| A_21_P0009328  | 1,52044 | 1,51446 | 1,004153623 | N/A             | N/A       | N/A          | Inc-PRR15L-1        |
| A_21_P0012572  | 1,54053 | 1,53455 | 1,004153623 | N/A             | N/A       | N/A          | XLOC_I2_010573      |
| A_33_P3355724  | 1,46123 | 1,45526 | 1,004146662 | ENST00000475047 | 89766     | AB096972     | UMODL1              |
| A_23_P335981   | 1,67496 | 1,669   | 1,004139702 | ENST00000243103 | 3228      | NM_173860    | HOXC12              |
| A_22_P00020036 | 6,84499 | 6,83906 | 1,004118822 | N/A             | N/A       | BG202057     | Inc-AP4S1-1         |
| A_24_P942132   | 1,68122 | 1,67531 | 1,004104902 | ENST00000347691 | 122553    | NM_001079537 | TRAPPC6B            |
| A_23_P205697   | 13,4929 | 13,487  | 1,004097942 | ENST00000334220 | 1743      | NM_001933    | DLST                |

|                |         |         |             |                 |           |              |                      |
|----------------|---------|---------|-------------|-----------------|-----------|--------------|----------------------|
| A_23_P348298   | 11,4774 | 11,4715 | 1,004097942 | ENST00000531072 | 29901     | NM_013299    | SAC3D1               |
| A_21_P0007998  | 1,42215 | 1,41626 | 1,004090982 | ENST00000423739 | N/A       | N/A          | N/A                  |
| A_33_P3339138  | 1,52048 | 1,51459 | 1,004090982 | ENST00000322329 | 388394    | NM_203400    | RPRML                |
| A_22_P00023676 | 1,48745 | 1,48156 | 1,004090982 | N/A             | 100507283 | NR_103862    | LOC100507283         |
| A_33_P3323599  | 1,69707 | 1,69119 | 1,004084022 | N/A             | 223075    | XM_005249661 | CCDC129              |
| A_21_P0001494  | 1,36493 | 1,35908 | 1,004063143 | N/A             | N/A       | N/A          | Inc-SLFNL1-1         |
| A_21_P0007680  | 1,45259 | 1,44675 | 1,004056184 | N/A             | N/A       | N/A          | Inc-PARP11-2         |
| A_33_P3229760  | 1,48325 | 1,47741 | 1,004056184 | N/A             | N/A       | N/A          | N/A                  |
| A_22_P00001543 | 1,61804 | 1,61221 | 1,004049224 | ENST00000508961 | 54848     | N/A          | ARHGEF38             |
| A_21_P0008207  | 1,6806  | 1,67477 | 1,004049224 | N/A             | N/A       | N/A          | Inc-SLC10A2-1        |
| A_21_P0009503  | 1,70369 | 1,69786 | 1,004049224 | N/A             | N/A       | N/A          | Inc-RP11-17M16.1.1-6 |
| A_22_P00004822 | 1,46008 | 1,45427 | 1,004035305 | N/A             | N/A       | BM745483     | Inc-CXorf56-2        |
| A_21_P0012068  | 1,36929 | 1,36348 | 1,004035305 | ENST00000453476 | N/A       | N/A          | N/A                  |
| A_22_P00002537 | 1,48929 | 1,48349 | 1,004028346 | N/A             | N/A       | N/A          | Inc-C17orf58-4       |
| A_24_P398898   | 14,7465 | 14,7407 | 1,004028346 | ENST00000561171 | 10933     | NM_206839    | MORF4L1              |
| A_21_P0003015  | 1,61557 | 1,60977 | 1,004028346 | N/A             | N/A       | N/A          | Inc-C3orf30-2        |
| A_22_P00000529 | 1,64898 | 1,64318 | 1,004028346 | N/A             | N/A       | N/A          | Inc-AC110373.1-6     |
| A_33_P3234635  | 1,69683 | 1,69105 | 1,004014427 | ENST00000409678 | 147111    | NM_178493    | NOTUM                |
| A_24_P168925   | 1,64264 | 1,63687 | 1,004007468 | ENST00000372045 | 91851     | NM_001143981 | CHRD1                |
| A_33_P3357999  | 1,79059 | 1,78482 | 1,004007468 | ENST00000295569 | 151647    | NM_182522    | FAM19A4              |
| A_33_P3424491  | 1,65644 | 1,65068 | 1,004000509 | ENST00000396952 | 143503    | NM_152430    | OR51E1               |
| A_22_P00021274 | 1,38161 | 1,37587 | 1,00398659  | N/A             | N/A       | DA358716     | Inc-PDPN-1           |
| A_33_P3249449  | 1,38138 | 1,37564 | 1,00398659  | ENST00000621481 | 343068    | NM_001013407 | PRAMEF5              |
| A_22_P00017118 | 1,39917 | 1,39344 | 1,003979631 | N/A             | 100874096 | NR_046663    | DOCK9-AS1            |
| A_21_P0005991  | 1,59232 | 1,5866  | 1,003972672 | ENST00000432783 | N/A       | N/A          | N/A                  |
| A_22_P00025789 | 1,52148 | 1,51576 | 1,003972672 | N/A             | N/A       | N/A          | Inc-TTC14-3          |
| A_22_P00009858 | 1,46359 | 1,45787 | 1,003972672 | ENST00000564185 | N/A       | CR748233     | N/A                  |
| A_33_P3358511  | 1,52163 | 1,51592 | 1,003965713 | ENST00000369963 | 3617      | CR749572     | IMPG1                |
| A_22_P00007449 | 1,67787 | 1,67217 | 1,003958754 | N/A             | 100873939 | NR_046622    | LN1-AS1              |
| A_22_P00006980 | 1,48013 | 1,47443 | 1,003958754 | ENST00000565841 | N/A       | N/A          | N/A                  |
| A_33_P3224100  | 1,45099 | 1,44529 | 1,003958754 | ENST00000493930 | 170063    | NM_152632    | CXorf22              |
| A_33_P3337554  | 1,4919  | 1,48621 | 1,003951795 | N/A             | 340273    | NM_001163993 | ABCB5                |
| A_33_P3330463  | 1,35791 | 1,35222 | 1,003951795 | ENST00000311787 | 170370    | NM_001164484 | FAM170B              |

|                |         |         |             |                 |           |              |              |
|----------------|---------|---------|-------------|-----------------|-----------|--------------|--------------|
| A_22_P00003748 | 1,64875 | 1,64306 | 1,003951795 | ENST00000578545 | N/A       | N/A          | N/A          |
| A_22_P00014240 | 1,64017 | 1,63448 | 1,003951795 | ENST00000557770 | N/A       | N/A          | N/A          |
| A_22_P00008153 | 6,11194 | 6,10625 | 1,003951795 | N/A             | N/A       | BX109589     | Inc-ILK-1    |
| A_21_P0008694  | 1,45271 | 1,44703 | 1,003944836 | N/A             | N/A       | N/A          | Inc-LRRC28-1 |
| A_19_P00804212 | 9,52215 | 9,51649 | 1,003930919 | ENST00000413128 | 27247     | NM_015700    | NFU1         |
| A_21_P0009453  | 1,45187 | 1,44621 | 1,003930919 | N/A             | N/A       | N/A          | Inc-RAB31-1  |
| A_21_P0000998  | 1,68191 | 1,67626 | 1,00392396  | ENST00000414923 | N/A       | N/A          | N/A          |
| A_21_P0006630  | 1,69348 | 1,68783 | 1,00392396  | ENST00000435539 | N/A       | N/A          | N/A          |
| A_22_P00013111 | 1,52195 | 1,51631 | 1,003917002 | ENST00000505796 | N/A       | N/A          | N/A          |
| A_33_P3422025  | 1,66314 | 1,65751 | 1,003910043 | ENST00000389536 | 201625    | NM_001291661 | DNAH12       |
| A_23_P19556    | 1,6642  | 1,65857 | 1,003910043 | ENST00000302103 | 10690     | NM_006581    | FUT9         |
| A_21_P0000791  | 1,60697 | 1,60137 | 1,003889167 | N/A             | 90499     | NR_038409    | FAM95A       |
| A_22_P00016848 | 1,47635 | 1,47075 | 1,003889167 | ENST00000514282 | N/A       | N/A          | N/A          |
| A_33_P3355508  | 1,53255 | 1,52696 | 1,003882209 | ENST00000330315 | 668       | NM_023067    | FOXL2        |
| A_22_P00017958 | 1,52986 | 1,52428 | 1,003875251 | N/A             | 101927465 | NR_046525    | CLYBL-AS1    |
| A_33_P3233978  | 5,67497 | 5,66939 | 1,003875251 | ENST00000379999 | 84893     | NM_032807    | FBXO18       |
| A_33_P3278654  | 1,65899 | 1,65343 | 1,003861334 | ENST00000550636 | 283332    | NR_026948    | LOC283332    |
| A_33_P3394995  | 1,46941 | 1,46385 | 1,003861334 | ENST00000517617 | 80243     | NM_025170    | PREX2        |
| A_19_P00322797 | 7,95329 | 7,94773 | 1,003861334 | ENST00000568056 | 6397      | NM_001204408 | SEC14L1      |
| A_33_P3213337  | 1,70104 | 1,69549 | 1,003854376 | ENST00000318792 | 400359    | NM_207444    | C15orf53     |
| A_23_P125977   | 1,69689 | 1,69134 | 1,003854376 | ENST00000374637 | 714       | NM_172369    | C1QC         |
| A_33_P3276019  | 1,6797  | 1,67415 | 1,003854376 | ENST00000537457 | 728597    | NM_001287444 | DCDC2C       |
| A_21_P0002741  | 5,50217 | 5,49662 | 1,003854376 | N/A             | N/A       | N/A          | Inc-PPM1M-2  |
| A_21_P0003837  | 1,39224 | 1,3867  | 1,003847418 | N/A             | N/A       | N/A          | Inc-LPHN3-2  |
| A_22_P00019242 | 1,68221 | 1,67668 | 1,00384046  | ENST00000523307 | N/A       | N/A          | N/A          |
| A_24_P296457   | 7,7373  | 7,73177 | 1,00384046  | ENST00000563607 | 5261      | NM_000294    | PHKG2        |
| A_21_P0011112  | 1,69386 | 1,68834 | 1,003833502 | ENST00000514503 | 101928102 | N/A          | LOC101928102 |
| A_21_P0012977  | 1,49164 | 1,48613 | 1,003826544 | ENST00000515123 | N/A       | N/A          | N/A          |
| A_32_P58872    | 1,48902 | 1,48351 | 1,003826544 | ENST00000447459 | 146395    | NM_001109763 | GSG1L        |
| A_23_P47800    | 12,9329 | 12,9274 | 1,003819586 | ENST00000535844 | 56616     | NM_019887    | DIABLO       |
| A_21_P0009524  | 1,65574 | 1,65028 | 1,003791754 | ENST00000582531 | N/A       | N/A          | N/A          |
| A_33_P3237210  | 1,52237 | 1,51691 | 1,003791754 | N/A             | 113829    | AF445025     | SLC35A4      |
| A_21_P0012030  | 1,47065 | 1,46519 | 1,003791754 | ENST00000608432 | 401014    | XM_005263847 | TEX41        |

|                |         |         |             |                 |           |              |                |
|----------------|---------|---------|-------------|-----------------|-----------|--------------|----------------|
| A_22_P00002897 | 3,11978 | 3,11432 | 1,003791754 | ENST00000505269 | 100506013 | N/A          | APELA          |
| A_22_P00002319 | 1,51426 | 1,50881 | 1,003784796 | N/A             | N/A       | N/A          | Inc-C11orf46-1 |
| A_22_P00012019 | 1,68188 | 1,67643 | 1,003784796 | ENST00000557965 | N/A       | N/A          | N/A            |
| A_33_P3269626  | 1,6609  | 1,65547 | 1,003770881 | ENST00000569833 | N/A       | AK123270     | N/A            |
| A_23_P305092   | 1,37249 | 1,36707 | 1,003763924 | ENST00000533709 | 56253     | NM_019604    | CRTAM          |
| A_21_P0010239  | 2,40045 | 2,39504 | 1,003756966 | ENST00000422473 | N/A       | N/A          | N/A            |
| A_21_P0013009  | 1,48109 | 1,47568 | 1,003756966 | ENST00000427049 | 100507506 | N/A          | LOC100507506   |
| A_33_P3381147  | 1,52243 | 1,51702 | 1,003756966 | ENST00000399685 | 387266    | NM_001012708 | KRTAP5-3       |
| A_23_P152651   | 11,8489 | 11,8435 | 1,003750009 | ENST00000584010 | 11325     | NM_007372    | DDX42          |
| A_33_P3285456  | 4,41822 | 4,41283 | 1,003743051 | ENST00000368775 | 100129271 | NM_001024679 | C1orf68        |
| A_24_P925737   | 1,67136 | 1,66597 | 1,003743051 | ENST00000367932 | 400793    | NM_001135240 | C1orf226       |
| A_33_P3354111  | 1,55039 | 1,545   | 1,003743051 | ENST00000299338 | 196951    | NM_152647    | FAM227B        |
| A_22_P00004952 | 1,4709  | 1,46552 | 1,003736094 | ENST00000579506 | 102724651 | NR_110798    | LOC102724651   |
| A_23_P363878   | 1,53652 | 1,53114 | 1,003736094 | ENST00000295049 | 130132    | NM_144629    | RFTN2          |
| A_33_P3244007  | 1,6558  | 1,65043 | 1,003729136 | ENST00000377119 | 10529     | N/A          | NEBL           |
| A_33_P3421571  | 9,93263 | 9,92726 | 1,003729136 | ENST00000374493 | 65059     | NM_213589    | RAPH1          |
| A_33_P3273474  | 1,60339 | 1,59803 | 1,003722179 | N/A             | 911       | NM_001765    | CD1C           |
| A_23_P27346    | 1,6714  | 1,66604 | 1,003722179 | ENST00000586253 | 4089      | NM_005359    | SMAD4          |
| A_33_P3525062  | 1,5086  | 1,50324 | 1,003722179 | ENST00000515337 | 285626    | NR_037889    | LOC285626      |
| A_22_P00013361 | 1,45287 | 1,44751 | 1,003722179 | ENST00000551656 | N/A       | N/A          | N/A            |
| A_21_P0003799  | 1,45068 | 1,44533 | 1,003715222 | N/A             | N/A       | N/A          | Inc-GPM6A-4    |
| A_22_P00022347 | 1,60508 | 1,59976 | 1,00369435  | N/A             | 100129250 | NR_102376    | TOPORS-AS1     |
| A_22_P00005987 | 1,35797 | 1,35266 | 1,003687393 | ENST00000413541 | N/A       | N/A          | N/A            |
| A_33_P3306024  | 10,5232 | 10,5179 | 1,003680436 | N/A             | 400709    | NR_002825    | SIGLEC16       |
| A_23_P203439   | 1,59927 | 1,59397 | 1,003680436 | ENST00000265969 | 3746      | NM_004976    | KCNC1          |
| A_21_P0007857  | 1,54165 | 1,53637 | 1,003666522 | ENST00000539391 | N/A       | N/A          | N/A            |
| A_33_P3335398  | 1,65181 | 1,64654 | 1,003659566 | ENST00000374792 | 9625      | NM_001080395 | AATK           |
| A_22_P00003842 | 4,58557 | 4,5803  | 1,003659566 | N/A             | 100129083 | NM_001256795 | LOC100129083   |
| A_22_P00000842 | 1,38586 | 1,3806  | 1,003652609 | N/A             | N/A       | N/A          | Inc-AGBL4-2    |
| A_21_P0009783  | 1,50215 | 1,49689 | 1,003652609 | N/A             | N/A       | N/A          | Inc-ZNF486-1   |
| A_22_P00003819 | 1,45173 | 1,44647 | 1,003652609 | ENST00000581533 | N/A       | N/A          | N/A            |
| A_23_P362759   | 1,66244 | 1,65719 | 1,003645652 | ENST00000428209 | 11107     | NM_018699    | PRDM5          |
| A_23_P378427   | 1,50246 | 1,49721 | 1,003645652 | ENST00000307844 | 147323    | NM_139171    | STARD6         |

|                |         |         |             |                 |           |              |                 |
|----------------|---------|---------|-------------|-----------------|-----------|--------------|-----------------|
| A_23_P89132    | 1,50097 | 1,49573 | 1,003638695 | ENST00000574002 | 7783      | NM_003460    | ZP2             |
| A_21_P0012811  | 1,68077 | 1,67555 | 1,003624782 | ENST00000513660 | N/A       | N/A          | N/A             |
| A_33_P3331351  | 1,56329 | 1,55808 | 1,003617825 | ENST00000503032 | N/A       | N/A          | N/A             |
| A_23_P170352   | 12,2911 | 12,2859 | 1,003610869 | ENST00000333676 | 6182      | NM_002949    | MRPL12          |
| A_33_P3350074  | 11,2906 | 11,2854 | 1,003610869 | ENST00000375261 | 60386     | NM_001126121 | SLC25A19        |
| A_21_P0005594  | 10,4163 | 10,4111 | 1,003610869 | N/A             | N/A       | N/A          | Inc-GNA12-1     |
| A_24_P255473   | 12,4576 | 12,4524 | 1,003610869 | ENST00000399149 | N/A       | N/A          | N/A             |
| A_21_P0004337  | 4,52106 | 4,51587 | 1,003603912 | N/A             | N/A       | N/A          | Inc-BNIP1-1     |
| A_21_P0004302  | 1,71942 | 1,71423 | 1,003603912 | ENST00000513418 | 4090      | N/A          | SMAD5           |
| A_24_P24002    | 3,38616 | 3,381   | 1,003583043 | ENST00000477971 | N/A       | N/A          | N/A             |
| A_22_P00012727 | 3,36367 | 3,35851 | 1,003583043 | ENST00000570919 | N/A       | N/A          | N/A             |
| A_22_P00007085 | 1,69658 | 1,69144 | 1,003569131 | N/A             | N/A       | N/A          | Inc-GLIS2-2     |
| A_33_P3390843  | 1,45059 | 1,44546 | 1,003562175 | N/A             | 100130386 | NR_028064    | LINC00552       |
| A_21_P0011444  | 1,61913 | 1,61402 | 1,003548262 | N/A             | N/A       | N/A          | XLOC_I2_005276  |
| A_23_P9823     | 12,1811 | 12,176  | 1,003541306 | ENST00000538698 | 22877     | NM_014938    | MLXIP           |
| A_19_P00320119 | 11,3879 | 11,3828 | 1,003541306 | N/A             | 55000     | NR_110492    | TUG1            |
| A_32_P171328   | 13,6983 | 13,6932 | 1,003541306 | ENST00000264552 | 27338     | NM_014501    | UBE2S           |
| A_22_P00013252 | 1,69406 | 1,68896 | 1,003541306 | N/A             | 100874204 | NR_046602    | ALDH1L1-AS1     |
| A_21_P0011944  | 1,45432 | 1,44923 | 1,00353435  | N/A             | N/A       | N/A          | XLOC_I2_008190  |
| A_21_P0005988  | 1,66006 | 1,65498 | 1,003527394 | N/A             | 101929582 | NR_121604    | LINC01241       |
| A_23_P47292    | 1,46462 | 1,45954 | 1,003527394 | ENST00000542305 | 9313      | NM_004771    | MMP20           |
| A_22_P00011044 | 1,68074 | 1,67566 | 1,003527394 | N/A             | N/A       | N/A          | Inc-NTN1-3      |
| A_21_P0013692  | 1,52124 | 1,51617 | 1,003520438 | ENST00000448570 | N/A       | N/A          | N/A             |
| A_22_P00003483 | 1,65545 | 1,65039 | 1,003513483 | N/A             | N/A       | N/A          | Inc-CCDC82-1    |
| A_22_P00025945 | 1,69721 | 1,69215 | 1,003513483 | N/A             | N/A       | N/A          | Inc-TMPRSS15-10 |
| A_22_P00024759 | 1,96175 | 1,9567  | 1,003506527 | N/A             | N/A       | DR033720     | Inc-C19orf12-3  |
| A_22_P00024124 | 1,54217 | 1,53713 | 1,003499571 | ENST00000427011 | N/A       | N/A          | N/A             |
| A_23_P56494    | 1,49335 | 1,48831 | 1,003499571 | ENST00000483641 | 151258    | NM_173512    | SLC38A11        |
| A_23_P403443   | 1,53542 | 1,53039 | 1,003492615 | ENST00000535402 | 283358    | NM_173593    | B4GALNT3        |
| A_33_P3272070  | 1,64683 | 1,6418  | 1,003492615 | ENST00000335238 | 283093    | NM_001005270 | OR4C12          |
| A_21_P0013778  | 1,45139 | 1,44636 | 1,003492615 | N/A             | 100131755 | NM_001256155 | ARMCX4          |
| A_23_P216756   | 1,70804 | 1,70302 | 1,00348566  | ENST00000291744 | 2220      | NM_004108    | FCN2            |
| A_33_P3413468  | 1,69841 | 1,6934  | 1,003478704 | ENST00000451436 | 60401     | NM_001242310 | EDA2R           |

|                |         |         |             |                 |           |           |                |
|----------------|---------|---------|-------------|-----------------|-----------|-----------|----------------|
| A_32_P194062   | 1,50006 | 1,49505 | 1,003478704 | ENST00000263321 | 7299      | NM_000372 | TYR            |
| A_22_P00014951 | 1,47157 | 1,46657 | 1,003471749 | ENST00000465933 | 101929159 | XR_249369 | LOC101929159   |
| A_22_P00008478 | 2,26923 | 2,26423 | 1,003471749 | ENST00000540533 | N/A       | N/A       | N/A            |
| A_21_P0009317  | 1,62505 | 1,62005 | 1,003471749 | ENST00000620903 | 284100    | NR_024178 | YWHAEP7        |
| A_21_P0005158  | 1,67846 | 1,67346 | 1,003471749 | N/A             | N/A       | N/A       | Inc-MBOAT1-3   |
| A_23_P438      | 1,66923 | 1,66425 | 1,003457838 | ENST00000442561 | 54900     | NM_017773 | LAX1           |
| A_21_P0009267  | 7,83533 | 7,83035 | 1,003457838 | ENST00000585484 | 101928104 | N/A       | LINC01482      |
| A_22_P00021112 | 1,45528 | 1,4503  | 1,003457838 | N/A             | N/A       | N/A       | Inc-LARS-1     |
| A_22_P00023293 | 1,67951 | 1,67455 | 1,003443927 | N/A             | 102723377 | NR_120672 | LOC102723377   |
| A_21_P0000745  | 1,4385  | 1,43354 | 1,003443927 | N/A             | 100506866 | NR_038271 | TTN-AS1        |
| A_22_P00007634 | 1,38372 | 1,37877 | 1,003436971 | N/A             | N/A       | N/A       | Inc-HERC1-1    |
| A_22_P00016986 | 1,51683 | 1,51188 | 1,003436971 | N/A             | N/A       | N/A       | Inc-TTC23-2    |
| A_33_P3268695  | 7,10876 | 7,10382 | 1,003430016 | ENST00000535216 | 84858     | NM_032772 | ZNF503         |
| A_23_P135007   | 1,5555  | 1,55057 | 1,003423061 | ENST00000625188 | 56656     | NM_019897 | OR2S2          |
| A_21_P0003514  | 1,77775 | 1,77283 | 1,003416106 | ENST00000510922 | N/A       | N/A       | N/A            |
| A_23_P213336   | 1,68247 | 1,67755 | 1,003416106 | ENST00000441680 | 2246      | NM_000800 | FGF1           |
| A_22_P00018532 | 1,35646 | 1,35155 | 1,003409151 | N/A             | N/A       | AA416704  | Inc-KCNG4-2    |
| A_23_P150590   | 1,55362 | 1,54872 | 1,003402196 | ENST00000279178 | 114571    | NM_080866 | SLC22A9        |
| A_33_P3245818  | 1,53579 | 1,53089 | 1,003402196 | ENST00000466449 | 80148     | AK126188  | PQLC1          |
| A_33_P3379056  | 1,65665 | 1,65176 | 1,003395241 | N/A             | N/A       | N/A       | N/A            |
| A_21_P0011038  | 1,50626 | 1,50137 | 1,003395241 | ENST00000540188 | 101928162 | NR_120463 | LOC101928162   |
| A_22_P00016607 | 1,45961 | 1,45473 | 1,003388286 | N/A             | N/A       | N/A       | Inc-TOB1-1     |
| A_33_P3405249  | 1,6778  | 1,67292 | 1,003388286 | ENST00000446429 | N/A       | N/A       | N/A            |
| A_22_P00023013 | 1,37064 | 1,36577 | 1,003381331 | ENST00000591158 | N/A       | N/A       | N/A            |
| A_32_P142818   | 6,23092 | 6,22606 | 1,003374376 | ENST00000361725 | 1745      | NM_178120 | DLX1           |
| A_21_P0007836  | 1,6148  | 1,60994 | 1,003374376 | N/A             | N/A       | N/A       | Inc-FAM113B-4  |
| A_22_P00007378 | 1,6761  | 1,67124 | 1,003374376 | N/A             | 104054148 | NR_126152 | LOC104054148   |
| A_19_P00321342 | 6,28241 | 6,27755 | 1,003374376 | ENST00000478913 | 203238    | AL832443  | CCDC171        |
| A_33_P3406961  | 5,63657 | 5,63172 | 1,003367421 | N/A             | N/A       | N/A       | XLOC_I2_013467 |
| A_22_P00001311 | 1,69858 | 1,69373 | 1,003367421 | N/A             | N/A       | N/A       | Inc-ANP32A-2   |
| A_22_P00004429 | 1,51312 | 1,50827 | 1,003367421 | N/A             | N/A       | N/A       | Inc-COQ9-1     |
| A_21_P0000989  | 1,5167  | 1,51185 | 1,003367421 | ENST00000443104 | 101927412 | NR_125940 | LOC101927412   |
| A_21_P0013613  | 1,35636 | 1,35151 | 1,003367421 | N/A             | N/A       | N/A       | XLOC_I2_015090 |

|                |         |         |             |                 |           |              |                |
|----------------|---------|---------|-------------|-----------------|-----------|--------------|----------------|
| A_23_P334328   | 1,51856 | 1,51372 | 1,003360466 | ENST00000483484 | 22798     | NM_007356    | LAMB4          |
| A_24_P191326   | 1,70628 | 1,70144 | 1,003360466 | ENST00000484290 | 4632      | NM_079420    | MYL1           |
| A_33_P3346062  | 1,36454 | 1,35971 | 1,003353511 | N/A             | N/A       | N/A          | N/A            |
| A_23_P412990   | 1,36048 | 1,35565 | 1,003353511 | ENST00000340177 | 11255     | NM_007232    | HRH3           |
| A_22_P00022238 | 1,51754 | 1,51271 | 1,003353511 | ENST00000495287 | 103344930 | NR_121649    | LINC01391      |
| A_22_P00008375 | 1,46752 | 1,46269 | 1,003353511 | ENST00000424017 | N/A       | N/A          | N/A            |
| A_22_P00013670 | 1,64476 | 1,63994 | 1,003346557 | ENST00000525429 | N/A       | N/A          | N/A            |
| A_21_P0012851  | 1,51826 | 1,51344 | 1,003346557 | N/A             | N/A       | N/A          | XLOC_I2_011793 |
| A_24_P328969   | 9,5391  | 9,5343  | 1,003332647 | ENST00000274496 | 81555     | NM_030799    | YIPF5          |
| A_22_P00014805 | 2,1569  | 2,15211 | 1,003325693 | ENST00000581183 | N/A       | N/A          | N/A            |
| A_21_P0005090  | 1,48677 | 1,48198 | 1,003325693 | N/A             | N/A       | N/A          | Inc-THBS2-7    |
| A_21_P0005969  | 1,47558 | 1,47081 | 1,003311784 | N/A             | N/A       | N/A          | Inc-RUNX1T1-4  |
| A_33_P3290065  | 1,61934 | 1,61457 | 1,003311784 | ENST00000614215 | 729159    | NM_001282301 | LOC729159      |
| A_21_P0000914  | 1,54035 | 1,53562 | 1,003283967 | ENST00000419450 | 101927244 | NR_125938    | LOC101927244   |
| A_21_P0008084  | 1,59648 | 1,59178 | 1,003263104 | N/A             | N/A       | N/A          | Inc-IRG1-1     |
| A_33_P3325748  | 1,63797 | 1,63327 | 1,003263104 | ENST00000407319 | 11078     | NM_138632    | TRIOBP         |
| A_21_P0012296  | 1,51833 | 1,51364 | 1,00325615  | N/A             | N/A       | N/A          | XLOC_I2_009510 |
| A_21_P0004214  | 1,37417 | 1,36948 | 1,00325615  | N/A             | N/A       | N/A          | Inc-ADAMTS16-3 |
| A_33_P3231342  | 1,44445 | 1,43977 | 1,003249196 | N/A             | N/A       | N/A          | N/A            |
| A_21_P0008457  | 1,50178 | 1,49711 | 1,003242242 | N/A             | N/A       | N/A          | Inc-MAP3K9-3   |
| A_33_P3231631  | 1,46995 | 1,46531 | 1,00322138  | ENST00000377169 | 442186    | NM_001005216 | OR2J3          |
| A_32_P324933   | 1,66471 | 1,66008 | 1,003214427 | N/A             | 283521    | NR_027047    | LINC00282      |
| A_21_P0009446  | 1,4661  | 1,46147 | 1,003214427 | ENST00000580378 | 645355    | N/A          | MIR3976HG      |
| A_33_P3213596  | 4,73697 | 4,73235 | 1,003207473 | ENST00000284483 | 23043     | NM_015028    | TNIK           |
| A_22_P00000962 | 1,63081 | 1,6262  | 1,003200519 | ENST00000381078 | N/A       | AK125751     | N/A            |
| A_22_P00008770 | 1,49574 | 1,49113 | 1,003200519 | ENST00000525309 | N/A       | BX118004     | N/A            |
| A_33_P3394065  | 1,53094 | 1,52633 | 1,003200519 | ENST00000422321 | 5305      | N/A          | PIP4K2A        |
| A_23_P255376   | 8,95637 | 8,95178 | 1,003186612 | ENST00000394650 | 55013     | NM_017918    | CCDC109B       |
| A_21_P0004217  | 1,38729 | 1,38273 | 1,003165752 | N/A             | N/A       | N/A          | Inc-KIAA0947-1 |
| A_21_P0006295  | 1,44881 | 1,44425 | 1,003165752 | N/A             | 101927916 | N/A          | LOC101927916   |
| A_22_P00025511 | 1,66296 | 1,65841 | 1,003158798 | N/A             | N/A       | DA504341     | Inc-CCNK-1     |
| A_22_P00006679 | 1,46075 | 1,4562  | 1,003158798 | N/A             | N/A       | N/A          | Inc-FPGT-1     |
| A_21_P0007517  | 1,69524 | 1,6907  | 1,003151845 | N/A             | N/A       | N/A          | Inc-CD9-2      |



|                |         |         |             |                 |           |              |                |
|----------------|---------|---------|-------------|-----------------|-----------|--------------|----------------|
| A_33_P3251257  | 1,50463 | 1,5001  | 1,003144892 | ENST00000619800 | N/A       | XM_005276719 | N/A            |
| A_21_P0002975  | 1,48878 | 1,48426 | 1,003137938 | N/A             | N/A       | N/A          | Inc-GPR27-1    |
| A_33_P3354434  | 12,4531 | 12,4486 | 1,003124032 | ENST00000503114 | 90933     | NM_033549    | TRIM41         |
| A_21_P0008949  | 6,00645 | 6,00196 | 1,003117079 | ENST00000571340 | N/A       | N/A          | N/A            |
| A_22_P00009991 | 1,60097 | 1,59648 | 1,003117079 | N/A             | N/A       | DA285471     | Inc-MLL5-1     |
| A_23_P1775     | 9,88661 | 9,88212 | 1,003117079 | ENST00000442480 | 1798      | NM_001382    | DPAGT1         |
| A_22_P00021502 | 1,69563 | 1,69115 | 1,003110126 | N/A             | 101929196 | NR_120348    | THSD4-AS1      |
| A_24_P99175    | 1,57662 | 1,57215 | 1,003103173 | ENST00000319374 | 283576    | NM_174976    | ZDHHC22        |
| A_23_P303072   | 1,52914 | 1,52467 | 1,003103173 | ENST00000340592 | 2890      | NM_000827    | GRIA1          |
| A_22_P00016222 | 1,64227 | 1,63781 | 1,00309622  | N/A             | N/A       | N/A          | Inc-TM6SF1-1   |
| A_22_P00023758 | 2,78085 | 2,77639 | 1,00309622  | N/A             | 102724883 | XR_424187    | LOC102724883   |
| A_22_P00005244 | 1,39957 | 1,39513 | 1,003082314 | N/A             | N/A       | N/A          | Inc-DLX2-5     |
| A_22_P00025562 | 1,67949 | 1,67505 | 1,003082314 | N/A             | N/A       | N/A          | Inc-KCNMA1-1   |
| A_22_P00020793 | 1,50996 | 1,50552 | 1,003082314 | N/A             | N/A       | N/A          | Inc-LACC1-1    |
| A_22_P00017833 | 1,4889  | 1,48446 | 1,003082314 | ENST00000448909 | N/A       | N/A          | N/A            |
| A_21_P0012494  | 1,67485 | 1,67043 | 1,003068408 | N/A             | N/A       | N/A          | XLOC_I2_009790 |
| A_21_P0009432  | 1,36462 | 1,36021 | 1,003061456 | ENST00000577408 | 101927715 | NR_104127    | LINC01029      |
| A_22_P00002148 | 1,50609 | 1,50168 | 1,003061456 | ENST00000393264 | N/A       | AK096774     | N/A            |
| A_23_P390139   | 1,47237 | 1,46796 | 1,003061456 | ENST00000297459 | 157753    | NM_153015    | TMEM74         |
| A_33_P3403204  | 1,47962 | 1,47522 | 1,003054503 | ENST00000359999 | 286204    | AK123000     | CRB2           |
| A_23_P62298    | 1,60249 | 1,59809 | 1,003054503 | ENST00000612180 | 54413     | NM_018977    | NLGN3          |
| A_33_P3384657  | 1,49246 | 1,48809 | 1,003033645 | ENST00000472151 | 2073      | N/A          | ERCC5          |
| A_33_P3695899  | 4,69416 | 4,68979 | 1,003033645 | N/A             | 441072    | NR_102755    | FLJ31104       |
| A_22_P00024739 | 1,69611 | 1,69174 | 1,003033645 | N/A             | N/A       | N/A          | Inc-FAR1-1     |
| A_33_P3340828  | 1,53997 | 1,5356  | 1,003033645 | N/A             | N/A       | N/A          | N/A            |
| A_21_P0010716  | 1,69346 | 1,6891  | 1,003026693 | N/A             | N/A       | N/A          | Inc-PHGDH-1    |
| A_23_P127418   | 1,52306 | 1,51871 | 1,00301974  | ENST00000257068 | 4544      | NM_005959    | MTNR1B         |
| A_22_P00024863 | 1,60791 | 1,60356 | 1,00301974  | N/A             | N/A       | N/A          | Inc-C17orf67-1 |
| A_22_P00021655 | 1,71019 | 1,70586 | 1,003005836 | N/A             | N/A       | N/A          | Inc-GPX5-1     |
| A_21_P0013824  | 1,38158 | 1,37725 | 1,003005836 | N/A             | N/A       | N/A          | XLOC_I2_015766 |
| A_22_P00009050 | 1,46674 | 1,46241 | 1,003005836 | ENST00000469196 | N/A       | N/A          | N/A            |
| A_23_P357983   | 1,68379 | 1,67946 | 1,003005836 | ENST00000423210 | 161003    | NM_145286    | STOML3         |
| A_33_P3253832  | 8,52201 | 8,51768 | 1,003005836 | N/A             | N/A       | N/A          | N/A            |

|                |         |         |             |                 |           |              |                  |
|----------------|---------|---------|-------------|-----------------|-----------|--------------|------------------|
| A_22_P00005170 | 1,46686 | 1,46254 | 1,002998884 | ENST00000553318 | N/A       | N/A          | N/A              |
| A_33_P3356990  | 1,39197 | 1,38765 | 1,002998884 | ENST00000415645 | 23117     | NM_130464    | NPIP3            |
| A_21_P0012578  | 1,46707 | 1,46276 | 1,002991931 | N/A             | N/A       | N/A          | XLOC_I2_010602   |
| A_21_P0006668  | 1,67745 | 1,67315 | 1,002984979 | ENST00000366376 | N/A       | N/A          | N/A              |
| A_22_P00017338 | 1,50945 | 1,50519 | 1,002957171 | N/A             | N/A       | AL832887     | Inc-USP40-1      |
| A_33_P3263890  | 1,5057  | 1,50144 | 1,002957171 | ENST00000239461 | 5396      | NM_006902    | PRRX1            |
| A_33_P3403242  | 1,47048 | 1,46623 | 1,002950219 | N/A             | N/A       | N/A          | N/A              |
| A_33_P3270404  | 9,77052 | 9,76627 | 1,002950219 | ENST00000361242 | 79065     | NM_001077198 | ATG9A            |
| A_22_P00000247 | 1,51179 | 1,50755 | 1,002943267 | N/A             | N/A       | N/A          | Inc-AC006372.1-1 |
| A_33_P3230676  | 2,336   | 2,33176 | 1,002943267 | N/A             | N/A       | N/A          | N/A              |
| A_23_P131208   | 5,28337 | 5,27913 | 1,002943267 | ENST00000417972 | 4929      | NM_006186    | NR4A2            |
| A_23_P318890   | 3,185   | 3,18076 | 1,002943267 | ENST00000304646 | 4992      | NM_012360    | OR1F1            |
| A_21_P0008132  | 1,68788 | 1,68366 | 1,002929363 | N/A             | N/A       | N/A          | Inc-USP12-1      |
| A_24_P12136    | 3,34572 | 3,3415  | 1,002929363 | ENST00000613039 | 170591    | NM_130772    | S100Z            |
| A_21_P0011571  | 1,49465 | 1,49044 | 1,002922412 | N/A             | N/A       | N/A          | XLOC_I2_006003   |
| A_22_P00013778 | 1,53438 | 1,53017 | 1,002922412 | ENST00000540171 | 101929949 | XR_253316    | LOC101929949     |
| A_23_P200216   | 13,2977 | 13,2935 | 1,00291546  | ENST00000495868 | 4116      | NM_002370    | MAGOH            |
| A_23_P209055   | 1,45293 | 1,44873 | 1,00291546  | ENST00000594250 | 933       | NM_001771    | CD22             |
| A_24_P68247    | 6,2579  | 6,25371 | 1,002908508 | ENST00000354241 | 89122     | NM_033017    | TRIM4            |
| A_21_P0012715  | 1,40289 | 1,3987  | 1,002908508 | ENST00000506739 | 152742    | NR_033931    | LINC01085        |
| A_22_P00025143 | 1,51463 | 1,51045 | 1,002901557 | N/A             | 102031319 | NR_104163    | LOC102031319     |
| A_33_P6601265  | 1,41312 | 1,40894 | 1,002901557 | ENST00000533358 | 51144     | XR_252883    | HSD17B12         |
| A_21_P0008170  | 1,52756 | 1,52338 | 1,002901557 | N/A             | N/A       | N/A          | Inc-DIAPH3-4     |
| A_21_P0008146  | 1,6824  | 1,67824 | 1,002887654 | N/A             | N/A       | N/A          | Inc-LHFP-1       |
| A_22_P00002470 | 1,6126  | 1,60845 | 1,002880702 | N/A             | N/A       | N/A          | Inc-C15orf48-1   |
| A_33_P3236906  | 1,51008 | 1,50594 | 1,002873751 | ENST00000421378 | 100131814 | NR_026805    | LINC00271        |
| A_22_P00010518 | 1,51419 | 1,51006 | 1,002866799 | N/A             | N/A       | N/A          | Inc-NBPF9-2      |
| A_22_P00004600 | 1,48966 | 1,48553 | 1,002866799 | ENST00000522799 | N/A       | N/A          | N/A              |
| A_21_P0010145  | 1,53824 | 1,53412 | 1,002859848 | ENST00000433210 | N/A       | N/A          | N/A              |
| A_33_P3248163  | 1,71039 | 1,70628 | 1,002852897 | ENST00000272395 | 129868    | NM_138800    | TRIM43           |
| A_33_P3251148  | 16,8079 | 16,8038 | 1,002845945 | ENST00000329563 | 706       | NM_001256530 | TSPO             |
| A_21_P0013556  | 10,2617 | 10,2576 | 1,002845945 | N/A             | N/A       | N/A          | XLOC_I2_014711   |
| A_21_P0001667  | 1,51437 | 1,51027 | 1,002845945 | N/A             | N/A       | N/A          | Inc-CLIC4-2      |

|                |         |         |             |                 |           |              |                |
|----------------|---------|---------|-------------|-----------------|-----------|--------------|----------------|
| A_33_P3372954  | 1,51798 | 1,51388 | 1,002845945 | N/A             | 387720    | XR_111130    | LOC387720      |
| A_33_P3366859  | 6,22817 | 6,22408 | 1,002838994 | ENST00000470054 | 574       | NM_001187    | BAGE           |
| A_22_P00009077 | 1,62748 | 1,62339 | 1,002838994 | N/A             | N/A       | N/A          | Inc-LGALS12-2  |
| A_22_P00002108 | 1,47047 | 1,46639 | 1,002832043 | ENST00000519400 | N/A       | N/A          | N/A            |
| A_33_P3322892  | 3,79712 | 3,79306 | 1,002818141 | ENST00000346693 | 83692     | BC025729     | CD99L2         |
| A_21_P0003621  | 1,65412 | 1,65006 | 1,002818141 | N/A             | N/A       | N/A          | Inc-PARM1-1    |
| A_21_P0009277  | 1,66863 | 1,66457 | 1,002818141 | N/A             | N/A       | N/A          | Inc-SEPT9-1    |
| A_24_P265088   | 2,64055 | 2,6365  | 1,00281119  | ENST00000393758 | 57595     | AK127016     | PDZD4          |
| A_33_P3235496  | 1,53672 | 1,53268 | 1,002804239 | ENST00000457108 | N/A       | N/A          | N/A            |
| A_23_P55544    | 1,36744 | 1,3634  | 1,002804239 | ENST00000439986 | 147372    | NM_133459    | CCBE1          |
| A_23_P118854   | 1,63546 | 1,63143 | 1,002797288 | N/A             | 8688      | NM_003770    | KRT37          |
| A_19_P00316361 | 1,57938 | 1,57536 | 1,002790337 | ENST00000502518 | N/A       | N/A          | N/A            |
| A_21_P0008393  | 1,61874 | 1,61473 | 1,002783387 | ENST00000555725 | 100507277 | XR_110252    | LOC100507277   |
| A_23_P210503   | 1,61614 | 1,61214 | 1,002776436 | ENST00000336443 | 57119     | NM_001302861 | EPPIN          |
| A_33_P3255359  | 1,44994 | 1,44596 | 1,002762535 | N/A             | N/A       | N/A          | N/A            |
| A_24_P282237   | 6,5269  | 6,52292 | 1,002762535 | ENST00000274891 | 5558      | NM_000947    | PRIM2          |
| A_21_P0009383  | 1,65746 | 1,65349 | 1,002755584 | N/A             | N/A       | N/A          | Inc-DHRS7B-2   |
| A_22_P00010573 | 1,46446 | 1,46051 | 1,002741683 | ENST00000456588 | 103724386 | NR_125770    | LINC00377      |
| A_22_P00007040 | 1,6533  | 1,64935 | 1,002741683 | N/A             | N/A       | N/A          | Inc-GJA5-2     |
| A_21_P0002281  | 1,53663 | 1,53269 | 1,002734732 | N/A             | N/A       | N/A          | Inc-GLI2-1     |
| A_22_P00023029 | 1,46374 | 1,45981 | 1,002727782 | N/A             | 100129620 | NR_033940    | LOC100129620   |
| A_21_P0002626  | 1,6492  | 1,64527 | 1,002727782 | ENST00000453965 | N/A       | N/A          | N/A            |
| A_21_P0008037  | 1,62919 | 1,62527 | 1,002720832 | N/A             | 101928839 | XR_253149    | LOC101928839   |
| A_22_P00023707 | 1,53179 | 1,52787 | 1,002720832 | ENST00000444112 | N/A       | N/A          | N/A            |
| A_22_P00016943 | 1,63203 | 1,62812 | 1,002713881 | N/A             | 101927447 | XR_244442    | LOC101927447   |
| A_33_P3410507  | 8,68975 | 8,68584 | 1,002713881 | ENST00000612450 | 9859      | NM_014812    | CEP170         |
| A_23_P38457    | 10,3741 | 10,3702 | 1,002706931 | ENST00000536202 | 57551     | NM_020791    | TAOK1          |
| A_24_P928473   | 1,62077 | 1,61689 | 1,002693031 | ENST00000437003 | N/A       | AK092832     | N/A            |
| A_21_P0012490  | 1,61774 | 1,61386 | 1,002693031 | N/A             | N/A       | N/A          | XLOC_I2_009614 |
| A_22_P00015137 | 1,51392 | 1,51004 | 1,002693031 | ENST00000568862 | N/A       | AK023940     | N/A            |
| A_21_P0008673  | 1,68524 | 1,68137 | 1,002686081 | N/A             | N/A       | N/A          | Inc-FURIN-1    |
| A_21_P0006419  | 1,45314 | 1,44929 | 1,002672181 | N/A             | N/A       | N/A          | Inc-SYTL5-1    |
| A_33_P3332287  | 1,63073 | 1,62688 | 1,002672181 | ENST00000449051 | N/A       | XR_133387    | N/A            |

|                |         |         |             |                 |           |              |                |
|----------------|---------|---------|-------------|-----------------|-----------|--------------|----------------|
| A_21_P0005744  | 1,66706 | 1,66321 | 1,002672181 | N/A             | N/A       | N/A          | Inc-GRHL2-5    |
| A_22_P00005840 | 2,37474 | 2,3709  | 1,002665231 | N/A             | N/A       | N/A          | Inc-ERGIC1-2   |
| A_33_P3323258  | 1,54016 | 1,53632 | 1,002665231 | N/A             | N/A       | N/A          | N/A            |
| A_21_P0008054  | 1,56548 | 1,56165 | 1,002658281 | N/A             | N/A       | N/A          | Inc-SLC25A15-1 |
| A_22_P00003421 | 1,5352  | 1,53137 | 1,002658281 | N/A             | 101927482 | NR_110225    | LOC101927482   |
| A_33_P3388691  | 1,64255 | 1,63872 | 1,002658281 | ENST00000417209 | 431704    | NM_001039152 | RGS21          |
| A_21_P0006790  | 1,36299 | 1,35916 | 1,002658281 | ENST00000425050 | 103695365 | NR_125760    | LINC01435      |
| A_33_P3261433  | 9,72121 | 9,71739 | 1,002651331 | N/A             | N/A       | N/A          | N/A            |
| A_33_P3313025  | 1,57062 | 1,56681 | 1,002644381 | N/A             | N/A       | N/A          | N/A            |
| A_22_P00008212 | 14,4495 | 14,4457 | 1,002637431 | ENST00000552182 | N/A       | DB066917     | N/A            |
| A_21_P0009978  | 1,50238 | 1,49859 | 1,002630481 | N/A             | N/A       | N/A          | Inc-MC3R-3     |
| A_21_P0007673  | 1,46531 | 1,46152 | 1,002630481 | N/A             | N/A       | N/A          | Inc-NOC4L-2    |
| A_22_P00020409 | 1,67524 | 1,67145 | 1,002630481 | ENST00000430058 | 101928337 | XR_252621    | PTCSC2         |
| A_21_P0003272  | 1,6036  | 1,59982 | 1,002623532 | ENST00000457815 | N/A       | N/A          | N/A            |
| A_23_P406448   | 1,70467 | 1,70089 | 1,002623532 | ENST00000243298 | 51209     | NM_016370    | RAB9B          |
| A_21_P0012881  | 1,61813 | 1,61435 | 1,002623532 | N/A             | N/A       | N/A          | XLOC_I2_011908 |
| A_22_P00009870 | 1,69208 | 1,6883  | 1,002623532 | ENST00000508313 | 100506085 | N/A          | LOC100506085   |
| A_21_P0000937  | 1,64873 | 1,64496 | 1,002616582 | ENST00000496488 | N/A       | N/A          | N/A            |
| A_22_P00005912 | 7,15817 | 7,15442 | 1,002602683 | ENST00000518886 | N/A       | N/A          | N/A            |
| A_22_P00003807 | 1,52828 | 1,52454 | 1,002595734 | ENST00000512748 | 102546229 | NR_105044    | LOC102546229   |
| A_33_P3270793  | 3,82251 | 3,81877 | 1,002595734 | ENST00000331243 | 151354    | NM_145175    | FAM84A         |
| A_21_P0006595  | 1,53054 | 1,52681 | 1,002588784 | ENST00000419158 | 101929148 | NR_110413    | LOC101929148   |
| A_21_P0008233  | 1,62354 | 1,61984 | 1,002567936 | N/A             | N/A       | N/A          | Inc-PABPC3-1   |
| A_23_P252641   | 13,8043 | 13,8006 | 1,002567936 | ENST00000419745 | 9527      | NM_001007024 | GOSR1          |
| A_21_P0002891  | 1,69243 | 1,68876 | 1,002547088 | N/A             | N/A       | N/A          | Inc-DHX36-2    |
| A_21_P0012369  | 1,46092 | 1,45725 | 1,002547088 | N/A             | N/A       | N/A          | XLOC_I2_009652 |
| A_21_P0006647  | 1,68105 | 1,67738 | 1,002547088 | ENST00000418270 | N/A       | N/A          | N/A            |
| A_23_P416666   | 1,69194 | 1,68828 | 1,002540139 | ENST00000369352 | 84694     | NM_032602    | GJA10          |
| A_21_P0009492  | 1,68432 | 1,68066 | 1,002540139 | N/A             | N/A       | N/A          | Inc-SERPINB8-1 |
| A_21_P0003433  | 1,61485 | 1,6112  | 1,00253319  | ENST00000508790 | N/A       | N/A          | N/A            |
| A_33_P3265264  | 1,63102 | 1,62738 | 1,002526241 | N/A             | N/A       | N/A          | N/A            |
| A_24_P102293   | 1,66792 | 1,66428 | 1,002526241 | ENST00000325089 | 26050     | NM_015567    | SLITRK5        |
| A_21_P0010667  | 1,46121 | 1,45757 | 1,002526241 | N/A             | N/A       | N/A          | XLOC_I2_001288 |

|                |         |         |             |                 |           |              |                |
|----------------|---------|---------|-------------|-----------------|-----------|--------------|----------------|
| A_22_P00022619 | 1,46393 | 1,46029 | 1,002526241 | ENST00000422017 | N/A       | N/A          | N/A            |
| A_21_P0005330  | 1,66019 | 1,65656 | 1,002519292 | ENST00000420146 | N/A       | N/A          | N/A            |
| A_24_P192434   | 8,32997 | 8,32634 | 1,002519292 | ENST00000276602 | 7013      | NM_017489    | TERF1          |
| A_21_P0013110  | 1,68561 | 1,68198 | 1,002519292 | N/A             | N/A       | N/A          | XLOC_I2_013153 |
| A_22_P00018218 | 1,4416  | 1,43797 | 1,002519292 | N/A             | N/A       | N/A          | Inc-ZNF672-1   |
| A_21_P0006137  | 1,46469 | 1,46108 | 1,002505395 | N/A             | N/A       | N/A          | Inc-ANKRD18B-3 |
| A_33_P3222947  | 1,61408 | 1,61047 | 1,002505395 | ENST00000620492 | 283953    | NM_001146336 | TMEM114        |
| A_21_P0006192  | 1,67399 | 1,67039 | 1,002498446 | N/A             | N/A       | N/A          | Inc-KRT8P11-1  |
| A_22_P00004156 | 1,45653 | 1,45293 | 1,002498446 | ENST00000541404 | N/A       | N/A          | N/A            |
| A_23_P127676   | 9,95991 | 9,95633 | 1,002484548 | ENST00000361367 | 9646      | NM_014633    | CTR9           |
| A_22_P00019243 | 1,39653 | 1,39295 | 1,002484548 | N/A             | N/A       | BF799184     | Inc-CLIC4-1    |
| A_21_P0007714  | 1,6581  | 1,65452 | 1,002484548 | N/A             | N/A       | N/A          | Inc-CTDSP2-3   |
| A_23_P376727   | 1,67706 | 1,67349 | 1,0024776   | ENST00000356140 | 130013    | NM_138326    | ACMSD          |
| A_21_P0014536  | 1,65395 | 1,65038 | 1,0024776   | N/A             | 101928817 | XR_245803    | LOC101928817   |
| A_22_P00014785 | 1,35687 | 1,35331 | 1,002470651 | N/A             | N/A       | BG199780     | Inc-SLC38A8-4  |
| A_21_P0013853  | 3,90303 | 3,89949 | 1,002456754 | N/A             | N/A       | N/A          | Inc-XIAP-1     |
| A_21_P0001660  | 1,66568 | 1,66214 | 1,002456754 | N/A             | N/A       | N/A          | Inc-DFFB-3     |
| A_22_P00008588 | 3,73756 | 3,73402 | 1,002456754 | N/A             | N/A       | N/A          | Inc-KCTD20-1   |
| A_22_P00010041 | 1,47481 | 1,47128 | 1,002449805 | N/A             | N/A       | BQ943474     | Inc-MNT-1      |
| A_33_P3209537  | 7,52508 | 7,52157 | 1,002435909 | ENST00000609967 | 57593     | NM_001110514 | EBF4           |
| A_23_P116235   | 16,448  | 16,4445 | 1,00242896  | ENST00000407067 | 4192      | NM_001012334 | MDK            |
| A_33_P3318027  | 14,0398 | 14,0363 | 1,00242896  | ENST00000493079 | 1460      | NM_001320    | CSNK2B         |
| A_33_P3331150  | 1,53465 | 1,53116 | 1,002422012 | ENST00000390606 | N/A       | L03830       | N/A            |
| A_33_P3224181  | 1,53305 | 1,52957 | 1,002415064 | ENST00000567304 | N/A       | N/A          | N/A            |
| A_21_P0008039  | 3,27483 | 3,27136 | 1,002408116 | N/A             | N/A       | N/A          | Inc-WASF3-1    |
| A_21_P0000729  | 1,65534 | 1,65187 | 1,002408116 | ENST00000555721 | 100506172 | N/A          | LINC01568      |
| A_22_P00008917 | 1,65258 | 1,64911 | 1,002408116 | ENST00000538219 | N/A       | AA345637     | N/A            |
| A_24_P156501   | 1,6112  | 1,60776 | 1,002387271 | ENST00000522192 | 1879      | NM_024007    | EBF1           |
| A_33_P3324186  | 6,24051 | 6,23707 | 1,002387271 | N/A             | 642366    | NR_046243    | LOC642366      |
| A_21_P0006256  | 1,44728 | 1,44385 | 1,002380323 | N/A             | N/A       | N/A          | Inc-PTPRD-5    |
| A_33_P3420941  | 1,59774 | 1,59432 | 1,002373375 | N/A             | 439950    | NR_046108    | CELF2-AS2      |
| A_23_P206806   | 1,52855 | 1,52513 | 1,002373375 | ENST00000358164 | 3683      | NM_002209    | ITGAL          |
| A_22_P00004729 | 1,38784 | 1,38443 | 1,002366427 | N/A             | N/A       | N/A          | Inc-CTIF-2     |

|                |         |         |             |                 |           |              |                   |
|----------------|---------|---------|-------------|-----------------|-----------|--------------|-------------------|
| A_22_P00009061 | 1,75185 | 1,74844 | 1,002366427 | N/A             | N/A       | N/A          | Inc-LEO1-1        |
| A_21_P0014099  | 3,34644 | 3,34305 | 1,002352532 | N/A             | 100507554 | XR_108428    | LOC100507554      |
| A_22_P00008575 | 1,68696 | 1,68357 | 1,002352532 | ENST00000430519 | N/A       | N/A          | N/A               |
| A_21_P0004408  | 1,48208 | 1,4787  | 1,002345584 | N/A             | N/A       | N/A          | Inc-MRPS27-1      |
| A_33_P3417976  | 1,62268 | 1,6193  | 1,002345584 | ENST00000389594 | 440184    | NR_110308    | LINC00238         |
| A_21_P0007553  | 1,66234 | 1,65897 | 1,002338636 | N/A             | N/A       | N/A          | Inc-ANP32D-1      |
| A_33_P3265920  | 7,33891 | 7,33555 | 1,002331689 | ENST00000430976 | 5775      | NM_002830    | PTPN4             |
| A_21_P0009201  | 1,47445 | 1,47109 | 1,002331689 | ENST00000584805 | 101927666 | NR_110809    | LOC101927666      |
| A_21_P0007841  | 1,38961 | 1,38626 | 1,002324741 | N/A             | N/A       | N/A          | Inc-GLIPR1L1-1    |
| A_22_P00009233 | 1,46198 | 1,45864 | 1,002317794 | N/A             | N/A       | N/A          | Inc-LRGUK-1       |
| A_21_P0008078  | 1,37022 | 1,36689 | 1,002310846 | N/A             | N/A       | N/A          | Inc-AL445989.1-19 |
| A_24_P941353   | 1,6548  | 1,65149 | 1,002296951 | ENST00000379145 | 9468      | NM_004845    | PCYT1B            |
| A_23_P2181     | 8,85103 | 8,84772 | 1,002296951 | ENST00000526084 | 51700     | NM_016229    | CYB5R2            |
| A_24_P358425   | 6,36728 | 6,36398 | 1,002290004 | ENST00000469247 | 253635    | NM_174931    | GPATCH11          |
| A_33_P3748714  | 5,92463 | 5,92134 | 1,002283056 | ENST00000327671 | 84750     | NM_032664    | FUT10             |
| A_22_P00024370 | 1,46103 | 1,45775 | 1,002276109 | ENST00000455977 | 103752583 | N/A          | LINC01075         |
| A_24_P124988   | 1,52662 | 1,52335 | 1,002269162 | ENST00000434739 | 342096    | NM_001038640 | GOLGA6A           |
| A_22_P00016155 | 1,56188 | 1,55861 | 1,002269162 | N/A             | 100506195 | NR_038950    | LARGE-AS1         |
| A_33_P3342146  | 1,68908 | 1,68581 | 1,002269162 | N/A             | N/A       | N/A          | N/A               |
| A_21_P0014596  | 1,53042 | 1,52716 | 1,002262215 | N/A             | 101927944 | NR_120630    | FAM53B-AS1        |
| A_21_P0013017  | 1,62227 | 1,61901 | 1,002262215 | N/A             | N/A       | N/A          | XLOC_I2_012418    |
| A_22_P00009252 | 1,68057 | 1,67731 | 1,002262215 | ENST00000389484 | 53353     | NM_018557    | LRP1B             |
| A_21_P0011261  | 1,4545  | 1,45124 | 1,002262215 | N/A             | N/A       | N/A          | XLOC_I2_004327    |
| A_21_P0009302  | 2,73138 | 2,72813 | 1,002255268 | ENST00000395667 | 374286    | NM_001282540 | CDRT1             |
| A_22_P00020822 | 1,68717 | 1,68393 | 1,002248321 | ENST00000522106 | N/A       | XR_113143    | N/A               |
| A_24_P402825   | 1,69144 | 1,68821 | 1,002241374 | ENST00000478261 | 55799     | NM_018398    | CACNA2D3          |
| A_33_P3401586  | 1,55773 | 1,5545  | 1,002241374 | ENST00000480514 | 100130771 | NR_027068    | EFCAB10           |
| A_21_P0009939  | 1,54832 | 1,5451  | 1,002234427 | N/A             | N/A       | N/A          | Inc-SNRPB2-1      |
| A_21_P0014087  | 1,55032 | 1,54711 | 1,00222748  | N/A             | 100506405 | XR_108393    | LOC100506405      |
| A_22_P00015483 | 1,60907 | 1,60586 | 1,00222748  | ENST00000444745 | 102723427 | N/A          | LOC102723427      |
| A_21_P0014090  | 1,51057 | 1,50737 | 1,002220533 | N/A             | 101927055 | NR_120594    | LOC101927055      |
| A_24_P25080    | 11,147  | 11,1438 | 1,002220533 | ENST00000616550 | 220869    | NM_001024916 | CBWD5             |
| A_22_P00019921 | 1,68876 | 1,68557 | 1,002213586 | ENST00000505632 | N/A       | N/A          | N/A               |

|                |         |         |             |                 |           |              |                |
|----------------|---------|---------|-------------|-----------------|-----------|--------------|----------------|
| A_33_P3344678  | 1,52118 | 1,518   | 1,002206639 | ENST00000438986 | 729159    | NM_001282301 | LOC729159      |
| A_24_P608268   | 1,50062 | 1,49745 | 1,002199692 | ENST00000390636 | N/A       | U21252       | N/A            |
| A_21_P0001758  | 1,68208 | 1,67891 | 1,002199692 | N/A             | 100505832 | XR_248694    | PROX1-AS1      |
| A_21_P0000853  | 1,69578 | 1,69262 | 1,002192746 | N/A             | 100506409 | NR_038962    | ELOVL2-AS1     |
| A_21_P0007227  | 1,50977 | 1,50663 | 1,002178852 | N/A             | N/A       | N/A          | Inc-TPCN2-4    |
| A_21_P0005336  | 1,61964 | 1,6165  | 1,002178852 | ENST00000438969 | N/A       | N/A          | N/A            |
| A_21_P0011254  | 1,71457 | 1,71143 | 1,002178852 | ENST00000504119 | 100507043 | NR_038861    | TUNAR          |
| A_33_P3283734  | 1,51067 | 1,50753 | 1,002178852 | N/A             | N/A       | N/A          | N/A            |
| A_21_P0014532  | 1,653   | 1,64988 | 1,002164959 | N/A             | N/A       | N/A          | N/A            |
| A_21_P0012916  | 1,51032 | 1,50721 | 1,002158013 | N/A             | N/A       | N/A          | XLOC_I2_012135 |
| A_33_P3271241  | 14,2201 | 14,217  | 1,002151066 | ENST00000373230 | 5464      | NM_021129    | PPA1           |
| A_24_P419309   | 10,5443 | 10,5412 | 1,002151066 | ENST00000491106 | 9410      | NM_004814    | SNRNP40        |
| A_33_P3343350  | 1,49748 | 1,49439 | 1,00214412  | ENST00000436781 | N/A       | N/A          | N/A            |
| A_22_P00011781 | 1,65123 | 1,64815 | 1,002137174 | N/A             | N/A       | N/A          | Inc-PFKP-7     |
| A_22_P00001936 | 1,52193 | 1,51885 | 1,002137174 | N/A             | N/A       | DB129520     | Inc-BARD1-1    |
| A_23_P167479   | 1,70724 | 1,70417 | 1,002130228 | ENST00000505432 | 27190     | NM_014443    | IL17B          |
| A_21_P0010306  | 1,51071 | 1,50764 | 1,002130228 | ENST00000602892 | 388815    | N/A          | MIR99AHG       |
| A_21_P0010102  | 1,51052 | 1,50746 | 1,002123281 | N/A             | N/A       | N/A          | Inc-PPDPF-1    |
| A_22_P00009742 | 1,70069 | 1,69763 | 1,002123281 | ENST00000441255 | 100507195 | NR_120458    | LOC100507195   |
| A_22_P00000965 | 1,6867  | 1,68364 | 1,002123281 | N/A             | 101929239 | NR_110871    | LOC101929239   |
| A_22_P00003100 | 1,46594 | 1,46288 | 1,002123281 | ENST00000521623 | N/A       | N/A          | N/A            |
| A_33_P3332596  | 1,48882 | 1,48576 | 1,002123281 | ENST00000565545 | N/A       | BX471465     | N/A            |
| A_32_P14582    | 1,68635 | 1,6833  | 1,002116335 | ENST00000497718 | 388503    | N/A          | C3P1           |
| A_24_P601972   | 8,04481 | 8,04177 | 1,002109389 | ENST00000398622 | 339804    | NM_001143959 | C2orf74        |
| A_23_P17438    | 1,50661 | 1,50357 | 1,002109389 | ENST00000371028 | 1908      | NM_207032    | EDN3           |
| A_22_P00012911 | 1,69013 | 1,68709 | 1,002109389 | N/A             | N/A       | AA682775     | Inc-RBMXL3-1   |
| A_22_P00013262 | 1,49056 | 1,48753 | 1,002102443 | N/A             | 101410536 | NR_120507    | EVX1-AS        |
| A_21_P0001870  | 1,51027 | 1,50724 | 1,002102443 | ENST00000412986 | 101927533 | XR_245013    | LOC101927533   |
| A_24_P158718   | 7,38106 | 7,37803 | 1,002102443 | ENST00000227451 | 23220     | NM_015177    | DTX4           |
| A_33_P3500631  | 1,53617 | 1,53315 | 1,002095497 | N/A             | 641364    | NR_038380    | SLC7A11-AS1    |
| A_21_P0010081  | 1,69355 | 1,69054 | 1,002088551 | N/A             | N/A       | N/A          | Inc-SPTLC3-1   |
| A_33_P3630777  | 1,65129 | 1,64828 | 1,002088551 | ENST00000443854 | N/A       | AJ301561     | N/A            |
| A_22_P00022093 | 1,63599 | 1,63299 | 1,002081605 | N/A             | 100885795 | NR_048543    | LARS2-AS1      |

|                |         |         |             |                 |           |              |                    |
|----------------|---------|---------|-------------|-----------------|-----------|--------------|--------------------|
| A_22_P00008120 | 1,66912 | 1,66612 | 1,002081605 | N/A             | 101928080 | XR_424103    | LOC101928080       |
| A_23_P33072    | 10,7174 | 10,7144 | 1,002081605 | ENST00000532522 | 84232     | NM_032272    | MAF1               |
| A_33_P3278789  | 1,50887 | 1,50587 | 1,002081605 | ENST00000373227 | 83795     | NM_001135106 | KCNK16             |
| A_23_P44760    | 9,12142 | 9,11843 | 1,002074659 | ENST00000409792 | 29072     | NM_014159    | SETD2              |
| A_33_P3365202  | 1,68923 | 1,68625 | 1,002067713 | ENST00000369657 | N/A       | N/A          | N/A                |
| A_33_P3400673  | 1,52949 | 1,52651 | 1,002067713 | ENST00000379668 | 390321    | NM_001005182 | OR6C1              |
| A_23_P325155   | 1,64653 | 1,64355 | 1,002067713 | ENST00000440122 | 131450    | NM_138939    | CD200R1            |
| A_21_P0005545  | 5,63203 | 5,62905 | 1,002067713 | N/A             | N/A       | N/A          | Inc-XRCC2-4        |
| A_33_P3251552  | 1,59722 | 1,59425 | 1,002060768 | ENST00000217260 | 343637    | NM_001029871 | RSPO4              |
| A_21_P0011144  | 1,68403 | 1,68106 | 1,002060768 | ENST00000428983 | N/A       | N/A          | N/A                |
| A_22_P00008452 | 1,61264 | 1,60968 | 1,002053822 | ENST00000565127 | N/A       | N/A          | N/A                |
| A_33_P3261595  | 1,37379 | 1,37084 | 1,002046876 | ENST00000338682 | 340120    | NM_001004441 | ANKRD34B           |
| A_22_P00007309 | 1,48972 | 1,48677 | 1,002046876 | ENST00000445340 | 51362     | R69497       | CDC40              |
| A_33_P3608210  | 1,69051 | 1,68756 | 1,002046876 | N/A             | 554202    | NR_027054    | MIR31HG            |
| A_22_P00021721 | 1,71609 | 1,71314 | 1,002046876 | ENST00000498630 | 104413890 | NR_126422    | ZBTB20-AS3         |
| A_22_P00019784 | 1,49289 | 1,48995 | 1,002039931 | N/A             | N/A       | N/A          | Inc-EFR3A-2        |
| A_22_P00009621 | 1,6646  | 1,66166 | 1,002039931 | N/A             | 102724323 | NR_120674    | LOC102724323       |
| A_24_P266019   | 1,44962 | 1,44668 | 1,002039931 | ENST00000307161 | 4543      | NM_005958    | MTNR1A             |
| A_33_P3365735  | 1,37983 | 1,3769  | 1,002032985 | ENST00000488355 | 7058      | NM_003247    | THBS2              |
| A_21_P0000308  | 9,17207 | 9,16914 | 1,002032985 | ENST00000577700 | 677798    | NR_002952    | SNORA9             |
| A_23_P11103    | 1,62594 | 1,62302 | 1,002026039 | ENST00000252677 | 9210      | NM_005448    | BMP15              |
| A_21_P0012818  | 1,61735 | 1,61444 | 1,002019094 | ENST00000502952 | 100506272 | N/A          | LOC100506272       |
| A_22_P00016265 | 1,49725 | 1,49434 | 1,002019094 | ENST00000571972 | N/A       | N/A          | N/A                |
| A_33_P3306207  | 8,77829 | 8,77538 | 1,002019094 | ENST00000340940 | 346689    | NM_198508    | KLRG2              |
| A_22_P00019253 | 1,52768 | 1,52478 | 1,002012148 | N/A             | N/A       | N/A          | Inc-AC009365.3.1-5 |
| A_22_P00016529 | 1,51    | 1,5071  | 1,002012148 | N/A             | N/A       | N/A          | Inc-TMTC3-6        |
| A_33_P3362587  | 1,67684 | 1,67397 | 1,001991312 | ENST00000394982 | 219793    | BC060774     | TBATA              |
| A_23_P34452    | 1,49897 | 1,4961  | 1,001991312 | ENST00000368742 | 4014      | NM_000427    | LOR                |
| A_19_P00316625 | 1,65136 | 1,64849 | 1,001991312 | N/A             | 100505881 | NR_038346    | MAGI2-AS3          |
| A_24_P280762   | 8,03773 | 8,03488 | 1,001977422 | ENST00000433730 | 80759     | NM_030568    | KHDC1              |
| A_22_P00019202 | 1,35318 | 1,35033 | 1,001977422 | N/A             | N/A       | N/A          | Inc-AC091801.1.1-7 |
| A_21_P0003727  | 6,40453 | 6,40169 | 1,001970477 | N/A             | N/A       | N/A          | Inc-GPR125-1       |
| A_23_P377750   | 1,35355 | 1,35071 | 1,001970477 | ENST00000264664 | 2255      | NM_004465    | FGF10              |



|                |         |         |             |                 |           |              |                |
|----------------|---------|---------|-------------|-----------------|-----------|--------------|----------------|
| A_21_P0002017  | 1,53118 | 1,52835 | 1,001963532 | ENST00000422996 | 100506474 | N/A          | LOC100506474   |
| A_33_P3296333  | 1,51469 | 1,51187 | 1,001956587 | ENST00000474900 | 50863     | NM_001144058 | NTM            |
| A_23_P259012   | 10,5884 | 10,5856 | 1,001942697 | ENST00000615113 | 8314      | NM_004656    | BAP1           |
| A_21_P0007246  | 1,40053 | 1,39773 | 1,001942697 | N/A             | N/A       | N/A          | Inc-C11orf82-4 |
| A_22_P00005037 | 1,47948 | 1,47669 | 1,001935752 | N/A             | N/A       | N/A          | Inc-DDX60-1    |
| A_33_P3279381  | 1,67124 | 1,66845 | 1,001935752 | N/A             | N/A       | N/A          | N/A            |
| A_24_P339869   | 1,68605 | 1,68327 | 1,001928807 | ENST00000310826 | 49854     | NM_020727    | ZBTB21         |
| A_21_P0010969  | 1,3853  | 1,38253 | 1,001921862 | N/A             | N/A       | N/A          | XLOC_I2_002276 |
| A_22_P00023523 | 1,65058 | 1,64782 | 1,001914917 | N/A             | N/A       | DA573114     | Inc-TNFRSF17-3 |
| A_33_P3363804  | 1,652   | 1,64924 | 1,001914917 | ENST00000621518 | 4684      | NM_001242608 | NCAM1          |
| A_21_P0006585  | 1,637   | 1,63425 | 1,001907973 | ENST00000435581 | 401577    | NR_033380    | CD99P1         |
| A_33_P3386681  | 1,50751 | 1,50476 | 1,001907973 | ENST00000378186 | 503497    | NM_001012417 | MS4A13         |
| A_33_P3210762  | 3,72818 | 3,72545 | 1,001894083 | ENST00000613213 | 11173     | NM_014272    | ADAMTS7        |
| A_21_P0005230  | 1,67003 | 1,6673  | 1,001894083 | ENST00000414915 | N/A       | N/A          | N/A            |
| A_21_P0009660  | 1,35396 | 1,35124 | 1,001887139 | N/A             | N/A       | N/A          | Inc-ZNF791-2   |
| A_22_P00018962 | 4,04955 | 4,04683 | 1,001887139 | N/A             | 102723809 | NR_110550    | LOC102723809   |
| A_21_P0010619  | 3,10069 | 3,09798 | 1,001880194 | ENST00000444349 | 101927084 | N/A          | LINC01359      |
| A_32_P165340   | 10,4732 | 10,4705 | 1,00187325  | ENST00000366839 | 6726      | NM_003133    | SRP9           |
| A_33_P3229380  | 10,4566 | 10,4539 | 1,00187325  | ENST00000415989 | 731275    | NR_029401    | LINC01347      |
| A_23_P93629    | 11,6402 | 11,6375 | 1,00187325  | ENST00000415680 | 8805      | NM_015905    | TRIM24         |
| A_21_P0007776  | 1,61036 | 1,60766 | 1,00187325  | N/A             | N/A       | N/A          | Inc-NCOR2-2    |
| A_33_P3301489  | 1,42944 | 1,42675 | 1,001866305 | ENST00000526254 | 646522    | NR_120444    | LOC646522      |
| A_21_P0003482  | 1,52981 | 1,52712 | 1,001866305 | ENST00000510169 | N/A       | N/A          | N/A            |
| A_33_P3293808  | 1,49803 | 1,49536 | 1,001852417 | N/A             | N/A       | AK091470     | Inc-C3orf37-1  |
| A_22_P00006820 | 1,61646 | 1,6138  | 1,001845472 | ENST00000553382 | 503519    | NR_038852    | LINC00929      |
| A_23_P302634   | 1,48341 | 1,48075 | 1,001845472 | ENST00000551340 | 283310    | NM_173591    | OTOGL          |
| A_21_P0012824  | 1,68743 | 1,68478 | 1,001838528 | N/A             | N/A       | N/A          | XLOC_I2_011508 |
| A_22_P00024515 | 1,40247 | 1,39983 | 1,001831584 | ENST00000419824 | N/A       | BG197735     | N/A            |
| A_33_P3224844  | 1,65267 | 1,65003 | 1,001831584 | N/A             | 643432    | NR_015362    | TSG1           |
| A_21_P0000687  | 1,61996 | 1,61735 | 1,001810752 | N/A             | 100379251 | NR_037806    | NPPA-AS1       |
| A_22_P00023116 | 1,47087 | 1,46827 | 1,001803808 | N/A             | N/A       | N/A          | Inc-TAF9-1     |
| A_22_P00010405 | 1,77779 | 1,7752  | 1,001796864 | N/A             | N/A       | N/A          | Inc-MYO1D-2    |
| A_33_P3248943  | 1,49606 | 1,49349 | 1,001782976 | ENST00000496251 | 1496      | N/A          | CTNNA2         |

|                |         |         |             |                 |           |              |                |
|----------------|---------|---------|-------------|-----------------|-----------|--------------|----------------|
| A_22_P00003564 | 1,63168 | 1,62913 | 1,001769088 | N/A             | N/A       | BC071802     | Inc-CCT4-1     |
| A_22_P00005617 | 1,65287 | 1,65032 | 1,001769088 | N/A             | N/A       | N/A          | Inc-EGFLAM-2   |
| A_33_P3224338  | 1,47645 | 1,4739  | 1,001769088 | ENST00000599640 | 101927468 | N/A          | LOC101927468   |
| A_33_P3224290  | 1,46491 | 1,46237 | 1,001762145 | ENST00000312422 | 219431    | NM_001004059 | OR4S2          |
| A_22_P00006129 | 1,60568 | 1,60314 | 1,001762145 | N/A             | N/A       | N/A          | Inc-FAM175B-1  |
| A_22_P00010355 | 1,46108 | 1,45855 | 1,001755201 | ENST00000420404 | N/A       | N/A          | N/A            |
| A_33_P3223097  | 8,74108 | 8,73856 | 1,001748257 | ENST00000448567 | 84791     | NR_026761    | LINC00467      |
| A_21_P0001511  | 1,47037 | 1,46786 | 1,001741314 | N/A             | N/A       | N/A          | Inc-C1orf168-2 |
| A_21_P0013672  | 1,60827 | 1,60578 | 1,001727427 | N/A             | N/A       | N/A          | XLOC_I2_015302 |
| A_33_P3331731  | 1,597   | 1,59451 | 1,001727427 | N/A             | N/A       | N/A          | N/A            |
| A_23_P3450     | 9,5981  | 9,59563 | 1,00171354  | ENST00000561691 | 27229     | NM_014444    | TUBGCP4        |
| A_24_P292253   | 1,52509 | 1,52262 | 1,00171354  | ENST00000397146 | 80760     | NM_030569    | ITIH5          |
| A_22_P00007527 | 1,46251 | 1,46005 | 1,001706597 | N/A             | N/A       | N/A          | Inc-HACE1-1    |
| A_33_P3280385  | 1,66061 | 1,65817 | 1,00169271  | N/A             | 1293      | NM_057165    | COL6A3         |
| A_22_P00019072 | 1,45829 | 1,45585 | 1,00169271  | N/A             | N/A       | BX090891     | Inc-OR13G1-1   |
| A_22_P00015656 | 1,52172 | 1,51928 | 1,00169271  | N/A             | N/A       | N/A          | Inc-SVIL-1     |
| A_22_P00014383 | 1,45993 | 1,4575  | 1,001685767 | N/A             | 101927547 | NR_046837    | ANKRD44-IT1    |
| A_21_P0006080  | 1,67379 | 1,67136 | 1,001685767 | ENST00000439418 | 494558    | N/A          | C9orf135-AS1   |
| A_21_P0008714  | 1,56934 | 1,56691 | 1,001685767 | N/A             | N/A       | N/A          | Inc-GABRB3-2   |
| A_22_P00012458 | 1,6655  | 1,66307 | 1,001685767 | N/A             | N/A       | CK905429     | Inc-PRPS1L1-1  |
| A_22_P00018329 | 1,56077 | 1,55834 | 1,001685767 | N/A             | N/A       | N/A          | Inc-ZNF99-1    |
| A_19_P00810474 | 8,18929 | 8,18686 | 1,001685767 | ENST00000572681 | 23152     | N/A          | CIC            |
| A_24_P40417    | 9,18758 | 9,18516 | 1,001678824 | ENST00000218200 | 2332      | NM_002024    | FMR1           |
| A_21_P0013864  | 1,50421 | 1,50181 | 1,001664938 | N/A             | N/A       | N/A          | N/A            |
| A_22_P00001949 | 1,60693 | 1,60454 | 1,001657995 | ENST00000510648 | 646241    | XR_241747    | LOC646241      |
| A_23_P49924    | 8,98127 | 8,9789  | 1,001644109 | ENST00000445655 | 115024    | NM_052935    | NT5C3B         |
| A_24_P30557    | 1,62632 | 1,62395 | 1,001644109 | ENST00000310346 | 6910      | NM_000192    | TBX5           |
| A_22_P00011357 | 1,50254 | 1,50018 | 1,001637166 | ENST00000453862 | 103625683 | N/A          | LINC00456      |
| A_21_P0000496  | 5,39156 | 5,38921 | 1,001630223 | ENST00000591956 | 677848    | NR_004395    | SNORD1A        |
| A_21_P0013547  | 1,40435 | 1,40201 | 1,00162328  | N/A             | N/A       | N/A          | XLOC_I2_014694 |
| A_23_P35484    | 1,61166 | 1,60933 | 1,001616338 | ENST00000531825 | 5407      | NM_006229    | PNLIPRP1       |
| A_32_P48949    | 1,47183 | 1,46951 | 1,001609395 | ENST00000375419 | 445577    | NM_001098808 | C9orf129       |
| A_33_P3407725  | 1,69314 | 1,69083 | 1,001602453 | N/A             | N/A       | N/A          | XLOC_I2_003856 |

|                |         |         |             |                 |           |              |                    |
|----------------|---------|---------|-------------|-----------------|-----------|--------------|--------------------|
| A_23_P62709    | 11,1228 | 11,1205 | 1,00159551  | ENST00000331860 | 6707      | NM_005416    | SPRR3              |
| A_33_P3304322  | 1,37172 | 1,36942 | 1,00159551  | ENST00000465922 | 11055     | DB090165     | ZBPB               |
| A_22_P00018802 | 1,65741 | 1,65512 | 1,001588567 | N/A             | N/A       | BG203545     | Inc-MTRR-6         |
| A_21_P0008763  | 1,52557 | 1,52328 | 1,001588567 | ENST00000558244 | 283688    | N/A          | LINC00927          |
| A_33_P3239594  | 1,4553  | 1,45301 | 1,001588567 | N/A             | 26050     | XM_005254038 | SLITRK5            |
| A_33_P3336878  | 6,79561 | 6,79335 | 1,00156774  | ENST00000369931 | 79847     | NM_024789    | TMEM180            |
| A_21_P0007007  | 1,47361 | 1,47136 | 1,001560798 | N/A             | N/A       | N/A          | Inc-GRID1-1        |
| A_23_P353056   | 9,07999 | 9,07776 | 1,001546913 | ENST00000525598 | 9854      | NM_014807    | C2CD2L             |
| A_33_P3311473  | 3,80788 | 3,80566 | 1,001539971 | ENST00000273859 | 57205     | NM_020453    | ATP10D             |
| A_21_P0002204  | 1,50538 | 1,50317 | 1,001533029 | N/A             | N/A       | N/A          | Inc-MTA3-2         |
| A_33_P3353737  | 1,6996  | 1,69739 | 1,001533029 | ENST00000305046 | 125       | AF153821     | ADH1B              |
| A_23_P370054   | 1,47386 | 1,47165 | 1,001533029 | ENST00000325250 | 286514    | NM_173699    | MAGEB18            |
| A_21_P0014050  | 1,91791 | 1,9157  | 1,001533029 | N/A             | N/A       | N/A          | N/A                |
| A_33_P3263935  | 1,50454 | 1,50234 | 1,001526087 | ENST00000382830 | 100288287 | NM_001164434 | KRTAP22-2          |
| A_21_P0013470  | 1,52511 | 1,52291 | 1,001526087 | ENST00000606573 | 100132923 | NR_027425    | FAM66D             |
| A_22_P00002441 | 11,248  | 11,2458 | 1,001526087 | ENST00000548104 | 102723354 | NR_110546    | LOC102723354       |
| A_22_P00003513 | 1,57087 | 1,56869 | 1,001512203 | N/A             | N/A       | N/A          | Inc-CCL1-2         |
| A_23_P420236   | 1,47682 | 1,47465 | 1,001505261 | ENST00000544246 | 5101      | NM_203487    | PCDH9              |
| A_23_P72503    | 9,27322 | 9,27105 | 1,001505261 | ENST00000226725 | 11275     | NM_007246    | KLHL2              |
| A_21_P0014109  | 1,44979 | 1,44763 | 1,001498319 | N/A             | N/A       | N/A          | N/A                |
| A_23_P353149   | 1,66475 | 1,66259 | 1,001498319 | ENST00000381821 | 339669    | NM_178552    | TEX33              |
| A_33_P3274955  | 1,65093 | 1,64877 | 1,001498319 | ENST00000280605 | 84076     | NM_032136    | TKTL2              |
| A_22_P00014607 | 1,44894 | 1,44679 | 1,001491377 | ENST00000536330 | N/A       | N/A          | N/A                |
| A_22_P00001416 | 1,59304 | 1,59091 | 1,001477494 | ENST00000526455 | N/A       | N/A          | N/A                |
| A_24_P376787   | 6,55404 | 6,55191 | 1,001477494 | ENST00000294753 | 84838     | NM_032752    | ZNF496             |
| A_22_P00013180 | 1,48488 | 1,48276 | 1,001470552 | N/A             | N/A       | N/A          | Inc-RNF144B-2      |
| A_22_P00010801 | 1,4862  | 1,48409 | 1,001463611 | ENST00000426166 | N/A       | N/A          | N/A                |
| A_21_P0003341  | 1,60031 | 1,59821 | 1,001456669 | N/A             | N/A       | N/A          | Inc-SOD3-4         |
| A_21_P0006746  | 1,58815 | 1,58605 | 1,001456669 | N/A             | N/A       | N/A          | Inc-CUL2-1         |
| A_22_P00016886 | 1,45979 | 1,45769 | 1,001456669 | ENST00000448680 | N/A       | N/A          | N/A                |
| A_21_P0002183  | 1,64959 | 1,6475  | 1,001449727 | N/A             | N/A       | N/A          | Inc-AC010872.2.1-2 |
| A_33_P3296721  | 1,48095 | 1,47887 | 1,001442786 | N/A             | N/A       | N/A          | N/A                |
| A_21_P0001746  | 1,64139 | 1,63931 | 1,001442786 | N/A             | N/A       | N/A          | Inc-CD1B-3         |

|                |         |         |             |                 |           |              |                |
|----------------|---------|---------|-------------|-----------------|-----------|--------------|----------------|
| A_21_P0006229  | 3,17304 | 3,17096 | 1,001442786 | N/A             | N/A       | N/A          | Inc-CDK9-1     |
| A_33_P3421303  | 1,65797 | 1,6559  | 1,001435845 | ENST00000231188 | 2916      | NM_000843    | GRM6           |
| A_22_P00018232 | 5,38561 | 5,38355 | 1,001428903 | ENST00000593670 | N/A       | DB525580     | N/A            |
| A_21_P0013111  | 1,67313 | 1,67107 | 1,001428903 | N/A             | N/A       | N/A          | XLOC_I2_013153 |
| A_22_P00022359 | 1,3628  | 1,36074 | 1,001428903 | N/A             | N/A       | BC034424     | Inc-TMEM202-2  |
| A_33_P3218258  | 1,68383 | 1,68177 | 1,001428903 | N/A             | N/A       | N/A          | N/A            |
| A_21_P0005488  | 1,35371 | 1,35166 | 1,001421962 | N/A             | N/A       | N/A          | Inc-TBX20-2    |
| A_33_P3214943  | 8,18759 | 8,18555 | 1,00141502  | ENST00000412663 | 9806      | NM_001134434 | SPOCK2         |
| A_23_P201596   | 8,9215  | 8,91946 | 1,00141502  | ENST00000528958 | 271       | NM_004037    | AMPD2          |
| A_22_P00003001 | 1,52219 | 1,52019 | 1,001387256 | N/A             | 100506409 | NR_038962    | ELOVL2-AS1     |
| A_33_P3355474  | 1,65087 | 1,64887 | 1,001387256 | N/A             | N/A       | N/A          | N/A            |
| A_23_P349343   | 1,50655 | 1,50455 | 1,001387256 | ENST00000494223 | 130540    | NM_139163    | ALS2CR12       |
| A_21_P0009026  | 1,51153 | 1,50954 | 1,001380315 | N/A             | N/A       | N/A          | Inc-ZNF423-1   |
| A_21_P0013459  | 1,67986 | 1,67787 | 1,001380315 | ENST00000416982 | 103724390 | N/A          | LINC01287      |
| A_22_P00011131 | 1,5656  | 1,56361 | 1,001380315 | N/A             | N/A       | N/A          | Inc-NUPL1-1    |
| A_21_P0003149  | 1,59751 | 1,59553 | 1,001373374 | N/A             | N/A       | N/A          | Inc-CBLB-7     |
| A_21_P0008977  | 1,45065 | 1,44868 | 1,001366433 | N/A             | N/A       | N/A          | Inc-WWOX-3     |
| A_32_P203066   | 1,45339 | 1,45142 | 1,001366433 | ENST00000446495 | N/A       | DB090170     | N/A            |
| A_21_P0003650  | 1,49661 | 1,49465 | 1,001359492 | N/A             | N/A       | N/A          | Inc-SPRY1-3    |
| A_21_P0003196  | 1,46817 | 1,46622 | 1,001352551 | N/A             | N/A       | N/A          | Inc-DCUN1D1-6  |
| A_33_P3361292  | 1,4499  | 1,44796 | 1,00134561  | N/A             | 150622    | N/A          | LINC01105      |
| A_21_P0002729  | 1,58543 | 1,58349 | 1,00134561  | ENST00000455626 | 101927829 | N/A          | LOC101927829   |
| A_33_P3261947  | 1,4828  | 1,48087 | 1,001338669 | ENST00000276467 | 54212     | NM_018967    | SNTG1          |
| A_33_P3382944  | 9,63639 | 9,63446 | 1,001338669 | ENST00000514277 | 374887    | NM_198537    | YJEFN3         |
| A_21_P0010609  | 1,63637 | 1,63445 | 1,001331729 | N/A             | N/A       | N/A          | XLOC_I2_000894 |
| A_33_P3325522  | 1,47075 | 1,46883 | 1,001331729 | ENST00000379591 | N/A       | N/A          | N/A            |
| A_21_P0004191  | 1,50659 | 1,50468 | 1,001324788 | ENST00000507236 | N/A       | N/A          | N/A            |
| A_22_P00025621 | 1,64434 | 1,64243 | 1,001324788 | ENST00000514327 | N/A       | N/A          | N/A            |
| A_21_P0001402  | 1,50663 | 1,50472 | 1,001324788 | ENST00000417409 | N/A       | N/A          | N/A            |
| A_21_P0009535  | 1,47772 | 1,47582 | 1,001317847 | N/A             | N/A       | N/A          | Inc-OSBPL1A-7  |
| A_21_P0006104  | 1,52727 | 1,52538 | 1,001310907 | ENST00000423637 | 101928748 | N/A          | LOC101928748   |
| A_23_P361654   | 1,35269 | 1,3508  | 1,001310907 | ENST00000492446 | N/A       | BC073764     | N/A            |
| A_22_P00022560 | 1,46889 | 1,46701 | 1,001303966 | N/A             | N/A       | AK095133     | Inc-MUSK-2     |

|                |         |         |             |                 |           |              |                 |
|----------------|---------|---------|-------------|-----------------|-----------|--------------|-----------------|
| A_22_P00020342 | 1,46027 | 1,4584  | 1,001297026 | ENST00000418518 | N/A       | N/A          | N/A             |
| A_21_P0011652  | 1,49988 | 1,49804 | 1,001276204 | N/A             | N/A       | N/A          | XLOC_I2_006398  |
| A_24_P68031    | 1,53004 | 1,5282  | 1,001276204 | ENST00000369285 | 55088     | AK092620     | CCDC186         |
| A_21_P0006178  | 1,53509 | 1,53327 | 1,001262324 | N/A             | N/A       | N/A          | Inc-GADD45G-6   |
| A_33_P3339148  | 1,64884 | 1,64702 | 1,001262324 | ENST00000623863 | N/A       | BC130506     | N/A             |
| A_21_P0013241  | 1,52357 | 1,52175 | 1,001262324 | N/A             | N/A       | N/A          | XLOC_I2_013481  |
| A_33_P3344039  | 6,79715 | 6,79533 | 1,001262324 | ENST00000477218 | 11159     | NM_007082    | RABL2A          |
| A_21_P0001437  | 1,52488 | 1,52308 | 1,001248444 | N/A             | N/A       | N/A          | Inc-KIAA1383-2  |
| A_22_P00015856 | 1,45981 | 1,45801 | 1,001248444 | ENST00000456755 | N/A       | BM551943     | N/A             |
| A_33_P3264246  | 1,39588 | 1,39408 | 1,001248444 | N/A             | N/A       | AF119900     | N/A             |
| A_22_P00016878 | 1,35762 | 1,35583 | 1,001241503 | N/A             | N/A       | N/A          | Inc-TSC22D1-2   |
| A_21_P0011505  | 1,68088 | 1,67909 | 1,001241503 | ENST00000565421 | N/A       | N/A          | N/A             |
| A_22_P00011461 | 1,52159 | 1,51981 | 1,001234563 | N/A             | N/A       | AK092105     | Inc-PAPPA-AS1-1 |
| A_22_P00002023 | 1,6528  | 1,65102 | 1,001234563 | N/A             | 101928002 | NR_110072    | LOC101928002    |
| A_22_P00000583 | 1,36541 | 1,36363 | 1,001234563 | ENST00000567533 | N/A       | AK094924     | N/A             |
| A_33_P3404489  | 3,37778 | 3,37601 | 1,001227623 | ENST00000358892 | 10046     | NM_001177465 | MAMLD1          |
| A_22_P00008819 | 1,63075 | 1,62898 | 1,001227623 | N/A             | 100506907 | NR_103787    | CCDC37-AS1      |
| A_23_P67367    | 7,06194 | 7,06017 | 1,001227623 | ENST00000520557 | 27294     | NM_014475    | DHDH            |
| A_23_P112296   | 1,55856 | 1,5568  | 1,001220683 | ENST00000393056 | 1621      | NM_000787    | DBH             |
| A_21_P0013561  | 1,46144 | 1,45969 | 1,001213744 | N/A             | N/A       | N/A          | XLOC_I2_014757  |
| A_21_P0002365  | 1,38574 | 1,384   | 1,001206804 | N/A             | N/A       | N/A          | Inc-MOGAT1-1    |
| A_21_P0004427  | 1,66395 | 1,66222 | 1,001199864 | N/A             | N/A       | N/A          | Inc-GIN1-1      |
| A_33_P33397081 | 1,45477 | 1,45304 | 1,001199864 | N/A             | N/A       | N/A          | N/A             |
| A_22_P00010992 | 1,67631 | 1,67459 | 1,001192924 | ENST00000416262 | N/A       | N/A          | N/A             |
| A_22_P00003518 | 1,47408 | 1,47237 | 1,001185984 | ENST00000579438 | N/A       | BC039379     | N/A             |
| A_21_P0009818  | 1,57901 | 1,57732 | 1,001172105 | N/A             | 101929707 | XR_253948    | LOC101929707    |
| A_22_P00022739 | 1,58121 | 1,57952 | 1,001172105 | ENST00000533329 | N/A       | N/A          | N/A             |
| A_22_P00018126 | 1,38027 | 1,37859 | 1,001165166 | ENST00000418426 | N/A       | N/A          | N/A             |
| A_33_P3401482  | 1,58183 | 1,58015 | 1,001165166 | N/A             | N/A       | AK125943     | N/A             |
| A_21_P0005337  | 1,59608 | 1,59441 | 1,001158226 | ENST00000461145 | 401410    | N/A          | LOC401410       |
| A_33_P3401068  | 1,67742 | 1,67575 | 1,001158226 | N/A             | N/A       | N/A          | N/A             |
| A_21_P0003616  | 1,50755 | 1,50588 | 1,001158226 | N/A             | N/A       | N/A          | Inc-LPHN3-3     |
| A_21_P0010067  | 1,49526 | 1,4936  | 1,001151287 | N/A             | N/A       | N/A          | Inc-SYCP2-2     |

|                |         |         |             |                 |           |                   |                |
|----------------|---------|---------|-------------|-----------------|-----------|-------------------|----------------|
| A_33_P3231414  | 1,4489  | 1,44725 | 1,001144347 | ENST00000421584 | 10859     | NM_006669         | LILRB1         |
| A_22_P00019680 | 1,35561 | 1,35396 | 1,001144347 | ENST00000546835 | N/A       | N/A               | N/A            |
| A_24_P290263   | 8,73183 | 8,73018 | 1,001144347 | ENST00000423238 | N/A       | N/A               | N/A            |
| A_21_P0004467  | 1,39347 | 1,39183 | 1,001137408 | N/A             | N/A       | N/A               | Inc-KCNMB1-3   |
| A_21_P0003772  | 1,52004 | 1,5184  | 1,001137408 | N/A             | 101927414 | XR_244724         | LOC101927414   |
| A_22_P00011591 | 1,38713 | 1,38552 | 1,00111659  | N/A             | N/A       | N/A               | Inc-PCDH9-2    |
| A_22_P00007064 | 12,163  | 12,1614 | 1,001109651 | N/A             | 100505938 | NR_125740         | LOC100505938   |
| A_21_P0011985  | 1,47952 | 1,47792 | 1,001109651 | ENST00000597051 | 101927687 | TCONS_I2_00015067 | LOC101927687   |
| A_33_P3245908  | 1,51933 | 1,51773 | 1,001109651 | ENST00000453436 | 170371    | NM_001288743      | C10orf128      |
| A_21_P0002810  | 1,46565 | 1,46405 | 1,001109651 | ENST00000464537 | 100505609 | XR_108518         | LOC100505609   |
| A_33_P3280561  | 1,65341 | 1,65183 | 1,001095772 | ENST00000391352 | 100505753 | NM_001146182      | KRTAP16-1      |
| A_33_P3351624  | 1,45171 | 1,45014 | 1,001088833 | ENST00000376301 | 53904     | NM_017433         | MYO3A          |
| A_22_P00013365 | 1,44903 | 1,44749 | 1,001068017 | ENST00000530177 | N/A       | N/A               | N/A            |
| A_22_P00011313 | 1,67713 | 1,67559 | 1,001068017 | N/A             | N/A       | BF509012          | Inc-OSBPL9-2   |
| A_33_P3311073  | 1,5022  | 1,50067 | 1,001061078 | ENST00000617330 | 3808      | NM_012313         | KIR2DS3        |
| A_19_P00321562 | 1,45672 | 1,4552  | 1,001054139 | ENST00000409974 | 285941    | NM_001145531      | C7orf71        |
| A_33_P3266410  | 7,14176 | 7,14024 | 1,001054139 | ENST00000322945 | 4150      | NM_002383         | MAZ            |
| A_33_P3366296  | 1,59876 | 1,59726 | 1,001040261 | N/A             | 387978    | NR_026731         | LINC01551      |
| A_21_P0000584  | 4,10505 | 4,10355 | 1,001040261 | ENST00000602301 | 100126299 | NR_030583         | VTRNA2-1       |
| A_21_P0011531  | 1,63623 | 1,63473 | 1,001040261 | ENST00000578881 | N/A       | N/A               | N/A            |
| A_21_P0014565  | 3,32731 | 3,32584 | 1,001019446 | ENST00000552060 | N/A       | XR_111334         | N/A            |
| A_33_P3224735  | 1,46908 | 1,46761 | 1,001019446 | ENST00000338957 | 340554    | NM_001010888      | ZC3H12B        |
| A_33_P3373580  | 1,5159  | 1,51444 | 1,001012507 | N/A             | N/A       | N/A               | N/A            |
| A_22_P00023487 | 1,47475 | 1,4733  | 1,001005569 | ENST00000449215 | N/A       | N/A               | N/A            |
| A_21_P0010815  | 1,36098 | 1,35953 | 1,001005569 | N/A             | N/A       | N/A               | XLOC_I2_001548 |
| A_21_P0002029  | 1,67537 | 1,67394 | 1,000991692 | ENST00000432612 | N/A       | XR_425378         | N/A            |
| A_22_P00011605 | 1,49165 | 1,49023 | 1,000984754 | N/A             | N/A       | N/A               | Inc-PCLO-2     |
| A_33_P3277527  | 1,46474 | 1,46333 | 1,000977815 | ENST00000462567 | 10319     | NM_006059         | LAMC3          |
| A_24_P24570    | 1,6809  | 1,67949 | 1,000977815 | N/A             | N/A       | AF132206          | N/A            |
| A_23_P215461   | 10,7746 | 10,7732 | 1,000970877 | ENST00000336180 | 3984      | NM_002314         | LIMK1          |
| A_21_P0006874  | 1,49895 | 1,49755 | 1,000970877 | N/A             | N/A       | N/A               | Inc-BICC1-1    |
| A_21_P0008093  | 1,51763 | 1,51623 | 1,000970877 | N/A             | N/A       | N/A               | Inc-NDFIP2-9   |
| A_32_P126733   | 1,50724 | 1,50585 | 1,000963939 | ENST00000261592 | 8715      | NM_003787         | NOL4           |

|                |         |         |             |                 |           |              |                       |
|----------------|---------|---------|-------------|-----------------|-----------|--------------|-----------------------|
| A_21_P0008940  | 1,47542 | 1,47404 | 1,000957001 | N/A             | N/A       | N/A          | Inc-RP11-327F22.5.1-7 |
| A_21_P0003923  | 1,37799 | 1,37662 | 1,000950063 | ENST00000565798 | N/A       | XR_241752    | N/A                   |
| A_21_P0008698  | 1,68161 | 1,68025 | 1,000943125 | N/A             | N/A       | N/A          | Inc-ASB7-2            |
| A_22_P00010093 | 1,45994 | 1,4586  | 1,000929249 | N/A             | N/A       | N/A          | Inc-MPZL1-1           |
| A_22_P00023005 | 1,68183 | 1,6805  | 1,000922311 | N/A             | N/A       | BM712886     | Inc-IL5RA-6           |
| A_33_P3787645  | 1,35252 | 1,35119 | 1,000922311 | ENST00000457402 | 440602    | NR_108042    | LOC440602             |
| A_21_P0003699  | 1,45719 | 1,45586 | 1,000922311 | N/A             | N/A       | N/A          | Inc-TRIML1-2          |
| A_21_P0000471  | 1,69502 | 1,69369 | 1,000922311 | N/A             | 100113402 | NR_037420    | SNORD111B             |
| A_21_P0008080  | 1,49959 | 1,49827 | 1,000915373 | ENST00000428761 | 100885781 | NR_047699    | LINC00348             |
| A_21_P0002070  | 1,45264 | 1,45132 | 1,000915373 | ENST00000455845 | N/A       | N/A          | N/A                   |
| A_21_P0009092  | 1,49827 | 1,49696 | 1,000908435 | ENST00000570769 | 1773      | N/A          | DNASE1                |
| A_22_P00012555 | 1,65681 | 1,6555  | 1,000908435 | ENST00000507027 | 102467077 | N/A          | LINC00603             |
| A_23_P55251    | 13,6132 | 13,6119 | 1,000901497 | ENST00000505306 | 3675      | NM_002204    | ITGA3                 |
| A_21_P0003193  | 1,67882 | 1,67752 | 1,000901497 | N/A             | N/A       | N/A          | Inc-DNAJC19-2         |
| A_22_P00002825 | 1,68538 | 1,68408 | 1,000901497 | N/A             | 150538    | NR_026830    | SATB2-AS1             |
| A_33_P3251412  | 1,65572 | 1,65444 | 1,000887622 | N/A             | N/A       | N/A          | N/A                   |
| A_22_P00016570 | 1,6345  | 1,63324 | 1,000873747 | N/A             | N/A       | N/A          | Inc-TNFRSF17-3        |
| A_33_P3290249  | 1,58683 | 1,58559 | 1,000859872 | ENST00000366476 | 127059    | NM_001004690 | OR2M5                 |
| A_22_P00000919 | 1,66029 | 1,65906 | 1,000852935 | N/A             | N/A       | BC033051     | Inc-AKAP10-1          |
| A_33_P3237507  | 1,45181 | 1,45059 | 1,000845997 | ENST00000531445 | 389197    | XM_003118524 | C4orf50               |
| A_33_P3397670  | 1,55969 | 1,55847 | 1,000845997 | ENST00000333235 | 114758    | NR_001554    | CSPG4P1Y              |
| A_21_P0003816  | 1,4716  | 1,47039 | 1,00083906  | N/A             | N/A       | N/A          | Inc-ACSL1-2           |
| A_24_P115971   | 10,0962 | 10,095  | 1,000832123 | ENST00000526557 | 60626     | NM_021932    | RIC8A                 |
| A_33_P3358957  | 7,75771 | 7,75652 | 1,000825185 | ENST00000331256 | 390928    | NM_001004318 | PAPL                  |
| A_21_P0003125  | 1,60099 | 1,5998  | 1,000825185 | N/A             | N/A       | N/A          | Inc-MAGI1-1           |
| A_22_P00008936 | 1,63491 | 1,63374 | 1,000811311 | ENST00000551332 | 283403    | NM_001242696 | C12orf80              |
| A_22_P00015810 | 1,59152 | 1,59035 | 1,000811311 | ENST00000442389 | N/A       | N/A          | N/A                   |
| A_22_P00015967 | 5,85721 | 5,85606 | 1,000797437 | N/A             | N/A       | N/A          | Inc-TEFM-5            |
| A_21_P0009090  | 1,50004 | 1,49889 | 1,000797437 | N/A             | N/A       | N/A          | Inc-CA5A-3            |
| A_22_P00021409 | 1,35597 | 1,35482 | 1,000797437 | N/A             | 100873983 | NR_046575    | MAGI1-AS1             |
| A_21_P0004362  | 1,44845 | 1,4473  | 1,000797437 | ENST00000504765 | N/A       | AK097766     | N/A                   |
| A_22_P00023578 | 1,50149 | 1,50034 | 1,000797437 | N/A             | N/A       | DB057760     | Inc-FGG-1             |
| A_33_P3390637  | 4,89296 | 4,89183 | 1,000783563 | ENST00000421779 | 151295    | NM_144712    | SLC23A3               |

|                |         |         |             |                 |           |              |                  |
|----------------|---------|---------|-------------|-----------------|-----------|--------------|------------------|
| A_22_P00003490 | 1,5005  | 1,49937 | 1,000783563 | ENST00000555875 | N/A       | N/A          | N/A              |
| A_21_P0005149  | 1,63581 | 1,63469 | 1,000776626 | N/A             | N/A       | N/A          | Inc-EXOC2-5      |
| A_22_P00001191 | 1,45054 | 1,44942 | 1,000776626 | N/A             | N/A       | AK092072     | Inc-ANGPTL2-3    |
| A_22_P00007756 | 1,39111 | 1,38999 | 1,000776626 | N/A             | N/A       | N/A          | Inc-HMGB4-1      |
| A_33_P3408232  | 1,43753 | 1,43642 | 1,000769689 | ENST00000561890 | 100507679 | NM_001198815 | MUC22            |
| A_22_P00009469 | 1,52189 | 1,52078 | 1,000769689 | ENST00000428495 | 101927098 | XR_425242    | LOC101927098     |
| A_21_P0012830  | 1,50317 | 1,50206 | 1,000769689 | N/A             | N/A       | N/A          | XLOC_I2_011604   |
| A_23_P77714    | 10,525  | 10,5239 | 1,000762753 | ENST00000572600 | 23059     | NM_024793    | CLUAP1           |
| A_32_P200608   | 1,6873  | 1,6862  | 1,000762753 | ENST00000432733 | 151300    | N/A          | LINC00608        |
| A_33_P3303305  | 1,4461  | 1,44501 | 1,000755816 | ENST00000400454 | 1826      | NM_001271534 | DSCAM            |
| A_22_P00013306 | 1,65709 | 1,65601 | 1,000748879 | ENST00000519008 | 497634    | NR_027013    | LINC00293        |
| A_32_P174164   | 1,46422 | 1,46314 | 1,000748879 | N/A             | 441601    | N/A          | LOC441601        |
| A_21_P0002872  | 1,5827  | 1,58162 | 1,000748879 | ENST00000474711 | N/A       | N/A          | N/A              |
| A_33_P3420545  | 1,5027  | 1,50163 | 1,000741943 | ENST00000297404 | 27012     | NM_014379    | KCNV1            |
| A_21_P0003843  | 1,4836  | 1,48253 | 1,000741943 | ENST00000504132 | N/A       | N/A          | N/A              |
| A_22_P00015505 | 3,27986 | 3,2788  | 1,000735006 | ENST00000419640 | N/A       | BF681027     | N/A              |
| A_24_P133253   | 9,65993 | 9,65887 | 1,000735006 | ENST00000378535 | 4254      | NM_000899    | KITLG            |
| A_33_P3351416  | 1,40022 | 1,39917 | 1,000728069 | ENST00000392100 | 64094     | NM_022138    | SMOC2            |
| A_22_P00019831 | 1,44812 | 1,44708 | 1,000721133 | ENST00000366424 | 101927137 | N/A          | LOC101927137     |
| A_33_P3252730  | 1,65497 | 1,65393 | 1,000721133 | N/A             | 388507    | NR_027049    | ZNF788           |
| A_21_P0007219  | 5,67522 | 5,67419 | 1,000714197 | N/A             | N/A       | N/A          | Inc-AP000769.1-1 |
| A_23_P325040   | 8,50345 | 8,50242 | 1,000714197 | ENST00000266732 | 7112      | NM_003276    | TMPO             |
| A_33_P3410053  | 1,50309 | 1,50208 | 1,000700324 | N/A             | N/A       | N/A          | N/A              |
| A_22_P00005659 | 1,60282 | 1,60181 | 1,000700324 | ENST00000544591 | 101060038 | XR_424318    | LOC101060038     |
| A_33_P3331916  | 1,45496 | 1,45396 | 1,000693387 | ENST00000440633 | 440132    | N/A          | LINC00545        |
| A_24_P182281   | 8,16135 | 8,16036 | 1,000686451 | ENST00000531950 | 11147     | NM_001036646 | HHLA3            |
| A_21_P0008243  | 1,503   | 1,50202 | 1,000679515 | N/A             | N/A       | N/A          | Inc-DAOA-5       |
| A_21_P0004835  | 1,42622 | 1,42525 | 1,000672579 | N/A             | N/A       | N/A          | Inc-BMP6-10      |
| A_21_P0006983  | 1,47743 | 1,47647 | 1,000665643 | ENST00000609683 | 220929    | N/A          | ZNF438           |
| A_22_P00001276 | 7,92417 | 7,92322 | 1,000658707 | N/A             | N/A       | N/A          | Inc-ANKRD6-1     |
| A_33_P3345409  | 1,66185 | 1,6609  | 1,000658707 | N/A             | N/A       | N/A          | N/A              |
| A_24_P6125     | 1,37296 | 1,37202 | 1,000651771 | ENST00000303592 | 3761      | NM_152868    | KCNJ4            |
| A_22_P00004971 | 1,48219 | 1,48125 | 1,000651771 | N/A             | 100873973 | NR_046536    | GPC6-AS2         |



|                |         |         |             |                 |           |              |                |
|----------------|---------|---------|-------------|-----------------|-----------|--------------|----------------|
| A_21_P0000016  | 1,52028 | 1,51936 | 1,000637899 | ENST00000550829 | 140807    | NM_001146225 | KRT72          |
| A_33_P3422951  | 1,5359  | 1,53499 | 1,000630963 | ENST00000602588 | 1768      | BC015442     | DNAH6          |
| A_33_P3276053  | 3,38475 | 3,38384 | 1,000630963 | N/A             | 8994      | BU428864     | LIMD1          |
| A_21_P0002194  | 1,65864 | 1,65773 | 1,000630963 | N/A             | N/A       | N/A          | Inc-LCLAT1-2   |
| A_22_P00024417 | 1,35389 | 1,35298 | 1,000630963 | N/A             | N/A       | N/A          | Inc-UBLCP1-7   |
| A_33_P3275878  | 1,647   | 1,6461  | 1,000624027 | ENST00000393822 | 6439      | NM_000542    | SFTPB          |
| A_22_P00008309 | 4,27716 | 4,27628 | 1,000610156 | N/A             | 100996301 | NR_121636    | FOXD3-AS1      |
| A_32_P352743   | 1,5845  | 1,58362 | 1,000610156 | ENST00000369630 | 284467    | NM_001004440 | FAM19A3        |
| A_22_P00020617 | 1,4964  | 1,49553 | 1,00060322  | N/A             | N/A       | N/A          | Inc-ZFC3H1-5   |
| A_22_P00023866 | 1,45815 | 1,45729 | 1,000596284 | N/A             | 104326189 | N/A          | LMO7DN-IT1     |
| A_33_P3378945  | 1,67459 | 1,67373 | 1,000596284 | ENST00000623604 | N/A       | N/A          | N/A            |
| A_22_P00010575 | 1,49398 | 1,49313 | 1,000589349 | N/A             | N/A       | N/A          | Inc-NDFIP2-11  |
| A_23_P324304   | 1,67078 | 1,66994 | 1,000582413 | ENST00000618119 | 238       | NM_004304    | ALK            |
| A_22_P00012369 | 6,61934 | 6,6185  | 1,000582413 | ENST00000544947 | N/A       | N/A          | N/A            |
| A_22_P00013573 | 1,70813 | 1,70731 | 1,000568542 | ENST00000561802 | N/A       | AK130058     | N/A            |
| A_22_P00007796 | 1,6886  | 1,68779 | 1,000561607 | N/A             | N/A       | N/A          | Inc-HOGA1-1    |
| A_22_P00020574 | 1,58791 | 1,5871  | 1,000561607 | N/A             | N/A       | N/A          | Inc-SLC7A1-2   |
| A_33_P3387062  | 1,47658 | 1,47577 | 1,000561607 | ENST00000449657 | N/A       | N/A          | N/A            |
| A_21_P0009944  | 1,46645 | 1,46565 | 1,000554672 | N/A             | N/A       | N/A          | Inc-SSTR4-6    |
| A_23_P85039    | 1,69506 | 1,69426 | 1,000554672 | ENST00000372129 | 8471      | NM_003604    | IRS4           |
| A_33_P3342722  | 1,4799  | 1,47911 | 1,000547736 | ENST00000397929 | 81832     | NM_138999    | NETO1          |
| A_22_P00003740 | 1,48515 | 1,48437 | 1,000540801 | ENST00000565257 | N/A       | BC037818     | N/A            |
| A_21_P0002428  | 1,40981 | 1,40905 | 1,000526931 | ENST00000423797 | 9167      | N/A          | COX7A2L        |
| A_33_P3354836  | 1,50283 | 1,50207 | 1,000526931 | ENST00000314612 | 81300     | NM_001004124 | OR4P4          |
| A_33_P3229147  | 1,53915 | 1,53839 | 1,000526931 | N/A             | N/A       | N/A          | Inc-USP35-5    |
| A_21_P0013167  | 1,70123 | 1,70047 | 1,000526931 | N/A             | N/A       | N/A          | XLOC_I2_013252 |
| A_33_P3438072  | 1,47722 | 1,47648 | 1,00051306  | ENST00000520390 | 157273    | NR_040039    | LOC157273      |
| A_22_P00025518 | 1,67878 | 1,67805 | 1,000506125 | ENST00000514926 | 441374    | NR_033962    | FLJ42969       |
| A_21_P0008192  | 1,71393 | 1,7132  | 1,000506125 | N/A             | N/A       | N/A          | Inc-SLITRK6-6  |
| A_24_P224966   | 3,65341 | 3,65268 | 1,000506125 | ENST00000619181 | 1188      | NM_000085    | CLCNKB         |
| A_24_P16184    | 1,45646 | 1,45575 | 1,000492256 | ENST00000442999 | 127550    | NM_001080438 | A3GALT2        |
| A_33_P3374563  | 9,98716 | 9,98645 | 1,000492256 | ENST00000045347 | 55812     | NM_018418    | SPATA7         |
| A_22_P00005664 | 1,46975 | 1,46905 | 1,000485321 | ENST00000443103 | N/A       | N/A          | N/A            |

|                |         |         |             |                 |           |              |              |
|----------------|---------|---------|-------------|-----------------|-----------|--------------|--------------|
| A_32_P150142   | 2,38792 | 2,38722 | 1,000485321 | ENST00000566570 | 222029    | NR_026929    | DKFZp434L192 |
| A_21_P0005956  | 1,35301 | 1,35232 | 1,000478386 | N/A             | N/A       | N/A          | Inc-CHRAC1-1 |
| A_24_P330263   | 1,61398 | 1,6133  | 1,000471451 | ENST00000334286 | 1910      | NM_003991    | EDNRB        |
| A_24_P230026   | 1,41565 | 1,415   | 1,000450647 | ENST00000498728 | 255926    | NR_001448    | ADAM5        |
| A_33_P3269570  | 1,45374 | 1,45312 | 1,000429844 | N/A             | 11126     | XM_005272929 | CD160        |
| A_23_P347029   | 2,6845  | 2,68388 | 1,000429844 | ENST00000506868 | 259296    | NM_176890    | TAS2R50      |
| A_21_P0008278  | 1,54234 | 1,54173 | 1,000422909 | ENST00000555539 | 100506498 | XR_110222    | LOC100506498 |
| A_22_P00011017 | 1,65252 | 1,65191 | 1,000422909 | N/A             | N/A       | N/A          | Inc-NSUN6-6  |
| A_33_P3780983  | 1,4923  | 1,4917  | 1,000415975 | ENST00000538474 | 142680    | NM_001177317 | SLC34A3      |
| A_23_P154411   | 10,7564 | 10,7558 | 1,000415975 | ENST00000448752 | 9360      | NM_004792    | PPIG         |
| A_23_P385835   | 1,56546 | 1,56488 | 1,000402106 | ENST00000304411 | 2850      | NM_018971    | GPR27        |
| A_22_P00015843 | 1,6275  | 1,62692 | 1,000402106 | N/A             | N/A       | N/A          | Inc-TBCD-2   |
| A_33_P3289338  | 1,62485 | 1,62427 | 1,000402106 | N/A             | 100131346 | AK127606     | LOC100131346 |
| A_21_P0000312  | 4,6901  | 4,68954 | 1,000388238 | N/A             | 677802    | NR_002956    | SNORA14B     |
| A_33_P3305254  | 7,20337 | 7,20284 | 1,000367435 | ENST00000373904 | 5711      | NM_005047    | PSMD5        |
| A_19_P00318638 | 1,50356 | 1,50304 | 1,000360501 | ENST00000423530 | 646324    | N/A          | LINC00607    |
| A_22_P00021364 | 1,6469  | 1,64638 | 1,000360501 | N/A             | N/A       | N/A          | Inc-YRDC-1   |
| A_24_P112941   | 1,45517 | 1,45467 | 1,000346634 | ENST00000561030 | 84894     | NM_032808    | LINGO1       |
| A_32_P109876   | 1,66257 | 1,66207 | 1,000346634 | ENST00000333891 | 27445     | NM_033026    | PCLO         |
| A_23_P301995   | 6,67889 | 6,6784  | 1,0003397   | ENST00000328205 | 286826    | NM_173083    | LIN9         |
| A_22_P00022804 | 1,51231 | 1,51183 | 1,000332766 | ENST00000413941 | N/A       | N/A          | N/A          |
| A_22_P00023409 | 1,50924 | 1,50876 | 1,000332766 | ENST00000420186 | N/A       | N/A          | N/A          |
| A_33_P3331711  | 6,18255 | 6,18208 | 1,000325832 | N/A             | 100130463 | AK124300     | LOC100130463 |
| A_33_P3372199  | 1,63844 | 1,63797 | 1,000325832 | ENST00000569677 | N/A       | N/A          | N/A          |
| A_33_P3295278  | 1,68661 | 1,68615 | 1,000318899 | ENST00000371759 | 284546    | NM_001136508 | C1orf185     |
| A_33_P3274647  | 1,654   | 1,65354 | 1,000318899 | ENST00000351010 | 815       | NM_015981    | CAMK2A       |
| A_23_P418562   | 1,68492 | 1,68446 | 1,000318899 | ENST00000254488 | 6538      | NM_014229    | SLC6A11      |
| A_21_P0012318  | 4,83726 | 4,83681 | 1,000311965 | ENST00000449711 | 101929374 | N/A          | LOC101929374 |
| A_22_P00017595 | 1,50965 | 1,5092  | 1,000311965 | ENST00000558920 | N/A       | BF214562     | N/A          |
| A_22_P00005832 | 1,43234 | 1,43191 | 1,000298098 | ENST00000576600 | N/A       | N/A          | N/A          |
| A_23_P147641   | 9,8725  | 9,87208 | 1,000291164 | ENST00000440819 | 6919      | NM_003195    | TCEA2        |
| A_33_P3354191  | 1,6     | 1,59958 | 1,000291164 | ENST00000534504 | N/A       | N/A          | N/A          |
| A_33_P3376131  | 1,50181 | 1,5014  | 1,000284231 | ENST00000327581 | 284958    | XM_001716359 | NT5DC4       |

|                |         |         |             |                 |           |              |               |
|----------------|---------|---------|-------------|-----------------|-----------|--------------|---------------|
| A_21_P0005854  | 1,45789 | 1,45748 | 1,000284231 | ENST00000524286 | 100505718 | NR_039986    | LOC100505718  |
| A_22_P00022971 | 1,38944 | 1,38904 | 1,000277297 | ENST00000554318 | N/A       | DB444431     | N/A           |
| A_23_P8848     | 11,4492 | 11,4488 | 1,000277297 | ENST00000523303 | 55756     | NM_018250    | INTS9         |
| A_24_P583225   | 7,27919 | 7,27881 | 1,000263431 | ENST00000448955 | 349114    | NR_026999    | LINC00265     |
| A_33_P3334220  | 1,6439  | 1,64353 | 1,000256497 | ENST00000377848 | 32        | NM_001093    | ACACB         |
| A_33_P3304748  | 7,02299 | 7,02262 | 1,000256497 | N/A             | N/A       | N/A          | N/A           |
| A_23_P100455   | 8,18225 | 8,18189 | 1,000249564 | ENST00000625049 | 64779     | NM_022764    | MTHFSD        |
| A_22_P00023264 | 1,59446 | 1,5941  | 1,000249564 | N/A             | N/A       | N/A          | Inc-EHD3-2    |
| A_24_P237443   | 1,59911 | 1,59876 | 1,000242631 | ENST00000356892 | 54440     | NM_018990    | SASH3         |
| A_21_P0001881  | 1,49708 | 1,49675 | 1,000228765 | N/A             | N/A       | N/A          | Inc-MRPL19-2  |
| A_22_P00012257 | 1,65068 | 1,65035 | 1,000228765 | N/A             | N/A       | N/A          | Inc-PPP1R1A-2 |
| A_22_P00023216 | 6,44525 | 6,44493 | 1,000221832 | ENST00000453087 | N/A       | N/A          | N/A           |
| A_32_P157481   | 6,93633 | 6,93602 | 1,000214899 | ENST00000311895 | 2072      | NM_005236    | ERCC4         |
| A_33_P3230876  | 10,3855 | 10,3852 | 1,000207966 | ENST00000521508 | 440138    | NM_001004127 | ALG11         |
| A_23_P376661   | 10,2051 | 10,2048 | 1,000207966 | ENST00000492411 | 4817      | NM_005600    | NIT1          |
| A_22_P00003439 | 1,5152  | 1,51493 | 1,000187167 | N/A             | N/A       | DB454575     | Inc-CCDC38-1  |
| A_33_P3259339  | 1,48775 | 1,4875  | 1,000173302 | ENST00000353414 | 1301      | NM_080629    | COL11A1       |
| A_21_P0010074  | 3,2698  | 3,26955 | 1,000173302 | N/A             | N/A       | N/A          | Inc-KCNQ2-2   |
| A_22_P00003433 | 1,39857 | 1,39834 | 1,000159437 | ENST00000511512 | N/A       | XR_171034    | N/A           |
| A_33_P3346766  | 1,47534 | 1,47512 | 1,000152504 | ENST00000457664 | 10941     | NM_001252274 | UGT2A1        |
| A_33_P3334908  | 3,7946  | 3,79439 | 1,000145572 | ENST00000334651 | 207063    | NM_145177    | DHRX          |
| A_33_P3358844  | 1,41709 | 1,41688 | 1,000145572 | ENST00000417823 | N/A       | N/A          | N/A           |
| A_22_P00011239 | 2,68004 | 2,67985 | 1,000131707 | N/A             | 102724446 | XR_425121    | LOC102724446  |
| A_22_P00010677 | 3,88972 | 3,88955 | 1,000117842 | N/A             | N/A       | N/A          | Inc-NEURL4-1  |
| A_33_P3352467  | 1,55506 | 1,55491 | 1,000103977 | ENST00000357585 | 6752      | NM_001050    | SSTR2         |
| A_21_P0012215  | 1,60008 | 1,59993 | 1,000103977 | ENST00000427022 | N/A       | N/A          | N/A           |
| A_21_P0001277  | 1,45169 | 1,45156 | 1,000090113 | N/A             | N/A       | N/A          | Inc-PTPRU-2   |
| A_21_P0002157  | 1,64134 | 1,64121 | 1,000090113 | N/A             | N/A       | N/A          | Inc-SNTG2-3   |
| A_22_P00012353 | 1,40372 | 1,4036  | 1,000083181 | N/A             | N/A       | N/A          | Inc-PRDX3-1   |
| A_22_P00008549 | 1,51216 | 1,51204 | 1,000083181 | ENST00000436078 | 102724550 | NR_110826    | LOC102724550  |
| A_21_P0008928  | 1,37828 | 1,37821 | 1,000048521 | N/A             | N/A       | N/A          | Inc-LONP2-2   |
| A_33_P3245907  | 1,5199  | 1,51983 | 1,000048521 | N/A             | N/A       | N/A          | N/A           |
| A_21_P0006836  | 1,65612 | 1,65606 | 1,00004159  | N/A             | N/A       | N/A          | Inc-MCM10-1   |

|                |         |         |              |                 |           |              |               |
|----------------|---------|---------|--------------|-----------------|-----------|--------------|---------------|
| A_21_P0007334  | 1,52852 | 1,52846 | 1,00004159   | ENST00000444572 | N/A       | N/A          | N/A           |
| A_21_P0004374  | 1,45968 | 1,45963 | 1,000034658  | N/A             | N/A       | N/A          | Inc-DROSHA-6  |
| A_22_P00005535 | 1,70168 | 1,70163 | 1,000034658  | ENST00000567491 | 100287216 | NR_029193    | SH3RF3-AS1    |
| A_21_P0008026  | 1,44774 | 1,4477  | 1,000027726  | N/A             | N/A       | N/A          | Inc-MRP63-1   |
| A_21_P0009691  | 1,48577 | 1,48574 | 1,000020795  | ENST00000622720 | N/A       | N/A          | N/A           |
| A_22_P00017862 | 1,36817 | 1,36814 | 1,000020795  | ENST00000551082 | N/A       | N/A          | N/A           |
| A_23_P68007    | 16,2105 | 16,2105 | 1            | ENST00000466678 | 483       | NM_001679    | ATP1B3        |
| A_33_P3365611  | 5,85329 | 5,85329 | 1            | ENST00000313334 | 91408     | NM_152265    | BTF3L4        |
| A_23_P202881   | 7,52252 | 7,52252 | 1            | ENST00000528863 | 9638      | NM_005103    | FEZ1          |
| A_33_P3342628  | 16,9595 | 16,9595 | 1            | ENST00000304952 | 57801     | NM_021170    | HES4          |
| A_22_P00010679 | 3,97328 | 3,97328 | 1            | N/A             | N/A       | BC042638     | Inc-NEUROD1-2 |
| A_21_P0009588  | 1,45086 | 1,45086 | 1            | N/A             | N/A       | N/A          | Inc-ZNF516-5  |
| A_22_P00015838 | 1,37324 | 1,37324 | 1            | N/A             | 101927142 | NR_110213    | LOC101927142  |
| A_33_P3289541  | 9,10917 | 9,10917 | 1            | ENST00000252674 | 4298      | NM_005934    | MLLT1         |
| A_22_P00022352 | 1,40649 | 1,40649 | 1            | ENST00000444926 | N/A       | N/A          | N/A           |
| A_22_P00025325 | 1,55863 | 1,55863 | 1            | ENST00000557770 | N/A       | N/A          | N/A           |
| A_33_P3244269  | 3,86648 | 3,86648 | 1            | N/A             | N/A       | N/A          | N/A           |
| A_33_P3250767  | 7,63119 | 7,63119 | 1            | N/A             | N/A       | N/A          | N/A           |
| A_33_P3308158  | 9,02307 | 9,02307 | 1            | ENST00000519878 | N/A       | N/A          | N/A           |
| A_33_P3384997  | 17,1791 | 17,1791 | 1            | ENST00000456044 | N/A       | N/A          | N/A           |
| A_33_P3827416  | 17,1684 | 17,1684 | 1            | N/A             | N/A       | AK024156     | N/A           |
| A_33_P3413053  | 11,8918 | 11,8918 | 1            | ENST00000283027 | 4682      | NM_002484    | NUBP1         |
| A_23_P59099    | 6,25581 | 6,25581 | 1            | ENST00000377149 | 26531     | NM_013937    | OR11A1        |
| A_33_P3280066  | 16,9491 | 16,9491 | 1            | ENST00000357037 | 284119    | NM_012232    | PTRF          |
| A_21_P0005985  | 9,54021 | 9,54021 | 1            | N/A             | 441394    | NR_003667    | SUGT1P1       |
| A_32_P101301   | 13,5755 | 13,5755 | 1            | ENST00000459775 | 10713     | NM_006590    | USP39         |
| A_23_P25224    | 14,6681 | 14,6681 | 1            | ENST00000366286 | 8531      | NM_003651    | YBX3          |
| A_32_P194779   | 8,61135 | 8,61135 | 1            | ENST00000373452 | 403341    | NM_001099270 | ZBTB34        |
| A_21_P0006751  | 1,35298 | 1,35306 | -1,000055453 | ENST00000419406 | 102724264 | XR_424115    | LOC102724264  |
| A_21_P0005400  | 1,65492 | 1,65501 | -1,000062385 | N/A             | N/A       | N/A          | Inc-COL1A2-1  |
| A_23_P18751    | 1,65849 | 1,65859 | -1,000069317 | ENST00000510647 | 28983     | NM_014058    | TMPRSS11E     |
| A_22_P00003231 | 1,5203  | 1,52042 | -1,000083181 | ENST00000544663 | N/A       | N/A          | N/A           |
| A_22_P00007802 | 1,66564 | 1,66577 | -1,000090113 | N/A             | N/A       | N/A          | Inc-HORMAD2-1 |

|                |         |         |              |                 |           |              |               |
|----------------|---------|---------|--------------|-----------------|-----------|--------------|---------------|
| A_22_P00008435 | 1,44778 | 1,44794 | -1,00011091  | N/A             | 729220    | NM_001242791 | FLJ45513      |
| A_21_P0003080  | 1,47446 | 1,47462 | -1,00011091  | N/A             | N/A       | N/A          | Inc-PYDC2-2   |
| A_21_P0005696  | 1,35524 | 1,3554  | -1,00011091  | N/A             | N/A       | N/A          | Inc-SOX17-1   |
| A_21_P0000879  | 1,64394 | 1,6441  | -1,00011091  | ENST00000563763 | 339166    | N/A          | LOC339166     |
| A_23_P169097   | 1,57941 | 1,57959 | -1,000124774 | ENST00000220856 | 8840      | NM_080838    | WISP1         |
| A_23_P207456   | 1,58524 | 1,58543 | -1,000131707 | ENST00000394620 | 6355      | NM_005623    | CCL8          |
| A_21_P0004933  | 1,4229  | 1,42309 | -1,000131707 | N/A             | N/A       | N/A          | Inc-GJA1-3    |
| A_24_P940897   | 1,5818  | 1,58199 | -1,000131707 | ENST00000377136 | 26716     | NM_030883    | OR2H1         |
| A_23_P30547    | 1,46004 | 1,46023 | -1,000131707 | ENST00000520322 | 3937      | NM_005565    | LCP2          |
| A_21_P0010411  | 1,49886 | 1,49905 | -1,000131707 | N/A             | N/A       | N/A          | Inc-ISX-2     |
| A_22_P00000234 | 1,49779 | 1,49799 | -1,000138639 | N/A             | 100506025 | NR_038947    | ISPD-AS1      |
| A_23_P256754   | 1,35406 | 1,35427 | -1,000145572 | ENST00000611484 | 2569      | NM_002042    | GABRR1        |
| A_22_P00002042 | 1,53492 | 1,53514 | -1,000152504 | N/A             | 100506451 | NR_038228    | RASSF8-AS1    |
| A_22_P00007161 | 3,95833 | 3,95856 | -1,000159437 | N/A             | N/A       | BG572799     | Inc-GNG11-1   |
| A_21_P0013722  | 1,52326 | 1,52349 | -1,000159437 | ENST00000618030 | N/A       | N/A          | N/A           |
| A_33_P3407751  | 1,50605 | 1,50628 | -1,000159437 | N/A             | N/A       | AK126029     | N/A           |
| A_22_P00021383 | 1,65065 | 1,65089 | -1,000166369 | N/A             | N/A       | N/A          | Inc-SLC38A8-5 |
| A_22_P00016970 | 1,65627 | 1,65654 | -1,000187167 | N/A             | N/A       | N/A          | Inc-TSTD2-2   |
| A_32_P1445     | 10,1577 | 10,158  | -1,000207966 | ENST00000423212 | 5771      | NM_080423    | PTPN2         |
| A_33_P3326225  | 10,9854 | 10,9857 | -1,000207966 | ENST00000409003 | 401474    | NM_001101676 | SAMD12        |
| A_19_P00813192 | 1,48124 | 1,48154 | -1,000207966 | ENST00000534659 | 643733    | N/A          | LOC643733     |
| A_33_P3257020  | 1,35696 | 1,35726 | -1,000207966 | N/A             | 100131691 | NR_027334    | MZF1-AS1      |
| A_33_P3266140  | 1,50045 | 1,50076 | -1,000214899 | N/A             | N/A       | N/A          | N/A           |
| A_22_P00016447 | 1,49553 | 1,49585 | -1,000221832 | N/A             | 101928098 | XR_246374    | LOC101928098  |
| A_23_P255076   | 7,32159 | 7,32191 | -1,000221832 | ENST00000369724 | 112611    | NM_033411    | RWDD2A        |
| A_24_P372553   | 8,44786 | 8,44819 | -1,000228765 | ENST00000419769 | 26098     | NM_015608    | EDRF1         |
| A_21_P0002700  | 1,67765 | 1,67799 | -1,000235698 | ENST00000427914 | 253573    | NR_033844    | LOC253573     |
| A_33_P3309792  | 1,51121 | 1,51155 | -1,000235698 | ENST00000442013 | N/A       | N/A          | N/A           |
| A_32_P810645   | 1,6428  | 1,64315 | -1,000242631 | ENST00000332558 | 286023    | NR_046323    | FLJ40288      |
| A_21_P0005429  | 1,49871 | 1,49909 | -1,000263431 | N/A             | N/A       | N/A          | Inc-CPA1-1    |
| A_23_P156890   | 1,49889 | 1,49927 | -1,000263431 | ENST00000237316 | 6943      | NM_003206    | TCF21         |
| A_22_P00025468 | 1,39088 | 1,39127 | -1,000270364 | N/A             | N/A       | N/A          | Inc-WDFY4-2   |
| A_24_P99071    | 10,1316 | 10,132  | -1,000277297 | ENST00000468620 | 3843      | NM_002271    | IPO5          |

|                |         |         |              |                 |           |              |               |
|----------------|---------|---------|--------------|-----------------|-----------|--------------|---------------|
| A_33_P3368369  | 1,67331 | 1,67371 | -1,000277297 | ENST00000442459 | 27129     | AL832181     | HSPB7         |
| A_22_P00015551 | 1,58311 | 1,58351 | -1,000277297 | ENST00000519983 | N/A       | N/A          | N/A           |
| A_21_P0007444  | 1,80495 | 1,80537 | -1,000291164 | ENST00000577699 | N/A       | N/A          | N/A           |
| A_33_P3299535  | 1,70988 | 1,7103  | -1,000291164 | ENST00000318184 | 341350    | NM_183378    | OVCH1         |
| A_21_P0012029  | 1,64833 | 1,64875 | -1,000291164 | ENST00000599072 | 401014    | N/A          | TEX41         |
| A_21_P0003915  | 1,41324 | 1,41367 | -1,000298098 | ENST00000610683 | 102723766 | NR_125934    | LOC102723766  |
| A_33_P3387450  | 1,66373 | 1,66416 | -1,000298098 | N/A             | N/A       | AF130116     | N/A           |
| A_22_P00022435 | 1,59032 | 1,59076 | -1,000305031 | N/A             | N/A       | N/A          | Inc-CD38-1    |
| A_21_P0005471  | 1,4984  | 1,49884 | -1,000305031 | N/A             | N/A       | N/A          | Inc-VWDE-3    |
| A_21_P0004454  | 1,65293 | 1,6534  | -1,000325832 | N/A             | N/A       | N/A          | Inc-PRELID2-1 |
| A_21_P0003552  | 1,40197 | 1,40244 | -1,000325832 | ENST00000514297 | N/A       | XR_249719    | N/A           |
| A_33_P3370634  | 9,12389 | 9,12436 | -1,000325832 | ENST00000557659 | 10175     | XR_245653    | CNIH1         |
| A_22_P00007799 | 1,64631 | 1,64679 | -1,000332766 | N/A             | N/A       | N/A          | Inc-HOOK1-1   |
| A_23_P165042   | 1,49322 | 1,49371 | -1,0003397   | ENST00000597791 | 100129935 | NR_026870    | LOC100129935  |
| A_21_P0008265  | 1,61231 | 1,6128  | -1,0003397   | ENST00000569854 | N/A       | N/A          | N/A           |
| A_33_P3316544  | 1,64465 | 1,64516 | -1,000353568 | ENST00000464300 | 165631    | NM_001113523 | PARP15        |
| A_33_P3216803  | 2,92088 | 2,92139 | -1,000353568 | N/A             | N/A       | CU691765     | N/A           |
| A_24_P205045   | 1,41497 | 1,4155  | -1,000367435 | ENST00000486496 | 26059     | NM_015576    | ERC2          |
| A_33_P3254912  | 1,80278 | 1,80333 | -1,000381304 | ENST00000284287 | 390275    | NM_001005194 | OR8A1         |
| A_21_P0005418  | 1,59229 | 1,59286 | -1,000395172 | N/A             | N/A       | N/A          | Inc-C7orf53-2 |
| A_22_P00003559 | 1,51794 | 1,51851 | -1,000395172 | N/A             | N/A       | N/A          | Inc-CCRN4L-5  |
| A_21_P0006311  | 1,54128 | 1,54186 | -1,000402106 | N/A             | N/A       | N/A          | Inc-C9orf80-1 |
| A_33_P3376239  | 11,1556 | 11,1562 | -1,000415975 | ENST00000257745 | 55904     | NM_182931    | KMT2E         |
| A_33_P3413895  | 1,51134 | 1,51194 | -1,000415975 | N/A             | 94158     | NR_003261    | CDRT15P1      |
| A_23_P120146   | 8,93174 | 8,93235 | -1,000422909 | ENST00000258449 | 9392      | NM_004257    | TGFBRAP1      |
| A_22_P00006841 | 1,45255 | 1,45317 | -1,000429844 | N/A             | N/A       | N/A          | Inc-GADD45B-1 |
| A_22_P00018444 | 1,58189 | 1,58251 | -1,000429844 | ENST00000512464 | N/A       | N/A          | N/A           |
| A_21_P0006568  | 1,64768 | 1,6483  | -1,000429844 | N/A             | N/A       | N/A          | Inc-PLP1-1    |
| A_23_P4628     | 1,56482 | 1,56546 | -1,000443713 | ENST00000341164 | 80095     | NM_025027    | ZNF606        |
| A_23_P215517   | 9,24155 | 9,24222 | -1,000464516 | ENST00000479700 | 55975     | NM_001172428 | KLHL7         |
| A_23_P4096     | 1,51726 | 1,51794 | -1,000471451 | ENST00000300900 | 762       | NM_000717    | CA4           |
| A_22_P00022715 | 1,66156 | 1,66226 | -1,000485321 | N/A             | 102724955 | XR_425460    | LOC102724955  |
| A_22_P00017745 | 1,64098 | 1,64169 | -1,000492256 | ENST00000582921 | N/A       | AK095723     | N/A           |

|                |         |         |              |                 |           |              |                |
|----------------|---------|---------|--------------|-----------------|-----------|--------------|----------------|
| A_22_P00011857 | 1,4757  | 1,47642 | -1,000499191 | N/A             | 100507071 | XR_110863    | LOC100507071   |
| A_24_P165545   | 2,55771 | 2,55844 | -1,000506125 | ENST00000379289 | 254173    | NM_153254    | TTL10          |
| A_33_P3288431  | 1,48359 | 1,48432 | -1,000506125 | ENST00000551163 | 160419    | NM_152589    | C12orf50       |
| A_21_P0010635  | 7,32238 | 7,32312 | -1,00051306  | ENST00000424711 | 101928079 | NR_104131    | LINC01057      |
| A_22_P00013302 | 1,5974  | 1,59814 | -1,00051306  | ENST00000569883 | N/A       | AF131786     | N/A            |
| A_33_P3259693  | 1,57    | 1,57074 | -1,00051306  | ENST00000334632 | 128366    | NM_001160325 | OR6P1          |
| A_21_P0003600  | 1,58094 | 1,58169 | -1,000519996 | N/A             | N/A       | N/A          | Inc-TBC1D1-1   |
| A_33_P3332627  | 8,7349  | 8,73568 | -1,000540801 | ENST00000417412 | N/A       | N/A          | N/A            |
| A_33_P3258602  | 1,64076 | 1,64156 | -1,000554672 | ENST00000302581 | 390190    | NM_001005566 | OR5B2          |
| A_23_P208085   | 1,47012 | 1,47093 | -1,000561607 | ENST00000483025 | 4155      | NM_001025101 | MBP            |
| A_21_P0009311  | 1,51801 | 1,51883 | -1,000568542 | N/A             | N/A       | N/A          | Inc-ACCN1-1    |
| A_33_P3407564  | 5,48223 | 5,48306 | -1,000575478 | N/A             | N/A       | N/A          | N/A            |
| A_21_P0005582  | 1,66337 | 1,6642  | -1,000575478 | N/A             | N/A       | N/A          | Inc-ARHGEF5-2  |
| A_33_P3413114  | 1,64489 | 1,64574 | -1,000589349 | ENST00000327883 | 92949     | NM_052866    | ADAMTSL1       |
| A_22_P00017774 | 1,37298 | 1,37383 | -1,000589349 | N/A             | N/A       | N/A          | Inc-YY1AP1-1   |
| A_33_P3322373  | 7,24112 | 7,24197 | -1,000589349 | ENST00000372038 | 26301     | NM_001282632 | GBGT1          |
| A_21_P0011204  | 1,48766 | 1,48852 | -1,000596284 | ENST00000605100 | 121952    | N/A          | METTL21EP      |
| A_33_P3420327  | 1,47136 | 1,47223 | -1,00060322  | N/A             | 85495     | CA413366     | RPPH1          |
| A_22_P00010859 | 6,10448 | 6,10536 | -1,000610156 | N/A             | N/A       | BC064338     | Inc-NOTCH2-1   |
| A_21_P0011325  | 1,45581 | 1,45669 | -1,000610156 | N/A             | N/A       | N/A          | XLOC_I2_004647 |
| A_21_P0001045  | 1,49515 | 1,49604 | -1,000617091 | N/A             | N/A       | N/A          | Inc-CDC73-2    |
| A_33_P3423859  | 10,7393 | 10,7402 | -1,000624027 | ENST00000370996 | 5509      | NM_006242    | PPP1R3D        |
| A_33_P3333992  | 5,31536 | 5,31627 | -1,000630963 | N/A             | 100132495 | AK127414     | LOC100132495   |
| A_21_P0012774  | 1,51523 | 1,51615 | -1,000637899 | ENST00000515128 | N/A       | N/A          | N/A            |
| A_33_P3353525  | 1,4869  | 1,48782 | -1,000637899 | ENST00000404622 | 5055      | N/A          | SERPINB2       |
| A_21_P0014416  | 1,35869 | 1,35961 | -1,000637899 | N/A             | N/A       | XR_109685    | N/A            |
| A_21_P0009894  | 1,36487 | 1,3658  | -1,000644835 | ENST00000453921 | N/A       | N/A          | N/A            |
| A_24_P37264    | 1,35427 | 1,3552  | -1,000644835 | ENST00000320892 | 9781      | NM_014746    | RNF144A        |
| A_22_P00007441 | 1,44659 | 1,44753 | -1,000651771 | N/A             | 100874374 | NR_046840    | ARHGEF38-IT1   |
| A_23_P391711   | 1,39927 | 1,40022 | -1,000658707 | ENST00000274024 | 2169      | NM_000134    | FABP2          |
| A_23_P41514    | 1,49499 | 1,49595 | -1,000665643 | ENST00000296513 | 132612    | NM_139243    | ADAD1          |
| A_22_P00023575 | 1,44999 | 1,45095 | -1,000665643 | ENST00000557547 | N/A       | DA576409     | N/A            |
| A_22_P00015110 | 1,51113 | 1,51211 | -1,000679515 | ENST00000522776 | N/A       | DA218095     | N/A            |

|                |         |         |              |                 |           |           |                      |
|----------------|---------|---------|--------------|-----------------|-----------|-----------|----------------------|
| A_22_P00020623 | 4,23785 | 4,23883 | -1,000679515 | N/A             | N/A       | N/A       | Inc-HYI-1            |
| A_22_P00015221 | 1,64373 | 1,64472 | -1,000686451 | N/A             | N/A       | DB052738  | Inc-SP110-1          |
| A_21_P0000569  | 1,5053  | 1,5063  | -1,000693387 | N/A             | 100303749 | NR_028474 | LOC100303749         |
| A_23_P53018    | 7,31869 | 7,3197  | -1,000700324 | ENST00000301790 | 117245    | NM_054108 | HRASLS5              |
| A_33_P3215527  | 1,4481  | 1,44911 | -1,000700324 | N/A             | N/A       | N/A       | N/A                  |
| A_22_P00008874 | 1,70728 | 1,7083  | -1,00070726  | N/A             | 727915    | NR_046012 | AGBL1-AS1            |
| A_22_P00022919 | 1,6442  | 1,64522 | -1,00070726  | ENST00000511514 | N/A       | N/A       | N/A                  |
| A_21_P0002542  | 1,64579 | 1,64681 | -1,00070726  | N/A             | N/A       | N/A       | Inc-TNP1-5           |
| A_33_P3217432  | 1,41785 | 1,41888 | -1,000714197 | ENST00000375849 | 23341     | BX648982  | DNAJC16              |
| A_33_P3793707  | 1,59465 | 1,59568 | -1,000714197 | N/A             | 157381    | BC033393  | LINC00964            |
| A_22_P00012086 | 1,51705 | 1,51808 | -1,000714197 | ENST00000564485 | N/A       | XR_133117 | N/A                  |
| A_24_P203134   | 1,56621 | 1,56725 | -1,000721133 | ENST00000371126 | 139170    | NM_178470 | DCAF12L1             |
| A_22_P00009141 | 1,59122 | 1,59229 | -1,000741943 | N/A             | N/A       | DB028748  | Inc-LIPG-2           |
| A_33_P3263497  | 3,27965 | 3,28072 | -1,000741943 | ENST00000401884 | 25992     | AL833363  | SNED1                |
| A_23_P159952   | 1,35232 | 1,35339 | -1,000741943 | ENST00000372728 | 55859     | NM_018476 | BEX1                 |
| A_33_P3278749  | 1,51307 | 1,51414 | -1,000741943 | N/A             | N/A       | AK128181  | Inc-BCL9L-1          |
| A_22_P00025017 | 1,49492 | 1,49599 | -1,000741943 | ENST00000438818 | 101929535 | XR_242017 | LOC101929535         |
| A_23_P380990   | 1,561   | 1,56209 | -1,000755816 | ENST00000272367 | 165530    | NM_173535 | CLEC4F               |
| A_22_P00004693 | 3,79134 | 3,79243 | -1,000755816 | N/A             | N/A       | DA625993  | nc-CTD-2517M22.14.1- |
| A_23_P15889    | 1,66497 | 1,66607 | -1,000762753 | ENST00000581425 | 147381    | NM_182511 | CBLN2                |
| A_22_P00009932 | 1,53906 | 1,54016 | -1,000762753 | ENST00000527997 | N/A       | N/A       | N/A                  |
| A_33_P3645805  | 14,1877 | 14,1888 | -1,000762753 | N/A             | N/A       | AK021797  | N/A                  |
| A_33_P3285024  | 10,3745 | 10,3756 | -1,000762753 | ENST00000343666 | 94107     | NM_053045 | TMEM203              |
| A_33_P3412087  | 1,39521 | 1,39632 | -1,000769689 | ENST00000239374 | 80129     | NM_025059 | CCDC170              |
| A_22_P00006915 | 1,44789 | 1,44901 | -1,000776626 | ENST00000562710 | 100861555 | NR_047495 | LINC00565            |
| A_21_P0003579  | 9,70128 | 9,7024  | -1,000776626 | N/A             | N/A       | N/A       | Inc-CPEB2-5          |
| A_21_P0005930  | 1,65835 | 1,65947 | -1,000776626 | ENST00000523852 | N/A       | N/A       | N/A                  |
| A_21_P0012652  | 1,54437 | 1,5455  | -1,000783563 | N/A             | N/A       | N/A       | XLOC_I2_011033       |
| A_22_P00008014 | 1,59633 | 1,59747 | -1,0007905   | N/A             | N/A       | N/A       | Inc-IFT140-1         |
| A_33_P3301485  | 1,45827 | 1,45942 | -1,000797437 | ENST00000491295 | 26088     | N/A       | GGA1                 |
| A_22_P00000179 | 1,64617 | 1,64732 | -1,000797437 | N/A             | N/A       | N/A       | Inc-ABHD12B-1        |
| A_22_P00002241 | 4,80933 | 4,81049 | -1,000804374 | ENST00000433460 | N/A       | N/A       | N/A                  |
| A_23_P160438   | 5,13579 | 5,137   | -1,00083906  | ENST00000241651 | 4656      | NM_002479 | MYOG                 |



|                |         |         |              |                 |           |              |                  |
|----------------|---------|---------|--------------|-----------------|-----------|--------------|------------------|
| A_33_P3252804  | 1,47224 | 1,47345 | -1,00083906  | ENST00000397541 | 494551    | NM_001105558 | WEE2             |
| A_33_P3291264  | 1,65767 | 1,65889 | -1,000845997 | N/A             | N/A       | BI767616     | Inc-LBX1-2       |
| A_33_P3420382  | 1,51819 | 1,51942 | -1,000852935 | N/A             | 100131492 | AF370412     | LOC100131492     |
| A_23_P109913   | 1,66597 | 1,66722 | -1,000866809 | ENST00000438735 | 10663     | NM_006564    | CXCR6            |
| A_22_P00025332 | 1,59434 | 1,59561 | -1,000880684 | ENST00000558454 | N/A       | N/A          | N/A              |
| A_23_P204208   | 1,59053 | 1,5918  | -1,000880684 | ENST00000539374 | 3824      | NM_002262    | KLRD1            |
| A_21_P0014005  | 1,51431 | 1,51559 | -1,000887622 | N/A             | N/A       | N/A          | N/A              |
| A_21_P0011410  | 1,65695 | 1,65824 | -1,00089456  | N/A             | N/A       | N/A          | Inc-ZNF280D-1    |
| A_23_P388379   | 1,50502 | 1,50632 | -1,000901497 | ENST00000355044 | 26033     | NM_207303    | ATRNL1           |
| A_23_P165061   | 15,2044 | 15,2057 | -1,000901497 | ENST00000592414 | 166       | NM_198969    | AES              |
| A_23_P40108    | 13,1135 | 13,1148 | -1,000901497 | ENST00000466192 | 1299      | NM_001853    | COL9A3           |
| A_33_P3360392  | 5,58305 | 5,58436 | -1,000908435 | ENST00000412122 | 100188953 | NR_024129    | LINC00092        |
| A_19_P00322946 | 1,65472 | 1,65603 | -1,000908435 | ENST00000468072 | 285401    | NR_027104    | LINC00698        |
| A_22_P00008315 | 1,48932 | 1,49064 | -1,000915373 | ENST00000427547 | N/A       | DA923414     | N/A              |
| A_33_P3366662  | 1,67634 | 1,67769 | -1,000936187 | ENST00000390432 | N/A       | X58737       | N/A              |
| A_21_P0012716  | 1,45441 | 1,45577 | -1,000943125 | ENST00000511453 | N/A       | N/A          | N/A              |
| A_21_P0002607  | 1,4981  | 1,49947 | -1,000950063 | N/A             | 102723413 | XR_425466    | LOC102723413     |
| A_23_P3014     | 1,62005 | 1,62143 | -1,000957001 | ENST00000304677 | 6039      | NM_005615    | RNASE6           |
| A_33_P3590673  | 1,37644 | 1,37782 | -1,000957001 | ENST00000508179 | 100505806 | NR_045196    | SNHG18           |
| A_22_P00021216 | 1,65264 | 1,65403 | -1,000963939 | N/A             | 101927020 | NR_125839    | LOC101927020     |
| A_22_P00023892 | 1,57436 | 1,57575 | -1,000963939 | N/A             | N/A       | N/A          | Inc-ALDH1A2-1    |
| A_33_P3647744  | 1,47883 | 1,48022 | -1,000963939 | N/A             | 401324    | NR_038864    | LOC401324        |
| A_33_P3339173  | 11,7405 | 11,7419 | -1,000970877 | ENST00000366839 | 6726      | NM_001130440 | SRP9             |
| A_21_P0014891  | 1,65422 | 1,65562 | -1,000970877 | N/A             | N/A       | N/A          | N/A              |
| A_23_P20980    | 14,0933 | 14,0947 | -1,000970877 | ENST00000528618 | 1537      | NM_001916    | CYC1             |
| A_23_P125042   | 6,28576 | 6,28719 | -1,000991692 | ENST00000187879 | 7673      | NM_013360    | ZNF222           |
| A_32_P81879    | 1,48048 | 1,48191 | -1,000991692 | ENST00000376971 | 128822    | NM_001008693 | CST9             |
| A_21_P0006622  | 1,45438 | 1,45581 | -1,000991692 | ENST00000458727 | 399717    | NR_104327    | GATA3-AS1        |
| A_21_P0010862  | 1,66548 | 1,66692 | -1,00099863  | ENST00000458084 | 387644    | N/A          | LINC00202-1      |
| A_22_P00021863 | 1,46206 | 1,46351 | -1,001005569 | N/A             | 102724176 | XR_425771    | LOC102724176     |
| A_21_P0008073  | 1,51559 | 1,51705 | -1,001012507 | N/A             | N/A       | N/A          | Inc-AL445989.1-9 |
| A_33_P3242104  | 1,51156 | 1,51302 | -1,001012507 | N/A             | N/A       | BG208718     | N/A              |
| A_21_P0009775  | 1,50391 | 1,50538 | -1,001019446 | N/A             | N/A       | N/A          | Inc-CDC42EP5-1   |

|                |         |         |              |                 |           |              |                       |
|----------------|---------|---------|--------------|-----------------|-----------|--------------|-----------------------|
| A_22_P00002837 | 1,43089 | 1,43237 | -1,001026384 | N/A             | N/A       | N/A          | Inc-C2orf84-1         |
| A_23_P111919   | 1,474   | 1,47549 | -1,001033323 | ENST00000475541 | 29942     | NM_013357    | PURG                  |
| A_23_P95130    | 11,3986 | 11,4001 | -1,001040261 | ENST00000473060 | 84255     | NM_207113    | SLC37A3               |
| A_23_P101237   | 10,5907 | 10,5922 | -1,001040261 | ENST00000592875 | 83608     | NM_031446    | C18orf21              |
| A_21_P0008984  | 1,69954 | 1,70104 | -1,001040261 | N/A             | N/A       | N/A          | Inc-IRF8-1            |
| A_24_P313096   | 10,8827 | 10,8842 | -1,001040261 | ENST00000261965 | 10426     | NM_006322    | TUBGCP3               |
| A_24_P178602   | 7,62367 | 7,62517 | -1,001040261 | ENST00000338230 | 162966    | NM_198457    | ZNF600                |
| A_23_P97328    | 12,1974 | 12,1989 | -1,001040261 | ENST00000472617 | 79169     | NM_024319    | C1orf35               |
| A_23_P146233   | 1,48034 | 1,48185 | -1,0010472   | ENST00000311322 | 4023      | NM_000237    | LPL                   |
| A_33_P3216955  | 1,51313 | 1,51465 | -1,001054139 | ENST00000621663 | 119504    | NM_001242546 | ANAPC16               |
| A_33_P3411980  | 1,45206 | 1,45358 | -1,001054139 | N/A             | 25890     | AL833204     | ABI3BP                |
| A_22_P00022136 | 1,64303 | 1,64456 | -1,001061078 | N/A             | N/A       | N/A          | Inc-DEF8-1            |
| A_22_P00001860 | 1,57581 | 1,57734 | -1,001061078 | ENST00000551387 | N/A       | N/A          | N/A                   |
| A_22_P00022001 | 1,48517 | 1,48671 | -1,001068017 | ENST00000509711 | N/A       | N/A          | N/A                   |
| A_22_P00012372 | 1,35147 | 1,35301 | -1,001068017 | ENST00000550337 | 101927058 | NR_110042    | LOC101927058          |
| A_32_P401091   | 1,48954 | 1,49109 | -1,001074955 | ENST00000250838 | 9426      | NM_004825    | CDY2A                 |
| A_22_P00011047 | 1,58036 | 1,58192 | -1,001081894 | N/A             | N/A       | N/A          | Inc-NTNG2-1           |
| A_21_P0000977  | 1,44679 | 1,44837 | -1,001095772 | ENST00000435828 | N/A       | N/A          | N/A                   |
| A_21_P0004521  | 1,51201 | 1,51359 | -1,001095772 | N/A             | N/A       | N/A          | Inc-C5orf27-1         |
| A_32_P300427   | 4,87911 | 4,88069 | -1,001095772 | ENST00000371149 | 164284    | NM_153360    | APCDD1L               |
| A_21_P0010192  | 1,49023 | 1,49183 | -1,001109651 | ENST00000441666 | N/A       | N/A          | N/A                   |
| A_23_P66739    | 1,71121 | 1,71281 | -1,001109651 | ENST00000574580 | 284111    | NM_177550    | SLC13A5               |
| A_23_P151778   | 1,66661 | 1,66822 | -1,00111659  | ENST00000250378 | 1215      | NM_001836    | CMA1                  |
| A_21_P0001411  | 1,95233 | 1,95394 | -1,00111659  | N/A             | N/A       | N/A          | Inc-CD46-2            |
| A_33_P3357000  | 1,59461 | 1,59624 | -1,001130468 | N/A             | N/A       | N/A          | N/A                   |
| A_19_P00322936 | 1,49095 | 1,49258 | -1,001130468 | N/A             | N/A       | N/A          | Inc-GTF2F2-2          |
| A_21_P0007313  | 1,592   | 1,59366 | -1,001151287 | N/A             | N/A       | N/A          | Inc-CDKN1C-1          |
| A_22_P00013283 | 1,71033 | 1,71202 | -1,001172105 | N/A             | N/A       | N/A          | nc-RP11-1070N10.3.1-1 |
| A_21_P0004702  | 1,56913 | 1,57083 | -1,001179045 | N/A             | 102724087 | XR_426112    | LOC102724087          |
| A_33_P3355618  | 1,45253 | 1,45423 | -1,001179045 | ENST00000607802 | 63930     | NR_033370    | LOC63930              |
| A_22_P00000701 | 1,46988 | 1,47158 | -1,001179045 | ENST00000519063 | 255926    | N/A          | ADAM5                 |
| A_21_P0009411  | 1,76996 | 1,77166 | -1,001179045 | ENST00000581183 | N/A       | N/A          | N/A                   |
| A_21_P0006151  | 1,49036 | 1,49207 | -1,001185984 | N/A             | N/A       | N/A          | Inc-ANXA1-1           |

|                |         |         |              |                 |           |           |                   |
|----------------|---------|---------|--------------|-----------------|-----------|-----------|-------------------|
| A_23_P97141    | 1,48569 | 1,48742 | -1,001199864 | ENST00000498352 | 5996      | NM_002922 | RGS1              |
| A_22_P00002673 | 1,46646 | 1,46819 | -1,001199864 | N/A             | N/A       | AA412646  | Inc-C1orf31-2     |
| A_22_P00002917 | 1,35639 | 1,35812 | -1,001199864 | N/A             | N/A       | N/A       | Inc-C5orf22-1     |
| A_33_P3245120  | 1,64192 | 1,64366 | -1,001206804 | N/A             | 200772    | NR_033841 | LOC200772         |
| A_21_P0009280  | 1,44583 | 1,44758 | -1,001213744 | N/A             | N/A       | N/A       | Inc-SEPT9-4       |
| A_22_P00017151 | 1,69211 | 1,69386 | -1,001213744 | N/A             | 101928731 | NR_110093 | LOC101928731      |
| A_22_P00019768 | 1,39572 | 1,39747 | -1,001213744 | N/A             | 101929595 | NR_125929 | LOC101929595      |
| A_21_P0007859  | 1,47363 | 1,47539 | -1,001220683 | N/A             | N/A       | N/A       | Inc-TMEM132B-3    |
| A_24_P294408   | 2,10817 | 2,10994 | -1,001227623 | ENST00000273371 | 51365     | NM_015900 | PLA1A             |
| A_33_P3413910  | 6,87484 | 6,87661 | -1,001227623 | ENST00000395737 | 79924     | NM_024866 | ADM2              |
| A_21_P0013935  | 1,47768 | 1,47946 | -1,001234563 | N/A             | N/A       | AK299452  | Inc-AC090186.1-1  |
| A_21_P0011152  | 1,64798 | 1,64976 | -1,001234563 | ENST00000438327 | 100874175 | N/A       | LINC00446         |
| A_24_P282416   | 4,45345 | 4,45524 | -1,001241503 | ENST00000372348 | 25        | NM_007313 | ABL1              |
| A_23_P8328     | 1,70176 | 1,70355 | -1,001241503 | ENST00000615358 | 3062      | NM_001526 | HCRTR2            |
| A_23_P109442   | 10,5449 | 10,5467 | -1,001248444 | ENST00000466781 | 89781     | NM_022081 | HPS4              |
| A_22_P00021059 | 1,49098 | 1,49278 | -1,001248444 | N/A             | N/A       | N/A       | Inc-CIT-3         |
| A_33_P3383556  | 1,5863  | 1,5881  | -1,001248444 | ENST00000434642 | 266629    | NM_174975 | SEC14L3           |
| A_22_P00005491 | 1,50598 | 1,50779 | -1,001255384 | N/A             | 100885789 | NR_104124 | IFNG-AS1          |
| A_22_P00006484 | 1,3741  | 1,37592 | -1,001262324 | N/A             | 100874239 | NR_046680 | ARHGAP26-AS1      |
| A_33_P3217094  | 1,47697 | 1,47879 | -1,001262324 | ENST00000329395 | 158381    | N/A       | ATP8B5P           |
| A_21_P0006123  | 1,36638 | 1,3682  | -1,001262324 | N/A             | N/A       | N/A       | Inc-KDM4C-4       |
| A_24_P942743   | 1,58854 | 1,59037 | -1,001269264 | ENST00000155093 | 7544      | NM_003411 | ZFY               |
| A_22_P00010262 | 1,50435 | 1,50622 | -1,001297026 | N/A             | 102724659 | NR_126000 | LOC102724659      |
| A_33_P3764663  | 1,57209 | 1,57397 | -1,001303966 | ENST00000599191 | 400058    | BC067894  | MKRN9P            |
| A_23_P353888   | 1,42655 | 1,42844 | -1,001310907 | ENST00000524396 | 81704     | NM_203447 | DOCK8             |
| A_23_P209129   | 1,45276 | 1,45465 | -1,001310907 | ENST00000301202 | 3904      | NM_002288 | LAIR2             |
| A_21_P0008236  | 1,44727 | 1,44916 | -1,001310907 | N/A             | N/A       | N/A       | Inc-AL445989.1-19 |
| A_23_P42045    | 10,6603 | 10,6622 | -1,001317847 | ENST00000392844 | 23595     | NM_181837 | ORC3              |
| A_32_P29965    | 1,45513 | 1,45704 | -1,001324788 | ENST00000243314 | 4108      | NM_005365 | MAGEA9            |
| A_21_P0012636  | 1,58764 | 1,58955 | -1,001324788 | N/A             | N/A       | N/A       | XLOC_I2_010947    |
| A_22_P00019507 | 1,62549 | 1,62742 | -1,001338669 | ENST00000565441 | 101927508 | XR_243453 | LOC101927508      |
| A_33_P3673242  | 1,41576 | 1,41772 | -1,001359492 | ENST00000624897 | N/A       | AF113687  | N/A               |
| A_24_P167338   | 6,04838 | 6,05034 | -1,001359492 | ENST00000527633 | 27314     | NM_014488 | RAB30             |

|                |         |         |              |                 |           |              |                |
|----------------|---------|---------|--------------|-----------------|-----------|--------------|----------------|
| A_22_P00004344 | 1,64188 | 1,64385 | -1,001366433 | ENST00000577175 | N/A       | N/A          | N/A            |
| A_33_P3308872  | 1,4361  | 1,43808 | -1,001373374 | ENST00000420508 | 25812     | NR_024591    | POM121L1P      |
| A_33_P3294645  | 1,59103 | 1,59304 | -1,001394197 | ENST00000271385 | 92235     | NM_001080426 | DUSP27         |
| A_21_P0004939  | 1,4496  | 1,45162 | -1,001401138 | N/A             | N/A       | N/A          | Inc-LAMA2-1    |
| A_22_P00013062 | 1,3549  | 1,35693 | -1,001408079 | ENST00000559227 | 283761    | NR_027076    | LINC00928      |
| A_22_P00022553 | 1,49729 | 1,49932 | -1,001408079 | N/A             | N/A       | N/A          | Inc-DNAJA4-1   |
| A_22_P00000257 | 1,44759 | 1,44962 | -1,001408079 | N/A             | 100130256 | XR_249242    | LOC100130256   |
| A_23_P27400    | 1,57058 | 1,57263 | -1,001421962 | ENST00000222115 | 3036      | NM_001523    | HAS1           |
| A_33_P3306110  | 1,65091 | 1,65297 | -1,001428903 | ENST00000409998 | 10203     | NM_005795    | CALCRL         |
| A_21_P0006919  | 1,50971 | 1,51177 | -1,001428903 | N/A             | N/A       | N/A          | Inc-C10orf96-1 |
| A_22_P00010063 | 1,65092 | 1,653   | -1,001442786 | N/A             | N/A       | DB524386     | Inc-MORN2-1    |
| A_23_P213706   | 1,40225 | 1,40433 | -1,001442786 | ENST00000350025 | 3565      | NM_000589    | IL4            |
| A_24_P384569   | 7,76135 | 7,76345 | -1,001456669 | ENST00000333395 | 2130      | NM_001163287 | EWSR1          |
| A_21_P0002862  | 1,68416 | 1,68626 | -1,001456669 | ENST00000478239 | N/A       | N/A          | N/A            |
| A_23_P256773   | 11,0459 | 11,048  | -1,001456669 | ENST00000478754 | 7260      | NM_003310    | TSSC1          |
| A_33_P3305208  | 13,4858 | 13,4879 | -1,001456669 | ENST00000534518 | N/A       | N/A          | N/A            |
| A_33_P3272513  | 1,5283  | 1,53042 | -1,001470552 | N/A             | N/A       | N/A          | N/A            |
| A_22_P00025169 | 1,55493 | 1,55706 | -1,001477494 | N/A             | 100874273 | NR_046798    | TGFA-IT1       |
| A_21_P0010659  | 1,40161 | 1,40375 | -1,001484436 | N/A             | N/A       | N/A          | XLOC_I2_001153 |
| A_21_P0001770  | 1,61169 | 1,61384 | -1,001491377 | ENST00000492352 | 101926966 | NR_110201    | LOC101926966   |
| A_33_P3413845  | 7,27703 | 7,27919 | -1,001498319 | ENST00000215570 | 26517     | NM_012458    | TIMM13         |
| A_33_P3462422  | 1,48791 | 1,49008 | -1,001505261 | ENST00000368248 | 387357    | NM_001164685 | THEMIS         |
| A_33_P3298810  | 1,47433 | 1,47651 | -1,001512203 | ENST00000327809 | 2865      | NM_005304    | FFAR3          |
| A_33_P3265783  | 1,65967 | 1,66185 | -1,001512203 | ENST00000246895 | 6779      | NM_003154    | STATH          |
| A_24_P63468    | 1,66001 | 1,6622  | -1,001519145 | ENST00000512135 | 64902     | NM_031900    | AGXT2          |
| A_21_P0008839  | 1,47974 | 1,48193 | -1,001519145 | N/A             | N/A       | N/A          | Inc-SLCO3A1-1  |
| A_33_P3307337  | 1,50262 | 1,50483 | -1,001533029 | ENST00000587800 | 5596      | NM_002747    | MAPK4          |
| A_33_P3357143  | 1,64398 | 1,64619 | -1,001533029 | ENST00000404297 | 4528      | XM_006712023 | MTIF2          |
| A_21_P0013641  | 1,44819 | 1,45041 | -1,001539971 | N/A             | 403323    | N/A          | LOC403323      |
| A_22_P00020222 | 1,61658 | 1,61881 | -1,001546913 | N/A             | N/A       | N/A          | Inc-OR52B2-1   |
| A_22_P00006108 | 4,39245 | 4,39469 | -1,001553856 | N/A             | N/A       | BU567998     | Inc-FAM171B-1  |
| A_22_P00014012 | 1,49818 | 1,50043 | -1,001560798 | ENST00000440116 | 100996635 | NR_110621    | LOC100996635   |
| A_21_P0004063  | 1,69967 | 1,70194 | -1,001574683 | N/A             | N/A       | N/A          | Inc-UBE2B-1    |

|                |         |         |              |                 |           |              |                |
|----------------|---------|---------|--------------|-----------------|-----------|--------------|----------------|
| A_22_P00011173 | 1,44188 | 1,44416 | -1,001581625 | ENST00000520075 | N/A       | N/A          | N/A            |
| A_21_P0009213  | 1,68838 | 1,69067 | -1,001588567 | N/A             | N/A       | N/A          | Inc-MIS12-1    |
| A_21_P0014117  | 1,57897 | 1,58127 | -1,00159551  | N/A             | 100507210 | XR_241571    | LOC100507210   |
| A_33_P3238280  | 1,65376 | 1,65607 | -1,001602453 | ENST00000389567 | 83850     | NM_031913    | ESYT3          |
| A_19_P00805263 | 1,51275 | 1,51507 | -1,001609395 | ENST00000415479 | N/A       | N/A          | N/A            |
| A_22_P00014197 | 1,54733 | 1,54965 | -1,001609395 | ENST00000552413 | N/A       | N/A          | N/A            |
| A_24_P3005     | 1,36144 | 1,36376 | -1,001609395 | ENST00000409435 | 6335      | NM_002977    | SCN9A          |
| A_22_P00018155 | 1,54329 | 1,54563 | -1,00162328  | ENST00000589476 | N/A       | N/A          | N/A            |
| A_23_P14673    | 1,69508 | 1,69742 | -1,00162328  | ENST00000559327 | 57722     | NM_020962    | IGDCC4         |
| A_22_P00018401 | 1,39985 | 1,4022  | -1,001630223 | N/A             | N/A       | N/A          | Inc-CCL1-2     |
| A_21_P0004168  | 1,50407 | 1,50643 | -1,001637166 | ENST00000507813 | N/A       | N/A          | N/A            |
| A_22_P00003823 | 1,70618 | 1,70855 | -1,001644109 | N/A             | N/A       | N/A          | Inc-CDS1-1     |
| A_33_P3393537  | 9,78947 | 9,79184 | -1,001644109 | ENST00000539896 | 5724      | NM_001164722 | PTAFR          |
| A_22_P00017699 | 1,51042 | 1,5128  | -1,001651052 | N/A             | N/A       | AL704334     | Inc-XKR9-1     |
| A_22_P00017187 | 1,43635 | 1,43873 | -1,001651052 | N/A             | N/A       | N/A          | Inc-UBXN4-2    |
| A_21_P0012721  | 1,64545 | 1,64784 | -1,001657995 | ENST00000508199 | N/A       | N/A          | N/A            |
| A_22_P00010134 | 1,39063 | 1,39302 | -1,001657995 | N/A             | N/A       | N/A          | Inc-MRPL32-2   |
| A_23_P387031   | 3,19656 | 3,19896 | -1,001664938 | ENST00000407622 | 91522     | NM_173465    | COL23A1        |
| A_32_P95151    | 1,58457 | 1,58701 | -1,00169271  | ENST00000567129 | N/A       | BC029043     | N/A            |
| A_23_P39517    | 8,32306 | 8,32551 | -1,001699653 | ENST00000490133 | 55133     | NM_018079    | SRBD1          |
| A_22_P00004261 | 1,48687 | 1,48932 | -1,001699653 | ENST00000448901 | 101929390 | N/A          | LINC01247      |
| A_22_P00020253 | 1,50671 | 1,50916 | -1,001699653 | N/A             | N/A       | N/A          | Inc-GADL1-3    |
| A_22_P00012696 | 1,5128  | 1,51525 | -1,001699653 | N/A             | 101929202 | NR_121652    | MKX-AS1        |
| A_24_P26792    | 1,44843 | 1,45092 | -1,001727427 | ENST00000360774 | 140803    | NM_017662    | TRPM6          |
| A_21_P0005148  | 1,51707 | 1,51956 | -1,001727427 | N/A             | N/A       | N/A          | Inc-FAM120B-3  |
| A_33_P3318097  | 1,63937 | 1,64186 | -1,001727427 | ENST00000332644 | 132724    | NM_182502    | TMPRSS11B      |
| A_21_P0011047  | 13,7522 | 13,7547 | -1,00173437  | ENST00000539977 | N/A       | N/A          | N/A            |
| A_24_P304723   | 13,478  | 13,4805 | -1,00173437  | ENST00000558492 | 5479      | NM_000942    | PPIB           |
| A_24_P658413   | 3,3909  | 3,39341 | -1,001741314 | ENST00000536621 | 10071     | NM_001164462 | MUC12          |
| A_22_P00004095 | 1,66128 | 1,66379 | -1,001741314 | N/A             | N/A       | N/A          | Inc-CITED2-1   |
| A_33_P3527931  | 1,48637 | 1,4889  | -1,001755201 | ENST00000378187 | 100170765 | NM_001130514 | ERICH4         |
| A_21_P0007793  | 1,65948 | 1,66201 | -1,001755201 | N/A             | N/A       | N/A          | Inc-SLC15A4-12 |
| A_22_P00022149 | 1,65333 | 1,65587 | -1,001762145 | N/A             | N/A       | N/A          | Inc-PCDH8-2    |

|                |         |         |              |                 |           |              |                      |
|----------------|---------|---------|--------------|-----------------|-----------|--------------|----------------------|
| A_21_P0001973  | 1,50611 | 1,50867 | -1,001776032 | N/A             | N/A       | N/A          | Inc-CCDC140-5        |
| A_21_P0001574  | 1,48535 | 1,48791 | -1,001776032 | N/A             | N/A       | N/A          | Inc-WARS2-2          |
| A_23_P48198    | 1,59663 | 1,5992  | -1,001782976 | ENST00000548660 | 83468     | NM_031302    | GLT8D2               |
| A_21_P0009222  | 1,50979 | 1,51236 | -1,001782976 | N/A             | N/A       | N/A          | Inc-COX10-6          |
| A_22_P00005402 | 1,64016 | 1,64274 | -1,00178992  | ENST00000580659 | 101927430 | XR_245478    | LOC101927430         |
| A_23_P92928    | 1,66003 | 1,66261 | -1,00178992  | ENST00000263413 | 729       | NM_000065    | C6                   |
| A_22_P00008842 | 1,64267 | 1,64525 | -1,00178992  | ENST00000413757 | N/A       | N/A          | N/A                  |
| A_33_P3281728  | 1,48303 | 1,48563 | -1,001803808 | N/A             | N/A       | N/A          | N/A                  |
| A_24_P257511   | 1,50105 | 1,50367 | -1,001817696 | ENST00000274353 | 635       | NM_001713    | BHMT                 |
| A_21_P0006060  | 1,4746  | 1,47722 | -1,001817696 | N/A             | N/A       | N/A          | Inc-COL5A1-2         |
| A_23_P15603    | 9,03017 | 9,03283 | -1,001845472 | ENST00000611231 | 79922     | NM_024864    | MRM1                 |
| A_21_P0001292  | 1,65671 | 1,65937 | -1,001845472 | N/A             | N/A       | N/A          | Inc-FOXD2-2          |
| A_33_P3784283  | 9,24819 | 9,25086 | -1,001852417 | ENST00000342505 | 3716      | NM_002227    | JAK1                 |
| A_24_P144332   | 1,56634 | 1,56902 | -1,001859361 | N/A             | 55449     | AF116636     | DHRS4-AS1            |
| A_22_P00000953 | 1,68164 | 1,68432 | -1,001859361 | N/A             | N/A       | N/A          | Inc-AKT1-2           |
| A_22_P00017690 | 1,49711 | 1,4998  | -1,001866305 | N/A             | N/A       | N/A          | Inc-XCL1-2           |
| A_33_P3242264  | 11,1112 | 11,1139 | -1,00187325  | ENST00000307089 | 387338    | NM_199044    | NSUN4                |
| A_22_P00015084 | 1,37999 | 1,38269 | -1,00187325  | N/A             | N/A       | AF400502     | Inc-SNURF-3          |
| A_33_P3228739  | 6,00469 | 6,00739 | -1,00187325  | ENST00000377924 | 100505591 | NM_001195545 | LRR3C                |
| A_33_P3361671  | 3,59167 | 3,59438 | -1,001880194 | N/A             | N/A       | N/A          | N/A                  |
| A_22_P00002508 | 1,44488 | 1,44759 | -1,001880194 | ENST00000569877 | N/A       | N/A          | N/A                  |
| A_33_P3341916  | 1,48372 | 1,48644 | -1,001887139 | ENST00000453436 | 170371    | NM_001288743 | C10orf128            |
| A_22_P00016649 | 1,56271 | 1,56543 | -1,001887139 | N/A             | N/A       | DA872620     | Inc-TP53I11-5        |
| A_22_P00008625 | 1,64233 | 1,64505 | -1,001887139 | ENST00000508484 | 339978    | XR_245259    | LOC339978            |
| A_21_P0007415  | 1,63324 | 1,63597 | -1,001894083 | N/A             | N/A       | N/A          | Inc-ROBO4-1          |
| A_23_P362770   | 1,70857 | 1,7113  | -1,001894083 | ENST00000296449 | 339834    | NM_178173    | CCDC36               |
| A_24_P212549   | 1,67249 | 1,67524 | -1,001907973 | ENST00000434803 | N/A       | XR_250827    | N/A                  |
| A_22_P00025439 | 4,03953 | 4,04228 | -1,001907973 | ENST00000418612 | 104355220 | N/A          | LINC01219            |
| A_22_P00007629 | 1,65619 | 1,65894 | -1,001907973 | N/A             | N/A       | N/A          | Inc-HENMT1-1         |
| A_22_P00025053 | 1,35482 | 1,35758 | -1,001914917 | N/A             | N/A       | N/A          | Inc-RP11-334E6.3.1-2 |
| A_22_P00017399 | 1,45114 | 1,45392 | -1,001928807 | N/A             | N/A       | DB448840     | Inc-VAX2-2           |
| A_23_P125680   | 1,45937 | 1,46215 | -1,001928807 | ENST00000440464 | 55026     | NM_017938    | TMEM255A             |
| A_21_P0007063  | 1,48337 | 1,48616 | -1,001935752 | N/A             | N/A       | N/A          | Inc-PHYHIPL-2        |

|                |         |         |              |                 |           |              |                       |
|----------------|---------|---------|--------------|-----------------|-----------|--------------|-----------------------|
| A_23_P129075   | 6,70151 | 6,70431 | -1,001942697 | ENST00000478130 | 79968     | NM_024908    | WDR76                 |
| A_21_P0001580  | 1,63829 | 1,6411  | -1,001949642 | N/A             | N/A       | N/A          | Inc-C1orf138-2        |
| A_21_P0004098  | 1,44927 | 1,45209 | -1,001956587 | N/A             | N/A       | N/A          | Inc-C5orf49-2         |
| A_22_P00002497 | 1,48411 | 1,48693 | -1,001956587 | ENST00000563338 | N/A       | BM705207     | N/A                   |
| A_21_P0005438  | 1,69067 | 1,6935  | -1,001963532 | N/A             | N/A       | N/A          | Inc-RP11-1220K2.2.1-1 |
| A_21_P0013077  | 1,65086 | 1,6537  | -1,001970477 | N/A             | N/A       | N/A          | XLOC_I2_012942        |
| A_24_P196528   | 1,4619  | 1,46475 | -1,001977422 | ENST00000535699 | 23418     | NM_201253    | CRB1                  |
| A_24_P223018   | 1,57263 | 1,5755  | -1,001991312 | ENST00000302328 | 11280     | NM_014139    | SCN11A                |
| A_33_P3379268  | 1,44734 | 1,45021 | -1,001991312 | ENST00000571800 | 388325    | NM_207103    | SCIMP                 |
| A_21_P0006103  | 1,48732 | 1,4902  | -1,001998258 | ENST00000423632 | N/A       | N/A          | N/A                   |
| A_21_P0008868  | 1,66101 | 1,66391 | -1,002012148 | N/A             | N/A       | N/A          | Inc-RP11-82I10.1.1-4  |
| A_33_P3281473  | 1,48333 | 1,48623 | -1,002012148 | N/A             | 100131726 | NR_024479    | FAM83A-AS1            |
| A_21_P0007618  | 1,484   | 1,4869  | -1,002012148 | N/A             | N/A       | N/A          | Inc-STAB2-1           |
| A_22_P00000591 | 1,37466 | 1,37756 | -1,002012148 | N/A             | 102723456 | XR_424816    | LOC102723456          |
| A_23_P152655   | 13,2083 | 13,2112 | -1,002012148 | ENST00000412356 | 3384      | NM_000873    | ICAM2                 |
| A_22_P00024569 | 1,39475 | 1,39766 | -1,002019094 | N/A             | N/A       | N/A          | Inc-OTX2-2            |
| A_21_P0003640  | 1,44481 | 1,44772 | -1,002019094 | N/A             | N/A       | N/A          | Inc-UGT8-4            |
| A_33_P3246513  | 2,05212 | 2,05503 | -1,002019094 | ENST00000510508 | 1735      | NM_001362    | DIO3                  |
| A_32_P148538   | 1,49774 | 1,50066 | -1,002026039 | ENST00000457765 | 9890      | NM_014839    | LPPR4                 |
| A_33_P3311730  | 4,54803 | 4,55095 | -1,002026039 | N/A             | N/A       | N/A          | N/A                   |
| A_21_P0012912  | 1,4169  | 1,41983 | -1,002032985 | ENST00000274361 | 256006    | N/A          | ANKRD31               |
| A_33_P3397507  | 1,45421 | 1,45714 | -1,002032985 | ENST00000380291 | 8905      | XM_005274612 | AP1S2                 |
| A_22_P00009796 | 1,50302 | 1,50596 | -1,002039931 | ENST00000412944 | 100507073 | N/A          | LOC100507073          |
| A_24_P202319   | 1,64123 | 1,64418 | -1,002046876 | ENST00000576957 | 489       | NM_174958    | ATP2A3                |
| A_33_P3215676  | 1,50564 | 1,5086  | -1,002053822 | ENST00000381273 | 100287284 | NM_001146221 | MANSC4                |
| A_21_P0012986  | 1,66216 | 1,66512 | -1,002053822 | N/A             | N/A       | N/A          | Inc-FGF10-3           |
| A_33_P3297813  | 1,57642 | 1,57941 | -1,002074659 | N/A             | 1756      | BC036103     | DMD                   |
| A_22_P00007068 | 1,45026 | 1,45327 | -1,002088551 | N/A             | N/A       | N/A          | Inc-GLDN-3            |
| A_21_P0003112  | 1,5391  | 1,54211 | -1,002088551 | N/A             | N/A       | N/A          | Inc-SCN11A-1          |
| A_33_P3273524  | 1,45052 | 1,45355 | -1,002102443 | ENST00000257951 | 3890      | NM_033045    | KRT84                 |
| A_23_P411947   | 1,58643 | 1,58946 | -1,002102443 | ENST00000367565 | 127670    | NM_172000    | TEDDM1                |
| A_32_P55804    | 1,63745 | 1,64049 | -1,002109389 | ENST00000371477 | 988       | NM_001253    | CDC5L                 |
| A_21_P0000805  | 1,61759 | 1,62063 | -1,002109389 | N/A             | 100507443 | NR_038437    | LOC100507443          |

|                |         |         |              |                 |           |              |                |
|----------------|---------|---------|--------------|-----------------|-----------|--------------|----------------|
| A_33_P3404596  | 1,51192 | 1,51496 | -1,002109389 | N/A             | N/A       | N/A          | N/A            |
| A_33_P3838128  | 1,56428 | 1,56732 | -1,002109389 | N/A             | 102724167 | DR033788     | PABPC5-AS1     |
| A_21_P0013622  | 2,78723 | 2,79029 | -1,002123281 | ENST00000423965 | 1182      | NM_001243372 | CLCN3          |
| A_33_P3275055  | 1,53072 | 1,53379 | -1,002130228 | ENST00000621530 | 256435    | NM_001160011 | ST6GALNAC3     |
| A_33_P3405023  | 1,46689 | 1,46997 | -1,002137174 | N/A             | 338436    | NR_103545    | BLACE          |
| A_22_P00010440 | 1,50276 | 1,50584 | -1,002137174 | ENST00000556602 | N/A       | BX648929     | N/A            |
| A_21_P0009914  | 1,48398 | 1,48706 | -1,002137174 | ENST00000433766 | 101927796 | NR_110064    | LINC01441      |
| A_33_P3280367  | 1,36756 | 1,37064 | -1,002137174 | ENST00000475131 | 25830     | NM_014351    | SULT4A1        |
| A_21_P0002115  | 1,50952 | 1,51261 | -1,00214412  | ENST00000441356 | 101929260 | N/A          | LOC101929260   |
| A_21_P0010934  | 1,70839 | 1,7115  | -1,002158013 | N/A             | 101928080 | XR_424103    | LOC101928080   |
| A_33_P3236247  | 1,50749 | 1,51062 | -1,002171906 | N/A             | N/A       | N/A          | N/A            |
| A_23_P80295    | 1,66131 | 1,66444 | -1,002171906 | ENST00000358763 | 8224      | NM_003490    | SYN3           |
| A_23_P144326   | 1,44596 | 1,44909 | -1,002171906 | ENST00000296525 | 140458    | NM_080874    | ASB5           |
| A_22_P00014725 | 1,63874 | 1,64188 | -1,002178852 | N/A             | N/A       | AK093513     | Inc-SLC2A12-4  |
| A_23_P211244   | 9,25128 | 9,25442 | -1,002178852 | ENST00000397637 | 3275      | NM_206962    | PRMT2          |
| A_22_P00021716 | 1,48704 | 1,49019 | -1,002185799 | N/A             | N/A       | N/A          | Inc-LAMA1-3    |
| A_21_P0008951  | 1,38021 | 1,38338 | -1,002199692 | N/A             | N/A       | N/A          | Inc-SETD6-3    |
| A_22_P00019369 | 1,56937 | 1,57254 | -1,002199692 | ENST00000398992 | 255649    | XR_247225    | OOSP1          |
| A_33_P3363949  | 1,42759 | 1,43076 | -1,002199692 | ENST00000361760 | 390142    | NM_001001967 | OR5D13         |
| A_21_P0011184  | 9,82272 | 9,8259  | -1,002206639 | N/A             | N/A       | N/A          | XL0C_I2_003992 |
| A_23_P165247   | 11,8428 | 11,846  | -1,002220533 | ENST00000585485 | 26528     | NM_170711    | DAZAP1         |
| A_24_P200219   | 1,45951 | 1,46271 | -1,002220533 | ENST00000264234 | 7348      | NM_006952    | UPK1B          |
| A_23_P135669   | 1,47989 | 1,48311 | -1,002234427 | ENST00000526750 | 81796     | NM_030958    | SLCO5A1        |
| A_21_P0005769  | 1,45236 | 1,45559 | -1,002241374 | N/A             | N/A       | N/A          | Inc-KHDRBS3-9  |
| A_24_P852601   | 1,65854 | 1,66177 | -1,002241374 | ENST00000396423 | 3174      | NM_004133    | HNF4G          |
| A_22_P00008029 | 1,50782 | 1,51105 | -1,002241374 | N/A             | N/A       | N/A          | Inc-IGFBP1-1   |
| A_23_P251785   | 9,16725 | 9,17049 | -1,002248321 | ENST00000379406 | 79612     | NM_024561    | NAA16          |
| A_21_P0009859  | 1,35348 | 1,35673 | -1,002255268 | N/A             | N/A       | N/A          | Inc-PFDN4-1    |
| A_23_P45598    | 1,35169 | 1,35496 | -1,002269162 | ENST00000602818 | 442867    | NM_001002760 | BPY2B          |
| A_21_P0014508  | 1,41951 | 1,42278 | -1,002269162 | N/A             | N/A       | AW513664     | N/A            |
| A_21_P0014711  | 7,97378 | 7,97706 | -1,002276109 | N/A             | 9470      | NM_001282958 | EIF4E2         |
| A_21_P0003285  | 1,65769 | 1,66098 | -1,002283056 | N/A             | N/A       | N/A          | Inc-ADAMTS9-2  |
| A_23_P52668    | 1,54443 | 1,54772 | -1,002283056 | ENST00000531174 | 10004     | NM_005468    | NAALADL1       |



|                |         |         |              |                 |           |              |                  |
|----------------|---------|---------|--------------|-----------------|-----------|--------------|------------------|
| A_33_P3422812  | 10,0332 | 10,0365 | -1,002290004 | N/A             | 647087    | NM_001130929 | C7orf73          |
| A_21_P0012193  | 1,65011 | 1,65341 | -1,002290004 | ENST00000439840 | 54072     | NR_024027    | LINC00158        |
| A_21_P0010875  | 7,74847 | 7,75178 | -1,002296951 | N/A             | N/A       | N/A          | XLOC_I2_001967   |
| A_22_P00006452 | 1,54236 | 1,54567 | -1,002296951 | ENST00000504799 | N/A       | N/A          | N/A              |
| A_21_P0011139  | 1,44638 | 1,44972 | -1,002317794 | N/A             | N/A       | N/A          | XLOC_I2_003682   |
| A_23_P254434   | 1,58306 | 1,58641 | -1,002324741 | ENST00000400237 | 10739     | NM_006605    | RFPL2            |
| A_33_P3324750  | 1,44791 | 1,45127 | -1,002331689 | N/A             | N/A       | AK125806     | lnc-AC092117.1-1 |
| A_22_P00004205 | 1,50797 | 1,51134 | -1,002338636 | N/A             | 100874212 | NR_046716    | MYCBP2-AS1       |
| A_21_P0009115  | 3,17717 | 3,18056 | -1,002352532 | ENST00000563921 | 101928737 | NR_110943    | LOC101928737     |
| A_33_P3420392  | 1,35924 | 1,36263 | -1,002352532 | ENST00000371105 | 7512      | N/A          | XPNPEP2          |
| A_32_P42197    | 15,9892 | 15,9926 | -1,00235948  | ENST00000340913 | 3178      | NM_031157    | HNRNPA1          |
| A_33_P3284463  | 12,5251 | 12,5285 | -1,00235948  | ENST00000381733 | 427       | NM_177924    | ASAH1            |
| A_21_P0003277  | 1,69918 | 1,70258 | -1,00235948  | N/A             | N/A       | N/A          | lnc-C3orf32-4    |
| A_32_P88719    | 6,60298 | 6,60638 | -1,00235948  | ENST00000304236 | 282808    | NM_001031834 | RAB40AL          |
| A_21_P0009865  | 1,46619 | 1,4696  | -1,002366427 | ENST00000366097 | N/A       | N/A          | N/A              |
| A_23_P352684   | 8,43019 | 8,4336  | -1,002366427 | ENST00000341516 | 8816      | NM_003861    | DCAF5            |
| A_22_P00015621 | 4,91043 | 4,91385 | -1,002373375 | ENST00000428200 | 79847     | NM_024789    | TMEM180          |
| A_22_P00020965 | 1,40062 | 1,40405 | -1,002380323 | N/A             | 101928052 | NR_125888    | LOC101928052     |
| A_33_P3405864  | 1,53379 | 1,53722 | -1,002380323 | N/A             | N/A       | N/A          | N/A              |
| A_22_P00011437 | 1,58139 | 1,58484 | -1,002394219 | ENST00000518330 | 101927908 | XR_245289    | LOC101927908     |
| A_33_P3295098  | 1,49355 | 1,497   | -1,002394219 | ENST00000289135 | 83850     | N/A          | ESYT3            |
| A_32_P215943   | 1,56539 | 1,56889 | -1,00242896  | ENST00000549354 | 126536    | NR_026828    | LINC00661        |
| A_21_P0004668  | 1,64716 | 1,65066 | -1,00242896  | N/A             | N/A       | N/A          | lnc-GJA10-1      |
| A_33_P3417222  | 12,8783 | 12,8818 | -1,00242896  | ENST00000378430 | 971       | AK309268     | CD72             |
| A_22_P00008514 | 1,44479 | 1,44832 | -1,002449805 | ENST00000554252 | N/A       | BX102671     | N/A              |
| A_22_P00013155 | 1,63622 | 1,63975 | -1,002449805 | ENST00000429317 | N/A       | N/A          | N/A              |
| A_21_P0005889  | 1,67343 | 1,67697 | -1,002456754 | N/A             | N/A       | N/A          | lnc-EXT1-4       |
| A_33_P3272184  | 1,44897 | 1,45251 | -1,002456754 | N/A             | 100131532 | NR_027434    | LOC100131532     |
| A_33_P3297808  | 1,46398 | 1,46752 | -1,002456754 | N/A             | N/A       | N/A          | N/A              |
| A_21_P0001461  | 1,44847 | 1,45204 | -1,0024776   | N/A             | N/A       | N/A          | lnc-C1orf174-2   |
| A_22_P00004309 | 1,65973 | 1,6633  | -1,0024776   | ENST00000451707 | N/A       | N/A          | N/A              |
| A_21_P0004369  | 1,48057 | 1,48416 | -1,002491497 | N/A             | N/A       | N/A          | lnc-CDH9-2       |
| A_22_P00024215 | 1,50018 | 1,50377 | -1,002491497 | ENST00000533812 | 100507431 | XR_429014    | LOC100507431     |

|                |         |         |              |                 |           |              |                  |
|----------------|---------|---------|--------------|-----------------|-----------|--------------|------------------|
| A_22_P00003970 | 1,66125 | 1,66484 | -1,002491497 | ENST00000555297 | N/A       | N/A          | N/A              |
| A_22_P00024314 | 1,6516  | 1,65523 | -1,002519292 | N/A             | N/A       | BX118099     | Inc-ERICH1-8     |
| A_21_P0002084  | 1,47219 | 1,47584 | -1,00253319  | ENST00000430551 | 101927360 | NR_110113    | LINC01103        |
| A_21_P0009829  | 1,50194 | 1,50562 | -1,002554038 | ENST00000432244 | 100505515 | N/A          | LOC100505515     |
| A_22_P00025901 | 1,64096 | 1,64465 | -1,002560987 | ENST00000559394 | N/A       | BX119465     | N/A              |
| A_33_P3254675  | 1,47195 | 1,47564 | -1,002560987 | N/A             | N/A       | N/A          | N/A              |
| A_24_P873764   | 11,8716 | 11,8753 | -1,002567936 | ENST00000614808 | 613       | NM_004327    | BCR              |
| A_33_P3244843  | 9,4193  | 9,423   | -1,002567936 | ENST00000529249 | 53632     | NM_017431    | PRKAG3           |
| A_24_P100996   | 1,57874 | 1,58244 | -1,002567936 | ENST00000324559 | 203859    | NM_213599    | ANO5             |
| A_24_P169507   | 1,48028 | 1,484   | -1,002581835 | ENST00000379439 | 140453    | NM_001040105 | MUC17            |
| A_33_P3353821  | 1,57144 | 1,57516 | -1,002581835 | ENST00000441055 | N/A       | N/A          | N/A              |
| A_21_P0006828  | 1,64788 | 1,65162 | -1,002595734 | N/A             | N/A       | N/A          | Inc-AL137145.1-4 |
| A_21_P0008867  | 1,39913 | 1,40287 | -1,002595734 | N/A             | N/A       | N/A          | Inc-RGMA-9       |
| A_21_P0004295  | 1,49675 | 1,5005  | -1,002602683 | ENST00000515533 | 56990     | N/A          | CDC42SE2         |
| A_22_P00006715 | 1,57163 | 1,57538 | -1,002602683 | ENST00000465347 | N/A       | N/A          | N/A              |
| A_33_P3267059  | 1,70302 | 1,70678 | -1,002609633 | ENST00000374084 | 6548      | DB094721     | SLC9A1           |
| A_33_P3370364  | 7,88007 | 7,88385 | -1,002623532 | ENST00000239032 | 2834      | NM_004248    | PRLHR            |
| A_33_P3314673  | 4,19686 | 4,20065 | -1,002630481 | ENST00000378644 | 100130958 | NM_001129979 | SYCE1L           |
| A_21_P0005983  | 3,11598 | 3,11978 | -1,002637431 | ENST00000464488 | 100288842 | N/A          | LOC100288842     |
| A_24_P49517    | 7,41391 | 7,41773 | -1,002651331 | ENST00000292562 | 90987     | NM_138367    | ZNF251           |
| A_32_P34844    | 1,47221 | 1,47604 | -1,002658281 | ENST00000282849 | 170692    | NM_199355    | ADAMTS18         |
| A_23_P404698   | 1,52506 | 1,52889 | -1,002658281 | ENST00000312481 | 256076    | NM_153264    | COL6A5           |
| A_21_P0009145  | 1,45304 | 1,45687 | -1,002658281 | N/A             | N/A       | N/A          | Inc-MTHFSD-5     |
| A_22_P00010057 | 1,85762 | 1,86146 | -1,002665231 | ENST00000550290 | N/A       | N/A          | N/A              |
| A_33_P3289810  | 1,35471 | 1,35855 | -1,002665231 | N/A             | N/A       | N/A          | N/A              |
| A_23_P1833     | 1,65935 | 1,66319 | -1,002665231 | ENST00000312527 | 27087     | NM_054025    | B3GAT1           |
| A_33_P3537861  | 1,46872 | 1,47257 | -1,002672181 | N/A             | 100126448 | EF565113     | LOC100126448     |
| A_33_P3320599  | 1,44501 | 1,44888 | -1,002686081 | ENST00000457256 | N/A       | N/A          | N/A              |
| A_33_P3246763  | 3,64836 | 3,65224 | -1,002693031 | ENST00000250615 | 15        | NM_001166579 | AANAT            |
| A_22_P00012895 | 1,4447  | 1,44859 | -1,002699981 | N/A             | 100874208 | NR_046685    | NDFIP2-AS1       |
| A_21_P0013125  | 1,40291 | 1,40681 | -1,002706931 | ENST00000354384 | 401236    | NM_001190766 | STMND1           |
| A_21_P0011125  | 1,50652 | 1,51042 | -1,002706931 | N/A             | N/A       | N/A          | XLOC_I2_003627   |
| A_23_P362148   | 1,45592 | 1,45984 | -1,002720832 | ENST00000341772 | 92737     | NM_139072    | DNER             |

|                |         |         |              |                 |           |              |                       |
|----------------|---------|---------|--------------|-----------------|-----------|--------------|-----------------------|
| A_22_P00014344 | 1,65607 | 1,65999 | -1,002720832 | ENST00000493529 | N/A       | N/A          | N/A                   |
| A_21_P0003753  | 1,46458 | 1,46851 | -1,002727782 | N/A             | N/A       | N/A          | Inc-EIF4E-1           |
| A_22_P00012855 | 1,3521  | 1,35606 | -1,002748633 | ENST00000561161 | N/A       | N/A          | N/A                   |
| A_21_P0001838  | 1,46774 | 1,47171 | -1,002755584 | ENST00000448650 | N/A       | N/A          | N/A                   |
| A_22_P00003161 | 1,48022 | 1,48419 | -1,002755584 | ENST00000436510 | N/A       | N/A          | N/A                   |
| A_21_P0011856  | 4,0637  | 4,06768 | -1,002762535 | N/A             | N/A       | N/A          | XLOC_I2_007571        |
| A_22_P00024706 | 1,52811 | 1,5321  | -1,002769485 | ENST00000426593 | 286370    | NR_038882    | LOC286370             |
| A_33_P3322814  | 1,47831 | 1,4823  | -1,002769485 | ENST00000317501 | 4916      | NM_001007156 | NTRK3                 |
| A_21_P0012769  | 1,70081 | 1,70483 | -1,002790337 | ENST00000506292 | 102724794 | N/A          | LOC102724794          |
| A_22_P00019297 | 4,32464 | 4,32866 | -1,002790337 | ENST00000573982 | N/A       | CU690329     | N/A                   |
| A_24_P242581   | 1,47236 | 1,4764  | -1,002804239 | ENST00000471020 | 200010    | NM_001011547 | SLC5A9                |
| A_23_P127267   | 1,57821 | 1,58226 | -1,00281119  | ENST00000371413 | 9211      | NM_005097    | LGI1                  |
| A_22_P00022617 | 1,56316 | 1,56721 | -1,00281119  | ENST00000525309 | N/A       | N/A          | N/A                   |
| A_21_P0006325  | 1,70742 | 1,71147 | -1,00281119  | N/A             | N/A       | N/A          | Inc-C9orf50-5         |
| A_21_P0005145  | 1,6445  | 1,64857 | -1,002825092 | N/A             | N/A       | N/A          | Inc-C6orf70-5         |
| A_22_P00023859 | 1,49864 | 1,50271 | -1,002825092 | N/A             | N/A       | N/A          | Inc-FAM163B-1         |
| A_22_P00011124 | 1,52979 | 1,53386 | -1,002825092 | N/A             | N/A       | N/A          | Inc-NUMB-4            |
| A_22_P00000613 | 1,35315 | 1,35722 | -1,002825092 | ENST00000447150 | N/A       | N/A          | N/A                   |
| A_22_P00006077 | 1,37525 | 1,37932 | -1,002825092 | ENST00000510029 | N/A       | N/A          | N/A                   |
| A_23_P353614   | 1,47655 | 1,48064 | -1,002838994 | ENST00000450307 | 254778    | NM_152765    | C8orf46               |
| A_21_P0001854  | 1,53992 | 1,54401 | -1,002838994 | ENST00000457385 | 100996902 | XR_244987    | LOC100996902          |
| A_21_P0002603  | 1,48426 | 1,48835 | -1,002838994 | N/A             | 101928427 | XR_427057    | LOC101928427          |
| A_23_P338603   | 10,9624 | 10,9665 | -1,002845945 | ENST00000522166 | 79145     | NM_001011667 | CHCHD7                |
| A_33_P3259135  | 1,63606 | 1,64017 | -1,002852897 | ENST00000621129 | 27065     | NM_001287763 | NSG1                  |
| A_33_P3631491  | 1,44916 | 1,45328 | -1,002859848 | N/A             | N/A       | AF307449     | Inc-CECR2-1           |
| A_22_P00002219 | 1,35114 | 1,35527 | -1,002866799 | N/A             | N/A       | AX721088     | Inc-BZRAP1-1          |
| A_21_P0011134  | 1,58194 | 1,58607 | -1,002866799 | N/A             | N/A       | N/A          | XLOC_I2_003647        |
| A_23_P317839   | 1,48147 | 1,48561 | -1,002873751 | ENST00000378695 | 256710    | NM_152779    | GLIPR1L1              |
| A_22_P00014293 | 1,65754 | 1,6617  | -1,002887654 | N/A             | N/A       | BG203906     | Inc-SERAC1-3          |
| A_22_P00001083 | 1,68305 | 1,68722 | -1,002894605 | N/A             | N/A       | BI771921     | Inc-ALDH7A1-1         |
| A_21_P0008437  | 1,44688 | 1,45106 | -1,002901557 | N/A             | N/A       | N/A          | Inc-RP11-463J10.2.1-1 |
| A_32_P405973   | 1,45648 | 1,46067 | -1,002908508 | ENST00000338316 | 108       | NM_020546    | ADCY2                 |
| A_21_P0008943  | 1,63274 | 1,63693 | -1,002908508 | N/A             | N/A       | N/A          | Inc-CHD9-5            |

|                |         |         |              |                 |           |              |                |
|----------------|---------|---------|--------------|-----------------|-----------|--------------|----------------|
| A_21_P0010881  | 16,9236 | 16,9278 | -1,00291546  | ENST00000447680 | N/A       | N/A          | N/A            |
| A_23_P21436    | 10,2583 | 10,2625 | -1,00291546  | ENST00000373896 | 26147     | NM_015651    | PHF19          |
| A_33_P3270435  | 1,47996 | 1,48417 | -1,002922412 | ENST00000311755 | 123346    | NR_002780    | HIGD2B         |
| A_32_P56713    | 9,963   | 9,96721 | -1,002922412 | ENST00000436990 | 613       | NM_004327    | BCR            |
| A_22_P00022033 | 2,05311 | 2,05733 | -1,002929363 | N/A             | N/A       | N/A          | Inc-C1orf96-2  |
| A_23_P433050   | 1,70528 | 1,7095  | -1,002929363 | ENST00000423548 | 59350     | NM_021634    | RXFP1          |
| A_21_P0003708  | 1,68956 | 1,6938  | -1,002943267 | N/A             | N/A       | N/A          | Inc-FRG1-2     |
| A_22_P00022671 | 1,47251 | 1,47677 | -1,002957171 | ENST00000436089 | N/A       | N/A          | N/A            |
| A_22_P00017808 | 1,63215 | 1,63642 | -1,002964123 | N/A             | N/A       | N/A          | Inc-ZBTB25-4   |
| A_24_P945096   | 1,46077 | 1,46504 | -1,002964123 | ENST00000404898 | 8911      | NM_021096    | CACNA1I        |
| A_22_P00021826 | 1,6337  | 1,63798 | -1,002971075 | N/A             | 100874201 | NR_046574    | B4GALT4-AS1    |
| A_33_P3348244  | 14,5807 | 14,585  | -1,002984979 | ENST00000297290 | 25798     | NM_015379    | BRI3           |
| A_33_P3292854  | 16,9852 | 16,9895 | -1,002984979 | ENST00000316448 | 811       | NM_004343    | CALR           |
| A_21_P0011021  | 11,9803 | 11,9846 | -1,002984979 | ENST00000526488 | 650368    | NR_024248    | TSSC2          |
| A_24_P367645   | 1,46878 | 1,47308 | -1,002984979 | ENST00000379643 | 256714    | NM_152780    | MAP7D2         |
| A_23_P212284   | 10,01   | 10,0143 | -1,002984979 | ENST00000394970 | 25886     | NM_015426    | POC1A          |
| A_21_P0004900  | 1,47667 | 1,48098 | -1,002991931 | N/A             | N/A       | N/A          | Inc-MYO6-3     |
| A_21_P0008010  | 1,46037 | 1,46471 | -1,003012788 | ENST00000445027 | N/A       | N/A          | N/A            |
| A_22_P00003282 | 1,46081 | 1,46517 | -1,003026693 | N/A             | N/A       | N/A          | Inc-CALML6-2   |
| A_23_P17821    | 1,44616 | 1,45052 | -1,003026693 | ENST00000215885 | 50487     | NM_015715    | PLA2G3         |
| A_21_P0002688  | 1,45607 | 1,46044 | -1,003033645 | N/A             | 101927252 | XR_425506    | LOC101927252   |
| A_22_P00001002 | 6,71744 | 6,72183 | -1,00304755  | ENST00000452532 | N/A       | N/A          | N/A            |
| A_23_P371076   | 6,24542 | 6,24981 | -1,00304755  | ENST00000472022 | 11278     | AF113122     | KLF12          |
| A_22_P00003472 | 12,7185 | 12,7229 | -1,003054503 | N/A             | 102031319 | NR_104163    | LOC102031319   |
| A_22_P00014730 | 4,6908  | 4,6952  | -1,003054503 | N/A             | N/A       | N/A          | Inc-SLC2A4RG-1 |
| A_22_P00022330 | 1,58274 | 1,58714 | -1,003054503 | ENST00000569998 | N/A       | DA711197     | N/A            |
| A_22_P00021754 | 4,97499 | 4,97941 | -1,003068408 | N/A             | N/A       | BX112083     | Inc-DDX19A-1   |
| A_23_P49865    | 5,47952 | 5,48394 | -1,003068408 | ENST00000571485 | 51087     | NM_015982    | YBX2           |
| A_21_P0012777  | 1,50324 | 1,50766 | -1,003068408 | ENST00000514420 | 401136    | NR_104048    | TMPRSS11BNL    |
| A_21_P0014845  | 1,64142 | 1,64585 | -1,003075361 | N/A             | N/A       | N/A          | N/A            |
| A_21_P0002463  | 1,57425 | 1,57869 | -1,003082314 | N/A             | N/A       | N/A          | Inc-REG1B-3    |
| A_33_P3243008  | 1,52104 | 1,52551 | -1,003103173 | ENST00000522372 | 157855    | NM_001031836 | KCNU1          |
| A_23_P313588   | 1,4428  | 1,44727 | -1,003103173 | ENST00000442782 | 164656    | BC039082     | TMPRSS6        |

|                |         |         |              |                 |           |              |                |
|----------------|---------|---------|--------------|-----------------|-----------|--------------|----------------|
| A_22_P00008834 | 1,46094 | 1,46541 | -1,003103173 | ENST00000430534 | N/A       | N/A          | N/A            |
| A_32_P78059    | 1,57212 | 1,5766  | -1,003110126 | ENST00000457826 | 283446    | NM_001101421 | MYO1H          |
| A_21_P0004788  | 1,63456 | 1,63905 | -1,003117079 | ENST00000417838 | N/A       | N/A          | N/A            |
| A_21_P0014686  | 9,90729 | 9,91178 | -1,003117079 | N/A             | N/A       | AK023887     | N/A            |
| A_23_P141389   | 17,4933 | 17,4978 | -1,003124032 | ENST00000589913 | 6155      | NM_000988    | RPL27          |
| A_24_P941896   | 1,57603 | 1,58054 | -1,003130985 | ENST00000327946 | 2894      | NM_017551    | GRID1          |
| A_33_P3417553  | 1,44463 | 1,44915 | -1,003137938 | N/A             | N/A       | N/A          | N/A            |
| A_23_P500741   | 3,29035 | 3,29488 | -1,003144892 | ENST00000268679 | 863       | NM_005187    | CBFA2T3        |
| A_23_P62309    | 1,67717 | 1,68171 | -1,003151845 | ENST00000371906 | 186       | NM_000686    | AGTR2          |
| A_21_P0007074  | 2,29208 | 2,29664 | -1,003165752 | ENST00000434189 | 101927396 | NR_120620    | LINC01514      |
| A_22_P00001021 | 1,45028 | 1,45485 | -1,003172705 | N/A             | 101929286 | NR_126365    | KCNMA1-AS3     |
| A_24_P178654   | 14,552  | 14,5566 | -1,003193566 | ENST00000430258 | N/A       | N/A          | N/A            |
| A_24_P84808    | 15,9153 | 15,9199 | -1,003193566 | ENST00000600588 | N/A       | N/A          | N/A            |
| A_23_P87580    | 8,96424 | 8,96884 | -1,003193566 | ENST00000266594 | 23519     | NM_012404    | ANP32D         |
| A_22_P00008589 | 1,70615 | 1,71075 | -1,003193566 | N/A             | N/A       | N/A          | Inc-KCTD3-1    |
| A_23_P307430   | 11,1716 | 11,1762 | -1,003193566 | ENST00000293406 | 124801    | NM_152344    | LSM12          |
| A_22_P00023944 | 1,5729  | 1,5775  | -1,003193566 | N/A             | N/A       | N/A          | Inc-ADRA1D-1   |
| A_21_P0008971  | 1,67451 | 1,67911 | -1,003193566 | N/A             | N/A       | N/A          | Inc-TERF2IP-1  |
| A_23_P119102   | 12,2702 | 12,2748 | -1,003193566 | ENST00000586014 | 7408      | NM_003370    | VASP           |
| A_21_P0006300  | 1,47639 | 1,48101 | -1,003207473 | N/A             | N/A       | N/A          | Inc-ALG2-1     |
| A_19_P00316657 | 1,63868 | 1,6433  | -1,003207473 | N/A             | N/A       | BC040150     | Inc-FAM84B-8   |
| A_22_P00023106 | 1,46486 | 1,46949 | -1,003214427 | N/A             | 101926898 | N/A          | LOC101926898   |
| A_22_P00020447 | 1,4764  | 1,48104 | -1,00322138  | N/A             | N/A       | AA626491     | Inc-CRNKL1-2   |
| A_33_P3562810  | 1,63148 | 1,63615 | -1,003242242 | N/A             | N/A       | AK093190     | Inc-TP53INP1-1 |
| A_23_P431912   | 1,6314  | 1,63611 | -1,003270058 | ENST00000323684 | 158506    | NM_152577    | ZNF645         |
| A_23_P415706   | 1,63748 | 1,64219 | -1,003270058 | ENST00000376682 | 283383    | NM_198827    | GPR133         |
| A_22_P00002350 | 1,46512 | 1,46984 | -1,003277012 | N/A             | N/A       | N/A          | Inc-C12orf23-1 |
| A_23_P17316    | 1,49543 | 1,50016 | -1,003283967 | ENST00000470246 | 128414    | NM_152864    | NKAIN4         |
| A_23_P59772    | 4,91872 | 4,9235  | -1,003318738 | ENST00000343257 | 1180      | NM_000083    | CLCN1          |
| A_23_P56505    | 1,6404  | 1,64518 | -1,003318738 | ENST00000614742 | 3676      | NM_000885    | ITGA4          |
| A_23_P510      | 1,42488 | 1,42966 | -1,003318738 | ENST00000366545 | 200150    | NM_152666    | PLD5           |
| A_19_P00803124 | 1,49599 | 1,50078 | -1,003325693 | N/A             | N/A       | N/A          | XLOC_I2_010494 |
| A_22_P00008405 | 3,18282 | 3,18762 | -1,003332647 | N/A             | N/A       | BE147964     | Inc-JPH1-5     |

|                |         |         |              |                 |           |              |               |
|----------------|---------|---------|--------------|-----------------|-----------|--------------|---------------|
| A_33_P3323959  | 1,46944 | 1,47425 | -1,003339602 | ENST00000424685 | 5649      | NM_005045    | RELN          |
| A_33_P3342370  | 1,4967  | 1,50151 | -1,003339602 | N/A             | N/A       | XM_001126459 | N/A           |
| A_33_P3360167  | 1,62903 | 1,63384 | -1,003339602 | ENST00000304418 | 390445    | NM_001004731 | OR5AU1        |
| A_22_P00003365 | 1,47285 | 1,47766 | -1,003339602 | ENST00000445464 | N/A       | N/A          | N/A           |
| A_33_P3383891  | 1,45301 | 1,45784 | -1,003353511 | ENST00000584546 | N/A       | N/A          | N/A           |
| A_21_P0014603  | 1,47775 | 1,4826  | -1,003367421 | N/A             | N/A       | XR_110493    | N/A           |
| A_21_P0004644  | 1,49044 | 1,4953  | -1,003374376 | N/A             | N/A       | N/A          | Inc-SLC39A7-2 |
| A_33_P3690224  | 1,52413 | 1,52899 | -1,003374376 | N/A             | 283214    | NR_046090    | LOC283214     |
| A_33_P3389689  | 4,27489 | 4,27976 | -1,003381331 | ENST00000397054 | 64175     | NM_022356    | P3H1          |
| A_23_P361820   | 9,36957 | 9,37444 | -1,003381331 | ENST00000421419 | 23130     | NM_015104    | ATG2A         |
| A_23_P112086   | 1,4463  | 1,45118 | -1,003388286 | ENST00000330590 | 1670      | NM_021010    | DEFA5         |
| A_23_P108514   | 10,3397 | 10,3446 | -1,003402196 | ENST00000396738 | 8576      | NM_001008910 | STK16         |
| A_21_P0001463  | 1,63709 | 1,64199 | -1,003402196 | N/A             | N/A       | N/A          | Inc-TNFRSF9-1 |
| A_23_P106998   | 10,6289 | 10,6338 | -1,003402196 | ENST00000313608 | 51649     | NM_016070    | MRPS23        |
| A_21_P0000887  | 1,65744 | 1,66236 | -1,003416106 | ENST00000591143 | 100505835 | NR_040036    | LINC01532     |
| A_33_P3364959  | 1,4423  | 1,44723 | -1,003423061 | N/A             | N/A       | DQ098707     | N/A           |
| A_21_P0013949  | 1,65396 | 1,65891 | -1,003436971 | N/A             | N/A       | N/A          | N/A           |
| A_22_P00002502 | 1,36883 | 1,37379 | -1,003443927 | ENST00000564305 | 101927009 | XR_253494    | LOC101927009  |
| A_21_P0006754  | 1,38381 | 1,38877 | -1,003443927 | ENST00000452578 | 101929465 | XR_246526    | LOC101929465  |
| A_22_P00001102 | 1,5202  | 1,52517 | -1,003450882 | ENST00000427695 | N/A       | N/A          | N/A           |
| A_22_P00016575 | 1,66743 | 1,6724  | -1,003450882 | ENST00000425800 | N/A       | N/A          | N/A           |
| A_23_P10232    | 6,9463  | 6,95129 | -1,003464793 | ENST00000322953 | 55024     | NM_017935    | BANK1         |
| A_22_P00006549 | 1,50147 | 1,50646 | -1,003464793 | N/A             | N/A       | N/A          | Inc-FKBP3-2   |
| A_23_P42189    | 1,44394 | 1,44894 | -1,003471749 | ENST00000468082 | 6568      | NM_005074    | SLC17A1       |
| A_33_P3419998  | 1,44245 | 1,44745 | -1,003471749 | ENST00000546875 | 9498      | NM_001039960 | SLC4A8        |
| A_22_P00003636 | 1,44648 | 1,45149 | -1,003478704 | ENST00000449303 | N/A       | N/A          | N/A           |
| A_19_P00319588 | 1,4441  | 1,44913 | -1,003492615 | N/A             | 101929562 | N/A          | LOC101929562  |
| A_21_P0004681  | 1,63257 | 1,6376  | -1,003492615 | ENST00000275162 | 134829    | NM_001010852 | CLVS2         |
| A_33_P3263317  | 3,64371 | 3,64874 | -1,003492615 | N/A             | N/A       | AK128421     | N/A           |
| A_22_P00005387 | 1,5031  | 1,50814 | -1,003499571 | N/A             | N/A       | N/A          | Inc-DROSHA-5  |
| A_22_P00024283 | 1,62982 | 1,63487 | -1,003506527 | N/A             | N/A       | N/A          | Inc-IRF1-1    |
| A_22_P00009179 | 1,53716 | 1,54221 | -1,003506527 | N/A             | N/A       | N/A          | Inc-LOX-1     |
| A_22_P00012023 | 1,47266 | 1,47774 | -1,003527394 | N/A             | 100506866 | NR_038272    | TTN-AS1       |

|                |         |         |              |                 |           |              |                       |
|----------------|---------|---------|--------------|-----------------|-----------|--------------|-----------------------|
| A_21_P0010837  | 1,63271 | 1,63779 | -1,003527394 | N/A             | N/A       | N/A          | XLOC_I2_001667        |
| A_21_P0005312  | 1,4344  | 1,43948 | -1,003527394 | ENST00000420758 | N/A       | N/A          | N/A                   |
| A_33_P3407835  | 6,92552 | 6,9306  | -1,003527394 | ENST00000296487 | 132160    | NM_144641    | PPM1M                 |
| A_23_P692      | 1,41944 | 1,42456 | -1,003555218 | ENST00000315987 | 3752      | NM_004980    | KCND3                 |
| A_23_P29655    | 8,82618 | 8,83134 | -1,003583043 | ENST00000542214 | 57415     | NM_020685    | C3orf14               |
| A_22_P00016208 | 4,48884 | 4,49402 | -1,003596956 | N/A             | N/A       | N/A          | Inc-TM2D2-1           |
| A_23_P370733   | 1,54249 | 1,54768 | -1,003603912 | ENST00000432950 | 389932    | NR_026743    | AKR1C6P               |
| A_23_P73457    | 12,236  | 12,2412 | -1,003610869 | ENST00000508797 | 80230     | NM_025158    | RUFY1                 |
| A_32_P184518   | 17,4375 | 17,4427 | -1,003610869 | ENST00000477341 | 6144      | NM_000982    | RPL21                 |
| A_33_P3324428  | 6,92996 | 6,93517 | -1,003617825 | ENST00000314126 | 8165      | NM_003488    | AKAP1                 |
| A_22_P00006985 | 1,50319 | 1,5084  | -1,003617825 | N/A             | N/A       | N/A          | Inc-GDPD4-1           |
| A_33_P3283552  | 1,46939 | 1,4746  | -1,003617825 | N/A             | 100132781 | NR_038890    | LOC100132781          |
| A_33_P3419026  | 1,51297 | 1,51819 | -1,003624782 | ENST00000418306 | 1740      | NM_001142700 | DLG2                  |
| A_33_P3292269  | 1,47265 | 1,47788 | -1,003631739 | N/A             | 100131802 | AK130887     | LOC100131802          |
| A_22_P00006646 | 1,40072 | 1,40597 | -1,003645652 | N/A             | N/A       | N/A          | Inc-FOXG1-6           |
| A_21_P0014326  | 1,64757 | 1,65283 | -1,003652609 | N/A             | N/A       | XM_006721356 | Inc-RP11-327F22.5.1-4 |
| A_21_P0002993  | 1,39561 | 1,40089 | -1,003666522 | N/A             | N/A       | N/A          | Inc-CHMP2B-2          |
| A_22_P00023150 | 4,80885 | 4,81413 | -1,003666522 | N/A             | 101929512 | NR_110593    | LOC101929512          |
| A_33_P3249888  | 1,45696 | 1,46225 | -1,003673479 | ENST00000551160 | 144453    | NM_001282614 | BEST3                 |
| A_23_P133245   | 13,1062 | 13,1115 | -1,003680436 | ENST00000610522 | 3550      | NM_006083    | IK                    |
| A_23_P35399    | 15,4342 | 15,4395 | -1,003680436 | ENST00000422982 | 311       | NM_145869    | ANXA11                |
| A_33_P3298990  | 1,66769 | 1,673   | -1,003687393 | ENST00000347785 | 921       | NM_014207    | CD5                   |
| A_22_P00004989 | 1,44412 | 1,44944 | -1,00369435  | ENST00000506917 | N/A       | N/A          | N/A                   |
| A_22_P00005384 | 1,44804 | 1,45336 | -1,00369435  | ENST00000515358 | N/A       | N/A          | N/A                   |
| A_21_P0000197  | 9,25223 | 9,25756 | -1,003701307 | ENST00000359193 | 8969      | NM_021064    | HIST1H2AG             |
| A_22_P00025277 | 1,4027  | 1,40803 | -1,003701307 | N/A             | N/A       | N/A          | Inc-CHMP7-2           |
| A_33_P6462199  | 1,57128 | 1,57662 | -1,003708265 | ENST00000515405 | 100506013 | NM_001297550 | APELA                 |
| A_22_P00013545 | 1,5717  | 1,57704 | -1,003708265 | N/A             | 101928376 | NR_108088    | IL12A-AS1             |
| A_21_P0002269  | 1,46256 | 1,46792 | -1,003722179 | ENST00000443205 | N/A       | N/A          | N/A                   |
| A_22_P00009192 | 1,47231 | 1,47768 | -1,003729136 | ENST00000458662 | N/A       | BM553369     | N/A                   |
| A_21_P0007644  | 1,46932 | 1,4747  | -1,003736094 | N/A             | N/A       | N/A          | Inc-P2RX7-2           |
| A_33_P3415216  | 10,7041 | 10,7095 | -1,003750009 | ENST00000426513 | 4358      | NM_002437    | MPV17                 |
| A_33_P3243657  | 11,009  | 11,0144 | -1,003750009 | ENST00000254616 | 26515     | NM_012192    | TIMM10B               |

|                |         |         |              |                 |           |              |                     |
|----------------|---------|---------|--------------|-----------------|-----------|--------------|---------------------|
| A_22_P00015372 | 1,44694 | 1,45234 | -1,003750009 | N/A             | N/A       | N/A          | Inc-SRBD1-2         |
| A_22_P00024489 | 1,56497 | 1,57037 | -1,003750009 | N/A             | N/A       | N/A          | Inc-HEPH-2          |
| A_32_P85106    | 1,44237 | 1,4478  | -1,003770881 | ENST00000230301 | 168090    | NM_144980    | C6orf118            |
| A_22_P00008395 | 1,44178 | 1,44721 | -1,003770881 | N/A             | N/A       | BX095802     | Inc-JMJD7-PLA2G4B-5 |
| A_22_P00014087 | 1,57246 | 1,5779  | -1,003777839 | ENST00000561655 | N/A       | AL521695     | N/A                 |
| A_21_P0012644  | 1,35056 | 1,356   | -1,003777839 | N/A             | N/A       | N/A          | XLOC_I2_010984      |
| A_21_P0007992  | 1,55669 | 1,56214 | -1,003784796 | ENST00000435067 | 103752581 | N/A          | LINC01055           |
| A_33_P3369979  | 1,56704 | 1,57252 | -1,00380567  | N/A             | 26246     | NM_001004686 | OR2L2               |
| A_21_P0002227  | 1,50641 | 1,5119  | -1,003812628 | N/A             | N/A       | N/A          | Inc-SLC1A4-1        |
| A_22_P00006787 | 1,35913 | 1,36462 | -1,003812628 | ENST00000536512 | N/A       | N/A          | N/A                 |
| A_21_P0011121  | 1,69209 | 1,69758 | -1,003812628 | ENST00000427890 | N/A       | N/A          | N/A                 |
| A_22_P00009987 | 1,4462  | 1,45169 | -1,003812628 | ENST00000563016 | 104355151 | NR_126392    | PWRN4               |
| A_21_P0006144  | 1,46545 | 1,47095 | -1,003819586 | N/A             | N/A       | N/A          | Inc-ZCCHC7-1        |
| A_21_P0005205  | 1,62675 | 1,63225 | -1,003819586 | ENST00000497017 | N/A       | N/A          | N/A                 |
| A_23_P255618   | 1,45278 | 1,45829 | -1,003826544 | ENST00000378491 | 140767    | NM_080723    | NRSN1               |
| A_33_P3296991  | 6,32069 | 6,32621 | -1,003833502 | N/A             | 401105    | NR_024413    | FLJ42393            |
| A_22_P00018591 | 1,62867 | 1,63419 | -1,003833502 | ENST00000454538 | 102725521 | N/A          | LOC102725521        |
| A_33_P3210499  | 1,51895 | 1,52447 | -1,003833502 | ENST00000390398 | N/A       | M14266       | N/A                 |
| A_21_P0005581  | 1,75738 | 1,76291 | -1,00384046  | N/A             | N/A       | N/A          | Inc-ARHGEF5-2       |
| A_32_P227930   | 1,44328 | 1,44881 | -1,00384046  | ENST00000409999 | 100190949 | NM_001145132 | C5orf52             |
| A_33_P3291796  | 3,23059 | 3,23612 | -1,00384046  | ENST00000487726 | 79012     | NM_024046    | CAMKV               |
| A_21_P0010664  | 1,49961 | 1,50516 | -1,003854376 | ENST00000565520 | 100288079 | N/A          | GS1-279B7.1         |
| A_33_P3303982  | 1,46584 | 1,4714  | -1,003861334 | ENST00000418789 | 642623    | NM_001143975 | UBTFL1              |
| A_24_P309216   | 1,65568 | 1,66125 | -1,003868292 | ENST00000344545 | 89882     | NM_033516    | TPD52L3             |
| A_23_P69573    | 4,63091 | 4,63651 | -1,003889167 | ENST00000455639 | 2982      | NM_000856    | GUCY1A3             |
| A_33_P3333523  | 10,0131 | 10,0187 | -1,003889167 | N/A             | N/A       | N/A          | N/A                 |
| A_22_P00024768 | 1,63588 | 1,64149 | -1,003896126 | ENST00000540161 | N/A       | DB024534     | N/A                 |
| A_33_P3267395  | 1,41911 | 1,42473 | -1,003903084 | ENST00000325157 | 150350    | NM_152512    | ENTHD1              |
| A_22_P00019150 | 1,44503 | 1,45065 | -1,003903084 | ENST00000450840 | 101927924 | NR_110285    | LOC101927924        |
| A_21_P0004995  | 6,03986 | 6,04549 | -1,003910043 | N/A             | N/A       | N/A          | Inc-ECI2-3          |
| A_22_P00008568 | 1,62686 | 1,6325  | -1,003917002 | N/A             | N/A       | N/A          | Inc-KCNS2-1         |
| A_21_P0009952  | 1,53474 | 1,5404  | -1,003930919 | N/A             | N/A       | N/A          | Inc-SYNDIG1-4       |
| A_19_P00320746 | 1,46184 | 1,4675  | -1,003930919 | ENST00000511029 | N/A       | N/A          | N/A                 |



|                |         |         |              |                 |           |           |                 |
|----------------|---------|---------|--------------|-----------------|-----------|-----------|-----------------|
| A_21_P0006747  | 1,51558 | 1,52124 | -1,003930919 | ENST00000442783 | N/A       | N/A       | N/A             |
| A_22_P00025882 | 1,56998 | 1,57565 | -1,003937878 | ENST00000417054 | N/A       | N/A       | N/A             |
| A_22_P00011854 | 2,43923 | 2,44492 | -1,003951795 | N/A             | N/A       | AA293893  | Inc-PHTF2-2     |
| A_22_P00002354 | 1,40481 | 1,4105  | -1,003951795 | ENST00000551280 | N/A       | BG194251  | N/A             |
| A_21_P0013270  | 10,2599 | 10,2656 | -1,003958754 | ENST00000431528 | 731275    | NR_029401 | LINC01347       |
| A_32_P55293    | 1,48226 | 1,48797 | -1,003965713 | ENST00000375318 | 119180    | NM_183058 | LYZL2           |
| A_21_P0001291  | 5,07068 | 5,07641 | -1,003979631 | N/A             | N/A       | N/A       | Inc-CYP4A22-2   |
| A_33_P3221019  | 4,51698 | 4,52272 | -1,00398659  | ENST00000546292 | 7455      | NM_173059 | ZAN             |
| A_33_P3214879  | 7,34472 | 7,35046 | -1,00398659  | N/A             | 3836      | NM_002264 | KPNA1           |
| A_21_P0013583  | 1,56836 | 1,57411 | -1,003993549 | N/A             | N/A       | N/A       | XLOC_I2_014830  |
| A_22_P00025352 | 1,46147 | 1,46723 | -1,004000509 | ENST00000446601 | N/A       | DA494348  | N/A             |
| A_21_P0002731  | 10,9317 | 10,9375 | -1,004028346 | ENST00000425195 | 102725370 | XR_425587 | LOC102725370    |
| A_21_P0002196  | 1,44601 | 1,45183 | -1,004042265 | N/A             | N/A       | N/A       | Inc-TTC27-1     |
| A_33_P3227896  | 1,37182 | 1,37765 | -1,004049224 | ENST00000561715 | 100271835 | NR_027145 | LIMS3-LOC440895 |
| A_23_P110777   | 1,4687  | 1,47453 | -1,004049224 | ENST00000274507 | 3950      | NM_002302 | LECT2           |
| A_33_P3305820  | 1,57083 | 1,57666 | -1,004049224 | N/A             | N/A       | N/A       | N/A             |
| A_23_P259863   | 7,28224 | 7,28807 | -1,004049224 | ENST00000618265 | 57126     | NM_020406 | CD177           |
| A_22_P00011322 | 1,42252 | 1,42836 | -1,004056184 | ENST00000420417 | N/A       | N/A       | N/A             |
| A_21_P0002248  | 1,51985 | 1,52569 | -1,004056184 | N/A             | N/A       | N/A       | Inc-DNAH6-3     |
| A_22_P00012351 | 3,652   | 3,65784 | -1,004056184 | N/A             | N/A       | BC038535  | Inc-PRDM9-2     |
| A_32_P178758   | 1,63356 | 1,63941 | -1,004063143 | N/A             | 285780    | NR_026970 | LY86-AS1        |
| A_23_P369344   | 1,39925 | 1,40511 | -1,004070103 | ENST00000366875 | 164127    | NM_152610 | CCDC185         |
| A_23_P67339    | 3,17659 | 3,18246 | -1,004077063 | ENST00000270645 | 57333     | NM_020650 | RCN3            |
| A_21_P0006994  | 1,48289 | 1,48877 | -1,004084022 | N/A             | N/A       | N/A       | Inc-PTPN20B-2   |
| A_22_P00024722 | 4,77685 | 4,78273 | -1,004084022 | N/A             | N/A       | N/A       | Inc-GRHL2-1     |
| A_21_P0003260  | 1,44351 | 1,4494  | -1,004090982 | N/A             | N/A       | N/A       | Inc-SEC62-1     |
| A_21_P0008006  | 1,56416 | 1,57006 | -1,004097942 | N/A             | N/A       | N/A       | Inc-RBM26-3     |
| A_24_P603224   | 12,7253 | 12,7312 | -1,004097942 | ENST00000373019 | 10946     | NM_006802 | SF3A3           |
| A_23_P19987    | 13,9477 | 13,9536 | -1,004097942 | ENST00000619562 | 10643     | NM_006547 | IGF2BP3         |
| A_23_P136371   | 1,69767 | 1,70358 | -1,004104902 | ENST00000504854 | 64579     | NM_022569 | NDST4           |
| A_21_P0012188  | 1,4442  | 1,45012 | -1,004111862 | N/A             | 100134423 | XR_430813 | LOC100134423    |
| A_23_P132237   | 1,63672 | 1,64264 | -1,004111862 | ENST00000216071 | 25770     | NM_015370 | C22orf31        |
| A_24_P215882   | 2,91953 | 2,92548 | -1,004132742 | ENST00000477621 | 398       | NM_001176 | ARHGDI8         |

|                |         |         |              |                 |           |              |                |
|----------------|---------|---------|--------------|-----------------|-----------|--------------|----------------|
| A_21_P0004545  | 1,52805 | 1,534   | -1,004132742 | N/A             | N/A       | N/A          | Inc-FAM153C-1  |
| A_33_P3832488  | 1,68437 | 1,69033 | -1,004139702 | ENST00000457274 | 400839    | NR_040102    | FLJ33581       |
| A_33_P3738799  | 1,37042 | 1,3764  | -1,004153623 | ENST00000508452 | 340074    | NR_027127    | LOC340074      |
| A_33_P3278941  | 10,5727 | 10,5787 | -1,004167543 | ENST00000559939 | 9985      | NM_001048205 | REC8           |
| A_22_P00020404 | 1,53812 | 1,54414 | -1,004181464 | ENST00000424528 | 400765    | NR_046105    | MIR137HG       |
| A_22_P00016869 | 5,52125 | 5,52729 | -1,004195385 | N/A             | 101927550 | NR_110102    | LOC101927550   |
| A_32_P319200   | 5,78463 | 5,79067 | -1,004195385 | ENST00000480559 | 91227     | NM_199127    | GGTLC2         |
| A_21_P0011400  | 5,90669 | 5,91274 | -1,004202346 | N/A             | N/A       | N/A          | Inc-GOLGA8J-3  |
| A_21_P0005454  | 1,57168 | 1,57774 | -1,004209306 | N/A             | N/A       | N/A          | Inc-WDR60-6    |
| A_23_P92517    | 1,65193 | 1,65799 | -1,004209306 | ENST00000504425 | 83894     | NM_031956    | TTC29          |
| A_33_P3775281  | 6,02305 | 6,02911 | -1,004209306 | ENST00000433059 | 644050    | NR_104176    | LINC01529      |
| A_22_P00017302 | 2,08346 | 2,08953 | -1,004216267 | ENST00000442550 | 54088     | NR_024357    | LINC00113      |
| A_19_P00319140 | 2,60826 | 2,61433 | -1,004216267 | N/A             | 101928682 | NR_104667    | LOC101928682   |
| A_33_P3234882  | 1,50078 | 1,50685 | -1,004216267 | ENST00000343110 | 5549      | NM_002725    | PRELP          |
| A_33_P3292588  | 1,63278 | 1,63885 | -1,004216267 | ENST00000411859 | 642623    | NM_001143975 | UBTFL1         |
| A_21_P0007652  | 1,43166 | 1,43774 | -1,004223228 | N/A             | N/A       | N/A          | Inc-AACS-3     |
| A_22_P00003510 | 1,56566 | 1,57176 | -1,004237149 | ENST00000513616 | N/A       | N/A          | N/A            |
| A_24_P96961    | 12,2727 | 12,2788 | -1,004237149 | ENST00000328089 | 80176     | NM_025106    | SPSB1          |
| A_33_P3345614  | 8,78157 | 8,78768 | -1,00424411  | N/A             | N/A       | N/A          | N/A            |
| A_23_P70278    | 1,46625 | 1,47236 | -1,00424411  | ENST00000368508 | 6098      | NM_002944    | ROS1           |
| A_21_P0006285  | 1,44449 | 1,45061 | -1,004251071 | N/A             | N/A       | N/A          | Inc-FRMD3-1    |
| A_32_P83270    | 1,35028 | 1,35642 | -1,004264993 | ENST00000421212 | 727982    | NR_034134    | LINC01249      |
| A_22_P00012222 | 1,66158 | 1,66773 | -1,004271954 | N/A             | 102723735 | XR_424348    | LOC102723735   |
| A_22_P00009249 | 1,63515 | 1,64131 | -1,004278915 | ENST00000540733 | 101928471 | NR_120473    | LOC101928471   |
| A_22_P00004974 | 1,66808 | 1,67425 | -1,004285876 | ENST00000438789 | 100874150 | NR_047004    | LINC00379      |
| A_21_P0012675  | 1,7014  | 1,70758 | -1,004292838 | N/A             | N/A       | N/A          | XLOC_I2_011225 |
| A_32_P216426   | 13,9967 | 14,0029 | -1,00430676  | ENST00000546565 | 144983    | NM_001011724 | HNRNPA1L2      |
| A_21_P0004045  | 1,49194 | 1,49814 | -1,00430676  | ENST00000513687 | 102467214 | NR_104672    | LOC102467214   |
| A_33_P3213169  | 1,53594 | 1,54217 | -1,004327644 | ENST00000567409 | 3687      | AK309642     | ITGAX          |
| A_22_P00013748 | 7,79178 | 7,79801 | -1,004327644 | ENST00000584201 | 100128893 | NR_102763    | GATA6-AS1      |
| A_33_P3306843  | 5,61107 | 5,61731 | -1,004334606 | ENST00000322146 | 162962    | NM_001102657 | ZNF836         |
| A_21_P0002939  | 1,35661 | 1,36286 | -1,004341567 | N/A             | N/A       | N/A          | Inc-OXSM-1     |
| A_22_P00009364 | 1,43943 | 1,44568 | -1,004341567 | ENST00000428346 | N/A       | N/A          | N/A            |

|                |         |         |              |                 |           |              |                |
|----------------|---------|---------|--------------|-----------------|-----------|--------------|----------------|
| A_21_P0010243  | 1,62846 | 1,63471 | -1,004341567 | N/A             | 101928398 | NR_109926    | LOC101928398   |
| A_22_P00002209 | 5,29701 | 5,3033  | -1,004369414 | ENST00000508309 | 729678    | NR_045678    | LINC00847      |
| A_22_P00024900 | 1,48818 | 1,49448 | -1,004376376 | N/A             | N/A       | BG221702     | Inc-GABPA-2    |
| A_22_P00023512 | 1,40444 | 1,41075 | -1,004383338 | N/A             | N/A       | AL079817     | Inc-RFWD2-2    |
| A_33_P3239724  | 1,44042 | 1,44673 | -1,004383338 | N/A             | N/A       | N/A          | N/A            |
| A_23_P371682   | 1,5688  | 1,57512 | -1,004390299 | ENST00000617456 | 10082     | NM_005708    | GPC6           |
| A_22_P00013553 | 1,64275 | 1,64908 | -1,004397261 | ENST00000513915 | 101927421 | N/A          | LOC101927421   |
| A_21_P0012613  | 1,6592  | 1,66553 | -1,004397261 | N/A             | N/A       | N/A          | XLOC_I2_010833 |
| A_22_P00003680 | 1,49937 | 1,5057  | -1,004397261 | ENST00000435554 | N/A       | N/A          | N/A            |
| A_22_P00002789 | 1,46554 | 1,47187 | -1,004397261 | N/A             | N/A       | N/A          | Inc-C2CD4A-7   |
| A_22_P00011409 | 1,56695 | 1,5733  | -1,004411185 | N/A             | N/A       | AA658566     | Inc-PAFAH1B2-1 |
| A_33_P3281641  | 1,54147 | 1,54782 | -1,004411185 | ENST00000309562 | 119765    | NM_001005470 | OR4B1          |
| A_22_P00007271 | 1,46222 | 1,46859 | -1,00442511  | ENST00000544813 | 10536     | NM_014262    | LEPREL2        |
| A_23_P354965   | 1,55423 | 1,5606  | -1,00442511  | ENST00000273908 | 79966     | NM_024906    | SCD5           |
| A_21_P0005163  | 1,56919 | 1,57557 | -1,004432072 | ENST00000506222 | 100507584 | NR_038989    | LINC01016      |
| A_23_P46584    | 1,49929 | 1,50568 | -1,004439034 | ENST00000367726 | 92346     | NM_139240    | C1orf105       |
| A_22_P00022337 | 1,62237 | 1,62876 | -1,004439034 | ENST00000448859 | 101929413 | N/A          | LOC101929413   |
| A_23_P28582    | 6,3965  | 6,40289 | -1,004439034 | ENST00000442128 | N/A       | N/A          | N/A            |
| A_22_P00015565 | 1,64482 | 1,65122 | -1,004445996 | N/A             | N/A       | AK057422     | Inc-STRA8-1    |
| A_21_P0003101  | 1,47505 | 1,48145 | -1,004445996 | ENST00000414047 | 9686      | N/A          | VGLL4          |
| A_33_P3223527  | 1,44262 | 1,44903 | -1,004452959 | N/A             | 100131472 | XR_426131    | LOC100131472   |
| A_22_P00000436 | 1,48999 | 1,49642 | -1,004466883 | ENST00000450458 | N/A       | N/A          | N/A            |
| A_22_P00004603 | 1,47001 | 1,47645 | -1,004473846 | ENST00000517676 | 101928058 | XR_428285    | LOC101928058   |
| A_22_P00023360 | 1,39632 | 1,40276 | -1,004473846 | N/A             | 101927969 | XR_245292    | LOC101927969   |
| A_22_P00003593 | 1,50012 | 1,50657 | -1,004480808 | N/A             | N/A       | N/A          | Inc-CD1D-2     |
| A_22_P00012641 | 1,36223 | 1,3687  | -1,004494733 | N/A             | 101929162 | NR_120474    | LOC101929162   |
| A_22_P00020925 | 1,62664 | 1,63312 | -1,004501696 | N/A             | N/A       | N/A          | Inc-VWDE-1     |
| A_22_P00001221 | 1,63179 | 1,63827 | -1,004501696 | ENST00000562916 | 146429    | NM_001242757 | SLC22A31       |
| A_24_P106839   | 6,27785 | 6,28433 | -1,004501696 | ENST00000528828 | 54904     | NM_023034    | WHSC1L1        |
| A_22_P00014894 | 10,8149 | 10,8214 | -1,004515622 | N/A             | N/A       | N/A          | Inc-SLC7A5-1   |
| A_33_P3222439  | 1,67651 | 1,68305 | -1,004543473 | ENST00000617120 | 401285    | NM_001145121 | TCP10L2        |
| A_23_P51213    | 1,44208 | 1,44862 | -1,004543473 | ENST00000374434 | 127294    | NM_152372    | MYOM3          |
| A_21_P0001716  | 4,40505 | 4,4116  | -1,004550436 | N/A             | N/A       | N/A          | Inc-MTR-1      |

|                |         |         |              |                 |           |              |                       |
|----------------|---------|---------|--------------|-----------------|-----------|--------------|-----------------------|
| A_22_P00023209 | 1,44948 | 1,45603 | -1,004550436 | ENST00000418379 | 101926942 | N/A          | LOC101926942          |
| A_23_P82795    | 1,62592 | 1,63249 | -1,004564362 | ENST00000304233 | 83655     | NR_040035    | LINC00208             |
| A_33_P3798739  | 6,26499 | 6,27157 | -1,004571325 | N/A             | 286382    | AK094356     | LOC286382             |
| A_33_P3277614  | 13,0478 | 13,0544 | -1,004585252 | ENST00000344357 | 29789     | NM_013341    | OLA1                  |
| A_33_P3370226  | 17,3461 | 17,3527 | -1,004585252 | ENST00000493874 | 6129      | NM_000971    | RPL7                  |
| A_21_P0002673  | 1,40761 | 1,41421 | -1,004585252 | N/A             | N/A       | N/A          | Inc-TGFBRAP1-2        |
| A_21_P0008695  | 1,49759 | 1,50419 | -1,004585252 | ENST00000622345 | N/A       | N/A          | N/A                   |
| A_22_P00006461 | 1,4622  | 1,46881 | -1,004592215 | N/A             | N/A       | N/A          | Inc-FCRL3-1           |
| A_33_P3289476  | 3,61417 | 3,62079 | -1,004599178 | N/A             | 100128697 | AK124043     | LOC100128697          |
| A_21_P0004382  | 1,45811 | 1,46474 | -1,004606142 | N/A             | 102723768 | XR_425854    | LOC102723768          |
| A_22_P00021471 | 1,56106 | 1,56769 | -1,004606142 | N/A             | N/A       | N/A          | Inc-KRT18-1           |
| A_22_P00021513 | 1,63394 | 1,64057 | -1,004606142 | ENST00000525097 | N/A       | BX103737     | N/A                   |
| A_33_P3298236  | 1,43995 | 1,4466  | -1,004620069 | ENST00000339452 | 54798     | NM_001142552 | DCHS2                 |
| A_33_P3218980  | 1,38467 | 1,39133 | -1,004627032 | ENST00000371203 | 953       | NM_001776    | ENTPD1                |
| A_23_P421221   | 9,45276 | 9,45942 | -1,004627032 | ENST00000265806 | 203069    | NM_001136108 | R3HCC1                |
| A_23_P365327   | 1,37777 | 1,38446 | -1,004647923 | ENST00000369746 | 90025     | AL137544     | UBE3D                 |
| A_22_P00020563 | 3,81546 | 3,82215 | -1,004647923 | ENST00000573651 | 84461     | NM_032442    | NEURL4                |
| A_33_P3324745  | 1,46525 | 1,47195 | -1,004654887 | N/A             | N/A       | N/A          | Inc-DPP4-2            |
| A_23_P76136    | 1,45378 | 1,46049 | -1,00466185  | ENST00000261177 | 441631    | NM_001080509 | TSPAN11               |
| A_22_P00012720 | 1,46537 | 1,47209 | -1,004668814 | N/A             | N/A       | N/A          | Inc-RAB3C-1           |
| A_21_P0005672  | 1,56445 | 1,57118 | -1,004675778 | N/A             | N/A       | N/A          | Inc-KIAA1967-1        |
| A_21_P0011348  | 1,4703  | 1,47703 | -1,004675778 | N/A             | 283683    | N/A          | LOC283683             |
| A_21_P0012094  | 1,43527 | 1,44201 | -1,004682742 | ENST00000414911 | N/A       | N/A          | N/A                   |
| A_33_P3354579  | 1,50617 | 1,51292 | -1,004689706 | N/A             | N/A       | N/A          | N/A                   |
| A_23_P425176   | 1,47177 | 1,47855 | -1,004710598 | ENST00000264952 | 131890    | AF282269     | GRK7                  |
| A_21_P0006219  | 1,44105 | 1,44784 | -1,004717562 | N/A             | N/A       | N/A          | Inc-RP11-295D22.1.1-6 |
| A_21_P0012093  | 1,70144 | 1,70824 | -1,004724526 | ENST00000431985 | N/A       | N/A          | N/A                   |
| A_22_P00023304 | 1,56811 | 1,57491 | -1,004724526 | N/A             | N/A       | BF966326     | Inc-TRAT1-1           |
| A_33_P3410849  | 10,8123 | 10,8191 | -1,004724526 | ENST00000409586 | 541565    | NM_001013842 | C8orf58               |
| A_22_P00009041 | 1,62519 | 1,63201 | -1,004738455 | ENST00000566241 | N/A       | AF086457     | N/A                   |
| A_23_P41847    | 1,53917 | 1,546   | -1,004745419 | ENST00000274545 | 2559      | NM_000811    | GABRA6                |
| A_22_P00010480 | 1,44169 | 1,44853 | -1,004752384 | N/A             | N/A       | DA167481     | Inc-NAT8L-1           |
| A_24_P237583   | 1,48616 | 1,49301 | -1,004759348 | ENST00000289953 | 90199     | NM_130896    | WFDC8                 |

|                |         |         |              |                 |           |              |               |
|----------------|---------|---------|--------------|-----------------|-----------|--------------|---------------|
| A_33_P3350972  | 1,50032 | 1,50717 | -1,004759348 | ENST00000446840 | 646588    | N/A          | LOC646588     |
| A_22_P00022640 | 1,62192 | 1,62878 | -1,004766313 | N/A             | 100287814 | NR_034037    | LINC00582     |
| A_33_P3365228  | 1,5626  | 1,56946 | -1,004766313 | ENST00000357599 | 54437     | NM_001256346 | SEMA5B        |
| A_33_P3365586  | 9,83586 | 9,84272 | -1,004766313 | ENST00000265619 | 9217      | NM_004738    | VAPB          |
| A_21_P0004134  | 1,49924 | 1,50613 | -1,004787206 | ENST00000508486 | 101928769 | NR_105001    | LOC101928769  |
| A_22_P00018816 | 1,43962 | 1,44652 | -1,004794171 | ENST00000416481 | N/A       | N/A          | N/A           |
| A_33_P3279600  | 1,40028 | 1,40723 | -1,004828995 | ENST00000406846 | 2492      | NM_000145    | FSHR          |
| A_22_P00003213 | 1,42357 | 1,43053 | -1,00483596  | N/A             | N/A       | N/A          | Inc-CA8-7     |
| A_22_P00003616 | 1,43937 | 1,44633 | -1,00483596  | N/A             | N/A       | AK091285     | Inc-CD3D-1    |
| A_23_P14165    | 1,65552 | 1,66251 | -1,004856855 | ENST00000340807 | 2841      | NM_005292    | GPR18         |
| A_22_P00015370 | 1,51147 | 1,51847 | -1,00486382  | ENST00000560705 | N/A       | BQ222563     | N/A           |
| A_33_P3373690  | 1,46745 | 1,47445 | -1,00486382  | N/A             | N/A       | N/A          | N/A           |
| A_24_P397255   | 1,6201  | 1,62712 | -1,004877751 | ENST00000296741 | 133121    | NM_153343    | ENPP6         |
| A_22_P00022862 | 1,5657  | 1,57272 | -1,004877751 | N/A             | N/A       | N/A          | Inc-C4orf46-1 |
| A_22_P00003663 | 1,46498 | 1,472   | -1,004877751 | N/A             | N/A       | BC035649     | Inc-CDC40-1   |
| A_21_P0014320  | 1,37367 | 1,38069 | -1,004877751 | N/A             | N/A       | N/A          | N/A           |
| A_22_P00004038 | 1,43955 | 1,44659 | -1,004891682 | N/A             | N/A       | BC050469     | Inc-CHRNA3-1  |
| A_24_P366509   | 1,45878 | 1,46582 | -1,004891682 | ENST00000614407 | 146850    | NM_001010855 | PIK3R6        |
| A_22_P00020389 | 1,66886 | 1,67592 | -1,004905612 | ENST00000512310 | N/A       | N/A          | N/A           |
| A_22_P00022282 | 1,55184 | 1,5589  | -1,004905612 | ENST00000434947 | N/A       | N/A          | N/A           |
| A_33_P3232403  | 1,54765 | 1,55471 | -1,004905612 | N/A             | 404744    | NR_015356    | NPSR1-AS1     |
| A_22_P00021925 | 1,36392 | 1,37099 | -1,004912578 | N/A             | 100862679 | NR_046390    | NAALADL2-AS3  |
| A_22_P00006524 | 1,45392 | 1,461   | -1,004919543 | N/A             | N/A       | N/A          | Inc-FGFR1-3   |
| A_21_P0001294  | 1,6288  | 1,63588 | -1,004919543 | N/A             | N/A       | N/A          | Inc-ELAVL4-2  |
| A_24_P98251    | 9,98555 | 9,99263 | -1,004919543 | ENST00000358544 | 157680    | NM_017890    | VPS13B        |
| A_33_P3345474  | 7,06017 | 7,06727 | -1,004933475 | ENST00000381051 | N/A       | BC036832     | N/A           |
| A_21_P0005536  | 1,44323 | 1,45033 | -1,004933475 | N/A             | N/A       | N/A          | Inc-EZH2-2    |
| A_22_P00021325 | 1,43489 | 1,44199 | -1,004933475 | N/A             | N/A       | DA759359     | Inc-SLCO1A2-1 |
| A_23_P38254    | 13,5697 | 13,5768 | -1,004933475 | ENST00000465825 | 60528     | NM_018127    | ELAC2         |
| A_21_P0005379  | 1,43766 | 1,44481 | -1,004968304 | N/A             | N/A       | N/A          | Inc-VWC2-1    |
| A_22_P00017400 | 1,64981 | 1,65696 | -1,004968304 | N/A             | N/A       | N/A          | Inc-VCAM1-1   |
| A_23_P137935   | 1,40702 | 1,41418 | -1,00497527  | ENST00000368141 | 4332      | NM_002432    | MNDA          |
| A_21_P0012779  | 1,47527 | 1,48244 | -1,004982236 | ENST00000501965 | 101929210 | NR_125922    | LOC101929210  |

|                |         |         |              |                 |           |              |                 |
|----------------|---------|---------|--------------|-----------------|-----------|--------------|-----------------|
| A_32_P213459   | 1,6881  | 1,69529 | -1,004996168 | ENST00000382255 | 10655     | NM_006557    | DMRT2           |
| A_21_P0003618  | 1,39816 | 1,40536 | -1,005003134 | N/A             | N/A       | N/A          | Inc-STAP1-3     |
| A_33_P3471712  | 18,2773 | 18,2845 | -1,005003134 | ENST00000448179 | 284600    | AK056486     | LOC284600       |
| A_33_P3269670  | 1,70506 | 1,71227 | -1,0050101   | ENST00000398800 | 100271715 | NM_001145451 | ARHGEF33        |
| A_22_P00000839 | 4,66315 | 4,67037 | -1,005017066 | N/A             | N/A       | N/A          | Inc-AGBL1-3     |
| A_33_P3307728  | 1,43744 | 1,44468 | -1,005030999 | ENST00000398530 | 440051    | NM_001005405 | KRTAP5-11       |
| A_22_P00010797 | 1,43764 | 1,44488 | -1,005030999 | N/A             | N/A       | N/A          | Inc-NLRP3-1     |
| A_22_P00001480 | 1,62001 | 1,62725 | -1,005030999 | ENST00000448311 | 100506682 | N/A          | LOC100506682    |
| A_21_P0007918  | 1,40218 | 1,40942 | -1,005030999 | ENST00000422609 | N/A       | N/A          | N/A             |
| A_33_P3383970  | 1,56426 | 1,57151 | -1,005037965 | ENST00000506111 | 81793     | NM_030956    | TLR10           |
| A_23_P51019    | 1,48188 | 1,48915 | -1,005051898 | ENST00000375427 | 6326      | NM_021007    | SCN2A           |
| A_33_P3482466  | 1,40441 | 1,41168 | -1,005051898 | N/A             | N/A       | AK094554     | N/A             |
| A_21_P0000162  | 1,46177 | 1,46906 | -1,005065831 | ENST00000412590 | 280657    | AK302765     | SSX6            |
| A_33_P3260110  | 1,35139 | 1,35869 | -1,005072798 | N/A             | N/A       | AK126960     | N/A             |
| A_22_P00010745 | 7,28447 | 7,29178 | -1,005079764 | N/A             | N/A       | AK311445     | Inc-NIPSNAP3B-1 |
| A_21_P0013683  | 1,43783 | 1,44515 | -1,005086731 | N/A             | 101928720 | N/A          | LINC01509       |
| A_33_P3313640  | 3,77814 | 3,78547 | -1,005093698 | N/A             | N/A       | N/A          | N/A             |
| A_23_P132316   | 3,47437 | 3,48173 | -1,005114598 | ENST00000381568 | 140564    | NM_152426    | APOBEC3D        |
| A_19_P00808846 | 1,4289  | 1,43628 | -1,005128532 | ENST00000413645 | N/A       | N/A          | N/A             |
| A_21_P0004773  | 1,4357  | 1,44308 | -1,005128532 | ENST00000434296 | 285758    | NR_038863    | LINC01268       |
| A_21_P0005327  | 1,4837  | 1,4911  | -1,005142466 | ENST00000431071 | N/A       | N/A          | N/A             |
| A_23_P81212    | 13,1627 | 13,1701 | -1,005142466 | ENST00000514581 | 51023     | NM_016067    | MRPS18C         |
| A_21_P0003983  | 1,54807 | 1,5555  | -1,005163368 | ENST00000511054 | N/A       | N/A          | N/A             |
| A_24_P945312   | 1,55732 | 1,56475 | -1,005163368 | ENST00000404991 | 56903     | NM_020144    | PAPOLB          |
| A_22_P00002267 | 1,49309 | 1,50056 | -1,005191237 | N/A             | 101927255 | XR_246174    | LOC101927255    |
| A_21_P0010364  | 1,37137 | 1,37884 | -1,005191237 | ENST00000428765 | N/A       | N/A          | N/A             |
| A_22_P00008952 | 1,63664 | 1,64412 | -1,005198205 | N/A             | 338651    | NR_021489    | KRTAP5-AS1      |
| A_33_P3242114  | 1,63481 | 1,64229 | -1,005198205 | ENST00000616018 | 101927468 | XR_426823    | LOC101927468    |
| A_21_P0014398  | 1,56379 | 1,57128 | -1,005205172 | N/A             | 100128988 | AK023614     | LOC100128988    |
| A_22_P00017554 | 1,43622 | 1,44371 | -1,005205172 | N/A             | 101928284 | XR_248995    | LOC101928284    |
| A_23_P169351   | 1,43626 | 1,44375 | -1,005205172 | ENST00000380607 | 6456      | NM_003026    | SH3GL2          |
| A_23_P127891   | 7,63784 | 7,64533 | -1,005205172 | ENST00000525528 | 627       | NM_170735    | BDNF            |
| A_24_P160696   | 1,39696 | 1,40447 | -1,005219108 | ENST00000496010 | 89876     | NM_033364    | MAATS1          |

|                |         |         |              |                 |           |              |                       |
|----------------|---------|---------|--------------|-----------------|-----------|--------------|-----------------------|
| A_33_P3376090  | 5,24997 | 5,25749 | -1,005226075 | ENST00000340750 | 26219     | NM_001004452 | OR1J4                 |
| A_21_P0003246  | 1,52806 | 1,53558 | -1,005226075 | N/A             | 101929453 | XR_241530    | LOC101929453          |
| A_22_P00023947 | 1,62012 | 1,62765 | -1,005233043 | ENST00000439412 | 400957    | N/A          | LINC01185             |
| A_22_P00020952 | 1,56605 | 1,57358 | -1,005233043 | ENST00000563252 | 101928707 | XR_429695    | LOC101928707          |
| A_32_P440667   | 1,49704 | 1,50457 | -1,005233043 | N/A             | 171024    | NM_001128933 | SYNPO2                |
| A_22_P00006275 | 1,44753 | 1,45507 | -1,005240011 | ENST00000436084 | N/A       | N/A          | N/A                   |
| A_24_P332862   | 8,26938 | 8,27692 | -1,005240011 | ENST00000355504 | 284443    | NM_001076678 | ZNF493                |
| A_21_P0006583  | 4,79745 | 4,80501 | -1,005253947 | ENST00000555168 | N/A       | N/A          | N/A                   |
| A_22_P00020833 | 1,45404 | 1,4616  | -1,005253947 | ENST00000508636 | N/A       | N/A          | N/A                   |
| A_19_P00327081 | 4,20536 | 4,21293 | -1,005260914 | N/A             | N/A       | N/A          | XLOC_I2_001273        |
| A_21_P0007744  | 2,38828 | 2,39586 | -1,005267882 | N/A             | N/A       | N/A          | Inc-RP11-167N24.6.1-1 |
| A_33_P3310232  | 15,8366 | 15,8442 | -1,005281818 | ENST00000267436 | 79944     | NM_024884    | L2HGDH                |
| A_24_P14531    | 12,7146 | 12,7222 | -1,005281818 | ENST00000398022 | 9777      | NM_014742    | TM9SF4                |
| A_21_P0014578  | 1,46029 | 1,4679  | -1,005288787 | N/A             | 100507065 | NR_120433    | LOC100507065          |
| A_21_P0004122  | 1,43414 | 1,44175 | -1,005288787 | ENST00000513673 | N/A       | N/A          | N/A                   |
| A_24_P174793   | 3,76509 | 3,77271 | -1,005295755 | ENST00000311106 | 5122      | NM_000439    | PCSK1                 |
| A_21_P0009434  | 1,43522 | 1,44285 | -1,005302723 | N/A             | N/A       | N/A          | Inc-USP14-1           |
| A_33_P3353073  | 6,02032 | 6,02795 | -1,005302723 | ENST00000316637 | 50619     | NM_022047    | DEF6                  |
| A_21_P0001672  | 1,4427  | 1,45034 | -1,005309691 | N/A             | N/A       | N/A          | Inc-UTP11L-2          |
| A_21_P0014742  | 5,33976 | 5,3474  | -1,005309691 | N/A             | N/A       | BC045168     | N/A                   |
| A_33_P3372563  | 6,3897  | 6,39735 | -1,005316659 | ENST00000372512 | 89845     | NM_033450    | ABCC10                |
| A_22_P00012710 | 7,01113 | 7,01878 | -1,005316659 | ENST00000531077 | N/A       | N/A          | N/A                   |
| A_22_P00024749 | 1,65355 | 1,66122 | -1,005330596 | ENST00000485347 | N/A       | N/A          | N/A                   |
| A_33_P3222728  | 1,45022 | 1,4579  | -1,005337565 | ENST00000341840 | 55888     | NM_001288592 | ZKSCAN7               |
| A_33_P3412752  | 1,56499 | 1,57267 | -1,005337565 | N/A             | 100128607 | AK127186     | LOC100128607          |
| A_22_P00008551 | 1,54219 | 1,54987 | -1,005337565 | ENST00000423466 | N/A       | BG202600     | N/A                   |
| A_33_P3347522  | 15,1775 | 15,1852 | -1,005351502 | N/A             | N/A       | N/A          | N/A                   |
| A_22_P00022302 | 13,4637 | 13,4714 | -1,005351502 | ENST00000534218 | N/A       | BG563712     | N/A                   |
| A_21_P0013403  | 1,41329 | 1,42101 | -1,005365439 | ENST00000419905 | 102724386 | NR_120521    | LINC01393             |
| A_22_P00024989 | 1,4909  | 1,49862 | -1,005365439 | ENST00000415940 | N/A       | N/A          | N/A                   |
| A_21_P0003972  | 1,60656 | 1,61431 | -1,005386345 | N/A             | N/A       | N/A          | Inc-FBXL7-3           |
| A_22_P00011744 | 1,43722 | 1,44497 | -1,005386345 | N/A             | N/A       | N/A          | Inc-PER2-2            |
| A_22_P00020692 | 1,46796 | 1,47572 | -1,005393314 | ENST00000519306 | N/A       | CR741371     | N/A                   |

|                |         |         |              |                 |           |              |                   |
|----------------|---------|---------|--------------|-----------------|-----------|--------------|-------------------|
| A_22_P00002572 | 1,62229 | 1,63006 | -1,005400283 | ENST00000574589 | 100506388 | NM_001242780 | LOC100506388      |
| A_21_P0009371  | 2,97079 | 2,97858 | -1,005414221 | N/A             | N/A       | N/A          | Inc-C17orf101-1   |
| A_21_P0006928  | 1,61809 | 1,62588 | -1,005414221 | N/A             | N/A       | N/A          | Inc-GPR26-4       |
| A_23_P364517   | 13,127  | 13,1348 | -1,00542119  | ENST00000488746 | 58515     | NM_021237    | SELK              |
| A_23_P13033    | 10,9601 | 10,9679 | -1,00542119  | ENST00000408993 | 5936      | NM_002896    | RBM4              |
| A_33_P3314937  | 1,66555 | 1,67338 | -1,005442097 | ENST00000426466 | 112401    | NM_033341    | BIRC8             |
| A_22_P00005865 | 1,50814 | 1,51598 | -1,005449066 | N/A             | N/A       | N/A          | Inc-ERP29-1       |
| A_33_P3336822  | 1,35449 | 1,36233 | -1,005449066 | ENST00000390297 | N/A       | U09907       | N/A               |
| A_22_P00001025 | 1,4816  | 1,48947 | -1,005469974 | N/A             | N/A       | N/A          | Inc-AL445989.1-13 |
| A_33_P3409269  | 1,61807 | 1,62595 | -1,005476944 | ENST00000507059 | 2324      | AB209637     | FLT4              |
| A_33_P3368186  | 17,1224 | 17,1303 | -1,005490883 | N/A             | N/A       | AY444749     | N/A               |
| A_21_P0000869  | 1,45411 | 1,46201 | -1,005490883 | N/A             | 100506229 | NR_039975    | LINC01093         |
| A_22_P00010757 | 1,49569 | 1,50359 | -1,005490883 | ENST00000518739 | 102724612 | NR_125825    | LOC102724612      |
| A_23_P407080   | 1,62384 | 1,63175 | -1,005497852 | ENST00000399564 | 133558    | NM_173489    | MROH2B            |
| A_33_P3247082  | 8,09644 | 8,10435 | -1,005497852 | ENST00000330048 | 386757    | NR_003083    | SLC6A10P          |
| A_33_P3335730  | 4,04865 | 4,05658 | -1,005511791 | ENST00000377300 | 441116    | NR_046113    | FLJ16171          |
| A_23_P409093   | 1,43549 | 1,44344 | -1,005525731 | ENST00000392977 | 121601    | NM_178826    | ANO4              |
| A_22_P00019781 | 1,70035 | 1,70832 | -1,005539671 | ENST00000451946 | N/A       | N/A          | N/A               |
| A_21_P0013827  | 1,46117 | 1,46915 | -1,00554664  | N/A             | N/A       | N/A          | XLOC_I2_015789    |
| A_24_P352116   | 9,01291 | 9,0209  | -1,00555361  | N/A             | 84973     | NR_003672    | SNHG7             |
| A_21_P0012057  | 1,44849 | 1,45648 | -1,00555361  | ENST00000417751 | 100499171 | N/A          | LINC00276         |
| A_33_P3404241  | 1,53585 | 1,54384 | -1,00555361  | N/A             | N/A       | N/A          | N/A               |
| A_22_P00003390 | 11,7601 | 11,7681 | -1,00556058  | N/A             | N/A       | N/A          | Inc-CCDC113-1     |
| A_33_P33308045 | 2,149   | 2,15702 | -1,005574521 | N/A             | 9470      | AK303802     | EIF4E2            |
| A_22_P00025320 | 1,43647 | 1,44449 | -1,005574521 | ENST00000423875 | 100133308 | NR_024472    | RSU1P2            |
| A_22_P00003237 | 1,54717 | 1,5552  | -1,005581491 | ENST00000460586 | 101927494 | XR_245082    | LOC101927494      |
| A_24_P309095   | 1,43135 | 1,43939 | -1,005588461 | ENST00000424685 | 5649      | NM_005045    | RELN              |
| A_24_P272917   | 5,45933 | 5,46738 | -1,005595431 | ENST00000504104 | 728373    | NM_001242326 | USP17L25          |
| A_22_P00015981 | 1,35021 | 1,35829 | -1,005616342 | ENST00000489626 | 102724407 | XR_426250    | LOC102724407      |
| A_21_P0012447  | 1,64766 | 1,65574 | -1,005616342 | ENST00000509077 | 4638      | NM_053027    | MYLK              |
| A_22_P00019549 | 1,61825 | 1,62634 | -1,005623312 | N/A             | N/A       | DB193767     | Inc-H3F3C-4       |
| A_23_P135769   | 14,3805 | 14,3886 | -1,005630283 | ENST00000462494 | 60        | NM_001101    | ACTB              |
| A_23_P88046    | 11,5606 | 11,5687 | -1,005630283 | ENST00000309957 | 55739     | NM_018210    | CARKD             |



|                |         |         |              |                 |           |              |                |
|----------------|---------|---------|--------------|-----------------|-----------|--------------|----------------|
| A_33_P3308716  | 1,55787 | 1,56598 | -1,005637253 | ENST00000390282 | N/A       | L39131       | N/A            |
| A_22_P00014641 | 1,53931 | 1,54743 | -1,005644224 | ENST00000455711 | 100144597 | N/A          | LINC01056      |
| A_23_P41498    | 1,35331 | 1,36144 | -1,005651195 | ENST00000237653 | 130       | NM_000672    | ADH6           |
| A_22_P00008242 | 1,43421 | 1,44234 | -1,005651195 | ENST00000554043 | N/A       | N/A          | N/A            |
| A_23_P45913    | 8,72367 | 8,73183 | -1,005672107 | ENST00000474025 | 9410      | NM_004814    | SNRNP40        |
| A_33_P3296024  | 8,32394 | 8,33211 | -1,005679078 | ENST00000612458 | 27164     | NM_171999    | SALL3          |
| A_22_P00016512 | 1,54972 | 1,5579  | -1,005686048 | ENST00000443479 | N/A       | N/A          | N/A            |
| A_21_P0003806  | 1,85222 | 1,86041 | -1,005693019 | N/A             | N/A       | N/A          | Inc-DCTD-6     |
| A_22_P00006203 | 1,56237 | 1,57056 | -1,005693019 | N/A             | 100874528 | NR_104188    | XXYLT1-AS1     |
| A_23_P71513    | 12,0867 | 12,0949 | -1,00569999  | ENST00000254624 | 23167     | NM_015137    | EFR3A          |
| A_22_P00024568 | 1,6376  | 1,64582 | -1,005713932 | N/A             | N/A       | N/A          | Inc-CLCN3-2    |
| A_22_P00005282 | 1,48723 | 1,49545 | -1,005713932 | ENST00000448431 | 101928031 | XR_245032    | LOC101928031   |
| A_22_P00003938 | 1,64943 | 1,65766 | -1,005720904 | ENST00000554046 | N/A       | BQ028359     | N/A            |
| A_33_P3329482  | 1,80933 | 1,81756 | -1,005720904 | ENST00000324682 | 286187    | NM_001013626 | PPP1R42        |
| A_23_P29924    | 9,45201 | 9,46024 | -1,005720904 | ENST00000382753 | 85013     | NM_032927    | TMEM128        |
| A_23_P327069   | 9,74734 | 9,75557 | -1,005720904 | ENST00000307659 | 9778      | NM_014743    | KIAA0232       |
| A_21_P0000129  | 1,40498 | 1,41322 | -1,005727875 | ENST00000460982 | 9201      | NM_001195430 | DCLK1          |
| A_23_P12357    | 1,44739 | 1,45564 | -1,005734846 | ENST00000535699 | 23418     | NM_201253    | CRB1           |
| A_21_P0004472  | 1,4897  | 1,49797 | -1,005748788 | N/A             | N/A       | N/A          | Inc-BOD1-1     |
| A_33_P3279550  | 1,45908 | 1,46735 | -1,005748788 | ENST00000366810 | 83881     | NM_001282402 | MIXL1          |
| A_33_P3341540  | 5,14467 | 5,15296 | -1,005762731 | N/A             | N/A       | N/A          | N/A            |
| A_21_P0007300  | 1,55984 | 1,56815 | -1,005776674 | N/A             | 102725260 | N/A          | LOC102725260   |
| A_21_P0000525  | 5,33771 | 5,34603 | -1,005783646 | N/A             | 285847    | NR_027117    | LOC285847      |
| A_22_P00011269 | 4,42223 | 4,43055 | -1,005783646 | N/A             | N/A       | N/A          | Inc-OR51B6-1   |
| A_21_P0006683  | 1,37756 | 1,38588 | -1,005783646 | N/A             | N/A       | N/A          | Inc-C10orf35-2 |
| A_21_P0007104  | 1,38306 | 1,39139 | -1,005790617 | N/A             | N/A       | N/A          | Inc-JMJD1C-1   |
| A_22_P00022735 | 1,4926  | 1,50093 | -1,005790617 | N/A             | N/A       | N/A          | Inc-C20orf62-2 |
| A_22_P00005740 | 1,62088 | 1,62924 | -1,005811532 | ENST00000549104 | N/A       | DB151746     | N/A            |
| A_22_P00013027 | 4,54102 | 4,54938 | -1,005811532 | ENST00000441383 | 104326057 | NR_126370    | GACAT1         |
| A_22_P00006062 | 1,37725 | 1,38562 | -1,005818504 | N/A             | N/A       | BC059397     | Inc-FAM132B-1  |
| A_21_P0006831  | 1,69796 | 1,70634 | -1,005825476 | N/A             | N/A       | N/A          | Inc-ITIH2-6    |
| A_33_P3313245  | 9,22664 | 9,23504 | -1,00583942  | ENST00000506639 | 23600     | NM_001167595 | AMACR          |
| A_22_P00012394 | 1,61889 | 1,6273  | -1,005846392 | N/A             | N/A       | N/A          | Inc-PRKAG2-2   |

|                |         |         |              |                 |           |              |                |
|----------------|---------|---------|--------------|-----------------|-----------|--------------|----------------|
| A_23_P362810   | 1,46051 | 1,46893 | -1,005853364 | ENST00000616659 | 132200    | NR_026866    | C3orf49        |
| A_21_P0010096  | 1,5463  | 1,55473 | -1,005860336 | N/A             | N/A       | N/A          | Inc-MC3R-2     |
| A_19_P00808384 | 1,49101 | 1,49945 | -1,005867308 | N/A             | N/A       | N/A          | Inc-TNFAIP3-1  |
| A_22_P00011027 | 4,2519  | 4,26036 | -1,005881252 | N/A             | 101930305 | XR_247850    | LOC101930305   |
| A_21_P0013991  | 4,81549 | 4,82395 | -1,005881252 | ENST00000612308 | N/A       | N/A          | N/A            |
| A_22_P00017881 | 1,52212 | 1,53058 | -1,005881252 | ENST00000420548 | N/A       | N/A          | N/A            |
| A_33_P3211384  | 3,74045 | 3,74892 | -1,005888224 | ENST00000600359 | 80726     | NM_001145305 | KIAA1683       |
| A_22_P00025588 | 1,46134 | 1,46981 | -1,005888224 | N/A             | N/A       | N/A          | Inc-DDX27-4    |
| A_22_P00005205 | 3,65523 | 3,66372 | -1,005902169 | N/A             | N/A       | AL832611     | Inc-DLGAP3-1   |
| A_33_P3312519  | 1,36032 | 1,36881 | -1,005902169 | ENST00000606109 | 448834    | NM_001025231 | KPRP           |
| A_22_P00008380 | 1,47022 | 1,47872 | -1,005909142 | N/A             | N/A       | N/A          | Inc-JAM3-2     |
| A_22_P00003345 | 1,48228 | 1,49078 | -1,005909142 | N/A             | 101929514 | XR_425617    | LOC101929514   |
| A_33_P3294826  | 6,20661 | 6,21511 | -1,005909142 | ENST00000368220 | 1382      | NM_001199723 | CRABP2         |
| A_21_P0002605  | 1,35174 | 1,36025 | -1,005916114 | N/A             | 102724744 | XR_425445    | LOC102724744   |
| A_22_P00009171 | 1,69529 | 1,7038  | -1,005916114 | ENST00000544086 | N/A       | N/A          | N/A            |
| A_33_P3330418  | 1,45989 | 1,4684  | -1,005916114 | ENST00000322301 | 26659     | NM_017506    | OR7A5          |
| A_32_P85676    | 1,36366 | 1,37218 | -1,005923086 | ENST00000510398 | 55351     | NM_018401    | STK32B         |
| A_21_P0003494  | 1,68727 | 1,6958  | -1,005930059 | ENST00000416680 | N/A       | N/A          | N/A            |
| A_23_P155360   | 6,52017 | 6,52871 | -1,005937032 | ENST00000425430 | 79885     | NM_024827    | HDAC11         |
| A_21_P0013942  | 1,61616 | 1,62471 | -1,005944004 | N/A             | N/A       | N/A          | N/A            |
| A_23_P417951   | 1,45654 | 1,46512 | -1,005964923 | ENST00000322128 | 85453     | NM_033512    | TSPYL5         |
| A_21_P0011757  | 1,4325  | 1,44108 | -1,005964923 | N/A             | N/A       | N/A          | XLOC_I2_007096 |
| A_33_P3211423  | 11,3252 | 11,3338 | -1,005978868 | ENST00000239231 | 79646     | BX648891     | PANK3          |
| A_24_P355649   | 10,4141 | 10,4227 | -1,005978868 | ENST00000528790 | 2313      | NM_002017    | FLI1           |
| A_23_P306941   | 1,61656 | 1,62517 | -1,005985841 | ENST00000615003 | 266747    | NM_153615    | RGL4           |
| A_24_P562369   | 1,63111 | 1,63973 | -1,005992814 | ENST00000420443 | N/A       | N/A          | N/A            |
| A_33_P3384977  | 1,55546 | 1,56409 | -1,005999787 | N/A             | N/A       | N/A          | N/A            |
| A_23_P49412    | 9,92091 | 9,92955 | -1,00600676  | ENST00000571654 | 78994     | NM_024031    | PRR14          |
| A_33_P3282404  | 1,43837 | 1,44705 | -1,006034653 | ENST00000333891 | 27445     | NM_033026    | PCLO           |
| A_22_P00025763 | 1,42874 | 1,43744 | -1,0060486   | ENST00000456440 | N/A       | N/A          | N/A            |
| A_22_P00008390 | 1,39127 | 1,39998 | -1,006055573 | ENST00000562900 | N/A       | BX118230     | N/A            |
| A_24_P817863   | 1,9059  | 1,91461 | -1,006055573 | ENST00000272845 | 285175    | NM_032504    | UNC80          |
| A_23_P41789    | 1,43724 | 1,44598 | -1,006076494 | ENST00000506176 | 28965     | NM_001017372 | SLC27A6        |

|                |         |         |              |                 |           |           |                       |
|----------------|---------|---------|--------------|-----------------|-----------|-----------|-----------------------|
| A_33_P3366484  | 6,3526  | 6,36135 | -1,006083467 | ENST00000622246 | 26275     | NM_198047 | HIBCH                 |
| A_23_P60793    | 5,64754 | 5,65632 | -1,006104389 | N/A             | 80161     | NR_026710 | ASMTL-AS1             |
| A_22_P00007016 | 1,49238 | 1,50117 | -1,006111362 | ENST00000486954 | 285972    | NR_034033 | LINC00996             |
| A_33_P3358676  | 1,67697 | 1,68576 | -1,006111362 | ENST00000438699 | 403323    | XR_252551 | LOC403323             |
| A_22_P00004525 | 1,64318 | 1,65198 | -1,006118336 | N/A             | N/A       | BI823728  | Inc-CRB2-1            |
| A_23_P77430    | 12,1352 | 12,144  | -1,006118336 | ENST00000568463 | 54496     | NM_019023 | PRMT7                 |
| A_21_P0004017  | 1,36526 | 1,37407 | -1,00612531  | N/A             | N/A       | N/A       | Inc-RP11-428C6.1.1-2  |
| A_21_P0009029  | 1,44523 | 1,45404 | -1,00612531  | N/A             | 102723323 | XR_424702 | LOC102723323          |
| A_33_P3403913  | 2,03163 | 2,04045 | -1,006132284 | ENST00000562687 | N/A       | N/A       | N/A                   |
| A_22_P00002469 | 1,43398 | 1,4428  | -1,006132284 | N/A             | N/A       | BF846222  | Inc-C15orf48-1        |
| A_22_P00006255 | 1,67069 | 1,67953 | -1,006146232 | ENST00000416595 | N/A       | N/A       | N/A                   |
| A_33_P3348061  | 1,4575  | 1,46635 | -1,006153206 | ENST00000216144 | 164633    | NM_182527 | CABP7                 |
| A_21_P0001199  | 1,44333 | 1,4522  | -1,006167155 | ENST00000458070 | N/A       | N/A       | N/A                   |
| A_23_P373464   | 1,34984 | 1,35873 | -1,006181103 | ENST00000317233 | 3899      | NM_002285 | AFF3                  |
| A_22_P00008657 | 1,43658 | 1,44548 | -1,006188077 | N/A             | N/A       | N/A       | Inc-KIAA0196-3        |
| A_33_P3396771  | 1,53832 | 1,54722 | -1,006188077 | N/A             | N/A       | N/A       | N/A                   |
| A_33_P3398074  | 2,61524 | 2,62415 | -1,006195052 | N/A             | 100133319 | AF132201  | PRO1804               |
| A_33_P3298935  | 1,39783 | 1,40674 | -1,006195052 | ENST00000431627 | N/A       | N/A       | N/A                   |
| A_33_P3239467  | 1,37501 | 1,38394 | -1,006209001 | ENST00000589300 | 150135    | NR_027272 | LINC00479             |
| A_21_P0010526  | 1,38925 | 1,39819 | -1,006215975 | N/A             | N/A       | N/A       | XLOC_I2_000138        |
| A_21_P0002485  | 1,44225 | 1,45119 | -1,006215975 | N/A             | N/A       | N/A       | Inc-ST6GAL2-2         |
| A_23_P129665   | 1,55839 | 1,56734 | -1,00622295  | ENST00000389202 | 3681      | NM_005353 | ITGAD                 |
| A_21_P0001464  | 1,6569  | 1,66586 | -1,006229924 | N/A             | 100506022 | N/A       | LOC100506022          |
| A_22_P00004891 | 1,54905 | 1,55802 | -1,006236899 | ENST00000553762 | 102723742 | BI520443  | LINC01500             |
| A_23_P76488    | 15,2285 | 15,2375 | -1,006257823 | ENST00000256951 | 2012      | NM_001423 | EMP1                  |
| A_33_P3351622  | 1,53505 | 1,54407 | -1,006271773 | ENST00000376301 | 53904     | N/A       | MYO3A                 |
| A_21_P0004251  | 1,45387 | 1,4629  | -1,006278748 | N/A             | N/A       | N/A       | Inc-CTD-2203A3.1.1-2  |
| A_22_P00016302 | 1,69161 | 1,70065 | -1,006285723 | ENST00000544759 | 100128554 | NR_015398 | LOC100128554          |
| A_21_P0001520  | 1,55092 | 1,55998 | -1,006299673 | N/A             | N/A       | N/A       | Inc-ELTD1-3           |
| A_22_P00025255 | 1,55583 | 1,5649  | -1,006306649 | N/A             | N/A       | N/A       | Inc-LRRC7-2           |
| A_22_P00013297 | 1,6326  | 1,64168 | -1,006313624 | N/A             | N/A       | DB574386  | Inc-RP11-1105G2.3.1-2 |
| A_23_P31747    | 11,476  | 11,4851 | -1,006327574 | ENST00000519791 | 84933     | NM_032847 | C8orf76               |
| A_23_P784      | 11,8722 | 11,8813 | -1,006327574 | ENST00000471853 | 84328     | NM_032368 | LZIC                  |

|                |         |         |              |                 |           |              |               |
|----------------|---------|---------|--------------|-----------------|-----------|--------------|---------------|
| A_33_P3301524  | 12,0048 | 12,0139 | -1,006327574 | ENST00000554811 | 7517      | NM_001100119 | XRCC3         |
| A_24_P15658    | 1,40395 | 1,41306 | -1,00633455  | ENST00000315948 | 116068    | NM_198273    | LYSMD3        |
| A_22_P00013405 | 1,55225 | 1,56136 | -1,00633455  | ENST00000525832 | N/A       | N/A          | N/A           |
| A_21_P0008471  | 1,68534 | 1,69446 | -1,006341525 | N/A             | N/A       | N/A          | Inc-GALC-6    |
| A_33_P3401146  | 1,48581 | 1,49493 | -1,006341525 | N/A             | N/A       | N/A          | N/A           |
| A_23_P71415    | 9,54116 | 9,55031 | -1,006362452 | ENST00000524254 | 55093     | NM_018024    | WDYHV1        |
| A_24_P328524   | 1,49295 | 1,5021  | -1,006362452 | ENST00000240874 | 8997      | NM_003947    | KALRN         |
| A_21_P0001341  | 1,45689 | 1,46606 | -1,006376403 | N/A             | N/A       | N/A          | Inc-ABCD3-2   |
| A_23_P258698   | 10,4372 | 10,4464 | -1,00639733  | ENST00000226578 | 4126      | NM_005908    | MANBA         |
| A_33_P3224090  | 1,47502 | 1,48424 | -1,006411282 | ENST00000553818 | N/A       | XR_243240    | N/A           |
| A_33_P3235410  | 8,10874 | 8,11796 | -1,006411282 | N/A             | 9200      | BC027709     | PTPLA         |
| A_22_P00018797 | 1,54286 | 1,55209 | -1,006418258 | ENST00000414598 | N/A       | N/A          | N/A           |
| A_33_P3475906  | 1,53595 | 1,54519 | -1,006425234 | N/A             | 100130331 | NR_027247    | LOC100130331  |
| A_21_P0005019  | 1,50512 | 1,51437 | -1,00643221  | N/A             | N/A       | N/A          | Inc-MAS1L-1   |
| A_21_P0008833  | 1,52614 | 1,5354  | -1,006439186 | N/A             | N/A       | N/A          | Inc-PML-1     |
| A_22_P00008141 | 1,49298 | 1,50225 | -1,006446162 | N/A             | N/A       | N/A          | Inc-IL5RA-6   |
| A_23_P202170   | 13,9395 | 13,9488 | -1,006467091 | ENST00000361464 | 10724     | NM_012215    | MGEA5         |
| A_33_P3239352  | 1,51209 | 1,52139 | -1,006467091 | ENST00000282075 | 57818     | NM_021176    | G6PC2         |
| A_33_P3225625  | 1,50935 | 1,51865 | -1,006467091 | ENST00000610889 | 445347    | NM_001003799 | TARP          |
| A_22_P00014627 | 1,37787 | 1,38719 | -1,006481043 | N/A             | N/A       | BX649099     | Inc-SLC16A3-5 |
| A_19_P00321478 | 1,51631 | 1,52565 | -1,006494996 | N/A             | N/A       | N/A          | Inc-MACC1-1   |
| A_22_P00019904 | 1,43529 | 1,44465 | -1,006508949 | N/A             | N/A       | AK125799     | Inc-ISLR-1    |
| A_21_P0002317  | 1,39673 | 1,40609 | -1,006508949 | N/A             | N/A       | N/A          | Inc-ITGA6-2   |
| A_22_P00010904 | 6,94825 | 6,95761 | -1,006508949 | ENST00000562672 | N/A       | BC033347     | N/A           |
| A_33_P3367541  | 1,46723 | 1,4766  | -1,006515926 | N/A             | N/A       | N/A          | Inc-SEC61G-7  |
| A_32_P201530   | 1,69666 | 1,70603 | -1,006515926 | ENST00000615049 | 80725     | NM_025248    | SRCIN1        |
| A_19_P00813077 | 4,62804 | 4,63742 | -1,006522903 | ENST00000611127 | 375190    | NM_001145710 | FAM228B       |
| A_33_P3270559  | 1,41381 | 1,42319 | -1,006522903 | ENST00000549927 | 374470    | N/A          | C12orf42      |
| A_23_P132417   | 10,2058 | 10,2152 | -1,006536856 | ENST00000265245 | 55341     | NM_018385    | LSG1          |
| A_33_P3314341  | 4,15066 | 4,16006 | -1,006536856 | ENST00000374244 | 158405    | XM_006716978 | KIAA1958      |
| A_23_P35645    | 11,397  | 11,4064 | -1,006536856 | ENST00000379888 | 84991     | NM_032905    | RBM17         |
| A_22_P00010590 | 1,52675 | 1,53617 | -1,00655081  | ENST00000553534 | N/A       | N/A          | N/A           |
| A_21_P0000983  | 1,6879  | 1,69735 | -1,006571741 | ENST00000449140 | N/A       | N/A          | N/A           |

|                |         |         |              |                 |           |              |              |
|----------------|---------|---------|--------------|-----------------|-----------|--------------|--------------|
| A_33_P3334708  | 1,48917 | 1,49864 | -1,006585695 | N/A             | 729627    | NM_001134659 | PRR23A       |
| A_33_P3210463  | 2,5246  | 2,53408 | -1,006592672 | ENST00000381423 | 343641    | NM_198994    | TGM6         |
| A_22_P00025894 | 1,63454 | 1,64402 | -1,006592672 | ENST00000431395 | 104266963 | N/A          | LINC01264    |
| A_21_P0009186  | 1,48432 | 1,4938  | -1,006592672 | ENST00000453339 | N/A       | N/A          | N/A          |
| A_21_P0005167  | 6,08533 | 6,09482 | -1,006599649 | ENST00000563807 | N/A       | N/A          | N/A          |
| A_21_P0013087  | 1,45371 | 1,46321 | -1,006606626 | N/A             | 101928307 | XR_241856    | LOC101928307 |
| A_24_P944253   | 1,36583 | 1,37534 | -1,006613604 | ENST00000489245 | 89857     | NM_130446    | KLHL6        |
| A_22_P00020021 | 1,45074 | 1,46025 | -1,006613604 | N/A             | N/A       | BC033402     | Inc-SKP2-1   |
| A_23_P1740     | 1,53937 | 1,54888 | -1,006613604 | ENST00000611284 | 4684      | NM_001076682 | NCAM1        |
| A_23_P111240   | 9,19078 | 9,2003  | -1,006620581 | ENST00000367582 | 9749      | NM_014721    | PHACTR2      |
| A_23_P123172   | 6,06017 | 6,06971 | -1,006634536 | ENST00000479887 | 441295    | NR_002157    | OR2A9P       |
| A_23_P31532    | 7,92211 | 7,93166 | -1,006641513 | ENST00000275766 | 92092     | NM_080660    | ZC3HAV1L     |
| A_22_P00020584 | 1,46909 | 1,47864 | -1,006641513 | ENST00000502437 | N/A       | N/A          | N/A          |
| A_23_P143987   | 8,78118 | 8,79074 | -1,006648491 | ENST00000354956 | 10533     | NM_006395    | ATG7         |
| A_21_P0000619  | 1,44535 | 1,45491 | -1,006648491 | N/A             | 100128505 | NR_033973    | ASTN2-AS1    |
| A_33_P3282023  | 1,43406 | 1,44362 | -1,006648491 | N/A             | N/A       | N/A          | N/A          |
| A_22_P00012449 | 1,37245 | 1,38205 | -1,006676401 | N/A             | N/A       | N/A          | Inc-PRPF18-4 |
| A_22_P00019349 | 2,33729 | 2,34689 | -1,006676401 | N/A             | N/A       | AW978577     | Inc-GTSF1L-1 |
| A_22_P00024016 | 1,6146  | 1,6242  | -1,006676401 | N/A             | 101927543 | NR_125419    | LOC101927543 |
| A_21_P0006540  | 1,61266 | 1,62227 | -1,006683379 | N/A             | N/A       | N/A          | Inc-MAGEE2-1 |
| A_23_P309292   | 6,58169 | 6,5913  | -1,006683379 | ENST00000311694 | 283450    | NM_001109662 | HECTD4       |
| A_22_P00018271 | 1,46665 | 1,47627 | -1,006690357 | N/A             | N/A       | N/A          | Inc-ZNF750-1 |
| A_21_P0006580  | 6,38202 | 6,39164 | -1,006690357 | ENST00000616978 | 84679     | NM_001257291 | SLC9A7       |
| A_21_P0013412  | 1,62684 | 1,63647 | -1,006697335 | N/A             | N/A       | N/A          | Inc-AGR3-1   |
| A_22_P00022549 | 1,55015 | 1,55979 | -1,006704313 | ENST00000456715 | N/A       | N/A          | N/A          |
| A_33_P3209457  | 1,48131 | 1,49098 | -1,006725247 | ENST00000372419 | 5631      | N/A          | PRPS1        |
| A_33_P3270668  | 1,6182  | 1,62788 | -1,006732225 | ENST00000409222 | 9715      | NM_001031690 | FAM131B      |
| A_22_P00017910 | 1,41747 | 1,42717 | -1,006746181 | N/A             | N/A       | N/A          | Inc-ZFP2-1   |
| A_33_P3541279  | 3,60307 | 3,61277 | -1,006746181 | N/A             | N/A       | AF116649     | N/A          |
| A_22_P00009509 | 1,5176  | 1,5273  | -1,006746181 | ENST00000505002 | N/A       | N/A          | N/A          |
| A_33_P3462960  | 10,3027 | 10,3124 | -1,006746181 | ENST00000602402 | 5611      | NM_006260    | DNAJC3       |
| A_22_P00022030 | 1,48414 | 1,49385 | -1,00675316  | N/A             | 102724246 | NR_110796    | TTC39C-AS1   |
| A_33_P3422923  | 1,66707 | 1,67679 | -1,006760138 | ENST00000491596 | 151325    | NR_003143    | MYADML       |

|                |         |         |              |                 |           |              |                    |
|----------------|---------|---------|--------------|-----------------|-----------|--------------|--------------------|
| A_22_P00017732 | 1,36345 | 1,37318 | -1,006767116 | ENST00000432942 | N/A       | N/A          | N/A                |
| A_22_P00006978 | 1,45247 | 1,4622  | -1,006767116 | N/A             | N/A       | DB156604     | Inc-GDF5-1         |
| A_22_P00008603 | 1,39628 | 1,40603 | -1,006781073 | ENST00000449531 | N/A       | BX105718     | N/A                |
| A_21_P0012422  | 1,62214 | 1,63189 | -1,006781073 | N/A             | N/A       | N/A          | XLOC_I2_010056     |
| A_23_P59358    | 7,91278 | 7,92253 | -1,006781073 | ENST00000524064 | 285753    | NM_173830    | CEP57L1            |
| A_22_P00020538 | 1,5525  | 1,56226 | -1,006788052 | N/A             | N/A       | DA116381     | Inc-ICA1-1         |
| A_21_P0009497  | 1,53408 | 1,54386 | -1,006802009 | N/A             | N/A       | N/A          | Inc-SOCS6-4        |
| A_33_P3254727  | 1,68216 | 1,69194 | -1,006802009 | N/A             | N/A       | N/A          | N/A                |
| A_22_P00024638 | 1,3668  | 1,37659 | -1,006808987 | N/A             | N/A       | BX110003     | Inc-EMILIN2-2      |
| A_23_P207387   | 9,10977 | 9,11958 | -1,006822945 | ENST00000428494 | 84514     | NM_032484    | GHDC               |
| A_24_P309645   | 9,3626  | 9,37241 | -1,006822945 | ENST00000551127 | 53373     | NM_017901    | TPCN1              |
| A_19_P00319682 | 1,42764 | 1,43746 | -1,006829924 | ENST00000465870 | 9208      | NM_001137550 | LRRFIP1            |
| A_21_P0002633  | 1,64505 | 1,65489 | -1,006843881 | N/A             | N/A       | N/A          | Inc-AC112715.2.1-1 |
| A_21_P0003356  | 1,53512 | 1,54497 | -1,00685086  | ENST00000510602 | N/A       | N/A          | N/A                |
| A_22_P00013388 | 1,42536 | 1,43522 | -1,006857839 | ENST00000509666 | N/A       | N/A          | N/A                |
| A_33_P3421656  | 1,49135 | 1,50121 | -1,006857839 | ENST00000370869 | 27283     | NM_014464    | TINAG              |
| A_21_P0014546  | 1,52196 | 1,53182 | -1,006857839 | N/A             | N/A       | N/A          | N/A                |
| A_33_P8579064  | 8,55915 | 8,56903 | -1,006871797 | ENST00000484770 | 9849      | AK095317     | ZNF518A            |
| A_21_P0004716  | 1,54179 | 1,55169 | -1,006885756 | ENST00000612554 | N/A       | N/A          | N/A                |
| A_24_P397294   | 6,54073 | 6,55063 | -1,006885756 | ENST00000510544 | 4056      | NM_145867    | LTC4S              |
| A_23_P84705    | 1,50335 | 1,51326 | -1,006892735 | ENST00000582931 | 23495     | NM_012452    | TNFRSF13B          |
| A_33_P3723827  | 1,3833  | 1,39322 | -1,006899714 | N/A             | N/A       | N/A          | N/A                |
| A_33_P3277228  | 1,61285 | 1,62278 | -1,006906693 | N/A             | N/A       | N/A          | N/A                |
| A_33_P3342153  | 1,68053 | 1,69046 | -1,006906693 | ENST00000526929 | 392188    | NM_001256872 | USP17L8            |
| A_22_P00011664 | 1,43845 | 1,44839 | -1,006913673 | N/A             | N/A       | N/A          | Inc-PDE6A-1        |
| A_21_P0004215  | 1,34943 | 1,35937 | -1,006913673 | N/A             | N/A       | N/A          | Inc-ADAMTS16-2     |
| A_22_P00021683 | 1,5542  | 1,56414 | -1,006913673 | N/A             | 101929109 | XR_241821    | LOC101929109       |
| A_24_P307384   | 3,54743 | 3,55742 | -1,00694857  | ENST00000511127 | N/A       | N/A          | N/A                |
| A_33_P3236416  | 5,98135 | 5,99135 | -1,00695555  | ENST00000621958 | 440435    | NM_001004334 | GPR179             |
| A_22_P00013324 | 1,47556 | 1,48557 | -1,00696253  | ENST00000569048 | N/A       | N/A          | N/A                |
| A_21_P0001022  | 1,41198 | 1,422   | -1,00696951  | ENST00000412932 | N/A       | N/A          | N/A                |
| A_22_P00011016 | 1,62392 | 1,63394 | -1,00696951  | N/A             | 100129213 | NR_038419    | SLC39A12-AS1       |
| A_21_P0002642  | 1,45586 | 1,4659  | -1,006983469 | ENST00000453678 | 102723818 | NR_110580    | LINC01248          |

|                |         |         |              |                 |           |              |               |
|----------------|---------|---------|--------------|-----------------|-----------|--------------|---------------|
| A_21_P0013450  | 1,77455 | 1,78459 | -1,006983469 | ENST00000419883 | N/A       | N/A          | N/A           |
| A_21_P0012000  | 1,39291 | 1,40296 | -1,006990449 | ENST00000604250 | 104355288 | NR_126404    | LINC01320     |
| A_33_P3421438  | 1,77318 | 1,78324 | -1,006997429 | N/A             | N/A       | N/A          | N/A           |
| A_22_P00022069 | 1,43059 | 1,44065 | -1,006997429 | ENST00000437830 | 101928226 | NR_125950    | LOC101928226  |
| A_19_P00802448 | 1,50014 | 1,51023 | -1,007018369 | N/A             | N/A       | N/A          | Inc-ANKRA2-3  |
| A_21_P0008108  | 1,54916 | 1,55925 | -1,007018369 | N/A             | N/A       | N/A          | Inc-RAP2A-1   |
| A_21_P0001242  | 1,35741 | 1,3675  | -1,007018369 | ENST00000457698 | 101927683 | NR_110683    | LOC101927683  |
| A_23_P61050    | 11,3028 | 11,3129 | -1,007025349 | ENST00000308807 | 197259    | NM_152649    | MLKL          |
| A_33_P3320197  | 1,64692 | 1,65706 | -1,00705327  | ENST00000619265 | 285016    | NM_001002919 | FAM150B       |
| A_21_P0004843  | 1,80964 | 1,8198  | -1,007067231 | N/A             | N/A       | N/A          | Inc-CD83-3    |
| A_22_P00001409 | 1,51117 | 1,52134 | -1,007074212 | N/A             | N/A       | N/A          | Inc-APC-4     |
| A_22_P00006746 | 1,48752 | 1,4977  | -1,007081192 | ENST00000558818 | N/A       | N/A          | N/A           |
| A_22_P00011539 | 1,5308  | 1,54101 | -1,007102134 | N/A             | N/A       | N/A          | Inc-PCDH10-5  |
| A_22_P00013040 | 1,48511 | 1,49532 | -1,007102134 | N/A             | N/A       | N/A          | Inc-RGS18-6   |
| A_33_P3237522  | 1,44711 | 1,45735 | -1,007123076 | N/A             | 100128568 | NR_046376    | LOC100128568  |
| A_22_P00000571 | 1,43296 | 1,44322 | -1,007137038 | ENST00000527270 | N/A       | N/A          | N/A           |
| A_33_P3407672  | 1,4251  | 1,43538 | -1,007151    | ENST00000334680 | 337979    | BC101686     | KRTAP22-1     |
| A_33_P3242783  | 4,62906 | 4,63935 | -1,007157981 | N/A             | 440082    | AK131474     | LOC440082     |
| A_21_P0003922  | 4,24554 | 4,25584 | -1,007164962 | ENST00000510067 | 101929284 | N/A          | LOC101929284  |
| A_33_P3249291  | 1,49051 | 1,50081 | -1,007164962 | ENST00000566668 | 146177    | NM_173615    | VWA3A         |
| A_22_P00020733 | 1,35433 | 1,36465 | -1,007178925 | N/A             | N/A       | CR748887     | Inc-TLR2-1    |
| A_22_P00023836 | 1,48467 | 1,49499 | -1,007178925 | ENST00000520386 | N/A       | BX113303     | N/A           |
| A_21_P0014863  | 8,62902 | 8,63935 | -1,007185906 | N/A             | 5527      | BC051442     | PPP2R5C       |
| A_21_P0006159  | 1,64885 | 1,6592  | -1,007199869 | ENST00000417801 | 101927477 | NR_121212    | LINC01507     |
| A_23_P167349   | 1,48928 | 1,49965 | -1,007213831 | ENST00000503472 | 2638      | NM_000583    | GC            |
| A_21_P0006072  | 1,5469  | 1,55727 | -1,007213831 | ENST00000426358 | N/A       | N/A          | N/A           |
| A_21_P0001903  | 1,48592 | 1,4963  | -1,007220813 | N/A             | N/A       | N/A          | Inc-BCL2L11-3 |
| A_33_P3327041  | 1,42734 | 1,43772 | -1,007220813 | N/A             | 100128054 | NR_033969    | PLCE1-AS1     |
| A_23_P203737   | 11,621  | 11,6314 | -1,007234776 | ENST00000535943 | 92105     | NM_033547    | INTS4         |
| A_33_P3300361  | 1,47349 | 1,4839  | -1,007241758 | N/A             | 100129397 | AK095841     | LOC100129397  |
| A_33_P3318122  | 7,08595 | 7,09637 | -1,007248739 | ENST00000566850 | 57020     | NM_020314    | C16orf62      |
| A_24_P251969   | 1,51214 | 1,52256 | -1,007248739 | ENST00000378046 | 2246      | NM_000800    | FGF1          |
| A_33_P3222129  | 1,44435 | 1,45477 | -1,007248739 | ENST00000402971 | 389090    | NM_001005853 | OR6B2         |

|                |         |         |              |                 |           |              |                  |
|----------------|---------|---------|--------------|-----------------|-----------|--------------|------------------|
| A_33_P3299042  | 3,97147 | 3,9819  | -1,007255721 | N/A             | N/A       | N/A          | N/A              |
| A_33_P3384942  | 1,48075 | 1,49118 | -1,007255721 | N/A             | N/A       | N/A          | N/A              |
| A_33_P3384362  | 1,42755 | 1,43798 | -1,007255721 | N/A             | N/A       | N/A          | Inc-ZIC1-1       |
| A_22_P00014315 | 1,54793 | 1,55839 | -1,007276667 | N/A             | N/A       | N/A          | Inc-SERPINB3-3   |
| A_24_P204819   | 1,77439 | 1,78487 | -1,007290631 | ENST00000302805 | 10251     | NM_005840    | SPRY3            |
| A_22_P00003206 | 8,25229 | 8,26278 | -1,007297613 | ENST00000532232 | 100505532 | N/A          | LINC01301        |
| A_21_P0014751  | 4,82837 | 4,83886 | -1,007297613 | N/A             | N/A       | N/A          | N/A              |
| A_22_P00023573 | 5,39768 | 5,40818 | -1,007304595 | N/A             | N/A       | AK096995     | Inc-MAB21L2-1    |
| A_23_P41009    | 9,49549 | 9,506   | -1,007311577 | ENST00000457927 | 51368     | NM_015926    | TEX264           |
| A_22_P00013845 | 1,47155 | 1,48206 | -1,007311577 | N/A             | 102724784 | NR_120590    | LOC102724784     |
| A_33_P3380032  | 1,4699  | 1,48042 | -1,007318559 | ENST00000620294 | 729528    | NM_001024661 | PRAMEF14         |
| A_21_P0010816  | 1,52599 | 1,53652 | -1,007325541 | ENST00000420453 | N/A       | N/A          | N/A              |
| A_21_P0002231  | 1,55047 | 1,561   | -1,007325541 | ENST00000441506 | 101927533 | XR_245012    | LOC101927533     |
| A_33_P3392530  | 1,55272 | 1,56325 | -1,007325541 | ENST00000399989 | 139604    | NM_001099921 | MAGEB16          |
| A_33_P3270723  | 1,54406 | 1,5546  | -1,007332524 | ENST00000613504 | 201625    | NM_198564    | DNAH12           |
| A_22_P00012314 | 1,61094 | 1,62149 | -1,007339506 | N/A             | N/A       | N/A          | Inc-PPP6C-1      |
| A_21_P0001468  | 1,52281 | 1,53337 | -1,007346488 | N/A             | N/A       | N/A          | Inc-LRRC38-4     |
| A_32_P45974    | 1,48307 | 1,49363 | -1,007346488 | N/A             | 29798     | BC071972     | C2orf27A         |
| A_22_P00002411 | 1,43912 | 1,44968 | -1,007346488 | N/A             | N/A       | N/A          | Inc-C14orf166B-2 |
| A_21_P0006907  | 1,53562 | 1,54619 | -1,007353471 | N/A             | N/A       | N/A          | Inc-ADD3-3       |
| A_21_P0007794  | 1,54619 | 1,55678 | -1,007367436 | N/A             | N/A       | N/A          | Inc-SLC15A4-9    |
| A_21_P0004851  | 1,67715 | 1,68775 | -1,007374418 | N/A             | N/A       | N/A          | Inc-HDGFL1-2     |
| A_23_P212639   | 13,3612 | 13,3718 | -1,007374418 | ENST00000456380 | 6434      | NM_004593    | TRA2B            |
| A_22_P00014440 | 1,61001 | 1,62065 | -1,007402349 | ENST00000519185 | N/A       | BX103480     | N/A              |
| A_33_P3433258  | 1,485   | 1,49565 | -1,007409332 | ENST00000509932 | 401134    | NR_033976    | LOC401134        |
| A_22_P00019847 | 1,44668 | 1,45733 | -1,007409332 | ENST00000535153 | N/A       | BC034423     | N/A              |
| A_33_P3212037  | 6,51707 | 6,52773 | -1,007416315 | ENST00000369475 | 8732      | AB012143     | RNGTT            |
| A_21_P0013617  | 2,42836 | 2,43904 | -1,00743028  | N/A             | 101930048 | N/A          | LOC101930048     |
| A_22_P00010385 | 1,45598 | 1,46666 | -1,00743028  | N/A             | N/A       | N/A          | Inc-MYL4-2       |
| A_33_P3687604  | 1,5196  | 1,53028 | -1,00743028  | N/A             | 285173    | AK093315     | LOC285173        |
| A_24_P217758   | 8,31194 | 8,32263 | -1,007437263 | N/A             | 4238      | NM_001242336 | MFAP3            |
| A_21_P0002834  | 1,43324 | 1,44394 | -1,007444246 | ENST00000420000 | N/A       | N/A          | N/A              |
| A_33_P3274189  | 4,94824 | 4,95895 | -1,00745123  | N/A             | N/A       | N/A          | N/A              |



|                |         |         |              |                 |           |              |                       |
|----------------|---------|---------|--------------|-----------------|-----------|--------------|-----------------------|
| A_22_P00008287 | 1,57599 | 1,5867  | -1,00745123  | ENST00000378799 | 9798      | N/A          | IST1                  |
| A_21_P0002159  | 1,74219 | 1,75291 | -1,007458213 | N/A             | N/A       | N/A          | Inc-TRAPPC12-3        |
| A_23_P158775   | 5,81683 | 5,82756 | -1,007465196 | ENST00000302509 | 7369      | NM_003361    | UMOD                  |
| A_24_P25544    | 1,40152 | 1,41226 | -1,007472179 | ENST00000502572 | 2668      | NM_000514    | GDNF                  |
| A_33_P3299339  | 1,49683 | 1,50757 | -1,007472179 | ENST00000409059 | 60482     | NM_021815    | SLC5A7                |
| A_24_P351466   | 1,41028 | 1,42103 | -1,007479162 | ENST00000491772 | 57650     | NM_020890    | KIAA1524              |
| A_21_P0007520  | 1,42833 | 1,43909 | -1,007486146 | N/A             | N/A       | N/A          | Inc-FOXJ2-1           |
| A_33_P3327106  | 1,38673 | 1,39749 | -1,007486146 | N/A             | 100129900 | AF109190     | LOC100129900          |
| A_33_P3244151  | 1,53185 | 1,54263 | -1,007500113 | N/A             | N/A       | N/A          | N/A                   |
| A_21_P0001163  | 1,47761 | 1,48841 | -1,00751408  | ENST00000414418 | N/A       | N/A          | N/A                   |
| A_23_P105651   | 1,384   | 1,3948  | -1,00751408  | ENST00000402685 | 29951     | NM_013377    | PDZRN4                |
| A_24_P49298    | 1,50412 | 1,51494 | -1,007528047 | ENST00000242505 | 317662    | AB023191     | FAM149B1              |
| A_22_P00005108 | 1,43595 | 1,44677 | -1,007528047 | N/A             | N/A       | N/A          | Inc-DHRS7-2           |
| A_23_P50799    | 7,45167 | 7,46251 | -1,007542014 | ENST00000305899 | 26538     | NM_013939    | OR10H2                |
| A_23_P89380    | 1,46573 | 1,47658 | -1,007548998 | ENST00000399246 | 6521      | NM_000342    | SLC4A1                |
| A_33_P3547141  | 1,52772 | 1,53859 | -1,007562966 | N/A             | N/A       | AF130053     | N/A                   |
| A_32_P4262     | 1,42241 | 1,43328 | -1,007562966 | ENST00000377308 | 26074     | NM_015585    | CFAP61                |
| A_21_P0010014  | 1,63963 | 1,65051 | -1,00756995  | N/A             | N/A       | N/A          | Inc-FOXA2-3           |
| A_33_P3249214  | 8,99156 | 9,00244 | -1,00756995  | ENST00000504123 | 246175    | NM_001286790 | CNOT6L                |
| A_21_P0012746  | 1,47334 | 1,48423 | -1,007576934 | ENST00000513270 | 104355285 | N/A          | LINC01256             |
| A_21_P0000825  | 1,52078 | 1,53167 | -1,007576934 | N/A             | 100506385 | N/A          | LINC01426             |
| A_32_P114746   | 2,72047 | 2,73138 | -1,007590902 | ENST00000620601 | 284680    | NM_182581    | C1orf111              |
| A_33_P3332576  | 1,67553 | 1,68644 | -1,007590902 | ENST00000311104 | 134391    | NM_194251    | GPR151                |
| A_19_P00318544 | 1,62499 | 1,63591 | -1,007597886 | ENST00000455821 | 101929337 | NR_125402    | LOC101929337          |
| A_22_P00000447 | 1,54676 | 1,55768 | -1,007597886 | ENST00000446024 | N/A       | N/A          | N/A                   |
| A_24_P630490   | 5,39002 | 5,40098 | -1,007625823 | ENST00000375129 | 494513    | NM_001042702 | DFNB59                |
| A_21_P0009733  | 1,5323  | 1,54327 | -1,007632807 | N/A             | N/A       | N/A          | Inc-CTD-2368P22.1.1-1 |
| A_21_P0006944  | 1,5374  | 1,54837 | -1,007632807 | ENST00000418524 | N/A       | N/A          | N/A                   |
| A_33_P3274462  | 1,51002 | 1,52099 | -1,007632807 | ENST00000565755 | 643714    | NR_033920    | CASC16                |
| A_22_P00002237 | 1,48896 | 1,49994 | -1,007639791 | N/A             | N/A       | N/A          | Inc-C10orf11-3        |
| A_21_P0007653  | 1,52712 | 1,5381  | -1,007639791 | ENST00000620193 | N/A       | N/A          | N/A                   |
| A_23_P402936   | 1,51299 | 1,52397 | -1,007639791 | ENST00000551461 | 8499      | NM_003625    | PPFIA2                |
| A_19_P00800206 | 10,924  | 10,935  | -1,00765376  | ENST00000449259 | 400958    | N/A          | LOC400958             |

|                |         |         |              |                 |           |              |                  |
|----------------|---------|---------|--------------|-----------------|-----------|--------------|------------------|
| A_23_P148600   | 4,95746 | 4,96847 | -1,007660745 | N/A             | 8552      | NR_024616    | INE1             |
| A_33_P3242214  | 1,54711 | 1,55812 | -1,007660745 | ENST00000517343 | 100505739 | NR_110433    | LOC100505739     |
| A_22_P00000279 | 1,51998 | 1,53101 | -1,007674714 | N/A             | N/A       | N/A          | Inc-AC008394.1-1 |
| A_33_P3270364  | 1,51428 | 1,52532 | -1,007681699 | ENST00000275162 | 134829    | NM_001010852 | CLVS2            |
| A_23_P214244   | 1,48793 | 1,49897 | -1,007681699 | ENST00000230565 | 59084     | NM_021572    | ENPP5            |
| A_21_P0014045  | 1,54822 | 1,55927 | -1,007688684 | ENST00000533930 | 49        | NM_001097    | ACR              |
| A_23_P373799   | 9,06061 | 9,07166 | -1,007688684 | ENST00000410053 | 57703     | NM_020943    | CWC22            |
| A_22_P00011036 | 1,43388 | 1,44495 | -1,007702653 | ENST00000416553 | N/A       | N/A          | N/A              |
| A_33_P3268035  | 2,27145 | 2,28253 | -1,007709638 | ENST00000375500 | 84569     | NM_032517    | LYZL1            |
| A_23_P135977   | 11,8537 | 11,8648 | -1,007723608 | ENST00000354558 | 9793      | NM_001008938 | CKAP5            |
| A_23_P3532     | 12,7969 | 12,808  | -1,007723608 | ENST00000381810 | 9516      | NM_004862    | LITAF            |
| A_23_P152727   | 13,1747 | 13,1858 | -1,007723608 | ENST00000579197 | 9842      | NM_014798    | PLEKHM1          |
| A_24_P66528    | 11,7091 | 11,7202 | -1,007723608 | ENST00000619790 | 6726      | NM_003133    | SRP9             |
| A_22_P00007193 | 1,49909 | 1,51021 | -1,007737578 | N/A             | N/A       | N/A          | Inc-GP9-1        |
| A_33_P3331952  | 2,00979 | 2,02091 | -1,007737578 | ENST00000456743 | 127062    | NM_001004689 | OR2M3            |
| A_21_P0010760  | 1,38473 | 1,39586 | -1,007744563 | ENST00000458145 | N/A       | N/A          | N/A              |
| A_22_P00022228 | 1,41474 | 1,42593 | -1,007786475 | N/A             | N/A       | N/A          | Inc-FAM213B-2    |
| A_23_P65174    | 10,105  | 10,1162 | -1,007793461 | ENST00000495157 | 51131     | NM_001040443 | PHF11            |
| A_22_P00006193 | 1,61221 | 1,62341 | -1,007793461 | ENST00000416309 | 158257    | NR_046163    | MIRLET7DHG       |
| A_21_P0008434  | 1,35066 | 1,36187 | -1,007800446 | N/A             | N/A       | N/A          | Inc-RPS29-1      |
| A_33_P3296841  | 1,53063 | 1,54184 | -1,007800446 | N/A             | 100131034 | AK126091     | LOC100131034     |
| A_22_P00019689 | 1,45257 | 1,46378 | -1,007800446 | ENST00000567803 | N/A       | DB051691     | N/A              |
| A_21_P0000317  | 7,58785 | 7,59908 | -1,007814417 | N/A             | 677807    | NR_002961    | SNORA22          |
| A_32_P874898   | 1,54238 | 1,55362 | -1,007821403 | ENST00000390381 | N/A       | AB305818     | N/A              |
| A_22_P00014341 | 1,4796  | 1,49086 | -1,007835374 | ENST00000475324 | N/A       | N/A          | N/A              |
| A_22_P00001371 | 1,52183 | 1,5331  | -1,00784236  | N/A             | 284215    | NR_036489    | DLGAP1-AS5       |
| A_21_P0012386  | 4,28591 | 4,29719 | -1,007849346 | ENST00000609293 | 101929607 | N/A          | LOC101929607     |
| A_21_P0005882  | 1,53948 | 1,55076 | -1,007849346 | N/A             | N/A       | N/A          | Inc-DPYS-2       |
| A_21_P0009628  | 1,41966 | 1,43095 | -1,007856332 | ENST00000587877 | 101927921 | NR_110792    | LINC01478        |
| A_21_P0007253  | 1,63042 | 1,64173 | -1,007870304 | N/A             | N/A       | N/A          | Inc-TMEM135-2    |
| A_24_P74571    | 8,11638 | 8,12769 | -1,007870304 | ENST00000489847 | 25776     | NM_001002880 | CBY1             |
| A_21_P0008193  | 1,3706  | 1,38192 | -1,00787729  | N/A             | N/A       | N/A          | Inc-SLITRK6-5    |
| A_21_P0006796  | 1,37906 | 1,39038 | -1,00787729  | ENST00000414774 | N/A       | N/A          | N/A              |

|                |         |         |              |                 |           |              |                    |
|----------------|---------|---------|--------------|-----------------|-----------|--------------|--------------------|
| A_22_P00001753 | 1,42644 | 1,43777 | -1,007884276 | ENST00000557426 | N/A       | N/A          | N/A                |
| A_33_P3240163  | 1,63487 | 1,64622 | -1,007898248 | ENST00000382575 | 641517    | NR_003668    | DEFB109P1B         |
| A_22_P00020981 | 1,5339  | 1,54525 | -1,007898248 | N/A             | N/A       | N21663       | Inc-TMEM41B-3      |
| A_23_P310560   | 8,12478 | 8,13614 | -1,007905235 | ENST00000521288 | 131870    | NM_152395    | NUDT16             |
| A_21_P0014056  | 1,60814 | 1,6195  | -1,007905235 | ENST00000481831 | 50717     | AK093176     | DCAF8              |
| A_21_P0004603  | 1,47404 | 1,4854  | -1,007905235 | ENST00000417773 | 387111    | N/A          | LINC00222          |
| A_23_P314789   | 2,13982 | 2,15118 | -1,007905235 | ENST00000488508 | 131540    | NM_001039617 | ZDHHC19            |
| A_19_P00321132 | 4,84795 | 4,85933 | -1,007919207 | ENST00000506206 | 101927136 | NR_110840    | LOC101927136       |
| A_21_P0014657  | 5,18689 | 5,19827 | -1,007919207 | N/A             | N/A       | N/A          | N/A                |
| A_24_P219971   | 13,1165 | 13,1279 | -1,00793318  | ENST00000266069 | 54994     | NM_017896    | GID8               |
| A_33_P3385101  | 13,5622 | 13,5736 | -1,00793318  | ENST00000317204 | 54472     | NM_019009    | TOLLIP             |
| A_22_P00001163 | 1,4855  | 1,49692 | -1,007947153 | ENST00000420901 | 101928476 | NR_125955    | LOC101928476       |
| A_22_P00014909 | 1,50207 | 1,51349 | -1,007947153 | ENST00000562197 | 100507050 | NM_001195528 | TPBGL              |
| A_22_P00010609 | 1,42549 | 1,43692 | -1,00795414  | ENST00000411790 | N/A       | BC039180     | N/A                |
| A_22_P00023320 | 1,37364 | 1,38508 | -1,007961126 | N/A             | N/A       | BI826564     | Inc-C9orf163-1     |
| A_21_P0007496  | 1,54276 | 1,5542  | -1,007961126 | ENST00000548512 | N/A       | N/A          | N/A                |
| A_22_P00014402 | 1,53731 | 1,54876 | -1,007968113 | N/A             | N/A       | N/A          | Inc-SGCA-1         |
| A_33_P3323975  | 1,48841 | 1,49986 | -1,007968113 | N/A             | N/A       | N/A          | N/A                |
| A_22_P00000297 | 1,44199 | 1,45345 | -1,0079751   | N/A             | N/A       | BG212602     | Inc-AC009365.3.1-3 |
| A_22_P00007267 | 1,47211 | 1,48359 | -1,007989073 | N/A             | 100874361 | NR_047115    | PPP2R2B-IT1        |
| A_22_P00024443 | 1,53634 | 1,54784 | -1,008003047 | ENST00000411946 | N/A       | N/A          | N/A                |
| A_21_P0010921  | 6,61053 | 6,62204 | -1,008010034 | N/A             | 414212    | N/A          | GLUD1P7            |
| A_23_P203488   | 7,29214 | 7,30367 | -1,008024008 | ENST00000531336 | 6609      | NM_000543    | SMPD1              |
| A_21_P0003577  | 1,52187 | 1,53342 | -1,008037982 | N/A             | N/A       | N/A          | Inc-CPEB2-7        |
| A_22_P00024973 | 1,61727 | 1,62882 | -1,008037982 | N/A             | N/A       | BI545612     | Inc-SLC15A3-1      |
| A_33_P3242609  | 1,47034 | 1,48189 | -1,008037982 | ENST00000344803 | 389763    | NM_001001670 | SPATA31D1          |
| A_33_P3404126  | 8,73246 | 8,74406 | -1,008072919 | ENST00000430644 | 10336     | XM_005272253 | PCGF3              |
| A_33_P3335895  | 1,4766  | 1,4882  | -1,008072919 | ENST00000435360 | 2670      | NM_001242376 | GFAP               |
| A_21_P0011511  | 1,53854 | 1,55015 | -1,008079906 | N/A             | N/A       | N/A          | XLOC_I2_005644     |
| A_22_P00011796 | 1,53508 | 1,54671 | -1,008093881 | ENST00000413269 | N/A       | N/A          | N/A                |
| A_21_P0014148  | 1,51444 | 1,52607 | -1,008093881 | N/A             | N/A       | XR_108599    | N/A                |
| A_21_P0014067  | 1,67929 | 1,69093 | -1,008100869 | ENST00000412772 | 100506775 | NR_117097    | LINC01353          |
| A_33_P3345225  | 1,3508  | 1,36244 | -1,008100869 | N/A             | N/A       | N/A          | Inc-TMEFF2-3       |

|                |         |         |              |                 |           |              |               |
|----------------|---------|---------|--------------|-----------------|-----------|--------------|---------------|
| A_22_P00023427 | 1,54181 | 1,55347 | -1,008114844 | N/A             | 101927139 | NR_123718    | LOC101927139  |
| A_33_P3290335  | 1,53169 | 1,54337 | -1,00812882  | ENST00000366790 | 142       | N/A          | PARP1         |
| A_23_P151232   | 1,35415 | 1,36583 | -1,00812882  | ENST00000435159 | 92293     | NM_001136103 | TMEM132C      |
| A_33_P3321507  | 12,2341 | 12,2458 | -1,008142796 | ENST00000430969 | 84629     | NM_001080495 | TNRC18        |
| A_23_P315933   | 12,4312 | 12,4429 | -1,008142796 | ENST00000497897 | 83451     | NM_148912    | ABHD11        |
| A_33_P3372886  | 10,5912 | 10,6029 | -1,008142796 | ENST00000397333 | 317781    | NM_175066    | DDX51         |
| A_33_P3223002  | 1,46516 | 1,47687 | -1,008149784 | ENST00000600626 | 27202     | NM_001271749 | C5AR2         |
| A_22_P00025300 | 1,4329  | 1,44461 | -1,008149784 | N/A             | N/A       | N/A          | Inc-MINA-1    |
| A_21_P0004614  | 1,48658 | 1,49829 | -1,008149784 | ENST00000449069 | N/A       | N/A          | N/A           |
| A_22_P00022532 | 1,48115 | 1,49286 | -1,008149784 | ENST00000580258 | N/A       | BX116393     | N/A           |
| A_22_P00009922 | 1,34934 | 1,36106 | -1,008156772 | ENST00000453762 | 440700    | NR_036683    | LOC440700     |
| A_22_P00003366 | 1,543   | 1,55475 | -1,008177736 | ENST00000457157 | 100996609 | N/A          | LINC01436     |
| A_22_P00005961 | 1,48387 | 1,49566 | -1,008205689 | N/A             | N/A       | N/A          | Inc-EXTL3-2   |
| A_21_P0013004  | 1,48563 | 1,49743 | -1,008212677 | ENST00000507627 | N/A       | N/A          | N/A           |
| A_21_P0006306  | 1,5389  | 1,5507  | -1,008212677 | ENST00000603487 | 101928550 | NR_121580    | SMC2-AS1      |
| A_22_P00012860 | 1,44615 | 1,45796 | -1,008219666 | ENST00000423593 | N/A       | N/A          | N/A           |
| A_22_P00001970 | 1,43049 | 1,4423  | -1,008219666 | ENST00000483544 | 144360    | NR_029451    | LINC00477     |
| A_21_P0011544  | 1,41977 | 1,43158 | -1,008219666 | ENST00000565120 | N/A       | XM_006710033 | N/A           |
| A_24_P64918    | 8,2668  | 8,27861 | -1,008219666 | ENST00000554015 | 22890     | NM_014950    | ZBTB1         |
| A_23_P80974    | 1,5404  | 1,55222 | -1,008226654 | ENST00000510293 | 6999      | NM_005651    | TDO2          |
| A_22_P00013527 | 1,54415 | 1,556   | -1,00824762  | N/A             | 348021    | NR_026852    | LINC00442     |
| A_21_P0007371  | 1,37668 | 1,38854 | -1,008254609 | N/A             | N/A       | N/A          | Inc-FCHSD2-1  |
| A_21_P0012356  | 1,61622 | 1,62808 | -1,008254609 | ENST00000432495 | N/A       | XR_249026    | N/A           |
| A_22_P00001148 | 5,89082 | 5,90269 | -1,008261597 | N/A             | N/A       | N/A          | Inc-AMIGO1-1  |
| A_24_P190007   | 1,68442 | 1,6963  | -1,008268586 | ENST00000381362 | 2813      | XM_005255261 | GP2           |
| A_22_P00003087 | 1,89492 | 1,9068  | -1,008268586 | N/A             | N/A       | BC043573     | Inc-C8orf74-1 |
| A_33_P3256883  | 4,19709 | 4,20897 | -1,008268586 | N/A             | N/A       | N/A          | N/A           |
| A_21_P0012033  | 5,89255 | 5,90443 | -1,008268586 | N/A             | N/A       | N/A          | Inc-DYNC112-1 |
| A_33_P3420035  | 9,86196 | 9,87384 | -1,008268586 | ENST00000396077 | 353274    | NM_181489    | ZNF445        |
| A_23_P136058   | 11,5228 | 11,5347 | -1,008282564 | ENST00000350721 | 545       | NM_001184    | ATR           |
| A_33_P3246833  | 14,2824 | 14,2943 | -1,008282564 | ENST00000259206 | 3557      | NM_173843    | IL1RN         |
| A_22_P00012931 | 1,48473 | 1,49664 | -1,008289553 | ENST00000509215 | N/A       | N/A          | N/A           |
| A_22_P00019112 | 1,47442 | 1,48635 | -1,008303531 | ENST00000412163 | 645188    | XR_109780    | LOC645188     |

|                |         |         |              |                 |           |           |                |
|----------------|---------|---------|--------------|-----------------|-----------|-----------|----------------|
| A_33_P3418621  | 1,54531 | 1,55724 | -1,008303531 | ENST00000403807 | 7441      | BC017922  | VPREB1         |
| A_23_P107623   | 1,53725 | 1,5492  | -1,008317509 | ENST00000269491 | 89777     | NM_080474 | SERPINB12      |
| A_23_P252193   | 5,60432 | 5,61628 | -1,008324498 | ENST00000264741 | 3680      | NM_002207 | ITGA9          |
| A_33_P3218490  | 1,48444 | 1,4964  | -1,008324498 | N/A             | 100128226 | AB128931  | LOC100128226   |
| A_21_P0010037  | 1,48346 | 1,49543 | -1,008331487 | N/A             | 102724950 | XR_425240 | LOC102724950   |
| A_21_P0008563  | 1,60686 | 1,61885 | -1,008345466 | ENST00000440479 | 338963    | AK093496  | LOC338963      |
| A_22_P00022583 | 5,67676 | 5,68877 | -1,008359444 | N/A             | N/A       | N/A       | Inc-SLURP1-1   |
| A_33_P3311966  | 1,35327 | 1,36529 | -1,008366434 | N/A             | N/A       | N/A       | N/A            |
| A_21_P0009232  | 1,66279 | 1,67482 | -1,008373423 | N/A             | N/A       | N/A       | Inc-NLK-1      |
| A_22_P00002145 | 1,67013 | 1,68216 | -1,008373423 | ENST00000565177 | N/A       | AK058075  | N/A            |
| A_22_P00019853 | 1,53713 | 1,54916 | -1,008373423 | ENST00000486508 | N/A       | BU852190  | N/A            |
| A_22_P00020231 | 1,60629 | 1,61835 | -1,008394392 | N/A             | N/A       | N/A       | Inc-CCNE2-1    |
| A_22_P00025156 | 1,48214 | 1,4942  | -1,008394392 | ENST00000537280 | N/A       | DB035218  | N/A            |
| A_21_P0001633  | 1,48271 | 1,49479 | -1,008408371 | N/A             | N/A       | N/A       | Inc-NVL-2      |
| A_22_P00012431 | 1,34929 | 1,36137 | -1,008408371 | N/A             | N/A       | BX096603  | Inc-PRMT8-2    |
| A_21_P0005506  | 1,48979 | 1,5019  | -1,008429341 | N/A             | N/A       | N/A       | Inc-CALN1-1    |
| A_23_P68740    | 4,57658 | 4,58869 | -1,008429341 | ENST00000337909 | 326       | NM_000383 | AIRE           |
| A_22_P00003955 | 1,34966 | 1,36182 | -1,008464291 | N/A             | N/A       | N/A       | Inc-CHADL-3    |
| A_19_P00321597 | 1,48355 | 1,49571 | -1,008464291 | ENST00000556462 | 388011    | AK097943  | LINC01550      |
| A_21_P0007596  | 1,53801 | 1,55017 | -1,008464291 | N/A             | N/A       | N/A       | Inc-LRR1Q1-1   |
| A_22_P00002514 | 1,64629 | 1,65847 | -1,008478271 | N/A             | 101928682 | NR_104667 | LOC101928682   |
| A_23_P159663   | 14,0882 | 14,1004 | -1,008492252 | ENST00000335890 | 8409      | NM_004182 | UXT            |
| A_23_P46482    | 1,54027 | 1,55247 | -1,008492252 | ENST00000367096 | 50604     | NM_018724 | IL20           |
| A_21_P0012941  | 1,48021 | 1,49241 | -1,008492252 | N/A             | N/A       | N/A       | XLOC_l2_011579 |
| A_21_P0002807  | 1,45142 | 1,46363 | -1,008499242 | ENST00000447709 | N/A       | N/A       | N/A            |
| A_21_P0012787  | 1,48113 | 1,49337 | -1,008520214 | N/A             | N/A       | N/A       | Inc-COL25A1-1  |
| A_22_P00009140 | 4,00394 | 4,01618 | -1,008520214 | ENST00000582983 | 101928144 | XR_248480 | LOC101928144   |
| A_21_P0004796  | 1,43781 | 1,45006 | -1,008527204 | ENST00000433486 | N/A       | N/A       | N/A            |
| A_21_P0003049  | 1,53148 | 1,54373 | -1,008527204 | N/A             | N/A       | N/A       | Inc-GMPS-1     |
| A_33_P3290301  | 1,42784 | 1,4401  | -1,008534195 | ENST00000448174 | N/A       | N/A       | N/A            |
| A_23_P366453   | 1,52754 | 1,53981 | -1,008541185 | ENST00000281156 | 202559    | NM_152688 | KHDRBS2        |
| A_33_P3416649  | 1,52101 | 1,5333  | -1,008555167 | N/A             | N/A       | N/A       | N/A            |
| A_21_P0005626  | 1,53128 | 1,54359 | -1,008569149 | ENST00000521221 | 102725286 | XR_426321 | LOC102725286   |

|                |         |         |              |                 |           |              |                |
|----------------|---------|---------|--------------|-----------------|-----------|--------------|----------------|
| A_24_P63537    | 1,42431 | 1,43665 | -1,008590121 | ENST00000296754 | 51752     | NM_016442    | ERAP1          |
| A_22_P00014580 | 1,3991  | 1,41144 | -1,008590121 | N/A             | N/A       | BI832795     | Inc-SLAMF7-2   |
| A_21_P0010563  | 1,4046  | 1,41695 | -1,008597112 | N/A             | N/A       | N/A          | XLOC_I2_000462 |
| A_22_P00011278 | 3,39156 | 3,40394 | -1,008618086 | ENST00000532274 | 101927120 | NR_110136    | LOC101927120   |
| A_33_P3368049  | 12,1584 | 12,1708 | -1,008632068 | ENST00000422725 | 643988    | NM_001242659 | C1orf233       |
| A_23_P164022   | 16,3543 | 16,3667 | -1,008632068 | ENST00000361007 | 4641      | NM_033375    | MYO1C          |
| A_22_P00013013 | 1,47786 | 1,49028 | -1,008646051 | ENST00000556708 | 100996663 | XR_158886    | LOC100996663   |
| A_22_P00025378 | 1,42152 | 1,434   | -1,008688    | N/A             | N/A       | N/A          | Inc-PAWR-2     |
| A_33_P3378915  | 7,63877 | 7,65126 | -1,008694992 | ENST00000359920 | 23370     | NM_001130955 | ARHGEF18       |
| A_22_P00015454 | 1,53558 | 1,54807 | -1,008694992 | ENST00000517380 | 101927798 | NR_125422    | LOC101927798   |
| A_23_P163408   | 7,37564 | 7,38814 | -1,008701984 | ENST00000562948 | 49855     | NM_020843    | SCAPER         |
| A_22_P00004556 | 1,53576 | 1,54827 | -1,008708976 | N/A             | N/A       | N/A          | Inc-CRNKL1-1   |
| A_33_P3469658  | 1,43319 | 1,4457  | -1,008708976 | N/A             | 284570    | BC040156     | LOC284570      |
| A_33_P3241949  | 1,36814 | 1,38066 | -1,008715967 | ENST00000506683 | N/A       | XM_006710161 | N/A            |
| A_33_P3847539  | 1,46622 | 1,47875 | -1,008722959 | ENST00000433856 | 101928122 | BC094791     | LINC01483      |
| A_21_P0005935  | 1,61145 | 1,62399 | -1,008729951 | N/A             | N/A       | N/A          | Inc-WRN-5      |
| A_24_P215765   | 1,382   | 1,39455 | -1,008736943 | ENST00000555815 | 57194     | NM_024490    | ATP10A         |
| A_33_P3212192  | 1,63626 | 1,64882 | -1,008743935 | ENST00000389494 | 1146      | NM_005199    | CHRNA1         |
| A_23_P129225   | 1,63384 | 1,64641 | -1,008750928 | ENST00000542188 | 4308      | NM_002420    | TRPM1          |
| A_21_P0005178  | 4,1296  | 4,14219 | -1,008764912 | N/A             | N/A       | N/A          | Inc-CITED2-4   |
| A_22_P00008125 | 1,67443 | 1,68703 | -1,008771904 | N/A             | N/A       | BG192738     | Inc-IL31RA-1   |
| A_22_P00004300 | 1,52669 | 1,53929 | -1,008771904 | N/A             | 101927723 | XR_245020    | LOC101927723   |
| A_21_P0012657  | 4,47051 | 4,48311 | -1,008771904 | N/A             | N/A       | N/A          | XLOC_I2_011044 |
| A_21_P0000970  | 1,50747 | 1,52008 | -1,008778896 | ENST00000456803 | N/A       | N/A          | N/A            |
| A_24_P170095   | 5,51788 | 5,5305  | -1,008785889 | ENST00000484005 | N/A       | N/A          | N/A            |
| A_33_P3729436  | 1,63161 | 1,64423 | -1,008785889 | N/A             | 100170224 | BF570972     | SNAR-B1        |
| A_33_P3308307  | 1,43746 | 1,45008 | -1,008785889 | ENST00000486417 | 117531    | NM_138691    | TMC1           |
| A_21_P0001250  | 4,76545 | 4,77808 | -1,008792881 | N/A             | N/A       | N/A          | Inc-SAMD11-2   |
| A_22_P00020420 | 1,47624 | 1,48888 | -1,008799874 | N/A             | 100873975 | NR_046554    | CNTN4-AS1      |
| A_22_P00010085 | 4,0913  | 4,10395 | -1,008806866 | ENST00000450750 | N/A       | N/A          | N/A            |
| A_21_P0012840  | 1,511   | 1,52366 | -1,008813859 | N/A             | 102724810 | N/A          | LOC102724810   |
| A_24_P740620   | 1,43174 | 1,44441 | -1,008820851 | ENST00000428155 | 197350    | XM_003403459 | CASP16         |
| A_23_P59783    | 1,68901 | 1,70168 | -1,008820851 | ENST00000408899 | 135941    | NM_001001659 | OR2A14         |

|                |         |         |              |                 |           |              |                |
|----------------|---------|---------|--------------|-----------------|-----------|--------------|----------------|
| A_23_P431981   | 10,2421 | 10,2548 | -1,008841829 | ENST00000216106 | 10042     | NM_001003681 | HMGXB4         |
| A_24_P261005   | 10,9556 | 10,9683 | -1,008841829 | ENST00000416469 | 114926    | NM_138436    | SMIM19         |
| A_22_P00020050 | 1,35244 | 1,36515 | -1,008848822 | ENST00000427080 | N/A       | N/A          | N/A            |
| A_33_P3298567  | 5,38403 | 5,39674 | -1,008848822 | ENST00000533976 | 55657     | AK309421     | ZNF692         |
| A_22_P00002899 | 1,6808  | 1,69351 | -1,008848822 | ENST00000502441 | 100337616 | N/A          | CSN1S2BP       |
| A_21_P0008258  | 1,52246 | 1,53517 | -1,008848822 | ENST00000439454 | 104355293 | NR_126409    | LINC00376      |
| A_22_P00013911 | 5,64057 | 5,6533  | -1,008862808 | N/A             | N/A       | N/A          | Inc-RPS27A-1   |
| A_33_P3387566  | 6,16248 | 6,17522 | -1,008869801 | ENST00000588043 | 23591     | NR_026770    | FAM215A        |
| A_21_P0006156  | 1,52264 | 1,53538 | -1,008869801 | N/A             | N/A       | N/A          | Inc-RORB-2     |
| A_23_P315772   | 1,48087 | 1,49361 | -1,008869801 | ENST00000218176 | 3750      | NM_004979    | KCND1          |
| A_22_P00020319 | 1,37676 | 1,38951 | -1,008876794 | N/A             | N/A       | N/A          | Inc-TMEM159-1  |
| A_22_P00002544 | 2,87829 | 2,89104 | -1,008876794 | N/A             | N/A       | N/A          | Inc-C17orf63-2 |
| A_22_P00013950 | 1,605   | 1,61776 | -1,008883787 | N/A             | 101928255 | XR_244322    | LOC101928255   |
| A_22_P00006597 | 1,50056 | 1,51334 | -1,008897773 | N/A             | N/A       | N/A          | Inc-FNDC3B-1   |
| A_21_P0009874  | 1,36162 | 1,37441 | -1,008904766 | ENST00000448825 | N/A       | N/A          | N/A            |
| A_23_P100654   | 10,1694 | 10,1822 | -1,008911759 | ENST00000311403 | 57659     | NM_020899    | ZBTB4          |
| A_21_P0002386  | 1,37739 | 1,39021 | -1,008925746 | N/A             | N/A       | N/A          | Inc-CMPK2-13   |
| A_22_P00000811 | 1,45821 | 1,47106 | -1,008946726 | ENST00000532453 | 101929269 | N/A          | LOC101929269   |
| A_23_P10156    | 8,854   | 8,86685 | -1,008946726 | ENST00000325167 | 79643     | NM_024591    | CHMP6          |
| A_22_P00023682 | 1,60264 | 1,6155  | -1,00895372  | N/A             | N/A       | N/A          | Inc-PLEKHA3-2  |
| A_22_P00021828 | 1,42412 | 1,43699 | -1,008960713 | ENST00000539532 | N/A       | BX641152     | N/A            |
| A_22_P00005400 | 1,5275  | 1,54038 | -1,008967707 | ENST00000575446 | N/A       | AL831865     | N/A            |
| A_22_P00004990 | 1,35366 | 1,36655 | -1,0089747   | N/A             | N/A       | N/A          | Inc-DCTN5-1    |
| A_33_P3356290  | 1,41793 | 1,43084 | -1,008988688 | ENST00000283269 | 8618      | NM_183393    | CADPS          |
| A_21_P0008955  | 1,69159 | 1,7045  | -1,008988688 | N/A             | N/A       | N/A          | Inc-CDH5-11    |
| A_23_P395404   | 1,68457 | 1,69748 | -1,008988688 | ENST00000180166 | 26281     | NM_019851    | FGF20          |
| A_22_P00007935 | 1,35964 | 1,37258 | -1,009009669 | ENST00000418379 | 101926942 | N/A          | LOC101926942   |
| A_33_P3382959  | 8,3267  | 8,33966 | -1,009023657 | ENST00000551025 | 9994      | NM_012115    | CASP8AP2       |
| A_23_P5679     | 1,47599 | 1,48896 | -1,009030651 | ENST00000259216 | 55997     | NM_032545    | CFC1           |
| A_21_P0014057  | 6,67913 | 6,69211 | -1,009037646 | N/A             | N/A       | N/A          | Inc-RGS5-1     |
| A_22_P00003890 | 1,43109 | 1,44407 | -1,009037646 | N/A             | N/A       | N/A          | Inc-CEP120-2   |
| A_22_P00024429 | 1,37508 | 1,38806 | -1,009037646 | N/A             | N/A       | N/A          | Inc-NRSN1-1    |
| A_33_P3223678  | 11,2974 | 11,3104 | -1,009051634 | ENST00000619587 | 8022      | NM_014564    | LHX3           |

|                |         |         |              |                 |           |              |              |
|----------------|---------|---------|--------------|-----------------|-----------|--------------|--------------|
| A_21_P0014797  | 2,29285 | 2,30585 | -1,009051634 | ENST00000559499 | 100507472 | NR_045387    | LOC100507472 |
| A_22_P00020959 | 1,52654 | 1,53955 | -1,009058628 | N/A             | N/A       | N/A          | Inc-HSDL2-1  |
| A_33_P3285877  | 3,71762 | 3,73066 | -1,009079611 | ENST00000381010 | 100113404 | NR_038194    | LINC00583    |
| A_22_P00013137 | 1,41736 | 1,43042 | -1,0090936   | N/A             | 643332    | NR_033909    | ECRP         |
| A_33_P3317543  | 6,53256 | 6,54563 | -1,009100595 | ENST00000449689 | 389524    | NM_001003795 | GTF2IRD2B    |
| A_33_P3241511  | 1,40019 | 1,41327 | -1,009107589 | ENST00000406799 | 3053      | NM_000185    | SERPIND1     |
| A_22_P00003666 | 13,6513 | 13,6644 | -1,009121578 | ENST00000422837 | N/A       | N/A          | N/A          |
| A_24_P235988   | 1,64425 | 1,65736 | -1,009128573 | ENST00000534609 | 64581     | NM_197947    | CLEC7A       |
| A_19_P00319044 | 1,52567 | 1,53878 | -1,009128573 | ENST00000416534 | 101929551 | N/A          | LOC101929551 |
| A_21_P0005304  | 1,4432  | 1,45631 | -1,009128573 | ENST00000456513 | N/A       | N/A          | N/A          |
| A_21_P0009920  | 1,48085 | 1,49398 | -1,009142563 | ENST00000424662 | N/A       | N/A          | N/A          |
| A_23_P40782    | 9,65635 | 9,6695  | -1,009156552 | ENST00000483146 | 51122     | NM_016094    | COMMD2       |
| A_21_P0008314  | 1,41451 | 1,42767 | -1,009163547 | N/A             | N/A       | N/A          | Inc-AP4S1-2  |
| A_33_P3346543  | 7,80996 | 7,82313 | -1,009170542 | N/A             | N/A       | N/A          | N/A          |
| A_23_P125686   | 1,73902 | 1,7522  | -1,009177538 | ENST00000489074 | 27160     | NR_002226    | INGX         |
| A_21_P0010768  | 6,26466 | 6,27785 | -1,009184533 | N/A             | 102723908 | XR_430630    | LOC102723908 |
| A_33_P3222069  | 11,3453 | 11,3585 | -1,009191528 | ENST00000323374 | 8877      | NM_182965    | SPHK1        |
| A_23_P30254    | 12,3154 | 12,3286 | -1,009191528 | ENST00000617412 | 10769     | NM_006622    | PLK2         |
| A_23_P375354   | 1,46862 | 1,48183 | -1,009198523 | ENST00000264037 | 7007      | NM_005422    | TECTA        |
| A_33_P3235905  | 1,44964 | 1,46287 | -1,009212514 | ENST00000455685 | N/A       | XR_159295    | N/A          |
| A_21_P0012324  | 1,39712 | 1,41036 | -1,009219509 | ENST00000444848 | N/A       | N/A          | N/A          |
| A_33_P3226498  | 1,47272 | 1,48597 | -1,009226504 | ENST00000370496 | 1297      | BC015409     | COL9A1       |
| A_24_P232790   | 8,72103 | 8,73429 | -1,0092335   | ENST00000599174 | 56936     | NM_001271507 | CCDC177      |
| A_22_P00009129 | 1,43481 | 1,44808 | -1,009240495 | ENST00000581212 | 56651     | NR_023925    | LINC00470    |
| A_21_P0001772  | 1,34953 | 1,3628  | -1,009240495 | ENST00000415396 | 101805491 | NR_103805    | LOC101805491 |
| A_22_P00006157 | 1,52528 | 1,53856 | -1,009247491 | ENST00000457115 | N/A       | N/A          | N/A          |
| A_23_P84929    | 11,7058 | 11,7191 | -1,009261482 | ENST00000615300 | 92745     | NM_033518    | SLC38A5      |
| A_33_P3361701  | 10,1071 | 10,1204 | -1,009261482 | ENST00000465855 | 9898      | NM_001287815 | UBAP2L       |
| A_33_P3435493  | 1,5244  | 1,5377  | -1,009261482 | ENST00000419814 | 400768    | XR_110483    | LOC400768    |
| A_33_P3414967  | 1,46951 | 1,48281 | -1,009261482 | ENST00000518864 | 54212     | NM_018967    | SNTG1        |
| A_21_P0012799  | 1,50273 | 1,51603 | -1,009261482 | ENST00000512536 | 641365    | NR_037866    | LINC00616    |
| A_23_P67952    | 7,60728 | 7,62058 | -1,009261482 | N/A             | 10408     | NR_026766    | MYCNOS       |
| A_22_P00019390 | 1,52233 | 1,53564 | -1,009268478 | N/A             | N/A       | DB144136     | Inc-PAX8-1   |



|                |         |         |              |                 |           |              |                      |
|----------------|---------|---------|--------------|-----------------|-----------|--------------|----------------------|
| A_21_P0005835  | 1,35592 | 1,36924 | -1,009275473 | ENST00000499425 | 100507632 | NR_038236    | LINC00968            |
| A_22_P00002652 | 1,44807 | 1,46144 | -1,009310453 | N/A             | N/A       | BM723559     | Inc-C1orf198-3       |
| A_22_P00023903 | 1,64607 | 1,65945 | -1,009317449 | N/A             | N/A       | CB959689     | Inc-TCERG1-2         |
| A_32_P75284    | 7,27953 | 7,29292 | -1,009324445 | ENST00000380615 | 84056     | NM_032116    | KATNAL1              |
| A_23_P252322   | 17,8424 | 17,8558 | -1,009331441 | ENST00000395659 | 514       | NM_006886    | ATP5E                |
| A_33_P3421973  | 1,39416 | 1,40756 | -1,009331441 | ENST00000276185 | 84443     | NM_032428    | FRMPD3               |
| A_23_P62752    | 4,26691 | 4,28031 | -1,009331441 | ENST00000376468 | 4879      | NM_002521    | NPPB                 |
| A_21_P0006209  | 1,51912 | 1,53253 | -1,009338437 | N/A             | N/A       | N/A          | Inc-RAD23B-11        |
| A_24_P126484   | 1,4494  | 1,46281 | -1,009338437 | ENST00000277795 | 64081     | AK092826     | PBLD                 |
| A_32_P191262   | 5,35935 | 5,37277 | -1,009345434 | ENST00000216139 | 49        | NM_001097    | ACR                  |
| A_21_P0003008  | 1,36952 | 1,38294 | -1,009345434 | N/A             | N/A       | N/A          | Inc-GTPBP8-1         |
| A_33_P3256083  | 1,67605 | 1,68947 | -1,009345434 | ENST00000621464 | N/A       | N/A          | N/A                  |
| A_33_P3328937  | 6,77889 | 6,79232 | -1,00935243  | ENST00000479267 | 11011     | NM_001284363 | TLK2                 |
| A_33_P3261182  | 9,42854 | 9,442   | -1,009373419 | ENST00000428202 | 134359    | NM_001099271 | POC5                 |
| A_33_P3795524  | 1,4893  | 1,50276 | -1,009373419 | N/A             | 83598     | NR_073385    | LRRC2-AS1            |
| A_21_P0009871  | 1,50844 | 1,52191 | -1,009380415 | N/A             | N/A       | N/A          | Inc-PPDPF-1          |
| A_24_P380311   | 1,62848 | 1,64196 | -1,009387412 | ENST00000348628 | 815       | NM_015981    | CAMK2A               |
| A_22_P00011265 | 1,52012 | 1,5336  | -1,009387412 | N/A             | 101927079 | NR_110480    | LOC101927079         |
| A_33_P3379606  | 4,67512 | 4,6886  | -1,009387412 | ENST00000334025 | 401190    | NM_001029875 | RGS7BP               |
| A_22_P00013380 | 1,41488 | 1,42838 | -1,009401405 | N/A             | N/A       | N/A          | Inc-RP11-17M16.1.1-4 |
| A_22_P00017715 | 7,20807 | 7,22157 | -1,009401405 | N/A             | N/A       | N/A          | Inc-XRCC3-1          |
| A_23_P103424   | 1,63333 | 1,64683 | -1,009401405 | ENST00000367556 | 85397     | NM_033345    | RGS8                 |
| A_33_P3375755  | 1,51255 | 1,52606 | -1,009408402 | N/A             | N/A       | N/A          | N/A                  |
| A_24_P48318    | 8,17268 | 8,1862  | -1,009415398 | ENST00000619299 | 54883     | NM_017748    | CWC25                |
| A_21_P0005384  | 1,50634 | 1,51986 | -1,009415398 | N/A             | 102723684 | XR_426184    | LOC102723684         |
| A_33_P3226630  | 1,36477 | 1,37832 | -1,009436389 | ENST00000619924 | 339524    | BC126240     | LINC01140            |
| A_22_P00011078 | 6,68459 | 6,69816 | -1,009450383 | N/A             | N/A       | AF086466     | Inc-NUCB1-1          |
| A_19_P00809747 | 1,39368 | 1,40725 | -1,009450383 | ENST00000489090 | 100507537 | N/A          | LOC100507537         |
| A_22_P00013292 | 1,61395 | 1,62753 | -1,00945738  | ENST00000523246 | 157273    | NR_040039    | LOC157273            |
| A_21_P0006154  | 1,41553 | 1,42911 | -1,00945738  | N/A             | N/A       | N/A          | Inc-ANXA1-4          |
| A_22_P00011091 | 1,52366 | 1,53725 | -1,009464377 | N/A             | N/A       | N/A          | Inc-NUDT11-3         |
| A_21_P0011420  | 1,42493 | 1,43852 | -1,009464377 | N/A             | N/A       | N/A          | XLOC_I2_005150       |
| A_23_P138435   | 11,9352 | 11,9488 | -1,009471374 | ENST00000334512 | 57178     | NM_020338    | ZMIZ1                |

|                |         |         |              |                 |           |              |                |
|----------------|---------|---------|--------------|-----------------|-----------|--------------|----------------|
| A_33_P3386935  | 1,43826 | 1,45187 | -1,009478371 | ENST00000295031 | 84542     | NM_032506    | KIAA1841       |
| A_22_P00025302 | 1,49527 | 1,50889 | -1,009485368 | ENST00000564193 | N/A       | BG208655     | N/A            |
| A_33_P3359183  | 1,60328 | 1,61691 | -1,009492365 | ENST00000276101 | 158835    | NM_001002254 | AWAT2          |
| A_21_P0009592  | 1,46759 | 1,48122 | -1,009492365 | ENST00000578833 | 101927715 | N/A          | LINC01029      |
| A_24_P150580   | 1,47792 | 1,49155 | -1,009492365 | ENST00000220062 | 51285     | NM_016563    | RASL12         |
| A_21_P0010781  | 1,5193  | 1,53295 | -1,00950636  | ENST00000452465 | N/A       | N/A          | N/A            |
| A_21_P0008979  | 1,47391 | 1,48758 | -1,009520355 | N/A             | N/A       | N/A          | Inc-DYNLRB2-3  |
| A_22_P00024010 | 1,52467 | 1,53834 | -1,009520355 | N/A             | N/A       | N/A          | Inc-SNX27-2    |
| A_21_P0007362  | 1,47858 | 1,49226 | -1,009527352 | N/A             | N/A       | N/A          | Inc-LTBP3-3    |
| A_22_P00005877 | 1,49823 | 1,51192 | -1,00953435  | N/A             | N/A       | BX247957     | Inc-ESR2-1     |
| A_23_P5392     | 10,4393 | 10,453  | -1,009541348 | ENST00000238721 | 9540      | NM_004881    | TP53I3         |
| A_21_P0004875  | 1,62186 | 1,63558 | -1,009555343 | N/A             | N/A       | N/A          | Inc-HMGA1-1    |
| A_21_P0008488  | 1,40251 | 1,41623 | -1,009555343 | N/A             | N/A       | N/A          | Inc-RTL1-4     |
| A_24_P192988   | 1,67257 | 1,68629 | -1,009555343 | ENST00000316398 | 220388    | BC044814     | CCDC89         |
| A_23_P354705   | 1,41854 | 1,43227 | -1,009562341 | ENST00000261197 | 6489      | NM_003034    | ST8SIA1        |
| A_21_P0010550  | 1,43408 | 1,44782 | -1,009569338 | N/A             | N/A       | N/A          | XLOC_I2_000384 |
| A_33_P3239190  | 1,40532 | 1,41906 | -1,009569338 | ENST00000553435 | N/A       | BQ188841     | N/A            |
| A_22_P00005539 | 1,47834 | 1,49208 | -1,009569338 | N/A             | N/A       | N/A          | Inc-EDAR-7     |
| A_23_P500956   | 7,75042 | 7,76416 | -1,009569338 | ENST00000405767 | 10678     | NM_006577    | B3GNT2         |
| A_33_P3289825  | 1,51974 | 1,53351 | -1,009590332 | N/A             | N/A       | AK125674     | N/A            |
| A_21_P0007350  | 1,41614 | 1,42992 | -1,00959733  | N/A             | N/A       | N/A          | Inc-CHST1-4    |
| A_22_P00017005 | 1,42223 | 1,43602 | -1,009604328 | N/A             | N/A       | N/A          | Inc-TTC33-1    |
| A_24_P945283   | 12,3915 | 12,4053 | -1,009611326 | ENST00000542398 | 1741      | NM_021120    | DLG3           |
| A_22_P00003410 | 1,61143 | 1,62523 | -1,009611326 | N/A             | 102467073 | N/A          | LOC102467073   |
| A_21_P0013146  | 1,44505 | 1,4589  | -1,009646317 | N/A             | 101929083 | N/A          | CASC6          |
| A_22_P00012267 | 1,52191 | 1,53576 | -1,009646317 | ENST00000521842 | N/A       | N/A          | N/A            |
| A_21_P0014258  | 1,44761 | 1,46146 | -1,009646317 | N/A             | 101927590 | AK302096     | LINC01166      |
| A_23_P328074   | 1,51681 | 1,53067 | -1,009653315 | ENST00000440970 | 6299      | NM_002968    | SALL1          |
| A_21_P0003167  | 4,72811 | 4,74198 | -1,009660314 | N/A             | N/A       | N/A          | Inc-TPRA1-2    |
| A_33_P3312807  | 4,01575 | 4,02966 | -1,009688308 | N/A             | 3653      | NR_023915    | IPW            |
| A_33_P3570228  | 9,53874 | 9,55267 | -1,009702305 | N/A             | 644962    | NR_077215    | TNRC18P1       |
| A_21_P0012511  | 1,42802 | 1,44196 | -1,009709304 | ENST00000496693 | N/A       | N/A          | N/A            |
| A_23_P17173    | 1,34962 | 1,36357 | -1,009716303 | ENST00000272395 | 129868    | NM_138800    | TRIM43         |

|                |         |         |              |                 |           |              |                |
|----------------|---------|---------|--------------|-----------------|-----------|--------------|----------------|
| A_33_P3400057  | 1,48064 | 1,49459 | -1,009716303 | ENST00000490617 | 170082    | NM_001297563 | TCEANC         |
| A_21_P0001345  | 1,38032 | 1,39429 | -1,009730301 | N/A             | N/A       | N/A          | Inc-SLC44A3-1  |
| A_21_P0003660  | 1,44736 | 1,46136 | -1,009751298 | N/A             | N/A       | N/A          | Inc-MMAA-1     |
| A_33_P3341479  | 2,8934  | 2,90745 | -1,009786294 | N/A             | 100874211 | NR_046706    | MID1P1-AS1     |
| A_22_P00019595 | 1,65041 | 1,66447 | -1,009793293 | N/A             | N/A       | N/A          | Inc-C5orf22-1  |
| A_33_P3225587  | 11,3129 | 11,327  | -1,009821291 | ENST00000481432 | 80218     | NM_025146    | NAA50          |
| A_22_P00022936 | 1,47277 | 1,48687 | -1,009821291 | ENST00000517407 | N/A       | N/A          | N/A            |
| A_32_P190769   | 1,4779  | 1,49201 | -1,00982829  | ENST00000429690 | 114905    | NM_031911    | C1QTNF7        |
| A_24_P759477   | 9,32708 | 9,34121 | -1,00984229  | ENST00000222573 | 3696      | NM_002214    | ITGB8          |
| A_21_P0013656  | 7,27734 | 7,29147 | -1,00984229  | N/A             | N/A       | N/A          | XLOC_I2_015213 |
| A_33_P3243929  | 5,40343 | 5,41759 | -1,009863289 | N/A             | 646748    | AK124016     | FLJ42022       |
| A_23_P48826    | 7,92902 | 7,94318 | -1,009863289 | ENST00000560442 | 140691    | NM_182985    | TRIM69         |
| A_33_P3503284  | 1,40841 | 1,42257 | -1,009863289 | ENST00000585477 | 284257    | NM_001257964 | BOD1L2         |
| A_33_P3405399  | 1,37803 | 1,3922  | -1,009870289 | ENST00000496592 | 57489     | NM_001184765 | ODF2L          |
| A_22_P00002302 | 1,60488 | 1,61907 | -1,009884289 | N/A             | 101927682 | NR_108080    | CD81-AS1       |
| A_22_P00025236 | 1,50029 | 1,5145  | -1,009898289 | ENST00000532961 | N/A       | N/A          | N/A            |
| A_22_P00005624 | 1,4773  | 1,49152 | -1,009905289 | N/A             | N/A       | N/A          | Inc-EGR4-1     |
| A_22_P00012233 | 1,43333 | 1,44755 | -1,009905289 | N/A             | N/A       | BM926533     | Inc-PPIC-1     |
| A_23_P392402   | 1,60093 | 1,61515 | -1,009905289 | ENST00000373256 | 2740      | NM_002062    | GLP1R          |
| A_24_P164998   | 1,51641 | 1,53063 | -1,009905289 | ENST00000590317 | 646627    | NM_001085474 | LYPD8          |
| A_33_P3225948  | 1,61295 | 1,62722 | -1,00994029  | ENST00000378190 | 55966     | NM_001042478 | AJAP1          |
| A_24_P772488   | 1,63832 | 1,6526  | -1,00994729  | ENST00000359827 | 91584     | NM_020911    | PLXNA4         |
| A_23_P153197   | 10,8842 | 10,8985 | -1,009961291 | ENST00000345133 | 7050      | NM_170695    | TGIF1          |
| A_33_P3388148  | 1,51581 | 1,53013 | -1,009975292 | ENST00000348639 | 1136      | NM_001166694 | CHRNA3         |
| A_33_P3343457  | 1,51334 | 1,52766 | -1,009975292 | ENST00000320584 | 374860    | NM_001145029 | ANKRD30B       |
| A_21_P0004985  | 1,45297 | 1,46729 | -1,009975292 | N/A             | N/A       | N/A          | Inc-EXOC2-9    |
| A_21_P0005554  | 1,41401 | 1,42833 | -1,009975292 | N/A             | N/A       | N/A          | Inc-SEPT7-1    |
| A_22_P00025920 | 1,68852 | 1,70286 | -1,009989294 | N/A             | 100506409 | NR_038962    | ELOVL2-AS1     |
| A_22_P00020427 | 1,59414 | 1,60849 | -1,009996295 | ENST00000420823 | 101927215 | NR_110118    | LINC01266      |
| A_21_P0004279  | 1,36648 | 1,38083 | -1,009996295 | N/A             | N/A       | N/A          | Inc-NR2F1-2    |
| A_22_P00006429 | 1,47406 | 1,48843 | -1,010010296 | N/A             | 100874034 | XR_251529    | UBXN7-AS1      |
| A_22_P00022353 | 1,51332 | 1,5277  | -1,010017297 | N/A             | N/A       | N/A          | Inc-MON2-3     |
| A_32_P203404   | 1,44201 | 1,4564  | -1,010024298 | ENST00000400291 | 125704    | NM_001044369 | FAM69C         |

|                |         |         |              |                 |           |              |               |
|----------------|---------|---------|--------------|-----------------|-----------|--------------|---------------|
| A_22_P00019050 | 1,42346 | 1,43785 | -1,010024298 | N/A             | N/A       | CA396498     | Inc-FBN2-6    |
| A_33_P3291836  | 1,42715 | 1,44154 | -1,010024298 | ENST00000402067 | N/A       | N/A          | N/A           |
| A_33_P3323779  | 1,41142 | 1,42582 | -1,010031299 | N/A             | 100271722 | N/A          | LINC00899     |
| A_23_P144843   | 1,6669  | 1,68131 | -1,0100383   | ENST00000381403 | 11082     | NM_007036    | ESM1          |
| A_33_P3364776  | 1,41317 | 1,42762 | -1,010066305 | ENST00000396843 | N/A       | XR_158938    | N/A           |
| A_22_P00011798 | 1,41678 | 1,43125 | -1,010080307 | N/A             | N/A       | N/A          | Inc-PGPEP1L-1 |
| A_33_P3307457  | 1,35124 | 1,36574 | -1,010101311 | ENST00000377721 | 83901     | NM_031963    | KRTAP9-8      |
| A_33_P3362636  | 13,2881 | 13,3026 | -1,010101311 | ENST00000620783 | 284106    | NM_001136498 | CISD3         |
| A_22_P00012085 | 7,11793 | 7,13243 | -1,010101311 | N/A             | N/A       | BU568189     | Inc-PMM2-3    |
| A_23_P165442   | 11,1742 | 11,1887 | -1,010101311 | ENST00000460499 | 29959     | NM_013392    | NRBP1         |
| A_21_P0008256  | 1,38591 | 1,40042 | -1,010108313 | N/A             | N/A       | N/A          | Inc-EBPL-1    |
| A_21_P0005902  | 1,67535 | 1,68986 | -1,010108313 | N/A             | N/A       | N/A          | Inc-FAM84B-2  |
| A_21_P0007668  | 1,41788 | 1,4324  | -1,010115314 | N/A             | N/A       | N/A          | Inc-FZD10-3   |
| A_33_P3302652  | 5,25499 | 5,26951 | -1,010115314 | ENST00000487977 | N/A       | XR_425100    | N/A           |
| A_21_P0001206  | 1,40658 | 1,42111 | -1,010122316 | ENST00000450681 | N/A       | N/A          | N/A           |
| A_21_P0013634  | 1,47097 | 1,4855  | -1,010122316 | ENST00000265417 | 221395    | NM_001098518 | GPR116        |
| A_21_P0000443  | 1,54069 | 1,55523 | -1,010129318 | N/A             | 100033800 | NR_003315    | SNORD115-23   |
| A_24_P62367    | 1,50881 | 1,52337 | -1,010143321 | ENST00000581527 | 9229      | NM_004746    | DLGAP1        |
| A_22_P00024889 | 1,65561 | 1,67017 | -1,010143321 | N/A             | 100874064 | NR_046527    | PCDH9-AS2     |
| A_33_P3280426  | 1,73882 | 1,7534  | -1,010157325 | ENST00000525892 | N/A       | AB529273     | N/A           |
| A_21_P0003136  | 1,47579 | 1,49037 | -1,010157325 | N/A             | N/A       | N/A          | Inc-VGLL3-1   |
| A_23_P200685   | 9,21361 | 9,2282  | -1,010164327 | ENST00000472447 | 54996     | NM_017898    | mar-02        |
| A_21_P0012710  | 1,42084 | 1,43546 | -1,010185333 | N/A             | N/A       | N/A          | Inc-FGFR1-4   |
| A_21_P0014194  | 2,88452 | 2,89915 | -1,010192335 | N/A             | N/A       | N/A          | N/A           |
| A_33_P3234657  | 1,42689 | 1,44152 | -1,010192335 | ENST00000389286 | 283659    | NM_173814    | PRTG          |
| A_24_P374461   | 1,51501 | 1,52965 | -1,010199337 | ENST00000333190 | 219578    | NM_181646    | ZNF804B       |
| A_33_P3373504  | 1,66154 | 1,67619 | -1,010206339 | N/A             | 100996646 | XM_005276412 | LOC100996646  |
| A_22_P00009327 | 4,42945 | 4,44411 | -1,010213341 | N/A             | N/A       | AL359058     | Inc-LRRC61-1  |
| A_32_P70818    | 1,34911 | 1,36379 | -1,010227346 | ENST00000402703 | 5083      | NM_006194    | PAX9          |
| A_33_P3310724  | 1,64592 | 1,66061 | -1,010234348 | N/A             | N/A       | N/A          | N/A           |
| A_21_P0005887  | 1,50913 | 1,52382 | -1,010234348 | N/A             | N/A       | N/A          | Inc-EIF3H-1   |
| A_33_P3240607  | 1,50491 | 1,5196  | -1,010234348 | N/A             | 100128699 | AK125870     | LOC100128699  |
| A_23_P72912    | 1,78982 | 1,80452 | -1,010241351 | ENST00000551071 | 9498      | AB018282     | SLC4A8        |

|                |         |         |              |                 |           |              |                |
|----------------|---------|---------|--------------|-----------------|-----------|--------------|----------------|
| A_33_P3237552  | 6,44396 | 6,45867 | -1,010248353 | ENST00000372338 | 84929     | NM_032843    | FIBCD1         |
| A_22_P00007160 | 3,84552 | 3,86023 | -1,010248353 | N/A             | N/A       | AK093624     | Inc-GNB2L1-1   |
| A_23_P145930   | 1,65232 | 1,66706 | -1,010269361 | N/A             | N/A       | N/A          | N/A            |
| A_21_P0009456  | 1,51425 | 1,52901 | -1,010283366 | N/A             | N/A       | N/A          | Inc-SLC35G4-2  |
| A_33_P3232290  | 1,67889 | 1,69366 | -1,010290369 | N/A             | 594857    | NM_001030013 | NPS            |
| A_33_P3351092  | 6,79616 | 6,81097 | -1,010318381 | ENST00000330798 | 337976    | NM_181616    | KRTAP20-2      |
| A_21_P0003788  | 1,47419 | 1,48902 | -1,010332387 | N/A             | 102724785 | XR_425793    | LOC102724785   |
| A_23_P360964   | 3,325   | 3,33983 | -1,010332387 | ENST00000391916 | 147906    | NM_145056    | DACT3          |
| A_23_P138881   | 5,20432 | 5,21917 | -1,010346393 | ENST00000502692 | 89        | NM_001104    | ACTN3          |
| A_33_P3366258  | 1,44624 | 1,46109 | -1,010346393 | ENST00000490698 | 441024    | XM_005265692 | MTHFD2L        |
| A_23_P120883   | 8,84963 | 8,86449 | -1,010353396 | ENST00000216117 | 3162      | NM_002133    | HMOX1          |
| A_21_P0012270  | 1,3835  | 1,39839 | -1,010374406 | N/A             | N/A       | N/A          | XLOC_I2_009395 |
| A_33_P3225685  | 10,9091 | 10,924  | -1,01038141  | ENST00000265471 | 26229     | NM_001288723 | B3GAT3         |
| A_19_P00802413 | 15,8552 | 15,8701 | -1,01038141  | ENST00000301015 | 9780      | NM_001142864 | PIEZO1         |
| A_22_P00025671 | 1,44836 | 1,46328 | -1,010395417 | ENST00000295666 | 3490      | N/A          | IGFBP7         |
| A_33_P3354858  | 8,57255 | 8,58748 | -1,01040242  | ENST00000263960 | 80219     | NM_025147    | COQ10B         |
| A_21_P0003926  | 1,50428 | 1,51923 | -1,010416428 | N/A             | 101929082 | N/A          | LINC01333      |
| A_33_P3375720  | 1,60352 | 1,61847 | -1,010416428 | N/A             | N/A       | N/A          | N/A            |
| A_33_P3228637  | 1,75899 | 1,77395 | -1,010423431 | ENST00000595059 | N/A       | BX649129     | N/A            |
| A_22_P00009435 | 1,44663 | 1,46159 | -1,010423431 | ENST00000559918 | N/A       | BU664347     | N/A            |
| A_22_P00019908 | 8,73856 | 8,75354 | -1,010437439 | N/A             | N/A       | N/A          | Inc-WNT1-2     |
| A_24_P555170   | 1,62922 | 1,6442  | -1,010437439 | ENST00000617217 | 100505679 | NM_001243531 | UBE2Q2L        |
| A_33_P3354539  | 8,78244 | 8,79742 | -1,010437439 | ENST00000607599 | 91612     | NM_145165    | CHURC1         |
| A_33_P3351524  | 9,48898 | 9,50397 | -1,010444443 | N/A             | N/A       | N/A          | N/A            |
| A_23_P104972   | 2,80148 | 2,81648 | -1,010451446 | ENST00000300190 | 64232     | NM_023945    | MS4A5          |
| A_21_P0006362  | 1,51278 | 1,52781 | -1,010472458 | ENST00000444985 | 100996590 | NR_104145    | LINC01505      |
| A_22_P00024197 | 1,50985 | 1,52488 | -1,010472458 | N/A             | N/A       | N/A          | Inc-SUPT6H-1   |
| A_33_P3409447  | 7,87382 | 7,88887 | -1,010486467 | ENST00000025301 | 11215     | NM_016248    | AKAP11         |
| A_33_P3377714  | 1,35705 | 1,37211 | -1,010493471 | N/A             | N/A       | N/A          | N/A            |
| A_22_P00008763 | 1,35821 | 1,37327 | -1,010493471 | N/A             | N/A       | N/A          | Inc-KIF13B-1   |
| A_24_P3140     | 9,09068 | 9,10578 | -1,010521488 | ENST00000483421 | 27332     | NM_014497    | ZNF638         |
| A_22_P00015105 | 1,50523 | 1,52033 | -1,010521488 | ENST00000579972 | N/A       | N/A          | N/A            |
| A_33_P3319791  | 1,3498  | 1,3649  | -1,010521488 | ENST00000545748 | 3164      | NM_001202234 | NR4A1          |

|                |         |         |              |                 |           |              |                |
|----------------|---------|---------|--------------|-----------------|-----------|--------------|----------------|
| A_21_P0001764  | 1,68692 | 1,70206 | -1,010549506 | ENST00000451123 | N/A       | N/A          | N/A            |
| A_22_P00023267 | 1,36935 | 1,38449 | -1,010549506 | ENST00000539514 | N/A       | N/A          | N/A            |
| A_22_P00024434 | 2,61909 | 2,63426 | -1,01057052  | N/A             | N/A       | N/A          | Inc-LRFN2-3    |
| A_21_P0009246  | 1,67083 | 1,68601 | -1,010577525 | N/A             | N/A       | N/A          | Inc-TMEM99-3   |
| A_21_P0004090  | 1,80821 | 1,82339 | -1,010577525 | ENST00000509745 | N/A       | N/A          | N/A            |
| A_22_P00011064 | 1,47243 | 1,48762 | -1,01058453  | ENST00000421112 | 100506474 | NR_038434    | LOC100506474   |
| A_21_P0008718  | 1,43178 | 1,44697 | -1,01058453  | ENST00000565706 | N/A       | N/A          | N/A            |
| A_33_P3375284  | 1,44579 | 1,46098 | -1,01058453  | ENST00000584301 | 353149    | XR_429853    | TBC1D26        |
| A_33_P3313810  | 1,42554 | 1,44075 | -1,010598539 | ENST00000293636 | 1990      | NM_001971    | CELA1          |
| A_24_P682579   | 1,43426 | 1,44951 | -1,01062656  | ENST00000562908 | N/A       | N/A          | N/A            |
| A_33_P3409027  | 1,60728 | 1,62254 | -1,010633565 | ENST00000354853 | 54456     | AK090740     | MOV10L1        |
| A_21_P0003778  | 1,38167 | 1,39696 | -1,01065458  | ENST00000508388 | N/A       | N/A          | N/A            |
| A_33_P3266132  | 3,45012 | 3,46542 | -1,010661586 | ENST00000350501 | 57822     | NM_198174    | GRHL3          |
| A_24_P97687    | 1,45629 | 1,4716  | -1,010668591 | ENST00000323865 | 3350      | NM_000524    | HTR1A          |
| A_22_P00017524 | 1,41919 | 1,43451 | -1,010675597 | ENST00000429809 | 101927889 | XR_246197    | LINC01153      |
| A_33_P3243429  | 8,77789 | 8,79322 | -1,010682602 | ENST00000312457 | 390212    | NM_206997    | GPR152         |
| A_21_P0010316  | 1,61854 | 1,63388 | -1,010689608 | N/A             | N/A       | N/A          | Inc-ADARB1-3   |
| A_33_P3365057  | 1,43111 | 1,44645 | -1,010689608 | N/A             | N/A       | N/A          | N/A            |
| A_22_P00010824 | 1,60463 | 1,61998 | -1,010696613 | ENST00000503048 | 101927134 | NR_109877    | LINC01470      |
| A_33_P3210663  | 1,40953 | 1,42488 | -1,010696613 | ENST00000522248 | 9892      | NM_001242794 | SNAP91         |
| A_22_P00012249 | 1,46637 | 1,48175 | -1,01071763  | ENST00000411431 | N/A       | N/A          | N/A            |
| A_21_P0010369  | 1,50447 | 1,51988 | -1,010738648 | ENST00000453866 | N/A       | N/A          | N/A            |
| A_21_P0011153  | 1,44356 | 1,45898 | -1,010745654 | N/A             | N/A       | N/A          | XLOC_I2_003803 |
| A_22_P00008260 | 1,4747  | 1,49013 | -1,01075266  | ENST00000505396 | 102467074 | N/A          | LINC01377      |
| A_22_P00008506 | 1,50753 | 1,52298 | -1,010766672 | ENST00000563772 | N/A       | N/A          | N/A            |
| A_21_P0006602  | 1,36651 | 1,38197 | -1,010773678 | N/A             | N/A       | N/A          | Inc-NLGN4Y-1   |
| A_21_P0005388  | 1,50872 | 1,52419 | -1,010780684 | N/A             | N/A       | N/A          | Inc-ZNF727-2   |
| A_23_P363954   | 1,74867 | 1,76414 | -1,010780684 | ENST00000281030 | 7069      | NM_003251    | THRSP          |
| A_23_P54681    | 1,50998 | 1,52546 | -1,01078769  | ENST00000219746 | 27324     | NM_001146188 | TOX3           |
| A_23_P431971   | 1,35547 | 1,37095 | -1,01078769  | ENST00000309155 | 55118     | NM_018058    | CRTAC1         |
| A_23_P126135   | 14,8651 | 14,8806 | -1,010801703 | ENST00000235329 | 9927      | NM_014874    | MFN2           |
| A_33_P3282693  | 5,44934 | 5,46484 | -1,010801703 | ENST00000574571 | 390756    | NR_024128    | OR3A4P         |
| A_32_P20367    | 15,9429 | 15,9584 | -1,010801703 | ENST00000443360 | 6201      | NM_001011    | RPS7           |

|                |         |         |              |                 |           |              |              |
|----------------|---------|---------|--------------|-----------------|-----------|--------------|--------------|
| A_33_P3362232  | 2,40031 | 2,41581 | -1,010801703 | N/A             | N/A       | N/A          | Inc-CLCN3-3  |
| A_33_P3326256  | 10,7092 | 10,7247 | -1,010801703 | ENST00000372945 | 51021     | NM_016065    | MRPS16       |
| A_21_P0011028  | 6,89592 | 6,91144 | -1,010815716 | ENST00000525757 | 102724910 | N/A          | LOC102724910 |
| A_33_P3218975  | 1,49604 | 1,51158 | -1,010829729 | ENST00000371207 | 953       | NM_001776    | ENTPD1       |
| A_22_P00001501 | 1,46977 | 1,48531 | -1,010829729 | N/A             | 101928386 | NR_110237    | LOC101928386 |
| A_24_P381441   | 1,44491 | 1,46045 | -1,010829729 | ENST00000320122 | 55885     | NM_018640    | LMO3         |
| A_23_P340019   | 1,40876 | 1,42431 | -1,010836735 | ENST00000615877 | 197358    | NM_178844    | NLRC3        |
| A_33_P3210934  | 1,47093 | 1,48648 | -1,010836735 | ENST00000617769 | 56136     | NM_031865    | PCDHA13      |
| A_24_P519651   | 1,65312 | 1,66868 | -1,010843742 | ENST00000457647 | 729121    | NR_024439    | RGPD4-AS1    |
| A_22_P00010728 | 1,65823 | 1,67379 | -1,010843742 | N/A             | N/A       | N/A          | Inc-NID1-3   |
| A_33_P3835524  | 5,34287 | 5,35843 | -1,010843742 | ENST00000529952 | 5452      | NM_001207026 | POU2F2       |
| A_23_P310410   | 1,49755 | 1,51313 | -1,010857755 | ENST00000368156 | 913       | NM_001042583 | CD1E         |
| A_22_P00009283 | 3,70346 | 3,71907 | -1,010878776 | ENST00000449713 | N/A       | XR_109681    | N/A          |
| A_21_P0003637  | 1,63489 | 1,65053 | -1,010899797 | N/A             | N/A       | N/A          | Inc-ALPK1-1  |
| A_21_P0002526  | 1,47341 | 1,48905 | -1,010899797 | N/A             | N/A       | N/A          | Inc-ZSWIM2-7 |
| A_22_P00002200 | 1,35215 | 1,36781 | -1,010913811 | N/A             | 101928666 | XR_246468    | LOC101928666 |
| A_21_P0008952  | 1,50187 | 1,51754 | -1,010920818 | N/A             | N/A       | N/A          | Inc-SETD6-4  |
| A_22_P00009560 | 1,50107 | 1,51675 | -1,010927825 | N/A             | N/A       | N/A          | Inc-MAP3K8-2 |
| A_22_P00018818 | 1,48873 | 1,50442 | -1,010934832 | N/A             | 101927284 | NR_110754    | LOC101927284 |
| A_22_P00025725 | 1,47208 | 1,48777 | -1,010934832 | ENST00000470263 | N/A       | BC031255     | N/A          |
| A_22_P00015812 | 1,68252 | 1,69824 | -1,010955854 | N/A             | N/A       | N/A          | Inc-TAT-1    |
| A_33_P3299750  | 1,43605 | 1,45177 | -1,010955854 | N/A             | N/A       | N/A          | N/A          |
| A_32_P358887   | 1,50716 | 1,52288 | -1,010955854 | ENST00000340595 | 8671      | NM_003759    | SLC4A4       |
| A_21_P0010143  | 1,43354 | 1,44927 | -1,010962862 | N/A             | N/A       | N/A          | Inc-CHODL-2  |
| A_22_P00005556 | 1,46181 | 1,47755 | -1,010969869 | N/A             | N/A       | N/A          | Inc-EEF1A1-1 |
| A_23_P362824   | 12,192  | 12,2078 | -1,011011915 | ENST00000493039 | 1477      | NM_001324    | CSTF1        |
| A_21_P0008348  | 1,3762  | 1,392   | -1,011011915 | N/A             | N/A       | N/A          | Inc-FUT8-2   |
| A_22_P00009556 | 1,57286 | 1,58866 | -1,011011915 | N/A             | N/A       | N/A          | Inc-MAP3K6-1 |
| A_33_P3298256  | 1,4281  | 1,44392 | -1,011025931 | N/A             | N/A       | N/A          | Inc-SEMA5A-1 |
| A_23_P385017   | 1,4733  | 1,48919 | -1,011074987 | ENST00000253801 | 2538      | NM_000151    | G6PC         |
| A_33_P3281191  | 10,8604 | 10,8763 | -1,011081996 | ENST00000366595 | 4811      | NM_002508    | NID1         |
| A_21_P0014273  | 5,84263 | 5,85853 | -1,011081996 | ENST00000532805 | 120227    | AK092584     | CYP2R1       |
| A_21_P0008067  | 1,35855 | 1,37446 | -1,011089004 | N/A             | N/A       | N/A          | Inc-OLFM4-4  |

|                |         |         |              |                 |           |              |                |
|----------------|---------|---------|--------------|-----------------|-----------|--------------|----------------|
| A_33_P3257130  | 1,35502 | 1,37093 | -1,011089004 | ENST00000315957 | 441670    | NM_001005500 | OR4M1          |
| A_22_P00014486 | 1,44278 | 1,45872 | -1,011110029 | N/A             | N/A       | N/A          | Inc-SHF-1      |
| A_22_P00017565 | 1,34907 | 1,36503 | -1,011124046 | N/A             | N/A       | N/A          | Inc-WDR54-1    |
| A_21_P0001032  | 1,39892 | 1,41488 | -1,011124046 | ENST00000427173 | 101928778 | N/A          | LOC101928778   |
| A_21_P0003240  | 1,40821 | 1,42418 | -1,011131055 | N/A             | N/A       | N/A          | Inc-CHMP2B-2   |
| A_22_P00024576 | 1,61957 | 1,63554 | -1,011131055 | ENST00000443926 | N/A       | N/A          | N/A            |
| A_21_P0013096  | 2,23786 | 2,25384 | -1,011138063 | N/A             | 101928249 | XR_428024    | LOC101928249   |
| A_33_P3357669  | 15,1724 | 15,1884 | -1,011152081 | ENST00000413663 | N/A       | N/A          | N/A            |
| A_33_P3419562  | 1,38431 | 1,40033 | -1,011166098 | ENST00000427338 | 402135    | NM_001004737 | OR5K2          |
| A_23_P395582   | 1,37814 | 1,39416 | -1,011166098 | ENST00000509524 | 132625    | AY429593     | ZFP42          |
| A_22_P00016146 | 8,87475 | 8,89078 | -1,011173107 | N/A             | N/A       | CR627086     | Inc-TIMM9-2    |
| A_33_P6808705  | 1,44085 | 1,45689 | -1,011180116 | N/A             | 101928002 | NR_110072    | LOC101928002   |
| A_22_P00012889 | 7,48073 | 7,49678 | -1,011187125 | ENST00000550905 | 100506465 | NR_110026    | LINC01234      |
| A_22_P00008597 | 1,49176 | 1,50782 | -1,011194134 | ENST00000487624 | N/A       | N/A          | N/A            |
| A_22_P00024524 | 1,40154 | 1,4176  | -1,011194134 | ENST00000539305 | N/A       | N/A          | N/A            |
| A_21_P0013890  | 1,35009 | 1,36616 | -1,011201143 | ENST00000442584 | N/A       | N/A          | N/A            |
| A_33_P3213822  | 1,43939 | 1,45546 | -1,011201143 | ENST00000444842 | 3776      | NM_001017424 | KCNK2          |
| A_21_P0004117  | 1,44049 | 1,4566  | -1,01122918  | ENST00000506492 | 101929681 | NR_104628    | LOC101929681   |
| A_21_P0013304  | 2,44731 | 2,46342 | -1,01122918  | N/A             | N/A       | N/A          | XLOC_I2_013808 |
| A_22_P00023854 | 1,42424 | 1,44036 | -1,01123619  | ENST00000420354 | N/A       | N/A          | N/A            |
| A_22_P00010318 | 1,60598 | 1,62212 | -1,011250208 | ENST00000570223 | 285834    | NR_003948    | HCG22          |
| A_22_P00022875 | 1,45869 | 1,47485 | -1,011264227 | N/A             | 101927410 | NR_110777    | LOC101927410   |
| A_22_P00003320 | 1,41423 | 1,43039 | -1,011264227 | ENST00000528811 | N/A       | N/A          | N/A            |
| A_33_P3256933  | 1,68544 | 1,70161 | -1,011271237 | ENST00000376152 | 653619    | NM_001098376 | PRAMEF15       |
| A_21_P0011362  | 4,73628 | 4,75246 | -1,011278247 | ENST00000567075 | 101059918 | NM_001282484 | GOLGA8R        |
| A_21_P0004775  | 1,43544 | 1,45163 | -1,011285256 | ENST00000446358 | N/A       | N/A          | N/A            |
| A_23_P71433    | 10,3583 | 10,3745 | -1,011292266 | ENST00000419880 | 55284     | NM_001001481 | UBE2W          |
| A_24_P325176   | 8,29607 | 8,31227 | -1,011292266 | ENST00000264501 | 84162     | NM_015312    | KIAA1109       |
| A_22_P00013650 | 1,42539 | 1,44159 | -1,011292266 | ENST00000517925 | 100505718 | NR_039986    | LOC100505718   |
| A_33_P3235891  | 5,16586 | 5,18207 | -1,011299276 | N/A             | N/A       | AK128523     | N/A            |
| A_23_P357881   | 1,66377 | 1,68    | -1,011313295 | ENST00000416057 | 926       | NM_172102    | CD8B           |
| A_24_P671164   | 1,37461 | 1,39084 | -1,011313295 | ENST00000618457 | 5618      | NM_000949    | PRLR           |
| A_33_P3272593  | 9,80255 | 9,8188  | -1,011327315 | ENST00000443824 | 56474     | NM_001144002 | CTPS2          |



|                |         |         |              |                 |           |              |                       |
|----------------|---------|---------|--------------|-----------------|-----------|--------------|-----------------------|
| A_24_P914817   | 9,23708 | 9,25333 | -1,011327315 | ENST00000352689 | 4289      | NM_013255    | MKLN1                 |
| A_22_P00006789 | 1,45118 | 1,46743 | -1,011327315 | N/A             | N/A       | CR738214     | Inc-FZD3-1            |
| A_23_P86710    | 1,59944 | 1,6157  | -1,011334325 | ENST00000491130 | 143162    | NM_001018071 | FRMPD2                |
| A_33_P3343402  | 1,61367 | 1,62993 | -1,011334325 | ENST00000371148 | 245913    | NM_001037497 | DEFB110               |
| A_33_P3577857  | 1,4403  | 1,45658 | -1,011348346 | ENST00000526131 | N/A       | BC067882     | N/A                   |
| A_23_P359588   | 4,70215 | 4,71843 | -1,011348346 | ENST00000615384 | 8641      | NM_032098    | PCDHGB4               |
| A_33_P3394584  | 1,62336 | 1,63964 | -1,011348346 | N/A             | 100192386 | NR_024389    | FLJ16779              |
| A_33_P8983918  | 1,41812 | 1,43441 | -1,011355356 | N/A             | 101060106 | XR_424809    | LOC101060106          |
| A_33_P3365357  | 13,9776 | 13,9939 | -1,011362366 | ENST00000442581 | 8692      | NM_033158    | HYAL2                 |
| A_22_P00010817 | 1,59577 | 1,61209 | -1,011376386 | N/A             | N/A       | N/A          | Inc-NMNAT3-4          |
| A_24_P363679   | 9,55142 | 9,56775 | -1,011383397 | ENST00000524164 | 51606     | NM_015941    | ATP6V1H               |
| A_24_P155617   | 1,46729 | 1,48364 | -1,011397418 | ENST00000489237 | 267012    | NM_172370    | DAOA                  |
| A_21_P0009568  | 1,43762 | 1,45397 | -1,011397418 | N/A             | 101927404 | XR_245477    | LOC101927404          |
| A_23_P161909   | 1,39763 | 1,41398 | -1,011397418 | ENST00000534744 | 932       | NM_006138    | MS4A3                 |
| A_32_P504827   | 1,50721 | 1,52357 | -1,011404428 | ENST00000305119 | 10071     | NM_001164462 | MUC12                 |
| A_21_P0008337  | 1,41995 | 1,43632 | -1,011411439 | N/A             | N/A       | N/A          | Inc-CDKN3-1           |
| A_22_P00008789 | 1,46509 | 1,48147 | -1,011418449 | N/A             | N/A       | N/A          | Inc-KIF7-1            |
| A_33_P3412687  | 7,85865 | 7,87506 | -1,011439481 | N/A             | N/A       | N/A          | N/A                   |
| A_21_P0008367  | 1,50582 | 1,52224 | -1,011446492 | N/A             | N/A       | N/A          | Inc-RP11-322L20.1.1-3 |
| A_23_P321984   | 1,46605 | 1,48248 | -1,011453503 | ENST00000621400 | 160365    | NM_172004    | CLECL1                |
| A_21_P0014542  | 1,62628 | 1,64271 | -1,011453503 | ENST00000434716 | 100507242 | N/A          | SNHG23                |
| A_21_P0011687  | 1,842   | 1,85844 | -1,011460514 | N/A             | N/A       | N/A          | XLOC_I2_006670        |
| A_23_P369237   | 1,41258 | 1,42903 | -1,011467525 | ENST00000444204 | 9370      | NM_004797    | ADIPOQ                |
| A_21_P0011159  | 1,47071 | 1,48716 | -1,011467525 | ENST00000415294 | N/A       | N/A          | N/A                   |
| A_23_P325501   | 10,5347 | 10,5512 | -1,01150258  | ENST00000400485 | 23515     | NM_015358    | MORC3                 |
| A_23_P8339     | 14,2992 | 14,3157 | -1,01150258  | ENST00000476826 | 29074     | NM_014161    | MRPL18                |
| A_23_P88740    | 12,2023 | 12,2188 | -1,01150258  | ENST00000299572 | 55839     | NM_018455    | CENPN                 |
| A_22_P00008218 | 1,35576 | 1,37226 | -1,01150258  | ENST00000502798 | 22987     | NM_014979    | SV2C                  |
| A_23_P49643    | 1,41426 | 1,43078 | -1,011516603 | ENST00000284154 | 10750     | NM_006613    | GRAP                  |
| A_33_P3345504  | 8,21113 | 8,22767 | -1,011530625 | ENST00000335387 | 54542     | NM_018835    | RC3H2                 |
| A_21_P0011485  | 1,40752 | 1,42409 | -1,01155166  | N/A             | N/A       | N/A          | XLOC_I2_005503        |
| A_22_P00009213 | 1,45733 | 1,47391 | -1,011558671 | N/A             | N/A       | BG459723     | Inc-LPIN3-2           |
| A_33_P3225106  | 1,42634 | 1,44294 | -1,011572695 | ENST00000370490 | 84631     | AJ278615     | SLITRK2               |

|                |         |         |              |                 |           |              |                |
|----------------|---------|---------|--------------|-----------------|-----------|--------------|----------------|
| A_23_P201035   | 9,92688 | 9,94351 | -1,01159373  | ENST00000427500 | 2629      | NM_001005741 | GBA            |
| A_19_P00316602 | 1,49458 | 1,51121 | -1,01159373  | N/A             | 441204    | N/A          | LOC441204      |
| A_21_P0008025  | 1,42262 | 1,43926 | -1,011600742 | N/A             | N/A       | N/A          | Inc-ZMYM2-3    |
| A_21_P0005872  | 1,3625  | 1,37915 | -1,011607754 | N/A             | N/A       | N/A          | Inc-RUNX1T1-4  |
| A_33_P3263629  | 1,42871 | 1,44537 | -1,011614766 | N/A             | N/A       | N/A          | XLOC_I2_013630 |
| A_33_P3334348  | 1,6534  | 1,67007 | -1,011621778 | ENST00000378075 | 390205    | NM_001145077 | LRRC10B        |
| A_21_P0008542  | 1,41087 | 1,42755 | -1,01162879  | N/A             | N/A       | N/A          | Inc-MAP3K9-3   |
| A_32_P876086   | 1,61194 | 1,62862 | -1,01162879  | ENST00000623367 | N/A       | AL834311     | N/A            |
| A_33_P3330125  | 15,5789 | 15,5956 | -1,011642814 | ENST00000413918 | 56616     | NM_001278302 | DIABLO         |
| A_22_P00003235 | 1,49011 | 1,50681 | -1,011642814 | N/A             | N/A       | N/A          | Inc-CADM1-4    |
| A_33_P3341836  | 5,02722 | 5,04392 | -1,011642814 | ENST00000434248 | 163131    | NM_001005851 | ZNF780B        |
| A_22_P00013907 | 1,35289 | 1,36959 | -1,011642814 | ENST00000459633 | 414243    | N/A          | LINC00595      |
| A_21_P0011065  | 11,9226 | 11,9393 | -1,011642814 | ENST00000550242 | N/A       | N/A          | N/A            |
| A_32_P158786   | 3,31886 | 3,33557 | -1,011649826 | ENST00000333722 | 115749    | NM_001170633 | C12orf56       |
| A_22_P00006512 | 1,41672 | 1,43345 | -1,011663851 | ENST00000444219 | 101929297 | NR_125862    | LOC101929297   |
| A_33_P3286499  | 1,36695 | 1,38368 | -1,011663851 | N/A             | N/A       | N/A          | N/A            |
| A_23_P302470   | 1,48848 | 1,50522 | -1,011670863 | ENST00000310613 | 27284     | NM_014465    | SULT1B1        |
| A_21_P0009717  | 1,4221  | 1,43886 | -1,011684888 | N/A             | N/A       | N/A          | Inc-LSR-1      |
| A_22_P00019388 | 1,50442 | 1,5212  | -1,011698913 | N/A             | 101927253 | XR_243718    | LOC101927253   |
| A_33_P3322378  | 1,35543 | 1,37221 | -1,011698913 | N/A             | 100873924 | NR_046901    | HLX-AS1        |
| A_33_P3341259  | 5,16417 | 5,18096 | -1,011705925 | ENST00000483190 | 116842    | AJ409065     | LEAP2          |
| A_23_P127233   | 12,1737 | 12,1905 | -1,011712938 | ENST00000369603 | 10285     | NM_005871    | SMNDC1         |
| A_32_P494620   | 4,83082 | 4,84762 | -1,011712938 | ENST00000496656 | 222662    | NM_182548    | LHFPL5         |
| A_23_P36641    | 1,63753 | 1,65433 | -1,011712938 | ENST00000229335 | 57379     | NM_020661    | AICDA          |
| A_24_P251734   | 1,47135 | 1,48816 | -1,011719951 | ENST00000379164 | 56884     | NM_020116    | FSTL5          |
| A_21_P0009861  | 1,35718 | 1,37399 | -1,011719951 | ENST00000450623 | 102723578 | N/A          | LINC01440      |
| A_32_P198523   | 1,39297 | 1,40979 | -1,011726964 | ENST00000343098 | 401024    | NM_173651    | FSIP2          |
| A_21_P0000722  | 1,73969 | 1,75653 | -1,011740989 | ENST00000521905 | 100616530 | NR_038207    | C8orf37-AS1    |
| A_22_P00014180 | 5,38735 | 5,40419 | -1,011740989 | ENST00000580695 | 10846     | AK090688     | PDE10A         |
| A_22_P00018037 | 1,4223  | 1,43916 | -1,011755015 | N/A             | N/A       | N/A          | Inc-ZNF236-1   |
| A_22_P00015286 | 1,39104 | 1,40791 | -1,011762028 | N/A             | N/A       | N/A          | Inc-SPATA7-1   |
| A_21_P0008533  | 1,44666 | 1,46357 | -1,01179008  | N/A             | N/A       | N/A          | Inc-FKBP3-1    |
| A_21_P0005093  | 1,75049 | 1,76741 | -1,011797094 | N/A             | 401287    | XR_428063    | LOC401287      |

|                |         |         |              |                 |           |              |                  |
|----------------|---------|---------|--------------|-----------------|-----------|--------------|------------------|
| A_21_P0007297  | 1,5014  | 1,51837 | -1,01183216  | ENST00000609260 | N/A       | N/A          | N/A              |
| A_21_P0005413  | 4,45524 | 4,47223 | -1,011846187 | ENST00000602761 | 340340    | N/A          | LOC340340        |
| A_33_P3338413  | 1,67171 | 1,6887  | -1,011846187 | ENST00000388781 | 22798     | NM_007356    | LAMB4            |
| A_21_P0007315  | 1,35166 | 1,36867 | -1,011860215 | N/A             | N/A       | N/A          | Inc-DENND5A-1    |
| A_33_P3282175  | 1,61593 | 1,63295 | -1,011867228 | ENST00000455554 | N/A       | N/A          | N/A              |
| A_33_P3389237  | 1,45245 | 1,46947 | -1,011867228 | ENST00000604629 | 10941     | NM_001252274 | UGT2A1           |
| A_33_P3294103  | 3,58199 | 3,59901 | -1,011867228 | N/A             | N/A       | N/A          | N/A              |
| A_22_P00006174 | 1,5941  | 1,61114 | -1,011881256 | N/A             | 100505746 | NR_038312    | ITGB2-AS1        |
| A_24_P296808   | 1,6338  | 1,65086 | -1,011895284 | ENST00000313683 | 55228     | NM_018215    | PNMAL1           |
| A_22_P00004502 | 1,61282 | 1,62988 | -1,011895284 | N/A             | 102724820 | NR_110604    | LANCL1-AS1       |
| A_21_P0009379  | 1,47529 | 1,49236 | -1,011902298 | N/A             | N/A       | N/A          | Inc-COX10-6      |
| A_23_P166027   | 1,46974 | 1,48681 | -1,011902298 | ENST00000371263 | 23626     | NM_012444    | SPO11            |
| A_21_P0012010  | 1,67639 | 1,69348 | -1,011916326 | N/A             | 284950    | N/A          | LOC284950        |
| A_33_P3319231  | 1,43563 | 1,45273 | -1,01192334  | ENST00000373248 | 84883     | AF337957     | AIFM2            |
| A_21_P0012335  | 1,46414 | 1,48124 | -1,01192334  | ENST00000418274 | 342850    | NM_001277333 | ANKRD62          |
| A_21_P0000620  | 1,41753 | 1,43463 | -1,01192334  | N/A             | 386597    | NR_033997    | RNF144A-AS1      |
| A_23_P38446    | 12,3318 | 12,3489 | -1,01192334  | ENST00000226225 | 7126      | NM_021137    | TNFAIP1          |
| A_33_P3380772  | 15,1852 | 15,2023 | -1,01192334  | ENST00000262659 | 140706    | NM_080625    | CCM2L            |
| A_32_P101779   | 1,34923 | 1,36634 | -1,011930354 | ENST00000540910 | 266629    | NM_174975    | SEC14L3          |
| A_33_P3219960  | 1,59541 | 1,61253 | -1,011937368 | ENST00000451103 | N/A       | XR_242268    | N/A              |
| A_33_P3369239  | 9,6421  | 9,65922 | -1,011937368 | ENST00000545607 | 9444      | NM_001301085 | QKI              |
| A_21_P0005761  | 1,46407 | 1,4812  | -1,011944382 | N/A             | N/A       | N/A          | Inc-ZNF572-1     |
| A_21_P0009125  | 1,35051 | 1,36765 | -1,011951397 | N/A             | N/A       | N/A          | Inc-IRX3-2       |
| A_33_P3218053  | 1,43655 | 1,45369 | -1,011951397 | ENST00000445873 | N/A       | BC019674     | Inc-PDZD7-4      |
| A_24_P33508    | 1,50285 | 1,52    | -1,011958411 | ENST00000332432 | 441061    | NM_001102562 | mar-11           |
| A_24_P358554   | 1,40888 | 1,42603 | -1,011958411 | ENST00000479949 | 63827     | NM_198427    | BCAN             |
| A_23_P406616   | 9,90522 | 9,92239 | -1,01197244  | ENST00000315965 | 168455    | NM_175884    | CCDC71L          |
| A_21_P0001358  | 1,36634 | 1,38354 | -1,011993483 | N/A             | N/A       | N/A          | Inc-PRMT6-4      |
| A_23_P111481   | 12,5033 | 12,5205 | -1,011993483 | ENST00000445337 | 51593     | NM_015908    | SRRT             |
| A_23_P129476   | 9,88556 | 9,90277 | -1,012000498 | ENST00000614968 | 9605      | NM_004913    | VPS9D1           |
| A_24_P309521   | 1,49152 | 1,50874 | -1,012007513 | ENST00000529694 | 3762      | NM_000890    | KCNJ5            |
| A_21_P0009596  | 1,43779 | 1,45503 | -1,012021542 | N/A             | N/A       | N/A          | Inc-AC068473.1-1 |
| A_22_P00003790 | 1,62673 | 1,64398 | -1,012028557 | N/A             | N/A       | N/A          | Inc-CDK5R1-4     |

|                |         |         |              |                 |           |              |                |
|----------------|---------|---------|--------------|-----------------|-----------|--------------|----------------|
| A_24_P363802   | 10,5752 | 10,5925 | -1,012063632 | ENST00000210313 | 5711      | NM_005047    | PSMD5          |
| A_23_P123974   | 13,3463 | 13,3636 | -1,012063632 | ENST00000400770 | 1841      | NM_012145    | DTYMK          |
| A_24_P417526   | 11,6853 | 11,7026 | -1,012063632 | ENST00000358464 | 284802    | NR_003579    | FRG1B          |
| A_33_P3283592  | 1,58359 | 1,60093 | -1,012091693 | ENST00000511063 | 285679    | NM_001142306 | C5orf60        |
| A_21_P0003151  | 2,61201 | 2,62935 | -1,012091693 | N/A             | N/A       | N/A          | Inc-CBLB-7     |
| A_21_P0013081  | 2,98082 | 2,99816 | -1,012091693 | N/A             | N/A       | N/A          | XLOC_I2_013000 |
| A_23_P257417   | 5,80765 | 5,825   | -1,012098708 | ENST00000411884 | 130162    | NM_152385    | CLHC1          |
| A_33_P3415124  | 4,22188 | 4,23924 | -1,012105723 | ENST00000514254 | 642797    | AK127211     | DNAH10OS       |
| A_22_P00023327 | 1,67172 | 1,68908 | -1,012105723 | ENST00000471638 | 101927866 | XR_241587    | LOC101927866   |
| A_23_P4161     | 4,49799 | 4,51535 | -1,012105723 | ENST00000448504 | 22901     | AB023218     | ARSG           |
| A_33_P3218504  | 2,82977 | 2,84714 | -1,012112739 | N/A             | N/A       | N/A          | N/A            |
| A_22_P00006853 | 1,48559 | 1,50297 | -1,012119754 | ENST00000556016 | N/A       | N/A          | N/A            |
| A_23_P168898   | 18,2269 | 18,2443 | -1,012133785 | ENST00000466800 | 6224      | NM_001023    | RPS20          |
| A_33_P3329467  | 13,6993 | 13,7167 | -1,012133785 | ENST00000359697 | 51657     | NM_016086    | STYXL1         |
| A_21_P0010317  | 1,68189 | 1,6993  | -1,012140801 | N/A             | N/A       | N/A          | Inc-COL6A1-1   |
| A_33_P3307960  | 1,41319 | 1,43061 | -1,012147816 | ENST00000359318 | 126767    | NM_001103170 | AADACL3        |
| A_21_P0013476  | 4,5351  | 4,55252 | -1,012147816 | N/A             | N/A       | N/A          | XLOC_I2_014196 |
| A_22_P00010043 | 1,41636 | 1,43381 | -1,012168864 | ENST00000426169 | N/A       | N/A          | N/A            |
| A_33_P3307810  | 1,76414 | 1,78162 | -1,012189911 | ENST00000448656 | 130940    | NM_138803    | CCDC148        |
| A_23_P151321   | 16,8167 | 16,8342 | -1,012203943 | ENST00000551291 | 6128      | NM_001024662 | RPL6           |
| A_33_P3289461  | 3,33221 | 3,34971 | -1,012203943 | ENST00000369916 | 140701    | NM_080622    | ABHD16B        |
| A_33_P3391316  | 1,34948 | 1,36698 | -1,012203943 | ENST00000594169 | N/A       | XR_109656    | N/A            |
| A_23_P393607   | 12,0895 | 12,107  | -1,012203943 | ENST00000366759 | 116841    | NM_053052    | SNAP47         |
| A_21_P0003368  | 1,43348 | 1,45099 | -1,012210959 | ENST00000511330 | N/A       | N/A          | N/A            |
| A_24_P349807   | 1,44008 | 1,4576  | -1,012217976 | ENST00000585734 | 284418    | NM_001145402 | FAM71E2        |
| A_21_P0009576  | 1,65066 | 1,66819 | -1,012224992 | N/A             | N/A       | N/A          | Inc-FBXO15-5   |
| A_22_P00025323 | 1,46385 | 1,48139 | -1,012232008 | ENST00000367563 | 388719    | NR_034131    | LINC00272      |
| A_21_P0001894  | 1,46558 | 1,48313 | -1,012239024 | ENST00000451464 | N/A       | N/A          | N/A            |
| A_33_P3230048  | 1,41534 | 1,4329  | -1,012246041 | N/A             | N/A       | N/A          | N/A            |
| A_22_P00011513 | 1,35358 | 1,37116 | -1,012260073 | N/A             | 101928385 | XR_242863    | LOC101928385   |
| A_21_P0014411  | 1,36759 | 1,38517 | -1,012260073 | N/A             | N/A       | XR_112127    | N/A            |
| A_21_P0014612  | 1,42531 | 1,44291 | -1,012274106 | N/A             | N/A       | N/A          | LOC100128095   |
| A_33_P3300800  | 1,43552 | 1,45315 | -1,012295156 | ENST00000526984 | 390226    | NR_024042    | GUCY2EP        |

|                |         |         |              |                 |           |              |                 |
|----------------|---------|---------|--------------|-----------------|-----------|--------------|-----------------|
| A_21_P0001508  | 1,35374 | 1,37137 | -1,012295156 | N/A             | N/A       | N/A          | Inc-PPAP2B-2    |
| A_22_P00023543 | 4,20364 | 4,22127 | -1,012295156 | N/A             | N/A       | BX098108     | Inc-RNF38-1     |
| A_22_P00005033 | 1,43392 | 1,45158 | -1,012316207 | ENST00000442155 | N/A       | N/A          | N/A             |
| A_33_P3373364  | 10,7882 | 10,8059 | -1,012344274 | ENST00000422221 | 25932     | NM_013943    | CLIC4           |
| A_21_P0008616  | 1,50126 | 1,51897 | -1,012351291 | N/A             | 102724283 | XR_429515    | LOC102724283    |
| A_21_P0012861  | 1,67626 | 1,69398 | -1,012358309 | N/A             | N/A       | N/A          | XLOC_I2_011854  |
| A_21_P0009259  | 1,61208 | 1,62981 | -1,012365326 | N/A             | 101927389 | XR_243722    | LOC101927389    |
| A_22_P00015718 | 1,50002 | 1,51777 | -1,01237936  | ENST00000568344 | N/A       | AK055647     | Inc-SYT16-1     |
| A_22_P00021613 | 1,48734 | 1,5051  | -1,012386377 | ENST00000436113 | N/A       | N/A          | N/A             |
| A_23_P152028   | 11,073  | 11,0908 | -1,012414447 | ENST00000261884 | 9325      | NM_016213    | TRIP4           |
| A_21_P0001662  | 1,40209 | 1,4199  | -1,012421465 | N/A             | N/A       | N/A          | Inc-AJAP1-3     |
| A_21_P0008261  | 1,59265 | 1,61048 | -1,0124355   | N/A             | N/A       | N/A          | Inc-SLITRK6-3   |
| A_21_P0006905  | 1,41756 | 1,43541 | -1,012449535 | N/A             | N/A       | N/A          | Inc-SORCS3-2    |
| A_33_P3256293  | 1,43282 | 1,45069 | -1,012463571 | ENST00000604177 | N/A       | N/A          | N/A             |
| A_24_P324814   | 10,1989 | 10,2168 | -1,012484625 | ENST00000582698 | 90799     | NM_138363    | CEP95           |
| A_33_P3246885  | 11,3807 | 11,3986 | -1,012484625 | ENST00000489395 | 93099     | NM_001190348 | DMKN            |
| A_21_P0007340  | 2,98253 | 3,00044 | -1,012491643 | N/A             | 100507144 | NR_120528    | LOC100507144    |
| A_24_P944756   | 1,43493 | 1,45285 | -1,012498661 | ENST00000417640 | 64168     | NM_022351    | NECAB1          |
| A_22_P00018936 | 1,43707 | 1,455   | -1,012505679 | N/A             | N/A       | DB448840     | Inc-VAX2-2      |
| A_32_P84369    | 1,43645 | 1,45439 | -1,012512697 | ENST00000502475 | 653316    | NR_038353    | FAM153C         |
| A_23_P137366   | 1,64793 | 1,66589 | -1,012526734 | ENST00000314933 | 713       | NM_000491    | C1QB            |
| A_21_P0003386  | 1,63121 | 1,6492  | -1,012547789 | ENST00000504132 | N/A       | N/A          | N/A             |
| A_33_P3351641  | 1,41021 | 1,4282  | -1,012547789 | ENST00000339140 | 139628    | NM_198451    | FOXR2           |
| A_33_P3309929  | 12,871  | 12,889  | -1,012554807 | ENST00000305264 | 8841      | NM_003883    | HDAC3           |
| A_24_P226508   | 1,49792 | 1,51594 | -1,012568844 | ENST00000312719 | 222537    | NM_153612    | HS3ST5          |
| A_22_P00002324 | 1,74788 | 1,7659  | -1,012568844 | N/A             | N/A       | DA529239     | Inc-C11orf55-1  |
| A_22_P00010384 | 3,9247  | 3,94272 | -1,012568844 | N/A             | N/A       | N/A          | Inc-MYL4-1      |
| A_22_P00007776 | 1,50025 | 1,51828 | -1,012575863 | N/A             | N/A       | N/A          | Inc-HNRNPA2B1-2 |
| A_22_P00018540 | 1,35197 | 1,37    | -1,012575863 | N/A             | 101929229 | NR_125432    | LOC101929229    |
| A_33_P3311503  | 1,467   | 1,48504 | -1,012582882 | ENST00000614072 | 10879     | NM_006685    | SMR3B           |
| A_22_P00000765 | 1,42598 | 1,44402 | -1,012582882 | ENST00000521490 | N/A       | A1142392     | N/A             |
| A_32_P204950   | 2,11497 | 2,13302 | -1,0125899   | N/A             | N/A       | BC043001     | Inc-FBXL7-2     |
| A_21_P0001507  | 1,45691 | 1,47496 | -1,0125899   | N/A             | N/A       | N/A          | Inc-PPAP2B-4    |

|                |         |         |              |                 |           |              |                       |
|----------------|---------|---------|--------------|-----------------|-----------|--------------|-----------------------|
| A_33_P3317731  | 5,00679 | 5,02484 | -1,0125899   | N/A             | N/A       | AK130876     | N/A                   |
| A_24_P333567   | 7,66733 | 7,68539 | -1,012596919 | ENST00000596585 | 100289341 | NR_027447    | MAN1B1-AS1            |
| A_22_P00010391 | 1,47866 | 1,49672 | -1,012596919 | ENST00000563252 | 101928707 | XR_243381    | LOC101928707          |
| A_21_P0002395  | 1,35722 | 1,37531 | -1,012617976 | N/A             | N/A       | N/A          | Inc-CMPK2-1           |
| A_21_P0002380  | 2,94888 | 2,96703 | -1,01266009  | N/A             | N/A       | N/A          | Inc-TMEM18-2          |
| A_33_P3405504  | 1,59537 | 1,61352 | -1,01266009  | N/A             | N/A       | N/A          | N/A                   |
| A_33_P3269791  | 1,61493 | 1,63308 | -1,01266009  | ENST00000612646 | 2832      | NM_005286    | NPBWR2                |
| A_22_P00011855 | 1,46186 | 1,48003 | -1,012674129 | N/A             | 100874021 | NR_046689    | MAGI2-AS2             |
| A_33_P3216288  | 1,49891 | 1,5171  | -1,012688168 | N/A             | N/A       | AK309023     | N/A                   |
| A_23_P31903    | 14,1539 | 14,1721 | -1,012695187 | ENST00000530836 | 51160     | NM_183057    | VPS28                 |
| A_19_P00321475 | 5,29569 | 5,3139  | -1,012702206 | N/A             | 727710    | XR_243489    | LOC727710             |
| A_21_P0003840  | 1,60559 | 1,62382 | -1,012716246 | N/A             | 101929448 | XR_425753    | LOC101929448          |
| A_21_P0008390  | 1,35094 | 1,36917 | -1,012716246 | N/A             | N/A       | N/A          | Inc-DLK1-6            |
| A_32_P134209   | 8,42709 | 8,44532 | -1,012716246 | ENST00000352511 | 93        | NM_001106    | ACVR2B                |
| A_33_P3368201  | 1,46045 | 1,47868 | -1,012716246 | ENST00000554613 | 643711    | NR_077240    | LOC643711             |
| A_21_P0005698  | 1,50124 | 1,51949 | -1,012730285 | N/A             | N/A       | N/A          | Inc-CHCHD7-2          |
| A_21_P0006903  | 6,36697 | 6,38523 | -1,012737305 | N/A             | N/A       | N/A          | Inc-BTRC-2            |
| A_21_P0009018  | 1,41824 | 1,43651 | -1,012744324 | N/A             | N/A       | N/A          | Inc-ZP2-1             |
| A_33_P3740529  | 1,48907 | 1,50735 | -1,012751344 | ENST00000500076 | 645485    | XR_242933    | LOC645485             |
| A_22_P00014810 | 1,45729 | 1,47558 | -1,012758364 | ENST00000533039 | N/A       | N/A          | N/A                   |
| A_33_P3356752  | 4,41799 | 4,43629 | -1,012765384 | ENST00000401670 | 2852      | NM_001039966 | GPER1                 |
| A_21_P0003910  | 1,62517 | 1,64347 | -1,012765384 | N/A             | N/A       | N/A          | Inc-RP11-487E13.1.1-1 |
| A_21_P0005605  | 5,28646 | 5,30479 | -1,012786444 | N/A             | N/A       | N/A          | Inc-GUSB-2            |
| A_22_P00008265 | 1,66236 | 1,6807  | -1,012793464 | N/A             | N/A       | N/A          | Inc-IRX2-5            |
| A_23_P209499   | 1,46437 | 1,48271 | -1,012793464 | ENST00000350526 | 5077      | NM_181458    | PAX3                  |
| A_21_P0001892  | 1,63973 | 1,65808 | -1,012800484 | ENST00000453322 | 101927383 | XR_244909    | LOC101927383          |
| A_33_P3267731  | 1,46225 | 1,48063 | -1,012821545 | ENST00000447497 | 100130954 | NR_034016    | LINC01502             |
| A_33_P3364646  | 1,99047 | 2,00885 | -1,012821545 | ENST00000264400 | 153020    | NM_152545    | RASGEF1B              |
| A_33_P3259022  | 5,73377 | 5,75217 | -1,012835586 | ENST00000219833 | 6530      | NM_001172504 | SLC6A2                |
| A_33_P3260193  | 1,36302 | 1,38144 | -1,012849627 | ENST00000475209 | 400757    | NM_001276352 | C1orf141              |
| A_21_P0000423  | 1,35935 | 1,37778 | -1,012856648 | N/A             | 767608    | NR_003220    | SNORD114-27           |
| A_22_P00003738 | 1,43412 | 1,45255 | -1,012856648 | ENST00000564293 | N/A       | N/A          | N/A                   |
| A_33_P3399598  | 3,25094 | 3,26937 | -1,012856648 | N/A             | 5826      | AK125109     | ABCD4                 |

|                |         |         |              |                 |           |              |                |
|----------------|---------|---------|--------------|-----------------|-----------|--------------|----------------|
| A_22_P00010525 | 1,42799 | 1,44643 | -1,012863668 | ENST00000421604 | N/A       | N/A          | N/A            |
| A_22_P00003481 | 2,71837 | 2,73681 | -1,012863668 | ENST00000473959 | 151887    | N/A          | CCDC80         |
| A_23_P66844    | 1,42249 | 1,44094 | -1,012870689 | ENST00000391417 | 100132476 | NM_033061    | KRTAP4-7       |
| A_22_P00024160 | 1,47019 | 1,48866 | -1,01288473  | N/A             | N/A       | BC040305     | Inc-MTRNR2L5-4 |
| A_24_P34534    | 1,65978 | 1,67826 | -1,012891751 | ENST00000358768 | 117583    | NM_152526    | PARD3B         |
| A_23_P69720    | 14,3835 | 14,402  | -1,012905793 | ENST00000509648 | 308       | NM_001154    | ANXA5          |
| A_21_P0010427  | 1,64799 | 1,66649 | -1,012905793 | N/A             | N/A       | N/A          | Inc-FAM19A5-1  |
| A_23_P107775   | 5,07641 | 5,09492 | -1,012912814 | ENST00000291934 | 147744    | NM_139172    | TMEM190        |
| A_21_P0011215  | 1,63217 | 1,6507  | -1,012926856 | ENST00000423575 | N/A       | N/A          | N/A            |
| A_22_P00014893 | 1,49834 | 1,51689 | -1,012940898 | N/A             | N/A       | N/A          | Inc-SLC7A13-2  |
| A_33_P3270346  | 3,34784 | 3,36639 | -1,012940898 | ENST00000615969 | 57292     | NM_020535    | KIR2DL5A       |
| A_21_P0005520  | 1,49092 | 1,50947 | -1,012940898 | N/A             | N/A       | N/A          | Inc-RELN-1     |
| A_33_P3215457  | 3,02533 | 3,04391 | -1,012961962 | ENST00000619629 | 4547      | NM_000253    | MTTP           |
| A_33_P3231437  | 1,39059 | 1,40917 | -1,012961962 | N/A             | N/A       | N/A          | N/A            |
| A_21_P0001316  | 1,42877 | 1,44739 | -1,012990048 | N/A             | N/A       | N/A          | Inc-CTH-1      |
| A_33_P3285911  | 5,25703 | 5,27569 | -1,013018134 | ENST00000368847 | 91749     | NM_153369    | KIAA1919       |
| A_21_P0013288  | 1,43468 | 1,45335 | -1,013025156 | N/A             | N/A       | N/A          | XLOC_l2_013741 |
| A_21_P0010415  | 7,2809  | 7,2996  | -1,013046221 | N/A             | N/A       | N/A          | Inc-APOL1-1    |
| A_21_P0008305  | 1,45796 | 1,47666 | -1,013046221 | N/A             | N/A       | N/A          | Inc-FOXG1-6    |
| A_24_P126491   | 1,42711 | 1,44583 | -1,013060265 | ENST00000397104 | 100287226 | NM_001242680 | ZNF729         |
| A_21_P0008642  | 1,45676 | 1,47548 | -1,013060265 | N/A             | N/A       | N/A          | Inc-RAB8B-1    |
| A_21_P0002920  | 4,46264 | 4,4814  | -1,013088353 | N/A             | N/A       | N/A          | Inc-CPN2-3     |
| A_21_P0000698  | 1,40036 | 1,41913 | -1,013095376 | ENST00000454455 | 100505964 | NR_037881    | LINC01304      |
| A_23_P207582   | 1,42126 | 1,44006 | -1,013116443 | ENST00000613642 | 6360      | XM_006725334 | CCL16          |
| A_33_P3340639  | 7,1815  | 7,20032 | -1,013130488 | ENST00000369425 | 57678     | AL832464     | GPAM           |
| A_21_P0008568  | 2,04332 | 2,06214 | -1,013130488 | ENST00000499797 | N/A       | XR_429516    | N/A            |
| A_33_P3395876  | 6,40364 | 6,42247 | -1,01313751  | ENST00000380702 | 5141      | NM_001111307 | PDE4A          |
| A_22_P00018979 | 1,3555  | 1,37433 | -1,01313751  | N/A             | N/A       | N/A          | Inc-CEP170-4   |
| A_22_P00010661 | 1,59694 | 1,61577 | -1,01313751  | N/A             | N/A       | N/A          | Inc-NELL1-1    |
| A_21_P0000770  | 1,34958 | 1,36842 | -1,013144533 | N/A             | 100505658 | NR_038333    | LOC100505658   |
| A_21_P0007474  | 1,35033 | 1,3692  | -1,013165601 | N/A             | N/A       | N/A          | Inc-SPATA19-1  |
| A_22_P00021261 | 2,33241 | 2,35128 | -1,013165601 | N/A             | N/A       | N/A          | Inc-C20orf3-3  |
| A_22_P00011467 | 1,76093 | 1,77982 | -1,013179646 | ENST00000438082 | N/A       | N/A          | N/A            |

|                |         |         |              |                 |           |              |                  |
|----------------|---------|---------|--------------|-----------------|-----------|--------------|------------------|
| A_22_P00024040 | 1,68055 | 1,69944 | -1,013179646 | ENST00000571192 | N/A       | N/A          | N/A              |
| A_24_P280274   | 1,42973 | 1,44863 | -1,013186669 | ENST00000368729 | 338324    | NM_176823    | S100A7A          |
| A_21_P0012336  | 6,77545 | 6,79437 | -1,013200715 | ENST00000412448 | 92086     | NM_178311    | GGTLC1           |
| A_33_P3321120  | 2,81557 | 2,83449 | -1,013200715 | N/A             | N/A       | N/A          | N/A              |
| A_21_P0010591  | 7,24526 | 7,26419 | -1,013207738 | N/A             | N/A       | N/A          | XLOC_I2_000727   |
| A_33_P3346691  | 1,4633  | 1,48223 | -1,013207738 | N/A             | N/A       | N/A          | N/A              |
| A_21_P0008180  | 1,4228  | 1,44173 | -1,013207738 | N/A             | N/A       | N/A          | Inc-AL355390.1-2 |
| A_22_P00017695 | 1,4712  | 1,49015 | -1,013221784 | ENST00000442316 | N/A       | N/A          | N/A              |
| A_23_P338168   | 9,16348 | 9,18244 | -1,013228807 | ENST00000338343 | 54620     | NM_001099784 | FBXL19           |
| A_24_P326398   | 1,42066 | 1,43964 | -1,013242854 | ENST00000373631 | 286204    | NM_173689    | CRB2             |
| A_32_P134007   | 1,38913 | 1,40811 | -1,013242854 | ENST00000622811 | 114786    | NM_052898    | XKR4             |
| A_23_P34510    | 10,1704 | 10,1894 | -1,0132569   | ENST00000467894 | 1912      | NM_198040    | PHC2             |
| A_22_P00020737 | 11,595  | 11,614  | -1,0132569   | N/A             | N/A       | CN291113     | Inc-C10orf71-1   |
| A_33_P3246613  | 11,0663 | 11,0853 | -1,0132569   | ENST00000478979 | 124093    | NM_001031737 | CCDC78           |
| A_21_P0003571  | 1,3614  | 1,3804  | -1,0132569   | N/A             | 102723525 | XR_425708    | LOC102723525     |
| A_21_P0008674  | 1,43254 | 1,45154 | -1,0132569   | N/A             | N/A       | N/A          | Inc-CHD2-1       |
| A_19_P00809915 | 1,64291 | 1,66192 | -1,013263924 | N/A             | N/A       | N/A          | Inc-C8orf45-1    |
| A_22_P00015050 | 2,78353 | 2,80254 | -1,013263924 | ENST00000512245 | N/A       | N/A          | N/A              |
| A_24_P255100   | 1,42543 | 1,44445 | -1,013270947 | ENST00000495399 | 138255    | NM_001010940 | C9orf135         |
| A_21_P0010390  | 1,62477 | 1,64379 | -1,013270947 | N/A             | N/A       | N/A          | Inc-CECR2-2      |
| A_33_P3362301  | 5,71383 | 5,73286 | -1,01327797  | ENST00000438353 | N/A       | AY956761     | N/A              |
| A_21_P0003139  | 1,41748 | 1,43653 | -1,013292018 | N/A             | N/A       | N/A          | Inc-RPL24-2      |
| A_23_P81018    | 1,46811 | 1,48717 | -1,013299041 | ENST00000295266 | 5161      | NM_005390    | PDHA2            |
| A_23_P9523     | 9,10861 | 9,12769 | -1,013313089 | ENST00000449378 | 64080     | NM_022128    | RBKS             |
| A_21_P0010477  | 1,36185 | 1,38094 | -1,013320112 | N/A             | N/A       | N/A          | Inc-SYN3-1       |
| A_22_P00025927 | 1,49446 | 1,51356 | -1,013327136 | N/A             | N/A       | BM666676     | Inc-PHYHIPL-1    |
| A_33_P3377274  | 5,12326 | 5,14237 | -1,01333416  | N/A             | N/A       | N/A          | N/A              |
| A_33_P3422394  | 1,45996 | 1,47907 | -1,01333416  | ENST00000421388 | 390616    | NM_001146341 | ANKRD34C         |
| A_21_P0014585  | 4,35333 | 4,37244 | -1,01333416  | N/A             | 100507297 | NR_047573    | TMEM44-AS1       |
| A_22_P00016711 | 1,61083 | 1,62995 | -1,013341184 | ENST00000503597 | N/A       | N/A          | N/A              |
| A_23_P364792   | 1,39743 | 1,41656 | -1,013348208 | ENST00000447520 | 246126    | NR_045129    | TXLNGY           |
| A_33_P6470630  | 1,49349 | 1,51268 | -1,013390353 | ENST00000441851 | 100505918 | N/A          | LOC100505918     |
| A_33_P3363515  | 16,6228 | 16,642  | -1,013397377 | ENST00000557439 | 7517      | N/A          | XRCC3            |



|                |         |         |              |                 |           |              |                    |
|----------------|---------|---------|--------------|-----------------|-----------|--------------|--------------------|
| A_21_P0007847  | 1,4961  | 1,5153  | -1,013397377 | N/A             | N/A       | N/A          | Inc-NEDD1-5        |
| A_23_P61398    | 14,2038 | 14,223  | -1,013397377 | ENST00000360612 | 415116    | NM_001001852 | PIM3               |
| A_21_P0004417  | 1,59386 | 1,61307 | -1,013404401 | N/A             | 102524628 | NR_105015    | RASGRF2-AS1        |
| A_22_P00025753 | 1,58968 | 1,6089  | -1,013411426 | ENST00000423629 | 100874151 | NR_047005    | LINC00381          |
| A_33_P3338833  | 1,65704 | 1,67628 | -1,013425475 | N/A             | N/A       | N/A          | N/A                |
| A_24_P418536   | 6,35288 | 6,37217 | -1,013460598 | ENST00000425480 | N/A       | N/A          | N/A                |
| A_23_P42032    | 1,46167 | 1,48097 | -1,013467623 | ENST00000369952 | 3617      | NM_001563    | IMPG1              |
| A_21_P0001115  | 1,66927 | 1,68858 | -1,013474648 | N/A             | N/A       | N/A          | Inc-MATN1-3        |
| A_22_P00002349 | 1,68959 | 1,7089  | -1,013474648 | ENST00000552470 | N/A       | N/A          | N/A                |
| A_22_P00010731 | 1,41675 | 1,43607 | -1,013481673 | N/A             | N/A       | N/A          | Inc-NID2-2         |
| A_33_P3236955  | 1,59855 | 1,61787 | -1,013481673 | N/A             | N/A       | BE782190     | N/A                |
| A_23_P429478   | 1,37574 | 1,39507 | -1,013488698 | ENST00000295226 | 151278    | NM_153038    | CCDC140            |
| A_22_P00011837 | 1,40768 | 1,42705 | -1,013516798 | ENST00000449463 | N/A       | N/A          | N/A                |
| A_23_P409502   | 1,36894 | 1,38832 | -1,013523823 | ENST00000590200 | 338321    | NM_176820    | NLRP9              |
| A_22_P00021659 | 1,48342 | 1,50281 | -1,013530848 | ENST00000448074 | 200132    | N/A          | TCTEX1D1           |
| A_23_P408280   | 1,47443 | 1,49383 | -1,013537874 | ENST00000313294 | 283847    | NM_001136505 | CCDC79             |
| A_21_P0013956  | 4,9595  | 4,9789  | -1,013537874 | ENST00000601609 | 8497      | XR_426803    | PPFIA4             |
| A_23_P150147   | 10,7729 | 10,7923 | -1,013537874 | ENST00000532881 | 54961     | NM_017857    | SSH3               |
| A_23_P216579   | 1,48675 | 1,50615 | -1,013537874 | ENST00000314527 | 114299    | NM_053016    | PALM2              |
| A_22_P00003488 | 1,426   | 1,44542 | -1,013551924 | N/A             | N/A       | N/A          | Inc-CCDC83-1       |
| A_23_P82099    | 1,42221 | 1,44163 | -1,013551924 | ENST00000159060 | 50508     | NM_015718    | NOX3               |
| A_21_P0014046  | 4,06132 | 4,08076 | -1,013565975 | N/A             | N/A       | AK129721     | N/A                |
| A_19_P00317237 | 9,83255 | 9,852   | -1,013573001 | N/A             | N/A       | N/A          | Inc-AC114947.1.1-2 |
| A_21_P0007591  | 1,48428 | 1,50375 | -1,013587052 | ENST00000550042 | N/A       | XM_006719676 | N/A                |
| A_22_P00008522 | 1,62753 | 1,647   | -1,013587052 | ENST00000584594 | N/A       | N/A          | N/A                |
| A_22_P00013218 | 1,6481  | 1,66757 | -1,013587052 | ENST00000474979 | N/A       | XM_003960334 | N/A                |
| A_33_P3252146  | 5,94619 | 5,96567 | -1,013594078 | ENST00000357878 | 340784    | NM_001105574 | HMX3               |
| A_33_P3305974  | 8,24989 | 8,26938 | -1,013601103 | ENST00000397138 | 8773      | NM_003825    | SNAP23             |
| A_33_P3368646  | 5,65954 | 5,67905 | -1,013615155 | ENST00000616478 | 154043    | NM_173515    | CNKS3              |
| A_33_P3439713  | 1,66055 | 1,68006 | -1,013615155 | ENST00000307050 | 161725    | AK094982     | OTUD7A             |
| A_22_P00021141 | 1,6071  | 1,62664 | -1,013636233 | N/A             | N/A       | BG184512     | Inc-PRDM4-4        |
| A_24_P706327   | 1,48509 | 1,50467 | -1,013664337 | ENST00000390461 | N/A       | X58739       | N/A                |
| A_33_P3251369  | 1,5957  | 1,61529 | -1,013671363 | ENST00000369575 | 139716    | NM_001081573 | GAB3               |

|                |         |         |              |                 |           |              |                |
|----------------|---------|---------|--------------|-----------------|-----------|--------------|----------------|
| A_33_P3397795  | 11,0904 | 11,11   | -1,013678389 | N/A             | 64430     | AK095489     | PCNXL4         |
| A_23_P99632    | 11,3365 | 11,3561 | -1,013678389 | ENST00000559449 | 55072     | NM_017999    | RNF31          |
| A_21_P0007782  | 1,43198 | 1,4516  | -1,013692442 | N/A             | N/A       | N/A          | Inc-DHX37-8    |
| A_23_P212749   | 8,92177 | 8,94139 | -1,013692442 | ENST00000510626 | 3064      | NM_002111    | HTT            |
| A_23_P47322    | 1,35841 | 1,37807 | -1,013720548 | ENST00000456861 | 54766     | NM_017589    | BTG4           |
| A_22_P00011985 | 1,46138 | 1,48105 | -1,013727575 | N/A             | N/A       | N/A          | Inc-PLAGL2-1   |
| A_33_P3300262  | 1,49365 | 1,51332 | -1,013727575 | ENST00000457137 | 5212      | NM_001177972 | VIT            |
| A_23_P331813   | 9,12684 | 9,14652 | -1,013734601 | ENST00000449313 | 57592     | NM_020832    | ZNF687         |
| A_23_P208835   | 11,4159 | 11,4356 | -1,013748655 | ENST00000595715 | 5605      | NM_030662    | MAP2K2         |
| A_21_P0010394  | 10,8338 | 10,8535 | -1,013748655 | N/A             | N/A       | N/A          | Inc-ZNF74-1    |
| A_32_P145153   | 17,6467 | 17,6664 | -1,013748655 | ENST00000490759 | 6160      | NM_000993    | RPL31          |
| A_22_P00014978 | 1,6007  | 1,62041 | -1,013755682 | N/A             | N/A       | N/A          | Inc-SMARCC2-4  |
| A_23_P84922    | 8,22075 | 8,24047 | -1,013762708 | ENST00000470998 | 55869     | NM_018486    | HDAC8          |
| A_22_P00004480 | 8,21484 | 8,23462 | -1,01380487  | ENST00000397644 | 100131551 | NR_024480    | LINC00887      |
| A_21_P0002468  | 6,29268 | 6,31246 | -1,01380487  | N/A             | N/A       | N/A          | Inc-SUCLG1-1   |
| A_22_P00003862 | 1,67893 | 1,69873 | -1,013818925 | ENST00000429539 | 101928298 | N/A          | LOC101928298   |
| A_23_P69326    | 2,24833 | 2,26815 | -1,01383298  | ENST00000283269 | 8618      | NM_183393    | CADPS          |
| A_21_P0012410  | 1,4943  | 1,51412 | -1,01383298  | N/A             | N/A       | N/A          | XLOC_I2_009979 |
| A_21_P0002759  | 1,3675  | 1,38732 | -1,01383298  | ENST00000488348 | N/A       | N/A          | N/A            |
| A_22_P00007694 | 1,45971 | 1,47954 | -1,013840007 | N/A             | N/A       | N/A          | Inc-HIST1H3F-1 |
| A_33_P3261586  | 1,54122 | 1,56105 | -1,013840007 | ENST00000453220 | 255101    | NM_194302    | CCDC108        |
| A_22_P00015780 | 1,72918 | 1,74905 | -1,013868117 | ENST00000536572 | N/A       | N/A          | N/A            |
| A_22_P00006293 | 14,4512 | 14,4711 | -1,0138892   | N/A             | N/A       | BP397453     | Inc-FAM83F-1   |
| A_21_P0012798  | 1,47666 | 1,49657 | -1,013896228 | ENST00000503208 | 641365    | N/A          | LINC00616      |
| A_22_P00001459 | 8,44274 | 8,46266 | -1,013903255 | N/A             | N/A       | N/A          | Inc-AQP11-2    |
| A_23_P151870   | 8,45751 | 8,47744 | -1,013910283 | ENST00000261858 | 26035     | NM_015554    | GLCE           |
| A_32_P51237    | 1,35278 | 1,37271 | -1,013910283 | ENST00000371150 | 163782    | NM_181712    | KANK4          |
| A_21_P0004172  | 1,41078 | 1,43071 | -1,013910283 | ENST00000506769 | 101927280 | N/A          | LOC101927280   |
| A_23_P156310   | 9,47174 | 9,4917  | -1,013931367 | ENST00000274254 | 6502      | NM_032637    | SKP2           |
| A_33_P3391090  | 1,45786 | 1,47782 | -1,013931367 | N/A             | 100131763 | AK094921     | LOC100131763   |
| A_22_P00022029 | 1,79977 | 1,81974 | -1,013938395 | N/A             | N/A       | N/A          | Inc-METTL13-1  |
| A_32_P196263   | 1,61038 | 1,63038 | -1,01395948  | ENST00000477180 | 56999     | NM_182920    | ADAMTS9        |
| A_23_P372356   | 1,75107 | 1,77107 | -1,01395948  | ENST00000624458 | 145858    | NM_153040    | C15orf32       |

|                |         |         |              |                 |           |              |                      |
|----------------|---------|---------|--------------|-----------------|-----------|--------------|----------------------|
| A_22_P00006364 | 3,02753 | 3,04753 | -1,01395948  | ENST00000432694 | N/A       | BQ707656     | N/A                  |
| A_21_P0009066  | 1,58826 | 1,60827 | -1,013966508 | N/A             | N/A       | N/A          | Inc-MAF-2            |
| A_32_P99055    | 1,35937 | 1,37941 | -1,013987593 | ENST00000354646 | 65267     | NM_020922    | WNK3                 |
| A_22_P00000329 | 1,40437 | 1,42442 | -1,013994622 | N/A             | N/A       | N/A          | Inc-AC012123.1.1-1   |
| A_22_P00012677 | 3,48452 | 3,50466 | -1,01405788  | N/A             | N/A       | N/A          | Inc-QPCT-2           |
| A_21_P0001677  | 1,49269 | 1,51285 | -1,014071938 | N/A             | N/A       | N/A          | Inc-HPDL-1           |
| A_33_P3239317  | 6,70778 | 6,72796 | -1,014085996 | N/A             | 400752    | NR_024270    | LINC01144            |
| A_33_P3215277  | 10,4679 | 10,4881 | -1,014100054 | ENST00000622375 | 146057    | NM_173500    | TTBK2                |
| A_33_P3257179  | 1,66282 | 1,68303 | -1,014107083 | N/A             | N/A       | N/A          | N/A                  |
| A_33_P3419264  | 1,4509  | 1,47114 | -1,014128171 | ENST00000296870 | 3562      | NM_000588    | IL3                  |
| A_21_P0014118  | 2,44668 | 2,46693 | -1,014135201 | N/A             | N/A       | XR_108490    | N/A                  |
| A_33_P3282978  | 5,99494 | 6,0152  | -1,01414223  | N/A             | N/A       | N/A          | N/A                  |
| A_22_P00021661 | 1,45925 | 1,47952 | -1,01414926  | ENST00000417161 | N/A       | N/A          | N/A                  |
| A_23_P120588   | 1,45949 | 1,47977 | -1,014156289 | ENST00000377009 | 140880    | NM_130794    | CST11                |
| A_21_P0012582  | 1,617   | 1,63729 | -1,014163319 | N/A             | N/A       | N/A          | XLOC_l2_010636       |
| A_21_P0004317  | 1,64288 | 1,66317 | -1,014163319 | N/A             | N/A       | N/A          | Inc-KIF4B-1          |
| A_21_P0008505  | 1,6063  | 1,6266  | -1,014170349 | N/A             | N/A       | N/A          | Inc-FOXG1-6          |
| A_23_P112531   | 13,5127 | 13,533  | -1,014170349 | ENST00000300434 | 399665    | NM_001035254 | FAM102A              |
| A_23_P432598   | 9,72779 | 9,7481  | -1,014177378 | ENST00000297265 | 92421     | NM_152284    | CHMP4C               |
| A_33_P3377609  | 1,48221 | 1,50258 | -1,014219558 | ENST00000402183 | 6677      | NM_001174044 | SPAM1                |
| A_32_P149298   | 5,95959 | 5,97997 | -1,014226588 | ENST00000453873 | 84542     | NM_001129993 | KIAA1841             |
| A_23_P205575   | 8,53117 | 8,55156 | -1,014233618 | ENST00000481661 | 64582     | NM_022571    | GPR135               |
| A_21_P0008416  | 1,47355 | 1,49396 | -1,014247678 | ENST00000550975 | N/A       | XR_424486    | N/A                  |
| A_21_P0004177  | 1,42057 | 1,44101 | -1,014268769 | N/A             | N/A       | N/A          | Inc-ZNF608-4         |
| A_21_P0004963  | 1,48629 | 1,50674 | -1,0142758   | N/A             | N/A       | N/A          | Inc-FNDC1-3          |
| A_22_P00006936 | 1,46088 | 1,48134 | -1,01428283  | ENST00000497946 | N/A       | N/A          | N/A                  |
| A_23_P377860   | 1,47739 | 1,49786 | -1,01428986  | N/A             | 150147    | NR_027243    | UMODL1-AS1           |
| A_21_P0003676  | 1,6518  | 1,67229 | -1,014303922 | N/A             | N/A       | N/A          | Inc-GALNTL6-2        |
| A_23_P157170   | 10,8141 | 10,8346 | -1,014310952 | ENST00000395176 | 84277     | NM_032317    | DNAJC30              |
| A_21_P0011035  | 8,28418 | 8,30468 | -1,014310952 | N/A             | 101928054 | XR_242910    | LOC101928054         |
| A_22_P00013701 | 3,09203 | 3,11255 | -1,014325014 | N/A             | N/A       | N/A          | Inc-RP11-770J1.4.1-1 |
| A_23_P74178    | 6,2113  | 6,23183 | -1,014332044 | ENST00000373706 | 3061      | NM_001525    | HCRTR1               |
| A_33_P3385161  | 1,4523  | 1,47284 | -1,014339075 | ENST00000398186 | 285588    | N/A          | EFCAB9               |

|                |         |         |              |                 |           |              |                |
|----------------|---------|---------|--------------|-----------------|-----------|--------------|----------------|
| A_22_P00006345 | 1,45767 | 1,47823 | -1,014353137 | ENST00000554319 | N/A       | CD103050     | N/A            |
| A_33_P3465247  | 8,9371  | 8,95768 | -1,014367199 | ENST00000618515 | 11127     | NM_001300791 | KIF3A          |
| A_33_P3295253  | 1,60289 | 1,62348 | -1,01437423  | ENST00000475434 | 56203     | AM393202     | LMOD3          |
| A_33_P3274821  | 1,48711 | 1,5077  | -1,01437423  | ENST00000376678 | 116437    | NR_026670    | LINC01257      |
| A_23_P340717   | 1,49263 | 1,51323 | -1,014381261 | ENST00000305901 | 3175      | NM_004498    | ONECUT1        |
| A_33_P3257222  | 12,0353 | 12,0559 | -1,014381261 | ENST00000470947 | 118881    | NM_144589    | COMTD1         |
| A_33_P3400993  | 1,38722 | 1,40784 | -1,014395324 | ENST00000420762 | 101929689 | XR_247063    | LOC101929689   |
| A_33_P3274105  | 9,13244 | 9,15307 | -1,014402355 | ENST00000403506 | 130162    | N/A          | CLHC1          |
| A_33_P3809328  | 3,01446 | 3,03509 | -1,014402355 | N/A             | N/A       | N/A          | N/A            |
| A_21_P0011088  | 1,36481 | 1,38546 | -1,014416418 | N/A             | N/A       | N/A          | XLOC_I2_003293 |
| A_33_P3346067  | 3,92878 | 3,94944 | -1,014423449 | N/A             | 388813    | NM_001256579 | LOC388813      |
| A_21_P0009634  | 1,379   | 1,39968 | -1,014437512 | ENST00000578633 | N/A       | XR_430113    | N/A            |
| A_33_P3268181  | 1,39204 | 1,41275 | -1,014458607 | ENST00000413578 | 55679     | NM_001161404 | LIMS2          |
| A_24_P235756   | 1,63953 | 1,66024 | -1,014458607 | ENST00000396950 | 81285     | NM_030774    | OR51E2         |
| A_22_P00008530 | 4,63377 | 4,65449 | -1,014465639 | N/A             | N/A       | N/A          | lnc-KCNJ4-2    |
| A_33_P3392092  | 1,48975 | 1,51048 | -1,014472671 | ENST00000579794 | 116       | NM_001117    | ADCYAP1        |
| A_24_P271773   | 1,44545 | 1,46619 | -1,014479702 | ENST00000623466 | 54661     | NR_001280    | PCDHB17P       |
| A_22_P00021017 | 1,37189 | 1,39265 | -1,014493766 | ENST00000586373 | 101928141 | NR_104129    | LINC01028      |
| A_22_P00025886 | 1,38996 | 1,41072 | -1,014493766 | N/A             | N/A       | N/A          | lnc-CMTM3-1    |
| A_33_P3327772  | 6,1239  | 6,14466 | -1,014493766 | ENST00000343533 | 538       | NM_000052    | ATP7A          |
| A_33_P3268403  | 1,36427 | 1,38503 | -1,014493766 | ENST00000476050 | 80342     | AK126139     | TRAF3IP3       |
| A_33_P3295348  | 1,66658 | 1,68735 | -1,014500798 | ENST00000455827 | 387836    | NM_001130711 | CLEC2A         |
| A_24_P229536   | 1,46023 | 1,481   | -1,014500798 | ENST00000418813 | 388815    | NR_111005    | MIR99AHG       |
| A_33_P3229968  | 1,60933 | 1,63011 | -1,01450783  | ENST00000455382 | N/A       | AB305927     | N/A            |
| A_21_P0010928  | 6,4778  | 6,49858 | -1,01450783  | N/A             | N/A       | N/A          | lnc-SORCS3-7   |
| A_33_P3404331  | 8,42852 | 8,44932 | -1,014521894 | ENST00000538427 | 23118     | NM_015093    | TAB2           |
| A_33_P3359022  | 1,47061 | 1,49149 | -1,014578153 | ENST00000244314 | 56269     | NM_019612    | IRGC           |
| A_33_P3310949  | 1,4769  | 1,49779 | -1,014585185 | N/A             | N/A       | AF461896     | N/A            |
| A_33_P3229958  | 1,38464 | 1,40553 | -1,014585185 | N/A             | N/A       | N/A          | N/A            |
| A_21_P0006365  | 1,63034 | 1,65123 | -1,014585185 | N/A             | N/A       | N/A          | lnc-RAD23B-8   |
| A_33_P3378360  | 13,8471 | 13,868  | -1,014592218 | ENST00000567272 | 27166     | NM_013237    | PRELID1        |
| A_21_P0006150  | 1,35089 | 1,37179 | -1,014592218 | N/A             | N/A       | N/A          | lnc-C9orf135-1 |
| A_33_P3315836  | 1,62072 | 1,64164 | -1,014606283 | N/A             | N/A       | N/A          | N/A            |

|                |         |         |              |                 |           |              |                |
|----------------|---------|---------|--------------|-----------------|-----------|--------------|----------------|
| A_21_P0005043  | 1,58658 | 1,60751 | -1,014613316 | N/A             | N/A       | N/A          | Inc-GPR63-4    |
| A_21_P0010240  | 2,9801  | 3,00105 | -1,014627382 | N/A             | 102724630 | XR_425268    | LOC102724630   |
| A_33_P3400973  | 1,7348  | 1,75577 | -1,014641447 | ENST00000460129 | 491       | NM_001001331 | ATP2B2         |
| A_33_P3229918  | 1,47819 | 1,49918 | -1,014655514 | ENST00000616441 | 171558    | NM_001243168 | PTCRA          |
| A_33_P3244369  | 4,28706 | 4,30806 | -1,014662547 | ENST00000614548 | 100132541 | NR_121572    | GXYLT1P3       |
| A_33_P3359383  | 1,35151 | 1,37252 | -1,01466958  | ENST00000308940 | 284433    | NM_001004466 | OR10H5         |
| A_21_P0008149  | 2,39273 | 2,41374 | -1,01466958  | N/A             | N/A       | N/A          | Inc-C13orf44-1 |
| A_21_P0003763  | 1,47436 | 1,49539 | -1,014683646 | N/A             | N/A       | N/A          | Inc-PDE5A-1    |
| A_33_P3407007  | 1,59336 | 1,61443 | -1,014711178 | ENST00000500989 | 100130231 | N/A          | LINC00861      |
| A_22_P00014160 | 1,64551 | 1,6666  | -1,014725846 | N/A             | N/A       | N/A          | Inc-SCPEP1-2   |
| A_33_P3312886  | 1,53101 | 1,55212 | -1,014739914 | N/A             | N/A       | N/A          | N/A            |
| A_23_P31996    | 1,38406 | 1,40517 | -1,014739914 | ENST00000491462 | 57864     | NM_033051    | SLC46A2        |
| A_22_P00020804 | 1,38602 | 1,40716 | -1,014761015 | ENST00000442567 | N/A       | N/A          | N/A            |
| A_33_P3284266  | 1,35005 | 1,37119 | -1,014761015 | N/A             | N/A       | N/A          | N/A            |
| A_22_P00013309 | 1,72245 | 1,74365 | -1,014803218 | ENST00000546696 | N/A       | N/A          | N/A            |
| A_33_P3233834  | 7,22648 | 7,2477  | -1,014817287 | ENST00000396816 | 3572      | NM_001190981 | IL6ST          |
| A_22_P00017860 | 1,66984 | 1,69107 | -1,014824321 | N/A             | N/A       | DA365556     | Inc-ZDHHC17-2  |
| A_22_P00016094 | 1,47901 | 1,50025 | -1,014831355 | N/A             | N/A       | DA084938     | Inc-THOC5-1    |
| A_22_P00008968 | 1,42161 | 1,44286 | -1,014838389 | ENST00000444442 | N/A       | N/A          | N/A            |
| A_22_P00001304 | 1,35186 | 1,37312 | -1,014845424 | ENST00000526327 | N/A       | N/A          | N/A            |
| A_21_P0009322  | 1,35025 | 1,37152 | -1,014852458 | N/A             | N/A       | N/A          | Inc-NEUROD2-1  |
| A_21_P0014423  | 7,07895 | 7,10022 | -1,014852458 | N/A             | N/A       | N/A          | N/A            |
| A_21_P0002390  | 1,44071 | 1,462   | -1,014866527 | N/A             | N/A       | N/A          | Inc-CMPK2-4    |
| A_33_P3410459  | 13,1213 | 13,1426 | -1,014873562 | ENST00000264896 | 950       | NM_001204255 | SCARB2         |
| A_32_P60065    | 1,45844 | 1,47975 | -1,014880596 | ENST00000296641 | 2151      | NM_004101    | F2RL2          |
| A_21_P0011044  | 2,27355 | 2,29487 | -1,014887631 | N/A             | N/A       | N/A          | XLOC_I2_002945 |
| A_33_P3321642  | 5,80426 | 5,82561 | -1,014908735 | ENST00000395927 | 79977     | NM_024915    | GRHL2          |
| A_24_P332482   | 15,127  | 15,1484 | -1,01494391  | ENST00000482584 | N/A       | N/A          | N/A            |
| A_33_P3409575  | 2,06547 | 2,0869  | -1,014965015 | N/A             | N/A       | N/A          | N/A            |
| A_23_P44436    | 7,26936 | 7,2908  | -1,01497205  | ENST00000377938 | 56287     | NM_019617    | GKN1           |
| A_23_P142255   | 7,10949 | 7,13097 | -1,015000192 | ENST00000543264 | 56961     | NM_020209    | SHD            |
| A_32_P741217   | 1,67415 | 1,69563 | -1,015000192 | ENST00000546029 | 283598    | NM_182560    | C14orf177      |
| A_21_P0010855  | 1,4153  | 1,43679 | -1,015007227 | N/A             | N/A       | N/A          | XLOC_I2_001851 |

|                |         |         |              |                 |           |              |              |
|----------------|---------|---------|--------------|-----------------|-----------|--------------|--------------|
| A_23_P128734   | 13,9169 | 13,9384 | -1,015014263 | ENST00000557016 | 2079      | NM_004450    | ERH          |
| A_24_P307653   | 1,66696 | 1,68846 | -1,015014263 | ENST00000266682 | 55117     | NM_182767    | SLC6A15      |
| A_33_P3335535  | 1,54846 | 1,56998 | -1,015028334 | ENST00000536898 | 100128682 | NR_040046    | LINC01531    |
| A_33_P3374318  | 1,36137 | 1,38292 | -1,015049441 | N/A             | N/A       | N/A          | Inc-MFSD9-4  |
| A_21_P0002737  | 1,67009 | 1,69164 | -1,015049441 | ENST00000415991 | N/A       | N/A          | N/A          |
| A_21_P0006040  | 1,48648 | 1,50803 | -1,015049441 | N/A             | N/A       | N/A          | Inc-ACTL7A-1 |
| A_33_P3343101  | 6,45064 | 6,47221 | -1,015063513 | N/A             | 55082     | XR_243043    | ARGLU1       |
| A_21_P0009056  | 5,0043  | 5,02588 | -1,015070549 | ENST00000561611 | 101927957 | N/A          | LINC01572    |
| A_33_P3266674  | 6,00108 | 6,02266 | -1,015070549 | ENST00000302995 | 140685    | NM_025224    | ZBTB46       |
| A_22_P00020058 | 1,44647 | 1,46805 | -1,015070549 | ENST00000507027 | 102467077 | N/A          | LINC00603    |
| A_22_P00013422 | 1,58728 | 1,60887 | -1,015077585 | ENST00000450760 | N/A       | N/A          | N/A          |
| A_33_P3367361  | 10,9472 | 10,9688 | -1,015084621 | ENST00000181796 | 83641     | NM_001282695 | FAM107B      |
| A_23_P256342   | 10,8643 | 10,8859 | -1,015084621 | ENST00000409076 | 23161     | NM_015132    | SNX13        |
| A_23_P371777   | 1,35568 | 1,37729 | -1,015091657 | ENST00000577647 | N/A       | BC036375     | N/A          |
| A_21_P0004789  | 6,50853 | 6,53015 | -1,015098693 | N/A             | N/A       | N/A          | Inc-KATNA1-1 |
| A_23_P324813   | 1,45886 | 1,48048 | -1,015098693 | ENST00000293805 | 255877    | NM_181844    | BCL6B        |
| A_33_P3292064  | 1,65824 | 1,67988 | -1,015112765 | N/A             | 254240    | BC062656     | BPIFC        |
| A_22_P00011742 | 1,62039 | 1,64203 | -1,015112765 | ENST00000521215 | N/A       | DB035978     | N/A          |
| A_33_P3313730  | 5,46801 | 5,48965 | -1,015112765 | ENST00000356331 | 6452      | NM_001145855 | SH3BP2       |
| A_23_P425197   | 1,487   | 1,50866 | -1,015126838 | ENST00000425614 | 149233    | NM_144701    | IL23R        |
| A_21_P0009621  | 1,48774 | 1,50941 | -1,015133874 | ENST00000592198 | N/A       | N/A          | N/A          |
| A_21_P0012247  | 1,34902 | 1,3707  | -1,01514091  | N/A             | 26220     | XR_109700    | DGCR5        |
| A_33_P3413791  | 1,36593 | 1,38762 | -1,015147947 | N/A             | 100130314 | AK126710     | LOC100130314 |
| A_24_P328492   | 7,89569 | 7,91739 | -1,015154983 | ENST00000394861 | 9655      | NM_144949    | SOCS5        |
| A_33_P3255324  | 1,40398 | 1,42569 | -1,01516202  | ENST00000483225 | 392459    | N/A          | CXXC1P1      |
| A_33_P3371333  | 1,47592 | 1,49763 | -1,01516202  | ENST00000563456 | 347688    | NM_177987    | TUBB8        |
| A_22_P00010283 | 6,56399 | 6,5857  | -1,01516202  | N/A             | N/A       | AK125312     | Inc-MTPAP-1  |
| A_24_P44780    | 1,48405 | 1,50578 | -1,015176093 | ENST00000300591 | 125336    | NM_001145472 | LOXHD1       |
| A_23_P52311    | 5,52339 | 5,54514 | -1,015190167 | ENST00000369839 | 6877      | NM_006951    | TAF5         |
| A_33_P3407638  | 9,89522 | 9,91699 | -1,01520424  | ENST00000282032 | 120534    | NM_152316    | ARL14EP      |
| A_33_P6713895  | 8,31706 | 8,33884 | -1,015211277 | ENST00000581989 | 23164     | NM_201274    | MPRIP        |
| A_22_P00018451 | 7,85364 | 7,87545 | -1,015232388 | N/A             | N/A       | N/A          | Inc-FRMD5-1  |
| A_22_P00002873 | 1,45694 | 1,47883 | -1,015288686 | ENST00000462300 | N/A       | N/A          | N/A          |

|                |         |         |              |                 |           |              |                      |
|----------------|---------|---------|--------------|-----------------|-----------|--------------|----------------------|
| A_24_P21266    | 6,58334 | 6,60526 | -1,015309799 | ENST00000397228 | 11160     | NM_001003790 | ERLIN2               |
| A_21_P0002952  | 1,60486 | 1,62678 | -1,015309799 | N/A             | N/A       | N/A          | Inc-FAM198A-2        |
| A_19_P00317753 | 4,73945 | 4,76137 | -1,015309799 | N/A             | 101929563 | N/A          | LOC101929563         |
| A_22_P00016259 | 7,6003  | 7,62228 | -1,015352025 | ENST00000411670 | 100131564 | NR_034089    | LOC100131564         |
| A_33_P3365750  | 1,38789 | 1,4099  | -1,015373139 | ENST00000553526 | 161436    | NM_183387    | EML5                 |
| A_21_P0004904  | 1,73258 | 1,7546  | -1,015380177 | N/A             | N/A       | N/A          | Inc-TPBG-2           |
| A_22_P00015453 | 1,44562 | 1,46764 | -1,015380177 | N/A             | 100874120 | NR_046742    | ZNF630-AS1           |
| A_21_P0004846  | 2,17376 | 2,19579 | -1,015387215 | N/A             | N/A       | N/A          | Inc-MYLIP-1          |
| A_21_P0012248  | 7,97851 | 8,00054 | -1,015387215 | N/A             | 26220     | NR_110533    | DGCR5                |
| A_21_P0009297  | 1,63632 | 1,65839 | -1,015415368 | N/A             | N/A       | N/A          | Inc-PIRT-2           |
| A_22_P00013451 | 5,90353 | 5,92561 | -1,015422406 | N/A             | N/A       | BU558156     | Inc-RP11-295K3.1.1-1 |
| A_22_P00003424 | 15,4825 | 15,5046 | -1,015436483 | ENST00000445172 | N/A       | XR_108641    | N/A                  |
| A_33_P3282880  | 1,66442 | 1,68652 | -1,015436483 | N/A             | 79589     | NM_194463    | RNF128               |
| A_24_P701030   | 1,4066  | 1,42871 | -1,015443522 | N/A             | 154442    | NR_037157    | BVES-AS1             |
| A_22_P00023588 | 6,85658 | 6,87873 | -1,015471676 | ENST00000428828 | 27442     | NR_038398    | CECR3                |
| A_23_P378288   | 7,28698 | 7,30915 | -1,015485754 | ENST00000262032 | 64375     | NM_022465    | IKZF4                |
| A_33_P3245021  | 1,47292 | 1,49511 | -1,015499831 | N/A             | N/A       | N/A          | N/A                  |
| A_23_P17144    | 12,6581 | 12,6803 | -1,01550687  | ENST00000616939 | 11321     | NM_007266    | GPN1                 |
| A_21_P0011583  | 1,41716 | 1,43937 | -1,015513909 | N/A             | N/A       | N/A          | XLOC_I2_006036       |
| A_22_P00015741 | 1,62668 | 1,64892 | -1,015535026 | N/A             | N/A       | N/A          | Inc-TADA2B-1         |
| A_22_P00016754 | 4,18463 | 4,2069  | -1,015556144 | N/A             | N/A       | N/A          | Inc-TRIM16-1         |
| A_33_P3398406  | 1,35423 | 1,37652 | -1,015570223 | ENST00000262441 | 9340      | NM_004246    | GLP2R                |
| A_21_P0012379  | 9,05475 | 9,07705 | -1,015577262 | N/A             | N/A       | N/A          | XLOC_I2_009773       |
| A_23_P305245   | 1,48502 | 1,50733 | -1,015584302 | ENST00000326474 | 401097    | NM_001168214 | C3orf80              |
| A_21_P0007603  | 1,36626 | 1,38858 | -1,015591341 | N/A             | N/A       | N/A          | Inc-CLLU1.1-9        |
| A_23_P217621   | 3,64345 | 3,66578 | -1,015598381 | ENST00000356784 | 54457     | NM_024885    | TAF7L                |
| A_33_P3285629  | 5,1745  | 5,19687 | -1,01562654  | ENST00000579312 | 64446     | NM_023036    | DNAI2                |
| A_22_P00017652 | 1,43817 | 1,46056 | -1,015640619 | N/A             | N/A       | N/A          | Inc-WRAP73-3         |
| A_22_P00016254 | 1,59839 | 1,62081 | -1,015661739 | ENST00000558897 | 101928227 | NR_120330    | LOC101928227         |
| A_33_P3338172  | 1,48441 | 1,50683 | -1,015661739 | N/A             | 404744    | NR_033665    | NPSR1-AS1            |
| A_23_P55779    | 4,41636 | 4,43879 | -1,015668779 | ENST00000330436 | 1553      | NM_000766    | CYP2A13              |
| A_21_P0003169  | 1,45493 | 1,47737 | -1,015675819 | N/A             | N/A       | N/A          | Inc-TPRA1-1          |
| A_22_P00004450 | 1,35077 | 1,37321 | -1,015675819 | ENST00000504046 | N/A       | N/A          | N/A                  |

|                |         |         |              |                 |        |              |                |
|----------------|---------|---------|--------------|-----------------|--------|--------------|----------------|
| A_23_P85053    | 9,11479 | 9,13723 | -1,015675819 | ENST00000307771 | 8233   | NM_005089    | ZRSR2          |
| A_21_P0013092  | 1,38276 | 1,40523 | -1,01569694  | N/A             | N/A    | N/A          | XLOC_I2_013119 |
| A_21_P0008136  | 1,42971 | 1,45218 | -1,01569694  | ENST00000420210 | N/A    | N/A          | N/A            |
| A_33_P3237359  | 10,7181 | 10,7406 | -1,015718061 | ENST00000325307 | 3149   | NM_001301228 | HMGB3          |
| A_22_P00025371 | 5,93398 | 5,95648 | -1,015718061 | N/A             | 401480 | XR_242443    | LOC401480      |
| A_22_P00003758 | 3,12853 | 3,15104 | -1,015725101 | N/A             | N/A    | N/A          | Inc-CDHR4-1    |
| A_22_P00017620 | 1,38741 | 1,40996 | -1,015753264 | ENST00000507424 | N/A    | AK125859     | N/A            |
| A_21_P0003082  | 1,45225 | 1,47481 | -1,015760304 | N/A             | N/A    | N/A          | Inc-HES1-2     |
| A_33_P3390008  | 1,39133 | 1,41389 | -1,015760304 | ENST00000390286 | N/A    | N/A          | N/A            |
| A_23_P56170    | 9,74265 | 9,76523 | -1,015774386 | ENST00000325464 | 10025  | NM_005481    | MED16          |
| A_23_P202206   | 11,3679 | 11,3905 | -1,015788468 | ENST00000498052 | 119391 | NM_183239    | GSTO2          |
| A_33_P3289204  | 7,37097 | 7,39358 | -1,015795509 | ENST00000489327 | 22848  | NM_014911    | AAK1           |
| A_22_P00023387 | 1,55377 | 1,57639 | -1,015802549 | ENST00000420905 | 400002 | XR_253017    | FLJ46363       |
| A_22_P00020147 | 1,47921 | 1,50187 | -1,015830714 | N/A             | N/A    | N/A          | Inc-CELF4-1    |
| A_22_P00021949 | 1,65748 | 1,68018 | -1,015858879 | N/A             | N/A    | AL833160     | Inc-EGR3-1     |
| A_22_P00025924 | 1,4124  | 1,4351  | -1,015858879 | N/A             | N/A    | BG211230     | Inc-HSPH1-3    |
| A_33_P3339860  | 13,2076 | 13,2303 | -1,015858879 | ENST00000617275 | 59339  | NM_021623    | PLEKHA2        |
| A_21_P0007735  | 6,3682  | 6,39092 | -1,015872962 | N/A             | N/A    | N/A          | Inc-KITLG-2    |
| A_21_P0012384  | 1,95769 | 1,98042 | -1,015880004 | ENST00000509306 | N/A    | N/A          | N/A            |
| A_33_P3395630  | 1,58805 | 1,61078 | -1,015880004 | N/A             | N/A    | N/A          | N/A            |
| A_33_P3326927  | 8,02914 | 8,05187 | -1,015880004 | ENST00000564230 | 7567   | NM_006961    | ZNF19          |
| A_22_P00008691 | 1,4246  | 1,44734 | -1,015887045 | ENST00000565449 | N/A    | N/A          | N/A            |
| A_23_P33433    | 9,29758 | 9,32034 | -1,015901128 | ENST00000616501 | 4150   | NM_001042539 | MAZ            |
| A_33_P3392087  | 8,41439 | 8,43716 | -1,01590817  | N/A             | 3425   | NM_000203    | IDUA           |
| A_23_P92196    | 5,18441 | 5,20725 | -1,015957463 | ENST00000295755 | 84666  | NM_032579    | RETNLB         |
| A_23_P211110   | 7,30514 | 7,32798 | -1,015957463 | ENST00000290399 | 6493   | NM_005069    | SIM2           |
| A_21_P0001698  | 1,84905 | 1,8719  | -1,015964506 | N/A             | N/A    | N/A          | Inc-UBL4B-1    |
| A_24_P927325   | 3,7878  | 3,81065 | -1,015964506 | ENST00000313663 | 26005  | NM_015531    | C2CD3          |
| A_23_P68868    | 13,1233 | 13,1462 | -1,015999717 | N/A             | 55000  | NR_002323    | TUG1           |
| A_23_P82941    | 11,6668 | 11,6897 | -1,015999717 | ENST00000518290 | 10565  | NM_006421    | ARFGEF1        |
| A_33_P3288969  | 1,66431 | 1,68727 | -1,016041972 | N/A             | N/A    | N/A          | N/A            |
| A_22_P00022879 | 2,6127  | 2,63567 | -1,016049015 | N/A             | N/A    | N/A          | Inc-SMAD5-1    |
| A_33_P3302015  | 1,40156 | 1,42454 | -1,016056057 | ENST00000388710 | 92949  | NM_001040272 | ADAMTSL1       |



|                |         |         |              |                 |           |              |                  |
|----------------|---------|---------|--------------|-----------------|-----------|--------------|------------------|
| A_22_P00020135 | 2,62594 | 2,64893 | -1,0160631   | N/A             | N/A       | N/A          | Inc-G3BP1-1      |
| A_22_P00001821 | 1,60796 | 1,63096 | -1,016070143 | N/A             | N/A       | N/A          | Inc-ATP6V1E2-3   |
| A_24_P142743   | 12,8303 | 12,8533 | -1,016070143 | ENST00000564572 | 1265      | AK300788     | CNN2             |
| A_23_P254688   | 2,17295 | 2,19596 | -1,016077186 | ENST00000511388 | 66000     | NM_023943    | TMEM108          |
| A_32_P50223    | 1,75539 | 1,77843 | -1,016098315 | ENST00000334770 | 126520    | NM_001243079 | PLK5             |
| A_33_P3323678  | 9,47511 | 9,49821 | -1,016140574 | ENST00000545001 | N/A       | N/A          | N/A              |
| A_33_P3861249  | 1,35119 | 1,37429 | -1,016140574 | ENST00000422652 | 643376    | NM_001145101 | BTBD18           |
| A_22_P00014931 | 3,97869 | 4,00181 | -1,016154661 | N/A             | N/A       | N/A          | Inc-SLITRK5-2    |
| A_33_P3233085  | 1,63483 | 1,65795 | -1,016154661 | N/A             | N/A       | N/A          | N/A              |
| A_22_P00025594 | 1,43155 | 1,4547  | -1,016175791 | ENST00000438522 | N/A       | N/A          | N/A              |
| A_33_P3231700  | 1,3687  | 1,39187 | -1,016189879 | N/A             | 342926    | BX648243     | ZNF677           |
| A_22_P00020377 | 1,42244 | 1,44562 | -1,016196922 | N/A             | N/A       | N/A          | Inc-NRAP-1       |
| A_22_P00013908 | 1,36407 | 1,38725 | -1,016196922 | ENST00000416341 | N/A       | BX111363     | N/A              |
| A_22_P00010569 | 1,39688 | 1,42007 | -1,016203966 | N/A             | N/A       | N/A          | Inc-NDEL1-2      |
| A_22_P00017940 | 1,36134 | 1,38453 | -1,016203966 | ENST00000400752 | 653808    | N/A          | ZG16             |
| A_23_P7282     | 10,6186 | 10,6418 | -1,01621101  | ENST00000323570 | 255520    | NM_153702    | ELMOD2           |
| A_22_P00003913 | 8,75392 | 8,77715 | -1,016232142 | N/A             | N/A       | BX647194     | Inc-CERS5-1      |
| A_21_P0006992  | 1,48209 | 1,50533 | -1,016239186 | N/A             | N/A       | N/A          | Inc-GDF10-2      |
| A_19_P00320434 | 7,48333 | 7,50659 | -1,016253274 | ENST00000439050 | 100996579 | NR_110163    | LOC100996579     |
| A_22_P00006277 | 1,91642 | 1,93969 | -1,016260318 | ENST00000422010 | N/A       | N/A          | N/A              |
| A_22_P00004521 | 9,3866  | 9,40988 | -1,016267362 | N/A             | N/A       | N/A          | Inc-CR392000.1-2 |
| A_23_P145357   | 11,7466 | 11,7699 | -1,016281451 | ENST00000374467 | 578       | NM_001188    | BAK1             |
| A_22_P00004660 | 7,56775 | 7,59105 | -1,016281451 | ENST00000555377 | N/A       | DJ031130     | N/A              |
| A_33_P3368039  | 10,4932 | 10,5165 | -1,016281451 | ENST00000393812 | 347734    | NM_001286520 | SLC35B2          |
| A_22_P00012735 | 3,82707 | 3,85038 | -1,016288495 | N/A             | N/A       | AK026512     | Inc-RAB9B-1      |
| A_32_P402562   | 1,62644 | 1,64977 | -1,016302584 | ENST00000321691 | 284083    | NM_001038704 | C17orf47         |
| A_24_P365322   | 5,15791 | 5,18125 | -1,016309629 | ENST00000397732 | 163051    | NM_152601    | ZNF709           |
| A_33_P3387943  | 1,37321 | 1,3966  | -1,016344852 | ENST00000264428 | 2743      | NM_000824    | GLRB             |
| A_24_P166094   | 10,303  | 10,3264 | -1,016351897 | ENST00000353617 | 27236     | NM_001025595 | ARFIP1           |
| A_22_P00009034 | 1,4556  | 1,47902 | -1,016365986 | ENST00000520275 | 100507267 | NR_108022    | LINC01187        |
| A_33_P3258777  | 3,91206 | 3,93549 | -1,016373031 | ENST00000511731 | N/A       | BC010180     | N/A              |
| A_22_P00010123 | 1,83214 | 1,85558 | -1,016380076 | N/A             | N/A       | AK094559     | Inc-MRPL15-1     |
| A_21_P0009253  | 1,44991 | 1,47336 | -1,016387121 | N/A             | N/A       | N/A          | Inc-ABI3-2       |

|                |         |         |              |                 |           |              |                  |
|----------------|---------|---------|--------------|-----------------|-----------|--------------|------------------|
| A_33_P3226620  | 1,67289 | 1,69639 | -1,016422347 | ENST00000250087 | 23746     | NM_001285402 | AIPL1            |
| A_23_P84736    | 1,46169 | 1,48519 | -1,016422347 | ENST00000466387 | 1496      | NM_004389    | CTNNA2           |
| A_23_P35529    | 1,38866 | 1,41217 | -1,016429392 | ENST00000373968 | 4153      | NM_000242    | MBL2             |
| A_22_P00025077 | 1,4077  | 1,43122 | -1,016436438 | N/A             | N/A       | N/A          | Inc-UTP23-3      |
| A_21_P0012446  | 3,17619 | 3,19972 | -1,016443483 | N/A             | N/A       | N/A          | XLOC_I2_010239   |
| A_23_P252023   | 1,44823 | 1,47177 | -1,016450529 | ENST00000456455 | 6757      | NM_175698    | SSX2             |
| A_22_P00021607 | 1,66255 | 1,6861  | -1,016457574 | N/A             | N/A       | N/A          | Inc-SH3BGRL3-1   |
| A_24_P295601   | 9,76523 | 9,78881 | -1,016478711 | ENST00000526508 | 9776      | NM_014741    | ATG13            |
| A_24_P152356   | 15,3885 | 15,4121 | -1,016492803 | ENST00000498507 | N/A       | N/A          | N/A              |
| A_22_P00021584 | 1,35164 | 1,37525 | -1,016499848 | ENST00000427339 | N/A       | N/A          | N/A              |
| A_22_P00002037 | 4,71725 | 4,74087 | -1,016506894 | ENST00000608031 | 768097    | NR_003245    | HAR1B            |
| A_33_P3329153  | 6,52773 | 6,55135 | -1,016506894 | ENST00000613626 | 8621      | NM_031267    | CDK13            |
| A_22_P00001363 | 1,40533 | 1,429   | -1,016542124 | N/A             | N/A       | N/A          | Inc-AP001496.1-9 |
| A_22_P00020320 | 12,1046 | 12,1283 | -1,016563263 | ENST00000443685 | N/A       | N/A          | N/A              |
| A_33_P3284036  | 1,46265 | 1,48637 | -1,016577356 | ENST00000478313 | 23562     | BQ056804     | CLDN14           |
| A_22_P00007564 | 1,44697 | 1,4707  | -1,016584402 | N/A             | 103344929 | NR_121648    | BGLT3            |
| A_22_P00004721 | 1,73822 | 1,76197 | -1,016598495 | N/A             | N/A       | N/A          | Inc-CTH-3        |
| A_22_P00001195 | 1,43342 | 1,45717 | -1,016598495 | N/A             | N/A       | N/A          | Inc-ANK2-2       |
| A_33_P3325914  | 9,87731 | 9,90109 | -1,016619635 | ENST00000395114 | 6892      | NM_172208    | TAPBP            |
| A_23_P306105   | 11,3694 | 11,3932 | -1,016633728 | ENST00000269195 | 2589      | NM_020474    | GALNT1           |
| A_22_P00017509 | 1,38341 | 1,40721 | -1,016633728 | N/A             | N/A       | N/A          | Inc-WBP4-1       |
| A_23_P43946    | 13,8538 | 13,8776 | -1,016633728 | ENST00000336133 | 84324     | NM_033082    | SARNP            |
| A_33_P3277288  | 1,75741 | 1,78122 | -1,016640775 | N/A             | N/A       | N/A          | XLOC_I2_006584   |
| A_22_P00011305 | 1,40296 | 1,42678 | -1,016647822 | N/A             | N/A       | N/A          | Inc-OSBPL1A-3    |
| A_21_P0012629  | 1,4784  | 1,50222 | -1,016647822 | ENST00000473701 | N/A       | N/A          | N/A              |
| A_22_P00006163 | 1,92966 | 1,95357 | -1,016711246 | N/A             | N/A       | BC044921     | Inc-FAM19A3-1    |
| A_33_P3290748  | 5,16201 | 5,18592 | -1,016711246 | N/A             | 648044    | XM_003959952 | LOC648044        |
| A_22_P00011086 | 1,37329 | 1,39724 | -1,016739435 | ENST00000519929 | 101927835 | NR_105064    | LOC101927835     |
| A_21_P0010291  | 1,35155 | 1,37551 | -1,016746483 | N/A             | N/A       | N/A          | Inc-SIK1-3       |
| A_23_P63158    | 1,41634 | 1,44032 | -1,016760578 | ENST00000368147 | 6708      | NM_003126    | SPTA1            |
| A_33_P3629247  | 6,04701 | 6,07099 | -1,016760578 | ENST00000496300 | 51281     | NM_017844    | ANKMY1           |
| A_22_P00003348 | 1,4801  | 1,50409 | -1,016767626 | N/A             | N/A       | N/A          | Inc-CBLB-6       |
| A_33_P3662553  | 10,7177 | 10,7417 | -1,016774673 | ENST00000490943 | 10971     | NM_006826    | YWHAQ            |

|                |         |         |              |                 |           |           |                       |
|----------------|---------|---------|--------------|-----------------|-----------|-----------|-----------------------|
| A_23_P59349    | 12,94   | 12,964  | -1,016774673 | ENST00000367658 | 51696     | NM_016217 | HECA                  |
| A_23_P210330   | 11,061  | 11,085  | -1,016774673 | ENST00000238875 | 29094     | NM_014181 | LGALS1                |
| A_23_P142856   | 1,45193 | 1,47595 | -1,016788769 | ENST00000413999 | 375318    | NM_198998 | AQP12A                |
| A_22_P00015773 | 6,78478 | 6,8088  | -1,016788769 | ENST00000436506 | 100996579 | NR_110163 | LOC100996579          |
| A_22_P00004862 | 1,3524  | 1,37644 | -1,016802865 | ENST00000518779 | 101929528 | NR_105005 | LOC101929528          |
| A_22_P00016599 | 1,6465  | 1,67057 | -1,016824009 | N/A             | N/A       | AW293258  | Inc-TNPO3-2           |
| A_23_P423197   | 14,3291 | 14,3532 | -1,016845153 | ENST00000356384 | 6256      | NM_002957 | RXRA                  |
| A_21_P0005396  | 1,3629  | 1,387   | -1,016845153 | N/A             | N/A       | N/A       | Inc-GNAI1-1           |
| A_23_P16762    | 12,8383 | 12,8624 | -1,016845153 | ENST00000410080 | 55660     | NM_017892 | PRPF40A               |
| A_23_P133236   | 7,46433 | 7,48845 | -1,01685925  | ENST00000239449 | 56122     | NM_018934 | PCDHB14               |
| A_33_P3272823  | 5,634   | 5,65817 | -1,016894492 | ENST00000597162 | 4099      | NM_002361 | MAG                   |
| A_22_P00004068 | 1,41847 | 1,44264 | -1,016894492 | ENST00000562790 | N/A       | N/A       | N/A                   |
| A_24_P942481   | 8,4081  | 8,43229 | -1,016908589 | ENST00000376958 | 160897    | NM_180989 | GPR180                |
| A_24_P18802    | 11,2727 | 11,2969 | -1,016915638 | ENST00000220509 | 57617     | NM_020857 | VPS18                 |
| A_33_P3393398  | 11,2631 | 11,2874 | -1,016986128 | N/A             | N/A       | N/A       | N/A                   |
| A_22_P00008947 | 1,63968 | 1,66399 | -1,016993177 | ENST00000413271 | N/A       | N/A       | N/A                   |
| A_21_P0003178  | 1,61131 | 1,63563 | -1,017000226 | N/A             | N/A       | N/A       | Inc-KY-1              |
| A_22_P00020034 | 1,5994  | 1,62372 | -1,017000226 | N/A             | N/A       | N/A       | Inc-ANKRD32-1         |
| A_22_P00024877 | 4,40337 | 4,42769 | -1,017000226 | ENST00000413944 | 100128317 | NR_126025 | LOC100128317          |
| A_21_P0001184  | 1,42849 | 1,45282 | -1,017007275 | N/A             | N/A       | N/A       | Inc-FCGR3B-3          |
| A_22_P00013461 | 1,35144 | 1,37579 | -1,017021374 | N/A             | N/A       | N/A       | Inc-RP11-322L20.1.1-4 |
| A_22_P00017887 | 1,44755 | 1,47192 | -1,017035473 | ENST00000523317 | N/A       | AA311918  | N/A                   |
| A_23_P41872    | 8,29547 | 8,31986 | -1,017049573 | ENST00000505433 | 11285     | NM_007255 | B4GALT7               |
| A_22_P00000266 | 1,36307 | 1,38747 | -1,017056622 | ENST00000451711 | N/A       | XR_241413 | N/A                   |
| A_23_P39304    | 1,36701 | 1,39142 | -1,017063672 | ENST00000270077 | 5678      | NM_002784 | PSG9                  |
| A_21_P0004071  | 1,45367 | 1,4781  | -1,017077771 | ENST00000513657 | N/A       | N/A       | N/A                   |
| A_22_P00019707 | 1,37636 | 1,4008  | -1,017084821 | ENST00000523232 | N/A       | DA593750  | N/A                   |
| A_23_P305033   | 6,33333 | 6,35777 | -1,017084821 | ENST00000378932 | 257397    | NM_152787 | TAB3                  |
| A_23_P326474   | 1,36569 | 1,39014 | -1,017091871 | ENST00000400105 | 91133     | NM_173464 | L3MBTL4               |
| A_21_P0013108  | 3,64303 | 3,66748 | -1,017091871 | N/A             | N/A       | N/A       | Inc-SHPRH-2           |
| A_21_P0012786  | 1,67128 | 1,69576 | -1,017113021 | N/A             | N/A       | N/A       | Inc-COL25A1-1         |
| A_22_P00011347 | 1,47018 | 1,49467 | -1,017120071 | ENST00000557467 | N/A       | BX091546  | N/A                   |
| A_23_P64990    | 8,52937 | 8,55387 | -1,017127122 | ENST00000488642 | 5893      | NM_134424 | RAD52                 |

|                |         |         |              |                 |           |              |                |
|----------------|---------|---------|--------------|-----------------|-----------|--------------|----------------|
| A_22_P00004766 | 1,61546 | 1,63998 | -1,017141222 | ENST00000427030 | N/A       | N/A          | N/A            |
| A_33_P3416574  | 12,2556 | 12,2802 | -1,017197626 | ENST00000275235 | 51390     | NM_016108    | AIG1           |
| A_33_P3261902  | 10,7385 | 10,7631 | -1,017197626 | ENST00000583973 | 55556     | NM_001126123 | ENOSF1         |
| A_33_P3289093  | 1,3787  | 1,40331 | -1,017204677 | N/A             | N/A       | N/A          | N/A            |
| A_21_P0011572  | 7,13607 | 7,16069 | -1,017211727 | ENST00000421108 | 220594    | NR_003554    | USP32P2        |
| A_21_P0014556  | 1,36748 | 1,3921  | -1,017211727 | N/A             | N/A       | AW976670     | Inc-ABHD12B-5  |
| A_21_P0009403  | 1,47864 | 1,50329 | -1,01723288  | N/A             | N/A       | N/A          | Inc-LGALS9B-2  |
| A_33_P3323535  | 1,59167 | 1,6164  | -1,017289289 | ENST00000390453 | N/A       | Y16433       | N/A            |
| A_22_P00013873 | 1,6566  | 1,68135 | -1,017303392 | N/A             | N/A       | CR749680     | Inc-RPP38-2    |
| A_21_P0000817  | 1,51844 | 1,54323 | -1,017331598 | ENST00000566533 | 645355    | NR_038839    | MIR3976HG      |
| A_22_P00022736 | 1,66798 | 1,69278 | -1,017338649 | ENST00000429444 | N/A       | XR_108264    | N/A            |
| A_21_P0011265  | 1,47807 | 1,50288 | -1,017345701 | N/A             | N/A       | N/A          | XLOC_I2_004381 |
| A_21_P0006216  | 1,44957 | 1,4744  | -1,017359804 | N/A             | N/A       | N/A          | Inc-PAPPA-3    |
| A_33_P3390955  | 1,37473 | 1,39957 | -1,017366856 | N/A             | 3262      | NR_004422    | HPVC1          |
| A_22_P00004699 | 4,13296 | 4,15781 | -1,017373908 | N/A             | 100287098 | NR_109770    | LOC100287098   |
| A_23_P57760    | 9,10793 | 9,13279 | -1,01738096  | ENST00000393010 | 92370     | NM_152282    | PXYLP1         |
| A_21_P0001801  | 1,41158 | 1,43647 | -1,017402116 | ENST00000414876 | 348761    | NR_033879    | SPATA3-AS1     |
| A_23_P352291   | 10,4366 | 10,4615 | -1,017409168 | ENST00000343255 | 10772     | NM_054016    | SRSF10         |
| A_21_P0011447  | 1,4497  | 1,47463 | -1,017430325 | N/A             | N/A       | N/A          | XLOC_I2_005298 |
| A_33_P3402773  | 7,87075 | 7,89569 | -1,017437377 | N/A             | N/A       | N/A          | N/A            |
| A_23_P139740   | 1,3691  | 1,39405 | -1,017444443 | ENST00000543701 | 56341     | NM_019854    | PRMT8          |
| A_22_P00013638 | 1,35161 | 1,37657 | -1,017451482 | ENST00000509715 | 101927359 | NR_125885    | LOC101927359   |
| A_23_P66948    | 11,2391 | 11,2641 | -1,017479692 | ENST00000269209 | 64762     | NM_022751    | GAREM          |
| A_33_P3287388  | 10,148  | 10,173  | -1,017479692 | N/A             | N/A       | N/A          | N/A            |
| A_21_P0001265  | 1,81375 | 1,83876 | -1,017486745 | N/A             | N/A       | N/A          | Inc-C1orf196-1 |
| A_24_P83437    | 5,4583  | 5,48333 | -1,01750085  | ENST00000361911 | 284695    | NM_182975    | ZNF326         |
| A_33_P3360311  | 1,46721 | 1,49224 | -1,01750085  | ENST00000261195 | 2998      | NM_021957    | GYS2           |
| A_22_P00016438 | 3,19939 | 3,22443 | -1,017507903 | ENST00000608606 | N/A       | N/A          | N/A            |
| A_33_P3304824  | 9,1524  | 9,17745 | -1,017514956 | ENST00000435624 | 145249    | NR_104113    | LINC00618      |
| A_21_P0002065  | 4,37541 | 4,40048 | -1,017529062 | ENST00000418001 | N/A       | N/A          | N/A            |
| A_33_P3318439  | 1,54453 | 1,56962 | -1,017543168 | ENST00000382968 | 285498    | NM_001131034 | RNF212         |
| A_23_P116614   | 10,018  | 10,0431 | -1,017550221 | ENST00000543262 | 10873     | NM_001014811 | ME3            |
| A_22_P00010961 | 1,58343 | 1,60854 | -1,017557274 | ENST00000520391 | N/A       | N/A          | N/A            |

|                |         |         |              |                 |           |              |                |
|----------------|---------|---------|--------------|-----------------|-----------|--------------|----------------|
| A_21_P0002706  | 1,65742 | 1,68256 | -1,017578434 | ENST00000467198 | N/A       | N/A          | N/A            |
| A_23_P381449   | 9,0263  | 9,05145 | -1,017585487 | ENST00000376741 | 6668      | NM_003110    | SP2            |
| A_22_P00007889 | 4,7365  | 4,76167 | -1,017599594 | N/A             | 100874270 | NR_046780    | HAO2-IT1       |
| A_32_P182473   | 9,59443 | 9,6196  | -1,017599594 | ENST00000439556 | 90589     | NM_145233    | ZNF625         |
| A_32_P219520   | 10,2503 | 10,2755 | -1,017620755 | ENST00000504771 | 25816     | NM_014350    | TNFAIP8        |
| A_21_P0005348  | 1,43367 | 1,45888 | -1,017627808 | N/A             | N/A       | N/A          | Inc-HEATR2-3   |
| A_23_P334883   | 7,5373  | 7,56252 | -1,017634862 | ENST00000423696 | 22941     | NM_012309    | SHANK2         |
| A_33_P3208951  | 1,60645 | 1,6317  | -1,017656023 | ENST00000321543 | 119682    | NM_001004755 | OR51L1         |
| A_23_P135995   | 10,6396 | 10,6649 | -1,017691293 | ENST00000310256 | 64801     | NM_022786    | ARV1           |
| A_22_P00010219 | 1,47647 | 1,50178 | -1,017698347 | N/A             | N/A       | N/A          | Inc-MST1-1     |
| A_21_P0000136  | 1,35335 | 1,3787  | -1,017726564 | N/A             | 2856      | NM_001197184 | GPR33          |
| A_24_P298724   | 1,38106 | 1,40641 | -1,017726564 | ENST00000319968 | 343172    | NM_001005522 | OR2T8          |
| A_22_P00024134 | 1,59102 | 1,61638 | -1,017733619 | N/A             | N/A       | N/A          | Inc-SIAH1-1    |
| A_22_P00013878 | 1,66261 | 1,68797 | -1,017733619 | ENST00000568110 | N/A       | AK130981     | N/A            |
| A_23_P140748   | 6,45333 | 6,47873 | -1,017761836 | ENST00000563799 | 65009     | NM_022910    | NDRG4          |
| A_22_P00021106 | 1,37127 | 1,39667 | -1,017761836 | N/A             | 101929485 | XR_251414    | LOC101929485   |
| A_33_P3371055  | 13,4394 | 13,4648 | -1,017761836 | ENST00000409784 | 5861      | NM_004161    | RAB1A          |
| A_23_P391255   | 1,45175 | 1,4772  | -1,01779711  | ENST00000543214 | 171482    | NM_174951    | FAM9A          |
| A_21_P0012643  | 1,37938 | 1,40488 | -1,017832385 | N/A             | N/A       | N/A          | XLOC_I2_010976 |
| A_23_P206532   | 12,7983 | 12,8238 | -1,017832385 | ENST00000566044 | 5257      | NM_001031835 | PHKB           |
| A_24_P930741   | 1,44633 | 1,47185 | -1,017846495 | ENST00000373048 | 284656    | NM_001099439 | EPHA10         |
| A_21_P0014206  | 6,48181 | 6,50735 | -1,017860606 | N/A             | N/A       | N/A          | N/A            |
| A_21_P0000029  | 5,67012 | 5,69567 | -1,017867661 | ENST00000393603 | 10466     | NM_001161520 | COG5           |
| A_22_P00023323 | 1,46091 | 1,48646 | -1,017867661 | N/A             | N/A       | N/A          | Inc-PPP2R2A-2  |
| A_33_P3381777  | 1,41544 | 1,44103 | -1,017895882 | ENST00000437044 | 340205    | NM_178174    | TREML1         |
| A_21_P0009926  | 12,6047 | 12,6303 | -1,017902938 | N/A             | N/A       | N/A          | Inc-STK35-1    |
| A_21_P0012291  | 5,7641  | 5,78972 | -1,017917049 | ENST00000418264 | 29801     | NM_001185024 | ZDHHC8         |
| A_21_P0002579  | 1,41772 | 1,44335 | -1,017924105 | N/A             | N/A       | N/A          | Inc-KLHL29-2   |
| A_22_P00010517 | 1,7167  | 1,74235 | -1,017938216 | N/A             | N/A       | DB046295     | Inc-NBPF9-1    |
| A_22_P00019180 | 1,64368 | 1,66934 | -1,017945272 | ENST00000533516 | N/A       | BG432420     | N/A            |
| A_21_P0002391  | 1,58404 | 1,60971 | -1,017952328 | ENST00000591093 | N/A       | N/A          | N/A            |
| A_23_P119337   | 9,07846 | 9,10415 | -1,01796644  | ENST00000423777 | 22809     | NM_012068    | ATF5           |
| A_21_P0001202  | 1,45063 | 1,47633 | -1,017973496 | ENST00000412174 | N/A       | N/A          | N/A            |

|                |         |         |              |                 |           |              |              |
|----------------|---------|---------|--------------|-----------------|-----------|--------------|--------------|
| A_22_P00004926 | 4,26373 | 4,28943 | -1,017973496 | N/A             | 340037    | NR_038915    | PRR7-AS1     |
| A_21_P0013881  | 1,4473  | 1,47301 | -1,017980552 | ENST00000472227 | N/A       | N/A          | N/A          |
| A_33_P3418390  | 1,44465 | 1,47037 | -1,017987608 | ENST00000440711 | N/A       | N/A          | N/A          |
| A_21_P0005633  | 2,02913 | 2,05486 | -1,017994665 | N/A             | N/A       | N/A          | Inc-BAALC-1  |
| A_21_P0002232  | 1,45012 | 1,47586 | -1,018001721 | N/A             | N/A       | N/A          | Inc-MEIS1-4  |
| A_23_P19333    | 1,42266 | 1,44842 | -1,018015833 | ENST00000589695 | 54210     | NM_018643    | TREM1        |
| A_22_P00003946 | 1,44191 | 1,4677  | -1,018037003 | ENST00000435357 | N/A       | N/A          | N/A          |
| A_21_P0001161  | 1,46766 | 1,49346 | -1,018044059 | ENST00000416343 | 100128787 | N/A          | LINC01349    |
| A_23_P398712   | 1,45112 | 1,47692 | -1,018044059 | ENST00000407844 | 23040     | NM_015025    | MYT1L        |
| A_22_P00013657 | 1,66966 | 1,69546 | -1,018044059 | ENST00000507929 | N/A       | DR158474     | N/A          |
| A_33_P3299119  | 3,81246 | 3,83826 | -1,018044059 | ENST00000538646 | 6927      | NM_000545    | HNF1A        |
| A_22_P00014014 | 1,42963 | 1,45544 | -1,018051116 | N/A             | 101928783 | N/A          | LOC101928783 |
| A_22_P00013434 | 1,43532 | 1,46113 | -1,018051116 | ENST00000547088 | N/A       | N/A          | N/A          |
| A_33_P3246838  | 1,35383 | 1,37967 | -1,018072286 | ENST00000390477 | N/A       | AY312959     | N/A          |
| A_33_P3244312  | 1,42736 | 1,45323 | -1,018093456 | ENST00000426402 | N/A       | M27337       | N/A          |
| A_33_P3422732  | 3,09486 | 3,12082 | -1,01815697  | N/A             | 100131180 | AK124533     | LOC100131180 |
| A_33_P3348474  | 1,99817 | 2,02414 | -1,018164027 | N/A             | 100128840 | AK058065     | LOC100128840 |
| A_33_P3267380  | 1,44817 | 1,47414 | -1,018164027 | ENST00000517913 | 6444      | NM_172244    | SGCD         |
| A_24_P132518   | 10,6844 | 10,7104 | -1,0181852   | ENST00000342222 | 3551      | NM_001556    | IKBKB        |
| A_33_P3301050  | 1,44908 | 1,47511 | -1,018206373 | ENST00000414222 | 10086     | NM_001145095 | HHLA1        |
| A_23_P142403   | 4,20599 | 4,23202 | -1,018206373 | ENST00000389363 | 53345     | NM_001001524 | TM6SF2       |
| A_21_P0003694  | 1,42659 | 1,45264 | -1,018220488 | N/A             | N/A       | N/A          | Inc-ZFP42-7  |
| A_21_P0004848  | 1,36131 | 1,38736 | -1,018220488 | N/A             | N/A       | N/A          | Inc-ID4-2    |
| A_33_P3368506  | 1,598   | 1,62406 | -1,018227546 | ENST00000299709 | 146167    | NM_001080442 | SLC38A8      |
| A_23_P117157   | 10,6039 | 10,63   | -1,018255777 | ENST00000378654 | 8803      | NM_003850    | SUCLA2       |
| A_22_P00018825 | 2,01071 | 2,03682 | -1,018262835 | N/A             | N/A       | BI765200     | Inc-SMAD5-2  |
| A_21_P0007070  | 9,40911 | 9,43524 | -1,018276952 | N/A             | N/A       | N/A          | Inc-RPP30-2  |
| A_33_P3781344  | 1,36802 | 1,39418 | -1,018298126 | N/A             | 339593    | N/A          | LOC339593    |
| A_22_P00018498 | 1,47347 | 1,49963 | -1,018298126 | ENST00000555465 | N/A       | N/A          | N/A          |
| A_33_P3348782  | 10,2132 | 10,2394 | -1,01832636  | ENST00000593545 | 29785     | AK296087     | CYP2S1       |
| A_22_P00005952 | 5,24506 | 5,27126 | -1,01832636  | ENST00000526041 | N/A       | D81231       | N/A          |
| A_22_P00011034 | 6,02079 | 6,04701 | -1,018340477 | ENST00000537714 | N/A       | N/A          | N/A          |
| A_22_P00013976 | 1,35588 | 1,38212 | -1,018354594 | N/A             | N/A       | N/A          | Inc-RTN4-3   |

|                |         |         |              |                 |           |              |                  |
|----------------|---------|---------|--------------|-----------------|-----------|--------------|------------------|
| A_23_P121586   | 1,45213 | 1,4784  | -1,018375771 | ENST00000264345 | 8916      | NM_014606    | HERC3            |
| A_21_P0009485  | 1,37489 | 1,40117 | -1,01838283  | N/A             | N/A       | N/A          | Inc-WDR7-2       |
| A_22_P00016560 | 1,59013 | 1,61642 | -1,018389888 | N/A             | 101927513 | XR_242423    | LOC101927513     |
| A_33_P3343800  | 1,57762 | 1,60392 | -1,018396947 | N/A             | N/A       | N/A          | N/A              |
| A_21_P0002998  | 1,42106 | 1,44736 | -1,018396947 | N/A             | N/A       | N/A          | Inc-EPHA6-2      |
| A_23_P215549   | 10,7107 | 10,737  | -1,018396947 | ENST00000460248 | 5446      | NM_000940    | PON3             |
| A_33_P3293519  | 1,44539 | 1,47176 | -1,018446362 | N/A             | 347745    | NR_022010    | PWAR4            |
| A_21_P0010801  | 3,92421 | 3,95058 | -1,018446362 | N/A             | N/A       | N/A          | XLOC_I2_001421   |
| A_23_P342641   | 8,80624 | 8,83261 | -1,018446362 | ENST00000370859 | 204962    | NM_152697    | SLC44A5          |
| A_33_P3241056  | 1,36603 | 1,39242 | -1,01846048  | ENST00000616258 | 154872    | NM_001024603 | LOC154872        |
| A_33_P3398401  | 10,871  | 10,8974 | -1,01846754  | ENST00000488263 | 51185     | NM_016302    | CRBN             |
| A_21_P0010342  | 3,68135 | 3,70777 | -1,018481659 | N/A             | N/A       | N/A          | Inc-AC007663.1-1 |
| A_22_P00010350 | 5,99342 | 6,01985 | -1,018488718 | N/A             | 104355296 | NR_126412    | SCEL-AS1         |
| A_33_P3298775  | 2,21762 | 2,24405 | -1,018488718 | ENST00000613411 | 400668    | NM_214710    | PRSS57           |
| A_22_P00014387 | 1,63052 | 1,65699 | -1,018516957 | ENST00000420395 | N/A       | N/A          | N/A              |
| A_23_P121956   | 10,3953 | 10,4218 | -1,018538137 | ENST00000521655 | 54974     | NM_017872    | THG1L            |
| A_33_P3270262  | 1,38498 | 1,41148 | -1,018538137 | ENST00000407030 | N/A       | N/A          | N/A              |
| A_23_P118300   | 9,62179 | 9,64838 | -1,018601679 | ENST00000427358 | 81889     | NM_031208    | FAHD1            |
| A_33_P3389634  | 14,1273 | 14,1539 | -1,018608739 | ENST00000409724 | 822       | NM_001747    | CAPG             |
| A_22_P00008071 | 15,0422 | 15,0688 | -1,018608739 | ENST00000526377 | N/A       | BI766433     | N/A              |
| A_21_P0013781  | 6,38896 | 6,41561 | -1,018644042 | N/A             | N/A       | N/A          | XLOC_I2_015578   |
| A_22_P00015348 | 6,60432 | 6,63101 | -1,018672285 | N/A             | 283335    | NR_033854    | LOC283335        |
| A_32_P74712    | 10,7835 | 10,8102 | -1,018679346 | ENST00000296257 | 59343     | NM_021627    | SENP2            |
| A_33_P3409302  | 5,97285 | 5,99957 | -1,018693468 | ENST00000370483 | 1355      | NM_078470    | COX15            |
| A_23_P97112    | 1,58609 | 1,61282 | -1,018700529 | ENST00000333360 | 6401      | NM_000450    | SELE             |
| A_22_P00006794 | 1,46863 | 1,49537 | -1,01870759  | N/A             | N/A       | AA432032     | Inc-G3BP1-1      |
| A_23_P396934   | 1,47081 | 1,49759 | -1,018735835 | ENST00000309447 | 57495     | NM_001144990 | NWD2             |
| A_23_P64525    | 1,54423 | 1,57101 | -1,018735835 | ENST00000618712 | 5897      | NM_000536    | RAG2             |
| A_23_P136325   | 8,30585 | 8,33264 | -1,018742897 | ENST00000494757 | 147179    | NM_133264    | WIPF2            |
| A_23_P76961    | 17,9839 | 18,0107 | -1,018749958 | ENST00000557367 | 6235      | NM_001032    | RPS29            |
| A_23_P324718   | 5,86845 | 5,89525 | -1,018749958 | ENST00000382499 | 8867      | NM_203446    | SYNJ1            |
| A_23_P29836    | 13,2745 | 13,3013 | -1,018749958 | ENST00000477126 | 131616    | BC019851     | TMEM42           |
| A_33_P3322544  | 1,35986 | 1,38667 | -1,01875702  | N/A             | 100288254 | AK097772     | FLJ40453         |

|                |         |         |              |                 |           |              |                       |
|----------------|---------|---------|--------------|-----------------|-----------|--------------|-----------------------|
| A_24_P498854   | 1,35274 | 1,37957 | -1,018771143 | ENST00000425879 | 284998    | NR_038231    | LINC01114             |
| A_24_P391568   | 6,91144 | 6,93828 | -1,018778204 | ENST00000471844 | 405       | NM_001668    | ARNT                  |
| A_33_P3252539  | 1,35222 | 1,37909 | -1,018799389 | ENST00000398455 | 613227    | NM_001109619 | HIGD1C                |
| A_24_P336474   | 1,46772 | 1,49464 | -1,018834699 | ENST00000302101 | 4807      | NM_005598    | NHLH1                 |
| A_22_P00012713 | 1,44032 | 1,46725 | -1,018841761 | ENST00000522898 | N/A       | DB044366     | N/A                   |
| A_21_P0005352  | 3,42556 | 3,45251 | -1,018855885 | N/A             | N/A       | N/A          | lnc-CHST12-1          |
| A_21_P0008693  | 1,44839 | 1,47535 | -1,018862947 | N/A             | N/A       | N/A          | lnc-SYNM-1            |
| A_33_P3288919  | 1,36856 | 1,39552 | -1,018862947 | N/A             | N/A       | N/A          | N/A                   |
| A_21_P0004097  | 3,02035 | 3,04732 | -1,01887001  | ENST00000514869 | 101929261 | XR_241733    | LOC101929261          |
| A_33_P3343981  | 8,63935 | 8,66633 | -1,018877072 | ENST00000572798 | 9625      | N/A          | AATK                  |
| A_33_P3883116  | 1,57644 | 1,60342 | -1,018877072 | N/A             | 253962    | NR_038439    | CACNA1G-AS1           |
| A_21_P0005758  | 1,66775 | 1,69475 | -1,018891197 | N/A             | N/A       | N/A          | lnc-RP11-785H20.1.1-1 |
| A_21_P0000202  | 13,0448 | 13,0718 | -1,018891197 | ENST00000337755 | 11282     | NM_054013    | MGAT4B                |
| A_33_P3236218  | 3,77051 | 3,79751 | -1,018891197 | ENST00000512227 | N/A       | N/A          | N/A                   |
| A_22_P00012731 | 1,44827 | 1,47527 | -1,018891197 | N/A             | N/A       | N/A          | lnc-RAB6C-3           |
| A_24_P253827   | 10,129  | 10,156  | -1,018891197 | ENST00000621914 | 163       | NM_001030006 | AP2B1                 |
| A_22_P00018599 | 1,65089 | 1,6779  | -1,018898259 | N/A             | N/A       | BQ223407     | lnc-FGFR10P2-2        |
| A_21_P0011568  | 1,65494 | 1,68195 | -1,018898259 | N/A             | N/A       | N/A          | lnc-LGALS9B-2         |
| A_23_P123393   | 5,94865 | 5,97571 | -1,018933572 | ENST00000519589 | 3786      | NM_004519    | KCNQ3                 |
| A_22_P00013654 | 1,73255 | 1,75962 | -1,018940635 | ENST00000561598 | N/A       | BC034640     | N/A                   |
| A_21_P0006131  | 1,35673 | 1,38384 | -1,018968886 | ENST00000602614 | N/A       | N/A          | N/A                   |
| A_24_P46725    | 8,47925 | 8,50637 | -1,018975949 | ENST00000342415 | 154007    | NM_152551    | SNRNP48               |
| A_33_P3322274  | 3,07773 | 3,10486 | -1,018983012 | ENST00000489921 | 7133      | NM_001066    | TNFRSF1B              |
| A_22_P00011520 | 8,06656 | 8,0937  | -1,018990075 | N/A             | N/A       | N/A          | lnc-PAXIP1-1          |
| A_21_P0014846  | 1,49026 | 1,51741 | -1,018997138 | N/A             | 100288831 | NR_103443    | SRGAP3-AS3            |
| A_22_P00001016 | 1,46014 | 1,48731 | -1,019011265 | ENST00000616785 | N/A       | N/A          | N/A                   |
| A_33_P3248903  | 6,9329  | 6,96007 | -1,019011265 | ENST00000339464 | 7477      | NM_058238    | WNT7B                 |
| A_24_P282309   | 11,1919 | 11,2191 | -1,019032455 | ENST00000371489 | 26509     | NM_133337    | MYOF                  |
| A_23_P88222    | 1,44657 | 1,47379 | -1,019046582 | ENST00000392593 | 122618    | NM_138790    | PLD4                  |
| A_21_P0008498  | 2,80527 | 2,83251 | -1,019060709 | N/A             | N/A       | N/A          | lnc-TMEM179-2         |
| A_33_P3394554  | 1,37237 | 1,39963 | -1,019074836 | ENST00000618988 | 101929983 | NM_001300891 | LOC101929983          |
| A_21_P0003969  | 1,44268 | 1,46995 | -1,0190819   | ENST00000508097 | N/A       | N/A          | N/A                   |
| A_22_P00000696 | 1,40138 | 1,42866 | -1,019088963 | N/A             | N/A       | N/A          | lnc-ADAM22-2          |



|                |         |         |              |                 |           |              |                |
|----------------|---------|---------|--------------|-----------------|-----------|--------------|----------------|
| A_21_P0002234  | 1,58203 | 1,60932 | -1,019096027 | N/A             | N/A       | N/A          | Inc-ETAA1-6    |
| A_24_P118231   | 10,5627 | 10,59   | -1,019103091 | ENST00000554951 | 27109     | NM_001003803 | ATP5S          |
| A_22_P00010754 | 5,65736 | 5,68468 | -1,019117219 | ENST00000569835 | N/A       | AK172857     | N/A            |
| A_21_P0010404  | 1,55576 | 1,58311 | -1,019138411 | N/A             | N/A       | N/A          | Inc-CRYBA4-1   |
| A_22_P00024726 | 1,44493 | 1,47228 | -1,019138411 | N/A             | N/A       | N/A          | Inc-XRCC3-1    |
| A_21_P0004865  | 1,36126 | 1,38863 | -1,01915254  | N/A             | N/A       | N/A          | Inc-ABT1-4     |
| A_33_P3347152  | 3,64235 | 3,66974 | -1,019166668 | ENST00000371458 | 8464      | N/A          | SUPT3H         |
| A_33_P3211478  | 1,59766 | 1,62505 | -1,019166668 | N/A             | N/A       | N/A          | N/A            |
| A_23_P112113   | 11,6651 | 11,6925 | -1,019173732 | ENST00000318410 | 9897      | NM_014846    | KIAA0196       |
| A_23_P82990    | 1,44527 | 1,47268 | -1,019180797 | ENST00000262551 | 4969      | NM_033014    | OGN            |
| A_21_P0001072  | 1,37551 | 1,40293 | -1,019187861 | N/A             | N/A       | N/A          | Inc-C1orf124-1 |
| A_21_P0006848  | 1,41435 | 1,4418  | -1,019209055 | N/A             | N/A       | N/A          | Inc-LYZL1-5    |
| A_19_P00319793 | 1,57526 | 1,60274 | -1,019230249 | ENST00000319701 | 100287948 | NR_046249    | GM140          |
| A_21_P0007349  | 1,59302 | 1,62055 | -1,019265573 | N/A             | N/A       | N/A          | Inc-CHST1-1    |
| A_22_P00001464 | 1,46021 | 1,48775 | -1,019272638 | ENST00000584560 | N/A       | N/A          | N/A            |
| A_23_P382000   | 1,40339 | 1,43098 | -1,019307964 | ENST00000242375 | 6718      | NM_005989    | AKR1D1         |
| A_33_P3357087  | 12,6831 | 12,7107 | -1,01931503  | ENST00000380044 | 4358      | NM_002437    | MPV17          |
| A_33_P3246163  | 17,5911 | 17,6187 | -1,01931503  | ENST00000425640 | 6125      | NM_000969    | RPL5           |
| A_22_P00015491 | 1,57543 | 1,60303 | -1,01931503  | ENST00000507117 | 100144602 | NR_034138    | EPHA5-AS1      |
| A_21_P0010378  | 1,35758 | 1,38524 | -1,019357423 | ENST00000426354 | N/A       | N/A          | N/A            |
| A_21_P0013356  | 1,58467 | 1,61237 | -1,019385686 | N/A             | N/A       | N/A          | XLOC_I2_014051 |
| A_24_P340128   | 1,35261 | 1,38032 | -1,019392752 | ENST00000381297 | 286530    | NM_178129    | P2RY8          |
| A_24_P190873   | 1,462   | 1,48973 | -1,019406883 | ENST00000341785 | 148753    | NM_173509    | FAM163A        |
| A_22_P00023038 | 10,8305 | 10,8583 | -1,019456347 | ENST00000553051 | 3714      | NM_145159    | JAG2           |
| A_24_P108311   | 11,7807 | 11,8085 | -1,019456347 | ENST00000456173 | 23327     | NM_015277    | NEDD4L         |
| A_22_P00008420 | 1,46102 | 1,48882 | -1,019456347 | ENST00000422198 | N/A       | BX112290     | N/A            |
| A_33_P3232204  | 5,55201 | 5,57982 | -1,019463413 | N/A             | N/A       | AF289611     | N/A            |
| A_21_P0001845  | 1,57827 | 1,60609 | -1,019470479 | ENST00000433429 | 102723362 | N/A          | LOC102723362   |
| A_24_P149689   | 1,42368 | 1,45151 | -1,019477546 | ENST00000374806 | 5535      | NM_147180    | PPP3R2         |
| A_22_P00020671 | 1,46843 | 1,49627 | -1,019484612 | ENST00000472243 | N/A       | N/A          | N/A            |
| A_21_P0009897  | 1,66656 | 1,69441 | -1,019491679 | ENST00000416563 | N/A       | N/A          | N/A            |
| A_22_P00008307 | 2,56393 | 2,59179 | -1,019498745 | N/A             | N/A       | AK127406     | Inc-ITGB2-1    |
| A_21_P0003893  | 1,40387 | 1,43178 | -1,019534079 | N/A             | N/A       | N/A          | Inc-C4orf34-1  |

|                |         |         |              |                 |        |              |                 |
|----------------|---------|---------|--------------|-----------------|--------|--------------|-----------------|
| A_19_P00317532 | 1,75962 | 1,78753 | -1,019534079 | N/A             | N/A    | N/A          | Inc-ARF5-2      |
| A_22_P00008801 | 1,66403 | 1,69196 | -1,019548213 | ENST00000514413 | N/A    | N/A          | N/A             |
| A_23_P115190   | 3,55881 | 3,58674 | -1,019548213 | ENST00000369512 | 4803   | NM_002506    | NGF             |
| A_23_P55448    | 1,44612 | 1,47406 | -1,01955528  | ENST00000251643 | 3859   | NM_000223    | KRT12           |
| A_21_P0002558  | 3,89975 | 3,92773 | -1,019583548 | N/A             | N/A    | N/A          | Inc-DTYMK-2     |
| A_21_P0011590  | 1,35306 | 1,38104 | -1,019583548 | ENST00000453355 | 201181 | N/A          | ZNF385C         |
| A_23_P69877    | 11,7947 | 11,8227 | -1,019597683 | ENST00000512132 | 643836 | NM_152283    | ZFP62           |
| A_33_P3364060  | 9,08536 | 9,11342 | -1,019640088 | ENST00000522016 | 55806  | NM_005144    | HR              |
| A_33_P3323607  | 6,00196 | 6,03003 | -1,019647155 | ENST00000409717 | 223075 | N/A          | CCDC129         |
| A_21_P0010743  | 6,36995 | 6,39802 | -1,019647155 | ENST00000412855 | N/A    | N/A          | N/A             |
| A_33_P3216557  | 1,60155 | 1,62962 | -1,019647155 | N/A             | N/A    | N/A          | N/A             |
| A_21_P0003063  | 1,39349 | 1,42158 | -1,019661291 | N/A             | N/A    | N/A          | Inc-NLGN1-1     |
| A_22_P00002707 | 8,03576 | 8,06386 | -1,019668359 | N/A             | N/A    | N/A          | Inc-C20orf196-1 |
| A_23_P124742   | 12,7708 | 12,7989 | -1,019668359 | ENST00000265689 | 1119   | NM_001277    | CHKA            |
| A_23_P46182    | 18,5688 | 18,5969 | -1,019668359 | ENST00000474582 | 6202   | NM_001012    | RPS8            |
| A_22_P00005721 | 1,43731 | 1,46542 | -1,019675426 | ENST00000458146 | N/A    | N/A          | N/A             |
| A_33_P3340525  | 1,37852 | 1,40663 | -1,019675426 | ENST00000228567 | 341359 | NM_198992    | SYT10           |
| A_21_P0011259  | 3,58509 | 3,61324 | -1,019703698 | ENST00000560510 | N/A    | N/A          | N/A             |
| A_33_P3327208  | 4,63572 | 4,66388 | -1,019710766 | ENST00000453500 | N/A    | N/A          | N/A             |
| A_22_P00016369 | 1,36537 | 1,39353 | -1,019710766 | N/A             | N/A    | N/A          | Inc-TMEM18-14   |
| A_23_P211493   | 4,77665 | 4,80484 | -1,019731971 | ENST00000406725 | 164656 | NM_153609    | TMPRSS6         |
| A_23_P159833   | 15,5001 | 15,5283 | -1,019739039 | ENST00000371437 | 4694   | NM_004541    | NDUFA1          |
| A_22_P00009572 | 1,66044 | 1,68865 | -1,019746107 | N/A             | 283214 | NR_046090    | LOC283214       |
| A_33_P3268161  | 1,60582 | 1,63404 | -1,019753176 | N/A             | N/A    | N/A          | N/A             |
| A_33_P3384442  | 16,7201 | 16,7484 | -1,019809724 | ENST00000370677 | 3911   | BC015386     | LAMA5           |
| A_21_P0008684  | 1,35631 | 1,38464 | -1,019830931 | ENST00000554837 | 145820 | NR_027133    | LINC00924       |
| A_21_P0009987  | 1,64073 | 1,66909 | -1,019852138 | N/A             | N/A    | N/A          | Inc-CDH4-2      |
| A_21_P0008897  | 1,46481 | 1,49318 | -1,019859207 | ENST00000564041 | 283867 | N/A          | LINC00922       |
| A_21_P0008105  | 1,37095 | 1,39932 | -1,019859207 | N/A             | N/A    | N/A          | Inc-GPC6-1      |
| A_22_P00023357 | 1,65894 | 1,68732 | -1,019866276 | N/A             | N/A    | N/A          | Inc-LOXHD1-1    |
| A_21_P0007590  | 1,37218 | 1,40062 | -1,019908692 | ENST00000550042 | N/A    | XM_006719676 | N/A             |
| A_21_P0012727  | 1,39483 | 1,42328 | -1,019915762 | ENST00000509559 | N/A    | N/A          | N/A             |
| A_22_P00024528 | 1,6104  | 1,63888 | -1,01993697  | N/A             | N/A    | DB251918     | Inc-ESCO2-1     |

|                |         |         |              |                 |           |              |                    |
|----------------|---------|---------|--------------|-----------------|-----------|--------------|--------------------|
| A_22_P00004253 | 1,66541 | 1,69389 | -1,01993697  | ENST00000425763 | N/A       | N/A          | N/A                |
| A_21_P0008036  | 1,58426 | 1,61274 | -1,01993697  | N/A             | N/A       | N/A          | Inc-TNFRSF19-5     |
| A_22_P00010398 | 3,61798 | 3,64649 | -1,01995818  | ENST00000455487 | N/A       | N/A          | N/A                |
| A_21_P0011658  | 1,35444 | 1,38297 | -1,019972319 | ENST00000507941 | N/A       | N/A          | N/A                |
| A_22_P00022143 | 2,55822 | 2,58676 | -1,019979389 | ENST00000447864 | N/A       | N/A          | N/A                |
| A_33_P3342300  | 2,51083 | 2,53937 | -1,019979389 | ENST00000409285 | 30813     | NM_001256272 | VSX1               |
| A_22_P00005310 | 1,44439 | 1,47295 | -1,019993529 | N/A             | N/A       | N/A          | Inc-DNAJC25-1      |
| A_22_P00000416 | 1,39937 | 1,42794 | -1,020000599 | N/A             | N/A       | N/A          | Inc-AC069257.9.1-1 |
| A_21_P0006904  | 1,57741 | 1,60598 | -1,020000599 | N/A             | N/A       | N/A          | Inc-SORCS3-3       |
| A_33_P3338047  | 1,44293 | 1,47153 | -1,02002181  | ENST00000491019 | 375775    | NM_001098537 | PNPLA7             |
| A_22_P00023236 | 1,59687 | 1,62547 | -1,02002181  | N/A             | N/A       | AK026512     | Inc-RAB9B-1        |
| A_21_P0007478  | 2,39562 | 2,42423 | -1,02002888  | ENST00000551922 | 283332    | NR_026948    | LOC283332          |
| A_22_P00016748 | 1,4413  | 1,46991 | -1,02002888  | ENST00000569860 | N/A       | BC039108     | N/A                |
| A_23_P49539    | 8,00715 | 8,03576 | -1,02002888  | ENST00000307745 | 57597     | NM_001291324 | BAHCC1             |
| A_22_P00013520 | 2,72896 | 2,7576  | -1,020050091 | ENST00000503106 | 101928858 | N/A          | LOC101928858       |
| A_33_P3233000  | 7,26042 | 7,28911 | -1,020085444 | N/A             | N/A       | N/A          | N/A                |
| A_23_P55064    | 6,37166 | 6,40035 | -1,020085444 | ENST00000498311 | 55135     | NM_018081    | WRAP53             |
| A_22_P00000688 | 1,44068 | 1,46941 | -1,020113727 | N/A             | N/A       | N/A          | Inc-ADAM2-1        |
| A_21_P0009720  | 2,5634  | 2,59215 | -1,020127869 | N/A             | N/A       | N/A          | Inc-AC092295.7.1-1 |
| A_23_P108265   | 4,73319 | 4,76195 | -1,02013494  | ENST00000248072 | 26658     | NM_012377    | OR7C2              |
| A_33_P3418511  | 1,44529 | 1,47408 | -1,020156154 | ENST00000569990 | 283902    | NR_027756    | HCCAT5             |
| A_21_P0013545  | 2,57615 | 2,60495 | -1,020163225 | ENST00000614900 | N/A       | N/A          | N/A                |
| A_23_P80008    | 5,14237 | 5,17117 | -1,020163225 | ENST00000375994 | 85366     | NM_033118    | MYLK2              |
| A_33_P3249160  | 1,64508 | 1,67392 | -1,02019151  | ENST00000358047 | 442444    | NM_001013736 | FAM47C             |
| A_33_P3236902  | 7,09876 | 7,1276  | -1,02019151  | ENST00000483366 | 4584      | NM_005960    | MUC3A              |
| A_22_P00004472 | 1,434   | 1,46285 | -1,020198582 | ENST00000568585 | N/A       | BC032898     | N/A                |
| A_21_P0000554  | 1,35294 | 1,3818  | -1,020205653 | ENST00000477496 | 8997      | NR_028136    | KALRN              |
| A_22_P00010189 | 6,60564 | 6,63451 | -1,020212725 | N/A             | 101926937 | XR_244896    | LOC101926937       |
| A_24_P109838   | 1,61471 | 1,6436  | -1,020226868 | ENST00000551818 | 55117     | NM_182767    | SLC6A15            |
| A_22_P00006783 | 5,13217 | 5,16108 | -1,020241011 | ENST00000420213 | N/A       | N/A          | N/A                |
| A_21_P0009294  | 2,15306 | 2,18202 | -1,020276371 | N/A             | N/A       | N/A          | Inc-TP53-1         |
| A_22_P00014389 | 1,45498 | 1,48396 | -1,020290515 | ENST00000457632 | N/A       | N/A          | N/A                |
| A_22_P00013221 | 1,3785  | 1,40748 | -1,020290515 | ENST00000552718 | N/A       | N/A          | N/A                |

|                |         |         |              |                 |           |              |                       |
|----------------|---------|---------|--------------|-----------------|-----------|--------------|-----------------------|
| A_33_P3210637  | 1,35342 | 1,38241 | -1,020297587 | ENST00000314634 | 219428    | NM_001004701 | OR4C16                |
| A_22_P00021473 | 1,49541 | 1,52441 | -1,020304659 | N/A             | N/A       | BX107056     | Inc-CRAMP1L-1         |
| A_23_P120335   | 12,5644 | 12,5934 | -1,020304659 | ENST00000420864 | 10651     | NM_006554    | MTX2                  |
| A_21_P0009082  | 1,46828 | 1,49733 | -1,020340021 | N/A             | N/A       | N/A          | Inc-AC092327.1-3      |
| A_24_P238420   | 1,69152 | 1,72057 | -1,020340021 | ENST00000392023 | 57731     | NM_025213    | SPTBN4                |
| A_21_P0008634  | 1,38894 | 1,41801 | -1,020354166 | N/A             | N/A       | N/A          | Inc-UNC13C-2          |
| A_21_P0007355  | 1,65075 | 1,67992 | -1,020424894 | N/A             | N/A       | N/A          | Inc-SLC15A3-3         |
| A_24_P109101   | 1,63783 | 1,66702 | -1,02043904  | ENST00000396188 | 339967    | NM_182606    | TMPRSS11A             |
| A_23_P15864    | 13,3337 | 13,3629 | -1,020446113 | ENST00000256429 | 8932      | NM_003927    | MBD2                  |
| A_21_P0011979  | 3,39839 | 3,42761 | -1,02046026  | N/A             | N/A       | N/A          | XLOC_I2_008352        |
| A_22_P00003745 | 1,45905 | 1,48828 | -1,020467333 | N/A             | 101929645 | NR_109948    | LOC101929645          |
| A_33_P3297630  | 1,36778 | 1,39701 | -1,020467333 | ENST00000596647 | 729966    | NR_036575    | LOC729966             |
| A_22_P00013400 | 8,78901 | 8,81826 | -1,02048148  | ENST00000584273 | N/A       | N/A          | N/A                   |
| A_22_P00013469 | 1,4559  | 1,48517 | -1,020495627 | N/A             | N/A       | N/A          | Inc-RP11-324D17.1.1-4 |
| A_22_P00008323 | 1,36917 | 1,39845 | -1,0205027   | N/A             | N/A       | N/A          | Inc-ITGBL1-1          |
| A_23_P157352   | 12,8854 | 12,9147 | -1,020516848 | ENST00000469351 | 51650     | NM_016071    | MRPS33                |
| A_33_P3372635  | 1,35649 | 1,3858  | -1,020523921 | ENST00000451783 | 286828    | NR_003720    | CSN1S2AP              |
| A_33_P3216322  | 1,46483 | 1,49414 | -1,020523921 | ENST00000518244 | 57715     | XR_428710    | SEMA4G                |
| A_22_P00024663 | 1,35975 | 1,3891  | -1,020552217 | N/A             | N/A       | DA382327     | Inc-NPIPL2-2          |
| A_21_P0001113  | 1,36657 | 1,39593 | -1,020559291 | ENST00000417651 | 101928460 | N/A          | LOC101928460          |
| A_21_P0005724  | 1,65316 | 1,68254 | -1,020573439 | N/A             | N/A       | N/A          | Inc-CRISPLD1-1        |
| A_33_P3276381  | 1,46363 | 1,49304 | -1,020594661 | ENST00000480235 | N/A       | N/A          | N/A                   |
| A_33_P3337485  | 1,63243 | 1,66189 | -1,020630033 | ENST00000311330 | 57124     | NM_020404    | CD248                 |
| A_21_P0009654  | 1,59789 | 1,62735 | -1,020630033 | ENST00000593980 | 93429     | N/A          | DKFZp434J0226         |
| A_21_P0012027  | 1,58776 | 1,61722 | -1,020630033 | ENST00000451027 | 401014    | N/A          | TEX41                 |
| A_22_P00011739 | 1,61034 | 1,63981 | -1,020637107 | ENST00000523166 | N/A       | N/A          | N/A                   |
| A_33_P3331613  | 1,35418 | 1,38366 | -1,020644182 | ENST00000406011 | N/A       | N/A          | N/A                   |
| A_21_P0003046  | 1,98283 | 2,01233 | -1,020658331 | N/A             | N/A       | N/A          | Inc-P2RY1-3           |
| A_21_P0001017  | 1,89418 | 1,92369 | -1,020665406 | N/A             | N/A       | N/A          | Inc-PPIAL4C-6         |
| A_21_P0007110  | 6,40063 | 6,43015 | -1,020672481 | N/A             | N/A       | N/A          | Inc-WAPAL-1           |
| A_21_P0008974  | 1,35362 | 1,38315 | -1,020679555 | ENST00000569938 | N/A       | N/A          | N/A                   |
| A_23_P25945    | 7,35571 | 7,38526 | -1,020693705 | ENST00000556560 | 57143     | NM_020421    | ADCK1                 |
| A_33_P3315268  | 6,3236  | 6,35318 | -1,02071493  | ENST00000304620 | 196374    | NM_173352    | KRT78                 |

|                |         |         |              |                 |           |              |                 |
|----------------|---------|---------|--------------|-----------------|-----------|--------------|-----------------|
| A_23_P430948   | 1,61491 | 1,6445  | -1,020722005 | ENST00000342695 | 84239     | NM_032279    | ATP13A4         |
| A_21_P0009038  | 2,07509 | 2,10468 | -1,020722005 | N/A             | N/A       | N/A          | Inc-CES1-2      |
| A_22_P00022058 | 1,62326 | 1,65285 | -1,020722005 | ENST00000505628 | N/A       | N/A          | N/A             |
| A_23_P377376   | 10,6195 | 10,6491 | -1,02072908  | ENST00000377982 | 10097     | NM_001005386 | ACTR2           |
| A_21_P0010590  | 4,66847 | 4,69807 | -1,02072908  | N/A             | 441124    | XR_247074    | LOC441124       |
| A_21_P0000533  | 1,37159 | 1,40123 | -1,020757381 | N/A             | 149047    | NR_027310    | MGC27382        |
| A_21_P0012963  | 1,43676 | 1,46641 | -1,020764457 | ENST00000515513 | 101928176 | NR_125806    | LINC01411       |
| A_22_P00020637 | 1,43899 | 1,46868 | -1,020792759 | ENST00000513197 | N/A       | N/A          | N/A             |
| A_33_P3232688  | 4,22649 | 4,25619 | -1,020799834 | ENST00000381524 | N/A       | N/A          | N/A             |
| A_21_P0000809  | 6,37915 | 6,40886 | -1,02080691  | N/A             | 100505681 | NR_038452    | NAPA-AS1        |
| A_33_P3308292  | 1,60574 | 1,63546 | -1,020813986 | ENST00000374144 | 118461    | NM_001135196 | C10orf71        |
| A_24_P50950    | 6,05338 | 6,08313 | -1,020835213 | ENST00000492980 | N/A       | AK095289     | N/A             |
| A_24_P126139   | 1,43866 | 1,46842 | -1,020842289 | ENST00000243298 | 51209     | NM_016370    | RAB9B           |
| A_21_P0002911  | 1,46192 | 1,49177 | -1,020905974 | ENST00000460993 | 102724604 | N/A          | LOC102724604    |
| A_21_P0006682  | 1,40856 | 1,43842 | -1,020913051 | N/A             | N/A       | N/A          | Inc-C10orf35-2  |
| A_23_P354217   | 5,37168 | 5,40156 | -1,020927204 | ENST00000327259 | 256472    | NM_153266    | TMEM151A        |
| A_24_P24142    | 15,2982 | 15,3281 | -1,020941357 | ENST00000433054 | N/A       | N/A          | N/A             |
| A_33_P3280811  | 6,1461  | 6,176   | -1,020941357 | ENST00000488285 | 158248    | NM_144965    | TTC16           |
| A_33_P3209869  | 9,09747 | 9,1274  | -1,020962587 | ENST00000528107 | 55346     | NM_018393    | TCP11L1         |
| A_21_P0012504  | 1,58717 | 1,61712 | -1,020976741 | ENST00000481334 | N/A       | N/A          | N/A             |
| A_21_P0011072  | 1,36942 | 1,39937 | -1,020976741 | ENST00000537374 | N/A       | AY070435     | N/A             |
| A_22_P00021578 | 6,00074 | 6,03071 | -1,020990895 | ENST00000532620 | 254187    | NM_152762    | TSGA10IP        |
| A_33_P3372501  | 6,95345 | 6,98347 | -1,02102628  | ENST00000555391 | 23368     | NM_015316    | PPP1R13B        |
| A_21_P0007761  | 9,62241 | 9,65243 | -1,02102628  | ENST00000609228 | 51275     | NR_015404    | MAPKAPK5-AS1    |
| A_23_P208302   | 1,58296 | 1,61299 | -1,021033357 | ENST00000252490 | 344       | NM_000483    | APOC2           |
| A_22_P00002699 | 4,07593 | 4,10597 | -1,021040435 | N/A             | N/A       | N/A          | Inc-C20orf118-1 |
| A_33_P3304486  | 1,60075 | 1,63082 | -1,021061667 | ENST00000624397 | N/A       | XR_171256    | N/A             |
| A_21_P0007864  | 1,57884 | 1,60892 | -1,021068744 | ENST00000541258 | 101927694 | NR_104648    | LOC101927694    |
| A_33_P3265394  | 5,15062 | 5,18073 | -1,021089977 | ENST00000538098 | 54663     | XM_005274055 | WDR74           |
| A_21_P0014654  | 1,4418  | 1,47191 | -1,021089977 | N/A             | N/A       | N/A          | N/A             |
| A_21_P0001773  | 7,64028 | 7,6704  | -1,021097055 | ENST00000468141 | 100134259 | NR_024452    | LINC01119       |
| A_21_P0004482  | 1,39208 | 1,42221 | -1,021104132 | N/A             | N/A       | N/A          | Inc-C5orf38-1   |
| A_21_P0008783  | 1,63984 | 1,66997 | -1,021104132 | N/A             | N/A       | N/A          | Inc-FAM174B-1   |

|                |         |         |              |                 |           |              |              |
|----------------|---------|---------|--------------|-----------------|-----------|--------------|--------------|
| A_33_P3401990  | 6,53605 | 6,56619 | -1,02111121  | ENST00000248948 | 29802     | NM_013378    | VPREB3       |
| A_22_P00015209 | 1,59714 | 1,62728 | -1,02111121  | ENST00000538297 | N/A       | BC039484     | N/A          |
| A_21_P0007403  | 1,46224 | 1,49239 | -1,021118288 | ENST00000499809 | 283143    | NR_034148    | LINC00900    |
| A_33_P3421209  | 1,57774 | 1,60791 | -1,021132444 | ENST00000463398 | 56776     | NM_020066    | FMN2         |
| A_22_P00010103 | 6,03517 | 6,06536 | -1,0211466   | ENST00000413311 | N/A       | N/A          | N/A          |
| A_22_P00003191 | 4,70113 | 4,73133 | -1,021153678 | ENST00000560465 | N/A       | BU594852     | N/A          |
| A_33_P3332955  | 1,57188 | 1,60208 | -1,021153678 | ENST00000348658 | 51266     | NM_016509    | CLEC1B       |
| A_21_P0010122  | 1,60139 | 1,63159 | -1,021153678 | N/A             | N/A       | N/A          | Inc-ZFP64-1  |
| A_24_P544882   | 10,0322 | 10,0624 | -1,021153678 | ENST00000244763 | 6745      | NM_003144    | SSR1         |
| A_33_P3227761  | 1,35475 | 1,38501 | -1,021196147 | N/A             | N/A       | N/A          | Inc-CSN2-1   |
| A_23_P15493    | 12,7764 | 12,8067 | -1,021224461 | ENST00000393038 | 51651     | NM_016077    | PTRH2        |
| A_24_P82880    | 11,8273 | 11,8576 | -1,021224461 | ENST00000586193 | 7171      | NM_003290    | TPM4         |
| A_23_P16694    | 2,01122 | 2,04154 | -1,021238619 | N/A             | 29034     | NR_002763    | CPS1-IT1     |
| A_21_P0005209  | 3,21346 | 3,24382 | -1,021266934 | ENST00000436915 | N/A       | N/A          | N/A          |
| A_33_P3243163  | 1,61977 | 1,65016 | -1,021288171 | ENST00000440671 | N/A       | N/A          | N/A          |
| A_23_P140648   | 12,4053 | 12,4357 | -1,02129525  | ENST00000610365 | 23191     | NM_014608    | CYFIP1       |
| A_22_P00021400 | 1,59643 | 1,62684 | -1,021302329 | N/A             | N/A       | N/A          | Inc-MAFK-2   |
| A_23_P161659   | 4,66038 | 4,6908  | -1,021309408 | ENST0000020926  | 57586     | NM_020826    | SYT13        |
| A_33_P3242883  | 1,64957 | 1,68002 | -1,021330646 | ENST00000518156 | 1750      | NM_005222    | DLX6         |
| A_21_P0013252  | 1,60821 | 1,63866 | -1,021330646 | ENST00000447776 | N/A       | N/A          | N/A          |
| A_23_P87678    | 1,38969 | 1,42015 | -1,021337725 | ENST00000551767 | 1833      | NM_004950    | EPYC         |
| A_22_P00009056 | 1,992   | 2,02248 | -1,021351884 | N/A             | N/A       | AL833114     | Inc-LEMD3-1  |
| A_23_P212854   | 1,44236 | 1,47285 | -1,021358963 | ENST00000504951 | 2994      | XM_005262969 | GYPB         |
| A_33_P3217283  | 1,44273 | 1,47322 | -1,021358963 | N/A             | 101927250 | XR_243443    | LOC101927250 |
| A_33_P7717154  | 5,28113 | 5,31163 | -1,021366043 | N/A             | N/A       | BC034573     | Inc-RNF39-4  |
| A_33_P3316045  | 14,5709 | 14,6014 | -1,021366043 | ENST00000404767 | 26173     | NM_001080453 | INTS1        |
| A_21_P0005918  | 1,73354 | 1,76405 | -1,021373122 | N/A             | N/A       | N/A          | Inc-PLEC-1   |
| A_33_P3397801  | 8,86948 | 8,89999 | -1,021373122 | ENST00000589754 | 642484    | N/A          | FLJ45743     |
| A_21_P0003155  | 4,61619 | 4,64672 | -1,021387282 | ENST00000464359 | 151658    | NR_015414    | LINC00635    |
| A_21_P0006835  | 3,19972 | 3,23026 | -1,021394362 | N/A             | N/A       | N/A          | Inc-GATA3-3  |
| A_21_P0001907  | 1,4614  | 1,49194 | -1,021394362 | ENST00000439382 | N/A       | N/A          | N/A          |
| A_33_P3300022  | 1,63836 | 1,6689  | -1,021394362 | N/A             | N/A       | N/A          | N/A          |
| A_21_P0010765  | 1,62343 | 1,65402 | -1,021429761 | ENST00000417385 | N/A       | N/A          | N/A          |

|                |         |         |              |                 |           |              |                      |
|----------------|---------|---------|--------------|-----------------|-----------|--------------|----------------------|
| A_21_P0003068  | 1,45859 | 1,48921 | -1,021451001 | N/A             | N/A       | N/A          | Inc-RP11-433C9.2.1-1 |
| A_22_P00003879 | 4,65211 | 4,68275 | -1,021465162 | N/A             | N/A       | AA454075     | Inc-CENPM-1          |
| A_23_P75749    | 1,3569  | 1,38755 | -1,021472242 | ENST00000529732 | 10249     | NM_201648    | GLYAT                |
| A_22_P00023365 | 1,5881  | 1,61876 | -1,021479322 | ENST00000547795 | N/A       | AA442586     | N/A                  |
| A_33_P3235856  | 6,12192 | 6,15259 | -1,021486403 | ENST00000396204 | 6096      | NM_006914    | RORB                 |
| A_33_P3317253  | 8,22357 | 8,25424 | -1,021486403 | ENST00000378000 | 9317      | NM_001001484 | PTER                 |
| A_22_P00004184 | 1,47717 | 1,50786 | -1,021500564 | N/A             | N/A       | N/A          | Inc-CLIP1-1          |
| A_33_P3287922  | 12,7501 | 12,7808 | -1,021507644 | ENST00000449821 | 9675      | XR_244159    | TTI1                 |
| A_33_P3356216  | 9,26256 | 9,29327 | -1,021514725 | ENST00000392859 | 372       | NM_001655    | ARCN1                |
| A_22_P00011918 | 1,38453 | 1,41527 | -1,021535967 | ENST00000578763 | 100289255 | NR_036581    | LINC00675            |
| A_33_P3421480  | 1,40252 | 1,43331 | -1,021571371 | N/A             | 100133145 | AK124561     | LOC100133145         |
| A_23_P80827    | 11,2678 | 11,2986 | -1,021578452 | ENST00000241502 | 84248     | NM_001011537 | FYTTD1               |
| A_19_P00319154 | 1,58697 | 1,61781 | -1,021606777 | N/A             | 100126447 | XR_109781    | LOC100126447         |
| A_23_P209337   | 8,39768 | 8,42852 | -1,021606777 | ENST00000426075 | 151194    | NM_145280    | METTL21A             |
| A_21_P0006882  | 4,36519 | 4,39605 | -1,021620939 | N/A             | N/A       | N/A          | Inc-C10orf11-1       |
| A_23_P501538   | 10,9766 | 11,0075 | -1,021649265 | ENST00000317201 | 3200      | NM_153631    | HOXA3                |
| A_24_P810697   | 7,51965 | 7,55056 | -1,021656346 | ENST00000375036 | 439921    | NM_001008529 | MXRA7                |
| A_23_P84047    | 1,61066 | 1,64158 | -1,021663428 | ENST00000312600 | 140886    | NM_080832    | PABPC5               |
| A_22_P00021593 | 4,24264 | 4,27359 | -1,021684673 | N/A             | N/A       | BX089237     | Inc-C12orf66-3       |
| A_23_P127684   | 4,19828 | 4,22924 | -1,021691755 | ENST00000278409 | 338674    | NM_003697    | OR5F1                |
| A_22_P00009132 | 3,30846 | 3,33944 | -1,021705919 | ENST00000577000 | 284185    | N/A          | LINC00482            |
| A_22_P00016331 | 1,57434 | 1,60533 | -1,021713001 | N/A             | N/A       | N/A          | Inc-TMEM156-1        |
| A_23_P157449   | 10,4199 | 10,4509 | -1,021720083 | ENST00000353107 | 5440      | NM_005034    | POLR2K               |
| A_22_P00012072 | 5,90701 | 5,93803 | -1,021734247 | N/A             | N/A       | N/A          | Inc-PMEL-1           |
| A_21_P0001420  | 1,37778 | 1,40881 | -1,021741329 | N/A             | N/A       | N/A          | Inc-RRP15-1          |
| A_21_P0004802  | 1,44114 | 1,47219 | -1,021755493 | N/A             | N/A       | N/A          | Inc-PDE10A-1         |
| A_33_P3287379  | 8,11486 | 8,14592 | -1,021762576 | ENST00000306875 | 84342     | NM_032382    | COG8                 |
| A_33_P3291176  | 6,24117 | 6,27224 | -1,021769658 | ENST00000339485 | 400673    | NM_001017921 | VMAC                 |
| A_21_P0001665  | 8,02403 | 8,05515 | -1,021805071 | N/A             | N/A       | N/A          | Inc-APITD1-1         |
| A_21_P0003065  | 1,39229 | 1,42341 | -1,021805071 | N/A             | N/A       | N/A          | Inc-TTC14-2          |
| A_21_P0006319  | 1,57648 | 1,60762 | -1,021819236 | N/A             | N/A       | N/A          | Inc-DENND1A-2        |
| A_22_P00004194 | 1,45765 | 1,4888  | -1,021826319 | ENST00000550035 | N/A       | BG496636     | N/A                  |
| A_21_P0008898  | 1,35905 | 1,39023 | -1,021847567 | ENST00000563931 | N/A       | N/A          | N/A                  |

|                |         |         |              |                 |           |              |                |
|----------------|---------|---------|--------------|-----------------|-----------|--------------|----------------|
| A_21_P0009498  | 1,45485 | 1,48606 | -1,021868816 | N/A             | N/A       | N/A          | Inc-SOCS6-5    |
| A_21_P0008381  | 1,43477 | 1,46598 | -1,021868816 | ENST00000553378 | N/A       | N/A          | N/A            |
| A_33_P3277318  | 1,44901 | 1,48024 | -1,021882982 | ENST00000554451 | N/A       | N/A          | N/A            |
| A_22_P00005296 | 4,47604 | 4,50728 | -1,021890065 | N/A             | N/A       | N/A          | Inc-DNAJB2-1   |
| A_21_P0007434  | 1,45014 | 1,48138 | -1,021890065 | ENST00000528119 | N/A       | N/A          | N/A            |
| A_21_P0007747  | 4,14688 | 4,17813 | -1,021897149 | ENST00000549004 | 643770    | NR_038383    | LOC643770      |
| A_23_P200138   | 1,63118 | 1,66245 | -1,021911315 | ENST00000289707 | 56833     | NM_020125    | SLAMF8         |
| A_33_P3392787  | 2,00777 | 2,03905 | -1,021918399 | ENST00000369703 | 159686    | NM_001008723 | CFAP58         |
| A_33_P3326553  | 9,24623 | 9,27752 | -1,021925482 | ENST00000375782 | 388595    | N/A          | TMEM82         |
| A_32_P8251     | 13,7301 | 13,7614 | -1,021932566 | ENST00000534320 | 57661     | NM_020901    | PHRF1          |
| A_21_P0000114  | 1,45564 | 1,48694 | -1,021932566 | ENST00000520772 | 8749      | NM_001190956 | ADAM18         |
| A_32_P58699    | 1,35453 | 1,38583 | -1,021932566 | ENST00000378805 | 220416    | NM_001282460 | LRRC63         |
| A_22_P00006298 | 1,3649  | 1,39622 | -1,021946733 | ENST00000420828 | N/A       | N/A          | N/A            |
| A_23_P83683    | 2,49839 | 2,52974 | -1,021967984 | ENST00000232603 | 27136     | NM_014429    | MORC1          |
| A_33_P3236272  | 4,19321 | 4,22457 | -1,021975067 | ENST00000286122 | 54971     | NM_001173539 | BANP           |
| A_32_P207180   | 10,4451 | 10,4765 | -1,022003403 | ENST00000573569 | 339231    | NM_001040025 | ARL16          |
| A_24_P159094   | 10,6331 | 10,6645 | -1,022003403 | ENST00000619583 | 55148     | NM_175748    | UBR7           |
| A_33_P3241325  | 5,15089 | 5,18233 | -1,022031739 | N/A             | 92659     | NR_015454    | MAFG-AS1       |
| A_22_P00005899 | 1,3554  | 1,38685 | -1,022038823 | ENST00000531784 | N/A       | N/A          | N/A            |
| A_33_P3409124  | 7,49795 | 7,5294  | -1,022038823 | ENST00000312521 | 9975      | NM_005126    | NR1D2          |
| A_22_P00022821 | 1,38765 | 1,41911 | -1,022045908 | N/A             | N/A       | DA320973     | Inc-DIO2-5     |
| A_21_P0008697  | 1,65016 | 1,68166 | -1,022074245 | N/A             | N/A       | N/A          | Inc-ASB7-4     |
| A_21_P0009488  | 1,55585 | 1,58736 | -1,02208133  | N/A             | N/A       | N/A          | Inc-MALT1-1    |
| A_22_P00008901 | 1,45991 | 1,49143 | -1,022088414 | ENST00000433637 | 101927314 | NR_110757    | LOC101927314   |
| A_33_P3283147  | 1,57765 | 1,60919 | -1,022102584 | ENST00000528616 | 219487    | NM_001005245 | OR5M11         |
| A_33_P3310976  | 8,4275  | 8,45907 | -1,022123838 | N/A             | N/A       | N/A          | Inc-CDH4-1     |
| A_33_P3508342  | 1,63475 | 1,66632 | -1,022123838 | ENST00000276737 | 51059     | NM_015912    | FAM135B        |
| A_21_P0012934  | 1,62382 | 1,65539 | -1,022123838 | N/A             | N/A       | N/A          | XLOC_I2_012323 |
| A_22_P00016756 | 2,6806  | 2,71218 | -1,022130923 | ENST00000453558 | 414778    | NR_052012    | HCG17          |
| A_33_P3359846  | 4,13795 | 4,16954 | -1,022138008 | N/A             | N/A       | N/A          | N/A            |
| A_33_P3404775  | 13,3296 | 13,3612 | -1,022145093 | ENST00000468476 | 8761      | NM_001135653 | PABPC4         |
| A_33_P3210885  | 5,94479 | 5,97642 | -1,022166348 | ENST00000350425 | 538       | NM_001282224 | ATP7A          |
| A_21_P0014081  | 1,57358 | 1,60523 | -1,022180518 | N/A             | N/A       | N/A          | Inc-NBPF3-4    |



|                |         |         |              |                 |           |              |                      |
|----------------|---------|---------|--------------|-----------------|-----------|--------------|----------------------|
| A_22_P00012224 | 1,42905 | 1,46071 | -1,022187603 | ENST00000550177 | N/A       | XR_110357    | N/A                  |
| A_23_P162807   | 12,7484 | 12,7801 | -1,022215945 | ENST00000461675 | 10240     | NM_005830    | MRPS31               |
| A_22_P00008765 | 1,45942 | 1,49117 | -1,022251373 | N/A             | N/A       | DB095685     | Inc-KIF15-1          |
| A_21_P0005243  | 1,435   | 1,46679 | -1,022279716 | ENST00000446000 | 101927378 | N/A          | LOC101927378         |
| A_24_P195794   | 16,7406 | 16,7724 | -1,022286802 | ENST00000488906 | N/A       | AK130930     | N/A                  |
| A_32_P49423    | 14,1381 | 14,1699 | -1,022286802 | ENST00000399556 | 4869      | NM_001037738 | NPM1                 |
| A_23_P20480    | 8,60029 | 8,63209 | -1,022286802 | ENST00000220659 | 55290     | NM_018310    | BRF2                 |
| A_23_P25994    | 10,0993 | 10,1312 | -1,022357664 | ENST00000557725 | 5641      | NM_001008530 | LGMN                 |
| A_21_P0001254  | 7,30873 | 7,34064 | -1,02236475  | N/A             | N/A       | N/A          | Inc-MIB2-1           |
| A_23_P66481    | 1,43284 | 1,4648  | -1,022400183 | ENST00000331238 | 146760    | NM_178568    | RTN4RL1              |
| A_22_P00000794 | 4,07735 | 4,10932 | -1,02240727  | N/A             | N/A       | N/A          | Inc-ADSS-2           |
| A_33_P6816082  | 1,63926 | 1,67125 | -1,022421444 | ENST00000493529 | 646168    | NR_033843    | LINC01330            |
| A_23_P252825   | 11,0339 | 11,0659 | -1,022428531 | ENST00000545718 | 22937     | NM_012235    | SCAP                 |
| A_33_P3291034  | 1,38744 | 1,41944 | -1,022428531 | N/A             | 390664    | NM_207419    | C1QTNF8              |
| A_24_P324640   | 9,71963 | 9,75164 | -1,022435618 | ENST00000600775 | 27300     | NM_014480    | ZNF544               |
| A_21_P0014157  | 6,95874 | 6,99075 | -1,022435618 | N/A             | N/A       | N/A          | N/A                  |
| A_24_P270496   | 1,62035 | 1,65239 | -1,022456879 | ENST00000344429 | 4857      | NM_006491    | NOVA1                |
| A_21_P0014292  | 1,40506 | 1,43712 | -1,022471053 | ENST00000558061 | N/A       | XR_109187    | N/A                  |
| A_22_P00003202 | 1,39035 | 1,42241 | -1,022471053 | ENST00000565082 | N/A       | N/A          | N/A                  |
| A_21_P0005602  | 1,57716 | 1,60923 | -1,02247814  | N/A             | N/A       | N/A          | Inc-RP4-725G10.1.1-5 |
| A_23_P104146   | 9,77654 | 9,80861 | -1,02247814  | ENST00000314607 | 9202      | NM_005095    | ZMYM4                |
| A_22_P00002901 | 3,80057 | 3,83266 | -1,022492315 | N/A             | 92070     | NR_033339    | CTBP1-AS2            |
| A_33_P3439919  | 1,35998 | 1,39208 | -1,022499402 | ENST00000521444 | N/A       | N/A          | N/A                  |
| A_33_P3759592  | 17,5756 | 17,6077 | -1,022499402 | N/A             | 246318    | AK023835     | FLJ13773             |
| A_23_P204375   | 8,26846 | 8,30058 | -1,022513577 | ENST00000329858 | 57121     | NM_020400    | LPAR5                |
| A_21_P0002058  | 1,356   | 1,38813 | -1,022520665 | N/A             | N/A       | N/A          | Inc-RAB1A-2          |
| A_19_P00316726 | 10,1898 | 10,222  | -1,022570279 | ENST00000421406 | 100500849 | N/A          | MIR3916              |
| A_23_P369485   | 1,59164 | 1,62384 | -1,022570279 | N/A             | 90768     | NR_027107    | LOC90768             |
| A_22_P00007130 | 4,40881 | 4,44101 | -1,022570279 | ENST00000423504 | N/A       | DA142060     | N/A                  |
| A_22_P00013658 | 1,45778 | 1,48999 | -1,022577367 | ENST00000519248 | N/A       | N/A          | N/A                  |
| A_21_P0000964  | 1,63526 | 1,66748 | -1,022584455 | ENST00000417514 | 284551    | NR_027085    | LINC01226            |
| A_22_P00013050 | 1,65367 | 1,68591 | -1,022598631 | ENST00000570153 | N/A       | AF297014     | N/A                  |
| A_21_P0006708  | 1,61568 | 1,64794 | -1,022612808 | N/A             | N/A       | N/A          | Inc-EMX2-5           |

|                |         |         |              |                 |           |              |                |
|----------------|---------|---------|--------------|-----------------|-----------|--------------|----------------|
| A_23_P317729   | 1,59129 | 1,62356 | -1,022619896 | ENST00000303846 | 121340    | NM_152860    | SP7            |
| A_23_P71855    | 6,25142 | 6,2837  | -1,022626984 | ENST00000223642 | 727       | NM_001735    | C5             |
| A_23_P40192    | 11,1834 | 11,2157 | -1,022641161 | ENST00000537909 | 64405     | NM_021248    | CDH22          |
| A_21_P0004144  | 1,65953 | 1,69185 | -1,022655338 | ENST00000506612 | N/A       | N/A          | N/A            |
| A_21_P0005780  | 1,60634 | 1,63868 | -1,022669515 | N/A             | N/A       | N/A          | Inc-ZNF623-1   |
| A_33_P3366179  | 1,57272 | 1,6051  | -1,02269787  | N/A             | N/A       | N/A          | N/A            |
| A_23_P87603    | 10,9107 | 10,9431 | -1,022712047 | ENST00000549679 | 6895      | NM_134323    | TARBP2         |
| A_22_P00020223 | 1,43842 | 1,47082 | -1,022712047 | N/A             | N/A       | N/A          | Inc-LETM2-1    |
| A_21_P0004174  | 1,42433 | 1,45676 | -1,022733314 | ENST00000515364 | N/A       | N/A          | N/A            |
| A_22_P00021939 | 1,42857 | 1,46102 | -1,022747492 | ENST00000437881 | N/A       | N/A          | N/A            |
| A_22_P00022066 | 1,65461 | 1,68707 | -1,022754582 | N/A             | N/A       | BC039473     | Inc-HLTF-1     |
| A_22_P00008766 | 4,0139  | 4,04638 | -1,02276876  | N/A             | N/A       | N/A          | Inc-KIF16B-1   |
| A_21_P0002306  | 4,1526  | 4,18509 | -1,022775849 | N/A             | N/A       | N/A          | Inc-UPP2-2     |
| A_21_P0011351  | 1,35814 | 1,39063 | -1,022775849 | N/A             | N/A       | N/A          | XLOC_I2_004843 |
| A_33_P3363341  | 1,42185 | 1,45435 | -1,022782939 | ENST00000619900 | 389177    | NM_001164436 | TMEM212        |
| A_33_P3262020  | 8,0247  | 8,0572  | -1,022782939 | ENST00000224181 | 733       | NM_000606    | C8G            |
| A_33_P3355538  | 1,36386 | 1,39642 | -1,022825476 | ENST00000494398 | 375298    | NM_001030311 | CERKL          |
| A_22_P00001856 | 1,43294 | 1,46551 | -1,022832566 | N/A             | 100507098 | NR_038264    | ADAMTS9-AS2    |
| A_33_P3375668  | 18,0222 | 18,0548 | -1,022853835 | ENST00000396982 | N/A       | N/A          | N/A            |
| A_33_P3373418  | 1,36236 | 1,39501 | -1,022889285 | N/A             | N/A       | N/A          | N/A            |
| A_23_P212945   | 1,6278  | 1,66046 | -1,022896375 | ENST00000533547 | 3347      | NM_000200    | HTN3           |
| A_21_P0010439  | 1,5865  | 1,61919 | -1,022917646 | N/A             | N/A       | N/A          | Inc-PVALB-2    |
| A_24_P316074   | 16,7484 | 16,7811 | -1,022924736 | ENST00000333817 | N/A       | N/A          | N/A            |
| A_23_P54540    | 11,11   | 11,1427 | -1,022924736 | ENST00000263791 | 440275    | NM_001013703 | EIF2AK4        |
| A_21_P0013238  | 5,80547 | 5,83817 | -1,022924736 | ENST00000423746 | N/A       | XR_242290    | N/A            |
| A_24_P595717   | 1,35849 | 1,3912  | -1,022931827 | ENST00000475900 | 165186    | NM_199280    | FAM179A        |
| A_21_P0002335  | 1,45736 | 1,49009 | -1,022946008 | N/A             | N/A       | N/A          | Inc-OBFC2A-3   |
| A_33_P3333282  | 6,31575 | 6,34848 | -1,022946008 | ENST00000293829 | 2256      | BC032502     | FGF11          |
| A_22_P00006377 | 4,90527 | 4,93801 | -1,022953098 | N/A             | N/A       | BQ721467     | Inc-FBN1-3     |
| A_33_P3798268  | 1,38048 | 1,41324 | -1,02296728  | ENST00000412578 | 285370    | NR_027102    | LINC00606      |
| A_21_P0001740  | 1,45723 | 1,49    | -1,02297437  | N/A             | N/A       | N/A          | Inc-WARS2-1    |
| A_33_P3707547  | 1,4371  | 1,46988 | -1,022981461 | N/A             | 541467    | BC045815     | LOC541467      |
| A_21_P0002827  | 1,36732 | 1,40011 | -1,022988552 | ENST00000440556 | N/A       | N/A          | N/A            |

|                |         |         |              |                 |           |              |                    |
|----------------|---------|---------|--------------|-----------------|-----------|--------------|--------------------|
| A_19_P00808320 | 13,1513 | 13,1841 | -1,022995643 | N/A             | N/A       | BC014023     | Inc-PPA2-1         |
| A_21_P0006204  | 1,6165  | 1,6493  | -1,022995643 | N/A             | N/A       | N/A          | Inc-RAD23B-6       |
| A_23_P311150   | 12,2437 | 12,2765 | -1,022995643 | ENST00000298130 | 171546    | NM_138288    | SPTSSA             |
| A_21_P0004619  | 1,57427 | 1,6071  | -1,023016915 | ENST00000414364 | 100505879 | NR_103750    | KIF25-AS1          |
| A_22_P00009531 | 1,43056 | 1,46348 | -1,023080737 | N/A             | N/A       | N/A          | Inc-MAP1LC3B-2     |
| A_21_P0011188  | 1,65914 | 1,69211 | -1,023116194 | ENST00000438352 | 100874176 | N/A          | LINC00448          |
| A_22_P00008837 | 1,73971 | 1,77269 | -1,023123286 | ENST00000419499 | N/A       | AK056689     | N/A                |
| A_23_P90944    | 1,37334 | 1,40632 | -1,023123286 | ENST00000424326 | 6332      | NM_002976    | SCN7A              |
| A_22_P00014248 | 14,3128 | 14,3458 | -1,02313747  | ENST00000439105 | N/A       | N/A          | N/A                |
| A_33_P3358686  | 3,70931 | 3,74237 | -1,023180022 | N/A             | N/A       | N/A          | N/A                |
| A_23_P128201   | 1,39289 | 1,42596 | -1,023187114 | ENST00000548221 | 3071      | NM_005337    | NCKAP1L            |
| A_21_P0003363  | 1,43209 | 1,46516 | -1,023187114 | ENST00000511634 | N/A       | N/A          | N/A                |
| A_33_P3320393  | 15,3438 | 15,3769 | -1,023208391 | ENST00000372940 | 51021     | NM_016065    | MRPS16             |
| A_21_P0007890  | 6,75027 | 6,78342 | -1,023243853 | ENST00000551629 | N/A       | N/A          | N/A                |
| A_21_P0007741  | 1,43914 | 1,47231 | -1,023258038 | N/A             | N/A       | N/A          | Inc-EEA1-1         |
| A_33_P3220415  | 6,44493 | 6,47812 | -1,023272224 | ENST00000555214 | 2592      | AK096026     | GALT               |
| A_19_P00804950 | 6,29328 | 6,32647 | -1,023272224 | N/A             | N/A       | N/A          | Inc-AC114947.1.1-2 |
| A_22_P00013341 | 1,61182 | 1,64501 | -1,023272224 | ENST00000522643 | N/A       | N/A          | N/A                |
| A_22_P00009636 | 1,99304 | 2,02626 | -1,023293502 | ENST00000563417 | N/A       | BC040600     | N/A                |
| A_19_P00317671 | 1,84311 | 1,87638 | -1,023328968 | N/A             | N/A       | BC128222     | N/A                |
| A_33_P3375636  | 1,43729 | 1,47058 | -1,023343154 | ENST00000377365 | 100131897 | NM_001129891 | FAM196B            |
| A_22_P00010770 | 1,72713 | 1,76043 | -1,023350247 | N/A             | 101929591 | NR_109956    | KIZ-AS1            |
| A_33_P3403615  | 11,7081 | 11,7414 | -1,023350247 | ENST00000618612 | 2280      | NM_000801    | FKBP1A             |
| A_33_P3224878  | 1,57202 | 1,60537 | -1,023385715 | ENST00000476089 | 3676      | NM_000885    | ITGA4              |
| A_33_P3377439  | 1,36066 | 1,39401 | -1,023385715 | ENST00000335040 | 138802    | NM_001004483 | OR13C8             |
| A_33_P3408953  | 5,97548 | 6,00886 | -1,023406995 | ENST00000619998 | 91227     | NM_001282879 | GGTLC2             |
| A_22_P00024803 | 18,7758 | 18,8092 | -1,023421183 | N/A             | N/A       | CN283862     | Inc-WWC2-1         |
| A_22_P00017353 | 12,9601 | 12,9935 | -1,023421183 | ENST00000452501 | N/A       | N/A          | N/A                |
| A_22_P00022197 | 1,5261  | 1,5595  | -1,023421183 | ENST00000517961 | N/A       | N/A          | N/A                |
| A_23_P18739    | 6,5157  | 6,54912 | -1,023435371 | ENST00000296582 | 55751     | NM_018241    | TMEM184C           |
| A_23_P154420   | 1,40908 | 1,44254 | -1,023463747 | ENST00000406506 | 3238      | NM_021193    | HOXD12             |
| A_21_P0012420  | 1,40215 | 1,43563 | -1,023477935 | ENST00000454508 | 100507391 | N/A          | LOC100507391       |
| A_23_P416813   | 1,64463 | 1,67812 | -1,023485029 | ENST00000392161 | 284406    | NM_133466    | ZFP82              |

|                |         |         |              |                 |           |              |                   |
|----------------|---------|---------|--------------|-----------------|-----------|--------------|-------------------|
| A_23_P135778   | 11,1029 | 11,1364 | -1,023492124 | ENST00000490777 | 55844     | NM_018461    | PPP2R2D           |
| A_23_P103328   | 1,57608 | 1,60959 | -1,023499218 | ENST00000460330 | 5733      | NM_198714    | PTGER3            |
| A_21_P0003019  | 1,58692 | 1,62044 | -1,023506312 | N/A             | N/A       | N/A          | Inc-NR112-1       |
| A_21_P0003540  | 1,43617 | 1,46969 | -1,023506312 | ENST00000508815 | N/A       | N/A          | N/A               |
| A_21_P0002327  | 1,58907 | 1,6226  | -1,023513407 | N/A             | N/A       | N/A          | Inc-ZNF804A-1     |
| A_22_P00019313 | 1,44001 | 1,47355 | -1,023520501 | N/A             | 100874282 | N/A          | MLIP-IT1          |
| A_33_P6816142  | 1,36945 | 1,40299 | -1,023520501 | ENST00000433396 | 100507073 | NR_110156    | LOC100507073      |
| A_23_P73632    | 1,60047 | 1,63401 | -1,023520501 | ENST00000378970 | 190       | NM_000475    | NROB1             |
| A_21_P0003072  | 4,59749 | 4,63114 | -1,023598544 | N/A             | N/A       | N/A          | Inc-EIF2B5-2      |
| A_33_P3294042  | 1,43047 | 1,46416 | -1,023626924 | ENST00000390364 | N/A       | D13084       | N/A               |
| A_33_P3229375  | 2,63318 | 2,66687 | -1,023626924 | ENST00000408907 | 122706    | NM_001099780 | PSMB11            |
| A_22_P00009285 | 1,436   | 1,46979 | -1,023697879 | N/A             | N/A       | N/A          | Inc-LRRC30-2      |
| A_21_P0010655  | 13,4581 | 13,4919 | -1,023704975 | ENST00000427962 | N/A       | N/A          | N/A               |
| A_33_P3780311  | 2,17198 | 2,20578 | -1,023704975 | N/A             | 349408    | NR_030727    | TLR8-AS1          |
| A_33_P3249897  | 1,63462 | 1,66843 | -1,023712071 | N/A             | N/A       | N/A          | N/A               |
| A_24_P126425   | 4,8947  | 4,92852 | -1,023719167 | ENST00000458257 | 84182     | NM_032222    | FAM188B           |
| A_22_P00002466 | 3,5715  | 3,60533 | -1,023726263 | ENST00000567484 | N/A       | AL109704     | N/A               |
| A_21_P0004405  | 1,5927  | 1,62653 | -1,023726263 | N/A             | N/A       | N/A          | Inc-CCDC125-6     |
| A_21_P0014723  | 1,43513 | 1,46896 | -1,023726263 | N/A             | N/A       | N/A          | N/A               |
| A_33_P3273143  | 2,54947 | 2,58337 | -1,023775935 | ENST00000406566 | N/A       | BC093099     | N/A               |
| A_24_P88565    | 10,2363 | 10,2702 | -1,023775935 | ENST00000484157 | 55974     | NM_018845    | SLC50A1           |
| A_22_P00012297 | 1,60324 | 1,63716 | -1,023790128 | N/A             | 100874275 | N/A          | LINC01216         |
| A_21_P0008238  | 1,43118 | 1,46511 | -1,023797224 | N/A             | N/A       | N/A          | Inc-AL445989.1-19 |
| A_22_P00000670 | 1,38487 | 1,4188  | -1,023797224 | ENST00000449485 | N/A       | N/A          | N/A               |
| A_33_P3214750  | 1,3764  | 1,41034 | -1,023804321 | N/A             | N/A       | N/A          | N/A               |
| A_33_P3407034  | 1,62124 | 1,65519 | -1,023811417 | ENST00000288135 | 3815      | NM_000222    | KIT               |
| A_21_P0001642  | 1,61554 | 1,64949 | -1,023811417 | N/A             | N/A       | N/A          | Inc-SIPA1L2-1     |
| A_22_P00010592 | 1,35879 | 1,39275 | -1,023818514 | ENST00000562322 | N/A       | N/A          | N/A               |
| A_33_P3212432  | 1,58754 | 1,62154 | -1,0238469   | ENST00000617347 | N/A       | X04925       | N/A               |
| A_23_P47377    | 13,2967 | 13,3307 | -1,0238469   | ENST00000278353 | 51144     | NM_016142    | HSD17B12          |
| A_22_P00010589 | 1,42855 | 1,46257 | -1,023861094 | ENST00000555642 | N/A       | N/A          | N/A               |
| A_33_P3355418  | 5,08306 | 5,11711 | -1,023882385 | ENST00000421325 | 123624    | NM_152336    | AGBL1             |
| A_22_P00002576 | 5,68297 | 5,71703 | -1,023889482 | N/A             | N/A       | DB058128     | Inc-C17orf97-6    |

|                |         |         |              |                 |           |              |                |
|----------------|---------|---------|--------------|-----------------|-----------|--------------|----------------|
| A_22_P00016527 | 1,56721 | 1,60129 | -1,023903676 | ENST00000549551 | N/A       | N/A          | N/A            |
| A_33_P3256828  | 1,43453 | 1,46863 | -1,023917871 | ENST00000606154 | N/A       | AK130711     | N/A            |
| A_22_P00001349 | 5,8606  | 5,8947  | -1,023917871 | ENST00000580684 | 339290    | NR_015389    | LINC00667      |
| A_24_P382579   | 6,26547 | 6,29961 | -1,02394626  | ENST00000217386 | 5020      | NM_000915    | OXT            |
| A_19_P00809455 | 4,61596 | 4,65013 | -1,023967553 | N/A             | N/A       | N/A          | lnc-HES1-3     |
| A_21_P0013223  | 1,58006 | 1,61423 | -1,023967553 | N/A             | N/A       | N/A          | XLOC_I2_013457 |
| A_22_P00012073 | 1,70758 | 1,74175 | -1,023967553 | N/A             | N/A       | N/A          | lnc-PMEL-2     |
| A_21_P0011803  | 1,61746 | 1,65164 | -1,02397465  | N/A             | N/A       | N/A          | XLOC_I2_007315 |
| A_23_P395595   | 10,9076 | 10,9418 | -1,023988846 | ENST00000263773 | 23360     | NM_015308    | FNBP4          |
| A_33_P3399101  | 8,45089 | 8,4851  | -1,023995943 | ENST00000342020 | 1514      | N/A          | CTSL           |
| A_22_P00023937 | 1,79771 | 1,83192 | -1,023995943 | N/A             | 100874231 | NR_046531    | SPATA13-AS1    |
| A_23_P203183   | 1,4201  | 1,45432 | -1,024003041 | ENST00000227667 | 345       | NM_000040    | APOC3          |
| A_33_P3368014  | 6,60638 | 6,64061 | -1,024010139 | ENST00000356742 | 84329     | NM_001040107 | HVCN1          |
| A_21_P0014608  | 4,29373 | 4,32797 | -1,024017237 | ENST00000506599 | 102724021 | XR_425148    | LOC102724021   |
| A_33_P3330990  | 5,95775 | 5,99202 | -1,024038531 | ENST00000444323 | N/A       | AI218952     | N/A            |
| A_24_P314179   | 10,9447 | 10,979  | -1,024059826 | ENST00000360214 | 2114      | NM_005239    | ETS2           |
| A_22_P00006706 | 1,62913 | 1,66343 | -1,024059826 | N/A             | N/A       | N/A          | lnc-FRG2C-6    |
| A_23_P98616    | 1,45453 | 1,48886 | -1,02408112  | ENST00000458333 | 9356      | NM_153277    | SLC22A6        |
| A_21_P0012635  | 1,54994 | 1,58431 | -1,024109514 | N/A             | N/A       | N/A          | XLOC_I2_010947 |
| A_23_P116850   | 1,38809 | 1,42247 | -1,024116613 | ENST00000309680 | 3849      | NM_000423    | KRT2           |
| A_21_P0004547  | 3,26249 | 3,29687 | -1,024116613 | N/A             | N/A       | N/A          | lnc-HNRNPAB-2  |
| A_21_P0011368  | 1,43679 | 1,47118 | -1,024123712 | N/A             | 101928134 | NR_120327    | LOC101928134   |
| A_22_P00002571 | 1,63716 | 1,6716  | -1,024159206 | N/A             | N/A       | N/A          | lnc-C17orf97-2 |
| A_21_P0008320  | 1,39092 | 1,42536 | -1,024159206 | N/A             | N/A       | N/A          | lnc-PAX9-5     |
| A_22_P00002938 | 8,56832 | 8,60282 | -1,0242018   | N/A             | 648987    | NR_034086    | LOC648987      |
| A_24_P346126   | 10,3201 | 10,3546 | -1,0242018   | ENST00000317633 | 8293      | NM_022968    | SERF1A         |
| A_33_P3353259  | 17,535  | 17,5695 | -1,0242018   | ENST00000454541 | N/A       | N/A          | N/A            |
| A_22_P00007622 | 1,5897  | 1,62421 | -1,024208899 | ENST00000506338 | N/A       | XR_244772    | N/A            |
| A_19_P00316871 | 1,57118 | 1,6057  | -1,024215999 | ENST00000417883 | 338588    | NR_015425    | LINC00705      |
| A_33_P3310649  | 2,15771 | 2,19225 | -1,024230198 | N/A             | N/A       | N/A          | lnc-KLF7-1     |
| A_33_P3532770  | 1,89259 | 1,92713 | -1,024230198 | N/A             | 283674    | AK092120     | LOC283674      |
| A_22_P00005785 | 3,573   | 3,60755 | -1,024237297 | ENST00000432163 | 100996624 | XR_158994    | LOC100996624   |
| A_33_P3272281  | 1,43383 | 1,46838 | -1,024237297 | ENST00000543308 | N/A       | AK126822     | N/A            |

|                |         |         |              |                 |           |              |                    |
|----------------|---------|---------|--------------|-----------------|-----------|--------------|--------------------|
| A_22_P00006387 | 1,35659 | 1,39115 | -1,024244396 | ENST00000542627 | N/A       | N/A          | N/A                |
| A_33_P3256565  | 2,25103 | 2,28566 | -1,024294094 | N/A             | N/A       | N/A          | N/A                |
| A_33_P3321372  | 8,38909 | 8,42372 | -1,024294094 | ENST00000276974 | N/A       | AK024257     | N/A                |
| A_24_P298495   | 4,02261 | 4,05729 | -1,024329594 | N/A             | 100130744 | NR_046285    | LOC100130744       |
| A_23_P163238   | 3,938   | 3,97268 | -1,024329594 | ENST00000509801 | 161497    | NM_153700    | STRC               |
| A_24_P349636   | 16,5504 | 16,5851 | -1,024343795 | ENST00000461513 | N/A       | N/A          | N/A                |
| A_33_P3292297  | 5,96023 | 5,99494 | -1,024350895 | ENST00000410024 | 64708     | NM_001282950 | COPS7B             |
| A_22_P00005855 | 1,58628 | 1,621   | -1,024357995 | ENST00000567210 | N/A       | AL117591     | N/A                |
| A_23_P139682   | 1,36832 | 1,40305 | -1,024365095 | ENST00000535230 | 5858      | NM_002864    | PZP                |
| A_22_P00000140 | 1,65519 | 1,68993 | -1,024372196 | N/A             | N/A       | N/A          | Inc-AADAT-2        |
| A_33_P3248602  | 6,35391 | 6,38865 | -1,024372196 | ENST00000425409 | 100288687 | NM_001293798 | DUX4               |
| A_21_P0005925  | 1,45373 | 1,48848 | -1,024379296 | N/A             | N/A       | N/A          | Inc-C8orf48-1      |
| A_22_P00022833 | 1,35594 | 1,39069 | -1,024379296 | N/A             | N/A       | N/A          | Inc-RAB11FIP2-1    |
| A_22_P00014469 | 1,35961 | 1,39443 | -1,024429001 | N/A             | N/A       | N/A          | Inc-SH3TC1-2       |
| A_22_P00011523 | 8,11865 | 8,15347 | -1,024429001 | N/A             | N/A       | BX103274     | Inc-PBX1-1         |
| A_32_P150632   | 8,32045 | 8,35533 | -1,024471606 | ENST00000438331 | 311       | N/A          | ANXA11             |
| A_33_P3405514  | 1,43204 | 1,46695 | -1,02449291  | N/A             | 100533997 | NM_001204811 | MAGEA10-MAGEA5     |
| A_21_P0013107  | 1,39944 | 1,43435 | -1,02449291  | N/A             | N/A       | N/A          | XLOC_I2_013153     |
| A_22_P00003512 | 6,44881 | 6,48376 | -1,024521315 | N/A             | N/A       | BX106859     | Inc-CCL1-1         |
| A_22_P00017251 | 1,3568  | 1,39177 | -1,024535518 | N/A             | N/A       | N/A          | Inc-UNC5CL-3       |
| A_21_P0009943  | 1,85921 | 1,89418 | -1,024535518 | ENST00000623256 | 101929625 | N/A          | LOC101929625       |
| A_33_P3235247  | 4,36457 | 4,39954 | -1,024535518 | ENST00000603694 | N/A       | N/A          | N/A                |
| A_23_P304524   | 1,58083 | 1,61591 | -1,024613638 | ENST00000411937 | 166614    | NM_001040260 | DCLK2              |
| A_21_P0009402  | 4,72399 | 4,75908 | -1,02462074  | N/A             | N/A       | N/A          | Inc-AC027763.2.1-1 |
| A_21_P0012546  | 1,35818 | 1,39328 | -1,024627842 | ENST00000463799 | 100287639 | N/A          | MTHFD2P1           |
| A_19_P00321722 | 10,0611 | 10,0962 | -1,024627842 | N/A             | N/A       | N/A          | Inc-CCDC71L-1      |
| A_33_P3240295  | 12,3462 | 12,3813 | -1,024627842 | ENST00000454475 | N/A       | N/A          | N/A                |
| A_33_P3417081  | 1,36198 | 1,39709 | -1,024634945 | ENST00000494925 | 650655    | NR_003574    | ABCA17P            |
| A_33_P3213617  | 4,10417 | 4,13929 | -1,024642047 | ENST00000390375 | N/A       | A25493       | N/A                |
| A_21_P0007738  | 1,4331  | 1,46824 | -1,024656251 | N/A             | N/A       | N/A          | Inc-C12orf12-1     |
| A_23_P138938   | 1,37493 | 1,41008 | -1,024663354 | ENST00000534780 | 5241      | NM_000926    | PGR                |
| A_32_P211117   | 1,6473  | 1,68247 | -1,024677559 | ENST00000459979 | 3232      | BC047605     | HOXD3              |
| A_22_P00005986 | 1,57317 | 1,60834 | -1,024677559 | N/A             | N/A       | N/A          | Inc-F2RL2-3        |

|                |         |         |              |                 |           |              |                       |
|----------------|---------|---------|--------------|-----------------|-----------|--------------|-----------------------|
| A_22_P00018899 | 1,41612 | 1,4513  | -1,024684661 | N/A             | N/A       | AK130909     | Inc-CTD-2054N24.2.1-3 |
| A_23_P133814   | 14,2547 | 14,2899 | -1,024698867 | ENST00000612966 | 8352      | NM_003531    | HIST1H3C              |
| A_33_P3241043  | 18,1825 | 18,2177 | -1,024698867 | N/A             | N/A       | N/A          | N/A                   |
| A_21_P0007107  | 1,42725 | 1,46249 | -1,024727278 | ENST00000427247 | N/A       | XR_424136    | N/A                   |
| A_22_P00025802 | 1,6381  | 1,67335 | -1,024734381 | N/A             | N/A       | AK094657     | Inc-CLUL1-1           |
| A_21_P0008556  | 1,60438 | 1,63963 | -1,024734381 | ENST00000561182 | 101928850 | XR_253389    | LOC101928850          |
| A_23_P26865    | 4,32947 | 4,36472 | -1,024734381 | ENST00000577963 | 4621      | NM_002470    | MYH3                  |
| A_21_P0007800  | 1,60841 | 1,6437  | -1,024762793 | ENST00000536341 | 100996679 | NR_104647    | LOC100996679          |
| A_22_P00017191 | 1,35603 | 1,39135 | -1,024784102 | N/A             | N/A       | N/A          | Inc-UCHL3-2           |
| A_21_P0009493  | 1,37701 | 1,41235 | -1,024798309 | N/A             | N/A       | N/A          | Inc-CCDC102B-2        |
| A_22_P00004091 | 1,42371 | 1,45911 | -1,02484093  | N/A             | N/A       | N/A          | Inc-CIT-4             |
| A_22_P00005248 | 1,58176 | 1,61716 | -1,02484093  | N/A             | N/A       | N/A          | Inc-DLX5-1            |
| A_21_P0003562  | 1,61596 | 1,65139 | -1,024862241 | N/A             | N/A       | N/A          | Inc-RP3-368B9.1.1-5   |
| A_23_P102242   | 9,08823 | 9,12367 | -1,024869345 | ENST00000409175 | 64844     | NM_022826    | mar-07                |
| A_24_P317450   | 7,58388 | 7,61936 | -1,024897761 | ENST00000522287 | 202459    | NR_028496    | OSTCP1                |
| A_33_P3370940  | 2,40789 | 2,44337 | -1,024897761 | N/A             | 3912      | BC044633     | LAMB1                 |
| A_24_P160104   | 7,46452 | 7,50001 | -1,024904865 | ENST00000474897 | 51807     | NM_018943    | TUBA8                 |
| A_21_P0012380  | 5,09132 | 5,12681 | -1,024904865 | N/A             | 401074    | N/A          | LINC00960             |
| A_21_P0005994  | 1,45238 | 1,48788 | -1,024911969 | ENST00000427039 | 101928438 | NR_109802    | LOC101928438          |
| A_22_P00004014 | 1,40267 | 1,43817 | -1,024911969 | N/A             | N/A       | BM682595     | Inc-CHMP4C-5          |
| A_22_P00008484 | 1,56582 | 1,60132 | -1,024911969 | ENST00000371741 | 3745      | AK126976     | KCNB1                 |
| A_22_P00006925 | 1,5824  | 1,61791 | -1,024919073 | ENST00000458168 | 100507163 | N/A          | LINC00709             |
| A_24_P53353    | 7,65878 | 7,69431 | -1,024933282 | ENST00000329286 | 201475    | NM_001025300 | RAB12                 |
| A_33_P3216808  | 1,63344 | 1,66897 | -1,024933282 | N/A             | 100129042 | AK126562     | LOC100129042          |
| A_33_P3395209  | 1,42842 | 1,46395 | -1,024933282 | N/A             | N/A       | N/A          | N/A                   |
| A_22_P00010621 | 1,45104 | 1,48658 | -1,024940386 | ENST00000511693 | N/A       | XM_006726418 | N/A                   |
| A_21_P0007514  | 1,43449 | 1,47004 | -1,02494749  | N/A             | N/A       | N/A          | Inc-KCNA1-1           |
| A_21_P0010229  | 1,36036 | 1,39591 | -1,02494749  | N/A             | N/A       | N/A          | Inc-KRTAP13-1-1       |
| A_21_P0012965  | 1,60906 | 1,64461 | -1,02494749  | N/A             | N/A       | N/A          | Inc-RP11-1026M7.2.1-1 |
| A_23_P102988   | 7,14538 | 7,18094 | -1,024954595 | ENST00000487165 | 10587     | NM_006440    | TXNRD2                |
| A_22_P00008692 | 1,41891 | 1,45448 | -1,024961699 | N/A             | N/A       | HY016478     | Inc-KIAA1147-3        |
| A_33_P3283651  | 1,61532 | 1,65091 | -1,024975908 | N/A             | N/A       | AF118062     | N/A                   |
| A_33_P3303302  | 9,93794 | 9,97353 | -1,024975908 | N/A             | N/A       | N/A          | N/A                   |

|                |         |         |              |                 |           |              |                |
|----------------|---------|---------|--------------|-----------------|-----------|--------------|----------------|
| A_23_P377434   | 11,5303 | 11,5659 | -1,024983013 | ENST00000430969 | 84629     | NM_001080495 | TNRC18         |
| A_21_P0011588  | 1,44556 | 1,48117 | -1,024990118 | ENST00000618554 | 201181    | NM_001242704 | ZNF385C        |
| A_21_P0008910  | 1,43091 | 1,46653 | -1,024997222 | N/A             | N/A       | N/A          | Inc-ACSM5-2    |
| A_21_P0012697  | 1,64329 | 1,67893 | -1,025011432 | ENST00000503140 | 101928509 | NR_125896    | LOC101928509   |
| A_23_P28707    | 13,9939 | 14,0296 | -1,025054062 | ENST00000370461 | 11054     | NM_007346    | OGFR           |
| A_33_P3221843  | 7,13572 | 7,17146 | -1,025082483 | ENST00000254759 | 51805     | XM_006715500 | COQ3           |
| A_22_P00010782 | 3,4788  | 3,51455 | -1,025089588 | N/A             | N/A       | N/A          | Inc-NKX6-3-1   |
| A_33_P3311258  | 1,46175 | 1,49751 | -1,025096693 | ENST00000334058 | 337971    | NM_181610    | KRTAP19-4      |
| A_22_P00017407 | 2,89235 | 2,92813 | -1,025110904 | ENST00000438499 | N/A       | N/A          | N/A            |
| A_21_P0005011  | 2,94227 | 2,97807 | -1,025125116 | N/A             | N/A       | N/A          | Inc-MBOAT1-1   |
| A_33_P3288594  | 1,39734 | 1,43314 | -1,025125116 | ENST00000483242 | 100129055 | NR_024524    | LOC100129055   |
| A_21_P0004002  | 1,45198 | 1,4878  | -1,025139327 | ENST00000511861 | N/A       | N/A          | N/A            |
| A_23_P253542   | 1,85695 | 1,89277 | -1,025139327 | ENST00000379494 | 23676     | NM_014332    | SMPX           |
| A_33_P3379881  | 1,40478 | 1,4406  | -1,025139327 | ENST00000320930 | 342184    | NM_001277314 | FMN1           |
| A_21_P0002683  | 1,43918 | 1,475   | -1,025139327 | N/A             | N/A       | N/A          | Inc-DLX2-1     |
| A_33_P3325543  | 1,37051 | 1,40635 | -1,025153538 | ENST00000374111 | 282966    | NM_001042427 | C10orf53       |
| A_33_P3323928  | 7,66428 | 7,70016 | -1,025181962 | ENST00000454935 | 90271     | NR_026762    | OLMALINC       |
| A_21_P0004371  | 1,61642 | 1,65231 | -1,025189068 | N/A             | N/A       | N/A          | Inc-DROSHA-7   |
| A_24_P67898    | 10,4911 | 10,527  | -1,025196174 | N/A             | 10724     | AF307332     | MGEA5          |
| A_23_P129704   | 11,367  | 11,4029 | -1,025196174 | ENST00000300086 | 54386     | NM_018975    | TERF2IP        |
| A_21_P0011174  | 1,57876 | 1,61468 | -1,025210387 | N/A             | N/A       | N/A          | XLOC_I2_003888 |
| A_22_P00015135 | 1,57401 | 1,60999 | -1,025253025 | ENST00000550766 | 8738      | N/A          | CRADD          |
| A_22_P00015331 | 1,42444 | 1,46042 | -1,025253025 | ENST00000601940 | N/A       | N/A          | N/A            |
| A_23_P209933   | 10,7054 | 10,7414 | -1,025267238 | ENST00000377386 | 10618     | NM_006464    | TGOLN2         |
| A_33_P3332690  | 15,7633 | 15,7993 | -1,025267238 | N/A             | 440423    | BC047718     | SUZ12P1        |
| A_22_P00011075 | 2,78942 | 2,82544 | -1,025281451 | N/A             | N/A       | BX096792     | Inc-NUBP1-1    |
| A_21_P0011822  | 6,18364 | 6,21969 | -1,025302772 | N/A             | N/A       | N/A          | Inc-ZAP70-2    |
| A_23_P338505   | 4,27243 | 4,30848 | -1,025302772 | ENST00000590281 | 91442     | NM_152266    | C19orf40       |
| A_21_P0013224  | 2,7554  | 2,79146 | -1,025309878 | N/A             | N/A       | N/A          | XLOC_I2_013458 |
| A_21_P0011951  | 5,77578 | 5,81185 | -1,025316985 | N/A             | N/A       | N/A          | XLOC_I2_008203 |
| A_22_P00008127 | 1,57034 | 1,60641 | -1,025316985 | N/A             | N/A       | N/A          | Inc-IL34-1     |
| A_21_P0002887  | 1,57601 | 1,61208 | -1,025316985 | ENST00000474444 | N/A       | N/A          | N/A            |
| A_22_P00003331 | 1,45147 | 1,48755 | -1,025324092 | ENST00000509602 | N/A       | N/A          | N/A            |



|                |         |         |              |                 |           |              |               |
|----------------|---------|---------|--------------|-----------------|-----------|--------------|---------------|
| A_22_P00002126 | 7,99906 | 8,03516 | -1,025338306 | N/A             | 100874048 | NR_104030    | DGUOK-AS1     |
| A_23_P78438    | 12,7508 | 12,7869 | -1,025338306 | ENST00000544274 | 55250     | NM_018255    | ELP2          |
| A_24_P563545   | 10,1204 | 10,1565 | -1,025338306 | ENST00000370112 | 148867    | NM_133496    | SLC30A7       |
| A_33_P3359408  | 1,63421 | 1,67031 | -1,025338306 | N/A             | N/A       | N/A          | N/A           |
| A_23_P142447   | 5,74047 | 5,77658 | -1,025345414 | ENST00000613525 | 4542      | NM_012335    | MYO1F         |
| A_22_P00021031 | 1,44832 | 1,48443 | -1,025345414 | N/A             | 613126    | NR_122109    | CYP51A1-AS1   |
| A_22_P00021539 | 1,61895 | 1,65506 | -1,025345414 | N/A             | 100874011 | NR_046665    | XIRP2-AS1     |
| A_22_P00001370 | 1,60732 | 1,64348 | -1,02538095  | N/A             | 101410534 | NR_102696    | DLGAP1-AS4    |
| A_21_P0009289  | 1,73304 | 1,7692  | -1,02538095  | N/A             | N/A       | N/A          | Inc-GPR172B-2 |
| A_33_P3394366  | 4,31179 | 4,34796 | -1,025388057 | N/A             | 728276    | N/A          | CLEC19A       |
| A_21_P0014472  | 5,80502 | 5,84119 | -1,025388057 | N/A             | N/A       | N/A          | N/A           |
| A_21_P0003730  | 1,64965 | 1,68583 | -1,025395165 | N/A             | N/A       | N/A          | Inc-SEPSECS-1 |
| A_21_P0012708  | 7,28911 | 7,3253  | -1,025402272 | ENST00000508156 | N/A       | N/A          | N/A           |
| A_33_P3298634  | 8,29347 | 8,32966 | -1,025402272 | ENST00000421540 | 9054      | NM_001198989 | NFS1          |
| A_24_P305623   | 10,7186 | 10,7548 | -1,02540938  | ENST00000542230 | 757       | NM_006134    | TMEM50B       |
| A_23_P253586   | 4,9277  | 4,96392 | -1,025423595 | ENST00000399151 | 9980      | NM_005128    | DOPEY2        |
| A_21_P0003189  | 2,1954  | 2,23163 | -1,025430703 | N/A             | N/A       | N/A          | Inc-MECOM-1   |
| A_22_P00019824 | 1,76463 | 1,80087 | -1,025437811 | ENST00000433315 | N/A       | N/A          | N/A           |
| A_33_P3411910  | 1,43132 | 1,46757 | -1,025444919 | ENST00000435991 | N/A       | N/A          | N/A           |
| A_33_P3331767  | 1,57031 | 1,60663 | -1,025494675 | ENST00000372952 | 78997     | NM_001256740 | GDAP1L1       |
| A_22_P00012472 | 1,42613 | 1,46246 | -1,025501783 | N/A             | N/A       | N/A          | Inc-PRR25-2   |
| A_22_P00023079 | 7,01281 | 7,04918 | -1,025530216 | N/A             | N/A       | AK024152     | Inc-MYO6-1    |
| A_33_P3345319  | 1,62044 | 1,65681 | -1,025530216 | N/A             | N/A       | N/A          | N/A           |
| A_22_P00022599 | 5,20668 | 5,24306 | -1,025537325 | ENST00000441949 | 101928770 | NR_126363    | LINC01526     |
| A_33_P3423931  | 4,64103 | 4,67741 | -1,025537325 | ENST00000619315 | 392399    | NM_001001676 | LCN9          |
| A_33_P3262515  | 11,5566 | 11,593  | -1,025551542 | ENST00000334062 | 22821     | NM_007368    | RASA3         |
| A_21_P0010819  | 1,61946 | 1,65588 | -1,025565759 | ENST00000420453 | N/A       | N/A          | N/A           |
| A_22_P00009874 | 1,62708 | 1,6635  | -1,025565759 | ENST00000582654 | N/A       | N/A          | N/A           |
| A_22_P00021403 | 1,42278 | 1,45921 | -1,025572868 | N/A             | N/A       | N/A          | Inc-NPY2R-1   |
| A_22_P00025124 | 1,61689 | 1,65333 | -1,025579976 | N/A             | N/A       | N/A          | Inc-CPPED1-5  |
| A_22_P00009325 | 2,93846 | 2,97492 | -1,025594194 | ENST00000520457 | 93668     | NR_026684    | HPYR1         |
| A_24_P175187   | 8,2477  | 8,28418 | -1,025608412 | ENST00000379958 | 54809     | NM_017654    | SAMD9         |
| A_22_P00021070 | 1,42709 | 1,46359 | -1,02562263  | ENST00000529910 | N/A       | N/A          | N/A           |

|                |         |         |              |                 |           |              |                |
|----------------|---------|---------|--------------|-----------------|-----------|--------------|----------------|
| A_33_P3803667  | 1,62356 | 1,66006 | -1,02562263  | ENST00000607074 | 401289    | AK095441     | FLJ38122       |
| A_21_P0005611  | 3,27196 | 3,30846 | -1,02562263  | N/A             | N/A       | N/A          | Inc-KIAA1147-3 |
| A_32_P204019   | 16,5617 | 16,5982 | -1,02562263  | ENST00000478358 | 6159      | NM_000992    | RPL29          |
| A_33_P3253538  | 1,36246 | 1,39898 | -1,025636848 | ENST00000328278 | 389257    | NM_001080478 | LRRC14B        |
| A_33_P3334180  | 5,27459 | 5,31116 | -1,025672395 | ENST00000473964 | 9651      | AB527144     | PLCH2          |
| A_23_P164035   | 11,2566 | 11,2932 | -1,025693723 | ENST00000581842 | 5705      | NM_002805    | PSMC5          |
| A_32_P303449   | 1,81107 | 1,8477  | -1,025715052 | ENST00000323675 | 374768    | NM_199339    | SPEM1          |
| A_23_P169112   | 9,34675 | 9,38338 | -1,025715052 | ENST00000526271 | 29894     | NM_013291    | CPSF1          |
| A_22_P00025736 | 1,38707 | 1,42373 | -1,025736382 | N/A             | N/A       | CR744472     | Inc-SNX20-4    |
| A_33_P3220753  | 1,68276 | 1,71942 | -1,025736382 | N/A             | 100505635 | XR_432015    | LOC100505635   |
| A_22_P00003025 | 4,86812 | 4,90479 | -1,025743491 | ENST00000426187 | N/A       | N/A          | N/A            |
| A_22_P00008463 | 1,62574 | 1,66244 | -1,025764821 | ENST00000524966 | N/A       | N/A          | N/A            |
| A_33_P3317942  | 1,42961 | 1,46633 | -1,025779042 | ENST00000503598 | N/A       | N/A          | N/A            |
| A_33_P3363933  | 3,14466 | 3,18139 | -1,025786152 | ENST00000321935 | 343413    | NM_001284217 | FCRL6          |
| A_22_P00017450 | 3,57236 | 3,60911 | -1,025800372 | N/A             | N/A       | N/A          | Inc-VRK1-1     |
| A_21_P0001816  | 1,39814 | 1,43489 | -1,025800372 | ENST00000450794 | 400940    | NR_026833    | LOC400940      |
| A_22_P00013743 | 1,3776  | 1,41435 | -1,025800372 | ENST00000526934 | N/A       | N/A          | N/A            |
| A_23_P162300   | 8,22325 | 8,26001 | -1,025807483 | ENST00000261233 | 11213     | NM_007199    | IRAK3          |
| A_21_P0004258  | 1,62706 | 1,66383 | -1,025814593 | N/A             | N/A       | N/A          | Inc-SREK1-1    |
| A_33_P3278033  | 7,93671 | 7,97348 | -1,025814593 | ENST00000358022 | 286319    | NM_001004125 | TUSC1          |
| A_23_P53541    | 12,151  | 12,1878 | -1,025835924 | ENST00000535717 | 1108      | NM_001273    | CHD4           |
| A_22_P00020465 | 1,39616 | 1,43296 | -1,025835924 | N/A             | 101927344 | XR_244438    | LOC101927344   |
| A_21_P0011246  | 1,45027 | 1,48707 | -1,025835924 | N/A             | N/A       | N/A          | XLOC_I2_004208 |
| A_22_P00016973 | 1,42101 | 1,45782 | -1,025843035 | N/A             | N/A       | N/A          | Inc-TTC14-1    |
| A_22_P00025544 | 1,38164 | 1,41845 | -1,025843035 | N/A             | N/A       | N/A          | Inc-UACA-1     |
| A_33_P3213874  | 1,42968 | 1,4665  | -1,025850146 | ENST00000303059 | 390154    | NM_001004747 | OR5T3          |
| A_21_P0014698  | 1,57076 | 1,60759 | -1,025857256 | N/A             | N/A       | N/A          | N/A            |
| A_22_P00018112 | 5,73737 | 5,77421 | -1,025864367 | ENST00000416124 | 102724231 | XR_425578    | LOC102724231   |
| A_22_P00020810 | 1,44075 | 1,47764 | -1,025899921 | ENST00000590021 | 102723379 | XR_430228    | LOC102723379   |
| A_23_P1374     | 1,61979 | 1,65673 | -1,025935477 | ENST00000263125 | 5588      | NM_006257    | PRKCQ          |
| A_33_P3234849  | 5,2749  | 5,31184 | -1,025935477 | ENST00000465299 | 7402      | NM_007124    | UTRN           |
| A_33_P3220780  | 1,41063 | 1,44761 | -1,025963922 | N/A             | N/A       | N/A          | N/A            |
| A_22_P00008722 | 4,85049 | 4,88749 | -1,025978145 | N/A             | N/A       | AL137668     | Inc-KIAA1609-1 |

|                |         |         |              |                 |           |              |              |
|----------------|---------|---------|--------------|-----------------|-----------|--------------|--------------|
| A_33_P3277965  | 4,97941 | 5,01641 | -1,025978145 | ENST00000589123 | 4782      | NM_205843    | NFIC         |
| A_33_P3289917  | 1,38886 | 1,42588 | -1,025992369 | ENST00000413199 | 389152    | NM_001134657 | PRR23C       |
| A_33_P3335661  | 1,52871 | 1,56576 | -1,026013704 | ENST00000389586 | 120406    | NM_182495    | NXPE2        |
| A_22_P00002982 | 9,63999 | 9,67704 | -1,026013704 | ENST00000562471 | N/A       | AK123786     | N/A          |
| A_33_P3317009  | 1,35809 | 1,39515 | -1,026020815 | ENST00000469799 | 6556      | AK294707     | SLC11A1      |
| A_23_P304304   | 4,41246 | 4,44952 | -1,026020815 | ENST00000359361 | 416       | NM_004042    | ARSF         |
| A_24_P229669   | 6,88612 | 6,92319 | -1,026027927 | ENST00000340249 | 283796    | NR_024074    | GOLGA8IP     |
| A_33_P3305920  | 1,62294 | 1,66001 | -1,026027927 | N/A             | 100874130 | NR_120399    | ENOX1-AS2    |
| A_24_P230057   | 13,6322 | 13,6693 | -1,026049263 | ENST00000427083 | N/A       | N/A          | N/A          |
| A_33_P3374987  | 1,42609 | 1,46319 | -1,026049263 | ENST00000300303 | 375607    | NM_198571    | NAT16        |
| A_33_P3251746  | 1,39845 | 1,43555 | -1,026049263 | ENST00000283225 | N/A       | N/A          | N/A          |
| A_21_P0005824  | 1,36762 | 1,40475 | -1,0260706   | N/A             | N/A       | N/A          | Inc-ZMAT4-3  |
| A_24_P675386   | 7,57336 | 7,6105  | -1,026077712 | N/A             | 10944     | NM_014267    | C11orf58     |
| A_23_P149427   | 2,17431 | 2,21146 | -1,026084824 | ENST00000480004 | 10753     | NM_006615    | CAPN9        |
| A_22_P00010771 | 1,37262 | 1,40981 | -1,026113273 | N/A             | N/A       | BC042893     | Inc-NKX2-4-2 |
| A_23_P104201   | 12,0998 | 12,137  | -1,026120386 | ENST00000375972 | 10730     | NM_139312    | YME1L1       |
| A_33_P7476087  | 10,5199 | 10,5571 | -1,026120386 | N/A             | 440944    | NR_027007    | THUMP3-AS1   |
| A_22_P00015002 | 8,45059 | 8,4878  | -1,026127499 | ENST00000607952 | N/A       | N/A          | N/A          |
| A_22_P00008403 | 1,64044 | 1,67766 | -1,026134611 | N/A             | N/A       | AK024242     | Inc-JPH1-3   |
| A_22_P00017317 | 1,39523 | 1,43245 | -1,026134611 | N/A             | N/A       | N/A          | Inc-USP31-2  |
| A_22_P00021083 | 5,80216 | 5,83939 | -1,026141724 | ENST00000555156 | 101954204 | NR_104063    | LINC00644    |
| A_23_P84154    | 1,35713 | 1,39436 | -1,026141724 | ENST00000295095 | 55843     | NM_018460    | ARHGAP15     |
| A_33_P3408237  | 7,90407 | 7,94133 | -1,026163062 | N/A             | N/A       | N/A          | N/A          |
| A_24_P935506   | 1,3692  | 1,40652 | -1,02620574  | N/A             | N/A       | N/A          | N/A          |
| A_21_P0007865  | 1,51363 | 1,551   | -1,026241306 | N/A             | N/A       | N/A          | Inc-RAN-3    |
| A_22_P00004864 | 1,44888 | 1,48625 | -1,026241306 | ENST00000518536 | N/A       | BM706447     | N/A          |
| A_22_P00010975 | 4,11108 | 4,14845 | -1,026241306 | N/A             | 100652846 | NR_045725    | CACNA1C-AS1  |
| A_33_P3295803  | 8,18588 | 8,22325 | -1,026241306 | ENST00000622293 | 84932     | NM_032846    | RAB2B        |
| A_24_P25550    | 1,42238 | 1,45979 | -1,02626976  | ENST00000394899 | 130       | NM_001102470 | ADH6         |
| A_23_P30630    | 6,23303 | 6,2705  | -1,026312442 | ENST00000619706 | 254394    | NM_017696    | MCM9         |
| A_33_P3289391  | 7,72174 | 7,75921 | -1,026312442 | N/A             | N/A       | N/A          | N/A          |
| A_22_P00013537 | 1,49055 | 1,52803 | -1,026319556 | ENST00000523264 | N/A       | BX116043     | N/A          |
| A_24_P116535   | 11,4237 | 11,4612 | -1,026333784 | ENST00000219271 | 4324      | NM_002428    | MMP15        |

|                |         |         |              |                 |           |              |                    |
|----------------|---------|---------|--------------|-----------------|-----------|--------------|--------------------|
| A_21_P0001599  | 1,35776 | 1,39526 | -1,026333784 | N/A             | N/A       | N/A          | Inc-NMNAT2-1       |
| A_24_P130792   | 8,14835 | 8,18588 | -1,026355126 | ENST00000475281 | 387338    | NM_199044    | NSUN4              |
| A_22_P00023713 | 1,42265 | 1,46019 | -1,02636224  | N/A             | N/A       | BX092414     | Inc-SLC36A4-2      |
| A_21_P0002619  | 9,52184 | 9,55939 | -1,026369355 | N/A             | N/A       | N/A          | Inc-AC007405.7.1-2 |
| A_21_P0005160  | 1,44842 | 1,48599 | -1,026383583 | N/A             | N/A       | N/A          | Inc-CCHCR1-1       |
| A_33_P3306352  | 5,86376 | 5,90133 | -1,026383583 | N/A             | N/A       | N/A          | N/A                |
| A_22_P00012848 | 6,33951 | 6,37708 | -1,026383583 | ENST00000462775 | 9462      | AF075003     | RASAL2             |
| A_33_P3297005  | 1,96166 | 1,99927 | -1,026412041 | ENST00000564182 | 197342    | NM_001257370 | EME2               |
| A_21_P0001009  | 1,44686 | 1,48448 | -1,026419155 | ENST00000445260 | N/A       | N/A          | N/A                |
| A_33_P3226650  | 1,64736 | 1,68499 | -1,02642627  | N/A             | 730152    | NR_033760    | GSTA7P             |
| A_33_P3233620  | 1,62856 | 1,6662  | -1,026433385 | ENST00000623963 | N/A       | CR749405     | N/A                |
| A_32_P25253    | 9,41972 | 9,45736 | -1,026433385 | ENST00000426679 | 81689     | NM_030940    | ISCA1              |
| A_33_P3229678  | 3,38124 | 3,41889 | -1,026440499 | N/A             | N/A       | N/A          | N/A                |
| A_22_P00013259 | 1,64171 | 1,67937 | -1,026447614 | N/A             | N/A       | N/A          | Inc-ROS1-1         |
| A_21_P0000421  | 1,62868 | 1,66634 | -1,026447614 | N/A             | 767604    | NR_003217    | SNORD114-24        |
| A_21_P0014451  | 1,44418 | 1,48186 | -1,026461844 | N/A             | N/A       | CD358791     | N/A                |
| A_33_P3223849  | 1,42439 | 1,46208 | -1,026468959 | ENST00000442080 | 647309    | NM_001146686 | GMNC               |
| A_22_P00000520 | 1,44325 | 1,48095 | -1,026476074 | N/A             | N/A       | BX114802     | Inc-AC109486.1-2   |
| A_22_P00023088 | 1,84965 | 1,88736 | -1,026483189 | ENST00000555871 | N/A       | N/A          | N/A                |
| A_22_P00011416 | 4,21072 | 4,24844 | -1,026490304 | ENST00000526968 | 5058      | N/A          | PAK1               |
| A_21_P0008455  | 1,56662 | 1,60437 | -1,026511649 | N/A             | N/A       | N/A          | Inc-MAP3K9-3       |
| A_21_P0004737  | 1,41338 | 1,45116 | -1,026532995 | ENST00000447728 | N/A       | N/A          | N/A                |
| A_22_P00011576 | 1,62386 | 1,66165 | -1,026540111 | ENST00000515263 | N/A       | N/A          | N/A                |
| A_33_P3293524  | 11,2531 | 11,2909 | -1,026547226 | ENST00000369780 | 9148      | NM_004210    | NEURL1             |
| A_24_P208825   | 12,6372 | 12,675  | -1,026547226 | ENST00000612020 | 4585      | NM_018406    | MUC4               |
| A_21_P0009679  | 1,64307 | 1,68095 | -1,026604152 | N/A             | N/A       | N/A          | Inc-SNAPC2-1       |
| A_33_P3228709  | 4,87513 | 4,91305 | -1,026632616 | ENST00000398536 | 440050    | NM_001012503 | KRTAP5-7           |
| A_22_P00012638 | 1,43829 | 1,47621 | -1,026632616 | N/A             | N/A       | N/A          | Inc-PVALB-1        |
| A_22_P00015383 | 1,51292 | 1,55084 | -1,026632616 | N/A             | N/A       | DB536005     | Inc-SRD5A3-2       |
| A_33_P3305531  | 6,46001 | 6,49795 | -1,026646848 | ENST00000437814 | 196074    | NM_001297775 | METTL15            |
| A_33_P3328564  | 1,3642  | 1,40215 | -1,026653964 | N/A             | N/A       | N/A          | N/A                |
| A_33_P3270429  | 3,44418 | 3,48214 | -1,02666108  | ENST00000383773 | 9975      | NR_110524    | NR1D2              |
| A_22_P00001892 | 5,60083 | 5,63881 | -1,026675313 | N/A             | 101927583 | NR_120450    | LOC101927583       |

|                |         |         |              |                 |        |              |                       |
|----------------|---------|---------|--------------|-----------------|--------|--------------|-----------------------|
| A_21_P0012773  | 1,44567 | 1,48366 | -1,026682429 | ENST00000505298 | N/A    | N/A          | N/A                   |
| A_21_P0008451  | 1,62607 | 1,66406 | -1,026682429 | N/A             | N/A    | N/A          | Inc-ZFP36L1-1         |
| A_21_P0002890  | 1,64567 | 1,6837  | -1,026710895 | N/A             | N/A    | N/A          | Inc-TMEM14E-2         |
| A_21_P0006991  | 2,19028 | 2,22831 | -1,026710895 | N/A             | N/A    | N/A          | Inc-GDF10-1           |
| A_22_P00008573 | 6,22039 | 6,25844 | -1,026725129 | N/A             | N/A    | N/A          | Inc-KCNT1-1           |
| A_22_P00000551 | 1,73154 | 1,76959 | -1,026725129 | ENST00000522531 | N/A    | XR_242404    | N/A                   |
| A_19_P00316857 | 6,39092 | 6,42899 | -1,026739362 | ENST00000445707 | 440993 | NR_122105    | LINC00969             |
| A_24_P256063   | 14,4741 | 14,5122 | -1,026760713 | ENST00000439811 | N/A    | N/A          | N/A                   |
| A_22_P00011777 | 1,56492 | 1,60305 | -1,026782064 | N/A             | N/A    | N/A          | Inc-PFKP-3            |
| A_33_P3272169  | 5,78972 | 5,82787 | -1,026796298 | ENST00000395060 | 7461   | NM_003388    | CLIP2                 |
| A_23_P163173   | 7,05942 | 7,09758 | -1,026803416 | ENST00000530080 | 56413  | NM_019839    | LTB4R2                |
| A_21_P0012593  | 1,35746 | 1,39564 | -1,02681765  | N/A             | N/A    | N/A          | XLOC_I2_010723        |
| A_22_P00012573 | 3,86196 | 3,90014 | -1,02681765  | N/A             | N/A    | N/A          | Inc-PTP4A3-3          |
| A_24_P706953   | 1,38111 | 1,4193  | -1,026824768 | ENST00000442682 | 155006 | NM_001085429 | TMEM213               |
| A_33_P3303519  | 6,78008 | 6,81827 | -1,026824768 | ENST00000544853 | 387837 | NM_205852    | CLEC12B               |
| A_23_P309850   | 12,4186 | 12,4568 | -1,026831885 | ENST00000315616 | 27079  | NM_152260    | RPUSD2                |
| A_21_P0006330  | 1,56518 | 1,60339 | -1,026839002 | N/A             | N/A    | N/A          | Inc-FAM78A-2          |
| A_21_P0009463  | 1,38262 | 1,42086 | -1,026860355 | N/A             | N/A    | N/A          | Inc-MIB1-1            |
| A_32_P12202    | 1,62712 | 1,66537 | -1,026867473 | ENST00000333995 | 171484 | XM_005274463 | FAM9C                 |
| A_21_P0014419  | 1,37583 | 1,41409 | -1,026874591 | N/A             | N/A    | N/A          | Inc-DGCR6-2           |
| A_21_P0008365  | 1,64677 | 1,68504 | -1,026881708 | N/A             | N/A    | N/A          | Inc-RP11-322L20.1.1-7 |
| A_21_P0001523  | 1,364   | 1,40228 | -1,026888826 | N/A             | N/A    | N/A          | Inc-TTLL7-5           |
| A_21_P0009834  | 1,35708 | 1,39536 | -1,026888826 | ENST00000438222 | N/A    | N/A          | N/A                   |
| A_21_P0007690  | 1,63541 | 1,67369 | -1,026888826 | N/A             | N/A    | N/A          | Inc-SLCO1A2-4         |
| A_33_P3368905  | 1,41932 | 1,45767 | -1,026938652 | ENST00000622328 | 388685 | N/A          | LINC01138             |
| A_21_P0011561  | 4,04158 | 4,07993 | -1,026938652 | N/A             | N/A    | N/A          | XLOC_I2_005933        |
| A_23_P89812    | 11,0075 | 11,0459 | -1,026974244 | ENST00000584581 | 55748  | NM_018235    | CNDP2                 |
| A_33_P3277012  | 4,92298 | 4,9614  | -1,026988481 | ENST00000338895 | 1677   | NM_004402    | DFFB                  |
| A_33_P3243554  | 6,28754 | 6,32599 | -1,027009837 | ENST00000460411 | 23157  | NM_145802    | set-06                |
| A_24_P50458    | 11,0052 | 11,0437 | -1,027045431 | ENST00000505638 | 7013   | NM_017489    | TERF1                 |
| A_22_P00005046 | 3,97924 | 4,01774 | -1,027045431 | ENST00000618742 | 389610 | NM_207411    | XKR5                  |
| A_33_P3245006  | 8,56804 | 8,60655 | -1,02705255  | ENST00000617083 | 26007  | NM_015533    | DAK                   |
| A_32_P337442   | 1,43895 | 1,47747 | -1,027059669 | ENST00000376500 | 256815 | NM_153714    | C10orf67              |

|                |         |         |              |                 |           |              |                |
|----------------|---------|---------|--------------|-----------------|-----------|--------------|----------------|
| A_24_P141019   | 7,22852 | 7,26705 | -1,027066788 | ENST00000489293 | 7982      | NM_018412    | ST7            |
| A_21_P0006850  | 6,88092 | 6,91946 | -1,027073907 | N/A             | N/A       | N/A          | Inc-LYZL1-2    |
| A_22_P00012133 | 1,42079 | 1,45937 | -1,027102384 | N/A             | 255130    | NR_034081    | IGFBP7-AS1     |
| A_33_P3317780  | 1,63981 | 1,67849 | -1,02717358  | N/A             | N/A       | BC071615     | Inc-FGFR1OP-2  |
| A_21_P0005503  | 5,23204 | 5,27073 | -1,0271807   | N/A             | N/A       | N/A          | Inc-SBDS-2     |
| A_32_P224149   | 11,0404 | 11,0791 | -1,027187819 | ENST00000238256 | 23307     | NM_015258    | FKBP15         |
| A_23_P566      | 12,3817 | 12,4204 | -1,027187819 | ENST00000361346 | 22887     | NM_014947    | FOXJ3          |
| A_23_P216149   | 10,875  | 10,9137 | -1,027187819 | ENST00000276603 | 7013      | NM_017489    | TERF1          |
| A_21_P0004208  | 3,77374 | 3,81246 | -1,027202059 | N/A             | N/A       | N/A          | Inc-C5orf38-4  |
| A_22_P00023057 | 7,89477 | 7,93349 | -1,027202059 | ENST00000359838 | N/A       | N/A          | N/A            |
| A_23_P164057   | 1,42642 | 1,46514 | -1,027202059 | ENST00000574313 | 4239      | NM_002404    | MFAP4          |
| A_22_P00011624 | 1,40641 | 1,44513 | -1,027202059 | ENST00000610780 | N/A       | AK172821     | N/A            |
| A_21_P0011101  | 1,39894 | 1,43768 | -1,0272163   | ENST00000542219 | 101927901 | N/A          | LOC101927901   |
| A_21_P0005551  | 1,63812 | 1,67687 | -1,02722342  | N/A             | N/A       | N/A          | Inc-NFE2L3-2   |
| A_21_P0005861  | 1,41998 | 1,45876 | -1,02724478  | N/A             | N/A       | N/A          | Inc-PEX2-1     |
| A_22_P00006885 | 1,74844 | 1,78722 | -1,02724478  | ENST00000581626 | N/A       | AL711312     | N/A            |
| A_22_P00019520 | 1,35795 | 1,39673 | -1,02724478  | ENST00000427064 | N/A       | N/A          | N/A            |
| A_23_P146111   | 6,99148 | 7,03026 | -1,02724478  | ENST00000520545 | 79815     | NM_024759    | NIPAL2         |
| A_21_P0002378  | 1,35732 | 1,39611 | -1,027251901 | N/A             | 727944    | XR_109991    | LOC727944      |
| A_23_P23855    | 11,6793 | 11,7181 | -1,027259021 | ENST00000622508 | 84265     | NM_032305    | POLR3GL        |
| A_23_P341065   | 10,3197 | 10,3585 | -1,027259021 | ENST00000611222 | 83642     | NM_031454    | SELO           |
| A_24_P56317    | 11,78   | 11,8188 | -1,027259021 | ENST00000376673 | 10150     | NM_144778    | MBNL2          |
| A_33_P3217867  | 1,39591 | 1,43473 | -1,027273262 | N/A             | N/A       | N/A          | N/A            |
| A_21_P0012245  | 9,61099 | 9,64982 | -1,027280383 | ENST00000414401 | 100130418 | NR_015352    | CECR7          |
| A_33_P3381707  | 1,39852 | 1,43738 | -1,027301745 | ENST00000609163 | 729920    | NM_001101426 | ISPD           |
| A_33_P3334590  | 6,36109 | 6,39996 | -1,027308865 | ENST00000568611 | 54893     | NM_017762    | MTMR10         |
| A_21_P0009136  | 1,6364  | 1,67529 | -1,027323107 | N/A             | N/A       | N/A          | Inc-ZDHHC7-1   |
| A_21_P0003954  | 1,39285 | 1,43174 | -1,027323107 | ENST00000513925 | N/A       | N/A          | N/A            |
| A_23_P78782    | 7,14791 | 7,18681 | -1,027330228 | ENST00000084798 | 770       | NM_001217    | CA11           |
| A_24_P9285     | 12,9319 | 12,9708 | -1,027330228 | ENST00000502721 | 10960     | NM_006816    | LMAN2          |
| A_23_P118690   | 12,0773 | 12,1162 | -1,027330228 | ENST00000394673 | 7756      | NM_001032293 | ZNF207         |
| A_24_P625382   | 13,1416 | 13,1805 | -1,027330228 | ENST00000536823 | 8531      | NM_003651    | YBX3           |
| A_33_P3230748  | 1,47174 | 1,51067 | -1,027351591 | N/A             | N/A       | DB453801     | Inc-CEACAM18-2 |

|                |         |         |              |                 |           |              |                  |
|----------------|---------|---------|--------------|-----------------|-----------|--------------|------------------|
| A_24_P23921    | 3,28072 | 3,31965 | -1,027351591 | ENST00000614158 | 388381    | NM_001080465 | C17orf98         |
| A_21_P0006357  | 3,18327 | 3,22221 | -1,027358712 | N/A             | N/A       | N/A          | Inc-CENPP-3      |
| A_21_P0004830  | 1,4113  | 1,45024 | -1,027358712 | N/A             | N/A       | N/A          | Inc-RREB1-4      |
| A_33_P3222635  | 1,41727 | 1,45623 | -1,027372954 | ENST00000503018 | 100132596 | NR_003254    | XGY2             |
| A_33_P3310226  | 6,20155 | 6,24051 | -1,027372954 | N/A             | 100129115 | AK095213     | LOC100129115     |
| A_21_P0003644  | 1,35859 | 1,39755 | -1,027372954 | N/A             | N/A       | N/A          | Inc-AC110373.1-4 |
| A_33_P3300843  | 7,73802 | 7,77705 | -1,027422804 | ENST00000624628 | N/A       | XR_428277    | N/A              |
| A_22_P00009476 | 1,35726 | 1,3963  | -1,027429925 | N/A             | 100533997 | NM_001204811 | MAGEA10-MAGEA5   |
| A_33_P3299776  | 1,6395  | 1,67854 | -1,027429925 | ENST00000287139 | 4838      | NM_018055    | NODAL            |
| A_33_P3285077  | 9,73199 | 9,77108 | -1,027465534 | ENST00000381571 | 54951     | NM_017845    | COMMD8           |
| A_22_P00000538 | 3,466   | 3,50512 | -1,0274869   | N/A             | 101928174 | NR_120329    | LOC101928174     |
| A_22_P00021105 | 8,22227 | 8,26144 | -1,02752251  | N/A             | N/A       | N/A          | Inc-C16orf13-1   |
| A_21_P0005589  | 1,37659 | 1,41584 | -1,02757949  | N/A             | N/A       | N/A          | Inc-AC006372.1-1 |
| A_33_P3260026  | 6,93479 | 6,97408 | -1,027607981 | ENST00000372314 | 83543     | NM_001185096 | AIF1L            |
| A_23_P33613    | 13,3209 | 13,3602 | -1,027615104 | ENST00000319285 | 79077     | NM_024096    | DCTPP1           |
| A_21_P0010087  | 1,36811 | 1,40741 | -1,027615104 | N/A             | 101929866 | XR_253975    | LOC101929866     |
| A_21_P0006394  | 1,96659 | 2,00589 | -1,027615104 | N/A             | N/A       | N/A          | Inc-PTGES2-1     |
| A_33_P3415560  | 1,42386 | 1,46316 | -1,027615104 | ENST00000392161 | 284406    | NM_133466    | ZFP82            |
| A_23_P252403   | 10,9887 | 11,028  | -1,027615104 | ENST00000274458 | 51397     | NM_016144    | COMMD10          |
| A_23_P215675   | 11,7585 | 11,7978 | -1,027615104 | ENST00000415798 | 55744     | NM_018224    | COA1             |
| A_33_P3314031  | 4,09405 | 4,13339 | -1,027643596 | ENST00000613578 | 201799    | NM_152680    | TMEM154          |
| A_22_P00009207 | 1,44427 | 1,48362 | -1,027650719 | ENST00000429878 | 100506457 | N/A          | LOC100506457     |
| A_21_P0008681  | 1,38083 | 1,42024 | -1,027693458 | N/A             | N/A       | N/A          | Inc-MCTP2-8      |
| A_21_P0001639  | 4,24486 | 4,28433 | -1,0277362   | N/A             | N/A       | N/A          | Inc-TAF5L-1      |
| A_33_P3390327  | 1,42417 | 1,46366 | -1,027750447 | ENST00000328314 | 390326    | NM_001005183 | OR6C76           |
| A_22_P00008781 | 10,7519 | 10,7914 | -1,027757571 | N/A             | N/A       | N/A          | Inc-KIF25-2      |
| A_33_P3405459  | 10,4663 | 10,5058 | -1,027757571 | ENST00000615526 | 79025     | NM_024059    | C20orf195        |
| A_23_P20022    | 11,0643 | 11,1038 | -1,027757571 | ENST00000466473 | 29923     | NM_013332    | HILPDA           |
| A_23_P361014   | 1,64057 | 1,68014 | -1,02780744  | ENST00000240587 | 57616     | NM_020856    | TSHZ3            |
| A_21_P0010419  | 1,43649 | 1,47607 | -1,027814564 | N/A             | 101927499 | XR_244444    | LOC101927499     |
| A_23_P42116    | 11,9124 | 11,952  | -1,027828812 | ENST00000525601 | 9374      | NM_005155    | PPT2             |
| A_23_P147984   | 12,0304 | 12,07   | -1,027828812 | ENST00000283943 | 9320      | NM_004238    | TRIP12           |
| A_24_P128308   | 1,4456  | 1,4852  | -1,027828812 | ENST00000469435 | 1316      | FW339972     | KLF6             |

|                |         |         |              |                 |           |              |                |
|----------------|---------|---------|--------------|-----------------|-----------|--------------|----------------|
| A_21_P0000495  | 13,2485 | 13,2881 | -1,027828812 | ENST00000594728 | 692158    | NR_004390    | SNORA57        |
| A_33_P3283828  | 7,00753 | 7,04718 | -1,027864435 | ENST00000389176 | 645811    | NM_001143980 | CCDC154        |
| A_32_P13795    | 7,37321 | 7,41287 | -1,02787156  | ENST00000264711 | 51277     | NM_016544    | DNAJC27        |
| A_22_P00015487 | 6,72912 | 6,76879 | -1,027878684 | ENST00000508572 | N/A       | N/A          | N/A            |
| A_32_P14894    | 16,7596 | 16,7993 | -1,027900059 | ENST00000408001 | 6204      | NM_001014    | RPS10          |
| A_33_P3384078  | 1,36533 | 1,40508 | -1,027935684 | ENST00000355283 | 221264    | AK131244     | AK9            |
| A_21_P0011775  | 1,40716 | 1,44692 | -1,027942809 | N/A             | N/A       | N/A          | Inc-ZNF681-2   |
| A_23_P61524    | 8,79916 | 8,83893 | -1,027949934 | ENST00000321895 | 64925     | NM_022903    | CCDC71         |
| A_22_P00018520 | 1,36852 | 1,40829 | -1,027949934 | ENST00000543404 | 3         | NR_040112    | A2MP1          |
| A_23_P416112   | 6,19028 | 6,23006 | -1,027957059 | ENST00000437070 | 165918    | NM_152617    | RNF168         |
| A_22_P00009732 | 2,65751 | 2,69733 | -1,027985561 | N/A             | N/A       | N/A          | Inc-MCU-1      |
| A_22_P00017793 | 6,63451 | 6,67441 | -1,028042566 | ENST00000503469 | N/A       | AK056982     | N/A            |
| A_23_P253321   | 1,44228 | 1,48221 | -1,028063943 | ENST00000301908 | 5368      | NM_006228    | PNOC           |
| A_24_P350576   | 5,77925 | 5,81921 | -1,028085322 | ENST00000436636 | 23043     | NM_015028    | TNIK           |
| A_22_P00001779 | 1,36263 | 1,40259 | -1,028085322 | N/A             | N/A       | N/A          | Inc-ATP1B3-3   |
| A_33_P3357979  | 9,22334 | 9,26336 | -1,028128079 | ENST00000514596 | 1487      | NM_001012614 | CTBP1          |
| A_24_P288890   | 1,42029 | 1,46031 | -1,028128079 | ENST00000324038 | 144347    | NM_181709    | FAM101A        |
| A_33_P3404411  | 11,1188 | 11,1589 | -1,028185093 | ENST00000382172 | 4285      | NM_005932    | MIPEP          |
| A_22_P00003829 | 1,42145 | 1,46155 | -1,028185093 | ENST00000563079 | 102723873 | N/A          | LOC102723873   |
| A_23_P368101   | 10,4828 | 10,5229 | -1,028185093 | ENST00000520159 | 79685     | NM_024632    | SAP30L         |
| A_33_P3244283  | 9,4011  | 9,44123 | -1,028206473 | ENST00000296238 | 94032     | NM_033259    | CAMK2N2        |
| A_24_P272967   | 8,46831 | 8,50844 | -1,028206473 | ENST00000409301 | 23080     | NM_015060    | AVL9           |
| A_23_P135132   | 1,36165 | 1,40181 | -1,028227854 | ENST00000431299 | 257019    | NM_174938    | FRMD3          |
| A_23_P338325   | 7,47162 | 7,5118  | -1,028242109 | ENST00000549985 | 2004      | XM_006719275 | ELK3           |
| A_33_P3266285  | 1,42149 | 1,46171 | -1,028270618 | ENST00000438700 | 374308    | NM_001034842 | PTCHD3         |
| A_22_P00000555 | 5,35744 | 5,39768 | -1,028284873 | ENST00000520259 | 101926892 | NR_110653    | LOC101926892   |
| A_21_P0012423  | 2,08326 | 2,12351 | -1,028292001 | N/A             | N/A       | N/A          | XLOC_I2_010056 |
| A_32_P121303   | 10,0596 | 10,0999 | -1,028327639 | ENST00000347635 | 10762     | NM_007172    | NUP50          |
| A_21_P0004220  | 2,54669 | 2,587   | -1,028334767 | N/A             | 102724943 | XR_425835    | LOC102724943   |
| A_24_P286054   | 8,52424 | 8,56455 | -1,028334767 | ENST00000512907 | 9765      | NM_001105251 | ZFYVE16        |
| A_33_P3338798  | 1,37932 | 1,4197  | -1,028384663 | ENST00000524136 | 442388    | XR_108906    | SDR16C6P       |
| A_21_P0014583  | 8,17505 | 8,21544 | -1,028391792 | N/A             | 100507033 | XR_110380    | LOC100507033   |
| A_22_P00006375 | 2,36429 | 2,4047  | -1,028406048 | N/A             | N/A       | N/A          | Inc-FBN1-1     |



|                |         |         |              |                 |           |              |                |
|----------------|---------|---------|--------------|-----------------|-----------|--------------|----------------|
| A_33_P3282261  | 5,53072 | 5,57113 | -1,028406048 | N/A             | N/A       | N/A          | XLOC_I2_000001 |
| A_23_P371410   | 6,35461 | 6,39503 | -1,028413177 | ENST00000370680 | 5567      | NM_207578    | PRKACB         |
| A_21_P0012696  | 1,4377  | 1,47812 | -1,028413177 | N/A             | N/A       | N/A          | XLOC_I2_011361 |
| A_24_P942250   | 9,53244 | 9,57287 | -1,028420305 | ENST00000564845 | 80205     | NM_025134    | CHD9           |
| A_22_P00004155 | 1,76456 | 1,80502 | -1,028441691 | ENST00000420905 | 400002    | XR_253017    | FLJ46363       |
| A_21_P0005821  | 1,69329 | 1,73376 | -1,028448819 | N/A             | N/A       | N/A          | Inc-C8orf86-1  |
| A_22_P00017046 | 1,58278 | 1,62326 | -1,028455948 | ENST00000517829 | 102725286 | XR_426321    | LOC102725286   |
| A_33_P3217153  | 5,01829 | 5,05879 | -1,028470206 | ENST00000393127 | 2893      | NM_001077243 | GRIA4          |
| A_22_P00014870 | 6,31209 | 6,3526  | -1,028477334 | N/A             | 574538    | NR_033859    | LOC574538      |
| A_23_P101972   | 4,66667 | 4,70718 | -1,028477334 | ENST00000295055 | 92291     | NM_144575    | CAPN13         |
| A_33_P3297655  | 1,36102 | 1,40156 | -1,028498721 | N/A             | N/A       | N/A          | N/A            |
| A_33_P3421144  | 1,35971 | 1,4003  | -1,028534367 | N/A             | N/A       | N/A          | N/A            |
| A_23_P25030    | 5,23996 | 5,2806  | -1,028570014 | ENST00000554150 | 8630      | NM_003725    | HSD17B6        |
| A_23_P70102    | 1,43303 | 1,47369 | -1,028584273 | ENST00000335244 | 153201    | NM_181776    | SLC36A2        |
| A_23_P325661   | 9,47927 | 9,51994 | -1,028591402 | ENST00000622676 | 7693      | NM_003435    | ZNF134         |
| A_24_P42557    | 1,44039 | 1,48107 | -1,028598532 | ENST00000342443 | 7253      | NM_001018036 | TSHR           |
| A_24_P286527   | 8,16851 | 8,2092  | -1,028605662 | ENST00000422177 | 64792     | NM_022777    | IFT22          |
| A_33_P3213103  | 1,41856 | 1,4593  | -1,028641311 | ENST00000400404 | 652991    | NM_001037802 | SKOR2          |
| A_21_P0006487  | 1,4433  | 1,48406 | -1,028655571 | N/A             | N/A       | N/A          | Inc-CXorf30-1  |
| A_21_P0009310  | 1,39685 | 1,43764 | -1,028676962 | N/A             | N/A       | N/A          | Inc-C17orf79-1 |
| A_21_P0006283  | 1,42316 | 1,46396 | -1,028684092 | ENST00000566873 | 101927450 | NR_109771    | LOC101927450   |
| A_22_P00002147 | 1,39513 | 1,43595 | -1,028698353 | N/A             | N/A       | AK128192     | Inc-BRD1-3     |
| A_22_P00021881 | 1,38978 | 1,43063 | -1,028719744 | ENST00000430545 | N/A       | BG432982     | N/A            |
| A_33_P3215883  | 1,38315 | 1,42402 | -1,028734005 | ENST00000282397 | 2321      | NM_002019    | FLT1           |
| A_24_P412156   | 1,7113  | 1,75225 | -1,028791052 | ENST00000374429 | 6387      | NM_000609    | CXCL12         |
| A_21_P0007650  | 1,41504 | 1,45611 | -1,028876628 | N/A             | N/A       | N/A          | Inc-FAM101A-2  |
| A_22_P00008950 | 1,39302 | 1,4341  | -1,02888376  | ENST00000565564 | N/A       | AY063454     | N/A            |
| A_33_P3268288  | 1,41964 | 1,46073 | -1,028890891 | N/A             | N/A       | N/A          | Inc-SFTA2-3    |
| A_23_P17204    | 12,2934 | 12,3345 | -1,028898023 | ENST00000462785 | 64682     | NM_022662    | ANAPC1         |
| A_24_P341923   | 3,63688 | 3,67798 | -1,028898023 | ENST00000587884 | 57724     | NM_020964    | EPG5           |
| A_33_P3262475  | 1,50054 | 1,54166 | -1,028912287 | ENST00000474333 | 387923    | N/A          | SERP2          |
| A_23_P408167   | 6,71324 | 6,75438 | -1,028926551 | ENST00000543253 | 114928    | NM_001004051 | GPRASP2        |
| A_21_P0005525  | 1,36739 | 1,40856 | -1,028947947 | N/A             | N/A       | N/A          | Inc-TSPAN12-2  |

|                |         |         |              |                 |           |              |                |
|----------------|---------|---------|--------------|-----------------|-----------|--------------|----------------|
| A_33_P3816266  | 7,21889 | 7,26007 | -1,028955079 | N/A             | 91548     | XR_247053    | LOC91548       |
| A_23_P323823   | 1,35748 | 1,39867 | -1,028962211 | ENST00000274764 | 255626    | NM_170610    | HIST1H2BA      |
| A_22_P00008219 | 6,97304 | 7,01423 | -1,028962211 | ENST00000448129 | N/A       | N/A          | N/A            |
| A_23_P66827    | 6,0516  | 6,09282 | -1,028983608 | ENST00000392176 | 80039     | NR_026809    | FAM106A        |
| A_24_P58501    | 1,73201 | 1,77327 | -1,029012138 | ENST00000618231 | 26682     | NM_001004195 | OR4F4          |
| A_21_P0000212  | 7,52609 | 7,56742 | -1,029062067 | ENST00000600238 | 26780     | NR_000012    | SNORA68        |
| A_24_P344416   | 7,11342 | 7,15476 | -1,0290692   | ENST00000434452 | 1825      | NM_024423    | DSC3           |
| A_21_P0011446  | 5,94084 | 5,9822  | -1,029083466 | ENST00000565194 | N/A       | N/A          | N/A            |
| A_21_P0000360  | 7,54076 | 7,58213 | -1,029090599 | N/A             | 677843    | NR_003019    | SNORA77        |
| A_24_P405981   | 4,91651 | 4,9579  | -1,029104866 | N/A             | 23548     | NM_012382    | TTC33          |
| A_24_P7750     | 9,78294 | 9,82436 | -1,029126265 | ENST00000515599 | N/A       | N/A          | N/A            |
| A_33_P3310620  | 1,44112 | 1,48255 | -1,029133399 | N/A             | N/A       | N/A          | XLOC_I2_005197 |
| A_21_P0008129  | 1,73103 | 1,77247 | -1,029140532 | N/A             | N/A       | N/A          | lnc-EFHA1-1    |
| A_33_P3393460  | 1,36274 | 1,40418 | -1,029140532 | N/A             | 391343    | XR_249068    | LOC391343      |
| A_23_P153878   | 1,44193 | 1,48339 | -1,029154799 | ENST00000215530 | 27006     | NM_020637    | FGF22          |
| A_23_P119617   | 10,0878 | 10,1293 | -1,029183334 | ENST00000592188 | 57794     | NM_172231    | SUGP1          |
| A_33_P3269879  | 7,05332 | 7,09483 | -1,029190468 | ENST00000523633 | 64760     | NM_022749    | FAM160B2       |
| A_32_P320835   | 1,42027 | 1,46183 | -1,029226137 | ENST00000592718 | 100652929 | NR_109783    | HP09025        |
| A_33_P3363725  | 1,44142 | 1,48301 | -1,02924754  | ENST00000317093 | 390075    | NM_001001922 | OR52N5         |
| A_24_P61753    | 10,06   | 10,1016 | -1,029254674 | ENST00000570628 | 23277     | NM_015229    | CLUH           |
| A_32_P70724    | 11,4926 | 11,5342 | -1,029254674 | ENST00000367264 | 10765     | NM_006618    | KDM5B          |
| A_22_P00018916 | 1,35812 | 1,39974 | -1,029268942 | N/A             | N/A       | N/A          | lnc-FOXB1-5    |
| A_22_P00012219 | 1,36233 | 1,40398 | -1,029290346 | N/A             | N/A       | N/A          | lnc-PPDPF-2    |
| A_22_P00019197 | 1,36021 | 1,40189 | -1,029311749 | N/A             | N/A       | N/A          | lnc-FAM26E-1   |
| A_21_P0008057  | 1,43585 | 1,47757 | -1,029340288 | N/A             | N/A       | N/A          | lnc-TNFSF11-1  |
| A_22_P00003598 | 1,41767 | 1,45941 | -1,029354558 | N/A             | N/A       | N/A          | lnc-CD226-1    |
| A_22_P00008444 | 1,36147 | 1,40322 | -1,029361693 | ENST00000444319 | 100188949 | NR_024464    | LINC00426      |
| A_33_P3372281  | 9,4837  | 9,52547 | -1,029375963 | ENST00000274747 | 57380     | NM_001286265 | MRS2           |
| A_24_P380567   | 1,40503 | 1,44683 | -1,029397369 | ENST00000431984 | 83698     | NM_031468    | CALN1          |
| A_22_P00023949 | 7,75727 | 7,79909 | -1,029411639 | N/A             | 100874089 | NR_046645    | RUVBL1-AS1     |
| A_22_P00002274 | 5,05491 | 5,09674 | -1,029418775 | N/A             | N/A       | BG484339     | lnc-C10orf31-5 |
| A_22_P00018027 | 1,42366 | 1,46549 | -1,029418775 | N/A             | 728805    | XR_244198    | LOC728805      |
| A_22_P00018405 | 1,44018 | 1,48202 | -1,02942591  | N/A             | 101929680 | NR_110260    | LOC101929680   |

|                |         |         |              |                 |           |              |               |
|----------------|---------|---------|--------------|-----------------|-----------|--------------|---------------|
| A_33_P3220857  | 6,16783 | 6,20969 | -1,029440181 | ENST00000376340 | 84267     | XM_005252271 | C9orf64       |
| A_22_P00004856 | 1,42863 | 1,47051 | -1,029454452 | N/A             | N/A       | N/A          | Inc-CYP3A43-2 |
| A_22_P00017751 | 6,63845 | 6,68038 | -1,029490131 | N/A             | N/A       | N/A          | Inc-YIF1A-3   |
| A_24_P944299   | 9,81553 | 9,8575  | -1,029518675 | ENST00000366766 | 8476      | NM_003607    | CDC42BPA      |
| A_33_P3299796  | 6,42811 | 6,47009 | -1,029525811 | ENST00000536349 | 11253     | XM_006717353 | MAN1B1        |
| A_33_P3301559  | 9,88212 | 9,92411 | -1,029532947 | ENST00000572600 | 23059     | NM_015041    | CLUAP1        |
| A_22_P00003496 | 2,00866 | 2,05065 | -1,029532947 | ENST00000414740 | 101928354 | XR_241980    | LOC101928354  |
| A_24_P374675   | 3,08957 | 3,13159 | -1,029554356 | ENST00000566707 | 64718     | NM_001037125 | UNKL          |
| A_33_P3316683  | 4,54686 | 4,58892 | -1,029582902 | ENST00000466252 | 90203     | NM_152897    | SNX21         |
| A_23_P23114    | 10,7376 | 10,7797 | -1,029611448 | ENST00000344035 | 8073      | NM_080391    | PTP4A2        |
| A_24_P921366   | 12,2251 | 12,2672 | -1,029611448 | ENST00000443197 | 800       | NM_033138    | CALD1         |
| A_33_P3372659  | 1,44006 | 1,48219 | -1,029632859 | N/A             | N/A       | N/A          | N/A           |
| A_21_P0004759  | 1,42935 | 1,4715  | -1,029647132 | ENST00000445346 | 101928280 | NR_125854    | LOC101928280  |
| A_22_P00002248 | 6,56682 | 6,60899 | -1,029661406 | ENST00000525909 | 399821    | NR_033847    | FLJ37035      |
| A_21_P0013828  | 1,42024 | 1,46242 | -1,029668544 | ENST00000445747 | N/A       | N/A          | N/A           |
| A_33_P3339446  | 1,35941 | 1,40161 | -1,029682818 | N/A             | N/A       | N/A          | N/A           |
| A_21_P0013538  | 1,3796  | 1,42183 | -1,02970423  | ENST00000519063 | 255926    | NR_001448    | ADAM5         |
| A_22_P00023553 | 3,04809 | 3,09035 | -1,029725642 | N/A             | N/A       | N/A          | Inc-RNF11-1   |
| A_33_P3216933  | 5,85437 | 5,89673 | -1,02979702  | ENST00000304987 | 23235     | NM_015191    | SIK2          |
| A_33_P3399765  | 7,51474 | 7,55711 | -1,029804158 | N/A             | N/A       | N/A          | N/A           |
| A_22_P00015243 | 3,64854 | 3,69091 | -1,029804158 | N/A             | N/A       | N/A          | Inc-SPAG1-3   |
| A_33_P3251776  | 8,20578 | 8,24816 | -1,029811296 | ENST00000262520 | 80270     | NM_001142777 | HSD3B7        |
| A_21_P0010633  | 6,7821  | 6,8245  | -1,029825572 | ENST00000414374 | 101928079 | NR_104131    | LINC01057     |
| A_21_P0003394  | 1,36201 | 1,40441 | -1,029825572 | ENST00000448824 | N/A       | N/A          | N/A           |
| A_23_P320261   | 14,9172 | 14,9596 | -1,029825572 | ENST00000467532 | 93099     | NM_001035516 | DMKN          |
| A_23_P139864   | 1,39883 | 1,44125 | -1,029839849 | ENST00000351606 | 83445     | NM_031289    | GSG1          |
| A_23_P94517    | 1,70037 | 1,74283 | -1,029868402 | ENST00000265922 | 1620      | NM_014618    | BRINP1        |
| A_21_P0004492  | 1,4181  | 1,46062 | -1,029911234 | N/A             | N/A       | N/A          | Inc-BASP1-3   |
| A_23_P18913    | 1,43674 | 1,47926 | -1,029911234 | ENST00000328275 | 285659    | NM_206880    | OR2V2         |
| A_33_P3375899  | 2,00611 | 2,04864 | -1,029918373 | N/A             | N/A       | N/A          | N/A           |
| A_21_P0002719  | 1,3578  | 1,40036 | -1,02993979  | ENST00000435560 | 101928739 | NR_125401    | LOC101928739  |
| A_32_P123629   | 10,4735 | 10,5161 | -1,029968346 | N/A             | 125488    | NM_001292030 | TTC39C        |
| A_22_P00011733 | 5,63067 | 5,67327 | -1,029968346 | N/A             | N/A       | AF086279     | Inc-PELI2-5   |

|                |         |         |              |                 |           |              |                       |
|----------------|---------|---------|--------------|-----------------|-----------|--------------|-----------------------|
| A_22_P00020062 | 3,13435 | 3,17698 | -1,029989764 | N/A             | N/A       | AL705479     | Inc-OR3A1-1           |
| A_33_P3295932  | 2,12291 | 2,16554 | -1,029989764 | N/A             | N/A       | N/A          | N/A                   |
| A_33_P3277096  | 4,40741 | 4,45006 | -1,030004043 | ENST00000383417 | N/A       | AJ315539     | N/A                   |
| A_33_P3317058  | 1,67482 | 1,71748 | -1,030011182 | ENST00000426455 | 10734     | NM_001282717 | STAG3                 |
| A_21_P0009097  | 3,89846 | 3,94112 | -1,030011182 | ENST00000567137 | 653550    | NR_110914    | TP53TG3C              |
| A_24_P237804   | 1,37108 | 1,41378 | -1,030039741 | ENST00000615053 | 317754    | NM_174981    | POTED                 |
| A_33_P3315899  | 10,1847 | 10,2274 | -1,030039741 | N/A             | N/A       | N/A          | N/A                   |
| A_24_P300777   | 15,0447 | 15,0874 | -1,030039741 | ENST00000445355 | 101       | NM_001109    | ADAM8                 |
| A_33_P3214782  | 3,73038 | 3,7731  | -1,03005402  | N/A             | N/A       | N/A          | N/A                   |
| A_23_P259292   | 4,13469 | 4,17744 | -1,03007544  | ENST00000530681 | 114902    | NM_015645    | C1QTNF5               |
| A_33_P3304157  | 1,72004 | 1,76279 | -1,03007544  | ENST00000620364 | 1310      | NM_001858    | COL19A1               |
| A_23_P20172    | 1,41468 | 1,45746 | -1,03009686  | ENST00000304402 | 2845      | NM_005295    | GPR22                 |
| A_21_P0006661  | 1,85592 | 1,89871 | -1,030104    | N/A             | 101929052 | N/A          | LINC00836             |
| A_22_P00006793 | 1,39005 | 1,43287 | -1,03012542  | N/A             | N/A       | BQ232667     | Inc-G2E3-2            |
| A_32_P76137    | 1,43145 | 1,47431 | -1,030153982 | ENST00000390256 | N/A       | AJ697910     | N/A                   |
| A_21_P0007048  | 1,4392  | 1,48208 | -1,030168263 | N/A             | N/A       | N/A          | Inc-PLXDC2-1          |
| A_23_P360167   | 13,3841 | 13,427  | -1,030182544 | ENST00000550201 | 10540     | NM_006400    | DCTN2                 |
| A_22_P00007957 | 1,73433 | 1,77723 | -1,030182544 | N/A             | N/A       | N/A          | Inc-ICOSLG-2          |
| A_23_P109026   | 10,258  | 10,3009 | -1,030182544 | ENST00000372861 | 60598     | NM_022358    | KCNK15                |
| A_33_P3308534  | 7,1871  | 7,23009 | -1,030246812 | ENST00000582350 | 114876    | NM_080597    | OSBPL1A               |
| A_24_P414952   | 8,7828  | 8,82579 | -1,030246812 | ENST00000312814 | 64418     | NM_022484    | TMEM168               |
| A_32_P9543     | 1,43672 | 1,47972 | -1,030253954 | ENST00000402255 | 200315    | NM_145699    | APOBEC3A              |
| A_23_P45389    | 12,3104 | 12,3534 | -1,030253954 | ENST00000243325 | 9367      | NM_004251    | RAB9A                 |
| A_21_P0000264  | 6,70962 | 6,75265 | -1,030275377 | N/A             | 619498    | NR_002579    | SNORD74               |
| A_24_P135193   | 4,721   | 4,7641  | -1,030325368 | ENST00000540917 | 55293     | NM_018314    | UEVLD                 |
| A_22_P00023629 | 1,37306 | 1,41619 | -1,030346793 | ENST00000523195 | 157693    | NR_103537    | FAM87A                |
| A_22_P00004692 | 6,57353 | 6,61671 | -1,030382503 | N/A             | N/A       | AK126743     | Inc-CTD-2517M22.14.1- |
| A_22_P00003242 | 6,48904 | 6,53224 | -1,030396787 | ENST00000494340 | N/A       | BC031255     | N/A                   |
| A_23_P92082    | 16,7164 | 16,7596 | -1,030396787 | ENST00000469678 | 7086      | NM_001064    | TKT                   |
| A_23_P48535    | 10,0618 | 10,105  | -1,030396787 | ENST00000539826 | 394       | NM_001030055 | ARHGAP5               |
| A_24_P285623   | 11,9973 | 12,0405 | -1,030396787 | ENST00000462685 | 1716      | NM_080916    | DGUOK                 |
| A_33_P3262890  | 16,4732 | 16,5164 | -1,030396787 | ENST00000416785 | N/A       | N/A          | N/A                   |
| A_21_P0001548  | 1,43697 | 1,48018 | -1,030403929 | N/A             | N/A       | N/A          | Inc-TGFBR3-1          |

|                |         |         |              |                 |           |              |               |
|----------------|---------|---------|--------------|-----------------|-----------|--------------|---------------|
| A_22_P00006505 | 1,41739 | 1,46065 | -1,030439641 | ENST00000611481 | 100506622 | NR_103810    | LINC00540     |
| A_24_P697685   | 1,41859 | 1,46186 | -1,030446783 | ENST00000389567 | 83850     | NM_031913    | ESYT3         |
| A_21_P0004857  | 1,38183 | 1,4251  | -1,030446783 | N/A             | N/A       | N/A          | Inc-BTN3A2-1  |
| A_22_P00011345 | 1,36372 | 1,40699 | -1,030446783 | N/A             | N/A       | N/A          | Inc-OTUD6B-1  |
| A_23_P58293    | 11,0724 | 11,1157 | -1,030468211 | ENST00000505307 | 7323      | NM_181886    | UBE2D3        |
| A_21_P0009451  | 1,39477 | 1,43807 | -1,030468211 | N/A             | N/A       | N/A          | Inc-NDUFV2-1  |
| A_23_P345707   | 8,34175 | 8,3851  | -1,030503925 | ENST00000268138 | 90381     | NM_152259    | TICRR         |
| A_21_P0002708  | 1,36804 | 1,41142 | -1,030525354 | ENST00000462531 | 101928190 | NR_125399    | LINC01487     |
| A_33_P3363893  | 1,4758  | 1,51919 | -1,030532497 | N/A             | N/A       | N/A          | N/A           |
| A_22_P00010013 | 10,5462 | 10,5896 | -1,03053964  | N/A             | N/A       | BX094640     | Inc-MME-4     |
| A_21_P0005796  | 1,36094 | 1,40435 | -1,030546783 | N/A             | N/A       | N/A          | Inc-PPP1R3B-2 |
| A_22_P00010614 | 1,40536 | 1,44878 | -1,030553927 | N/A             | N/A       | N/A          | Inc-NDUFB4-2  |
| A_21_P0010433  | 1,43272 | 1,47614 | -1,030553927 | N/A             | 101929416 | N/A          | LOC101929416  |
| A_33_P3343996  | 6,46511 | 6,50853 | -1,030553927 | ENST00000430278 | 64327     | NM_022458    | LMBR1         |
| A_24_P306824   | 1,41117 | 1,45462 | -1,030575357 | ENST00000320542 | 619373    | NM_001100916 | MBOAT4        |
| A_21_P0010298  | 2,58003 | 2,62351 | -1,030596787 | N/A             | N/A       | N/A          | Inc-ICOSLG-4  |
| A_24_P161581   | 6,29243 | 6,33596 | -1,030632505 | ENST00000376325 | 729956    | NM_001145176 | SHISA7        |
| A_21_P0010517  | 2,88543 | 2,92898 | -1,030646793 | ENST00000490966 | 4485      | N/A          | MST1          |
| A_21_P0007338  | 1,82152 | 1,86508 | -1,030653937 | ENST00000532428 | 51074     | N/A          | APIP          |
| A_32_P101352   | 3,35388 | 3,3975  | -1,030696802 | ENST00000374251 | 158830    | NM_001025265 | CXorf65       |
| A_33_P3375299  | 3,01414 | 3,05782 | -1,030739668 | ENST00000404289 | N/A       | BF244550     | N/A           |
| A_33_P3386581  | 10,0929 | 10,1366 | -1,030753957 | ENST00000285243 | 91369     | NM_052855    | ANKRD40       |
| A_23_P17307    | 11,6664 | 11,7101 | -1,030753957 | ENST00000370487 | 55257     | NM_018270    | MRGBP         |
| A_23_P108294   | 11,5979 | 11,6416 | -1,030753957 | ENST00000621795 | 8612      | NM_177543    | PPAP2C        |
| A_23_P259054   | 12,0336 | 12,0773 | -1,030753957 | ENST00000503491 | 57231     | NM_153816    | SNX14         |
| A_22_P00010638 | 3,58486 | 3,62859 | -1,030775391 | ENST00000457898 | N/A       | AK097742     | N/A           |
| A_21_P0009511  | 1,43451 | 1,47825 | -1,030782536 | ENST00000572608 | 102723363 | XR_424076    | LOC102723363  |
| A_21_P0008012  | 1,43653 | 1,48028 | -1,030789681 | ENST00000435401 | 100874139 | N/A          | LINC00353     |
| A_21_P0003795  | 1,37361 | 1,41736 | -1,030789681 | ENST00000508977 | N/A       | N/A          | N/A           |
| A_33_P3410889  | 1,4049  | 1,44866 | -1,030796826 | ENST00000398721 | 403339    | NM_001166478 | DEFB133       |
| A_22_P00024771 | 2,12841 | 2,17218 | -1,030803971 | N/A             | N/A       | N/A          | Inc-RGPD3-2   |
| A_24_P565556   | 7,21712 | 7,2609  | -1,030811116 | ENST00000262374 | 56052     | N/A          | ALG1          |
| A_23_P147296   | 10,9083 | 10,9521 | -1,030825406 | ENST00000462320 | 27247     | NM_015700    | NFU1          |

|                |         |         |              |                 |           |              |               |
|----------------|---------|---------|--------------|-----------------|-----------|--------------|---------------|
| A_23_P128828   | 13,9764 | 14,0202 | -1,030825406 | ENST00000554062 | 8106      | NM_004643    | PABPN1        |
| A_33_P3306018  | 1,7088  | 1,75261 | -1,030832551 | N/A             | N/A       | AK127893     | N/A           |
| A_33_P3392867  | 1,41213 | 1,45596 | -1,030846842 | ENST00000621010 | 5470      | NM_006239    | PPEF2         |
| A_22_P00023014 | 8,74614 | 8,79007 | -1,030918297 | N/A             | N/A       | N/A          | Inc-MFSD9-4   |
| A_33_P3409567  | 1,36337 | 1,40731 | -1,030925443 | ENST00000509713 | 102724735 | N/A          | LOC102724735  |
| A_22_P00004187 | 1,41272 | 1,45667 | -1,030932589 | N/A             | N/A       | N/A          | Inc-CLK4-1    |
| A_23_P403991   | 1,35902 | 1,40301 | -1,030961173 | ENST00000324695 | 79054     | NM_024080    | TRPM8         |
| A_33_P3391375  | 9,14358 | 9,18758 | -1,030968319 | ENST00000378619 | 347404    | NM_198511    | LANCL3        |
| A_33_P3311041  | 2,55942 | 2,60345 | -1,030989757 | N/A             | 6461      | AK096227     | SHB           |
| A_24_P48248    | 6,53674 | 6,5808  | -1,031011196 | ENST00000588073 | 78995     | NM_024032    | C17orf53      |
| A_33_P3225572  | 10,71   | 10,7541 | -1,031039783 | N/A             | N/A       | N/A          | N/A           |
| A_22_P00010999 | 3,75701 | 3,80111 | -1,031039783 | N/A             | N/A       | N/A          | Inc-NSG1.1-1  |
| A_33_P3408632  | 6,81476 | 6,85886 | -1,031039783 | ENST00000514938 | 91289     | NM_033200    | LMF2          |
| A_21_P0002804  | 2,71961 | 2,76378 | -1,03108981  | ENST00000468232 | N/A       | N/A          | N/A           |
| A_32_P141418   | 1,40992 | 1,45411 | -1,031104104 | ENST00000467083 | 55130     | NM_018076    | ARMC4         |
| A_23_P128372   | 11,5728 | 11,617  | -1,031111251 | ENST00000001008 | 2288      | NM_002014    | FKBP4         |
| A_33_P3230698  | 1,76563 | 1,80988 | -1,031146987 | ENST00000498729 | 547       | NM_001244008 | KIF1A         |
| A_21_P0004625  | 3,31929 | 3,36367 | -1,031239907 | ENST00000437718 | N/A       | N/A          | N/A           |
| A_33_P3210800  | 1,41356 | 1,45794 | -1,031239907 | N/A             | N/A       | N/A          | Inc-GNG11-2   |
| A_33_P3323929  | 3,52409 | 3,56848 | -1,031247055 | N/A             | 399819    | AK097855     | FLJ40536      |
| A_21_P0008138  | 1,41456 | 1,45895 | -1,031247055 | N/A             | N/A       | N/A          | Inc-KATNAL1-3 |
| A_33_P3370222  | 1,41442 | 1,45884 | -1,0312685   | N/A             | N/A       | N/A          | N/A           |
| A_23_P250122   | 6,83453 | 6,87898 | -1,031289945 | ENST00000313766 | 56975     | NM_020223    | FAM20C        |
| A_21_P0013884  | 1,53777 | 1,58223 | -1,031297093 | ENST00000437359 | N/A       | N/A          | N/A           |
| A_23_P112135   | 12,9131 | 12,9576 | -1,031325687 | ENST00000262213 | 23471     | NM_014294    | TRAM1         |
| A_19_P00315541 | 1,41898 | 1,46349 | -1,031332836 | ENST00000606706 | 100507428 | NR_108063    | LINC00458     |
| A_21_P0012114  | 4,77644 | 4,82099 | -1,031361431 | ENST00000431580 | N/A       | N/A          | N/A           |
| A_23_P24004    | 11,9235 | 11,9681 | -1,031397176 | ENST00000611722 | 3433      | NM_001547    | IFIT2         |
| A_24_P391104   | 10,2751 | 10,3197 | -1,031397176 | ENST00000254325 | 5989      | NM_002918    | RFX1          |
| A_23_P25204    | 16,1867 | 16,2313 | -1,031397176 | ENST00000549338 | 5250      | NM_213611    | SLC25A3       |
| A_23_P158118   | 1,41189 | 1,45651 | -1,031411474 | ENST00000511190 | 83844     | NM_031907    | USP26         |
| A_23_P159851   | 1,43356 | 1,47819 | -1,031418623 | ENST00000298085 | 84889     | NM_032803    | SLC7A3        |
| A_21_P0000785  | 7,01666 | 7,06133 | -1,031447221 | N/A             | 100628315 | NR_038397    | DNM3OS        |

|                |         |         |              |                 |        |              |                |
|----------------|---------|---------|--------------|-----------------|--------|--------------|----------------|
| A_24_P222872   | 13,0635 | 13,1082 | -1,031468669 | ENST00000446481 | 54578  | NM_001072    | UGT1A6         |
| A_23_P131096   | 11,092  | 11,1368 | -1,031540168 | ENST00000589961 | 5442   | NM_005035    | POLRMT         |
| A_33_P3352349  | 8,80886 | 8,85367 | -1,031547318 | ENST00000398470 | 728318 | NM_001190460 | KRTAP9-1       |
| A_22_P00020469 | 8,46684 | 8,51166 | -1,031554468 | N/A             | N/A    | N/A          | Inc-OLFML2A-1  |
| A_22_P00002358 | 2,11932 | 2,16415 | -1,031561618 | ENST00000548415 | N/A    | BI769462     | N/A            |
| A_22_P00013937 | 5,9683  | 6,01316 | -1,031583069 | ENST00000438837 | 8566   | AK056502     | PDXK           |
| A_21_P0013790  | 1,40808 | 1,45295 | -1,031590219 | N/A             | N/A    | N/A          | XLOC_I2_015596 |
| A_23_P32938    | 10,9388 | 10,9837 | -1,031611671 | ENST00000322536 | 1662   | NM_004398    | DDX10          |
| A_33_P3254460  | 13,2112 | 13,2561 | -1,031611671 | ENST00000357338 | 65989  | NM_206539    | DLK2           |
| A_22_P00014760 | 2,13507 | 2,18003 | -1,031654575 | ENST00000450325 | N/A    | N/A          | N/A            |
| A_33_P3286218  | 8,21372 | 8,2587  | -1,031668877 | N/A             | 79469  | NR_002771    | DLEU2L         |
| A_22_P00010431 | 5,26835 | 5,31335 | -1,031683179 | N/A             | N/A    | N/A          | Inc-N4BP2-1    |
| A_23_P315602   | 1,41365 | 1,45866 | -1,03169033  | ENST00000417925 | 10777  | NM_016300    | ARPP21         |
| A_33_P3292478  | 8,9032  | 8,94825 | -1,031718935 | ENST00000621559 | 6360   | XM_006725334 | CCL16          |
| A_33_P3215166  | 1,43206 | 1,47711 | -1,031718935 | ENST00000443577 | N/A    | N/A          | N/A            |
| A_21_P0006136  | 2,22946 | 2,27455 | -1,031747541 | N/A             | N/A    | N/A          | Inc-TMEM215-1  |
| A_22_P00002428 | 1,38379 | 1,4289  | -1,031761844 | N/A             | N/A    | N/A          | Inc-C14orf28-1 |
| A_33_P3258997  | 7,37224 | 7,41738 | -1,031783299 | ENST00000372936 | 79979  | NM_024917    | TRMT2B         |
| A_21_P0004491  | 1,41191 | 1,4571  | -1,031819059 | N/A             | N/A    | N/A          | Inc-BASP1-3    |
| A_23_P342091   | 12,0681 | 12,1133 | -1,031826211 | ENST00000424266 | 221443 | NM_145063    | OARD1          |
| A_24_P579356   | 1,3632  | 1,40841 | -1,031833363 | ENST00000314319 | 79822  | NM_001010000 | ARHGAP28       |
| A_21_P0011575  | 1,41376 | 1,45897 | -1,031833363 | N/A             | N/A    | N/A          | XLOC_I2_006013 |
| A_33_P3715843  | 1,35967 | 1,4049  | -1,031847667 | N/A             | 348035 | BC032242     | MGC40069       |
| A_33_P3336262  | 4,75634 | 4,80164 | -1,031897734 | ENST00000412120 | 85452  | XM_006710997 | CFAP74         |
| A_23_P129425   | 1,40313 | 1,44843 | -1,031897734 | ENST00000466164 | 55815  | NM_018430    | TSNAXIP1       |
| A_23_P251945   | 11,4089 | 11,4542 | -1,031897734 | ENST00000424236 | 51164  | NM_016221    | DCTN4          |
| A_23_P67312    | 7,65833 | 7,70368 | -1,031933498 | ENST00000464860 | 7695   | NM_003437    | ZNF136         |
| A_24_P367496   | 2,96097 | 3,00632 | -1,031933498 | ENST00000580955 | 1394   | AK124894     | CRHR1          |
| A_33_P3256760  | 1,43286 | 1,47821 | -1,031933498 | N/A             | 404266 | NR_033201    | HOXB-AS3       |
| A_22_P00023966 | 1,36948 | 1,41483 | -1,031933498 | N/A             | N/A    | N/A          | Inc-LEPRE1-1   |
| A_23_P69683    | 9,28089 | 9,32624 | -1,031933498 | ENST00000265175 | 10427  | NM_006323    | SEC24B         |
| A_21_P0011051  | 3,97039 | 4,01575 | -1,03194065  | ENST00000551082 | N/A    | N/A          | N/A            |
| A_21_P0001853  | 1,36509 | 1,41046 | -1,031947803 | ENST00000431712 | N/A    | N/A          | N/A            |

|                |         |         |              |                 |           |              |                 |
|----------------|---------|---------|--------------|-----------------|-----------|--------------|-----------------|
| A_32_P199767   | 5,32629 | 5,37168 | -1,031962109 | ENST00000409324 | 57232     | NM_001037735 | ZNF630          |
| A_21_P0007096  | 1,587   | 1,63239 | -1,031962109 | N/A             | N/A       | N/A          | Inc-C10orf31-10 |
| A_33_P3294053  | 10,5422 | 10,5876 | -1,031969262 | ENST00000393537 | 51239     | NM_016466    | ANKRD39         |
| A_23_P98963    | 10,1884 | 10,2338 | -1,031969262 | ENST00000261900 | 904       | NM_001277842 | CCNT1           |
| A_22_P00016508 | 4,83655 | 4,88196 | -1,031976415 | ENST00000432412 | N/A       | BF678696     | N/A             |
| A_33_P3400239  | 1,43113 | 1,47655 | -1,031983569 | N/A             | 79953     | XM_006723626 | SYNDIG1         |
| A_33_P3248765  | 9,09676 | 9,14218 | -1,031983569 | ENST00000367254 | 51094     | NM_001290557 | ADIPOR1         |
| A_22_P00024748 | 1,43259 | 1,47805 | -1,032012182 | ENST00000568036 | N/A       | N/A          | N/A             |
| A_22_P00005425 | 1,42373 | 1,46919 | -1,032012182 | N/A             | N/A       | N/A          | Inc-DTWD2-1     |
| A_23_P369994   | 1,41245 | 1,45792 | -1,032019335 | ENST00000255448 | 9201      | NM_004734    | DCLK1           |
| A_21_P0007399  | 1,72122 | 1,7667  | -1,032026488 | N/A             | N/A       | N/A          | Inc-C11orf92-1  |
| A_21_P0006596  | 1,35877 | 1,40426 | -1,032033642 | ENST00000417910 | 101929148 | N/A          | LOC101929148    |
| A_33_P3257944  | 10,5176 | 10,5631 | -1,032040795 | ENST00000443413 | N/A       | N/A          | N/A             |
| A_21_P0010487  | 1,41053 | 1,45605 | -1,032055103 | ENST00000616018 | 102724558 | NR_120328    | LOC102724558    |
| A_24_P461238   | 1,40967 | 1,45524 | -1,032090872 | ENST00000411989 | 400866    | NR_027066    | LINC00114       |
| A_22_P00014309 | 1,41322 | 1,45882 | -1,032112334 | N/A             | N/A       | N/A          | Inc-SERPINA4-1  |
| A_33_P3237944  | 6,42758 | 6,4732  | -1,032126642 | ENST00000394061 | 9179      | NM_004722    | AP4M1           |
| A_19_P00813593 | 7,80146 | 7,84709 | -1,032133796 | ENST00000295549 | 375295    | NR_040001    | LINC01116       |
| A_21_P0002959  | 1,43215 | 1,4778  | -1,032148104 | N/A             | N/A       | N/A          | Inc-ARIH2-1     |
| A_33_P3253476  | 1,43183 | 1,47749 | -1,032155259 | ENST00000619932 | 101929780 | NR_104217    | NBPF25P         |
| A_19_P00322357 | 7,5118  | 7,55747 | -1,032162413 | ENST00000574526 | 101928738 | NR_110851    | LOC101928738    |
| A_24_P239419   | 2,60801 | 2,65369 | -1,032169568 | ENST00000450221 | 7957      | NM_001018041 | EPM2A           |
| A_21_P0002730  | 10,5932 | 10,6389 | -1,032183877 | ENST00000425195 | 102725370 | XR_425587    | LOC102725370    |
| A_32_P113436   | 11,6181 | 11,6638 | -1,032183877 | ENST00000565308 | 144983    | NM_001011724 | HNRNPA1L2       |
| A_21_P0008715  | 3,65702 | 3,70279 | -1,03223396  | N/A             | N/A       | N/A          | Inc-GABRB3-1    |
| A_33_P3503279  | 3,28262 | 3,32839 | -1,03223396  | N/A             | N/A       | N/A          | N/A             |
| A_21_P0012321  | 1,40689 | 1,45271 | -1,032269735 | ENST00000457193 | 101929374 | XR_244410    | LOC101929374    |
| A_32_P124746   | 4,42707 | 4,47291 | -1,032284045 | ENST00000605984 | N/A       | BC009638     | N/A             |
| A_21_P0009891  | 1,80078 | 1,84664 | -1,032298356 | ENST00000452395 | 100505683 | N/A          | LINC01431       |
| A_21_P0007302  | 3,6852  | 3,73115 | -1,032362756 | ENST00000529070 | 100128239 | N/A          | LOC100128239    |
| A_33_P3276519  | 8,97286 | 9,01882 | -1,032369912 | ENST00000566653 | 64223     | NM_022372    | MLST8           |
| A_33_P3309999  | 5,60527 | 5,65124 | -1,032377068 | ENST00000360028 | 340578    | NM_001013628 | DCAF12L2        |
| A_21_P0008670  | 4,94055 | 4,98656 | -1,032405692 | ENST00000536780 | 254559    | NR_015411    | LINC00925       |



|                |         |         |              |                 |           |              |                |
|----------------|---------|---------|--------------|-----------------|-----------|--------------|----------------|
| A_22_P00006472 | 2,64287 | 2,6889  | -1,032420004 | N/A             | 101926911 | NR_110104    | LOC101926911   |
| A_33_P3393996  | 1,42504 | 1,47111 | -1,032448629 | ENST00000431137 | N/A       | N/A          | N/A            |
| A_23_P139575   | 15,0125 | 15,0586 | -1,032470098 | ENST00000429243 | 54458     | NM_001005354 | PRR13          |
| A_21_P0012293  | 1,3998  | 1,44591 | -1,032477255 | N/A             | N/A       | N/A          | XLOC_I2_009493 |
| A_22_P00018178 | 6,17188 | 6,21801 | -1,032491568 | ENST00000502275 | N/A       | N/A          | N/A            |
| A_21_P0005464  | 3,99474 | 4,0409  | -1,032513038 | N/A             | N/A       | N/A          | Inc-FTSJ2-1    |
| A_24_P331779   | 1,69661 | 1,74278 | -1,032520195 | ENST00000368581 | 345895    | NM_001010892 | RSPH4A         |
| A_23_P421011   | 9,41249 | 9,45867 | -1,032527352 | ENST00000370200 | 81621     | NM_030929    | KAZALD1        |
| A_21_P0014139  | 1,42564 | 1,47183 | -1,032534509 | ENST00000507837 | 4552      | N/A          | MTRR           |
| A_23_P169576   | 10,4038 | 10,45   | -1,032541666 | ENST00000260762 | 54536     | NM_019053    | EXOC6          |
| A_24_P216765   | 13,2856 | 13,3318 | -1,032541666 | ENST00000467767 | 9804      | NM_014765    | TOMM20         |
| A_21_P0004218  | 1,41306 | 1,45926 | -1,032541666 | N/A             | N/A       | N/A          | Inc-KIAA0947-1 |
| A_21_P0007670  | 1,76197 | 1,80821 | -1,032570295 | ENST00000535487 | N/A       | N/A          | N/A            |
| A_21_P0013608  | 5,05595 | 5,1022  | -1,032577452 | N/A             | 101928483 | XR_252671    | LINC01573      |
| A_21_P0012880  | 7,01182 | 7,05812 | -1,032613239 | ENST00000493082 | 65980     | N/A          | BRD9           |
| A_33_P3334015  | 3,50378 | 3,55011 | -1,032634712 | ENST00000611551 | 256302    | NM_152914    | NATD1          |
| A_33_P3250133  | 7,97505 | 8,02142 | -1,032663343 | ENST00000359236 | 54621     | NM_019086    | VSIG10         |
| A_33_P3424222  | 5,92707 | 5,97347 | -1,032684817 | ENST00000484729 | 3119      | NM_002123    | HLA-DQB1       |
| A_21_P0000130  | 8,66006 | 8,70649 | -1,032706291 | N/A             | 100289187 | NM_001195541 | GS1-259H13.2   |
| A_33_P3211854  | 1,35786 | 1,4043  | -1,032713449 | N/A             | N/A       | N/A          | N/A            |
| A_21_P0010223  | 1,4114  | 1,45786 | -1,032727766 | N/A             | N/A       | N/A          | Inc-NCAM2-7    |
| A_21_P0004662  | 1,72286 | 1,76933 | -1,032734924 | N/A             | N/A       | N/A          | Inc-SH3BGRL2-3 |
| A_33_P3263851  | 5,74695 | 5,79347 | -1,032770717 | N/A             | 400863    | N/A          | LOC400863      |
| A_21_P0009919  | 1,41042 | 1,45694 | -1,032770717 | ENST00000441277 | N/A       | N/A          | N/A            |
| A_21_P0008918  | 3,86627 | 3,91283 | -1,032799352 | N/A             | N/A       | N/A          | Inc-IL4R-2     |
| A_22_P00017365 | 5,41476 | 5,46132 | -1,032799352 | ENST00000510059 | N/A       | N/A          | N/A            |
| A_23_P33465    | 11,682  | 11,7286 | -1,032827987 | ENST00000487969 | 79174     | NM_024324    | CRELD2         |
| A_33_P3257817  | 13,2753 | 13,3219 | -1,032827987 | N/A             | 102723701 | NR_125821    | LOC102723701   |
| A_22_P00014684 | 1,40129 | 1,44791 | -1,032842305 | N/A             | N/A       | N/A          | Inc-SLC25A2-4  |
| A_22_P00002218 | 1,35893 | 1,40557 | -1,032856624 | ENST00000417465 | N/A       | N/A          | N/A            |
| A_19_P00319509 | 1,69521 | 1,74187 | -1,032870942 | ENST00000475886 | 285401    | NR_027104    | LINC00698      |
| A_33_P3236382  | 1,40423 | 1,4509  | -1,032878102 | ENST00000290378 | 70        | NM_005159    | ACTC1          |
| A_22_P00014771 | 5,95751 | 6,00419 | -1,032885261 | N/A             | N/A       | DB164272     | Inc-SLC36A4-1  |

|                |         |         |              |                 |           |              |               |
|----------------|---------|---------|--------------|-----------------|-----------|--------------|---------------|
| A_33_P3221788  | 12,0418 | 12,0885 | -1,03289958  | ENST00000244040 | 57403     | NM_020673    | RAB22A        |
| A_23_P90612    | 12,1137 | 12,1604 | -1,03289958  | ENST00000264156 | 4175      | NM_005915    | MCM6          |
| A_21_P0005921  | 1,42616 | 1,47287 | -1,032906739 | N/A             | N/A       | N/A          | Inc-DLGAP2-2  |
| A_33_P3391736  | 1,38533 | 1,43206 | -1,032921059 | N/A             | N/A       | BM918748     | Inc-ZCCHC7-3  |
| A_22_P00012044 | 4,50615 | 4,55292 | -1,032949698 | ENST00000517655 | 100616530 | N/A          | C8orf37-AS1   |
| A_22_P00004836 | 1,52054 | 1,56731 | -1,032949698 | N/A             | N/A       | BE550536     | Inc-CYB5D2-2  |
| A_33_P3350621  | 1,38683 | 1,43361 | -1,032956858 | ENST00000409559 | 25927     | NM_001111101 | CNRIP1        |
| A_22_P00002039 | 7,78161 | 7,82843 | -1,032985498 | N/A             | 100506451 | NR_038227    | RASSF8-AS1    |
| A_33_P3391295  | 1,41038 | 1,45721 | -1,032992658 | N/A             | N/A       | N/A          | N/A           |
| A_21_P0011260  | 1,85655 | 1,90339 | -1,032999818 | ENST00000618272 | N/A       | N/A          | N/A           |
| A_21_P0014474  | 1,36017 | 1,40702 | -1,033006978 | N/A             | N/A       | N/A          | N/A           |
| A_23_P80068    | 12,1383 | 12,1852 | -1,03304278  | ENST00000339775 | 10950     | NM_006806    | BTG3          |
| A_22_P00023600 | 1,36545 | 1,41237 | -1,033057101 | ENST00000563289 | N/A       | AW874696     | N/A           |
| A_22_P00024191 | 1,80159 | 1,84853 | -1,033071423 | ENST00000580639 | N/A       | N/A          | N/A           |
| A_21_P0007436  | 1,40758 | 1,45453 | -1,033078583 | N/A             | N/A       | N/A          | Inc-CD6-1     |
| A_33_P3339375  | 8,64337 | 8,69036 | -1,033107227 | ENST00000428041 | 89839     | NM_001039841 | ARHGAP11B     |
| A_23_P142424   | 8,61719 | 8,66419 | -1,033114388 | ENST00000588018 | 79713     | NM_024660    | IGFLR1        |
| A_21_P0012759  | 1,42319 | 1,47022 | -1,033135871 | ENST00000509017 | N/A       | XR_425819    | N/A           |
| A_33_P3217103  | 8,42622 | 8,47327 | -1,033150193 | ENST00000262829 | 23543     | NM_001031695 | RBFOX2        |
| A_33_P3415211  | 11,1132 | 11,1603 | -1,033186    | ENST00000426513 | 4358      | NM_002437    | MPV17         |
| A_21_P0005797  | 1,37093 | 1,41803 | -1,033186    | N/A             | N/A       | N/A          | Inc-PPP1R3B-2 |
| A_33_P3334423  | 2,80654 | 2,85365 | -1,033193162 | ENST00000368748 | 6706      | NM_001014291 | SPRR2G        |
| A_33_P3366754  | 4,9094  | 4,95655 | -1,033221808 | N/A             | 100128670 | AK126945     | LOC100128670  |
| A_24_P202497   | 6,93602 | 6,98317 | -1,033221808 | ENST00000262120 | 57045     | NM_020648    | TWSG1         |
| A_33_P3394699  | 1,5085  | 1,55568 | -1,033243294 | ENST00000278947 | 6327      | AK127499     | SCN2B         |
| A_21_P0014634  | 1,41719 | 1,46438 | -1,033250456 | N/A             | N/A       | N/A          | N/A           |
| A_24_P383478   | 4,12595 | 4,17318 | -1,033279104 | ENST00000404742 | 2099      | NM_000125    | ESR1          |
| A_32_P37360    | 8,28684 | 8,33409 | -1,033293428 | ENST00000486863 | 246269    | NM_145315    | LACE1         |
| A_24_P32394    | 5,08022 | 5,12751 | -1,033322078 | ENST00000452187 | 84083     | NM_032143    | ZRANB3        |
| A_23_P211285   | 12,5955 | 12,6428 | -1,03332924  | ENST00000460259 | 4731      | NM_021075    | NDUFV3        |
| A_23_P93844    | 16,615  | 16,6623 | -1,03332924  | ENST00000483581 | 54543     | NM_019059    | TOMM7         |
| A_23_P203475   | 13,1914 | 13,2387 | -1,03332924  | ENST00000303927 | 112464    | NM_145040    | PRKCDBP       |
| A_22_P00005210 | 1,35908 | 1,40644 | -1,033372216 | ENST00000452349 | 100507257 | NR_047664    | MEG9          |

|                |         |         |              |                 |           |              |                       |
|----------------|---------|---------|--------------|-----------------|-----------|--------------|-----------------------|
| A_21_P0011873  | 7,37428 | 7,42168 | -1,033400868 | N/A             | N/A       | N/A          | XLOC_I2_007767        |
| A_21_P0013049  | 1,36754 | 1,41495 | -1,033408031 | N/A             | N/A       | N/A          | XLOC_I2_012807        |
| A_33_P3411384  | 8,80124 | 8,84866 | -1,033415194 | N/A             | N/A       | N/A          | N/A                   |
| A_23_P210900   | 11,9956 | 12,0431 | -1,0334725   | ENST00000360596 | 55902     | NM_018677    | ACSS2                 |
| A_21_P0011738  | 4,41308 | 4,46061 | -1,033493991 | ENST00000582581 | 284395    | NR_040029    | LOC284395             |
| A_23_P123330   | 17,1509 | 17,1985 | -1,033544137 | ENST00000517489 | 6156      | NM_000989    | RPL30                 |
| A_21_P0013671  | 9,21155 | 9,25916 | -1,033551301 | N/A             | N/A       | N/A          | XLOC_I2_015295        |
| A_33_P3321136  | 5,3278  | 5,37543 | -1,033565629 | ENST00000518198 | 22898     | NM_014957    | DENND3                |
| A_33_P3366376  | 1,41798 | 1,46561 | -1,033565629 | ENST00000382835 | 643812    | NM_001077711 | KRTAP27-1             |
| A_22_P00017458 | 1,40889 | 1,45653 | -1,033572794 | N/A             | N/A       | N/A          | Inc-VRK2-2            |
| A_22_P00012964 | 4,34816 | 4,39582 | -1,033587122 | ENST00000439259 | 101927948 | NR_110287    | LOC101927948          |
| A_22_P00011032 | 8,31098 | 8,35864 | -1,033587122 | ENST00000544842 | N/A       | AK022856     | N/A                   |
| A_33_P3332666  | 5,6108  | 5,65849 | -1,033608615 | ENST00000426514 | 56848     | NM_020126    | SPHK2                 |
| A_33_P3310047  | 9,62147 | 9,66917 | -1,03361578  | ENST00000289292 | 57477     | NM_020717    | SHROOM4               |
| A_22_P00025913 | 3,62416 | 3,6719  | -1,033644438 | N/A             | N/A       | N/A          | Inc-AC002472.13.1-1   |
| A_33_P3403643  | 6,26729 | 6,31507 | -1,033673097 | N/A             | 101059906 | XM_003960862 | LOC101059906          |
| A_22_P00007258 | 8,78522 | 8,83302 | -1,033687427 | N/A             | N/A       | BU754164     | Inc-GPR143-1          |
| A_21_P0004011  | 1,40632 | 1,45417 | -1,033723252 | ENST00000515556 | N/A       | N/A          | N/A                   |
| A_22_P00000527 | 1,39749 | 1,44535 | -1,033730418 | N/A             | N/A       | N/A          | Inc-AC110373.1-6      |
| A_24_P397903   | 1,41865 | 1,46652 | -1,033737583 | ENST00000263849 | 51101     | NM_016010    | ZC2HC1A               |
| A_33_P3422897  | 7,75081 | 7,79874 | -1,033780576 | ENST00000374733 | 19        | NM_005502    | ABCA1                 |
| A_24_P942346   | 1,37496 | 1,42293 | -1,033809239 | ENST00000541398 | 345930    | NM_001077706 | ECT2L                 |
| A_22_P00014210 | 5,45273 | 5,5007  | -1,033809239 | N/A             | 100506826 | NR_038266    | MYLK-AS1              |
| A_33_P3364348  | 9,44052 | 9,48852 | -1,033830736 | ENST00000342232 | 56704     | NM_020647    | JPH1                  |
| A_24_P282751   | 5,79559 | 5,84359 | -1,033830736 | ENST00000337768 | 9913      | NM_014860    | SUPT7L                |
| A_33_P3386459  | 9,07274 | 9,12079 | -1,033866567 | ENST00000554090 | 394       | NM_001030055 | ARHGAP5               |
| A_23_P203957   | 1,39423 | 1,44228 | -1,033866567 | ENST00000319685 | 83857     | NM_175861    | TMTC1                 |
| A_22_P00003788 | 7,98739 | 8,03547 | -1,033888066 | N/A             | N/A       | BX098590     | Inc-CDK5R1-2          |
| A_22_P00013706 | 1,36283 | 1,41092 | -1,033895232 | N/A             | N/A       | N/A          | Inc-RP11-778D12.2.1-5 |
| A_24_P362646   | 10,0646 | 10,1127 | -1,033902398 | ENST00000409705 | 10190     | NM_005783    | TXNDC9                |
| A_22_P00008613 | 1,71566 | 1,76378 | -1,033916731 | N/A             | 102723544 | NR_120482    | LOC102723544          |
| A_23_P385427   | 9,1167  | 9,16482 | -1,033916731 | ENST00000623416 | N/A       | N/A          | N/A                   |
| A_24_P84781    | 4,12204 | 4,17017 | -1,033923898 | N/A             | N/A       | AK021933     | N/A                   |

|                |         |         |              |                 |           |              |                      |
|----------------|---------|---------|--------------|-----------------|-----------|--------------|----------------------|
| A_23_P91104    | 3,07792 | 3,12609 | -1,033952565 | ENST00000620977 | 3777      | NM_002246    | KCNK3                |
| A_21_P0003565  | 2,02522 | 2,0734  | -1,033959732 | N/A             | N/A       | N/A          | Inc-S100P-1          |
| A_33_P3293748  | 1,37729 | 1,42549 | -1,033974066 | ENST00000333149 | 135892    | NM_178125    | TRIM50               |
| A_33_P3423365  | 12,7999 | 12,8481 | -1,033974066 | ENST00000449733 | 2934      | NM_001127663 | GSN                  |
| A_33_P3360942  | 9,03512 | 9,0835  | -1,034103079 | ENST00000621999 | 9522      | NM_004866    | SCAMP1               |
| A_24_P418809   | 16,4183 | 16,4667 | -1,034117415 | ENST00000494081 | 2778      | NM_001077489 | GNAS                 |
| A_32_P115505   | 8,40218 | 8,45059 | -1,034124583 | ENST00000614971 | 26046     | NM_015565    | LTN1                 |
| A_33_P3383876  | 1,40213 | 1,45058 | -1,034153255 | N/A             | N/A       | N/A          | Inc-CD99L2-1         |
| A_32_P49844    | 9,83709 | 9,88556 | -1,034167592 | ENST00000449922 | 23433     | NM_012249    | RHOQ                 |
| A_23_P315910   | 1,42354 | 1,47203 | -1,034181928 | ENST00000330682 | 162699    | NM_145653    | TCEB3C               |
| A_22_P00018377 | 1,42771 | 1,47624 | -1,034210602 | N/A             | N/A       | DB079229     | Inc-FGL2-1           |
| A_32_P33114    | 1,4258  | 1,47433 | -1,034210602 | ENST00000257408 | 152831    | NM_175737    | KLB                  |
| A_19_P00315936 | 7,53809 | 7,58663 | -1,034217771 | ENST00000469218 | 285286    | N/A          | LINC00877            |
| A_33_P3411080  | 4,95205 | 5,00059 | -1,034217771 | ENST00000417245 | 25794     | NM_012418    | FSCN2                |
| A_21_P0012389  | 5,90443 | 5,95301 | -1,034246446 | N/A             | N/A       | N/A          | XLOC_I2_009867       |
| A_22_P00012334 | 2,13968 | 2,18826 | -1,034246446 | ENST00000534604 | N/A       | DA511341     | N/A                  |
| A_33_P3330791  | 1,41513 | 1,46372 | -1,034253615 | N/A             | 401220    | BC036933     | LOC401220            |
| A_23_P53856    | 13,3693 | 13,4179 | -1,034260784 | ENST00000511143 | 10443     | NM_014887    | N4BP2L2              |
| A_24_P145629   | 11,5716 | 11,6202 | -1,034260784 | ENST00000491976 | 347735    | NM_178865    | SERINC2              |
| A_22_P00001859 | 1,37924 | 1,42784 | -1,034260784 | ENST00000546770 | N/A       | N/A          | N/A                  |
| A_21_P0003951  | 7,46663 | 7,51525 | -1,034275122 | ENST00000512521 | N/A       | N/A          | N/A                  |
| A_21_P0004377  | 1,42559 | 1,47423 | -1,03428946  | N/A             | N/A       | N/A          | Inc-PRLR-1           |
| A_21_P0012608  | 2,92919 | 2,97783 | -1,03428946  | N/A             | N/A       | N/A          | XLOC_I2_010816       |
| A_22_P00017983 | 1,41962 | 1,46832 | -1,034332476 | N/A             | N/A       | N/A          | Inc-ZMYM3-1          |
| A_33_P3390673  | 7,6266  | 7,6753  | -1,034332476 | N/A             | N/A       | N/A          | XLOC_I2_001559       |
| A_22_P00000368 | 3,71033 | 3,75907 | -1,034361154 | N/A             | 100507582 | NR_125916    | BHLHE40-AS1          |
| A_22_P00011351 | 5,1606  | 5,20934 | -1,034361154 | N/A             | N/A       | AK022210     | Inc-OVGP1-1          |
| A_23_P432272   | 1,38141 | 1,43016 | -1,034368324 | ENST00000256339 | 57578     | NM_020818    | UNC79                |
| A_22_P00010205 | 7,20607 | 7,25483 | -1,034375493 | ENST00000265081 | 4437      | NM_002439    | MSH3                 |
| A_33_P3270519  | 5,63539 | 5,68416 | -1,034382663 | ENST00000540970 | 85369     | NM_033088    | STRIP1               |
| A_22_P00023007 | 1,74878 | 1,79758 | -1,034404173 | N/A             | N/A       | BX508466     | Inc-RP11-712L6.5.1-1 |
| A_22_P00001635 | 4,93863 | 4,98746 | -1,034425683 | ENST00000425246 | N/A       | N/A          | N/A                  |
| A_24_P86993    | 1,42526 | 1,4741  | -1,034432853 | ENST00000299106 | 83700     | NM_032801    | JAM3                 |

|                |         |         |              |                 |           |              |                    |
|----------------|---------|---------|--------------|-----------------|-----------|--------------|--------------------|
| A_22_P00011058 | 1,38503 | 1,43388 | -1,034440023 | N/A             | 102724452 | XR_424663    | LOC102724452       |
| A_23_P131036   | 1,63496 | 1,68382 | -1,034447193 | N/A             | 100862728 | NR_046420    | UPK1A-AS1          |
| A_24_P178503   | 1,37226 | 1,42115 | -1,034468704 | ENST00000621589 | 10060     | NM_005691    | ABCC9              |
| A_23_P101960   | 10,531  | 10,5799 | -1,034475875 | ENST00000282388 | 678       | NM_006887    | ZFP36L2            |
| A_21_P0011534  | 1,97156 | 2,02046 | -1,034475875 | N/A             | N/A       | N/A          | XLOC_I2_005714     |
| A_21_P0011529  | 6,70399 | 6,75292 | -1,034497386 | ENST00000587622 | 6198      | NM_001272043 | RPS6KB1            |
| A_22_P00000220 | 1,67063 | 1,71957 | -1,034504557 | N/A             | N/A       | N/A          | Inc-AC005323.1.1-1 |
| A_23_P76071    | 6,57677 | 6,62575 | -1,03453324  | ENST00000535274 | 79369     | NM_030765    | B3GNT4             |
| A_23_P24716    | 14,3737 | 14,4227 | -1,034547582 | ENST00000005286 | 54972     | NM_017870    | TMEM132A           |
| A_23_P55688    | 9,14976 | 9,19878 | -1,034561923 | ENST00000196489 | 55659     | NM_017879    | ZNF416             |
| A_21_P0003362  | 1,40553 | 1,45457 | -1,034576266 | ENST00000511875 | N/A       | N/A          | N/A                |
| A_33_P6816999  | 9,65569 | 9,70474 | -1,034583437 | N/A             | 440944    | NR_027007    | THUMPDP3-AS1       |
| A_23_P23507    | 1,3808  | 1,42985 | -1,034583437 | ENST00000334438 | 128360    | NM_001004475 | OR10T2             |
| A_21_P0002795  | 1,37106 | 1,42012 | -1,034590608 | ENST00000490897 | N/A       | N/A          | N/A                |
| A_23_P131139   | 8,35804 | 8,40713 | -1,034612122 | ENST00000308100 | 116093    | NM_052952    | DIRC1              |
| A_22_P00025112 | 10,7268 | 10,7759 | -1,034619293 | N/A             | N/A       | AK090628     | Inc-OPN4-2         |
| A_33_P3276475  | 9,7534  | 9,80255 | -1,034655151 | ENST00000526991 | 57132     | NM_020412    | CHMP1B             |
| A_22_P00006729 | 1,36006 | 1,40923 | -1,034669495 | ENST00000553827 | N/A       | AA333164     | N/A                |
| A_23_P374149   | 9,6628  | 9,71201 | -1,034698182 | ENST00000373451 | 23070     | NM_015050    | CMTR1              |
| A_23_P370147   | 2,48393 | 2,53317 | -1,034719698 | ENST00000316517 | N/A       | N/A          | N/A                |
| A_21_P0010091  | 4,50848 | 4,55777 | -1,03475556  | N/A             | N/A       | N/A          | Inc-NCOA3-8        |
| A_24_P120537   | 8,07912 | 8,12841 | -1,03475556  | ENST00000511705 | 153769    | NM_152550    | SH3RF2             |
| A_33_P3311285  | 14,4801 | 14,5294 | -1,034762732 | ENST00000368300 | 4000      | NM_170707    | LMNA               |
| A_22_P00002084 | 1,35846 | 1,40781 | -1,034798595 | ENST00000418927 | N/A       | N/A          | N/A                |
| A_24_P4816     | 9,8477  | 9,89708 | -1,034820113 | ENST00000540424 | 23710     | NM_031412    | GABARAPL1          |
| A_23_P23616    | 8,36363 | 8,41302 | -1,034827286 | ENST00000379409 | 84069     | NM_032129    | PLEKHN1            |
| A_21_P0014500  | 1,36565 | 1,41504 | -1,034827286 | N/A             | N/A       | N/A          | N/A                |
| A_19_P00322837 | 1,39827 | 1,44768 | -1,034841632 | ENST00000503048 | 101927134 | N/A          | LINC01470          |
| A_21_P0005215  | 1,41599 | 1,4654  | -1,034841632 | ENST00000442176 | 101927524 | NR_110094    | MEOX2-AS1          |
| A_22_P00009357 | 4,01148 | 4,0609  | -1,034848805 | ENST00000450290 | N/A       | N/A          | N/A                |
| A_33_P3375766  | 1,35824 | 1,40768 | -1,034863151 | ENST00000350228 | 3747      | NM_153748    | KCNC2              |
| A_22_P00001733 | 1,49956 | 1,54905 | -1,034899017 | ENST00000422353 | 102724861 | N/A          | LOC102724861       |
| A_22_P00003816 | 5,38455 | 5,43407 | -1,034920537 | N/A             | 102723641 | N/A          | HID1-AS1           |

|                |         |         |              |                 |           |              |                    |
|----------------|---------|---------|--------------|-----------------|-----------|--------------|--------------------|
| A_21_P0000405  | 1,36442 | 1,41395 | -1,034927711 | N/A             | 767584    | NR_003200    | SNORD114-8         |
| A_22_P00016856 | 5,01165 | 5,06124 | -1,034970753 | N/A             | N/A       | AF147349     | Inc-TRPM7-1        |
| A_24_P148235   | 18,4025 | 18,4521 | -1,034977927 | ENST00000392558 | 6232      | NM_001030    | RPS27              |
| A_24_P264063   | 4,73111 | 4,78075 | -1,035006623 | N/A             | 729173    | XR_110528    | LOC729173          |
| A_22_P00024850 | 1,39501 | 1,44474 | -1,035071192 | N/A             | N/A       | N/A          | Inc-NOC3L-2        |
| A_23_P411157   | 5,51425 | 5,56398 | -1,035071192 | N/A             | 7471      | NM_005430    | WNT1               |
| A_22_P00013783 | 5,15296 | 5,20273 | -1,035099891 | N/A             | N/A       | N/A          | Inc-RP11-9B6.1.1-2 |
| A_33_P3392580  | 8,70487 | 8,75464 | -1,035099891 | ENST00000373449 | 204       | NM_013411    | AK2                |
| A_23_P3527     | 11,9509 | 12,0007 | -1,035121416 | ENST00000219252 | 5432      | NM_032940    | POLR2C             |
| A_23_P219084   | 10,0842 | 10,134  | -1,035121416 | ENST00000487620 | 7551      | NM_032924    | ZNF3               |
| A_22_P00002769 | 7,58181 | 7,63163 | -1,035135766 | ENST00000412643 | N/A       | AK123383     | N/A                |
| A_23_P126803   | 13,2764 | 13,3263 | -1,035193167 | ENST00000294742 | 10092     | NM_005717    | ARPC5              |
| A_33_P3235189  | 7,05436 | 7,10436 | -1,035264924 | ENST00000614878 | 124930    | NM_152345    | ANKRD13B           |
| A_21_P0010715  | 1,40969 | 1,45971 | -1,035279276 | N/A             | 643160    | N/A          | CYMP               |
| A_23_P145501   | 8,55248 | 8,60252 | -1,035293628 | ENST00000368058 | 9439      | NM_004830    | MED23              |
| A_21_P0001517  | 4,76475 | 4,81484 | -1,035329509 | N/A             | N/A       | N/A          | Inc-DEPDC1-1       |
| A_21_P0004486  | 1,37947 | 1,42957 | -1,035336685 | N/A             | N/A       | N/A          | Inc-ADCY2-5        |
| A_23_P158725   | 15,9118 | 15,9619 | -1,035336685 | ENST00000582743 | 9123      | NM_001042422 | SLC16A3            |
| A_23_P33187    | 8,50844 | 8,55856 | -1,035351038 | ENST00000375223 | 84641     | NM_032558    | HIATL1             |
| A_21_P0004807  | 2,593   | 2,64313 | -1,035358215 | ENST00000449466 | 101929484 | XR_245642    | LOC101929484       |
| A_21_P0012766  | 7,83083 | 7,88101 | -1,035394098 | ENST00000513501 | 59271     | NM_058187    | EVA1C              |
| A_22_P00001419 | 1,3905  | 1,44069 | -1,035401275 | ENST00000526179 | N/A       | N/A          | N/A                |
| A_33_P3791118  | 1,42134 | 1,47157 | -1,035429983 | N/A             | 267020    | BG113928     | ATP5L2             |
| A_21_P0002873  | 1,41688 | 1,46711 | -1,035429983 | ENST00000481624 | 101929694 | N/A          | LOC101929694       |
| A_32_P529488   | 3,58941 | 3,63965 | -1,03543716  | ENST00000424684 | N/A       | XM_006711085 | N/A                |
| A_21_P0009086  | 1,7599  | 1,81017 | -1,035458692 | ENST00000595886 | 400550    | NR_033925    | FENDRR             |
| A_33_P3339531  | 8,05941 | 8,10968 | -1,035458692 | ENST00000216241 | 150356    | NM_138481    | CHADL              |
| A_22_P00010737 | 1,42236 | 1,47272 | -1,035523289 | N/A             | 101927954 | NR_121565    | LOC101927954       |
| A_23_P167096   | 6,13444 | 6,18483 | -1,035544822 | ENST00000618562 | 7424      | NM_005429    | VEGFC              |
| A_22_P00016479 | 7,4387  | 7,4891  | -1,035552    | N/A             | N/A       | AL137366     | Inc-TMEM86A-2      |
| A_33_P3358923  | 1,41018 | 1,46058 | -1,035552    | ENST00000334529 | 151888    | NM_181780    | BTLA               |
| A_23_P83939    | 10,8006 | 10,851  | -1,035552    | ENST00000380155 | 94056     | NM_032796    | SYAP1              |
| A_32_P118258   | 17,8134 | 17,8638 | -1,035552    | ENST00000483765 | 6144      | NM_000982    | RPL21              |

|                |         |         |              |                 |           |              |                |
|----------------|---------|---------|--------------|-----------------|-----------|--------------|----------------|
| A_23_P85922    | 1,42167 | 1,47208 | -1,035559178 | N/A             | 353500    | NM_181809    | BMP8A          |
| A_23_P427217   | 8,7191  | 8,76951 | -1,035559178 | ENST00000542921 | 221037    | NM_032776    | JMJD1C         |
| A_22_P00024773 | 1,42233 | 1,47277 | -1,035580712 | N/A             | 101929478 | NR_120361    | LINGO1-AS2     |
| A_21_P0001055  | 1,47013 | 1,5206  | -1,035602247 | N/A             | N/A       | N/A          | Inc-TRAF5-4    |
| A_33_P3389842  | 1,38907 | 1,43954 | -1,035602247 | ENST00000503884 | 8842      | NM_001145850 | PROM1          |
| A_23_P7066     | 17,3274 | 17,3779 | -1,035623782 | ENST00000437992 | 6133      | NM_001024921 | RPL9           |
| A_23_P65584    | 9,58546 | 9,63598 | -1,035638138 | ENST00000555511 | 51004     | NM_182476    | COQ6           |
| A_22_P00025153 | 1,4003  | 1,45082 | -1,035638138 | ENST00000583122 | N/A       | DB516369     | N/A            |
| A_24_P204204   | 6,34284 | 6,39337 | -1,035645317 | ENST00000604654 | N/A       | N/A          | N/A            |
| A_22_P00006683 | 1,40193 | 1,45247 | -1,035652495 | ENST00000444827 | 101927295 | N/A          | LINC01360      |
| A_22_P00025925 | 1,42218 | 1,47273 | -1,035659674 | N/A             | N/A       | N/A          | Inc-PARN-4     |
| A_21_P0007915  | 1,40317 | 1,45373 | -1,035666853 | N/A             | 101927176 | N/A          | LINC01069      |
| A_23_P100764   | 12,8146 | 12,8652 | -1,035695568 | ENST00000593166 | 51629     | NM_016016    | SLC25A39       |
| A_21_P0010435  | 1,79274 | 1,84342 | -1,035753001 | N/A             | N/A       | N/A          | Inc-C22orf42-2 |
| A_22_P00004541 | 14,0485 | 14,0992 | -1,035767359 | N/A             | 100874032 | NR_046734    | PRRT3-AS1      |
| A_21_P0001756  | 2,04992 | 2,10066 | -1,035796077 | N/A             | N/A       | N/A          | Inc-BATF3-2    |
| A_22_P00006061 | 4,80601 | 4,85675 | -1,035796077 | N/A             | N/A       | AB074268     | Inc-FAM131B-1  |
| A_21_P0005665  | 1,39968 | 1,45043 | -1,035803257 | N/A             | N/A       | N/A          | Inc-SH2D4A-2   |
| A_21_P0004442  | 1,68176 | 1,73255 | -1,035831976 | N/A             | N/A       | N/A          | Inc-C5orf63-2  |
| A_24_P36299    | 5,34003 | 5,39088 | -1,035875056 | ENST00000599284 | 2909      | NM_004491    | ARHGAP35       |
| A_24_P327499   | 9,05284 | 9,10372 | -1,035896597 | ENST00000449821 | 9675      | XR_244159    | TTI1           |
| A_22_P00012505 | 4,85408 | 4,905   | -1,035925318 | N/A             | N/A       | CA310410     | Inc-PSMA2-2    |
| A_33_P3290829  | 3,52057 | 3,5715  | -1,035932499 | N/A             | 101059906 | XM_003959933 | LOC101059906   |
| A_22_P00021091 | 4,58911 | 4,64008 | -1,035961221 | N/A             | N/A       | N/A          | Inc-ABCC3-1    |
| A_24_P98411    | 11,7899 | 11,8409 | -1,035982764 | ENST00000324460 | 3309      | NM_005347    | HSPA5          |
| A_24_P169843   | 13,267  | 13,318  | -1,035982764 | ENST00000453838 | N/A       | N/A          | N/A            |
| A_21_P0003144  | 1,3803  | 1,43132 | -1,035997125 | N/A             | N/A       | N/A          | Inc-CBLB-5     |
| A_21_P0007792  | 1,36978 | 1,42082 | -1,036011487 | N/A             | N/A       | N/A          | Inc-SLC15A4-13 |
| A_24_P167825   | 9,33998 | 9,39104 | -1,03602585  | ENST00000562258 | 23339     | NM_015289    | VPS39          |
| A_33_P3339990  | 2,82116 | 2,87223 | -1,036033031 | N/A             | 100128429 | AK123323     | LOC100128429   |
| A_22_P00009080 | 1,40731 | 1,45844 | -1,036076119 | ENST00000456368 | 400696    | NR_034156    | LGALS17A       |
| A_23_P125624   | 11,8541 | 11,9053 | -1,036126391 | ENST00000494361 | 23597     | NM_001037171 | ACOT9          |
| A_21_P0011124  | 9,02983 | 9,08105 | -1,036140755 | N/A             | N/A       | N/A          | XLOC_l2_003627 |

|                |         |         |              |                 |           |              |                 |
|----------------|---------|---------|--------------|-----------------|-----------|--------------|-----------------|
| A_21_P0011843  | 1,39242 | 1,44367 | -1,036162301 | ENST00000604870 | 5239      | N/A          | PGM5            |
| A_23_P116797   | 11,2626 | 11,3139 | -1,036198213 | ENST00000550199 | 60314     | NM_021640    | C12orf10        |
| A_22_P00000351 | 1,39681 | 1,44813 | -1,036212577 | ENST00000560242 | N/A       | BG218536     | N/A             |
| A_21_P0004390  | 4,88702 | 4,9384  | -1,036255673 | N/A             | N/A       | N/A          | Inc-SLC38A9-1   |
| A_21_P0001132  | 1,72519 | 1,77658 | -1,036262856 | ENST00000449958 | N/A       | N/A          | N/A             |
| A_33_P3842770  | 10,4362 | 10,4876 | -1,036270039 | N/A             | 101928669 | XR_424064    | LOC101928669    |
| A_23_P2446     | 10,9155 | 10,9669 | -1,036270039 | ENST00000433461 | 10329     | NM_014254    | TMEM5           |
| A_33_P3213508  | 1,37543 | 1,42685 | -1,036284405 | ENST00000297001 | 100130988 | NM_001161834 | C7orf72         |
| A_21_P0013185  | 1,37499 | 1,42642 | -1,036291588 | N/A             | N/A       | N/A          | XLOC_I2_013314  |
| A_33_P3736235  | 1,39965 | 1,4511  | -1,036305954 | N/A             | 401400    | BF316573     | LOC401400       |
| A_22_P00008772 | 3,41311 | 3,46457 | -1,036313137 | N/A             | N/A       | AK123098     | Inc-KIF1C-2     |
| A_23_P91943    | 1,41872 | 1,47019 | -1,03632032  | ENST00000496308 | 3592      | NM_000882    | IL12A           |
| A_33_P3214427  | 4,06682 | 4,11829 | -1,03632032  | N/A             | N/A       | N/A          | Inc-KIAA1324L-1 |
| A_21_P0003021  | 1,55496 | 1,60643 | -1,03632032  | N/A             | 102723597 | XR_427400    | LOC102723597    |
| A_33_P3271105  | 5,29731 | 5,3488  | -1,036334687 | ENST00000531243 | 8761      | NM_001135654 | PABPC4          |
| A_23_P388168   | 1,39371 | 1,4452  | -1,036334687 | ENST00000371655 | 5865      | NM_002867    | RAB3B           |
| A_33_P3416814  | 3,32375 | 3,37526 | -1,036349053 | N/A             | 102724833 | XM_006714944 | LOC102724833    |
| A_33_P3242829  | 5,0906  | 5,14211 | -1,036349053 | ENST00000370505 | 5586      | AF118089     | PKN2            |
| A_33_P3271490  | 9,55031 | 9,60185 | -1,036370604 | ENST00000392753 | 5937      | NM_016836    | RBMS1           |
| A_23_P258367   | 7,59194 | 7,64349 | -1,036377788 | ENST00000372770 | 2733      | NM_001499    | GLE1            |
| A_32_P65628    | 1,36434 | 1,41591 | -1,036392155 | ENST00000272324 | 130120    | NM_001008387 | REG3G           |
| A_33_P3307903  | 9,57616 | 9,62779 | -1,036435258 | ENST00000216414 | 1033      | NM_005192    | CDKN3           |
| A_21_P0005292  | 5,16827 | 5,21994 | -1,036463995 | ENST00000420185 | N/A       | N/A          | N/A             |
| A_21_P0008223  | 1,39837 | 1,45009 | -1,036499916 | N/A             | N/A       | N/A          | Inc-TUBGCP3-4   |
| A_33_P3510508  | 1,39822 | 1,44996 | -1,036514285 | N/A             | N/A       | N/A          | N/A             |
| A_22_P00018413 | 1,36074 | 1,41249 | -1,03652147  | ENST00000415469 | 170425    | NR_038220    | LINC00858       |
| A_33_P3274428  | 16,6043 | 16,6561 | -1,036557394 | ENST00000624302 | N/A       | N/A          | N/A             |
| A_22_P00019006 | 1,41885 | 1,47065 | -1,036557394 | ENST00000523385 | N/A       | N/A          | N/A             |
| A_33_P3387561  | 10,2484 | 10,3002 | -1,036557394 | ENST00000610577 | 126014    | NM_206818    | OSCAR           |
| A_32_P135348   | 10,675  | 10,7268 | -1,036557394 | ENST00000470074 | 85461     | NM_033394    | TANC1           |
| A_21_P0000543  | 6,78075 | 6,83263 | -1,036614874 | N/A             | 84852     | NR_027645    | ATP1A1-AS1      |
| A_22_P00010689 | 9,11158 | 9,16348 | -1,036629245 | ENST00000565980 | 54920     | NM_017803    | DUS2            |
| A_23_P101351   | 10,1998 | 10,2517 | -1,036629245 | ENST00000535489 | 79088     | NM_024106    | ZNF426          |



|                |         |         |              |                 |           |              |                  |
|----------------|---------|---------|--------------|-----------------|-----------|--------------|------------------|
| A_33_P3382281  | 1,91963 | 1,97156 | -1,036650801 | ENST00000488816 | 128710    | N/A          | SLX4IP           |
| A_33_P3234103  | 12,1099 | 12,1619 | -1,036701101 | ENST00000262519 | 9739      | XM_005255723 | SETD1A           |
| A_21_P0014820  | 11,2669 | 11,3189 | -1,036701101 | ENST00000413518 | N/A       | AK054868     | N/A              |
| A_22_P00013375 | 2,54138 | 2,59339 | -1,036708287 | ENST00000534492 | N/A       | DB092784     | N/A              |
| A_23_P255672   | 4,58657 | 4,63859 | -1,036715473 | ENST00000514025 | 84448     | NM_032432    | ABLIM2           |
| A_21_P0007645  | 1,47653 | 1,52861 | -1,03675859  | N/A             | N/A       | N/A          | Inc-RNF34-1      |
| A_23_P78980    | 14,2491 | 14,3012 | -1,036772962 | ENST00000318683 | 10331     | NM_014256    | B3GNT3           |
| A_24_P58308    | 17,2106 | 17,2627 | -1,036772962 | ENST00000594193 | N/A       | AF147412     | N/A              |
| A_21_P0010232  | 1,68834 | 1,74047 | -1,036794521 | N/A             | N/A       | N/A          | Inc-C21orf63-1   |
| A_22_P00002862 | 9,00877 | 9,06091 | -1,036801708 | N/A             | N/A       | AK092456     | Inc-C3orf52-1    |
| A_32_P178800   | 7,61431 | 7,66649 | -1,036830455 | ENST00000296585 | 3673      | NM_002203    | ITGA2            |
| A_22_P00018472 | 4,83752 | 4,8897  | -1,036830455 | N/A             | N/A       | N/A          | Inc-SPSB4-1      |
| A_33_P3231542  | 9,42395 | 9,47614 | -1,036837641 | ENST00000268489 | 463       | NM_006885    | ZFHX3            |
| A_33_P3248749  | 10,1416 | 10,1938 | -1,036844828 | ENST00000372165 | 221421    | AK055407     | RSPH9            |
| A_24_P110082   | 14,966  | 15,0182 | -1,036844828 | ENST00000496042 | N/A       | N/A          | N/A              |
| A_33_P3409062  | 5,44633 | 5,49854 | -1,036852015 | ENST00000262629 | 7305      | NM_003332    | TYROBP           |
| A_22_P00012961 | 1,38806 | 1,44034 | -1,036902325 | ENST00000420648 | N/A       | N/A          | N/A              |
| A_33_P3321682  | 13,0737 | 13,126  | -1,036916699 | N/A             | N/A       | N/A          | N/A              |
| A_23_P208706   | 12,4782 | 12,5305 | -1,036916699 | ENST00000513545 | 581       | NM_138764    | BAX              |
| A_21_P0004571  | 1,82121 | 1,87354 | -1,036938262 | N/A             | 102723365 | XR_427758    | LOC102723365     |
| A_33_P3228773  | 1,70842 | 1,76077 | -1,036952637 | N/A             | 116159    | JF693912     | CYR1             |
| A_23_P14473    | 13,2772 | 13,3296 | -1,036988575 | ENST00000216416 | 10175     | NM_005776    | CNIH1            |
| A_22_P00002110 | 1,38648 | 1,43888 | -1,036988575 | ENST00000518605 | N/A       | N/A          | N/A              |
| A_21_P0008808  | 4,58128 | 4,63377 | -1,037053268 | N/A             | 102725458 | N/A          | LOC102725458     |
| A_23_P329152   | 11,1394 | 11,1919 | -1,037060457 | ENST00000586544 | 3609      | NM_012218    | ILF3             |
| A_21_P0009594  | 1,39023 | 1,44278 | -1,037096399 | ENST00000575722 | N/A       | N/A          | N/A              |
| A_33_P3305088  | 3,39016 | 3,44272 | -1,037103588 | N/A             | 100129840 | AK126633     | LOC100129840     |
| A_33_P3403399  | 1,4148  | 1,46739 | -1,037125154 | ENST00000395585 | 55244     | NM_018242    | SLC47A1          |
| A_23_P5757     | 10,9382 | 10,9908 | -1,037132343 | ENST00000484969 | 51002     | NM_016058    | TPRKB            |
| A_21_P0013182  | 1,71284 | 1,76546 | -1,03714672  | ENST00000446399 | 101927769 | NR_110117    | LOC101927769     |
| A_24_P74064    | 7,7796  | 7,83225 | -1,037168287 | ENST00000615385 | 7541      | NM_003409    | ZBTB14           |
| A_21_P0004622  | 4,42084 | 4,47353 | -1,037197044 | N/A             | N/A       | N/A          | Inc-AL035696.1-5 |
| A_24_P921477   | 10,3924 | 10,4451 | -1,037204234 | ENST00000341249 | 124512    | NM_001206987 | METTL23          |

|                |         |         |              |                 |           |              |                |
|----------------|---------|---------|--------------|-----------------|-----------|--------------|----------------|
| A_33_P3361227  | 1,4878  | 1,5405  | -1,037204234 | ENST00000409461 | 144715    | N/A          | RAD9B          |
| A_22_P00015377 | 11,6116 | 11,6643 | -1,037204234 | ENST00000380361 | 100862671 | NM_001256829 | TMEM265        |
| A_24_P344295   | 9,17389 | 9,22664 | -1,037240181 | ENST00000573404 | 26001     | NM_015528    | RNF167         |
| A_33_P3371360  | 1,36043 | 1,41319 | -1,037247371 | ENST00000338882 | 728464    | NM_001123364 | METTTL24       |
| A_33_P3266536  | 1,66057 | 1,71336 | -1,03726894  | N/A             | 114041    | NR_026543    | B3GALT5-AS1    |
| A_33_P3292230  | 1,39536 | 1,44817 | -1,037283319 | ENST00000616117 | 402160    | N/A          | CFAP99         |
| A_22_P00011791 | 4,75933 | 4,81215 | -1,037290509 | N/A             | N/A       | N/A          | Inc-PGBD5-2    |
| A_21_P0001375  | 1,98164 | 2,03448 | -1,037304889 | N/A             | N/A       | N/A          | Inc-ADAMTSL4-1 |
| A_22_P00023002 | 7,64456 | 7,69743 | -1,03732646  | N/A             | N/A       | BU501378     | Inc-PCYOX1-1   |
| A_23_P21673    | 10,9679 | 11,0208 | -1,037348031 | ENST00000380249 | 54914     | NM_017794    | FOCAD          |
| A_24_P359441   | 1,71054 | 1,76344 | -1,037348031 | ENST00000215855 | 1417      | NM_004076    | CRYBB3         |
| A_23_P339687   | 10,036  | 10,0889 | -1,037348031 | ENST00000600299 | 171392    | NM_138330    | ZNF675         |
| A_22_P00006795 | 1,39361 | 1,44654 | -1,037369602 | N/A             | 101927096 | NR_109873    | CTB-113P19.1   |
| A_33_P3326235  | 3,84535 | 3,89829 | -1,037376792 | ENST00000472539 | 3042      | NM_001003938 | HBM            |
| A_22_P00002793 | 1,38237 | 1,43532 | -1,037383983 | ENST00000565136 | N/A       | DB049433     | N/A            |
| A_22_P00020486 | 4,92023 | 4,9732  | -1,037398364 | N/A             | N/A       | N/A          | Inc-RARRES2-3  |
| A_23_P359540   | 10,0378 | 10,0908 | -1,037419937 | ENST00000244537 | 8361      | NM_003540    | HIST1H4F       |
| A_21_P0008835  | 2,66092 | 2,71397 | -1,037455891 | N/A             | N/A       | N/A          | Inc-HMG20A-5   |
| A_23_P87013    | 5,52473 | 5,57781 | -1,037477465 | ENST00000392951 | 6876      | NM_001001522 | TAGLN          |
| A_33_P3353712  | 13,1035 | 13,1566 | -1,037491848 | ENST00000378518 | 11079     | NM_007033    | RER1           |
| A_23_P86504    | 10,581  | 10,6341 | -1,037491848 | ENST00000370033 | 79591     | NM_024541    | C10orf76       |
| A_23_P351866   | 1,40829 | 1,4614  | -1,037499039 | ENST00000590542 | 126205    | NM_176811    | NLRP8          |
| A_33_P3344603  | 5,07388 | 5,12699 | -1,037499039 | ENST00000558320 | 54816     | NM_001288589 | ZNF280D        |
| A_33_P3386995  | 5,91591 | 5,96902 | -1,037499039 | ENST00000283033 | 51061     | BC018635     | TXNDC11        |
| A_33_P3258008  | 4,8738  | 4,92698 | -1,03754938  | ENST00000539584 | 89910     | NM_130466    | UBE3B          |
| A_19_P00810899 | 8,97095 | 9,02414 | -1,037556572 | ENST00000565256 | 654434    | NR_027058    | SNHG20         |
| A_23_P389118   | 11,3193 | 11,3726 | -1,037635684 | ENST00000320560 | 196527    | NM_001025356 | ANO6           |
| A_23_P370097   | 11,276  | 11,3293 | -1,037635684 | ENST00000471318 | 65062     | NM_001044385 | TMEM237        |
| A_23_P17706    | 9,19641 | 9,24972 | -1,037642877 | ENST00000319363 | 23765     | NM_014339    | IL17RA         |
| A_21_P0000213  | 5,76444 | 5,81775 | -1,037642877 | N/A             | 26808     | NR_000013    | SNORD42B       |
| A_33_P3219398  | 1,63477 | 1,6881  | -1,037657262 | ENST00000538137 | 25925     | NM_015461    | ZNF521         |
| A_33_P3414312  | 8,99254 | 9,04588 | -1,037664454 | ENST00000445583 | 84669     | NM_032582    | USP32          |
| A_22_P00009764 | 1,41574 | 1,46908 | -1,037664454 | ENST00000564741 | N/A       | N/A          | N/A            |

|                |         |         |              |                 |           |              |                |
|----------------|---------|---------|--------------|-----------------|-----------|--------------|----------------|
| A_21_P0011680  | 1,6956  | 1,74897 | -1,037686032 | N/A             | N/A       | N/A          | XLOC_I2_006648 |
| A_21_P0003853  | 9,03926 | 9,09266 | -1,03770761  | N/A             | N/A       | N/A          | Inc-FAM160A1-1 |
| A_32_P103614   | 5,0126  | 5,066   | -1,03770761  | N/A             | 100128511 | NR_046283    | NEBL-AS1       |
| A_21_P0007102  | 1,37708 | 1,43054 | -1,037750768 | N/A             | N/A       | N/A          | Inc-MBL2-2     |
| A_33_P3243897  | 8,08998 | 8,14347 | -1,037772348 | ENST00000610020 | 79871     | NM_024813    | RPAP2          |
| A_23_P100583   | 2,54357 | 2,59707 | -1,037779541 | ENST00000582328 | 4025      | NM_006151    | LPO            |
| A_33_P3387691  | 1,69944 | 1,75299 | -1,037815509 | ENST00000369022 | 256380    | NM_198081    | SCML4          |
| A_24_P21507    | 1,41243 | 1,46602 | -1,037844283 | ENST00000376603 | 9576      | NM_172242    | SPAG6          |
| A_32_P87697    | 1,44628 | 1,49992 | -1,037880253 | ENST00000613328 | 3122      | NM_019111    | HLA-DRA        |
| A_22_P00022943 | 1,392   | 1,44564 | -1,037880253 | ENST00000520459 | N/A       | N/A          | N/A            |
| A_22_P00002940 | 10,8421 | 10,8958 | -1,037923418 | N/A             | 643977    | NR_104643    | FLJ32255       |
| A_22_P00015877 | 1,39308 | 1,4468  | -1,037937807 | ENST00000551761 | N/A       | CR742860     | N/A            |
| A_33_P3399870  | 9,30537 | 9,3591  | -1,037945001 | ENST00000392687 | 253782    | NM_001256126 | CERS6          |
| A_33_P3367596  | 4,44642 | 4,50019 | -1,03797378  | ENST00000380833 | 1183      | NM_001830    | CLCN4          |
| A_33_P3217500  | 5,7904  | 5,84418 | -1,037980974 | N/A             | N/A       | DW451783     | N/A            |
| A_22_P00020349 | 2,45869 | 2,51248 | -1,037988169 | N/A             | N/A       | N/A          | Inc-GTDC1-4    |
| A_22_P00004986 | 1,53025 | 1,58405 | -1,037995364 | ENST00000512547 | N/A       | XR_244767    | N/A            |
| A_21_P0001923  | 10,2698 | 10,3236 | -1,037995364 | ENST00000450667 | N/A       | N/A          | N/A            |
| A_22_P00018339 | 1,47372 | 1,52752 | -1,037995364 | N/A             | N/A       | N/A          | Inc-ZPLD1-1    |
| A_23_P44139    | 9,84367 | 9,89752 | -1,038031339 | ENST00000615550 | 5558      | NM_000947    | PRIM2          |
| A_22_P00016787 | 4,09505 | 4,14892 | -1,038045729 | ENST00000517689 | 100505659 | N/A          | LINC00967      |
| A_23_P258381   | 9,91866 | 9,97254 | -1,038052924 | ENST00000508126 | 92369     | AK056367     | SPSB4          |
| A_33_P3417944  | 4,91713 | 4,97102 | -1,038060119 | ENST00000425430 | 79885     | NM_001136041 | HDAC11         |
| A_22_P00009120 | 2,68094 | 2,73484 | -1,038067315 | ENST00000562945 | N/A       | AK128166     | N/A            |
| A_22_P00003771 | 1,38792 | 1,44186 | -1,038096096 | N/A             | N/A       | N/A          | Inc-CDK17-3    |
| A_22_P00012373 | 5,03841 | 5,09236 | -1,038103292 | ENST00000485770 | N/A       | N/A          | N/A            |
| A_21_P0012022  | 1,41275 | 1,46676 | -1,038146466 | ENST00000433673 | N/A       | N/A          | N/A            |
| A_33_P3310567  | 1,39235 | 1,44637 | -1,038153662 | ENST00000616656 | N/A       | N/A          | N/A            |
| A_33_P3338292  | 1,52304 | 1,57706 | -1,038153662 | N/A             | N/A       | N/A          | N/A            |
| A_32_P132860   | 1,61068 | 1,66475 | -1,038189643 | ENST00000444374 | 100129066 | NR_024280    | UNQ6494        |
| A_19_P00802550 | 6,86337 | 6,91744 | -1,038189643 | N/A             | N/A       | N/A          | Inc-C12orf75-1 |
| A_21_P0004126  | 1,79653 | 1,8506  | -1,038189643 | ENST00000514113 | N/A       | N/A          | N/A            |
| A_22_P00024984 | 5,062   | 5,11609 | -1,038204035 | N/A             | N/A       | N/A          | Inc-ARHGEF40-1 |

|                |         |         |              |                 |           |              |                |
|----------------|---------|---------|--------------|-----------------|-----------|--------------|----------------|
| A_33_P3381751  | 10,2944 | 10,3485 | -1,038211231 | ENST00000541036 | 7074      | NM_003253    | TIAM1          |
| A_24_P378987   | 10,063  | 10,1171 | -1,038211231 | ENST00000334651 | 207063    | NM_145177    | DHRSX          |
| A_23_P356694   | 2,01965 | 2,07376 | -1,038218428 | ENST00000376309 | 245936    | NM_153324    | DEFB123        |
| A_21_P0001686  | 1,64298 | 1,69711 | -1,038232821 | N/A             | N/A       | N/A          | Inc-IL12RB2-2  |
| A_23_P338233   | 9,48918 | 9,54334 | -1,03825441  | ENST00000333924 | 144233    | NM_181708    | BCDIN3D        |
| A_23_P28186    | 1,7083  | 1,76249 | -1,038276    | ENST00000622030 | 6716      | NM_000348    | SRD5A2         |
| A_33_P3306327  | 10,2359 | 10,2901 | -1,038283197 | N/A             | N/A       | N/A          | N/A            |
| A_21_P0007056  | 1,3804  | 1,43462 | -1,038297591 | N/A             | N/A       | N/A          | Inc-MAP3K8-5   |
| A_22_P00021285 | 1,72563 | 1,77987 | -1,038311985 | ENST00000426515 | N/A       | N/A          | N/A            |
| A_32_P117693   | 1,41277 | 1,46703 | -1,038326379 | ENST00000496687 | 407738    | NM_213609    | FAM19A1        |
| A_22_P00011165 | 1,41287 | 1,46716 | -1,038347971 | N/A             | N/A       | N/A          | Inc-OCIAD2-1   |
| A_33_P3399593  | 4,38731 | 4,44162 | -1,038362365 | ENST00000255784 | 79879     | NM_024821    | CCDC134        |
| A_33_P3292794  | 8,44875 | 8,50314 | -1,038419946 | ENST00000401977 | 23583     | NM_014311    | SMUG1          |
| A_24_P19752    | 11,0219 | 11,0763 | -1,038427144 | ENST00000472750 | 5824      | NM_002857    | PEX19          |
| A_33_P3214481  | 10,5631 | 10,6175 | -1,038427144 | ENST00000263556 | 5033      | NM_001142595 | P4HA1          |
| A_21_P0008543  | 1,38941 | 1,44383 | -1,03844154  | N/A             | N/A       | N/A          | Inc-ABCD4-1    |
| A_19_P00321721 | 2,64246 | 2,69692 | -1,038470332 | ENST00000436295 | N/A       | N/A          | N/A            |
| A_22_P00009635 | 1,36028 | 1,41476 | -1,038484728 | N/A             | N/A       | N/A          | Inc-MARCKSL1-1 |
| A_33_P3229754  | 1,40565 | 1,46016 | -1,038506323 | N/A             | N/A       | N/A          | N/A            |
| A_33_P3303890  | 1,40891 | 1,46343 | -1,038513521 | ENST00000472867 | N/A       | BC140752     | N/A            |
| A_22_P00001456 | 1,71539 | 1,76992 | -1,03852072  | N/A             | N/A       | N/A          | Inc-APPL2-1    |
| A_33_P3381378  | 1,36959 | 1,42412 | -1,03852072  | ENST00000398485 | 5075      | NM_001257096 | PAX1           |
| A_33_P3417955  | 1,40945 | 1,46402 | -1,038549514 | ENST00000530020 | 100652857 | NR_046005    | TMCO5B         |
| A_33_P3264524  | 1,7278  | 1,78242 | -1,038585508 | ENST00000442535 | N/A       | N/A          | N/A            |
| A_22_P00009259 | 3,35868 | 3,4133  | -1,038585508 | N/A             | 100996404 | XR_172370    | LOC100996404   |
| A_33_P3281176  | 2,75979 | 2,81443 | -1,038599906 | N/A             | N/A       | N/A          | N/A            |
| A_23_P102517   | 9,14736 | 9,20204 | -1,038628703 | ENST00000287600 | 5147      | NM_002601    | PDE6D          |
| A_33_P3389827  | 12,9852 | 13,0399 | -1,038643101 | ENST00000487138 | 150696    | NM_001165978 | PROM2          |
| A_24_P923251   | 11,2099 | 11,2646 | -1,038643101 | ENST00000468262 | 7052      | NM_198951    | TGM2           |
| A_21_P0003232  | 3,11182 | 3,16653 | -1,0386503   | N/A             | N/A       | N/A          | Inc-KCTD6-1    |
| A_32_P71943    | 8,77441 | 8,82915 | -1,038671899 | ENST00000367162 | 25778     | NM_015375    | DSTYK          |
| A_33_P3217485  | 1,43975 | 1,49454 | -1,038707897 | ENST00000359286 | 440077    | NM_001004328 | ZNF705A        |
| A_33_P3314421  | 1,83373 | 1,88854 | -1,038722297 | N/A             | N/A       | AK024188     | N/A            |

|                |         |         |              |                 |           |              |               |
|----------------|---------|---------|--------------|-----------------|-----------|--------------|---------------|
| A_21_P0001058  | 1,38144 | 1,43626 | -1,038729497 | ENST00000444750 | N/A       | N/A          | N/A           |
| A_24_P666105   | 5,79249 | 5,84732 | -1,038736697 | ENST00000409911 | 80059     | NM_001134745 | LRRTM4        |
| A_33_P3424591  | 5,87112 | 5,92597 | -1,038751097 | ENST00000390549 | N/A       | BC073773     | N/A           |
| A_33_P3235142  | 1,38018 | 1,43507 | -1,038779897 | N/A             | N/A       | N/A          | N/A           |
| A_33_P3414402  | 5,8674  | 5,92229 | -1,038779897 | ENST00000309902 | 55628     | NM_001146190 | ZNF407        |
| A_23_P355471   | 6,68038 | 6,73537 | -1,038851903 | ENST00000411851 | 6915      | NM_201636    | TBXA2R        |
| A_24_P257359   | 17,5859 | 17,6409 | -1,038859103 | ENST00000434031 | 6138      | NM_002948    | RPL15         |
| A_21_P0014750  | 1,37413 | 1,42913 | -1,038859103 | N/A             | N/A       | N/A          | N/A           |
| A_33_P3435546  | 1,40228 | 1,45736 | -1,038916711 | N/A             | N/A       | AL137361     | N/A           |
| A_33_P3403418  | 10,7772 | 10,8323 | -1,038931114 | ENST00000521387 | 1495      | NM_001903    | CTNNA1        |
| A_33_P3334398  | 5,62106 | 5,67617 | -1,038938315 | ENST00000476083 | 765       | NM_001270500 | CA6           |
| A_33_P3295640  | 6,97911 | 7,03424 | -1,038952718 | N/A             | 9546      | NM_004886    | APBA3         |
| A_33_P3222019  | 6,19763 | 6,25276 | -1,038952718 | ENST00000547525 | 9671      | NM_014653    | WSCD2         |
| A_21_P0013989  | 1,38813 | 1,44328 | -1,038967121 | N/A             | N/A       | N/A          | N/A           |
| A_21_P0002321  | 1,38572 | 1,44088 | -1,038974323 | N/A             | N/A       | N/A          | Inc-HNRNPA3-3 |
| A_23_P153571   | 1,4652  | 1,52037 | -1,038981524 | ENST00000600243 | 147920    | NM_001002915 | IGFL2         |
| A_23_P129118   | 10,7581 | 10,8133 | -1,03900313  | ENST00000204549 | 10081     | NM_005707    | PDCD7         |
| A_21_P0012164  | 6,69246 | 6,74768 | -1,039017533 | ENST00000453481 | 728882    | N/A          | FAM182B       |
| A_33_P3304678  | 1,69095 | 1,74618 | -1,039024735 | ENST00000379053 | 149837    | N/A          | LINC00654     |
| A_33_P3389967  | 5,81403 | 5,86928 | -1,039039139 | ENST00000394253 | 25862     | NM_001286554 | USP49         |
| A_22_P00001825 | 1,38562 | 1,44091 | -1,039067948 | ENST00000429469 | N/A       | N/A          | N/A           |
| A_23_P205875   | 7,19917 | 7,25446 | -1,039067948 | ENST00000560678 | 54581     | NR_004859    | SCAND2P       |
| A_22_P00004695 | 10,6755 | 10,7308 | -1,03907515  | ENST00000529424 | 9401      | NM_004260    | RECQL4        |
| A_33_P3307500  | 5,84619 | 5,90156 | -1,039125568 | ENST00000432245 | 64220     | NM_001142620 | STRA6         |
| A_21_P0006631  | 1,39072 | 1,44609 | -1,039125568 | N/A             | N/A       | N/A          | Inc-WDR37-3   |
| A_33_P3325275  | 8,12106 | 8,17645 | -1,039139973 | ENST00000382285 | 80023     | NM_024958    | NRSN2         |
| A_23_P14062    | 12,0073 | 12,0627 | -1,039147176 | ENST00000535718 | 57122     | NM_020401    | NUP107        |
| A_24_P913716   | 10,3158 | 10,3712 | -1,039147176 | ENST00000593903 | 93010     | NM_145236    | B3GNT7        |
| A_22_P00024530 | 1,36468 | 1,4201  | -1,039161582 | N/A             | 101927392 | XR_242418    | LOC101927392  |
| A_23_P70318    | 4,6199  | 4,67534 | -1,039175988 | ENST00000321037 | 22875     | NM_014936    | ENPP4         |
| A_32_P169131   | 10,8046 | 10,8601 | -1,039219207 | ENST00000262374 | 56052     | N/A          | ALG1          |
| A_23_P216679   | 7,27008 | 7,32561 | -1,039240817 | ENST00000375241 | 8555      | NM_033331    | CDC14B        |
| A_22_P00015090 | 4,08731 | 4,14285 | -1,03924802  | ENST00000557558 | N/A       | N/A          | N/A           |

|                |         |         |              |                 |           |              |                |
|----------------|---------|---------|--------------|-----------------|-----------|--------------|----------------|
| A_33_P3303772  | 5,13946 | 5,19506 | -1,039291243 | ENST00000621716 | 6531      | NM_001044    | SLC6A3         |
| A_23_P71419    | 13,7312 | 13,7868 | -1,039291243 | ENST00000523890 | 10987     | NM_006837    | COP55          |
| A_23_P98898    | 8,67505 | 8,73071 | -1,039334466 | ENST00000555408 | 1017      | NM_001798    | CDK2           |
| A_21_P0007482  | 1,37832 | 1,43402 | -1,039363283 | ENST00000509760 | 440119    | NR_033834    | FZD10-AS1      |
| A_33_P3270237  | 1,38739 | 1,44316 | -1,039413715 | N/A             | N/A       | XR_133213    | N/A            |
| A_33_P3401621  | 11,5288 | 11,5846 | -1,039435329 | ENST00000256442 | 891       | NM_031966    | CCNB1          |
| A_33_P3212221  | 4,73488 | 4,7907  | -1,039449739 | ENST00000469974 | 9681      | NM_001007188 | DEPDC5         |
| A_33_P3236921  | 9,51412 | 9,56996 | -1,039464149 | ENST00000491816 | 142       | NM_001618    | PARP1          |
| A_21_P0012099  | 1,40319 | 1,45912 | -1,039528996 | ENST00000451851 | N/A       | XR_249249    | N/A            |
| A_21_P0011917  | 2,56176 | 2,61769 | -1,039528996 | N/A             | N/A       | N/A          | XLOC_I2_008014 |
| A_22_P00007374 | 5,87946 | 5,9354  | -1,039536201 | ENST00000566840 | N/A       | BC009884     | N/A            |
| A_21_P0012133  | 3,35013 | 3,40609 | -1,039550612 | ENST00000486775 | 284759    | N/A          | SIRPB2         |
| A_33_P3366456  | 7,68088 | 7,73688 | -1,039579435 | ENST00000510882 | 154150    | NM_138574    | HDGFL1         |
| A_33_P3327454  | 11,8378 | 11,8938 | -1,039579435 | ENST00000563073 | 89970     | NM_133368    | RSPRY1         |
| A_21_P0005079  | 5,67151 | 5,7276  | -1,03964429  | N/A             | N/A       | N/A          | Inc-LPA-1      |
| A_21_P0000651  | 8,31022 | 8,36634 | -1,039665909 | N/A             | 100132101 | N/A          | HERC2P7        |
| A_22_P00023764 | 1,55845 | 1,61463 | -1,039709148 | N/A             | 374987    | NR_103535    | NEXN-AS1       |
| A_22_P00000929 | 1,39675 | 1,453   | -1,039759596 | N/A             | N/A       | AK126806     | Inc-AKIP1-2    |
| A_21_P0008809  | 1,40663 | 1,46292 | -1,039788425 | N/A             | 101928792 | XR_248077    | LOC101928792   |
| A_23_P17287    | 11,803  | 11,8593 | -1,039795632 | ENST00000482918 | 285148    | NM_001039613 | IAH1           |
| A_33_P3280147  | 1,52328 | 1,57958 | -1,039795632 | ENST00000374983 | 400624    | NR_028337    | FLJ45079       |
| A_21_P0001333  | 1,37967 | 1,43597 | -1,039795632 | N/A             | N/A       | N/A          | Inc-PKN2-2     |
| A_33_P3221925  | 1,69391 | 1,75021 | -1,039795632 | N/A             | N/A       | N/A          | N/A            |
| A_23_P434900   | 13,5747 | 13,631  | -1,039795632 | ENST00000248098 | 90861     | NM_144570    | HN1L           |
| A_33_P3211513  | 7,26308 | 7,3194  | -1,039810047 | ENST00000481641 | 1195      | NM_001162407 | CLK1           |
| A_22_P00018805 | 1,38583 | 1,44222 | -1,0398605   | ENST00000512517 | 101928776 | NR_110951    | LINC01258      |
| A_22_P00022483 | 1,36891 | 1,42531 | -1,039867708 | ENST00000426166 | N/A       | N/A          | N/A            |
| A_33_P3235034  | 5,77554 | 5,83194 | -1,039867708 | N/A             | 100129503 | XR_243769    | PP13           |
| A_23_P82000    | 10,8137 | 10,8701 | -1,039867708 | ENST00000338863 | 7005      | NM_003214    | TEAD3          |
| A_24_P522631   | 11,4917 | 11,5481 | -1,039867708 | ENST00000340381 | 199953    | NM_001130924 | TMEM201        |
| A_33_P3629131  | 6,9027  | 6,95911 | -1,039874916 | N/A             | 94145     | BX484257     | CDRT3          |
| A_23_P345710   | 8,33181 | 8,38829 | -1,039925372 | ENST00000437101 | 152002    | NM_152531    | XXYLT1         |
| A_33_P3225696  | 15,9464 | 16,0029 | -1,039939788 | ENST00000301215 | 116115    | NM_133444    | ZNF526         |

|                |         |         |              |                 |           |              |                     |
|----------------|---------|---------|--------------|-----------------|-----------|--------------|---------------------|
| A_23_P24129    | 12,1886 | 12,2451 | -1,039939788 | ENST00000373970 | 22943     | NM_012242    | DKK1                |
| A_33_P3287636  | 3,98456 | 4,04112 | -1,039983039 | ENST00000390449 | N/A       | X58736       | N/A                 |
| A_23_P41948    | 9,79484 | 9,85141 | -1,039990248 | ENST00000265295 | 54908     | NM_017785    | SPDL1               |
| A_22_P00002658 | 7,04541 | 7,10198 | -1,039990248 | N/A             | N/A       | BI826926     | Inc-C1orf201-1      |
| A_23_P219144   | 14,7882 | 14,8448 | -1,040011874 | ENST00000345519 | 1211      | NM_007096    | CLTA                |
| A_33_P3249354  | 8,66936 | 8,72596 | -1,040011874 | ENST00000265295 | 54908     | NM_017785    | SPDL1               |
| A_21_P0014138  | 3,47947 | 3,53613 | -1,040055128 | ENST00000511639 | 4552      | N/A          | MTRR                |
| A_23_P1186     | 1,37915 | 1,43582 | -1,040062337 | ENST00000298943 | 389941    | NM_001010908 | C1QL3               |
| A_23_P300245   | 1,35613 | 1,41287 | -1,040112802 | ENST00000601660 | 63946     | NM_001040283 | DMRTC2              |
| A_33_P3325826  | 1,35669 | 1,41343 | -1,040112802 | N/A             | N/A       | N/A          | N/A                 |
| A_22_P00024589 | 5,17722 | 5,23398 | -1,040127221 | N/A             | N/A       | AK095151     | Inc-KB-1980E6.3.1-1 |
| A_21_P0006978  | 1,40315 | 1,45993 | -1,040141641 | N/A             | N/A       | N/A          | Inc-ACBD5-2         |
| A_32_P178945   | 9,88115 | 9,93794 | -1,04014885  | ENST00000367084 | 55432     | NM_018566    | YOD1                |
| A_33_P3267740  | 4,98232 | 5,03916 | -1,0401849   | ENST00000347077 | 339327    | NM_178544    | ZNF546              |
| A_32_P233304   | 9,56417 | 9,62103 | -1,04019932  | ENST00000328205 | 286826    | NM_173083    | LIN9                |
| A_23_P78526    | 8,89078 | 8,94764 | -1,04019932  | ENST00000480278 | 56971     | NM_020219    | CEACAM19            |
| A_22_P00004902 | 6,73158 | 6,78844 | -1,04019932  | N/A             | N/A       | N/A          | Inc-DALRD3-1        |
| A_23_P430747   | 1,38317 | 1,44004 | -1,04020653  | ENST00000408967 | 9142      | NM_004709    | TMEM257             |
| A_23_P89343    | 9,50632 | 9,5632  | -1,04021374  | ENST00000359238 | 29916     | NM_152244    | SNX11               |
| A_33_P3418571  | 2,97452 | 3,03143 | -1,040235371 | N/A             | N/A       | N/A          | N/A                 |
| A_24_P114249   | 9,36772 | 9,42467 | -1,040264213 | ENST00000392701 | 2591      | NM_004482    | GALNT3              |
| A_23_P6045     | 1,38375 | 1,44071 | -1,040271424 | ENST00000382398 | 81623     | NM_030931    | DEFB126             |
| A_24_P47182    | 12,5317 | 12,5887 | -1,040300267 | ENST00000211998 | 7414      | NM_014000    | VCL                 |
| A_21_P0002336  | 1,35715 | 1,41415 | -1,040300267 | N/A             | N/A       | N/A          | Inc-CASP10-1        |
| A_23_P319874   | 5,24338 | 5,30038 | -1,040300267 | ENST00000396078 | 285343    | NM_001029840 | TCAIM               |
| A_33_P3292769  | 1,66586 | 1,72286 | -1,040300267 | ENST00000329021 | 150372    | NM_145912    | NFAM1               |
| A_23_P90888    | 1,37662 | 1,43364 | -1,040314688 | ENST00000435083 | 1134      | NM_001039523 | CHRNA1              |
| A_22_P00025223 | 1,38506 | 1,44208 | -1,040314688 | N/A             | N/A       | N/A          | Inc-RHOB-6          |
| A_21_P0012809  | 1,35784 | 1,41492 | -1,040357955 | ENST00000502345 | N/A       | N/A          | N/A                 |
| A_32_P73045    | 10,2684 | 10,3255 | -1,040372377 | ENST00000537658 | 55907     | NM_018686    | CMAS                |
| A_22_P00023670 | 3,77577 | 3,8329  | -1,040394011 | N/A             | 100131193 | NR_024580    | CCDC183-AS1         |
| A_22_P00009088 | 1,36641 | 1,42354 | -1,040394011 | ENST00000402154 | N/A       | HY010410     | N/A                 |
| A_21_P0013010  | 1,40676 | 1,46391 | -1,040408434 | N/A             | N/A       | N/A          | XLOC_I2_012374      |

|                |         |         |              |                 |           |              |               |
|----------------|---------|---------|--------------|-----------------|-----------|--------------|---------------|
| A_22_P00004212 | 1,80613 | 1,8633  | -1,040422858 | N/A             | N/A       | N/A          | Inc-CLRN2-1   |
| A_22_P00020315 | 10,2253 | 10,2825 | -1,040444493 | ENST00000527984 | N/A       | N/A          | N/A           |
| A_33_P3275751  | 11,4955 | 11,5527 | -1,040444493 | ENST00000443798 | 6397      | NM_001204410 | SEC14L1       |
| A_23_P163455   | 2,70405 | 2,76129 | -1,04047334  | ENST00000300231 | 4130      | NM_002373    | MAP1A         |
| A_21_P0008145  | 1,37534 | 1,43267 | -1,040538251 | N/A             | N/A       | N/A          | Inc-LHFP-2    |
| A_24_P60680    | 4,80112 | 4,85846 | -1,040545463 | ENST00000377138 | 442194    | NM_013941    | OR10C1        |
| A_21_P0009809  | 1,40044 | 1,45779 | -1,040552676 | ENST00000412553 | 29075     | N/A          | LINC00652     |
| A_33_P3293213  | 5,00517 | 5,06254 | -1,040567101 | ENST00000393423 | 57139     | NM_001161616 | RGL3          |
| A_33_P3254900  | 3,83487 | 3,89226 | -1,040581526 | ENST00000621407 | N/A       | N/A          | N/A           |
| A_21_P0002496  | 5,09789 | 5,15532 | -1,040610378 | N/A             | N/A       | N/A          | Inc-CCDC93-3  |
| A_22_P00003271 | 4,55196 | 4,60939 | -1,040610378 | ENST00000450550 | 101927043 | NR_110208    | LOC101927043  |
| A_33_P3237492  | 5,32945 | 5,3869  | -1,040624804 | ENST00000418165 | N/A       | CA849059     | N/A           |
| A_33_P3289860  | 9,65794 | 9,7154  | -1,040632017 | N/A             | N/A       | BX648603     | N/A           |
| A_22_P00004465 | 9,5802  | 9,63768 | -1,040646443 | N/A             | N/A       | N/A          | Inc-CPEB4-1   |
| A_21_P0013948  | 5,63994 | 5,69742 | -1,040646443 | N/A             | N/A       | N/A          | N/A           |
| A_23_P74042    | 4,29584 | 4,35333 | -1,040653656 | ENST00000370725 | 23266     | NM_012302    | LPHN2         |
| A_23_P65741    | 10,8942 | 10,9517 | -1,04066087  | ENST00000530537 | 115752    | NM_133375    | DIS3L         |
| A_33_P3381621  | 2,56732 | 2,62484 | -1,040675296 | N/A             | 151056    | BC065041     | PLB1          |
| A_21_P0003288  | 1,40415 | 1,46169 | -1,040689723 | ENST00000479244 | N/A       | N/A          | N/A           |
| A_33_P3411338  | 2,31317 | 2,37073 | -1,04070415  | ENST00000265162 | 2028      | NM_001977    | ENPEP         |
| A_33_P3395008  | 9,04681 | 9,10438 | -1,040711364 | ENST00000439055 | 55289     | NM_001142807 | ACOXL         |
| A_21_P0001459  | 1,69996 | 1,75754 | -1,040718578 | N/A             | N/A       | N/A          | Inc-TTC34-3   |
| A_22_P00012743 | 5,24459 | 5,30218 | -1,040725791 | N/A             | 100996437 | NR_110037    | LOC100996437  |
| A_21_P0005980  | 1,39408 | 1,45175 | -1,040783503 | N/A             | N/A       | N/A          | Inc-LY6H-1    |
| A_21_P0012344  | 1,99035 | 2,04804 | -1,040797932 | ENST00000443839 | N/A       | N/A          | N/A           |
| A_33_P3354267  | 12,6041 | 12,6618 | -1,040805146 | ENST00000432648 | 79647     | NM_024595    | AKIRIN1       |
| A_23_P143551   | 11,1824 | 11,2401 | -1,040805146 | ENST00000481365 | 529       | NM_001696    | ATP6V1E1      |
| A_33_P3321996  | 1,50341 | 1,56115 | -1,040834003 | N/A             | N/A       | DB053889     | Inc-SDCCAG8-2 |
| A_23_P25503    | 11,7528 | 11,8106 | -1,040877291 | ENST00000398316 | 22862     | NM_001079673 | FNDC3A        |
| A_33_P3366903  | 10,3806 | 10,4384 | -1,040877291 | ENST00000390664 | 4166      | NM_021615    | CHST6         |
| A_23_P112596   | 11,9348 | 11,9926 | -1,040877291 | ENST00000286621 | 132       | NM_001123    | ADK           |
| A_22_P00025503 | 1,40065 | 1,45847 | -1,040891721 | N/A             | N/A       | N/A          | Inc-LSM11-1   |
| A_22_P00019996 | 1,70913 | 1,76701 | -1,040935012 | ENST00000579714 | N/A       | N/A          | N/A           |



|                |         |         |              |                 |           |              |                      |
|----------------|---------|---------|--------------|-----------------|-----------|--------------|----------------------|
| A_21_P0007293  | 1,55814 | 1,61602 | -1,040935012 | N/A             | N/A       | N/A          | Inc-RP11-688I9.2.1-3 |
| A_33_P3416563  | 12,103  | 12,1609 | -1,040949442 | ENST00000275235 | 51390     | NM_016108    | AIG1                 |
| A_19_P00322605 | 1,38009 | 1,438   | -1,040956657 | ENST00000458028 | 100507254 | N/A          | LINC01013            |
| A_22_P00013303 | 1,36317 | 1,42108 | -1,040956657 | ENST00000433315 | N/A       | N/A          | N/A                  |
| A_19_P00322977 | 7,76164 | 7,81957 | -1,040971088 | N/A             | 378805    | NR_109854    | LINC-PINT            |
| A_33_P3317761  | 4,44181 | 4,49976 | -1,040985519 | N/A             | N/A       | N/A          | N/A                  |
| A_33_P3417452  | 8,71338 | 8,77137 | -1,041014382 | ENST00000403903 | 100125288 | NM_001103167 | ZGLP1                |
| A_22_P00003933 | 10,2368 | 10,2948 | -1,041021598 | ENST00000448256 | 102723826 | N/A          | LOC102723826         |
| A_33_P3410831  | 11,0841 | 11,1421 | -1,041021598 | N/A             | 729609    | N/A          | LOC729609            |
| A_21_P0009971  | 7,01392 | 7,07195 | -1,041043245 | N/A             | N/A       | N/A          | Inc-CEBPB-1          |
| A_23_P55190    | 13,7768 | 13,8349 | -1,041093758 | ENST00000590977 | 9343      | NM_004247    | EFTUD2               |
| A_33_P3259303  | 1,35533 | 1,41348 | -1,04112984  | N/A             | N/A       | N/A          | N/A                  |
| A_24_P64126    | 9,62734 | 9,68551 | -1,041144274 | ENST00000614678 | 8895      | XM_005251093 | CPNE3                |
| A_33_P3287547  | 5,68877 | 5,74695 | -1,04115149  | ENST00000479566 | 5590      | N/A          | PRKCZ                |
| A_23_P27066    | 11,048  | 11,1062 | -1,041165924 | ENST00000396981 | 7326      | NM_003342    | UBE2G1               |
| A_32_P175934   | 1,38253 | 1,44077 | -1,041194792 | ENST00000368046 | 962       | NM_001778    | CD48                 |
| A_22_P00014799 | 7,79838 | 7,85664 | -1,041209226 | ENST00000580861 | 100499467 | NR_036488    | LINC00673            |
| A_21_P0014584  | 11,201  | 11,2593 | -1,041238095 | N/A             | N/A       | AK094623     | N/A                  |
| A_23_P218988   | 10,2104 | 10,2687 | -1,041238095 | ENST00000621204 | 64924     | NM_022902    | SLC30A5              |
| A_22_P00019887 | 1,37888 | 1,4372  | -1,041252529 | ENST00000553754 | N/A       | BU623300     | N/A                  |
| A_33_P3395804  | 3,58657 | 3,64491 | -1,041266964 | ENST00000377306 | 26074     | NM_001167816 | CFAP61               |
| A_21_P0013981  | 1,40347 | 1,46181 | -1,041266964 | ENST00000481779 | 1131      | XM_005273033 | CHRM3                |
| A_23_P392942   | 1,36503 | 1,42339 | -1,041281399 | ENST00000381998 | 4481      | NM_002445    | MSR1                 |
| A_33_P3365034  | 2,44401 | 2,50238 | -1,041288617 | N/A             | 2840      | BX538082     | GPR17                |
| A_22_P00016743 | 1,37025 | 1,42863 | -1,041295835 | ENST00000550723 | 101928137 | NR_110130    | LOC101928137         |
| A_23_P165136   | 2,16301 | 2,2214  | -1,041303052 | ENST00000595840 | 126364    | NM_145256    | LRRC25               |
| A_22_P00000283 | 3,76076 | 3,81916 | -1,04131027  | ENST00000563734 | 100126328 | N/A          | MIR940               |
| A_33_P3351934  | 12,301  | 12,3594 | -1,04131027  | N/A             | 55154     | BC070067     | MSTO1                |
| A_23_P422193   | 7,81957 | 7,878   | -1,041331924 | ENST00000337852 | 6839      | NM_003173    | SUV39H1              |
| A_21_P0001261  | 1,37769 | 1,43613 | -1,041339142 | N/A             | N/A       | N/A          | Inc-UBIAD1-1         |
| A_22_P00016442 | 1,39443 | 1,45287 | -1,041339142 | N/A             | N/A       | BX092241     | Inc-TMEM55A-1        |
| A_33_P3258875  | 1,81904 | 1,87748 | -1,041339142 | ENST00000435702 | 400870    | XR_109691    | FLJ41733             |
| A_33_P3247237  | 7,19216 | 7,25061 | -1,04134636  | ENST00000324544 | 25792     | NM_001131015 | CIZ1                 |

|                |         |         |              |                 |           |              |               |
|----------------|---------|---------|--------------|-----------------|-----------|--------------|---------------|
| A_22_P00016473 | 1,39758 | 1,45607 | -1,041375233 | ENST00000520766 | 101927774 | NR_121672    | LINC00824     |
| A_22_P00018357 | 4,66136 | 4,71985 | -1,041375233 | N/A             | N/A       | BG206007     | Inc-ZSWIM2-5  |
| A_33_P3284808  | 4,07065 | 4,12914 | -1,041375233 | ENST00000454679 | 340895    | NM_001142308 | MALRD1        |
| A_24_P136211   | 16,6719 | 16,7304 | -1,041382451 | ENST00000460876 | N/A       | XM_006709980 | N/A           |
| A_33_P3408569  | 1,37617 | 1,43468 | -1,041389669 | N/A             | N/A       | N/A          | Inc-KHDRBS2-1 |
| A_22_P00004046 | 6,62939 | 6,68794 | -1,041418543 | N/A             | N/A       | N/A          | Inc-CHST1-4   |
| A_21_P0000598  | 9,86419 | 9,92276 | -1,04143298  | ENST00000426721 | 6468      | NM_022039    | FBXW4         |
| A_22_P00009008 | 2,34335 | 2,40195 | -1,041454636 | N/A             | N/A       | N/A          | Inc-LARS-1    |
| A_21_P0004675  | 1,38661 | 1,44525 | -1,041483512 | ENST00000416104 | 387111    | N/A          | LINC00222     |
| A_21_P0002259  | 4,76628 | 4,82494 | -1,04149795  | N/A             | N/A       | N/A          | Inc-NPAS2-1   |
| A_22_P00011643 | 7,57431 | 7,63298 | -1,041505169 | N/A             | N/A       | N/A          | Inc-PDCD11-2  |
| A_24_P194934   | 16,852  | 16,9107 | -1,041526827 | ENST00000470598 | N/A       | N/A          | N/A           |
| A_21_P0007825  | 6,40289 | 6,46165 | -1,041570144 | N/A             | N/A       | N/A          | Inc-DERA-1    |
| A_24_P128683   | 9,22397 | 9,28276 | -1,041591803 | ENST00000409789 | 27013     | NM_015680    | CNPPD1        |
| A_33_P3338909  | 13,9993 | 14,0581 | -1,041599023 | ENST00000462965 | 10092     | NM_001270439 | ARPC5         |
| A_23_P21409    | 10,6316 | 10,6904 | -1,041599023 | ENST00000620544 | 80254     | NM_001042384 | CEP63         |
| A_23_P27840    | 11,418  | 11,4768 | -1,041599023 | ENST00000432763 | 6829      | NM_003169    | SUPT5H        |
| A_24_P11587    | 8,4641  | 8,52292 | -1,041613462 | ENST00000295030 | 5194      | NM_002618    | PEX13         |
| A_21_P0012705  | 1,55478 | 1,61361 | -1,041620682 | N/A             | 102723973 | XR_425829    | LOC102723973  |
| A_23_P404134   | 11,6492 | 11,7081 | -1,041671223 | ENST00000448790 | 9878      | AB018280     | TOX4          |
| A_24_P234415   | 7,36152 | 7,42044 | -1,041685664 | ENST00000273183 | 6769      | NM_003149    | STAC          |
| A_22_P00018083 | 1,37175 | 1,43074 | -1,041736208 | N/A             | 167465    | NM_152625    | ZNF366        |
| A_33_P3325897  | 1,38035 | 1,43943 | -1,041801197 | ENST00000612993 | 4352      | NM_005373    | MPL           |
| A_33_P3228285  | 12,3774 | 12,4365 | -1,04181564  | ENST00000507915 | 338692    | NM_207354    | ANKRD13D      |
| A_21_P0008234  | 1,35555 | 1,41468 | -1,041837304 | N/A             | N/A       | N/A          | Inc-COG6-2    |
| A_23_P105545   | 5,71976 | 5,77889 | -1,041837304 | ENST00000539047 | 6843      | NM_016830    | VAMP1         |
| A_23_P37702    | 1,40106 | 1,46021 | -1,041851747 | ENST00000562432 | 7177      | NM_003294    | TPSAB1        |
| A_33_P3311458  | 8,39333 | 8,4525  | -1,04186619  | N/A             | N/A       | N/A          | N/A           |
| A_19_P00808088 | 3,54798 | 3,60719 | -1,041895077 | N/A             | 100288428 | NR_033378    | LMCD1-AS1     |
| A_21_P0005644  | 2,87901 | 2,93824 | -1,041909521 | N/A             | N/A       | N/A          | Inc-DLGAP2-2  |
| A_21_P0003737  | 1,39451 | 1,45376 | -1,041923965 | N/A             | N/A       | N/A          | Inc-ARAP2-4   |
| A_22_P00015881 | 1,40165 | 1,46092 | -1,041938409 | ENST00000477014 | 85012     | N/A          | TCEAL3        |
| A_33_P3410372  | 5,32406 | 5,38334 | -1,041945631 | ENST00000376006 | 170685    | NM_153183    | NUDT10        |

|                |         |         |              |                 |           |              |                |
|----------------|---------|---------|--------------|-----------------|-----------|--------------|----------------|
| A_22_P00008630 | 1,38883 | 1,44812 | -1,041952854 | ENST00000505083 | 101927845 | NR_125427    | LOC101927845   |
| A_33_P3280346  | 1,35867 | 1,41798 | -1,041967298 | N/A             | 100130857 | AK097050     | LOC100130857   |
| A_33_P3399028  | 9,53343 | 9,59276 | -1,041981743 | ENST00000479267 | 11011     | NM_006852    | TLK2           |
| A_21_P0003399  | 1,58268 | 1,64207 | -1,042025079 | ENST00000505741 | 101927109 | XR_244710    | LOC101927109   |
| A_33_P3262421  | 1,38104 | 1,44049 | -1,042068416 | N/A             | N/A       | AB051446     | N/A            |
| A_22_P00005796 | 1,3592  | 1,41872 | -1,042118979 | N/A             | 644093    | NR_120602    | HCG2040054     |
| A_33_P3258339  | 5,70101 | 5,76054 | -1,042126203 | ENST00000409887 | 388341    | NM_001113567 | LRRC75A        |
| A_33_P3310415  | 1,37278 | 1,43234 | -1,042147873 | N/A             | N/A       | AY358259     | N/A            |
| A_33_P3364808  | 4,95916 | 5,01874 | -1,04216232  | ENST00000391970 | 5788      | NM_002838    | PTPRC          |
| A_21_P0007892  | 5,86227 | 5,9219  | -1,04219844  | N/A             | N/A       | N/A          | Inc-TMEM116-1  |
| A_22_P00002067 | 1,46281 | 1,52245 | -1,042205664 | N/A             | N/A       | AK091275     | Inc-BLID-3     |
| A_22_P00005576 | 1,37996 | 1,43968 | -1,042263457 | ENST00000446139 | 104355290 | NR_126406    | MIR217HG       |
| A_33_P3235491  | 5,36268 | 5,42243 | -1,042285131 | N/A             | N/A       | N/A          | N/A            |
| A_33_P3317548  | 5,68229 | 5,74206 | -1,04229958  | N/A             | N/A       | N/A          | N/A            |
| A_23_P86632    | 9,64592 | 9,70576 | -1,042350154 | ENST00000378242 | 64421     | NM_001033858 | DCLRE1C        |
| A_21_P0000490  | 4,75908 | 4,81892 | -1,042350154 | N/A             | 692229    | NR_004381    | SNORD105       |
| A_33_P3293138  | 3,41989 | 3,47975 | -1,042364604 | N/A             | N/A       | N/A          | N/A            |
| A_21_P0009857  | 1,43002 | 1,48991 | -1,04238628  | ENST00000448013 | N/A       | N/A          | N/A            |
| A_23_P85392    | 12,964  | 13,0239 | -1,042393505 | ENST00000306256 | 11079     | NM_007033    | RER1           |
| A_22_P00017265 | 1,82513 | 1,88509 | -1,042436858 | N/A             | 554201    | NR_038850    | CCDC148-AS1    |
| A_23_P106145   | 12,6423 | 12,7023 | -1,042465761 | ENST00000555069 | 30001     | GQ129372     | ERO1L          |
| A_23_P100632   | 16,1199 | 16,18   | -1,042538022 | ENST00000481647 | 51155     | NM_001002033 | HN1            |
| A_24_P121271   | 11,302  | 11,3621 | -1,042538022 | ENST00000266679 | 11052     | NM_007007    | CPSF6          |
| A_33_P3264835  | 1,37693 | 1,43704 | -1,042545248 | ENST00000374757 | 5909      | N/A          | RAP1GAP        |
| A_33_P3374162  | 1,35738 | 1,41756 | -1,042595834 | ENST00000390399 | N/A       | AB305921     | N/A            |
| A_21_P0011109  | 17,0071 | 17,0673 | -1,042610287 | ENST00000477404 | 6232      | NM_001030    | RPS27          |
| A_21_P0010562  | 6,74351 | 6,80376 | -1,042646422 | N/A             | N/A       | N/A          | XLOC_I2_000427 |
| A_33_P3292650  | 1,37612 | 1,43639 | -1,042660876 | ENST00000356291 | 389208    | NM_207407    | TMPRSS11F      |
| A_22_P00016774 | 3,39514 | 3,45543 | -1,042675331 | N/A             | N/A       | N/A          | Inc-TRIM41-1   |
| A_23_P27983    | 5,05305 | 5,11335 | -1,042682558 | ENST00000589298 | 333       | NM_005166    | APLP1          |
| A_23_P132388   | 11,2157 | 11,276  | -1,042682558 | ENST00000252785 | 9997      | NM_005138    | SCO2           |
| A_33_P3411325  | 6,16646 | 6,22679 | -1,04270424  | N/A             | N/A       | N/A          | N/A            |
| A_22_P00013063 | 1,69433 | 1,75468 | -1,042718695 | ENST00000559967 | 283761    | NR_027074    | LINC00928      |

|                |         |         |              |                 |           |              |               |
|----------------|---------|---------|--------------|-----------------|-----------|--------------|---------------|
| A_22_P00012162 | 1,40039 | 1,46075 | -1,042725923 | N/A             | 101928300 | XR_243033    | LOC101928300  |
| A_23_P9443     | 11,6933 | 11,7537 | -1,042754834 | ENST00000461539 | 51759     | NM_016520    | C9orf78       |
| A_33_P3365810  | 12,0798 | 12,1402 | -1,042754834 | ENST00000541223 | 6182      | NM_002949    | MRPL12        |
| A_24_P357037   | 11,4434 | 11,5038 | -1,042754834 | ENST00000481546 | 7327      | NM_182688    | UBE2G2        |
| A_33_P3319006  | 6,21473 | 6,27515 | -1,04276929  | ENST00000371634 | 733       | NM_000606    | C8G           |
| A_33_P3333900  | 1,37199 | 1,43242 | -1,042776517 | N/A             | 100129572 | AK096041     | LOC100129572  |
| A_22_P00023203 | 1,37019 | 1,43067 | -1,042812658 | N/A             | N/A       | N/A          | Inc-ATG2B-3   |
| A_33_P3348639  | 14,2101 | 14,2706 | -1,042827115 | ENST00000395309 | 3895      | NM_001271014 | KTN1          |
| A_32_P10272    | 10,9261 | 10,9866 | -1,042827115 | ENST00000275546 | 5383      | NR_027775    | PMS2P5        |
| A_23_P201790   | 13,6556 | 13,7161 | -1,042827115 | ENST00000391959 | 4660      | NM_002481    | PPP1R12B      |
| A_23_P31055    | 12,5673 | 12,6278 | -1,042827115 | ENST00000340413 | 348995    | NM_198887    | NUP43         |
| A_23_P347541   | 3,93255 | 3,99306 | -1,042834343 | ENST00000361820 | 116443    | NM_133445    | GRIN3A        |
| A_21_P0009945  | 1,39983 | 1,46037 | -1,042856028 | N/A             | N/A       | N/A          | Inc-SSTR4-5   |
| A_24_P79070    | 4,87325 | 4,9338  | -1,042863257 | ENST00000300873 | 94235     | NM_033258    | GNG8          |
| A_24_P284523   | 9,91595 | 9,97653 | -1,042884943 | ENST00000253055 | 4294      | NM_002446    | MAP3K10       |
| A_19_P00802587 | 3,5566  | 3,6172  | -1,0428994   | ENST00000435044 | N/A       | N/A          | N/A           |
| A_21_P0001904  | 1,36622 | 1,42682 | -1,0428994   | ENST00000426124 | N/A       | N/A          | N/A           |
| A_22_P00015867 | 4,24443 | 4,30505 | -1,042913858 | N/A             | N/A       | N/A          | Inc-TBX15-2   |
| A_33_P3332885  | 6,97632 | 7,03695 | -1,042921087 | ENST00000377600 | 11120     | NM_001197234 | BTN2A1        |
| A_32_P377880   | 1,36069 | 1,42136 | -1,042950003 | ENST00000326524 | 2668      | NM_001190468 | GDNF          |
| A_21_P0009421  | 1,35438 | 1,41508 | -1,042971691 | ENST00000566101 | 101927900 | NR_110791    | LINC01477     |
| A_22_P00009276 | 1,73332 | 1,79405 | -1,042993379 | N/A             | N/A       | N/A          | Inc-LRRC16A-1 |
| A_33_P3268174  | 9,98915 | 10,0499 | -1,043007838 | ENST00000379485 | 89890     | NM_152903    | KBTBD6        |
| A_22_P00006356 | 1,39788 | 1,45863 | -1,043007838 | ENST00000454882 | N/A       | N/A          | N/A           |
| A_23_P134714   | 10,7839 | 10,8447 | -1,043043987 | ENST00000522791 | 10247     | NM_005836    | HRSP12        |
| A_24_P358164   | 16,1331 | 16,1939 | -1,043043987 | ENST00000483479 | 653162    | NR_026890    | RPSAP9        |
| A_23_P351535   | 4,5208  | 4,58165 | -1,043080137 | ENST00000449830 | 100131454 | NR_024120    | DBIL5P        |
| A_21_P0009271  | 4,76137 | 4,82225 | -1,043101827 | N/A             | N/A       | N/A          | Inc-GPR142-1  |
| A_33_P6549164  | 16,215  | 16,2759 | -1,043116288 | ENST00000473357 | 66035     | AK055523     | SLC2A11       |
| A_21_P0003255  | 3,14189 | 3,20279 | -1,043116288 | N/A             | N/A       | N/A          | Inc-P2RY1-3   |
| A_33_P3320418  | 1,74379 | 1,80477 | -1,043174132 | N/A             | N/A       | N/A          | N/A           |
| A_23_P92349    | 9,52367 | 9,58466 | -1,043181363 | ENST00000398484 | 53834     | NM_001004356 | FGFRL1        |
| A_23_P9415     | 10,2022 | 10,2632 | -1,043188594 | ENST00000541043 | 48        | NM_002197    | ACO1          |

|                |         |         |              |                 |           |              |              |
|----------------|---------|---------|--------------|-----------------|-----------|--------------|--------------|
| A_33_P3350580  | 3,4968  | 3,55782 | -1,043203055 | N/A             | N/A       | AK131548     | N/A          |
| A_22_P00017490 | 4,94773 | 5,00876 | -1,043210286 | N/A             | 104413891 | NR_126423    | SAPCD1-AS1   |
| A_22_P00010810 | 8,32364 | 8,38472 | -1,043246442 | N/A             | N/A       | N/A          | Inc-NMNAT1-2 |
| A_32_P179676   | 9,71713 | 9,77821 | -1,043246442 | ENST00000602145 | 10766     | NM_016272    | TOB2         |
| A_32_P80068    | 13,077  | 13,1381 | -1,043260904 | ENST00000502784 | 29121     | NM_001004419 | CLEC2D       |
| A_22_P00012149 | 1,70128 | 1,76242 | -1,04328983  | ENST00000503691 | N/A       | N/A          | N/A          |
| A_23_P19702    | 12,6773 | 12,7385 | -1,04333322  | ENST00000470466 | 23118     | NM_015093    | TAB2         |
| A_23_P64280    | 6,18914 | 6,25039 | -1,04336938  | ENST00000624557 | N/A       | AY358681     | N/A          |
| A_24_P914625   | 1,3969  | 1,45816 | -1,043376612 | ENST00000611697 | 389206    | NM_207406    | BEND4        |
| A_21_P0006395  | 10,2541 | 10,3154 | -1,043405541 | N/A             | N/A       | N/A          | Inc-PTGES2-1 |
| A_22_P00021615 | 1,38901 | 1,45037 | -1,043448936 | N/A             | N/A       | N/A          | Inc-MDGA1-1  |
| A_21_P0002049  | 1,38636 | 1,44774 | -1,043463401 | ENST00000430650 | 400952    | N/A          | LINC01121    |
| A_22_P00001736 | 1,3836  | 1,44503 | -1,043499566 | N/A             | N/A       | N/A          | Inc-ATL1-1   |
| A_33_P3312212  | 8,27182 | 8,33325 | -1,043499566 | ENST00000506652 | 5562      | NM_206907    | PRKAA1       |
| A_22_P00000483 | 5,97189 | 6,03334 | -1,043514032 | ENST00000598053 | 100132815 | NR_103742    | IPO5P1       |
| A_21_P0013143  | 8,3468  | 8,40829 | -1,043542964 | ENST00000436672 | N/A       | N/A          | N/A          |
| A_23_P30283    | 9,62034 | 9,68184 | -1,043550198 | ENST00000312637 | 345757    | XM_006714600 | FAM174A      |
| A_21_P0000899  | 5,62841 | 5,68996 | -1,043586365 | N/A             | 100506990 | NR_040091    | LOC100506990 |
| A_33_P3326922  | 2,94537 | 3,00695 | -1,043608066 | N/A             | N/A       | AK129975     | N/A          |
| A_21_P0014042  | 3,26745 | 3,32903 | -1,043608066 | ENST00000381596 | 10326     | NM_001135844 | SIRPB1       |
| A_32_P95223    | 11,7862 | 11,8478 | -1,043622534 | ENST00000453932 | 619190    | NR_003262    | FDPSP2       |
| A_22_P00008848 | 2,99489 | 3,05655 | -1,043665938 | N/A             | N/A       | BF979447     | Inc-KLF7-1   |
| A_23_P54006    | 13,0792 | 13,1409 | -1,043694875 | ENST00000399332 | 25831     | NM_015382    | HECTD1       |
| A_22_P00008073 | 3,38403 | 3,44575 | -1,043709343 | N/A             | N/A       | N/A          | Inc-IKBKE-1  |
| A_22_P00020102 | 1,37103 | 1,43284 | -1,043774455 | ENST00000425322 | N/A       | N/A          | N/A          |
| A_33_P3400224  | 5,07922 | 5,14105 | -1,043788925 | ENST00000466569 | 22873     | NM_014934    | DZIP1        |
| A_33_P3225600  | 1,85433 | 1,91617 | -1,04379616  | ENST00000464747 | 4780      | NM_006164    | NFE2L2       |
| A_21_P0003380  | 2,92653 | 2,9884  | -1,043817866 | ENST00000506460 | N/A       | N/A          | N/A          |
| A_21_P0007763  | 12,3657 | 12,4276 | -1,043839571 | ENST00000590479 | 51275     | NR_015404    | MAPKAPK5-AS1 |
| A_23_P71241    | 12,8475 | 12,9094 | -1,043839571 | ENST00000450622 | 23480     | NM_014302    | SEC61G       |
| A_22_P00001692 | 4,48082 | 4,54278 | -1,043882984 | N/A             | N/A       | N/A          | Inc-ATAD1-2  |
| A_21_P0014618  | 5,13276 | 5,19475 | -1,043904692 | N/A             | 101928521 | XR_246615    | LOC101928521 |
| A_23_P115824   | 11,7021 | 11,7641 | -1,043911927 | ENST00000265866 | 3189      | NM_012207    | HNRNPH3      |

|                |         |         |              |                 |           |              |                |
|----------------|---------|---------|--------------|-----------------|-----------|--------------|----------------|
| A_24_P75230    | 15,1823 | 15,2443 | -1,043911927 | ENST00000503948 | 103910    | NM_033546    | MYL12B         |
| A_23_P88033    | 1,36768 | 1,42976 | -1,043969816 | ENST00000376143 | 2259      | NM_175929    | FGF14          |
| A_23_P74097    | 9,6748  | 9,73689 | -1,043977052 | ENST00000613537 | 6924      | NM_003198    | TCEB3          |
| A_22_P00016458 | 1,39472 | 1,45682 | -1,043984288 | N/A             | 157376    | NR_103547    | FER1L6-AS2     |
| A_22_P00001495 | 1,35478 | 1,41693 | -1,044020471 | N/A             | N/A       | N/A          | Inc-ARFIP1-2   |
| A_21_P0014919  | 3,83266 | 3,89482 | -1,044027707 | N/A             | 100130148 | NR_024560    | MAPT-IT1       |
| A_33_P3275226  | 1,3919  | 1,45409 | -1,044049418 | ENST00000414750 | 101927156 | N/A          | LOC101927156   |
| A_23_P96777    | 11,7699 | 11,8321 | -1,044056654 | ENST00000378251 | 57470     | NM_020710    | LRRC47         |
| A_23_P162982   | 10,3391 | 10,4013 | -1,044056654 | ENST00000313250 | 10901     | NM_021004    | DHRS4          |
| A_33_P3272539  | 10,5267 | 10,5889 | -1,044056654 | ENST00000377725 | 57449     | NM_001265594 | PLEKHG5        |
| A_21_P0003765  | 1,37614 | 1,43837 | -1,044078365 | N/A             | N/A       | N/A          | Inc-ANXA5-1    |
| A_22_P00006296 | 5,93846 | 6,00074 | -1,044114551 | N/A             | N/A       | CU688373     | Inc-FAM83H-1   |
| A_21_P0012555  | 6,29877 | 6,36109 | -1,0441435   | ENST00000496403 | N/A       | N/A          | N/A            |
| A_33_P3531204  | 4,29537 | 4,35772 | -1,044165213 | N/A             | 542767    | NM_001135816 | C1QTNF9B-AS1   |
| A_21_P0007412  | 3,99279 | 4,05518 | -1,044194164 | N/A             | N/A       | N/A          | Inc-BLID-1     |
| A_23_P102122   | 15,8234 | 15,8858 | -1,044201401 | ENST00000470146 | 10109     | NM_152862    | ARPC2          |
| A_33_P3282740  | 5,66667 | 5,72912 | -1,044237591 | ENST00000435115 | 57234     | NR_111950    | LINC00869      |
| A_23_P258018   | 8,32337 | 8,38584 | -1,044252068 | ENST00000513662 | 4636      | NM_002477    | MYL5           |
| A_23_P3514     | 11,8832 | 11,9457 | -1,044273782 | ENST00000564150 | 29105     | NM_013242    | CFAP20         |
| A_24_P114438   | 6,04872 | 6,11123 | -1,044281021 | ENST00000284719 | 29789     | NM_013341    | OLA1           |
| A_21_P0002504  | 1,39183 | 1,45438 | -1,044309975 | N/A             | N/A       | N/A          | Inc-POTEF-3    |
| A_21_P0011715  | 7,71844 | 7,78101 | -1,044324452 | ENST00000619327 | 100507290 | N/A          | ZNF865         |
| A_21_P0011307  | 3,14542 | 3,208   | -1,044331691 | ENST00000567075 | N/A       | N/A          | N/A            |
| A_21_P0000737  | 1,52626 | 1,58884 | -1,044331691 | N/A             | 100507433 | NR_038247    | ZNF571-AS1     |
| A_21_P0002437  | 1,7256  | 1,78823 | -1,044367885 | N/A             | N/A       | N/A          | Inc-PIGF-3     |
| A_23_P64689    | 9,33969 | 9,40245 | -1,044461997 | ENST00000548043 | 9924      | NM_014871    | PAN2           |
| A_21_P0009085  | 1,64315 | 1,70594 | -1,044483716 | ENST00000595886 | 400550    | NR_033925    | FENDRR         |
| A_33_P3265606  | 12,6887 | 12,7515 | -1,044490956 | ENST00000619076 | 2730      | NM_002061    | GCLM           |
| A_24_P54178    | 12,0194 | 12,0822 | -1,044490956 | ENST00000370290 | 50999     | NM_016040    | TMED5          |
| A_21_P0001487  | 1,38904 | 1,45185 | -1,044498196 | N/A             | N/A       | N/A          | Inc-MATN1-1    |
| A_21_P0006359  | 1,36025 | 1,42307 | -1,044505435 | N/A             | N/A       | N/A          | Inc-C9orf102-3 |
| A_22_P00004109 | 3,91819 | 3,98108 | -1,044556116 | N/A             | N/A       | N/A          | Inc-CLCN3-1    |
| A_22_P00007240 | 9,40332 | 9,46622 | -1,044563357 | N/A             | N/A       | N/A          | Inc-GPR12-1    |

|                |         |         |              |                 |           |              |                |
|----------------|---------|---------|--------------|-----------------|-----------|--------------|----------------|
| A_22_P00023598 | 1,35286 | 1,4158  | -1,044592319 | N/A             | N/A       | AK128174     | Inc-HSPA4-2    |
| A_23_P67646    | 1,39543 | 1,45838 | -1,044599559 | ENST00000586334 | 26330     | NM_014364    | GAPDHS         |
| A_22_P00013504 | 1,39457 | 1,45754 | -1,044614041 | ENST00000355869 | 100507065 | N/A          | LOC100507065   |
| A_21_P0011796  | 12,239  | 12,302  | -1,044635763 | ENST00000342073 | N/A       | N/A          | N/A            |
| A_22_P00011639 | 10,7779 | 10,8409 | -1,044635763 | N/A             | 101927206 | XR_241444    | LOC101927206   |
| A_23_P25638    | 10,3794 | 10,4424 | -1,044635763 | ENST00000282003 | 79596     | NM_024546    | RNF219         |
| A_23_P155989   | 7,90935 | 7,97236 | -1,044643004 | ENST00000242872 | 64105     | NM_022145    | CENPK          |
| A_21_P0014878  | 3,79669 | 3,85971 | -1,044650245 | N/A             | N/A       | AI432163     | N/A            |
| A_22_P00023324 | 5,76108 | 5,82411 | -1,044657486 | N/A             | N/A       | AK093543     | Inc-RNF149-2   |
| A_33_P3285092  | 4,88566 | 4,94872 | -1,044679209 | N/A             | 100129763 | AK126123     | LOC100129763   |
| A_22_P00025587 | 5,06985 | 5,13292 | -1,04468645  | ENST00000445172 | N/A       | XR_108641    | N/A            |
| A_22_P00016050 | 1,36994 | 1,43303 | -1,044700933 | ENST00000424257 | N/A       | N/A          | N/A            |
| A_33_P3218797  | 11,9618 | 12,0249 | -1,044708174 | ENST00000370177 | 79144     | N/A          | PPDPF          |
| A_24_P405054   | 9,51442 | 9,57752 | -1,044708174 | ENST00000486763 | 26099     | NM_001114600 | SZRD1          |
| A_21_P0007613  | 1,54557 | 1,6087  | -1,044729898 | N/A             | N/A       | N/A          | Inc-C12orf48-3 |
| A_19_P00802238 | 1,95256 | 2,01576 | -1,04478059  | N/A             | N/A       | N/A          | Inc-FBXW4-1    |
| A_22_P00011012 | 1,37347 | 1,43669 | -1,044795074 | N/A             | N/A       | N/A          | Inc-NSUN6-1    |
| A_21_P0014136  | 2,51497 | 2,57819 | -1,044795074 | N/A             | N/A       | BX369009     | N/A            |
| A_21_P0010088  | 9,96616 | 10,0294 | -1,044809558 | ENST00000595203 | 101927326 | XR_244183    | LOC101927326   |
| A_22_P00008925 | 3,67471 | 3,73797 | -1,044824042 | N/A             | N/A       | DB056977     | Inc-KRAS-1     |
| A_22_P00008919 | 3,44592 | 3,5092  | -1,044838527 | ENST00000444330 | N/A       | N/A          | N/A            |
| A_24_P316305   | 9,61601 | 9,67931 | -1,044853011 | ENST00000156471 | 9716      | AK001173     | AQR            |
| A_23_P379327   | 10,2156 | 10,2789 | -1,044853011 | ENST00000450403 | 54629     | NM_001040450 | FAM63B         |
| A_21_P0002728  | 1,37116 | 1,43449 | -1,044874739 | N/A             | N/A       | N/A          | Inc-KCNH8-1    |
| A_22_P00012549 | 1,39158 | 1,45495 | -1,044903709 | N/A             | N/A       | DA878172     | Inc-PTGDR2-2   |
| A_23_P31161    | 1,59539 | 1,65876 | -1,044903709 | ENST00000480781 | 1358      | NM_001869    | CPA2           |
| A_33_P3369178  | 1,37266 | 1,43605 | -1,044918195 | ENST00000445192 | 10216     | NM_005807    | PRG4           |
| A_23_P12062    | 10,6454 | 10,7088 | -1,044925438 | ENST00000316891 | 54802     | NM_017646    | TRIT1          |
| A_33_P3214456  | 8,65569 | 8,7191  | -1,04493268  | ENST00000369031 | 57107     | NM_020381    | PDSS2          |
| A_24_P932736   | 7,30948 | 7,37292 | -1,044954409 | ENST00000397358 | 79618     | XM_005273639 | HMBOX1         |
| A_33_P3360097  | 15,4494 | 15,5129 | -1,044997869 | ENST00000567391 | 353       | NM_000485    | APRT           |
| A_22_P00014312 | 2,41281 | 2,47633 | -1,045012356 | ENST00000456505 | 221241    | NR_027245    | LINC00305      |
| A_21_P0012218  | 1,3891  | 1,45262 | -1,045012356 | N/A             | N/A       | N/A          | XLOC_I2_009136 |

|                |         |         |              |                 |           |                   |                |
|----------------|---------|---------|--------------|-----------------|-----------|-------------------|----------------|
| A_21_P0007676  | 3,37601 | 3,43954 | -1,045019599 | N/A             | N/A       | N/A               | Inc-SLC6A12-5  |
| A_21_P0013289  | 4,18536 | 4,24899 | -1,045092037 | N/A             | 646588    | XR_426148         | LOC646588      |
| A_24_P80338    | 9,00483 | 9,06847 | -1,045099281 | ENST00000233027 | 6787      | NM_003157         | NEK4           |
| A_22_P00019409 | 1,39397 | 1,45762 | -1,045106525 | ENST00000457518 | N/A       | N/A               | N/A            |
| A_32_P305020   | 1,72053 | 1,78418 | -1,045106525 | ENST00000391854 | 2786      | NM_001098722      | GNG4           |
| A_33_P3375398  | 9,85556 | 9,91924 | -1,045128258 | ENST00000568546 | 10607     | NM_006453         | TBL3           |
| A_33_P3760125  | 12,0173 | 12,081  | -1,045142746 | ENST00000458667 | 102725353 | AK026667          | LOC102725353   |
| A_21_P0000096  | 1,35339 | 1,41709 | -1,045142746 | N/A             | 56265     | NM_019609         | CPXM1          |
| A_33_P3272264  | 1,69697 | 1,76067 | -1,045142746 | ENST00000376345 | 79018     | N/A               | GID4           |
| A_23_P5945     | 11,3966 | 11,4603 | -1,045142746 | ENST00000484417 | 60625     | NM_021931         | DHX35          |
| A_19_P00315705 | 4,79768 | 4,86138 | -1,045142746 | ENST00000430266 | 101927354 | NR_108073         | LOC101927354   |
| A_33_P3399492  | 12,0953 | 12,159  | -1,045142746 | ENST00000436493 | 6389      | NM_004168         | SDHA           |
| A_21_P0008602  | 1,71636 | 1,78009 | -1,04516448  | ENST00000557523 | 503519    | N/A               | LINC00929      |
| A_33_P3262083  | 2,16054 | 2,22429 | -1,045178969 | N/A             | 100126784 | NR_015384         | LOC100126784   |
| A_23_P79441    | 8,10718 | 8,17094 | -1,045186213 | ENST00000420306 | 54980     | NM_017880         | C2orf42        |
| A_33_P6472133  | 8,96641 | 9,03017 | -1,045186213 | ENST00000463420 | 201651    | NR_026915         | AADACP1        |
| A_22_P00020109 | 4,56793 | 4,63171 | -1,045200703 | N/A             | N/A       | BX484563          | Inc-MPHOSPH8-3 |
| A_22_P00014131 | 1,68156 | 1,74536 | -1,045215193 | N/A             | N/A       | N/A               | Inc-SCGB1D4-1  |
| A_33_P3277514  | 2,2226  | 2,28646 | -1,045258663 | ENST00000308731 | 695       | NM_001287344      | BTK            |
| A_22_P00018230 | 1,41527 | 1,47915 | -1,045273153 | N/A             | N/A       | N/A               | Inc-ZNF680-2   |
| A_33_P6753179  | 1,37166 | 1,43558 | -1,045302135 | ENST00000421951 | 645784    | DQ786297          | ANKRD36BP2     |
| A_21_P0009538  | 1,35401 | 1,41795 | -1,045316626 | N/A             | N/A       | N/A               | Inc-DSC3-2     |
| A_23_P18993    | 4,50231 | 4,56627 | -1,045331117 | ENST00000452157 | 166968    | NM_152622         | MIER3          |
| A_33_P3255701  | 3,77657 | 3,84054 | -1,045338363 | ENST00000358748 | 401554    | XR_108962         | FLJ46836       |
| A_33_P3246883  | 12,8399 | 12,9039 | -1,0453601   | ENST00000408915 | 93099     | NM_033317         | DMKN           |
| A_24_P95822    | 10,5939 | 10,6579 | -1,0453601   | ENST00000564551 | 27020     | NM_012428         | NPTN           |
| A_33_P3341891  | 4,25233 | 4,31634 | -1,045367346 | ENST00000414848 | 646268    | NR_033946         | LOC646268      |
| A_21_P0011984  | 1,35493 | 1,41896 | -1,045381838 | ENST00000601136 | 101927687 | TCONS_I2_00015065 | LOC101927687   |
| A_23_P415395   | 1,39359 | 1,45764 | -1,04539633  | ENST00000595891 | 85509     | NM_145208         | MBD3L1         |
| A_33_P3321293  | 10,741  | 10,8051 | -1,045432562 | ENST00000361170 | 128239    | NM_178229         | IQGAP3         |
| A_24_P91310    | 11,8989 | 11,963  | -1,045432562 | ENST00000601194 | 5704      | NM_006503         | PSMC4          |
| A_21_P0011063  | 1,40849 | 1,47263 | -1,045461548 | N/A             | N/A       | N/A               | XLOC_I2_003133 |
| A_33_P3238651  | 1,36194 | 1,42611 | -1,045483287 | ENST00000404489 | 645840    | NM_001039783      | TXNRD3NB       |



|                |         |         |              |                 |           |              |                    |
|----------------|---------|---------|--------------|-----------------|-----------|--------------|--------------------|
| A_33_P3409886  | 8,10603 | 8,17021 | -1,045490534 | ENST00000316509 | 6844      | NM_014232    | VAMP2              |
| A_23_P155288   | 11,3909 | 11,4551 | -1,045505028 | ENST00000478254 | 85476     | NM_024996    | GFM1               |
| A_21_P0010982  | 11,8949 | 11,9591 | -1,045505028 | ENST00000534336 | 378938    | NR_002819    | MALAT1             |
| A_22_P00006018 | 10,0393 | 10,1035 | -1,045505028 | ENST00000565797 | N/A       | BC067908     | N/A                |
| A_33_P3320548  | 10,8071 | 10,8713 | -1,045505028 | ENST00000489145 | 11097     | NM_007342    | NUPL2              |
| A_33_P3277238  | 1,53275 | 1,59698 | -1,045526769 | ENST00000603173 | 10367     | XM_005269387 | MICU1              |
| A_22_P00010413 | 2,48662 | 2,55088 | -1,04554851  | N/A             | N/A       | N/A          | Inc-MYOC-1         |
| A_33_P3242659  | 5,61569 | 5,68005 | -1,045620985 | ENST00000378826 | 63971     | NM_022113    | KIF13A             |
| A_21_P0014889  | 2,76622 | 2,8306  | -1,04563548  | ENST00000533434 | 100507431 | NR_125383    | LOC100507431       |
| A_22_P00022711 | 1,38612 | 1,45051 | -1,045642728 | ENST00000446557 | N/A       | N/A          | N/A                |
| A_33_P3422559  | 1,39131 | 1,4557  | -1,045642728 | N/A             | 100132071 | AK128253     | LOC100132071       |
| A_21_P0011053  | 2,12246 | 2,18694 | -1,045707961 | N/A             | N/A       | N/A          | XLOC_I2_003066     |
| A_22_P00013430 | 13,6484 | 13,7129 | -1,045722457 | ENST00000256015 | 694       | NM_001731    | BTG1               |
| A_33_P3256095  | 11,7369 | 11,8014 | -1,045722457 | N/A             | N/A       | N/A          | XLOC_I2_001324     |
| A_24_P183864   | 11,2153 | 11,2798 | -1,045722457 | ENST00000256108 | 3612      | NM_005536    | IMPA1              |
| A_19_P00321461 | 7,24497 | 7,30948 | -1,045729706 | ENST00000512915 | N/A       | N/A          | N/A                |
| A_21_P0003247  | 1,772   | 1,83653 | -1,045744203 | N/A             | N/A       | N/A          | Inc-CCDC54-2       |
| A_22_P00004369 | 1,35217 | 1,41675 | -1,045780446 | N/A             | N/A       | N/A          | Inc-COL4A3BP-1     |
| A_33_P3326898  | 4,38289 | 4,44756 | -1,045845687 | N/A             | N/A       | N/A          | N/A                |
| A_23_P97932    | 12,6823 | 12,747  | -1,045867435 | ENST00000468633 | 22921     | NM_012228    | MSRB2              |
| A_24_P154037   | 10,2037 | 10,2684 | -1,045867435 | ENST00000375856 | 8660      | NM_003749    | IRS2               |
| A_23_P48610    | 11,1979 | 11,2626 | -1,045867435 | ENST00000557041 | 90809     | NM_144568    | TMEM55B            |
| A_21_P0012702  | 1,36907 | 1,43377 | -1,045867435 | N/A             | N/A       | N/A          | XLOC_I2_011413     |
| A_22_P00016033 | 2,76278 | 2,82749 | -1,045874685 | ENST00000450746 | 101928015 | XR_245199    | LOC101928015       |
| A_21_P0004247  | 3,9995  | 4,06421 | -1,045874685 | N/A             | N/A       | N/A          | Inc-AC114947.1.1-2 |
| A_23_P143981   | 1,5698  | 1,63452 | -1,045881934 | ENST00000492059 | 2199      | NM_001004019 | FBLN2              |
| A_22_P00009971 | 1,39008 | 1,45483 | -1,045903683 | N/A             | N/A       | N/A          | Inc-MKI67IP-6      |
| A_23_P42322    | 4,57606 | 4,64082 | -1,045910932 | ENST00000433947 | 1302      | NM_080680    | COL11A2            |
| A_24_P255384   | 5,67982 | 5,74461 | -1,045932682 | ENST00000394891 | N/A       | N/A          | N/A                |
| A_33_P3339820  | 15,72   | 15,7848 | -1,045939932 | ENST00000371059 | 3953      | NM_001003680 | LEPR               |
| A_23_P74799    | 12,2096 | 12,2744 | -1,045939932 | ENST00000370041 | 29957     | NM_213651    | SLC25A24           |
| A_33_P3407013  | 1,39168 | 1,45649 | -1,045947182 | ENST00000406575 | 3569      | XM_005249745 | IL6                |
| A_33_P3393543  | 1,38918 | 1,45399 | -1,045947182 | N/A             | 400692    | AL831916     | LOC400692          |

|                |         |         |              |                 |           |              |                       |
|----------------|---------|---------|--------------|-----------------|-----------|--------------|-----------------------|
| A_33_P3383044  | 1,38069 | 1,44551 | -1,045954432 | ENST00000476298 | 27077     | N/A          | B9D1                  |
| A_22_P00014901 | 5,57113 | 5,63596 | -1,045961682 | N/A             | 100506023 | N/A          | LOC100506023          |
| A_23_P17330    | 9,52956 | 9,59443 | -1,045990682 | ENST00000369908 | 54963     | NM_017859    | UCKL1                 |
| A_22_P00008559 | 4,91512 | 4,98    | -1,045997933 | ENST00000506392 | 101927059 | XR_246560    | LOC101927059          |
| A_32_P69465    | 9,55106 | 9,61601 | -1,046048686 | ENST00000410014 | 729967    | NM_001145450 | MORN2                 |
| A_33_P3445679  | 6,6008  | 6,66576 | -1,046055937 | ENST00000617777 | 400123    | NR_033877    | LINC00548             |
| A_22_P00020040 | 5,7781  | 5,84307 | -1,046063187 | N/A             | N/A       | HY037890     | Inc-SPAG1-4           |
| A_33_P3295415  | 4,82147 | 4,88644 | -1,046063187 | ENST00000394807 | 79842     | NM_024784    | ZBTB3                 |
| A_33_P3294459  | 7,51055 | 7,57554 | -1,046077689 | N/A             | 53844     | AK123640     | COPG2IT1              |
| A_23_P117274   | 9,12332 | 9,18832 | -1,04608494  | ENST00000382172 | 4285      | NM_005932    | MIPEP                 |
| A_21_P0007617  | 1,3909  | 1,45592 | -1,046099442 | N/A             | N/A       | N/A          | Inc-RP11-552114.1.1-1 |
| A_33_P3266839  | 1,71525 | 1,7803  | -1,046121195 | ENST00000480336 | 728116    | NM_001145720 | ZBTB8B                |
| A_32_P488818   | 1,39074 | 1,45583 | -1,0461502   | ENST00000510035 | 285525    | NM_182592    | YIPF7                 |
| A_33_P3231005  | 16,0099 | 16,0751 | -1,046229968 | N/A             | N/A       | N/A          | N/A                   |
| A_33_P3297285  | 3,52433 | 3,58961 | -1,046287985 | N/A             | N/A       | AK124758     | N/A                   |
| A_23_P121396   | 8,6969  | 8,76218 | -1,046287985 | ENST00000469657 | 131118    | NM_145261    | DNAJC19               |
| A_23_P209904   | 15,0891 | 15,1544 | -1,04630249  | ENST00000264039 | 2817      | NM_002081    | GPC1                  |
| A_33_P3376478  | 6,12531 | 6,19063 | -1,046316995 | ENST00000369887 | 1586      | NM_000102    | CYP17A1               |
| A_22_P00005894 | 4,44267 | 4,50802 | -1,046338752 | ENST00000590328 | N/A       | N/A          | N/A                   |
| A_21_P0003710  | 4,90282 | 4,9682  | -1,046360511 | N/A             | N/A       | N/A          | Inc-FAM53A-1          |
| A_33_P3414912  | 6,53224 | 6,59762 | -1,046360511 | ENST00000488424 | 80896     | NM_001200056 | NPL                   |
| A_33_P3240482  | 1,35236 | 1,41775 | -1,046367763 | N/A             | 391518    | NR_002311    | VENTXP7               |
| A_22_P00007994 | 1,56562 | 1,63102 | -1,046375016 | N/A             | N/A       | BX108877     | Inc-IFIT2-1           |
| A_32_P3556     | 12,504  | 12,5694 | -1,046375016 | ENST00000568784 | 55737     | NM_018206    | VPS35                 |
| A_21_P0010777  | 1,50692 | 1,5724  | -1,046433041 | N/A             | 100289211 | N/A          | LINC00624             |
| A_33_P3336387  | 7,45998 | 7,52547 | -1,046440295 | ENST00000480071 | 196743    | NM_207128    | PAOX                  |
| A_32_P129527   | 10,5135 | 10,579  | -1,046447548 | ENST00000418781 | 55780     | NM_018341    | ERMARD                |
| A_22_P00004770 | 2,26189 | 2,32741 | -1,046462055 | N/A             | N/A       | AK097851     | Inc-CTU2-1            |
| A_21_P0008322  | 3,03771 | 3,10323 | -1,046462055 | ENST00000554829 | N/A       | N/A          | N/A                   |
| A_33_P3301970  | 8,57482 | 8,64035 | -1,046469309 | ENST00000392249 | 55437     | NM_018571    | STRADB                |
| A_21_P0011285  | 2,7105  | 2,77603 | -1,046469309 | N/A             | N/A       | N/A          | XLOC_I2_004553        |
| A_22_P00020897 | 5,16444 | 5,22998 | -1,046476562 | N/A             | N/A       | CR749680     | Inc-RPP38-2           |
| A_22_P00009977 | 1,35624 | 1,42181 | -1,046498323 | N/A             | N/A       | N/A          | Inc-MKKS-3            |

|                |         |         |              |                 |           |              |                |
|----------------|---------|---------|--------------|-----------------|-----------|--------------|----------------|
| A_22_P00021964 | 7,86177 | 7,92738 | -1,046527339 | ENST00000528781 | 101928813 | N/A          | LOC101928813   |
| A_22_P00003063 | 1,43069 | 1,49636 | -1,046570863 | N/A             | N/A       | N/A          | Inc-C8orf22-6  |
| A_21_P0005378  | 6,83099 | 6,89668 | -1,046585372 | N/A             | N/A       | N/A          | Inc-ABCA13-1   |
| A_24_P295999   | 12,1641 | 12,2298 | -1,046592627 | ENST00000011653 | 920       | NM_000616    | CD4            |
| A_23_P258570   | 11,4093 | 11,475  | -1,046592627 | ENST00000361815 | 5716      | NM_002814    | PSMD10         |
| A_23_P305140   | 10,072  | 10,1377 | -1,046592627 | ENST00000369883 | 119032    | NM_144591    | C10orf32       |
| A_33_P3262108  | 1,36286 | 1,4286  | -1,046621645 | N/A             | N/A       | N/A          | N/A            |
| A_33_P3341325  | 1,37564 | 1,44142 | -1,046650664 | ENST00000448737 | N/A       | N/A          | N/A            |
| A_22_P00017596 | 1,3631  | 1,42892 | -1,046679683 | ENST00000558866 | N/A       | BF214562     | N/A            |
| A_22_P00005305 | 5,57687 | 5,64275 | -1,046723214 | N/A             | 100874130 | NR_120399    | ENOX1-AS2      |
| A_21_P0009332  | 3,7598  | 3,82568 | -1,046723214 | N/A             | N/A       | N/A          | Inc-COL1A1-4   |
| A_21_P0010678  | 2,1896  | 2,25549 | -1,04673047  | ENST00000435973 | 101927504 | XR_247091    | LOC101927504   |
| A_22_P00004265 | 7,94504 | 8,01094 | -1,046737725 | N/A             | N/A       | N/A          | Inc-CMTM5-1    |
| A_22_P00000593 | 1,76163 | 1,82754 | -1,046744981 | N/A             | N/A       | AI927428     | Inc-ACAD10-1   |
| A_33_P3293381  | 1,38294 | 1,44885 | -1,046744981 | ENST00000428466 | 83937     | N/A          | RASSF4         |
| A_23_P143694   | 2,18462 | 2,25053 | -1,046744981 | ENST00000396884 | 6663      | NM_006941    | SOX10          |
| A_33_P3236077  | 1,38967 | 1,4556  | -1,046759492 | ENST00000511148 | 645104    | NM_001079827 | CLRN2          |
| A_23_P254472   | 11,1124 | 11,1784 | -1,046810282 | ENST00000545879 | 79624     | NM_024573    | C6orf211       |
| A_22_P00023527 | 8,05773 | 8,12374 | -1,046817538 | ENST00000591886 | N/A       | N/A          | N/A            |
| A_23_P155332   | 13,052  | 13,1181 | -1,046882844 | ENST00000460231 | 57092     | NM_020357    | PCNP           |
| A_22_P00013194 | 4,96513 | 5,03126 | -1,046904613 | ENST00000523870 | N/A       | BG190865     | N/A            |
| A_33_P3214914  | 1,51702 | 1,58316 | -1,04691187  | ENST00000561890 | 100507679 | NM_001198815 | MUC22          |
| A_21_P0003615  | 1,36111 | 1,42727 | -1,046926383 | N/A             | N/A       | N/A          | Inc-LPHN3-2    |
| A_22_P00005487 | 1,36182 | 1,42799 | -1,04693364  | ENST00000400306 | 100507175 | NR_103861    | LOC100507175   |
| A_22_P00002044 | 8,20137 | 8,26756 | -1,046948154 | ENST00000618166 | 9522      | NM_004866    | SCAMP1         |
| A_23_P28733    | 7,87924 | 7,94544 | -1,046955411 | ENST00000373664 | 5933      | NM_002895    | RBL1           |
| A_21_P0009349  | 1,36685 | 1,43308 | -1,046977182 | N/A             | N/A       | N/A          | Inc-C17orf58-5 |
| A_21_P0004263  | 1,37797 | 1,4442  | -1,046977182 | N/A             | N/A       | N/A          | Inc-MCCC2-2    |
| A_23_P110879   | 9,11309 | 9,17934 | -1,046991696 | ENST00000532708 | 10758     | NM_147686    | TRAF3IP2       |
| A_22_P00003786 | 6,69714 | 6,76341 | -1,047006211 | ENST00000605952 | 285973    | NM_173681    | ATG9B          |
| A_24_P246467   | 8,12269 | 8,18899 | -1,047027983 | ENST00000417080 | 1386      | NM_001880    | ATF2           |
| A_21_P0001713  | 1,69601 | 1,76232 | -1,04703524  | N/A             | N/A       | N/A          | Inc-LYPLAL1-1  |
| A_23_P304509   | 1,36561 | 1,43194 | -1,047049755 | ENST00000298454 | 196740    | NM_144984    | VSTM4          |

|                |         |         |              |                 |           |              |                |
|----------------|---------|---------|--------------|-----------------|-----------|--------------|----------------|
| A_21_P0013472  | 4,81413 | 4,88047 | -1,047057013 | N/A             | N/A       | N/A          | XLOC_I2_014182 |
| A_21_P0006304  | 2,67938 | 2,74584 | -1,047144108 | N/A             | N/A       | N/A          | Inc-ERP44-3    |
| A_33_P3290945  | 8,03298 | 8,09945 | -1,047151367 | ENST00000465560 | 55037     | NM_017952    | PTCD3          |
| A_21_P0011276  | 6,58929 | 6,65578 | -1,047165883 | ENST00000619210 | 503639    | AB451460     | DUXAP10        |
| A_33_P3267745  | 5,12358 | 5,19017 | -1,04723847  | ENST00000561457 | 90120     | NM_001256526 | C9orf69        |
| A_33_P3230688  | 13,2583 | 13,3249 | -1,047245729 | ENST00000472018 | 8558      | NM_052988    | CDK10          |
| A_33_P3232965  | 2,24748 | 2,31409 | -1,047252988 | ENST00000316081 | 221400    | NM_001010870 | TDRD6          |
| A_22_P00017824 | 1,57132 | 1,63795 | -1,047267506 | N/A             | N/A       | DB307814     | Inc-ZC3H12B-4  |
| A_32_P52911    | 9,05036 | 9,117   | -1,047274765 | ENST00000327435 | 55256     | NM_018269    | ADI1           |
| A_21_P0009480  | 1,64266 | 1,70933 | -1,047296543 | N/A             | N/A       | N/A          | Inc-DCC-1      |
| A_23_P391725   | 11,2718 | 11,3385 | -1,047318321 | ENST00000481583 | 1810      | NM_001938    | DR1            |
| A_22_P00008943 | 13,3026 | 13,3693 | -1,047318321 | ENST00000327741 | 3887      | NM_002281    | KRT81          |
| A_24_P229151   | 1,70165 | 1,76841 | -1,047361878 | ENST00000390458 | N/A       | D13076       | N/A            |
| A_23_P35230    | 10,17   | 10,2368 | -1,047390918 | ENST00000480003 | 4179      | NM_172350    | CD46           |
| A_33_P3502305  | 1,96481 | 2,03163 | -1,047405438 | N/A             | 100132101 | AF071178     | HERC2P7        |
| A_23_P360179   | 9,66552 | 9,73237 | -1,047427218 | ENST00000573186 | 84461     | NM_032442    | NEURL4         |
| A_32_P123143   | 1,5291  | 1,59596 | -1,047434478 | ENST00000303230 | 348980    | NM_021072    | HCN1           |
| A_32_P381593   | 1,59206 | 1,65893 | -1,047441739 | ENST00000309536 | 115111    | NM_134266    | SLC26A7        |
| A_23_P426989   | 10,4129 | 10,4798 | -1,04746352  | ENST00000475978 | 80851     | NM_030645    | SH3BP5L        |
| A_24_P208045   | 10,3575 | 10,4244 | -1,04746352  | ENST00000439962 | 80267     | NM_025191    | EDEM3          |
| A_22_P00010086 | 6,28181 | 6,34876 | -1,047499823 | N/A             | 100874197 | NR_046563    | EFCAB6-AS1     |
| A_24_P418619   | 15,9768 | 16,0438 | -1,047536127 | ENST00000460492 | 6204      | NM_001014    | RPS10          |
| A_33_P3260455  | 8,41349 | 8,48049 | -1,047536127 | N/A             | N/A       | N/A          | N/A            |
| A_33_P3365267  | 3,79556 | 3,86261 | -1,047572433 | N/A             | N/A       | N/A          | N/A            |
| A_24_P268786   | 9,69242 | 9,75965 | -1,047703143 | ENST00000602751 | 55892     | NM_018657    | MYNN           |
| A_21_P0010817  | 3,29857 | 3,36581 | -1,047710405 | N/A             | N/A       | N/A          | XLOC_I2_001549 |
| A_21_P0012943  | 4,77731 | 4,84458 | -1,047732192 | N/A             | N/A       | N/A          | XLOC_I2_011620 |
| A_23_P63929    | 11,0875 | 11,1548 | -1,047753979 | ENST00000605543 | 55717     | NM_018117    | WDR11          |
| A_21_P0013506  | 3,75593 | 3,82326 | -1,047775766 | N/A             | N/A       | N/A          | XLOC_I2_014423 |
| A_33_P3381851  | 8,85634 | 8,92369 | -1,047790292 | ENST00000380095 | 353333    | NM_181688    | KRTAP10-10     |
| A_33_P3332066  | 9,18899 | 9,25637 | -1,04781208  | ENST00000468738 | 399818    | NM_212554    | METTL10        |
| A_22_P00020715 | 1,36244 | 1,42988 | -1,047855658 | ENST00000555490 | N/A       | N/A          | N/A            |
| A_23_P2492     | 11,1062 | 11,1737 | -1,047899238 | ENST00000360817 | 716       | NM_001734    | C1S            |

|                |         |         |              |                 |           |              |                |
|----------------|---------|---------|--------------|-----------------|-----------|--------------|----------------|
| A_33_P3239267  | 13,8281 | 13,8956 | -1,047899238 | ENST00000333323 | 389119    | NM_203370    | FAM212A        |
| A_33_P3224324  | 1,35071 | 1,41824 | -1,047921029 | ENST00000393282 | 50507     | NM_001143836 | NOX4           |
| A_24_P32085    | 9,15421 | 9,22175 | -1,047928293 | ENST00000262244 | 79817     | NM_024761    | MOB3B          |
| A_23_P255869   | 11,0199 | 11,0875 | -1,047971876 | ENST00000223864 | 55848     | NM_018465    | PLGRKT         |
| A_24_P179044   | 6,09764 | 6,16526 | -1,047986404 | ENST00000392185 | 51429     | NM_016224    | SNX9           |
| A_21_P0014624  | 2,15164 | 2,21926 | -1,047986404 | N/A             | 102725057 | XR_424658    | LOC102725057   |
| A_22_P00025282 | 6,29207 | 6,35969 | -1,047986404 | N/A             | N/A       | XM_003118552 | Inc-COL9A1-1   |
| A_23_P38696    | 1,37512 | 1,44276 | -1,048000932 | ENST00000257197 | 1823      | NM_004948    | DSC1           |
| A_22_P00003274 | 1,68603 | 1,75371 | -1,048029989 | N/A             | 100506068 | NR_040041    | DACT3-AS1      |
| A_22_P00015006 | 1,38458 | 1,45227 | -1,048037254 | N/A             | N/A       | N/A          | Inc-SMOC1-2    |
| A_21_P0012960  | 4,33344 | 4,40119 | -1,048080841 | ENST00000515304 | 255187    | NR_122044    | LOC255187      |
| A_33_P3415526  | 15,2871 | 15,3549 | -1,048117166 | ENST00000594933 | N/A       | N/A          | N/A            |
| A_23_P6196     | 10,2719 | 10,3397 | -1,048117166 | ENST00000373991 | 51282     | NM_016558    | SCAND1         |
| A_21_P0007481  | 4,25125 | 4,31908 | -1,048138961 | ENST00000540684 | 387895    | NR_033878    | LINC00944      |
| A_33_P3229241  | 9,95472 | 10,0226 | -1,048175287 | ENST00000369167 | 440689    | BC110793     | HIST2H2BF      |
| A_22_P00021097 | 1,49    | 1,55788 | -1,048175287 | N/A             | 101928404 | NR_110699    | LOC101928404   |
| A_24_P270814   | 8,64455 | 8,71244 | -1,048182553 | ENST00000300574 | 1398      | NM_016823    | CRK            |
| A_24_P175989   | 11,7829 | 11,8508 | -1,048189818 | ENST00000548259 | 51699     | NM_016226    | VPS29          |
| A_33_P3348794  | 3,03207 | 3,09999 | -1,048204349 | ENST00000434336 | 729574    | NM_001282321 | FAM231A        |
| A_19_P00319800 | 5,72935 | 5,79727 | -1,048204349 | ENST00000435144 | 100287225 | NR_040074    | LOC100287225   |
| A_23_P113972   | 9,62422 | 9,69215 | -1,048211615 | ENST00000506936 | 55763     | NM_001024924 | EXOC1          |
| A_21_P0010584  | 2,01233 | 2,08029 | -1,048233412 | N/A             | N/A       | N/A          | XLOC_I2_000696 |
| A_22_P00006139 | 1,7807  | 1,84869 | -1,04825521  | N/A             | N/A       | AL040642     | Inc-FAM186B-1  |
| A_24_P409857   | 14,7428 | 14,8108 | -1,048262476 | ENST00000436324 | 3150      | NM_004965    | HMG1N1         |
| A_24_P125561   | 2,86116 | 2,92919 | -1,048284274 | ENST00000250360 | 27180     | NM_014441    | SIGLEC9        |
| A_33_P3396244  | 1,76767 | 1,83577 | -1,048335138 | ENST00000329476 | 4887      | NM_000910    | NPY2R          |
| A_24_P389959   | 13,3766 | 13,4447 | -1,048335138 | ENST00000550171 | 22818     | NM_016057    | COPZ1          |
| A_33_P3366221  | 1,37964 | 1,44777 | -1,048356938 | ENST00000477948 | 22854     | NM_014917    | NTNG1          |
| A_33_P3353916  | 3,9889  | 4,05704 | -1,048364204 | ENST00000430981 | 6419      | NM_001276325 | SETMAR         |
| A_32_P68746    | 10,9916 | 11,0598 | -1,048407806 | ENST00000379752 | 55234     | NM_018225    | SMU1           |
| A_22_P00016183 | 6,69061 | 6,75885 | -1,048436874 | N/A             | N/A       | N/A          | Inc-TLE3-6     |
| A_21_P0012514  | 1,35755 | 1,42586 | -1,048487746 | N/A             | N/A       | N/A          | Inc-SOX2-1     |
| A_33_P3520693  | 5,54634 | 5,6147  | -1,048524084 | N/A             | 646903    | NR_036538    | LOC646903      |

|                |         |         |              |                 |           |           |                |
|----------------|---------|---------|--------------|-----------------|-----------|-----------|----------------|
| A_21_P0003599  | 1,36423 | 1,43259 | -1,048524084 | ENST00000506010 | N/A       | N/A       | N/A            |
| A_21_P0000406  | 1,3519  | 1,42027 | -1,048531352 | N/A             | 767585    | NR_003201 | SNORD114-9     |
| A_23_P101392   | 7,41773 | 7,48612 | -1,048545888 | ENST00000187762 | 79041     | NM_024074 | TMEM38A        |
| A_21_P0014144  | 1,68572 | 1,75421 | -1,04861857  | N/A             | 100506858 | NR_104616 | LOC100506858   |
| A_23_P252653   | 11,4921 | 11,5606 | -1,048625839 | ENST00000465009 | 10494     | NM_006374 | STK25          |
| A_24_P137997   | 6,18389 | 6,25239 | -1,048625839 | ENST00000527740 | 80778     | NM_030580 | ZNF34          |
| A_22_P00008079 | 1,35282 | 1,42134 | -1,048640376 | N/A             | N/A       | N/A       | Inc-IKZF2-3    |
| A_33_P3337959  | 2,01588 | 2,08441 | -1,048647644 | ENST00000599640 | 101927468 | AK128227  | LOC101927468   |
| A_33_P3401782  | 6,65578 | 6,72435 | -1,048676719 | ENST00000594163 | 284325    | NM_198476 | C19orf54       |
| A_33_P3255046  | 10,7668 | 10,8354 | -1,048698526 | N/A             | N/A       | N/A       | N/A            |
| A_23_P254741   | 10,4517 | 10,5203 | -1,048698526 | ENST00000382120 | 6649      | NM_003102 | SOD3           |
| A_33_P3402943  | 2,67874 | 2,74742 | -1,04875668  | N/A             | 100128591 | AK128705  | LOC100128591   |
| A_22_P00000825 | 1,71911 | 1,78781 | -1,048771219 | ENST00000436433 | N/A       | N/A       | N/A            |
| A_23_P360209   | 15,7713 | 15,84   | -1,048771219 | ENST00000361227 | 4537      | HV963894  | ND3            |
| A_22_P00017115 | 1,37451 | 1,44323 | -1,048785758 | N/A             | 348808    | NR_002811 | NPHP3-AS1      |
| A_22_P00008233 | 1,36214 | 1,43087 | -1,048793028 | ENST00000617323 | 102723766 | N/A       | LOC102723766   |
| A_23_P424734   | 5,58001 | 5,64874 | -1,048793028 | ENST00000564324 | 283849    | NM_178516 | EXOC3L1        |
| A_23_P80832    | 8,60783 | 8,67659 | -1,048814837 | ENST00000421852 | 90407     | NM_080652 | TMEM41A        |
| A_23_P116890   | 7,36379 | 7,43256 | -1,048822107 | ENST00000617030 | 5544      | NM_006249 | PRB3           |
| A_21_P0000452  | 1,351   | 1,41981 | -1,048851187 | N/A             | 100033806 | NR_003347 | SNORD115-32    |
| A_23_P153037   | 5,88285 | 5,95167 | -1,048858457 | ENST00000579528 | 57547     | NM_020787 | ZNF624         |
| A_21_P0011137  | 2,67627 | 2,74515 | -1,048902079 | N/A             | N/A       | N/A       | XLOC_I2_003674 |
| A_23_P300728   | 9,58224 | 9,65112 | -1,048902079 | ENST00000454132 | 64327     | NM_022458 | LMBR1          |
| A_23_P388993   | 8,26109 | 8,32997 | -1,048902079 | ENST00000278590 | 85463     | NM_033390 | ZC3H12C        |
| A_33_P3249696  | 1,34939 | 1,41832 | -1,048938432 | N/A             | 284215    | NR_036489 | DLGAP1-AS5     |
| A_21_P0008311  | 1,3659  | 1,43487 | -1,048967515 | N/A             | N/A       | N/A       | Inc-C14orf23-2 |
| A_22_P00001748 | 1,42648 | 1,49547 | -1,048982057 | ENST00000429634 | N/A       | N/A       | N/A            |
| A_23_P360245   | 12,0188 | 12,0878 | -1,048989328 | ENST00000302764 | 134492    | NM_145266 | NUDCD2         |
| A_22_P00005558 | 5,77864 | 5,84771 | -1,049040226 | ENST00000435627 | N/A       | BC044750  | N/A            |
| A_22_P00012921 | 3,02013 | 3,08921 | -1,049047498 | N/A             | N/A       | N/A       | Inc-RBPMS-1    |
| A_21_P0002362  | 1,35989 | 1,42898 | -1,049054769 | N/A             | N/A       | N/A       | Inc-CCDC140-3  |
| A_24_P71439    | 9,01803 | 9,08712 | -1,049054769 | ENST00000403432 | 23369     | NM_015317 | PUM2           |
| A_21_P0004700  | 1,35409 | 1,42326 | -1,049112943 | ENST00000434562 | N/A       | N/A       | N/A            |

|                |         |         |              |                 |           |              |                |
|----------------|---------|---------|--------------|-----------------|-----------|--------------|----------------|
| A_33_P3302325  | 1,81924 | 1,88842 | -1,049120214 | N/A             | N/A       | CR737729     | N/A            |
| A_23_P145817   | 12,0548 | 12,124  | -1,049134758 | ENST00000476623 | 115416    | NM_138446    | MALSU1         |
| A_21_P0002147  | 1,39448 | 1,46368 | -1,049134758 | N/A             | N/A       | N/A          | Inc-PER2-1     |
| A_33_P3353906  | 7,0821  | 7,15133 | -1,049156575 | N/A             | N/A       | N/A          | N/A            |
| A_22_P00004022 | 1,54109 | 1,61034 | -1,049171119 | N/A             | 100506497 | NR_038965    | LOC100506497   |
| A_21_P0000387  | 4,69672 | 4,76599 | -1,049185664 | N/A             | 692206    | NR_003071    | SNORD90        |
| A_21_P0011401  | 7,6054  | 7,67476 | -1,049251118 | N/A             | 100996255 | N/A          | LOC100996255   |
| A_21_P0014635  | 2,63984 | 2,70921 | -1,049258391 | N/A             | N/A       | N/A          | N/A            |
| A_33_P3333554  | 4,95858 | 5,02797 | -1,049272936 | ENST00000613959 | 653857    | BX640643     | ACTR3C         |
| A_21_P0011746  | 1,6842  | 1,75361 | -1,049287483 | N/A             | N/A       | N/A          | XLOC_I2_007034 |
| A_32_P377008   | 2,66482 | 2,73428 | -1,049323849 | ENST00000422194 | 102725299 | N/A          | LOC102725299   |
| A_33_P3212804  | 1,69089 | 1,76036 | -1,049331122 | ENST00000467813 | 150297    | NM_001010859 | C22orf42       |
| A_22_P00014157 | 10,2148 | 10,2843 | -1,049352943 | ENST00000434139 | N/A       | XR_241053    | N/A            |
| A_24_P222684   | 11,2266 | 11,2961 | -1,049352943 | ENST00000367444 | 6738      | NM_001042369 | TROVE2         |
| A_23_P168211   | 11,6135 | 11,683  | -1,049352943 | ENST00000285279 | 81552     | NM_030796    | VOPP1          |
| A_22_P00021117 | 4,45297 | 4,52247 | -1,049352943 | N/A             | N/A       | BG207856     | Inc-ESCO2-2    |
| A_23_P212329   | 10,3712 | 10,4407 | -1,049352943 | ENST00000602307 | 25930     | NM_015466    | PTPN23         |
| A_23_P2601     | 15,9926 | 16,0621 | -1,049352943 | ENST00000614327 | 7184      | NM_003299    | HSP90B1        |
| A_24_P304987   | 10,024  | 10,0935 | -1,049352943 | ENST00000355423 | 29115     | NM_013260    | SAP30BP        |
| A_23_P54929    | 9,8695  | 9,93903 | -1,049374763 | ENST00000219168 | 57149     | NM_020424    | LYRM1          |
| A_22_P00007343 | 7,42553 | 7,49511 | -1,049411133 | ENST00000574120 | 84461     | NM_032442    | NEURL4         |
| A_24_P408740   | 11,5537 | 11,6233 | -1,049425681 | ENST00000396610 | 152100    | NM_182523    | CMC1           |
| A_19_P00323103 | 6,22938 | 6,29904 | -1,049469326 | ENST00000602837 | 10477     | N/A          | UBE2E3         |
| A_22_P00018676 | 1,55219 | 1,62186 | -1,0494766   | N/A             | N/A       | N/A          | Inc-SSTR4-1    |
| A_23_P87591    | 11,4554 | 11,5251 | -1,049498424 | ENST00000247843 | 8089      | NM_006530    | YEATS4         |
| A_23_P128023   | 1,72923 | 1,79901 | -1,049556622 | ENST00000380224 | 79339     | NM_033179    | OR51B4         |
| A_22_P00009095 | 1,33705 | 1,40684 | -1,049563897 | N/A             | N/A       | N/A          | Inc-LHX2-2     |
| A_24_P759674   | 7,0946  | 7,1644  | -1,049571172 | N/A             | 79991     | NM_024928    | OBFC1          |
| A_32_P198990   | 6,48591 | 6,55578 | -1,049622099 | N/A             | 100131929 | AK126439     | LOC100131929   |
| A_33_P3261505  | 7,38403 | 7,45391 | -1,049629374 | ENST00000282041 | 57724     | NM_020964    | EPG5           |
| A_22_P00019357 | 1,33672 | 1,4066  | -1,049629374 | N/A             | N/A       | BF727361     | Inc-UMPS-1     |
| A_24_P183264   | 13,6877 | 13,7576 | -1,049643925 | ENST00000510787 | 689       | NM_001037637 | BTF3           |
| A_33_P3360301  | 11,6871 | 11,757  | -1,049643925 | ENST00000453664 | 10869     | NM_001199161 | USP19          |

|                |         |         |              |                 |           |              |                |
|----------------|---------|---------|--------------|-----------------|-----------|--------------|----------------|
| A_23_P110571   | 10,8477 | 10,9176 | -1,049643925 | ENST00000261569 | 375449    | NM_001164664 | MAST4          |
| A_22_P00002594 | 1,33663 | 1,40655 | -1,049658477 | N/A             | N/A       | N/A          | Inc-C19orf54-1 |
| A_21_P0001720  | 3,00827 | 3,07823 | -1,04968758  | N/A             | N/A       | N/A          | Inc-MTOR-2     |
| A_24_P138713   | 7,36991 | 7,43991 | -1,049716684 | ENST00000299192 | 55027     | NM_182922    | HEATR3         |
| A_23_P155939   | 8,50198 | 8,57198 | -1,049716684 | ENST00000610261 | 152687    | NM_182524    | ZNF595         |
| A_33_P3376075  | 5,59487 | 5,66501 | -1,049818554 | N/A             | N/A       | N/A          | N/A            |
| A_23_P48988    | 3,00164 | 3,07182 | -1,049847661 | ENST00000564054 | 6457      | NM_003027    | SH3GL3         |
| A_23_P90444    | 12,4242 | 12,4944 | -1,049862215 | ENST00000262633 | 79171     | NM_024321    | RBM42          |
| A_33_P3297277  | 17,1985 | 17,2687 | -1,049862215 | ENST00000428806 | N/A       | N/A          | N/A            |
| A_33_P3380867  | 9,42258 | 9,49279 | -1,049869492 | ENST00000293328 | 6777      | NM_012448    | STAT5B         |
| A_21_P0009476  | 7,01312 | 7,08333 | -1,049869492 | N/A             | N/A       | N/A          | Inc-KATNAL2-4  |
| A_24_P364954   | 9,67673 | 9,74695 | -1,04987677  | ENST00000579407 | 79701     | NM_024648    | OGFOD3         |
| A_22_P00004425 | 3,33099 | 3,40122 | -1,049884047 | ENST00000515670 | N/A       | N/A          | N/A            |
| A_22_P00017402 | 1,69542 | 1,76566 | -1,049891324 | N/A             | N/A       | N/A          | Inc-VCAN-1     |
| A_24_P316939   | 9,71671 | 9,78697 | -1,049905879 | ENST00000474195 | 9208      | NM_001137550 | LRRFIP1        |
| A_23_P94009    | 12,3828 | 12,4531 | -1,049934989 | ENST00000249299 | 51691     | NM_016200    | LSM8           |
| A_23_P500734   | 10,1542 | 10,2245 | -1,049934989 | ENST00000368863 | 23126     | NM_015100    | POGZ           |
| A_21_P0009305  | 6,00818 | 6,07853 | -1,049971377 | N/A             | N/A       | N/A          | Inc-MFAP4-4    |
| A_22_P00003503 | 4,49758 | 4,56793 | -1,049971377 | N/A             | 100129931 | NR_033828    | LOC100129931   |
| A_21_P0014628  | 4,82324 | 4,89363 | -1,050000489 | ENST00000615955 | N/A       | N/A          | N/A            |
| A_33_P3334743  | 5,67208 | 5,74248 | -1,050007767 | ENST00000264431 | 9693      | NM_014247    | RAPGEF2        |
| A_33_P3560878  | 3,89548 | 3,96593 | -1,050044158 | ENST00000556033 | 283587    | NR_046094    | LINC01146      |
| A_33_P3420914  | 7,14239 | 7,21286 | -1,050058715 | ENST00000456932 | N/A       | XR_433169    | N/A            |
| A_33_P3292739  | 5,2099  | 5,28038 | -1,050065994 | ENST00000333796 | 377630    | NM_201402    | USP17L2        |
| A_23_P30976    | 1,56258 | 1,6331  | -1,050095108 | ENST00000492807 | 2911      | NM_001278065 | GRM1           |
| A_33_P3413514  | 5,12663 | 5,19716 | -1,050102387 | N/A             | N/A       | N/A          | N/A            |
| A_22_P00008720 | 6,43015 | 6,50069 | -1,050109666 | N/A             | N/A       | N/A          | Inc-KIAA1598-1 |
| A_23_P154208   | 10,4298 | 10,5005 | -1,050226133 | ENST00000455197 | 55577     | NM_017567    | NAGK           |
| A_19_P00808072 | 8,02737 | 8,0981  | -1,050247972 | N/A             | N/A       | N/A          | Inc-RTL1-2     |
| A_21_P0014230  | 2,28702 | 2,35777 | -1,050262532 | ENST00000447915 | 51148     | NM_001286760 | CERCAM         |
| A_21_P0001783  | 1,37113 | 1,44193 | -1,050298932 | ENST00000425949 | 100505964 | NR_037881    | LINC01304      |
| A_33_P3238533  | 2,26137 | 2,33218 | -1,050306212 | ENST00000300227 | 374864    | NM_001105528 | CCDC178        |
| A_21_P0009921  | 1,37753 | 1,44834 | -1,050306212 | ENST00000440889 | N/A       | N/A          | N/A            |



|                |         |         |              |                 |           |              |               |
|----------------|---------|---------|--------------|-----------------|-----------|--------------|---------------|
| A_33_P3292283  | 1,35183 | 1,42268 | -1,050335333 | ENST00000242109 | 9808      | NR_022006    | KIAA0087      |
| A_22_P00009914 | 1,35945 | 1,43032 | -1,050349894 | N/A             | N/A       | N/A          | Inc-MGMT-4    |
| A_24_P110331   | 1,37312 | 1,44404 | -1,050386297 | ENST00000330655 | 255275    | NM_001145113 | MYADML2       |
| A_33_P3290085  | 9,93636 | 10,0073 | -1,050400858 | ENST00000337673 | 84124     | NM_032164    | ZNF394        |
| A_22_P00023644 | 5,40663 | 5,47757 | -1,050400858 | N/A             | 101928668 | XR_243157    | LOC101928668  |
| A_19_P00810045 | 8,67274 | 8,74369 | -1,050408139 | ENST00000446594 | 6945      | NM_170607    | MLX           |
| A_21_P0004277  | 1,37794 | 1,4489  | -1,05041542  | N/A             | N/A       | N/A          | Inc-GPR98-2   |
| A_21_P0003052  | 1,35322 | 1,42424 | -1,050459106 | N/A             | N/A       | N/A          | Inc-MFSD1-1   |
| A_23_P103812   | 1,34844 | 1,41949 | -1,05048095  | ENST00000367462 | 339479    | NM_199051    | BRINP3        |
| A_22_P00003385 | 1,68615 | 1,7572  | -1,05048095  | N/A             | N/A       | N/A          | Inc-CCDC103-1 |
| A_21_P0010075  | 3,11199 | 3,18305 | -1,050488232 | N/A             | N/A       | N/A          | Inc-NPBWR2-1  |
| A_22_P00022443 | 1,69086 | 1,76193 | -1,050495513 | N/A             | N/A       | N/A          | Inc-LRRC8C-1  |
| A_23_P112311   | 9,0831  | 9,15421 | -1,050524639 | ENST00000450136 | 22954     | NM_012210    | TRIM32        |
| A_33_P3240492  | 1,37441 | 1,44553 | -1,050531921 | ENST00000373880 | 84457     | NM_032439    | PHYHIPL       |
| A_33_P3354564  | 9,35812 | 9,42926 | -1,050546485 | ENST00000409861 | 2820      | NM_001083112 | GPD2          |
| A_23_P215454   | 4,34132 | 4,41246 | -1,050546485 | ENST00000380576 | 2006      | NM_001278939 | ELN           |
| A_24_P82155    | 5,7472  | 5,81835 | -1,050553767 | ENST00000620154 | 348094    | BC042002     | ANKDD1A       |
| A_21_P0006435  | 1,42938 | 1,50053 | -1,050553767 | ENST00000413328 | N/A       | N/A          | N/A           |
| A_24_P193943   | 7,0504  | 7,1216  | -1,050590177 | ENST00000400334 | 23556     | NM_176787    | PIGN          |
| A_24_P114183   | 13,9805 | 14,0517 | -1,050590177 | ENST00000447866 | 2224      | NM_002004    | FDPS          |
| A_33_P3325665  | 2,85172 | 2,92293 | -1,050597459 | N/A             | 84502     | BC109228     | JPH4          |
| A_23_P381505   | 6,98919 | 7,06048 | -1,050655718 | ENST00000326715 | 221806    | NM_001135924 | VWDE          |
| A_22_P00000462 | 3,13769 | 3,20901 | -1,050677566 | ENST00000414126 | N/A       | N/A          | N/A           |
| A_21_P0007798  | 1,7053  | 1,77667 | -1,05071398  | N/A             | N/A       | N/A          | Inc-SLC15A4-2 |
| A_33_P3408280  | 3,57113 | 3,64251 | -1,050721263 | N/A             | N/A       | N/A          | N/A           |
| A_33_P3283237  | 6,34445 | 6,41585 | -1,050735829 | ENST00000465888 | 404281    | NM_206923    | YY2           |
| A_33_P3356031  | 5,66016 | 5,73157 | -1,050743113 | ENST00000367538 | 9887      | N/A          | SMG7          |
| A_33_P3347037  | 3,82981 | 3,90122 | -1,050743113 | N/A             | 203429    | NR_026595    | FAM226A       |
| A_33_P3282973  | 5,02875 | 5,10019 | -1,050764962 | ENST00000297574 | 79870     | N/A          | BAALC         |
| A_33_P3326672  | 7,01856 | 7,09001 | -1,050772246 | ENST00000535338 | 158431    | NM_001001662 | ZNF782        |
| A_32_P98227    | 3,76844 | 3,83989 | -1,050772246 | ENST00000429277 | 11155     | NM_001171610 | LDB3          |
| A_21_P0004606  | 1,33821 | 1,40969 | -1,050794096 | N/A             | N/A       | N/A          | Inc-QKI-2     |
| A_21_P0012299  | 6,30901 | 6,3805  | -1,05080138  | ENST00000433633 | N/A       | N/A          | N/A           |

|                |         |         |              |                 |           |              |              |
|----------------|---------|---------|--------------|-----------------|-----------|--------------|--------------|
| A_22_P00006598 | 7,43656 | 7,50807 | -1,050815947 | N/A             | 101927675 | XR_427815    | LOC101927675 |
| A_33_P3266619  | 1,33693 | 1,40844 | -1,050815947 | ENST00000547602 | 728114    | XR_245977    | LOC728114    |
| A_22_P00009666 | 1,33767 | 1,40921 | -1,050837798 | ENST00000423311 | 104310353 | N/A          | LINC01399    |
| A_33_P3320159  | 3,9885  | 4,06005 | -1,050845082 | ENST00000619643 | 56169     | NM_031415    | GSDMC        |
| A_22_P00016813 | 1,37665 | 1,44823 | -1,050866934 | ENST00000512464 | N/A       | N/A          | N/A          |
| A_33_P3276159  | 1,73038 | 1,80197 | -1,050874218 | N/A             | 100996890 | XM_003846754 | LOC100996890 |
| A_33_P3373614  | 1,36867 | 1,44028 | -1,050888787 | ENST00000403714 | 22979     | NM_014971    | EFR3B        |
| A_21_P0010797  | 1,80764 | 1,87925 | -1,050888787 | ENST00000428687 | N/A       | N/A          | N/A          |
| A_23_P126677   | 1,71932 | 1,79094 | -1,050896071 | ENST00000370662 | 58511     | NM_021233    | DNASE2B      |
| A_24_P187023   | 15,9682 | 16,0399 | -1,050954347 | ENST00000588562 | N/A       | N/A          | N/A          |
| A_33_P3273599  | 5,75001 | 5,82174 | -1,050976201 | ENST00000503952 | 27152     | NM_015693    | INTU         |
| A_23_P88848    | 8,70689 | 8,77864 | -1,05099077  | ENST00000561965 | 54920     | NM_017803    | DUS2         |
| A_21_P0005859  | 1,35527 | 1,42702 | -1,05099077  | N/A             | N/A       | N/A          | Inc-JPH1-2   |
| A_24_P390403   | 10,3339 | 10,4057 | -1,051027196 | ENST00000389629 | 23168     | NM_015138    | RTF1         |
| A_33_P3315679  | 1,33791 | 1,40971 | -1,051027196 | ENST00000381471 | 2315      | NM_005511    | MLANA        |
| A_23_P128396   | 10,9714 | 11,0432 | -1,051027196 | ENST00000392465 | 80196     | NM_194271    | RNF34        |
| A_33_P3220390  | 6,64738 | 6,71931 | -1,051121907 | N/A             | 9589      | BC028180     | WTAP         |
| A_22_P00002868 | 1,33891 | 1,41087 | -1,051143765 | ENST00000418282 | 60467     | NR_026783    | BPESC1       |
| A_24_P366652   | 1,74567 | 1,81768 | -1,051180195 | ENST00000444228 | 3681      | NM_005353    | ITGAD        |
| A_33_P3304082  | 1,3663  | 1,43831 | -1,051180195 | ENST00000577765 | N/A       | N/A          | N/A          |
| A_22_P00025750 | 4,7641  | 4,83623 | -1,051267634 | ENST00000424689 | N/A       | N/A          | N/A          |
| A_23_P63908    | 9,86908 | 9,94122 | -1,05127492  | ENST00000298746 | 142940    | NM_139169    | TRUB1        |
| A_23_P214037   | 15,1251 | 15,1973 | -1,051318643 | ENST00000502784 | 4869      | NM_002520    | NPM1         |
| A_33_P3411628  | 2,03749 | 2,10977 | -1,051376942 | ENST00000380150 | 1029      | NM_000077    | CDKN2A       |
| A_22_P00012941 | 6,63805 | 6,71034 | -1,051384229 | ENST00000519134 | N/A       | DB201663     | N/A          |
| A_33_P3253365  | 6,53507 | 6,60743 | -1,051435244 | ENST00000618777 | N/A       | AB051501     | N/A          |
| A_21_P0001650  | 1,34805 | 1,42042 | -1,051442532 | N/A             | N/A       | N/A          | Inc-PLD5-2   |
| A_21_P0014948  | 8,29807 | 8,37046 | -1,051457108 | ENST00000575568 | N/A       | XR_431075    | N/A          |
| A_21_P0002733  | 10,3317 | 10,4041 | -1,051464397 | ENST00000455984 | 102725370 | XR_425587    | LOC102725370 |
| A_32_P94001    | 5,53096 | 5,60337 | -1,051471685 | ENST00000502308 | 403315    | NR_003612    | FAM92A1P2    |
| A_22_P00015852 | 1,35802 | 1,43044 | -1,051478973 | N/A             | 100862679 | NR_046390    | NAALADL2-AS3 |
| A_24_P170774   | 6,15601 | 6,22845 | -1,05149355  | ENST00000389798 | 23143     | NM_015116    | LRCH1        |
| A_33_P3238415  | 2,89835 | 2,97079 | -1,05149355  | ENST00000351606 | 83445     | NM_001080554 | GSG1         |

|                |         |         |              |                 |           |              |                |
|----------------|---------|---------|--------------|-----------------|-----------|--------------|----------------|
| A_23_P152047   | 7,39453 | 7,46702 | -1,051529992 | ENST00000562212 | 192683    | NM_138967    | SCAMP5         |
| A_33_P6608390  | 7,24301 | 7,31551 | -1,051537281 | ENST00000518373 | 253943    | N/A          | YTHDF3         |
| A_22_P00024894 | 1,73448 | 1,807   | -1,051551858 | ENST00000524287 | N/A       | CN267986     | N/A            |
| A_23_P163148   | 10,2646 | 10,3372 | -1,051610171 | ENST00000557658 | 63894     | NM_022067    | VIPAS39        |
| A_24_P332971   | 11,5208 | 11,5934 | -1,051610171 | ENST00000466005 | 285855    | NM_198486    | RPL7L1         |
| A_23_P432591   | 8,06287 | 8,13549 | -1,051624749 | ENST00000620431 | 202243    | NM_176816    | CCDC125        |
| A_33_P3209885  | 1,99276 | 2,0654  | -1,051639328 | ENST00000578808 | 57125     | NM_020405    | PLXDC1         |
| A_33_P3216819  | 1,7082  | 1,78084 | -1,051639328 | ENST00000341875 | 389761    | NM_001145197 | SPATA31D4      |
| A_21_P0005709  | 1,37337 | 1,44607 | -1,051683065 | N/A             | N/A       | N/A          | Inc-NKAIN3-1   |
| A_33_P3250209  | 1,34814 | 1,42084 | -1,051683065 | ENST00000487107 | 387640    | NM_207371    | SKIDA1         |
| A_23_P35576    | 8,58848 | 8,66122 | -1,051712224 | ENST00000316045 | 9849      | NM_014803    | ZNF518A        |
| A_23_P411113   | 6,70117 | 6,77393 | -1,051726804 | ENST00000264638 | 8506      | NM_003632    | CNTNAP1        |
| A_21_P0005875  | 1,49337 | 1,56619 | -1,051770545 | N/A             | N/A       | N/A          | Inc-TSPYL5-2   |
| A_23_P65674    | 11,2575 | 11,3304 | -1,051828869 | ENST00000560549 | 29766     | NM_014547    | TMOD3          |
| A_33_P3353767  | 1,64831 | 1,72122 | -1,05183616  | ENST00000322564 | 400224    | NM_001161498 | PLEKHD1        |
| A_21_P0001171  | 4,25867 | 4,33159 | -1,051843451 | ENST00000457719 | N/A       | N/A          | N/A            |
| A_22_P00008206 | 1,94721 | 2,02015 | -1,051858033 | N/A             | 101929402 | NR_126027    | EXTL3-AS1      |
| A_21_P0014396  | 8,06351 | 8,13647 | -1,051872615 | ENST00000600039 | 100132815 | NR_103741    | IPO5P1         |
| A_22_P00004148 | 8,78546 | 8,85843 | -1,051879906 | N/A             | N/A       | N/A          | Inc-CLEC18B-2  |
| A_22_P00007583 | 1,33775 | 1,4108  | -1,051938236 | N/A             | N/A       | N/A          | Inc-HDAC9-3    |
| A_24_P409330   | 13,6836 | 13,7567 | -1,051974694 | ENST00000553711 | 122704    | NM_181304    | MRPL52         |
| A_23_P34606    | 9,65887 | 9,73199 | -1,051989278 | ENST00000490931 | 2475      | NM_004958    | MTOR           |
| A_24_P117147   | 3,43544 | 3,50856 | -1,051989278 | ENST00000620731 | 3811      | NM_013289    | KIR3DL1        |
| A_23_P352717   | 2,98642 | 3,05954 | -1,051989278 | ENST00000319560 | 203562    | NM_182541    | TMEM31         |
| A_19_P00319337 | 5,31627 | 5,38945 | -1,052033029 | ENST00000420557 | 80069     | NR_026780    | LINC00574      |
| A_33_P3267280  | 8,04318 | 8,11638 | -1,052047614 | ENST00000622025 | 10106     | NM_005730    | CTDSP2         |
| A_33_P3280355  | 13,1023 | 13,1755 | -1,052047614 | N/A             | N/A       | N/A          | N/A            |
| A_32_P743184   | 1,33992 | 1,41314 | -1,052062198 | ENST00000557188 | 359787    | NM_199286    | DPPA3          |
| A_22_P00021021 | 1,54651 | 1,61979 | -1,052105953 | ENST00000588651 | N/A       | XR_244093    | N/A            |
| A_21_P0010353  | 3,89396 | 3,96725 | -1,052113246 | ENST00000430449 | N/A       | N/A          | N/A            |
| A_33_P3244998  | 16,2064 | 16,2797 | -1,052120539 | ENST00000295025 | 57489     | NM_001007022 | ODF2L          |
| A_23_P17955    | 8,06953 | 8,14285 | -1,052135124 | ENST00000283627 | 25827     | NM_012157    | FBXL2          |
| A_21_P0012181  | 4,30157 | 4,37493 | -1,052164296 | N/A             | N/A       | N/A          | XLOC_I2_009135 |

|                |         |         |              |                 |           |              |               |
|----------------|---------|---------|--------------|-----------------|-----------|--------------|---------------|
| A_22_P00009525 | 6,96435 | 7,03774 | -1,052186176 | N/A             | N/A       | N/A          | Inc-MANSC4-3  |
| A_33_P3247803  | 7,789   | 7,86242 | -1,052208055 | ENST00000517700 | 389677    | NM_203390    | RBM12B        |
| A_21_P0003248  | 1,34176 | 1,41519 | -1,052215349 | N/A             | N/A       | N/A          | Inc-C3orf30-4 |
| A_33_P3249364  | 4,63779 | 4,71125 | -1,052237229 | ENST00000553189 | 83857     | XM_006719156 | TMTC1         |
| A_22_P00023331 | 1,35061 | 1,42407 | -1,052237229 | N/A             | N/A       | BG206194     | Inc-OAZ3-4    |
| A_23_P79015    | 1,79952 | 1,87298 | -1,052237229 | ENST00000596348 | 6324      | NM_199037    | SCN1B         |
| A_21_P0008982  | 3,53952 | 3,61299 | -1,052244523 | ENST00000569104 | N/A       | N/A          | N/A           |
| A_22_P00012632 | 1,36914 | 1,44262 | -1,052251816 | N/A             | N/A       | N/A          | Inc-PTX4-2    |
| A_33_P3241753  | 11,8742 | 11,9477 | -1,052266404 | ENST00000327772 | 55967     | NM_018838    | NDUFA12       |
| A_32_P65589    | 1,37045 | 1,44396 | -1,052273698 | N/A             | N/A       | AJ252276     | N/A           |
| A_22_P00017623 | 8,31371 | 8,38725 | -1,052295579 | N/A             | 100505616 | NR_110100    | SNHG21        |
| A_23_P13852    | 14,1407 | 14,2143 | -1,052339344 | ENST00000541731 | 11171     | NM_007178    | STRAP         |
| A_33_P3338961  | 10,8219 | 10,8955 | -1,052339344 | N/A             | N/A       | N/A          | N/A           |
| A_21_P0005557  | 2,25321 | 2,32683 | -1,052353932 | N/A             | N/A       | N/A          | Inc-PPIA-1    |
| A_21_P0003980  | 2,20185 | 2,27548 | -1,052361227 | ENST00000502100 | N/A       | N/A          | N/A           |
| A_22_P00006418 | 9,7215  | 9,79526 | -1,052456058 | N/A             | 619343    | NR_073397    | ERICH1-AS1    |
| A_32_P129214   | 1,33876 | 1,41252 | -1,052456058 | ENST00000452561 | 387486    | NR_109786    | LINC00320     |
| A_23_P143559   | 5,24486 | 5,31862 | -1,052456058 | ENST00000412649 | 8218      | NM_007098    | CLTCL1        |
| A_21_P0012541  | 1,33742 | 1,4112  | -1,052470649 | ENST00000470712 | 285286    | NR_104116    | LINC00877     |
| A_22_P00001571 | 1,34181 | 1,4156  | -1,052477944 | N/A             | N/A       | N/A          | Inc-ARL4A-2   |
| A_24_P84428    | 10,527  | 10,6008 | -1,052485239 | ENST00000453625 | 27101     | NM_014412    | CACYBP        |
| A_33_P3424328  | 1,3395  | 1,41335 | -1,052521716 | ENST00000612677 | 401258    | NM_001257357 | RAB44         |
| A_23_P77160    | 10,3409 | 10,4148 | -1,052558194 | ENST00000561186 | 54778     | NM_017610    | RNF111        |
| A_22_P00006071 | 1,33805 | 1,41198 | -1,052580082 | N/A             | 414245    | NR_038373    | DNAJC9-AS1    |
| A_23_P139820   | 9,74421 | 9,81815 | -1,052587378 | ENST00000551215 | 4891      | NM_000617    | SLC11A2       |
| A_33_P6471335  | 1,59436 | 1,6683  | -1,052587378 | N/A             | 100506844 | N/A          | LOC100506844  |
| A_21_P0007615  | 1,46194 | 1,5359  | -1,05260197  | N/A             | N/A       | N/A          | Inc-ASCL1-1   |
| A_21_P0007878  | 1,36955 | 1,44354 | -1,052623858 | N/A             | N/A       | N/A          | Inc-KRT80-2   |
| A_23_P17134    | 2,53207 | 2,60606 | -1,052623858 | ENST00000353004 | 4118      | NM_002371    | MAL           |
| A_24_P401100   | 17,0286 | 17,1026 | -1,052631155 | ENST00000482912 | N/A       | N/A          | N/A           |
| A_22_P00012738 | 1,87511 | 1,94911 | -1,052631155 | N/A             | N/A       | N/A          | Inc-RABEP2-2  |
| A_24_P143324   | 1,33813 | 1,41213 | -1,052631155 | ENST00000430451 | 83851     | NM_031914    | SYT16         |
| A_21_P0005236  | 1,62577 | 1,6998  | -1,052653044 | ENST00000449899 | N/A       | N/A          | N/A           |

|                |         |         |              |                 |           |              |              |
|----------------|---------|---------|--------------|-----------------|-----------|--------------|--------------|
| A_21_P0006628  | 1,33908 | 1,41312 | -1,05266034  | ENST00000422661 | 101927419 | NR_120621    | LOC101927419 |
| A_22_P00011469 | 4,99127 | 5,06536 | -1,052696823 | N/A             | N/A       | BC043279     | Inc-PAQR3-1  |
| A_33_P3708763  | 1,34772 | 1,42187 | -1,052740605 | N/A             | 100874205 | NR_109811    | ATP11A-AS1   |
| A_22_P00002700 | 1,34847 | 1,42262 | -1,052740605 | ENST00000583223 | N/A       | XR_109637    | N/A          |
| A_33_P3279049  | 6,64259 | 6,71675 | -1,052747902 | ENST00000397053 | 26019     | NM_080599    | UPF2         |
| A_33_P3382412  | 9,50179 | 9,57599 | -1,05277709  | ENST00000390651 | 90333     | NM_001277120 | ZNF468       |
| A_22_P00007982 | 1,34026 | 1,41456 | -1,052850066 | N/A             | 100131434 | NR_027455    | LINC00893    |
| A_33_P3323029  | 1,61637 | 1,69077 | -1,052923046 | N/A             | 400965    | AK098018     | LOC400965    |
| A_33_P3337161  | 6,388   | 6,46242 | -1,052937643 | ENST00000554781 | 196883    | NM_001198568 | ADCY4        |
| A_22_P00005190 | 4,71325 | 4,78768 | -1,052944942 | N/A             | N/A       | BC037537     | Inc-DISP2-2  |
| A_21_P0005004  | 1,45674 | 1,53118 | -1,05295224  | N/A             | N/A       | N/A          | Inc-DTNBP1-1 |
| A_23_P397055   | 9,82701 | 9,90145 | -1,05295224  | ENST00000035307 | 54480     | NM_019015    | CHPF2        |
| A_33_P6474388  | 8,49214 | 8,56658 | -1,05295224  | N/A             | 101928053 | NR_120540    | LOC101928053 |
| A_33_P3277659  | 1,35666 | 1,43111 | -1,052959539 | ENST00000451052 | 374860    | NM_001145029 | ANKRD30B     |
| A_33_P3381097  | 1,33883 | 1,41331 | -1,052981435 | ENST00000307552 | 390201    | NM_001005324 | OR10V1       |
| A_22_P00015397 | 9,44868 | 9,52318 | -1,052996032 | N/A             | N/A       | BC039097     | Inc-SRP54-1  |
| A_23_P349083   | 9,25916 | 9,33366 | -1,052996032 | ENST00000430046 | 115548    | NM_138782    | FCHO2        |
| A_33_P3217594  | 5,51837 | 5,59289 | -1,05301063  | N/A             | 390963    | N/A          | ZNF818P      |
| A_23_P338401   | 3,76929 | 3,84381 | -1,05301063  | ENST00000297792 | 221656    | NM_153042    | KDM1B        |
| A_33_P3292158  | 1,35392 | 1,42849 | -1,053047125 | N/A             | N/A       | N/A          | N/A          |
| A_24_P16730    | 3,84149 | 3,91606 | -1,053047125 | ENST00000544803 | 80856     | NM_030650    | KIAA1715     |
| A_22_P00020426 | 1,34827 | 1,42288 | -1,053076322 | N/A             | N/A       | N/A          | Inc-FOXA1-2  |
| A_22_P00023841 | 5,4549  | 5,52957 | -1,053120119 | N/A             | N/A       | N/A          | Inc-HLCS-1   |
| A_23_P46924    | 11,8237 | 11,8984 | -1,053142018 | ENST00000368858 | 9184      | NM_001007793 | BUB3         |
| A_21_P0014896  | 2,46006 | 2,53479 | -1,053163918 | ENST00000540997 | N/A       | XR_159115    | N/A          |
| A_21_P0010286  | 1,33783 | 1,41265 | -1,05322962  | N/A             | N/A       | N/A          | Inc-PRDM15-1 |
| A_33_P3294072  | 4,26417 | 4,339   | -1,05323692  | N/A             | N/A       | N/A          | N/A          |
| A_24_P613108   | 1,36415 | 1,43899 | -1,053244221 | N/A             | N/A       | N/A          | N/A          |
| A_33_P3310296  | 5,74168 | 5,81654 | -1,053258822 | N/A             | N/A       | N/A          | N/A          |
| A_21_P0005484  | 2,53959 | 2,61447 | -1,053273423 | N/A             | N/A       | N/A          | Inc-SKAP2-1  |
| A_33_P3333089  | 1,33916 | 1,41412 | -1,053331831 | ENST00000619172 | N/A       | XM_006726815 | N/A          |
| A_23_P28420    | 11,4624 | 11,5374 | -1,053361036 | ENST00000396387 | 29789     | NM_013341    | OLA1         |
| A_23_P374294   | 3,77686 | 3,85189 | -1,05338294  | ENST00000476558 | 79741     | NM_145023    | CCDC7        |

|                |         |         |              |                 |           |              |              |
|----------------|---------|---------|--------------|-----------------|-----------|--------------|--------------|
| A_22_P00019241 | 1,33795 | 1,413   | -1,053397543 | N/A             | 100873997 | NR_046621    | KCNQ5-AS1    |
| A_33_P3602006  | 14,6145 | 14,6896 | -1,053434052 | ENST00000237283 | 134637    | NM_001286259 | ADAT2        |
| A_24_P398972   | 10,6239 | 10,699  | -1,053434052 | ENST00000321998 | 10229     | NM_016138    | COQ7         |
| A_24_P374962   | 9,18932 | 9,26445 | -1,053455958 | ENST00000426587 | 442582    | NR_040584    | STAG3L2      |
| A_24_P319364   | 14,939  | 15,0142 | -1,053507073 | ENST00000368026 | 50848     | NM_016946    | F11R         |
| A_24_P721898   | 10,0473 | 10,1225 | -1,053507073 | ENST00000613725 | 55727     | NM_001002860 | BTBD7        |
| A_33_P3304603  | 7,96462 | 8,0399  | -1,053565493 | ENST00000611351 | 57178     | NM_020338    | ZMIZ1        |
| A_22_P00002593 | 4,38464 | 4,45992 | -1,053565493 | ENST00000562076 | N/A       | GQ868703     | N/A          |
| A_33_P3242919  | 11,4407 | 11,516  | -1,053580099 | ENST00000620401 | 4670      | NM_005968    | HNRNPM       |
| A_33_P3325558  | 11,128  | 11,2033 | -1,053580099 | ENST00000367690 | 9910      | AK022043     | RABGAP1L     |
| A_33_P3333708  | 9,91975 | 9,99506 | -1,053587402 | N/A             | N/A       | N/A          | N/A          |
| A_33_P3368144  | 2,98503 | 3,06036 | -1,053602008 | N/A             | N/A       | N/A          | N/A          |
| A_21_P0001789  | 1,34746 | 1,4228  | -1,053609311 | N/A             | N/A       | N/A          | Inc-TMEM17-2 |
| A_22_P00017945 | 1,36668 | 1,44205 | -1,05363122  | N/A             | N/A       | BG205156     | Inc-ZIC1-2   |
| A_23_P166196   | 11,7302 | 11,8056 | -1,05365313  | ENST00000373932 | 25980     | NM_015511    | AAR2         |
| A_21_P0002052  | 1,84664 | 1,92204 | -1,05365313  | N/A             | N/A       | N/A          | Inc-PNPT1-1  |
| A_22_P00016635 | 1,34107 | 1,41648 | -1,053660434 | N/A             | N/A       | N/A          | Inc-TOR3A-1  |
| A_32_P14721    | 3,22538 | 3,30079 | -1,053660434 | ENST00000479363 | 201625    | NM_001291661 | DNAH12       |
| A_23_P74344    | 8,56767 | 8,6431  | -1,05367504  | ENST00000467021 | 117143    | NM_053053    | TADA1        |
| A_24_P577694   | 1,34708 | 1,42252 | -1,053682344 | ENST00000297323 | 107       | NM_021116    | ADCY1        |
| A_23_P152984   | 12,1453 | 12,2208 | -1,053726166 | ENST00000505490 | 10189     | NM_005782    | ALYREF       |
| A_33_P3317613  | 1,51942 | 1,59492 | -1,053726166 | N/A             | 6854      | NM_133625    | SYN2         |
| A_32_P200308   | 1,41104 | 1,48661 | -1,053777295 | ENST00000509893 | 728724    | NR_033916    | LINC00977    |
| A_23_P217899   | 10,4324 | 10,508  | -1,053799208 | ENST00000408952 | 81669     | NM_030937    | CCNL2        |
| A_24_P61864    | 10,3134 | 10,389  | -1,053799208 | ENST00000582331 | 57003     | NM_020198    | CCDC47       |
| A_21_P0011536  | 6,4312  | 6,50681 | -1,053806512 | ENST00000578386 | 147172    | NR_015341    | LRRC37BP1    |
| A_22_P00022907 | 1,43911 | 1,51473 | -1,053813816 | ENST00000560451 | 4122      | N/A          | MAN2A2       |
| A_33_P3614398  | 1,34702 | 1,4227  | -1,053857644 | N/A             | 283516    | AK096235     | LOC283516    |
| A_33_P3364811  | 1,34048 | 1,41616 | -1,053857644 | ENST00000367379 | 5788      | NM_002838    | PTPRC        |
| A_22_P00016827 | 1,33852 | 1,41423 | -1,053879559 | N/A             | N/A       | N/A          | Inc-TRIP4-2  |
| A_23_P9761     | 9,17488 | 9,2506  | -1,053886864 | ENST00000380262 | 116840    | NM_001037144 | CNTROB       |
| A_33_P3416221  | 7,75099 | 7,82672 | -1,053894169 | ENST00000485344 | 4705      | AK091719     | NDUFA10      |
| A_22_P00023529 | 1,34192 | 1,41767 | -1,053908779 | N/A             | N/A       | N/A          | Inc-PFKP-4   |

|                |         |         |              |                 |           |              |                |
|----------------|---------|---------|--------------|-----------------|-----------|--------------|----------------|
| A_33_P3298975  | 1,73295 | 1,80876 | -1,053952611 | ENST00000553003 | N/A       | N/A          | N/A            |
| A_33_P3295343  | 1,3475  | 1,42333 | -1,053967222 | ENST00000299642 | 10143     | NM_005752    | CLEC3A         |
| A_21_P0003898  | 1,40881 | 1,48467 | -1,053989139 | N/A             | N/A       | N/A          | Inc-ANKRD56-1  |
| A_21_P0013983  | 1,33988 | 1,41576 | -1,05400375  | ENST00000437348 | N/A       | AK126066     | N/A            |
| A_23_P18362    | 1,67102 | 1,74692 | -1,054018362 | ENST00000241274 | 22865     | NM_014926    | SLITRK3        |
| A_33_P3256793  | 7,03695 | 7,11286 | -1,054025668 | ENST00000369938 | 57535     | NM_020775    | KIAA1324       |
| A_33_P3275315  | 1,36313 | 1,43914 | -1,05409873  | N/A             | 414196    | NR_126062    | CELF2-AS1      |
| A_22_P00011976 | 1,34426 | 1,42029 | -1,054113343 | ENST00000445072 | N/A       | N/A          | N/A            |
| A_23_P166779   | 3,48954 | 3,56559 | -1,054127956 | ENST00000442796 | 29931     | NR_024065    | LINC00312      |
| A_33_P3417985  | 1,33836 | 1,41442 | -1,054135263 | ENST00000357377 | 219965    | NM_001005489 | OR5B17         |
| A_21_P0013067  | 1,33937 | 1,41546 | -1,054157183 | N/A             | N/A       | N/A          | XLOC_I2_012919 |
| A_23_P51884    | 12,1599 | 12,236  | -1,05416449  | ENST00000493657 | 126789    | NM_153339    | PUSL1          |
| A_33_P3464438  | 1,34196 | 1,4181  | -1,054193718 | ENST00000619530 | 338005    | AK058096     | LINC00221      |
| A_33_P3364268  | 5,83335 | 5,90951 | -1,054208332 | ENST00000467242 | 81606     | NM_030915    | LBH            |
| A_23_P27128    | 1,35131 | 1,42749 | -1,054222947 | ENST00000293303 | 317719    | NM_152467    | KLHL10         |
| A_24_P26073    | 12,2298 | 12,306  | -1,054237562 | ENST00000463456 | 10128     | NM_133259    | LRPPRC         |
| A_33_P3284117  | 1,33923 | 1,41544 | -1,054244869 | N/A             | N/A       | N/A          | N/A            |
| A_22_P00005529 | 1,34653 | 1,42276 | -1,054259484 | ENST00000427591 | 102724096 | NR_125874    | LOC102724096   |
| A_22_P00025057 | 1,50578 | 1,58206 | -1,054296022 | N/A             | 101929636 | XR_244161    | LOC101929636   |
| A_22_P00009356 | 4,37493 | 4,45124 | -1,054317946 | N/A             | N/A       | N/A          | Inc-LRRTM1-2   |
| A_21_P0003918  | 1,34754 | 1,42389 | -1,054347178 | N/A             | N/A       | N/A          | Inc-TRIML2-3   |
| A_23_P137248   | 6,93884 | 7,01522 | -1,054369103 | ENST00000528056 | 5616      | NR_028062    | PRKY           |
| A_33_P3405379  | 4,05031 | 4,12671 | -1,05438372  | ENST00000313616 | 157777    | NM_001136160 | MCMDC2         |
| A_21_P0006012  | 4,1332  | 4,20961 | -1,054391028 | ENST00000611126 | N/A       | N/A          | N/A            |
| A_22_P00009379 | 1,34419 | 1,4206  | -1,054391028 | ENST00000518103 | N/A       | N/A          | N/A            |
| A_21_P0002483  | 6,74999 | 6,82642 | -1,054405646 | ENST00000610036 | N/A       | XR_109933    | N/A            |
| A_33_P3241937  | 8,31607 | 8,3925  | -1,054405646 | ENST00000310924 | 125058    | NM_019020    | TBC1D16        |
| A_22_P00016058 | 4,88542 | 4,96188 | -1,054427572 | ENST00000434020 | 100506047 | XR_109976    | LOC100506047   |
| A_33_P7501941  | 1,3489  | 1,42539 | -1,054449498 | N/A             | 101928885 | XR_249792    | LOC101928885   |
| A_24_P920646   | 1,33983 | 1,41634 | -1,054464116 | N/A             | 1588      | BC035714     | CYP19A1        |
| A_21_P0012819  | 1,82539 | 1,90191 | -1,054471425 | ENST00000506276 | N/A       | XR_425829    | N/A            |
| A_22_P00001029 | 1,34838 | 1,42493 | -1,054493352 | ENST00000415120 | N/A       | N/A          | N/A            |
| A_33_P3227899  | 2,90174 | 2,97832 | -1,05451528  | ENST00000620833 | 440896    | NR_015361    | LOC440896      |

|                |         |         |              |                 |           |              |                |
|----------------|---------|---------|--------------|-----------------|-----------|--------------|----------------|
| A_23_P218892   | 12,3244 | 12,401  | -1,054529899 | ENST00000422614 | 1981      | NM_182917    | EIF4G1         |
| A_22_P00003588 | 2,53294 | 2,60954 | -1,054529899 | ENST00000415019 | N/A       | AK097921     | N/A            |
| A_22_P00016890 | 1,34638 | 1,42299 | -1,054537208 | ENST00000554814 | N/A       | DB038017     | N/A            |
| A_22_P00004801 | 5,1364  | 5,21303 | -1,054551827 | ENST00000610705 | N/A       | N/A          | N/A            |
| A_33_P3410599  | 9,19311 | 9,26974 | -1,054551827 | ENST00000369754 | 55603     | NM_017633    | FAM46A         |
| A_24_P547010   | 16,8293 | 16,906  | -1,054602996 | ENST00000429515 | N/A       | N/A          | N/A            |
| A_32_P108107   | 1,33966 | 1,41636 | -1,054602996 | ENST00000376315 | 245932    | NM_153323    | DEFB119        |
| A_22_P00010826 | 7,05009 | 7,12679 | -1,054602996 | N/A             | N/A       | AV696027     | Inc-NNT-1      |
| A_23_P258194   | 3,92659 | 4,00337 | -1,054661477 | ENST00000465606 | 150209    | NM_001018060 | AIFM3          |
| A_23_P20660    | 1,35693 | 1,43372 | -1,054668787 | ENST00000375765 | 54769     | AK124628     | DIRAS2         |
| A_21_P0006475  | 1,7269  | 1,80372 | -1,054690719 | N/A             | N/A       | N/A          | Inc-SHOX-1     |
| A_22_P00018822 | 1,3401  | 1,417   | -1,054749205 | N/A             | N/A       | N/A          | Inc-C9orf66-1  |
| A_21_P0004946  | 1,34672 | 1,42363 | -1,054756516 | N/A             | N/A       | N/A          | Inc-TNFAIP3-5  |
| A_21_P0014611  | 1,34083 | 1,41777 | -1,054778449 | N/A             | N/A       | N/A          | Inc-BLID-1     |
| A_21_P0002566  | 6,62481 | 6,70177 | -1,054793072 | N/A             | N/A       | N/A          | Inc-SOX11-3    |
| A_22_P00017437 | 1,34615 | 1,42314 | -1,054815006 | ENST00000559590 | N/A       | N/A          | N/A            |
| A_33_P3389540  | 16,5419 | 16,6189 | -1,054822317 | ENST00000372214 | N/A       | N/A          | N/A            |
| A_22_P00003709 | 1,3531  | 1,43011 | -1,054829629 | ENST00000504827 | N/A       | N/A          | N/A            |
| A_33_P3364954  | 1,34988 | 1,42689 | -1,054829629 | N/A             | N/A       | N/A          | N/A            |
| A_24_P395621   | 8,31162 | 8,38864 | -1,05483694  | ENST00000361677 | 146923    | NM_173079    | RUNDC1         |
| A_33_P3318509  | 1,34054 | 1,41758 | -1,054851563 | ENST00000299663 | 26253     | NM_014358    | CLEC4E         |
| A_21_P0008422  | 1,33897 | 1,41604 | -1,054873499 | N/A             | N/A       | N/A          | Inc-MBIP-1     |
| A_21_P0001445  | 3,71142 | 3,78849 | -1,054873499 | ENST00000440494 | 339529    | NR_033883    | LOC339529      |
| A_33_P3224483  | 8,05095 | 8,12804 | -1,054888122 | N/A             | 11158     | BC020495     | RABL2B         |
| A_21_P0003096  | 1,33931 | 1,41641 | -1,054895434 | N/A             | N/A       | N/A          | Inc-IL5RA-3    |
| A_21_P0001143  | 1,34043 | 1,41753 | -1,054895434 | ENST00000427806 | N/A       | N/A          | N/A            |
| A_22_P00011670 | 11,3496 | 11,4267 | -1,054895434 | ENST00000579339 | 100131814 | NR_026805    | LINC00271      |
| A_21_P0010652  | 1,33903 | 1,41614 | -1,054902746 | N/A             | N/A       | N/A          | XLOC_I2_001097 |
| A_21_P0006241  | 1,34164 | 1,41876 | -1,054910058 | N/A             | N/A       | N/A          | Inc-OLFM1-2    |
| A_21_P0005026  | 1,33946 | 1,41659 | -1,05491737  | N/A             | 100505711 | XR_242019    | LOC100505711   |
| A_22_P00008870 | 1,34919 | 1,42632 | -1,05491737  | N/A             | 100874019 | NR_046687    | KLHL6-AS1      |
| A_33_P3318534  | 6,50416 | 6,58133 | -1,054946619 | ENST00000393010 | 92370     | NM_152282    | PXYLP1         |
| A_23_P259314   | 1,7808  | 1,85798 | -1,054953932 | ENST00000430575 | 6192      | NM_001008    | RPS4Y1         |



|                |         |         |              |                 |           |              |                       |
|----------------|---------|---------|--------------|-----------------|-----------|--------------|-----------------------|
| A_22_P00006228 | 1,34597 | 1,42316 | -1,054961244 | ENST00000445883 | N/A       | N/A          | N/A                   |
| A_24_P181101   | 10,0875 | 10,1647 | -1,054968557 | ENST00000340353 | 65084     | NM_022918    | TMEM135               |
| A_22_P00018883 | 1,41383 | 1,49103 | -1,054968557 | N/A             | 100874264 | NR_046764    | AOAH-IT1              |
| A_22_P00000270 | 1,53046 | 1,60772 | -1,055012432 | ENST00000452813 | N/A       | N/A          | N/A                   |
| A_33_P3276068  | 10,6803 | 10,7576 | -1,055041684 | ENST00000356128 | 100128327 | AK002042     | TRAPPC3L              |
| A_23_P390384   | 8,44661 | 8,52391 | -1,055041684 | ENST00000409324 | 57232     | NM_001037735 | ZNF630                |
| A_23_P117068   | 14,0581 | 14,1354 | -1,055041684 | ENST00000549580 | 6636      | NM_003095    | SNRPF                 |
| A_33_P3252884  | 8,37358 | 8,45089 | -1,055048997 | ENST00000332830 | 57649     | NM_001033561 | PHF12                 |
| A_21_P0000781  | 8,78207 | 8,8594  | -1,055063623 | N/A             | 100506311 | NR_038366    | HOTAIRM1              |
| A_33_P3231428  | 4,40289 | 4,48024 | -1,05507825  | N/A             | N/A       | AK126714     | N/A                   |
| A_22_P00009853 | 1,36177 | 1,43912 | -1,05507825  | N/A             | 100874249 | NR_046909    | DENND5B-AS1           |
| A_33_P3283709  | 1,34078 | 1,41815 | -1,055092876 | ENST00000588126 | N/A       | N/A          | N/A                   |
| A_23_P15798    | 4,90887 | 4,98628 | -1,055122213 | ENST00000394014 | 83755     | NM_031854    | KRTAP4-12             |
| A_24_P321626   | 8,63437 | 8,71179 | -1,055129444 | ENST00000228347 | 55703     | NM_018082    | POLR3B                |
| A_24_P139620   | 7,25982 | 7,33725 | -1,055136757 | ENST00000482385 | 27005     | NM_001014443 | USP21                 |
| A_24_P19175    | 8,59422 | 8,67171 | -1,05518064  | ENST00000394341 | 140467    | NM_018083    | ZNF358                |
| A_33_P3347330  | 14,8636 | 14,9411 | -1,055187954 | ENST00000621567 | 54543     | NM_019059    | TOMM7                 |
| A_33_P3252889  | 4,79441 | 4,87199 | -1,055246468 | ENST00000268756 | 57649     | NM_020889    | PHF12                 |
| A_23_P23090    | 2,32076 | 2,39837 | -1,055268411 | ENST00000497198 | 5132      | NM_002597    | PDC                   |
| A_32_P228414   | 8,26249 | 8,34016 | -1,055312299 | ENST00000467707 | 26130     | NM_015635    | GAPVD1                |
| A_32_P218355   | 11,735  | 11,8127 | -1,055334244 | N/A             | 647024    | NM_001164446 | C6orf132              |
| A_21_P0011600  | 10,8223 | 10,9    | -1,055334244 | ENST00000578759 | N/A       | N/A          | N/A                   |
| A_24_P181506   | 11,3298 | 11,4075 | -1,055334244 | ENST00000394979 | 9726      | NM_014699    | ZNF646                |
| A_23_P373031   | 7,98856 | 8,06627 | -1,055341559 | ENST00000399634 | 775       | NM_000719    | CACNA1C               |
| A_22_P00000884 | 2,85052 | 2,92831 | -1,055400081 | N/A             | N/A       | N/A          | Inc-AHCY-1            |
| A_22_P00000428 | 8,48906 | 8,56686 | -1,055407397 | N/A             | N/A       | N/A          | Inc-AC073263.1-2      |
| A_22_P00003614 | 1,34681 | 1,42462 | -1,055414713 | N/A             | N/A       | CR745678     | Inc-CD38-3            |
| A_33_P3691615  | 6,33223 | 6,41007 | -1,055436659 | N/A             | N/A       | AK094945     | Inc-RP11-389E17.1.1-1 |
| A_24_P921933   | 7,73241 | 7,81026 | -1,055443975 | N/A             | 6426      | NM_001078166 | SRSF1                 |
| A_21_P0002343  | 1,34254 | 1,42039 | -1,055443975 | N/A             | N/A       | N/A          | Inc-SPAG16-1          |
| A_23_P7361     | 8,27931 | 8,35718 | -1,055458607 | ENST00000394607 | 79071     | NM_024090    | ELOVL6                |
| A_22_P00023268 | 1,3414  | 1,41927 | -1,055458607 | N/A             | N/A       | N/A          | Inc-PIKFYVE-2         |
| A_24_P135391   | 12,1645 | 12,2424 | -1,055480555 | ENST00000521313 | N/A       | N/A          | N/A                   |

|                |         |         |              |                 |           |              |                |
|----------------|---------|---------|--------------|-----------------|-----------|--------------|----------------|
| A_32_P44568    | 12,2458 | 12,3237 | -1,055480555 | ENST00000397561 | 3939      | NM_005566    | LDHA           |
| A_23_P106127   | 9,75421 | 9,83212 | -1,055487871 | ENST00000261244 | 9786      | NM_014749    | KIAA0586       |
| A_23_P349373   | 1,71584 | 1,79375 | -1,055487871 | ENST00000621764 | N/A       | BC024764     | N/A            |
| A_21_P0008557  | 1,34326 | 1,4212  | -1,055509819 | N/A             | 101928907 | XR_243166    | LOC101928907   |
| A_32_P82111    | 2,01141 | 2,08939 | -1,055539085 | ENST00000338305 | 57497     | AB033072     | LRFN2          |
| A_21_P0006384  | 4,7924  | 4,87038 | -1,055539085 | N/A             | N/A       | N/A          | Inc-DIRAS2-1   |
| A_21_P0014048  | 11,8409 | 11,9189 | -1,055553718 | ENST00000620700 | N/A       | N/A          | N/A            |
| A_33_P3278144  | 15,2397 | 15,3177 | -1,055553718 | ENST00000458542 | 338699    | NM_001300977 | ANKRD42        |
| A_23_P3823     | 11,9477 | 12,0257 | -1,055553718 | ENST00000567530 | 10295     | NM_001122957 | BCKDK          |
| A_33_P3209404  | 6,83534 | 6,91336 | -1,055568351 | N/A             | N/A       | N/A          | XLOC_I2_006173 |
| A_33_P3335525  | 1,3417  | 1,41972 | -1,055568351 | ENST00000368189 | 83416     | AF343663     | FCRL5          |
| A_22_P00016559 | 1,34664 | 1,42468 | -1,055582984 | N/A             | 286059    | NR_038873    | LOC286059      |
| A_33_P3216192  | 6,30276 | 6,38082 | -1,055597618 | ENST00000497246 | N/A       | N/A          | N/A            |
| A_33_P3245188  | 6,06932 | 6,14741 | -1,055619569 | N/A             | N/A       | BC003386     | N/A            |
| A_23_P126649   | 1,69985 | 1,77794 | -1,055619569 | ENST00000391860 | 79605     | NM_001258311 | PGBD5          |
| A_23_P79818    | 13,153  | 13,2311 | -1,055626886 | ENST00000372970 | 51526     | NM_016470    | OSER1          |
| A_33_P3219303  | 10,4914 | 10,5695 | -1,055626886 | ENST00000351304 | 1056      | NM_001807    | CEL            |
| A_33_P6473144  | 1,3412  | 1,41941 | -1,055707376 | N/A             | 101929319 | NR_110248    | LOC101929319   |
| A_22_P00019560 | 3,94603 | 4,02426 | -1,055722011 | N/A             | N/A       | N/A          | Inc-SFN-1      |
| A_23_P119573   | 1,55389 | 1,63212 | -1,055722011 | ENST00000615435 | 3780      | NM_002248    | KCNN1          |
| A_21_P0006214  | 1,33999 | 1,41822 | -1,055722011 | N/A             | N/A       | N/A          | Inc-DEC1-2     |
| A_32_P123255   | 5,97409 | 6,05233 | -1,055729329 | ENST00000343905 | 347454    | NM_001105576 | SOWAHD         |
| A_19_P00322440 | 1,34592 | 1,42417 | -1,055736647 | ENST00000598996 | 400550    | NR_036444    | FENDRR         |
| A_22_P00008882 | 1,34033 | 1,41859 | -1,055743965 | ENST00000570008 | 101929701 | NR_120368    | LINC01584      |
| A_21_P0008742  | 1,34038 | 1,41865 | -1,055751283 | ENST00000560818 | 101928499 | XR_248132    | LOC101928499   |
| A_33_P3338270  | 2,86941 | 2,94769 | -1,055758601 | ENST00000560634 | 102725249 | AK125436     | LOC102725249   |
| A_21_P0006535  | 1,38776 | 1,46605 | -1,055765919 | N/A             | N/A       | N/A          | Inc-AKAP4-1    |
| A_23_P254415   | 17,1458 | 17,2241 | -1,055773237 | ENST00000458478 | 388524    | NR_003662    | RPSAP58        |
| A_22_P00011550 | 1,34017 | 1,41847 | -1,055773237 | N/A             | N/A       | N/A          | Inc-PCDH18-1   |
| A_33_P3259112  | 1,68804 | 1,76638 | -1,055802509 | ENST00000535058 | 400046    | NR_033988    | FLJ41278       |
| A_22_P00023828 | 3,90923 | 3,98758 | -1,055809828 | ENST00000568118 | 23491     | NM_001185177 | CES3           |
| A_23_P74059    | 1,33972 | 1,41808 | -1,055817146 | ENST00000610706 | 4878      | NM_006172    | NPPA           |
| A_24_P355967   | 1,36169 | 1,44008 | -1,055839101 | ENST00000542664 | 3356      | NM_000621    | HTR2A          |

|                |         |         |              |                 |           |              |                  |
|----------------|---------|---------|--------------|-----------------|-----------|--------------|------------------|
| A_23_P99927    | 12,8355 | 12,9139 | -1,05584642  | ENST00000261875 | 51495     | NM_016395    | PTPLAD1          |
| A_33_P6473169  | 1,34334 | 1,42175 | -1,055853738 | ENST00000564534 | 101929144 | NR_110745    | LOC101929144     |
| A_24_P404868   | 1,34731 | 1,42578 | -1,055897651 | ENST00000436213 | 441509    | NM_001024452 | GLRA4            |
| A_24_P74329    | 10,029  | 10,1075 | -1,055919608 | ENST00000339914 | 284443    | NM_001076678 | ZNF493           |
| A_22_P00006869 | 1,34505 | 1,42357 | -1,055934246 | ENST00000429916 | N/A       | N/A          | N/A              |
| A_23_P22994    | 9,38338 | 9,46197 | -1,055985482 | ENST00000372651 | 4802      | NM_014223    | NFYC             |
| A_19_P00800638 | 10,1717 | 10,2503 | -1,055992801 | N/A             | 100505875 | NR_038342    | LINC01088        |
| A_22_P00007565 | 1,82027 | 1,89888 | -1,056000121 | N/A             | N/A       | N/A          | Inc-HBXIP-1      |
| A_33_P3364235  | 1,34265 | 1,42129 | -1,05602208  | N/A             | 100506241 | N/A          | LL22NC01-81G9.3  |
| A_33_P3261877  | 9,73168 | 9,81032 | -1,05602208  | N/A             | 100506639 | AF131822     | LOC100506639     |
| A_21_P0002197  | 1,34686 | 1,42552 | -1,05603672  | ENST00000440786 | 100271832 | NR_027097    | LOC100271832     |
| A_23_P256948   | 1,34205 | 1,42071 | -1,05603672  | ENST00000325509 | 9242      | NM_005098    | MSC              |
| A_23_P348146   | 1,34095 | 1,41962 | -1,05604404  | ENST00000466548 | 122060    | NM_001040153 | SLAIN1           |
| A_23_P435601   | 1,34131 | 1,42    | -1,05605868  | ENST00000451528 | 7903      | NM_175052    | ST8SIA4          |
| A_23_P84359    | 4,39917 | 4,47789 | -1,05608064  | ENST00000403001 | 6758      | NM_021015    | SSX5             |
| A_21_P0012950  | 1,34669 | 1,42541 | -1,05608064  | N/A             | N/A       | N/A          | XLOC_I2_011728   |
| A_21_P0014512  | 1,35352 | 1,43225 | -1,05608796  | N/A             | N/A       | AK097695     | N/A              |
| A_22_P00010690 | 1,6924  | 1,77116 | -1,056109921 | N/A             | N/A       | N/A          | Inc-NFE2L2-1     |
| A_23_P120629   | 2,31531 | 2,39416 | -1,056175807 | ENST00000568305 | 434       | NM_001672    | ASIP             |
| A_19_P00315631 | 1,3433  | 1,42215 | -1,056175807 | N/A             | 101927668 | N/A          | LOC101927668     |
| A_22_P00012251 | 6,11453 | 6,19338 | -1,056175807 | ENST00000545800 | N/A       | BM915382     | N/A              |
| A_22_P00021240 | 6,65685 | 6,73575 | -1,056212412 | N/A             | N/A       | AK096219     | Inc-PSMG4-1      |
| A_21_P0013534  | 1,34835 | 1,42725 | -1,056212412 | ENST00000529252 | 100132103 | NR_027424    | FAM66E           |
| A_33_P3272990  | 10,1601 | 10,239  | -1,056212412 | ENST00000601844 | 23770     | NM_012181    | FKBP8            |
| A_23_P93823    | 10,2831 | 10,362  | -1,056212412 | ENST00000480432 | 5982      | NM_181471    | RFC2             |
| A_22_P00024439 | 3,94294 | 4,02186 | -1,056227054 | N/A             | N/A       | N/A          | Inc-AC021066.1-1 |
| A_21_P0006617  | 1,3407  | 1,41964 | -1,056241697 | ENST00000422206 | N/A       | N/A          | N/A              |
| A_21_P0004989  | 5,58685 | 5,6658  | -1,056249018 | N/A             | N/A       | N/A          | Inc-GMDS-1       |
| A_22_P00015387 | 1,35085 | 1,42983 | -1,056270982 | N/A             | N/A       | N/A          | Inc-SREK1-2      |
| A_33_P3531970  | 1,35701 | 1,436   | -1,056278304 | ENST00000583687 | 643542    | NR_033921    | LOC643542        |
| A_33_P3330079  | 1,34409 | 1,42311 | -1,056300269 | N/A             | 100128242 | XR_110532    | LOC100128242     |
| A_33_P3232319  | 3,95595 | 4,03501 | -1,056329556 | ENST00000430130 | 401387    | NM_001161528 | LRRD1            |
| A_22_P00004706 | 1,35516 | 1,43423 | -1,056336878 | ENST00000563574 | N/A       | AF086093     | N/A              |

|                |         |         |              |                 |           |              |                |
|----------------|---------|---------|--------------|-----------------|-----------|--------------|----------------|
| A_33_P3211968  | 1,34562 | 1,4247  | -1,0563442   | N/A             | N/A       | N/A          | Inc-TCL1B-2    |
| A_22_P00009534 | 1,34156 | 1,42066 | -1,056358844 | ENST00000566798 | N/A       | N/A          | N/A            |
| A_24_P874052   | 1,34831 | 1,42742 | -1,056366166 | N/A             | N/A       | XM_005276115 | Inc-IDS-2      |
| A_33_P3321462  | 1,43431 | 1,51342 | -1,056366166 | ENST00000360374 | 219968    | NM_001005218 | OR5B21         |
| A_21_P0003702  | 1,34571 | 1,42486 | -1,056395455 | N/A             | N/A       | N/A          | Inc-TRIML1-5   |
| A_33_P3297321  | 1,37718 | 1,45634 | -1,056402778 | N/A             | 644694    | CF272591     | CDRT15P2       |
| A_21_P0013918  | 5,68906 | 5,76824 | -1,056417423 | ENST00000603357 | N/A       | N/A          | N/A            |
| A_33_P3258316  | 11,34   | 11,4192 | -1,056432068 | N/A             | N/A       | N/A          | XLOC_I2_013837 |
| A_24_P73290    | 9,88876 | 9,96798 | -1,056446713 | ENST00000377685 | 488       | NM_001681    | ATP2A2         |
| A_21_P0014238  | 2,21449 | 2,29374 | -1,056468682 | N/A             | 8555      | XM_005252287 | CDC14B         |
| A_33_P3320493  | 5,2361  | 5,31536 | -1,056476004 | N/A             | 10743     | AJ271790     | RAI1           |
| A_22_P00007614 | 1,3481  | 1,42736 | -1,056476004 | N/A             | N/A       | N/A          | Inc-HEBP1-1    |
| A_23_P88095    | 9,00209 | 9,08137 | -1,05649065  | ENST00000377636 | 9882      | NM_014832    | TBC1D4         |
| A_22_P00006631 | 1,34462 | 1,42391 | -1,056497974 | ENST00000445070 | N/A       | N/A          | N/A            |
| A_33_P3215834  | 1,39842 | 1,47771 | -1,056497974 | ENST00000507866 | 57537     | NM_020777    | SORCS2         |
| A_33_P3283201  | 5,66388 | 5,7432  | -1,056519943 | N/A             | N/A       | AK128779     | N/A            |
| A_24_P268993   | 7,32272 | 7,40205 | -1,056527266 | ENST00000485457 | 116842    | NM_052971    | LEAP2          |
| A_22_P00001263 | 1,34397 | 1,4233  | -1,056527266 | N/A             | N/A       | N/A          | Inc-ANKRD42-3  |
| A_33_P3291414  | 6,34991 | 6,4293  | -1,056571207 | N/A             | 100996573 | XM_003846565 | LOC100996573   |
| A_33_P3311971  | 1,66566 | 1,74505 | -1,056571207 | ENST00000390368 | N/A       | AB306227     | N/A            |
| A_19_P00321734 | 4,86233 | 4,94175 | -1,056593178 | ENST00000474477 | 100498859 | N/A          | LINC00881      |
| A_32_P9986     | 1,54223 | 1,62169 | -1,056622473 | N/A             | N/A       | N/A          | Inc-PHF10-1    |
| A_22_P00002554 | 1,34282 | 1,4223  | -1,056637121 | N/A             | N/A       | N/A          | Inc-C17orf75-1 |
| A_33_P3333436  | 3,51416 | 3,59365 | -1,056644445 | ENST00000478085 | 27352     | AK000006     | SGSM3          |
| A_33_P3300864  | 1,34858 | 1,42807 | -1,056644445 | ENST00000313503 | 390151    | NM_001005200 | OR8H2          |
| A_33_P3241482  | 10,693  | 10,7725 | -1,056651769 | ENST00000358149 | 23567     | NM_012279    | ZNF346         |
| A_22_P00011232 | 1,34855 | 1,4281  | -1,056688391 | N/A             | N/A       | BC038194     | Inc-OR10J3-1   |
| A_33_P3278755  | 1,348   | 1,42757 | -1,05670304  | ENST00000535679 | 391365    | NM_001032377 | SULT6B1        |
| A_21_P0009826  | 1,46106 | 1,54064 | -1,056710364 | ENST00000424931 | N/A       | N/A          | N/A            |
| A_24_P13032    | 9,2768  | 9,35638 | -1,056710364 | ENST00000473824 | 7321      | NM_003338    | UBE2D1         |
| A_23_P87072    | 4,64872 | 4,72831 | -1,056717689 | ENST00000284288 | 116337    | NM_052959    | PANX3          |
| A_22_P00009104 | 1,61973 | 1,69932 | -1,056717689 | N/A             | N/A       | N/A          | Inc-LIFR-4     |
| A_33_P3376154  | 8,02533 | 8,10492 | -1,056717689 | N/A             | 100128002 | XR_159537    | LOC100128002   |

|                |         |         |              |                 |           |              |               |
|----------------|---------|---------|--------------|-----------------|-----------|--------------|---------------|
| A_32_P95739    | 15,6477 | 15,7273 | -1,056725014 | ENST00000396705 | 7167      | NM_000365    | TPI1          |
| A_22_P00002950 | 6,33363 | 6,41325 | -1,056739663 | N/A             | N/A       | N/A          | Inc-C5orf47-2 |
| A_23_P386450   | 9,0492  | 9,12886 | -1,056768962 | ENST00000506928 | 51426     | NM_016218    | POLK          |
| A_23_P335239   | 4,60001 | 4,67968 | -1,056776287 | ENST00000262994 | 2549      | NM_207123    | GAB1          |
| A_21_P0001800  | 3,75445 | 3,83412 | -1,056776287 | N/A             | N/A       | N/A          | Inc-TNP1-3    |
| A_33_P3301752  | 3,28086 | 3,36054 | -1,056783612 | N/A             | 79860     | AK025022     | FLJ21369      |
| A_33_P3398722  | 1,34431 | 1,42399 | -1,056783612 | N/A             | N/A       | BC030136     | N/A           |
| A_24_P346368   | 12,033  | 12,1127 | -1,056798263 | ENST00000341567 | 55069     | NM_017994    | TMEM248       |
| A_33_P3245784  | 4,13818 | 4,2179  | -1,056812913 | ENST00000314529 | 253639    | NM_175888    | ZNF620        |
| A_23_P200143   | 8,50028 | 8,58001 | -1,056820238 | ENST00000368073 | 50717     | NM_015726    | DCAF8         |
| A_23_P59807    | 1,61503 | 1,69476 | -1,056820238 | ENST00000265441 | 7472      | NM_003391    | WNT2          |
| A_33_P3235043  | 1,34365 | 1,42346 | -1,056878843 | N/A             | 440730    | NM_001004342 | TRIM67        |
| A_33_P3334260  | 1,64847 | 1,72831 | -1,05690082  | ENST00000418344 | 729987    | NR_046088    | LOC729987     |
| A_22_P00019840 | 4,31868 | 4,39858 | -1,056944776 | ENST00000412293 | 100134368 | NR_024453    | LOC100134368  |
| A_33_P3235766  | 11,2029 | 11,2828 | -1,056944776 | ENST00000399302 | 79832     | NM_001076786 | QSER1         |
| A_33_P3390708  | 2,81325 | 2,89317 | -1,056959429 | ENST00000474495 | 23670     | NM_013390    | TMEM2         |
| A_23_P361940   | 1,34777 | 1,42771 | -1,056974081 | ENST00000534968 | 8832      | NM_003874    | CD84          |
| A_23_P430930   | 1,34579 | 1,42574 | -1,056981408 | ENST00000276659 | 340419    | NM_178565    | RSPO2         |
| A_24_P95029    | 14,5203 | 14,6003 | -1,057018041 | ENST00000416801 | 8887      | NM_006024    | TAX1BP1       |
| A_24_P17302    | 7,20155 | 7,28157 | -1,057032694 | ENST00000349431 | 118424    | NM_194458    | UBE2J2        |
| A_24_P349728   | 1,34292 | 1,42296 | -1,057047348 | N/A             | 100129312 | AK095037     | LOC100129312  |
| A_22_P00021977 | 1,34492 | 1,42499 | -1,057069329 | ENST00000558874 | 101927112 | NR_120320    | LINC01581     |
| A_23_P354297   | 12,6094 | 12,6895 | -1,05709131  | ENST00000464728 | 63922     | NM_022092    | CHTF18        |
| A_22_P00016681 | 6,21318 | 6,29328 | -1,05709131  | N/A             | N/A       | N/A          | Inc-TPPP2-1   |
| A_33_P3310696  | 11,9851 | 12,0652 | -1,05709131  | ENST00000400930 | 118424    | NM_194458    | UBE2J2        |
| A_21_P0005113  | 1,7285  | 1,80863 | -1,057113292 | N/A             | N/A       | N/A          | Inc-HLA-DRA-1 |
| A_22_P00019667 | 2,02701 | 2,10716 | -1,057127947 | N/A             | N/A       | N/A          | Inc-ADAM21-2  |
| A_23_P79591    | 1,58249 | 1,66264 | -1,057127947 | ENST00000233242 | 338       | NM_000384    | APOB          |
| A_22_P00020190 | 1,3595  | 1,43967 | -1,057142602 | ENST00000582518 | N/A       | N/A          | N/A           |
| A_21_P0004531  | 5,36663 | 5,44681 | -1,057149929 | N/A             | 101929719 | XR_425926    | LOC101929719  |
| A_32_P225604   | 17,5176 | 17,5978 | -1,057164585 | ENST00000426545 | 6125      | NM_000969    | RPL5          |
| A_22_P00008291 | 1,34534 | 1,42559 | -1,057201224 | ENST00000423218 | N/A       | XM_005254228 | Inc-ITGA11-1  |
| A_32_P153892   | 9,25795 | 9,33823 | -1,057223208 | ENST00000344293 | 83860     | NM_031923    | TAF3          |

|                |         |         |              |                 |           |              |                     |
|----------------|---------|---------|--------------|-----------------|-----------|--------------|---------------------|
| A_21_P0007691  | 1,34339 | 1,42371 | -1,057252521 | N/A             | N/A       | N/A          | Inc-SLCO1A2-3       |
| A_33_P3221578  | 1,34453 | 1,4249  | -1,057289163 | ENST00000518973 | 401478    | XR_171754    | FLJ45872            |
| A_22_P00002012 | 9,14685 | 9,22723 | -1,057296491 | N/A             | N/A       | N/A          | Inc-BDKRB1-1        |
| A_24_P308029   | 4,44692 | 4,52731 | -1,05730382  | ENST00000592984 | 126393    | NM_144617    | HSPB6               |
| A_22_P00004004 | 1,34583 | 1,42622 | -1,05730382  | N/A             | N/A       | N/A          | Inc-CHMP1A-1        |
| A_33_P3333364  | 1,34737 | 1,42776 | -1,05730382  | ENST00000390287 | N/A       | AY043127     | N/A                 |
| A_19_P00320066 | 1,68101 | 1,76142 | -1,057318478 | ENST00000532564 | N/A       | N/A          | N/A                 |
| A_24_P69095    | 8,247   | 8,32743 | -1,057333135 | ENST00000618628 | 8507      | NM_003633    | ENC1                |
| A_23_P404059   | 1,34531 | 1,42576 | -1,057347793 | ENST00000464219 | 139135    | NM_173493    | PASD1               |
| A_33_P3710082  | 1,34215 | 1,42265 | -1,057384439 | ENST00000423724 | 799       | NM_001164737 | CALCR               |
| A_21_P0011938  | 7,59374 | 7,6743  | -1,057428415 | ENST00000528268 | 57730     | NM_025190    | ANKRD36B            |
| A_21_P0007899  | 1,34818 | 1,42874 | -1,057428415 | ENST00000537478 | 100996671 | NR_110036    | LOC100996671        |
| A_21_P0011889  | 4,18316 | 4,26373 | -1,057435744 | N/A             | 101927187 | N/A          | LOC101927187        |
| A_33_P3234108  | 1,34628 | 1,42686 | -1,057443074 | N/A             | N/A       | N/A          | N/A                 |
| A_24_P358131   | 12,5712 | 12,6518 | -1,057457733 | ENST00000404956 | N/A       | N/A          | N/A                 |
| A_33_P3867391  | 2,3239  | 2,40451 | -1,057465063 | N/A             | 26651     | BM563292     | OR7E19P             |
| A_23_P54170    | 9,94292 | 10,0236 | -1,057516373 | ENST00000556044 | 10001     | NM_005466    | MED6                |
| A_23_P140450   | 9,63058 | 9,71136 | -1,057589677 | ENST00000380902 | 11001     | NM_003645    | SLC27A2             |
| A_23_P320829   | 5,4671  | 5,54789 | -1,057597008 | ENST00000555529 | 145508    | NM_152446    | CEP128              |
| A_21_P0001960  | 1,34742 | 1,42822 | -1,057604338 | ENST00000434559 | N/A       | N/A          | N/A                 |
| A_21_P0003321  | 1,34321 | 1,42404 | -1,057626331 | ENST00000507652 | 101928551 | N/A          | LOC101928551        |
| A_24_P372217   | 9,69595 | 9,77679 | -1,057633662 | ENST00000276461 | 11160     | NM_007175    | ERLIN2              |
| A_33_P3307267  | 1,34447 | 1,42534 | -1,057655655 | ENST00000321023 | 7450      | BC022258     | VWF                 |
| A_22_P00013549 | 1,3461  | 1,42699 | -1,057670317 | N/A             | N/A       | BX108061     | Inc-RP11-43D2.2.1-1 |
| A_21_P0012201  | 1,34481 | 1,4258  | -1,057743632 | N/A             | N/A       | N/A          | XLOC_I2_009198      |
| A_33_P3413216  | 10,735  | 10,816  | -1,057750964 | ENST00000409543 | 7106      | NM_001025237 | TSPAN4              |
| A_23_P106694   | 11,8037 | 11,8847 | -1,057750964 | ENST00000547687 | 5119      | NM_002768    | CHMP1A              |
| A_23_P69100    | 4,60573 | 4,68674 | -1,057758295 | ENST00000496710 | 26084     | NM_015595    | ARHGEF26            |
| A_22_P00003220 | 5,74429 | 5,82536 | -1,057802287 | ENST00000449188 | 647219    | N/A          | ASCL5               |
| A_19_P00319721 | 5,95799 | 6,03908 | -1,057816952 | N/A             | 283011    | N/A          | FLJ37201            |
| A_21_P0008810  | 1,47926 | 1,56039 | -1,057846281 | ENST00000570105 | N/A       | N/A          | N/A                 |
| A_21_P0002087  | 1,34498 | 1,42616 | -1,057882944 | ENST00000455614 | N/A       | N/A          | N/A                 |
| A_24_P385585   | 5,7155  | 5,79672 | -1,057912275 | ENST00000355654 | 129787    | NM_152834    | TMEM18              |

|                |         |         |              |                 |        |           |                |
|----------------|---------|---------|--------------|-----------------|--------|-----------|----------------|
| A_21_P0003845  | 1,34865 | 1,4299  | -1,057934274 | N/A             | N/A    | N/A       | Inc-AIMP1-1    |
| A_24_P320759   | 9,02004 | 9,10131 | -1,05794894  | ENST00000482465 | 79706  | NM_024653 | PRKRIP1        |
| A_22_P00021850 | 1,35486 | 1,43617 | -1,057978273 | N/A             | N/A    | N/A       | Inc-SIM2-1     |
| A_33_P3402354  | 5,99781 | 6,07913 | -1,057985606 | N/A             | 56252  | L40403    | YLPM1          |
| A_21_P0005909  | 3,22948 | 3,31082 | -1,058000273 | N/A             | N/A    | N/A       | Inc-ASAP1-2    |
| A_32_P32739    | 8,10518 | 8,18653 | -1,058007607 | ENST00000293404 | 162417 | NM_153006 | NAGS           |
| A_21_P0004899  | 1,34786 | 1,42925 | -1,058036941 | N/A             | N/A    | N/A       | Inc-MYO6-2     |
| A_21_P0008406  | 1,34712 | 1,42852 | -1,058044275 | N/A             | N/A    | N/A       | Inc-RNASE1-1   |
| A_24_P353905   | 1,63036 | 1,71185 | -1,058110281 | ENST00000476718 | 54587  | NM_032348 | MXRA8          |
| A_33_P3288135  | 6,45566 | 6,53716 | -1,058117616 | ENST00000506642 | 10814  | N/A       | CPLX2          |
| A_24_P381505   | 4,09216 | 4,17366 | -1,058117616 | ENST00000320460 | 144321 | NM_152436 | GLIPR1L2       |
| A_22_P00020116 | 5,98874 | 6,07027 | -1,058139619 | ENST00000553301 | N/A    | DA209974  | N/A            |
| A_33_P3232980  | 4,69952 | 4,78106 | -1,058146953 | ENST00000300843 | 57787  | NM_031417 | MARK4          |
| A_22_P00005026 | 1,43071 | 1,51232 | -1,058198296 | N/A             | N/A    | N/A       | Inc-DDX51-2    |
| A_33_P3389668  | 2,13875 | 2,22038 | -1,058212966 | N/A             | N/A    | N/A       | N/A            |
| A_22_P00013975 | 1,3451  | 1,42673 | -1,058212966 | N/A             | N/A    | N/A       | Inc-RTN4-2     |
| A_22_P00023046 | 2,44239 | 2,52404 | -1,058227636 | N/A             | N/A    | N/A       | Inc-PLD5-1     |
| A_19_P00321194 | 1,34211 | 1,42382 | -1,058271647 | ENST00000601523 | 641516 | NR_002838 | KC6            |
| A_33_P3367550  | 2,7986  | 2,88031 | -1,058271647 | ENST00000440244 | 401242 | N/A       | LOC401242      |
| A_23_P150555   | 1,63845 | 1,72026 | -1,058345004 | ENST00000244926 | 10647  | NM_006551 | SCGB1D2        |
| A_21_P0011805  | 1,34385 | 1,42566 | -1,058345004 | N/A             | N/A    | N/A       | XLOC_I2_007401 |
| A_23_P106236   | 1,34624 | 1,42812 | -1,058396356 | N/A             | 29018  | NR_024620 | FOXN3-AS2      |
| A_23_P81399    | 14,356  | 14,4379 | -1,058411029 | ENST00000360718 | 8878   | NM_003900 | SQSTM1         |
| A_32_P228268   | 1,61052 | 1,69244 | -1,058425702 | ENST00000492261 | 196385 | NM_207437 | DNAH10         |
| A_21_P0005939  | 1,34298 | 1,42496 | -1,058469721 | N/A             | N/A    | N/A       | Inc-TRIM55-1   |
| A_23_P142634   | 13,1454 | 13,2274 | -1,058484395 | ENST00000537825 | 29081  | NM_014168 | METTL5         |
| A_21_P0002347  | 2,41022 | 2,49222 | -1,058484395 | N/A             | N/A    | N/A       | Inc-SMARCAL1-1 |
| A_24_P297539   | 14,2752 | 14,3572 | -1,058484395 | ENST00000617055 | 11065  | NM_181801 | UBE2C          |
| A_33_P3413025  | 1,66107 | 1,74308 | -1,058491732 | ENST00000390457 | N/A    | D13075    | N/A            |
| A_21_P0000708  | 4,5291  | 4,61113 | -1,058506406 | ENST00000556964 | 317760 | NR_037933 | ADAM20P1       |
| A_33_P3880302  | 9,73919 | 9,82122 | -1,058506406 | ENST00000374632 | 2048   | NM_004442 | EPHB2          |
| A_23_P101111   | 9,24655 | 9,32864 | -1,058550429 | ENST00000590599 | 9150   | NM_004715 | CTDP1          |
| A_23_P152804   | 14,6317 | 14,7138 | -1,058557766 | ENST00000013034 | 4830   | NM_198175 | NME1           |

|                |         |         |              |                 |           |              |                     |
|----------------|---------|---------|--------------|-----------------|-----------|--------------|---------------------|
| A_33_P3231472  | 8,26144 | 8,3436  | -1,058601791 | ENST00000486372 | 27348     | NM_014506    | TOR1B               |
| A_23_P28084    | 11,2527 | 11,3349 | -1,058631142 | ENST00000587230 | 8677      | NM_001271610 | STX10               |
| A_22_P00023410 | 2,98752 | 3,06972 | -1,058631142 | ENST00000562167 | 101927277 | XR_243982    | LOC101927277        |
| A_24_P216681   | 11,4015 | 11,4837 | -1,058631142 | ENST00000315732 | 84967     | NM_032881    | LSM10               |
| A_22_P00025366 | 1,34261 | 1,42482 | -1,05863848  | N/A             | N/A       | AF419291     | Inc-UCP2-1          |
| A_21_P0002653  | 7,83201 | 7,91429 | -1,058689847 | ENST00000435504 | 55252     | XM_006712039 | ASXL2               |
| A_23_P12336    | 9,86979 | 9,95208 | -1,058697185 | ENST00000370078 | 55170     | NM_018137    | PRMT6               |
| A_33_P3369567  | 9,43983 | 9,52215 | -1,0587192   | ENST00000294715 | 4046      | NM_001289005 | LSP1                |
| A_24_P380348   | 8,0399  | 8,12226 | -1,058748555 | ENST00000619054 | 60682     | NM_001044305 | SMAP1               |
| A_21_P0013521  | 1,77434 | 1,85672 | -1,058763232 | N/A             | N/A       | N/A          | XLOC_I2_014579      |
| A_23_P151059   | 3,30776 | 3,39016 | -1,05877791  | ENST00000538603 | 55138     | NM_018088    | FAM90A1             |
| A_23_P114883   | 7,59766 | 7,68006 | -1,05877791  | ENST00000354955 | 2331      | NM_002023    | FMOD                |
| A_23_P26021    | 12,2139 | 12,2963 | -1,05877791  | ENST00000299259 | 9318      | NM_004236    | COPS2               |
| A_21_P0003253  | 1,73953 | 1,82195 | -1,058792588 | N/A             | N/A       | N/A          | Inc-GYG1-1          |
| A_21_P0001246  | 11,2429 | 11,3254 | -1,058851301 | ENST00000458044 | 101927851 | N/A          | LOC101927851        |
| A_23_P59397    | 10,3991 | 10,4816 | -1,058851301 | ENST00000252655 | 83861     | NM_031924    | RSPH3               |
| A_33_P3325011  | 16,2887 | 16,3712 | -1,058851301 | ENST00000487608 | N/A       | N/A          | N/A                 |
| A_21_P0002985  | 1,34199 | 1,4245  | -1,058858641 | N/A             | N/A       | N/A          | Inc-ROBO2-5         |
| A_21_P0009632  | 3,91371 | 3,99624 | -1,05887332  | N/A             | N/A       | N/A          | Inc-LMAN1-1         |
| A_23_P322735   | 1,66604 | 1,74859 | -1,058887999 | ENST00000486417 | 117531    | NM_138691    | TMC1                |
| A_23_P150741   | 10,0989 | 10,1815 | -1,058924698 | ENST00000442398 | 26005     | NM_001286577 | C2CD3               |
| A_24_P194154   | 12,7757 | 12,8583 | -1,058924698 | ENST00000599848 | 5976      | NM_002911    | UPF1                |
| A_23_P334218   | 9,01189 | 9,09451 | -1,058939378 | ENST00000287380 | 93594     | NM_145647    | TBC1D31             |
| A_22_P00005452 | 4,86558 | 4,94824 | -1,058968738 | ENST00000449242 | N/A       | BE906333     | N/A                 |
| A_33_P3751193  | 1,34236 | 1,42504 | -1,058983419 | N/A             | N/A       | N/A          | N/A                 |
| A_23_P154065   | 14,466  | 14,5487 | -1,058998099 | ENST00000248437 | 7277      | NM_006000    | TUBA4A              |
| A_23_P64799    | 10,9996 | 11,0823 | -1,058998099 | ENST00000552876 | 8086      | NM_015665    | AAAS                |
| A_22_P00022854 | 1,76838 | 1,8511  | -1,05901278  | N/A             | 100874275 | N/A          | LINC01216           |
| A_24_P165656   | 8,55628 | 8,639   | -1,05901278  | ENST00000234179 | 23683     | NM_005813    | PRKD3               |
| A_24_P234792   | 9,67144 | 9,75421 | -1,059049483 | ENST00000345990 | 1456      | NM_001044723 | CSNK1G3             |
| A_21_P0008970  | 1,34314 | 1,42598 | -1,05910087  | N/A             | N/A       | N/A          | Inc-AC009120.10.1-2 |
| A_33_P3311907  | 8,44904 | 8,53193 | -1,059137576 | ENST00000379291 | 51256     | NM_001258457 | TBC1D7              |
| A_33_P3387696  | 10,9746 | 11,0575 | -1,059144918 | ENST00000358230 | 51643     | NM_001282606 | TMBIM4              |



|                |         |         |              |                 |           |              |                |
|----------------|---------|---------|--------------|-----------------|-----------|--------------|----------------|
| A_22_P00007173 | 1,3422  | 1,42512 | -1,059159601 | N/A             | N/A       | N/A          | Inc-GNLY-1     |
| A_22_P00008861 | 3,88218 | 3,96514 | -1,059188967 | N/A             | N/A       | N/A          | Inc-KLHDC9-1   |
| A_23_P115346   | 10,185  | 10,2681 | -1,059291757 | ENST00000468891 | 1939      | NM_006893    | EIF2D          |
| A_21_P0010942  | 4,21226 | 4,29537 | -1,059299099 | ENST00000411791 | 643161    | NM_001146157 | FAM25A         |
| A_23_P87879    | 1,55238 | 1,63552 | -1,059321127 | ENST00000228434 | 969       | NM_001781    | CD69           |
| A_21_P0005279  | 1,34602 | 1,42916 | -1,059321127 | N/A             | N/A       | N/A          | Inc-INTS1-1    |
| A_21_P0005510  | 1,34274 | 1,42591 | -1,059343155 | N/A             | N/A       | N/A          | Inc-PCLO-1     |
| A_21_P0009028  | 1,6958  | 1,77902 | -1,05937987  | N/A             | N/A       | N/A          | Inc-SALL1-1    |
| A_24_P352637   | 3,33726 | 3,4205  | -1,059394556 | ENST00000556621 | 283629    | NM_174944    | TSSK4          |
| A_32_P73217    | 9,04473 | 9,12797 | -1,059394556 | ENST00000338272 | 56900     | NM_020141    | TMEM167B       |
| A_32_P466877   | 2,50594 | 2,5892  | -1,059409242 | ENST00000316436 | 132228    | AK095927     | LSMEM2         |
| A_21_P0006439  | 4,88749 | 4,97077 | -1,059423929 | N/A             | N/A       | N/A          | Inc-SLC25A6-1  |
| A_32_P220739   | 4,26354 | 4,34694 | -1,059512053 | ENST00000615961 | 26149     | NM_033160    | ZNF658         |
| A_23_P202501   | 8,54619 | 8,62962 | -1,059534085 | ENST00000466945 | 55328     | NM_001031709 | RNLS           |
| A_22_P00000254 | 4,50748 | 4,59092 | -1,059541429 | ENST00000438935 | N/A       | N/A          | N/A            |
| A_21_P0000865  | 7,81908 | 7,90257 | -1,059578151 | ENST00000506222 | 100507584 | NR_038989    | LINC01016      |
| A_23_P94857    | 10,8609 | 10,9444 | -1,059585495 | ENST00000544448 | 11253     | NM_016219    | MAN1B1         |
| A_21_P0006910  | 5,93044 | 6,01395 | -1,05959284  | N/A             | N/A       | N/A          | Inc-ADD3-2     |
| A_19_P00321178 | 1,43186 | 1,51539 | -1,059607529 | ENST00000420819 | 101927136 | NR_110840    | LOC101927136   |
| A_21_P0010800  | 3,23724 | 3,32081 | -1,059636908 | N/A             | 101927762 | NR_120629    | LOC101927762   |
| A_23_P114134   | 1,49935 | 1,58294 | -1,059651598 | ENST00000298396 | 10214     | NM_021014    | SSX3           |
| A_33_P3268395  | 1,56639 | 1,64998 | -1,059651598 | N/A             | N/A       | N/A          | N/A            |
| A_32_P168886   | 15,2146 | 15,2982 | -1,059658943 | ENST00000353999 | 7458      | NM_022170    | EIF4H          |
| A_22_P00024059 | 8,83302 | 8,91667 | -1,059695668 | N/A             | N/A       | N/A          | Inc-NDE1-1     |
| A_23_P214658   | 9,48524 | 9,56891 | -1,059710359 | ENST00000375050 | 5089      | NM_002586    | PBX2           |
| A_33_P3329169  | 1,47336 | 1,55705 | -1,05972505  | ENST00000430871 | 79679     | NR_045603    | VTCN1          |
| A_33_P3278764  | 1,3983  | 1,48204 | -1,059761778 | N/A             | 100132078 | NR_046085    | LOC100132078   |
| A_33_P3325250  | 1,70273 | 1,78647 | -1,059761778 | N/A             | N/A       | N/A          | N/A            |
| A_32_P100430   | 9,20375 | 9,2875  | -1,059769123 | N/A             | 101927974 | XR_242328    | LOC101927974   |
| A_21_P0012145  | 3,16349 | 3,24724 | -1,059769123 | N/A             | N/A       | N/A          | Inc-SPTLC3-2   |
| A_21_P0010272  | 1,34726 | 1,43106 | -1,059805853 | N/A             | N/A       | N/A          | Inc-TMPRSS15-9 |
| A_33_P3240318  | 8,89572 | 8,97954 | -1,059820545 | ENST00000370002 | 5309      | NM_005029    | PITX3          |
| A_22_P00020217 | 6,46079 | 6,54463 | -1,059835237 | ENST00000425153 | N/A       | N/A          | N/A            |

|                |         |         |              |                 |           |              |                |
|----------------|---------|---------|--------------|-----------------|-----------|--------------|----------------|
| A_21_P0014448  | 2,14312 | 2,22696 | -1,059835237 | N/A             | 101927659 | NR_108077    | SMAD1-AS2      |
| A_22_P00009165 | 7,25821 | 7,34208 | -1,059857276 | N/A             | 100873949 | NR_046696    | IPO9-AS1       |
| A_23_P300781   | 10,5454 | 10,6293 | -1,059879316 | ENST00000423368 | 4850      | NM_013316    | CNOT4          |
| A_23_P214411   | 10,0516 | 10,1355 | -1,059879316 | ENST00000470973 | 2739      | NM_006708    | GLO1           |
| A_32_P20691    | 9,89074 | 9,97467 | -1,059901355 | ENST00000562078 | 1198      | NM_003992    | CLK3           |
| A_33_P3327290  | 1,61217 | 1,69611 | -1,059908702 | ENST00000333141 | 285429    | NM_001029955 | DCAF4L1        |
| A_23_P69497    | 5,01321 | 5,09716 | -1,059916049 | ENST00000296130 | 7123      | NM_003278    | CLEC3B         |
| A_22_P00001586 | 1,80817 | 1,89212 | -1,059916049 | N/A             | N/A       | BX499407     | Inc-ARMC1-2    |
| A_22_P00019071 | 1,43973 | 1,52371 | -1,059938089 | N/A             | N/A       | BC071802     | Inc-CCT4-1     |
| A_21_P0011668  | 2,93807 | 3,02205 | -1,059938089 | N/A             | N/A       | N/A          | XLOC_I2_006575 |
| A_33_P3374952  | 13,1932 | 13,2772 | -1,059952783 | ENST00000372299 | 128209    | NM_173484    | KLF17          |
| A_24_P849801   | 12,3003 | 12,3843 | -1,059952783 | ENST00000234875 | 6146      | NM_000983    | RPL22          |
| A_21_P0009962  | 1,34415 | 1,42815 | -1,059952783 | N/A             | N/A       | N/A          | Inc-NCOA3-9    |
| A_33_P3421703  | 1,38599 | 1,47002 | -1,059974825 | ENST00000613139 | 6668      | BC005914     | SP2            |
| A_21_P0012085  | 2,02476 | 2,1088  | -1,059982172 | ENST00000420579 | 101060091 | N/A          | LOC101060091   |
| A_33_P3655646  | 1,35226 | 1,43635 | -1,060018909 | N/A             | 5915      | BC069735     | RARB           |
| A_23_P132763   | 3,81358 | 3,89767 | -1,060018909 | ENST00000398399 | 389136    | NM_016206    | VGLL3          |
| A_21_P0005219  | 2,45271 | 2,53683 | -1,060040951 | ENST00000442800 | 223082    | N/A          | ZNRF2          |
| A_24_P753161   | 7,11828 | 7,20243 | -1,060062995 | ENST00000374580 | 659       | NM_001204    | BMPR2          |
| A_21_P0014151  | 1,71403 | 1,79818 | -1,060062995 | N/A             | 100506851 | XR_108264    | LOC100506851   |
| A_21_P0001623  | 3,44157 | 3,52574 | -1,06007769  | N/A             | N/A       | N/A          | Inc-PTPN14-3   |
| A_24_P351283   | 6,34952 | 6,43369 | -1,06007769  | ENST00000263268 | 55686     | NM_018000    | MREG           |
| A_33_P3359508  | 1,48015 | 1,56437 | -1,06011443  | N/A             | 1789      | AB208880     | DNMT3B         |
| A_22_P00021653 | 4,40686 | 4,49108 | -1,06011443  | ENST00000478745 | N/A       | N/A          | N/A            |
| A_33_P3381064  | 3,08521 | 3,16949 | -1,06015852  | ENST00000478520 | 729159    | NM_001282301 | LOC729159      |
| A_24_P19268    | 12,3278 | 12,4121 | -1,060173217 | ENST00000613286 | 148206    | NM_182515    | ZNF714         |
| A_33_P3677020  | 4,56721 | 4,65158 | -1,060224658 | N/A             | 283888    | NR_037158    | IL21R-AS1      |
| A_22_P00007933 | 7,47593 | 7,56032 | -1,060239356 | N/A             | 100873982 | NR_046570    | ABCC5-AS1      |
| A_23_P415827   | 8,91299 | 8,9974  | -1,060254055 | ENST00000620483 | 23176     | NM_015146    | set-08         |
| A_23_P207666   | 8,5442  | 8,62863 | -1,060268753 | ENST00000574788 | 84669     | NM_032582    | USP32          |
| A_23_P218637   | 10,6061 | 10,6906 | -1,060320199 | ENST00000329516 | 84220     | NM_005054    | RGPD5          |
| A_33_P3372600  | 1,66325 | 1,74777 | -1,060334898 | ENST00000565543 | 102723640 | HY009132     | LOC102723640   |
| A_22_P00014702 | 3,32546 | 3,40999 | -1,060342248 | N/A             | N/A       | N/A          | Inc-SLC25A37-1 |

|                |         |         |              |                 |           |              |                |
|----------------|---------|---------|--------------|-----------------|-----------|--------------|----------------|
| A_22_P00002611 | 5,18233 | 5,26687 | -1,060349597 | N/A             | N/A       | N/A          | Inc-C1QTNF8-4  |
| A_23_P304543   | 10,0086 | 10,0932 | -1,060393697 | ENST00000466971 | 4799      | NM_147133    | NFX1           |
| A_33_P3259821  | 6,91979 | 7,0044  | -1,060401047 | ENST00000461998 | 23348     | NM_001130050 | DOCK9          |
| A_33_P3279847  | 6,46242 | 6,54708 | -1,060437798 | ENST00000367363 | 135250    | NM_139165    | RAET1E         |
| A_21_P0002344  | 2,02977 | 2,11444 | -1,060445149 | N/A             | 101928103 | N/A          | LOC101928103   |
| A_33_P3373970  | 1,70703 | 1,79171 | -1,060452499 | N/A             | N/A       | N/A          | N/A            |
| A_22_P00010175 | 7,7921  | 7,8768  | -1,0604672   | N/A             | 100505641 | NR_046254    | FGD5-AS1       |
| A_24_P191971   | 7,99619 | 8,08094 | -1,060503954 | ENST00000297109 | 79685     | NM_024632    | SAP30L         |
| A_21_P0012300  | 7,21919 | 7,30396 | -1,060518656 | N/A             | N/A       | N/A          | XLOC_I2_009571 |
| A_21_P0005470  | 4,49311 | 4,57788 | -1,060518656 | N/A             | N/A       | N/A          | Inc-NDUFA4-1   |
| A_23_P104819   | 1,61055 | 1,69535 | -1,060540709 | ENST00000531295 | 11181     | NM_007180    | TREH           |
| A_22_P00010031 | 4,05787 | 4,14269 | -1,060555411 | ENST00000415655 | N/A       | N/A          | N/A            |
| A_33_P3233784  | 5,08128 | 5,16614 | -1,060584817 | ENST00000423535 | 255349    | NM_001001663 | TMEM211        |
| A_22_P00001070 | 1,34633 | 1,4312  | -1,060592168 | ENST00000566990 | N/A       | BG188072     | N/A            |
| A_21_P0014173  | 5,35231 | 5,43725 | -1,06064363  | N/A             | 102724889 | XR_425995    | LOC102724889   |
| A_22_P00012220 | 2,48095 | 2,56589 | -1,06064363  | N/A             | 100132163 | NR_029379    | PHKA2-AS1      |
| A_23_P213661   | 8,89486 | 8,9798  | -1,06064363  | ENST00000358359 | 23262     | NM_015216    | PIIP5K2        |
| A_21_P0014242  | 1,34474 | 1,42973 | -1,060680389 | N/A             | N/A       | AK131516     | Inc-DENND1A-3  |
| A_33_P3358347  | 9,24392 | 9,32891 | -1,060680389 | N/A             | N/A       | N/A          | N/A            |
| A_23_P31866    | 10,567  | 10,652  | -1,060687741 | ENST00000519391 | 90390     | NM_080651    | MED30          |
| A_33_P3362781  | 7,53905 | 7,62405 | -1,060687741 | ENST00000564159 | 79786     | XR_243425    | KLHL36         |
| A_21_P0007311  | 9,03826 | 9,12332 | -1,060731855 | N/A             | N/A       | N/A          | Inc-C11orf89-1 |
| A_23_P254896   | 1,40352 | 1,4886  | -1,06074656  | ENST00000439435 | 8823      | NM_003868    | FGF16          |
| A_23_P397208   | 4,26961 | 4,3547  | -1,060753913 | ENST00000472225 | 2946      | NM_000848    | GSTM2          |
| A_33_P3216433  | 8,01094 | 8,09604 | -1,060761265 | ENST00000424846 | 147804    | NR_003148    | TPM3P9         |
| A_21_P0008273  | 1,62182 | 1,70693 | -1,060768618 | ENST00000499910 | 101929241 | NR_110165    | LOC101929241   |
| A_21_P0006353  | 1,73189 | 1,81702 | -1,060783323 | N/A             | N/A       | N/A          | Inc-RORB-2     |
| A_33_P3262485  | 5,03735 | 5,12249 | -1,060790676 | ENST00000293725 | 147837    | NM_145276    | ZNF563         |
| A_21_P0001802  | 5,09438 | 5,17956 | -1,060820088 | ENST00000414876 | 348761    | NR_033879    | SPATA3-AS1     |
| A_23_P150931   | 9,37877 | 9,46396 | -1,060827441 | ENST00000547813 | 55716     | NM_018113    | LMBR1L         |
| A_21_P0000137  | 5,31023 | 5,39544 | -1,060842147 | ENST00000561796 | 146227    | NM_001197224 | BEAN1          |
| A_22_P00018561 | 3,36581 | 3,4511  | -1,060900974 | N/A             | N/A       | N/A          | Inc-SERPINH1-1 |
| A_21_P0001590  | 1,35266 | 1,43803 | -1,060959805 | N/A             | N/A       | N/A          | Inc-PIGM-3     |

|                |         |         |              |                 |           |              |                |
|----------------|---------|---------|--------------|-----------------|-----------|--------------|----------------|
| A_23_P157051   | 8,23915 | 8,32453 | -1,060967159 | ENST00000479916 | 9179      | NM_004722    | AP4M1          |
| A_24_P213924   | 12,7425 | 12,8279 | -1,060981867 | ENST00000343629 | 57707     | NM_020947    | TLDC1          |
| A_23_P103942   | 11,0036 | 11,089  | -1,060981867 | ENST00000377577 | 55735     | NM_018198    | DNAJC11        |
| A_32_P18072    | 5,00338 | 5,08884 | -1,061025993 | N/A             | N/A       | N/A          | lnc-RLBP1-1    |
| A_21_P0009529  | 1,34466 | 1,43014 | -1,061040702 | N/A             | N/A       | N/A          | lnc-PIEZO2-3   |
| A_33_P3368706  | 10,2172 | 10,3027 | -1,061055411 | ENST00000372654 | 4802      | NM_001142590 | NFYC           |
| A_21_P0013758  | 1,34389 | 1,42942 | -1,061077476 | N/A             | 101928761 | XM_005274633 | LOC101928761   |
| A_22_P00010780 | 5,62761 | 5,71318 | -1,061106895 | ENST00000513489 | 101928978 | NR_125909    | LOC101928978   |
| A_33_P3372869  | 6,36398 | 6,44958 | -1,061128961 | ENST00000615769 | 11056     | NM_001291476 | DDX52          |
| A_33_P3345016  | 3,76186 | 3,84749 | -1,061151027 | ENST00000289753 | 3362      | NM_000871    | HTR6           |
| A_33_P3671647  | 2,77857 | 2,86422 | -1,061165737 | ENST00000512043 | 441025    | NR_033964    | LOC441025      |
| A_21_P0009821  | 6,28342 | 6,36911 | -1,061195159 | N/A             | 100652730 | NR_046224    | LINC00659      |
| A_23_P26325    | 10,2561 | 10,3418 | -1,061202515 | ENST00000219244 | 6361      | NM_002987    | CCL17          |
| A_33_P3386089  | 1,67999 | 1,7657  | -1,061209871 | ENST00000376987 | N/A       | N/A          | N/A            |
| A_21_P0010912  | 16,5292 | 16,615  | -1,061276075 | N/A             | N/A       | N/A          | XLOC_l2_002176 |
| A_24_P145911   | 10,9837 | 11,0695 | -1,061276075 | ENST00000342294 | 6434      | XM_006713724 | TRA2B          |
| A_23_P59192    | 14,402  | 14,4878 | -1,061276075 | ENST00000374018 | 6631      | NM_003093    | SNRPC          |
| A_21_P0009405  | 1,67896 | 1,76481 | -1,061312856 | N/A             | 102723471 | XR_424817    | LOC102723471   |
| A_23_P31315    | 14,5892 | 14,6751 | -1,061349639 | ENST00000481057 | 11335     | NM_016587    | CBX3           |
| A_33_P3381305  | 9,28029 | 9,3662  | -1,061356996 | N/A             | N/A       | N/A          | N/A            |
| A_33_P3300975  | 8,78312 | 8,86911 | -1,061415852 | ENST00000430889 | 3221      | NM_014620    | HOXC4          |
| A_21_P0009045  | 1,34874 | 1,43483 | -1,061489426 | N/A             | N/A       | N/A          | lnc-CDH11-1    |
| A_24_P943957   | 8,81739 | 8,90349 | -1,061496784 | ENST00000264380 | 200576    | NM_015040    | PIKFYVE        |
| A_33_P3217507  | 1,34527 | 1,4314  | -1,061518857 | N/A             | N/A       | N/A          | N/A            |
| A_21_P0014852  | 2,30986 | 2,3961  | -1,061599797 | ENST00000513535 | N/A       | N/A          | N/A            |
| A_19_P00318889 | 4,54169 | 4,62793 | -1,061599797 | ENST00000461374 | 85379     | XM_003846461 | KIAA1671       |
| A_22_P00000881 | 1,34539 | 1,43164 | -1,061607156 | ENST00000433342 | 284498    | NM_001010881 | C1orf167       |
| A_33_P3252236  | 9,26284 | 9,34912 | -1,061629231 | ENST00000303775 | 29104     | NR_047510    | N6AMT1         |
| A_22_P00010457 | 1,34557 | 1,43186 | -1,06163659  | N/A             | N/A       | N/A          | lnc-NACA2-1    |
| A_33_P3360887  | 12,1023 | 12,1886 | -1,061643949 | ENST00000370082 | 85441     | BC104974     | HELZ2          |
| A_24_P722216   | 8,78488 | 8,87124 | -1,061688102 | ENST00000263035 | 55526     | NM_018706    | DHTKD1         |
| A_22_P00000845 | 1,34696 | 1,43335 | -1,06171018  | ENST00000514258 | 1393      | N/A          | CRHBP          |
| A_33_P3403887  | 3,43902 | 3,52542 | -1,061717539 | ENST00000361724 | 27328     | AB026187     | PCDH11X        |

|                |         |         |              |                 |           |              |                       |
|----------------|---------|---------|--------------|-----------------|-----------|--------------|-----------------------|
| A_33_P3406962  | 1,74803 | 1,83443 | -1,061717539 | ENST00000532977 | 2626      | XM_006716249 | GATA4                 |
| A_23_P74205    | 1,33959 | 1,426   | -1,061724898 | N/A             | N/A       | AF090941     | N/A                   |
| A_22_P00004048 | 1,35109 | 1,43751 | -1,061732257 | ENST00000414965 | N/A       | N/A          | N/A                   |
| A_23_P16214    | 9,51368 | 9,60015 | -1,061769055 | ENST00000393261 | 84261     | NM_032301    | FBXW9                 |
| A_23_P425502   | 8,69343 | 8,77992 | -1,061783774 | ENST00000442660 | 29980     | NM_017613    | DONSON                |
| A_24_P169073   | 10,0691 | 10,1556 | -1,061791134 | ENST00000375662 | 348487    | NM_182623    | FAM131C               |
| A_23_P90497    | 3,33356 | 3,4201  | -1,061820573 | ENST00000595581 | 23547     | NM_012276    | LILRA4                |
| A_24_P133488   | 8,88741 | 8,974   | -1,061857374 | ENST00000392590 | 55038     | NM_017955    | CDCA4                 |
| A_23_P25684    | 12,2103 | 12,2969 | -1,061864734 | ENST00000553578 | 51109     | NM_016026    | RDH11                 |
| A_24_P128145   | 7,07633 | 7,16296 | -1,061886815 | ENST00000435231 | 1386      | NM_001880    | ATF2                  |
| A_24_P415601   | 12,5233 | 12,61   | -1,06193834  | ENST00000524464 | 6050      | NM_002939    | RNH1                  |
| A_33_P3317988  | 8,5259  | 8,61261 | -1,0619457   | ENST00000371870 | 51727     | NM_016308    | CMPK1                 |
| A_33_P3290174  | 8,07429 | 8,16101 | -1,061953061 | ENST00000305631 | 123099    | NM_206918    | DEGS2                 |
| A_33_P3209866  | 8,43559 | 8,52231 | -1,061953061 | ENST00000382289 | 23189     | NM_001256877 | KANK1                 |
| A_21_P0004638  | 6,21204 | 6,29877 | -1,061960422 | N/A             | 414760    | N/A          | HCG14                 |
| A_24_P85942    | 8,6059  | 8,69266 | -1,061982505 | ENST00000482325 | 9648      | NM_181453    | GCC2                  |
| A_33_P3264667  | 1,73338 | 1,8202  | -1,062026673 | ENST00000285949 | 340665    | NM_183374    | CYP26C1               |
| A_21_P0000097  | 4,55593 | 4,64277 | -1,062041396 | ENST00000419197 | 5049      | NM_001184746 | PAFAH1B2              |
| A_22_P00007891 | 1,79145 | 1,87832 | -1,062063481 | ENST00000618977 | 5570      | NM_001270393 | PKIB                  |
| A_22_P00022849 | 1,34516 | 1,43204 | -1,062070842 | ENST00000429317 | N/A       | N/A          | N/A                   |
| A_21_P0003691  | 1,88537 | 1,97225 | -1,062070842 | N/A             | N/A       | N/A          | Inc-RP11-701P16.2.1-2 |
| A_33_P3434239  | 1,34761 | 1,43456 | -1,062122376 | ENST00000579781 | 400660    | AK094957     | LINC00683             |
| A_21_P0012116  | 8,05486 | 8,14185 | -1,062151824 | ENST00000610388 | 342892    | NM_001193552 | ZNF850                |
| A_22_P00021489 | 1,34619 | 1,43319 | -1,062159186 | N/A             | N/A       | N/A          | Inc-ATP11B-4          |
| A_21_P0007515  | 3,96369 | 4,05073 | -1,062188636 | ENST00000537192 | N/A       | N/A          | N/A                   |
| A_22_P00016883 | 1,39718 | 1,48428 | -1,062232812 | N/A             | N/A       | N/A          | Inc-TSEN15-2          |
| A_23_P38271    | 1,34649 | 1,43367 | -1,062291717 | ENST00000397183 | 4620      | NM_017534    | MYH2                  |
| A_23_P307400   | 12,2864 | 12,3736 | -1,062306443 | ENST00000556440 | 90799     | NM_138363    | CEP95                 |
| A_22_P00021844 | 2,06164 | 2,14887 | -1,062328534 | N/A             | N/A       | DW433444     | Inc-PGPEP1L-2         |
| A_21_P0002604  | 1,60741 | 1,69472 | -1,062387443 | ENST00000618807 | N/A       | N/A          | N/A                   |
| A_21_P0011459  | 2,32229 | 2,40966 | -1,062431628 | N/A             | 101927814 | N/A          | LOC101927814          |
| A_21_P0002038  | 2,71789 | 2,80527 | -1,062438992 | ENST00000416279 | N/A       | N/A          | N/A                   |
| A_33_P6811423  | 2,2583  | 2,34575 | -1,062490543 | N/A             | 100506844 | N/A          | LOC100506844          |

|                |         |         |              |                 |           |              |                |
|----------------|---------|---------|--------------|-----------------|-----------|--------------|----------------|
| A_24_P158903   | 6,66094 | 6,74848 | -1,062556827 | ENST00000448290 | 51135     | NM_016123    | IRAK4          |
| A_22_P00003217 | 2,6847  | 2,77233 | -1,062623114 | N/A             | N/A       | N/A          | Inc-CACNA1C-1  |
| A_23_P334608   | 13,076  | 13,1637 | -1,062674674 | ENST00000447929 | 2990      | NM_000181    | GUSB           |
| A_33_P3412016  | 10,4779 | 10,5656 | -1,062674674 | ENST00000560089 | 10509     | NM_020210    | SEMA4B         |
| A_32_P128209   | 5,45663 | 5,54435 | -1,062689406 | ENST00000436592 | 202299    | NR_026936    | LINC01554      |
| A_24_P920979   | 8,48737 | 8,57515 | -1,062733603 | ENST00000332783 | 140460    | NM_198243    | ASB7           |
| A_23_P256244   | 6,95103 | 7,03882 | -1,06274097  | ENST00000497705 | 55074     | AK096148     | OXR1           |
| A_33_P3661329  | 1,94412 | 2,03192 | -1,062748336 | ENST00000423197 | 284661    | NR_027088    | LOC284661      |
| A_21_P0014709  | 11,3435 | 11,4313 | -1,062748336 | N/A             | 654433    | NR_047570    | PAX8-AS1       |
| A_23_P160869   | 8,83816 | 8,92603 | -1,062799902 | ENST00000466161 | 9860      | NM_014813    | LRIG2          |
| A_33_P3420053  | 3,12833 | 3,21621 | -1,062807269 | ENST00000598578 | 55786     | NM_001136038 | ZNF415         |
| A_23_P43490    | 8,67777 | 8,76572 | -1,062858838 | ENST00000530628 | 1029      | NM_058197    | CDKN2A         |
| A_33_P3416682  | 4,83136 | 4,91942 | -1,06293988  | ENST00000378711 | 400950    | NM_001242815 | C2orf91        |
| A_22_P00015779 | 3,30284 | 3,3909  | -1,06293988  | ENST00000543558 | N/A       | N/A          | N/A            |
| A_23_P170888   | 1,34894 | 1,43701 | -1,062947248 | ENST00000332007 | 1804      | NM_001039350 | DPP6           |
| A_23_P140170   | 11,207  | 11,2951 | -1,062969351 | ENST00000307712 | 10484     | NM_006364    | SEC23A         |
| A_23_P1594     | 13,7919 | 13,88   | -1,062969351 | ENST00000426086 | 7423      | NM_003377    | VEGFB          |
| A_33_P6475164  | 1,72662 | 1,81473 | -1,062976719 | ENST00000429010 | 101929086 | NR_108090    | LINC01447      |
| A_33_P3311205  | 6,39588 | 6,48401 | -1,062991455 | ENST00000548825 | 25766     | NM_012272    | PRPF40B        |
| A_23_P112406   | 12,7292 | 12,8174 | -1,063043033 | ENST00000372108 | 9328      | NM_012087    | GTF3C5         |
| A_22_P00019073 | 1,69412 | 1,78232 | -1,063043033 | ENST00000518590 | N/A       | N/A          | N/A            |
| A_33_P3329597  | 10,9976 | 11,0858 | -1,063043033 | ENST00000433642 | 388552    | NM_212550    | BLOC1S3        |
| A_23_P50081    | 12,6463 | 12,7346 | -1,06311672  | ENST00000590107 | 3613      | NM_014214    | IMPA2          |
| A_22_P00001855 | 2,63847 | 2,72677 | -1,06311672  | N/A             | 101929335 | NR_110150    | ADAMTS9-AS1    |
| A_22_P00003131 | 4,93155 | 5,01991 | -1,063160935 | N/A             | N/A       | N/A          | Inc-C9orf139-1 |
| A_21_P0001432  | 1,67217 | 1,76054 | -1,063168304 | N/A             | N/A       | N/A          | Inc-SNAP47-1   |
| A_23_P28953    | 9,51103 | 9,59947 | -1,063219891 | ENST00000328111 | 1789      | NM_175850    | DNMT3B         |
| A_33_P3410892  | 6,10128 | 6,18973 | -1,06322726  | ENST00000587271 | N/A       | N/A          | N/A            |
| A_33_P3274935  | 9,95044 | 10,0389 | -1,06323463  | ENST00000425042 | 283987    | NM_030630    | HID1           |
| A_33_P3353330  | 2,87081 | 2,9593  | -1,06325674  | N/A             | N/A       | AK098147     | Inc-MTFP1-2    |
| A_33_P3323486  | 4,07542 | 4,16394 | -1,06327885  | N/A             | N/A       | AB529256     | N/A            |
| A_23_P97541    | 3,26035 | 3,3489  | -1,06330096  | ENST00000367070 | 722       | NM_000715    | C4BPA          |
| A_22_P00010071 | 4,74174 | 4,83029 | -1,06330096  | ENST00000568136 | N/A       | N/A          | N/A            |

|                |         |         |              |                 |           |              |               |
|----------------|---------|---------|--------------|-----------------|-----------|--------------|---------------|
| A_24_P270144   | 16,6278 | 16,7164 | -1,063337812 | ENST00000551173 | 967       | NM_001257389 | CD63          |
| A_24_P174824   | 10,584  | 10,6726 | -1,063337812 | ENST00000297151 | 10569     | NM_006425    | SLU7          |
| A_33_P3418942  | 11,2366 | 11,3252 | -1,063337812 | ENST00000567110 | 11051     | NM_007006    | NUDT21        |
| A_23_P169838   | 13,0413 | 13,13   | -1,06341152  | ENST00000413171 | 23353     | NM_025154    | SUN1          |
| A_24_P409824   | 7,38145 | 7,47019 | -1,063441004 | ENST00000420492 | N/A       | N/A          | N/A           |
| A_33_P3350374  | 11,1196 | 11,2084 | -1,063485232 | ENST00000372188 | 84293     | NM_001243780 | FAM213A       |
| A_33_P3210875  | 7,06678 | 7,15559 | -1,063492604 | ENST00000343533 | 538       | NM_000052    | ATP7A         |
| A_33_P3366102  | 8,56322 | 8,65203 | -1,063492604 | ENST00000459661 | 55975     | NM_001172428 | KLHL7         |
| A_24_P361816   | 6,59578 | 6,68459 | -1,063492604 | ENST00000390285 | N/A       | BC023973     | N/A           |
| A_21_P0008540  | 5,37674 | 5,46557 | -1,063507347 | N/A             | N/A       | N/A          | Inc-MAP3K9-3  |
| A_23_P307955   | 6,53047 | 6,61934 | -1,063536834 | ENST00000379262 | 23408     | NM_031244    | SIRT5         |
| A_22_P00022929 | 6,47062 | 6,55952 | -1,06355895  | ENST00000424313 | N/A       | BM690161     | N/A           |
| A_21_P0007584  | 1,60197 | 1,69091 | -1,063588439 | N/A             | N/A       | N/A          | Inc-ZDHHC17-6 |
| A_33_P3391240  | 1,69881 | 1,78777 | -1,063603183 | ENST00000537763 | 401409    | NM_001008749 | RAB19         |
| A_33_P3369461  | 5,92866 | 6,01763 | -1,063610556 | ENST00000369862 | 57463     | NM_020703    | AMIGO1        |
| A_33_P3351944  | 8,56871 | 8,65769 | -1,063617928 | ENST00000420316 | 1956      | NM_201283    | EGFR          |
| A_23_P323924   | 13,4791 | 13,5681 | -1,063632673 | ENST00000359980 | 118813    | NM_001002261 | ZFYVE27       |
| A_33_P3284295  | 2,41061 | 2,49961 | -1,063632673 | N/A             | N/A       | N/A          | N/A           |
| A_22_P00008034 | 4,26518 | 4,35422 | -1,063662163 | ENST00000441803 | N/A       | BC035740     | N/A           |
| A_23_P156445   | 1,71903 | 1,80813 | -1,063706401 | ENST00000370336 | 55510     | NM_018665    | DDX43         |
| A_23_P102876   | 14,0863 | 14,1754 | -1,063706401 | ENST00000286788 | 10694     | NM_006585    | CCT8          |
| A_23_P168868   | 13,9582 | 14,0473 | -1,063706401 | ENST00000337004 | 9791      | NM_014754    | PTDSS1        |
| A_22_P00018683 | 2,73791 | 2,82708 | -1,063758013 | N/A             | N/A       | N/A          | Inc-WDR67-2   |
| A_21_P0005402  | 1,50212 | 1,59129 | -1,063758013 | N/A             | N/A       | N/A          | Inc-ASB4-3    |
| A_23_P255444   | 8,89343 | 8,98264 | -1,063787507 | ENST00000514301 | 27071     | NM_014395    | DAPP1         |
| A_21_P0002589  | 1,53759 | 1,6268  | -1,063787507 | N/A             | N/A       | N/A          | Inc-GALM-3    |
| A_22_P00001798 | 1,59646 | 1,68572 | -1,063824376 | N/A             | N/A       | N/A          | Inc-ATP6AP2-3 |
| A_24_P110062   | 9,31344 | 9,40274 | -1,063853872 | ENST00000527079 | 114971    | NM_175732    | PTPMT1        |
| A_33_P3293391  | 6,77856 | 6,86788 | -1,06386862  | N/A             | 642826    | BC008503     | BMS1P6        |
| A_22_P00004149 | 5,20315 | 5,2925  | -1,063890743 | ENST00000562888 | 101928035 | NR_104657    | LOC101928035  |
| A_23_P130352   | 9,18832 | 9,2778  | -1,063986614 | ENST00000580638 | 284252    | NM_198991    | KCTD1         |
| A_23_P9582     | 14,4035 | 14,4931 | -1,064075117 | ENST00000569217 | 7284      | NM_003321    | TUFM          |
| A_33_P3284662  | 9,60954 | 9,69915 | -1,064082493 | ENST00000390658 | 163126    | NM_153232    | EID2          |

|                |         |         |              |                 |           |              |               |
|----------------|---------|---------|--------------|-----------------|-----------|--------------|---------------|
| A_23_P313476   | 8,87359 | 8,96326 | -1,064126748 | ENST00000619268 | 84498     | NM_032448    | FAM120B       |
| A_24_P204214   | 11,1057 | 11,1954 | -1,064148876 | ENST00000579974 | 9611      | NM_006311    | NCOR1         |
| A_23_P111228   | 8,56658 | 8,6563  | -1,064163628 | ENST00000369242 | 51805     | NM_017421    | COQ3          |
| A_21_P0011997  | 1,35001 | 1,43975 | -1,064178381 | ENST00000450695 | 100506274 | N/A          | LOC100506274  |
| A_23_P165598   | 3,95728 | 4,04702 | -1,064178381 | ENST00000621326 | 92196     | NM_001017920 | DAPL1         |
| A_24_P178396   | 3,01651 | 3,10629 | -1,064207886 | ENST00000432940 | 441273    | NM_001031618 | SPDYE2        |
| A_33_P3302428  | 9,55939 | 9,64919 | -1,06422264  | ENST00000301624 | 57690     | NM_001142640 | TNRC6C        |
| A_23_P1505     | 10,4803 | 10,5701 | -1,06422264  | ENST00000529993 | 4041      | NM_002335    | LRP5          |
| A_22_P00013891 | 3,14302 | 3,23285 | -1,06424477  | N/A             | N/A       | N/A          | Inc-RPRML-4   |
| A_33_P3300757  | 7,04817 | 7,13806 | -1,064289031 | ENST00000237163 | 23033     | NM_001199942 | DOPEY1        |
| A_33_P3339276  | 5,00182 | 5,09177 | -1,064333295 | ENST00000566754 | 54988     | NM_017888    | ACSM5         |
| A_22_P00021955 | 3,07906 | 3,16902 | -1,064340672 | ENST00000412381 | N/A       | N/A          | N/A           |
| A_21_P0001600  | 4,63493 | 4,7249  | -1,06434805  | N/A             | N/A       | N/A          | Inc-EDEM3-2   |
| A_24_P218970   | 11,2248 | 11,3148 | -1,064370182 | ENST00000262056 | 1975      | NM_001417    | EIF4B         |
| A_24_P25530    | 3,68226 | 3,77226 | -1,064370182 | ENST00000293190 | 2905      | NM_000835    | GRIN2C        |
| A_33_P3335451  | 13,6932 | 13,7832 | -1,064370182 | ENST00000311101 | 55486     | NM_018622    | PARL          |
| A_33_P3309809  | 4,10037 | 4,1904  | -1,064392316 | N/A             | 84236     | XM_005246899 | RHBDD1        |
| A_33_P3419108  | 1,66992 | 1,75999 | -1,064421827 | ENST00000306589 | 442862    | NM_001002758 | PRY2          |
| A_33_P3355266  | 12,6314 | 12,7215 | -1,064443962 | ENST00000457433 | 64129     | NM_022164    | TINAGL1       |
| A_22_P00010546 | 1,98965 | 2,0798  | -1,064480853 | N/A             | 101927377 | XR_244186    | LOC101927377  |
| A_33_P3240144  | 4,37135 | 4,46161 | -1,064562019 | N/A             | N/A       | N/A          | N/A           |
| A_24_P233078   | 10,5298 | 10,6201 | -1,064591535 | ENST00000441253 | 23615     | N/A          | PYY2          |
| A_33_P3229869  | 4,74568 | 4,836   | -1,064606293 | ENST00000383019 | 100128714 | NR_040082    | LOC100128714  |
| A_23_P1170     | 5,4363  | 5,52665 | -1,064628432 | ENST00000374370 | 93550     | NM_174890    | ZFAND4        |
| A_21_P0002030  | 2,45985 | 2,55024 | -1,06465795  | ENST00000440785 | N/A       | N/A          | N/A           |
| A_21_P0014708  | 4,65134 | 4,74174 | -1,064665329 | ENST00000505245 | 90423     | AK123751     | ATP6V1E2      |
| A_21_P0010899  | 13,489  | 13,5794 | -1,064665329 | ENST00000414870 | N/A       | N/A          | N/A           |
| A_33_P3324765  | 11,5898 | 11,6803 | -1,064739129 | ENST00000403276 | 1453      | NM_001893    | CSNK1D        |
| A_22_P00015268 | 4,3193  | 4,4098  | -1,064739129 | N/A             | N/A       | N/A          | Inc-SPARCL1-1 |
| A_33_P3866448  | 1,98112 | 2,07163 | -1,064746509 | N/A             | N/A       | BX648501     | N/A           |
| A_21_P0001236  | 1,73429 | 1,82481 | -1,064753889 | N/A             | N/A       | N/A          | Inc-C1orf96-2 |
| A_23_P137046   | 7,73177 | 7,82245 | -1,064871981 | ENST00000378220 | 60506     | NM_022567    | NYX           |
| A_23_P130169   | 8,82043 | 8,91111 | -1,064871981 | ENST00000622396 | 9755      | NM_014726    | TBKBP1        |



|                |         |         |              |                 |           |              |                |
|----------------|---------|---------|--------------|-----------------|-----------|--------------|----------------|
| A_22_P00022679 | 5,45912 | 5,54981 | -1,064879362 | N/A             | N/A       | N/A          | Inc-CLCN6-1    |
| A_24_P195724   | 13,0025 | 13,0932 | -1,064886743 | ENST00000458237 | N/A       | N/A          | N/A            |
| A_23_P307570   | 1,69804 | 1,78874 | -1,064886743 | ENST00000467409 | 150000    | NR_003087    | ABCC13         |
| A_24_P287780   | 7,99988 | 8,09063 | -1,06492365  | ENST00000550872 | 5119      | NM_002768    | CHMP1A         |
| A_22_P00002296 | 4,13153 | 4,22231 | -1,064945795 | N/A             | N/A       | N/A          | Inc-C11orf1-1  |
| A_33_P3374833  | 11,9027 | 11,9935 | -1,064960558 | ENST00000220531 | 26258     | NM_012388    | BLOC1S6        |
| A_23_P9289     | 5,54259 | 5,6334  | -1,06496794  | ENST00000458034 | 5991      | NM_134428    | RFX3           |
| A_22_P00015369 | 2,06714 | 2,15797 | -1,064982704 | N/A             | N/A       | N/A          | Inc-SQLE-1     |
| A_22_P00021466 | 6,71458 | 6,80542 | -1,064990086 | N/A             | N/A       | N/A          | Inc-CENPP-1    |
| A_33_P3272483  | 12,8834 | 12,9743 | -1,065034378 | ENST00000524782 | 84364     | NM_032389    | ARFGAP2        |
| A_22_P00004533 | 1,42629 | 1,51726 | -1,065086055 | ENST00000528480 | 102724915 | N/A          | LOC102724915   |
| A_33_P3570974  | 5,7922  | 5,88327 | -1,065159884 | N/A             | N/A       | BC043205     | Inc-INTS9-1    |
| A_23_P24077    | 5,26182 | 5,35294 | -1,0651968   | ENST00000394957 | 64115     | NM_022153    | C10orf54       |
| A_22_P00023563 | 4,42536 | 4,51651 | -1,065218951 | N/A             | N/A       | DA338519     | Inc-CYTH4-1    |
| A_33_P3275065  | 1,66073 | 1,75196 | -1,065278021 | ENST00000450456 | N/A       | N/A          | N/A            |
| A_22_P00003997 | 1,57056 | 1,6618  | -1,065285405 | ENST00000512628 | N/A       | N/A          | N/A            |
| A_24_P181944   | 8,93075 | 9,022   | -1,065292789 | ENST00000486408 | 51230     | NM_016436    | PHF20          |
| A_23_P20832    | 11,8076 | 11,8989 | -1,065329709 | ENST00000372739 | 6709      | NM_003127    | SPTAN1         |
| A_24_P129232   | 11,8081 | 11,8994 | -1,065329709 | ENST00000339697 | 57515     | NM_020755    | SERINC1        |
| A_24_P602507   | 7,39836 | 7,4897  | -1,065359247 | ENST00000408962 | 123688    | NM_001013619 | HYKK           |
| A_21_P0014587  | 1,51023 | 1,60158 | -1,065366632 | ENST00000417931 | 100507058 | NR_108052    | LINC00845      |
| A_33_P3343516  | 4,50831 | 4,59971 | -1,065403555 | ENST00000566462 | 100129617 | NR_045112    | LOC100129617   |
| A_24_P57367    | 12,6941 | 12,7855 | -1,065403555 | ENST00000538132 | 191       | NM_000687    | AHCY           |
| A_33_P3290296  | 7,29292 | 7,38432 | -1,065403555 | ENST00000605265 | N/A       | AK125829     | N/A            |
| A_22_P00017561 | 8,53354 | 8,62502 | -1,065462635 | N/A             | 266655    | NR_015427    | LINC00094      |
| A_33_P3336720  | 6,66333 | 6,75481 | -1,065462635 | ENST00000598398 | 57817     | NM_021175    | HAMP           |
| A_23_P503127   | 2,90745 | 2,99896 | -1,065484791 | ENST00000396417 | 55964     | NM_145733    | set-03         |
| A_24_P355720   | 2,48997 | 2,58151 | -1,065506947 | ENST00000168712 | 2249      | NM_002007    | FGF4           |
| A_33_P3316562  | 4,22973 | 4,32128 | -1,065514333 | ENST00000418736 | 9252      | NM_182398    | RPS6KA5        |
| A_33_P3302796  | 14,3386 | 14,4302 | -1,065551262 | ENST00000450554 | 11338     | NM_007279    | U2AF2          |
| A_24_P203814   | 6,798   | 6,88961 | -1,065558647 | ENST00000331979 | N/A       | N/A          | N/A            |
| A_21_P0006310  | 6,41213 | 6,50379 | -1,065595578 | N/A             | N/A       | N/A          | Inc-C9orf152-1 |
| A_22_P00017894 | 4,94647 | 5,03813 | -1,065595578 | ENST00000552780 | N/A       | N/A          | N/A            |

|                |         |         |              |                 |           |              |                  |
|----------------|---------|---------|--------------|-----------------|-----------|--------------|------------------|
| A_21_P0011580  | 5,51729 | 5,60897 | -1,06561035  | N/A             | N/A       | N/A          | XLOC_I2_006025   |
| A_21_P0013000  | 15,6388 | 15,7305 | -1,065625123 | ENST00000604257 | N/A       | N/A          | N/A              |
| A_22_P00020401 | 1,65272 | 1,74444 | -1,065639895 | ENST00000435485 | N/A       | N/A          | N/A              |
| A_22_P00010715 | 1,65992 | 1,75166 | -1,065654668 | ENST00000507337 | 102724596 | NR_110882    | LOC102724596     |
| A_33_P3394868  | 9,74487 | 9,83673 | -1,065743311 | ENST00000444870 | 388588    | NM_001163724 | SMIM1            |
| A_21_P0008102  | 1,43438 | 1,52626 | -1,065758085 | N/A             | N/A       | N/A          | Inc-GPC5-3       |
| A_33_P3243175  | 12,0093 | 12,1012 | -1,06577286  | N/A             | 55163     | NM_018129    | PNPO             |
| A_33_P3230264  | 10,6677 | 10,7596 | -1,06577286  | ENST00000394299 | 2719      | NM_001164617 | GPC3             |
| A_32_P179837   | 5,69711 | 5,78906 | -1,065809797 | ENST00000569714 | 146310    | NM_174903    | RNF151           |
| A_22_P00000609 | 3,96704 | 4,05899 | -1,065809797 | N/A             | N/A       | BC019855     | Inc-ACOT1-1      |
| A_23_P397341   | 7,96809 | 8,06004 | -1,065809797 | ENST00000293978 | 124222    | NM_152341    | PAQR4            |
| A_22_P00004763 | 7,28471 | 7,37668 | -1,065824573 | N/A             | N/A       | CO247556     | Inc-CTTN-3       |
| A_21_P0001717  | 6,4853  | 6,57731 | -1,065854124 | N/A             | N/A       | N/A          | Inc-NLRP3-1      |
| A_24_P348925   | 10,1123 | 10,2044 | -1,065920617 | ENST00000555842 | 8812      | NM_001099402 | CCNK             |
| A_33_P3447441  | 7,13538 | 7,22754 | -1,065964949 | N/A             | N/A       | AL713660     | Inc-WDR1-1       |
| A_33_P3296289  | 3,43335 | 3,5256  | -1,066031449 | N/A             | 100128508 | AF370407     | LOC100128508     |
| A_33_P3232038  | 8,39904 | 8,49133 | -1,066061006 | ENST00000498308 | 100533952 | NM_001204513 | RBAK-RBAKDN      |
| A_33_P3292126  | 8,639   | 8,73129 | -1,066061006 | N/A             | N/A       | N/A          | XLOC_I2_013837   |
| A_33_P3556116  | 1,68296 | 1,77526 | -1,066068396 | ENST00000563737 | N/A       | AL109682     | N/A              |
| A_33_P3301381  | 11,7127 | 11,805  | -1,066068396 | ENST00000331426 | 375287    | NM_198557    | RBM43            |
| A_33_P3234048  | 3,06642 | 3,15875 | -1,066090564 | ENST00000354366 | 55051     | AK125681     | NRDE2            |
| A_23_P165989   | 8,20753 | 8,29989 | -1,066112733 | ENST00000372518 | 140825    | NM_080749    | NEURL2           |
| A_24_P81841    | 10,5033 | 10,5957 | -1,066142293 | ENST00000228872 | 1027      | NM_004064    | CDKN1B           |
| A_33_P3441576  | 8,14347 | 8,23591 | -1,066171853 | ENST00000604423 | 653464    | NM_001271872 | SRGAP2C          |
| A_24_P102895   | 7,53007 | 7,62255 | -1,066201414 | ENST00000361771 | 23038     | NM_015023    | WDTC1            |
| A_22_P00012574 | 2,40673 | 2,49922 | -1,066208804 | ENST00000453045 | 101928040 | XR_242647    | BARX1-AS1        |
| A_33_P3247858  | 1,48439 | 1,57696 | -1,066267929 | ENST00000488694 | 4354      | NM_001166461 | MPP1             |
| A_23_P154330   | 11,4802 | 11,5728 | -1,066290101 | ENST00000264255 | 10190     | NM_005783    | TXNDC9           |
| A_22_P00006200 | 6,6365  | 6,72912 | -1,066304883 | ENST00000369796 | 85369     | NM_033088    | STRIP1           |
| A_24_P323114   | 7,3719  | 7,46452 | -1,066304883 | ENST00000404883 | 305       | NR_001446    | ANXA2P3          |
| A_22_P00001022 | 1,47843 | 1,5711  | -1,066341839 | N/A             | N/A       | BG181360     | Inc-AL391421.1-5 |
| A_33_P3219197  | 7,236   | 7,32868 | -1,066349231 | ENST00000478158 | 26000     | NM_015527    | TBC1D10B         |
| A_33_P3235137  | 1,67933 | 1,77209 | -1,066408363 | ENST00000569446 | 83482     | NM_031309    | SCRT1            |

|                |         |         |              |                 |           |              |              |
|----------------|---------|---------|--------------|-----------------|-----------|--------------|--------------|
| A_23_P337550   | 12,0424 | 12,1352 | -1,066437931 | ENST00000376488 | 55593     | NM_017602    | OTUD5        |
| A_21_P0012793  | 2,86791 | 2,96074 | -1,066460107 | ENST00000509105 | 101927282 | N/A          | LOC101927282 |
| A_33_P3413083  | 9,55267 | 9,64557 | -1,066511853 | ENST00000262187 | 6009      | NM_005614    | RHEB         |
| A_24_P465772   | 15,0182 | 15,1111 | -1,066511853 | ENST00000493929 | 204010    | NR_026825    | RPSAP52      |
| A_22_P00013019 | 1,75139 | 1,84429 | -1,066511853 | ENST00000557715 | N/A       | N/A          | N/A          |
| A_23_P302568   | 5,21069 | 5,30361 | -1,066526638 | ENST00000233535 | 7781      | NM_003459    | SLC30A3      |
| A_22_P00004242 | 2,88141 | 2,97434 | -1,066534031 | ENST00000563954 | N/A       | XR_243482    | N/A          |
| A_22_P00023799 | 2,80122 | 2,89419 | -1,066563602 | N/A             | N/A       | N/A          | Inc-KCNT1-2  |
| A_33_P3374971  | 2,0576  | 2,15058 | -1,066570995 | ENST00000532912 | 642569    | NR_028346    | TRIM53AP     |
| A_22_P00025425 | 2,7484  | 2,8414  | -1,066585781 | N/A             | N/A       | N/A          | Inc-ARMC6-1  |
| A_19_P00801917 | 8,5486  | 8,64173 | -1,066681894 | N/A             | N/A       | N/A          | Inc-FARS2-2  |
| A_33_P3366540  | 1,69786 | 1,79105 | -1,066726257 | ENST00000397998 | 55790     | NM_001130518 | CSGALNACT1   |
| A_23_P75889    | 11,9271 | 12,0203 | -1,066733651 | ENST00000533717 | 5719      | NM_175932    | PSMD13       |
| A_24_P316489   | 8,97442 | 9,06767 | -1,066770622 | ENST00000497536 | 4705      | NM_004544    | NDUFA10      |
| A_23_P60166    | 5,87863 | 5,97189 | -1,066778016 | ENST00000286234 | 64798     | NM_022783    | DEPTOR       |
| A_33_P3242493  | 7,97236 | 8,06565 | -1,0668002   | ENST00000326291 | 10464     | NM_006346    | PIBF1        |
| A_22_P00005122 | 10,0338 | 10,1271 | -1,066807594 | N/A             | N/A       | N/A          | Inc-DHX15-1  |
| A_23_P206626   | 1,89367 | 1,98698 | -1,066814989 | ENST00000300061 | 6340      | NM_001039    | SCNN1G       |
| A_22_P00003317 | 1,39998 | 1,4933  | -1,066822383 | N/A             | N/A       | N/A          | Inc-CAPZA3-3 |
| A_22_P00008982 | 1,73818 | 1,83152 | -1,066837173 | N/A             | N/A       | CR740118     | Inc-LAMA2-2  |
| A_19_P00316547 | 6,58302 | 6,67637 | -1,066844568 | ENST00000505702 | N/A       | N/A          | N/A          |
| A_33_P3307113  | 4,33522 | 4,42858 | -1,066851962 | ENST00000436428 | 692094    | NM_001044264 | MSMP         |
| A_21_P0005624  | 1,55257 | 1,64596 | -1,066874147 | ENST00000506428 | 100505532 | NR_103854    | LINC01301    |
| A_32_P129288   | 12,6759 | 12,7693 | -1,066881542 | ENST00000311481 | 81876     | NM_030981    | RAB1B        |
| A_33_P3210368  | 4,68151 | 4,77502 | -1,066962891 | ENST00000574418 | 9274      | NM_001286526 | BCL7C        |
| A_24_P941625   | 4,4604  | 4,55392 | -1,066970287 | ENST00000341976 | 7621      | NM_021916    | ZNF70        |
| A_22_P00021975 | 2,42664 | 2,52021 | -1,067007266 | ENST00000481182 | 27033     | NM_014383    | ZBTB32       |
| A_21_P0006608  | 1,70377 | 1,79735 | -1,067014662 | N/A             | N/A       | N/A          | Inc-RBMY1B-1 |
| A_22_P00012872 | 9,06725 | 9,16084 | -1,067022058 | ENST00000566108 | N/A       | N/A          | N/A          |
| A_23_P201287   | 10,0652 | 10,1588 | -1,067029454 | ENST00000620295 | 23095     | NM_015074    | KIF1B        |
| A_33_P3388588  | 12,9801 | 13,0737 | -1,067029454 | ENST00000378340 | 400558    | NR_046200    | LOC400558    |
| A_33_P3313801  | 4,17254 | 4,26616 | -1,067044246 | ENST00000317945 | 91057     | NM_080654    | CCDC34       |
| A_21_P0014008  | 7,87506 | 7,96874 | -1,067088624 | ENST00000568013 | 79692     | NM_001242797 | ZNF322       |

|                |         |         |              |                 |           |              |                  |
|----------------|---------|---------|--------------|-----------------|-----------|--------------|------------------|
| A_23_P72989    | 2,03283 | 2,12652 | -1,06709602  | ENST00000330953 | 1233      | NM_005508    | CCR4             |
| A_23_P149099   | 14,3817 | 14,4754 | -1,067103417 | ENST00000375048 | 1650      | NM_005216    | DDOST            |
| A_33_P3273777  | 4,52785 | 4,62159 | -1,067133004 | ENST00000296882 | 375519    | NM_198568    | GJB7             |
| A_23_P331560   | 1,41367 | 1,50743 | -1,067147798 | ENST00000265715 | 5172      | NM_000441    | SLC26A4          |
| A_22_P00015965 | 8,23292 | 8,3267  | -1,067162591 | N/A             | N/A       | BX493510     | Inc-TEFM-2       |
| A_24_P70993    | 10,6568 | 10,7506 | -1,067177386 | ENST00000497752 | 4267      | NM_002414    | CD99             |
| A_33_P3283780  | 8,26186 | 8,35566 | -1,067177386 | ENST00000322357 | 51341     | NM_015898    | ZBTB7A           |
| A_24_P237757   | 10,7935 | 10,8873 | -1,067177386 | ENST00000382881 | 7750      | AL136621     | ZMYM2            |
| A_33_P3294720  | 3,78663 | 3,88047 | -1,067206974 | N/A             | 100130865 | AK123130     | LOC100130865     |
| A_33_P3268868  | 7,01253 | 7,10639 | -1,067221769 | N/A             | N/A       | N/A          | N/A              |
| A_22_P00019460 | 3,67819 | 3,77207 | -1,067236564 | ENST00000457157 | 100996609 | N/A          | LINC01436        |
| A_24_P47681    | 9,59312 | 9,68703 | -1,067258757 | ENST00000545606 | 55832     | AL136810     | CAND1            |
| A_23_P154740   | 10,5052 | 10,5992 | -1,067325338 | ENST00000441136 | 55857     | NM_018474    | KIZ              |
| A_22_P00025368 | 1,36529 | 1,45935 | -1,067369728 | ENST00000507948 | N/A       | N/A          | N/A              |
| A_23_P215070   | 9,65079 | 9,74487 | -1,067384525 | ENST00000223208 | 95681     | NM_018718    | CEP41            |
| A_33_P3250068  | 12,4858 | 12,5799 | -1,067399322 | ENST00000427123 | 9784      | NM_014748    | SNX17            |
| A_23_P117363   | 6,27755 | 6,37166 | -1,067406721 | ENST00000341584 | 866       | NM_001756    | SERPINA6         |
| A_33_P3359771  | 1,60261 | 1,69676 | -1,067436316 | ENST00000459972 | 477       | NM_000702    | ATP1A2           |
| A_22_P00001711 | 2,56909 | 2,66324 | -1,067436316 | N/A             | N/A       | N/A          | Inc-ATG16L2-3    |
| A_23_P41588    | 11,0144 | 11,1086 | -1,067473311 | ENST00000230771 | 23438     | NM_012208    | HARS2            |
| A_33_P3275801  | 7,77782 | 7,87208 | -1,067517707 | ENST00000373960 | 1674      | NM_001927    | DES              |
| A_21_P0007425  | 4,44442 | 4,53876 | -1,067576904 | N/A             | N/A       | N/A          | Inc-TSSC4-2      |
| A_23_P258088   | 4,15117 | 4,24554 | -1,067599104 | ENST00000620693 | 29993     | NM_020804    | PACSIN1          |
| A_22_P00007264 | 1,43328 | 1,52768 | -1,067621304 | ENST00000478814 | N/A       | N/A          | N/A              |
| A_33_P3323989  | 1,78155 | 1,87596 | -1,067628705 | N/A             | N/A       | N/A          | N/A              |
| A_33_P3404448  | 8,45616 | 8,55072 | -1,067739714 | ENST00000342415 | 154007    | NM_152551    | SNRNP48          |
| A_33_P3241316  | 4,42412 | 4,51873 | -1,06777672  | ENST00000561893 | 255189    | NM_213600    | PLA2G4F          |
| A_21_P0008790  | 3,85536 | 3,94999 | -1,067791522 | N/A             | N/A       | N/A          | Inc-AC016251.1-8 |
| A_24_P8109     | 9,12079 | 9,21546 | -1,067821128 | ENST00000524802 | 338440    | NM_001012302 | ANO9             |
| A_23_P1206     | 17,4511 | 17,5458 | -1,067843333 | ENST00000605314 | 6229      | NM_001026    | RPS24            |
| A_22_P00024525 | 1,67431 | 1,76907 | -1,067887744 | ENST00000548506 | N/A       | DA539686     | N/A              |
| A_23_P97221    | 8,24433 | 8,3391  | -1,067895147 | ENST00000372502 | 51058     | NM_015911    | ZNF691           |
| A_22_P00015513 | 5,1401  | 5,23494 | -1,067946962 | N/A             | 101929294 | NR_125808    | LOC101929294     |

|                |         |         |              |                 |           |              |                |
|----------------|---------|---------|--------------|-----------------|-----------|--------------|----------------|
| A_33_P3395196  | 3,72166 | 3,81659 | -1,068013586 | N/A             | N/A       | DA380124     | N/A            |
| A_33_P3270826  | 1,70019 | 1,79517 | -1,068050602 | N/A             | 284486    | NM_182578    | THEM5          |
| A_33_P3315929  | 9,94351 | 10,0385 | -1,068058005 | ENST00000374255 | 9991      | NM_001244897 | PTBP3          |
| A_21_P0013752  | 1,97941 | 2,0746  | -1,068206079 | N/A             | N/A       | N/A          | XL0C_I2_015441 |
| A_23_P63178    | 12,2183 | 12,3135 | -1,068213484 | ENST00000263974 | 6883      | NM_005644    | TAF12          |
| A_22_P00012561 | 8,2167  | 8,31194 | -1,068243101 | N/A             | 100506476 | NR_109995    | LOC100506476   |
| A_22_P00016145 | 7,64834 | 7,74363 | -1,068280124 | N/A             | N/A       | N/A          | Inc-TIMM9-2    |
| A_23_P81241    | 12,4271 | 12,5224 | -1,068287529 | ENST00000503388 | 80762     | NM_030571    | NDFIP1         |
| A_23_P18017    | 3,28607 | 3,38142 | -1,068324554 | ENST00000296046 | 1359      | NM_001870    | CPA3           |
| A_23_P43141    | 15,6759 | 15,7713 | -1,06836158  | ENST00000519517 | 3646      | NM_001568    | EIF3E          |
| A_22_P00017934 | 4,20195 | 4,29735 | -1,06836158  | N/A             | N/A       | N/A          | Inc-ZFP90-2    |
| A_23_P41390    | 9,34802 | 9,44345 | -1,068383796 | ENST00000502669 | 54436     | NM_018986    | SH3TC1         |
| A_33_P3326387  | 2,75716 | 2,85261 | -1,068398607 | ENST00000512432 | 91050     | NM_173463    | CCDC149        |
| A_24_P322635   | 9,92379 | 10,0193 | -1,068443041 | ENST00000396391 | 63916     | NM_182764    | ELMO2          |
| A_33_P6807856  | 4,23544 | 4,33095 | -1,068443041 | ENST00000447563 | 154822    | NR_024394    | LINC00689      |
| A_33_P3415778  | 2,98678 | 3,08232 | -1,068465259 | N/A             | 100129721 | AK126643     | LOC100129721   |
| A_22_P00021084 | 5,97375 | 6,06932 | -1,068487478 | N/A             | N/A       | N/A          | Inc-KANSL3-1   |
| A_24_P417706   | 5,25241 | 5,34798 | -1,068487478 | ENST00000427908 | 83463     | NM_001142935 | MXD3           |
| A_23_P27197    | 2,01178 | 2,10739 | -1,068517103 | ENST00000343246 | 85289     | NM_033188    | KRTAP4-5       |
| A_24_P360078   | 9,07238 | 9,16801 | -1,068531916 | ENST00000510157 | 987       | NM_006726    | LRBA           |
| A_33_P3415321  | 3,93276 | 4,02842 | -1,068554135 | N/A             | 338069    | NR_002329    | ST7-OT4        |
| A_23_P134100   | 4,5825  | 4,67816 | -1,068554135 | ENST00000438272 | 79465     | NM_024518    | ULBP3          |
| A_33_P3258349  | 1,95215 | 2,04784 | -1,068576356 | ENST00000504250 | 644145    | NR_003935    | LOC644145      |
| A_23_P140328   | 11,8829 | 11,9786 | -1,068583762 | ENST00000556925 | 9147      | NM_004713    | NEMF           |
| A_21_P0004315  | 3,56043 | 3,65613 | -1,068583762 | N/A             | N/A       | N/A          | Inc-G3BP1-2    |
| A_22_P00011268 | 3,64277 | 3,73849 | -1,068598576 | N/A             | N/A       | AY195961     | Inc-OR51B4-3   |
| A_33_P3397910  | 1,50894 | 1,60469 | -1,068620797 | N/A             | N/A       | N/A          | Inc-RAB1A-1    |
| A_21_P0008725  | 3,17682 | 3,27257 | -1,068620797 | N/A             | 102724253 | XR_424595    | LOC102724253   |
| A_21_P0003437  | 3,09665 | 3,19241 | -1,068628204 | ENST00000503637 | N/A       | N/A          | N/A            |
| A_22_P00011635 | 4,59433 | 4,6901  | -1,068635612 | ENST00000523269 | 728264    | NR_105060    | MIR143HG       |
| A_33_P3807132  | 1,68998 | 1,78582 | -1,068687463 | N/A             | 339468    | XR_246343    | LOC339468      |
| A_22_P00024468 | 10,3016 | 10,3975 | -1,06873191  | N/A             | N/A       | N/A          | Inc-CTNNA2-1   |
| A_33_P3387518  | 1,52817 | 1,62414 | -1,068783766 | ENST00000475839 | 55079     | NM_018008    | FEZF2          |

|                |         |         |              |                 |           |              |                       |
|----------------|---------|---------|--------------|-----------------|-----------|--------------|-----------------------|
| A_33_P3751889  | 11,7904 | 11,8864 | -1,068805991 | ENST00000382034 | 10043     | NM_001135732 | TOM1                  |
| A_24_P6083     | 13,2911 | 13,3871 | -1,068805991 | ENST00000517886 | 400916    | NM_213720    | CHCHD10               |
| A_21_P0014324  | 6,32546 | 6,42154 | -1,06886526  | N/A             | N/A       | N/A          | N/A                   |
| A_33_P3384617  | 5,31677 | 5,41292 | -1,068917123 | N/A             | N/A       | N/A          | XLOC_I2_003882        |
| A_33_P3417936  | 5,48742 | 5,58358 | -1,068924532 | ENST00000495099 | 79885     | NM_024827    | HDAC11                |
| A_33_P3307192  | 1,77723 | 1,8734  | -1,068931941 | N/A             | N/A       | N/A          | N/A                   |
| A_22_P00007499 | 1,69742 | 1,79368 | -1,068998627 | ENST00000550874 | N/A       | N/A          | N/A                   |
| A_33_P3268564  | 9,25516 | 9,35147 | -1,069035676 | ENST00000393348 | 8440      | NM_001004722 | NCK2                  |
| A_33_P3308299  | 1,6708  | 1,76713 | -1,069050496 | N/A             | N/A       | N/A          | Inc-LANCL2-1          |
| A_21_P0004450  | 1,47695 | 1,57328 | -1,069050496 | N/A             | 101926905 | N/A          | LOC101926905          |
| A_24_P395317   | 4,98102 | 5,07741 | -1,069094958 | ENST00000377767 | 22894     | NM_014953    | DIS3                  |
| A_23_P414964   | 8,43802 | 8,53445 | -1,0691246   | ENST00000599145 | 201514    | NM_173548    | ZNF584                |
| A_22_P00005886 | 1,67263 | 1,7691  | -1,069154243 | ENST00000445514 | 101927661 | N/A          | LOC101927661          |
| A_23_P21800    | 1,46115 | 1,55763 | -1,069161654 | ENST00000492167 | N/A       | XM_006725443 | N/A                   |
| A_23_P383915   | 9,19144 | 9,28794 | -1,069176475 | ENST00000260723 | 118663    | NM_144587    | BTBD16                |
| A_33_P3306948  | 10,064  | 10,1605 | -1,069176475 | ENST00000538239 | 4040      | NM_002336    | LRP6                  |
| A_22_P00009527 | 6,25766 | 6,35429 | -1,069272822 | N/A             | N/A       | BG194226     | Inc-MAOA-1            |
| A_19_P00321631 | 4,50929 | 4,60596 | -1,069302469 | ENST00000430094 | 100422737 | N/A          | LOC100422737          |
| A_33_P3373560  | 8,39393 | 8,49065 | -1,069339529 | ENST00000372739 | 6709      | NM_001130438 | SPTAN1                |
| A_22_P00014974 | 1,70652 | 1,80326 | -1,069354353 | N/A             | N/A       | N/A          | Inc-SMARCAL1-4        |
| A_21_P0011925  | 4,87228 | 4,96903 | -1,069361766 | N/A             | N/A       | N/A          | Inc-TEX261-2          |
| A_21_P0013343  | 8,14622 | 8,243   | -1,069384003 | N/A             | N/A       | N/A          | XLOC_I2_013931        |
| A_21_P0000119  | 4,85432 | 4,95112 | -1,069398827 | ENST00000464028 | 79783     | NM_001193311 | SUGCT                 |
| A_22_P00005974 | 4,79816 | 4,89496 | -1,069398827 | ENST00000507644 | N/A       | N/A          | N/A                   |
| A_23_P153022   | 12,8548 | 12,9516 | -1,069398827 | ENST00000542137 | 85294     | NM_033184    | KRTAP2-4              |
| A_22_P00025508 | 1,50345 | 1,60031 | -1,069443303 | N/A             | N/A       | N/A          | Inc-C5orf17-2         |
| A_33_P3331366  | 13,2493 | 13,3463 | -1,069547088 | ENST00000316881 | 7706      | NM_005082    | TRIM25                |
| A_22_P00022975 | 3,82809 | 3,92517 | -1,069606398 | ENST00000585228 | N/A       | N/A          | N/A                   |
| A_22_P00001264 | 2,98325 | 3,08034 | -1,069613812 | ENST00000522947 | N/A       | N/A          | N/A                   |
| A_23_P45108    | 11,1025 | 11,1996 | -1,069621226 | ENST00000357496 | 54870     | NM_017730    | QRICH1                |
| A_33_P3222056  | 2,41653 | 2,51367 | -1,069650882 | N/A             | N/A       | N/A          | Inc-RP11-148O21.2.1-1 |
| A_21_P0010311  | 1,67521 | 1,77238 | -1,069673125 | N/A             | 100874093 | N/A          | BRWD1-AS1             |
| A_21_P0003486  | 4,21736 | 4,31455 | -1,069687954 | N/A             | N/A       | N/A          | Inc-PPP3CA-2          |

|                |         |         |              |                 |           |              |                  |
|----------------|---------|---------|--------------|-----------------|-----------|--------------|------------------|
| A_23_P32223    | 11,5386 | 11,6358 | -1,069695369 | ENST00000491487 | 25792     | NM_012127    | CIZ1             |
| A_22_P00013572 | 1,65532 | 1,75257 | -1,069732442 | ENST00000561875 | 100506172 | NR_038234    | LINCO1568        |
| A_24_P106112   | 9,85785 | 9,95518 | -1,069791763 | ENST00000237596 | 5311      | NM_000297    | PKD2             |
| A_21_P0006262  | 1,46753 | 1,56492 | -1,069836255 | N/A             | 101926900 | N/A          | DNAJB5-AS1       |
| A_23_P6624     | 13,0191 | 13,1165 | -1,06984367  | ENST00000479719 | 7372      | NM_000373    | UMPS             |
| A_22_P00006710 | 8,89158 | 8,98904 | -1,069888165 | ENST00000441716 | 100128124 | NM_001129895 | HGC6.3           |
| A_24_P920188   | 9,57465 | 9,67212 | -1,069895581 | ENST00000589881 | 7572      | NM_006965    | ZNF24            |
| A_33_P3366019  | 1,59818 | 1,69567 | -1,069910413 | N/A             | 389715    | NR_024481    | FAM205BP         |
| A_22_P00002533 | 3,04607 | 3,14367 | -1,069991993 | ENST00000582507 | N/A       | N/A          | N/A              |
| A_23_P400298   | 11,2636 | 11,3612 | -1,069991993 | ENST00000575164 | 64063     | NM_022119    | PRSS22           |
| A_23_P26173    | 12,3981 | 12,4957 | -1,069991993 | ENST00000543455 | 23423     | NM_007364    | TMED3            |
| A_23_P318604   | 9,67893 | 9,77654 | -1,069999409 | ENST00000528663 | 50626     | XM_006716562 | CYHR1            |
| A_33_P3287258  | 4,03877 | 4,1364  | -1,070014243 | ENST00000596210 | N/A       | N/A          | N/A              |
| A_32_P409222   | 9,58757 | 9,68522 | -1,070029076 | ENST00000598519 | 89887     | NM_033113    | ZNF628           |
| A_24_P233570   | 16,3121 | 16,4098 | -1,070066161 | ENST00000262193 | 5689      | NM_002793    | PSMB1            |
| A_23_P116898   | 1,70269 | 1,80043 | -1,07009583  | ENST00000318602 | 2         | NM_000014    | A2M              |
| A_23_P344281   | 1,65169 | 1,74944 | -1,070103248 | ENST00000597850 | 284307    | NM_001010879 | ZIK1             |
| A_21_P0004937  | 5,66818 | 5,76605 | -1,07019226  | N/A             | N/A       | N/A          | Inc-TRMT11-1     |
| A_33_P3400653  | 12,2407 | 12,3386 | -1,070214514 | ENST00000267859 | 663       | XM_005254607 | BNIP2            |
| A_24_P84880    | 9,52282 | 9,62076 | -1,070244187 | ENST00000438944 | 148709    | NR_002929    | LOC148709        |
| A_33_P3291160  | 5,54536 | 5,64331 | -1,070251606 | N/A             | N/A       | N/A          | N/A              |
| A_23_P46412    | 5,64141 | 5,73937 | -1,070259024 | ENST00000379101 | 6339      | NM_001130413 | SCNN1D           |
| A_33_P3418000  | 3,99586 | 4,09386 | -1,070288698 | ENST00000314117 | 768211    | NM_001085399 | RELL1            |
| A_33_P3259148  | 9,4517  | 9,54974 | -1,070318374 | ENST00000421016 | 729288    | NM_001145045 | ZNF286B          |
| A_21_P0007872  | 1,73572 | 1,83379 | -1,07034063  | N/A             | N/A       | N/A          | Inc-SLCO1A2-4    |
| A_21_P0007948  | 6,1777  | 6,27579 | -1,070355469 | N/A             | N/A       | N/A          | Inc-AL359392.1-2 |
| A_23_P88119    | 12,8877 | 12,9858 | -1,070362888 | ENST00000602786 | 10808     | NM_006644    | HSPH1            |
| A_24_P118489   | 10,7688 | 10,8669 | -1,070362888 | ENST00000611636 | 123720    | NM_001080435 | WHAMM            |
| A_24_P46577    | 13,5575 | 13,6556 | -1,070362888 | ENST00000484199 | 30834     | NM_170783    | ZNRD1            |
| A_23_P14975    | 10,0783 | 10,1765 | -1,070437082 | ENST00000602942 | 84080     | NM_032140    | ENKD1            |
| A_23_P137856   | 11,4734 | 11,5716 | -1,070437082 | ENST00000337604 | 4582      | NM_002456    | MUC1             |
| A_23_P311232   | 8,33737 | 8,43559 | -1,070451922 | ENST00000263710 | 23332     | NM_015282    | CLASP1           |
| A_33_P3238920  | 7,55791 | 7,65621 | -1,070511282 | ENST00000369081 | 22876     | NM_001243195 | INPP5F           |

|                |         |         |              |                 |           |              |                |
|----------------|---------|---------|--------------|-----------------|-----------|--------------|----------------|
| A_33_P3258824  | 10,644  | 10,7425 | -1,070659697 | ENST00000579475 | 4853      | NM_001200001 | NOTCH2         |
| A_33_P3261700  | 6,69422 | 6,79273 | -1,070667118 | ENST00000262346 | 81573     | NM_030816    | ANKRD13C       |
| A_21_P0006230  | 3,74021 | 3,83879 | -1,070719068 | N/A             | N/A       | N/A          | Inc-C9orf16-1  |
| A_33_P3766959  | 11,2404 | 11,339  | -1,070733912 | ENST00000555178 | 55775     | NM_018319    | TDP1           |
| A_22_P00014212 | 6,78561 | 6,88422 | -1,070741333 | N/A             | 101928323 | NR_125400    | LOC101928323   |
| A_22_P00019657 | 5,12486 | 5,22352 | -1,070778443 | N/A             | N/A       | N/A          | Inc-NFAT5-1    |
| A_23_P110076   | 9,16651 | 9,26519 | -1,070793287 | ENST00000332629 | 348793    | NM_182627    | WDR53          |
| A_23_P62807    | 12,1277 | 12,2264 | -1,070808132 | ENST00000366510 | 51097     | NM_016002    | SCCPDH         |
| A_22_P00004844 | 2,85365 | 2,95235 | -1,070808132 | N/A             | N/A       | AK097267     | Inc-CYGB-1     |
| A_23_P137470   | 6,10418 | 6,20289 | -1,070815554 | ENST00000308942 | 57568     | NM_020808    | SIPA1L2        |
| A_21_P0007433  | 3,03938 | 3,13812 | -1,070837821 | N/A             | N/A       | N/A          | Inc-FSHB-2     |
| A_32_P49848    | 7,93554 | 8,03428 | -1,070837821 | ENST00000489471 | 23433     | NM_012249    | RHOQ           |
| A_23_P366125   | 6,66769 | 6,76645 | -1,070852666 | ENST00000570069 | 197342    | AK074080     | EME2           |
| A_23_P330262   | 7,38366 | 7,48242 | -1,070852666 | ENST00000335312 | 23396     | NM_012398    | PIP5K1C        |
| A_33_P3252954  | 3,72522 | 3,82401 | -1,070874934 | N/A             | N/A       | AK129677     | N/A            |
| A_23_P145089   | 13,5283 | 13,6271 | -1,070882357 | ENST00000371554 | 3326      | NM_007355    | HSP90AB1       |
| A_23_P132358   | 9,96449 | 10,0633 | -1,07088978  | ENST00000327555 | 27349     | NM_173467    | MCAT           |
| A_32_P41065    | 9,95244 | 10,0513 | -1,070926895 | ENST00000426664 | 23023     | NM_001017395 | TMCC1          |
| A_22_P00023006 | 10,1647 | 10,2636 | -1,070956588 | N/A             | N/A       | DB050967     | Inc-CHRNA6-1   |
| A_22_P00001709 | 4,8834  | 4,98232 | -1,070971434 | N/A             | N/A       | N/A          | Inc-ATG16L2-1  |
| A_32_P169735   | 9,97588 | 10,0748 | -1,070971434 | ENST00000354441 | 123016    | NM_144596    | TTC8           |
| A_33_P3312119  | 3,62079 | 3,71974 | -1,070993705 | ENST00000367072 | 100130967 | NM_001302839 | C6orf99        |
| A_23_P336929   | 4,19019 | 4,28917 | -1,071015976 | ENST00000615911 | 55588     | NM_017592    | MED29          |
| A_33_P3382489  | 3,41574 | 3,51475 | -1,071038247 | ENST00000429878 | 100506457 | N/A          | LOC100506457   |
| A_33_P3234804  | 9,57919 | 9,67823 | -1,071060519 | ENST00000306193 | 84869     | NM_032783    | CBR4           |
| A_33_P3267948  | 6,30837 | 6,40741 | -1,071060519 | ENST00000264088 | 79085     | NM_024103    | SLC25A23       |
| A_23_P130466   | 8,91667 | 9,01571 | -1,071060519 | ENST00000621650 | 7554      | NM_021089    | ZNF8           |
| A_33_P3305915  | 8,2068  | 8,30585 | -1,071067943 | ENST00000406772 | 26088     | NM_001172688 | GGA1           |
| A_33_P3275163  | 6,35803 | 6,4571  | -1,071082791 | N/A             | N/A       | N/A          | N/A            |
| A_24_P264909   | 11,9399 | 12,039  | -1,071105064 | ENST00000612570 | 54602     | NM_019080    | NDFIP2         |
| A_21_P0011141  | 6,73718 | 6,83629 | -1,071112488 | N/A             | N/A       | N/A          | XLOC_I2_003705 |
| A_24_P175059   | 8,62729 | 8,72641 | -1,071119913 | ENST00000360666 | 9474      | NM_004849    | ATG5           |
| A_24_P55496    | 6,45923 | 6,55836 | -1,071127337 | ENST00000518199 | 116039    | NM_053001    | OSR2           |



|                |         |         |              |                 |           |              |                  |
|----------------|---------|---------|--------------|-----------------|-----------|--------------|------------------|
| A_23_P115482   | 12,5895 | 12,6887 | -1,07117931  | ENST00000367274 | 29089     | NM_014176    | UBE2T            |
| A_21_P0001299  | 3,03185 | 3,13115 | -1,071253561 | N/A             | N/A       | N/A          | Inc-ACOT11-1     |
| A_21_P0007870  | 3,89805 | 3,99736 | -1,071260986 | ENST00000510134 | 10748     | NR_028045    | KLRAP1           |
| A_33_P6703419  | 7,51902 | 7,61836 | -1,071283263 | ENST00000471797 | 285973    | N/A          | ATG9B            |
| A_22_P00015189 | 1,78639 | 1,88576 | -1,07130554  | N/A             | N/A       | N/A          | Inc-SOX13-1      |
| A_22_P00019740 | 1,43053 | 1,52992 | -1,071320391 | N/A             | N/A       | CB960930     | Inc-MUC20-4      |
| A_23_P45851    | 11,7681 | 11,8675 | -1,071327817 | ENST00000370152 | 64645     | NM_033055    | HIAT1            |
| A_22_P00010155 | 11,5783 | 11,6777 | -1,071327817 | ENST00000560703 | 26589     | NM_022163    | MRPL46           |
| A_22_P00015379 | 11,2587 | 11,3581 | -1,071327817 | N/A             | 101929494 | XR_424822    | LOC101929494     |
| A_33_P3239787  | 3,48075 | 3,58019 | -1,071357521 | ENST00000300850 | 9726      | NM_014699    | ZNF646           |
| A_33_P3362063  | 3,34512 | 3,44458 | -1,071372373 | ENST00000409786 | 440925    | NR_027433    | LINC01124        |
| A_23_P157875   | 3,62243 | 3,72189 | -1,071372373 | ENST00000371806 | 2219      | NM_002003    | FCN1             |
| A_23_P355536   | 10,8679 | 10,9674 | -1,071402079 | ENST00000408019 | 159195    | NM_152586    | USP54            |
| A_33_P3292679  | 12,3641 | 12,4636 | -1,071402079 | ENST00000556162 | 58533     | NM_021249    | SNX6             |
| A_22_P00000510 | 2,26534 | 2,36485 | -1,071409505 | N/A             | N/A       | AF116706     | Inc-AC107021.1-1 |
| A_33_P3291394  | 11,4098 | 11,5094 | -1,071476345 | ENST00000616939 | 11321     | NM_007266    | GPN1             |
| A_21_P0000618  | 4,08525 | 4,18485 | -1,071476345 | N/A             | 440952    | NR_033965    | EIF1B-AS1        |
| A_21_P0014836  | 1,65195 | 1,75162 | -1,071528335 | N/A             | N/A       | N/A          | N/A              |
| A_33_P3251984  | 4,54976 | 4,64945 | -1,071543189 | ENST00000309099 | 116535    | NM_001098515 | MRGPRF           |
| A_33_P3398005  | 5,68523 | 5,78497 | -1,071580327 | N/A             | N/A       | N/A          | N/A              |
| A_22_P00016860 | 4,52524 | 4,625   | -1,071595182 | N/A             | N/A       | BC020903     | Inc-TRPV1-1      |
| A_33_P3265945  | 7,94466 | 8,04442 | -1,071595182 | N/A             | N/A       | AK129671     | N/A              |
| A_23_P65466    | 8,07195 | 8,17174 | -1,071617466 | ENST00000622293 | 84932     | NM_032846    | RAB2B            |
| A_24_P380330   | 8,62054 | 8,72036 | -1,071639749 | ENST00000239231 | 79646     | NM_024594    | PANK3            |
| A_23_P254181   | 3,2486  | 3,34849 | -1,071691747 | N/A             | 79015     | NR_034104    | LINC01260        |
| A_21_P0011392  | 5,74074 | 5,84064 | -1,071699175 | N/A             | 646396    | N/A          | REREP3           |
| A_33_P3308105  | 12,4005 | 12,5004 | -1,071699175 | ENST00000260118 | 8836      | NM_003878    | GGH              |
| A_21_P0010859  | 6,67473 | 6,7747  | -1,071751176 | ENST00000414939 | N/A       | XR_428678    | N/A              |
| A_21_P0005728  | 1,69693 | 1,7969  | -1,071751176 | ENST00000518706 | 102724874 | N/A          | LOC102724874     |
| A_23_P69521    | 15,18   | 15,28   | -1,071773463 | ENST00000237654 | 10983     | NM_006835    | CCNI             |
| A_32_P148275   | 1,65601 | 1,75606 | -1,071810608 | ENST00000551346 | 121599    | NM_152323    | SPIC             |
| A_33_P3367293  | 4,14081 | 4,2409  | -1,071840325 | N/A             | 644314    | NR_003669    | MT1IP            |
| A_22_P00016661 | 7,01907 | 7,1192  | -1,071870043 | N/A             | 101928200 | NR_120541    | MRGPRF-AS1       |

|                |         |         |              |                 |           |              |                |
|----------------|---------|---------|--------------|-----------------|-----------|--------------|----------------|
| A_23_P5342     | 1,69271 | 1,79291 | -1,071922052 | ENST00000389484 | 53353     | NM_018557    | LRP1B          |
| A_33_P3309859  | 7,24361 | 7,3439  | -1,071988924 | N/A             | N/A       | N/A          | Inc-FAM43A-2   |
| A_21_P0012205  | 4,08031 | 4,18064 | -1,072018647 | N/A             | N/A       | N/A          | XLOC_I2_009219 |
| A_22_P00010983 | 1,50803 | 1,60837 | -1,072026077 | N/A             | N/A       | N/A          | Inc-NRN1-1     |
| A_33_P3324552  | 5,28818 | 5,38854 | -1,072040939 | N/A             | N/A       | N/A          | N/A            |
| A_23_P29851    | 9,91794 | 10,0183 | -1,072040939 | ENST00000515119 | 4043      | NM_002337    | LRPAP1         |
| A_23_P154875   | 12,8848 | 12,9852 | -1,072070662 | ENST00000330333 | 25825     | NM_012105    | BACE2          |
| A_21_P0004879  | 1,68303 | 1,7835  | -1,072122681 | N/A             | N/A       | N/A          | Inc-DAAM2-1    |
| A_33_P3253304  | 2,85035 | 2,95082 | -1,072122681 | N/A             | N/A       | N/A          | N/A            |
| A_22_P00002427 | 1,38544 | 1,48594 | -1,072144975 | N/A             | N/A       | N/A          | Inc-C14orf23-6 |
| A_24_P548866   | 4,97759 | 5,07812 | -1,07216727  | N/A             | 25994     | NM_001099668 | HIGD1A         |
| A_22_P00006772 | 5,51446 | 5,61504 | -1,072204429 | N/A             | N/A       | AL713703     | Inc-FUS-1      |
| A_23_P256724   | 4,66994 | 4,77052 | -1,072204429 | ENST00000517558 | 8794      | NM_003841    | TNFRSF10C      |
| A_22_P00024247 | 1,43435 | 1,53504 | -1,072286184 | N/A             | N/A       | N/A          | Inc-ZNF672-1   |
| A_23_P117778   | 9,45797 | 9,55875 | -1,072353079 | ENST00000564488 | 84993     | NM_032907    | UBL7           |
| A_23_P322116   | 4,66467 | 4,76545 | -1,072353079 | ENST00000373235 | 339488    | NM_178548    | TFAP2E         |
| A_22_P00013445 | 5,1564  | 5,25721 | -1,072375378 | ENST00000561476 | N/A       | BC033399     | N/A            |
| A_33_P3243248  | 4,99883 | 5,09965 | -1,072382811 | ENST00000469991 | 57169     | BU664634     | ZNFX1          |
| A_21_P0003216  | 6,7288  | 6,82962 | -1,072382811 | N/A             | 101927440 | XR_249342    | LOC101927440   |
| A_22_P00006966 | 1,70655 | 1,8074  | -1,072405111 | N/A             | N/A       | N/A          | Inc-GDAP1-1    |
| A_24_P273245   | 9,13486 | 9,23573 | -1,072419978 | ENST00000476047 | N/A       | N/A          | N/A            |
| A_21_P0005693  | 5,29927 | 5,40023 | -1,072486881 | ENST00000521660 | 101929217 | NR_105004    | LOC101929217   |
| A_21_P0004270  | 1,65726 | 1,75831 | -1,072553788 | N/A             | N/A       | N/A          | Inc-ATG10-1    |
| A_33_P3391521  | 2,2906  | 2,39166 | -1,072561222 | ENST00000366589 | 56605     | N/A          | ERO1LB         |
| A_33_P3305855  | 5,46952 | 5,57062 | -1,072590961 | ENST00000623174 | N/A       | XR_245616    | N/A            |
| A_33_P3636080  | 8,61993 | 8,72103 | -1,072590961 | ENST00000556740 | 27030     | NM_001040108 | MLH3           |
| A_33_P3394347  | 6,46634 | 6,56745 | -1,072598395 | N/A             | 116933    | NR_024066    | CLRN1-AS1      |
| A_22_P00002988 | 2,88225 | 2,98344 | -1,072657874 | ENST00000566733 | N/A       | BX647262     | N/A            |
| A_23_P347198   | 10,6808 | 10,782  | -1,072665309 | ENST00000465379 | 6670      | NM_003111    | SP3            |
| A_23_P67932    | 3,18523 | 3,28644 | -1,072672745 | ENST00000295683 | 3577      | NM_000634    | CXCR1          |
| A_21_P0010256  | 7,0383  | 7,13955 | -1,072702486 | N/A             | N/A       | N/A          | Inc-PKNOX1-2   |
| A_33_P3264444  | 7,77281 | 7,87409 | -1,072724792 | ENST00000482292 | N/A       | N/A          | N/A            |
| A_21_P0013082  | 1,65255 | 1,75383 | -1,072724792 | N/A             | N/A       | N/A          | XLOC_I2_013001 |

|                |         |         |              |                 |           |              |                |
|----------------|---------|---------|--------------|-----------------|-----------|--------------|----------------|
| A_23_P29985    | 9,64736 | 9,74866 | -1,072739664 | N/A             | 152992    | AK022953     | TRMT44         |
| A_21_P0009116  | 6,76949 | 6,8708  | -1,072747099 | N/A             | N/A       | N/A          | Inc-BANP-1     |
| A_21_P0008250  | 1,68408 | 1,78539 | -1,072747099 | N/A             | N/A       | N/A          | Inc-EPST11-3   |
| A_22_P00019012 | 1,38798 | 1,4893  | -1,072754535 | N/A             | N/A       | AA777538     | Inc-CDR2-1     |
| A_33_P3248424  | 7,57235 | 7,67369 | -1,072769407 | N/A             | 90268     | NM_138348    | OTULIN         |
| A_21_P0008921  | 2,35151 | 2,45288 | -1,072791714 | N/A             | 101928829 | XR_248192    | LOC101928829   |
| A_23_P128930   | 12,6149 | 12,7163 | -1,072814023 | ENST00000606149 | 5706      | NM_002806    | PSMC6          |
| A_23_P48628    | 7,5502  | 7,65163 | -1,072836332 | ENST00000394715 | 7597      | NM_006977    | ZBTB25         |
| A_33_P3234667  | 9,87638 | 9,97786 | -1,072873514 | ENST00000620510 | 7586      | NM_001287054 | ZKSCAN1        |
| A_23_P121413   | 2,69647 | 2,798   | -1,072910697 | ENST00000319153 | 165721    | NM_153330    | DNAJB8         |
| A_32_P223464   | 3,43374 | 3,53533 | -1,07295532  | ENST00000342506 | 401027    | NM_213608    | C2orf66        |
| A_23_P266      | 8,82385 | 8,92546 | -1,072970194 | ENST00000412108 | 5301      | NR_023916    | PIN1P1         |
| A_33_P3349702  | 4,74198 | 4,84359 | -1,072970194 | ENST00000443042 | 400927    | NR_002821    | LOC400927      |
| A_22_P00024838 | 4,05231 | 4,15398 | -1,073014818 | ENST00000560391 | N/A       | N/A          | N/A            |
| A_33_P3372666  | 11,1105 | 11,2122 | -1,073037131 | ENST00000426681 | 5154      | NM_033023    | PDGFA          |
| A_22_P00016721 | 5,59059 | 5,69231 | -1,073052007 | N/A             | N/A       | N/A          | Inc-TRAPPC6B-1 |
| A_23_P94819    | 4,85128 | 4,95306 | -1,073096635 | ENST00000323434 | 9501      | NM_006987    | RPH3AL         |
| A_24_P25326    | 6,92146 | 7,02326 | -1,073111511 | ENST00000357182 | 9204      | NM_007167    | ZMYM6          |
| A_33_P3277075  | 5,97219 | 6,074   | -1,07311895  | ENST00000622697 | 2562      | NM_000814    | GABRB3         |
| A_22_P00001196 | 6,03631 | 6,13814 | -1,073133826 | N/A             | 101409258 | NR_102429    | OSGEPL1-AS1    |
| A_33_P3378644  | 6,72294 | 6,8248  | -1,073156142 | ENST00000554937 | 1911      | NM_004426    | PHC1           |
| A_33_P3358855  | 3,35528 | 3,45716 | -1,073171019 | N/A             | N/A       | N/A          | N/A            |
| A_24_P220897   | 4,45718 | 4,55908 | -1,073185896 | ENST00000450845 | 202051    | NM_194296    | SPATA24        |
| A_23_P23074    | 12,2775 | 12,3794 | -1,073185896 | ENST00000485662 | 10561     | NM_006417    | IFI44          |
| A_33_P3211734  | 10,8884 | 10,9903 | -1,073185896 | ENST00000369524 | 80143     | NM_001102396 | SIKE1          |
| A_33_P3236322  | 1,66526 | 1,76717 | -1,073193335 | ENST00000371169 | N/A       | XM_003846629 | N/A            |
| A_23_P375281   | 6,82572 | 6,92763 | -1,073193335 | ENST00000572705 | 7442      | NM_080706    | TRPV1          |
| A_33_P3227174  | 2,44539 | 2,5474  | -1,073267726 | N/A             | N/A       | N/A          | N/A            |
| A_33_P3313846  | 4,40926 | 4,51133 | -1,073312363 | ENST00000334554 | 29801     | NM_013373    | ZDHC8          |
| A_21_P0008709  | 1,65056 | 1,75265 | -1,073327242 | N/A             | 102725478 | XR_424583    | LOC102725478   |
| A_23_P137697   | 3,81856 | 3,92066 | -1,073334682 | ENST00000466167 | 6403      | NM_003005    | SELP           |
| A_23_P126089   | 9,27966 | 9,38179 | -1,073357001 | N/A             | 6702      | NR_003062    | SPRR2C         |
| A_19_P00809119 | 10,3314 | 10,4336 | -1,073409082 | ENST00000444265 | 401237    | NR_015410    | CASC15         |

|                |         |         |              |                 |           |           |                       |
|----------------|---------|---------|--------------|-----------------|-----------|-----------|-----------------------|
| A_22_P00000444 | 2,80766 | 2,90988 | -1,073423963 | ENST00000446029 | N/A       | N/A       | N/A                   |
| A_21_P0013312  | 3,44056 | 3,54284 | -1,073468606 | N/A             | N/A       | N/A       | XLOC_I2_013853        |
| A_23_P139912   | 16,0003 | 16,1026 | -1,073483488 | ENST00000548176 | 3489      | NM_002178 | IGFBP6                |
| A_23_P253301   | 10,2185 | 10,3208 | -1,073483488 | ENST00000239940 | 5217      | NM_053024 | PFN2                  |
| A_22_P00019757 | 7,30915 | 7,41148 | -1,07350581  | ENST00000415586 | N/A       | BI260832  | N/A                   |
| A_33_P3851513  | 8,65086 | 8,75323 | -1,073535575 | ENST00000442461 | 132660    | NM_194282 | LIN54                 |
| A_33_P3282619  | 6,24981 | 6,35224 | -1,073580223 | N/A             | N/A       | AK130019  | Inc-RP11-305N23.1.1-1 |
| A_21_P0014926  | 1,71689 | 1,81937 | -1,073617431 | N/A             | 100289308 | XR_133259 | LOC100289308          |
| A_32_P42925    | 16,0306 | 16,1331 | -1,073632315 | ENST00000581193 | 103910    | NM_033546 | MYL12B                |
| A_21_P0012564  | 17,2921 | 17,3946 | -1,073632315 | N/A             | N/A       | N/A       | XLOC_I2_010508        |
| A_23_P161022   | 11,1412 | 11,2437 | -1,073632315 | ENST00000478558 | 23557     | NM_012437 | SNAPIN                |
| A_33_P6455786  | 11,5839 | 11,6864 | -1,073632315 | ENST00000403729 | 118429    | NM_058172 | ANTXR2                |
| A_22_P00006209 | 8,09778 | 8,2003  | -1,073647198 | N/A             | 100507297 | NR_047573 | TMEM44-AS1            |
| A_21_P0010170  | 2,72075 | 2,82327 | -1,073647198 | ENST00000424569 | N/A       | N/A       | N/A                   |
| A_23_P141656   | 10,8171 | 10,9197 | -1,073706736 | ENST00000580055 | 1819      | NM_001388 | DRG2                  |
| A_23_P419602   | 11,5572 | 11,6598 | -1,073706736 | ENST00000424354 | 6721      | NM_004599 | SREBF2                |
| A_19_P00320362 | 4,62995 | 4,73256 | -1,073714178 | ENST00000566912 | 729177    | NR_034143 | NBAT1                 |
| A_21_P0003157  | 1,44366 | 1,54628 | -1,07372162  | N/A             | N/A       | N/A       | Inc-CD47-1            |
| A_33_P3219256  | 8,39219 | 8,49483 | -1,073736506 | ENST00000372037 | 657       | NM_004329 | BMPR1A                |
| A_24_P66105    | 3,37251 | 3,4752  | -1,073773719 | ENST00000616266 | 79917     | NM_024859 | MAGIX                 |
| A_24_P150931   | 3,51828 | 3,62097 | -1,073773719 | ENST00000328741 | 11248     | NM_007225 | NXPH3                 |
| A_33_P3302075  | 12,8496 | 12,9523 | -1,073781162 | ENST00000450233 | 54576     | NM_019076 | UGT1A8                |
| A_19_P00808453 | 15,4705 | 15,5732 | -1,073781162 | ENST00000322347 | 9377      | NM_004255 | COX5A                 |
| A_24_P204043   | 4,96542 | 5,06815 | -1,073803491 | ENST00000605935 | 24149     | NM_014345 | ZNF318                |
| A_23_P99579    | 8,47595 | 8,57871 | -1,07382582  | ENST00000306954 | 84520     | NM_032490 | C14orf142             |
| A_24_P15765    | 14,2532 | 14,356  | -1,073855593 | ENST00000441482 | 645884    | N/A       | RPS7P5                |
| A_33_P3254216  | 5,47454 | 5,57738 | -1,073885367 | ENST00000395161 | 5602      | NM_138980 | MAPK10                |
| A_33_P3363938  | 6,79738 | 6,90025 | -1,073907698 | ENST00000534372 | 4676      | AK316548  | NAP1L4                |
| A_33_P3283616  | 1,6001  | 1,70297 | -1,073907698 | ENST00000360027 | 4068      | NM_002351 | SH2D1A                |
| A_22_P00004935 | 1,77485 | 1,87774 | -1,073922586 | N/A             | N/A       | N/A       | Inc-DBX1-5            |
| A_21_P0004457  | 1,43735 | 1,54024 | -1,073922586 | N/A             | N/A       | N/A       | Inc-CSNK1A1-1         |
| A_23_P216476   | 11,6788 | 11,7817 | -1,07393003  | ENST00000307750 | 9925      | NM_014872 | ZBTB5                 |
| A_21_P0008099  | 4,5514  | 4,65431 | -1,073937474 | ENST00000325089 | 26050     | N/A       | SLITRK5               |

|                |         |         |              |                 |           |              |                  |
|----------------|---------|---------|--------------|-----------------|-----------|--------------|------------------|
| A_33_P3235690  | 9,36798 | 9,47092 | -1,073959806 | ENST00000355725 | 57187     | NM_001081550 | THOC2            |
| A_21_P0008252  | 7,1284  | 7,23136 | -1,073974694 | N/A             | N/A       | N/A          | Inc-TSC22D1-1    |
| A_21_P0003736  | 1,66571 | 1,76871 | -1,074004472 | N/A             | N/A       | N/A          | Inc-ARAP2-7      |
| A_33_P3216869  | 5,84503 | 5,94805 | -1,074019361 | ENST00000406419 | 1381      | NM_004378    | CRABP1           |
| A_32_P14762    | 3,73598 | 3,83903 | -1,074041694 | N/A             | 441161    | NM_001080507 | OOEP             |
| A_21_P0014132  | 8,10946 | 8,21253 | -1,074056584 | N/A             | N/A       | N/A          | N/A              |
| A_21_P0011048  | 2,16787 | 2,27102 | -1,074116144 | N/A             | N/A       | N/A          | XLOC_I2_003039   |
| A_23_P144165   | 9,12204 | 9,2252  | -1,074123589 | ENST00000495008 | 9666      | NM_014648    | DZIP3            |
| A_33_P3217958  | 5,18418 | 5,2874  | -1,074168262 | ENST00000409418 | 9873      | NM_014824    | FCHSD2           |
| A_21_P0000050  | 1,66837 | 1,7716  | -1,074175707 | N/A             | 27185     | NM_001164549 | DISC1            |
| A_33_P3216008  | 8,69036 | 8,79362 | -1,074198044 | ENST00000298260 | 221150    | NM_145061    | SKA3             |
| A_22_P00008365 | 4,96876 | 5,07207 | -1,074235274 | ENST00000553051 | 3714      | NM_145159    | JAG2             |
| A_33_P3233749  | 1,77719 | 1,8805  | -1,074235274 | N/A             | 100128751 | AY194294     | LOC100128751     |
| A_23_P14389    | 9,30428 | 9,40762 | -1,074257612 | ENST00000397341 | 22985     | NM_014977    | ACIN1            |
| A_22_P00015588 | 7,00914 | 7,1125  | -1,074272505 | N/A             | 102724791 | XR_426874    | LOC102724791     |
| A_21_P0014644  | 1,42593 | 1,52929 | -1,074272505 | ENST00000522486 | N/A       | N/A          | N/A              |
| A_33_P3676746  | 9,56174 | 9,66515 | -1,074309737 | ENST00000549293 | 56252     | NM_019589    | YLPM1            |
| A_23_P376488   | 4,48339 | 4,58683 | -1,074332077 | ENST00000376122 | 7124      | NM_000594    | TNF              |
| A_23_P106391   | 8,11796 | 8,22142 | -1,07434697  | ENST00000249861 | 56906     | NM_020147    | THAP10           |
| A_21_P0009444  | 3,27366 | 3,37716 | -1,074376758 | N/A             | N/A       | N/A          | Inc-AP001496.1-2 |
| A_23_P110791   | 3,02392 | 3,12743 | -1,074384205 | ENST00000286301 | 1436      | NM_005211    | CSF1R            |
| A_22_P00009701 | 8,41677 | 8,52032 | -1,074413993 | ENST00000585258 | 100131655 | NR_040024    | LOC100131655     |
| A_23_P147665   | 3,25466 | 3,35826 | -1,07445123  | ENST00000329293 | 283298    | NM_198474    | OLFML1           |
| A_21_P0010522  | 1,93819 | 2,04191 | -1,074540604 | ENST00000451482 | 101928303 | NR_110698    | LOC101928303     |
| A_33_P3288859  | 9,43344 | 9,53722 | -1,074585294 | ENST00000314567 | 150383    | NM_207327    | CDPF1            |
| A_33_P3290714  | 1,66507 | 1,76887 | -1,074600191 | ENST00000406696 | 90161     | NM_001077188 | HS6ST2           |
| A_23_P31755    | 1,66941 | 1,77323 | -1,074615089 | ENST00000276571 | 1392      | NM_000756    | CRH              |
| A_33_P3409518  | 3,114   | 3,21792 | -1,074689578 | N/A             | 643224    | NR_027156    | TUBBP5           |
| A_22_P00011390 | 2,70066 | 2,80462 | -1,074719375 | N/A             | N/A       | N/A          | Inc-PABPC4-1     |
| A_23_P211141   | 2,80923 | 2,91321 | -1,074734274 | ENST00000617870 | 1826      | NM_001389    | DSCAM            |
| A_23_P315122   | 7,74626 | 7,85026 | -1,074749173 | ENST00000491023 | 2016      | NM_004097    | EMX1             |
| A_21_P0014185  | 4,44286 | 4,54686 | -1,074749173 | N/A             | N/A       | AF090910     | N/A              |
| A_33_P3324495  | 9,85483 | 9,95883 | -1,074749173 | ENST00000330701 | 286128    | NM_173832    | ZFP41            |

|                |         |         |              |                 |           |              |                  |
|----------------|---------|---------|--------------|-----------------|-----------|--------------|------------------|
| A_24_P63799    | 4,23668 | 4,34087 | -1,074890724 | ENST00000369046 | 55278     | NM_018292    | QRSL1            |
| A_33_P3557274  | 8,2401  | 8,34429 | -1,074890724 | N/A             | 100996924 | XM_003846648 | LOC100996924     |
| A_33_P3310009  | 1,76307 | 1,86727 | -1,074898175 | ENST00000451261 | 347442    | NM_001136533 | DCAF8L2          |
| A_33_P3221898  | 3,32275 | 3,42699 | -1,074927978 | ENST00000429445 | 339240    | NR_001443    | KRT17P5          |
| A_33_P3273919  | 4,70419 | 4,80852 | -1,074995038 | N/A             | 285498    | AK124578     | RNF212           |
| A_23_P161156   | 8,76512 | 8,86948 | -1,075017392 | ENST00000538351 | 220929    | NM_182755    | ZNF438           |
| A_33_P3339361  | 7,82544 | 7,92983 | -1,075039746 | N/A             | 9824      | NM_199357    | ARHGAP11A        |
| A_23_P150876   | 12,5939 | 12,6983 | -1,075047198 | ENST00000267202 | 79720     | NM_024667    | VPS37B           |
| A_22_P00000856 | 9,12608 | 9,23049 | -1,07505465  | N/A             | N/A       | N/A          | Inc-AGPAT2-2     |
| A_23_P70307    | 1,66201 | 1,76644 | -1,075069553 | ENST00000535039 | 64094     | NM_022138    | SMOC2            |
| A_23_P35591    | 12,4524 | 12,5569 | -1,075121717 | ENST00000370885 | 51013     | NM_016046    | EXOSC1           |
| A_33_P3220395  | 1,44815 | 1,55268 | -1,075144074 | N/A             | N/A       | N/A          | N/A              |
| A_19_P00320028 | 9,68006 | 9,78462 | -1,075166431 | N/A             | 100216546 | NR_039981    | LINC01004        |
| A_23_P26687    | 10,3033 | 10,4079 | -1,075196241 | ENST00000333050 | 25880     | NM_015421    | TMEM186          |
| A_33_P3329740  | 12,4924 | 12,5971 | -1,075270771 | N/A             | N/A       | N/A          | N/A              |
| A_22_P00008020 | 7,5609  | 7,66561 | -1,075278224 | N/A             | 101929089 | NR_120576    | LOC101929089     |
| A_22_P00008902 | 1,70551 | 1,81022 | -1,075278224 | ENST00000417315 | N/A       | N/A          | N/A              |
| A_33_P3360456  | 1,76128 | 1,86602 | -1,075300584 | ENST00000451275 | 7710      | NM_001085384 | ZNF154           |
| A_22_P00025009 | 4,12848 | 4,23322 | -1,075300584 | ENST00000458693 | N/A       | N/A          | N/A              |
| A_33_P3391211  | 9,84272 | 9,94748 | -1,075315491 | ENST00000329286 | 201475    | NM_001025300 | RAB12            |
| A_23_P200598   | 11,1566 | 11,2614 | -1,075345306 | ENST00000264198 | 79594     | NM_024544    | MUL1             |
| A_33_P3224971  | 11,8514 | 11,9562 | -1,075345306 | N/A             | N/A       | N/A          | N/A              |
| A_21_P0007156  | 1,46618 | 1,57099 | -1,075352759 | ENST00000428160 | N/A       | N/A          | N/A              |
| A_23_P32029    | 9,44123 | 9,54609 | -1,075390029 | ENST00000375259 | 11046     | NM_007001    | SLC35D2          |
| A_21_P0013628  | 4,15202 | 4,25689 | -1,075397483 | N/A             | N/A       | N/A          | XLOC_I2_015160   |
| A_33_P3248231  | 6,87418 | 6,97911 | -1,075442208 | N/A             | 283028    | XR_171099    | LOC283028        |
| A_21_P0009083  | 1,65398 | 1,75893 | -1,075457117 | N/A             | N/A       | N/A          | Inc-AC092327.1-2 |
| A_33_P3636257  | 5,40419 | 5,50914 | -1,075457117 | ENST00000436290 | 642345    | NR_033829    | MIR4500HG        |
| A_33_P3380071  | 6,82828 | 6,93325 | -1,075472026 | ENST00000435950 | 100130673 | NR_038454    | LOC100130673     |
| A_33_P3298139  | 3,18036 | 3,28542 | -1,07553912  | ENST00000400841 | 64109     | NM_022148    | CRLF2            |
| A_23_P397910   | 10,9874 | 11,0925 | -1,075568941 | ENST00000270279 | 23624     | NM_012116    | CBLC             |
| A_23_P127460   | 11,593  | 11,6981 | -1,075568941 | ENST00000531339 | 6494      | NM_153253    | SIPA1            |
| A_24_P835500   | 12,506  | 12,6112 | -1,075643496 | ENST00000381440 | 162073    | NM_001034841 | ITPRIPL2         |

|                |         |         |              |                 |           |              |              |
|----------------|---------|---------|--------------|-----------------|-----------|--------------|--------------|
| A_33_P3395442  | 1,64144 | 1,74664 | -1,075643496 | N/A             | N/A       | AK056500     | Inc-VAMP1-1  |
| A_32_P192545   | 8,30339 | 8,40859 | -1,075643496 | ENST00000622517 | 158931    | NM_001006938 | TCEAL6       |
| A_23_P23639    | 7,05888 | 7,16408 | -1,075643496 | ENST00000530971 | 255231    | NM_153259    | MCOLN2       |
| A_33_P3291445  | 2,21926 | 2,3245  | -1,07567332  | ENST00000359130 | 10026     | BC026186     | PIGK         |
| A_22_P00011627 | 5,9514  | 6,05669 | -1,0757106   | ENST00000422374 | N/A       | AK127270     | N/A          |
| A_24_P22079    | 10,6411 | 10,7464 | -1,075718056 | ENST00000379561 | 2308      | NM_002015    | FOXO1        |
| A_33_P3320152  | 10,6472 | 10,7525 | -1,075718056 | ENST00000367208 | 6635      | NM_003094    | SNRPE        |
| A_22_P00014114 | 2,5101  | 2,61541 | -1,075725513 | ENST00000551229 | N/A       | BU852676     | N/A          |
| A_19_P00321143 | 7,10455 | 7,20988 | -1,075740426 | N/A             | 100294145 | N/A          | LOC100294145 |
| A_23_P22915    | 8,8438  | 8,94917 | -1,075770252 | ENST00000357650 | 148867    | NM_133496    | SLC30A7      |
| A_23_P108376   | 8,60969 | 8,71507 | -1,075777709 | ENST00000467668 | 63892     | NM_022065    | THADA        |
| A_23_P86660    | 9,76196 | 9,86736 | -1,075792622 | ENST00000411529 | 220988    | NM_194247    | HNRNPA3      |
| A_21_P0008172  | 1,69248 | 1,79789 | -1,075800079 | N/A             | N/A       | N/A          | Inc-DIAPH3-3 |
| A_21_P0005678  | 2,01056 | 2,11597 | -1,075800079 | N/A             | N/A       | N/A          | Inc-WRN-2    |
| A_23_P60599    | 15,4097 | 15,5152 | -1,075867193 | ENST00000373409 | 54578     | NM_001072    | UGT1A6       |
| A_33_P3390739  | 10,6126 | 10,7181 | -1,075867193 | ENST00000615506 | 6767      | NM_003932    | ST13         |
| A_33_P3293645  | 1,66115 | 1,76666 | -1,07587465  | N/A             | N/A       | N/A          | N/A          |
| A_21_P0009392  | 6,46874 | 6,57425 | -1,07587465  | N/A             | N/A       | N/A          | Inc-RGS9-1   |
| A_33_P3312975  | 6,2735  | 6,37915 | -1,075979059 | ENST00000409078 | 23332     | NM_015282    | CLASP1       |
| A_32_P227317   | 6,47481 | 6,58046 | -1,075979059 | ENST00000437401 | 84771     | NR_024004    | DDX11L2      |
| A_21_P0014531  | 2,51456 | 2,62032 | -1,076061101 | N/A             | N/A       | N/A          | N/A          |
| A_22_P00006034 | 6,5443  | 6,65007 | -1,07606856  | ENST00000552063 | N/A       | XR_245975    | N/A          |
| A_19_P00321575 | 2,16586 | 2,27164 | -1,076076019 | ENST00000418282 | 60467     | NR_026783    | BPESC1       |
| A_33_P3279009  | 11,835  | 11,9408 | -1,076090937 | ENST00000617742 | 3166      | NM_018942    | HMX1         |
| A_33_P3399248  | 11,2584 | 11,3642 | -1,076090937 | ENST00000239878 | 51569     | NM_001286706 | UFM1         |
| A_23_P61531    | 11,6089 | 11,7147 | -1,076090937 | ENST00000307363 | 2720      | NM_000404    | GLB1         |
| A_22_P00021246 | 4,18082 | 4,28663 | -1,076098395 | N/A             | N/A       | N/A          | Inc-DPP4-1   |
| A_24_P23522    | 6,79273 | 6,8986  | -1,07614315  | ENST00000313516 | 168451    | NM_182529    | THAP5        |
| A_24_P288323   | 7,15848 | 7,26451 | -1,076262505 | ENST00000597145 | 91039     | NM_139159    | DPP9         |
| A_32_P13756    | 1,80836 | 1,91439 | -1,076262505 | ENST00000398780 | 440956    | NM_001143833 | IQCF6        |
| A_33_P3415859  | 12,3202 | 12,4263 | -1,076314727 | N/A             | 197358    | AK090476     | NLRC3        |
| A_33_P3367994  | 9,62306 | 9,72921 | -1,07635203  | ENST00000372977 | 129685    | NM_138572    | TAF8         |
| A_24_P341344   | 3,05405 | 3,16023 | -1,076374412 | N/A             | 641384    | NR_103558    | TMEM75       |

|                |         |         |              |                 |           |              |              |
|----------------|---------|---------|--------------|-----------------|-----------|--------------|--------------|
| A_23_P251095   | 13,3718 | 13,478  | -1,076389334 | ENST00000478795 | 5160      | NM_000284    | PDHA1        |
| A_33_P3210810  | 5,81775 | 5,92395 | -1,076389334 | N/A             | 84719     | NR_046213    | LINC00260    |
| A_23_P165676   | 6,19307 | 6,29927 | -1,076389334 | ENST00000491265 | N/A       | XM_005263792 | N/A          |
| A_23_P18887    | 8,79153 | 8,89774 | -1,076396795 | ENST00000512218 | 64087     | NM_022132    | MCCC2        |
| A_23_P43049    | 11,8922 | 11,9985 | -1,076463946 | ENST00000522141 | 10671     | NM_006571    | DCTN6        |
| A_33_P3861634  | 1,79803 | 1,90436 | -1,076486331 | ENST00000420866 | 285084    | NR_038897    | LINC01305    |
| A_22_P00014120 | 5,74831 | 5,85465 | -1,076493792 | N/A             | N/A       | BC036224     | Inc-SCAP-1   |
| A_21_P0009523  | 1,77603 | 1,88239 | -1,076508716 | N/A             | N/A       | N/A          | Inc-PPP4R1-3 |
| A_23_P170857   | 11,6216 | 11,728  | -1,076538563 | ENST00000447382 | 3556      | NM_002182    | IL1RAP       |
| A_33_P3383431  | 10,8532 | 10,9596 | -1,076538563 | ENST00000397075 | 10901     | NM_001282989 | DHRS4        |
| A_33_P3268954  | 6,48288 | 6,58929 | -1,076546025 | N/A             | 345630    | NR_024356    | FBLL1        |
| A_19_P00319625 | 1,68014 | 1,78661 | -1,076590799 | N/A             | N/A       | N/A          | Inc-SHPRH-2  |
| A_23_P368711   | 3,89574 | 4,00222 | -1,076598261 | ENST00000245621 | 79168     | NM_024318    | LILRA6       |
| A_24_P366787   | 3,96412 | 4,07065 | -1,076635574 | N/A             | 440556    | NR_024371    | LINC00982    |
| A_24_P402415   | 1,63574 | 1,7423  | -1,076657962 | ENST00000367019 | 255928    | NM_153262    | SYT14        |
| A_22_P00007826 | 5,2366  | 5,34318 | -1,076672888 | N/A             | N/A       | N/A          | Inc-HPD-1    |
| A_24_P205589   | 11,1139 | 11,2205 | -1,076687814 | ENST00000481175 | 11332     | NM_007274    | ACOT7        |
| A_24_P658427   | 9,31311 | 9,41972 | -1,076695277 | ENST00000380959 | 4781      | NM_005596    | NFIB         |
| A_33_P3354783  | 3,16248 | 3,26915 | -1,076740056 | N/A             | N/A       | N/A          | N/A          |
| A_33_P3350744  | 1,65243 | 1,75912 | -1,076754983 | N/A             | N/A       | N/A          | N/A          |
| A_22_P00012729 | 3,24984 | 3,35653 | -1,076754983 | N/A             | N/A       | N/A          | Inc-RAB4A-1  |
| A_23_P75402    | 13,2825 | 13,3892 | -1,076762446 | ENST00000525378 | 4722      | NM_004551    | NDUFS3       |
| A_23_P19455    | 9,88964 | 9,99635 | -1,07676991  | ENST00000376406 | 9656      | NM_014641    | MDC1         |
| A_24_P198844   | 9,82916 | 9,93597 | -1,076844549 | ENST00000571822 | 9526      | NM_004870    | MPDU1        |
| A_23_P214144   | 5,32256 | 5,42938 | -1,076852013 | ENST00000327673 | 1300      | NM_000493    | COL10A1      |
| A_21_P0013341  | 8,28116 | 8,38801 | -1,076874406 | ENST00000464543 | N/A       | N/A          | N/A          |
| A_23_P308954   | 6,1916  | 6,29848 | -1,076896799 | ENST00000457056 | 80823     | NM_030639    | BHLHB9       |
| A_21_P0007062  | 1,69554 | 1,80245 | -1,076919192 | ENST00000432535 | 100507008 | NR_108046    | LINC00844    |
| A_23_P60227    | 5,22732 | 5,3343  | -1,076971446 | ENST00000335119 | 881       | NM_005893    | CCIN         |
| A_33_P3407863  | 3,6442  | 3,75129 | -1,077053564 | N/A             | N/A       | XR_133565    | Inc-GABRE-1  |
| A_22_P00015497 | 4,20575 | 4,31285 | -1,07706103  | N/A             | 100506776 | NR_040085    | TRG-AS1      |
| A_23_P121374   | 5,05622 | 5,1634  | -1,077120756 | ENST00000357599 | 54437     | NM_001031702 | SEMA5B       |
| A_19_P00800549 | 12,8121 | 12,9193 | -1,077135689 | ENST00000368279 | 11243     | NM_001199654 | PMF1         |



|                |         |         |              |                 |           |              |              |
|----------------|---------|---------|--------------|-----------------|-----------|--------------|--------------|
| A_24_P11131    | 11,5644 | 11,6716 | -1,077135689 | ENST00000447431 | 10250     | NM_005839    | SRRM1        |
| A_23_P47709    | 5,107   | 5,21425 | -1,07717302  | ENST00000298223 | 2350      | NM_000803    | FOLR2        |
| A_21_P0012081  | 6,99503 | 7,10229 | -1,077180486 | ENST00000439494 | N/A       | N/A          | N/A          |
| A_24_P11506    | 11,0253 | 11,1326 | -1,077210353 | ENST00000460143 | 8942      | NM_001032998 | KYNU         |
| A_23_P209200   | 11,0329 | 11,1402 | -1,077210353 | ENST00000574121 | 898       | NM_001238    | CCNE1        |
| A_22_P00004648 | 1,67763 | 1,78496 | -1,077232753 | ENST00000511661 | 102467147 | NR_104664    | LOC102467147 |
| A_22_P00007981 | 4,9682  | 5,07556 | -1,077255153 | ENST00000427113 | N/A       | N/A          | N/A          |
| A_21_P0001831  | 2,93379 | 3,04118 | -1,077277554 | ENST00000426539 | N/A       | N/A          | N/A          |
| A_33_P3216292  | 15,0521 | 15,1595 | -1,077285022 | ENST00000375066 | 55357     | NM_001267571 | TBC1D2       |
| A_24_P291426   | 8,97827 | 9,0857  | -1,077307423 | ENST00000258428 | 51455     | NM_016316    | REV1         |
| A_33_P3327921  | 4,27465 | 4,38212 | -1,077337293 | N/A             | 23433     | NM_012249    | RHOQ         |
| A_21_P0013916  | 1,64246 | 1,74995 | -1,077352228 | N/A             | 342850    | BX648696     | ANKRD62      |
| A_23_P60579    | 11,5543 | 11,6618 | -1,077359696 | ENST00000566556 | 4351      | NM_002435    | MPI          |
| A_33_P7325293  | 16,0558 | 16,1633 | -1,077359696 | ENST00000240159 | 81790     | NM_001160223 | RNF170       |
| A_22_P00020274 | 2,27196 | 2,37947 | -1,077367164 | ENST00000503677 | 102723920 | N/A          | LOC102723920 |
| A_32_P206899   | 10,3179 | 10,4255 | -1,077434375 | ENST00000389173 | 146754    | NM_020877    | DNAH2        |
| A_33_P3248794  | 12,6565 | 12,7641 | -1,077434375 | ENST00000342556 | 4665      | NM_005967    | NAB2         |
| A_23_P170088   | 5,95689 | 6,06455 | -1,077479186 | N/A             | 54932     | NR_104599    | EXD3         |
| A_23_P42498    | 13,4769 | 13,5847 | -1,07758375  | ENST00000368979 | 8724      | NM_003795    | SNX3         |
| A_23_P157513   | 6,93795 | 7,04575 | -1,07758375  | ENST00000311923 | 4342      | NM_005372    | MOS          |
| A_33_P3221443  | 4,51587 | 4,62369 | -1,077598688 | ENST00000357002 | 9534      | NM_001278677 | ZNF254       |
| A_23_P431388   | 10,9346 | 11,0425 | -1,077658445 | ENST00000473361 | 90853     | NM_144569    | SPOCD1       |
| A_22_P00011826 | 6,95761 | 7,06552 | -1,077665915 | N/A             | N/A       | N/A          | Inc-PHF2-1   |
| A_22_P00017021 | 3,28928 | 3,39724 | -1,077703264 | N/A             | N/A       | N/A          | Inc-TTC5-1   |
| A_21_P0003570  | 1,66779 | 1,77577 | -1,077718205 | N/A             | 102723525 | XR_425708    | LOC102723525 |
| A_23_P250982   | 10,4676 | 10,5756 | -1,077733145 | ENST00000173527 | 51015     | NM_016048    | ISOC1        |
| A_23_P80718    | 1,55234 | 1,6604  | -1,077777968 | ENST00000478300 | 132204    | NM_144642    | SYNPR        |
| A_33_P3377304  | 7,02625 | 7,13432 | -1,077785438 | ENST00000346198 | 6934      | NM_001198531 | TCF7L2       |
| A_23_P128543   | 12,8294 | 12,9375 | -1,07780785  | ENST00000258648 | 29079     | NM_014166    | MED4         |
| A_24_P386771   | 11,8056 | 11,9137 | -1,07780785  | ENST00000550261 | 5501      | NM_002710    | PPP1CC       |
| A_33_P3366039  | 12,9077 | 13,0158 | -1,07780785  | ENST00000451924 | 6159      | NM_000992    | RPL29        |
| A_22_P00013949 | 2,25172 | 2,35985 | -1,077830263 | ENST00000419628 | 101928233 | XR_244321    | LOC101928233 |
| A_33_P3674851  | 10,1669 | 10,2751 | -1,077882561 | ENST00000611132 | 51028     | NM_001282169 | VPS36        |

|                |         |         |              |                 |           |              |               |
|----------------|---------|---------|--------------|-----------------|-----------|--------------|---------------|
| A_21_P0012465  | 1,64982 | 1,75803 | -1,077890032 | ENST00000471222 | 101928022 | N/A          | LINC01214     |
| A_21_P0006126  | 1,54679 | 1,65504 | -1,077919918 | N/A             | N/A       | N/A          | Inc-TYRP1-2   |
| A_22_P00024564 | 6,22482 | 6,33307 | -1,077919918 | N/A             | 102724094 | NR_120519    | LOC102724094  |
| A_23_P367628   | 10,435  | 10,5433 | -1,077957277 | ENST00000333957 | 9847      | NM_014802    | C2CD5         |
| A_33_P3237819  | 1,6155  | 1,72387 | -1,078009581 | N/A             | N/A       | N/A          | N/A           |
| A_21_P0014572  | 3,22501 | 3,3334  | -1,078024525 | N/A             | N/A       | N/A          | Inc-CACNB3-1  |
| A_33_P3309110  | 6,03741 | 6,14581 | -1,078031998 | N/A             | 100506713 | NR_040089    | ALOX12-AS1    |
| A_22_P00006605 | 2,35586 | 2,46428 | -1,078046942 | ENST00000553425 | N/A       | N/A          | N/A           |
| A_22_P00023942 | 1,64448 | 1,75294 | -1,078076833 | ENST00000431759 | 440584    | NR_033967    | SLC2A1-AS1    |
| A_23_P376036   | 2,37123 | 2,4797  | -1,078084305 | ENST00000558881 | 161829    | NM_152596    | EXD1          |
| A_21_P0000935  | 5,80069 | 5,90921 | -1,078121669 | ENST00000427439 | N/A       | N/A          | N/A           |
| A_22_P00000490 | 6,72046 | 6,829   | -1,078136616 | ENST00000567853 | N/A       | AF086565     | N/A           |
| A_24_P301454   | 4,81892 | 4,92747 | -1,078144089 | ENST00000356906 | 10230     | NR_003108    | NBR2          |
| A_22_P00000738 | 4,62793 | 4,7365  | -1,078159035 | N/A             | N/A       | N/A          | Inc-ADAR-1    |
| A_19_P00322219 | 2,3561  | 2,4647  | -1,078181455 | ENST00000422403 | 440823    | NR_033321    | MIAT          |
| A_33_P3262133  | 4,19428 | 4,30298 | -1,078256191 | ENST00000312756 | 85476     | AK022724     | GFM1          |
| A_21_P0008097  | 3,17987 | 3,28857 | -1,078256191 | N/A             | N/A       | N/A          | Inc-NDFIP2-12 |
| A_24_P706340   | 2,14045 | 2,24922 | -1,07830851  | ENST00000375915 | 728215    | NM_001080396 | FAM155A       |
| A_22_P00015744 | 13,7755 | 13,8843 | -1,078330933 | N/A             | N/A       | N/A          | Inc-TAF12-2   |
| A_33_P3303748  | 5,09674 | 5,20556 | -1,078345882 | ENST00000563377 | 55066     | NM_017990    | PDPR          |
| A_24_P780052   | 15,9619 | 16,0708 | -1,07840568  | ENST00000453374 | 388524    | NR_003662    | RPSAP58       |
| A_33_P3240518  | 13,8834 | 13,9923 | -1,07840568  | ENST00000378853 | 54998     | NM_001127230 | AURKAIP1      |
| A_24_P281643   | 2,77366 | 2,8826  | -1,07843558  | ENST00000566803 | N/A       | N/A          | N/A           |
| A_21_P0001969  | 4,92726 | 5,03621 | -1,078443055 | ENST00000451711 | N/A       | N/A          | N/A           |
| A_23_P64873    | 4,21583 | 4,32482 | -1,078472956 | ENST00000552962 | 1634      | NM_001920    | DCN           |
| A_24_P289188   | 14,806  | 14,915  | -1,078480432 | ENST00000496414 | N/A       | N/A          | N/A           |
| A_23_P91619    | 17,2795 | 17,3885 | -1,078480432 | ENST00000613839 | 4282      | NM_002415    | MIF           |
| A_21_P0002173  | 1,65713 | 1,76616 | -1,078502858 | N/A             | N/A       | N/A          | Inc-TRIB2-3   |
| A_33_P3339231  | 9,54412 | 9,65315 | -1,078502858 | ENST00000473989 | 254048    | NM_173569    | UBN2          |
| A_21_P0012416  | 1,91275 | 2,02179 | -1,078510334 | ENST00000482787 | 100996490 | N/A          | LINC01206     |
| A_32_P416583   | 6,0798  | 6,18886 | -1,078525285 | ENST00000541020 | 84166     | NM_032206    | NLRC5         |
| A_33_P3248384  | 9,56736 | 9,67645 | -1,078547713 | N/A             | N/A       | N/A          | XLOC_014422   |
| A_33_P3365878  | 12,139  | 12,2481 | -1,078555189 | ENST00000372827 | 656       | NM_001720    | BMP8B         |

|                |         |         |              |                 |           |              |                      |
|----------------|---------|---------|--------------|-----------------|-----------|--------------|----------------------|
| A_33_P3304268  | 2,4738  | 2,58292 | -1,078570141 | N/A             | N/A       | AK096549     | Inc-PSMG4-2          |
| A_22_P00001004 | 5,709   | 5,81815 | -1,078592569 | ENST00000452795 | N/A       | N/A          | N/A                  |
| A_21_P0010620  | 1,45351 | 1,56267 | -1,078600046 | N/A             | N/A       | N/A          | XLOC_I2_000942       |
| A_24_P53051    | 7,78872 | 7,89796 | -1,078659858 | ENST00000559782 | 114294    | NM_171846    | LACTB                |
| A_33_P3359084  | 5,32728 | 5,43653 | -1,078667334 | ENST00000339381 | 83756     | AK122959     | TAS1R3               |
| A_21_P0006164  | 1,4252  | 1,53448 | -1,078689765 | N/A             | N/A       | N/A          | Inc-NTRK2-1          |
| A_23_P216966   | 10,1524 | 10,2617 | -1,078704719 | ENST00000223423 | 5742      | NM_000962    | PTGS1                |
| A_22_P00024021 | 6,4765  | 6,58591 | -1,078786969 | N/A             | N/A       | N/A          | Inc-PRDX6-1          |
| A_23_P350886   | 8,90349 | 9,01291 | -1,078794447 | ENST00000614467 | 23506     | NM_015349    | GLTSCR1L             |
| A_21_P0011870  | 1,63542 | 1,74488 | -1,078824358 | ENST00000617028 | 100996693 | N/A          | LOC100996693         |
| A_23_P118643   | 11,2611 | 11,3706 | -1,078854269 | ENST00000450253 | 1977      | NM_001968    | EIF4E                |
| A_23_P252062   | 11,3891 | 11,4986 | -1,078854269 | ENST00000396999 | 5468      | NM_138711    | PPARG                |
| A_22_P00019903 | 2,00052 | 2,11012 | -1,078929052 | N/A             | N/A       | N/A          | Inc-RP11-334E6.3.1-1 |
| A_23_P126037   | 10,6546 | 10,7642 | -1,078929052 | ENST00000372771 | 6018      | NM_012421    | RLF                  |
| A_22_P00020068 | 1,54013 | 1,64974 | -1,078936531 | N/A             | 100288866 | NR_103773    | LOC100288866         |
| A_33_P3347049  | 6,50823 | 6,61785 | -1,07894401  | N/A             | N/A       | N/A          | N/A                  |
| A_33_P3286754  | 6,97605 | 7,0857  | -1,078966446 | ENST00000405717 | 23541     | NM_033382    | SEC14L2              |
| A_22_P00017815 | 9,18451 | 9,29419 | -1,078988883 | ENST00000555578 | 196872    | NR_024396    | LINC00638            |
| A_23_P141248   | 5,67732 | 5,78703 | -1,07901132  | ENST00000344595 | 63826     | NM_021947    | SRR                  |
| A_22_P00011968 | 2,90697 | 3,01669 | -1,079018799 | N/A             | N/A       | N/A          | Inc-PLA2G15-2        |
| A_23_P24389    | 7,58738 | 7,69714 | -1,079048716 | ENST00000473405 | 283234    | NM_032251    | CCDC88B              |
| A_33_P3235776  | 1,38056 | 1,49036 | -1,079078634 | N/A             | 79632     | BX640728     | FAM184A              |
| A_23_P170608   | 4,62849 | 4,73834 | -1,079116033 | ENST00000553557 | 64061     | NM_022117    | TSPYL2               |
| A_33_P3424566  | 5,64205 | 5,75192 | -1,079130993 | N/A             | 401261    | XR_250002    | FLJ38717             |
| A_33_P3268368  | 9,01479 | 9,12466 | -1,079130993 | ENST00000441788 | 51343     | NM_016263    | FZR1                 |
| A_32_P72492    | 2,26443 | 2,37433 | -1,079153433 | ENST00000295622 | 152405    | NM_152539    | C3orf30              |
| A_33_P3271121  | 5,85361 | 5,96351 | -1,079153433 | N/A             | N/A       | N/A          | N/A                  |
| A_21_P0006321  | 1,99005 | 2,10001 | -1,079198314 | N/A             | N/A       | N/A          | Inc-PTGES2-1         |
| A_24_P298587   | 3,71536 | 3,8254  | -1,079258159 | ENST00000531225 | 340393    | NM_001280561 | TMEM249              |
| A_24_P401601   | 10,8853 | 10,9954 | -1,079303045 | ENST00000599859 | N/A       | N/A          | N/A                  |
| A_23_P42935    | 9,10503 | 9,21513 | -1,079303045 | ENST00000497784 | 673       | NM_004333    | BRAF                 |
| A_33_P3386364  | 10,4521 | 10,5622 | -1,079303045 | ENST00000327470 | 2188      | NM_022725    | FANCF                |
| A_22_P00001561 | 6,03489 | 6,145   | -1,079310527 | ENST00000563464 | N/A       | N/A          | N/A                  |

|                |         |         |              |                 |           |              |                       |
|----------------|---------|---------|--------------|-----------------|-----------|--------------|-----------------------|
| A_23_P4962     | 3,62518 | 3,73532 | -1,079332971 | ENST00000621651 | 126206    | NM_153447    | NLRP5                 |
| A_33_P3220445  | 9,05863 | 9,16879 | -1,079347933 | ENST00000545279 | 4090      | NM_001001419 | SMAD5                 |
| A_23_P58763    | 11,6348 | 11,745  | -1,07937786  | ENST00000506949 | 53918     | NM_015946    | PELO                  |
| A_22_P00015826 | 5,17534 | 5,28561 | -1,079430233 | N/A             | N/A       | N/A          | lnc-TBC1D22A-2        |
| A_21_P0012113  | 4,02121 | 4,13153 | -1,079467644 | ENST00000431580 | N/A       | N/A          | N/A                   |
| A_33_P3415097  | 8,17738 | 8,28783 | -1,079564918 | ENST00000380833 | 1183      | NM_001830    | CLCN4                 |
| A_23_P365767   | 1,92506 | 2,03557 | -1,079609817 | ENST00000350061 | 776       | NM_000720    | CACNA1D               |
| A_22_P00006845 | 4,8959  | 5,00649 | -1,079669685 | ENST00000446201 | 101927847 | NR_109791    | LOC101927847          |
| A_23_P65699    | 12,319  | 12,4296 | -1,079677168 | ENST00000535302 | 80208     | NM_025137    | SPG11                 |
| A_21_P0013575  | 1,66408 | 1,77469 | -1,079684652 | N/A             | N/A       | N/A          | XLOC_I2_014821        |
| A_33_P3276207  | 6,75376 | 6,86457 | -1,079834338 | ENST00000273347 | 91775     | NM_001134456 | NXPE3                 |
| A_22_P00018422 | 5,58887 | 5,69978 | -1,079909189 | ENST00000485770 | N/A       | N/A          | N/A                   |
| A_19_P00808044 | 1,70042 | 1,8114  | -1,079961588 | ENST00000597702 | 100505495 | NR_040109    | PCAT19                |
| A_21_P0010927  | 6,21385 | 6,32489 | -1,080006504 | ENST00000423621 | 100874184 | N/A          | LINC00502             |
| A_24_P168574   | 9,09266 | 9,20375 | -1,080043934 | ENST00000481768 | 2778      | AJ224867     | GNAS                  |
| A_33_P3213997  | 12,2955 | 12,4066 | -1,080051421 | ENST00000335125 | 317749    | NM_001193636 | DHRS4L2               |
| A_33_P3223958  | 2,75596 | 2,86707 | -1,080058907 | ENST00000377712 | 51471     | NM_016347    | NAT8B                 |
| A_33_P3350508  | 6,89668 | 7,0078  | -1,080066393 | ENST00000460382 | 79068     | NM_001080432 | FTO                   |
| A_24_P349207   | 6,18231 | 6,29356 | -1,080163722 | ENST00000441186 | 441081    | NR_073404    | LOC441081             |
| A_33_P3226710  | 7,11474 | 7,22599 | -1,080163722 | ENST00000333319 | 129790    | NR_026865    | C7orf13               |
| A_33_P3386558  | 3,24651 | 3,35781 | -1,080201158 | ENST00000357447 | 55691     | NM_018027    | FRMD4A                |
| A_32_P12104    | 3,51357 | 3,6249  | -1,08022362  | ENST00000454465 | 64682     | NM_022662    | ANAPC1                |
| A_33_P3254291  | 4,84417 | 4,95555 | -1,080261059 | ENST00000315544 | 4850      | NM_001190848 | CNOT4                 |
| A_23_P57401    | 7,27408 | 7,38554 | -1,080320963 | ENST00000463909 | 8216      | NM_006767    | LZTR1                 |
| A_33_P3265309  | 3,57892 | 3,6904  | -1,080335939 | ENST00000221954 | 1089      | NM_001817    | CEACAM4               |
| A_22_P00005988 | 5,02676 | 5,1384  | -1,080455759 | N/A             | 102723542 | XR_426728    | LOC102723542          |
| A_24_P381499   | 4,20621 | 4,31793 | -1,080515674 | ENST00000320460 | 144321    | NM_152436    | GLIPR1L2              |
| A_21_P0004469  | 1,76982 | 1,88158 | -1,080545633 | N/A             | N/A       | N/A          | lnc-FBXW11-1          |
| A_21_P0010032  | 5,30559 | 5,41736 | -1,080553122 | ENST00000615955 | N/A       | N/A          | N/A                   |
| A_22_P00003981 | 14,5258 | 14,6376 | -1,080575592 | ENST00000565153 | N/A       | N/A          | N/A                   |
| A_23_P136238   | 11,8345 | 11,9463 | -1,080575592 | ENST00000343666 | 94107     | NM_053045    | TMEM203               |
| A_22_P00012922 | 8,13774 | 8,24956 | -1,080590572 | ENST00000559555 | 4947      | NM_002537    | OAZ2                  |
| A_22_P00024619 | 10,2231 | 10,335  | -1,080650494 | N/A             | N/A       | DB125444     | lnc-RP11-503N18.3.1-3 |

|                |         |         |              |                 |           |              |                      |
|----------------|---------|---------|--------------|-----------------|-----------|--------------|----------------------|
| A_24_P399362   | 10,8482 | 10,9601 | -1,080650494 | ENST00000317615 | 56984     | NM_020232    | PSMG2                |
| A_23_P103034   | 1,942   | 2,05391 | -1,080657985 | ENST00000466315 | 1413      | NM_001886    | CRYBA4               |
| A_21_P0004231  | 3,47041 | 3,58237 | -1,080695438 | N/A             | N/A       | N/A          | Inc-FAM105B-3        |
| A_22_P00003249 | 1,39418 | 1,50617 | -1,080717911 | ENST00000570015 | 102216268 | NR_104332    | CISTR                |
| A_22_P00013499 | 2,87126 | 2,98325 | -1,080717911 | N/A             | N/A       | N/A          | Inc-RP11-362K2.2.1-2 |
| A_23_P58266    | 18,1653 | 18,2773 | -1,080725402 | ENST00000296370 | 6286      | NM_005980    | S100P                |
| A_22_P00025915 | 1,63409 | 1,74612 | -1,080747875 | ENST00000580927 | N/A       | N/A          | N/A                  |
| A_21_P0012385  | 2,61666 | 2,72875 | -1,080792823 | N/A             | N/A       | N/A          | XLOC_I2_009804       |
| A_22_P00023030 | 8,1504  | 8,26249 | -1,080792823 | ENST00000509548 | N/A       | N/A          | N/A                  |
| A_21_P0011728  | 4,39954 | 4,51165 | -1,080807806 | ENST00000590092 | 284440    | NR_026956    | LINC00663            |
| A_22_P00021994 | 1,93289 | 2,04502 | -1,08082279  | N/A             | N/A       | N/A          | Inc-CNOT1-1          |
| A_33_P3327140  | 8,94392 | 9,05609 | -1,080852757 | N/A             | N/A       | N/A          | N/A                  |
| A_33_P3395547  | 3,3755  | 3,4877  | -1,080875233 | ENST00000417674 | 26062     | N/A          | HYALP1               |
| A_21_P0012831  | 4,96989 | 5,08212 | -1,080897709 | ENST00000461998 | 23348     | NM_001130050 | DOCK9                |
| A_23_P59855    | 6,77011 | 6,8824  | -1,080942663 | ENST00000430838 | 7697      | NM_006524    | ZNF138               |
| A_21_P0014487  | 1,65646 | 1,76876 | -1,080950156 | N/A             | 100506275 | NR_122033    | KRBOX1-AS1           |
| A_33_P3248245  | 1,46893 | 1,58129 | -1,080995112 | N/A             | N/A       | CD675678     | N/A                  |
| A_33_P3223759  | 11,1011 | 11,2135 | -1,081025084 | ENST00000397786 | 9969      | NM_005121    | MED13                |
| A_33_P3334037  | 10,6373 | 10,7497 | -1,081025084 | ENST00000261167 | 51729     | NM_016312    | WBP11                |
| A_23_P136460   | 9,0885  | 9,20094 | -1,081055057 | ENST00000033079 | 51306     | NM_016603    | FAM13B               |
| A_33_P3254013  | 5,4536  | 5,56606 | -1,081070044 | ENST00000515868 | 2580      | AK131464     | GAK                  |
| A_22_P00003268 | 4,20409 | 4,31659 | -1,081100018 | N/A             | N/A       | N/A          | Inc-CALM1-5          |
| A_33_P3290909  | 10,2982 | 10,4108 | -1,081174957 | ENST00000375340 | 8243      | NM_001281463 | SMC1A                |
| A_22_P00013598 | 1,62581 | 1,7385  | -1,081242406 | ENST00000551928 | N/A       | N/A          | N/A                  |
| A_23_P54000    | 12,1469 | 12,2596 | -1,081249901 | ENST00000362031 | 58533     | NM_021249    | SNX6                 |
| A_21_P0010118  | 5,03971 | 5,15244 | -1,081272385 | ENST00000615120 | N/A       | N/A          | N/A                  |
| A_21_P0000664  | 3,22131 | 3,3341  | -1,081317354 | ENST00000544344 | 920       | AK310750     | CD4                  |
| A_23_P168276   | 10,1028 | 10,2156 | -1,08132485  | ENST00000613034 | 9519      | NM_004865    | TBPL1                |
| A_22_P00020726 | 10,5771 | 10,6899 | -1,08132485  | N/A             | N/A       | N/A          | Inc-ZNF8-1           |
| A_21_P0006569  | 12,9408 | 13,0537 | -1,081399804 | N/A             | 102724491 | N/A          | LOC102724491         |
| A_33_P3317431  | 15,429  | 15,5419 | -1,081399804 | ENST00000447700 | N/A       | N/A          | N/A                  |
| A_21_P0007803  | 3,59115 | 3,70409 | -1,081429787 | N/A             | N/A       | N/A          | Inc-TMEM132D-2       |
| A_23_P364355   | 3,36778 | 3,48075 | -1,081452275 | ENST00000390361 | N/A       | X58329       | N/A                  |

|                |         |         |              |                 |           |              |                |
|----------------|---------|---------|--------------|-----------------|-----------|--------------|----------------|
| A_21_P0000893  | 7,16543 | 7,27843 | -1,081474763 | N/A             | 100506686 | NR_040051    | IQCH-AS1       |
| A_33_P3365621  | 1,69843 | 1,81149 | -1,081519742 | ENST00000305159 | 341152    | NM_001005285 | OR2AT4         |
| A_23_P417100   | 1,63434 | 1,7474  | -1,081519742 | ENST00000345847 | 81871     | NM_030976    | KRTAP4-6       |
| A_23_P22382    | 13,1076 | 13,2207 | -1,081549728 | ENST00000478158 | 26000     | NM_015527    | TBC1D10B       |
| A_23_P393531   | 4,89422 | 5,00734 | -1,081564722 | ENST00000523221 | 3631      | NM_004027    | INPP4A         |
| A_24_P743672   | 7,5863  | 7,69942 | -1,081564722 | N/A             | N/A       | N/A          | N/A            |
| A_23_P100676   | 8,17772 | 8,29088 | -1,08159471  | ENST00000570756 | 23293     | NM_017575    | SMG6           |
| A_22_P00005408 | 1,55827 | 1,67143 | -1,08159471  | N/A             | 101929459 | XR_425050    | LOC101929459   |
| A_33_P3398877  | 5,98104 | 6,09421 | -1,081602207 | N/A             | N/A       | N/A          | N/A            |
| A_21_P0009132  | 3,50206 | 3,61525 | -1,081617201 | N/A             | N/A       | N/A          | Inc-PMFBP1-4   |
| A_22_P00001044 | 6,0686  | 6,18179 | -1,081617201 | ENST00000497675 | 199990    | AK125445     | C1orf86        |
| A_22_P00004316 | 4,73159 | 4,84479 | -1,081624698 | N/A             | 253039    | NR_024408    | PSMD5-AS1      |
| A_23_P149050   | 7,97949 | 8,09271 | -1,081639693 | ENST00000473798 | 79854     | NR_024321    | LINC00115      |
| A_22_P00007026 | 1,68513 | 1,79836 | -1,08164719  | N/A             | N/A       | DA621942     | Inc-GIP-2      |
| A_33_P3296697  | 1,69225 | 1,80559 | -1,081729665 | N/A             | N/A       | N/A          | XLOC_l2_003886 |
| A_21_P0010857  | 11,1538 | 11,2672 | -1,081774654 | ENST00000440192 | N/A       | N/A          | N/A            |
| A_33_P3327250  | 7,38005 | 7,49346 | -1,081782152 | N/A             | N/A       | N/A          | N/A            |
| A_33_P3236046  | 4,7771  | 4,89052 | -1,08178965  | N/A             | N/A       | AK130276     | N/A            |
| A_33_P3340792  | 8,42244 | 8,53589 | -1,081812146 | ENST00000526278 | 79947     | NM_001243564 | DHDDS          |
| A_19_P00801735 | 9,98585 | 10,0993 | -1,081812146 | ENST00000437235 | 101928545 | N/A          | SEPT7-AS1      |
| A_22_P00022918 | 1,35805 | 1,47151 | -1,081819644 | ENST00000441568 | N/A       | AK055550     | N/A            |
| A_32_P159535   | 4,17105 | 4,28453 | -1,081834642 | ENST00000445502 | N/A       | N/A          | N/A            |
| A_23_P56709    | 9,81302 | 9,92651 | -1,08184214  | ENST00000472030 | 7844      | NM_005667    | RNF103         |
| A_23_P70670    | 7,40273 | 7,51626 | -1,081872136 | ENST00000379153 | 9308      | NM_004233    | CD83           |
| A_22_P00013742 | 3,51286 | 3,62641 | -1,081887134 | ENST00000562040 | N/A       | CR745865     | N/A            |
| A_22_P00005498 | 3,62602 | 3,7396  | -1,081909631 | ENST00000412241 | N/A       | BC043266     | N/A            |
| A_22_P00001485 | 1,46019 | 1,57378 | -1,08191713  | ENST00000411856 | N/A       | N/A          | N/A            |
| A_21_P0006030  | 1,43577 | 1,54941 | -1,081954627 | ENST00000366188 | N/A       | N/A          | N/A            |
| A_22_P00009403 | 6,46309 | 6,57677 | -1,081984626 | ENST00000302291 | 7798      | NM_033631    | LUZP1          |
| A_24_P213783   | 17,1875 | 17,3012 | -1,081999626 | ENST00000413849 | 6160      | NM_000993    | RPL31          |
| A_24_P854913   | 6,83941 | 6,95313 | -1,082014625 | ENST00000411432 | 151194    | NM_001127395 | METTTL21A      |
| A_33_P3286387  | 6,81015 | 6,92389 | -1,082029625 | ENST00000371394 | 79813     | NM_001145527 | EHMT1          |
| A_33_P3305288  | 1,61892 | 1,73267 | -1,082037126 | ENST00000340634 | 344838    | NM_198504    | PAQR9          |

|                |         |         |              |                 |           |              |              |
|----------------|---------|---------|--------------|-----------------|-----------|--------------|--------------|
| A_22_P00019616 | 6,91336 | 7,02725 | -1,082142132 | N/A             | N/A       | DA134497     | Inc-KBTBD5-1 |
| A_22_P00020711 | 1,65548 | 1,7694  | -1,082164635 | ENST00000533591 | N/A       | CF139581     | N/A          |
| A_21_P0009431  | 1,65751 | 1,77156 | -1,082262152 | ENST00000578803 | 400660    | NR_120419    | LINC00683    |
| A_33_P3256033  | 9,47392 | 9,58802 | -1,082299661 | ENST00000264033 | 867       | NM_005188    | CBL          |
| A_21_P0003672  | 1,42064 | 1,53475 | -1,082307163 | N/A             | N/A       | N/A          | Inc-NPY5R-1  |
| A_32_P202182   | 5,16267 | 5,27683 | -1,082344674 | ENST00000442619 | 728524    | NR_003664    | SPDYE8P      |
| A_23_P109895   | 9,90806 | 10,0223 | -1,082404693 | ENST00000480524 | 65010     | NM_001040454 | SLC26A6      |
| A_32_P84009    | 11,4874 | 11,6017 | -1,08244971  | ENST00000581487 | 146223    | NM_181521    | CMTM4        |
| A_22_P00010429 | 2,15619 | 2,27052 | -1,082472219 | ENST00000457813 | N/A       | N/A          | N/A          |
| A_23_P78944    | 7,23671 | 7,35114 | -1,082547253 | ENST00000221496 | 268       | NM_000479    | AMH          |
| A_32_P52816    | 9,75694 | 9,8714  | -1,082569764 | N/A             | 51768     | NM_016551    | TM7SF3       |
| A_23_P148609   | 7,83142 | 7,94595 | -1,082622292 | ENST00000476971 | 10761     | NM_021796    | PLAC1        |
| A_23_P20035    | 5,03316 | 5,14771 | -1,082637301 | ENST00000397095 | 115330    | XM_006715642 | GPR146       |
| A_24_P273666   | 17,096  | 17,2106 | -1,082674823 | ENST00000480975 | 2778      | NM_001077489 | GNAS         |
| A_22_P00008114 | 5,00227 | 5,11687 | -1,082674823 | ENST00000448831 | 127294    | NM_152372    | MYOM3        |
| A_21_P0008066  | 4,22898 | 4,34361 | -1,082697337 | N/A             | N/A       | N/A          | Inc-OLFM4-2  |
| A_22_P00016525 | 3,92489 | 4,03953 | -1,082704841 | N/A             | 102724811 | XR_429170    | LOC102724811 |
| A_33_P3228271  | 9,89002 | 10,0047 | -1,082734861 | ENST00000398411 | 1471      | NM_001288614 | CST3         |
| A_22_P00021130 | 5,92273 | 6,03741 | -1,082734861 | N/A             | N/A       | AK022993     | Inc-TFB1M-1  |
| A_33_P3391578  | 3,56084 | 3,67555 | -1,082757376 | ENST00000469465 | 649946    | NR_003040    | RPL23AP64    |
| A_33_P3352837  | 1,84422 | 1,95894 | -1,082764881 | N/A             | N/A       | N/A          | N/A          |
| A_22_P00012749 | 6,52178 | 6,6365  | -1,082764881 | N/A             | 101927318 | NR_110589    | LOC101927318 |
| A_22_P00009690 | 3,76678 | 3,88158 | -1,082824924 | ENST00000450310 | N/A       | N/A          | N/A          |
| A_33_P3247255  | 7,67626 | 7,79108 | -1,082839935 | ENST00000491166 | 55002     | NM_017905    | TMCO3        |
| A_33_P3248004  | 2,19716 | 2,31199 | -1,082847441 | ENST00000528390 | 399886    | NR_122071    | LOC399886    |
| A_33_P3262128  | 1,63479 | 1,74972 | -1,082922501 | N/A             | N/A       | N/A          | N/A          |
| A_33_P3589217  | 12,5438 | 12,6588 | -1,082975046 | ENST00000484026 | 293       | NM_001636    | SLC25A6      |
| A_33_P3231267  | 3,71998 | 3,83502 | -1,083005072 | N/A             | N/A       | N/A          | Inc-ITGA2-1  |
| A_23_P500985   | 6,59009 | 6,70514 | -1,083012579 | ENST00000400661 | 5081      | NM_013945    | PAX7         |
| A_33_P3352098  | 4,73543 | 4,85049 | -1,083020086 | ENST00000358246 | 58475     | NM_021201    | MS4A7        |
| A_23_P258433   | 1,40174 | 1,51681 | -1,083027593 | ENST00000537611 | 51802     | NM_017419    | ASIC5        |
| A_33_P3218138  | 13,2283 | 13,3434 | -1,083050114 | ENST00000617998 | 5430      | NM_000937    | POLR2A       |
| A_23_P427622   | 9,41306 | 9,52821 | -1,083087651 | ENST00000545209 | 121665    | NM_139015    | SPPL3        |

|                |         |         |              |                 |           |              |                |
|----------------|---------|---------|--------------|-----------------|-----------|--------------|----------------|
| A_33_P3382748  | 3,13644 | 3,2516  | -1,083095158 | N/A             | 5927      | NM_001042603 | KDM5A          |
| A_33_P3372566  | 6,12666 | 6,24183 | -1,083102665 | ENST00000443426 | 89845     | N/A          | ABCC10         |
| A_33_P3372293  | 1,97549 | 2,09072 | -1,083147711 | ENST00000376954 | 347344    | NM_007137    | ZNF81          |
| A_33_P3329795  | 4,05882 | 4,17405 | -1,083147711 | ENST00000525264 | 440044    | NM_001004326 | SLC22A20       |
| A_21_P0010628  | 1,68986 | 1,80511 | -1,083162727 | N/A             | N/A       | N/A          | XLOC_I2_000961 |
| A_33_P3421695  | 9,2972  | 9,41249 | -1,083192759 | ENST00000405570 | 1499      | NM_001098210 | CTNNB1         |
| A_23_P24104    | 15,4612 | 15,5765 | -1,083200267 | ENST00000446342 | 5328      | NM_002658    | PLAU           |
| A_33_P3388745  | 5,16636 | 5,28167 | -1,083207775 | N/A             | 100132207 | AK123339     | LOC100132207   |
| A_19_P00320140 | 5,76722 | 5,88261 | -1,083267843 | N/A             | 441094    | NR_109825    | NR2F1-AS1      |
| A_33_P3345354  | 12,0915 | 12,2069 | -1,083275352 | ENST00000368216 | 51093     | NM_015997    | RRNAD1         |
| A_22_P00012056 | 1,72776 | 1,84318 | -1,083290369 | N/A             | N/A       | DB219765     | Inc-PLK1-2     |
| A_33_P3261147  | 1,61072 | 1,72614 | -1,083290369 | ENST00000315409 | 390442    | NM_001004479 | OR11H4         |
| A_33_P3683076  | 7,49069 | 7,60613 | -1,083305387 | N/A             | 10916     | AK091003     | MAGED2         |
| A_23_P59825    | 1,65435 | 1,76982 | -1,083327914 | ENST00000249284 | 50833     | NM_016945    | TAS2R16        |
| A_21_P0000714  | 12,7862 | 12,9017 | -1,083350441 | ENST00000493536 | 100507246 | NR_038108    | SNHG16         |
| A_22_P00022235 | 1,63691 | 1,75246 | -1,083387988 | ENST00000400540 | 440131    | N/A          | LINC00544      |
| A_23_P161076   | 3,38547 | 3,50106 | -1,083418026 | ENST00000369478 | 914       | NM_001767    | CD2            |
| A_33_P3389298  | 6,77212 | 6,88772 | -1,083425536 | ENST00000601142 | 90075     | NM_001099438 | ZNF30          |
| A_33_P3277437  | 6,73846 | 6,8541  | -1,083455575 | ENST00000563117 | 112479    | NM_001142725 | ERI2           |
| A_23_P160800   | 3,43882 | 3,55446 | -1,083455575 | ENST00000254227 | 8431      | NM_021969    | NROB2          |
| A_22_P00018177 | 2,54812 | 2,66385 | -1,083523167 | ENST00000510242 | N/A       | N/A          | N/A            |
| A_21_P0000610  | 5,28709 | 5,40284 | -1,083538188 | ENST00000503458 | 401164    | NR_033869    | LINC01060      |
| A_33_P3265189  | 2,9479  | 3,06368 | -1,083560719 | N/A             | 1828      | NM_001942    | DSG1           |
| A_22_P00002756 | 2,86179 | 2,9776  | -1,083583252 | N/A             | N/A       | N/A          | Inc-C21orf67-1 |
| A_33_P3363091  | 7,62342 | 7,73923 | -1,083583252 | N/A             | 55697     | U25801       | VAC14          |
| A_19_P00327320 | 4,07126 | 4,18712 | -1,083620807 | N/A             | N/A       | N/A          | Inc-ZDHHC2-1   |
| A_33_P3323718  | 6,73883 | 6,85473 | -1,083650851 | ENST00000322954 | 55075     | NM_001008224 | UACA           |
| A_24_P410627   | 11,3202 | 11,4361 | -1,083650851 | ENST00000496169 | 23608     | NM_001291663 | MKRN1          |
| A_23_P54636    | 12,5685 | 12,6844 | -1,083650851 | ENST00000563305 | 9114      | NM_004691    | ATP6V0D1       |
| A_33_P3238325  | 3,95429 | 4,0702  | -1,083658363 | N/A             | N/A       | N/A          | N/A            |
| A_23_P20045    | 8,86072 | 8,97663 | -1,083658363 | ENST00000469417 | 5189      | NM_000466    | PEX1           |
| A_22_P00005150 | 7,89229 | 8,00822 | -1,083673385 | N/A             | N/A       | AK125142     | Inc-DHX38-5    |
| A_21_P0006188  | 1,45489 | 1,57085 | -1,08369592  | N/A             | N/A       | N/A          | Inc-C9orf102-4 |



|                |         |         |              |                 |           |              |              |
|----------------|---------|---------|--------------|-----------------|-----------|--------------|--------------|
| A_22_P00008201 | 3,91117 | 4,02714 | -1,083703432 | N/A             | N/A       | N/A          | Inc-INTS4-1  |
| A_23_P761      | 14,7765 | 14,8925 | -1,083725967 | ENST00000493673 | 5692      | NM_002796    | PSMB4        |
| A_24_P411899   | 9,2144  | 9,33045 | -1,083763527 | ENST00000341084 | 25897     | NM_183419    | RNF19A       |
| A_23_P38219    | 12,175  | 12,2911 | -1,083801088 | ENST00000572723 | 10594     | NM_006445    | PRPF8        |
| A_23_P320858   | 1,64719 | 1,76332 | -1,083823625 | ENST00000623624 | N/A       | BC069077     | N/A          |
| A_21_P0002675  | 3,76469 | 3,88084 | -1,08383865  | ENST00000457336 | 400999    | NR_033871    | FLJ42351     |
| A_33_P3250055  | 3,93157 | 4,04773 | -1,083846163 | N/A             | 6300      | AK308768     | MAPK12       |
| A_24_P349560   | 8,88555 | 9,00175 | -1,083876214 | ENST00000528228 | 1977      | NM_001968    | EIF4E        |
| A_33_P3813684  | 10,3119 | 10,4281 | -1,083876214 | ENST00000424943 | 440594    | NR_033966    | FLJ31662     |
| A_22_P00017839 | 3,37822 | 3,49447 | -1,083913779 | ENST00000438790 | N/A       | N/A          | N/A          |
| A_33_P3423825  | 6,03956 | 6,15582 | -1,083921292 | N/A             | N/A       | N/A          | N/A          |
| A_33_P3290573  | 8,37942 | 8,49571 | -1,083943831 | ENST00000369754 | 55603     | NM_017633    | FAM46A       |
| A_24_P287826   | 9,83011 | 9,94641 | -1,083951345 | ENST00000361070 | 55159     | NM_018124    | RFWD3        |
| A_22_P00010118 | 7,80505 | 7,92139 | -1,083981399 | ENST00000424756 | N/A       | N/A          | N/A          |
| A_33_P3577120  | 8,37019 | 8,48653 | -1,083981399 | ENST00000568546 | 10607     | BC033227     | TBL3         |
| A_21_P0014614  | 2,27179 | 2,38828 | -1,084094108 | N/A             | N/A       | N/A          | N/A          |
| A_24_P125881   | 12,435  | 12,5515 | -1,084101623 | ENST00000389262 | 9993      | NM_005137    | DGCR2        |
| A_23_P157879   | 3,48133 | 3,59786 | -1,084124166 | ENST00000371806 | 2219      | NM_002003    | FCN1         |
| A_33_P3371984  | 5,24608 | 5,36268 | -1,08417677  | ENST00000370901 | 3547      | NM_205833    | IGSF1        |
| A_23_P334123   | 11,5563 | 11,6729 | -1,08417677  | ENST00000567957 | 81533     | NM_030790    | ITFG1        |
| A_23_P15786    | 2,01403 | 2,13066 | -1,084199315 | ENST00000312150 | 147183    | NM_181534    | KRT25        |
| A_21_P0011495  | 4,19536 | 4,312   | -1,08420683  | ENST00000507418 | 727856    | NR_110561    | DDX11L16     |
| A_22_P00001917 | 7,09143 | 7,20807 | -1,08420683  | ENST00000481262 | 3712      | XR_243098    | IVD          |
| A_33_P3396434  | 18,4521 | 18,5688 | -1,084251922 | N/A             | N/A       | N/A          | N/A          |
| A_21_P0011391  | 9,19227 | 9,30897 | -1,084251922 | ENST00000555186 | 11200     | NM_001005735 | CHEK2        |
| A_22_P00015590 | 10,1807 | 10,2974 | -1,084251922 | ENST00000456771 | N/A       | N/A          | N/A          |
| A_33_P3421331  | 1,62888 | 1,74559 | -1,084259437 | ENST00000620245 | 652991    | NM_001278063 | SKOR2        |
| A_22_P00015032 | 3,3646  | 3,48133 | -1,084274468 | N/A             | N/A       | BC035260     | Inc-SMUG1-6  |
| A_33_P3381361  | 4,43879 | 4,55564 | -1,084364659 | ENST00000562775 | 6687      | AF090912     | SPG7         |
| A_33_P3355055  | 11,371  | 11,4879 | -1,084402241 | ENST00000442210 | 51329     | NM_001278378 | ARL6IP4      |
| A_23_P340158   | 13,6797 | 13,7966 | -1,084402241 | ENST00000545932 | 23479     | NM_014301    | ISCU         |
| A_21_P0009314  | 2,49599 | 2,61292 | -1,084424791 | N/A             | 102724792 | XR_433367    | LOC102724792 |
| A_33_P3362737  | 4,15713 | 4,27412 | -1,084469892 | N/A             | N/A       | AK124695     | N/A          |

|                |         |         |              |                 |           |              |                 |
|----------------|---------|---------|--------------|-----------------|-----------|--------------|-----------------|
| A_22_P00009417 | 1,95842 | 2,07542 | -1,084477409 | N/A             | 104472519 | NR_126434    | STX18-IT1       |
| A_32_P85042    | 4,33202 | 4,44904 | -1,084492443 | ENST00000397094 | N/A       | N/A          | N/A             |
| A_22_P00005391 | 4,71483 | 4,83185 | -1,084492443 | ENST00000280904 | 1824      | AF085831     | DSC2            |
| A_22_P00007880 | 5,15268 | 5,26976 | -1,084537547 | N/A             | N/A       | AB528276     | Inc-HSCB-1      |
| A_19_P00319712 | 4,96931 | 5,0864  | -1,084545064 | ENST00000606884 | N/A       | N/A          | N/A             |
| A_23_P70566    | 5,88191 | 5,99901 | -1,084552582 | ENST00000375156 | 63943     | NM_022110    | FKBPL           |
| A_21_P0006544  | 3,6117  | 3,7288  | -1,084552582 | N/A             | 102725285 | XR_426541    | LOC102725285    |
| A_33_P3414944  | 3,12063 | 3,23775 | -1,084567617 | N/A             | N/A       | N/A          | Inc-GABARAPL3-4 |
| A_33_P3371588  | 2,74954 | 2,86667 | -1,084575135 | ENST00000369498 | 65991     | NM_023934    | FUNDC2          |
| A_22_P00015572 | 6,58279 | 6,69999 | -1,08462776  | N/A             | N/A       | N/A          | Inc-STT3B-1     |
| A_33_P3789327  | 2,7214  | 2,83864 | -1,084657832 | N/A             | 100113393 | AV755695     | SNORD12B        |
| A_24_P47467    | 11,9393 | 12,0566 | -1,084702943 | ENST00000227525 | 79073     | NM_024092    | TMEM109         |
| A_24_P124992   | 13,7015 | 13,8188 | -1,084702943 | ENST00000557929 | 5685      | NM_002789    | PSMA4           |
| A_24_P870101   | 5,72597 | 5,84327 | -1,084702943 | N/A             | N/A       | AK026209     | Inc-EXOSC6-3    |
| A_24_P27229    | 6,63266 | 6,74999 | -1,084725499 | ENST00000444623 | 51380     | NM_015989    | CSAD            |
| A_21_P0013877  | 17,2385 | 17,3559 | -1,084778132 | N/A             | N/A       | N/A          | XLOC_I2_015885  |
| A_32_P210642   | 10,3929 | 10,5103 | -1,084778132 | ENST00000308874 | 51162     | NM_201446    | EGFL7           |
| A_33_P3423721  | 14,4243 | 14,5417 | -1,084778132 | ENST00000301008 | 57338     | NM_001271605 | JPH3            |
| A_23_P368278   | 9,86576 | 9,98324 | -1,084838286 | ENST00000311172 | 9873      | NM_014824    | FCHSD2          |
| A_23_P15402    | 13,6454 | 13,7629 | -1,084853325 | ENST00000576579 | 112483    | NM_133491    | SAT2            |
| A_33_P3387956  | 11,723  | 11,8405 | -1,084853325 | ENST00000473532 | 29952     | NM_013379    | DPP7            |
| A_21_P0004210  | 1,74162 | 1,85921 | -1,084921004 | N/A             | N/A       | N/A          | Inc-IRX1-3      |
| A_21_P0005863  | 1,72331 | 1,84094 | -1,084951085 | ENST00000520988 | N/A       | N/A          | N/A             |
| A_21_P0001018  | 5,33478 | 5,45245 | -1,084981166 | N/A             | 100996741 | XR_250844    | LOC100996741    |
| A_33_P3229122  | 1,68858 | 1,80627 | -1,084996208 | N/A             | 8343      | NM_003522    | HIST1H2BF       |
| A_32_P22338    | 9,27559 | 9,39333 | -1,085033811 | ENST00000622242 | 10015     | NM_013374    | PDCD6IP         |
| A_33_P3236568  | 2,10782 | 2,22558 | -1,085048853 | ENST00000368784 | 353141    | NM_178430    | LCE2D           |
| A_22_P00002639 | 5,75993 | 5,87777 | -1,085109023 | N/A             | N/A       | N/A          | Inc-C1orf185-2  |
| A_33_P3314468  | 8,27821 | 8,39605 | -1,085109023 | ENST00000486633 | 10989     | NM_001100170 | IMMT            |
| A_33_P3373469  | 15,7599 | 15,8778 | -1,085154152 | ENST00000310118 | 5708      | NM_002808    | PSMD2           |
| A_23_P365844   | 10,6304 | 10,7483 | -1,085154152 | ENST00000390658 | 163126    | NM_153232    | EID2            |
| A_33_P3687389  | 3,49866 | 3,61663 | -1,085206805 | N/A             | N/A       | CA309819     | N/A             |
| A_21_P0001597  | 1,67587 | 1,79386 | -1,08522185  | N/A             | N/A       | N/A          | Inc-ACBD6-3     |

|                |         |         |              |                 |        |              |                |
|----------------|---------|---------|--------------|-----------------|--------|--------------|----------------|
| A_23_P146456   | 11,7843 | 11,9023 | -1,085229372 | ENST00000259470 | 1515   | NM_001333    | CTSV           |
| A_22_P00003400 | 1,46341 | 1,58143 | -1,085244416 | N/A             | N/A    | N/A          | Inc-CCDC125-2  |
| A_23_P350689   | 9,96685 | 10,0849 | -1,085266984 | ENST00000478793 | 254887 | NM_173570    | ZDHHC23        |
| A_33_P3257808  | 8,28058 | 8,39868 | -1,085304597 | ENST00000581685 | 2177   | NM_001018115 | FANCD2         |
| A_24_P416346   | 9,05635 | 9,17448 | -1,085327165 | ENST00000591713 | 2118   | NM_001079675 | ETV4           |
| A_23_P208636   | 1,80065 | 1,91885 | -1,085379827 | ENST00000391814 | 50944  | NM_016148    | SHANK1         |
| A_33_P3402414  | 8,94656 | 9,06483 | -1,085432491 | ENST00000425198 | 989    | NM_001788    | set-07         |
| A_23_P14948    | 11,6075 | 11,7258 | -1,085455062 | ENST00000562886 | 8720   | NM_003791    | MBTPS1         |
| A_23_P11915    | 8,07744 | 8,19575 | -1,085462586 | ENST00000369443 | 54834  | NM_017686    | GDAP2          |
| A_24_P366749   | 1,39165 | 1,51    | -1,085492682 | ENST00000368487 | 57198  | NM_001005855 | ATP8B2         |
| A_22_P00018323 | 8,81496 | 8,93331 | -1,085492682 | ENST00000484709 | 23145  | NM_198455    | SSPO           |
| A_21_P0006556  | 6,13954 | 6,2579  | -1,085500206 | N/A             | N/A    | N/A          | Inc-VCX-2      |
| A_21_P0003060  | 1,83152 | 1,94988 | -1,085500206 | N/A             | N/A    | N/A          | Inc-NLGN1-1    |
| A_22_P00003718 | 1,69422 | 1,81259 | -1,08550773  | ENST00000580883 | N/A    | AK127888     | N/A            |
| A_21_P0010877  | 9,47473 | 9,59312 | -1,085522779 | N/A             | N/A    | N/A          | XLOC_I2_001972 |
| A_23_P104323   | 12,1805 | 12,2989 | -1,085530303 | ENST00000306010 | 4255   | NM_002412    | MGMT           |
| A_23_P8185     | 14,4931 | 14,6115 | -1,085530303 | ENST00000367088 | 6993   | NM_006519    | DYNLT1         |
| A_23_P117971   | 13,6066 | 13,725  | -1,085530303 | ENST00000623879 | N/A    | M15530       | N/A            |
| A_22_P00014624 | 2,2625  | 2,38092 | -1,085545352 | N/A             | N/A    | AY485348     | Inc-SLC16A3-2  |
| A_33_P3247644  | 9,3464  | 9,46485 | -1,085567925 | ENST00000324489 | 222166 | NM_152793    | MTURN          |
| A_33_P3299165  | 4,09072 | 4,20924 | -1,085620599 | ENST00000400540 | 440131 | NR_033889    | LINC00544      |
| A_21_P0004881  | 1,43339 | 1,55192 | -1,085628124 | N/A             | N/A    | N/A          | Inc-TSPO2-1    |
| A_23_P254648   | 8,83091 | 8,94947 | -1,085650699 | ENST00000453291 | 26190  | NM_012164    | FBXW2          |
| A_33_P3728167  | 5,70992 | 5,8285  | -1,085665749 | ENST00000614547 | 1003   | NM_001795    | CDH5           |
| A_33_P3260722  | 7,44427 | 7,56286 | -1,085673275 | N/A             | 7405   | NM_003369    | UVRAG          |
| A_22_P00019795 | 8,44502 | 8,56361 | -1,085673275 | ENST00000438736 | N/A    | N/A          | N/A            |
| A_33_P3313652  | 5,04877 | 5,16746 | -1,08574853  | N/A             | N/A    | N/A          | N/A            |
| A_22_P00007975 | 4,32969 | 4,4484  | -1,085763582 | N/A             | N/A    | N/A          | Inc-IDI1-1     |
| A_22_P00003384 | 2,85744 | 2,9762  | -1,085801212 | N/A             | N/A    | N/A          | Inc-CCDC102B-8 |
| A_21_P0014718  | 8,48214 | 8,6009  | -1,085801212 | ENST00000467997 | 133015 | XM_006713940 | PACRGL         |
| A_19_P00811440 | 4,35812 | 4,47689 | -1,085808739 | N/A             | N/A    | N/A          | Inc-KLF7-1     |
| A_33_P3368328  | 14,252  | 14,3708 | -1,085831318 | ENST00000440277 | 11331  | NM_001144831 | PHB2           |
| A_23_P158053   | 11,7533 | 11,8722 | -1,085906584 | ENST00000372994 | 79095  | NM_024112    | C9orf16        |

|                |         |         |              |                 |           |              |                       |
|----------------|---------|---------|--------------|-----------------|-----------|--------------|-----------------------|
| A_32_P209989   | 11,8504 | 11,9693 | -1,085906584 | ENST00000560703 | 26589     | NM_022163    | MRPL46                |
| A_21_P0008443  | 4,70914 | 4,82806 | -1,085921638 | N/A             | N/A       | N/A          | Inc-RP11-1085N6.3.1-2 |
| A_33_P3232930  | 1,62911 | 1,74808 | -1,085959274 | N/A             | 100289178 | NR_040077    | GNG12-AS1             |
| A_33_P3300217  | 2,23857 | 2,35756 | -1,085974329 | N/A             | 91807     | NM_182493    | MYLK3                 |
| A_23_P364890   | 9,61132 | 9,7304  | -1,086042078 | ENST00000357890 | 9810      | NM_014771    | RNF40                 |
| A_23_P129577   | 6,1522  | 6,27133 | -1,086079718 | ENST00000396862 | 91151     | NM_033208    | TIGD7                 |
| A_21_P0005083  | 1,61019 | 1,72937 | -1,086117359 | N/A             | N/A       | N/A          | Inc-C6orf118-1        |
| A_23_P98345    | 10,3763 | 10,4955 | -1,086132416 | ENST00000265909 | 399979    | NM_014758    | SNX19                 |
| A_23_P73511    | 9,39182 | 9,51103 | -1,086139944 | ENST00000469505 | 369       | NM_001654    | ARAF                  |
| A_21_P0013307  | 9,34233 | 9,4616  | -1,086185117 | ENST00000429248 | N/A       | N/A          | N/A                   |
| A_24_P308229   | 8,4633  | 8,58258 | -1,086192645 | ENST00000520372 | 55057     | NM_001039775 | AIM1L                 |
| A_24_P187614   | 3,13253 | 3,25182 | -1,086200174 | N/A             | 100129648 | AK097637     | LOC100129648          |
| A_33_P3393350  | 13,8448 | 13,9641 | -1,086207703 | ENST00000569675 | 89941     | NM_138769    | RHOT2                 |
| A_33_P3252630  | 6,30569 | 6,42503 | -1,08623782  | ENST00000357002 | 9534      | NM_001278677 | ZNF254                |
| A_33_P3392245  | 4,48928 | 4,60866 | -1,086267937 | ENST00000370269 | 55719     | NM_001136123 | FAM178A               |
| A_33_P3281468  | 4,87768 | 4,99707 | -1,086275467 | ENST00000290607 | 57519     | NM_020759    | STARD9                |
| A_22_P00019125 | 2,74041 | 2,8598  | -1,086275467 | N/A             | N/A       | AK302750     | Inc-SLC35A1-1         |
| A_21_P0002818  | 1,63009 | 1,74951 | -1,086298055 | N/A             | N/A       | N/A          | Inc-EIF4A2-1          |
| A_21_P0005893  | 3,80366 | 3,92324 | -1,086418536 | N/A             | N/A       | N/A          | Inc-EXT1-1            |
| A_23_P54079    | 10,2786 | 10,3982 | -1,086433597 | ENST00000553292 | 55644     | NM_017807    | OSGEP                 |
| A_23_P42198    | 12,0822 | 12,2019 | -1,086508906 | ENST00000614378 | 8355      | NM_003534    | HIST1H3G              |
| A_23_P368338   | 1,4865  | 1,6062  | -1,086508906 | ENST00000368602 | 100128327 | NM_001139444 | TRAPPC3L              |
| A_22_P00004162 | 1,71764 | 1,83736 | -1,086523968 | N/A             | N/A       | BC040306     | Inc-CLEC3A-2          |
| A_23_P427014   | 2,16949 | 2,28927 | -1,086569156 | ENST00000399899 | 9073      | NM_199328    | CLDN8                 |
| A_33_P3230290  | 12,5285 | 12,6483 | -1,08658422  | ENST00000492936 | 116983    | NM_030649    | ACAP3                 |
| A_21_P0007322  | 1,67676 | 1,79663 | -1,086636942 | N/A             | N/A       | N/A          | Inc-PLEKHA7-1         |
| A_23_P74843    | 12,4545 | 12,5744 | -1,086659538 | ENST00000366922 | 55699     | NM_018060    | IARS2                 |
| A_22_P00001924 | 7,79619 | 7,91611 | -1,086674603 | N/A             | N/A       | N/A          | Inc-BAI3-3            |
| A_21_P0009193  | 5,79397 | 5,91389 | -1,086674603 | ENST00000608940 | N/A       | N/A          | N/A                   |
| A_23_P429514   | 1,66363 | 1,78361 | -1,086719797 | ENST00000311378 | 124857    | NM_175575    | WFIKKN2               |
| A_21_P0003595  | 12,4755 | 12,5955 | -1,086734863 | N/A             | N/A       | N/A          | Inc-PCDH7-13          |
| A_21_P0010806  | 5,44143 | 5,56144 | -1,086742395 | N/A             | N/A       | N/A          | XLOC_I2_001496        |
| A_33_P3392892  | 7,32423 | 7,44427 | -1,086764994 | ENST00000301831 | 54986     | NM_017886    | ULK4                  |

|                |         |         |              |                 |           |              |                |
|----------------|---------|---------|--------------|-----------------|-----------|--------------|----------------|
| A_21_P0007835  | 5,57441 | 5,69454 | -1,086832792 | N/A             | N/A       | N/A          | Inc-ARID2-2    |
| A_23_P107132   | 1,46353 | 1,58368 | -1,086847858 | ENST00000226193 | 5957      | NM_002903    | RCVRN          |
| A_21_P0013322  | 5,95553 | 6,0757  | -1,086862925 | ENST00000442563 | 27342     | N/A          | RABGEF1        |
| A_21_P0013099  | 6,01427 | 6,13444 | -1,086862925 | N/A             | N/A       | N/A          | XLOC_I2_013125 |
| A_33_P3665777  | 16,5126 | 16,6328 | -1,086885526 | ENST00000334701 | 3320      | NM_001017963 | HSP90AA1       |
| A_33_P3242878  | 1,64285 | 1,76307 | -1,086900594 | ENST00000404038 | 64800     | NM_022785    | EFCAB6         |
| A_33_P3224206  | 2,3623  | 2,48253 | -1,086908128 | N/A             | N/A       | N/A          | Inc-ALX3-1     |
| A_33_P3377194  | 8,51567 | 8,63603 | -1,087006073 | ENST00000380572 | 148       | NM_033304    | ADRA1A         |
| A_22_P00001073 | 3,49468 | 3,61506 | -1,087021142 | ENST00000557962 | N/A       | N/A          | N/A            |
| A_33_P3352873  | 9,12827 | 9,2487  | -1,087058816 | ENST00000369760 | 594       | NM_000056    | BCKDHB         |
| A_21_P0004236  | 2,09831 | 2,21874 | -1,087058816 | N/A             | N/A       | N/A          | Inc-C5orf17-1  |
| A_33_P3237567  | 7,48685 | 7,60728 | -1,087058816 | ENST00000464610 | 3105      | AK316198     | HLA-A          |
| A_21_P0006334  | 6,20632 | 6,32681 | -1,087104026 | N/A             | N/A       | N/A          | Inc-QSOX2-1    |
| A_23_P99405    | 10,7894 | 10,9099 | -1,087111561 | ENST00000382883 | 7750      | NM_003453    | ZMYM2          |
| A_23_P255701   | 1,74475 | 1,86527 | -1,087126632 | ENST00000583171 | 83450     | NM_031294    | LRRC48         |
| A_24_P110273   | 9,89252 | 10,0131 | -1,087171845 | ENST00000456678 | N/A       | N/A          | N/A            |
| A_21_P0014623  | 9,09342 | 9,21404 | -1,087201989 | N/A             | 100505616 | NR_110096    | SNHG21         |
| A_33_P3213149  | 3,15695 | 3,2776  | -1,087224597 | ENST00000426585 | N/A       | N/A          | N/A            |
| A_21_P0012272  | 3,04031 | 3,16098 | -1,087239669 | N/A             | N/A       | N/A          | XLOC_I2_009439 |
| A_33_P3271126  | 10,795  | 10,9157 | -1,087262278 | N/A             | N/A       | N/A          | N/A            |
| A_23_P63829    | 11,3996 | 11,5203 | -1,087262278 | ENST00000378372 | 51182     | NM_016299    | HSPA14         |
| A_24_P44931    | 9,29092 | 9,41166 | -1,087292423 | ENST00000359935 | 84954     | NM_032868    | MPND           |
| A_33_P3376622  | 4,04983 | 4,17061 | -1,08732257  | ENST00000618652 | 4302      | NM_005937    | MLLT6          |
| A_21_P0011474  | 9,92411 | 10,0449 | -1,087330107 | ENST00000567422 | 11200     | NM_001005735 | CHEK2          |
| A_33_P3772937  | 13,4054 | 13,5262 | -1,087337643 | N/A             | 90133     | AL133645     | KRT8P12        |
| A_32_P44512    | 11,7635 | 11,8843 | -1,087337643 | ENST00000620312 | 6767      | NM_003932    | ST13           |
| A_33_P3254811  | 2,6889  | 2,80977 | -1,087390403 | ENST00000335012 | 285382    | NM_001025266 | C3orf70        |
| A_23_P94660    | 12,2501 | 12,371  | -1,087413015 | ENST00000223865 | 54662     | NM_018201    | TBC1D13        |
| A_23_P123424   | 4,65886 | 4,77983 | -1,087465777 | ENST00000289957 | 1142      | NM_000749    | CHRN3          |
| A_24_P40795    | 16,1461 | 16,2671 | -1,087488391 | ENST00000481681 | N/A       | N/A          | N/A            |
| A_23_P380871   | 1,79261 | 1,91362 | -1,087495929 | ENST00000335510 | 504180    | NM_001040703 | DEFB105B       |
| A_21_P0009900  | 1,65806 | 1,77908 | -1,087503467 | ENST00000433587 | N/A       | N/A          | N/A            |
| A_22_P00003769 | 1,70299 | 1,82405 | -1,087533619 | N/A             | N/A       | N/A          | Inc-CDK17-1    |

|                |         |         |              |                 |        |              |                |
|----------------|---------|---------|--------------|-----------------|--------|--------------|----------------|
| A_33_P3237344  | 4,22605 | 4,34713 | -1,087548696 | N/A             | N/A    | N/A          | N/A            |
| A_24_P396375   | 10,6821 | 10,8032 | -1,087563772 | ENST00000415912 | 1889   | NM_001113347 | ECE1           |
| A_21_P0000262  | 11,0453 | 11,1664 | -1,087563772 | ENST00000466550 | 619499 | NR_002575    | SNORA27        |
| A_33_P3362831  | 1,64976 | 1,77087 | -1,087571311 | ENST00000622580 | 7135   | NM_003281    | TNNI1          |
| A_22_P00018930 | 3,14482 | 3,26605 | -1,087661776 | N/A             | N/A    | N/A          | Inc-APOBEC4-1  |
| A_33_P3276297  | 4,96959 | 5,09083 | -1,087669315 | N/A             | N/A    | AY326463     | N/A            |
| A_33_P3289167  | 5,47138 | 5,59266 | -1,087699472 | ENST00000392197 | 27033  | NM_014383    | ZBTB32         |
| A_33_P3384710  | 7,64001 | 7,76135 | -1,087744709 | ENST00000341217 | 55731  | NM_001288631 | FAM222B        |
| A_23_P60499    | 11,2925 | 11,4139 | -1,087789948 | ENST00000277225 | 58499  | NM_021224    | ZNF462         |
| A_23_P431305   | 3,24961 | 3,37102 | -1,087797488 | ENST00000617017 | 138311 | NM_152421    | FAM69B         |
| A_23_P411102   | 6,25734 | 6,37883 | -1,08785781  | ENST00000399510 | 1742   | NM_001365    | DLG4           |
| A_33_P3242743  | 8,93591 | 9,05748 | -1,087918136 | ENST00000622789 | 10139  | NM_001267549 | ARFRP1         |
| A_23_P83045    | 15,486  | 15,6076 | -1,087940759 | ENST00000493886 | 7415   | NM_007126    | VCP            |
| A_24_P131589   | 9,48412 | 9,60576 | -1,087970923 | ENST00000330540 | 942    | NM_006889    | CD86           |
| A_33_P3278118  | 6,72259 | 6,84427 | -1,088001089 | ENST00000613118 | 836    | NM_004346    | CASP3          |
| A_21_P0010095  | 1,7635  | 1,88518 | -1,088001089 | N/A             | N/A    | N/A          | Inc-CEBPB-6    |
| A_21_P0002710  | 1,87727 | 1,99896 | -1,08800863  | ENST00000489729 | 254827 | N/A          | NAALADL2       |
| A_33_P3802146  | 14,1315 | 14,2532 | -1,088016172 | ENST00000505089 | 201853 | NR_126435    | LINC00504      |
| A_21_P0012079  | 13,8776 | 13,9993 | -1,088016172 | ENST00000409569 | 541471 | NR_024373    | MIR4435-1HG    |
| A_23_P151133   | 7,67947 | 7,80119 | -1,088031255 | ENST00000011898 | 10867  | NM_006675    | TSPAN9         |
| A_21_P0001480  | 6,35025 | 6,47199 | -1,088046338 | N/A             | N/A    | N/A          | Inc-C1orf201-2 |
| A_23_P73142    | 9,44345 | 9,56519 | -1,088046338 | ENST00000581120 | 51204  | NM_016360    | TACO1          |
| A_33_P3220213  | 1,64475 | 1,7665  | -1,08805388  | N/A             | N/A    | N/A          | N/A            |
| A_24_P938614   | 9,93825 | 10,06   | -1,08805388  | ENST00000295887 | 1040   | NM_001263    | CDS1           |
| A_21_P0003290  | 15,8922 | 16,014  | -1,08809159  | N/A             | N/A    | N/A          | Inc-MINA-3     |
| A_24_P305960   | 11,7511 | 11,8729 | -1,08809159  | ENST00000511171 | 221496 | NM_181336    | LEMD2          |
| A_24_P165423   | 4,87674 | 4,99861 | -1,088144386 | ENST00000315901 | 116362 | NM_052960    | RBP7           |
| A_24_P22981    | 4,67791 | 4,79979 | -1,088151928 | ENST00000589717 | 56242  | NM_021047    | ZNF253         |
| A_22_P00001057 | 7,04787 | 7,16975 | -1,088151928 | ENST00000479229 | N/A    | Z47263       | N/A            |
| A_32_P173058   | 10,2245 | 10,3464 | -1,088167013 | ENST00000528080 | 440026 | NM_015012    | TMEM41B        |
| A_33_P3363061  | 8,73274 | 8,85471 | -1,088219813 | ENST00000397228 | 11160  | NM_001003790 | ERLIN2         |
| A_23_P167509   | 1,66945 | 1,79145 | -1,088242442 | ENST00000541131 | 26999  | NM_014376    | CYFIP2         |
| A_23_P77562    | 11,1502 | 11,2722 | -1,088242442 | ENST00000566848 | 124446 | NM_194280    | TMEM219        |

|                |         |         |              |                 |           |              |                     |
|----------------|---------|---------|--------------|-----------------|-----------|--------------|---------------------|
| A_21_P0005542  | 5,59428 | 5,71629 | -1,088249985 | N/A             | N/A       | N/A          | Inc-ACTR3C-1        |
| A_24_P933908   | 1,62018 | 1,74226 | -1,088302788 | ENST00000409458 | 10457     | BC011595     | GPNMB               |
| A_24_P402836   | 8,20899 | 8,33111 | -1,088332963 | ENST00000240499 | 7700      | NM_003441    | ZNF141              |
| A_19_P00803086 | 8,44086 | 8,56299 | -1,088340507 | N/A             | N/A       | N/A          | Inc-RPRML-3         |
| A_23_P22263    | 12,9094 | 13,0316 | -1,088393315 | ENST00000355163 | 54971     | NM_079837    | BANP                |
| A_22_P00004181 | 1,71314 | 1,83536 | -1,088408403 | ENST00000455028 | N/A       | N/A          | N/A                 |
| A_21_P0011043  | 2,61128 | 2,73353 | -1,088431036 | ENST00000545069 | N/A       | XM_006719179 | N/A                 |
| A_24_P307808   | 1,63485 | 1,75711 | -1,088438581 | ENST00000507359 | 57528     | NM_020768    | KCTD16              |
| A_33_P3295066  | 16,3667 | 16,489  | -1,088468759 | N/A             | 222901    | NR_026673    | RPL23P8             |
| A_22_P00013798 | 4,38517 | 4,50748 | -1,088476304 | N/A             | 101928433 | XR_241982    | LOC101928433        |
| A_32_P170397   | 3,8227  | 3,94502 | -1,088483848 | N/A             | N/A       | AK057625     | Inc-JMJD7-PLA2G4B-1 |
| A_32_P751535   | 14,096  | 14,2184 | -1,088544208 | ENST00000440227 | N/A       | N/A          | N/A                 |
| A_33_P3307223  | 1,62894 | 1,75139 | -1,088581935 | N/A             | N/A       | AK128215     | N/A                 |
| A_33_P3353275  | 2,29246 | 2,41494 | -1,088604572 | N/A             | N/A       | N/A          | N/A                 |
| A_22_P00010128 | 3,17698 | 3,29946 | -1,088604572 | N/A             | 101927907 | NR_110284    | LOC101927907        |
| A_23_P71752    | 13,2321 | 13,3546 | -1,088619663 | ENST00000488164 | 7763      | NM_006007    | ZFAND5              |
| A_33_P3409944  | 1,99264 | 2,11525 | -1,088702669 | ENST00000351050 | 2780      | NM_005272    | GNAT2               |
| A_33_P3309271  | 7,71483 | 7,83746 | -1,088717762 | ENST00000397456 | 63915     | NM_001199323 | BLOC1S5             |
| A_33_P3248973  | 4,20457 | 4,32722 | -1,088732855 | N/A             | 100034248 | AK128820     | LOC100034248        |
| A_33_P3344204  | 7,45852 | 7,58118 | -1,088740402 | ENST00000283441 | 79844     | NM_024786    | ZDHC11              |
| A_23_P159671   | 10,4639 | 10,5867 | -1,088846059 | ENST00000469485 | 5256      | NM_000292    | PHKA2               |
| A_22_P00025307 | 1,63554 | 1,75834 | -1,088846059 | N/A             | N/A       | N/A          | Inc-STAT3-1         |
| A_22_P00018850 | 2,73098 | 2,8538  | -1,088861153 | ENST00000509950 | 101927207 | NR_110805    | LOC101927207        |
| A_33_P3385561  | 11,9319 | 12,0548 | -1,088921534 | N/A             | N/A       | AK130932     | N/A                 |
| A_23_P143935   | 9,76025 | 9,88318 | -1,088944178 | ENST00000412723 | 80235     | NM_025163    | PIGZ                |
| A_32_P31992    | 10,7715 | 10,8946 | -1,089072501 | ENST00000439215 | N/A       | N/A          | N/A                 |
| A_23_P147109   | 11,3354 | 11,4585 | -1,089072501 | ENST00000357503 | 54863     | NM_017723    | TOR4A               |
| A_21_P0008548  | 1,44951 | 1,57265 | -1,089102697 | ENST00000554822 | 388011    | N/A          | LINC01550           |
| A_33_P3311373  | 1,62436 | 1,74751 | -1,089110247 | N/A             | 100506747 | NR_036557    | LOC100506747        |
| A_33_P3424295  | 6,72952 | 6,85275 | -1,089170641 | ENST00000414589 | 7186      | NM_021138    | TRAF2               |
| A_19_P00318174 | 5,83364 | 5,95689 | -1,08918574  | ENST00000423704 | 100506014 | XR_425355    | LOC100506014        |
| A_22_P00003797 | 8,32579 | 8,44904 | -1,08918574  | N/A             | N/A       | N/A          | Inc-CDKAL1-1        |
| A_33_P3316456  | 7,60989 | 7,73317 | -1,08920839  | ENST00000367553 | 80896     | NM_001200050 | NPL                 |

|                |         |         |              |                 |           |              |               |
|----------------|---------|---------|--------------|-----------------|-----------|--------------|---------------|
| A_24_P119813   | 1,68018 | 1,8035  | -1,089238589 | N/A             | 100131561 | NR_024013    | FKSG29        |
| A_23_P17695    | 9,49667 | 9,62008 | -1,089306542 | ENST00000352133 | 54020     | NM_018964    | SLC37A1       |
| A_21_P0007762  | 9,62645 | 9,7499  | -1,089336744 | ENST00000609228 | 51275     | NR_015404    | MAPKAPK5-AS1  |
| A_33_P3408222  | 2,14963 | 2,27311 | -1,089359397 | N/A             | N/A       | N/A          | N/A           |
| A_33_P3234377  | 10,3864 | 10,5099 | -1,089374498 | N/A             | N/A       | N/A          | N/A           |
| A_23_P42004    | 1,76275 | 1,88632 | -1,089427356 | ENST00000330550 | 85413     | NM_033125    | SLC22A16      |
| A_22_P00021804 | 1,64864 | 1,77222 | -1,089434908 | N/A             | N/A       | BU607998     | Inc-ZNF217-3  |
| A_23_P83736    | 10,407  | 10,5306 | -1,089450011 | ENST00000302327 | 3622      | NM_001564    | ING2          |
| A_33_P3882624  | 9,6117  | 9,73531 | -1,089457562 | ENST00000608126 | 25913     | NM_015450    | POT1          |
| A_23_P332509   | 9,42147 | 9,54509 | -1,089465114 | ENST00000485694 | 51594     | NM_015909    | NBAS          |
| A_32_P126698   | 2,87491 | 2,99859 | -1,089510424 | ENST00000555872 | 90141     | NM_001284269 | EFCAB11       |
| A_32_P50417    | 4,77098 | 4,8947  | -1,089540632 | N/A             | N/A       | AK092531     | N/A           |
| A_23_P44257    | 11,7839 | 11,9077 | -1,089601051 | ENST00000381571 | 54951     | NM_017845    | COMMD8        |
| A_24_P397150   | 11,3406 | 11,4645 | -1,089676579 | ENST00000618573 | 2580      | NM_005255    | GAK           |
| A_33_P3882659  | 12,0241 | 12,148  | -1,089676579 | ENST00000468766 | N/A       | AY956766     | N/A           |
| A_23_P2725     | 17,1835 | 17,3074 | -1,089676579 | ENST00000493317 | 6144      | NM_000982    | RPL21         |
| A_33_P3422240  | 4,42566 | 4,54959 | -1,089699238 | ENST00000507531 | 57654     | NM_020894    | UVSSA         |
| A_33_P3346338  | 4,10084 | 4,22479 | -1,089714345 | ENST00000518866 | 93594     | NM_001145088 | TBC1D31       |
| A_24_P351304   | 9,23267 | 9,35669 | -1,089767219 | ENST00000442664 | 10989     | NM_006839    | IMMT          |
| A_21_P0004561  | 1,7026  | 1,82663 | -1,089774773 | N/A             | N/A       | N/A          | Inc-ZNF366-2  |
| A_33_P3316661  | 1,6385  | 1,76256 | -1,089797435 | ENST00000547347 | 374470    | NR_103526    | C12orf42      |
| A_22_P00013938 | 5,18541 | 5,30956 | -1,089865422 | ENST00000436359 | N/A       | XR_425283    | N/A           |
| A_22_P00018053 | 1,67492 | 1,79915 | -1,089925859 | N/A             | N/A       | N/A          | Inc-ZNF286A-2 |
| A_33_P3282291  | 6,8653  | 6,98956 | -1,089948523 | N/A             | 647662    | AK097358     | FLJ40039      |
| A_23_P20606    | 10,5025 | 10,6268 | -1,089978743 | ENST00000374767 | 25934     | NM_015469    | NIPSNAP3A     |
| A_23_P81973    | 11,1843 | 11,3086 | -1,089978743 | ENST00000461067 | 7923      | NM_014234    | HSD17B8       |
| A_33_P3350196  | 2,29861 | 2,42299 | -1,090039186 | N/A             | N/A       | N/A          | N/A           |
| A_21_P0005405  | 1,43704 | 1,56149 | -1,090092077 | N/A             | N/A       | N/A          | Inc-DYNC1I1-3 |
| A_21_P0000858  | 1,81114 | 1,93561 | -1,090107189 | N/A             | 100506207 | NR_038979    | LOC100506207  |
| A_32_P205553   | 12,3331 | 12,4576 | -1,090129857 | ENST00000602923 | 51121     | NM_016093    | RPL26L1       |
| A_22_P00006583 | 6,05518 | 6,17974 | -1,090175195 | N/A             | N/A       | N/A          | Inc-FMR1NB-1  |
| A_33_P3252206  | 9,37037 | 9,49493 | -1,090175195 | ENST00000523116 | 23484     | NM_001128208 | LEPROTL1      |
| A_23_P105519   | 12,3636 | 12,4882 | -1,090205422 | ENST00000567636 | 51729     | NM_016312    | WBP11         |



|                |         |         |              |                 |           |              |                |
|----------------|---------|---------|--------------|-----------------|-----------|--------------|----------------|
| A_33_P3382849  | 5,01448 | 5,13917 | -1,090273434 | ENST00000527761 | 49        | NM_001097    | ACR            |
| A_33_P3344574  | 8,92744 | 9,05217 | -1,090303664 | ENST00000372325 | 729238    | NM_001098668 | SFTPA2         |
| A_21_P0013570  | 1,4492  | 1,57393 | -1,090303664 | N/A             | N/A       | N/A          | XLOC_I2_014814 |
| A_23_P150457   | 1,641   | 1,76576 | -1,090326336 | ENST00000438354 | 10894     | NM_006691    | LYVE1          |
| A_33_P3223749  | 9,53159 | 9,65635 | -1,090326336 | ENST00000416199 | 9282      | NM_004229    | MED14          |
| A_23_P94860    | 10,6658 | 10,7906 | -1,090356567 | ENST00000302174 | 53343     | NM_024047    | NUDT9          |
| A_23_P164148   | 10,7823 | 10,9071 | -1,090356567 | ENST00000588320 | 6945      | NM_170607    | MLX            |
| A_21_P0003273  | 1,62319 | 1,748   | -1,090364124 | N/A             | N/A       | N/A          | Inc-HES1-2     |
| A_33_P3345638  | 1,63624 | 1,76106 | -1,090371682 | N/A             | N/A       | N/A          | N/A            |
| A_24_P143843   | 5,36402 | 5,48887 | -1,090394356 | ENST00000342688 | N/A       | N/A          | N/A            |
| A_23_P90542    | 3,99736 | 4,12223 | -1,090409472 | ENST00000589285 | 163255    | NM_152606    | ZNF540         |
| A_33_P3855484  | 1,68435 | 1,80922 | -1,090409472 | N/A             | N/A       | N/A          | N/A            |
| A_23_P321320   | 11,9463 | 12,0712 | -1,090432147 | ENST00000295641 | 114790    | NM_052902    | STK11IP        |
| A_33_P3392004  | 2,54373 | 2,66864 | -1,090439705 | N/A             | 100129785 | AK125285     | LOC100129785   |
| A_23_P87120    | 1,93414 | 2,05909 | -1,090469939 | ENST00000530327 | N/A       | N/A          | N/A            |
| A_33_P3376636  | 7,84532 | 7,97028 | -1,090477498 | ENST00000323060 | 80207     | NM_001017989 | OPA3           |
| A_22_P00012194 | 5,47927 | 5,60432 | -1,090545527 | ENST00000521586 | 103021164 | NR_117099    | CASC21         |
| A_22_P00002832 | 5,30165 | 5,42671 | -1,090553087 | N/A             | N/A       | AK127773     | Inc-C2orf76-2  |
| A_21_P0011498  | 5,32603 | 5,45112 | -1,090575764 | ENST00000498687 | 100506281 | N/A          | LOC100506281   |
| A_33_P3409553  | 15,9307 | 16,0558 | -1,090583324 | ENST00000431782 | N/A       | N/A          | N/A            |
| A_24_P811704   | 9,71029 | 9,83541 | -1,090598442 | ENST00000545069 | 8496      | NM_003622    | PPFIBP1        |
| A_33_P3346333  | 4,25335 | 4,37849 | -1,090613561 | N/A             | N/A       | N/A          | N/A            |
| A_33_P3217356  | 3,50936 | 3,63453 | -1,09063624  | ENST00000606738 | 388630    | NM_001194986 | TRABD2B        |
| A_33_P3397658  | 8,00922 | 8,1344  | -1,0906438   | ENST00000394243 | 11346     | N/A          | SYNPO          |
| A_21_P0010524  | 1,64207 | 1,76726 | -1,09065136  | N/A             | N/A       | N/A          | XLOC_I2_000116 |
| A_23_P211797   | 10,5107 | 10,6359 | -1,09065892  | ENST00000495261 | 4976      | NM_130837    | OPA1           |
| A_23_P49009    | 11,0528 | 11,178  | -1,09065892  | ENST00000617710 | 254531    | NM_153613    | LPCAT4         |
| A_22_P00019133 | 1,71864 | 1,8439  | -1,09070428  | ENST00000513859 | N/A       | N/A          | N/A            |
| A_22_P00002363 | 4,3511  | 4,47638 | -1,0907194   | N/A             | N/A       | N/A          | Inc-C12orf48-1 |
| A_33_P3375613  | 12,3077 | 12,433  | -1,090734521 | ENST00000520976 | 100533105 | NM_001204173 | C8orf44-SGK3   |
| A_24_P167473   | 14,7607 | 14,886  | -1,090734521 | ENST00000467622 | 10094     | NM_001278556 | ARPC3          |
| A_22_P00014723 | 4,063   | 4,18833 | -1,090757202 | N/A             | 100507308 | NR_109982    | TARID          |
| A_32_P213881   | 1,62406 | 1,74941 | -1,090772324 | ENST00000400633 | 400831    | NM_001009612 | C2orf202       |

|                |         |         |              |                 |           |              |                |
|----------------|---------|---------|--------------|-----------------|-----------|--------------|----------------|
| A_22_P00015416 | 1,68214 | 1,80749 | -1,090772324 | N/A             | N/A       | CD675892     | Inc-SRSF2-2    |
| A_33_P3319150  | 3,09627 | 3,22166 | -1,090802567 | N/A             | 101930426 | XM_005276049 | LOC101930426   |
| A_24_P224776   | 11,625  | 11,7504 | -1,090810128 | ENST00000593829 | 25804     | NM_012321    | LSM4           |
| A_33_P3271445  | 10,7389 | 10,8643 | -1,090810128 | ENST00000357457 | 10087     | NM_001130105 | COL4A3BP       |
| A_22_P00003746 | 1,64827 | 1,77371 | -1,090840372 | ENST00000579862 | N/A       | BQ215975     | N/A            |
| A_33_P3261024  | 2,23684 | 2,3623  | -1,090855494 | N/A             | N/A       | N/A          | N/A            |
| A_24_P400376   | 13,5067 | 13,6322 | -1,090885739 | ENST00000395422 | 51142     | NM_016139    | CHCHD2         |
| A_23_P135611   | 10,3833 | 10,5088 | -1,090885739 | ENST00000484831 | 55152     | NM_018114    | DALRD3         |
| A_23_P141405   | 17,0487 | 17,1742 | -1,090885739 | ENST00000393183 | 4831      | NM_002512    | NME2           |
| A_24_P394246   | 11,1807 | 11,3062 | -1,090885739 | ENST00000497863 | 51246     | NM_016479    | SHISA5         |
| A_24_P62530    | 5,11195 | 5,23746 | -1,090893301 | ENST00000366691 | 58480     | NM_021205    | RHOU           |
| A_21_P0011710  | 6,28837 | 6,41389 | -1,090900862 | N/A             | N/A       | N/A          | XLOC_I2_006812 |
| A_33_P3313704  | 4,26717 | 4,39271 | -1,090915986 | N/A             | 100128374 | XR_112969    | LOC100128374   |
| A_23_P201047   | 9,55839 | 9,68395 | -1,090931109 | ENST00000469769 | 7059      | NM_007112    | THBS3          |
| A_33_P3632937  | 12,0566 | 12,1822 | -1,090961356 | N/A             | 100131262 | XR_132952    | LOC100131262   |
| A_21_P0014353  | 2,184   | 2,30965 | -1,090999167 | N/A             | 100506882 | XR_109418    | LOC100506882   |
| A_21_P0009282  | 1,62937 | 1,75503 | -1,091006729 | N/A             | N/A       | N/A          | Inc-TMEM235-1  |
| A_19_P00318883 | 9,61287 | 9,73854 | -1,091014291 | ENST00000398043 | 100505854 | NR_038361    | APTR           |
| A_23_P8906     | 6,75059 | 6,87627 | -1,091021854 | ENST00000424843 | 29967     | NM_013437    | LRP12          |
| A_33_P3347976  | 8,8365  | 8,96222 | -1,091052104 | ENST00000261537 | 57534     | NM_020774    | MIB1           |
| A_21_P0001490  | 1,52861 | 1,65435 | -1,091067229 | N/A             | N/A       | N/A          | Inc-C1orf212-1 |
| A_24_P248863   | 7,29663 | 7,42239 | -1,091082355 | ENST00000302874 | 29063     | NM_024936    | ZCCHC4         |
| A_33_P3811287  | 9,9394  | 10,0652 | -1,091112606 | ENST00000488459 | 10075     | NM_031407    | HUWE1          |
| A_33_P3334436  | 4,50059 | 4,62648 | -1,091180676 | ENST00000453616 | N/A       | N/A          | N/A            |
| A_22_P00012795 | 2,38845 | 2,51436 | -1,091195803 | ENST00000522365 | 103352670 | NR_122034    | LINC01419      |
| A_24_P44514    | 13,3589 | 13,4849 | -1,091263877 | ENST00000612800 | 10519     | NM_006384    | CIB1           |
| A_23_P171077   | 13,9384 | 14,0644 | -1,091263877 | ENST00000276096 | 10682     | NM_006579    | EBP            |
| A_21_P0007999  | 1,43642 | 1,56245 | -1,091286569 | ENST00000432697 | 100874143 | NR_046995    | LINC00358      |
| A_21_P0012469  | 1,4685  | 1,59456 | -1,091309262 | N/A             | N/A       | N/A          | XLOC_I2_010448 |
| A_33_P3370265  | 3,50442 | 3,63056 | -1,091369779 | N/A             | N/A       | N/A          | Inc-SLC29A4-1  |
| A_33_P3262470  | 3,77988 | 3,90603 | -1,091377344 | ENST00000493476 | 387923    | AB464252     | SERP2          |
| A_21_P0009759  | 1,75977 | 1,88594 | -1,091392474 | N/A             | N/A       | N/A          | Inc-TSHZ3-1    |
| A_23_P122579   | 10,2288 | 10,355  | -1,091415169 | ENST00000622655 | 1616      | NM_001350    | DAXX           |

|                |         |         |              |                 |           |              |                |
|----------------|---------|---------|--------------|-----------------|-----------|--------------|----------------|
| A_32_P150856   | 12,2069 | 12,3331 | -1,091415169 | ENST00000467614 | 407835    | NR_002144    | LOC407835      |
| A_24_P737939   | 7,98799 | 8,11421 | -1,091430299 | ENST00000372441 | 221424    | NM_001012974 | LRRC73         |
| A_33_P3222539  | 3,72491 | 3,85116 | -1,091452995 | N/A             | N/A       | DA751309     | N/A            |
| A_21_P0007667  | 2,52524 | 2,65149 | -1,091452995 | N/A             | N/A       | N/A          | Inc-TMEM132C-5 |
| A_24_P419132   | 5,4728  | 5,59907 | -1,091468126 | ENST00000372926 | 2491      | NM_006733    | CENPI          |
| A_21_P0014839  | 7,37983 | 7,5061  | -1,091468126 | ENST00000487811 | 10617     | N/A          | STAMBP         |
| A_33_P3289845  | 7,00721 | 7,13349 | -1,091475691 | ENST00000437936 | 374918    | NM_198541    | IGFL1          |
| A_24_P148750   | 5,95835 | 6,08464 | -1,091483257 | ENST00000408919 | 9467      | NM_004844    | SH3BP5         |
| A_21_P0013477  | 12,565  | 12,6913 | -1,091490823 | ENST00000425197 | N/A       | N/A          | N/A            |
| A_23_P128641   | 8,65329 | 8,77964 | -1,091528651 | ENST00000255304 | 10208     | NM_005800    | USPL1          |
| A_33_P3670415  | 8,6608  | 8,78724 | -1,091596747 | ENST00000423729 | 339983    | NM_178557    | NAT8L          |
| A_24_P136551   | 7,70962 | 7,83607 | -1,091604313 | ENST00000374747 | 55666     | AB040932     | NPLOC4         |
| A_21_P0006184  | 1,75472 | 1,88121 | -1,091634579 | N/A             | 102724478 | XR_426414    | LOC102724478   |
| A_33_P3386775  | 5,99064 | 6,11721 | -1,091695114 | ENST00000355638 | 4185      | NM_002390    | ADAM11         |
| A_22_P00011417 | 7,45518 | 7,58181 | -1,091740517 | N/A             | N/A       | N/A          | Inc-PAK2-1     |
| A_23_P37994    | 3,60001 | 3,72669 | -1,091778355 | ENST00000564949 | 24150     | NM_016212    | TP53TG3        |
| A_22_P00005049 | 5,19263 | 5,31933 | -1,09179349  | N/A             | 100874042 | NR_046853    | HM13-AS1       |
| A_23_P106080   | 4,68954 | 4,81626 | -1,091808626 | ENST00000481538 | 84659     | NM_032572    | RNASE7         |
| A_22_P00007660 | 4,49085 | 4,6176  | -1,091831329 | ENST00000517365 | 101927040 | NR_110954    | LOC101927040   |
| A_21_P0002339  | 1,63241 | 1,75916 | -1,091831329 | N/A             | N/A       | N/A          | Inc-CPO-1      |
| A_21_P0000298  | 7,14429 | 7,27106 | -1,091846466 | N/A             | 319103    | NR_002916    | SNORD8         |
| A_22_P00015312 | 4,96903 | 5,09587 | -1,091899444 | ENST00000442780 | N/A       | N/A          | N/A            |
| A_21_P0008124  | 1,68206 | 1,80893 | -1,091922149 | N/A             | N/A       | N/A          | Inc-SPACA7-2   |
| A_23_P257201   | 10,0168 | 10,1437 | -1,091944855 | ENST00000608991 | 81847     | NM_030963    | RNF146         |
| A_22_P00002093 | 2,34319 | 2,47011 | -1,091959993 | N/A             | N/A       | N/A          | Inc-BMP6-7     |
| A_22_P00016580 | 1,67026 | 1,79725 | -1,092012976 | ENST00000624517 | N/A       | BC038781     | N/A            |
| A_23_P38784    | 1,78487 | 1,91186 | -1,092012976 | ENST00000317643 | 27036     | NM_014385    | SIGLEC7        |
| A_23_P204751   | 10,3555 | 10,4825 | -1,092020546 | ENST00000228468 | 41        | NM_020039    | ASIC1          |
| A_33_P3263841  | 6,93973 | 7,06678 | -1,092058393 | ENST00000324439 | 25898     | NM_001278539 | RCHY1          |
| A_23_P356646   | 7,37702 | 7,50409 | -1,092073532 | ENST00000400754 | 100132288 | NR_038327    | TEKT4P2        |
| A_33_P3292840  | 7,34129 | 7,46837 | -1,092081102 | N/A             | 79096     | NM_001003678 | C11orf49       |
| A_23_P3663     | 13,9261 | 14,0532 | -1,092096241 | ENST00000615744 | 84331     | NM_138418    | FAM195A        |
| A_23_P116694   | 18,2549 | 18,3821 | -1,092171942 | ENST00000548590 | 6231      | NM_001029    | RPS26          |

|                |         |         |              |                 |           |              |                    |
|----------------|---------|---------|--------------|-----------------|-----------|--------------|--------------------|
| A_22_P00018466 | 5,25321 | 5,38043 | -1,092187083 | N/A             | 102725086 | N/A          | LOC102725086       |
| A_22_P00009551 | 2,66926 | 2,79648 | -1,092187083 | N/A             | N/A       | N/A          | Inc-MAP3K2-1       |
| A_22_P00005102 | 1,71897 | 1,84624 | -1,092224936 | N/A             | N/A       | N/A          | Inc-DHFR-2         |
| A_24_P889720   | 17,5797 | 17,707  | -1,092247649 | ENST00000542416 | 7316      | NM_021009    | UBC                |
| A_21_P0004575  | 3,97703 | 4,1044  | -1,092300646 | ENST00000519040 | 102546298 | NR_105061    | LOC102546298       |
| A_21_P0007400  | 5,23557 | 5,36296 | -1,092315789 | N/A             | N/A       | N/A          | Inc-IL18-1         |
| A_32_P468341   | 2,14218 | 2,26964 | -1,09236879  | ENST00000476357 | 148345    | NM_001170754 | C1orf127           |
| A_33_P3330209  | 2,44083 | 2,56842 | -1,092467226 | ENST00000403018 | 26053     | NM_001127232 | AUTS2              |
| A_23_P124476   | 8,68584 | 8,81348 | -1,092505089 | ENST00000504131 | 1182      | NM_173872    | CLCN3              |
| A_33_P3410011  | 1,65658 | 1,78422 | -1,092505089 | ENST00000493133 | 57326     | NM_020524    | PBXIP1             |
| A_23_P365189   | 6,40858 | 6,5364  | -1,092641406 | ENST00000574442 | 23125     | NM_015099    | CAMTA2             |
| A_22_P00010168 | 5,9638  | 6,09164 | -1,092656553 | N/A             | 100507291 | NR_121609    | LOC100507291       |
| A_33_P3353630  | 3,7288  | 3,85672 | -1,092717144 | N/A             | N/A       | N/A          | N/A                |
| A_32_P357301   | 6,87308 | 7,00103 | -1,092739867 | ENST00000432191 | 51535     | NM_016488    | PPHLN1             |
| A_22_P00001341 | 6,87925 | 7,00721 | -1,092747441 | ENST00000501122 | 693197    | NR_030343    | MIR612             |
| A_24_P7085     | 13,9411 | 14,0691 | -1,092777739 | ENST00000488409 | 118432    | NR_002778    | RPL29P2            |
| A_33_P3282836  | 18,0989 | 18,2269 | -1,092777739 | ENST00000417088 | 6234      | NM_001031    | RPS28              |
| A_21_P0005280  | 1,38842 | 1,51643 | -1,092785314 | N/A             | N/A       | N/A          | Inc-GNA12-2        |
| A_33_P3336437  | 5,54789 | 5,67591 | -1,092792888 | ENST00000555422 | 23093     | NM_015072    | TTLL5              |
| A_33_P3368540  | 7,97796 | 8,10603 | -1,092830762 | ENST00000490889 | 9901      | XR_249341    | SRGAP3             |
| A_21_P0007928  | 5,11086 | 5,23893 | -1,092830762 | ENST00000431171 | N/A       | N/A          | N/A                |
| A_21_P0001470  | 5,91865 | 6,04673 | -1,092838337 | N/A             | N/A       | N/A          | Inc-C1orf195-2     |
| A_33_P3325866  | 5,25268 | 5,38078 | -1,092853487 | N/A             | 64839     | BC063316     | FBXL17             |
| A_23_P54376    | 10,3938 | 10,5219 | -1,092853487 | ENST00000561480 | 9399      | NM_004809    | STOML1             |
| A_33_P3374758  | 9,37551 | 9,50364 | -1,092876213 | ENST00000568180 | 1783      | NM_006141    | DYNC1LI2           |
| A_33_P3211174  | 7,04918 | 7,17733 | -1,092891363 | ENST00000262971 | 51588     | AK315530     | PIAS4              |
| A_22_P00017320 | 6,93828 | 7,06649 | -1,092936816 | ENST00000443946 | 339803    | NR_036496    | LOC339803          |
| A_21_P0000712  | 1,64687 | 1,77509 | -1,092944392 | ENST00000414877 | 100551499 | NR_038033    | LINC00159          |
| A_23_P61180    | 8,04442 | 8,17268 | -1,092974695 | ENST00000399012 | 55344     | NM_018390    | PLCXD1             |
| A_23_P108932   | 8,70786 | 8,83612 | -1,092974695 | N/A             | 56969     | NR_002229    | RPL23AP32          |
| A_21_P0002696  | 3,03893 | 3,1672  | -1,092982271 | N/A             | N/A       | N/A          | Inc-AC131097.4.1-3 |
| A_33_P3285734  | 1,51014 | 1,63843 | -1,092997423 | ENST00000392235 | 343413    | NM_001284217 | FCRL6              |
| A_33_P3276927  | 7,11736 | 7,24566 | -1,093004999 | N/A             | N/A       | N/A          | N/A                |

|                |         |         |              |                 |           |              |                     |
|----------------|---------|---------|--------------|-----------------|-----------|--------------|---------------------|
| A_22_P00010241 | 5,68848 | 5,81683 | -1,093042881 | N/A             | N/A       | N/A          | Inc-MTA3-3          |
| A_22_P00005667 | 1,64137 | 1,76975 | -1,09306561  | ENST00000523110 | N/A       | N/A          | N/A                 |
| A_23_P57379    | 11,9901 | 12,1185 | -1,093080763 | ENST00000493724 | 8318      | NM_003504    | CDC45               |
| A_22_P00002109 | 1,66311 | 1,79157 | -1,093126224 | ENST00000523205 | N/A       | N/A          | N/A                 |
| A_33_P7799182  | 2,55563 | 2,68409 | -1,093126224 | ENST00000505396 | 102467074 | N/A          | LINC01377           |
| A_24_P879563   | 9,73121 | 9,85969 | -1,093141378 | N/A             | 220906    | NR_033805    | WAC-AS1             |
| A_33_P3276748  | 2,5085  | 2,63699 | -1,093148955 | N/A             | 100128573 | NR_024491    | LOC100128573        |
| A_22_P00013885 | 1,64634 | 1,77499 | -1,093270196 | ENST00000575126 | N/A       | N/A          | N/A                 |
| A_21_P0011049  | 7,15605 | 7,28471 | -1,093277774 | N/A             | N/A       | N/A          | XLOC_I2_003050      |
| A_21_P0000382  | 5,79838 | 5,92707 | -1,093300509 | N/A             | 692111    | NR_003059    | SNORD71             |
| A_21_P0008954  | 5,26133 | 5,39002 | -1,093300509 | N/A             | N/A       | N/A          | Inc-SETD6-8         |
| A_22_P00013559 | 1,61584 | 1,74461 | -1,093361136 | N/A             | N/A       | N/A          | Inc-RP11-43D2.2.1-3 |
| A_23_P55073    | 11,1243 | 11,2531 | -1,093383872 | ENST00000583108 | 25926     | NM_015462    | NOL11               |
| A_33_P3380837  | 12,7924 | 12,9212 | -1,093383872 | ENST00000312371 | 155185    | NM_133463    | AMZ1                |
| A_32_P47988    | 5,87162 | 6,00047 | -1,093421766 | ENST00000508738 | 817       | NM_001221    | CAMK2D              |
| A_23_P159907   | 2,11473 | 2,24359 | -1,093429345 | ENST00000481193 | 81557     | NM_030801    | MAGED4B             |
| A_23_P128067   | 18,5969 | 18,7258 | -1,093459662 | ENST00000552314 | 6171      | NM_001035267 | RPL41               |
| A_23_P153098   | 11,4697 | 11,5986 | -1,093459662 | ENST00000588183 | 84064     | NM_032124    | HDHD2               |
| A_23_P116587   | 4,32079 | 4,44983 | -1,093565777 | ENST00000529803 | 4975      | NM_006189    | OMP                 |
| A_33_P3395201  | 2,50768 | 2,63675 | -1,093588517 | ENST00000552958 | N/A       | DB026495     | N/A                 |
| A_21_P0013687  | 4,32722 | 4,45635 | -1,093633999 | N/A             | N/A       | N/A          | XLOC_I2_015410      |
| A_22_P00001797 | 3,81877 | 3,94792 | -1,093649161 | ENST00000447570 | 101927476 | NR_110386    | LOC101927476        |
| A_22_P00012589 | 7,74394 | 7,87317 | -1,093709807 | N/A             | N/A       | BC067356     | Inc-PTPN23-1        |
| A_21_P0010453  | 5,6004  | 5,72963 | -1,093709807 | N/A             | N/A       | N/A          | Inc-C22orf26-2      |
| A_21_P0005756  | 2,44608 | 2,57534 | -1,09373255  | N/A             | N/A       | N/A          | Inc-NOV-1           |
| A_23_P157580   | 12,4902 | 12,6195 | -1,093762875 | ENST00000413219 | 6386      | NM_005625    | SDCBP               |
| A_32_P82623    | 6,25844 | 6,38777 | -1,09378562  | ENST00000494702 | 340351    | NM_178563    | AGBL3               |
| A_21_P0003306  | 1,40274 | 1,53213 | -1,09383111  | N/A             | N/A       | N/A          | Inc-DCUN1D1-6       |
| A_23_P168092   | 1,61703 | 1,74644 | -1,093846274 | ENST00000383418 | N/A       | AJ245419     | N/A                 |
| A_23_P364837   | 7,2052  | 7,33461 | -1,093846274 | ENST00000620676 | 55187     | NM_015378    | VPS13D              |
| A_33_P3230017  | 9,25821 | 9,38763 | -1,093853856 | ENST00000462353 | 6791      | NR_001587    | AURKAPS1            |
| A_22_P00001559 | 7,08877 | 7,2182  | -1,093861438 | N/A             | N/A       | BM464804     | Inc-ARID4A-1        |
| A_23_P32165    | 1,69141 | 1,82089 | -1,093899349 | ENST00000373615 | 9355      | NM_004789    | LHX2                |

|                |         |         |              |                 |           |              |                |
|----------------|---------|---------|--------------|-----------------|-----------|--------------|----------------|
| A_33_P3265249  | 1,67306 | 1,80263 | -1,093967592 | N/A             | N/A       | N/A          | N/A            |
| A_22_P00003475 | 1,61627 | 1,74586 | -1,093982758 | N/A             | N/A       | BG201704     | Inc-CCDC7-4    |
| A_33_P3361584  | 5,5894  | 5,71901 | -1,093997924 | N/A             | 100130930 | AK126579     | LOC100130930   |
| A_33_P3306085  | 2,85801 | 2,98767 | -1,094035839 | ENST00000399080 | 729475    | NM_001099218 | RAD51AP2       |
| A_22_P00024700 | 1,70942 | 1,8391  | -1,094051006 | N/A             | 442497    | N/A          | LOC442497      |
| A_22_P00014528 | 1,47379 | 1,60348 | -1,094058589 | N/A             | N/A       | N/A          | Inc-SIGLEC16-1 |
| A_33_P3351279  | 3,6134  | 3,74312 | -1,09408134  | ENST00000367282 | 9283      | NM_004767    | GPR37L1        |
| A_33_P3398548  | 6,97101 | 7,1008  | -1,094134426 | ENST00000329281 | 8548      | NM_003666    | BLZF1          |
| A_22_P00011447 | 1,67815 | 1,80799 | -1,094172347 | N/A             | N/A       | N/A          | Inc-PANK3-9    |
| A_33_P3256257  | 4,92053 | 5,05041 | -1,094202684 | ENST00000613957 | 100132476 | NM_033061    | KRTAP4-7       |
| A_32_P159234   | 3,53571 | 3,6656  | -1,094210269 | ENST00000524591 | 57604     | NM_020844    | KIAA1456       |
| A_33_P3313595  | 12,0257 | 12,1556 | -1,094217853 | ENST00000341028 | 984       | NM_033487    | CDK11B         |
| A_24_P100190   | 6,69036 | 6,82026 | -1,094217853 | ENST00000441947 | N/A       | N/A          | N/A            |
| A_33_P3341329  | 11,8615 | 11,9914 | -1,094217853 | ENST00000266529 | 85437     | NM_033114    | ZCRB1          |
| A_33_P3273173  | 5,64697 | 5,77692 | -1,094255777 | ENST00000489030 | 8237      | NM_004651    | USP11          |
| A_19_P00805748 | 1,68284 | 1,81281 | -1,094270946 | ENST00000500117 | N/A       | N/A          | N/A            |
| A_24_P50368    | 3,35116 | 3,48114 | -1,094278531 | ENST00000560104 | 414899    | NM_001001786 | BLID           |
| A_23_P74435    | 10,7232 | 10,8532 | -1,094293701 | ENST00000468913 | 79078     | NM_024097    | C1orf50        |
| A_23_P64129    | 12,1041 | 12,2341 | -1,094293701 | ENST00000443524 | 10553     | NM_006410    | HTATIP2        |
| A_22_P00014590 | 2,97937 | 3,10938 | -1,094301286 | N/A             | N/A       | N/A          | Inc-SLC12A7-1  |
| A_21_P0009873  | 10,3506 | 10,4807 | -1,094369555 | N/A             | 100505771 | XR_109592    | LOC100505771   |
| A_21_P0011714  | 6,49136 | 6,62153 | -1,094422655 | ENST00000611751 | 79168     | NM_024318    | LILRA6         |
| A_33_P3288649  | 10,2292 | 10,3594 | -1,094445413 | ENST00000613671 | 3206      | NM_018951    | HOXA10         |
| A_23_P501996   | 13,4368 | 13,567  | -1,094445413 | ENST00000341698 | 7335      | NM_001032288 | UBE2V1         |
| A_33_P3736691  | 6,14816 | 6,27838 | -1,094460585 | ENST00000261560 | 80264     | NM_025189    | ZNF430         |
| A_33_P3407057  | 3,95119 | 4,08142 | -1,094468172 | N/A             | N/A       | N/A          | N/A            |
| A_33_P3405531  | 7,35909 | 7,48937 | -1,094506104 | ENST00000398559 | 7110      | NM_007114    | TMF1           |
| A_33_P3298406  | 6,52085 | 6,65114 | -1,09451369  | ENST00000466840 | 375748    | NM_001010895 | ERCC6L2        |
| A_21_P0007912  | 4,28829 | 4,41858 | -1,09451369  | N/A             | 101927224 | N/A          | LINC01049      |
| A_21_P0008032  | 1,73591 | 1,86625 | -1,094551624 | N/A             | N/A       | N/A          | Inc-SGCG-3     |
| A_21_P0008423  | 1,65897 | 1,78933 | -1,094566798 | N/A             | N/A       | N/A          | Inc-SLC25A21-2 |
| A_21_P0012870  | 1,62688 | 1,75731 | -1,094619908 | N/A             | N/A       | N/A          | XLOC_I2_011873 |
| A_32_P204722   | 7,61909 | 7,74952 | -1,094619908 | N/A             | N/A       | N/A          | N/A            |

|                |         |         |              |                 |           |              |                |
|----------------|---------|---------|--------------|-----------------|-----------|--------------|----------------|
| A_22_P00008494 | 4,16415 | 4,29461 | -1,09464267  | ENST00000562112 | 256236    | NR_002798    | NAPSB          |
| A_32_P101699   | 9,07951 | 9,20999 | -1,094657845 | N/A             | 729887    | XR_243500    | LOC729887      |
| A_22_P00017671 | 4,41121 | 4,54169 | -1,094657845 | ENST00000534160 | N/A       | N/A          | N/A            |
| A_24_P918266   | 9,4416  | 9,57214 | -1,094703371 | ENST00000266712 | 160418    | NM_181783    | TMTC3          |
| A_21_P0003716  | 2,79819 | 2,92876 | -1,094726135 | N/A             | N/A       | N/A          | Inc-PPP2R2C-1  |
| A_23_P96853    | 12,2603 | 12,3909 | -1,0947489   | ENST00000371778 | 11124     | NM_007051    | FAF1           |
| A_22_P00010887 | 3,69642 | 3,82707 | -1,094786842 | N/A             | N/A       | N/A          | Inc-NPDC1-2    |
| A_22_P00016682 | 3,17261 | 3,30329 | -1,094809607 | N/A             | N/A       | N/A          | Inc-TPR-1      |
| A_22_P00000388 | 10,0434 | 10,1741 | -1,094824785 | ENST00000512517 | 101928776 | NR_110951    | LINC01258      |
| A_33_P3312611  | 2,21353 | 2,34423 | -1,094824785 | N/A             | 643723    | N/A          | LYPLAL1-AS1    |
| A_23_P24623    | 10,6381 | 10,7688 | -1,094824785 | ENST00000395934 | 26610     | NM_019040    | ELP4           |
| A_33_P3226546  | 1,81166 | 1,94241 | -1,094862729 | N/A             | N/A       | N/A          | N/A            |
| A_33_P3299656  | 5,34083 | 5,47167 | -1,094931032 | ENST00000482855 | 6103      | NM_000328    | RPGR           |
| A_33_P3234490  | 9,85394 | 9,98484 | -1,09497657  | ENST00000305321 | 654483    | NM_001039182 | BOLA2B         |
| A_23_P133133   | 8,61789 | 8,74893 | -1,095082833 | ENST00000505127 | 80216     | NM_025144    | ALPK1          |
| A_21_P0013345  | 2,71686 | 2,84796 | -1,095128377 | N/A             | N/A       | N/A          | XLOC_I2_013963 |
| A_33_P3335800  | 3,94944 | 4,08055 | -1,095135968 | N/A             | 100128219 | AK095925     | LOC100128219   |
| A_33_P3255499  | 9,42335 | 9,5545  | -1,095166332 | N/A             | 92014     | NR_024872    | SLC25A51       |
| A_22_P00008178 | 1,45409 | 1,58528 | -1,095196696 | N/A             | N/A       | DB049370     | Inc-INPPL1-2   |
| A_23_P254768   | 5,10491 | 5,2361  | -1,095196696 | N/A             | 54435     | NR_002139    | HCG4           |
| A_23_P66158    | 10,4591 | 10,5903 | -1,095204288 | ENST00000219837 | 400506    | NM_001012991 | KNOP1          |
| A_33_P3349444  | 10,8276 | 10,9588 | -1,095204288 | ENST00000402937 | 4668      | NM_000262    | NAGA           |
| A_21_P0014766  | 4,5322  | 4,66341 | -1,095211879 | N/A             | N/A       | N/A          | N/A            |
| A_33_P3327888  | 3,58584 | 3,7171  | -1,095249837 | N/A             | 100507249 | AF220264     | C8orf17        |
| A_23_P118493   | 10,4943 | 10,6256 | -1,095280204 | ENST00000575882 | 10040     | NM_005486    | TOM1L1         |
| A_24_P157424   | 9,89829 | 10,0296 | -1,095287796 | ENST00000428425 | 22916     | NM_007362    | NCBP2          |
| A_24_P36229    | 2,73353 | 2,86486 | -1,09530298  | ENST00000591182 | 1837      | NM_001391    | DTNA           |
| A_33_P3409077  | 5,64817 | 5,77961 | -1,095386496 | ENST00000509492 | 221322    | NM_152730    | TBC1D32        |
| A_21_P0012698  | 1,77997 | 1,91143 | -1,095401681 | N/A             | N/A       | N/A          | XLOC_I2_011399 |
| A_21_P0010066  | 1,75572 | 1,8872  | -1,095416867 | N/A             | N/A       | N/A          | Inc-ANKRD60-1  |
| A_24_P40907    | 8,33943 | 8,47091 | -1,095416867 | ENST00000381883 | 403313    | NM_203453    | PPAPDC2        |
| A_23_P119222   | 2,63026 | 2,76174 | -1,095416867 | ENST00000221515 | 56729     | NM_020415    | RETN           |
| A_21_P0013085  | 13,6271 | 13,7586 | -1,095432053 | N/A             | N/A       | N/A          | XLOC_I2_013031 |

|                |         |         |              |                 |           |              |                |
|----------------|---------|---------|--------------|-----------------|-----------|--------------|----------------|
| A_23_P8281     | 12,9123 | 13,0438 | -1,095432053 | ENST00000543628 | 3459      | NM_000416    | IFNGR1         |
| A_23_P168864   | 7,43418 | 7,56573 | -1,095470018 | ENST00000394909 | 7564      | NM_001029976 | ZNF16          |
| A_33_P3357620  | 8,77032 | 8,9019  | -1,095492798 | N/A             | 79447     | NM_024516    | PAGR1          |
| A_21_P0011682  | 1,62454 | 1,75622 | -1,095568735 | N/A             | N/A       | N/A          | XLOC_I2_006651 |
| A_21_P0001573  | 1,58852 | 1,72024 | -1,095599111 | N/A             | N/A       | N/A          | Inc-IGSF3-1    |
| A_23_P132936   | 12,6309 | 12,7627 | -1,095659865 | ENST00000507678 | 60559     | NM_021928    | SPCS3          |
| A_33_P3222139  | 8,44047 | 8,5723  | -1,095682649 | ENST00000578469 | 6720      | NM_001005291 | SREBF1         |
| A_22_P00009193 | 2,62163 | 2,75349 | -1,095705433 | N/A             | N/A       | N/A          | Inc-LPGAT1-2   |
| A_33_P3673310  | 6,99238 | 7,12426 | -1,095720623 | N/A             | N/A       | N/A          | N/A            |
| A_24_P354715   | 11,4506 | 11,5825 | -1,095735813 | ENST00000257770 | 4907      | NM_002526    | NT5E           |
| A_33_P3642217  | 2,19039 | 2,32229 | -1,095735813 | N/A             | N/A       | N/A          | N/A            |
| A_24_P408321   | 11,4192 | 11,5512 | -1,095811766 | ENST00000358053 | 9885      | NM_144498    | OSBPL2         |
| A_21_P0001868  | 1,60607 | 1,73812 | -1,095849745 | N/A             | N/A       | N/A          | Inc-ACTR2-3    |
| A_22_P00025312 | 2,02122 | 2,15338 | -1,095933303 | N/A             | N/A       | N/A          | Inc-KBTBD3-1   |
| A_23_P70148    | 9,84072 | 9,97289 | -1,095940899 | ENST00000503059 | 23530     | NM_182977    | NNT            |
| A_33_P3222977  | 2,7884  | 2,92059 | -1,095956092 | ENST00000283025 | 146279    | NM_144674    | TEKT5          |
| A_23_P78734    | 10,1826 | 10,3148 | -1,095963689 | ENST00000595016 | 79784     | NM_001077186 | MYH14          |
| A_33_P3210702  | 14,2613 | 14,3935 | -1,095963689 | ENST00000506742 | N/A       | N/A          | N/A            |
| A_23_P19322    | 8,65933 | 8,79153 | -1,095963689 | ENST00000229903 | 55776     | NM_018322    | SAYSD1         |
| A_33_P3221971  | 6,68355 | 6,81582 | -1,096016867 | ENST00000329600 | 390637    | NM_001013657 | GDPGP1         |
| A_21_P0013968  | 4,9176  | 5,04989 | -1,096032061 | N/A             | 100507656 | XM_003119675 | LOC100507656   |
| A_21_P0003722  | 6,00849 | 6,14079 | -1,096039658 | N/A             | N/A       | N/A          | Inc-RAB28-4    |
| A_21_P0008652  | 2,9393  | 3,07165 | -1,096077644 | N/A             | N/A       | N/A          | Inc-THSD4-1    |
| A_24_P823684   | 11,9526 | 12,085  | -1,096115632 | ENST00000505987 | 3326      | NM_007355    | HSP90AB1       |
| A_22_P00015283 | 1,39246 | 1,52486 | -1,096115632 | N/A             | N/A       | N/A          | Inc-SPATA5-1   |
| A_24_P29595    | 7,7279  | 7,86032 | -1,096130828 | ENST00000321680 | 134957    | NM_139244    | STXBP5         |
| A_21_P0008944  | 1,64575 | 1,77822 | -1,096168817 | N/A             | N/A       | N/A          | Inc-CHD9-5     |
| A_33_P3350583  | 5,90603 | 6,03851 | -1,096176415 | ENST00000370784 | 159091    | NM_138819    | FAM122C        |
| A_24_P94402    | 1,68921 | 1,82178 | -1,096244801 | ENST00000281043 | 4613      | NM_005378    | MYCN           |
| A_33_P3247919  | 4,32482 | 4,45739 | -1,096244801 | N/A             | N/A       | N/A          | N/A            |
| A_23_P3643     | 5,9411  | 6,07368 | -1,096252399 | ENST00000613572 | 1775      | NM_001374    | DNASE1L2       |
| A_21_P0014481  | 1,66388 | 1,79647 | -1,096259998 | N/A             | N/A       | BC128230     | N/A            |
| A_23_P161488   | 11,8795 | 12,0121 | -1,096267597 | ENST00000369087 | 7073      | NM_001033925 | TIAL1          |



|                |         |         |              |                 |           |              |                |
|----------------|---------|---------|--------------|-----------------|-----------|--------------|----------------|
| A_23_P84448    | 12,0364 | 12,169  | -1,096267597 | ENST00000498660 | 7277      | NM_006000    | TUBA4A         |
| A_33_P3262351  | 3,65784 | 3,79045 | -1,096275195 | ENST00000399810 | 134121    | NM_001089584 | C5orf49        |
| A_21_P0003203  | 1,44389 | 1,5765  | -1,096275195 | N/A             | N/A       | N/A          | Inc-FGF12-2    |
| A_23_P163209   | 6,562   | 6,69464 | -1,096297992 | ENST00000260442 | 10017     | NM_020396    | BCL2L10        |
| A_33_P3341901  | 11,736  | 11,8687 | -1,096343587 | ENST00000375151 | 90121     | NM_058163    | TSR2           |
| A_21_P0014729  | 10,5814 | 10,7141 | -1,096343587 | N/A             | 84820     | BC017341     | POLR2J4        |
| A_23_P46222    | 6,0255  | 6,15825 | -1,096381584 | ENST00000368385 | 80128     | NM_001282379 | TRIM46         |
| A_33_P3222565  | 6,91607 | 7,04883 | -1,096389183 | ENST00000372156 | 81619     | NM_030927    | TSPAN14        |
| A_23_P89073    | 7,80119 | 7,93396 | -1,096396783 | ENST00000539742 | 7571      | NM_145911    | ZNF23          |
| A_22_P00023876 | 1,66146 | 1,79425 | -1,096411982 | ENST00000541885 | N/A       | BF690662     | N/A            |
| A_33_P3255304  | 3,28191 | 3,41472 | -1,096427182 | ENST00000327365 | 2687      | NM_001099781 | GGT5           |
| A_33_P3350688  | 1,66187 | 1,79468 | -1,096427182 | N/A             | N/A       | N/A          | Inc-FRMD4B-2   |
| A_24_P129588   | 4,76288 | 4,8957  | -1,096434782 | ENST00000371483 | 338557    | NM_181745    | FFAR4          |
| A_22_P00023557 | 6,92906 | 7,06194 | -1,096480382 | ENST00000450290 | N/A       | N/A          | N/A            |
| A_33_P3289218  | 7,64094 | 7,77389 | -1,096533585 | ENST00000339092 | 22848     | NM_014911    | AAK1           |
| A_33_P3350726  | 9,70928 | 9,84225 | -1,096548786 | ENST00000396999 | 5468      | NM_138711    | PPARG          |
| A_22_P00004806 | 3,10722 | 3,24023 | -1,096579189 | ENST00000416204 | 102723927 | NR_110592    | LOC102723927   |
| A_22_P00009373 | 3,18742 | 3,32044 | -1,09658679  | N/A             | 100874370 | NR_046769    | CACNA1C-IT3    |
| A_33_P3220853  | 3,93742 | 4,07046 | -1,096601992 | N/A             | N/A       | N/A          | XLOC_I2_007738 |
| A_22_P00018238 | 2,96425 | 3,09732 | -1,096624796 | N/A             | N/A       | N/A          | Inc-ZNF687-1   |
| A_23_P38011    | 9,24425 | 9,37733 | -1,096632397 | ENST00000564622 | 9785      | NM_014003    | DHX38          |
| A_24_P109176   | 1,37155 | 1,50465 | -1,0966476   | ENST00000462655 | 340152    | NM_207360    | ZC3H12D        |
| A_21_P0010461  | 4,90771 | 5,04084 | -1,096670404 | N/A             | 101928824 | XR_244407    | LOC101928824   |
| A_23_P30069    | 9,03892 | 9,17207 | -1,096685607 | ENST00000511577 | 91351     | NM_001012967 | DDX60L         |
| A_23_P166716   | 12,6169 | 12,7501 | -1,096723616 | ENST00000309922 | 54931     | NM_017819    | TRMT10C        |
| A_23_P31444    | 1,68431 | 1,81751 | -1,096723616 | ENST00000493463 | 30816     | NM_014590    | ERVW-1         |
| A_24_P336957   | 10,1396 | 10,2728 | -1,096723616 | ENST00000484881 | 27429     | NM_145074    | HTRA2          |
| A_23_P34852    | 4,60087 | 4,73408 | -1,096731218 | ENST00000483406 | 11330     | NM_007272    | CTRC           |
| A_23_P56298    | 5,9237  | 6,05697 | -1,096776831 | ENST00000261560 | 80264     | NM_025189    | ZNF430         |
| A_33_P3407780  | 11,8465 | 11,9798 | -1,096799638 | ENST00000263212 | 9647      | NM_014634    | PPM1F          |
| A_23_P66732    | 5,98578 | 6,1191  | -1,096814843 | ENST00000325418 | 83903     | NM_031965    | GSG2           |
| A_21_P0006423  | 1,66113 | 1,79449 | -1,096845254 | N/A             | N/A       | N/A          | Inc-FAAH2-3    |
| A_22_P00015108 | 4,02653 | 4,15989 | -1,096845254 | ENST00000455071 | 101928820 | XR_241868    | LOC101928820   |

|                |         |         |              |                 |           |              |                    |
|----------------|---------|---------|--------------|-----------------|-----------|--------------|--------------------|
| A_23_P302060   | 1,96685 | 2,10023 | -1,096860459 | ENST00000448696 | 338376    | NM_176891    | IFNE               |
| A_21_P0002593  | 1,48785 | 1,62128 | -1,096898474 | N/A             | N/A       | N/A          | Inc-AC018682.6.1-1 |
| A_33_P3419339  | 8,45503 | 8,58848 | -1,09691368  | ENST00000369851 | 2773      | NM_006496    | GNAI3              |
| A_22_P00023631 | 1,61007 | 1,74352 | -1,09691368  | N/A             | N/A       | BX647249     | Inc-ZNF667-2       |
| A_23_P420610   | 6,88371 | 7,01723 | -1,096966904 | ENST00000287761 | 115548    | NM_138782    | FCHO2              |
| A_33_P3348204  | 3,83946 | 3,97305 | -1,097020131 | ENST00000408897 | 152756    | NM_153027    | FAM218A            |
| A_21_P0002927  | 1,67373 | 1,80735 | -1,097042943 | N/A             | N/A       | N/A          | Inc-CHL1-1         |
| A_22_P00012611 | 1,70982 | 1,84349 | -1,097080964 | N/A             | N/A       | BX113107     | Inc-PTPRU-1        |
| A_23_P144096   | 7,94031 | 8,07401 | -1,097103778 | ENST00000348721 | 1154      | NM_145071    | CISH               |
| A_33_P3335030  | 7,43012 | 7,56382 | -1,097103778 | ENST00000620383 | 375248    | NM_001164315 | ANKRD36            |
| A_23_P166      | 10,2715 | 10,4052 | -1,097103778 | ENST00000371940 | 148932    | NM_145279    | MOB3C              |
| A_21_P0014241  | 1,37318 | 1,5069  | -1,097118987 | ENST00000478815 | N/A       | AK055759     | N/A                |
| A_33_P3632866  | 2,35882 | 2,4926  | -1,097164616 | ENST00000371957 | 169436    | NM_153710    | STKLD1             |
| A_24_P241330   | 10,6597 | 10,7935 | -1,097179826 | ENST00000393514 | 79882     | NM_024824    | ZC3H14             |
| A_24_P43826    | 1,70931 | 1,84311 | -1,097179826 | ENST00000535548 | 64641     | NM_022659    | EBF2               |
| A_22_P00003468 | 1,72396 | 1,85777 | -1,097187431 | ENST00000531846 | N/A       | CR745539     | N/A                |
| A_23_P30307    | 8,61049 | 8,74436 | -1,097233062 | ENST00000420343 | 9443      | NM_004270    | MED7               |
| A_22_P00017033 | 5,4251  | 5,55908 | -1,097316725 | N/A             | N/A       | XM_006716967 | Inc-TTLL11-1       |
| A_23_P54891    | 10,9043 | 11,0383 | -1,097331938 | ENST00000430477 | 64755     | NM_022744    | C16orf58           |
| A_23_P33759    | 15,2853 | 15,4193 | -1,097331938 | ENST00000616661 | 9249      | NM_004753    | DHRS3              |
| A_19_P00323609 | 3,78285 | 3,91689 | -1,097362363 | N/A             | N/A       | N/A          | Inc-PROC-2         |
| A_33_P3309832  | 1,62714 | 1,76118 | -1,097362363 | ENST00000369310 | 79949     | NM_182601    | PLEKHS1            |
| A_22_P00024075 | 5,32574 | 5,45985 | -1,097415608 | ENST00000512036 | N/A       | N/A          | N/A                |
| A_22_P00014694 | 10,6284 | 10,7626 | -1,097484071 | ENST00000359232 | 123096    | NM_001291813 | SLC25A29           |
| A_22_P00002164 | 3,12252 | 3,25678 | -1,097529715 | N/A             | 100874353 | NR_046793    | RPS6KA2-IT1        |
| A_21_P0012441  | 4,00056 | 4,13484 | -1,09754493  | N/A             | 9881      | XM_006713432 | TRANK1             |
| A_33_P3407195  | 10,7228 | 10,8571 | -1,097560145 | ENST00000040738 | 259282    | NM_148894    | BOD1L1             |
| A_21_P0009401  | 1,36187 | 1,49618 | -1,097567753 | N/A             | N/A       | N/A          | Inc-ANKFY1-1       |
| A_22_P00007250 | 1,92273 | 2,05706 | -1,097582968 | ENST00000376678 | 116437    | NR_026670    | LINC01257          |
| A_33_P3406636  | 5,88383 | 6,01817 | -1,097590576 | ENST00000512132 | 643836    | NM_152283    | ZFP62              |
| A_33_P3359344  | 10,3284 | 10,4628 | -1,097636225 | ENST00000487186 | 199990    | NM_182533    | C1orf86            |
| A_23_P97442    | 11,1211 | 11,2556 | -1,09771231  | ENST00000471456 | 84065     | NM_032125    | TMEM222            |
| A_22_P00004633 | 6,01462 | 6,14917 | -1,097750354 | ENST00000414483 | N/A       | N/A          | N/A                |

|                |         |         |              |                 |           |              |                |
|----------------|---------|---------|--------------|-----------------|-----------|--------------|----------------|
| A_22_P00005112 | 6,20289 | 6,33744 | -1,097750354 | N/A             | N/A       | N/A          | Inc-DHRS7B-3   |
| A_22_P00020625 | 1,71423 | 1,84878 | -1,097750354 | ENST00000566562 | N/A       | BX116282     | N/A            |
| A_23_P127394   | 10,1968 | 10,3314 | -1,0977884   | ENST00000443527 | 1408      | NM_021117    | CRY2           |
| A_33_P3223472  | 13,0246 | 13,1592 | -1,0977884   | ENST00000577866 | 51321     | NM_016627    | AMZ2           |
| A_22_P00003532 | 3,3712  | 3,50589 | -1,097856886 | ENST00000536141 | N/A       | N/A          | N/A            |
| A_23_P60240    | 10,8906 | 11,0253 | -1,097864496 | ENST00000491687 | 84720     | NM_032634    | PIGO           |
| A_23_P9135     | 8,05457 | 8,18929 | -1,097879715 | ENST00000377561 | 79937     | NM_033655    | CNTNAP3        |
| A_22_P00012264 | 1,62924 | 1,76396 | -1,097879715 | ENST00000521298 | N/A       | N/A          | N/A            |
| A_23_P8482     | 11,4995 | 11,6343 | -1,097940596 | ENST00000425198 | 989       | NM_001011553 | set-07         |
| A_21_P0003975  | 2,12267 | 2,25753 | -1,097986259 | ENST00000503267 | 102723526 | XR_425842    | LOC102723526   |
| A_23_P102109   | 13,0727 | 13,2076 | -1,098016702 | ENST00000486997 | 7277      | NM_006000    | TUBA4A         |
| A_22_P00019317 | 7,09994 | 7,23488 | -1,098047146 | N/A             | N/A       | N/A          | Inc-NMNAT3-3   |
| A_33_P3217437  | 6,57125 | 6,70624 | -1,098085202 | N/A             | 163351    | NM_198460    | GBP6           |
| A_22_P00000536 | 3,14711 | 3,28212 | -1,098100425 | ENST00000560140 | 102724779 | N/A          | LOC102724779   |
| A_23_P423309   | 1,60803 | 1,74305 | -1,098108037 | ENST00000231484 | 51294     | NM_016580    | PCDH12         |
| A_22_P00009202 | 1,60921 | 1,74434 | -1,098191766 | ENST00000507857 | N/A       | N/A          | N/A            |
| A_32_P133670   | 9,01377 | 9,14891 | -1,098199379 | ENST00000559548 | 8125      | NM_006305    | ANP32A         |
| A_33_P3397288  | 4,23806 | 4,37321 | -1,098206991 | ENST00000395654 | 1908      | NM_207032    | EDN3           |
| A_33_P3250273  | 1,64407 | 1,77925 | -1,098229828 | ENST00000512854 | N/A       | N/A          | N/A            |
| A_22_P00012693 | 5,32677 | 5,462   | -1,09826789  | ENST00000452252 | 63877     | XR_428712    | FAM204A        |
| A_22_P00013557 | 1,47609 | 1,61135 | -1,098290728 | ENST00000511631 | N/A       | N/A          | N/A            |
| A_22_P00007949 | 1,62527 | 1,76057 | -1,09832118  | N/A             | N/A       | BG207970     | Inc-IBTK-3     |
| A_23_P149259   | 9,75164 | 9,88696 | -1,098336406 | ENST00000495881 | 84283     | NM_032323    | TMEM79         |
| A_23_P318989   | 1,94163 | 2,07696 | -1,098344019 | ENST00000524279 | 115795    | NM_173472    | FANCD2OS       |
| A_22_P00001836 | 5,21425 | 5,34964 | -1,098389698 | ENST00000559246 | N/A       | N/A          | N/A            |
| A_33_P3354847  | 1,48443 | 1,61982 | -1,098389698 | ENST00000343036 | 389799    | NM_207417    | C9orf171       |
| A_24_P48204    | 8,89444 | 9,02983 | -1,098389698 | ENST00000269389 | 6398      | NM_003004    | SECTM1         |
| A_23_P150950   | 11,2262 | 11,3616 | -1,098397312 | ENST00000552994 | 196441    | NM_144982    | ZFC3H1         |
| A_23_P253412   | 12,5354 | 12,6708 | -1,098397312 | ENST00000374865 | 54534     | NM_019051    | MRPL50         |
| A_21_P0011765  | 2,95106 | 3,0865  | -1,098427766 | N/A             | N/A       | N/A          | XLOC_I2_007135 |
| A_19_P00319404 | 4,80865 | 4,94411 | -1,098442994 | ENST00000426635 | 79940     | NR_121612    | LINC00472      |
| A_22_P00009784 | 1,6653  | 1,80078 | -1,098458222 | ENST00000509265 | 645323    | NR_024384    | LINC00461      |
| A_24_P282043   | 7,93429 | 8,06987 | -1,098534364 | ENST00000457749 | 7576      | NM_006969    | ZNF28          |

|                |         |         |              |                 |           |              |                    |
|----------------|---------|---------|--------------|-----------------|-----------|--------------|--------------------|
| A_22_P00012901 | 4,8712  | 5,00679 | -1,098541978 | ENST00000430749 | 23354     | NM_015302    | HAUS5              |
| A_33_P3277447  | 7,76498 | 7,9006  | -1,098564822 | ENST00000286298 | 1836      | NM_000112    | SLC26A2            |
| A_23_P86411    | 3,48903 | 3,62469 | -1,098595281 | ENST00000619592 | 53904     | NM_017433    | MYO3A              |
| A_33_P3284711  | 3,83435 | 3,97003 | -1,098610511 | N/A             | 283932    | NR_024348    | FBXL19-AS1         |
| A_23_P66402    | 10,2004 | 10,3361 | -1,098625741 | ENST00000268711 | 55090     | NM_018019    | MED9               |
| A_22_P00019433 | 5,89525 | 6,03102 | -1,098679048 | N/A             | N/A       | BX649099     | Inc-SLC16A3-5      |
| A_33_P3333603  | 4,23981 | 4,37558 | -1,098679048 | ENST00000381280 | 64093     | NM_022137    | SMOC1              |
| A_22_P00024043 | 7,48287 | 7,61866 | -1,098694279 | ENST00000620428 | 8694      | NM_012079    | DGAT1              |
| A_21_P0003858  | 3,70599 | 3,84179 | -1,098701895 | N/A             | N/A       | N/A          | Inc-CLCN3-1        |
| A_24_P239731   | 13,0661 | 13,202  | -1,098778053 | ENST00000371711 | 9334      | NM_004776    | B4GALT5            |
| A_21_P0014477  | 4,509   | 4,6449  | -1,098778053 | N/A             | N/A       | N/A          | N/A                |
| A_33_P3325280  | 11,3048 | 11,4407 | -1,098778053 | ENST00000427415 | 255812    | N/A          | SDHAP1             |
| A_21_P0002458  | 3,81916 | 3,95507 | -1,09878567  | N/A             | N/A       | N/A          | Inc-CD207-1        |
| A_23_P206612   | 9,69181 | 9,82774 | -1,098800902 | ENST00000219689 | 57478     | NM_020718    | USP31              |
| A_33_P3325068  | 7,51626 | 7,6522  | -1,098808518 | ENST00000529937 | 23410     | AK074992     | SIRT3              |
| A_33_P3236734  | 3,34134 | 3,47731 | -1,098831368 | ENST00000547437 | 388512    | NM_001204118 | CLEC17A            |
| A_23_P15073    | 9,64343 | 9,77943 | -1,098854218 | ENST00000563088 | 339123    | NM_001005920 | JMJD8              |
| A_23_P113417   | 9,21575 | 9,35175 | -1,098854218 | ENST00000443656 | 80233     | NM_025161    | C17orf70           |
| A_23_P58967    | 12,9873 | 13,1233 | -1,098854218 | ENST00000495527 | 9877      | NM_014827    | ZC3H11A            |
| A_23_P46455    | 9,60449 | 9,7405  | -1,098861834 | ENST00000263697 | 22826     | NM_014280    | DNAJC8             |
| A_22_P00016425 | 3,63305 | 3,7691  | -1,098892302 | N/A             | N/A       | BC050301     | Inc-TMEM30B-1      |
| A_23_P168080   | 9,25883 | 9,39488 | -1,098892302 | ENST00000464293 | 6499      | NM_006929    | SKIV2L             |
| A_22_P00012925 | 4,15175 | 4,28783 | -1,098915153 | ENST00000452288 | N/A       | N/A          | N/A                |
| A_24_P206736   | 8,52358 | 8,65967 | -1,09892277  | ENST00000532305 | 7702      | NM_003442    | ZNF143             |
| A_22_P00000531 | 1,92227 | 2,05841 | -1,098960856 | ENST00000424383 | 392617    | NM_001128636 | ELFN1              |
| A_21_P0011888  | 4,7135  | 4,84966 | -1,098976091 | N/A             | 101927187 | XR_241443    | LOC101927187       |
| A_24_P118260   | 4,17492 | 4,3111  | -1,098991326 | ENST00000312710 | N/A       | N/A          | N/A                |
| A_33_P3349045  | 6,30747 | 6,44366 | -1,098998944 | ENST00000565696 | 3566      | NM_001257407 | IL4R               |
| A_21_P0003931  | 1,376   | 1,51227 | -1,099059887 | ENST00000505254 | 728264    | N/A          | MIR143HG           |
| A_33_P3236628  | 1,38758 | 1,52387 | -1,099075123 | ENST00000595085 | 593       | AL833143     | BCKDHA             |
| A_21_P0005612  | 2,26779 | 2,40413 | -1,099113215 | N/A             | N/A       | N/A          | Inc-AC099552.4.1-2 |
| A_33_P3323068  | 5,24838 | 5,38482 | -1,099189402 | ENST00000366905 | 56895     | NM_020133    | AGPAT4             |
| A_33_P3226678  | 5,26863 | 5,40515 | -1,099250356 | ENST00000583797 | 645027    | NM_001145127 | EVPLL              |

|                |         |         |              |                 |           |              |              |
|----------------|---------|---------|--------------|-----------------|-----------|--------------|--------------|
| A_23_P500130   | 9,73854 | 9,87511 | -1,099288454 | ENST00000382289 | 23189     | NM_153186    | KANK1        |
| A_33_P3354728  | 6,42326 | 6,55992 | -1,099357033 | ENST00000484315 | N/A       | N/A          | N/A          |
| A_22_P00013777 | 1,60094 | 1,73761 | -1,099364653 | ENST00000533992 | N/A       | N/A          | N/A          |
| A_32_P8925     | 1,55311 | 1,68978 | -1,099364653 | ENST00000308105 | 200159    | NM_001012970 | C1orf100     |
| A_23_P418431   | 2,33614 | 2,47282 | -1,099372274 | ENST00000369570 | 63914     | NR_026784    | C6orf164     |
| A_33_P3210059  | 10,0698 | 10,2065 | -1,099387514 | ENST00000215793 | 10291     | NM_005877    | SF3A1        |
| A_24_P326739   | 7,47343 | 7,61015 | -1,099402755 | ENST00000486433 | 27165     | NM_013267    | GLS2         |
| A_33_P3352544  | 10,6788 | 10,8156 | -1,099463721 | ENST00000486165 | 10005     | NM_005469    | ACOT8        |
| A_33_P3386132  | 9,0309  | 9,1677  | -1,099463721 | ENST00000258457 | 79074     | NM_024093    | C2orf49      |
| A_33_P3361027  | 12,4135 | 12,5503 | -1,099463721 | ENST00000405938 | 24144     | NM_001008697 | TFIP11       |
| A_21_P0000532  | 1,5368  | 1,67362 | -1,099478963 | ENST00000436742 | 149047    | NR_027310    | MGC27382     |
| A_21_P0005131  | 2,13953 | 2,27638 | -1,099501826 | N/A             | N/A       | N/A          | Inc-TRMT11-1 |
| A_22_P00016466 | 1,66142 | 1,79828 | -1,099509447 | N/A             | 101927413 | XR_242419    | LOC101927413 |
| A_22_P00018346 | 12,3594 | 12,4963 | -1,099539932 | N/A             | 100507458 | XR_243341    | ZNF213-AS1   |
| A_33_P3225983  | 8,07058 | 8,20753 | -1,09957804  | N/A             | N/A       | N/A          | N/A          |
| A_23_P169117   | 12,2277 | 12,3647 | -1,099616149 | ENST00000380527 | 10670     | NM_006570    | RRAGA        |
| A_33_P3403429  | 3,17096 | 3,30796 | -1,099616149 | ENST00000520099 | 100130742 | NM_001129890 | LRRC69       |
| A_33_P3236651  | 12,7067 | 12,8437 | -1,099616149 | ENST00000397981 | 5609      | NM_001297555 | MAP2K7       |
| A_21_P0013440  | 5,91812 | 6,05518 | -1,099661882 | ENST00000449307 | 102725415 | N/A          | LOC102725415 |
| A_23_P138631   | 12,4709 | 12,608  | -1,099692372 | ENST00000424783 | 9126      | NM_005445    | SMC3         |
| A_33_P3369190  | 9,79102 | 9,92819 | -1,09974573  | ENST00000515456 | 5066      | NM_001177306 | PAM          |
| A_22_P00017344 | 1,96794 | 2,10518 | -1,099799092 | N/A             | N/A       | N/A          | Inc-USP50-1  |
| A_22_P00025341 | 1,7029  | 1,84019 | -1,099837208 | N/A             | N/A       | N/A          | Inc-MAPK6-6  |
| A_32_P162150   | 8,56539 | 8,70268 | -1,099837208 | ENST00000378930 | 257397    | NM_152787    | TAB3         |
| A_33_P3210203  | 12,1965 | 12,3338 | -1,099844832 | ENST00000378247 | 84501     | NM_032451    | SPIRE2       |
| A_33_P3247068  | 1,97297 | 2,1103  | -1,099867703 | N/A             | N/A       | N/A          | N/A          |
| A_33_P3390264  | 1,68417 | 1,82152 | -1,09988295  | ENST00000395079 | 81341     | NM_207374    | OR10W1       |
| A_33_P3380196  | 3,01531 | 3,15267 | -1,099890574 | N/A             | 10142     | BC015533     | AKAP9        |
| A_23_P127697   | 2,41474 | 2,55214 | -1,09992107  | ENST00000527596 | N/A       | AB529247     | N/A          |
| A_33_P3289192  | 11,0464 | 11,1838 | -1,09992107  | ENST00000367826 | 10767     | NM_006620    | HBS1L        |
| A_21_P0006853  | 1,68335 | 1,82076 | -1,099928694 | ENST00000420945 | 646034    | XR_432557    | LOC646034    |
| A_23_P137139   | 1,8076  | 1,94506 | -1,099966815 | ENST00000488970 | 695       | NM_000061    | BTK          |
| A_33_P3282202  | 3,36119 | 3,49866 | -1,09997444  | N/A             | N/A       | AK124041     | N/A          |

|                |         |         |              |                 |           |              |                |
|----------------|---------|---------|--------------|-----------------|-----------|--------------|----------------|
| A_21_P0000631  | 1,73641 | 1,87391 | -1,099997313 | ENST00000531091 | 643733    | NR_034079    | LOC643733      |
| A_32_P144220   | 14,1301 | 14,2676 | -1,099997313 | ENST00000569826 | N/A       | N/A          | N/A            |
| A_23_P7313     | 12,5586 | 12,6961 | -1,099997313 | ENST00000360804 | 6696      | NM_001040058 | SPP1           |
| A_23_P92614    | 7,70743 | 7,84493 | -1,099997313 | ENST00000295488 | 113510    | NM_133636    | HELQ           |
| A_22_P00000379 | 6,95438 | 7,09193 | -1,100035437 | ENST00000565686 | 101929408 | AK123063     | LOC101929408   |
| A_21_P0004465  | 1,77649 | 1,91408 | -1,100065937 | N/A             | N/A       | N/A          | Inc-SLIT3-1    |
| A_21_P0010519  | 6,72394 | 6,86156 | -1,100088812 | ENST00000497359 | 4485      | N/A          | MST1           |
| A_24_P841677   | 5,32322 | 5,4609  | -1,100134565 | ENST00000379687 | 256643    | NM_198279    | CXorf23        |
| A_33_P3358977  | 9,98451 | 10,1222 | -1,10014219  | ENST00000308418 | 84153     | NM_032193    | RNASEH2C       |
| A_23_P26649    | 12,1528 | 12,2905 | -1,100149816 | ENST00000572391 | 57407     | NM_020677    | NMRAL1         |
| A_23_P81484    | 1,56091 | 1,69862 | -1,100157442 | N/A             | 353189    | AF119865     | SLCO4C1        |
| A_22_P00025389 | 3,52697 | 3,66476 | -1,100218449 | N/A             | 101927800 | XR_242846    | LOC101927800   |
| A_23_P73667    | 5,26687 | 5,40467 | -1,100226075 | ENST00000375327 | 158787    | NM_001031745 | RIBC1          |
| A_22_P00011606 | 3,01847 | 3,15629 | -1,100241328 | ENST00000519038 | N/A       | N/A          | N/A            |
| A_32_P163089   | 9,14855 | 9,28648 | -1,10032522  | ENST00000548458 | 387882    | NM_001145199 | C12orf75       |
| A_21_P0004308  | 3,43143 | 3,56936 | -1,10032522  | N/A             | N/A       | N/A          | Inc-NDFIP1-1   |
| A_22_P00002740 | 7,92738 | 8,06531 | -1,10032522  | ENST00000339818 | 755       | NM_001271441 | C21orf2        |
| A_21_P0001044  | 1,95017 | 2,08815 | -1,100363355 | ENST00000420807 | 101929184 | N/A          | LINC01031      |
| A_33_P3321602  | 7,21486 | 7,35287 | -1,100386237 | ENST00000493669 | 65979     | XM_006710850 | PHACTR4        |
| A_23_P66110    | 9,78533 | 9,92341 | -1,100439629 | ENST00000569930 | 7249      | NM_000548    | TSC2           |
| A_23_P206022   | 5,36296 | 5,50106 | -1,100454884 | ENST00000315757 | 22801     | NM_001004439 | ITGA11         |
| A_22_P00008688 | 2,00446 | 2,14256 | -1,100454884 | N/A             | N/A       | N/A          | Inc-KIAA1147-2 |
| A_23_P406350   | 10,0193 | 10,1574 | -1,100454884 | ENST00000301327 | 113655    | NM_138431    | MFSD3          |
| A_23_P335039   | 9,7695  | 9,90767 | -1,10050828  | ENST00000338977 | 170960    | NM_133474    | ZNF721         |
| A_24_P216313   | 13,5566 | 13,6948 | -1,100531165 | ENST00000461043 | 51614     | NM_015966    | ERGIC3         |
| A_23_P22761    | 3,83795 | 3,97618 | -1,10055405  | ENST00000334060 | 6473      | NM_006883    | SHOX           |
| A_23_P118353   | 9,92014 | 10,0584 | -1,100576936 | ENST00000586859 | 6730      | NM_014230    | SRP68          |
| A_21_P0004889  | 2,0746  | 2,21288 | -1,100592193 | N/A             | N/A       | N/A          | Inc-OPN5-1     |
| A_23_P385771   | 11,0374 | 11,1757 | -1,10060745  | ENST00000357296 | 196743    | NM_152911    | PAOX           |
| A_33_P3309175  | 3,05509 | 3,19339 | -1,10060745  | ENST00000409797 | 64857     | NM_022835    | PLEKHG2        |
| A_21_P0003320  | 4,05093 | 4,18926 | -1,100630337 | ENST00000499452 | 100996286 | NR_121627    | LOC100996286   |
| A_19_P00319532 | 4,51038 | 4,64872 | -1,100637966 | ENST00000453213 | 100506190 | N/A          | LINC00963      |
| A_33_P3287310  | 7,86276 | 8,00114 | -1,100668483 | N/A             | N/A       | N/A          | N/A            |

|                |         |         |              |                 |           |              |                |
|----------------|---------|---------|--------------|-----------------|-----------|--------------|----------------|
| A_33_P3349552  | 13,4702 | 13,6086 | -1,100683741 | ENST00000343516 | 57524     | NM_020764    | CASKIN1        |
| A_23_P406330   | 7,63507 | 7,77347 | -1,100683741 | ENST00000614549 | 64744     | NM_022733    | SMAP2          |
| A_33_P3336627  | 1,62444 | 1,76287 | -1,10070663  | ENST00000375024 | 219870    | NM_001001953 | OR10G9         |
| A_22_P00006381 | 7,59299 | 7,73144 | -1,100721889 | ENST00000514409 | N/A       | XR_425882    | N/A            |
| A_33_P3316928  | 10,818  | 10,9565 | -1,100760038 | ENST00000358912 | 57162     | NM_020651    | PELI1          |
| A_23_P401904   | 13,2397 | 13,3782 | -1,100760038 | ENST00000312189 | 26147     | NM_001009936 | PHF19          |
| A_33_P3264121  | 14,5452 | 14,6838 | -1,100836339 | ENST00000518218 | 6902      | NM_004607    | TBCA           |
| A_23_P370569   | 6,996   | 7,13462 | -1,1008516   | ENST00000398055 | 144577    | NM_152440    | C12orf66       |
| A_23_P202658   | 18,0685 | 18,2072 | -1,100912646 | ENST00000494593 | 2950      | NM_000852    | GSTP1          |
| A_23_P130653   | 7,84922 | 7,98799 | -1,100966064 | ENST00000458671 | 83546     | NM_031429    | RTBDN          |
| A_33_P3278220  | 10,5741 | 10,7129 | -1,100988958 | ENST00000373544 | 10244     | AL832249     | RABEPK         |
| A_24_P98613    | 10,663  | 10,8018 | -1,100988958 | ENST00000616406 | 81619     | NM_030927    | TSPAN14        |
| A_23_P60296    | 12,0582 | 12,197  | -1,100988958 | ENST00000346234 | 26578     | NM_012383    | OSTF1          |
| A_33_P3321632  | 4,57551 | 4,71433 | -1,101004221 | N/A             | N/A       | N/A          | N/A            |
| A_33_P3239195  | 9,85448 | 9,99335 | -1,10104238  | ENST00000415184 | N/A       | N/A          | N/A            |
| A_21_P0012148  | 7,57702 | 7,71595 | -1,101088172 | N/A             | N/A       | N/A          | XLOC_I2_008632 |
| A_33_P3405269  | 1,72654 | 1,86565 | -1,101225559 | ENST00000290374 | 57369     | NM_020660    | GJD2           |
| A_33_P3315719  | 7,72611 | 7,86523 | -1,101233192 | ENST00000405000 | 130271    | NM_172069    | PLEKHH2        |
| A_21_P0012058  | 5,0974  | 5,2366  | -1,101294259 | N/A             | 100874343 | N/A          | HS1BP3-IT1     |
| A_23_P91657    | 10,3325 | 10,4717 | -1,101294259 | ENST00000406548 | 2130      | NM_013986    | EWSR1          |
| A_21_P0003420  | 1,6526  | 1,79181 | -1,101301893 | ENST00000515232 | N/A       | N/A          | N/A            |
| A_33_P3386414  | 1,91885 | 2,05809 | -1,101324794 | ENST00000319675 | 138009    | NM_152418    | DCAF4L2        |
| A_33_P3255404  | 3,65931 | 3,79859 | -1,10135533  | ENST00000064724 | 5010      | NM_005602    | CLDN11         |
| A_22_P00022693 | 10,5215 | 10,6608 | -1,101370598 | ENST00000515682 | 54436     | NM_018986    | SH3TC1         |
| A_22_P00002900 | 7,30367 | 7,44301 | -1,101401135 | N/A             | 92070     | NR_033339    | CTBP1-AS2      |
| A_33_P3441021  | 1,68124 | 1,8206  | -1,101416404 | ENST00000453450 | 387890    | NM_001136534 | TMEM233        |
| A_21_P0004348  | 1,47724 | 1,61661 | -1,101424038 | N/A             | N/A       | N/A          | Inc-SLC9A3-1   |
| A_33_P3354061  | 3,98955 | 4,12894 | -1,101439307 | N/A             | N/A       | N/A          | N/A            |
| A_19_P00320229 | 5,76294 | 5,90237 | -1,101469846 | N/A             | 441172    | NR_033896    | FLJ46906       |
| A_21_P0010205  | 4,7412  | 4,88087 | -1,101653097 | ENST00000411989 | 400866    | N/A          | LINC00114      |
| A_21_P0006865  | 1,64725 | 1,78692 | -1,101653097 | ENST00000431737 | 100506835 | NR_038268    | LINC00840      |
| A_33_P3283515  | 6,69974 | 6,83941 | -1,101653097 | ENST00000397559 | 23037     | XM_006714456 | PDZD2          |
| A_23_P136635   | 10,6479 | 10,7876 | -1,101676005 | ENST00000255194 | 8546      | NM_003664    | AP3B1          |

|                |         |         |              |                 |           |              |                  |
|----------------|---------|---------|--------------|-----------------|-----------|--------------|------------------|
| A_33_P3295283  | 14,9348 | 15,0745 | -1,101676005 | ENST00000535479 | 10162     | NM_005768    | LPCAT3           |
| A_21_P0008247  | 2,44015 | 2,57987 | -1,101691278 | N/A             | N/A       | N/A          | Inc-USP12-5      |
| A_22_P00022141 | 6,70807 | 6,84781 | -1,10170655  | N/A             | N/A       | N/A          | Inc-TLCD2-2      |
| A_21_P0005515  | 1,69301 | 1,83278 | -1,10172946  | N/A             | N/A       | N/A          | Inc-AC092031.1-1 |
| A_23_P372334   | 12,5551 | 12,6949 | -1,10175237  | ENST00000604367 | 151903    | NM_144716    | CCDC12           |
| A_21_P0009515  | 3,95369 | 4,0935  | -1,101760007 | ENST00000558690 | N/A       | N/A          | N/A              |
| A_33_P3396469  | 2,76191 | 2,90174 | -1,101775281 | N/A             | N/A       | N/A          | N/A              |
| A_23_P28090    | 9,29419 | 9,43404 | -1,101790554 | ENST00000440593 | 8677      | NM_003765    | STX10            |
| A_24_P662366   | 7,35016 | 7,49002 | -1,101798192 | N/A             | N/A       | N/A          | N/A              |
| A_23_P206759   | 8,39416 | 8,53404 | -1,101813466 | ENST00000536027 | 9798      | NM_014761    | IST1             |
| A_22_P00008202 | 3,1089  | 3,24878 | -1,101813466 | N/A             | N/A       | DA105415     | Inc-INTS4-2      |
| A_19_P00318904 | 5,5305  | 5,67045 | -1,101866927 | N/A             | N/A       | N/A          | N/A              |
| A_24_P283288   | 8,50665 | 8,64662 | -1,101882203 | ENST00000474429 | 1432      | NM_139013    | MAPK14           |
| A_32_P6015     | 10,2775 | 10,4175 | -1,101905116 | ENST00000252971 | 3110      | NM_005515    | MNX1             |
| A_33_P3316323  | 12,6287 | 12,7687 | -1,101905116 | ENST00000409972 | 5937      | NM_016836    | RBMS1            |
| A_22_P00003555 | 1,64866 | 1,78884 | -1,102042605 | ENST00000507145 | 100874047 | NR_051987    | LINC00499        |
| A_23_P213678   | 12,4537 | 12,5939 | -1,102057883 | ENST00000345721 | 5066      | NM_000919    | PAM              |
| A_33_P3396492  | 7,97263 | 8,11291 | -1,102118996 | ENST00000267383 | 64403     | NM_022478    | CDH24            |
| A_22_P00016692 | 6,03544 | 6,17574 | -1,102134274 | ENST00000564772 | N/A       | AK093872     | N/A              |
| A_21_P0008992  | 4,28943 | 4,42974 | -1,102141914 | N/A             | N/A       | N/A          | Inc-JPH3-3       |
| A_24_P301837   | 4,91972 | 5,06003 | -1,102141914 | ENST00000317393 | 11255     | NM_007232    | HRH3             |
| A_24_P729905   | 9,19935 | 9,33969 | -1,102164833 | ENST00000490752 | 642517    | NM_001190810 | AGAP9            |
| A_33_P3348328  | 2,31972 | 2,46006 | -1,102164833 | N/A             | N/A       | N/A          | N/A              |
| A_22_P00001136 | 5,37724 | 5,51765 | -1,102218311 | ENST00000511537 | 399881    | NR_033868    | HNRNPKP3         |
| A_23_P148150   | 11,8127 | 11,9532 | -1,102287073 | ENST00000343053 | 25920     | NM_015456    | NELFB            |
| A_21_P0003305  | 2,52567 | 2,66623 | -1,102332917 | N/A             | N/A       | N/A          | Inc-DCUN1D1-6    |
| A_23_P253046   | 11,0772 | 11,2178 | -1,102363481 | ENST00000467648 | 7360      | NM_006759    | UGP2             |
| A_24_P67308    | 16,8038 | 16,9444 | -1,102363481 | ENST00000432746 | 100129424 | NR_026660    | RPL19P12         |
| A_33_P6817354  | 9,06349 | 9,2041  | -1,102371122 | N/A             | 100505641 | NR_046251    | FGD5-AS1         |
| A_22_P00011599 | 6,76101 | 6,90167 | -1,102409328 | N/A             | N/A       | DB041598     | Inc-PCGF2-1      |
| A_24_P182764   | 10,4125 | 10,5532 | -1,102439893 | ENST00000475693 | 23192     | NM_178326    | ATG4B            |
| A_33_P3289422  | 10,4505 | 10,5912 | -1,102439893 | ENST00000396408 | 91661     | NM_001040185 | ZNF765           |
| A_23_P215491   | 10,6463 | 10,787  | -1,102439893 | ENST00000416943 | 6369      | NM_002991    | CCL24            |



|                |         |         |              |                 |           |              |                |
|----------------|---------|---------|--------------|-----------------|-----------|--------------|----------------|
| A_22_P00019581 | 1,42476 | 1,56552 | -1,102485743 | ENST00000560924 | N/A       | XR_424506    | N/A            |
| A_33_P3342235  | 15,1414 | 15,2822 | -1,102516311 | ENST00000611094 | 148170    | NM_145057    | CDC42EP5       |
| A_21_P0013894  | 13,1867 | 13,3275 | -1,102516311 | N/A             | N/A       | N/A          | XLOC_I2_015938 |
| A_33_P3384932  | 11,3772 | 11,518  | -1,102516311 | ENST00000376693 | 254552    | NM_001243750 | NUDT8          |
| A_33_P3294790  | 7,15133 | 7,29214 | -1,102523953 | ENST00000431518 | N/A       | AX721280     | N/A            |
| A_33_P3309064  | 7,33001 | 7,47085 | -1,10254688  | ENST00000397553 | 55245     | NM_001184977 | UQCC1          |
| A_33_P3330503  | 7,70446 | 7,84532 | -1,102562165 | ENST00000447989 | 501       | NM_001182    | ALDH7A1        |
| A_22_P00012268 | 1,72361 | 1,86453 | -1,10260802  | ENST00000522129 | N/A       | N/A          | N/A            |
| A_23_P69362    | 11,622  | 11,763  | -1,102669163 | ENST00000442740 | 79714     | NM_024661    | CCDC51         |
| A_23_P339633   | 7,99269 | 8,1337  | -1,102676806 | ENST00000473067 | 253635    | NM_174931    | GPATCH11       |
| A_23_P142013   | 6,16402 | 6,30509 | -1,102722666 | ENST00000358368 | 56949     | NM_020196    | XAB2           |
| A_22_P00003697 | 1,41941 | 1,56055 | -1,102776172 | ENST00000564041 | 283867    | NR_027755    | LINC00922      |
| A_23_P218096   | 9,40988 | 9,55106 | -1,102806748 | ENST00000267229 | 64062     | NM_022118    | RBM26          |
| A_23_P420348   | 1,71323 | 1,85444 | -1,10282968  | ENST00000358970 | 317754    | NM_174981    | POTED          |
| A_33_P3226643  | 6,79232 | 6,93356 | -1,102852613 | ENST00000409422 | 79065     | NM_001077198 | ATG9A          |
| A_21_P0006773  | 1,63016 | 1,77142 | -1,102867902 | ENST00000429070 | N/A       | N/A          | N/A            |
| A_33_P3414883  | 4,34713 | 4,4886  | -1,103028448 | N/A             | 23300     | N/A          | ATMIN          |
| A_21_P0009563  | 1,72057 | 1,86221 | -1,103158431 | N/A             | N/A       | N/A          | Inc-LMAN1-2    |
| A_22_P00017020 | 4,30298 | 4,44463 | -1,103166078 | N/A             | 100128127 | NR_111905    | GPR123-AS1     |
| A_33_P3299254  | 7,66938 | 7,81104 | -1,103173724 | ENST00000248948 | 29802     | NM_013378    | VPREB3         |
| A_21_P0002201  | 4,67741 | 4,81912 | -1,103211958 | N/A             | N/A       | N/A          | Inc-GALM-2     |
| A_23_P15146    | 7,77821 | 7,91993 | -1,103219605 | ENST00000529550 | 9235      | NM_001012631 | IL32           |
| A_21_P0005170  | 1,4675  | 1,60927 | -1,10325784  | N/A             | N/A       | N/A          | Inc-ELOVL5-2   |
| A_21_P0014488  | 2,87006 | 3,01184 | -1,103265488 | N/A             | 101928658 | XR_245255    | LOC101928658   |
| A_33_P3257297  | 3,6343  | 3,77615 | -1,10331902  | ENST00000369704 | 159686    | NM_001008723 | CFAP58         |
| A_22_P00014710 | 3,5538  | 3,69566 | -1,103326667 | N/A             | N/A       | N/A          | Inc-SLC25A47-4 |
| A_22_P00004991 | 4,53489 | 4,67679 | -1,103357258 | N/A             | N/A       | BC013247     | Inc-DCTN5-2    |
| A_33_P3309684  | 15,2572 | 15,3991 | -1,103357258 | ENST00000474540 | N/A       | N/A          | N/A            |
| A_33_P3230254  | 5,65875 | 5,80069 | -1,10338785  | ENST00000251496 | 64151     | NM_022346    | NCAPG          |
| A_22_P00019068 | 1,58813 | 1,73016 | -1,103456686 | N/A             | N/A       | N/A          | Inc-CLEC14A-2  |
| A_24_P176714   | 9,7304  | 9,8725  | -1,103510227 | ENST00000261499 | 27077     | NM_015681    | B9D1           |
| A_32_P114215   | 14,3262 | 14,4683 | -1,103510227 | ENST00000483290 | 170622    | NM_203497    | COMMD6         |
| A_23_P211598   | 9,76868 | 9,91081 | -1,103533174 | ENST00000485648 | 5372      | NM_002676    | PMM1           |

|                |         |         |              |                 |           |              |                    |
|----------------|---------|---------|--------------|-----------------|-----------|--------------|--------------------|
| A_33_P3365988  | 6,44646 | 6,5886  | -1,103540823 | N/A             | 728463    | NR_046268    | TGFB2-AS1          |
| A_23_P66260    | 9,25958 | 9,40178 | -1,103586719 | ENST00000575471 | 10308     | NM_003414    | ZNF267             |
| A_24_P354496   | 5,91683 | 6,05921 | -1,103724418 | ENST00000578387 | 152641    | NR_024008    | WWC2-AS2           |
| A_24_P76707    | 2,46379 | 2,60619 | -1,103739719 | N/A             | N/A       | N/A          | Inc-ADAMTS14-2     |
| A_22_P00021279 | 11,3486 | 11,491  | -1,103739719 | ENST00000439105 | N/A       | N/A          | N/A                |
| A_21_P0000756  | 9,4318  | 9,57421 | -1,10374737  | N/A             | 100507173 | NR_038293    | LINC01012          |
| A_22_P00020847 | 1,75855 | 1,90099 | -1,103770322 | ENST00000412153 | N/A       | N/A          | N/A                |
| A_21_P0004140  | 1,9002  | 2,04265 | -1,103777973 | ENST00000506250 | 102477328 | NR_105007    | LOC102477328       |
| A_21_P0002617  | 1,48189 | 1,62439 | -1,103816227 | N/A             | N/A       | N/A          | Inc-SLC4A10-4      |
| A_22_P00023652 | 3,15955 | 3,30205 | -1,103816227 | N/A             | N/A       | AK091020     | Inc-PLEKHJ1-1      |
| A_21_P0000657  | 7,61633 | 7,75883 | -1,103816227 | N/A             | 100289230 | N/A          | LOC100289230       |
| A_21_P0008155  | 1,77408 | 1,91659 | -1,103823878 | N/A             | N/A       | N/A          | Inc-NUFIP1-1       |
| A_24_P143440   | 12,3033 | 12,4459 | -1,103892741 | ENST00000357156 | 83658     | NM_014183    | DYNLRB1            |
| A_22_P00011301 | 11,6175 | 11,7601 | -1,103892741 | N/A             | 55000     | NR_110492    | TUG1               |
| A_21_P0008582  | 2,85856 | 3,00122 | -1,103938651 | N/A             | N/A       | N/A          | Inc-OR4N4-2        |
| A_23_P48886    | 9,86229 | 10,005  | -1,103976911 | ENST00000260408 | 102       | NM_001110    | ADAM10             |
| A_33_P3329508  | 5,83693 | 5,97967 | -1,103999868 | ENST00000368614 | 80313     | NM_001143757 | LRRC27             |
| A_22_P00014781 | 1,68881 | 1,83157 | -1,104015173 | N/A             | 102724163 | NR_120308    | LOC102724163       |
| A_33_P3376806  | 4,67679 | 4,81959 | -1,104045783 | ENST00000323327 | 256815    | NM_153714    | C10orf67           |
| A_23_P167856   | 7,76539 | 7,90819 | -1,104045783 | ENST00000323267 | 55362     | NM_018426    | TMEM63B            |
| A_22_P00008062 | 3,47756 | 3,62041 | -1,104084047 | N/A             | 101928142 | NR_110203    | AADACL2-AS1        |
| A_23_P324490   | 10,2974 | 10,4403 | -1,104122313 | ENST00000299505 | 9710      | NM_014686    | KIAA0355           |
| A_33_P3646133  | 9,61897 | 9,76196 | -1,104191193 | ENST00000320805 | 84901     | NM_032815    | NFATC2IP           |
| A_21_P0009425  | 1,61189 | 1,75489 | -1,104198847 | ENST00000565170 | 101928167 | NR_110800    | LOC101928167       |
| A_23_P207174   | 4,57974 | 4,72277 | -1,104221809 | ENST00000558284 | 1443      | NM_022644    | CSH2               |
| A_23_P75088    | 1,3946  | 1,53765 | -1,104237116 | ENST00000370215 | 79955     | NM_024895    | PDZD7              |
| A_21_P0005347  | 1,62526 | 1,76832 | -1,10424477  | ENST00000452622 | 441307    | NR_033963    | FLJ44511           |
| A_22_P00014222 | 2,09409 | 2,23716 | -1,104252425 | N/A             | 101929741 | NR_125930    | LOC101929741       |
| A_22_P00000435 | 9,52099 | 9,6641  | -1,104283041 | N/A             | N/A       | N/A          | Inc-AC074212.3.1-1 |
| A_22_P00006834 | 3,18661 | 3,32976 | -1,104313659 | N/A             | N/A       | N/A          | Inc-GABRG3-2       |
| A_23_P126291   | 13,1693 | 13,3125 | -1,104351932 | ENST00000469451 | 6635      | NM_003094    | SNRPE              |
| A_22_P00000603 | 7,35845 | 7,5017  | -1,104390207 | N/A             | N/A       | N/A          | Inc-ACCSL-1        |
| A_23_P316381   | 8,19813 | 8,34144 | -1,104436138 | ENST00000413009 | 8310      | NM_003501    | ACOX3              |

|                |         |         |              |                 |           |              |              |
|----------------|---------|---------|--------------|-----------------|-----------|--------------|--------------|
| A_33_P3281940  | 9,8592  | 10,0026 | -1,104505039 | ENST00000436630 | 6120      | NM_001278283 | RPE          |
| A_33_P3275668  | 15,4121 | 15,5555 | -1,104505039 | ENST00000375964 | 7917      | NM_004639    | BAG6         |
| A_23_P65712    | 11,183  | 11,3264 | -1,104505039 | ENST00000304191 | 83640     | NM_031452    | FAM103A1     |
| A_24_P174367   | 9,93488 | 10,0783 | -1,10452035  | ENST00000618156 | 5504      | NM_006241    | PPP1R2       |
| A_33_P3375576  | 10,0477 | 10,1912 | -1,1045816   | ENST00000611373 | 9053      | NM_003980    | MAP7         |
| A_33_P3219010  | 11,8748 | 12,0183 | -1,1045816   | ENST00000505713 | 27068     | AK299501     | PPA2         |
| A_33_P3296205  | 14,31   | 14,4535 | -1,1045816   | ENST00000458659 | 8848      | NM_183422    | TSC22D1      |
| A_32_P919718   | 9,03283 | 9,17635 | -1,104596913 | ENST00000332900 | 284186    | NM_178520    | TMEM105      |
| A_21_P0003760  | 4,73857 | 4,88216 | -1,104650509 | N/A             | N/A       | N/A          | Inc-SEC24D-1 |
| A_33_P3351894  | 10,3799 | 10,5236 | -1,104734738 | N/A             | 284889    | NR_038911    | MIF-AS1      |
| A_23_P111978   | 4,82777 | 4,97148 | -1,104742395 | ENST00000303015 | 51305     | NM_001282534 | KCNK9        |
| A_23_P25626    | 9,88529 | 10,029  | -1,104742395 | ENST00000613797 | 79866     | NM_024808    | BORA         |
| A_23_P132915   | 8,07622 | 8,22    | -1,104795999 | ENST00000508737 | 92689     | NM_138389    | FAM114A1     |
| A_32_P193822   | 8,97206 | 9,11586 | -1,104811315 | ENST00000367211 | 9877      | NM_014827    | ZC3H11A      |
| A_23_P210348   | 13,061  | 13,2049 | -1,104887897 | ENST00000482463 | 9167      | NM_004718    | COX7A2L      |
| A_33_P3293593  | 5,35768 | 5,50161 | -1,104910873 | ENST00000311308 | 148014    | NM_152479    | TTC9B        |
| A_21_P0008055  | 2,97286 | 3,11682 | -1,104933849 | N/A             | N/A       | N/A          | Inc-NAA16-1  |
| A_23_P251717   | 11,1637 | 11,3077 | -1,104964485 | ENST00000376368 | 11152     | NM_007075    | WDR45        |
| A_22_P00007879 | 4,36309 | 4,50709 | -1,104964485 | N/A             | N/A       | BC060374     | Inc-HSCB-1   |
| A_23_P312300   | 1,60677 | 1,75083 | -1,10501044  | ENST00000244930 | 4246      | NM_002407    | SCGB2A1      |
| A_24_P504621   | 4,11887 | 4,26294 | -1,105018099 | N/A             | N/A       | N/A          | N/A          |
| A_33_P3354935  | 6,48376 | 6,62784 | -1,105025759 | ENST00000369802 | 1435      | NM_172212    | CSF1         |
| A_23_P20970    | 10,9525 | 11,0966 | -1,105041078 | ENST00000505993 | 9140      | NM_004707    | ATG12        |
| A_23_P78888    | 16,2181 | 16,3622 | -1,105041078 | ENST00000593503 | 2091      | NM_001436    | FBL          |
| A_32_P100641   | 5,05781 | 5,20193 | -1,105056397 | ENST00000594200 | 100128139 | NR_110663    | LINC01233    |
| A_24_P169402   | 1,61441 | 1,75855 | -1,105071716 | ENST00000351747 | 201625    | NM_001291661 | DNAH12       |
| A_22_P00015797 | 5,76798 | 5,91217 | -1,105110016 | N/A             | N/A       | N/A          | Inc-TAS1R2-1 |
| A_33_P3360823  | 9,40579 | 9,55001 | -1,105132996 | ENST00000481909 | 80007     | NM_024942    | C10orf88     |
| A_21_P0008660  | 1,59974 | 1,74398 | -1,105148317 | N/A             | N/A       | N/A          | Inc-TMED3-2  |
| A_22_P00017270 | 3,71974 | 3,86401 | -1,105171298 | ENST00000567877 | N/A       | N/A          | N/A          |
| A_24_P247732   | 3,14501 | 3,28928 | -1,105171298 | ENST00000442731 | 8884      | NM_021095    | SLC5A6       |
| A_22_P00011184 | 3,89615 | 4,04042 | -1,105171298 | ENST00000456795 | N/A       | N/A          | N/A          |
| A_21_P0005370  | 3,50538 | 3,64973 | -1,105232583 | ENST00000461424 | 2692      | N/A          | GHRHR        |

|                |         |         |              |                 |           |              |                |
|----------------|---------|---------|--------------|-----------------|-----------|--------------|----------------|
| A_33_P3364112  | 8,50637 | 8,65086 | -1,105339841 | ENST00000550389 | 10818     | NM_001278351 | FRS2           |
| A_24_P134653   | 10,9637 | 11,1082 | -1,105347503 | ENST00000464463 | 8481      | NM_003611    | OFD1           |
| A_33_P3215729  | 4,0702  | 4,21472 | -1,105362826 | N/A             | N/A       | N/A          | N/A            |
| A_24_P184732   | 4,88644 | 5,03098 | -1,10537815  | ENST00000554301 | 89932     | NM_173462    | PAPLN          |
| A_33_P3667419  | 1,6784  | 1,82298 | -1,105408798 | ENST00000504339 | 340107    | NR_037896    | LOC340107      |
| A_22_P00016053 | 1,63537 | 1,77997 | -1,105424122 | ENST00000581442 | 100505592 | NR_110428    | LINC01540      |
| A_33_P3255814  | 8,71609 | 8,86072 | -1,105447109 | ENST00000378386 | 57380     | NM_001286264 | MRS2           |
| A_32_P122240   | 6,58105 | 6,72573 | -1,105485422 | ENST00000449188 | 647219    | NM_001270601 | ASCL5          |
| A_23_P18282    | 1,73401 | 1,87869 | -1,105485422 | ENST00000346219 | 9940      | NM_007335    | DLEC1          |
| A_24_P391991   | 6,1249  | 6,26958 | -1,105485422 | ENST00000409072 | 340286    | NR_028347    | FAM183B        |
| A_23_P67748    | 7,53619 | 7,68088 | -1,105493084 | ENST00000328024 | 9230      | NM_004218    | RAB11B         |
| A_23_P54291    | 10,222  | 10,3667 | -1,105500747 | ENST00000561166 | 53905     | NM_017434    | DUOX1          |
| A_22_P00007177 | 2,12376 | 2,26852 | -1,105546724 | N/A             | N/A       | BX107041     | Inc-GNRHR2-1   |
| A_23_P18325    | 12,2835 | 12,4283 | -1,105577377 | ENST00000470131 | 11235     | NM_007217    | PDCD10         |
| A_33_P3366146  | 14,9057 | 15,0505 | -1,105577377 | ENST00000556647 | 6430      | NM_001039465 | SRSF5          |
| A_23_P307382   | 3,18369 | 3,32856 | -1,105631021 | ENST00000217420 | 140679    | NM_080552    | SLC32A1        |
| A_24_P385280   | 9,95633 | 10,1012 | -1,105631021 | ENST00000354775 | 223       | NM_000696    | ALDH9A1        |
| A_19_P00809372 | 3,34971 | 3,49468 | -1,105707661 | N/A             | N/A       | N/A          | XLOC_I2_008203 |
| A_23_P119254   | 10,5236 | 10,6686 | -1,105730653 | ENST00000263382 | 55723     | NM_018154    | ASF1B          |
| A_23_P25566    | 3,59645 | 3,74146 | -1,105738318 | ENST00000376414 | 1880      | NM_004951    | GPR183         |
| A_21_P0014944  | 5,63303 | 5,7781  | -1,105784305 | N/A             | 102724156 | XR_426407    | LOC102724156   |
| A_33_P3235611  | 9,54825 | 9,69334 | -1,105799635 | N/A             | 113235    | NM_080669    | SLC46A1        |
| A_23_P337753   | 5,74795 | 5,89313 | -1,10586862  | ENST00000483728 | 93349     | NM_138402    | SP140L         |
| A_24_P255005   | 4,80558 | 4,95082 | -1,105914613 | ENST00000586022 | N/A       | N/A          | N/A            |
| A_22_P00003355 | 1,70735 | 1,85265 | -1,105960607 | N/A             | 81832     | NM_138966    | NETO1          |
| A_33_P3211633  | 7,16199 | 7,30732 | -1,105983605 | ENST00000369441 | 10885     | NM_006784    | WDR3           |
| A_33_P3322046  | 4,59371 | 4,73904 | -1,105983605 | N/A             | N/A       | N/A          | N/A            |
| A_23_P164341   | 9,85002 | 9,99541 | -1,106029603 | ENST00000316509 | 6844      | NM_014232    | VAMP2          |
| A_32_P151875   | 10,7328 | 10,8782 | -1,106037269 | ENST00000426851 | 57541     | NM_020781    | ZNF398         |
| A_21_P0012988  | 4,60549 | 4,75091 | -1,106052602 | ENST00000511794 | N/A       | N/A          | N/A            |
| A_24_P28619    | 8,96547 | 9,1109  | -1,106060269 | ENST00000366962 | 90806     | NM_144567    | ANGEL2         |
| A_24_P139604   | 1,65685 | 1,8023  | -1,106075602 | ENST00000392254 | 149628    | NM_198930    | PYHIN1         |
| A_33_P3317327  | 1,66788 | 1,81335 | -1,106090936 | ENST00000355722 | 79054     | AY532376     | TRPM8          |

|                |         |         |              |                 |           |              |                |
|----------------|---------|---------|--------------|-----------------|-----------|--------------|----------------|
| A_22_P00021519 | 1,60237 | 1,74784 | -1,106090936 | ENST00000478310 | 26266     | NM_012450    | SLC13A4        |
| A_33_P3232655  | 1,67624 | 1,82172 | -1,106098603 | ENST00000489974 | 2692      | NM_000823    | GHRHR          |
| A_24_P251688   | 11,876  | 12,0215 | -1,106113937 | ENST00000468892 | 55324     | NM_018358    | ABCF3          |
| A_23_P211748   | 10,9431 | 11,0886 | -1,106113937 | ENST00000283875 | 2960      | NM_005513    | GTF2E1         |
| A_33_P3281686  | 5,96927 | 6,11477 | -1,106113937 | ENST00000461648 | 7249      | NM_001077183 | TSC2           |
| A_32_P51848    | 2,62563 | 2,77124 | -1,106198277 | N/A             | 54491     | NM_019018    | FAM105A        |
| A_33_P3272849  | 3,64973 | 3,79541 | -1,106251951 | ENST00000479767 | 138307    | XM_006716953 | LCN8           |
| A_22_P00010361 | 1,4305  | 1,5762  | -1,106267287 | N/A             | N/A       | N/A          | Inc-MYEF2-2    |
| A_23_P371168   | 1,73804 | 1,88377 | -1,106290292 | ENST00000508504 | 166655    | NM_152620    | TRIM60         |
| A_24_P383076   | 7,24014 | 7,38589 | -1,106305628 | ENST00000502617 | 132949    | NM_181806    | AASDH          |
| A_24_P381494   | 9,45867 | 9,60449 | -1,106359308 | ENST00000550782 | 4891      | NM_000617    | SLC11A2        |
| A_33_P3304427  | 2,99166 | 3,13751 | -1,106382314 | ENST00000513468 | 345643    | NM_001190787 | MCIDAS         |
| A_21_P0014513  | 4,34642 | 4,4923  | -1,106405321 | N/A             | N/A       | BG205415     | N/A            |
| A_33_P3229196  | 16,0901 | 16,236  | -1,106420659 | ENST00000397420 | 977       | NM_004357    | CD151          |
| A_23_P317056   | 6,74318 | 6,88912 | -1,106451336 | ENST00000361681 | 4541      | N/A          | ND6            |
| A_21_P0010217  | 2,22429 | 2,37026 | -1,106474344 | N/A             | 100861510 | N/A          | LRRC3-AS1      |
| A_21_P0000740  | 7,50206 | 7,64804 | -1,106482014 | ENST00000491442 | 59269     | NR_038260    | HIVEP3         |
| A_22_P00012736 | 9,44933 | 9,59536 | -1,106520362 | N/A             | 100289092 | NR_046287    | ATP2A1-AS1     |
| A_22_P00010109 | 1,4236  | 1,56965 | -1,106535702 | ENST00000562772 | 338694    | NR_104161    | LOC338694      |
| A_23_P2573     | 8,25464 | 8,40075 | -1,106581723 | ENST00000266534 | 84216     | NM_032256    | TMEM117        |
| A_24_P120970   | 7,59334 | 7,7395  | -1,106620074 | N/A             | 85026     | NR_122035    | ARRDC1-AS1     |
| A_23_P100141   | 8,73817 | 8,88437 | -1,106650757 | ENST00000397464 | 64718     | NM_001193388 | UNKL           |
| A_24_P22050    | 7,60587 | 7,75208 | -1,106658428 | ENST00000267328 | 55647     | NM_017817    | RAB20          |
| A_23_P36203    | 1,63458 | 1,7808  | -1,106666098 | ENST00000530810 | 255725    | NM_001004052 | OR52B2         |
| A_21_P0012929  | 5,26615 | 5,4124  | -1,106689111 | N/A             | N/A       | N/A          | XLOC_I2_012319 |
| A_33_P3223082  | 8,69883 | 8,8451  | -1,106704453 | N/A             | 9801      | NM_014763    | MRPL19         |
| A_23_P385105   | 4,357   | 4,50328 | -1,106712124 | ENST00000473443 | 84812     | NM_032726    | PLCD4          |
| A_33_P3239148  | 5,75145 | 5,89776 | -1,106735138 | ENST00000366197 | 147694    | NM_001172773 | ZNF548         |
| A_22_P00003232 | 9,24763 | 9,39394 | -1,106735138 | ENST00000535683 | 283143    | NR_034148    | LINC00900      |
| A_22_P00003546 | 10,2211 | 10,3675 | -1,106804182 | ENST00000565225 | 101928527 | XR_243152    | PIGBOS1        |
| A_22_P00010261 | 1,61375 | 1,76016 | -1,106811854 | N/A             | N/A       | CU677428     | Inc-MTHFD2L-1  |
| A_22_P00019477 | 2,39392 | 2,5404  | -1,106865558 | ENST00000560103 | N/A       | N/A          | N/A            |
| A_33_P3236881  | 15,611  | 15,7575 | -1,106880902 | ENST00000375136 | 100532736 | NM_001204088 | MINOS1-NBL1    |

|                |         |         |              |                 |           |              |                      |
|----------------|---------|---------|--------------|-----------------|-----------|--------------|----------------------|
| A_23_P60324    | 12,5873 | 12,7338 | -1,106880902 | ENST00000489050 | 10422     | NM_016172    | UBAC1                |
| A_21_P0012213  | 3,1914  | 3,33792 | -1,106896247 | N/A             | N/A       | N/A          | Inc-BACH1-1          |
| A_23_P385081   | 9,27458 | 9,42113 | -1,106919265 | ENST00000567638 | 10066     | NM_005697    | SCAMP2               |
| A_21_P0005317  | 1,99236 | 2,13894 | -1,106942283 | ENST00000456952 | N/A       | XR_250237    | N/A                  |
| A_23_P168288   | 2,10739 | 2,25405 | -1,107003666 | ENST00000296980 | 116379    | NM_052962    | IL22RA2              |
| A_23_P71981    | 9,97653 | 10,1232 | -1,107011339 | ENST00000471992 | 26284     | NM_005702    | ERAL1                |
| A_23_P79331    | 12,9675 | 13,1142 | -1,107034359 | ENST00000444881 | 64114     | NM_022152    | TMBIM1               |
| A_23_P141484   | 9,96643 | 10,1132 | -1,107088074 | ENST00000581407 | 55731     | NM_018182    | FAM222B              |
| A_33_P3232047  | 13,5342 | 13,681  | -1,107111096 | ENST00000379542 | 81853     | NM_030969    | TMEM14B              |
| A_33_P3420976  | 2,08498 | 2,23182 | -1,107141792 | ENST00000509189 | 100132916 | NM_001164442 | FAM159B              |
| A_21_P0008797  | 1,66222 | 1,80909 | -1,107164814 | N/A             | N/A       | N/A          | Inc-RP11-82I10.1.1-4 |
| A_24_P64167    | 9,74906 | 9,89593 | -1,107164814 | ENST00000540753 | 5742      | NM_000962    | PTGS1                |
| A_33_P3816042  | 2,94624 | 3,09312 | -1,107172489 | ENST00000623630 | 440888    | NR_027714    | ACTR3BP2             |
| A_24_P23245    | 12,9975 | 13,1444 | -1,107187837 | ENST00000605927 | 4700      | NM_002490    | NDUFA6               |
| A_33_P3771067  | 3,74217 | 3,88912 | -1,10722621  | ENST00000504610 | 283140    | NR_126004    | LOC283140            |
| A_23_P120227   | 10,6198 | 10,7668 | -1,107264584 | ENST00000395323 | 81606     | NM_030915    | LBH                  |
| A_23_P112016   | 1,62892 | 1,77592 | -1,107264584 | ENST00000316609 | 10395     | NM_024767    | DLC1                 |
| A_33_P3341399  | 1,6441  | 1,79115 | -1,10730296  | ENST00000581617 | 374786    | NM_198529    | EFCAB5               |
| A_23_P121614   | 1,51752 | 1,66464 | -1,107356688 | ENST00000413702 | 4589      | NM_152291    | MUC7                 |
| A_19_P00319099 | 5,59025 | 5,73737 | -1,107356688 | N/A             | N/A       | N/A          | Inc-RAD23B-2         |
| A_33_P3237744  | 3,62621 | 3,77333 | -1,107356688 | ENST00000612221 | 100130827 | N/A          | SBK3                 |
| A_32_P19716    | 8,02019 | 8,16733 | -1,107372039 | ENST00000421812 | 90874     | NM_001080470 | ZNF697               |
| A_33_P3375794  | 2,13615 | 2,2833  | -1,107379715 | N/A             | N/A       | N/A          | N/A                  |
| A_22_P00000545 | 7,57823 | 7,72539 | -1,107387391 | ENST00000508795 | 100506639 | NR_102752    | LOC100506639         |
| A_32_P197825   | 3,76486 | 3,91206 | -1,107418095 | ENST00000465668 | 5343      | NM_001032392 | PLGLB1               |
| A_33_P3421923  | 1,62278 | 1,77    | -1,107433447 | ENST00000368125 | 57863     | NM_021189    | CADM3                |
| A_33_P3294951  | 8,47206 | 8,61931 | -1,107456475 | ENST00000539585 | 259293    | NM_001097643 | TAS2R30              |
| A_32_P194821   | 15,4753 | 15,6226 | -1,107494858 | ENST00000480465 | 6144      | NM_000982    | RPL21                |
| A_22_P00018523 | 2,36185 | 2,5092  | -1,107533241 | N/A             | N/A       | AIO40785     | Inc-TSPYL4-1         |
| A_22_P00009248 | 1,69879 | 1,84614 | -1,107533241 | ENST00000536131 | N/A       | N/A          | N/A                  |
| A_24_P276531   | 7,60689 | 7,75424 | -1,107533241 | ENST00000296215 | 79753     | NM_024700    | SNIP1                |
| A_33_P3419458  | 6,72573 | 6,87308 | -1,107533241 | N/A             | 677882    | NR_003022    | SNORA59B             |
| A_33_P3226177  | 2,04221 | 2,1896  | -1,107563949 | ENST00000620969 | 26999     | NM_014376    | CYFIP2               |

|                |         |         |              |                 |           |              |              |
|----------------|---------|---------|--------------|-----------------|-----------|--------------|--------------|
| A_22_P00003857 | 1,62254 | 1,76996 | -1,10758698  | N/A             | N/A       | N/A          | Inc-CEL-1    |
| A_24_P398432   | 10,9983 | 11,1458 | -1,1076484   | ENST00000541623 | 116985    | NM_001040118 | ARAP1        |
| A_33_P3386686  | 6,73644 | 6,88394 | -1,1076484   | N/A             | 100132874 | XM_005273698 | LOC100132874 |
| A_21_P0004724  | 3,32818 | 3,47576 | -1,107709822 | N/A             | N/A       | N/A          | Inc-F13A1-4  |
| A_24_P299911   | 7,38814 | 7,53574 | -1,107725179 | ENST00000358649 | 23178     | NM_015148    | PASK         |
| A_33_P3234202  | 1,61468 | 1,7623  | -1,107740535 | ENST00000394549 | 1776      | NM_004944    | DNASE1L3     |
| A_32_P159400   | 9,18148 | 9,32925 | -1,107855715 | ENST00000517465 | 51366     | NM_015902    | UBR5         |
| A_33_P3347457  | 2,79068 | 2,93846 | -1,107863394 | N/A             | N/A       | N/A          | N/A          |
| A_24_P295877   | 7,4841  | 7,63197 | -1,107932509 | ENST00000438539 | 9731      | NM_014704    | CEP104       |
| A_32_P62211    | 6,24461 | 6,39248 | -1,107932509 | N/A             | 101928433 | XR_241982    | LOC101928433 |
| A_24_P734953   | 8,90465 | 9,05255 | -1,107955548 | ENST00000531285 | 388610    | NM_001013642 | TRNP1        |
| A_21_P0006658  | 1,72173 | 1,86971 | -1,108016987 | N/A             | N/A       | N/A          | Inc-ARL5B-1  |
| A_21_P0009732  | 1,59817 | 1,74615 | -1,108016987 | N/A             | N/A       | N/A          | Inc-ZNF583-1 |
| A_33_P3335902  | 8,5764  | 8,72438 | -1,108016987 | ENST00000372828 | 54470     | NM_001184768 | ARMCX6       |
| A_21_P0001152  | 12,9349 | 13,083  | -1,108109153 | N/A             | N/A       | N/A          | Inc-TMED5-1  |
| A_33_P3279019  | 11,3066 | 11,4547 | -1,108109153 | ENST00000269489 | 5275      | NM_012397    | SERPINB13    |
| A_22_P00003329 | 3,01262 | 3,16079 | -1,108162921 | N/A             | N/A       | BQ009088     | Inc-CASP9-2  |
| A_24_P277955   | 12,5632 | 12,7114 | -1,108185964 | ENST00000480497 | 51024     | NM_016068    | FIS1         |
| A_21_P0013244  | 5,6533  | 5,80154 | -1,10821669  | ENST00000456590 | 113878    | NM_001102594 | DTX2         |
| A_23_P349882   | 8,33532 | 8,4836  | -1,108247417 | ENST00000259467 | 5082      | NM_005388    | PDCL         |
| A_33_P3260669  | 11,3581 | 11,5064 | -1,108262781 | ENST00000419617 | 6788      | NM_001256312 | STK3         |
| A_23_P42368    | 10,2459 | 10,3942 | -1,108262781 | ENST00000367630 | 51534     | NM_016485    | VTA1         |
| A_22_P00015282 | 8,26555 | 8,41386 | -1,108270463 | ENST00000599069 | 55672     | NM_017940    | NBPF1        |
| A_22_P00002055 | 3,59709 | 3,74545 | -1,108308873 | N/A             | N/A       | N/A          | Inc-BIVM-1   |
| A_21_P0010288  | 2,07424 | 2,2226  | -1,108308873 | N/A             | N/A       | N/A          | Inc-SIK1-5   |
| A_33_P3313417  | 1,36357 | 1,51203 | -1,108385698 | ENST00000221905 | 115703    | AY044864     | ARHGAP33     |
| A_22_P00022135 | 10,5169 | 10,6654 | -1,108416429 | ENST00000304189 | 83541     | NM_001289145 | FAM110A      |
| A_23_P386764   | 11,0194 | 11,1679 | -1,108416429 | ENST00000372546 | 57171     | NM_020438    | DOLPP1       |
| A_21_P0003039  | 1,43496 | 1,58347 | -1,108424112 | N/A             | N/A       | N/A          | Inc-ZIC1-3   |
| A_21_P0012889  | 1,78324 | 1,9318  | -1,108462528 | ENST00000511721 | N/A       | N/A          | N/A          |
| A_23_P23564    | 1,43805 | 1,58663 | -1,108477895 | ENST00000489625 | 8394      | NM_003557    | PIP5K1A      |
| A_24_P944131   | 1,91594 | 2,06454 | -1,108493261 | ENST00000243673 | 10888     | NM_016540    | GPR83        |
| A_23_P12053    | 10,2152 | 10,3638 | -1,108493261 | ENST00000375759 | 23013     | NM_015001    | SPEN         |

|                |         |         |              |                 |           |              |               |
|----------------|---------|---------|--------------|-----------------|-----------|--------------|---------------|
| A_33_P3282374  | 1,74365 | 1,89229 | -1,108523996 | ENST00000535064 | 26230     | N/A          | TIAM2         |
| A_33_P3352958  | 5,99    | 6,13866 | -1,108539363 | ENST00000323854 | 284131    | NM_001164638 | ENDOV         |
| A_21_P0005941  | 3,95751 | 4,10623 | -1,108585467 | N/A             | 101926947 | XR_426334    | NCRNA00249    |
| A_33_P3360326  | 7,2125  | 7,36123 | -1,108593151 | N/A             | N/A       | BQ932264     | N/A           |
| A_23_P57306    | 10,4497 | 10,5985 | -1,108646942 | ENST00000314103 | 8208      | NM_005441    | CHAF1B        |
| A_21_P0000502  | 5,98531 | 6,13416 | -1,108685365 | ENST00000602813 | 26824     | NR_004407    | RNU11         |
| A_22_P00024587 | 1,51546 | 1,66435 | -1,108716105 | N/A             | N/A       | BX102312     | Inc-GANC-1    |
| A_21_P0014037  | 2,9673  | 3,11619 | -1,108716105 | N/A             | N/A       | N/A          | N/A           |
| A_23_P200535   | 11,3221 | 11,471  | -1,10872379  | ENST00000373162 | 27095     | NM_014408    | TRAPPC3       |
| A_22_P00023291 | 2,44492 | 2,59402 | -1,108877502 | N/A             | N/A       | AL137542     | Inc-ASPHD1-1  |
| A_22_P00003107 | 8,28221 | 8,43131 | -1,108877502 | ENST00000422343 | N/A       | N/A          | N/A           |
| A_33_P3369766  | 10,9821 | 11,1313 | -1,108954367 | ENST00000258648 | 29079     | NM_014166    | MED4          |
| A_33_P3332438  | 11,0937 | 11,2429 | -1,108954367 | ENST00000433539 | 116254    | NM_138785    | GINM1         |
| A_21_P0000109  | 9,98049 | 10,1297 | -1,108962053 | ENST00000544932 | 100463487 | NM_001190706 | MTRNR2L9      |
| A_33_P3347417  | 9,64175 | 9,79102 | -1,109008175 | ENST00000375759 | 23013     | NM_015001    | SPEN          |
| A_23_P35055    | 4,53018 | 4,67947 | -1,109023549 | ENST00000367615 | 7827      | NM_014625    | NPHS2         |
| A_23_P100355   | 12,5426 | 12,6919 | -1,109031236 | ENST00000561610 | 5531      | XM_006721061 | PPP4C         |
| A_33_P3379962  | 16,4282 | 16,5775 | -1,109031236 | ENST00000396634 | 3105      | NM_002116    | HLA-A         |
| A_23_P363174   | 7,45546 | 7,60478 | -1,109046611 | N/A             | 8332      | NM_003511    | HIST1H2AL     |
| A_33_P3378737  | 4,59548 | 4,7448  | -1,109046611 | N/A             | N/A       | N/A          | N/A           |
| A_22_P00015046 | 5,17558 | 5,32494 | -1,10907736  | ENST00000413826 | 4881      | N/A          | NPR1          |
| A_22_P00004662 | 11,2487 | 11,3981 | -1,109108111 | ENST00000552098 | N/A       | N/A          | N/A           |
| A_21_P0009918  | 1,67555 | 1,82497 | -1,109123487 | ENST00000424850 | N/A       | N/A          | N/A           |
| A_22_P00011023 | 1,90478 | 2,05421 | -1,109131175 | ENST00000449314 | N/A       | BC043526     | N/A           |
| A_23_P204079   | 9,37414 | 9,52367 | -1,109208056 | ENST00000267017 | 8620      | NM_003717    | NPFF          |
| A_22_P00011977 | 3,91494 | 4,06448 | -1,109215745 | N/A             | N/A       | N/A          | Inc-PLA2G4A-7 |
| A_22_P00015570 | 2,09082 | 2,24036 | -1,109215745 | N/A             | N/A       | N/A          | Inc-STRN3-2   |
| A_22_P00017939 | 1,55577 | 1,70532 | -1,109223433 | N/A             | N/A       | N/A          | Inc-ZFYVE26-1 |
| A_22_P00003569 | 7,48512 | 7,63469 | -1,109238811 | ENST00000509788 | 100505806 | NR_045196    | SNHG18        |
| A_24_P910297   | 9,74204 | 9,89162 | -1,109246499 | ENST00000610329 | 2801      | NM_004486    | GOLGA2        |
| A_22_P00025749 | 2,58512 | 2,7347  | -1,109246499 | N/A             | N/A       | N/A          | Inc-RAD23B-10 |
| A_21_P0007499  | 5,10677 | 5,25636 | -1,109254188 | ENST00000508145 | N/A       | N/A          | N/A           |
| A_21_P0012646  | 12,8971 | 13,0467 | -1,109261877 | ENST00000508231 | 9588      | NM_004905    | PRDX6         |



|                |         |         |              |                 |           |              |                  |
|----------------|---------|---------|--------------|-----------------|-----------|--------------|------------------|
| A_22_P00023634 | 1,36473 | 1,51433 | -1,109261877 | ENST00000549710 | N/A       | N/A          | N/A              |
| A_23_P137865   | 11,1703 | 11,3199 | -1,109261877 | ENST00000424959 | 4580      | NM_198883    | MTX1             |
| A_21_P0008043  | 1,60772 | 1,75738 | -1,109308011 | N/A             | N/A       | N/A          | Inc-USPL1-1      |
| A_22_P00009086 | 7,91351 | 8,06318 | -1,1093157   | N/A             | 100507006 | NR_120420    | LOC100507006     |
| A_23_P212552   | 10,3594 | 10,5091 | -1,109338768 | ENST00000474363 | 79718     | NM_024665    | TBL1XR1          |
| A_33_P3620832  | 2,58635 | 2,73605 | -1,109338768 | ENST00000374374 | 158399    | NM_001007169 | ZNF483           |
| A_33_P3263379  | 9,52318 | 9,67292 | -1,109369525 | N/A             | 692086    | NR_003045    | SNORD17          |
| A_21_P0010106  | 2,1232  | 2,27294 | -1,109369525 | N/A             | N/A       | N/A          | Inc-GPCPD1-1     |
| A_33_P3219591  | 8,37226 | 8,52201 | -1,109377215 | ENST00000319921 | 57674     | NM_020954    | RNF213           |
| A_33_P3606465  | 5,48965 | 5,6394  | -1,109377215 | ENST00000579647 | 645158    | NR_033754    | CBX3P2           |
| A_22_P00001849 | 3,63622 | 3,78598 | -1,109384905 | N/A             | 100652759 | NR_045697    | PRICKLE2-AS1     |
| A_22_P00022336 | 5,14291 | 5,29278 | -1,109469494 | N/A             | N/A       | N/A          | Inc-ADAMTS18-6   |
| A_23_P9362     | 15,2598 | 15,4097 | -1,109492565 | ENST00000259457 | 5695      | NM_002799    | PSMB7            |
| A_33_P3224723  | 6,11793 | 6,26784 | -1,109500256 | ENST00000580842 | 373863    | NM_194249    | DND1             |
| A_21_P0004720  | 2,54062 | 2,69061 | -1,109561781 | N/A             | N/A       | N/A          | Inc-C6orf146-1   |
| A_21_P0000038  | 3,41727 | 3,56732 | -1,109607927 | ENST00000445927 | 285051    | NM_001163561 | C2orf61          |
| A_21_P0007495  | 1,65186 | 1,80203 | -1,109700226 | N/A             | N/A       | N/A          | Inc-BEST3-1      |
| A_33_P3343715  | 4,32702 | 4,47721 | -1,10971561  | N/A             | 2016      | BC037242     | EMX1             |
| A_23_P10442    | 10,2489 | 10,3991 | -1,109723302 | ENST00000399443 | 114876    | NM_080597    | OSBPL1A          |
| A_24_P153576   | 9,34427 | 9,49455 | -1,10978484  | ENST00000367503 | 257218    | NM_173082    | SHPRH            |
| A_33_P3385062  | 6,30873 | 6,45901 | -1,10978484  | ENST00000243706 | 79441     | CR749640     | HAUS3            |
| A_22_P00000969 | 1,5934  | 1,74369 | -1,109792532 | N/A             | N/A       | N/A          | Inc-AL078585.1-4 |
| A_33_P3325547  | 3,91538 | 4,06568 | -1,109800225 | ENST00000535836 | 282966    | NM_182554    | C10orf53         |
| A_23_P166899   | 12,3355 | 12,4858 | -1,109800225 | ENST00000495390 | 51726     | NM_016306    | DNAJB11          |
| A_23_P374767   | 9,13056 | 9,28089 | -1,109823302 | ENST00000440652 | 51619     | NM_015983    | UBE2D4           |
| A_23_P32320    | 8,46491 | 8,61525 | -1,109830995 | ENST00000583503 | 79058     | NM_024083    | ASPSR1           |
| A_24_P67395    | 8,79074 | 8,94108 | -1,109830995 | ENST00000414328 | 3856      | NM_002273    | KRT8             |
| A_21_P0002628  | 1,94883 | 2,0992  | -1,109854074 | ENST00000447835 | 102724849 | NR_110607    | LOC102724849     |
| A_33_P3253175  | 3,15478 | 3,30515 | -1,109854074 | ENST00000381329 | 22884     | BC018044     | WDR37            |
| A_21_P0013977  | 10,2313 | 10,3817 | -1,109877153 | ENST00000493650 | 55795     | BC008975     | PCID2            |
| A_32_P96807    | 10,4328 | 10,5833 | -1,109954086 | ENST00000367696 | 149041    | NM_001300850 | RC3H1            |
| A_32_P116058   | 11,3516 | 11,5021 | -1,109954086 | N/A             | 266655    | NR_015427    | LINC00094        |
| A_33_P3392077  | 11,1603 | 11,3108 | -1,109954086 | ENST00000238721 | 9540      | NM_004881    | TP53I3           |

|                |         |         |              |                 |           |              |                |
|----------------|---------|---------|--------------|-----------------|-----------|--------------|----------------|
| A_21_P0013014  | 1,76146 | 1,91204 | -1,110015637 | N/A             | N/A       | N/A          | XLOC_I2_012397 |
| A_33_P3312754  | 8,0818  | 8,23239 | -1,110023331 | ENST00000567993 | 102467146 | NR_104663    | LOC102467146   |
| A_22_P00016779 | 5,692   | 5,84263 | -1,110054108 | N/A             | N/A       | N/A          | Inc-TRIM41-3   |
| A_32_P156963   | 14,7841 | 14,9348 | -1,110107969 | ENST00000594933 | 71        | NM_001614    | ACTG1          |
| A_22_P00021635 | 1,61003 | 1,76081 | -1,110169528 | N/A             | N/A       | N/A          | Inc-HAS2-1     |
| A_23_P211167   | 5,06124 | 5,21203 | -1,110177223 | ENST00000339818 | 755       | NM_004928    | C21orf2        |
| A_33_P3271001  | 1,57021 | 1,72111 | -1,110261873 | ENST00000374762 | 55335     | NM_018376    | NIPSNAP3B      |
| A_23_P130089   | 9,72995 | 9,88086 | -1,110269569 | ENST00000322326 | 90410     | NM_174887    | IFT20          |
| A_24_P693433   | 6,4171  | 6,56805 | -1,110300353 | N/A             | N/A       | AK022364     | Inc-VSIG10-1   |
| A_33_P3219121  | 3,84294 | 3,99404 | -1,110415799 | ENST00000393501 | 8997      | AK131379     | KALRN          |
| A_22_P00014822 | 1,65149 | 1,80268 | -1,110485073 | N/A             | N/A       | CD358374     | Inc-SLC3A2-1   |
| A_33_P3416937  | 4,66266 | 4,81392 | -1,110538955 | ENST00000374624 | 54942     | BG213342     | FAM206A        |
| A_23_P12173    | 11,8367 | 11,988  | -1,110569746 | ENST00000487235 | 200186    | NM_181715    | CRTC2          |
| A_24_P220618   | 10,9456 | 11,097  | -1,110646728 | ENST00000253048 | 23211     | NM_015168    | ZC3H4          |
| A_33_P3383283  | 12,4336 | 12,585  | -1,110646728 | ENST00000401018 | 843       | NM_032977    | CASP10         |
| A_23_P29830    | 5,23827 | 5,38975 | -1,110708317 | ENST00000405772 | 868       | NM_170662    | CBLB           |
| A_22_P00021530 | 1,52848 | 1,67996 | -1,110708317 | ENST00000413290 | N/A       | N/A          | N/A            |
| A_24_P850428   | 15,0485 | 15,2    | -1,110723714 | ENST00000401872 | N/A       | BC070327     | N/A            |
| A_22_P00024189 | 3,10425 | 3,25583 | -1,110785308 | N/A             | N/A       | N/A          | Inc-RNLS-1     |
| A_33_P3274164  | 6,93544 | 7,08702 | -1,110785308 | N/A             | 84444     | XM_005259660 | DOT1L          |
| A_23_P59130    | 4,76845 | 4,92023 | -1,110939306 | ENST00000615363 | 58496     | NM_021221    | LY6G5B         |
| A_32_P159445   | 11,9115 | 12,0634 | -1,111031715 | ENST00000375365 | 23096     | NM_015075    | IQSEC2         |
| A_33_P3313411  | 12,7393 | 12,8912 | -1,111031715 | ENST00000378944 | 115703    | NM_001172630 | ARHGAP33       |
| A_22_P00001823 | 2,67851 | 2,83044 | -1,111054819 | ENST00000609480 | 100130705 | NM_001195150 | LOC100130705   |
| A_33_P3415698  | 6,08699 | 6,23895 | -1,111077923 | ENST00000301272 | 126259    | NM_144615    | TMIGD2         |
| A_33_P3272461  | 12,69   | 12,842  | -1,111108729 | ENST00000260953 | 29081     | NM_014168    | METTL5         |
| A_21_P0012661  | 1,71225 | 1,86442 | -1,111239664 | N/A             | N/A       | N/A          | XLOC_I2_011095 |
| A_33_P3354499  | 10,7199 | 10,8721 | -1,111262772 | N/A             | 401480    | XR_242443    | LOC401480      |
| A_33_P3537875  | 15,105  | 15,2572 | -1,111262772 | N/A             | 84757     | BC004943     | MGC10814       |
| A_33_P3239914  | 3,15494 | 3,30715 | -1,111270474 | N/A             | 100130741 | AK127222     | LOC100130741   |
| A_23_P343826   | 5,46063 | 5,61284 | -1,111270474 | ENST00000523856 | 89848     | NM_033449    | FCHSD1         |
| A_21_P0007707  | 1,66298 | 1,81524 | -1,111308989 | N/A             | N/A       | N/A          | Inc-C1QL4-2    |
| A_22_P00001974 | 4,5695  | 4,72176 | -1,111308989 | ENST00000427048 | N/A       | N/A          | N/A            |

|                |         |         |              |                 |           |              |                |
|----------------|---------|---------|--------------|-----------------|-----------|--------------|----------------|
| A_24_P284805   | 4,51401 | 4,66629 | -1,111324395 | ENST00000412277 | 27124     | NM_001284286 | INPP5J         |
| A_23_P71946    | 7,44356 | 7,59585 | -1,111332098 | ENST00000374183 | 54836     | NM_017688    | BSPRY          |
| A_33_P3267482  | 11,8253 | 11,9776 | -1,111339801 | ENST00000366622 | 84451     | NM_032435    | KIAA1804       |
| A_23_P54488    | 4,1044  | 4,25671 | -1,111347504 | ENST00000560124 | 23205     | NM_015162    | ACSBG1         |
| A_33_P3348313  | 9,81936 | 9,97167 | -1,111347504 | ENST00000442215 | 54859     | NM_001031703 | ELP6           |
| A_24_P49183    | 4,46602 | 4,61839 | -1,111393725 | ENST00000491734 | 54932     | NM_017820    | EXD3           |
| A_21_P0007541  | 3,9372  | 4,08957 | -1,111393725 | ENST00000537655 | N/A       | N/A          | N/A            |
| A_33_P3317593  | 14,6838 | 14,8362 | -1,111416836 | ENST00000317368 | 162       | NM_001127    | AP1B1          |
| A_33_P3269779  | 3,35136 | 3,50378 | -1,111432244 | ENST00000413658 | 7551      | NM_017715    | ZNF3           |
| A_22_P00005633 | 6,60667 | 6,7591  | -1,111439948 | N/A             | N/A       | N/A          | Inc-EIF1-1     |
| A_22_P00014127 | 1,49302 | 1,64545 | -1,111439948 | N/A             | N/A       | N/A          | Inc-SCD-3      |
| A_23_P73170    | 1,50922 | 1,66168 | -1,11146306  | ENST00000296499 | 9348      | NM_004784    | NDST3          |
| A_23_P23438    | 8,26391 | 8,41645 | -1,111524694 | ENST00000368286 | 64218     | NM_022367    | SEMA4A         |
| A_33_P3315704  | 5,81219 | 5,96481 | -1,111586332 | N/A             | N/A       | N/A          | N/A            |
| A_33_P3355694  | 1,69591 | 1,8486  | -1,111640267 | ENST00000580780 | N/A       | N/A          | N/A            |
| A_32_P94722    | 10,8812 | 11,0339 | -1,111647973 | ENST00000481247 | 114781    | NM_052893    | BTBD9          |
| A_33_P3408212  | 11,4991 | 11,6519 | -1,111725029 | ENST00000559111 | 7184      | NM_003299    | HSP90B1        |
| A_23_P50839    | 10,9986 | 11,1514 | -1,111725029 | ENST00000434436 | 53615     | NM_001281453 | MBD3           |
| A_33_P3396459  | 9,35449 | 9,50733 | -1,111755853 | ENST00000412877 | 5437      | NM_001278714 | POLR2H         |
| A_21_P0003747  | 1,66449 | 1,81733 | -1,111755853 | N/A             | N/A       | N/A          | Inc-BTC-1      |
| A_22_P00023281 | 5,19053 | 5,34339 | -1,111771265 | N/A             | 101929010 | NR_110090    | SIRPG-AS1      |
| A_24_P303589   | 10,5318 | 10,6847 | -1,111802091 | ENST00000409469 | 8454      | NM_003592    | CUL1           |
| A_24_P161959   | 10,5209 | 10,6738 | -1,111802091 | ENST00000532586 | 374395    | NM_199337    | TMEM179B       |
| A_21_P0010599  | 7,67476 | 7,82773 | -1,111856037 | N/A             | N/A       | N/A          | XLOC_I2_000791 |
| A_24_P88554    | 10,4895 | 10,6425 | -1,111879158 | ENST00000537888 | 8799      | NM_003846    | PEX11B         |
| A_23_P145965   | 10,3182 | 10,4713 | -1,11195623  | ENST00000304842 | 8460      | NM_003596    | TPST1          |
| A_22_P00023104 | 3,33154 | 3,4847  | -1,112002476 | N/A             | N/A       | N/A          | Inc-RREB1-1    |
| A_22_P00014667 | 3,3493  | 3,50246 | -1,112002476 | N/A             | N/A       | BQ015826     | Inc-SLC23A1-1  |
| A_24_P366777   | 9,74302 | 9,89624 | -1,112048724 | ENST00000579793 | N/A       | AK075065     | N/A            |
| A_23_P33093    | 4,85695 | 5,01021 | -1,112079557 | ENST00000318803 | 81849     | NM_030965    | ST6GALNAC5     |
| A_21_P0000325  | 9,64307 | 9,79642 | -1,112148934 | N/A             | 677819    | NR_002970    | SNORA37        |
| A_33_P3408137  | 3,22654 | 3,3799  | -1,112156643 | ENST00000440018 | N/A       | AK124216     | N/A            |
| A_22_P00023679 | 1,71596 | 1,86932 | -1,112156643 | N/A             | N/A       | N/A          | Inc-QPCT-3     |

|                |         |         |              |                 |           |              |               |
|----------------|---------|---------|--------------|-----------------|-----------|--------------|---------------|
| A_23_P370574   | 4,61231 | 4,76573 | -1,112202897 | ENST00000617100 | 115653    | NM_153443    | KIR3DL3       |
| A_33_P3373403  | 4,37086 | 4,52428 | -1,112202897 | ENST00000485470 | 51177     | NM_016274    | PLEKHO1       |
| A_22_P00010936 | 4,64065 | 4,79413 | -1,112249153 | ENST00000558382 | N/A       | DA414630     | N/A           |
| A_23_P208238   | 8,24165 | 8,39521 | -1,112310831 | N/A             | 7696      | N/A          | ZNF137P       |
| A_22_P00005087 | 8,4871  | 8,64067 | -1,112318541 | ENST00000620428 | 8694      | NM_012079    | DGAT1         |
| A_21_P0006193  | 5,86428 | 6,01788 | -1,112341671 | N/A             | N/A       | N/A          | Inc-STX17-1   |
| A_23_P399255   | 1,6027  | 1,75631 | -1,112349381 | ENST00000544682 | 221687    | NM_152737    | RNF182        |
| A_33_P3304097  | 2,3234  | 2,47703 | -1,112364802 | N/A             | N/A       | N/A          | N/A           |
| A_33_P3500167  | 3,51069 | 3,66435 | -1,112387933 | ENST00000617301 | 176       | NM_001135    | ACAN          |
| A_33_P3333092  | 2,03235 | 2,18602 | -1,112395644 | ENST00000581247 | N/A       | N/A          | N/A           |
| A_23_P51117    | 10,1186 | 10,2723 | -1,112418776 | ENST00000272342 | 54465     | NM_019002    | ETAA1         |
| A_22_P00001741 | 5,1954  | 5,34914 | -1,112449619 | ENST00000433688 | 65998     | NM_001144936 | C11orf95      |
| A_22_P00000062 | 1,66727 | 1,82105 | -1,112480463 | ENST00000416894 | 100874054 | NR_051960    | FALEC         |
| A_22_P00005302 | 1,87007 | 2,02386 | -1,112488174 | N/A             | N/A       | N/A          | Inc-DNAJC11-2 |
| A_23_P38408    | 10,789  | 10,9428 | -1,112495885 | ENST00000620927 | 79893     | NM_024835    | GGNBP2        |
| A_21_P0013251  | 11,898  | 12,0518 | -1,112495885 | ENST00000451831 | 5395      | NM_000535    | PMS2          |
| A_23_P67162    | 11,2593 | 11,4132 | -1,112573    | ENST00000586352 | 5300      | NM_006221    | PIN1          |
| A_22_P00016085 | 1,62678 | 1,7807  | -1,112588424 | N/A             | N/A       | N/A          | Inc-THBS4-3   |
| A_19_P00317597 | 7,40595 | 7,55992 | -1,112626984 | ENST00000585822 | N/A       | N/A          | N/A           |
| A_33_P3298455  | 4,65403 | 4,80801 | -1,112634696 | ENST00000504184 | 54944     | NR_120386    | LINC01521     |
| A_33_P3219514  | 4,88262 | 5,03665 | -1,112673258 | ENST00000395541 | 80070     | AJ515154     | ADAMTS20      |
| A_23_P121345   | 6,9899  | 7,14394 | -1,11268097  | ENST00000338733 | 55171     | NM_018138    | TBCCD1        |
| A_33_P3363310  | 6,18456 | 6,33861 | -1,112688683 | ENST00000376536 | 387273    | N/A          | KRTAP5-10     |
| A_22_P00012101 | 1,6263  | 1,78037 | -1,112704108 | N/A             | N/A       | N/A          | Inc-PNRC2-2   |
| A_33_P3551349  | 6,97074 | 7,12485 | -1,112734959 | ENST00000596267 | N/A       | AK127450     | N/A           |
| A_33_P6703408  | 1,71762 | 1,87174 | -1,112742672 | ENST00000404733 | 285973    | N/A          | ATG9B         |
| A_24_P318897   | 8,39803 | 8,5522  | -1,112781237 | ENST00000372547 | 90203     | NM_001042633 | SNX21         |
| A_24_P282578   | 12,5004 | 12,6546 | -1,112804377 | ENST00000531917 | 6746      | NM_003145    | SSR2          |
| A_22_P00012227 | 10,1697 | 10,324  | -1,112881514 | N/A             | N/A       | N/A          | Inc-PPIA-1    |
| A_33_P3233189  | 1,64977 | 1,80409 | -1,112896942 | ENST00000414919 | 387804    | NM_001144871 | VSTM5         |
| A_33_P3286608  | 8,53014 | 8,68446 | -1,112896942 | ENST00000329291 | 267002    | NM_170725    | PGBD2         |
| A_21_P0009928  | 2,77304 | 2,92741 | -1,112935512 | N/A             | N/A       | N/A          | Inc-STK35-2   |
| A_23_P314760   | 10,8413 | 10,9957 | -1,112958655 | ENST00000479461 | 51422     | NM_016203    | PRKAG2        |

|                |         |         |              |                 |           |              |                |
|----------------|---------|---------|--------------|-----------------|-----------|--------------|----------------|
| A_24_P64039    | 10,0687 | 10,2231 | -1,112958655 | ENST00000518421 | 10947     | NM_006803    | AP3M2          |
| A_22_P00005478 | 2,64486 | 2,79928 | -1,112974084 | N/A             | N/A       | N/A          | Inc-DYNLL2-2   |
| A_33_P3258478  | 3,24344 | 3,39789 | -1,112997228 | ENST00000611586 | N/A       | AJ630586     | N/A            |
| A_23_P36266    | 11,1971 | 11,3516 | -1,113035803 | ENST00000227868 | 8050      | NM_003477    | PDHX           |
| A_24_P358328   | 14,6275 | 14,782  | -1,113035803 | N/A             | 286016    | NR_002187    | TPI1P2         |
| A_32_P215113   | 11,0083 | 11,1629 | -1,113112955 | ENST00000590792 | 131076    | NM_001017928 | CCDC58         |
| A_23_P18452    | 1,46822 | 1,62283 | -1,113120671 | ENST00000264888 | 4283      | NM_002416    | CXCL9          |
| A_33_P3226910  | 1,62075 | 1,77539 | -1,113143817 | ENST00000264952 | 131890    | NM_139209    | GRK7           |
| A_21_P0004790  | 4,05327 | 4,20795 | -1,113174681 | ENST00000456346 | N/A       | N/A          | N/A            |
| A_23_P60591    | 12,0983 | 12,2531 | -1,113267276 | ENST00000316603 | 7266      | NM_003315    | DNAJC7         |
| A_22_P00020191 | 1,57242 | 1,72722 | -1,113267276 | N/A             | N/A       | DB551264     | Inc-C16orf61-1 |
| A_24_P72518    | 10,7965 | 10,9513 | -1,113267276 | ENST00000325006 | 23382     | NM_015328    | AHCYL2         |
| A_33_P3885807  | 1,71476 | 1,8696  | -1,113298143 | N/A             | 100874012 | NR_049725    | NAV2-AS5       |
| A_22_P00011917 | 2,81405 | 2,96895 | -1,113344444 | N/A             | N/A       | BM148394     | Inc-PIPOX-2    |
| A_24_P98555    | 9,15003 | 9,30497 | -1,113375313 | ENST00000448258 | 404636    | NM_001303111 | FAM45A         |
| A_33_P3603812  | 5,74344 | 5,89844 | -1,113421618 | ENST00000317568 | 83786     | NM_001300833 | FRMD8          |
| A_24_P360722   | 8,28358 | 8,43861 | -1,113444771 | ENST00000280886 | 22982     | NM_014974    | DIP2C          |
| A_22_P00016911 | 17,6235 | 17,7786 | -1,113498797 | N/A             | 100151683 | NR_023343    | RNU4ATAC       |
| A_22_P00010730 | 1,65613 | 1,81126 | -1,113521952 | N/A             | N/A       | BX089171     | Inc-NID2-1     |
| A_33_P3250438  | 6,90955 | 7,06483 | -1,113637733 | N/A             | 79086     | NM_001300925 | SMIM7          |
| A_21_P0006259  | 3,6904  | 3,84568 | -1,113637733 | N/A             | N/A       | N/A          | Inc-C9orf82-1  |
| A_23_P349398   | 4,37401 | 4,5293  | -1,113645453 | ENST00000327939 | 326340    | NM_175619    | ZAR1           |
| A_33_P3335498  | 5,30424 | 5,45957 | -1,11367633  | ENST00000374928 | 11279     | NM_001159296 | KLF8           |
| A_24_P926195   | 10,3193 | 10,4747 | -1,113730367 | ENST00000356554 | 10905     | NM_006699    | MAN1A2         |
| A_23_P152949   | 4,88801 | 5,04342 | -1,113738087 | ENST00000584580 | 90506     | NM_033413    | LRRC46         |
| A_33_P3345186  | 4,64914 | 4,80462 | -1,113792127 | ENST00000615522 | 166012    | NM_152889    | CHST13         |
| A_22_P00018076 | 1,65918 | 1,81467 | -1,113799847 | ENST00000411439 | 101929397 | NR_120659    | LINC01518      |
| A_21_P0000717  | 12,2231 | 12,3786 | -1,113807568 | ENST00000590964 | 124512    | NM_001206987 | METTLL23       |
| A_33_P3286273  | 1,41583 | 1,57136 | -1,113830729 | ENST00000422359 | 340900    | N/A          | EBLN1          |
| A_24_P481783   | 7,73923 | 7,89477 | -1,113838449 | ENST00000561387 | 390595    | NM_001163692 | UBAP1L         |
| A_33_P3374878  | 1,43546 | 1,59102 | -1,113853891 | ENST00000335110 | 79633     | NM_001291303 | FAT4           |
| A_23_P7221     | 16,8631 | 17,0187 | -1,113884774 | ENST00000506397 | 6164      | NM_033625    | RPL34          |
| A_23_P22433    | 9,59776 | 9,7534  | -1,113915657 | ENST00000218340 | 6102      | NM_006915    | RP2            |

|                |         |         |              |                 |           |              |               |
|----------------|---------|---------|--------------|-----------------|-----------|--------------|---------------|
| A_21_P0014131  | 4,92795 | 5,08364 | -1,113954263 | N/A             | N/A       | N/A          | N/A           |
| A_33_P3223607  | 13,3955 | 13,5512 | -1,113961985 | N/A             | 27158     | NM_001144026 | NDOR1         |
| A_33_P3383566  | 1,6452  | 1,80092 | -1,113977428 | ENST00000400814 | 65121     | NM_023013    | PRAMEF1       |
| A_24_P110354   | 1,64534 | 1,80106 | -1,113977428 | ENST00000330910 | 644994    | N/A          | SMIM23        |
| A_24_P499215   | 5,35573 | 5,51151 | -1,114023758 | ENST00000426241 | N/A       | N/A          | N/A           |
| A_33_P3316064  | 5,47876 | 5,63455 | -1,11403148  | ENST00000380336 | 340591    | XR_110931    | CA5BP1        |
| A_23_P146058   | 11,7881 | 11,9439 | -1,114039201 | ENST00000518738 | 528       | NM_001695    | ATP6V1C1      |
| A_22_P00015201 | 1,59559 | 1,75142 | -1,114062368 | N/A             | N/A       | BQ429228     | Inc-SOX2-1    |
| A_22_P00002090 | 3,98212 | 4,13795 | -1,114062368 | ENST00000503668 | 728655    | NR_004855    | HULC          |
| A_22_P00019652 | 5,42417 | 5,58001 | -1,11407009  | N/A             | N/A       | N/A          | Inc-TMEM30B-1 |
| A_23_P158570   | 6,24313 | 6,39898 | -1,114077812 | ENST00000541070 | 36        | NM_001609    | ACADSB        |
| A_33_P3755633  | 5,54514 | 5,70101 | -1,114093256 | N/A             | N/A       | DA515661     | N/A           |
| A_21_P0004268  | 1,4487  | 1,60458 | -1,114100979 | N/A             | N/A       | N/A          | Inc-PDE8B-1   |
| A_23_P111288   | 14,1019 | 14,2578 | -1,114116423 | ENST00000541412 | 51522     | NM_016462    | TMEM14C       |
| A_23_P111343   | 11,6396 | 11,7955 | -1,114116423 | ENST00000526228 | 9774      | NM_014739    | BCLAF1        |
| A_21_P0010270  | 1,65403 | 1,80994 | -1,114124146 | ENST00000435315 | N/A       | N/A          | N/A           |
| A_21_P0003226  | 5,41292 | 5,56891 | -1,114185928 | N/A             | N/A       | N/A          | Inc-TRAK1-1   |
| A_32_P186981   | 16,5882 | 16,7442 | -1,114193651 | ENST00000581091 | 6139      | NM_000985    | RPL17         |
| A_24_P327050   | 12,5887 | 12,7447 | -1,114193651 | ENST00000562125 | 51693     | NM_016209    | TRAPPC2L      |
| A_21_P0009595  | 2,36565 | 2,52169 | -1,114224543 | ENST00000575722 | N/A       | XR_111805    | N/A           |
| A_23_P39647    | 8,06876 | 8,22495 | -1,114340398 | ENST00000425141 | 6508      | NM_005070    | SLC4A3        |
| A_33_P3233170  | 10,0889 | 10,2451 | -1,114348122 | N/A             | N/A       | AK074630     | N/A           |
| A_22_P00016924 | 1,7216  | 1,87781 | -1,114355846 | ENST00000546558 | N/A       | N/A          | N/A           |
| A_23_P211840   | 9,35175 | 9,50798 | -1,114371294 | ENST00000465627 | 9039      | NM_003968    | UBA3          |
| A_33_P3390950  | 7,45705 | 7,61329 | -1,114379018 | ENST00000534398 | N/A       | AK125852     | N/A           |
| A_33_P3328251  | 1,73726 | 1,89352 | -1,114394467 | ENST00000511360 | N/A       | N/A          | N/A           |
| A_22_P00014300 | 1,93454 | 2,09082 | -1,114409916 | N/A             | N/A       | N/A          | Inc-SERHL2-3  |
| A_23_P205098   | 8,83183 | 8,98812 | -1,11441764  | ENST00000315596 | 23047     | NM_015032    | PDS5B         |
| A_22_P00016846 | 3,36799 | 3,52433 | -1,114456264 | ENST00000434565 | 100874188 | N/A          | LINC00571     |
| A_33_P3264179  | 3,59462 | 3,75099 | -1,114479439 | ENST00000368789 | 353145    | NM_178435    | LCE3E         |
| A_23_P93009    | 6,917   | 7,0734  | -1,114502614 | ENST00000506997 | 6728      | NM_001204199 | SRP19         |
| A_33_P3228718  | 1,7433  | 1,89972 | -1,114518064 | ENST00000476906 | N/A       | BC118600     | N/A           |
| A_23_P251836   | 2,96496 | 3,12142 | -1,114548966 | ENST00000506953 | 4889      | NM_006174    | NPY5R         |

|                |         |         |              |                 |           |              |              |
|----------------|---------|---------|--------------|-----------------|-----------|--------------|--------------|
| A_22_P00019162 | 1,5714  | 1,72788 | -1,114564417 | N/A             | N/A       | N/A          | Inc-DIO2-2   |
| A_23_P120237   | 12,276  | 12,4325 | -1,114579868 | ENST00000479456 | 56910     | NM_020151    | STARD7       |
| A_33_P3324454  | 11,2304 | 11,3869 | -1,114579868 | ENST00000611494 | 1200      | NM_000391    | TPP1         |
| A_21_P0014072  | 6,80986 | 6,96639 | -1,114603045 | N/A             | 100507670 | XR_108348    | LOC100507670 |
| A_21_P0005801  | 2,57061 | 2,72714 | -1,114603045 | N/A             | N/A       | N/A          | Inc-SGCZ-2   |
| A_33_P3683351  | 1,36327 | 1,51985 | -1,114641675 | ENST00000589723 | 284240    | XR_248506    | LOC284240    |
| A_33_P3401013  | 1,62234 | 1,77892 | -1,114641675 | N/A             | N/A       | BC126993     | N/A          |
| A_24_P322229   | 2,9646  | 3,12122 | -1,11467258  | ENST00000603017 | 91608     | NM_033315    | RASL10B      |
| A_22_P00003765 | 2,90275 | 3,05938 | -1,114680306 | N/A             | N/A       | BG184313     | Inc-CDK1-3   |
| A_33_P3308263  | 9,77253 | 9,9292  | -1,114711212 | ENST00000477647 | 84925     | NM_032839    | DIRC2        |
| A_33_P3267431  | 3,72256 | 3,87923 | -1,114711212 | N/A             | 642648    | AK123383     | LOC642648    |
| A_23_P171258   | 10,4576 | 10,6143 | -1,114734392 | ENST00000490858 | 22        | NM_004299    | ABCB7        |
| A_33_P3391631  | 1,54263 | 1,69937 | -1,1147653   | ENST00000518682 | N/A       | N/A          | N/A          |
| A_24_P151032   | 3,14444 | 3,3012  | -1,114780754 | ENST00000570772 | 4635      | NM_002476    | MYL4         |
| A_23_P155868   | 10,965  | 11,1219 | -1,114888938 | ENST00000520121 | 10424     | NM_006320    | PGRMC2       |
| A_33_P3325120  | 9,00681 | 9,16373 | -1,114904394 | ENST00000367203 | 9580      | BC040649     | SOX13        |
| A_33_P3336527  | 9,76095 | 9,91794 | -1,11495849  | ENST00000325823 | 23042     | NM_001285449 | PDXDC1       |
| A_33_P3309468  | 13,0316 | 13,1886 | -1,114966219 | ENST00000357368 | 5802      | NM_002850    | PTPRS        |
| A_22_P00013634 | 1,58974 | 1,74675 | -1,114973947 | ENST00000510967 | N/A       | N/A          | N/A          |
| A_33_P3350413  | 5,14834 | 5,30535 | -1,114973947 | N/A             | 6840      | AK310272     | SVIL         |
| A_33_P3366987  | 6,29398 | 6,45103 | -1,115004861 | ENST00000508133 | 166647    | NM_145290    | GPR125       |
| A_21_P0003905  | 1,41466 | 1,57172 | -1,11501259  | N/A             | 102724809 | XR_425795    | LOC102724809 |
| A_23_P207842   | 7,0323  | 7,18938 | -1,115028047 | ENST00000617726 | 5914      | NM_001024809 | RARA         |
| A_33_P3345936  | 15,1668 | 15,3239 | -1,115043505 | ENST00000221922 | 26093     | NM_015603    | CCDC9        |
| A_23_P116624   | 4,08673 | 4,24393 | -1,115120797 | ENST00000298923 | 9152      | NM_004211    | SLC6A5       |
| A_23_P153767   | 11,5423 | 11,6995 | -1,115120797 | ENST00000593845 | 26993     | NM_014371    | AKAP8L       |
| A_33_P3304107  | 7,8462  | 8,00346 | -1,115167174 | ENST00000396128 | 54813     | NM_017658    | KLHL28       |
| A_33_P3213155  | 1,6499  | 1,8072  | -1,115198094 | ENST00000400593 | 387590    | N/A          | TPTEP1       |
| A_22_P00005093 | 5,62264 | 5,77995 | -1,115205824 | ENST00000284061 | 8526      | N/A          | DGKE         |
| A_23_P431939   | 9,86068 | 10,018  | -1,115213554 | ENST00000367579 | 3140      | NM_001531    | MR1          |
| A_23_P27636    | 6,16335 | 6,32069 | -1,115229014 | ENST00000254321 | 90592     | NM_144566    | ZNF700       |
| A_32_P57237    | 17,163  | 17,3204 | -1,115275396 | ENST00000403842 | 6144      | NM_000982    | RPL21        |
| A_23_P210538   | 6,82733 | 6,98475 | -1,115290857 | ENST00000352077 | 63916     | NM_182764    | ELMO2        |

|                |         |         |              |                 |           |              |              |
|----------------|---------|---------|--------------|-----------------|-----------|--------------|--------------|
| A_33_P3559102  | 5,71238 | 5,8698  | -1,115290857 | N/A             | 440864    | BQ213652     | LOC440864    |
| A_33_P3332982  | 5,1348  | 5,29222 | -1,115290857 | ENST00000390295 | N/A       | KJ149306     | N/A          |
| A_33_P3629930  | 1,56037 | 1,71792 | -1,115391359 | N/A             | 414201    | NR_038867    | ZNF32-AS3    |
| A_32_P29806    | 9,18099 | 9,33856 | -1,115406822 | ENST00000332896 | 8738      | NM_003805    | CRADD        |
| A_23_P212675   | 1,41883 | 1,57642 | -1,115422285 | ENST00000333911 | 347736    | XM_005247430 | NME9         |
| A_23_P57521    | 13,1142 | 13,2718 | -1,115430017 | ENST00000477256 | 51386     | NM_016091    | EIF3L        |
| A_24_P200162   | 13,4531 | 13,6107 | -1,115430017 | ENST00000452906 | 25994     | NM_014056    | HIGD1A       |
| A_23_P21425    | 6,37653 | 6,53417 | -1,115460943 | ENST00000276218 | 139760    | NM_178471    | GPR119       |
| A_21_P0006765  | 1,61534 | 1,77299 | -1,115468675 | ENST00000441001 | N/A       | N/A          | N/A          |
| A_33_P3346891  | 2,24907 | 2,40673 | -1,115476407 | ENST00000518079 | 4603      | NM_001294282 | MYBL1        |
| A_21_P0001364  | 5,40467 | 5,56236 | -1,115499603 | N/A             | N/A       | N/A          | Inc-DDX20-4  |
| A_23_P364107   | 9,37472 | 9,53244 | -1,115522799 | ENST00000470424 | 55320     | NM_018353    | MIS18BP1     |
| A_24_P3804     | 8,4953  | 8,65302 | -1,115522799 | ENST00000548003 | 401251    | NM_001039651 | SAPCD1       |
| A_23_P139669   | 1,62858 | 1,78632 | -1,115538264 | ENST00000479059 | 6515      | NM_006931    | SLC2A3       |
| A_22_P00014508 | 1,60235 | 1,76011 | -1,115553729 | ENST00000491909 | N/A       | N/A          | N/A          |
| A_22_P00017762 | 10,1452 | 10,303  | -1,115584659 | N/A             | 100129961 | NR_036549    | CCNT2-AS1    |
| A_22_P00008581 | 3,49283 | 3,65063 | -1,115584659 | ENST00000423112 | 101929302 | NR_121586    | RFX3-AS1     |
| A_24_P362317   | 12,6708 | 12,8286 | -1,115584659 | ENST00000368471 | 103       | NM_001111    | ADAR         |
| A_21_P0002650  | 6,05003 | 6,20785 | -1,115600124 | N/A             | N/A       | N/A          | Inc-HS1BP3-1 |
| A_22_P00022974 | 1,58405 | 1,74193 | -1,115646522 | N/A             | N/A       | N/A          | Inc-PPP4R1-8 |
| A_24_P172993   | 9,82467 | 9,98262 | -1,115700654 | ENST00000319380 | 63893     | NM_022066    | UBE2O        |
| A_23_P66011    | 1,71518 | 1,87314 | -1,115708388 | ENST00000305202 | 54550     | NM_019065    | NECAB2       |
| A_22_P00013727 | 1,58463 | 1,74261 | -1,115723855 | ENST00000503307 | 643201    | NR_036494    | LOC643201    |
| A_21_P0011052  | 13,6655 | 13,8235 | -1,115739322 | ENST00000488396 | N/A       | N/A          | N/A          |
| A_22_P00002567 | 9,63175 | 9,78977 | -1,11575479  | ENST00000571336 | 55421     | NM_001114118 | C17orf85     |
| A_21_P0007770  | 4,34148 | 4,49954 | -1,115785726 | ENST00000321694 | 54621     | XR_424416    | VSIG10       |
| A_21_P0000766  | 11,9641 | 12,1222 | -1,115816662 | ENST00000416067 | 100132288 | NR_038328    | TEKT4P2      |
| A_23_P47879    | 14,5535 | 14,7116 | -1,115816662 | ENST00000300134 | 6778      | NM_003153    | STAT6        |
| A_22_P00012629 | 1,83253 | 1,99065 | -1,115832131 | N/A             | N/A       | N/A          | Inc-PTTG1-2  |
| A_22_P00010556 | 1,6033  | 1,76151 | -1,115901742 | ENST00000593786 | 23054     | N/A          | NCOA6        |
| A_33_P3292660  | 2,96858 | 3,1268  | -1,115909477 | N/A             | 2892      | NM_001256743 | GRIA3        |
| A_22_P00017203 | 3,15435 | 3,31258 | -1,115917212 | N/A             | N/A       | N/A          | Inc-UCK1-1   |
| A_21_P0009292  | 2,13587 | 2,29412 | -1,115932682 | N/A             | N/A       | N/A          | Inc-AIPL1-1  |



|                |         |         |              |                 |           |              |                |
|----------------|---------|---------|--------------|-----------------|-----------|--------------|----------------|
| A_24_P476086   | 5,771   | 5,92927 | -1,115948152 | ENST00000368564 | 3841      | XM_006715474 | KPNA5          |
| A_24_P247026   | 3,46793 | 3,62621 | -1,115955887 | ENST00000339465 | 283726    | NM_001008226 | FAM154B        |
| A_22_P00022993 | 2,21394 | 2,37229 | -1,116010035 | N/A             | N/A       | BX115195     | Inc-CHRNA9-2   |
| A_23_P106617   | 1,5512  | 1,70956 | -1,116017771 | ENST00000219454 | 58189     | NM_021197    | WFDC1          |
| A_22_P00022127 | 6,10995 | 6,26834 | -1,116040978 | N/A             | N/A       | DA380299     | Inc-TNFRSF17-2 |
| A_33_P3267612  | 4,97639 | 5,1348  | -1,11605645  | ENST00000509909 | 728264    | NR_105059    | MIR143HG       |
| A_24_P153763   | 1,68119 | 1,83965 | -1,11609513  | ENST00000523703 | 101927588 | NR_125420    | LOC101927588   |
| A_33_P3254380  | 6,62809 | 6,78658 | -1,116118339 | ENST00000328306 | 84679     | NM_001257291 | SLC9A7         |
| A_23_P60458    | 11,6314 | 11,7899 | -1,116126075 | ENST00000358994 | 5524      | NM_178001    | PPP2R4         |
| A_23_P250455   | 9,68917 | 9,8477  | -1,116149285 | ENST00000486227 | 10013     | NM_006044    | HDAC6          |
| A_22_P00021796 | 7,55886 | 7,71742 | -1,116172494 | N/A             | N/A       | BC104002     | Inc-TM7SF2-1   |
| A_21_P0000572  | 10,6143 | 10,7729 | -1,116203442 | N/A             | 100306951 | NR_028514    | PITPNA-AS1     |
| A_33_P3222932  | 6,43149 | 6,59009 | -1,116203442 | ENST00000621082 | 440829    | NM_001207020 | SHISA8         |
| A_23_P10182    | 1,6224  | 1,78101 | -1,116211179 | ENST00000460921 | 8309      | NM_003500    | ACOX2          |
| A_32_P170925   | 9,40211 | 9,56074 | -1,116226653 | ENST00000523403 | 114112    | NM_052883    | TXNRD3         |
| A_33_P3380331  | 9,37343 | 9,5321  | -1,116257602 | ENST00000491638 | 28511     | NM_001144927 | NKIRAS2        |
| A_23_P105900   | 14,0146 | 14,1733 | -1,116280814 | ENST00000426582 | 690       | NR_026983    | BTF3P11        |
| A_23_P380917   | 15,0164 | 15,1751 | -1,116280814 | ENST00000558924 | 23478     | NM_014300    | SEC11A         |
| A_21_P0001827  | 1,78263 | 1,94134 | -1,116288551 | ENST00000414086 | N/A       | N/A          | N/A            |
| A_33_P3315748  | 1,37302 | 1,53176 | -1,116311764 | N/A             | N/A       | N/A          | N/A            |
| A_33_P3351316  | 1,62081 | 1,77956 | -1,116319502 | ENST00000273146 | 729085    | AK091001     | FAM198A        |
| A_24_P535219   | 7,77389 | 7,93267 | -1,116342715 | ENST00000612128 | 55274     | KC839989     | PHF10          |
| A_21_P0000022  | 7,89754 | 8,05634 | -1,116358191 | ENST00000539286 | 25798     | NM_001159491 | BRI3           |
| A_23_P218068   | 9,44274 | 9,60163 | -1,116427835 | ENST00000424268 | 54477     | NM_019012    | PLEKHA5        |
| A_33_P3312779  | 3,09648 | 3,25537 | -1,116427835 | ENST00000612593 | 260429    | NM_152891    | PRSS33         |
| A_23_P29803    | 13,103  | 13,2619 | -1,116435574 | ENST00000476003 | 5437      | NM_006232    | POLR2H         |
| A_23_P369733   | 10,6741 | 10,8331 | -1,116512962 | ENST00000317506 | 57610     | NM_020850    | RANBP10        |
| A_33_P3524912  | 5,38106 | 5,54007 | -1,116520701 | ENST00000415305 | 283038    | NR_033848    | LOC283038      |
| A_23_P257609   | 15,2205 | 15,3796 | -1,116590355 | ENST00000443998 | 6159      | NM_000992    | RPL29          |
| A_23_P40078    | 11,4048 | 11,5639 | -1,116590355 | ENST00000406957 | 7514      | NM_003400    | XPO1           |
| A_33_P3353496  | 11,7739 | 11,933  | -1,116590355 | ENST00000321660 | 219770    | NM_153368    | GJD4           |
| A_23_P330836   | 5,1634  | 5,32256 | -1,116636794 | ENST00000624822 | 203414    | NR_126059    | LINC01560      |
| A_24_P53215    | 11,4683 | 11,6275 | -1,116667754 | ENST00000412096 | 201294    | NM_199242    | UNC13D         |

|                |         |         |              |                 |           |              |                |
|----------------|---------|---------|--------------|-----------------|-----------|--------------|----------------|
| A_33_P3369834  | 7,53259 | 7,69184 | -1,116706456 | ENST00000233596 | 92840     | NM_138393    | REEP6          |
| A_33_P3244895  | 1,73205 | 1,8914  | -1,116783863 | N/A             | 9911      | AY358192     | TMCC2          |
| A_21_P0013273  | 1,69908 | 1,85853 | -1,116861275 | N/A             | N/A       | N/A          | XLOC_I2_013628 |
| A_33_P3314151  | 5,88405 | 6,04353 | -1,1168845   | ENST00000333750 | 84766     | NM_001144958 | CRACR2A        |
| A_22_P00015699 | 2,61333 | 2,77289 | -1,116946434 | ENST00000567515 | N/A       | N/A          | N/A            |
| A_23_P257131   | 10,5954 | 10,755  | -1,116977403 | ENST00000295030 | 5194      | NM_002618    | PEX13          |
| A_33_P3362641  | 9,63768 | 9,79729 | -1,116985146 | ENST00000273986 | 493856    | NM_001008388 | CISD2          |
| A_24_P98385    | 8,86607 | 9,02573 | -1,117023858 | ENST00000389120 | 56254     | NM_019592    | RNF20          |
| A_21_P0000725  | 5,57089 | 5,73057 | -1,117039343 | N/A             | 552860    | NR_038210    | SAMD12-AS1     |
| A_33_P3298535  | 15,5203 | 15,68   | -1,117054829 | ENST00000397416 | 140823    | NM_080748    | ROMO1          |
| A_19_P00803472 | 8,96326 | 9,12297 | -1,117062572 | N/A             | N/A       | N/A          | Inc-GDF10-2    |
| A_21_P0002645  | 2,48807 | 2,6478  | -1,117078058 | ENST00000592816 | 102800314 | NR_110497    | MIR7515HG      |
| A_22_P00016485 | 1,63919 | 1,79894 | -1,117093544 | N/A             | N/A       | BX088939     | Inc-TMEM9-1    |
| A_22_P00020941 | 1,62789 | 1,78773 | -1,117163234 | N/A             | 104326058 | NR_126371    | SMAD1-AS1      |
| A_22_P00013225 | 1,45762 | 1,61749 | -1,117186465 | N/A             | N/A       | N/A          | Inc-RNMTL1-1   |
| A_33_P3277805  | 12,368  | 12,5279 | -1,117209696 | N/A             | N/A       | N/A          | N/A            |
| A_23_P90911    | 10,0118 | 10,1717 | -1,117209696 | ENST00000381249 | 57665     | NM_020905    | RDH14          |
| A_33_P3220152  | 10,7137 | 10,8736 | -1,117209696 | ENST00000438103 | 22904     | NM_014963    | SBNO2          |
| A_23_P389919   | 9,62332 | 9,7833  | -1,117271649 | ENST00000312087 | 7468      | NM_133330    | WHSC1          |
| A_24_P937325   | 6,46373 | 6,62374 | -1,117294883 | ENST00000472289 | 121512    | AL713762     | FGD4           |
| A_23_P369701   | 11,6882 | 11,8483 | -1,117364585 | ENST00000258884 | 58489     | NM_021214    | ABHD17C        |
| A_23_P67992    | 10,1509 | 10,311  | -1,117364585 | ENST00000355848 | 10438     | NM_006333    | C1D            |
| A_23_P350808   | 2,0171  | 2,17721 | -1,11737233  | ENST00000489023 | 285175    | AB058746     | UNC80          |
| A_23_P211680   | 1,62337 | 1,78352 | -1,117403311 | ENST00000311597 | 23209     | NM_015166    | MLC1           |
| A_24_P282762   | 5,76824 | 5,92841 | -1,117418801 | ENST00000409443 | 9874      | NM_012290    | TLK1           |
| A_23_P71537    | 8,84464 | 9,00483 | -1,117434292 | ENST00000521168 | 79848     | NM_001291339 | CSPP1          |
| A_21_P0004992  | 9,43627 | 9,59648 | -1,117449783 | N/A             | N/A       | N/A          | Inc-C6orf146-2 |
| A_33_P3833211  | 6,05398 | 6,21426 | -1,117504004 | ENST00000399179 | 1763      | NM_001080449 | DNA2           |
| A_24_P44596    | 11,2314 | 11,3917 | -1,117519496 | ENST00000566455 | 22879     | NM_014940    | MON1B          |
| A_33_P3401661  | 3,87611 | 4,03645 | -1,11755048  | N/A             | N/A       | N/A          | N/A            |
| A_33_P6810548  | 1,63495 | 1,79529 | -1,11755048  | N/A             | 101928264 | XR_426854    | LOC101928264   |
| A_33_P3287611  | 6,80621 | 6,96661 | -1,117596959 | ENST00000417996 | 3850      | NM_057088    | KRT3           |
| A_33_P3275707  | 10,5611 | 10,7215 | -1,117596959 | N/A             | 130340    | NM_001039569 | AP1S3          |

|                |         |         |              |                 |           |              |                  |
|----------------|---------|---------|--------------|-----------------|-----------|--------------|------------------|
| A_22_P00018931 | 5,21156 | 5,37197 | -1,117604705 | N/A             | N/A       | N/A          | Inc-C8A-1        |
| A_23_P218579   | 6,17356 | 6,33398 | -1,117612452 | ENST00000392089 | 79411     | NM_024506    | GLB1L            |
| A_22_P00001368 | 8,11927 | 8,27971 | -1,117627946 | N/A             | N/A       | BC043357     | Inc-AP002478.1-2 |
| A_33_P3366780  | 5,74747 | 5,90791 | -1,117627946 | N/A             | N/A       | N/A          | N/A              |
| A_33_P3292864  | 7,50866 | 7,66915 | -1,11766668  | N/A             | N/A       | AK090448     | N/A              |
| A_22_P00013046 | 3,71801 | 3,87857 | -1,117720911 | ENST00000530241 | 8490      | N/A          | RGS5             |
| A_22_P00019233 | 2,0869  | 2,24748 | -1,117736406 | ENST00000607954 | 5335      | N/A          | PLCG1            |
| A_33_P3402600  | 9,89387 | 10,0545 | -1,117775145 | N/A             | N/A       | N/A          | N/A              |
| A_22_P00008132 | 5,48047 | 5,64118 | -1,117837129 | N/A             | 80161     | NR_026710    | ASMTL-AS1        |
| A_22_P00006211 | 2,27235 | 2,43307 | -1,117844877 | N/A             | N/A       | N/A          | Inc-FAM43A-7     |
| A_33_P3230011  | 3,36657 | 3,5274  | -1,117930112 | ENST00000399165 | 219736    | NM_001130159 | STOX1            |
| A_23_P352426   | 5,59454 | 5,7554  | -1,117953359 | ENST00000395906 | 374286    | NM_006382    | CDRT1            |
| A_23_P45087    | 7,26523 | 7,42609 | -1,117953359 | ENST00000395391 | 51427     | NM_016220    | ZNF107           |
| A_33_P3325018  | 11,0975 | 11,2584 | -1,117984356 | ENST00000185150 | 27248     | NM_015701    | ERLEC1           |
| A_23_P82296    | 12,3091 | 12,47   | -1,117984356 | ENST00000431068 | 2783      | NM_005273    | GNB2             |
| A_23_P132285   | 13,1426 | 13,3035 | -1,117984356 | ENST00000404802 | 4357      | NM_001130517 | MPST             |
| A_32_P21384    | 16,2759 | 16,4368 | -1,117984356 | ENST00000498103 | 6139      | NM_000985    | RPL17            |
| A_33_P3223239  | 7,8705  | 8,03148 | -1,118046351 | ENST00000490067 | 54879     | NM_138729    | ST7L             |
| A_33_P3329834  | 10,204  | 10,365  | -1,118061851 | ENST00000370022 | 55119     | NM_018061    | PRPF38B          |
| A_33_P3319406  | 4,03119 | 4,19221 | -1,118077351 | ENST00000376410 | 57584     | BX537570     | ARHGAP21         |
| A_21_P0007460  | 1,61722 | 1,77827 | -1,118100601 | ENST00000534757 | 100616234 | N/A          | MIR4454          |
| A_21_P0009011  | 2,45308 | 2,61419 | -1,118147102 | N/A             | N/A       | N/A          | Inc-PARN-6       |
| A_21_P0006007  | 1,60983 | 1,77104 | -1,118224609 | N/A             | N/A       | N/A          | Inc-CLTA-1       |
| A_33_P3213288  | 4,53292 | 4,69416 | -1,118247862 | N/A             | 199       | NM_004847    | AIF1             |
| A_22_P00003175 | 4,29689 | 4,45816 | -1,118271116 | ENST00000563018 | N/A       | BC009060     | N/A              |
| A_24_P123408   | 4,95655 | 5,11783 | -1,118278867 | ENST00000517451 | 22885     | NM_014945    | ABLIM3           |
| A_21_P0001533  | 1,60876 | 1,77006 | -1,11829437  | ENST00000437598 | N/A       | N/A          | N/A              |
| A_24_P382001   | 11,5846 | 11,7459 | -1,11829437  | ENST00000481810 | 51728     | NM_016310    | POLR3K           |
| A_33_P3242069  | 3,20916 | 3,3705  | -1,118325376 | ENST00000495602 | 729159    | NM_001282301 | LOC729159        |
| A_33_P3286278  | 17,4853 | 17,6467 | -1,118371887 | ENST00000053867 | 2896      | NM_002087    | GRN              |
| A_33_P3251462  | 11,7727 | 11,9342 | -1,118449409 | ENST00000603872 | 128653    | NM_080739    | C2orf141         |
| A_33_P3411392  | 1,61162 | 1,7732  | -1,118511431 | ENST00000435497 | 140875    | N/A          | LINC00028        |
| A_22_P00006126 | 3,99074 | 4,15242 | -1,118588963 | N/A             | N/A       | CU674285     | Inc-FAM174B-4    |

|                |         |         |              |                 |           |              |                |
|----------------|---------|---------|--------------|-----------------|-----------|--------------|----------------|
| A_33_P3341239  | 14,0161 | 14,1779 | -1,118682008 | ENST00000276052 | 5127      | NM_006201    | CDK16          |
| A_22_P00018655 | 1,59803 | 1,75985 | -1,118697516 | N/A             | N/A       | N/A          | Inc-CREG1-2    |
| A_33_P3234060  | 1,71317 | 1,87504 | -1,118736288 | ENST00000388975 | 346288    | NM_207366    | set-14         |
| A_22_P00015552 | 3,19182 | 3,35371 | -1,118751797 | N/A             | N/A       | AK130710     | Inc-STOM-1     |
| A_24_P917026   | 9,2071  | 9,36899 | -1,118751797 | ENST00000358273 | 4763      | NM_001042492 | NF1            |
| A_32_P167239   | 11,1462 | 11,3082 | -1,118837101 | ENST00000296721 | 134265    | NM_152406    | AFAP1L1        |
| A_21_P0011521  | 4,05635 | 4,21837 | -1,118852612 | N/A             | N/A       | N/A          | XLOC_I2_005692 |
| A_23_P110052   | 1,57664 | 1,73873 | -1,1189069   | ENST00000330315 | 668       | NM_023067    | FOXL2          |
| A_23_P60225    | 11,4575 | 11,6196 | -1,118914656 | ENST00000491488 | 9380      | NM_012203    | GRHPR          |
| A_23_P384499   | 10,6444 | 10,8065 | -1,118914656 | ENST00000306801 | 57521     | NM_020761    | RPTOR          |
| A_24_P156576   | 6,94242 | 7,10455 | -1,118937923 | ENST00000477386 | 54960     | NM_017856    | GEMIN8         |
| A_32_P93391    | 9,85851 | 10,0207 | -1,118984459 | ENST00000397061 | 390916    | NM_001105570 | NUDT19         |
| A_22_P00000522 | 12,6753 | 12,8375 | -1,118992216 | ENST00000582689 | 100287225 | N/A          | LOC100287225   |
| A_33_P3258265  | 5,71318 | 5,87542 | -1,119023241 | ENST00000613223 | 10500     | NM_030913    | SEMA6C         |
| A_19_P00322526 | 2,60286 | 2,76512 | -1,119038754 | ENST00000447262 | 104355138 | N/A          | LINC01162      |
| A_23_P32629    | 1,65455 | 1,81683 | -1,119054267 | ENST00000620595 | 266722    | NM_153456    | HS6ST3         |
| A_33_P3410166  | 1,65211 | 1,81441 | -1,119069781 | N/A             | N/A       | N/A          | N/A            |
| A_23_P4474     | 11,1752 | 11,3375 | -1,119069781 | ENST00000256433 | 51124     | NM_016097    | IER3IP1        |
| A_21_P0012648  | 5,46585 | 5,62817 | -1,119085295 | N/A             | N/A       | N/A          | XLOC_I2_011011 |
| A_24_P353794   | 9,79614 | 9,95853 | -1,119139594 | ENST00000485438 | 2590      | NM_004481    | GALNT2         |
| A_23_P156993   | 6,70866 | 6,87105 | -1,119139594 | ENST00000414802 | 4850      | NM_001008225 | CNOT4          |
| A_33_P3279379  | 5,01344 | 5,17585 | -1,119155109 | ENST00000504533 | 171220    | NR_033796    | DSTNP2         |
| A_22_P00011609 | 4,24597 | 4,40838 | -1,119155109 | N/A             | 101929066 | NR_125430    | LOC101929066   |
| A_23_P142031   | 6,05944 | 6,22186 | -1,119162866 | ENST00000344158 | 646643    | NM_001101401 | SBK2           |
| A_33_P3247342  | 4,82201 | 4,98444 | -1,119170624 | ENST00000402530 | 50636     | NM_001001666 | ANO7           |
| A_24_P169896   | 3,70578 | 3,86826 | -1,119209412 | ENST00000619342 | 100653515 | NM_001243541 | KIAA1731NL     |
| A_33_P3364289  | 7,10487 | 7,26735 | -1,119209412 | ENST00000613195 | 84941     | NM_001291274 | HSH2D          |
| A_33_P3358582  | 1,59439 | 1,75688 | -1,11921717  | N/A             | N/A       | N/A          | N/A            |
| A_33_P3416966  | 1,68724 | 1,84974 | -1,119224928 | ENST00000389677 | 84553     | NM_032511    | FAXC           |
| A_23_P204850   | 11,5486 | 11,7111 | -1,119224928 | ENST00000267163 | 5925      | NM_000321    | RB1            |
| A_33_P3348670  | 2,84035 | 3,0029  | -1,119263718 | N/A             | N/A       | N/A          | N/A            |
| A_23_P106258   | 5,06552 | 5,22807 | -1,119263718 | ENST00000361529 | 283600    | NM_207117    | SLC25A47       |
| A_33_P3381816  | 7,26705 | 7,42963 | -1,119286992 | ENST00000374921 | 27130     | NM_183245    | INVS           |

|                |         |         |              |                 |           |              |                  |
|----------------|---------|---------|--------------|-----------------|-----------|--------------|------------------|
| A_33_P3210343  | 10,0899 | 10,2525 | -1,119302509 | ENST00000396373 | 2120      | NM_001987    | ETV6             |
| A_21_P0012485  | 2,56003 | 2,72265 | -1,119318026 | N/A             | N/A       | N/A          | XL0C_I2_010511   |
| A_33_P3381313  | 3,81025 | 3,97289 | -1,119333543 | ENST00000505231 | 729830    | NM_001109977 | FAM160A1         |
| A_21_P0009285  | 4,93525 | 5,09789 | -1,119333543 | N/A             | N/A       | N/A          | Inc-C1QTNF1-1    |
| A_22_P00006360 | 3,61781 | 3,78049 | -1,119364578 | N/A             | N/A       | XM_006717819 | Inc-FAS-1        |
| A_23_P31840    | 15,3126 | 15,4753 | -1,119380096 | ENST00000534380 | 1936      | NM_032378    | EEF1D            |
| A_33_P3380587  | 6,2464  | 6,40915 | -1,119418891 | ENST00000373206 | 26523     | NM_012199    | AGO1             |
| A_33_P3335401  | 2,71611 | 2,87887 | -1,119426651 | N/A             | N/A       | N/A          | N/A              |
| A_23_P200030   | 7,33555 | 7,49832 | -1,11943441  | ENST00000370898 | 8790      | NM_003838    | FPGT             |
| A_23_P103149   | 13,3825 | 13,5453 | -1,119457688 | ENST00000216254 | 50        | NM_001098    | ACO2             |
| A_23_P139527   | 2,37229 | 2,53511 | -1,119473207 | ENST00000289004 | 3242      | NM_002150    | HPD              |
| A_33_P3356075  | 4,99151 | 5,15443 | -1,119550806 | ENST00000396099 | 23175     | NM_001261429 | LPIN1            |
| A_23_P301942   | 1,93597 | 2,09894 | -1,119589607 | ENST00000295440 | 4880      | NM_024409    | NPPC             |
| A_33_P3394031  | 6,13215 | 6,29521 | -1,119659453 | ENST00000374223 | 91544     | NM_183008    | UBXN11           |
| A_23_P33683    | 5,04392 | 5,20699 | -1,119667214 | ENST00000381035 | 51257     | NM_016496    | mar-02           |
| A_22_P00008639 | 1,6789  | 1,842   | -1,119690497 | ENST00000524346 | N/A       | N/A          | N/A              |
| A_33_P3330786  | 1,63964 | 1,80278 | -1,119721542 | N/A             | 728339    | XR_425830    | LOC728339        |
| A_22_P00000432 | 2,81195 | 2,97514 | -1,119760349 | N/A             | N/A       | N/A          | Inc-AC073348.1-2 |
| A_33_P3415042  | 10,5542 | 10,7174 | -1,119768111 | ENST00000393896 | 47        | NM_001303274 | ACLY             |
| A_33_P3273884  | 1,94847 | 2,11175 | -1,119830206 | ENST00000477036 | 3117      | NM_002122    | HLA-DQA1         |
| A_33_P3241071  | 1,63258 | 1,79586 | -1,119830206 | N/A             | 100287284 | NM_001146221 | MANSC4           |
| A_23_P310331   | 11,6275 | 11,7908 | -1,11984573  | ENST00000340578 | 8498      | NM_003624    | RANBP3           |
| A_19_P00810751 | 5,0576  | 5,22097 | -1,119900066 | N/A             | N/A       | N/A          | Inc-GBP5-2       |
| A_33_P3415744  | 8,25805 | 8,42144 | -1,119915592 | ENST00000438709 | 57730     | NM_025190    | ANKRD36B         |
| A_33_P3416881  | 4,26662 | 4,43007 | -1,119962169 | ENST00000623058 | 29798     | NM_013310    | C2orf27A         |
| A_23_P88626    | 3,18385 | 3,34731 | -1,119969932 | ENST00000300060 | 290       | NM_001150    | ANPEP            |
| A_22_P00020938 | 6,51047 | 6,674   | -1,120024274 | N/A             | N/A       | AK057858     | Inc-DHX34-2      |
| A_24_P34611    | 3,62929 | 3,79283 | -1,120032038 | ENST00000260653 | 6496      | NM_005413    | SIX3             |
| A_21_P0009835  | 3,82822 | 3,99182 | -1,120078619 | ENST00000449427 | 100270679 | N/A          | LINC01432        |
| A_23_P149975   | 12,3794 | 12,543  | -1,120078619 | ENST00000378467 | 83641     | NM_031453    | FAM107B          |
| A_23_P359616   | 11,9209 | 12,0846 | -1,12015626  | ENST00000370654 | 80135     | NM_025065    | RPF1             |
| A_33_P3261869  | 7,2862  | 7,44994 | -1,120187318 | ENST00000397940 | 10361     | NM_001286680 | NPM2             |
| A_23_P148473   | 5,79376 | 5,95751 | -1,120195082 | ENST00000456850 | 3561      | NM_000206    | IL2RG            |

|                |         |         |              |                 |           |              |               |
|----------------|---------|---------|--------------|-----------------|-----------|--------------|---------------|
| A_21_P0007795  | 1,47685 | 1,64063 | -1,120218376 | N/A             | N/A       | N/A          | Inc-SLC15A4-8 |
| A_23_P371787   | 12,2319 | 12,3958 | -1,120311557 | ENST00000342745 | 9766      | NM_014734    | SUSD6         |
| A_23_P209652   | 5,55436 | 5,71842 | -1,120435811 | ENST00000403263 | 54891     | NM_017759    | INO80D        |
| A_33_P3407606  | 3,19496 | 3,35906 | -1,120466876 | ENST00000447323 | 4478      | XR_426530    | MSN           |
| A_23_P34548    | 7,10382 | 7,26797 | -1,120505709 | ENST00000622598 | 10806     | NM_006642    | SDCCAG8       |
| A_23_P132041   | 1,55151 | 1,71579 | -1,120606682 | ENST00000538900 | 140894    | XM_005260295 | CNBD2         |
| A_24_P251962   | 6,35358 | 6,51787 | -1,120614449 | ENST00000231130 | 56133     | NM_018936    | PCDHB2        |
| A_23_P379945   | 10,142  | 10,3063 | -1,120622217 | ENST00000389857 | 440193    | NM_001080414 | CCDC88C       |
| A_19_P00317360 | 4,94872 | 5,11311 | -1,120692127 | ENST00000504381 | 27032     | NM_001199182 | ATP2C1        |
| A_33_P3299934  | 1,62702 | 1,79141 | -1,120692127 | ENST00000581851 | 100289255 | NR_036581    | LINC00675     |
| A_22_P00021677 | 10,6325 | 10,7969 | -1,120699895 | ENST00000340022 | 889       | NM_194455    | KRIT1         |
| A_33_P3251054  | 10,9024 | 11,0668 | -1,120699895 | ENST00000357058 | 152006    | NM_194328    | RNF38         |
| A_23_P357929   | 5,65678 | 5,82119 | -1,120707663 | ENST00000235345 | 23169     | NM_015139    | SLC35D1       |
| A_23_P202458   | 11,0079 | 11,1724 | -1,120777579 | ENST00000298299 | 7570      | NM_006963    | ZNF22         |
| A_33_P3347772  | 7,71876 | 7,88327 | -1,120785347 | ENST00000473479 | 4735      | AK025163     | set-02        |
| A_33_P3393010  | 2,99243 | 3,15695 | -1,120793116 | ENST00000492861 | 91461     | AK311155     | PKDCC         |
| A_23_P47466    | 2,22203 | 2,38656 | -1,120800885 | ENST00000287143 | 10394     | NM_006093    | PRG3          |
| A_23_P216915   | 2,70485 | 2,86941 | -1,120824192 | ENST00000373588 | 2516      | NM_004959    | NR5A1         |
| A_21_P0010501  | 5,75482 | 5,91948 | -1,120901884 | N/A             | N/A       | N/A          | HOTAIR        |
| A_22_P00003446 | 6,25547 | 6,4202  | -1,120956272 | N/A             | N/A       | N/A          | Inc-CCDC51-1  |
| A_22_P00012584 | 1,60968 | 1,77442 | -1,120964042 | N/A             | 100505832 | XR_247058    | PROX1-AS1     |
| A_33_P3339987  | 2,5671  | 2,73188 | -1,120995122 | ENST00000490892 | N/A       | N/A          | N/A           |
| A_23_P80626    | 8,01775 | 8,18259 | -1,121041744 | ENST00000412055 | 285368    | NM_207351    | PRRT3         |
| A_19_P00319276 | 3,27933 | 3,44418 | -1,121049514 | N/A             | N/A       | N/A          | Inc-BMP7-2    |
| A_23_P46039    | 1,75318 | 1,91805 | -1,121065055 | ENST00000236938 | 84824     | NM_032738    | FCRLA         |
| A_23_P168610   | 10,1266 | 10,2915 | -1,121088367 | ENST00000262067 | 27075     | NM_014399    | TSPAN13       |
| A_33_P3377100  | 1,65133 | 1,81626 | -1,12111168  | ENST00000237527 | 2691      | NM_021081    | GHRH          |
| A_33_P3333537  | 7,60328 | 7,76821 | -1,12111168  | ENST00000395898 | 54832     | NM_020821    | VPS13C        |
| A_33_P3352887  | 8,79362 | 8,95863 | -1,121173849 | ENST00000424684 | 388692    | NR_111933    | LOC388692     |
| A_33_P3250830  | 5,2786  | 5,44362 | -1,121181621 | ENST00000367912 | 339512    | XM_005245126 | C1orf110      |
| A_24_P66780    | 8,05677 | 8,22182 | -1,121204935 | ENST00000306858 | 222584    | NM_001010872 | FAM83B        |
| A_23_P24926    | 13,6042 | 13,7693 | -1,121243794 | ENST00000525099 | 2339      | NM_002027    | FNTA          |
| A_23_P45917    | 15,0745 | 15,2397 | -1,121321515 | ENST00000477676 | 1163      | NM_001826    | CKS1B         |

|                |         |         |              |                 |           |              |               |
|----------------|---------|---------|--------------|-----------------|-----------|--------------|---------------|
| A_33_P3250521  | 1,60753 | 1,77274 | -1,121329288 | ENST00000355568 | 341676    | NM_199289    | NEK5          |
| A_21_P0004755  | 2,32859 | 2,49384 | -1,121360378 | ENST00000420819 | 101927136 | N/A          | LOC101927136  |
| A_23_P79572    | 3,58829 | 3,75358 | -1,121391469 | N/A             | 85009     | NR_026664    | MGC16025      |
| A_32_P353798   | 12,3147 | 12,48   | -1,121399242 | ENST00000308020 | 81490     | NM_030783    | PTDSS2        |
| A_23_P95302    | 12,5748 | 12,7401 | -1,121399242 | ENST00000392542 | 5985      | NM_181578    | RFC5          |
| A_33_P3279407  | 1,61781 | 1,78319 | -1,121461428 | ENST00000619146 | 8224      | NM_133633    | SYN3          |
| A_23_P76102    | 7,64632 | 7,81184 | -1,12157026  | ENST00000546799 | 10220     | NM_005811    | GDF11         |
| A_33_P3255354  | 7,18839 | 7,35391 | -1,12157026  | ENST00000487810 | 22978     | NM_012229    | NT5C2         |
| A_23_P54963    | 10,5784 | 10,744  | -1,121632455 | ENST00000493104 | 64978     | NM_032478    | MRPL38        |
| A_33_P3375950  | 15,3528 | 15,5184 | -1,121632455 | ENST00000494116 | N/A       | N/A          | N/A           |
| A_23_P48217    | 8,99872 | 9,16438 | -1,121679103 | ENST00000326765 | 81575     | NM_030817    | APOLD1        |
| A_21_P0007310  | 2,85447 | 3,02013 | -1,121679103 | N/A             | 100133545 | NR_024471    | MRPL23-AS1    |
| A_23_P65472    | 1,39721 | 1,56297 | -1,121756855 | ENST00000557105 | 122651    | NM_145250    | RNASE11       |
| A_22_P00004511 | 4,58928 | 4,75505 | -1,12176463  | N/A             | N/A       | N/A          | Inc-CPT2-6    |
| A_22_P00000491 | 1,66517 | 1,83097 | -1,121787957 | ENST00000446169 | N/A       | N/A          | N/A           |
| A_33_P3329991  | 10,8183 | 10,9841 | -1,121787957 | N/A             | N/A       | N/A          | N/A           |
| A_33_P3256396  | 1,90641 | 2,07224 | -1,121811284 | ENST00000496357 | 8447      | NM_003585    | DOC2B         |
| A_33_P3382105  | 12,1604 | 12,3263 | -1,121865716 | N/A             | N/A       | N/A          | N/A           |
| A_23_P156748   | 11,466  | 11,6319 | -1,121865716 | ENST00000360359 | 23294     | NM_015245    | ANKS1A        |
| A_22_P00002040 | 12,3128 | 12,4788 | -1,121943481 | N/A             | N/A       | AK055961     | Inc-BHLHE41-2 |
| A_23_P317105   | 8,61557 | 8,78157 | -1,121943481 | ENST00000225737 | 11216     | NM_007202    | AKAP10        |
| A_22_P00004216 | 8,69404 | 8,86004 | -1,121943481 | N/A             | 283314    | NR_026947    | C1RL-AS1      |
| A_21_P0012930  | 3,42312 | 3,58913 | -1,121951257 | ENST00000513919 | 643201    | NR_036494    | LOC643201     |
| A_22_P00022191 | 1,74413 | 1,91015 | -1,121959034 | N/A             | 101929225 | NR_110101    | MCM8-AS1      |
| A_33_P3300680  | 8,5976  | 8,76369 | -1,122013473 | ENST00000342680 | 83636     | NM_001256046 | C19orf12      |
| A_23_P46429    | 13,5401 | 13,7062 | -1,12202125  | ENST00000617517 | 3491      | NM_001554    | CYR61         |
| A_32_P108254   | 6,98347 | 7,14961 | -1,12205236  | ENST00000375556 | 54757     | NM_017565    | FAM20A        |
| A_33_P3374049  | 9,75845 | 9,92461 | -1,122067915 | ENST00000567634 | 90231     | NM_138346    | KIAA2013      |
| A_33_P3368675  | 8,75354 | 8,9197  | -1,122067915 | N/A             | 387263    | NM_001029863 | C6orf120      |
| A_23_P152344   | 7,37532 | 7,54153 | -1,122106804 | ENST00000562609 | 2975      | NM_001520    | GTF3C1        |
| A_23_P383590   | 1,62094 | 1,78718 | -1,122130137 | ENST00000484933 | 339524    | NR_026985    | LINC01140     |
| A_22_P00018221 | 2,03474 | 2,20098 | -1,122130137 | ENST00000420585 | N/A       | N/A          | N/A           |
| A_24_P277747   | 8,8046  | 8,97095 | -1,122215699 | ENST00000394142 | 10695     | NM_006586    | CNPY3         |

|                |         |         |              |                 |           |           |               |
|----------------|---------|---------|--------------|-----------------|-----------|-----------|---------------|
| A_22_P00014057 | 9,46904 | 9,63543 | -1,122246814 | ENST00000568471 | N/A       | N/A       | N/A           |
| A_22_P00006994 | 4,75431 | 4,92074 | -1,122277929 | N/A             | N/A       | N/A       | Inc-GFI1B-1   |
| A_22_P00017555 | 8,19031 | 8,35675 | -1,122285708 | N/A             | N/A       | AL136830  | Inc-WDR45L-1  |
| A_22_P00022326 | 4,23834 | 4,40487 | -1,122355722 | N/A             | 101927793 | XR_424747 | LOC101927793  |
| A_21_P0013568  | 4,39217 | 4,55876 | -1,122402401 | ENST00000625012 | N/A       | N/A       | N/A           |
| A_33_P3353425  | 7,29122 | 7,45784 | -1,122425741 | ENST00000478329 | 57695     | NM_020935 | USP37         |
| A_33_P3381781  | 5,52665 | 5,69332 | -1,122464642 | ENST00000369067 | 23248     | N/A       | RPRD2         |
| A_22_P00023919 | 7,67503 | 7,84177 | -1,122519105 | N/A             | N/A       | N/A       | Inc-MEGF10-1  |
| A_21_P0013607  | 3,75925 | 3,92612 | -1,122620259 | N/A             | 101928483 | N/A       | LINC01573     |
| A_21_P0007979  | 5,14805 | 5,31492 | -1,122620259 | ENST00000432770 | N/A       | N/A       | N/A           |
| A_21_P0010602  | 4,76036 | 4,92726 | -1,122643604 | ENST00000362058 | 9696      | NM_014675 | CROCC         |
| A_22_P00002021 | 1,76124 | 1,92819 | -1,122682512 | N/A             | 100874313 | NR_046839 | AGBL4-IT1     |
| A_21_P0007769  | 1,59147 | 1,75845 | -1,122705858 | N/A             | N/A       | N/A       | Inc-MED13L-1  |
| A_33_P3362812  | 14,7017 | 14,8688 | -1,122799246 | ENST00000416186 | N/A       | N/A       | N/A           |
| A_21_P0014429  | 1,64158 | 1,80869 | -1,122807029 | ENST00000462631 | 112885    | XR_109729 | PHF21B        |
| A_22_P00016144 | 8,99905 | 9,16617 | -1,122814811 | ENST00000554218 | 379025    | NR_029435 | PSMA3-AS1     |
| A_33_P3301915  | 2,40378 | 2,57095 | -1,122853726 | ENST00000500968 | 158880    | NM_201286 | USP51         |
| A_22_P00020276 | 6,22251 | 6,3897  | -1,122869292 | ENST00000563660 | 4123      | BX647111  | MAN2C1        |
| A_23_P167983   | 11,3062 | 11,4734 | -1,122877075 | ENST00000314088 | 8334      | BC050602  | HIST1H2AC     |
| A_33_P3404566  | 4,75197 | 4,91917 | -1,122877075 | N/A             | N/A       | N/A       | N/A           |
| A_23_P218131   | 10,3485 | 10,5157 | -1,122877075 | ENST00000398337 | 64423     | NM_032714 | INF2          |
| A_33_P3299719  | 1,96841 | 2,13571 | -1,12295491  | ENST00000329335 | 94137     | AK127545  | RP1L1         |
| A_23_P59153    | 10,4951 | 10,6625 | -1,12303275  | ENST00000375661 | 57819     | NM_021177 | LSM2          |
| A_33_P3309804  | 4,69904 | 4,86649 | -1,123071672 | ENST00000530028 | 23741     | NM_014335 | EID1          |
| A_22_P00002114 | 1,44304 | 1,61052 | -1,123095026 | ENST00000518902 | N/A       | N/A       | N/A           |
| A_33_P3351259  | 4,81091 | 4,97843 | -1,123126165 | N/A             | 100130560 | AK127462  | LOC100130560  |
| A_22_P00002048 | 13,8017 | 13,9693 | -1,123188446 | N/A             | N/A       | BX648058  | Inc-BID-2     |
| A_33_P3210622  | 6,65853 | 6,82617 | -1,123219588 | ENST00000482921 | 79754     | NM_024701 | ASB13         |
| A_19_P00321166 | 8,02505 | 8,19271 | -1,123235159 | N/A             | 100132356 | NR_034127 | LOC100132356  |
| A_21_P0003828  | 5,83608 | 6,00384 | -1,123313018 | N/A             | N/A       | N/A       | Inc-TBC1D19-4 |
| A_22_P00008945 | 1,96118 | 2,12899 | -1,12335195  | N/A             | N/A       | BC042076  | Inc-KRT81-3   |
| A_21_P0000034  | 8,3851  | 8,55292 | -1,123359737 | ENST00000299335 | 1353      | NM_004375 | COX11         |
| A_21_P0010339  | 4,55818 | 4,72615 | -1,123476541 | ENST00000438850 | N/A       | N/A       | N/A           |



|                |         |         |              |                 |           |              |                |
|----------------|---------|---------|--------------|-----------------|-----------|--------------|----------------|
| A_23_P121480   | 1,67397 | 1,84194 | -1,123476541 | ENST00000478595 | 4345      | NM_001004196 | CD200          |
| A_23_P99163    | 10,0509 | 10,2189 | -1,123499903 | ENST00000258534 | 55332     | NM_018370    | DRAM1          |
| A_21_P0000463  | 8,84866 | 9,01666 | -1,123499903 | N/A             | 100113382 | NR_003688    | SNORD105B      |
| A_21_P0009988  | 2,02539 | 2,19345 | -1,123546629 | N/A             | N/A       | N/A          | Inc-LSM14B-1   |
| A_22_P00003211 | 1,82805 | 1,99614 | -1,123569993 | ENST00000532768 | 102724496 | N/A          | LOC102724496   |
| A_33_P3210904  | 6,90498 | 7,07307 | -1,123569993 | ENST00000397101 | 6396      | AK095629     | SEC13          |
| A_21_P0011605  | 9,37733 | 9,54543 | -1,123577781 | ENST00000565833 | 201283    | NR_026903    | AMZ2P1         |
| A_22_P00012468 | 6,80027 | 6,96838 | -1,123585569 | N/A             | 100506325 | NR_103857    | SP2-AS1        |
| A_33_P3421183  | 4,22479 | 4,39293 | -1,123608933 | ENST00000473333 | N/A       | N/A          | N/A            |
| A_22_P00023586 | 6,9734  | 7,14176 | -1,123780288 | ENST00000497089 | 3205      | NM_152739    | HOXA9          |
| A_24_P297537   | 5,02216 | 5,19053 | -1,123788078 | ENST00000356751 | 284358    | NM_182574    | MAMSTR         |
| A_23_P1956     | 12,4357 | 12,6041 | -1,123811447 | ENST00000307366 | 79064     | NM_001080501 | TMEM223        |
| A_21_P0014590  | 3,30546 | 3,47389 | -1,123834816 | N/A             | N/A       | N/A          | N/A            |
| A_22_P00025377 | 1,60014 | 1,76858 | -1,123842606 | N/A             | 100874237 | NR_046666    | CACNA2D3-AS1   |
| A_24_P389491   | 10,2573 | 10,4258 | -1,123889346 | ENST00000461102 | 51117     | NM_016035    | COQ4           |
| A_21_P0012667  | 1,66359 | 1,83214 | -1,123928298 | ENST00000503987 | 101927237 | NR_110747    | LOC101927237   |
| A_33_P3309646  | 3,31699 | 3,48557 | -1,123951669 | ENST00000441159 | N/A       | AK090395     | N/A            |
| A_22_P00024035 | 1,65669 | 1,82529 | -1,123967251 | ENST00000424084 | N/A       | N/A          | N/A            |
| A_21_P0010932  | 2,15386 | 2,32254 | -1,124029578 | ENST00000417149 | N/A       | N/A          | N/A            |
| A_33_P3255209  | 11,6726 | 11,8413 | -1,124045161 | ENST00000281923 | 4249      | NM_002410    | MGAT5          |
| A_21_P0005490  | 1,42541 | 1,59414 | -1,124068535 | N/A             | N/A       | N/A          | Inc-HERPUD2-4  |
| A_32_P220696   | 8,20812 | 8,37687 | -1,124084118 | ENST00000276602 | 7013      | NM_017489    | TERF1          |
| A_23_P137434   | 12,7729 | 12,9417 | -1,124123076 | ENST00000242719 | 26994     | NM_014372    | RNF11          |
| A_23_P155477   | 5,29344 | 5,46225 | -1,124130868 | ENST00000449241 | 51161     | NM_016210    | C3orf18        |
| A_22_P00001437 | 2,74335 | 2,91218 | -1,124146452 | ENST00000450551 | N/A       | N/A          | N/A            |
| A_22_P00021771 | 1,38641 | 1,55526 | -1,124162036 | ENST00000414065 | N/A       | N/A          | N/A            |
| A_33_P3351745  | 4,50108 | 4,66994 | -1,124169828 | ENST00000451963 | 79037     | NM_024070    | PVRIG          |
| A_22_P00016584 | 5,89883 | 6,06772 | -1,124193205 | ENST00000423632 | N/A       | N/A          | N/A            |
| A_33_P3357918  | 14,2442 | 14,4132 | -1,124278924 | ENST00000252603 | 25796     | NM_012088    | PGLS           |
| A_21_P0006976  | 3,89596 | 4,06496 | -1,124278924 | ENST00000455612 | 101929117 | XR_242740    | LOC101929117   |
| A_21_P0011491  | 18,2952 | 18,4642 | -1,124278924 | N/A             | N/A       | N/A          | XLOC_l2_005557 |
| A_21_P0003075  | 4,86787 | 5,03688 | -1,124286717 | ENST00000434896 | N/A       | N/A          | N/A            |
| A_24_P313180   | 3,62469 | 3,79374 | -1,124317889 | ENST00000256319 | 11161     | AF134159     | C14orf1        |

|                |         |         |              |                 |           |              |                  |
|----------------|---------|---------|--------------|-----------------|-----------|--------------|------------------|
| A_23_P97283    | 10,5021 | 10,6712 | -1,124356856 | ENST00000468632 | 79957     | NM_024897    | PAQR6            |
| A_21_P0000604  | 2,91576 | 3,08487 | -1,124364649 | ENST00000514950 | 390213    | NR_033791    | DOC2GP           |
| A_22_P00018296 | 4,21395 | 4,38306 | -1,124364649 | N/A             | N/A       | N/A          | Inc-ZNF814-1     |
| A_23_P335848   | 9,65243 | 9,82162 | -1,124426999 | ENST00000361006 | 9815      | NM_057169    | GIT2             |
| A_22_P00000560 | 6,18823 | 6,35746 | -1,124458175 | N/A             | N/A       | N/A          | Inc-AC127496.3-4 |
| A_33_P3279470  | 4,26218 | 4,43141 | -1,124458175 | ENST00000290953 | 181       | NM_001138    | AGRP             |
| A_22_P00014138 | 3,24002 | 3,4093  | -1,124497146 | ENST00000424453 | N/A       | N/A          | N/A              |
| A_21_P0000518  | 2,74538 | 2,91467 | -1,124504941 | ENST00000514871 | 283731    | NR_027073    | LOC283731        |
| A_21_P0010673  | 3,51511 | 3,68451 | -1,124590683 | ENST00000617077 | 101928976 | N/A          | LOC101928976     |
| A_22_P00005635 | 3,40904 | 3,57849 | -1,124629659 | N/A             | 102724805 | XR_425420    | LOC102724805     |
| A_33_P3210160  | 18,4953 | 18,6648 | -1,124668637 | ENST00000432005 | 100507290 | NM_001195605 | ZNF865           |
| A_23_P143127   | 13,1503 | 13,3198 | -1,124668637 | ENST00000318522 | 27436     | XM_005264267 | EML4             |
| A_32_P85813    | 9,70836 | 9,87792 | -1,124715411 | ENST00000408927 | 5910      | NM_001100426 | RAP1GDS1         |
| A_33_P3332744  | 6,46538 | 6,63497 | -1,124738799 | ENST00000586175 | 9267      | NM_001292018 | CYTH1            |
| A_33_P3390232  | 4,97843 | 5,14805 | -1,124762188 | N/A             | N/A       | BX648392     | N/A              |
| A_33_P3406281  | 7,07173 | 7,24137 | -1,124777781 | ENST00000262878 | 25939     | NM_015474    | SAMHD1           |
| A_23_P164638   | 7,13651 | 7,3062  | -1,124816763 | ENST00000442920 | 79744     | NM_024691    | ZNF419           |
| A_23_P39453    | 8,82358 | 8,99329 | -1,124832356 | ENST00000402693 | 399664    | NM_203304    | MEX3D            |
| A_24_P268015   | 10,2135 | 10,3833 | -1,124902529 | ENST00000373073 | 64769     | NM_022756    | MEAF6            |
| A_23_P304287   | 13,1158 | 13,2856 | -1,124902529 | ENST00000292644 | 5701      | NM_002803    | PSMC2            |
| A_21_P0006814  | 1,748   | 1,91781 | -1,124910327 | N/A             | N/A       | N/A          | Inc-PFKP-8       |
| A_33_P3302344  | 3,67042 | 3,84026 | -1,124933719 | N/A             | 100128320 | AK125438     | LOC100128320     |
| A_22_P00024044 | 4,61645 | 4,78633 | -1,124964909 | ENST00000561310 | N/A       | DA446599     | N/A              |
| A_23_P108028   | 10,2537 | 10,4236 | -1,124980504 | ENST00000456324 | 7705      | NM_007145    | ZNF146           |
| A_33_P3585268  | 15,8778 | 16,0478 | -1,125058485 | ENST00000490122 | 2771      | NM_001282619 | GNAI2            |
| A_23_P4572     | 15,275  | 15,445  | -1,125058485 | ENST00000578611 | 10627     | NM_006471    | MYL12A           |
| A_21_P0014073  | 4,65316 | 4,82324 | -1,125120873 | N/A             | 101927886 | XR_241120    | LOC101927886     |
| A_24_P111511   | 7,16612 | 7,33621 | -1,125128672 | ENST00000392695 | 79809     | NM_024753    | TTC21B           |
| A_33_P3247678  | 10,8249 | 10,995  | -1,125136471 | N/A             | N/A       | N/A          | N/A              |
| A_33_P3350892  | 4,29218 | 4,46229 | -1,125144269 | N/A             | 651337    | AK125987     | LOC651337        |
| A_23_P167805   | 2,49181 | 2,662   | -1,125206662 | ENST00000615536 | 135152    | NM_080742    | B3GAT2           |
| A_22_P00020132 | 1,63288 | 1,80308 | -1,125214462 | N/A             | N/A       | N/A          | Inc-RPS4XP21-1   |
| A_23_P86182    | 13,7868 | 13,957  | -1,125214462 | ENST00000581066 | 54460     | NM_031901    | MRPS21           |

|                |         |         |              |                 |           |              |               |
|----------------|---------|---------|--------------|-----------------|-----------|--------------|---------------|
| A_33_P3246026  | 1,5495  | 1,71973 | -1,12523786  | ENST00000334879 | 644414    | NM_001040448 | DEFB131       |
| A_21_P0000017  | 5,0689  | 5,23915 | -1,125253459 | N/A             | 6224      | NM_001146227 | RPS20         |
| A_33_P3273394  | 1,67469 | 1,84499 | -1,125292458 | N/A             | 101928423 | XR_242343    | LOC101928423  |
| A_23_P82351    | 7,97286 | 8,14319 | -1,125315858 | ENST00000434373 | 27241     | NM_198428    | BBS9          |
| A_32_P89679    | 8,5983  | 8,76872 | -1,125386061 | ENST00000308742 | 144245    | NM_001013620 | ALG10B        |
| A_33_P3399755  | 9,89781 | 10,0683 | -1,125440667 | ENST00000570199 | 2038      | N/A          | EPB42         |
| A_33_P3411397  | 15,508  | 15,6785 | -1,125448468 | ENST00000381401 | 293       | NM_001636    | SLC25A6       |
| A_22_P00016227 | 1,77137 | 1,94189 | -1,12546407  | ENST00000437113 | 104355149 | N/A          | LINC01039     |
| A_21_P0000901  | 3,43102 | 3,60156 | -1,125479672 | N/A             | 285266    | NR_040100    | ENTPD3-AS1    |
| A_23_P214046   | 12,1989 | 12,3695 | -1,125526481 | ENST00000265094 | 23291     | NM_012300    | FBXW11        |
| A_23_P71649    | 3,776   | 3,94663 | -1,125549886 | ENST00000374448 | 4593      | NM_005592    | MUSK          |
| A_33_P3246028  | 1,71883 | 1,88946 | -1,125549886 | ENST00000409358 | 149069    | NM_001099434 | DCDC2B        |
| A_21_P0007559  | 1,77035 | 1,94103 | -1,125588895 | N/A             | N/A       | N/A          | Inc-TARBP2-3  |
| A_22_P00004674 | 2,17415 | 2,34484 | -1,125596697 | ENST00000562572 | N/A       | N/A          | N/A           |
| A_24_P336848   | 10,3623 | 10,533  | -1,125604499 | ENST00000394666 | 98        | NM_138448    | ACYP2         |
| A_23_P201711   | 17,4152 | 17,5859 | -1,125604499 | ENST00000462776 | 6277      | NM_014624    | S100A6        |
| A_24_P831309   | 8,64794 | 8,81865 | -1,125612301 | ENST00000408893 | 388759    | NM_207401    | C1orf229      |
| A_33_P3357573  | 3,47481 | 3,64552 | -1,125612301 | ENST00000398940 | 55534     | NM_018717    | MAML3         |
| A_19_P00326248 | 3,94088 | 4,11175 | -1,125737142 | N/A             | N/A       | N/A          | Inc-CHIC1-2   |
| A_21_P0004858  | 1,59346 | 1,76434 | -1,125744945 | N/A             | N/A       | N/A          | Inc-BTN3A2-1  |
| A_32_P136402   | 12,7673 | 12,9382 | -1,125760552 | ENST00000469153 | 80145     | NM_025075    | THOC7         |
| A_33_P3367830  | 8,68822 | 8,85916 | -1,125791765 | ENST00000526628 | 30008     | NM_016938    | EFEMP2        |
| A_33_P3346529  | 1,61382 | 1,78476 | -1,125791765 | ENST00000366492 | 441932    | NM_001004698 | OR2W5         |
| A_33_P3870906  | 1,77156 | 1,94252 | -1,125807372 | N/A             | 100507634 | N/A          | LOC100507634  |
| A_23_P331253   | 8,93652 | 9,10748 | -1,125807372 | ENST00000369658 | 7511      | NM_020383    | XPNPEP1       |
| A_22_P00012092 | 1,61268 | 1,78368 | -1,125838586 | ENST00000579752 | 94151     | NR_103559    | CDRT8         |
| A_22_P00016098 | 2,24067 | 2,41171 | -1,125869801 | N/A             | N/A       | N/A          | Inc-THRSP-1   |
| A_22_P00006910 | 2,80342 | 2,97452 | -1,125916626 | N/A             | N/A       | BI461347     | Inc-GAS2-1    |
| A_33_P3216458  | 3,2905  | 3,46165 | -1,125955648 | ENST00000444281 | 8745      | NM_003812    | ADAM23        |
| A_22_P00020656 | 1,73699 | 1,90819 | -1,125994671 | N/A             | N/A       | AK098665     | Inc-RNF144B-1 |
| A_22_P00010713 | 4,44332 | 4,61454 | -1,126010281 | N/A             | N/A       | N/A          | Inc-NGFR-1    |
| A_21_P0009077  | 4,20241 | 4,37372 | -1,126080527 | N/A             | N/A       | N/A          | Inc-GINS2-3   |
| A_21_P0011212  | 4,69095 | 4,86233 | -1,126135166 | ENST00000424329 | 101930748 | N/A          | LINC00367     |

|                |         |         |              |                 |           |              |               |
|----------------|---------|---------|--------------|-----------------|-----------|--------------|---------------|
| A_33_P3292719  | 1,62507 | 1,79659 | -1,126244453 | ENST00000293922 | 390667    | NM_001013658 | PTX4          |
| A_22_P00024695 | 7,61395 | 7,78551 | -1,126275679 | N/A             | 100506469 | NR_038396    | TMEM147-AS1   |
| A_22_P00007508 | 1,64028 | 1,81188 | -1,126306907 | ENST00000435352 | N/A       | DB100530     | N/A           |
| A_33_P3417695  | 11,2542 | 11,4259 | -1,126384979 | ENST00000329363 | 440836    | NM_001014440 | ODF3B         |
| A_21_P0001553  | 4,81862 | 4,99035 | -1,126408402 | N/A             | N/A       | N/A          | Inc-DPYD-1    |
| A_33_P3324394  | 2,52678 | 2,69851 | -1,126408402 | ENST00000537380 | 4261      | NM_001286403 | CIITA         |
| A_33_P3567512  | 9,77275 | 9,94465 | -1,12654114  | ENST00000566025 | N/A       | BC125059     | N/A           |
| A_23_P149206   | 11,6464 | 11,8183 | -1,12654114  | ENST00000356836 | 8704      | NM_003780    | B4GALT2       |
| A_21_P0002185  | 4,14398 | 4,31591 | -1,126564566 | N/A             | N/A       | N/A          | Inc-EFR3B-3   |
| A_33_P3289536  | 5,49473 | 5,66667 | -1,126572375 | ENST00000462993 | 29887     | NM_001199835 | SNX10         |
| A_23_P29422    | 8,45437 | 8,62633 | -1,126587992 | ENST00000296048 | 2992      | NM_004130    | GYG1          |
| A_23_P501339   | 9,83753 | 10,0096 | -1,126673894 | ENST00000562041 | 10423     | NM_006319    | CDIPT         |
| A_22_P00005314 | 5,54585 | 5,71794 | -1,126689513 | N/A             | N/A       | N/A          | Inc-DNASE1-1  |
| A_22_P00009029 | 12,784  | 12,9561 | -1,126697322 | N/A             | 84973     | NR_024543    | SNHG7         |
| A_22_P00005977 | 2,36878 | 2,54089 | -1,126705132 | N/A             | 285780    | NR_026970    | LY86-AS1      |
| A_33_P3280841  | 3,71488 | 3,88707 | -1,126767612 | ENST00000417193 | 388387    | NR_027254    | LINC00671     |
| A_33_P3325758  | 3,2238  | 3,39618 | -1,126916014 | N/A             | N/A       | XM_001714032 | Inc-SPATC1-1  |
| A_33_P3349591  | 5,91389 | 6,08632 | -1,126955071 | ENST00000607327 | 100129461 | NR_126016    | LOC100129461  |
| A_22_P00005359 | 5,08669 | 5,25912 | -1,126955071 | ENST00000521601 | 1807      | NM_001385    | DPYS          |
| A_23_P143994   | 7,57788 | 7,75042 | -1,127041    | ENST00000421731 | 2177      | NM_001018115 | FANCD2        |
| A_33_P3324805  | 5,00649 | 5,17907 | -1,127072249 | ENST00000430831 | N/A       | N/A          | N/A           |
| A_23_P200386   | 14,0233 | 14,1959 | -1,127087874 | ENST00000307714 | 10657     | NM_006559    | KHDRBS1       |
| A_24_P319354   | 9,78835 | 9,96097 | -1,127103499 | ENST00000439961 | 7341      | NM_001005781 | SUMO1         |
| A_33_P3376786  | 1,47572 | 1,64839 | -1,127142562 | ENST00000377469 | 102724515 | XR_425415    | LINC01291     |
| A_23_P117494   | 13,4467 | 13,6194 | -1,127166    | ENST00000556284 | 4522      | NM_005956    | MTHFD1        |
| A_23_P145175   | 8,90066 | 9,07343 | -1,127220692 | ENST00000361428 | 24149     | NM_014345    | ZNF318        |
| A_33_P3305851  | 7,53923 | 7,7121  | -1,127298828 | ENST00000471696 | 51714     | NM_016275    | SELT          |
| A_23_P257895   | 9,48185 | 9,65476 | -1,127330083 | ENST00000544786 | 5594      | NM_138957    | MAPK1         |
| A_22_P00004355 | 4,85354 | 5,02646 | -1,127337898 | N/A             | N/A       | AK026906     | Inc-COL24A1-1 |
| A_23_P217178   | 3,7396  | 3,91252 | -1,127337898 | ENST00000285879 | 9947      | NM_005462    | MAGEC1        |
| A_23_P125435   | 1,58419 | 1,75714 | -1,12736134  | ENST00000295454 | 2560      | NM_000812    | GABRB1        |
| A_33_P3893191  | 8,85367 | 9,02662 | -1,12736134  | ENST00000491724 | 100169989 | NR_036635    | DBIL5P2       |
| A_23_P15564    | 12,6866 | 12,8596 | -1,127400412 | ENST00000577866 | 51321     | NM_016627    | AMZ2          |

|                |         |         |              |                 |           |              |                       |
|----------------|---------|---------|--------------|-----------------|-----------|--------------|-----------------------|
| A_23_P146077   | 11,7617 | 11,9348 | -1,12747856  | ENST00000344423 | 55893     | NM_018660    | ZNF395                |
| A_22_P00012195 | 2,00505 | 2,17816 | -1,127486375 | ENST00000519319 | 100750225 | NR_045262    | PCAT1                 |
| A_24_P36890    | 5,6363  | 5,80945 | -1,127517636 | ENST00000611549 | 5909      | NM_002885    | RAP1GAP               |
| A_23_P164927   | 6,91946 | 7,09265 | -1,127548898 | ENST00000344846 | 23546     | NM_012451    | SYNGR4                |
| A_22_P00009587 | 3,71209 | 3,88531 | -1,127572345 | N/A             | N/A       | N/A          | Inc-MAPK6-1           |
| A_24_P416411   | 8,59188 | 8,76512 | -1,127587977 | ENST00000613219 | 5193      | NM_000286    | PEX12                 |
| A_23_P315789   | 7,86316 | 8,03642 | -1,127603609 | ENST00000255476 | 5994      | NM_000538    | RFXAP                 |
| A_33_P3276918  | 7,74601 | 7,91929 | -1,127619241 | ENST00000405197 | 54478     | NM_001195228 | FAM64A                |
| A_23_P300867   | 8,36697 | 8,54034 | -1,127689587 | ENST00000545536 | 145282    | NM_138731    | MIPOL1                |
| A_22_P00013919 | 4,11688 | 4,29026 | -1,127697404 | N/A             | N/A       | N/A          | Inc-RPS6-1            |
| A_33_P3401252  | 12,756  | 12,9294 | -1,127713037 | ENST00000415545 | N/A       | AY956769     | N/A                   |
| A_23_P48807    | 10,8754 | 11,0488 | -1,127713037 | ENST00000560031 | 2585      | NM_001001556 | GALK2                 |
| A_33_P3229256  | 14,5789 | 14,7523 | -1,127713037 | ENST00000583655 | 30833     | NM_014595    | NT5C                  |
| A_22_P00004074 | 3,21652 | 3,38992 | -1,127713037 | N/A             | N/A       | N/A          | Inc-CIB2-1            |
| A_23_P400235   | 10,4355 | 10,6089 | -1,127713037 | ENST00000274813 | 4594      | NM_000255    | MUT                   |
| A_21_P0005843  | 5,47705 | 5,65066 | -1,1278772   | N/A             | N/A       | N/A          | Inc-ASPH-6            |
| A_21_P0006924  | 3,02511 | 3,19873 | -1,127885018 | N/A             | N/A       | N/A          | Inc-SEC23IP-1         |
| A_21_P0013826  | 5,85578 | 6,0294  | -1,127885018 | ENST00000412509 | N/A       | N/A          | N/A                   |
| A_33_P3266889  | 4,04702 | 4,22075 | -1,127971018 | N/A             | N/A       | N/A          | N/A                   |
| A_33_P3259960  | 4,07638 | 4,25012 | -1,127978837 | N/A             | 100128019 | AK125579     | LOC100128019          |
| A_33_P3270802  | 14,0363 | 14,2101 | -1,128025749 | ENST00000540437 | 54973     | NM_001256456 | CPSF3L                |
| A_22_P00012285 | 6,68174 | 6,85554 | -1,128025749 | N/A             | 101927489 | NR_120623    | TCERG1L-AS1           |
| A_21_P0005313  | 1,42514 | 1,59899 | -1,128064844 | ENST00000413094 | N/A       | N/A          | N/A                   |
| A_33_P3251617  | 5,52032 | 5,69417 | -1,128064844 | ENST00000409912 | 388948    | NR_034099    | LINC01118             |
| A_23_P142950   | 10,6699 | 10,8438 | -1,128103941 | ENST00000409480 | 26058     | NM_015575    | GIGYF2                |
| A_23_P131626   | 12,4649 | 12,6389 | -1,128182137 | ENST00000497539 | 23020     | NM_014014    | SNRNP200              |
| A_33_P3269723  | 6,63744 | 6,8115  | -1,128229058 | ENST00000497434 | 125150    | NM_001042697 | ZSWIM7                |
| A_23_P218654   | 13,279  | 13,4531 | -1,12826034  | ENST00000477340 | 84619     | NM_032527    | ZGPAT                 |
| A_22_P00019065 | 5,61311 | 5,78724 | -1,128283802 | N/A             | N/A       | DA880232     | Inc-RP11-1105G2.3.1-3 |
| A_23_P30956    | 9,93197 | 10,1061 | -1,128283802 | ENST00000369278 | 23376     | NM_015323    | UFL1                  |
| A_21_P0005285  | 1,36924 | 1,54339 | -1,128299443 | ENST00000425322 | N/A       | N/A          | N/A                   |
| A_23_P411922   | 7,94292 | 8,11707 | -1,128299443 | ENST00000548825 | 25766     | NM_001031698 | PRPF40B               |
| A_21_P0000385  | 6,49021 | 6,66438 | -1,128315085 | ENST00000595794 | 692204    | NR_003069    | SNORD88C              |

|                |         |         |              |                 |           |              |                   |
|----------------|---------|---------|--------------|-----------------|-----------|--------------|-------------------|
| A_23_P122775   | 9,9948  | 10,169  | -1,128338548 | ENST00000539449 | 84816     | NM_032730    | RTN4IP1           |
| A_24_P280901   | 15,849  | 16,0233 | -1,128416761 | ENST00000497298 | 6144      | NM_000982    | RPL21             |
| A_32_P183918   | 4,16764 | 4,34195 | -1,128424582 | ENST00000420981 | 221756    | NR_033851    | SERPINB9P1        |
| A_24_P409042   | 12,2384 | 12,4128 | -1,128494979 | ENST00000505065 | 56990     | NM_020240    | CDC42SE2          |
| A_33_P3341474  | 4,1828  | 4,35721 | -1,128502801 | ENST00000514251 | 253461    | NM_001080412 | ZBTB38            |
| A_33_P3272952  | 1,71233 | 1,88683 | -1,128573203 | N/A             | N/A       | N/A          | N/A               |
| A_21_P0002596  | 1,60981 | 1,78434 | -1,128596672 | N/A             | N/A       | N/A          | Inc-LGALSL-1      |
| A_23_P78289    | 11,373  | 11,5476 | -1,128651433 | ENST00000405159 | 84923     | NM_032837    | FAM104A           |
| A_24_P287941   | 8,835   | 9,00965 | -1,12869055  | ENST00000253789 | 29893     | NM_013290    | PSMC3IP           |
| A_33_P3241646  | 8,36846 | 8,54319 | -1,128753139 | ENST00000239231 | 79646     | NM_024594    | PANK3             |
| A_33_P3215178  | 6,90889 | 7,08367 | -1,128792259 | ENST00000409527 | 9091      | NM_004204    | PIGQ              |
| A_21_P0012690  | 1,646   | 1,82084 | -1,128839206 | N/A             | N/A       | N/A          | XLOC_I2_011302    |
| A_22_P00001350 | 4,08383 | 4,25867 | -1,128839206 | N/A             | N/A       | N/A          | Inc-AP001496.1-10 |
| A_21_P0014782  | 8,84432 | 9,0192  | -1,128870504 | ENST00000585776 | N/A       | AK097447     | N/A               |
| A_21_P0005634  | 1,3862  | 1,5611  | -1,128886154 | ENST00000500180 | 101927657 | NR_125421    | LOC101927657      |
| A_21_P0000095  | 7,67275 | 7,84775 | -1,128964405 | ENST00000540122 | 8226      | NM_001178135 | HDHD1             |
| A_22_P00008771 | 4,89779 | 5,07284 | -1,129003532 | N/A             | 101927979 | XR_243582    | LOC101927979      |
| A_19_P00808758 | 14,3784 | 14,5535 | -1,129042661 | N/A             | N/A       | N/A          | N/A               |
| A_21_P0010979  | 8,00169 | 8,17684 | -1,129081792 | ENST00000619960 | N/A       | XM_006718754 | N/A               |
| A_33_P3653330  | 1,6151  | 1,79028 | -1,129105271 | ENST00000602584 | 6416      | NM_001281435 | MAP2K4            |
| A_21_P0014665  | 9,40399 | 9,57919 | -1,129120923 | N/A             | 102723630 | XR_424068    | LOC102723630      |
| A_33_P3287710  | 7,2989  | 7,47415 | -1,129160056 | N/A             | 100128292 | NR_024585    | DLG5-AS1          |
| A_23_P66487    | 9,442   | 9,61729 | -1,129191364 | ENST00000323347 | 6603      | NM_001098426 | SMARCD2           |
| A_21_P0006946  | 3,35917 | 3,53453 | -1,129246154 | N/A             | N/A       | N/A          | Inc-PITRM1-7      |
| A_24_P135628   | 10,2906 | 10,466  | -1,129277464 | ENST00000610809 | N/A       | XM_005276385 | N/A               |
| A_23_P258393   | 7,2233  | 7,39874 | -1,129308774 | ENST00000296487 | 132160    | NM_144641    | PPM1M             |
| A_21_P0006312  | 2,85917 | 3,03461 | -1,129308774 | N/A             | N/A       | N/A          | Inc-SLC46A2-2     |
| A_24_P53241    | 1,3963  | 1,5718  | -1,129355742 | ENST00000395988 | 93649     | NM_153604    | MYOCD             |
| A_23_P170626   | 12,3257 | 12,5012 | -1,129355742 | ENST00000355315 | 79145     | NM_001011667 | CHCHD7            |
| A_21_P0003604  | 4,50036 | 4,6759  | -1,129387055 | N/A             | N/A       | N/A          | Inc-DCAF4L1-1     |
| A_22_P00017147 | 4,07436 | 4,24992 | -1,129402711 | ENST00000529094 | N/A       | BC040333     | N/A               |
| A_21_P0011354  | 10,7697 | 10,9453 | -1,129434026 | N/A             | N/A       | N/A          | XLOC_I2_004844    |
| A_33_P3327642  | 10,607  | 10,7826 | -1,129434026 | ENST00000374211 | 55057     | NM_001039775 | AIM1L             |

|                |         |         |              |                 |           |              |                |
|----------------|---------|---------|--------------|-----------------|-----------|--------------|----------------|
| A_23_P130343   | 12,1822 | 12,3578 | -1,129434026 | ENST00000580059 | 284252    | NM_198991    | KCTD1          |
| A_23_P47691    | 7,45132 | 7,62699 | -1,129488827 | ENST00000254436 | 6737      | NM_003141    | TRIM21         |
| A_33_P3545065  | 10,1242 | 10,2999 | -1,129512315 | ENST00000579186 | 6458      | NR_033412    | SH3GL1P1       |
| A_22_P00024304 | 1,79542 | 1,97119 | -1,12956712  | N/A             | N/A       | AK026213     | Inc-PEA15-1    |
| A_33_P3239338  | 13,1108 | 13,2866 | -1,129590609 | ENST00000527211 | 8525      | NM_001105540 | DGKZ           |
| A_23_P202138   | 9,32666 | 9,50253 | -1,129645419 | ENST00000224807 | 81855     | NM_030971    | SFXN3          |
| A_22_P00017635 | 4,73256 | 4,90844 | -1,129653249 | N/A             | N/A       | N/A          | Inc-WNT1-2     |
| A_21_P0008886  | 1,44451 | 1,62043 | -1,12968457  | ENST00000567317 | 101928276 | N/A          | LINC01227      |
| A_33_P3373214  | 9,45543 | 9,63142 | -1,129739384 | ENST00000357082 | 100533106 | NM_001204180 | ZHX1-C8orf76   |
| A_33_P3270852  | 17,6664 | 17,8424 | -1,129747215 | ENST00000496507 | 6235      | NM_001032    | RPS29          |
| A_21_P0011528  | 1,62795 | 1,80397 | -1,129762876 | N/A             | N/A       | N/A          | XLOC_I2_005695 |
| A_24_P401174   | 5,50627 | 5,68229 | -1,129762876 | ENST00000567894 | 23247     | NM_015202    | KIAA0556       |
| A_22_P00003461 | 3,42743 | 3,60346 | -1,129770707 | ENST00000553177 | 100131138 | N/A          | LINC01405      |
| A_21_P0009637  | 1,64447 | 1,82052 | -1,129786369 | N/A             | N/A       | N/A          | Inc-FBXO15-5   |
| A_21_P0002910  | 1,59834 | 1,77439 | -1,129786369 | ENST00000457125 | N/A       | N/A          | N/A            |
| A_23_P145935   | 8,59902 | 8,77507 | -1,129786369 | ENST00000614832 | 2051      | NM_004445    | EPHB6          |
| A_21_P0012893  | 2,16337 | 2,33951 | -1,129856851 | N/A             | N/A       | N/A          | Inc-MYO10-1    |
| A_33_P3336642  | 9,87576 | 10,0519 | -1,129856851 | ENST00000513006 | 84321     | NM_032361    | THOC3          |
| A_22_P00024656 | 1,63767 | 1,81389 | -1,129919506 | ENST00000454625 | N/A       | N/A          | N/A            |
| A_33_P3356910  | 7,77482 | 7,95105 | -1,129927338 | ENST00000372773 | 158931    | NM_001006938 | TCEAL6         |
| A_33_P3403952  | 4,46093 | 4,63717 | -1,12993517  | N/A             | 84193     | BC066931     | SETD3          |
| A_23_P77545    | 2,54681 | 2,72307 | -1,129950834 | ENST00000293897 | 6755      | NM_001053    | SSTR5          |
| A_22_P00004788 | 5,57199 | 5,74831 | -1,129997828 | N/A             | N/A       | N/A          | Inc-CXADR-1    |
| A_24_P186274   | 4,54418 | 4,72058 | -1,13006049  | ENST00000377694 | 347252    | NM_001007563 | IGFBPL1        |
| A_21_P0014023  | 13,6375 | 13,8139 | -1,13006049  | N/A             | N/A       | N/A          | N/A            |
| A_33_P3234277  | 6,37396 | 6,55037 | -1,130068323 | ENST00000463243 | 3113      | NM_001242524 | HLA-DPA1       |
| A_23_P43119    | 2,02259 | 2,19905 | -1,130107489 | ENST00000276616 | 85481     | NM_033126    | PSKH2          |
| A_24_P319923   | 2,18416 | 2,36067 | -1,130146657 | ENST00000418370 | 4638      | NM_053025    | MYLK           |
| A_19_P00321571 | 2,95288 | 3,1294  | -1,13015449  | N/A             | 102216342 | NR_108097    | LINC01108      |
| A_21_P0010045  | 3,50816 | 3,68469 | -1,130162324 | N/A             | N/A       | N/A          | Inc-SLC35C2-1  |
| A_22_P00024613 | 3,86732 | 4,04386 | -1,130170158 | N/A             | 101929472 | NR_109945    | CTD-2350J17.1  |
| A_21_P0013686  | 1,41162 | 1,58821 | -1,130209327 | ENST00000449730 | N/A       | N/A          | N/A            |
| A_23_P117380   | 6,60899 | 6,78561 | -1,130232829 | ENST00000617881 | 90050     | NM_138344    | FAM181A        |

|                |         |         |              |                 |           |              |                |
|----------------|---------|---------|--------------|-----------------|-----------|--------------|----------------|
| A_22_P00003263 | 2,53594 | 2,7126  | -1,130264166 | ENST00000444942 | 400238    | N/A          | LINC00642      |
| A_24_P269814   | 13,2157 | 13,3925 | -1,130373853 | ENST00000368988 | 59338     | NM_001001974 | PLEKHA1        |
| A_22_P00007635 | 6,56847 | 6,74529 | -1,130389524 | N/A             | 285512    | NR_002806    | FAM13A-AS1     |
| A_21_P0008811  | 1,87587 | 2,05269 | -1,130389524 | ENST00000566676 | N/A       | XR_424585    | N/A            |
| A_32_P24372    | 4,17518 | 4,35201 | -1,130397359 | ENST00000581291 | 414060    | NM_001001418 | TBC1D3C        |
| A_23_P54340    | 1,36091 | 1,53775 | -1,130405194 | ENST00000422354 | 84465     | NM_032445    | MEGF11         |
| A_22_P00004211 | 4,79955 | 4,97639 | -1,130405194 | ENST00000503067 | 100506791 | NR_125810    | LINC01511      |
| A_33_P3352664  | 6,04419 | 6,22105 | -1,130420865 | ENST00000303846 | 121340    | NM_001300837 | SP7            |
| A_33_P3395971  | 8,18715 | 8,36405 | -1,130452207 | ENST00000421832 | 90353     | NM_145232    | CTU1           |
| A_33_P3268343  | 13,5418 | 13,7187 | -1,130452207 | ENST00000334828 | 441531    | NM_001029891 | PGAM4          |
| A_24_P219053   | 7,25604 | 7,43295 | -1,130460043 | ENST00000497558 | 55425     | AB051491     | GPALPP1        |
| A_23_P335905   | 7,334   | 7,51098 | -1,130514895 | ENST00000440309 | 27148     | NM_015690    | STK36          |
| A_33_P3394312  | 4,29196 | 4,46899 | -1,130554076 | ENST00000408979 | 442361    | NM_001005480 | OR2A2          |
| A_22_P00011689 | 1,50134 | 1,6784  | -1,130577586 | N/A             | N/A       | N/A          | Inc-PDGFRL-1   |
| A_23_P117558   | 12,9085 | 13,0856 | -1,130608932 | ENST00000216330 | 2287      | NM_002013    | FKBP3          |
| A_22_P00012830 | 7,35086 | 7,52796 | -1,130608932 | N/A             | 100505894 | NR_039995    | TMEM161B-AS1   |
| A_22_P00005107 | 2,73681 | 2,91395 | -1,13064028  | N/A             | 101927702 | XR_245766    | LOC101927702   |
| A_21_P0011769  | 1,59984 | 1,77704 | -1,130687303 | ENST00000453968 | 102723617 | N/A          | LOC102723617   |
| A_24_P207727   | 10,0636 | 10,2408 | -1,130687303 | ENST00000493216 | 51586     | NM_001003891 | MED15          |
| A_24_P207828   | 1,68147 | 1,85868 | -1,13069514  | ENST00000368780 | 26239     | NM_014357    | LCE2B          |
| A_22_P00013539 | 4,28851 | 4,46581 | -1,130765679 | ENST00000521904 | N/A       | BF701780     | N/A            |
| A_32_P96719    | 9,18699 | 9,36441 | -1,130859737 | ENST00000303383 | 79801     | NM_024745    | SHCBP1         |
| A_22_P00014322 | 1,39773 | 1,57518 | -1,130883253 | N/A             | N/A       | N/A          | Inc-SERPINB8-3 |
| A_33_P3331335  | 1,89896 | 2,07644 | -1,130906769 | ENST00000409262 | 200424    | NM_001287491 | TET3           |
| A_33_P3531206  | 3,04157 | 3,21906 | -1,130914608 | N/A             | 542767    | NM_001014442 | C1QTNF9B-AS1   |
| A_23_P66117    | 12,8608 | 13,0383 | -1,130922447 | ENST00000301678 | 83986     | NM_032039    | ITFG3          |
| A_22_P00015071 | 4,43231 | 4,60984 | -1,130945964 | N/A             | N/A       | N/A          | Inc-SNTG2-4    |
| A_22_P00022809 | 4,04186 | 4,21941 | -1,130961643 | ENST00000561051 | N/A       | DA472297     | N/A            |
| A_21_P0008654  | 1,70245 | 1,88002 | -1,130977321 | ENST00000615095 | 101929221 | N/A          | C15orf59-AS1   |
| A_24_P161914   | 7,93462 | 8,11225 | -1,131024358 | ENST00000415103 | N/A       | N/A          | N/A            |
| A_33_P3311267  | 7,75698 | 7,93462 | -1,131032198 | ENST00000334055 | 337969    | NM_181608    | KRTAP19-2      |
| A_33_P3371154  | 2,77084 | 2,9485  | -1,131047877 | ENST00000373784 | 22891     | NM_199451    | ZNF365         |
| A_23_P54953    | 7,87545 | 8,05314 | -1,131071397 | ENST00000579877 | 29115     | NM_013260    | SAP30BP        |



|                |         |         |              |                 |           |              |                       |
|----------------|---------|---------|--------------|-----------------|-----------|--------------|-----------------------|
| A_33_P3275422  | 8,90501 | 9,08274 | -1,131102757 | ENST00000360899 | 283601    | NR_024096    | LINC00523             |
| A_33_P3218356  | 9,35882 | 9,53657 | -1,131118438 | ENST00000479160 | 56900     | NM_020141    | TMEM167B              |
| A_23_P110846   | 9,87834 | 10,0561 | -1,131126278 | ENST00000517876 | 9337      | NM_004779    | CNOT8                 |
| A_23_P44956    | 17,6716 | 17,8494 | -1,13115764  | ENST00000439255 | 6165      | NM_000996    | RPL35A                |
| A_33_P3248900  | 12,4963 | 12,6741 | -1,13115764  | ENST00000526704 | 399844    | NR_028324    | LINC01002             |
| A_19_P00805291 | 14,8669 | 15,0447 | -1,13115764  | ENST00000406671 | N/A       | N/A          | N/A                   |
| A_22_P00015227 | 1,56822 | 1,74608 | -1,131204685 | ENST00000437243 | N/A       | BG216764     | N/A                   |
| A_22_P00023795 | 2,07359 | 2,25155 | -1,131283097 | N/A             | N/A       | N/A          | Inc-NCL-2             |
| A_33_P3369213  | 5,10334 | 5,28137 | -1,131337988 | ENST00000616693 | 399744    | NR_024497    | LINC00999             |
| A_21_P0007021  | 1,52526 | 1,70332 | -1,131361514 | N/A             | N/A       | N/A          | Inc-VAX1-1            |
| A_33_P3333480  | 4,14335 | 4,32148 | -1,131416409 | N/A             | 171022    | NR_026690    | ABHD11-AS1            |
| A_24_P361457   | 6,01877 | 6,19695 | -1,131455622 | ENST00000518137 | 284131    | NM_173627    | ENDOV                 |
| A_23_P159039   | 13,6175 | 13,7957 | -1,131471307 | ENST00000377533 | 23513     | NM_182706    | SCRIB                 |
| A_23_P316531   | 5,92642 | 6,10463 | -1,13147915  | ENST00000304244 | 2848      | NM_005298    | GPR25                 |
| A_22_P00007097 | 3,5521  | 3,73038 | -1,131534051 | N/A             | 102724883 | XR_424187    | LOC102724883          |
| A_24_P102880   | 4,52999 | 4,70838 | -1,131620329 | ENST00000367296 | 89796     | NM_020443    | NAV1                  |
| A_33_P3254650  | 2,66623 | 2,84463 | -1,131628173 | N/A             | N/A       | N/A          | N/A                   |
| A_33_P3381265  | 5,89419 | 6,07259 | -1,131628173 | ENST00000532621 | 51700     | NM_001302826 | CYB5R2                |
| A_33_P3264188  | 1,58588 | 1,76429 | -1,131636017 | ENST00000317834 | 120775    | NM_001004684 | OR2D3                 |
| A_33_P3215739  | 7,78031 | 7,95876 | -1,131667393 | ENST00000383693 | 348801    | NM_001085451 | LNP1                  |
| A_22_P00002176 | 3,3324  | 3,51091 | -1,131714459 | N/A             | 85001     | NR_026914    | MGC16275              |
| A_21_P0013749  | 2,07921 | 2,25777 | -1,131753682 | N/A             | N/A       | N/A          | XLOC_I2_015441        |
| A_21_P0004202  | 4,59507 | 4,77366 | -1,131777216 | N/A             | N/A       | N/A          | Inc-C5orf38-1         |
| A_23_P355993   | 6,92614 | 7,10487 | -1,13188705  | ENST00000595189 | 80110     | NM_025040    | ZNF614                |
| A_22_P00013415 | 1,54549 | 1,72424 | -1,131902741 | ENST00000499006 | 388011    | NR_015430    | LINC01550             |
| A_24_P334529   | 4,9851  | 5,16389 | -1,131934125 | ENST00000619750 | 56112     | NM_032011    | PCDHGA3               |
| A_33_P3609431  | 11,9289 | 12,1077 | -1,131941971 | ENST00000596769 | N/A       | AK127846     | N/A                   |
| A_23_P156061   | 7,87606 | 8,05486 | -1,131941971 | ENST00000395770 | 4012      | NM_005575    | LNPEP                 |
| A_21_P0004965  | 1,60819 | 1,787   | -1,131949817 | N/A             | N/A       | N/A          | Inc-FNDC1-4           |
| A_21_P0008377  | 1,89947 | 2,07829 | -1,131957663 | N/A             | N/A       | N/A          | nc-RP11-1070N10.3.1-1 |
| A_23_P157268   | 9,29173 | 9,4706  | -1,131996894 | ENST00000287916 | 9069      | NM_012129    | CLDN12                |
| A_23_P55342    | 10,4419 | 10,6208 | -1,132020434 | ENST00000005340 | 1856      | NM_004422    | DVL2                  |
| A_21_P0013653  | 7,48811 | 7,66702 | -1,13202828  | N/A             | 102723390 | N/A          | LOC102723390          |

|                |         |         |              |                 |           |              |                |
|----------------|---------|---------|--------------|-----------------|-----------|--------------|----------------|
| A_33_P3247609  | 2,08515 | 2,26407 | -1,132036127 | ENST00000537055 | 90485     | NM_001005850 | ZNF835         |
| A_33_P3881056  | 3,49946 | 3,67843 | -1,132075361 | N/A             | 100996405 | XM_003846604 | LOC100996405   |
| A_33_P3396692  | 11,1679 | 11,3469 | -1,132098902 | ENST00000244763 | 6745      | NM_003144    | SSR1           |
| A_33_P3422466  | 4,84948 | 5,02848 | -1,132098902 | ENST00000392462 | 283385    | NM_173855    | MORN3          |
| A_21_P0005443  | 3,13878 | 3,31782 | -1,132130291 | ENST00000486954 | 285972    | NR_034033    | LINC00996      |
| A_32_P360193   | 4,75552 | 4,9346  | -1,132161681 | ENST00000532027 | 144132    | NM_144666    | DNHD1          |
| A_22_P00020027 | 4,84009 | 5,01922 | -1,132200919 | ENST00000533311 | N/A       | N/A          | N/A            |
| A_19_P00812587 | 15,81   | 15,9892 | -1,132255855 | ENST00000406671 | 6125      | NM_000969    | RPL5           |
| A_33_P3329352  | 5,24019 | 5,4194  | -1,132263703 | ENST00000529541 | N/A       | N/A          | N/A            |
| A_24_P28811    | 7,93824 | 8,11752 | -1,132318643 | ENST00000439137 | 646802    | NR_103761    | CYP4F62P       |
| A_23_P348323   | 5,81185 | 5,99114 | -1,132326491 | ENST00000611883 | 7703      | NM_007144    | PCGF2          |
| A_23_P213592   | 11,5456 | 11,7249 | -1,13233434  | ENST00000274811 | 22838     | NM_014901    | RNF44          |
| A_23_P3453     | 11,9042 | 12,0835 | -1,13233434  | ENST00000562303 | 26015     | NM_015540    | RPAP1          |
| A_33_P3233125  | 7,80297 | 7,98234 | -1,132389282 | ENST00000020673 | 5662      | NM_002779    | PSD            |
| A_33_P3351510  | 3,0245  | 3,20388 | -1,132397132 | ENST00000378993 | 11141     | NM_014271    | IL1RAPL1       |
| A_23_P104362   | 13,7375 | 13,9169 | -1,13241283  | ENST00000368547 | 1892      | NM_004092    | ECHS1          |
| A_23_P10135    | 10,2302 | 10,4096 | -1,13241283  | ENST00000485789 | 28511     | NM_001001349 | NKIRAS2        |
| A_22_P00009106 | 10,9354 | 11,1148 | -1,13241283  | N/A             | 100874375 | NR_046848    | FAM155A-IT1    |
| A_22_P00015581 | 2,05952 | 2,23899 | -1,132467776 | ENST00000536673 | N/A       | N/A          | N/A            |
| A_24_P201064   | 10,0385 | 10,2181 | -1,132569827 | ENST00000310455 | 79660     | NM_001201329 | PPP1R3B        |
| A_23_P154986   | 5,04084 | 5,22044 | -1,132569827 | ENST00000412658 | 2678      | NM_001288833 | GGT1           |
| A_24_P274814   | 5,70715 | 5,88676 | -1,132577677 | ENST00000414508 | 6916      | NM_030984    | TBXAS1         |
| A_22_P00023823 | 4,65376 | 4,83339 | -1,132593378 | ENST00000413043 | N/A       | N/A          | N/A            |
| A_22_P00007972 | 5,77421 | 5,95391 | -1,132648333 | N/A             | N/A       | AK055981     | Inc-IDH2-1     |
| A_23_P95823    | 11,4054 | 11,5851 | -1,132648333 | ENST00000563900 | 197370    | NM_145080    | NSMCE1         |
| A_33_P3316261  | 2,40839 | 2,58812 | -1,132671886 | N/A             | N/A       | N/A          | N/A            |
| A_21_P0000833  | 6,55836 | 6,73811 | -1,132687588 | N/A             | 100507392 | NR_038908    | SENCR          |
| A_23_P160154   | 11,3157 | 11,4955 | -1,132726845 | ENST00000418277 | 2582      | NM_000403    | GALE           |
| A_33_P3211203  | 8,20096 | 8,38078 | -1,132742548 | N/A             | 101927919 | N/A          | LOC101927919   |
| A_21_P0011636  | 4,27359 | 4,45345 | -1,132773955 | ENST00000421796 | N/A       | N/A          | N/A            |
| A_22_P00006015 | 1,95599 | 2,13587 | -1,132789659 | N/A             | N/A       | N/A          | Inc-FAM103A1-2 |
| A_21_P0004478  | 6,29491 | 6,47481 | -1,132805362 | N/A             | 102724758 | XR_425942    | LOC102724758   |
| A_22_P00011486 | 1,56829 | 1,74836 | -1,132938854 | N/A             | 100506443 | NR_103784    | ITPKB-IT1      |

|                |         |         |              |                 |           |              |                |
|----------------|---------|---------|--------------|-----------------|-----------|--------------|----------------|
| A_33_P3344291  | 5,94713 | 6,1273  | -1,133017387 | N/A             | 100130698 | XR_111092    | LOC100130698   |
| A_23_P126313   | 1,38403 | 1,56426 | -1,133064508 | ENST00000367848 | 55811     | NM_018417    | ADCY10         |
| A_21_P0010936  | 6,04098 | 6,2213  | -1,133135195 | ENST00000414939 | N/A       | XR_428678    | N/A            |
| A_22_P00001594 | 1,59568 | 1,77603 | -1,133158758 | N/A             | N/A       | BU783273     | Inc-ARMCX6-1   |
| A_33_P3247086  | 1,62451 | 1,80486 | -1,133158758 | ENST00000438155 | N/A       | N/A          | N/A            |
| A_23_P314191   | 9,08024 | 9,2606  | -1,133166612 | ENST00000426126 | 23390     | NM_015336    | ZDHHC17        |
| A_21_P0013535  | 5,60897 | 5,78944 | -1,133253015 | N/A             | N/A       | N/A          | XLOC_I2_014123 |
| A_21_P0006301  | 1,63292 | 1,8134  | -1,133260871 | N/A             | N/A       | N/A          | Inc-ALG2-2     |
| A_33_P3618561  | 1,93425 | 2,11473 | -1,133260871 | N/A             | 730961    | BC034282     | LOC730961      |
| A_21_P0009646  | 2,07585 | 2,25634 | -1,133268726 | ENST00000546512 | 126536    | N/A          | LINC00661      |
| A_33_P3279949  | 3,51119 | 3,69169 | -1,133276581 | N/A             | 100128170 | AK124170     | LOC100128170   |
| A_23_P123228   | 1,61764 | 1,79814 | -1,133276581 | ENST00000340010 | 1811      | NM_000111    | SLC26A3        |
| A_24_P67142    | 7,19137 | 7,3719  | -1,133300147 | ENST00000300278 | 6651      | NM_032195    | SON            |
| A_22_P00007742 | 6,48066 | 6,6612  | -1,133308003 | N/A             | 253044    | NR_045123    | LINGO1-AS1     |
| A_23_P37598    | 11,3571 | 11,5378 | -1,133433697 | ENST00000561898 | 27020     | NM_012428    | NPTN           |
| A_33_P3245248  | 9,57029 | 9,751   | -1,133441554 | ENST00000602385 | 7012      | NR_001566    | TERC           |
| A_33_P3265479  | 5,11882 | 5,29955 | -1,133457267 | ENST00000522974 | 57623     | AB167741     | ZFAT           |
| A_21_P0006441  | 1,71846 | 1,89923 | -1,133488693 | ENST00000608576 | 4281      | XR_247300    | MID1           |
| A_33_P3289371  | 6,1987  | 6,37949 | -1,133504407 | ENST00000492611 | 116154    | BC036834     | PHACTR3        |
| A_24_P281395   | 7,10781 | 7,28866 | -1,133551549 | ENST00000455013 | N/A       | N/A          | N/A            |
| A_23_P131050   | 3,11809 | 3,29896 | -1,133567263 | ENST00000588485 | 81616     | NM_030924    | ACSBG2         |
| A_19_P00318559 | 2,32198 | 2,50285 | -1,133567263 | ENST00000512067 | 643401    | CQ819097     | LINC01021      |
| A_33_P3404843  | 5,72473 | 5,90561 | -1,133575121 | ENST00000585444 | 57794     | NM_172231    | SUGP1          |
| A_23_P135914   | 11,6454 | 11,8263 | -1,133590836 | ENST00000565990 | 23450     | NM_012426    | SF3B3          |
| A_33_P3219720  | 11,9686 | 12,1495 | -1,133590836 | ENST00000485560 | 57209     | XR_428646    | ZNF248         |
| A_33_P3264089  | 7,16261 | 7,34353 | -1,133606551 | ENST00000477367 | 653857    | NM_001164458 | ACTR3C         |
| A_22_P00017200 | 2,93484 | 3,11576 | -1,133606551 | ENST00000451690 | 102724954 | NR_126003    | LINC01032      |
| A_33_P3395650  | 3,66162 | 3,84256 | -1,133622266 | ENST00000611914 | 56110     | NM_032054    | PCDHGA5        |
| A_22_P00022727 | 3,91841 | 4,09939 | -1,133653697 | N/A             | N/A       | N/A          | Inc-TAF6-1     |
| A_21_P0007709  | 2,48035 | 2,66133 | -1,133653697 | N/A             | N/A       | N/A          | Inc-KRT80-5    |
| A_22_P00006754 | 8,10297 | 8,28395 | -1,133653697 | N/A             | N/A       | AB062482     | Inc-FST-1      |
| A_19_P00809886 | 5,60723 | 5,78822 | -1,133661555 | ENST00000587506 | N/A       | N/A          | N/A            |
| A_33_P3322430  | 12,2365 | 12,4175 | -1,133669413 | N/A             | N/A       | N/A          | N/A            |

|                |         |         |              |                 |           |              |              |
|----------------|---------|---------|--------------|-----------------|-----------|--------------|--------------|
| A_33_P3228072  | 9,13023 | 9,31136 | -1,133771571 | ENST00000474871 | 27031     | NM_153240    | NPHP3        |
| A_23_P141965   | 11,1354 | 11,3166 | -1,133826584 | ENST00000593360 | 93323     | NM_033417    | HAUS8        |
| A_21_P0005472  | 1,59427 | 1,77549 | -1,133842302 | N/A             | N/A       | N/A          | Inc-VWDE-4   |
| A_23_P254031   | 9,51649 | 9,69781 | -1,133920897 | ENST00000461970 | 7270      | NM_007344    | TTF1         |
| A_23_P346384   | 3,87653 | 4,05787 | -1,133936616 | ENST00000318325 | 84545     | NM_176792    | MRPL43       |
| A_24_P54808    | 9,20269 | 9,38405 | -1,133952336 | ENST00000273963 | 57563     | NM_020803    | KLHL8        |
| A_21_P0000103  | 8,05805 | 8,23941 | -1,133952336 | ENST00000543500 | 100462983 | NM_001190472 | MTRNR2L3     |
| A_23_P143885   | 9,52547 | 9,70686 | -1,133975916 | ENST00000413728 | 50650     | NM_019555    | ARHGEF3      |
| A_24_P406301   | 15,421  | 15,6024 | -1,133983776 | ENST00000464564 | 4708      | NM_004546    | NDUFB2       |
| A_23_P86002    | 9,77781 | 9,95927 | -1,134030938 | ENST00000370280 | 50999     | NM_016040    | TMED5        |
| A_33_P3308387  | 7,71528 | 7,89678 | -1,134062381 | ENST00000481483 | 835       | NM_032982    | CASP2        |
| A_23_P406438   | 9,55968 | 9,74118 | -1,134062381 | ENST00000357311 | 6733      | NM_182691    | SRPK2        |
| A_23_P571      | 14,0614 | 14,2429 | -1,134062381 | ENST00000426263 | 6513      | NM_006516    | SLC2A1       |
| A_32_P315371   | 2,58172 | 2,76324 | -1,134078102 | N/A             | N/A       | AK054783     | Inc-MSRA-1   |
| A_23_P360797   | 3,88317 | 4,06475 | -1,134125268 | ENST00000331010 | 4908      | NM_002527    | NTF3         |
| A_33_P3234015  | 9,736   | 9,91759 | -1,134133129 | ENST00000273317 | 8994      | NM_014240    | LIMD1        |
| A_23_P82748    | 13,7385 | 13,9201 | -1,134140991 | ENST00000517350 | 56943     | NM_020189    | ENY2         |
| A_21_P0000784  | 7,42211 | 7,60371 | -1,134140991 | N/A             | 100506469 | NR_038396    | TMEM147-AS1  |
| A_33_P3230548  | 9,49239 | 9,67421 | -1,134313952 | ENST00000367350 | 9928      | NM_014875    | KIF14        |
| A_22_P00019822 | 1,63221 | 1,81404 | -1,134321814 | ENST00000436670 | 285889    | N/A          | LOC285889    |
| A_32_P430359   | 13,2501 | 13,432  | -1,134376853 | ENST00000314045 | 79039     | NM_024072    | DDX54        |
| A_22_P00008973 | 5,41736 | 5,59933 | -1,134431895 | N/A             | N/A       | DA445576     | Inc-LALBA-1  |
| A_33_P3256054  | 11,5549 | 11,7369 | -1,134455485 | ENST00000565250 | 64223     | NM_022372    | MLST8        |
| A_33_P3489629  | 1,61705 | 1,79907 | -1,134471212 | ENST00000461033 | 151649    | NM_001252657 | PP2D1        |
| A_23_P202750   | 8,07538 | 8,25747 | -1,134526258 | ENST00000528099 | 28970     | NM_014039    | C11orf54     |
| A_33_P3606692  | 1,69812 | 1,88022 | -1,134534122 | N/A             | 283404    | N/A          | LINC00592    |
| A_33_P3314166  | 5,78497 | 5,96708 | -1,134541986 | ENST00000608005 | N/A       | N/A          | N/A          |
| A_22_P00003923 | 1,42586 | 1,60803 | -1,134589171 | N/A             | N/A       | BC031323     | Inc-CETN3-1  |
| A_22_P00010511 | 9,67326 | 9,85556 | -1,134691413 | N/A             | N/A       | N/A          | Inc-NBPF3-4  |
| A_23_P430411   | 3,72998 | 3,91229 | -1,134699278 | ENST00000610622 | 3689      | L78790       | ITGB2        |
| A_22_P00009430 | 1,56466 | 1,74698 | -1,134707143 | N/A             | N/A       | BX104743     | Inc-LYRM2-1  |
| A_33_P3337719  | 9,63382 | 9,81623 | -1,134777932 | N/A             | 100134868 | NR_004846    | LOC100134868 |
| A_33_P3666797  | 6,81548 | 6,9979  | -1,134785798 | ENST00000376958 | 160897    | NM_180989    | GPR180       |

|                |         |         |              |                 |           |              |                |
|----------------|---------|---------|--------------|-----------------|-----------|--------------|----------------|
| A_22_P00006217 | 5,09463 | 5,27719 | -1,134895923 | N/A             | N/A       | N/A          | Inc-FAM46D-1   |
| A_19_P00318297 | 7,80272 | 7,98532 | -1,13492739  | ENST00000440088 | 100505854 | BC037783     | APTR           |
| A_22_P00020287 | 4,72015 | 4,90282 | -1,134982458 | N/A             | N/A       | BC038570     | Inc-CPVL-4     |
| A_19_P00315551 | 6,65513 | 6,83786 | -1,135029662 | ENST00000508564 | 400043    | NR_026656    | LOC400043      |
| A_33_P3222243  | 8,30663 | 8,48939 | -1,135053264 | ENST00000424716 | 285103    | N/A          | MED15P9        |
| A_33_P3365087  | 4,15989 | 4,34267 | -1,135069    | ENST00000377930 | 729233    | NM_001130404 | PRR20B         |
| A_22_P00011743 | 5,33533 | 5,51812 | -1,135076867 | N/A             | N/A       | N/A          | Inc-PER2-1     |
| A_22_P00001425 | 5,44043 | 5,6233  | -1,135139811 | N/A             | N/A       | N/A          | Inc-APITD1-1   |
| A_21_P0013927  | 4,49108 | 4,67397 | -1,135155548 | ENST00000484786 | 22906     | XM_005264959 | TRAK1          |
| A_33_P3420446  | 8,05904 | 8,24194 | -1,135163416 | ENST00000430130 | 401387    | NM_001161528 | LRRD1          |
| A_23_P131653   | 10,4551 | 10,6381 | -1,135242102 | ENST00000412717 | 5281      | NM_002643    | PIGF           |
| A_24_P72479    | 14,0285 | 14,2115 | -1,135242102 | ENST00000463009 | 10552     | NM_006409    | ARPC1A         |
| A_33_P3271171  | 7,68352 | 7,86655 | -1,135265709 | ENST00000447684 | 4849      | AL133647     | CNOT3          |
| A_22_P00005350 | 1,59869 | 1,78182 | -1,135344402 | N/A             | 104169670 | NR_126167    | TMEM5-AS1      |
| A_22_P00017935 | 1,61784 | 1,80098 | -1,135352272 | ENST00000520870 | N/A       | N/A          | N/A            |
| A_23_P39605    | 1,59449 | 1,77767 | -1,135383751 | ENST00000409309 | 27233     | NM_006588    | SULT1C4        |
| A_33_P3271945  | 5,27719 | 5,46038 | -1,135391621 | ENST00000380496 | 54801     | N/A          | HAUS6          |
| A_33_P3414482  | 15,2023 | 15,3855 | -1,135399491 | ENST00000245206 | 2806      | NM_002080    | GOT2           |
| A_33_P3210168  | 12,7947 | 12,9779 | -1,135399491 | ENST00000380889 | 5300      | NM_006221    | PIN1           |
| A_22_P00014850 | 3,32003 | 3,50332 | -1,135470323 | ENST00000607654 | N/A       | AK056734     | N/A            |
| A_33_P3221498  | 4,52056 | 4,70386 | -1,135478194 | ENST00000405627 | 56164     | NM_001260504 | STK31          |
| A_22_P00009380 | 1,39579 | 1,57914 | -1,135517547 | ENST00000523820 | N/A       | BE247487     | N/A            |
| A_22_P00019999 | 1,61718 | 1,80054 | -1,135525418 | N/A             | N/A       | N/A          | Inc-FBXL5-1    |
| A_21_P0013876  | 1,56043 | 1,74379 | -1,135525418 | N/A             | N/A       | N/A          | XLOC_I2_015879 |
| A_22_P00006989 | 2,82868 | 3,01205 | -1,135533289 | ENST00000557350 | N/A       | N/A          | N/A            |
| A_21_P0012672  | 1,72986 | 1,91325 | -1,135549031 | N/A             | N/A       | N/A          | XLOC_I2_011173 |
| A_33_P3332135  | 8,6442  | 8,82759 | -1,135549031 | ENST00000413580 | 162466    | NM_001143804 | PHOSPHO1       |
| A_23_P380754   | 6,38109 | 6,56468 | -1,135706462 | ENST00000485223 | 5644      | NM_002769    | PRSS1          |
| A_24_P134319   | 11,4249 | 11,6085 | -1,135714334 | ENST00000349014 | 23394     | NM_001282531 | ADNP           |
| A_24_P349466   | 8,06407 | 8,2477  | -1,135737951 | ENST00000596581 | 54458     | NM_001005354 | PRR13          |
| A_33_P3317580  | 4,31771 | 4,50136 | -1,135753696 | ENST00000306793 | 2675      | NM_001495    | GFRA2          |
| A_24_P246692   | 15,2775 | 15,4612 | -1,135793059 | ENST00000422772 | N/A       | N/A          | N/A            |
| A_21_P0011468  | 9,19408 | 9,37778 | -1,135793059 | ENST00000564730 | 8924      | NM_004667    | HERC2          |

|                |         |         |              |                 |           |              |                |
|----------------|---------|---------|--------------|-----------------|-----------|--------------|----------------|
| A_23_P32115    | 2,92631 | 3,11001 | -1,135793059 | ENST00000491603 | 286256    | NM_178536    | LCN12          |
| A_33_P3259239  | 2,00555 | 2,18927 | -1,135808804 | N/A             | N/A       | N/A          | N/A            |
| A_33_P3410093  | 9,32957 | 9,51335 | -1,135856042 | ENST00000548852 | 4048      | NM_001256644 | LTA4H          |
| A_23_P132669   | 11,4206 | 11,6044 | -1,135871789 | ENST00000407584 | 55830     | NM_001010983 | GLT8D1         |
| A_33_P3326730  | 1,59828 | 1,78212 | -1,135903282 | ENST00000371682 | 84960     | NM_001039374 | CCDC183        |
| A_23_P92552    | 8,32114 | 8,50499 | -1,135911156 | ENST00000513504 | 5188      | NM_004564    | GATB           |
| A_33_P3241388  | 1,59277 | 1,77663 | -1,135919029 | ENST00000377634 | 57835     | NM_021196    | SLC4A5         |
| A_22_P00003225 | 1,96204 | 2,14595 | -1,135958398 | ENST00000549864 | 100506125 | NR_110020    | LOC100506125   |
| A_23_P216038   | 9,76313 | 9,9471  | -1,136005642 | ENST00000395383 | 51105     | AB101203     | PHF20L1        |
| A_21_P0008901  | 1,34229 | 1,52628 | -1,13602139  | N/A             | N/A       | N/A          | Inc-GLIS2-1    |
| A_33_P3228558  | 13,292  | 13,476  | -1,136029265 | ENST00000376922 | 201176    | NM_001282290 | ARHGAP27       |
| A_22_P00013705 | 10,366  | 10,55   | -1,136029265 | N/A             | 102723356 | NR_125796    | ZFPM2-AS1      |
| A_22_P00015305 | 5,13112 | 5,31514 | -1,136045014 | ENST00000523913 | 84651     | NM_032566    | SPINK7         |
| A_23_P139585   | 3,63732 | 3,82138 | -1,136076512 | ENST00000243052 | 5153      | NM_000924    | PDE1B          |
| A_33_P3539345  | 9,87483 | 10,0589 | -1,136084387 | ENST00000615563 | 4646      | NM_004999    | MYO6           |
| A_23_P82206    | 11,3776 | 11,5617 | -1,136108011 | ENST00000488087 | 55862     | NM_018479    | ECHDC1         |
| A_23_P165891   | 8,01004 | 8,19416 | -1,136123761 | ENST00000434858 | 9014      | NM_005680    | TAF1B          |
| A_22_P00015005 | 1,58174 | 1,76587 | -1,136131636 | N/A             | N/A       | DA406683     | Inc-SMOC1-2    |
| A_23_P416191   | 7,97153 | 8,1557  | -1,136163137 | ENST00000616314 | 259290    | NM_176885    | TAS2R31        |
| A_22_P00024230 | 3,51634 | 3,70055 | -1,136194638 | ENST00000426716 | N/A       | N/A          | N/A            |
| A_21_P0011627  | 6,45165 | 6,63587 | -1,136202514 | N/A             | N/A       | N/A          | XLOC_I2_005871 |
| A_33_P3695548  | 7,68846 | 7,87282 | -1,136312777 | ENST00000538196 | 5426      | NM_006231    | POLE           |
| A_19_P00324582 | 7,32925 | 7,51366 | -1,136352159 | N/A             | N/A       | N/A          | N/A            |
| A_21_P0012712  | 1,86281 | 2,04727 | -1,136391543 | ENST00000515691 | 101929019 | N/A          | LOC101929019   |
| A_32_P99100    | 12,9657 | 13,1503 | -1,136501824 | ENST00000619256 | 5796      | NM_002844    | PTPRK          |
| A_33_P3622802  | 9,54934 | 9,73398 | -1,136533335 | ENST00000346832 | 10006     | NM_005470    | ABI1           |
| A_33_P3269503  | 1,65378 | 1,83845 | -1,136556969 | ENST00000529785 | N/A       | AK300121     | N/A            |
| A_22_P00019478 | 5,5996  | 5,78437 | -1,136635752 | N/A             | 100874366 | NR_047507    | HOXC13-AS      |
| A_24_P194755   | 3,13852 | 3,32332 | -1,136659388 | ENST00000588810 | 84939     | NM_032853    | MUM1           |
| A_22_P00006671 | 1,4906  | 1,6754  | -1,136659388 | ENST00000422305 | 102723924 | XR_426679    | LOC102723924   |
| A_24_P240065   | 11,0379 | 11,2227 | -1,136659388 | ENST00000409810 | 51652     | NM_016079    | CHMP3          |
| A_23_P100883   | 11,5223 | 11,7071 | -1,136659388 | ENST00000322652 | 23512     | NM_015355    | SUZ12          |
| A_23_P131074   | 2,62437 | 2,80923 | -1,136706661 | ENST00000342640 | 51298     | NM_016585    | THEG           |

|                |         |         |              |                 |           |              |                |
|----------------|---------|---------|--------------|-----------------|-----------|--------------|----------------|
| A_33_P3408655  | 2,15428 | 2,33923 | -1,136777575 | N/A             | 914       | AK310676     | CD2            |
| A_33_P3420466  | 5,24194 | 5,42693 | -1,136809093 | ENST00000421259 | 4148      | NM_002381    | MATN3          |
| A_24_P350644   | 12,4829 | 12,6679 | -1,136816973 | ENST00000357304 | 84726     | NM_013318    | PRRC2B         |
| A_24_P206047   | 10,652  | 10,837  | -1,136816973 | ENST00000491736 | 291       | NM_001151    | SLC25A4        |
| A_33_P3226154  | 2,0067  | 2,19174 | -1,136848493 | ENST00000390237 | 102724332 | AY538254     | LOC102724332   |
| A_22_P00006705 | 1,724   | 1,90904 | -1,136848493 | N/A             | N/A       | N/A          | Inc-FRG2C-5    |
| A_23_P103532   | 7,5061  | 7,69116 | -1,136864253 | ENST00000493800 | 23432     | NM_001267609 | GPR161         |
| A_33_P3420442  | 6,41188 | 6,59695 | -1,136872133 | ENST00000375871 | 23552     | NM_001039803 | CDK20          |
| A_23_P14892    | 2,94512 | 3,1302  | -1,136880014 | ENST00000215539 | 3483      | NM_004970    | IGFALS         |
| A_33_P3287631  | 11,3832 | 11,5683 | -1,136895774 | ENST00000353047 | 1508      | NM_147780    | CTSB           |
| A_33_P3210965  | 10,4175 | 10,6026 | -1,136895774 | ENST00000460357 | 79600     | NM_001082538 | TCTN1          |
| A_24_P302685   | 5,72639 | 5,91153 | -1,136927296 | ENST00000355771 | 50649     | NM_015320    | ARHGEF4        |
| A_22_P00012509 | 5,25658 | 5,44172 | -1,136927296 | N/A             | 101927886 | XR_241120    | LOC101927886   |
| A_24_P16559    | 1,83192 | 2,0171  | -1,136958819 | ENST00000360232 | 93986     | NM_148900    | FOXP2          |
| A_32_P12639    | 11,5313 | 11,7165 | -1,13697458  | ENST00000577724 | 5718      | NM_002816    | PSMD12         |
| A_23_P120428   | 2,61854 | 2,80376 | -1,136990342 | ENST00000494455 | 27296     | NM_014477    | TP53TG5        |
| A_33_P3276455  | 9,63029 | 9,81553 | -1,137006105 | ENST00000367264 | 10765     | NM_006618    | KDM5B          |
| A_33_P3477521  | 7,06828 | 7,25356 | -1,137037629 | ENST00000499842 | 284080    | NR_038230    | LOC284080      |
| A_33_P3323822  | 8,03276 | 8,21814 | -1,137116446 | ENST00000368655 | 57459     | NM_020699    | GATAD2B        |
| A_23_P166459   | 15,3824 | 15,5678 | -1,13713221  | ENST00000425542 | 3956      | NM_002305    | LGALS1         |
| A_33_P3397180  | 5,77295 | 5,95835 | -1,13713221  | N/A             | 100129324 | AK128261     | LOC100129324   |
| A_33_P3344276  | 3,91447 | 4,09988 | -1,137140092 | ENST00000446825 | 64342     | NM_022460    | HS1BP3         |
| A_22_P00024071 | 1,57626 | 1,7617  | -1,137163738 | N/A             | N/A       | N/A          | Inc-C1orf200-3 |
| A_21_P0009976  | 5,31143 | 5,4969  | -1,137187385 | N/A             | N/A       | N/A          | Inc-TSHZ2-3    |
| A_21_P0014893  | 3,16114 | 3,34664 | -1,137211032 | N/A             | N/A       | N/A          | N/A            |
| A_19_P00315492 | 3,54057 | 3,7263  | -1,137392345 | ENST00000504984 | 100507487 | XR_251651    | LOC100507487   |
| A_19_P00315810 | 6,75578 | 6,94152 | -1,137400229 | ENST00000455068 | N/A       | N/A          | N/A            |
| A_22_P00013929 | 1,73145 | 1,91723 | -1,137431765 | ENST00000532065 | 101928132 | XR_242857    | LOC101928132   |
| A_33_P3229246  | 5,90724 | 6,09303 | -1,137439649 | ENST00000369160 | 8349      | NM_003528    | HIST2H2BE      |
| A_33_P3355649  | 3,62119 | 3,80698 | -1,137439649 | N/A             | N/A       | AK128759     | N/A            |
| A_33_P3231923  | 9,2506  | 9,43652 | -1,137542147 | ENST00000409590 | 101927285 | NR_110219    | LOC101927285   |
| A_33_P3367471  | 1,57103 | 1,75696 | -1,137550032 | ENST00000367326 | 57480     | NM_001029884 | PLEKHG1        |
| A_33_P3298111  | 3,82428 | 4,01022 | -1,137557917 | ENST00000466831 | 221178    | AK092754     | SPATA13        |

|                |         |         |              |                 |           |              |                |
|----------------|---------|---------|--------------|-----------------|-----------|--------------|----------------|
| A_33_P3418091  | 4,56627 | 4,75222 | -1,137565802 | ENST00000419208 | 57611     | NM_001130136 | ISLR2          |
| A_21_P0013065  | 11,3726 | 11,5586 | -1,137605228 | ENST00000446953 | N/A       | N/A          | N/A            |
| A_23_P68851    | 11,2961 | 11,4821 | -1,137605228 | ENST00000400335 | 83999     | NM_001039570 | KREMEN1        |
| A_22_P00007175 | 3,21164 | 3,39766 | -1,137620999 | ENST00000523840 | N/A       | N/A          | N/A            |
| A_23_P134109   | 8,76406 | 8,95012 | -1,137652541 | ENST00000368126 | 2037      | NM_001431    | EPB41L2        |
| A_33_P3234641  | 17,7978 | 17,9839 | -1,137684083 | ENST00000440360 | N/A       | BU566292     | N/A            |
| A_21_P0002434  | 3,74836 | 3,93446 | -1,137684083 | N/A             | N/A       | N/A          | Inc-PREPL-1    |
| A_24_P150874   | 8,08813 | 8,2743  | -1,137739286 | N/A             | 10672     | NM_006572    | GNA13          |
| A_23_P158277   | 10,5914 | 10,7776 | -1,137762944 | ENST00000489814 | 255104    | NM_181719    | TMCO4          |
| A_23_P90369    | 13,6923 | 13,8785 | -1,137762944 | ENST00000586704 | 91304     | NM_001033026 | TMEM259        |
| A_33_P3273480  | 3,48584 | 3,67209 | -1,137802377 | ENST00000382179 | 9024      | NM_001256627 | BRSK2          |
| A_21_P0000753  | 6,13329 | 6,31954 | -1,137802377 | N/A             | 100507086 | NR_038289    | DLG1-AS1       |
| A_21_P0011332  | 4,70667 | 4,89296 | -1,137833924 | ENST00000567704 | N/A       | N/A          | N/A            |
| A_33_P3270109  | 10,4572 | 10,6435 | -1,137841811 | ENST00000315141 | 123169    | NM_001286430 | LEO1           |
| A_21_P0011231  | 4,57712 | 4,76344 | -1,137857585 | ENST00000448411 | 100874176 | N/A          | LINC00448      |
| A_24_P385336   | 4,88618 | 5,0726  | -1,137936458 | ENST00000369559 | 204851    | NM_152696    | HIPK1          |
| A_22_P00002481 | 5,16692 | 5,35349 | -1,138054778 | N/A             | N/A       | N/A          | Inc-C15orf57-2 |
| A_23_P216655   | 9,18347 | 9,37006 | -1,138070554 | ENST00000341469 | 9830      | NM_014788    | TRIM14         |
| A_21_P0010774  | 8,25901 | 8,44562 | -1,138086332 | N/A             | N/A       | N/A          | Inc-PPIAL4G-4  |
| A_33_P3213712  | 5,10156 | 5,28818 | -1,13809422  | N/A             | N/A       | N/A          | N/A            |
| A_22_P00019413 | 3,02599 | 3,21268 | -1,138149442 | ENST00000525424 | N/A       | DA758496     | N/A            |
| A_22_P00001757 | 2,67465 | 2,86136 | -1,13816522  | ENST00000518301 | 285629    | NR_027111    | LOC285629      |
| A_32_P76060    | 9,42168 | 9,6084  | -1,13817311  | ENST00000558373 | 51496     | NM_016396    | CTDSPL2        |
| A_22_P00023465 | 5,40755 | 5,59428 | -1,138180999 | ENST00000521428 | N/A       | BX106515     | N/A            |
| A_23_P104583   | 10,1804 | 10,3672 | -1,138236225 | ENST00000539970 | 57175     | NM_020441    | CORO1B         |
| A_23_P91076    | 10,5787 | 10,7655 | -1,138236225 | ENST00000283206 | 84910     | NM_032824    | TMEM87B        |
| A_23_P54846    | 14,5004 | 14,6872 | -1,138236225 | ENST00000564678 | 9709      | NM_014685    | HERPUD1        |
| A_23_P5325     | 9,89983 | 10,0867 | -1,138291454 | ENST00000445889 | 2071      | NM_000122    | ERCC3          |
| A_33_P3318861  | 10,9236 | 11,1105 | -1,138315124 | ENST00000452335 | 391475    | NM_001093730 | DYTN           |
| A_24_P386334   | 9,73689 | 9,92379 | -1,138315124 | ENST00000483980 | 56904     | NM_020145    | SH3GLB2        |
| A_23_P131646   | 11,2749 | 11,4619 | -1,138394029 | ENST00000283646 | 22934     | NM_144563    | RPIA           |
| A_19_P00800467 | 13,6335 | 13,8205 | -1,138394029 | ENST00000427761 | 29121     | NM_001004419 | CLEC2D         |
| A_24_P659036   | 5,53275 | 5,71976 | -1,13840192  | ENST00000471942 | 414918    | NM_001001794 | DENND6B        |



|                |         |         |              |                 |           |              |                       |
|----------------|---------|---------|--------------|-----------------|-----------|--------------|-----------------------|
| A_23_P500333   | 6,94335 | 7,13037 | -1,138409811 | ENST00000357475 | 23648     | NM_001009955 | SSBP3                 |
| A_33_P3373850  | 10,4701 | 10,6572 | -1,138472939 | ENST00000293883 | 84219     | NM_032259    | WDR24                 |
| A_23_P388670   | 13,968  | 14,1551 | -1,138472939 | ENST00000413268 | 4048      | NM_000895    | LTA4H                 |
| A_33_P3360216  | 8,79881 | 8,98594 | -1,138496613 | ENST00000358739 | 8329      | NM_003509    | HIST1H2AI             |
| A_33_P3350453  | 1,62047 | 1,8076  | -1,138496613 | N/A             | N/A       | N/A          | N/A                   |
| A_22_P00013633 | 3,28053 | 3,46769 | -1,138520288 | N/A             | N/A       | DB289084     | Inc-RP11-625H11.1.1-3 |
| A_23_P146830   | 8,74063 | 8,92779 | -1,138520288 | ENST00000331531 | 1468      | NM_012140    | SLC25A10              |
| A_22_P00015770 | 2,55162 | 2,7388  | -1,138536071 | ENST00000427460 | N/A       | N/A          | N/A                   |
| A_24_P29445    | 13,4849 | 13,6721 | -1,138551855 | ENST00000480194 | 81853     | NM_030969    | TMEM14B               |
| A_33_P3277611  | 6,13638 | 6,3236  | -1,138567639 | ENST00000339996 | 389827    | NM_001080483 | TMEM8C                |
| A_21_P0000179  | 14,0674 | 14,2547 | -1,138630776 | N/A             | 10430     | NM_001242597 | TMEM147               |
| A_21_P0009385  | 1,69718 | 1,88453 | -1,138670239 | ENST00000578070 | N/A       | N/A          | N/A                   |
| A_33_P3348752  | 10,8281 | 11,0155 | -1,138709703 | ENST00000602786 | 10808     | NM_006644    | HSPH1                 |
| A_24_P350200   | 17,232  | 17,4194 | -1,138709703 | ENST00000416718 | 101929612 | AK057071     | LOC101929612          |
| A_32_P198923   | 11,9647 | 12,1522 | -1,138788635 | ENST00000415292 | 7534      | NM_145690    | YWHAZ                 |
| A_24_P788878   | 4,67246 | 4,85997 | -1,138796528 | ENST00000380392 | 388125    | NM_001007595 | C2CD4B                |
| A_19_P00808834 | 5,17956 | 5,36707 | -1,138796528 | ENST00000587877 | 101927921 | NR_110792    | LINC01478             |
| A_24_P198629   | 8,52458 | 8,7121  | -1,138804422 | ENST00000559169 | 55180     | NM_001040616 | LINS                  |
| A_33_P3344406  | 9,08065 | 9,26818 | -1,138812315 | ENST00000602424 | 100271849 | NM_001145785 | MEF2B                 |
| A_23_P110412   | 1,81782 | 2,00535 | -1,138812315 | ENST00000449862 | 441027    | NM_001080506 | TMEM150C              |
| A_24_P58242    | 8,36602 | 8,55358 | -1,138835997 | ENST00000489168 | N/A       | N/A          | N/A                   |
| A_22_P00011317 | 3,68681 | 3,87445 | -1,138899149 | ENST00000603514 | 101926940 | NR_104632    | LOC101926940          |
| A_21_P0010134  | 1,9319  | 2,11954 | -1,138899149 | ENST00000457325 | N/A       | N/A          | N/A                   |
| A_19_P00320729 | 8,701   | 8,88873 | -1,138970199 | ENST00000570137 | 124359    | AK023660     | CDYL2                 |
| A_22_P00007954 | 4,8242  | 5,01198 | -1,139009674 | N/A             | 102724450 | NR_125997    | LOC102724450          |
| A_33_P3257533  | 3,28525 | 3,47307 | -1,139041254 | N/A             | N/A       | N/A          | N/A                   |
| A_22_P00019766 | 2,96212 | 3,14996 | -1,139057045 | N/A             | 100287722 | NR_125965    | AP4B1-AS1             |
| A_33_P3261625  | 13,7279 | 13,9158 | -1,139104418 | ENST00000375661 | 57819     | NM_021177    | LSM2                  |
| A_33_P3411244  | 1,59933 | 1,78729 | -1,139151793 | ENST00000310194 | 341568    | NM_001005203 | OR8S1                 |
| A_32_P54553    | 4,77539 | 4,96339 | -1,139183377 | ENST00000454608 | 373856    | XM_006726833 | USP41                 |
| A_22_P00015299 | 1,58242 | 1,77048 | -1,139230756 | ENST00000559034 | N/A       | N/A          | N/A                   |
| A_23_P39718    | 11,0047 | 11,1928 | -1,139262342 | ENST00000451623 | 9637      | NM_001042548 | FEZ2                  |
| A_23_P258124   | 6,58458 | 6,7727  | -1,139278136 | N/A             | 23567     | NM_012279    | ZNF346                |

|                |         |         |              |                 |           |              |                    |
|----------------|---------|---------|--------------|-----------------|-----------|--------------|--------------------|
| A_19_P00316454 | 1,49846 | 1,68661 | -1,139301827 | ENST00000431554 | 101927189 | N/A          | LOC101927189       |
| A_22_P00018828 | 2,65727 | 2,84544 | -1,139317621 | N/A             | N/A       | N/A          | Inc-PARP11-1       |
| A_24_P24790    | 16,9688 | 17,157  | -1,139341313 | ENST00000469899 | N/A       | N/A          | N/A                |
| A_23_P33216    | 15,3465 | 15,5347 | -1,139341313 | ENST00000550162 | 506       | NM_001686    | ATP5B              |
| A_21_P0000371  | 6,25317 | 6,44139 | -1,139357107 | N/A             | 692076    | NR_003037    | SNORD7             |
| A_33_P3259620  | 9,61681 | 9,80506 | -1,1393808   | ENST00000358746 | 9652      | NM_014639    | TTC37              |
| A_23_P201747   | 3,24779 | 3,43605 | -1,139388697 | ENST00000375486 | 11240     | NM_007365    | PADI2              |
| A_21_P0009990  | 5,05914 | 5,24752 | -1,139483473 | N/A             | N/A       | N/A          | Inc-BIRC7-1        |
| A_22_P00012254 | 11,5369 | 11,7253 | -1,13949927  | N/A             | 102724362 | XR_424592    | LOC102724362       |
| A_32_P328023   | 3,30734 | 3,4958  | -1,139546661 | ENST00000322313 | 55339     | NM_018383    | WDR33              |
| A_22_P00000269 | 5,919   | 6,10766 | -1,139704647 | N/A             | N/A       | N/A          | Inc-AC007557.1.1-3 |
| A_23_P301896   | 9,02707 | 9,21575 | -1,139720447 | ENST00000343137 | 7799      | NM_015866    | PRDM2              |
| A_23_P156970   | 11,7155 | 11,9042 | -1,139736247 | ENST00000223215 | 4232      | NM_002402    | MEST               |
| A_21_P0007837  | 1,71892 | 1,90762 | -1,139736247 | N/A             | N/A       | N/A          | Inc-KRT7-1         |
| A_22_P00002568 | 2,66728 | 2,85598 | -1,139736247 | N/A             | N/A       | AL832593     | Inc-C17orf89-1     |
| A_33_P3336696  | 16,6506 | 16,8393 | -1,139736247 | ENST00000361335 | 4539      | AK311996     | ND4L               |
| A_23_P1199     | 12,7198 | 12,9085 | -1,139736247 | ENST00000378952 | 11164     | NM_014142    | NUDT5              |
| A_33_P3305399  | 7,348   | 7,53674 | -1,139767847 | ENST00000368962 | 9869      | NM_001243491 | SETDB1             |
| A_22_P00008379 | 4,12937 | 4,31813 | -1,139783648 | N/A             | N/A       | N/A          | Inc-JAM3-1         |
| A_33_P3396956  | 7,78436 | 7,97313 | -1,139791548 | ENST00000616918 | 126695    | NM_152365    | KDF1               |
| A_33_P3343428  | 10,8911 | 11,08   | -1,139894259 | ENST00000359831 | 10758     | NM_147686    | TRAF3IP2           |
| A_22_P00015253 | 4,26036 | 4,44927 | -1,13990216  | ENST00000501718 | N/A       | N/A          | N/A                |
| A_33_P3311920  | 5,26564 | 5,45461 | -1,139949568 | N/A             | N/A       | N/A          | N/A                |
| A_19_P00806441 | 1,60083 | 1,78982 | -1,139965371 | N/A             | N/A       | N/A          | Inc-ANKRD10-4      |
| A_24_P8768     | 13,6665 | 13,8555 | -1,139973273 | ENST00000487659 | 55052     | NM_017971    | MRPL20             |
| A_21_P0014444  | 10,2735 | 10,4625 | -1,139973273 | N/A             | 100507639 | NR_121625    | LOC100507639       |
| A_23_P110802   | 9,91178 | 10,1008 | -1,139989076 | ENST00000283006 | 64946     | NM_022909    | CENPH              |
| A_24_P284324   | 9,49719 | 9,68622 | -1,139996978 | ENST00000582330 | 54868     | NM_017728    | TMEM104            |
| A_33_P3285235  | 4,97403 | 5,16311 | -1,140036488 | ENST00000311921 | 22847     | NM_001136156 | ZNF507             |
| A_23_P321959   | 11,6633 | 11,8524 | -1,140052292 | ENST00000478705 | 113402    | NM_145169    | SFT2D1             |
| A_33_P3359984  | 12,1333 | 12,3225 | -1,140131318 | ENST00000493052 | N/A       | N/A          | N/A                |
| A_33_P3238966  | 13,1771 | 13,3663 | -1,140131318 | ENST00000331134 | 55666     | NM_017921    | NPLOC4             |
| A_21_P0012729  | 1,62784 | 1,81707 | -1,140155026 | ENST00000514130 | 100505702 | N/A          | LINC01094          |

|                |         |         |              |                 |        |              |              |
|----------------|---------|---------|--------------|-----------------|--------|--------------|--------------|
| A_23_P82868    | 13,0914 | 13,2807 | -1,140210348 | ENST00000352041 | 5327   | NM_000930    | PLAT         |
| A_24_P256552   | 9,45062 | 9,63999 | -1,140265673 | ENST00000526480 | 1479   | NM_001033505 | CSTF3        |
| A_32_P227845   | 12,4441 | 12,6335 | -1,140289384 | ENST00000437008 | 220729 | NR_003266    | LOC220729    |
| A_24_P97526    | 11,8233 | 12,0127 | -1,140289384 | ENST00000205636 | 54918  | NM_017801    | CMTM6        |
| A_23_P332908   | 9,92526 | 10,1147 | -1,140321    | ENST00000548100 | 196441 | NM_144982    | ZFC3H1       |
| A_22_P00012120 | 7,71907 | 7,90853 | -1,140336809 | N/A             | N/A    | N/A          | Inc-POLE2-1  |
| A_23_P55649    | 1,65046 | 1,83992 | -1,140336809 | ENST00000598953 | 2358   | NM_001462    | FPR2         |
| A_22_P00001792 | 9,02414 | 9,21361 | -1,140344713 | ENST00000556713 | N/A    | BQ082534     | N/A          |
| A_23_P502930   | 14,8133 | 15,0028 | -1,140368426 | ENST00000460980 | 10922  | NM_006712    | FASTK        |
| A_22_P00003471 | 5,46325 | 5,65281 | -1,140415853 | N/A             | N/A    | N/A          | Inc-CCDC69-1 |
| A_33_P3210848  | 12,2055 | 12,3951 | -1,140447473 | ENST00000424383 | 392617 | NM_001128636 | ELFN1        |
| A_24_P191417   | 11,4254 | 11,615  | -1,140447473 | ENST00000337386 | 4664   | NM_005966    | NAB1         |
| A_23_P146811   | 9,28391 | 9,47353 | -1,140463283 | ENST00000296701 | 81545  | NM_030793    | FBXO38       |
| A_23_P77440    | 7,44883 | 7,63847 | -1,140479093 | ENST00000569766 | 4775   | NM_173165    | NFATC3       |
| A_33_P3222451  | 1,69357 | 1,88331 | -1,140558148 | ENST00000391830 | 84335  | NM_001278160 | AKT1S1       |
| A_23_P257198   | 13,4735 | 13,6633 | -1,140605583 | ENST00000502423 | 4724   | NM_002495    | NDUFS4       |
| A_22_P00006278 | 8,39835 | 8,58823 | -1,140668834 | N/A             | N/A    | N/A          | Inc-FAM76A-1 |
| A_23_P320290   | 5,65158 | 5,84147 | -1,14067674  | ENST00000515386 | 152485 | NM_178835    | ZNF827       |
| A_33_P3310512  | 3,1662  | 3,3561  | -1,140684647 | N/A             | N/A    | N/A          | N/A          |
| A_33_P3372742  | 7,72229 | 7,91222 | -1,140708367 | ENST00000617152 | 440051 | N/A          | KRTAP5-11    |
| A_23_P321160   | 6,1059  | 6,29583 | -1,140708367 | ENST00000399604 | 84622  | NM_032530    | ZNF594       |
| A_23_P100344   | 9,80293 | 9,99288 | -1,140724181 | ENST00000575571 | 23594  | NM_014321    | ORC6         |
| A_33_P3260747  | 2,30863 | 2,49861 | -1,140747902 | ENST00000373677 | 340527 | BC033261     | NHSL2        |
| A_23_P140301   | 14,2343 | 14,4243 | -1,140763716 | ENST00000557087 | 5684   | NM_002788    | PSMA3        |
| A_22_P00025961 | 7,11539 | 7,30545 | -1,14081116  | N/A             | N/A    | BF341178     | Inc-CNPY3-1  |
| A_33_P3320994  | 6,25206 | 6,44214 | -1,140826975 | ENST00000234668 | 84144  | AL834286     | SYDE2        |
| A_33_P3233250  | 1,63999 | 1,83009 | -1,14084279  | ENST00000368725 | 645922 | NM_001045479 | S100A7L2     |
| A_21_P0005493  | 1,84318 | 2,0333  | -1,140858606 | N/A             | N/A    | N/A          | Inc-GLI3-1   |
| A_23_P501080   | 9,27934 | 9,46947 | -1,140866514 | ENST00000450302 | 168374 | NM_007139    | ZNF92        |
| A_22_P00018308 | 6,41256 | 6,60271 | -1,14088233  | N/A             | N/A    | AF086256     | Inc-ZNF841-1 |
| A_23_P68436    | 2,04686 | 2,23703 | -1,140898146 | ENST00000372785 | 128488 | NM_080869    | WFDC12       |
| A_21_P0000299  | 8,95381 | 9,14399 | -1,140906054 | N/A             | 641451 | NR_002917    | SNORA19      |
| A_23_P147245   | 9,49091 | 9,68112 | -1,140929779 | ENST00000396556 | 114884 | NM_017784    | OSBPL10      |

|                |         |         |              |                 |           |              |                    |
|----------------|---------|---------|--------------|-----------------|-----------|--------------|--------------------|
| A_23_P255695   | 2,69917 | 2,88938 | -1,140929779 | ENST00000360657 | 10786     | NM_006632    | SLC17A3            |
| A_33_P3352085  | 4,12223 | 4,31246 | -1,140945595 | N/A             | N/A       | N/A          | N/A                |
| A_22_P00002284 | 1,65114 | 1,84139 | -1,140961412 | N/A             | N/A       | BG190789     | Inc-C10orf68-2     |
| A_23_P73848    | 1,36379 | 1,55409 | -1,141000956 | ENST00000454875 | 83869     | NR_125733    | TTY14              |
| A_19_P00317789 | 11,5213 | 11,7116 | -1,141000956 | ENST00000307533 | 93622     | NR_015433    | LOC93622           |
| A_23_P27515    | 10,6851 | 10,8754 | -1,141000956 | ENST00000488311 | 23646     | NM_012268    | PLD3               |
| A_21_P0002079  | 1,53846 | 1,72877 | -1,141008865 | ENST00000422683 | N/A       | N/A          | N/A                |
| A_21_P0004794  | 6,96338 | 7,15369 | -1,141008865 | ENST00000453579 | N/A       | N/A          | N/A                |
| A_22_P00025183 | 1,63297 | 1,82332 | -1,1410405   | ENST00000454204 | N/A       | N/A          | N/A                |
| A_23_P156497   | 10,9954 | 11,1858 | -1,141080047 | ENST00000304434 | 60481     | NM_021814    | ELOVL5             |
| A_33_P3341722  | 11,2462 | 11,4366 | -1,141080047 | N/A             | N/A       | CU692082     | N/A                |
| A_23_P346302   | 12,1702 | 12,3606 | -1,141080047 | ENST00000274712 | 153527    | NM_144723    | ZMAT2              |
| A_22_P00006222 | 5,06148 | 5,25191 | -1,141103775 | ENST00000439745 | N/A       | N/A          | N/A                |
| A_22_P00009976 | 1,6232  | 1,81365 | -1,141119594 | N/A             | N/A       | N/A          | Inc-MKKS-3         |
| A_23_P65455    | 10,2622 | 10,4527 | -1,141159143 | ENST00000554406 | 54930     | NM_017815    | HAUS4              |
| A_33_P3354683  | 13,4079 | 13,5984 | -1,141159143 | ENST00000487231 | 94005     | NM_033198    | PIGS               |
| A_23_P205584   | 7,03266 | 7,2233  | -1,141269887 | ENST00000356057 | 51528     | NM_001284201 | JKAMP              |
| A_24_P522998   | 1,60362 | 1,79441 | -1,141388553 | ENST00000433746 | 127254    | NM_001002912 | ERICH3             |
| A_23_P43086    | 11,4932 | 11,684  | -1,141396465 | ENST00000519513 | 55909     | NM_018688    | BIN3               |
| A_22_P00015990 | 3,1057  | 3,29652 | -1,141412288 | ENST00000496886 | 200424    | NM_001287491 | TET3               |
| A_33_P3452297  | 5,72912 | 5,92    | -1,141459759 | ENST00000419069 | 378828    | N/A          | LINC00317          |
| A_21_P0006605  | 1,53546 | 1,72637 | -1,141483495 | N/A             | N/A       | N/A          | Inc-AC006156.2-6   |
| A_33_P3378318  | 2,53479 | 2,72573 | -1,141507232 | ENST00000604857 | N/A       | N/A          | N/A                |
| A_33_P3392187  | 2,75026 | 2,94127 | -1,14156262  | ENST00000407595 | 114800    | NM_001080433 | CCDC85A            |
| A_22_P00002087 | 1,43158 | 1,62262 | -1,141586358 | N/A             | N/A       | N/A          | Inc-BMP6-10        |
| A_24_P357535   | 1,5207  | 1,71175 | -1,141594271 | ENST00000248058 | 390892    | NM_001005190 | OR7A10             |
| A_22_P00000906 | 2,30797 | 2,49904 | -1,141610097 | ENST00000573698 | N/A       | N/A          | N/A                |
| A_21_P0008731  | 1,74961 | 1,94069 | -1,14161801  | N/A             | N/A       | N/A          | Inc-OIP5-1         |
| A_21_P0005576  | 1,58913 | 1,78022 | -1,141625923 | N/A             | N/A       | N/A          | Inc-AC009365.3.1-1 |
| A_33_P3241081  | 3,82942 | 4,02053 | -1,14164175  | ENST00000603450 | 254268    | NM_152763    | AKNAD1             |
| A_21_P0010052  | 1,58162 | 1,77276 | -1,14166549  | N/A             | N/A       | N/A          | Inc-PREX1-2        |
| A_24_P410605   | 3,76715 | 3,95833 | -1,141697144 | ENST00000371080 | 4919      | NM_001083592 | ROR1               |
| A_21_P0000706  | 2,28018 | 2,47142 | -1,141744627 | N/A             | 100507582 | NR_037903    | BHLHE40-AS1        |

|                |         |         |              |                 |           |              |               |
|----------------|---------|---------|--------------|-----------------|-----------|--------------|---------------|
| A_21_P0013166  | 7,64762 | 7,83886 | -1,141744627 | ENST00000510017 | N/A       | N/A          | N/A           |
| A_22_P00006661 | 1,73896 | 1,93021 | -1,141752541 | ENST00000477059 | 103344930 | NR_121649    | LINC01391     |
| A_21_P0006894  | 4,78328 | 4,97458 | -1,141792111 | N/A             | N/A       | N/A          | Inc-RPP30-1   |
| A_33_P3218135  | 4,00785 | 4,19917 | -1,14180794  | ENST00000539969 | 100128554 | NR_015398    | LOC100128554  |
| A_23_P131737   | 9,68442 | 9,87576 | -1,141823769 | ENST00000416400 | 51542     | NM_016516    | VPS54         |
| A_23_P16063    | 4,64578 | 4,83726 | -1,141934578 | ENST00000602210 | 2901      | NM_002088    | GRIK5         |
| A_24_P255303   | 11,9549 | 12,1464 | -1,141950408 | ENST00000457786 | N/A       | N/A          | N/A           |
| A_24_P606663   | 14,0547 | 14,2462 | -1,141950408 | ENST00000431058 | N/A       | N/A          | N/A           |
| A_22_P00018427 | 6,37616 | 6,56779 | -1,142053313 | ENST00000508923 | N/A       | N/A          | N/A           |
| A_22_P00007772 | 1,94325 | 2,13491 | -1,142077062 | N/A             | N/A       | N/A          | Inc-HNRNPA1-2 |
| A_22_P00009257 | 7,66606 | 7,85772 | -1,142077062 | N/A             | N/A       | N/A          | Inc-LRP5-1    |
| A_33_P3370132  | 10,8791 | 11,0708 | -1,142108727 | ENST00000471166 | 23534     | NM_012470    | TNPO3         |
| A_33_P3662685  | 2,17281 | 2,36452 | -1,142116644 | ENST00000433042 | 449492    | NR_073408    | DEFA9P        |
| A_24_P615822   | 9,29961 | 9,49137 | -1,142156227 | ENST00000602440 | 9790      | NM_014753    | BMS1          |
| A_22_P00005105 | 1,34225 | 1,53402 | -1,142164144 | N/A             | N/A       | N/A          | Inc-DHRS2-2   |
| A_23_P7402     | 11,1776 | 11,3694 | -1,142187895 | ENST00000513490 | 23037     | NM_178140    | PDZD2         |
| A_21_P0005848  | 1,71015 | 1,902   | -1,142227481 | N/A             | 552859    | N/A          | LINC00251     |
| A_23_P420373   | 3,44139 | 3,63326 | -1,142243316 | ENST00000406659 | 1788      | NM_175630    | DNMT3A        |
| A_22_P00020433 | 1,56505 | 1,757   | -1,142306657 | ENST00000539362 | N/A       | BG189845     | N/A           |
| A_33_P3402788  | 1,60938 | 1,80141 | -1,142370002 | N/A             | N/A       | N/A          | Inc-SLC16A8-2 |
| A_22_P00007675 | 3,94642 | 4,13847 | -1,142385838 | N/A             | N/A       | BX648970     | Inc-HIATL1-5  |
| A_21_P0003351  | 1,89287 | 2,08498 | -1,14243335  | ENST00000503465 | N/A       | N/A          | N/A           |
| A_24_P218814   | 6,46663 | 6,65878 | -1,142465025 | ENST00000548123 | 5959      | NM_002905    | RDH5          |
| A_23_P69020    | 3,60175 | 3,7939  | -1,142465025 | ENST00000621172 | 200959    | NM_001105580 | GABRR3        |
| A_22_P00001293 | 1,55247 | 1,74463 | -1,142472944 | N/A             | 100861514 | NR_104120    | ELMO1-AS1     |
| A_33_P3379116  | 2,53789 | 2,73007 | -1,142488782 | N/A             | N/A       | N/A          | N/A           |
| A_21_P0000342  | 6,30537 | 6,49757 | -1,142504621 | ENST00000495973 | 677795    | NR_002990    | SNORA5B       |
| A_22_P00012892 | 3,01076 | 3,20297 | -1,14251254  | N/A             | N/A       | BE252560     | Inc-RBM22-2   |
| A_23_P86943    | 11,0365 | 11,2288 | -1,142583816 | ENST00000332118 | 6734      | NM_003139    | SRPR          |
| A_23_P32577    | 8,13468 | 8,32702 | -1,142615495 | ENST00000611519 | 1602      | NM_080759    | DACH1         |
| A_33_P3356886  | 5,68271 | 5,87508 | -1,142639256 | ENST00000393277 | 163259    | NM_001256404 | DENND2C       |
| A_33_P3290487  | 11,4412 | 11,6336 | -1,142663016 | ENST00000539836 | 79759     | NM_001172668 | ZNF668        |
| A_33_P3221313  | 5,67708 | 5,86953 | -1,142702619 | ENST00000423383 | 2491      | NM_006733    | CENPI         |

|                |         |         |              |                 |           |              |                  |
|----------------|---------|---------|--------------|-----------------|-----------|--------------|------------------|
| A_21_P0011097  | 1,5853  | 1,77779 | -1,142734302 | N/A             | N/A       | N/A          | XLOC_I2_003400   |
| A_33_P3297923  | 13,6897 | 13,8823 | -1,142821434 | ENST00000409012 | 286262    | NM_001128228 | TPRN             |
| A_33_P3242124  | 7,41428 | 7,60689 | -1,142829356 | ENST00000595958 | 93323     | NM_033417    | HAUS8            |
| A_22_P00011314 | 4,82305 | 5,01567 | -1,142837277 | N/A             | N/A       | N/A          | Inc-OSCAR-1      |
| A_24_P67027    | 8,53231 | 8,72508 | -1,142956106 | ENST00000416636 | 1196      | NM_001294338 | CLK2             |
| A_23_P114626   | 2,73658 | 2,92939 | -1,142987796 | ENST00000367698 | 462       | NM_000488    | SERPINC1         |
| A_24_P399622   | 10,1865 | 10,3794 | -1,143059102 | ENST00000593484 | 11316     | NM_199444    | COPE             |
| A_33_P3299349  | 1,60959 | 1,80254 | -1,143098718 | ENST00000624445 | N/A       | N/A          | N/A              |
| A_24_P366457   | 12,5255 | 12,7185 | -1,143138335 | ENST00000480085 | N/A       | N/A          | N/A              |
| A_23_P215669   | 8,52862 | 8,72163 | -1,143146259 | ENST00000476151 | 246721    | NM_032959    | POLR2J2          |
| A_21_P0008580  | 6,79502 | 6,98805 | -1,143162107 | N/A             | 101929151 | XR_243177    | LOC101929151     |
| A_33_P3264875  | 9,2606  | 9,45364 | -1,14317003  | ENST00000355958 | 2870      | NM_001004105 | GRK6             |
| A_23_P10815    | 12,4086 | 12,6017 | -1,143217574 | ENST00000257075 | 9698      | NM_001020658 | PUM1             |
| A_23_P115366   | 10,3219 | 10,515  | -1,143217574 | ENST00000371873 | 51727     | NM_016308    | CMPK1            |
| A_21_P0000880  | 2,72755 | 2,92072 | -1,143273045 | N/A             | 100506436 | NR_040012    | SPAG5-AS1        |
| A_33_P3228132  | 1,63506 | 1,82824 | -1,14328097  | ENST00000497328 | 400891    | NM_001291006 | LRRC74B          |
| A_21_P0007046  | 4,46288 | 4,65611 | -1,143320593 | N/A             | N/A       | N/A          | Inc-GATA3-1      |
| A_23_P411833   | 13,0049 | 13,1982 | -1,143376069 | ENST00000547407 | 197335    | NM_145294    | WDR90            |
| A_33_P3288180  | 11,1946 | 11,3879 | -1,143376069 | ENST00000468397 | 728642    | NM_024011    | CDK11A           |
| A_33_P3386181  | 7,84554 | 8,0389  | -1,143423622 | ENST00000371515 | 55734     | NM_018197    | ZFP64            |
| A_23_P73637    | 3,82303 | 4,01643 | -1,143455325 | ENST00000302917 | 56156     | NM_031273    | TEX13B           |
| A_24_P208998   | 3,15855 | 3,35197 | -1,143471176 | ENST00000381018 | 373       | NM_001656    | TRIM23           |
| A_33_P3363665  | 9,34866 | 9,54213 | -1,143510807 | ENST00000372651 | 4802      | NM_001142587 | NFYC             |
| A_24_P795371   | 7,20683 | 7,40035 | -1,143550438 | N/A             | 644192    | NR_102743    | NR2F2-AS1        |
| A_19_P00803775 | 4,24159 | 4,43515 | -1,143582145 | N/A             | N/A       | N/A          | Inc-AC136604.1-1 |
| A_23_P392429   | 1,38148 | 1,57505 | -1,143590072 | ENST00000306346 | 252884    | NM_145756    | ZNF396           |
| A_33_P3325023  | 10,31   | 10,5036 | -1,143613852 | ENST00000185150 | 27248     | NM_015701    | ERLEC1           |
| A_23_P46819    | 8,67702 | 8,87063 | -1,143621779 | ENST00000393441 | 8945      | NM_033637    | BTRC             |
| A_33_P3348973  | 5,21545 | 5,40906 | -1,143621779 | ENST00000443896 | 200576    | NM_001178000 | PIKFYVE          |
| A_24_P331560   | 5,69417 | 5,88782 | -1,143653487 | ENST00000217961 | 412       | NM_000351    | STS              |
| A_33_P3227857  | 3,12104 | 3,31471 | -1,143669342 | N/A             | 285521    | NM_001297733 | COX18            |
| A_21_P0005289  | 1,5492  | 1,74293 | -1,143716907 | ENST00000412197 | N/A       | N/A          | N/A              |
| A_21_P0011699  | 4,73049 | 4,92422 | -1,143716907 | N/A             | N/A       | N/A          | XLOC_I2_006745   |

|                |         |         |              |                 |           |              |                |
|----------------|---------|---------|--------------|-----------------|-----------|--------------|----------------|
| A_23_P14667    | 4,29807 | 4,49181 | -1,143724835 | ENST00000394573 | 9154      | NM_004213    | SLC28A1        |
| A_23_P501007   | 14,1084 | 14,3022 | -1,143772402 | ENST00000394555 | 2202      | NM_001039348 | EFEMP1         |
| A_33_P7354526  | 8,29834 | 8,49214 | -1,143772402 | ENST00000262160 | 4087      | N/A          | SMAD2          |
| A_33_P3367642  | 13,7419 | 13,9357 | -1,143772402 | ENST00000216080 | 91289     | NM_033200    | LMF2           |
| A_23_P251795   | 6,36273 | 6,55663 | -1,143851685 | ENST00000471050 | 221914    | XM_006715892 | GPC2           |
| A_33_P3298120  | 3,16636 | 3,36029 | -1,143875471 | ENST00000408930 | 641654    | NM_001037558 | HEPN1          |
| A_22_P00008747 | 9,82746 | 10,0214 | -1,143883399 | N/A             | N/A       | N/A          | Inc-KIAA1967-2 |
| A_21_P0010539  | 1,83855 | 2,03253 | -1,143915115 | N/A             | N/A       | N/A          | XLOC_I2_000324 |
| A_33_P3312150  | 3,30692 | 3,5009  | -1,143915115 | ENST00000618686 | N/A       | AF172850     | N/A            |
| A_22_P00012445 | 3,56829 | 3,76233 | -1,14396269  | ENST00000595538 | N/A       | BC002572     | N/A            |
| A_21_P0008396  | 1,3948  | 1,58886 | -1,143978549 | N/A             | N/A       | N/A          | Inc-TNFAIP2-1  |
| A_23_P68423    | 4,39999 | 4,59406 | -1,143986478 | ENST00000342272 | 57158     | NM_175913    | JPH2           |
| A_21_P0001949  | 3,59365 | 3,7878  | -1,144049916 | ENST00000447194 | 101927431 | NR_110223    | LOC101927431   |
| A_23_P373927   | 7,0903  | 7,28447 | -1,144065776 | ENST00000262455 | 23071     | AB011145     | ERP44          |
| A_22_P00005940 | 6,81863 | 7,01281 | -1,144073706 | N/A             | N/A       | AK296734     | Inc-EXOC3-1    |
| A_21_P0014325  | 2,87202 | 3,06623 | -1,144097497 | ENST00000358463 | 388289    | NM_207385    | C16orf47       |
| A_22_P00021268 | 5,53835 | 5,7326  | -1,144129219 | N/A             | N/A       | CU679210     | Inc-UBE2Z-1    |
| A_21_P0009120  | 7,29259 | 7,48685 | -1,144137149 | ENST00000573042 | 100507501 | NR_039999    | LINC01569      |
| A_33_P3419806  | 17,9626 | 18,1569 | -1,144168872 | ENST00000430795 | 6235      | NM_001032    | RPS29          |
| A_32_P191860   | 5,20934 | 5,40368 | -1,144200595 | ENST00000379204 | 284402    | NM_001025591 | SCGB2B2        |
| A_23_P6561     | 9,60614 | 9,80054 | -1,144248182 | ENST00000533473 | 55096     | NM_018029    | EBLN2          |
| A_23_P211627   | 8,33627 | 8,53079 | -1,144343362 | ENST00000405676 | 10762     | NM_007172    | NUP50          |
| A_23_P111092   | 10,2755 | 10,4701 | -1,14440682  | ENST00000461453 | 26716     | NM_030883    | OR2H1          |
| A_23_P88904    | 11,0345 | 11,2292 | -1,144486147 | ENST00000562120 | 4913      | NM_002528    | NTHL1          |
| A_23_P89302    | 2,69402 | 2,88875 | -1,144509946 | ENST00000226021 | 786       | NM_000727    | CACNG1         |
| A_21_P0005132  | 1,64658 | 1,84134 | -1,144533745 | N/A             | N/A       | N/A          | Inc-LAMA2-1    |
| A_21_P0009295  | 7,89139 | 8,08618 | -1,144557546 | N/A             | N/A       | N/A          | Inc-ALOX12B-1  |
| A_33_P3250463  | 8,23719 | 8,43202 | -1,14458928  | ENST00000424766 | 5378      | NM_001128144 | PMS1           |
| A_21_P0007602  | 2,39996 | 2,59484 | -1,144628949 | N/A             | 102725323 | N/A          | LOC102725323   |
| A_23_P74928    | 8,32508 | 8,51998 | -1,144644817 | ENST00000438435 | 3140      | NM_001531    | MR1            |
| A_21_P0005179  | 3,07165 | 3,2667  | -1,144763834 | ENST00000436953 | N/A       | N/A          | N/A            |
| A_21_P0008040  | 5,2874  | 5,48258 | -1,144866993 | N/A             | N/A       | N/A          | Inc-GSX1-1     |
| A_21_P0000583  | 10,5794 | 10,7746 | -1,144882864 | N/A             | 439994    | NR_029408    | LOC439994      |

|                |         |         |              |                 |           |              |                 |
|----------------|---------|---------|--------------|-----------------|-----------|--------------|-----------------|
| A_23_P213908   | 10,9057 | 11,1011 | -1,14504159  | ENST00000511371 | 51808     | NM_032177    | PHAX            |
| A_23_P84872    | 8,49189 | 8,68731 | -1,145057463 | ENST00000339901 | 79048     | NM_024077    | SECISBP2        |
| A_21_P0001832  | 2,96835 | 3,16378 | -1,1450654   | ENST00000442387 | N/A       | N/A          | N/A             |
| A_24_P781615   | 2,49204 | 2,68751 | -1,145097149 | ENST00000585538 | 90586     | NR_002773    | AOC4P           |
| A_22_P00016459 | 1,66591 | 1,8614  | -1,145113023 | N/A             | N/A       | N/A          | Inc-TMEM65-3    |
| A_22_P00021123 | 3,42247 | 3,61798 | -1,145128898 | N/A             | N/A       | N/A          | Inc-CHAC1-2     |
| A_33_P3392952  | 10,1178 | 10,3134 | -1,145200337 | ENST00000335255 | 3607      | NM_004514    | FOXK2           |
| A_23_P421379   | 1,91994 | 2,11554 | -1,145200337 | ENST00000418738 | 3481      | NM_000612    | IGF2            |
| A_24_P409985   | 6,77368 | 6,96933 | -1,145240027 | ENST00000419280 | 93109     | NM_001011655 | TMEM44          |
| A_33_P3313695  | 1,6596  | 1,85528 | -1,145263842 | N/A             | N/A       | N/A          | N/A             |
| A_23_P165402   | 13,6682 | 13,8639 | -1,145279719 | ENST00000233468 | 51639     | NM_016047    | SF3B6           |
| A_33_P3380372  | 3,99159 | 4,1874  | -1,145367046 | ENST00000439197 | N/A       | N/A          | N/A             |
| A_33_P3420900  | 3,99364 | 4,18947 | -1,145382924 | ENST00000358524 | 399967    | NM_212555    | PATE2           |
| A_21_P0013102  | 9,63509 | 9,83096 | -1,145414681 | ENST00000455011 | 102723724 | XR_426077    | LOC102723724    |
| A_22_P00007020 | 8,15919 | 8,35507 | -1,145422262 | N/A             | 102724826 | NR_126465    | ZNF337-AS1      |
| A_23_P153183   | 2,46045 | 2,65633 | -1,145422262 | ENST00000279451 | 22866     | NM_001168648 | CNKS2           |
| A_22_P00018389 | 2,0696  | 2,26553 | -1,145462318 | N/A             | 100874235 | NR_046579    | CACNA1C-AS2     |
| A_21_P0007656  | 1,58572 | 1,78167 | -1,145478198 | N/A             | N/A       | N/A          | Inc-TMEM132B-3  |
| A_22_P00010309 | 9,28432 | 9,48027 | -1,145478198 | ENST00000524858 | N/A       | N/A          | N/A             |
| A_21_P0009935  | 1,70825 | 1,90424 | -1,145509958 | N/A             | N/A       | N/A          | Inc-C20orf187-1 |
| A_21_P0006577  | 1,80678 | 2,00284 | -1,14556554  | N/A             | 102724092 | XR_426521    | LOC102724092    |
| A_23_P6099     | 8,36808 | 8,56415 | -1,14557348  | ENST00000494924 | 23236     | NM_015192    | PLCB1           |
| A_21_P0000480  | 7,31385 | 7,50994 | -1,145589361 | N/A             | N/A       | N/A          | N/A             |
| A_23_P100420   | 11,1452 | 11,3413 | -1,145597302 | ENST00000568020 | 23174     | NM_015144    | ZCCHC14         |
| A_21_P0004902  | 5,02993 | 5,22603 | -1,145597302 | ENST00000427048 | N/A       | N/A          | N/A             |
| A_32_P53486    | 14,9685 | 15,1647 | -1,145676711 | ENST00000305321 | 654483    | NM_001039182 | BOLA2B          |
| A_22_P00005581 | 3,30137 | 3,49757 | -1,145676711 | ENST00000521055 | N/A       | CV393458     | N/A             |
| A_23_P93750    | 13,2227 | 13,4189 | -1,145676711 | ENST00000480956 | 23658     | NM_012322    | LSM5            |
| A_22_P00005683 | 9,4845  | 9,68073 | -1,145700535 | N/A             | 101410538 | NR_102705    | MMP24-AS1       |
| A_22_P00012306 | 3,35969 | 3,55594 | -1,145716418 | N/A             | N/A       | N/A          | Inc-PPP4R1-5    |
| A_33_P3210969  | 4,61029 | 4,80657 | -1,145740243 | N/A             | N/A       | N/A          | N/A             |
| A_22_P00014382 | 11,307  | 11,5033 | -1,145756126 | N/A             | N/A       | AK123825     | Inc-SEZ6L2-1    |
| A_23_P109072   | 12,854  | 13,0504 | -1,145835547 | ENST00000371539 | 57167     | NM_020436    | SALL4           |



|                |         |         |              |                 |           |              |                |
|----------------|---------|---------|--------------|-----------------|-----------|--------------|----------------|
| A_33_P3219596  | 6,00588 | 6,2023  | -1,145851432 | ENST00000536780 | 254559    | NR_015411    | LINC00925      |
| A_33_P3256848  | 4,63742 | 4,83386 | -1,145867317 | ENST00000368676 | 8038      | NM_021641    | ADAM12         |
| A_33_P3344405  | 10,6118 | 10,8083 | -1,145914973 | ENST00000602424 | 100271849 | NM_001145785 | MEF2B          |
| A_33_P3360684  | 9,2041  | 9,40068 | -1,145978518 | ENST00000545736 | 57175     | NM_001018070 | CORO1B         |
| A_24_P32887    | 9,46622 | 9,6628  | -1,145978518 | ENST00000371834 | 8019      | NM_007371    | BRD3           |
| A_23_P46017    | 10,3169 | 10,5135 | -1,145994405 | ENST00000370485 | 56267     | NM_001008661 | CCBL2          |
| A_22_P00021110 | 3,81176 | 4,00856 | -1,146153284 | ENST00000443593 | N/A       | N/A          | N/A            |
| A_33_P3388376  | 4,53854 | 4,73543 | -1,146224787 | ENST00000590047 | 414059    | NM_001001417 | TBC1D3B        |
| A_23_P128147   | 16,4134 | 16,6104 | -1,146312186 | ENST00000547765 | 10376     | NM_006082    | TUBA1B         |
| A_33_P6467722  | 1,58011 | 1,77714 | -1,146336023 | ENST00000499242 | 730971    | NR_027441    | FLJ36777       |
| A_21_P0013498  | 4,13663 | 4,33368 | -1,146351915 | N/A             | N/A       | N/A          | XLOC_I2_014289 |
| A_22_P00011978 | 2,92854 | 3,12563 | -1,146383699 | N/A             | N/A       | AK095109     | Inc-PLA2G6-1   |
| A_23_P80377    | 10,2591 | 10,4562 | -1,146391645 | ENST00000407585 | 11252     | NM_007229    | PACSIN2        |
| A_23_P160240   | 8,47091 | 8,66804 | -1,146415484 | ENST00000614551 | 51205     | NM_016361    | ACP6           |
| A_24_P934800   | 8,88708 | 9,08422 | -1,14642343  | ENST00000562215 | 112479    | NM_001142725 | ERI2           |
| A_22_P00019244 | 5,58919 | 5,78637 | -1,146455216 | ENST00000443205 | N/A       | N/A          | N/A            |
| A_23_P114839   | 8,79035 | 8,98761 | -1,146518791 | ENST00000477194 | 2275      | NM_004468    | FHL3           |
| A_33_P3367647  | 1,55745 | 1,75472 | -1,146526738 | ENST00000401414 | 345930    | NM_001077706 | ECT2L          |
| A_23_P303851   | 5,48028 | 5,67756 | -1,146534685 | ENST00000571573 | 259291    | NM_176886    | TAS2R45        |
| A_23_P14649    | 12,8392 | 13,0365 | -1,146550579 | N/A             | 80035     | NR_026808    | ANP32A-IT1     |
| A_23_P416212   | 4,90573 | 5,10307 | -1,146582369 | ENST00000565659 | 94086     | NM_033194    | HSPB9          |
| A_33_P3238032  | 2,35501 | 2,55238 | -1,146606212 | ENST00000388914 | 339965    | NM_001042784 | CCDC158        |
| A_24_P183994   | 3,83621 | 4,03358 | -1,146606212 | ENST00000340717 | 158158    | AK056176     | RASEF          |
| A_23_P360240   | 11,1255 | 11,3229 | -1,146630055 | ENST00000535653 | 26579     | NM_138768    | MYEOV          |
| A_23_P50331    | 10,9605 | 11,1579 | -1,146630055 | ENST00000585831 | 26017     | AF151902     | FAM32A         |
| A_32_P89310    | 6,783   | 6,98044 | -1,146661847 | ENST00000343987 | 389072    | NM_001080475 | PLEKHM3        |
| A_23_P103011   | 8,41882 | 8,61627 | -1,146669795 | ENST00000263116 | 9609      | NM_004914    | RAB36          |
| A_22_P00020220 | 6,64882 | 6,84637 | -1,146749279 | N/A             | N/A       | BI828099     | Inc-SARM1-2    |
| A_33_P3312642  | 3,06516 | 3,26273 | -1,146765176 | ENST00000371125 | 100130613 | NM_001122716 | PRR32          |
| A_23_P115792   | 13,3108 | 13,5084 | -1,146789023 | ENST00000392799 | 59338     | NM_001001974 | PLEKHA1        |
| A_23_P9056     | 11,3813 | 11,5789 | -1,146789023 | ENST00000435644 | 9821      | NM_014781    | RB1CC1         |
| A_33_P3387095  | 1,60824 | 1,80587 | -1,14681287  | N/A             | N/A       | N/A          | N/A            |
| A_22_P00003681 | 1,38736 | 1,58501 | -1,146828768 | ENST00000517964 | N/A       | XR_171713    | N/A            |

|                |         |         |              |                 |           |              |                      |
|----------------|---------|---------|--------------|-----------------|-----------|--------------|----------------------|
| A_33_P3277953  | 3,71071 | 3,90839 | -1,146852616 | N/A             | 100128811 | NR_027333    | GPR158-AS1           |
| A_24_P258846   | 6,24517 | 6,44288 | -1,146876464 | ENST00000592223 | 4772      | NM_172390    | NFATC1               |
| A_23_P20876    | 9,33763 | 9,53546 | -1,146971863 | ENST00000620992 | 138639    | NM_177995    | PTPDC1               |
| A_33_P3514669  | 1,60859 | 1,80648 | -1,147019565 | ENST00000439059 | 284632    | NR_027087    | LOC284632            |
| A_33_P3355185  | 6,56232 | 6,76023 | -1,147035466 | ENST00000589955 | 596       | NM_000657    | BCL2                 |
| A_33_P3388080  | 7,26281 | 7,46074 | -1,147051368 | ENST00000558575 | 731223    | N/A          | LINC01220            |
| A_22_P00018011 | 1,81996 | 2,01805 | -1,147178587 | N/A             | N/A       | N/A          | Inc-ZNF18-1          |
| A_22_P00000268 | 1,55203 | 1,75018 | -1,147226298 | ENST00000564299 | N/A       | L23402       | N/A                  |
| A_33_P3323842  | 5,64851 | 5,84675 | -1,147297867 | N/A             | 497258    | NR_002832    | BDNF-AS              |
| A_33_P3380477  | 2,76745 | 2,96592 | -1,147480789 | N/A             | 27198     | AK122659     | HCAR1                |
| A_23_P119266   | 9,68963 | 9,88811 | -1,147488742 | ENST00000588777 | 1777      | NM_001375    | DNASE2               |
| A_22_P00013357 | 7,78479 | 7,98327 | -1,147488742 | N/A             | N/A       | N/A          | Inc-RP11-166B2.1.1-1 |
| A_33_P3329712  | 1,6409  | 1,83939 | -1,147496696 | ENST00000609912 | N/A       | N/A          | N/A                  |
| A_32_P503113   | 1,69075 | 1,88924 | -1,147496696 | ENST00000292574 | 126402    | NM_173482    | CCDC105              |
| A_33_P3290089  | 5,43349 | 5,63203 | -1,147536466 | ENST00000595770 | N/A       | XR_109536    | N/A                  |
| A_24_P56194    | 7,70783 | 7,90642 | -1,147576237 | ENST00000228865 | 1389      | NM_001310    | CREBL2               |
| A_33_P3340752  | 2,28622 | 2,48486 | -1,14761601  | N/A             | 100130887 | NR_120495    | ATE1-AS1             |
| A_21_P0013340  | 12,6836 | 12,8823 | -1,147663739 | ENST00000478672 | N/A       | N/A          | N/A                  |
| A_33_P3708658  | 4,86536 | 5,06408 | -1,147679649 | N/A             | N/A       | AK096370     | Inc-RP11-712L6.5.1-2 |
| A_33_P3344618  | 9,43847 | 9,63731 | -1,147775114 | ENST00000373033 | 7942      | NM_007162    | TFEB                 |
| A_21_P0002595  | 1,58131 | 1,78017 | -1,147791026 | N/A             | 286749    | NM_001198593 | STON1-GTF2A1L        |
| A_33_P3422931  | 12,6335 | 12,8324 | -1,14782285  | ENST00000569585 | 65993     | NM_001300900 | MRPS34               |
| A_21_P0012195  | 1,42885 | 1,62776 | -1,147830806 | N/A             | 101928011 | XR_244302    | LOC101928011         |
| A_22_P00000387 | 3,48037 | 3,67929 | -1,147838762 | N/A             | 79667     | NR_026804    | KLF3-AS1             |
| A_33_P3251347  | 3,82043 | 4,01936 | -1,147846719 | ENST00000378928 | 257397    | XR_430492    | TAB3                 |
| A_33_P3366396  | 3,63811 | 3,83707 | -1,147870588 | ENST00000432774 | N/A       | N/A          | N/A                  |
| A_33_P3210379  | 12,217  | 12,416  | -1,147902414 | ENST00000512120 | 92304     | NM_052863    | SCGB3A1              |
| A_21_P0004397  | 1,63802 | 1,83705 | -1,147926284 | N/A             | N/A       | N/A          | Inc-ACTBL2-1         |
| A_21_P0012436  | 2,36806 | 2,5671  | -1,147934241 | N/A             | N/A       | N/A          | XLOC_I2_010139       |
| A_33_P3271166  | 3,62822 | 3,82731 | -1,147974026 | ENST00000343870 | 254783    | NM_001005490 | OR6C74               |
| A_21_P0010099  | 1,6848  | 1,884   | -1,148061558 | N/A             | N/A       | N/A          | Inc-SLC17A9-2        |
| A_22_P00011099 | 3,24046 | 3,43971 | -1,148101347 | ENST00000503650 | N/A       | N/A          | N/A                  |
| A_33_P3321611  | 5,49328 | 5,69259 | -1,148149097 | ENST00000463428 | 65979     | NM_001048183 | PHACTR4              |

|                |         |         |              |                 |           |              |              |
|----------------|---------|---------|--------------|-----------------|-----------|--------------|--------------|
| A_21_P0014200  | 5,22656 | 5,42588 | -1,148157055 | ENST00000608694 | N/A       | AK123679     | N/A          |
| A_22_P00015658 | 1,5466  | 1,74596 | -1,148188889 | ENST00000610966 | 55530     | NM_018711    | SVOP         |
| A_33_P3373139  | 6,88528 | 7,08468 | -1,148220724 | ENST00000470139 | 23334     | AK131107     | SZT2         |
| A_21_P0001153  | 8,20236 | 8,40177 | -1,148228683 | ENST00000457387 | 100131564 | NR_034089    | LOC100131564 |
| A_33_P3245952  | 3,03039 | 3,22981 | -1,148236642 | N/A             | 648570    | AK130915     | LOC648570    |
| A_22_P00014877 | 3,78529 | 3,98476 | -1,148276437 | N/A             | N/A       | N/A          | Inc-SLC6A4-1 |
| A_22_P00002025 | 4,26495 | 4,46447 | -1,148316234 | N/A             | N/A       | N/A          | Inc-BEST4-1  |
| A_33_P3397348  | 4,34195 | 4,54149 | -1,148332154 | N/A             | 149134    | N/A          | LINC01341    |
| A_21_P0004984  | 1,55393 | 1,75349 | -1,148348073 | N/A             | N/A       | N/A          | Inc-EXOC2-5  |
| A_24_P89872    | 9,43069 | 9,63029 | -1,148379912 | ENST00000374861 | 7743      | NM_197977    | ZNF189       |
| A_22_P00003881 | 6,23831 | 6,43804 | -1,148483397 | N/A             | N/A       | N/A          | Inc-CENPP-2  |
| A_22_P00005857 | 1,58355 | 1,78328 | -1,148483397 | N/A             | 100507435 | NR_103863    | DLGAP2-AS1   |
| A_23_P254801   | 8,37443 | 8,57422 | -1,148531162 | ENST00000373271 | 5335      | NM_002660    | PLCG1        |
| A_24_P91701    | 8,65988 | 8,85971 | -1,148563006 | ENST00000614553 | 51233     | NM_016449    | DRICH1       |
| A_21_P0014074  | 4,62266 | 4,82252 | -1,14858689  | N/A             | N/A       | CR749479     | N/A          |
| A_23_P3038     | 14,2597 | 14,4596 | -1,148618736 | ENST00000557323 | 2877      | NM_002083    | GPX2         |
| A_33_P3270136  | 1,56962 | 1,76955 | -1,148642621 | ENST00000595203 | 101927326 | AK130385     | LOC101927326 |
| A_23_P57697    | 12,5929 | 12,7929 | -1,148698355 | ENST00000308361 | 170506    | NM_020865    | DHX36        |
| A_24_P41864    | 1,69253 | 1,89259 | -1,148746129 | ENST00000491514 | 395       | NM_006125    | ARHGAP6      |
| A_24_P783008   | 1,64948 | 1,84955 | -1,148754092 | ENST00000441223 | 200726    | NM_001102659 | LOC200726    |
| A_33_P3263274  | 12,3237 | 12,5238 | -1,148777979 | N/A             | N/A       | N/A          | N/A          |
| A_33_P3341841  | 1,61776 | 1,81789 | -1,148801868 | ENST00000358241 | 344892    | NM_001004312 | RTP2         |
| A_23_P207868   | 1,62861 | 1,82875 | -1,148809831 | ENST00000334109 | 85280     | NM_033191    | KRTAP9-4     |
| A_23_P334845   | 4,28172 | 4,48191 | -1,148849646 | ENST00000487035 | 84986     | NM_032900    | ARHGAP19     |
| A_24_P16124    | 14,7055 | 14,9057 | -1,148857609 | ENST00000414714 | 340198    | NR_001590    | IFITM4P      |
| A_23_P324523   | 11,1219 | 11,3221 | -1,148857609 | ENST00000308214 | 124152    | NM_153208    | IQCK         |
| A_23_P26810    | 9,18218 | 9,38244 | -1,14890539  | ENST00000445888 | 7157      | NM_000546    | TP53         |
| A_23_P217528   | 9,11874 | 9,31902 | -1,148921317 | ENST00000358094 | 11279     | NM_007250    | KLF8         |
| A_32_P186027   | 10,6122 | 10,8125 | -1,148937245 | ENST00000409628 | 8125      | NM_006305    | ANP32A       |
| A_24_P276628   | 9,2091  | 9,4094  | -1,148937245 | ENST00000449045 | 5538      | NM_000310    | PPT1         |
| A_21_P0000064  | 6,78634 | 6,98671 | -1,148992993 | ENST00000405413 | 10855     | NM_006665    | HPSE         |
| A_22_P00022097 | 1,67413 | 1,87453 | -1,149016886 | ENST00000438837 | 8566      | N/A          | PDXK         |
| A_23_P300090   | 1,6048  | 1,8053  | -1,149096533 | ENST00000394059 | 84068     | NM_032128    | SLC10A7      |

|                |         |         |              |                 |           |              |              |
|----------------|---------|---------|--------------|-----------------|-----------|--------------|--------------|
| A_33_P3270593  | 5,83455 | 6,03517 | -1,149192116 | N/A             | N/A       | N/A          | N/A          |
| A_23_P205818   | 9,04552 | 9,24623 | -1,149263808 | ENST00000420765 | 9677      | NM_001130858 | PIIP5K1      |
| A_21_P0001944  | 1,98174 | 2,18252 | -1,149319572 | ENST00000428474 | 101927156 | N/A          | LOC101927156 |
| A_22_P00019205 | 5,35082 | 5,55163 | -1,149343472 | ENST00000530960 | N/A       | N/A          | N/A          |
| A_21_P0007674  | 1,67168 | 1,87257 | -1,149407207 | N/A             | N/A       | N/A          | Inc-P2RX2-1  |
| A_33_P3354151  | 9,43591 | 9,63684 | -1,149439076 | ENST00000369152 | 51027     | NM_016074    | BOLA1        |
| A_33_P3215422  | 3,19362 | 3,39458 | -1,149462978 | ENST00000264824 | 4066      | NM_005583    | LYL1         |
| A_23_P34066    | 5,25816 | 5,45912 | -1,149462978 | ENST00000369423 | 3581      | NM_176786    | IL9R         |
| A_33_P3231140  | 6,06159 | 6,26256 | -1,149470945 | ENST00000504087 | 57182     | NM_001167882 | ANKRD50      |
| A_32_P80741    | 1,86501 | 2,06598 | -1,149470945 | ENST00000303202 | 492307    | NM_001007176 | C8orf22      |
| A_23_P384698   | 7,59585 | 7,79684 | -1,14948688  | ENST00000326237 | 442075    | NR_103821    | EMC3-AS1     |
| A_23_P378526   | 10,8894 | 11,0904 | -1,149494848 | ENST00000496816 | 51750     | NM_016434    | RTEL1        |
| A_22_P00007574 | 4,77808 | 4,97918 | -1,149574528 | ENST00000430728 | N/A       | N/A          | N/A          |
| A_21_P0011770  | 10,0259 | 10,227  | -1,149574528 | ENST00000592712 | 101927667 | N/A          | LINC01535    |
| A_33_P3318946  | 10,6706 | 10,8718 | -1,149654213 | ENST00000255039 | 60484     | NM_021817    | HAPLN2       |
| A_33_P3612740  | 9,28928 | 9,4905  | -1,149670151 | ENST00000421625 | 84196     | NM_001032730 | USP48        |
| A_22_P00007721 | 2,33402 | 2,53527 | -1,149694058 | N/A             | N/A       | N/A          | Inc-HLA-E-4  |
| A_23_P16817    | 10,4444 | 10,6457 | -1,149733904 | ENST00000496205 | 1195      | NM_004071    | CLK1         |
| A_33_P3346688  | 4,61307 | 4,81437 | -1,149733904 | ENST00000527983 | N/A       | AK310467     | N/A          |
| A_19_P00317653 | 9,05884 | 9,26019 | -1,149773751 | ENST00000602175 | N/A       | XR_425690    | N/A          |
| A_33_P3286699  | 1,65402 | 1,85539 | -1,14978969  | N/A             | N/A       | N/A          | N/A          |
| A_23_P435697   | 9,11283 | 9,31421 | -1,14979766  | ENST00000337623 | 26098     | NM_015608    | EDRF1        |
| A_21_P0013094  | 1,57166 | 1,77306 | -1,1498136   | ENST00000422736 | N/A       | N/A          | N/A          |
| A_23_P93269    | 9,91924 | 10,1207 | -1,14986142  | ENST00000377325 | 7718      | NM_003447    | ZNF165       |
| A_21_P0013163  | 8,22669 | 8,42816 | -1,149869391 | ENST00000533735 | 646024    | NR_024045    | RAET1K       |
| A_22_P00015216 | 1,8439  | 2,04543 | -1,149917213 | ENST00000538693 | 102606463 | N/A          | LINC01152    |
| A_33_P3377294  | 8,67988 | 8,88144 | -1,149941125 | ENST00000349937 | 6934      | N/A          | TCF7L2       |
| A_21_P0004325  | 2,21619 | 2,41777 | -1,149957067 | N/A             | 102724458 | XR_425932    | LOC102724458 |
| A_32_P14744    | 17,1391 | 17,3407 | -1,149973009 | ENST00000457423 | 6210      | NM_001019    | RPS15A       |
| A_23_P45999    | 10,3036 | 10,5052 | -1,149973009 | ENST00000354287 | 26232     | NM_012168    | FBXO2        |
| A_24_P16378    | 5,11396 | 5,31561 | -1,150012865 | ENST00000517319 | 138050    | NM_152419    | HGSNAT       |
| A_22_P00005603 | 5,81293 | 6,01462 | -1,15004475  | N/A             | 729723    | NR_034113    | DNAJC27-AS1  |
| A_22_P00025387 | 3,39946 | 3,60116 | -1,150052722 | ENST00000420237 | 101929648 | XR_247061    | LOC101929648 |

|                |         |         |              |                 |           |              |              |
|----------------|---------|---------|--------------|-----------------|-----------|--------------|--------------|
| A_33_P3274304  | 12,1459 | 12,3476 | -1,150052722 | ENST00000323571 | 147179    | NM_133264    | WIPF2        |
| A_23_P350754   | 8,61368 | 8,81541 | -1,150076637 | ENST00000526052 | 10819     | NR_045002    | OR7E14P      |
| A_22_P00012891 | 8,77748 | 8,97925 | -1,150108524 | N/A             | N/A       | AK056449     | Inc-RBM22-1  |
| A_21_P0001288  | 1,68171 | 1,88353 | -1,150148384 | N/A             | N/A       | N/A          | Inc-FOXO6-1  |
| A_33_P3297888  | 7,68893 | 7,89076 | -1,150156357 | ENST00000620431 | 202243    | NM_176816    | CCDC125      |
| A_23_P111888   | 8,03664 | 8,23849 | -1,150172301 | ENST00000520337 | 115908    | NM_138455    | CTHRC1       |
| A_33_P3296499  | 8,1402  | 8,34217 | -1,150267974 | ENST00000368202 | 5796      | NM_001291983 | PTPRK        |
| A_22_P00007456 | 1,59755 | 1,79952 | -1,150267974 | N/A             | N/A       | N/A          | Inc-GTDC1-5  |
| A_21_P0014203  | 4,344   | 4,54599 | -1,15028392  | N/A             | N/A       | N/A          | N/A          |
| A_24_P371628   | 6,34671 | 6,5488  | -1,150363655 | ENST00000284268 | 56172     | NM_054027    | ANKH         |
| A_23_P38497    | 10,9501 | 11,1522 | -1,150371628 | ENST00000544061 | 8402      | NM_003562    | SLC25A11     |
| A_22_P00013067 | 1,8555  | 2,0576  | -1,150371628 | N/A             | 101928222 | NR_110235    | LOC101928222 |
| A_33_P3412479  | 7,56467 | 7,76682 | -1,150411498 | ENST00000414009 | 3257      | NM_182639    | HPS1         |
| A_33_P3288684  | 5,03069 | 5,23287 | -1,15043542  | N/A             | N/A       | N/A          | N/A          |
| A_23_P61127    | 11,6323 | 11,8345 | -1,150451369 | ENST00000490078 | 79135     | NM_024122    | APOO         |
| A_21_P0012366  | 7,84994 | 8,05217 | -1,150475292 | ENST00000437591 | N/A       | XM_005275947 | N/A          |
| A_32_P167791   | 11,4765 | 11,6788 | -1,150531115 | ENST00000620312 | 6767      | NM_003932    | ST13         |
| A_33_P3214533  | 3,05177 | 3,25408 | -1,15053909  | N/A             | N/A       | AK127153     | N/A          |
| A_33_P3303602  | 6,51787 | 6,7202  | -1,15055504  | ENST00000527674 | 8525      | AK123378     | DGKZ         |
| A_33_P3311755  | 10,3724 | 10,5748 | -1,150610866 | ENST00000560125 | 9493      | NM_138555    | KIF23        |
| A_24_P649388   | 7,4891  | 7,69152 | -1,150626817 | ENST00000513501 | 59271     | NM_058187    | EVA1C        |
| A_22_P00003219 | 3,1861  | 3,38856 | -1,15065872  | ENST00000428646 | N/A       | N/A          | N/A          |
| A_21_P0007579  | 3,22897 | 3,43143 | -1,15065872  | N/A             | N/A       | N/A          | Inc-RAB3IP-1 |
| A_24_P143653   | 5,41759 | 5,62012 | -1,150714551 | ENST00000401540 | N/A       | N/A          | N/A          |
| A_23_P63281    | 9,6041  | 9,80665 | -1,150730504 | ENST00000343938 | 80772     | NM_001029885 | CPTP         |
| A_21_P0003572  | 3,40581 | 3,60836 | -1,150730504 | N/A             | N/A       | N/A          | Inc-DRD5-8   |
| A_19_P00801627 | 11,3793 | 11,5819 | -1,150770386 | ENST00000560832 | 723972    | AK311417     | ANP32AP1     |
| A_21_P0013206  | 2,3964  | 2,59906 | -1,150818246 | N/A             | 402269    | XM_005276304 | LOC402269    |
| A_24_P15877    | 1,99217 | 2,19485 | -1,1508342   | ENST00000597650 | N/A       | AF333762     | N/A          |
| A_22_P00023814 | 3,48114 | 3,68383 | -1,150842177 | N/A             | 100874021 | NR_046689    | MAGI2-AS2    |
| A_22_P00015075 | 2,95396 | 3,1567  | -1,150882063 | N/A             | N/A       | AF400485     | Inc-SNURF-1  |
| A_21_P0000529  | 2,1724  | 2,37519 | -1,15092195  | N/A             | 125144    | NR_027176    | LRRC75A-AS1  |
| A_33_P3279831  | 10,5295 | 10,7323 | -1,150929928 | ENST00000336032 | 10957     | NM_006813    | PNRC1        |

|                |         |         |              |                 |           |              |                |
|----------------|---------|---------|--------------|-----------------|-----------|--------------|----------------|
| A_33_P3326046  | 11,317  | 11,5198 | -1,150929928 | ENST00000574548 | 26001     | NM_015528    | RNF167         |
| A_19_P00322498 | 4,91161 | 5,11442 | -1,150937905 | ENST00000558071 | N/A       | XR_424607    | N/A            |
| A_21_P0000115  | 11,6529 | 11,8558 | -1,151009707 | ENST00000553164 | 10330     | NM_001190991 | CNPY2          |
| A_33_P3421219  | 12,3172 | 12,5201 | -1,151009707 | N/A             | N/A       | AK001442     | lnc-SHCBP1L-1  |
| A_21_P0013581  | 11,0631 | 11,266  | -1,151009707 | N/A             | 642236    | N/A          | LOC642236      |
| A_33_P3235330  | 6,90242 | 7,10532 | -1,151009707 | ENST00000333027 | 8897      | NM_021090    | MTMR3          |
| A_21_P0006289  | 3,02629 | 3,22926 | -1,151065555 | N/A             | N/A       | N/A          | lnc-CDK20-5    |
| A_21_P0008260  | 1,39355 | 1,59657 | -1,151105449 | N/A             | 102725429 | XR_424460    | LOC102725429   |
| A_33_P3402489  | 4,23048 | 4,43355 | -1,151145344 | ENST00000228928 | 4940      | NM_006187    | OAS3           |
| A_24_P940135   | 9,77619 | 9,97934 | -1,151209179 | ENST00000477677 | 1486      | NM_004388    | CTBS           |
| A_23_P58321    | 10,0788 | 10,282  | -1,151249077 | ENST00000618014 | 890       | NM_001237    | CCNA2          |
| A_23_P76557    | 12,7892 | 12,9924 | -1,151249077 | ENST00000546788 | 55967     | NM_018838    | NDUFA12        |
| A_23_P82324    | 7,85772 | 8,06094 | -1,151265037 | ENST00000396946 | 84433     | NM_032415    | CARD11         |
| A_21_P0011730  | 5,53344 | 5,73675 | -1,151336859 | ENST00000598425 | N/A       | N/A          | N/A            |
| A_22_P00019335 | 2,88811 | 3,09145 | -1,151360801 | N/A             | N/A       | AK022003     | lnc-C17orf66-1 |
| A_33_P3381464  | 5,59778 | 5,80113 | -1,151368781 | N/A             | N/A       | AK125883     | N/A            |
| A_21_P0000792  | 1,64872 | 1,85207 | -1,151368781 | N/A             | 100506779 | NR_038410    | BZRAP1-AS1     |
| A_23_P79043    | 13,0488 | 13,2522 | -1,151408685 | ENST00000477168 | 10430     | NM_032635    | TMEM147        |
| A_33_P3268408  | 9,03641 | 9,23981 | -1,151408685 | ENST00000605511 | N/A       | N/A          | N/A            |
| A_22_P00009644 | 5,06442 | 5,26782 | -1,151408685 | N/A             | 101929106 | NR_110052    | LOC101929106   |
| A_24_P16610    | 8,81457 | 9,01803 | -1,151456572 | ENST00000568844 | 84937     | NM_032268    | ZNRF1          |
| A_22_P00001872 | 1,53882 | 1,7424  | -1,151552352 | N/A             | N/A       | N/A          | lnc-AWAT2-1    |
| A_33_P3389578  | 7,97769 | 8,18127 | -1,151552352 | N/A             | N/A       | N/A          | N/A            |
| A_23_P206359   | 13,5957 | 13,7993 | -1,151568316 | ENST00000621016 | 999       | NM_004360    | CDH1           |
| A_23_P398836   | 6,25091 | 6,45459 | -1,151632174 | ENST00000281741 | 57544     | NM_020784    | TXNDC16        |
| A_21_P0008869  | 5,51402 | 5,71771 | -1,151640156 | N/A             | N/A       | N/A          | lnc-TM2D3-1    |
| A_23_P395374   | 10,3546 | 10,5583 | -1,151648139 | N/A             | 8360      | NM_003539    | HIST1H4D       |
| A_24_P882914   | 9,53761 | 9,74144 | -1,151751918 | ENST00000369151 | 143384    | NM_153810    | CACUL1         |
| A_23_P391164   | 7,96198 | 8,16581 | -1,151751918 | ENST00000488055 | 84450     | NM_032434    | ZNF512         |
| A_23_P6398     | 8,19508 | 8,39904 | -1,151855706 | ENST00000415447 | 162       | NM_001127    | AP1B1          |
| A_23_P145218   | 6,91647 | 7,12051 | -1,15191958  | ENST00000377662 | 54718     | BC166633     | BTN2A3P        |
| A_21_P0007853  | 1,59719 | 1,8013  | -1,151975473 | N/A             | N/A       | N/A          | lnc-HNF1A-1    |
| A_33_P3264349  | 1,68343 | 1,88756 | -1,151991443 | N/A             | 150185    | NR_024381    | LINC00895      |

|                |         |         |              |                 |           |              |                |
|----------------|---------|---------|--------------|-----------------|-----------|--------------|----------------|
| A_23_P319492   | 8,12008 | 8,32425 | -1,152023383 | ENST00000531935 | 79607     | NM_024556    | FAM118B        |
| A_33_P3282669  | 7,53382 | 7,73802 | -1,152047339 | ENST00000429502 | 27343     | NM_001174084 | POLL           |
| A_22_P00020635 | 1,68596 | 1,89017 | -1,152055324 | N/A             | 100128325 | XR_242350    | LOC100128325   |
| A_23_P434352   | 13,4558 | 13,6601 | -1,152127196 | ENST00000341926 | 831       | NM_001042440 | CAST           |
| A_23_P67896    | 5,18073 | 5,38519 | -1,152254978 | ENST00000409101 | 6328      | NM_006922    | SCN3A          |
| A_23_P141044   | 10,2731 | 10,4776 | -1,152286925 | ENST00000223459 | 146542    | NM_145271    | ZNF688         |
| A_22_P00001097 | 3,29565 | 3,5002  | -1,152326861 | N/A             | 101928118 | NR_125949    | LOC101928118   |
| A_33_P3363680  | 2,57297 | 2,77758 | -1,152374786 | N/A             | N/A       | N/A          | XLOC_I2_000018 |
| A_21_P0010337  | 4,44885 | 4,65353 | -1,152430701 | N/A             | N/A       | N/A          | Inc-RABL2B-2   |
| A_22_P00009473 | 12,0934 | 12,2981 | -1,152446677 | ENST00000533935 | 114796    | NR_021487    | PSMG3-AS1      |
| A_23_P97892    | 6,47292 | 6,67762 | -1,152446677 | ENST00000425280 | 8861      | NM_003893    | LDB1           |
| A_22_P00017114 | 1,68301 | 1,88778 | -1,152502596 | N/A             | N/A       | N/A          | Inc-UAP1L1-2   |
| A_33_P3274731  | 1,54909 | 1,75388 | -1,152518573 | ENST00000621829 | 1213      | NM_001288653 | CLTC           |
| A_22_P00024512 | 4,66896 | 4,8738  | -1,152558517 | N/A             | 100506681 | NR_120502    | JARID2-AS1     |
| A_23_P74467    | 10,4908 | 10,6957 | -1,152606451 | ENST00000368320 | 22889     | NM_014949    | KIAA0907       |
| A_23_P360754   | 1,5671  | 1,772   | -1,152606451 | ENST00000367996 | 9507      | NM_005099    | ADAMTS4        |
| A_33_P3383436  | 11,5704 | 11,7753 | -1,152606451 | ENST00000382755 | 317749    | NM_001193636 | DHRS4L2        |
| A_23_P16058    | 7,17551 | 7,38046 | -1,152646398 | ENST00000622376 | 162979    | NM_145288    | ZNF296         |
| A_33_P3362526  | 4,55792 | 4,76288 | -1,152654388 | ENST00000225728 | 51003     | NM_016060    | MED31          |
| A_33_P3519223  | 5,41194 | 5,61691 | -1,152662378 | N/A             | N/A       | N/A          | N/A            |
| A_23_P57347    | 10,3223 | 10,5273 | -1,152686347 | ENST00000359568 | 5116      | NM_006031    | PCNT           |
| A_33_P3420167  | 15,2375 | 15,4425 | -1,152686347 | ENST00000455206 | N/A       | N/A          | N/A            |
| A_32_P116271   | 6,71642 | 6,92146 | -1,152718306 | ENST00000624443 | 404201    | NR_015359    | WDFY3-AS2      |
| A_23_P94365    | 9,64765 | 9,85269 | -1,152718306 | ENST00000308860 | 203054    | NM_174922    | ADCK5          |
| A_23_P93898    | 2,8017  | 3,00677 | -1,152742277 | ENST00000265825 | 29999     | NM_020369    | FSCN3          |
| A_24_P39724    | 7,0037  | 7,20883 | -1,152790219 | ENST00000315286 | 124808    | NM_144609    | CCDC43         |
| A_22_P00016110 | 10,4223 | 10,6275 | -1,152846154 | ENST00000555446 | 79178     | NM_001256323 | THTPA          |
| A_23_P431410   | 12,3849 | 12,5901 | -1,152846154 | ENST00000392753 | 5937      | NM_016836    | RBMS1          |
| A_33_P3359943  | 1,54575 | 1,75099 | -1,152878118 | ENST00000618917 | 7180      | XM_005249357 | CRISP2         |
| A_23_P395911   | 7,66915 | 7,87441 | -1,152894101 | ENST00000601394 | 115290    | AK021860     | FBXO17         |
| A_24_P85537    | 1,68567 | 1,89096 | -1,152918075 | ENST00000439882 | 9175      | NM_004721    | MAP3K13        |
| A_33_P3229161  | 9,00622 | 9,21155 | -1,152950041 | ENST00000521776 | 9724      | NM_021645    | UTP14C         |
| A_24_P397584   | 9,40152 | 9,60688 | -1,152974016 | ENST00000372876 | 6903      | NM_003192    | TBCC           |

|                |         |         |              |                 |           |              |                |
|----------------|---------|---------|--------------|-----------------|-----------|--------------|----------------|
| A_23_P139795   | 6,49795 | 6,70333 | -1,15299     | ENST00000257552 | 4440      | NM_002442    | MSI1           |
| A_33_P3225091  | 7,33928 | 7,54466 | -1,15299     | ENST00000252891 | 9253      | NM_004756    | NUMBL          |
| A_32_P62997    | 11,5808 | 11,7862 | -1,153005984 | ENST00000301905 | 55872     | NM_018492    | PBK            |
| A_23_P302595   | 1,53191 | 1,73732 | -1,153013976 | ENST00000487130 | 221718    | NR_027793    | LINC00518      |
| A_23_P355980   | 1,79886 | 2,0043  | -1,153037952 | ENST00000413302 | 9127      | AB002058     | P2RX6          |
| A_23_P64954    | 9,90314 | 10,1086 | -1,153053937 | ENST00000542371 | 8078      | NM_003481    | USP5           |
| A_33_P3397150  | 7,36838 | 7,57388 | -1,153085907 | ENST00000618550 | 80164     | NM_001190467 | PRR36          |
| A_21_P0013856  | 4,72631 | 4,93181 | -1,153085907 | N/A             | N/A       | N/A          | Inc-MAGEA8-2   |
| A_23_P331748   | 3,979   | 4,18463 | -1,153189815 | ENST00000421133 | 945       | NM_001772    | CD33           |
| A_24_P378019   | 1,54485 | 1,75049 | -1,153197808 | ENST00000330243 | 3665      | NM_004031    | IRF7           |
| A_33_P3216568  | 3,11661 | 3,32226 | -1,153205802 | ENST00000621226 | 4586      | XM_006709945 | MUC5AC         |
| A_23_P429581   | 6,46974 | 6,67545 | -1,153253763 | ENST00000519845 | 91147     | NM_153704    | TMEM67         |
| A_33_P3296482  | 7,76712 | 7,97286 | -1,153277745 | ENST00000495748 | 5796      | NM_001291982 | PTPRK          |
| A_21_P0008456  | 1,61437 | 1,82015 | -1,153309721 | N/A             | N/A       | N/A          | Inc-MAP3K9-3   |
| A_23_P162596   | 10,169  | 10,3748 | -1,153325709 | ENST00000188312 | 64431     | NM_022496    | ACTR6          |
| A_21_P0009484  | 7,23136 | 7,43722 | -1,153373676 | N/A             | N/A       | N/A          | Inc-WDR7-6     |
| A_22_P00024611 | 1,63933 | 1,84519 | -1,153373676 | N/A             | N/A       | N/A          | Inc-USP13-1    |
| A_22_P00012807 | 5,07187 | 5,27775 | -1,153389665 | N/A             | N/A       | N/A          | Inc-RAP1GDS1-3 |
| A_19_P00812349 | 7,24137 | 7,44728 | -1,153413649 | ENST00000600047 | 390980    | NM_001023563 | ZNF805         |
| A_22_P00011501 | 1,58147 | 1,78744 | -1,153461619 | ENST00000547089 | N/A       | BX646043     | N/A            |
| A_24_P500891   | 12,8451 | 13,0511 | -1,153485605 | ENST00000373449 | 204       | NM_013411    | AK2            |
| A_33_P3275290  | 10,5415 | 10,7475 | -1,153485605 | ENST00000463827 | 55830     | NM_001010983 | GLT8D1         |
| A_21_P0012044  | 1,5568  | 1,76284 | -1,153517587 | ENST00000439237 | 102725407 | N/A          | LOC102725407   |
| A_24_P102981   | 12,3868 | 12,5929 | -1,153565561 | ENST00000477917 | 3300      | NM_006736    | DNAJB2         |
| A_33_P3365666  | 7,0316  | 7,23774 | -1,153597545 | N/A             | N/A       | N/A          | N/A            |
| A_24_P590560   | 6,41689 | 6,62307 | -1,15362953  | ENST00000549207 | 54700     | NM_018427    | RRN3           |
| A_23_P394448   | 8,02249 | 8,22868 | -1,153637527 | ENST00000612226 | 23333     | NM_015283    | DPY19L1        |
| A_21_P0007401  | 1,56276 | 1,76897 | -1,15365352  | N/A             | N/A       | N/A          | Inc-USP28-2    |
| A_33_P3260654  | 8,70578 | 8,91205 | -1,1537015   | ENST00000610439 | N/A       | EU030678     | N/A            |
| A_33_P3296562  | 1,73329 | 1,93959 | -1,153725491 | ENST00000426969 | 339788    | NR_015405    | LINC00298      |
| A_23_P103905   | 10,8803 | 11,0866 | -1,153725491 | ENST00000467540 | 51506     | NM_016406    | UFC1           |
| A_23_P145388   | 16,2218 | 16,4282 | -1,153805464 | ENST00000373627 | 23787     | NM_014341    | MTCH1          |
| A_21_P0005944  | 1,56619 | 1,77263 | -1,153837454 | ENST00000523550 | N/A       | N/A          | N/A            |



|                |         |         |              |                 |           |              |                |
|----------------|---------|---------|--------------|-----------------|-----------|--------------|----------------|
| A_24_P154868   | 1,40055 | 1,60703 | -1,153869446 | ENST00000230588 | 4224      | NM_005588    | MEP1A          |
| A_24_P98914    | 12,089  | 12,2955 | -1,153885442 | ENST00000547581 | 5213      | NM_000289    | PFKM           |
| A_21_P0000925  | 2,81443 | 3,02094 | -1,15389344  | N/A             | N/A       | AK022825     | Inc-SCCPDH-1   |
| A_22_P00011688 | 3,98611 | 4,19268 | -1,15394143  | ENST00000517660 | 5159      | NM_002609    | PDGFRB         |
| A_23_P72157    | 6,0171  | 6,22368 | -1,153949429 | ENST00000404286 | 84179     | NM_032219    | MFSDF          |
| A_22_P00008495 | 5,78248 | 5,98906 | -1,153949429 | ENST00000525179 | 256236    | NR_002798    | NAPSB          |
| A_23_P205529   | 11,6156 | 11,8222 | -1,153965426 | ENST00000554849 | 64745     | NM_022734    | METTLL17       |
| A_33_P3280694  | 7,46837 | 7,67503 | -1,154013419 | ENST00000334003 | 54103     | AL834358     | GSAP           |
| A_33_P3304402  | 1,56947 | 1,77615 | -1,154029417 | N/A             | N/A       | N/A          | N/A            |
| A_32_P834166   | 5,88715 | 6,09391 | -1,154093412 | ENST00000266880 | N/A       | AF128541     | N/A            |
| A_33_P3307894  | 10,3646 | 10,5714 | -1,154125411 | N/A             | N/A       | N/A          | N/A            |
| A_23_P424900   | 3,16001 | 3,36682 | -1,15413341  | ENST00000484512 | 128344    | NM_181643    | PIFO           |
| A_23_P9883     | 1,6965  | 1,90333 | -1,15414941  | ENST00000336119 | 114548    | NM_001079821 | NLRP3          |
| A_33_P3419594  | 9,31598 | 9,52282 | -1,15415741  | N/A             | 5152      | AK074662     | PDE9A          |
| A_22_P00006349 | 2,45039 | 2,65727 | -1,154189411 | N/A             | N/A       | N/A          | Inc-FANK1-3    |
| A_23_P87150    | 10,6309 | 10,8378 | -1,154205411 | ENST00000530561 | 9404      | NM_004811    | LPXN           |
| A_24_P334130   | 1,37068 | 1,57762 | -1,154237413 | ENST00000426059 | 2335      | NM_054034    | FN1            |
| A_22_P00025189 | 1,57123 | 1,77818 | -1,154245414 | N/A             | N/A       | N/A          | Inc-FNBP1L-1   |
| A_22_P00001783 | 1,57351 | 1,7805  | -1,154277417 | N/A             | 100874090 | NR_046647    | SLC6A1-AS1     |
| A_24_P510377   | 5,14667 | 5,35371 | -1,154317422 | ENST00000434244 | N/A       | BC031250     | N/A            |
| A_23_P32217    | 9,55197 | 9,75904 | -1,154341425 | ENST00000379858 | 10210     | NM_005802    | TOPORS         |
| A_22_P00025501 | 1,47564 | 1,68274 | -1,154365429 | ENST00000443783 | 414351    | N/A          | LINC00229      |
| A_21_P0013021  | 3,43971 | 3,64683 | -1,154381432 | N/A             | N/A       | N/A          | XLOC_I2_012467 |
| A_22_P00013576 | 2,15955 | 2,36684 | -1,154517467 | ENST00000565061 | N/A       | N/A          | N/A            |
| A_33_P3418194  | 14,2791 | 14,4864 | -1,154525469 | ENST00000615007 | 66004     | NM_177458    | LYNX1          |
| A_22_P00013817 | 5,54056 | 5,74795 | -1,154597495 | N/A             | N/A       | N/A          | Inc-RPA2-1     |
| A_23_P124122   | 11,4498 | 11,6572 | -1,154605498 | ENST00000539093 | 5827      | NM_018663    | PXMP2          |
| A_21_P0001313  | 1,54175 | 1,74924 | -1,154677528 | N/A             | N/A       | N/A          | Inc-NFIA-1     |
| A_22_P00015346 | 1,69408 | 1,9016  | -1,154701539 | ENST00000567258 | N/A       | BC039360     | N/A            |
| A_22_P00014975 | 11,7346 | 11,9422 | -1,154765571 | N/A             | 6601      | NM_003075    | SMARCC2        |
| A_33_P3409154  | 8,48177 | 8,6894  | -1,154789584 | ENST00000406686 | 63027     | NM_015482    | SLC22A23       |
| A_33_P3306828  | 2,65032 | 2,85801 | -1,154837611 | ENST00000438300 | N/A       | XM_005276120 | N/A            |
| A_22_P00018860 | 15,979  | 16,1867 | -1,154845616 | N/A             | N/A       | N/A          | Inc-SERHL2-3   |

|                |         |         |              |                 |           |              |              |
|----------------|---------|---------|--------------|-----------------|-----------|--------------|--------------|
| A_33_P3237634  | 12,8279 | 13,0356 | -1,154845616 | ENST00000372383 | 1831      | NM_004089    | TSC22D3      |
| A_21_P0003830  | 3,29106 | 3,49883 | -1,154901651 | N/A             | N/A       | N/A          | Inc-TBC1D1-1 |
| A_21_P0000611  | 9,59109 | 9,79889 | -1,154925667 | N/A             | 90024     | NR_033874    | FLJ20021     |
| A_22_P00005536 | 5,41778 | 5,62562 | -1,154957689 | N/A             | 644903    | XR_244911    | FLJ38668     |
| A_23_P166280   | 4,77029 | 4,97815 | -1,1549737   | ENST00000407780 | N/A       | N/A          | N/A          |
| A_23_P413788   | 6,81066 | 7,01856 | -1,155005723 | ENST00000394790 | 170384    | NM_173540    | FUT11        |
| A_24_P209113   | 8,50605 | 8,71395 | -1,155005723 | ENST00000253814 | 80762     | NM_030571    | NDFIP1       |
| A_21_P0000353  | 6,01962 | 6,22758 | -1,155053759 | N/A             | 677773    | NR_003007    | SCARNA23     |
| A_22_P00012874 | 1,6111  | 1,81912 | -1,155101798 | ENST00000564555 | N/A       | AK307212     | N/A          |
| A_21_P0011476  | 9,96721 | 10,1753 | -1,155157845 | ENST00000567422 | 11200     | NM_001005735 | CHEK2        |
| A_23_P208961   | 10,7381 | 10,9462 | -1,155165852 | ENST00000591453 | 84939     | NM_032853    | MUM1         |
| A_32_P206698   | 11,3957 | 11,6039 | -1,155245925 | ENST00000600888 | 1163      | NM_001826    | CKS1B        |
| A_23_P68892    | 12,1864 | 12,3946 | -1,155245925 | ENST00000216038 | 51493     | NM_014306    | RTCB         |
| A_33_P3246598  | 5,8881  | 6,09631 | -1,155253932 | ENST00000413272 | 389643    | NM_001010906 | NUGGC        |
| A_22_P00007142 | 12,5054 | 12,7137 | -1,155326003 | ENST00000453717 | N/A       | BC033528     | N/A          |
| A_33_P3284686  | 6,62757 | 6,83589 | -1,155342019 | ENST00000550646 | 23648     | NM_145716    | SSBP3        |
| A_24_P98109    | 7,57362 | 7,78198 | -1,155374053 | ENST00000446848 | 29887     | NM_013322    | SNX10        |
| A_33_P3379371  | 13,1906 | 13,399  | -1,155406087 | ENST00000473208 | 6259      | NM_001005861 | RYK          |
| A_22_P00009291 | 5,96322 | 6,17163 | -1,155414095 | ENST00000528781 | 101928813 | XR_247265    | LOC101928813 |
| A_21_P0004179  | 1,69613 | 1,90457 | -1,155438122 | ENST00000450613 | N/A       | N/A          | N/A          |
| A_23_P34568    | 9,76777 | 9,97624 | -1,155462149 | ENST00000373178 | 54936     | NM_017825    | ADPRHL2      |
| A_33_P3864861  | 1,59492 | 1,80341 | -1,155478167 | ENST00000426428 | 339505    | NR_033887    | LINC01141    |
| A_32_P22257    | 13,3144 | 13,5229 | -1,155486176 | ENST00000443046 | 3150      | NM_004965    | HMG1         |
| A_23_P345220   | 7,79934 | 8,00787 | -1,155510204 | ENST00000315994 | 9644      | NM_014631    | SH3PXD2A     |
| A_33_P3328395  | 1,42227 | 1,63087 | -1,155566271 | ENST00000569028 | 146481    | NR_026980    | FRG2DP       |
| A_33_P3418175  | 10,9583 | 11,1669 | -1,155566271 | ENST00000615007 | 66004     | NM_177458    | LYNX1        |
| A_24_P84608    | 8,86125 | 9,06987 | -1,155582291 | ENST00000453177 | N/A       | N/A          | N/A          |
| A_22_P00012686 | 1,60242 | 1,81107 | -1,155606321 | ENST00000584807 | 100188917 | N/A          | ESP33        |
| A_23_P204423   | 11,4783 | 11,6871 | -1,155726478 | ENST00000335007 | 5501      | NM_002710    | PPP1CC       |
| A_23_P66306    | 11,3924 | 11,6012 | -1,155726478 | ENST00000262374 | 56052     | NM_019109    | ALG1         |
| A_21_P0014422  | 10,7084 | 10,9172 | -1,155726478 | ENST00000366413 | 646513    | XR_159371    | LOC646513    |
| A_22_P00007179 | 3,61277 | 3,82158 | -1,155734489 | N/A             | N/A       | N/A          | Inc-GNRHR2-1 |
| A_33_P3298440  | 5,33402 | 5,54285 | -1,155750511 | N/A             | 729324    | AK055581     | LOC729324    |

|                |         |         |              |                 |           |              |              |
|----------------|---------|---------|--------------|-----------------|-----------|--------------|--------------|
| A_22_P00023997 | 1,5367  | 1,74553 | -1,155750511 | N/A             | N/A       | N/A          | Inc-CHST1-4  |
| A_23_P65518    | 1,71083 | 1,91975 | -1,155822612 | ENST00000395153 | 51339     | NM_016651    | DACT1        |
| A_22_P00002812 | 3,94481 | 4,15373 | -1,155822612 | N/A             | 100874343 | N/A          | HS1BP3-IT1   |
| A_21_P0009866  | 3,55508 | 3,76402 | -1,155838636 | ENST00000426580 | 101927820 | N/A          | LOC101927820 |
| A_21_P0009578  | 6,40797 | 6,61694 | -1,155862671 | N/A             | N/A       | N/A          | Inc-FBXO15-4 |
| A_33_P3289286  | 6,87833 | 7,08731 | -1,155870683 | ENST00000399766 | 55219     | NM_018202    | TMEM57       |
| A_23_P25215    | 11,1006 | 11,3096 | -1,155886707 | ENST00000421138 | 5965      | NM_032941    | RECQL        |
| A_19_P00320971 | 4,76269 | 4,9717  | -1,155894719 | ENST00000488173 | 647107    | N/A          | LINC01192    |
| A_24_P83678    | 7,52157 | 7,73058 | -1,155894719 | ENST00000275053 | 253714    | NM_198468    | MMS22L       |
| A_33_P3265803  | 5,04563 | 5,25464 | -1,155894719 | ENST00000400154 | 245911    | NM_001002035 | DEFB108B     |
| A_23_P51317    | 8,08565 | 8,29475 | -1,155966829 | ENST00000370141 | 54482     | NM_019083    | TRMT13       |
| A_21_P0005424  | 2,33789 | 2,547   | -1,155974842 | N/A             | N/A       | N/A          | Inc-SPAM1-4  |
| A_21_P0003283  | 2,12166 | 2,3308  | -1,15599888  | N/A             | N/A       | N/A          | Inc-ANO10-1  |
| A_23_P110957   | 1,61856 | 1,82773 | -1,156022919 | ENST00000259806 | 2295      | NM_001452    | FOXF2        |
| A_33_P3713357  | 12,282  | 12,4912 | -1,156046958 | ENST00000491388 | 214       | NM_001627    | ALCAM        |
| A_21_P0014855  | 3,45306 | 3,66226 | -1,156046958 | N/A             | N/A       | N/A          | N/A          |
| A_23_P39386    | 7,02792 | 7,23716 | -1,15607901  | ENST00000437550 | 10870     | NM_014266    | HCST         |
| A_33_P3248863  | 12,4723 | 12,6816 | -1,156127091 | ENST00000331336 | 124751    | NM_213597    | KRBA2        |
| A_33_P7431456  | 17,4752 | 17,6845 | -1,156127091 | ENST00000612468 | 3133      | NM_005516    | HLA-E        |
| A_23_P26117    | 9,31929 | 9,52861 | -1,156143119 | ENST00000564570 | 4123      | NM_006715    | MAN2C1       |
| A_32_P110016   | 5,4817  | 5,69105 | -1,15616716  | N/A             | 101928424 | XR_252953    | LOC101928424 |
| A_22_P00009826 | 1,89622 | 2,10564 | -1,156223259 | ENST00000573312 | N/A       | N/A          | N/A          |
| A_33_P3314276  | 13,2476 | 13,4571 | -1,156287376 | ENST00000308748 | 253982    | NM_181718    | ASPHD1       |
| A_22_P00004422 | 5,30987 | 5,51943 | -1,156335465 | N/A             | N/A       | N/A          | Inc-COPZ2-1  |
| A_21_P0000526  | 2,05809 | 2,26765 | -1,156335465 | N/A             | 65982     | NR_027135    | ZSCAN18      |
| A_23_P21086    | 5,72563 | 5,93519 | -1,156335465 | ENST00000520124 | 203190    | NM_139278    | LGI3         |
| A_22_P00017691 | 3,04391 | 3,25349 | -1,156351496 | ENST00000422253 | 101928565 | N/A          | LOC101928565 |
| A_33_P3246010  | 9,99806 | 10,2077 | -1,156399588 | N/A             | N/A       | AK092494     | N/A          |
| A_33_P3294404  | 9,16617 | 9,37587 | -1,156447682 | ENST00000446189 | 79647     | NM_024595    | AKIRIN1      |
| A_33_P3381948  | 10,7243 | 10,9341 | -1,156527844 | ENST00000590071 | 126374    | NM_001080436 | WTIP         |
| A_23_P31109    | 12,2036 | 12,4135 | -1,156608011 | ENST00000367419 | 116254    | NM_138785    | GINM1        |
| A_23_P166698   | 12,4667 | 12,6766 | -1,156608011 | ENST00000011691 | 51188     | NM_016305    | SS18L2       |
| A_23_P170959   | 2,50418 | 2,71421 | -1,156712237 | ENST00000482695 | 89782     | NM_033029    | LMLN         |

|                |         |         |              |                 |           |              |                |
|----------------|---------|---------|--------------|-----------------|-----------|--------------|----------------|
| A_33_P3233645  | 6,47167 | 6,68174 | -1,156744308 | ENST00000379811 | 4495      | NM_001301267 | MT1G           |
| A_33_P3313030  | 4,70612 | 4,91625 | -1,156792417 | N/A             | 79770     | NM_024715    | TXNDC15        |
| A_32_P101689   | 13,8088 | 14,019  | -1,156848546 | ENST00000359943 | 10447     | NM_014888    | FAM3C          |
| A_23_P53467    | 9,33391 | 9,54412 | -1,156856565 | ENST00000342502 | 121457    | NM_201612    | IKBIP          |
| A_23_P139998   | 10,2081 | 10,4184 | -1,156928735 | ENST00000480738 | 337867    | NM_177967    | UBAC2          |
| A_24_P327084   | 4,76316 | 4,97349 | -1,156952793 | ENST00000293851 | 260429    | NM_152891    | PRSS33         |
| A_19_P00811264 | 6,00285 | 6,21318 | -1,156952793 | N/A             | N/A       | N/A          | Inc-TSHZ1-1    |
| A_24_P131522   | 9,74144 | 9,95178 | -1,156960813 | ENST00000303714 | 84168     | NM_032208    | ANTXR1         |
| A_23_P354805   | 9,0904  | 9,30078 | -1,156992891 | ENST00000377669 | 11278     | NM_007249    | KLF12          |
| A_23_P18604    | 11,1072 | 11,3176 | -1,15700893  | ENST00000606142 | 51056     | NM_015907    | LAP3           |
| A_23_P259451   | 11,3432 | 11,5537 | -1,157089131 | ENST00000296581 | 11157     | NM_007080    | LSM6           |
| A_23_P44974    | 13,8866 | 14,0971 | -1,157089131 | ENST00000613356 | 28998     | NM_014078    | MRPL13         |
| A_23_P79251    | 4,74285 | 4,95343 | -1,157153295 | ENST00000322054 | 30845     | NM_014600    | EHD3           |
| A_21_P0013517  | 13,4179 | 13,6285 | -1,157169337 | N/A             | N/A       | N/A          | XLOC_I2_014549 |
| A_21_P0007508  | 2,50639 | 2,71705 | -1,157217463 | N/A             | N/A       | N/A          | Inc-C12orf49-1 |
| A_24_P109214   | 7,59077 | 7,80146 | -1,157241527 | ENST00000588750 | 341       | NM_001645    | APOC1          |
| A_23_P130182   | 9,74652 | 9,95724 | -1,157265592 | ENST00000580390 | 9212      | NM_004217    | AURKB          |
| A_33_P3465440  | 1,38384 | 1,59457 | -1,157273613 | N/A             | N/A       | N/A          | N/A            |
| A_32_P159612   | 5,50106 | 5,7118  | -1,157281635 | ENST00000225823 | 40        | NM_183377    | ASIC2          |
| A_22_P00012145 | 4,13833 | 4,34909 | -1,157297678 | N/A             | N/A       | BC035163     | Inc-POLR3E-2   |
| A_23_P213832   | 8,43716 | 8,64794 | -1,157313722 | ENST00000514646 | 84651     | NM_032566    | SPINK7         |
| A_23_P386241   | 14,2693 | 14,4801 | -1,157329766 | ENST00000304189 | 83541     | NM_001042353 | FAM110A        |
| A_24_P50554    | 16,3622 | 16,5731 | -1,157409989 | ENST00000461464 | N/A       | N/A          | N/A            |
| A_22_P00014979 | 7,67155 | 7,88254 | -1,157482194 | N/A             | N/A       | N/A          | Inc-SMARCC2-5  |
| A_23_P413285   | 6,42461 | 6,63563 | -1,157506263 | ENST00000514039 | 57545     | NM_001080522 | CC2D2A         |
| A_22_P00019534 | 1,49844 | 1,70947 | -1,157514287 | ENST00000567742 | N/A       | N/A          | N/A            |
| A_32_P203029   | 1,60272 | 1,81381 | -1,157562427 | ENST00000461107 | 171483    | NM_205849    | FAM9B          |
| A_22_P00025822 | 3,95097 | 4,16206 | -1,157562427 | N/A             | 100130264 | NR_024564    | LOC100130264   |
| A_33_P3266998  | 6,09989 | 6,31102 | -1,157594522 | ENST00000392176 | 100996259 | NR_126160    | FAM106B        |
| A_33_P3365392  | 5,86596 | 6,07721 | -1,157690812 | N/A             | 401557    | NR_046107    | LOC401557      |
| A_23_P404045   | 5,19856 | 5,40987 | -1,15773896  | ENST00000376585 | 4524      | NM_005957    | MTHFR          |
| A_33_P3285893  | 5,08623 | 5,29755 | -1,157746985 | ENST00000409497 | 9805      | NM_001145513 | SCRN1          |
| A_24_P213120   | 1,57709 | 1,78843 | -1,157763035 | ENST00000329862 | 120146    | NM_001136486 | TRIM64         |

|                |         |         |              |                 |           |              |              |
|----------------|---------|---------|--------------|-----------------|-----------|--------------|--------------|
| A_23_P100642   | 4,51259 | 4,72399 | -1,157811186 | ENST00000269582 | 5409      | NM_002686    | PNMT         |
| A_23_P254756   | 12,0622 | 12,2736 | -1,157811186 | ENST00000310786 | 8763      | NM_006016    | CD164        |
| A_23_P98483    | 12,2028 | 12,4142 | -1,157811186 | N/A             | 58486     | NM_021211    | ZBED5        |
| A_22_P00015751 | 5,93735 | 6,14882 | -1,157867365 | N/A             | N/A       | DQ323994     | Inc-TAF1C-1  |
| A_33_P3331326  | 10,4427 | 10,6542 | -1,157891442 | N/A             | N/A       | N/A          | N/A          |
| A_23_P61633    | 12,7312 | 12,9427 | -1,157891442 | ENST00000420716 | 10188     | NM_005781    | TNK2         |
| A_21_P0001664  | 4,74764 | 4,95916 | -1,157907494 | ENST00000414210 | 100505887 | N/A          | LOC100505887 |
| A_22_P00023975 | 5,37354 | 5,58511 | -1,157947625 | N/A             | 101927832 | NR_125393    | PAQR9-AS1    |
| A_33_P3418130  | 4,14778 | 4,35936 | -1,157955651 | ENST00000373373 | 139596    | NM_145052    | UPRT         |
| A_22_P00020454 | 4,17894 | 4,39052 | -1,157955651 | N/A             | N/A       | BE048204     | Inc-CHPF-1   |
| A_33_P3228573  | 11,8572 | 12,0688 | -1,157971704 | ENST00000584454 | 79058     | NM_001251888 | ASPSR1       |
| A_21_P0014940  | 6,18422 | 6,39588 | -1,158019863 | N/A             | N/A       | AB019568     | Inc-TSC1-1   |
| A_33_P3346937  | 5,25749 | 5,46918 | -1,158043944 | ENST00000393630 | 23041     | NM_001278471 | MON2         |
| A_23_P61042    | 1,59612 | 1,80781 | -1,158043944 | ENST00000390539 | N/A       | S55735       | N/A          |
| A_33_P3350547  | 1,97913 | 2,19082 | -1,158043944 | ENST00000333535 | 6331      | NM_001099404 | SCN5A        |
| A_24_P345498   | 11,7734 | 11,9851 | -1,158051971 | ENST00000460284 | 7520      | NM_021141    | XRCC5        |
| A_33_P3269803  | 12,327  | 12,5387 | -1,158051971 | ENST00000331148 | 9746      | NM_014718    | CLSTN3       |
| A_33_P3419003  | 16,7571 | 16,9688 | -1,158051971 | ENST00000424692 | N/A       | N/A          | N/A          |
| A_24_P238333   | 11,4884 | 11,7001 | -1,158051971 | ENST00000560515 | 10412     | NM_014886    | NSA2         |
| A_21_P0014561  | 3,43605 | 3,64776 | -1,158059998 | N/A             | 100506016 | XR_110305    | LOC100506016 |
| A_21_P0008444  | 3,13096 | 3,34282 | -1,15818041  | N/A             | N/A       | N/A          | Inc-OTX2-3   |
| A_23_P48669    | 11,435  | 11,6469 | -1,158212522 | ENST00000555837 | 1033      | NM_005192    | CDKN3        |
| A_33_P3294961  | 12,0371 | 12,249  | -1,158212522 | ENST00000398475 | 7462      | XM_005250562 | LAT2         |
| A_23_P133359   | 1,50827 | 1,72018 | -1,15822055  | ENST00000523286 | 80108     | NM_030613    | ZFP2         |
| A_24_P143127   | 1,81325 | 2,02522 | -1,15826872  | ENST00000541091 | 2892      | NM_000828    | GRIA3        |
| A_21_P0004526  | 1,66168 | 1,87377 | -1,158365067 | N/A             | N/A       | N/A          | Inc-PRR16-1  |
| A_23_P107513   | 7,84589 | 8,05805 | -1,158421272 | ENST00000423709 | 79959     | NM_024899    | CEP76        |
| A_23_P166566   | 2,97128 | 3,18347 | -1,158445361 | ENST00000481536 | 79825     | NM_024768    | EFCC1        |
| A_33_P3324890  | 11,1313 | 11,3435 | -1,158453391 | ENST00000507090 | N/A       | N/A          | N/A          |
| A_19_P00315593 | 5,44793 | 5,66016 | -1,15847748  | ENST00000521373 | N/A       | N/A          | N/A          |
| A_22_P00020841 | 2,96703 | 3,17929 | -1,158501571 | N/A             | N/A       | N/A          | Inc-RBMS1-2  |
| A_23_P80336    | 11,9417 | 12,154  | -1,158533691 | ENST00000492561 | 56993     | NM_020243    | TOMM22       |
| A_32_P70158    | 4,04135 | 4,2537  | -1,158573844 | ENST00000346401 | 11025     | NM_006864    | LILRB3       |

|                |         |         |              |                 |           |              |                    |
|----------------|---------|---------|--------------|-----------------|-----------|--------------|--------------------|
| A_22_P00000274 | 1,65832 | 1,87068 | -1,158581875 | N/A             | N/A       | AK123150     | Inc-AC008060.7.1-2 |
| A_33_P3281616  | 9,33209 | 9,54448 | -1,158605967 | ENST00000381037 | 150383    | NM_207327    | CDPF1              |
| A_33_P3239455  | 5,30811 | 5,52055 | -1,158646122 | ENST00000394939 | 389524    | NM_001003795 | GTF2IRD2B          |
| A_33_P6811736  | 1,58294 | 1,79539 | -1,158654153 | ENST00000501499 | 643770    | NR_038383    | LOC643770          |
| A_22_P00016489 | 6,43221 | 6,64468 | -1,158670215 | N/A             | 102724715 | XR_424811    | LOC102724715       |
| A_22_P00007888 | 6,44459 | 6,65707 | -1,158678247 | ENST00000583864 | 100188953 | DA079394     | LINC00092          |
| A_23_P71727    | 13,892  | 14,1045 | -1,158694309 | ENST00000314355 | 1164      | NM_001827    | CKS2               |
| A_24_P131392   | 6,77955 | 6,99213 | -1,158758563 | ENST00000442857 | 151393    | NM_144713    | RMDN2              |
| A_22_P00008013 | 3,41535 | 3,62794 | -1,158766595 | N/A             | N/A       | AK125500     | Inc-IFRD2-2        |
| A_22_P00021957 | 4,70521 | 4,91786 | -1,158814788 | ENST00000525758 | N/A       | BX647519     | N/A                |
| A_33_P3417589  | 10,6338 | 10,8465 | -1,15885495  | ENST00000441609 | N/A       | N/A          | N/A                |
| A_23_P204246   | 3,30796 | 3,52073 | -1,158911179 | ENST00000433083 | 1911      | NM_004426    | PHC1               |
| A_21_P0014849  | 5,55571 | 5,76856 | -1,158975445 | N/A             | N/A       | N/A          | N/A                |
| A_33_P3414113  | 4,97584 | 5,18872 | -1,158999545 | N/A             | 729041    | NR_045483    | FAAHP1             |
| A_21_P0004860  | 5,79428 | 6,00716 | -1,158999545 | N/A             | 11120     | NM_001197234 | BTN2A1             |
| A_24_P139094   | 13,3967 | 13,6096 | -1,159015612 | ENST00000598564 | 6455      | NM_003025    | SH3GL1             |
| A_21_P0013609  | 3,0191  | 3,23205 | -1,159055781 | N/A             | N/A       | N/A          | XLOC_I2_015075     |
| A_22_P00000759 | 1,65273 | 1,86571 | -1,159079884 | ENST00000512746 | N/A       | N/A          | N/A                |
| A_21_P0002554  | 1,3987  | 1,61175 | -1,159136124 | N/A             | N/A       | N/A          | Inc-HDAC4-2        |
| A_22_P00014709 | 4,82887 | 5,04193 | -1,159144158 | N/A             | N/A       | N/A          | Inc-SLC25A47-3     |
| A_21_P0006356  | 1,60227 | 1,81533 | -1,159144158 | N/A             | N/A       | N/A          | Inc-NAA35-1        |
| A_22_P00017143 | 2,66037 | 2,87343 | -1,159144158 | ENST00000496217 | N/A       | N/A          | N/A                |
| A_21_P0011156  | 1,57752 | 1,79059 | -1,159152193 | N/A             | N/A       | N/A          | XLOC_I2_003839     |
| A_23_P53476    | 16,6759 | 16,889  | -1,159176297 | ENST00000396076 | 3945      | NM_002300    | LDHB               |
| A_23_P121602   | 8,72873 | 8,94184 | -1,159184332 | ENST00000296504 | 8819      | NM_003864    | SAP30              |
| A_19_P00325768 | 12,1926 | 12,4058 | -1,159256648 | N/A             | N/A       | N/A          | N/A                |
| A_33_P3402500  | 14,3144 | 14,5276 | -1,159256648 | ENST00000495549 | 51522     | NM_001165258 | TMEM14C            |
| A_22_P00003212 | 4,59406 | 4,80729 | -1,159280754 | ENST00000529518 | N/A       | N/A          | N/A                |
| A_23_P121276   | 7,83281 | 8,04609 | -1,159320932 | ENST00000535191 | 6787      | NM_003157    | NEK4               |
| A_23_P328836   | 8,25107 | 8,46436 | -1,159328968 | ENST00000356016 | 84458     | NM_032440    | LCOR               |
| A_23_P366726   | 5,32014 | 5,53344 | -1,159337004 | ENST00000380067 | 399512    | NM_201520    | SLC25A35           |
| A_33_P3365616  | 10,3066 | 10,5199 | -1,159337004 | ENST00000313334 | 91408     | NM_152265    | BTF3L4             |
| A_21_P0008966  | 1,55327 | 1,76657 | -1,159337004 | N/A             | N/A       | N/A          | Inc-CALB2-1        |

|                |         |         |              |                 |           |              |                |
|----------------|---------|---------|--------------|-----------------|-----------|--------------|----------------|
| A_23_P90565    | 5,17863 | 5,39205 | -1,159433439 | ENST00000272321 | 51057     | NM_015910    | WDPCP          |
| A_22_P00006274 | 2,60698 | 2,82047 | -1,159489697 | ENST00000413050 | 101927502 | NR_109772    | LOC101927502   |
| A_33_P3399980  | 1,59976 | 1,81325 | -1,159489697 | ENST00000381142 | 7306      | NM_000550    | TYRP1          |
| A_24_P170763   | 12,0921 | 12,3056 | -1,159497734 | ENST00000251343 | 23351     | NM_015299    | KHNYN          |
| A_23_P98382    | 14,5167 | 14,7302 | -1,159497734 | ENST00000507614 | 26521     | NM_012459    | TIMM8B         |
| A_23_P206107   | 8,95994 | 9,17345 | -1,159505771 | ENST00000570276 | 25989     | NM_001099436 | ULK3           |
| A_22_P00017819 | 4,10661 | 4,32017 | -1,159545957 | ENST00000452923 | N/A       | N/A          | N/A            |
| A_23_P22096    | 11,289  | 11,5026 | -1,159578107 | ENST00000519993 | 5747      | NM_153831    | PTK2           |
| A_23_P654      | 9,58402 | 9,79762 | -1,159578107 | ENST00000375733 | 7709      | NM_003443    | ZBTB17         |
| A_23_P167389   | 11,9728 | 12,1864 | -1,159578107 | ENST00000512390 | 64411     | NM_022481    | ARAP3          |
| A_23_P414328   | 1,61757 | 1,83118 | -1,159586144 | ENST00000307139 | 27091     | NM_145811    | CACNG5         |
| A_21_P0012286  | 2,45806 | 2,67184 | -1,159722792 | N/A             | N/A       | N/A          | XLOC_I2_009469 |
| A_21_P0005574  | 1,75875 | 1,97254 | -1,159730831 | N/A             | N/A       | N/A          | Inc-ASB15-1    |
| A_23_P390744   | 12,9537 | 13,1675 | -1,159738869 | ENST00000255759 | 123811    | NM_144600    | FOPNL          |
| A_23_P309261   | 11,3841 | 11,5979 | -1,159738869 | ENST00000487258 | 10142     | NM_005751    | AKAP9          |
| A_23_P124164   | 10,0981 | 10,3119 | -1,159738869 | ENST00000485703 | 57461     | NM_020701    | ISY1           |
| A_33_P3385983  | 6,2781  | 6,49191 | -1,159746908 | ENST00000430024 | 7568      | NM_021143    | ZNF20          |
| A_24_P417189   | 7,60433 | 7,81815 | -1,159754947 | ENST00000342782 | 1852      | NM_001395    | DUSP9          |
| A_24_P359117   | 9,35233 | 9,5662  | -1,159795142 | ENST00000335500 | 23131     | NM_001002909 | GPATCH8        |
| A_22_P00010682 | 1,6979  | 1,91177 | -1,159795142 | ENST00000433356 | N/A       | N/A          | N/A            |
| A_22_P00007235 | 4,22834 | 4,44222 | -1,159803181 | N/A             | N/A       | N/A          | Inc-GPN2-1     |
| A_22_P00012447 | 3,84441 | 4,0583  | -1,15981122  | N/A             | N/A       | N/A          | Inc-PRPF18-2   |
| A_23_P35617    | 10,9112 | 11,1251 | -1,159819259 | ENST00000371385 | 51196     | NM_016341    | PLCE1          |
| A_22_P00022568 | 1,9945  | 2,20841 | -1,159827298 | ENST00000429469 | N/A       | N/A          | N/A            |
| A_23_P259580   | 8,08154 | 8,29547 | -1,159843377 | ENST00000437116 | 6892      | NM_172208    | TAPBP          |
| A_22_P00002072 | 1,50436 | 1,71833 | -1,159875535 | ENST00000487973 | 9576      | N/A          | SPAG6          |
| A_33_P3230073  | 13,6194 | 13,8334 | -1,159899655 | ENST00000447259 | N/A       | N/A          | N/A            |
| A_33_P3261648  | 8,20179 | 8,41582 | -1,159923774 | ENST00000452478 | 57730     | NM_025190    | ANKRD36B       |
| A_22_P00005708 | 4,8578  | 5,07187 | -1,159955935 | N/A             | N/A       | AK128630     | Inc-ELMOD3-1   |
| A_21_P0006522  | 4,68929 | 4,9034  | -1,159988096 | N/A             | N/A       | N/A          | Inc-ARSD-2     |
| A_33_P3308585  | 6,84935 | 7,06348 | -1,160004177 | N/A             | 283314    | NR_026947    | C1RL-AS1       |
| A_22_P00018023 | 1,58891 | 1,80304 | -1,160004177 | N/A             | N/A       | N/A          | Inc-ZNF208-1   |
| A_33_P3284129  | 4,48912 | 4,70325 | -1,160004177 | ENST00000397463 | 116372    | NM_144586    | LYPD1          |

|                |         |         |              |                 |           |              |               |
|----------------|---------|---------|--------------|-----------------|-----------|--------------|---------------|
| A_21_P0004003  | 1,68531 | 1,89947 | -1,160028299 | ENST00000438117 | N/A       | N/A          | N/A           |
| A_22_P00010913 | 1,51142 | 1,72563 | -1,160068503 | N/A             | 102724776 | NR_125937    | LOC102724776  |
| A_33_P3256585  | 4,30317 | 4,51743 | -1,160108708 | N/A             | 100129528 | XM_005275730 | MUC8          |
| A_33_P3330211  | 4,18778 | 4,40207 | -1,160132832 | ENST00000476695 | 26053     | NM_001127232 | AUTS2         |
| A_23_P38181    | 10,3107 | 10,525  | -1,160140874 | ENST00000613421 | 23163     | NM_138619    | GGA3          |
| A_32_P115050   | 2,67079 | 2,88513 | -1,16017304  | N/A             | 646576    | NR_037595    | HHIP-AS1      |
| A_33_P3278916  | 3,47908 | 3,69343 | -1,160181082 | ENST00000361997 | 51105     | N/A          | PHF20L1       |
| A_23_P12140    | 14,0098 | 14,2242 | -1,160221292 | ENST00000461952 | 6125      | NM_000969    | RPL5          |
| A_33_P3400943  | 11,2274 | 11,4418 | -1,160221292 | ENST00000611166 | 29965     | NM_001199054 | CDIP1         |
| A_33_P3224020  | 13,9791 | 14,1936 | -1,160301715 | N/A             | 644000    | BC033982     | ARAFP2        |
| A_21_P0002981  | 2,24488 | 2,45942 | -1,160333886 | N/A             | N/A       | N/A          | Inc-ROBO2-1   |
| A_24_P191656   | 10,3672 | 10,5818 | -1,160382144 | ENST00000511227 | 28976     | NM_014049    | ACAD9         |
| A_33_P3274199  | 13,5229 | 13,7375 | -1,160382144 | ENST00000579674 | 90313     | NM_138349    | TP53I13       |
| A_23_P28969    | 13,2293 | 13,4439 | -1,160382144 | ENST00000217402 | 128866    | NM_176812    | CHMP4B        |
| A_33_P3406572  | 1,64128 | 1,85604 | -1,160510841 | N/A             | N/A       | N/A          | Inc-VAPB-1    |
| A_33_P3399693  | 5,28488 | 5,49969 | -1,160551062 | N/A             | 100127955 | AK127048     | LOC100127955  |
| A_23_P211106   | 8,80679 | 9,02166 | -1,160599329 | ENST00000487297 | 54093     | NM_017438    | SETD4         |
| A_32_P106194   | 8,2298  | 8,44468 | -1,160607374 | ENST00000300433 | 162461    | NM_153229    | TMEM92        |
| A_23_P150255   | 12,0733 | 12,2882 | -1,160623463 | ENST00000310137 | 10432     | NM_006328    | RBM14         |
| A_23_P256148   | 9,69808 | 9,91299 | -1,160631508 | ENST00000446189 | 79647     | NM_024595    | AKIRIN1       |
| A_33_P3316721  | 1,6145  | 1,82943 | -1,160647598 | ENST00000377574 | 116085    | NM_144585    | SLC22A12      |
| A_22_P00017756 | 3,22147 | 3,43644 | -1,160679778 | ENST00000553381 | 56252     | N/A          | YLPM1         |
| A_23_P99625    | 3,1847  | 3,39974 | -1,160736096 | ENST00000267426 | 161247    | NM_203402    | FITM1         |
| A_33_P3308672  | 4,02351 | 4,23858 | -1,160760233 | ENST00000614972 | 91948     | AK025311     | LINC00923     |
| A_23_P113184   | 11,085  | 11,3001 | -1,160784371 | ENST00000463855 | 79068     | NM_001080432 | FTO           |
| A_21_P0006728  | 7,13404 | 7,34915 | -1,160792417 | ENST00000449712 | 100216001 | N/A          | LINC00704     |
| A_21_P0009846  | 3,78568 | 4,0008  | -1,160800463 | ENST00000416646 | N/A       | N/A          | N/A           |
| A_24_P117177   | 5,9423  | 6,15743 | -1,160808509 | ENST00000486336 | 90203     | NM_152897    | SNX21         |
| A_21_P0003294  | 9,69848 | 9,91367 | -1,160856787 | N/A             | N/A       | N/A          | Inc-NAA50-2   |
| A_22_P00016652 | 1,54377 | 1,75899 | -1,160880926 | N/A             | N/A       | N/A          | Inc-TP53I13-2 |
| A_23_P321223   | 1,63223 | 1,84752 | -1,160937254 | ENST00000329406 | 5367      | NM_002674    | PMCH          |
| A_21_P0006444  | 1,64915 | 1,86446 | -1,160953348 | N/A             | N/A       | N/A          | Inc-MAP7D2-1  |
| A_33_P3414949  | 3,81797 | 4,03328 | -1,160953348 | N/A             | 5827      | BC009836     | PXMP2         |



|                |         |         |              |                 |           |              |                  |
|----------------|---------|---------|--------------|-----------------|-----------|--------------|------------------|
| A_33_P3398912  | 11,491  | 11,7064 | -1,161025774 | ENST00000485978 | 11182     | NM_017585    | SLC2A6           |
| A_23_P61960    | 4,55763 | 4,77307 | -1,161057965 | ENST00000606024 | 155066    | NM_145230    | ATP6V0E2         |
| A_23_P162918   | 5,48887 | 5,70431 | -1,161057965 | ENST00000555820 | 12        | NM_001085    | SERPINA3         |
| A_33_P3393941  | 12,1143 | 12,3298 | -1,161106253 | ENST00000562886 | 8720      | NM_003791    | MBTPS1           |
| A_23_P43412    | 1,70201 | 1,91751 | -1,161106253 | ENST00000616898 | 55363     | NM_018437    | HEMGN            |
| A_33_P3734384  | 1,50159 | 1,71713 | -1,161138447 | N/A             | N/A       | AK097526     | Inc-MYO1G-1      |
| A_22_P00008513 | 1,61984 | 1,8355  | -1,161235031 | ENST00000555156 | 101954204 | NR_104063    | LINC00644        |
| A_33_P3226212  | 2,59137 | 2,80707 | -1,161267228 | ENST00000460679 | 58494     | NM_001270408 | JAM2             |
| A_21_P0010138  | 1,6386  | 1,85433 | -1,161291376 | N/A             | N/A       | N/A          | Inc-AF127577.1-6 |
| A_33_P3417113  | 3,37365 | 3,58941 | -1,161315525 | ENST00000381553 | 387129    | NM_001300934 | NPSR1            |
| A_23_P216689   | 10,8191 | 11,0349 | -1,161347724 | ENST00000303407 | 8019      | NM_007371    | BRD3             |
| A_33_P3385750  | 4,20711 | 4,42292 | -1,161355774 | ENST00000445217 | 390927    | NM_001013659 | ZNF793           |
| A_23_P2645     | 3,47851 | 3,69434 | -1,161371874 | ENST00000257549 | 10993     | NM_006843    | SDS              |
| A_33_P3333187  | 4,22101 | 4,43689 | -1,161412124 | N/A             | N/A       | N/A          | N/A              |
| A_33_P3239102  | 11,5143 | 11,7302 | -1,161428225 | N/A             | N/A       | N/A          | N/A              |
| A_33_P3799692  | 6,57484 | 6,79078 | -1,161460427 | ENST00000609742 | N/A       | BC043009     | N/A              |
| A_22_P00002543 | 8,90904 | 9,12502 | -1,16149263  | N/A             | N/A       | AI632035     | Inc-C17orf63-1   |
| A_24_P106591   | 10,579  | 10,795  | -1,161508732 | ENST00000244777 | 63915     | NM_201280    | BLOC1S5          |
| A_23_P148297   | 11,7147 | 11,9307 | -1,161508732 | ENST00000373212 | 6451      | NM_003022    | SH3BGRL          |
| A_24_P177585   | 7,12944 | 7,3455  | -1,161557039 | ENST00000381254 | 348654    | NM_182625    | GEN1             |
| A_33_P3326647  | 1,76871 | 1,98484 | -1,161613399 | ENST00000342528 | 340990    | AK128214     | OTOG             |
| A_22_P00015411 | 4,49931 | 4,71545 | -1,161621451 | N/A             | 100507599 | XR_109753    | LOC100507599     |
| A_23_P343594   | 7,67369 | 7,88983 | -1,161621451 | ENST00000251722 | 55230     | NM_018218    | USP40            |
| A_33_P3324810  | 3,71723 | 3,93349 | -1,161718076 | ENST00000390446 | N/A       | AK127936     | N/A              |
| A_23_P96350    | 8,16358 | 8,37987 | -1,161742233 | ENST00000553851 | 11230     | NM_007213    | PRAF2            |
| A_21_P0012520  | 1,72426 | 1,94058 | -1,161766391 | ENST00000416648 | N/A       | N/A          | N/A              |
| A_23_P200001   | 5,11311 | 5,32945 | -1,161782497 | ENST00000480732 | 91624     | NM_144573    | NEXN             |
| A_21_P0014594  | 2,68971 | 2,90607 | -1,161798603 | N/A             | N/A       | N/A          | Inc-PDCD11-1     |
| A_23_P14774    | 16,5242 | 16,7406 | -1,161830815 | ENST00000533777 | 1512      | NM_004390    | CTSH             |
| A_22_P00012702 | 4,01186 | 4,22834 | -1,161895243 | N/A             | 100874203 | NR_046583    | COL4A2-AS1       |
| A_23_P29684    | 12,4687 | 12,6852 | -1,16191135  | ENST00000486616 | 50853     | NM_015873    | VILL             |
| A_33_P3330498  | 5,91526 | 6,13179 | -1,161935511 | ENST00000409134 | 501       | NM_001182    | ALDH7A1          |
| A_33_P3252475  | 1,54669 | 1,76326 | -1,161967728 | ENST00000499006 | 388011    | NR_015430    | LINC01550        |

|                |         |         |              |                 |           |              |                       |
|----------------|---------|---------|--------------|-----------------|-----------|--------------|-----------------------|
| A_23_P144311   | 11,372  | 11,5886 | -1,16199189  | ENST00000381227 | 5431      | NM_000938    | POLR2B                |
| A_33_P3702281  | 10,0026 | 10,2193 | -1,162072436 | N/A             | 284014    | AK095567     | LOC284014             |
| A_23_P396917   | 4,06325 | 4,28    | -1,162112711 | ENST00000307257 | 79864     | NM_199124    | C11orf63              |
| A_23_P109907   | 14,6934 | 14,9102 | -1,162152988 | ENST00000344209 | 286676    | NM_175924    | ILDR1                 |
| A_22_P00006933 | 2,24499 | 2,46179 | -1,162152988 | N/A             | N/A       | N/A          | Inc-GATAD2B-1         |
| A_23_P63038    | 10,0918 | 10,3087 | -1,162233545 | ENST00000462474 | 64175     | NM_022356    | P3H1                  |
| A_33_P3287883  | 7,79717 | 8,0141  | -1,162257713 | ENST00000617682 | 100133331 | NR_028327    | LOC100133331          |
| A_33_P3351495  | 2,1103  | 2,32723 | -1,162257713 | ENST00000442856 | N/A       | N/A          | N/A                   |
| A_23_P75179    | 1,50144 | 1,71846 | -1,162330221 | N/A             | 54777     | NM_001200049 | CFAP46                |
| A_23_P7560     | 1,46735 | 1,68439 | -1,162346334 | ENST00000231228 | 3593      | NM_002187    | IL12B                 |
| A_21_P0008219  | 6,21704 | 6,43413 | -1,162386619 | N/A             | N/A       | N/A          | Inc-TUBGCP3-6         |
| A_21_P0006997  | 3,55038 | 3,76761 | -1,162499423 | N/A             | N/A       | N/A          | Inc-MBL2-2            |
| A_23_P303101   | 3,9981  | 4,21533 | -1,162499423 | ENST00000617094 | 56098     | NM_032406    | PCDHGC4               |
| A_22_P00002693 | 5,55376 | 5,771   | -1,162507481 | ENST00000436334 | N/A       | N/A          | N/A                   |
| A_23_P430792   | 1,58821 | 1,80549 | -1,162539713 | ENST00000603323 | 256957    | NM_152781    | HEATR9                |
| A_21_P0007417  | 1,96425 | 2,18154 | -1,162547771 | N/A             | N/A       | N/A          | Inc-RP11-680F20.4.1-2 |
| A_24_P195037   | 10,66   | 10,8773 | -1,162555829 | ENST00000493514 | 148423    | NM_198077    | C1orf52               |
| A_23_P66599    | 12,1995 | 12,4168 | -1,162555829 | ENST00000253794 | 84313     | NM_032353    | VPS25                 |
| A_21_P0001596  | 3,83903 | 4,05635 | -1,162571946 | N/A             | N/A       | N/A          | Inc-CREG1-1           |
| A_33_P3324692  | 8,5723  | 8,78971 | -1,162644473 | ENST00000425059 | 644974    | NM_001136152 | ALG1L2                |
| A_22_P00022297 | 2,92488 | 3,14232 | -1,16266865  | ENST00000521681 | N/A       | BX956631     | N/A                   |
| A_22_P00014455 | 4,23349 | 4,45097 | -1,162700886 | N/A             | N/A       | N/A          | Inc-SH3BGR13-1        |
| A_33_P3233666  | 8,78184 | 8,99935 | -1,162725064 | ENST00000489806 | 10556     | NM_001104546 | RPP30                 |
| A_33_P3248072  | 8,21773 | 8,43526 | -1,162741183 | ENST00000279477 | 10326     | NM_001135844 | SIRPB1                |
| A_22_P00011352 | 3,85371 | 4,07126 | -1,162757302 | N/A             | N/A       | N/A          | Inc-OVGP1-2           |
| A_33_P3289005  | 8,15603 | 8,37358 | -1,162757302 | ENST00000446015 | 130340    | NM_001039569 | AP1S3                 |
| A_24_P374759   | 1,3844  | 1,6021  | -1,162878203 | ENST00000492584 | 26059     | NM_015576    | ERC2                  |
| A_23_P46309    | 9,41209 | 9,62982 | -1,162902384 | ENST00000373832 | 1104      | NM_001048199 | RCC1                  |
| A_22_P00023509 | 1,54346 | 1,76124 | -1,162942688 | N/A             | N/A       | AK056505     | Inc-SPATA19-2         |
| A_33_P3307157  | 1,35105 | 1,56883 | -1,162942688 | ENST00000369519 | 282996    | NM_001134363 | RBM20                 |
| A_21_P0005718  | 1,76054 | 1,97833 | -1,162950749 | N/A             | N/A       | N/A          | Inc-RP11-383H13.1.1-2 |
| A_24_P357709   | 9,12112 | 9,33891 | -1,162950749 | ENST00000492449 | 23355     | NM_001009921 | VPS8                  |
| A_22_P00008677 | 1,64556 | 1,86341 | -1,162999116 | N/A             | 100874264 | NR_046764    | AOAH-IT1              |

|                |         |         |              |                 |           |              |                |
|----------------|---------|---------|--------------|-----------------|-----------|--------------|----------------|
| A_23_P31984    | 3,28355 | 3,50141 | -1,163007177 | ENST00000333999 | 10881     | NM_006687    | ACTL7A         |
| A_33_P3239587  | 13,9346 | 14,1525 | -1,163039423 | ENST00000375036 | 439921    | NM_001008529 | MXRA7          |
| A_22_P00010415 | 1,55043 | 1,76834 | -1,163047485 | N/A             | N/A       | N/A          | Inc-MYOCD-1    |
| A_32_P99432    | 12,5486 | 12,7666 | -1,163120042 | ENST00000317378 | 126003    | NM_174894    | TRAPPC5        |
| A_22_P00023433 | 4,30806 | 4,52609 | -1,163144228 | ENST00000607953 | N/A       | N/A          | N/A            |
| A_33_P3355950  | 1,87869 | 2,0968  | -1,163208728 | ENST00000584910 | 284276    | N/A          | LINC00908      |
| A_22_P00009573 | 5,69742 | 5,91555 | -1,163224854 | N/A             | N/A       | AL117542     | Inc-MAP6-3     |
| A_19_P00318725 | 2,85598 | 3,07415 | -1,163257106 | ENST00000422047 | 101927528 | N/A          | LINC01204      |
| A_21_P0013710  | 2,82227 | 3,04049 | -1,163297422 | ENST00000427778 | N/A       | N/A          | N/A            |
| A_23_P319005   | 3,06368 | 3,28191 | -1,163305485 | ENST00000303177 | 51617     | NM_015980    | HMP19          |
| A_23_P26759    | 8,71111 | 8,92934 | -1,163305485 | ENST00000592228 | 124583    | NM_138793    | CANT1          |
| A_23_P204016   | 8,63873 | 8,857   | -1,16333774  | ENST00000548860 | 784       | NM_000725    | CACNB3         |
| A_22_P00006337 | 1,36554 | 1,5839  | -1,163410315 | ENST00000560008 | 254559    | NR_015411    | LINC00925      |
| A_23_P329112   | 4,30113 | 4,51956 | -1,163466765 | ENST00000527670 | 3718      | NM_000215    | JAK3           |
| A_24_P190877   | 6,63587 | 6,85432 | -1,163482894 | ENST00000367506 | 81627     | NM_030934    | TRMT1L         |
| A_23_P346291   | 2,83018 | 3,04869 | -1,163531283 | ENST00000332582 | 54328     | NM_018969    | GPR173         |
| A_23_P40989    | 8,03611 | 8,25464 | -1,163547413 | ENST00000263966 | 8975      | NM_003940    | USP13          |
| A_23_P157361   | 9,83067 | 10,0492 | -1,163547413 | ENST00000467220 | 55112     | NM_018051    | WDR60          |
| A_22_P00010774 | 1,70158 | 1,92012 | -1,163555478 | N/A             | N/A       | N/A          | Inc-NKX2-5-2   |
| A_33_P3210423  | 7,19513 | 7,41367 | -1,163555478 | ENST00000577831 | 5469      | NM_004774    | MED1           |
| A_23_P382188   | 11,5851 | 11,8037 | -1,16360387  | ENST00000597593 | 55620     | NM_001013841 | STAP2          |
| A_33_P3225512  | 8,8483  | 9,06692 | -1,163620001 | ENST00000620097 | 4939      | NM_002535    | OAS2           |
| A_21_P0011709  | 1,56949 | 1,78813 | -1,163636133 | N/A             | N/A       | N/A          | XLOC_I2_006812 |
| A_21_P0004324  | 1,53929 | 1,75797 | -1,163668396 | N/A             | N/A       | N/A          | Inc-GABRG2-1   |
| A_21_P0011566  | 11,2537 | 11,4724 | -1,163684528 | N/A             | N/A       | N/A          | XLOC_I2_005952 |
| A_24_P410582   | 8,66771 | 8,88642 | -1,163692594 | ENST00000419541 | 9686      | NM_014667    | VGLL4          |
| A_22_P00007093 | 1,38849 | 1,60721 | -1,16370066  | N/A             | 100505784 | XR_109853    | LOC100505784   |
| A_23_P412321   | 5,02555 | 5,24431 | -1,163732925 | ENST00000292303 | 1234      | NM_000579    | CCR5           |
| A_21_P0003709  | 3,98088 | 4,19965 | -1,163740992 | N/A             | N/A       | N/A          | Inc-FAM53A-2   |
| A_22_P00007448 | 1,92065 | 2,13953 | -1,163829726 | N/A             | 100873955 | NR_046827    | LNK1-AS2       |
| A_23_P156355   | 10,1757 | 10,3946 | -1,16384586  | ENST00000296595 | 153396    | NM_153354    | TMEM161B       |
| A_32_P150891   | 9,11126 | 9,33016 | -1,16384586  | ENST00000400324 | 81624     | NM_001042517 | DIAPH3         |
| A_24_P612446   | 7,87888 | 8,09778 | -1,16384586  | ENST00000480824 | 221477    | NM_152734    | C6orf89        |

|                |         |         |              |                 |           |              |                |
|----------------|---------|---------|--------------|-----------------|-----------|--------------|----------------|
| A_23_P106056   | 14,2156 | 14,4345 | -1,16384586  | ENST00000535847 | 1603      | NM_001344    | DAD1           |
| A_33_P3240931  | 8,86281 | 9,08172 | -1,163853927 | ENST00000339020 | 643155    | NM_001048249 | SMIM15         |
| A_33_P3335624  | 10,8835 | 11,1025 | -1,163926534 | ENST00000338548 | 5716      | N/A          | PSMD10         |
| A_33_P3362046  | 5,82174 | 6,04078 | -1,163958806 | ENST00000618902 | N/A       | N/A          | N/A            |
| A_32_P412313   | 8,11123 | 8,33031 | -1,163991078 | ENST00000450050 | 140459    | NM_017873    | ASB6           |
| A_21_P0005121  | 4,2263  | 4,44538 | -1,163991078 | ENST00000420766 | N/A       | XR_108615    | N/A            |
| A_22_P00007393 | 3,28628 | 3,50538 | -1,164007214 | N/A             | N/A       | N/A          | Inc-GRID2IP-1  |
| A_24_P57528    | 9,75904 | 9,97823 | -1,164079831 | ENST00000542342 | 201266    | NM_139177    | SLC39A11       |
| A_23_P166929   | 4,5819  | 4,80112 | -1,164104038 | ENST00000472941 | 5274      | NM_005025    | SERPINI1       |
| A_33_P3231950  | 5,64644 | 5,86568 | -1,164120176 | N/A             | N/A       | N/A          | N/A            |
| A_33_P3414851  | 8,62669 | 8,84595 | -1,164136314 | ENST00000372247 | 55182     | NM_018150    | RNF220         |
| A_33_P3411907  | 1,67906 | 1,89849 | -1,164273498 | ENST00000380628 | 2250      | NM_033143    | FGF5           |
| A_33_P3222653  | 2,16392 | 2,38338 | -1,164297709 | ENST00000514902 | 100131366 | NR_033938    | LINC00605      |
| A_32_P352697   | 6,82705 | 7,04652 | -1,164305779 | ENST00000615500 | 91746     | NM_001031732 | YTHDC1         |
| A_19_P00320193 | 1,62616 | 1,84564 | -1,16431385  | ENST00000506836 | 102467147 | N/A          | LOC102467147   |
| A_33_P3216898  | 4,23883 | 4,45838 | -1,164370344 | N/A             | 286367    | NR_024011    | LOC286367      |
| A_33_P3401753  | 2,19761 | 2,41729 | -1,164475269 | ENST00000597214 | 2865      | NM_005304    | FFAR3          |
| A_23_P130418   | 14,162  | 14,3817 | -1,164491412 | ENST00000318388 | 4729      | NM_021074    | NDUFV2         |
| A_23_P342727   | 6,30085 | 6,52056 | -1,164499484 | ENST00000255486 | 90627     | NM_178006    | STARD13        |
| A_21_P0009661  | 1,94794 | 2,16769 | -1,164531771 | ENST00000414548 | N/A       | N/A          | N/A            |
| A_23_P49816    | 3,37691 | 3,59667 | -1,164539843 | ENST00000585130 | 55803     | NM_018404    | ADAP2          |
| A_22_P00010449 | 8,99058 | 9,21034 | -1,164539843 | ENST00000574592 | 23059     | NM_015041    | CLUAP1         |
| A_23_P57868    | 13,1538 | 13,3736 | -1,164572131 | ENST00000404366 | 95        | NM_000666    | ACY1           |
| A_23_P2097     | 8,01813 | 8,23802 | -1,164644783 | ENST00000531101 | 55128     | NM_018073    | TRIM68         |
| A_23_P391607   | 11,6535 | 11,8734 | -1,164652856 | ENST00000371421 | 92714     | NM_152285    | ARRDC1         |
| A_22_P00020273 | 1,53985 | 1,75981 | -1,164701294 | N/A             | N/A       | N/A          | Inc-B4GALNT3-2 |
| A_21_P0010828  | 1,57654 | 1,79653 | -1,164725513 | N/A             | N/A       | N/A          | XL0C_I2_001592 |
| A_33_P3394405  | 5,0501  | 5,27011 | -1,16474166  | N/A             | 727721    | DB238770     | LOC727721      |
| A_23_P210015   | 8,99087 | 9,21092 | -1,164773954 | ENST00000175756 | 26469     | NM_014369    | PTPN18         |
| A_23_P101131   | 1,57179 | 1,79187 | -1,164798175 | ENST00000529320 | 2922      | NM_002091    | GRP            |
| A_24_P298716   | 1,72205 | 1,94214 | -1,164806249 | ENST00000622692 | 252946    | NR_001553    | FAM197Y2       |
| A_22_P00012823 | 5,54285 | 5,76294 | -1,164806249 | N/A             | 728095    | NR_109897    | LOC728095      |
| A_21_P0010917  | 1,64979 | 1,86996 | -1,164870841 | ENST00000419779 | N/A       | N/A          | N/A            |

|                |         |         |              |                 |           |              |               |
|----------------|---------|---------|--------------|-----------------|-----------|--------------|---------------|
| A_24_P56252    | 10,6034 | 10,8236 | -1,164895064 | ENST00000450142 | 4659      | NM_002480    | PPP1R12A      |
| A_33_P3294911  | 3,99604 | 4,21629 | -1,164935437 | N/A             | 144577    | NM_001300940 | C12orf66      |
| A_33_P3388312  | 11,448  | 11,6683 | -1,164975811 | ENST00000345317 | 8935      | BC036044     | SKAP2         |
| A_23_P152284   | 10,1529 | 10,3733 | -1,165056564 | ENST00000466183 | 79622     | NM_024571    | SNRNP25       |
| A_21_P0007786  | 3,86826 | 4,0887  | -1,165088867 | ENST00000540684 | 387895    | NR_033878    | LINC00944     |
| A_24_P160680   | 1,65391 | 1,87439 | -1,16512117  | ENST00000574799 | 55036     | NM_017950    | CCDC40        |
| A_23_P412515   | 5,01777 | 5,23827 | -1,165137322 | ENST00000394604 | 9069      | NM_012129    | CLDN12        |
| A_22_P00019501 | 8,33409 | 8,55467 | -1,165201933 | ENST00000507733 | N/A       | N/A          | N/A           |
| A_23_P105619   | 8,40107 | 8,62167 | -1,165218086 | ENST00000552801 | 89894     | NM_138341    | TMEM116       |
| A_23_P4592     | 2,89536 | 3,11598 | -1,16523424  | ENST00000425629 | 946       | NM_001245    | SIGLEC6       |
| A_23_P65089    | 14,2049 | 14,4256 | -1,165298856 | ENST00000534843 | 51202     | NM_016355    | DDX47         |
| A_23_P143474   | 15,8858 | 16,1065 | -1,165298856 | ENST00000429064 | 539       | NM_001697    | ATP5O         |
| A_24_P391960   | 13,9949 | 14,2156 | -1,165298856 | ENST00000423841 | N/A       | N/A          | N/A           |
| A_23_P44421    | 1,34971 | 1,57042 | -1,165306933 | ENST00000302495 | 203100    | NM_153692    | HTRA4         |
| A_22_P00014169 | 1,63447 | 1,8552  | -1,165323088 | N/A             | N/A       | N/A          | Inc-SCRN3-4   |
| A_33_P3354291  | 1,64623 | 1,86699 | -1,16534732  | N/A             | 85371     | NR_046312    | KIAA1656      |
| A_33_P3325634  | 8,17684 | 8,39768 | -1,165411943 | ENST00000378187 | 100170765 | NM_001130514 | ERICH4        |
| A_23_P380379   | 3,45695 | 3,67779 | -1,165411943 | ENST00000328705 | 84698     | NM_001286548 | CAPS2         |
| A_21_P0010274  | 1,85966 | 2,08055 | -1,165452333 | N/A             | N/A       | N/A          | Inc-LTN1-1    |
| A_21_P0001693  | 1,67125 | 1,89219 | -1,165492726 | N/A             | N/A       | N/A          | Inc-DR1-1     |
| A_33_P3318696  | 8,75532 | 8,97628 | -1,165508883 | ENST00000370485 | 56267     | NM_001008661 | CCBL2         |
| A_33_P3300495  | 8,48653 | 8,70752 | -1,165533119 | ENST00000409310 | 5343      | BC022294     | PLGLB1        |
| A_23_P12896    | 9,78697 | 10,008  | -1,165565435 | ENST00000327470 | 2188      | NM_022725    | FANCF         |
| A_23_P501722   | 1,38688 | 1,60795 | -1,165597752 | ENST00000493924 | 10077     | NM_139022    | TSPAN32       |
| A_23_P121499   | 7,95876 | 8,17984 | -1,165605831 | ENST00000503569 | 7466      | NM_006005    | WFS1          |
| A_21_P0010276  | 1,562   | 1,78311 | -1,16563007  | N/A             | N/A       | N/A          | Inc-TMEM50B-1 |
| A_21_P0005426  | 1,5416  | 1,76271 | -1,16563007  | N/A             | N/A       | N/A          | Inc-ARF5-5    |
| A_22_P00013974 | 2,03954 | 2,26066 | -1,165638149 | N/A             | N/A       | N/A          | Inc-RTN4-1    |
| A_23_P409516   | 7,99165 | 8,21289 | -1,165735108 | ENST00000394264 | 116224    | NM_138333    | FAM122A       |
| A_21_P0014437  | 6,11123 | 6,33248 | -1,165743189 | N/A             | N/A       | BC033052     | N/A           |
| A_24_P260699   | 2,05224 | 2,27355 | -1,165791671 | ENST00000373479 | 9025      | NM_003958    | RNF8          |
| A_23_P80954    | 3,9051  | 4,12643 | -1,165807833 | ENST00000398516 | 10861     | NM_022042    | SLC26A1       |
| A_21_P0003863  | 1,52988 | 1,75125 | -1,165840156 | N/A             | 101928439 | XR_425808    | LOC101928439  |

|                |         |         |              |                 |           |              |                |
|----------------|---------|---------|--------------|-----------------|-----------|--------------|----------------|
| A_23_P156049   | 12,4414 | 12,6628 | -1,1658644   | ENST00000504459 | 3074      | NM_000521    | HEXB           |
| A_21_P0008527  | 2,00837 | 2,22978 | -1,165872481 | N/A             | N/A       | N/A          | Inc-JPH4-1     |
| A_33_P3369760  | 6,00337 | 6,22482 | -1,165904806 | ENST00000377959 | 152007    | NM_001287011 | GLIPR2         |
| A_22_P00009060 | 3,19712 | 3,41863 | -1,165953296 | N/A             | N/A       | CN315368     | Inc-LENG9-2    |
| A_22_P00022253 | 9,73091 | 9,95244 | -1,165969459 | N/A             | N/A       | N/A          | Inc-FAM160A1-1 |
| A_22_P00018055 | 1,65906 | 1,8806  | -1,165977541 | N/A             | N/A       | N/A          | Inc-ZNF286A-4  |
| A_33_P3867584  | 3,28886 | 3,5105  | -1,166058363 | ENST00000434296 | 285758    | NR_038863    | LINC01268      |
| A_22_P00024003 | 1,52436 | 1,74601 | -1,166066446 | ENST00000496220 | 401103    | NR_040105    | FLJ46066       |
| A_23_P214300   | 4,22558 | 4,44724 | -1,166074529 | ENST00000493331 | 2939      | NM_000846    | GSTA2          |
| A_33_P3240652  | 1,6211  | 1,84288 | -1,166171524 | N/A             | N/A       | N/A          | N/A            |
| A_21_P0007973  | 1,50343 | 1,72522 | -1,166179607 | ENST00000444605 | N/A       | N/A          | N/A            |
| A_23_P422851   | 9,28583 | 9,50768 | -1,166228108 | ENST00000420687 | 91768     | NM_138375    | CABLES1        |
| A_33_P3422479  | 6,08002 | 6,30187 | -1,166228108 | ENST00000326434 | 78987     | NM_001031717 | CRELD1         |
| A_21_P0006966  | 1,42836 | 1,65022 | -1,166236192 | ENST00000602311 | 101928322 | NR_120637    | LOC101928322   |
| A_23_P207020   | 13,7599 | 13,9818 | -1,166268527 | ENST00000576517 | 56270     | NM_019613    | WDR45B         |
| A_21_P0010284  | 1,69124 | 1,91316 | -1,166284695 | N/A             | N/A       | N/A          | Inc-PSMG1-3    |
| A_33_P3315169  | 1,54787 | 1,76985 | -1,166333201 | N/A             | N/A       | N/A          | N/A            |
| A_24_P370420   | 9,43004 | 9,65208 | -1,166381708 | ENST00000618102 | 81554     | NM_030798    | WBSCR16        |
| A_33_P3322103  | 4,63356 | 4,85561 | -1,166389793 | N/A             | N/A       | N/A          | N/A            |
| A_32_P210252   | 15,0632 | 15,2853 | -1,166430218 | ENST00000234875 | 6146      | NM_000983    | RPL22          |
| A_24_P194931   | 9,00415 | 9,22625 | -1,166430218 | ENST00000616407 | 57223     | NM_020463    | SMEK2          |
| A_22_P00017291 | 1,4823  | 1,70441 | -1,166438303 | N/A             | N/A       | N/A          | Inc-USP13-1    |
| A_33_P3243364  | 5,45461 | 5,67676 | -1,166470644 | ENST00000311895 | 2072      | NM_005236    | ERCC4          |
| A_23_P397899   | 9,32925 | 9,55142 | -1,166486815 | ENST00000374242 | 58493     | NM_021218    | INIP           |
| A_33_P3351615  | 13,5927 | 13,8149 | -1,166511071 | ENST00000492051 | N/A       | N/A          | N/A            |
| A_23_P137209   | 11,9141 | 12,1364 | -1,166591931 | ENST00000377269 | 7317      | NM_003334    | UBA1           |
| A_24_P109644   | 5,21808 | 5,44043 | -1,166632362 | ENST00000542775 | N/A       | AF229166     | N/A            |
| A_33_P3403927  | 10,5165 | 10,7389 | -1,166672795 | ENST00000369886 | 140700    | NM_080621    | SAMD10         |
| A_22_P00006752 | 4,2691  | 4,49153 | -1,166697056 | ENST00000560743 | 101928245 | XR_243144    | LOC101928245   |
| A_23_P111604   | 1,72698 | 1,94948 | -1,166753666 | ENST00000602349 | 30010     | NM_152745    | NXPH1          |
| A_23_P157715   | 13,0718 | 13,2943 | -1,166753666 | ENST00000526183 | 84988     | NM_032902    | PPP1R16A       |
| A_21_P0005746  | 1,63816 | 1,86072 | -1,166802191 | N/A             | N/A       | N/A          | Inc-GRHL2-2    |
| A_33_P3284873  | 2,05325 | 2,27581 | -1,166802191 | N/A             | N/A       | N/A          | N/A            |

|                |         |         |              |                 |           |              |              |
|----------------|---------|---------|--------------|-----------------|-----------|--------------|--------------|
| A_23_P66311    | 5,81109 | 6,03368 | -1,166826454 | ENST00000573804 | 1773      | NM_005223    | DNASE1       |
| A_22_P00018246 | 1,60868 | 1,83135 | -1,166891158 | ENST00000519793 | N/A       | DA442494     | N/A          |
| A_22_P00008177 | 3,6639  | 3,88682 | -1,167093383 | N/A             | N/A       | N/A          | Inc-INPPL1-1 |
| A_33_P3292635  | 1,39949 | 1,62244 | -1,167117652 | N/A             | N/A       | N/A          | Inc-TIGIT-2  |
| A_33_P3254306  | 4,73026 | 4,95322 | -1,167125742 | ENST00000389168 | 201163    | AK126951     | FLCN         |
| A_23_P55802    | 9,06525 | 9,28822 | -1,167133832 | ENST00000444449 | 8907      | NM_032493    | AP1M1        |
| A_22_P00004084 | 1,6483  | 1,87127 | -1,167133832 | N/A             | 102723704 | NR_125932    | LOC102723704 |
| A_24_P247106   | 9,26519 | 9,48819 | -1,167158102 | ENST00000359883 | 50808     | NM_016282    | AK3          |
| A_33_P3215788  | 7,36088 | 7,58388 | -1,167158102 | ENST00000461153 | 375248    | NM_001164315 | ANKRD36      |
| A_22_P00004863 | 1,69866 | 1,9217  | -1,167190463 | ENST00000522744 | 101929528 | NR_105005    | LOC101929528 |
| A_21_P0011179  | 1,42651 | 1,64959 | -1,167222825 | ENST00000577004 | N/A       | N/A          | N/A          |
| A_23_P71644    | 11,9152 | 12,1383 | -1,167239006 | ENST00000476212 | 2189      | NM_004629    | FANCG        |
| A_23_P250054   | 8,7417  | 8,96482 | -1,167255187 | ENST00000497099 | 63891     | NM_022064    | RNF123       |
| A_23_P301336   | 6,33979 | 6,56293 | -1,167271369 | ENST00000613938 | 27291     | NM_014472    | R3HCC1L      |
| A_33_P3378777  | 1,59724 | 1,82042 | -1,167303733 | ENST00000538190 | 100132464 | NR_026642    | FAM99B       |
| A_22_P00016965 | 2,85833 | 3,08151 | -1,167303733 | N/A             | N/A       | N/A          | Inc-TSSK3-1  |
| A_21_P0007526  | 1,67336 | 1,89659 | -1,167344189 | N/A             | N/A       | N/A          | Inc-PDE6H-2  |
| A_21_P0008919  | 10,2116 | 10,435  | -1,167481752 | N/A             | N/A       | N/A          | Inc-IL4R-1   |
| A_33_P3280575  | 5,78759 | 6,011   | -1,167489844 | N/A             | N/A       | CU691877     | N/A          |
| A_22_P00009691 | 1,38335 | 1,60679 | -1,167514122 | ENST00000445568 | N/A       | N/A          | N/A          |
| A_23_P384517   | 10,9688 | 11,1924 | -1,16764361  | ENST00000345003 | 2992      | NM_004130    | GYG1         |
| A_33_P3337574  | 1,55888 | 1,7825  | -1,167659797 | N/A             | 283480    | NR_036486    | FGF14-IT1    |
| A_24_P228130   | 2,34874 | 2,5724  | -1,167692172 | ENST00000621940 | 414062    | NM_001001437 | CCL3L3       |
| A_21_P0002936  | 3,45647 | 3,68013 | -1,167692172 | N/A             | N/A       | N/A          | Inc-KAT2B-2  |
| A_24_P131173   | 4,82916 | 5,05285 | -1,167716454 | ENST00000294889 | 79762     | NM_024709    | C1orf115     |
| A_23_P108303   | 13,6524 | 13,8761 | -1,167724548 | ENST00000601258 | 4701      | NM_005001    | NDUFA7       |
| A_33_P3305117  | 11,2453 | 11,469  | -1,167724548 | N/A             | N/A       | AK092835     | N/A          |
| A_23_P354798   | 7,99882 | 8,22259 | -1,167781208 | ENST00000308197 | 93058     | NM_144576    | COQ10A       |
| A_22_P00014646 | 1,95036 | 2,17415 | -1,167797397 | ENST00000437857 | 57821     | NM_001300968 | CCDC181      |
| A_23_P37910    | 9,11342 | 9,33721 | -1,167797397 | ENST00000395202 | 5595      | NM_002746    | MAPK3        |
| A_23_P312718   | 10,7975 | 11,0213 | -1,167805491 | ENST00000257694 | 50640     | NM_015723    | PNPLA8       |
| A_33_P3456341  | 8,96222 | 9,18606 | -1,16783787  | ENST00000616828 | 113251    | NM_001170804 | LARP4        |
| A_23_P124837   | 9,88246 | 10,1063 | -1,16783787  | ENST00000556356 | 4035      | NM_002332    | LRP1         |

|                |         |         |              |                 |           |              |                |
|----------------|---------|---------|--------------|-----------------|-----------|--------------|----------------|
| A_19_P00806320 | 11,2253 | 11,4492 | -1,16788644  | ENST00000315717 | 10109     | NM_152862    | ARPC2          |
| A_24_P157342   | 11,5434 | 11,7673 | -1,16788644  | ENST00000530758 | 55845     | NM_018462    | BRK1           |
| A_33_P3281807  | 7,22413 | 7,44809 | -1,167935012 | ENST00000397472 | 347862    | NM_182612    | PDDC1          |
| A_23_P205293   | 5,13368 | 5,35768 | -1,167967395 | ENST00000409242 | 55218     | NM_018199    | EXD2           |
| A_23_P142688   | 9,22987 | 9,45388 | -1,16797549  | ENST00000273048 | 79137     | NM_024293    | FAM134A        |
| A_22_P00012740 | 3,96349 | 4,18754 | -1,168007874 | N/A             | N/A       | N/A          | Inc-RABEP2-4   |
| A_23_P149221   | 8,01473 | 8,23882 | -1,168040258 | ENST00000372172 | 79654     | NM_024602    | HECTD3         |
| A_22_P00023463 | 3,71822 | 3,94231 | -1,168040258 | N/A             | N/A       | N/A          | Inc-SEN5-1     |
| A_33_P3226070  | 5,11247 | 5,33663 | -1,168096934 | N/A             | N/A       | XM_006713937 | Inc-CRIPAK-1   |
| A_22_P00011970 | 3,46695 | 3,69115 | -1,16812932  | N/A             | N/A       | AA335815     | Inc-PLA2G2C-2  |
| A_23_P19576    | 15,0953 | 15,3195 | -1,16812932  | ENST00000367569 | 83443     | NM_031287    | SF3B5          |
| A_22_P00007903 | 3,19306 | 3,41727 | -1,168137417 | ENST00000553729 | 100302145 | AF469208     | MIR1247        |
| A_33_P3296592  | 8,25747 | 8,48177 | -1,168210292 | ENST00000334736 | 56946     | NM_001300942 | C11orf30       |
| A_33_P3305458  | 7,32662 | 7,55092 | -1,168210292 | ENST00000375201 | 1388      | NM_004381    | ATF6B          |
| A_33_P3273969  | 10,596  | 10,8203 | -1,168210292 | ENST00000367214 | 9877      | NM_014827    | ZC3H11A        |
| A_33_P3351982  | 10,3311 | 10,5554 | -1,168210292 | ENST00000480666 | 493753    | NM_001008215 | COA5           |
| A_23_P39185    | 8,19416 | 8,41847 | -1,168218389 | ENST00000592573 | 112724    | NM_138412    | RDH13          |
| A_21_P0011602  | 6,08464 | 6,30901 | -1,168266975 | ENST00000582394 | 84669     | NM_032582    | USP32          |
| A_22_P00007835 | 1,35565 | 1,58004 | -1,168283171 | N/A             | 101927942 | XR_249525    | LOC101927942   |
| A_22_P00006603 | 3,87064 | 4,09505 | -1,168299367 | ENST00000558575 | 731223    | NR_038421    | LINC01220      |
| A_21_P0014732  | 3,74125 | 3,96569 | -1,168323661 | ENST00000422968 | N/A       | XR_250281    | N/A            |
| A_23_P48307    | 12,3121 | 12,5366 | -1,168372251 | ENST00000281589 | 5042      | NM_030979    | PABPC3         |
| A_33_P3224426  | 3,97305 | 4,19758 | -1,168396547 | ENST00000513405 | N/A       | N/A          | N/A            |
| A_23_P81262    | 2,1966  | 2,42118 | -1,168437042 | ENST00000194152 | 56131     | NM_018938    | PCDHB4         |
| A_33_P3411204  | 5,13729 | 5,36188 | -1,168445141 | ENST00000495262 | 2651      | NM_001491    | GCNT2          |
| A_24_P379512   | 7,56834 | 7,79304 | -1,168534233 | ENST00000370812 | 10026     | NM_005482    | PIGK           |
| A_23_P66798    | 18,7258 | 18,9505 | -1,168534233 | ENST00000361566 | 3880      | NM_002276    | KRT19          |
| A_22_P00018775 | 1,77577 | 2,00052 | -1,168574732 | ENST00000435552 | N/A       | N/A          | N/A            |
| A_21_P0011914  | 2,60371 | 2,82847 | -1,168582832 | N/A             | N/A       | N/A          | XLOC_I2_008009 |
| A_23_P59654    | 2,8031  | 3,02787 | -1,168590932 | ENST00000222674 | 64111     | NM_022150    | NPVF           |
| A_23_P155969   | 8,10379 | 8,32859 | -1,168615233 | ENST00000510192 | 10733     | NM_014264    | PLK4           |
| A_22_P00011178 | 1,54861 | 1,77342 | -1,168623333 | ENST00000526840 | 101928944 | NR_120570    | LOC101928944   |
| A_23_P502609   | 9,52033 | 9,74518 | -1,168655735 | ENST00000480424 | 9091      | NM_004204    | PIGQ           |



|                |         |         |              |                 |           |              |                |
|----------------|---------|---------|--------------|-----------------|-----------|--------------|----------------|
| A_33_P3412160  | 7,92943 | 8,15429 | -1,168663835 | ENST00000482889 | 23155     | NM_001048210 | CLCC1          |
| A_23_P50146    | 7,25888 | 7,48374 | -1,168663835 | ENST00000389474 | 284266    | NM_213602    | SIGLEC15       |
| A_32_P109572   | 10,7533 | 10,9782 | -1,168696238 | ENST00000600873 | 3191      | NM_001533    | HNRNPL         |
| A_33_P3367855  | 13,7638 | 13,9887 | -1,168696238 | ENST00000222254 | 5296      | NM_005027    | PIK3R2         |
| A_33_P3636590  | 10,1359 | 10,3608 | -1,168696238 | ENST00000307227 | 8801      | NM_003848    | SUCLG2         |
| A_24_P926367   | 12,827  | 13,052  | -1,168777249 | ENST00000354618 | 9967      | NM_005119    | THRAP3         |
| A_22_P00004828 | 1,45483 | 1,67983 | -1,168777249 | N/A             | N/A       | N/A          | Inc-CYB561-2   |
| A_23_P44857    | 1,60299 | 1,82805 | -1,168825858 | ENST00000390455 | N/A       | BC070329     | N/A            |
| A_23_P259272   | 12,485  | 12,7101 | -1,168858265 | ENST00000315436 | 55884     | NM_018639    | WSB2           |
| A_21_P0014651  | 6,18676 | 6,41188 | -1,168874469 | N/A             | 100129203 | NR_110295    | LOC100129203   |
| A_23_P147495   | 8,66872 | 8,89406 | -1,169052727 | ENST00000218147 | 63035     | NM_021946    | BCORL1         |
| A_19_P00322850 | 1,51662 | 1,74202 | -1,169101347 | ENST00000511661 | 102467147 | NR_104664    | LOC102467147   |
| A_24_P419120   | 11,2148 | 11,4402 | -1,169101347 | ENST00000356884 | 23299     | NM_015250    | BICD2          |
| A_33_P3275722  | 6,24916 | 6,47457 | -1,169109451 | ENST00000383415 | 58530     | NM_021246    | LY6G6D         |
| A_33_P3425296  | 2,18085 | 2,40632 | -1,169158074 | ENST00000284414 | 387646    | NR_003525    | LRRC37A6P      |
| A_21_P0003289  | 9,6685  | 9,89405 | -1,169222908 | N/A             | N/A       | N/A          | Inc-MINA-3     |
| A_21_P0000227  | 7,8829  | 8,10848 | -1,169247221 | ENST00000599167 | 84546     | NR_001285    | SNORD35B       |
| A_24_P62615    | 12,5137 | 12,7393 | -1,16926343  | ENST00000372792 | 10487     | NM_006367    | CAP1           |
| A_22_P00018620 | 2,33299 | 2,55867 | -1,16932827  | ENST00000430387 | N/A       | N/A          | N/A            |
| A_22_P00006112 | 8,76121 | 8,98695 | -1,169376902 | N/A             | 441094    | NR_109825    | NR2F1-AS1      |
| A_23_P157914   | 3,96593 | 4,19172 | -1,16941743  | ENST00000377182 | 256691    | NM_153267    | MAMDC2         |
| A_22_P00002313 | 2,06626 | 2,29208 | -1,169441748 | N/A             | 101929653 | NR_110140    | LOC101929653   |
| A_33_P3355783  | 7,87743 | 8,10332 | -1,169498491 | N/A             | 100129473 | XR_247231    | LOC100129473   |
| A_23_P144531   | 15,1704 | 15,3963 | -1,169506597 | N/A             | 80216     | AK026323     | ALPK1          |
| A_23_P150009   | 10,6922 | 10,9181 | -1,169506597 | ENST00000487315 | 84287     | NM_198046    | ZDHHC16        |
| A_23_P16225    | 5,57391 | 5,79982 | -1,169514704 | ENST00000549706 | 54831     | NM_017682    | BEST2          |
| A_22_P00003844 | 5,78637 | 6,01234 | -1,169563343 | ENST00000427333 | 101927541 | NR_109943    | LINC01273      |
| A_33_P3385765  | 11,6991 | 11,9251 | -1,169587664 | ENST00000343949 | 284390    | NM_001012753 | ZNF763         |
| A_21_P0013250  | 8,25388 | 8,47991 | -1,169611985 | N/A             | N/A       | N/A          | XL0C_I2_013485 |
| A_33_P7289027  | 9,38045 | 9,60649 | -1,169620092 | N/A             | 401320    | NR_038889    | LOC401320      |
| A_33_P3290328  | 8,52682 | 8,75291 | -1,169660629 | ENST00000292782 | 54165     | NM_020640    | DCUN1D1        |
| A_21_P0007360  | 4,31222 | 4,53832 | -1,169668737 | N/A             | N/A       | N/A          | Inc-RCOR2-1    |
| A_33_P3249529  | 10,4971 | 10,7232 | -1,169668737 | ENST00000304743 | 22990     | NM_014982    | PCNX           |

|                |         |         |              |                 |           |              |                    |
|----------------|---------|---------|--------------|-----------------|-----------|--------------|--------------------|
| A_22_P00017039 | 6,15882 | 6,38495 | -1,169693059 | ENST00000605506 | N/A       | N/A          | N/A                |
| A_22_P00010809 | 3,22067 | 3,44686 | -1,169741707 | N/A             | N/A       | N/A          | Inc-NMNAT1-1       |
| A_23_P33847    | 1,53269 | 1,75888 | -1,169741707 | ENST00000340666 | 6853      | NM_006950    | SYN1               |
| A_33_P3752697  | 12,6622 | 12,8884 | -1,169749815 | N/A             | N/A       | AK098235     | N/A                |
| A_19_P00804777 | 10,84   | 11,0663 | -1,169830898 | ENST00000586954 | 148189    | N/A          | LINC00662          |
| A_32_P91902    | 10,751  | 10,9773 | -1,169830898 | ENST00000372164 | 81619     | NM_030927    | TSPAN14            |
| A_24_P210637   | 6,40169 | 6,62809 | -1,169911988 | ENST00000306243 | 113189    | NM_130468    | CHST14             |
| A_21_P0006329  | 2,58318 | 2,80959 | -1,169920097 | N/A             | N/A       | N/A          | Inc-C9orf50-1      |
| A_33_P3399291  | 12,9818 | 13,2083 | -1,169993082 | ENST00000493209 | 2987      | NM_001242840 | GUK1               |
| A_23_P63660    | 14,4302 | 14,6568 | -1,170074183 | ENST00000615554 | 84293     | NM_032333    | FAM213A            |
| A_23_P135690   | 18,6648 | 18,8914 | -1,170074183 | ENST00000589138 | 54862     | AK023399     | CC2D1A             |
| A_24_P82466    | 1,8154  | 2,04204 | -1,170106625 | ENST00000437099 | 8522      | NM_201433    | GAS7               |
| A_22_P00024714 | 3,11848 | 3,34512 | -1,170106625 | N/A             | N/A       | N/A          | Inc-MYL4-2         |
| A_23_P163697   | 8,27361 | 8,50028 | -1,170130957 | ENST00000355377 | 51760     | NM_016524    | SYT17              |
| A_22_P00018680 | 10,5497 | 10,7766 | -1,170317518 | ENST00000437967 | N/A       | N/A          | N/A                |
| A_21_P0000600  | 5,78159 | 6,00849 | -1,170317518 | ENST00000476548 | 11020     | NR_033531    | IFT27              |
| A_21_P0013780  | 4,20141 | 4,42836 | -1,170358079 | N/A             | 100131755 | NR_028407    | ARMCX4             |
| A_19_P00809902 | 9,58132 | 9,8083  | -1,170382416 | N/A             | 100506380 | N/A          | LINC01006          |
| A_23_P14340    | 10,2741 | 10,5011 | -1,170398641 | ENST00000603544 | 9692      | NM_014672    | KIAA0391           |
| A_21_P0010044  | 9,85106 | 10,0781 | -1,170431092 | N/A             | N/A       | N/A          | Inc-PLTP-1         |
| A_23_P379630   | 8,62259 | 8,84963 | -1,170431092 | ENST00000288439 | 124565    | NM_138570    | SLC38A10           |
| A_33_P3211679  | 7,12615 | 7,35329 | -1,170512223 | ENST00000261177 | 441631    | NM_001080509 | TSPAN11            |
| A_21_P0010269  | 3,24119 | 3,46835 | -1,17052845  | N/A             | N/A       | N/A          | Inc-AF165138.7.1-3 |
| A_21_P0005884  | 1,46718 | 1,69437 | -1,170552791 | N/A             | 101927413 | XR_242419    | LOC101927413       |
| A_23_P21560    | 5,50805 | 5,73544 | -1,170715075 | ENST00000406434 | 81553     | NM_030797    | FAM49A             |
| A_32_P94087    | 15,7083 | 15,9357 | -1,17072319  | ENST00000491826 | 402176    | NR_027153    | RPL21P44           |
| A_22_P00002553 | 13,9183 | 14,1458 | -1,170804341 | ENST00000580828 | 677842    | CD050382     | SNORA76C           |
| A_33_P3228762  | 12,5946 | 12,8221 | -1,170804341 | ENST00000324194 | 55186     | NM_001104647 | SLC25A36           |
| A_24_P20200    | 9,52992 | 9,75743 | -1,170812456 | ENST00000404460 | 55041     | NM_001267066 | PLEKHB2            |
| A_21_P0013056  | 5,41913 | 5,6467  | -1,17086115  | N/A             | N/A       | N/A          | XLOC_I2_012847     |
| A_33_P3297626  | 3,58961 | 3,81723 | -1,17090173  | ENST00000356068 | N/A       | N/A          | N/A                |
| A_21_P0010684  | 7,35114 | 7,57876 | -1,17090173  | ENST00000457084 | N/A       | N/A          | N/A                |
| A_22_P00013842 | 1,41228 | 1,63992 | -1,170917962 | ENST00000519755 | N/A       | N/A          | N/A                |

|                |         |         |              |                 |           |              |               |
|----------------|---------|---------|--------------|-----------------|-----------|--------------|---------------|
| A_24_P137582   | 8,52757 | 8,75532 | -1,171007244 | ENST00000427854 | 84340     | NM_170681    | GFM2          |
| A_21_P0011667  | 2,29903 | 2,52678 | -1,171007244 | ENST00000576789 | 23370     | XM_005272464 | ARHGEF18      |
| A_33_P3304576  | 3,68304 | 3,9108  | -1,17101536  | ENST00000399676 | 439915    | NM_001001480 | KRTAP5-5      |
| A_22_P00012938 | 4,89183 | 5,1196  | -1,171023477 | N/A             | N/A       | N/A          | Inc-RCSD1-1   |
| A_23_P147383   | 9,82381 | 10,0516 | -1,171039711 | ENST00000527144 | 8733      | NM_003801    | GPAA1         |
| A_33_P3383331  | 6,30021 | 6,52804 | -1,17107218  | ENST00000370156 | 23443     | NM_012243    | SLC35A3       |
| A_23_P99452    | 5,88834 | 6,11621 | -1,171104649 | ENST00000544455 | 675       | NM_000059    | BRCA2         |
| A_33_P3254412  | 5,78328 | 6,01126 | -1,171193945 | ENST00000361658 | 9706      | NM_014683    | ULK2          |
| A_23_P126623   | 11,739  | 11,967  | -1,171210181 | ENST00000498356 | 5226      | NM_002631    | PGD           |
| A_33_P3377705  | 1,66162 | 1,88963 | -1,171218299 | ENST00000246222 | N/A       | N/A          | N/A           |
| A_23_P363831   | 7,7166  | 7,94466 | -1,171258891 | ENST00000532927 | 26273     | NM_033406    | FBXO3         |
| A_33_P3259917  | 3,07371 | 3,30178 | -1,17126701  | ENST00000340880 | 114770    | NM_052890    | PGLYRP2       |
| A_24_P303145   | 7,34423 | 7,57235 | -1,171307604 | ENST00000284268 | 56172     | NM_054027    | ANKH          |
| A_22_P00009864 | 8,64939 | 8,87758 | -1,171364437 | ENST00000584867 | N/A       | BU568811     | N/A           |
| A_33_P3286349  | 6,51146 | 6,73968 | -1,171388795 | ENST00000587789 | 352909    | NM_001256716 | DNAAF3        |
| A_21_P0006925  | 4,32148 | 4,54976 | -1,171437513 | N/A             | N/A       | N/A          | Inc-SEC23IP-1 |
| A_22_P00010968 | 4,71254 | 4,94082 | -1,171437513 | ENST00000412426 | N/A       | N/A          | N/A           |
| A_22_P00018663 | 1,3561  | 1,58443 | -1,171478113 | N/A             | N/A       | N/A          | Inc-PPFIA2-1  |
| A_22_P00020149 | 3,42805 | 3,65639 | -1,171486233 | ENST00000447384 | N/A       | BC040729     | N/A           |
| A_24_P919899   | 5,38945 | 5,61782 | -1,171510594 | ENST00000576409 | 64756     | AF111705     | ATPAF1        |
| A_24_P29733    | 8,87202 | 9,10043 | -1,171543075 | ENST00000265741 | 5218      | NM_012395    | CDK14         |
| A_33_P3328772  | 5,29051 | 5,51893 | -1,171551196 | N/A             | 54477     | NM_001190860 | PLEKHA5       |
| A_22_P00002419 | 1,55443 | 1,7829  | -1,171591799 | ENST00000548775 | 102724917 | CF593422     | LOC102724917  |
| A_24_P173325   | 16,3942 | 16,6228 | -1,171697375 | ENST00000598780 | 7311      | NM_001033930 | UBA52         |
| A_33_P3335710  | 1,54091 | 1,76951 | -1,171697375 | N/A             | 727775    | AK092129     | LOC727775     |
| A_23_P259874   | 10,8032 | 11,0318 | -1,171697375 | ENST00000309934 | 26984     | NM_012430    | SEC22A        |
| A_21_P0010158  | 3,12701 | 3,35562 | -1,171705497 | ENST00000424837 | 102724502 | XR_425265    | LOC102724502  |
| A_23_P28375    | 7,5941  | 7,82278 | -1,17176235  | ENST00000282570 | 64395     | NM_178439    | GMCL1         |
| A_23_P211136   | 7,68779 | 7,91648 | -1,171770472 | ENST00000333229 | 54014     | NM_018963    | BRWD1         |
| A_22_P00016387 | 3,29777 | 3,52652 | -1,171819205 | ENST00000444963 | N/A       | N/A          | N/A           |
| A_23_P250485   | 4,62667 | 4,85543 | -1,171827328 | ENST00000291416 | 55223     | NM_018207    | TRIM62        |
| A_33_P3245631  | 4,26468 | 4,49352 | -1,171892309 | ENST00000524442 | 22996     | NM_001297662 | TTC39A        |
| A_24_P89426    | 6,65786 | 6,88681 | -1,171981665 | ENST00000375916 | 55937     | NM_019101    | APOM          |

|                |         |         |              |                 |           |                   |                      |
|----------------|---------|---------|--------------|-----------------|-----------|-------------------|----------------------|
| A_33_P3378354  | 4,10355 | 4,33254 | -1,17201416  | ENST00000389600 | 2974      | N/A               | GUCY1B2              |
| A_33_P3344209  | 1,59561 | 1,8246  | -1,17201416  | ENST00000382776 | 79844     | NM_024786         | ZDHC11               |
| A_23_P320185   | 14,0473 | 14,2763 | -1,172022284 | ENST00000593233 | 126328    | NM_175614         | NDUFA11              |
| A_33_P3232493  | 6,59161 | 6,82062 | -1,172030408 | N/A             | N/A       | AK130794          | N/A                  |
| A_23_P122001   | 9,57554 | 9,80461 | -1,172079152 | ENST00000265081 | 4437      | NM_002439         | MSH3                 |
| A_21_P0005208  | 4,61919 | 4,84827 | -1,172087276 | ENST00000436915 | N/A       | N/A               | N/A                  |
| A_23_P60283    | 9,52897 | 9,75807 | -1,172103525 | ENST00000485042 | 7507      | NM_000380         | XPA                  |
| A_22_P00005598 | 4,76091 | 4,99005 | -1,172136023 | ENST00000520146 | N/A       | DA009597          | N/A                  |
| A_33_P3391418  | 8,67623 | 8,90541 | -1,172168522 | ENST00000264728 | 55287     | NM_001284407      | TMEM40               |
| A_24_P118591   | 16,0782 | 16,3074 | -1,172184772 | ENST00000404609 | N/A       | N/A               | N/A                  |
| A_23_P206856   | 10,6969 | 10,9261 | -1,172184772 | ENST00000262144 | 79726     | NM_030581         | WDR59                |
| A_21_P0012320  | 5,72295 | 5,95219 | -1,172217272 | ENST00000454268 | 101929374 | TCONS_I2_00018192 | LOC101929374         |
| A_21_P0010978  | 7,51399 | 7,74327 | -1,172249773 | ENST00000501122 | N/A       | N/A               | N/A                  |
| A_33_P3351914  | 13,3098 | 13,5391 | -1,172266024 | ENST00000485344 | 4705      | NM_004544         | NDUFA10              |
| A_23_P13899    | 16,7993 | 17,0286 | -1,172266024 | ENST00000474249 | 2597      | NM_002046         | GAPDH                |
| A_22_P00013508 | 2,90339 | 3,13274 | -1,172306653 | N/A             | 102725057 | XR_424658         | LOC102725057         |
| A_23_P153256   | 9,24333 | 9,47277 | -1,172379787 | ENST00000598770 | 374928    | XM_005258879      | ZNF773               |
| A_24_P126471   | 7,36571 | 7,5952  | -1,172420419 | ENST00000415287 | 56996     | NM_020246         | SLC12A9              |
| A_22_P00016610 | 1,68659 | 1,9161  | -1,172436673 | ENST00000549744 | N/A       | N/A               | N/A                  |
| A_33_P3333045  | 4,16164 | 4,39119 | -1,17246918  | ENST00000467600 | 11159     | BC040495          | RABL2A               |
| A_23_P12816    | 8,87758 | 9,10714 | -1,172477307 | ENST00000394036 | 3070      | NM_018063         | HELLS                |
| A_22_P00013906 | 5,98906 | 6,21862 | -1,172477307 | ENST00000415959 | 414243    | NR_073447         | LINC00595            |
| A_21_P0009096  | 2,96033 | 3,18992 | -1,172501688 | N/A             | N/A       | N/A               | Inc-CTD-3203P2.2.1-1 |
| A_24_P318134   | 5,74486 | 5,97446 | -1,172509815 | ENST00000257940 | 84872     | NM_032786         | ZC3H10               |
| A_22_P00005417 | 2,56781 | 2,79741 | -1,172509815 | ENST00000431557 | N/A       | AF052121          | N/A                  |
| A_22_P00018172 | 5,32282 | 5,55248 | -1,17255858  | ENST00000609714 | 255403    | NM_001289930      | ZNF718               |
| A_23_P133904   | 1,62492 | 1,85459 | -1,172566707 | ENST00000376191 | 401250    | NM_001011700      | MCCD1                |
| A_33_P3260575  | 8,93751 | 9,16725 | -1,172623602 | ENST00000372842 | 51148     | NM_016174         | CERCAM               |
| A_23_P106602   | 1,8811  | 2,11101 | -1,172761786 | ENST00000262424 | 83716     | NM_031476         | CRISPLD2             |
| A_21_P0001622  | 1,99552 | 2,22544 | -1,172769915 | N/A             | N/A       | N/A               | Inc-ANGEL2-1         |
| A_33_P3256303  | 3,26376 | 3,49368 | -1,172769915 | ENST00000388962 | 6404      | NM_001206609      | SELPLG               |
| A_23_P102611   | 3,414   | 3,64393 | -1,172778044 | ENST00000372868 | 8839      | NM_003881         | WISP2                |
| A_21_P0001267  | 3,20882 | 3,43882 | -1,172834949 | ENST00000475078 | 26099     | N/A               | SZRD1                |

|                |         |         |              |                 |           |              |               |
|----------------|---------|---------|--------------|-----------------|-----------|--------------|---------------|
| A_23_P215534   | 5,05972 | 5,28973 | -1,172843079 | ENST00000307403 | 155435    | NM_053043    | RBM33         |
| A_33_P3272117  | 9,34391 | 9,57392 | -1,172843079 | ENST00000583503 | 79058     | NM_024083    | ASPSCR1       |
| A_23_P367676   | 10,823  | 11,0532 | -1,17299755  | ENST00000394949 | 25942     | NM_015477    | SIN3A         |
| A_24_P306136   | 7,04018 | 7,27039 | -1,173005681 | ENST00000251879 | 57589     | NM_001135920 | RIC1          |
| A_24_P153701   | 1,57958 | 1,80979 | -1,173005681 | ENST00000542632 | 646982    | NR_024505    | LINC00598     |
| A_23_P50508    | 4,22412 | 4,45436 | -1,173030073 | ENST00000594790 | 8605      | NM_003706    | PLA2G4C       |
| A_21_P0008221  | 1,73138 | 1,96166 | -1,173062597 | N/A             | N/A       | N/A          | Inc-TUBGCP3-5 |
| A_23_P70571    | 11,0955 | 11,3259 | -1,173160173 | ENST00000612440 | 7922      | NM_006979    | SLC39A7       |
| A_22_P00013251 | 2,40318 | 2,63362 | -1,173192701 | N/A             | N/A       | DB475605     | Inc-ROPN1B-2  |
| A_33_P3376976  | 1,53988 | 1,77035 | -1,173217097 | N/A             | 646813    | AB231713     | LOC646813     |
| A_23_P36611    | 5,37116 | 5,60168 | -1,173257758 | ENST00000357310 | 317       | NM_181861    | APAF1         |
| A_22_P00003121 | 4,41391 | 4,64444 | -1,17326589  | ENST00000452377 | N/A       | N/A          | N/A           |
| A_24_P321752   | 7,60478 | 7,83533 | -1,173282155 | ENST00000298832 | 23093     | NM_015072    | TTL5          |
| A_23_P416314   | 12,5366 | 12,7673 | -1,17340415  | ENST00000536887 | 117245    | NM_054108    | HRASLS5       |
| A_23_P14886    | 12,8189 | 13,0496 | -1,17340415  | ENST00000527168 | 84572     | NM_032520    | GNPTG         |
| A_22_P00002045 | 6,35999 | 6,59072 | -1,173428551 | ENST00000614488 | 9522      | NM_004866    | SCAMP1        |
| A_33_P3326530  | 5,28393 | 5,51469 | -1,173452952 | ENST00000545287 | 55288     | NM_001033567 | RHOT1         |
| A_23_P214474   | 13,3172 | 13,548  | -1,173485487 | ENST00000487182 | 100188893 | NM_001134493 | TOMM6         |
| A_21_P0012503  | 1,64451 | 1,87532 | -1,173493621 | ENST00000469812 | N/A       | N/A          | N/A           |
| A_33_P3231047  | 1,65329 | 1,8841  | -1,173493621 | ENST00000324364 | 79635     | NM_001142683 | CCDC121       |
| A_33_P3282213  | 1,51342 | 1,74431 | -1,173558695 | N/A             | N/A       | N/A          | N/A           |
| A_23_P105794   | 7,12552 | 7,35644 | -1,173583099 | ENST00000476830 | 94240     | NM_033255    | EPSTI1        |
| A_21_P0006169  | 3,25742 | 3,48836 | -1,173599369 | ENST00000415801 | 100506834 | NR_049794    | LOC100506834  |
| A_23_P2683     | 9,98883 | 10,2198 | -1,173623773 | ENST00000380650 | 79657     | NM_024604    | RPAP3         |
| A_21_P0000108  | 12,4472 | 12,6782 | -1,173648178 | ENST00000536684 | 100463486 | NM_001190702 | MTRNR2L8      |
| A_24_P15292    | 7,47127 | 7,70228 | -1,173656313 | ENST00000469904 | 83932     | NM_032018    | SPRTN         |
| A_33_P3298024  | 10,6738 | 10,9049 | -1,173729532 | ENST00000427699 | 8714      | NM_001144070 | ABCC3         |
| A_23_P398770   | 8,7353  | 8,96641 | -1,173737668 | ENST00000307063 | 114825    | NM_001130864 | PWWP2A        |
| A_22_P00017556 | 1,52424 | 1,75535 | -1,173737668 | N/A             | N/A       | N/A          | Inc-WDR45L-2  |
| A_33_P3406899  | 11,5238 | 11,755  | -1,173810892 | ENST00000613405 | 22906     | NM_001265608 | TRAK1         |
| A_22_P00006493 | 1,43004 | 1,66128 | -1,173843437 | N/A             | N/A       | N/A          | Inc-FGF23-1   |
| A_33_P3352687  | 12,8957 | 13,127  | -1,173892257 | ENST00000622077 | 100133161 | NR_028326    | LINC01001     |
| A_33_P3337627  | 9,66348 | 9,89482 | -1,173924805 | ENST00000344327 | 7225      | NM_004621    | TRPC6         |

|                |         |         |              |                 |           |              |                |
|----------------|---------|---------|--------------|-----------------|-----------|--------------|----------------|
| A_23_P68628    | 9,63328 | 9,86463 | -1,173932942 | ENST00000485399 | 63941     | NM_031232    | NECAB3         |
| A_23_P164313   | 7,97824 | 8,20978 | -1,174087556 | ENST00000453408 | 50488     | NM_153827    | MINK1          |
| A_33_P3390713  | 1,47043 | 1,70197 | -1,174087556 | N/A             | N/A       | N/A          | N/A            |
| A_23_P385246   | 8,85293 | 9,08453 | -1,174136386 | ENST00000490264 | 200845    | NM_153331    | KCTD6          |
| A_23_P139028   | 3,76596 | 3,99758 | -1,174152663 | ENST00000260264 | 25833     | NM_014352    | POU2F3         |
| A_24_P323815   | 10,7017 | 10,9334 | -1,174217774 | ENST00000482517 | 23077     | NM_015057    | MYCBP2         |
| A_22_P00015420 | 3,25968 | 3,49139 | -1,174225913 | ENST00000581153 | N/A       | N/A          | N/A            |
| A_21_P0008403  | 9,20808 | 9,43983 | -1,17425847  | N/A             | N/A       | N/A          | Inc-C14orf79-2 |
| A_33_P3241596  | 13,2263 | 13,4581 | -1,174299167 | N/A             | N/A       | N/A          | N/A            |
| A_23_P35684    | 8,34102 | 8,57284 | -1,174315447 | ENST00000361976 | 22876     | NM_014937    | INPP5F         |
| A_22_P00001889 | 1,65082 | 1,88265 | -1,174323587 | ENST00000416845 | N/A       | N/A          | N/A            |
| A_33_P3402056  | 6,15465 | 6,38648 | -1,174323587 | ENST00000619252 | 389831    | NM_001242480 | LOC389831      |
| A_33_P3420083  | 1,46219 | 1,69406 | -1,174356146 | N/A             | 85452     | AK094642     | CFAP74         |
| A_33_P3216442  | 5,80113 | 6,03302 | -1,174372426 | ENST00000433947 | 1302      | NM_080680    | COL11A2        |
| A_22_P00007158 | 1,58501 | 1,8169  | -1,174372426 | N/A             | N/A       | N/A          | Inc-GNB1L-1    |
| A_21_P0013932  | 8,74893 | 8,98084 | -1,174388707 | ENST00000603395 | N/A       | N/A          | N/A            |
| A_33_P3221234  | 3,94352 | 4,17548 | -1,174429409 | ENST00000359942 | 3652      | NM_001145349 | IPP            |
| A_23_P131801   | 2,59666 | 2,82868 | -1,174478253 | ENST00000373077 | 10110     | NM_170693    | SGK2           |
| A_22_P00015473 | 1,71576 | 1,94778 | -1,174478253 | ENST00000551174 | 101929084 | NR_110103    | LOC101929084   |
| A_32_P135517   | 2,87326 | 3,1053  | -1,174494535 | N/A             | N/A       | AK123826     | Inc-CHST4-3    |
| A_33_P6559885  | 4,92852 | 5,1606  | -1,174527099 | ENST00000478086 | 9849      | NM_001278524 | ZNF518A        |
| A_33_P3377364  | 15,3575 | 15,5896 | -1,174543382 | ENST00000450894 | 3691      | NM_000213    | ITGB4          |
| A_21_P0000059  | 1,56965 | 1,8018  | -1,174584089 | ENST00000421988 | 164668    | NM_001166004 | APOBEC3H       |
| A_24_P381555   | 8,06386 | 8,29607 | -1,174632939 | ENST00000621421 | 10284     | NM_005870    | SAP18          |
| A_22_P00018539 | 8,27505 | 8,50731 | -1,17467365  | N/A             | 101928085 | NR_121674    | ERICH6-AS1     |
| A_33_P3362952  | 6,84035 | 7,07268 | -1,174730647 | N/A             | N/A       | AK125981     | Inc-TBC1D29-1  |
| A_21_P0006345  | 3,96087 | 4,19321 | -1,174738789 | N/A             | N/A       | N/A          | Inc-TMEM215-1  |
| A_19_P00812944 | 3,32644 | 3,55881 | -1,174763218 | N/A             | N/A       | N/A          | XLOC_I2_001408 |
| A_33_P3231382  | 1,63994 | 1,87237 | -1,174812076 | ENST00000313865 | N/A       | AF452715     | N/A            |
| A_21_P0006375  | 2,19382 | 2,42627 | -1,174828362 | ENST00000409414 | 375791    | NM_199001    | CYSRT1         |
| A_21_P0014716  | 10,5893 | 10,8219 | -1,174950518 | ENST00000438796 | N/A       | AK055819     | N/A            |
| A_22_P00010721 | 1,56603 | 1,79869 | -1,174999384 | N/A             | N/A       | BX115293     | Inc-NHLH2-2    |
| A_33_P3422595  | 1,51789 | 1,75056 | -1,175007528 | ENST00000390343 | N/A       | AK291611     | N/A            |

|                |         |         |              |                 |           |              |                |
|----------------|---------|---------|--------------|-----------------|-----------|--------------|----------------|
| A_21_P0008832  | 2,43742 | 2,67013 | -1,175040107 | ENST00000562031 | 101929221 | NR_120352    | C15orf59-AS1   |
| A_21_P0007725  | 1,56205 | 1,79479 | -1,175064541 | N/A             | N/A       | N/A          | Inc-KCNC2-2    |
| A_22_P00009577 | 8,97063 | 9,20339 | -1,175080831 | ENST00000564248 | N/A       | AJ420543     | N/A            |
| A_22_P00007555 | 1,70423 | 1,93708 | -1,175154139 | N/A             | N/A       | N/A          | Inc-HAS2-1     |
| A_21_P0010215  | 4,73179 | 4,96465 | -1,175162284 | ENST00000424921 | 101928576 | XR_244329    | LOC101928576   |
| A_24_P105391   | 7,13839 | 7,37126 | -1,17517043  | ENST00000372517 | 114625    | NM_001017922 | ERMAP          |
| A_33_P3378835  | 14,1959 | 14,4288 | -1,175194867 | ENST00000262613 | 9368      | NM_004252    | SLC9A3R1       |
| A_21_P0007016  | 1,61863 | 1,85159 | -1,175243743 | N/A             | N/A       | N/A          | Inc-SORCS1-1   |
| A_33_P6818718  | 6,24671 | 6,47967 | -1,175243743 | N/A             | 100507034 | NR_038284    | PITRM1-AS1     |
| A_24_P128163   | 1,50733 | 1,74033 | -1,175276328 | ENST00000367995 | 9507      | BC030812     | ADAMTS4        |
| A_19_P00806486 | 1,74431 | 1,97731 | -1,175276328 | N/A             | N/A       | N/A          | XLOC_I2_009140 |
| A_23_P160992   | 5,37777 | 5,6108  | -1,175300768 | ENST00000367749 | 2329      | NM_002022    | FMO4           |
| A_19_P00806593 | 4,21894 | 4,452   | -1,175325208 | N/A             | N/A       | N/A          | Inc-MAPK13-1   |
| A_23_P156531   | 14,7138 | 14,9469 | -1,175357795 | ENST00000462957 | 5689      | NM_002793    | PSMB1          |
| A_24_P331373   | 4,76958 | 5,0027  | -1,175374089 | ENST00000493099 | 83606     | NM_031444    | GUCD1          |
| A_22_P00019337 | 3,86928 | 4,10242 | -1,175390383 | N/A             | N/A       | N/A          | Inc-UNC5CL-3   |
| A_33_P3311994  | 1,46073 | 1,69391 | -1,175422973 | ENST00000309447 | 57495     | NM_001144990 | NWD2           |
| A_33_P3317123  | 13,4122 | 13,6454 | -1,175439268 | ENST00000465076 | 9632      | NM_004922    | SEC24C         |
| A_23_P56314    | 15,927  | 16,1602 | -1,175439268 | ENST00000593029 | 10975     | NM_006830    | UQCR11         |
| A_23_P213085   | 6,72796 | 6,96128 | -1,175537042 | ENST00000432059 | 84068     | NM_001300842 | SLC10A7        |
| A_33_P3293346  | 7,06411 | 7,29744 | -1,17554519  | ENST00000452413 | 51133     | NM_016121    | KCTD3          |
| A_22_P00007755 | 1,53201 | 1,7654  | -1,175594081 | N/A             | 402779    | NR_038372    | CSMD2-AS1      |
| A_33_P3384477  | 1,73174 | 1,96515 | -1,175610378 | N/A             | N/A       | AK126351     | Inc-CCDC148-1  |
| A_22_P00018387 | 2,95483 | 3,18827 | -1,175634824 | N/A             | 100289509 | NR_045118    | KCNIP2-AS1     |
| A_32_P125832   | 6,27897 | 6,51242 | -1,175642973 | ENST00000583490 | 100128893 | NR_102763    | GATA6-AS1      |
| A_22_P00003310 | 1,51077 | 1,74423 | -1,175651122 | N/A             | 100505696 | NR_046084    | SH3BP5-AS1     |
| A_23_P43326    | 11,9835 | 12,217  | -1,175683719 | N/A             | 10558     | NM_006415    | SPTLC1         |
| A_33_P3294886  | 1,73278 | 1,96634 | -1,175732615 | ENST00000463641 | 6293      | N/A          | VPS52          |
| A_23_P37410    | 1,46827 | 1,70187 | -1,175765214 | ENST00000260433 | 1588      | NM_031226    | CYP19A1        |
| A_22_P00000004 | 4,61713 | 4,85073 | -1,175765214 | N/A             | N/A       | AK023948     | Inc-WISP1-1    |
| A_33_P3297030  | 7,25754 | 7,49116 | -1,175781513 | ENST00000570359 | 55275     | AK128440     | VPS53          |
| A_33_P3299696  | 1,52942 | 1,76313 | -1,175854865 | ENST00000445385 | 389762    | NM_207416    | SPATA31D3      |
| A_32_P20523    | 10,2808 | 10,5146 | -1,175928221 | ENST00000317005 | 166815    | NM_145715    | TIGD2          |

|                |         |         |              |                 |        |              |                |
|----------------|---------|---------|--------------|-----------------|--------|--------------|----------------|
| A_22_P00002500 | 4,83932 | 5,07315 | -1,175952674 | N/A             | N/A    | BC017893     | Inc-C16orf61-2 |
| A_33_P3301097  | 2,04901 | 2,28292 | -1,176017884 | N/A             | N/A    | N/A          | N/A            |
| A_33_P3379811  | 1,59948 | 1,8334  | -1,176026036 | ENST00000549828 | 196415 | NM_001101339 | C12orf77       |
| A_33_P3298661  | 8,43131 | 8,66536 | -1,176132011 | ENST00000544464 | 7707   | NM_021964    | ZNF148         |
| A_23_P340251   | 12,1162 | 12,3503 | -1,176172774 | ENST00000429861 | 5862   | NM_002865    | RAB2A          |
| A_33_P3335576  | 6,66178 | 6,89592 | -1,176205384 | N/A             | N/A    | N/A          | N/A            |
| A_32_P151366   | 9,30722 | 9,54146 | -1,176286916 | ENST00000606117 | 23408  | NM_012241    | SIRT5          |
| A_33_P3318681  | 1,62053 | 1,85483 | -1,176335837 | ENST00000359440 | 342125 | NM_001080532 | TMC3           |
| A_32_P166693   | 10,854  | 11,0883 | -1,176335837 | ENST00000311127 | 57493  | NM_020733    | HEG1           |
| A_33_P3405384  | 4,64082 | 4,87513 | -1,176343991 | ENST00000422365 | 157777 | NM_173518    | MCMDC2         |
| A_32_P185481   | 4,51765 | 4,75197 | -1,176352145 | N/A             | N/A    | AK127494     | N/A            |
| A_24_P37939    | 7,10695 | 7,34129 | -1,176368452 | ENST00000401695 | 6208   | N/A          | RPS14          |
| A_33_P3278043  | 5,51671 | 5,7511  | -1,176409223 | ENST00000394876 | 93587  | NM_152292    | TRMT10A        |
| A_22_P00022795 | 1,59182 | 1,82622 | -1,176417377 | ENST00000539105 | N/A    | BX108990     | N/A            |
| A_23_P412392   | 9,78977 | 10,0242 | -1,17644184  | ENST00000578049 | 9554   | NM_004892    | SEC22B         |
| A_33_P3353030  | 8,94978 | 9,18422 | -1,176449995 | ENST00000296099 | 7349   | NM_003353    | UCN            |
| A_23_P14072    | 14,3886 | 14,6231 | -1,176498923 | ENST00000550170 | 3856   | NM_002273    | KRT8           |
| A_23_P54649    | 13,7049 | 13,9395 | -1,176580475 | ENST00000345057 | 8717   | NM_003789    | TRADD          |
| A_33_P3372332  | 13,9461 | 14,1807 | -1,176580475 | ENST00000562209 | 1535   | NM_000101    | CYBA           |
| A_23_P124044   | 10,2728 | 10,5075 | -1,176662032 | ENST00000527658 | 10522  | NM_021008    | DEAF1          |
| A_23_P28590    | 10,1547 | 10,3894 | -1,176662032 | ENST00000488516 | 79675  | NM_024622    | FASTKD1        |
| A_21_P0013471  | 5,29545 | 5,5302  | -1,176702812 | N/A             | N/A    | N/A          | XLOC_I2_014171 |
| A_21_P0002932  | 8,92478 | 9,15955 | -1,176719125 | N/A             | N/A    | N/A          | Inc-FBLN2-1    |
| A_22_P00010686 | 8,73722 | 8,97206 | -1,176776221 | ENST00000307892 | 80777  | NM_030579    | CYB5B          |
| A_33_P3230339  | 9,81216 | 10,047  | -1,176776221 | ENST00000461970 | 7270   | NM_007344    | TTF1           |
| A_22_P00014206 | 1,76259 | 1,99744 | -1,176784378 | N/A             | N/A    | BC026287     | Inc-SEC16B.1-4 |
| A_22_P00003321 | 8,5923  | 8,82721 | -1,17683332  | N/A             | N/A    | CD674525     | Inc-CARHSP1-1  |
| A_22_P00000927 | 1,84273 | 2,07764 | -1,17683332  | N/A             | 613126 | NR_122109    | CYP51A1-AS1    |
| A_23_P70998    | 9,19106 | 9,42598 | -1,176841477 | ENST00000406829 | 729852 | NM_001302350 | UMAD1          |
| A_22_P00020307 | 2,33161 | 2,56654 | -1,176849635 | N/A             | N/A    | N/A          | Inc-FGD3-1     |
| A_22_P00010748 | 2,24938 | 2,48439 | -1,176914895 | N/A             | N/A    | N/A          | Inc-NKAIN3-1   |
| A_24_P173566   | 2,66347 | 2,89854 | -1,176963842 | ENST00000390319 | N/A    | X57818       | N/A            |
| A_21_P0010729  | 4,22509 | 4,46021 | -1,177004634 | ENST00000578899 | 388692 | NR_111933    | LOC388692      |



|                |         |         |              |                 |           |              |                |
|----------------|---------|---------|--------------|-----------------|-----------|--------------|----------------|
| A_33_P3414127  | 6,59981 | 6,83496 | -1,177029109 | ENST00000588993 | 339324    | NM_001012756 | ZNF260         |
| A_33_P3301778  | 1,84326 | 2,07845 | -1,177061744 | ENST00000477615 | 100289017 | NR_024346    | MOXD2P         |
| A_21_P0004313  | 3,314   | 3,54929 | -1,177143334 | N/A             | N/A       | N/A          | Inc-PPARGC1B-1 |
| A_24_P915371   | 13,2028 | 13,4381 | -1,177151494 | ENST00000491765 | 150678    | NM_001163424 | MYEOV2         |
| A_23_P64214    | 6,39863 | 6,63393 | -1,177151494 | ENST00000527861 | 9159      | NM_004716    | PCSK7          |
| A_33_P3228591  | 3,34437 | 3,57969 | -1,177167812 | ENST00000376357 | N/A       | AK301084     | N/A            |
| A_33_P3414362  | 7,25954 | 7,49486 | -1,177167812 | ENST00000300896 | 84669     | NM_032582    | USP32          |
| A_33_P3288942  | 9,93597 | 10,1713 | -1,177175972 | ENST00000472095 | 83641     | NM_001282695 | FAM107B        |
| A_33_P3249524  | 8,39365 | 8,62902 | -1,177208611 | ENST00000432940 | 441273    | NM_001031618 | SPDYE2         |
| A_22_P00015813 | 5,52369 | 5,75908 | -1,17722493  | ENST00000519861 | 101927612 | NR_108048    | RNF139-AS1     |
| A_23_P358009   | 8,64861 | 8,884   | -1,17722493  | ENST00000616884 | 23341     | NM_015291    | DNAJC16        |
| A_24_P357100   | 5,71218 | 5,94769 | -1,177322853 | ENST00000216127 | 23551     | NM_014310    | RASD2          |
| A_23_P389692   | 5,49112 | 5,72667 | -1,177355496 | ENST00000280020 | 57536     | NM_020776    | KIAA1328       |
| A_33_P3343467  | 6,34543 | 6,58105 | -1,177412623 | N/A             | 255031    | NR_015401    | LINC00957      |
| A_23_P89062    | 9,32072 | 9,55634 | -1,177412623 | ENST00000254109 | 100132341 | NR_024034    | CLUHP3         |
| A_23_P120710   | 9,95015 | 10,1858 | -1,177437107 | ENST00000355666 | 7267      | NM_003316    | TTC3           |
| A_22_P00006199 | 10,2294 | 10,4651 | -1,177477914 | N/A             | N/A       | N/A          | Inc-FAM40A-1   |
| A_24_P134816   | 10,6077 | 10,8434 | -1,177477914 | ENST00000334801 | 283149    | NM_182557    | BCL9L          |
| A_23_P80473    | 9,17864 | 9,41451 | -1,177616671 | ENST00000319340 | 166012    | NM_152889    | CHST13         |
| A_33_P3422728  | 6,43278 | 6,6687  | -1,177657485 | ENST00000493965 | 79937     | NM_033655    | CNTNAP3        |
| A_22_P00009827 | 6,6784  | 6,91432 | -1,177657485 | ENST00000572343 | 101929650 | XR_243528    | LOC101929650   |
| A_33_P3306264  | 9,82436 | 10,0603 | -1,17767381  | ENST00000244333 | 27076     | NM_014400    | LYPD3          |
| A_21_P0001188  | 3,46542 | 3,70147 | -1,177763607 | N/A             | 101928484 | NR_110811    | LINC01363      |
| A_24_P247074   | 11,4851 | 11,7212 | -1,177804426 | ENST00000451609 | N/A       | N/A          | N/A            |
| A_22_P00000472 | 2,79981 | 3,03594 | -1,177828918 | N/A             | 100128788 | NR_027275    | SRRM2-AS1      |
| A_23_P110433   | 10,6934 | 10,9296 | -1,177886068 | ENST00000510930 | 23398     | NM_015342    | PPWD1          |
| A_33_P3211376  | 1,59857 | 1,83481 | -1,177918726 | N/A             | 100128329 | AF119909     | PRO2958        |
| A_21_P0002475  | 5,58086 | 5,81711 | -1,177926891 | ENST00000528268 | 375248    | NM_001164315 | ANKRD36        |
| A_33_P3270742  | 2,4889  | 2,72521 | -1,177975881 | N/A             | N/A       | N/A          | N/A            |
| A_21_P0008748  | 2,93168 | 3,16801 | -1,177992211 | N/A             | N/A       | N/A          | Inc-PIF1-1     |
| A_24_P411815   | 11,469  | 11,7054 | -1,178049369 | ENST00000306984 | 136647    | NM_138701    | MPLKIP         |
| A_23_P210300   | 10,8677 | 11,1042 | -1,178131028 | ENST00000336112 | 55252     | NM_018263    | ASXL2          |
| A_24_P758256   | 1,70339 | 1,93991 | -1,17814736  | ENST00000597191 | N/A       | N/A          | N/A            |

|                |         |         |              |                 |           |              |                |
|----------------|---------|---------|--------------|-----------------|-----------|--------------|----------------|
| A_23_P251974   | 3,45405 | 3,69062 | -1,178188193 | ENST00000361625 | 9372      | AF130420     | ZFYVE9         |
| A_23_P435501   | 11,6705 | 11,9071 | -1,178212693 | ENST00000255175 | 10955     | NM_198941    | SERINC3        |
| A_24_P116805   | 8,93824 | 9,17488 | -1,17824536  | ENST00000404395 | 6774      | NM_213662    | STAT3          |
| A_22_P00004006 | 2,52052 | 2,75716 | -1,17824536  | N/A             | 100846978 | N/A          | LINC00506      |
| A_33_P3243307  | 4,94209 | 5,17876 | -1,178269861 | N/A             | N/A       | N/A          | Inc-LSMD1-1    |
| A_23_P98310    | 10,479  | 10,7158 | -1,178376039 | ENST00000323959 | 1479      | NM_001326    | CSTF3          |
| A_21_P0002616  | 3,46283 | 3,69965 | -1,178392375 | N/A             | N/A       | N/A          | Inc-TNFAIP6-2  |
| A_33_P3398236  | 5,93563 | 6,17251 | -1,178441384 | N/A             | 340267    | AJ890452     | COL28A1        |
| A_21_P0001567  | 3,0459  | 3,2828  | -1,178457721 | N/A             | N/A       | N/A          | Inc-TAF13-1    |
| A_24_P406245   | 8,83612 | 9,07302 | -1,178457721 | N/A             | N/A       | BC010535     | N/A            |
| A_33_P3296871  | 10,0807 | 10,3176 | -1,178457721 | ENST00000359467 | 7582      | NM_006955    | ZNF33B         |
| A_23_P171150   | 1,51073 | 1,74766 | -1,178482226 | ENST00000373114 | 56062     | NM_057162    | KLHL4          |
| A_21_P0011887  | 1,59899 | 1,83593 | -1,178490395 | ENST00000443866 | 728763    | N/A          | LOC728763      |
| A_21_P0008829  | 4,91249 | 5,14944 | -1,178498563 | N/A             | N/A       | N/A          | Inc-ZNF609-3   |
| A_23_P148785   | 7,53222 | 7,76925 | -1,178563915 | ENST00000367829 | 375035    | NM_199344    | SFT2D2         |
| A_24_P331904   | 14,2023 | 14,4394 | -1,178621101 | ENST00000569245 | 54939     | NM_017828    | COMMD4         |
| A_21_P0010250  | 3,5497  | 3,78684 | -1,17865378  | N/A             | 54089     | NR_024028    | LINC00112      |
| A_21_P0008266  | 4,77983 | 5,017   | -1,178678289 | N/A             | N/A       | N/A          | Inc-TUBGCP3-6  |
| A_24_P277615   | 8,76153 | 8,99872 | -1,178694629 | ENST00000393319 | 81786     | NM_203297    | TRIM7          |
| A_24_P235316   | 12,2654 | 12,5026 | -1,178702799 | ENST00000522010 | 7419      | NM_005662    | VDAC3          |
| A_22_P00002125 | 6,6538  | 6,89103 | -1,17872731  | N/A             | N/A       | N/A          | Inc-BOLA2B-1   |
| A_21_P0008402  | 5,15982 | 5,39705 | -1,17872731  | N/A             | N/A       | N/A          | Inc-C14orf79-2 |
| A_21_P0006109  | 2,87367 | 3,11095 | -1,178768162 | N/A             | N/A       | N/A          | Inc-ANGPTL2-2  |
| A_21_P0013760  | 10,5146 | 10,7519 | -1,178784504 | ENST00000448552 | 54921     | NM_001039690 | CHTF8          |
| A_23_P372467   | 12,9759 | 13,2132 | -1,178784504 | ENST00000484217 | 130872    | NM_152392    | AHSA2          |
| A_21_P0013236  | 8,26314 | 8,50059 | -1,178907071 | ENST00000414608 | 2969      | NM_032999    | GTF2I          |
| A_33_P3424339  | 5,90203 | 6,13954 | -1,178956101 | ENST00000444823 | N/A       | N/A          | N/A            |
| A_24_P289273   | 3,2529  | 3,49046 | -1,178996961 | ENST00000372092 | 5995      | BC008094     | RGR            |
| A_23_P371145   | 4,60338 | 4,84099 | -1,179037823 | ENST00000375418 | 113622    | NM_138430    | ADPRHL1        |
| A_24_P157087   | 8,79592 | 9,03353 | -1,179037823 | ENST00000323492 | 841       | NM_033355    | CASP8          |
| A_22_P00000772 | 1,54298 | 1,78063 | -1,179070513 | ENST00000580524 | N/A       | CB105476     | N/A            |
| A_22_P00021498 | 1,56295 | 1,80062 | -1,179086859 | N/A             | N/A       | BI755742     | Inc-FAM184B-1  |
| A_33_P3295523  | 11,1791 | 11,4168 | -1,179111377 | ENST00000306897 | 5881      | NM_005052    | RAC3           |

|                |         |         |              |                 |           |              |                |
|----------------|---------|---------|--------------|-----------------|-----------|--------------|----------------|
| A_24_P385190   | 2,68505 | 2,92277 | -1,179127724 | ENST00000471005 | 6521      | NM_000342    | SLC4A1         |
| A_33_P3414017  | 9,9683  | 10,2061 | -1,17919311  | N/A             | N/A       | N/A          | N/A            |
| A_23_P25253    | 12,3909 | 12,6287 | -1,17919311  | ENST00000428559 | 51071     | NM_015954    | DERA           |
| A_22_P00013395 | 1,62223 | 1,86005 | -1,179209457 | ENST00000552615 | 643711    | NR_077241    | LOC643711      |
| A_23_P119418   | 10,5479 | 10,7858 | -1,179274848 | ENST00000574110 | 8725      | NM_003796    | URI1           |
| A_23_P66635    | 1,53328 | 1,77119 | -1,179283022 | ENST00000305869 | 6356      | NM_002986    | CCL11          |
| A_22_P00020035 | 2,91492 | 3,15285 | -1,179299371 | ENST00000451419 | 30        | BG533949     | ACAA1          |
| A_21_P0013960  | 5,19196 | 5,42994 | -1,179340243 | N/A             | 101930246 | XR_250239    | LOC101930246   |
| A_22_P00002641 | 1,60025 | 1,83827 | -1,179372942 | N/A             | N/A       | N/A          | Inc-C1orf186-1 |
| A_22_P00001486 | 2,55262 | 2,79068 | -1,179405641 | N/A             | N/A       | BC126990     | Inc-ARF6-2     |
| A_22_P00022688 | 1,64145 | 1,87952 | -1,179413816 | N/A             | N/A       | N/A          | Inc-CCL2-3     |
| A_24_P340976   | 15,1374 | 15,3755 | -1,179438342 | ENST00000456555 | N/A       | N/A          | N/A            |
| A_33_P3242973  | 6,74289 | 6,98103 | -1,179471043 | ENST00000550858 | 10644     | NM_006548    | IGF2BP2        |
| A_33_P3329622  | 1,58338 | 1,82165 | -1,179577329 | ENST00000395690 | 374977    | BC143891     | MROH7          |
| A_33_P3332052  | 2,61788 | 2,85615 | -1,179577329 | ENST00000571176 | 284129    | NM_001166347 | SLC26A11       |
| A_33_P3379841  | 6,37682 | 6,61511 | -1,179593682 | N/A             | 116828    | NR_026928    | N4BP2L2-IT2    |
| A_33_P3353866  | 1,54311 | 1,78141 | -1,179601858 | ENST00000525093 | 80168     | NM_025098    | MOGAT2         |
| A_24_P50028    | 1,61346 | 1,85176 | -1,179601858 | ENST00000320578 | 54734     | NM_017516    | RAB39A         |
| A_22_P00018524 | 1,51257 | 1,75088 | -1,179610034 | N/A             | 285547    | NR_034054    | LINC01097      |
| A_24_P165595   | 8,77584 | 9,0142  | -1,179650917 | ENST00000295087 | 26225     | NM_012097    | ARL5A          |
| A_23_P72840    | 7,41178 | 7,65016 | -1,179667271 | ENST00000368399 | 54344     | NM_018973    | DPM3           |
| A_33_P3319834  | 1,47008 | 1,70846 | -1,179667271 | ENST00000403423 | 343172    | NM_001005522 | OR2T8          |
| A_21_P0012294  | 6,81237 | 7,05077 | -1,179683625 | ENST00000402176 | N/A       | N/A          | N/A            |
| A_23_P131330   | 1,50615 | 1,74456 | -1,179691802 | ENST00000409148 | 347730    | NM_178839    | LRRTM1         |
| A_21_P0005689  | 13,8349 | 14,0734 | -1,179765397 | N/A             | 101929622 | XR_426298    | LOC101929622   |
| A_23_P139929   | 12,6873 | 12,9258 | -1,179765397 | ENST00000455836 | 10961     | NM_006817    | ERP29          |
| A_33_P3344127  | 9,53692 | 9,77544 | -1,179781752 | ENST00000602637 | 8334      | NM_003512    | HIST1H2AC      |
| A_24_P862886   | 3,01171 | 3,25023 | -1,179781752 | ENST00000421395 | 1816      | NM_000798    | DRD5           |
| A_21_P0014017  | 3,56559 | 3,80413 | -1,179798107 | N/A             | 101930017 | XM_005276635 | LOC101930017   |
| A_21_P0000345  | 2,39141 | 2,63002 | -1,179855353 | N/A             | 677816    | NR_002993    | SNORA35        |
| A_22_P00011026 | 6,88394 | 7,12258 | -1,179879888 | N/A             | N/A       | N/A          | Inc-NT5DC2-1   |
| A_21_P0011737  | 1,70458 | 1,94325 | -1,179904423 | N/A             | N/A       | N/A          | XLOC_I2_006996 |
| A_23_P72853    | 10,1225 | 10,3612 | -1,179928958 | ENST00000329548 | 84975     | NM_032889    | MFSD5          |

|                |         |         |              |                 |           |           |               |
|----------------|---------|---------|--------------|-----------------|-----------|-----------|---------------|
| A_23_P67466    | 14,0422 | 14,2809 | -1,179928958 | ENST00000620216 | 5714      | NM_002812 | PSMD8         |
| A_23_P157970   | 8,77964 | 9,01841 | -1,17998621  | ENST00000262456 | 27130     | NM_014425 | INVS          |
| A_33_P3230951  | 1,62669 | 1,86547 | -1,179994389 | ENST00000599641 | 100073347 | NR_024059 | MIMT1         |
| A_23_P167997   | 9,88411 | 10,1229 | -1,180002569 | ENST00000541790 | 8339      | NM_003518 | HIST1H2BG     |
| A_23_P361773   | 9,51894 | 9,75774 | -1,180010748 | ENST00000414200 | 896       | NM_001760 | CCND3         |
| A_19_P00318848 | 2,44277 | 2,6816  | -1,180035286 | N/A             | 100133545 | N/A       | MRPL23-AS1    |
| A_23_P63153    | 10,4122 | 10,6511 | -1,180092543 | ENST00000369702 | 11218     | NM_007204 | DDX20         |
| A_33_P3309491  | 14,2837 | 14,5226 | -1,180092543 | ENST00000428026 | 10076     | NM_005704 | PTPRU         |
| A_22_P00021872 | 2,50709 | 2,74604 | -1,180133442 | ENST00000431911 | N/A       | N/A       | N/A           |
| A_32_P168349   | 5,53154 | 5,77052 | -1,180157983 | ENST00000466799 | 80739     | NM_138277 | C6orf25       |
| A_23_P387552   | 12,2696 | 12,5086 | -1,180174343 | ENST00000425354 | 5916      | NM_000966 | RARG          |
| A_24_P159181   | 12,1724 | 12,4114 | -1,180174343 | ENST00000204549 | 10081     | NM_005707 | PDCD7         |
| A_33_P3222852  | 4,28571 | 4,52476 | -1,180215246 | N/A             | N/A       | AY203941  | N/A           |
| A_33_P3419938  | 13,9985 | 14,2376 | -1,18025615  | ENST00000345392 | 7428      | NM_000551 | VHL           |
| A_33_P3318424  | 3,85287 | 4,09203 | -1,180305236 | N/A             | N/A       | N/A       | N/A           |
| A_21_P0003775  | 3,78406 | 4,0233  | -1,180370688 | N/A             | N/A       | N/A       | Inc-SLC7A11-1 |
| A_23_P20463    | 13,46   | 13,6993 | -1,180419779 | ENST00000297338 | 5885      | NM_006265 | RAD21         |
| A_22_P00011810 | 4,59276 | 4,83206 | -1,180419779 | N/A             | N/A       | AK023907  | Inc-PHACTR4-1 |
| A_21_P0007816  | 3,38246 | 3,62181 | -1,18046069  | N/A             | N/A       | N/A       | Inc-KCNA5-3   |
| A_23_P93690    | 15,4256 | 15,665  | -1,180501603 | ENST00000303887 | 4176      | NM_182776 | MCM7          |
| A_22_P00025517 | 4,78009 | 5,01949 | -1,180501603 | ENST00000425505 | 100038246 | BC019674  | TLX1NB        |
| A_24_P133584   | 8,47793 | 8,71741 | -1,180567065 | ENST00000560937 | 4240      | NM_005928 | MFGE8         |
| A_23_P145376   | 10,635  | 10,8745 | -1,180583431 | ENST00000373759 | 5603      | NM_002754 | MAPK13        |
| A_23_P115467   | 7,16902 | 7,40855 | -1,180607981 | ENST00000368717 | 6276      | NM_002962 | S100A5        |
| A_33_P3326822  | 2,70085 | 2,94039 | -1,180616165 | ENST00000461246 | 11185     | N/A       | INMT          |
| A_23_P349310   | 10,2625 | 10,5021 | -1,180665266 | ENST00000464539 | 27327     | NM_014494 | TNRC6A        |
| A_23_P137391   | 15,6526 | 15,8922 | -1,180665266 | ENST00000464920 | 2023      | NM_001428 | ENO1          |
| A_22_P00006370 | 1,9965  | 2,23612 | -1,180681634 | ENST00000507203 | N/A       | N/A       | N/A           |
| A_33_P3234138  | 5,82536 | 6,06509 | -1,18077166  | N/A             | 131909    | NR_036433 | FAM172BP      |
| A_24_P941988   | 8,94721 | 9,18699 | -1,180812583 | ENST00000615843 | 6683      | NM_014946 | SPAST         |
| A_24_P92163    | 9,11958 | 9,35939 | -1,180837137 | ENST00000339367 | N/A       | N/A       | N/A           |
| A_24_P385313   | 15,0101 | 15,25   | -1,180910804 | ENST00000359947 | 5792      | NM_002840 | PTPRF         |
| A_33_P3278501  | 1,58388 | 1,82381 | -1,180935361 | ENST00000603247 | N/A       | N/A       | N/A           |

|                |         |         |              |                 |           |              |                |
|----------------|---------|---------|--------------|-----------------|-----------|--------------|----------------|
| A_22_P00025273 | 1,5924  | 1,83234 | -1,180943546 | N/A             | 439950    | NR_046108    | CELF2-AS2      |
| A_33_P3270271  | 1,41412 | 1,6541  | -1,18097629  | ENST00000563701 | 440386    | XR_243473    | LOC440386      |
| A_24_P704446   | 1,6894  | 1,92943 | -1,18101722  | ENST00000389583 | 643236    | NM_001123376 | TMEM72         |
| A_21_P0002537  | 1,54145 | 1,78155 | -1,181074524 | N/A             | N/A       | N/A          | Inc-IKZF2-2    |
| A_21_P0014347  | 3,51545 | 3,75556 | -1,181082711 | N/A             | N/A       | AK096807     | N/A            |
| A_23_P109593   | 9,69669 | 9,93682 | -1,181099084 | ENST00000355704 | 25771     | NM_014346    | TBC1D22A       |
| A_32_P379467   | 2,27272 | 2,51292 | -1,181156393 | ENST00000435464 | 57611     | NM_020851    | ISLR2          |
| A_33_P3266479  | 1,35572 | 1,59598 | -1,181205517 | ENST00000359688 | 441933    | NM_001005487 | OR13G1         |
| A_23_P34460    | 7,81815 | 8,05843 | -1,181221892 | ENST00000427993 | 23443     | NM_012243    | SLC35A3        |
| A_33_P3800664  | 9,67645 | 9,91675 | -1,181238267 | ENST00000607307 | N/A       | AK090649     | N/A            |
| A_32_P4199     | 7,22016 | 7,46046 | -1,181238267 | ENST00000312828 | 220441    | NM_173557    | RNF152         |
| A_33_P3347697  | 1,50532 | 1,74563 | -1,181246455 | ENST00000539517 | 4857      | NM_002515    | NOVA1          |
| A_33_P3415962  | 4,48191 | 4,72225 | -1,181271019 | N/A             | 100506947 | AK130540     | LOC100506947   |
| A_32_P60716    | 1,54816 | 1,7885  | -1,181271019 | ENST00000388914 | 339965    | NM_001042784 | CCDC158        |
| A_24_P118884   | 3,63266 | 3,87305 | -1,181311959 | ENST00000442164 | N/A       | N/A          | N/A            |
| A_23_P27285    | 10,0107 | 10,2511 | -1,181320148 | ENST00000592447 | 65258     | NM_023075    | MPPE1          |
| A_21_P0002933  | 1,68181 | 1,92221 | -1,181320148 | ENST00000596963 | N/A       | N/A          | N/A            |
| A_21_P0012700  | 1,53704 | 1,77748 | -1,181352901 | N/A             | N/A       | N/A          | XLOC_I2_011407 |
| A_21_P0011560  | 5,4701  | 5,71059 | -1,181393844 | N/A             | N/A       | N/A          | XLOC_I2_005921 |
| A_33_P3342663  | 1,50332 | 1,7439  | -1,181467546 | ENST00000619289 | 80332     | NM_153202    | ADAM33         |
| A_22_P00024273 | 8,6894  | 8,93006 | -1,181533062 | ENST00000423020 | N/A       | DA103928     | N/A            |
| A_21_P0011287  | 1,34303 | 1,58371 | -1,181549442 | N/A             | N/A       | N/A          | XLOC_I2_004556 |
| A_23_P39774    | 10,0114 | 10,2522 | -1,181647724 | ENST00000450162 | 11017     | NM_006857    | SNRNP27        |
| A_33_P3745164  | 1,5148  | 1,75561 | -1,181655915 | ENST00000383699 | 253559    | NM_001167674 | CADM2          |
| A_23_P319640   | 8,29876 | 8,53963 | -1,18170506  | N/A             | 151534    | NR_024606    | LBX2-AS1       |
| A_33_P3412428  | 3,65041 | 3,89131 | -1,181729633 | ENST00000618895 | 203102    | NM_145004    | ADAM32         |
| A_33_P3809606  | 12,0513 | 12,2922 | -1,181729633 | ENST00000553648 | N/A       | N/A          | N/A            |
| A_22_P00006335 | 6,16861 | 6,40958 | -1,181786972 | N/A             | N/A       | BC031940     | Inc-FANCI-1    |
| A_23_P107963   | 10,8899 | 11,1309 | -1,181811547 | ENST00000310160 | 2523      | NM_000148    | FUT1           |
| A_23_P251021   | 3,84686 | 4,08798 | -1,181909851 | ENST00000376800 | 10255     | NR_028032    | HCG9           |
| A_21_P0012118  | 4,81571 | 5,05685 | -1,181926236 | N/A             | N/A       | N/A          | XLOC_I2_008599 |
| A_33_P3300817  | 18,1955 | 18,4367 | -1,181975392 | ENST00000599232 | 6193      | NM_001009    | RPS5           |
| A_33_P3577671  | 11,8576 | 12,0988 | -1,181975392 | ENST00000321147 | 54878     | NM_130434    | DPP8           |

|                |         |         |              |                 |           |              |                      |
|----------------|---------|---------|--------------|-----------------|-----------|--------------|----------------------|
| A_24_P8318     | 8,05154 | 8,29283 | -1,18204913  | ENST00000491831 | 27125     | NM_014423    | AFF4                 |
| A_24_P274831   | 1,47402 | 1,71532 | -1,182057323 | ENST00000313543 | 168537    | NM_153236    | GIMAP7               |
| A_21_P0007935  | 2,19858 | 2,43995 | -1,182114678 | N/A             | N/A       | N/A          | Inc-KIAA1704-2       |
| A_21_P0006199  | 1,56484 | 1,80622 | -1,182122872 | N/A             | N/A       | N/A          | Inc-ZNF462-1         |
| A_23_P350187   | 8,21706 | 8,45846 | -1,18213926  | ENST00000265149 | 54790     | NM_001127208 | TET2                 |
| A_33_P3261620  | 5,09236 | 5,3338  | -1,182172036 | ENST00000427970 | 2693      | NM_004122    | GHSR                 |
| A_21_P0006921  | 1,74018 | 1,98164 | -1,182188425 | N/A             | N/A       | N/A          | Inc-EMX2-2           |
| A_21_P0011293  | 6,32953 | 6,57099 | -1,182188425 | N/A             | N/A       | N/A          | XLOC_I2_004594       |
| A_23_P316064   | 4,37111 | 4,61257 | -1,182188425 | ENST00000421794 | 353174    | NM_180990    | ZACN                 |
| A_22_P00006409 | 1,58302 | 1,8245  | -1,182204814 | N/A             | N/A       | N/A          | Inc-FBXO15-3         |
| A_22_P00013700 | 1,50061 | 1,74209 | -1,182204814 | N/A             | N/A       | N/A          | Inc-RP11-770G2.3.1-2 |
| A_33_P3286318  | 15,1751 | 15,4166 | -1,182221203 | ENST00000534819 | N/A       | BC011771     | N/A                  |
| A_23_P143006   | 5,04693 | 5,28845 | -1,182237592 | ENST00000165524 | 51052     | NM_015893    | PRLH                 |
| A_24_P270033   | 9,28617 | 9,52772 | -1,182262176 | ENST00000278949 | 196264    | NM_198275    | MPZL3                |
| A_33_P3219050  | 1,77667 | 2,01823 | -1,182270371 | N/A             | 100128571 | AK131515     | LOC100128571         |
| A_21_P0002639  | 5,01388 | 5,25551 | -1,182327736 | N/A             | N/A       | N/A          | Inc-TMEM18-6         |
| A_22_P00005695 | 1,77615 | 2,01781 | -1,182352322 | N/A             | N/A       | BX091701     | Inc-ELAVL4-4         |
| A_23_P154894   | 15,7047 | 15,9464 | -1,182385105 | ENST00000291568 | 1476      | NM_000100    | CSTB                 |
| A_21_P0004888  | 3,51929 | 3,76099 | -1,182385105 | N/A             | N/A       | N/A          | Inc-CD2AP-1          |
| A_22_P00002143 | 1,35037 | 1,59215 | -1,182450672 | N/A             | 100874261 | NR_047479    | LINC00854            |
| A_23_P22565    | 1,52873 | 1,77061 | -1,182532636 | ENST00000370350 | 89885     | NM_033085    | FATE1                |
| A_23_P156687   | 8,35533 | 8,59722 | -1,182540833 | ENST00000425368 | 629       | NM_001710    | CFB                  |
| A_21_P0004241  | 6,2795  | 6,52139 | -1,182540833 | N/A             | N/A       | N/A          | Inc-AC091435.2-1     |
| A_22_P00019404 | 1,54596 | 1,78797 | -1,182639198 | N/A             | N/A       | XM_005264708 | Inc-ACP1-7           |
| A_22_P00000785 | 1,56741 | 1,80943 | -1,182647395 | N/A             | 100130522 | NR_028339    | PARD6G-AS1           |
| A_33_P3215933  | 4,66224 | 4,90426 | -1,182647395 | ENST00000446386 | 196264    | NM_198275    | MPZL3                |
| A_24_P256337   | 8,64567 | 8,88772 | -1,182671988 | ENST00000347275 | 84146     | NM_201269    | ZNF644               |
| A_21_P0012668  | 1,93729 | 2,17934 | -1,182671988 | N/A             | N/A       | N/A          | XLOC_I2_011145       |
| A_22_P00024640 | 2,59324 | 2,83533 | -1,182704779 | ENST00000383019 | 100128714 | NR_040082    | LOC100128714         |
| A_21_P0007623  | 1,489   | 1,7311  | -1,182712977 | N/A             | N/A       | N/A          | Inc-FICD-1           |
| A_23_P410717   | 7,90353 | 8,14565 | -1,182729373 | ENST00000290363 | 148523    | NM_144697    | CIART                |
| A_33_P3340294  | 6,44847 | 6,69061 | -1,182745769 | ENST00000401878 | 155435    | NM_053043    | RBM33                |
| A_21_P0012313  | 5,67233 | 5,9145  | -1,182770364 | ENST00000609229 | 5625      | N/A          | PRODH                |

|                |         |         |              |                 |           |              |                |
|----------------|---------|---------|--------------|-----------------|-----------|--------------|----------------|
| A_23_P14273    | 13,6577 | 13,8999 | -1,182794959 | ENST00000311141 | 79038     | NM_024071    | ZFYVE21        |
| A_23_P250644   | 8,45877 | 8,701   | -1,182819555 | ENST00000458198 | 91368     | N/A          | CDKN2AIPNL     |
| A_21_P0013763  | 1,52732 | 1,76964 | -1,182893345 | N/A             | N/A       | N/A          | XLOC_I2_015520 |
| A_33_P3224680  | 8,81896 | 9,06129 | -1,182901545 | ENST00000370143 | 54482     | AK289404     | TRMT13         |
| A_23_P28638    | 10,13   | 10,3724 | -1,182958941 | ENST00000403716 | 55041     | NM_017958    | PLEKHB2        |
| A_22_P00002065 | 1,52696 | 1,76945 | -1,18303274  | ENST00000526674 | N/A       | AK311733     | N/A            |
| A_24_P196499   | 5,01141 | 5,25392 | -1,18304914  | ENST00000471257 | 51742     | AB030181     | ARID4B         |
| A_23_P153867   | 2,4795  | 2,72204 | -1,183073741 | ENST00000557925 | 79603     | NM_024552    | CERS4          |
| A_21_P0014854  | 2,58194 | 2,82463 | -1,183196754 | N/A             | N/A       | N/A          | N/A            |
| A_22_P00016257 | 10,0449 | 10,2876 | -1,183204956 | N/A             | N/A       | N/A          | Inc-TMED5-1    |
| A_33_P3404052  | 7,81991 | 8,06261 | -1,183204956 | ENST00000274456 | 25816     | NM_001286813 | TNFAIP8        |
| A_21_P0009347  | 1,58233 | 1,82507 | -1,183237761 | N/A             | N/A       | N/A          | Inc-HELZ-1     |
| A_33_P3408877  | 8,2092  | 8,45196 | -1,183254165 | N/A             | N/A       | N/A          | N/A            |
| A_33_P3385711  | 1,85095 | 2,09379 | -1,18331978  | ENST00000322653 | 390067    | NM_001005289 | OR52H1         |
| A_33_P3225186  | 1,74068 | 1,98356 | -1,183352589 | ENST00000390429 | N/A       | N/A          | N/A            |
| A_22_P00022503 | 4,33477 | 4,57765 | -1,183352589 | N/A             | N/A       | N/A          | Inc-PUM2-1     |
| A_21_P0002445  | 4,1874  | 4,43031 | -1,183377197 | N/A             | N/A       | N/A          | Inc-BCL11A-1   |
| A_19_P00315824 | 6,68322 | 6,92614 | -1,183385399 | ENST00000594315 | 100505495 | NR_040109    | PCAT19         |
| A_33_P3244104  | 1,85901 | 2,10195 | -1,183401804 | ENST00000435676 | 149297    | AB593134     | FAM78B         |
| A_33_P3406706  | 7,63706 | 7,88007 | -1,183459225 | ENST00000287675 | 9941      | NM_005107    | EXOGEN         |
| A_22_P00019273 | 8,24403 | 8,4871  | -1,183508445 | N/A             | N/A       | AK091631     | Inc-MED7-1     |
| A_22_P00023239 | 3,38932 | 3,6324  | -1,183516648 | N/A             | N/A       | N/A          | Inc-CAPRIN2-2  |
| A_33_P3309662  | 14,6813 | 14,9244 | -1,183533055 | ENST00000585480 | 2879      | NM_001039848 | GPX4           |
| A_32_P191786   | 4,27828 | 4,5214  | -1,183549463 | ENST00000600132 | 170961    | NM_133475    | ANKRD24        |
| A_33_P3236868  | 12,0748 | 12,318  | -1,183615094 | ENST00000568370 | 4501      | NM_005952    | MT1X           |
| A_24_P273253   | 9,18244 | 9,42567 | -1,183639707 | ENST00000333244 | 113146    | NM_138420    | AHNAK2         |
| A_22_P00012968 | 4,73433 | 4,97759 | -1,18366432  | N/A             | N/A       | CF130048     | Inc-RELL2-1    |
| A_23_P88893    | 12,0431 | 12,2864 | -1,183697139 | ENST00000610455 | 54849     | NM_017702    | DEF8           |
| A_22_P00014097 | 4,40207 | 4,64537 | -1,183697139 | N/A             | N/A       | AK097045     | Inc-SAT2-1     |
| A_23_P209726   | 5,7819  | 6,02523 | -1,183721754 | ENST00000392045 | 11262     | NM_007237    | SP140          |
| A_33_P3287195  | 5,39205 | 5,63539 | -1,183729959 | N/A             | N/A       | AY129018     | N/A            |
| A_23_P349127   | 7,11591 | 7,35929 | -1,183762779 | ENST00000356231 | 146059    | NM_138477    | CDAN1          |
| A_24_P143574   | 3,33698 | 3,58037 | -1,183770984 | ENST00000562014 | 10326     | NM_006065    | SIRPB1         |

|                |         |         |              |                 |           |              |                  |
|----------------|---------|---------|--------------|-----------------|-----------|--------------|------------------|
| A_23_P76245    | 1,51301 | 1,75641 | -1,18377919  | ENST00000354534 | 6334      | NM_014191    | SCN8A            |
| A_23_P308305   | 9,44738 | 9,69079 | -1,183787395 | ENST00000584250 | 125488    | NM_001243425 | TTC39C           |
| A_22_P00019126 | 1,54857 | 1,79201 | -1,183812011 | ENST00000568267 | N/A       | N/A          | N/A              |
| A_33_P3334292  | 8,13197 | 8,37544 | -1,183836628 | ENST00000419275 | 644591    | AK123006     | PPIAL4G          |
| A_33_P3375528  | 6,92128 | 7,1648  | -1,183877658 | ENST00000451637 | 166968    | NM_152622    | MIER3            |
| A_33_P3372647  | 3,44307 | 3,68664 | -1,183918688 | ENST00000390301 | N/A       | DQ098690     | N/A              |
| A_21_P0005101  | 6,07344 | 6,31701 | -1,183918688 | N/A             | N/A       | N/A          | Inc-WRNIP1-2     |
| A_33_P3311863  | 5,22623 | 5,46983 | -1,183943308 | ENST00000448903 | 161       | NM_001242837 | AP2A2            |
| A_23_P100963   | 4,79163 | 5,03523 | -1,183943308 | ENST00000355530 | 201305    | NM_182538    | SPNS3            |
| A_33_P3389060  | 9,82122 | 10,0649 | -1,184008961 | ENST00000484546 | 55755     | NM_018249    | CDK5RAP2         |
| A_23_P414913   | 8,3973  | 8,64098 | -1,184008961 | ENST00000474050 | 152007    | NM_022343    | GLIPR2           |
| A_24_P153456   | 6,15195 | 6,39565 | -1,184025375 | ENST00000283441 | 79844     | NM_024786    | ZDHHC11          |
| A_33_P3325296  | 2,95301 | 3,19673 | -1,184041789 | N/A             | N/A       | N/A          | N/A              |
| A_23_P111141   | 12,4932 | 12,737  | -1,184107448 | ENST00000419496 | 7917      | NM_004639    | BAG6             |
| A_23_P341532   | 10,3538 | 10,5976 | -1,184107448 | ENST00000317257 | 83852     | NM_031915    | SETDB2           |
| A_22_P00022973 | 1,51949 | 1,76337 | -1,184173111 | N/A             | N/A       | N/A          | Inc-SALL3-1      |
| A_22_P00000233 | 5,71869 | 5,96258 | -1,184181319 | N/A             | N/A       | AK126240     | Inc-AC005838.1-4 |
| A_33_P3417260  | 10,7593 | 11,0032 | -1,184189527 | ENST00000494066 | 54981     | NM_017881    | NMRK1            |
| A_23_P422540   | 11,1584 | 11,4023 | -1,184189527 | ENST00000537526 | 23326     | NM_015276    | USP22            |
| A_33_P3338417  | 9,06847 | 9,31242 | -1,184230569 | ENST00000235521 | 10352     | NM_201263    | WARS2            |
| A_21_P0014722  | 4,46121 | 4,70521 | -1,184271612 | ENST00000512507 | 9555      | AB209490     | H2AFY            |
| A_24_P132470   | 11,6643 | 11,9083 | -1,184271612 | ENST00000251527 | 57488     | NM_020728    | ESYT2            |
| A_33_P3412613  | 6,66995 | 6,914   | -1,184312656 | ENST00000393053 | 7112      | NM_001032283 | TMPO             |
| A_33_P3265950  | 8,79836 | 9,04243 | -1,184329074 | ENST00000342704 | 9139      | NM_005093    | CBFA2T2          |
| A_21_P0010376  | 4,15309 | 4,3972  | -1,184361911 | N/A             | N/A       | N/A          | Inc-ZMAT5-1      |
| A_22_P00014381 | 2,03316 | 2,27739 | -1,184460428 | ENST00000420391 | N/A       | BG212324     | N/A              |
| A_22_P00008908 | 4,51334 | 4,75762 | -1,184501479 | N/A             | N/A       | AK123781     | Inc-KLHL8-1      |
| A_23_P18276    | 13,2176 | 13,4619 | -1,1845179   | ENST00000464087 | 10181     | NM_005778    | RBM5             |
| A_22_P00000406 | 6,57731 | 6,82163 | -1,184534321 | N/A             | 102724508 | NR_110881    | LOC102724508     |
| A_23_P164966   | 1,50546 | 1,74979 | -1,184542531 | ENST00000301295 | 147945    | NM_134444    | NLRP4            |
| A_22_P00009781 | 5,77239 | 6,01677 | -1,184583585 | N/A             | N/A       | AK091631     | Inc-MED7-1       |
| A_33_P3224250  | 4,19512 | 4,43952 | -1,184600007 | ENST00000356970 | 23155     | NM_001048210 | CLCC1            |
| A_33_P3281577  | 1,49869 | 1,74313 | -1,184632852 | ENST00000613186 | 696       | NM_001732    | BTN1A1           |



|                |         |         |              |                 |           |              |              |
|----------------|---------|---------|--------------|-----------------|-----------|--------------|--------------|
| A_23_P156443   | 4,57154 | 4,81598 | -1,184632852 | ENST00000356348 | 3841      | NM_002269    | KPNA5        |
| A_24_P302998   | 14,8806 | 15,1251 | -1,18468212  | ENST00000515202 | 521       | NM_007100    | ATP5I        |
| A_24_P187948   | 13,3803 | 13,6248 | -1,18468212  | ENST00000494097 | 637       | NM_197966    | BID          |
| A_19_P00811706 | 4,31523 | 4,55973 | -1,18468212  | ENST00000616304 | 4026      | NM_005578    | LPP          |
| A_33_P3341906  | 1,4043  | 1,64885 | -1,184723179 | ENST00000374148 | 170371    | XM_006717655 | C10orf128    |
| A_22_P00019654 | 4,77278 | 5,01735 | -1,184739603 | ENST00000521660 | 101929217 | NR_105004    | LOC101929217 |
| A_23_P43566    | 15,0655 | 15,3101 | -1,184764239 | ENST00000373768 | 4702      | NM_014222    | NDUFA8       |
| A_21_P0003230  | 2,40984 | 2,65452 | -1,184829938 | N/A             | 101929054 | XR_425565    | LOC101929054 |
| A_33_P3227264  | 13,088  | 13,3327 | -1,184846363 | ENST00000463652 | 728642    | NM_024011    | CDK11A       |
| A_19_P00318954 | 3,88121 | 4,12595 | -1,184879215 | ENST00000580948 | N/A       | N/A          | N/A          |
| A_23_P502678   | 11,2818 | 11,5266 | -1,184928494 | ENST00000397070 | 83877     | NM_031940    | TM2D2        |
| A_23_P376114   | 1,99787 | 2,24268 | -1,184936707 | ENST00000622844 | 259292    | NM_176887    | TAS2R46      |
| A_22_P00021561 | 4,08569 | 4,33051 | -1,18494492  | ENST00000443621 | N/A       | N/A          | N/A          |
| A_33_P3275199  | 9,15388 | 9,3987  | -1,18494492  | ENST00000615982 | 8629      | NM_003724    | JRK          |
| A_24_P201125   | 1,53852 | 1,78335 | -1,184953134 | ENST00000375231 | 22869     | NM_014930    | ZNF510       |
| A_33_P3242952  | 9,32106 | 9,5659  | -1,184961347 | ENST00000470041 | 729533    | NM_001123168 | FAM72A       |
| A_21_P0012452  | 1,5931  | 1,83798 | -1,184994202 | ENST00000474651 | N/A       | N/A          | N/A          |
| A_33_P3350452  | 10,2249 | 10,4698 | -1,185010629 | ENST00000482912 | N/A       | N/A          | N/A          |
| A_24_P364838   | 11,2784 | 11,5233 | -1,185010629 | ENST00000432365 | 9351      | NM_004785    | SLC9A3R2     |
| A_23_P253464   | 7,37952 | 7,62443 | -1,185018843 | ENST00000475656 | 84142     | NM_139076    | FAM175A      |
| A_24_P551028   | 8,04102 | 8,28597 | -1,185051699 | ENST00000280098 | 339745    | NM_001001664 | SPOPL        |
| A_23_P168812   | 6,99888 | 7,24393 | -1,185133844 | ENST00000408938 | 221786    | NM_145111    | FAM200A      |
| A_24_P943472   | 9,23127 | 9,47633 | -1,185142059 | ENST00000312521 | 9975      | NM_005126    | NR1D2        |
| A_21_P0000994  | 1,5346  | 1,77967 | -1,185150273 | ENST00000425185 | N/A       | N/A          | N/A          |
| A_22_P00020157 | 4,539   | 4,78424 | -1,185289934 | N/A             | N/A       | AK125316     | Inc-RAD1-1   |
| A_23_P54991    | 10,8946 | 11,1399 | -1,18533923  | ENST00000579991 | 140735    | NM_080677    | DYNLL2       |
| A_24_P348989   | 5,53573 | 5,78104 | -1,185347446 | ENST00000613536 | 11024     | NM_006863    | LILRA1       |
| A_22_P00013169 | 8,30382 | 8,54914 | -1,185355662 | N/A             | N/A       | N/A          | Inc-RNF13-2  |
| A_33_P3299066  | 5,74104 | 5,98642 | -1,185404961 | ENST00000417972 | 4929      | NM_006186    | NR4A2        |
| A_33_P3273267  | 2,57819 | 2,82367 | -1,18548713  | ENST00000443465 | N/A       | XM_006726809 | N/A          |
| A_22_P00004406 | 1,93635 | 2,18184 | -1,185495347 | ENST00000564681 | N/A       | BC037343     | N/A          |
| A_23_P171366   | 11,599  | 11,8445 | -1,185503564 | ENST00000467378 | 8237      | NM_004651    | USP11        |
| A_24_P647682   | 8,25647 | 8,50198 | -1,185511781 | ENST00000416519 | N/A       | N/A          | N/A          |

|                |         |         |              |                 |           |              |                |
|----------------|---------|---------|--------------|-----------------|-----------|--------------|----------------|
| A_24_P343271   | 7,52445 | 7,76998 | -1,185528216 | ENST00000444024 | 55005     | NM_017909    | RMND1          |
| A_23_P107051   | 7,72568 | 7,97126 | -1,185569304 | ENST00000309889 | 8557      | NM_003673    | TCAP           |
| A_23_P105307   | 11,9337 | 12,1793 | -1,18558574  | ENST00000550957 | 1606      | NM_201444    | DGKA           |
| A_23_P55127    | 7,95765 | 8,2033  | -1,18562683  | ENST00000527582 | 56985     | NM_020233    | ADPRM          |
| A_33_P3260868  | 1,72387 | 1,96954 | -1,185643266 | N/A             | N/A       | N/A          | N/A            |
| A_21_P0010266  | 1,63997 | 1,88566 | -1,185659703 | N/A             | N/A       | N/A          | Inc-TPTE-4     |
| A_32_P112279   | 10,8309 | 11,0767 | -1,185750108 | ENST00000448552 | 54921     | NM_001039690 | CHTF8          |
| A_32_P530933   | 1,6712  | 1,91704 | -1,185782985 | ENST00000622086 | 26108     | NM_015617    | PYGO1          |
| A_23_P7083     | 8,42435 | 8,67022 | -1,185807642 | N/A             | 92070     | NR_033339    | CTBP1-AS2      |
| A_22_P00000285 | 2,53527 | 2,78114 | -1,185807642 | N/A             | 100287036 | NM_001242885 | LOC100287036   |
| A_23_P408455   | 11,5074 | 11,7533 | -1,185832301 | ENST00000446041 | 55186     | NM_001104647 | SLC25A36       |
| A_33_P3220202  | 10,9079 | 11,1538 | -1,185832301 | ENST00000291906 | 29941     | NM_013355    | PKN3           |
| A_23_P17880    | 7,15932 | 7,40526 | -1,18586518  | ENST00000486019 | 10126     | NM_005740    | DNAL4          |
| A_22_P00020594 | 2,42567 | 2,67163 | -1,185881619 | N/A             | N/A       | AK091499     | Inc-AGMAT-1    |
| A_33_P3213006  | 12,132  | 12,378  | -1,185914499 | ENST00000377747 | 728255    | NM_001257305 | KRTAP1-4       |
| A_33_P3219697  | 13,3567 | 13,6028 | -1,185996704 | N/A             | 339416    | NM_198493    | ANKRD45        |
| A_21_P0010690  | 1,71889 | 1,96502 | -1,186021366 | ENST00000413332 | 100133612 | N/A          | LINC01134      |
| A_33_P3350207  | 12,1938 | 12,4401 | -1,186161129 | ENST00000576921 | 54985     | NM_017885    | HCFC1R1        |
| A_33_P3390107  | 13,8385 | 14,0848 | -1,186161129 | N/A             | 100008588 | NR_003286    | RNA18S5        |
| A_33_P3413701  | 10,005  | 10,2514 | -1,18624335  | ENST00000443439 | 51752     | NM_001040458 | ERAP1          |
| A_23_P376799   | 10,4546 | 10,701  | -1,18624335  | ENST00000471102 | 253725    | NM_015262    | FAM21C         |
| A_21_P0002056  | 1,49638 | 1,74286 | -1,186309131 | ENST00000423539 | N/A       | N/A          | N/A            |
| A_33_P3302312  | 10,8773 | 11,1238 | -1,186325577 | ENST00000372491 | 389792    | NM_203434    | IER5L          |
| A_33_P3230588  | 5,97598 | 6,22251 | -1,186350246 | N/A             | N/A       | DB321672     | N/A            |
| A_21_P0003913  | 1,65102 | 1,89755 | -1,186350246 | N/A             | N/A       | N/A          | Inc-CLDN24-2   |
| A_24_P358245   | 7,94172 | 8,18826 | -1,18635847  | ENST00000434138 | 158381    | NR_003582    | ATP8B5P        |
| A_22_P00002291 | 1,35558 | 1,60217 | -1,186399586 | N/A             | N/A       | N/A          | Inc-C10orf85-1 |
| A_23_P130113   | 4,00157 | 4,24824 | -1,186465376 | ENST00000254850 | 433       | NM_080912    | ASGR2          |
| A_24_P182929   | 1,60166 | 1,84834 | -1,1864736   | ENST00000490337 | 7881      | NM_003471    | KCNAB1         |
| A_24_P36097    | 10,5852 | 10,8319 | -1,186490048 | ENST00000327154 | 84268     | NM_001160266 | RPAIN          |
| A_21_P0007840  | 1,64146 | 1,8882  | -1,186522945 | ENST00000544089 | N/A       | N/A          | N/A            |
| A_33_P3256773  | 9,13129 | 9,37811 | -1,186588742 | ENST00000374234 | 58493     | NM_021218    | INIP           |
| A_21_P0012173  | 1,60293 | 1,84981 | -1,186638092 | ENST00000423581 | N/A       | N/A          | N/A            |

|                |         |         |              |                 |           |              |               |
|----------------|---------|---------|--------------|-----------------|-----------|--------------|---------------|
| A_24_P926507   | 4,72868 | 4,97558 | -1,186654542 | ENST00000321925 | 6563      | NM_001146037 | SLC14A1       |
| A_23_P106973   | 16,5382 | 16,7851 | -1,186654542 | ENST00000329047 | 10801     | NM_006640    | set-09        |
| A_22_P00001222 | 11,2858 | 11,5327 | -1,186654542 | ENST00000577703 | 4729      | NM_021074    | NDUFV2        |
| A_21_P0010724  | 7,21741 | 7,46433 | -1,186670993 | ENST00000544283 | 645166    | NR_027354    | LOC645166     |
| A_23_P72025    | 7,72035 | 7,9673  | -1,186695669 | ENST00000440964 | 788       | NM_000387    | SLC25A20      |
| A_33_P3374035  | 1,51901 | 1,76596 | -1,186695669 | N/A             | 8566      | AK094630     | PDXK          |
| A_22_P00021143 | 5,47399 | 5,72096 | -1,18671212  | N/A             | N/A       | AA405962     | Inc-CCDC166-1 |
| A_23_P152666   | 10,9321 | 11,1791 | -1,186736798 | ENST00000299335 | 1353      | NM_004375    | COX11         |
| A_23_P381478   | 1,57612 | 1,82313 | -1,186745024 | ENST00000294600 | 148870    | NM_152492    | CCDC27        |
| A_33_P3422170  | 7,90966 | 8,15671 | -1,186777928 | ENST00000437410 | 220988    | NM_194247    | HNRNPA3       |
| A_33_P3226800  | 1,50772 | 1,75479 | -1,18679438  | N/A             | N/A       | N/A          | N/A           |
| A_24_P63262    | 12,2424 | 12,4895 | -1,186819059 | ENST00000296255 | 6184      | NM_002950    | RPN1          |
| A_23_P364465   | 11,4651 | 11,7122 | -1,186819059 | ENST00000506184 | 65056     | NM_022913    | GPBP1         |
| A_22_P00008064 | 1,5184  | 1,76551 | -1,186827285 | ENST00000493545 | N/A       | N/A          | N/A           |
| A_22_P00013058 | 3,5958  | 3,84294 | -1,186851965 | N/A             | N/A       | BC018684     | Inc-RHBDD1-1  |
| A_23_P213369   | 9,08673 | 9,33391 | -1,186884872 | ENST00000507481 | 9812      | NM_014773    | KIAA0141      |
| A_23_P258340   | 16,6466 | 16,8938 | -1,186901326 | ENST00000455837 | 5478      | NM_021130    | PPIA          |
| A_33_P3293266  | 10,3464 | 10,5936 | -1,186901326 | ENST00000438836 | 84286     | NM_001297427 | TMEM175       |
| A_33_P3290919  | 13,0223 | 13,2695 | -1,186901326 | ENST00000379701 | 573       | NM_001172415 | BAG1          |
| A_23_P95231    | 1,9658  | 2,21308 | -1,186967143 | ENST00000554533 | 55259     | NM_018272    | CASC1         |
| A_22_P00010953 | 2,25886 | 2,50614 | -1,186967143 | N/A             | N/A       | N/A          | Inc-NR5A1-1   |
| A_24_P277807   | 12,4038 | 12,6511 | -1,186983598 | ENST00000349379 | 8724      | NM_003795    | SNX3          |
| A_21_P0004936  | 3,7505  | 3,9978  | -1,186983598 | N/A             | N/A       | N/A          | Inc-CLVS2-2   |
| A_33_P3797897  | 1,50067 | 1,74803 | -1,187032965 | N/A             | 494558    | BI561609     | C9orf135-AS1  |
| A_33_P3312499  | 2,66133 | 2,9087  | -1,187041192 | ENST00000405633 | 219995    | NM_001098835 | MS4A15        |
| A_22_P00006955 | 3,20074 | 3,44813 | -1,187057648 | ENST00000449333 | N/A       | N/A          | N/A           |
| A_24_P100761   | 7,15197 | 7,3994  | -1,187090561 | ENST00000587294 | 54828     | NM_017679    | BCAS3         |
| A_21_P0007978  | 1,35177 | 1,59923 | -1,187115246 | N/A             | 100861573 | N/A          | LINC00572     |
| A_23_P12643    | 1,77361 | 2,02108 | -1,187123475 | ENST00000615257 | 57412     | NM_020682    | AS3MT         |
| A_23_P122233   | 12,306  | 12,5535 | -1,187148161 | ENST00000519059 | 29093     | NM_001014990 | MRPL22        |
| A_22_P00009102 | 2,70543 | 2,95301 | -1,187213992 | N/A             | N/A       | BP871037     | Inc-LIFR-2    |
| A_22_P00000788 | 1,43997 | 1,68758 | -1,18723868  | ENST00000448825 | N/A       | N/A          | N/A           |
| A_23_P88484    | 14,915  | 15,1627 | -1,187312746 | ENST00000559852 | 1854      | NM_001025248 | DUT           |

|                |         |         |              |                 |           |              |                |
|----------------|---------|---------|--------------|-----------------|-----------|--------------|----------------|
| A_22_P00020569 | 8,21177 | 8,45947 | -1,187312746 | N/A             | 100507495 | NR_040047    | SDCBP2-AS1     |
| A_33_P3332871  | 3,92082 | 4,16857 | -1,187353895 | N/A             | N/A       | BE616696     | N/A            |
| A_33_P3233659  | 7,76228 | 8,01004 | -1,187362126 | ENST00000470933 | 10556     | NM_001104546 | RPP30          |
| A_33_P3351166  | 1,48061 | 1,72842 | -1,187403277 | N/A             | N/A       | N/A          | N/A            |
| A_32_P183218   | 3,59727 | 3,8451  | -1,187419738 | ENST00000375256 | 195828    | NM_153695    | ZNF367         |
| A_33_P3250595  | 6,44112 | 6,68898 | -1,187444443 | ENST00000487427 | 6453      | NM_001001132 | ITSN1          |
| A_33_P3246623  | 4,27871 | 4,52657 | -1,187444443 | ENST00000370276 | 343099    | NM_206886    | CCDC18         |
| A_23_P7172     | 11,2651 | 11,513  | -1,187477354 | ENST00000512556 | 55276     | NM_018290    | PGM2           |
| A_33_P3276813  | 6,80595 | 7,05389 | -1,187510278 | ENST00000370618 | 346007    | NM_001142800 | EYS            |
| A_22_P00020071 | 2,32699 | 2,57495 | -1,18752674  | N/A             | N/A       | N/A          | Inc-ZDHHC9-1   |
| A_23_P201097   | 14,2899 | 14,5379 | -1,187559666 | ENST00000464858 | 2987      | NM_000858    | GUK1           |
| A_33_P3385912  | 5,41638 | 5,66443 | -1,187600824 | N/A             | N/A       | N/A          | N/A            |
| A_23_P46170    | 10,598  | 10,8461 | -1,187641984 | ENST00000372457 | 112950    | NM_201542    | MED8           |
| A_21_P0007722  | 1,57818 | 1,82628 | -1,187641984 | N/A             | N/A       | N/A          | Inc-IFNG-2     |
| A_21_P0010657  | 2,26709 | 2,51519 | -1,187641984 | ENST00000441085 | N/A       | N/A          | N/A            |
| A_22_P00017136 | 1,69078 | 1,93889 | -1,187650216 | ENST00000428474 | 101927156 | N/A          | LOC101927156   |
| A_24_P168994   | 3,4067  | 3,65482 | -1,187658449 | ENST00000491819 | 353149    | NM_178571    | TBC1D26        |
| A_33_P3261054  | 5,33273 | 5,58086 | -1,187666681 | ENST00000315396 | 93233     | NM_144577    | CCDC114        |
| A_33_P3328289  | 4,39696 | 4,64513 | -1,18769961  | N/A             | N/A       | N/A          | N/A            |
| A_24_P113221   | 11,506  | 11,7542 | -1,187724308 | ENST00000399061 | 7572      | NM_006965    | ZNF24          |
| A_22_P00008730 | 1,34545 | 1,59369 | -1,187757239 | N/A             | N/A       | N/A          | Inc-KIAA1755-1 |
| A_33_P3227482  | 1,69294 | 1,94125 | -1,187814871 | ENST00000604907 | 100533789 | NR_126038    | LRRC37A8P      |
| A_24_P357518   | 14,3696 | 14,618  | -1,187888973 | ENST00000493462 | 6144      | NM_000982    | RPL21          |
| A_33_P3263938  | 4,05271 | 4,30113 | -1,187905441 | ENST00000316144 | 389812    | NM_203347    | LCN15          |
| A_32_P389118   | 6,41561 | 6,66405 | -1,187921909 | ENST00000233099 | 54497     | NM_019024    | HEATR5B        |
| A_33_P3278187  | 8,16322 | 8,41169 | -1,187946611 | ENST00000375259 | 11046     | NM_001286990 | SLC35D2        |
| A_23_P434398   | 1,48828 | 1,73677 | -1,18796308  | ENST00000358430 | 167838    | NM_153235    | TXLNB          |
| A_19_P00320716 | 2,89357 | 3,14211 | -1,188004252 | ENST00000479612 | 100302640 | N/A          | LINC00882      |
| A_24_P408715   | 1,53114 | 1,77971 | -1,188028956 | ENST00000296292 | 91869     | NM_052859    | RFT1           |
| A_33_P3224045  | 12,9489 | 13,1975 | -1,188053661 | ENST00000301264 | 1613      | NM_001348    | DAPK3          |
| A_32_P62863    | 12,1669 | 12,4155 | -1,188053661 | ENST00000412423 | 29970     | NM_014575    | SCHIP1         |
| A_22_P00010847 | 2,88834 | 3,13702 | -1,188119542 | N/A             | N/A       | N/A          | Inc-NOM1-4     |
| A_23_P60627    | 5,54878 | 5,79755 | -1,188193664 | ENST00000380173 | 247       | NM_001141    | ALOX15B        |

|                |         |         |              |                 |           |              |              |
|----------------|---------|---------|--------------|-----------------|-----------|--------------|--------------|
| A_24_P179611   | 11,9908 | 12,2396 | -1,188218372 | ENST00000613151 | 7175      | NM_003292    | TPR          |
| A_23_P129101   | 12,5986 | 12,8475 | -1,188300735 | ENST00000569410 | 3073      | NM_000520    | HEXA         |
| A_22_P00016621 | 8,97177 | 9,22069 | -1,188317209 | N/A             | 100507316 | NR_120683    | LOC100507316 |
| A_33_P3273459  | 4,45221 | 4,70113 | -1,188317209 | ENST00000466212 | 374955    | XR_241189    | SPATA21      |
| A_22_P00008124 | 1,80432 | 2,05325 | -1,188325446 | N/A             | N/A       | N/A          | Inc-IL3-3    |
| A_33_P3266614  | 7,20372 | 7,45265 | -1,188325446 | N/A             | N/A       | N/A          | N/A          |
| A_33_P3346533  | 7,39973 | 7,64867 | -1,188333683 | N/A             | N/A       | N/A          | N/A          |
| A_21_P0009617  | 4,90795 | 5,15691 | -1,188350157 | ENST00000583578 | 284276    | NR_015417    | LINC00908    |
| A_21_P0002702  | 6,98375 | 7,23271 | -1,188350157 | N/A             | 100506637 | NR_109996    | PRKAR2A-AS1  |
| A_22_P00010038 | 1,70832 | 1,95731 | -1,188374868 | ENST00000561934 | N/A       | N/A          | N/A          |
| A_23_P23017    | 11,2505 | 11,4995 | -1,188383105 | ENST00000470385 | 54987     | NM_017887    | C1orf123     |
| A_33_P3335746  | 6,23707 | 6,48615 | -1,188449005 | ENST00000395589 | 10302     | NM_006049    | SNAPC5       |
| A_33_P3332997  | 1,54523 | 1,79434 | -1,188473718 | ENST00000557418 | 3169      | N/A          | FOXA1        |
| A_23_P139198   | 2,39799 | 2,64718 | -1,188539623 | ENST00000394618 | 85329     | NM_033101    | LGALS12      |
| A_33_P3667484  | 14,0248 | 14,274  | -1,188547861 | ENST00000491397 | 648740    | NR_024438    | ACTG1P4      |
| A_21_P0003897  | 1,55036 | 1,79958 | -1,188564338 | N/A             | N/A       | N/A          | Inc-UGT2A3-1 |
| A_33_P3265270  | 5,02588 | 5,27517 | -1,188622009 | ENST00000481996 | 26503     | NM_012434    | SLC17A5      |
| A_23_P59481    | 10,4434 | 10,6927 | -1,188630248 | ENST00000470408 | 9690      | NM_014671    | UBE3C        |
| A_23_P119857   | 9,86298 | 10,1123 | -1,188646726 | ENST00000495698 | 130502    | NM_001008237 | TTC32        |
| A_22_P00022502 | 5,39231 | 5,64168 | -1,188687922 | ENST00000457813 | N/A       | N/A          | N/A          |
| A_33_P3236267  | 14,0571 | 14,3065 | -1,18871264  | ENST00000515031 | 201853    | NR_126435    | LINC00504    |
| A_33_P3382331  | 5,16389 | 5,41336 | -1,188770319 | ENST00000445535 | 3310      | NM_002155    | HSPA6        |
| A_23_P200792   | 12,3056 | 12,5551 | -1,188795039 | ENST00000256646 | 4853      | NM_024408    | NOTCH2       |
| A_23_P48455    | 8,45947 | 8,70897 | -1,188795039 | ENST00000541086 | 81693     | NM_030943    | AMN          |
| A_21_P0013912  | 4,67421 | 4,92372 | -1,188803279 | ENST00000328759 | 374920    | NM_199341    | C19orf68     |
| A_33_P3292851  | 7,9019  | 8,15142 | -1,188811519 | N/A             | 7329      | XM_006720938 | UBE2I        |
| A_33_P3356406  | 6,20718 | 6,45677 | -1,188869202 | ENST00000402219 | 6654      | NM_005633    | SOS1         |
| A_21_P0006243  | 2,07117 | 2,32076 | -1,188869202 | N/A             | N/A       | N/A          | Inc-EGFL7-2  |
| A_33_P3324894  | 4,04249 | 4,29218 | -1,188951611 | N/A             | N/A       | AK130532     | N/A          |
| A_22_P00002120 | 2,6961  | 2,94586 | -1,189009301 | N/A             | 102724551 | XR_425930    | LOC102724551 |
| A_33_P3232562  | 9,47204 | 9,72181 | -1,189017542 | ENST00000373493 | 5928      | NM_005610    | RBBP4        |
| A_21_P0011637  | 4,3197  | 4,5695  | -1,189042267 | ENST00000584962 | 644945    | NR_029393    | KRT16P3      |
| A_22_P00010807 | 5,74661 | 5,99645 | -1,189075235 | N/A             | 101978719 | NR_104091    | LINC00970    |

|                |         |         |              |                 |           |              |                    |
|----------------|---------|---------|--------------|-----------------|-----------|--------------|--------------------|
| A_22_P00009064 | 3,51855 | 3,76844 | -1,189116446 | N/A             | N/A       | AA292921     | Inc-LEO1-4         |
| A_33_P3261973  | 5,78673 | 6,03663 | -1,189124688 | ENST00000369564 | 10717     | NM_006594    | AP4B1              |
| A_22_P00022495 | 1,58184 | 1,83175 | -1,189132931 | ENST00000435301 | 101927512 | XR_425250    | LOC101927512       |
| A_23_P43079    | 9,09496 | 9,34502 | -1,189256574 | ENST00000521155 | 55656     | NM_017864    | INTS8              |
| A_21_P0002374  | 3,70513 | 3,95522 | -1,189281304 | N/A             | N/A       | N/A          | Inc-AC112715.2.1-3 |
| A_23_P130444   | 7,33852 | 7,58865 | -1,189314278 | ENST00000301093 | 55762     | NM_018260    | ZNF701             |
| A_22_P00018820 | 1,52469 | 1,77489 | -1,189371986 | N/A             | N/A       | BG697942     | Inc-CES1-3         |
| A_33_P3352995  | 2,45018 | 2,70045 | -1,189429696 | ENST00000382614 | 387733    | NM_001025295 | IFITM5             |
| A_33_P3380612  | 5,7245  | 5,97481 | -1,189462674 | ENST00000412328 | 3339      | NM_005529    | HSPG2              |
| A_22_P00011022 | 2,59585 | 2,84621 | -1,189503898 | ENST00000448740 | N/A       | AK093256     | N/A                |
| A_33_P3315342  | 4,53553 | 4,7859  | -1,189512143 | ENST00000441785 | 128272    | NM_153213    | ARHGEF19           |
| A_22_P00018981 | 1,80087 | 2,05125 | -1,189520389 | N/A             | N/A       | N/A          | Inc-CYP11B1-1      |
| A_33_P8921834  | 2,0618  | 2,31233 | -1,189644072 | N/A             | N/A       | XM_005264708 | Inc-ACP1-7         |
| A_22_P00014366 | 5,77773 | 6,02827 | -1,189652318 | N/A             | 100506428 | NR_038894    | CBR3-AS1           |
| A_21_P0012800  | 1,50135 | 1,752   | -1,189743028 | ENST00000513895 | 641365    | N/A          | LINC00616          |
| A_33_P3424577  | 7,95466 | 8,20532 | -1,189751275 | ENST00000613594 | N/A       | A23747       | N/A                |
| A_21_P0012262  | 1,87484 | 2,12554 | -1,189784262 | ENST00000433457 | N/A       | N/A          | N/A                |
| A_33_P3356230  | 1,63857 | 1,88938 | -1,189874982 | ENST00000327925 | 339184    | NM_001004306 | CCDC144NL          |
| A_33_P3860067  | 4,19115 | 4,442   | -1,189907973 | ENST00000439423 | N/A       | BC009388     | N/A                |
| A_22_P00024925 | 2,84873 | 3,09958 | -1,189907973 | N/A             | 101410540 | NR_102707    | FANK1-AS1          |
| A_22_P00023662 | 3,8303  | 4,08125 | -1,189990454 | ENST00000445585 | N/A       | N/A          | N/A                |
| A_33_P3390678  | 1,64935 | 1,90031 | -1,189998702 | N/A             | N/A       | N/A          | N/A                |
| A_33_P3314643  | 5,45521 | 5,7063  | -1,190105937 | ENST00000463490 | 25876     | NM_015417    | SPEF1              |
| A_22_P00008793 | 1,78689 | 2,03803 | -1,190147183 | ENST00000426090 | N/A       | N/A          | N/A                |
| A_21_P0007178  | 1,5029  | 1,75409 | -1,190188431 | N/A             | N/A       | N/A          | Inc-PDE3B-1        |
| A_23_P390596   | 11,4817 | 11,7329 | -1,190196681 | ENST00000291041 | 5681      | NM_006742    | PSKH1              |
| A_21_P0005725  | 1,58402 | 1,83523 | -1,190204931 | N/A             | N/A       | N/A          | Inc-HNF4G-1        |
| A_22_P00023649 | 1,59668 | 1,84795 | -1,190254431 | ENST00000441665 | N/A       | N/A          | N/A                |
| A_21_P0007058  | 1,43868 | 1,68996 | -1,190262682 | N/A             | N/A       | N/A          | Inc-C10orf136-1    |
| A_33_P3229239  | 5,59341 | 5,8447  | -1,190270932 | ENST00000369167 | 440689    | N/A          | HIST2H2BF          |
| A_21_P0014003  | 6,80717 | 7,05847 | -1,190279182 | ENST00000521821 | 667       | N/A          | DST                |
| A_23_P73721    | 5,94737 | 6,1987  | -1,190303934 | ENST00000262850 | 10325     | NM_016656    | RRAGB              |
| A_21_P0002976  | 7,22782 | 7,47922 | -1,190361689 | N/A             | N/A       | N/A          | Inc-GPR27-2        |

|                |         |         |              |                 |           |              |             |
|----------------|---------|---------|--------------|-----------------|-----------|--------------|-------------|
| A_33_P3403153  | 1,4976  | 1,74902 | -1,190378191 | ENST00000393975 | 114898    | NM_031908    | C1QTNF2     |
| A_22_P00015604 | 3,49705 | 3,74853 | -1,190427698 | N/A             | N/A       | N/A          | Inc-STYX-2  |
| A_23_P92754    | 5,31311 | 5,5646  | -1,19043595  | ENST00000502906 | 2264      | NM_213647    | FGFR4       |
| A_23_P204967   | 10,0065 | 10,258  | -1,190444201 | ENST00000361479 | 54737     | NM_017520    | MPHOSPH8    |
| A_23_P131588   | 1,50666 | 1,75816 | -1,190444201 | ENST00000295379 | 27302     | NM_014482    | BMP10       |
| A_24_P128524   | 5,6137  | 5,86521 | -1,190452453 | ENST00000343813 | 23463     | NM_012405    | ICMT        |
| A_22_P00017153 | 1,81516 | 2,0667  | -1,190477208 | ENST00000423667 | N/A       | N/A          | N/A         |
| A_22_P00005762 | 1,66482 | 1,91649 | -1,190584486 | N/A             | N/A       | N/A          | Inc-ENO3-1  |
| A_22_P00002601 | 1,55261 | 1,80436 | -1,190650507 | N/A             | N/A       | N/A          | Inc-C1QBP-1 |
| A_33_P3227666  | 9,03254 | 9,28432 | -1,190675267 | ENST00000312916 | 55109     | NM_018046    | AGGF1       |
| A_21_P0002228  | 4,4586  | 4,71043 | -1,190716533 | N/A             | N/A       | N/A          | Inc-CEP68-1 |
| A_23_P98844    | 5,36849 | 5,62033 | -1,190724786 | ENST00000471370 | 115557    | NM_182947    | ARHGEF25    |
| A_21_P0009724  | 3,96133 | 4,21318 | -1,19073304  | N/A             | N/A       | N/A          | Inc-IGFL1-1 |
| A_21_P0005876  | 1,82854 | 2,08041 | -1,190749547 | N/A             | N/A       | N/A          | Inc-STK3-1  |
| A_32_P67259    | 13,4986 | 13,7505 | -1,190774308 | ENST00000515467 | 6389      | NM_004168    | SDHA        |
| A_21_P0006825  | 1,57548 | 1,8274  | -1,190790816 | ENST00000608526 | 439949    | XR_428664    | PRKCCQ-AS1  |
| A_23_P11461    | 12,7346 | 12,9866 | -1,190856849 | ENST00000490555 | 7335      | NM_001032288 | UBE2V1      |
| A_23_P132595   | 10,1964 | 10,4484 | -1,190856849 | ENST00000273038 | 9686      | NM_014667    | VGLL4       |
| A_22_P00009098 | 7,73212 | 7,9842  | -1,190922886 | N/A             | 100885776 | NR_047679    | UGDH-AS1    |
| A_23_P135990   | 3,78361 | 4,0357  | -1,190931141 | ENST00000310926 | 6578      | NM_005630    | SLCO2A1     |
| A_24_P311856   | 4,36751 | 4,61963 | -1,190955906 | ENST00000489611 | 1297      | NM_001851    | COL9A1      |
| A_23_P145555   | 1,58114 | 1,83332 | -1,191005438 | ENST00000274897 | 90523     | NM_138569    | MLIP        |
| A_22_P00008437 | 1,54552 | 1,79771 | -1,191013693 | N/A             | N/A       | N/A          | Inc-KAT7-4  |
| A_33_P3294578  | 12,0347 | 12,2869 | -1,191021949 | ENST00000476635 | 5584      | NM_002740    | PRKCI       |
| A_21_P0014659  | 4,77075 | 5,02299 | -1,191054971 | N/A             | N/A       | BU727401     | N/A         |
| A_24_P117942   | 8,89045 | 9,14284 | -1,191178814 | ENST00000557754 | 387990    | NM_207377    | TOMM20L     |
| A_23_P46315    | 10,9252 | 11,1776 | -1,191187071 | ENST00000393277 | 163259    | AK124287     | DENND2C     |
| A_21_P0000775  | 5,71432 | 5,96673 | -1,191195327 | N/A             | 100505975 | N/A          | ENO1-AS1    |
| A_23_P66715    | 8,37075 | 8,62316 | -1,191195327 | ENST00000487231 | 94005     | NM_033198    | PIGS        |
| A_33_P3228872  | 7,17979 | 7,43222 | -1,191211841 | ENST00000314594 | 27291     | NM_001256619 | R3HCC1L     |
| A_23_P4074     | 1,53614 | 1,78866 | -1,191286155 | ENST00000396219 | 146845    | NM_145054    | CFAP52      |
| A_21_P0014025  | 1,62221 | 1,87476 | -1,191310927 | N/A             | N/A       | U82306       | N/A         |
| A_33_P3361348  | 4,88196 | 5,13455 | -1,191343958 | ENST00000621574 | 246       | NM_001140    | ALOX15      |

|                |         |         |              |                 |           |              |                |
|----------------|---------|---------|--------------|-----------------|-----------|--------------|----------------|
| A_24_P279797   | 7,69714 | 7,94981 | -1,191410022 | ENST00000319545 | 84245     | NM_001031727 | MRI1           |
| A_21_P0007845  | 1,60101 | 1,85378 | -1,191492607 | ENST00000549914 | 102725316 | XR_424397    | LOC102725316   |
| A_22_P00022723 | 3,30916 | 3,56199 | -1,191542161 | N/A             | N/A       | N/A          | Inc-ALDH1A1-2  |
| A_22_P00016333 | 4,55621 | 4,80907 | -1,191566939 | N/A             | N/A       | BX282506     | Inc-TMEM159-2  |
| A_23_P78762    | 4,54556 | 4,79844 | -1,191583457 | ENST00000263278 | 51171     | NM_016246    | HSD17B14       |
| A_33_P3252359  | 9,48482 | 9,73776 | -1,191633015 | ENST00000392379 | 622       | NM_203314    | BDH1           |
| A_33_P3373715  | 6,30481 | 6,55775 | -1,191633015 | N/A             | N/A       | N/A          | N/A            |
| A_33_P3266550  | 9,04506 | 9,29801 | -1,191641275 | ENST00000611156 | 28        | NM_020469    | ABO            |
| A_21_P0010778  | 6,35076 | 6,60374 | -1,191666054 | N/A             | N/A       | N/A          | XLOC_I2_001134 |
| A_21_P0006494  | 3,40632 | 3,65931 | -1,191674314 | N/A             | N/A       | N/A          | Inc-ZNF673-2   |
| A_23_P27734    | 4,80005 | 5,05305 | -1,191682575 | ENST00000449844 | 4861      | NM_002517    | NPAS1          |
| A_23_P256504   | 2,7386  | 2,99166 | -1,191732136 | ENST00000265132 | 259       | NM_001633    | AMBP           |
| A_22_P00009727 | 1,51484 | 1,76792 | -1,191748657 | ENST00000556030 | 101927153 | NR_120321    | LOC101927153   |
| A_21_P0014458  | 5,55719 | 5,81027 | -1,191748657 | N/A             | N/A       | AK096487     | N/A            |
| A_21_P0001754  | 1,65719 | 1,91036 | -1,191823005 | N/A             | N/A       | N/A          | Inc-TMEM206-1  |
| A_23_P170839   | 12,3534 | 12,6066 | -1,191847788 | ENST00000391973 | 4735      | NM_001008491 | set-02         |
| A_22_P00006942 | 5,55462 | 5,80785 | -1,191872572 | N/A             | 400761    | NR_033981    | FLJ27354       |
| A_33_P3228305  | 8,86194 | 9,11521 | -1,191905619 | ENST00000378004 | 23092     | NM_015071    | ARHGAP26       |
| A_23_P162702   | 9,14319 | 9,39646 | -1,191905619 | ENST00000550722 | 283450    | NM_001109662 | HECTD4         |
| A_22_P00002995 | 4,69359 | 4,94689 | -1,191930404 | N/A             | N/A       | AL832252     | Inc-C6orf221-2 |
| A_33_P3400823  | 3,02403 | 3,27741 | -1,1919965   | ENST00000371980 | 541468    | NM_001013615 | LURAP1         |
| A_24_P362881   | 1,54433 | 1,79778 | -1,192054338 | ENST00000264538 | 55081     | NM_018010    | IFT57          |
| A_33_P3337044  | 11,8675 | 12,121  | -1,192095652 | ENST00000371897 | 11182     | NM_017585    | SLC2A6         |
| A_33_P3352941  | 5,85697 | 6,11048 | -1,192103915 | N/A             | 692224    | NR_003136    | FBXO22-AS1     |
| A_21_P0013952  | 7,77116 | 8,0247  | -1,192128704 | ENST00000580155 | 146713    | NM_001082575 | RBFOX3         |
| A_21_P0006770  | 2,08673 | 2,34029 | -1,192145231 | ENST00000427247 | N/A       | N/A          | N/A            |
| A_23_P337849   | 3,2336  | 3,48727 | -1,192236131 | ENST00000420342 | 11189     | NM_007185    | CELF3          |
| A_22_P00016519 | 1,46278 | 1,71649 | -1,192269187 | N/A             | 100874326 | NR_046774    | DSCAM-IT1      |
| A_22_P00010972 | 6,51176 | 6,76548 | -1,192277451 | N/A             | N/A       | N/A          | Inc-NRIP2-1    |
| A_21_P0003649  | 1,52454 | 1,77837 | -1,192368361 | N/A             | N/A       | N/A          | Inc-SPRY1-1    |
| A_23_P33984    | 7,11424 | 7,36807 | -1,192368361 | ENST00000380342 | 57393     | NM_020665    | TMEM27         |
| A_32_P158083   | 1,5212  | 1,77504 | -1,192376626 | N/A             | 375612    | NM_199000    | LHFPL3         |
| A_24_P178175   | 6,95668 | 7,21067 | -1,192500607 | ENST00000453783 | 2678      | NM_001288833 | GGT1           |



|                |         |         |              |                 |           |              |                 |
|----------------|---------|---------|--------------|-----------------|-----------|--------------|-----------------|
| A_22_P00008689 | 1,87925 | 2,13325 | -1,192508872 | N/A             | N/A       | N/A          | Inc-KIAA1147-2  |
| A_21_P0009769  | 1,53205 | 1,78612 | -1,192566735 | ENST00000588094 | 342908    | N/A          | ZNF404          |
| A_22_P00010077 | 4,99256 | 5,24664 | -1,192575001 | N/A             | N/A       | N/A          | Inc-MPHOSPH8-3  |
| A_22_P00014843 | 5,93138 | 6,18546 | -1,192575001 | ENST00000550684 | N/A       | DB161231     | N/A             |
| A_32_P25437    | 8,22119 | 8,47528 | -1,192583267 | ENST00000262461 | 6558      | NM_001046    | SLC12A2         |
| A_24_P307626   | 10,0893 | 10,3434 | -1,192591534 | ENST00000477338 | 480       | NM_144699    | ATP1A4          |
| A_33_P3372426  | 1,58868 | 1,84281 | -1,192616333 | ENST00000284987 | 11096     | NM_007038    | ADAMTS5         |
| A_23_P32021    | 8,76847 | 9,02261 | -1,1926246   | ENST00000375305 | 2176      | NM_000136    | FANCC           |
| A_22_P00009854 | 1,49218 | 1,74632 | -1,1926246   | N/A             | N/A       | AF339825     | Inc-METTTL21C-1 |
| A_22_P00006477 | 4,24878 | 4,50296 | -1,192657667 | N/A             | 100506994 | NR_038283    | PTPRG-AS1       |
| A_33_P3357964  | 4,34441 | 4,59862 | -1,192682468 | N/A             | 5170      | AF111845     | PDPK1           |
| A_33_P3223088  | 5,48285 | 5,73711 | -1,192723804 | ENST00000409374 | 9801      | XR_427001    | MRPL19          |
| A_21_P0011060  | 1,61233 | 1,8666  | -1,192732071 | N/A             | N/A       | N/A          | XLOC_I2_003073  |
| A_22_P00003254 | 3,23946 | 3,49384 | -1,192823016 | ENST00000575202 | N/A       | N/A          | N/A             |
| A_22_P00005527 | 3,26813 | 3,52262 | -1,192913967 | N/A             | N/A       | AK091810     | Inc-ECHDC3-2    |
| A_33_P3246995  | 14,195  | 14,4495 | -1,192922236 | ENST00000455434 | N/A       | N/A          | N/A             |
| A_33_P3266396  | 13,2737 | 13,5283 | -1,193004926 | ENST00000343938 | 80772     | NM_001029885 | CPTP            |
| A_33_P3371381  | 1,77833 | 2,03293 | -1,193004926 | ENST00000506596 | 728780    | N/A          | ANKDD1B         |
| A_33_P3415032  | 2,11144 | 2,36604 | -1,193004926 | ENST00000369769 | 3738      | NM_002232    | KCNA3           |
| A_21_P0001324  | 1,55549 | 1,81011 | -1,193021465 | ENST00000436742 | 149047    | N/A          | MGC27382        |
| A_33_P3410449  | 4,80581 | 5,06043 | -1,193021465 | ENST00000623402 | 91179     | NM_153334    | SCARF2          |
| A_21_P0000689  | 1,4945  | 1,74919 | -1,193079352 | ENST00000445785 | 100359394 | N/A          | LINC00102       |
| A_21_P0008246  | 1,46333 | 1,71811 | -1,193153782 | ENST00000620494 | N/A       | N/A          | N/A             |
| A_33_P3399733  | 3,72751 | 3,98235 | -1,193203405 | N/A             | N/A       | BC101193     | Inc-CDS1-2      |
| A_33_P3369663  | 9,29577 | 9,55061 | -1,193203405 | ENST00000450538 | 23353     | NM_001171945 | SUN1            |
| A_23_P103442   | 11,4271 | 11,682  | -1,19325303  | ENST00000487788 | 64769     | NM_022756    | MEAF6           |
| A_23_P204791   | 1,65758 | 1,9125  | -1,193269572 | ENST00000618760 | 4842      | NM_000620    | NOS1            |
| A_22_P00025496 | 3,12196 | 3,37691 | -1,193294386 | N/A             | N/A       | BG206007     | Inc-ZSWIM2-5    |
| A_19_P00319963 | 3,19514 | 3,45012 | -1,1933192   | ENST00000455005 | 101929683 | XR_242023    | LOC101929683    |
| A_33_P3289251  | 9,98519 | 10,2402 | -1,193344015 | N/A             | 644727    | AK095971     | LOC644727       |
| A_23_P55961    | 1,83515 | 2,09023 | -1,193401917 | ENST00000221399 | 7288      | NM_003323    | TULP2           |
| A_33_P3405285  | 13,3882 | 13,6433 | -1,193418462 | ENST00000229465 | 83445     | NM_001080554 | GSG1            |
| A_33_P3411885  | 7,25507 | 7,51025 | -1,193484641 | N/A             | 100128851 | AK127423     | LOC100128851    |

|                |         |         |              |                 |           |              |                       |
|----------------|---------|---------|--------------|-----------------|-----------|--------------|-----------------------|
| A_23_P6596     | 8,42336 | 8,67855 | -1,193492913 | ENST00000476918 | 3280      | NM_005524    | HES1                  |
| A_23_P130064   | 12,5026 | 12,7578 | -1,193501186 | ENST00000428788 | 11267     | NM_007241    | SNF8                  |
| A_23_P61810    | 10,2955 | 10,5508 | -1,193583916 | N/A             | 10458     | NM_017450    | BAIAP2                |
| A_21_P0004853  | 4,25584 | 4,51115 | -1,193592189 | N/A             | N/A       | N/A          | Inc-NRSN1-3           |
| A_22_P00019430 | 1,50243 | 1,75781 | -1,193650104 | ENST00000534666 | N/A       | DB249866     | N/A                   |
| A_23_P111005   | 12,4993 | 12,7547 | -1,193666652 | ENST00000510102 | 25844     | NM_015388    | YIPF3                 |
| A_21_P0000867  | 12,5473 | 12,8029 | -1,193832141 | N/A             | 100131117 | NR_038993    | ZBTB20-AS1            |
| A_33_P3423631  | 7,88425 | 8,13986 | -1,193840416 | ENST00000420906 | 7468      | NM_007331    | WHSC1                 |
| A_22_P00017747 | 1,55589 | 1,81154 | -1,193873516 | N/A             | N/A       | N/A          | Inc-YES1-2            |
| A_21_P0010972  | 1,88946 | 2,14514 | -1,193898343 | N/A             | 100507261 | XR_109044    | MIR670HG              |
| A_23_P68899    | 11,8382 | 12,0939 | -1,193914894 | ENST00000403313 | 25828     | NM_012473    | TXN2                  |
| A_19_P00320144 | 1,68732 | 1,94309 | -1,193972824 | N/A             | N/A       | N/A          | Inc-RP3-368B9.1.1-1   |
| A_21_P0014850  | 2,17816 | 2,43393 | -1,193972824 | N/A             | N/A       | N/A          | N/A                   |
| A_21_P0007209  | 1,66285 | 1,91864 | -1,193989376 | N/A             | N/A       | N/A          | Inc-CTD-2210P24.4.1-1 |
| A_22_P00004476 | 3,24631 | 3,50226 | -1,194121801 | N/A             | N/A       | AK094838     | Inc-CPM-1             |
| A_22_P00003381 | 3,56129 | 3,81739 | -1,194245963 | ENST00000580057 | N/A       | BG182041     | N/A                   |
| A_23_P109269   | 12,6235 | 12,8796 | -1,194245963 | ENST00000495695 | 3911      | NM_005560    | LAMA5                 |
| A_23_P357794   | 7,86655 | 8,12269 | -1,194279075 | ENST00000305949 | 27085     | NM_022045    | MTBP                  |
| A_24_P369694   | 10,4403 | 10,6965 | -1,194328745 | ENST00000556218 | 5527      | NM_178587    | PPP2R5C               |
| A_33_P3330404  | 5,85635 | 6,11262 | -1,194386695 | ENST00000538490 | 399888    | NM_001164379 | FAM180B               |
| A_23_P30913    | 3,71783 | 3,97412 | -1,194403253 | ENST00000511285 | 3113      | NM_033554    | HLA-DPA1              |
| A_24_P910733   | 10,6457 | 10,902  | -1,194411532 | ENST00000392456 | 152137    | NM_178335    | CCDC50                |
| A_33_P3289207  | 7,77413 | 8,03045 | -1,19442809  | N/A             | 22848     | BC090950     | AAK1                  |
| A_23_P325726   | 6,51944 | 6,77579 | -1,194452928 | ENST00000481208 | 26027     | NM_015547    | ACOT11                |
| A_21_P0001893  | 2,76129 | 3,01765 | -1,194461207 | ENST00000452037 | N/A       | N/A          | N/A                   |
| A_33_P3248982  | 3,88464 | 4,14103 | -1,194486046 | ENST00000320634 | 23017     | NM_012306    | FAIM2                 |
| A_24_P35478    | 8,43335 | 8,68975 | -1,194494325 | ENST00000374789 | 56288     | NM_019619    | PARD3                 |
| A_33_P3214056  | 12,5996 | 12,8562 | -1,194659929 | ENST00000443018 | 57234     | NR_111952    | LINC00869             |
| A_22_P00015150 | 1,65826 | 1,9149  | -1,194693052 | ENST00000430078 | 401281    | N/A          | FLJ27255              |
| A_33_P3253960  | 5,34318 | 5,59988 | -1,194742739 | ENST00000610443 | 79154     | AB209247     | DHRS11                |
| A_23_P123672   | 10,5833 | 10,84   | -1,194742739 | ENST00000355295 | 23424     | NM_014290    | TDRD7                 |
| A_21_P0000400  | 1,49952 | 1,75625 | -1,194767583 | N/A             | 767579    | NR_003195    | SNORD114-3            |
| A_32_P701268   | 1,64239 | 1,89913 | -1,194775865 | ENST00000474524 | 116931    | NM_053002    | MED12L                |

|                |         |         |              |                 |           |              |                  |
|----------------|---------|---------|--------------|-----------------|-----------|--------------|------------------|
| A_33_P3451157  | 13,7472 | 14,004  | -1,194825555 | N/A             | N/A       | AK054980     | N/A              |
| A_23_P63379    | 6,86083 | 7,1177  | -1,19488353  | ENST00000369111 | 23632     | NM_012113    | CA14             |
| A_23_P171255   | 10,8736 | 11,1305 | -1,194908377 | ENST00000583666 | 3476      | NM_001551    | IGBP1            |
| A_24_P376309   | 11,134  | 11,3909 | -1,194908377 | ENST00000612501 | 84687     | NM_032595    | PPP1R9B          |
| A_22_P00012883 | 5,3565  | 5,61342 | -1,194924942 | N/A             | N/A       | BC048201     | Inc-RBM11-2      |
| A_24_P65121    | 3,62447 | 3,88141 | -1,194941508 | ENST00000394135 | 64927     | NM_001288615 | TTC23            |
| A_23_P53724    | 7,10809 | 7,36503 | -1,194941508 | ENST00000266546 | 9746      | NM_014718    | CLSTN3           |
| A_22_P00000239 | 1,69922 | 1,9562  | -1,194974639 | N/A             | N/A       | N/A          | Inc-AC006035.2-5 |
| A_22_P00000675 | 1,62608 | 1,88307 | -1,194982922 | ENST00000414967 | N/A       | N/A          | N/A              |
| A_22_P00015665 | 1,50252 | 1,75952 | -1,194991205 | N/A             | N/A       | BG396090     | Inc-SYCE1L-1     |
| A_21_P0006297  | 4,15781 | 4,41483 | -1,195007771 | ENST00000474602 | 8555      | N/A          | CDC14B           |
| A_22_P00022469 | 1,43125 | 1,68831 | -1,195040904 | N/A             | N/A       | N/A          | Inc-RPIA-3       |
| A_24_P605081   | 4,92222 | 5,17932 | -1,195074038 | N/A             | 253039    | NR_024408    | PSMD5-AS1        |
| A_21_P0008534  | 1,54429 | 1,80147 | -1,195140309 | N/A             | N/A       | N/A          | Inc-TXNDC16-1    |
| A_32_P114574   | 11,6121 | 11,8693 | -1,195156877 | ENST00000367679 | 27101     | NM_014412    | CACYBP           |
| A_33_P3372104  | 4,82943 | 5,08669 | -1,195206584 | N/A             | N/A       | N/A          | N/A              |
| A_21_P0007179  | 2,06563 | 2,32298 | -1,195281147 | N/A             | N/A       | N/A          | Inc-INSC-2       |
| A_33_P3381410  | 6,93092 | 7,18839 | -1,195380572 | ENST00000410039 | 4999      | NM_006190    | ORC2             |
| A_23_P88817    | 8,17848 | 8,43596 | -1,195388857 | ENST00000569024 | 23417     | NM_012213    | MLYCD            |
| A_22_P00005332 | 10,6013 | 10,8588 | -1,195405429 | N/A             | N/A       | N/A          | Inc-DOLPP1-1     |
| A_21_P0001803  | 4,49679 | 4,75431 | -1,195422001 | ENST00000413842 | N/A       | N/A          | N/A              |
| A_23_P371129   | 8,34429 | 8,60182 | -1,195430287 | ENST00000294008 | 84464     | NM_032444    | SLX4             |
| A_22_P00011839 | 1,36217 | 1,61973 | -1,195455146 | ENST00000565451 | 101927132 | NR_110650    | LOC101927132     |
| A_21_P0004960  | 1,86146 | 2,11903 | -1,195463432 | N/A             | N/A       | N/A          | Inc-CLDN20-3     |
| A_23_P108708   | 13,2943 | 13,5519 | -1,195488291 | ENST00000461845 | 51255     | NM_016494    | RNF181           |
| A_22_P00005381 | 6,01126 | 6,26889 | -1,195513151 | N/A             | N/A       | N/A          | Inc-DRGX-1       |
| A_23_P314798   | 5,67879 | 5,93645 | -1,195538011 | ENST00000498036 | 127579    | NM_144622    | DCST2            |
| A_22_P00005562 | 7,6085  | 7,86619 | -1,195562872 | N/A             | 101927167 | NR_125398    | GATA2-AS1        |
| A_24_P115199   | 10,9038 | 11,1615 | -1,195571159 | ENST00000328914 | 221937    | NM_001037165 | FOXK1            |
| A_33_P3359253  | 2,79529 | 3,05302 | -1,19559602  | ENST00000376655 | 10459     | N/A          | MAD2L2           |
| A_24_P289404   | 16,236  | 16,4938 | -1,195654032 | ENST00000447425 | 6231      | NM_001029    | RPS26            |
| A_21_P0000497  | 5,44555 | 5,70337 | -1,195670608 | N/A             | 677849    | NR_004396    | SNORD1B          |
| A_23_P56787    | 2,66152 | 2,91937 | -1,195695471 | ENST00000431078 | 129684    | NM_130773    | CNTNAP5          |

|                |         |         |              |                 |           |              |                |
|----------------|---------|---------|--------------|-----------------|-----------|--------------|----------------|
| A_32_P45738    | 13,9549 | 14,2128 | -1,195736912 | ENST00000334828 | 5223      | NM_002629    | PGAM1          |
| A_22_P00013859 | 2,86684 | 3,12483 | -1,195811508 | ENST00000558309 | 145837    | N/A          | LOC145837      |
| A_33_P3306048  | 6,44253 | 6,70055 | -1,195836374 | N/A             | 503645    | NR_002221    | DPRXP4         |
| A_33_P3295108  | 8,91905 | 9,17707 | -1,195836374 | ENST00000318010 | 2595      | NM_198141    | GANC           |
| A_33_P3306442  | 2,60475 | 2,86278 | -1,195844663 | ENST00000524722 | 84074     | XM_005257728 | QRICH2         |
| A_22_P00019651 | 3,66457 | 3,92264 | -1,195877782 | ENST00000424592 | N/A       | N/A          | N/A            |
| A_22_P00019508 | 1,56088 | 1,81899 | -1,195910977 | ENST00000507849 | N/A       | N/A          | N/A            |
| A_23_P502882   | 9,81249 | 10,0706 | -1,195910977 | ENST00000346541 | 9139      | NM_005093    | CBFA2T2        |
| A_21_P0014309  | 3,19263 | 3,45082 | -1,195977294 | ENST00000553080 | 197335    | AK093609     | WDR90          |
| A_33_P3299487  | 4,97429 | 5,23257 | -1,196051905 | ENST00000374207 | 55057     | NM_001039775 | AIM1L          |
| A_23_P90143    | 18,2177 | 18,476  | -1,196068486 | ENST00000474171 | 23521     | NM_012423    | RPL13A         |
| A_21_P0007908  | 3,40031 | 3,65862 | -1,196076777 | ENST00000443778 | 100506697 | NR_038995    | LINC00327      |
| A_23_P329870   | 11,1838 | 11,4422 | -1,196151394 | ENST00000313080 | 79651     | NM_024599    | RHBDF2         |
| A_33_P3783235  | 6,15136 | 6,40979 | -1,196176268 | ENST00000607837 | N/A       | AK095104     | N/A            |
| A_23_P309989   | 6,0573  | 6,31575 | -1,196192851 | ENST00000247178 | 22863     | NM_014924    | ATG14          |
| A_21_P0004787  | 3,12877 | 3,38726 | -1,196226017 | ENST00000422023 | N/A       | N/A          | N/A            |
| A_33_P3385957  | 5,98607 | 6,24461 | -1,196267475 | ENST00000440761 | 25809     | NM_012263    | TTLL1          |
| A_23_P41437    | 9,86035 | 10,1189 | -1,196275767 | ENST00000510755 | 55325     | NM_018359    | UFSP2          |
| A_23_P151150   | 10,4277 | 10,6863 | -1,196317228 | ENST00000359843 | 2305      | NM_202002    | FOXMI          |
| A_21_P0009375  | 4,79979 | 5,05845 | -1,196366982 | N/A             | N/A       | N/A          | Inc-CYB5D2-1   |
| A_19_P00322017 | 1,69389 | 1,95256 | -1,196375275 | ENST00000450205 | 100126693 | N/A          | LINC00322      |
| A_22_P00015514 | 1,45764 | 1,71641 | -1,196458204 | N/A             | 101929294 | NR_125808    | LOC101929294   |
| A_33_P3383034  | 11,5262 | 11,785  | -1,196483084 | ENST00000246548 | 10054     | NM_005499    | UBA2           |
| A_24_P273143   | 12,6741 | 12,9329 | -1,196483084 | ENST00000455131 | 112597    | NR_024204    | LINC00152      |
| A_33_P3376954  | 4,11899 | 4,3778  | -1,196491377 | N/A             | N/A       | N/A          | XLOC_I2_001648 |
| A_33_P3288484  | 6,14373 | 6,40254 | -1,196491377 | ENST00000523377 | 57226     | NM_020466    | LYRM2          |
| A_21_P0011457  | 4,42769 | 4,68651 | -1,196499671 | N/A             | N/A       | N/A          | XLOC_I2_005403 |
| A_23_P92860    | 10,4455 | 10,7044 | -1,196566021 | ENST00000501463 | 10309     | NM_021147    | CCNO           |
| A_23_P216118   | 1,52617 | 1,78515 | -1,196632374 | ENST00000453357 | 137970    | NM_080872    | UNC5D          |
| A_33_P3859897  | 1,56387 | 1,8229  | -1,196673847 | N/A             | N/A       | AK098828     | Inc-KBTBD5-2   |
| A_23_P124642   | 4,92638 | 5,18541 | -1,196673847 | ENST00000539159 | 10125     | NM_005739    | RASGRP1        |
| A_19_P00322109 | 7,07139 | 7,33044 | -1,196690437 | N/A             | 401320    | NR_038889    | LOC401320      |
| A_32_P183765   | 2,85576 | 3,11483 | -1,196707026 | ENST00000436443 | 2066      | NM_005235    | ERBB4          |

|                |         |         |              |                 |        |              |                |
|----------------|---------|---------|--------------|-----------------|--------|--------------|----------------|
| A_23_P18267    | 10,0847 | 10,3438 | -1,196731911 | ENST00000479512 | 10641  | NM_006545    | NPRL2          |
| A_22_P00019724 | 1,47612 | 1,73525 | -1,196756797 | ENST00000456537 | N/A    | N/A          | N/A            |
| A_23_P138693   | 5,95082 | 6,20997 | -1,196773388 | ENST00000378150 | 9397   | NM_004808    | NMT2           |
| A_22_P00025891 | 2,96267 | 3,22182 | -1,196773388 | ENST00000428426 | N/A    | XR_243988    | N/A            |
| A_23_P169873   | 3,69845 | 3,95765 | -1,196814866 | ENST00000451043 | 7221   | N/A          | TRPC2          |
| A_22_P00004590 | 10,5709 | 10,8301 | -1,196814866 | N/A             | N/A    | N/A          | Inc-CS-1       |
| A_33_P3424694  | 3,77481 | 4,03405 | -1,196848049 | N/A             | N/A    | N/A          | XLOC_I2_000407 |
| A_22_P00024775 | 3,53047 | 3,78971 | -1,196848049 | N/A             | N/A    | U04815       | Inc-S100A1-2   |
| A_21_P0008208  | 3,06553 | 3,32477 | -1,196848049 | N/A             | N/A    | N/A          | Inc-EFNB2-5    |
| A_23_P368740   | 7,22512 | 7,48443 | -1,196906122 | ENST00000497036 | 83933  | NM_032019    | HDAC10         |
| A_19_P00800555 | 12,1309 | 12,3903 | -1,196980791 | N/A             | N/A    | N/A          | Inc-UQCRFS1-7  |
| A_33_P3278362  | 5,06408 | 5,32351 | -1,197005682 | ENST00000307518 | 26287  | NM_001291218 | ANKRD2         |
| A_21_P0004151  | 1,64574 | 1,90517 | -1,197005682 | ENST00000508719 | N/A    | N/A          | N/A            |
| A_24_P310894   | 13,6644 | 13,9239 | -1,197063762 | ENST00000263168 | 829    | NM_006135    | CAPZA1         |
| A_23_P21033    | 13,3307 | 13,5902 | -1,197063762 | ENST00000514075 | 8833   | NM_003875    | GMPS           |
| A_21_P0001467  | 6,87733 | 7,13685 | -1,197080357 | N/A             | N/A    | N/A          | Inc-MAD2L2-1   |
| A_33_P3235184  | 8,09144 | 8,35103 | -1,197138441 | ENST00000424673 | N/A    | N/A          | N/A            |
| A_33_P3331346  | 11,4837 | 11,7433 | -1,197146739 | ENST00000269383 | 201292 | NM_173547    | TRIM65         |
| A_23_P251132   | 1,49862 | 1,75825 | -1,197171633 | ENST00000308624 | 54221  | NM_018968    | SNTG2          |
| A_33_P3414903  | 11,8201 | 12,0798 | -1,197229722 | ENST00000463899 | 80896  | BC034966     | NPL            |
| A_33_P3279654  | 1,62314 | 1,88288 | -1,197262917 | ENST00000611759 | 401024 | NM_173651    | FSIP2          |
| A_33_P3278347  | 8,55991 | 8,81974 | -1,197337608 | N/A             | 114041 | NR_026542    | B3GALT5-AS1    |
| A_22_P00008302 | 4,75985 | 5,01972 | -1,197370806 | N/A             | N/A    | BX337828     | Inc-ITGAL-1    |
| A_33_P3379356  | 1,83713 | 2,09701 | -1,197379105 | ENST00000482101 | 2099   | NM_001122742 | ESR1           |
| A_23_P155376   | 10,6906 | 10,9506 | -1,197478705 | ENST00000397170 | 78987  | NM_015513    | CRELD1         |
| A_32_P98072    | 5,25636 | 5,51636 | -1,197478705 | ENST00000368804 | 7062   | NM_007113    | TCHH           |
| A_33_P3227798  | 1,58438 | 1,8444  | -1,197495305 | ENST00000379677 | N/A    | AK124439     | N/A            |
| A_21_P0009931  | 1,54399 | 1,80402 | -1,197503606 | ENST00000587737 | N/A    | N/A          | N/A            |
| A_22_P00025441 | 5,27806 | 5,53809 | -1,197503606 | N/A             | N/A    | BC070093     | Inc-ANKRD42-2  |
| A_23_P134433   | 13,2695 | 13,5296 | -1,19756171  | ENST00000297375 | 2020   | NM_001427    | EN2            |
| A_23_P69437    | 11,7202 | 11,9803 | -1,19756171  | ENST00000472593 | 55689  | NM_018023    | YEATS2         |
| A_22_P00008938 | 1,5004  | 1,76051 | -1,197570011 | ENST00000547538 | N/A    | N/A          | N/A            |
| A_22_P00015833 | 1,63821 | 1,8984  | -1,197636421 | ENST00000360528 | N/A    | N/A          | N/A            |

|                |         |         |              |                 |           |              |                    |
|----------------|---------|---------|--------------|-----------------|-----------|--------------|--------------------|
| A_21_P0000562  | 1,9374  | 2,19761 | -1,197653023 | N/A             | 100302740 | NR_028371    | FAS-AS1            |
| A_33_P3288659  | 4,42387 | 4,68409 | -1,197661325 | ENST00000617065 | 81569     | NM_030812    | ACTL8              |
| A_33_P3372288  | 2,35985 | 2,62009 | -1,197677928 | ENST00000334937 | 347344    | BC039609     | ZNF81              |
| A_33_P3525377  | 1,47388 | 1,73415 | -1,197702833 | N/A             | N/A       | AK123125     | Inc-PDE6B-1        |
| A_33_P3381762  | 8,94917 | 9,20946 | -1,197719437 | N/A             | N/A       | N/A          | N/A                |
| A_33_P3402868  | 4,50871 | 4,76901 | -1,197727739 | ENST00000263269 | 2906      | NM_000836    | GRIN2D             |
| A_33_P3231242  | 12,5419 | 12,8022 | -1,197727739 | ENST00000440229 | N/A       | N/A          | N/A                |
| A_33_P3395883  | 11,0425 | 11,3028 | -1,197727739 | N/A             | N/A       | N/A          | N/A                |
| A_22_P00000402 | 1,53965 | 1,79996 | -1,197736041 | N/A             | N/A       | N/A          | Inc-AC027763.2.1-2 |
| A_33_P3228252  | 12,7385 | 12,9989 | -1,197810762 | N/A             | N/A       | DA666023     | N/A                |
| A_33_P3319920  | 11,3418 | 11,6022 | -1,197810762 | ENST00000611640 | 23030     | NM_015015    | KDM4B              |
| A_22_P00017471 | 3,83502 | 4,09546 | -1,197843973 | N/A             | 100996654 | NR_110040    | LOC100996654       |
| A_22_P00018437 | 8,45795 | 8,7184  | -1,197852276 | ENST00000512245 | N/A       | N/A          | N/A                |
| A_22_P00022512 | 4,32281 | 4,58332 | -1,197902094 | N/A             | N/A       | XM_006723874 | Inc-OPRL1-1        |
| A_23_P39813    | 7,48845 | 7,74898 | -1,197918701 | ENST00000489152 | 64427     | NM_022492    | TTC31              |
| A_33_P3422247  | 1,79869 | 2,05925 | -1,197943611 | ENST00000618286 | 363       | NM_001652    | AQP6               |
| A_19_P00316985 | 4,32598 | 4,58657 | -1,197968522 | ENST00000421704 | 79940     | NR_121612    | LINC00472          |
| A_23_P15705    | 14,1664 | 14,427  | -1,197976826 | ENST00000571309 | 5694      | NM_002798    | PSMB6              |
| A_24_P276791   | 9,75872 | 10,0196 | -1,198209353 | ENST00000444987 | 115353    | NM_052940    | LRRC42             |
| A_33_P3384562  | 10,9891 | 11,25   | -1,198225964 | ENST00000355572 | 9260      | NM_213636    | PDLIM7             |
| A_24_P401870   | 2,40277 | 2,66367 | -1,198225964 | ENST00000314330 | 401563    | NM_207511    | C9orf139           |
| A_23_P73420    | 8,4983  | 8,75921 | -1,198234269 | ENST00000389328 | 83696     | NM_031466    | TRAPPC9            |
| A_21_P0005185  | 3,10131 | 3,36224 | -1,19825088  | N/A             | 401287    | XR_428063    | LOC401287          |
| A_23_P390958   | 3,0143  | 3,27524 | -1,198259186 | ENST00000526308 | 54660     | AF217743     | PCDHB18P           |
| A_23_P73114    | 5,34826 | 5,60923 | -1,198284103 | ENST00000394236 | 5627      | NM_000313    | PROS1              |
| A_22_P00021523 | 5,08592 | 5,34689 | -1,198284103 | ENST00000580326 | N/A       | BX119021     | N/A                |
| A_23_P77048    | 12,8262 | 13,0872 | -1,198309021 | ENST00000359232 | 123096    | NM_001039355 | SLC25A29           |
| A_32_P194115   | 8,53614 | 8,79718 | -1,198342246 | ENST00000406622 | 25777     | NM_015374    | SUN2               |
| A_33_P3296313  | 1,52207 | 1,78315 | -1,198375472 | N/A             | N/A       | N/A          | N/A                |
| A_22_P00005605 | 1,55491 | 1,81603 | -1,198408698 | N/A             | 729723    | NR_034113    | DNAJC27-AS1        |
| A_33_P3224380  | 11,4296 | 11,6908 | -1,198475154 | ENST00000392381 | 1739      | NM_001098424 | DLG1               |
| A_32_P57728    | 12,0694 | 12,3306 | -1,198475154 | N/A             | 5379      | NR_003613    | PMS2P1             |
| A_24_P181422   | 8,77538 | 9,03674 | -1,198608076 | ENST00000415968 | 117155    | NM_054020    | CATSPER2           |

|                |         |         |              |                 |           |              |                    |
|----------------|---------|---------|--------------|-----------------|-----------|--------------|--------------------|
| A_33_P3388391  | 12,2596 | 12,521  | -1,198641309 | ENST00000339480 | 127534    | NM_153212    | GJB4               |
| A_33_P3265111  | 1,9259  | 2,18736 | -1,19869116  | ENST00000591008 | 284424    | NR_027148    | MIR7-3HG           |
| A_23_P337726   | 17,3671 | 17,6286 | -1,198724396 | ENST00000361899 | 4508      | AK131288     | ATP6               |
| A_33_P3327799  | 13,1475 | 13,409  | -1,198724396 | ENST00000584430 | N/A       | N/A          | N/A                |
| A_23_P118246   | 10,7468 | 11,0083 | -1,198724396 | ENST00000253462 | 51659     | NM_016095    | GIN52              |
| A_22_P00012339 | 3,92745 | 4,18899 | -1,198757632 | N/A             | N/A       | N/A          | Inc-PRDM13-4       |
| A_22_P00018321 | 4,33368 | 4,59531 | -1,198832416 | ENST00000620923 | 23145     | NM_198455    | SSPO               |
| A_21_P0006869  | 1,50613 | 1,7678  | -1,198865656 | N/A             | 102724306 | XR_424117    | LOC102724306       |
| A_21_P0000263  | 8,92865 | 9,19038 | -1,198915516 | ENST00000584056 | 619505    | NR_002576    | SNORA21            |
| A_23_P369666   | 8,49065 | 8,75252 | -1,199031865 | ENST00000468376 | 23613     | AL137703     | ZMYND8             |
| A_23_P10206    | 6,60188 | 6,86376 | -1,199040176 | ENST00000303924 | 3037      | NM_005328    | HAS2               |
| A_23_P149992   | 12,6249 | 12,8868 | -1,199056799 | ENST00000490391 | 9124      | NM_020992    | PDLIM1             |
| A_32_P187599   | 13,8055 | 14,0674 | -1,199056799 | ENST00000510079 | 26135     | NM_001018067 | SERBP1             |
| A_33_P3214874  | 12,8443 | 13,1062 | -1,199056799 | ENST00000373625 | 23633     | NM_012316    | KPNA6              |
| A_21_P0010789  | 4,29485 | 4,55676 | -1,19906511  | ENST00000429227 | N/A       | N/A          | N/A                |
| A_23_P250358   | 6,50882 | 6,77074 | -1,199073421 | ENST00000273960 | 55008     | NM_017912    | HERC6              |
| A_33_P3414683  | 5,3935  | 5,65552 | -1,199156538 | ENST00000301332 | 90990     | NM_145754    | KIFC2              |
| A_33_P3297345  | 3,56712 | 3,82917 | -1,199181474 | ENST00000368236 | 164118    | NM_001105669 | TTC24              |
| A_21_P0012021  | 2,24956 | 2,51161 | -1,199181474 | N/A             | N/A       | N/A          | Inc-AC114783.1.1-1 |
| A_32_P205241   | 5,75217 | 6,01427 | -1,199223035 | ENST00000241125 | 2700      | NM_021954    | GJA3               |
| A_23_P167444   | 12,9274 | 13,1895 | -1,199223035 | ENST00000457472 | 10412     | NM_014886    | NSA2               |
| A_23_P337658   | 3,28036 | 3,54247 | -1,199231347 | ENST00000457560 | 248       | NM_001631    | ALPI               |
| A_23_P24529    | 8,29312 | 8,55524 | -1,19923966  | ENST00000532163 | 55216     | NM_018195    | C11orf57           |
| A_22_P00017768 | 3,91555 | 4,17768 | -1,199247972 | ENST00000567259 | N/A       | BC015673     | N/A                |
| A_33_P3251582  | 4,91786 | 5,18015 | -1,19938098  | ENST00000461945 | 55604     | NM_001173977 | LRRC16A            |
| A_23_P24384    | 11,2874 | 11,5497 | -1,199389294 | ENST00000463837 | 283234    | NM_032251    | CCDC88B            |
| A_33_P3573141  | 3,30533 | 3,5677  | -1,19944749  | ENST00000612143 | N/A       | N/A          | N/A                |
| A_33_P3274851  | 14,7501 | 15,0125 | -1,199472432 | ENST00000491989 | 1329      | NM_001862    | COX5B              |
| A_22_P00018311 | 1,71752 | 1,97996 | -1,199505689 | N/A             | N/A       | N/A          | Inc-ZNF85-1        |
| A_32_P234738   | 15,368  | 15,6305 | -1,199555576 | ENST00000493317 | 6144      | NM_000982    | RPL21              |
| A_21_P0013024  | 1,6556  | 1,91812 | -1,199572206 | ENST00000573382 | 101929726 | XR_242025    | LOC101929726       |
| A_23_P354341   | 1,48152 | 1,74413 | -1,199647041 | ENST00000369288 | 11126     | NM_007053    | CD160              |
| A_21_P0002276  | 5,29026 | 5,55287 | -1,199647041 | N/A             | N/A       | N/A          | Inc-INSIG2-3       |

|                |         |         |              |                 |           |              |              |
|----------------|---------|---------|--------------|-----------------|-----------|--------------|--------------|
| A_24_P79403    | 2,43233 | 2,69498 | -1,199680303 | ENST00000296029 | 5196      | NM_002619    | PF4          |
| A_33_P3265744  | 3,13392 | 3,39667 | -1,199763461 | N/A             | 5733      | NM_198715    | PTGER3       |
| A_33_P3325195  | 8,98305 | 9,24583 | -1,19978841  | N/A             | 22997     | AB028953     | IGSF9B       |
| A_22_P00012821 | 1,59481 | 1,85762 | -1,199813359 | N/A             | 101927969 | XR_249895    | LOC101927969 |
| A_22_P00021770 | 8,0782  | 8,34102 | -1,199821675 | N/A             | N/A       | AK000821     | Inc-RHOC-1   |
| A_33_P3335022  | 5,95248 | 6,21531 | -1,199829992 | ENST00000615794 | 57730     | XM_006712662 | ANKRD36B     |
| A_23_P168357   | 1,60537 | 1,86825 | -1,199871576 | ENST00000011292 | 1357      | BT007313     | CPA1         |
| A_24_P414332   | 8,02947 | 8,29236 | -1,199879893 | ENST00000307808 | 4299      | NM_005935    | AFF1         |
| A_23_P26468    | 10,1537 | 10,4166 | -1,19988821  | ENST00000219551 | 9028      | NM_001278720 | RHBDL1       |
| A_32_P80255    | 8,5081  | 8,77103 | -1,199913161 | ENST00000620157 | 1656      | NM_001257191 | DDX6         |
| A_22_P00009610 | 7,77448 | 8,03741 | -1,199913161 | ENST00000582505 | N/A       | N/A          | N/A          |
| A_22_P00008923 | 3,97687 | 4,23981 | -1,199921478 | N/A             | N/A       | BC037882     | Inc-KPNA4-1  |
| A_33_P3403963  | 1,50794 | 1,77092 | -1,199954747 | ENST00000377602 | 338596    | NM_001004470 | ST8SIA6      |
| A_24_P76358    | 12,0178 | 12,2808 | -1,199971382 | ENST00000398190 | N/A       | N/A          | N/A          |
| A_32_P57854    | 13,626  | 13,889  | -1,199971382 | ENST00000429985 | 100128731 | NM_001134693 | OST4         |
| A_21_P0005814  | 4,0233  | 4,28634 | -1,200004653 | N/A             | N/A       | N/A          | Inc-GSR-1    |
| A_22_P00017667 | 6,49858 | 6,76162 | -1,200004653 | ENST00000524770 | 100508120 | NR_046229    | GMDS-AS1     |
| A_22_P00024184 | 1,53494 | 1,79803 | -1,200046243 | ENST00000515692 | N/A       | N/A          | N/A          |
| A_23_P106906   | 13,1436 | 13,4067 | -1,200054561 | ENST00000345988 | 5493      | NM_002705    | PPL          |
| A_33_P3412317  | 4,69974 | 4,96287 | -1,200079516 | N/A             | N/A       | N/A          | N/A          |
| A_24_P83808    | 11,8085 | 12,0717 | -1,200137745 | ENST00000518383 | N/A       | N/A          | N/A          |
| A_33_P3293169  | 6,86844 | 7,13167 | -1,200162702 | ENST00000528950 | 55626     | NM_001300731 | AMBRA1       |
| A_21_P0001363  | 1,63262 | 1,89589 | -1,200195978 | N/A             | N/A       | N/A          | Inc-UBL4B-1  |
| A_33_P3280805  | 8,3824  | 8,64567 | -1,200195978 | ENST00000357063 | 4008      | NM_015842    | LMO7         |
| A_23_P46639    | 1,51323 | 1,77652 | -1,200212616 | ENST00000361249 | 731       | NM_000562    | C8A          |
| A_23_P60534    | 10,3829 | 10,6463 | -1,200304131 | ENST00000472723 | 27433     | NM_130459    | TOR2A        |
| A_23_P95879    | 17,8808 | 18,1442 | -1,200304131 | ENST00000439590 | 6169      | NM_000999    | RPL38        |
| A_22_P00001386 | 1,43237 | 1,69587 | -1,200387333 | ENST00000512900 | N/A       | N/A          | N/A          |
| A_23_P169437   | 12,5618 | 12,8253 | -1,200387333 | ENST00000373017 | 3934      | NM_005564    | LCN2         |
| A_23_P206059   | 12,9743 | 13,2378 | -1,200387333 | ENST00000361188 | 9055      | NM_003981    | PRC1         |
| A_21_P0010537  | 3,83685 | 4,10037 | -1,200403974 | ENST00000394662 | 400759    | N/A          | GBP1P1       |
| A_22_P00019116 | 2,15357 | 2,41712 | -1,200428936 | ENST00000555460 | N/A       | N/A          | N/A          |
| A_23_P159125   | 14,7662 | 15,0298 | -1,20047054  | ENST00000450736 | 9121      | NM_004695    | SLC16A5      |



|                |         |         |              |                 |           |              |                |
|----------------|---------|---------|--------------|-----------------|-----------|--------------|----------------|
| A_22_P00001918 | 1,49075 | 1,75435 | -1,20047054  | N/A             | N/A       | BC039302     | Inc-BAI1-1     |
| A_22_P00003413 | 1,55627 | 1,81996 | -1,200545432 | ENST00000439237 | 102725407 | XR_425532    | LOC102725407   |
| A_21_P0008639  | 1,65289 | 1,91686 | -1,200778458 | N/A             | N/A       | N/A          | Inc-C2CD4A-6   |
| A_23_P201002   | 13,5203 | 13,7843 | -1,200803427 | ENST00000480686 | 55182     | NM_018150    | RNF220         |
| A_23_P422724   | 12,081  | 12,345  | -1,200803427 | ENST00000306442 | 5480      | NM_000943    | PPIC           |
| A_33_P3295009  | 6,26285 | 6,5269  | -1,200845045 | ENST00000432854 | N/A       | AB209486     | Inc-AEBP1-1    |
| A_33_P3659876  | 9,17369 | 9,43776 | -1,200861692 | ENST00000467785 | 54892     | NM_001281932 | NCAPG2         |
| A_33_P3379956  | 1,52    | 1,78413 | -1,200911636 | ENST00000342355 | N/A       | AK126066     | N/A            |
| A_22_P00025175 | 6,84335 | 7,10749 | -1,20091996  | ENST00000427824 | N/A       | BC045184     | N/A            |
| A_33_P3418400  | 4,44862 | 4,7128  | -1,200953257 | ENST00000282185 | 83734     | NM_001131028 | ATG10          |
| A_23_P106117   | 1,69677 | 1,96103 | -1,201019854 | ENST00000327720 | 4990      | NM_007374    | SIX6           |
| A_33_P3315331  | 5,18049 | 5,44478 | -1,201044828 | ENST00000221818 | 79935     | NM_024877    | CNTD2          |
| A_22_P00011282 | 2,02611 | 2,2904  | -1,201044828 | ENST00000527565 | 283299    | NR_036678    | LOC283299      |
| A_33_P3311825  | 1,59276 | 1,85705 | -1,201044828 | ENST00000520457 | 93668     | NR_026684    | HPYR1          |
| A_23_P45524    | 15,0401 | 15,3044 | -1,201053154 | ENST00000372635 | 27018     | NM_014380    | NGFRAP1        |
| A_19_P00320498 | 1,6327  | 1,89702 | -1,201069804 | ENST00000418918 | 440823    | NR_033319    | MIAT           |
| A_33_P3345643  | 7,53078 | 7,79517 | -1,201128081 | ENST00000522356 | N/A       | N/A          | N/A            |
| A_23_P65963    | 11,4201 | 11,6845 | -1,201136407 | ENST00000619034 | 51283     | NM_016561    | BFAR           |
| A_22_P00007297 | 4,81172 | 5,07613 | -1,201144733 | N/A             | N/A       | N/A          | Inc-GPR3-2     |
| A_33_P3718152  | 2,54279 | 2,80727 | -1,201203014 | N/A             | N/A       | AK055876     | Inc-ACOT1-3    |
| A_33_P3399468  | 12,9101 | 13,1747 | -1,201302931 | N/A             | 100133182 | XR_429801    | LOC100133182   |
| A_23_P204087   | 8,68887 | 8,95352 | -1,201344566 | ENST00000620097 | 4939      | NM_016817    | OAS2           |
| A_24_P74981    | 9,91397 | 10,1787 | -1,201411185 | ENST00000356634 | 23028     | NM_015013    | KDM1A          |
| A_21_P0011194  | 1,52154 | 1,78627 | -1,201411185 | N/A             | N/A       | N/A          | XLOC_I2_004115 |
| A_33_P3243622  | 8,05125 | 8,31607 | -1,201486135 | ENST00000407642 | 50717     | NM_015726    | DCAF8          |
| A_22_P00013112 | 5,22438 | 5,48937 | -1,20162772  | ENST00000433761 | N/A       | N/A          | N/A            |
| A_33_P3301040  | 4,35599 | 4,62103 | -1,201669366 | ENST00000357759 | 11148     | NM_001282558 | HHLA2          |
| A_33_P3375646  | 5,83194 | 6,097   | -1,201686025 | N/A             | 8225      | AK296003     | GTPBP6         |
| A_21_P0006135  | 5,55489 | 5,82006 | -1,201777653 | N/A             | N/A       | N/A          | Inc-IFNK-1     |
| A_22_P00010173 | 10,4876 | 10,7528 | -1,201802643 | N/A             | 100505641 | NR_046251    | FGD5-AS1       |
| A_32_P16315    | 4,36729 | 4,6325  | -1,201810973 | ENST00000568584 | 347688    | N/A          | TUBB8          |
| A_22_P00008239 | 8,28036 | 8,54568 | -1,20190261  | N/A             | N/A       | N/A          | Inc-IRF2BP2-3  |
| A_22_P00006889 | 1,56925 | 1,8346  | -1,201927604 | N/A             | N/A       | BX102312     | Inc-GANC-1     |

|                |         |         |              |                 |           |              |               |
|----------------|---------|---------|--------------|-----------------|-----------|--------------|---------------|
| A_33_P3215347  | 2,09423 | 2,3596  | -1,201944266 | ENST00000601863 | 100996662 | XR_246623    | LOC100996662  |
| A_22_P00016413 | 2,44447 | 2,70985 | -1,201952597 | ENST00000467017 | N/A       | N/A          | N/A           |
| A_23_P23443    | 13,5707 | 13,8361 | -1,20196926  | ENST00000375980 | 79180     | NM_024329    | EFHD2         |
| A_33_P3373343  | 1,62701 | 1,89241 | -1,20196926  | ENST00000381130 | 347527    | NM_001011719 | ARSH          |
| A_22_P00014873 | 1,48495 | 1,75036 | -1,201977591 | N/A             | N/A       | N/A          | Inc-SLC6A12-6 |
| A_24_P117323   | 6,64326 | 6,90869 | -1,201994254 | ENST00000328879 | 84861     | NM_032775    | KLHL22        |
| A_22_P00009322 | 4,66093 | 4,92638 | -1,202010918 | N/A             | N/A       | N/A          | Inc-LRRC57-1  |
| A_32_P385587   | 4,21339 | 4,47887 | -1,202035913 | ENST00000330807 | 212       | NM_000032    | ALAS2         |
| A_23_P144877   | 11,7745 | 12,04   | -1,202052577 | ENST00000313115 | 475       | NM_004045    | ATOX1         |
| A_21_P0011663  | 2,34553 | 2,61106 | -1,202077573 | ENST00000582578 | 220158    | N/A          | GTSCR1        |
| A_22_P00011649 | 1,70187 | 1,96751 | -1,202169231 | ENST00000415991 | N/A       | N/A          | N/A           |
| A_33_P3400147  | 2,9202  | 3,1859  | -1,202219228 | ENST00000497878 | 79816     | NM_001143986 | TLE6          |
| A_32_P163858   | 10,8591 | 11,1248 | -1,202219228 | ENST00000578585 | 6319      | NM_005063    | SCD           |
| A_23_P386384   | 1,50168 | 1,76747 | -1,202294229 | ENST00000488027 | 127795    | NM_152377    | C1orf87       |
| A_23_P43273    | 10,0748 | 10,3406 | -1,202302563 | ENST00000437196 | 2131      | NM_000127    | EXT1          |
| A_23_P62659    | 14,8506 | 15,1164 | -1,202302563 | ENST00000433473 | 5538      | NM_000310    | PPT1          |
| A_23_P420334   | 7,50535 | 7,77116 | -1,202310897 | ENST00000397766 | 161779    | NM_152595    | PGBD4         |
| A_24_P130865   | 6,03226 | 6,29809 | -1,202327564 | ENST00000615775 | 23133     | NM_015107    | PHF8          |
| A_24_P405960   | 4,0261  | 4,29196 | -1,202352566 | ENST00000624949 | 56124     | NM_018932    | PCDHB12       |
| A_23_P108948   | 9,56108 | 9,82701 | -1,202410906 | ENST00000620139 | 55686     | NM_018000    | MREG          |
| A_32_P395879   | 3,59311 | 3,8591  | -1,202460914 | ENST00000498725 | 203238    | NM_173550    | CCDC171       |
| A_33_P3308456  | 8,63966 | 8,90574 | -1,20253593  | ENST00000422730 | 360205    | NM_001282275 | PRAC2         |
| A_33_P3389912  | 1,48599 | 1,75212 | -1,202577607 | N/A             | 100130542 | AK127083     | LOC100130542  |
| A_32_P82475    | 8,21405 | 8,48019 | -1,202585943 | N/A             | 283596    | NR_003138    | SNHG10        |
| A_21_P0005445  | 1,48892 | 1,75508 | -1,202602614 | N/A             | N/A       | N/A          | Inc-DPP6-3    |
| A_21_P0009598  | 1,48374 | 1,74991 | -1,20261095  | N/A             | N/A       | N/A          | Inc-LRRC30-3  |
| A_33_P3355821  | 5,47808 | 5,74429 | -1,202644294 | N/A             | 10793     | NM_021148    | ZNF273        |
| A_24_P826348   | 6,62575 | 6,89204 | -1,202710985 | ENST00000409871 | 376940    | NM_198581    | ZC3H6         |
| A_33_P3334121  | 6,92248 | 7,18878 | -1,202719321 | N/A             | N/A       | N/A          | N/A           |
| A_33_P3277183  | 1,4997  | 1,766   | -1,202719321 | ENST00000475488 | 23145     | AK127639     | SSPO          |
| A_21_P0008182  | 2,3033  | 2,56964 | -1,202752668 | N/A             | 101927176 | NR_108076    | LINC01069     |
| A_24_P290927   | 5,9771  | 6,24345 | -1,202761005 | ENST00000441890 | 9898      | NM_014847    | UBAP2L        |
| A_21_P0005268  | 1,60515 | 1,87163 | -1,20286939  | ENST00000565102 | N/A       | AK127874     | N/A           |

|                |         |         |              |                 |           |              |              |
|----------------|---------|---------|--------------|-----------------|-----------|--------------|--------------|
| A_23_P207850   | 14,6702 | 14,9367 | -1,202886065 | ENST00000254051 | 84951     | NM_032865    | TNS4         |
| A_33_P3415843  | 6,55663 | 6,82314 | -1,202894403 | N/A             | N/A       | N/A          | N/A          |
| A_24_P366122   | 6,32647 | 6,59298 | -1,202894403 | ENST00000590289 | 79777     | NM_024722    | ACBD4        |
| A_22_P00002171 | 3,90733 | 4,17384 | -1,202894403 | ENST00000527945 | 100506305 | N/A          | LINC00958    |
| A_22_P00020772 | 1,70184 | 1,96841 | -1,202944431 | N/A             | 101928461 | NR_125858    | LOC101928461 |
| A_33_P3270581  | 17,2454 | 17,512  | -1,202969446 | ENST00000491837 | N/A       | N/A          | N/A          |
| A_23_P156880   | 4,65658 | 4,92328 | -1,203052832 | ENST00000513998 | 5167      | NM_006208    | ENPP1        |
| A_23_P5002     | 2,2805  | 2,54721 | -1,203061171 | ENST00000396857 | 11184     | NM_001042600 | MAP4K1       |
| A_22_P00005219 | 3,60795 | 3,87472 | -1,203111206 | ENST00000556407 | 55384     | NR_046466    | MEG3         |
| A_33_P3409672  | 7,3132  | 7,58007 | -1,203194602 | ENST00000448753 | 9681      | NM_001242896 | DEPDC5       |
| A_23_P126393   | 11,7593 | 12,0262 | -1,203219622 | ENST00000271640 | 9869      | NM_012432    | SETDB1       |
| A_21_P0014165  | 1,48357 | 1,75063 | -1,203353071 | N/A             | 100506379 | XR_108671    | LOC100506379 |
| A_33_P3246068  | 12,6112 | 12,8783 | -1,203386436 | ENST00000368302 | 28956     | NM_014017    | LAMTOR2      |
| A_33_P3449397  | 11,5163 | 11,7834 | -1,203386436 | ENST00000543235 | 56339     | NM_019852    | METTL3       |
| A_21_P0002979  | 1,48362 | 1,75077 | -1,203428142 | N/A             | N/A       | N/A          | Inc-FRG2C-4  |
| A_23_P51853    | 7,98208 | 8,24929 | -1,203478193 | ENST00000374142 | 84243     | NM_032283    | ZDHHC18      |
| A_33_P3244863  | 6,00886 | 6,27609 | -1,203494876 | ENST00000367607 | 9857      | NM_014810    | CEP350       |
| A_22_P00006733 | 1,48003 | 1,7473  | -1,203528245 | ENST00000444210 | N/A       | N/A          | N/A          |
| A_21_P0006158  | 1,48164 | 1,74893 | -1,203544929 | N/A             | N/A       | N/A          | Inc-GCNT1-2  |
| A_32_P538017   | 4,44775 | 4,71509 | -1,203586642 | ENST00000335385 | 347853    | NM_005995    | TBX10        |
| A_33_P3258581  | 7,47311 | 7,74049 | -1,203620013 | N/A             | 389791    | NR_024425    | PTGES2-AS1   |
| A_24_P199929   | 5,84955 | 6,11693 | -1,203620013 | ENST00000416400 | 51542     | NM_016516    | VPS54        |
| A_23_P388855   | 6,67595 | 6,94335 | -1,203636699 | ENST00000372724 | 23522     | NM_012330    | KAT6B        |
| A_22_P00005962 | 1,5935  | 1,8609  | -1,203636699 | N/A             | N/A       | AA420872     | Inc-EXTL3-3  |
| A_24_P932016   | 8,46052 | 8,72799 | -1,203695101 | ENST00000218328 | 10075     | NM_031407    | HUWE1        |
| A_33_P3340424  | 12,4121 | 12,6796 | -1,203720131 | N/A             | N/A       | N/A          | N/A          |
| A_23_P48713    | 9,29801 | 9,56553 | -1,203736819 | ENST00000556219 | 145482    | NM_152444    | PTGR2        |
| A_33_P3276856  | 3,66067 | 3,92825 | -1,203786882 | ENST00000543639 | 54768     | NM_001198542 | HYDIN        |
| A_33_P3243113  | 1,42048 | 1,68806 | -1,203786882 | ENST00000622160 | 64493     | NR_024121    | LINC00235    |
| A_23_P18413    | 14,3022 | 14,5699 | -1,203887014 | ENST00000498399 | 51300     | NM_016589    | TIMMDC1      |
| A_22_P00012038 | 9,58579 | 9,85362 | -1,2039955   | ENST00000324489 | 222166    | NM_152793    | MTURN        |
| A_32_P41553    | 6,02686 | 6,29469 | -1,2039955   | ENST00000368253 | 128229    | NM_144627    | TSACC        |
| A_33_P3359250  | 5,30302 | 5,57089 | -1,204028882 | ENST00000376664 | 10459     | N/A          | MAD2L2       |

|                |         |         |              |                 |           |              |                    |
|----------------|---------|---------|--------------|-----------------|-----------|--------------|--------------------|
| A_23_P112478   | 9,12646 | 9,39434 | -1,204037228 | ENST00000379155 | 318       | NM_001161    | NUDT2              |
| A_23_P331928   | 13,4427 | 13,7106 | -1,20405392  | ENST00000287097 | 135228    | NM_133493    | CD109              |
| A_23_P87616    | 15,627  | 15,8949 | -1,20405392  | ENST00000549164 | 517       | NM_001002031 | ATP5G2             |
| A_33_P3299314  | 12,2115 | 12,4794 | -1,20405392  | ENST00000344063 | 6158      | NM_001136134 | RPL28              |
| A_21_P0001095  | 1,55728 | 1,8252  | -1,204070612 | ENST00000413887 | N/A       | N/A          | N/A                |
| A_22_P00012354 | 2,89011 | 3,15812 | -1,204145728 | N/A             | N/A       | N/A          | Inc-PRDX6-1        |
| A_23_P203841   | 9,60495 | 9,87299 | -1,204170767 | ENST00000551812 | 11176     | NM_013449    | BAZ2A              |
| A_21_P0009985  | 2,94418 | 3,21223 | -1,204179114 | N/A             | N/A       | N/A          | Inc-C20orf197-1    |
| A_21_P0007287  | 3,08198 | 3,35027 | -1,204379452 | N/A             | N/A       | N/A          | Inc-AP000679.2.1-1 |
| A_22_P00008987 | 5,61284 | 5,88114 | -1,204387801 | N/A             | 101930114 | XR_426894    | LOC101930114       |
| A_22_P00011127 | 1,45076 | 1,71907 | -1,204396149 | N/A             | N/A       | N/A          | Inc-NUP160-1       |
| A_22_P00001697 | 9,17934 | 9,44768 | -1,204421194 | ENST00000582557 | 440423    | NR_024187    | SUZ12P1            |
| A_22_P00011983 | 7,33431 | 7,60267 | -1,204437891 | ENST00000445415 | 84848     | NR_024607    | MIR503HG           |
| A_22_P00000170 | 1,76031 | 2,02868 | -1,204446239 | N/A             | N/A       | DA742775     | Inc-ABCC5-1        |
| A_22_P00022844 | 1,59997 | 1,86834 | -1,204446239 | ENST00000624232 | 339862    | NM_001257177 | LOC339862          |
| A_23_P393051   | 12,3503 | 12,6187 | -1,204471285 | ENST00000616918 | 126695    | NM_152365    | KDF1               |
| A_33_P3269388  | 8,24956 | 8,51801 | -1,20451303  | ENST00000618899 | 79143     | NM_001146082 | MBOAT7             |
| A_19_P00320067 | 1,54696 | 1,81546 | -1,204554776 | ENST00000609207 | 100130417 | NR_026874    | LOC100130417       |
| A_22_P00019673 | 1,73705 | 2,00555 | -1,204554776 | N/A             | 101927539 | NR_110807    | LOC101927539       |
| A_23_P142075   | 8,95482 | 9,22334 | -1,204571475 | ENST00000592828 | 54        | NM_001611    | ACP5               |
| A_33_P3350202  | 9,80014 | 10,0687 | -1,204604873 | ENST00000244051 | 27304     | NM_014484    | MOCS3              |
| A_23_P44244    | 11,3864 | 11,655  | -1,204638272 | ENST00000371122 | 6594      | NM_003069    | SMARCA1            |
| A_33_P6475039  | 11,3024 | 11,571  | -1,204638272 | ENST00000472323 | 100874131 | NR_046877    | ZBTB20-AS4         |
| A_21_P0003851  | 3,28126 | 3,54988 | -1,204654972 | ENST00000503950 | N/A       | N/A          | N/A                |
| A_33_P3373185  | 9,86133 | 10,13   | -1,204696723 | ENST00000517560 | 399744    | NR_024497    | LINC00999          |
| A_22_P00017827 | 6,17459 | 6,44326 | -1,204696723 | N/A             | N/A       | BG211832     | Inc-ZC3H12D-2      |
| A_23_P167129   | 1,48349 | 1,75217 | -1,204705073 | ENST00000503090 | 64399     | NM_022475    | HHIP               |
| A_23_P56328    | 1,50549 | 1,77418 | -1,204713424 | ENST00000252590 | 83483     | AK096030     | PLVAP              |
| A_33_P6822021  | 9,45942 | 9,72813 | -1,204730125 | ENST00000349223 | 4775      | NM_004555    | NFATC3             |
| A_33_P3220095  | 10,4306 | 10,6994 | -1,204805282 | ENST00000342427 | 84905     | NM_001282933 | ZNF341             |
| A_21_P0007038  | 6,52292 | 6,79173 | -1,204813633 | N/A             | N/A       | N/A          | Inc-BNIP3-2        |
| A_22_P00008176 | 4,34843 | 4,61734 | -1,204897147 | N/A             | N/A       | N/A          | Inc-INPP5F-1       |
| A_24_P580248   | 1,50474 | 1,77367 | -1,204913851 | N/A             | N/A       | N/A          | XLOC_I2_000384     |

|                |         |         |              |                 |           |              |                |
|----------------|---------|---------|--------------|-----------------|-----------|--------------|----------------|
| A_24_P89843    | 9,87676 | 10,1458 | -1,205005724 | ENST00000306145 | 50626     | NM_032687    | CYHR1          |
| A_33_P3229335  | 5,69388 | 5,96295 | -1,205030782 | ENST00000620438 | 128312    | NM_175055    | HIST3H2BB      |
| A_21_P0012222  | 2,29794 | 2,56702 | -1,205039135 | N/A             | N/A       | N/A          | XLOC_I2_009136 |
| A_23_P257256   | 10,9142 | 11,1834 | -1,205139371 | ENST00000515666 | 2870      | NM_002082    | GRK6           |
| A_22_P00001455 | 1,65821 | 1,92746 | -1,205181139 | N/A             | N/A       | N/A          | Inc-APOM-3     |
| A_21_P0009966  | 1,48639 | 1,75565 | -1,205189493 | N/A             | N/A       | N/A          | Inc-ARFGEF2-4  |
| A_33_P3277407  | 6,23895 | 6,50823 | -1,2052062   | ENST00000473063 | 55904     | NM_182931    | KMT2E          |
| A_21_P0007019  | 1,77663 | 2,04593 | -1,205222908 | N/A             | N/A       | N/A          | Inc-VAX1-1     |
| A_22_P00008915 | 1,9004  | 2,16971 | -1,205231262 | N/A             | 144571    | NR_026971    | A2M-AS1        |
| A_24_P291598   | 11,8632 | 12,1327 | -1,205389999 | ENST00000485450 | 7375      | NM_003363    | USP4           |
| A_32_P170749   | 11,132  | 11,4015 | -1,205389999 | ENST00000618922 | 10734     | NM_001282718 | STAG3          |
| A_23_P150189   | 9,9911  | 10,2607 | -1,205473553 | ENST00000464884 | 4361      | NM_005590    | MRE11A         |
| A_33_P3306802  | 3,67642 | 3,94603 | -1,205481909 | N/A             | 100130916 | AY358791     | LOC100130916   |
| A_33_P3321801  | 6,557   | 6,82673 | -1,205582182 | ENST00000609630 | 100272216 | N/A          | LOC100272216   |
| A_21_P0007381  | 1,47588 | 1,74567 | -1,205632322 | N/A             | N/A       | N/A          | Inc-RAB30-2    |
| A_33_P3293353  | 7,16408 | 7,43392 | -1,205674107 | ENST00000448333 | 51133     | NM_016121    | KCTD3          |
| A_23_P344655   | 2,68488 | 2,95483 | -1,205766038 | N/A             | 647115    | AK094167     | FLJ36848       |
| A_33_P3403132  | 14,8985 | 15,1685 | -1,205807828 | ENST00000291442 | 2063      | NM_005234    | NR2F6          |
| A_24_P254949   | 4,62711 | 4,89711 | -1,205807828 | ENST00000421970 | 5239      | NM_021965    | PGM5           |
| A_22_P00011535 | 1,53065 | 1,80065 | -1,205807828 | N/A             | 100885778 | NR_047687    | NALCN-AS1      |
| A_33_P3237225  | 11,206  | 11,476  | -1,205807828 | ENST00000440021 | 55030     | NM_152231    | FBXO34         |
| A_23_P315345   | 5,68618 | 5,9562  | -1,205824544 | ENST00000373669 | 5303      | NM_006223    | PIN4           |
| A_33_P3366161  | 1,38999 | 1,66003 | -1,20584126  | ENST00000568847 | 18        | NM_000663    | ABAT           |
| A_33_P3378702  | 5,67591 | 5,94595 | -1,20584126  | N/A             | N/A       | AK127786     | N/A            |
| A_22_P00016700 | 6,36882 | 6,63887 | -1,205849619 | ENST00000423222 | N/A       | BC071808     | N/A            |
| A_33_P3411744  | 1,52742 | 1,79748 | -1,205857977 | ENST00000414938 | 100126791 | NR_004428    | EGOT           |
| A_22_P00011457 | 1,47322 | 1,7433  | -1,205874694 | N/A             | N/A       | N/A          | Inc-PAPOLG-1   |
| A_23_P167468   | 1,63166 | 1,90178 | -1,205908128 | ENST00000508107 | 5618      | NM_000949    | PRLR           |
| A_33_P3550618  | 1,66777 | 1,93804 | -1,206033515 | N/A             | N/A       | AK096066     | Inc-EXOSC6-2   |
| A_33_P3388651  | 11,696  | 11,9663 | -1,206058594 | ENST00000277895 | 3983      | NM_001003408 | ABLIM1         |
| A_22_P00019411 | 1,59731 | 1,86766 | -1,206100394 | N/A             | N/A       | N/A          | Inc-EDEM3-1    |
| A_22_P00010873 | 1,59717 | 1,86754 | -1,206117114 | N/A             | N/A       | BF223154     | Inc-NPAS3-1    |
| A_23_P32125    | 12,0509 | 12,3213 | -1,206142195 | ENST00000399219 | 23203     | NM_015160    | PMPCA          |

|                |         |         |              |                 |           |              |                       |
|----------------|---------|---------|--------------|-----------------|-----------|--------------|-----------------------|
| A_32_P109922   | 10,1016 | 10,372  | -1,206142195 | ENST00000523243 | 57623     | NM_020863    | ZFAT                  |
| A_24_P196534   | 9,60794 | 9,87834 | -1,206142195 | ENST00000291547 | 5316      | NM_004571    | PKNOX1                |
| A_33_P3241244  | 1,57683 | 1,84725 | -1,206158916 | N/A             | 100131822 | AK128841     | LOC100131822          |
| A_33_P3344991  | 8,57422 | 8,84464 | -1,206158916 | N/A             | 101060376 | AK122833     | TBC1D3L               |
| A_22_P00002355 | 1,53292 | 1,80336 | -1,206175637 | N/A             | N/A       | N/A          | Inc-C12orf39-1        |
| A_22_P00017243 | 1,50825 | 1,77874 | -1,20621744  | N/A             | N/A       | N/A          | Inc-UMPS-2            |
| A_23_P93704    | 5,99374 | 6,26425 | -1,206234162 | ENST00000496728 | 402573    | NM_001004323 | C7orf61               |
| A_22_P00000860 | 1,51517 | 1,78576 | -1,206301052 | N/A             | N/A       | N/A          | Inc-AGPAT5-2          |
| A_21_P0009779  | 3,71301 | 3,98367 | -1,206359583 | N/A             | 100506634 | N/A          | LOC100506634          |
| A_22_P00003356 | 1,91516 | 2,18585 | -1,206384669 | ENST00000580927 | N/A       | N/A          | N/A                   |
| A_23_P118061   | 12,2481 | 12,5188 | -1,206393031 | ENST00000526149 | 51192     | NM_181641    | CKLF                  |
| A_21_P0012039  | 1,69971 | 1,97042 | -1,206401393 | ENST00000467633 | N/A       | N/A          | N/A                   |
| A_23_P107412   | 14,2915 | 14,5623 | -1,206476655 | ENST00000473021 | 5034      | NM_000918    | P4HB                  |
| A_23_P52121    | 3,68287 | 3,95369 | -1,20649338  | ENST00000401008 | 5174      | NM_002614    | PDZK1                 |
| A_21_P0010670  | 4,94175 | 5,21257 | -1,20649338  | ENST00000446962 | 102723761 | N/A          | LOC102723761          |
| A_21_P0007241  | 4,27628 | 4,54715 | -1,206535195 | N/A             | N/A       | N/A          | Inc-USP35-1           |
| A_23_P38041    | 10,9565 | 11,2274 | -1,206560284 | ENST00000568202 | 51172     | NM_016256    | NAGPA                 |
| A_24_P74070    | 9,06384 | 9,33474 | -1,206560284 | ENST00000353265 | 84552     | NM_032510    | PARD6G                |
| A_22_P00000500 | 2,43636 | 2,7073  | -1,206593738 | ENST00000412360 | N/A       | N/A          | N/A                   |
| A_22_P00022451 | 3,52039 | 3,79134 | -1,206602101 | N/A             | N/A       | N/A          | Inc-RP11-582J16.5.1-2 |
| A_33_P3347869  | 9,04972 | 9,32072 | -1,20664392  | ENST00000596238 | 718       | NM_000064    | C3                    |
| A_33_P3385662  | 4,21131 | 4,48237 | -1,206694104 | ENST00000557959 | N/A       | N/A          | N/A                   |
| A_33_P3258747  | 7,27077 | 7,54186 | -1,206719196 | ENST00000469079 | 59271     | NM_001286556 | EVA1C                 |
| A_33_P3233229  | 1,60701 | 1,87815 | -1,206761019 | N/A             | N/A       | N/A          | N/A                   |
| A_24_P406986   | 7,36198 | 7,63324 | -1,206861399 | ENST00000525205 | 29015     | NM_199329    | SLC43A3               |
| A_32_P131367   | 9,59563 | 9,86692 | -1,206886495 | ENST00000467996 | 11342     | NM_007282    | RNF13                 |
| A_33_P3281196  | 9,67017 | 9,94156 | -1,206970153 | ENST00000507022 | 92259     | NM_033281    | MRPS36                |
| A_23_P62605    | 17,7013 | 17,9727 | -1,206978519 | ENST00000482370 | 6135      | NM_000975    | RPL11                 |
| A_33_P3351851  | 6,72158 | 6,99301 | -1,207003618 | ENST00000618305 | 8368      | NM_003546    | HIST1H4L              |
| A_33_P3215305  | 1,7682  | 2,03969 | -1,207053816 | ENST00000418274 | 342850    | NM_001277333 | ANKRD62               |
| A_22_P00012839 | 1,59526 | 1,86675 | -1,207053816 | N/A             | 101929423 | NR_109941    | MEF2C-AS1             |
| A_33_P3358163  | 3,94705 | 4,21854 | -1,207053816 | N/A             | 23742     | NM_018958    | NPAP1                 |
| A_23_P126388   | 14,957  | 15,2285 | -1,207062183 | ENST00000319041 | 83442     | NM_031286    | SH3BGL3               |

|                |         |         |              |                 |           |              |                  |
|----------------|---------|---------|--------------|-----------------|-----------|--------------|------------------|
| A_33_P3300395  | 10,5382 | 10,8097 | -1,207062183 | ENST00000309048 | 378708    | NM_199294    | APITD1           |
| A_33_P3320804  | 13,6119 | 13,8834 | -1,207062183 | ENST00000613416 | 9807      | NM_001242829 | IP6K1            |
| A_23_P9255     | 11,0056 | 11,2771 | -1,207062183 | ENST00000375754 | 6850      | NM_003177    | SYK              |
| A_33_P3315764  | 7,40499 | 7,67653 | -1,20709565  | ENST00000503591 | 7157      | NM_001126118 | TP53             |
| A_33_P3363186  | 5,8209  | 6,09248 | -1,207129119 | N/A             | N/A       | N/A          | N/A              |
| A_21_P0014337  | 1,60795 | 1,87961 | -1,207196058 | N/A             | 100289580 | NR_103774    | LOC100289580     |
| A_23_P76749    | 1,94387 | 2,21553 | -1,207196058 | ENST00000553471 | 57452     | NM_020692    | GALNT16          |
| A_21_P0011713  | 7,83498 | 8,10669 | -1,207237897 | N/A             | N/A       | N/A          | XLOC_I2_006821   |
| A_33_P3390177  | 4,634   | 4,90573 | -1,207254633 | N/A             | 401106    | NR_033929    | LINC00884        |
| A_33_P3370787  | 9,55634 | 9,8281  | -1,207279737 | ENST00000374630 | 2048      | NM_004442    | EPHB2            |
| A_23_P110362   | 10,3999 | 10,6717 | -1,207313211 | ENST00000515100 | 8649      | NM_021970    | LAMTOR3          |
| A_24_P85243    | 2,84992 | 3,12196 | -1,20751407  | ENST00000360669 | 285596    | N/A          | FAM153A          |
| A_19_P00322495 | 5,97743 | 6,24952 | -1,20755592  | N/A             | 100130890 | NM_001195131 | TSTD3            |
| A_32_P361113   | 1,49712 | 1,76923 | -1,207572661 | ENST00000573951 | 283876    | NR_033904    | LINC00921        |
| A_24_P196372   | 7,14394 | 7,41605 | -1,207572661 | ENST00000489683 | 60509     | NM_001035507 | AGBL5            |
| A_23_P19352    | 9,80665 | 10,0788 | -1,207606142 | ENST00000394142 | 10695     | NM_006586    | CNPY3            |
| A_33_P3308132  | 9,43737 | 9,70962 | -1,20768985  | N/A             | 102725127 | N/A          | LOC102725127     |
| A_21_P0006127  | 2,33541 | 2,60766 | -1,20768985  | N/A             | N/A       | N/A          | Inc-C9orf150-1   |
| A_21_P0006324  | 3,62911 | 3,90138 | -1,207706592 | N/A             | N/A       | N/A          | Inc-IER5L-1      |
| A_22_P00012150 | 1,68478 | 1,95712 | -1,207765192 | ENST00000564240 | N/A       | BC059953     | N/A              |
| A_23_P95594    | 8,28566 | 8,55802 | -1,207781935 | ENST00000520546 | 9         | NM_000662    | NAT1             |
| A_33_P3365856  | 3,96569 | 4,23806 | -1,207790307 | N/A             | N/A       | CD674797     | Inc-AL117340.1-2 |
| A_22_P00010498 | 3,15028 | 3,42267 | -1,207807051 | ENST00000422415 | N/A       | N/A          | N/A              |
| A_21_P0010587  | 1,66018 | 1,93257 | -1,207807051 | N/A             | N/A       | N/A          | XLOC_I2_000697   |
| A_23_P108662   | 13,7823 | 14,0547 | -1,207815423 | ENST00000462189 | 7841      | NM_006302    | MOGS             |
| A_21_P0013030  | 3,47833 | 3,75076 | -1,207840539 | N/A             | N/A       | N/A          | XLOC_I2_012621   |
| A_23_P161583   | 1,49253 | 1,76496 | -1,207840539 | ENST00000534061 | 10003     | NM_005467    | NAALAD2          |
| A_32_P147622   | 9,33366 | 9,60614 | -1,2078824   | N/A             | 100289410 | NR_034002    | MCF2L-AS1        |
| A_24_P220771   | 4,11939 | 4,39187 | -1,2078824   | ENST00000514252 | 26057     | NM_032217    | ANKRD17          |
| A_22_P00005707 | 2,19677 | 2,46926 | -1,207890772 | N/A             | N/A       | N/A          | Inc-ELMOD2-1     |
| A_21_P0004075  | 1,49213 | 1,76463 | -1,207899145 | ENST00000505567 | N/A       | N/A          | N/A              |
| A_23_P93727    | 1,59061 | 1,86311 | -1,207899145 | ENST00000476701 | 221935    | NM_001079653 | SDK1             |
| A_23_P38346    | 10,5656 | 10,8381 | -1,207899145 | ENST00000251642 | 79132     | NM_024119    | DHX58            |

|                |         |         |              |                 |           |              |              |
|----------------|---------|---------|--------------|-----------------|-----------|--------------|--------------|
| A_23_P29594    | 10,6899 | 10,9624 | -1,207899145 | ENST00000296277 | 116832    | NM_052969    | RPL39L       |
| A_22_P00007301 | 3,49046 | 3,7631  | -1,208016366 | N/A             | 101928185 | XR_244859    | LOC101928185 |
| A_33_P3240727  | 1,69019 | 1,96285 | -1,208033113 | ENST00000421812 | 90874     | NM_001080470 | ZNF697       |
| A_21_P0000814  | 1,62634 | 1,89903 | -1,208058233 | ENST00000453410 | 494558    | NR_038833    | C9orf135-AS1 |
| A_33_P3221528  | 11,6772 | 11,9499 | -1,208066607 | ENST00000258886 | 3658      | NM_004136    | IREB2        |
| A_33_P3246017  | 2,44631 | 2,71902 | -1,208074981 | ENST00000396165 | 4253      | XM_005267650 | CTAGE5       |
| A_33_P3368238  | 1,67563 | 1,94834 | -1,208074981 | ENST00000518177 | N/A       | N/A          | N/A          |
| A_21_P0002138  | 1,52314 | 1,79591 | -1,208125224 | ENST00000426870 | N/A       | N/A          | N/A          |
| A_22_P00010081 | 6,66846 | 6,94124 | -1,208133598 | N/A             | 220906    | NR_033805    | WAC-AS1      |
| A_23_P102842   | 12,0098 | 12,2826 | -1,208150347 | ENST00000440385 | 9054      | NM_021100    | NFS1         |
| A_32_P186474   | 10,2207 | 10,4935 | -1,208150347 | ENST00000454520 | 29127     | NM_013277    | RACGAP1      |
| A_24_P387869   | 9,34188 | 9,61468 | -1,208150347 | ENST00000370521 | 5586      | NM_006256    | PKN2         |
| A_24_P30923    | 10,6537 | 10,9265 | -1,208150347 | ENST00000329565 | 8303      | NM_003498    | SNN          |
| A_22_P00005647 | 1,6698  | 1,9427  | -1,208234092 | ENST00000538837 | N/A       | CU679252     | N/A          |
| A_23_P171249   | 12,9844 | 13,2573 | -1,208234092 | ENST00000342206 | 3476      | NM_001551    | IGBP1        |
| A_33_P3360227  | 2,06393 | 2,33685 | -1,208250842 | N/A             | N/A       | DC397705     | N/A          |
| A_33_P3348127  | 1,47687 | 1,74985 | -1,208301093 | ENST00000371559 | 2902      | NM_001185091 | GRIN1        |
| A_33_P3212679  | 14,1675 | 14,4405 | -1,208317843 | ENST00000429728 | 6637      | NM_003096    | SNRPG        |
| A_23_P75299    | 13,6721 | 13,9451 | -1,208317843 | ENST00000368842 | 64077     | NM_022126    | LHPP         |
| A_33_P3299436  | 17,6077 | 17,8808 | -1,208401601 | N/A             | N/A       | N/A          | N/A          |
| A_23_P127088   | 10,826  | 11,0991 | -1,208401601 | ENST00000369937 | 79004     | NM_024040    | CUEDC2       |
| A_22_P00005528 | 5,24806 | 5,52125 | -1,208476987 | ENST00000564055 | N/A       | BC001713     | N/A          |
| A_24_P74896    | 4,3774  | 4,65064 | -1,20851887  | ENST00000622546 | N/A       | XM_006710216 | N/A          |
| A_33_P3404623  | 7,71033 | 7,98358 | -1,208527247 | ENST00000393119 | 54903     | NM_017777    | MKS1         |
| A_33_P3216277  | 3,16418 | 3,43745 | -1,208544001 | N/A             | 101059976 | XM_003959913 | LOC101059976 |
| A_33_P3314466  | 6,46732 | 6,7406  | -1,208552378 | ENST00000486633 | 10989     | N/A          | IMMT         |
| A_24_P266285   | 7,90483 | 8,17812 | -1,208560755 | ENST00000325979 | 23288     | NM_152558    | IQCE         |
| A_33_P3815560  | 10,0614 | 10,3347 | -1,208569132 | ENST00000420783 | 11180     | NM_018031    | WDR6         |
| A_33_P3274501  | 1,4737  | 1,74702 | -1,208585887 | ENST00000545196 | 51348     | NM_001291823 | KLRF1        |
| A_22_P00020094 | 1,96914 | 2,2425  | -1,208619396 | N/A             | N/A       | BF752179     | Inc-NENF-2   |
| A_21_P0002555  | 5,10387 | 5,37724 | -1,208627774 | N/A             | N/A       | N/A          | Inc-OR6B2-1  |
| A_33_P3286046  | 9,84332 | 10,1168 | -1,20871993  | ENST00000434727 | 25911     | NM_015448    | DPCD         |
| A_23_P55421    | 7,34282 | 7,61633 | -1,208745065 | ENST00000269385 | 57332     | NM_020649    | CBX8         |



|                |         |         |              |                 |           |              |                       |
|----------------|---------|---------|--------------|-----------------|-----------|--------------|-----------------------|
| A_21_P0006021  | 1,62037 | 1,89399 | -1,208837231 | ENST00000413050 | 101927502 | N/A          | LOC101927502          |
| A_23_P47410    | 6,01042 | 6,28405 | -1,20884561  | ENST00000464067 | 90952     | NM_138961    | ESAM                  |
| A_23_P160729   | 8,54719 | 8,82087 | -1,208887506 | ENST00000462591 | 10717     | NM_006594    | AP4B1                 |
| A_24_P302374   | 9,88841 | 10,1621 | -1,208895886 | ENST00000312413 | 1185      | NM_001286    | CLCN6                 |
| A_24_P456490   | 5,0233  | 5,29701 | -1,208912645 | ENST00000368102 | 284677    | NM_001134233 | C1orf204              |
| A_23_P113161   | 6,18573 | 6,4595  | -1,208962923 | ENST00000235307 | 81563     | NM_030806    | C1orf21               |
| A_21_P0010569  | 1,71973 | 1,9935  | -1,208962923 | ENST00000435735 | N/A       | N/A          | N/A                   |
| A_33_P3390013  | 7,17146 | 7,44523 | -1,208962923 | ENST00000464589 | 9510      | NM_006988    | ADAMTS1               |
| A_19_P00322420 | 4,78768 | 5,06148 | -1,208988063 | ENST00000503259 | 100505702 | N/A          | LINC01094             |
| A_24_P188878   | 15,5994 | 15,8732 | -1,208988063 | ENST00000506397 | 6164      | NM_033625    | RPL34                 |
| A_24_P153324   | 12,1944 | 12,4682 | -1,208988063 | ENST00000424827 | N/A       | N/A          | N/A                   |
| A_21_P0008911  | 3,65663 | 3,93044 | -1,208996443 | N/A             | N/A       | N/A          | Inc-RP11-368J21.2.1-1 |
| A_21_P0014440  | 2,99835 | 3,27218 | -1,209013203 | N/A             | N/A       | BG198360     | N/A                   |
| A_21_P0012151  | 1,49411 | 1,76801 | -1,209071866 | ENST00000448374 | 149773    | N/A          | APCDD1L-AS1           |
| A_33_P3325871  | 5,90156 | 6,17548 | -1,209088628 | N/A             | 644903    | XR_244911    | FLJ38668              |
| A_22_P00019517 | 1,49427 | 1,76823 | -1,209122151 | ENST00000563003 | N/A       | BC043241     | N/A                   |
| A_21_P0008117  | 1,5942  | 1,86817 | -1,209130532 | N/A             | N/A       | N/A          | Inc-COL4A2-2          |
| A_33_P3230436  | 7,05199 | 7,32598 | -1,209147295 | N/A             | 148206    | NM_182515    | ZNF714                |
| A_21_P0013269  | 9,2252  | 9,49926 | -1,209205964 | N/A             | 101928451 | N/A          | LOC101928451          |
| A_33_P3273552  | 12,0577 | 12,3318 | -1,209239491 | ENST00000293670 | 3889      | NM_002282    | KRT83                 |
| A_24_P6825     | 1,49371 | 1,76784 | -1,209264637 | ENST00000611638 | 644353    | NM_001143978 | ZCCHC18               |
| A_33_P3302736  | 6,38777 | 6,66206 | -1,209398756 | ENST00000590777 | 100101467 | NM_001166012 | ZSCAN30               |
| A_22_P00022764 | 3,30472 | 3,57904 | -1,209423905 | N/A             | 101927045 | NR_110032    | LOC101927045          |
| A_23_P316741   | 11,8653 | 12,1397 | -1,209490971 | ENST00000468468 | 7106      | NM_001025237 | TSPAN4                |
| A_21_P0005546  | 4,7949  | 5,06937 | -1,209549658 | N/A             | N/A       | N/A          | Inc-AC099552.4.1-1    |
| A_23_P65830    | 10,7568 | 11,0313 | -1,20957481  | ENST00000494993 | 374659    | NM_198527    | HDDC3                 |
| A_22_P00025160 | 1,65654 | 1,93116 | -1,209675424 | N/A             | N/A       | BI713744     | Inc-RP11-27909.4.1-2  |
| A_23_P502269   | 11,3675 | 11,6422 | -1,209742504 | ENST00000451060 | 84271     | NM_032311    | POLDIP3               |
| A_33_P3273073  | 2,40241 | 2,6772  | -1,209817974 | ENST00000329255 | 60529     | NM_021926    | ALX4                  |
| A_33_P3395976  | 11,5624 | 11,8372 | -1,20982636  | ENST00000421832 | 90353     | NM_145232    | CTU1                  |
| A_21_P0009407  | 1,4953  | 1,77011 | -1,209834746 | N/A             | 101927471 | XR_243725    | LOC101927471          |
| A_21_P0011076  | 1,59035 | 1,86517 | -1,209843132 | N/A             | 101929584 | N/A          | LOC101929584          |
| A_33_P3781094  | 1,49283 | 1,76774 | -1,209918608 | ENST00000440664 | 100505929 | NR_037585    | LINC01549             |

|                |         |         |              |                 |           |              |                |
|----------------|---------|---------|--------------|-----------------|-----------|--------------|----------------|
| A_33_P3209816  | 4,07521 | 4,35012 | -1,209918608 | ENST00000342179 | 147991    | NM_207325    | DPY19L3        |
| A_33_P3281716  | 6,94124 | 7,21636 | -1,210094738 | ENST00000445384 | N/A       | N/A          | N/A            |
| A_33_P3343690  | 6,43913 | 6,71426 | -1,210103126 | ENST00000260270 | 2230      | NM_004109    | FDX1           |
| A_32_P141969   | 1,47487 | 1,75007 | -1,210161842 | ENST00000394480 | 4916      | XR_253443    | NTRK3          |
| A_24_P830667   | 14,8079 | 15,0832 | -1,210245727 | ENST00000463605 | 6144      | NM_000982    | RPL21          |
| A_33_P3685216  | 3,20388 | 3,47927 | -1,210321228 | ENST00000598345 | 1         | NM_130786    | A1BG           |
| A_23_P53567    | 10,5062 | 10,7816 | -1,210329617 | ENST00000536197 | 51019     | NM_016053    | CCDC53         |
| A_23_P309207   | 6,72604 | 7,00145 | -1,210338007 | ENST00000420592 | 84765     | NM_032679    | ZNF577         |
| A_23_P41987    | 4,97713 | 5,25268 | -1,210455464 | ENST00000378362 | 2676      | NM_001496    | GFRA3          |
| A_23_P135084   | 18,1442 | 18,4198 | -1,210497416 | ENST00000588490 | 6130      | NM_000972    | RPL7A          |
| A_33_P3214705  | 10,3442 | 10,6198 | -1,210497416 | ENST00000595077 | 55049     | NM_001100418 | C19orf60       |
| A_33_P3238310  | 5,99166 | 6,26729 | -1,210522588 | ENST00000492930 | 56911     | NM_001286623 | MAP3K7CL       |
| A_21_P0013759  | 8,29057 | 8,56625 | -1,210564542 | ENST00000444706 | N/A       | N/A          | N/A            |
| A_23_P142631   | 10,1605 | 10,4362 | -1,210581324 | ENST00000496149 | 2281      | NM_054033    | FKBP1B         |
| A_23_P158662   | 10,781  | 11,0567 | -1,210581324 | ENST00000578279 | 2873      | NM_212492    | GPS1           |
| A_23_P348208   | 13,0152 | 13,2911 | -1,210749158 | ENST00000368762 | 6698      | NM_005987    | SPRR1A         |
| A_23_P66608    | 12,5934 | 12,8693 | -1,210749158 | ENST00000465682 | 2648      | NM_021078    | KAT2A          |
| A_21_P0013176  | 2,83587 | 3,11182 | -1,21079112  | N/A             | N/A       | N/A          | XLOC_I2_013293 |
| A_33_P3325661  | 5,00031 | 5,27627 | -1,210799513 | ENST00000390397 | N/A       | X51791       | N/A            |
| A_21_P0009760  | 1,49479 | 1,77078 | -1,210824691 | ENST00000593211 | N/A       | N/A          | N/A            |
| A_21_P0005290  | 1,50907 | 1,78508 | -1,210841477 | ENST00000430537 | N/A       | N/A          | N/A            |
| A_33_P3407941  | 3,33127 | 3,60734 | -1,210891835 | N/A             | N/A       | N/A          | N/A            |
| A_23_P154500   | 8,46529 | 8,74137 | -1,210900229 | ENST00000380756 | 1788      | NM_175629    | DNMT3A         |
| A_23_P326170   | 14,5645 | 14,8406 | -1,210917015 | ENST00000432899 | 805       | NM_001743    | CALM2          |
| A_23_P346048   | 11,089  | 11,3652 | -1,211000953 | ENST00000619021 | 400322    | NR_002824    | HERC2P2        |
| A_24_P363711   | 2,1037  | 2,38002 | -1,211101685 | ENST00000297436 | 1671      | NM_001926    | DEFA6          |
| A_22_P00005241 | 1,9066  | 2,18293 | -1,21111008  | N/A             | 101929947 | XR_251218    | LOC101929947   |
| A_22_P00024658 | 4,97009 | 5,24642 | -1,21111008  | ENST00000413567 | N/A       | N/A          | N/A            |
| A_33_P3380263  | 7,18681 | 7,46316 | -1,21112687  | ENST00000317502 | 92170     | NM_138384    | MTG1           |
| A_33_P3305388  | 1,48339 | 1,75977 | -1,211152054 | ENST00000313447 | 219453    | NM_001004058 | OR8K5          |
| A_19_P00321098 | 1,47453 | 1,75095 | -1,211185635 | ENST00000415245 | N/A       | N/A          | N/A            |
| A_23_P116602   | 9,75928 | 10,0357 | -1,211185635 | ENST00000529308 | 57558     | NM_020798    | USP35          |
| A_24_P36745    | 8,83033 | 9,10678 | -1,211210821 | ENST00000378421 | 159013    | NM_144970    | CXorf38        |

|                |         |         |              |                 |           |              |                |
|----------------|---------|---------|--------------|-----------------|-----------|--------------|----------------|
| A_33_P3313314  | 1,5921  | 1,86857 | -1,211227612 | ENST00000361941 | 10580     | NM_001034954 | SORBS1         |
| A_33_P3323101  | 8,29375 | 8,57029 | -1,211286383 | ENST00000478556 | 7581      | NM_001278171 | ZNF33A         |
| A_33_P3753757  | 5,64592 | 5,92252 | -1,21133676  | N/A             | N/A       | AK095652     | Inc-SUSD1-1    |
| A_33_P3236436  | 1,47079 | 1,74746 | -1,211395536 | ENST00000511965 | 646603    | NM_001080531 | C4orf51        |
| A_24_P227450   | 8,29699 | 8,57366 | -1,211395536 | ENST00000547491 | 80724     | NM_025247    | ACAD10         |
| A_33_P3252043  | 16,0273 | 16,304  | -1,211420726 | ENST00000575069 | 5034      | NM_000918    | P4HB           |
| A_21_P0006996  | 1,46451 | 1,74125 | -1,211454315 | N/A             | N/A       | N/A          | Inc-MBL2-1     |
| A_33_P3336652  | 14,4878 | 14,7646 | -1,211504699 | ENST00000528251 | 4718      | NM_001204054 | NDUFC2         |
| A_33_P3886707  | 13,8639 | 14,1407 | -1,211504699 | ENST00000351450 | 27068     | NM_176869    | PPA2           |
| A_23_P170290   | 8,1197  | 8,39651 | -1,211513096 | ENST00000399766 | 55219     | NM_018202    | TMEM57         |
| A_23_P311895   | 1,48824 | 1,76511 | -1,211563483 | ENST00000185206 | 53405     | NM_016929    | CLIC5          |
| A_23_P102017   | 1,72176 | 1,99868 | -1,211605473 | ENST00000397283 | 57471     | AB033015     | ERMN           |
| A_33_P3280237  | 1,97438 | 2,25133 | -1,211630668 | N/A             | N/A       | N/A          | N/A            |
| A_23_P301247   | 11,6354 | 11,9124 | -1,21167266  | N/A             | 8338      | NM_003517    | HIST2H2AC      |
| A_33_P3303910  | 1,48459 | 1,76163 | -1,211706256 | N/A             | 9679      | AK127323     | FAM53B         |
| A_23_P133648   | 4,88087 | 5,15791 | -1,211706256 | ENST00000259963 | 51439     | NM_016255    | FAM8A1         |
| A_33_P3679901  | 3,3675  | 3,64468 | -1,211823846 | ENST00000482201 | N/A       | X64982       | N/A            |
| A_32_P806841   | 8,50769 | 8,78488 | -1,211832246 | ENST00000404894 | 10124     | NM_005738    | ARL4A          |
| A_22_P00015757 | 4,09474 | 4,37198 | -1,211874245 | N/A             | N/A       | BC043377     | Inc-TAF4B-4    |
| A_23_P133095   | 9,58082 | 9,85807 | -1,211882645 | ENST00000264431 | 9693      | NM_014247    | RAPGEF2        |
| A_33_P3408054  | 12,9454 | 13,2227 | -1,211924647 | ENST00000602906 | N/A       | AY956763     | N/A            |
| A_22_P00012992 | 1,52423 | 1,80153 | -1,211924647 | ENST00000508206 | 317671    | BX104057     | RFESD          |
| A_23_P213718   | 16,1279 | 16,4052 | -1,211924647 | ENST00000378665 | 27089     | NM_014402    | UQCRC          |
| A_23_P386478   | 1,40951 | 1,68682 | -1,211933047 | ENST00000511909 | 79931     | NM_024873    | TNIP3          |
| A_22_P00007112 | 6,33138 | 6,60871 | -1,211949848 | N/A             | N/A       | XM_006717970 | Inc-GLUD1-3    |
| A_21_P0011834  | 1,54047 | 1,81782 | -1,21196665  | N/A             | N/A       | N/A          | XLOC_I2_007468 |
| A_33_P3238690  | 5,96803 | 6,24542 | -1,212000253 | ENST00000265149 | 54790     | NM_001127208 | TET2           |
| A_33_P3423874  | 10,227  | 10,5044 | -1,212008654 | ENST00000380565 | 100820829 | NM_001018100 | MYZAP          |
| A_23_P132675   | 13,7071 | 13,9845 | -1,212008654 | ENST00000415995 | 7384      | NM_003365    | UQCRC1         |
| A_33_P3679941  | 1,67805 | 1,95546 | -1,212017055 | ENST00000622038 | N/A       | AK090861     | N/A            |
| A_23_P356021   | 6,2093  | 6,48671 | -1,212017055 | ENST00000452869 | 2187      | NM_001018113 | FANCB          |
| A_33_P3368139  | 11,0256 | 11,3031 | -1,212092667 | ENST00000469188 | 4214      | NM_005921    | MAP3K1         |
| A_23_P80156    | 9,68774 | 9,96532 | -1,212159882 | ENST00000482508 | 3275      | NM_206962    | PRMT2          |

|                |         |         |              |                 |           |              |                    |
|----------------|---------|---------|--------------|-----------------|-----------|--------------|--------------------|
| A_33_P3247689  | 1,63538 | 1,91297 | -1,212168284 | N/A             | N/A       | N/A          | N/A                |
| A_22_P00011671 | 4,00514 | 4,28281 | -1,212235502 | ENST00000438618 | 100131814 | NR_026805    | LINC00271          |
| A_23_P402733   | 8,17952 | 8,45719 | -1,212235502 | ENST00000300278 | 6651      | NM_032195    | SON                |
| A_21_P0013268  | 8,91205 | 9,18974 | -1,212252308 | N/A             | N/A       | N/A          | XLOC_I2_013594     |
| A_21_P0005910  | 3,43392 | 3,71167 | -1,212302725 | ENST00000524079 | 137835    | N/A          | TMEM71             |
| A_22_P00018911 | 4,98979 | 5,2676  | -1,212353144 | N/A             | N/A       | N/A          | Inc-TRAPPC8-2      |
| A_23_P363255   | 4,29442 | 4,57224 | -1,212361548 | ENST00000432185 | 80323     | NM_025214    | CCDC68             |
| A_22_P00004270 | 1,66937 | 1,94721 | -1,212378355 | N/A             | N/A       | N/A          | Inc-CNBD1-4        |
| A_32_P98502    | 13,5811 | 13,859  | -1,212428777 | ENST00000322347 | 9377      | NM_004255    | COX5A              |
| A_22_P00018804 | 5,12699 | 5,4049  | -1,212437181 | ENST00000369851 | 2773      | N/A          | GNAI3              |
| A_33_P3361851  | 14,032  | 14,31   | -1,212512819 | ENST00000265062 | 7879      | NM_004637    | RAB7A              |
| A_23_P65262    | 9,4591  | 9,73711 | -1,212521224 | ENST00000509076 | 10443     | NM_001278432 | N4BP2L2            |
| A_21_P0002177  | 3,34422 | 3,62223 | -1,212521224 | N/A             | N/A       | N/A          | Inc-AC008271.1.1-1 |
| A_22_P00004110 | 6,50007 | 6,77813 | -1,212563247 | N/A             | N/A       | N/A          | Inc-CLCN3-1        |
| A_33_P3294237  | 9,46567 | 9,74374 | -1,212571652 | ENST00000373036 | 4520      | NM_005955    | MTF1               |
| A_21_P0011823  | 1,57321 | 1,8513  | -1,212588462 | N/A             | N/A       | N/A          | XLOC_I2_007449     |
| A_23_P30554    | 1,70731 | 1,98541 | -1,212596867 | ENST00000520740 | 30820     | NM_001034837 | KCNIP1             |
| A_21_P0012277  | 5,65199 | 5,93009 | -1,212596867 | N/A             | N/A       | N/A          | XLOC_I2_009448     |
| A_32_P111306   | 1,65661 | 1,935   | -1,212840639 | ENST00000548219 | 193629    | NR_027072    | LINC00189          |
| A_33_P3227041  | 13,6693 | 13,9477 | -1,212849046 | ENST00000342111 | 637       | NM_197966    | BID                |
| A_23_P321501   | 10,9794 | 11,2579 | -1,212933117 | ENST00000556701 | 10202     | NM_182908    | DHRS2              |
| A_23_P357966   | 1,5069  | 1,78542 | -1,212949932 | ENST00000360540 | 115294    | NM_052937    | PCMTD1             |
| A_33_P3341269  | 2,56157 | 2,84015 | -1,213000378 | N/A             | N/A       | N/A          | Inc-LGALS14-1      |
| A_22_P00001223 | 6,50774 | 6,78634 | -1,213017194 | N/A             | N/A       | N/A          | Inc-ANKRD13B-1     |
| A_23_P419795   | 8,82687 | 9,10548 | -1,213025602 | ENST00000525040 | 81846     | NM_030962    | SBF2               |
| A_23_P99292    | 9,40462 | 9,68325 | -1,213042418 | ENST00000535558 | 10635     | NM_006479    | RAD51AP1           |
| A_23_P212522   | 9,7188  | 9,99755 | -1,21314332  | ENST00000323116 | 23200     | NM_014616    | ATP11B             |
| A_22_P00003924 | 1,46321 | 1,74197 | -1,213151729 | ENST00000520032 | N/A       | BM693730     | N/A                |
| A_24_P93967    | 9,37279 | 9,65157 | -1,213168547 | ENST00000616614 | 2332      | NM_002024    | FMR1               |
| A_21_P0013820  | 12,4486 | 12,7274 | -1,213185365 | N/A             | N/A       | N/A          | XLOC_I2_015762     |
| A_22_P00016109 | 1,51244 | 1,79134 | -1,21326946  | N/A             | 79178     | NR_046051    | THTPA              |
| A_33_P3219870  | 11,5139 | 11,7928 | -1,21326946  | ENST00000617551 | 57104     | NM_020376    | PNPLA2             |
| A_22_P00017284 | 4,32412 | 4,60307 | -1,213311509 | N/A             | N/A       | N/A          | Inc-USP10-2        |

|                |         |         |              |                 |           |              |                      |
|----------------|---------|---------|--------------|-----------------|-----------|--------------|----------------------|
| A_23_P201731   | 8,68626 | 8,96522 | -1,213319919 | ENST00000336184 | 7188      | NM_004619    | TRAF5                |
| A_19_P00317937 | 6,26237 | 6,54133 | -1,213319919 | ENST00000244070 | 55370     | NR_003505    | PPP4R1L              |
| A_24_P35228    | 9,36308 | 9,6421  | -1,213370381 | ENST00000251808 | 79977     | NM_024915    | GRHL2                |
| A_33_P3356811  | 6,04673 | 6,32575 | -1,213370381 | ENST00000368771 | 353135    | NM_178353    | LCE1E                |
| A_33_P3276913  | 6,85041 | 7,12944 | -1,213378791 | N/A             | N/A       | BG533310     | N/A                  |
| A_24_P178148   | 6,1315  | 6,41065 | -1,213479722 | N/A             | 100129455 | XR_249246    | LOC100129455         |
| A_32_P11894    | 11,3259 | 11,6051 | -1,213521778 | ENST00000543139 | 91574     | NM_152269    | C12orf65             |
| A_21_P0001867  | 1,57585 | 1,85507 | -1,213538602 | N/A             | N/A       | N/A          | Inc-ACTR2-1          |
| A_23_P315892   | 9,09144 | 9,37068 | -1,213555425 | ENST00000485320 | 30815     | NM_013443    | ST6GALNAC6           |
| A_24_P85158    | 10,1089 | 10,3882 | -1,213605896 | ENST00000529937 | 23410     | NM_012239    | SIRT3                |
| A_33_P3299865  | 12,0292 | 12,3085 | -1,213605896 | ENST00000355057 | 8362      | NM_003541    | HIST1H4K             |
| A_33_P3417305  | 6,24085 | 6,52017 | -1,213622721 | ENST00000451550 | N/A       | N/A          | N/A                  |
| A_33_P3424217  | 1,77572 | 2,05516 | -1,213723671 | ENST00000399670 | 3119      | NM_001243962 | HLA-DQB1             |
| A_22_P00024561 | 4,17845 | 4,45789 | -1,213723671 | N/A             | N/A       | N/A          | Inc-ROM1-2           |
| A_33_P3258801  | 5,23152 | 5,51099 | -1,21374891  | ENST00000246515 | 57152     | NM_020427    | SLURP1               |
| A_21_P0009167  | 1,44513 | 1,72465 | -1,213790976 | N/A             | N/A       | N/A          | Inc-GRB7-1           |
| A_33_P3653912  | 5,16138 | 5,44092 | -1,213807803 | ENST00000233379 | 51011     | XM_006712560 | FAHD2A               |
| A_33_P3356080  | 1,47771 | 1,75727 | -1,21382463  | ENST00000407524 | 150935    | NR_037808    | LOC150935            |
| A_21_P0009723  | 3,05473 | 3,3343  | -1,213833044 | ENST00000597989 | N/A       | N/A          | N/A                  |
| A_33_P3575854  | 10,5691 | 10,8488 | -1,213942426 | ENST00000609350 | 642361    | NR_029407    | LOC642361            |
| A_22_P00006040 | 4,35378 | 4,63356 | -1,214009743 | N/A             | N/A       | BC039686     | Inc-FAM120AOS-1      |
| A_33_P3399453  | 9,97387 | 10,2537 | -1,214051818 | ENST00000483316 | 829       | NM_006135    | CAPZA1               |
| A_23_P98070    | 1,59892 | 1,87876 | -1,214060233 | ENST00000371447 | 5146      | NM_006204    | PDE6C                |
| A_21_P0012574  | 1,6907  | 1,97056 | -1,214077064 | ENST00000505386 | 101929019 | N/A          | LOC101929019         |
| A_22_P00013435 | 3,71616 | 3,99604 | -1,214093895 | N/A             | N/A       | N/A          | Inc-RP11-276H1.3.1-1 |
| A_23_P160406   | 11,3229 | 11,6028 | -1,214110726 | ENST00000495537 | 51133     | NM_016121    | KCTD3                |
| A_33_P3415336  | 2,97377 | 3,25367 | -1,214110726 | ENST00000462747 | 57679     | N/A          | ALS2                 |
| A_23_P76983    | 6,06455 | 6,34445 | -1,214110726 | ENST00000394009 | 80127     | NM_025057    | CCDC176              |
| A_32_P54018    | 10,1004 | 10,3803 | -1,214110726 | ENST00000556746 | 57456     | NM_020696    | KIAA1143             |
| A_23_P47728    | 3,56487 | 3,84481 | -1,214144388 | ENST00000614044 | 4135      | NM_033063    | MAP6                 |
| A_23_P121106   | 4,62032 | 4,90027 | -1,214152804 | ENST00000295934 | 8820      | NM_003865    | HESX1                |
| A_21_P0014835  | 1,49476 | 1,77475 | -1,214186468 | N/A             | N/A       | N/A          | N/A                  |
| A_33_P3228543  | 2,0667  | 2,3467  | -1,214194884 | N/A             | N/A       | N/A          | N/A                  |

|                |         |         |              |                 |           |                   |                |
|----------------|---------|---------|--------------|-----------------|-----------|-------------------|----------------|
| A_33_P3410654  | 1,55565 | 1,83573 | -1,214262216 | ENST00000396502 | 387837    | NM_205852         | CLEC12B        |
| A_23_P84344    | 11,5392 | 11,8193 | -1,214279049 | ENST00000531205 | 59307     | NM_021805         | SIGIRR         |
| A_19_P00316219 | 6,79916 | 7,07935 | -1,214354802 | N/A             | N/A       | N/A               | N/A            |
| A_23_P139509   | 11,9517 | 12,2319 | -1,214363219 | ENST00000611644 | 51290     | NM_016570         | ERGIC2         |
| A_22_P00022522 | 1,60556 | 1,88583 | -1,214422142 | N/A             | 101929532 | NR_110255         | LOC101929532   |
| A_24_P377124   | 1,8095  | 2,0898  | -1,214447395 | ENST00000445696 | 7066      | NM_000460         | THPO           |
| A_21_P0002968  | 1,62904 | 1,90938 | -1,214481067 | N/A             | N/A       | N/A               | Inc-SLC25A26-1 |
| A_21_P0002611  | 1,59786 | 1,87823 | -1,214506322 | N/A             | N/A       | N/A               | Inc-CCDC74A-1  |
| A_22_P00004611 | 1,62646 | 1,90688 | -1,214548414 | ENST00000581489 | 101929511 | XR_243526         | LOC101929511   |
| A_22_P00010106 | 1,47138 | 1,75182 | -1,214565252 | N/A             | N/A       | DB231084          | Inc-MRGPRD-1   |
| A_21_P0005499  | 1,95526 | 2,23588 | -1,214716798 | N/A             | N/A       | N/A               | Inc-ZNF680-11  |
| A_33_P3299766  | 7,34834 | 7,62899 | -1,214742058 | ENST00000369246 | 57700     | N/A               | FAM160B1       |
| A_33_P3381186  | 1,44892 | 1,72963 | -1,214792579 | ENST00000536262 | 160728    | NM_145913         | SLC5A8         |
| A_21_P0008407  | 3,38526 | 3,666   | -1,21481784  | ENST00000554526 | N/A       | N/A               | N/A            |
| A_33_P3668839  | 9,20872 | 9,4895  | -1,214851522 | N/A             | 644656    | NR_036539         | LOC644656      |
| A_33_P3251703  | 17,4318 | 17,7126 | -1,214868364 | ENST00000392531 | 1396      | NM_001311         | CRIP1          |
| A_21_P0012295  | 1,63939 | 1,92019 | -1,214868364 | N/A             | N/A       | N/A               | XLOC_I2_009508 |
| A_23_P40611    | 6,91473 | 7,19554 | -1,214876785 | ENST00000471659 | 6948      | NM_000355         | TCN2           |
| A_22_P00002471 | 1,40835 | 1,68927 | -1,214969418 | N/A             | N/A       | AA766861          | Inc-C15orf48-2 |
| A_21_P0014417  | 1,54139 | 1,82231 | -1,214969418 | N/A             | N/A       | N/A               | N/A            |
| A_23_P390443   | 2,31712 | 2,59805 | -1,214977839 | ENST00000376325 | 729956    | NM_001145176      | SHISA7         |
| A_21_P0011573  | 8,71812 | 8,99905 | -1,214977839 | ENST00000421796 | N/A       | TCONS_I2_00011128 | N/A            |
| A_22_P00008393 | 7,21315 | 7,49415 | -1,215036792 | N/A             | 101928363 | NR_120332         | EHD4-AS1       |
| A_23_P215088   | 10,7365 | 11,0175 | -1,215036792 | ENST00000467642 | 51530     | NM_016478         | ZC3HC1         |
| A_21_P0011603  | 11,1417 | 11,4227 | -1,215036792 | ENST00000565833 | 51321     | NM_016627         | AMZ2           |
| A_33_P3267195  | 7,50479 | 7,78582 | -1,215062058 | ENST00000380106 | 497048    | NR_122107         | KU-MEL-3       |
| A_23_P206396   | 12,8583 | 13,1394 | -1,215121015 | ENST00000527845 | 51192     | NM_001040138      | CKLF           |
| A_33_P3245183  | 7,31516 | 7,59626 | -1,215121015 | ENST00000431010 | 3269      | NM_001098213      | HRH1           |
| A_21_P0012701  | 1,46919 | 1,7503  | -1,215129437 | N/A             | N/A       | N/A               | XLOC_I2_011411 |
| A_33_P3346680  | 7,84801 | 8,12913 | -1,21513786  | N/A             | N/A       | N/A               | N/A            |
| A_21_P0004184  | 2,18507 | 2,46625 | -1,215188397 | N/A             | N/A       | N/A               | Inc-PRELI2-1   |
| A_24_P932305   | 1,51956 | 1,80083 | -1,215264207 | N/A             | 100129033 | AY358807          | QIQN5815       |
| A_21_P0004316  | 3,75749 | 4,03877 | -1,215272631 | N/A             | N/A       | N/A               | Inc-CNOT8-1    |

|                |         |         |              |                 |           |              |                 |
|----------------|---------|---------|--------------|-----------------|-----------|--------------|-----------------|
| A_24_P29723    | 11,1192 | 11,4005 | -1,215289478 | ENST00000412064 | 5447      | NM_000941    | POR             |
| A_33_P3400728  | 3,52542 | 3,80681 | -1,215365294 | ENST00000352483 | 54101     | NM_020639    | RIPK4           |
| A_33_P3333317  | 10,4348 | 10,7162 | -1,215373718 | ENST00000378748 | 10133     | NM_001008211 | OPTN            |
| A_33_P3422248  | 9,39002 | 9,67144 | -1,215390567 | ENST00000581347 | 645369    | XM_005258130 | TMEM200C        |
| A_33_P3272773  | 8,29955 | 8,58098 | -1,215398992 | ENST00000302342 | 7764      | NM_006526    | ZNF217          |
| A_33_P3258223  | 8,79129 | 9,07274 | -1,215415841 | ENST00000354230 | 4176      | NM_005916    | MCM7            |
| A_22_P00013604 | 2,80254 | 3,08403 | -1,21544954  | ENST00000438589 | 388630    | NM_001194986 | TRABD2B         |
| A_21_P0012637  | 1,591   | 1,8725  | -1,215457965 | N/A             | N/A       | N/A          | XLOC_I2_010948  |
| A_21_P0012828  | 1,60104 | 1,88274 | -1,215626474 | N/A             | N/A       | N/A          | XLOC_I2_011579  |
| A_33_P3219803  | 16,7254 | 17,0071 | -1,215626474 | ENST00000466801 | 5757      | NM_001099285 | PTMA            |
| A_22_P00020228 | 1,6685  | 1,95027 | -1,215685458 | N/A             | N/A       | DB215008     | Inc-OR10AB1P-2  |
| A_23_P28886    | 13,725  | 14,0068 | -1,215710738 | ENST00000379160 | 5111      | NM_002592    | PCNA            |
| A_22_P00007941 | 1,53414 | 1,81598 | -1,215744445 | N/A             | 101929592 | NR_125986    | LOC101929592    |
| A_33_P3411890  | 5,02702 | 5,30893 | -1,215803435 | N/A             | N/A       | N/A          | N/A             |
| A_24_P289636   | 9,66221 | 9,94418 | -1,215854    | ENST00000379095 | 51335     | AK098314     | NGRN            |
| A_23_P120467   | 8,92429 | 9,20631 | -1,215896139 | ENST00000361387 | 55734     | NM_199427    | ZFP64           |
| A_23_P300826   | 9,30863 | 9,59069 | -1,215929851 | ENST00000461130 | 221545    | NM_145029    | C6orf136        |
| A_33_P3392366  | 8,83544 | 9,11751 | -1,215938279 | ENST00000564585 | 101929634 | XR_245823    | LOC101929634    |
| A_23_P88234    | 11,3086 | 11,5907 | -1,215963564 | ENST00000560600 | 51016     | NM_016049    | EMC9            |
| A_33_P3299279  | 7,82021 | 8,10231 | -1,215963564 | ENST00000314890 | 389289    | NM_001014279 | ANXA2R          |
| A_33_P3275835  | 11,3254 | 11,6075 | -1,215963564 | ENST00000336067 | 27433     | NM_001134430 | TOR2A           |
| A_19_P00317748 | 1,63282 | 1,91495 | -1,21598885  | ENST00000513234 | 101928858 | XR_249793    | LOC101928858    |
| A_24_P373152   | 6,76911 | 7,05132 | -1,216056281 | ENST00000341223 | 1073      | NM_021914    | CFL2            |
| A_24_P324712   | 3,58214 | 3,86436 | -1,21606471  | ENST00000381160 | 29881     | NM_013389    | NPC1L1          |
| A_33_P3261192  | 1,55581 | 1,83807 | -1,216098427 | N/A             | N/A       | N/A          | N/A             |
| A_22_P00006326 | 1,81852 | 2,1008  | -1,216115285 | N/A             | N/A       | BG218223     | Inc-FAM9C-2     |
| A_33_P3387455  | 1,4629  | 1,74519 | -1,216123715 | ENST00000379711 | 57713     | NM_001029880 | SFMBT2          |
| A_23_P144677   | 10,5474 | 10,8297 | -1,216132144 | ENST00000231368 | 4012      | AF178574     | LNPEP           |
| A_23_P252681   | 8,37756 | 8,65988 | -1,216149004 | ENST00000411591 | 5130      | NM_005017    | PCYT1A          |
| A_32_P190951   | 1,54274 | 1,82513 | -1,216208013 | ENST00000390622 | N/A       | AY393117     | N/A             |
| A_23_P165180   | 12,9024 | 13,1848 | -1,216216443 | ENST00000407360 | 8625      | NM_003721    | RFXANK          |
| A_21_P0005382  | 1,53467 | 1,81719 | -1,216317609 | N/A             | N/A       | N/A          | Inc-POM121L12-2 |
| A_24_P284584   | 6,77238 | 7,05497 | -1,216376627 | ENST00000603380 | 84527     | NM_032497    | ZNF559          |

|                |         |         |              |                 |           |              |              |
|----------------|---------|---------|--------------|-----------------|-----------|--------------|--------------|
| A_21_P0000715  | 9,97851 | 10,2611 | -1,216376627 | ENST00000587501 | 85451     | NR_038131    | UNK          |
| A_23_P365226   | 4,20112 | 4,48372 | -1,216385058 | ENST00000286544 | 145483    | NM_152445    | FAM161B      |
| A_33_P3309289  | 5,19212 | 5,47476 | -1,216418784 | N/A             | 6484      | AK021929     | ST3GAL4      |
| A_22_P00019278 | 1,49995 | 1,78263 | -1,216452511 | N/A             | N/A       | BG204456     | Inc-CMAS-1   |
| A_22_P00019562 | 7,92139 | 8,20411 | -1,216486239 | ENST00000545606 | 55832     | AK056140     | CAND1        |
| A_33_P3282556  | 11,447  | 11,7298 | -1,216553697 | ENST00000566264 | 79652     | NM_024600    | TMEM204      |
| A_21_P0011328  | 1,56396 | 1,84676 | -1,216553697 | ENST00000559964 | 283673    | NR_026949    | EWSAT1       |
| A_22_P00003466 | 5,91077 | 6,19363 | -1,216604293 | N/A             | 100507419 | XR_424759    | MMP25-AS1    |
| A_21_P0013371  | 5,04789 | 5,33079 | -1,216638025 | N/A             | 100506098 | XR_108746    | LOC100506098 |
| A_22_P00022206 | 4,25482 | 4,53774 | -1,216654891 | ENST00000592638 | 101927943 | XR_243874    | LOC101927943 |
| A_23_P363778   | 1,62483 | 1,90777 | -1,216671758 | ENST00000295113 | 2487      | NM_001463    | FRZB         |
| A_22_P00000873 | 5,54611 | 5,82911 | -1,216722359 | N/A             | N/A       | BC038776     | Inc-AGRP-5   |
| A_33_P3333033  | 10,3204 | 10,6034 | -1,216722359 | ENST00000574857 | 9905      | AK124883     | SGSM2        |
| A_21_P0002180  | 4,50397 | 4,78707 | -1,216806698 | N/A             | N/A       | N/A          | Inc-KCNS3-3  |
| A_23_P321913   | 9,16519 | 9,44833 | -1,216840436 | ENST00000316637 | 50619     | NM_022047    | DEF6         |
| A_23_P154108   | 11,7216 | 12,0048 | -1,216891044 | ENST00000409317 | 1781      | NM_001378    | DYNC112      |
| A_22_P00018081 | 3,8824  | 4,1656  | -1,216891044 | N/A             | 101929464 | NR_125978    | LOC101929464 |
| A_33_P3685572  | 6,90779 | 7,19105 | -1,216941654 | ENST00000565617 | N/A       | BX649145     | N/A          |
| A_33_P3780572  | 2,06299 | 2,34627 | -1,216958524 | ENST00000510832 | 401164    | AK095968     | LINC01060    |
| A_23_P122464   | 8,52326 | 8,80655 | -1,21696696  | ENST00000252207 | 7746      | NM_006299    | ZSCAN9       |
| A_23_P157283   | 10,8146 | 11,0979 | -1,216975395 | ENST00000481425 | 79161     | NM_024315    | TMEM243      |
| A_33_P3219105  | 12,1552 | 12,4385 | -1,216975395 | ENST00000430724 | N/A       | N/A          | N/A          |
| A_23_P48099    | 11,7621 | 12,0454 | -1,216975395 | ENST00000547269 | 79023     | NM_024057    | NUP37        |
| A_23_P340171   | 1,5701  | 1,85342 | -1,216992266 | ENST00000602346 | 63970     | NM_001251964 | TP53AIP1     |
| A_22_P00016185 | 3,25841 | 3,54175 | -1,217009137 | N/A             | N/A       | N/A          | Inc-TLE3-8   |
| A_21_P0009961  | 5,41053 | 5,69388 | -1,217017573 | N/A             | N/A       | N/A          | Inc-NCOA3-4  |
| A_23_P41854    | 11,9104 | 12,1938 | -1,217059752 | ENST00000254691 | 84674     | NM_032587    | CARD6        |
| A_23_P317244   | 4,21917 | 4,50275 | -1,21721161  | ENST00000394637 | 124912    | NM_173847    | SPACA3       |
| A_32_P168247   | 16,7947 | 17,0783 | -1,217228484 | ENST00000549525 | 1337      | NM_004373    | COX6A1       |
| A_24_P285480   | 12,1179 | 12,4016 | -1,217312859 | ENST00000476552 | 9553      | NM_004891    | MRPL33       |
| A_21_P0012739  | 5,77712 | 6,06083 | -1,217321297 | ENST00000511497 | 100507487 | NR_125882    | LOC100507487 |
| A_23_P93258    | 11,8002 | 12,084  | -1,21739724  | ENST00000621411 | 8358      | NM_003537    | HIST1H3B     |
| A_33_P3232527  | 6,59949 | 6,88337 | -1,217464749 | ENST00000367512 | 80267     | NM_025191    | EDEM3        |



|                |         |         |              |                 |           |              |                  |
|----------------|---------|---------|--------------|-----------------|-----------|--------------|------------------|
| A_21_P0000561  | 5,40098 | 5,68495 | -1,2175407   | N/A             | 100302739 | NR_028370    | PCNA-AS1         |
| A_22_P00010295 | 1,67467 | 1,95869 | -1,217582898 | ENST00000502001 | 100505738 | NR_039989    | MIR4458HG        |
| A_23_P252145   | 8,30828 | 8,5923  | -1,217582898 | ENST00000436587 | 56913     | NM_020156    | C1GALT1          |
| A_24_P398500   | 7,18905 | 7,47311 | -1,217616657 | ENST00000536198 | 10198     | NM_022782    | MPHOSPH9         |
| A_21_P0014231  | 8,23849 | 8,52256 | -1,217625097 | N/A             | N/A       | N/A          | Inc-WDR34-1      |
| A_21_P0004582  | 1,61048 | 1,89479 | -1,217827672 | N/A             | N/A       | N/A          | Inc-BOD1-1       |
| A_33_P3315944  | 1,64409 | 1,92848 | -1,217895205 | ENST00000332372 | 344018    | NM_001004311 | FIGLA            |
| A_22_P00022613 | 1,61457 | 1,89896 | -1,217895205 | ENST00000451953 | 100506527 | N/A          | LINC01007        |
| A_33_P3240966  | 6,03851 | 6,32294 | -1,217928972 | ENST00000481421 | N/A       | N/A          | N/A              |
| A_23_P1431     | 7,44123 | 7,72568 | -1,217945857 | ENST00000372037 | 657       | NM_004329    | BMPR1A           |
| A_24_P235400   | 1,45973 | 1,74419 | -1,217954299 | ENST00000544227 | 4325      | NM_005941    | MMP16            |
| A_23_P162719   | 8,15671 | 8,44117 | -1,217954299 | ENST00000400324 | 81624     | NM_030932    | DIAPH3           |
| A_33_P3263061  | 12,6588 | 12,9433 | -1,217988068 | ENST00000381809 | 50808     | NM_016282    | AK3              |
| A_33_P3376026  | 4,56823 | 4,85276 | -1,218013396 | N/A             | 100128770 | NR_047572    | LOC100128770     |
| A_33_P3296181  | 2,99896 | 3,28355 | -1,218064052 | ENST00000621940 | 414062    | NM_001001437 | CCL3L3           |
| A_33_P3394395  | 9,57247 | 9,85716 | -1,218148485 | ENST00000370791 | 374986    | NM_001270384 | FAM73A           |
| A_23_P321466   | 7,66094 | 7,94571 | -1,218216036 | ENST00000593942 | 92960     | NM_080662    | PEX11G           |
| A_22_P00001037 | 1,53392 | 1,8187  | -1,21822448  | ENST00000455977 | 103752583 | NR_125787    | LINC01075        |
| A_22_P00019675 | 1,76801 | 2,05285 | -1,218275145 | N/A             | N/A       | N/A          | Inc-ELP4-1       |
| A_22_P00005652 | 1,46054 | 1,7454  | -1,218292034 | N/A             | N/A       | BC043181     | Inc-EIF2C2-2     |
| A_22_P00025010 | 3,37716 | 3,66202 | -1,218292034 | ENST00000427073 | N/A       | N/A          | N/A              |
| A_21_P0001283  | 1,47972 | 1,76476 | -1,218444046 | N/A             | N/A       | N/A          | Inc-AL591845.1-1 |
| A_23_P99138    | 14,829  | 15,1142 | -1,218579183 | ENST00000229238 | 51258     | NM_016497    | MRPL51           |
| A_23_P405707   | 7,94318 | 8,22838 | -1,218579183 | ENST00000615339 | 54880     | BC128456     | BCOR             |
| A_23_P407115   | 6,76676 | 7,05199 | -1,218604523 | ENST00000617781 | 8396      | NM_003559    | PIP4K2B          |
| A_33_P3514859  | 8,33031 | 8,61557 | -1,218629863 | ENST00000621883 | 101929709 | NR_125822    | LOC101929709     |
| A_33_P3375368  | 5,04764 | 5,33294 | -1,218663651 | ENST00000407714 | 2859      | NM_001195381 | GPR35            |
| A_23_P390545   | 1,62032 | 1,9057  | -1,21873123  | ENST00000610569 | 9708      | NM_014004    | PCDHGA8          |
| A_23_P91081    | 13,7741 | 14,0595 | -1,218748126 | ENST00000456133 | 4072      | NM_002354    | EPCAM            |
| A_23_P93623    | 15,4193 | 15,7047 | -1,218748126 | ENST00000249289 | 9296      | NM_004231    | ATP6V1F          |
| A_21_P0009560  | 1,49681 | 1,78222 | -1,218756573 | N/A             | N/A       | N/A          | Inc-TCF4-1       |
| A_23_P404094   | 5,91244 | 6,19788 | -1,218781917 | N/A             | 439931    | NR_027052    | THAP7-AS1        |
| A_21_P0004610  | 1,46979 | 1,75527 | -1,218815709 | N/A             | 101927048 | N/A          | LOC101927048     |

|                |         |         |              |                 |           |              |                       |
|----------------|---------|---------|--------------|-----------------|-----------|--------------|-----------------------|
| A_33_P3424207  | 11,9457 | 12,2312 | -1,218832606 | ENST00000358201 | 79874     | NM_024816    | RABEP2                |
| A_22_P00019882 | 1,72591 | 2,01141 | -1,218832606 | ENST00000510744 | N/A       | N/A          | N/A                   |
| A_33_P3297599  | 14,0029 | 14,2885 | -1,218917092 | N/A             | N/A       | AF416714     | N/A                   |
| A_22_P00019049 | 1,48491 | 1,77052 | -1,218925541 | ENST00000554412 | N/A       | N/A          | N/A                   |
| A_23_P53866    | 10,5157 | 10,8014 | -1,219001583 | ENST00000356576 | 57511     | NM_020751    | COG6                  |
| A_22_P00014678 | 1,48231 | 1,7681  | -1,219077631 | N/A             | N/A       | N/A          | Inc-SLC25A16-2        |
| A_33_P3315634  | 4,01841 | 4,30422 | -1,219094531 | N/A             | N/A       | N/A          | N/A                   |
| A_23_P395534   | 8,89636 | 9,18218 | -1,219102981 | ENST00000345034 | 6248      | NM_006511    | RSC1A1                |
| A_33_P3390122  | 4,51608 | 4,80198 | -1,219170585 | ENST00000370759 | 54810     | NM_017655    | GIPC2                 |
| A_21_P0013598  | 1,4158  | 1,70172 | -1,219187486 | N/A             | N/A       | N/A          | XLOC_I2_015011        |
| A_33_P3351790  | 1,50806 | 1,794   | -1,219204388 | N/A             | N/A       | N/A          | N/A                   |
| A_21_P0012174  | 15,4513 | 15,7373 | -1,219255094 | ENST00000450472 | N/A       | N/A          | N/A                   |
| A_24_P481824   | 6,06579 | 6,35185 | -1,219305803 | ENST00000414645 | 286148    | NM_181787    | DPY19L4               |
| A_22_P00015177 | 2,03969 | 2,32576 | -1,219314254 | N/A             | N/A       | N/A          | Inc-SORL1-2           |
| A_33_P3372368  | 10,2477 | 10,5338 | -1,219339609 | ENST00000551318 | 3856      | NR_045962    | KRT8                  |
| A_32_P138617   | 9,06129 | 9,34741 | -1,219356513 | ENST00000316407 | 205717    | NM_001009899 | KIAA2018              |
| A_22_P00013518 | 4,12267 | 4,40881 | -1,219373417 | N/A             | N/A       | DA829461     | Inc-RP11-392018.1.1-2 |
| A_33_P3216651  | 3,24236 | 3,5285  | -1,219373417 | ENST00000307198 | 220074    | NM_001145310 | LRTOMT                |
| A_24_P941051   | 8,62962 | 8,91578 | -1,219390321 | ENST00000331173 | 23283     | NM_015235    | CSTF2T                |
| A_23_P202860   | 9,93961 | 10,2258 | -1,219415678 | ENST00000525015 | 120227    | NM_024514    | CYP2R1                |
| A_22_P00014498 | 2,5952  | 2,88141 | -1,219432583 | N/A             | N/A       | N/A          | Inc-SHISA9-2          |
| A_33_P3311956  | 8,97925 | 9,26548 | -1,219449488 | ENST00000464964 | 9637      | NM_001042548 | FEZ2                  |
| A_22_P00018343 | 2,06236 | 2,34874 | -1,219576283 | N/A             | 100852409 | NR_046218    | NEGR1-IT1             |
| A_23_P117928   | 10,7659 | 11,0523 | -1,21959319  | ENST00000561234 | 22893     | NM_014952    | BAHD1                 |
| A_21_P0012505  | 5,3791  | 5,66551 | -1,219601644 | ENST00000487963 | N/A       | N/A          | N/A                   |
| A_24_P373286   | 7,86388 | 8,1504  | -1,219694637 | ENST00000396208 | 9738      | NM_014711    | CCP110                |
| A_33_P3263614  | 4,45317 | 4,73969 | -1,219694637 | ENST00000608765 | 55616     | NM_001143778 | ASAP3                 |
| A_32_P129669   | 7,22298 | 7,5096  | -1,219779183 | ENST00000276185 | 84443     | NM_032428    | FRMPD3                |
| A_23_P207367   | 6,95504 | 7,24167 | -1,219787638 | ENST00000345506 | 6776      | NM_003152    | STAT5A                |
| A_21_P0001690  | 1,54124 | 1,82787 | -1,219787638 | N/A             | N/A       | N/A          | Inc-IFI44-2           |
| A_33_P3379001  | 2,98606 | 3,27279 | -1,21987219  | ENST00000329542 | 90249     | NM_133369    | UNC5A                 |
| A_33_P3422787  | 4,17366 | 4,4604  | -1,219880646 | N/A             | N/A       | AK309441     | Inc-TM4SF4-2          |
| A_33_P3354604  | 2,62935 | 2,9162  | -1,21997366  | ENST00000620732 | 9560      | NM_001291470 | CCL4L2                |

|                |         |         |              |                 |           |              |                |
|----------------|---------|---------|--------------|-----------------|-----------|--------------|----------------|
| A_23_P217901   | 12,5238 | 12,8107 | -1,220015942 | ENST00000486084 | 100131187 | NM_001113207 | TSTD1          |
| A_21_P0000905  | 1,46166 | 1,74867 | -1,220108967 | N/A             | 100287944 | NR_040246    | LOC100287944   |
| A_33_P3251932  | 7,23872 | 7,52578 | -1,220151254 | ENST00000337565 | 10018     | NM_207002    | BCL2L11        |
| A_24_P230514   | 1,63584 | 1,92295 | -1,220193542 | N/A             | N/A       | AK094424     | Inc-ATG7-1     |
| A_22_P00013343 | 8,83893 | 9,12608 | -1,220227373 | ENST00000517897 | N/A       | D38715       | N/A            |
| A_21_P0006776  | 1,61815 | 1,90536 | -1,220278122 | ENST00000444137 | 101929646 | N/A          | LOC101929646   |
| A_33_P3363105  | 5,1384  | 5,42564 | -1,220303497 | N/A             | N/A       | N/A          | N/A            |
| A_33_P3327592  | 11,4139 | 11,7012 | -1,220354249 | ENST00000392894 | 11342     | NM_007282    | RNF13          |
| A_33_P3321314  | 1,47483 | 1,76213 | -1,220354249 | ENST00000616518 | N/A       | M62376       | N/A            |
| A_23_P146654   | 14,0178 | 14,3052 | -1,220438841 | ENST00000379707 | 573       | NM_004323    | BAG1           |
| A_23_P1072     | 14,585  | 14,8724 | -1,220438841 | ENST00000537345 | 476       | NM_000701    | ATP1A1         |
| A_24_P322369   | 12,5372 | 12,8246 | -1,220438841 | ENST00000238497 | 9525      | NM_004869    | VPS4B          |
| A_22_P00005606 | 8,50284 | 8,79035 | -1,220531898 | N/A             | N/A       | N/A          | Inc-EFR3B-3    |
| A_21_P0001576  | 1,40344 | 1,69095 | -1,220531898 | N/A             | N/A       | N/A          | Inc-PRKAB2-1   |
| A_23_P346982   | 5,55163 | 5,83916 | -1,220548819 | ENST00000510708 | 285605    | NM_173666    | DTWD2          |
| A_21_P0012019  | 1,43067 | 1,71822 | -1,220565739 | N/A             | 100506563 | N/A          | LOC100506563   |
| A_33_P3383936  | 3,90882 | 4,1964  | -1,22059112  | ENST00000395745 | 22907     | NM_014966    | DHX30          |
| A_33_P3282649  | 2,75331 | 3,04089 | -1,22059112  | N/A             | N/A       | N/A          | N/A            |
| A_23_P66813    | 11,2991 | 11,5867 | -1,220608041 | ENST00000574992 | 51547     | NM_016538    | SIRT7          |
| A_21_P0013072  | 3,6973  | 3,98494 | -1,220641884 | N/A             | N/A       | N/A          | XL0C_I2_012925 |
| A_22_P00010269 | 1,62827 | 1,91604 | -1,22075188  | ENST00000566485 | N/A       | N/A          | N/A            |
| A_32_P91250    | 11,6411 | 11,9289 | -1,220777265 | ENST00000496722 | 7332      | NM_003347    | UBE2L3         |
| A_21_P0013730  | 1,62838 | 1,91625 | -1,220836499 | ENST00000588215 | 101928381 | N/A          | LOC101928381   |
| A_22_P00002388 | 5,92342 | 6,2113  | -1,220844961 | ENST00000419448 | 23250     | N/A          | ATP11A         |
| A_23_P413888   | 1,72424 | 2,01216 | -1,220878811 | ENST00000360388 | 222553    | NM_001029858 | SLC35F1        |
| A_22_P00012657 | 1,58762 | 1,87561 | -1,22093805  | ENST00000439804 | 103344926 | N/A          | LINCR-0002     |
| A_32_P155811   | 7,99658 | 8,28458 | -1,220946513 | ENST00000359314 | 23607     | NM_012120    | CD2AP          |
| A_33_P3362886  | 8,10669 | 8,39481 | -1,221048072 | N/A             | N/A       | AK056419     | Inc-COPZ2-1    |
| A_22_P00008690 | 1,70566 | 1,99379 | -1,221056536 | N/A             | N/A       | N/A          | Inc-KIAA1147-2 |
| A_23_P162355   | 3,84207 | 4,13021 | -1,221065    | ENST00000312492 | 3222      | NM_018953    | HOXC5          |
| A_33_P3398000  | 2,03086 | 2,31902 | -1,221081927 | N/A             | 100506866 | NR_038272    | TTN-AS1        |
| A_22_P00005862 | 4,65291 | 4,9411  | -1,221107319 | N/A             | N/A       | N/A          | Inc-ERMP1-1    |
| A_22_P00024476 | 1,48493 | 1,77318 | -1,221158105 | N/A             | N/A       | N/A          | Inc-TRPV3-1    |

|                |         |         |              |                 |           |              |               |
|----------------|---------|---------|--------------|-----------------|-----------|--------------|---------------|
| A_23_P117424   | 10,3347 | 10,623  | -1,221200428 | ENST00000558914 | 80344     | NM_025230    | DCAF11        |
| A_22_P00017352 | 7,99519 | 8,28358 | -1,221276613 | N/A             | 100129387 | NR_024490    | GABPB1-AS1    |
| A_22_P00008474 | 1,77168 | 2,06008 | -1,221285078 | ENST00000561816 | N/A       | AK095844     | N/A           |
| A_22_P00019143 | 5,61504 | 5,90353 | -1,221361268 | N/A             | N/A       | N/A          | Inc-DHX15-1   |
| A_21_P0000837  | 1,45669 | 1,74546 | -1,221598334 | ENST00000591961 | 100507589 | NR_038913    | NAGPA-AS1     |
| A_22_P00023609 | 3,47331 | 3,76208 | -1,221598334 | N/A             | N/A       | DB065448     | Inc-DUSP1-2   |
| A_21_P0009321  | 5,64017 | 5,92899 | -1,221640672 | N/A             | 101929494 | XR_424823    | LOC101929494  |
| A_22_P00009258 | 4,02818 | 4,31706 | -1,22169148  | ENST00000432495 | N/A       | XR_249026    | N/A           |
| A_23_P374351   | 10,526  | 10,8149 | -1,221708416 | ENST00000449081 | 222658    | NM_173562    | KCTD20        |
| A_33_P3320272  | 8,2107  | 8,4996  | -1,221708416 | ENST00000357501 | 84283     | NM_032323    | TMEM79        |
| A_24_P932939   | 1,4874  | 1,7763  | -1,221708416 | ENST00000420091 | 401052    | NM_001008737 | LOC401052     |
| A_33_P3407356  | 3,666   | 3,95494 | -1,22174229  | N/A             | 731656    | NR_027454    | LINC01348     |
| A_23_P124108   | 3,74312 | 4,03206 | -1,22174229  | ENST00000544665 | 3684      | NM_000632    | ITGAM         |
| A_22_P00005757 | 3,27718 | 3,56621 | -1,221818508 | N/A             | 100129203 | NR_110295    | LOC100129203  |
| A_22_P00024393 | 3,83202 | 4,12111 | -1,221869323 | N/A             | 100873941 | NR_046634    | OPA1-AS1      |
| A_23_P66891    | 10,1861 | 10,4752 | -1,221877793 | ENST00000335793 | 23580     | NM_012121    | CDC42EP4      |
| A_33_P3257015  | 13,9887 | 14,2778 | -1,221877793 | ENST00000580496 | N/A       | N/A          | N/A           |
| A_23_P50591    | 8,41125 | 8,70041 | -1,22192861  | ENST00000263372 | 9424      | NM_004823    | KCNK6         |
| A_22_P00021960 | 4,78609 | 5,07526 | -1,22193708  | N/A             | N/A       | N/A          | Inc-SMYD3-2   |
| A_23_P150407   | 9,27999 | 9,56922 | -1,2219879   | ENST00000616094 | 90993     | NM_052854    | CREB3L1       |
| A_22_P00018253 | 8,75156 | 9,04084 | -1,222030252 | ENST00000411844 | 100132341 | NR_024034    | CLUHP3        |
| A_23_P25674    | 11,4665 | 11,756  | -1,222216616 | ENST00000553652 | 1152      | NM_001823    | CKB           |
| A_23_P206501   | 5,54899 | 5,83851 | -1,22223356  | ENST00000620745 | 497190    | NM_001011880 | CLEC18B       |
| A_21_P0008950  | 2,57936 | 2,86895 | -1,222292864 | N/A             | N/A       | N/A          | Inc-NDRG4-1   |
| A_32_P105549   | 17,5458 | 17,8354 | -1,222301337 | ENST00000584982 | 728113    | NM_001098845 | ANXA8L1       |
| A_22_P00001756 | 1,47522 | 1,76489 | -1,222360645 | ENST00000451816 | N/A       | N/A          | N/A           |
| A_33_P3245977  | 5,60105 | 5,89082 | -1,222445375 | ENST00000319854 | 134549    | NM_133456    | SHROOM1       |
| A_22_P00018338 | 1,46449 | 1,75427 | -1,222453849 | ENST00000440351 | N/A       | N/A          | N/A           |
| A_21_P0009367  | 7,06763 | 7,35746 | -1,222496216 | N/A             | N/A       | N/A          | Inc-TMEM105-2 |
| A_24_P109432   | 8,81233 | 9,10222 | -1,22254706  | ENST00000478884 | 65065     | NM_001114132 | NBEAL1        |
| A_23_P65442    | 11,3181 | 11,608  | -1,222555534 | ENST00000396864 | 10379     | NM_006084    | IRF9          |
| A_22_P00006100 | 6,85432 | 7,14429 | -1,222614854 | ENST00000495363 | N/A       | N/A          | N/A           |
| A_33_P3268649  | 5,29487 | 5,58487 | -1,222640278 | ENST00000436643 | 66035     | NM_001282864 | SLC2A11       |

|                |         |         |              |                 |           |              |                |
|----------------|---------|---------|--------------|-----------------|-----------|--------------|----------------|
| A_24_P944827   | 7,27672 | 7,5668  | -1,222708077 | ENST00000354449 | 10533     | NM_006395    | ATG7           |
| A_23_P73239    | 11,4391 | 11,7292 | -1,222725028 | ENST00000360982 | 10787     | NM_205842    | NCKAP1         |
| A_24_P219156   | 6,41895 | 6,70908 | -1,222750454 | ENST00000556186 | 55147     | NM_001077351 | RBM23          |
| A_21_P0000991  | 1,65833 | 1,94847 | -1,222758929 | ENST00000419658 | N/A       | N/A          | N/A            |
| A_33_P3212930  | 1,73832 | 2,02846 | -1,222758929 | ENST00000605714 | N/A       | N/A          | N/A            |
| A_33_P3218951  | 5,1264  | 5,41662 | -1,222826735 | ENST00000254719 | 6117      | NM_002945    | RPA1           |
| A_24_P75917    | 7,11863 | 7,40889 | -1,22286064  | ENST00000507171 | 9720      | NM_014695    | CCDC144A       |
| A_24_P221883   | 11,3869 | 11,6772 | -1,222894545 | ENST00000488202 | 55486     | NM_018622    | PARL           |
| A_21_P0014345  | 7,83705 | 8,12738 | -1,222919975 | N/A             | N/A       | N/A          | N/A            |
| A_23_P44768    | 10,3604 | 10,6508 | -1,222979313 | ENST00000331710 | 29110     | NM_013254    | TBK1           |
| A_22_P00019456 | 2,1817  | 2,47211 | -1,22298779  | N/A             | 102723735 | XR_424348    | LOC102723735   |
| A_22_P00017746 | 1,47313 | 1,76354 | -1,22298779  | N/A             | N/A       | AK095723     | Inc-YES1-1     |
| A_23_P117851   | 2,87244 | 3,16288 | -1,223013221 | ENST00000395018 | 594855    | NM_001030005 | CPLX3          |
| A_24_P177279   | 1,5008  | 1,7913  | -1,223064086 | ENST00000306149 | 27254     | NM_014460    | CSDC2          |
| A_33_P3501900  | 3,6568  | 3,94733 | -1,223089519 | ENST00000585659 | 386758    | NR_037160    | ZNF582-AS1     |
| A_23_P138089   | 1,65354 | 1,94412 | -1,223131909 | ENST00000488271 | 4359      | NM_000530    | MPZ            |
| A_21_P0001766  | 3,59685 | 3,88747 | -1,223165822 | ENST00000378479 | 400952    | NR_033831    | LINC01121      |
| A_23_P397248   | 7,96124 | 8,25193 | -1,223225172 | ENST00000370565 | 9635      | NM_006536    | CLCA2          |
| A_21_P0002484  | 3,07218 | 3,36289 | -1,223242129 | N/A             | N/A       | N/A          | Inc-UXS1-2     |
| A_23_P68807    | 7,76345 | 8,05424 | -1,223309962 | N/A             | N/A       | BC021857     | N/A            |
| A_33_P3281816  | 10,1012 | 10,392  | -1,223318441 | ENST00000449311 | 10487     | NM_006367    | CAP1           |
| A_22_P00006971 | 4,28471 | 4,57551 | -1,223318441 | N/A             | N/A       | CU693275     | Inc-GDE1-1     |
| A_21_P0000334  | 6,62705 | 6,91789 | -1,223352359 | N/A             | 677829    | NR_002979    | SNORA49        |
| A_22_P00018778 | 4,19486 | 4,48579 | -1,223428679 | ENST00000554787 | N/A       | N/A          | N/A            |
| A_33_P3291871  | 3,16288 | 3,45387 | -1,223479561 | N/A             | N/A       | N/A          | N/A            |
| A_22_P00025437 | 5,85041 | 6,1414  | -1,223479561 | N/A             | 92659     | NR_015454    | MAFG-AS1       |
| A_24_P287756   | 11,2755 | 11,5665 | -1,223488041 | ENST00000300291 | 11051     | NM_007006    | NUDT21         |
| A_22_P00015612 | 1,7116  | 2,00269 | -1,223564369 | ENST00000566385 | 100861549 | NR_047492    | LINC00562      |
| A_23_P132405   | 13,3349 | 13,626  | -1,22357285  | ENST00000511325 | 28976     | NM_014049    | ACAD9          |
| A_33_P3361309  | 14,4405 | 14,7317 | -1,223657664 | N/A             | N/A       | N/A          | N/A            |
| A_23_P20823    | 12,1017 | 12,3929 | -1,223657664 | ENST00000372715 | 89891     | NM_052844    | WDR34          |
| A_24_P255114   | 2,14449 | 2,43571 | -1,223674628 | ENST00000299512 | N/A       | AF220493     | N/A            |
| A_21_P0011092  | 1,62941 | 1,92065 | -1,223691592 | N/A             | N/A       | N/A          | XLOC_I2_003295 |

|                |         |         |              |                 |           |              |                |
|----------------|---------|---------|--------------|-----------------|-----------|--------------|----------------|
| A_33_P3218772  | 6,11296 | 6,40423 | -1,223717038 | ENST00000397053 | 26019     | NM_080599    | UPF2           |
| A_23_P88963    | 16,0596 | 16,3509 | -1,223742485 | ENST00000569545 | 226       | NM_000034    | ALDOA          |
| A_24_P349743   | 14,5104 | 14,8017 | -1,223742485 | ENST00000429844 | 388524    | NR_003662    | RPSAP58        |
| A_33_P3378383  | 1,63558 | 1,92697 | -1,223818828 | ENST00000571780 | 196968    | NR_003260    | DNM1P46        |
| A_23_P210274   | 10,9578 | 11,2492 | -1,223827311 | ENST00000497443 | 25843     | NM_015387    | MOB4           |
| A_21_P0011412  | 2,52633 | 2,8178  | -1,223886693 | ENST00000425045 | 196968    | N/A          | DNM1P46        |
| A_21_P0013353  | 4,83386 | 5,12534 | -1,223895176 | N/A             | N/A       | N/A          | XLOC_I2_014048 |
| A_21_P0000344  | 9,92239 | 10,2139 | -1,223920627 | ENST00000396953 | 6161      | NM_001007074 | RPL32          |
| A_33_P3346826  | 6,79689 | 7,08843 | -1,223946078 | ENST00000528652 | 9235      | NM_001012633 | IL32           |
| A_32_P58407    | 8,08677 | 8,37833 | -1,223963045 | ENST00000369697 | 3752      | AF070632     | KCND3          |
| A_24_P213354   | 14,1596 | 14,4512 | -1,223996981 | ENST00000396131 | N/A       | N/A          | N/A            |
| A_23_P53788    | 11,9204 | 12,2121 | -1,224081825 | ENST00000461838 | 219402    | NM_152912    | MTIF3          |
| A_33_P3275948  | 10,7528 | 11,0445 | -1,224081825 | ENST00000396013 | 83930     | NM_032016    | STARD3NL       |
| A_22_P00005297 | 4,19758 | 4,48928 | -1,224081825 | ENST00000242315 | 23349     | XR_242502    | KIAA1045       |
| A_33_P3209176  | 13,8747 | 14,1664 | -1,224081825 | N/A             | N/A       | N/A          | N/A            |
| A_33_P3363173  | 4,35914 | 4,65091 | -1,22414122  | N/A             | N/A       | N/A          | N/A            |
| A_24_P51080    | 3,85019 | 4,14197 | -1,224149705 | N/A             | 441094    | NR_109818    | NR2F1-AS1      |
| A_22_P00005444 | 2,30564 | 2,59742 | -1,224149705 | N/A             | N/A       | N/A          | Inc-DUSP1-3    |
| A_21_P0009581  | 1,63048 | 1,92227 | -1,22415819  | N/A             | N/A       | N/A          | Inc-ZADH2-2    |
| A_33_P3281358  | 7,26643 | 7,55822 | -1,22415819  | ENST00000472621 | 377       | XM_005268856 | ARF3           |
| A_33_P3352517  | 1,54431 | 1,83617 | -1,224217588 | ENST00000381139 | 641372    | NM_001037162 | ACOT6          |
| A_22_P00025942 | 1,50981 | 1,80172 | -1,224260017 | ENST00000319701 | 100287948 | N/A          | GM140          |
| A_21_P0005368  | 5,08159 | 5,37354 | -1,224293961 | N/A             | N/A       | N/A          | Inc-GARS-4     |
| A_23_P132226   | 11,0292 | 11,3212 | -1,224336392 | ENST00000403880 | 8459      | NM_001008566 | TPST2          |
| A_23_P89884    | 12,9708 | 13,2629 | -1,22442126  | ENST00000595974 | 10155     | NM_005762    | TRIM28         |
| A_23_P216630   | 13,1988 | 13,4909 | -1,22442126  | ENST00000374720 | 23446     | NM_080546    | SLC44A1        |
| A_33_P3364038  | 1,49307 | 1,78519 | -1,224438234 | ENST00000522154 | 345611    | NM_001145805 | IRGM           |
| A_21_P0004758  | 6,66007 | 6,95226 | -1,224497646 | N/A             | N/A       | N/A          | Inc-HMGCLL1-1  |
| A_21_P0001924  | 1,46173 | 1,75392 | -1,224497646 | N/A             | N/A       | N/A          | Inc-ACVR2A-1   |
| A_23_P102262   | 11,8642 | 12,1564 | -1,224506133 | ENST00000393909 | 9801      | NM_014763    | MRPL19         |
| A_33_P3414267  | 2,65243 | 2,94474 | -1,224599501 | ENST00000255008 | 6754      | NM_001052    | SSTR4          |
| A_24_P6467     | 4,70964 | 5,00203 | -1,224667409 | ENST00000393277 | 163259    | NM_198459    | DENND2C        |
| A_21_P0004859  | 5,20755 | 5,49995 | -1,224675898 | N/A             | 11120     | NM_001197234 | BTN2A1         |

|                |         |         |              |                 |           |              |                |
|----------------|---------|---------|--------------|-----------------|-----------|--------------|----------------|
| A_23_P59426    | 10,9359 | 11,2283 | -1,224675898 | ENST00000473219 | 22976     | NM_007349    | PAXIP1         |
| A_33_P3378051  | 4,84359 | 5,136   | -1,224684386 | ENST00000428443 | 91404     | NM_178123    | SESTD1         |
| A_22_P00011998 | 5,16083 | 5,45332 | -1,224752299 | N/A             | 101928153 | NR_110531    | ITGA9-AS1      |
| A_23_P171143   | 12,7178 | 13,0103 | -1,224760789 | ENST00000373020 | 7105      | NM_003270    | TSPAN6         |
| A_22_P00023286 | 3,2847  | 3,57722 | -1,224777768 | N/A             | N/A       | XR_133208    | Inc-CD1D-3     |
| A_21_P0012271  | 1,96004 | 2,25256 | -1,224777768 | N/A             | N/A       | N/A          | XLOC_I2_009405 |
| A_33_P3248028  | 1,47102 | 1,76358 | -1,224811726 | N/A             | N/A       | N/A          | N/A            |
| A_33_P3316728  | 1,43507 | 1,72773 | -1,224896626 | ENST00000567850 | N/A       | BC006530     | N/A            |
| A_22_P00008471 | 1,77728 | 2,06997 | -1,224922098 | N/A             | N/A       | N/A          | Inc-KCNA1-2    |
| A_24_P315346   | 1,5635  | 1,85623 | -1,22495606  | ENST00000419331 | 29797     | NR_024583    | POM121L8P      |
| A_23_P132294   | 13,1592 | 13,452  | -1,225015497 | ENST00000406772 | 26088     | NM_001001560 | GGA1           |
| A_23_P142708   | 9,90658 | 10,1994 | -1,225032479 | ENST00000434524 | 81562     | NM_030805    | LMAN2L         |
| A_21_P0008805  | 4,1231  | 4,41593 | -1,225040971 | N/A             | N/A       | N/A          | Inc-TM2D3-1    |
| A_24_P223604   | 12,8115 | 13,1044 | -1,225100411 | ENST00000517624 | 25962     | NM_015496    | KIAA1429       |
| A_22_P00000148 | 10,1101 | 10,403  | -1,225100411 | N/A             | 101928760 | XR_245260    | LOC101928760   |
| A_22_P00011393 | 9,54484 | 9,83778 | -1,225134379 | ENST00000427240 | 728448    | NR_003929    | PPIEL          |
| A_23_P152678   | 9,21774 | 9,51073 | -1,22517684  | ENST00000477683 | 27077     | NM_015681    | B9D1           |
| A_22_P00021255 | 1,79063 | 2,08366 | -1,225210809 | N/A             | 102723671 | XR_426671    | LOC102723671   |
| A_23_P402670   | 1,63855 | 1,93162 | -1,22524478  | ENST00000289429 | 909       | NM_001763    | CD1A           |
| A_33_P3339202  | 5,75168 | 6,04493 | -1,225397659 | ENST00000563550 | 149086    | N/A          | LINC01225      |
| A_33_P3295650  | 4,48541 | 4,77866 | -1,225397659 | ENST00000265381 | 320       | NM_001163    | APBA1          |
| A_22_P00003387 | 4,94388 | 5,23716 | -1,22542314  | N/A             | N/A       | N/A          | Inc-CCDC107-2  |
| A_21_P0006808  | 1,61801 | 1,91129 | -1,22542314  | N/A             | N/A       | N/A          | Inc-GTPBP4-2   |
| A_23_P41166    | 8,98162 | 9,27491 | -1,225431634 | ENST00000392781 | 8706      | NM_001038628 | B3GALNT1       |
| A_24_P305764   | 11,9244 | 12,2177 | -1,225440129 | ENST00000379404 | 6611      | NM_004595    | SMS            |
| A_23_P6201     | 1,59027 | 1,88358 | -1,225448623 | ENST00000536861 | 149998    | NM_198996    | LIPI           |
| A_23_P377882   | 4,23169 | 4,52502 | -1,225465611 | ENST00000461280 | 3757      | NM_172056    | KCNH2          |
| A_23_P149813   | 2,6533  | 2,94669 | -1,225516578 | ENST00000602389 | 6251      | NM_012425    | RSU1           |
| A_22_P00025333 | 5,40444 | 5,69791 | -1,225584537 | ENST00000451376 | 220972    | NM_145021    | mar-08         |
| A_24_P551842   | 17,4978 | 17,7913 | -1,225610022 | ENST00000361789 | 4519      | HV444967     | CYTB           |
| A_19_P00322737 | 4,37849 | 4,67212 | -1,225720466 | ENST00000594934 | 9534      | NM_001278663 | ZNF254         |
| A_24_P54485    | 8,67955 | 8,97322 | -1,225754451 | ENST00000259229 | 84317     | NM_032357    | CCDC115        |
| A_22_P00010188 | 2,14084 | 2,43452 | -1,225762947 | N/A             | N/A       | N/A          | Inc-MRPS5-1    |

|                |         |         |              |                 |        |              |                      |
|----------------|---------|---------|--------------|-----------------|--------|--------------|----------------------|
| A_22_P00021338 | 8,8728  | 9,16651 | -1,225788436 | ENST00000621494 | 55668  | NM_017926    | GPATCH2L             |
| A_22_P00013211 | 5,16899 | 5,46272 | -1,225805429 | N/A             | 80862  | NR_026751    | ZNRD1-AS1            |
| A_24_P753476   | 8,55181 | 8,84555 | -1,225813926 | ENST00000442849 | 340508 | NR_002942    | GAS2L1P2             |
| A_33_P3224423  | 7,4362  | 7,72996 | -1,22583092  | ENST00000430942 | 27434  | NM_013284    | POLM                 |
| A_22_P00003735 | 1,5646  | 1,85836 | -1,22583092  | ENST00000563811 | N/A    | N/A          | N/A                  |
| A_22_P00011209 | 1,40756 | 1,70135 | -1,22585641  | N/A             | N/A    | N/A          | Inc-OLR1-3           |
| A_33_P3321050  | 9,39394 | 9,68774 | -1,225864907 | ENST00000402863 | 9749   | NM_001100165 | PHACTR2              |
| A_22_P00007260 | 4,06448 | 4,35832 | -1,225898896 | N/A             | N/A    | N/A          | Inc-GPR144-2         |
| A_24_P127021   | 11,1915 | 11,4854 | -1,225949881 | ENST00000522430 | 6767   | NM_003932    | ST13                 |
| A_33_P3306363  | 3,91252 | 4,20645 | -1,225975374 | N/A             | N/A    | N/A          | N/A                  |
| A_23_P94879    | 1,7257  | 2,01965 | -1,22599237  | ENST00000311907 | 2147   | NM_000506    | F2                   |
| A_22_P00022720 | 1,54688 | 1,84085 | -1,226009366 | ENST00000554921 | N/A    | N/A          | N/A                  |
| A_19_P00802168 | 3,42537 | 3,7194  | -1,226060355 | N/A             | N/A    | N/A          | XLOC_I2_012323       |
| A_21_P0010031  | 1,49642 | 1,79047 | -1,226077352 | N/A             | N/A    | N/A          | Inc-FAM182B-7        |
| A_22_P00014403 | 3,53793 | 3,83202 | -1,226111346 | ENST00000509943 | N/A    | N/A          | N/A                  |
| A_23_P254702   | 12,4    | 12,6941 | -1,226119845 | ENST00000397239 | 7913   | NM_003472    | DEK                  |
| A_23_P90743    | 1,61778 | 1,91194 | -1,226170839 | ENST00000233735 | 5967   | NM_002909    | REG1A                |
| A_33_P3314086  | 1,55236 | 1,84656 | -1,226204836 | N/A             | 170067 | NM_001136233 | SUPT20HL2            |
| A_33_P3330731  | 3,27449 | 3,56873 | -1,226238834 | ENST00000406335 | 25807  | N/A          | RHBDD3               |
| A_23_P76951    | 13,5471 | 13,8414 | -1,226289833 | ENST00000457354 | 81542  | NM_030755    | TMX1                 |
| A_23_P77813    | 11,715  | 12,0093 | -1,226289833 | ENST00000269373 | 79672  | NM_024619    | FN3KRP               |
| A_33_P3281408  | 12,2348 | 12,5291 | -1,226289833 | ENST00000402708 | 51646  | NM_001127401 | YPEL5                |
| A_24_P11307    | 10,0389 | 10,3332 | -1,226289833 | ENST00000481423 | 10768  | NM_006621    | AHCYL1               |
| A_33_P3314794  | 1,45947 | 1,7538  | -1,226315334 | ENST00000254653 | 79781  | NM_024726    | IQCA1                |
| A_22_P00013623 | 1,46971 | 1,76408 | -1,226349335 | N/A             | N/A    | N/A          | Inc-RP11-58E21.3.1-1 |
| A_22_P00009167 | 4,16514 | 4,45956 | -1,226391838 | N/A             | N/A    | N/A          | Inc-LMX1A-1          |
| A_33_P3391826  | 2,71724 | 3,01171 | -1,226434342 | ENST00000373611 | 2691   | NM_021081    | GHRH                 |
| A_21_P0006279  | 4,40048 | 4,69496 | -1,226442843 | N/A             | N/A    | N/A          | Inc-TRPM6-4          |
| A_33_P3265956  | 11,745  | 12,0395 | -1,226459845 | N/A             | 9139   | JF432662     | CBFA2T2              |
| A_21_P0011596  | 1,42473 | 1,71945 | -1,226646885 | N/A             | N/A    | N/A          | XLOC_I2_006138       |
| A_24_P68783    | 1,60747 | 1,9022  | -1,226655388 | ENST00000393200 | 26525  | NM_012275    | IL36RN               |
| A_33_P3285580  | 5,66042 | 5,95519 | -1,226689398 | N/A             | 132158 | NM_145262    | GLYCTK               |
| A_23_P18649    | 1,60449 | 1,89931 | -1,226731913 | ENST00000394329 | 79633  | NM_001291303 | FAT4                 |



|                |         |         |              |                 |           |              |                |
|----------------|---------|---------|--------------|-----------------|-----------|--------------|----------------|
| A_22_P00019353 | 1,63004 | 1,9249  | -1,226765925 | ENST00000565936 | 101928752 | XR_245846    | LINC01043      |
| A_21_P0013308  | 4,60464 | 4,89953 | -1,226791436 | N/A             | N/A       | N/A          | XLOC_I2_013846 |
| A_23_P12733    | 1,54282 | 1,83773 | -1,226808443 | ENST00000373255 | 55506     | NM_018649    | H2AFY2         |
| A_23_P342131   | 7,39164 | 7,68656 | -1,226816946 | ENST00000540755 | 220002    | NM_153611    | CYB561A3       |
| A_19_P00318227 | 4,48459 | 4,77953 | -1,226833954 | N/A             | N/A       | N/A          | Inc-RGL4-1     |
| A_33_P3421728  | 1,47934 | 1,77434 | -1,226884977 | ENST00000265022 | 1608      | NM_001346    | DGKG           |
| A_23_P147255   | 2,02028 | 2,31531 | -1,22691049  | ENST00000400314 | 54039     | NM_020528    | PCBP3          |
| A_23_P103371   | 5,1941  | 5,48913 | -1,22691049  | ENST00000373440 | 113451    | NM_052998    | AZIN2          |
| A_33_P3372874  | 1,47874 | 1,77379 | -1,226927499 | ENST00000327968 | 168400    | NM_182699    | DDX53          |
| A_33_P3231858  | 5,89576 | 6,191   | -1,227089093 | N/A             | 100133991 | NR_024435    | MAP3K14-AS1    |
| A_22_P00017304 | 1,65567 | 1,95093 | -1,227106104 | N/A             | N/A       | N/A          | Inc-USP20-1    |
| A_21_P0011907  | 5,23235 | 5,52788 | -1,227335778 | N/A             | N/A       | N/A          | XLOC_I2_007931 |
| A_19_P00320101 | 1,45959 | 1,75515 | -1,2273613   | N/A             | 283174    | NR_024344    | MIR4697HG      |
| A_32_P182156   | 11,2903 | 11,5859 | -1,22739533  | ENST00000463816 | 118472    | NM_145806    | ZNF511         |
| A_23_P201939   | 8,73693 | 9,03254 | -1,227403838 | ENST00000471106 | 333926    | NM_005167    | PPM1J          |
| A_33_P3251751  | 1,65099 | 1,9466  | -1,227403838 | N/A             | 134147    | NM_138809    | CMBL           |
| A_22_P00020649 | 3,31416 | 3,60981 | -1,22743787  | ENST00000452888 | N/A       | N/A          | N/A            |
| A_22_P00001848 | 4,81959 | 5,11528 | -1,227471902 | N/A             | 100507062 | NR_038286    | PSMD6-AS2      |
| A_23_P159227   | 10,7129 | 11,0086 | -1,22748041  | ENST00000461564 | 8751      | NM_207191    | ADAM15         |
| A_23_P127186   | 11,74   | 12,0359 | -1,227650587 | ENST00000368997 | 10579     | NM_206862    | TACC2          |
| A_33_P3312564  | 11,3616 | 11,6575 | -1,227650587 | ENST00000414733 | N/A       | N/A          | N/A            |
| A_21_P0000659  | 5,94897 | 6,24493 | -1,227701644 | ENST00000426037 | 100289373 | NR_036531    | UBAC2-AS1      |
| A_21_P0010686  | 4,59622 | 4,89218 | -1,227701644 | ENST00000412115 | N/A       | N/A          | N/A            |
| A_24_P94319    | 3,78849 | 4,08447 | -1,227718664 | ENST00000371273 | 163747    | NM_152607    | C1orf177       |
| A_33_P3420665  | 3,29019 | 3,58627 | -1,227803766 | ENST00000394237 | N/A       | XM_006715292 | N/A            |
| A_33_P3303015  | 16,0943 | 16,3904 | -1,227820787 | ENST00000418783 | 6203      | NM_001013    | RPS9           |
| A_33_P3306153  | 5,93261 | 6,22874 | -1,227846319 | ENST00000356719 | 84542     | NM_032506    | KIAA1841       |
| A_33_P3311711  | 1,87695 | 2,17311 | -1,227871852 | N/A             | N/A       | N/A          | N/A            |
| A_24_P386746   | 3,05694 | 3,35312 | -1,227888874 | ENST00000543045 | 83758     | NM_031491    | RBP5           |
| A_23_P135184   | 12,4774 | 12,7736 | -1,227905896 | ENST00000393157 | 5900      | NM_001042368 | RALGDS         |
| A_32_P177539   | 1,64922 | 1,94543 | -1,227914407 | ENST00000290552 | 79190     | NM_024335    | IRX6           |
| A_23_P115492   | 4,89548 | 5,19175 | -1,227965476 | ENST00000366965 | 79805     | NM_024749    | VASH2          |
| A_24_P29401    | 7,95655 | 8,25289 | -1,228025059 | ENST00000521381 | 5295      | NM_181523    | PIK3R1         |

|                |         |         |              |                 |           |              |               |
|----------------|---------|---------|--------------|-----------------|-----------|--------------|---------------|
| A_22_P00002378 | 1,63943 | 1,93581 | -1,228059107 | ENST00000538920 | N/A       | DA719165     | N/A           |
| A_33_P3348151  | 5,72696 | 6,02342 | -1,228127207 | N/A             | N/A       | N/A          | N/A           |
| A_23_P308136   | 2,55639 | 2,85286 | -1,22813572  | ENST00000453152 | 135892    | NM_178125    | TRIM50        |
| A_21_P0003766  | 1,65156 | 1,94804 | -1,228144233 | N/A             | N/A       | N/A          | Inc-NUDT6-1   |
| A_24_P409830   | 2,7101  | 3,00659 | -1,228152745 | ENST00000417412 | 642006    | N/A          | GUSBP10       |
| A_24_P233878   | 7,94981 | 8,24633 | -1,228178284 | ENST00000491626 | 54834     | NM_017686    | GDAP2         |
| A_23_P19886    | 1,46709 | 1,76365 | -1,228212337 | ENST00000381539 | 387129    | NM_207173    | NPSR1         |
| A_21_P0006264  | 1,47939 | 1,77598 | -1,228237877 | N/A             | N/A       | N/A          | Inc-SHB-1     |
| A_23_P103414   | 12,7681 | 13,0647 | -1,228246391 | ENST00000542507 | 51441     | NM_016258    | YTHDF2        |
| A_21_P0005088  | 1,3985  | 1,69511 | -1,228254905 | N/A             | N/A       | N/A          | Inc-FRMD1-4   |
| A_21_P0009680  | 1,39942 | 1,69604 | -1,228263418 | N/A             | N/A       | N/A          | Inc-SNAPC2-2  |
| A_33_P3421365  | 7,07491 | 7,37155 | -1,228280446 | ENST00000395395 | 169841    | NM_001301275 | ZNF169        |
| A_22_P00014904 | 1,55028 | 1,84696 | -1,228314501 | N/A             | N/A       | DA759359     | Inc-SLCO1A2-1 |
| A_21_P0000577  | 2,67248 | 2,96918 | -1,22833153  | N/A             | 100289511 | NR_029378    | LOC100289511  |
| A_21_P0001107  | 5,83025 | 6,12696 | -1,228340044 | N/A             | N/A       | N/A          | Inc-ID3-4     |
| A_23_P94141    | 5,786   | 6,08278 | -1,228399645 | ENST00000481490 | 25788     | NM_001205262 | RAD54B        |
| A_22_P00001138 | 8,08366 | 8,3805  | -1,228450733 | ENST00000582866 | N/A       | AK098016     | N/A           |
| A_33_P3233050  | 1,50064 | 1,79752 | -1,228484794 | N/A             | 25813     | AK124895     | SAMM50        |
| A_24_P205213   | 4,21941 | 4,5163  | -1,228493309 | ENST00000396151 | 411       | NM_198709    | ARSB          |
| A_23_P52266    | 12,0688 | 12,3657 | -1,228501824 | ENST00000371804 | 3434      | NM_001548    | IFIT1         |
| A_33_P3260684  | 1,46348 | 1,7604  | -1,228518855 | ENST00000355728 | 254879    | NM_001005471 | OR2T6         |
| A_33_P3316239  | 4,54938 | 4,84633 | -1,228544402 | N/A             | 100130419 | AK126781     | LOC100130419  |
| A_22_P00012461 | 4,47966 | 4,77665 | -1,228578465 | N/A             | N/A       | N/A          | Inc-PRR14-1   |
| A_23_P107801   | 7,66459 | 7,96161 | -1,228604012 | ENST00000221671 | 84167     | NM_032207    | C19orf44      |
| A_21_P0006175  | 1,66819 | 1,96524 | -1,228629561 | N/A             | N/A       | N/A          | Inc-GADD45G-2 |
| A_22_P00009772 | 1,6587  | 1,95575 | -1,228629561 | N/A             | N/A       | DA853231     | Inc-MED12L-2  |
| A_23_P116902   | 3,73174 | 4,02885 | -1,228680659 | ENST00000228936 | 420       | NM_021071    | ART4          |
| A_22_P00010587 | 1,459   | 1,75612 | -1,228689176 | N/A             | N/A       | BX641061     | Inc-NDNL2-1   |
| A_21_P0008131  | 3,72733 | 4,02446 | -1,228697692 | N/A             | N/A       | N/A          | Inc-CENPJ-2   |
| A_22_P00017797 | 6,40398 | 6,70117 | -1,228748794 | ENST00000569134 | N/A       | AF086375     | N/A           |
| A_33_P3358243  | 11,7001 | 11,9973 | -1,228757311 | ENST00000297625 | 57462     | NM_020702    | KIAA1161      |
| A_32_P942508   | 1,80643 | 2,1037  | -1,228816932 | ENST00000613377 | 284123    | NR_028336    | FAM27L        |
| A_21_P0009772  | 2,37305 | 2,67034 | -1,228833967 | N/A             | N/A       | N/A          | Inc-GNG8-1    |

|                |         |         |              |                 |           |              |              |
|----------------|---------|---------|--------------|-----------------|-----------|--------------|--------------|
| A_22_P00003261 | 8,84026 | 9,13762 | -1,228893592 | N/A             | N/A       | CR749568     | lnc-CALHM3-2 |
| A_33_P3243935  | 2,13672 | 2,43412 | -1,228927664 | N/A             | N/A       | AF130083     | N/A          |
| A_22_P00016186 | 1,45137 | 1,74878 | -1,228936183 | ENST00000565707 | N/A       | BC040335     | N/A          |
| A_21_P0010469  | 4,30906 | 4,60647 | -1,228936183 | N/A             | 100144603 | NR_110536    | CHKB-AS1     |
| A_33_P3317442  | 4,78273 | 5,08022 | -1,229004331 | ENST00000375608 | 23263     | NM_024979    | MCF2L        |
| A_22_P00012817 | 1,47489 | 1,77241 | -1,229029888 | ENST00000455576 | N/A       | DA240288     | N/A          |
| A_23_P18806    | 9,41277 | 9,71029 | -1,229029888 | ENST00000519064 | 81555     | NM_001024947 | YIPF5        |
| A_21_P0000418  | 1,50457 | 1,80212 | -1,229055445 | N/A             | 767599    | NR_003214    | SNORD114-21  |
| A_33_P3225046  | 2,46061 | 2,75816 | -1,229055445 | ENST00000485761 | 947       | NM_001025109 | CD34         |
| A_33_P3351791  | 3,58561 | 3,88317 | -1,229063964 | N/A             | N/A       | N/A          | N/A          |
| A_21_P0007168  | 5,75031 | 6,04788 | -1,229072484 | ENST00000617529 | 101927503 | XR_428869    | LOC101927503 |
| A_23_P324989   | 3,48153 | 3,77923 | -1,229183239 | ENST00000420326 | 9400      | AB042823     | RECQL5       |
| A_33_P3404546  | 5,81246 | 6,11025 | -1,229259922 | ENST00000570156 | 84033     | NM_001271223 | OBSCN        |
| A_33_P3883912  | 9,18422 | 9,48207 | -1,229311047 | ENST00000324170 | 54819     | NM_017665    | ZCCHC10      |
| A_33_P3247988  | 7,76682 | 8,06472 | -1,229353652 | ENST00000586616 | 54760     | NM_017573    | PCSK4        |
| A_32_P95960    | 2,65349 | 2,9514  | -1,229362173 | ENST00000290855 | 29121     | NM_001004419 | CLEC2D       |
| A_21_P0002419  | 1,49838 | 1,7963  | -1,229370695 | N/A             | N/A       | N/A          | lnc-CAPN13-2 |
| A_21_P0000143  | 3,78924 | 4,08719 | -1,229396259 | N/A             | 84516     | NM_001199011 | DCTN5        |
| A_23_P12680    | 6,83336 | 7,13138 | -1,229455911 | ENST00000394934 | 5660      | NM_001042465 | PSAP         |
| A_23_P67589    | 11,8218 | 12,1199 | -1,229524088 | ENST00000597371 | 55049     | NM_001100418 | C19orf60     |
| A_23_P310582   | 7,54495 | 7,84309 | -1,229558179 | ENST00000418497 | 54879     | NM_138729    | ST7L         |
| A_23_P25735    | 14,8793 | 15,1775 | -1,229609315 | ENST00000554541 | 5687      | NM_002791    | PSMA6        |
| A_22_P00005071 | 1,71656 | 2,01483 | -1,229668978 | N/A             | N/A       | N/A          | lnc-DERA-1   |
| A_24_P299663   | 2,11327 | 2,41157 | -1,229694548 | ENST00000622512 | 10472     | NM_006352    | ZBTB18       |
| A_22_P00007736 | 1,51376 | 1,8121  | -1,229728643 | ENST00000529545 | 55823     | N/A          | VPS11        |
| A_22_P00022348 | 4,52679 | 4,82516 | -1,229754215 | ENST00000436492 | N/A       | N/A          | N/A          |
| A_23_P101073   | 1,92329 | 2,22171 | -1,229796836 | ENST00000322608 | 8387      | NM_003553    | OR1E1        |
| A_22_P00020739 | 4,34796 | 4,64649 | -1,229890607 | ENST00000434321 | N/A       | N/A          | N/A          |
| A_21_P0001536  | 1,5392  | 1,8378  | -1,229950283 | N/A             | N/A       | N/A          | lnc-GTF2B-2  |
| A_23_P117546   | 9,76696 | 10,0656 | -1,229984385 | ENST00000216373 | 6655      | NM_006939    | SOS2         |
| A_22_P00007485 | 4,42791 | 4,72656 | -1,22999291  | N/A             | N/A       | N/A          | lnc-GTPBP8-2 |
| A_24_P224116   | 2,12534 | 2,424   | -1,230001436 | ENST00000308366 | 5319      | NM_000928    | PLA2G1B      |
| A_33_P3246108  | 6,61511 | 6,91377 | -1,230001436 | ENST00000326765 | 81575     | NM_001130415 | APOLD1       |

|                |         |         |              |                 |           |              |              |
|----------------|---------|---------|--------------|-----------------|-----------|--------------|--------------|
| A_33_P3406778  | 1,90078 | 2,19949 | -1,230044065 | ENST00000405431 | N/A       | AK023843     | N/A          |
| A_19_P00318679 | 2,95439 | 3,25312 | -1,230061118 | ENST00000558071 | N/A       | XR_424607    | N/A          |
| A_24_P116606   | 5,36815 | 5,66692 | -1,230095223 | ENST00000355860 | 51741     | NM_130791    | WVVOX        |
| A_22_P00008175 | 2,0227  | 2,32155 | -1,230163435 | N/A             | N/A       | N/A          | Inc-INPP4B-2 |
| A_23_P119562   | 12,9156 | 13,2145 | -1,23020607  | ENST00000617994 | 1675      | NM_001928    | CFD          |
| A_33_P3362891  | 12,8693 | 13,1683 | -1,230291345 | ENST00000356674 | 3181      | NM_002137    | HNRNPA2B1    |
| A_24_P406132   | 12,0949 | 12,3939 | -1,230291345 | ENST00000211287 | 5603      | NM_002754    | MAPK13       |
| A_22_P00021463 | 1,64681 | 1,94584 | -1,230316928 | ENST00000449525 | N/A       | N/A          | N/A          |
| A_21_P0002006  | 1,64908 | 1,94814 | -1,230342512 | N/A             | 104326052 | NR_126359    | NRIR         |
| A_23_P158596   | 9,51748 | 9,81657 | -1,230368097 | ENST00000513739 | 57085     | NM_001040196 | AGTRAP       |
| A_21_P0014721  | 3,81633 | 4,11545 | -1,230393682 | ENST00000512175 | 100506564 | NM_001256475 | THEGL        |
| A_33_P3274701  | 2,21075 | 2,50991 | -1,230427796 | N/A             | N/A       | AK024162     | N/A          |
| A_32_P99902    | 10,728  | 11,0272 | -1,230461911 | ENST00000505341 | 123207    | NM_144597    | C15orf40     |
| A_24_P93452    | 9,93059 | 10,2298 | -1,23047044  | ENST00000465511 | N/A       | N/A          | N/A          |
| A_33_P3212269  | 2,54194 | 2,84121 | -1,230521615 | ENST00000534743 | N/A       | N/A          | N/A          |
| A_23_P38468    | 11,8683 | 12,1676 | -1,230547203 | ENST00000550383 | 30851     | NM_014604    | TAX1BP3      |
| A_23_P98744    | 4,47028 | 4,76958 | -1,230547203 | ENST00000325719 | 119774    | NM_001005172 | OR52K2       |
| A_19_P00315581 | 12,0298 | 12,3292 | -1,230632501 | ENST00000452840 | 400955    | NR_033873    | LINC01122    |
| A_33_P3237517  | 6,74876 | 7,04817 | -1,230641031 | ENST00000369578 | 23036     | AK123473     | ZNF292       |
| A_21_P0014853  | 7,92089 | 8,22034 | -1,230675152 | ENST00000500823 | 100652791 | NR_045217    | GS1-24F4.2   |
| A_22_P00014056 | 1,49992 | 1,79942 | -1,230717805 | ENST00000569009 | N/A       | AI114816     | N/A          |
| A_23_P345678   | 4,36558 | 4,66509 | -1,230726336 | ENST00000287647 | 2177      | NM_033084    | FANCD2       |
| A_33_P3238215  | 10,9929 | 11,2925 | -1,230803115 | ENST00000493868 | 22837     | NM_001278458 | COBLL1       |
| A_23_P375524   | 15,3855 | 15,6851 | -1,230803115 | ENST00000326233 | 353134    | NM_178352    | LCE1D        |
| A_22_P00000584 | 4,23737 | 4,53698 | -1,230811646 | ENST00000497320 | N/A       | XR_426123    | N/A          |
| A_22_P00012712 | 1,4752  | 1,77482 | -1,230820178 | ENST00000521274 | N/A       | N/A          | N/A          |
| A_23_P393025   | 1,49745 | 1,79712 | -1,230862835 | ENST00000280191 | 132851    | BC039342     | SPATA4       |
| A_33_P3353581  | 12,154  | 12,4537 | -1,230888431 | ENST00000554337 | 3476      | NM_001551    | IGBP1        |
| A_23_P69826    | 12,6483 | 12,9481 | -1,230973752 | ENST00000510645 | 1665      | NM_001358    | DHX15        |
| A_24_P85258    | 1,47759 | 1,77741 | -1,230990817 | ENST00000270720 | 85452     | AB051538     | CFAP74       |
| A_33_P3408983  | 6,64061 | 6,94048 | -1,231033481 | ENST00000512211 | 324       | NM_001127511 | APC          |
| A_23_P105747   | 8,66037 | 8,96026 | -1,231050547 | ENST00000547790 | 55198     | NM_018171    | APPL2        |
| A_22_P00015968 | 3,15071 | 3,45062 | -1,231067613 | ENST00000522960 | N/A       | N/A          | N/A          |

|                |         |         |              |                 |           |              |                       |
|----------------|---------|---------|--------------|-----------------|-----------|--------------|-----------------------|
| A_23_P42096    | 9,63415 | 9,93408 | -1,231084679 | ENST00000490904 | 4216      | NM_005922    | MAP3K4                |
| A_21_P0011670  | 1,58116 | 1,8811  | -1,231093213 | N/A             | N/A       | N/A          | XLOC_I2_006578        |
| A_33_P3395321  | 13,5736 | 13,8736 | -1,231144413 | ENST00000584079 | 51155     | NM_001002032 | HN1                   |
| A_33_P3253006  | 1,47328 | 1,77331 | -1,231170015 | N/A             | 1409      | X14789       | CRYAA                 |
| A_21_P0009223  | 3,13795 | 3,43801 | -1,231195616 | ENST00000458492 | N/A       | N/A          | N/A                   |
| A_24_P59247    | 12,8512 | 13,1513 | -1,231229753 | ENST00000537214 | N/A       | N/A          | N/A                   |
| A_22_P00017692 | 2,09379 | 2,39392 | -1,231255356 | ENST00000422548 | 100505918 | NR_037851    | LOC100505918          |
| A_33_P3289050  | 1,5445  | 1,84467 | -1,231289494 | ENST00000419273 | N/A       | N/A          | N/A                   |
| A_33_P3338693  | 5,55046 | 5,85063 | -1,231289494 | ENST00000495883 | 6616      | NM_003081    | SNAP25                |
| A_23_P348524   | 1,5965  | 1,89669 | -1,231306563 | ENST00000308906 | 198437    | NM_001007125 | LKAAEAR1              |
| A_21_P0001705  | 12,1905 | 12,4907 | -1,231315098 | ENST00000620190 | 57234     | NR_111952    | LINC00869             |
| A_21_P0009734  | 8,48321 | 8,78343 | -1,231332168 | ENST00000606966 | N/A       | XR_244051    | N/A                   |
| A_33_P3403179  | 6,82201 | 7,12225 | -1,231349238 | N/A             | N/A       | N/A          | XLOC_I2_011987        |
| A_33_P3302662  | 1,66411 | 1,96436 | -1,231357773 | ENST00000461758 | 7091      | N/A          | TLE4                  |
| A_23_P382794   | 4,1276  | 4,42791 | -1,231408985 | ENST00000538986 | 259295    | NM_176889    | TAS2R20               |
| A_19_P00804120 | 3,00363 | 3,30398 | -1,231443127 | N/A             | N/A       | N/A          | N/A                   |
| A_21_P0003826  | 1,66637 | 1,96675 | -1,231468734 | N/A             | N/A       | N/A          | Inc-S100P-1           |
| A_23_P428842   | 10,7639 | 11,0643 | -1,231485806 | ENST00000347147 | 93109     | NM_138399    | TMEM44                |
| A_23_P90453    | 4,19268 | 4,49311 | -1,231511415 | ENST00000338897 | 388533    | NM_207392    | KRTDAP                |
| A_33_P3217764  | 3,87923 | 4,17968 | -1,231528487 | N/A             | N/A       | N/A          | Inc-C4orf42-3         |
| A_23_P170541   | 2,08129 | 2,38174 | -1,231528487 | ENST00000456941 | 81033     | NM_173092    | KCNH6                 |
| A_33_P3791552  | 1,47884 | 1,77935 | -1,231579706 | N/A             | 284950    | NR_038888    | LOC284950             |
| A_22_P00005910 | 5,96595 | 6,26663 | -1,231724838 | ENST00000545239 | 338817    | NR_033890    | LINC01252             |
| A_33_P3353365  | 3,8667  | 4,16739 | -1,231733376 | ENST00000397076 | 10050     | XM_006714946 | SLC17A4               |
| A_21_P0009228  | 4,56653 | 4,8673  | -1,231801679 | N/A             | 102724831 | XR_424804    | LOC102724831          |
| A_22_P00002920 | 4,26773 | 4,56851 | -1,231810217 | N/A             | N/A       | N/A          | Inc-C5orf25-1         |
| A_22_P00004848 | 6,15168 | 6,45251 | -1,231852909 | ENST00000518024 | 100133669 | BC007589     | LOC100133669          |
| A_33_P3296975  | 3,6925  | 3,99336 | -1,231878525 | ENST00000393544 | N/A       | AK093353     | N/A                   |
| A_21_P0007422  | 5,26659 | 5,56746 | -1,231887064 | N/A             | N/A       | N/A          | Inc-RP11-890B15.2.1-2 |
| A_23_P134755   | 7,54654 | 7,84741 | -1,231887064 | ENST00000395715 | 7227      | NM_014112    | TRPS1                 |
| A_21_P0014277  | 4,29557 | 4,59644 | -1,231887064 | N/A             | 100506606 | NR_103860    | LOC100506606          |
| A_21_P0004784  | 3,21124 | 3,51215 | -1,23192122  | ENST00000421237 | N/A       | N/A          | N/A                   |
| A_22_P00014784 | 1,54115 | 1,84207 | -1,231929759 | N/A             | N/A       | BM932316     | Inc-SLC38A8-4         |

|                |         |         |              |                 |           |              |              |
|----------------|---------|---------|--------------|-----------------|-----------|--------------|--------------|
| A_33_P3335725  | 3,86696 | 4,16789 | -1,231938298 | ENST00000341500 | 3643      | NM_000208    | INSR         |
| A_23_P118693   | 4,46021 | 4,76117 | -1,231963916 | ENST00000226247 | 8456      | NM_003593    | FOXN1        |
| A_23_P98085    | 8,98372 | 9,2847  | -1,231980994 | ENST00000532280 | 5728      | NM_000314    | PTEN         |
| A_23_P46894    | 5,10983 | 5,41082 | -1,231989534 | ENST00000395562 | 1103      | NM_020549    | CHAT         |
| A_24_P273413   | 11,6105 | 11,9115 | -1,231998073 | ENST00000409040 | 27436     | XM_005264268 | EML4         |
| A_23_P141520   | 12,201  | 12,502  | -1,231998073 | ENST00000546495 | 124944    | NM_174893    | C17orf49     |
| A_33_P3384337  | 1,82165 | 2,12267 | -1,232015153 | N/A             | N/A       | N/A          | N/A          |
| A_21_P0005740  | 1,34676 | 1,64779 | -1,232023692 | N/A             | N/A       | N/A          | Inc-SPAG1-2  |
| A_21_P0008061  | 1,61428 | 1,91533 | -1,232040772 | N/A             | N/A       | N/A          | Inc-SPERT-1  |
| A_22_P00009975 | 1,47284 | 1,77392 | -1,232066392 | N/A             | N/A       | N/A          | Inc-MKKS-3   |
| A_33_P3372580  | 10,8613 | 11,1624 | -1,232083472 | ENST00000618996 | 9382      | NM_018714    | COG1         |
| A_24_P348594   | 1,64256 | 1,94366 | -1,232083472 | ENST00000216211 | 7380      | NM_006953    | UPK3A        |
| A_33_P3356182  | 2,37393 | 2,67506 | -1,232109093 | N/A             | N/A       | N/A          | N/A          |
| A_24_P158946   | 9,91892 | 10,2201 | -1,232151795 | ENST00000395740 | 121512    | NM_139241    | FGD4         |
| A_23_P23006    | 12,9649 | 13,2661 | -1,232168876 | ENST00000464385 | 4898      | NM_002525    | NRD1         |
| A_24_P156388   | 7,04349 | 7,34472 | -1,232194499 | ENST00000381031 | 55020     | NM_017931    | TTC38        |
| A_21_P0000297  | 5,34851 | 5,64978 | -1,232228663 | N/A             | 26786     | NR_002914    | SNORD62A     |
| A_24_P145184   | 1,48555 | 1,78684 | -1,232245746 | ENST00000373964 | 1620      | BC021560     | BRINP1       |
| A_24_P393958   | 8,30024 | 8,60153 | -1,232245746 | ENST00000370763 | 11080     | NM_007034    | DNAJB4       |
| A_22_P00001987 | 1,67813 | 1,97953 | -1,232339703 | ENST00000451230 | N/A       | N/A          | N/A          |
| A_33_P3231432  | 14,7902 | 15,0917 | -1,232425125 | ENST00000396075 | 3945      | NM_001174097 | LDHB         |
| A_23_P24311    | 5,47063 | 5,77214 | -1,232433668 | ENST00000349015 | 222       | NM_000695    | ALDH3B2      |
| A_33_P3799936  | 11,7253 | 12,0269 | -1,232510554 | ENST00000167825 | 55160     | NM_018125    | ARHGEF10L    |
| A_33_P3363355  | 11,8823 | 12,1839 | -1,232510554 | ENST00000393717 | 3386      | NM_022377    | ICAM4        |
| A_22_P00010047 | 2,49155 | 2,79317 | -1,23252764  | N/A             | N/A       | DA240949     | Inc-MOCS2-1  |
| A_33_P3302220  | 7,67885 | 7,98049 | -1,232544727 | ENST00000547594 | 7181      | NM_001032287 | NR2C1        |
| A_24_P182620   | 9,97205 | 10,2737 | -1,23255327  | ENST00000498157 | 1952      | NM_001408    | CELSR2       |
| A_21_P0006731  | 5,01991 | 5,32157 | -1,232561813 | ENST00000425246 | N/A       | N/A          | N/A          |
| A_24_P527404   | 5,85179 | 6,15346 | -1,232570357 | ENST00000372037 | 657       | NM_004329    | BMPR1A       |
| A_24_P23258    | 10,1057 | 10,4074 | -1,232595988 | ENST00000406902 | 23151     | NM_015124    | GRAMD4       |
| A_22_P00005726 | 5,0544  | 5,35619 | -1,232672883 | ENST00000506534 | 100287592 | NR_104653    | LOC100287592 |
| A_22_P00017614 | 1,53445 | 1,83624 | -1,232672883 | N/A             | N/A       | N/A          | Inc-WFDC2-2  |
| A_33_P3376836  | 10,3994 | 10,7012 | -1,232681428 | N/A             | N/A       | N/A          | N/A          |

|                |         |         |              |                 |           |              |              |
|----------------|---------|---------|--------------|-----------------|-----------|--------------|--------------|
| A_23_P25150    | 9,74018 | 10,042  | -1,232698516 | ENST00000504557 | 3225      | NM_006897    | HOXC9        |
| A_33_P3292218  | 11,3895 | 11,6914 | -1,232766874 | ENST00000515696 | N/A       | N/A          | N/A          |
| A_23_P9018     | 3,32226 | 3,62416 | -1,232766874 | ENST00000314265 | 503618    | NM_001040702 | DEFB104B     |
| A_22_P00010270 | 1,50468 | 1,80664 | -1,232818144 | ENST00000563331 | 101928614 | XR_243492    | LOC101928614 |
| A_33_P3338491  | 4,679   | 4,98102 | -1,232869417 | N/A             | 392196    | NR_003275    | LOC392196    |
| A_19_P00319534 | 1,87932 | 2,18136 | -1,232886508 | N/A             | 8123      | NR_022008    | PWAR5        |
| A_33_P3421759  | 7,81282 | 8,11486 | -1,232886508 | ENST00000300278 | 6651      | NM_032195    | SON          |
| A_23_P5089     | 12,823  | 13,1251 | -1,232937783 | ENST00000590265 | 513       | NM_001001975 | ATP5D        |
| A_22_P00022223 | 7,31219 | 7,61431 | -1,232954876 | N/A             | 103695435 | NR_125768    | BBOX1-AS1    |
| A_33_P3257170  | 7,16975 | 7,47192 | -1,232997607 | ENST00000461523 | 80742     | AK131382     | PRR3         |
| A_33_P3362548  | 5,09519 | 5,39743 | -1,233057434 | N/A             | N/A       | N/A          | N/A          |
| A_22_P00009189 | 1,69475 | 1,99704 | -1,233100169 | ENST00000413062 | N/A       | N/A          | N/A          |
| A_23_P36928    | 12,3232 | 12,6256 | -1,233194192 | ENST00000399696 | 51082     | NM_015972    | POLR1D       |
| A_23_P217228   | 1,51563 | 1,81806 | -1,233219836 | ENST00000492706 | 7216      | NM_016157    | TRO          |
| A_33_P3348927  | 2,62009 | 2,92256 | -1,233254029 | N/A             | N/A       | N/A          | N/A          |
| A_21_P0002020  | 4,01063 | 4,31312 | -1,233271125 | ENST00000448379 | N/A       | N/A          | N/A          |
| A_33_P3406265  | 2,20442 | 2,50696 | -1,233313868 | N/A             | N/A       | N/A          | N/A          |
| A_21_P0014494  | 10,6248 | 10,9274 | -1,233365161 | N/A             | 101928649 | NR_109909    | CTC-338M12.4 |
| A_21_P0013589  | 5,71292 | 6,01552 | -1,233365161 | ENST00000451596 | 100507540 | NR_110953    | LINC01504    |
| A_21_P0010945  | 1,54638 | 1,84905 | -1,233425006 | N/A             | 101929287 | N/A          | LOC101929287 |
| A_24_P254346   | 10,3934 | 10,6961 | -1,233450654 | ENST00000497493 | 10311     | NM_006052    | DSCR3        |
| A_33_P3343090  | 12,6322 | 12,9349 | -1,233450654 | ENST00000601097 | 55201     | NM_018174    | MAP1S        |
| A_33_P3238410  | 6,05607 | 6,35878 | -1,233459204 | ENST00000390679 | 6305      | NM_002972    | SBF1         |
| A_23_P336678   | 5,46857 | 5,77129 | -1,233467754 | ENST00000314140 | 122876    | NM_145171    | GPHB5        |
| A_22_P00001724 | 8,68283 | 8,98559 | -1,233501953 | N/A             | N/A       | BP417745     | Inc-ATG7-2   |
| A_23_P127662   | 2,09971 | 2,40258 | -1,233596007 | ENST00000357821 | 283159    | NM_001002917 | OR8D1        |
| A_22_P00018504 | 1,50271 | 1,80565 | -1,233655862 | N/A             | 101927356 | NR_110076    | LOC101927356 |
| A_33_P3263824  | 11,3532 | 11,6562 | -1,23370717  | ENST00000476012 | 84545     | NM_176793    | MRPL43       |
| A_21_P0001368  | 4,06402 | 4,36703 | -1,233715721 | N/A             | 101929147 | N/A          | LOC101929147 |
| A_33_P3420611  | 1,65127 | 1,95438 | -1,233801239 | ENST00000545221 | 124538    | NM_001004707 | OR4D2        |
| A_22_P00006383 | 1,7347  | 2,0379  | -1,23387821  | N/A             | N/A       | N/A          | Inc-FBN2-4   |
| A_21_P0000155  | 6,34901 | 6,65226 | -1,233920973 | ENST00000460021 | 5701      | NM_001204453 | PSMC2        |
| A_24_P61772    | 3,27605 | 3,57931 | -1,233929526 | ENST00000261651 | 96597     | XM_006710029 | TBC1D27      |

|                |         |         |              |                 |           |              |              |
|----------------|---------|---------|--------------|-----------------|-----------|--------------|--------------|
| A_22_P00009994 | 1,73081 | 2,03412 | -1,233972292 | ENST00000445051 | 101929548 | NR_121601    | FOCAD-AS1    |
| A_21_P0014789  | 1,65603 | 1,9594  | -1,234023612 | ENST00000538759 | N/A       | N/A          | N/A          |
| A_21_P0009650  | 5,90494 | 6,20834 | -1,234049273 | ENST00000595783 | 100652911 | XR_132655    | LOC100652911 |
| A_32_P850562   | 5,92959 | 6,23303 | -1,234083489 | N/A             | 102724826 | NR_126466    | ZNF337-AS1   |
| A_23_P132889   | 3,68077 | 3,98429 | -1,234151923 | ENST00000511535 | 1400      | NM_001014809 | CRMP1        |
| A_21_P0007198  | 1,44468 | 1,74821 | -1,234160478 | N/A             | N/A       | N/A          | Inc-API5-4   |
| A_33_P3231557  | 8,19173 | 8,4953  | -1,234194696 | ENST00000463569 | 8555      | NM_003671    | CDC14B       |
| A_24_P288298   | 2,53189 | 2,8355  | -1,234228916 | ENST00000622882 | 3805      | NM_002255    | KIR2DL4      |
| A_32_P141238   | 2,17752 | 2,48116 | -1,234254581 | ENST00000612575 | 57101     | NM_001278597 | ANO2         |
| A_33_P3238250  | 11,5247 | 11,8284 | -1,234305914 | ENST00000289779 | 50848     | NM_016946    | F11R         |
| A_23_P74320    | 8,24375 | 8,54747 | -1,234323025 | ENST00000367772 | 57147     | NM_020423    | SCYL3        |
| A_33_P3338928  | 8,38412 | 8,68788 | -1,234357248 | ENST00000320816 | 1601      | NM_001343    | DAB2         |
| A_23_P203030   | 9,81768 | 10,1215 | -1,234408584 | ENST00000280346 | 1737      | NM_001931    | DLAT         |
| A_24_P42624    | 3,44638 | 3,75025 | -1,234451367 | ENST00000453304 | 8633      | NM_003728    | UNC5C        |
| A_24_P376391   | 9,08237 | 9,38626 | -1,23446848  | ENST00000512744 | 23129     | NM_015103    | PLXND1       |
| A_21_P0014483  | 11,3612 | 11,6651 | -1,234477037 | N/A             | 100505641 | NR_046251    | FGD5-AS1     |
| A_23_P33894    | 10,8673 | 11,1712 | -1,234477037 | ENST00000487482 | 10916     | NM_201222    | MAGED2       |
| A_21_P0007693  | 1,4832  | 1,78711 | -1,234485593 | N/A             | N/A       | N/A          | Inc-IFLTD1-1 |
| A_23_P69339    | 12,9212 | 13,2252 | -1,234562607 | ENST00000480865 | 30        | NM_001607    | ACAA1        |
| A_33_P3266609  | 3,01615 | 3,3202  | -1,234605394 | N/A             | N/A       | N/A          | N/A          |
| A_33_P3240612  | 1,63018 | 1,93425 | -1,23462251  | N/A             | N/A       | AK130189     | N/A          |
| A_33_P3805839  | 4,86413 | 5,16827 | -1,234682415 | ENST00000567885 | N/A       | N/A          | N/A          |
| A_24_P349616   | 8,32896 | 8,63313 | -1,23470809  | ENST00000302904 | 7343      | NM_001076683 | UBTF         |
| A_33_P3319625  | 6,05892 | 6,36313 | -1,234742324 | ENST00000371189 | 4774      | NM_001134673 | NFIA         |
| A_23_P128554   | 13,7242 | 14,0285 | -1,234819354 | ENST00000242827 | 84650     | NM_032565    | EBPL         |
| A_21_P0002508  | 1,6804  | 1,98473 | -1,234845031 | N/A             | N/A       | N/A          | Inc-NXPH2-4  |
| A_21_P0014155  | 1,55341 | 1,85782 | -1,234913508 | ENST00000606767 | 100129461 | N/A          | LOC100129461 |
| A_23_P24616    | 7,96603 | 8,27045 | -1,234922067 | ENST00000545756 | 54414     | NM_170601    | SIAE         |
| A_22_P00010172 | 1,55521 | 1,85966 | -1,234947747 | ENST00000580960 | N/A       | CF596610     | N/A          |
| A_23_P206920   | 1,44607 | 1,75053 | -1,234956307 | ENST00000300036 | 4629      | NM_001040114 | MYH11        |
| A_23_P70047    | 11,3381 | 11,6426 | -1,234990548 | ENST00000505625 | 9782      | NM_199189    | MATR3        |
| A_21_P0008442  | 2,82644 | 3,13096 | -1,235007669 | N/A             | N/A       | N/A          | Inc-TBPL2-1  |
| A_24_P936010   | 3,89904 | 4,20364 | -1,235076154 | N/A             | N/A       | AY358253     | N/A          |



|                |         |         |              |                 |           |              |                       |
|----------------|---------|---------|--------------|-----------------|-----------|--------------|-----------------------|
| A_22_P00002795 | 1,84246 | 2,14712 | -1,23512752  | ENST00000610202 | 100506286 | XR_109926    | LOC100506286          |
| A_32_P86118    | 8,80981 | 9,11449 | -1,235144643 | ENST00000275072 | 135293    | NM_001010853 | PM20D2                |
| A_23_P43779    | 11,5737 | 11,8784 | -1,235161766 | ENST00000264389 | 51138     | NM_016129    | COPS4                 |
| A_24_P307135   | 3,22202 | 3,52673 | -1,235170327 | ENST00000383159 | 7148      | NM_019105    | TNXB                  |
| A_22_P00012097 | 1,54983 | 1,85454 | -1,235170327 | N/A             | N/A       | N/A          | Inc-PNMA2-1           |
| A_33_P3218768  | 7,58289 | 7,88761 | -1,235178889 | ENST00000397053 | 26019     | NM_080599    | UPF2                  |
| A_24_P801079   | 9,05003 | 9,35479 | -1,235213136 | N/A             | N/A       | AY239294     | N/A                   |
| A_32_P214665   | 6,89891 | 7,20372 | -1,235255946 | ENST00000504449 | 654790    | NM_001102566 | PCP4L1                |
| A_33_P3267577  | 1,47664 | 1,78146 | -1,235264508 | ENST00000372781 | 6406      | NM_003007    | SEMG1                 |
| A_22_P00013340 | 2,84842 | 3,15329 | -1,23530732  | N/A             | N/A       | BQ426089     | Inc-RP11-150012.3.1-3 |
| A_24_P376229   | 11,7492 | 12,0541 | -1,235333007 | ENST00000246548 | 10054     | NM_005499    | UBA2                  |
| A_22_P00001477 | 3,9062  | 4,21113 | -1,235358696 | ENST00000591357 | 8629      | NM_001279352 | JRK                   |
| A_33_P3419735  | 7,50807 | 7,81302 | -1,235375822 | N/A             | N/A       | N/A          | N/A                   |
| A_23_P323751   | 11,4941 | 11,7991 | -1,235418637 | ENST00000217429 | 81610     | NM_030919    | FAM83D                |
| A_22_P00011960 | 5,03892 | 5,34396 | -1,235452891 | N/A             | N/A       | N/A          | Inc-PKN3-2            |
| A_33_P3242663  | 1,99944 | 2,30448 | -1,235452891 | ENST00000517399 | 79805     | NM_001301056 | VASH2                 |
| A_23_P116642   | 1,81134 | 2,11643 | -1,235495709 | ENST00000474359 | 65012     | NM_133489    | SLC26A10              |
| A_23_P133058   | 10,9062 | 11,2113 | -1,235504273 | ENST00000500563 | 114932    | NM_203462    | MRFAP1L1              |
| A_24_P261929   | 12,6215 | 12,9266 | -1,235504273 | ENST00000393115 | 122509    | NM_206949    | IFI27L1               |
| A_23_P340922   | 6,70303 | 7,00819 | -1,235555657 | ENST00000599379 | 84330     | NM_032370    | ZNF414                |
| A_22_P00003337 | 3,25408 | 3,55927 | -1,23558135  | ENST00000507641 | 100996485 | NM_001277348 | C5orf66               |
| A_24_P118376   | 8,31351 | 8,61874 | -1,235615608 | ENST00000620096 | 125931    | NM_001102598 | CEACAM20              |
| A_23_P352435   | 8,50455 | 8,80981 | -1,235641302 | ENST00000382788 | 6002      | NM_002926    | RGS12                 |
| A_33_P3306427  | 1,51099 | 1,81631 | -1,235692692 | ENST00000335302 | 26740     | NM_054107    | OR1J2                 |
| A_33_P3267185  | 3,86888 | 4,17428 | -1,235761215 | ENST00000359142 | 490       | NM_001001323 | ATP2B1                |
| A_23_P158024   | 12,2722 | 12,5776 | -1,235761215 | ENST00000378911 | 11258     | NM_007234    | DCTN3                 |
| A_23_P302681   | 6,95313 | 7,25859 | -1,23581261  | ENST00000419119 | 63979     | NM_001042762 | FIGNL1                |
| A_22_P00012856 | 4,02966 | 4,33522 | -1,235898273 | ENST00000434223 | N/A       | N/A          | N/A                   |
| A_21_P0010606  | 1,55609 | 1,86169 | -1,23593254  | ENST00000602765 | N/A       | N/A          | N/A                   |
| A_23_P154306   | 11,17   | 11,4756 | -1,23593254  | ENST00000392749 | 10010     | NM_004180    | TANK                  |
| A_33_P3404744  | 4,10458 | 4,41022 | -1,235966808 | ENST00000536272 | 158405    | NM_001287036 | KIAA1958              |
| A_23_P47058    | 7,52685 | 7,83249 | -1,235966808 | ENST00000545804 | 50624     | NM_022034    | CUZD1                 |
| A_22_P00001968 | 4,49453 | 4,80035 | -1,236121025 | N/A             | N/A       | N/A          | Inc-BCAR1-1           |

|                |         |         |              |                 |           |              |                       |
|----------------|---------|---------|--------------|-----------------|-----------|--------------|-----------------------|
| A_23_P43580    | 7,72714 | 8,03298 | -1,236138161 | ENST00000613863 | 11064     | NM_007018    | CNTRL                 |
| A_33_P3258091  | 13,859  | 14,1649 | -1,236189572 | ENST00000295640 | 6051      | NM_020216    | RNPEP                 |
| A_22_P00017434 | 2,80215 | 3,10808 | -1,236215278 | N/A             | N/A       | N/A          | Inc-VPRBP-1           |
| A_23_P205746   | 1,46866 | 1,77461 | -1,236232416 | ENST00000334192 | 2009      | NM_001008707 | EML1                  |
| A_23_P316460   | 8,18021 | 8,48619 | -1,236258123 | ENST00000343855 | 113763    | NM_138434    | ZBED6CL               |
| A_22_P00014635 | 1,54538 | 1,85139 | -1,23628383  | N/A             | 101928489 | NR_110889    | LOC101928489          |
| A_33_P3310754  | 1,44742 | 1,75357 | -1,236403806 | N/A             | N/A       | N/A          | N/A                   |
| A_23_P352358   | 11,9047 | 12,2109 | -1,236446657 | ENST00000616327 | 90231     | NM_138346    | KIAA2013              |
| A_21_P0003304  | 3,07329 | 3,37951 | -1,236463798 | ENST00000460993 | 102724604 | NR_125407    | LOC102724604          |
| A_21_P0010868  | 5,18392 | 5,49014 | -1,236463798 | N/A             | N/A       | N/A          | XLOC_I2_001945        |
| A_33_P3333683  | 4,11618 | 4,42245 | -1,236506651 | N/A             | N/A       | N/A          | N/A                   |
| A_23_P8095     | 12,0065 | 12,3128 | -1,236532364 | ENST00000375094 | 6048      | NM_006913    | RNF5                  |
| A_22_P00005649 | 5,90951 | 6,21581 | -1,236532364 | ENST00000610001 | N/A       | XM_006713836 | N/A                   |
| A_21_P0003707  | 1,73069 | 2,037   | -1,236540935 | N/A             | N/A       | N/A          | Inc-FRG1-4            |
| A_33_P3676515  | 5,54926 | 5,85558 | -1,236549506 | ENST00000599569 | 728039    | N/A          | SSR4P1                |
| A_33_P3319845  | 2,662   | 2,96835 | -1,23657522  | ENST00000380219 | 390058    | NM_001004750 | OR51B6                |
| A_24_P53150    | 10,9535 | 11,2599 | -1,236618077 | ENST00000326181 | 84231     | NM_032271    | TRAF7                 |
| A_22_P00019521 | 4,22802 | 4,53444 | -1,23663522  | N/A             | N/A       | N/A          | Inc-OAZ3-1            |
| A_33_P3405897  | 8,8474  | 9,15388 | -1,236686651 | ENST00000397718 | 9842      | NM_014798    | PLEKHM1               |
| A_33_P3258612  | 13,1172 | 13,4237 | -1,236703796 | ENST00000379160 | 5111      | NM_002592    | PCNA                  |
| A_23_P109774   | 10,3526 | 10,6591 | -1,236703796 | ENST00000312938 | 27107     | NM_014415    | ZBTB11                |
| A_32_P112910   | 3,08008 | 3,38662 | -1,236738085 | ENST00000334179 | 164153    | NM_203412    | UBL4B                 |
| A_33_P3276112  | 4,60068 | 4,90724 | -1,23675523  | N/A             | N/A       | AK126743     | Inc-CTD-2517M22.14.1- |
| A_33_P3867461  | 15,2329 | 15,5395 | -1,23678952  | ENST00000445791 | 401014    | NR_033870    | TEX41                 |
| A_23_P92362    | 14,2676 | 14,5743 | -1,236875251 | ENST00000394223 | 4717      | NM_002494    | NDUFC1                |
| A_23_P16976    | 13,7094 | 14,0161 | -1,236875251 | ENST00000477632 | 307       | NM_001153    | ANXA4                 |
| A_22_P00002556 | 4,55064 | 4,85734 | -1,236875251 | N/A             | N/A       | XR_109455    | Inc-C17orf75-3        |
| A_33_P3354479  | 17,3946 | 17,7013 | -1,236875251 | ENST00000623642 | N/A       | N/A          | N/A                   |
| A_24_P376129   | 3,89063 | 4,19736 | -1,236900971 | ENST00000374057 | 25861     | AK056190     | DFNB31                |
| A_23_P164258   | 4,76117 | 5,06792 | -1,236918119 | ENST00000583215 | 51268     | NM_016518    | PIPOX                 |
| A_33_P3373144  | 6,83429 | 7,14104 | -1,236918119 | ENST00000357658 | 23334     | BC051343     | SZT2                  |
| A_22_P00016433 | 3,55011 | 3,8569  | -1,236952414 | N/A             | 101927734 | XR_249196    | LOC101927734          |
| A_33_P3359590  | 5,39522 | 5,70202 | -1,236960988 | ENST00000336761 | 26528     | NM_170711    | DAZAP1                |

|                |         |         |              |                 |           |              |              |
|----------------|---------|---------|--------------|-----------------|-----------|--------------|--------------|
| A_23_P406424   | 13,5512 | 13,858  | -1,236960988 | ENST00000471038 | 389       | NM_175744    | RHOC         |
| A_22_P00021230 | 1,54592 | 1,85274 | -1,236978136 | ENST00000514072 | 26525     | N/A          | IL36RN       |
| A_21_P0012724  | 2,29604 | 2,60286 | -1,236978136 | ENST00000515623 | N/A       | N/A          | N/A          |
| A_19_P00316624 | 1,60832 | 1,91516 | -1,236995284 | ENST00000514050 | N/A       | XM_005263390 | N/A          |
| A_23_P49279    | 9,45677 | 9,76366 | -1,237038156 | ENST00000285697 | 388272    | NM_001001436 | C16orf87     |
| A_23_P125265   | 14,5122 | 14,8191 | -1,23704673  | ENST00000582898 | 3838      | NM_002266    | KPNA2        |
| A_21_P0013095  | 1,4668  | 1,77376 | -1,237098179 | N/A             | 101928231 | N/A          | LOC101928231 |
| A_23_P83781    | 11,9979 | 12,305  | -1,237218233 | ENST00000586299 | 9267      | NM_004762    | CYTH1        |
| A_22_P00010333 | 1,3424  | 1,64952 | -1,237235385 | ENST00000452888 | N/A       | N/A          | N/A          |
| A_33_P3266489  | 2,52791 | 2,83505 | -1,237252537 | ENST00000338616 | 347468    | NM_001004486 | OR13H1       |
| A_21_P0011471  | 4,55564 | 4,86285 | -1,23731257  | ENST00000562687 | N/A       | N/A          | N/A          |
| A_21_P0003092  | 3,27279 | 3,58    | -1,23731257  | ENST00000620737 | N/A       | KJ535002     | N/A          |
| A_24_P66545    | 1,74015 | 2,04738 | -1,237329723 | ENST00000296343 | 9711      | NM_001145642 | KIAA0226     |
| A_21_P0005366  | 4,16122 | 4,46845 | -1,237329723 | N/A             | N/A       | N/A          | Inc-EVX1-14  |
| A_22_P00023877 | 5,32984 | 5,6371  | -1,237355453 | ENST00000433344 | N/A       | N/A          | N/A          |
| A_32_P88415    | 3,72209 | 4,02936 | -1,237364029 | ENST00000456566 | 91977     | NM_133371    | MYOZ3        |
| A_23_P85534    | 3,17929 | 3,48666 | -1,2374498   | ENST00000367685 | 9293      | NM_005684    | GPR52        |
| A_23_P320717   | 9,68667 | 9,99407 | -1,237475532 | ENST00000526700 | 25839     | NM_015386    | COG4         |
| A_22_P00017657 | 1,77799 | 2,08542 | -1,237501265 | ENST00000505166 | N/A       | BG184752     | N/A          |
| A_33_P3285018  | 3,74664 | 4,0541  | -1,237526998 | N/A             | 388559    | XM_006723522 | ZNF888       |
| A_33_P3318227  | 1,5084  | 1,81591 | -1,237569889 | N/A             | N/A       | N/A          | N/A          |
| A_22_P00024229 | 5,37514 | 5,68271 | -1,237621359 | ENST00000508572 | N/A       | N/A          | N/A          |
| A_33_P3335966  | 10,0211 | 10,3287 | -1,237647095 | ENST00000559831 | 7168      | NM_001018005 | TPM1         |
| A_33_P3229037  | 4,09597 | 4,40357 | -1,237647095 | N/A             | N/A       | N/A          | N/A          |
| A_23_P152583   | 8,55358 | 8,86125 | -1,237707147 | ENST00000300682 | 64772     | NM_001042573 | ENGASE       |
| A_22_P00018315 | 4,29334 | 4,60102 | -1,237715726 | N/A             | N/A       | N/A          | Inc-ZNF852-2 |
| A_23_P106158   | 8,40294 | 8,71065 | -1,237741464 | ENST00000261699 | 79944     | NM_024884    | L2HGDH       |
| A_33_P3236986  | 5,99468 | 6,30245 | -1,237792941 | N/A             | 102724307 | XR_424180    | CYP17A1-AS1  |
| A_23_P35456    | 13,3426 | 13,6504 | -1,237818681 | ENST00000355946 | 9644      | NM_014631    | SH3PXD2A     |
| A_23_P141146   | 7,30308 | 7,61095 | -1,237878742 | ENST00000394294 | 84961     | NM_032875    | FBXL20       |
| A_21_P0003949  | 1,58996 | 1,89792 | -1,237955967 | ENST00000515086 | N/A       | N/A          | N/A          |
| A_23_P42087    | 10,1919 | 10,4999 | -1,237990291 | ENST00000490918 | 670       | NM_004332    | BPHL         |
| A_21_P0007392  | 1,75489 | 2,0629  | -1,237998872 | N/A             | N/A       | N/A          | Inc-PDGF-1   |

|                |         |         |              |                 |           |              |                      |
|----------------|---------|---------|--------------|-----------------|-----------|--------------|----------------------|
| A_22_P00014063 | 2,29122 | 2,59926 | -1,238024616 | ENST00000579769 | N/A       | N/A          | N/A                  |
| A_33_P3365995  | 3,50875 | 3,81681 | -1,238041778 | ENST00000405643 | 375449    | NM_001290226 | MAST4                |
| A_23_P56356    | 5,21893 | 5,52704 | -1,238084686 | ENST00000411743 | 151056    | NM_153021    | PLB1                 |
| A_33_P3370570  | 1,46698 | 1,77515 | -1,238136178 | ENST00000395528 | 206338    | NM_173800    | AQPEP                |
| A_23_P153628   | 9,01598 | 9,32416 | -1,23814476  | ENST00000585563 | 90522     | NM_001039672 | YIF1B                |
| A_23_P165722   | 13,8172 | 14,1254 | -1,238161925 | ENST00000258416 | 9470      | NM_004846    | EIF4E2               |
| A_33_P3377619  | 11,0123 | 11,3206 | -1,23824775  | ENST00000481360 | 143384    | NM_153810    | CACUL1               |
| A_23_P148821   | 9,93408 | 10,2424 | -1,238264916 | ENST00000464270 | 51611     | NM_001077394 | DPH5                 |
| A_22_P00003340 | 4,79613 | 5,10445 | -1,238264916 | N/A             | N/A       | AK021573     | Inc-CATSPERB-1       |
| A_33_P3359047  | 6,39405 | 6,70238 | -1,238273499 | ENST00000392854 | 130574    | NM_001195685 | LYPD6                |
| A_21_P0000900  | 3,4438  | 3,75213 | -1,238273499 | N/A             | 100505678 | NR_040093    | STARD4-AS1           |
| A_33_P3243230  | 3,88531 | 4,19365 | -1,238282082 | N/A             | N/A       | N/A          | N/A                  |
| A_21_P0012641  | 2,63675 | 2,94512 | -1,238307832 | N/A             | N/A       | N/A          | XLOC_I2_010969       |
| A_23_P119130   | 17,4635 | 17,7719 | -1,238333582 | ENST00000600467 | 6223      | NM_001022    | RPS19                |
| A_23_P142154   | 11,116  | 11,4244 | -1,238333582 | ENST00000253237 | 83743     | NM_031485    | GRWD1                |
| A_21_P0005052  | 1,52168 | 1,83019 | -1,238428004 | N/A             | N/A       | N/A          | Inc-HDAC2-1          |
| A_22_P00009777 | 2,60093 | 2,90951 | -1,238488094 | ENST00000551940 | N/A       | DB065886     | N/A                  |
| A_22_P00023305 | 6,16013 | 6,46874 | -1,238513848 | N/A             | N/A       | N/A          | Inc-ALX1-2           |
| A_23_P26094    | 10,7132 | 11,0219 | -1,238591113 | ENST00000380516 | 79811     | NM_024755    | SLTM                 |
| A_33_P3239322  | 2,20766 | 2,51638 | -1,238608284 | N/A             | 100132474 | AK125160     | LOC100132474         |
| A_33_P3389336  | 2,51681 | 2,82564 | -1,238702727 | N/A             | 101929918 | XR_424216    | LOC101929918         |
| A_21_P0011032  | 2,94019 | 3,24904 | -1,238719899 | N/A             | N/A       | N/A          | XLOC_I2_002775       |
| A_21_P0004289  | 5,40043 | 5,7093  | -1,238737071 | N/A             | N/A       | N/A          | Inc-RP11-43D2.2.1-10 |
| A_33_P3281273  | 5,91274 | 6,22162 | -1,238745658 | ENST00000246115 | 8698      | NM_003775    | S1PR4                |
| A_23_P122563   | 11,8911 | 12,2    | -1,23876283  | ENST00000374610 | 10471     | NM_014260    | PFDN6                |
| A_24_P358868   | 5,87198 | 6,1809  | -1,238780003 | ENST00000594710 | 388523    | NM_001267716 | ZNF728               |
| A_21_P0011138  | 3,44478 | 3,75396 | -1,239003274 | N/A             | N/A       | N/A          | XLOC_I2_003674       |
| A_32_P151263   | 1,46785 | 1,77709 | -1,239054804 | ENST00000317370 | 6517      | NM_001042    | SLC2A4               |
| A_23_P431933   | 7,72996 | 8,03921 | -1,239063393 | ENST00000348335 | 84254     | NM_032294    | CAMKK1               |
| A_21_P0001104  | 2,88791 | 3,19729 | -1,239175048 | ENST00000421114 | N/A       | N/A          | N/A                  |
| A_23_P149470   | 11,5106 | 11,8201 | -1,239278124 | ENST00000467295 | 4720      | NM_004550    | NDUFS2               |
| A_24_P5890     | 1,85281 | 2,16251 | -1,239449937 | ENST00000615969 | 57292     | NM_020535    | KIR2DL5A             |
| A_24_P91472    | 11,6672 | 11,9769 | -1,239449937 | ENST00000245812 | 84266     | NM_032306    | ALKBH7               |

|                |         |         |              |                 |           |              |                |
|----------------|---------|---------|--------------|-----------------|-----------|--------------|----------------|
| A_33_P3297562  | 1,50095 | 1,81076 | -1,239544444 | ENST00000302057 | 153572    | NM_033267    | IRX2           |
| A_22_P00008629 | 1,51269 | 1,82256 | -1,239595996 | ENST00000523150 | N/A       | DA245781     | N/A            |
| A_23_P96209    | 12,3946 | 12,7045 | -1,239621773 | ENST00000306306 | 80346     | NM_025232    | REEP4          |
| A_23_P313      | 10,8457 | 11,1556 | -1,239621773 | ENST00000478502 | 553115    | NM_012392    | PEF1           |
| A_23_P88249    | 10,7642 | 11,0741 | -1,239621773 | ENST00000346528 | 55147     | NM_001077351 | RBM23          |
| A_24_P264664   | 11,2868 | 11,5967 | -1,239621773 | ENST00000394196 | 1106      | NM_001271    | CHD2           |
| A_33_P3342111  | 7,79384 | 8,10379 | -1,239664736 | N/A             | 169841    | AK122832     | ZNF169         |
| A_23_P126486   | 11,3788 | 11,6888 | -1,2397077   | ENST00000412962 | 84809     | NR_026752    | CROCCP2        |
| A_21_P0013723  | 9,92783 | 10,2379 | -1,239767852 | ENST00000430302 | 102724238 | NR_126048    | LOC102724238   |
| A_23_P31372    | 14,7571 | 15,0672 | -1,239793633 | ENST00000424167 | 4191      | NM_005918    | MDH2           |
| A_23_P133075   | 8,6203  | 8,9304  | -1,239793633 | ENST00000514689 | 93627     | NM_033115    | TBCK           |
| A_21_P0012898  | 3,83057 | 4,14081 | -1,239913949 | N/A             | N/A       | N/A          | XLOC_I2_011987 |
| A_24_P312519   | 4,96465 | 5,2749  | -1,239922544 | ENST00000495025 | 64081     | NM_001033083 | PBLD           |
| A_33_P3304963  | 6,02132 | 6,33159 | -1,239939733 | ENST00000472387 | 80313     | NM_001143759 | LRRC27         |
| A_24_P93371    | 11,0695 | 11,3798 | -1,239965517 | ENST00000569853 | 54939     | NM_017828    | COMMD4         |
| A_23_P358470   | 7,723   | 8,03332 | -1,239982706 | ENST00000512658 | 201973    | NM_152683    | PRIMPOL        |
| A_22_P00009518 | 1,50169 | 1,81202 | -1,239991301 | ENST00000424506 | N/A       | N/A          | N/A            |
| A_23_P417942   | 9,45704 | 9,76738 | -1,239999896 | ENST00000260506 | 54874     | NM_001024948 | FNBP1L         |
| A_33_P6474088  | 8,04243 | 8,35281 | -1,240034277 | N/A             | 100507399 | NR_103542    | HCG8           |
| A_22_P00006101 | 2,96642 | 3,27701 | -1,240214791 | N/A             | 100129722 | NR_038389    | C9orf173-AS1   |
| A_23_P34942    | 4,60625 | 4,91689 | -1,240257774 | ENST00000492613 | 7813      | NM_005665    | EVI5           |
| A_23_P25403    | 6,16526 | 6,4759  | -1,240257774 | ENST00000552343 | 29915     | NM_013320    | HCFC2          |
| A_22_P00021629 | 2,93279 | 3,24344 | -1,240266371 | N/A             | N/A       | N/A          | Inc-DEXI-1     |
| A_22_P00021205 | 11,5203 | 11,831  | -1,240309356 | ENST00000426615 | 102800310 | NR_110457    | HAGLROS        |
| A_33_P3259722  | 8,47824 | 8,78901 | -1,240369537 | ENST00000486082 | 84065     | NM_032125    | TMEM222        |
| A_21_P0012200  | 16,8938 | 17,2046 | -1,24039533  | ENST00000320371 | N/A       | N/A          | N/A            |
| A_22_P00017941 | 1,44855 | 1,75938 | -1,240421124 | N/A             | N/A       | N/A          | Inc-ZG16-2     |
| A_24_P42389    | 4,24184 | 4,55273 | -1,240472713 | ENST00000338352 | 139562    | BC137355     | OTUD6A         |
| A_22_P00004515 | 6,55856 | 6,86946 | -1,240481311 | N/A             | N/A       | BC038570     | Inc-CPVL-4     |
| A_33_P3246543  | 8,26621 | 8,57712 | -1,24048991  | ENST00000519719 | 27430     | NM_182796    | MAT2B          |
| A_33_P3751230  | 2,49774 | 2,8087  | -1,240532902 | N/A             | N/A       | N/A          | Inc-MIB2-1     |
| A_23_P321511   | 8,29236 | 8,60335 | -1,240558699 | ENST00000506088 | 115123    | NM_178450    | mar-03         |
| A_24_P398940   | 10,9847 | 11,2957 | -1,240567298 | ENST00000345795 | 113201    | NM_138423    | CASC4          |

|                |         |         |              |                 |           |              |                       |
|----------------|---------|---------|--------------|-----------------|-----------|--------------|-----------------------|
| A_33_P3420013  | 5,19139 | 5,50242 | -1,240593095 | N/A             | N/A       | N/A          | N/A                   |
| A_33_P3266863  | 2,49475 | 2,80593 | -1,240722089 | ENST00000372237 | 79639     | NM_024587    | TMEM53                |
| A_21_P0000513  | 5,34369 | 5,65488 | -1,240730689 | N/A             | 56664     | NR_026703    | VTRNA1-1              |
| A_23_P6651     | 7,40239 | 7,71359 | -1,240739289 | ENST00000431842 | 23272     | NM_015224    | FAM208A               |
| A_23_P422794   | 11,1962 | 11,5074 | -1,240739289 | ENST00000522563 | 286053    | NM_173685    | NSMCE2                |
| A_23_P254594   | 7,04652 | 7,35775 | -1,240765089 | ENST00000276414 | 2796      | NM_000825    | GNRH1                 |
| A_21_P0008659  | 1,97821 | 2,28946 | -1,24078229  | N/A             | N/A       | N/A          | Inc-ANKRD34C-1        |
| A_19_P00317818 | 4,76878 | 5,08003 | -1,24078229  | N/A             | N/A       | N/A          | Inc-ERP44-3           |
| A_21_P0012074  | 5,15395 | 5,4653  | -1,240868298 | N/A             | N/A       | N/A          | XLOC_I2_008128        |
| A_22_P00016771 | 6,74966 | 7,06105 | -1,240902702 | N/A             | 104533120 | NR_126470    | TRIM31-AS1            |
| A_24_P101101   | 13,4034 | 13,7148 | -1,240911304 | ENST00000437414 | N/A       | N/A          | N/A                   |
| A_23_P137689   | 4,6345  | 4,94594 | -1,24094571  | ENST00000294794 | 25903     | NM_015441    | OLFML2B               |
| A_21_P0013391  | 1,4586  | 1,77009 | -1,240988718 | ENST00000419226 | N/A       | N/A          | N/A                   |
| A_32_P43465    | 8,74298 | 9,0545  | -1,241014524 | ENST00000396965 | 7569      | NM_006962    | ZNF182                |
| A_22_P00007918 | 2,53751 | 2,8491  | -1,24107474  | N/A             | N/A       | BX116572     | Inc-HSPB8-2           |
| A_21_P0009380  | 3,94766 | 4,25927 | -1,241091945 | N/A             | N/A       | N/A          | Inc-COX10-1           |
| A_23_P141779   | 9,42113 | 9,73278 | -1,241126356 | ENST00000590901 | 30827     | NM_014593    | CXXC1                 |
| A_22_P00012919 | 6,65435 | 6,96603 | -1,241152165 | ENST00000377205 | 64802     | NM_001297778 | NMNAT1                |
| A_22_P00018234 | 1,55721 | 1,86892 | -1,241177974 | ENST00000599944 | N/A       | AK124278     | N/A                   |
| A_21_P0006028  | 3,52262 | 3,83435 | -1,24119518  | ENST00000367276 | 101927489 | NR_120623    | TCERG1L-AS1           |
| A_21_P0006221  | 1,65756 | 1,96939 | -1,241281217 | N/A             | N/A       | N/A          | Inc-RP11-295D22.1.1-2 |
| A_21_P0010263  | 5,88261 | 6,19453 | -1,241358654 | N/A             | N/A       | N/A          | Inc-ADARB1-3          |
| A_33_P3279681  | 8,9102  | 9,22215 | -1,241384468 | ENST00000451287 | 147699    | NM_001080401 | PPM1N                 |
| A_24_P301557   | 9,39721 | 9,70928 | -1,241487727 | ENST00000261596 | 9663      | NM_014646    | LPIN2                 |
| A_33_P3256902  | 11,9251 | 12,2372 | -1,241513544 | ENST00000333139 | N/A       | N/A          | N/A                   |
| A_33_P3310989  | 6,04379 | 6,3559  | -1,241522149 | ENST00000428931 | 9898      | NM_014847    | UBAP2L                |
| A_23_P140675   | 2,40823 | 2,72047 | -1,241634027 | ENST00000567019 | 2038      | NM_000119    | EPB42                 |
| A_21_P0013582  | 10,4995 | 10,8118 | -1,241685666 | ENST00000617940 | N/A       | XR_430390    | N/A                   |
| A_24_P18621    | 11,1867 | 11,4991 | -1,241771736 | ENST00000360995 | 121536    | NM_153207    | AEBP2                 |
| A_23_P134925   | 11,923  | 12,2355 | -1,241857812 | ENST00000620910 | 665       | NM_004331    | BNIP3L                |
| A_21_P0000915  | 1,61833 | 1,93084 | -1,24186642  | ENST00000440762 | 101927295 | NR_110676    | LINC01360             |
| A_22_P00013100 | 1,4406  | 1,75318 | -1,241926677 | ENST00000544036 | N/A       | N/A          | N/A                   |
| A_33_P3358824  | 5,25392 | 5,56662 | -1,242029982 | ENST00000358133 | 5351      | NM_000302    | PLOD1                 |

|                |         |         |              |                 |           |              |                |
|----------------|---------|---------|--------------|-----------------|-----------|--------------|----------------|
| A_23_P59005    | 12,1982 | 12,511  | -1,242116076 | ENST00000354258 | 6890      | NM_000593    | TAP1           |
| A_22_P00011483 | 1,45034 | 1,7632  | -1,242167735 | ENST00000576797 | 101927311 | NR_110909    | LOC101927311   |
| A_23_P129246   | 9,99366 | 10,3066 | -1,242236618 | ENST00000616065 | 80301     | NM_025201    | PLEKHO2        |
| A_23_P25305    | 2,14193 | 2,45497 | -1,242322726 | ENST00000266744 | 429       | NM_004316    | ASCL1          |
| A_33_P3250308  | 1,48884 | 1,80192 | -1,242357171 | ENST00000378421 | 159013    | AL832829     | CXorf38        |
| A_23_P90845    | 9,5523  | 9,86542 | -1,242391617 | ENST00000433529 | 7072      | NM_022173    | TIA1           |
| A_33_P3697530  | 4,3478  | 4,66093 | -1,242400228 | ENST00000469653 | 10507     | NM_001142287 | SEMA4D         |
| A_21_P0004591  | 1,50588 | 1,81904 | -1,242426064 | ENST00000425438 | 653483    | NR_027906    | MLLT4-AS1      |
| A_23_P140009   | 2,79878 | 3,11199 | -1,242469124 | ENST00000245312 | 6555      | NM_000452    | SLC10A2        |
| A_22_P00000899 | 4,21629 | 4,52952 | -1,242486348 | ENST00000417650 | N/A       | N/A          | N/A            |
| A_22_P00008937 | 7,2563  | 7,56954 | -1,24249496  | ENST00000553017 | 283403    | NM_001242696 | C12orf80       |
| A_22_P00016451 | 2,7266  | 3,03985 | -1,242503573 | ENST00000455005 | 101929683 | XR_242023    | LOC101929683   |
| A_33_P3341105  | 5,73675 | 6,05003 | -1,24252941  | ENST00000331056 | 5148      | NM_002602    | PDE6G          |
| A_21_P0006391  | 1,6415  | 1,95485 | -1,242589699 | N/A             | N/A       | N/A          | Inc-TNC-3      |
| A_22_P00017985 | 1,3861  | 1,69947 | -1,242606925 | N/A             | N/A       | N/A          | Inc-ZMYND11-1  |
| A_33_P3389478  | 5,12888 | 5,44226 | -1,242615539 | ENST00000380799 | 6619      | N/A          | SNAPC3         |
| A_24_P3973     | 13,9527 | 14,2661 | -1,242632765 | ENST00000360787 | 3181      | NM_002137    | HNRNPA2B1      |
| A_33_P3345501  | 11,6647 | 11,9781 | -1,242632765 | ENST00000511141 | N/A       | N/A          | N/A            |
| A_33_P3385417  | 1,65278 | 1,96619 | -1,242641378 | N/A             | N/A       | N/A          | N/A            |
| A_21_P0002576  | 1,65239 | 1,96591 | -1,242736129 | ENST00000450628 | N/A       | N/A          | N/A            |
| A_33_P3300232  | 2,33661 | 2,65017 | -1,242770585 | ENST00000543521 | 54768     | NM_001270974 | HYDIN          |
| A_33_P3268582  | 1,39446 | 1,70802 | -1,242770585 | ENST00000332831 | 729759    | NM_001005221 | OR4F29         |
| A_23_P345081   | 11,6331 | 11,9468 | -1,24289119  | ENST00000424881 | 79027     | NM_001083956 | ZNF655         |
| A_23_P65797    | 9,70169 | 10,0154 | -1,242899805 | ENST00000536947 | 64410     | NM_022480    | KLHL25         |
| A_21_P0010687  | 2,77179 | 3,08558 | -1,242968728 | N/A             | N/A       | N/A          | XLOC_I2_000018 |
| A_23_P55091    | 11,4585 | 11,7723 | -1,242977344 | ENST00000427159 | 117246    | NM_017647    | FTSJ3          |
| A_24_P134074   | 18,0773 | 18,3911 | -1,242977344 | ENST00000600467 | 6223      | NM_001022    | RPS19          |
| A_23_P55376    | 10,4752 | 10,789  | -1,242977344 | ENST00000610328 | 284058    | NM_015443    | KANSL1         |
| A_22_P00008604 | 5,25779 | 5,5716  | -1,242985959 | ENST00000412339 | N/A       | N/A          | N/A            |
| A_33_P3411682  | 2,34094 | 2,65478 | -1,243011807 | ENST00000532034 | N/A       | AB231720     | N/A            |
| A_22_P00009683 | 4,2409  | 4,55475 | -1,243020423 | N/A             | N/A       | N/A          | Inc-MBL2-5     |
| A_32_P181527   | 2,99108 | 3,30494 | -1,243029039 | ENST00000378279 | 441376    | NM_001025357 | AARD           |
| A_19_P00807643 | 4,90158 | 5,21545 | -1,243037655 | N/A             | 285154    | NR_027252    | CYP1B1-AS1     |

|                |         |         |              |                 |        |              |                       |
|----------------|---------|---------|--------------|-----------------|--------|--------------|-----------------------|
| A_23_P94095    | 8,95932 | 9,27322 | -1,243063503 | ENST00000520311 | 157567 | NM_198401    | ANKRD46               |
| A_23_P214950   | 16,0863 | 16,4005 | -1,243322018 | ENST00000421351 | 64065  | NM_022121    | PERP                  |
| A_21_P0004812  | 4,86995 | 5,18418 | -1,243347872 | N/A             | N/A    | N/A          | Inc-AL035696.1-4      |
| A_23_P142974   | 9,94567 | 10,2599 | -1,243347872 | ENST00000409202 | 9938   | NM_001007231 | ARHGAP25              |
| A_23_P377819   | 14,6732 | 14,9875 | -1,243408201 | ENST00000556647 | 6430   | NM_001039465 | SRSF5                 |
| A_33_P3350553  | 3,80587 | 4,12019 | -1,243425439 | ENST00000376964 | 8409   | N/A          | UXT                   |
| A_21_P0007609  | 1,52865 | 1,84301 | -1,243459914 | N/A             | N/A    | N/A          | Inc-RP11-511B23.3.1-2 |
| A_23_P107661   | 11,9422 | 12,2566 | -1,243494391 | ENST00000322088 | 5518   | NM_014225    | PPP2R1A               |
| A_33_P3812815  | 11,3304 | 11,6448 | -1,243494391 | ENST00000537889 | 5310   | NM_000296    | PKD1                  |
| A_24_P796321   | 1,46856 | 1,78302 | -1,243546108 | ENST00000396841 | 342900 | NM_001143832 | LEUTX                 |
| A_23_P143147   | 10,8817 | 11,1962 | -1,243580586 | ENST00000335351 | 10732  | NM_006602    | TCFL5                 |
| A_24_P937306   | 1,55283 | 1,86747 | -1,24370127  | ENST00000380291 | 8905   | XR_247290    | AP1S2                 |
| A_21_P0008477  | 1,6195  | 1,93414 | -1,24370127  | N/A             | N/A    | N/A          | Inc-ASB2-1            |
| A_23_P74299    | 1,43558 | 1,75039 | -1,24384783  | ENST00000367235 | 134    | NM_000674    | ADORA1                |
| A_22_P00008570 | 1,81618 | 2,131   | -1,243856452 | ENST00000431697 | N/A    | N/A          | N/A                   |
| A_22_P00016327 | 4,01082 | 4,32568 | -1,24389094  | N/A             | N/A    | AA845538     | Inc-TMEM14C-1         |
| A_24_P923381   | 2,93336 | 3,24824 | -1,243908184 | N/A             | N/A    | L26245       | N/A                   |
| A_23_P500886   | 5,21009 | 5,52499 | -1,243925428 | ENST00000433422 | 24146  | NM_014343    | CLDN15                |
| A_23_P355364   | 5,93289 | 6,24784 | -1,24396854  | ENST00000481048 | 84859  | NM_032773    | LRCH3                 |
| A_33_P3246920  | 1,42753 | 1,74251 | -1,243994408 | ENST00000338325 | 114784 | BC031871     | CSMD2                 |
| A_33_P3337733  | 3,85167 | 4,16665 | -1,243994408 | ENST00000379640 | N/A    | AK127731     | N/A                   |
| A_23_P81912    | 12,7298 | 13,0448 | -1,244011653 | ENST00000396389 | 203068 | NM_178014    | TUBB                  |
| A_33_P3768930  | 1,47326 | 1,78832 | -1,244063391 | N/A             | N/A    | BF175071     | N/A                   |
| A_23_P354827   | 9,64451 | 9,95959 | -1,244080638 | ENST00000325134 | 162972 | NM_001277090 | ZNF550                |
| A_23_P107684   | 8,93894 | 9,2541  | -1,244149626 | ENST00000196482 | 25799  | NM_014347    | ZNF324                |
| A_23_P205046   | 10,9071 | 11,2223 | -1,244184122 | ENST00000267339 | 55608  | NM_017664    | ANKRD10               |
| A_22_P00023237 | 3,12038 | 3,43563 | -1,244227243 | ENST00000562869 | N/A    | N/A          | N/A                   |
| A_22_P00002460 | 1,60185 | 1,91712 | -1,244244492 | N/A             | N/A    | N/A          | Inc-C15orf41-3        |
| A_33_P3361157  | 4,89526 | 5,21069 | -1,24438249  | ENST00000610445 | N/A    | N/A          | N/A                   |
| A_22_P00013060 | 1,46693 | 1,78237 | -1,244391116 | ENST00000580360 | N/A    | T82254       | N/A                   |
| A_33_P3337727  | 3,90603 | 4,22148 | -1,244399741 | N/A             | N/A    | N/A          | N/A                   |
| A_23_P212339   | 9,2736  | 9,58909 | -1,244434244 | ENST00000296137 | 79443  | NM_024513    | FYCO1                 |
| A_23_P1575     | 2,56316 | 2,87868 | -1,244460121 | ENST00000329758 | 57093  | NM_020358    | TRIM49                |



|                |         |         |              |                 |           |              |                |
|----------------|---------|---------|--------------|-----------------|-----------|--------------|----------------|
| A_23_P73660    | 8,4878  | 8,80334 | -1,244477373 | ENST00000380579 | 6399      | NM_001011658 | TRAPPC2        |
| A_21_P0007459  | 1,85176 | 2,16735 | -1,244520504 | ENST00000529466 | 100500938 | NM_001195637 | CCDC179        |
| A_21_P0013259  | 8,05424 | 8,36983 | -1,244520504 | ENST00000453227 | 100289187 | NM_001195541 | GS1-259H13.2   |
| A_33_P3340025  | 11,4945 | 11,8101 | -1,244529131 | ENST00000262460 | 9837      | NM_021067    | GINS1          |
| A_22_P00014949 | 4,33998 | 4,65559 | -1,244537757 | ENST00000450888 | 642345    | N/A          | MIR4500HG      |
| A_23_P94552    | 7,77743 | 8,09305 | -1,244546384 | ENST00000538669 | 23670     | NM_013390    | TMEM2          |
| A_21_P0010576  | 6,58133 | 6,89698 | -1,244572264 | ENST00000449219 | N/A       | XR_431357    | N/A            |
| A_33_P3353846  | 3,46075 | 3,77641 | -1,24458089  | ENST00000470917 | 222642    | NM_001010873 | TSPO2          |
| A_23_P138725   | 14,2809 | 14,5966 | -1,244615398 | ENST00000285605 | 83742     | N/A          | MARVELD1       |
| A_24_P152468   | 9,69781 | 10,0136 | -1,244693044 | N/A             | 100128364 | XR_108776    | LOC100128364   |
| A_32_P77977    | 8,07986 | 8,39567 | -1,244710299 | ENST00000373014 | 51118     | NM_016037    | UTP11L         |
| A_23_P330537   | 7,52547 | 7,8413  | -1,244727554 | ENST00000564070 | 90864     | NM_080861    | SPSB3          |
| A_24_P833129   | 3,56359 | 3,87952 | -1,244813835 | ENST00000479493 | 729920    | NM_001101426 | ISPD           |
| A_33_P3285299  | 3,2261  | 3,54203 | -1,244813835 | ENST00000374314 | 9721      | NM_014696    | GPRIN2         |
| A_24_P322611   | 9,53512 | 9,85106 | -1,244822464 | ENST00000370366 | 11083     | NM_022105    | DIDO1          |
| A_22_P00007428 | 4,59156 | 4,90751 | -1,244831092 | ENST00000522667 | N/A       | N/A          | N/A            |
| A_21_P0011559  | 3,35826 | 3,67422 | -1,244839721 | ENST00000576963 | N/A       | N/A          | N/A            |
| A_22_P00006656 | 2,64872 | 2,96472 | -1,244874235 | ENST00000565822 | N/A       | N/A          | N/A            |
| A_33_P3265194  | 2,92468 | 3,24068 | -1,244874235 | ENST00000397671 | 642843    | N/A          | CPSF4L         |
| A_33_P3343479  | 1,51814 | 1,83414 | -1,244874235 | ENST00000484153 | N/A       | AL833920     | N/A            |
| A_24_P252575   | 10,7104 | 11,0264 | -1,244874235 | ENST00000373647 | 23637     | NM_012197    | RABGAP1        |
| A_33_P3356092  | 3,0513  | 3,36731 | -1,244882864 | ENST00000328403 | 114781    | NM_052893    | BTBD9          |
| A_33_P3256113  | 6,61329 | 6,92931 | -1,244891493 | ENST00000607545 | 728411    | NR_027026    | GUSBP1         |
| A_21_P0007657  | 3,36528 | 3,68135 | -1,244934639 | N/A             | N/A       | N/A          | Inc-TMEM132B-4 |
| A_32_P135336   | 8,66594 | 8,98203 | -1,244951897 | N/A             | 388242    | NR_002556    | LOC388242      |
| A_21_P0006988  | 1,51713 | 1,83323 | -1,244960526 | N/A             | N/A       | N/A          | Inc-ZNF32-3    |
| A_22_P00013662 | 2,73772 | 3,05386 | -1,244995045 | ENST00000524467 | N/A       | N/A          | N/A            |
| A_24_P346101   | 8,53714 | 8,8533  | -1,245012304 | ENST00000334744 | 153768    | NM_138492    | PRELID2        |
| A_19_P00320108 | 6,09826 | 6,41455 | -1,245124496 | ENST00000435466 | N/A       | N/A          | N/A            |
| A_24_P456723   | 5,35104 | 5,6674  | -1,245184911 | N/A             | 728537    | N/A          | LINC01125      |
| A_21_P0013825  | 9,46862 | 9,78499 | -1,245193542 | ENST00000453704 | 27067     | NM_001164380 | STAU2          |
| A_23_P38584    | 1,53056 | 1,84705 | -1,245297119 | ENST00000301656 | 342574    | NM_181537    | KRT27          |
| A_32_P132477   | 7,62017 | 7,93671 | -1,245340278 | N/A             | N/A       | N/A          | N/A            |

|                |         |         |              |                 |        |              |                       |
|----------------|---------|---------|--------------|-----------------|--------|--------------|-----------------------|
| A_24_P190541   | 9,67823 | 9,9948  | -1,245366175 | ENST00000446924 | 54014  | NM_018963    | BRWD1                 |
| A_23_P403424   | 12,7578 | 13,0744 | -1,245392072 | ENST00000483748 | 8681   | NM_005090    | JMJD7-PLA2G4B         |
| A_22_P00020477 | 1,46524 | 1,78189 | -1,245435234 | N/A             | N/A    | DB067770     | Inc-RP11-625H11.1.1-2 |
| A_23_P126716   | 15,9823 | 16,299  | -1,245478399 | ENST00000465645 | 93974  | NM_178191    | ATPIF1                |
| A_22_P00011449 | 3,80176 | 4,11847 | -1,245487032 | N/A             | N/A    | N/A          | Inc-PANK4-2           |
| A_23_P150053   | 7,90445 | 8,22119 | -1,245512931 | ENST00000458208 | 59     | NM_001613    | ACTA2                 |
| A_21_P0013910  | 16,7911 | 17,1079 | -1,245564732 | ENST00000602494 | 5757   | NM_001099285 | PTMA                  |
| A_22_P00007532 | 1,69437 | 2,01122 | -1,2456079   | N/A             | N/A    | N/A          | Inc-HADH-1            |
| A_32_P113584   | 7,12904 | 7,44592 | -1,245633802 | ENST00000369577 | 23036  | NM_015021    | ZNF292                |
| A_22_P00011365 | 4,15909 | 4,47604 | -1,245694242 | N/A             | N/A    | N/A          | Inc-P2RX3-1           |
| A_24_P570049   | 8,69107 | 9,00806 | -1,245728781 | ENST00000407236 | 5465   | NM_005036    | PPARA                 |
| A_22_P00011840 | 1,619   | 1,93603 | -1,24576332  | N/A             | N/A    | N/A          | Inc-PHKB-3            |
| A_33_P3253672  | 10,9095 | 11,2266 | -1,245823766 | ENST00000257981 | 23416  | NM_012284    | KCNH3                 |
| A_21_P0009372  | 1,48149 | 1,7986  | -1,245832402 | N/A             | N/A    | N/A          | Inc-RAB40B-1          |
| A_21_P0000716  | 1,49351 | 1,81065 | -1,245858309 | ENST00000549576 | 641515 | N/A          | MGAT4EP               |
| A_23_P142776   | 12,4306 | 12,7478 | -1,245910123 | ENST00000434851 | 8665   | NM_003754    | EIF3F                 |
| A_33_P3325102  | 5,05879 | 5,376   | -1,245918759 | N/A             | N/A    | N/A          | N/A                   |
| A_24_P85775    | 5,14693 | 5,46418 | -1,245953304 | ENST00000373927 | 9473   | NM_001039477 | THEMIS2               |
| A_23_P122174   | 9,12942 | 9,44669 | -1,245970577 | ENST00000542685 | 7518   | NM_022550    | XRCC4                 |
| A_21_P0014164  | 1,55154 | 1,86884 | -1,245996486 | N/A             | N/A    | N/A          | N/A                   |
| A_33_P3324298  | 4,66749 | 4,98492 | -1,246108767 | N/A             | N/A    | N/A          | N/A                   |
| A_22_P00011780 | 3,78734 | 4,10478 | -1,246117404 | ENST00000436340 | N/A    | N/A          | N/A                   |
| A_24_P359030   | 1,53472 | 1,85217 | -1,246126042 | N/A             | 440072 | NR_024233    | LINC00167             |
| A_33_P3286481  | 13,889  | 14,2066 | -1,246255611 | ENST00000605188 | N/A    | N/A          | N/A                   |
| A_33_P3251771  | 6,93325 | 7,25089 | -1,246290165 | ENST00000568744 | 1540   | NM_015247    | CYLD                  |
| A_22_P00009581 | 5,51333 | 5,83105 | -1,246359276 | N/A             | N/A    | XM_005263135 | Inc-MAPK10-1          |
| A_33_P3260322  | 8,75697 | 9,07471 | -1,246376554 | ENST00000487099 | 2649   | NM_033334    | NR6A1                 |
| A_21_P0012400  | 7,54432 | 7,86213 | -1,24643703  | ENST00000513809 | 152195 | NR_027766    | NUDT16P1              |
| A_23_P61778    | 9,10578 | 9,42359 | -1,24643703  | ENST00000336868 | 64359  | NM_022463    | NXN                   |
| A_24_P226970   | 1,55613 | 1,87397 | -1,246462949 | ENST00000395254 | 22891  | NM_014951    | ZNF365                |
| A_21_P0013202  | 5,3173  | 5,63518 | -1,246497509 | ENST00000453012 | N/A    | N/A          | N/A                   |
| A_22_P00012516 | 6,32738 | 6,64526 | -1,246497509 | ENST00000558478 | N/A    | BC043574     | N/A                   |
| A_23_P372638   | 11,0575 | 11,3754 | -1,246514789 | ENST00000565832 | 80205  | NM_025134    | CHD9                  |

|                |         |         |              |                 |           |              |                |
|----------------|---------|---------|--------------|-----------------|-----------|--------------|----------------|
| A_32_P217655   | 11,5732 | 11,8911 | -1,246514789 | ENST00000608018 | 645166    | NR_027355    | LOC645166      |
| A_22_P00006744 | 2,42232 | 2,74024 | -1,24653207  | N/A             | N/A       | N/A          | Inc-FSIP1-3    |
| A_33_P3290394  | 7,84391 | 8,16196 | -1,246644399 | ENST00000374202 | 3561      | NM_000206    | IL2RG          |
| A_33_P3241786  | 1,45362 | 1,77168 | -1,24665304  | ENST00000413157 | 119       | NM_017482    | ADD2           |
| A_24_P345822   | 12,8884 | 13,2065 | -1,246687605 | ENST00000490574 | 10342     | NM_006070    | TFG            |
| A_24_P127312   | 10,6046 | 10,9227 | -1,246687605 | ENST00000498256 | N/A       | N/A          | N/A            |
| A_21_P0013248  | 9,22431 | 9,54246 | -1,246730813 | N/A             | N/A       | N/A          | XLOC_I2_013485 |
| A_32_P181638   | 1,51865 | 1,83685 | -1,246774022 | ENST00000314641 | 11149     | NM_147147    | BVES           |
| A_33_P3295423  | 8,1699  | 8,48818 | -1,24684316  | N/A             | 79364     | NM_001040653 | ZXDC           |
| A_23_P71148    | 13,4289 | 13,7472 | -1,246860445 | ENST00000265523 | 644       | NM_000712    | BLVRA          |
| A_23_P56590    | 8,21321 | 8,53153 | -1,24687773  | ENST00000426049 | 10438     | NM_006333    | C1D            |
| A_23_P133807   | 7,09637 | 7,4147  | -1,246886373 | ENST00000456846 | 129685    | NM_138572    | TAF8           |
| A_21_P0011389  | 5,11732 | 5,43573 | -1,246955517 | N/A             | N/A       | N/A          | XLOC_I2_005076 |
| A_22_P00023445 | 4,91625 | 5,23466 | -1,246955517 | ENST00000585902 | N/A       | CD675892     | N/A            |
| A_21_P0013584  | 6,70055 | 7,01907 | -1,247050596 | N/A             | 102725126 | XR_432423    | LOC102725126   |
| A_33_P3829391  | 4,18136 | 4,49992 | -1,247085172 | N/A             | 641510    | BC030809     | LOC641510      |
| A_22_P00011496 | 1,44677 | 1,76536 | -1,247111105 | N/A             | N/A       | N/A          | Inc-PARVA-1    |
| A_33_P3337540  | 11,7963 | 12,1149 | -1,247119749 | ENST00000382264 | 3455      | NM_000874    | IFNAR2         |
| A_33_P3257005  | 5,70371 | 6,02232 | -1,247128393 | ENST00000446594 | N/A       | N/A          | N/A            |
| A_23_P73413    | 1,52291 | 1,84157 | -1,247171616 | ENST00000520249 | 115111    | NM_052832    | SLC26A7        |
| A_21_P0006245  | 3,05592 | 3,37459 | -1,247180261 | N/A             | 102724193 | XR_428621    | LOC102724193   |
| A_23_P426140   | 7,31795 | 7,6367  | -1,247249421 | ENST00000294353 | 79699     | NM_024646    | ZYG11B         |
| A_23_P399146   | 6,25011 | 6,5689  | -1,247284003 | ENST00000240719 | 256051    | NM_153263    | ZNF549         |
| A_33_P3347663  | 1,87734 | 2,19615 | -1,247301294 | ENST00000573860 | N/A       | XR_245489    | N/A            |
| A_33_P3271711  | 7,88793 | 8,2068  | -1,247353169 | N/A             | N/A       | N/A          | N/A            |
| A_23_P502035   | 10,1255 | 10,4444 | -1,247379107 | ENST00000554550 | 2592      | NM_000155    | GALT           |
| A_22_P00014482 | 5,21716 | 5,53606 | -1,247379107 | N/A             | N/A       | BX647213     | Inc-SHCBP1-2   |
| A_22_P00002857 | 4,9434  | 5,26239 | -1,247456925 | N/A             | 339942    | NR_026991    | H1FX-AS1       |
| A_33_P3405839  | 2,59339 | 2,9124  | -1,247474219 | ENST00000423320 | 7173      | NM_175722    | TPO            |
| A_23_P217341   | 2,12966 | 2,4487  | -1,247500159 | ENST00000378981 | 4112      | NM_002363    | MAGEB1         |
| A_22_P00017647 | 4,7426  | 5,06173 | -1,247577985 | ENST00000451118 | N/A       | N/A          | N/A            |
| A_21_P0009202  | 4,20845 | 4,52758 | -1,247577985 | ENST00000453722 | N/A       | N/A          | N/A            |
| A_19_P00808033 | 7,23488 | 7,55404 | -1,247603928 | N/A             | 6801      | NM_003162    | STRN           |

|                |         |         |              |                 |           |              |                |
|----------------|---------|---------|--------------|-----------------|-----------|--------------|----------------|
| A_23_P93180    | 10,2865 | 10,6057 | -1,247638519 | ENST00000396984 | 8347      | NM_003526    | HIST1H2BC      |
| A_22_P00009100 | 6,57461 | 6,89381 | -1,247638519 | N/A             | 101929664 | NR_110541    | HORMAD2-AS1    |
| A_33_P3212645  | 12,0901 | 12,4094 | -1,247725002 | ENST00000593495 | 388677    | NM_203458    | NOTCH2NL       |
| A_21_P0012112  | 17,766  | 18,0853 | -1,247725002 | N/A             | N/A       | N/A          | XLOC_I2_008560 |
| A_23_P104865   | 1,51211 | 1,83143 | -1,247742299 | ENST00000355343 | N/A       | AB529259     | N/A            |
| A_21_P0004439  | 3,91757 | 4,23694 | -1,247785544 | N/A             | 101927488 | NR_105039    | LOC101927488   |
| A_23_P87964    | 11,792  | 12,1114 | -1,247811491 | ENST00000378720 | 2098      | NM_001984    | ESD            |
| A_21_P0000646  | 1,78859 | 2,10802 | -1,247837439 | ENST00000499809 | 283143    | N/A          | LINC00900      |
| A_33_P3386760  | 7,02233 | 7,34177 | -1,247846088 | ENST00000454252 | 11200     | NM_145862    | CHEK2          |
| A_21_P0004530  | 1,45782 | 1,77728 | -1,247863387 | N/A             | N/A       | N/A          | Inc-C5orf32-1  |
| A_33_P3262022  | 4,06919 | 4,38865 | -1,247863387 | N/A             | N/A       | N/A          | N/A            |
| A_33_P3284838  | 1,43211 | 1,75159 | -1,247880686 | ENST00000376501 | 387642    | NR_103721    | LINC01552      |
| A_22_P00009395 | 6,27316 | 6,59265 | -1,247889336 | N/A             | 254100    | NR_038923    | SSSCA1-AS1     |
| A_22_P00020940 | 4,99035 | 5,30987 | -1,247915285 | ENST00000434552 | N/A       | N/A          | N/A            |
| A_33_P3407042  | 11,3737 | 11,6933 | -1,247984486 | ENST00000379198 | 126792    | NM_080605    | B3GALT6        |
| A_33_P3294002  | 12,1564 | 12,476  | -1,247984486 | ENST00000381278 | 53947     | NM_017436    | A4GALT         |
| A_21_P0010915  | 1,55514 | 1,87495 | -1,248166157 | ENST00000425137 | N/A       | N/A          | N/A            |
| A_23_P318464   | 1,50571 | 1,82559 | -1,24822672  | ENST00000166244 | 2046      | NM_020526    | EPHA8          |
| A_23_P111273   | 10,6447 | 10,9646 | -1,248244024 | ENST00000446018 | 51256     | NM_016495    | TBC1D7         |
| A_21_P0000026  | 10,9283 | 11,2483 | -1,248330549 | ENST00000563387 | 123207    | NM_001160115 | C15orf40       |
| A_22_P00014016 | 14,3532 | 14,6732 | -1,248330549 | ENST00000490410 | N/A       | AL833768     | N/A            |
| A_21_P0005891  | 5,15508 | 5,47508 | -1,248330549 | N/A             | N/A       | N/A          | Inc-EXT1-3     |
| A_21_P0007834  | 1,67513 | 1,99514 | -1,248339202 | ENST00000552712 | 101927038 | XR_432814    | LOC101927038   |
| A_22_P00003343 | 5,38019 | 5,70023 | -1,24836516  | N/A             | N/A       | AK098042     | Inc-CBFA2T3-2  |
| A_24_P315941   | 1,77652 | 2,09657 | -1,248373813 | ENST00000390625 | N/A       | D83692       | N/A            |
| A_23_P47426    | 6,84818 | 7,16826 | -1,248399773 | ENST00000531338 | 27034     | NM_014384    | ACAD8          |
| A_23_P65427    | 16,3808 | 16,7009 | -1,24841708  | ENST00000559042 | 5721      | NM_002818    | PSME2          |
| A_33_P3357818  | 2,03431 | 2,35443 | -1,248434386 | ENST00000374619 | 3352      | NM_000864    | HTR1D          |
| A_33_P3424367  | 6,71254 | 7,03266 | -1,248434386 | ENST00000342043 | 9830      | NM_033219    | TRIM14         |
| A_33_P3267651  | 6,40647 | 6,72668 | -1,24851227  | ENST00000479138 | 9666      | NM_014648    | DZIP3          |
| A_33_P3362696  | 7,2182  | 7,53842 | -1,248520924 | ENST00000392837 | 55188     | NM_018157    | RIC8B          |
| A_24_P726336   | 8,02843 | 8,34869 | -1,248555541 | ENST00000427704 | 9749      | NM_001100164 | PHACTR2        |
| A_22_P00001179 | 5,73575 | 6,05607 | -1,248607468 | N/A             | 100507530 | NR_125386    | LOC100507530   |

|                |         |         |              |                 |           |           |               |
|----------------|---------|---------|--------------|-----------------|-----------|-----------|---------------|
| A_23_P217917   | 7,35746 | 7,67778 | -1,248607468 | ENST00000336075 | 2948      | NM_147148 | GSTM4         |
| A_32_P74120    | 13,4501 | 13,7705 | -1,248676708 | ENST00000452795 | 57234     | NR_111952 | LINC00869     |
| A_21_P0008854  | 5,25603 | 5,57651 | -1,248745951 | N/A             | N/A       | N/A       | Inc-HEXA-3    |
| A_33_P3486059  | 3,25349 | 3,57403 | -1,248797886 | N/A             | N/A       | N/A       | N/A           |
| A_23_P1292     | 5,78065 | 6,10128 | -1,248875792 | ENST00000623073 | 2074      | NM_000124 | ERCC6         |
| A_33_P3287785  | 2,25612 | 2,57676 | -1,248884449 | ENST00000610854 | 4747      | NM_006158 | NEFL          |
| A_23_P47034    | 8,64992 | 8,97063 | -1,248945047 | ENST00000282728 | 3087      | NM_002729 | HHEX          |
| A_22_P00013704 | 5,36545 | 5,68618 | -1,248962361 | N/A             | 102723356 | NR_125797 | ZFPM2-AS1     |
| A_22_P00005722 | 1,69917 | 2,01991 | -1,248971018 | ENST00000437080 | N/A       | N/A       | N/A           |
| A_33_P3316696  | 5,71059 | 6,03134 | -1,248979675 | N/A             | N/A       | N/A       | N/A           |
| A_33_P3394352  | 4,53381 | 4,8546  | -1,249014305 | ENST00000541903 | 55275     | BC029560  | VPS53         |
| A_33_P3324505  | 2,27682 | 2,59764 | -1,249040278 | N/A             | N/A       | N/A       | N/A           |
| A_19_P00326532 | 6,41007 | 6,7309  | -1,249048935 | ENST00000499418 | 101927612 | NR_108047 | RNF139-AS1    |
| A_24_P319715   | 11,9951 | 12,316  | -1,249109541 | ENST00000381611 | 10130     | NM_005742 | PDIA6         |
| A_33_P3682006  | 5,6199  | 5,94084 | -1,249144174 | N/A             | 138948    | NR_102735 | DBH-AS1       |
| A_33_P3319982  | 6,13983 | 6,46079 | -1,249161491 | N/A             | N/A       | BC015443  | Inc-TMC7-1    |
| A_24_P334640   | 5,39817 | 5,71923 | -1,249248079 | ENST00000360726 | 85315     | NM_133367 | PAQR8         |
| A_22_P00004408 | 5,22839 | 5,54958 | -1,249360653 | N/A             | 101927155 | NR_120412 | LMO7-AS1      |
| A_23_P406928   | 14,0296 | 14,3508 | -1,249369313 | ENST00000361567 | 4540      | HV444971  | ND5           |
| A_22_P00023526 | 6,8986  | 7,21985 | -1,249412614 | N/A             | 100652739 | NR_045126 | RAET1E-AS1    |
| A_23_P155123   | 7,11554 | 7,43681 | -1,249429934 | ENST00000359033 | 1565      | NM_000106 | CYP2D6        |
| A_22_P00007300 | 2,50974 | 2,83102 | -1,249438595 | N/A             | N/A       | N/A       | Inc-GPR39-1   |
| A_22_P00006677 | 1,96707 | 2,28841 | -1,249490558 | N/A             | N/A       | N/A       | Inc-FPGS-2    |
| A_22_P00013134 | 2,62898 | 2,95033 | -1,249499219 | N/A             | N/A       | N/A       | Inc-RNASE10-2 |
| A_21_P0007919  | 1,44543 | 1,76683 | -1,249542524 | ENST00000447784 | 100652856 | N/A       | LINC00408     |
| A_33_P3240200  | 11,7132 | 12,0347 | -1,249629139 | ENST00000475443 | 25911     | NM_015448 | DPCD          |
| A_21_P0001023  | 6,2166  | 6,53813 | -1,249655125 | ENST00000437833 | 6391      | N/A       | SDHC          |
| A_23_P333498   | 8,92238 | 9,24392 | -1,249663787 | ENST00000242108 | 80820     | NM_030636 | EEP1          |
| A_23_P370142   | 11,9005 | 12,2221 | -1,24971576  | ENST00000527958 | 5049      | NM_002572 | PAFAH1B2      |
| A_24_P944049   | 5,58738 | 5,90898 | -1,24971576  | ENST00000377990 | 23177     | NM_015147 | CEP68         |
| A_19_P00811196 | 9,85676 | 10,1784 | -1,24975041  | ENST00000416650 | 100505854 | NR_038361 | APTR          |
| A_33_P3396339  | 1,394   | 1,71571 | -1,249811049 | N/A             | N/A       | N/A       | N/A           |
| A_22_P00018316 | 2,92104 | 3,24276 | -1,249819713 | ENST00000457543 | 54753     | NM_017560 | ZNF853        |

|                |         |         |              |                 |           |              |                |
|----------------|---------|---------|--------------|-----------------|-----------|--------------|----------------|
| A_33_P3368109  | 6,09331 | 6,41505 | -1,249837039 | N/A             | N/A       | N/A          | N/A            |
| A_33_P3413388  | 1,44294 | 1,76472 | -1,249871692 | N/A             | N/A       | N/A          | N/A            |
| A_23_P397308   | 4,39271 | 4,71454 | -1,24991501  | ENST00000472792 | 89953     | NM_138343    | KLC4           |
| A_33_P3245321  | 9,0315  | 9,35337 | -1,249949666 | ENST00000375576 | 401541    | NM_001012267 | CENPP          |
| A_23_P16743    | 3,85327 | 4,17518 | -1,249984322 | ENST00000281923 | 4249      | NM_002410    | MGAT5          |
| A_22_P00001695 | 6,36933 | 6,6913  | -1,250036309 | ENST00000580085 | N/A       | N/A          | N/A            |
| A_32_P152767   | 1,75388 | 2,07585 | -1,250036309 | ENST00000449193 | 387640    | NM_207371    | SKIDA1         |
| A_21_P0000031  | 1,4282  | 1,75026 | -1,250114292 | ENST00000450979 | 390245    | NM_001161630 | KDM4E          |
| A_22_P00018741 | 3,4201  | 3,74217 | -1,250122957 | ENST00000442780 | N/A       | N/A          | N/A            |
| A_23_P124224   | 10,5545 | 10,8766 | -1,250148953 | ENST00000262415 | 1659      | NM_004941    | DHX8           |
| A_33_P3414058  | 9,00904 | 9,33118 | -1,250183615 | ENST00000377313 | 4221      | NM_130803    | MEN1           |
| A_23_P103099   | 9,6084  | 9,93059 | -1,250226944 | ENST00000438146 | 23543     | NM_001031695 | RBFOX2         |
| A_33_P3561747  | 1,46842 | 1,79063 | -1,250244276 | N/A             | 162083    | NM_001145545 | C16orf82       |
| A_33_P3795707  | 4,82692 | 5,14914 | -1,250252942 | N/A             | 692157    | CU457294     | SNORA16B       |
| A_23_P3562     | 10,2415 | 10,5638 | -1,250322273 | ENST00000561933 | 84138     | NM_032178    | SLC7A6OS       |
| A_21_P0013200  | 1,42344 | 1,74582 | -1,250391607 | N/A             | N/A       | N/A          | XLOC_I2_013416 |
| A_21_P0008515  | 5,68712 | 6,00953 | -1,250417609 | ENST00000557723 | N/A       | N/A          | N/A            |
| A_22_P00001826 | 1,57814 | 1,90057 | -1,250434943 | N/A             | N/A       | N/A          | Inc-ATP6V1G3-2 |
| A_23_P201022   | 3,6882  | 4,01063 | -1,250434943 | ENST00000342741 | 5313      | NM_000298    | PKLR           |
| A_23_P80778    | 11,7523 | 12,0748 | -1,250495616 | ENST00000477647 | 84925     | NM_032839    | DIRC2          |
| A_23_P145904   | 14,9494 | 15,2719 | -1,250495616 | ENST00000381124 | 94239     | NM_012412    | H2AFV          |
| A_24_P346886   | 14,4437 | 14,7662 | -1,250495616 | ENST00000370322 | 4714      | NM_005004    | NDUFB8         |
| A_22_P00012212 | 9,50301 | 9,82554 | -1,25052162  | N/A             | 150381    | NR_027034    | PRR34-AS1      |
| A_23_P316812   | 8,44592 | 8,76847 | -1,250538956 | ENST00000460134 | 246182    | NR_002796    | AKR7A2P1       |
| A_23_P16143    | 11,7012 | 12,0238 | -1,250582297 | ENST00000594965 | 2962      | NM_002096    | GTF2F1         |
| A_33_P3332547  | 10,4079 | 10,7305 | -1,250582297 | ENST00000475932 | 100505385 | NM_001197113 | IQCJ-SCHIP1    |
| A_22_P00022956 | 4,88399 | 5,20668 | -1,250660315 | N/A             | N/A       | BG203768     | Inc-INPPL1-1   |
| A_24_P270890   | 10,6863 | 11,009  | -1,250668984 | ENST00000572686 | 8405      | NM_001007226 | SPOP           |
| A_23_P88630    | 9,79142 | 10,1142 | -1,250738338 | ENST00000559724 | 641       | NM_000057    | BLM            |
| A_33_P3288589  | 2,38722 | 2,7101  | -1,250825035 | N/A             | N/A       | N/A          | N/A            |
| A_33_P3277988  | 8,23208 | 8,55496 | -1,250825035 | ENST00000270139 | 3454      | NM_000629    | IFNAR1         |
| A_23_P205738   | 8,44148 | 8,76441 | -1,250868386 | ENST00000345514 | 64919     | NM_138576    | BCL11B         |
| A_33_P3386219  | 3,90386 | 4,22689 | -1,250955093 | ENST00000378241 | 64421     | NM_001289079 | DCLRE1C        |

|                |         |         |              |                 |           |              |                      |
|----------------|---------|---------|--------------|-----------------|-----------|--------------|----------------------|
| A_22_P00017996 | 6,11559 | 6,43863 | -1,250963764 | N/A             | N/A       | N/A          | Inc-ZNF131-2         |
| A_33_P3398564  | 12,1743 | 12,4974 | -1,251015791 | ENST00000467278 | 116983    | NM_030649    | ACAP3                |
| A_23_P51660    | 12,144  | 12,4672 | -1,251102508 | ENST00000533178 | 4595      | NM_012222    | MUTYH                |
| A_33_P3227904  | 5,8031  | 6,12639 | -1,251180558 | ENST00000294454 | 284723    | NM_207348    | SLC25A34             |
| A_22_P00001454 | 1,43892 | 1,76222 | -1,251189231 | ENST00000417782 | N/A       | N/A          | N/A                  |
| A_22_P00004474 | 5,71261 | 6,03595 | -1,251223921 | N/A             | N/A       | N/A          | Inc-CPLX1-2          |
| A_33_P3901921  | 5,77491 | 6,09826 | -1,251232594 | ENST00000392914 | 55010     | NM_017915    | PARPBP               |
| A_22_P00013889 | 5,79458 | 6,11793 | -1,251232594 | ENST00000571901 | 101927060 | BX647871     | LOC101927060         |
| A_23_P53276    | 12,3292 | 12,6526 | -1,251275959 | ENST00000557589 | 8914      | NM_003920    | TIMELESS             |
| A_22_P00003003 | 1,58136 | 1,90478 | -1,251293306 | N/A             | N/A       | N/A          | Inc-C6orf228-3       |
| A_22_P00007967 | 1,51721 | 1,84066 | -1,251319326 | ENST00000451217 | N/A       | N/A          | N/A                  |
| A_22_P00001218 | 6,80492 | 7,1284  | -1,251345347 | N/A             | N/A       | N/A          | Inc-ANKRD11-2        |
| A_24_P119685   | 6,05123 | 6,3748  | -1,251423412 | ENST00000284548 | 84033     | NM_052843    | OBSCN                |
| A_23_P321473   | 6,52512 | 6,84876 | -1,251484133 | ENST00000419687 | 199870    | NM_152660    | FAM76A               |
| A_21_P0013104  | 5,06226 | 5,3859  | -1,251484133 | N/A             | N/A       | N/A          | XLOC_I2_013149       |
| A_23_P202004   | 9,40245 | 9,72613 | -1,251518832 | ENST00000320152 | 56952     | NM_020200    | PRTFDC1              |
| A_33_P3416366  | 7,47085 | 7,79462 | -1,251596908 | ENST00000587368 | 10036     | NM_005483    | CHAF1A               |
| A_21_P0009923  | 1,57172 | 1,89549 | -1,251596908 | N/A             | N/A       | N/A          | Inc-RP11-93B14.6.1-1 |
| A_24_P4877     | 8,72925 | 9,05308 | -1,251648962 | ENST00000266529 | 85437     | NM_033114    | ZCRB1                |
| A_19_P00316839 | 1,63852 | 1,96243 | -1,25171837  | ENST00000414222 | 10086     | NM_001145095 | HHLA1                |
| A_33_P3300665  | 1,48504 | 1,809   | -1,251761752 | ENST00000370138 | 127495    | NM_001256385 | LRRC39               |
| A_33_P3260134  | 4,75885 | 5,08288 | -1,251822489 | ENST00000357724 | 4916      | NM_002530    | NTRK3                |
| A_21_P0006867  | 3,65718 | 3,98128 | -1,25188323  | N/A             | N/A       | N/A          | Inc-C10orf136-1      |
| A_24_P366526   | 16,0991 | 16,4232 | -1,25188323  | N/A             | 9144      | BC105992     | SYNGR2               |
| A_23_P103720   | 8,93959 | 9,26372 | -1,251909262 | ENST00000375826 | 79814     | NM_024758    | AGMAT                |
| A_19_P00805548 | 8,23974 | 8,5639  | -1,251935295 | ENST00000372037 | 657       | NM_004329    | BMPR1A               |
| A_24_P95038    | 16,9739 | 17,2981 | -1,251970007 | ENST00000415933 | 5478      | NM_021130    | PPIA                 |
| A_21_P0003888  | 1,45826 | 1,78254 | -1,252039432 | N/A             | N/A       | N/A          | Inc-MRFAP1L1-2       |
| A_33_P3407524  | 5,41399 | 5,73832 | -1,252082826 | ENST00000337852 | 6839      | NM_001282166 | SUV39H1              |
| A_33_P3214310  | 7,39755 | 7,722   | -1,252186975 | N/A             | 27086     | NM_001012505 | FOXP1                |
| A_21_P0013042  | 4,68505 | 5,00954 | -1,252221694 | N/A             | N/A       | N/A          | XLOC_I2_012748       |
| A_21_P0000090  | 10,6746 | 10,9991 | -1,252230373 | ENST00000543727 | 10102     | NM_001172697 | TSFM                 |
| A_33_P3355208  | 5,09259 | 5,41714 | -1,252273773 | N/A             | 54677     | NM_001243745 | CROT                 |

|                |         |         |              |                 |           |              |                |
|----------------|---------|---------|--------------|-----------------|-----------|--------------|----------------|
| A_33_P3319957  | 2,88938 | 3,21399 | -1,252325855 | ENST00000370638 | 100505741 | BC064144     | SPATA1         |
| A_22_P00012350 | 1,54394 | 1,86863 | -1,2523953   | ENST00000507674 | N/A       | N/A          | N/A            |
| A_22_P00001203 | 6,03195 | 6,35672 | -1,25246475  | N/A             | 101752400 | NR_103792    | CAPN10-AS1     |
| A_23_P209944   | 9,31421 | 9,63902 | -1,252499476 | ENST00000295802 | 54884     | NM_017750    | RETSAT         |
| A_21_P0013655  | 9,70548 | 10,0303 | -1,252508158 | N/A             | N/A       | N/A          | XLOC_I2_015213 |
| A_33_P3279730  | 7,57512 | 7,90002 | -1,252577614 | ENST00000444947 | N/A       | XM_005261299 | N/A            |
| A_33_P3376071  | 16,9546 | 17,2795 | -1,252577614 | ENST00000467573 | N/A       | N/A          | N/A            |
| A_33_P3228402  | 1,98846 | 2,31337 | -1,252586296 | N/A             | N/A       | N/A          | N/A            |
| A_23_P78268    | 10,8985 | 11,2236 | -1,25275127  | ENST00000576239 | 51031     | NM_016080    | GLOD4          |
| A_21_P0013355  | 4,55848 | 4,88363 | -1,252794688 | N/A             | 101930608 | XR_426267    | LOC101930608   |
| A_33_P3372297  | 3,86478 | 4,18996 | -1,252820739 | ENST00000572152 | 29        | NM_001159746 | ABR            |
| A_22_P00004734 | 3,08056 | 3,40581 | -1,252881528 | N/A             | N/A       | N/A          | Inc-CTNNA1-2   |
| A_33_P3287113  | 6,99533 | 7,3206  | -1,252898896 | ENST00000503548 | 57654     | XM_006713899 | UVSSA          |
| A_21_P0011549  | 6,25674 | 6,58203 | -1,252916265 | N/A             | N/A       | N/A          | XLOC_I2_005871 |
| A_22_P00019948 | 1,61392 | 1,93924 | -1,252942319 | ENST00000504167 | N/A       | N/A          | N/A            |
| A_23_P100602   | 8,90228 | 9,22763 | -1,252968374 | ENST00000575132 | 6904      | NM_005993    | TBCD           |
| A_33_P3257538  | 6,63628 | 6,96172 | -1,25304654  | ENST00000408962 | 123688    | NM_001083612 | HYKK           |
| A_23_P325642   | 3,22403 | 3,54951 | -1,253081283 | ENST00000404312 | 64714     | NM_006849    | PDIA2          |
| A_23_P160668   | 2,77843 | 3,10396 | -1,253124712 | N/A             | 4610      | NM_005376    | MYCL           |
| A_22_P00004254 | 1,49482 | 1,82036 | -1,253133398 | N/A             | 386597    | NR_033997    | RNF144A-AS1    |
| A_22_P00023114 | 2,05909 | 2,38468 | -1,253176829 | ENST00000506032 | N/A       | N/A          | N/A            |
| A_24_P268123   | 5,95301 | 6,27869 | -1,253255009 | ENST00000489897 | 6487      | NM_174963    | ST3GAL3        |
| A_33_P3269718  | 11,2656 | 11,5913 | -1,253272383 | ENST00000497816 | 3712      | NM_001159508 | IVD            |
| A_21_P0013753  | 14,5294 | 14,8552 | -1,253359256 | N/A             | N/A       | N/A          | XLOC_I2_015451 |
| A_21_P0005886  | 4,21714 | 4,54298 | -1,253394007 | N/A             | N/A       | N/A          | Inc-CSMD3-1    |
| A_24_P149395   | 8,78724 | 9,11309 | -1,253402695 | ENST00000288828 | 26100     | NM_015610    | WIPI2          |
| A_23_P60775    | 1,57238 | 1,89827 | -1,253437447 | ENST00000586050 | 60680     | NM_021938    | CELF5          |
| A_22_P00011387 | 3,351   | 3,67689 | -1,253437447 | ENST00000535936 | N/A       | N/A          | N/A            |
| A_23_P355385   | 11,8693 | 12,1952 | -1,253446135 | ENST00000451402 | 5537      | NM_002721    | PPP6C          |
| A_23_P55998    | 12,0164 | 12,3423 | -1,253446135 | ENST00000412532 | 6510      | NM_005628    | SLC1A5         |
| A_23_P82975    | 4,01256 | 4,33846 | -1,253446135 | ENST00000441350 | 157680    | NM_181661    | VPS13B         |
| A_24_P233944   | 8,61874 | 8,9447  | -1,253498266 | ENST00000483427 | 10390     | NM_001007794 | CEPT1          |
| A_23_P108922   | 8,7588  | 9,08478 | -1,253515643 | ENST00000396049 | N/A       | AK001650     | N/A            |



|                |         |         |              |                 |           |              |                |
|----------------|---------|---------|--------------|-----------------|-----------|--------------|----------------|
| A_33_P3666884  | 7,45221 | 7,77821 | -1,25353302  | ENST00000492278 | 375775    | NM_001098537 | PNPLA7         |
| A_32_P203430   | 7,00987 | 7,33587 | -1,25353302  | ENST00000601142 | 90075     | NM_194325    | ZNF30          |
| A_32_P45009    | 12,2869 | 12,613  | -1,253619912 | ENST00000415913 | 3417      | NM_005896    | IDH1           |
| A_33_P3276250  | 2,28066 | 2,60679 | -1,25364598  | ENST00000449424 | N/A       | N/A          | N/A            |
| A_33_P3214339  | 4,20012 | 4,52632 | -1,253706809 | ENST00000477665 | 257068    | NM_153268    | PLCXD2         |
| A_21_P0009907  | 2,80593 | 3,1322  | -1,253767641 | N/A             | 102723483 | NR_110624    | CSE1L-AS1      |
| A_21_P0002348  | 1,45162 | 1,77799 | -1,253854548 | N/A             | N/A       | N/A          | Inc-SMARCAL1-2 |
| A_23_P122976   | 9,76284 | 10,0893 | -1,25393277  | ENST00000351004 | 2770      | NM_002069    | GNAI1          |
| A_22_P00024420 | 4,87965 | 5,20616 | -1,253976229 | N/A             | N/A       | AU155391     | Inc-GCGR-1     |
| A_21_P0002254  | 3,6295  | 3,95608 | -1,254037074 | N/A             | 101928113 | XR_245035    | ST3GAL5-AS1    |
| A_23_P429535   | 10,9804 | 11,307  | -1,254054459 | ENST00000263956 | 9330      | NM_012086    | GTF3C3         |
| A_22_P00000913 | 4,46723 | 4,79384 | -1,254063151 | N/A             | N/A       | N/A          | Inc-AK1-1      |
| A_33_P3295749  | 1,63374 | 1,96041 | -1,254115307 | ENST00000378692 | 144321    | NR_072995    | GLIPR1L2       |
| A_22_P00015220 | 2,86525 | 3,19197 | -1,254158772 | ENST00000442627 | N/A       | N/A          | N/A            |
| A_33_P3290739  | 1,69519 | 2,02196 | -1,254202239 | ENST00000390451 | N/A       | D13071       | N/A            |
| A_21_P0003037  | 2,93193 | 3,25871 | -1,254210932 | N/A             | N/A       | N/A          | Inc-U2SURP-3   |
| A_33_P3350566  | 4,36653 | 4,69333 | -1,25422832  | ENST00000401624 | 8911      | NM_021096    | CACNA1I        |
| A_23_P200874   | 7,93772 | 8,26459 | -1,254289177 | ENST00000476272 | 64793     | NM_022778    | CEP85          |
| A_21_P0007955  | 1,51893 | 1,84584 | -1,254323953 | N/A             | N/A       | N/A          | Inc-SLITRK5-3  |
| A_22_P00001377 | 6,54585 | 6,87278 | -1,254341342 | ENST00000591501 | 147727    | NR_024333    | ILF3-AS1       |
| A_23_P102235   | 13,4839 | 13,8109 | -1,254402205 | ENST00000429728 | 6637      | NM_003096    | SNRPG          |
| A_23_P335388   | 1,41591 | 1,74299 | -1,254471765 | ENST00000616425 | 284099    | NM_173625    | C17orf78       |
| A_33_P3416473  | 1,85207 | 2,17921 | -1,254523938 | N/A             | 57002     | NM_001282446 | YAE1D1         |
| A_21_P0001737  | 1,57522 | 1,90238 | -1,25454133  | N/A             | N/A       | N/A          | Inc-ATP1A1OS-3 |
| A_33_P3380913  | 3,30305 | 3,63033 | -1,254645684 | N/A             | N/A       | N/A          | N/A            |
| A_23_P79587    | 7,26605 | 7,59334 | -1,254654381 | ENST00000485563 | 250       | AK075432     | ALPP           |
| A_33_P3263463  | 1,72167 | 2,04901 | -1,254697864 | ENST00000589653 | 644554    | NR_040013    | LOC644554      |
| A_22_P00005685 | 3,4386  | 3,76596 | -1,254715258 | N/A             | N/A       | N/A          | Inc-ELAC2-1    |
| A_23_P94422    | 10,9197 | 11,2471 | -1,254750047 | ENST00000298048 | 9833      | NM_014791    | MELK           |
| A_23_P50775    | 10,007  | 10,3344 | -1,254750047 | ENST00000246529 | 79414     | NM_024509    | LRFN3          |
| A_33_P3312194  | 3,40854 | 3,73598 | -1,254784836 | ENST00000392178 | 1155      | N/A          | TBCB           |
| A_33_P3358469  | 2,81673 | 3,14419 | -1,254802232 | ENST00000482119 | 2736      | NM_005270    | GLI2           |
| A_33_P3877728  | 10,8785 | 11,206  | -1,254837023 | N/A             | 140772    | BX647090     | SMCR6          |

|                |         |         |              |                 |           |              |              |
|----------------|---------|---------|--------------|-----------------|-----------|--------------|--------------|
| A_33_P3388870  | 10,6974 | 11,0249 | -1,254837023 | ENST00000548925 | 2647      | NM_001487    | BLOC1S1      |
| A_24_P58647    | 11,8864 | 12,2139 | -1,254837023 | ENST00000448802 | N/A       | N/A          | N/A          |
| A_22_P00005505 | 3,73849 | 4,0661  | -1,254932703 | N/A             | 101928573 | XR_241986    | LOC101928573 |
| A_22_P00020945 | 1,61256 | 1,94017 | -1,254932703 | ENST00000501718 | N/A       | N/A          | N/A          |
| A_21_P0006171  | 1,52279 | 1,8504  | -1,254932703 | ENST00000415801 | 100506834 | NR_049794    | LOC100506834 |
| A_33_P3322388  | 8,85815 | 9,18577 | -1,254941401 | ENST00000290702 | 6703      | NM_006945    | SPRR2D       |
| A_23_P70359    | 7,34353 | 7,67118 | -1,254967497 | N/A             | 79992     | NR_024277    | AGPAT4-IT1   |
| A_21_P0013716  | 1,47257 | 1,80025 | -1,254993594 | ENST00000609203 | N/A       | N/A          | N/A          |
| A_21_P0005720  | 4,2506  | 4,57838 | -1,255080586 | N/A             | 101926947 | XR_426332    | NCRNA00249   |
| A_23_P148194   | 10,4583 | 10,7862 | -1,255184985 | ENST00000327435 | 55256     | NM_018269    | ADI1         |
| A_33_P3352522  | 8,79742 | 9,12535 | -1,255211087 | N/A             | 650669    | AK092862     | GAS6-AS1     |
| A_22_P00013953 | 3,47019 | 3,79812 | -1,255211087 | N/A             | N/A       | N/A          | Inc-RSPRY1-1 |
| A_33_P3378334  | 9,03316 | 9,36128 | -1,255376406 | ENST00000374787 | 10592     | NM_001042550 | SMC2         |
| A_23_P85441    | 11,1179 | 11,4461 | -1,255446021 | ENST00000611023 | 57549     | NM_020789    | IGSF9        |
| A_22_P00020449 | 1,46786 | 1,7961  | -1,25548083  | ENST00000411790 | N/A       | BC039180     | N/A          |
| A_23_P106898   | 9,41126 | 9,73954 | -1,25551564  | ENST00000318663 | 93129     | NM_152288    | ORAI3        |
| A_23_P206228   | 10,1912 | 10,5195 | -1,255533045 | ENST00000560637 | 54832     | NM_020821    | VPS13C       |
| A_33_P3514487  | 2,05925 | 2,38759 | -1,255567856 | ENST00000610713 | 284415    | NM_198481    | VSTM1        |
| A_32_P230547   | 10,2823 | 10,6107 | -1,255620075 | ENST00000340370 | 85440     | NM_033407    | DOCK7        |
| A_23_P13604    | 13,944  | 14,2725 | -1,255707111 | ENST00000261313 | 5037      | NM_002567    | PEBP1        |
| A_21_P0006528  | 5,19175 | 5,52032 | -1,25576804  | N/A             | N/A       | N/A          | Inc-GEMIN8-1 |
| A_24_P135483   | 7,74192 | 8,07058 | -1,255846381 | ENST00000372164 | 81619     | NM_030927    | TSPAN14      |
| A_22_P00023392 | 7,19072 | 7,51941 | -1,255872496 | ENST00000506550 | 100506526 | NR_105000    | LOC100506526 |
| A_23_P420361   | 14,5623 | 14,891  | -1,255881201 | ENST00000530758 | 55845     | NM_018462    | BRK1         |
| A_24_P416159   | 10,4724 | 10,8011 | -1,255881201 | ENST00000544545 | 5934      | NM_005611    | RBL2         |
| A_21_P0000222  | 7,76274 | 8,09144 | -1,255881201 | N/A             | 94161     | NR_000024    | SNORD46      |
| A_32_P74366    | 8,80812 | 9,13684 | -1,255898611 | ENST00000310421 | 80124     | AF088033     | VCPIP1       |
| A_33_P3310966  | 7,23243 | 7,56117 | -1,255916022 | N/A             | 100506119 | AK092192     | LINC01503    |
| A_23_P61707    | 1,95177 | 2,28066 | -1,256046609 | ENST00000370552 | 60495     | NM_021828    | HPSE2        |
| A_22_P00003949 | 1,55073 | 1,87966 | -1,256081434 | ENST00000502300 | N/A       | N/A          | N/A          |
| A_23_P887      | 5,62215 | 5,95109 | -1,256090141 | ENST00000584998 | 9641      | NM_014002    | IKBKE        |
| A_23_P425925   | 4,37244 | 4,70145 | -1,256151088 | ENST00000394052 | 125113    | NM_152349    | KRT222       |
| A_21_P0000541  | 4,24122 | 4,57024 | -1,256159795 | N/A             | 100128164 | NR_027622    | LOC100128164 |

|                |         |         |              |                 |           |              |               |
|----------------|---------|---------|--------------|-----------------|-----------|--------------|---------------|
| A_24_P148590   | 1,58443 | 1,91355 | -1,256246868 | ENST00000305249 | 6869      | NM_015727    | TACR1         |
| A_22_P00022753 | 3,17777 | 3,50697 | -1,256316532 | ENST00000412979 | 55677     | N/A          | IWS1          |
| A_23_P342398   | 1,44944 | 1,77867 | -1,256342656 | N/A             | 253128    | N/A          | LINC00612     |
| A_33_P3418448  | 4,39486 | 4,72425 | -1,256481997 | N/A             | N/A       | N/A          | N/A           |
| A_23_P80278    | 10,2317 | 10,5611 | -1,256490706 | ENST00000464333 | 9814      | NM_001007467 | SFI1          |
| A_22_P00019589 | 6,15346 | 6,48288 | -1,256508125 | N/A             | N/A       | N/A          | Inc-ITGAL-2   |
| A_33_P3385376  | 1,64026 | 1,96968 | -1,256508125 | N/A             | 284612    | NM_001040709 | SYPL2         |
| A_33_P3329301  | 6,84302 | 7,17247 | -1,256534253 | N/A             | 646014    | AK126557     | LOC646014     |
| A_23_P38328    | 7,3062  | 7,6357  | -1,256577802 | ENST00000528353 | 80174     | AK023149     | DBF4B         |
| A_23_P426153   | 1,43714 | 1,76674 | -1,256664905 | ENST00000352312 | 348807    | NM_182628    | CCDC37        |
| A_24_P48495    | 9,5604  | 9,89002 | -1,256682326 | ENST00000594326 | 27076     | NM_014400    | LYPD3         |
| A_21_P0013433  | 7,12392 | 7,45355 | -1,256691037 | N/A             | 102725377 | N/A          | LOC102725377  |
| A_33_P3416588  | 4,50585 | 4,83548 | -1,256691037 | ENST00000594852 | 6014      | NM_002930    | RIT2          |
| A_33_P3221980  | 9,99263 | 10,3223 | -1,25672588  | N/A             | N/A       | N/A          | N/A           |
| A_23_P338372   | 1,6604  | 1,99013 | -1,256778147 | ENST00000368986 | 7101      | NM_003269    | NR2E1         |
| A_23_P18641    | 7,41148 | 7,74124 | -1,256804281 | ENST00000513433 | 83891     | NM_031953    | SNX25         |
| A_21_P0002629  | 1,53412 | 1,86391 | -1,256830416 | N/A             | N/A       | N/A          | Inc-CDK5R2-1  |
| A_33_P3213134  | 9,21092 | 9,54088 | -1,256978523 | N/A             | N/A       | N/A          | N/A           |
| A_33_P3324839  | 3,44523 | 3,77527 | -1,257048227 | ENST00000418600 | 8831      | NM_006772    | SYNGAP1       |
| A_22_P00012003 | 8,84772 | 9,17779 | -1,257074367 | ENST00000423733 | 5335      | N/A          | PLCG1         |
| A_19_P00318189 | 8,06987 | 8,40004 | -1,257161503 | N/A             | 401320    | NR_038889    | LOC401320     |
| A_33_P3360236  | 1,49008 | 1,82027 | -1,257178932 | N/A             | 100506351 | XR_108863    | LOC100506351  |
| A_21_P0000510  | 7,5378  | 7,86812 | -1,25729222  | ENST00000421840 | 55592     | NR_024261    | GOLGA2P5      |
| A_23_P63096    | 4,47789 | 4,80823 | -1,25730965  | ENST00000339922 | 391104    | NM_001004319 | VHLL          |
| A_22_P00022942 | 2,01285 | 2,34319 | -1,25730965  | N/A             | N/A       | N/A          | Inc-RTN3-1    |
| A_24_P196704   | 10,6136 | 10,944  | -1,257361941 | ENST00000495267 | 55904     | NM_182931    | KMT2E         |
| A_23_P106773   | 12,4629 | 12,7933 | -1,257361941 | ENST00000395630 | 6799      | NM_177528    | SULT1A2       |
| A_22_P00011800 | 4,41188 | 4,7423  | -1,257379372 | N/A             | N/A       | AK130321     | Inc-PGPEP1L-3 |
| A_21_P0005914  | 1,45353 | 1,78401 | -1,257431666 | N/A             | N/A       | N/A          | Inc-FAM135B-3 |
| A_33_P3399064  | 11,1433 | 11,4739 | -1,25753626  | N/A             | 100008587 | NR_003285    | RNA5-8S5      |
| A_33_P3241095  | 1,63372 | 1,9645  | -1,257693169 | N/A             | 51643     | AK127285     | TMBIM4        |
| A_24_P314534   | 2,8336  | 3,16444 | -1,257745476 | ENST00000399889 | 337959    | NM_181621    | KRTAP13-2     |
| A_21_P0007503  | 1,51925 | 1,8501  | -1,257754194 | N/A             | N/A       | N/A          | Inc-RNFT2-1   |

|                |         |         |              |                 |           |              |               |
|----------------|---------|---------|--------------|-----------------|-----------|--------------|---------------|
| A_33_P3230219  | 14,5342 | 14,8651 | -1,257797785 | ENST00000373463 | 113452    | NM_033504    | TMEM54        |
| A_23_P12784    | 10,8769 | 11,2078 | -1,257797785 | ENST00000371019 | 23401     | NM_012083    | FRAT2         |
| A_33_P3291600  | 1,44094 | 1,77186 | -1,257815222 | ENST00000561215 | 101927332 | NR_120325    | LINC01582     |
| A_19_P00320492 | 4,82753 | 5,15852 | -1,257876253 | N/A             | N/A       | N/A          | Inc-MRPL14-1  |
| A_22_P00007291 | 1,42548 | 1,75647 | -1,257876253 | ENST00000448347 | N/A       | N/A          | N/A           |
| A_22_P00007033 | 6,76479 | 7,09579 | -1,257884972 | ENST00000547893 | 9994      | NM_012115    | CASP8AP2      |
| A_33_P3405921  | 9,20848 | 9,53949 | -1,257893691 | ENST00000569558 | 2622      | NM_001286205 | GAS8          |
| A_32_P163805   | 1,60051 | 1,93155 | -1,257919848 | ENST00000320202 | 283197    | NR_026946    | LINC00301     |
| A_33_P3244834  | 5,6236  | 5,95464 | -1,257919848 | N/A             | N/A       | N/A          | N/A           |
| A_33_P3276282  | 6,56071 | 6,89176 | -1,257928568 | ENST00000617451 | 5792      | BC048416     | PTPRF         |
| A_33_P3312246  | 9,84114 | 10,1722 | -1,257937287 | ENST00000479165 | 55023     | NM_017934    | PHIP          |
| A_23_P101623   | 1,71547 | 2,04657 | -1,257972165 | ENST00000592189 | 63934     | NM_022103    | ZNF667        |
| A_23_P316472   | 2,48373 | 2,81486 | -1,257998324 | ENST00000530197 | 144132    | NM_144666    | DNHD1         |
| A_22_P00017577 | 1,52969 | 1,86082 | -1,257998324 | N/A             | N/A       | N/A          | Inc-WDR65-1   |
| A_21_P0000436  | 1,89563 | 2,22678 | -1,258015764 | N/A             | 767569    | NR_003237    | SNORD113-9    |
| A_19_P00315668 | 6,37028 | 6,70151 | -1,258085525 | ENST00000406875 | 28996     | NM_022740    | HIPK2         |
| A_22_P00001274 | 1,49866 | 1,83003 | -1,258207616 | N/A             | N/A       | AK127599     | Inc-ANKRD56-2 |
| A_22_P00014787 | 1,6325  | 1,96389 | -1,258225059 | N/A             | N/A       | BX105277     | Inc-SLC38A8-6 |
| A_33_P3308050  | 12,8725 | 13,2039 | -1,258233378 | ENST00000258416 | 9470      | NM_004846    | EIF4E2        |
| A_23_P45517    | 7,4194  | 7,75081 | -1,258242501 | ENST00000612937 | 28227     | NM_013239    | PPP2R3B       |
| A_23_P358394   | 1,36574 | 1,69718 | -1,258268666 | ENST00000612873 | 9750      | NM_015864    | FAM65B        |
| A_22_P00005981 | 3,57826 | 3,9097  | -1,258268666 | N/A             | 101928004 | XR_241966    | LOC101928004  |
| A_23_P144778   | 1,44772 | 1,77921 | -1,258312275 | ENST00000437669 | 1160      | NM_001825    | CKMT2         |
| A_23_P36700    | 9,49765 | 9,82916 | -1,258329719 | ENST00000543567 | 55080     | NM_018009    | TAPBPL        |
| A_22_P00005731 | 1,42976 | 1,76128 | -1,258338441 | N/A             | N/A       | N/A          | Inc-EMID1-1   |
| A_24_P680908   | 1,46779 | 1,79932 | -1,258347163 | ENST00000356929 | 7562      | NM_021269    | ZNF708        |
| A_19_P00318894 | 3,52574 | 3,85741 | -1,25846928  | ENST00000558225 | 51621     | N/A          | KLF13         |
| A_33_P3228985  | 1,45866 | 1,79033 | -1,25846928  | ENST00000530515 | 100132396 | NM_001193630 | ZNF705B       |
| A_23_P97623    | 10,5603 | 10,892  | -1,25849545  | ENST00000474456 | 64121     | NM_022157    | RRAGC         |
| A_33_P3290343  | 8,7748  | 9,10653 | -1,258521619 | ENST00000614273 | 1545      | NM_000104    | CYP1B1        |
| A_33_P3340981  | 1,65187 | 1,9837  | -1,258608857 | ENST00000400432 | N/A       | N/A          | N/A           |
| A_32_P114028   | 1,49503 | 1,82688 | -1,258626305 | ENST00000623087 | 79741     | NM_024688    | CCDC7         |
| A_22_P00004339 | 2,40926 | 2,74114 | -1,258652477 | ENST00000520544 | N/A       | N/A          | N/A           |

|                |         |         |              |                 |           |              |                |
|----------------|---------|---------|--------------|-----------------|-----------|--------------|----------------|
| A_33_P3335935  | 8,94269 | 9,27458 | -1,258661202 | ENST00000248098 | 90861     | NM_144570    | HN1L           |
| A_33_P3404954  | 10,9124 | 11,2443 | -1,258669926 | ENST00000354886 | 145389    | NM_001172702 | SLC38A6        |
| A_23_P77103    | 12,1268 | 12,4587 | -1,258669926 | ENST00000562107 | 6652      | NM_003104    | SORD           |
| A_23_P59107    | 13,3577 | 13,6897 | -1,258757174 | ENST00000460640 | 28973     | NM_014046    | MRPS18B        |
| A_23_P93311    | 12,4563 | 12,7883 | -1,258757174 | ENST00000418800 | 780       | NM_013993    | DDR1           |
| A_33_P3362567  | 7,77572 | 8,10777 | -1,258800799 | N/A             | N/A       | N/A          | N/A            |
| A_22_P00020746 | 1,42898 | 1,76114 | -1,258896782 | N/A             | N/A       | BC034421     | Inc-SEMA5B-1   |
| A_22_P00014673 | 1,70049 | 2,03268 | -1,25892296  | ENST00000560900 | N/A       | DA631439     | N/A            |
| A_23_P97860    | 11,583  | 11,9152 | -1,258931686 | ENST00000456827 | 3988      | NM_000235    | LIPA           |
| A_23_P93464    | 10,0034 | 10,3356 | -1,258931686 | ENST00000468520 | 594       | NM_000056    | BCKDHB         |
| A_21_P0011278  | 1,6839  | 2,01612 | -1,258949139 | ENST00000435322 | N/A       | N/A          | N/A            |
| A_21_P0011177  | 1,38226 | 1,71449 | -1,258957865 | ENST00000608957 | 100652865 | N/A          | LINC00539      |
| A_21_P0013975  | 5,83391 | 6,16616 | -1,258975318 | N/A             | N/A       | AY358662     | N/A            |
| A_23_P57829    | 2,2833  | 2,61558 | -1,259001498 | ENST00000613455 | 151835    | NM_153635    | CPNE9          |
| A_33_P3841755  | 2,9485  | 3,28086 | -1,259071314 | N/A             | 145945    | AL137758     | LOC145945      |
| A_32_P41405    | 12,7883 | 13,1207 | -1,259106223 | ENST00000506672 | 84321     | NM_032361    | THOC3          |
| A_23_P206018   | 10,5863 | 10,9187 | -1,259106223 | ENST00000559556 | 7168      | NM_001018004 | TPM1           |
| A_21_P0011911  | 2,17903 | 2,51144 | -1,259114951 | ENST00000422351 | 102723854 | N/A          | LOC102723854   |
| A_33_P3300747  | 5,59239 | 5,92487 | -1,259176045 | ENST00000396621 | 137872    | NM_144650    | ADHFE1         |
| A_33_P3375516  | 1,50696 | 1,83945 | -1,259184773 | ENST00000515458 | 253314    | NM_001099408 | EIF4E1B        |
| A_33_P3410650  | 5,51281 | 5,84532 | -1,259202229 | ENST00000471631 | 26206     | NM_001039592 | SPAG8          |
| A_23_P364567   | 1,88709 | 2,21965 | -1,259245871 | ENST00000468836 | 7401      | NM_052995    | CLRN1          |
| A_33_P3291118  | 6,42119 | 6,75376 | -1,259254599 | ENST00000583112 | 114659    | NM_052888    | LRR37B         |
| A_23_P376599   | 12,5177 | 12,8503 | -1,259280785 | ENST00000019317 | 10928     | NM_006788    | RALBP1         |
| A_21_P0011082  | 1,41374 | 1,74636 | -1,259298242 | ENST00000566278 | 3         | NR_040112    | A2MP1          |
| A_23_P356667   | 1,44923 | 1,78201 | -1,259437911 | ENST00000280245 | 220047    | NM_173556    | CCDC83         |
| A_23_P52738    | 11,1129 | 11,4457 | -1,25945537  | ENST00000529149 | 28960     | NM_014026    | DCPS           |
| A_21_P0012409  | 4,71205 | 5,04497 | -1,259560133 | N/A             | N/A       | N/A          | XLOC_I2_009968 |
| A_21_P0006816  | 1,496   | 1,82894 | -1,259577594 | N/A             | N/A       | N/A          | Inc-PFKP-16    |
| A_22_P00005153 | 4,75483 | 5,08778 | -1,259586325 | N/A             | N/A       | N/A          | Inc-DHX57-2    |
| A_23_P253200   | 13,2331 | 13,5661 | -1,25962998  | ENST00000413699 | 6138      | NM_002948    | RPL15          |
| A_23_P344884   | 4,34891 | 4,68194 | -1,259656173 | ENST00000531958 | 57571     | NM_001166222 | CARNS1         |
| A_22_P00018319 | 3,96069 | 4,29373 | -1,259664905 | ENST00000472797 | 23145     | NM_198455    | SSPO           |

|                |         |         |              |                 |           |              |                |
|----------------|---------|---------|--------------|-----------------|-----------|--------------|----------------|
| A_33_P3417339  | 6,97141 | 7,30456 | -1,259760953 | ENST00000296043 | 57619     | NM_020859    | SHROOM3        |
| A_33_P3284552  | 3,86527 | 4,19847 | -1,259804614 | N/A             | 11316     | AK023303     | COPE           |
| A_22_P00008277 | 1,42108 | 1,75429 | -1,259813346 | N/A             | 100506858 | N/A          | LOC100506858   |
| A_32_P213624   | 8,62471 | 8,95795 | -1,259839544 | ENST00000370128 | 8634      | NM_001130841 | RTCA           |
| A_33_P3418394  | 3,99139 | 4,32464 | -1,259848276 | ENST00000509910 | 9140      | NM_004707    | ATG12          |
| A_22_P00001627 | 1,61112 | 1,94442 | -1,25989194  | N/A             | N/A       | DB458682     | Inc-ASAP1-3    |
| A_22_P00015319 | 1,82969 | 2,16301 | -1,259909406 | ENST00000453636 | N/A       | N/A          | N/A            |
| A_22_P00021348 | 1,40655 | 1,73995 | -1,259979272 | N/A             | N/A       | N/A          | Inc-TSPYL2-2   |
| A_22_P00010860 | 7,87317 | 8,20658 | -1,259988005 | ENST00000578049 | 9554      | NM_004892    | SEC22B         |
| A_23_P331092   | 9,0209  | 9,35449 | -1,26014522  | ENST00000354376 | 158055    | NM_152571    | C9orf163       |
| A_21_P0003966  | 3,68325 | 4,01685 | -1,260153954 | N/A             | N/A       | N/A          | Inc-MTRR-2     |
| A_23_P258093   | 10,355  | 10,6887 | -1,260241305 | ENST00000395499 | 10554     | NM_006411    | AGPAT1         |
| A_23_P327777   | 4,60256 | 4,9363  | -1,260276246 | ENST00000328453 | 352954    | NM_178831    | GATS           |
| A_23_P399681   | 3,60645 | 3,94022 | -1,260302453 | ENST00000373534 | 81629     | NM_052841    | TSSK3          |
| A_33_P3389188  | 11,7692 | 12,103  | -1,260328661 | ENST00000373895 | 7019      | NM_001270782 | TFAM           |
| A_24_P73075    | 7,21103 | 7,54495 | -1,260433496 | ENST00000462711 | 54970     | NM_017868    | TTC12          |
| A_23_P252471   | 5,11658 | 5,45053 | -1,260459707 | ENST00000563924 | 5175      | NM_000442    | PECAM1         |
| A_23_P338495   | 3,33773 | 3,67171 | -1,260485917 | ENST00000476962 | 220972    | NM_001282866 | mar-08         |
| A_24_P287473   | 11,589  | 11,923  | -1,260503392 | ENST00000324679 | 60485     | NM_021818    | SAV1           |
| A_33_P3397506  | 2,68992 | 3,02392 | -1,260503392 | N/A             | N/A       | N/A          | N/A            |
| A_21_P0010252  | 2,61419 | 2,94826 | -1,260564553 | N/A             | N/A       | N/A          | Inc-UMODL1-4   |
| A_23_P372308   | 5,90017 | 6,23426 | -1,260582028 | ENST00000554387 | 56963     | NM_020211    | RGMA           |
| A_33_P3370284  | 15,0339 | 15,368  | -1,260590766 | ENST00000085079 | 29924     | NM_001130071 | EPN1           |
| A_22_P00015933 | 4,16621 | 4,50036 | -1,260634456 | N/A             | 101929132 | XR_247847    | LOC101929132   |
| A_21_P0014788  | 1,94078 | 2,27494 | -1,260643194 | N/A             | N/A       | AA682772     | N/A            |
| A_21_P0006331  | 5,23967 | 5,57391 | -1,2607131   | N/A             | N/A       | N/A          | Inc-RALGDS-2   |
| A_21_P0012694  | 1,58933 | 1,92359 | -1,260730578 | N/A             | N/A       | N/A          | XLOC_I2_011327 |
| A_21_P0000667  | 3,10792 | 3,44223 | -1,260774272 | N/A             | 100500773 | NR_036611    | LOC100500773   |
| A_33_P3418486  | 1,5722  | 1,9066  | -1,260852926 | ENST00000589729 | N/A       | N/A          | N/A            |
| A_21_P0010125  | 1,43871 | 1,77311 | -1,260852926 | N/A             | N/A       | N/A          | Inc-PPP1R3D-1  |
| A_23_P215751   | 12,401  | 12,7354 | -1,260852926 | ENST00000611607 | 4698      | NM_005000    | NDUFA5         |
| A_22_P00015407 | 5,4458  | 5,78022 | -1,260870405 | N/A             | N/A       | N/A          | Inc-SRPR-1     |
| A_21_P0011398  | 5,30593 | 5,64057 | -1,261062693 | ENST00000622062 | 339005    | N/A          | WHAMMP3        |

|                |         |         |              |                 |        |              |                 |
|----------------|---------|---------|--------------|-----------------|--------|--------------|-----------------|
| A_24_P795594   | 7,69611 | 8,03077 | -1,261080175 | N/A             | 79796  | NM_001077691 | ALG9            |
| A_33_P3363260  | 6,10536 | 6,44002 | -1,261080175 | ENST00000298198 | 283209 | NM_173582    | PGM2L1          |
| A_24_P290225   | 1,46925 | 1,80394 | -1,261106399 | ENST00000331351 | 9951   | NM_006040    | HS3ST4          |
| A_24_P706314   | 11,0986 | 11,4333 | -1,26111514  | ENST00000411529 | 220988 | NM_194247    | HNRNPA3         |
| A_33_P3675395  | 1,61936 | 1,95408 | -1,261132623 | N/A             | 400812 | XR_247116    | FLJ39095        |
| A_22_P00018047 | 1,89515 | 2,22989 | -1,261150106 | N/A             | N/A    | AK090569     | Inc-ZNF267-1    |
| A_21_P0009714  | 1,52709 | 1,86187 | -1,261185073 | ENST00000601776 | N/A    | N/A          | N/A             |
| A_33_P3254801  | 11,3802 | 11,715  | -1,261202557 | ENST00000370461 | 11054  | NM_007346    | OGFR            |
| A_33_P3353979  | 3,6026  | 3,93742 | -1,261220041 | ENST00000503753 | 83849  | NM_181519    | SYT15           |
| A_22_P00016598 | 8,1651  | 8,49995 | -1,261246268 | ENST00000460528 | N/A    | AK090715     | N/A             |
| A_21_P0005231  | 2,92001 | 3,25487 | -1,26125501  | ENST00000436266 | N/A    | N/A          | N/A             |
| A_21_P0009501  | 2,79235 | 3,12722 | -1,261263752 | ENST00000584677 | 339298 | NR_040034    | LOC339298       |
| A_33_P3395905  | 1,49497 | 1,82989 | -1,261307465 | ENST00000390433 | N/A    | D13078       | N/A             |
| A_23_P121898   | 8,1253  | 8,46024 | -1,261324951 | ENST00000515166 | 79668  | NM_024615    | PARP8           |
| A_33_P3381191  | 4,53774 | 4,87272 | -1,261359923 | ENST00000397223 | 80020  | NM_024955    | FOXRED2         |
| A_33_P3270636  | 11,9443 | 12,2794 | -1,261464844 | ENST00000417841 | 51246  | NM_001272068 | SHISA5          |
| A_23_P323094   | 4,15093 | 4,48603 | -1,261464844 | ENST00000544916 | 1911   | NM_004426    | PHC1            |
| A_32_P112592   | 1,44866 | 1,78384 | -1,261534796 | ENST00000490006 | 339524 | NR_026989    | LINC01140       |
| A_33_P3334948  | 4,82099 | 5,15619 | -1,261552285 | N/A             | N/A    | N/A          | N/A             |
| A_23_P46369    | 10,4431 | 10,7783 | -1,261552285 | ENST00000484297 | 5872   | NM_002870    | RAB13           |
| A_23_P251421   | 10,8713 | 11,2065 | -1,261552285 | ENST00000467411 | 83879  | NM_031942    | CDCA7           |
| A_24_P941148   | 9,0985  | 9,43374 | -1,261587263 | ENST00000380502 | 54801  | NM_017645    | HAUS6           |
| A_33_P3351559  | 9,33721 | 9,67252 | -1,261648477 | ENST00000266517 | 55500  | NM_018638    | ETNK1           |
| A_23_P69293    | 7,16333 | 7,49866 | -1,261665967 | ENST00000315251 | 55349  | NM_018397    | CHDH            |
| A_23_P383688   | 9,74167 | 10,0771 | -1,261753423 | ENST00000244571 | 57505  | NM_020745    | AARS2           |
| A_33_P3376017  | 6,34255 | 6,67802 | -1,261788406 | N/A             | N/A    | AB209470     | Inc-KIAA0319L-1 |
| A_22_P00003281 | 3,86059 | 4,1962  | -1,261910857 | N/A             | N/A    | N/A          | Inc-CALML6-1    |
| A_24_P225518   | 7,25262 | 7,58827 | -1,261945845 | ENST00000488011 | 80772  | NM_001029885 | CPTP            |
| A_33_P3340560  | 1,54314 | 1,87883 | -1,261980834 | N/A             | N/A    | N/A          | XLOC_I2_015200  |
| A_33_P3395274  | 11,1594 | 11,4951 | -1,261989581 | ENST00000322342 | 284273 | NM_175907    | ZADH2           |
| A_21_P0000599  | 9,5545  | 9,89036 | -1,262129548 | ENST00000599191 | 23608  | NM_013446    | MKRN1           |
| A_22_P00004246 | 4,40357 | 4,73945 | -1,262147045 | ENST00000414654 | N/A    | N/A          | N/A             |
| A_33_P3230137  | 4,41283 | 4,74872 | -1,262155794 | ENST00000378785 | 219293 | NM_001039211 | ATAD3C          |

|                |         |         |              |                 |           |              |                 |
|----------------|---------|---------|--------------|-----------------|-----------|--------------|-----------------|
| A_24_P355876   | 16,9203 | 17,2562 | -1,262164543 | ENST00000549385 | 7009      | NM_003217    | TMBIM6          |
| A_21_P0007524  | 4,77307 | 5,10898 | -1,262173291 | N/A             | N/A       | N/A          | Inc-GABARAPL1-1 |
| A_24_P118472   | 9,3092  | 9,64516 | -1,262217036 | ENST00000493920 | N/A       | N/A          | N/A             |
| A_33_P3413810  | 3,23703 | 3,573   | -1,262225785 | N/A             | 101928038 | XM_005276035 | LOC101928038    |
| A_22_P00016129 | 4,25852 | 4,59455 | -1,26227828  | N/A             | N/A       | N/A          | Inc-TIGD7-1     |
| A_21_P0014393  | 1,82672 | 2,16275 | -1,26227828  | N/A             | 100507373 | NR_045214    | LOC100507373    |
| A_23_P207299   | 8,22935 | 8,56539 | -1,26228703  | ENST00000466544 | 51136     | NM_016125    | RNFT1           |
| A_21_P0007210  | 1,58732 | 1,9234  | -1,262322028 | N/A             | N/A       | N/A          | Inc-CREB3L1-3   |
| A_33_P3398181  | 5,68933 | 6,0255  | -1,262400778 | N/A             | 100127909 | AK130422     | LOC100127909    |
| A_24_P367329   | 10,011  | 10,3472 | -1,26242703  | ENST00000563867 | N/A       | XM_001714437 | N/A             |
| A_21_P0013256  | 4,09027 | 4,42667 | -1,262602051 | ENST00000439784 | N/A       | N/A          | N/A             |
| A_23_P403398   | 9,84958 | 10,1861 | -1,262707076 | ENST00000496846 | 222161    | NR_002186    | DKFZP58611420   |
| A_21_P0004223  | 3,03735 | 3,3739  | -1,262733333 | N/A             | N/A       | N/A          | Inc-ADCY2-1     |
| A_21_P0012486  | 3,66955 | 4,00611 | -1,262742086 | N/A             | N/A       | N/A          | XLOC_I2_010511  |
| A_23_P170820   | 12,4788 | 12,8154 | -1,262777097 | ENST00000440538 | 9698      | NM_001020658 | PUM1            |
| A_22_P00011792 | 8,05241 | 8,38909 | -1,262847122 | ENST00000507241 | N/A       | AK096154     | N/A             |
| A_22_P00018419 | 1,50967 | 1,84636 | -1,262855876 | N/A             | N/A       | N/A          | Inc-TLE3-6      |
| A_33_P3229083  | 12,0014 | 12,3381 | -1,262864629 | ENST00000356950 | 85236     | NM_080593    | HIST1H2BK       |
| A_24_P419028   | 5,95219 | 6,28891 | -1,262882136 | N/A             | 643616    | AB014771     | MOP-1           |
| A_32_P223189   | 8,62932 | 8,96607 | -1,262908398 | ENST00000497904 | 474338    | NR_002190    | SUMO1P3         |
| A_21_P0009301  | 3,51261 | 3,84937 | -1,262917151 | N/A             | N/A       | N/A          | Inc-CDRT4-1     |
| A_21_P0014227  | 1,42847 | 1,76523 | -1,262917151 | N/A             | 100506331 | XR_108933    | LOC100506331    |
| A_23_P78458    | 9,37587 | 9,71267 | -1,262952167 | ENST00000243644 | 59348     | NM_021632    | ZNF350          |
| A_24_P842006   | 7,29768 | 7,6345  | -1,262969676 | ENST00000544643 | 90835     | NM_001014979 | C16orf93        |
| A_33_P3210866  | 9,98645 | 10,3233 | -1,262995939 | ENST00000487863 | 388558    | CR749856     | ZNF808          |
| A_22_P00020251 | 1,36389 | 1,70081 | -1,263057221 | ENST00000559600 | N/A       | N/A          | N/A             |
| A_33_P3454968  | 12,7478 | 13,0848 | -1,263127262 | N/A             | 645553    | XR_244001    | LOC645553       |
| A_21_P0012333  | 7,1517  | 7,48876 | -1,263179795 | ENST00000314235 | 27094     | NM_171829    | KCNMB3          |
| A_33_P3679221  | 1,46897 | 1,80603 | -1,263179795 | ENST00000514957 | 152578    | NR_040106    | LOC152578       |
| A_23_P20316    | 1,54789 | 1,88497 | -1,263197306 | ENST00000285381 | 761       | NM_005181    | CA3             |
| A_33_P3234487  | 15,0997 | 15,4368 | -1,263214818 | ENST00000305321 | 654483    | NM_001039182 | BOLA2B          |
| A_24_P376422   | 8,66735 | 9,0045  | -1,263258599 | ENST00000538869 | N/A       | XM_006716222 | N/A             |
| A_24_P48162    | 12,742  | 13,0792 | -1,263302381 | ENST00000436333 | 4350      | NM_002434    | MPG             |



|                |         |         |              |                 |           |              |                |
|----------------|---------|---------|--------------|-----------------|-----------|--------------|----------------|
| A_21_P0002083  | 1,6341  | 1,97134 | -1,263337407 | ENST00000449772 | 101927331 | XR_244907    | LOC101927331   |
| A_33_P3350858  | 1,96082 | 2,29809 | -1,263363678 | N/A             | 100652857 | NR_046005    | TMCO5B         |
| A_23_P101615   | 7,64899 | 7,98633 | -1,263424978 | ENST00000392173 | 147929    | NM_001042474 | ZNF565         |
| A_22_P00025460 | 1,99125 | 2,32859 | -1,263424978 | N/A             | N/A       | N/A          | Inc-KIFC3-1    |
| A_24_P362904   | 6,07306 | 6,41043 | -1,263451251 | ENST00000232375 | 5210      | NM_004567    | PFKFB4         |
| A_23_P131149   | 10,2994 | 10,6368 | -1,263477524 | ENST00000392857 | 5000      | NM_002552    | ORC4           |
| A_23_P146444   | 11,8178 | 12,1552 | -1,263477524 | ENST00000375077 | 7464      | NM_003389    | CORO2A         |
| A_23_P121182   | 10,8821 | 11,2195 | -1,263477524 | ENST00000383779 | 26061     | NM_012260    | HACL1          |
| A_33_P3248759  | 11,5167 | 11,8541 | -1,263477524 | ENST00000293883 | 84219     | NM_001303027 | WDR24          |
| A_19_P00322299 | 8,24816 | 8,58569 | -1,26359138  | ENST00000252744 | 57688     | NM_020928    | ZSWIM6         |
| A_23_P208523   | 7,49597 | 7,83351 | -1,263600138 | ENST00000614037 | 79165     | NM_024316    | LENG1          |
| A_23_P401076   | 9,24065 | 9,57824 | -1,263643932 | ENST00000375469 | 203328    | NM_145006    | SUSD3          |
| A_24_P145316   | 6,59657 | 6,93419 | -1,263670209 | ENST00000338950 | 84062     | NM_183040    | DTNBP1         |
| A_33_P3261695  | 3,49883 | 3,83648 | -1,263696487 | ENST00000548638 | 647310    | NM_001195082 | TEX22          |
| A_21_P0002400  | 1,48911 | 1,82679 | -1,263722765 | N/A             | N/A       | N/A          | Inc-ITGB1BP1-1 |
| A_32_P153773   | 3,08938 | 3,42725 | -1,263889205 | ENST00000371372 | 774       | NM_000718    | CACNA1B        |
| A_21_P0000760  | 11,2561 | 11,594  | -1,263915487 | N/A             | 100526771 | NR_038318    | TMPRSS4-AS1    |
| A_23_P89799    | 10,8951 | 11,233  | -1,263915487 | ENST00000591171 | 10449     | NM_006111    | ACAA2          |
| A_33_P3302280  | 4,92074 | 5,25867 | -1,26394177  | ENST00000374269 | 149420    | NM_001243533 | PDIK1L         |
| A_23_P139600   | 6,65707 | 6,99503 | -1,263968053 | ENST00000446861 | 8437      | NM_004658    | RASAL1         |
| A_22_P00007682 | 3,39888 | 3,73688 | -1,264003098 | N/A             | N/A       | CR746899     | Inc-HIGD1A-1   |
| A_23_P306223   | 2,32254 | 2,6606  | -1,264055668 | ENST00000379044 | 170302    | NM_139058    | ARX            |
| A_33_P3376273  | 2,98976 | 3,32782 | -1,264055668 | N/A             | N/A       | N/A          | N/A            |
| A_21_P0013665  | 1,63172 | 1,9698  | -1,264073192 | N/A             | N/A       | N/A          | XLOC_I2_015239 |
| A_23_P84000    | 1,74261 | 2,0807  | -1,264081954 | ENST00000300105 | 10369     | NM_006078    | CACNG2         |
| A_33_P3235053  | 14,3905 | 14,7286 | -1,264090716 | ENST00000254816 | 91107     | NM_033452    | TRIM47         |
| A_33_P3249837  | 1,63736 | 1,97549 | -1,264117002 | ENST00000473550 | 344595    | N/A          | LINC00883      |
| A_32_P224850   | 9,83956 | 10,1777 | -1,264125764 | N/A             | 101927764 | XR_425464    | LOC101927764   |
| A_33_P3243439  | 4,79296 | 5,13112 | -1,264143289 | ENST00000311268 | 27239     | NM_019858    | GPR162         |
| A_33_P3411307  | 6,23367 | 6,57183 | -1,264143289 | N/A             | 100130276 | AK128269     | LOC100130276   |
| A_22_P00002813 | 6,04168 | 6,37985 | -1,264152051 | ENST00000433219 | N/A       | N/A          | N/A            |
| A_33_P3238773  | 1,46299 | 1,80117 | -1,264160814 | N/A             | N/A       | N/A          | N/A            |
| A_33_P3315819  | 2,64183 | 2,9801  | -1,264239678 | N/A             | N/A       | AK055890     | Inc-C2orf54-2  |

|                |         |         |              |                 |           |              |                |
|----------------|---------|---------|--------------|-----------------|-----------|--------------|----------------|
| A_33_P3396537  | 3,06118 | 3,39946 | -1,264248442 | ENST00000412678 | 389118    | NM_001007540 | CDHR4          |
| A_22_P00019338 | 3,72431 | 4,06261 | -1,264265968 | ENST00000553757 | N/A       | N/A          | N/A            |
| A_21_P0002061  | 6,39205 | 6,73036 | -1,264274731 | ENST00000451698 | 101927577 | NR_110264    | LOC101927577   |
| A_22_P00007333 | 1,64412 | 1,98247 | -1,264309785 | N/A             | N/A       | N/A          | Inc-GPR98-3    |
| A_21_P0003338  | 1,52867 | 1,86707 | -1,264353603 | ENST00000505628 | N/A       | N/A          | N/A            |
| A_22_P00019981 | 3,26605 | 3,60452 | -1,264414951 | N/A             | N/A       | AW804661     | Inc-RBL2-2     |
| A_23_P301340   | 12,0156 | 12,3541 | -1,264441244 | ENST00000576090 | 146705    | NM_144679    | ENTHD2         |
| A_24_P225010   | 17,285  | 17,6235 | -1,264441244 | ENST00000433675 | 6209      | NM_001018    | RPS15          |
| A_23_P200239   | 10,8488 | 11,1874 | -1,264528892 | ENST00000371399 | 54432     | NM_018982    | YIPF1          |
| A_21_P0011173  | 1,81242 | 2,15106 | -1,264563953 | N/A             | N/A       | N/A          | XLOC_I2_003888 |
| A_23_P129433   | 8,46436 | 8,80308 | -1,264634077 | ENST00000564704 | 6553      | NM_004594    | SLC9A5         |
| A_23_P10506    | 1,41703 | 1,75582 | -1,264695439 | ENST00000295256 | 27306     | NM_014485    | HPGDS          |
| A_21_P0013007  | 5,14721 | 5,48607 | -1,264756804 | ENST00000510155 | 643201    | N/A          | LOC643201      |
| A_33_P3290667  | 11,5    | 11,8389 | -1,264791871 | ENST00000492132 | 51714     | NM_016275    | SELT           |
| A_24_P288915   | 8,02183 | 8,36075 | -1,264809404 | ENST00000445752 | N/A       | AK093811     | N/A            |
| A_22_P00002468 | 4,56879 | 4,90771 | -1,264809404 | N/A             | N/A       | AK056686     | Inc-C15orf48-1 |
| A_32_P38283    | 5,13408 | 5,47304 | -1,264844473 | ENST00000610291 | 6991      | NM_174910    | TCTE3          |
| A_22_P00013973 | 1,69131 | 2,03028 | -1,26485324  | N/A             | N/A       | N/A          | Inc-RTN3-2     |
| A_33_P3275415  | 4,22231 | 4,56141 | -1,26496722  | N/A             | N/A       | N/A          | N/A            |
| A_23_P52499    | 1,61118 | 1,95036 | -1,265037367 | ENST00000497497 | 6571      | NM_003054    | SLC18A2        |
| A_21_P0002043  | 1,43678 | 1,77609 | -1,265151363 | ENST00000432125 | 100130502 | N/A          | LOC100130502   |
| A_33_P3824237  | 9,07705 | 9,41639 | -1,265177672 | ENST00000422847 | 439990    | NR_038464    | LINC00857      |
| A_23_P302787   | 9,43148 | 9,77083 | -1,265186441 | ENST00000295549 | 375295    | NR_040001    | LINC01116      |
| A_23_P150365   | 13,6821 | 14,0215 | -1,26523029  | ENST00000546316 | 25996     | NM_015523    | REXO2          |
| A_33_P3263193  | 10,3559 | 10,6953 | -1,26523029  | ENST00000464682 | 83695     | NM_001257097 | RHNO1          |
| A_33_P3303449  | 5,26448 | 5,60391 | -1,2652566   | ENST00000344610 | 3953      | NM_001198688 | LEPR           |
| A_33_P3329552  | 1,76205 | 2,10151 | -1,265282911 | ENST00000532111 | N/A       | N/A          | N/A            |
| A_33_P3260373  | 5,4993  | 5,83879 | -1,265309222 | ENST00000561790 | 100534599 | NM_001204890 | ISY1-RAB43     |
| A_33_P3330761  | 1,69196 | 2,03146 | -1,265317992 | N/A             | N/A       | N/A          | N/A            |
| A_22_P00021984 | 5,05685 | 5,39642 | -1,265379387 | ENST00000570266 | N/A       | CD641523     | N/A            |
| A_23_P321034   | 7,85887 | 8,19847 | -1,2654057   | ENST00000613764 | 10207     | NM_176877    | INADL          |
| A_24_P189458   | 9,96097 | 10,3006 | -1,265432014 | ENST00000464321 | 54780     | NM_017615    | NSMCE4A        |
| A_22_P00025259 | 1,4022  | 1,74184 | -1,265440785 | N/A             | 102724691 | NR_110603    | LOC102724691   |

|                |         |         |              |                 |           |              |                 |
|----------------|---------|---------|--------------|-----------------|-----------|--------------|-----------------|
| A_23_P76350    | 3,35851 | 3,69818 | -1,2654671   | ENST00000542751 | 2784      | NM_002075    | GNB3            |
| A_22_P00014356 | 3,35439 | 3,69407 | -1,265475871 | N/A             | N/A       | BX642546     | Inc-SERTAD2-4   |
| A_23_P431853   | 14,0271 | 14,3669 | -1,265581135 | ENST00000361453 | 4536      | HW291277     | ND2             |
| A_23_P372874   | 14,922  | 15,2619 | -1,265668861 | ENST00000491177 | 6284      | NM_001024210 | S100A13         |
| A_33_P3214720  | 11,0571 | 11,397  | -1,265668861 | ENST00000373087 | 80149     | NM_025079    | ZC3H12A         |
| A_23_P170337   | 12,0043 | 12,3442 | -1,265668861 | ENST00000375341 | 8659      | NM_003748    | ALDH4A1         |
| A_19_P00316705 | 2,84015 | 3,18014 | -1,26574782  | N/A             | N/A       | N/A          | Inc-MMRN1-2     |
| A_23_P112548   | 7,08899 | 7,42899 | -1,265756594 | ENST00000485934 | 81932     | NM_031219    | HDHD3           |
| A_24_P49597    | 13,7348 | 14,0748 | -1,265756594 | ENST00000473094 | N/A       | N/A          | N/A             |
| A_21_P0014501  | 3,07304 | 3,41311 | -1,26581801  | ENST00000422430 | 100507114 | XR_245416    | LINC00445       |
| A_21_P0006866  | 1,63743 | 1,97762 | -1,265923303 | N/A             | N/A       | N/A          | Inc-C10orf136-1 |
| A_24_P270999   | 2,35558 | 2,69593 | -1,266063706 | ENST00000435607 | 6329      | NM_000334    | SCN4A           |
| A_21_P0007397  | 2,1119  | 2,45226 | -1,266072481 | N/A             | N/A       | N/A          | Inc-ARHGAP20-1  |
| A_24_P391230   | 1,46885 | 1,80927 | -1,266125137 | ENST00000299340 | 116159    | NM_052954    | CYR1            |
| A_33_P3397905  | 6,92101 | 7,26148 | -1,266169018 | N/A             | 10282     | NM_005868    | BET1            |
| A_33_P3224946  | 1,41247 | 1,75304 | -1,266256785 | N/A             | N/A       | AK127903     | Inc-SREK1-1     |
| A_23_P411188   | 6,38269 | 6,72329 | -1,266283117 | ENST00000250699 | 57053     | NM_020402    | CHRNA10         |
| A_22_P00010768 | 1,87523 | 2,21593 | -1,266370892 | ENST00000624692 | 101929608 | NR_109878    | LOC101929608    |
| A_23_P104804   | 4,50949 | 4,85022 | -1,266397226 | ENST00000539918 | 7704      | NM_006006    | ZBTB16          |
| A_22_P00023248 | 1,42288 | 1,76361 | -1,266397226 | N/A             | N/A       | N/A          | Inc-FMNL2-2     |
| A_24_P278172   | 9,15718 | 9,49794 | -1,26642356  | ENST00000487330 | 7763      | NM_006007    | ZFAND5          |
| A_33_P3419460  | 5,41662 | 5,75746 | -1,266493787 | ENST00000400000 | 9218      | NM_003574    | VAPA            |
| A_23_P311780   | 1,44575 | 1,78665 | -1,26654646  | ENST00000609812 | 147719    | NM_173506    | LYPD4           |
| A_24_P212129   | 9,01956 | 9,36051 | -1,266590356 | ENST00000478556 | 7581      | NM_006974    | ZNF33A          |
| A_23_P27353    | 4,15445 | 4,4954  | -1,266590356 | ENST00000586448 | 8170      | NM_007163    | SLC14A2         |
| A_21_P0000289  | 6,00928 | 6,35025 | -1,266607915 | ENST00000497648 | 26805     | NR_002749    | SNORD45A        |
| A_21_P0012891  | 2,43347 | 2,77445 | -1,266616695 | ENST00000607662 | 729506    | NR_039984    | LOC729506       |
| A_23_P23575    | 10,836  | 11,177  | -1,266634254 | ENST00000310483 | 27173     | NM_014437    | SLC39A1         |
| A_24_P107317   | 1,63711 | 1,97821 | -1,266722053 | ENST00000260187 | 9099      | NM_004205    | USP2            |
| A_21_P0005002  | 10,0453 | 10,3864 | -1,266722053 | N/A             | N/A       | N/A          | Inc-CCDC90A-5   |
| A_24_P393864   | 7,1399  | 7,48104 | -1,266757175 | ENST00000369604 | 10745     | NM_006608    | PHTF1           |
| A_33_P3256894  | 7,80716 | 8,14835 | -1,266801078 | ENST00000417804 | 253725    | NM_001169107 | FAM21C          |
| A_21_P0002606  | 3,99988 | 4,34116 | -1,266880107 | N/A             | N/A       | N/A          | Inc-FOXD4L1-1   |

|                |         |         |              |                 |           |              |                 |
|----------------|---------|---------|--------------|-----------------|-----------|--------------|-----------------|
| A_23_P99204    | 8,70417 | 9,04552 | -1,266941578 | ENST00000443596 | 51275     | NR_015404    | MAPKAPK5-AS1    |
| A_33_P3364721  | 1,4759  | 1,81727 | -1,266959142 | N/A             | N/A       | N/A          | N/A             |
| A_23_P75071    | 7,73892 | 8,08032 | -1,266985488 | ENST00000371728 | 9585      | NM_016195    | KIF20B          |
| A_33_P3356392  | 3,53491 | 3,87633 | -1,267003052 | ENST00000393423 | 57139     | NM_001161616 | RGL3            |
| A_21_P0011539  | 1,59507 | 1,93657 | -1,267073312 | N/A             | N/A       | N/A          | XLOC_I2_005737  |
| A_23_P89310    | 12,4377 | 12,7793 | -1,267161142 | ENST00000314728 | 22905     | NM_014964    | EPN2            |
| A_22_P00011037 | 8,84103 | 9,18282 | -1,267328035 | ENST00000441638 | N/A       | N/A          | N/A             |
| A_22_P00014453 | 1,54952 | 1,89132 | -1,26733682  | ENST00000429444 | N/A       | XR_108264    | N/A             |
| A_23_P99661    | 11,3189 | 11,6608 | -1,267424668 | ENST00000553709 | 55701     | NM_018071    | ARHGEF40        |
| A_33_P3398251  | 2,35628 | 2,69824 | -1,26747738  | ENST00000455775 | 50943     | NM_014009    | FOXP3           |
| A_23_P160934   | 8,33211 | 8,67408 | -1,267486165 | ENST00000616917 | 81611     | NM_030920    | ANP32E          |
| A_21_P0001001  | 2,22349 | 2,56552 | -1,267538879 | N/A             | N/A       | N/A          | Inc-KCNC4-1     |
| A_23_P49220    | 10,7919 | 11,134  | -1,267600382 | ENST00000563484 | 22980     | NM_014972    | TCF25           |
| A_23_P8702     | 1,53755 | 1,87971 | -1,267653101 | ENST00000291009 | 5304      | NM_002652    | PIP             |
| A_22_P00018730 | 3,33517 | 3,67735 | -1,267670675 | N/A             | N/A       | N/A          | Inc-C3orf71-1   |
| A_23_P32036    | 11,2885 | 11,6307 | -1,267688249 | ENST00000494066 | 54981     | NM_017881    | NMRK1           |
| A_33_P3280801  | 10,3472 | 10,6894 | -1,267688249 | ENST00000357063 | 4008      | NM_005358    | LMO7            |
| A_33_P3467933  | 1,55407 | 1,89631 | -1,267723397 | N/A             | 286154    | AK096739     | LOC286154       |
| A_22_P00004593 | 1,46874 | 1,81099 | -1,267732184 | N/A             | 100506241 | N/A          | LL22NC01-81G9.3 |
| A_33_P3380211  | 8,89835 | 9,24065 | -1,267776121 | ENST00000358100 | 10142     | NM_005751    | AKAP9           |
| A_23_P67399    | 11,2033 | 11,5456 | -1,267776121 | ENST00000594581 | 29888     | NM_001039877 | STRN4           |
| A_33_P3410251  | 8,43976 | 8,78207 | -1,267784909 | ENST00000478701 | 285175    | AK090815     | UNC80           |
| A_22_P00008052 | 7,88498 | 8,22729 | -1,267784909 | ENST00000598518 | 645553    | XR_244001    | LOC645553       |
| A_23_P38190    | 5,59988 | 5,9423  | -1,267881576 | ENST00000584000 | 94103     | NM_139280    | ORMDL3          |
| A_23_P327370   | 9,39646 | 9,73891 | -1,267907941 | ENST00000269919 | 54858     | NM_017712    | PGPEP1          |
| A_23_P117515   | 6,78275 | 7,12527 | -1,267969462 | ENST00000395168 | 5926      | NM_002892    | ARID4A          |
| A_33_P3688869  | 3,15047 | 3,49311 | -1,268074933 | ENST00000560285 | 440910    | NR_030728    | LOC440910       |
| A_33_P3407985  | 5,91499 | 6,25766 | -1,268101302 | ENST00000301665 | 147184    | NM_001195386 | TMEM99          |
| A_24_P96593    | 8,53153 | 8,87422 | -1,268118882 | ENST00000540033 | 7813      | NM_005665    | EVI5            |
| A_33_P3393708  | 2,28467 | 2,6274  | -1,268154042 | N/A             | N/A       | N/A          | N/A             |
| A_19_P00319528 | 3,52986 | 3,87263 | -1,268189204 | ENST00000522718 | 100507420 | NR_121620    | LOC100507420    |
| A_33_P3888629  | 10,1511 | 10,4939 | -1,268215575 | ENST00000264674 | 2122      | NM_001164000 | MECOM           |
| A_21_P0008980  | 2,37506 | 2,71789 | -1,268241947 | N/A             | N/A       | N/A          | Inc-WFDC1-1     |

|                |         |         |              |                 |           |              |                |
|----------------|---------|---------|--------------|-----------------|-----------|--------------|----------------|
| A_32_P61857    | 9,08613 | 9,42897 | -1,268250738 | ENST00000256858 | 57614     | NM_020854    | KIAA1468       |
| A_23_P256933   | 17,1921 | 17,535  | -1,268303484 | ENST00000446071 | 6152      | NM_000986    | RPL24          |
| A_33_P3278313  | 5,26931 | 5,61222 | -1,268312275 | ENST00000614640 | 253827    | NM_001193460 | MSRB3          |
| A_22_P00003891 | 5,30863 | 5,65158 | -1,268347441 | N/A             | N/A       | N/A          | Inc-CEP152-1   |
| A_24_P940149   | 1,43505 | 1,77805 | -1,268391399 | ENST00000380486 | 25966     | NM_015500    | C2CD2          |
| A_21_P0006554  | 1,55775 | 1,90078 | -1,268417775 | N/A             | N/A       | N/A          | Inc-F8A3-1     |
| A_21_P0010482  | 4,33182 | 4,67486 | -1,268426567 | N/A             | N/A       | N/A          | Inc-C22orf26-2 |
| A_33_P3263459  | 1,62456 | 1,96761 | -1,268435359 | ENST00000443721 | 758       | NM_001044370 | MPPED1         |
| A_32_P167122   | 8,68539 | 9,02845 | -1,268444151 | ENST00000367005 | 55758     | NM_018254    | RCOR3          |
| A_33_P3335740  | 5,4227  | 5,76577 | -1,268452944 | ENST00000615671 | 55056     | NR_026891    | FLJ10038       |
| A_33_P3336567  | 3,02285 | 3,36597 | -1,268496906 | N/A             | N/A       | N/A          | N/A            |
| A_22_P00001790 | 4,6422  | 4,98539 | -1,268558455 | N/A             | 101928521 | XR_246615    | LOC101928521   |
| A_33_P3356070  | 1,44654 | 1,78976 | -1,268584834 | ENST00000396099 | 23175     | NM_001261428 | LPIN1          |
| A_22_P00004217 | 8,75464 | 9,09788 | -1,268602421 | N/A             | 283314    | NR_026947    | C1RL-AS1       |
| A_22_P00001189 | 1,5209  | 1,86415 | -1,268611214 | N/A             | N/A       | N/A          | Inc-ANGPTL2-2  |
| A_33_P3263696  | 8,02371 | 8,36697 | -1,268620007 | ENST00000533316 | 9776      | NM_001205119 | ATG13          |
| A_22_P00010539 | 3,11638 | 3,45966 | -1,268637594 | N/A             | N/A       | AK096228     | Inc-NCL-1      |
| A_33_P3308128  | 3,30515 | 3,64854 | -1,268734327 | N/A             | N/A       | AK172772     | N/A            |
| A_23_P35883    | 8,35281 | 8,69622 | -1,268751915 | ENST00000532101 | 55572     | NM_017547    | FOXRED1        |
| A_22_P00012241 | 2,88959 | 3,23308 | -1,268822272 | N/A             | N/A       | AK299913     | Inc-PPIL2-1    |
| A_23_P147070   | 8,21211 | 8,55565 | -1,268866246 | ENST00000340926 | 23353     | AK022469     | SUN1           |
| A_33_P3215999  | 8,28897 | 8,63254 | -1,268892632 | ENST00000588199 | 125061    | NM_001145526 | AFMID          |
| A_24_P336577   | 7,97126 | 8,31486 | -1,268919018 | ENST00000444059 | 55924     | NM_019099    | FAM212B        |
| A_21_P0009956  | 3,39618 | 3,73979 | -1,268927814 | ENST00000428529 | N/A       | N/A          | N/A            |
| A_33_P3340205  | 7,19685 | 7,54046 | -1,268927814 | ENST00000621454 | 100037417 | NM_001084393 | DDTL           |
| A_23_P34233    | 5,27282 | 5,6166  | -1,269077347 | ENST00000219771 | 23475     | NM_014298    | QPRT           |
| A_33_P3346841  | 11,6891 | 12,033  | -1,26918291  | ENST00000478283 | 51441     | NM_001173128 | YTHDF2         |
| A_22_P00010879 | 3,90122 | 4,24512 | -1,26918291  | N/A             | 92659     | NR_015454    | MAFG-AS1       |
| A_22_P00002238 | 1,42675 | 1,77069 | -1,2692181   | N/A             | 101929328 | NR_120655    | KCNMA1-AS1     |
| A_22_P00012777 | 1,55989 | 1,90385 | -1,269235695 | ENST00000437837 | N/A       | N/A          | N/A            |
| A_23_P44674    | 15,907  | 16,251  | -1,269270886 | ENST00000496700 | 1396      | NM_001311    | CRIP1          |
| A_23_P160751   | 1,42103 | 1,76507 | -1,269306078 | ENST00000368181 | 79368     | NM_030764    | FCRL2          |
| A_23_P145074   | 11,6613 | 12,0054 | -1,269358868 | ENST00000336032 | 10957     | NM_006813    | PNRC1          |

|                |         |         |              |                 |           |              |              |
|----------------|---------|---------|--------------|-----------------|-----------|--------------|--------------|
| A_24_P272873   | 16,2934 | 16,6375 | -1,269358868 | ENST00000487479 | 645683    | NR_004844    | RPL13AP3     |
| A_32_P46981    | 10,4864 | 10,8305 | -1,269358868 | ENST00000451882 | 440498    | NM_001136180 | HSBP1L1      |
| A_23_P360302   | 1,4176  | 1,76172 | -1,269376465 | ENST00000218006 | 2986      | NM_001522    | GUCY2F       |
| A_21_P0010231  | 1,40696 | 1,7512  | -1,269482054 | N/A             | N/A       | N/A          | Inc-SOD1-1   |
| A_33_P3275630  | 2,91891 | 3,26319 | -1,269517252 | N/A             | 100131820 | AK125613     | LOC100131820 |
| A_21_P0002123  | 4,84762 | 5,19196 | -1,26957005  | ENST00000339037 | 375295    | N/A          | LINC01116    |
| A_21_P0012749  | 1,4793  | 1,82367 | -1,269596451 | ENST00000515282 | 100874047 | N/A          | LINC00499    |
| A_23_P339053   | 10,9301 | 11,2745 | -1,269622851 | ENST00000569656 | N/A       | XR_429679    | N/A          |
| A_23_P98402    | 10,8725 | 11,2169 | -1,269622851 | ENST00000620360 | 51092     | NM_001040455 | SIDT2        |
| A_33_P3364338  | 1,55622 | 1,90066 | -1,269658053 | ENST00000478270 | N/A       | N/A          | N/A          |
| A_23_P217958   | 12,2661 | 12,6106 | -1,269710858 | ENST00000360289 | 3098      | NM_033500    | HK1          |
| A_33_P3259373  | 1,5685  | 1,91305 | -1,269754864 | N/A             | 145624    | NR_022009    | PWAR1        |
| A_22_P00010472 | 2,1702  | 2,51478 | -1,269781268 | N/A             | 102724167 | NR_110659    | PABPC5-AS1   |
| A_33_P3322175  | 2,80443 | 3,14909 | -1,269851681 | ENST00000594725 | N/A       | XR_244009    | N/A          |
| A_33_P3263747  | 7,8656  | 8,21027 | -1,269860483 | N/A             | N/A       | N/A          | N/A          |
| A_21_P0010503  | 2,87343 | 3,21812 | -1,269878087 | N/A             | 100124700 | NR_047518    | HOTAIR       |
| A_33_P3299421  | 6,8605  | 7,2052  | -1,26988689  | ENST00000332854 | 348327    | NM_020880    | ZNF530       |
| A_23_P83149    | 5,50651 | 5,85121 | -1,26988689  | ENST00000377041 | 51104     | NM_016014    | ABHD17B      |
| A_23_P137035   | 14,1132 | 14,4579 | -1,26988689  | ENST00000380421 | 8544      | NM_003662    | PIR          |
| A_22_P00012407 | 2,10421 | 2,44898 | -1,269948506 | N/A             | N/A       | N/A          | Inc-PRKD1-4  |
| A_33_P3280950  | 5,6396  | 5,98439 | -1,269966112 | N/A             | 144571    | NR_026971    | A2M-AS1      |
| A_23_P343963   | 9,04588 | 9,39068 | -1,269974914 | ENST00000333407 | 113828    | NM_138435    | FAM83F       |
| A_19_P00805593 | 2,23208 | 2,57698 | -1,270062945 | N/A             | N/A       | N/A          | Inc-GPR26-4  |
| A_24_P358205   | 10,7302 | 11,0751 | -1,270062945 | ENST00000417077 | N/A       | N/A          | N/A          |
| A_22_P00016119 | 4,22766 | 4,57258 | -1,270080552 | N/A             | N/A       | AK123461     | Inc-TIFA-1   |
| A_33_P3244643  | 7,85741 | 8,20236 | -1,270106963 | ENST00000410025 | 440585    | NM_001101376 | FAM183A      |
| A_23_P133332   | 11,3647 | 11,7097 | -1,270150983 | ENST00000515226 | 23107     | NM_015084    | MRPS27       |
| A_33_P3226465  | 6,88208 | 7,22712 | -1,270186199 | ENST00000570478 | 474170    | NM_001006607 | LRRC37A2     |
| A_33_P3400389  | 13,3861 | 13,7312 | -1,270239026 | ENST00000409718 | 26010     | NM_001282735 | SPATS2L      |
| A_22_P00005945 | 3,32603 | 3,67114 | -1,27024783  | ENST00000551408 | N/A       | N/A          | N/A          |
| A_22_P00015339 | 1,46574 | 1,81092 | -1,270309465 | ENST00000508291 | N/A       | N/A          | N/A          |
| A_33_P3390960  | 1,49341 | 1,83865 | -1,270362296 | N/A             | 389362    | AK095683     | PSMG4        |
| A_19_P00801506 | 9,14218 | 9,48753 | -1,27045916  | N/A             | N/A       | N/A          | N/A          |

|                |         |         |              |                 |           |              |                |
|----------------|---------|---------|--------------|-----------------|-----------|--------------|----------------|
| A_22_P00005525 | 1,43757 | 1,78295 | -1,270485579 | N/A             | N/A       | AK127472     | Inc-ECHDC1-1   |
| A_24_P151498   | 10,7725 | 11,1179 | -1,270503192 | ENST00000482508 | 3275      | NM_206962    | PRMT2          |
| A_24_P76879    | 10,8396 | 11,185  | -1,270503192 | ENST00000368608 | 7259      | NM_003309    | TSPYL1         |
| A_24_P220472   | 3,31279 | 3,65821 | -1,270520805 | ENST00000334325 | 353324    | NM_181727    | SPATA12        |
| A_21_P0004751  | 3,29464 | 3,64006 | -1,270520805 | ENST00000430821 | 101927048 | NR_110843    | LOC101927048   |
| A_22_P00011379 | 4,08055 | 4,42602 | -1,270564839 | ENST00000541254 | N/A       | N/A          | N/A            |
| A_33_P3391076  | 8,15989 | 8,50538 | -1,270582453 | ENST00000469707 | 10150     | NM_207304    | MBNL2          |
| A_33_P3221748  | 1,55647 | 1,90212 | -1,270723372 | ENST00000338888 | 864       | NM_001031680 | RUNX3          |
| A_21_P0010706  | 2,56244 | 2,90809 | -1,270723372 | ENST00000447329 | N/A       | N/A          | N/A            |
| A_21_P0013966  | 7,80403 | 8,1497  | -1,270740989 | N/A             | N/A       | AF090926     | Inc-DHX40-1    |
| A_24_P290354   | 10,7955 | 11,1412 | -1,270767413 | ENST00000471197 | 7763      | NM_006007    | ZFAND5         |
| A_21_P0011758  | 5,29198 | 5,6377  | -1,27078503  | N/A             | N/A       | N/A          | XLOC_I2_007097 |
| A_22_P00006574 | 1,46179 | 1,80756 | -1,270829073 | N/A             | N/A       | N/A          | Inc-FMN2-2     |
| A_24_P412734   | 9,21193 | 9,55771 | -1,270837881 | ENST00000571878 | 146547    | NM_173502    | PRSS36         |
| A_23_P85726    | 9,10621 | 9,45201 | -1,270855499 | ENST00000310392 | 92342     | NM_033418    | METT18         |
| A_21_P0013528  | 8,25193 | 8,59794 | -1,271040499 | ENST00000521696 | N/A       | N/A          | N/A            |
| A_22_P00003199 | 1,45876 | 1,80481 | -1,271075741 | N/A             | N/A       | N/A          | Inc-CA7-3      |
| A_22_P00014201 | 4,28054 | 4,62667 | -1,271146226 | N/A             | 100874325 | NR_046766    | ATP2B2-IT2     |
| A_23_P306845   | 1,52524 | 1,87139 | -1,271163848 | ENST00000532620 | 254187    | NM_152762    | TSGA10IP       |
| A_19_P00315452 | 9,74233 | 10,0885 | -1,27118147  | ENST00000586949 | 100130938 | XR_110148    | LOC100130938   |
| A_23_P102258   | 12,889  | 13,2353 | -1,27129602  | ENST00000468875 | 116540    | NM_053050    | MRPL53         |
| A_33_P3256347  | 13,6948 | 14,0411 | -1,27129602  | ENST00000541231 | 26521     | NM_012459    | TIMM8B         |
| A_23_P113777   | 1,47675 | 1,82319 | -1,271419394 | ENST00000622834 | 9358      | NM_004791    | ITGBL1         |
| A_33_P3262217  | 4,02571 | 4,37216 | -1,271428207 | N/A             | N/A       | N/A          | N/A            |
| A_21_P0004514  | 3,17736 | 3,52389 | -1,271498711 | N/A             | N/A       | N/A          | Inc-XRCC4-1    |
| A_22_P00016054 | 8,5927  | 8,93929 | -1,271551593 | N/A             | 649446    | NR_024101    | DLGAP1-AS1     |
| A_21_P0007893  | 3,15189 | 3,49849 | -1,271560406 | N/A             | N/A       | N/A          | Inc-TAOK3-1    |
| A_24_P82135    | 5,62931 | 5,97598 | -1,271622104 | ENST00000261847 | 9728      | NM_014701    | SECISBP2L      |
| A_22_P00012934 | 6,13019 | 6,47686 | -1,271622104 | N/A             | N/A       | AK021739     | Inc-RCL1-1     |
| A_33_P3260106  | 3,88344 | 4,23012 | -1,271630919 | N/A             | N/A       | N/A          | N/A            |
| A_23_P13438    | 10,2061 | 10,5528 | -1,271648547 | ENST00000527102 | 84280     | NM_032320    | BTBD10         |
| A_22_P00016450 | 9,49349 | 9,84027 | -1,271719064 | N/A             | N/A       | N/A          | Inc-TMEM63A-1  |
| A_33_P3423949  | 8,63722 | 8,98401 | -1,271727879 | ENST00000310942 | 84733     | NM_005189    | CBX2           |

|                |         |         |              |                 |           |              |              |
|----------------|---------|---------|--------------|-----------------|-----------|--------------|--------------|
| A_21_P0003581  | 2,88651 | 3,23337 | -1,271789586 | N/A             | N/A       | N/A          | Inc-CD38-2   |
| A_21_P0002443  | 2,37519 | 2,72225 | -1,271965905 | N/A             | N/A       | N/A          | Inc-BCL11A-5 |
| A_33_P3311750  | 7,77928 | 8,12641 | -1,272027623 | ENST00000285176 | 9720      | NM_014695    | CCDC144A     |
| A_22_P00012799 | 1,51938 | 1,86652 | -1,27203644  | ENST00000537998 | N/A       | N/A          | N/A          |
| A_23_P418464   | 1,79307 | 2,14029 | -1,272106979 | ENST00000375855 | 158046    | NM_145283    | NXNL2        |
| A_23_P1782     | 12,8745 | 13,2218 | -1,272177521 | ENST00000227155 | 3732      | NM_002231    | CD82         |
| A_23_P209805   | 11,2969 | 11,6442 | -1,272177521 | ENST00000409581 | 4664      | NM_005966    | NAB1         |
| A_23_P168993   | 3,47249 | 3,81986 | -1,272239249 | ENST00000614635 | 155       | NM_000025    | ADRB3        |
| A_23_P388146   | 11,9099 | 12,2573 | -1,272265705 | ENST00000603829 | N/A       | BC011243     | N/A          |
| A_21_P0000088  | 3,86436 | 4,21179 | -1,272292161 | N/A             | 57732     | NM_001172658 | ZFYVE28      |
| A_33_P3211054  | 4,84505 | 5,19263 | -1,272424451 | ENST00000472043 | 127396    | NM_152373    | ZNF684       |
| A_33_P3234025  | 1,49217 | 1,83978 | -1,27245091  | N/A             | 23254     | XM_005245796 | KAZN         |
| A_21_P0005257  | 3,18932 | 3,53693 | -1,27245091  | ENST00000411856 | N/A       | N/A          | N/A          |
| A_33_P3280360  | 1,56628 | 1,91392 | -1,272477371 | N/A             | 100133857 | AK128800     | LOC100133857 |
| A_22_P00023384 | 4,5603  | 4,90795 | -1,272486191 | ENST00000553901 | N/A       | XR_245752    | N/A          |
| A_33_P3387771  | 7,93375 | 8,28145 | -1,272530293 | ENST00000324545 | 8239      | NM_001039590 | USP9X        |
| A_21_P0014135  | 11,3244 | 11,6721 | -1,272530293 | N/A             | N/A       | AV738989     | N/A          |
| A_33_P3422439  | 4,99201 | 5,33976 | -1,272574396 | ENST00000491722 | N/A       | N/A          | N/A          |
| A_21_P0014281  | 1,70824 | 2,05602 | -1,272600859 | N/A             | N/A       | BX096603     | N/A          |
| A_32_P223140   | 2,46606 | 2,8139  | -1,272653786 | ENST00000395809 | 221002    | NM_145313    | RASGEF1A     |
| A_33_P3318911  | 9,82045 | 10,1683 | -1,272662607 | ENST00000406424 | 51763     | NM_001135642 | INPP5K       |
| A_22_P00011177 | 1,36713 | 1,71501 | -1,272689072 | ENST00000532605 | N/A       | N/A          | N/A          |
| A_22_P00007581 | 5,76355 | 6,11161 | -1,27284787  | ENST00000406451 | 9734      | N/A          | HDAC9        |
| A_22_P00023524 | 1,55462 | 1,90268 | -1,27284787  | N/A             | N/A       | N/A          | Inc-SPRY2-2  |
| A_33_P3212615  | 9,84027 | 10,1884 | -1,272909631 | ENST00000233156 | 7035      | NM_006287    | TFPI         |
| A_23_P410587   | 6,98671 | 7,33489 | -1,272953747 | ENST00000511647 | 79960     | NM_024900    | JADE1        |
| A_23_P64617    | 9,91212 | 10,2603 | -1,272953747 | ENST00000531380 | 8322      | NM_012193    | FZD4         |
| A_33_P3282075  | 7,80783 | 8,15603 | -1,272971394 | ENST00000536300 | 80320     | NM_001258248 | SP6          |
| A_19_P00811178 | 5,07945 | 5,42766 | -1,272980218 | ENST00000414769 | 84848     | NR_024607    | MIR503HG     |
| A_33_P3291594  | 3,53593 | 3,88418 | -1,273015513 | ENST00000370131 | 1629      | M19301       | DBT          |
| A_23_P12189    | 10,1749 | 10,5232 | -1,273059633 | ENST00000377038 | 1676      | NM_213566    | DFFA         |
| A_33_P3312258  | 12,1614 | 12,5097 | -1,273059633 | ENST00000400534 | 203068    | NM_001293212 | TUBB         |
| A_33_P3322192  | 6,31432 | 6,66266 | -1,27309493  | ENST00000548294 | N/A       | N/A          | N/A          |



|                |         |         |              |                 |           |              |               |
|----------------|---------|---------|--------------|-----------------|-----------|--------------|---------------|
| A_23_P13822    | 9,45575 | 9,80409 | -1,27309493  | ENST00000075503 | 55359     | NM_018423    | STYK1         |
| A_24_P267997   | 7,4269  | 7,77527 | -1,273121404 | ENST00000528443 | 26092     | NM_015602    | TOR1AIP1      |
| A_23_P37441    | 17,0783 | 17,4267 | -1,273147878 | ENST00000557901 | 567       | NM_004048    | B2M           |
| A_22_P00024028 | 1,42685 | 1,77531 | -1,273200828 | N/A             | N/A       | N/A          | Inc-GLYATL2-2 |
| A_33_P3213374  | 5,79328 | 6,14177 | -1,273227303 | ENST00000618718 | 10370     | NM_006079    | CITED2        |
| A_21_P0004453  | 3,45324 | 3,80176 | -1,27325378  | N/A             | N/A       | N/A          | Inc-PRELI2-2  |
| A_24_P184844   | 4,19563 | 4,54418 | -1,273280257 | N/A             | 1106      | AF006514     | CHD2          |
| A_23_P157736   | 1,56008 | 1,90863 | -1,273280257 | ENST00000372264 | 84814     | NM_032728    | PPAPDC3       |
| A_22_P00019558 | 2,9087  | 3,25727 | -1,273297908 | N/A             | N/A       | N/A          | Inc-ZBTB38-1  |
| A_33_P3287879  | 9,39596 | 9,74456 | -1,273324386 | ENST00000369163 | 8357      | NM_003536    | HIST1H3H      |
| A_22_P00012319 | 7,54536 | 7,89401 | -1,273368517 | ENST00000616428 | N/A       | N/A          | N/A           |
| A_22_P00003327 | 1,48843 | 1,83719 | -1,27346561  | ENST00000519173 | N/A       | N/A          | N/A           |
| A_24_P152188   | 1,62116 | 1,96992 | -1,27346561  | ENST00000295902 | 166336    | NM_198859    | PRICKLE2      |
| A_33_P3215557  | 7,65652 | 8,00543 | -1,273598022 | ENST00000613213 | 11173     | NM_014272    | ADAMTS7       |
| A_21_P0010168  | 2,96074 | 3,30969 | -1,273633334 | N/A             | 101928689 | N/A          | LINC01424     |
| A_33_P3348802  | 8,23591 | 8,58495 | -1,27371279  | ENST00000420509 | N/A       | BC044750     | N/A           |
| A_21_P0010499  | 1,67215 | 2,02122 | -1,273739276 | N/A             | N/A       | N/A          | HOTTIP        |
| A_23_P138776   | 7,54811 | 7,8972  | -1,273756934 | ENST00000525230 | 53        | NM_001610    | ACP2          |
| A_22_P00011611 | 5,75795 | 6,10707 | -1,273783421 | N/A             | N/A       | N/A          | Inc-PCM1-4    |
| A_33_P3408227  | 2,94864 | 3,29777 | -1,27379225  | N/A             | N/A       | N/A          | N/A           |
| A_33_P3342957  | 9,33823 | 9,68737 | -1,27380108  | ENST00000263955 | 9262      | NM_004226    | STK17B        |
| A_23_P45976    | 4,58081 | 4,92998 | -1,273827568 | ENST00000495204 | 5909      | NM_002885    | RAP1GAP       |
| A_23_P73571    | 1,50717 | 1,85639 | -1,273871716 | ENST00000337685 | 139221    | NM_152423    | MUM1L1        |
| A_21_P0010259  | 1,52504 | 1,87427 | -1,273880546 | N/A             | 102723380 | XR_425283    | LOC102723380  |
| A_33_P3302791  | 8,19327 | 8,5425  | -1,273880546 | ENST00000451905 | 730338    | XR_242176    | LOC730338     |
| A_21_P0014362  | 2,93766 | 3,28693 | -1,273915866 | N/A             | 102724715 | XR_424811    | LOC102724715  |
| A_23_P123727   | 8,54349 | 8,89289 | -1,274030663 | ENST00000375963 | 79670     | NM_024617    | ZCCHC6        |
| A_23_P122197   | 12,9914 | 13,3409 | -1,274118975 | ENST00000256442 | 891       | NM_031966    | CCNB1         |
| A_33_P3231981  | 15,1872 | 15,5367 | -1,274118975 | ENST00000377488 | 11315     | NM_007262    | PARK7         |
| A_24_P136402   | 3,94022 | 4,28972 | -1,274118975 | ENST00000389506 | 4297      | NM_005933    | KMT2A         |
| A_33_P3260974  | 6,674   | 7,02354 | -1,274154301 | N/A             | N/A       | DA734158     | N/A           |
| A_23_P14636    | 11,6729 | 12,0226 | -1,274295617 | ENST00000267812 | 4236      | NM_005926    | MFAP1         |
| A_23_P164946   | 7,95629 | 8,30604 | -1,274339782 | ENST00000391909 | 79147     | NM_001039885 | FKRP          |

|                |         |         |              |                 |           |              |                      |
|----------------|---------|---------|--------------|-----------------|-----------|--------------|----------------------|
| A_32_P65706    | 2,46856 | 2,81831 | -1,274339782 | ENST00000380683 | 100129385 | NM_001271829 | C9orf92              |
| A_22_P00013711 | 5,06912 | 5,41889 | -1,274357448 | N/A             | N/A       | N/A          | Inc-RP11-791J7.2.1-1 |
| A_22_P00011722 | 1,40301 | 1,75283 | -1,274401615 | N/A             | N/A       | BC043400     | Inc-PEBP4-1          |
| A_24_P75157    | 1,46259 | 1,81242 | -1,274410448 | ENST00000464222 | 6953      | NM_004610    | TCP10                |
| A_24_P56270    | 8,55892 | 8,90876 | -1,274419282 | ENST00000344096 | 8445      | NM_006482    | DYRK2                |
| A_22_P00021258 | 4,18754 | 4,53741 | -1,274445783 | N/A             | N/A       | BE738439     | Inc-TMEM232-3        |
| A_23_P150935   | 12,3095 | 12,6594 | -1,274472285 | ENST00000257909 | 10024     | NM_005480    | TROAP                |
| A_23_P259189   | 11,3655 | 11,7155 | -1,274560627 | ENST00000488683 | 25932     | NM_013943    | CLIC4                |
| A_33_P3266080  | 11,0934 | 11,4434 | -1,274560627 | ENST00000294168 | 10629     | NM_006473    | TAF6L                |
| A_33_P3307163  | 7,15476 | 7,50479 | -1,274587131 | ENST00000369519 | 282996    | NM_001134363 | RBM20                |
| A_23_P23719    | 9,66036 | 10,0104 | -1,274595966 | ENST00000618148 | 11311     | NM_007259    | VPS45                |
| A_21_P0002609  | 1,64131 | 1,99144 | -1,274675482 | N/A             | N/A       | N/A          | Inc-GYPC-1           |
| A_21_P0014274  | 9,72096 | 10,0712 | -1,274772675 | ENST00000530083 | 171391    | NR_126343    | LOC171391            |
| A_33_P3219230  | 1,39847 | 1,74873 | -1,274790347 | ENST00000596254 | N/A       | XM_003403481 | N/A                  |
| A_22_P00017991 | 8,31802 | 8,66842 | -1,27491406  | N/A             | 100505812 | NR_040599    | CARD8-AS1            |
| A_23_P140146   | 14,2627 | 14,6131 | -1,27491406  | ENST00000554909 | 83982     | NM_032036    | IFI27L2              |
| A_32_P155826   | 3,13491 | 3,48538 | -1,27497592  | ENST00000437322 | 158572    | NR_026742    | USP27X-AS1           |
| A_22_P00012899 | 6,32101 | 6,67153 | -1,275020108 | N/A             | N/A       | N/A          | Inc-RBM34-1          |
| A_33_P3217322  | 1,45897 | 1,8095  | -1,275028946 | N/A             | 54777     | NM_001200049 | CFAP46               |
| A_24_P56240    | 9,62356 | 9,97424 | -1,27516152  | ENST00000331366 | 144402    | NM_153634    | CPNE8                |
| A_33_P3382471  | 1,9698  | 2,32049 | -1,275170359 | ENST00000490948 | 284541    | NM_001010969 | CYP4A22              |
| A_23_P51187    | 13,352  | 13,7028 | -1,27526759  | ENST00000400921 | 5590      | NM_002744    | PRKCZ                |
| A_23_P312999   | 1,59874 | 1,9496  | -1,275320628 | ENST00000503883 | 255119    | NM_152770    | C4orf22              |
| A_21_P0001417  | 2,68272 | 3,03369 | -1,27541787  | N/A             | N/A       | N/A          | Inc-ATF3-1           |
| A_23_P500601   | 10,384  | 10,735  | -1,275444392 | ENST00000355947 | 89122     | NM_033017    | TRIM4                |
| A_24_P391368   | 11,9674 | 12,3184 | -1,275444392 | ENST00000493643 | 25814     | NM_013236    | ATXN10               |
| A_33_P3601163  | 10,0534 | 10,4045 | -1,275532802 | ENST00000591501 | 147727    | NR_024333    | ILF3-AS1             |
| A_24_P396650   | 10,2861 | 10,6373 | -1,275621218 | ENST00000374168 | 6195      | NM_002953    | RPS6KA1              |
| A_22_P00016535 | 1,66464 | 2,01588 | -1,275656586 | ENST00000557295 | 283553    | N/A          | LINC00640            |
| A_22_P00022123 | 4,75117 | 5,10243 | -1,275674271 | N/A             | N/A       | N/A          | Inc-TK2-2            |
| A_24_P58177    | 5,73643 | 6,08773 | -1,27570964  | ENST00000298858 | 80017     | NM_001286473 | C14orf159            |
| A_33_P3304998  | 1,42812 | 1,77943 | -1,275718483 | N/A             | N/A       | N/A          | N/A                  |
| A_23_P411335   | 7,68931 | 8,04062 | -1,275718483 | ENST00000357799 | 151246    | NM_152524    | SGOL2                |

|                |         |         |              |                 |           |              |                |
|----------------|---------|---------|--------------|-----------------|-----------|--------------|----------------|
| A_23_P107855   | 7,60294 | 7,95426 | -1,275727326 | ENST00000221665 | 84922     | NM_032836    | FIZ1           |
| A_21_P0001097  | 6,47457 | 6,82594 | -1,27577154  | N/A             | N/A       | N/A          | Inc-TNFRSF9-1  |
| A_33_P3279181  | 5,73057 | 6,08199 | -1,275815755 | N/A             | N/A       | N/A          | N/A            |
| A_23_P373054   | 8,12804 | 8,47957 | -1,275913035 | ENST00000342649 | 285343    | NM_173826    | TCAIM          |
| A_33_P3331511  | 4,23255 | 4,58412 | -1,275948412 | ENST00000480237 | 100287569 | NR_027345    | LINC00173      |
| A_22_P00003880 | 7,22268 | 7,57431 | -1,276001478 | N/A             | N/A       | N/A          | Inc-CENPP-1    |
| A_33_P3411637  | 5,07315 | 5,42479 | -1,276010322 | ENST00000450520 | N/A       | BC136790     | N/A            |
| A_23_P61149    | 4,78466 | 5,1364  | -1,276098772 | ENST00000445964 | 3635      | NM_001017915 | INPP5D         |
| A_23_P377616   | 9,06987 | 9,42168 | -1,27616069  | ENST00000621399 | 1153      | AK128423     | CIRBP          |
| A_21_P0011010  | 9,31698 | 9,66882 | -1,276187227 | N/A             | N/A       | N/A          | XLOC_I2_002651 |
| A_23_P138480   | 5,64331 | 5,99522 | -1,27624915  | ENST00000239125 | 79946     | NM_024886    | C10orf95       |
| A_33_P3224157  | 4,92747 | 5,27938 | -1,27624915  | ENST00000392950 | 92335     | NM_001165969 | STRADA         |
| A_32_P162187   | 6,39012 | 6,74205 | -1,276266842 | ENST00000299367 | 717       | NM_000063    | C2             |
| A_22_P00018189 | 8,91471 | 9,26666 | -1,276284535 | N/A             | N/A       | N/A          | Inc-ZNF609-1   |
| A_23_P24332    | 1,55453 | 1,9065  | -1,276302229 | ENST00000527569 | 143662    | NM_145650    | MUC15          |
| A_22_P00010664 | 1,49922 | 1,85121 | -1,276319922 | N/A             | N/A       | N/A          | Inc-NENF-1     |
| A_24_P67699    | 17,6409 | 17,9929 | -1,276328769 | ENST00000446445 | 6147      | NM_000984    | RPL23A         |
| A_33_P3377519  | 3,5615  | 3,91351 | -1,276337616 | ENST00000222728 | 3203      | XM_006715716 | HOXA6          |
| A_22_P00016852 | 1,83234 | 2,18447 | -1,276443783 | N/A             | N/A       | N/A          | Inc-TRPM2-1    |
| A_32_P122402   | 9,22917 | 9,58132 | -1,276461478 | ENST00000445872 | 441455    | NR_026792    | LOC441455      |
| A_23_P219060   | 8,51142 | 8,86359 | -1,276479174 | ENST00000614086 | 63940     | NM_022107    | GPSM3          |
| A_33_P3257891  | 2,65199 | 3,00424 | -1,276549959 | ENST00000211122 | 2940      | NM_000847    | GSTA3          |
| A_32_P151800   | 9,87792 | 10,2302 | -1,276576504 | ENST00000584486 | 728833    | NM_207418    | FAM72D         |
| A_22_P00013890 | 5,02906 | 5,38138 | -1,276611899 | ENST00000570314 | 101927060 | N/A          | LOC101927060   |
| A_21_P0009324  | 8,27754 | 8,62989 | -1,276638446 | N/A             | N/A       | N/A          | Inc-CCR7-1     |
| A_23_P108743   | 1,39724 | 1,74964 | -1,276682691 | ENST00000409273 | 129446    | NM_152381    | XIRP2          |
| A_22_P00018986 | 1,43016 | 1,78259 | -1,27670924  | N/A             | 101928440 | NR_120550    | FBXO3-AS1      |
| A_24_P143301   | 1,3438  | 1,69625 | -1,276726939 | ENST00000274766 | 353219    | NM_181337    | KAAG1          |
| A_33_P3266915  | 1,49243 | 1,84488 | -1,276726939 | N/A             | N/A       | N/A          | Inc-CPNE5-1    |
| A_33_P3421363  | 7,35775 | 7,71033 | -1,276841989 | ENST00000492115 | 169841    | NM_194320    | ZNF169         |
| A_21_P0005999  | 1,72898 | 2,0816  | -1,276877391 | ENST00000442260 | N/A       | N/A          | N/A            |
| A_24_P213763   | 5,14447 | 5,49709 | -1,276877391 | ENST00000397495 | N/A       | BC013798     | N/A            |
| A_23_P418083   | 8,0161  | 8,36879 | -1,276939347 | ENST00000392959 | 167691    | NM_181714    | LCA5           |

|                |         |         |              |                 |           |              |                    |
|----------------|---------|---------|--------------|-----------------|-----------|--------------|--------------------|
| A_23_P90079    | 4,6447  | 4,99739 | -1,276939347 | ENST00000460935 | 90576     | NM_001080821 | ZNF799             |
| A_24_P307306   | 5,86953 | 6,22223 | -1,276948198 | ENST00000443168 | N/A       | N/A          | N/A                |
| A_23_P16415    | 10,4041 | 10,7568 | -1,276948198 | ENST00000590278 | 4037      | NM_002333    | LRP3               |
| A_24_P136641   | 9,59594 | 9,94867 | -1,276974751 | N/A             | 100129250 | NR_033991    | TOPORS-AS1         |
| A_22_P00019621 | 3,64393 | 3,99668 | -1,276992454 | N/A             | N/A       | CD367206     | Inc-C1QTNF5-1      |
| A_33_P3339256  | 2,93226 | 3,28505 | -1,27702786  | N/A             | N/A       | AK126938     | N/A                |
| A_33_P3422113  | 10,1955 | 10,5483 | -1,277036712 | N/A             | 221584    | NR_024063    | ZSCAN12P1          |
| A_33_P3229181  | 12,6303 | 12,9831 | -1,277036712 | ENST00000354161 | 56996     | NM_020246    | SLC12A9            |
| A_23_P13701    | 11,7717 | 12,1245 | -1,277036712 | ENST00000556010 | 51643     | NM_016056    | TMBIM4             |
| A_22_P00000363 | 6,00795 | 6,36084 | -1,27711638  | N/A             | N/A       | BX108291     | Inc-AC016722.2.1-2 |
| A_23_P165090   | 12,9071 | 13,26   | -1,277125233 | ENST00000538929 | 374291    | NM_024407    | NDUFS7             |
| A_22_P00001239 | 1,51652 | 1,86942 | -1,277125233 | ENST00000418875 | N/A       | N/A          | N/A                |
| A_23_P66050    | 7,48193 | 7,83498 | -1,277258025 | ENST00000449549 | 84752     | NM_033309    | B3GNT9             |
| A_22_P00002525 | 2,90396 | 3,25701 | -1,277258025 | N/A             | 339192    | XR_424828    | LOC339192          |
| A_23_P382043   | 10,3849 | 10,7381 | -1,277390831 | ENST00000319550 | 221294    | NM_152729    | NT5DC1             |
| A_21_P0000953  | 1,54911 | 1,90246 | -1,277523651 | ENST00000420211 | N/A       | N/A          | N/A                |
| A_33_P3300273  | 7,67196 | 8,02533 | -1,277541361 | ENST00000294661 | 148423    | NM_198077    | C1orf52            |
| A_33_P3226129  | 3,72975 | 4,08318 | -1,277594494 | N/A             | N/A       | N/A          | N/A                |
| A_21_P0009980  | 1,65111 | 2,00454 | -1,277594494 | N/A             | N/A       | N/A          | Inc-MC3R-1         |
| A_23_P141960   | 9,32864 | 9,6822  | -1,277709622 | ENST00000322354 | 29946     | NM_203344    | SERTAD3            |
| A_21_P0011017  | 12,0878 | 12,4414 | -1,277745048 | N/A             | N/A       | N/A          | XLOC_I2_002767     |
| A_33_P3480561  | 5,68069 | 6,03429 | -1,277745048 | ENST00000462718 | 83592     | NM_001271025 | AKR1E2             |
| A_24_P122337   | 7,34318 | 7,69681 | -1,277771618 | ENST00000276141 | 94121     | NM_080737    | SYTL4              |
| A_33_P3416009  | 1,65019 | 2,00382 | -1,277771618 | ENST00000303113 | 29980     | AK001274     | DONSON             |
| A_33_P3212102  | 1,80197 | 2,15561 | -1,277780475 | ENST00000273905 | 345274    | NM_197965    | SLC10A6            |
| A_22_P00005133 | 6,30809 | 6,66178 | -1,27782476  | ENST00000542248 | 387895    | N/A          | LINC00944          |
| A_33_P3363560  | 11,2552 | 11,6089 | -1,277833618 | ENST00000376014 | 55092     | NM_001136216 | TMEM51             |
| A_19_P00802936 | 14,4227 | 14,7765 | -1,277922193 | ENST00000530758 | 55845     | NM_018462    | BRK1               |
| A_23_P366035   | 1,44834 | 1,80217 | -1,277948767 | ENST00000554566 | 145447    | NM_001206673 | ABHD12B            |
| A_24_P229164   | 8,26045 | 8,61431 | -1,277975342 | ENST00000536617 | 9026      | NM_003959    | HIP1R              |
| A_33_P3875565  | 1,45165 | 1,80554 | -1,278001917 | ENST00000449427 | 100270679 | NR_038394    | LINC01432          |
| A_21_P0003852  | 1,50891 | 1,86281 | -1,278010775 | N/A             | N/A       | N/A          | Inc-MGST2-1        |
| A_23_P78504    | 1,52621 | 1,88035 | -1,278223397 | ENST00000254181 | 57663     | NM_020903    | USP29              |

|                |         |         |              |                 |           |              |                       |
|----------------|---------|---------|--------------|-----------------|-----------|--------------|-----------------------|
| A_23_P81507    | 8,24087 | 8,59504 | -1,278249977 | ENST00000261800 | 2196      | NM_001447    | FAT2                  |
| A_22_P00020462 | 2,08441 | 2,43865 | -1,278312    | N/A             | 100874078 | NR_046592    | EIF1AX-AS1            |
| A_21_P0001454  | 2,29446 | 2,64872 | -1,278329721 | N/A             | N/A       | N/A          | Inc-NOC2L-5           |
| A_19_P00321556 | 1,42571 | 1,78001 | -1,278365164 | ENST00000435394 | 101927528 | N/A          | LINC01204             |
| A_23_P138524   | 1,60333 | 1,95769 | -1,278418331 | ENST00000241305 | 119587    | NM_198148    | CPXM2                 |
| A_21_P0007260  | 1,63159 | 1,98596 | -1,278427192 | N/A             | N/A       | N/A          | Inc-RP11-201M22.1.1-2 |
| A_23_P359904   | 12,6679 | 13,0223 | -1,278453777 | ENST00000319863 | 347862    | NM_182612    | PDDC1                 |
| A_21_P0009876  | 2,99692 | 3,35136 | -1,278489223 | ENST00000450640 | 101929207 | NR_109860    | LOC101929207          |
| A_22_P00018659 | 1,36207 | 1,71656 | -1,278533533 | N/A             | N/A       | N/A          | Inc-CPT2-4            |
| A_33_P3268793  | 10,578  | 10,9325 | -1,278542395 | ENST00000329478 | 113179    | NM_138422    | ADAT3                 |
| A_21_P0004873  | 1,41304 | 1,76767 | -1,278657609 | ENST00000530000 | 100653005 | XR_132518    | LOC100653005          |
| A_33_P3210303  | 1,35928 | 1,71396 | -1,278701925 | N/A             | N/A       | CU688821     | N/A                   |
| A_21_P0013131  | 3,49923 | 3,85391 | -1,278701925 | ENST00000450618 | N/A       | XR_242007    | N/A                   |
| A_23_P115922   | 12,159  | 12,5137 | -1,278719651 | ENST00000373218 | 1979      | NM_004096    | EIF4EBP2              |
| A_22_P00021819 | 1,56473 | 1,91951 | -1,278790561 | ENST00000567103 | N/A       | N/A          | N/A                   |
| A_33_P3269408  | 15,1929 | 15,5477 | -1,278808289 | ENST00000388920 | 399823    | NM_207426    | FOXI2                 |
| A_32_P505730   | 2,68691 | 3,04173 | -1,278826017 | ENST00000304890 | 3116      | BC017967     | HLA-DPB2              |
| A_22_P00012284 | 4,40903 | 4,76387 | -1,278843745 | N/A             | N/A       | N/A          | Inc-PPP2R2D-3         |
| A_33_P3415491  | 8,24929 | 8,60414 | -1,278852609 | ENST00000615333 | 197335    | NM_145294    | WDR90                 |
| A_23_P160567   | 5,56856 | 5,92342 | -1,278861474 | ENST00000611861 | 84217     | NM_032257    | ZMYND12               |
| A_21_P0009133  | 4,09733 | 4,45221 | -1,278879203 | N/A             | N/A       | N/A          | Inc-CLEC18B-3         |
| A_21_P0010725  | 7,40075 | 7,75578 | -1,279012177 | ENST00000457390 | N/A       | N/A          | N/A                   |
| A_22_P00002070 | 6,16756 | 6,5226  | -1,279021043 | ENST00000560376 | N/A       | N/A          | N/A                   |
| A_33_P3289352  | 5,55317 | 5,90821 | -1,279021043 | ENST00000368456 | 90780     | NM_138300    | PYGO2                 |
| A_33_P3329023  | 4,43515 | 4,7902  | -1,279029908 | ENST00000615519 | 388650    | NM_001252273 | FAM69A                |
| A_23_P351328   | 1,66969 | 2,02495 | -1,279216099 | ENST00000335524 | 339779    | NM_178553    | PRR30                 |
| A_22_P00014036 | 2,93421 | 3,28949 | -1,279233832 | N/A             | N/A       | N/A          | Inc-S100A1-2          |
| A_21_P0011426  | 3,62267 | 3,97801 | -1,279287035 | ENST00000254109 | 100132341 | N/A          | CLUHP3                |
| A_23_P30275    | 9,84194 | 10,1973 | -1,27930477  | ENST00000507621 | 78991     | NM_024028    | PCYOX1L               |
| A_23_P154832   | 14,4195 | 14,7749 | -1,279340241 | ENST00000400093 | 522       | NM_001003703 | ATP5J                 |
| A_23_P155052   | 4,69379 | 5,04925 | -1,279393448 | ENST00000409652 | 80830     | NM_030641    | APOL6                 |
| A_21_P0006516  | 3,16378 | 3,51929 | -1,279437789 | ENST00000592070 | 100506757 | NR_038998    | LINC00629             |
| A_33_P3323048  | 5,26886 | 5,62437 | -1,279437789 | ENST00000507030 | 84068     | NM_001029998 | SLC10A7               |

|                |         |         |              |                 |           |              |                  |
|----------------|---------|---------|--------------|-----------------|-----------|--------------|------------------|
| A_33_P3410385  | 3,42219 | 3,77772 | -1,279455526 | ENST00000379672 | 9912      | NM_014859    | ARHGAP44         |
| A_22_P00009703 | 3,63475 | 3,9903  | -1,279473263 | ENST00000579480 | N/A       | BG033148     | N/A              |
| A_22_P00002244 | 9,43696 | 9,79254 | -1,279499869 | N/A             | 102724002 | XR_424156    | LOC102724002     |
| A_23_P77000    | 7,27789 | 7,63356 | -1,279579691 | ENST00000167106 | 22846     | NM_014909    | VASH1            |
| A_32_P107746   | 11,0908 | 11,4465 | -1,2796063   | ENST00000554405 | 2029      | NM_207042    | ENSA             |
| A_33_P3328751  | 1,45001 | 1,80575 | -1,279641778 | N/A             | N/A       | N/A          | N/A              |
| A_33_P3267233  | 2,53274 | 2,88852 | -1,279677258 | N/A             | N/A       | CU692315     | N/A              |
| A_24_P242361   | 8,14592 | 8,50175 | -1,279721609 | ENST00000370550 | 9653      | NM_012262    | HS2ST1           |
| A_24_P205019   | 8,33758 | 8,69343 | -1,27973935  | ENST00000292579 | 58500     | NM_021061    | ZNF250           |
| A_24_P414719   | 8,17645 | 8,53231 | -1,27974822  | N/A             | 4800      | NM_002505    | NFYA             |
| A_33_P3376249  | 17,7126 | 18,0685 | -1,279783703 | ENST00000368709 | 6273      | NM_005978    | S100A2           |
| A_33_P3499692  | 9,87857 | 10,2345 | -1,279810316 | N/A             | 645261    | AF258587     | LOC645261        |
| A_22_P00003071 | 1,46296 | 1,81893 | -1,2798458   | ENST00000524098 | N/A       | N/A          | N/A              |
| A_22_P00011218 | 5,79199 | 6,14816 | -1,280023237 | N/A             | N/A       | N/A          | Inc-OPN4-1       |
| A_33_P3373437  | 3,17324 | 3,52941 | -1,280023237 | ENST00000523608 | N/A       | N/A          | N/A              |
| A_33_P3328921  | 1,54728 | 1,90349 | -1,280058727 | ENST00000559615 | N/A       | BX161431     | N/A              |
| A_22_P00025068 | 2,3194  | 2,67565 | -1,280094218 | N/A             | N/A       | N/A          | Inc-MAEL-1       |
| A_33_P3227556  | 9,74374 | 10,1001 | -1,280191824 | N/A             | N/A       | N/A          | N/A              |
| A_23_P259207   | 4,82343 | 5,1798  | -1,280200698 | ENST00000496844 | 55258     | NM_018271    | THNSL2           |
| A_21_P0006174  | 5,50493 | 5,86132 | -1,280218445 | N/A             | N/A       | N/A          | Inc-C9orf79-1    |
| A_33_P3619819  | 14,605  | 14,9614 | -1,280227319 | N/A             | N/A       | N/A          | Inc-USP35-1      |
| A_24_P791829   | 10,8618 | 11,2182 | -1,280227319 | ENST00000225388 | 57532     | NM_020772    | NUFIP2           |
| A_24_P56467    | 13,487  | 13,8434 | -1,280227319 | ENST00000559287 | 51292     | NM_001002000 | GMPR2            |
| A_21_P0014619  | 4,82543 | 5,18186 | -1,280253941 | N/A             | 101928953 | BQ082135     | LOC101928953     |
| A_22_P00025793 | 1,49947 | 1,85592 | -1,280271689 | N/A             | N/A       | N/A          | Inc-AC135050.1-1 |
| A_22_P00015526 | 1,41656 | 1,77303 | -1,280289438 | ENST00000512873 | 101929199 | NR_125921    | LOC101929199     |
| A_21_P0007006  | 2,37912 | 2,7356  | -1,280298312 | N/A             | N/A       | N/A          | Inc-DYDC1-3      |
| A_22_P00023034 | 2,39376 | 2,75026 | -1,280316061 | ENST00000501143 | 101927792 | XR_243463    | LOC101927792     |
| A_22_P00009839 | 1,58598 | 1,94262 | -1,280440309 | ENST00000524707 | N/A       | N/A          | N/A              |
| A_23_P64650    | 13,2065 | 13,5632 | -1,280493562 | ENST00000323833 | 10102     | NM_005726    | TSFM             |
| A_33_P3334791  | 7,55257 | 7,90935 | -1,28056457  | ENST00000368264 | 112770    | NM_001256608 | GLMP             |
| A_21_P0003626  | 2,28686 | 2,64364 | -1,28056457  | N/A             | N/A       | N/A          | Inc-COPS4-1      |
| A_23_P419202   | 4,95534 | 5,31219 | -1,280626705 | ENST00000602828 | 26149     | NM_033160    | ZNF658           |

|                |         |         |              |                 |           |              |              |
|----------------|---------|---------|--------------|-----------------|-----------|--------------|--------------|
| A_32_P192474   | 5,69652 | 6,05338 | -1,280635582 | ENST00000460171 | 80863     | NM_030651    | PRRT1        |
| A_21_P0014876  | 8,39964 | 8,7565  | -1,280635582 | N/A             | N/A       | N/A          | N/A          |
| A_23_P141021   | 7,38325 | 7,74014 | -1,280662212 | ENST00000563095 | 54947     | NM_017839    | LPCAT2       |
| A_21_P0009569  | 1,69606 | 2,053   | -1,280706597 | N/A             | N/A       | N/A          | Inc-CDH19-1  |
| A_33_P3258660  | 5,31766 | 5,67471 | -1,28080425  | ENST00000273908 | 79966     | NM_024906    | SCD5         |
| A_33_P3421084  | 4,35259 | 4,70964 | -1,28080425  | ENST00000560282 | 388182    | NR_028139    | SPATA41      |
| A_32_P321996   | 1,58263 | 1,93975 | -1,280866396 | ENST00000360890 | 57705     | NM_020945    | WDFY4        |
| A_23_P423331   | 3,91004 | 4,26717 | -1,280875275 | ENST00000393229 | 84628     | NM_032536    | NTNG2        |
| A_32_P156892   | 11,9059 | 12,2631 | -1,280937425 | ENST00000421179 | 6767      | NM_003932    | ST13         |
| A_24_P251661   | 6,47429 | 6,83152 | -1,280964061 | ENST00000314235 | 27094     | NM_171828    | KCNMB3       |
| A_21_P0012910  | 8,35103 | 8,70828 | -1,280981819 | ENST00000492832 | 387036    | N/A          | GUSBP2       |
| A_23_P211039   | 8,61302 | 8,97028 | -1,280990698 | ENST00000464589 | 9510      | NM_006988    | ADAMTS1      |
| A_33_P3322594  | 3,33579 | 3,69311 | -1,281043974 | ENST00000400004 | 645864    | N/A          | MAGEB17      |
| A_24_P88801    | 5,96102 | 6,31836 | -1,281061734 | ENST00000355301 | 4867      | NM_000272    | NPHP1        |
| A_23_P50426    | 11,5877 | 11,9452 | -1,281203816 | ENST00000586659 | 25959     | NM_015493    | KANK2        |
| A_33_P3241741  | 6,67128 | 7,02884 | -1,281257101 | N/A             | 677808    | NR_002962    | SNORA23      |
| A_23_P120860   | 10,0709 | 10,4285 | -1,281292625 | ENST00000216121 | 8508      | NM_003634    | NIPSNAP1     |
| A_24_P301547   | 5,79871 | 6,15632 | -1,281301506 | ENST00000426147 | 55028     | NM_017941    | C17orf80     |
| A_23_P211643   | 4,23956 | 4,5972  | -1,281328151 | ENST00000493286 | 5465      | NM_005036    | PPARA        |
| A_23_P154874   | 6,86124 | 7,21889 | -1,281337032 | ENST00000497493 | 10311     | NM_006052    | DSCR3        |
| A_33_P3345708  | 7,46803 | 7,8257  | -1,281354795 | ENST00000368600 | 148327    | NM_130898    | CREB3L4      |
| A_33_P3214052  | 2,65452 | 3,01222 | -1,281381441 | N/A             | N/A       | N/A          | Inc-SHPRH-2  |
| A_21_P0003278  | 8,23143 | 8,58914 | -1,281390323 | N/A             | N/A       | N/A          | Inc-WNT7A-1  |
| A_33_P3382147  | 7,34755 | 7,7053  | -1,281425851 | ENST00000487412 | 90627     | AY082592     | STARD13      |
| A_23_P119714   | 11,8227 | 12,1805 | -1,281470262 | ENST00000359435 | 29086     | NM_001033549 | BABAM1       |
| A_23_P163099   | 9,12502 | 9,48291 | -1,281550207 | ENST00000556584 | 5427      | NM_002692    | POLE2        |
| A_33_P3238636  | 1,46792 | 1,82582 | -1,28155909  | ENST00000447353 | 129881    | NM_001085447 | CCDC173      |
| A_24_P269779   | 1,5907  | 1,94874 | -1,281683459 | ENST00000373115 | 9469      | NM_004273    | CHST3        |
| A_19_P00320731 | 4,41407 | 4,77222 | -1,281781187 | ENST00000450550 | 101927043 | N/A          | LOC101927043 |
| A_21_P0008447  | 4,08492 | 4,44308 | -1,281790071 | N/A             | N/A       | N/A          | Inc-SGPP1-1  |
| A_33_P3261927  | 7,44271 | 7,80087 | -1,281790071 | ENST00000331410 | 285989    | NM_213603    | ZNF789       |
| A_23_P133755   | 11,4309 | 11,7891 | -1,281825611 | ENST00000369110 | 5550      | NM_002726    | PREP         |
| A_23_P57667    | 15,4474 | 15,8056 | -1,281825611 | ENST00000393409 | 5361      | NM_032242    | PLXNA1       |

|                |         |         |              |                 |           |              |              |
|----------------|---------|---------|--------------|-----------------|-----------|--------------|--------------|
| A_23_P160214   | 6,85089 | 7,20911 | -1,281843381 | ENST00000447632 | 22996     | NM_001080494 | TTC39A       |
| A_33_P3235706  | 4,46646 | 4,82469 | -1,281852266 | N/A             | 23318     | BC048301     | ZCCHC11      |
| A_33_P3229477  | 6,91252 | 7,27077 | -1,281870036 | ENST00000337532 | 143098    | NM_173496    | MPP7         |
| A_23_P213093   | 13,0586 | 13,4169 | -1,281914463 | ENST00000381473 | 54940     | NM_001079839 | OCIAD1       |
| A_23_P136172   | 9,51577 | 9,87411 | -1,281950006 | ENST00000617977 | 137695    | NM_152417    | TMEM68       |
| A_22_P00010509 | 3,34548 | 3,70383 | -1,281958892 | N/A             | N/A       | N/A          | Inc-NBPF24-4 |
| A_21_P0007692  | 3,94391 | 4,3023  | -1,281994436 | N/A             | 102724247 | XR_424331    | LOC102724247 |
| A_21_P0014943  | 1,48579 | 1,84422 | -1,28202998  | N/A             | 101930418 | XR_250440    | LOC101930418 |
| A_23_P348383   | 6,88268 | 7,24112 | -1,282038867 | ENST00000389652 | 57545     | NM_001080522 | CC2D2A       |
| A_23_P41194    | 6,63075 | 6,98919 | -1,282038867 | ENST00000522329 | 151827    | NM_153353    | LRR34        |
| A_23_P164528   | 8,69577 | 9,05422 | -1,282047753 | ENST00000615645 | 23335     | NM_015285    | WDR7         |
| A_33_P3372722  | 3,31909 | 3,67755 | -1,28205664  | N/A             | N/A       | N/A          | Inc-ENDOD1-1 |
| A_22_P00018871 | 2,46342 | 2,82188 | -1,28205664  | ENST00000457858 | 102724076 | N/A          | LINC01038    |
| A_21_P0001486  | 6,23671 | 6,59517 | -1,28205664  | N/A             | N/A       | N/A          | Inc-TAF12-3  |
| A_21_P0001731  | 1,44863 | 1,80712 | -1,2820833   | ENST00000452509 | 100505768 | NR_038324    | LINC01364    |
| A_22_P00021102 | 5,00203 | 5,36052 | -1,2820833   | N/A             | N/A       | BC036938     | Inc-LRRC17-1 |
| A_33_P3782529  | 3,9097  | 4,26821 | -1,282101073 | N/A             | 553103    | NR_110997    | LOC553103    |
| A_22_P00014474 | 1,41878 | 1,77736 | -1,282163283 | N/A             | N/A       | N/A          | Inc-SHANK2-4 |
| A_33_P3422289  | 9,61729 | 9,97588 | -1,28217217  | N/A             | N/A       | N/A          | Inc-TMED5-1  |
| A_33_P3346403  | 15,7233 | 16,0821 | -1,282358818 | ENST00000397729 | 5757      | NM_001099285 | PTMA         |
| A_22_P00025283 | 1,66013 | 2,01894 | -1,282367706 | N/A             | N/A       | N/A          | Inc-H2AFV-1  |
| A_23_P4160     | 7,62292 | 7,98175 | -1,282385484 | ENST00000356906 | 10230     | NR_003108    | NBR2         |
| A_22_P00000933 | 1,46307 | 1,82206 | -1,282527713 | ENST00000448674 | N/A       | XM_005252244 | N/A          |
| A_23_P137705   | 7,79268 | 8,15183 | -1,282669958 | ENST00000465440 | 9095      | NM_005149    | TBX19        |
| A_33_P3282205  | 1,45855 | 1,81773 | -1,28269663  | N/A             | N/A       | AK026419     | N/A          |
| A_21_P0013693  | 1,70179 | 2,06113 | -1,282838894 | ENST00000423138 | 158381    | N/A          | ATP8B5P      |
| A_23_P101407   | 11,224  | 11,5834 | -1,282892247 | ENST00000599899 | 718       | NM_000064    | C3           |
| A_21_P0008791  | 5,00973 | 5,36914 | -1,282901139 | ENST00000611265 | 400456    | N/A          | LINC01197    |
| A_33_P3212167  | 2,79275 | 3,15222 | -1,282954495 | ENST00000546208 | 88        | NM_001278344 | ACTN2        |
| A_23_P93360    | 8,23882 | 8,5983  | -1,282963387 | ENST00000462045 | 177       | NM_001136    | AGER         |
| A_33_P3348887  | 7,49572 | 7,85522 | -1,282981173 | ENST00000373482 | 5090      | NM_006195    | PBX3         |
| A_23_P31218    | 5,87078 | 6,2303  | -1,282998959 | ENST00000333319 | 129790    | NR_026865    | C7orf13      |
| A_21_P0002527  | 1,54684 | 1,90641 | -1,283043425 | N/A             | N/A       | N/A          | Inc-ZSWIM2-4 |



|                |         |         |              |                 |           |              |                |
|----------------|---------|---------|--------------|-----------------|-----------|--------------|----------------|
| A_24_P4661     | 11,6815 | 12,0411 | -1,283070106 | ENST00000397776 | 9538      | NM_004879    | EI24           |
| A_21_P0008800  | 1,37697 | 1,73663 | -1,283123468 | ENST00000561362 | N/A       | N/A          | N/A            |
| A_23_P29953    | 10,1189 | 10,4786 | -1,283159044 | ENST00000320650 | 3600      | NM_172175    | IL15           |
| A_22_P00006082 | 3,08487 | 3,44478 | -1,283345836 | ENST00000443359 | N/A       | N/A          | N/A            |
| A_23_P50517    | 1,38717 | 1,74708 | -1,283345836 | ENST00000314121 | 84215     | NM_001277075 | ZNF541         |
| A_23_P13907    | 1,45568 | 1,8156  | -1,283354731 | ENST00000481539 | 3479      | NM_000618    | IGF1           |
| A_19_P00322757 | 3,62391 | 3,98386 | -1,283381418 | ENST00000442625 | 23263     | BC035340     | MCF2L          |
| A_23_P75380    | 12,4968 | 12,8568 | -1,283425898 | ENST00000279146 | 9049      | NM_003977    | AIP            |
| A_23_P48835    | 12,4912 | 12,8512 | -1,283425898 | ENST00000260363 | 9493      | NM_138555    | KIF23          |
| A_21_P0014703  | 5,95201 | 6,31209 | -1,283497068 | N/A             | 643837    | NR_047526    | LINC01128      |
| A_33_P3322539  | 3,4806  | 3,8408  | -1,283603831 | ENST00000380030 | 139105    | NM_001184767 | BEND2          |
| A_33_P3325384  | 3,96175 | 4,32196 | -1,283612728 | N/A             | 100130992 | NR_038921    | LOC100130992   |
| A_33_P3381691  | 3,11885 | 3,47908 | -1,283630523 | ENST00000623295 | 140834    | NM_001287807 | C20orf62       |
| A_22_P00006986 | 3,50899 | 3,86928 | -1,283683908 | N/A             | N/A       | N/A          | Inc-GDPD4-2    |
| A_24_P366535   | 11,8687 | 12,229  | -1,283692806 | ENST00000604252 | N/A       | N/A          | N/A            |
| A_24_P64653    | 4,75791 | 5,11823 | -1,283710602 | ENST00000614691 | 196410    | NM_152637    | METTL7B        |
| A_22_P00001119 | 3,15875 | 3,51913 | -1,283763991 | N/A             | N/A       | N/A          | Inc-ALPK3-1    |
| A_21_P0014743  | 1,6512  | 2,01163 | -1,283808484 | N/A             | N/A       | N/A          | N/A            |
| A_21_P0013205  | 1,62157 | 1,982   | -1,283808484 | N/A             | N/A       | N/A          | XLOC_I2_013427 |
| A_23_P252082   | 6,41091 | 6,77147 | -1,283924172 | ENST00000484928 | 55365     | NM_018487    | TMEM176A       |
| A_23_P158318   | 1,4831  | 1,84375 | -1,28400427  | ENST00000550066 | 4920      | NM_004560    | ROR2           |
| A_23_P39088    | 13,2866 | 13,6473 | -1,284048771 | ENST00000391851 | 3276      | NM_001536    | PRMT1          |
| A_24_P143189   | 16,7851 | 17,1458 | -1,284048771 | ENST00000380633 | 7114      | NM_021109    | TMSB4X         |
| A_22_P00012887 | 4,74724 | 5,10797 | -1,284075472 | N/A             | N/A       | N/A          | Inc-RBM17-1    |
| A_24_P24685    | 8,72233 | 9,0831  | -1,284111075 | ENST00000451823 | N/A       | N/A          | N/A            |
| A_22_P00003104 | 3,95903 | 4,31991 | -1,284208987 | ENST00000432783 | 158435    | NR_033838    | LOC158435      |
| A_33_P3271725  | 5,43608 | 5,79696 | -1,284208987 | ENST00000398814 | 80125     | NM_025055    | CCDC33         |
| A_33_P3708364  | 16,1633 | 16,5242 | -1,28422679  | N/A             | 644285    | AK126853     | LOC644285      |
| A_33_P3319421  | 1,96605 | 2,32699 | -1,284262397 | ENST00000619103 | N/A       | N/A          | N/A            |
| A_33_P3280317  | 1,54706 | 1,9081  | -1,284351418 | ENST00000624685 | 388667    | NM_001013643 | C1orf137       |
| A_33_P3379391  | 6,80436 | 7,16543 | -1,284378126 | ENST00000389078 | 55766     | NM_177925    | H2AFJ          |
| A_23_P85560    | 13,9425 | 14,3036 | -1,284404834 | ENST00000373586 | 8668      | NM_003757    | EIF3I          |
| A_21_P0010514  | 6,65982 | 7,02098 | -1,284458252 | ENST00000544155 | N/A       | XR_427269    | N/A            |

|                |         |         |              |                 |           |              |                |
|----------------|---------|---------|--------------|-----------------|-----------|--------------|----------------|
| A_33_P3291776  | 14,2725 | 14,6337 | -1,284493865 | ENST00000461452 | 54187     | NM_018946    | NANS           |
| A_23_P141076   | 1,57386 | 1,93506 | -1,284493865 | ENST00000394747 | 85320     | NM_033151    | ABCC11         |
| A_33_P3284108  | 7,02198 | 7,38325 | -1,284556191 | ENST00000570034 | 4905      | NM_006178    | NSF            |
| A_33_P3426943  | 1,57867 | 1,94001 | -1,284618519 | N/A             | 151484    | NR_038238    | LOC151484      |
| A_23_P7655     | 8,14466 | 8,50605 | -1,284663042 | ENST00000393770 | 662       | NM_013978    | BNIP1          |
| A_24_P272061   | 17,1176 | 17,479  | -1,284671946 | ENST00000430133 | 23521     | NM_012423    | RPL13A         |
| A_24_P238499   | 7,03083 | 7,39224 | -1,284680851 | N/A             | 494514    | NM_001012716 | TYMSOS         |
| A_21_P0002207  | 4,84744 | 5,2089  | -1,284725375 | N/A             | N/A       | N/A          | Inc-SIX3-3     |
| A_33_P3226825  | 2,06008 | 2,42157 | -1,284752091 | ENST00000431365 | 117579    | NM_080864    | RLN3           |
| A_21_P0007550  | 4,53658 | 4,89809 | -1,284769901 | N/A             | N/A       | N/A          | Inc-TMEM106C-1 |
| A_33_P3370060  | 7,41115 | 7,77281 | -1,284903489 | ENST00000562773 | 57636     | NM_001199417 | ARHGAP23       |
| A_22_P00009183 | 2,55238 | 2,91413 | -1,284983647 | N/A             | N/A       | N/A          | Inc-LOX-5      |
| A_21_P0001304  | 2,46026 | 2,82203 | -1,285001461 | N/A             | N/A       | N/A          | Inc-PRKAA2-2   |
| A_22_P00011672 | 1,429   | 1,79077 | -1,285001461 | ENST00000579944 | 100131814 | NR_026805    | LINC00271      |
| A_19_P00317878 | 5,49255 | 5,85437 | -1,285045997 | N/A             | 100652730 | NR_046224    | LINC00659      |
| A_24_P16950    | 6,75438 | 7,11624 | -1,285081626 | ENST00000429604 | 90338     | NM_198893    | ZNF160         |
| A_22_P00001813 | 7,60371 | 7,96563 | -1,285135072 | ENST00000523791 | N/A       | N/A          | N/A            |
| A_22_P00004407 | 4,34418 | 4,70612 | -1,285152888 | N/A             | N/A       | BX101153     | Inc-COMMD6-1   |
| A_21_P0008857  | 5,80344 | 6,16553 | -1,285286515 | N/A             | N/A       | N/A          | Inc-PEAK1.1-1  |
| A_33_P3223111  | 6,02232 | 6,38441 | -1,285286515 | N/A             | N/A       | N/A          | N/A            |
| A_33_P3278211  | 5,23893 | 5,60105 | -1,285313242 | N/A             | 79812     | XM_006717970 | MMRN2          |
| A_22_P00005454 | 3,9133  | 4,27561 | -1,285482527 | ENST00000518163 | N/A       | BG459920     | N/A            |
| A_23_P62227    | 1,4588  | 1,82112 | -1,285491437 | ENST00000378962 | 80231     | NM_025159    | CXorf21        |
| A_24_P32574    | 1,39614 | 1,75869 | -1,285696391 | ENST00000304613 | 85442     | NM_152643    | KNDC1          |
| A_21_P0009645  | 1,45282 | 1,81565 | -1,285945945 | ENST00000588275 | 101928845 | XR_244102    | LOC101928845   |
| A_22_P00002330 | 1,45151 | 1,81447 | -1,286061826 | ENST00000534756 | 101928536 | NR_120553    | LINC01493      |
| A_21_P0009697  | 2,21272 | 2,57569 | -1,28607074  | N/A             | N/A       | N/A          | Inc-ZNF730-1   |
| A_32_P158746   | 15,3707 | 15,7337 | -1,286097483 | ENST00000422360 | 6139      | NM_000985    | RPL17          |
| A_24_P32139    | 3,31211 | 3,67519 | -1,286168802 | ENST00000415389 | 285242    | NM_182589    | HTR3E          |
| A_21_P0009344  | 1,44367 | 1,80678 | -1,286195547 | N/A             | N/A       | N/A          | Inc-NACA2-2    |
| A_23_P68949    | 12,7539 | 13,1172 | -1,286364948 | ENST00000455824 | 6767      | NM_003932    | ST13           |
| A_33_P3392097  | 4,81363 | 5,17697 | -1,286400614 | N/A             | N/A       | N/A          | Inc-ZNF2-1     |
| A_22_P00007458 | 2,46804 | 2,83143 | -1,286445198 | N/A             | N/A       | N/A          | Inc-GTDC1-7    |

|                |         |         |              |                 |           |              |                |
|----------------|---------|---------|--------------|-----------------|-----------|--------------|----------------|
| A_24_P318990   | 5,56828 | 5,9317  | -1,286471949 | ENST00000390291 | N/A       | BC012876     | N/A            |
| A_33_P3260733  | 1,42389 | 1,78734 | -1,286498701 | ENST00000511135 | 2690      | NM_001242462 | GHR            |
| A_24_P322395   | 9,55382 | 9,91728 | -1,286507618 | ENST00000602166 | 112398    | NM_080732    | EGLN2          |
| A_21_P0012139  | 1,49883 | 1,8623  | -1,286516535 | ENST00000433681 | N/A       | N/A          | N/A            |
| A_22_P00003349 | 2,34078 | 2,70426 | -1,286525453 | ENST00000607801 | 100302640 | NR_028303    | LINC00882      |
| A_23_P35066    | 12,7441 | 13,1076 | -1,286543288 | ENST00000529992 | 51375     | NM_015976    | SNX7           |
| A_22_P00006790 | 7,39641 | 7,75999 | -1,286614631 | N/A             | N/A       | N/A          | Inc-FZD4-1     |
| A_33_P3287529  | 9,35479 | 9,71839 | -1,286632468 | ENST00000478938 | 51150     | NM_016176    | SDF4           |
| A_32_P232192   | 5,17145 | 5,53505 | -1,286632468 | ENST00000273009 | 129563    | NM_001257281 | DIS3L2         |
| A_22_P00001693 | 1,47107 | 1,83467 | -1,286632468 | ENST00000446794 | N/A       | N/A          | N/A            |
| A_21_P0012633  | 2,10484 | 2,46856 | -1,286739491 | N/A             | N/A       | N/A          | XL0C_I2_010947 |
| A_32_P118397   | 1,57363 | 1,9374  | -1,286784087 | ENST00000394468 | 253012    | NM_001039372 | HEPACAM2       |
| A_33_P3373598  | 1,35042 | 1,71419 | -1,286784087 | ENST00000421694 | 221438    | NR_002794    | TREML5P        |
| A_23_P503182   | 11,6555 | 12,0194 | -1,286900043 | ENST00000544583 | 29        | NM_021962    | ABR            |
| A_23_P502797   | 10,4471 | 10,811  | -1,286900043 | ENST00000233055 | 57590     | NM_020830    | WDFY1          |
| A_23_P72138    | 12,8682 | 13,2321 | -1,286900043 | ENST00000310776 | 56945     | NM_020191    | MRPS22         |
| A_22_P00021553 | 8,18653 | 8,55044 | -1,286908963 | ENST00000582435 | 101927323 | NR_110773    | PPP4R1-AS1     |
| A_24_P65941    | 8,22701 | 8,59096 | -1,286944644 | N/A             | 80215     | NR_026812    | RUNX1-IT1      |
| A_33_P3289000  | 6,63961 | 7,0037  | -1,287069536 | N/A             | N/A       | N/A          | N/A            |
| A_33_P3309481  | 2,81741 | 3,18159 | -1,28714983  | ENST00000490575 | 148713    | NR_002930    | PTPRVP         |
| A_33_P3215968  | 1,38755 | 1,75175 | -1,287167674 | N/A             | N/A       | N/A          | N/A            |
| A_33_P3788772  | 2,74812 | 3,11234 | -1,287185518 | N/A             | 200609    | AL137458     | LOC200609      |
| A_23_P252962   | 7,97203 | 8,33627 | -1,287203363 | ENST00000381291 | 6453      | NM_001001132 | ITSN1          |
| A_21_P0014773  | 4,85206 | 5,21631 | -1,287212285 | N/A             | N/A       | N/A          | N/A            |
| A_23_P399501   | 15,5896 | 15,9539 | -1,287256897 | ENST00000567118 | 5315      | NM_182470    | PKM            |
| A_33_P3398187  | 2,4797  | 2,84401 | -1,28726582  | N/A             | N/A       | N/A          | N/A            |
| A_33_P3368610  | 11,1958 | 11,5602 | -1,287346126 | ENST00000552761 | 51535     | NM_201438    | PPHLN1         |
| A_22_P00007307 | 4,87096 | 5,23557 | -1,287533527 | ENST00000415174 | 151475    | NR_040038    | LOC151475      |
| A_23_P70701    | 8,85673 | 9,2214  | -1,287587075 | ENST00000350026 | 57492     | NM_017519    | ARID1B         |
| A_33_P3336622  | 11,3763 | 11,741  | -1,28761385  | ENST00000573505 | 224       | NM_001031806 | ALDH3A2        |
| A_33_P3268334  | 11,5825 | 11,9472 | -1,28761385  | ENST00000402426 | 5223      | NM_002629    | PGAM1          |
| A_32_P77502    | 13,4262 | 13,791  | -1,287703104 | ENST00000483137 | 220988    | NM_194247    | HNRNPA3        |
| A_21_P0000292  | 1,71336 | 2,07818 | -1,287720955 | ENST00000450626 | 440799    | NR_002829    | P2RX6P         |

|                |         |         |              |                 |           |              |              |
|----------------|---------|---------|--------------|-----------------|-----------|--------------|--------------|
| A_21_P0000134  | 1,56115 | 1,926   | -1,287747733 | ENST00000522210 | 203074    | NM_001197020 | PRSS55       |
| A_23_P354288   | 1,54489 | 1,90978 | -1,287783437 | ENST00000294829 | 149647    | NM_153606    | FAM71A       |
| A_33_P3249002  | 12,4734 | 12,8383 | -1,287792363 | N/A             | N/A       | N/A          | N/A          |
| A_21_P0006896  | 1,63823 | 2,00314 | -1,28780129  | N/A             | N/A       | N/A          | Inc-TNKS2-1  |
| A_22_P00018320 | 1,62235 | 1,98729 | -1,287828069 | ENST00000613885 | 23145     | NM_198455    | SSPO         |
| A_24_P105747   | 8,60252 | 8,96747 | -1,287836996 | ENST00000334271 | 130340    | NM_001039569 | AP1S3        |
| A_22_P00004583 | 2,70862 | 3,07371 | -1,287961974 | ENST00000454253 | N/A       | N/A          | N/A          |
| A_33_P3326423  | 10,7483 | 11,1134 | -1,287970902 | ENST00000370162 | 27343     | NM_001174084 | POLL         |
| A_23_P217009   | 7,44301 | 7,80813 | -1,287988757 | ENST00000297623 | 84688     | NM_032596    | C9orf24      |
| A_21_P0014334  | 5,1647  | 5,52982 | -1,287988757 | N/A             | 101928557 | XR_243490    | LOC101928557 |
| A_32_P66974    | 9,27411 | 9,63931 | -1,28806018  | ENST00000540028 | 9159      | NM_004716    | PCSK7        |
| A_24_P239811   | 7,36947 | 7,73467 | -1,28806018  | ENST00000496466 | 91544     | NM_183008    | UBXN11       |
| A_23_P252711   | 10,8447 | 11,2099 | -1,28806018  | ENST00000522447 | 51110     | NM_016027    | LACTB2       |
| A_21_P0013626  | 1,60356 | 1,96878 | -1,288078037 | ENST00000557161 | 10850     | N/A          | CCL27        |
| A_33_P3301445  | 10,2595 | 10,6248 | -1,288149465 | N/A             | N/A       | N/A          | N/A          |
| A_21_P0006226  | 2,66905 | 3,0344  | -1,288194109 | N/A             | N/A       | N/A          | Inc-PBX3-1   |
| A_21_P0003578  | 1,56985 | 1,93523 | -1,288220897 | N/A             | N/A       | N/A          | Inc-CPEB2-5  |
| A_22_P00018352 | 2,24378 | 2,60918 | -1,288238756 | N/A             | 101927757 | XR_248470    | LOC101927757 |
| A_22_P00020628 | 1,42682 | 1,79229 | -1,288301263 | N/A             | 100874196 | NR_046540    | DIAPH3-AS2   |
| A_33_P3352652  | 1,42751 | 1,79299 | -1,288310193 | ENST00000329564 | 390083    | NM_001003443 | OR56A3       |
| A_24_P402080   | 11,6301 | 11,9956 | -1,288328053 | ENST00000397860 | 4155      | NM_001025100 | MBP          |
| A_22_P00017899 | 1,41537 | 1,78088 | -1,288336983 | ENST00000547563 | N/A       | BG211543     | N/A          |
| A_21_P0014390  | 3,8642  | 4,22973 | -1,288354843 | N/A             | 101928464 | XR_244094    | LOC101928464 |
| A_33_P3380751  | 4,48024 | 4,84582 | -1,288399495 | ENST00000261197 | 6489      | NM_003034    | ST8SIA1      |
| A_33_P3275000  | 4,22666 | 4,59224 | -1,288399495 | ENST00000400239 | 9923      | NM_001083621 | ZBTB40       |
| A_22_P00021727 | 1,6535  | 2,01911 | -1,288426286 | ENST00000589999 | 101927210 | XR_243979    | LOC101927210 |
| A_33_P3242483  | 8,97234 | 9,33797 | -1,288444148 | ENST00000345122 | 394       | NM_001030055 | ARHGAP5      |
| A_23_P40315    | 6,53572 | 6,90138 | -1,288470941 | ENST00000608192 | 55184     | NM_001099407 | DZANK1       |
| A_24_P256307   | 13,7137 | 14,0795 | -1,288595981 | ENST00000256682 | 377       | NM_001659    | ARF3         |
| A_23_P4545     | 1,46065 | 1,82646 | -1,288604913 | ENST00000587291 | 83876     | NM_031939    | MRO          |
| A_33_P3386156  | 3,4444  | 3,81025 | -1,288640641 | ENST00000334293 | 60680     | NM_021938    | CELF5        |
| A_32_P138004   | 11,0333 | 11,3992 | -1,288685303 | ENST00000535029 | 404636    | NM_207009    | FAM45A       |
| A_33_P3364884  | 11,8405 | 12,2064 | -1,288685303 | ENST00000461692 | 5162      | NM_000925    | PDHB         |

|                |         |         |              |                 |           |              |                       |
|----------------|---------|---------|--------------|-----------------|-----------|--------------|-----------------------|
| A_23_P109229   | 1,39548 | 1,76146 | -1,288756764 | ENST00000375519 | 140732    | NM_080675    | SUN5                  |
| A_23_P102202   | 12,1517 | 12,5177 | -1,28877463  | ENST00000614496 | 2956      | NM_000179    | MSH6                  |
| A_22_P00005600 | 1,54107 | 1,90707 | -1,28877463  | N/A             | N/A       | N/A          | Inc-EFR3A-6           |
| A_33_P3213685  | 1,65909 | 2,0251  | -1,288783564 | ENST00000409082 | 81617     | NM_001287339 | CAB39L                |
| A_33_P3289446  | 1,50171 | 1,8678  | -1,288855031 | N/A             | 100131048 | AK125976     | LOC100131048          |
| A_21_P0005028  | 2,88321 | 3,24943 | -1,288971174 | N/A             | N/A       | N/A          | Inc-MRPS18A-3         |
| A_24_P109071   | 3,70232 | 4,06858 | -1,289006912 | ENST00000297814 | 55582     | NM_017576    | KIF27                 |
| A_23_P152125   | 8,93414 | 9,30041 | -1,289015847 | ENST00000561895 | 4597      | NM_002461    | MVD                   |
| A_21_P0003077  | 1,70986 | 2,07615 | -1,289033717 | N/A             | 101929152 | XR_241635    | P3H2-AS1              |
| A_33_P3309075  | 10,1403 | 10,5066 | -1,289042652 | ENST00000409318 | 11138     | NM_001102426 | TBC1D8                |
| A_23_P206371   | 12,8668 | 13,2331 | -1,289042652 | ENST00000568503 | 8996      | NM_003946    | NOL3                  |
| A_33_P3663142  | 3,25507 | 3,62138 | -1,289051586 | ENST00000449086 | 400946    | NR_033875    | LINC00954             |
| A_23_P28857    | 5,18829 | 5,55462 | -1,289069457 | ENST00000381580 | 55423     | NM_018556    | SIRPG                 |
| A_22_P00013331 | 1,38094 | 1,74736 | -1,289149876 | N/A             | N/A       | N/A          | Inc-RP11-144F15.1.1-1 |
| A_32_P5276     | 5,91361 | 6,28006 | -1,289176683 | ENST00000465817 | 26084     | NM_001251962 | ARHGFB2               |
| A_23_P59022    | 9,7527  | 10,1192 | -1,289221363 | ENST00000372917 | 55809     | NM_033502    | TRERF1                |
| A_22_P00008619 | 2,69147 | 3,058   | -1,289248172 | ENST00000439472 | 246119    | NR_001542    | TTY10                 |
| A_23_P35782    | 7,34089 | 7,70743 | -1,289257108 | ENST00000338447 | 79829     | NM_024771    | NAA40                 |
| A_32_P202703   | 8,2365  | 8,60305 | -1,289266045 | ENST00000624847 | 389831    | NM_001242480 | LOC389831             |
| A_21_P0012677  | 1,5544  | 1,92096 | -1,289274981 | N/A             | N/A       | N/A          | XLOC_I2_011244        |
| A_24_P100742   | 7,73635 | 8,10297 | -1,289328602 | ENST00000541051 | 118       | NM_014189    | ADD1                  |
| A_24_P291973   | 10,6572 | 11,0239 | -1,2894001   | ENST00000475109 | 989       | NM_001011553 | set-07                |
| A_24_P42681    | 11,5659 | 11,9326 | -1,2894001   | ENST00000488085 | 5708      | NM_002808    | PSMD2                 |
| A_23_P46907    | 9,0192  | 9,38595 | -1,289444788 | ENST00000361114 | 10367     | NM_006077    | MICU1                 |
| A_21_P0003146  | 1,40865 | 1,77544 | -1,289480539 | N/A             | N/A       | N/A          | Inc-CBLB-5            |
| A_21_P0007092  | 4,91191 | 5,27884 | -1,289605677 | ENST00000607898 | 101927824 | XR_242705    | LOC101927824          |
| A_23_P166775   | 7,76821 | 8,13522 | -1,28967719  | ENST00000461995 | 84818     | NM_153461    | IL17RC                |
| A_23_P157333   | 8,55292 | 8,92002 | -1,289757647 | ENST00000488068 | 2041      | NM_005232    | EPHA1                 |
| A_22_P00024392 | 2,09451 | 2,46161 | -1,289757647 | ENST00000450971 | N/A       | N/A          | N/A                   |
| A_24_P235429   | 10,7683 | 11,1354 | -1,289757647 | ENST00000374736 | 19        | NM_005502    | ABCA1                 |
| A_21_P0011674  | 3,08897 | 3,45609 | -1,289775527 | N/A             | N/A       | N/A          | XLOC_I2_006595        |
| A_23_P305723   | 10,1768 | 10,544  | -1,289847049 | ENST00000355356 | 57708     | NM_020948    | MIER1                 |
| A_22_P00020865 | 1,62167 | 1,98897 | -1,289936458 | N/A             | N/A       | N/A          | Inc-GSG1-1            |

|                |         |         |              |                 |           |              |                    |
|----------------|---------|---------|--------------|-----------------|-----------|--------------|--------------------|
| A_24_P636974   | 4,36703 | 4,73433 | -1,289936458 | N/A             | N/A       | N/A          | Inc-SEPT7L-1       |
| A_24_P678418   | 8,15788 | 8,52526 | -1,290007989 | N/A             | 400242    | NR_015415    | DICER1-AS1         |
| A_33_P3434927  | 1,42522 | 1,79261 | -1,29001693  | N/A             | 266671    | AF521131     | MAGI2-IT1          |
| A_23_P432545   | 10,0557 | 10,4231 | -1,290025872 | ENST00000526531 | 283229    | NM_173584    | CRACR2B            |
| A_33_P3258417  | 5,56606 | 5,93346 | -1,290025872 | N/A             | N/A       | N/A          | N/A                |
| A_33_P3386019  | 1,45537 | 1,82277 | -1,290025872 | ENST00000398760 | N/A       | N/A          | N/A                |
| A_22_P00003178 | 1,36431 | 1,73177 | -1,290079524 | ENST00000447524 | N/A       | N/A          | N/A                |
| A_24_P73370    | 10,2077 | 10,5752 | -1,290115293 | ENST00000321867 | 8408      | NM_003565    | ULK1               |
| A_23_P132910   | 10,9633 | 11,3308 | -1,290115293 | ENST00000510871 | 54502     | NM_019027    | RBM47              |
| A_33_P3391727  | 10,8639 | 11,2314 | -1,290115293 | ENST00000574992 | 51547     | NM_016538    | SIRT7              |
| A_33_P3335735  | 6,97004 | 7,33758 | -1,290151063 | N/A             | 100128977 | NR_024559    | MAPT-AS1           |
| A_21_P0010300  | 3,64649 | 4,01417 | -1,290276266 | N/A             | N/A       | N/A          | Inc-TSPEAR-1       |
| A_22_P00012513 | 1,86537 | 2,23319 | -1,290401482 | N/A             | 101927870 | NR_110141    | LOC101927870       |
| A_22_P00013167 | 1,55135 | 1,91922 | -1,290446204 | N/A             | N/A       | N/A          | Inc-RNF125-3       |
| A_23_P349025   | 2,25084 | 2,61883 | -1,290553545 | ENST00000216471 | 161394    | NM_001010860 | SAMD15             |
| A_21_P0005462  | 1,3788  | 1,7468  | -1,29056249  | N/A             | N/A       | N/A          | Inc-AC145676.2.1-2 |
| A_32_P149546   | 3,06019 | 3,42825 | -1,290616165 | ENST00000492631 | 9696      | NM_014675    | CROCC              |
| A_33_P3759611  | 4,07089 | 4,43906 | -1,290714573 | ENST00000599188 | 5143      | NM_000923    | PDE4C              |
| A_19_P00320579 | 6,11621 | 6,48438 | -1,290714573 | N/A             | 378805    | NR_109855    | LINC-PINT          |
| A_23_P208325   | 6,08608 | 6,45435 | -1,290804041 | ENST00000291182 | 9310      | NM_004234    | ZNF235             |
| A_22_P00005662 | 3,60858 | 3,97687 | -1,290821936 | N/A             | N/A       | N/A          | Inc-EIF3A-1        |
| A_33_P3268664  | 1,41144 | 1,77978 | -1,290866673 | ENST00000390278 | N/A       | N/A          | N/A                |
| A_22_P00001122 | 5,89739 | 6,26575 | -1,290884569 | N/A             | N/A       | N/A          | Inc-ALX1-2         |
| A_24_P342511   | 2,61375 | 2,98217 | -1,290938256 | ENST00000513116 | 3925      | NM_001145454 | STMN1              |
| A_22_P00003401 | 1,55457 | 1,92304 | -1,290982997 | ENST00000479830 | N/A       | XR_241811    | N/A                |
| A_21_P0014064  | 1,52843 | 1,89692 | -1,291000894 | N/A             | N/A       | N/A          | N/A                |
| A_22_P00008224 | 1,39599 | 1,76448 | -1,291000894 | ENST00000602452 | 101928601 | NM_001282136 | MEI4               |
| A_23_P217339   | 8,10813 | 8,47662 | -1,291000894 | ENST00000262848 | 5613      | NM_005044    | PRKX               |
| A_23_P153562   | 6,73989 | 7,10842 | -1,291036689 | ENST00000355085 | 728       | NM_001736    | C5AR1              |
| A_22_P00025164 | 3,21243 | 3,58101 | -1,291081434 | ENST00000541293 | N/A       | N/A          | N/A                |
| A_23_P91334    | 1,61263 | 1,98125 | -1,29111723  | ENST00000254963 | 116835    | NM_052970    | HSPA12B            |
| A_33_P3251727  | 1,64292 | 2,01155 | -1,29112618  | ENST00000366574 | 6262      | NM_001035    | RYR2               |
| A_23_P167493   | 1,63464 | 2,00328 | -1,291135129 | ENST00000296777 | 9607      | NM_004291    | CARTPT             |

|                |         |         |              |                 |           |              |              |
|----------------|---------|---------|--------------|-----------------|-----------|--------------|--------------|
| A_22_P00008322 | 2,30255 | 2,67123 | -1,291170928 | N/A             | N/A       | N/A          | Inc-ITGB8-4  |
| A_33_P3370707  | 1,37396 | 1,74276 | -1,291278329 | ENST00000602001 | 1406      | NM_000554    | CRX          |
| A_23_P125204   | 3,49252 | 3,86133 | -1,291287279 | ENST00000431524 | 219869    | NM_001004464 | OR10G8       |
| A_22_P00014413 | 4,91579 | 5,28462 | -1,29130518  | ENST00000445646 | N/A       | N/A          | N/A          |
| A_22_P00018612 | 2,81985 | 3,18871 | -1,291332033 | N/A             | N/A       | N/A          | Inc-TRPV6-2  |
| A_22_P00019536 | 2,84156 | 3,2105  | -1,291403641 | N/A             | N/A       | AK129870     | Inc-MMD-4    |
| A_24_P37540    | 5,9562  | 6,32515 | -1,291412593 | ENST00000383827 | 100526693 | NM_001198793 | ARPC4-TTLL3  |
| A_22_P00017880 | 1,50905 | 1,8781  | -1,29150211  | ENST00000454965 | N/A       | N/A          | N/A          |
| A_23_P384748   | 7,63538 | 8,00445 | -1,291520014 | ENST00000282406 | 130271    | NM_172069    | PLEKHH2      |
| A_21_P0002726  | 1,37877 | 1,74788 | -1,291555823 | ENST00000440266 | N/A       | N/A          | N/A          |
| A_22_P00007108 | 1,43902 | 1,80817 | -1,291591633 | N/A             | N/A       | N/A          | Inc-GLT1D1-3 |
| A_32_P439662   | 1,636   | 2,00517 | -1,291609538 | ENST00000589793 | 8632      | NM_173628    | DNAH17       |
| A_33_P3223056  | 1,6164  | 1,98559 | -1,291627444 | ENST00000270328 | 81794     | NM_030957    | ADAMTS10     |
| A_24_P229884   | 13,5119 | 13,8811 | -1,291636397 | ENST00000591870 | 440335    | NM_001253790 | SMIM22       |
| A_23_P155556   | 12,7801 | 13,1493 | -1,291636397 | ENST00000510545 | 56650     | NM_001040199 | CLDND1       |
| A_33_P3388183  | 2,94493 | 3,31416 | -1,291663256 | N/A             | N/A       | AK126237     | N/A          |
| A_24_P26554    | 7,87861 | 8,2479  | -1,291716976 | ENST00000463032 | 57128     | NM_020408    | LYRM4        |
| A_24_P922919   | 1,53059 | 1,89995 | -1,291779652 | N/A             | 52        | NM_001040649 | ACP1         |
| A_33_P3273629  | 2,8151  | 3,18448 | -1,29179756  | ENST00000433419 | 9720      | NM_014695    | CCDC144A     |
| A_33_P3374997  | 2,37856 | 2,74798 | -1,291833376 | N/A             | 144486    | NR_027035    | CEP83-AS1    |
| A_22_P00015060 | 2,02585 | 2,39528 | -1,291842331 | N/A             | N/A       | N/A          | Inc-SNRPD1-2 |
| A_23_P388812   | 8,86799 | 9,23748 | -1,291896058 | ENST00000435431 | 150468    | AK097948     | CKAP2L       |
| A_21_P0006200  | 1,36417 | 1,73367 | -1,291905013 | N/A             | N/A       | N/A          | Inc-RAD23B-3 |
| A_33_P3218760  | 11,8994 | 12,269  | -1,291994564 | ENST00000397053 | 26019     | NM_080599    | UPF2         |
| A_23_P304386   | 12,064  | 12,4336 | -1,291994564 | ENST00000274787 | 192286    | NM_138820    | HIGD2A       |
| A_22_P00012112 | 6,33438 | 6,70399 | -1,292003519 | ENST00000526036 | 100287896 | XR_132892    | LOC100287896 |
| A_33_P3786807  | 3,99098 | 4,36073 | -1,292128902 | N/A             | 100170220 | CA436475     | SNAR-E       |
| A_33_P3229572  | 6,43836 | 6,80812 | -1,292137859 | ENST00000418645 | 100271927 | NM_001277335 | RASA4B       |
| A_24_P942694   | 8,00413 | 8,37413 | -1,292352831 | ENST00000369287 | 55088     | NM_018017    | CCDC186      |
| A_33_P3286684  | 1,89722 | 2,26723 | -1,292361789 | ENST00000484847 | 10320     | AF116605     | IKZF1        |
| A_23_P59976    | 4,41657 | 4,78666 | -1,292433454 | ENST00000220940 | 2765      | NM_002066    | GML          |
| A_22_P00000131 | 1,69188 | 2,06202 | -1,292478247 | ENST00000543922 | N/A       | N/A          | N/A          |
| A_23_P163235   | 11,5363 | 11,9065 | -1,292532001 | ENST00000413453 | 548596    | NM_001015001 | CKMT1A       |

|                |         |         |              |                 |           |              |                |
|----------------|---------|---------|--------------|-----------------|-----------|--------------|----------------|
| A_24_P320545   | 7,50896 | 7,87924 | -1,292603676 | ENST00000345201 | 5754      | NM_002821    | PTK7           |
| A_33_P3340060  | 16,1423 | 16,5126 | -1,292621596 | ENST00000446057 | 23521     | NM_012423    | RPL13A         |
| A_24_P940477   | 1,37541 | 1,74576 | -1,292666395 | N/A             | 8939      | XM_006717313 | FUBP3          |
| A_23_P213602   | 8,54658 | 8,91694 | -1,292675356 | ENST00000510842 | 1456      | NM_001044723 | CSNK1G3        |
| A_22_P00016181 | 5,42766 | 5,79805 | -1,292702236 | ENST00000561316 | N/A       | N/A          | N/A            |
| A_23_P502081   | 1,48965 | 1,86015 | -1,292800804 | ENST00000298296 | 139081    | NM_138702    | MAGEC3         |
| A_24_P940006   | 1,77398 | 2,14449 | -1,292809765 | ENST00000226091 | 1949      | NM_001406    | EFNB3          |
| A_22_P00005497 | 7,33269 | 7,70325 | -1,292854571 | ENST00000519017 | 161582    | NM_001033560 | DYX1C1         |
| A_22_P00008751 | 5,20802 | 5,57861 | -1,292881455 | N/A             | 100506299 | NR_110154    | ID2-AS1        |
| A_22_P00001270 | 11,0853 | 11,456  | -1,292980036 | N/A             | N/A       | BX110621     | Inc-ANKRD53-1  |
| A_21_P0004310  | 3,63965 | 4,01046 | -1,293078625 | N/A             | N/A       | N/A          | Inc-ARHGAP26-4 |
| A_23_P47616    | 1,38877 | 1,75959 | -1,293087588 | ENST00000343844 | 2346      | NM_004476    | FOLH1          |
| A_23_P398637   | 7,30838 | 7,67921 | -1,293096551 | ENST00000273962 | 93587     | NM_152292    | TRMT10A        |
| A_23_P14876    | 16,2797 | 16,6506 | -1,293159294 | ENST00000558527 | 6727      | NM_003134    | SRP14          |
| A_21_P0012466  | 1,42395 | 1,79488 | -1,293186185 | N/A             | N/A       | N/A          | XLOC_I2_010405 |
| A_22_P00005468 | 3,23126 | 3,6022  | -1,293195148 | N/A             | N/A       | N/A          | Inc-DYDC1-4    |
| A_21_P0012207  | 3,74425 | 4,11523 | -1,293231004 | N/A             | N/A       | N/A          | XLOC_I2_009219 |
| A_33_P3269149  | 8,19118 | 8,56221 | -1,293275825 | ENST00000259400 | 55014     | NM_017919    | STX17          |
| A_22_P00009886 | 3,61063 | 3,98167 | -1,293284789 | N/A             | N/A       | N/A          | Inc-MFSD3-1    |
| A_22_P00011122 | 6,31726 | 6,6883  | -1,293284789 | N/A             | N/A       | BX101396     | Inc-NUMB-2     |
| A_33_P3374221  | 2,70666 | 3,07773 | -1,293311682 | N/A             | 643936    | AK127740     | LOC643936      |
| A_33_P3381292  | 8,931   | 9,30215 | -1,293383401 | N/A             | N/A       | N/A          | N/A            |
| A_22_P00025948 | 3,00789 | 3,37909 | -1,293428227 | ENST00000578129 | N/A       | N/A          | N/A            |
| A_22_P00018309 | 9,35337 | 9,72458 | -1,293437192 | ENST00000569291 | N/A       | AF086443     | N/A            |
| A_24_P655458   | 1,67488 | 2,04611 | -1,293455123 | ENST00000341495 | 285852    | NM_198153    | TREML4         |
| A_23_P146908   | 10,4539 | 10,8252 | -1,293517883 | ENST00000575858 | 9482      | NM_004853    | STX8           |
| A_33_P3653271  | 1,40548 | 1,77686 | -1,293589613 | N/A             | 100507362 | NR_037179    | LINC01015      |
| A_24_P263910   | 6,62008 | 6,99148 | -1,293607546 | ENST00000529902 | 283551    | NR_126500    | LINC01588      |
| A_23_P328766   | 5,42058 | 5,79199 | -1,293616513 | ENST00000590202 | 162655    | NM_145287    | ZNF519         |
| A_21_P0014811  | 2,64595 | 3,01741 | -1,293661347 | N/A             | N/A       | N/A          | N/A            |
| A_33_P3360758  | 4,35851 | 4,73004 | -1,293724117 | N/A             | N/A       | N/A          | N/A            |
| A_24_P15391    | 4,17876 | 4,55034 | -1,293768955 | ENST00000428390 | 344167    | NM_001135649 | FOXI3          |
| A_33_P3415430  | 12,7408 | 13,1124 | -1,293786891 | ENST00000545241 | 3304      | NM_005346    | HSPA1B         |



|                |         |         |              |                 |           |              |                |
|----------------|---------|---------|--------------|-----------------|-----------|--------------|----------------|
| A_21_P0005928  | 1,43359 | 1,80523 | -1,293822763 | ENST00000518324 | N/A       | N/A          | N/A            |
| A_33_P3357431  | 2,61496 | 2,9866  | -1,293822763 | N/A             | 100128310 | AK097866     | LOC100128310   |
| A_21_P0006967  | 1,42442 | 1,79615 | -1,293903478 | N/A             | N/A       | N/A          | Inc-C10orf31-7 |
| A_33_P3270623  | 2,51105 | 2,88279 | -1,293912447 | ENST00000329203 | 220382    | NM_175885    | FAM181B        |
| A_22_P00005873 | 1,35466 | 1,7264  | -1,293912447 | N/A             | N/A       | BG207856     | Inc-ESCO2-2    |
| A_23_P74526    | 10,6268 | 10,9986 | -1,29396626  | ENST00000474804 | 10450     | NM_203456    | PPIE           |
| A_32_P172882   | 1,44316 | 1,81497 | -1,293975229 | N/A             | 399806    | NR_029380    | LBX1-AS1       |
| A_24_P247902   | 4,01281 | 4,38464 | -1,293993168 | ENST00000423517 | 27445     | NM_014510    | PCLO           |
| A_22_P00018875 | 1,45307 | 1,82492 | -1,294011106 | N/A             | N/A       | N/A          | Inc-CCNJL-1    |
| A_33_P3258013  | 10,6953 | 11,0672 | -1,294055954 | ENST00000340074 | 89910     | NM_001270449 | UBE3B          |
| A_22_P00022216 | 4,70471 | 5,07665 | -1,294091834 | N/A             | N/A       | BG540908     | Inc-PAPSS2-2   |
| A_23_P141680   | 6,57323 | 6,94517 | -1,294091834 | ENST00000613443 | 54828     | NM_017679    | BCAS3          |
| A_24_P367079   | 1,64328 | 2,01525 | -1,294118744 | ENST00000489761 | 389376    | NM_205854    | SFTA2          |
| A_24_P371194   | 11,1381 | 11,5101 | -1,294145654 | ENST00000467349 | 116540    | NM_053050    | MRPL53         |
| A_23_P94911    | 8,58436 | 8,95637 | -1,294154625 | ENST00000324461 | 284349    | NM_181845    | ZNF283         |
| A_21_P0009288  | 1,9898  | 2,36185 | -1,294190507 | N/A             | N/A       | N/A          | Inc-P2RX5-1    |
| A_23_P73012    | 10,7652 | 11,1373 | -1,294235361 | ENST00000463372 | 84909     | NM_032823    | C9orf3         |
| A_23_P25348    | 5,65656 | 6,02869 | -1,294262274 | ENST00000413681 | 80724     | NM_025247    | ACAD10         |
| A_21_P0001201  | 1,40846 | 1,78059 | -1,294262274 | ENST00000456771 | N/A       | N/A          | N/A            |
| A_21_P0000174  | 4,68194 | 5,0541  | -1,294289188 | N/A             | 441108    | AK309191     | C5orf56        |
| A_24_P287974   | 8,28319 | 8,65535 | -1,294289188 | ENST00000360238 | 404093    | NM_001292025 | CUEDC1         |
| A_22_P00023920 | 1,39529 | 1,76752 | -1,294351989 | N/A             | N/A       | N/A          | Inc-PACRGL-3   |
| A_33_P3298062  | 11,412  | 11,7843 | -1,294414792 | ENST00000443376 | 10057     | NM_001023587 | ABCC5          |
| A_22_P00009760 | 1,61164 | 1,98402 | -1,294486572 | ENST00000507435 | N/A       | N/A          | N/A            |
| A_21_P0013791  | 12,2708 | 12,6432 | -1,294504518 | ENST00000424002 | N/A       | N/A          | N/A            |
| A_24_P91094    | 4,21269 | 4,5851  | -1,29451349  | ENST00000612735 | 10900     | NM_006695    | RUNDC3A        |
| A_23_P135164   | 6,69379 | 7,06623 | -1,294540409 | ENST00000474787 | 91373     | NM_207309    | UAP1L1         |
| A_23_P215227   | 11,963  | 12,3355 | -1,294594249 | ENST00000487480 | 10049     | NM_005494    | DNAJB6         |
| A_32_P155247   | 15,4884 | 15,8609 | -1,294594249 | ENST00000427242 | 2512      | NM_000146    | FTL            |
| A_21_P0011122  | 1,41351 | 1,78603 | -1,294612196 | N/A             | N/A       | N/A          | XLOC_I2_003626 |
| A_32_P189413   | 1,67065 | 2,04319 | -1,294630143 | ENST00000379445 | 613212    | NM_001048252 | CTXN3          |
| A_21_P0004795  | 1,49428 | 1,86682 | -1,294630143 | ENST00000449072 | N/A       | N/A          | N/A            |
| A_23_P73540    | 10,2681 | 10,6407 | -1,294683986 | ENST00000606812 | 90060     | NM_033626    | CCDC120        |

|                |         |         |              |                 |           |              |                      |
|----------------|---------|---------|--------------|-----------------|-----------|--------------|----------------------|
| A_23_P106682   | 14,5017 | 14,8743 | -1,294683986 | ENST00000359543 | 2013      | NM_001424    | EMP2                 |
| A_24_P115990   | 1,68808 | 2,06069 | -1,294692961 | ENST00000257863 | 269       | NM_020547    | AMHR2                |
| A_22_P00013498 | 6,16896 | 6,54169 | -1,294800655 | N/A             | N/A       | N/A          | Inc-RP11-362K2.2.1-1 |
| A_21_P0013089  | 7,09601 | 7,46875 | -1,294809629 | N/A             | N/A       | N/A          | XLOC_I2_013056       |
| A_21_P0007054  | 2,09715 | 2,46991 | -1,294827579 | N/A             | 102724333 | N/A          | LOC102724333         |
| A_32_P189790   | 2,8368  | 3,2096  | -1,29486348  | ENST00000378779 | 374387    | NR_027134    | DKFZp779M0652        |
| A_22_P00004219 | 2,34235 | 2,71516 | -1,294872456 | N/A             | 101929732 | XR_429659    | LOC101929732         |
| A_22_P00005058 | 4,61864 | 4,99151 | -1,294926309 | N/A             | N/A       | N/A          | Inc-DENND1A-4        |
| A_33_P3366998  | 2,10548 | 2,47837 | -1,294944261 | ENST00000368287 | 55862     | N/A          | ECHDC1               |
| A_33_P3210975  | 2,02424 | 2,39718 | -1,294989141 | N/A             | N/A       | N/A          | N/A                  |
| A_22_P00006103 | 5,07238 | 5,44534 | -1,295007093 | N/A             | N/A       | AK300095     | Inc-FAM168A-2        |
| A_21_P0008349  | 1,55119 | 1,92421 | -1,295060952 | ENST00000554187 | N/A       | N/A          | N/A                  |
| A_23_P64204    | 9,66691 | 10,0401 | -1,295213565 | ENST00000535142 | 9183      | NM_004724    | ZW10                 |
| A_22_P00003964 | 5,83303 | 6,20632 | -1,295303345 | N/A             | 503569    | NR_033932    | RGMB-AS1             |
| A_24_P917306   | 1,48969 | 1,86299 | -1,295312323 | ENST00000494108 | 79750     | N/A          | ZNF385D              |
| A_23_P91512    | 2,25734 | 2,6307  | -1,295366195 | ENST00000399137 | 23562     | NM_144492    | CLDN14               |
| A_24_P233917   | 12,6156 | 12,989  | -1,295402111 | ENST00000371933 | 9813      | NM_014774    | EFCAB14              |
| A_22_P00020743 | 1,39095 | 1,76443 | -1,295473945 | N/A             | 101101775 | NR_073458    | TMEM220-AS1          |
| A_33_P3297141  | 10,0974 | 10,4709 | -1,295491904 | ENST00000302313 | 57599     | NM_020839    | WDR48                |
| A_23_P118174   | 10,2424 | 10,6159 | -1,295491904 | ENST00000562272 | 5347      | AK310544     | PLK1                 |
| A_22_P00019785 | 1,55464 | 1,92825 | -1,295590684 | N/A             | 102724776 | NR_125937    | LOC102724776         |
| A_22_P00003334 | 2,59215 | 2,96578 | -1,295608645 | N/A             | N/A       | N/A          | Inc-CAST-4           |
| A_24_P237778   | 1,48812 | 1,86178 | -1,295635587 | ENST00000263979 | 57134     | NM_020379    | MAN1C1               |
| A_23_P29723    | 5,4049  | 5,77864 | -1,295707434 | ENST00000263753 | 151648    | NM_001012410 | SGOL1                |
| A_21_P0007327  | 4,55392 | 4,9277  | -1,295743359 | ENST00000525512 | N/A       | N/A          | N/A                  |
| A_21_P0008255  | 2,4123  | 2,78608 | -1,295743359 | N/A             | N/A       | N/A          | Inc-SUCLA2-1         |
| A_22_P00017297 | 1,5054  | 1,87918 | -1,295743359 | ENST00000575820 | N/A       | XR_428653    | N/A                  |
| A_32_P91042    | 7,08977 | 7,46356 | -1,295752341 | N/A             | 100129034 | NR_027406    | LOC100129034         |
| A_23_P50815    | 6,72668 | 7,10049 | -1,295770304 | ENST00000611471 | 57348     | NM_020659    | TTYH1                |
| A_33_P3306146  | 11,0349 | 11,4089 | -1,295940965 | ENST00000446342 | 5328      | NM_001145031 | PLAU                 |
| A_22_P00000453 | 1,99013 | 2,36413 | -1,295940965 | N/A             | 101929341 | XR_242465    | LOC101929341         |
| A_33_P3345816  | 3,20942 | 3,58347 | -1,29598588  | ENST00000619052 | 2852      | NM_001039966 | GPER1                |
| A_23_P119907   | 8,7565  | 9,13056 | -1,295994863 | ENST00000483188 | 55139     | NM_018089    | ANKZF1               |

|                |         |         |              |                 |           |              |                |
|----------------|---------|---------|--------------|-----------------|-----------|--------------|----------------|
| A_22_P00020767 | 1,95429 | 2,32838 | -1,296021813 | N/A             | N/A       | N/A          | Inc-STK39-2    |
| A_24_P108451   | 15,3342 | 15,7083 | -1,296030796 | ENST00000356487 | 2821      | NM_000175    | GPI            |
| A_23_P111054   | 11,1042 | 11,4783 | -1,296030796 | ENST00000615966 | 3018      | NM_021062    | HIST1H2BB      |
| A_33_P3264272  | 6,62514 | 6,99929 | -1,296075714 | N/A             | 25949     | NM_015484    | SYF2           |
| A_23_P434301   | 15,1337 | 15,508  | -1,296210477 | ENST00000448874 | 5757      | NM_002823    | PTMA           |
| A_23_P50942    | 11,5052 | 11,8795 | -1,296210477 | ENST00000264158 | 22930     | NM_012233    | RAB3GAP1       |
| A_23_P92410    | 12,4204 | 12,7947 | -1,296210477 | ENST00000613118 | 836       | NM_004346    | CASP3          |
| A_24_P754817   | 4,85933 | 5,23366 | -1,296237431 | ENST00000558550 | 79631     | NM_024580    | EFTUD1         |
| A_33_P3388397  | 8,82496 | 9,19935 | -1,296291341 | ENST00000339480 | 127534    | NM_153212    | GJB4           |
| A_32_P164246   | 14,5966 | 14,971  | -1,296300326 | N/A             | 94234     | NM_033260    | FOXQ1          |
| A_21_P0013337  | 2,16735 | 2,54176 | -1,296309312 | N/A             | N/A       | N/A          | XLOC_I2_013931 |
| A_22_P00011158 | 9,04443 | 9,41886 | -1,296327282 | ENST00000453660 | 28        | N/A          | ABO            |
| A_33_P3272663  | 4,91553 | 5,29002 | -1,296381196 | N/A             | N/A       | AK130940     | N/A            |
| A_33_P3344156  | 4,00375 | 4,37825 | -1,296390182 | ENST00000247992 | 391013    | NM_001105572 | PLA2G2C        |
| A_33_P3219505  | 1,47915 | 1,85372 | -1,296453085 | N/A             | N/A       | N/A          | N/A            |
| A_32_P100830   | 3,18305 | 3,55763 | -1,296462071 | ENST00000389916 | 124602    | NM_153209    | KIF19          |
| A_23_P420551   | 11,4023 | 11,7769 | -1,296480044 | ENST00000545913 | 11113     | NM_007174    | CIT            |
| A_33_P3277110  | 10,9937 | 11,3684 | -1,296569912 | ENST00000381151 | 6526      | NM_006933    | SLC5A3         |
| A_23_P419239   | 9,49627 | 9,87104 | -1,296632824 | ENST00000544191 | 55500     | NM_018638    | ETNK1          |
| A_22_P00008300 | 3,84233 | 4,21714 | -1,296668775 | N/A             | N/A       | N/A          | Inc-ITGA7-1    |
| A_24_P348806   | 8,51001 | 8,88482 | -1,296668775 | ENST00000530489 | 144100    | NM_175058    | PLEKHA7        |
| A_22_P00001558 | 6,97942 | 7,35429 | -1,296722703 | N/A             | 440288    | NR_120377    | UBL7-AS1       |
| A_24_P230916   | 10,2869 | 10,6618 | -1,296749668 | ENST00000479067 | 57708     | NM_001077702 | MIER1          |
| A_23_P6546     | 8,50875 | 8,88369 | -1,296785622 | ENST00000425018 | 85378     | NM_020461    | TUBGCP6        |
| A_33_P3369829  | 2,01303 | 2,38806 | -1,296866522 | N/A             | 154822    | N/A          | LINC00689      |
| A_22_P00003230 | 4,18712 | 4,56218 | -1,29689349  | N/A             | N/A       | N/A          | Inc-CACYBP-1   |
| A_21_P0009964  | 6,5549  | 6,92996 | -1,29689349  | N/A             | N/A       | N/A          | Inc-NCOA3-10   |
| A_33_P3401647  | 1,37149 | 1,74659 | -1,296929448 | ENST00000301242 | 94274     | NM_033256    | PPP1R14A       |
| A_33_P3274245  | 4,25979 | 4,63493 | -1,296965407 | ENST00000518137 | 284131    | NM_173627    | ENDOV          |
| A_23_P31224    | 9,21618 | 9,59139 | -1,297028338 | ENST00000432297 | 29992     | NM_178273    | PILRA          |
| A_33_P3423585  | 1,42192 | 1,79716 | -1,297055309 | ENST00000260323 | 440279    | NM_001080534 | UNC13C         |
| A_22_P00004272 | 1,47783 | 1,8531  | -1,297082281 | N/A             | N/A       | BC032031     | Inc-CNBD1-4    |
| A_21_P0011216  | 1,41476 | 1,7901  | -1,297145217 | ENST00000411525 | 100652865 | NR_103841    | LINC00539      |

|                |         |         |              |                 |           |              |                       |
|----------------|---------|---------|--------------|-----------------|-----------|--------------|-----------------------|
| A_22_P00018302 | 3,26193 | 3,63732 | -1,297190173 | N/A             | N/A       | N/A          | Inc-ZNF827-4          |
| A_23_P86100    | 7,77077 | 8,14622 | -1,297244123 | ENST00000469647 | 126823    | NM_001007255 | KLHDC9                |
| A_33_P3232478  | 4,02143 | 4,39696 | -1,29731606  | ENST00000356253 | 781       | NM_000722    | CACNA2D1              |
| A_22_P00021646 | 3,00246 | 3,37801 | -1,297334044 | ENST00000564156 | 100505853 | XR_110155    | LOC100505853          |
| A_23_P102950   | 7,91857 | 8,29413 | -1,297343037 | ENST00000493019 | 89765     | NM_080860    | RSPH1                 |
| A_23_P49842    | 9,1557  | 9,53126 | -1,297343037 | ENST00000487844 | 9094      | NM_005148    | UNC119                |
| A_23_P408239   | 5,95464 | 6,33025 | -1,297388    | ENST00000493544 | 23178     | NM_001252124 | PASK                  |
| A_24_P307175   | 9,30577 | 9,6814  | -1,297405986 | ENST00000305513 | 114826    | NM_052928    | SMYD4                 |
| A_22_P00007550 | 1,36707 | 1,74272 | -1,297423972 | N/A             | N/A       | N/A          | Inc-HAPLN1-1          |
| A_21_P0007456  | 3,73437 | 4,11003 | -1,297432965 | N/A             | N/A       | N/A          | Inc-IFITM2-1          |
| A_23_P209678   | 1,84676 | 2,22243 | -1,297441958 | ENST00000234313 | 5341      | NM_002664    | PLEK                  |
| A_23_P16722    | 2,18433 | 2,56003 | -1,297468938 | ENST00000409592 | 55619     | NM_014689    | DOCK10                |
| A_22_P00001910 | 1,48326 | 1,85901 | -1,297513905 | ENST00000421261 | N/A       | N/A          | N/A                   |
| A_33_P3362991  | 1,38803 | 1,76387 | -1,297594851 | N/A             | N/A       | N/A          | N/A                   |
| A_22_P00001156 | 3,16231 | 3,53818 | -1,297621834 | ENST00000568384 | N/A       | AK026713     | N/A                   |
| A_33_P3253069  | 4,09673 | 4,47261 | -1,297630829 | ENST00000368053 | 9439      | AF104255     | MED23                 |
| A_33_P3339197  | 2,2748  | 2,65073 | -1,297675802 | N/A             | N/A       | N/A          | N/A                   |
| A_33_P3288814  | 2,29717 | 2,67313 | -1,297702786 | N/A             | N/A       | N/A          | N/A                   |
| A_23_P167585   | 2,72954 | 3,10553 | -1,297729772 | ENST00000621295 | 2661      | NM_005260    | GDF9                  |
| A_23_P10385    | 9,10253 | 9,47855 | -1,297756758 | ENST00000475419 | 51514     | NM_016448    | DTL                   |
| A_21_P0006438  | 2,88632 | 3,26235 | -1,297765753 | N/A             | N/A       | N/A          | Inc-SLC25A6-1         |
| A_21_P0012170  | 4,23137 | 4,60742 | -1,297783744 | ENST00000624937 | N/A       | XR_244292    | N/A                   |
| A_33_P3250383  | 6,12046 | 6,49652 | -1,297792739 | ENST00000393892 | 1267      | NM_033133    | CNP                   |
| A_21_P0008547  | 1,65615 | 2,03223 | -1,297810731 | N/A             | N/A       | N/A          | Inc-RP11-204N11.1.1-3 |
| A_22_P00010591 | 1,4401  | 1,81618 | -1,297810731 | ENST00000567448 | N/A       | N/A          | N/A                   |
| A_22_P00003295 | 1,54471 | 1,92079 | -1,297810731 | N/A             | 100505678 | NR_040093    | STARD4-AS1            |
| A_22_P00001438 | 2,41626 | 2,79235 | -1,297819727 | ENST00000450216 | N/A       | N/A          | N/A                   |
| A_21_P0011766  | 5,53907 | 5,91526 | -1,297909688 | N/A             | N/A       | N/A          | XLOC_I2_007147        |
| A_23_P129389   | 13,039  | 13,4152 | -1,297918684 | ENST00000313732 | 55625     | NM_017740    | ZDHHC7                |
| A_21_P0012390  | 3,42985 | 3,8062  | -1,298053639 | N/A             | N/A       | N/A          | XLOC_I2_009882        |
| A_22_P00003637 | 1,73606 | 2,11245 | -1,298089629 | N/A             | N/A       | N/A          | Inc-CD59-1            |
| A_23_P408353   | 13,6203 | 13,9967 | -1,298098626 | ENST00000468995 | 3105      | NM_002116    | HLA-A                 |
| A_22_P00014967 | 1,90457 | 2,28106 | -1,298179609 | N/A             | N/A       | AK096135     | Inc-SMAD6-1           |

|                |         |         |              |                 |           |              |                       |
|----------------|---------|---------|--------------|-----------------|-----------|--------------|-----------------------|
| A_23_P77073    | 10,6587 | 11,0352 | -1,298188607 | ENST00000261854 | 84888     | NM_032802    | SPPL2A                |
| A_22_P00022181 | 6,76807 | 7,14463 | -1,298242598 | N/A             | N/A       | N/A          | Inc-SUMO1-1           |
| A_23_P133923   | 12,2736 | 12,6503 | -1,298368586 | ENST00000375896 | 7918      | NM_033177    | GPANK1                |
| A_23_P157679   | 10,5276 | 10,9043 | -1,298368586 | ENST00000521974 | 84294     | NM_032334    | UTP23                 |
| A_24_P317827   | 7,19105 | 7,56775 | -1,298368586 | ENST00000377988 | 51754     | NM_001042590 | TMEM8B                |
| A_21_P0007031  | 3,19221 | 3,56896 | -1,298413585 | N/A             | N/A       | N/A          | Inc-C10orf90-2        |
| A_24_P76854    | 6,39622 | 6,77302 | -1,298458586 | ENST00000391419 | 81872     | NM_001123387 | KRTAP2-1              |
| A_23_P200999   | 8,94072 | 9,31757 | -1,298503588 | ENST00000361392 | 6487      | NM_174963    | ST3GAL3               |
| A_22_P00013689 | 1,38751 | 1,76437 | -1,298512588 | N/A             | N/A       | DB049326     | Inc-RP11-728F11.4.1-2 |
| A_22_P00015607 | 2,14465 | 2,52151 | -1,298512588 | ENST00000456100 | N/A       | N/A          | N/A                   |
| A_22_P00001557 | 4,80823 | 5,1851  | -1,298521589 | ENST00000562869 | N/A       | XR_424640    | N/A                   |
| A_22_P00011325 | 11,2043 | 11,5812 | -1,298548591 | N/A             | N/A       | AK125769     | Inc-OST4-2            |
| A_22_P00012683 | 1,77176 | 2,14868 | -1,298566593 | N/A             | N/A       | XM_006726511 | Inc-QSOX2-1           |
| A_32_P25295    | 5,85089 | 6,22786 | -1,298611599 | ENST00000580874 | 4761      | NM_006160    | NEUROD2               |
| A_23_P428640   | 7,42766 | 7,80463 | -1,298611599 | ENST00000558058 | 90673     | NM_001276318 | PPP1R3E               |
| A_23_P206792   | 4,45458 | 4,83156 | -1,2986206   | ENST00000395091 | 92595     | NM_033410    | ZNF764                |
| A_33_P3360525  | 7,76321 | 8,1402  | -1,298629601 | N/A             | N/A       | BU535024     | N/A                   |
| A_24_P128563   | 10,1244 | 10,5014 | -1,298638603 | ENST00000471599 | 23633     | NM_012316    | KPNA6                 |
| A_19_P00320371 | 4,7909  | 5,16799 | -1,298719619 | ENST00000590628 | 101927151 | NR_110687    | LOC101927151          |
| A_22_P00004393 | 11,8807 | 12,2578 | -1,298728621 | ENST00000614891 | 114569    | NM_052886    | MAL2                  |
| A_22_P00006672 | 3,13601 | 3,51311 | -1,298728621 | N/A             | N/A       | N/A          | Inc-FOXO6-3           |
| A_21_P0000845  | 7,64126 | 8,01844 | -1,298800639 | N/A             | 650794    | N/A          | MIPEPP3               |
| A_22_P00014663 | 1,43833 | 1,81553 | -1,298818645 | N/A             | N/A       | N/A          | Inc-SLC22A18-1        |
| A_22_P00018944 | 2,31472 | 2,69199 | -1,298881665 | ENST00000543321 | N/A       | AK125676     | N/A                   |
| A_23_P166491   | 9,38525 | 9,76252 | -1,298881665 | ENST00000470518 | 27352     | NM_015705    | SGSM3                 |
| A_21_P0005047  | 1,54409 | 1,92137 | -1,298890669 | N/A             | N/A       | N/A          | Inc-HACE1-3           |
| A_21_P0000322  | 10,9543 | 11,3316 | -1,298908675 | N/A             | 677815    | NR_002968    | SNORA34               |
| A_21_P0003908  | 1,63669 | 2,01403 | -1,298944689 | N/A             | N/A       | N/A          | Inc-SCRG1-1           |
| A_23_P142146   | 17,512  | 17,8894 | -1,298998712 | ENST00000549370 | 6141      | NM_000979    | RPL18                 |
| A_21_P0010577  | 4,99308 | 5,37049 | -1,299007716 | N/A             | N/A       | N/A          | XLOC_I2_000641        |
| A_33_P3356462  | 4,66629 | 5,04372 | -1,299025724 | ENST00000355522 | 145741    | NM_207322    | C2CD4A                |
| A_23_P143414   | 15,0298 | 15,4073 | -1,299088755 | ENST00000336695 | 140823    | NM_080748    | ROMO1                 |
| A_33_P3371769  | 13,261  | 13,6385 | -1,299088755 | N/A             | N/A       | N/A          | N/A                   |

|                |         |         |              |                 |           |              |                    |
|----------------|---------|---------|--------------|-----------------|-----------|--------------|--------------------|
| A_22_P00014000 | 2,70904 | 3,08669 | -1,299223831 | ENST00000521955 | N/A       | N/A          | N/A                |
| A_23_P45234    | 4,75007 | 5,12775 | -1,299250847 | ENST00000377065 | 7592      | NM_153380    | ZNF41              |
| A_24_P921897   | 8,34492 | 8,72264 | -1,299286871 | ENST00000371208 | 51361     | NM_015888    | HOOK1              |
| A_23_P502170   | 6,65732 | 7,03504 | -1,299286871 | ENST00000479242 | 51626     | NM_015522    | DYNC2LI1           |
| A_21_P0011649  | 1,38577 | 1,7635  | -1,299295877 | ENST00000417918 | 390858    | N/A          | OACYLP             |
| A_23_P11005    | 15,6076 | 15,9854 | -1,299358921 | ENST00000388820 | 11173     | NM_014272    | ADAMTS7            |
| A_23_P135061   | 12,0534 | 12,4312 | -1,299358921 | ENST00000343933 | 7464      | NM_003389    | CORO2A             |
| A_33_P3371663  | 8,70015 | 9,07806 | -1,299457996 | ENST00000563518 | 4058      | NM_002344    | LTK                |
| A_21_P0001441  | 1,4379  | 1,81586 | -1,299503032 | N/A             | N/A       | N/A          | Inc-C1orf31-7      |
| A_33_P3329644  | 9,56519 | 9,9432  | -1,29954807  | ENST00000503331 | 644974    | NM_001136152 | ALG1L2             |
| A_21_P0007348  | 1,77635 | 2,15443 | -1,299611126 | N/A             | N/A       | N/A          | Inc-TP53I11-2      |
| A_22_P00015537 | 2,51704 | 2,89514 | -1,299629143 | N/A             | 153469    | NR_038902    | JAKMIP2-AS1        |
| A_22_P00000240 | 2,82147 | 3,1996  | -1,299656168 | N/A             | N/A       | N/A          | Inc-AC006050.2.1-3 |
| A_23_P153745   | 12,0454 | 12,4236 | -1,299719229 | ENST00000593731 | 10437     | NM_006332    | IFI30              |
| A_23_P212310   | 10,8916 | 11,2698 | -1,299719229 | ENST00000442215 | 54859     | NM_001031703 | ELP6               |
| A_33_P6505283  | 10,2471 | 10,6253 | -1,299719229 | N/A             | 100507316 | NR_120683    | LOC100507316       |
| A_24_P289726   | 11,512  | 11,8902 | -1,299719229 | ENST00000264639 | 5709      | NM_002809    | PSMD3              |
| A_22_P00024338 | 1,61108 | 1,98938 | -1,299809322 | ENST00000523874 | N/A       | CN294846     | N/A                |
| A_33_P3318504  | 2,87595 | 3,25429 | -1,299845361 | N/A             | N/A       | AB072904     | N/A                |
| A_23_P46982    | 11,0004 | 11,3788 | -1,299899421 | ENST00000355839 | 64210     | NM_022362    | MMS19              |
| A_24_P333993   | 1,45849 | 1,83695 | -1,299953484 | ENST00000360358 | 343171    | NM_001001957 | OR2W3              |
| A_23_P339480   | 12,206  | 12,5845 | -1,299989526 | ENST00000494601 | 8520      | NM_003642    | HAT1               |
| A_22_P00023791 | 3,04138 | 3,41989 | -1,299998537 | N/A             | N/A       | BG220587     | Inc-PCDH12-1       |
| A_23_P96325    | 8,2992  | 8,67777 | -1,300052604 | ENST00000334463 | 54821     | NM_017669    | ERCC6L             |
| A_33_P3314073  | 3,44042 | 3,8194  | -1,300422119 | N/A             | N/A       | N/A          | N/A                |
| A_33_P3383551  | 2,20203 | 2,58102 | -1,300431133 | N/A             | 266629    | XM_005261527 | SEC14L3            |
| A_24_P275873   | 12,1873 | 12,5664 | -1,300530289 | ENST00000576677 | 6904      | NM_005993    | TBCD               |
| A_23_P130787   | 7,15504 | 7,53414 | -1,300530289 | ENST00000012049 | 54814     | NM_017659    | QPCTL              |
| A_24_P317708   | 7,45391 | 7,83309 | -1,300602408 | ENST00000396721 | 195814    | NM_138969    | SDR16C5            |
| A_33_P3212782  | 13,7106 | 14,0898 | -1,300620438 | ENST00000482532 | 805       | NM_001743    | CALM2              |
| A_33_P3382887  | 6,36334 | 6,74264 | -1,300710594 | ENST00000590085 | N/A       | N/A          | N/A                |
| A_24_P941912   | 9,59614 | 9,97545 | -1,300719609 | ENST00000296161 | 151636    | NM_138287    | DTX3L              |
| A_22_P00006111 | 8,03741 | 8,41677 | -1,30076469  | N/A             | 441094    | NR_109820    | NR2F1-AS1          |

|                |         |         |              |                 |           |              |                |
|----------------|---------|---------|--------------|-----------------|-----------|--------------|----------------|
| A_24_P190168   | 9,62008 | 9,99944 | -1,30076469  | ENST00000226230 | 27346     | NM_014573    | TMEM97         |
| A_24_P210399   | 10,5943 | 10,9737 | -1,300800755 | ENST00000376387 | 9375      | NM_004800    | TM9SF2         |
| A_22_P00013214 | 5,38519 | 5,76461 | -1,300818788 | N/A             | 80862     | NR_026751    | ZNRD1-AS1      |
| A_33_P3253089  | 1,43022 | 1,80971 | -1,300881906 | ENST00000496687 | 407738    | NM_213609    | FAM19A1        |
| A_23_P118002   | 13,7629 | 14,1424 | -1,300890923 | ENST00000563898 | 7385      | NM_003366    | UQCRC2         |
| A_24_P299210   | 2,58905 | 2,96858 | -1,300917974 | ENST00000262676 | 22996     | AB007921     | TTC39A         |
| A_21_P0006364  | 1,42749 | 1,80706 | -1,300954044 | N/A             | N/A       | N/A          | Inc-RAD23B-5   |
| A_33_P3327961  | 7,61836 | 7,99794 | -1,300963062 | ENST00000376716 | 284370    | NM_001199324 | ZNF615         |
| A_21_P0004227  | 1,46861 | 1,84823 | -1,300999132 | N/A             | N/A       | N/A          | Inc-MARCH6-1   |
| A_33_P3378081  | 1,64472 | 2,02437 | -1,301026186 | ENST00000441037 | 123624    | NM_152336    | AGBL1          |
| A_23_P14105    | 8,40713 | 8,78691 | -1,301143426 | ENST00000430805 | 1102      | NM_001268    | RCBTB2         |
| A_33_P3361811  | 8,39605 | 8,77584 | -1,301152445 | ENST00000497727 | 79612     | NM_024561    | NAA16          |
| A_21_P0008201  | 1,59886 | 1,97866 | -1,301161464 | N/A             | 101927248 | NR_120417    | LOC101927248   |
| A_33_P3214229  | 1,50353 | 1,88339 | -1,301215579 | ENST00000558922 | 283673    | NR_026949    | EWSAT1         |
| A_33_P3222233  | 1,40778 | 1,78766 | -1,301233617 | ENST00000410012 | 387707    | NM_001159747 | CC2D2B         |
| A_23_P162874   | 14,9854 | 15,3653 | -1,301251656 | ENST00000554401 | 3320      | NM_005348    | HSP90AA1       |
| A_33_P3246935  | 1,40538 | 1,78532 | -1,301287735 | ENST00000373380 | 114784    | NM_052896    | CSMD2          |
| A_24_P89835    | 2,19639 | 2,57633 | -1,301287735 | ENST00000475376 | 225689    | NM_139021    | MAPK15         |
| A_33_P3281563  | 1,44915 | 1,8291  | -1,301296755 | N/A             | N/A       | N/A          | N/A            |
| A_33_P3336592  | 4,9732  | 5,35317 | -1,301314795 | N/A             | 51621     | AK127052     | KLF13          |
| A_24_P374516   | 15,7661 | 16,1461 | -1,301341855 | ENST00000323496 | 7114      | NM_021109    | TMSB4X         |
| A_33_P3398411  | 1,50761 | 1,88767 | -1,301395978 | ENST00000283172 | 283349    | NM_178169    | RASSF3         |
| A_33_P3295091  | 5,23425 | 5,61437 | -1,301450103 | N/A             | 400804    | NR_024236    | C1orf140       |
| A_23_P209195   | 7,85594 | 8,23612 | -1,301504229 | ENST00000392276 | 83636     | NM_031448    | C19orf12       |
| A_24_P15821    | 15,7877 | 16,168  | -1,30161249  | ENST00000530952 | N/A       | N/A          | N/A            |
| A_22_P00003818 | 4,86883 | 5,24919 | -1,301666624 | N/A             | 100874058 | NR_049718    | COX10-AS1      |
| A_32_P162250   | 8,65729 | 9,03768 | -1,301693691 | ENST00000368149 | 93663     | NM_033515    | ARHGAP18       |
| A_23_P106299   | 15,4166 | 15,797  | -1,301702714 | ENST00000486144 | 10169     | NM_001018108 | SERF2          |
| A_23_P11968    | 1,40996 | 1,7904  | -1,301738805 | ENST00000357001 | 2980      | NM_033553    | GUCA2A         |
| A_24_P932594   | 2,14747 | 2,52791 | -1,301738805 | ENST00000570983 | 9706      | NM_014683    | ULK2           |
| A_33_P3649236  | 3,50682 | 3,8873  | -1,301774898 | N/A             | N/A       | AK091264     | N/A            |
| A_23_P100392   | 10,8958 | 11,2763 | -1,301792944 | ENST00000409906 | 6923      | NM_007108    | TCEB2          |
| A_21_P0011787  | 1,99249 | 2,37305 | -1,301847085 | N/A             | N/A       | N/A          | XLOC_I2_007167 |

|                |         |         |              |                 |           |              |                |
|----------------|---------|---------|--------------|-----------------|-----------|--------------|----------------|
| A_33_P3319780  | 1,53155 | 1,91221 | -1,301937326 | N/A             | 80758     | AK125417     | PRR7           |
| A_22_P00018036 | 7,79081 | 8,17147 | -1,301937326 | N/A             | N/A       | N/A          | Inc-ZNF236-1   |
| A_33_P3255949  | 15,2443 | 15,625  | -1,301973424 | ENST00000395678 | 1890      | NM_001113756 | TYMP           |
| A_23_P1043     | 11,2771 | 11,6579 | -1,302063673 | ENST00000465162 | 55765     | NM_018265    | C1orf106       |
| A_33_P3259393  | 10,2854 | 10,6662 | -1,302063673 | ENST00000558770 | 145864    | NM_178232    | HAPLN3         |
| A_21_P0006532  | 5,39309 | 5,77398 | -1,302144902 | ENST00000602507 | N/A       | N/A          | N/A            |
| A_33_P3360728  | 14,0386 | 14,4195 | -1,302153928 | ENST00000263368 | 645       | NM_000713    | BLVRB          |
| A_19_P00805954 | 3,79589 | 4,17681 | -1,30217198  | N/A             | 100129461 | NR_126016    | LOC100129461   |
| A_21_P0005767  | 3,20901 | 3,58998 | -1,30221711  | N/A             | N/A       | N/A          | Inc-KHDRBS3-4  |
| A_33_P3274127  | 1,58326 | 1,96425 | -1,302235163 | ENST00000377470 | 375686    | NM_198572    | SPATC1         |
| A_32_P356316   | 2,34933 | 2,73038 | -1,302289323 | ENST00000229829 | 3111      | NM_002119    | HLA-DOA        |
| A_22_P00014047 | 5,17876 | 5,55983 | -1,302307376 | ENST00000534768 | 6290      | N/A          | SAA3P          |
| A_22_P00014820 | 6,96172 | 7,34282 | -1,302334457 | N/A             | N/A       | BC033876     | Inc-SLC39A8-1  |
| A_32_P524014   | 10,3321 | 10,7132 | -1,302334457 | ENST00000367545 | 7402      | NM_007124    | UTRN           |
| A_23_P163492   | 6,83972 | 7,22085 | -1,302361539 | ENST00000324385 | 8938      | NM_003933    | BAIAP3         |
| A_21_P0012530  | 4,77468 | 5,15586 | -1,302406676 | ENST00000449158 | 101927347 | N/A          | GRM7-AS3       |
| A_33_P3408752  | 3,71674 | 4,09797 | -1,302451815 | ENST00000615371 | 100132074 | NM_001291281 | FOXO6          |
| A_23_P54205    | 4,63717 | 5,0185  | -1,302542097 | ENST00000312858 | 55668     | NM_017926    | GPATCH2L       |
| A_33_P3377229  | 4,46581 | 4,84718 | -1,302578212 | ENST00000381153 | 29125     | NM_001142946 | C11orf21       |
| A_22_P00012433 | 1,48868 | 1,87007 | -1,302596269 | ENST00000419863 | N/A       | N/A          | N/A            |
| A_21_P0003067  | 2,78697 | 3,16841 | -1,302641415 | N/A             | N/A       | N/A          | Inc-ATP11B-1   |
| A_33_P3335940  | 9,39068 | 9,77223 | -1,30274074  | ENST00000566691 | 90861     | NM_144570    | HN1L           |
| A_24_P127075   | 5,84821 | 6,22978 | -1,3027588   | ENST00000529023 | 65084     | NM_022918    | TMEM135        |
| A_32_P22078    | 15,0986 | 15,4802 | -1,30278589  | ENST00000498085 | 6203      | NM_001013    | RPS9           |
| A_21_P0010549  | 1,40108 | 1,78271 | -1,302812981 | N/A             | N/A       | N/A          | XLOC_I2_000384 |
| A_32_P177955   | 5,72327 | 6,10494 | -1,302849103 | N/A             | 441461    | NR_038853    | STX17-AS1      |
| A_33_P3242014  | 7,41669 | 7,79838 | -1,302867165 | ENST00000540574 | 1911      | NM_004426    | PHC1           |
| A_23_P208288   | 7,35811 | 7,7398  | -1,302867165 | ENST00000391705 | 57343     | NM_020657    | ZNF304         |
| A_33_P3242833  | 10,0431 | 10,4248 | -1,302876196 | ENST00000370505 | 5586      | NM_006256    | PKN2           |
| A_33_P3312509  | 4,6759  | 5,0576  | -1,302876196 | ENST00000393060 | 9719      | NM_014694    | ADAMTSL2       |
| A_33_P3340847  | 9,32034 | 9,70205 | -1,302885227 | ENST00000254691 | 84674     | NM_032587    | CARD6          |
| A_22_P00020612 | 7,10022 | 7,48193 | -1,302885227 | N/A             | N/A       | AK093356     | Inc-CISD2-1    |
| A_21_P0013737  | 1,57204 | 1,95377 | -1,302903289 | N/A             | N/A       | N/A          | XLOC_I2_015315 |



|                |         |         |              |                 |           |              |                  |
|----------------|---------|---------|--------------|-----------------|-----------|--------------|------------------|
| A_21_P0013901  | 1,40775 | 1,78956 | -1,302975539 | ENST00000311828 | N/A       | N/A          | N/A              |
| A_21_P0005967  | 1,46838 | 1,85021 | -1,302993602 | ENST00000506428 | 100505532 | NR_103854    | LINC01301        |
| A_22_P00011202 | 2,64101 | 3,02285 | -1,303002634 | N/A             | N/A       | N/A          | Inc-OLFML3-1     |
| A_33_P3273854  | 5,87828 | 6,26017 | -1,303047793 | ENST00000454872 | 254827    | NM_207015    | NAALADL2         |
| A_23_P10077    | 10,8559 | 11,2378 | -1,303056825 | ENST00000529255 | 57104     | NM_020376    | PNPLA2           |
| A_21_P0008703  | 1,56858 | 1,95051 | -1,303083922 | N/A             | N/A       | N/A          | Inc-POTEB-2      |
| A_22_P00002448 | 2,60522 | 2,9872  | -1,303129084 | ENST00000565241 | 791114    | NR_026646    | PWRN1            |
| A_23_P251453   | 2,74781 | 3,12984 | -1,303174248 | ENST00000354370 | 3174      | NM_004133    | HNF4G            |
| A_22_P00011677 | 7,15706 | 7,53923 | -1,303300715 | ENST00000434541 | N/A       | N/A          | N/A              |
| A_33_P3237850  | 7,46916 | 7,85133 | -1,303300715 | N/A             | 642477    | NR_122112    | LINC01296        |
| A_23_P160828   | 7,66024 | 8,04243 | -1,303318782 | ENST00000487177 | 54991     | NM_017891    | C1orf159         |
| A_23_P141032   | 15,0672 | 15,4494 | -1,303327816 | ENST00000565078 | 1327      | NM_001861    | COX4I1           |
| A_22_P00006353 | 5,98506 | 6,36728 | -1,303345885 | N/A             | N/A       | N/A          | Inc-FARP1-1      |
| A_22_P00000554 | 6,93446 | 7,31672 | -1,303382021 | N/A             | N/A       | AY358191     | Inc-AC118344.1-1 |
| A_23_P134295   | 12,2672 | 12,6495 | -1,303418159 | ENST00000397048 | 4521      | NM_198949    | NUDT1            |
| A_22_P00001259 | 3,97412 | 4,35643 | -1,303427194 | N/A             | N/A       | CD512643     | Inc-ANKRD42-1    |
| A_33_P3365805  | 8,58298 | 8,96547 | -1,303589828 | ENST00000377453 | 1203      | NM_006493    | CLN5             |
| A_32_P150876   | 4,93437 | 5,31699 | -1,303707299 | ENST00000582008 | 339290    | NR_015389    | LINC00667        |
| A_21_P0005697  | 2,74437 | 3,12701 | -1,303725372 | N/A             | N/A       | N/A          | Inc-XKR4-2       |
| A_33_P3388331  | 4,27679 | 4,65947 | -1,30376152  | ENST00000457029 | 10160     | NM_005766    | FARP1            |
| A_21_P0009265  | 6,94657 | 7,32925 | -1,30376152  | ENST00000582940 | 100507002 | NR_110801    | LOC100507002     |
| A_23_P104563   | 10,0369 | 10,4196 | -1,303779594 | ENST00000539743 | 1374      | NM_001031847 | CPT1A            |
| A_33_P3250730  | 8,4992  | 8,88194 | -1,303815743 | ENST00000347842 | 55515     | NM_182847    | ASIC4            |
| A_32_P50123    | 4,80058 | 5,1834  | -1,303888044 | ENST00000605610 | 647135    | NM_001271870 | SRGAP2B          |
| A_33_P3393986  | 2,01371 | 2,39659 | -1,303942272 | N/A             | N/A       | N/A          | N/A              |
| A_24_P349965   | 5,22072 | 5,60362 | -1,303960348 | ENST00000400401 | 6941      | NM_007109    | TCF19            |
| A_33_P3340260  | 1,39275 | 1,77572 | -1,304023619 | ENST00000399391 | 340990    | NM_001277269 | OTOG             |
| A_23_P55632    | 13,4491 | 13,8321 | -1,304050735 | ENST00000283752 | 6317      | NM_006919    | SERPINB3         |
| A_33_P3406567  | 2,46893 | 2,85196 | -1,304077853 | ENST00000389939 | 931       | NM_152866    | MS4A1            |
| A_33_P3237669  | 1,63916 | 2,02234 | -1,304213447 | ENST00000593362 | 147872    | NM_144688    | CCDC155          |
| A_32_P125803   | 5,51099 | 5,89419 | -1,304231528 | N/A             | 100505538 | NR_038991    | RBM26-AS1        |
| A_23_P207345   | 1,50989 | 1,89312 | -1,304258649 | ENST00000355638 | 4185      | NM_002390    | ADAM11           |
| A_22_P00015936 | 2,31548 | 2,69873 | -1,30427673  | ENST00000437615 | 401288    | NR_026781    | LINC00242        |

|                |         |         |              |                 |           |              |                |
|----------------|---------|---------|--------------|-----------------|-----------|--------------|----------------|
| A_33_P3404097  | 15,3367 | 15,72   | -1,304321933 | ENST00000613141 | 595135    | NR_002836    | PGM5P2         |
| A_21_P0000092  | 8,76791 | 9,15122 | -1,304330974 | ENST00000550078 | 100381270 | NM_001174108 | ZBED6          |
| A_23_P99604    | 9,25306 | 9,63639 | -1,304349056 | ENST00000549159 | 55632     | NM_017769    | G2E3           |
| A_33_P3807593  | 9,05359 | 9,43696 | -1,304385221 | N/A             | 286437    | NR_039980    | LOC286437      |
| A_22_P00011471 | 7,41637 | 7,79974 | -1,304385221 | ENST00000573315 | N/A       | N/A          | N/A            |
| A_21_P0014726  | 3,56539 | 3,94877 | -1,304394262 | N/A             | 101929188 | XR_242002    | LOC101929188   |
| A_23_P45059    | 9,93241 | 10,3158 | -1,304403304 | ENST00000280333 | 1793      | NM_001380    | DOCK1          |
| A_23_P387057   | 11,4164 | 11,7998 | -1,304412345 | ENST00000400534 | 203068    | NM_178014    | TUBB           |
| A_22_P00014857 | 1,37517 | 1,75865 | -1,304484679 | ENST00000432993 | N/A       | BC043385     | N/A            |
| A_22_P00018990 | 1,47563 | 1,85915 | -1,304520848 | ENST00000562814 | 100616251 | N/A          | MIR1587        |
| A_23_P105705   | 1,77908 | 2,16264 | -1,304557017 | ENST00000228837 | 2251      | NM_020996    | FGF6           |
| A_24_P151      | 7,89678 | 8,28036 | -1,304575102 | ENST00000378092 | 8514      | NM_003636    | KCNAB2         |
| A_33_P3284197  | 13,1975 | 13,5811 | -1,304593188 | ENST00000371992 | 55624     | NM_001243766 | POMGNT1        |
| A_22_P00025669 | 1,7468  | 2,13047 | -1,304656488 | N/A             | N/A       | N/A          | Inc-PEAK1.1-2  |
| A_24_P263937   | 10,2576 | 10,6414 | -1,304774055 | ENST00000372521 | 374969    | NM_199342    | CCDC23         |
| A_21_P0006274  | 10,761  | 11,1448 | -1,304774055 | N/A             | N/A       | N/A          | Inc-APBA1-2    |
| A_23_P133424   | 13,9858 | 14,3696 | -1,304774055 | ENST00000522552 | 6500      | NM_006930    | SKP1           |
| A_33_P3375527  | 5,7206  | 6,10448 | -1,304846409 | ENST00000381213 | 166968    | NM_152622    | MIER3          |
| A_24_P194730   | 5,22777 | 5,61165 | -1,304846409 | ENST00000329665 | 342945    | NM_181846    | ZSCAN22        |
| A_23_P344988   | 7,92872 | 8,31266 | -1,304900677 | ENST00000356971 | 22858     | NM_016513    | ICK            |
| A_33_P3754922  | 1,40764 | 1,79166 | -1,304973038 | N/A             | 26824     | BP873537     | RNU11          |
| A_24_P306561   | 12,5464 | 12,9305 | -1,305045403 | ENST00000561585 | 22980     | NM_014972    | TCF25          |
| A_24_P341476   | 15,5809 | 15,9651 | -1,305135865 | ENST00000567149 | N/A       | N/A          | N/A            |
| A_33_P3384148  | 2,31881 | 2,70304 | -1,305163005 | ENST00000324616 | 283461    | NM_001031748 | C12orf40       |
| A_22_P00007769 | 6,79587 | 7,18014 | -1,305199193 | N/A             | N/A       | N/A          | Inc-HNMT-2     |
| A_33_P3220437  | 12,721  | 13,1053 | -1,305226334 | ENST00000536716 | 126282    | NM_001167942 | TNFAIP8L1      |
| A_32_P133518   | 3,60092 | 3,98522 | -1,305226334 | N/A             | N/A       | AL565221     | N/A            |
| A_22_P00019909 | 2,3245  | 2,70881 | -1,305235381 | N/A             | N/A       | DB295404     | Inc-MESP2-1    |
| A_32_P179740   | 8,38829 | 8,77261 | -1,305244428 | ENST00000419735 | 222255    | NM_020725    | ATXN7L1        |
| A_22_P00002226 | 1,48435 | 1,86879 | -1,305353    | N/A             | 102723377 | NR_120672    | LOC102723377   |
| A_21_P0013592  | 2,96472 | 3,3493  | -1,305479678 | N/A             | N/A       | N/A          | XL0C_I2_014850 |
| A_21_P0004164  | 1,60576 | 1,99035 | -1,305488727 | ENST00000503367 | 102467212 | N/A          | LOC102467212   |
| A_33_P3361417  | 8,82405 | 9,20872 | -1,305561121 | ENST00000370474 | 135154    | NM_145267    | C6orf57        |

|                |         |         |              |                 |           |              |                      |
|----------------|---------|---------|--------------|-----------------|-----------|--------------|----------------------|
| A_23_P69617    | 1,58886 | 1,97354 | -1,30557017  | ENST00000453304 | 8633      | NM_003728    | UNC5C                |
| A_23_P50504    | 15,0858 | 15,4705 | -1,305588269 | ENST00000622577 | 2512      | NM_000146    | FTL                  |
| A_33_P3291614  | 3,67399 | 4,05882 | -1,30570592  | N/A             | 100133039 | AK058041     | LOC100133039         |
| A_22_P00018643 | 1,46616 | 1,85102 | -1,305733072 | N/A             | N/A       | BX089002     | Inc-TEKT5-2          |
| A_23_P29282    | 4,18202 | 4,56691 | -1,305760224 | ENST00000333039 | 23467     | NM_014293    | NPTXR                |
| A_32_P100439   | 11,0357 | 11,4206 | -1,305769275 | ENST00000324489 | 222166    | NM_152793    | MTURN                |
| A_21_P0011928  | 11,4084 | 11,7933 | -1,305769275 | ENST00000603980 | 5037      | NM_002567    | PEBP1                |
| A_33_P3519683  | 10,6712 | 11,0561 | -1,305769275 | ENST00000473383 | 339487    | NM_178547    | ZBTB8OS              |
| A_22_P00019422 | 4,15604 | 4,54102 | -1,305841684 | N/A             | N/A       | N/A          | Inc-C10orf31-1       |
| A_33_P3402304  | 4,76919 | 5,1542  | -1,305868839 | ENST00000588982 | 201501    | NM_001039360 | ZBTB7C               |
| A_24_P59667    | 9,11216 | 9,49719 | -1,305886942 | ENST00000458235 | 3718      | NM_000215    | JAK3                 |
| A_23_P28318    | 9,7787  | 10,1638 | -1,305950306 | ENST00000474257 | 55471     | NM_144736    | NDUFAF7              |
| A_22_P00013775 | 2,94089 | 3,32603 | -1,305986515 | ENST00000607710 | N/A       | N/A          | N/A                  |
| A_23_P389500   | 1,43305 | 1,81828 | -1,306067989 | ENST00000305089 | 5968      | NM_006507    | REG1B                |
| A_23_P128967   | 8,54747 | 8,93272 | -1,306086095 | ENST00000554501 | 4329      | NM_005589    | ALDH6A1              |
| A_33_P3227225  | 2,85286 | 3,2382  | -1,306167575 | N/A             | N/A       | N/A          | N/A                  |
| A_21_P0001010  | 8,60938 | 8,99482 | -1,306258115 | N/A             | N/A       | N/A          | Inc-RP3-377D14.1.1-7 |
| A_21_P0004977  | 2,57037 | 2,95581 | -1,306258115 | N/A             | N/A       | N/A          | Inc-FAM120B-6        |
| A_33_P3328626  | 5,28237 | 5,66782 | -1,306267169 | N/A             | N/A       | N/A          | N/A                  |
| A_21_P0014887  | 3,03533 | 3,42079 | -1,306276224 | N/A             | 100652768 | NR_045215    | LOC100652768         |
| A_23_P148916   | 12,2517 | 12,6372 | -1,306312442 | ENST00000435274 | 114883    | NM_148909    | OSBPL9               |
| A_33_P3255677  | 5,15485 | 5,54036 | -1,306321497 | N/A             | N/A       | N/A          | N/A                  |
| A_22_P00007536 | 3,63794 | 4,02351 | -1,306375826 | N/A             | 386627    | NR_037897    | SAP30L-AS1           |
| A_22_P00010339 | 2,60004 | 2,98589 | -1,306629394 | N/A             | N/A       | N/A          | Inc-MYBPH-2          |
| A_21_P0009386  | 7,43958 | 7,82544 | -1,306638451 | N/A             | N/A       | N/A          | Inc-ATAD5-3          |
| A_32_P206293   | 10,3059 | 10,6918 | -1,306674679 | ENST00000622479 | 79692     | NM_001242797 | ZNF322               |
| A_23_P20752    | 8,92975 | 9,31566 | -1,306683736 | ENST00000325303 | 23552     | NM_001039803 | CDK20                |
| A_24_P126305   | 10,0694 | 10,4554 | -1,306765254 | ENST00000591026 | 26048     | BC014054     | ZNF500               |
| A_23_P83110    | 11,4581 | 11,8441 | -1,306765254 | ENST00000484546 | 55755     | NM_018249    | CDK5RAP2             |
| A_21_P0000742  | 6,88681 | 7,27284 | -1,306792428 | N/A             | 100506826 | NR_038266    | MYLK-AS1             |
| A_22_P00020532 | 1,64186 | 2,02791 | -1,306810544 | ENST00000518266 | N/A       | N/A          | N/A                  |
| A_21_P0005587  | 1,51095 | 1,89707 | -1,306873952 | N/A             | N/A       | N/A          | Inc-AC021218.2.1-2   |
| A_22_P00006590 | 1,54727 | 1,93339 | -1,306873952 | N/A             | 100129046 | NR_034091    | LOC100129046         |

|                |         |         |              |                 |           |              |                |
|----------------|---------|---------|--------------|-----------------|-----------|--------------|----------------|
| A_32_P53558    | 8,36136 | 8,74755 | -1,306937364 | N/A             | N/A       | N/A          | N/A            |
| A_23_P14124    | 4,09776 | 4,484   | -1,306982659 | ENST00000241463 | 387496    | NM_206827    | RASL11A        |
| A_33_P3249259  | 4,80783 | 5,1941  | -1,307009838 | ENST00000202625 | 343641    | NM_198994    | TGM6           |
| A_24_P131066   | 1,75371 | 2,14009 | -1,307109496 | ENST00000256652 | 9398      | NM_004258    | CD101          |
| A_22_P00009654 | 9,96532 | 10,3518 | -1,307200101 | N/A             | N/A       | BC011998     | Inc-MAT2B-3    |
| A_21_P0004043  | 1,56584 | 1,95233 | -1,307209162 | N/A             | N/A       | N/A          | Inc-FER-1      |
| A_33_P3384543  | 12,61   | 12,9965 | -1,307218223 | ENST00000396420 | 55624     | NM_001243766 | POMGNT1        |
| A_23_P408108   | 6,82859 | 7,21515 | -1,30727259  | ENST00000351870 | 7978      | NM_006980    | MTERF1         |
| A_33_P3349536  | 9,15647 | 9,54306 | -1,307299774 | ENST00000528276 | 1111      | NM_001114121 | CHEK1          |
| A_21_P0003270  | 5,95026 | 6,33686 | -1,307308835 | N/A             | N/A       | N/A          | Inc-DNAJB11-3  |
| A_21_P0008460  | 1,52606 | 1,91266 | -1,307308835 | ENST00000557577 | N/A       | XR_245783    | N/A            |
| A_22_P00004728 | 5,18912 | 5,57573 | -1,307317897 | N/A             | N/A       | BX415456     | Inc-CTIF-1     |
| A_22_P00025694 | 1,57479 | 1,96141 | -1,307326959 | N/A             | N/A       | N/A          | Inc-SLC7A7-1   |
| A_21_P0008821  | 1,48178 | 1,86842 | -1,307345082 | N/A             | 102725022 | N/A          | LOC102725022   |
| A_21_P0001271  | 1,39953 | 1,78617 | -1,307345082 | ENST00000477916 | N/A       | N/A          | N/A            |
| A_33_P3342720  | 3,2084  | 3,59506 | -1,307363206 | ENST00000357084 | 487       | NM_173201    | ATP2A1         |
| A_21_P0013651  | 4,78224 | 5,16899 | -1,307444766 | N/A             | N/A       | N/A          | XLOC_I2_015213 |
| A_33_P3353431  | 2,66799 | 3,05488 | -1,307571647 | N/A             | N/A       | N/A          | N/A            |
| A_32_P171061   | 10,3414 | 10,7283 | -1,307580711 | ENST00000331289 | 430       | NM_005170    | ASCL2          |
| A_23_P133345   | 11,6372 | 12,0241 | -1,307580711 | ENST00000518855 | 9685      | NM_014666    | CLINT1         |
| A_21_P0005823  | 3,49006 | 3,87698 | -1,307598838 | N/A             | N/A       | N/A          | Inc-ADAM2-4    |
| A_33_P3226610  | 6,21736 | 6,60432 | -1,307635093 | ENST00000495873 | 11168     | NM_021144    | PSIP1          |
| A_22_P00009800 | 1,41309 | 1,80009 | -1,307671349 | ENST00000411701 | 101060019 | NR_110169    | LOC101060019   |
| A_21_P0007463  | 1,6443  | 2,03133 | -1,307698541 | N/A             | N/A       | N/A          | Inc-CPSF7-2    |
| A_33_P3297040  | 1,36447 | 1,75154 | -1,307734799 | ENST00000527246 | 59351     | NM_021635    | PBOV1          |
| A_33_P3605352  | 3,47576 | 3,86285 | -1,307752928 | ENST00000474080 | 25937     | BC066916     | WWTR1          |
| A_33_P3333890  | 4,16206 | 4,54916 | -1,307761993 | ENST00000382226 | 254251    | NM_001166139 | LCORL          |
| A_33_P3324065  | 6,28609 | 6,67326 | -1,307825447 | ENST00000319129 | 85302     | NM_001080542 | FBF1           |
| A_23_P40025    | 14,5152 | 14,9024 | -1,307852643 | ENST00000552459 | 9802      | NM_014764    | DAZAP2         |
| A_33_P3240532  | 8,15247 | 8,53994 | -1,30809743  | ENST00000304685 | 23179     | NM_015149    | RGL1           |
| A_33_P3217776  | 1,54392 | 1,93142 | -1,308124631 | ENST00000279575 | 5545      | NM_002723    | PRB4           |
| A_23_P113471   | 8,60182 | 8,98933 | -1,308133699 | ENST00000491179 | 158584    | NM_174912    | FAAH2          |
| A_33_P3348156  | 2,80507 | 3,19263 | -1,308179036 | ENST00000438067 | 8643      | N/A          | PTCH2          |

|                |         |         |              |                 |           |              |               |
|----------------|---------|---------|--------------|-----------------|-----------|--------------|---------------|
| A_24_P941167   | 11,9846 | 12,3722 | -1,308215307 | ENST00000409652 | 80830     | NM_030641    | APOL6         |
| A_23_P501822   | 14,4952 | 14,8828 | -1,308215307 | ENST00000393931 | 3728      | NM_002230    | JUP           |
| A_22_P00017022 | 5,83973 | 6,22734 | -1,308224375 | ENST00000556738 | N/A       | BC040287     | N/A           |
| A_33_P3273068  | 1,5883  | 1,97591 | -1,308224375 | ENST00000329255 | 60529     | AB058691     | ALX4          |
| A_21_P0009514  | 1,40239 | 1,79002 | -1,308242511 | N/A             | N/A       | N/A          | Inc-METTL4-1  |
| A_22_P00023172 | 3,46225 | 3,84995 | -1,308305989 | N/A             | 101928020 | NR_110291    | LOC101928020  |
| A_21_P0014683  | 8,70975 | 9,09747 | -1,308324126 | ENST00000566070 | 101928188 | XR_243371    | LOC101928188  |
| A_23_P160177   | 8,88904 | 9,2768  | -1,308360401 | ENST00000469023 | 480       | NM_144699    | ATP1A4        |
| A_33_P3286146  | 1,42896 | 1,81678 | -1,308414815 | N/A             | 100132891 | NR_033652    | LOC100132891  |
| A_21_P0006998  | 10,5614 | 10,9493 | -1,308487371 | N/A             | N/A       | N/A          | Inc-ZWINT-1   |
| A_22_P00005311 | 8,82982 | 9,21774 | -1,30850551  | N/A             | N/A       | N/A          | Inc-DNAJC7-1  |
| A_32_P9963     | 9,82162 | 10,2096 | -1,308559931 | ENST00000368455 | 3298      | NM_004506    | HSF2          |
| A_23_P106835   | 10,6511 | 11,0391 | -1,308578071 | ENST00000562813 | 583       | NM_031885    | BBS2          |
| A_21_P0008819  | 2,10001 | 2,48807 | -1,308632495 | N/A             | N/A       | N/A          | Inc-GOLGA8J-2 |
| A_21_P0009158  | 5,6442  | 6,03226 | -1,308632495 | ENST00000458492 | N/A       | N/A          | N/A           |
| A_33_P3345952  | 1,44416 | 1,83225 | -1,308659707 | N/A             | 100129213 | NR_038419    | SLC39A12-AS1  |
| A_22_P00010561 | 1,56081 | 1,94898 | -1,308732277 | N/A             | N/A       | N/A          | Inc-NDC80-1   |
| A_33_P3410296  | 10,5701 | 10,9583 | -1,308759491 | ENST00000368627 | 10570     | NM_006426    | DPYSL4        |
| A_32_P90047    | 13,1008 | 13,489  | -1,308759491 | ENST00000409860 | 401115    | NM_001141936 | C4orf48       |
| A_21_P0000523  | 1,61414 | 2,00245 | -1,308859283 | ENST00000435075 | 285045    | NR_027100    | LINC00486     |
| A_23_P419696   | 1,71248 | 2,10095 | -1,309004448 | ENST00000345008 | 116372    | NM_144586    | LYPD1         |
| A_24_P294842   | 6,35942 | 6,74803 | -1,309131481 | ENST00000244769 | 6310      | NM_000332    | ATXN1         |
| A_33_P3228014  | 1,40084 | 1,78951 | -1,309185928 | ENST00000358585 | 404552    | NM_206998    | SCGB1D4       |
| A_33_P3320503  | 6,16437 | 6,55317 | -1,309303902 | ENST00000395774 | 10743     | NM_030665    | RAI1          |
| A_23_P29994    | 10,5028 | 10,8916 | -1,309303902 | ENST00000505727 | 3516      | NM_203284    | RBPJ          |
| A_21_P0008671  | 3,17242 | 3,56129 | -1,309367432 | N/A             | N/A       | N/A          | Inc-FANCI-3   |
| A_33_P3254761  | 1,39546 | 1,78437 | -1,309403736 | N/A             | 101928058 | XM_006716242 | LOC101928058  |
| A_21_P0003444  | 1,4952  | 1,88416 | -1,309449117 | N/A             | 100750326 | N/A          | HTT-AS        |
| A_21_P0010432  | 1,36332 | 1,75231 | -1,309476346 | N/A             | 101929416 | N/A          | LOC101929416  |
| A_33_P3264569  | 1,55529 | 1,94434 | -1,309530807 | ENST00000426318 | N/A       | AB306184     | N/A           |
| A_33_P3415992  | 2,10297 | 2,49204 | -1,309548961 | N/A             | N/A       | N/A          | N/A           |
| A_33_P3368830  | 7,79045 | 8,17952 | -1,309548961 | ENST00000368039 | 4063      | NM_001033667 | LY9           |
| A_33_P3340309  | 12,0459 | 12,435  | -1,309576193 | ENST00000380412 | 79724     | NM_024671    | ZNF768        |

|                |         |         |              |                 |           |           |                |
|----------------|---------|---------|--------------|-----------------|-----------|-----------|----------------|
| A_21_P0001602  | 1,37036 | 1,75955 | -1,309657891 | N/A             | N/A       | N/A       | Inc-IVNS1ABP-2 |
| A_23_P213431   | 11,6001 | 11,9893 | -1,309666969 | ENST00000515125 | 84340     | NM_032380 | GFM2           |
| A_33_P3269134  | 1,7076  | 2,09688 | -1,309739594 | N/A             | 55677     | XR_427099 | IWS1           |
| A_21_P0003939  | 3,05709 | 3,44638 | -1,309748673 | N/A             | 101928885 | XR_241812 | LOC101928885   |
| A_33_P3280040  | 4,83905 | 5,22839 | -1,309794066 | ENST00000566858 | N/A       | AK125549  | N/A            |
| A_32_P42054    | 9,29898 | 9,68836 | -1,309830382 | ENST00000542735 | 373863    | NM_194249 | DND1           |
| A_21_P0003448  | 1,63038 | 2,01978 | -1,30984854  | ENST00000507932 | N/A       | N/A       | N/A            |
| A_23_P40453    | 7,97533 | 8,36477 | -1,309884857 | ENST00000290354 | 874       | NM_001236 | CBR3           |
| A_22_P00021816 | 1,37033 | 1,7599  | -1,310002895 | ENST00000519506 | 101927487 | NR_125418 | LOC101927487   |
| A_21_P0011172  | 1,49259 | 1,88219 | -1,310030136 | N/A             | N/A       | N/A       | XLOC_I2_003888 |
| A_32_P32856    | 2,86545 | 3,25507 | -1,310048297 | ENST00000610789 | 56097     | NM_032407 | PCDHGC5        |
| A_22_P00022325 | 1,48717 | 1,87681 | -1,310066458 | N/A             | N/A       | DB342842  | Inc-ARHGAP17-1 |
| A_22_P00019813 | 2,80485 | 3,19456 | -1,310130025 | N/A             | N/A       | N/A       | Inc-TASP1-5    |
| A_33_P3312504  | 9,31276 | 9,7029  | -1,310520571 | ENST00000409656 | 23550     | NM_012455 | PSD4           |
| A_22_P00014830 | 2,44557 | 2,83571 | -1,310520571 | N/A             | N/A       | BC031326  | Inc-SLC44A5-2  |
| A_23_P436048   | 5,6536  | 6,04379 | -1,310565991 | ENST00000491034 | 23566     | NM_012152 | LPAR3          |
| A_23_P93881    | 13,7264 | 14,1166 | -1,310575076 | ENST00000011473 | 6856      | NM_182715 | SYPL1          |
| A_24_P84752    | 3,90563 | 4,29584 | -1,31058416  | N/A             | N/A       | AK002210  | N/A            |
| A_33_P3235716  | 14,0919 | 14,4822 | -1,310665921 | ENST00000569380 | 90864     | NM_080861 | SPSB3          |
| A_24_P867342   | 4,62416 | 5,01448 | -1,310684091 | ENST00000589256 | 125061    | NR_027083 | AFMID          |
| A_23_P89422    | 5,08884 | 5,47927 | -1,310784029 | ENST00000518929 | 10349     | NM_080282 | ABCA10         |
| A_33_P3247252  | 1,56144 | 1,95189 | -1,310802201 | N/A             | N/A       | N/A       | N/A            |
| A_22_P00024329 | 5,55014 | 5,94062 | -1,310829458 | N/A             | 85001     | NR_026914 | MGC16275       |
| A_22_P00017829 | 1,55303 | 1,94354 | -1,310856716 | N/A             | N/A       | BX093121  | Inc-ZC3H12D-4  |
| A_23_P32847    | 2,65897 | 3,04953 | -1,310902148 | ENST00000611049 | 2895      | NM_001510 | GRID2          |
| A_33_P3388501  | 8,68788 | 9,07846 | -1,310920321 | ENST00000491855 | 1118      | NM_003465 | CHIT1          |
| A_21_P0006138  | 1,3915  | 1,78217 | -1,311002103 | N/A             | N/A       | N/A       | Inc-ANKRD18B-1 |
| A_33_P3268634  | 8,94857 | 9,33926 | -1,311020278 | ENST00000302533 | 84305     | NM_032345 | WIBG           |
| A_21_P0001828  | 2,31867 | 2,70942 | -1,311074803 | ENST00000450715 | N/A       | AY928977  | N/A            |
| A_33_P3264116  | 6,07027 | 6,46103 | -1,31108389  | ENST00000340650 | 378884    | NM_198586 | NHLRC1         |
| A_23_P160167   | 14,8191 | 15,2099 | -1,311120242 | ENST00000475163 | 10103     | NM_005727 | TSPAN1         |
| A_21_P0005879  | 1,57029 | 1,96118 | -1,311202036 | N/A             | N/A       | N/A       | Inc-KLF10-1    |
| A_23_P206382   | 10,8794 | 11,2704 | -1,311302014 | ENST00000219139 | 80262     | NM_025187 | C16orf70       |

|                |         |         |              |                 |           |              |                 |
|----------------|---------|---------|--------------|-----------------|-----------|--------------|-----------------|
| A_23_P312358   | 3,73496 | 4,12619 | -1,311511084 | ENST00000469555 | 222389    | NM_152751    | BEND7           |
| A_33_P3490449  | 1,95779 | 2,34909 | -1,31157472  | N/A             | N/A       | N/A          | XLOC_I2_013461  |
| A_32_P205944   | 8,07232 | 8,46369 | -1,31163836  | ENST00000302558 | 84220     | NM_005054    | RGPD5           |
| A_33_P3328736  | 11,1879 | 11,5793 | -1,311665635 | ENST00000372521 | 374969    | NM_199342    | CCDC23          |
| A_21_P0006078  | 6,27376 | 6,66518 | -1,311683818 | ENST00000417843 | 103352539 | NR_121647    | LINC01410       |
| A_32_P229746   | 13,7453 | 14,1368 | -1,311756556 | ENST00000487480 | 10049     | NM_005494    | DNAJB6          |
| A_23_P218190   | 4,54823 | 4,93973 | -1,311756556 | ENST00000565274 | 825       | NM_000070    | CAPN3           |
| A_22_P00014861 | 3,53134 | 3,92284 | -1,311756556 | N/A             | 101928829 | XR_243384    | LOC101928829    |
| A_21_P0013460  | 3,19535 | 3,58692 | -1,311820204 | ENST00000447933 | 100506380 | NR_103858    | LINC01006       |
| A_23_P56249    | 13,1637 | 13,5553 | -1,311847483 | ENST00000585910 | 1155      | NM_001281    | TBCB            |
| A_23_P148641   | 1,74777 | 2,13938 | -1,311856576 | ENST00000413466 | 83867     | NR_001551    | TTY12           |
| A_21_P0012158  | 3,91984 | 4,31154 | -1,311938416 | N/A             | N/A       | N/A          | lnc-C20orf197-4 |
| A_33_P3396239  | 11,8284 | 12,2201 | -1,311938416 | ENST00000404603 | 6634      | NM_004175    | SNRPD3          |
| A_23_P97532    | 9,81339 | 10,2051 | -1,31194751  | ENST00000487194 | 9341      | NM_004781    | VAMP3           |
| A_33_P3257050  | 2,97701 | 3,36872 | -1,31194751  | ENST00000314232 | N/A       | N/A          | N/A             |
| A_22_P00003531 | 1,38829 | 1,78005 | -1,311992979 | N/A             | N/A       | N/A          | lnc-CCND2-1     |
| A_33_P3226560  | 3,86157 | 4,25335 | -1,312011168 | N/A             | N/A       | N/A          | N/A             |
| A_19_P00321656 | 1,50983 | 1,90167 | -1,312065734 | ENST00000498304 | 23576     | NM_001134445 | DDAH1           |
| A_32_P46603    | 1,39761 | 1,78945 | -1,312065734 | ENST00000490947 | 200403    | NM_144992    | VWA3B           |
| A_33_P3417667  | 1,53453 | 1,92638 | -1,312074828 | N/A             | 147276    | AK055900     | C18orf15        |
| A_33_P3401119  | 3,19098 | 3,58285 | -1,312093018 | ENST00000442076 | 54754     | NM_017561    | NUTM2F          |
| A_22_P00009154 | 6,58993 | 6,98183 | -1,312120302 | ENST00000435354 | 129790    | NR_026865    | C7orf13         |
| A_21_P0006190  | 2,43499 | 2,82692 | -1,312147587 | N/A             | N/A       | N/A          | lnc-KRT8P11-1   |
| A_33_P3209831  | 7,11071 | 7,50265 | -1,312156682 | ENST00000529555 | 25850     | NM_003419    | ZNF345          |
| A_21_P0010532  | 2,9024  | 3,29448 | -1,312284021 | ENST00000425517 | N/A       | N/A          | N/A             |
| A_24_P19544    | 10,0519 | 10,444  | -1,312302213 | ENST00000355999 | 27347     | NM_013233    | STK39           |
| A_33_P3300893  | 8,58946 | 8,98162 | -1,312356792 | ENST00000395344 | 8567      | NM_130475    | MADD            |
| A_33_P6468957  | 1,38616 | 1,77833 | -1,312365888 | ENST00000514736 | 101928656 | NR_108093    | LINC01099       |
| A_22_P00009333 | 1,36114 | 1,75336 | -1,312411372 | ENST00000448001 | N/A       | N/A          | N/A             |
| A_23_P352535   | 8,50314 | 8,89541 | -1,312456858 | ENST00000299824 | 26051     | NM_015568    | PPP1R16B        |
| A_24_P13475    | 7,46251 | 7,85481 | -1,31248415  | ENST00000382108 | 221178    | NM_001286792 | SPATA13         |
| A_33_P3376444  | 1,75246 | 2,14479 | -1,312511442 | N/A             | 254887    | AK127260     | ZDHHC23         |
| A_33_P3343412  | 1,92359 | 2,31592 | -1,312511442 | N/A             | 284808    | AK096092     | FLJ38773        |

|                |         |         |              |                 |           |              |                  |
|----------------|---------|---------|--------------|-----------------|-----------|--------------|------------------|
| A_33_P3313145  | 1,42426 | 1,81662 | -1,312538735 | ENST00000493136 | 3699      | NM_002217    | ITIH3            |
| A_23_P161237   | 10,7287 | 11,1211 | -1,312575127 | ENST00000369983 | 8729      | NM_004193    | GBF1             |
| A_22_P00011910 | 6,12294 | 6,51536 | -1,312593324 | N/A             | 100507475 | NR_046452    | IDH1-AS1         |
| A_23_P136909   | 7,57844 | 7,9709  | -1,312629717 | ENST00000358130 | 79366     | NM_030763    | HMG5             |
| A_21_P0014294  | 3,4766  | 3,86907 | -1,312638815 | N/A             | N/A       | N/A          | N/A              |
| A_23_P201295   | 5,01505 | 5,40755 | -1,312666111 | ENST00000344008 | 54897     | NM_017766    | CASZ1            |
| A_23_P154585   | 9,89593 | 10,2885 | -1,312729804 | ENST00000472219 | 90203     | NM_001042633 | SNX21            |
| A_33_P3424297  | 12,3606 | 12,7532 | -1,312757101 | ENST00000492132 | 51714     | NM_016275    | SELT             |
| A_33_P3287959  | 10,7317 | 11,1243 | -1,312757101 | ENST00000262940 | 10156     | NM_006989    | RASA4            |
| A_22_P00004630 | 3,3644  | 3,75701 | -1,312766201 | N/A             | N/A       | N/A          | Inc-CT47A1-1     |
| A_23_P152462   | 1,8936  | 2,28622 | -1,3127753   | ENST00000215095 | 112755    | AY995211     | STX1B            |
| A_22_P00012412 | 1,59397 | 1,9866  | -1,3127844   | ENST00000549742 | N/A       | N/A          | N/A              |
| A_21_P0007363  | 2,98937 | 3,38205 | -1,312829898 | N/A             | N/A       | N/A          | Inc-CFL1-1       |
| A_33_P3665553  | 9,06641 | 9,4591  | -1,312838998 | N/A             | 100233156 | AK126241     | LOC100233156     |
| A_23_P388150   | 1,46725 | 1,85996 | -1,312857198 | ENST00000373032 | 84647     | NM_032562    | PLA2G12B         |
| A_21_P0011033  | 4,0113  | 4,40405 | -1,312893599 | N/A             | N/A       | N/A          | XLOC_I2_002855   |
| A_21_P0012640  | 1,72644 | 2,11932 | -1,313011908 | N/A             | N/A       | N/A          | XLOC_I2_010968   |
| A_33_P3298382  | 3,69235 | 4,08525 | -1,31303011  | N/A             | N/A       | BC127811     | N/A              |
| A_24_P125690   | 13,399  | 13,7919 | -1,31303011  | ENST00000600434 | 64981     | NM_023937    | MRPL34           |
| A_23_P79094    | 1,46903 | 1,86203 | -1,313121125 | ENST00000612127 | 11026     | NM_006865    | LILRA3           |
| A_23_P251173   | 11,6929 | 12,0859 | -1,313121125 | ENST00000199389 | 27102     | NM_014413    | EIF2AK1          |
| A_33_P3383988  | 1,37211 | 1,76517 | -1,313175738 | ENST00000390441 | N/A       | AB306076     | N/A              |
| A_23_P152838   | 7,90524 | 8,29834 | -1,313212147 | ENST00000618639 | 6352      | NM_002985    | CCL5             |
| A_21_P0003865  | 1,74873 | 2,14183 | -1,313212147 | N/A             | N/A       | N/A          | Inc-CDKN2AIP-1   |
| A_24_P281872   | 1,4154  | 1,80852 | -1,313230352 | ENST00000341016 | 25763     | NM_012274    | HYPM             |
| A_21_P0007167  | 1,41993 | 1,81305 | -1,313230352 | N/A             | N/A       | N/A          | Inc-B4GALNT4-1   |
| A_21_P0000326  | 3,57135 | 3,9645  | -1,31325766  | N/A             | 677820    | NR_002971    | SNORA38          |
| A_22_P00009287 | 1,95062 | 2,34382 | -1,313303175 | N/A             | N/A       | BC022425     | Inc-LRRC30-4     |
| A_23_P370989   | 10,9437 | 11,337  | -1,31339421  | ENST00000518382 | 4173      | NM_005914    | MCM4             |
| A_22_P00003950 | 1,55667 | 1,94997 | -1,31339421  | N/A             | N/A       | N/A          | Inc-CHAD-3       |
| A_24_P76995    | 4,61785 | 5,01118 | -1,313421521 | ENST00000551407 | 23390     | NM_015336    | ZDHHC17          |
| A_21_P0014626  | 12,2631 | 12,6565 | -1,31348525  | ENST00000392894 | 11342     | NM_007282    | RNF13            |
| A_22_P00000408 | 1,37935 | 1,77279 | -1,313521668 | N/A             | N/A       | N/A          | Inc-AC040934.1-3 |



|                |         |         |              |                 |           |              |               |
|----------------|---------|---------|--------------|-----------------|-----------|--------------|---------------|
| A_24_P64362    | 8,12374 | 8,5172  | -1,313539878 | ENST00000369889 | 54838     | NM_017787    | WBP1L         |
| A_23_P417261   | 2,32298 | 2,71648 | -1,313576297 | ENST00000295824 | 151651    | NM_144715    | EFHB          |
| A_22_P00004376 | 6,08827 | 6,48181 | -1,313612718 | ENST00000423045 | 54039     | N/A          | PCBP3         |
| A_21_P0008213  | 1,5381  | 1,9317  | -1,313667351 | N/A             | N/A       | N/A          | Inc-COL4A1-2  |
| A_21_P0010491  | 10,9866 | 11,3802 | -1,313667351 | ENST00000623227 | N/A       | N/A          | N/A           |
| A_21_P0002000  | 2,16275 | 2,55639 | -1,313703774 | ENST00000453678 | N/A       | N/A          | N/A           |
| A_21_P0001711  | 4,18689 | 4,58056 | -1,313731092 | N/A             | 100506696 | NR_046326    | PCAT6         |
| A_22_P00004841 | 1,69623 | 2,08992 | -1,313749304 | N/A             | 101927894 | XR_242850    | LOC101927894  |
| A_23_P252335   | 10,8496 | 11,2433 | -1,31375841  | ENST00000290130 | 54069     | NM_018944    | MIS18A        |
| A_21_P0008653  | 1,46124 | 1,85494 | -1,31375841  | N/A             | N/A       | N/A          | Inc-THSD4-3   |
| A_23_P18692    | 10,0406 | 10,4343 | -1,31375841  | ENST00000296412 | 128       | NM_000671    | ADH5          |
| A_22_P00012105 | 1,63586 | 2,02958 | -1,313776623 | ENST00000503652 | N/A       | N/A          | N/A           |
| A_33_P3353360  | 3,43712 | 3,83085 | -1,313785729 | N/A             | 55845     | AK290580     | BRK1          |
| A_23_P405129   | 5,46117 | 5,85502 | -1,313895012 | ENST00000261978 | 4053      | NM_000428    | LTBP2         |
| A_21_P0007148  | 2,72401 | 3,11788 | -1,313913226 | N/A             | N/A       | N/A          | Inc-APOC3-2   |
| A_33_P3409506  | 7,56425 | 7,95818 | -1,313967871 | ENST00000479413 | 138241    | NM_182505    | C9orf85       |
| A_22_P00017781 | 3,61737 | 4,0113  | -1,313967871 | N/A             | 728537    | N/A          | LINC01125     |
| A_33_P3333507  | 6,24345 | 6,63744 | -1,314022519 | ENST00000348610 | 57337     | NM_020654    | SENP7         |
| A_22_P00008487 | 1,90833 | 2,30237 | -1,31406806  | N/A             | N/A       | AW404679     | Inc-KCNC2-1   |
| A_24_P203226   | 15,4425 | 15,8366 | -1,314122712 | ENST00000577856 | 653505    | NM_001143883 | PPIAL4B       |
| A_22_P00016942 | 2,95373 | 3,34799 | -1,314268461 | N/A             | N/A       | BM919801     | Inc-TSPO-2    |
| A_21_P0002045  | 4,02081 | 4,41511 | -1,314304901 | ENST00000444871 | 100130502 | N/A          | LOC100130502  |
| A_19_P00317042 | 5,09817 | 5,49255 | -1,314377783 | N/A             | N/A       | AK027340     | Inc-GGCT-1    |
| A_23_P7976     | 11,7887 | 12,1831 | -1,314396005 | ENST00000304218 | 3008      | NM_005321    | HIST1H1E      |
| A_32_P43050    | 11,7143 | 12,1088 | -1,314487115 | ENST00000358464 | 2483      | NM_004477    | FRG1          |
| A_23_P111657   | 1,42379 | 1,81835 | -1,314541784 | ENST00000297261 | 6469      | NM_000193    | SHH           |
| A_33_P8922891  | 6,33047 | 6,72509 | -1,314596455 | N/A             | 101927751 | XM_005255009 | LOC101927751  |
| A_22_P00008553 | 1,37426 | 1,76901 | -1,314714918 | ENST00000442937 | 100505566 | NR_047568    | LINC00578     |
| A_23_P18055    | 5,23746 | 5,63227 | -1,314769596 | N/A             | 711       | NR_024615    | ERC2-IT1      |
| A_21_P0008217  | 2,37243 | 2,76727 | -1,314796936 | N/A             | N/A       | N/A          | Inc-TUBGCP3-8 |
| A_21_P0004550  | 2,40178 | 2,79674 | -1,314906303 | N/A             | N/A       | N/A          | Inc-SLC12A7-1 |
| A_33_P3317664  | 10,0249 | 10,4199 | -1,31494276  | ENST00000427865 | 4245      | NM_001114618 | MGAT1         |
| A_21_P0001320  | 2,00061 | 2,39562 | -1,314951875 | N/A             | N/A       | N/A          | Inc-FPGT-4    |

|                |         |         |              |                 |           |              |                      |
|----------------|---------|---------|--------------|-----------------|-----------|--------------|----------------------|
| A_22_P00009866 | 2,70565 | 3,10069 | -1,314979219 | ENST00000559299 | N/A       | N/A          | N/A                  |
| A_23_P65157    | 14,3964 | 14,7916 | -1,315125063 | ENST00000468918 | 10063     | NM_005694    | COX17                |
| A_22_P00023587 | 11,4674 | 11,8627 | -1,315216223 | ENST00000569284 | 1018      | NM_001258    | CDK3                 |
| A_33_P3221458  | 8,30604 | 8,70137 | -1,315243573 | ENST00000416749 | 7754      | NR_002722    | ZNF204P              |
| A_33_P3415191  | 11,5881 | 11,9835 | -1,31530739  | ENST00000536015 | 5205      | NM_005603    | ATP8B1               |
| A_33_P3411090  | 6,45839 | 6,85379 | -1,31530739  | ENST00000389651 | 161823    | NM_001012969 | ADAL                 |
| A_21_P0002863  | 1,39961 | 1,79503 | -1,315325624 | ENST00000464131 | N/A       | N/A          | N/A                  |
| A_22_P00021735 | 3,60589 | 4,00132 | -1,315334742 | N/A             | N/A       | BM978283     | Inc-CTU2-2           |
| A_33_P3288294  | 6,64497 | 7,0405  | -1,315425917 | ENST00000520767 | 84750     | AJ535838     | FUT10                |
| A_23_P78563    | 14,7916 | 15,1872 | -1,315489743 | ENST00000588141 | 59286     | NM_024292    | UBL5                 |
| A_33_P3294078  | 2,145   | 2,54062 | -1,31550798  | N/A             | N/A       | N/A          | N/A                  |
| A_23_P28139    | 1,40375 | 1,79939 | -1,315526217 | ENST00000485440 | 6344      | NM_002980    | SCTR                 |
| A_23_P211252   | 4,95458 | 5,35024 | -1,315544454 | ENST00000397728 | 4047      | NM_001001438 | LSS                  |
| A_22_P00007107 | 2,28646 | 2,68219 | -1,315608286 | ENST00000542578 | 101927735 | NR_110058    | LOC101927735         |
| A_24_P185205   | 9,18734 | 9,58311 | -1,315644763 | ENST00000301057 | 90313     | NM_138349    | TP53I13              |
| A_23_P314250   | 4,40997 | 4,80581 | -1,3157086   | ENST00000247295 | 286336    | NM_033387    | FAM78A               |
| A_22_P00009361 | 1,64427 | 2,04011 | -1,3157086   | N/A             | N/A       | BX089959     | Inc-LRRTM2-1         |
| A_21_P0007886  | 1,47813 | 1,87409 | -1,315818042 | N/A             | N/A       | N/A          | Inc-RP11-181C3.1.1-1 |
| A_22_P00016879 | 4,69736 | 5,09333 | -1,315827163 | ENST00000361875 | 9819      | N/A          | TSC22D2              |
| A_33_P3227492  | 5,52831 | 5,92432 | -1,315863646 | ENST00000366713 | 574432    | NR_103539    | IBA57-AS1            |
| A_33_P3210760  | 6,20471 | 6,6008  | -1,315936615 | N/A             | N/A       | AI205683     | N/A                  |
| A_21_P0002805  | 4,16645 | 4,5626  | -1,315991344 | ENST00000467896 | 102724479 | XR_427436    | LOC102724479         |
| A_21_P0009008  | 6,60843 | 7,00468 | -1,316082565 | ENST00000566787 | N/A       | N/A          | N/A                  |
| A_21_P0005278  | 1,35496 | 1,75132 | -1,316182915 | ENST00000462565 | N/A       | N/A          | N/A                  |
| A_33_P3383261  | 10,3859 | 10,7823 | -1,316219408 | ENST00000060969 | 80143     | NM_001102396 | SIKE1                |
| A_22_P00016775 | 10,2603 | 10,6568 | -1,316310644 | ENST00000514146 | 100507602 | NR_102762    | TRIM52-AS1           |
| A_24_P225970   | 8,25677 | 8,65329 | -1,316328893 | ENST00000417364 | 151648    | NM_001012409 | SGOL1                |
| A_21_P0000686  | 4,55717 | 4,95371 | -1,316347141 | N/A             | 100379571 | NR_037803    | BACE1-AS             |
| A_24_P369898   | 4,81257 | 5,20911 | -1,316347141 | ENST00000579052 | 80022     | BC128044     | MYO15B               |
| A_22_P00011159 | 7,31344 | 7,71001 | -1,316374514 | ENST00000538324 | 28        | NM_020469    | ABO                  |
| A_23_P301925   | 17,2562 | 17,6528 | -1,316401887 | ENST00000361624 | 4512      | HV963900     | COX1                 |
| A_24_P359191   | 6,18642 | 6,58302 | -1,316401887 | ENST00000615188 | 6533      | NM_003043    | SLC6A6               |
| A_23_P83094    | 8,38584 | 8,78244 | -1,316401887 | ENST00000440700 | 7091      | NM_007005    | TLE4                 |

|                |         |         |              |                 |           |              |              |
|----------------|---------|---------|--------------|-----------------|-----------|--------------|--------------|
| A_23_P213247   | 10,9704 | 11,367  | -1,316401887 | ENST00000511441 | 26234     | NM_012161    | FBXL5        |
| A_33_P3396181  | 1,5065  | 1,90317 | -1,316465761 | ENST00000496337 | 93432     | NM_001293626 | LOC93432     |
| A_21_P0010554  | 3,20176 | 3,59858 | -1,316602644 | N/A             | 101927345 | N/A          | LOC101927345 |
| A_23_P142421   | 9,45469 | 9,85168 | -1,316757795 | ENST00000586308 | 9757      | NM_014727    | KMT2B        |
| A_23_P71864    | 9,0045  | 9,40152 | -1,316785176 | ENST00000439290 | 84895     | NM_032809    | FAM73B       |
| A_23_P75453    | 9,48154 | 9,87857 | -1,316794304 | ENST00000337652 | 4221      | NM_130803    | MEN1         |
| A_21_P0009242  | 3,79693 | 4,19404 | -1,316867324 | N/A             | N/A       | N/A          | Inc-MRM1-2   |
| A_33_P3303104  | 7,33176 | 7,72889 | -1,31688558  | ENST00000602751 | 55892     | NM_001185119 | MYNN         |
| A_33_P3269588  | 8,97134 | 9,36865 | -1,317049894 | ENST00000354828 | 2551      | NM_002040    | GABPA        |
| A_33_P3313785  | 8,91578 | 9,31311 | -1,317068152 | ENST00000433542 | 64770     | NM_022757    | CCDC14       |
| A_21_P0007115  | 1,50866 | 1,906   | -1,317077281 | N/A             | N/A       | N/A          | Inc-ABLIM1-1 |
| A_24_P213643   | 6,57217 | 6,96962 | -1,317177707 | ENST00000571707 | 83882     | NM_031945    | TSPAN10      |
| A_33_P3390853  | 13,2679 | 13,6655 | -1,317314664 | ENST00000423617 | 550643    | NR_015367    | LINC01420    |
| A_33_P3356325  | 7,10674 | 7,50435 | -1,317323795 | ENST00000541426 | 2120      | NM_001987    | ETV6         |
| A_32_P42725    | 1,59107 | 1,98872 | -1,317360319 | ENST00000449024 | N/A       | XM_006711715 | N/A          |
| A_33_P3265355  | 12,1012 | 12,4989 | -1,317405976 | ENST00000367208 | 6635      | NM_003094    | SNRPE        |
| A_22_P00004668 | 1,50596 | 1,90376 | -1,317497295 | ENST00000556586 | 145216    | NR_038436    | LINC00637    |
| A_23_P424582   | 9,89877 | 10,2966 | -1,317524692 | ENST00000490624 | 80864     | NM_030652    | EGFL8        |
| A_21_P0002384  | 1,71886 | 2,11677 | -1,317597753 | N/A             | N/A       | N/A          | Inc-CMPK2-13 |
| A_33_P3288694  | 7,85234 | 8,25026 | -1,317606886 | N/A             | 101929243 | XR_249973    | LOC101929243 |
| A_33_P3271599  | 6,04942 | 6,44735 | -1,317616019 | ENST00000396499 | 202243    | NM_176816    | CCDC125      |
| A_21_P0013499  | 1,88683 | 2,28481 | -1,317661685 | ENST00000523011 | 101926977 | XR_242405    | LOC101926977 |
| A_33_P3242603  | 8,80761 | 9,20559 | -1,317661685 | ENST00000479076 | 645676    | NR_027023    | ASH1L-AS1    |
| A_22_P00005435 | 3,1016  | 3,49968 | -1,317753021 | N/A             | N/A       | N/A          | Inc-DTYMK-4  |
| A_33_P3263170  | 14,9547 | 15,3528 | -1,31777129  | ENST00000429728 | 6637      | NM_003096    | SNRPG        |
| A_21_P0006496  | 11,1483 | 11,5465 | -1,317862634 | ENST00000442437 | 645037    | NM_001098411 | GAGE2B       |
| A_22_P00007261 | 1,46    | 1,8582  | -1,317862634 | N/A             | N/A       | N/A          | Inc-GPR144-3 |
| A_33_P3369495  | 1,58156 | 1,97979 | -1,317890038 | ENST00000376855 | 9071      | N/A          | CLDN10       |
| A_23_P53152    | 8,9469  | 9,34532 | -1,318063613 | ENST00000534147 | 56672     | NM_020642    | AKIP1        |
| A_33_P3233774  | 7,44386 | 7,84237 | -1,318145841 | ENST00000575752 | 7727      | NM_001032292 | ZNF174       |
| A_22_P00021295 | 1,49475 | 1,89327 | -1,318154977 | ENST00000448901 | 101929390 | N/A          | LINC01247    |
| A_21_P0011140  | 2,81307 | 3,21164 | -1,318200662 | N/A             | 100507240 | N/A          | VWA8-AS1     |
| A_21_P0011537  | 3,81723 | 4,21583 | -1,318228073 | ENST00000578883 | N/A       | XM_003960735 | N/A          |

|                |         |         |              |                 |           |              |                      |
|----------------|---------|---------|--------------|-----------------|-----------|--------------|----------------------|
| A_24_P83455    | 2,72464 | 3,12329 | -1,31827376  | N/A             | 200197    | NR_027136    | TMEM51-AS1           |
| A_22_P00016893 | 2,76946 | 3,1682  | -1,318356001 | ENST00000555798 | N/A       | N/A          | N/A                  |
| A_33_P3388222  | 1,71428 | 2,11314 | -1,318465664 | N/A             | 642620    | AK057320     | LOC642620            |
| A_21_P0006546  | 1,39922 | 1,79809 | -1,318474803 | N/A             | N/A       | N/A          | Inc-RP1-241P17.4.1-1 |
| A_33_P3293207  | 7,37155 | 7,77043 | -1,318483942 | ENST00000286688 | 157657    | NM_177965    | C8orf37              |
| A_23_P208516   | 12,4551 | 12,854  | -1,31850222  | ENST00000494142 | 79143     | NM_024298    | MBOAT7               |
| A_24_P133162   | 7,24566 | 7,64456 | -1,31850222  | ENST00000468303 | 90529     | NM_178122    | STPG1                |
| A_33_P3361457  | 10,323  | 10,722  | -1,318593614 | ENST00000382238 | 3455      | NM_000874    | IFNAR2               |
| A_21_P0013944  | 3,30995 | 3,70914 | -1,318767282 | N/A             | N/A       | BC022404     | Inc-JMJD7-PLA2G4B-1  |
| A_22_P00025209 | 1,4055  | 1,8047  | -1,318776423 | N/A             | 100874004 | NR_046642    | PPEF1-AS1            |
| A_22_P00009514 | 3,95135 | 4,35064 | -1,318858695 | ENST00000567079 | N/A       | N/A          | N/A                  |
| A_22_P00021455 | 3,27093 | 3,67023 | -1,318867837 | ENST00000450888 | 642345    | N/A          | MIR4500HG            |
| A_33_P3271065  | 2,21857 | 2,61788 | -1,318876979 | ENST00000408989 | 89766     | NM_001199527 | UMODL1               |
| A_21_P0008490  | 3,55742 | 3,95679 | -1,31893183  | N/A             | N/A       | N/A          | Inc-RTL1-6           |
| A_21_P0008798  | 1,65926 | 2,05864 | -1,318940972 | N/A             | N/A       | N/A          | Inc-RP11-82I10.1.1-4 |
| A_23_P25475    | 7,03474 | 7,43418 | -1,318995827 | ENST00000301466 | 8435      | NM_003578    | SOAT2                |
| A_23_P60354    | 7,68274 | 8,08219 | -1,319004969 | ENST00000382183 | 6595      | NM_139045    | SMARCA2              |
| A_22_P00009208 | 1,72055 | 2,12007 | -1,319068969 | ENST00000449986 | 100506457 | NR_110197    | LOC100506457         |
| A_32_P184464   | 4,25303 | 4,65258 | -1,319096399 | ENST00000620893 | 54763     | NM_017578    | ROPN1                |
| A_22_P00012570 | 10,8731 | 11,2727 | -1,319142116 | N/A             | N/A       | N/A          | Inc-PTP4A2-1         |
| A_24_P941824   | 11,2178 | 11,6175 | -1,319233555 | ENST00000375712 | 9371      | NM_004798    | KIF3B                |
| A_23_P410613   | 10,5131 | 10,9128 | -1,319233555 | ENST00000280756 | 90488     | NM_152261    | TMEM263              |
| A_24_P414999   | 11,0483 | 11,448  | -1,319233555 | ENST00000521545 | 55353     | NM_018407    | LAPTM4B              |
| A_33_P6812319  | 6,76286 | 7,16261 | -1,319279277 | ENST00000460259 | 4731      | N/A          | NDUFV3               |
| A_22_P00014719 | 1,67886 | 2,07863 | -1,319297567 | ENST00000576476 | 101929726 | XR_242025    | LOC101929726         |
| A_24_P14464    | 12,4191 | 12,8189 | -1,319325001 | ENST00000372676 | 10406     | NM_006103    | WFDC2                |
| A_21_P0005787  | 6,42301 | 6,82282 | -1,319334146 | N/A             | 101927815 | N/A          | LOC101927815         |
| A_23_P215318   | 8,52256 | 8,92238 | -1,319343291 | ENST00000310301 | 27072     | NM_014396    | VPS41                |
| A_33_P3259053  | 2,99043 | 3,39038 | -1,319462181 | ENST00000473000 | 389362    | NM_001135750 | PSMG4                |
| A_33_P3380493  | 4,55491 | 4,95487 | -1,319471327 | ENST00000614679 | 83442     | NM_031286    | SH3BGL3              |
| A_23_P436117   | 9,12466 | 9,52465 | -1,319498765 | ENST00000381714 | 10363     | NM_018200    | HMG20A               |
| A_33_P3315425  | 7,05168 | 7,45167 | -1,319498765 | ENST00000573134 | 64863     | NM_022840    | METTL4               |
| A_23_P141126   | 7,95068 | 8,3507  | -1,319526203 | ENST00000588479 | 2584      | NM_000154    | GALK1                |

|                |         |         |              |                 |           |              |                |
|----------------|---------|---------|--------------|-----------------|-----------|--------------|----------------|
| A_22_P00003023 | 3,91862 | 4,31868 | -1,319562789 | N/A             | N/A       | N/A          | Inc-C7orf13-1  |
| A_22_P00018626 | 1,4898  | 1,88987 | -1,319571935 | ENST00000502071 | 101928580 | NR_120556    | LOC101928580   |
| A_21_P0004024  | 6,32984 | 6,72993 | -1,319590229 | N/A             | N/A       | N/A          | Inc-RASA1-3    |
| A_22_P00004013 | 1,54166 | 1,9418  | -1,319635963 | ENST00000534675 | N/A       | N/A          | N/A            |
| A_23_P150064   | 6,5481  | 6,94825 | -1,31964511  | ENST00000372027 | 79812     | NM_024756    | MMRN2          |
| A_24_P179183   | 8,5781  | 8,97827 | -1,319663404 | ENST00000383440 | 23253     | NM_015208    | ANKRD12        |
| A_24_P264207   | 16,18   | 16,5802 | -1,319690846 | ENST00000426188 | 5757      | NM_002823    | PTMA           |
| A_33_P3387991  | 2,6359  | 3,03618 | -1,319764027 | ENST00000206513 | 1053      | NM_001805    | CEBPE          |
| A_23_P417415   | 11,8041 | 12,2044 | -1,319782323 | ENST00000481208 | 26027     | NM_147161    | ACOT11         |
| A_24_P246943   | 15,0586 | 15,4589 | -1,319782323 | ENST00000441944 | 5478      | NM_021130    | PPIA           |
| A_33_P3316539  | 7,52975 | 7,93019 | -1,319910402 | ENST00000004531 | 6542      | NM_001008539 | SLC7A2         |
| A_33_P3419012  | 2,18306 | 2,58354 | -1,319946998 | N/A             | N/A       | N/A          | N/A            |
| A_33_P3416797  | 3,46643 | 3,86696 | -1,319992745 | N/A             | 144203    | AL831947     | OVOS2          |
| A_24_P303454   | 7,41287 | 7,81348 | -1,320065943 | ENST00000456877 | 26230     | NM_012454    | TIAM2          |
| A_24_P510357   | 1,44859 | 1,84925 | -1,320111694 | ENST00000390312 | N/A       | S76132       | N/A            |
| A_33_P3342410  | 10,209  | 10,6097 | -1,320148295 | ENST00000263026 | 29904     | NM_013302    | EEF2K          |
| A_23_P212728   | 11,0925 | 11,4932 | -1,320148295 | ENST00000471273 | 55773     | NM_001199198 | TBC1D23        |
| A_23_P430381   | 7,89953 | 8,30024 | -1,320157446 | ENST00000368908 | 388695    | NM_212551    | LYSMD1         |
| A_33_P3780987  | 1,45583 | 1,85655 | -1,320166597 | ENST00000377713 | 285641    | NM_001145017 | SLC36A3        |
| A_33_P3237050  | 1,55532 | 1,95609 | -1,320212351 | ENST00000305045 | 122740    | NM_001004712 | OR4K14         |
| A_33_P3343220  | 13,4109 | 13,8117 | -1,320239804 | ENST00000343938 | 80772     | NM_001029885 | CPTP           |
| A_23_P118150   | 11,5986 | 11,9994 | -1,320239804 | ENST00000304414 | 23204     | NM_015161    | ARL6IP1        |
| A_24_P194714   | 14,2413 | 14,6421 | -1,320239804 | ENST00000327490 | 283991    | NM_182565    | UBALD2         |
| A_33_P3389028  | 3,07535 | 3,4762  | -1,320285561 | N/A             | N/A       | N/A          | N/A            |
| A_23_P37877    | 9,23477 | 9,63569 | -1,320349623 | ENST00000565425 | 64428     | NM_022493    | NARFL          |
| A_32_P229618   | 4,5214  | 4,92244 | -1,320459451 | ENST00000426717 | 1740      | NM_001364    | DLG2           |
| A_21_P0008500  | 1,64533 | 2,0464  | -1,32048691  | N/A             | N/A       | N/A          | Inc-GPR132-2   |
| A_21_P0013106  | 1,40921 | 1,81032 | -1,320523522 | N/A             | N/A       | N/A          | XLOC_I2_013151 |
| A_24_P84508    | 16,5775 | 16,9787 | -1,320605903 | ENST00000332361 | N/A       | N/A          | N/A            |
| A_21_P0005092  | 1,52008 | 1,92129 | -1,320615057 | ENST00000439703 | 101929484 | XR_245642    | LOC101929484   |
| A_23_P8754     | 7,22354 | 7,62479 | -1,320651673 | ENST00000358954 | 10157     | NM_005763    | AASS           |
| A_33_P3404480  | 1,61435 | 2,01562 | -1,320669981 | ENST00000359962 | 58538     | NM_033066    | MPP4           |
| A_23_P256413   | 14,3869 | 14,7882 | -1,320697444 | ENST00000464689 | 112616    | NM_138410    | CMTM7          |

|                |         |         |              |                 |           |              |                |
|----------------|---------|---------|--------------|-----------------|-----------|--------------|----------------|
| A_24_P409126   | 4,47409 | 4,87541 | -1,320715753 | N/A             | 22862     | AK056071     | FNDC3A         |
| A_23_P371613   | 12,2134 | 12,6149 | -1,320880544 | ENST00000372837 | 118487    | NM_203298    | CHCHD1         |
| A_21_P0014629  | 2,12731 | 2,52881 | -1,320880544 | N/A             | 644767    | XR_111749    | FLJ44838       |
| A_33_P3270218  | 1,47189 | 1,87366 | -1,32112777  | ENST00000404008 | 84132     | AK298164     | USP42          |
| A_33_P3354374  | 1,47345 | 1,87523 | -1,321136927 | N/A             | 100507410 | NR_040018    | C1QTNF1-AS1    |
| A_22_P00015999 | 4,41094 | 4,81281 | -1,321219346 | ENST00000431401 | 101928106 | XR_251961    | LOC101928106   |
| A_21_P0012836  | 1,44862 | 1,8505  | -1,321228504 | N/A             | N/A       | N/A          | XLOC_I2_011656 |
| A_21_P0013911  | 5,14944 | 5,55138 | -1,321283454 | N/A             | N/A       | N/A          | N/A            |
| A_33_P3309130  | 1,64834 | 2,05037 | -1,321365882 | ENST00000315938 | 220032    | NM_182833    | GDPD4          |
| A_22_P00001680 | 3,68362 | 4,08569 | -1,321402519 | N/A             | N/A       | N/A          | Inc-ASPSCR1-1  |
| A_22_P00018938 | 1,87298 | 2,27511 | -1,321457476 | N/A             | N/A       | N/A          | Inc-C6orf228-3 |
| A_33_P3406255  | 9,3591  | 9,76129 | -1,321512435 | N/A             | N/A       | N/A          | N/A            |
| A_24_P292964   | 11,2704 | 11,6726 | -1,321521595 | ENST00000582114 | 80279     | NM_001278198 | CDK5RAP3       |
| A_33_P3330039  | 9,28357 | 9,68581 | -1,321558236 | ENST00000607609 | 51177     | NM_016274    | PLEKHO1        |
| A_24_P322908   | 6,91502 | 7,31728 | -1,321576556 | ENST00000621775 | 389856    | NM_001145073 | USP27X         |
| A_22_P00021297 | 1,53076 | 1,93305 | -1,321604038 | N/A             | N/A       | N/A          | Inc-EMP2-2     |
| A_24_P119545   | 3,67798 | 4,08031 | -1,321640681 | ENST00000366784 | 3707      | XM_005273120 | ITPKB          |
| A_33_P3234989  | 8,47299 | 8,87533 | -1,321649842 | ENST00000552912 | 28981     | NM_014055    | IFT81          |
| A_24_P394420   | 3,4408  | 3,84318 | -1,321686487 | ENST00000321442 | 94081     | NM_022754    | SFXN1          |
| A_24_P342484   | 2,47545 | 2,87786 | -1,321713971 | ENST00000368111 | 1401      | NM_000567    | CRP            |
| A_22_P00019695 | 1,55232 | 1,95479 | -1,32176894  | N/A             | N/A       | N/A          | Inc-CST7-2     |
| A_24_P63563    | 11,0297 | 11,4322 | -1,321796426 | ENST00000194118 | 9812      | NM_014773    | KIAA0141       |
| A_23_P105002   | 9,17596 | 9,57849 | -1,321823912 | ENST00000278833 | 6094      | NM_000327    | ROM1           |
| A_21_P0001256  | 1,46954 | 1,87208 | -1,321833075 | N/A             | N/A       | N/A          | Inc-DFFB-3     |
| A_21_P0014826  | 3,35724 | 3,7598  | -1,321851399 | N/A             | N/A       | N/A          | N/A            |
| A_23_P326691   | 10,975  | 11,3776 | -1,321888049 | ENST00000373493 | 5928      | NM_005610    | RBBP4          |
| A_33_P3370244  | 1,62963 | 2,03235 | -1,321998005 | ENST00000444310 | 342346    | NM_001145011 | C16orf96       |
| A_21_P0010257  | 4,98129 | 5,38403 | -1,322016332 | N/A             | N/A       | N/A          | Inc-PKNOX1-2   |
| A_23_P250385   | 10,1638 | 10,5666 | -1,322071314 | ENST00000331442 | 3009      | NM_005322    | HIST1H1B       |
| A_23_P30666    | 15,3414 | 15,7442 | -1,322071314 | ENST00000296861 | 27242     | NM_014452    | TNFRSF21       |
| A_23_P412932   | 1,56079 | 1,96364 | -1,322117135 | ENST00000373368 | 6694      | NM_006944    | SPP2           |
| A_21_P0011509  | 5,12838 | 5,53126 | -1,322144628 | ENST00000574727 | 245       | N/A          | ALOX12P2       |
| A_33_P3231407  | 4,35012 | 4,75302 | -1,322162957 | ENST00000368135 | 149628    | XM_005244930 | PYHIN1         |

|                |         |         |              |                 |           |              |              |
|----------------|---------|---------|--------------|-----------------|-----------|--------------|--------------|
| A_21_P0009639  | 2,11688 | 2,51979 | -1,322172121 | N/A             | N/A       | N/A          | Inc-ZNF516-3 |
| A_33_P3320619  | 3,92351 | 4,32643 | -1,322181286 | ENST00000376643 | 10013     | NM_006044    | HDAC6        |
| A_21_P0000215  | 8,25777 | 8,6608  | -1,322282101 | ENST00000485390 | 26811     | NR_000015    | SNORD55      |
| A_33_P3351052  | 9,0578  | 9,46092 | -1,322364592 | ENST00000373012 | 5453      | NM_002699    | POU3F1       |
| A_33_P3255741  | 4,66696 | 5,07008 | -1,322364592 | ENST00000376954 | 347344    | NM_007137    | ZNF81        |
| A_22_P00002608 | 8,65831 | 9,06157 | -1,322492921 | ENST00000566499 | 146336    | NR_027242    | SSTR5-AS1    |
| A_24_P361167   | 11,5077 | 11,911  | -1,322529589 | ENST00000557364 | 57680     | NM_020920    | CHD8         |
| A_22_P00012866 | 11,9555 | 12,3588 | -1,322529589 | ENST00000444958 | 57291     | NR_024031    | DANCR        |
| A_33_P3329592  | 4,31684 | 4,72015 | -1,322538756 | ENST00000587722 | 388552    | NM_212550    | BLOC1S3      |
| A_22_P00012859 | 5,92089 | 6,3242  | -1,322538756 | ENST00000442026 | 104355287 | NR_126403    | LINC01317    |
| A_22_P00007386 | 1,49618 | 1,89959 | -1,322630431 | ENST00000561496 | N/A       | BC035378     | N/A          |
| A_22_P00011327 | 1,40723 | 1,81071 | -1,322694607 | N/A             | N/A       | N/A          | Inc-OST4-3   |
| A_32_P8361     | 10,3775 | 10,781  | -1,322712943 | ENST00000587938 | 23383     | NM_015329    | MAU2         |
| A_33_P3409513  | 11,7384 | 12,142  | -1,32280463  | ENST00000417877 | 5600      | NM_002751    | MAPK11       |
| A_23_P99172    | 10,0252 | 10,4288 | -1,32280463  | ENST00000422000 | 84318     | NM_032358    | CCDC77       |
| A_23_P395632   | 1,51181 | 1,91544 | -1,322832137 | ENST00000217043 | 140902    | NM_178491    | R3HDML       |
| A_24_P1773     | 7,19472 | 7,59837 | -1,322850475 | ENST00000285737 | 83752     | NM_031490    | LONP2        |
| A_23_P394043   | 7,50738 | 7,91106 | -1,322877984 | ENST00000160298 | 57662     | NM_001080429 | CAMSAP3      |
| A_23_P89410    | 11,8222 | 12,2259 | -1,322896323 | ENST00000590185 | 8678      | NM_003766    | BECN1        |
| A_33_P3344086  | 13,9146 | 14,3183 | -1,322896323 | ENST00000333151 | 8331      | NM_021066    | HIST1H2AJ    |
| A_23_P205724   | 7,45028 | 7,854   | -1,322914662 | ENST00000553409 | 55051     | NM_017970    | NRDE2        |
| A_21_P0014399  | 2,69247 | 3,09627 | -1,322988022 | N/A             | 101927117 | NR_109889    | PLCG1-AS1    |
| A_33_P3618429  | 9,03353 | 9,43737 | -1,323024704 | ENST00000602585 | 441733    | N/A          | PRKXP1       |
| A_33_P3305105  | 4,42974 | 4,8336  | -1,323043045 | ENST00000449321 | 4013      | NM_198315    | VWA5A        |
| A_33_P3714341  | 1,4314  | 1,8353  | -1,323079728 | N/A             | N/A       | AB363267     | N/A          |
| A_22_P00004773 | 1,39249 | 1,79643 | -1,323116412 | N/A             | N/A       | N/A          | Inc-CTU2-4   |
| A_23_P152428   | 7,09169 | 7,49572 | -1,323198955 | ENST00000268485 | 91862     | NM_052858    | MARVELD3     |
| A_24_P258051   | 8,12226 | 8,52646 | -1,323354883 | ENST00000342386 | 84930     | NM_032844    | MASTL        |
| A_22_P00016776 | 9,84636 | 10,2506 | -1,323391575 | N/A             | 101928649 | NR_109909    | CTC-338M12.4 |
| A_21_P0013389  | 6,89146 | 7,2957  | -1,323391575 | N/A             | 100132832 | NR_028058    | PMS2P9       |
| A_33_P3296772  | 4,45555 | 4,85979 | -1,323391575 | N/A             | 145438    | NR_037676    | FRMD6-AS1    |
| A_23_P60286    | 10,5607 | 10,965  | -1,323446614 | ENST00000550704 | 1975      | NM_001417    | EIF4B        |
| A_33_P3302657  | 2,53465 | 2,93895 | -1,323446614 | ENST00000376525 | 7091      | N/A          | TLE4         |

|                |         |         |              |                 |           |              |              |
|----------------|---------|---------|--------------|-----------------|-----------|--------------|--------------|
| A_33_P3412149  | 9,58677 | 9,9911  | -1,323474135 | ENST00000369970 | 23155     | NM_001048210 | CLCC1        |
| A_33_P3242814  | 1,55571 | 1,96004 | -1,323474135 | N/A             | N/A       | N/A          | N/A          |
| A_21_P0012933  | 1,44831 | 1,85281 | -1,323630096 | ENST00000515403 | 643201    | N/A          | LOC643201    |
| A_33_P3401981  | 3,20764 | 3,61214 | -1,323630096 | ENST00000587564 | 399473    | NM_001042522 | SPRED3       |
| A_22_P00017750 | 1,41195 | 1,81651 | -1,323685145 | ENST00000501708 | 102725477 | AK125412     | LOC102725477 |
| A_23_P384532   | 1,70375 | 2,10832 | -1,32369432  | ENST00000398545 | 220136    | NM_145020    | CFAP53       |
| A_23_P51996    | 11,1288 | 11,5334 | -1,323721846 | ENST00000370008 | 6814      | NM_007269    | STXBP3       |
| A_24_P414786   | 10,3767 | 10,7813 | -1,323721846 | ENST00000307731 | 51362     | NM_015891    | CDC40        |
| A_23_P395426   | 9,90906 | 10,3137 | -1,323758548 | ENST00000370366 | 11083     | NM_022105    | DIDO1        |
| A_23_P92441    | 11,0914 | 11,4961 | -1,323813602 | ENST00000504707 | 4085      | NM_002358    | MAD2L1       |
| A_24_P542375   | 14,7996 | 15,2044 | -1,323905365 | ENST00000448874 | 5757      | NM_002823    | PTMA         |
| A_23_P25706    | 10,2374 | 10,6422 | -1,323905365 | ENST00000298912 | 79789     | NM_024734    | CLMN         |
| A_23_P313981   | 1,70462 | 2,10948 | -1,323960426 | ENST00000619595 | 5273      | NM_005024    | SERPINB10    |
| A_24_P340679   | 15,5104 | 15,9153 | -1,323997135 | ENST00000486414 | 5478      | NM_021130    | PPIA         |
| A_33_P3314441  | 8,10545 | 8,51042 | -1,324061377 | ENST00000619412 | 64839     | NM_001163315 | FBXL17       |
| A_24_P188447   | 1,50836 | 1,91334 | -1,324070555 | ENST00000357083 | 1996      | NM_021952    | ELAVL4       |
| A_23_P368393   | 8,26374 | 8,66872 | -1,324070555 | ENST00000414963 | 23451     | NM_001005526 | SF3B1        |
| A_33_P3374478  | 1,55974 | 1,96473 | -1,324079733 | ENST00000429162 | 113201    | AK098265     | CASC4        |
| A_23_P353742   | 10,944  | 11,349  | -1,32408891  | ENST00000458649 | 55626     | NM_017749    | AMBRA1       |
| A_24_P7652     | 3,07883 | 3,48386 | -1,324116444 | ENST00000452324 | 256714    | NM_152780    | MAP7D2       |
| A_22_P00022339 | 2,99953 | 3,40457 | -1,324125622 | ENST00000440609 | N/A       | N/A          | N/A          |
| A_24_P278367   | 9,92854 | 10,3336 | -1,324143979 | ENST00000470322 | 10121     | NM_005736    | ACTR1A       |
| A_33_P3723600  | 1,36682 | 1,77192 | -1,324180692 | ENST00000558165 | 7302      | NR_028510    | TYRO3P       |
| A_21_P0014783  | 1,52561 | 1,93072 | -1,324189871 | ENST00000608358 | N/A       | AF447871     | N/A          |
| A_33_P3361896  | 1,52394 | 1,92913 | -1,324263302 | N/A             | 100127994 | AK127538     | LOC100127994 |
| A_22_P00017995 | 9,23504 | 9,64031 | -1,324336736 | N/A             | 153684    | NR_015447    | LOC153684    |
| A_33_P3260680  | 1,99324 | 2,39852 | -1,324345916 | ENST00000366475 | 127074    | NM_001004696 | OR2T4        |
| A_22_P00025626 | 2,72641 | 3,13179 | -1,324437716 | N/A             | 100507118 | NR_051984    | PRC1-AS1     |
| A_22_P00025678 | 1,46497 | 1,87037 | -1,324456077 | N/A             | N/A       | BX096603     | Inc-PRMT8-2  |
| A_23_P69226    | 10,4017 | 10,8071 | -1,324456077 | ENST00000429759 | 55831     | NM_018447    | EMC3         |
| A_21_P0001366  | 1,4469  | 1,85231 | -1,324465257 | N/A             | N/A       | N/A          | Inc-TSHB-2   |
| A_22_P00023815 | 1,47216 | 1,87757 | -1,324465257 | ENST00000439904 | N/A       | BC023330     | N/A          |
| A_23_P96285    | 3,60194 | 4,00738 | -1,324492799 | ENST00000535845 | 65055     | NM_022912    | REEP1        |



|                |         |         |              |                 |           |              |                       |
|----------------|---------|---------|--------------|-----------------|-----------|--------------|-----------------------|
| A_33_P3357322  | 9,27491 | 9,68037 | -1,32451116  | ENST00000286398 | 10592     | NM_001042550 | SMC2                  |
| A_23_P434473   | 8,33111 | 8,73664 | -1,324575428 | ENST00000488151 | 201595    | NM_178862    | STT3B                 |
| A_22_P00002415 | 1,36296 | 1,76853 | -1,324612153 | ENST00000554515 | N/A       | N/A          | N/A                   |
| A_21_P0013788  | 1,54644 | 1,95202 | -1,324621335 | ENST00000276185 | 84443     | N/A          | FRMPD3                |
| A_23_P208293   | 14,2143 | 14,6199 | -1,324639698 | ENST00000252483 | 5819      | NM_001042724 | PVRL2                 |
| A_21_P0001029  | 2,52426 | 2,92993 | -1,324703971 | N/A             | N/A       | N/A          | Inc-PRRC2C-1          |
| A_22_P00024357 | 1,47917 | 1,88486 | -1,324722336 | N/A             | N/A       | N/A          | Inc-CCDC69-1          |
| A_23_P2066     | 8,40923 | 8,81496 | -1,324759066 | ENST00000527830 | 51074     | NM_015957    | APIP                  |
| A_33_P3354001  | 3,19339 | 3,59916 | -1,324795796 | ENST00000615869 | 93664     | NM_001167940 | CADPS2                |
| A_33_P3416166  | 1,64406 | 2,04992 | -1,324878444 | ENST00000559008 | 101929560 | XR_248148    | LOC101929560          |
| A_23_P144458   | 8,27654 | 8,68246 | -1,324933545 | ENST00000508738 | 817       | NM_001221    | CAMK2D                |
| A_22_P00013207 | 8,15463 | 8,56066 | -1,32503457  | N/A             | N/A       | BC005095     | Inc-RNF24-2           |
| A_24_P57700    | 8,58649 | 8,99254 | -1,325052939 | ENST00000540170 | 23051     | NM_015035    | ZHX3                  |
| A_33_P3290562  | 9,59069 | 9,99676 | -1,325071308 | ENST00000395925 | 2737      | NM_000168    | GLI3                  |
| A_22_P00009793 | 9,27866 | 9,68484 | -1,325172344 | N/A             | N/A       | N/A          | Inc-MEGF11-2          |
| A_24_P15586    | 1,88971 | 2,2959  | -1,325181529 | ENST00000415914 | 168451    | NM_182529    | THAP5                 |
| A_21_P0008624  | 5,79534 | 6,20155 | -1,3251999   | N/A             | N/A       | N/A          | Inc-VPS18-1           |
| A_33_P3287685  | 12,1133 | 12,5196 | -1,325282573 | ENST00000612029 | 4849      | NM_014516    | CNOT3                 |
| A_24_P299318   | 4,83571 | 5,24216 | -1,325420373 | ENST00000329099 | 359845    | NM_182705    | FAM101B               |
| A_23_P6708     | 13,1942 | 13,6007 | -1,325466309 | ENST00000602845 | 152217    | NR_024388    | NCBP2-AS2             |
| A_23_P212002   | 10,851  | 11,2575 | -1,325466309 | ENST00000617821 | 4820      | NM_005385    | NKTR                  |
| A_23_P212397   | 10,0795 | 10,486  | -1,325466309 | ENST00000265537 | 23395     | NM_015340    | LARS2                 |
| A_21_P0009762  | 1,57194 | 1,97848 | -1,325503059 | N/A             | N/A       | N/A          | Inc-ANKRD27-4         |
| A_21_P0005487  | 1,38192 | 1,78847 | -1,325512247 | N/A             | N/A       | N/A          | Inc-RP1-170O19.17.1-3 |
| A_23_P320021   | 2,7939  | 3,20051 | -1,325567375 | ENST00000614066 | 7287      | NM_003322    | TULP1                 |
| A_33_P3381870  | 10,1745 | 10,5814 | -1,325833857 | ENST00000358242 | 2039      | NM_001978    | DMTN                  |
| A_22_P00017083 | 6,61785 | 7,02477 | -1,325852237 | N/A             | N/A       | AK126333     | Inc-TWSG1-1           |
| A_23_P126613   | 3,76233 | 4,1693  | -1,325898189 | ENST00000484864 | 89872     | NM_080429    | AQP10                 |
| A_24_P926760   | 10,1671 | 10,5741 | -1,32592576  | ENST00000466553 | 4820      | NM_005385    | NKTR                  |
| A_24_P324314   | 6,90814 | 7,31516 | -1,325944142 | ENST00000375036 | 439921    | NM_001008529 | MXRA7                 |
| A_22_P00012951 | 3,54763 | 3,95468 | -1,325971714 | N/A             | N/A       | N/A          | Inc-RECQL5-1          |
| A_22_P00016179 | 3,61194 | 4,01903 | -1,326008478 | ENST00000561310 | N/A       | DA446599     | N/A                   |
| A_23_P148513   | 13,8188 | 14,2259 | -1,32601767  | ENST00000370641 | 2787      | NM_005274    | GNG5                  |

|                |         |         |              |                 |           |              |                |
|----------------|---------|---------|--------------|-----------------|-----------|--------------|----------------|
| A_21_P0006170  | 1,49264 | 1,89981 | -1,32608201  | N/A             | N/A       | N/A          | Inc-C9orf170-1 |
| A_33_P3422429  | 11,0756 | 11,4828 | -1,326109585 | ENST00000459752 | 10207     | AJ001306     | INADL          |
| A_32_P36143    | 5,97093 | 6,37815 | -1,326127969 | N/A             | N/A       | AL523350     | N/A            |
| A_24_P393470   | 5,56078 | 5,96803 | -1,326155546 | ENST00000477565 | 729991    | NM_001145783 | MEF2BNB        |
| A_23_P29046    | 11,5111 | 11,9184 | -1,326201507 | ENST00000290349 | 873       | NM_001757    | CBR1           |
| A_22_P00002552 | 8,88519 | 9,29249 | -1,326201507 | ENST00000582766 | 104909134 | NM_001303016 | MGC57346-CRHR1 |
| A_23_P406071   | 6,41065 | 6,81797 | -1,326219893 | N/A             | N/A       | AK097098     | N/A            |
| A_33_P3350684  | 2,18062 | 2,58794 | -1,326219893 | N/A             | N/A       | N/A          | N/A            |
| A_33_P3338740  | 2,66589 | 3,07329 | -1,326293436 | ENST00000266991 | 50846     | NM_021044    | DHH            |
| A_21_P0008156  | 3,77923 | 4,18669 | -1,326348596 | N/A             | N/A       | N/A          | Inc-TPT1-1     |
| A_33_P3335077  | 5,51037 | 5,91783 | -1,326348596 | N/A             | N/A       | BC023640     | N/A            |
| A_33_P3313519  | 4,55252 | 4,96005 | -1,326412952 | ENST00000617299 | 89832     | NM_139320    | CHRFAM7A       |
| A_21_P0011794  | 1,39467 | 1,80222 | -1,326431341 | N/A             | N/A       | N/A          | XLOC_I2_007237 |
| A_22_P00024661 | 1,38916 | 1,79674 | -1,326458923 | N/A             | N/A       | N/A          | Inc-LEFTY2-1   |
| A_23_P200728   | 1,53695 | 1,94454 | -1,326468118 | ENST00000426740 | 2214      | NM_000569    | FCGR3A         |
| A_22_P00001582 | 1,89702 | 2,30475 | -1,326596845 | ENST00000537292 | 100507091 | NR_038290    | LOC100507091   |
| A_33_P3263284  | 8,42399 | 8,83183 | -1,326697997 | N/A             | 100130238 | NR_024563    | LOC100130238   |
| A_23_P70095    | 1,47056 | 1,87844 | -1,326734781 | ENST00000523813 | 972       | NM_001025158 | CD74           |
| A_24_P252780   | 7,60951 | 8,01746 | -1,326799156 | ENST00000369301 | 374354    | NM_198514    | NHLRC2         |
| A_23_P140960   | 14,4132 | 14,8212 | -1,326845141 | ENST00000484769 | 4706      | NM_005003    | NDUFAB1        |
| A_33_P3382560  | 16,0399 | 16,448  | -1,326937114 | ENST00000479658 | 6147      | NM_000984    | RPL23A         |
| A_22_P00001884 | 1,52019 | 1,92836 | -1,327001499 | ENST00000602823 | N/A       | XR_426058    | N/A            |
| A_33_P3369063  | 1,5545  | 1,96274 | -1,327065887 | ENST00000528843 | N/A       | AB529231     | N/A            |
| A_33_P3417980  | 3,47413 | 3,8824  | -1,327093483 | ENST00000459925 | 388284    | BC132880     | C16orf86       |
| A_22_P00017208 | 2,03918 | 2,44752 | -1,327157875 | N/A             | N/A       | N/A          | Inc-UCN-1      |
| A_33_P3210358  | 3,44613 | 3,85449 | -1,327176274 | N/A             | N/A       | N/A          | N/A            |
| A_22_P00025866 | 4,37696 | 4,78533 | -1,327185473 | N/A             | N/A       | AK057919     | Inc-VMO1-1     |
| A_23_P128323   | 12,1789 | 12,5873 | -1,327213071 | ENST00000338748 | 6337      | NM_001038    | SCNN1A         |
| A_22_P00015495 | 4,65471 | 5,06311 | -1,327213071 | ENST00000437698 | 90627     | NM_001243476 | STARD13        |
| A_33_P3272189  | 7,47019 | 7,87861 | -1,32723147  | ENST00000438943 | 84804     | NM_032718    | MFSD9          |
| A_21_P0001886  | 2,23319 | 2,64163 | -1,32724987  | ENST00000619740 | N/A       | N/A          | N/A            |
| A_22_P00003809 | 1,80486 | 2,21335 | -1,32729587  | N/A             | N/A       | N/A          | Inc-CDKN2C-1   |
| A_23_P81859    | 12,8072 | 13,2157 | -1,32730507  | N/A             | 85235     | NM_080596    | HIST1H2AH      |

|                |         |         |              |                 |           |              |                |
|----------------|---------|---------|--------------|-----------------|-----------|--------------|----------------|
| A_24_P313334   | 10,4336 | 10,8421 | -1,32730507  | ENST00000445816 | 10169     | NM_001199877 | SERF2          |
| A_22_P00004470 | 3,29996 | 3,70847 | -1,32731427  | ENST00000520300 | N/A       | N/A          | N/A            |
| A_33_P3462975  | 1,59969 | 2,00822 | -1,327332671 | N/A             | 401497    | NR_046204    | LINC01242      |
| A_23_P398491   | 8,58333 | 8,99186 | -1,327332671 | ENST00000559153 | 90416     | NM_001289132 | C15orf57       |
| A_23_P207879   | 5,16854 | 5,57718 | -1,327433879 | ENST00000575500 | 79092     | NM_024110    | CARD14         |
| A_21_P0013757  | 17,8276 | 18,2363 | -1,327489086 | N/A             | N/A       | N/A          | XLOC_I2_015478 |
| A_24_P302802   | 9,95959 | 10,3683 | -1,327498288 | ENST00000474833 | 5096      | NM_000532    | PCCB           |
| A_24_P500422   | 2,71705 | 3,12584 | -1,327571902 | ENST00000602367 | 730101    | NR_024403    | LOC730101      |
| A_24_P121956   | 8,05572 | 8,46454 | -1,327599508 | ENST00000585416 | 255043    | NM_173804    | TMEM86B        |
| A_22_P00007339 | 1,67725 | 2,08612 | -1,32764552  | N/A             | N/A       | N/A          | Inc-GPRC5A-2   |
| A_24_P107336   | 9,73631 | 10,1452 | -1,327663925 | ENST00000281187 | 112936    | NM_052875    | VPS26B         |
| A_23_P208240   | 4,18875 | 4,59767 | -1,327691533 | N/A             | 90338     | BC000807     | ZNF160         |
| A_33_P3307197  | 11,1184 | 11,5274 | -1,327765158 | ENST00000497385 | 5738      | NM_020440    | PTGFRN         |
| A_19_P00322259 | 4,24334 | 4,65236 | -1,327783565 | ENST00000591188 | 100506374 | XM_006710057 | LOC100506374   |
| A_33_P3244578  | 5,55744 | 5,96649 | -1,327811176 | N/A             | 100129675 | AK125061     | LOC100129675   |
| A_33_P3212994  | 10,0043 | 10,4134 | -1,327857195 | ENST00000318387 | 11130     | NM_032997    | ZWINT          |
| A_33_P3380618  | 4,5025  | 4,91161 | -1,327866399 | ENST00000453796 | 3339      | NM_001291860 | HSPG2          |
| A_33_P3309225  | 1,4679  | 1,87702 | -1,327875603 | ENST00000553510 | N/A       | BX090553     | N/A            |
| A_22_P00024019 | 3,54438 | 3,9535  | -1,327875603 | N/A             | 100874088 | NR_046638    | PCYT1B-AS1     |
| A_22_P00008389 | 3,41767 | 3,82684 | -1,327921625 | ENST00000505035 | 162083    | NM_001145545 | C16orf82       |
| A_21_P0004647  | 3,40394 | 3,81315 | -1,327958443 | N/A             | N/A       | N/A          | Inc-C6orf89-1  |
| A_21_P0006482  | 1,46196 | 1,87117 | -1,327958443 | N/A             | N/A       | N/A          | Inc-TMSB4X-1   |
| A_33_P3394694  | 9,2003  | 9,60954 | -1,327986058 | ENST00000612545 | N/A       | AK126742     | N/A            |
| A_22_P00014588 | 1,56155 | 1,9709  | -1,328087315 | N/A             | N/A       | N/A          | Inc-SLC12A7-1  |
| A_22_P00012522 | 1,51045 | 1,91984 | -1,328124138 | ENST00000440714 | N/A       | N/A          | N/A            |
| A_23_P16242    | 6,20389 | 6,61329 | -1,328133344 | ENST00000430024 | 7568      | NM_021143    | ZNF20          |
| A_21_P0009799  | 4,8587  | 5,26816 | -1,328188581 | N/A             | N/A       | N/A          | Inc-C19orf26-1 |
| A_22_P00012129 | 6,50525 | 6,91473 | -1,328206993 | N/A             | N/A       | N/A          | Inc-POLR1E-3   |
| A_23_P368126   | 13,1554 | 13,5649 | -1,328225406 | ENST00000359172 | 10768     | NM_006621    | AHCYL1         |
| A_22_P00009704 | 1,54111 | 1,95062 | -1,328234613 | ENST00000582805 | 101927715 | NR_104127    | LINC01029      |
| A_23_P213166   | 7,90594 | 8,31548 | -1,328262233 | ENST00000506675 | 55345     | NM_018392    | ZGRF1          |
| A_21_P0010529  | 3,79351 | 4,20318 | -1,328381927 | N/A             | N/A       | N/A          | XLOC_I2_000217 |
| A_23_P210608   | 11,2094 | 11,6191 | -1,32840955  | ENST00000302342 | 7764      | NM_006526    | ZNF217         |

|                |         |         |              |                 |           |              |                |
|----------------|---------|---------|--------------|-----------------|-----------|--------------|----------------|
| A_33_P3279124  | 10,7095 | 11,1192 | -1,32840955  | ENST00000434114 | 253725    | NM_001169107 | FAM21C         |
| A_22_P00020548 | 1,67107 | 2,08083 | -1,328464799 | N/A             | N/A       | N/A          | lnc-FAM161B-1  |
| A_22_P00001583 | 3,44904 | 3,85885 | -1,32851084  | N/A             | N/A       | BG208742     | lnc-ARL6IP5-1  |
| A_22_P00001310 | 1,64954 | 2,05937 | -1,328529258 | N/A             | N/A       | AK057971     | lnc-ANP32A-2   |
| A_32_P57810    | 4,03792 | 4,44775 | -1,328529258 | ENST00000319945 | 114804    | NM_052916    | RNF157         |
| A_24_P126892   | 1,53176 | 1,94163 | -1,328566093 | N/A             | N/A       | AF116680     | N/A            |
| A_33_P3396389  | 4,71099 | 5,12098 | -1,328676604 | ENST00000413623 | 3554      | NM_000877    | IL1R1          |
| A_24_P337000   | 10,6977 | 11,1077 | -1,328685814 | ENST00000319190 | 57217     | NM_020458    | TTC7A          |
| A_22_P00013900 | 1,35837 | 1,76846 | -1,328768704 | ENST00000510845 | N/A       | BU674282     | N/A            |
| A_33_P3302300  | 1,5645  | 1,97464 | -1,328814757 | N/A             | 100128333 | AK127681     | LOC100128333   |
| A_23_P64499    | 10,0002 | 10,4104 | -1,328870022 | ENST00000614710 | 81532     | NM_053005    | MOB2           |
| A_23_P501985   | 1,43573 | 1,84593 | -1,328870022 | ENST00000419094 | 1438      | NM_172249    | CSF2RA         |
| A_22_P00015676 | 1,60599 | 2,01627 | -1,328943712 | ENST00000563268 | N/A       | N/A          | N/A            |
| A_24_P93309    | 3,97024 | 4,38054 | -1,328962135 | ENST00000378441 | 441549    | NM_001029954 | CDNF           |
| A_22_P00025222 | 1,35729 | 1,76759 | -1,328962135 | N/A             | 100874236 | NR_052004    | COL18A1-AS2    |
| A_23_P409489   | 1,44429 | 1,8547  | -1,329063467 | ENST00000371174 | 1791      | NM_004088    | DNTT           |
| A_21_P0010845  | 5,88244 | 6,29292 | -1,329127956 | N/A             | N/A       | N/A          | XLOC_I2_001771 |
| A_33_P3283619  | 2,34049 | 2,75125 | -1,329385939 | ENST00000494073 | 4068      | NM_001114937 | SH2D1A         |
| A_23_P12147    | 6,86618 | 7,27703 | -1,329468873 | ENST00000294811 | 148304    | NM_152485    | C1orf74        |
| A_22_P00017173 | 1,39325 | 1,80419 | -1,329551813 | ENST00000517335 | 101927740 | NR_109890    | LOC101927740   |
| A_33_P3350343  | 4,96122 | 5,3722  | -1,329588676 | N/A             | 101929115 | XR_246488    | LOC101929115   |
| A_23_P84576    | 6,04467 | 6,45566 | -1,329597892 | ENST00000409349 | 84168     | NM_053034    | ANTXR1         |
| A_23_P161352   | 10,5172 | 10,9283 | -1,329699273 | ENST00000471481 | 9200      | NM_014241    | PTPLA          |
| A_33_P3376947  | 5,03621 | 5,44731 | -1,329699273 | ENST00000537276 | 23457     | AK027624     | ABCB9          |
| A_32_P205637   | 9,62489 | 10,036  | -1,32970849  | ENST00000371610 | 84612     | NM_032521    | PARD6B         |
| A_21_P0004110  | 2,17547 | 2,58658 | -1,32970849  | ENST00000503488 | N/A       | N/A          | N/A            |
| A_22_P00023770 | 1,4621  | 1,87323 | -1,329726923 | N/A             | N/A       | N/A          | lnc-ZNF395-1   |
| A_33_P3375259  | 2,85649 | 3,26766 | -1,329763792 | N/A             | 100128830 | XR_242765    | LINC01165      |
| A_24_P71153    | 7,61162 | 8,02281 | -1,329782226 | ENST00000374282 | 5051      | NM_000437    | PAFAH2         |
| A_23_P109345   | 14,6161 | 15,0273 | -1,329791444 | ENST00000445724 | 754       | NM_004339    | PTTG1IP        |
| A_23_P423482   | 5,57573 | 5,98698 | -1,329837532 | ENST00000288228 | 145773    | NM_152450    | FAM81A         |
| A_22_P00024034 | 1,44938 | 1,86065 | -1,329855967 | N/A             | N/A       | N/A          | lnc-SBDS-3     |
| A_22_P00002974 | 3,89998 | 4,31133 | -1,329929712 | N/A             | N/A       | N/A          | lnc-C6orf118-1 |

|                |         |         |              |                 |           |              |                      |
|----------------|---------|---------|--------------|-----------------|-----------|--------------|----------------------|
| A_23_P161686   | 10,5736 | 10,985  | -1,329975805 | ENST00000526162 | 9743      | NM_014715    | ARHGAP32             |
| A_22_P00014427 | 3,50841 | 3,91984 | -1,330003461 | N/A             | N/A       | AL832796     | Inc-SGSH-1           |
| A_33_P3235098  | 5,83165 | 6,24313 | -1,330049556 | ENST00000372321 | 728130    | NR_075100    | NUTM2D               |
| A_33_P3359115  | 10,9172 | 11,3287 | -1,330067995 | ENST00000472827 | 55788     | NM_018368    | LMBRD1               |
| A_33_P3619221  | 11,6751 | 12,0867 | -1,330160191 | ENST00000461685 | 23613     | NM_001281773 | ZMYND8               |
| A_23_P85015    | 1,59227 | 2,0039  | -1,330187851 | ENST00000378069 | 4129      | NM_000898    | MAOB                 |
| A_24_P193498   | 7,74049 | 8,15214 | -1,330206292 | ENST00000558677 | 80213     | NM_078474    | TM2D3                |
| A_23_P7965     | 1,39596 | 1,80764 | -1,330233953 | ENST00000373025 | 5225      | NM_002630    | PGC                  |
| A_33_P3246505  | 7,74533 | 8,15702 | -1,330243174 | ENST00000375322 | 1326      | AB209539     | MAP3K8               |
| A_22_P00006446 | 2,09635 | 2,50811 | -1,330307719 | N/A             | N/A       | AK090994     | Inc-FBXW11-3         |
| A_21_P0010764  | 5,12305 | 5,53483 | -1,330326161 | ENST00000424711 | 101928079 | N/A          | LINC01057            |
| A_23_P151459   | 12,0929 | 12,5047 | -1,330344603 | ENST00000612956 | 23077     | NM_015057    | MYCBP2               |
| A_23_P129956   | 10,028  | 10,4399 | -1,330436819 | ENST00000226004 | 1845      | NM_004090    | DUSP3                |
| A_32_P399187   | 1,35192 | 1,76392 | -1,330529041 | ENST00000569832 | 146336    | NR_027242    | SSTR5-AS1            |
| A_21_P0003282  | 1,47595 | 1,88813 | -1,330695057 | N/A             | N/A       | N/A          | Inc-NGLY1-1          |
| A_24_P411749   | 10,992  | 11,4042 | -1,330713504 | ENST00000367609 | 57211     | NM_020455    | GPR126               |
| A_22_P00023895 | 2,13003 | 2,54239 | -1,330861093 | N/A             | 100129316 | N/A          | LOC100129316         |
| A_22_P00017386 | 9,52745 | 9,93989 | -1,330934894 | N/A             | N/A       | AK307123     | Inc-VAMP1-1          |
| A_33_P3502640  | 10,5799 | 10,9924 | -1,330990247 | ENST00000446820 | 113878    | NM_020892    | DTX2                 |
| A_23_P208880   | 9,05609 | 9,46862 | -1,331017925 | ENST00000624301 | 29128     | NM_013282    | UHRF1                |
| A_22_P00016086 | 7,27185 | 7,68449 | -1,331119414 | N/A             | N/A       | AK025196     | Inc-THEMIS-1         |
| A_23_P119143   | 8,79963 | 9,21228 | -1,33112864  | ENST00000586480 | 7087      | NM_003259    | ICAM5                |
| A_21_P0011795  | 1,48778 | 1,90047 | -1,331165547 | N/A             | N/A       | N/A          | XLOC_I2_007270       |
| A_21_P0004290  | 2,97642 | 3,38914 | -1,331193229 | N/A             | N/A       | N/A          | Inc-RP11-43D2.2.1-10 |
| A_21_P0005361  | 1,6305  | 2,04332 | -1,331285503 | N/A             | N/A       | N/A          | Inc-IL6-1            |
| A_21_P0002023  | 1,36901 | 1,78194 | -1,331387012 | ENST00000428280 | N/A       | N/A          | N/A                  |
| A_21_P0009940  | 1,67265 | 2,08559 | -1,331396241 | N/A             | N/A       | N/A          | Inc-PCSK2-1          |
| A_19_P00321588 | 2,76787 | 3,18096 | -1,331534676 | ENST00000555004 | 56967     | NM_001282463 | C14orf132            |
| A_32_P203013   | 13,9503 | 14,3634 | -1,331543906 | ENST00000441932 | 376693    | NR_026667    | RPS10P7              |
| A_33_P3623118  | 5,53937 | 5,95248 | -1,331553135 | N/A             | N/A       | AK054653     | Inc-MGAT1-1          |
| A_33_P6498866  | 1,69369 | 2,10685 | -1,331599284 | ENST00000427918 | 101927195 | NR_120413    | LINC00382            |
| A_21_P0014330  | 2,57591 | 2,98914 | -1,331663895 | N/A             | N/A       | AF086125     | Inc-CDH16-2          |
| A_22_P00022174 | 2,39504 | 2,80827 | -1,331663895 | ENST00000527315 | 79400     | AK074071     | NOX5                 |

|                |         |         |              |                 |           |              |              |
|----------------|---------|---------|--------------|-----------------|-----------|--------------|--------------|
| A_23_P76109    | 12,3873 | 12,8006 | -1,33172851  | ENST00000280571 | 196383    | AK056934     | RILPL2       |
| A_21_P0010026  | 3,57568 | 3,98911 | -1,331848516 | N/A             | N/A       | N/A          | Inc-GGTLC1-4 |
| A_21_P0008628  | 1,75421 | 2,16787 | -1,332060861 | N/A             | 101928388 | N/A          | PLA2G4E-AS1  |
| A_24_P202581   | 7,82278 | 8,2365  | -1,332116261 | ENST00000354532 | 9138      | NM_199002    | ARHGEF1      |
| A_24_P346517   | 1,34487 | 1,75875 | -1,332264006 | ENST00000285928 | 136332    | NM_144648    | LRGUK        |
| A_24_P265856   | 9,43404 | 9,84802 | -1,332356355 | ENST00000314261 | 57337     | NM_020654    | SENP7        |
| A_23_P137765   | 5,10019 | 5,51425 | -1,332430238 | ENST00000374284 | 5051      | NM_000437    | PAFAH2       |
| A_24_P212127   | 7,58213 | 7,99619 | -1,332430238 | ENST00000478556 | 7581      | NM_006954    | ZNF33A       |
| A_33_P3292621  | 4,90913 | 5,32322 | -1,332457946 | ENST00000600277 | 376497    | XM_006722749 | SLC27A1      |
| A_23_P138665   | 13,126  | 13,5401 | -1,332467181 | ENST00000277865 | 2746      | NM_005271    | GLUD1        |
| A_23_P360079   | 5,64361 | 6,05772 | -1,332476417 | ENST00000409213 | 344148    | NM_207363    | NCKAP5       |
| A_21_P0005573  | 9,01015 | 9,42426 | -1,332476417 | N/A             | N/A       | N/A          | Inc-PIK3CG-2 |
| A_22_P00010560 | 6,85934 | 7,2735  | -1,332522598 | ENST00000493417 | 57720     | NM_001287346 | GPR107       |
| A_33_P3347928  | 10,453  | 10,8673 | -1,332651913 | ENST00000295925 | 57018     | NM_020307    | CCNL1        |
| A_33_P3315027  | 17,7581 | 18,1725 | -1,332744289 | ENST00000482216 | N/A       | N/A          | N/A          |
| A_19_P00320611 | 7,54153 | 7,95599 | -1,332799717 | N/A             | 101927151 | XR_424964    | LOC101927151 |
| A_24_P937855   | 8,25058 | 8,66505 | -1,332808956 | ENST00000369528 | 80143     | NM_001102396 | SIKE1        |
| A_33_P3413518  | 1,524   | 1,93848 | -1,332818194 | N/A             | N/A       | N/A          | N/A          |
| A_23_P8716     | 1,37479 | 1,78928 | -1,332827433 | ENST00000623829 | 26211     | NM_012369    | OR2F1        |
| A_33_P3351264  | 1,39575 | 1,81027 | -1,332855148 | ENST00000585332 | 728361    | N/A          | OVOL3        |
| A_21_P0005517  | 1,62395 | 2,03851 | -1,332892103 | ENST00000618028 | N/A       | N/A          | N/A          |
| A_32_P44775    | 9,13279 | 9,54741 | -1,332947538 | ENST00000473252 | 138241    | NM_182505    | C9orf85      |
| A_22_P00015111 | 1,39258 | 1,80723 | -1,332975256 | ENST00000522123 | N/A       | BG209048     | N/A          |
| A_23_P37415    | 5,58813 | 6,00285 | -1,333039934 | ENST00000261847 | 9728      | NM_014701    | SECISBP2L    |
| A_22_P00005524 | 2,44337 | 2,85833 | -1,333261711 | N/A             | N/A       | N/A          | Inc-ECCL1-2  |
| A_21_P0012473  | 7,96774 | 8,3828  | -1,333354129 | ENST00000423931 | 7716      | NM_007146    | VEZF1        |
| A_24_P404245   | 9,18546 | 9,60063 | -1,333455796 | ENST00000572924 | 5833      | NM_002861    | PCYT2        |
| A_23_P24535    | 9,07096 | 9,48615 | -1,333474281 | ENST00000464224 | 54970     | NM_017868    | TTC12        |
| A_33_P3269338  | 10,4407 | 10,8559 | -1,333483524 | ENST00000587439 | 23354     | NM_015302    | HAUS5        |
| A_23_P97795    | 8,76033 | 9,17554 | -1,333492767 | ENST00000476758 | 91452     | NM_145698    | ACBD5        |
| A_22_P00009996 | 6,994   | 7,40927 | -1,333548227 | ENST00000612330 | N/A       | AK092875     | N/A          |
| A_23_P127406   | 6,19907 | 6,61435 | -1,33355747  | ENST00000610872 | 55693     | NM_018039    | KDM4D        |
| A_32_P52330    | 7,94633 | 8,36177 | -1,333705375 | ENST00000269720 | 113230    | NM_001291291 | LOC113230    |

|                |         |         |              |                 |           |              |                 |
|----------------|---------|---------|--------------|-----------------|-----------|--------------|-----------------|
| A_21_P0006315  | 1,74172 | 2,1572  | -1,333742354 | N/A             | N/A       | N/A          | Inc-PAPPA-AS1-3 |
| A_22_P00024899 | 1,43261 | 1,84814 | -1,333788578 | ENST00000524012 | N/A       | XR_133485    | N/A             |
| A_22_P00006182 | 3,10175 | 3,51733 | -1,333834805 | ENST00000515213 | 442497    | NR_033960    | LOC442497       |
| A_33_P3229276  | 4,77052 | 5,18613 | -1,333862541 | ENST00000502939 | 54993     | NM_001007072 | ZSCAN2          |
| A_24_P886040   | 8,81387 | 9,2295  | -1,333881033 | ENST00000389063 | 167227    | NM_152624    | DCP2            |
| A_22_P00008384 | 2,61706 | 3,03273 | -1,333918016 | N/A             | N/A       | N/A          | Inc-JARID2-1    |
| A_33_P3326210  | 6,73743 | 7,15312 | -1,333936508 | ENST00000397418 | 157570    | NM_001017420 | ESCO2           |
| A_22_P00010416 | 2,87441 | 3,29019 | -1,334019726 | ENST00000577679 | 284034    | NR_034144    | LINC00670       |
| A_21_P0011684  | 9,52594 | 9,94191 | -1,334195426 | N/A             | N/A       | N/A          | XLOC_I2_006665  |
| A_23_P208358   | 17,2627 | 17,6789 | -1,334408145 | ENST00000560881 | 6158      | NM_000991    | RPL28           |
| A_33_P3217534  | 5,59582 | 6,01206 | -1,334445143 | ENST00000401878 | 155435    | NM_053043    | RBM33           |
| A_33_P3253070  | 4,49715 | 4,91352 | -1,334565394 | ENST00000368053 | 9439      | NM_001270522 | MED23           |
| A_33_P3384667  | 6,83866 | 7,25507 | -1,334602397 | N/A             | 8816      | NM_001284208 | DCAF5           |
| A_21_P0001237  | 1,64667 | 2,06312 | -1,3346394   | ENST00000436739 | N/A       | N/A          | N/A             |
| A_22_P00011089 | 1,50781 | 1,92432 | -1,334694908 | ENST00000448761 | 102723426 | NR_110654    | LINC01496       |
| A_23_P379034   | 4,3626  | 4,77915 | -1,334731914 | ENST00000381669 | 80115     | NM_025045    | BAIAP2L2        |
| A_32_P181297   | 7,6262  | 8,04279 | -1,334768921 | N/A             | 93653     | NR_002330    | ST7-AS1         |
| A_22_P00000867 | 16,1253 | 16,5419 | -1,334778173 | ENST00000461111 | 375790    | NM_198576    | AGRN            |
| A_32_P41487    | 16,9107 | 17,3274 | -1,334870696 | ENST00000619352 | 3151      | NM_005517    | HMG2            |
| A_21_P0006855  | 4,04788 | 4,46473 | -1,335009492 | N/A             | N/A       | N/A          | Inc-GJD4-1      |
| A_19_P00317449 | 6,35224 | 6,76911 | -1,335028    | ENST00000343776 | 339500    | NM_178549    | ZNF678          |
| A_24_P405430   | 7,82437 | 8,24128 | -1,335065015 | ENST00000433529 | 7072      | NM_022173    | TIA1            |
| A_21_P0008190  | 1,70135 | 2,11838 | -1,335176067 | N/A             | N/A       | N/A          | Inc-SLITRK1-1   |
| A_19_P00321998 | 1,74751 | 2,16454 | -1,335176067 | N/A             | N/A       | N/A          | XLOC_I2_013153  |
| A_22_P00021164 | 6,29035 | 6,70742 | -1,335213087 | ENST00000426037 | 100289373 | NR_036531    | UBAC2-AS1       |
| A_23_P370625   | 9,91324 | 10,3304 | -1,335296384 | ENST00000354177 | 57190     | NM_020451    | SEPN1           |
| A_33_P3328903  | 1,3852  | 1,80237 | -1,33530564  | N/A             | 102724970 | XM_006711085 | LOC102724970    |
| A_33_P3230788  | 6,43349 | 6,85069 | -1,335333407 | ENST00000374439 | 4593      | N/A          | MUSK            |
| A_23_P151653   | 9,98211 | 10,3994 | -1,335416712 | ENST00000557181 | 328       | NM_080649    | APEX1           |
| A_22_P00012340 | 2,78745 | 3,20484 | -1,335509279 | N/A             | N/A       | AF075065     | Inc-PRDM14-1    |
| A_23_P105118   | 1,82639 | 2,24378 | -1,335509279 | ENST00000321961 | 79324     | NM_001005237 | OR51G1          |
| A_23_P141715   | 10,8635 | 11,2809 | -1,335518536 | ENST00000383056 | 25941     | NM_015476    | TPGS2           |
| A_22_P00022623 | 3,53508 | 3,95252 | -1,335555565 | N/A             | N/A       | N/A          | Inc-EIF4E1B-1   |

|                |         |         |              |                 |           |              |                |
|----------------|---------|---------|--------------|-----------------|-----------|--------------|----------------|
| A_21_P0001505  | 1,3589  | 1,77635 | -1,335564823 | N/A             | N/A       | N/A          | Inc-LRP8-1     |
| A_24_P169386   | 1,34091 | 1,7584  | -1,335601853 | ENST00000610442 | N/A       | AK055413     | N/A            |
| A_22_P00025851 | 4,11327 | 4,53077 | -1,335611111 | N/A             | N/A       | BU160016     | Inc-NUFIP2-1   |
| A_21_P0010844  | 7,49832 | 7,91582 | -1,335611111 | N/A             | N/A       | N/A          | XL0C_I2_001760 |
| A_23_P8013     | 13,5528 | 13,9703 | -1,335611111 | ENST00000377401 | 8340      | NM_003519    | HIST1H2BL      |
| A_22_P00005438 | 1,37671 | 1,79422 | -1,335620368 | N/A             | N/A       | N/A          | Inc-DUOXA1-1   |
| A_22_P00009172 | 9,09824 | 9,51577 | -1,335638884 | ENST00000565185 | 100507577 | NR_040677    | LOC100507577   |
| A_21_P0002293  | 1,48831 | 1,90607 | -1,335851834 | ENST00000437751 | 389043    | NR_036499    | LINC01120      |
| A_22_P00003323 | 1,50155 | 1,91932 | -1,335861093 | N/A             | N/A       | N/A          | Inc-CASC1-1    |
| A_23_P300100   | 2,63461 | 3,05253 | -1,335999993 | ENST00000375105 | 26279     | BC025706     | PLA2G2D        |
| A_33_P3285809  | 7,93952 | 8,35747 | -1,336027774 | ENST00000490476 | 117178    | NM_001166417 | SSX2IP         |
| A_33_P3284584  | 6,96603 | 7,38403 | -1,336074078 | ENST00000421078 | N/A       | N/A          | N/A            |
| A_23_P54116    | 11,5819 | 12      | -1,336166691 | ENST00000553307 | 23002     | NM_014992    | DAAM1          |
| A_33_P3243702  | 7,59626 | 8,0144  | -1,336203738 | ENST00000409223 | 377007    | NM_198582    | KLHL30         |
| A_33_P3498613  | 2,15561 | 2,57375 | -1,336203738 | ENST00000423374 | N/A       | N/A          | N/A            |
| A_21_P0005037  | 3,43509 | 3,85327 | -1,336240786 | N/A             | 102724168 | XR_426066    | LOC102724168   |
| A_33_P3215575  | 9,40274 | 9,82095 | -1,336268573 | ENST00000375415 | 55160     | NM_018125    | ARHGEF10L      |
| A_33_P3217495  | 5,29648 | 5,71472 | -1,33629636  | ENST00000330498 | 6524      | NM_003041    | SLC5A2         |
| A_23_P392126   | 8,56903 | 8,98728 | -1,336305622 | ENST00000379103 | 201229    | NM_001076680 | LYRM9          |
| A_33_P3373433  | 2,58617 | 3,00443 | -1,336314885 | N/A             | N/A       | N/A          | N/A            |
| A_22_P00006474 | 2,28496 | 2,70323 | -1,336324148 | N/A             | N/A       | N/A          | Inc-FEV-1      |
| A_19_P00809368 | 1,45684 | 1,87515 | -1,336361199 | ENST00000607746 | 101929623 | NR_110028    | LINC01215      |
| A_23_P11256    | 1,65427 | 2,07262 | -1,336398251 | ENST00000373359 | 139599    | NM_138703    | MAGEE2         |
| A_24_P926400   | 6,94009 | 7,35845 | -1,336407515 | ENST00000489772 | 26088     | BC029388     | GGA1           |
| A_33_P3379482  | 2,07043 | 2,4889  | -1,336509414 | ENST00000586231 | 100130581 | N/A          | LINC00910      |
| A_24_P781757   | 8,72752 | 9,14604 | -1,336555735 | N/A             | 148413    | NR_015434    | LOC148413      |
| A_24_P751247   | 6,74848 | 7,16703 | -1,336583528 | N/A             | N/A       | BX117289     | Inc-FOXI2-1    |
| A_23_P121545   | 2,83697 | 3,25554 | -1,336602057 | ENST00000280187 | 2823      | NM_201591    | GPM6A          |
| A_22_P00020380 | 1,41503 | 1,83363 | -1,336629852 | N/A             | 100506858 | N/A          | LOC100506858   |
| A_19_P00319829 | 5,66963 | 6,08827 | -1,336666911 | ENST00000453454 | 220729    | XR_425697    | LOC220729      |
| A_23_P141738   | 9,10152 | 9,52033 | -1,336824427 | ENST00000415083 | 6760      | NM_001007559 | SS18           |
| A_22_P00010577 | 5,59701 | 6,01584 | -1,336842959 | N/A             | 100505538 | NR_038991    | RBM26-AS1      |
| A_22_P00008556 | 1,43054 | 1,84943 | -1,336898558 | N/A             | N/A       | N/A          | Inc-KCNMB2-8   |



|                |         |         |              |                 |           |              |                 |
|----------------|---------|---------|--------------|-----------------|-----------|--------------|-----------------|
| A_33_P3377514  | 1,47732 | 1,89622 | -1,336907825 | ENST00000343060 | 3198      | NM_005522    | HOXA1           |
| A_21_P0000807  | 1,64365 | 2,06265 | -1,337000495 | ENST00000517869 | 100130231 | NR_038447    | LINC00861       |
| A_33_P3418371  | 5,04155 | 5,46063 | -1,337074637 | N/A             | 100129831 | AY358234     | EPWW6493        |
| A_24_P374652   | 10,2277 | 10,6468 | -1,337093172 | ENST00000367142 | 64710     | NM_022731    | NUCKS1          |
| A_23_P153236   | 13,7715 | 14,1906 | -1,337093172 | ENST00000600118 | 27243     | NM_014453    | CHMP2A          |
| A_21_P0007226  | 1,52827 | 1,94746 | -1,337176587 | N/A             | N/A       | N/A          | Inc-LRP5-1      |
| A_21_P0010022  | 3,12519 | 3,54438 | -1,337176587 | ENST00000442440 | 100505683 | NR_109884    | LINC01431       |
| A_33_P3390391  | 6,86376 | 7,28299 | -1,337213662 | ENST00000602258 | 29998     | NM_015711    | GLTSCR1         |
| A_23_P400984   | 5,58211 | 6,00142 | -1,337287815 | ENST00000392202 | 200576    | NM_001178000 | PIKFYVE         |
| A_23_P204702   | 14,1754 | 14,5948 | -1,337371242 | ENST00000547013 | 7009      | NM_003217    | TMBIM6          |
| A_21_P0011778  | 2,58794 | 3,00735 | -1,337380512 | ENST00000413796 | N/A       | N/A          | N/A             |
| A_19_P00318443 | 2,20973 | 2,62915 | -1,337389782 | N/A             | N/A       | N/A          | Inc-MAGI2-1     |
| A_21_P0009353  | 1,46648 | 1,88603 | -1,337510299 | N/A             | N/A       | N/A          | Inc-ABCA5-3     |
| A_22_P00012594 | 10,4481 | 10,8677 | -1,337556654 | ENST00000564675 | 10073     | NM_005701    | SNUPN           |
| A_33_P3305571  | 10,3063 | 10,7259 | -1,337556654 | ENST00000496281 | 8771      | NM_003823    | TNFRSF6B        |
| A_23_P67278    | 5,03786 | 5,45746 | -1,337556654 | ENST00000301547 | 10224     | NM_005815    | ZNF443          |
| A_22_P00002801 | 1,41404 | 1,83373 | -1,337640098 | N/A             | N/A       | DA215960     | Inc-C2orf40-6   |
| A_24_P225961   | 10,5334 | 10,9531 | -1,337649369 | ENST00000308775 | 1605      | NM_004393    | DAG1            |
| A_24_P347480   | 11,4292 | 11,8489 | -1,337649369 | ENST00000238616 | 91754     | NM_033116    | NEK9            |
| A_33_P3331853  | 1,54031 | 1,96022 | -1,337844093 | ENST00000396182 | 5137      | NM_001191056 | PDE1C           |
| A_21_P0010540  | 1,39174 | 1,81166 | -1,337853366 | N/A             | N/A       | N/A          | XLOC_I2_000339  |
| A_22_P00009011 | 6,17574 | 6,59578 | -1,337964651 | N/A             | N/A       | N/A          | Inc-LAT2-1      |
| A_22_P00019505 | 1,50109 | 1,92118 | -1,338011022 | N/A             | N/A       | BG213430     | Inc-KIAA1324L-2 |
| A_24_P405621   | 9,9115  | 10,3317 | -1,338113044 | ENST00000489895 | 11188     | NM_007184    | NISCH           |
| A_23_P344408   | 1,59249 | 2,01269 | -1,338113044 | ENST00000309894 | 1444      | NM_022579    | CSHL1           |
| A_23_P383435   | 13,2781 | 13,6983 | -1,338113044 | ENST00000617922 | 9326      | NM_004773    | ZNHIT3          |
| A_22_P00007383 | 1,51188 | 1,93209 | -1,338122319 | ENST00000514926 | 441374    | NR_033962    | FLJ42969        |
| A_21_P0013666  | 1,63401 | 2,05434 | -1,338233625 | ENST00000447148 | N/A       | XR_242633    | N/A             |
| A_32_P95729    | 11,6319 | 12,0524 | -1,338391326 | ENST00000566615 | 55215     | NM_018193    | FANCI           |
| A_22_P00000352 | 1,53449 | 1,955   | -1,338400603 | ENST00000558860 | N/A       | DA861405     | N/A             |
| A_23_P53137    | 4,72615 | 5,14667 | -1,33840988  | ENST00000620888 | 3047      | NM_000559    | HBG1            |
| A_33_P3365553  | 3,02652 | 3,44707 | -1,338437711 | ENST00000420040 | 389634    | NR_024420    | LINC00937       |
| A_33_P3412716  | 10,9991 | 11,4197 | -1,338484099 | ENST00000467688 | N/A       | N/A          | N/A             |

|                |         |         |              |                 |           |              |              |
|----------------|---------|---------|--------------|-----------------|-----------|--------------|--------------|
| A_33_P3351499  | 2,73247 | 3,15311 | -1,33852121  | ENST00000591685 | N/A       | N/A          | N/A          |
| A_23_P25587    | 2,6606  | 3,08128 | -1,338558322 | ENST00000377962 | 11061     | NM_007015    | LECT1        |
| A_21_P0012355  | 1,51871 | 1,93947 | -1,33863255  | N/A             | 101929416 | XR_249026    | LOC101929416 |
| A_21_P0002575  | 3,4631  | 3,88389 | -1,338660386 | N/A             | N/A       | N/A          | Inc-KCNS3-4  |
| A_21_P0011306  | 13,3674 | 13,7882 | -1,338669665 | ENST00000592456 | 9144      | NM_004710    | SYNGR2       |
| A_33_P3268900  | 14,1936 | 14,6145 | -1,338762458 | N/A             | 665       | AF370457     | BNIP3L       |
| A_23_P252155   | 10,9741 | 11,3951 | -1,338855257 | ENST00000407982 | 55342     | NM_018387    | STRBP        |
| A_24_P400355   | 11,9591 | 12,3801 | -1,338855257 | ENST00000265857 | 51608     | NM_015949    | GET4         |
| A_33_P3363316  | 3,42624 | 3,84727 | -1,338883098 | ENST00000416824 | 255031    | NR_015401    | LINC00957    |
| A_21_P0009712  | 3,28989 | 3,71094 | -1,338901659 | ENST00000589967 | 100996681 | XR_158931    | LOC100996681 |
| A_21_P0006981  | 3,51311 | 3,93419 | -1,338929501 | N/A             | N/A       | N/A          | Inc-ZNF438-3 |
| A_23_P29575    | 13,0866 | 13,5077 | -1,338948063 | ENST00000256441 | 92259     | NM_033281    | MRPS36       |
| A_22_P00020576 | 6,95278 | 7,37393 | -1,338994468 | ENST00000619240 | 9455      | N/A          | HOMER2       |
| A_21_P0000386  | 7,88584 | 8,307   | -1,339003749 | N/A             | 692205    | NR_003070    | SNORD89      |
| A_21_P0009683  | 1,48594 | 1,90716 | -1,339059438 | N/A             | N/A       | N/A          | Inc-ZNF333-3 |
| A_33_P3571824  | 3,22561 | 3,64701 | -1,339226518 | ENST00000610621 | 9437      | NM_004829    | NCR1         |
| A_23_P427296   | 1,59241 | 2,01386 | -1,339272933 | N/A             | 100132319 | AF315716     | LOC100132319 |
| A_22_P00008113 | 4,65091 | 5,07238 | -1,339291499 | N/A             | N/A       | N/A          | Inc-IL21R-1  |
| A_24_P93896    | 1,48726 | 1,90874 | -1,339300782 | ENST00000369875 | 54805     | NM_199077    | CNNM2        |
| A_23_P45361    | 11,4427 | 11,8642 | -1,339319349 | ENST00000328078 | 2747      | NM_012084    | GLUD2        |
| A_22_P00013174 | 2,78627 | 3,20778 | -1,339328633 | N/A             | N/A       | N/A          | Inc-RNF139-1 |
| A_21_P0000142  | 4,49855 | 4,92006 | -1,339328633 | ENST00000465629 | 7844      | NM_001198952 | RNF103       |
| A_22_P00023762 | 2,52151 | 2,94307 | -1,339375051 | ENST00000550470 | N/A       | CR745651     | N/A          |
| A_23_P94546    | 7,12679 | 7,54836 | -1,339384335 | ENST00000376362 | 80318     | NM_025211    | GKAP1        |
| A_23_P252462   | 2,28226 | 2,70389 | -1,33944004  | ENST00000541995 | 50614     | NM_021808    | GALNT9       |
| A_22_P00020057 | 2,21132 | 2,63296 | -1,339449324 | ENST00000543490 | 200726    | NM_001102659 | LOC200726    |
| A_22_P00000222 | 6,69816 | 7,11983 | -1,339477177 | N/A             | 100506585 | NR_038966    | LOC100506585 |
| A_23_P421526   | 3,00067 | 3,42247 | -1,339597882 | ENST00000328248 | 146852    | NM_153007    | ODF4         |
| A_33_P3317168  | 6,64924 | 7,07106 | -1,339616453 | ENST00000369805 | 79574     | NM_139053    | EPS8L3       |
| A_21_P0006368  | 1,50313 | 1,92515 | -1,339802176 | N/A             | N/A       | N/A          | Inc-TLR4-2   |
| A_33_P3213512  | 3,84026 | 4,26237 | -1,33988576  | N/A             | N/A       | N/A          | N/A          |
| A_22_P00014082 | 1,57191 | 1,99403 | -1,339895047 | N/A             | 79804     | NR_003679    | HAND2-AS1    |
| A_21_P0007542  | 3,30036 | 3,72256 | -1,339969349 | N/A             | N/A       | N/A          | Inc-ALG10B-2 |

|                |         |         |              |                 |           |              |                |
|----------------|---------|---------|--------------|-----------------|-----------|--------------|----------------|
| A_22_P00023055 | 3,56464 | 3,98687 | -1,339997213 | N/A             | N/A       | N/A          | Inc-RGMA-5     |
| A_21_P0001558  | 1,36742 | 1,78966 | -1,340006501 | ENST00000416343 | 100128787 | NR_038914    | LINC01349      |
| A_22_P00003379 | 2,04363 | 2,46587 | -1,340006501 | ENST00000579651 | N/A       | AK026731     | N/A            |
| A_21_P0005971  | 5,21687 | 5,63914 | -1,340034366 | N/A             | N/A       | N/A          | Inc-RBM12B-2   |
| A_33_P3231120  | 5,00929 | 5,43156 | -1,340034366 | ENST00000618861 | 64921     | NM_022900    | CASD1          |
| A_21_P0009309  | 1,36664 | 1,78893 | -1,340052943 | N/A             | N/A       | N/A          | Inc-SEZ6-2     |
| A_21_P0013988  | 3,63923 | 4,06157 | -1,340099386 | N/A             | N/A       | N/A          | N/A            |
| A_33_P3345812  | 4,12339 | 4,54573 | -1,340099386 | ENST00000619052 | 2852      | NM_001039966 | GPER1          |
| A_22_P00008475 | 2,35443 | 2,77679 | -1,340117964 | ENST00000527819 | N/A       | N/A          | N/A            |
| A_19_P00327035 | 6,50446 | 6,92687 | -1,34016441  | ENST00000433161 | 768096    | NR_003244    | HAR1A          |
| A_23_P85963    | 1,55409 | 1,97651 | -1,340173699 | ENST00000302617 | 391112    | NM_001005189 | OR6Y1          |
| A_23_P452      | 1,82663 | 2,24907 | -1,340192278 | ENST00000367921 | 4921      | NM_001014796 | DDR2           |
| A_33_P3645465  | 8,34047 | 8,76292 | -1,340201568 | N/A             | 282997    | NR_026932    | PDCD4-AS1      |
| A_21_P0002476  | 2,11903 | 2,54151 | -1,340229437 | N/A             | N/A       | N/A          | Inc-C2orf55-1  |
| A_23_P118571   | 1,50213 | 1,92462 | -1,340238727 | ENST00000301691 | 50964     | NM_025237    | SOST           |
| A_33_P3297921  | 11,8895 | 12,3121 | -1,340340919 | ENST00000336230 | 51253     | NM_016491    | MRPL37         |
| A_33_P3228212  | 1,62361 | 2,04629 | -1,340415245 | N/A             | N/A       | N/A          | N/A            |
| A_22_P00007895 | 3,44397 | 3,8667  | -1,340461701 | N/A             | N/A       | DB451431     | Inc-HSP90AA1-1 |
| A_22_P00002849 | 1,76201 | 2,18477 | -1,340489575 | ENST00000437047 | N/A       | N/A          | N/A            |
| A_32_P130630   | 5,16174 | 5,58459 | -1,340573202 | ENST00000261187 | 9194      | NM_004731    | SLC16A7        |
| A_22_P00013853 | 1,65891 | 2,08188 | -1,340684713 | ENST00000583854 | 100134391 | NM_001278587 | LOC100134391   |
| A_21_P0003389  | 1,4178  | 1,84078 | -1,340694005 | ENST00000420701 | N/A       | N/A          | N/A            |
| A_33_P3399107  | 9,44648 | 9,8695  | -1,340731178 | ENST00000466394 | 5297      | NM_058004    | PI4KA          |
| A_19_P00802954 | 3,24606 | 3,66909 | -1,340740471 | N/A             | 441239    | XM_006726448 | LOC441239      |
| A_23_P89921    | 7,76892 | 8,19196 | -1,340749765 | ENST00000592095 | 7733      | NM_013256    | ZNF180         |
| A_33_P3237874  | 8,96522 | 9,38828 | -1,340768351 | ENST00000380327 | 10024     | NM_001100620 | TROAP          |
| A_23_P145485   | 11,7106 | 12,1338 | -1,340898467 | ENST00000367351 | 80328     | NM_025217    | ULBP2          |
| A_22_P00004225 | 1,53523 | 1,95852 | -1,340982119 | N/A             | N/A       | N/A          | Inc-CLVS1-2    |
| A_22_P00011144 | 1,72746 | 2,15076 | -1,340991414 | N/A             | N/A       | N/A          | Inc-NYX-1      |
| A_33_P3291541  | 7,25061 | 7,67399 | -1,341065776 | ENST00000489135 | 255104    | NM_181719    | TMCO4          |
| A_22_P00019010 | 3,58037 | 4,00375 | -1,341065776 | N/A             | 100507071 | XR_110863    | LOC100507071   |
| A_23_P352266   | 7,49195 | 7,91548 | -1,341205217 | ENST00000398117 | 596       | NM_000633    | BCL2           |
| A_33_P3217307  | 2,59986 | 3,02343 | -1,341242404 | N/A             | 339487    | AY158005     | ZBTB8OS        |

|                |         |         |              |                 |           |              |             |
|----------------|---------|---------|--------------|-----------------|-----------|--------------|-------------|
| A_33_P3331095  | 5,43804 | 5,86161 | -1,341242404 | ENST00000388807 | 222255    | XM_006715900 | ATXN7L1     |
| A_22_P00012510 | 1,3685  | 1,79212 | -1,341288888 | N/A             | N/A       | N/A          | Inc-PSMB7-1 |
| A_33_P3272673  | 3,11619 | 3,53989 | -1,341363267 | N/A             | N/A       | AF151083     | N/A         |
| A_23_P71037    | 5,11711 | 5,54082 | -1,341372565 | ENST00000485300 | 3569      | NM_000600    | IL6         |
| A_22_P00011046 | 3,61691 | 4,04064 | -1,34139116  | N/A             | N/A       | AF147335     | Inc-NTN3-1  |
| A_23_P252808   | 11,4894 | 11,9132 | -1,341456247 | ENST00000494741 | 23559     | NM_012477    | WBP1        |
| A_21_P0009211  | 1,39777 | 1,8216  | -1,341484142 | ENST00000608984 | N/A       | N/A          | N/A         |
| A_23_P211522   | 8,58708 | 9,01091 | -1,341484142 | ENST00000381535 | 9145      | NM_145738    | SYNGR1      |
| A_21_P0003413  | 1,53182 | 1,95566 | -1,34149344  | ENST00000513711 | N/A       | N/A          | N/A         |
| A_21_P0011964  | 1,37007 | 1,79393 | -1,341512037 | ENST00000444030 | N/A       | N/A          | N/A         |
| A_23_P256735   | 6,72828 | 7,15222 | -1,341586429 | ENST00000220763 | 10404     | NM_016134    | CPQ         |
| A_33_P3372667  | 5,8422  | 6,26629 | -1,341725923 | N/A             | N/A       | N/A          | Inc-VIP-1   |
| A_33_P3271530  | 4,43399 | 4,85815 | -1,341791026 | ENST00000485830 | 80055     | NM_024989    | PGAP1       |
| A_23_P162120   | 9,78658 | 10,2109 | -1,341939844 | ENST00000616538 | 4926      | NM_006185    | NUMA1       |
| A_23_P110243   | 9,10076 | 9,52512 | -1,341977051 | ENST00000388822 | 57721     | XM_005263166 | METT14      |
| A_23_P90722    | 2,55927 | 2,98365 | -1,341995655 | ENST00000497977 | 5798      | NM_002846    | PTPRN       |
| A_22_P00016470 | 1,38645 | 1,81086 | -1,342023561 | ENST00000517583 | 101927774 | NR_121672    | LINC00824   |
| A_22_P00001508 | 3,64532 | 4,0699  | -1,342181708 | ENST00000569920 | 102723510 | NR_120306    | LCMT1-AS1   |
| A_23_P26777    | 11,4645 | 11,8891 | -1,342200314 | ENST00000245544 | 79902     | NM_024844    | NUP85       |
| A_33_P3310159  | 1,34403 | 1,76864 | -1,342209618 | ENST00000402815 | 1607      | NM_004080    | DGKB        |
| A_21_P0014774  | 3,11128 | 3,53593 | -1,342246832 | N/A             | N/A       | N/A          | N/A         |
| A_19_P00318183 | 4,72656 | 5,15122 | -1,342256136 | ENST00000508732 | 400456    | NR_034095    | LINC01197   |
| A_33_P3419557  | 4,21368 | 4,63837 | -1,342284048 | ENST00000383695 | 403277    | NM_001005516 | OR5K3       |
| A_33_P3245126  | 6,22786 | 6,65256 | -1,342293352 | N/A             | N/A       | N/A          | N/A         |
| A_33_P3382399  | 5,06958 | 5,49432 | -1,342330568 | ENST00000580358 | 83896     | NM_031958    | KRTAP3-1    |
| A_21_P0007897  | 1,614   | 2,03887 | -1,34245153  | N/A             | N/A       | N/A          | Inc-DHX37-5 |
| A_21_P0007145  | 5,05384 | 5,47876 | -1,342498057 | ENST00000413292 | 5526      | N/A          | PPP2R5B     |
| A_33_P3560176  | 1,41463 | 1,83957 | -1,342516668 | N/A             | N/A       | BX096849     | N/A         |
| A_33_P3233030  | 11,9578 | 12,3828 | -1,342572503 | ENST00000402485 | N/A       | N/A          | N/A         |
| A_33_P3333542  | 1,71545 | 2,14045 | -1,342572503 | N/A             | N/A       | AF289601     | N/A         |
| A_23_P133123   | 10,0488 | 10,4738 | -1,342572503 | ENST00000622785 | 84057     | NM_032117    | MND1        |
| A_22_P00021018 | 1,70909 | 2,13411 | -1,342591115 | ENST00000584608 | N/A       | DA481142     | N/A         |
| A_21_P0004676  | 2,39936 | 2,82439 | -1,342600421 | ENST00000444910 | 387111    | NR_033376    | LINC00222   |

|                |         |         |              |                 |           |              |                |
|----------------|---------|---------|--------------|-----------------|-----------|--------------|----------------|
| A_33_P3368636  | 14,2943 | 14,7194 | -1,342665566 | ENST00000513369 | N/A       | N/A          | N/A            |
| A_33_P3334155  | 2,66385 | 3,08897 | -1,342684179 | N/A             | 100652791 | AK127831     | GS1-24F4.2     |
| A_22_P00001540 | 6,31628 | 6,74143 | -1,3427121   | N/A             | N/A       | N/A          | Inc-ARHGEF2-2  |
| A_22_P00014044 | 1,58475 | 2,00992 | -1,342730714 | ENST00000415532 | N/A       | N/A          | N/A            |
| A_23_P385206   | 10,8042 | 11,2295 | -1,342851712 | ENST00000373943 | 23673     | NM_177424    | STX12          |
| A_32_P207169   | 8,571   | 8,99638 | -1,342926177 | N/A             | 574036    | NR_024337    | SERTAD4-AS1    |
| A_22_P00002078 | 1,36736 | 1,79283 | -1,343009956 | N/A             | N/A       | N/A          | Inc-BMP2K-1    |
| A_24_P256415   | 3,66202 | 4,08752 | -1,343037884 | N/A             | 100128288 | NR_024447    | LOC100128288   |
| A_22_P00024607 | 3,66909 | 4,09474 | -1,343177529 | ENST00000438633 | N/A       | N/A          | N/A            |
| A_22_P00011059 | 2,39294 | 2,81859 | -1,343177529 | ENST00000547033 | N/A       | BG210412     | N/A            |
| A_32_P192970   | 6,60813 | 7,03379 | -1,34318684  | ENST00000454547 | 8659      | NM_170726    | ALDH4A1        |
| A_21_P0007032  | 1,99704 | 2,42279 | -1,343270634 | N/A             | N/A       | N/A          | Inc-EBF3-7     |
| A_33_P3382949  | 1,38852 | 1,81433 | -1,343326501 | N/A             | N/A       | N/A          | N/A            |
| A_23_P255503   | 8,23104 | 8,65692 | -1,343391681 | ENST00000527958 | 5049      | NM_002572    | PAFAH1B2       |
| A_23_P96976    | 11,4356 | 11,8615 | -1,343410304 | ENST00000479629 | 51538     | NM_016505    | ZCCHC17        |
| A_23_P4144     | 12,2808 | 12,7067 | -1,343410304 | ENST00000590958 | 80347     | NM_025233    | COASY          |
| A_23_P23171    | 6,55289 | 6,97881 | -1,343428928 | ENST00000373210 | 192670    | NM_017629    | AGO4           |
| A_33_P3236157  | 12,7693 | 13,1953 | -1,343503426 | ENST00000539287 | 7374      | NM_003362    | UNG            |
| A_22_P00015815 | 3,6284  | 4,05441 | -1,343512738 | N/A             | 790953    | NR_122123    | TSL            |
| A_23_P368996   | 9,72247 | 10,1485 | -1,343531363 | ENST00000611111 | 115399    | NM_198075    | LRRC56         |
| A_21_P0010280  | 3,84851 | 4,27465 | -1,343633806 | N/A             | N/A       | N/A          | Inc-PSMG1-5    |
| A_23_P146922   | 7,84065 | 8,2668  | -1,34364312  | ENST00000327773 | 2621      | NM_000820    | GAS6           |
| A_33_P3392405  | 1,41826 | 1,84447 | -1,343699002 | ENST00000472542 | 387695    | NM_207373    | C10orf99       |
| A_33_P3395713  | 7,6526  | 8,07883 | -1,343717629 | ENST00000446924 | 54014     | NM_018963    | BRWD1          |
| A_23_P27795    | 16,4415 | 16,8678 | -1,343782828 | ENST00000585357 | 10653     | NM_021102    | SPINT2         |
| A_19_P00316326 | 10,3916 | 10,818  | -1,343875976 | ENST00000447637 | 9175      | NM_001242317 | MAP3K13        |
| A_22_P00003529 | 3,67135 | 4,09776 | -1,343885291 | N/A             | N/A       | N/A          | Inc-CCNB2-1    |
| A_21_P0008812  | 1,73323 | 2,15968 | -1,343922552 | N/A             | N/A       | N/A          | Inc-C15orf2-8  |
| A_24_P77904    | 8,71244 | 9,13892 | -1,343950498 | ENST00000521421 | 3206      | NM_018951    | HOXA10         |
| A_22_P00013647 | 3,01461 | 3,44139 | -1,344229994 | ENST00000507989 | N/A       | N/A          | N/A            |
| A_22_P00008806 | 1,42321 | 1,85002 | -1,344257946 | N/A             | N/A       | N/A          | Inc-KL-3       |
| A_21_P0001469  | 3,59529 | 4,02212 | -1,344276582 | N/A             | N/A       | N/A          | Inc-C1orf195-3 |
| A_21_P0013012  | 2,6918  | 3,11864 | -1,3442859   | N/A             | N/A       | N/A          | XLOC_l2_012397 |

|                |         |         |              |                 |           |              |                |
|----------------|---------|---------|--------------|-----------------|-----------|--------------|----------------|
| A_33_P3231888  | 10,1556 | 10,5825 | -1,344341808 | ENST00000231512 | 56951     | NM_020199    | C5orf15        |
| A_33_P3258117  | 7,85098 | 8,27789 | -1,344351127 | ENST00000394045 | 3070      | NM_001289072 | HELLS          |
| A_24_P236091   | 5,34057 | 5,76759 | -1,344453632 | ENST00000535366 | 2026      | NM_001975    | ENO2           |
| A_24_P265506   | 1,47104 | 1,89811 | -1,344500228 | ENST00000534682 | 4914      | NM_002529    | NTRK1          |
| A_22_P00012358 | 1,51585 | 1,94292 | -1,344500228 | ENST00000504620 | N/A       | N/A          | N/A            |
| A_21_P0007073  | 6,03925 | 6,46634 | -1,344518867 | N/A             | N/A       | N/A          | Inc-SCD-1      |
| A_33_P3366082  | 12,5799 | 13,007  | -1,344528187 | ENST00000242827 | 84650     | NM_032565    | EBPL           |
| A_33_P3323914  | 6,29746 | 6,72456 | -1,344528187 | N/A             | N/A       | N/A          | N/A            |
| A_33_P3216610  | 12,47   | 12,8971 | -1,344528187 | ENST00000618855 | 56649     | NM_001290094 | TMPRSS4        |
| A_24_P462899   | 11,4565 | 11,8837 | -1,344621385 | ENST00000368325 | 387103    | NM_001012507 | CENPW          |
| A_32_P132438   | 12,3298 | 12,757  | -1,344621385 | ENST00000621116 | 8165      | NM_003488    | AKAP1          |
| A_23_P61447    | 9,58104 | 10,0083 | -1,344677308 | ENST00000506422 | 2110      | NM_004453    | ETFHD          |
| A_22_P00010898 | 1,69119 | 2,11852 | -1,344742553 | ENST00000435492 | N/A       | N/A          | N/A            |
| A_33_P3349651  | 9,67736 | 10,1047 | -1,344751875 | ENST00000318950 | 23075     | NM_015055    | SWAP70         |
| A_22_P00017060 | 6,78398 | 7,21134 | -1,344770517 | ENST00000468964 | 101       | NM_001164489 | ADAM8          |
| A_22_P00015195 | 9,81851 | 10,2459 | -1,344798481 | N/A             | 100996842 | XR_433332    | LOC100996842   |
| A_33_P3348469  | 6,14106 | 6,56847 | -1,344817124 | N/A             | 81573     | NM_030816    | ANKRD13C       |
| A_21_P0001275  | 2,40413 | 2,83162 | -1,344891698 | N/A             | N/A       | N/A          | Inc-EPB41-1    |
| A_33_P3274184  | 3,21081 | 3,63832 | -1,344910343 | N/A             | N/A       | N/A          | N/A            |
| A_24_P13083    | 1,68951 | 2,11705 | -1,34493831  | ENST00000520358 | 90139     | NM_130783    | TSPAN18        |
| A_33_P3288074  | 6,47812 | 6,90571 | -1,344984922 | N/A             | N/A       | BC019017     | Inc-ATG2B-2    |
| A_22_P00007454 | 1,59444 | 2,02206 | -1,345012891 | N/A             | N/A       | N/A          | Inc-GTDC1-3    |
| A_22_P00006643 | 1,68607 | 2,1137  | -1,345022214 | ENST00000550024 | N/A       | N/A          | N/A            |
| A_22_P00001984 | 1,35017 | 1,77783 | -1,345050183 | ENST00000555595 | N/A       | BG982821     | N/A            |
| A_22_P00007447 | 3,72654 | 4,15422 | -1,34506883  | N/A             | 100506444 | NR_125918    | LOC100506444   |
| A_21_P0014283  | 1,70736 | 2,13507 | -1,3450968   | N/A             | N/A       | AK092621     | N/A            |
| A_33_P3413384  | 2,89172 | 3,31948 | -1,345143418 | N/A             | N/A       | N/A          | N/A            |
| A_21_P0012616  | 7,59729 | 8,02505 | -1,345143418 | N/A             | N/A       | N/A          | XLOC_I2_010854 |
| A_21_P0010278  | 1,63698 | 2,06475 | -1,345152742 | N/A             | N/A       | N/A          | Inc-PIGP-1     |
| A_33_P3289162  | 3,46719 | 3,89499 | -1,345180714 | ENST00000484110 | 11037     | AK128867     | STON1          |
| A_24_P767901   | 1,38332 | 1,81118 | -1,34523666  | ENST00000514414 | N/A       | N/A          | N/A            |
| A_23_P137361   | 9,37962 | 9,80748 | -1,34523666  | ENST00000471223 | 49856     | NM_017818    | WRAP73         |
| A_22_P00020910 | 5,62604 | 6,05398 | -1,345311257 | N/A             | 100507564 | NR_038953    | LOC100507564   |

|                |         |         |              |                 |           |              |              |
|----------------|---------|---------|--------------|-----------------|-----------|--------------|--------------|
| A_33_P3289661  | 2,36099 | 2,78896 | -1,345339233 | N/A             | 100128298 | AF314543     | OCR1         |
| A_21_P0014464  | 1,45748 | 1,88554 | -1,345423162 | N/A             | 100507201 | NR_110161    | LOC100507201 |
| A_23_P65481    | 10,835  | 11,2631 | -1,345460466 | ENST00000555008 | 7011      | NM_007110    | TEP1         |
| A_33_P3309799  | 4,86585 | 5,29397 | -1,345479118 | ENST00000354038 | 10107     | NM_006778    | TRIM10       |
| A_21_P0008964  | 5,43927 | 5,8674  | -1,345488444 | N/A             | N/A       | N/A          | Inc-CDH3-1   |
| A_23_P155417   | 8,59938 | 9,02753 | -1,345507096 | ENST00000361143 | 84836     | NM_032750    | ABHD14B      |
| A_21_P0005820  | 1,3562  | 1,78443 | -1,345581709 | ENST00000519764 | N/A       | N/A          | N/A          |
| A_33_P3307887  | 1,35202 | 1,78027 | -1,345600363 | N/A             | 100128653 | XR_108727    | LOC100128653 |
| A_22_P00015940 | 5,50543 | 5,93371 | -1,345628344 | N/A             | 728558    | NR_038444    | ENTPD1-AS1   |
| A_21_P0014738  | 5,67848 | 6,10679 | -1,345656326 | N/A             | 101930282 | XR_250610    | LOC101930282 |
| A_33_P3415551  | 1,51085 | 1,93917 | -1,345665654 | ENST00000486463 | 150763    | NM_207328    | GPAT2        |
| A_33_P3221253  | 7,69079 | 8,11927 | -1,345814901 | ENST00000616304 | 4026      | NM_005578    | LPP          |
| A_23_P2801     | 10,4184 | 10,8469 | -1,345833558 | ENST00000239882 | 1997      | NM_172373    | ELF1         |
| A_33_P3396120  | 4,61963 | 5,04815 | -1,345852215 | ENST00000575779 | 84622     | NM_032530    | ZNF594       |
| A_33_P3290602  | 12,6594 | 13,088  | -1,345926847 | N/A             | 101410538 | NR_102705    | MMP24-AS1    |
| A_22_P00015225 | 2,77147 | 3,2001  | -1,345954835 | N/A             | N/A       | N/A          | Inc-SP140-4  |
| A_33_P3355040  | 5,44859 | 5,87723 | -1,345964165 | N/A             | 728903    | AK093722     | LOC728903    |
| A_33_P3324980  | 3,41097 | 3,83969 | -1,346038803 | ENST00000309334 | 84159     | NM_032199    | ARID5B       |
| A_22_P00019972 | 3,20258 | 3,63131 | -1,346048133 | N/A             | 101929865 | XR_253639    | LOC101929865 |
| A_23_P6771     | 8,42144 | 8,85024 | -1,346113445 | ENST00000157600 | 29995     | NM_014583    | LMCD1        |
| A_22_P00020679 | 10,7541 | 11,183  | -1,346206754 | N/A             | N/A       | DA300903     | Inc-MFSD6-1  |
| A_33_P3217147  | 5,26398 | 5,69292 | -1,346244079 | ENST00000361720 | 63906     | NM_022078    | GPATCH3      |
| A_33_P3418414  | 1,6477  | 2,07665 | -1,346253411 | ENST00000483058 | 257202    | NM_182701    | GPX6         |
| A_22_P00019974 | 1,46504 | 1,89405 | -1,346309401 | ENST00000455174 | N/A       | N/A          | N/A          |
| A_23_P103968   | 10,9205 | 11,3496 | -1,346393391 | ENST00000361640 | 22977     | NM_012067    | AKR7A3       |
| A_32_P790284   | 3,54912 | 3,97823 | -1,346402723 | ENST00000245121 | 83473     | NM_031303    | KATNAL2      |
| A_24_P941359   | 1,44996 | 1,8791  | -1,346430721 | ENST00000259698 | 9750      | NM_014722    | FAM65B       |
| A_23_P311358   | 6,58749 | 7,01666 | -1,34645872  | ENST00000610704 | 8427      | XM_006716151 | ZNF282       |
| A_23_P12635    | 11,6969 | 12,1262 | -1,346580054 | ENST00000224862 | 79176     | NM_024326    | FBXL15       |
| A_24_P115007   | 8,51909 | 8,94857 | -1,346748072 | ENST00000357578 | 7915      | NM_170740    | ALDH5A1      |
| A_22_P00000861 | 3,72087 | 4,15039 | -1,346785412 | N/A             | N/A       | N/A          | Inc-AGPAT6-1 |
| A_21_P0000710  | 2,1714  | 2,60093 | -1,346794748 | N/A             | 387065    | NR_037938    | HMGA1P7      |
| A_23_P394323   | 3,07858 | 3,50816 | -1,346841425 | N/A             | 283742    | AK095745     | FAM98B       |

|                |         |         |              |                 |           |              |                |
|----------------|---------|---------|--------------|-----------------|-----------|--------------|----------------|
| A_23_P109677   | 14,5436 | 14,9732 | -1,346860096 | ENST00000496953 | N/A       | N/A          | N/A            |
| A_22_P00003395 | 6,06394 | 6,49358 | -1,34689744  | N/A             | 102725059 | XR_433694    | LOC102725059   |
| A_22_P00006851 | 1,58015 | 2,00979 | -1,34689744  | N/A             | 100873978 | XR_425584    | RBMS3-AS2      |
| A_21_P0011490  | 2,9516  | 3,38124 | -1,34689744  | ENST00000567330 | N/A       | N/A          | N/A            |
| A_32_P103291   | 11,2621 | 11,6919 | -1,347046824 | ENST00000490322 | 64754     | NM_022743    | SMYD3          |
| A_23_P3994     | 12,7171 | 13,1469 | -1,347046824 | ENST00000575427 | 254863    | NM_152766    | TMEM256        |
| A_23_P154345   | 10,7308 | 11,1607 | -1,347140197 | ENST00000622246 | 26275     | NM_014362    | HIBCH          |
| A_33_P3338793  | 4,83863 | 5,26863 | -1,347233577 | ENST00000477616 | 3748      | NM_004977    | KCNC3          |
| A_23_P149419   | 9,23337 | 9,66348 | -1,347336302 | ENST00000361720 | 63906     | NM_022078    | GPATCH3        |
| A_22_P00004879 | 4,70237 | 5,13251 | -1,34736432  | N/A             | N/A       | N/A          | Inc-CYS1-2     |
| A_23_P58464    | 1,6183  | 2,04845 | -1,347373659 | ENST00000231136 | 56130     | NM_018939    | PCDHB6         |
| A_21_P0014831  | 1,36515 | 1,79548 | -1,347541776 | ENST00000375625 | N/A       | XR_133576    | N/A            |
| A_24_P405002   | 8,3344  | 8,76478 | -1,347588479 | ENST00000619836 | 149420    | NM_152835    | PDIK1L         |
| A_23_P257231   | 2,13459 | 2,56505 | -1,347663208 | ENST00000411864 | 64850     | NM_031279    | ETNPPL         |
| A_23_P120048   | 8,49766 | 8,92817 | -1,347709915 | ENST00000392783 | 29994     | NM_013450    | BAZ2B          |
| A_33_P3238685  | 7,30158 | 7,73212 | -1,34773794  | ENST00000380013 | 54790     | NM_001127208 | TET2           |
| A_21_P0000336  | 8,58569 | 9,01627 | -1,347775308 | N/A             | 677833    | NR_002982    | SNORA54        |
| A_23_P42784    | 5,35472 | 5,78537 | -1,347840704 | ENST00000354639 | 56164     | NM_032944    | STK31          |
| A_33_P3288209  | 2,02062 | 2,4513  | -1,347868732 | ENST00000441149 | 1759      | AB209124     | DNM1           |
| A_33_P3319760  | 13,2039 | 13,6347 | -1,347980849 | ENST00000397334 | 8407      | NM_001277224 | TAGLN2         |
| A_33_P3302125  | 3,18246 | 3,6134  | -1,348111664 | ENST00000368779 | 353139    | NM_178428    | LCE2A          |
| A_22_P00001091 | 1,3478  | 1,77879 | -1,348158387 | ENST00000538025 | N/A       | N/A          | N/A            |
| A_21_P0005151  | 1,48934 | 1,92042 | -1,348242492 | N/A             | N/A       | N/A          | Inc-EXOC2-8    |
| A_21_P0008856  | 6,05834 | 6,48946 | -1,348279874 | ENST00000560626 | 79834     | N/A          | PEAK1          |
| A_21_P0012709  | 3,77445 | 4,20559 | -1,348298565 | N/A             | N/A       | N/A          | XLOC_I2_011424 |
| A_23_P337155   | 4,02036 | 4,45153 | -1,348326602 | ENST00000395739 | 146691    | NM_001082968 | TOM1L2         |
| A_33_P3378056  | 4,70941 | 5,1407  | -1,348438758 | ENST00000478375 | 7020      | M61156       | TFAP2A         |
| A_33_P3337569  | 1,34718 | 1,77853 | -1,348494839 | ENST00000509633 | 401137    | NM_214711    | PRR27          |
| A_23_P96087    | 10,4891 | 10,9205 | -1,348541575 | ENST00000333762 | 8971      | NM_006026    | H1FX           |
| A_23_P140035   | 10,3641 | 10,7955 | -1,348541575 | ENST00000379487 | 11193     | NM_007187    | WBP4           |
| A_22_P00008737 | 6,58492 | 7,01634 | -1,34856027  | N/A             | N/A       | BC071821     | Inc-KIAA1755-6 |
| A_23_P379789   | 1,60478 | 2,03643 | -1,34877528  | ENST00000315087 | 29906     | NM_013305    | ST8SIA5        |
| A_21_P0002571  | 2,11755 | 2,54926 | -1,348831375 | N/A             | N/A       | N/A          | Inc-ID2-1      |



|                |         |         |              |                 |           |              |              |
|----------------|---------|---------|--------------|-----------------|-----------|--------------|--------------|
| A_33_P3267270  | 5,19322 | 5,62498 | -1,348878123 | ENST00000371331 | 127428    | NM_153035    | TCEANC2      |
| A_21_P0006495  | 3,65154 | 4,08336 | -1,348934222 | N/A             | N/A       | N/A          | Inc-TIMP1-1  |
| A_33_P3215367  | 4,00826 | 4,44023 | -1,349074481 | N/A             | N/A       | AK126800     | N/A          |
| A_22_P00008008 | 2,47769 | 2,90968 | -1,349093183 | ENST00000540761 | N/A       | N/A          | N/A          |
| A_23_P500353   | 3,18408 | 3,61609 | -1,349111886 | ENST00000610748 | 3781      | NM_021614    | KCNN2        |
| A_22_P00020246 | 3,00315 | 3,43523 | -1,349177347 | N/A             | N/A       | N/A          | Inc-GPR55-2  |
| A_33_P3283646  | 3,24738 | 3,67949 | -1,349205402 | N/A             | N/A       | N/A          | N/A          |
| A_32_P70927    | 4,17199 | 4,60413 | -1,349233458 | ENST00000374968 | 203569    | NM_207339    | PAGE2        |
| A_21_P0003683  | 1,3964  | 1,82854 | -1,349233458 | N/A             | N/A       | N/A          | Inc-CEP44-5  |
| A_23_P351138   | 5,00898 | 5,44116 | -1,349270868 | ENST00000445369 | 9080      | NM_020982    | CLDN9        |
| A_33_P3290338  | 11,3117 | 11,7439 | -1,349289573 | ENST00000366792 | 142       | NM_001618    | PARP1        |
| A_33_P3300941  | 1,73958 | 2,1718  | -1,349308278 | N/A             | 246734    | AF156973     | NPCDR1       |
| A_33_P3407643  | 1,34065 | 1,77316 | -1,349579533 | ENST00000338832 | 349633    | NM_001145024 | PLET1        |
| A_33_P3246927  | 1,38946 | 1,822   | -1,349607597 | ENST00000373377 | 114784    | AK122603     | CSMD2        |
| A_22_P00025731 | 1,6099  | 2,04244 | -1,349607597 | N/A             | 101928819 | XR_249795    | LOC101928819 |
| A_22_P00019886 | 5,88085 | 6,31339 | -1,349607597 | N/A             | 101927219 | NR_109949    | HNF4A-AS1    |
| A_33_P3250333  | 2,83634 | 3,26892 | -1,349645017 | ENST00000497783 | 196385    | NM_207437    | DNAH10       |
| A_23_P34142    | 11,7258 | 12,1584 | -1,349663727 | ENST00000372656 | 51186     | NM_016303    | WBP5         |
| A_23_P161091   | 8,90736 | 9,33998 | -1,349682437 | ENST00000373329 | 79830     | NM_024772    | ZMYM1        |
| A_33_P3212500  | 3,41608 | 3,84871 | -1,349691793 | N/A             | 100129060 | AK127934     | SEMA3F-AS1   |
| A_21_P0010861  | 4,81338 | 5,24608 | -1,349757282 | ENST00000458682 | 387644    | N/A          | LINC00202-1  |
| A_33_P3406939  | 7,79341 | 8,22614 | -1,34978535  | ENST00000379166 | 347240    | NM_194313    | KIF24        |
| A_23_P128073   | 13,3402 | 13,773  | -1,349850843 | ENST00000267064 | 6601      | NM_139067    | SMARCC2      |
| A_23_P7873     | 12,4836 | 12,9164 | -1,349850843 | ENST00000616552 | 4172      | NM_002388    | MCM3         |
| A_23_P140375   | 1,46996 | 1,90277 | -1,3498602   | ENST00000298352 | 58157     | NM_021257    | NGB          |
| A_33_P3308586  | 3,09035 | 3,52325 | -1,349944411 | ENST00000604182 | 503835    | NM_001012729 | DUXA         |
| A_33_P3373358  | 3,41492 | 3,84785 | -1,349972482 | ENST00000426548 | 10052     | NM_005497    | GJC1         |
| A_22_P00017626 | 1,39991 | 1,83287 | -1,350000555 | ENST00000510459 | N/A       | N/A          | N/A          |
| A_33_P3627001  | 7,2735  | 7,70658 | -1,350112849 | ENST00000256404 | 157310    | NM_144962    | PEBP4        |
| A_22_P00008949 | 5,00471 | 5,43781 | -1,350131566 | N/A             | 101928689 | N/A          | LINC01424    |
| A_22_P00023878 | 1,60902 | 2,04221 | -1,350215794 | ENST00000568659 | N/A       | BX106581     | N/A          |
| A_22_P00017414 | 3,12722 | 3,56043 | -1,350234512 | ENST00000510203 | N/A       | N/A          | N/A          |
| A_22_P00011497 | 7,17489 | 7,60816 | -1,350290668 | ENST00000454307 | N/A       | BX103087     | N/A          |

|                |         |         |              |                 |           |              |              |
|----------------|---------|---------|--------------|-----------------|-----------|--------------|--------------|
| A_24_P354689   | 4,97783 | 5,4111  | -1,350290668 | ENST00000282223 | 6695      | NM_004598    | SPOCK1       |
| A_23_P426472   | 7,89822 | 8,33152 | -1,350318747 | ENST00000589703 | 7596      | NM_003425    | ZNF45        |
| A_33_P3402646  | 2,51958 | 2,95288 | -1,350318747 | ENST00000390435 | N/A       | AB305746     | N/A          |
| A_24_P66838    | 3,43444 | 3,86775 | -1,350328107 | ENST00000434035 | N/A       | N/A          | N/A          |
| A_22_P00015652 | 6,12767 | 6,56105 | -1,350393626 | ENST00000585025 | N/A       | N/A          | N/A          |
| A_32_P199462   | 1,64625 | 2,07966 | -1,350421707 | ENST00000341287 | 389073    | NM_001099334 | C2orf80      |
| A_22_P00007827 | 2,07684 | 2,51045 | -1,350608929 | ENST00000538710 | N/A       | BG686031     | N/A          |
| A_21_P0005521  | 9,51307 | 9,94671 | -1,350637014 | N/A             | 100216545 | NR_024586    | KMT2E-AS1    |
| A_21_P0010313  | 3,3115  | 3,74519 | -1,350683824 | N/A             | N/A       | N/A          | Inc-MX1-3    |
| A_24_P27412    | 8,71395 | 9,1477  | -1,350739999 | ENST00000569817 | 10073     | NM_005701    | SNUPN        |
| A_23_P419107   | 5,38712 | 5,8209  | -1,350768087 | ENST00000299045 | 255394    | NM_152772    | TCP11L2      |
| A_23_P119295   | 11,576  | 12,0098 | -1,350786813 | ENST00000585898 | 51295     | NM_016581    | ECSIT        |
| A_23_P320578   | 10,7619 | 11,1958 | -1,350880445 | ENST00000367558 | 6004      | NM_002928    | RGS16        |
| A_23_P121141   | 8,02652 | 8,46052 | -1,350974085 | ENST00000504964 | 28990     | NM_014065    | ASTE1        |
| A_22_P00012349 | 1,49096 | 1,92498 | -1,350992813 | ENST00000513155 | 101928918 | XR_244661    | LOC101928918 |
| A_33_P3290522  | 1,50288 | 1,93692 | -1,351011542 | ENST00000550378 | N/A       | N/A          | N/A          |
| A_33_P3404588  | 8,46194 | 8,89599 | -1,351020907 | ENST00000395740 | 121512    | NM_139241    | FGD4         |
| A_33_P3252414  | 8,07401 | 8,5081  | -1,351058365 | ENST00000381178 | 7054      | NM_199292    | TH           |
| A_24_P19810    | 11,6628 | 12,0969 | -1,35106773  | ENST00000482168 | 79717     | NM_024664    | PPCS         |
| A_24_P42014    | 17,157  | 17,5911 | -1,35106773  | ENST00000401715 | N/A       | N/A          | N/A          |
| A_22_P00006555 | 1,99335 | 2,42777 | -1,35136744  | N/A             | N/A       | N/A          | Inc-FLNB-2   |
| A_23_P379692   | 2,33923 | 2,77366 | -1,351376807 | ENST00000556047 | 283579    | NM_174943    | C14orf178    |
| A_33_P3373388  | 1,54583 | 1,98026 | -1,351376807 | ENST00000437025 | 2554      | NM_001127644 | GABRA1       |
| A_21_P0011329  | 1,39519 | 1,82974 | -1,351489216 | ENST00000558147 | 283673    | N/A          | EWSAT1       |
| A_21_P0006989  | 2,63184 | 3,06642 | -1,35151732  | ENST00000452578 | 101929465 | XR_246526    | LOC101929465 |
| A_22_P00001260 | 2,25849 | 2,69309 | -1,351536056 | N/A             | 102724712 | XR_424263    | LOC102724712 |
| A_33_P3809497  | 1,36106 | 1,79581 | -1,351676585 | ENST00000614177 | 400087    | NR_033987    | FLJ37505     |
| A_24_P256404   | 5,40215 | 5,83693 | -1,351704693 | N/A             | 100133616 | AK093202     | LOC100133616 |
| A_33_P3326483  | 1,58347 | 2,01839 | -1,351835869 | ENST00000299529 | 1381      | NM_004378    | CRABP1       |
| A_32_P10100    | 13,6361 | 14,0711 | -1,351910833 | N/A             | N/A       | N/A          | N/A          |
| A_21_P0004883  | 7,3819  | 7,81692 | -1,351929575 | N/A             | N/A       | N/A          | Inc-UBR2-1   |
| A_32_P173662   | 1,54074 | 1,97581 | -1,35197643  | ENST00000339139 | 7180      | NM_003296    | CRISP2       |
| A_23_P27147    | 16,0504 | 16,4855 | -1,352004544 | ENST00000579978 | 51529     | NM_001002244 | ANAPC11      |

|                |         |         |              |                 |           |              |                |
|----------------|---------|---------|--------------|-----------------|-----------|--------------|----------------|
| A_33_P3405957  | 10,3332 | 10,7683 | -1,352004544 | ENST00000334801 | 283149    | NM_182557    | BCL9L          |
| A_21_P0001702  | 3,92975 | 4,36496 | -1,352107633 | N/A             | N/A       | N/A          | Inc-CHD1L-1    |
| A_22_P00001252 | 5,73228 | 6,16756 | -1,352173239 | N/A             | N/A       | N/A          | Inc-ANKRD34B-1 |
| A_23_P385861   | 10,8989 | 11,3342 | -1,352191984 | ENST00000521098 | 157313    | NM_152562    | CDCA2          |
| A_22_P00003658 | 1,69468 | 2,13003 | -1,352238848 | ENST00000446055 | N/A       | BX092573     | N/A            |
| A_33_P3408962  | 4,3602  | 4,79559 | -1,352276341 | ENST00000354534 | 6334      | NM_014191    | SCN8A          |
| A_22_P00021301 | 2,83887 | 3,27428 | -1,352295088 | N/A             | N/A       | AK096356     | Inc-ATP4B-1    |
| A_24_P944144   | 9,10043 | 9,53589 | -1,352341955 | ENST00000395340 | 11083     | NM_080797    | DIDO1          |
| A_23_P431569   | 9,14501 | 9,5805  | -1,352370077 | N/A             | 100049716 | NR_122124    | LOC100049716   |
| A_23_P99642    | 5,72128 | 6,15681 | -1,352407573 | ENST00000554061 | 9056      | NM_001126106 | SLC7A7         |
| A_22_P00020414 | 5,45881 | 5,89442 | -1,352482569 | N/A             | N/A       | N/A          | Inc-TTC7B-2    |
| A_32_P79483    | 3,99668 | 4,43231 | -1,352501318 | ENST00000606448 | 283481    | NR_036487    | FGF14-AS2      |
| A_22_P00022398 | 1,50227 | 1,93794 | -1,352538818 | N/A             | 100874031 | NR_046730    | AGBL5-AS1      |
| A_23_P86216    | 14,5726 | 15,0083 | -1,352566943 | ENST00000477897 | 5686      | NM_002790    | PSMA5          |
| A_23_P11598    | 6,011   | 6,44672 | -1,352585694 | ENST00000493756 | 127396    | NM_152373    | ZNF684         |
| A_21_P0007382  | 8,64662 | 9,08237 | -1,352613821 | N/A             | N/A       | N/A          | Inc-GPR83-2    |
| A_21_P0014908  | 6,76835 | 7,2041  | -1,352613821 | ENST00000586348 | N/A       | XR_430753    | N/A            |
| A_21_P0014158  | 1,37206 | 1,80784 | -1,352641948 | N/A             | N/A       | AK127725     | Inc-FTSJD2-1   |
| A_19_P00811717 | 5,56891 | 6,00469 | -1,352641948 | ENST00000488386 | 222256    | XM_005250224 | CDHR3          |
| A_24_P366644   | 1,47503 | 1,91088 | -1,35270758  | ENST00000418613 | N/A       | N/A          | N/A            |
| A_33_P3229527  | 7,58964 | 8,02554 | -1,352754462 | N/A             | N/A       | N/A          | N/A            |
| A_19_P00322173 | 1,35047 | 1,78639 | -1,352773215 | N/A             | N/A       | N/A          | Inc-COL5A1-1   |
| A_21_P0002522  | 1,34925 | 1,78551 | -1,353092061 | N/A             | 102724194 | N/A          | LOC102724194   |
| A_22_P00015441 | 2,9872  | 3,42346 | -1,353092061 | ENST00000582587 | 9382      | NM_018714    | COG1           |
| A_23_P27649    | 7,46127 | 7,89754 | -1,35310144  | ENST00000344980 | 163059    | NM_001080411 | ZNF433         |
| A_22_P00016997 | 1,66177 | 2,09805 | -1,353110819 | ENST00000581640 | 257203    | NR_026719    | DSCR9          |
| A_33_P3259943  | 3,30079 | 3,73713 | -1,353167094 | N/A             | 101928290 | NR_120465    | PLBD1-AS1      |
| A_21_P0005646  | 3,13624 | 3,57273 | -1,353307793 | N/A             | N/A       | N/A          | Inc-MYOM2-1    |
| A_33_P3278137  | 1,6243  | 2,06084 | -1,353354696 | ENST00000426558 | 641311    | NR_002595    | RPL31P11       |
| A_23_P303548   | 6,02342 | 6,46001 | -1,353401601 | ENST00000201961 | 140688    | NM_001256798 | NOL4L          |
| A_23_P52101    | 11,7122 | 12,1488 | -1,353410982 | ENST00000497655 | 51706     | NM_016243    | CYB5R1         |
| A_24_P217848   | 13,6077 | 14,0443 | -1,353410982 | ENST00000618958 | 8330      | NM_003510    | HIST1H2AK      |
| A_19_P00812340 | 14,6587 | 15,0953 | -1,353410982 | ENST00000455449 | 2512      | NM_000146    | FTL            |

|                |         |         |              |                 |           |              |                |
|----------------|---------|---------|--------------|-----------------|-----------|--------------|----------------|
| A_23_P116037   | 8,6916  | 9,12827 | -1,353476651 | ENST00000527851 | 7108      | NM_003273    | TM7SF2         |
| A_23_P341223   | 13,3052 | 13,7419 | -1,353504796 | ENST00000377658 | 9903      | NM_014851    | KLHL21         |
| A_21_P0000782  | 1,64114 | 2,0779  | -1,353561088 | N/A             | 100288077 | NR_038390    | WTAPP1         |
| A_21_P0006122  | 1,4426  | 1,87946 | -1,353654913 | N/A             | N/A       | N/A          | Inc-KDM4C-3    |
| A_33_P3327245  | 8,24267 | 8,67955 | -1,353673679 | ENST00000317257 | 83852     | NM_031915    | SETDB2         |
| A_22_P00009970 | 1,43298 | 1,86987 | -1,353683062 | ENST00000451749 | N/A       | N/A          | N/A            |
| A_33_P3294089  | 1,49439 | 1,9313  | -1,353701828 | N/A             | N/A       | N/A          | N/A            |
| A_21_P0011599  | 5,47382 | 5,91077 | -1,353739361 | N/A             | N/A       | N/A          | XLOC_I2_006152 |
| A_23_P26713    | 17,7283 | 18,1653 | -1,353786279 | ENST00000584583 | 9349      | NM_000978    | RPL23          |
| A_23_P502413   | 13,546  | 13,9831 | -1,35388012  | ENST00000341074 | 6318      | NM_002974    | SERPINB4       |
| A_33_P3822503  | 9,65718 | 10,0943 | -1,353898889 | ENST00000395019 | 1489      | NM_001330    | CTF1           |
| A_33_P3270445  | 4,48816 | 4,92531 | -1,353927042 | ENST00000527361 | 576       | NM_001294335 | BAI2           |
| A_24_P65373    | 4,09112 | 4,52838 | -1,354030278 | ENST00000262407 | 3674      | NM_000419    | ITGA2B         |
| A_33_P3327333  | 10,9646 | 11,4019 | -1,35406782  | ENST00000377135 | 3661      | NM_001197123 | IRF3           |
| A_24_P330773   | 7,8725  | 8,30983 | -1,354095978 | ENST00000258947 | 10241     | NM_005831    | CALCOCO2       |
| A_24_P42436    | 6,78751 | 7,22486 | -1,354114749 | ENST00000533509 | 9743      | NM_014715    | ARHGAP32       |
| A_24_P73599    | 1,48165 | 1,9191  | -1,354208613 | ENST00000394660 | 3603      | NM_172217    | IL16           |
| A_23_P122216   | 5,31595 | 5,75348 | -1,354283708 | ENST00000503759 | 4015      | NM_002317    | LOX            |
| A_24_P587443   | 1,5926  | 2,03016 | -1,35431187  | N/A             | N/A       | N/A          | N/A            |
| A_33_P3384721  | 14,2115 | 14,6492 | -1,35444433  | ENST00000533549 | 4714      | NM_005004    | NDUFB8         |
| A_32_P218989   | 13,5084 | 13,9461 | -1,35444433  | ENST00000616651 | 4904      | NM_004559    | YBX1           |
| A_21_P0011499  | 6,33465 | 6,77238 | -1,354471465 | ENST00000512279 | 101928203 | N/A          | LOC101928203   |
| A_21_P0006379  | 2,15058 | 2,58832 | -1,354480853 | N/A             | N/A       | N/A          | Inc-B4GALT1-1  |
| A_23_P167201   | 5,93009 | 6,3679  | -1,354546575 | ENST00000514585 | 51091     | NM_016955    | SEPSECS        |
| A_33_P3387524  | 4,21198 | 4,64991 | -1,354659247 | ENST00000370966 | 55635     | NM_001114120 | DEPDC1         |
| A_22_P00004645 | 4,95487 | 5,39284 | -1,354696807 | N/A             | N/A       | N/A          | Inc-CTBP2-1    |
| A_21_P0011677  | 1,8734  | 2,31138 | -1,354706197 | N/A             | N/A       | N/A          | XLOC_I2_006624 |
| A_23_P26557    | 10,4562 | 10,8942 | -1,354724977 | ENST00000569994 | 80178     | NM_025108    | C16orf59       |
| A_32_P32653    | 11,1724 | 11,6105 | -1,354818883 | ENST00000323460 | 205564    | NM_152699    | SENP5          |
| A_23_P300150   | 9,26936 | 9,70751 | -1,354865838 | ENST00000329101 | 4772      | NM_172387    | NFATC1         |
| A_33_P3327647  | 1,46578 | 1,90393 | -1,354865838 | ENST00000555596 | N/A       | N/A          | N/A            |
| A_33_P3309414  | 1,51782 | 1,95599 | -1,354884621 | ENST00000501499 | 643770    | N/A          | LOC643770      |
| A_33_P3271800  | 9,10828 | 9,54646 | -1,354894012 | ENST00000496069 | 22933     | NM_012237    | SIRT2          |

|                |         |         |              |                 |           |              |                |
|----------------|---------|---------|--------------|-----------------|-----------|--------------|----------------|
| A_33_P3803639  | 12,9954 | 13,4336 | -1,354912795 | ENST00000247668 | 7186      | NM_021138    | TRAF2          |
| A_23_P258769   | 1,45232 | 1,89053 | -1,354922187 | ENST00000399500 | 3115      | NM_002121    | HLA-DPB1       |
| A_23_P87973    | 10,1155 | 10,5538 | -1,355006714 | ENST00000457662 | 10206     | NM_213590    | TRIM13         |
| A_33_P3313221  | 5,46272 | 5,90102 | -1,355006714 | ENST00000397034 | 51058     | NM_001242739 | ZNF691         |
| A_21_P0004128  | 4,69443 | 5,13276 | -1,355034891 | N/A             | N/A       | N/A          | Inc-EMB-3      |
| A_33_P3388357  | 1,41386 | 1,85222 | -1,355063068 | ENST00000303868 | 83889     | NM_001291088 | WDR87          |
| A_33_P3278058  | 5,53126 | 5,96977 | -1,355203964 | ENST00000280350 | 120379    | NM_138789    | PIH1D2         |
| A_33_P3372069  | 1,4376  | 1,87611 | -1,355203964 | ENST00000620478 | 341947    | NM_182971    | COX8C          |
| A_23_P145761   | 9,57214 | 10,0107 | -1,355250933 | ENST00000404894 | 10124     | NM_005738    | ARL4A          |
| A_33_P3295203  | 3,72289 | 4,16146 | -1,355260327 | ENST00000222115 | 3036      | NM_001523    | HAS1           |
| A_22_P00003682 | 1,50619 | 1,94477 | -1,355269721 | ENST00000522524 | N/A       | N/A          | N/A            |
| A_22_P00018442 | 1,54559 | 1,98423 | -1,355326086 | N/A             | N/A       | N/A          | Inc-SLC25A47-2 |
| A_33_P3410700  | 14,5241 | 14,9628 | -1,355382454 | ENST00000361851 | 4509      | AK128101     | ATP8           |
| A_23_P22765    | 13,694  | 14,1327 | -1,355382454 | ENST00000377811 | 54539     | NM_019056    | NDUFB11        |
| A_23_P79545    | 11,1443 | 11,583  | -1,355382454 | ENST00000487809 | 8802      | NM_003849    | SUCLG1         |
| A_21_P0001541  | 1,68177 | 2,12053 | -1,355438824 | N/A             | 101927952 | XR_246371    | LOC101927952   |
| A_24_P44462    | 9,95085 | 10,3898 | -1,355617344 | ENST00000288398 | 7168      | NM_000366    | TPM1           |
| A_23_P215913   | 13,1394 | 13,5784 | -1,355664327 | ENST00000405140 | 1191      | NM_001831    | CLU            |
| A_22_P00010393 | 2,00107 | 2,44015 | -1,355739503 | ENST00000494900 | N/A       | N/A          | N/A            |
| A_33_P3733417  | 1,7617  | 2,20079 | -1,3557489   | ENST00000362072 | 1813      | NM_000795    | DRD2           |
| A_23_P101655   | 13,482  | 13,9211 | -1,355758298 | ENST00000252699 | 81        | NM_004924    | ACTN4          |
| A_21_P0003629  | 1,3951  | 1,83422 | -1,355777092 | N/A             | N/A       | N/A          | Inc-HERC6-2    |
| A_23_P423457   | 8,06004 | 8,4992  | -1,355814683 | ENST00000513907 | 256987    | NM_178276    | SERINC5        |
| A_33_P3807062  | 11,4386 | 11,8778 | -1,355852275 | ENST00000433484 | 55355     | NM_018410    | HJURP          |
| A_21_P0014298  | 4,28031 | 4,7196  | -1,35593686  | N/A             | N/A       | AK128480     | Inc-PRC1-1     |
| A_21_P0000177  | 9,2847  | 9,72409 | -1,35603085  | ENST00000591087 | 100287177 | BC007358     | C19orf83       |
| A_23_P90925    | 2,25945 | 2,69902 | -1,356200047 | ENST00000327407 | 27177     | NM_173178    | IL36B          |
| A_24_P314571   | 8,56455 | 9,00415 | -1,356228249 | ENST00000592540 | 147841    | AK075287     | SPC24          |
| A_21_P0011618  | 1,40818 | 1,84786 | -1,356303456 | ENST00000435925 | 339260    | NR_123730    | LOC339260      |
| A_22_P00014270 | 6,1749  | 6,61461 | -1,35633166  | N/A             | 100507057 | NR_038285    | MF12-AS1       |
| A_33_P3382351  | 12,6256 | 13,0654 | -1,356416275 | ENST00000402093 | 440400    | NM_001004333 | RNASEK         |
| A_23_P88703    | 10,5099 | 10,9497 | -1,356416275 | ENST00000450115 | 7158      | NM_005657    | TP53BP1        |
| A_33_P3384133  | 6,39835 | 6,83816 | -1,356425677 | ENST00000340363 | 100141515 | NM_001163075 | C17orf99       |

|                |         |         |              |                 |           |              |                       |
|----------------|---------|---------|--------------|-----------------|-----------|--------------|-----------------------|
| A_23_P345799   | 1,71534 | 2,15516 | -1,356435079 | ENST00000332386 | 199786    | NM_173544    | FAM129C               |
| A_21_P0004747  | 3,94899 | 4,38887 | -1,356491493 | ENST00000447315 | 101929515 | XR_242016    | LOC101929515          |
| A_21_P0009194  | 6,8006  | 7,2405  | -1,356510298 | ENST00000425510 | N/A       | N/A          | N/A                   |
| A_33_P3335984  | 6,03034 | 6,47032 | -1,356585521 | N/A             | 202020    | BC132927     | TAPT1-AS1             |
| A_23_P331895   | 9,92461 | 10,3646 | -1,356594924 | ENST00000407643 | 80727     | NM_025250    | TTYH3                 |
| A_33_P3398196  | 2,49518 | 2,93518 | -1,356604327 | ENST00000585720 | 84669     | N/A          | USP32                 |
| A_33_P3394789  | 6,71397 | 7,15399 | -1,356623134 | N/A             | 100653296 | XR_424298    | LOC100653296          |
| A_21_P0004392  | 1,62767 | 2,06771 | -1,356641941 | N/A             | N/A       | N/A          | Inc-CTC-236F12.4.1-1  |
| A_22_P00000504 | 4,46388 | 4,90397 | -1,356688959 | N/A             | N/A       | N/A          | Inc-AC105020.1-1      |
| A_33_P3258946  | 8,62195 | 9,06205 | -1,356698363 | ENST00000407552 | 22933     | NM_001193286 | SIRT2                 |
| A_23_P47357    | 17,6911 | 18,1312 | -1,356698363 | ENST00000527853 | 6230      | NM_001028    | RPS25                 |
| A_21_P0007643  | 3,35312 | 3,79327 | -1,356745384 | N/A             | N/A       | N/A          | Inc-HNF1A-1           |
| A_33_P3376065  | 1,8506  | 2,29077 | -1,356764192 | ENST00000456255 | N/A       | N/A          | N/A                   |
| A_32_P209230   | 15,6851 | 16,1253 | -1,356792406 | ENST00000372638 | 163732    | NM_133467    | CITED4                |
| A_23_P139558   | 10,5516 | 10,992  | -1,35698051  | ENST00000546450 | 64786     | NM_022771    | TBC1D15               |
| A_22_P00013524 | 2,16157 | 2,602   | -1,357008728 | N/A             | N/A       | DB041946     | Inc-RP11-404P21.6.1-3 |
| A_21_P0012549  | 3,89092 | 4,33137 | -1,35702754  | ENST00000507238 | 132241    | N/A          | RPL32P3               |
| A_33_P3229022  | 12,4263 | 12,8668 | -1,357074572 | N/A             | N/A       | N/A          | N/A                   |
| A_23_P146990   | 10,1811 | 10,6216 | -1,357074572 | ENST00000265428 | 11059     | NM_007013    | WWP1                  |
| A_23_P422083   | 8,61931 | 9,05985 | -1,357112199 | ENST00000285419 | 55529     | NM_018710    | TMEM55A               |
| A_33_P3268487  | 9,82673 | 10,2673 | -1,357140419 | ENST00000396600 | 18        | NM_000663    | ABAT                  |
| A_33_P3387601  | 1,56121 | 2,00181 | -1,357168641 | ENST00000600104 | 606293    | NR_002948    | KLKP1                 |
| A_33_P3223544  | 13,2953 | 13,7359 | -1,357168641 | ENST00000545407 | 51643     | NM_001282606 | TMBIM4                |
| A_21_P0002067  | 1,40679 | 1,84741 | -1,357187455 | N/A             | N/A       | N/A          | Inc-REG1B-4           |
| A_23_P52067    | 5,30038 | 5,74104 | -1,357225085 | ENST00000361548 | 57822     | NM_198173    | GRHL3                 |
| A_32_P81676    | 2,36684 | 2,8075  | -1,357225085 | ENST00000519461 | 157627    | NR_024281    | LINC00599             |
| A_24_P156922   | 4,93045 | 5,37116 | -1,357272124 | ENST00000473584 | 6342      | NM_001007098 | SCP2                  |
| A_33_P3231653  | 9,5022  | 9,94292 | -1,357281531 | ENST00000388711 | 51280     | NM_016548    | GOLM1                 |
| A_22_P00014818 | 7,30456 | 7,74533 | -1,357328572 | N/A             | 101927809 | XR_243869    | LOC101927809          |
| A_23_P214969   | 10,5048 | 10,9456 | -1,357356797 | ENST00000536159 | 10370     | NM_006079    | CITED2                |
| A_33_P3277728  | 8,02868 | 8,46953 | -1,35740384  | ENST00000379960 | 6453      | NM_001001132 | ITSN1                 |
| A_23_P119464   | 8,70268 | 9,14358 | -1,357450885 | ENST00000592247 | 85415     | NM_033103    | RHPN2                 |
| A_24_P150486   | 8,82189 | 9,26284 | -1,357497932 | ENST00000216484 | 9517      | NM_004863    | SPTLC2                |

|                |         |         |              |                 |           |              |                |
|----------------|---------|---------|--------------|-----------------|-----------|--------------|----------------|
| A_22_P00014980 | 1,90057 | 2,34153 | -1,357507341 | N/A             | N/A       | N/A          | Inc-SMC1A-1    |
| A_23_P68910    | 8,57062 | 9,01158 | -1,357507341 | ENST00000617123 | 6753      | NM_001051    | SSTR3          |
| A_33_P3316587  | 5,04372 | 5,48472 | -1,35754498  | ENST00000613450 | 5003      | NM_007105    | SLC22A18AS     |
| A_22_P00005671 | 2,63136 | 3,07237 | -1,35755439  | N/A             | N/A       | DQ289488     | Inc-EIF3M-2    |
| A_33_P3315986  | 4,44463 | 4,88566 | -1,35757321  | N/A             | N/A       | N/A          | N/A            |
| A_21_P0003884  | 1,47586 | 1,91692 | -1,35760144  | N/A             | N/A       | N/A          | Inc-POLN-1     |
| A_33_P3386970  | 6,80542 | 7,24649 | -1,35761085  | N/A             | N/A       | BC039426     | Inc-PIGM-1     |
| A_33_P3225522  | 9,01451 | 9,45575 | -1,357770833 | ENST00000449768 | 4939      | NM_001032731 | OAS2           |
| A_23_P48936    | 12,8324 | 13,2737 | -1,357827303 | ENST00000327367 | 4088      | NM_005902    | SMAD3          |
| A_23_P168951   | 8,67893 | 9,12032 | -1,357912011 | ENST00000314393 | 22882     | NM_014943    | ZHX2           |
| A_23_P383132   | 11,1478 | 11,5893 | -1,358015551 | ENST00000443632 | 23119     | NM_015094    | HIC2           |
| A_22_P00013988 | 1,52738 | 1,96889 | -1,358024964 | ENST00000581940 | N/A       | N/A          | N/A            |
| A_23_P392962   | 2,91467 | 3,3563  | -1,358137926 | ENST00000571380 | 10750     | NM_006613    | GRAP           |
| A_33_P3222962  | 2,04175 | 2,4834  | -1,358156754 | ENST00000457095 | 158787    | NM_144968    | RIBC1          |
| A_23_P90523    | 8,75993 | 9,20159 | -1,358166168 | ENST00000595769 | 79629     | XM_005260079 | OCEL1          |
| A_33_P3368785  | 10,102  | 10,5437 | -1,358203825 | N/A             | 649446    | NR_024101    | DLGAP1-AS1     |
| A_23_P313512   | 10,4074 | 10,8491 | -1,358203825 | ENST00000280665 | 196513    | NM_152640    | DCP1B          |
| A_24_P303594   | 8,16196 | 8,60373 | -1,358269727 | ENST00000377776 | 57180     | NM_001040135 | ACTR3B         |
| A_24_P58727    | 14,9596 | 15,4014 | -1,358297971 | ENST00000567565 | N/A       | N/A          | N/A            |
| A_33_P3356320  | 5,20222 | 5,6442  | -1,358467452 | ENST00000575151 | 400566    | NM_001013672 | C17orf97       |
| A_21_P0014949  | 8,39447 | 8,8365  | -1,358514534 | ENST00000569955 | 9520      | NM_006310    | NPEPPS         |
| A_21_P0007098  | 1,75834 | 2,20043 | -1,358571034 | N/A             | N/A       | N/A          | Inc-SVIL-2     |
| A_33_P3218787  | 2,46908 | 2,91123 | -1,358627537 | N/A             | N/A       | N/A          | N/A            |
| A_24_P103886   | 10,7212 | 11,1634 | -1,358674624 | ENST00000381344 | 3422      | NM_004508    | IDI1           |
| A_22_P00023655 | 1,45911 | 1,90132 | -1,358684041 | ENST00000559904 | N/A       | N/A          | N/A            |
| A_21_P0009316  | 3,26718 | 3,70947 | -1,358759385 | N/A             | N/A       | N/A          | Inc-CCL23-1    |
| A_23_P57961    | 9,79949 | 10,2418 | -1,358778222 | ENST00000483676 | 5364      | NM_002673    | PLXNB1         |
| A_24_P333494   | 10,2048 | 10,6472 | -1,358862989 | ENST00000375592 | 54455     | NM_018994    | FBXO42         |
| A_32_P121085   | 4,01417 | 4,45658 | -1,358872408 | ENST00000312943 | 79930     | NM_001144875 | DOK3           |
| A_33_P3291732  | 6,21358 | 6,656   | -1,358881827 | ENST00000598356 | N/A       | XM_006722749 | N/A            |
| A_21_P0001685  | 1,70756 | 2,15001 | -1,358910085 | ENST00000230113 | 102724481 | N/A          | LOC102724481   |
| A_21_P0013272  | 1,41155 | 1,85402 | -1,358928923 | N/A             | N/A       | N/A          | XLOC_I2_013621 |
| A_21_P0011764  | 3,55339 | 3,99586 | -1,358928923 | N/A             | N/A       | N/A          | XLOC_I2_007135 |

|                |         |         |              |                 |           |              |               |
|----------------|---------|---------|--------------|-----------------|-----------|--------------|---------------|
| A_24_P56484    | 8,92002 | 9,3626  | -1,35903254  | ENST00000216807 | 84312     | NM_032352    | BRMS1L        |
| A_23_P502142   | 7,69647 | 8,13915 | -1,359126745 | ENST00000368678 | 2534      | NM_002037    | FYN           |
| A_22_P00018971 | 2,4834  | 2,9261  | -1,359145586 | N/A             | N/A       | N/A          | Inc-NSMCE1-3  |
| A_23_P50039    | 2,66707 | 3,10979 | -1,359164428 | ENST00000324750 | 4161      | NM_005913    | MC5R          |
| A_32_P19806    | 7,36013 | 7,80297 | -1,359277485 | ENST00000328843 | 8701      | NM_001277115 | DNAH11        |
| A_21_P0004705  | 1,61959 | 2,06249 | -1,359334017 | ENST00000456118 | N/A       | N/A          | N/A           |
| A_22_P00015973 | 2,21997 | 2,66287 | -1,359334017 | ENST00000566922 | N/A       | N/A          | N/A           |
| A_22_P00004358 | 5,22912 | 5,67208 | -1,359390551 | ENST00000608807 | 101927391 | NR_110084    | LOC101927391  |
| A_22_P00005828 | 1,54343 | 1,98643 | -1,359428242 | N/A             | N/A       | N/A          | Inc-ERAL1-5   |
| A_23_P252283   | 11,1924 | 11,6354 | -1,359428242 | ENST00000324689 | 84282     | NM_032322    | RNF135        |
| A_33_P3579984  | 4,53698 | 4,9803  | -1,359729806 | ENST00000569008 | N/A       | AK094521     | N/A           |
| A_22_P00009852 | 1,35627 | 1,79961 | -1,359748656 | N/A             | N/A       | BM563242     | Inc-METTL20-1 |
| A_21_P0007651  | 2,86486 | 3,30821 | -1,359758081 | N/A             | N/A       | N/A          | Inc-AACS-2    |
| A_22_P00022828 | 1,53327 | 1,97664 | -1,359776932 | N/A             | N/A       | N/A          | Inc-RLBP1-1   |
| A_23_P121596   | 1,45956 | 1,903   | -1,35984291  | ENST00000296028 | 5473      | NM_002704    | PPBP          |
| A_23_P13753    | 7,66978 | 8,11323 | -1,359852336 | ENST00000540264 | 4778      | NM_006163    | NFE2          |
| A_24_P67408    | 10,4656 | 10,9091 | -1,359899465 | ENST00000420550 | N/A       | N/A          | N/A           |
| A_33_P3239152  | 12,0466 | 12,4902 | -1,35999373  | ENST00000358201 | 79874     | NM_024816    | RABEP2        |
| A_23_P60002    | 11,0139 | 11,4575 | -1,35999373  | ENST00000220853 | 9694      | NM_014673    | EMC2          |
| A_23_P393777   | 3,46968 | 3,9133  | -1,360012583 | ENST00000306051 | 5729      | NM_000953    | PTGDR         |
| A_23_P169197   | 10,2204 | 10,6641 | -1,360088001 | ENST00000398803 | 84263     | NM_032303    | HSDL2         |
| A_32_P215318   | 7,92353 | 8,36743 | -1,360276562 | ENST00000612007 | 31        | NM_198839    | ACACA         |
| A_21_P0000548  | 5,46918 | 5,91308 | -1,360276562 | N/A             | 10015     | NM_001256192 | PDCD6IP       |
| A_23_P153480   | 2,70174 | 3,1459  | -1,360521731 | ENST00000595585 | 25818     | NM_012427    | KLK5          |
| A_23_P70785    | 10,4772 | 10,9214 | -1,360559453 | ENST00000369066 | 202       | NM_001624    | AIM1          |
| A_23_P119362   | 11,8766 | 12,3208 | -1,360559453 | ENST00000597057 | 2014      | NM_001425    | EMP3          |
| A_33_P7278111  | 13,0166 | 13,4608 | -1,360559453 | ENST00000619747 | 55353     | NM_018407    | LAPTM4B       |
| A_23_P133629   | 10,8168 | 11,2611 | -1,360653763 | ENST00000394886 | 8697      | NM_004661    | CDC23         |
| A_21_P0013734  | 2,19195 | 2,63631 | -1,360710352 | N/A             | 101927993 | N/A          | LOC101927993  |
| A_33_P3346669  | 9,71329 | 10,1577 | -1,360757512 | ENST00000371375 | 51196     | NM_016341    | PLCE1         |
| A_33_P3376205  | 1,57324 | 2,01765 | -1,360757512 | ENST00000622585 | N/A       | XM_006711716 | N/A           |
| A_33_P3217639  | 1,64775 | 2,09217 | -1,360766944 | ENST00000528446 | 387715    | NM_001099667 | ARMS2         |
| A_33_P3344861  | 1,60531 | 2,04975 | -1,360785808 | ENST00000377722 | 389602    | NM_001291913 | LOC389602     |



|                |         |         |              |                 |           |              |                |
|----------------|---------|---------|--------------|-----------------|-----------|--------------|----------------|
| A_21_P0010985  | 1,49009 | 1,93454 | -1,36079524  | N/A             | N/A       | N/A          | XLOC_I2_002355 |
| A_33_P3293187  | 2,92993 | 3,3744  | -1,360814105 | ENST00000323329 | 8170      | NM_007163    | SLC14A2        |
| A_33_P3321923  | 14,6492 | 15,0937 | -1,360842403 | ENST00000507324 | N/A       | N/A          | N/A            |
| A_32_P179746   | 6,92495 | 7,36947 | -1,360861268 | N/A             | 101929687 | XR_427741    | LOC101929687   |
| A_23_P130547   | 1,82529 | 2,26982 | -1,360870701 | ENST00000308682 | 125958    | NM_001005191 | OR7D4          |
| A_21_P0003237  | 1,38475 | 1,82929 | -1,360880134 | N/A             | N/A       | N/A          | Inc-ROBO2-4    |
| A_23_P5568     | 8,46593 | 8,91063 | -1,361031069 | ENST00000310981 | 84826     | NM_032740    | SFT2D3         |
| A_33_P3316329  | 1,44966 | 1,89468 | -1,361332988 | ENST00000434751 | N/A       | N/A          | N/A            |
| A_21_P0002252  | 4,15961 | 4,60464 | -1,361342425 | N/A             | N/A       | N/A          | Inc-ATOH8-2    |
| A_21_P0014803  | 6,98143 | 7,42649 | -1,361370733 | ENST00000563903 | N/A       | N/A          | N/A            |
| A_23_P355447   | 2,587   | 3,03207 | -1,361380169 | ENST00000319374 | 283576    | NM_174976    | ZDHHC22        |
| A_21_P0004529  | 1,63063 | 2,07575 | -1,361427352 | N/A             | N/A       | XM_005276270 | Inc-SLC25A48-2 |
| A_23_P251443   | 1,74985 | 2,19498 | -1,361436789 | ENST00000523695 | 1135      | NM_000742    | CHRNA2         |
| A_23_P165186   | 9,73493 | 10,1801 | -1,361474536 | ENST00000590890 | 55957     | NM_019104    | LIN37          |
| A_22_P00012804 | 1,47745 | 1,92273 | -1,361578348 | N/A             | N/A       | DB461599     | Inc-RAP1GDS1-1 |
| A_33_P3367984  | 8,28297 | 8,72835 | -1,361672728 | ENST00000272895 | 26154     | NM_173076    | ABCA12         |
| A_33_P3248992  | 7,47671 | 7,92211 | -1,361691605 | ENST00000358776 | 36        | NM_001609    | ACADSB         |
| A_21_P0001170  | 1,35751 | 1,80298 | -1,361757677 | ENST00000449439 | N/A       | N/A          | N/A            |
| A_33_P3369550  | 11,5403 | 11,9858 | -1,361785994 | ENST00000460795 | 9295      | NM_004768    | SRSF11         |
| A_22_P00009190 | 2,23899 | 2,6845  | -1,361795433 | ENST00000436963 | 100862704 | NR_046414    | LINC00441      |
| A_23_P144578   | 8,28658 | 8,73218 | -1,361880389 | ENST00000295448 | 132789    | NM_138335    | GNPDA2         |
| A_21_P0007814  | 1,49532 | 1,94094 | -1,361899269 | ENST00000613771 | N/A       | N/A          | N/A            |
| A_22_P00020049 | 3,32258 | 3,76821 | -1,361908709 | N/A             | N/A       | N/A          | Inc-C9orf103-2 |
| A_33_P3833256  | 3,44223 | 3,88806 | -1,362097522 | ENST00000500698 | 440028    | NR_033972    | LOC440028      |
| A_22_P00010068 | 7,32898 | 7,77482 | -1,362106964 | ENST00000532845 | 101927204 | NR_110184    | LOC101927204   |
| A_23_P29747    | 17,8198 | 18,2657 | -1,362163613 | ENST00000580755 | 6147      | NM_000984    | RPL23A         |
| A_33_P3415350  | 1,63001 | 2,07602 | -1,362267477 | ENST00000523207 | 9312      | NM_004770    | KCNB2          |
| A_22_P00010897 | 1,53708 | 1,9831  | -1,36227692  | N/A             | N/A       | DA382327     | Inc-NPIPL2-2   |
| A_23_P121885   | 5,36052 | 5,80659 | -1,362324133 | ENST00000503804 | 83853     | NM_031916    | ROPN1L         |
| A_23_P500271   | 12,0226 | 12,4687 | -1,362352462 | ENST00000473745 | 3663      | NM_001098627 | IRF5           |
| A_24_P144499   | 14,6974 | 15,1435 | -1,362352462 | ENST00000585245 | 644591    | NM_001123068 | PPIAL4G        |
| A_33_P3322874  | 2,62865 | 3,07487 | -1,362465784 | ENST00000433433 | 102682016 | NR_110374    | LINC01159      |
| A_24_P883629   | 6,95637 | 7,40273 | -1,362598005 | ENST00000258457 | 79074     | NM_024093    | C2orf49        |

|                |         |         |              |                 |           |              |                  |
|----------------|---------|---------|--------------|-----------------|-----------|--------------|------------------|
| A_33_P3210671  | 2,61253 | 3,05894 | -1,36264523  | ENST00000444924 | 150763    | NM_207328    | GPAT2            |
| A_23_P257164   | 7,94773 | 8,39416 | -1,362664121 | ENST00000273588 | 275       | NM_000481    | AMT              |
| A_24_P652700   | 8,54319 | 8,98964 | -1,362683011 | ENST00000399334 | 22995     | NM_014985    | CEP152           |
| A_33_P3409337  | 3,28907 | 3,73564 | -1,362796361 | ENST00000492247 | 80127     | NM_025057    | CCDC176          |
| A_33_P3389332  | 1,43245 | 1,87903 | -1,362805807 | N/A             | 100128531 | NR_038941    | LOC100128531     |
| A_22_P00017337 | 1,4833  | 1,92996 | -1,362881379 | ENST00000514766 | N/A       | N/A          | N/A              |
| A_23_P59202    | 9,96243 | 10,4091 | -1,362890826 | ENST00000361288 | 6882      | NM_005643    | TAF11            |
| A_23_P310295   | 7,05296 | 7,49964 | -1,362900273 | ENST00000420826 | N/A       | BC002811     | N/A              |
| A_23_P214026   | 1,383   | 1,82981 | -1,363023088 | ENST00000508053 | 2201      | NM_001999    | FBN2             |
| A_22_P00006675 | 1,34915 | 1,79597 | -1,363032536 | ENST00000416951 | 103106903 | NR_120347    | LINC01276        |
| A_21_P0011240  | 1,79002 | 2,23684 | -1,363032536 | N/A             | N/A       | N/A          | XLOC_I2_004180   |
| A_33_P3408177  | 2,49222 | 2,93906 | -1,363051432 | ENST00000393316 | 440603    | NM_001010922 | BCL2L15          |
| A_33_P3317225  | 1,51395 | 1,96094 | -1,363193158 | ENST00000355281 | 81466     | NM_001258284 | OR2L5            |
| A_33_P3252394  | 5,04517 | 5,49225 | -1,363278201 | ENST00000252506 | 10912     | NM_006705    | GADD45G          |
| A_21_P0007799  | 5,49133 | 5,93846 | -1,36332545  | N/A             | N/A       | N/A          | Inc-SLC15A4-2    |
| A_32_P2103     | 8,87422 | 9,32137 | -1,36334435  | N/A             | N/A       | N/A          | N/A              |
| A_24_P918384   | 3,2211  | 3,66833 | -1,363419952 | ENST00000354179 | 64324     | NM_022455    | NSD1             |
| A_21_P0006603  | 1,41395 | 1,8613  | -1,363533362 | N/A             | N/A       | N/A          | Inc-CYorf15A.1-1 |
| A_23_P83751    | 6,20997 | 6,65732 | -1,363533362 | ENST00000227349 | 79864     | NM_024806    | C11orf63         |
| A_24_P180680   | 14,3586 | 14,806  | -1,36358062  | ENST00000619747 | 55353     | NM_018407    | LAPTM4B          |
| A_24_P184445   | 6,01788 | 6,46538 | -1,363675139 | ENST00000548882 | 4327      | NM_002429    | MMP19            |
| A_33_P3375541  | 4,75272 | 5,20022 | -1,363675139 | ENST00000300692 | 915       | NM_000732    | CD3D             |
| A_33_P3221353  | 7,83469 | 8,28221 | -1,363694044 | ENST00000379302 | 23078     | NM_001009814 | VWA8             |
| A_33_P3336198  | 8,34792 | 8,79557 | -1,363816931 | ENST00000328540 | 283870    | NM_182563    | BRICD5           |
| A_22_P00001799 | 1,48198 | 1,92966 | -1,363845291 | ENST00000447651 | N/A       | N/A          | N/A              |
| A_33_P3400324  | 11,7311 | 12,1789 | -1,363958737 | ENST00000495893 | 80012     | NM_024947    | PHC3             |
| A_21_P0013003  | 1,47977 | 1,92759 | -1,363977646 | ENST00000505824 | N/A       | N/A          | N/A              |
| A_22_P00007591 | 1,35013 | 1,79797 | -1,363996554 | N/A             | N/A       | BC036196     | Inc-HDDC2-5      |
| A_21_P0014502  | 4,23322 | 4,6811  | -1,364034373 | N/A             | N/A       | AY952884     | N/A              |
| A_33_P3392977  | 11,5465 | 11,9944 | -1,364053283 | ENST00000569745 | 23582     | NM_012142    | CCNDBP1          |
| A_21_P0009169  | 1,47907 | 1,92706 | -1,364138379 | ENST00000492522 | N/A       | N/A          | N/A              |
| A_24_P194962   | 16,4522 | 16,9002 | -1,364147835 | ENST00000481963 | N/A       | N/A          | N/A              |
| A_24_P101391   | 14,1101 | 14,5581 | -1,364147835 | ENST00000444752 | 4904      | NM_004559    | YBX1             |

|                |         |         |              |                 |           |              |               |
|----------------|---------|---------|--------------|-----------------|-----------|--------------|---------------|
| A_22_P00003889 | 1,34851 | 1,79668 | -1,364308589 | ENST00000503896 | 57507     | NM_020747    | ZNF608        |
| A_22_P00001249 | 1,65795 | 2,10613 | -1,364318045 | N/A             | N/A       | BX096547     | Inc-ANKRD32-2 |
| A_24_P723735   | 2,07029 | 2,51847 | -1,364318045 | ENST00000562403 | N/A       | N/A          | N/A           |
| A_23_P80648    | 8,38681 | 8,835   | -1,364327502 | ENST00000471841 | 55669     | NM_033540    | MFN1          |
| A_33_P3329063  | 1,54184 | 1,99005 | -1,364346416 | ENST00000614638 | 9437      | NM_004829    | NCR1          |
| A_22_P00003407 | 1,41606 | 1,86431 | -1,364384244 | ENST00000515199 | N/A       | N/A          | N/A           |
| A_23_P31896    | 11,0672 | 11,5155 | -1,364431531 | ENST00000522652 | 6482      | NM_003033    | ST3GAL1       |
| A_24_P236522   | 9,83812 | 10,2865 | -1,364507193 | ENST00000305596 | 10421     | NM_001243646 | CD2BP2        |
| A_22_P00023080 | 9,06692 | 9,51538 | -1,36458286  | ENST00000361127 | 9860      | XR_426743    | LRIG2         |
| A_21_P0001178  | 7,05527 | 7,50378 | -1,364630153 | N/A             | N/A       | N/A          | Inc-GOLPH3L-1 |
| A_21_P0013352  | 5,06703 | 5,51561 | -1,364696367 | ENST00000486492 | 79970     | NR_027788    | ZNF767P       |
| A_33_P3418992  | 2,79255 | 3,24119 | -1,364753124 | N/A             | 645769    | AK123791     | LOC645769     |
| A_21_P0002769  | 2,88596 | 3,33468 | -1,364828805 | ENST00000482019 | N/A       | N/A          | N/A           |
| A_23_P140725   | 7,71595 | 8,16468 | -1,364838265 | ENST00000565298 | 9742      | NM_014714    | IFT140        |
| A_33_P3346638  | 1,39299 | 1,84174 | -1,364857186 | ENST00000603850 | N/A       | N/A          | N/A           |
| A_33_P3544880  | 8,08923 | 8,53807 | -1,364942333 | N/A             | 142937    | BC008131     | LOC142937     |
| A_22_P00024557 | 2,58832 | 3,03717 | -1,364951794 | ENST00000554160 | N/A       | N/A          | N/A           |
| A_33_P3618960  | 2,96534 | 3,41427 | -1,365027485 | ENST00000487342 | 9127      | NM_005446    | P2RX6         |
| A_33_P3359308  | 7,15536 | 7,60433 | -1,365065332 | ENST00000486442 | 114818    | NM_052920    | KLHL29        |
| A_23_P69249    | 12,0169 | 12,4659 | -1,365093718 | ENST00000461125 | 86        | AK223212     | ACTL6A        |
| A_23_P40847    | 2,98958 | 3,4386  | -1,365112642 | ENST00000309575 | 9435      | NM_004267    | CHST2         |
| A_23_P15414    | 4,83206 | 5,28113 | -1,365159954 | ENST00000576012 | 8578      | NM_003693    | SCARF1        |
| A_21_P0012685  | 9,58909 | 10,0382 | -1,365197805 | ENST00000511213 | 100507639 | NR_121625    | LOC100507639  |
| A_33_P3313055  | 6,28148 | 6,73062 | -1,365226194 | ENST00000263388 | 4854      | NM_000435    | NOTCH3        |
| A_23_P399797   | 1,92204 | 2,37123 | -1,36527351  | N/A             | 9597      | NR_026763    | SMAD5-AS1     |
| A_33_P3245799  | 1,97168 | 2,42096 | -1,365358683 | ENST00000569839 | 221188    | N/A          | GPR114        |
| A_23_P336796   | 6,70238 | 7,1517  | -1,365396539 | ENST00000398675 | 283464    | NM_173601    | GXYLT1        |
| A_23_P115091   | 12,3565 | 12,8059 | -1,365472255 | ENST00000497968 | 57111     | NM_020387    | RAB25         |
| A_21_P0006057  | 1,92449 | 2,37393 | -1,365510114 | ENST00000435157 | N/A       | N/A          | N/A           |
| A_33_P3290617  | 1,65956 | 2,10906 | -1,365566905 | N/A             | N/A       | N/A          | N/A           |
| A_23_P425752   | 7,25729 | 7,70681 | -1,365585836 | ENST00000342043 | 9830      | NM_033219    | TRIM14        |
| A_32_P470728   | 4,4755  | 4,92505 | -1,365614233 | ENST00000302945 | 219409    | NM_145657    | GSX1          |
| A_23_P7325     | 3,64952 | 4,09913 | -1,365671029 | ENST00000265016 | 683       | NM_004334    | BST1          |

|                |         |         |              |                 |           |              |                |
|----------------|---------|---------|--------------|-----------------|-----------|--------------|----------------|
| A_21_P0014432  | 7,30732 | 7,75698 | -1,36571836  | N/A             | 100507599 | XR_172371    | LOC100507599   |
| A_23_P319270   | 11,785  | 12,2348 | -1,365850896 | ENST00000269392 | 22994     | NM_014984    | CEP131         |
| A_33_P3363420  | 6,29    | 6,73989 | -1,365936105 | ENST00000621208 | 257019    | NM_174938    | FRMD3          |
| A_33_P3386765  | 11,9023 | 12,3522 | -1,365945573 | ENST00000273596 | 25864     | NM_015407    | ABHD14A        |
| A_32_P137966   | 4,63314 | 5,08306 | -1,365964509 | ENST00000549341 | 120863    | NM_152317    | DEPDC4         |
| A_23_P209625   | 10,4747 | 10,9247 | -1,366040257 | ENST00000610745 | 1545      | NM_000104    | CYP1B1         |
| A_21_P0010900  | 1,72768 | 2,17771 | -1,366068663 | N/A             | N/A       | N/A          | XLOC_I2_002100 |
| A_23_P357811   | 12,4047 | 12,8548 | -1,366134947 | ENST00000485910 | 4154      | NM_021038    | MBNL1          |
| A_23_P53530    | 6,69852 | 7,14873 | -1,366239113 | ENST00000552029 | 80298     | NM_001033050 | MTERF2         |
| A_23_P397455   | 8,50419 | 8,95447 | -1,366305405 | ENST00000243349 | 130399    | NM_145259    | ACVR1C         |
| A_33_P3294133  | 12,9017 | 13,352  | -1,366324346 | ENST00000549592 | 1975      | NM_001300821 | EIF4B          |
| A_33_P3334092  | 3,6856  | 4,13597 | -1,366390642 | N/A             | N/A       | AK096917     | Inc-SHISA8-1   |
| A_22_P00000649 | 1,48597 | 1,93635 | -1,366400114 | N/A             | N/A       | N/A          | Inc-ACSS3-2    |
| A_33_P3251227  | 7,55638 | 8,00682 | -1,366456942 | ENST00000402468 | 56913     | AJ132443     | C1GALT1        |
| A_33_P3214303  | 12,0646 | 12,5151 | -1,366513772 | ENST00000615603 | 27086     | NM_001244808 | FOXP1          |
| A_22_P00008058 | 1,56632 | 2,01685 | -1,366542188 | ENST00000432249 | N/A       | N/A          | N/A            |
| A_33_P3269159  | 1,36613 | 1,81669 | -1,366570605 | ENST00000470333 | 259232    | AK094390     | NALCN          |
| A_23_P147605   | 10,555  | 11,0056 | -1,366608495 | ENST00000278460 | 79096     | NM_001003676 | C11orf49       |
| A_33_P3334047  | 6,61694 | 7,06763 | -1,366693751 | N/A             | N/A       | N/A          | N/A            |
| A_33_P3309607  | 3,02367 | 3,47437 | -1,366703224 | ENST00000409203 | 151246    | BC048349     | SGOL2          |
| A_22_P00004951 | 4,80709 | 5,25779 | -1,366703224 | N/A             | 100874207 | NR_046683    | ST3GAL6-AS1    |
| A_33_P3307447  | 13,0032 | 13,4539 | -1,366703224 | ENST00000359025 | 132241    | AX721251     | RPL32P3        |
| A_22_P00018008 | 3,32926 | 3,78003 | -1,366769539 | ENST00000576906 | N/A       | N/A          | N/A            |
| A_23_P50418    | 8,65535 | 9,10621 | -1,366854805 | ENST00000343325 | 163049    | NM_153358    | ZNF791         |
| A_23_P218675   | 14,0443 | 14,4952 | -1,366892703 | ENST00000447118 | 10406     | NM_006103    | WFDC2          |
| A_23_P377299   | 1,34145 | 1,79241 | -1,366949552 | ENST00000402825 | 9718      | NM_014693    | ECE2           |
| A_21_P0006052  | 5,73413 | 6,18518 | -1,367034829 | N/A             | N/A       | N/A          | Inc-GPR144-1   |
| A_23_P154235   | 10,8378 | 11,289  | -1,36717697  | ENST00000243346 | 9111      | NM_004688    | NMI            |
| A_33_P3371325  | 4,43141 | 4,88262 | -1,367186446 | N/A             | N/A       | N/A          | N/A            |
| A_22_P00006407 | 1,60461 | 2,05585 | -1,367214876 | ENST00000581541 | N/A       | N/A          | N/A            |
| A_32_P149174   | 8,3925  | 8,8438  | -1,367271739 | ENST00000408925 | 441150    | NM_001008739 | C6orf226       |
| A_33_P3291379  | 1,36722 | 1,81852 | -1,367271739 | ENST00000281047 | 343930    | NM_001105569 | MSGN1          |
| A_23_P114164   | 9,86864 | 10,3201 | -1,367423382 | ENST00000338222 | 29978     | NM_013444    | UBQLN2         |

|                |         |         |              |                 |           |              |                |
|----------------|---------|---------|--------------|-----------------|-----------|--------------|----------------|
| A_33_P3383236  | 1,34886 | 1,80037 | -1,367470774 | ENST00000494447 | 375307    | NM_198559    | CATIP          |
| A_24_P147398   | 3,25537 | 3,70691 | -1,36749921  | ENST00000572607 | 55275     | NM_018289    | VPS53          |
| A_22_P00006862 | 8,99283 | 9,4445  | -1,36762244  | N/A             | 100506963 | NR_038280    | TCEB3-AS1      |
| A_33_P3227631  | 2,77289 | 3,22461 | -1,367669839 | ENST00000546225 | 64799     | NM_001031715 | IQCH           |
| A_21_P0000506  | 10,3375 | 10,7894 | -1,367840489 | ENST00000582557 | 440423    | NR_024187    | SUZ12P1        |
| A_23_P111843   | 14,2395 | 14,6914 | -1,367840489 | ENST00000485387 | 10467     | NM_006349    | ZNHIT1         |
| A_23_P143952   | 5,66133 | 6,11329 | -1,367897377 | ENST00000341893 | 79598     | NM_024548    | CEP97          |
| A_33_P3287646  | 16,915  | 17,3671 | -1,368030125 | ENST00000248553 | 3315      | NM_001540    | HSPB1          |
| A_21_P0003940  | 5,33582 | 5,78794 | -1,36804909  | N/A             | N/A       | N/A          | Inc-CCDC125-1  |
| A_21_P0012443  | 2,50882 | 2,96097 | -1,368077538 | N/A             | N/A       | N/A          | XLOC_I2_010226 |
| A_21_P0011522  | 7,24393 | 7,69611 | -1,368105987 | N/A             | N/A       | N/A          | XLOC_I2_005692 |
| A_23_P166421   | 10,2181 | 10,6703 | -1,368124953 | ENST00000433426 | 83874     | NM_031937    | TBC1D10A       |
| A_33_P3358392  | 2,2521  | 2,70444 | -1,368257723 | ENST00000345514 | 64919     | NM_138576    | BCL11B         |
| A_21_P0003678  | 1,6093  | 2,06164 | -1,368257723 | N/A             | N/A       | N/A          | Inc-SAP30-2    |
| A_24_P118011   | 7,10112 | 7,55348 | -1,368276691 | ENST00000295112 | 344405    | NR_027258    | PRORS1P        |
| A_22_P00007437 | 1,4008  | 1,8532  | -1,368314629 | N/A             | N/A       | N/A          | Inc-GSG2-3     |
| A_21_P0000346  | 3,61986 | 4,07233 | -1,368381021 | N/A             | 677818    | NR_002994    | SNORA36B       |
| A_23_P343808   | 4,43031 | 4,88281 | -1,368409476 | ENST00000469581 | 6654      | NM_005633    | SOS1           |
| A_23_P28169    | 10,8323 | 11,2848 | -1,368409476 | ENST00000495469 | 151188    | NM_152522    | ARL6IP6        |
| A_33_P3312802  | 7,56923 | 8,02183 | -1,368504331 | ENST00000450028 | 399670    | NR_003680    | RPL13AP17      |
| A_21_P0008525  | 1,43164 | 1,88426 | -1,368523302 | N/A             | N/A       | N/A          | Inc-DLK1-6     |
| A_22_P00001449 | 1,85102 | 2,30367 | -1,36855176  | N/A             | 101928001 | NR_110822    | PRKCA-AS1      |
| A_21_P0008806  | 3,4145  | 3,86753 | -1,368912279 | N/A             | 101927505 | N/A          | LOC101927505   |
| A_33_P3262391  | 1,64869 | 2,10179 | -1,3689787   | N/A             | N/A       | N/A          | N/A            |
| A_23_P422071   | 11,1001 | 11,5532 | -1,3689787   | ENST00000383209 | 8705      | NM_003782    | B3GALT4        |
| A_21_P0014104  | 1,52095 | 1,97423 | -1,369149514 | N/A             | N/A       | N/A          | N/A            |
| A_23_P339773   | 10,748  | 11,2013 | -1,369168494 | ENST00000378344 | 127262    | NM_182752    | TPRG1L         |
| A_24_P338187   | 11,1954 | 11,6487 | -1,369168494 | ENST00000481819 | 3189      | NM_012207    | HNRNPH3        |
| A_23_P116942   | 5,07284 | 5,52618 | -1,369206456 | ENST00000203629 | 3902      | NM_002286    | LAG3           |
| A_22_P00012484 | 4,92603 | 5,37943 | -1,369263401 | ENST00000526206 | N/A       | XR_424260    | N/A            |
| A_23_P98248    | 11,9169 | 12,3703 | -1,369263401 | ENST00000539595 | 83707     | NM_001033678 | TRPT1          |
| A_21_P0014725  | 4,16252 | 4,61596 | -1,369301365 | N/A             | N/A       | BX954921     | N/A            |
| A_24_P921321   | 8,08764 | 8,54109 | -1,369310857 | ENST00000613246 | 5795      | NM_002843    | PTPRJ          |

|                |         |         |              |                 |           |              |                |
|----------------|---------|---------|--------------|-----------------|-----------|--------------|----------------|
| A_22_P00020268 | 5,77186 | 6,22546 | -1,369453234 | ENST00000518420 | N/A       | N/A          | N/A            |
| A_33_P3293925  | 1,99411 | 2,44771 | -1,369453234 | ENST00000398000 | 79742     | NM_176819    | CXorf36        |
| A_33_P3409274  | 1,49236 | 1,94606 | -1,369548161 | ENST00000454421 | N/A       | FJ385288     | N/A            |
| A_24_P230176   | 11,2798 | 11,7335 | -1,369548161 | ENST00000329214 | 339230    | NM_199287    | CCDC137        |
| A_23_P367586   | 4,03274 | 4,48655 | -1,369652588 | ENST00000472080 | 144132    | NM_173589    | DNHD1          |
| A_33_P3415255  | 5,29278 | 5,74661 | -1,369671575 | ENST00000601945 | 57191     | NM_020633    | VN1R1          |
| A_21_P0009080  | 3,54126 | 3,99519 | -1,369766517 | N/A             | N/A       | N/A          | Inc-COX4NB-1   |
| A_23_P61280    | 8,13132 | 8,58537 | -1,369880456 | ENST00000617523 | 26958     | NM_012133    | COPG2          |
| A_33_P3298387  | 7,23638 | 7,69045 | -1,369899446 | ENST00000570220 | 5347      | AB084459     | PLK1           |
| A_23_P67648    | 14,7624 | 15,2166 | -1,370022892 | ENST00000588780 | 826       | NM_001749    | CAPNS1         |
| A_22_P00005246 | 6,59517 | 7,04939 | -1,370041885 | ENST00000511867 | N/A       | N/A          | N/A            |
| A_22_P00003514 | 3,11942 | 3,57364 | -1,370041885 | N/A             | N/A       | N/A          | Inc-CCL1-3     |
| A_22_P00008301 | 8,34598 | 8,80032 | -1,370155847 | ENST00000572988 | N/A       | XR_429819    | N/A            |
| A_24_P142151   | 8,27045 | 8,72479 | -1,370155847 | ENST00000559433 | 123355    | NM_144598    | LRRC28         |
| A_22_P00001547 | 1,65718 | 2,11162 | -1,370250822 | N/A             | N/A       | N/A          | Inc-ARHGFE5-2  |
| A_33_P3405789  | 10,6086 | 11,0631 | -1,37030781  | ENST00000448120 | 7289      | NM_003324    | TULP3          |
| A_22_P00022095 | 2,17108 | 2,62563 | -1,370355302 | N/A             | 101928335 | NR_110395    | LOC101928335   |
| A_33_P3292387  | 4,98347 | 5,43804 | -1,3703743   | ENST00000354431 | 127255    | NM_001105659 | LRRIQ3         |
| A_21_P0001106  | 4,39674 | 4,85152 | -1,370573787 | ENST00000451217 | N/A       | N/A          | N/A            |
| A_33_P3352307  | 8,43261 | 8,88741 | -1,370592787 | ENST00000530305 | 6195      | NM_002953    | RPS6KA1        |
| A_24_P196592   | 11,9499 | 12,4047 | -1,370592787 | ENST00000612672 | 79148     | NM_001032278 | MMP28          |
| A_23_P97064    | 7,5893  | 8,04411 | -1,370602288 | ENST00000449067 | 26270     | NM_018438    | FBXO6          |
| A_33_P3671506  | 6,33894 | 6,79378 | -1,370630789 | N/A             | 153811    | AK021734     | LOC153811      |
| A_22_P00002059 | 4,06568 | 4,52056 | -1,370668791 | N/A             | 399959    | NR_024430    | MIR100HG       |
| A_23_P130856   | 7,04447 | 7,49937 | -1,370687793 | ENST00000586984 | 84902     | NM_032816    | CEP89          |
| A_24_P33156    | 7,55428 | 8,00922 | -1,370725797 | ENST00000585419 | 125061    | NM_001010982 | AFMID          |
| A_23_P502590   | 1,54295 | 1,99803 | -1,370858819 | ENST00000391729 | 3809      | NM_012314    | KIR2DS4        |
| A_23_P333063   | 8,58001 | 9,03512 | -1,370887326 | ENST00000476049 | 6605      | NM_003079    | SMARCE1        |
| A_23_P425304   | 5,52004 | 5,97517 | -1,370906331 | ENST00000369902 | 51684     | NM_016169    | SUFU           |
| A_33_P3351664  | 9,36005 | 9,81519 | -1,370915833 | ENST00000389641 | 284001    | NM_198082    | CCDC57         |
| A_33_P3357773  | 3,69287 | 4,14801 | -1,370915833 | N/A             | N/A       | N/A          | N/A            |
| A_21_P0010661  | 3,21438 | 3,66955 | -1,370944341 | N/A             | N/A       | N/A          | XLOC_I2_001196 |
| A_21_P0013578  | 5,66354 | 6,11879 | -1,371020364 | N/A             | 102725126 | N/A          | LOC102725126   |

|                |         |         |              |                 |           |              |                |
|----------------|---------|---------|--------------|-----------------|-----------|--------------|----------------|
| A_21_P0003440  | 1,48788 | 1,94316 | -1,371048874 | ENST00000512839 | 401164    | NR_033869    | LINC01060      |
| A_21_P0005240  | 4,54959 | 5,00497 | -1,371143911 | N/A             | N/A       | N/A          | Inc-RSBN1L-1   |
| A_23_P20196    | 13,3125 | 13,7679 | -1,371162919 | ENST00000484375 | 10095     | NM_005720    | ARPC1B         |
| A_32_P720220   | 7,51828 | 7,97378 | -1,371257964 | ENST00000318426 | 283422    | NR_036555    | LINC01559      |
| A_32_P470868   | 1,61173 | 2,06726 | -1,371286479 | ENST00000482992 | 220081    | NM_182542    | ERICH6B        |
| A_24_P277367   | 7,11953 | 7,57512 | -1,371343511 | ENST00000296027 | 6374      | NM_002994    | CXCL5          |
| A_21_P0013502  | 3,62097 | 4,07656 | -1,371343511 | N/A             | N/A       | N/A          | XLOC_I2_014369 |
| A_22_P00025064 | 2,32518 | 2,78085 | -1,371419556 | ENST00000360035 | 56001     | NM_022053    | NXF2           |
| A_22_P00003368 | 2,2591  | 2,71477 | -1,371419556 | N/A             | N/A       | N/A          | Inc-CBR4-1     |
| A_33_P3336587  | 3,03834 | 3,49406 | -1,371467087 | ENST00000559094 | 283710    | NM_001243538 | LOC283710      |
| A_19_P00316758 | 11,2672 | 11,723  | -1,371543139 | N/A             | 9175      | NR_038322    | MAP3K13        |
| A_22_P00007730 | 1,46464 | 1,92055 | -1,371647718 | N/A             | N/A       | N/A          | Inc-HMBOX1-3   |
| A_22_P00009748 | 4,23469 | 4,6906  | -1,371647718 | ENST00000435021 | N/A       | N/A          | N/A            |
| A_22_P00008499 | 8,22391 | 8,67988 | -1,371704764 | N/A             | N/A       | AK097081     | Inc-KCNE4-1    |
| A_21_P0009764  | 8,15891 | 8,61494 | -1,371761813 | ENST00000592431 | N/A       | N/A          | N/A            |
| A_24_P381199   | 7,35538 | 7,81141 | -1,371761813 | ENST00000618326 | 117854    | NM_001003818 | TRIM6          |
| A_24_P16815    | 7,08402 | 7,5401  | -1,371809356 | ENST00000373978 | 9203      | NM_005096    | ZMYM3          |
| A_23_P502047   | 4,84479 | 5,30089 | -1,371828373 | ENST00000460627 | 8646      | NM_003741    | CHRD           |
| A_22_P00025426 | 2,55485 | 3,011   | -1,371875918 | N/A             | N/A       | CR740889     | Inc-EME1-1     |
| A_33_P3391339  | 9,28684 | 9,74302 | -1,371904446 | ENST00000624585 | N/A       | XR_432952    | N/A            |
| A_21_P0011825  | 1,37458 | 1,83078 | -1,371923464 | N/A             | N/A       | N/A          | XLOC_I2_007449 |
| A_33_P3359832  | 3,04089 | 3,49717 | -1,371999542 | N/A             | N/A       | N/A          | N/A            |
| A_33_P3318322  | 3,05151 | 3,50779 | -1,371999542 | ENST00000380079 | 79689     | NM_001205315 | STEAP4         |
| A_23_P76914    | 11,4267 | 11,8832 | -1,372208778 | ENST00000553535 | 6495      | NM_005982    | SIX1           |
| A_21_P0001995  | 7,09001 | 7,54654 | -1,372237312 | ENST00000457371 | 100505964 | N/A          | LINC01304      |
| A_33_P3298473  | 1,4023  | 1,85892 | -1,372322919 | N/A             | 100996465 | XM_003960837 | LOC100996465   |
| A_22_P00014273 | 1,52447 | 1,98112 | -1,372351456 | N/A             | N/A       | N/A          | Inc-SENP6-2    |
| A_33_P3272330  | 7,78758 | 8,24433 | -1,372446584 | ENST00000402667 | 1788      | NM_175629    | DNMT3A         |
| A_33_P3391596  | 4,49905 | 4,9558  | -1,372446584 | N/A             | 3910      | NM_001105206 | LAMA4          |
| A_33_P3340624  | 10,2636 | 10,7204 | -1,37249415  | ENST00000443589 | N/A       | N/A          | N/A            |
| A_23_P311201   | 8,70723 | 9,16405 | -1,372513177 | ENST00000344989 | 10772     | NM_054016    | SRSF10         |
| A_22_P00005191 | 7,2609  | 7,71777 | -1,372560745 | N/A             | N/A       | N/A          | Inc-DKK3-1     |
| A_33_P3219454  | 15,2902 | 15,7471 | -1,372589287 | N/A             | N/A       | N/A          | N/A            |

|                |         |         |              |                 |           |              |                |
|----------------|---------|---------|--------------|-----------------|-----------|--------------|----------------|
| A_33_P3318465  | 12,402  | 12,8589 | -1,372589287 | ENST00000392244 | 7341      | NM_003352    | SUMO1          |
| A_23_P207014   | 10,8233 | 11,2802 | -1,372589287 | ENST00000486827 | 5889      | NM_002876    | RAD51C         |
| A_33_P3420862  | 5,17005 | 5,62698 | -1,37261783  | ENST00000374971 | 389860    | NM_001015038 | PAGE2B         |
| A_23_P132139   | 7,01555 | 7,47262 | -1,372751036 | ENST00000417060 | 54058     | NM_001286462 | C21orf58       |
| A_22_P00020745 | 1,47024 | 1,92732 | -1,372760551 | ENST00000532068 | N/A       | BU176067     | N/A            |
| A_23_P138975   | 9,42467 | 9,88179 | -1,372798613 | ENST00000542140 | 10179     | NM_016090    | RBM7           |
| A_22_P00024129 | 2,15282 | 2,61009 | -1,372941353 | N/A             | 101926962 | NR_110658    | LOC101926962   |
| A_32_P196047   | 10,2937 | 10,751  | -1,372969903 | ENST00000414645 | 286148    | NM_181787    | DPY19L4        |
| A_23_P149613   | 3,76583 | 4,22313 | -1,372969903 | ENST00000469711 | 2326      | NM_002021    | FMO1           |
| A_22_P00017043 | 3,63706 | 4,09448 | -1,373084108 | N/A             | N/A       | N/A          | Inc-TTLL7-7    |
| A_22_P00024058 | 1,87686 | 2,33429 | -1,373093625 | ENST00000432994 | N/A       | AK095365     | N/A            |
| A_23_P21785    | 8,26215 | 8,71982 | -1,373322066 | ENST00000314622 | 63899     | NM_022072    | NSUN3          |
| A_23_P130735   | 4,55273 | 5,01045 | -1,373369662 | ENST00000335875 | 28968     | NM_014037    | SLC6A16        |
| A_33_P3347057  | 1,39026 | 1,84806 | -1,37344582  | N/A             | 100132005 | AK092662     | LOC100132005   |
| A_32_P831725   | 5,13188 | 5,58973 | -1,373493421 | ENST00000343010 | 375341    | NM_198562    | C3orf62        |
| A_23_P218793   | 6,57873 | 7,0366  | -1,373512462 | ENST00000428799 | 63929     | NM_022098    | XPNPEP3        |
| A_23_P138514   | 13,0602 | 13,5181 | -1,373541024 | ENST00000479958 | 23412     | NM_012071    | COMMD3         |
| A_22_P00022752 | 2,45241 | 2,91044 | -1,373664798 | N/A             | N/A       | N/A          | Inc-C5orf27-2  |
| A_23_P59179    | 9,27076 | 9,72886 | -1,37373145  | ENST00000462174 | 6257      | NM_021976    | RXR8           |
| A_21_P0009382  | 9,76252 | 10,2207 | -1,373807628 | N/A             | 101060544 | N/A          | LINC01563      |
| A_23_P89601    | 4,27291 | 4,73111 | -1,373826673 | ENST00000225899 | 3882      | NM_002278    | KRT32          |
| A_23_P133770   | 10,0309 | 10,4891 | -1,373826673 | ENST00000373408 | 154467    | NM_138493    | CCDC167        |
| A_21_P0008687  | 1,73963 | 2,19785 | -1,373845718 | ENST00000558449 | N/A       | N/A          | N/A            |
| A_23_P107612   | 7,80892 | 8,26718 | -1,37388381  | ENST00000262094 | 5874      | NM_004163    | RAB27B         |
| A_24_P943106   | 9,1742  | 9,63246 | -1,37388381  | ENST00000473835 | 23350     | NM_001080415 | U2SURP         |
| A_24_P153568   | 1,34309 | 1,80136 | -1,373893333 | ENST00000361050 | 219972    | NM_001039396 | MPEG1          |
| A_23_P6615     | 1,40201 | 1,86031 | -1,373921903 | ENST00000282957 | 1360      | NM_001871    | CPB1           |
| A_22_P00002738 | 3,57324 | 4,03159 | -1,37396952  | N/A             | N/A       | N/A          | Inc-C20orf96-3 |
| A_22_P00022284 | 2,05139 | 2,50974 | -1,37396952  | ENST00000454387 | N/A       | N/A          | N/A            |
| A_23_P80048    | 14,0202 | 14,4787 | -1,374112382 | ENST00000616711 | 80307     | NR_119376    | FER1L4         |
| A_21_P0008030  | 2,8355  | 3,294   | -1,374112382 | N/A             | N/A       | N/A          | Inc-SGCG-5     |
| A_23_P392384   | 10,7692 | 11,2277 | -1,374112382 | ENST00000372314 | 83543     | NM_001185095 | AIF1L          |
| A_23_P410965   | 14,998  | 15,4565 | -1,374112382 | ENST00000401073 | 57648     | NM_020888    | KIAA1522       |



|                |         |         |              |                 |           |              |                |
|----------------|---------|---------|--------------|-----------------|-----------|--------------|----------------|
| A_22_P00019378 | 1,37354 | 1,83207 | -1,374140956 | N/A             | N/A       | N/A          | Inc-MYBPH-1    |
| A_22_P00021464 | 3,21399 | 3,67254 | -1,374160006 | N/A             | N/A       | N/A          | Inc-C12orf48-1 |
| A_23_P414978   | 9,72613 | 10,1847 | -1,374179056 | ENST00000339418 | 256281    | NM_177533    | NUDT14         |
| A_21_P0004574  | 1,51321 | 1,97184 | -1,374236208 | N/A             | N/A       | N/A          | Inc-ALDH7A1-2  |
| A_22_P00005827 | 1,51536 | 1,97401 | -1,374255259 | N/A             | 101927018 | NR_110803    | LOC101927018   |
| A_33_P3409266  | 2,53348 | 2,99214 | -1,374264784 | N/A             | 100130322 | AF220234     | GAFA2          |
| A_33_P3301709  | 6,77044 | 7,22919 | -1,374350518 | ENST00000391854 | 2786      | NM_001098722 | GNG4           |
| A_24_P335305   | 8,69071 | 9,14976 | -1,374636336 | ENST00000228928 | 4940      | NM_006187    | OAS3           |
| A_33_P3369286  | 10,0425 | 10,5016 | -1,374683978 | ENST00000256079 | 10526     | NM_006390    | IPO8           |
| A_21_P0004698  | 2,71151 | 3,17075 | -1,374817385 | N/A             | N/A       | N/A          | Inc-FNDC1-1    |
| A_23_P145424   | 5,21944 | 5,67879 | -1,374922213 | ENST00000617909 | 22832     | NM_014895    | CEP162         |
| A_21_P0003776  | 2,87708 | 3,33649 | -1,374979396 | N/A             | N/A       | N/A          | Inc-ELF2-2     |
| A_21_P0012998  | 4,04613 | 4,5056  | -1,375036581 | ENST00000505712 | 101929495 | N/A          | LINC01339      |
| A_23_P155351   | 6,1616  | 6,6211  | -1,375065174 | ENST00000383778 | 686       | NM_000060    | BTD            |
| A_23_P51231    | 1,43473 | 1,89427 | -1,3751033   | ENST00000308873 | 864       | NM_001031680 | RUNX3          |
| A_23_P253524   | 9,98823 | 10,4478 | -1,375131894 | ENST00000611174 | 1062      | NM_001813    | CENPE          |
| A_23_P136012   | 9,76811 | 10,2277 | -1,375150958 | ENST00000515664 | 26269     | NM_012180    | FBXO8          |
| A_33_P3213204  | 10,6591 | 11,1188 | -1,375255812 | ENST00000317897 | 64110     | NM_022149    | MAGEF1         |
| A_21_P0006469  | 3,69473 | 4,15445 | -1,375274877 | N/A             | N/A       | N/A          | Inc-IDS-3      |
| A_22_P00025691 | 4,75246 | 5,21228 | -1,375370207 | ENST00000417794 | N/A       | R84760       | N/A            |
| A_24_P400324   | 2,66324 | 3,12307 | -1,375379741 | ENST00000408005 | 221981    | NM_015204    | THSD7A         |
| A_22_P00017701 | 1,75261 | 2,21253 | -1,375465544 | ENST00000525575 | N/A       | BF673870     | N/A            |
| A_33_P3274416  | 3,27501 | 3,73496 | -1,375494146 | ENST00000513891 | 653712    | NR_034179    | LOC653712      |
| A_33_P3226407  | 2,89117 | 3,35116 | -1,375532284 | N/A             | 649305    | XR_432303    | LOC649305      |
| A_23_P319423   | 11,7176 | 12,1776 | -1,375541818 | ENST00000359534 | 8645      | NM_003740    | KCNK5          |
| A_23_P409541   | 9,93334 | 10,3934 | -1,375599027 | ENST00000465887 | 51082     | NM_152705    | POLR1D         |
| A_33_P3379046  | 5,60288 | 6,06306 | -1,37571345  | N/A             | 729770    | XR_112442    | LOC729770      |
| A_21_P0009377  | 11,1402 | 11,6005 | -1,375827884 | ENST00000575301 | N/A       | N/A          | Inc-NLGN2-1    |
| A_33_P3308512  | 1,54571 | 2,00611 | -1,375923252 | ENST00000612036 | 117247    | NM_018593    | SLC16A10       |
| A_23_P387943   | 9,58802 | 10,0485 | -1,375999552 | ENST00000619992 | 835       | NM_032982    | CASP2          |
| A_21_P0010365  | 1,72974 | 2,19028 | -1,376056779 | ENST00000415702 | 101927526 | N/A          | LOC101927526   |
| A_22_P00025539 | 5,72785 | 6,18855 | -1,376209397 | N/A             | 101930240 | N/A          | LOC101930240   |
| A_22_P00005927 | 3,52247 | 3,98322 | -1,376257094 | N/A             | 161159    | NR_073422    | ACTN1-AS1      |

|                |         |         |              |                 |           |              |                |
|----------------|---------|---------|--------------|-----------------|-----------|--------------|----------------|
| A_22_P00012873 | 2,05706 | 2,51787 | -1,376314332 | ENST00000564686 | 100506070 | NR_103445    | RBFADN         |
| A_21_P0013530  | 1,4366  | 1,89746 | -1,376362032 | N/A             | N/A       | N/A          | Inc-FBXO25-5   |
| A_22_P00011949 | 1,38012 | 1,84111 | -1,37648606  | ENST00000431359 | N/A       | N/A          | N/A            |
| A_23_P252236   | 2,22446 | 2,68547 | -1,376505143 | ENST00000511406 | 3818      | NM_000892    | KLKB1          |
| A_22_P00006930 | 3,19873 | 3,65974 | -1,376505143 | ENST00000578741 | N/A       | N/A          | N/A            |
| A_24_P183664   | 3,26294 | 3,72407 | -1,376619642 | ENST00000539664 | 9865      | NM_014817    | TRIL           |
| A_22_P00002216 | 8,00787 | 8,46908 | -1,37669598  | ENST00000416869 | N/A       | BC070363     | N/A            |
| A_33_P3323939  | 4,836   | 5,29731 | -1,376791409 | ENST00000404459 | 643418    | NM_001102469 | LIPN           |
| A_24_P159648   | 10,0127 | 10,4741 | -1,3768773   | ENST00000321280 | 10458     | NM_006340    | BAIAP2         |
| A_21_P0009788  | 6,13042 | 6,59202 | -1,377068189 | N/A             | N/A       | N/A          | Inc-ZNF793-1   |
| A_22_P00023361 | 1,43287 | 1,89449 | -1,377087279 | N/A             | N/A       | AK055631     | Inc-SLC44A5-1  |
| A_23_P132644   | 9,70353 | 10,1652 | -1,377135006 | ENST00000538775 | 57552     | NM_020792    | NCEH1          |
| A_19_P00811284 | 8,66475 | 9,12646 | -1,377173189 | ENST00000350030 | 4678      | NM_002482    | NASP           |
| A_33_P3402635  | 3,49368 | 3,95541 | -1,377192281 | N/A             | 750       | NR_122031    | GAS8-AS1       |
| A_24_P38572    | 8,53845 | 9,00026 | -1,377268651 | ENST00000297990 | 65083     | NM_022917    | NOL6           |
| A_33_P6559875  | 6,80002 | 7,26187 | -1,377306837 | ENST00000488700 | 9849      | NM_001278524 | ZNF518A        |
| A_23_P371266   | 3,53381 | 3,99567 | -1,377316384 | ENST00000367731 | 26052     | NM_015569    | DNM3           |
| A_33_P3405369  | 2,11101 | 2,57297 | -1,377411856 | ENST00000399682 | 387267    | NM_001012709 | KRTAP5-4       |
| A_23_P212715   | 9,26336 | 9,72544 | -1,377526431 | ENST00000476370 | 868       | NM_170662    | CBLB           |
| A_24_P154573   | 2,48062 | 2,94272 | -1,377545527 | ENST00000337872 | 166793    | NM_145291    | ZBTB49         |
| A_23_P121265   | 10,171  | 10,6331 | -1,377545527 | ENST00000305533 | 11344     | NM_007284    | TWF2           |
| A_24_P7946     | 5,1815  | 5,64361 | -1,377555076 | ENST00000486013 | 60412     | NM_001037126 | EXOC4          |
| A_24_P378402   | 2,02905 | 2,49116 | -1,377555076 | ENST00000301744 | 146434    | NM_152457    | ZNF597         |
| A_23_P72737    | 15,7442 | 16,2064 | -1,377641015 | ENST00000408968 | 8519      | NM_003641    | IFITM1         |
| A_33_P3219469  | 11,994  | 12,4563 | -1,377736509 | ENST00000369367 | 9169      | NM_004719    | SCAF11         |
| A_23_P48175    | 12,5529 | 13,0152 | -1,377736509 | ENST00000449758 | 79022     | NM_024056    | TMEM106C       |
| A_22_P00002486 | 6,98887 | 7,45132 | -1,377879762 | N/A             | N/A       | N/A          | Inc-C16orf13-3 |
| A_33_P3367717  | 1,34574 | 1,80826 | -1,377946619 | ENST00000526502 | 392197    | NM_001256869 | USP17L7        |
| A_33_P3376080  | 3,97268 | 4,43532 | -1,378061238 | ENST00000259357 | 347168    | NM_001004451 | OR1J1          |
| A_33_P3259938  | 4,9922  | 5,4549  | -1,378118551 | N/A             | N/A       | AK128153     | Inc-RNF208-1   |
| A_21_P0000780  | 3,49384 | 3,95658 | -1,378156762 | N/A             | 25850     | NR_038362    | ZNF345         |
| A_33_P3330872  | 3,37651 | 3,83927 | -1,378175867 | ENST00000380692 | 10943     | NM_078629    | MSL3           |
| A_33_P3227842  | 6,52835 | 6,99123 | -1,378290505 | ENST00000373797 | 2035      | NM_001166006 | EPB41          |

|                |         |         |              |                 |           |              |                |
|----------------|---------|---------|--------------|-----------------|-----------|--------------|----------------|
| A_23_P163546   | 11,4313 | 11,8942 | -1,378309613 | ENST00000566903 | 9013      | NM_005679    | TAF1C          |
| A_33_P3314511  | 3,23594 | 3,69888 | -1,378347828 | ENST00000402849 | 6634      | AK296173     | SNRPD3         |
| A_33_P3386242  | 11,3874 | 11,8504 | -1,378405153 | ENST00000374253 | 10256     | NM_001297647 | CNKSRI         |
| A_21_P0006666  | 1,48938 | 1,95244 | -1,37846248  | ENST00000416310 | N/A       | N/A          | N/A            |
| A_23_P57155    | 1,7984  | 2,26152 | -1,37851981  | ENST00000378961 | 1114      | NM_001819    | CHGB           |
| A_23_P63789    | 10,8807 | 11,3439 | -1,378596254 | ENST00000489649 | 11130     | NM_032997    | ZWINT          |
| A_22_P00003431 | 8,00269 | 8,46593 | -1,378634477 | N/A             | 103695435 | NR_125768    | BBOX1-AS1      |
| A_19_P00318514 | 1,37592 | 1,8392  | -1,378672701 | ENST00000590968 | N/A       | N/A          | N/A            |
| A_24_P22746    | 9,50042 | 9,96375 | -1,378720483 | ENST00000322342 | 284273    | NM_175907    | ZADH2          |
| A_23_P169050   | 12,5992 | 13,0626 | -1,378787381 | ENST00000522938 | 28957     | NM_014018    | MRPS28         |
| A_21_P0013880  | 1,43983 | 1,90324 | -1,378796938 | ENST00000460561 | N/A       | N/A          | N/A            |
| A_23_P22660    | 3,18762 | 3,65103 | -1,378796938 | ENST00000614798 | 10800     | NM_006639    | CYSLTR1        |
| A_21_P0008704  | 1,46237 | 1,92581 | -1,37882561  | N/A             | N/A       | N/A          | Inc-POTEB-4    |
| A_33_P3213342  | 3,73666 | 4,20012 | -1,378844724 | ENST00000399668 | 57082     | NM_170589    | CASC5          |
| A_21_P0012899  | 8,86226 | 9,32582 | -1,378940302 | N/A             | 102725134 | N/A          | LOC102725134   |
| A_24_P92952    | 9,15044 | 9,61403 | -1,378968976 | ENST00000532781 | 8289      | NM_006015    | ARID1A         |
| A_23_P142714   | 10,6003 | 11,0639 | -1,378978535 | ENST00000472070 | 8604      | NM_003705    | SLC25A12       |
| A_23_P319617   | 6,94204 | 7,40566 | -1,378997652 | ENST00000276055 | 56548     | NM_019886    | CHST7          |
| A_23_P49559    | 4,13722 | 4,60087 | -1,379026327 | ENST00000335666 | 350383    | NM_181790    | GPR142         |
| A_22_P00002020 | 1,97225 | 2,43591 | -1,379035886 | ENST00000415486 | 10742     | NM_001172732 | RAI2           |
| A_33_P3289491  | 3,63326 | 4,09694 | -1,379055004 | N/A             | 100129069 | AK127359     | LOC100129069   |
| A_32_P738377   | 5,75702 | 6,2207  | -1,379055004 | N/A             | 284837    | NR_026961    | AATBC          |
| A_33_P3213119  | 4,88146 | 5,34516 | -1,379074122 | N/A             | 594842    | NR_002835    | HAS2-AS1       |
| A_24_P403244   | 11,195  | 11,6587 | -1,379074122 | ENST00000609309 | 29990     | NM_178238    | PILRB          |
| A_23_P24633    | 11,4629 | 11,9266 | -1,379074122 | ENST00000533975 | 29087     | NM_199297    | THYN1          |
| A_21_P0010017  | 1,63847 | 2,10226 | -1,379160155 | N/A             | N/A       | N/A          | Inc-FOXA2-1    |
| A_24_P3783     | 12,5404 | 13,0042 | -1,379169715 | ENST00000621112 | 8342      | NM_003521    | HIST1H2BM      |
| A_23_P131825   | 5,93677 | 6,40063 | -1,379227074 | ENST00000372557 | 7125      | NM_003279    | TNNC2          |
| A_21_P0013886  | 1,4888  | 1,95267 | -1,379236634 | ENST00000417252 | N/A       | N/A          | N/A            |
| A_32_P226858   | 11,5094 | 11,9733 | -1,379265315 | ENST00000455105 | N/A       | N/A          | N/A            |
| A_22_P00025585 | 1,43712 | 1,90107 | -1,379313118 | ENST00000444795 | 104326190 | N/A          | LINC01309      |
| A_22_P00002996 | 6,51673 | 6,98073 | -1,379360922 | N/A             | N/A       | BC031876     | Inc-C6orf221-2 |
| A_21_P0013808  | 1,38626 | 1,85029 | -1,379389605 | N/A             | 101928228 | XR_247295    | LOC101928228   |

|                |         |         |              |                 |           |              |                      |
|----------------|---------|---------|--------------|-----------------|-----------|--------------|----------------------|
| A_23_P53370    | 6,33596 | 6,80002 | -1,379418289 | ENST00000548445 | 27289     | NM_014470    | RND1                 |
| A_23_P163820   | 9,83292 | 10,297  | -1,379437412 | ENST00000262525 | 23361     | NM_001080417 | ZNF629               |
| A_33_P3241428  | 9,03548 | 9,49966 | -1,379533031 | ENST00000404537 | 23363     | NM_015311    | OBSL1                |
| A_23_P49060    | 12,4459 | 12,9101 | -1,379552155 | ENST00000562057 | 6692      | NM_181642    | SPINT1               |
| A_23_P62868    | 11,8089 | 12,2731 | -1,379552155 | ENST00000490565 | 5394      | XR_426611    | EXOSC10              |
| A_22_P00015591 | 1,70714 | 2,1714  | -1,37960953  | N/A             | N/A       | AA371472     | Inc-STX8-1           |
| A_21_P0007820  | 1,36204 | 1,82639 | -1,379695597 | N/A             | N/A       | N/A          | Inc-CLEC2D-4         |
| A_22_P00023571 | 5,40244 | 5,86681 | -1,379714724 | N/A             | N/A       | N/A          | Inc-RP11-677C1.2.1-1 |
| A_22_P00006161 | 3,97823 | 4,44267 | -1,37978167  | ENST00000464420 | 101927111 | NR_109993    | SUCLG2-AS1           |
| A_23_P349928   | 14,8574 | 15,3219 | -1,379839055 | ENST00000264052 | 6672      | NM_003113    | SP100                |
| A_33_P3386770  | 5,0461  | 5,51064 | -1,379877313 | N/A             | N/A       | XM_005276024 | Inc-MAPK15-3         |
| A_24_P229180   | 1,93221 | 2,39679 | -1,379915571 | N/A             | N/A       | AF119913     | N/A                  |
| A_23_P369983   | 10,701  | 11,1656 | -1,379934701 | ENST00000586372 | 147965    | NM_174905    | FAM98C               |
| A_33_P3372207  | 2,99798 | 3,4626  | -1,379953831 | N/A             | N/A       | N/A          | N/A                  |
| A_33_P3666817  | 4,83548 | 5,3001  | -1,379953831 | ENST00000412307 | 414236    | NM_001001791 | C10orf55             |
| A_24_P200942   | 10,0967 | 10,5614 | -1,380030354 | ENST00000496728 | 81628     | NM_030935    | TSC22D4              |
| A_22_P00001012 | 4,14017 | 4,60489 | -1,380049486 | N/A             | N/A       | N/A          | Inc-AL359736.1-2     |
| A_22_P00005746 | 1,70899 | 2,17376 | -1,380097315 | N/A             | 255082    | NR_026939    | CASC2                |
| A_23_P142239   | 9,58611 | 10,0509 | -1,380116448 | N/A             | 90522     | NM_001145463 | YIF1B                |
| A_23_P44684    | 10,4258 | 10,8906 | -1,380126014 | ENST00000540509 | 1894      | NM_018098    | ECT2                 |
| A_21_P0001306  | 3,33883 | 3,80366 | -1,380154713 | N/A             | N/A       | N/A          | Inc-PRKAA2-1         |
| A_22_P00013349 | 4,54485 | 5,00973 | -1,380202547 | N/A             | 100507420 | NR_121620    | LOC100507420         |
| A_23_P140830   | 10,8001 | 11,2651 | -1,380317353 | ENST00000393997 | 79767     | NM_024712    | ELMO3                |
| A_23_P35219    | 9,06949 | 9,53455 | -1,38037476  | ENST00000462283 | 4751      | NM_002497    | NEK2                 |
| A_21_P0011192  | 2,36413 | 2,82924 | -1,380422601 | N/A             | N/A       | N/A          | XLOC_I2_004072       |
| A_21_P0010049  | 1,43084 | 1,89596 | -1,38043217  | N/A             | N/A       | N/A          | Inc-PREX1-7          |
| A_33_P3417474  | 1,45935 | 1,92449 | -1,380451307 | ENST00000621052 | N/A       | XR_246983    | N/A                  |
| A_32_P49508    | 1,4328  | 1,89803 | -1,380537426 | ENST00000370852 | 54511     | NM_019036    | HMGCLL1              |
| A_23_P386912   | 1,3543  | 1,81957 | -1,380575704 | ENST00000506580 | 7363      | NM_021139    | UGT2B4               |
| A_23_P358221   | 6,87991 | 7,34521 | -1,380604412 | ENST00000296328 | 26043     | NM_015562    | UBXN7                |
| A_21_P0008620  | 5,60337 | 6,06882 | -1,380747964 | ENST00000560341 | 100131089 | NR_040062    | SRP14-AS1            |
| A_33_P3213772  | 10,1366 | 10,6022 | -1,380891531 | ENST00000604247 | 23380     | NM_001300952 | SRGAP2               |
| A_33_P3290672  | 11,2317 | 11,6974 | -1,38098725  | ENST00000615547 | 51714     | NM_016275    | SELT                 |

|                |         |         |              |                 |           |              |              |
|----------------|---------|---------|--------------|-----------------|-----------|--------------|--------------|
| A_22_P00005729 | 2,2344  | 2,70012 | -1,381006395 | N/A             | 642366    | NR_046243    | LOC642366    |
| A_21_P0006212  | 1,64855 | 2,11434 | -1,381073403 | N/A             | N/A       | N/A          | Inc-PRPF4-1  |
| A_23_P152768   | 9,15453 | 9,62034 | -1,381092549 | ENST00000589688 | 7283      | NM_001070    | TUBG1        |
| A_33_P3424612  | 4,09988 | 4,56574 | -1,381140415 | ENST00000483158 | N/A       | L37726       | N/A          |
| A_23_P154256   | 9,11586 | 9,58175 | -1,381169135 | ENST00000446464 | 84173     | NM_032213    | ELMOD3       |
| A_24_P65910    | 11,7054 | 12,1713 | -1,381178709 | ENST00000374385 | 55245     | NM_018244    | UQCC1        |
| A_21_P0009093  | 7,63469 | 8,10062 | -1,38120743  | ENST00000572466 | N/A       | N/A          | N/A          |
| A_24_P215407   | 8,89003 | 9,35596 | -1,38120743  | ENST00000617381 | 1656      | NM_004397    | DDX6         |
| A_33_P3261545  | 4,84044 | 5,30651 | -1,38134147  | N/A             | N/A       | BC028053     | N/A          |
| A_21_P0001393  | 3,52445 | 3,99053 | -1,381351044 | N/A             | N/A       | N/A          | Inc-XPR1-1   |
| A_33_P3389653  | 6,94952 | 7,41574 | -1,381485098 | ENST00000546160 | 5144      | NM_001165899 | PDE4D        |
| A_33_P3220192  | 5,28269 | 5,74895 | -1,381523401 | N/A             | 100133205 | NR_026775    | LINC00240    |
| A_33_P3291708  | 5,46633 | 5,93261 | -1,381542554 | N/A             | N/A       | N/A          | N/A          |
| A_24_P228796   | 10,5666 | 11,0329 | -1,381561706 | ENST00000621907 | 2579      | NM_021123    | GAGE7        |
| A_24_P348845   | 1,36997 | 1,83636 | -1,381647895 | ENST00000334067 | 254950    | NM_181623    | KRTAP15-1    |
| A_22_P00005892 | 2,42973 | 2,89615 | -1,381676626 | N/A             | 101929439 | NR_120360    | LOC101929439 |
| A_33_P3370015  | 5,07665 | 5,54307 | -1,381676626 | ENST00000430550 | N/A       | N/A          | N/A          |
| A_33_P3273290  | 8,97628 | 9,44274 | -1,381714935 | ENST00000464469 | 7576      | BC070146     | ZNF28        |
| A_33_P3347639  | 8,14147 | 8,60813 | -1,381906494 | ENST00000373842 | 54797     | NM_017638    | MED18        |
| A_21_P0001911  | 6,61139 | 7,07808 | -1,38193523  | N/A             | 254128    | NR_037858    | NIFK-AS1     |
| A_23_P54622    | 11,3585 | 11,8253 | -1,382040602 | ENST00000160827 | 3835      | NM_007317    | KIF22        |
| A_23_P397856   | 5,8419  | 6,30873 | -1,382069341 | ENST00000392679 | 114609    | NM_001039661 | TIRAP        |
| A_33_P3849600  | 13,3491 | 13,816  | -1,382136401 | N/A             | 3324      | M30627       | HSP90AA2P    |
| A_24_P569294   | 12,5702 | 13,0372 | -1,382232207 | ENST00000308018 | 6183      | NM_021107    | MRPS12       |
| A_24_P14260    | 6,435   | 6,90209 | -1,382318437 | ENST00000391898 | 22900     | NM_014959    | CARD8        |
| A_33_P3244322  | 9,37175 | 9,83885 | -1,382328019 | ENST00000614495 | 83596     | NM_001282521 | BCL2L12      |
| A_23_P201368   | 10,5662 | 11,0333 | -1,382328019 | ENST00000370625 | 1486      | NM_004388    | CTBS         |
| A_21_P0014059  | 2,42263 | 2,88975 | -1,382347182 | ENST00000489002 | 5279      | XR_425075    | PIGC         |
| A_23_P200199   | 11,3992 | 11,8664 | -1,382423838 | ENST00000472624 | 51060     | NM_015913    | TXNDC12      |
| A_23_P22352    | 7,55321 | 8,02044 | -1,382452585 | ENST00000342409 | 55691     | AK001072     | FRMD4A       |
| A_22_P00004331 | 7,30421 | 7,77144 | -1,382452585 | ENST00000219689 | 57478     | NM_020718    | USP31        |
| A_23_P357546   | 7,77527 | 8,24267 | -1,382615496 | ENST00000258362 | 25953     | NM_015488    | PNKD         |
| A_21_P0014837  | 1,36689 | 1,83434 | -1,382663414 | N/A             | 100507388 | NR_121617    | LOC100507388 |

|                |         |         |              |                 |           |              |                      |
|----------------|---------|---------|--------------|-----------------|-----------|--------------|----------------------|
| A_23_P351757   | 10,271  | 10,7385 | -1,382711335 | ENST00000543623 | 113026    | NM_133373    | PLCD3                |
| A_24_P416961   | 6,07282 | 6,54051 | -1,382893447 | ENST00000495096 | 421       | NM_001670    | ARVCF                |
| A_33_P3323742  | 10,0569 | 10,5246 | -1,382903033 | ENST00000374468 | 55629     | NM_017761    | PNRC2                |
| A_33_P3304794  | 3,4243  | 3,89201 | -1,382912618 | N/A             | N/A       | AK096324     | N/A                  |
| A_24_P914513   | 6,58802 | 7,05575 | -1,382931789 | ENST00000545529 | 594       | NM_183050    | BCKDHB               |
| A_32_P19539    | 1,36352 | 1,83127 | -1,382950961 | ENST00000370203 | 148534    | NM_001199679 | TMEM56               |
| A_21_P0013657  | 3,17755 | 3,64532 | -1,382970133 | N/A             | N/A       | N/A          | XLOC_I2_015213       |
| A_23_P8834     | 10,3287 | 10,7965 | -1,382998891 | ENST00000521400 | 2053      | NM_001979    | EPHX2                |
| A_33_P3328445  | 7,5017  | 7,96955 | -1,383046823 | N/A             | 100506713 | AK074580     | ALOX12-AS1           |
| A_21_P0003584  | 1,98756 | 2,45553 | -1,383161867 | N/A             | N/A       | N/A          | Inc-RBPJ-1           |
| A_23_P7783     | 10,6432 | 11,1112 | -1,383190629 | ENST00000542866 | 51780     | NM_016604    | KDM3B                |
| A_23_P81825    | 3,50856 | 3,97661 | -1,383238568 | ENST00000230361 | 2979      | NM_002098    | GUCA1B               |
| A_24_P33552    | 16,0821 | 16,5504 | -1,383478285 | ENST00000438548 | N/A       | N/A          | N/A                  |
| A_24_P29686    | 10,7346 | 11,2029 | -1,383478285 | ENST00000441627 | 83637     | NM_031449    | ZMIZ2                |
| A_21_P0001747  | 3,60373 | 4,07204 | -1,383487875 | N/A             | N/A       | N/A          | Inc-MRPS14-1         |
| A_33_P3291559  | 4,5925  | 5,06082 | -1,383497465 | N/A             | N/A       | AK022341     | N/A                  |
| A_21_P0002198  | 1,41693 | 1,88537 | -1,383612545 | N/A             | N/A       | N/A          | Inc-TTC27-1          |
| A_23_P253389   | 9,0105  | 9,47897 | -1,383641317 | ENST00000310317 | 6522      | NM_003040    | SLC4A2               |
| A_33_P3298356  | 11,6721 | 12,1407 | -1,383766001 | ENST00000616170 | 51100     | NM_001206651 | SH3GLB1              |
| A_21_P0005350  | 1,79847 | 2,26709 | -1,383785185 | N/A             | N/A       | N/A          | Inc-ELFN1-1          |
| A_22_P00018052 | 2,58536 | 3,05405 | -1,383852328 | N/A             | N/A       | N/A          | Inc-ZNF286A-1        |
| A_21_P0009616  | 1,52046 | 1,98924 | -1,38393866  | N/A             | N/A       | N/A          | Inc-RP11-17M16.1.1-2 |
| A_33_P3325429  | 1,4606  | 1,92952 | -1,384072965 | N/A             | N/A       | AB306153     | N/A                  |
| A_33_P8991074  | 5,23257 | 5,70153 | -1,38411134  | N/A             | 101927768 | NR_125845    | LOC101927768         |
| A_24_P178631   | 9,57351 | 10,0425 | -1,384140122 | N/A             | N/A       | AK027667     | N/A                  |
| A_33_P3234794  | 5,18486 | 5,65385 | -1,384140122 | ENST00000373345 | 343578    | NM_001164431 | ARHGAP40             |
| A_33_P3239184  | 12,5523 | 13,0213 | -1,384149716 | ENST00000512278 | N/A       | N/A          | N/A                  |
| A_22_P00000543 | 1,42627 | 1,89532 | -1,384197688 | N/A             | N/A       | N/A          | Inc-AC114947.1.1-1   |
| A_21_P0008761  | 2,5627  | 3,03185 | -1,384293636 | N/A             | N/A       | N/A          | Inc-ADAMTS7-1        |
| A_22_P00009924 | 5,98061 | 6,44983 | -1,384360804 | N/A             | 100506161 | NR_110614    | TAF1A-AS1            |
| A_23_P163737   | 1,53999 | 2,00925 | -1,384399188 | ENST00000304936 | 4993      | NM_012368    | OR2C1                |
| A_33_P3394213  | 4,54333 | 5,0126  | -1,384408784 | ENST00000234389 | 116444    | NM_138690    | GRIN3B               |
| A_23_P403335   | 8,76252 | 9,23181 | -1,384427976 | ENST00000525344 | 23086     | NM_015065    | EXPH5                |

|                |         |         |              |                 |           |              |                    |
|----------------|---------|---------|--------------|-----------------|-----------|--------------|--------------------|
| A_23_P144054   | 10,7985 | 11,2678 | -1,384437572 | ENST00000330452 | 5580      | NM_006254    | PRKCD              |
| A_22_P00015644 | 1,71785 | 2,18715 | -1,384437572 | N/A             | N/A       | N/A          | Inc-SUPT6H-2       |
| A_22_P00009574 | 6,95163 | 7,42105 | -1,384552731 | N/A             | 100506113 | XR_110893    | LOC100506113       |
| A_19_P00325810 | 7,40205 | 7,87172 | -1,384792676 | ENST00000484801 | 80759     | NR_027005    | KHDC1              |
| A_22_P00023909 | 3,76163 | 4,23137 | -1,384859869 | ENST00000570024 | 100507534 | N/A          | LOC100507534       |
| A_21_P0003275  | 4,94231 | 5,41218 | -1,384984663 | N/A             | N/A       | N/A          | Inc-AC069257.9.1-5 |
| A_21_P0009778  | 1,62983 | 2,09971 | -1,384994263 | ENST00000597980 | 102723931 | XR_244021    | LOC102723931       |
| A_23_P218463   | 12,7785 | 13,2485 | -1,385109468 | ENST00000357949 | 29950     | NM_013376    | SERTAD1            |
| A_33_P3218301  | 3,78341 | 4,25353 | -1,385224683 | N/A             | 150763    | XM_006712308 | GPAT2              |
| A_22_P00004169 | 2,59646 | 3,06669 | -1,385330305 | ENST00000596555 | 440508    | N/A          | CLEC4GP1           |
| A_21_P0000895  | 3,27239 | 3,74265 | -1,385359113 | ENST00000560341 | 100131089 | NR_040062    | SRP14-AS1          |
| A_33_P3265290  | 16,3375 | 16,8079 | -1,385493555 | ENST00000394077 | 6152      | NM_000986    | RPL24              |
| A_21_P0014921  | 5,79483 | 6,26524 | -1,385503159 | ENST00000577902 | 653645    | NR_002924    | TBC1D3P1-DHX40P1   |
| A_21_P0008719  | 1,53719 | 2,00765 | -1,385551177 | N/A             | N/A       | N/A          | Inc-GJD2-1         |
| A_21_P0008491  | 1,42117 | 1,89164 | -1,385560781 | ENST00000556987 | 338002    | NR_126006    | LINC00524          |
| A_22_P00003884 | 4,97458 | 5,44506 | -1,385570385 | ENST00000434944 | 158314    | NR_027341    | LINC00475          |
| A_22_P00018891 | 8,09431 | 8,56485 | -1,385628011 | N/A             | N/A       | N/A          | Inc-ERLEC1-1       |
| A_22_P00012706 | 1,43888 | 1,90946 | -1,385666429 | ENST00000503163 | N/A       | N/A          | N/A                |
| A_33_P3356701  | 13,1778 | 13,6484 | -1,385685639 | ENST00000467312 | 84885     | NM_032799    | ZDHHC12            |
| A_23_P503010   | 1,55072 | 2,02143 | -1,385791296 | ENST00000531433 | 123041    | NM_153646    | SLC24A4            |
| A_21_P0002225  | 1,43129 | 1,90204 | -1,385829719 | N/A             | N/A       | N/A          | Inc-LGALSL-1       |
| A_24_P162244   | 4,49153 | 4,96229 | -1,385839325 | ENST00000303521 | 49855     | AB040887     | SCAPER             |
| A_33_P3258752  | 1,36676 | 1,83753 | -1,385848931 | N/A             | N/A       | N/A          | N/A                |
| A_33_P3423655  | 1,55383 | 2,02464 | -1,385887355 | ENST00000563496 | 100129654 | NM_001193502 | TCF24              |
| A_24_P223384   | 9,01571 | 9,48653 | -1,385896961 | ENST00000615868 | 8335      | NM_003513    | HIST1H2AB          |
| A_23_P6464     | 7,22384 | 7,69466 | -1,385896961 | ENST00000402064 | 8398      | NM_003560    | PLA2G6             |
| A_22_P00003692 | 1,41295 | 1,88383 | -1,3859546   | ENST00000507887 | N/A       | N/A          | N/A                |
| A_33_P3347437  | 2,80087 | 3,27179 | -1,385993028 | ENST00000523118 | 441355    | NR_033830    | FLJ39080           |
| A_22_P00011200 | 3,86023 | 4,33119 | -1,386031456 | N/A             | N/A       | N/A          | Inc-OLFML2A-1      |
| A_23_P23346    | 9,0057  | 9,47667 | -1,386041063 | ENST00000368921 | 10962     | NM_006818    | MLLT11             |
| A_32_P355396   | 6,86004 | 7,33104 | -1,386069886 | ENST00000359520 | 9895      | NM_014844    | TECPR2             |
| A_21_P0014094  | 8,26171 | 8,73274 | -1,386098708 | N/A             | N/A       | AK096649     | N/A                |
| A_33_P3358681  | 2,14806 | 2,61925 | -1,38625244  | N/A             | N/A       | N/A          | Inc-HDDC2-2        |

|                |         |         |              |                 |           |              |               |
|----------------|---------|---------|--------------|-----------------|-----------|--------------|---------------|
| A_23_P70371    | 10,6762 | 11,1474 | -1,386262049 | ENST00000509876 | 23469     | NM_015153    | PHF3          |
| A_33_P3303430  | 10,9569 | 11,4281 | -1,386262049 | ENST00000425226 | N/A       | N/A          | N/A           |
| A_22_P00003006 | 1,58137 | 2,05258 | -1,386271658 | N/A             | N/A       | N/A          | Inc-C6orf70-2 |
| A_33_P3344951  | 9,98751 | 10,4588 | -1,386348531 | ENST00000478178 | 100137047 | NM_001114632 | JMJD7         |
| A_21_P0013567  | 9,70205 | 10,1734 | -1,386406189 | ENST00000618187 | 3516      | NM_203284    | RBPJ          |
| A_33_P3210468  | 2,99998 | 3,4715  | -1,386569566 | ENST00000372754 | 8785      | NM_003833    | MATN4         |
| A_24_P105733   | 1,53388 | 2,00545 | -1,386617622 | ENST00000479185 | 7145      | NM_022648    | TNS1          |
| A_19_P00315753 | 6,02575 | 6,49733 | -1,386627233 | ENST00000466734 | 344595    | NR_028301    | LINC00883     |
| A_19_P00318561 | 6,90751 | 7,37913 | -1,386665679 | N/A             | 100506516 | NR_108081    | LINC01176     |
| A_23_P203173   | 2,83864 | 3,31034 | -1,386742574 | ENST00000227752 | 3587      | NM_001558    | IL10RA        |
| A_21_P0002427  | 2,12431 | 2,59609 | -1,386819474 | N/A             | N/A       | N/A          | Inc-KCNG3-1   |
| A_24_P147407   | 8,71301 | 9,18481 | -1,386838699 | ENST00000336174 | 92335     | NM_153335    | STRADA        |
| A_24_P167642   | 8,31948 | 8,79129 | -1,386848312 | ENST00000254299 | 2643      | NM_000161    | GCH1          |
| A_21_P0006058  | 2,90154 | 3,37349 | -1,386982899 | ENST00000439014 | N/A       | N/A          | N/A           |
| A_33_P3254267  | 1,43922 | 1,91119 | -1,387002127 | ENST00000413613 | N/A       | N/A          | N/A           |
| A_33_P3347291  | 2,39184 | 2,86384 | -1,387030969 | ENST00000013222 | 11185     | NM_001199219 | INMT          |
| A_23_P33720    | 7,38931 | 7,86144 | -1,387155959 | ENST00000445533 | 10667     | NM_006567    | FARS2         |
| A_22_P00017159 | 1,65122 | 2,12337 | -1,387175189 | N/A             | N/A       | N/A          | Inc-UBE3C-1   |
| A_24_P91140    | 12,3398 | 12,8121 | -1,387319424 | ENST00000422514 | 6147      | NM_000984    | RPL23A        |
| A_23_P25873    | 10,1377 | 10,61   | -1,387319424 | ENST00000567693 | 11169     | NM_007086    | WDHD1         |
| A_21_P0004917  | 1,3601  | 1,83242 | -1,387338657 | N/A             | N/A       | N/A          | Inc-QRSL1-1   |
| A_33_P3388466  | 3,74774 | 4,22007 | -1,387348273 | ENST00000425234 | 11119     | NM_007048    | BTN3A1        |
| A_24_P241792   | 9,389   | 9,86133 | -1,387348273 | ENST00000429604 | 90338     | NM_198893    | ZNF160        |
| A_23_P1981     | 3,65315 | 4,12555 | -1,387415589 | ENST00000397262 | 3630      | NM_000207    | INS           |
| A_23_P251680   | 11,9488 | 12,4212 | -1,387415589 | ENST00000412786 | 1312      | NM_000754    | COMT          |
| A_22_P00021641 | 1,70253 | 2,175   | -1,387482909 | N/A             | N/A       | N/A          | Inc-TMEM160-1 |
| A_22_P00002165 | 1,68705 | 2,15955 | -1,387511761 | ENST00000585911 | N/A       | N/A          | N/A           |
| A_23_P202905   | 4,95371 | 5,42624 | -1,387540614 | ENST00000392678 | 114609    | NM_148910    | TIRAP         |
| A_22_P00000879 | 1,72647 | 2,19916 | -1,387694505 | ENST00000477153 | N/A       | BG192935     | N/A           |
| A_21_P0008562  | 1,4641  | 1,93679 | -1,387694505 | ENST00000554333 | 101926928 | NR_110106    | LOC101926928  |
| A_23_P402751   | 17,3407 | 17,8134 | -1,387704124 | ENST00000361739 | 4513      | BC000228     | COX2          |
| A_33_P3217649  | 7,21574 | 7,68846 | -1,387723362 | ENST00000371786 | 138162    | NM_001048265 | C9orf116      |
| A_21_P0008328  | 1,51988 | 1,99264 | -1,387761838 | N/A             | N/A       | N/A          | Inc-GEMIN2-2  |



|                |         |         |              |                 |           |              |                |
|----------------|---------|---------|--------------|-----------------|-----------|--------------|----------------|
| A_21_P0011321  | 1,60379 | 2,07655 | -1,387761838 | N/A             | N/A       | N/A          | XLOC_I2_004640 |
| A_22_P00007627 | 1,63498 | 2,10782 | -1,387838794 | N/A             | N/A       | N/A          | Inc-HELZ-3     |
| A_22_P00010889 | 5,58839 | 6,06126 | -1,387867654 | N/A             | N/A       | N/A          | Inc-NPFFR2-2   |
| A_22_P00016190 | 4,12781 | 4,60068 | -1,387867654 | ENST00000557900 | 101928955 | XR_243168    | LOC101928955   |
| A_33_P3259548  | 6,53119 | 7,00407 | -1,387877274 | ENST00000330689 | 54554     | NM_019069    | WDR5B          |
| A_22_P00010386 | 12,6177 | 13,0906 | -1,387896514 | ENST00000548571 | 140465    | NM_001199629 | MYL6B          |
| A_23_P91891    | 13,5519 | 14,0248 | -1,387896514 | ENST00000333188 | 9276      | NM_004766    | COPB2          |
| A_21_P0001993  | 3,82102 | 4,29399 | -1,387963857 | ENST00000438482 | 100506014 | XR_109907    | LOC100506014   |
| A_24_P267686   | 5,30144 | 5,77451 | -1,388060066 | ENST00000603208 | N/A       | N/A          | N/A            |
| A_23_P110882   | 9,42209 | 9,89522 | -1,388117795 | ENST00000420283 | 23270     | NM_021648    | TSPYL4         |
| A_33_P3232552  | 1,62174 | 2,09492 | -1,388165905 | ENST00000264424 | 2983      | NM_001291953 | GUCY1B3        |
| A_33_P3363898  | 12,8221 | 13,2953 | -1,388185149 | ENST00000251413 | 7283      | NM_001070    | TUBG1          |
| A_24_P119609   | 6,54708 | 7,0203  | -1,388204393 | ENST00000318217 | 4642      | NM_015194    | MYO1D          |
| A_22_P00000346 | 6,4077  | 6,88092 | -1,388204393 | N/A             | 644192    | NR_102744    | NR2F2-AS1      |
| A_23_P74088    | 5,38921 | 5,8625  | -1,388271751 | ENST00000512731 | 8510      | NM_006983    | MMP23B         |
| A_23_P131866   | 12,1104 | 12,5837 | -1,388281374 | ENST00000347343 | 6790      | NM_198433    | AURKA          |
| A_33_P3588134  | 5,3343  | 5,80765 | -1,388329489 | ENST00000395842 | 56666     | NM_052839    | PANX2          |
| A_23_P33607    | 9,51487 | 9,98823 | -1,388339112 | ENST00000581216 | 79736     | NM_024683    | TEFM           |
| A_23_P410998   | 9,87411 | 10,3475 | -1,388367982 | ENST00000553116 | 5869      | NM_002868    | RAB5B          |
| A_21_P0007558  | 1,85959 | 2,33299 | -1,388377606 | N/A             | N/A       | N/A          | Inc-DAZAP2-1   |
| A_32_P161913   | 4,60529 | 5,07875 | -1,388435348 | N/A             | 339453    | NM_001114748 | TMEM240        |
| A_23_P160787   | 12,9935 | 13,467  | -1,388473844 | ENST00000356607 | 5195      | NM_004565    | PEX14          |
| A_23_P25396    | 2,84339 | 3,31699 | -1,388570089 | ENST00000551379 | 9971      | NM_005123    | NR1H4          |
| A_21_P0011619  | 10,5071 | 10,9807 | -1,388570089 | ENST00000586223 | 440419    | N/A          | TBC1D3P5       |
| A_23_P398044   | 11,7867 | 12,2603 | -1,388570089 | ENST00000269967 | 90324     | NM_052848    | CCDC97         |
| A_22_P00023010 | 3,60346 | 4,07716 | -1,388666341 | ENST00000498832 | N/A       | N/A          | N/A            |
| A_33_P3350634  | 11,0323 | 11,506  | -1,388666341 | ENST00000160827 | 3835      | NM_001256270 | KIF22          |
| A_23_P39910    | 9,42496 | 9,89877 | -1,388772225 | ENST00000328709 | 493753    | NM_001008215 | COA5           |
| A_33_P3310286  | 4,29509 | 4,76919 | -1,389051414 | N/A             | N/A       | N/A          | N/A            |
| A_23_P75038    | 10,1574 | 10,6316 | -1,389147699 | ENST00000369305 | 9937      | NM_014881    | DCLRE1A        |
| A_23_P366366   | 12,9108 | 13,385  | -1,389147699 | ENST00000426154 | 9805      | NM_014766    | SCRN1          |
| A_23_P58482    | 11,4457 | 11,92   | -1,389243991 | ENST00000446023 | 4245      | NM_002406    | MGAT1          |
| A_33_P3333177  | 2,85879 | 3,33314 | -1,389292139 | N/A             | 644083    | XR_112044    | LOC644083      |

|                |         |         |              |                 |           |              |                |
|----------------|---------|---------|--------------|-----------------|-----------|--------------|----------------|
| A_21_P0000300  | 9,02231 | 9,49667 | -1,389301769 | ENST00000579085 | 652965    | NR_002918    | SNORA48        |
| A_22_P00020025 | 1,4398  | 1,91419 | -1,389330659 | ENST00000455084 | 246119    | NR_001542    | TTY10          |
| A_21_P0008473  | 2,47467 | 2,94908 | -1,389349919 | N/A             | N/A       | N/A          | Inc-GALC-3     |
| A_19_P00806930 | 6,93575 | 7,41019 | -1,389378811 | N/A             | N/A       | N/A          | XLOC_I2_003627 |
| A_23_P16944    | 14,3157 | 14,7902 | -1,389436594 | ENST00000381150 | 6382      | NM_001006946 | SDC1           |
| A_32_P220472   | 12,2714 | 12,746  | -1,389532906 | ENST00000559775 | 54469     | NM_019006    | ZFAND6         |
| A_23_P201319   | 6,45192 | 6,92657 | -1,389581064 | ENST00000284476 | 84976     | NM_032890    | DISP1          |
| A_24_P118527   | 3,61375 | 4,08844 | -1,389619592 | ENST00000322315 | 126326    | NM_133261    | GIPC3          |
| A_24_P916141   | 11,4529 | 11,9276 | -1,389629225 | ENST00000614556 | 10238     | NM_005828    | DCAF7          |
| A_24_P391526   | 10,6894 | 11,1641 | -1,389629225 | ENST00000485420 | 9500      | NM_001005333 | MAGED1         |
| A_21_P0007523  | 6,67197 | 7,1467  | -1,389658121 | N/A             | 100506660 | N/A          | DDX11-AS1      |
| A_33_P3243214  | 7,04747 | 7,52223 | -1,389687019 | ENST00000389017 | 54785     | NM_017622    | C17orf59       |
| A_23_P151614   | 10,6008 | 11,0756 | -1,38972555  | ENST00000470718 | 5720      | NM_006263    | PSME1          |
| A_33_P3380647  | 1,67353 | 2,14851 | -1,389898952 | N/A             | 80144     | AK092082     | FRAS1          |
| A_21_P0014534  | 5,86681 | 6,34182 | -1,389927854 | N/A             | 101928504 | XR_245792    | LOC101928504   |
| A_21_P0000738  | 4,53117 | 5,00626 | -1,39000493  | ENST00000501169 | 100507466 | NR_038251    | DPH6-AS1       |
| A_32_P95914    | 8,05749 | 8,5326  | -1,3900242   | ENST00000275053 | 253714    | NM_198468    | MMS22L         |
| A_23_P162211   | 8,84987 | 9,32517 | -1,390207275 | ENST00000535902 | 54682     | NM_018050    | MANSC1         |
| A_22_P00012595 | 8,28783 | 8,76318 | -1,390255457 | N/A             | 101928062 | NR_120461    | LINC01481      |
| A_32_P214925   | 5,76547 | 6,24085 | -1,390284367 | ENST00000357344 | 285966    | NM_173678    | TCAF2          |
| A_23_P5389     | 12,165  | 12,6404 | -1,39030364  | ENST00000540596 | 84661     | NM_032574    | DPY30          |
| A_33_P3326617  | 5,88615 | 6,36157 | -1,390322914 | ENST00000382666 | 81889     | NM_001018104 | FAHD1          |
| A_33_P3461129  | 1,64271 | 2,11817 | -1,390361463 | N/A             | N/A       | AL050020     | Inc-NMNAT2-2   |
| A_21_P0013469  | 2,09321 | 2,56909 | -1,390766286 | ENST00000520255 | 157273    | NR_040039    | LOC157273      |
| A_32_P133840   | 4,93208 | 5,40798 | -1,390785566 | ENST00000545499 | 9911      | NM_014858    | TMCC2          |
| A_21_P0014095  | 1,6521  | 2,12805 | -1,390833768 | N/A             | N/A       | N/A          | N/A            |
| A_24_P49533    | 8,49679 | 8,97286 | -1,390949459 | ENST00000294353 | 79699     | NM_024646    | ZYG11B         |
| A_22_P00017258 | 1,955   | 2,43111 | -1,390988025 | ENST00000453798 | N/A       | N/A          | N/A            |
| A_32_P509677   | 1,41215 | 1,88834 | -1,39106516  | ENST00000608990 | 284805    | NM_182584    | C20orf203      |
| A_24_P6370     | 9,31136 | 9,78756 | -1,391074802 | ENST00000367910 | 339512    | NM_178550    | C1orf110       |
| A_23_P251499   | 7,14574 | 7,62196 | -1,391094087 | ENST00000486440 | 5118      | NM_002593    | PCOLCE         |
| A_22_P00022215 | 4,20987 | 4,68627 | -1,39126766  | ENST00000433460 | N/A       | N/A          | N/A            |
| A_23_P66137    | 4,64969 | 5,12611 | -1,391286947 | ENST00000566034 | 30812     | NM_014587    | SOX8           |

|                |         |         |              |                 |           |              |              |
|----------------|---------|---------|--------------|-----------------|-----------|--------------|--------------|
| A_22_P00001802 | 1,56068 | 2,03717 | -1,391354454 | ENST00000567261 | N/A       | N/A          | N/A          |
| A_33_P3236426  | 5,49377 | 5,97033 | -1,391421965 | N/A             | 641928    | AK131514     | FLJ16734     |
| A_23_P502654   | 8,46089 | 8,93751 | -1,391479833 | ENST00000395684 | 6470      | NM_004169    | SHMT1        |
| A_22_P00001660 | 2,12442 | 2,60108 | -1,391518414 | N/A             | N/A       | N/A          | Inc-ASF1A-1  |
| A_23_P39110    | 11,8885 | 12,3652 | -1,391556996 | ENST00000594338 | 10856     | NM_006666    | RUVBL2       |
| A_23_P152807   | 10,1147 | 10,5914 | -1,391556996 | ENST00000258955 | 55316     | NM_018346    | RSAD1        |
| A_22_P00014490 | 6,10032 | 6,57703 | -1,391566641 | N/A             | N/A       | AK024952     | Inc-SHFM1-1  |
| A_22_P00018166 | 2,85936 | 3,33614 | -1,391634162 | ENST00000527895 | 100505622 | NR_038332    | LOC100505622 |
| A_22_P00018754 | 3,78267 | 4,25951 | -1,39169204  | ENST00000574969 | N/A       | N/A          | N/A          |
| A_24_P246963   | 8,34638 | 8,82325 | -1,391720979 | ENST00000552545 | N/A       | N/A          | N/A          |
| A_33_P3309456  | 1,49539 | 1,97238 | -1,391836744 | ENST00000449981 | 1769      | NM_001206927 | DNAH8        |
| A_33_P3663277  | 1,72837 | 2,20539 | -1,391865687 | ENST00000420171 | 339666    | NR_038918    | LOC339666    |
| A_21_P0009459  | 5,25912 | 5,73616 | -1,391884983 | ENST00000586226 | N/A       | N/A          | N/A          |
| A_19_P00317913 | 3,12307 | 3,60015 | -1,391923574 | N/A             | 285830    | NR_026973    | HLA-F-AS1    |
| A_23_P142750   | 11,136  | 11,6131 | -1,391942871 | ENST00000395127 | 5610      | NM_002759    | EIF2AK2      |
| A_21_P0005407  | 5,26424 | 5,74139 | -1,391991113 | N/A             | 101927610 | XR_252273    | LOC101927610 |
| A_22_P00020106 | 8,10693 | 8,58411 | -1,392020058 | N/A             | N/A       | N/A          | Inc-SMG1-2   |
| A_33_P3358908  | 8,68148 | 9,15884 | -1,392193747 | ENST00000391355 | 100507608 | NM_001277331 | KRTAP9-6     |
| A_21_P0014601  | 12,5201 | 12,9975 | -1,392232347 | ENST00000466213 | 6421      | XM_005271111 | SFPQ         |
| A_24_P407717   | 10,0501 | 10,5276 | -1,392328853 | ENST00000392562 | 2885      | NM_002086    | GRB2         |
| A_24_P226108   | 5,69997 | 6,17752 | -1,392377108 | ENST00000295971 | 54502     | NM_019027    | RBM47        |
| A_23_P92672    | 6,03663 | 6,5142  | -1,39239641  | ENST00000622858 | 100506658 | NM_002538    | OCLN         |
| A_33_P3357530  | 12,9258 | 13,4034 | -1,392425365 | ENST00000611005 | 10723     | NM_006598    | SLC12A7      |
| A_24_P294931   | 10,392  | 10,8696 | -1,392425365 | ENST00000230402 | 5528      | NM_180976    | PPP2R5D      |
| A_21_P0007827  | 1,43463 | 1,91232 | -1,392512232 | N/A             | 101928705 | XR_242929    | LOC101928705 |
| A_32_P175539   | 12,8589 | 13,3366 | -1,392521884 | ENST00000394885 | 5955      | NM_002902    | RCN2         |
| A_23_P163227   | 13,7214 | 14,1991 | -1,392521884 | ENST00000413453 | 548596    | NM_001015001 | CKMT1A       |
| A_21_P0006383  | 1,47782 | 1,95555 | -1,392550841 | N/A             | N/A       | N/A          | Inc-CDK20-4  |
| A_33_P3371318  | 1,65762 | 2,13539 | -1,392589451 | N/A             | N/A       | BC066548     | N/A          |
| A_23_P254733   | 10,8583 | 11,3361 | -1,392618409 | ENST00000502461 | 79682     | NM_024629    | CENPU        |
| A_24_P7600     | 1,66209 | 2,13994 | -1,392666675 | ENST00000504595 | 23194     | NM_012304    | FBXL7        |
| A_23_P151267   | 13,11   | 13,5879 | -1,392714942 | ENST00000552783 | 51474     | NM_016357    | LIMA1        |
| A_22_P00003762 | 6,80782 | 7,28583 | -1,392821135 | N/A             | N/A       | N/A          | Inc-CDIPT-2  |

|                |         |         |              |                 |           |              |                       |
|----------------|---------|---------|--------------|-----------------|-----------|--------------|-----------------------|
| A_22_P00023020 | 2,33446 | 2,81258 | -1,392927336 | N/A             | N/A       | N/A          | Inc-MAP6D1-1          |
| A_22_P00003397 | 5,31492 | 5,79305 | -1,392936991 | N/A             | 102725059 | XR_433694    | LOC102725059          |
| A_22_P00015056 | 1,73826 | 2,21642 | -1,392965957 | N/A             | N/A       | N/A          | Inc-SNRNP200-1        |
| A_33_P3373805  | 6,14853 | 6,62669 | -1,392965957 | ENST00000515519 | 255187    | N/A          | LOC255187             |
| A_22_P00004333 | 6,95794 | 7,4362  | -1,393062513 | ENST00000576313 | N/A       | XR_243725    | N/A                   |
| A_22_P00013884 | 3,81505 | 4,29334 | -1,393091482 | ENST00000572349 | N/A       | N/A          | N/A                   |
| A_22_P00022164 | 4,27178 | 4,75007 | -1,393091482 | ENST00000439406 | 102723474 | BE961141     | LOC102723474          |
| A_23_P114929   | 10,9418 | 11,4201 | -1,393101138 | ENST00000271373 | 25874     | NM_015415    | MPC2                  |
| A_23_P101699   | 8,0572  | 8,53554 | -1,393139763 | ENST00000615225 | 84717     | NM_032631    | HDGFRP2               |
| A_33_P3241756  | 6,06126 | 6,53963 | -1,393168733 | ENST00000517917 | 3551      | AK309052     | IKBKB                 |
| A_21_P0008621  | 2,05065 | 2,52903 | -1,39317839  | N/A             | N/A       | N/A          | Inc-EIF2AK4-2         |
| A_21_P0003909  | 2,01155 | 2,48997 | -1,393217018 | N/A             | N/A       | N/A          | Inc-RP11-487E13.1.1-1 |
| A_23_P45338    | 1,47261 | 1,95105 | -1,393236332 | ENST00000343571 | 80258     | NM_025184    | EFHC2                 |
| A_33_P3411741  | 6,34006 | 6,81863 | -1,393361881 | ENST00000278951 | 51092     | NM_001040455 | SIDT2                 |
| A_23_P88420    | 15,7471 | 16,2257 | -1,393390855 | ENST00000531430 | 4738      | NM_006156    | NEDD8                 |
| A_32_P80597    | 4,52476 | 5,00357 | -1,393593693 | ENST00000394607 | 79071     | AK026192     | ELOVL6                |
| A_32_P23125    | 4,40838 | 4,88721 | -1,393613013 | ENST00000564492 | 140828    | NR_001558    | LINC00261             |
| A_33_P3320943  | 14,2005 | 14,6794 | -1,393680633 | N/A             | N/A       | N/A          | N/A                   |
| A_22_P00010400 | 1,4795  | 1,95842 | -1,393699953 | ENST00000432575 | N/A       | N/A          | N/A                   |
| A_23_P48698    | 4,06349 | 4,54244 | -1,393728935 | ENST00000256389 | 8748      | NM_003814    | ADAM20                |
| A_33_P3270203  | 5,04019 | 5,51917 | -1,393757917 | ENST00000273009 | 129563    | NM_001257281 | DIS3L2                |
| A_33_P3217998  | 11,5374 | 12,0164 | -1,393777239 | ENST00000420396 | 246181    | NR_040288    | AKR7L                 |
| A_23_P81934    | 2,63443 | 3,11345 | -1,393796561 | ENST00000485548 | 80739     | NM_025260    | C6orf25               |
| A_22_P00012618 | 2,35279 | 2,83188 | -1,39386419  | N/A             | 154860    | NR_036484    | FEZF1-AS1             |
| A_23_P215132   | 9,20527 | 9,68442 | -1,39392216  | ENST00000466182 | 29062     | NM_014149    | WDR91                 |
| A_22_P00017148 | 3,30597 | 3,78512 | -1,39392216  | N/A             | 643339    | NR_040096    | LOC643339             |
| A_23_P48339    | 7,53946 | 8,01865 | -1,393960808 | ENST00000470695 | 8100      | NM_175605    | IFT88                 |
| A_21_P0006485  | 1,48576 | 1,96495 | -1,393960808 | N/A             | N/A       | N/A          | Inc-MAGEB10-1         |
| A_33_P3262292  | 5,37823 | 5,85745 | -1,393989795 | ENST00000429160 | 26043     | NM_015562    | UBXN7                 |
| A_22_P00004462 | 1,43169 | 1,91105 | -1,394125075 | ENST00000503532 | 101929071 | NR_121681    | LINC01182             |
| A_24_P146211   | 11,6127 | 12,0921 | -1,394163729 | ENST00000377777 | 3017      | NM_021063    | HIST1H2BD             |
| A_21_P0002050  | 1,4741  | 1,95368 | -1,394337685 | ENST00000453936 | N/A       | N/A          | N/A                   |
| A_21_P0014652  | 4,32921 | 4,80885 | -1,394395675 | N/A             | N/A       | BX114926     | Inc-STX3-2            |

|                |         |         |              |                 |           |              |                |
|----------------|---------|---------|--------------|-----------------|-----------|--------------|----------------|
| A_22_P00012861 | 1,50558 | 1,98527 | -1,394444002 | ENST00000422558 | N/A       | DB026764     | N/A            |
| A_33_P3272442  | 4,40861 | 4,88834 | -1,394482665 | N/A             | 100129195 | NR_103455    | ZSCAN16-AS1    |
| A_33_P3400643  | 4,68708 | 5,16692 | -1,394588993 | ENST00000448963 | 643529    | NR_038382    | LINC00865      |
| A_22_P00021490 | 2,46268 | 2,94252 | -1,394588993 | ENST00000518355 | N/A       | DB201663     | N/A            |
| A_22_P00024977 | 6,91215 | 7,39202 | -1,394617993 | N/A             | N/A       | BC015447     | Inc-CETP-1     |
| A_33_P3352718  | 1,58823 | 2,06814 | -1,394656666 | ENST00000548936 | 400073    | BC046185     | C12orf76       |
| A_33_P3402103  | 6,24701 | 6,72697 | -1,394704996 | ENST00000483528 | 90529     | NM_001199012 | STPG1          |
| A_22_P00017497 | 1,3966  | 1,87668 | -1,39482101  | ENST00000539206 | N/A       | N/A          | N/A            |
| A_33_P3798989  | 4,33222 | 4,81238 | -1,394898357 | N/A             | 399975    | AK127847     | FLJ45950       |
| A_22_P00015747 | 1,8678  | 2,34808 | -1,395014386 | N/A             | N/A       | BX103036     | Inc-TAF15-1    |
| A_33_P3231761  | 1,68199 | 2,16235 | -1,395091744 | N/A             | N/A       | N/A          | N/A            |
| A_32_P106732   | 8,75775 | 9,2382  | -1,395178777 | ENST00000267430 | 57697     | NM_020937    | FANCM          |
| A_23_P64243    | 4,23157 | 4,71205 | -1,39520779  | ENST00000264031 | 7379      | NM_006760    | UPK2           |
| A_22_P00008647 | 5,24936 | 5,72998 | -1,395343188 | ENST00000558783 | N/A       | AY358648     | N/A            |
| A_23_P350895   | 5,22385 | 5,70452 | -1,395391548 | ENST00000317419 | N/A       | AK022408     | N/A            |
| A_22_P00005688 | 3,12959 | 3,61027 | -1,39540122  | N/A             | 101928418 | NR_104605    | LOC101928418   |
| A_24_P518369   | 4,96584 | 5,44658 | -1,395459254 | ENST00000513203 | N/A       | N/A          | N/A            |
| A_22_P00019837 | 5,7529  | 6,23367 | -1,395488272 | N/A             | N/A       | N/A          | Inc-GTDC1-6    |
| A_21_P0013551  | 1,34358 | 1,82438 | -1,395517291 | N/A             | N/A       | N/A          | XLOC_I2_014697 |
| A_33_P3299309  | 3,56443 | 4,04529 | -1,39557533  | ENST00000431533 | 6158      | NM_001136136 | RPL28          |
| A_24_P242688   | 11,0554 | 11,5363 | -1,395614024 | ENST00000380649 | 3030      | NM_000182    | HADHA          |
| A_33_P3320698  | 1,70215 | 2,18306 | -1,395623698 | N/A             | N/A       | N/A          | N/A            |
| A_33_P3376007  | 12,474  | 12,955  | -1,395710764 | ENST00000373609 | 200081    | NM_175852    | TXLNA          |
| A_21_P0002982  | 1,36988 | 1,8509  | -1,395730113 | N/A             | N/A       | N/A          | Inc-ROBO2-4    |
| A_24_P692426   | 1,55329 | 2,03431 | -1,395730113 | ENST00000431596 | N/A       | N/A          | N/A            |
| A_23_P154840   | 14,9531 | 15,4342 | -1,395807511 | ENST00000470944 | 6647      | NM_000454    | SOD1           |
| A_22_P00002741 | 1,72668 | 2,2078  | -1,395826861 | ENST00000568332 | N/A       | BC035333     | N/A            |
| A_21_P0006879  | 1,80383 | 2,28496 | -1,395836536 | ENST00000610279 | N/A       | N/A          | N/A            |
| A_33_P3324786  | 8,04062 | 8,52178 | -1,395865562 | ENST00000217162 | 10732     | XM_005260184 | TCFL5          |
| A_22_P00009206 | 1,44683 | 1,92806 | -1,395933291 | ENST00000412606 | 100506457 | NR_110196    | LOC100506457   |
| A_33_P3324860  | 2,85633 | 3,33757 | -1,395942967 | ENST00000368192 | 2117      | NM_001145312 | ETV3           |
| A_22_P00025194 | 1,52589 | 2,00718 | -1,395991348 | N/A             | 101928453 | NR_120638    | LOC101928453   |
| A_24_P532180   | 6,66576 | 7,14705 | -1,395991348 | N/A             | 90246     | NR_026954    | LOC90246       |

|                |         |         |              |                 |           |              |                |
|----------------|---------|---------|--------------|-----------------|-----------|--------------|----------------|
| A_23_P14928    | 11,7197 | 12,201  | -1,396001024 | ENST00000569980 | 57017     | NM_020312    | COQ9           |
| A_23_P100912   | 6,57024 | 7,05168 | -1,3961365   | ENST00000394869 | 28964     | NM_014030    | GIT1           |
| A_23_P258221   | 11,6202 | 12,1017 | -1,396194564 | ENST00000437205 | 10057     | NM_005688    | ABCC5          |
| A_33_P3418731  | 3,21509 | 3,69682 | -1,396417169 | ENST00000495307 | 147947    | NR_003127    | ZNF542P        |
| A_33_P3333777  | 8,53046 | 9,0122  | -1,396426848 | N/A             | 100129387 | NR_024490    | GABPB1-AS1     |
| A_33_P3284533  | 2,99281 | 3,47459 | -1,396465566 | ENST00000390440 | N/A       | L06884       | N/A            |
| A_33_P3883985  | 1,5312  | 2,01303 | -1,396513965 | ENST00000565467 | 64788     | NR_036442    | LMF1           |
| A_23_P114221   | 12,9147 | 13,3967 | -1,396678532 | ENST00000465244 | 5931      | NM_002893    | RBBP7          |
| A_24_P272225   | 9,10748 | 9,58953 | -1,396726938 | N/A             | 645676    | NR_027023    | ASH1L-AS1      |
| A_33_P3298577  | 6,88127 | 7,36346 | -1,396862484 | ENST00000602398 | 55206     | NM_001167856 | SBNO1          |
| A_33_P3333488  | 12,0835 | 12,5657 | -1,396872167 | ENST00000567398 | 3029      | NM_001040427 | HAGH           |
| A_33_P3290924  | 11,4986 | 11,9809 | -1,396968994 | ENST00000468274 | 573       | NM_001172415 | BAG1           |
| A_21_P0000585  | 13,2891 | 13,7715 | -1,397065828 | ENST00000540486 | 58485     | NM_021210    | TRAPPC1        |
| A_23_P209360   | 10,6583 | 11,1407 | -1,397065828 | ENST00000486442 | 114818    | NM_052920    | KLHL29         |
| A_23_P162010   | 1,68806 | 2,17049 | -1,397094879 | ENST00000525462 | 887       | NM_176875    | CCKBR          |
| A_21_P0013501  | 6,00384 | 6,48636 | -1,397182037 | ENST00000297518 | N/A       | N/A          | XLOC_I2_014331 |
| A_33_P3323059  | 3,73246 | 4,21506 | -1,397259516 | ENST00000595202 | 162967    | AK307375     | ZNF320         |
| A_23_P422115   | 9,41639 | 9,89909 | -1,39735637  | ENST00000371789 | 138162    | NM_001048265 | C9orf116       |
| A_21_P0002490  | 1,55398 | 2,03668 | -1,39735637  | N/A             | N/A       | N/A          | Inc-NPHP1-1    |
| A_23_P403955   | 9,22723 | 9,71007 | -1,397491976 | ENST00000611008 | 23435     | NM_007375    | TARDBP         |
| A_22_P00017308 | 3,23507 | 3,71801 | -1,397588847 | ENST00000453910 | 388815    | NR_027790    | MIR99AHG       |
| A_24_P261169   | 4,3459  | 4,82887 | -1,397617909 | ENST00000422704 | 10507     | NM_006378    | SEMA4D         |
| A_22_P00017616 | 6,53155 | 7,01453 | -1,397627596 | N/A             | 400604    | NR_038458    | TOB1-AS1       |
| A_22_P00002102 | 3,23484 | 3,71783 | -1,397637284 | ENST00000421320 | 101929445 | XR_246525    | LOC101929445   |
| A_33_P3265941  | 8,86004 | 9,34304 | -1,397646972 | ENST00000513713 | N/A       | N/A          | N/A            |
| A_33_P3344229  | 8,64605 | 9,12909 | -1,397685723 | N/A             | 8359      | NM_003538    | HIST1H4A       |
| A_23_P105571   | 5,82202 | 6,30537 | -1,397986084 | ENST00000550385 | 56994     | NM_020244    | CHPT1          |
| A_33_P3415240  | 1,58076 | 2,06415 | -1,398024845 | ENST00000472943 | 730091    | NR_038387    | LINC00886      |
| A_33_P3320077  | 1,45933 | 1,94279 | -1,398092679 | ENST00000543693 | 4781      | NM_001282787 | NFIB           |
| A_21_P0008825  | 1,62277 | 2,1063  | -1,398160517 | N/A             | N/A       | N/A          | Inc-MAPK6-10   |
| A_33_P3336700  | 9,78163 | 10,2652 | -1,398199283 | ENST00000296043 | 57619     | NM_020859    | SHROOM3        |
| A_21_P0004133  | 3,54929 | 4,03289 | -1,398228358 | ENST00000510261 | N/A       | N/A          | N/A            |
| A_33_P3377691  | 5,66692 | 6,15052 | -1,398228358 | ENST00000379205 | 201725    | NM_001008393 | C4orf46        |

|                |         |         |              |                 |           |              |                |
|----------------|---------|---------|--------------|-----------------|-----------|--------------|----------------|
| A_21_P0009743  | 1,60951 | 2,09312 | -1,39823805  | N/A             | N/A       | N/A          | Inc-ZNF100-3   |
| A_33_P3348091  | 7,93738 | 8,42101 | -1,398257433 | ENST00000318809 | 8425      | NM_001042544 | LTBP4          |
| A_21_P0001327  | 1,93645 | 2,42011 | -1,39828651  | N/A             | N/A       | N/A          | Inc-LPHN2-1    |
| A_23_P166686   | 13,2427 | 13,7264 | -1,398325279 | ENST00000422605 | 51421     | NM_016201    | AMOTL2         |
| A_22_P00017645 | 3,89428 | 4,37806 | -1,398402821 | ENST00000469806 | N/A       | N/A          | N/A            |
| A_24_P142495   | 10,858  | 11,3418 | -1,398422207 | ENST00000344363 | 81850     | NM_030966    | KRTAP1-3       |
| A_21_P0003632  | 1,54991 | 2,03376 | -1,398470673 | N/A             | N/A       | N/A          | Inc-RAP1GDS1-3 |
| A_32_P84454    | 4,76817 | 5,25207 | -1,398519141 | N/A             | 100129794 | NR_033240    | SLC25A21-AS1   |
| A_23_P62901    | 11,3661 | 11,85   | -1,398519141 | ENST00000475157 | 7832      | NM_006763    | BTG2           |
| A_22_P00016133 | 1,43716 | 1,92107 | -1,398528835 | ENST00000465249 | 101929754 | NR_121661    | LOC101929754   |
| A_22_P00014175 | 2,67101 | 3,15494 | -1,398548223 | N/A             | 100505501 | XR_108911    | LOC100505501   |
| A_21_P0012491  | 1,55088 | 2,03489 | -1,398625777 | N/A             | 645206    | NR_038840    | LINC00693      |
| A_21_P0000516  | 2,22062 | 2,70464 | -1,398635472 | N/A             | 653492    | NR_026824    | PSG10P         |
| A_33_P3347413  | 6,58827 | 7,07229 | -1,398635472 | ENST00000368463 | 57326     | NM_020524    | PBXIP1         |
| A_23_P331700   | 6,69751 | 7,18182 | -1,398916644 | ENST00000612155 | 222183    | NM_001291831 | SRRM3          |
| A_33_P3282018  | 3,33174 | 3,81608 | -1,398945733 | ENST00000375597 | 23263     | NM_024979    | MCF2L          |
| A_21_P0006207  | 3,40122 | 3,8856  | -1,398984521 | N/A             | N/A       | N/A          | Inc-RAD23B-8   |
| A_33_P3284404  | 8,70752 | 9,19198 | -1,399062099 | ENST00000415332 | 9145      | NM_145731    | SYNGR1         |
| A_22_P00025898 | 2,82725 | 3,31173 | -1,399081495 | N/A             | N/A       | N/A          | Inc-B9D1-1     |
| A_23_P108835   | 11,3113 | 11,7959 | -1,399197872 | ENST00000379520 | 51646     | NM_016061    | YPEL5          |
| A_23_P31399    | 12,213  | 12,6976 | -1,399197872 | ENST00000222572 | 5445      | NM_000305    | PON2           |
| A_33_P3320277  | 5,41536 | 5,90017 | -1,399401555 | ENST00000235329 | 9927      | NM_014874    | MFN2           |
| A_33_P3420235  | 1,57573 | 2,06055 | -1,399411255 | ENST00000367534 | 10092     | N/A          | ARPC5          |
| A_22_P00020609 | 5,71842 | 6,20326 | -1,399430655 | N/A             | 100286938 | NR_026668    | VPS13A-AS1     |
| A_24_P365327   | 12,124  | 12,6089 | -1,399488857 | ENST00000570462 | 26065     | NM_015578    | LSM14A         |
| A_21_P0012522  | 1,40879 | 1,89377 | -1,399566463 | ENST00000423318 | 100507391 | N/A          | LOC100507391   |
| A_33_P3363645  | 5,24728 | 5,73228 | -1,399585866 | ENST00000504385 | 4245      | NM_001114618 | MGAT1          |
| A_21_P0005050  | 1,36229 | 1,84734 | -1,399634372 | N/A             | 101927664 | XR_250087    | LOC101927664   |
| A_22_P00024424 | 3,78492 | 4,26999 | -1,399653776 | N/A             | 104326055 | NR_126362    | APOA1-AS       |
| A_24_P370887   | 11,8837 | 12,3688 | -1,399682881 | ENST00000054666 | 9341      | NM_004781    | VAMP3          |
| A_23_P66854    | 2,11817 | 2,60328 | -1,399692583 | ENST00000167588 | 54474     | NM_019010    | KRT20          |
| A_23_P159101   | 9,45018 | 9,9353  | -1,399702285 | ENST00000412157 | 11066     | NM_022717    | SNRNP35        |
| A_23_P419150   | 1,38508 | 1,8703  | -1,399799308 | ENST00000325980 | 27287     | NM_014468    | VENTX          |

|                |         |         |              |                 |           |              |                       |
|----------------|---------|---------|--------------|-----------------|-----------|--------------|-----------------------|
| A_21_P0011582  | 6,54607 | 7,0313  | -1,399809011 | ENST00000582878 | N/A       | N/A          | N/A                   |
| A_33_P3419865  | 4,0541  | 4,53938 | -1,399857525 | N/A             | N/A       | N/A          | Inc-C5orf42-2         |
| A_33_P3373273  | 3,45609 | 3,94137 | -1,399857525 | ENST00000376503 | 6564      | NM_005073    | SLC15A1               |
| A_23_P204696   | 8,98486 | 9,4702  | -1,399915745 | ENST00000228872 | 1027      | NM_004064    | CDKN1B                |
| A_22_P00023107 | 4,14306 | 4,62849 | -1,400003079 | N/A             | N/A       | N/A          | Inc-CCDC37-3          |
| A_22_P00015573 | 5,69141 | 6,17689 | -1,4000516   | N/A             | N/A       | N/A          | Inc-STT3B-1           |
| A_23_P109382   | 1,52302 | 2,00852 | -1,400071009 | ENST00000086933 | 2928      | NM_005315    | GSC2                  |
| A_22_P00022351 | 1,65851 | 2,14406 | -1,400119533 | ENST00000522228 | N/A       | AW405469     | N/A                   |
| A_33_P3284919  | 7,16855 | 7,65424 | -1,400255408 | ENST00000341697 | 10500     | NM_001178061 | SEMA6C                |
| A_23_P39955    | 2,03851 | 2,52426 | -1,400313644 | ENST00000438902 | 72        | NM_001615    | ACTG2                 |
| A_33_P3474859  | 9,43908 | 9,92495 | -1,400430124 | N/A             | N/A       | BC110369     | Inc-RP11-195B21.3.1-2 |
| A_24_P134789   | 7,00856 | 7,49452 | -1,40051749  | ENST00000380095 | 353333    | NM_181688    | KRTAP10-10            |
| A_21_P0001300  | 3,11165 | 3,59763 | -1,400536905 | N/A             | N/A       | N/A          | Inc-BSND-1            |
| A_23_P120776   | 11,2415 | 11,7275 | -1,400556321 | ENST00000470922 | 6576      | NM_005984    | SLC25A1               |
| A_23_P142969   | 4,41556 | 4,90158 | -1,400575737 | ENST00000614034 | 7549      | NM_021088    | ZNF2                  |
| A_21_P0007203  | 1,51873 | 2,00487 | -1,400692238 | N/A             | N/A       | N/A          | Inc-PRDM11-2          |
| A_23_P137016   | 13,9703 | 14,4565 | -1,400750493 | ENST00000474223 | 6303      | NM_002970    | SAT1                  |
| A_33_P3234402  | 2,23987 | 2,72618 | -1,400857299 | N/A             | N/A       | N/A          | N/A                   |
| A_21_P0000996  | 1,3747  | 1,86108 | -1,40092527  | ENST00000418242 | 100505940 | N/A          | LOC100505940          |
| A_33_P3380897  | 11,0383 | 11,5247 | -1,400944691 | N/A             | 528       | NM_001695    | ATP6V1C1              |
| A_21_P0010630  | 1,66531 | 2,15178 | -1,401012667 | ENST00000421931 | 101927498 | NR_110633    | LINC01361             |
| A_24_P330385   | 4,44756 | 4,93404 | -1,401022378 | ENST00000474774 | 51310     | NM_016609    | SLC22A17              |
| A_23_P101013   | 10,4523 | 10,9388 | -1,401041801 | ENST00000591436 | 11322     | NM_007267    | TMC6                  |
| A_19_P00319765 | 3,43745 | 3,92403 | -1,401119493 | ENST00000469178 | 201617    | N/A          | LINC00870             |
| A_21_P0005126  | 1,36411 | 1,85072 | -1,401148629 | N/A             | N/A       | N/A          | Inc-LIN28B-3          |
| A_19_P00322929 | 7,26831 | 7,75494 | -1,401168053 | ENST00000513179 | N/A       | N/A          | N/A                   |
| A_33_P3346716  | 1,49753 | 1,98437 | -1,401372023 | N/A             | N/A       | N/A          | N/A                   |
| A_21_P0004931  | 1,35205 | 1,83901 | -1,401488591 | N/A             | 101927959 | XR_245585    | LOC101927959          |
| A_23_P257355   | 1,48133 | 1,96832 | -1,401517734 | ENST00000039007 | 5009      | NM_000531    | OTC                   |
| A_24_P399888   | 9,28276 | 9,76978 | -1,401546879 | ENST00000396437 | 79019     | XR_244383    | CENPM                 |
| A_22_P00023946 | 1,93848 | 2,42567 | -1,40171204  | N/A             | N/A       | BX114413     | Inc-STK3-3            |
| A_23_P144384   | 11,0677 | 11,5549 | -1,401721756 | ENST00000265000 | 51809     | NM_017423    | GALNT7                |
| A_22_P00004088 | 3,38992 | 3,87713 | -1,401731472 | ENST00000509470 | N/A       | AF086288     | N/A                   |



|                |         |         |              |                 |        |              |                       |
|----------------|---------|---------|--------------|-----------------|--------|--------------|-----------------------|
| A_22_P00010852 | 3,70615 | 4,19343 | -1,401799486 | ENST00000500728 | 4043   | NM_002337    | LRPAP1                |
| A_22_P00021344 | 2,11838 | 2,60568 | -1,401818919 | N/A             | N/A    | BX092254     | Inc-RP11-324D17.1.1-2 |
| A_32_P30710    | 16,3074 | 16,7947 | -1,401818919 | ENST00000584583 | 9349   | NM_000978    | RPL23                 |
| A_24_P72364    | 1,76476 | 2,2521  | -1,401857786 | ENST00000259870 | 29113  | NM_014070    | C6orf15               |
| A_21_P0013442  | 1,39244 | 1,8798  | -1,40187722  | ENST00000446187 | N/A    | N/A          | N/A                   |
| A_23_P71790    | 7,20468 | 7,69211 | -1,401945241 | ENST00000445819 | 158056 | NM_206920    | MAMDC4                |
| A_33_P3527721  | 8,13549 | 8,62292 | -1,401945241 | N/A             | 284219 | AK094436     | LOC284219             |
| A_22_P00017844 | 6,08379 | 6,57125 | -1,401974394 | ENST00000585873 | 54877  | NR_126534    | ZCCHC2                |
| A_33_P3888365  | 9,08209 | 9,56957 | -1,40199383  | ENST00000616024 | 54665  | NM_018364    | RSBN1                 |
| A_33_P3402968  | 1,5023  | 1,9898  | -1,402013266 | ENST00000400588 | 128954 | NM_001037814 | GAB4                  |
| A_33_P3217123  | 13,6422 | 14,1301 | -1,40240204  | ENST00000616144 | 83596  | NM_138639    | BCL2L12               |
| A_32_P152204   | 1,6207  | 2,10864 | -1,402440924 | ENST00000456080 | 401067 | NM_001085479 | IQCF3                 |
| A_24_P940166   | 7,83249 | 8,32045 | -1,402460366 | ENST00000456849 | 9060   | NM_001015880 | PAPSS2                |
| A_33_P6818629  | 3,33983 | 3,82787 | -1,402538137 | N/A             | 400960 | NR_033872    | PCBP1-AS1             |
| A_21_P0002423  | 1,37683 | 1,86487 | -1,402538137 | N/A             | N/A    | N/A          | Inc-HNRPLL-1          |
| A_22_P00011470 | 2,91748 | 3,40555 | -1,402567302 | ENST00000572266 | 283875 | NR_033861    | LINC00514             |
| A_21_P0014438  | 2,06513 | 2,55329 | -1,402654801 | N/A             | N/A    | N/A          | N/A                   |
| A_23_P4919     | 11,5408 | 12,0292 | -1,40288816  | ENST00000330720 | 10945  | NM_006801    | KDELRL1               |
| A_33_P3605269  | 2,57213 | 3,06056 | -1,402917332 | ENST00000533985 | 283102 | NR_027713    | KRT8P41               |
| A_21_P0010643  | 1,41937 | 1,90783 | -1,402946506 | N/A             | N/A    | N/A          | XL0C_I2_001064        |
| A_23_P156852   | 11,3493 | 11,8378 | -1,402985404 | ENST00000464583 | 10455  | NM_206836    | ECI2                  |
| A_23_P149064   | 8,81541 | 9,30393 | -1,403004854 | ENST00000493601 | 10076  | NM_005704    | PTPRU                 |
| A_23_P146367   | 14,3442 | 14,8328 | -1,403082655 | ENST00000490488 | 84270  | NM_032310    | C9orf89               |
| A_33_P3281033  | 6,57299 | 7,06163 | -1,403121557 | N/A             | 140733 | BC035876     | MACROD2               |
| A_23_P254831   | 5,02171 | 5,51037 | -1,403141009 | ENST00000378988 | 4113   | NM_002364    | MAGEB2                |
| A_21_P0004522  | 1,88318 | 2,37197 | -1,40326745  | N/A             | N/A    | N/A          | Inc-FAM174A-1         |
| A_33_P3234855  | 5,55345 | 6,04227 | -1,403296631 | ENST00000367524 | 7402   | NM_007124    | UTRN                  |
| A_21_P0012985  | 4,666   | 5,15485 | -1,403325812 | N/A             | N/A    | N/A          | Inc-FGF10-3           |
| A_23_P103226   | 2,2993  | 2,78817 | -1,403345266 | ENST00000493636 | 2166   | NM_001441    | FAAH                  |
| A_23_P92154    | 10,0838 | 10,5727 | -1,403374448 | ENST00000509828 | 8930   | NM_003925    | MBD4                  |
| A_22_P00004373 | 4,34087 | 4,82977 | -1,403374448 | ENST00000446184 | N/A    | N/A          | N/A                   |
| A_23_P360291   | 3,79439 | 4,28342 | -1,403500911 | ENST00000480730 | 6892   | AF067286     | TAPBP                 |
| A_23_P135474   | 12,2617 | 12,7508 | -1,403569011 | ENST00000336230 | 51253  | NM_016491    | MRPL37                |

|                |         |         |              |                 |           |              |                |
|----------------|---------|---------|--------------|-----------------|-----------|--------------|----------------|
| A_22_P00008991 | 5,28618 | 5,77529 | -1,403578739 | N/A             | 100874068 | NR_120385    | GRTP1-AS1      |
| A_23_P4909     | 10,1738 | 10,663  | -1,403666302 | ENST00000599687 | 6625      | NM_003089    | SNRNP70        |
| A_22_P00020716 | 3,75196 | 4,24122 | -1,40372468  | N/A             | N/A       | N/A          | Inc-ZNF852-2   |
| A_24_P64407    | 6,35525 | 6,8446  | -1,403812252 | ENST00000339992 | 3167      | NM_005519    | HMX2           |
| A_22_P00002613 | 1,83845 | 2,32784 | -1,403851174 | ENST00000420143 | 400110    | NR_073430    | ANKRD20A19P    |
| A_24_P354337   | 5,00357 | 5,49296 | -1,403851174 | ENST00000496713 | 84100     | NM_032146    | ARL6           |
| A_22_P00025265 | 3,97982 | 4,46921 | -1,403851174 | ENST00000555693 | N/A       | CR737186     | N/A            |
| A_21_P0013846  | 11,4609 | 11,9505 | -1,404055535 | ENST00000423617 | 550643    | NR_015367    | LINC01420      |
| A_23_P59138    | 9,29327 | 9,78294 | -1,404123662 | ENST00000620031 | 5460      | NM_002701    | POU5F1         |
| A_22_P00002961 | 1,48295 | 1,97264 | -1,404143127 | N/A             | N/A       | DA821820     | Inc-C5orf63-3  |
| A_23_P35970    | 10,1075 | 10,5973 | -1,404250192 | ENST00000527992 | 2542      | NM_001467    | SLC37A4        |
| A_23_P120442   | 9,78362 | 10,2735 | -1,404328062 | ENST00000371997 | 8202      | NM_181659    | NCOA3          |
| A_24_P269895   | 10,1858 | 10,6759 | -1,404542228 | ENST00000401429 | 220988    | NM_194247    | HNRNPA3        |
| A_23_P29079    | 10,1614 | 10,6515 | -1,404542228 | ENST00000495274 | 5211      | NM_001002021 | PFKL           |
| A_24_P361006   | 11,4961 | 11,9863 | -1,404639587 | ENST00000544675 | 4704      | NM_005002    | NDUFA9         |
| A_23_P147277   | 11,9871 | 12,4774 | -1,404736952 | ENST00000577197 | 283989    | NM_207346    | TSEN54         |
| A_21_P0005507  | 1,38655 | 1,87695 | -1,404834325 | N/A             | N/A       | N/A          | Inc-RFC2-1     |
| A_33_P3214948  | 3,5309  | 4,02143 | -1,404960919 | ENST00000373109 | 9806      | NM_014767    | SPOCK2         |
| A_21_P0012841  | 1,64459 | 2,13523 | -1,405068046 | ENST00000510302 | 102724855 | N/A          | CTD-2151A2.1   |
| A_19_P00318909 | 4,28384 | 4,77449 | -1,405077785 | N/A             | N/A       | N/A          | XLOC_I2_010751 |
| A_33_P3364964  | 6,62669 | 7,11736 | -1,405097264 | N/A             | 100129596 | AK130913     | LOC100129596   |
| A_33_P3282318  | 3,70969 | 4,20038 | -1,405116742 | ENST00000328558 | N/A       | N/A          | N/A            |
| A_21_P0005120  | 5,07362 | 5,56432 | -1,405126482 | ENST00000427048 | N/A       | N/A          | N/A            |
| A_33_P3363425  | 6,32895 | 6,81969 | -1,405165441 | ENST00000621208 | 257019    | NM_174938    | FRMD3          |
| A_33_P3359120  | 1,42664 | 1,91739 | -1,405175181 | ENST00000424940 | N/A       | N/A          | N/A            |
| A_22_P00009405 | 2,07655 | 2,56732 | -1,405194661 | N/A             | 102723391 | XR_425895    | LOC102723391   |
| A_22_P00013857 | 8,62534 | 9,11616 | -1,405243362 | N/A             | N/A       | AK098234     | Inc-RPL7L1-1   |
| A_21_P0009329  | 7,08497 | 7,57585 | -1,405301806 | N/A             | N/A       | N/A          | Inc-COPZ2-1    |
| A_32_P30905    | 1,39115 | 1,88212 | -1,405389476 | ENST00000325239 | 57705     | NM_020945    | WDFY4          |
| A_23_P166023   | 12,0341 | 12,5251 | -1,4054187   | ENST00000487129 | 5203      | NM_002623    | PFDN4          |
| A_22_P00009054 | 3,90897 | 4,39999 | -1,405438184 | N/A             | N/A       | N/A          | Inc-LEKR1-4    |
| A_23_P359277   | 7,46156 | 7,95259 | -1,405447925 | ENST00000425382 | 79993     | NM_024930    | ELOVL7         |
| A_21_P0008991  | 1,60999 | 2,10107 | -1,405496635 | N/A             | N/A       | N/A          | Inc-JPH3-3     |

|                |         |         |              |                 |           |              |                    |
|----------------|---------|---------|--------------|-----------------|-----------|--------------|--------------------|
| A_23_P69329    | 6,70177 | 7,19286 | -1,405506378 | ENST00000320295 | 3373      | NM_153281    | HYAL1              |
| A_22_P00016082 | 3,14646 | 3,63756 | -1,40551612  | N/A             | N/A       | N/A          | Inc-THBS3-1        |
| A_22_P00006365 | 3,5002  | 3,99139 | -1,405603803 | N/A             | N/A       | AK296065     | Inc-FASTK-1        |
| A_33_P3351735  | 2,10906 | 2,60028 | -1,405633032 | ENST00000333861 | 55231     | NM_018219    | CCDC87             |
| A_33_P3404950  | 4,40487 | 4,89615 | -1,405691492 | ENST00000322753 | 440574    | NM_001204083 | MINOS1             |
| A_33_P3370812  | 6,85886 | 7,35016 | -1,405710979 | N/A             | 23216     | BC028196     | TBC1D1             |
| A_24_P99795    | 10,8933 | 11,3846 | -1,405710979 | ENST00000085068 | 79763     | NM_024710    | ISOC2              |
| A_22_P00025114 | 1,53839 | 2,02987 | -1,405886376 | N/A             | N/A       | N/A          | Inc-POU5F1B-3      |
| A_33_P3371698  | 1,51689 | 2,00837 | -1,405886376 | N/A             | N/A       | N/A          | N/A                |
| A_23_P51711    | 3,76402 | 4,25553 | -1,405915611 | ENST00000488764 | 51032     | NM_015849    | CELA2B             |
| A_23_P152115   | 13,5784 | 14,07   | -1,406003319 | ENST00000568561 | 4832      | NM_002513    | NME3               |
| A_32_P28685    | 12,0203 | 12,5119 | -1,406003319 | ENST00000272567 | 6627      | NM_003090    | SNRPA1             |
| A_24_P41408    | 2,68258 | 3,17426 | -1,406081287 | N/A             | 100128374 | XR_108730    | LOC100128374       |
| A_21_P0009119  | 9,02497 | 9,51677 | -1,406198246 | N/A             | N/A       | N/A          | Inc-SPIRE2-1       |
| A_33_P3234859  | 6,47528 | 6,96716 | -1,406276224 | ENST00000367545 | 7402      | NM_007124    | UTRN               |
| A_21_P0007913  | 7,59105 | 8,08296 | -1,406305467 | ENST00000413591 | N/A       | N/A          | N/A                |
| A_23_P326319   | 6,76526 | 7,25729 | -1,406422445 | ENST00000452191 | 89927     | NM_033201    | C16orf45           |
| A_22_P00003785 | 3,98261 | 4,47473 | -1,406510185 | ENST00000476282 | 285973    | NM_173681    | ATG9B              |
| A_21_P0002756  | 1,64444 | 2,13672 | -1,406666181 | ENST00000473938 | N/A       | N/A          | N/A                |
| A_23_P218047   | 15,4589 | 15,9512 | -1,406685682 | ENST00000252242 | 3852      | NM_000424    | KRT5               |
| A_24_P11436    | 4,90001 | 5,39231 | -1,406685682 | ENST00000488771 | 55001     | NM_017904    | TTC22              |
| A_23_P371865   | 4,85997 | 5,35231 | -1,406724684 | ENST00000570137 | 124359    | NM_152342    | CDYL2              |
| A_23_P46396    | 9,07626 | 9,5686  | -1,406724684 | ENST00000370197 | 58155     | NM_021190    | PTBP2              |
| A_22_P00012487 | 1,36698 | 1,85934 | -1,406744185 | N/A             | N/A       | N/A          | Inc-PRSS38-1       |
| A_22_P00000227 | 2,29809 | 2,79046 | -1,406753936 | N/A             | N/A       | AY312371     | Inc-AC005493.1-1   |
| A_33_P3234540  | 10,4619 | 10,9543 | -1,406783189 | N/A             | N/A       | N/A          | N/A                |
| A_33_P3396951  | 9,54213 | 10,0346 | -1,406851448 | ENST00000620910 | 665       | NM_004331    | BNIP3L             |
| A_21_P0009234  | 5,56924 | 6,06192 | -1,407056246 | N/A             | N/A       | N/A          | Inc-AC003101.1.1-1 |
| A_23_P135486   | 1,63094 | 2,12376 | -1,407192794 | ENST00000302312 | 51327     | NM_016633    | AHSP               |
| A_23_P127095   | 15,118  | 15,611  | -1,407368375 | ENST00000369811 | 84833     | NM_032747    | USMG5              |
| A_22_P00011638 | 1,37957 | 1,87272 | -1,40751471  | N/A             | 101927206 | XR_425550    | LOC101927206       |
| A_24_P185186   | 1,93991 | 2,4333  | -1,407748877 | ENST00000503131 | 201191    | NM_174920    | SAMD14             |
| A_23_P366216   | 12,7328 | 13,2263 | -1,407856217 | N/A             | 8345      | NM_003524    | HIST1H2BH          |

|                |         |         |              |                 |        |              |               |
|----------------|---------|---------|--------------|-----------------|--------|--------------|---------------|
| A_23_P3982     | 13,409  | 13,9026 | -1,407953805 | ENST00000498164 | 84299  | NM_032339    | MIEN1         |
| A_22_P00006749 | 1,5334  | 2,02701 | -1,407963564 | ENST00000559318 | N/A    | N/A          | N/A           |
| A_23_P16384    | 1,50281 | 1,9965  | -1,408041641 | ENST00000592784 | 199713 | NM_139176    | NLRP7         |
| A_21_P0000194  | 2,86959 | 3,36335 | -1,408109961 | N/A             | 51363  | NM_001270765 | CHST15        |
| A_24_P174503   | 6,16957 | 6,66333 | -1,408109961 | ENST00000399379 | 275    | NM_000481    | AMT           |
| A_23_P303317   | 9,63283 | 10,1266 | -1,408119721 | ENST00000515545 | 79364  | NM_025112    | ZXDC          |
| A_24_P160874   | 11,3626 | 11,8564 | -1,408149002 | ENST00000617900 | 1854   | NM_001025248 | DUT           |
| A_33_P3317473  | 5,70452 | 6,19838 | -1,408207567 | ENST00000397284 | N/A    | N/A          | N/A           |
| A_32_P9575     | 9,58243 | 10,0763 | -1,408217328 | ENST00000573318 | 84311  | NM_032351    | MRPL45        |
| A_33_P3373203  | 7,71425 | 8,20812 | -1,408217328 | N/A             | N/A    | AK126778     | N/A           |
| A_23_P107322   | 7,56645 | 8,06037 | -1,408266134 | ENST00000480954 | 84940  | NM_032854    | CORO6         |
| A_22_P00022019 | 1,40894 | 1,90287 | -1,408275895 | N/A             | N/A    | N/A          | Inc-ARRB2-2   |
| A_23_P129786   | 16,3267 | 16,8207 | -1,408344227 | ENST00000395751 | 6720   | NM_001005291 | SREBF1        |
| A_22_P00001170 | 2,2812  | 2,77525 | -1,408393037 | ENST00000579981 | N/A    | N/A          | N/A           |
| A_33_P3228385  | 14,8966 | 15,3907 | -1,408441849 | ENST00000335514 | 93974  | NM_016311    | ATPIF1        |
| A_23_P422718   | 1,38443 | 1,87859 | -1,408500426 | ENST00000372236 | 5429   | NM_006502    | POLH          |
| A_24_P324011   | 7,99586 | 8,49006 | -1,408539478 | ENST00000322444 | 23510  | NM_015353    | KCTD2         |
| A_22_P00008311 | 5,60461 | 6,09887 | -1,408598059 | N/A             | N/A    | KF925354     | Inc-ITGB3BP-1 |
| A_33_P3423285  | 2,84271 | 3,33698 | -1,408607823 | N/A             | N/A    | BC132680     | Inc-SRGAP3-1  |
| A_33_P3812669  | 11,8327 | 12,327  | -1,408637114 | ENST00000540424 | 23710  | NM_031412    | GABARAPL1     |
| A_23_P121976   | 1,4103  | 1,90465 | -1,408685935 | ENST00000230732 | 5459   | NM_002700    | POU4F3        |
| A_22_P00016912 | 1,71782 | 2,21234 | -1,408851937 | N/A             | N/A    | DR157277     | Inc-TSN-4     |
| A_33_P3278068  | 10,2889 | 10,7835 | -1,408930063 | ENST00000239882 | 1997   | NM_001145353 | ELF1          |
| A_32_P45493    | 11,5665 | 12,0611 | -1,408930063 | ENST00000341154 | 10772  | NM_006625    | SRSF10        |
| A_22_P00005335 | 4,2493  | 4,74391 | -1,408939829 | ENST00000484028 | N/A    | N/A          | N/A           |
| A_22_P00008997 | 5,22859 | 5,72327 | -1,409008192 | ENST00000430429 | N/A    | N/A          | N/A           |
| A_32_P507710   | 7,33725 | 7,83201 | -1,409086327 | ENST00000479693 | 375133 | NR_003700    | PI4KAP2       |
| A_32_P16854    | 10,2687 | 10,7635 | -1,409125395 | ENST00000508755 | 25847  | NM_015391    | ANAPC13       |
| A_33_P3371708  | 1,44932 | 1,94423 | -1,40923284  | N/A             | N/A    | N/A          | N/A           |
| A_22_P00008767 | 1,95815 | 2,45308 | -1,409252376 | N/A             | N/A    | N/A          | Inc-KIF16B-2  |
| A_22_P00003977 | 6,10647 | 6,6015  | -1,409350061 | N/A             | N/A    | N/A          | Inc-CHD9-1    |
| A_33_P3260509  | 1,43479 | 1,92983 | -1,40935983  | ENST00000443330 | N/A    | N/A          | N/A           |
| A_23_P218646   | 12,3361 | 12,8312 | -1,409418445 | ENST00000496281 | 8771   | NM_003823    | TNFRSF6B      |

|                |         |         |              |                 |           |              |                       |
|----------------|---------|---------|--------------|-----------------|-----------|--------------|-----------------------|
| A_33_P3273238  | 8,81348 | 9,30863 | -1,409467293 | ENST00000598199 | 162967    | NM_207333    | ZNF320                |
| A_23_P503200   | 10,8778 | 11,373  | -1,409516142 | ENST00000621772 | 55274     | NM_018288    | PHF10                 |
| A_33_P6592586  | 3,09732 | 3,59253 | -1,409525912 | ENST00000344312 | 90627     | N/A          | STARD13               |
| A_33_P3373765  | 9,27638 | 9,77163 | -1,409564993 | ENST00000611962 | 1815      | NM_000797    | DRD4                  |
| A_33_P3232937  | 4,71454 | 5,2099  | -1,409672471 | N/A             | 100289178 | NR_040077    | GNG12-AS1             |
| A_23_P15375    | 9,16042 | 9,65594 | -1,409828817 | ENST00000245543 | 79637     | AK025813     | ARMC7                 |
| A_33_P3414122  | 9,5398  | 10,0354 | -1,409906997 | ENST00000523638 | 339324    | NM_001012756 | ZNF260                |
| A_23_P112950   | 9,65315 | 10,1488 | -1,409955862 | ENST00000540793 | 55729     | NM_018179    | ATF7IP                |
| A_22_P00001175 | 1,50639 | 2,00216 | -1,410073143 | ENST00000556271 | N/A       | N/A          | N/A                   |
| A_23_P54692    | 6,19838 | 6,69422 | -1,410141562 | N/A             | 101927910 | XM_005256332 | LOC101927910          |
| A_22_P00006984 | 3,81739 | 4,31333 | -1,410239309 | N/A             | N/A       | N/A          | Inc-GDPD4-1           |
| A_23_P71867    | 7,07533 | 7,57137 | -1,410337063 | ENST00000602473 | 3590      | NM_001142784 | IL11RA                |
| A_33_P3217009  | 5,97517 | 6,47127 | -1,410395718 | N/A             | 154860    | NR_036484    | FEZF1-AS1             |
| A_33_P3814721  | 2,36341 | 2,85958 | -1,410464153 | ENST00000530161 | 387755    | NM_001031853 | INSC                  |
| A_24_P152094   | 13,0896 | 13,5858 | -1,410493483 | ENST00000377951 | N/A       | XM_003960530 | N/A                   |
| A_23_P66777    | 10,5768 | 11,073  | -1,410493483 | ENST00000531206 | 996       | NM_001256    | CDC27                 |
| A_23_P16116    | 8,54075 | 9,03698 | -1,410522814 | ENST00000596216 | 53916     | NM_016154    | RAB4B                 |
| A_23_P140563   | 8,0968  | 8,59304 | -1,410532591 | ENST00000494567 | 64927     | NM_001288615 | TTC23                 |
| A_33_P3314301  | 4,20559 | 4,70186 | -1,410561922 | ENST00000502798 | 22987     | NM_014979    | SV2C                  |
| A_33_P3336992  | 8,77641 | 9,2727  | -1,410581477 | ENST00000473020 | 28973     | NM_014046    | MRPS18B               |
| A_21_P0004863  | 7,40712 | 7,90353 | -1,410698811 | ENST00000607119 | N/A       | XR_427900    | N/A                   |
| A_23_P115356   | 12,9114 | 13,4079 | -1,410786817 | ENST00000235835 | 8574      | NM_003689    | AKR7A2                |
| A_22_P00007371 | 1,57393 | 2,07043 | -1,410786817 | N/A             | N/A       | N/A          | Inc-GREM2-7           |
| A_22_P00003701 | 4,85482 | 5,35132 | -1,410786817 | ENST00000563855 | N/A       | N/A          | N/A                   |
| A_24_P243776   | 10,3141 | 10,8106 | -1,410786817 | ENST00000361946 | 11179     | NM_021994    | ZNF277                |
| A_23_P382506   | 2,5813  | 3,07792 | -1,410904168 | ENST00000570470 | 26184     | NR_002169    | OR1F2P                |
| A_33_P3269218  | 7,90819 | 8,40484 | -1,410933507 | ENST00000465256 | 576       | NM_001294335 | BAI2                  |
| A_24_P41021    | 7,57208 | 8,06876 | -1,410962847 | ENST00000298097 | 254170    | NM_203301    | FBXO33                |
| A_33_P3337009  | 7,88761 | 8,38431 | -1,410982407 | ENST00000372560 | 79717     | NM_001287507 | PPCS                  |
| A_24_P233850   | 10,4115 | 10,9083 | -1,411080213 | ENST00000392169 | 6391      | NM_003001    | SDHC                  |
| A_22_P00022664 | 1,79288 | 2,2897  | -1,411099774 | ENST00000424395 | N/A       | N/A          | N/A                   |
| A_22_P00017735 | 5,86568 | 6,36273 | -1,411324755 | N/A             | N/A       | AK000085     | nc-XXbac-B461K10.4.1- |
| A_23_P252740   | 7,51506 | 8,01222 | -1,411432368 | ENST00000313655 | 79075     | NM_024094    | DSCC1                 |

|                |         |         |              |                 |           |              |                       |
|----------------|---------|---------|--------------|-----------------|-----------|--------------|-----------------------|
| A_33_P3254331  | 5,74975 | 6,24701 | -1,411530204 | ENST00000375949 | 11330     | NM_007272    | CTRC                  |
| A_21_P0004400  | 1,48945 | 1,98674 | -1,411559556 | N/A             | N/A       | N/A          | Inc-PDE4D-1           |
| A_24_P245322   | 7,91193 | 8,40923 | -1,41156934  | ENST00000585981 | 5573      | NM_212472    | PRKAR1A               |
| A_24_P142983   | 11,059  | 11,5563 | -1,41156934  | ENST00000477245 | 5297      | NM_058004    | PI4KA                 |
| A_23_P77818    | 15,2958 | 15,7931 | -1,41156934  | ENST00000580649 | 10476     | NM_006356    | ATP5H                 |
| A_33_P3222867  | 3,12176 | 3,61914 | -1,411647617 | N/A             | 7059      | CR933610     | THBS3                 |
| A_21_P0002436  | 2,46646 | 2,96392 | -1,411725897 | N/A             | N/A       | N/A          | Inc-ATP6V1E2-2        |
| A_24_P201381   | 4,72677 | 5,22438 | -1,411872685 | ENST00000311575 | 143282    | NM_152429    | FGFBP3                |
| A_24_P202558   | 5,85019 | 6,34787 | -1,411941191 | ENST00000222345 | 23094     | NM_015073    | SIPA1L3               |
| A_23_P95640    | 3,08112 | 3,57892 | -1,412058638 | ENST00000582070 | 440712    | NM_001007544 | C1orf186              |
| A_23_P386168   | 10,5127 | 11,0106 | -1,412156518 | ENST00000552360 | 255783    | NM_178511    | INAFM1                |
| A_24_P913115   | 8,98904 | 9,48697 | -1,412185883 | ENST00000371953 | 5728      | NM_000314    | PTEN                  |
| A_33_P3237905  | 1,55517 | 2,05311 | -1,412195672 | N/A             | N/A       | N/A          | N/A                   |
| A_32_P227605   | 3,11829 | 3,61634 | -1,41230335  | ENST00000334176 | 388531    | NM_207391    | RGS9BP                |
| A_33_P3346083  | 1,97017 | 2,46823 | -1,41231314  | ENST00000452803 | 341019    | NM_181807    | DCDC1                 |
| A_24_P160969   | 8,03122 | 8,52937 | -1,412401247 | ENST00000533937 | 9537      | NM_001258320 | TP53I11               |
| A_23_P55281    | 5,71794 | 6,21611 | -1,412420827 | ENST00000567101 | 3217      | NM_004502    | HOXB7                 |
| A_24_P356338   | 11,359  | 11,8572 | -1,412450198 | ENST00000565985 | 11345     | NM_007285    | GABARAPL2             |
| A_21_P0011165  | 1,44053 | 1,93879 | -1,412508941 | N/A             | N/A       | N/A          | XLOC_I2_003877        |
| A_33_P3605529  | 1,35829 | 1,85663 | -1,41258727  | ENST00000612023 | 400548    | NR_033984    | LOC400548             |
| A_21_P0007832  | 1,4707  | 1,96904 | -1,41258727  | N/A             | 283463    | N/A          | MUC19                 |
| A_22_P00009751 | 2,06454 | 2,56295 | -1,41265581  | N/A             | N/A       | N/A          | Inc-ME3-1             |
| A_23_P60130    | 13,4134 | 13,9119 | -1,412743939 | ENST00000614891 | 114569    | NM_052886    | MAL2                  |
| A_23_P62731    | 11,3602 | 11,8587 | -1,412743939 | ENST00000367677 | 63931     | NM_022100    | MRPS14                |
| A_22_P00018558 | 4,87146 | 5,37023 | -1,413008359 | ENST00000572821 | N/A       | N/A          | N/A                   |
| A_22_P00017051 | 3,88289 | 4,38167 | -1,413018153 | N/A             | N/A       | N/A          | Inc-TUBA1C-1          |
| A_23_P2967     | 10,9265 | 11,4254 | -1,413135689 | ENST00000557391 | 8906      | NM_003917    | AP1G2                 |
| A_33_P3800496  | 1,64758 | 2,14666 | -1,413312012 | N/A             | 677827    | BX470739     | SNORA46               |
| A_22_P00013280 | 4,21152 | 4,71071 | -1,413419776 | N/A             | N/A       | AK026763     | Inc-RP11-105C20.2.1-4 |
| A_22_P00001140 | 1,71124 | 2,21057 | -1,413556942 | N/A             | N/A       | N/A          | Inc-AMDHD1-2          |
| A_33_P3266783  | 2,64163 | 3,14099 | -1,413586336 | ENST00000580729 | N/A       | N/A          | N/A                   |
| A_24_P912439   | 1,66455 | 2,16392 | -1,413596135 | ENST00000312033 | 80709     | AB075848     | AKNA                  |
| A_24_P497318   | 4,20222 | 4,70167 | -1,413674523 | ENST00000560518 | 100129973 | NR_102751    | LOC100129973          |

|                |         |         |              |                 |           |              |                     |
|----------------|---------|---------|--------------|-----------------|-----------|--------------|---------------------|
| A_23_P90296    | 7,67001 | 8,16958 | -1,413792114 | ENST00000348817 | 9149      | NM_004714    | DYRK1B              |
| A_33_P3659678  | 9,30668 | 9,80629 | -1,413831313 | ENST00000487099 | 2649      | NM_033334    | NR6A1               |
| A_32_P31771    | 5,30925 | 5,80888 | -1,413850913 | ENST00000409660 | 80856     | NM_030650    | KIAA1715            |
| A_21_P0004483  | 1,46208 | 1,96175 | -1,413890114 | N/A             | N/A       | N/A          | Inc-IRX1-4          |
| A_22_P00017044 | 1,50621 | 2,00603 | -1,414037127 | N/A             | 101927434 | NR_125943    | LOC101927434        |
| A_23_P371885   | 8,39056 | 8,89045 | -1,414105738 | ENST00000615623 | 51326     | NM_016632    | ARL17A              |
| A_33_P3424108  | 4,07866 | 4,57862 | -1,414174353 | N/A             | N/A       | N/A          | N/A                 |
| A_22_P00015007 | 1,63349 | 2,13345 | -1,414174353 | N/A             | N/A       | N/A          | Inc-SMOC2-1         |
| A_33_P3363340  | 1,41764 | 1,91764 | -1,414213562 | ENST00000469981 | 389177    | N/A          | TMEM212             |
| A_21_P0013659  | 3,03872 | 3,53872 | -1,414213562 | N/A             | N/A       | N/A          | XLOC_I2_015216      |
| A_22_P00025922 | 4,96005 | 5,46009 | -1,414252773 | ENST00000594927 | 101929007 | XR_244108    | LOC101929007        |
| A_23_P103201   | 11,3528 | 11,8529 | -1,414311592 | ENST00000334351 | 55629     | NM_017761    | PNRC2               |
| A_33_P3267230  | 9,85603 | 10,3562 | -1,414380216 | ENST00000611281 | 414059    | NM_001001417 | TBC1D3B             |
| A_23_P168567   | 14,1607 | 14,6609 | -1,414409628 | ENST00000544802 | 2969      | NM_032999    | GTF2I               |
| A_33_P3255274  | 7,67686 | 8,17708 | -1,414429236 | N/A             | 26505     | NM_017623    | CNNM3               |
| A_32_P528967   | 1,43878 | 1,93903 | -1,414458648 | ENST00000312295 | 132112    | NM_153708    | RTP1                |
| A_21_P0005130  | 3,82187 | 4,32213 | -1,414468452 | N/A             | N/A       | N/A          | Inc-TRMT11-1        |
| A_33_P3313796  | 10,1047 | 10,605  | -1,41450767  | ENST00000328697 | 91057     | NM_030771    | CCDC34              |
| A_24_P204727   | 1,58926 | 2,08967 | -1,414615525 | ENST00000390624 | N/A       | Z18824       | N/A                 |
| A_33_P3264238  | 2,23772 | 2,73813 | -1,414615525 | ENST00000619852 | 140883    | BC042370     | ZNF280B             |
| A_22_P00005476 | 3,31173 | 3,81217 | -1,414644942 | N/A             | N/A       | BG187868     | Inc-DYNC1L1-1       |
| A_33_P3302185  | 1,75785 | 2,2583  | -1,414654747 | ENST00000293937 | 64711     | NM_001009606 | HS3ST6              |
| A_23_P56256    | 12,6766 | 13,1771 | -1,414703776 | ENST00000589069 | 5438      | NM_006233    | POLR2I              |
| A_23_P149545   | 6,31459 | 6,81511 | -1,414723388 | ENST00000369155 | 8349      | NM_003528    | HIST2H2BE           |
| A_21_P0014591  | 6,77619 | 7,27672 | -1,414733195 | N/A             | N/A       | N/A          | N/A                 |
| A_22_P00013801 | 1,38292 | 1,88367 | -1,414948947 | N/A             | N/A       | N/A          | Inc-RP4-604K5.1.1-3 |
| A_24_P99216    | 10,4202 | 10,921  | -1,414997986 | ENST00000546834 | 26020     | NM_014045    | LRP10               |
| A_33_P3839897  | 3,85143 | 4,3523  | -1,415066644 | N/A             | 100151683 | DW419002     | RNU4ATAC            |
| A_33_P3321150  | 12,148  | 12,6489 | -1,41509607  | ENST00000409777 | 8452      | NM_003590    | CUL3                |
| A_23_P501877   | 9,88613 | 10,3871 | -1,415164732 | ENST00000216923 | 55734     | NM_018197    | ZFP64               |
| A_23_P64306    | 1,35606 | 1,85716 | -1,415292258 | ENST00000613263 | 79097     | NM_024114    | TRIM48              |
| A_21_P0007785  | 1,49918 | 2,00034 | -1,415351119 | N/A             | N/A       | N/A          | Inc-DHX37-10        |
| A_23_P163353   | 8,55496 | 9,05635 | -1,415576778 | ENST00000249636 | 8554      | NM_016166    | PIAS1               |

|                |         |         |              |                 |           |              |                       |
|----------------|---------|---------|--------------|-----------------|-----------|--------------|-----------------------|
| A_22_P00009871 | 8,82655 | 9,32802 | -1,415655276 | N/A             | N/A       | N/A          | Inc-MFAP4-1           |
| A_21_P0007284  | 3,48807 | 3,98955 | -1,415665089 | N/A             | N/A       | N/A          | Inc-CTD-2523D13.1.1-5 |
| A_21_P0011168  | 2,99629 | 3,49778 | -1,415674902 | ENST00000582957 | 284233    | N/A          | CYP4F35P              |
| A_33_P6471080  | 1,33717 | 1,83886 | -1,415871169 | ENST00000513157 | 101929505 | NR_104625    | LOC101929505          |
| A_21_P0003701  | 1,72441 | 2,22614 | -1,415910426 | ENST00000512839 | 401164    | NR_033869    | LINC01060             |
| A_24_P226278   | 7,94098 | 8,44274 | -1,415939869 | ENST00000612830 | 23338     | NM_015288    | JADE2                 |
| A_21_P0011003  | 2,28566 | 2,78763 | -1,41614599  | N/A             | N/A       | N/A          | XLOC_I2_002537        |
| A_24_P942969   | 2,80707 | 3,30916 | -1,416263787 | ENST00000425340 | 2524      | NM_000511    | FUT2                  |
| A_33_P3872301  | 1,47531 | 1,97741 | -1,416273603 | N/A             | 100170226 | BF570763     | SNAR-C3               |
| A_21_P0008767  | 1,67475 | 2,17685 | -1,416273603 | N/A             | N/A       | N/A          | Inc-MEX3B-2           |
| A_24_P112160   | 12,517  | 13,0191 | -1,416273603 | ENST00000257632 | 80761     | NM_030570    | UPK3B                 |
| A_21_P0009761  | 1,70171 | 2,20396 | -1,416420864 | ENST00000590021 | 102723379 | N/A          | LOC102723379          |
| A_33_P3360785  | 2,82047 | 3,32275 | -1,416450318 | N/A             | N/A       | AK130121     | N/A                   |
| A_24_P173754   | 8,57767 | 9,07999 | -1,416489591 | ENST00000367514 | 81563     | NM_030806    | C1orf21               |
| A_33_P3285868  | 11,6888 | 12,1912 | -1,41656814  | ENST00000293230 | 114757    | NM_134268    | CYGB                  |
| A_21_P0001696  | 1,44461 | 1,94701 | -1,41656814  | N/A             | N/A       | N/A          | Inc-S1PR1-2           |
| A_24_P350307   | 14,971  | 15,4734 | -1,41656814  | ENST00000494933 | N/A       | N/A          | N/A                   |
| A_22_P00023867 | 7,61758 | 8,12008 | -1,416666332 | N/A             | 101928954 | XR_252644    | LOC101928954          |
| A_24_P320163   | 1,61012 | 2,11278 | -1,416823454 | ENST00000513150 | 10895     | NR_026769    | PPBPP2                |
| A_22_P00003573 | 2,92039 | 3,42312 | -1,416892201 | N/A             | N/A       | AK125051     | Inc-CCT7-1            |
| A_21_P0010212  | 2,24922 | 2,75211 | -1,417049348 | ENST00000624113 | 114038    | N/A          | LINC00313             |
| A_23_P7866     | 6,61019 | 7,11312 | -1,417088637 | ENST00000283303 | 221393    | NM_153838    | GPR115                |
| A_33_P3351101  | 7,71558 | 8,21852 | -1,41709846  | ENST00000479086 | 219743    | NM_173555    | TYSND1                |
| A_22_P00006522 | 3,57487 | 4,07788 | -1,41716722  | N/A             | N/A       | N/A          | Inc-FGFR4-1           |
| A_21_P0001963  | 1,58621 | 2,08923 | -1,417177043 | ENST00000447835 | 102724849 | N/A          | LOC102724849          |
| A_22_P00000467 | 4,07497 | 4,57809 | -1,417275277 | ENST00000622128 | 100506136 | NR_038948    | LOC100506136          |
| A_22_P00004726 | 1,41555 | 1,91873 | -1,417334221 | N/A             | N/A       | N/A          | Inc-CTH-6             |
| A_24_P275073   | 1,4047  | 1,90794 | -1,417393168 | ENST00000373208 | 140766    | NM_139155    | ADAMTS14              |
| A_33_P3258061  | 6,12427 | 6,62757 | -1,417452117 | ENST00000340790 | 342979    | NM_001145028 | PALM3                 |
| A_23_P145238   | 13,2994 | 13,8028 | -1,41755037  | N/A             | 85236     | NM_080593    | HIST1H2BK             |
| A_24_P70888    | 13,7659 | 14,2693 | -1,41755037  | ENST00000463165 | 23654     | NM_012401    | PLXNB2                |
| A_21_P0007229  | 11,8627 | 12,3661 | -1,41755037  | ENST00000561588 | N/A       | XR_252919    | N/A                   |
| A_23_P933      | 9,56459 | 10,068  | -1,417560196 | ENST00000495272 | 25950     | NM_015485    | RWDD3                 |



|                |         |         |              |                 |        |              |                |
|----------------|---------|---------|--------------|-----------------|--------|--------------|----------------|
| A_23_P40588    | 8,91137 | 9,4148  | -1,417579848 | ENST00000483861 | 150274 | NM_172002    | HSCB           |
| A_23_P16562    | 8,54496 | 9,0484  | -1,417589674 | ENST00000600239 | 10147  | NM_001017392 | SUGP2          |
| A_21_P0013957  | 3,36818 | 3,87163 | -1,4175995   | N/A             | N/A    | N/A          | N/A            |
| A_24_P109652   | 9,08137 | 9,58506 | -1,417835345 | ENST00000312493 | 79834  | NM_024776    | PEAK1          |
| A_21_P0002089  | 2,41429 | 2,91805 | -1,41790414  | ENST00000417284 | 729121 | N/A          | RGPD4-AS1      |
| A_33_P3285639  | 3,69155 | 4,19536 | -1,417953282 | ENST00000393482 | 80705  | NM_025244    | TSGA10         |
| A_32_P514790   | 9,78218 | 10,2861 | -1,418061399 | ENST00000589666 | 85451  | NM_001080419 | UNK            |
| A_21_P0000857  | 3,74397 | 4,24789 | -1,418061399 | N/A             | 340544 | NR_038978    | MORF4L2-AS1    |
| A_33_P3364459  | 10,5583 | 11,0624 | -1,418238337 | ENST00000348719 | 51292  | NM_001283021 | GMPR2          |
| A_33_P3576574  | 1,44701 | 1,95113 | -1,418257998 | ENST00000400540 | 440131 | N/A          | LINC00544      |
| A_33_P3378549  | 2,14071 | 2,64486 | -1,41828749  | N/A             | N/A    | N/A          | XLOC_I2_008259 |
| A_22_P00005374 | 1,75291 | 2,25709 | -1,418316983 | N/A             | N/A    | AL598298     | Inc-DRD5-2     |
| A_23_P39076    | 13,8434 | 14,3476 | -1,418336645 | ENST00000246792 | 6237   | NM_006270    | RRAS           |
| A_24_P7934     | 15,6982 | 16,2025 | -1,41843496  | ENST00000598383 | N/A    | N/A          | N/A            |
| A_33_P3499174  | 13,2341 | 13,7385 | -1,418533282 | ENST00000372850 | 81605  | NM_001265582 | URM1           |
| A_23_P138717   | 13,0457 | 13,5502 | -1,418631611 | ENST00000369103 | 6001   | NM_001005339 | RGS10          |
| A_21_P0014391  | 4,60742 | 5,11195 | -1,418661111 | N/A             | N/A    | N/A          | N/A            |
| A_23_P46351    | 5,78351 | 6,28809 | -1,418710279 | ENST00000526413 | 11022  | NM_006862    | TDRKH          |
| A_33_P3233916  | 1,68212 | 2,18676 | -1,418769282 | ENST00000396356 | 55553  | NM_017508    | SOX6           |
| A_22_P00003393 | 3,6022  | 4,10685 | -1,418779116 | N/A             | N/A    | AF086143     | Inc-CCDC117-1  |
| A_33_P3818787  | 4,31396 | 4,81862 | -1,418788951 | ENST00000507914 | 344967 | NR_027277    | LOC344967      |
| A_23_P145957   | 8,19981 | 8,70452 | -1,418838123 | ENST00000378099 | 27010  | NM_022445    | TPK1           |
| A_22_P00001092 | 5,78104 | 6,28576 | -1,418847958 | N/A             | N/A    | N/A          | Inc-ALG10B-1   |
| A_21_P0006939  | 1,46254 | 1,96729 | -1,418877462 | N/A             | N/A    | N/A          | Inc-GPR123-4   |
| A_24_P187351   | 3,79306 | 4,29789 | -1,418956144 | ENST00000361528 | 4850   | NM_013316    | CNOT4          |
| A_22_P00024845 | 5,14105 | 5,64592 | -1,418995486 | N/A             | N/A    | AL137752     | Inc-HSPB6-1    |
| A_22_P00016087 | 7,2715  | 7,77643 | -1,419054502 | N/A             | N/A    | AK022139     | Inc-THEMIS-2   |
| A_22_P00023712 | 10,3589 | 10,8639 | -1,419123356 | ENST00000537269 | N/A    | BX092498     | N/A            |
| A_22_P00012844 | 4,53938 | 5,04438 | -1,419123356 | N/A             | N/A    | AK125418     | Inc-RASA1-7    |
| A_33_P3613000  | 4,43837 | 4,94366 | -1,419408647 | ENST00000379091 | 65986  | NM_001105539 | ZBTB10         |
| A_23_P109768   | 14,1649 | 14,6702 | -1,419418485 | ENST00000477393 | 9616   | NM_014245    | RNF7           |
| A_22_P00014276 | 1,47546 | 1,98077 | -1,419428324 | N/A             | N/A    | N/A          | Inc-SEPHS2-1   |
| A_23_P308021   | 4,69835 | 5,20369 | -1,41945784  | ENST00000438189 | 57010  | NM_145200    | CABP4          |

|                |         |         |              |                 |           |              |              |
|----------------|---------|---------|--------------|-----------------|-----------|--------------|--------------|
| A_33_P3423700  | 7,88075 | 8,38616 | -1,419526715 | N/A             | 100131829 | AK124002     | LOC100131829 |
| A_21_P0009396  | 5,58032 | 6,08575 | -1,419546394 | N/A             | N/A       | N/A          | Inc-SEPT9-1  |
| A_22_P00019661 | 2,81051 | 3,31601 | -1,419615272 | ENST00000314040 | N/A       | AK091913     | N/A          |
| A_23_P81880    | 15,2822 | 15,7877 | -1,419615272 | ENST00000398073 | 10106     | NM_005730    | CTDSP2       |
| A_32_P141612   | 6,13732 | 6,64287 | -1,419664473 | ENST00000392857 | 5000      | NM_002552    | ORC4         |
| A_22_P00022405 | 1,57894 | 2,08457 | -1,419743198 | ENST00000448740 | N/A       | AK093256     | N/A          |
| A_21_P0004641  | 3,91571 | 4,42139 | -1,419792404 | ENST00000561890 | 100507679 | NM_001198815 | MUC22        |
| A_24_P86389    | 12,9989 | 13,5046 | -1,419812086 | ENST00000359611 | 8336      | NM_003514    | HIST1H2AM    |
| A_24_P177604   | 5,70176 | 6,20753 | -1,419880978 | ENST00000055335 | 89801     | NM_033215    | PPP1R3F      |
| A_33_P3368471  | 9,91043 | 10,4163 | -1,4199794   | ENST00000460749 | 221294    | NM_152729    | NT5DC1       |
| A_33_P3408898  | 9,51961 | 10,0255 | -1,419999085 | ENST00000408925 | 441150    | NM_001008739 | C6orf226     |
| A_32_P448360   | 7,24336 | 7,74929 | -1,420038456 | N/A             | 339201    | NR_049729    | ASB16-AS1    |
| A_24_P53519    | 11,4227 | 11,9287 | -1,420107359 | ENST00000301280 | 10036     | NM_005483    | CHAF1A       |
| A_23_P56654    | 9,48247 | 9,98849 | -1,420127046 | ENST00000462609 | 84693     | NM_032601    | MCEE         |
| A_33_P3327404  | 3,93839 | 4,44442 | -1,420136889 | ENST00000335450 | 130399    | NM_145259    | ACVR1C       |
| A_33_P3287745  | 12,5558 | 13,0619 | -1,420205796 | ENST00000448516 | 84148     | NM_182958    | KAT8         |
| A_23_P217554   | 1,48196 | 1,98807 | -1,42021564  | ENST00000286482 | 4107      | NM_005364    | MAGEA8       |
| A_21_P0001529  | 3,40199 | 3,90818 | -1,420294396 | N/A             | 103695366 | NR_125761    | LINC01461    |
| A_22_P00012882 | 3,88865 | 4,39486 | -1,420314086 | N/A             | N/A       | N/A          | Inc-RBM11-1  |
| A_23_P105730   | 3,84357 | 4,34978 | -1,420314086 | ENST00000541087 | 56890     | NM_020128    | MDM1         |
| A_23_P397320   | 1,48533 | 1,99156 | -1,420333776 | ENST00000300961 | 126306    | NM_144616    | JSRP1        |
| A_22_P00008922 | 7,23105 | 7,7373  | -1,420353466 | ENST00000435469 | N/A       | N/A          | N/A          |
| A_23_P2582     | 10,4901 | 10,9964 | -1,420402692 | ENST00000459625 | 51564     | NM_015401    | HDAC7        |
| A_22_P00002151 | 3,71051 | 4,21683 | -1,420422383 | ENST00000417135 | N/A       | N/A          | N/A          |
| A_23_P105562   | 7,67778 | 8,18415 | -1,420471612 | ENST00000261405 | 7450      | NM_000552    | VWF          |
| A_21_P0013362  | 1,45775 | 1,96415 | -1,42050115  | ENST00000458645 | N/A       | N/A          | N/A          |
| A_23_P92281    | 12,1656 | 12,672  | -1,42050115  | ENST00000488781 | 29083     | NM_014170    | GTPBP8       |
| A_24_P144601   | 5,57891 | 6,08533 | -1,420520843 | ENST00000428824 | 5460      | NM_002701    | POU5F1       |
| A_33_P3217743  | 2,93906 | 3,44557 | -1,420609462 | ENST00000624628 | 401149    | N/A          | LINC01061    |
| A_32_P151782   | 9,30282 | 9,80939 | -1,420668545 | ENST00000612598 | N/A       | N/A          | N/A          |
| A_23_P30098    | 1,5273  | 2,03389 | -1,42068824  | ENST00000265512 | 127       | NM_000670    | ADH4         |
| A_23_P16032    | 10,4487 | 10,9553 | -1,420698087 | N/A             | 10597     | NR_002166    | TRAPPC2B     |
| A_23_P137532   | 10,132  | 10,6386 | -1,420698087 | ENST00000481933 | 5351      | NM_000302    | PLOD1        |

|                |         |         |              |                 |           |              |              |
|----------------|---------|---------|--------------|-----------------|-----------|--------------|--------------|
| A_23_P367405   | 12,2226 | 12,7292 | -1,420698087 | ENST00000299299 | 5092      | NM_000281    | PCBD1        |
| A_23_P107735   | 10,1409 | 10,6476 | -1,420796566 | ENST00000221972 | 973       | NM_001783    | CD79A        |
| A_33_P3220698  | 13,0752 | 13,582  | -1,420895052 | ENST00000201647 | 54869     | NM_133180    | EPS8L1       |
| A_33_P3418321  | 1,59456 | 2,10139 | -1,420924599 | N/A             | N/A       | N/A          | N/A          |
| A_23_P27810    | 9,85306 | 10,3599 | -1,420934448 | ENST00000395835 | 84775     | NM_032689    | ZNF607       |
| A_21_P0002732  | 5,47251 | 5,97945 | -1,421032943 | ENST00000414382 | 102725370 | N/A          | LOC102725370 |
| A_23_P144465   | 10,3401 | 10,8473 | -1,421289062 | ENST00000514815 | 9061      | NM_005443    | PAPSS1       |
| A_21_P0008655  | 1,3647  | 1,87196 | -1,421348173 | N/A             | N/A       | N/A          | Inc-PML-3    |
| A_33_P3409099  | 5,21994 | 5,72724 | -1,421387582 | ENST00000244769 | 6310      | NM_000332    | ATXN1        |
| A_23_P7684     | 6,25904 | 6,76676 | -1,421801439 | ENST00000541762 | 79616     | NM_024565    | CCNJL        |
| A_21_P0010315  | 4,22075 | 4,72852 | -1,421850716 | N/A             | N/A       | N/A          | Inc-ADARB1-1 |
| A_21_P0013565  | 8,62633 | 9,13412 | -1,421870427 | ENST00000479351 | N/A       | N/A          | N/A          |
| A_21_P0008737  | 1,40791 | 1,91577 | -1,421939418 | ENST00000558792 | 101928442 | NR_120336    | LINC01491    |
| A_33_P3210218  | 11,271  | 11,7789 | -1,421978843 | ENST00000589189 | 2589      | NM_020474    | GALNT1       |
| A_33_P3299834  | 5,44068 | 5,94865 | -1,42204784  | ENST00000615234 | 5434      | NM_002695    | POLR2E       |
| A_33_P3319041  | 10,1086 | 10,6166 | -1,422077411 | ENST00000325307 | 3149      | NM_001301228 | HMGB3        |
| A_24_P280497   | 11,8734 | 12,3817 | -1,422373154 | ENST00000434748 | 57666     | NM_001142641 | FBRSL1       |
| A_22_P00025447 | 4,03016 | 4,53854 | -1,422452029 | N/A             | 101929760 | NR_110542    | PIK3IP1-AS1  |
| A_33_P3315410  | 10,2876 | 10,796  | -1,422471749 | ENST00000240316 | 8161      | NM_004645    | COIL         |
| A_33_P3266265  | 9,5348  | 10,0434 | -1,422668959 | ENST00000333421 | 51104     | NM_001025780 | ABHD17B      |
| A_21_P0005578  | 1,4693  | 1,97792 | -1,422688681 | N/A             | N/A       | N/A          | Inc-EXOC4-2  |
| A_22_P00025785 | 1,43808 | 1,9467  | -1,422688681 | N/A             | N/A       | N/A          | Inc-RTL1-5   |
| A_22_P00016948 | 4,05367 | 4,56236 | -1,422757712 | ENST00000604369 | 102723508 | NR_110456    | KANTR        |
| A_23_P68155    | 10,1787 | 10,6874 | -1,422767574 | ENST00000263642 | 64135     | NM_022168    | IFIH1        |
| A_33_P3393694  | 15,5589 | 16,0677 | -1,422866196 | ENST00000598681 | 29997     | NM_015710    | GLTSCR2      |
| A_21_P0013246  | 11,1349 | 11,6438 | -1,422964825 | ENST00000428678 | 80761     | NM_030570    | UPK3B        |
| A_21_P0001346  | 1,4363  | 1,94521 | -1,422974689 | N/A             | N/A       | N/A          | Inc-TMEM56-1 |
| A_23_P152963   | 8,13574 | 8,64488 | -1,423201563 | ENST00000389017 | 54785     | NM_017622    | C17orf59     |
| A_23_P404565   | 6,06536 | 6,57461 | -1,423310081 | ENST00000461809 | 66035     | NM_030807    | SLC2A11      |
| A_33_P3262814  | 7,24916 | 7,7585  | -1,423398874 | ENST00000298249 | 221035    | NM_001001330 | REEP3        |
| A_21_P0006942  | 1,34459 | 1,85394 | -1,42340874  | N/A             | N/A       | N/A          | Inc-GPR123-1 |
| A_19_P00323025 | 1,48486 | 1,99423 | -1,423428473 | ENST00000467995 | 100498859 | N/A          | LINC00881    |
| A_23_P254842   | 9,88443 | 10,3938 | -1,423428473 | ENST00000381077 | 8226      | NM_012080    | HDHD1        |

|                |         |         |              |                 |           |              |              |
|----------------|---------|---------|--------------|-----------------|-----------|--------------|--------------|
| A_22_P00005214 | 1,35769 | 1,86719 | -1,423556743 | ENST00000554195 | 283601    | DB043610     | LINC00523    |
| A_23_P71319    | 12,8525 | 13,362  | -1,423556743 | ENST00000525607 | 2222      | NM_004462    | FDFT1        |
| A_33_P3253682  | 10,2677 | 10,7772 | -1,423556743 | ENST00000409449 | 53938     | NM_032472    | PPIL3        |
| A_23_P360804   | 7,41219 | 7,9217  | -1,42356661  | ENST00000244751 | 57699     | NM_020939    | CPNE5        |
| A_23_P29495    | 11,9985 | 12,5081 | -1,42365542  | ENST00000396185 | 1499      | NM_001904    | CTNNB1       |
| A_21_P0001593  | 3,29357 | 3,80321 | -1,423694892 | N/A             | 102724358 | XR_425046    | LOC102724358 |
| A_33_P3238479  | 3,36543 | 3,87511 | -1,423734366 | N/A             | N/A       | N/A          | N/A          |
| A_23_P69242    | 12,0489 | 12,5586 | -1,423754103 | ENST00000272902 | 285362    | NM_182760    | SUMF1        |
| A_23_P207742   | 10,6795 | 11,1892 | -1,423754103 | ENST00000264637 | 7067      | NM_003250    | THRA         |
| A_21_P0010870  | 6,48491 | 6,99466 | -1,423803448 | ENST00000608163 | 253725    | NM_001169106 | FAM21C       |
| A_33_P3222380  | 9,80165 | 10,3114 | -1,423803448 | ENST00000333244 | 113146    | NM_138420    | AHNAK2       |
| A_33_P3259440  | 1,48544 | 1,99523 | -1,423842925 | ENST00000434739 | 342096    | NM_001038640 | GOLGA6A      |
| A_21_P0012106  | 1,47118 | 1,98105 | -1,423921881 | ENST00000413563 | 646324    | NR_037195    | LINC00607    |
| A_33_P6471837  | 6,89318 | 7,40307 | -1,423941621 | N/A             | 151534    | NR_024606    | LBX2-AS1     |
| A_23_P125348   | 11,0819 | 11,5918 | -1,423951491 | ENST00000572656 | 58485     | NM_021210    | TRAPPC1      |
| A_22_P00012098 | 1,62878 | 2,13875 | -1,424020584 | ENST00000380573 | 148       | XM_006716292 | ADRA1A       |
| A_33_P3393341  | 12,1952 | 12,7052 | -1,424050196 | ENST00000373257 | 64900     | NM_001301860 | LPIN3        |
| A_23_P145437   | 12,0846 | 12,5946 | -1,424050196 | ENST00000479165 | 55023     | NM_017934    | PHIP         |
| A_23_P158007   | 10,808  | 11,3181 | -1,424148907 | ENST00000467312 | 84885     | NM_032799    | ZDHHC12      |
| A_33_P3816688  | 9,06602 | 9,57616 | -1,424188393 | ENST00000309241 | 133522    | NM_133263    | PPARGC1B     |
| A_33_P3338186  | 12,6299 | 13,1401 | -1,424247625 | ENST00000337014 | 284004    | NM_173620    | HEXDC        |
| A_33_P3382309  | 3,77959 | 4,28986 | -1,424316731 | ENST00000512462 | 63976     | NM_199454    | PRDM16       |
| A_21_P0002016  | 1,60659 | 2,11688 | -1,424336477 | ENST00000421112 | 100506474 | NR_038434    | LOC100506474 |
| A_22_P00004317 | 8,07941 | 8,58977 | -1,424405587 | N/A             | 253039    | NR_024408    | PSMD5-AS1    |
| A_23_P200203   | 11,5901 | 12,1005 | -1,424445081 | ENST00000358358 | 55268     | NM_018281    | ECHDC2       |
| A_21_P0004276  | 3,29796 | 3,80867 | -1,424751192 | N/A             | N/A       | N/A          | Inc-POLR3G-1 |
| A_21_P0011279  | 1,39334 | 1,90407 | -1,424770944 | ENST00000425648 | N/A       | N/A          | N/A          |
| A_23_P132057   | 1,72026 | 2,231   | -1,424780819 | ENST00000332587 | 54072     | NR_024027    | LINC00158    |
| A_22_P00015400 | 3,70364 | 4,21446 | -1,424859828 | N/A             | 102723834 | XR_425103    | LOC102723834 |
| A_33_P3210561  | 13,4682 | 13,9791 | -1,424938841 | N/A             | N/A       | N/A          | N/A          |
| A_22_P00004378 | 1,4007  | 1,91166 | -1,424998104 | ENST00000435738 | N/A       | N/A          | N/A          |
| A_23_P385126   | 7,8124  | 8,32337 | -1,425007982 | ENST00000616885 | 91614     | NM_139160    | DEPDC7       |
| A_33_P3382162  | 9,45388 | 9,96486 | -1,425017859 | ENST00000368870 | 5993      | NM_000449    | RFX5         |

|                |         |         |              |                 |           |              |                |
|----------------|---------|---------|--------------|-----------------|-----------|--------------|----------------|
| A_22_P00004722 | 3,4511  | 3,96216 | -1,425096881 | N/A             | 100132618 | NR_038420    | ZRANB2-AS1     |
| A_33_P3277140  | 14,8925 | 15,4036 | -1,425136394 | ENST00000486890 | 440574    | NM_001032363 | MINOS1         |
| A_33_P3423845  | 8,82533 | 9,33656 | -1,425264817 | N/A             | N/A       | N/A          | N/A            |
| A_33_P3333327  | 3,78473 | 4,29599 | -1,425294455 | N/A             | N/A       | N/A          | N/A            |
| A_24_P466374   | 9,72213 | 10,2335 | -1,425403133 | ENST00000436342 | 2140      | NM_001990    | EYA3           |
| A_22_P00023071 | 1,6889  | 2,20028 | -1,425413013 | N/A             | 102724587 | XR_424628    | LOC102724587   |
| A_24_P359405   | 5,26635 | 5,77773 | -1,425413013 | ENST00000549583 | 196403    | NM_178502    | DTX3           |
| A_23_P413303   | 3,99926 | 4,51064 | -1,425413013 | ENST00000604157 | 54553     | NR_033797    | DKFZP434I0714  |
| A_23_P10685    | 12,4495 | 12,9609 | -1,425432773 | ENST00000433386 | 23640     | NM_012267    | HSPBP1         |
| A_23_P123622   | 7,00687 | 7,51828 | -1,425442654 | ENST00000469249 | 4882      | NM_003995    | NPR2           |
| A_33_P6815522  | 6,55638 | 7,06787 | -1,425521699 | N/A             | 284900    | NR_026962    | TTC28-AS1      |
| A_22_P00007459 | 3,00105 | 3,51261 | -1,425590868 | N/A             | 101928431 | XR_429385    | LOC101928431   |
| A_23_P593      | 11,0809 | 11,5925 | -1,425630394 | ENST00000355105 | 60313     | NM_021639    | GPBP1L1        |
| A_24_P375819   | 4,9391  | 5,45077 | -1,425699568 | ENST00000538670 | 93164     | NR_002774    | HTR7P1         |
| A_23_P37914    | 2,75259 | 3,26433 | -1,425768745 | ENST00000488922 | 115584    | NM_052944    | SLC5A11        |
| A_22_P00012687 | 7,94133 | 8,45307 | -1,425768745 | N/A             | 100507156 | NR_038323    | LOC100507156   |
| A_23_P29318    | 11,7596 | 12,2714 | -1,425828042 | ENST00000494795 | 25813     | NM_015380    | SAMM50         |
| A_33_P3304754  | 4,68582 | 5,19765 | -1,425857691 | ENST00000490010 | 7174      | BC024905     | TPP2           |
| A_32_P226205   | 3,56579 | 4,07764 | -1,425877458 | ENST00000419474 | 85446     | NM_033400    | ZFHX2          |
| A_33_P3401284  | 10,1043 | 10,6163 | -1,426025717 | ENST00000602361 | 6023      | NR_003051    | RMRP           |
| A_23_P435521   | 4,4814  | 4,99341 | -1,426035602 | N/A             | 113277    | NM_145041    | TMEM106A       |
| A_21_P0001550  | 9,94982 | 10,4619 | -1,426104795 | ENST00000440778 | 100131564 | NR_034089    | LOC100131564   |
| A_24_P410463   | 2,08114 | 2,59324 | -1,426124565 | ENST00000359047 | 140803    | NM_017662    | TRPM6          |
| A_22_P00004418 | 7,19889 | 7,71101 | -1,426144336 | N/A             | N/A       | BC008846     | Inc-COPS7B-1   |
| A_22_P00009669 | 3,83813 | 4,35043 | -1,426322282 | N/A             | N/A       | N/A          | Inc-MBD2-2     |
| A_23_P411612   | 8,99593 | 9,50825 | -1,426342055 | ENST00000338146 | 283377    | NM_207344    | SPRYD4         |
| A_23_P90589    | 9,92955 | 10,4419 | -1,426371715 | ENST00000258383 | 65080     | NM_022915    | MRPL44         |
| A_23_P132175   | 9,70013 | 10,2125 | -1,426391489 | ENST00000043402 | 65078     | NM_023004    | RTN4R          |
| A_21_P0003105  | 1,36765 | 1,88012 | -1,426490363 | N/A             | N/A       | N/A          | Inc-RFTN1-1    |
| A_33_P3361746  | 7,46356 | 7,97605 | -1,426510138 | ENST00000220888 | 7227      | NM_014112    | TRPS1          |
| A_33_P3377005  | 10,1067 | 10,6192 | -1,426520026 | ENST00000469990 | 256329    | NM_173573    | LMNTD2         |
| A_21_P0004356  | 1,59016 | 2,10268 | -1,426539802 | ENST00000509057 | N/A       | N/A          | N/A            |
| A_21_P0002672  | 1,4948  | 2,00733 | -1,42654969  | N/A             | N/A       | N/A          | Inc-TGFBRAP1-6 |

|                |         |         |              |                 |           |              |                  |
|----------------|---------|---------|--------------|-----------------|-----------|--------------|------------------|
| A_24_P310224   | 7,94433 | 8,45686 | -1,42654969  | ENST00000601469 | 84671     | NM_032584    | ZNF347           |
| A_23_P53957    | 12,9839 | 13,4965 | -1,426618908 | ENST00000557612 | 51241     | NM_016468    | COX16            |
| A_33_P3341716  | 7,40035 | 7,91316 | -1,426826583 | ENST00000448246 | 6671      | NM_003112    | SP4              |
| A_21_P0006480  | 1,8169  | 2,32982 | -1,426935377 | N/A             | 101928275 | XR_247297    | LOC101928275     |
| A_33_P3463924  | 5,00059 | 5,51359 | -1,427014506 | N/A             | 57399     | AF264626     | LOC57399         |
| A_23_P101532   | 17,5308 | 18,0438 | -1,427014506 | ENST00000601306 | 6205      | NM_001015    | RPS11            |
| A_21_P0007576  | 1,43824 | 1,95127 | -1,42704418  | N/A             | N/A       | N/A          | Inc-DYRK2-2      |
| A_23_P87323    | 9,47277 | 9,98585 | -1,427093638 | ENST00000263401 | 29099     | NM_014186    | COMMD9           |
| A_22_P00003258 | 8,13522 | 8,64834 | -1,427133206 | N/A             | 100874362 | NR_102279    | HOXB-AS1         |
| A_23_P35168    | 10,0269 | 10,5401 | -1,427212346 | ENST00000494765 | 29929     | NM_013339    | ALG6             |
| A_33_P3209706  | 4,17768 | 4,69095 | -1,427281596 | N/A             | 503582    | NM_001012659 | ARGFX            |
| A_24_P122636   | 1,49565 | 2,00901 | -1,427370637 | ENST00000469520 | 10380     | NM_006085    | BPNT1            |
| A_33_P3395219  | 3,27918 | 3,79262 | -1,42744979  | N/A             | 374987    | NR_103535    | NEXN-AS1         |
| A_24_P870799   | 1,46275 | 1,97628 | -1,427538841 | ENST00000373091 | 2899      | NM_000831    | GRIK3            |
| A_22_P00004142 | 7,23774 | 7,75129 | -1,427558632 | N/A             | N/A       | N/A          | Inc-CLDN6-2      |
| A_22_P00009713 | 2,99389 | 3,5076  | -1,427716962 | N/A             | N/A       | N/A          | Inc-MCCC2-2      |
| A_21_P0014316  | 3,03717 | 3,55091 | -1,42774665  | N/A             | N/A       | XR_133117    | N/A              |
| A_33_P3232995  | 2,09312 | 2,60698 | -1,427865412 | ENST00000251864 | 56165     | NM_198795    | TDRD1            |
| A_21_P0004876  | 1,44571 | 1,95963 | -1,427924797 | N/A             | N/A       | N/A          | Inc-AL353597.1-2 |
| A_23_P380928   | 8,09042 | 8,6044  | -1,427984183 | ENST00000493241 | 100526693 | NM_001198793 | ARPC4-TTLL3      |
| A_23_P357374   | 6,02457 | 6,53868 | -1,428112864 | ENST00000270631 | 113091    | NM_178449    | PTH2             |
| A_23_P215505   | 5,19989 | 5,71409 | -1,428201957 | ENST00000620335 | 9771      | NM_012294    | RAPGEF5          |
| A_32_P199252   | 12,5156 | 13,0299 | -1,428300956 | ENST00000530115 | 3320      | NM_001017963 | HSP90AA1         |
| A_19_P00803226 | 10,4025 | 10,9168 | -1,428300956 | N/A             | N/A       | N/A          | Inc-TOP1MT-2     |
| A_23_P47885    | 9,75657 | 10,271  | -1,428429664 | ENST00000320743 | 121227    | NM_153377    | LRIG3            |
| A_22_P00003224 | 4,44797 | 4,96254 | -1,428568287 | ENST00000472243 | N/A       | N/A          | N/A              |
| A_21_P0001334  | 3,04173 | 3,55637 | -1,428637603 | N/A             | N/A       | N/A          | Inc-PKN2-1       |
| A_22_P00017319 | 1,68822 | 2,20289 | -1,428667311 | N/A             | N/A       | N/A          | Inc-USP31-3      |
| A_21_P0003132  | 4,3972  | 4,91191 | -1,428706923 | ENST00000482003 | N/A       | N/A          | N/A              |
| A_21_P0005135  | 2,55578 | 3,07056 | -1,428776246 | ENST00000440397 | 102723649 | NR_125867    | LOC102723649     |
| A_22_P00021891 | 1,34442 | 1,85927 | -1,428845572 | N/A             | N/A       | N/A          | Inc-CDYL2-3      |
| A_33_P3422374  | 4,40405 | 4,91892 | -1,42886538  | ENST00000388923 | 206412    | NM_001010868 | C6orf163         |
| A_23_P206140   | 12,7641 | 13,279  | -1,428895093 | ENST00000394852 | 55466     | NM_018602    | DNAJA4           |

|                |         |         |              |                 |           |              |                |
|----------------|---------|---------|--------------|-----------------|-----------|--------------|----------------|
| A_23_P210948   | 9,94823 | 10,4632 | -1,428964425 | ENST00000496812 | 55245     | NM_018244    | UQCC1          |
| A_22_P00014869 | 1,49507 | 2,01007 | -1,42899414  | N/A             | N/A       | N/A          | Inc-SLC6A12-2  |
| A_33_P3392740  | 5,37247 | 5,88748 | -1,429004045 | N/A             | 84913     | AL831857     | ATOH8          |
| A_33_P3379157  | 13,0991 | 13,6142 | -1,429093193 | ENST00000471737 | 23787     | NM_001271641 | MTCH1          |
| A_22_P00019286 | 7,92386 | 8,43897 | -1,429103099 | ENST00000448543 | N/A       | DB092756     | N/A            |
| A_23_P255785   | 12,1859 | 12,7011 | -1,429192254 | ENST00000481752 | 4690      | NM_006153    | NCK1           |
| A_33_P3341490  | 6,61488 | 7,13008 | -1,429192254 | ENST00000584763 | 284116    | NR_033415    | KRT42P         |
| A_33_P3340189  | 2,442   | 2,95735 | -1,429340858 | N/A             | N/A       | N/A          | N/A            |
| A_23_P5258     | 1,58665 | 2,1021  | -1,429439936 | ENST00000322107 | 126541    | NM_001004465 | OR10H4         |
| A_33_P3273584  | 6,12354 | 6,63914 | -1,429588565 | ENST00000602755 | 677766    | NR_003023    | SCARNA2        |
| A_23_P82929    | 8,68389 | 9,19972 | -1,429816494 | ENST00000259526 | 4856      | NM_002514    | NOV            |
| A_19_P00801324 | 7,06075 | 7,57659 | -1,429826405 | ENST00000566551 | 100996511 | NR_110616    | LINC01355      |
| A_24_P193592   | 6,44983 | 6,96568 | -1,429836316 | ENST00000293968 | 899       | NM_001761    | CCNF           |
| A_24_P273203   | 15,4073 | 15,9232 | -1,429885871 | ENST00000492925 | N/A       | N/A          | N/A            |
| A_22_P00013881 | 7,06105 | 7,57702 | -1,429955251 | N/A             | 100144595 | NM_001256368 | LOC100144595   |
| A_33_P3302676  | 5,41144 | 5,92741 | -1,429955251 | ENST00000485159 | 7091      | N/A          | TLE4           |
| A_24_P202840   | 3,24362 | 3,7596  | -1,429965163 | ENST00000359801 | 284759    | NM_001122962 | SIRPB2         |
| A_33_P3265224  | 6,66031 | 7,17636 | -1,430034547 | ENST00000537589 | 23177     | BX648774     | CEP68          |
| A_33_P6570282  | 9,50425 | 10,0203 | -1,430034547 | ENST00000578200 | 100499466 | NR_027418    | LINC00674      |
| A_23_P118406   | 9,16155 | 9,67762 | -1,430054371 | ENST00000585044 | 79415     | NM_001033046 | C17orf62       |
| A_21_P0014759  | 4,48048 | 4,99658 | -1,430084109 | N/A             | 100506458 | AK097034     | LOC100506458   |
| A_33_P3365142  | 5,19595 | 5,71218 | -1,430212978 | ENST00000375272 | 2571      | NM_013445    | GAD1           |
| A_33_P3314500  | 2,74288 | 3,25921 | -1,430312116 | ENST00000619759 | 4588      | NM_005961    | MUC6           |
| A_33_P3245066  | 9,81032 | 10,3267 | -1,430361688 | ENST00000480991 | 728661    | NM_001290264 | SLC35E2B       |
| A_33_P3311992  | 1,37557 | 1,89202 | -1,430431091 | ENST00000354212 | 9863      | NM_012301    | MAGI2          |
| A_33_P3240976  | 2,95883 | 3,47537 | -1,430520329 | N/A             | N/A       | AK027209     | N/A            |
| A_22_P00008041 | 1,37711 | 1,89367 | -1,430540161 | ENST00000509824 | N/A       | N/A          | N/A            |
| A_33_P3221303  | 5,98377 | 6,50035 | -1,430559992 | ENST00000332438 | 2826      | NM_016602    | CCR10          |
| A_21_P0013604  | 1,56117 | 2,07776 | -1,430569908 | N/A             | N/A       | N/A          | XLOC_I2_015039 |
| A_23_P503233   | 14,1991 | 14,7157 | -1,430579824 | ENST00000366587 | 128178    | NM_080738    | EDARADD        |
| A_23_P330070   | 9,72544 | 10,2421 | -1,430639321 | ENST00000339091 | 7035      | NM_001032281 | TFPI           |
| A_22_P00013899 | 1,5968  | 2,11348 | -1,430659154 | ENST00000512952 | N/A       | N/A          | N/A            |
| A_24_P712562   | 4,24574 | 4,76244 | -1,430678988 | ENST00000397861 | 339210    | NM_001085430 | C17orf67       |

|                |         |         |              |                 |           |              |               |
|----------------|---------|---------|--------------|-----------------|-----------|--------------|---------------|
| A_21_P0004304  | 4,70821 | 5,22493 | -1,430698821 | N/A             | N/A       | N/A          | Inc-CXXC5-1   |
| A_21_P0003619  | 2,94948 | 3,46624 | -1,430738489 | N/A             | N/A       | N/A          | Inc-STAP1-1   |
| A_21_P0001674  | 3,75864 | 4,27541 | -1,430748406 | N/A             | N/A       | N/A          | Inc-NDUFS5-2  |
| A_23_P121095   | 11,4981 | 12,0149 | -1,430778158 | ENST00000435706 | 7155      | NM_001068    | TOP2B         |
| A_22_P00002482 | 5,23366 | 5,75049 | -1,430807911 | ENST00000558017 | 390637    | AL110290     | GDPGP1        |
| A_24_P92267    | 4,34464 | 4,86158 | -1,430917009 | ENST00000426330 | N/A       | N/A          | N/A           |
| A_24_P119201   | 2,05585 | 2,57282 | -1,430946764 | ENST00000583046 | 8932      | NM_015832    | MBD2          |
| A_24_P341504   | 9,19747 | 9,71462 | -1,431125309 | ENST00000423855 | 55599     | NM_017619    | RNPC3         |
| A_24_P403734   | 12,5845 | 13,1017 | -1,431174909 | ENST00000546970 | 25946     | NM_015481    | ZNF385A       |
| A_33_P3236698  | 1,42888 | 1,94617 | -1,431264193 | N/A             | 138649    | AK292218     | ANKRD19P      |
| A_33_P3285987  | 9,84161 | 10,3589 | -1,431264193 | ENST00000303459 | 196074    | NM_152636    | METTL15       |
| A_21_P0006352  | 1,44745 | 1,96481 | -1,43133364  | N/A             | N/A       | N/A          | Inc-ANXA1-2   |
| A_33_P3330283  | 10,5239 | 11,0413 | -1,431373326 | ENST00000426431 | 6667      | NM_138473    | SP1           |
| A_33_P3318852  | 4,72597 | 5,24338 | -1,431383248 | ENST00000310452 | 54885     | NM_198881    | TBC1D8B       |
| A_23_P92499    | 9,55808 | 10,0756 | -1,431492389 | ENST00000260010 | 7097      | NM_003264    | TLR2          |
| A_23_P126917   | 5,94553 | 6,46309 | -1,431532079 | ENST00000318837 | 3321      | NM_001542    | IGSF3         |
| A_22_P00022587 | 6,8248  | 7,34239 | -1,431561847 | N/A             | N/A       | BX101396     | Inc-NUMB-2    |
| A_23_P36647    | 10,1494 | 10,667  | -1,43157177  | ENST00000587630 | 79089     | NM_177441    | TMUB2         |
| A_23_P301053   | 1,48018 | 1,99787 | -1,431661079 | ENST00000244221 | 400961    | NM_020459    | PAIP2B        |
| A_23_P121702   | 14,7781 | 15,2958 | -1,431671003 | ENST00000381464 | 132299    | NM_001014446 | OCIAD2        |
| A_23_P157404   | 10,9588 | 11,4765 | -1,431671003 | ENST00000337619 | 1174      | NM_001283    | AP1S1         |
| A_33_P3255824  | 4,23012 | 4,74784 | -1,43169085  | N/A             | N/A       | N/A          | N/A           |
| A_22_P00023893 | 2,18154 | 2,69936 | -1,431790091 | ENST00000449958 | N/A       | N/A          | N/A           |
| A_21_P0007704  | 1,64436 | 2,16222 | -1,431829789 | N/A             | N/A       | N/A          | Inc-DBX2-1    |
| A_23_P206280   | 15,349  | 15,8669 | -1,431869488 | ENST00000388813 | 9289      | NM_201525    | GPR56         |
| A_23_P319792   | 9,41092 | 9,9289  | -1,43194889  | ENST00000264951 | 54464     | NM_019001    | XRN1          |
| A_33_P3272948  | 6,33105 | 6,84904 | -1,431958816 | ENST00000381365 | 100130311 | NM_001145536 | C17orf107     |
| A_33_P3380982  | 10,008  | 10,526  | -1,431968741 | ENST00000230461 | 55754     | NM_018247    | TMEM30A       |
| A_24_P289170   | 6,93223 | 7,45028 | -1,43201837  | ENST00000556767 | 440193    | NM_001080414 | CCDC88C       |
| A_22_P00005309 | 2,4667  | 2,98479 | -1,432058075 | N/A             | N/A       | CV572980     | Inc-DNAJC24-1 |
| A_22_P00021207 | 1,44166 | 1,95979 | -1,43209778  | N/A             | N/A       | N/A          | Inc-CILP2-1   |
| A_24_P376047   | 2,29467 | 2,81287 | -1,432167268 | ENST00000431178 | 9622      | NM_004917    | KLK4          |
| A_33_P3391290  | 2,95055 | 3,4688  | -1,432216904 | ENST00000507742 | 9315      | NM_001142483 | NREP          |



|                |         |         |              |                 |           |              |               |
|----------------|---------|---------|--------------|-----------------|-----------|--------------|---------------|
| A_22_P00024345 | 6,12876 | 6,64711 | -1,432316181 | ENST00000553682 | 103695436 | NR_125769    | LINC01269     |
| A_24_P153043   | 15,3012 | 15,8196 | -1,432365822 | ENST00000450734 | 118433    | NR_000029    | RPL23AP7      |
| A_23_P19164    | 10,2759 | 10,7943 | -1,432365822 | ENST00000520274 | 7265      | NM_003314    | TTC1          |
| A_21_P0009276  | 4,68554 | 5,20394 | -1,432365822 | N/A             | N/A       | N/A          | Inc-SEPT9-1   |
| A_33_P3277808  | 3,30271 | 3,82121 | -1,43246511  | N/A             | 101928125 | N/A          | LOC101928125  |
| A_32_P347617   | 2,97492 | 3,49345 | -1,432494897 | ENST00000613677 | 164668    | NM_181773    | APOBEC3H      |
| A_24_P293120   | 9,06903 | 9,58757 | -1,432504827 | ENST00000529930 | 79177     | NM_024327    | ZNF576        |
| A_21_P0007475  | 1,34882 | 1,86737 | -1,432514756 | N/A             | N/A       | N/A          | Inc-SPATA19-1 |
| A_22_P00023873 | 1,46661 | 1,98516 | -1,432514756 | N/A             | N/A       | AK095296     | Inc-CXADR-2   |
| A_23_P56922    | 15,3281 | 15,8467 | -1,432564404 | ENST00000559254 | 3336      | NM_002157    | HSPE1         |
| A_22_P00019877 | 1,3701  | 1,88897 | -1,432832533 | N/A             | N/A       | N/A          | Inc-LRRC48-1  |
| A_22_P00019123 | 4,6169  | 5,13579 | -1,432852397 | ENST00000399333 | 55508     | AF119871     | SLC35E3       |
| A_23_P216894   | 7,747   | 8,26592 | -1,432882192 | ENST00000265960 | 79109     | NM_001006617 | MAPKAP1       |
| A_33_P3375710  | 5,46453 | 5,98346 | -1,432892124 | N/A             | N/A       | XM_006710484 | Inc-VAMP3-1   |
| A_33_P3373134  | 2,74515 | 3,2641  | -1,432911989 | ENST00000470139 | 23334     | NM_015284    | SZT2          |
| A_21_P0001279  | 2,77565 | 3,29464 | -1,432951718 | N/A             | N/A       | N/A          | Inc-ZCCHC17-6 |
| A_33_P3343720  | 4,41779 | 4,93678 | -1,432951718 | ENST00000400271 | 10136     | NM_005747    | CELA3A        |
| A_33_P3771039  | 15,8273 | 16,3464 | -1,433060979 | ENST00000416734 | N/A       | N/A          | N/A           |
| A_22_P00005226 | 3,33597 | 3,85511 | -1,433100713 | ENST00000614605 | 79104     | NR_024149    | MEG8          |
| A_24_P51588    | 11,608  | 12,1272 | -1,433160315 | ENST00000488340 | 81669     | NM_030937    | CCNL2         |
| A_22_P00001674 | 1,69636 | 2,21573 | -1,433329201 | ENST00000518489 | N/A       | N/A          | N/A           |
| A_23_P36439    | 1,56365 | 2,08313 | -1,433438491 | ENST00000321688 | 121129    | NM_001258285 | OR2AP1        |
| A_33_P3280531  | 13,6385 | 14,158  | -1,433458363 | N/A             | 1384      | NM_001257363 | CRAT          |
| A_23_P66766    | 11,6289 | 12,1484 | -1,433458363 | ENST00000536255 | 84268     | NM_001160246 | RPAIN         |
| A_22_P00024617 | 7,39202 | 7,91161 | -1,43354779  | N/A             | 100288730 | NR_029383    | PAN3-AS1      |
| A_33_P3349716  | 10,3882 | 10,9079 | -1,433657096 | ENST00000439461 | 90321     | NM_001010851 | ZNF766        |
| A_21_P0006160  | 1,39799 | 1,91774 | -1,433706784 | N/A             | N/A       | N/A          | Inc-TLE4-2    |
| A_22_P00002998 | 11,1331 | 11,6529 | -1,433756473 | N/A             | 102723648 | XR_427920    | LOC102723648  |
| A_32_P375286   | 1,51224 | 2,03209 | -1,433806164 | ENST00000322734 | 285349    | NM_173658    | ZNF660        |
| A_33_P3384284  | 4,72948 | 5,24936 | -1,43383598  | ENST00000436466 | 100130302 | NM_001136234 | SUPT20HL1     |
| A_23_P55400    | 1,59198 | 2,1119  | -1,433875735 | ENST00000393986 | 8689      | NM_003771    | KRT36         |
| A_21_P0013221  | 1,68427 | 2,20421 | -1,433895613 | N/A             | 101929381 | XR_432175    | LOC101929381  |
| A_32_P119033   | 2,75314 | 3,27323 | -1,434044706 | ENST00000328457 | 345557    | NM_001005473 | PLCXD3        |

|                |         |         |              |                 |           |              |              |
|----------------|---------|---------|--------------|-----------------|-----------|--------------|--------------|
| A_33_P3363120  | 4,24708 | 4,76718 | -1,434054646 | N/A             | 692148    | NR_004387    | SCARNA10     |
| A_33_P3412767  | 3,59035 | 4,11051 | -1,434114288 | ENST00000341460 | 84144     | NM_032184    | SYDE2        |
| A_33_P3334843  | 4,53634 | 5,05652 | -1,434134169 | ENST00000331659 | 5337      | AF318333     | PLD1         |
| A_22_P00013883 | 1,83773 | 2,35796 | -1,434183873 | N/A             | N/A       | N/A          | Inc-RPRM-5   |
| A_21_P0001050  | 5,92561 | 6,44603 | -1,434372764 | N/A             | 100506696 | NR_046325    | PCAT6        |
| A_24_P924836   | 3,83108 | 4,35155 | -1,434422477 | N/A             | 9946      | BC022827     | CRYZL1       |
| A_22_P00018897 | 3,70847 | 4,22898 | -1,434462248 | ENST00000453798 | N/A       | N/A          | N/A          |
| A_22_P00014862 | 2,27434 | 2,79489 | -1,43450202  | N/A             | N/A       | DB091200     | Inc-SLC5A8-1 |
| A_21_P0014420  | 4,23924 | 4,75985 | -1,434561681 | N/A             | N/A       | N/A          | N/A          |
| A_22_P00017639 | 1,86415 | 2,38484 | -1,434641232 | N/A             | 93654     | NR_109980    | ST7-AS2      |
| A_33_P3377261  | 12,0828 | 12,6035 | -1,434651176 | ENST00000478598 | 9616      | NM_014245    | RNF7         |
| A_23_P70045    | 13,8397 | 14,3605 | -1,434750622 | ENST00000506671 | 9555      | NM_138610    | H2AFY        |
| A_23_P75204    | 11,9213 | 12,4421 | -1,434750622 | ENST00000468209 | 54780     | NM_017615    | NSMCE4A      |
| A_21_P0010344  | 2,55614 | 3,0772  | -1,435009214 | N/A             | N/A       | N/A          | Inc-RGL4-4   |
| A_19_P00317949 | 2,85196 | 3,37309 | -1,435078842 | N/A             | 646982    | NR_024507    | LINC00598    |
| A_24_P161403   | 14,9078 | 15,429  | -1,435148475 | ENST00000469748 | N/A       | N/A          | N/A          |
| A_33_P3372705  | 8,77507 | 9,29635 | -1,435228058 | ENST00000304465 | 647135    | NM_001271870 | SRGAP2B      |
| A_32_P73821    | 12,5265 | 13,0478 | -1,435247955 | ENST00000534699 | 7812      | NM_001007553 | CSDE1        |
| A_23_P55880    | 8,11044 | 8,63177 | -1,4352778   | ENST00000593682 | 163050    | NM_144976    | ZNF564       |
| A_22_P00022865 | 1,44203 | 1,96338 | -1,435297698 | ENST00000512717 | N/A       | N/A          | N/A          |
| A_33_P3354106  | 5,24585 | 5,76722 | -1,435317595 | ENST00000327442 | 402569    | NM_001145715 | KPNA7        |
| A_23_P166154   | 3,03965 | 3,5611  | -1,435397188 | ENST00000582267 | 728882    | NR_027061    | FAM182B      |
| A_32_P918263   | 9,50935 | 10,0309 | -1,435496686 | ENST00000448566 | N/A       | N/A          | N/A          |
| A_21_P0001499  | 1,6194  | 2,141   | -1,435546437 | N/A             | N/A       | N/A          | Inc-STIL-3   |
| A_21_P0014310  | 1,4177  | 1,93937 | -1,435616092 | N/A             | 100287301 | XR_109239    | GS52         |
| A_22_P00021379 | 1,47114 | 1,99292 | -1,435725557 | N/A             | 102723824 | NR_110584    | LOC102723824 |
| A_22_P00000286 | 1,52494 | 2,04674 | -1,43574546  | ENST00000561669 | N/A       | N/A          | N/A          |
| A_23_P428248   | 7,95599 | 8,47793 | -1,435884793 | ENST00000440121 | 199223    | NM_145755    | TTC21A       |
| A_22_P00019436 | 1,58216 | 2,10421 | -1,435994278 | ENST00000530150 | 101409254 | NR_102423    | LINC00681    |
| A_33_P3355567  | 4,92132 | 5,44341 | -1,436034092 | ENST00000515730 | N/A       | AL833436     | N/A          |
| A_24_P157370   | 2,98734 | 3,5096  | -1,436203317 | ENST00000288167 | 55540     | NM_018725    | IL17RB       |
| A_23_P153853   | 11,8508 | 12,3731 | -1,436243138 | ENST00000598316 | 1891      | NM_001398    | ECH1         |
| A_23_P155514   | 3,07396 | 3,59628 | -1,436263049 | ENST00000411641 | 197       | NM_001622    | AHSG         |

|                |         |         |              |                 |           |              |                 |
|----------------|---------|---------|--------------|-----------------|-----------|--------------|-----------------|
| A_22_P00003171 | 1,42131 | 1,94374 | -1,436372562 | N/A             | N/A       | BQ429837     | Inc-C9orf68-1   |
| A_33_P3843358  | 4,87621 | 5,39864 | -1,436372562 | N/A             | 319103    | BG944179     | SNORD8          |
| A_33_P3230798  | 4,30972 | 4,83234 | -1,436561742 | N/A             | N/A       | N/A          | N/A             |
| A_23_P24149    | 1,66975 | 2,19243 | -1,436621488 | ENST00000377371 | 221074    | NM_152725    | SLC39A12        |
| A_33_P3248962  | 1,9623  | 2,48504 | -1,436681237 | N/A             | 8764      | NM_003820    | TNFRSF14        |
| A_22_P00014463 | 3,32186 | 3,84464 | -1,436721071 | ENST00000456553 | 256643    | NM_198279    | CXorf23         |
| A_33_P3276833  | 1,59791 | 2,12071 | -1,436740988 | ENST00000370616 | 346007    | NM_001292009 | EYS             |
| A_21_P0010538  | 1,45058 | 1,97339 | -1,436750947 | N/A             | N/A       | N/A          | XLLOC_I2_000324 |
| A_21_P0001376  | 1,45399 | 1,97687 | -1,43682066  | N/A             | N/A       | N/A          | Inc-TTC24-1     |
| A_24_P317907   | 3,38161 | 3,90453 | -1,436860498 | ENST00000371247 | 10580     | NM_001034954 | SORBS1          |
| A_22_P00015819 | 5,54435 | 6,06751 | -1,437099547 | N/A             | N/A       | N/A          | Inc-TBC1D12-1   |
| A_23_P4041     | 10,1608 | 10,684  | -1,437139393 | ENST00000417982 | 58488     | NM_021213    | PCTP            |
| A_21_P0012847  | 2,01952 | 2,54279 | -1,437209125 | N/A             | N/A       | N/A          | XLLOC_I2_011737 |
| A_21_P0011824  | 3,9167  | 4,44    | -1,437239011 | N/A             | 728537    | NR_038386    | LINC01125       |
| A_33_P3300132  | 3,3563  | 3,87967 | -1,437308748 | N/A             | 100132183 | AF461899     | FP6628          |
| A_23_P39402    | 8,26523 | 8,7886  | -1,437308748 | ENST00000592353 | 84964     | NM_198867    | ALKBH6          |
| A_23_P106002   | 13,7993 | 14,3227 | -1,437338636 | ENST00000554001 | 4792      | NM_020529    | NFKBIA          |
| A_23_P46063    | 8,89918 | 9,42258 | -1,437338636 | ENST00000483228 | 29922     | NM_013330    | NME7            |
| A_33_P3314446  | 7,74898 | 8,27245 | -1,437408378 | ENST00000604105 | 440225    | NR_028506    | NF1P2           |
| A_33_P3217119  | 7,51749 | 8,04102 | -1,437468159 | ENST00000354267 | 127700    | NM_206837    | OSCP1           |
| A_24_P37519    | 7,55822 | 8,0818  | -1,437517979 | ENST00000536047 | 54585     | NM_020347    | LZTFL1          |
| A_33_P3375140  | 5,8625  | 6,38612 | -1,437557836 | ENST00000607697 | N/A       | AK023946     | N/A             |
| A_21_P0001557  | 1,45921 | 1,98296 | -1,437687379 | N/A             | N/A       | N/A          | Inc-DBT-1       |
| A_33_P3269844  | 8,69657 | 9,22035 | -1,437717275 | ENST00000371542 | 389816    | NM_001013653 | LRRC26          |
| A_22_P00014130 | 1,65406 | 2,17786 | -1,437737206 | N/A             | N/A       | DB050389     | Inc-SCG3-1      |
| A_23_P50241    | 9,77163 | 10,2955 | -1,437806967 | ENST00000589347 | 1209      | NM_001294    | CLPTM1          |
| A_22_P00001302 | 1,81899 | 2,34288 | -1,4378269   | ENST00000531798 | N/A       | N/A          | N/A             |
| A_33_P3337034  | 8,47382 | 8,99773 | -1,437846832 | ENST00000466185 | 8899      | NM_003913    | PRPF4B          |
| A_22_P00000693 | 5,99522 | 6,51919 | -1,437906632 | N/A             | N/A       | N/A          | Inc-ADAM21-2    |
| A_23_P203115   | 7,63413 | 8,15814 | -1,4379465   | ENST00000533627 | 84866     | NM_032780    | TMEM25          |
| A_22_P00010242 | 1,60812 | 2,13217 | -1,437986369 | N/A             | 100048912 | NR_047533    | CDKN2B-AS1      |
| A_22_P00000733 | 1,57843 | 2,10255 | -1,438056142 | N/A             | N/A       | N/A          | Inc-ADAMTS9-1   |
| A_33_P3356220  | 12,4659 | 12,9901 | -1,438135887 | ENST00000584850 | 10948     | NM_001165937 | STARD3          |

|                |         |         |              |                 |           |              |                |
|----------------|---------|---------|--------------|-----------------|-----------|--------------|----------------|
| A_21_P0008150  | 1,60189 | 2,1261  | -1,438145855 | N/A             | N/A       | N/A          | Inc-C13orf44-1 |
| A_33_P3414880  | 6,36188 | 6,88612 | -1,438175761 | N/A             | 339192    | XR_424829    | LOC339192      |
| A_21_P0008399  | 5,51561 | 6,03986 | -1,43818573  | N/A             | N/A       | N/A          | Inc-KIF26A-1   |
| A_23_P218817   | 8,40774 | 8,93204 | -1,438235574 | ENST00000360719 | 1375      | NM_152246    | CPT1B          |
| A_21_P0011957  | 1,44137 | 1,9658  | -1,438365178 | N/A             | N/A       | N/A          | XLOC_I2_008221 |
| A_32_P47754    | 4,07104 | 4,59573 | -1,438624421 | ENST00000431042 | 144195    | NM_001286233 | SLC2A14        |
| A_21_P0005491  | 4,52731 | 5,05204 | -1,438664309 | N/A             | N/A       | N/A          | Inc-C7orf11-5  |
| A_22_P00025420 | 2,12071 | 2,64549 | -1,43871417  | ENST00000447999 | N/A       | N/A          | N/A            |
| A_22_P00003037 | 2,56138 | 3,08629 | -1,438843817 | N/A             | 100874100 | NR_110029    | STEAP2-AS1     |
| A_22_P00007687 | 8,36949 | 8,89444 | -1,438883711 | ENST00000606878 | 100133205 | NR_026775    | LINC00240      |
| A_21_P0006985  | 4,03546 | 4,56046 | -1,438933358 | N/A             | N/A       | N/A          | Inc-NRP1-1     |
| A_24_P392480   | 5,66103 | 6,18608 | -1,438983451 | ENST00000322217 | 339344    | BC044311     | MYPOP          |
| A_21_P0009695  | 4,09966 | 4,62471 | -1,438983451 | ENST00000594200 | 100128139 | NR_110663    | LINC01233      |
| A_21_P0011304  | 1,97888 | 2,50396 | -1,439013374 | N/A             | N/A       | N/A          | XLOC_I2_004596 |
| A_23_P23765    | 9,957   | 10,4821 | -1,439033323 | ENST00000489863 | 23421     | NM_014288    | ITGB3BP        |
| A_21_P0011959  | 4,53269 | 5,05781 | -1,439053272 | N/A             | N/A       | N/A          | XLOC_I2_008221 |
| A_22_P00005847 | 1,77787 | 2,30302 | -1,439083197 | N/A             | N/A       | N/A          | Inc-ERH-1      |
| A_33_P3268974  | 4,98707 | 5,51226 | -1,439123097 | ENST00000584999 | 9400      | NM_001003716 | RECQL5         |
| A_33_P3336657  | 2,47703 | 3,00225 | -1,439153023 | ENST00000427836 | 389072    | NM_001080475 | PLEKHM3        |
| A_33_P3401477  | 1,63469 | 2,15995 | -1,439192925 | N/A             | N/A       | AK310493     | Inc-WNT8A-2    |
| A_22_P00019425 | 2,72241 | 3,24779 | -1,439312639 | N/A             | N/A       | AK027391     | Inc-C20orf96-4 |
| A_33_P3253812  | 8,8109  | 9,33629 | -1,439322616 | N/A             | N/A       | N/A          | N/A            |
| A_23_P137814   | 13,1719 | 13,6974 | -1,439432363 | ENST00000236067 | 533       | NM_004047    | ATP6V0B        |
| A_21_P0013673  | 1,51535 | 2,04092 | -1,439502206 | N/A             | 101926917 | N/A          | LOC101926917   |
| A_21_P0014731  | 4,14711 | 4,67274 | -1,439562075 | N/A             | N/A       | N/A          | N/A            |
| A_24_P67681    | 11,2187 | 11,7445 | -1,439731715 | ENST00000589177 | N/A       | N/A          | N/A            |
| A_24_P941557   | 1,56012 | 2,086   | -1,439811553 | ENST00000489637 | 89853     | NM_001011703 | MVB12B         |
| A_33_P3303507  | 2,38977 | 2,91576 | -1,439921338 | N/A             | N/A       | N/A          | N/A            |
| A_24_P18105    | 11,7817 | 12,3077 | -1,439931319 | ENST00000356457 | 444       | NM_032466    | ASPH           |
| A_33_P3671378  | 6,00441 | 6,53047 | -1,439991205 | ENST00000463535 | 51148     | NM_016174    | CERCAM         |
| A_24_P361643   | 4,6388  | 5,16491 | -1,440041112 | ENST00000396908 | 148137    | NM_001039887 | PROSER3        |
| A_19_P00317412 | 9,58275 | 10,1089 | -1,440081039 | N/A             | 728431    | NR_038842    | LINC01137      |
| A_21_P0010186  | 1,35982 | 1,88619 | -1,440300657 | ENST00000441759 | N/A       | N/A          | N/A            |

|                |         |         |              |                 |           |              |               |
|----------------|---------|---------|--------------|-----------------|-----------|--------------|---------------|
| A_23_P258136   | 6,74264 | 7,26905 | -1,440340591 | ENST00000217939 | 25878     | NM_015419    | MXRA5         |
| A_33_P3321417  | 7,21985 | 7,74626 | -1,440340591 | ENST00000440641 | 55929     | NM_019100    | DMAP1         |
| A_22_P00005514 | 1,83901 | 2,36544 | -1,440360559 | N/A             | N/A       | N/A          | Inc-EBF3-1    |
| A_23_P51745    | 1,42818 | 1,95464 | -1,440390511 | ENST00000271331 | 84432     | NM_032414    | PROK1         |
| A_21_P0013309  | 3,24428 | 3,77079 | -1,440440432 | ENST00000513727 | N/A       | N/A          | N/A           |
| A_22_P00022593 | 1,57912 | 2,10579 | -1,44060019  | ENST00000416173 | N/A       | N/A          | N/A           |
| A_22_P00023581 | 1,48702 | 2,01371 | -1,440620161 | ENST00000444196 | N/A       | BQ082343     | N/A           |
| A_22_P00002692 | 3,62197 | 4,14868 | -1,440640133 | N/A             | N/A       | N/A          | Inc-C1orf95-1 |
| A_21_P0014066  | 1,56773 | 2,09468 | -1,440879811 | N/A             | N/A       | BX396776     | N/A           |
| A_33_P3259736  | 4,6325  | 5,15946 | -1,440889798 | ENST00000382079 | 23600     | NM_014324    | AMACR         |
| A_33_P3227691  | 5,25977 | 5,78673 | -1,440889798 | ENST00000564812 | 6553      | NM_004594    | SLC9A5        |
| A_24_P275828   | 10,2128 | 10,7398 | -1,440929749 | ENST00000614824 | 93210     | NM_033419    | PGAP3         |
| A_22_P00024437 | 6,49896 | 7,026   | -1,4409697   | ENST00000441841 | 340581    | XR_244539    | LOC340581     |
| A_22_P00025093 | 9,50364 | 10,0307 | -1,440989677 | ENST00000447271 | 5774      | NM_001145369 | PTPN3         |
| A_23_P200772   | 11,0691 | 11,5962 | -1,44102963  | ENST00000337393 | 84146     | NM_201269    | ZNF644        |
| A_33_P3257554  | 8,41645 | 8,94358 | -1,441059596 | ENST00000373855 | 11064     | NM_007018    | CNTRL         |
| A_23_P133470   | 10,0523 | 10,5796 | -1,441229413 | ENST00000361557 | 9867      | NM_014819    | PJA2          |
| A_23_P37265    | 11,1629 | 11,6902 | -1,441229413 | ENST00000261558 | 55745     | NM_018229    | AP5M1         |
| A_21_P0009552  | 1,52092 | 2,04824 | -1,441249393 | N/A             | N/A       | N/A          | Inc-SYT4-1    |
| A_22_P00002001 | 1,96406 | 2,49155 | -1,441419232 | ENST00000431525 | N/A       | N/A          | N/A           |
| A_23_P322625   | 1,47544 | 2,00297 | -1,441459198 | ENST00000392039 | 9290      | NM_005683    | GPR55         |
| A_21_P0014024  | 2,76365 | 3,29129 | -1,441569108 | N/A             | 101927777 | NR_125803    | SATB1-AS1     |
| A_23_P202708   | 10,4509 | 10,9786 | -1,441629062 | ENST00000402192 | 8567      | NM_003682    | MADD          |
| A_33_P3212117  | 2,04027 | 2,56804 | -1,441699012 | N/A             | 100288619 | AK130873     | LOC100288619  |
| A_23_P55256    | 8,95592 | 9,4837  | -1,441709005 | ENST00000362063 | 22834     | NM_014897    | ZNF652        |
| A_21_P0000891  | 6,87374 | 7,40153 | -1,441718998 | N/A             | 100507495 | NR_040047    | SDCBP2-AS1    |
| A_33_P3316786  | 9,69    | 10,2178 | -1,441728992 | ENST00000611519 | 1602      | NM_080759    | DACH1         |
| A_23_P303810   | 9,37811 | 9,90602 | -1,441838922 | ENST00000485253 | 131544    | NM_153605    | CRYBG3        |
| A_23_P128783   | 11,2075 | 11,7355 | -1,441928871 | ENST00000618169 | 55837     | NM_018453    | EAPP          |
| A_21_P0014332  | 4,42245 | 4,95051 | -1,441988841 | N/A             | N/A       | AW874688     | N/A           |
| A_33_P3279629  | 9,65949 | 10,1876 | -1,442038817 | ENST00000273610 | 90226     | NM_033199    | UCN2          |
| A_24_P201404   | 9,29369 | 9,82187 | -1,442108787 | ENST00000331239 | 28970     | NM_014039    | C11orf54      |
| A_21_P0014609  | 2,68522 | 3,21346 | -1,442168764 | N/A             | N/A       | N/A          | N/A           |

|                |         |         |              |                 |           |              |              |
|----------------|---------|---------|--------------|-----------------|-----------|--------------|--------------|
| A_22_P00013612 | 1,47172 | 2,00024 | -1,442448689 | ENST00000474711 | N/A       | N/A          | N/A          |
| A_19_P00804417 | 6,61887 | 7,14744 | -1,442498681 | N/A             | N/A       | N/A          | N/A          |
| A_22_P00019828 | 7,9426  | 8,47121 | -1,442538676 | N/A             | N/A       | DJ031128     | Inc-PLCD3-1  |
| A_22_P00001436 | 1,59272 | 2,12138 | -1,442588672 | ENST00000430520 | N/A       | DA533471     | N/A          |
| A_24_P307486   | 13,7705 | 14,2992 | -1,442628669 | ENST00000403866 | N/A       | N/A          | N/A          |
| A_33_P3295173  | 3,39475 | 3,92351 | -1,442688668 | ENST00000371377 | 51668     | AK225916     | HSPB11       |
| A_24_P280897   | 12,3111 | 12,8399 | -1,442728668 | ENST00000497298 | N/A       | N/A          | N/A          |
| A_22_P00002137 | 6,31507 | 6,84397 | -1,442828674 | N/A             | N/A       | N/A          | Inc-BPHL-1   |
| A_24_P213548   | 7,16507 | 7,69401 | -1,442868678 | ENST00000356554 | 10905     | NM_006699    | MAN1A2       |
| A_23_P350551   | 13,7854 | 14,3144 | -1,442928687 | ENST00000229281 | 113246    | NM_138425    | C12orf57     |
| A_24_P396753   | 5,07789 | 5,60697 | -1,443008702 | ENST00000155926 | 28951     | NM_021643    | TRIB2        |
| A_23_P18465    | 10,1553 | 10,6844 | -1,443028707 | ENST00000381897 | 5981      | NM_002913    | RFC1         |
| A_21_P0000144  | 3,21478 | 3,74397 | -1,44311873  | ENST00000436752 | 100505478 | NM_001199233 | LOC100505478 |
| A_23_P339652   | 1,66795 | 2,19716 | -1,443138736 | ENST00000408947 | 259286    | NM_176882    | TAS2R40      |
| A_22_P00005880 | 2,34137 | 2,87062 | -1,443178749 | ENST00000556556 | N/A       | N/A          | N/A          |
| A_21_P0010338  | 7,34177 | 7,87106 | -1,443218763 | ENST00000424770 | N/A       | N/A          | N/A          |
| A_23_P78479    | 2,60028 | 3,12959 | -1,44323877  | ENST00000599935 | 23619     | NM_015363    | ZIM2         |
| A_23_P153640   | 9,58837 | 10,1178 | -1,443358821 | ENST00000306065 | 84079     | NM_032139    | ANKRD27      |
| A_23_P66180    | 3,66115 | 4,19083 | -1,443608957 | ENST00000005284 | 10368     | NM_006539    | CACNG3       |
| A_23_P376172   | 1,35257 | 1,88226 | -1,443618964 | ENST00000329454 | 149563    | NM_178840    | C1orf64      |
| A_22_P00008872 | 3,82568 | 4,35539 | -1,443638977 | N/A             | 101929679 | XR_424660    | LOC101929679 |
| A_33_P3374180  | 1,96372 | 2,49347 | -1,443679003 | N/A             | 388799    | XM_005260411 | FAM209B      |
| A_21_P0002432  | 1,38524 | 1,91503 | -1,443719031 | N/A             | N/A       | N/A          | Inc-THADA-1  |
| A_33_P3244669  | 11,6363 | 12,1662 | -1,443829113 | ENST00000230461 | 55754     | NM_018247    | TMEM30A      |
| A_23_P213375   | 5,33605 | 5,86596 | -1,443839121 | ENST00000194155 | 56133     | NM_018936    | PCDHB2       |
| A_23_P11408    | 1,40025 | 1,93034 | -1,444019275 | ENST00000472391 | 442862    | NM_001002758 | PRY2         |
| A_21_P0008244  | 1,35642 | 1,8866  | -1,444109361 | N/A             | N/A       | N/A          | Inc-SOX1-4   |
| A_33_P3316978  | 8,73987 | 9,27009 | -1,444149401 | ENST00000377939 | 388591    | NM_207396    | RNF207       |
| A_21_P0013027  | 3,59831 | 4,12867 | -1,444289548 | ENST00000511369 | 101927189 | NR_125842    | LOC101927189 |
| A_33_P3215317  | 4,02466 | 4,55506 | -1,444329593 | ENST00000370684 | 5567      | NM_001300917 | PRKACB       |
| A_33_P3366493  | 6,51919 | 7,04976 | -1,444499796 | N/A             | N/A       | N/A          | N/A          |
| A_23_P114826   | 12,6003 | 13,1309 | -1,444529834 | ENST00000462067 | 64960     | NM_031280    | MRPS15       |
| A_33_P3334635  | 10,3329 | 10,8635 | -1,444529834 | ENST00000313433 | 6118      | NM_001286076 | RPA2         |

|                |         |         |              |                 |           |              |               |
|----------------|---------|---------|--------------|-----------------|-----------|--------------|---------------|
| A_19_P00318361 | 5,50184 | 6,03253 | -1,444619951 | N/A             | 285352    | NR_033373    | KIF9-AS1      |
| A_33_P3372979  | 9,09106 | 9,62179 | -1,444660005 | N/A             | 283267    | NR_015451    | LINC00294     |
| A_22_P00009779 | 3,32398 | 3,85488 | -1,444830246 | ENST00000576138 | N/A       | N/A          | N/A           |
| A_33_P3355090  | 8,17426 | 8,70517 | -1,444840261 | ENST00000458198 | 91368     | NM_080656    | CDKN2AIPNL    |
| A_23_P75529    | 1,68652 | 2,21744 | -1,444850276 | ENST00000526955 | 63876     | NM_022062    | PKNOX2        |
| A_21_P0007388  | 2,15001 | 2,68094 | -1,444860291 | N/A             | N/A       | N/A          | Inc-CCDC82-4  |
| A_33_P3209182  | 1,53685 | 2,06784 | -1,444920382 | ENST00000519677 | N/A       | N/A          | N/A           |
| A_24_P274270   | 10,3756 | 10,9067 | -1,445030556 | ENST00000452281 | 6772      | NM_139266    | STAT1         |
| A_23_P386320   | 5,2836  | 5,81475 | -1,445080638 | ENST00000296351 | 4241      | NM_033316    | MF12          |
| A_22_P00006090 | 2,92072 | 3,4519  | -1,445110688 | ENST00000509332 | 100996286 | NR_121627    | LOC100996286  |
| A_21_P0000896  | 1,49735 | 2,02858 | -1,445160773 | ENST00000421703 | 284649    | NR_040063    | SMG7-AS1      |
| A_24_P79808    | 8,20658 | 8,73782 | -1,44517079  | ENST00000368463 | 57326     | NM_020524    | PBXIP1        |
| A_22_P00015633 | 3,95658 | 4,488   | -1,44535111  | N/A             | N/A       | BG196607     | Inc-SUMO1-1   |
| A_23_P374389   | 11,475  | 12,0065 | -1,445431259 | ENST00000305233 | 170394    | NM_138499    | PWWP2B        |
| A_33_P3239414  | 14,6408 | 15,1724 | -1,445531453 | ENST00000395416 | N/A       | N/A          | N/A           |
| A_22_P00016419 | 2,81919 | 3,35089 | -1,445631653 | N/A             | N/A       | N/A          | Inc-TMEM234-1 |
| A_22_P00011845 | 1,59572 | 2,12743 | -1,445641673 | N/A             | N/A       | N/A          | Inc-PHLDB1-1  |
| A_33_P3240348  | 6,58245 | 7,11424 | -1,445721839 | ENST00000556855 | 4763      | NM_000267    | NF1           |
| A_33_P3392250  | 7,66049 | 8,19231 | -1,445751902 | N/A             | 55719     | NM_001243770 | FAM178A       |
| A_22_P00024187 | 1,97581 | 2,50768 | -1,445802009 | ENST00000500850 | N/A       | BC037861     | N/A           |
| A_22_P00025286 | 12,9609 | 13,4929 | -1,445932295 | ENST00000569980 | 57017     | NM_020312    | COQ9          |
| A_24_P325520   | 9,99977 | 10,5318 | -1,445962362 | ENST00000256637 | 6272      | NM_002959    | SORT1         |
| A_23_P428129   | 8,01746 | 8,54949 | -1,445962362 | ENST00000616138 | 1028      | NM_000076    | CDKN1C        |
| A_22_P00021997 | 2,51268 | 3,04477 | -1,446022499 | N/A             | N/A       | N/A          | Inc-IL17B-3   |
| A_22_P00024597 | 1,74179 | 2,27393 | -1,446072615 | ENST00000561161 | N/A       | N/A          | N/A           |
| A_22_P00010971 | 6,96894 | 7,5011  | -1,446092662 | N/A             | N/A       | N/A          | Inc-NRIP2-1   |
| A_22_P00009626 | 4,42026 | 4,95253 | -1,446202926 | N/A             | 101927768 | NR_125845    | LOC101927768  |
| A_33_P3349269  | 8,2739  | 8,80624 | -1,446273098 | ENST00000398654 | 9063      | NM_004671    | PIAS2         |
| A_22_P00004335 | 2,23959 | 2,77198 | -1,446323223 | N/A             | N/A       | BC036702     | Inc-COIL-3    |
| A_33_P3446495  | 8,70212 | 9,23452 | -1,446333248 | ENST00000398540 | 23150     | NM_015123    | FRMD4B        |
| A_33_P3318414  | 12,0411 | 12,5736 | -1,446433503 | ENST00000313093 | 23526     | NM_012292    | HMHA1         |
| A_33_P3365368  | 1,42637 | 1,95906 | -1,446624008 | N/A             | 100130278 | AK094114     | LOC100130278  |
| A_22_P00009753 | 3,30205 | 3,83487 | -1,446754368 | ENST00000413901 | N/A       | BI668294     | N/A           |

|                |         |         |              |                 |           |              |              |
|----------------|---------|---------|--------------|-----------------|-----------|--------------|--------------|
| A_24_P135862   | 2,60662 | 3,13948 | -1,446794481 | N/A             | N/A       | AF119866     | N/A          |
| A_33_P3363620  | 7,57627 | 8,10913 | -1,446794481 | ENST00000537354 | 641649    | NM_001098824 | TMEM91       |
| A_33_P3407746  | 3,58868 | 4,12155 | -1,44680451  | ENST00000378551 | 5495      | NM_177968    | PPM1B        |
| A_33_P3398316  | 1,5451  | 2,07805 | -1,44688474  | ENST00000260229 | 64066     | NM_022122    | MMP27        |
| A_33_P3352822  | 6,12793 | 6,66094 | -1,446944915 | ENST00000282282 | 284306    | AX721128     | ZNF547       |
| A_21_P0014462  | 5,993   | 6,52628 | -1,447215736 | N/A             | 100507113 | XR_112334    | ZNF638-IT1   |
| A_33_P3285271  | 2,73188 | 3,2652  | -1,447255862 | ENST00000367754 | 388714    | NR_002601    | FMO6P        |
| A_24_P481375   | 9,51712 | 10,0505 | -1,447316053 | ENST00000421202 | 100131564 | NR_034089    | LOC100131564 |
| A_24_P57170    | 7,51719 | 8,05065 | -1,447396311 | ENST00000539771 | 148137    | NM_001039887 | PROSER3      |
| A_22_P00011939 | 1,86527 | 2,39874 | -1,447406344 | N/A             | N/A       | N/A          | Inc-PIWIL4-1 |
| A_23_P132277   | 11,2471 | 11,7807 | -1,447536774 | ENST00000216122 | 4174      | NM_006739    | MCM5         |
| A_22_P00007751 | 4,35064 | 4,88427 | -1,447566875 | N/A             | N/A       | BC040577     | Inc-HMGB2-3  |
| A_33_P3225298  | 7,65805 | 8,19173 | -1,447617045 | ENST00000408926 | 389668    | NM_001287258 | XKR9         |
| A_23_P358944   | 12,2748 | 12,8086 | -1,447737459 | ENST00000435786 | 5371      | NM_033244    | PML          |
| A_33_P3262794  | 6,52139 | 7,05527 | -1,447817741 | ENST00000560121 | 54816     | NM_017661    | ZNF280D      |
| A_33_P3415113  | 3,02929 | 3,56318 | -1,447827777 | ENST00000376490 | 1185      | NM_001286    | CLCN6        |
| A_22_P00000410 | 2,95663 | 3,49065 | -1,447958245 | ENST00000572007 | N/A       | XR_111805    | N/A          |
| A_22_P00023143 | 3,53231 | 4,06652 | -1,448148951 | N/A             | N/A       | AV761168     | Inc-POLE3-1  |
| A_22_P00023421 | 3,53151 | 4,06586 | -1,448289487 | ENST00000562040 | N/A       | CR745865     | N/A          |
| A_21_P0005461  | 4,71667 | 5,25103 | -1,448299526 | N/A             | 102723672 | XR_426123    | LOC102723672 |
| A_19_P00808348 | 9,62693 | 10,1614 | -1,448409957 | ENST00000586784 | 101927151 | N/A          | LOC101927151 |
| A_23_P161399   | 9,54543 | 10,0799 | -1,448409957 | ENST00000485566 | 4601      | NM_130439    | MXI1         |
| A_24_P365526   | 1,67643 | 2,21091 | -1,448419997 | ENST00000375862 | 3055      | NM_002110    | HCK          |
| A_24_P541919   | 5,64915 | 6,18364 | -1,448430037 | ENST00000389082 | 160518    | NM_144973    | DENND5B      |
| A_23_P62881    | 1,37825 | 1,91288 | -1,4485706   | ENST00000435165 | 84251     | NM_032291    | SGIP1        |
| A_21_P0007345  | 1,97615 | 2,51083 | -1,448620805 | N/A             | N/A       | N/A          | Inc-ALX4-1   |
| A_19_P00809076 | 8,37897 | 8,9137  | -1,448671011 | N/A             | 644246    | NR_034172    | KANSL1-AS1   |
| A_23_P93213    | 2,19931 | 2,7341  | -1,448731261 | ENST00000372585 | 10864     | NM_153320    | SLC22A7      |
| A_24_P280833   | 7,5311  | 8,06594 | -1,448781471 | ENST00000418362 | 100129138 | NR_033990    | LOC100129138 |
| A_23_P259098   | 4,61408 | 5,14892 | -1,448781471 | ENST00000340487 | 80345     | NM_025231    | ZSCAN16      |
| A_22_P00009547 | 1,89153 | 2,42645 | -1,44886181  | N/A             | 104355297 | NR_126414    | ABCA9-AS1    |
| A_23_P134167   | 7,82503 | 8,36005 | -1,448962241 | ENST00000369037 | 57107     | NM_020381    | PDSS2        |
| A_23_P307844   | 3,28949 | 3,82451 | -1,448962241 | ENST00000451000 | 254295    | NM_174933    | PHYHD1       |



|                |         |         |              |                 |           |              |                 |
|----------------|---------|---------|--------------|-----------------|-----------|--------------|-----------------|
| A_22_P00000925 | 1,57414 | 2,10921 | -1,449012459 | ENST00000542988 | N/A       | N/A          | N/A             |
| A_23_P141180   | 12,2573 | 12,7924 | -1,449042591 | ENST00000581396 | 146691    | NM_001082968 | TOM1L2          |
| A_23_P122896   | 5,61868 | 6,15378 | -1,449042591 | ENST00000473374 | 7036      | NM_003227    | TFR2            |
| A_33_P3344277  | 4,80501 | 5,34028 | -1,449213349 | N/A             | 64342     | BC057389     | HS1BP3          |
| A_33_P3842886  | 12,0528 | 12,5882 | -1,449343942 | ENST00000430942 | 27434     | NM_013284    | POLM            |
| A_22_P00007515 | 3,17426 | 3,70969 | -1,449374081 | N/A             | N/A       | N/A          | Inc-H2AFV-1     |
| A_33_P3345479  | 6,19788 | 6,73332 | -1,449384127 | ENST00000360737 | 400931    | NR_027033    | MIRLET7BHG      |
| A_33_P3340620  | 2,6478  | 3,18327 | -1,449414267 | ENST00000597833 | 22952     | NR_040249    | CYP2G1P         |
| A_23_P128919   | 15,2465 | 15,782  | -1,449444407 | ENST00000254301 | 3958      | NM_002306    | LGALS3          |
| A_22_P00006967 | 3,78619 | 4,3217  | -1,449454453 | ENST00000435163 | 100505783 | NR_038337    | OSER1-AS1       |
| A_23_P167920   | 8,96747 | 9,50301 | -1,449484594 | ENST00000616526 | 28514     | NM_005618    | DLL1            |
| A_23_P346376   | 1,41979 | 1,95535 | -1,449504689 | ENST00000475374 | 27334     | NM_014499    | P2RY10          |
| A_33_P3302025  | 2,14514 | 2,68077 | -1,449575021 | ENST00000380566 | 92949     | NM_052866    | ADAMTSL1        |
| A_23_P254507   | 1,63233 | 2,16805 | -1,449665453 | ENST00000508121 | 84525     | NM_139211    | HOPX            |
| A_33_P3340264  | 2,6041  | 3,13984 | -1,44968555  | N/A             | N/A       | N/A          | N/A             |
| A_33_P3242649  | 8,66663 | 9,20241 | -1,449725744 | ENST00000263181 | 81930     | NM_031217    | KIF18A          |
| A_23_P159839   | 10,8929 | 11,4287 | -1,449745841 | ENST00000371313 | 29071     | NM_152692    | C1GALT1C1       |
| A_21_P0012208  | 8,04547 | 8,5814  | -1,449876483 | N/A             | N/A       | N/A          | Inc-C21orf58-1  |
| A_22_P00015457 | 11,8393 | 12,3753 | -1,449946833 | ENST00000473756 | N/A       | N/A          | N/A             |
| A_21_P0013662  | 16,9895 | 17,5256 | -1,450047339 | ENST00000447574 | 3315      | N/A          | HSPB1           |
| A_23_P170636   | 1,87774 | 2,41388 | -1,450087543 | ENST00000328405 | 131096    | NM_144633    | KCNH8           |
| A_33_P3331272  | 1,37865 | 1,91482 | -1,450117697 | N/A             | N/A       | N/A          | N/A             |
| A_23_P208870   | 10,6768 | 11,213  | -1,450147852 | ENST00000476266 | 208       | NM_001626    | AKT2            |
| A_33_P3357954  | 4,64815 | 5,18441 | -1,450208163 | ENST00000403685 | 2115      | NM_004956    | ETV1            |
| A_22_P00011488 | 3,4331  | 3,96936 | -1,450208163 | ENST00000567871 | 26873     | N/A          | OPLAH           |
| A_33_P3308833  | 5,97254 | 6,50882 | -1,450228268 | ENST00000475776 | 54058     | NM_001286476 | C21orf58        |
| A_22_P00015234 | 1,90607 | 2,44239 | -1,450268477 | N/A             | N/A       | DB050195     | Inc-SPACA3-1    |
| A_21_P0005960  | 3,29667 | 3,83311 | -1,450389112 | N/A             | N/A       | N/A          | Inc-PRAGMIN.1-3 |
| A_22_P00009697 | 1,90536 | 2,44184 | -1,450429326 | N/A             | N/A       | N/A          | Inc-MBOAT4-1    |
| A_24_P67748    | 7,98175 | 8,51841 | -1,450610302 | ENST00000619705 | N/A       | N/A          | N/A             |
| A_23_P348159   | 3,29896 | 3,83567 | -1,450660577 | ENST00000439203 | 667       | XM_005249317 | DST             |
| A_33_P3388810  | 2,92961 | 3,46643 | -1,450771189 | ENST00000370895 | 100526835 | BX640903     | FPGT-TNNI3K     |
| A_22_P00007673 | 7,30118 | 7,8382  | -1,450972322 | N/A             | N/A       | N/A          | Inc-HIATL1-1    |

|                |         |         |              |                 |           |              |              |
|----------------|---------|---------|--------------|-----------------|-----------|--------------|--------------|
| A_22_P00010804 | 2,42718 | 2,96425 | -1,45102261  | N/A             | N/A       | N/A          | Inc-NME3-1   |
| A_33_P3308055  | 10,0683 | 10,6054 | -1,451052784 | N/A             | 9470      | NM_001282958 | EIF4E2       |
| A_23_P24211    | 2,63789 | 3,17499 | -1,451052784 | ENST00000368808 | 118856    | NM_147191    | MMP21        |
| A_23_P204736   | 3,0906  | 3,62774 | -1,451093016 | ENST00000301149 | 2819      | NM_005276    | GPD1         |
| A_33_P3394183  | 8,43836 | 8,97559 | -1,451183543 | ENST00000336614 | 388569    | NM_207395    | ZNF324B      |
| A_21_P0004108  | 5,93803 | 6,47528 | -1,45120366  | ENST00000512978 | N/A       | N/A          | N/A          |
| A_33_P3221064  | 12,8333 | 13,3706 | -1,451253956 | ENST00000595118 | 8425      | NM_001042544 | LTBP4        |
| A_33_P3386562  | 1,41132 | 1,94883 | -1,451465217 | ENST00000371838 | 84871     | NM_032785    | AGBL4        |
| A_33_P3293869  | 5,88647 | 6,42399 | -1,451475278 | ENST00000369086 | 7073      | AB209260     | TIAL1        |
| A_22_P00010207 | 2,77679 | 3,31433 | -1,4514954   | N/A             | 100506235 | XR_245000    | LOC100506235 |
| A_23_P139471   | 5,42564 | 5,96322 | -1,451535645 | ENST00000552361 | 6231      | NM_001029    | RPS26        |
| A_23_P142096   | 2,28    | 2,8176  | -1,451555767 | ENST00000270590 | 2854      | NM_001506    | GPR32        |
| A_24_P160380   | 1,43651 | 1,97412 | -1,451565829 | ENST00000265810 | 64236     | NM_176871    | PDLIM2       |
| A_23_P135357   | 8,79791 | 9,33567 | -1,451716759 | ENST00000304478 | 55178     | NM_018146    | RNMTL1       |
| A_33_P3216853  | 6,1659  | 6,70372 | -1,451777135 | ENST00000409684 | 150590    | NM_144706    | C2orf15      |
| A_33_P3415166  | 1,9014  | 2,43923 | -1,451787198 | N/A             | N/A       | N/A          | N/A          |
| A_23_P152082   | 4,39164 | 4,92948 | -1,451797262 | ENST00000563899 | 51332     | NM_016642    | SPTBN5       |
| A_33_P3355732  | 3,35074 | 3,88865 | -1,451867705 | ENST00000491559 | 89766     | AB096971     | UMODL1       |
| A_23_P54100    | 1,96041 | 2,49839 | -1,451938152 | ENST00000344288 | 2100      | NM_001437    | ESR2         |
| A_23_P37988    | 10,288  | 10,826  | -1,45195828  | ENST00000567011 | 221184    | NM_152727    | CPNE2        |
| A_24_P382319   | 12,1817 | 12,7198 | -1,452058925 | ENST00000403444 | 634       | NM_001712    | CEACAM1      |
| A_24_P125839   | 6,85312 | 7,39131 | -1,452149512 | ENST00000400559 | 54149     | NM_017447    | C21orf91     |
| A_33_P3382629  | 4,03597 | 4,5743  | -1,452290437 | N/A             | N/A       | AY070437     | Inc-GFM1-1   |
| A_22_P00014656 | 2,89492 | 3,43335 | -1,452391105 | N/A             | N/A       | BM052692     | Inc-SLC1A7-1 |
| A_21_P0002122  | 1,72317 | 2,26171 | -1,452501849 | ENST00000431455 | N/A       | N/A          | N/A          |
| A_33_P3248967  | 10,9411 | 11,4797 | -1,452562258 | ENST00000261681 | 64398     | NM_022474    | MPP5         |
| A_23_P74162    | 6,11937 | 6,65817 | -1,45276364  | ENST00000617816 | 55721     | NM_018134    | IQCC         |
| A_23_P47777    | 10,9247 | 11,4636 | -1,452864341 | ENST00000548358 | 92979     | NM_138396    | mar-09       |
| A_24_P944444   | 9,22095 | 9,75988 | -1,452894553 | ENST00000514566 | 23005     | NM_014994    | MAPKBP1      |
| A_23_P402331   | 3,93924 | 4,47821 | -1,452934836 | ENST00000372789 | 149708    | NM_145652    | WFDC5        |
| A_33_P3309222  | 2,70464 | 3,24362 | -1,452944907 | ENST00000400831 | 441178    | NR_117092    | LOC441178    |
| A_33_P3337981  | 4,8634  | 5,40263 | -1,453196705 | ENST00000415980 | 9896      | NM_014845    | FIG4         |
| A_23_P89710    | 9,51994 | 10,0592 | -1,453226924 | ENST00000430049 | 55125     | NM_032142    | CEP192       |

|                |         |         |              |                 |           |              |               |
|----------------|---------|---------|--------------|-----------------|-----------|--------------|---------------|
| A_23_P112482   | 15,4974 | 16,0367 | -1,453267217 | ENST00000494313 | 360       | NM_004925    | AQP3          |
| A_24_P298877   | 12,3016 | 12,8409 | -1,453267217 | ENST00000474140 | 339448    | NM_207356    | C1orf174      |
| A_23_P122852   | 9,72509 | 10,2644 | -1,45327729  | ENST00000356800 | 6604      | NM_003078    | SMARCD3       |
| A_22_P00010900 | 6,34335 | 6,88268 | -1,453297437 | ENST00000574939 | N/A       | XM_006716895 | N/A           |
| A_22_P00003411 | 1,48385 | 2,02323 | -1,453347805 | N/A             | N/A       | N/A          | Inc-CCDC13-1  |
| A_33_P3375185  | 5,34268 | 5,88209 | -1,453378027 | ENST00000339355 | 343521    | NM_001013632 | TCTEX1D4      |
| A_21_P0010492  | 8,15767 | 8,69726 | -1,453559371 | ENST00000624368 | N/A       | N/A          | N/A           |
| A_22_P00008896 | 1,9456  | 2,4852  | -1,453569446 | N/A             | N/A       | N/A          | Inc-KLHL31-3  |
| A_23_P70007    | 11,5557 | 12,0953 | -1,453569446 | ENST00000358715 | 3161      | NM_012484    | HMMR          |
| A_33_P3401008  | 2,08783 | 2,62761 | -1,453750814 | ENST00000592731 | 284417    | NM_001282011 | TMEM150B      |
| A_21_P0000301  | 7,21636 | 7,75614 | -1,453750814 | N/A             | 654319    | NR_002919    | SNORA5A       |
| A_22_P00020282 | 1,34392 | 1,8839  | -1,453952361 | N/A             | N/A       | N/A          | Inc-ZNF217-2  |
| A_22_P00017480 | 1,6666  | 2,20662 | -1,453992674 | N/A             | N/A       | N/A          | Inc-VSTM4-1   |
| A_33_P3241204  | 3,00044 | 3,54057 | -1,454103539 | ENST00000369783 | 119395    | NM_001129742 | CALHM3        |
| A_33_P3302373  | 3,52784 | 4,06805 | -1,454184174 | ENST00000562955 | 23334     | NM_015284    | SZT2          |
| A_22_P00008520 | 1,55107 | 2,09136 | -1,454264814 | ENST00000518357 | 257358    | NR_026945    | LINC01366     |
| A_21_P0007757  | 2,31049 | 2,85093 | -1,454416024 | N/A             | N/A       | N/A          | Inc-SSH1-2    |
| A_33_P3389133  | 6,10876 | 6,64924 | -1,45445635  | ENST00000371994 | 9562      | NM_001178117 | MINPP1        |
| A_33_P3279940  | 11,4144 | 11,9549 | -1,454476513 | ENST00000371178 | 83941     | NM_032027    | TM2D1         |
| A_32_P120895   | 10,3912 | 10,9317 | -1,454476513 | ENST00000560491 | 256586    | NM_153374    | LYSMD2        |
| A_33_P3311770  | 7,21037 | 7,75099 | -1,454597498 | ENST00000331410 | 285989    | NM_213603    | ZNF789        |
| A_33_P3320052  | 1,43301 | 1,97364 | -1,454607581 | N/A             | N/A       | N/A          | N/A           |
| A_21_P0007923  | 1,75577 | 2,29643 | -1,454637829 | ENST00000443719 | 103689843 | N/A          | LINC01046     |
| A_23_P32707    | 10,2073 | 10,748  | -1,45467816  | ENST00000552462 | 9700      | NM_012291    | ESPL1         |
| A_21_P0012754  | 1,55127 | 2,09199 | -1,454698327 | N/A             | 101929911 | N/A          | LOC101929911  |
| A_33_P3235731  | 1,37357 | 1,91429 | -1,454698327 | N/A             | 101930072 | XM_005276324 | LOC101930072  |
| A_23_P203267   | 12,9047 | 13,4455 | -1,454778994 | ENST00000341846 | 23650     | NM_012101    | TRIM29        |
| A_22_P00024127 | 2,15854 | 2,69955 | -1,454990769 | ENST00000457372 | N/A       | N/A          | N/A           |
| A_21_P0005523  | 1,3974  | 1,93856 | -1,455142055 | N/A             | N/A       | N/A          | Inc-CTTNBP2-3 |
| A_22_P00018021 | 2,60619 | 3,14751 | -1,455303444 | ENST00000584721 | N/A       | N/A          | N/A           |
| A_24_P627984   | 6,37745 | 6,91892 | -1,455454763 | ENST00000322716 | 9852      | NM_014805    | EPM2AIP1      |
| A_33_P3295313  | 1,38099 | 1,92247 | -1,455464852 | ENST00000440896 | 2206      | NM_000139    | MS4A2         |
| A_23_P208400   | 6,41286 | 6,95438 | -1,455505206 | ENST00000593724 | 79934     | NM_024876    | ADCK4         |

|                |         |         |              |                 |           |              |                |
|----------------|---------|---------|--------------|-----------------|-----------|--------------|----------------|
| A_22_P00023797 | 2,9106  | 3,45218 | -1,45556574  | N/A             | N/A       | N/A          | Inc-MDM4-1     |
| A_23_P6252     | 1,63791 | 2,17958 | -1,455656546 | ENST00000465532 | 84677     | NR_026838    | DSCR8          |
| A_24_P15898    | 2,61311 | 3,15478 | -1,455656546 | ENST00000295012 | 574407    | NR_073155    | C1orf145       |
| A_33_P3365134  | 10,7323 | 11,274  | -1,455686816 | ENST00000556597 | 23368     | NM_015316    | PPP1R13B       |
| A_23_P394836   | 11,7654 | 12,3071 | -1,455686816 | ENST00000392634 | 64423     | NM_022489    | INF2           |
| A_24_P350008   | 14,4478 | 14,9895 | -1,455686816 | ENST00000442083 | N/A       | N/A          | N/A            |
| A_21_P0014013  | 8,3483  | 8,89003 | -1,455717086 | N/A             | N/A       | N/A          | N/A            |
| A_22_P00005436 | 2,22657 | 2,76834 | -1,455757448 | N/A             | N/A       | N/A          | Inc-DUOX1-1    |
| A_21_P0013987  | 1,37986 | 1,92186 | -1,455989549 | N/A             | 100509780 | AK098579     | LOC100509780   |
| A_19_P00316185 | 7,53336 | 8,07538 | -1,456009733 | N/A             | 101927686 | XR_426095    | LOC101927686   |
| A_23_P311640   | 8,57341 | 9,11552 | -1,456100567 | ENST00000474713 | 3268      | NM_006076    | AGFG2          |
| A_21_P0001530  | 1,61254 | 2,1548  | -1,456251969 | N/A             | N/A       | N/A          | Inc-ODF2L-1    |
| A_22_P00019537 | 3,61821 | 4,16055 | -1,456332723 | ENST00000414480 | 103695431 | N/A          | LINC01048      |
| A_33_P3252196  | 10,3695 | 10,9119 | -1,456393291 | ENST00000320356 | 2146      | NM_004456    | EZH2           |
| A_21_P0008157  | 1,34469 | 1,88709 | -1,456393291 | N/A             | N/A       | N/A          | Inc-SLC25A30-2 |
| A_23_P107211   | 9,9063  | 10,4487 | -1,456393291 | ENST00000393860 | 5878      | NM_201434    | RAB5C          |
| A_21_P0005184  | 4,11221 | 4,65471 | -1,456494244 | N/A             | N/A       | N/A          | Inc-WDR27-1    |
| A_19_P00322384 | 4,45006 | 4,99256 | -1,456494244 | ENST00000441570 | 79940     | NR_121612    | LINC00472      |
| A_23_P106241   | 9,95178 | 10,4943 | -1,456514435 | ENST00000267622 | 9321      | NM_004239    | TRIP11         |
| A_23_P200560   | 13,6774 | 14,2201 | -1,456696171 | ENST00000400259 | 998       | NM_001039802 | CDC42          |
| A_21_P0000558  | 1,83992 | 2,38269 | -1,456766852 | N/A             | 100302650 | NR_028308    | BRE-AS1        |
| A_23_P122144   | 3,59384 | 4,13663 | -1,456787047 | ENST00000515801 | 133688    | NM_152404    | UGT3A1         |
| A_23_P436526   | 6,01063 | 6,55343 | -1,456797145 | ENST00000318596 | 284439    | NM_178526    | SLC25A42       |
| A_21_P0009789  | 2,6737  | 3,21652 | -1,456817341 | N/A             | N/A       | N/A          | Inc-SELV.1-1   |
| A_21_P0008707  | 1,542   | 2,08482 | -1,456817341 | ENST00000567854 | 791115    | NR_026647    | PWRN2          |
| A_33_P3376828  | 10,4987 | 11,0416 | -1,456898126 | ENST00000454304 | 112616    | NM_138410    | CMTM7          |
| A_33_P3301306  | 8,95079 | 9,49382 | -1,457029412 | ENST00000355193 | 58508     | NM_170606    | KMT2C          |
| A_22_P00005437 | 1,62726 | 2,17034 | -1,457079909 | N/A             | N/A       | N/A          | Inc-DUOX2-2    |
| A_23_P213102   | 11,1728 | 11,7161 | -1,45730212  | ENST00000507699 | 23022     | NM_016081    | PALLD          |
| A_23_P57492    | 1,71113 | 2,25444 | -1,457312221 | ENST00000266086 | 6527      | NM_014227    | SLC5A4         |
| A_22_P00024819 | 3,13159 | 3,67493 | -1,457342525 | ENST00000564692 | 4351      | AL565098     | MPI            |
| A_22_P00008369 | 2,89951 | 3,44291 | -1,457403136 | N/A             | 102724416 | XR_426706    | LOC102724416   |
| A_23_P20363    | 10,2099 | 10,7533 | -1,457403136 | ENST00000263849 | 51101     | NM_016010    | ZC2HC1A        |

|                |         |         |              |                 |        |              |                |
|----------------|---------|---------|--------------|-----------------|--------|--------------|----------------|
| A_24_P164894   | 5,76228 | 6,30569 | -1,457413238 | ENST00000475009 | 10311  | NM_006052    | DSCR3          |
| A_21_P0013566  | 2,13491 | 2,67834 | -1,457433442 | N/A             | 643827 | N/A          | CNTNAP3P2      |
| A_22_P00004669 | 6,20076 | 6,74437 | -1,457615292 | ENST00000556653 | N/A    | N/A          | N/A            |
| A_21_P0007525  | 2,14244 | 2,68611 | -1,457675914 | N/A             | N/A    | N/A          | Inc-KIAA1467-1 |
| A_24_P58488    | 2,30197 | 2,84567 | -1,457706226 | ENST00000615983 | 129852 | NM_001100396 | C2orf73        |
| A_24_P100830   | 4,9462  | 5,48992 | -1,457726434 | ENST00000281471 | 196394 | NM_001278412 | AMN1           |
| A_33_P3334688  | 1,58773 | 2,13145 | -1,457726434 | ENST00000565951 | 221184 | AK126138     | CPNE2          |
| A_23_P168403   | 1,36382 | 1,90754 | -1,457726434 | ENST00000262186 | 3757   | NM_000238    | KCNH2          |
| A_33_P3387075  | 2,80025 | 3,34399 | -1,457746643 | N/A             | N/A    | N/A          | N/A            |
| A_22_P00010376 | 3,13702 | 3,68096 | -1,457948743 | ENST00000569543 | N/A    | CR749723     | N/A            |
| A_33_P3301291  | 2,05471 | 2,59866 | -1,457958849 | ENST00000376708 | 442425 | NM_001013735 | FOXB2          |
| A_33_P3320499  | 5,59518 | 6,13925 | -1,458080124 | ENST00000353383 | 10743  | NM_030665    | RAI1           |
| A_23_P305527   | 1,38685 | 1,93101 | -1,458171086 | ENST00000358864 | 117532 | NM_080751    | TMC2           |
| A_33_P3419113  | 1,40123 | 1,94551 | -1,458292379 | ENST00000303728 | 442862 | NM_001002758 | PRY2           |
| A_23_P49499    | 12,6954 | 13,2397 | -1,458312595 | ENST00000225276 | 10610  | NM_006456    | ST6GALNAC2     |
| A_23_P7957     | 2,74225 | 3,28666 | -1,45842379  | ENST00000372808 | 27232  | NM_018960    | GNMT           |
| A_22_P00014396 | 2,82806 | 3,37251 | -1,458464227 | ENST00000518446 | 253970 | NM_001101341 | SFTA3          |
| A_32_P50431    | 3,1782  | 3,72274 | -1,458555213 | ENST00000615506 | 6767   | NM_003932    | ST13           |
| A_33_P3297468  | 7,68811 | 8,23266 | -1,458565323 | ENST00000538474 | 142680 | NM_001177317 | SLC34A3        |
| A_33_P3410724  | 12,8415 | 13,3861 | -1,458615874 | ENST00000342751 | 6391   | NM_003001    | SDHC           |
| A_33_P3260969  | 9,1477  | 9,69242 | -1,458737203 | ENST00000463201 | 118471 | NM_145202    | PRAP1          |
| A_33_P3278560  | 4,5163  | 5,0611  | -1,458818095 | ENST00000597850 | 284307 | NM_001010879 | ZIK1           |
| A_22_P00009585 | 6,41818 | 6,96301 | -1,458848431 | ENST00000611604 | 286076 | NR_015445    | BREA2          |
| A_23_P18490    | 9,14467 | 9,68963 | -1,458979892 | ENST00000514708 | 10296  | NM_001017405 | MAEA           |
| A_24_P41570    | 14,377  | 14,922  | -1,459020344 | ENST00000527366 | 3015   | NM_002106    | H2AFZ          |
| A_33_P3405334  | 13,5362 | 14,0812 | -1,459020344 | ENST00000357164 | 2760   | NM_000405    | GM2A           |
| A_22_P00016669 | 1,63894 | 2,184   | -1,459081024 | ENST00000547102 | 126536 | NR_026828    | LINC00661      |
| A_23_P132079   | 1,38986 | 1,93493 | -1,459091138 | ENST00000479548 | 56245  | NM_019596    | C21orf62       |
| A_22_P00020859 | 2,38571 | 2,93082 | -1,459131593 | N/A             | N/A    | AK123656     | Inc-IL12RB2-1  |
| A_23_P344594   | 4,23071 | 4,77584 | -1,459151821 | ENST00000296776 | 134288 | NM_153217    | TMEM174        |
| A_23_P395555   | 9,54306 | 10,0882 | -1,459161935 | ENST00000590089 | 7769   | NM_001032372 | ZNF226         |
| A_22_P00019797 | 2,02015 | 2,56533 | -1,459202392 | ENST00000507997 | N/A    | BX117217     | N/A            |
| A_23_P398294   | 12,0378 | 12,583  | -1,459222621 | ENST00000253083 | 9026   | NM_003959    | HIP1R          |

|                |         |         |              |                 |           |              |                |
|----------------|---------|---------|--------------|-----------------|-----------|--------------|----------------|
| A_33_P3281303  | 1,57467 | 2,11992 | -1,459273195 | N/A             | N/A       | N/A          | N/A            |
| A_24_P337058   | 11,5598 | 12,1051 | -1,459323771 | ENST00000468977 | 57018     | NM_020307    | CCNL1          |
| A_21_P0013285  | 3,24084 | 3,78619 | -1,459374348 | N/A             | 101927668 | N/A          | LOC101927668   |
| A_23_P135548   | 9,88775 | 10,4332 | -1,459475507 | ENST00000370192 | 1806      | NM_000110    | DPYD           |
| A_21_P0014175  | 7,96161 | 8,50707 | -1,459485624 | N/A             | 100506302 | NR_126344    | LOC100506302   |
| A_22_P00020016 | 1,7219  | 2,26744 | -1,459566557 | ENST00000538329 | N/A       | N/A          | N/A            |
| A_24_P943095   | 6,28433 | 6,82988 | -1,459576674 | ENST00000492188 | 92521     | NM_001033553 | SPECC1         |
| A_23_P407614   | 9,07198 | 9,61759 | -1,459637377 | ENST00000302964 | 260434    | NM_152901    | PYDC1          |
| A_22_P00024637 | 6,84366 | 7,38931 | -1,459677848 | N/A             | N/A       | N/A          | Inc-SYNC-2     |
| A_23_P432512   | 8,51317 | 9,05884 | -1,459698083 | ENST00000446951 | 23759     | NM_148175    | PPIL2          |
| A_23_P41217    | 1,96141 | 2,50709 | -1,459708201 | ENST00000308611 | 131450    | NM_138806    | CD200R1        |
| A_33_P3533001  | 4,48747 | 5,03316 | -1,459718319 | N/A             | 286480    | AL568675     | UBE2E4P        |
| A_23_P326760   | 1,60147 | 2,14729 | -1,459849859 | ENST00000396217 | 25924     | NM_015460    | MYRIP          |
| A_33_P3212909  | 1,96285 | 2,50867 | -1,459849859 | ENST00000419474 | 85446     | NM_033400    | ZFHX2          |
| A_24_P383609   | 8,41239 | 8,95835 | -1,459991531 | ENST00000340087 | 340719    | NM_199461    | NANOS1         |
| A_23_P87351    | 12,0144 | 12,5604 | -1,460032011 | ENST00000532170 | 6240      | NM_001033    | RRM1           |
| A_33_P3414695  | 10,7275 | 11,2735 | -1,460032011 | ENST00000375000 | 50809     | NM_016287    | HP1BP3         |
| A_21_P0003208  | 10,1063 | 10,6524 | -1,460133216 | N/A             | N/A       | N/A          | Inc-KIAA0226-3 |
| A_23_P501713   | 3,0189  | 3,56514 | -1,460274915 | ENST00000496265 | 84639     | NM_032556    | IL1F10         |
| A_33_P3357470  | 6,54512 | 7,09143 | -1,46034577  | ENST00000469714 | 9185      | NM_004726    | REPS2          |
| A_23_P62081    | 3,38384 | 3,93015 | -1,46034577  | ENST00000475752 | 6447      | NM_003020    | SCG5           |
| A_24_P288836   | 4,60489 | 5,15148 | -1,460629223 | ENST00000461425 | 3116      | NR_001435    | HLA-DPB2       |
| A_21_P0006902  | 8,25532 | 8,80191 | -1,460629223 | ENST00000454935 | N/A       | N/A          | N/A            |
| A_23_P314120   | 9,88358 | 10,4302 | -1,460659596 | ENST00000468532 | 1120      | NM_005198    | CHKB           |
| A_22_P00014899 | 5,12249 | 5,66912 | -1,460669721 | N/A             | N/A       | N/A          | Inc-SLC9A1-1   |
| A_33_P3302741  | 3,10506 | 3,65181 | -1,460791221 | ENST00000589178 | 100101467 | AK131291     | ZSCAN30        |
| A_22_P00015715 | 1,61987 | 2,16683 | -1,46100387  | N/A             | N/A       | DA207246     | Inc-SYT13-1    |
| A_33_P3387045  | 8,58258 | 9,12979 | -1,461257065 | ENST00000332439 | 124637    | NM_144607    | CYB5D1         |
| A_33_P3280320  | 2,80291 | 3,35013 | -1,461267194 | N/A             | 100288524 | NM_001195127 | WI2-2373I.2    |
| A_21_P0002655  | 3,3489  | 3,89615 | -1,46129758  | N/A             | 100505774 | XR_109967    | LOC100505774   |
| A_21_P0014670  | 2,78327 | 3,33059 | -1,461368485 | N/A             | N/A       | N/A          | N/A            |
| A_21_P0007560  | 1,51119 | 2,05854 | -1,461398873 | N/A             | N/A       | N/A          | Inc-HOXC13-2   |
| A_23_P418493   | 9,85512 | 10,4025 | -1,461429262 | ENST00000496852 | 91647     | NM_145691    | ATPAF2         |

|                |         |         |              |                 |           |              |                 |
|----------------|---------|---------|--------------|-----------------|-----------|--------------|-----------------|
| A_23_P154358   | 11,5021 | 12,0495 | -1,461449522 | ENST00000487138 | 150696    | NM_144707    | PROM2           |
| A_23_P151791   | 8,34963 | 8,89704 | -1,461459652 | ENST00000553481 | 1241      | NM_181657    | LTB4R           |
| A_33_P3389113  | 2,98193 | 3,52962 | -1,461743322 | N/A             | 643749    | NR_034108    | TRAF3IP2-AS1    |
| A_24_P329229   | 3,44766 | 3,9954  | -1,461793983 | ENST00000275532 | 154881    | NM_153033    | KCTD7           |
| A_21_P0005907  | 1,95869 | 2,50654 | -1,461905443 | N/A             | N/A       | N/A          | Inc-FAM84B-8    |
| A_21_P0009394  | 4,85759 | 5,4055  | -1,461966243 | N/A             | N/A       | N/A          | Inc-AMZ2-1      |
| A_23_P212497   | 7,51366 | 8,06157 | -1,461966243 | ENST00000485198 | 84129     | NM_032169    | ACAD11          |
| A_21_P0011956  | 4,89449 | 5,44246 | -1,462027046 | N/A             | N/A       | N/A          | XLOC_I2_008221  |
| A_23_P420269   | 5,36217 | 5,91014 | -1,462027046 | ENST00000444766 | 57508     | NM_020748    | INTS2           |
| A_23_P217845   | 7,7233  | 8,27137 | -1,46212839  | ENST00000367558 | 6004      | NM_002928    | RGS16           |
| A_24_P409346   | 7,71359 | 8,26171 | -1,462179064 | ENST00000527824 | 9520      | NM_006310    | NPEPPS          |
| A_22_P00025554 | 2,46526 | 3,01339 | -1,462189199 | ENST00000535242 | N/A       | N/A          | N/A             |
| A_22_P00007081 | 1,39664 | 1,9449  | -1,462320962 | N/A             | N/A       | N/A          | Inc-GLIPR1L1-1  |
| A_33_P3613516  | 10,1312 | 10,6795 | -1,462361506 | N/A             | 101927167 | AK024653     | GATA2-AS1       |
| A_22_P00017891 | 2,91106 | 3,45939 | -1,462391916 | N/A             | N/A       | N/A          | Inc-ZFC3H1-1    |
| A_21_P0009220  | 1,45819 | 2,00653 | -1,462402052 | N/A             | N/A       | N/A          | Inc-C17orf48-4  |
| A_22_P00018839 | 1,58349 | 2,13185 | -1,462422325 | ENST00000435738 | N/A       | N/A          | N/A             |
| A_33_P3409086  | 1,34758 | 1,89606 | -1,462543971 | ENST00000368696 | 6271      | NM_006271    | S100A1          |
| A_32_P74955    | 8,45846 | 9,00704 | -1,462645351 | ENST00000334344 | 196528    | NM_152641    | ARID2           |
| A_23_P391275   | 8,11075 | 8,65933 | -1,462645351 | ENST00000482807 | 11123     | NM_013441    | RCAN3           |
| A_23_P92954    | 10,9732 | 11,5218 | -1,462665627 | ENST00000522415 | 3295      | NM_000414    | HSD17B4         |
| A_23_P304682   | 12,2496 | 12,7983 | -1,462767015 | ENST00000359543 | 2013      | NM_001424    | EMP2            |
| A_23_P387537   | 2,98391 | 3,53266 | -1,462817712 | ENST00000538575 | 79057     | NM_024082    | PRRG3           |
| A_33_P3270926  | 2,86136 | 3,41012 | -1,462827851 | N/A             | N/A       | XR_110088    | N/A             |
| A_24_P228149   | 14,7157 | 15,2646 | -1,462969812 | ENST00000587118 | 3860      | NM_002274    | KRT13           |
| A_21_P0010872  | 1,38172 | 1,93064 | -1,462990093 | N/A             | 100996567 | N/A          | ANTXRPL1        |
| A_33_P3287892  | 4,66206 | 5,21101 | -1,463020515 | ENST00000480144 | 79811     | AK131242     | SLTM            |
| A_21_P0013635  | 3,30756 | 3,85651 | -1,463020515 | N/A             | N/A       | N/A          | XLOC_I2_015177  |
| A_21_P0006231  | 3,81089 | 4,35985 | -1,463030656 | N/A             | N/A       | N/A          | Inc-METTLL11A-5 |
| A_23_P141939   | 1,3986  | 1,94766 | -1,463132069 | ENST00000305444 | 390883    | NM_001001958 | OR7G3           |
| A_21_P0012850  | 3,74265 | 4,29173 | -1,463152353 | N/A             | 101926941 | NR_120664    | LOC101926941    |
| A_33_P3226605  | 10,6216 | 11,1707 | -1,463172637 | ENST00000380733 | 11168     | NM_033222    | PSIP1           |
| A_23_P213863   | 7,16773 | 7,71692 | -1,463263917 | ENST00000507212 | 54540     | NM_001190946 | FAM193B         |

|                |         |         |              |                 |           |              |                |
|----------------|---------|---------|--------------|-----------------|-----------|--------------|----------------|
| A_23_P68610    | 12,4938 | 13,043  | -1,46327406  | ENST00000340513 | 22974     | NM_012112    | TPX2           |
| A_23_P17074    | 11,5967 | 12,1459 | -1,46327406  | ENST00000465315 | 84317     | NM_032357    | CCDC115        |
| A_23_P154188   | 10,1305 | 10,6798 | -1,463375489 | ENST00000259234 | 79595     | NM_024545    | SAP130         |
| A_23_P17769    | 13,3013 | 13,8507 | -1,463476926 | ENST00000615721 | 1652      | NM_001355    | DDT            |
| A_23_P107166   | 6,37781 | 6,92728 | -1,463547936 | ENST00000586346 | 79777     | NM_024722    | ACBD4          |
| A_21_P0005034  | 1,61619 | 2,16566 | -1,463547936 | N/A             | N/A       | N/A          | Inc-HTR1B-2    |
| A_24_P943575   | 10,3521 | 10,9016 | -1,46357837  | ENST00000373233 | 84181     | NM_032221    | CHD6           |
| A_21_P0001423  | 1,55207 | 2,10167 | -1,463679821 | N/A             | N/A       | N/A          | Inc-LYPLAL1-1  |
| A_21_P0008845  | 4,20924 | 4,75885 | -1,463689967 | N/A             | N/A       | N/A          | Inc-OIP5-1     |
| A_21_P0003198  | 1,41297 | 1,96258 | -1,463689967 | N/A             | N/A       | N/A          | Inc-CRYGS-1    |
| A_33_P3236558  | 7,17105 | 7,72067 | -1,463700113 | ENST00000487174 | 56063     | NM_019118    | TMEM234        |
| A_22_P00008974 | 1,55025 | 2,09989 | -1,463720404 | ENST00000583316 | 400643    | NR_034100    | LINC00668      |
| A_22_P00014113 | 4,0096  | 4,55936 | -1,463842158 | N/A             | N/A       | N/A          | Inc-SBK2-1     |
| A_22_P00014194 | 3,77641 | 4,32618 | -1,463852304 | N/A             | N/A       | DA295001     | Inc-SDSL-4     |
| A_23_P393172   | 1,71579 | 2,26568 | -1,463974069 | ENST00000396073 | 10117     | NM_031889    | ENAM           |
| A_23_P129169   | 4,04891 | 4,59895 | -1,46412629  | ENST00000435365 | 1583      | NM_000781    | CYP11A1        |
| A_24_P119577   | 9,71267 | 10,2628 | -1,464217629 | ENST00000373836 | 65979     | NM_001048183 | PHACTR4        |
| A_23_P388433   | 10,5378 | 11,088  | -1,464288675 | ENST00000623169 | 401152    | NM_001170330 | C4orf3         |
| A_32_P799227   | 5,1846  | 5,73487 | -1,464359725 | ENST00000602967 | 729262    | NM_001278495 | NUTM2B         |
| A_22_P00001596 | 6,59237 | 7,14268 | -1,464400326 | N/A             | N/A       | AK093901     | Inc-ARPC2-1    |
| A_33_P3277943  | 8,90763 | 9,45797 | -1,464430778 | ENST00000504123 | 246175    | NM_001286790 | CNOT6L         |
| A_33_P3299872  | 8,433   | 8,9834  | -1,464491683 | ENST00000229633 | 135114    | NM_138571    | HINT3          |
| A_24_P294821   | 4,03405 | 4,58453 | -1,464572894 | ENST00000367122 | 8871      | NM_003898    | SYNJ2          |
| A_33_P3416772  | 9,36486 | 9,91565 | -1,464887629 | ENST00000379339 | 54991     | NM_017891    | C1orf159       |
| A_21_P0012794  | 5,73102 | 6,28181 | -1,464887629 | ENST00000510592 | N/A       | N/A          | N/A            |
| A_33_P3407344  | 1,96729 | 2,5181  | -1,464907937 | ENST00000368488 | 387119    | NM_001042475 | CEP85L         |
| A_22_P00020724 | 1,50792 | 2,05897 | -1,465151652 | ENST00000426922 | 101929218 | NR_120652    | LINC01517      |
| A_23_P49849    | 1,77822 | 2,32934 | -1,465222743 | ENST00000335960 | 124925    | NM_178860    | SEZ6           |
| A_22_P00023035 | 3,61123 | 4,16252 | -1,465395408 | N/A             | N/A       | CD706782     | Inc-IKZF2-4    |
| A_19_P00805452 | 6,35835 | 6,90986 | -1,465618887 | N/A             | N/A       | N/A          | XLOC_l2_010558 |
| A_23_P157793   | 2,92256 | 3,47413 | -1,465679841 | ENST00000617161 | 768       | NM_001216    | CA9            |
| A_19_P00320218 | 6,35159 | 6,90321 | -1,465730639 | ENST00000415434 | 101927289 | NR_110220    | LINC01237      |
| A_22_P00011765 | 1,62722 | 2,17886 | -1,465750958 | N/A             | N/A       | AK074162     | Inc-PFKL-1     |



|                |         |         |              |                 |           |              |                |
|----------------|---------|---------|--------------|-----------------|-----------|--------------|----------------|
| A_22_P00006369 | 1,74524 | 2,29699 | -1,465862721 | ENST00000511385 | 339975    | N/A          | LOC339975      |
| A_21_P0007724  | 2,60176 | 3,15353 | -1,465883042 | N/A             | 283392    | NR_026837    | TRHDE-AS1      |
| A_23_P343366   | 4,33434 | 4,88618 | -1,465954169 | ENST00000369500 | 126868    | NM_152367    | MAB21L3        |
| A_21_P0000146  | 6,69174 | 7,24361 | -1,465984653 | ENST00000505897 | 5164      | NM_001199900 | PDK2           |
| A_32_P97862    | 4,94082 | 5,49274 | -1,466035461 | ENST00000334122 | 374973    | NM_001145474 | TEX38          |
| A_23_P34628    | 10,6927 | 11,2447 | -1,466116757 | ENST00000370500 | 2959      | NM_001514    | GTF2B          |
| A_23_P215479   | 9,0897  | 9,64175 | -1,46616757  | ENST00000361545 | 7461      | NM_003388    | CLIP2          |
| A_22_P00008972 | 1,3734  | 1,92547 | -1,466187895 | N/A             | N/A       | BG199818     | Inc-LACTBL1-1  |
| A_23_P386905   | 9,89909 | 10,4513 | -1,466330182 | ENST00000587324 | 80700     | NM_025241    | UBXN6          |
| A_21_P0007960  | 2,67736 | 3,22965 | -1,466411495 | N/A             | N/A       | N/A          | Inc-FARP1-1    |
| A_23_P74115    | 10,2812 | 10,8335 | -1,466421659 | ENST00000371975 | 8438      | NM_003579    | RAD54L         |
| A_33_P3345886  | 2,20325 | 2,75557 | -1,466441988 | ENST00000493635 | 221472    | AK131079     | FGD2           |
| A_21_P0012487  | 4,39052 | 4,94291 | -1,466513142 | N/A             | N/A       | N/A          | XLOC_I2_010511 |
| A_33_P3422258  | 12,028  | 12,5804 | -1,466523307 | ENST00000321777 | 401466    | NM_001293320 | C8orf59        |
| A_21_P0005422  | 2,56933 | 3,12176 | -1,466553803 | N/A             | N/A       | N/A          | Inc-SPAM1-1    |
| A_33_P3270034  | 14,0909 | 14,6434 | -1,466624963 | ENST00000581486 | 8031      | NM_001145260 | NCOA4          |
| A_21_P0013833  | 5,3643  | 5,91683 | -1,466655461 | N/A             | N/A       | N/A          | XLOC_I2_015827 |
| A_22_P00005752 | 1,66822 | 2,22078 | -1,466685959 | N/A             | N/A       | N/A          | Inc-ENAH-1     |
| A_21_P0012995  | 9,94601 | 10,4987 | -1,466818127 | N/A             | N/A       | N/A          | Inc-TAF9-2     |
| A_22_P00013795 | 1,44708 | 1,99978 | -1,466828294 | ENST00000505702 | N/A       | N/A          | N/A            |
| A_23_P103897   | 3,60282 | 4,1556  | -1,466909635 | ENST00000431031 | 100505741 | XR_246362    | SPATA1         |
| A_33_P3233953  | 11,8774 | 12,4302 | -1,46692997  | N/A             | N/A       | N/A          | N/A            |
| A_33_P3232798  | 8,00478 | 8,55759 | -1,466940138 | ENST00000287263 | 80223     | NM_025151    | RAB11FIP1      |
| A_21_P0005917  | 8,1372  | 8,69003 | -1,466960475 | N/A             | 100507316 | NR_120682    | LOC100507316   |
| A_23_P53363    | 9,80939 | 10,3623 | -1,467041822 | ENST00000549257 | 91419     | NM_033276    | XRCC6BP1       |
| A_21_P0011316  | 3,42095 | 3,9739  | -1,467082498 | N/A             | N/A       | N/A          | XLOC_I2_004631 |
| A_23_P313389   | 11,5069 | 12,0599 | -1,467133344 | ENST00000474306 | 7357      | NM_003358    | UGCG           |
| A_22_P00011711 | 1,42086 | 1,97387 | -1,467143514 | N/A             | 196047    | NR_002791    | EMX2OS         |
| A_22_P00025155 | 2,99001 | 3,54304 | -1,467163853 | ENST00000563397 | N/A       | N/A          | N/A            |
| A_21_P0004996  | 1,65447 | 2,2075  | -1,467163853 | N/A             | N/A       | N/A          | Inc-RPP40-1    |
| A_21_P0009706  | 1,99987 | 2,55291 | -1,467174022 | N/A             | N/A       | N/A          | Inc-ZNF536-2   |
| A_22_P00014828 | 5,18709 | 5,7402  | -1,467245212 | N/A             | N/A       | N/A          | Inc-SLC44A3-2  |
| A_33_P3407409  | 1,47045 | 2,02357 | -1,467255382 | ENST00000252463 | 84891     | NM_001282416 | ZSCAN10        |

|                |         |         |              |                 |           |              |                |
|----------------|---------|---------|--------------|-----------------|-----------|--------------|----------------|
| A_21_P0009852  | 5,42817 | 5,98135 | -1,467316405 | ENST00000411453 | 101927541 | NR_109943    | LINC01273      |
| A_24_P187921   | 5,58657 | 6,13983 | -1,467397772 | ENST00000612218 | 79694     | NM_024641    | MANEA          |
| A_21_P0000049  | 1,51352 | 2,06683 | -1,467448629 | ENST00000535983 | 27185     | NM_001164538 | DISC1          |
| A_23_P26771    | 1,96243 | 2,51574 | -1,467448629 | ENST00000330793 | 10871     | NM_006678    | CD300C         |
| A_19_P00323005 | 1,69203 | 2,24538 | -1,467489316 | ENST00000432743 | N/A       | N/A          | N/A            |
| A_23_P387523   | 10,1652 | 10,7186 | -1,467540176 | ENST00000374651 | 9923      | NM_001083621 | ZBTB40         |
| A_22_P00023880 | 1,33655 | 1,88998 | -1,467570693 | N/A             | N/A       | N/A          | Inc-ANKMY2-1   |
| A_33_P3339696  | 2,59239 | 3,14606 | -1,467814852 | N/A             | N/A       | N/A          | N/A            |
| A_21_P0008104  | 2,06113 | 2,61496 | -1,467977647 | N/A             | N/A       | N/A          | Inc-GPC6-1     |
| A_23_P64932    | 4,12509 | 4,679   | -1,468059051 | ENST00000392839 | 55188     | NM_018157    | RIC8B          |
| A_22_P00021588 | 4,45373 | 5,00765 | -1,468069227 | N/A             | 101930532 | N/A          | LOC101930532   |
| A_23_P89187    | 12,2815 | 12,8355 | -1,468150636 | ENST00000435347 | 3927      | NM_006148    | LASP1          |
| A_21_P0000270  | 7,40566 | 7,95969 | -1,468181166 | ENST00000494445 | 6043      | NR_002586    | SNORA63        |
| A_23_P317324   | 9,73652 | 10,2906 | -1,46823205  | ENST00000468789 | 2122      | NM_005241    | MECOM          |
| A_21_P0006079  | 5,63739 | 6,1916  | -1,468364357 | ENST00000432148 | 101927015 | NR_109769    | LINC01506      |
| A_21_P0006519  | 1,43311 | 1,98742 | -1,46846614  | N/A             | N/A       | N/A          | Inc-MAGEA8-2   |
| A_23_P341527   | 2,37822 | 2,93257 | -1,468506855 | ENST00000525273 | 149095    | NM_152494    | DCST1          |
| A_33_P3420204  | 9,63543 | 10,1898 | -1,468527213 | ENST00000338797 | 23373     | NM_001098482 | CRTC1          |
| A_21_P0012203  | 1,87391 | 2,42836 | -1,468608647 | N/A             | N/A       | N/A          | XLOC_I2_009216 |
| A_23_P74349    | 9,83143 | 10,3859 | -1,468629007 | ENST00000271452 | 83540     | NM_145697    | NUF2           |
| A_21_P0014544  | 5,86282 | 6,4174  | -1,468740988 | N/A             | 100507437 | NR_125384    | LOC100507437   |
| A_33_P3282305  | 3,0693  | 3,62391 | -1,46877153  | ENST00000381305 | 105       | AK289895     | ADARB2         |
| A_33_P3590259  | 13,1207 | 13,6754 | -1,46886316  | ENST00000337225 | 9547      | NM_004887    | CXCL14         |
| A_22_P00014833 | 2,65965 | 3,21438 | -1,468893704 | N/A             | 102724552 | NR_125999    | LOC102724552   |
| A_22_P00007007 | 3,07947 | 3,6343  | -1,468995524 | N/A             | N/A       | N/A          | Inc-GGPS1-1    |
| A_21_P0005809  | 3,32526 | 3,88014 | -1,469046436 | N/A             | N/A       | N/A          | Inc-INTS9-1    |
| A_33_P3256685  | 11,0025 | 11,5574 | -1,469066802 | ENST00000369466 | 8458      | NM_003594    | TTF2           |
| A_22_P00019429 | 1,64951 | 2,20442 | -1,469076985 | N/A             | N/A       | N/A          | Inc-FAM83F-1   |
| A_33_P3424864  | 1,63071 | 2,18563 | -1,469087168 | N/A             | N/A       | N/A          | N/A            |
| A_22_P00000259 | 3,14751 | 3,70251 | -1,469168633 | N/A             | 101929753 | NR_110576    | LOC101929753   |
| A_22_P00016483 | 11,2842 | 11,8393 | -1,469270472 | N/A             | 148413    | NR_015434    | LOC148413      |
| A_23_P66563    | 8,89406 | 9,44933 | -1,469443614 | ENST00000543872 | 55181     | NM_018149    | SMG8           |
| A_33_P3288871  | 4,35721 | 4,91249 | -1,469453799 | N/A             | N/A       | DC378344     | N/A            |

|                |         |         |              |                 |           |              |               |
|----------------|---------|---------|--------------|-----------------|-----------|--------------|---------------|
| A_21_P0014406  | 1,47263 | 2,02798 | -1,469525099 | N/A             | 100506175 | NR_111906    | LOC100506175  |
| A_24_P191067   | 13,3366 | 13,892  | -1,46957603  | ENST00000361311 | 22883     | NM_001009566 | CLSTN1        |
| A_23_P51085    | 9,56891 | 10,1244 | -1,46966771  | ENST00000611144 | 57405     | NM_020675    | SPC25         |
| A_22_P00015078 | 3,27843 | 3,834   | -1,469749208 | N/A             | N/A       | AF400496     | Inc-SNURF-3   |
| A_23_P327519   | 8,52646 | 9,08209 | -1,469810334 | ENST00000296632 | 134429    | NM_139164    | STARD4        |
| A_23_P4885     | 8,59122 | 9,14685 | -1,469810334 | ENST00000597774 | 160       | NM_014203    | AP2A1         |
| A_22_P00006290 | 9,07745 | 9,63328 | -1,470014107 | N/A             | 100505648 | NR_040058    | RAD51-AS1     |
| A_21_P0010141  | 7,4185  | 7,9744  | -1,470085434 | ENST00000435697 | 388815    | N/A          | MIR99AHG      |
| A_33_P3224858  | 7,1644  | 7,72035 | -1,470136384 | ENST00000390013 | 5610      | NM_001135652 | EIF2AK2       |
| A_24_P113144   | 6,57183 | 7,12797 | -1,470330011 | ENST00000321990 | 79915     | NM_024857    | ATAD5         |
| A_33_P3241433  | 8,00376 | 8,55991 | -1,470340203 | ENST00000601469 | 84671     | NM_001172674 | ZNF347        |
| A_21_P0013982  | 1,48297 | 2,03918 | -1,470401354 | ENST00000611237 | N/A       | XM_003119160 | N/A           |
| A_23_P124927   | 6,1414  | 6,69782 | -1,470615402 | ENST00000503044 | 10636     | NM_006480    | RGS14         |
| A_23_P132159   | 7,59992 | 8,15638 | -1,470656177 | ENST00000215794 | 11274     | NM_017414    | USP18         |
| A_21_P0002044  | 4,00199 | 4,55848 | -1,470686759 | N/A             | N/A       | N/A          | Inc-SIX2-3    |
| A_23_P13065    | 10,1211 | 10,6776 | -1,470696953 | ENST00000446113 | 54503     | NM_019028    | ZDHHC13       |
| A_24_P110291   | 5,6176  | 6,17419 | -1,470788703 | N/A             | 100129917 | NR_036511    | LOC100129917  |
| A_33_P3245699  | 3,5846  | 4,14129 | -1,470890653 | N/A             | 100128374 | XR_171620    | LOC100128374  |
| A_23_P213754   | 12,3442 | 12,9009 | -1,470900849 | ENST00000265192 | 51247     | NM_001033112 | PAIP2         |
| A_21_P0005111  | 5,38806 | 5,94479 | -1,470931436 | ENST00000606723 | N/A       | N/A          | N/A           |
| A_33_P3382648  | 2,60895 | 3,1657  | -1,470951827 | ENST00000382670 | 378948    | NM_001006121 | RBMY1B        |
| A_23_P153301   | 11,8927 | 12,4495 | -1,471002807 | ENST00000617332 | 1048      | NM_004363    | CEACAM5       |
| A_22_P00020142 | 2,10284 | 2,65965 | -1,471013004 | N/A             | N/A       | BX537654     | Inc-AEBP2-3   |
| A_23_P21376    | 4,18624 | 4,7433  | -1,471267933 | ENST00000354212 | 9863      | NM_012301    | MAGI2         |
| A_33_P3812038  | 10,9497 | 11,5069 | -1,471410713 | N/A             | 340335    | AK074459     | LOC340335     |
| A_23_P30655    | 10,4622 | 11,0194 | -1,471410713 | ENST00000616555 | 4794      | NM_004556    | NFKBIE        |
| A_19_P00318492 | 5,09177 | 5,64898 | -1,471420912 | ENST00000429578 | N/A       | AK054628     | N/A           |
| A_22_P00003332 | 5,09696 | 5,65417 | -1,471420912 | N/A             | N/A       | N/A          | Inc-CAST-2    |
| A_23_P79496    | 1,55391 | 2,11114 | -1,47144131  | ENST00000394754 | 286749    | NM_001198593 | STON1-GTF2A1L |
| A_23_P129717   | 3,40333 | 3,96069 | -1,471573906 | ENST00000300005 | 112479    | NM_080663    | ERI2          |
| A_23_P385067   | 1,47537 | 2,03283 | -1,471675912 | ENST00000360731 | 54102     | NM_053277    | CLIC6         |
| A_22_P00010644 | 3,22673 | 3,78425 | -1,471737118 | N/A             | N/A       | N/A          | Inc-NEDD1-4   |
| A_32_P145010   | 3,04667 | 3,6043  | -1,471849337 | N/A             | 729683    | NR_046273    | LOC729683     |

|                |         |         |              |                 |           |              |                |
|----------------|---------|---------|--------------|-----------------|-----------|--------------|----------------|
| A_32_P82189    | 6,32681 | 6,88448 | -1,471890146 | ENST00000307507 | 84140     | NM_032180    | FAM161A        |
| A_24_P75190    | 3,61232 | 4,16999 | -1,471890146 | ENST00000429817 | 3045      | NM_000519    | HBD            |
| A_22_P00002499 | 1,8187  | 2,37653 | -1,472053393 | N/A             | 102724118 | XR_429782    | LOC102724118   |
| A_33_P3713035  | 2,92813 | 3,48611 | -1,472206453 | N/A             | 221814    | AL122087     | LOC221814      |
| A_21_P0007288  | 1,96094 | 2,51898 | -1,472267682 | N/A             | N/A       | N/A          | Inc-SORL1-1    |
| A_23_P348749   | 4,41669 | 4,97474 | -1,472277887 | ENST00000285397 | 221264    | NM_145025    | AK9            |
| A_23_P340890   | 9,62103 | 10,1791 | -1,472298297 | ENST00000307896 | 90326     | NM_001195753 | THAP3          |
| A_33_P3231953  | 8,14254 | 8,70069 | -1,472379941 | ENST00000345356 | 1303      | NM_004370    | COL12A1        |
| A_22_P00017472 | 1,64491 | 2,2031  | -1,472420764 | N/A             | N/A       | N/A          | Inc-VSTM2B-1   |
| A_22_P00004423 | 1,37388 | 1,93221 | -1,472563656 | N/A             | N/A       | N/A          | Inc-COQ10B-1   |
| A_23_P111361   | 3,40999 | 3,96832 | -1,472563656 | ENST00000447468 | 285755    | NM_173672    | PPIL6          |
| A_22_P00016322 | 2,5823  | 3,14079 | -1,472726977 | N/A             | N/A       | BX103869     | Inc-TMEM135-4  |
| A_24_P329635   | 9,74338 | 10,302  | -1,472859689 | ENST00000440111 | 7248      | NM_000368    | TSC1           |
| A_33_P3320832  | 1,56102 | 2,11968 | -1,472900526 | ENST00000376865 | 129521    | NM_001011717 | NMS            |
| A_33_P3394494  | 9,84802 | 10,4067 | -1,472920945 | ENST00000356683 | 23587     | NM_203415    | ELP5           |
| A_33_P3408852  | 2,90321 | 3,46191 | -1,472941364 | ENST00000538803 | 2046      | NM_001006943 | EPHA8          |
| A_33_P3408450  | 7,51318 | 8,07195 | -1,473012834 | ENST00000556585 | 643382    | NM_001146683 | TMEM253        |
| A_23_P64770    | 12,5447 | 13,1035 | -1,473043464 | ENST00000308025 | 9416      | NM_004818    | DDX23          |
| A_23_P141893   | 11,0628 | 11,6216 | -1,473043464 | ENST00000401705 | 147699    | NM_001080401 | PPM1N          |
| A_33_P3337977  | 4,16055 | 4,71937 | -1,473063885 | ENST00000368941 | 9896      | N/A          | FIG4           |
| A_23_P365248   | 3,65482 | 4,21368 | -1,473104728 | ENST00000308251 | 93107     | NM_172347    | KCNG4          |
| A_33_P3306163  | 13,9514 | 14,5104 | -1,473247686 | ENST00000556322 | 3958      | NM_001177388 | LGALS3         |
| A_22_P00007435 | 1,37859 | 1,9377  | -1,47336002  | N/A             | N/A       | N/A          | Inc-GSG2-1     |
| A_22_P00007337 | 1,9895  | 2,54874 | -1,473492789 | N/A             | N/A       | N/A          | Inc-GPRC5A-1   |
| A_22_P00024313 | 3,06095 | 3,62024 | -1,473543857 | N/A             | N/A       | N/A          | Inc-MFSD2A-1   |
| A_24_P194420   | 4,77249 | 5,33178 | -1,473543857 | ENST00000255784 | 79879     | NM_024821    | CCDC134        |
| A_33_P3416321  | 9,0142  | 9,57351 | -1,473564285 | ENST00000355773 | 26503     | NM_012434    | SLC17A5        |
| A_24_P65507    | 13,4539 | 14,0133 | -1,473656213 | ENST00000584514 | 201254    | NM_144998    | STRA13         |
| A_33_P3391865  | 9,62913 | 10,1887 | -1,473829872 | ENST00000392634 | 64423     | NM_001031714 | INF2           |
| A_23_P30799    | 9,50707 | 10,0667 | -1,473891168 | ENST00000618052 | 8968      | NM_021018    | HIST1H3F       |
| A_21_P0001089  | 1,61184 | 2,17163 | -1,474054637 | ENST00000457440 | N/A       | N/A          | N/A            |
| A_22_P00002636 | 4,6926  | 5,25241 | -1,474075072 | N/A             | N/A       | N/A          | Inc-C1orf177-2 |
| A_33_P3284586  | 7,26451 | 7,82437 | -1,47412616  | ENST00000258200 | 55336     | NM_018378    | FBXL8          |

|                |         |         |              |                 |           |              |                      |
|----------------|---------|---------|--------------|-----------------|-----------|--------------|----------------------|
| A_33_P3266730  | 3,53283 | 4,09281 | -1,47424878  | ENST00000263033 | 94121     | NM_080737    | SYTL4                |
| A_24_P32118    | 9,33656 | 9,89666 | -1,474371409 | ENST00000347230 | 23503     | NM_015346    | ZFYVE26              |
| A_21_P0004147  | 1,34659 | 1,90672 | -1,474402068 | ENST00000513755 | 728769    | N/A          | SCAMP1-AS1           |
| A_33_P3417960  | 1,62558 | 2,18574 | -1,474432728 | N/A             | 645206    | N/A          | LINC00693            |
| A_23_P421811   | 3,90777 | 4,46796 | -1,474463388 | ENST00000466091 | 140699    | NM_152503    | MROH8                |
| A_33_P3232080  | 1,76472 | 2,32493 | -1,474483829 | ENST00000618265 | 57126     | NM_020406    | CD177                |
| A_32_P100109   | 6,89004 | 7,45061 | -1,474851807 | ENST00000303843 | 9185      | NM_004726    | REPS2                |
| A_24_P7121     | 2,05628 | 2,61706 | -1,475066504 | ENST00000381782 | 79730     | NM_024677    | NSUN7                |
| A_33_P3316835  | 4,7899  | 5,35104 | -1,475434627 | ENST00000264370 | 55345     | AK002193     | ZGRF1                |
| A_22_P00025871 | 2,51555 | 3,07671 | -1,475455081 | ENST00000447910 | 768097    | NR_003245    | HAR1B                |
| A_24_P916718   | 4,1086  | 4,6698  | -1,47549599  | ENST00000302017 | 168544    | NM_207336    | ZNF467               |
| A_21_P0008585  | 1,9263  | 2,48756 | -1,475557356 | N/A             | N/A       | N/A          | Inc-MKRN3-3          |
| A_23_P152234   | 2,89218 | 3,45349 | -1,475608495 | ENST00000268595 | 146225    | NM_144673    | CMTM2                |
| A_23_P48747    | 11,8984 | 12,4599 | -1,475802843 | ENST00000558340 | 115817    | NM_138452    | DHRS1                |
| A_33_P3400424  | 6,03797 | 6,59949 | -1,475823302 | ENST00000618487 | 284370    | NM_001199324 | ZNF615               |
| A_33_P3367811  | 1,49438 | 2,05617 | -1,476099528 | N/A             | 284001    | AL137530     | CCDC57               |
| A_23_P145514   | 8,99482 | 9,55665 | -1,476140454 | ENST00000367748 | 53832     | NM_014432    | IL20RA               |
| A_33_P3316068  | 3,28144 | 3,84334 | -1,476212079 | ENST00000380313 | 11238     | N/A          | CA5B                 |
| A_33_P3311046  | 4,9411  | 5,50302 | -1,476232544 | ENST00000317965 | 391196    | NM_001004691 | OR2M7                |
| A_23_P128956   | 8,98695 | 9,54888 | -1,476242776 | ENST00000556143 | 53349     | NM_021260    | ZFYVE1               |
| A_33_P3315423  | 3,66974 | 4,23169 | -1,476263241 | ENST00000291416 | 55223     | NM_018207    | TRIM62               |
| A_33_P3224745  | 11,9624 | 12,5244 | -1,476314406 | ENST00000565460 | 23659     | NM_012320    | PLA2G15              |
| A_23_P432013   | 2,89575 | 3,45788 | -1,476447441 | ENST00000306176 | 131368    | NM_175056    | ZPLD1                |
| A_22_P00025856 | 4,96039 | 5,52267 | -1,476600958 | ENST00000414038 | 100132735 | N/A          | LOC100132735         |
| A_22_P00021358 | 1,3708  | 1,93326 | -1,4767852   | ENST00000541797 | N/A       | DA234517     | N/A                  |
| A_21_P0012859  | 1,42582 | 1,98846 | -1,476969465 | ENST00000507373 | 255187    | N/A          | LOC255187            |
| A_21_P0014272  | 6,27017 | 6,83283 | -1,47698994  | N/A             | N/A       | XR_109069    | N/A                  |
| A_33_P3425356  | 10,1232 | 10,6859 | -1,477030892 | ENST00000491704 | 25852     | NM_015396    | ARMC8                |
| A_33_P3268304  | 5,0485  | 5,61129 | -1,477123037 | ENST00000612860 | 55679     | NM_001161404 | LIMS2                |
| A_22_P00015091 | 1,89987 | 2,46268 | -1,477143514 | ENST00000557171 | 100128714 | NR_040082    | LOC100128714         |
| A_33_P3237804  | 4,44141 | 5,0043  | -1,477225426 | N/A             | N/A       | AL109667     | Inc-RP11-351M8.1.1-1 |
| A_33_P3366321  | 2,16599 | 2,72896 | -1,477307344 | N/A             | N/A       | N/A          | N/A                  |
| A_23_P86252    | 9,90461 | 10,4676 | -1,477327823 | ENST00000367728 | 5279      | NM_002642    | PIGC                 |

|                |         |         |              |                 |           |              |              |
|----------------|---------|---------|--------------|-----------------|-----------|--------------|--------------|
| A_23_P100127   | 10,1261 | 10,6891 | -1,477338064 | ENST00000527044 | 57082     | NM_170589    | CASC5        |
| A_22_P00008481 | 1,62466 | 2,18773 | -1,477409746 | ENST00000564261 | N/A       | BC042499     | N/A          |
| A_32_P113066   | 1,57046 | 2,13365 | -1,477532639 | ENST00000510733 | 9227      | NM_004744    | LRAT         |
| A_22_P00011057 | 2,87975 | 3,44327 | -1,477870646 | N/A             | N/A       | N/A          | Inc-NTRK3-2  |
| A_22_P00012820 | 1,57283 | 2,13649 | -1,478014067 | N/A             | N/A       | N/A          | Inc-RARS-1   |
| A_19_P00801945 | 2,48847 | 3,05214 | -1,478024311 | ENST00000439120 | 441204    | N/A          | LOC441204    |
| A_33_P3243118  | 4,48977 | 5,05352 | -1,478106273 | ENST00000314259 | 219432    | NM_001004704 | OR4C6        |
| A_24_P132099   | 11,5056 | 12,0694 | -1,478157501 | ENST00000275036 | 9324      | NM_138730    | HMG3         |
| A_33_P3268555  | 1,66694 | 2,23084 | -1,478259963 | ENST00000544128 | 11262     | NM_001005176 | SP140        |
| A_22_P00006740 | 3,51712 | 4,08107 | -1,478311196 | ENST00000530389 | N/A       | N/A          | N/A          |
| A_24_P416257   | 9,56694 | 10,1309 | -1,478321443 | ENST00000309859 | 23062     | NM_015044    | GGA2         |
| A_23_P118105   | 14,2706 | 14,8346 | -1,478362431 | ENST00000268668 | 4716      | NM_004548    | NDUFB10      |
| A_23_P65789    | 7,53512 | 8,09914 | -1,478382926 | ENST00000456504 | 55784     | NM_018349    | MCTP2        |
| A_23_P204998   | 6,97974 | 7,54394 | -1,47856739  | ENST00000595437 | 10160     | NM_005766    | FARP1        |
| A_33_P3394809  | 10,1458 | 10,71   | -1,47856739  | ENST00000538721 | 5833      | NM_001282203 | PCYT2        |
| A_33_P3360718  | 7,06317 | 7,6274  | -1,478598136 | ENST00000573502 | 996       | NM_001114091 | CDC27        |
| A_21_P0003715  | 5,39062 | 5,95489 | -1,478639132 | N/A             | N/A       | N/A          | Inc-CYTL1-1  |
| A_23_P354074   | 6,80171 | 7,36604 | -1,478700628 | ENST00000389794 | 1130      | NM_000081    | LYST         |
| A_22_P00012827 | 1,35773 | 1,92214 | -1,478782627 | ENST00000515750 | N/A       | N/A          | N/A          |
| A_21_P0014167  | 3,86285 | 4,42743 | -1,47895689  | ENST00000379433 | 4739      | AY166681     | NEDD9        |
| A_24_P917886   | 4,60127 | 5,16586 | -1,478967141 | ENST00000621226 | 4586      | XM_006709947 | MUC5AC       |
| A_23_P351320   | 8,54686 | 9,11158 | -1,479100416 | ENST00000606893 | 51362     | NM_015891    | CDC40        |
| A_21_P0010997  | 6,82137 | 7,38613 | -1,479141426 | ENST00000532168 | 283140    | XM_006709955 | LOC283140    |
| A_33_P3367201  | 6,12696 | 6,69174 | -1,479161931 | ENST00000545712 | 326625    | NM_052845    | MMAB         |
| A_22_P00014972 | 5,69024 | 6,25507 | -1,479213196 | N/A             | 101928156 | XR_241404    | LOC101928156 |
| A_23_P168240   | 7,30545 | 7,8703  | -1,479233702 | ENST00000466185 | 8899      | NM_003913    | PRPF4B       |
| A_24_P246351   | 15,0785 | 15,6434 | -1,479284969 | ENST00000599206 | 112703    | NM_138411    | FAM71E1      |
| A_33_P3677298  | 1,53946 | 2,10454 | -1,479469546 | N/A             | 152286    | AL117431     | LOC152286    |
| A_33_P3329477  | 9,37696 | 9,94225 | -1,479684915 | ENST00000441655 | 283345    | NR_002803    | RPL13P5      |
| A_22_P00012718 | 1,38205 | 1,94737 | -1,479715684 | ENST00000532606 | N/A       | N/A          | N/A          |
| A_33_P3305775  | 4,64513 | 5,21046 | -1,479725941 | N/A             | N/A       | N/A          | Inc-HDHC3-4  |
| A_21_P0014287  | 1,69731 | 2,2627  | -1,479787482 | N/A             | 100507654 | BC034289     | LOC100507654 |
| A_22_P00005554 | 5,51694 | 6,08234 | -1,479797739 | N/A             | 643339    | NR_040096    | LOC643339    |

|                |         |         |              |                 |           |              |                |
|----------------|---------|---------|--------------|-----------------|-----------|--------------|----------------|
| A_33_P3351775  | 7,43222 | 7,99762 | -1,479797739 | ENST00000412562 | N/A       | N/A          | N/A            |
| A_22_P00012024 | 2,26815 | 2,8336  | -1,479849026 | N/A             | 100506866 | NR_038271    | TTN-AS1        |
| A_33_P3248644  | 14,0558 | 14,6214 | -1,480002897 | ENST00000494984 | 5859      | NM_005051    | QARS           |
| A_23_P12572    | 10,4884 | 11,0541 | -1,480105487 | ENST00000369331 | 840       | NM_033338    | CASP7          |
| A_24_P87458    | 2,02046 | 2,58617 | -1,480115746 | ENST00000586838 | 85302     | NM_001080542 | FBF1           |
| A_23_P49759    | 1,78378 | 2,34964 | -1,480269645 | ENST00000225842 | 6346      | NM_002981    | CCL1           |
| A_33_P3254606  | 9,861   | 10,4269 | -1,480310687 | ENST00000587391 | 284403    | NM_001083961 | WDR62          |
| A_22_P00024090 | 5,6674  | 6,23335 | -1,480361992 | N/A             | N/A       | BC053565     | Inc-GBP5-2     |
| A_33_P3212570  | 7,15624 | 7,72229 | -1,480464606 | N/A             | 100652740 | NR_102400    | PYCARD-AS1     |
| A_23_P145330   | 8,80593 | 9,37201 | -1,480495392 | ENST00000467553 | 54535     | NM_019052    | CCHCR1         |
| A_32_P192594   | 10,4636 | 11,0297 | -1,480515916 | ENST00000620617 | N/A       | BC014066     | N/A            |
| A_33_P3215565  | 3,09099 | 3,65718 | -1,480608278 | N/A             | N/A       | N/A          | N/A            |
| A_33_P3380625  | 6,25276 | 6,81899 | -1,48064933  | ENST00000374676 | 3339      | NM_001291860 | HSPG2          |
| A_24_P252846   | 7,78825 | 8,35462 | -1,48079302  | ENST00000334307 | 119710    | NM_138787    | C11orf74       |
| A_21_P0004018  | 2,02816 | 2,59467 | -1,480936724 | N/A             | N/A       | N/A          | Inc-AGGF1-1    |
| A_22_P00012107 | 2,12714 | 2,69366 | -1,480946989 | N/A             | 100506881 | NR_125364    | MKLN1-AS       |
| A_23_P22129    | 4,95632 | 5,52291 | -1,481018847 | ENST00000310778 | 9001      | NM_177977    | HAP1           |
| A_33_P3296281  | 1,38846 | 1,95511 | -1,481080442 | N/A             | N/A       | AK130265     | N/A            |
| A_23_P8900     | 15,0142 | 15,5809 | -1,481131773 | ENST00000522940 | 1345      | NM_004374    | COX6C          |
| A_33_P3338152  | 10,2456 | 10,8123 | -1,481131773 | ENST00000475432 | 64344     | XR_243952    | HIF3A          |
| A_22_P00014707 | 1,55602 | 2,1228  | -1,481213907 | N/A             | N/A       | N/A          | Inc-SLC25A47-1 |
| A_33_P3416612  | 1,49925 | 2,06609 | -1,48127551  | N/A             | 284835    | NR_024100    | LINC00323      |
| A_21_P0013774  | 1,6167  | 2,18359 | -1,481326848 | N/A             | N/A       | N/A          | XLOC_I2_015565 |
| A_21_P0000173  | 9,54859 | 10,1155 | -1,481347384 | ENST00000378953 | 441108    | NR_045116    | C5orf56        |
| A_19_P00321743 | 9,14604 | 9,71296 | -1,481357652 | ENST00000586949 | 100130938 | XR_110148    | LOC100130938   |
| A_23_P356965   | 6,68597 | 7,25293 | -1,481398724 | ENST00000327026 | 284001    | AK125941     | CCDC57         |
| A_32_P505133   | 5,19475 | 5,76175 | -1,481439798 | ENST00000584868 | 126526    | NM_001256440 | C19orf47       |
| A_33_P3303394  | 13,9334 | 14,5004 | -1,481439798 | N/A             | N/A       | N/A          | N/A            |
| A_33_P3239860  | 6,69278 | 7,25982 | -1,481480873 | ENST00000395720 | 348094    | BC101273     | ANKDD1A        |
| A_21_P0006861  | 1,42506 | 1,99217 | -1,481552756 | N/A             | N/A       | N/A          | Inc-FXYD4-1    |
| A_22_P00008019 | 5,377   | 5,94414 | -1,481583565 | N/A             | 101929089 | NR_120574    | LOC101929089   |
| A_23_P419156   | 3,00486 | 3,57212 | -1,481706805 | ENST00000249389 | 611       | NM_001708    | OPN1SW         |
| A_24_P142305   | 2,38224 | 2,94968 | -1,481891683 | ENST00000251595 | 3040      | NM_000517    | HBA2           |

|                |         |         |              |                 |           |              |              |
|----------------|---------|---------|--------------|-----------------|-----------|--------------|--------------|
| A_24_P398950   | 11,0648 | 11,6323 | -1,481953315 | ENST00000394275 | 55898     | NM_001039675 | UNC45A       |
| A_23_P157299   | 1,51719 | 2,08469 | -1,481953315 | ENST00000413907 | 165       | NM_001129    | AEBP1        |
| A_21_P0000187  | 1,67481 | 2,24231 | -1,481953315 | N/A             | 100287036 | NM_001242885 | LOC100287036 |
| A_21_P0010328  | 7,41909 | 7,9866  | -1,481963587 | ENST00000444039 | 101928891 | NR_110537    | LOC101928891 |
| A_21_P0001776  | 2,98409 | 3,55162 | -1,481984132 | N/A             | 101928113 | NR_110569    | ST3GAL5-AS1  |
| A_23_P203137   | 11,5185 | 12,0862 | -1,482158772 | ENST00000431736 | 9354      | NM_004788    | UBE4A        |
| A_23_P59069    | 12,2782 | 12,8459 | -1,482158772 | N/A             | 8348      | NM_003527    | HIST1H2BO    |
| A_24_P334300   | 4,63269 | 5,20064 | -1,482415632 | ENST00000454309 | 2257      | NM_004113    | FGF12        |
| A_33_P7883685  | 8,57366 | 9,14171 | -1,482518389 | ENST00000537369 | 9383      | NR_003255    | TSIX         |
| A_21_P0009067  | 3,57722 | 4,14529 | -1,482538941 | ENST00000568389 | 102467146 | NR_104663    | LOC102467146 |
| A_23_P101281   | 10,0203 | 10,5884 | -1,48256977  | ENST00000339656 | 84914     | NM_032828    | ZNF587       |
| A_24_P333106   | 14,886  | 15,4541 | -1,48256977  | ENST00000479812 | N/A       | N/A          | N/A          |
| A_21_P0005234  | 1,4035  | 1,97168 | -1,482651984 | ENST00000426205 | 102723605 | NR_120515    | LINC01445    |
| A_23_P18447    | 2,0079  | 2,57615 | -1,482723924 | ENST00000264867 | 10891     | NM_013261    | PPARGC1A     |
| A_23_P316850   | 9,57974 | 10,148  | -1,482734202 | ENST00000315489 | 284451    | NM_182577    | ODF3L2       |
| A_22_P00018438 | 1,58715 | 2,15542 | -1,482744479 | ENST00000519652 | N/A       | DA189000     | N/A          |
| A_21_P0009189  | 4,36606 | 4,93437 | -1,48278559  | N/A             | N/A       | N/A          | Inc-MYO19-1  |
| A_33_P3257030  | 11,1983 | 11,7667 | -1,482878094 | ENST00000393928 | 10609     | NM_006455    | P3H4         |
| A_21_P0009790  | 3,294   | 3,86243 | -1,48290893  | N/A             | N/A       | N/A          | Inc-BCL3-1   |
| A_22_P00021447 | 3,41889 | 3,98735 | -1,482939766 | N/A             | N/A       | N/A          | Inc-NPB-1    |
| A_22_P00006523 | 2,6811  | 3,24961 | -1,482991162 | ENST00000503095 | N/A       | N/A          | N/A          |
| A_32_P220750   | 6,18546 | 6,75405 | -1,483073399 | N/A             | 5343      | NM_001032392 | PLGLB1       |
| A_21_P0008569  | 2,49366 | 3,06239 | -1,483217324 | N/A             | N/A       | N/A          | Inc-DUT-1    |
| A_33_P3398597  | 7,22085 | 7,78969 | -1,483330418 | ENST00000589694 | 54869     | NM_133180    | EPS8L1       |
| A_23_P70213    | 2,57918 | 3,14803 | -1,4833407   | ENST00000508376 | 324       | NM_000038    | APC          |
| A_21_P0006886  | 3,07034 | 3,63923 | -1,483381827 | ENST00000439559 | 102723652 | XR_428774    | LOC102723652 |
| A_24_P369656   | 1,73211 | 2,30125 | -1,4836389   | ENST00000360392 | 114088    | NM_052978    | TRIM9        |
| A_22_P00018233 | 1,36558 | 1,93474 | -1,483659468 | ENST00000425228 | N/A       | N/A          | N/A          |
| A_33_P3352677  | 4,22212 | 4,79138 | -1,483762311 | ENST00000406912 | N/A       | BG222044     | N/A          |
| A_22_P00018245 | 1,35513 | 1,92441 | -1,48378288  | ENST00000523121 | N/A       | XR_108870    | N/A          |
| A_22_P00014089 | 1,45603 | 2,02539 | -1,483865161 | ENST00000585482 | 23098     | AK026824     | SARM1        |
| A_33_P3299982  | 13,2435 | 13,8129 | -1,483906303 | ENST00000594264 | 7392      | NM_003367    | USF2         |
| A_33_P3324687  | 5,07741 | 5,64697 | -1,484070883 | ENST00000566382 | N/A       | N/A          | N/A          |



|                |         |         |              |                 |           |              |                 |
|----------------|---------|---------|--------------|-----------------|-----------|--------------|-----------------|
| A_24_P370970   | 6,8088  | 7,37839 | -1,484101743 | ENST00000487995 | 25936     | NM_015471    | NSL1            |
| A_22_P00004415 | 4,13981 | 4,70941 | -1,48411203  | ENST00000584952 | N/A       | BC005072     | N/A             |
| A_23_P47857    | 11,8494 | 12,4191 | -1,484214905 | ENST00000343028 | 51768     | NM_016551    | TM7SF3          |
| A_21_P0007848  | 1,67308 | 2,24285 | -1,484286921 | ENST00000547418 | 101929058 | NR_126333    | LOC101929058    |
| A_23_P255523   | 8,57939 | 9,14918 | -1,484307498 | ENST00000490528 | 54784     | NM_017621    | ALKBH4          |
| A_24_P367432   | 1,40627 | 1,97606 | -1,484307498 | ENST00000390633 | N/A       | KJ880584     | N/A             |
| A_23_P310      | 10,1001 | 10,6699 | -1,484317786 | ENST00000329421 | 65108     | NM_023009    | MARCKSL1        |
| A_21_P0012249  | 6,82163 | 7,39164 | -1,484533861 | ENST00000438948 | N/A       | N/A          | N/A             |
| A_23_P115573   | 10,9696 | 11,5397 | -1,484626474 | ENST00000362011 | 149345    | NM_198149    | SHISA4          |
| A_24_P169048   | 1,57206 | 2,14218 | -1,484647055 | ENST00000621921 | 10737     | NR_001450    | RFPL3S          |
| A_23_P88643    | 3,47927 | 4,04955 | -1,484811717 | ENST00000328795 | 283694    | NM_001005241 | OR4N4           |
| A_22_P00022557 | 4,75588 | 5,32629 | -1,484945518 | N/A             | N/A       | N/A          | Inc-FITM2-1     |
| A_23_P336506   | 3,57864 | 4,14915 | -1,48504845  | ENST00000240691 | 50835     | NM_023917    | TAS2R9          |
| A_22_P00001285 | 11,2295 | 11,8002 | -1,485244041 | N/A             | N/A       | N/A          | Inc-ANKS1A-1    |
| A_21_P0002398  | 6,20261 | 6,77331 | -1,485244041 | N/A             | N/A       | N/A          | Inc-KIDINS220-6 |
| A_22_P00008855 | 1,77371 | 2,34446 | -1,485295516 | N/A             | N/A       | N/A          | Inc-KLHDC10-2   |
| A_19_P00321692 | 3,85865 | 4,42945 | -1,485346994 | ENST00000447453 | 644838    | N/A          | LOC644838       |
| A_22_P00024064 | 3,57167 | 4,14249 | -1,485367585 | N/A             | 101409261 | NR_102430    | OGFR-AS1        |
| A_23_P424002   | 9,69976 | 10,2706 | -1,485388177 | ENST00000429375 | 5451      | NM_002697    | POU2F1          |
| A_21_P0011913  | 1,98437 | 2,55522 | -1,485398473 | ENST00000441997 | 101927043 | N/A          | LOC101927043    |
| A_21_P0006303  | 1,34566 | 1,91669 | -1,485583812 | N/A             | N/A       | N/A          | Inc-ERP44-3     |
| A_33_P3568504  | 1,5173  | 2,08835 | -1,485604407 | ENST00000409702 | 151242    | NM_001261424 | PPP1R1C         |
| A_22_P00016011 | 1,45191 | 2,02299 | -1,485635299 | N/A             | N/A       | N/A          | Inc-TFDP2-1     |
| A_21_P0003567  | 1,61309 | 2,18433 | -1,485800071 | N/A             | N/A       | N/A          | Inc-HTRA3-1     |
| A_33_P3308219  | 4,05806 | 4,62935 | -1,485851566 | N/A             | N/A       | N/A          | N/A             |
| A_23_P126528   | 1,55834 | 2,12966 | -1,485882463 | ENST00000369771 | 3744      | NM_005549    | KCNA10          |
| A_23_P155786   | 1,65711 | 2,22851 | -1,48596486  | ENST00000506796 | 6783      | NM_005420    | SULT1E1         |
| A_21_P0010617  | 8,31452 | 8,88593 | -1,48597516  | ENST00000437410 | N/A       | N/A          | N/A             |
| A_21_P0012873  | 2,30965 | 2,88124 | -1,486160572 | ENST00000511819 | 100507387 | NR_038402    | LOC100507387    |
| A_24_P117672   | 8,68662 | 9,25821 | -1,486160572 | ENST00000622360 | 58506     | NM_021228    | SCAF1           |
| A_23_P346969   | 7,58348 | 8,15507 | -1,486160572 | ENST00000481749 | 5291      | NM_006219    | PIK3CB          |
| A_23_P316974   | 10,5408 | 11,1124 | -1,486170873 | ENST00000355585 | 8871      | NM_003898    | SYNJ2           |
| A_23_P89973    | 2,07523 | 2,64696 | -1,486304797 | ENST00000309383 | 84446     | NM_032430    | BRSK1           |

|                |         |         |              |                 |           |              |                |
|----------------|---------|---------|--------------|-----------------|-----------|--------------|----------------|
| A_21_P0007424  | 2,11083 | 2,68258 | -1,486325402 | N/A             | N/A       | N/A          | Inc-SPATA19-1  |
| A_33_P3299811  | 5,88868 | 6,46044 | -1,486335704 | ENST00000424044 | 642946    | NR_027286    | FLVCR1-AS1     |
| A_32_P209624   | 6,70555 | 7,27734 | -1,486366612 | N/A             | 7686      | NR_026640    | MKRN7P         |
| A_22_P00008314 | 1,41327 | 1,98506 | -1,486366612 | ENST00000432537 | 199899    | NR_038252    | LINC00466      |
| A_21_P0006005  | 6,44002 | 7,01182 | -1,486376915 | ENST00000431981 | N/A       | XM_006716895 | N/A            |
| A_24_P250335   | 12,4401 | 13,0119 | -1,486376915 | ENST00000596860 | 6626      | NM_004596    | SNRPA          |
| A_22_P00014804 | 2,87518 | 3,44722 | -1,486624202 | ENST00000583460 | N/A       | N/A          | N/A            |
| A_33_P3302210  | 6,04549 | 6,61758 | -1,486675725 | N/A             | 100129129 | N/A          | LOC100129129   |
| A_23_P46852    | 11,0523 | 11,6244 | -1,48668603  | ENST00000472951 | 79991     | NM_024928    | OBFC1          |
| A_33_P3409620  | 4,57765 | 5,1498  | -1,486737556 | N/A             | 100131860 | AK097109     | LOC100131860   |
| A_24_P297098   | 10,143  | 10,7152 | -1,486789083 | ENST00000374012 | 51230     | NM_016436    | PHF20          |
| A_21_P0003231  | 3,42699 | 3,99926 | -1,486861224 | N/A             | N/A       | N/A          | Inc-GLYCTK-1   |
| A_33_P3293913  | 4,17612 | 4,74843 | -1,486902449 | ENST00000373886 | 80114     | NM_001080512 | BICC1          |
| A_23_P17844    | 3,7596  | 4,33202 | -1,487015824 | ENST00000404171 | 5816      | NM_002854    | PVALB          |
| A_33_P3235370  | 6,17634 | 6,74876 | -1,487015824 | ENST00000533543 | 58500     | NM_021061    | ZNF250         |
| A_33_P3722568  | 6,60971 | 7,18217 | -1,487057054 | N/A             | 283981    | NR_027232    | LINC00685      |
| A_33_P3397716  | 4,92372 | 5,49623 | -1,487108592 | N/A             | N/A       | AK097240     | Inc-GGCT-1     |
| A_24_P169148   | 14,7286 | 15,3012 | -1,487201365 | ENST00000522557 | 3146      | NM_002128    | HMGB1          |
| A_22_P00012464 | 6,42371 | 6,99632 | -1,487211674 | N/A             | N/A       | BC041763     | Inc-PRR15L-2   |
| A_22_P00023496 | 2,8683  | 3,44098 | -1,487283836 | N/A             | 101409257 | NR_102425    | EZR-AS1        |
| A_21_P0000839  | 4,11312 | 4,68604 | -1,487531274 | N/A             | 254100    | NR_038923    | SSSCA1-AS1     |
| A_24_P292470   | 10,6092 | 11,1824 | -1,487820004 | ENST00000426995 | 7352      | NM_022803    | UCP3           |
| A_33_P3292874  | 2,35465 | 2,92788 | -1,487850942 | ENST00000595897 | N/A       | AK090448     | N/A            |
| A_23_P82334    | 9,68622 | 10,2595 | -1,487902508 | ENST00000416240 | 10165     | NM_014251    | SLC25A13       |
| A_21_P0005172  | 5,42938 | 6,00267 | -1,487912822 | N/A             | 79940     | NR_121612    | LINC00472      |
| A_23_P31116    | 11,4739 | 12,0472 | -1,487923135 | ENST00000476436 | 55856     | NM_018473    | ACOT13         |
| A_33_P3273623  | 1,39812 | 1,97146 | -1,48796439  | ENST00000378792 | 6366      | NM_002989    | CCL21          |
| A_33_P3432135  | 3,00923 | 3,58264 | -1,488036588 | N/A             | 285965    | NR_033897    | EPHA1-AS1      |
| A_21_P0011095  | 1,66032 | 2,23376 | -1,488067531 | N/A             | N/A       | N/A          | XLOC_I2_003391 |
| A_22_P00014188 | 2,24114 | 2,81466 | -1,488150049 | ENST00000581911 | N/A       | N/A          | N/A            |
| A_19_P00317444 | 6,9855  | 7,55913 | -1,48826352  | ENST00000377722 | 389602    | NM_001291913 | LOC389602      |
| A_32_P204795   | 1,46936 | 2,04299 | -1,48826352  | ENST00000592146 | 100128252 | NR_036522    | ZNF667-AS1     |
| A_33_P3268618  | 9,05748 | 9,63117 | -1,488325416 | ENST00000399820 | 57728     | NM_025132    | WDR19          |

|                |         |         |              |                 |           |              |                       |
|----------------|---------|---------|--------------|-----------------|-----------|--------------|-----------------------|
| A_21_P0012944  | 7,69005 | 8,26374 | -1,488325416 | N/A             | 11039     | N/A          | SMA4                  |
| A_21_P0010213  | 1,74991 | 2,32366 | -1,488387315 | ENST00000623549 | 114038    | N/A          | LINC00313             |
| A_21_P0010922  | 2,5398  | 3,11359 | -1,488428582 | ENST00000449695 | 650623    | NR_027512    | BEND3P3               |
| A_24_P341116   | 1,66391 | 2,23772 | -1,488449217 | ENST00000469935 | 388007    | NR_015340    | SERPINA13P            |
| A_21_P0000420  | 1,49717 | 2,07117 | -1,488645255 | N/A             | 767603    | NR_003216    | SNORD114-23           |
| A_19_P00317159 | 3,37868 | 3,95272 | -1,48868653  | ENST00000499046 | 100506639 | N/A          | LOC100506639          |
| A_33_P3401452  | 5,80274 | 6,37682 | -1,488727805 | ENST00000309279 | 84181     | NM_032221    | CHD6                  |
| A_24_P208909   | 8,22809 | 8,80234 | -1,48890324  | ENST00000338700 | 23321     | NM_015271    | TRIM2                 |
| A_22_P00015430 | 1,44732 | 2,02157 | -1,48890324  | N/A             | N/A       | N/A          | Inc-SSH2-1            |
| A_33_P3411296  | 10,2242 | 10,7985 | -1,488954842 | ENST00000331327 | 5813      | NM_005859    | PURA                  |
| A_21_P0005831  | 1,65686 | 2,23117 | -1,488965163 | N/A             | N/A       | N/A          | Inc-OPRK1-1           |
| A_22_P00005165 | 2,77787 | 3,35224 | -1,489027089 | N/A             | N/A       | N/A          | Inc-DIO2-2            |
| A_23_P13740    | 1,71562 | 2,29002 | -1,489058052 | ENST00000397909 | 89795     | NM_014903    | NAV3                  |
| A_22_P00022788 | 3,26106 | 3,83548 | -1,489078695 | N/A             | N/A       | N/A          | Inc-MAP3K2-1          |
| A_23_P83200    | 8,94358 | 9,51811 | -1,489192236 | ENST00000467161 | 158067    | NM_152572    | AK8                   |
| A_23_P14804    | 14,0083 | 14,583  | -1,489367726 | ENST00000560715 | 10099     | NM_005724    | TSPAN3                |
| A_33_P3356607  | 11,7286 | 12,3033 | -1,489367726 | ENST00000401525 | 26100     | NM_001033518 | WIPI2                 |
| A_24_P363087   | 9,66917 | 10,2439 | -1,489398696 | ENST00000610475 | 51149     | NM_016175    | C5orf45               |
| A_21_P0007282  | 1,57258 | 2,14747 | -1,489563885 | N/A             | N/A       | N/A          | Inc-CTD-2523D13.1.1-3 |
| A_22_P00002018 | 2,01937 | 2,59428 | -1,489584535 | ENST00000557546 | N/A       | BX111562     | N/A                   |
| A_33_P3234447  | 1,56797 | 2,14292 | -1,489625836 | N/A             | N/A       | N/A          | N/A                   |
| A_33_P3370890  | 1,51759 | 2,09255 | -1,489636161 | ENST00000368656 | 619208    | BC044912     | FAM229B               |
| A_24_P366415   | 13,9912 | 14,5664 | -1,489883991 | ENST00000440938 | N/A       | N/A          | N/A                   |
| A_33_P3342285  | 12,9367 | 13,5119 | -1,489883991 | ENST00000356415 | 5906      | NM_001010935 | RAP1A                 |
| A_33_P3283044  | 5,33147 | 5,90669 | -1,489904645 | ENST00000400050 | 23255     | NM_015210    | MTCL1                 |
| A_33_P3344504  | 1,40611 | 1,98137 | -1,489945954 | ENST00000382938 | 321       | AK124794     | APBA2                 |
| A_21_P0008509  | 3,08587 | 3,66115 | -1,48996661  | ENST00000533625 | 319089    | N/A          | TTC6                  |
| A_21_P0011409  | 6,53813 | 7,11342 | -1,489976937 | N/A             | N/A       | N/A          | XLOC_I2_004898        |
| A_21_P0002349  | 5,19616 | 5,77161 | -1,49014219  | N/A             | N/A       | N/A          | Inc-SMARCAL1-2        |
| A_21_P0001964  | 2,70752 | 3,28298 | -1,490152519 | ENST00000414756 | N/A       | N/A          | N/A                   |
| A_33_P3327270  | 9,16373 | 9,73919 | -1,490152519 | ENST00000427199 | 100302736 | NM_001164469 | TMED7-TICAM2          |
| A_21_P0005147  | 4,68427 | 5,25977 | -1,490193835 | N/A             | N/A       | N/A          | Inc-FAM120B-3         |
| A_24_P865226   | 1,47467 | 2,05024 | -1,490266142 | N/A             | 440356    | NR_015396    | CDIPT-AS1             |

|                |         |         |              |                 |           |              |                      |
|----------------|---------|---------|--------------|-----------------|-----------|--------------|----------------------|
| A_21_P0008862  | 3,87899 | 4,45458 | -1,490286801 | ENST00000559267 | 101929560 | XR_424652    | LOC101929560         |
| A_33_P3289034  | 4,13258 | 4,70821 | -1,490328122 | ENST00000528248 | 9033      | NM_001253837 | PKD2L1               |
| A_21_P0000862  | 2,00354 | 2,57918 | -1,490338452 | ENST00000434974 | 100132987 | NR_038985    | LINC00856            |
| A_24_P566701   | 10,2628 | 10,8385 | -1,490400435 | ENST00000438081 | 6500      | NM_170679    | SKP1                 |
| A_23_P365719   | 13,7792 | 14,3549 | -1,490400435 | ENST00000551943 | 6892      | NM_003190    | TAPBP                |
| A_23_P134176   | 12,3843 | 12,9601 | -1,490503745 | ENST00000541573 | 6648      | NM_001024465 | SOD2                 |
| A_23_P163143   | 11,5299 | 12,1057 | -1,490503745 | ENST00000357971 | 97        | NM_001302617 | ACYP1                |
| A_23_P65386    | 4,02774 | 4,60361 | -1,490576066 | ENST00000203664 | 78990     | NM_023112    | OTUB2                |
| A_22_P00014777 | 6,53868 | 7,11474 | -1,490772385 | N/A             | N/A       | AK130780     | Inc-SLC38A6-1        |
| A_24_P497464   | 4,30729 | 4,8834  | -1,490824052 | ENST00000434703 | 400618    | NR_103738    | SOX9-AS1             |
| A_32_P934840   | 2,65109 | 3,22727 | -1,490896389 | ENST00000518698 | 116328    | NM_052958    | C8orf34              |
| A_24_P344516   | 6,68008 | 7,2563  | -1,490937726 | ENST00000270443 | 79986     | N/A          | ZNF702P              |
| A_33_P3348625  | 1,51033 | 2,08655 | -1,490937726 | N/A             | N/A       | N/A          | N/A                  |
| A_21_P0001481  | 5,4063  | 5,98256 | -1,490979064 | N/A             | N/A       | N/A          | Inc-C1orf201-3       |
| A_33_P3266315  | 10,7663 | 11,3426 | -1,491020404 | ENST00000616170 | 51100     | NM_001206651 | SH3GLB1              |
| A_22_P00016395 | 5,68327 | 6,25957 | -1,491020404 | N/A             | N/A       | N/A          | Inc-TMEM189-UBE2V1-1 |
| A_23_P201605   | 5,57832 | 6,15465 | -1,491051409 | ENST00000235453 | 163486    | NM_144977    | DENND1B              |
| A_22_P00024049 | 4,01986 | 4,59622 | -1,491082415 | ENST00000612592 | N/A       | N/A          | N/A                  |
| A_33_P3394710  | 6,95049 | 7,52685 | -1,491082415 | ENST00000369557 | 10559     | NM_001168398 | SLC35A1              |
| A_23_P212447   | 8,68246 | 9,25883 | -1,49109275  | ENST00000348417 | 55764     | NM_018262    | IFT122               |
| A_21_P0000131  | 12,2539 | 12,8303 | -1,491123757 | ENST00000472283 | 23261     | NM_001195563 | CAMTA1               |
| A_33_P3316118  | 2,75557 | 3,33197 | -1,491123757 | ENST00000521743 | 9892      | NM_001256717 | SNAP91               |
| A_22_P00017312 | 5,87041 | 6,44695 | -1,491268463 | N/A             | N/A       | N/A          | Inc-USP28-1          |
| A_23_P138910   | 1,52067 | 2,09733 | -1,491392509 | ENST00000525943 | 29118     | NM_013264    | DDX25                |
| A_32_P175301   | 10,3116 | 10,8884 | -1,491537241 | ENST00000262585 | 22898     | NM_014957    | DENND3               |
| A_23_P136817   | 10,5326 | 11,1094 | -1,491537241 | ENST00000333479 | 9735      | NM_014708    | KNTC1                |
| A_23_P159390   | 10,3704 | 10,9472 | -1,491537241 | ENST00000260810 | 11073     | NM_007027    | TOPBP1               |
| A_21_P0013923  | 12,746  | 13,3228 | -1,491537241 | ENST00000426289 | N/A       | N/A          | N/A                  |
| A_33_P3345673  | 1,5223  | 2,09913 | -1,491568257 | N/A             | 285103    | BC036597     | MED15P9              |
| A_22_P00001719 | 1,76834 | 2,34539 | -1,491795727 | ENST00000450811 | N/A       | N/A          | N/A                  |
| A_22_P00010170 | 6,23638 | 6,81368 | -1,492054258 | N/A             | N/A       | N/A          | Inc-MRPS22-1         |
| A_23_P99360    | 8,61968 | 9,19704 | -1,492116312 | ENST00000378182 | 10206     | NM_213590    | TRIM13               |
| A_21_P0006440  | 2,95971 | 3,53711 | -1,492157683 | ENST00000438499 | N/A       | N/A          | N/A                  |

|                |         |         |              |                 |        |              |                    |
|----------------|---------|---------|--------------|-----------------|--------|--------------|--------------------|
| A_22_P00016482 | 7,65463 | 8,23208 | -1,492209398 | N/A             | 148413 | NR_015434    | LOC148413          |
| A_21_P0002077  | 1,71853 | 2,29604 | -1,492271459 | ENST00000443030 | N/A    | N/A          | N/A                |
| A_24_P292929   | 4,34694 | 4,92449 | -1,492312834 | ENST00000158166 | 84254  | NM_172207    | CAMKK1             |
| A_24_P253818   | 5,43248 | 6,01011 | -1,492395588 | ENST00000593158 | 2319   | NM_004475    | FLOT2              |
| A_23_P97990    | 14,4989 | 15,0766 | -1,492468001 | ENST00000420892 | 5654   | NM_002775    | HTRA1              |
| A_33_P3290124  | 8,42563 | 9,00335 | -1,492488691 | ENST00000420175 | 136371 | NM_001142459 | ASB10              |
| A_23_P79069    | 3,18847 | 3,76621 | -1,492509382 | ENST00000602101 | 64926  | NM_022904    | RASAL3             |
| A_33_P3252794  | 10,3091 | 10,8869 | -1,492571455 | ENST00000340042 | 2738   | NM_138465    | GLI4               |
| A_21_P0003754  | 1,42781 | 2,00563 | -1,492592146 | N/A             | N/A    | N/A          | Inc-LEF1-1         |
| A_33_P3384322  | 7,21389 | 7,79178 | -1,492664569 | ENST00000381920 | 79091  | BX537921     | METTLL22           |
| A_23_P368259   | 5,43023 | 6,00818 | -1,492726648 | ENST00000326282 | 126272 | BC009725     | EID2B              |
| A_24_P307580   | 6,72509 | 7,30308 | -1,492768036 | ENST00000532505 | 10553  | NM_001098523 | HTATIP2            |
| A_23_P335452   | 7,27819 | 7,85625 | -1,492840467 | ENST00000372336 | 219654 | NM_153367    | ZCCHC24            |
| A_23_P373584   | 1,86221 | 2,44037 | -1,492943947 | ENST00000613692 | 137868 | NM_139167    | SGCZ               |
| A_33_P3346498  | 6,90209 | 7,48039 | -1,49308883  | ENST00000392437 | 4976   | NM_130831    | OPA1               |
| A_21_P0004052  | 1,506   | 2,08431 | -1,493099179 | ENST00000513366 | N/A    | N/A          | N/A                |
| A_24_P114032   | 5,43136 | 6,00982 | -1,493254428 | ENST00000498667 | 1944   | NM_004952    | EFNA3              |
| A_21_P0007329  | 9,20946 | 9,78794 | -1,493275129 | N/A             | N/A    | N/A          | Inc-CCDC34-1       |
| A_22_P00023415 | 1,78817 | 2,36667 | -1,493295831 | N/A             | N/A    | BQ067871     | Inc-C17orf80-4     |
| A_23_P207319   | 9,20059 | 9,7791  | -1,493306181 | ENST00000592267 | 9020   | NM_003954    | MAP3K14            |
| A_24_P33982    | 7,854   | 8,43261 | -1,493409693 | ENST00000612535 | 284021 | NM_001291317 | MILR1              |
| A_33_P3329444  | 6,56707 | 7,14574 | -1,493471803 | ENST00000594582 | 284358 | NM_182574    | MAMSTR             |
| A_33_P3225552  | 2,00535 | 2,58407 | -1,493523564 | ENST00000625176 | N/A    | AF132198     | N/A                |
| A_33_P3704280  | 5,2318  | 5,8106  | -1,493606385 | N/A             | 386627 | AK095428     | SAP30L-AS1         |
| A_22_P00000975 | 1,73574 | 2,31472 | -1,493792749 | N/A             | N/A    | N/A          | Inc-AL117340.1-1   |
| A_23_P30126    | 14,6751 | 15,2541 | -1,493813457 | ENST00000382333 | 9982   | NM_005130    | FGFBP1             |
| A_33_P3353941  | 3,54175 | 4,12091 | -1,493979136 | ENST00000543390 | 5293   | NM_005026    | PIK3CD             |
| A_23_P59410    | 1,39593 | 1,97526 | -1,494155189 | ENST00000354419 | 3834   | NM_030615    | KIF25              |
| A_21_P0003091  | 10,1926 | 10,772  | -1,494227688 | N/A             | N/A    | N/A          | Inc-AC069257.9.1-5 |
| A_22_P00003111 | 3,14887 | 3,72841 | -1,494372695 | N/A             | N/A    | N/A          | Inc-C9orf103-2     |
| A_23_P155711   | 5,86626 | 6,44581 | -1,494383054 | ENST00000264596 | 55247  | NM_018248    | NEIL3              |
| A_21_P0014016  | 2,97397 | 3,55357 | -1,494434846 | N/A             | N/A    | BF447189     | N/A                |
| A_24_P218006   | 8,10571 | 8,68539 | -1,494517717 | ENST00000395176 | 84277  | NM_032317    | DNAJC30            |

|                |         |         |              |                 |           |              |               |
|----------------|---------|---------|--------------|-----------------|-----------|--------------|---------------|
| A_21_P0014882  | 3,36856 | 3,94836 | -1,494642033 | N/A             | N/A       | N/A          | N/A           |
| A_33_P3326312  | 8,96126 | 9,54116 | -1,494745637 | N/A             | N/A       | N/A          | N/A           |
| A_33_P3394965  | 1,47693 | 2,05686 | -1,49477672  | N/A             | N/A       | N/A          | N/A           |
| A_23_P381017   | 9,52436 | 10,1043 | -1,494787081 | ENST00000297873 | 155368    | NM_152559    | WBSCR27       |
| A_32_P25357    | 5,38382 | 5,9638  | -1,494828526 | ENST00000289746 | 1013      | NM_004933    | CDH15         |
| A_23_P339309   | 6,26924 | 6,84935 | -1,49496323  | ENST00000553404 | 91750     | NM_001024674 | LIN52         |
| A_23_P396299   | 3,42181 | 4,00199 | -1,495035767 | N/A             | 100129827 | NR_034094    | MRVI1-AS1     |
| A_21_P0001052  | 2,3475  | 2,92772 | -1,495077219 | ENST00000417084 | N/A       | N/A          | N/A           |
| A_23_P388780   | 8,92079 | 9,50108 | -1,495149762 | ENST00000440641 | 55929     | NM_019100    | DMAP1         |
| A_19_P00321715 | 3,04887 | 3,62929 | -1,495284495 | ENST00000527474 | 399959    | NR_024430    | MIR100HG      |
| A_24_P214858   | 3,67863 | 4,25908 | -1,495315589 | ENST00000483722 | 79865     | NM_024807    | TREML2        |
| A_33_P3324680  | 1,42762 | 2,00807 | -1,495315589 | N/A             | N/A       | N/A          | N/A           |
| A_21_P0006526  | 2,75079 | 3,33127 | -1,495346684 | N/A             | N/A       | N/A          | Inc-ARHGAP6-1 |
| A_33_P3268522  | 2,57987 | 3,16036 | -1,495357049 | ENST00000610177 | 644794    | XR_108826    | LOC644794     |
| A_23_P101297   | 10,8018 | 11,3823 | -1,495367414 | ENST00000586405 | 24139     | NM_012155    | EML2          |
| A_23_P309361   | 11,4338 | 12,0144 | -1,495471068 | ENST00000370032 | 113802    | NM_144584    | HENMT1        |
| A_23_P18317    | 12,661  | 13,2417 | -1,49557473  | ENST00000315891 | 54946     | NM_017836    | SLC41A3       |
| A_23_P253921   | 3,11379 | 3,69453 | -1,495616197 | ENST00000273320 | 55888     | NM_018651    | ZKSCAN7       |
| A_22_P00022144 | 2,6365  | 3,21726 | -1,495636931 | ENST00000452618 | N/A       | N/A          | N/A           |
| A_24_P177568   | 3,03387 | 3,61464 | -1,495647298 | ENST00000311048 | 170959    | NM_133473    | ZNF431        |
| A_33_P3297255  | 9,95548 | 10,5363 | -1,495699134 | ENST00000503782 | 83463     | NM_031300    | MXD3          |
| A_22_P00001942 | 3,26132 | 3,84233 | -1,495896127 | ENST00000511821 | N/A       | BX391450     | N/A           |
| A_23_P62679    | 1,46294 | 2,04396 | -1,495906496 | N/A             | N/A       | AF217973     | N/A           |
| A_21_P0007047  | 1,50785 | 2,08895 | -1,495989449 | N/A             | N/A       | N/A          | Inc-PLXDC2-1  |
| A_33_P3240602  | 1,51746 | 2,09858 | -1,496010188 | N/A             | 147920    | AK125754     | IGFL2         |
| A_33_P3420048  | 2,07086 | 2,65199 | -1,496020557 | ENST00000314499 | 80034     | NM_001172173 | CSRNP3        |
| A_33_P3396578  | 2,38294 | 2,96407 | -1,496020557 | N/A             | 2869      | BC018116     | GRK5          |
| A_23_P97296    | 12,3939 | 12,9752 | -1,496196851 | ENST00000496239 | 55707     | NM_018090    | NECAP2        |
| A_24_P475814   | 10,4651 | 11,0464 | -1,496196851 | ENST00000263275 | 80207     | NM_025136    | OPA3          |
| A_33_P3340869  | 4,37372 | 4,95509 | -1,496269449 | ENST00000597830 | 643719    | NR_027620    | SCGB1B2P      |
| A_24_P323084   | 7,26764 | 7,84922 | -1,496487263 | N/A             | 284185    | NR_038080    | LINC00482     |
| A_21_P0014229  | 2,2031  | 2,78468 | -1,496487263 | N/A             | N/A       | XR_108947    | Inc-FAM125B-3 |
| A_23_P81408    | 11,3001 | 11,8818 | -1,496611743 | ENST00000523606 | 27430     | NM_182796    | MAT2B         |

|                |         |         |              |                 |           |              |                |
|----------------|---------|---------|--------------|-----------------|-----------|--------------|----------------|
| A_33_P3367924  | 3,20694 | 3,7887  | -1,496673986 | ENST00000411789 | 390748    | NM_001294328 | PABPN1L        |
| A_19_P00318154 | 2,18003 | 2,76191 | -1,496798481 | N/A             | 100293612 | XR_110033    | LOC100293612   |
| A_23_P376627   | 12,2905 | 12,8725 | -1,496922987 | ENST00000610344 | 728294    | NM_152783    | D2HGDH         |
| A_33_P3342780  | 2,27528 | 2,85744 | -1,49708901  | ENST00000371911 | 11093     | NM_139026    | ADAMTS13       |
| A_19_P00808883 | 5,90765 | 6,48982 | -1,497099387 | N/A             | N/A       | N/A          | Q7Z2X8         |
| A_23_P433586   | 5,35264 | 5,93495 | -1,497244674 | ENST00000276198 | 3358      | BC028688     | HTR2C          |
| A_24_P661641   | 7,88536 | 8,46772 | -1,497296565 | ENST00000609803 | 400027    | NR_028408    | LINC00938      |
| A_22_P00009974 | 2,70026 | 3,28262 | -1,497296565 | N/A             | 100131208 | NR_040710    | SNAP25-AS1     |
| A_21_P0003796  | 1,57395 | 2,15642 | -1,497410733 | N/A             | N/A       | N/A          | Inc-HMGB2-4    |
| A_24_P150466   | 3,76638 | 4,34891 | -1,497473009 | ENST00000381280 | 64093     | NM_001034852 | SMOC1          |
| A_24_P332739   | 11,7316 | 12,3143 | -1,497649475 | ENST00000508439 | 728411    | NR_027028    | GUSBP1         |
| A_23_P50907    | 11,7275 | 12,3104 | -1,497857107 | ENST00000374907 | 3685      | NM_002210    | ITGAV          |
| A_23_P125809   | 1,37896 | 1,96188 | -1,497877872 | ENST00000310164 | 170261    | NM_173798    | ZCCHC12        |
| A_22_P00009163 | 6,28121 | 6,8642  | -1,497950551 | N/A             | 102723465 | XR_425055    | LOC102723465   |
| A_21_P0003839  | 2,49096 | 3,07396 | -1,497960934 | N/A             | N/A       | N/A          | Inc-METAP1-1   |
| A_21_P0009481  | 9,96486 | 10,5479 | -1,498002467 | ENST00000262094 | 5874      | NM_004163    | RAB27B         |
| A_33_P3236403  | 12,9883 | 13,5714 | -1,498064769 | ENST00000221455 | 11129     | NM_007056    | CLASRP         |
| A_21_P0003785  | 1,66543 | 2,24855 | -1,498085536 | N/A             | N/A       | N/A          | Inc-SH3D19-1   |
| A_33_P3279109  | 8,44819 | 9,0315  | -1,498282844 | ENST00000612186 | 7627      | BC039601     | ZNF75A         |
| A_24_P83586    | 7,35882 | 7,94224 | -1,498397087 | ENST00000616135 | 25974     | NM_015506    | MMACHC         |
| A_32_P235796   | 6,32294 | 6,90642 | -1,498459405 | ENST00000542236 | 166379    | NM_152618    | BBS12          |
| A_21_P0008795  | 1,95947 | 2,54304 | -1,498552887 | ENST00000559363 | 101927310 | NR_110756    | LOC101927310   |
| A_24_P902052   | 10,7215 | 11,3053 | -1,498791811 | ENST00000411630 | 57291     | NR_024031    | DANCR          |
| A_23_P109636   | 9,57287 | 10,1569 | -1,499030773 | ENST00000496559 | 26018     | NM_015541    | LRIG1          |
| A_22_P00006155 | 1,46475 | 2,0488  | -1,499051554 | N/A             | N/A       | BX098229     | Inc-FAM196A-2  |
| A_21_P0004642  | 2,33363 | 2,91781 | -1,499186638 | ENST00000415276 | 253018    | NR_026791    | HCG27          |
| A_21_P0003566  | 1,98792 | 2,57213 | -1,499217813 | N/A             | N/A       | N/A          | Inc-KIAA0232-1 |
| A_33_P3378697  | 7,27314 | 7,85741 | -1,499280165 | N/A             | N/A       | XR_171111    | N/A            |
| A_23_P379614   | 10,7589 | 11,3432 | -1,499311342 | ENST00000220514 | 11339     | NM_007280    | OIP5           |
| A_23_P115407   | 7,88724 | 8,47156 | -1,499332127 | ENST00000490021 | 2944      | NM_146421    | GSTM1          |
| A_32_P140489   | 1,60847 | 2,1928  | -1,49934252  | ENST00000287020 | 392255    | NM_001001557 | GDF6           |
| A_22_P00007924 | 3,58849 | 4,17295 | -1,499477631 | N/A             | 100507064 | NR_038287    | TEX26-AS1      |
| A_24_P23445    | 7,94595 | 8,53046 | -1,499529599 | ENST00000602478 | 267010    | NR_029422    | RNU12          |

|                |         |         |              |                 |           |              |                      |
|----------------|---------|---------|--------------|-----------------|-----------|--------------|----------------------|
| A_33_P3358228  | 6,62398 | 7,20853 | -1,499571176 | ENST00000298715 | 340706    | AK122716     | VWA2                 |
| A_24_P73943    | 6,28916 | 6,87374 | -1,499602359 | ENST00000299335 | 1353      | NM_004375    | COX11                |
| A_22_P00015803 | 4,52583 | 5,11058 | -1,499779075 | N/A             | N/A       | N/A          | Inc-TAS2R42-1        |
| A_21_P0011609  | 3,91283 | 4,49758 | -1,499779075 | N/A             | 100130520 | XM_005275830 | LOC100130520         |
| A_22_P00014625 | 6,29292 | 6,87771 | -1,499820658 | ENST00000566986 | N/A       | AK129602     | N/A                  |
| A_32_P88120    | 2,91937 | 3,50418 | -1,49984145  | ENST00000339468 | 29799     | NM_013313    | YPEL1                |
| A_23_P375      | 11,9083 | 12,4932 | -1,499935018 | ENST00000327331 | 55143     | NM_018101    | CDCA8                |
| A_22_P00015326 | 4,09569 | 4,68063 | -1,499976606 | ENST00000619889 | N/A       | AK091906     | N/A                  |
| A_33_P3377459  | 3,17115 | 3,75613 | -1,500018194 | ENST00000562717 | 64282     | NM_001040284 | PAPD5                |
| A_23_P371039   | 2,52771 | 3,11279 | -1,500122171 | ENST00000370501 | 4923      | NM_002531    | NTSR1                |
| A_21_P0008796  | 4,64039 | 5,2255  | -1,500153366 | N/A             | N/A       | N/A          | Inc-RP11-82I10.1.1-2 |
| A_21_P0003821  | 3,49736 | 4,08253 | -1,500215757 | N/A             | N/A       | N/A          | Inc-FRG2-5           |
| A_32_P187704   | 1,77504 | 2,36026 | -1,500267751 | ENST00000521574 | 54212     | XM_006716494 | SNTG1                |
| A_21_P0002965  | 1,50327 | 2,08865 | -1,500434145 | N/A             | N/A       | N/A          | Inc-SYNPR-1          |
| A_23_P132526   | 9,19038 | 9,77577 | -1,500444546 | ENST00000511760 | 30849     | NM_014602    | PIK3R4               |
| A_23_P210482   | 13,9666 | 14,552  | -1,500454946 | ENST00000464097 | 100       | NM_000022    | ADA                  |
| A_23_P337642   | 1,73031 | 2,31572 | -1,500465346 | ENST00000496610 | 492       | NM_021949    | ATP2B3               |
| A_33_P3260175  | 4,06202 | 4,64745 | -1,500486147 | ENST00000415386 | N/A       | BC036435     | N/A                  |
| A_22_P00000978 | 1,79218 | 2,37762 | -1,500496548 | ENST00000447478 | N/A       | N/A          | N/A                  |
| A_23_P45011    | 9,40068 | 9,98619 | -1,500569354 | ENST00000361131 | 81706     | NM_030949    | PPP1R14C             |
| A_33_P3283460  | 2,75857 | 3,34437 | -1,500871018 | ENST00000371012 | 57708     | NM_001278215 | MIER1                |
| A_23_P146512   | 10,1679 | 10,7537 | -1,500871018 | ENST00000388711 | 51280     | NM_016548    | GOLM1                |
| A_23_P127948   | 11,7137 | 12,2995 | -1,500871018 | ENST00000528655 | 133       | NM_001124    | ADM                  |
| A_33_P3413759  | 4,24465 | 4,83049 | -1,500912632 | ENST00000340967 | 340485    | NM_001010887 | ACER2                |
| A_21_P0009351  | 1,77288 | 2,35882 | -1,501016671 | N/A             | N/A       | N/A          | Inc-ABCA8-1          |
| A_33_P3235880  | 1,55244 | 2,13839 | -1,501027075 | ENST00000405044 | 254272    | NM_001039397 | TBC1D28              |
| A_23_P164253   | 2,23301 | 2,81937 | -1,501453713 | ENST00000583761 | 23614     | NR_002181    | PPY2                 |
| A_21_P0001350  | 2,04958 | 2,63615 | -1,501672282 | ENST00000451675 | 102723661 | NR_125991    | LOC102723661         |
| A_24_P49383    | 10,1569 | 10,7436 | -1,501807602 | ENST00000526415 | 28971     | NM_024684    | AAMDC                |
| A_24_P149902   | 3,03573 | 3,62243 | -1,501807602 | ENST00000471000 | 51684     | NM_016169    | SUFU                 |
| A_33_P3398946  | 5,02108 | 5,60798 | -1,502015812 | ENST00000302165 | 26145     | NM_015649    | IRF2BP1              |
| A_21_P0013964  | 1,40687 | 1,99389 | -1,502140751 | N/A             | N/A       | AK123224     | Inc-ZNF768-1         |
| A_33_P3256560  | 12,4889 | 13,076  | -1,50222405  | ENST00000291900 | 10444     | NM_006336    | ZER1                 |



|                |         |         |              |                 |           |              |              |
|----------------|---------|---------|--------------|-----------------|-----------|--------------|--------------|
| A_21_P0008570  | 9,01091 | 9,5981  | -1,502317766 | N/A             | N/A       | N/A          | Inc-USP8-2   |
| A_22_P00006013 | 1,71446 | 2,30168 | -1,502349006 | ENST00000543970 | N/A       | BU570017     | N/A          |
| A_33_P3346936  | 3,91779 | 4,50507 | -1,502411488 | ENST00000549378 | 23041     | BC111488     | MON2         |
| A_33_P3212754  | 7,67653 | 8,26391 | -1,502515631 | ENST00000253262 | 54754     | NM_017561    | NUTM2F       |
| A_24_P72064    | 2,05897 | 2,64643 | -1,502598951 | ENST00000230882 | 2690      | NM_000163    | GHR          |
| A_33_P3387786  | 2,33464 | 2,92218 | -1,502682275 | ENST00000590384 | N/A       | N/A          | N/A          |
| A_23_P110811   | 15,7931 | 16,3808 | -1,502848937 | ENST00000509578 | 1350      | NM_001867    | COX7C        |
| A_33_P3289128  | 9,03428 | 9,62203 | -1,502901023 | ENST00000342537 | 100128927 | NM_001137601 | ZBTB42       |
| A_23_P7827     | 8,67345 | 9,2613  | -1,503005199 | ENST00000368605 | 441168    | NM_001010919 | FAM26F       |
| A_23_P122443   | 13,5612 | 14,1491 | -1,50305729  | ENST00000343677 | 3006      | NM_005319    | HIST1H1C     |
| A_24_P242299   | 12,2969 | 12,8848 | -1,50305729  | ENST00000254821 | 9406      | NM_005455    | ZRANB2       |
| A_22_P00022845 | 3,65403 | 4,24212 | -1,503255253 | N/A             | N/A       | BX373851     | Inc-RPS27L-1 |
| A_23_P2998     | 12,4365 | 13,0246 | -1,503265673 | ENST00000358043 | 5018      | NM_005015    | OXA1L        |
| A_24_P16036    | 11,22   | 11,8081 | -1,503265673 | ENST00000474668 | 391356    | NM_001013663 | PTRHD1       |
| A_33_P3423941  | 14,6199 | 15,208  | -1,503265673 | ENST00000408968 | 8519      | NM_003641    | IFITM1       |
| A_23_P55990    | 9,55309 | 10,1413 | -1,503380296 | ENST00000595826 | 8775      | NM_003827    | NAPA         |
| A_33_P3411477  | 5,29771 | 5,88615 | -1,503619989 | ENST00000339852 | 342897    | NM_001001414 | NCCRP1       |
| A_22_P00025171 | 1,47584 | 2,06439 | -1,503734639 | ENST00000382897 | 642484    | XR_159014    | FLJ45743     |
| A_33_P3399267  | 6,44767 | 7,03626 | -1,503776332 | ENST00000379972 | 3601      | NM_172200    | IL15RA       |
| A_33_P3310961  | 4,77556 | 5,3643  | -1,503932691 | ENST00000369655 | 100505933 | NR_038943    | ADD3-AS1     |
| A_24_P394368   | 6,06751 | 6,65634 | -1,504026514 | ENST00000512095 | 57728     | NM_025132    | WDR19        |
| A_32_P222695   | 7,86591 | 8,45475 | -1,504036939 | ENST00000333677 | 389337    | NM_001001669 | ARHGEF37     |
| A_33_P3368776  | 1,42456 | 2,01341 | -1,504047364 | ENST00000328886 | 388364    | NM_206832    | TMIGD1       |
| A_23_P149368   | 1,4552  | 2,04416 | -1,504162047 | ENST00000495126 | 115350    | NM_052938    | FCRL1        |
| A_33_P3305348  | 4,41948 | 5,00852 | -1,504245457 | ENST00000283351 | 22878     | NM_014939    | TRAPPC8      |
| A_21_P0007867  | 1,62266 | 2,2119  | -1,504454005 | N/A             | N/A       | N/A          | Inc-FBXL14-2 |
| A_23_P89270    | 3,74075 | 4,33021 | -1,50468344  | ENST00000450523 | 5345      | NM_000934    | SERPINF2     |
| A_22_P00022283 | 2,07398 | 2,66347 | -1,504714729 | N/A             | 101926943 | NR_110044    | LOC101926943 |
| A_33_P3371718  | 13,3161 | 13,9057 | -1,504829462 | ENST00000474223 | 6303      | NM_002970    | SAT1         |
| A_22_P00012741 | 4,58683 | 5,17645 | -1,504850324 | N/A             | N/A       | N/A          | Inc-RABEPK-1 |
| A_23_P501547   | 8,10231 | 8,69195 | -1,504871186 | ENST00000307885 | 112       | NM_015270    | ADCY6        |
| A_19_P00316324 | 2,73932 | 3,32926 | -1,505184147 | ENST00000437601 | 100506810 | NR_038856    | LINC01132    |
| A_24_P343621   | 3,89525 | 4,48519 | -1,505184147 | ENST00000422887 | 79746     | NM_024693    | ECHDC3       |

|                |         |         |              |                 |           |              |                |
|----------------|---------|---------|--------------|-----------------|-----------|--------------|----------------|
| A_21_P0013071  | 7,65084 | 8,24087 | -1,505278048 | N/A             | N/A       | N/A          | XLOC_I2_012925 |
| A_33_P3215193  | 8,04411 | 8,63437 | -1,505518045 | ENST00000403197 | 64802     | NM_001297779 | NMNAT1         |
| A_23_P44195    | 8,95012 | 9,5405  | -1,505643275 | ENST00000284073 | 124540    | NM_138962    | MSI2           |
| A_22_P00009648 | 1,42985 | 2,02028 | -1,505695458 | ENST00000574842 | N/A       | N/A          | N/A            |
| A_23_P96965    | 8,81573 | 9,40617 | -1,505705895 | ENST00000409190 | 81493     | NM_030786    | SYNC           |
| A_22_P00017385 | 5,3869  | 5,97743 | -1,505799828 | N/A             | N/A       | CU680245     | Inc-VAMP1-1    |
| A_22_P00000083 | 2,24872 | 2,83927 | -1,505820703 | N/A             | 101154753 | NR_109836    | PANDAR         |
| A_22_P00007717 | 5,22014 | 5,81083 | -1,505966836 | ENST00000412095 | 100507463 | NR_037173    | PSMB8-AS1      |
| A_23_P113623   | 12,8752 | 13,4659 | -1,505977275 | ENST00000621878 | 84311     | NM_032351    | MRPL45         |
| A_19_P00316144 | 1,61062 | 2,20148 | -1,506144302 | ENST00000342990 | N/A       | N/A          | N/A            |
| A_24_P540057   | 5,28866 | 5,8797  | -1,50633223  | ENST00000616011 | 763       | NM_001739    | CA5A           |
| A_24_P323148   | 8,17295 | 8,76406 | -1,50640532  | ENST00000414615 | 284348    | NM_182573    | LYPD5          |
| A_24_P238118   | 1,64673 | 2,23786 | -1,506426203 | N/A             | 100192379 | NR_024365    | PP12613        |
| A_24_P135501   | 15,5367 | 16,1279 | -1,506499297 | ENST00000497325 | N/A       | N/A          | N/A            |
| A_23_P328206   | 8,27899 | 8,87026 | -1,506572395 | ENST00000324109 | 23268     | NM_015221    | DNMBP          |
| A_22_P00001321 | 4,6021  | 5,19351 | -1,506718601 | N/A             | N/A       | BC031882     | Inc-ANTXRL-2   |
| A_23_P43763    | 9,83467 | 10,4262 | -1,506843931 | ENST00000219207 | 51090     | NM_015993    | PLLP           |
| A_33_P3228757  | 6,85069 | 7,44236 | -1,506990163 | ENST00000614383 | 730051    | NM_001144989 | ZNF814         |
| A_33_P3397770  | 1,36798 | 1,9597  | -1,507042393 | N/A             | N/A       | CR745709     | N/A            |
| A_21_P0009074  | 3,08974 | 3,68176 | -1,507355806 | ENST00000565374 | N/A       | N/A          | N/A            |
| A_24_P28295    | 9,18058 | 9,77275 | -1,507512537 | ENST00000367686 | 9910      | NM_001243765 | RABGAP1L       |
| A_23_P348063   | 7,53881 | 8,13105 | -1,507585684 | ENST00000328933 | 9145      | NM_004711    | SYNGR1         |
| A_24_P212234   | 4,64762 | 5,23996 | -1,507690185 | ENST00000324642 | 348932    | NM_182632    | SLC6A18        |
| A_33_P3242458  | 10,0817 | 10,6741 | -1,507752889 | ENST00000506102 | 54946     | NM_017836    | SLC41A3        |
| A_22_P00025883 | 2,9261  | 3,51855 | -1,507805145 | N/A             | N/A       | N/A          | Inc-FBXO47-1   |
| A_33_P3292130  | 11,3951 | 11,9876 | -1,507857403 | N/A             | N/A       | N/A          | XLOC_I2_013383 |
| A_23_P338952   | 10,188  | 10,7806 | -1,507961923 | ENST00000373475 | 64766     | NM_022753    | S100BPB        |
| A_33_P3331641  | 7,4133  | 8,0059  | -1,507961923 | N/A             | 100131213 | NR_110301    | ZNF503-AS2     |
| A_33_P3423121  | 4,86672 | 5,45933 | -1,507972375 | N/A             | 5962      | NM_001260492 | RDX            |
| A_23_P255057   | 8,75847 | 9,35109 | -1,507982828 | ENST00000460713 | 55032     | NM_017945    | SLC35A5        |
| A_22_P00011160 | 4,21051 | 4,80317 | -1,508024639 | N/A             | N/A       | N/A          | Inc-OBSCN-1    |
| A_33_P3397066  | 1,89523 | 2,48795 | -1,508087357 | N/A             | N/A       | CR736467     | N/A            |
| A_21_P0005946  | 1,38492 | 1,97779 | -1,508244164 | N/A             | N/A       | N/A          | Inc-FAM83A-1   |

|                |         |         |              |                 |           |              |                |
|----------------|---------|---------|--------------|-----------------|-----------|--------------|----------------|
| A_22_P00004826 | 1,66383 | 2,25673 | -1,508275527 | ENST00000441841 | 340581    | XR_244539    | LOC340581      |
| A_24_P791040   | 4,81654 | 5,40952 | -1,508359166 | ENST00000608872 | 26190     | NM_012164    | FBXW2          |
| A_24_P245358   | 14,6997 | 15,2927 | -1,508380077 | ENST00000592364 | 498       | NM_001001937 | ATP5A1         |
| A_21_P0000193  | 11,9776 | 12,5706 | -1,508380077 | ENST00000373019 | 10946     | NM_006802    | SF3A3          |
| A_22_P00017906 | 1,66353 | 2,25654 | -1,508390532 | ENST00000524014 | 102724874 | NR_125830    | LOC102724874   |
| A_23_P155257   | 12,6126 | 13,2057 | -1,508484633 | ENST00000498215 | 27086     | NM_032682    | FOXP1          |
| A_22_P00004279 | 8,92397 | 9,51712 | -1,508536914 | ENST00000507727 | 199857    | NM_144988    | ALG14          |
| A_24_P193295   | 11,3162 | 11,9095 | -1,508693768 | ENST00000533601 | 376267    | NM_198686    | RAB15          |
| A_23_P415558   | 9,8801  | 10,4735 | -1,508798346 | ENST00000335870 | 7988      | NM_012256    | ZNF212         |
| A_24_P166645   | 10,7007 | 11,2941 | -1,508798346 | ENST00000425389 | 29803     | NM_014374    | REPIN1         |
| A_23_P390116   | 7,85444 | 8,44786 | -1,508819263 | ENST00000382095 | 221178    | NM_153023    | SPATA13        |
| A_33_P7314857  | 3,74682 | 4,34036 | -1,508944768 | ENST00000508313 | 100506085 | NR_037878    | LOC100506085   |
| A_22_P00003542 | 1,58199 | 2,17564 | -1,509059824 | N/A             | N/A       | N/A          | Inc-CCNK-2     |
| A_23_P164674   | 5,48713 | 6,08078 | -1,509059824 | ENST00000590612 | 7768      | NM_013362    | ZNF225         |
| A_21_P0004062  | 3,12759 | 3,72125 | -1,509070284 | ENST00000513561 | N/A       | N/A          | N/A            |
| A_24_P355493   | 9,18796 | 9,78163 | -1,509080744 | ENST00000481452 | 64077     | NM_022126    | LHPP           |
| A_22_P00008693 | 2,53869 | 3,13238 | -1,509101665 | N/A             | N/A       | N/A          | Inc-KIAA1147-3 |
| A_23_P79302    | 8,94139 | 9,53512 | -1,509143506 | ENST00000409876 | 130576    | NM_177964    | LYPD6B         |
| A_33_P3379136  | 1,36266 | 1,95639 | -1,509143506 | N/A             | N/A       | N/A          | N/A            |
| A_22_P00013989 | 2,62819 | 3,22202 | -1,509248116 | ENST00000503218 | N/A       | N/A          | N/A            |
| A_23_P376088   | 8,00516 | 8,59902 | -1,5092795   | ENST00000476221 | 54923     | NM_017806    | LIME1          |
| A_23_P214168   | 12,6961 | 13,29   | -1,509321347 | ENST00000322507 | 1303      | NM_004370    | COL12A1        |
| A_33_P3277758  | 4,45073 | 5,04467 | -1,509363195 | N/A             | N/A       | N/A          | N/A            |
| A_33_P3325306  | 13,7929 | 14,3869 | -1,509425969 | ENST00000463841 | 3336      | N/A          | HSPE1          |
| A_21_P0004121  | 9,77577 | 10,3698 | -1,509457356 | ENST00000511579 | N/A       | N/A          | N/A            |
| A_23_P3330999  | 5,13917 | 5,7332  | -1,509457356 | ENST00000354577 | 9439      | NM_015979    | MED23          |
| A_33_P3294172  | 1,46567 | 2,05973 | -1,509488745 | N/A             | N/A       | N/A          | N/A            |
| A_23_P389102   | 10,8354 | 11,4296 | -1,509635234 | ENST00000318217 | 4642      | NM_015194    | MYO1D          |
| A_23_P212511   | 9,10465 | 9,69887 | -1,509656162 | ENST00000470669 | 151613    | NM_001042601 | TTC14          |
| A_21_P0012982  | 2,23482 | 2,82905 | -1,509666626 | ENST00000510758 | N/A       | N/A          | N/A            |
| A_23_P20275    | 11,1277 | 11,722  | -1,509739877 | ENST00000315367 | 79666     | NM_024613    | PLEKHF2        |
| A_33_P3289113  | 6,18998 | 6,78429 | -1,509750342 | ENST00000572088 | 1353      | AK124809     | COX11          |
| A_33_P3399768  | 5,46293 | 6,0573  | -1,509813132 | N/A             | 100129269 | NR_034126    | LINC01160      |

|                |         |         |              |                 |           |              |                       |
|----------------|---------|---------|--------------|-----------------|-----------|--------------|-----------------------|
| A_33_P3214129  | 12,142  | 12,7364 | -1,509844528 | N/A             | 728061    | AK025151     | LOC728061             |
| A_22_P00012299 | 2,43056 | 3,02497 | -1,509854994 | N/A             | N/A       | N/A          | Inc-PPP4C-1           |
| A_23_P219197   | 9,53285 | 10,1273 | -1,509896856 | ENST00000478599 | 5998      | NM_134427    | RGS3                  |
| A_33_P3346287  | 1,35873 | 1,95319 | -1,509907322 | ENST00000430192 | 339789    | NR_034135    | LINC00299             |
| A_23_P147711   | 2,11388 | 2,70841 | -1,509980585 | ENST00000368680 | 4881      | NM_000906    | NPR1                  |
| A_19_P00812911 | 9,70404 | 10,2986 | -1,510011985 | N/A             | 728431    | N/A          | LINC01137             |
| A_23_P330461   | 12,5679 | 13,1627 | -1,510263204 | ENST00000617472 | 147798    | NM_144686    | TMC4                  |
| A_33_P3410194  | 9,02811 | 9,62306 | -1,510420237 | ENST00000254810 | N/A       | AK054591     | N/A                   |
| A_24_P450285   | 6,11087 | 6,70595 | -1,510556346 | ENST00000415318 | 283152    | NM_001145018 | CCDC153               |
| A_19_P00317904 | 8,2435  | 8,8386  | -1,510577287 | N/A             | N/A       | N/A          | Inc-ZNF674-3          |
| A_23_P11980    | 3,60926 | 4,20437 | -1,510587758 | ENST00000610710 | 149465    | NM_001195831 | CFAP57                |
| A_21_P0014248  | 4,16306 | 4,75823 | -1,510650583 | N/A             | 100507347 | NR_108061    | VIM-AS1               |
| A_33_P3504002  | 2,5339  | 3,12919 | -1,51077624  | ENST00000520902 | 286186    | NR_033893    | LINC01299             |
| A_22_P00014132 | 2,00401 | 2,59962 | -1,511111378 | N/A             | N/A       | BG184172     | Inc-SCGB1D4-2         |
| A_23_P346900   | 2,59115 | 3,1868  | -1,511153276 | ENST00000424201 | 9254      | NM_001005505 | CACNA2D2              |
| A_23_P135787   | 8,08893 | 8,68475 | -1,511331353 | ENST00000614479 | 2804      | NM_001256487 | GOLGB1                |
| A_23_P89589    | 9,46128 | 10,0573 | -1,511540883 | ENST00000582719 | 5187      | NM_002616    | PER1                  |
| A_23_P394567   | 7,03882 | 7,63507 | -1,511781877 | ENST00000197268 | 57613     | NM_020853    | KIAA1467              |
| A_21_P0001466  | 1,49545 | 2,09172 | -1,511802835 | N/A             | N/A       | N/A          | Inc-MTOR-1            |
| A_24_P79054    | 10,2462 | 10,8425 | -1,511834273 | ENST00000221930 | 7040      | NM_000660    | TGFB1                 |
| A_22_P00008159 | 3,3231  | 3,91942 | -1,511855231 | ENST00000608010 | N/A       | N/A          | N/A                   |
| A_22_P00011719 | 5,90561 | 6,50193 | -1,511855231 | N/A             | N/A       | AK026213     | Inc-PEA15-1           |
| A_24_P126628   | 9,91437 | 10,5107 | -1,511865711 | ENST00000300128 | 23306     | NM_015257    | TMEM194A              |
| A_22_P00019938 | 4,25107 | 4,84744 | -1,511907629 | ENST00000494761 | 101927346 | XR_245076    | LOC101927346          |
| A_24_P311926   | 15,741  | 16,3375 | -1,512043872 | ENST00000428701 | 3135      | NM_002127    | HLA-G                 |
| A_23_P336198   | 7,80583 | 8,40252 | -1,512243018 | ENST00000482540 | 113263    | NM_138426    | GLCCI1                |
| A_33_P3294608  | 15,4368 | 16,0335 | -1,5122535   | ENST00000395353 | 9961      | NM_017458    | MVP                   |
| A_22_P00007940 | 6,24614 | 6,84302 | -1,512442191 | N/A             | 100132774 | NR_033827    | KDM4A-AS1             |
| A_19_P00808382 | 6,23604 | 6,83305 | -1,512578482 | N/A             | 100506334 | NR_038883    | LINC00649             |
| A_23_P200637   | 7,38784 | 7,98493 | -1,512662359 | ENST00000251547 | 93611     | NM_001014765 | FBXO44                |
| A_24_P199484   | 1,40378 | 2,00089 | -1,512683329 | N/A             | 9068      | NM_004673    | ANGPTL1               |
| A_22_P00022627 | 1,52575 | 2,12308 | -1,512914019 | N/A             | N/A       | N/A          | Inc-RP11-295D22.1.1-5 |
| A_22_P00009825 | 4,91385 | 5,51127 | -1,513008403 | N/A             | 100507053 | NR_037884    | LOC100507053          |

|                |         |         |              |                 |           |              |                |
|----------------|---------|---------|--------------|-----------------|-----------|--------------|----------------|
| A_23_P40956    | 2,51764 | 3,11508 | -1,513029378 | ENST00000287656 | 51738     | NM_016362    | GHRL           |
| A_33_P3214586  | 9,80629 | 10,4038 | -1,513102792 | ENST00000372354 | 9048      | NM_057090    | ARTN           |
| A_33_P3407429  | 2,57903 | 3,17659 | -1,513155233 | N/A             | N/A       | N/A          | N/A            |
| A_23_P149649   | 13,1953 | 13,7929 | -1,513197187 | ENST00000475506 | 6390      | NM_003000    | SDHB           |
| A_21_P0009241  | 4,48655 | 5,0843  | -1,513354526 | N/A             | N/A       | N/A          | Inc-MRM1-1     |
| A_21_P0013654  | 6,80457 | 7,40239 | -1,513427956 | N/A             | 102723780 | N/A          | LOC102723780   |
| A_33_P3287428  | 6,20017 | 6,798   | -1,513438446 | N/A             | 55073     | BC107850     | LRRC37A4P      |
| A_33_P3807268  | 8,99935 | 9,59731 | -1,513574827 | N/A             | 94236     | AF395440     | DNAJA1P5       |
| A_21_P0004536  | 1,57725 | 2,17532 | -1,513690236 | N/A             | N/A       | N/A          | Inc-NEURL1B-3  |
| A_23_P115105   | 12,0712 | 12,6693 | -1,513721713 | ENST00000401088 | 26099     | NM_001114600 | SZRD1          |
| A_23_P21838    | 14,0411 | 14,6393 | -1,513826639 | ENST00000393892 | 1267      | NM_033133    | CNP            |
| A_23_P207650   | 13,9201 | 14,5184 | -1,513931573 | ENST00000583858 | 37        | NM_000018    | ACADVL         |
| A_33_P3334313  | 7,01695 | 7,61528 | -1,513963055 | ENST00000377776 | 57180     | NM_020445    | ACTR3B         |
| A_23_P28730    | 11,4475 | 12,0459 | -1,514036515 | ENST00000450537 | 57473     | NM_020713    | ZNF512B        |
| A_22_P00001999 | 2,16752 | 2,76598 | -1,514099483 | N/A             | N/A       | N/A          | Inc-BCL7C-1    |
| A_23_P5064     | 5,43187 | 6,03034 | -1,514109978 | ENST00000222374 | 199731    | NM_145296    | CADM4          |
| A_33_P3260100  | 11,8357 | 12,4342 | -1,514141463 | ENST00000373408 | 154467    | NM_138493    | CCDC167        |
| A_23_P79703    | 13,0511 | 13,6496 | -1,514141463 | ENST00000494615 | 3032      | NM_000183    | HADHB          |
| A_24_P325107   | 7,31632 | 7,91483 | -1,514151959 | ENST00000369250 | 57700     | NM_020940    | FAM160B1       |
| A_21_P0008128  | 3,16597 | 3,76449 | -1,514162454 | N/A             | N/A       | N/A          | Inc-CRYL1-1    |
| A_22_P00013710 | 6,66266 | 7,26123 | -1,514214932 | N/A             | 594842    | NR_002835    | HAS2-AS1       |
| A_22_P00000594 | 1,77376 | 2,37243 | -1,514319893 | ENST00000575554 | 387646    | N/A          | LRRC37A6P      |
| A_19_P00807468 | 4,37715 | 4,97584 | -1,514340886 | N/A             | N/A       | N/A          | Inc-HIST1H1A-1 |
| A_33_P3257628  | 8,53785 | 9,13655 | -1,514351383 | ENST00000393612 | 25839     | NM_001195139 | COG4           |
| A_23_P11664    | 12,5706 | 13,1693 | -1,514351383 | ENST00000489188 | 9295      | NM_004768    | SRSF11         |
| A_21_P0000220  | 7,57554 | 8,17426 | -1,514372376 | ENST00000476268 | 26818     | NR_000020    | SNORD33        |
| A_33_P3406828  | 5,21489 | 5,81373 | -1,514498343 | N/A             | 727764    | NR_046439    | MAFIP          |
| A_23_P157007   | 5,60579 | 6,20471 | -1,514582327 | ENST00000450753 | 28959     | NM_014020    | TMEM176B       |
| A_33_P3227231  | 2,53573 | 3,13472 | -1,514655817 | ENST00000481817 | 155060    | AK303492     | LOC155060      |
| A_21_P0002097  | 4,58869 | 5,18777 | -1,514750309 | ENST00000441053 | N/A       | N/A          | N/A            |
| A_21_P0000148  | 13,0344 | 13,6335 | -1,514771308 | ENST00000366466 | 4712      | NM_002493    | NDUFB6         |
| A_21_P0013378  | 2,15133 | 2,75045 | -1,514792308 | ENST00000445615 | N/A       | N/A          | N/A            |
| A_22_P00010487 | 3,32756 | 3,92675 | -1,514865807 | ENST00000528326 | N/A       | N/A          | N/A            |

|                |         |         |              |                 |           |              |                       |
|----------------|---------|---------|--------------|-----------------|-----------|--------------|-----------------------|
| A_21_P0008571  | 1,38413 | 1,98337 | -1,51491831  | N/A             | N/A       | N/A          | Inc-SMAD3-1           |
| A_33_P3281333  | 9,36345 | 9,96271 | -1,514939311 | ENST00000336278 | 6645      | NM_006750    | SNTB2                 |
| A_33_P3323544  | 2,78492 | 3,38418 | -1,514939311 | N/A             | N/A       | N/A          | N/A                   |
| A_23_P73982    | 10,3748 | 10,9741 | -1,514981315 | ENST00000371429 | 55706     | NM_018087    | NDC1                  |
| A_24_P307827   | 10,6148 | 11,2143 | -1,51519135  | ENST00000286760 | 123720    | NM_001080435 | WHAMM                 |
| A_23_P85893    | 10,7843 | 11,3838 | -1,51519135  | ENST00000362007 | 112770    | NM_144580    | GLMP                  |
| A_21_P0010129  | 1,54957 | 2,14922 | -1,515348896 | N/A             | N/A       | N/A          | Inc-TCFL5-2           |
| A_22_P00025696 | 1,58374 | 2,18346 | -1,515422423 | N/A             | N/A       | N/A          | Inc-CTD-2117L12.1.1-1 |
| A_21_P0008164  | 1,4286  | 2,02834 | -1,515443431 | N/A             | N/A       | N/A          | Inc-INTS6-1           |
| A_23_P3312     | 5,19351 | 5,79328 | -1,515474944 | ENST00000249842 | 3671      | NM_005545    | ISLR                  |
| A_33_P3365037  | 11,4936 | 12,0934 | -1,515506458 | ENST00000592083 | 2067      | NM_202001    | ERCC1                 |
| A_23_P394377   | 4,53192 | 5,13188 | -1,515674543 | ENST00000312942 | 283518    | NM_199464    | KCNRG                 |
| A_33_P3284252  | 1,53014 | 2,13015 | -1,515727073 | N/A             | N/A       | N/A          | N/A                   |
| A_33_P3380529  | 6,99033 | 7,59044 | -1,515832139 | ENST00000376378 | 56952     | NM_001282786 | PRTFDC1               |
| A_33_P3321836  | 10,1105 | 10,7107 | -1,515926704 | ENST00000614805 | 23654     | NM_012401    | PLXNB2                |
| A_23_P357101   | 9,02114 | 9,62147 | -1,516063309 | ENST00000308521 | 200316    | NM_145298    | APOBEC3F              |
| A_21_P0000655  | 7,87409 | 8,47465 | -1,516305025 | N/A             | 100129917 | NR_036511    | LOC100129917          |
| A_23_P256542   | 12,9481 | 13,5487 | -1,516347066 | ENST00000477892 | 26355     | NM_014367    | FAM162A               |
| A_21_P0007374  | 6,04323 | 6,6439  | -1,516420642 | N/A             | N/A       | N/A          | Inc-PRKRIR-1          |
| A_23_P114353   | 1,70485 | 2,30564 | -1,516546779 | ENST00000263032 | 55998     | NM_032946    | NXF5                  |
| A_24_P911607   | 5,66842 | 6,26924 | -1,516578315 | ENST00000339464 | 7477      | NM_058238    | WNT7B                 |
| A_23_P119095   | 13,6496 | 14,2507 | -1,516872683 | ENST00000418234 | 10848     | NM_006663    | PPP1R13L              |
| A_23_P114903   | 4,67878 | 5,27995 | -1,516946284 | ENST00000309758 | 3310      | NM_002155    | HSPA6                 |
| A_22_P00009923 | 1,61602 | 2,21724 | -1,516998859 | N/A             | N/A       | N/A          | Inc-MIA3-1            |
| A_24_P396702   | 8,11349 | 8,71476 | -1,517051435 | ENST00000480212 | 9936      | NM_014880    | CD302                 |
| A_33_P3362153  | 13,0213 | 13,6226 | -1,517082981 | ENST00000444469 | 388564    | NM_001190764 | TMEM238               |
| A_24_P377225   | 6,83024 | 7,4316  | -1,517146076 | ENST00000441222 | 64854     | NM_022832    | USP46                 |
| A_21_P0011147  | 3,85232 | 4,45373 | -1,517198657 | ENST00000400311 | N/A       | N/A          | N/A                   |
| A_22_P00016925 | 1,5746  | 2,1761  | -1,517293308 | ENST00000549055 | N/A       | CA394149     | N/A                   |
| A_33_P3423600  | 13,26   | 13,8615 | -1,517293308 | ENST00000573786 | 339229    | NM_001039842 | OXLD1                 |
| A_23_P116387   | 9,12173 | 9,72328 | -1,517345894 | ENST00000278849 | 3619      | NM_001040694 | INCENP                |
| A_33_P3234899  | 13,3318 | 13,9334 | -1,517398482 | ENST00000613870 | 5691      | NM_002795    | PSMB3                 |
| A_22_P00001773 | 3,92066 | 4,5223  | -1,517440554 | ENST00000430107 | 101929023 | XR_425208    | LOC101929023          |

|                |         |         |              |                 |           |              |                |
|----------------|---------|---------|--------------|-----------------|-----------|--------------|----------------|
| A_24_P319613   | 7,39411 | 7,99586 | -1,517556258 | ENST00000540251 | 4751      | NM_002497    | NEK2           |
| A_21_P0014787  | 1,50326 | 2,10503 | -1,517577296 | N/A             | N/A       | N/A          | N/A            |
| A_33_P3340580  | 4,25888 | 4,8608  | -1,51773509  | ENST00000618554 | 201181    | NM_001242704 | ZNF385C        |
| A_33_P3399448  | 5,49165 | 6,0936  | -1,51776665  | N/A             | 54436     | BC068094     | SH3TC1         |
| A_33_P3672482  | 6,07767 | 6,67971 | -1,517861336 | ENST00000003302 | 57646     | NM_020886    | USP28          |
| A_21_P0012989  | 3,50697 | 4,10904 | -1,5178929   | ENST00000503882 | N/A       | N/A          | N/A            |
| A_22_P00016959 | 3,58328 | 4,18536 | -1,517903421 | ENST00000437610 | 101927534 | XR_245057    | LOC101927534   |
| A_23_P87049    | 12,3044 | 12,9065 | -1,517924464 | ENST00000527649 | 6653      | NM_003105    | SORL1          |
| A_23_P214638   | 8,96846 | 9,57062 | -1,517987594 | ENST00000469681 | 10919     | NM_006709    | EHMT2          |
| A_33_P3308949  | 9,70686 | 10,3091 | -1,518071771 | ENST00000370132 | 1629      | NM_001918    | DBT            |
| A_21_P0006857  | 1,64836 | 2,25067 | -1,51814543  | N/A             | N/A       | N/A          | Inc-ANKRD30A-3 |
| A_22_P00003394 | 4,64124 | 5,24365 | -1,518250664 | N/A             | N/A       | N/A          | Inc-CCDC117-1  |
| A_33_P3384958  | 6,66518 | 7,26764 | -1,518303283 | ENST00000457765 | 9890      | NM_014839    | LPPR4          |
| A_23_P88880    | 1,4638  | 2,06626 | -1,518303283 | ENST00000262383 | 23090     | NM_015069    | ZNF423         |
| A_33_P6817004  | 2,56985 | 3,17242 | -1,518419053 | N/A             | 400960    | NR_033872    | PCBP1-AS1      |
| A_33_P3319463  | 8,01645 | 8,61904 | -1,518440102 | ENST00000583565 | 8031      | NM_001145261 | NCOA4          |
| A_22_P00017169 | 2,56748 | 3,17007 | -1,518440102 | ENST00000520323 | N/A       | N/A          | N/A            |
| A_21_P0012378  | 1,42314 | 2,02585 | -1,518566408 | ENST00000473713 | 201617    | N/A          | LINC00870      |
| A_23_P139250   | 1,38338 | 1,9861  | -1,518576934 | ENST00000317121 | 387748    | NM_001005180 | OR56B1         |
| A_33_P3295148  | 12,3647 | 12,9675 | -1,518661144 | ENST00000507952 | 2749      | NR_048575    | GLUD1P3        |
| A_21_P0003164  | 1,42283 | 2,02573 | -1,518766413 | N/A             | N/A       | N/A          | Inc-KLF15-3    |
| A_33_P3362869  | 11,7518 | 12,3547 | -1,518766413 | ENST00000555084 | 131118    | NM_001190233 | DNAJC19        |
| A_33_P3237590  | 6,829   | 7,4319  | -1,518766413 | N/A             | N/A       | AK123396     | Inc-ANKH-1     |
| A_24_P355145   | 1,3552  | 1,95815 | -1,518819051 | ENST00000524076 | 85479     | NM_033105    | DNAJC5B        |
| A_23_P140423   | 13,7167 | 14,3197 | -1,51887169  | ENST00000553666 | 4707      | NM_004545    | NDUFB1         |
| A_33_P3368452  | 9,13351 | 9,73652 | -1,518882218 | ENST00000400322 | 100507436 | NM_000247    | MICA           |
| A_21_P0009360  | 6,48636 | 7,08944 | -1,518955916 | ENST00000578206 | 100499467 | NR_036488    | LINC00673      |
| A_23_P131683   | 3,84937 | 4,45245 | -1,518955916 | ENST00000402218 | 22924     | NM_012326    | MAPRE3         |
| A_21_P0009684  | 1,74659 | 2,35    | -1,5193034   | N/A             | N/A       | N/A          | Inc-ZNF333-2   |
| A_22_P00000869 | 1,88603 | 2,48948 | -1,519345524 | N/A             | N/A       | N/A          | Inc-AGRP-2     |
| A_33_P3269976  | 3,16307 | 3,7666  | -1,519429777 | N/A             | N/A       | BG675116     | N/A            |
| A_22_P00015403 | 3,26832 | 3,87187 | -1,519450841 | ENST00000453666 | N/A       | N/A          | N/A            |
| A_23_P157963   | 3,37418 | 3,97776 | -1,519482438 | ENST00000380647 | 54875     | NM_017738    | CNTLN          |

|                |         |         |              |                 |           |              |                       |
|----------------|---------|---------|--------------|-----------------|-----------|--------------|-----------------------|
| A_33_P3267160  | 4,45387 | 5,05746 | -1,51949297  | ENST00000369681 | 51167     | AK124658     | CYB5R4                |
| A_23_P56938    | 8,66419 | 9,26782 | -1,5195351   | ENST00000295025 | 5966      | NM_002908    | REL                   |
| A_23_P80739    | 8,18094 | 8,78458 | -1,519545632 | ENST00000463876 | 5333      | NM_006225    | PLCD1                 |
| A_24_P295590   | 5,34144 | 5,9452  | -1,51967203  | ENST00000489171 | 83937     | NM_032023    | RASSF4                |
| A_33_P3424112  | 7,25701 | 7,86096 | -1,519872181 | ENST00000588725 | 79665     | NM_024612    | DHX40                 |
| A_24_P362969   | 1,71627 | 2,32031 | -1,519966998 | ENST00000328546 | 345275    | NM_178135    | HSD17B13              |
| A_33_P3255434  | 4,44308 | 5,04713 | -1,519977534 | ENST00000398461 | 55384     | NR_002766    | MEG3                  |
| A_32_P66222    | 3,99714 | 4,60127 | -1,520061822 | ENST00000359341 | 441430    | NM_001012421 | ANKRD20A2             |
| A_24_P9671     | 12,713  | 13,3172 | -1,520135577 | ENST00000495015 | 3301      | NM_001539    | DNAJA1                |
| A_23_P167005   | 5,72014 | 6,32444 | -1,520240949 | ENST00000355897 | 26996     | NM_014373    | GPR160                |
| A_23_P354175   | 10,0745 | 10,6788 | -1,520240949 | ENST00000382936 | 92305     | NM_138385    | TMEM129               |
| A_33_P3242383  | 4,07716 | 4,68151 | -1,520293637 | ENST00000504956 | 4299      | AK296149     | AFF1                  |
| A_33_P3390576  | 5,69105 | 6,29549 | -1,520388481 | ENST00000389506 | 4297      | NM_001197104 | KMT2A                 |
| A_33_P3377199  | 16,0233 | 16,6278 | -1,520451714 | ENST00000372079 | 5052      | NM_002574    | PRDX1                 |
| A_33_P3299560  | 6,1035  | 6,70807 | -1,520525488 | N/A             | 389170    | AK094480     | LEKR1                 |
| A_22_P00011899 | 8,22034 | 8,82496 | -1,520578186 | ENST00000490162 | 340340    | N/A          | LOC340340             |
| A_21_P0013128  | 2,41561 | 3,02035 | -1,52070467  | N/A             | 414766    | XR_241996    | HCG16                 |
| A_21_P0005816  | 4,39815 | 5,00313 | -1,520957668 | N/A             | N/A       | N/A          | Inc-RP11-419C23.1.1-2 |
| A_22_P00008492 | 1,72963 | 2,33464 | -1,520989296 | N/A             | N/A       | N/A          | Inc-KCNC2-4           |
| A_24_P911362   | 1,61022 | 2,21533 | -1,521094726 | ENST00000427181 | 7148      | U52700       | TNXB                  |
| A_23_P73429    | 15,3066 | 15,9118 | -1,52118962  | ENST00000473883 | 3059      | NM_005335    | HCLS1                 |
| A_33_P3399045  | 1,53864 | 2,14387 | -1,521221253 | N/A             | N/A       | BC032569     | N/A                   |
| A_23_P77669    | 6,80522 | 7,41051 | -1,52128452  | ENST00000565601 | 55565     | NM_017530    | ZNF821                |
| A_23_P142294   | 12,4128 | 13,0181 | -1,521295065 | ENST00000292147 | 23474     | NM_014297    | ETHE1                 |
| A_23_P210445   | 6,08503 | 6,69036 | -1,5213267   | ENST00000427442 | 26013     | NM_032107    | L3MBTL1               |
| A_24_P636882   | 7,54328 | 8,14863 | -1,52134779  | ENST00000263955 | 9262      | NM_004226    | STK17B                |
| A_22_P00007593 | 2,69498 | 3,30036 | -1,521379426 | N/A             | 104355145 | NR_126386    | NCOA7-AS1             |
| A_33_P3390918  | 3,72777 | 4,33319 | -1,521421608 | ENST00000334574 | 123722    | NM_001007122 | FSD2                  |
| A_33_P3307875  | 10,1276 | 10,7331 | -1,521505976 | ENST00000298130 | 171546    | NM_138288    | SPTSSA                |
| A_21_P0012180  | 1,36052 | 1,96605 | -1,521537615 | N/A             | N/A       | N/A          | XLOC_I2_009135        |
| A_22_P00007695 | 8,50499 | 9,11055 | -1,521569255 | N/A             | N/A       | BX648801     | Inc-HIST2H2AA3-1      |
| A_24_P246636   | 2,88395 | 3,48954 | -1,521600895 | N/A             | N/A       | N/A          | N/A                   |
| A_33_P3399268  | 7,35329 | 7,95902 | -1,521748559 | ENST00000379971 | 3601      | N/A          | IL15RA                |



|                |         |         |              |                 |           |              |                |
|----------------|---------|---------|--------------|-----------------|-----------|--------------|----------------|
| A_33_P3390027  | 9,46821 | 10,0741 | -1,521917336 | ENST00000405068 | 23265     | AK022397     | EXOC7          |
| A_24_P35891    | 12,4198 | 13,0257 | -1,521927885 | ENST00000421093 | 51222     | NM_016423    | ZNF219         |
| A_24_P359545   | 8,70069 | 9,30668 | -1,522022831 | ENST00000399794 | 494115    | NM_019610    | RBMXL1         |
| A_33_P3264072  | 4,09235 | 4,69835 | -1,522033381 | N/A             | 100128593 | NR_033913    | LOC100128593   |
| A_23_P103971   | 1,46697 | 2,07307 | -1,522138884 | ENST00000334194 | 199974    | NM_178134    | CYP4Z1         |
| A_23_P320897   | 6,98073 | 7,58703 | -1,522349912 | ENST00000294737 | 163486    | NM_001195215 | DENND1B        |
| A_33_P3254956  | 4,03063 | 4,63696 | -1,522381568 | ENST00000329553 | 53820     | NM_018962    | RIPPLY3        |
| A_21_P0009757  | 3,66411 | 4,27045 | -1,522392121 | N/A             | N/A       | N/A          | Inc-C19orf12-2 |
| A_23_P4400     | 8,50224 | 9,10861 | -1,522423778 | ENST00000391413 | 653240    | NM_033059    | KRTAP4-11      |
| A_32_P120791   | 5,86188 | 6,46828 | -1,522455437 | N/A             | N/A       | BC040303     | Inc-EYS-2      |
| A_21_P0004923  | 1,46868 | 2,07509 | -1,522465989 | N/A             | N/A       | N/A          | Inc-RFPL4B-3   |
| A_23_P366682   | 6,58362 | 7,19013 | -1,522571522 | ENST00000359315 | 91978     | NM_033513    | TPGS1          |
| A_22_P00016531 | 1,59024 | 2,19677 | -1,52259263  | ENST00000549470 | N/A       | N/A          | N/A            |
| A_22_P00020352 | 2,54978 | 3,15649 | -1,52278261  | N/A             | N/A       | N/A          | Inc-PAQR9-1    |
| A_23_P31858    | 1,53051 | 2,13735 | -1,522919833 | ENST00000276480 | 9705      | NM_014682    | ST18           |
| A_21_P0000428  | 1,39649 | 2,00354 | -1,523141527 | N/A             | 767612    | NR_003224    | SNORD114-31    |
| A_23_P8253     | 7,45355 | 8,06065 | -1,523194316 | ENST00000367363 | 135250    | NM_139165    | RAET1E         |
| A_33_P3404531  | 6,77393 | 7,38106 | -1,52322599  | ENST00000490089 | 55063     | NM_001258008 | ZCWPW1         |
| A_22_P00025535 | 1,49332 | 2,1005  | -1,523278782 | N/A             | N/A       | N/A          | Inc-C15orf2-8  |
| A_22_P00015507 | 4,03088 | 4,63811 | -1,523331576 | N/A             | N/A       | N/A          | Inc-STAT6-2    |
| A_19_P00811234 | 9,00175 | 9,60914 | -1,523500528 | N/A             | N/A       | N/A          | N/A            |
| A_23_P500542   | 7,08804 | 7,69545 | -1,523521648 | ENST00000371956 | 127343    | NM_147192    | DMBX1          |
| A_22_P00003364 | 4,56403 | 5,17145 | -1,523532209 | N/A             | N/A       | N/A          | Inc-CBR1-1     |
| A_22_P00016379 | 7,8364  | 8,44384 | -1,523553329 | ENST00000596366 | 100505761 | NR_038937    | RPARP-AS1      |
| A_33_P3213317  | 2,36211 | 2,96962 | -1,523627254 | N/A             | N/A       | N/A          | N/A            |
| A_23_P100499   | 8,75615 | 9,36373 | -1,523701183 | ENST00000585653 | 79641     | NM_024589    | ROGDI          |
| A_21_P0013249  | 3,75025 | 4,35789 | -1,523764553 | N/A             | N/A       | N/A          | XLOC_I2_013485 |
| A_33_P3386870  | 3,39863 | 4,00639 | -1,523891302 | ENST00000452760 | N/A       | N/A          | N/A            |
| A_32_P197524   | 6,56745 | 7,17522 | -1,523901865 | N/A             | 83939     | NM_032025    | EIF2A          |
| A_21_P0014383  | 4,65929 | 5,26714 | -1,52398637  | N/A             | N/A       | BE714980     | N/A            |
| A_23_P120281   | 6,29848 | 6,90669 | -1,524366702 | ENST00000376651 | 10913     | NM_022336    | EDAR           |
| A_24_P236753   | 2,07845 | 2,68671 | -1,524419534 | ENST00000343572 | 8447      | NM_003585    | DOC2B          |
| A_33_P3224715  | 1,70015 | 2,30846 | -1,524472367 | N/A             | N/A       | N/A          | N/A            |

|                |         |         |              |                 |           |              |              |
|----------------|---------|---------|--------------|-----------------|-----------|--------------|--------------|
| A_23_P169293   | 1,74559 | 2,35393 | -1,524504068 | ENST00000382276 | 1761      | NM_021951    | DMRT1        |
| A_21_P0012625  | 1,80916 | 2,41758 | -1,524588607 | ENST00000503100 | 101927849 | N/A          | LOC101927849 |
| A_22_P00017263 | 3,81381 | 4,42223 | -1,524588607 | N/A             | N/A       | N/A          | Inc-UPK3B-1  |
| A_24_P177964   | 11,2914 | 11,9    | -1,524778836 | ENST00000335999 | 57701     | NM_001037806 | NCKAP5L      |
| A_33_P3373046  | 3,11576 | 3,72453 | -1,524958519 | ENST00000610548 | 400720    | NM_001024596 | ZNF772       |
| A_24_P256512   | 1,49932 | 2,10817 | -1,525043083 | ENST00000537309 | 246744    | NM_001007532 | STH          |
| A_24_P224488   | 6,71141 | 7,32032 | -1,525106509 | ENST00000344290 | 4137      | NM_016835    | MAPT         |
| A_33_P3330264  | 8,0673  | 8,67623 | -1,525127652 | ENST00000395761 | 2919      | NM_001511    | CXCL1        |
| A_33_P3283713  | 11,8968 | 12,506  | -1,525413106 | ENST00000273596 | 25864     | NM_015407    | ABHD14A      |
| A_24_P275585   | 3,62429 | 4,23349 | -1,525413106 | ENST00000358767 | 64799     | NM_001031715 | IQCH         |
| A_23_P131449   | 5,10656 | 5,71579 | -1,525444826 | ENST00000290390 | 388963    | NM_001145054 | C2orf81      |
| A_23_P213840   | 12,8196 | 13,4289 | -1,525518843 | ENST00000517669 | 8992      | NM_003945    | ATP6V0E1     |
| A_21_P0012234  | 2,99552 | 3,60484 | -1,525539991 | ENST00000419664 | N/A       | N/A          | N/A          |
| A_22_P00011164 | 2,24709 | 2,85649 | -1,525624588 | N/A             | N/A       | N/A          | Inc-OCA2-3   |
| A_24_P135921   | 9,47353 | 10,083  | -1,525698613 | ENST00000416467 | N/A       | N/A          | N/A          |
| A_23_P420256   | 9,32386 | 9,93334 | -1,525709189 | ENST00000237822 | 60526     | NM_021925    | C2orf43      |
| A_24_P618401   | 3,82158 | 4,43106 | -1,525709189 | N/A             | 100131067 | NR_034121    | CKMT2-AS1    |
| A_22_P00012448 | 1,97412 | 2,58369 | -1,52580437  | N/A             | N/A       | N/A          | Inc-PRPF18-3 |
| A_33_P3299882  | 4,70186 | 5,31143 | -1,52580437  | ENST00000287022 | 7381      | NM_001254752 | UQCRB        |
| A_21_P0012084  | 1,38002 | 1,98965 | -1,525867828 | ENST00000416105 | 103344932 | NR_121185    | PGM5P4-AS1   |
| A_21_P0009601  | 1,7217  | 2,33161 | -1,526163999 | N/A             | N/A       | N/A          | Inc-VAPA-1   |
| A_23_P45166    | 11,5797 | 12,1898 | -1,526365005 | ENST00000328195 | 11212     | NM_007198    | PROSC        |
| A_23_P47282    | 11,385  | 11,9951 | -1,526365005 | ENST00000278742 | 6768      | NM_021978    | ST14         |
| A_21_P0002828  | 3,76099 | 4,37111 | -1,526386165 | ENST00000439479 | N/A       | N/A          | N/A          |
| A_22_P00018449 | 1,40454 | 2,01467 | -1,526396745 | N/A             | 100130587 | NR_110634    | LOC100130587 |
| A_24_P88696    | 1,93959 | 2,54978 | -1,526460227 | ENST00000305409 | 7857      | NM_003469    | SCG2         |
| A_21_P0013907  | 1,92186 | 2,53207 | -1,526481389 | ENST00000455084 | 246119    | NR_001542    | TTY10        |
| A_24_P678104   | 8,97518 | 9,58546 | -1,526555456 | ENST00000370053 | 50861     | NM_015894    | STMN3        |
| A_21_P0013264  | 4,43532 | 5,04563 | -1,5265872   | N/A             | 401398    | NR_125718    | POT1-AS1     |
| A_24_P48069    | 9,70751 | 10,3179 | -1,526671854 | ENST00000340099 | 55715     | NM_018110    | DOK4         |
| A_21_P0011592  | 4,78401 | 5,39463 | -1,526915262 | ENST00000587874 | 100130581 | NR_027412    | LINC00910    |
| A_23_P140427   | 3,59272 | 4,20336 | -1,526936429 | ENST00000554045 | 51466     | NM_016337    | EVL          |
| A_21_P0007301  | 1,38951 | 2,00015 | -1,526936429 | N/A             | N/A       | N/A          | Inc-NTM-4    |

|                |         |         |              |                 |           |              |                |
|----------------|---------|---------|--------------|-----------------|-----------|--------------|----------------|
| A_33_P3282051  | 1,4     | 2,01081 | -1,527116367 | N/A             | N/A       | N/A          | N/A            |
| A_33_P3334443  | 9,37201 | 9,98291 | -1,527211636 | ENST00000370310 | 388650    | NM_001252271 | FAM69A         |
| A_24_P296254   | 5,52926 | 6,14021 | -1,527264566 | ENST00000361627 | 9824      | NM_014783    | ARHGAP11A      |
| A_33_P3724155  | 11,1607 | 11,7717 | -1,527317498 | ENST00000614504 | 91319     | NM_198440    | DERL3          |
| A_24_P244356   | 11,2195 | 11,8305 | -1,527317498 | ENST00000292199 | 79671     | NM_001282144 | NLRX1          |
| A_33_P3232363  | 2,08815 | 2,69917 | -1,527338671 | N/A             | N/A       | AF111851     | N/A            |
| A_19_P00319413 | 11,0099 | 11,621  | -1,527423367 | ENST00000520819 | N/A       | N/A          | N/A            |
| A_23_P133842   | 2,99765 | 3,60892 | -1,527603362 | ENST00000338379 | 3010      | NM_005323    | HIST1H1T       |
| A_23_P428219   | 8,51259 | 9,12389 | -1,527635128 | ENST00000428826 | 2145      | NM_001991    | EZH1           |
| A_23_P254353   | 9,39756 | 10,0089 | -1,527677483 | ENST00000392815 | 10811     | NM_006647    | NOXA1          |
| A_33_P3405068  | 6,0622  | 6,67358 | -1,52771984  | ENST00000367296 | 89796     | NM_020443    | NAV1           |
| A_23_P3979     | 11,1251 | 11,7365 | -1,527741019 | ENST00000577767 | 51081     | NM_015971    | MRPS7          |
| A_22_P00005012 | 1,51326 | 2,12471 | -1,527793967 | N/A             | N/A       | DB096999     | Inc-DDX20-2    |
| A_32_P397824   | 3,13202 | 3,74354 | -1,527868098 | ENST00000333129 | 55137     | NM_018086    | FIGN           |
| A_24_P185368   | 4,9071  | 5,51863 | -1,527878689 | ENST00000612521 | 201516    | NM_152677    | ZSCAN4         |
| A_33_P3352578  | 1,56123 | 2,17281 | -1,527931642 | ENST00000382064 | 338339    | NM_080387    | CLEC4D         |
| A_33_P3211014  | 3,04849 | 3,66022 | -1,528090512 | N/A             | N/A       | AY203951     | N/A            |
| A_21_P0003927  | 1,45323 | 2,06496 | -1,528090512 | ENST00000506471 | 100505878 | NR_105017    | LOC100505878   |
| A_23_P111041   | 12,121  | 12,7328 | -1,528164657 | ENST00000377733 | 8346      | NM_003525    | HIST1H2BI      |
| A_33_P3422085  | 2,33768 | 2,94948 | -1,528164657 | ENST00000598475 | 494119    | NM_001009615 | SPANXN2        |
| A_23_P65930    | 11,5698 | 12,1817 | -1,528270585 | ENST00000561768 | 84936     | NM_001077268 | ZFYVE19        |
| A_33_P3250018  | 4,25671 | 4,86861 | -1,528270585 | ENST00000544223 | 29915     | NM_013320    | HCFC2          |
| A_23_P360354   | 2,27943 | 2,89134 | -1,528281179 | ENST00000507832 | 153643    | NM_152548    | FAM81B         |
| A_33_P3321347  | 1,76674 | 2,37871 | -1,528344739 | ENST00000444532 | 388849    | NM_001243537 | LOC388849      |
| A_23_P15450    | 1,56268 | 2,17484 | -1,528546033 | ENST00000575734 | 55273     | NM_018286    | TMEM100        |
| A_21_P0006483  | 2,88211 | 3,49429 | -1,528567223 | N/A             | N/A       | N/A          | Inc-EGFL6-2    |
| A_23_P43613    | 12,6054 | 13,2176 | -1,528588413 | ENST00000350021 | 4712      | NM_182739    | NDUFB6         |
| A_22_P00025716 | 2,02834 | 2,64055 | -1,528599009 | N/A             | N/A       | N/A          | Inc-C17orf97-5 |
| A_23_P161125   | 10,679  | 11,2914 | -1,528800335 | ENST00000471160 | 4343      | NM_020963    | MOV10          |
| A_32_P36694    | 5,30845 | 5,92089 | -1,528842723 | ENST00000283928 | 221895    | NM_175061    | JAZF1          |
| A_22_P00007002 | 6,04265 | 6,65513 | -1,528885113 | N/A             | N/A       | AK096687     | Inc-GGCT-1     |
| A_24_P491397   | 6,78506 | 7,39755 | -1,52889571  | ENST00000371360 | 388633    | NM_001010978 | LDLRAD1        |
| A_33_P3301932  | 1,73452 | 2,34707 | -1,528959296 | N/A             | N/A       | CB993317     | N/A            |

|                |         |         |              |                 |           |              |                 |
|----------------|---------|---------|--------------|-----------------|-----------|--------------|-----------------|
| A_21_P0004375  | 1,44084 | 2,0534  | -1,528969894 | N/A             | N/A       | N/A          | Inc-DROSHA-4    |
| A_33_P3216467  | 8,39521 | 9,00777 | -1,528969894 | ENST00000263266 | 54854     | NM_017708    | FAM83E          |
| A_33_P3240158  | 5,57416 | 6,18676 | -1,529012287 | N/A             | N/A       | N/A          | N/A             |
| A_23_P75867    | 2,13174 | 2,74437 | -1,529044082 | ENST00000379829 | 283297    | NM_207186    | OR10A4          |
| A_22_P00000471 | 5,17585 | 5,78852 | -1,529086477 | N/A             | 100128788 | NR_027274    | SRRM2-AS1       |
| A_33_P3316475  | 1,94434 | 2,55712 | -1,529203068 | ENST00000382376 | 400830    | NM_207469    | DEFB132         |
| A_24_P208436   | 2,09122 | 2,70405 | -1,529256067 | ENST00000409365 | 5136      | NM_001003683 | PDE1A           |
| A_23_P52031    | 13,0692 | 13,6821 | -1,529330269 | ENST00000540265 | 5236      | NM_002633    | PGM1            |
| A_23_P158925   | 10,0943 | 10,7074 | -1,529542294 | ENST00000499527 | 166647    | NM_145290    | GPR125          |
| A_24_P296508   | 7,47415 | 8,08729 | -1,529584703 | ENST00000613070 | 124935    | NM_152346    | SLC43A2         |
| A_23_P110184   | 7,52831 | 8,14147 | -1,529605907 | ENST00000393766 | 6307      | NM_006745    | MSMO1           |
| A_23_P216355   | 7,6367  | 8,24989 | -1,529637715 | ENST00000409379 | 4796      | NM_013432    | TONSL           |
| A_23_P148959   | 11,6094 | 12,2226 | -1,529648317 | ENST00000371180 | 83941     | NM_032027    | TM2D1           |
| A_33_P3840630  | 9,01882 | 9,6321  | -1,529733142 | ENST00000512810 | 285527    | NM_015030    | FRYL            |
| A_22_P00006697 | 3,3262  | 3,93952 | -1,529775555 | N/A             | N/A       | N/A          | Inc-FRG1B-1     |
| A_22_P00011004 | 1,3658  | 1,97929 | -1,529955827 | ENST00000443373 | N/A       | N/A          | N/A             |
| A_24_P105298   | 16,4988 | 17,1124 | -1,530072485 | ENST00000440551 | 3020      | NM_002107    | H3F3A           |
| A_33_P3247848  | 4,90868 | 5,52235 | -1,530146726 | ENST00000594159 | 730051    | NM_001144989 | ZNF814          |
| A_33_P3339070  | 6,19584 | 6,80959 | -1,530231578 | ENST00000430998 | 100216001 | NR_024475    | LINC00704       |
| A_33_P3407601  | 10,3154 | 10,9292 | -1,530284613 | N/A             | N/A       | N/A          | N/A             |
| A_33_P3316493  | 5,61129 | 6,2251  | -1,53029522  | ENST00000462707 | 29062     | NM_014149    | WDR91           |
| A_22_P00007047 | 1,56363 | 2,17752 | -1,53038008  | N/A             | N/A       | N/A          | Inc-GK-1        |
| A_22_P00003403 | 1,75231 | 2,36622 | -1,530401295 | N/A             | 101928885 | XR_241812    | LOC101928885    |
| A_23_P58579    | 7,47809 | 8,09207 | -1,530475553 | ENST00000612671 | 84851     | NM_032765    | TRIM52          |
| A_32_P306678   | 4,23033 | 4,84438 | -1,530549814 | ENST00000509176 | 401145    | NM_001145065 | CCSER1          |
| A_22_P00000931 | 2,45653 | 3,07069 | -1,530666517 | N/A             | N/A       | N/A          | Inc-AKIP1-3     |
| A_23_P865      | 7,21067 | 7,82503 | -1,530878727 | ENST00000287474 | 391059    | NM_001013660 | FRRS1           |
| A_21_P0003789  | 2,07966 | 2,69402 | -1,530878727 | N/A             | N/A       | N/A          | Inc-PPID-1      |
| A_21_P0012968  | 2,05516 | 2,66967 | -1,531037904 | N/A             | 100996325 | N/A          | LOC100996325    |
| A_22_P00006901 | 5,95897 | 6,57353 | -1,531090966 | N/A             | 692148    | NR_004387    | SCARNA10        |
| A_33_P3303215  | 10,2544 | 10,869  | -1,531133418 | ENST00000473754 | 10772     | NM_001191009 | SRSF10          |
| A_22_P00008661 | 2,12471 | 2,73932 | -1,531144031 | N/A             | N/A       | N/A          | Inc-KIAA0226L-4 |
| A_24_P353103   | 1,56191 | 2,17652 | -1,531144031 | ENST00000329285 | 148103    | NM_001007248 | ZNF599          |

|                |         |         |              |                 |           |              |                |
|----------------|---------|---------|--------------|-----------------|-----------|--------------|----------------|
| A_33_P3220047  | 1,86055 | 2,4752  | -1,531186484 | ENST00000312033 | 80709     | NM_030767    | AKNA           |
| A_23_P102919   | 1,64643 | 2,2611  | -1,531207711 | ENST00000615480 | 10317     | NM_033171    | B3GALT5        |
| A_24_P221968   | 2,15405 | 2,76878 | -1,531271393 | ENST00000565598 | 643802    | N/A          | LOC643802      |
| A_21_P0000573  | 2,49439 | 3,10915 | -1,531303235 | ENST00000429614 | 221262    | NR_028595    | CCDC162P       |
| A_33_P3347971  | 8,80234 | 9,4173  | -1,531515534 | ENST00000448733 | 7163      | NM_001287140 | TPD52          |
| A_23_P151746   | 12,3882 | 13,0032 | -1,531557997 | ENST00000556816 | 122961    | NM_194279    | ISCA2          |
| A_33_P3366048  | 4,10822 | 4,72329 | -1,531632311 | ENST00000359676 | 140688    | NM_001256798 | NOL4L          |
| A_21_P0014672  | 6,39478 | 7,00987 | -1,531653544 | N/A             | 101928069 | XR_247243    | LOC101928069   |
| A_22_P0000800  | 1,66716 | 2,28226 | -1,53166416  | ENST00000535764 | N/A       | N/A          | N/A            |
| A_33_P3212700  | 5,27073 | 5,88586 | -1,531696011 | N/A             | N/A       | N/A          | N/A            |
| A_23_P82588    | 10,0073 | 10,6225 | -1,531770331 | ENST00000481123 | 154791    | NM_197964    | C7orf55        |
| A_33_P3247431  | 1,42068 | 2,03598 | -1,531876509 | ENST00000368755 | 6701      | NM_001017418 | SPRR2B         |
| A_23_P420942   | 6,48875 | 7,10407 | -1,531897745 | N/A             | 4493      | XM_005255956 | MT1E           |
| A_21_P0007435  | 1,54634 | 2,16172 | -1,531961456 | ENST00000524565 | 101928812 | NR_120557    | LOC101928812   |
| A_24_P90900    | 4,16006 | 4,77556 | -1,532088887 | ENST00000576915 | 1506      | NM_001907    | CTRL           |
| A_33_P3227506  | 6,68958 | 7,30514 | -1,532152606 | ENST00000321892 | 2186      | NM_182641    | BPTF           |
| A_23_P149200   | 11,2308 | 11,8465 | -1,532301294 | ENST00000372462 | 991       | NM_001255    | CDC20          |
| A_22_P00001375 | 12,6071 | 13,2234 | -1,532938693 | ENST00000584204 | N/A       | N/A          | N/A            |
| A_33_P3860715  | 1,66027 | 2,2766  | -1,53297057  | N/A             | 647008    | AK128002     | FLJ46120       |
| A_23_P115885   | 7,97313 | 8,58946 | -1,53297057  | ENST00000472891 | 9562      | NM_004897    | MINPP1         |
| A_33_P3259203  | 2,7788  | 3,39514 | -1,532981195 | ENST00000375353 | 348013    | XM_006719983 | TMEM255B       |
| A_33_P3254656  | 1,57831 | 2,1947  | -1,533034325 | N/A             | N/A       | N/A          | N/A            |
| A_22_P00011247 | 1,52679 | 2,14327 | -1,533129964 | N/A             | N/A       | N/A          | Inc-OR1J2-2    |
| A_22_P00017072 | 3,32872 | 3,94526 | -1,533193726 | N/A             | N/A       | N/A          | Inc-TUFM-2     |
| A_21_P0006520  | 7,10842 | 7,72507 | -1,533310631 | N/A             | N/A       | BC030106     | Inc-ATP2B3-1   |
| A_21_P0011176  | 4,05579 | 4,67246 | -1,533331887 | N/A             | N/A       | N/A          | XLOC_I2_003897 |
| A_33_P3229156  | 1,64664 | 2,26332 | -1,533342516 | ENST00000488738 | 63910     | NM_001302643 | SLC17A9        |
| A_24_P75456    | 11,5777 | 12,1944 | -1,533363772 | ENST00000482002 | N/A       | N/A          | N/A            |
| A_23_P367663   | 1,58889 | 2,2056  | -1,533374401 | N/A             | 57000     | NR_103560    | GSN-AS1        |
| A_33_P3399581  | 4,68243 | 5,29927 | -1,533512578 | ENST00000424636 | 1787      | NM_004412    | TRDMT1         |
| A_24_P203418   | 3,20154 | 3,81856 | -1,533703921 | ENST00000617374 | N/A       | KJ423956     | N/A            |
| A_22_P00022761 | 1,4682  | 2,08528 | -1,533767707 | N/A             | 100132116 | NR_125373    | ACTA2-AS1      |
| A_23_P14708    | 8,53287 | 9,15003 | -1,53385276  | ENST00000267807 | 54816     | NM_017661    | ZNF280D        |

|                |         |         |              |                 |           |              |                |
|----------------|---------|---------|--------------|-----------------|-----------|--------------|----------------|
| A_23_P68505    | 10,4588 | 11,076  | -1,533895288 | ENST00000358293 | 63939     | NM_001190826 | FAM217B        |
| A_23_P46871    | 8,33658 | 8,95381 | -1,533927185 | ENST00000373189 | 55315     | NM_018344    | SLC29A3        |
| A_19_P00324399 | 8,96053 | 9,57786 | -1,534033512 | N/A             | 101928062 | NR_120459    | LINC01481      |
| A_22_P00004066 | 5,93963 | 6,557   | -1,534076045 | N/A             | N/A       | XM_005255009 | Inc-CHSY1-5    |
| A_33_P3370555  | 5,65578 | 6,27316 | -1,534086679 | ENST00000474294 | 2581      | D25284       | GALC           |
| A_33_P3347108  | 10,8937 | 11,5111 | -1,534107946 | ENST00000554157 | 91875     | NM_138376    | TTC5           |
| A_22_P00002783 | 1,4543  | 2,07179 | -1,534203651 | N/A             | N/A       | N/A          | Inc-C2CD4A-2   |
| A_32_P15799    | 14,8765 | 15,494  | -1,534214286 | ENST00000619352 | 3151      | NM_005517    | HMG2           |
| A_24_P90097    | 11,7661 | 12,3836 | -1,534214286 | ENST00000277900 | 120       | NM_016824    | ADD3           |
| A_21_P0008626  | 9,78114 | 10,3987 | -1,534278093 | N/A             | 729082    | NR_026757    | OIP5-AS1       |
| A_24_P37589    | 3,09023 | 3,70798 | -1,534480168 | ENST00000512463 | 55        | NM_001099    | ACPP           |
| A_21_P0009420  | 4,31047 | 4,92824 | -1,53450144  | N/A             | N/A       | N/A          | Inc-TMEM105-2  |
| A_23_P384056   | 11,926  | 12,5438 | -1,53453335  | ENST00000489746 | 64770     | NM_022757    | CCDC14         |
| A_23_P25019    | 10,2402 | 10,858  | -1,53453335  | ENST00000338193 | 5557      | NM_000946    | PRIM1          |
| A_24_P203000   | 5,21354 | 5,83139 | -1,534586534 | ENST00000216223 | 3560      | NM_000878    | IL2RB          |
| A_21_P0009399  | 2,75368 | 3,37158 | -1,534639719 | N/A             | N/A       | N/A          | Inc-UTS2R-1    |
| A_24_P102053   | 5,40691 | 6,02491 | -1,534746096 | ENST00000617792 | 100506658 | NM_002538    | OCLN           |
| A_23_P31135    | 11,1364 | 11,7546 | -1,534958872 | ENST00000472052 | 39        | NM_005891    | ACAT2          |
| A_23_P301521   | 1,94701 | 2,56523 | -1,534980151 | ENST00000375377 | 57608     | NM_020848    | KIAA1462       |
| A_22_P00017233 | 4,63143 | 5,24967 | -1,53500143  | N/A             | 285266    | NR_040100    | ENTPD3-AS1     |
| A_33_P3304247  | 4,57282 | 5,19108 | -1,53502271  | N/A             | N/A       | AK130267     | N/A            |
| A_21_P0011456  | 7,68472 | 8,30302 | -1,535065271 | ENST00000526173 | 8399      | NM_003561    | PLA2G10        |
| A_22_P00023037 | 1,48524 | 2,10354 | -1,535065271 | ENST00000589652 | 63934     | NR_030740    | ZNF667         |
| A_21_P0003103  | 1,38076 | 1,99913 | -1,535139754 | N/A             | N/A       | N/A          | Inc-IQSEC1-1   |
| A_22_P00017431 | 3,31058 | 3,92901 | -1,5352036   | N/A             | N/A       | N/A          | Inc-VN1R1-1    |
| A_21_P0013057  | 7,08766 | 7,70616 | -1,535278091 | N/A             | N/A       | N/A          | XLOC_I2_012847 |
| A_24_P21887    | 8,78582 | 9,40433 | -1,535288732 | ENST00000378486 | 9651      | NM_014638    | PLCH2          |
| A_22_P00011938 | 1,59086 | 2,20939 | -1,535310016 | ENST00000438416 | N/A       | N/A          | N/A            |
| A_33_P3233318  | 3,32438 | 3,94294 | -1,535341942 | N/A             | N/A       | N/A          | N/A            |
| A_22_P00003992 | 3,71956 | 4,33815 | -1,535373869 | ENST00000556466 | N/A       | N/A          | N/A            |
| A_23_P165937   | 10,3518 | 10,9704 | -1,535384512 | ENST00000480153 | 79980     | NM_024918    | DSN1           |
| A_22_P00005052 | 8,08127 | 8,69991 | -1,535427082 | N/A             | N/A       | N/A          | Inc-DEGS2-4    |
| A_33_P3272668  | 1,49249 | 2,11128 | -1,535586732 | N/A             | N/A       | N/A          | N/A            |

|                |         |         |              |                 |           |              |                |
|----------------|---------|---------|--------------|-----------------|-----------|--------------|----------------|
| A_23_P434518   | 6,9303  | 7,54933 | -1,535842206 | ENST00000359574 | 3955      | NM_001040168 | LFNG           |
| A_33_P3309561  | 1,69456 | 2,31387 | -1,536140313 | ENST00000440289 | 5795      | NM_001098503 | PTPRJ          |
| A_24_P376294   | 9,75774 | 10,3772 | -1,536300037 | ENST00000593587 | 11100     | NM_007040    | HNRNPUL1       |
| A_23_P211401   | 7,0313  | 7,65084 | -1,53638523  | ENST00000407188 | 83999     | NM_001039570 | KREMEN1        |
| A_33_P3243345  | 2,63903 | 3,2586  | -1,536417179 | ENST00000443990 | 646498    | NM_001080528 | C3orf84        |
| A_22_P00008121 | 1,47448 | 2,09409 | -1,536459778 | N/A             | N/A       | N/A          | Inc-IL2RA-3    |
| A_21_P0013513  | 1,42997 | 2,04958 | -1,536459778 | ENST00000518311 | N/A       | N/A          | N/A            |
| A_22_P00014842 | 5,39972 | 6,01935 | -1,536481078 | N/A             | N/A       | N/A          | Inc-SLC48A1-1  |
| A_23_P69179    | 11,1766 | 11,7963 | -1,53655563  | ENST00000319332 | 55214     | NM_018192    | P3H2           |
| A_33_P3384835  | 4,27449 | 4,89422 | -1,536587582 | N/A             | 101927100 | NR_109874    | LOC101927100   |
| A_23_P251377   | 9,85231 | 10,4721 | -1,536651489 | ENST00000389735 | 56941     | NM_001006109 | HMCES          |
| A_33_P3383059  | 10,4302 | 11,05   | -1,53666214  | N/A             | N/A       | N/A          | N/A            |
| A_23_P113317   | 9,96419 | 10,584  | -1,536672791 | ENST00000472301 | 54681     | NM_177938    | P4HTM          |
| A_23_P412427   | 5,69913 | 6,31901 | -1,536747353 | N/A             | 171391    | AF435951     | LOC171391      |
| A_33_P3319925  | 3,5408  | 4,16079 | -1,536864529 | ENST00000449753 | 730249    | NM_001258406 | IRG1           |
| A_23_P126197   | 12,8963 | 13,5163 | -1,536875181 | ENST00000373795 | 6429      | NM_005626    | SRSF4          |
| A_22_P00016891 | 2,52702 | 3,14711 | -1,53697106  | ENST00000553760 | N/A       | N/A          | N/A            |
| A_23_P51410    | 7,3994  | 8,01954 | -1,537024328 | ENST00000453676 | 64754     | NM_022743    | SMYD3          |
| A_24_P911676   | 7,79108 | 8,41125 | -1,53705629  | ENST00000244745 | 6659      | NM_003107    | SOX4           |
| A_21_P0013115  | 2,16566 | 2,78584 | -1,537066944 | N/A             | N/A       | N/A          | XL0C_I2_013192 |
| A_33_P3286293  | 9,67762 | 10,2978 | -1,537066944 | ENST00000377256 | 56998     | NM_020248    | CTNNBIP1       |
| A_21_P0014923  | 3,26998 | 3,89024 | -1,537152179 | N/A             | N/A       | DA106905     | N/A            |
| A_21_P0002357  | 2,50217 | 3,12252 | -1,537248075 | N/A             | N/A       | N/A          | Inc-SLC4A3-5   |
| A_24_P206776   | 4,67373 | 5,29418 | -1,537354632 | ENST00000527899 | 1410      | NM_001885    | CRYAB          |
| A_21_P0005087  | 2,63943 | 3,26008 | -1,53756777  | N/A             | N/A       | N/A          | Inc-GPR31-1    |
| A_33_P3302070  | 8,96026 | 9,58104 | -1,537706325 | N/A             | N/A       | N/A          | N/A            |
| A_33_P3327165  | 8,55954 | 9,18034 | -1,537727642 | ENST00000447456 | 343099    | NM_206886    | CCDC18         |
| A_24_P932418   | 9,63569 | 10,2565 | -1,537738301 | ENST00000448903 | 161       | NM_012305    | AP2A2          |
| A_33_P3269688  | 1,60953 | 2,23053 | -1,537940831 | ENST00000544719 | 26974     | NM_001291490 | ZNF285         |
| A_33_P3349002  | 3,20409 | 3,82516 | -1,538015454 | N/A             | N/A       | N/A          | N/A            |
| A_33_P3331906  | 8,67468 | 9,29577 | -1,538036776 | ENST00000524887 | 6645      | NM_006750    | SNTB2          |
| A_24_P484965   | 1,62993 | 2,25103 | -1,538047437 | ENST00000423031 | 401014    | XM_005263847 | TEX41          |
| A_23_P26945    | 11,006  | 11,6271 | -1,538047437 | ENST00000225927 | 4669      | NM_000263    | NAGLU          |

|                |         |         |              |                 |           |              |                |
|----------------|---------|---------|--------------|-----------------|-----------|--------------|----------------|
| A_22_P00002815 | 3,91399 | 4,5351  | -1,538058098 | N/A             | 101928371 | NR_110236    | LOC101928371   |
| A_24_P296907   | 5,63881 | 6,25996 | -1,538100742 | ENST00000522483 | 199745    | NM_152658    | THAP8          |
| A_21_P0005202  | 4,49517 | 5,11633 | -1,538111404 | ENST00000479592 | 100507642 | NR_108064    | LOC100507642   |
| A_23_P75790    | 12,5272 | 13,1484 | -1,53815405  | ENST00000265460 | 745       | NM_013279    | MYRF           |
| A_32_P90483    | 4,48702 | 5,10829 | -1,538228683 | ENST00000376352 | 252983    | NM_178509    | STXBP4         |
| A_23_P112103   | 8,62137 | 9,24265 | -1,538239346 | ENST00000534602 | 79792     | NM_024736    | GSDMD          |
| A_21_P0011689  | 1,85378 | 2,47506 | -1,538239346 | N/A             | N/A       | N/A          | XLOC_I2_006675 |
| A_23_P370924   | 11,9773 | 12,5986 | -1,53826067  | ENST00000477703 | 440957    | NM_001124767 | SMIM4          |
| A_19_P00321858 | 2,97587 | 3,59727 | -1,538367298 | ENST00000467692 | 100506403 | NR_073512    | LOC100506403   |
| A_23_P17021    | 7,0044  | 7,62583 | -1,538399288 | ENST00000548868 | 79634     | NM_024583    | SCRN3          |
| A_22_P00010958 | 3,76949 | 4,39101 | -1,538495261 | N/A             | N/A       | BC027323     | Inc-NRARP-1    |
| A_22_P00003766 | 8,15076 | 8,77237 | -1,538591241 | ENST00000615852 | N/A       | XR_429898    | N/A            |
| A_23_P256965   | 2,99708 | 3,61879 | -1,538697891 | N/A             | 83656     | NR_026814    | FAM167A-AS1    |
| A_23_P142815   | 4,22924 | 4,851   | -1,538751219 | ENST00000234396 | 525       | NM_001692    | ATP6V1B1       |
| A_33_P3259507  | 7,01065 | 7,63266 | -1,539017888 | ENST00000432825 | 26267     | NM_012166    | FBXO10         |
| A_22_P00000630 | 2,59467 | 3,21675 | -1,539092563 | N/A             | N/A       | N/A          | Inc-ACP2-1     |
| A_22_P00011029 | 3,61396 | 4,23626 | -1,539327281 | N/A             | N/A       | CR736616     | Inc-NT5DC3-3   |
| A_23_P60210    | 2,39818 | 3,02054 | -1,539391301 | ENST00000223862 | 6013      | NM_006911    | RLN1           |
| A_24_P187119   | 6,50379 | 7,12615 | -1,539391301 | N/A             | 84268     | AK098491     | RPAIN          |
| A_21_P0000685  | 1,71371 | 2,33614 | -1,539465995 | ENST00000421868 | 100286922 | NR_037694    | LOC100286922   |
| A_33_P3284951  | 9,52861 | 10,1511 | -1,539530021 | ENST00000216122 | 4174      | NM_006739    | MCM5           |
| A_22_P00014981 | 1,72209 | 2,34464 | -1,539594049 | N/A             | N/A       | N/A          | Inc-SMC1A-2    |
| A_23_P218505   | 8,21289 | 8,83544 | -1,539594049 | ENST00000391869 | 3972      | NM_000894    | LHB            |
| A_23_P377141   | 8,22535 | 8,848   | -1,539700769 | ENST00000357409 | 23230     | NM_015186    | VPS13A         |
| A_24_P860797   | 4,31634 | 4,9391  | -1,53981817  | ENST00000244221 | 400961    | NM_020459    | PAIP2B         |
| A_24_P238143   | 8,82325 | 9,44607 | -1,539882211 | ENST00000570311 | 474170    | NM_001006607 | LRRC37A2       |
| A_24_P194661   | 1,59999 | 2,22285 | -1,539924906 | N/A             | 285097    | XR_108456    | FLJ38379       |
| A_22_P00006958 | 2,65536 | 3,27828 | -1,539988951 | N/A             | N/A       | BJ995728     | Inc-GCNT3-1    |
| A_33_P3322730  | 1,38073 | 2,00371 | -1,540052999 | N/A             | N/A       | N/A          | N/A            |
| A_22_P00019984 | 1,44073 | 2,06372 | -1,540063674 | N/A             | N/A       | N/A          | Inc-COX19-2    |
| A_33_P3431595  | 10,1258 | 10,7488 | -1,540074348 | ENST00000524181 | 286122    | NM_173687    | C8orf31        |
| A_21_P0013064  | 2,00269 | 2,62576 | -1,540149075 | N/A             | N/A       | N/A          | XLOC_I2_012899 |
| A_33_P3377239  | 6,51297 | 7,13607 | -1,540181102 | ENST00000609087 | 100270804 | N/A          | LOC100270804   |



|                |         |         |              |                 |           |              |                  |
|----------------|---------|---------|--------------|-----------------|-----------|--------------|------------------|
| A_23_P120931   | 9,64065 | 10,264  | -1,540448018 | ENST00000428892 | 27350     | NM_014508    | APOBEC3C         |
| A_22_P00019281 | 1,77461 | 2,39799 | -1,540480051 | ENST00000414127 | N/A       | N/A          | N/A              |
| A_33_P3388283  | 3,62678 | 4,25035 | -1,540682943 | ENST00000496907 | 3155      | N/A          | HMGCL            |
| A_24_P11462    | 7,36774 | 7,99134 | -1,540714981 | ENST00000294517 | 113451    | NM_052998    | AZIN2            |
| A_33_P3374982  | 1,57906 | 2,20268 | -1,54073634  | N/A             | N/A       | N/A          | N/A              |
| A_21_P0011700  | 1,38698 | 2,01071 | -1,540853819 | N/A             | 147710    | XM_006723031 | IGSF23           |
| A_23_P114307   | 3,04272 | 3,66645 | -1,540853819 | ENST00000374519 | 5030      | NM_002565    | P2RY4            |
| A_23_P397376   | 5,4905  | 6,11424 | -1,5408645   | ENST00000393350 | 4094      | NM_001031804 | MAF              |
| A_24_P927716   | 2,54176 | 3,16551 | -1,54087518  | ENST00000506741 | 643036    | NR_003542    | SLED1            |
| A_22_P00017609 | 3,35881 | 3,98261 | -1,540928584 | N/A             | 100874110 | NR_046719    | GLYCTK-AS1       |
| A_33_P3679768  | 11,2343 | 11,8581 | -1,540928584 | N/A             | N/A       | AW303581     | N/A              |
| A_23_P303718   | 7,46587 | 8,08968 | -1,540939265 | ENST00000482156 | 667       | NM_015548    | DST              |
| A_33_P6468355  | 5,85121 | 6,47503 | -1,540949946 | N/A             | 57212     | NR_033711    | TP73-AS1         |
| A_22_P00023161 | 2,69711 | 3,32102 | -1,541046078 | N/A             | N/A       | N/A          | Inc-AC016251.1-2 |
| A_32_P183904   | 3,19197 | 3,81593 | -1,541099488 | ENST00000290894 | 90525     | NM_138356    | SHF              |
| A_23_P259333   | 10,095  | 10,719  | -1,541142217 | ENST00000405204 | 51250     | NM_016487    | C6orf203         |
| A_33_P3258274  | 9,98016 | 10,6042 | -1,541184947 | ENST00000481132 | 7035      | AB209866     | TFPI             |
| A_21_P0013709  | 6,72538 | 7,3495  | -1,541270411 | ENST00000423122 | 100506119 | N/A          | LINC01503        |
| A_21_P0003673  | 2,17672 | 2,80087 | -1,541302461 | N/A             | N/A       | N/A          | Inc-PALLD-1      |
| A_19_P00316538 | 1,61699 | 2,24114 | -1,541302461 | ENST00000444266 | 102724321 | NR_110600    | LOC102724321     |
| A_21_P0010393  | 3,16269 | 3,78708 | -1,541558886 | N/A             | N/A       | N/A          | Inc-ZNF74-1      |
| A_24_P48587    | 11,8938 | 12,5183 | -1,541676428 | ENST00000222266 | 55851     | NM_172341    | PSENEIN          |
| A_33_P3403778  | 12,944  | 13,5689 | -1,542103931 | ENST00000325421 | 163033    | NM_152600    | ZNF579           |
| A_33_P3449097  | 5,5456  | 6,17058 | -1,542189446 | ENST00000621293 | 83882     | NM_001290212 | TSPAN10          |
| A_22_P00005334 | 2,77548 | 3,40078 | -1,542531552 | N/A             | N/A       | BX090936     | Inc-DOPEY1-1     |
| A_23_P127013   | 3,87143 | 4,49694 | -1,542756101 | ENST00000466338 | 6934      | NM_030756    | TCF7L2           |
| A_22_P00021516 | 1,47994 | 2,10548 | -1,542788182 | ENST00000497285 | N/A       | N/A          | N/A              |
| A_21_P0014873  | 1,37    | 1,99565 | -1,542905818 | ENST00000550907 | N/A       | N/A          | N/A              |
| A_33_P3789382  | 5,66641 | 6,29207 | -1,542916513 | N/A             | 84989     | NR_027182    | JMJD1C-AS1       |
| A_21_P0008995  | 1,68341 | 2,30909 | -1,542937903 | N/A             | N/A       | N/A          | Inc-BANP-1       |
| A_33_P3304372  | 5,51967 | 6,14554 | -1,543141118 | ENST00000511532 | 55314     | NM_018342    | TMEM144          |
| A_21_P0011267  | 4,78793 | 5,41381 | -1,543151814 | ENST00000554732 | 283547    | NR_039982    | LINC00639        |
| A_33_P3232677  | 2,14578 | 2,77179 | -1,543290872 | ENST00000428118 | N/A       | N/A          | N/A              |

|                |         |         |              |                 |           |              |                |
|----------------|---------|---------|--------------|-----------------|-----------|--------------|----------------|
| A_23_P164387   | 11,5283 | 12,1545 | -1,543494134 | ENST00000578112 | 6605      | NM_003079    | SMARCE1        |
| A_23_P25835    | 9,58362 | 10,2099 | -1,543579726 | ENST00000246166 | 2342      | NM_002028    | FNTB           |
| A_33_P3255766  | 9,75622 | 10,3825 | -1,543579726 | ENST00000409129 | 60491     | NM_001142356 | NIF3L1         |
| A_33_P3263902  | 6,41784 | 7,04415 | -1,543611824 | ENST00000393134 | 4601      | NM_005962    | MXI1           |
| A_21_P0000181  | 9,61468 | 10,2411 | -1,543729523 | ENST00000461580 | 23261     | NM_001242701 | CAMTA1         |
| A_23_P361448   | 6,39164 | 7,01815 | -1,543825829 | ENST00000416495 | 143686    | NM_144665    | SESN3          |
| A_22_P00003528 | 1,41829 | 2,04485 | -1,543879335 | N/A             | N/A       | N/A          | Inc-CCNB1IP1-2 |
| A_22_P00021928 | 2,07829 | 2,70485 | -1,543879335 | N/A             | N/A       | AK096426     | Inc-MTRNR2L3-1 |
| A_21_P0001038  | 1,68412 | 2,31085 | -1,544061268 | ENST00000426262 | N/A       | N/A          | N/A            |
| A_23_P68121    | 8,32425 | 8,95105 | -1,544136189 | ENST00000460725 | 23550     | NM_012455    | PSD4           |
| A_24_P592012   | 4,46554 | 5,09259 | -1,54440379  | ENST00000395104 | 140685    | NM_025224    | ZBTB46         |
| A_22_P00012531 | 6,66736 | 7,29464 | -1,544650025 | N/A             | N/A       | BM970278     | Inc-PSPC1-1    |
| A_33_P3369039  | 12,6573 | 13,2846 | -1,544671438 | ENST00000321030 | 26121     | NM_015629    | PRPF31         |
| A_24_P115621   | 9,97289 | 10,6003 | -1,544789218 | ENST00000373218 | 1979      | NM_004096    | EIF4EBP2       |
| A_23_P432626   | 6,5857  | 7,21315 | -1,544832049 | ENST00000446236 | 55972     | NM_018843    | SLC25A40       |
| A_21_P0004413  | 2,42758 | 3,05509 | -1,544896298 | N/A             | N/A       | N/A          | Inc-ANKRA2-5   |
| A_33_P3295458  | 4,81392 | 5,44143 | -1,544896298 | N/A             | 339674    | NR_024355    | LINC00634      |
| A_33_P3366391  | 4,49604 | 5,12358 | -1,544928424 | ENST00000534728 | N/A       | N/A          | N/A            |
| A_33_P3336617  | 12,4682 | 13,0958 | -1,544992677 | ENST00000476965 | 224       | NM_000382    | ALDH3A2        |
| A_32_P129950   | 9,3956  | 10,0233 | -1,545099771 | ENST00000610563 | 387921    | NM_001012754 | NHLRC3         |
| A_22_P00019235 | 5,6357  | 6,26349 | -1,545196163 | N/A             | 101559451 | NR_103482    | LOC101559451   |
| A_32_P219116   | 10,2557 | 10,8835 | -1,545206873 | ENST00000545981 | 55835     | NM_018451    | CENPJ          |
| A_23_P214222   | 13,4217 | 14,0495 | -1,545206873 | ENST00000612661 | 4082      | D10522       | MARCKS         |
| A_33_P3345126  | 3,28212 | 3,91004 | -1,545335405 | ENST00000619231 | 374900    | NM_198539    | ZNF568         |
| A_21_P0005406  | 1,57934 | 2,20732 | -1,545399675 | N/A             | N/A       | N/A          | Inc-NPTX2-1    |
| A_21_P0013806  | 11,1301 | 11,7581 | -1,545421099 | ENST00000434972 | 3032      | NM_001281513 | HADHB          |
| A_33_P3348046  | 1,45419 | 2,08219 | -1,545421099 | N/A             | N/A       | N/A          | N/A            |
| A_21_P0010520  | 5,99749 | 6,6255  | -1,545431811 | ENST00000544155 | N/A       | XM_006713169 | N/A            |
| A_19_P00809992 | 5,36515 | 5,99318 | -1,545453236 | ENST00000446360 | 119710    | NM_001276722 | C11orf74       |
| A_19_P00322938 | 7,98358 | 8,61163 | -1,54547466  | ENST00000440438 | 401320    | NR_038889    | LOC401320      |
| A_32_P153071   | 2,46179 | 3,08995 | -1,545592501 | ENST00000262178 | 7434      | NM_003382    | VIPR2          |
| A_21_P0013462  | 4,07788 | 4,70638 | -1,545956794 | ENST00000418309 | N/A       | N/A          | N/A            |
| A_24_P93664    | 1,6615  | 2,29015 | -1,546117539 | ENST00000337335 | 574407    | NR_073154    | C1orf145       |

|                |         |         |              |                 |           |              |                    |
|----------------|---------|---------|--------------|-----------------|-----------|--------------|--------------------|
| A_33_P3259042  | 2,81719 | 3,44592 | -1,546203276 | ENST00000395988 | 93649     | NM_001146312 | MYOCD              |
| A_21_P0005225  | 1,45005 | 2,07878 | -1,546203276 | ENST00000415356 | N/A       | N/A          | N/A                |
| A_22_P00022130 | 3,1005  | 3,72927 | -1,546246147 | N/A             | N/A       | N/A          | Inc-GTPBP8-2       |
| A_23_P373119   | 10,7283 | 11,3571 | -1,5462783   | ENST00000393368 | 128872    | NR_002165    | HMGB3P1            |
| A_21_P0003735  | 1,56902 | 2,19802 | -1,546492675 | ENST00000507759 | N/A       | N/A          | N/A                |
| A_33_P3306342  | 2,17328 | 2,80237 | -1,546589153 | ENST00000317093 | 390075    | NM_001001922 | OR52N5             |
| A_33_P3401267  | 5,9038  | 6,53294 | -1,546642755 | ENST00000487919 | 9637      | NM_001042548 | FEZ2               |
| A_33_P3246985  | 3,77461 | 4,4038  | -1,546696358 | ENST00000313342 | 9659      | NM_022359    | PDE4DIP            |
| A_23_P380965   | 11,1966 | 11,8258 | -1,546707079 | ENST00000554721 | 51528     | NM_016475    | JKAMP              |
| A_33_P3296497  | 7,36346 | 7,99269 | -1,546739242 | ENST00000495748 | 5796      | XM_006725022 | PTPRK              |
| A_21_P0009722  | 3,77297 | 4,40237 | -1,546921513 | N/A             | N/A       | N/A          | Inc-ZNF227-1       |
| A_23_P23194    | 9,82224 | 10,4517 | -1,546985849 | ENST00000492302 | 65018     | NM_032409    | PINK1              |
| A_23_P43476    | 6,96128 | 7,59077 | -1,547018018 | ENST00000382100 | 7436      | NM_003383    | VLDLR              |
| A_22_P00010980 | 7,64698 | 8,27654 | -1,547093082 | N/A             | 55449     | NR_023924    | DHRS4-AS1          |
| A_21_P0014767  | 1,34522 | 1,9748  | -1,547114529 | ENST00000573229 | 286023    | N/A          | FLJ40288           |
| A_21_P0013121  | 1,51609 | 2,14578 | -1,547232495 | N/A             | N/A       | N/A          | Inc-LY86-3         |
| A_19_P00320038 | 1,85716 | 2,48701 | -1,547404098 | N/A             | 80069     | NR_026780    | LINC00574          |
| A_23_P144348   | 3,65862 | 4,28851 | -1,547447002 | ENST00000503823 | 9353      | NM_004787    | SLIT2              |
| A_23_P126363   | 1,46847 | 2,09846 | -1,547554267 | ENST00000369400 | 11085     | NM_021794    | ADAM30             |
| A_33_P3353242  | 9,94748 | 10,5775 | -1,547586447 | ENST00000248553 | 3315      | NM_001540    | HSPB1              |
| A_23_P55319    | 12,0309 | 12,661  | -1,547672266 | ENST00000577789 | 2319      | NM_004475    | FLOT2              |
| A_22_P00001339 | 3,05278 | 3,68304 | -1,547843918 | N/A             | N/A       | N/A          | Inc-AP000679.2.1-2 |
| A_33_P3369844  | 13,4753 | 14,1056 | -1,547886834 | ENST00000606017 | 100133941 | NM_013230    | CD24               |
| A_23_P379054   | 1,36055 | 1,99085 | -1,547886834 | ENST00000539749 | 149461    | NM_148960    | CLDN19             |
| A_32_P832001   | 1,59079 | 2,22117 | -1,54797267  | ENST00000546238 | 731157    | NR_105024    | LOC731157          |
| A_33_P3209522  | 12,2463 | 12,8768 | -1,548101432 | ENST00000299977 | 162394    | NM_144975    | SLFN5              |
| A_22_P00015155 | 1,71341 | 2,34401 | -1,548208742 | N/A             | N/A       | N/A          | Inc-SOD3-3         |
| A_23_P152818   | 8,14418 | 8,7748  | -1,548230204 | ENST00000259021 | 11143     | NM_007067    | KAT7               |
| A_23_P164228   | 12,9417 | 13,5724 | -1,548316059 | ENST00000393366 | 516       | NM_005175    | ATP5G1             |
| A_22_P00005573 | 1,42124 | 2,05212 | -1,548509249 | N/A             | N/A       | N/A          | Inc-EFCAB5-1       |
| A_33_P3229221  | 4,96685 | 5,59805 | -1,548852757 | ENST00000373159 | 27095     | N/A          | TRAPPC3            |
| A_23_P319549   | 1,65597 | 2,28725 | -1,548938646 | ENST00000533339 | 149465    | NM_152498    | CFAP57             |
| A_23_P23502    | 3,28829 | 3,91963 | -1,549003066 | ENST00000335094 | 128372    | NM_001005185 | OR6N1              |

|                |         |         |              |                 |           |              |                |
|----------------|---------|---------|--------------|-----------------|-----------|--------------|----------------|
| A_22_P00004203 | 1,60283 | 2,23422 | -1,549056752 | ENST00000527774 | N/A       | N/A          | N/A            |
| A_33_P3301034  | 4,76985 | 5,40125 | -1,549067489 | ENST00000560213 | 123355    | NM_001284400 | LRRC28         |
| A_22_P00000450 | 5,86345 | 6,49492 | -1,549142652 | N/A             | 102724330 | XR_428344    | LOC102724330   |
| A_23_P159650   | 14,5034 | 15,1349 | -1,549174866 | ENST00000373335 | 1349      | NM_001866    | COX7B          |
| A_33_P3330443  | 2,36667 | 2,99835 | -1,549368163 | N/A             | 90362     | NM_147189    | FAM110B        |
| A_33_P3397525  | 5,90898 | 6,54073 | -1,549443341 | ENST00000290167 | 54361     | NM_030761    | WNT4           |
| A_23_P316085   | 1,53023 | 2,16203 | -1,549497041 | N/A             | 100507135 | NR_045180    | SPG20-AS1      |
| A_33_P3797820  | 4,43864 | 5,07046 | -1,549518522 | ENST00000439559 | 102723652 | XR_432607    | LOC102723652   |
| A_22_P00015037 | 1,60058 | 2,23241 | -1,549529262 | N/A             | N/A       | N/A          | Inc-SMYD3-3    |
| A_22_P00020247 | 1,37847 | 2,01035 | -1,549582966 | N/A             | 101927155 | NR_120410    | LMO7-AS1       |
| A_23_P252764   | 6,15314 | 6,78506 | -1,54962593  | ENST00000423555 | 6595      | NM_139045    | SMARCA2        |
| A_23_P345591   | 13,831  | 14,4631 | -1,549819283 | ENST00000457444 | 5683      | NM_002787    | PSMA2          |
| A_24_P401990   | 7,49253 | 8,12478 | -1,54998043  | ENST00000485403 | 2068      | NM_000400    | ERCC2          |
| A_21_P0008161  | 2,43675 | 3,06911 | -1,550098614 | N/A             | N/A       | N/A          | Inc-SUCLA2-4   |
| A_33_P3335975  | 1,48506 | 2,11742 | -1,550098614 | N/A             | 100128176 | NR_038408    | LOC100128176   |
| A_21_P0011702  | 8,11421 | 8,74657 | -1,550098614 | N/A             | N/A       | N/A          | XLOC_I2_006789 |
| A_24_P408801   | 4,04683 | 4,67921 | -1,550120103 | ENST00000594901 | 100293516 | U71363       | ZNF587B        |
| A_21_P0014426  | 5,05717 | 5,68963 | -1,550206063 | N/A             | 100506472 | NR_040535    | LOC100506472   |
| A_23_P202894   | 1,44364 | 2,07628 | -1,550399489 | ENST00000527795 | 56        | NM_001612    | ACRV1          |
| A_21_P0006399  | 1,63679 | 2,26945 | -1,550420982 | N/A             | N/A       | XM_006717352 | Inc-QSOX2-1    |
| A_21_P0014154  | 1,47458 | 2,10728 | -1,550463969 | N/A             | N/A       | N/A          | N/A            |
| A_22_P00025199 | 2,68728 | 3,32003 | -1,550517705 | ENST00000442864 | N/A       | N/A          | N/A            |
| A_23_P70547    | 4,37273 | 5,00556 | -1,550603687 | ENST00000375654 | 3305      | NM_005527    | HSPA1L         |
| A_22_P00011051 | 3,95507 | 4,58796 | -1,550668176 | N/A             | N/A       | N/A          | Inc-NTRK2-2    |
| A_21_P0004543  | 1,50526 | 2,13816 | -1,550678924 | N/A             | N/A       | N/A          | Inc-FAM153C-3  |
| A_21_P0000751  | 5,38833 | 6,02132 | -1,550775663 | N/A             | 100507062 | NR_038286    | PSMD6-AS2      |
| A_33_P3394252  | 1,44163 | 2,07476 | -1,550926159 | N/A             | 151050    | NM_152519    | KANSL1L        |
| A_33_P3322383  | 1,64399 | 2,27714 | -1,55094766  | N/A             | N/A       | N/A          | Inc-PAX9-2     |
| A_22_P00005925 | 1,54796 | 2,1812  | -1,551044416 | N/A             | 100133311 | NR_038831    | HOXA-AS3       |
| A_22_P00016207 | 1,37255 | 2,00579 | -1,551044416 | N/A             | 100996570 | NR_110618    | NFIA-AS2       |
| A_23_P393620   | 11,4371 | 12,0705 | -1,551216442 | ENST00000222543 | 7980      | NM_006528    | TFPI2          |
| A_22_P00016784 | 4,62605 | 5,25949 | -1,551259451 | N/A             | 101929099 | NR_110786    | LOC101929099   |
| A_24_P258235   | 7,82406 | 8,45751 | -1,551270204 | ENST00000378397 | 26338     | NM_001004739 | OR5L2          |

|                |         |         |              |                 |           |              |                       |
|----------------|---------|---------|--------------|-----------------|-----------|--------------|-----------------------|
| A_21_P0001446  | 1,50777 | 2,1413  | -1,551356227 | N/A             | N/A       | N/A          | Inc-EFCAB2-1          |
| A_22_P00024208 | 1,39392 | 2,02748 | -1,551388487 | ENST00000453030 | 84253     | XM_005252268 | GARNL3                |
| A_24_P169544   | 8,14285 | 8,77641 | -1,551388487 | ENST00000601808 | 7565      | NM_006959    | ZNF17                 |
| A_22_P00001296 | 3,55486 | 4,18854 | -1,551517533 | ENST00000534086 | N/A       | XM_001717040 | N/A                   |
| A_23_P127584   | 5,25103 | 5,8849  | -1,551721878 | ENST00000299964 | 4837      | NM_006169    | NNMT                  |
| A_21_P0003462  | 1,42757 | 2,06154 | -1,551829439 | ENST00000508563 | N/A       | N/A          | N/A                   |
| A_23_P50919    | 9,45991 | 10,0939 | -1,551850952 | ENST00000478966 | 5270      | NM_006216    | SERPINE2              |
| A_24_P916496   | 10,0061 | 10,6403 | -1,552076857 | ENST00000413366 | 5578      | NM_002737    | PRKCA                 |
| A_23_P323143   | 8,16733 | 8,8016  | -1,552152166 | ENST00000472212 | 79970     | NR_027788    | ZNF767P               |
| A_22_P00005494 | 1,9567  | 2,59097 | -1,552152166 | ENST00000434786 | N/A       | XR_109944    | N/A                   |
| A_22_P00015972 | 4,66012 | 5,29449 | -1,552259757 | N/A             | N/A       | BX089002     | Inc-TEKT5-2           |
| A_24_P212811   | 3,49406 | 4,12848 | -1,552313555 | ENST00000606888 | 284615    | NM_001039888 | ANKRD34A              |
| A_23_P110062   | 10,3691 | 11,0036 | -1,552399636 | ENST00000492226 | 8893      | NM_003907    | EIF2B5                |
| A_22_P00010741 | 1,93021 | 2,56484 | -1,552539528 | ENST00000614283 | N/A       | EG327614     | N/A                   |
| A_21_P0012236  | 7,74327 | 8,37791 | -1,552550289 | ENST00000620025 | 4763      | NM_000267    | NF1                   |
| A_22_P00015949 | 1,39636 | 2,03105 | -1,552604097 | ENST00000414201 | N/A       | AK097816     | N/A                   |
| A_23_P138105   | 8,5962  | 9,23089 | -1,552604097 | ENST00000373842 | 54797     | NM_017638    | MED18                 |
| A_21_P0003141  | 1,64357 | 2,27854 | -1,552905458 | N/A             | N/A       | N/A          | Inc-CBLB-1            |
| A_23_P81690    | 15,3653 | 16,0003 | -1,55293775  | ENST00000459637 | 1347      | NM_001865    | COX7A2                |
| A_23_P108699   | 2,37433 | 3,00937 | -1,552980807 | ENST00000304421 | 2492      | NM_000145    | FSHR                  |
| A_23_P70843    | 8,80057 | 9,43569 | -1,553066925 | ENST00000418040 | 669       | NM_199186    | BPGM                  |
| A_23_P142250   | 1,48574 | 2,12087 | -1,55307769  | ENST00000587772 | 11136     | NM_014270    | SLC7A9                |
| A_21_P0002165  | 3,34177 | 3,97703 | -1,553217643 | N/A             | 101929643 | XR_241266    | LOC101929643          |
| A_24_P182539   | 5,3474  | 5,98312 | -1,553712962 | ENST00000317868 | 84938     | NM_032852    | ATG4C                 |
| A_33_P3293114  | 12,5305 | 13,1664 | -1,553906825 | ENST00000395136 | 9295      | NM_001190987 | SRSF11                |
| A_33_P3298413  | 12,2446 | 12,8807 | -1,554122257 | ENST00000304979 | 10465     | NM_006347    | PPIH                  |
| A_23_P86133    | 11,6285 | 12,2646 | -1,554122257 | ENST00000373912 | 6118      | NM_002946    | RPA2                  |
| A_33_P3329765  | 1,60225 | 2,23842 | -1,554197666 | ENST00000434611 | N/A       | N/A          | N/A                   |
| A_22_P00003373 | 1,51983 | 2,15619 | -1,554402364 | ENST00000570408 | N/A       | BM711518     | N/A                   |
| A_32_P438767   | 2,43249 | 3,06885 | -1,554402364 | ENST00000313341 | 63973     | NM_024019    | NEUROG2               |
| A_22_P00004230 | 2,72307 | 3,35947 | -1,554445462 | ENST00000523042 | 101929628 | N/A          | LOC101929628          |
| A_23_P142872   | 9,33331 | 9,96986 | -1,554607089 | ENST00000282111 | 83439     | NM_031283    | TCF7L1                |
| A_21_P0014296  | 1,62788 | 2,26443 | -1,554607089 | N/A             | N/A       | AK125516     | Inc-RP11-625H11.1.1-3 |

|                |         |         |              |                 |           |              |                |
|----------------|---------|---------|--------------|-----------------|-----------|--------------|----------------|
| A_21_P0002356  | 2,90097 | 3,53756 | -1,554650192 | N/A             | N/A       | N/A          | Inc-SLC4A3-4   |
| A_21_P0008332  | 2,49819 | 3,13491 | -1,554790287 | N/A             | N/A       | N/A          | Inc-FANCM-5    |
| A_23_P50108    | 11,4768 | 12,1137 | -1,554984285 | ENST00000261597 | 10403     | NM_006101    | NDC80          |
| A_33_P3805085  | 6,85554 | 7,49253 | -1,555081293 | ENST00000615660 | 96459     | NM_133372    | FNIP1          |
| A_33_P3299892  | 16,2833 | 16,9203 | -1,555092072 | ENST00000496387 | 7388      | NM_001297565 | UQCRH          |
| A_24_P68631    | 11,5476 | 12,1846 | -1,555092072 | ENST00000331128 | 317772    | NM_175065    | HIST2H2AB      |
| A_22_P00016532 | 2,15016 | 2,78745 | -1,555404696 | N/A             | N/A       | BC034289     | Inc-TMTC4-1    |
| A_24_P284893   | 12,6267 | 13,264  | -1,555415478 | ENST00000373237 | 5690      | NM_002794    | PSMB2          |
| A_24_P39101    | 8,73638 | 9,3738  | -1,555544859 | ENST00000228495 | 83892     | NM_031954    | KCTD10         |
| A_23_P118095   | 5,7638  | 6,40139 | -1,555728167 | ENST00000268661 | 6123      | NM_005061    | RPL3L          |
| A_33_P3264960  | 1,5658  | 2,20339 | -1,555728167 | N/A             | N/A       | N/A          | N/A            |
| A_33_P3216267  | 5,72264 | 6,36027 | -1,555771302 | ENST00000447359 | N/A       | N/A          | N/A            |
| A_33_P3289780  | 11,9858 | 12,6235 | -1,55584679  | ENST00000554880 | 9556      | NM_001127393 | C14orf2        |
| A_23_P26674    | 11,3943 | 12,0321 | -1,555954637 | ENST00000552771 | 9665      | NM_014647    | KIAA0430       |
| A_22_P00005639 | 3,38226 | 4,02012 | -1,556019349 | N/A             | N/A       | N/A          | Inc-EIF2AK3-4  |
| A_33_P3358856  | 12,2744 | 12,9123 | -1,556062491 | ENST00000494093 | N/A       | N/A          | N/A            |
| A_21_P0014617  | 1,36276 | 2,00073 | -1,556137994 | N/A             | N/A       | XR_133406    | N/A            |
| A_22_P00023389 | 1,48758 | 2,12567 | -1,556267435 | N/A             | N/A       | N/A          | Inc-FAM114A1-1 |
| A_24_P82957    | 10,3372 | 10,9754 | -1,556386099 | ENST00000622999 | 55905     | NM_018683    | RNF114         |
| A_24_P695306   | 2,85107 | 3,48934 | -1,556461617 | ENST00000455783 | 730130    | NM_001136002 | TMEM229A       |
| A_22_P00008853 | 3,42113 | 4,05943 | -1,556493983 | N/A             | N/A       | N/A          | Inc-KLF9-2     |
| A_33_P3407049  | 5,28017 | 5,91865 | -1,556688194 | N/A             | N/A       | N/A          | N/A            |
| A_22_P00006953 | 1,65696 | 2,29552 | -1,556774517 | N/A             | N/A       | AF075013     | Inc-GCM1-1     |
| A_33_P3374117  | 5,64091 | 6,2795  | -1,55680689  | ENST00000602586 | 101927507 | XR_248745    | LOC101927507   |
| A_22_P00024433 | 6,12117 | 6,75979 | -1,556839263 | ENST00000462159 | 163786    | NM_194292    | SASS6          |
| A_33_P3298539  | 4,86158 | 5,50048 | -1,557141446 | ENST00000236850 | 335       | NM_000039    | APOA1          |
| A_23_P149678   | 11,5592 | 12,1982 | -1,557249382 | ENST00000393045 | 10401     | NM_006099    | PIAS3          |
| A_19_P00320948 | 9,31566 | 9,95472 | -1,557314148 | ENST00000507992 | 285550    | N/A          | FAM200B        |
| A_22_P00021304 | 1,68981 | 2,32891 | -1,557357326 | ENST00000533459 | N/A       | DA321576     | N/A            |
| A_22_P00012904 | 3,33314 | 3,97239 | -1,557519256 | N/A             | 102724438 | XR_425572    | LOC102724438   |
| A_22_P00016266 | 2,76397 | 3,40333 | -1,557638016 | N/A             | N/A       | N/A          | Inc-TMEM105-1  |
| A_23_P44932    | 11,5629 | 12,2023 | -1,557681203 | ENST00000460851 | 83939     | NM_032025    | EIF2A          |
| A_23_P163467   | 12,4406 | 13,0801 | -1,557789177 | ENST00000382688 | 388115    | NM_207380    | C15orf52       |

|                |         |         |              |                 |           |                   |              |
|----------------|---------|---------|--------------|-----------------|-----------|-------------------|--------------|
| A_33_P3440636  | 5,7494  | 6,38896 | -1,557853965 | N/A             | 286071    | AK091759          | LOC286071    |
| A_21_P0011986  | 2,60045 | 3,24002 | -1,557864763 | ENST00000608040 | 101927687 | TCONS_I2_00015069 | LOC101927687 |
| A_24_P185158   | 9,4855  | 10,1251 | -1,557897159 | ENST00000309428 | 162427    | NM_178126         | FAM134C      |
| A_33_P3344816  | 7,68235 | 8,32196 | -1,557907957 | ENST00000396403 | 126017    | NM_001004301      | ZNF813       |
| A_23_P337689   | 1,37909 | 2,01878 | -1,557994348 | N/A             | N/A       | DQ289490          | Inc-EIF3M-2  |
| A_22_P00014964 | 1,92137 | 2,56114 | -1,558080744 | N/A             | N/A       | BI765200          | Inc-SMAD5-2  |
| A_23_P84836    | 10,8051 | 11,4449 | -1,558113144 | ENST00000322157 | 9520      | NM_006310         | NPEPPS       |
| A_24_P103264   | 7,71135 | 8,35141 | -1,55839397  | ENST00000394511 | 7368      | NM_003360         | UGT8         |
| A_33_P3321130  | 7,92253 | 8,56266 | -1,558469585 | ENST00000520482 | 22898     | AK125506          | DENND3       |
| A_22_P00022592 | 1,41659 | 2,05716 | -1,558944967 | N/A             | N/A       | N/A               | Inc-FKBP14-1 |
| A_21_P0008666  | 2,39749 | 3,03816 | -1,559053029 | N/A             | N/A       | N/A               | Inc-SH3GL3-1 |
| A_23_P329890   | 9,29047 | 9,93124 | -1,559161098 | ENST00000314475 | 219902    | NM_174926         | TMEM136      |
| A_22_P00023842 | 2,00328 | 2,6441  | -1,559215135 | ENST00000560590 | N/A       | N/A               | N/A          |
| A_23_P49429    | 11,2244 | 11,8653 | -1,559301599 | ENST00000405142 | 84309     | NM_032349         | NUDT16L1     |
| A_22_P00023405 | 3,46769 | 4,1086  | -1,559312407 | ENST00000436885 | N/A       | N/A               | N/A          |
| A_33_P3399263  | 8,68861 | 9,32957 | -1,55936645  | ENST00000379972 | 3601      | NM_001243539      | IL15RA       |
| A_33_P3268763  | 14,3508 | 14,9918 | -1,559409685 | ENST00000462940 | 83590     | NM_031434         | TMUB1        |
| A_33_P3364571  | 2,87472 | 3,51584 | -1,559539399 | ENST00000548649 | 7148      | NM_019105         | TNXB         |
| A_21_P0002182  | 4,08844 | 4,72967 | -1,559658312 | ENST00000607100 | 400946    | N/A               | LINC00954    |
| A_23_P59798    | 13,3442 | 13,9858 | -1,56005836  | ENST00000475010 | 23608     | NM_013446         | MKRN1        |
| A_33_P3866631  | 11,5337 | 12,1754 | -1,560166499 | N/A             | 26120     | AL049980          | DKFZP564C152 |
| A_33_P3240182  | 3,58237 | 4,22412 | -1,560220571 | ENST00000390626 | N/A       | KJ424130          | N/A          |
| A_23_P432034   | 8,74946 | 9,3914  | -1,560426063 | ENST00000249064 | 150275    | NM_173510         | CCDC117      |
| A_33_P3236563  | 6,78242 | 7,42441 | -1,560480144 | ENST00000616697 | 221       | NM_001290058      | ALDH3B1      |
| A_24_P304071   | 7,69743 | 8,33943 | -1,56049096  | ENST00000611722 | 3433      | NM_001547         | IFIT2        |
| A_21_P0014395  | 2,2783  | 2,92039 | -1,560588312 | N/A             | N/A       | N/A               | Inc-ZNF100-2 |
| A_24_P20630    | 6,60271 | 7,24526 | -1,561085981 | ENST00000503879 | 51176     | NM_016269         | LEF1         |
| A_23_P11995    | 15,8303 | 16,4732 | -1,561464749 | ENST00000424390 | 5052      | NM_002574         | PRDX1        |
| A_24_P255314   | 9,82554 | 10,4685 | -1,56152969  | ENST00000447193 | N/A       | N/A               | N/A          |
| A_33_P3245228  | 3,66306 | 4,3061  | -1,561616282 | ENST00000618484 | 51297     | NM_130852         | BPIFA1       |
| A_23_P372925   | 9,72328 | 10,3664 | -1,561702879 | ENST00000361786 | 85457     | NM_033426         | CIPC         |
| A_22_P00022881 | 1,78141 | 2,42482 | -1,562016832 | N/A             | 101926963 | NR_110054         | LOC101926963 |
| A_23_P105409   | 4,71179 | 5,3552  | -1,562016832 | ENST00000552365 | 7786      | NM_006301         | MAP3K12      |

|                |         |         |              |                 |           |              |                  |
|----------------|---------|---------|--------------|-----------------|-----------|--------------|------------------|
| A_19_P00317628 | 2,0968  | 2,74041 | -1,562233389 | N/A             | N/A       | N/A          | Inc-AC092031.1-1 |
| A_22_P00008663 | 2,77811 | 3,42181 | -1,562330849 | ENST00000555713 | N/A       | DA126874     | N/A              |
| A_23_P10463    | 15,7305 | 16,3743 | -1,562439145 | ENST00000372969 | 4725      | NM_004552    | NDUFS5           |
| A_21_P0008340  | 1,37057 | 2,0144  | -1,562471636 | N/A             | N/A       | N/A          | Inc-C14orf101-1  |
| A_24_P203056   | 9,32301 | 9,96685 | -1,562482466 | ENST00000538010 | 605       | NM_020993    | BCL7A            |
| A_23_P138680   | 9,89482 | 10,5387 | -1,562525788 | ENST00000379972 | 3601      | NM_172200    | IL15RA           |
| A_21_P0007539  | 3,58895 | 4,23284 | -1,562536618 | N/A             | N/A       | N/A          | Inc-FGD4-1       |
| A_23_P417282   | 11,3185 | 11,9624 | -1,562547449 | ENST00000268035 | 3480      | NM_000875    | IGF1R            |
| A_21_P0004448  | 3,33501 | 3,979   | -1,562644929 | N/A             | N/A       | N/A          | Inc-PFDN1-1      |
| A_33_P3385387  | 12,1114 | 12,7555 | -1,562764079 | ENST00000478088 | N/A       | N/A          | N/A              |
| A_21_P0003881  | 1,49721 | 2,14142 | -1,562883238 | ENST00000503609 | N/A       | XR_249721    | N/A              |
| A_33_P3338788  | 2,86751 | 3,51176 | -1,562926571 | N/A             | N/A       | N/A          | N/A              |
| A_33_P3210516  | 6,00419 | 6,64847 | -1,562959072 | N/A             | N/A       | N/A          | N/A              |
| A_22_P00019417 | 2,23241 | 2,87671 | -1,562980739 | N/A             | 100874074 | NR_046551    | DLEU7-AS1        |
| A_21_P0003964  | 1,95009 | 2,59444 | -1,563034909 | ENST00000500616 | N/A       | N/A          | N/A              |
| A_33_P3404959  | 8,6543  | 9,29869 | -1,563078246 | ENST00000306336 | 388969    | NM_001013649 | C2orf68          |
| A_21_P0005539  | 4,81726 | 5,46169 | -1,563121584 | N/A             | N/A       | N/A          | Inc-ACTR3C-2     |
| A_23_P24586    | 9,20159 | 9,84636 | -1,563490009 | ENST00000263776 | 84680     | NM_032592    | ACCS             |
| A_22_P00000747 | 2,27031 | 2,91515 | -1,563565872 | ENST00000436003 | N/A       | N/A          | N/A              |
| A_23_P363968   | 8,24667 | 8,89158 | -1,563641738 | ENST00000266542 | 51279     | NM_016546    | C1RL             |
| A_23_P63402    | 9,90379 | 10,5487 | -1,563641738 | ENST00000264126 | 29899     | NM_013296    | GPSM2            |
| A_33_P3345350  | 2,75498 | 3,39991 | -1,563663415 | ENST00000434016 | 644168    | NM_001276451 | DRGX             |
| A_33_P3251492  | 7,31034 | 7,95534 | -1,563739286 | ENST00000522060 | 100133669 | NR_026913    | LOC100133669     |
| A_21_P0011608  | 2,01386 | 2,65897 | -1,56385852  | N/A             | N/A       | N/A          | XLOC_I2_006173   |
| A_32_P129968   | 8,29989 | 8,94501 | -1,56386936  | ENST00000421176 | 342909    | CR936662     | ZNF284           |
| A_21_P0014777  | 2,34011 | 2,98528 | -1,56392356  | N/A             | N/A       | N/A          | N/A              |
| A_21_P0004906  | 2,02684 | 2,67207 | -1,563988603 | N/A             | N/A       | N/A          | Inc-AL079342.1-1 |
| A_21_P0011324  | 2,82583 | 3,47108 | -1,564010285 | N/A             | N/A       | N/A          | XLOC_I2_004640   |
| A_23_P80342    | 7,67972 | 8,32508 | -1,564129539 | ENST00000216160 | 10454     | NM_006116    | TAB1             |
| A_24_P390583   | 10,2511 | 10,8966 | -1,564281331 | ENST00000219689 | 57478     | NM_020718    | USP31            |
| A_22_P00010375 | 3,46142 | 4,10715 | -1,564530735 | N/A             | N/A       | AF086004     | Inc-MYH13-3      |
| A_23_P218331   | 11,4485 | 12,0944 | -1,564715102 | ENST00000581573 | 1534      | NM_001017916 | CYB561           |
| A_23_P96623    | 3,92284 | 4,56879 | -1,564769332 | ENST00000488220 | 2652      | NM_000513    | OPN1MW           |



|                |         |         |              |                 |           |              |              |
|----------------|---------|---------|--------------|-----------------|-----------|--------------|--------------|
| A_21_P0001048  | 2,71648 | 3,36249 | -1,56483441  | ENST00000432488 | 104266961 | N/A          | LINC01221    |
| A_33_P3347672  | 1,39377 | 2,03984 | -1,564899491 | ENST00000502301 | 645323    | NR_015436    | LINC00461    |
| A_33_P3399560  | 6,74177 | 7,38784 | -1,564899491 | ENST00000440696 | 11020     | NM_001177701 | IFT27        |
| A_22_P00001895 | 7,10407 | 7,75016 | -1,564921185 | N/A             | 100049716 | NR_122124    | LOC100049716 |
| A_23_P63232    | 9,36158 | 10,0077 | -1,564953727 | ENST00000368603 | 148327    | NM_130898    | CREB3L4      |
| A_23_P42684    | 1,72469 | 2,37106 | -1,565224937 | ENST00000311067 | 55025     | XR_108766    | FLJ20712     |
| A_22_P00014006 | 3,82007 | 4,46646 | -1,565246635 | N/A             | N/A       | BE220423     | Inc-RWDD2B-1 |
| A_24_P225468   | 8,63254 | 9,27895 | -1,565268334 | ENST00000616917 | 81611     | NM_030920    | ANP32E       |
| A_33_P3229370  | 1,4824  | 2,12883 | -1,565290034 | ENST00000378700 | 3400      | NM_001546    | ID4          |
| A_23_P79134    | 7,26482 | 7,91135 | -1,565398535 | ENST00000436066 | 79156     | NM_024310    | PLEKHF1      |
| A_23_P83838    | 2,45637 | 3,10297 | -1,565474491 | ENST00000317995 | 767       | NM_004056    | CA8          |
| A_33_P3406072  | 3,9739  | 4,62057 | -1,56555045  | ENST00000304195 | 257019    | NM_001244959 | FRMD3        |
| A_23_P18196    | 11,6255 | 12,2722 | -1,565583005 | ENST00000296273 | 5984      | NM_002916    | RFC4         |
| A_24_P195669   | 3,74332 | 4,39016 | -1,565734937 | ENST00000581866 | 80022     | AK074680     | MYO15B       |
| A_21_P0003613  | 2,78763 | 3,43464 | -1,565919447 | N/A             | N/A       | N/A          | Inc-POLR2B-2 |
| A_33_P3323760  | 9,22625 | 9,87334 | -1,566006282 | N/A             | 153684    | NR_015447    | LOC153684    |
| A_24_P194000   | 12,9446 | 13,5917 | -1,566017137 | ENST00000392776 | 10055     | NM_005500    | SAE1         |
| A_33_P3240867  | 1,66083 | 2,30797 | -1,566060557 | ENST00000335678 | 6011      | NM_002929    | GRK1         |
| A_21_P0010637  | 7,14925 | 7,79644 | -1,566114833 | ENST00000452922 | 101928079 | N/A          | LINC01057    |
| A_22_P00015781 | 4,94973 | 5,59701 | -1,566212535 | N/A             | N/A       | N/A          | Inc-TAOK3-4  |
| A_32_P71447    | 10,5989 | 11,2462 | -1,566234248 | ENST00000534548 | 23310     | NM_015261    | NCAPD3       |
| A_23_P201264   | 7,87836 | 8,5259  | -1,566494821 | ENST00000377205 | 64802     | NM_022787    | NMNAT1       |
| A_23_P394259   | 2,56099 | 3,20856 | -1,566527396 | N/A             | 4355      | AL136554     | MPP2         |
| A_23_P312851   | 6,86983 | 7,51749 | -1,566625124 | ENST00000549564 | 6490      | NM_006928    | PMEL         |
| A_33_P3220994  | 6,02735 | 6,67523 | -1,56686404  | N/A             | N/A       | N/A          | N/A          |
| A_21_P0004476  | 1,35463 | 2,00253 | -1,566885762 | ENST00000519603 | N/A       | N/A          | N/A          |
| A_33_P3283001  | 1,50476 | 2,1527  | -1,566929206 | ENST00000504077 | 728093    | XR_425912    | LOC728093    |
| A_21_P0010244  | 3,95541 | 4,60338 | -1,56696179  | N/A             | N/A       | N/A          | Inc-ETS2-4   |
| A_33_P3311353  | 1,76287 | 2,41086 | -1,566983512 | ENST00000333756 | 256646    | NM_175741    | NUTM1        |
| A_23_P118203   | 11,8469 | 12,4949 | -1,566994374 | ENST00000382280 | 124220    | NM_145252    | ZG16B        |
| A_33_P3334225  | 13,043  | 13,691  | -1,566994374 | ENST00000619487 | 31        | NM_198839    | ACACA        |
| A_33_P3285047  | 9,49415 | 10,1423 | -1,567157306 | ENST00000498240 | 7627      | NM_001302109 | ZNF75A       |
| A_24_P405190   | 11,0275 | 11,6757 | -1,567211621 | ENST00000527390 | 23032     | NM_201626    | USP33        |

|                |         |         |              |                 |           |              |                |
|----------------|---------|---------|--------------|-----------------|-----------|--------------|----------------|
| A_32_P119616   | 11,7264 | 12,3748 | -1,567428897 | ENST00000560044 | 2108      | NM_000126    | ETFA           |
| A_33_P3232523  | 4,63429 | 5,28269 | -1,567428897 | ENST00000328429 | 80832     | BC006276     | APOL4          |
| A_33_P3361102  | 1,80336 | 2,4518  | -1,567472356 | ENST00000303635 | 23261     | NM_015215    | CAMTA1         |
| A_23_P8640     | 4,61351 | 5,26206 | -1,567591875 | ENST00000617001 | 2852      | NM_001039966 | GPER1          |
| A_23_P310257   | 2,63615 | 3,28485 | -1,567754869 | ENST00000391810 | 3817      | NM_001002231 | KLK2           |
| A_22_P00016934 | 1,61009 | 2,25886 | -1,567830939 | N/A             | N/A       | N/A          | Inc-TSPAN32-1  |
| A_22_P00017580 | 6,84708 | 7,49597 | -1,567961353 | N/A             | N/A       | N/A          | Inc-WDR67-2    |
| A_23_P89215    | 4,17228 | 4,82124 | -1,568037432 | ENST00000300784 | 64122     | NM_022158    | FN3K           |
| A_33_P3298612  | 1,46767 | 2,11665 | -1,56805917  | N/A             | N/A       | N/A          | N/A            |
| A_24_P307724   | 2,1291  | 2,77811 | -1,568091777 | ENST00000507444 | 401172    | NR_028351    | FLJ33360       |
| A_22_P00010019 | 1,71353 | 2,36262 | -1,568178733 | ENST00000573934 | N/A       | N/A          | N/A            |
| A_21_P0009108  | 1,61529 | 2,2648  | -1,568635331 | N/A             | N/A       | N/A          | Inc-CDH5-3     |
| A_21_P0009620  | 2,20923 | 2,85879 | -1,568689696 | ENST00000592801 | 497259    | N/A          | C18orf61       |
| A_21_P0012238  | 7,20032 | 7,84994 | -1,568754938 | ENST00000454360 | 5290      | NM_006218    | PIK3CA         |
| A_33_P3375809  | 5,53458 | 6,18422 | -1,568776685 | N/A             | 729970    | NR_033998    | LOC729970      |
| A_23_P213620   | 5,47112 | 6,12077 | -1,568787559 | ENST00000504198 | 5521      | NM_001271948 | PPP2R2B        |
| A_32_P55882    | 3,02614 | 3,67582 | -1,568820182 | N/A             | N/A       | CB242429     | Inc-TBCC-1     |
| A_23_P8400     | 10,6551 | 11,3048 | -1,56884193  | ENST00000485972 | 1020      | NM_004935    | CDK5           |
| A_21_P0007153  | 5,23064 | 5,88038 | -1,568885429 | N/A             | 143666    | N/A          | LOC143666      |
| A_22_P00012650 | 1,34151 | 1,99125 | -1,568885429 | N/A             | N/A       | N/A          | Inc-PXDN-3     |
| A_23_P416434   | 4,79724 | 5,44705 | -1,568961553 | ENST00000395003 | 23338     | NM_015288    | JADE2          |
| A_24_P220485   | 11,615  | 12,265  | -1,569168196 | ENST00000373580 | 169611    | NM_182487    | OLFML2A        |
| A_22_P00003128 | 1,93532 | 2,58536 | -1,569211703 | N/A             | N/A       | BX108194     | Inc-C9orf131-1 |
| A_33_P3252925  | 7,9709  | 8,62104 | -1,569320476 | ENST00000226319 | 79960     | NM_001287439 | JADE1          |
| A_22_P00012106 | 1,70133 | 2,35151 | -1,569363988 | N/A             | N/A       | AK094048     | Inc-PODN-1     |
| A_21_P0004274  | 8,59703 | 9,24727 | -1,569429257 | N/A             | N/A       | N/A          | Inc-RASA1-3    |
| A_24_P358805   | 1,51058 | 2,16088 | -1,569494529 | ENST00000332904 | 92211     | NM_001171971 | CDHR1          |
| A_23_P54556    | 10,4448 | 11,0951 | -1,569494529 | ENST00000318282 | 57496     | NM_014048    | MKL2           |
| A_33_P3367481  | 9,56007 | 10,2104 | -1,569527166 | ENST00000614079 | 2909      | NM_004491    | ARHGAP35       |
| A_22_P00005553 | 1,61877 | 2,26923 | -1,569668601 | N/A             | 102724901 | XR_424396    | LOC102724901   |
| A_23_P131785   | 2,00297 | 2,65349 | -1,569733883 | ENST00000262865 | 671       | NM_001725    | BPI            |
| A_24_P57730    | 9,47554 | 10,1261 | -1,569777406 | ENST00000355151 | 122704    | NM_181304    | MRPL52         |
| A_33_P6811959  | 1,62421 | 2,2748  | -1,569810049 | ENST00000471357 | 339894    | NR_034007    | LINC00880      |

|                |         |         |              |                 |           |              |                |
|----------------|---------|---------|--------------|-----------------|-----------|--------------|----------------|
| A_21_P0013637  | 4,42292 | 5,07362 | -1,569929746 | ENST00000402318 | N/A       | N/A          | N/A            |
| A_21_P0009797  | 6,37883 | 7,02953 | -1,569929746 | N/A             | N/A       | N/A          | Inc-ZNF8-3     |
| A_21_P0010990  | 2,77327 | 3,42409 | -1,570060334 | N/A             | N/A       | N/A          | XLOC_I2_002433 |
| A_33_P3403937  | 1,46795 | 2,11883 | -1,570125633 | N/A             | 100129399 | AK124011     | LOC100129399   |
| A_23_P167227   | 12,747  | 13,3979 | -1,570147399 | ENST00000603302 | 3033      | NM_005327    | HADH           |
| A_22_P00024487 | 1,64051 | 2,29143 | -1,570169166 | N/A             | N/A       | N/A          | Inc-PNPLA3-1   |
| A_33_P3269423  | 2,48486 | 3,13586 | -1,570256237 | ENST00000356049 | 400165    | NM_207440    | ATP11AUN       |
| A_21_P0012993  | 7,07307 | 7,72412 | -1,570310659 | ENST00000447012 | 4671      | N/A          | NAIP           |
| A_21_P0008780  | 1,46215 | 2,11327 | -1,570386853 | N/A             | N/A       | N/A          | Inc-VPS33B-2   |
| A_23_P47102    | 4,17813 | 4,82943 | -1,570582797 | ENST00000255082 | 91703     | NM_080658    | ACY3           |
| A_32_P212058   | 3,95881 | 4,61029 | -1,570778765 | ENST00000409690 | 84984     | NM_032898    | CEP19          |
| A_21_P0003085  | 3,43938 | 4,09095 | -1,570876759 | N/A             | N/A       | N/A          | Inc-FAM43A-6   |
| A_22_P00013776 | 4,31154 | 4,96317 | -1,570942091 | ENST00000530350 | N/A       | N/A          | N/A            |
| A_21_P0014522  | 5,58605 | 6,23793 | -1,571214338 | N/A             | 101927365 | XR_245564    | LOC101927365   |
| A_23_P365725   | 1,34375 | 1,99575 | -1,571345033 | ENST00000302797 | 259249    | NM_147199    | MRGPRX1        |
| A_33_P3891747  | 2,59484 | 3,24707 | -1,571595563 | N/A             | 284072    | AK095403     | LOC284072      |
| A_32_P420009   | 9,23303 | 9,88529 | -1,571628244 | ENST00000318962 | 259173    | NM_147129    | ALS2CL         |
| A_33_P3396326  | 2,95858 | 3,61107 | -1,571878819 | ENST00000614509 | N/A       | N/A          | N/A            |
| A_32_P180958   | 10,324  | 10,9766 | -1,571998673 | ENST00000433351 | 51449     | NM_016297    | PCYOX1         |
| A_21_P0008611  | 1,6541  | 2,30674 | -1,572042259 | N/A             | N/A       | N/A          | Inc-C15orf41-1 |
| A_33_P3251989  | 9,17669 | 9,8294  | -1,572118537 | ENST00000486447 | 9419      | NM_014171    | CRIP1          |
| A_22_P00015790 | 1,49143 | 2,14424 | -1,572227511 | N/A             | N/A       | N/A          | Inc-TARBP1-5   |
| A_24_P171268   | 8,6566  | 9,30951 | -1,572336494 | ENST00000577571 | 83593     | NM_182663    | RASSF5         |
| A_19_P00802420 | 2,20164 | 2,85472 | -1,572521781 | N/A             | N/A       | N/A          | Inc-CKAP2L-1   |
| A_23_P37005    | 9,23049 | 9,88358 | -1,572532681 | ENST00000379477 | 9617      | NM_004294    | MTRF1          |
| A_33_P3249072  | 4,64537 | 5,29847 | -1,572543581 | N/A             | N/A       | N/A          | N/A            |
| A_21_P0013924  | 13,5262 | 14,1793 | -1,572543581 | ENST00000434394 | N/A       | N/A          | N/A            |
| A_32_P98975    | 9,65413 | 10,3073 | -1,572619883 | ENST00000559103 | 90416     | NM_052849    | C15orf57       |
| A_23_P109333   | 12,1149 | 12,7681 | -1,572652585 | ENST00000291577 | 8209      | NM_004649    | C21orf33       |
| A_32_P59678    | 5,81654 | 6,46974 | -1,572652585 | ENST00000409192 | 340277    | NM_001127364 | FAM221A        |
| A_22_P00020378 | 1,50043 | 2,15372 | -1,572750695 | ENST00000497397 | N/A       | AJ617578     | N/A            |
| A_33_P3272402  | 5,5052  | 6,1585  | -1,572761597 | ENST00000315906 | 161931    | NM_139174    | ADAD2          |
| A_33_P3390570  | 11,4779 | 12,1313 | -1,572870616 | ENST00000389506 | 4297      | NM_005933    | KMT2A          |

|                |         |         |              |                 |           |              |               |
|----------------|---------|---------|--------------|-----------------|-----------|--------------|---------------|
| A_33_P3404676  | 2,18889 | 2,84233 | -1,572914226 | ENST00000371958 | 154796    | N/A          | AMOT          |
| A_33_P3335596  | 7,77176 | 8,42532 | -1,573045063 | ENST00000582725 | 79415     | NM_001193653 | C17orf62      |
| A_33_P3407925  | 12,5331 | 13,1867 | -1,573088677 | ENST00000262291 | 81671     | NM_030938    | VMP1          |
| A_22_P00016724 | 3,46817 | 4,12179 | -1,573110485 | N/A             | N/A       | N/A          | Inc-TRAPPC8-2 |
| A_23_P332374   | 7,26419 | 7,91786 | -1,573165006 | ENST00000262259 | 7728      | NM_007147    | ZNF175        |
| A_22_P00006819 | 3,28794 | 3,94161 | -1,573165006 | ENST00000557523 | 503519    | NR_038852    | LINC00929     |
| A_22_P00007951 | 1,67163 | 2,32531 | -1,57317591  | N/A             | 100505921 | NR_110018    | LOC100505921  |
| A_23_P204913   | 1,39187 | 2,04559 | -1,573219529 | ENST00000255324 | 56163     | NM_031277    | RNF17         |
| A_24_P318073   | 8,75811 | 9,41209 | -1,573503077 | ENST00000526942 | 84881     | NM_032795    | RPUSD4        |
| A_23_P204879   | 6,53924 | 7,19327 | -1,573557612 | ENST00000410043 | 81617     | NM_030925    | CAB39L        |
| A_22_P00025774 | 1,47573 | 2,12982 | -1,573623055 | ENST00000476987 | N/A       | N/A          | N/A           |
| A_33_P3371727  | 6,30956 | 6,96368 | -1,573655778 | ENST00000379253 | 6303      | AK310078     | SAT1          |
| A_22_P00016690 | 1,84034 | 2,49461 | -1,573819403 | N/A             | N/A       | N/A          | Inc-TPSG1-2   |
| A_33_P3232277  | 7,75016 | 8,40444 | -1,573830312 | ENST00000511490 | 900       | NM_004060    | CCNG1         |
| A_22_P00008823 | 1,89871 | 2,55308 | -1,573928496 | ENST00000453688 | N/A       | N/A          | N/A           |
| A_23_P23048    | 11,65   | 12,3044 | -1,573961225 | ENST00000368738 | 6280      | NM_002965    | S100A9        |
| A_21_P0013929  | 2,07575 | 2,73024 | -1,574059417 | ENST00000423292 | N/A       | AK128390     | N/A           |
| A_33_P3724157  | 3,93527 | 4,58978 | -1,574081238 | ENST00000614504 | 91319     | NM_198440    | DERL3         |
| A_33_P3244808  | 7,39265 | 8,04722 | -1,574146704 | ENST00000372207 | 266675    | NM_153274    | BEST4         |
| A_23_P23102    | 7,79974 | 8,45437 | -1,574212172 | ENST00000361328 | 7579      | NM_145238    | ZSCAN20       |
| A_22_P00018420 | 2,37456 | 3,02929 | -1,574321292 | ENST00000427804 | N/A       | BM729034     | N/A           |
| A_33_P3236297  | 1,51248 | 2,16724 | -1,574354029 | ENST00000307378 | 6579      | NM_134431    | SLCO1A2       |
| A_23_P14035    | 1,56142 | 2,21619 | -1,574364942 | ENST00000228850 | 10566     | NM_006422    | AKAP3         |
| A_23_P32135    | 8,73381 | 9,38863 | -1,574419506 | ENST00000350499 | 11092     | NM_018956    | C9orf9        |
| A_21_P0009060  | 1,40086 | 2,05569 | -1,574430419 | ENST00000568137 | 101928035 | NR_104657    | LOC101928035  |
| A_22_P00006134 | 2,32542 | 2,98033 | -1,574517727 | N/A             | N/A       | N/A          | Inc-FAM182A-3 |
| A_22_P00012764 | 4,48953 | 5,14447 | -1,574550468 | ENST00000451160 | 58499     | NM_021224    | ZNF462        |
| A_33_P3247022  | 7,98633 | 8,64134 | -1,574626868 | ENST00000308108 | 9134      | NM_057749    | CCNE2         |
| A_33_P3361891  | 5,87683 | 6,53185 | -1,574637782 | ENST00000419127 | 344805    | NM_001042575 | TMPRSS7       |
| A_23_P111188   | 6,19609 | 6,85121 | -1,574746931 | ENST00000383196 | 9278      | NM_005453    | ZBTB22        |
| A_24_P337397   | 8,96814 | 9,62332 | -1,574812425 | ENST00000515249 | 57763     | NM_023039    | ANKRA2        |
| A_33_P3301129  | 1,35956 | 2,01497 | -1,575063507 | N/A             | N/A       | N/A          | N/A           |
| A_23_P83328    | 4,00337 | 4,65886 | -1,57515085  | ENST00000480266 | 2022      | NM_000118    | ENG           |

|                |         |         |              |                 |           |              |                      |
|----------------|---------|---------|--------------|-----------------|-----------|--------------|----------------------|
| A_21_P0008324  | 5,96865 | 6,62422 | -1,575238197 | N/A             | N/A       | N/A          | Inc-MIPOL1-4         |
| A_33_P3220207  | 1,77609 | 2,4319  | -1,575500268 | ENST00000376528 | 219681    | NM_001282746 | ARMC3                |
| A_24_P346855   | 7,57056 | 8,22645 | -1,575587635 | ENST00000617118 | 4288      | NM_002417    | MKI67                |
| A_24_P262407   | 6,94278 | 7,59867 | -1,575587635 | ENST00000546243 | 7067      | NM_199334    | THRA                 |
| A_24_P349151   | 6,45103 | 7,10695 | -1,575620399 | ENST00000462159 | 163786    | NM_194292    | SASS6                |
| A_33_P3629151  | 3,31194 | 3,96789 | -1,575653163 | N/A             | 94151     | AI150443     | CDRT8                |
| A_33_P3304878  | 3,94067 | 4,59666 | -1,57569685  | ENST00000374161 | 57705     | NM_020945    | WDFY4                |
| A_33_P3228102  | 8,10132 | 8,75739 | -1,575784228 | ENST00000383282 | 27031     | NM_153240    | NPHP3                |
| A_22_P00000121 | 1,75731 | 2,41346 | -1,57587161  | N/A             | N/A       | AK090747     | Inc-NGDN-1           |
| A_21_P0014784  | 2,17049 | 2,82677 | -1,576013617 | ENST00000456856 | N/A       | N/A          | N/A                  |
| A_22_P00016937 | 3,06669 | 3,72307 | -1,576122862 | N/A             | N/A       | CN275044     | Inc-TSPAN5-2         |
| A_22_P00018170 | 3,15329 | 3,80976 | -1,576221189 | N/A             | N/A       | N/A          | Inc-ZNF585B-1        |
| A_22_P00013696 | 1,4781  | 2,13459 | -1,57624304  | N/A             | N/A       | BG207842     | Inc-RP11-763F8.1.1-1 |
| A_33_P3264394  | 3,72583 | 4,38239 | -1,576319521 | ENST00000583693 | 79058     | AK127311     | ASPSCR1              |
| A_23_P70445    | 11,4213 | 12,0779 | -1,576363227 | ENST00000614911 | 8353      | NM_003532    | HIST1H3E             |
| A_21_P0014795  | 1,68934 | 2,34599 | -1,57641786  | N/A             | 100652749 | NR_102753    | SPATA8-AS1           |
| A_21_P0006019  | 2,26288 | 2,91981 | -1,576723843 | ENST00000423681 | 101927358 | N/A          | LOC101927358         |
| A_21_P0011290  | 1,69824 | 2,3552  | -1,576756631 | N/A             | N/A       | N/A          | XLOC_I2_004563       |
| A_21_P0011084  | 7,59691 | 8,25388 | -1,57676756  | N/A             | N/A       | N/A          | XLOC_I2_003293       |
| A_19_P00808588 | 4,43355 | 5,0906  | -1,576854997 | ENST00000513638 | 400759    | N/A          | GBP1P1               |
| A_33_P3355230  | 4,98673 | 5,64389 | -1,576975231 | ENST00000620403 | 3903      | NM_002287    | LAIR1                |
| A_33_P3378047  | 8,52178 | 9,17894 | -1,576975231 | ENST00000428443 | 91404     | NM_178123    | SESTD1               |
| A_23_P412562   | 4,21506 | 4,87228 | -1,577040816 | ENST00000369718 | 128346    | NM_174896    | C1orf162             |
| A_23_P333057   | 2,58676 | 3,24407 | -1,5771392   | N/A             | 154089    | N/A          | LINC01312            |
| A_24_P516246   | 1,64582 | 2,30319 | -1,577204793 | ENST00000515617 | 440101    | NR_026655    | FLJ12825             |
| A_33_P3315979  | 2,53731 | 3,19478 | -1,577314121 | ENST00000331723 | 441669    | NM_172194    | OR4Q3                |
| A_24_P944616   | 13,2049 | 13,8625 | -1,577456257 | ENST00000375003 | 50809     | NM_016287    | HP1BP3               |
| A_22_P00002578 | 2,72677 | 3,38444 | -1,577532798 | ENST00000590604 | N/A       | N/A          | N/A                  |
| A_33_P3280666  | 6,81511 | 7,47287 | -1,577631213 | ENST00000396103 | 112885    | NM_138415    | PHF21B               |
| A_23_P9280     | 8,43095 | 9,08878 | -1,577707762 | ENST00000376347 | 389765    | NR_029410    | LOC389765            |
| A_23_P34209    | 2,03192 | 2,68992 | -1,577893682 | ENST00000400581 | 83863     | NR_001541    | TTY5                 |
| A_23_P74737    | 4,24824 | 4,9063  | -1,577959306 | ENST00000495923 | 2140      | NM_001990    | EYA3                 |
| A_33_P3350673  | 5,61165 | 6,26988 | -1,578145256 | ENST00000381260 | 84525     | NM_001145460 | HOPX                 |

|                |         |         |              |                 |           |              |                |
|----------------|---------|---------|--------------|-----------------|-----------|--------------|----------------|
| A_33_P3303259  | 8,59454 | 9,25277 | -1,578145256 | ENST00000446672 | 143       | N/A          | PARP4          |
| A_23_P121665   | 1,50008 | 2,15838 | -1,57822183  | ENST00000507866 | 57537     | NM_020777    | SORCS2         |
| A_23_P153692   | 12,2859 | 12,9446 | -1,578659466 | ENST00000262887 | 7515      | NM_006297    | XRCC1          |
| A_24_P237878   | 10,9484 | 11,6071 | -1,578659466 | ENST00000574190 | 348262    | NM_207368    | FAM195B        |
| A_33_P3239287  | 11,6908 | 12,3495 | -1,578659466 | ENST00000330494 | 1107      | NM_001005271 | CHD3           |
| A_21_P0008594  | 2,19082 | 2,84954 | -1,578681351 | ENST00000565893 | N/A       | N/A          | N/A            |
| A_33_P3416142  | 4,25778 | 4,91651 | -1,578692294 | ENST00000436880 | 100131234 | N/A          | MIR181A1HG     |
| A_21_P0010485  | 4,13035 | 4,7891  | -1,578714179 | ENST00000376800 | 10255     | N/A          | HCG9           |
| A_23_P113283   | 4,69177 | 5,35056 | -1,578757951 | ENST00000432729 | 64393     | NM_022470    | ZMAT3          |
| A_33_P3404641  | 4,87352 | 5,53252 | -1,578987773 | N/A             | 150381    | NR_027034    | PRR34-AS1      |
| A_33_P3404418  | 8,36477 | 9,02381 | -1,579031553 | ENST00000495230 | 9064      | NM_004672    | MAP3K6         |
| A_33_P6470820  | 1,3756  | 2,03474 | -1,579141007 | ENST00000443154 | 101928597 | NR_110091    | LOC101928597   |
| A_33_P3382100  | 2,4752  | 3,13435 | -1,579151953 | ENST00000437879 | 91156     | NM_001164586 | IGFN1          |
| A_23_P24884    | 10,0545 | 10,7137 | -1,579206683 | ENST00000357665 | 6764      | NM_005418    | ST5            |
| A_23_P96331    | 4,6101  | 5,26931 | -1,579217629 | ENST00000376701 | 7454      | NM_000377    | WAS            |
| A_33_P3392330  | 5,23126 | 5,89049 | -1,579239522 | ENST00000372875 | 51117     | AK301333     | COQ4           |
| A_24_P120934   | 2,9551  | 3,61442 | -1,579338043 | ENST00000494726 | 10912     | NM_006705    | GADD45G        |
| A_33_P3280845  | 2,38865 | 3,04809 | -1,579469414 | ENST00000284240 | 7070      | NM_006288    | THY1           |
| A_21_P0000732  | 10,1248 | 10,7843 | -1,579535104 | N/A             | 100507567 | NR_038237    | RAB11B-AS1     |
| A_21_P0007885  | 3,38662 | 4,04613 | -1,579546052 | ENST00000549004 | 643770    | NR_038383    | LOC643770      |
| A_23_P113656   | 3,8115  | 4,47132 | -1,579885495 | ENST00000264071 | 10382     | NM_006087    | TUBB4A         |
| A_33_P3315949  | 7,00291 | 7,66277 | -1,579929299 | ENST00000410006 | 388389    | NM_001258397 | CCDC103        |
| A_23_P142022   | 9,96798 | 10,6279 | -1,579995008 | ENST00000498612 | 26121     | NM_015629    | PRPF31         |
| A_22_P00007734 | 5,52313 | 6,18307 | -1,580016911 | ENST00000534551 | 55823     | NM_001290185 | VPS11          |
| A_22_P00001651 | 1,47857 | 2,13855 | -1,580060719 | N/A             | 102723335 | XR_429626    | LOC102723335   |
| A_21_P0011200  | 2,96962 | 3,6299  | -1,580389318 | N/A             | N/A       | N/A          | Inc-NUPL1-2    |
| A_33_P3212027  | 6,23454 | 6,89483 | -1,580400272 | ENST00000379550 | 1998      | NM_201999    | ELF2           |
| A_33_P3374365  | 12,0717 | 12,732  | -1,580411227 | N/A             | N/A       | N/A          | N/A            |
| A_21_P0000578  | 1,72094 | 2,38126 | -1,580433136 | N/A             | 100132163 | NR_029379    | PHKA2-AS1      |
| A_33_P3428984  | 1,65292 | 2,31355 | -1,580772769 | N/A             | 728445    | CD243366     | LOC728445      |
| A_33_P3215611  | 2,20904 | 2,86971 | -1,580816598 | N/A             | N/A       | N/A          | N/A            |
| A_21_P0013803  | 1,61076 | 2,27145 | -1,580838513 | N/A             | N/A       | N/A          | XLOC_I2_015659 |
| A_33_P3342528  | 7,74736 | 8,4081  | -1,580893302 | ENST00000305097 | 5028      | NM_002563    | P2RY1          |

|                |         |         |              |                 |           |              |              |
|----------------|---------|---------|--------------|-----------------|-----------|--------------|--------------|
| A_33_P3783812  | 7,28299 | 7,94395 | -1,581134394 | N/A             | 619426    | AK022255     | C8orf60      |
| A_23_P374902   | 4,27045 | 4,93155 | -1,581287836 | ENST00000601435 | 125875    | NM_152353    | CLDND2       |
| A_33_P3851788  | 6,13564 | 6,79689 | -1,581452254 | N/A             | 148046    | NR_027271    | CIRBP-AS1    |
| A_22_P00013399 | 1,44533 | 2,10664 | -1,581518026 | ENST00000557729 | N/A       | N/A          | N/A          |
| A_22_P00007749 | 1,74202 | 2,40338 | -1,581572839 | N/A             | N/A       | BG182298     | Inc-HMGB2-1  |
| A_33_P3352073  | 1,3768  | 2,03821 | -1,581627653 | N/A             | 401093    | NR_027038    | MBNL1-AS1    |
| A_33_P3387621  | 12,6919 | 13,3534 | -1,581726323 | ENST00000544458 | 85415     | NM_033103    | RHPN2        |
| A_33_P3256532  | 7,65691 | 8,31841 | -1,581726323 | ENST00000617438 | 84060     | NM_032120    | RBM48        |
| A_33_P3217238  | 11,4381 | 12,0998 | -1,581945612 | ENST00000287394 | 29028     | NM_014109    | ATAD2        |
| A_33_P3406702  | 14,293  | 14,9547 | -1,581945612 | N/A             | N/A       | N/A          | N/A          |
| A_21_P0005516  | 1,70589 | 2,3676  | -1,581956577 | ENST00000616956 | 100506136 | NR_038948    | LOC100506136 |
| A_21_P0004254  | 3,65078 | 4,31269 | -1,582175898 | N/A             | N/A       | N/A          | Inc-GPBP1-3  |
| A_23_P166910   | 10,811  | 11,473  | -1,582274602 | ENST00000509279 | 23317     | NM_015268    | DNAJC13      |
| A_24_P116242   | 11,9434 | 12,6054 | -1,582274602 | ENST00000553579 | 23588     | NM_014315    | KLHDC2       |
| A_32_P80245    | 1,42852 | 2,09056 | -1,582318473 | ENST00000376881 | 346171    | NM_001109809 | ZFP57        |
| A_32_P96692    | 6,11827 | 6,78036 | -1,582373313 | N/A             | 5429      | NM_006502    | POLH         |
| A_24_P314931   | 7,26862 | 7,93092 | -1,582603661 | ENST00000383611 | 80352     | NM_025236    | RNF39        |
| A_22_P00024163 | 2,42645 | 3,08878 | -1,582636571 | ENST00000557474 | N/A       | DA933438     | N/A          |
| A_23_P322      | 9,53309 | 10,1955 | -1,582724333 | ENST00000359751 | 1945      | NM_182690    | EFNA4        |
| A_21_P0014840  | 1,7123  | 2,37474 | -1,582757246 | N/A             | 100507630 | AF119861     | LOC100507630 |
| A_32_P41375    | 10,5483 | 11,2108 | -1,582823072 | N/A             | 402483    | N/A          | LINC01000    |
| A_22_P00007712 | 3,76449 | 4,42727 | -1,583130298 | ENST00000463275 | 10255     | NR_028032    | HCG9         |
| A_23_P259090   | 7,46018 | 8,12305 | -1,583229062 | ENST00000230792 | 83594     | NM_031438    | NUDT12       |
| A_23_P36484    | 4,48209 | 5,14499 | -1,583261985 | ENST00000360752 | 8608      | NM_003708    | RDH16        |
| A_33_P3264815  | 10,3728 | 11,0357 | -1,583261985 | ENST00000561311 | 83660     | NM_015059    | TLN2         |
| A_33_P3297305  | 5,13161 | 5,79458 | -1,583338807 | ENST00000409890 | 84173     | NM_032213    | ELMOD3       |
| A_24_P148450   | 10,9371 | 11,6001 | -1,583371732 | ENST00000602479 | 10477     | NM_006357    | UBE2E3       |
| A_32_P51787    | 3,84892 | 4,51209 | -1,583558319 | ENST00000312918 | N/A       | N/A          | N/A          |
| A_24_P262201   | 13,4439 | 14,1071 | -1,583591249 | ENST00000569544 | 445329    | NM_001017390 | SULT1A4      |
| A_22_P00001430 | 3,38856 | 4,05183 | -1,583668087 | ENST00000567376 | N/A       | N/A          | N/A          |
| A_21_P0001286  | 1,43444 | 2,09778 | -1,583744929 | N/A             | N/A       | N/A          | Inc-UTP11L-3 |
| A_23_P1387     | 6,81444 | 7,47809 | -1,584085274 | ENST00000487035 | 84986     | NM_032900    | ARHGAP19     |
| A_22_P00014797 | 2,54874 | 3,21243 | -1,584129195 | ENST00000579631 | N/A       | N/A          | N/A          |

|                |         |         |              |                 |           |              |                 |
|----------------|---------|---------|--------------|-----------------|-----------|--------------|-----------------|
| A_22_P00001124 | 4,25501 | 4,91872 | -1,584151155 | N/A             | N/A       | N/A          | Inc-ALX3-2      |
| A_21_P0010711  | 1,75595 | 2,41966 | -1,584151155 | N/A             | N/A       | N/A          | Inc-PRMT6-1     |
| A_23_P348767   | 1,6081  | 2,27218 | -1,584557486 | ENST00000400440 | 140699    | NM_213631    | MROH8           |
| A_33_P3422103  | 1,453   | 2,1172  | -1,584689291 | N/A             | N/A       | N/A          | N/A             |
| A_22_P00015088 | 2,76987 | 3,43408 | -1,584700275 | N/A             | N/A       | AF400489     | Inc-SNURF-3     |
| A_33_P3246804  | 11,0069 | 11,6712 | -1,584799137 | ENST00000394250 | 10948     | NM_001165937 | STARD3          |
| A_33_P3257150  | 12,1429 | 12,8072 | -1,584799137 | ENST00000400259 | 998       | NM_001039802 | CDC42           |
| A_22_P00007603 | 3,84828 | 4,51259 | -1,584810122 | N/A             | 101928246 | XR_247296    | LOC101928246    |
| A_33_P3295200  | 1,62363 | 2,28802 | -1,584898005 | ENST00000222115 | 3036      | NM_001523    | HAS1            |
| A_33_P3383796  | 3,09981 | 3,76423 | -1,584930963 | ENST00000596005 | 401647    | NM_001010917 | GOLGA7B         |
| A_22_P00001537 | 2,22117 | 2,88578 | -1,585139709 | N/A             | N/A       | AK127010     | Inc-ARHGEF10L-1 |
| A_33_P3480395  | 2,82564 | 3,49027 | -1,585161683 | ENST00000360835 | 80274     | AK055463     | SCUBE1          |
| A_19_P00804049 | 5,22677 | 5,89141 | -1,585172671 | N/A             | 401320    | NR_038889    | LOC401320       |
| A_33_P3293432  | 8,40406 | 9,0688  | -1,585282551 | ENST00000584306 | 374819    | NM_199340    | LRRRC37A3       |
| A_21_P0011598  | 4,58819 | 5,25295 | -1,585304527 | ENST00000590744 | N/A       | XR_430004    | N/A             |
| A_33_P3235568  | 12,1683 | 12,8333 | -1,585568273 | ENST00000375142 | 832       | NM_001206541 | CAPZB           |
| A_22_P00002524 | 5,06284 | 5,72785 | -1,585579264 | N/A             | N/A       | N/A          | Inc-C17orf46-1  |
| A_21_P0007846  | 1,43104 | 2,09622 | -1,585766111 | N/A             | N/A       | N/A          | Inc-NEDD1-5     |
| A_23_P332960   | 10,7561 | 11,4213 | -1,585788095 | ENST00000492023 | 283232    | NM_001042463 | TMEM80          |
| A_23_P424712   | 8,87452 | 9,5398  | -1,585876032 | ENST00000393965 | 84865     | NM_032779    | CCDC142         |
| A_23_P25935    | 10,2435 | 10,9088 | -1,585898017 | ENST00000256319 | 11161     | NM_007176    | C14orf1         |
| A_24_P156113   | 13,0984 | 13,7638 | -1,586007947 | ENST00000263277 | 30846     | NM_014601    | EHD2            |
| A_21_P0014632  | 4,79909 | 5,46453 | -1,586051921 | N/A             | 101928979 | XR_426812    | LOC101928979    |
| A_23_P157569   | 8,30158 | 8,9671  | -1,586139873 | ENST00000496501 | 137872    | NM_144650    | ADHFE1          |
| A_23_P75622    | 16,1827 | 16,8483 | -1,58622783  | ENST00000529770 | 10632     | NM_006476    | ATP5L           |
| A_22_P00016875 | 4,3552  | 5,02085 | -1,586282805 | N/A             | N/A       | N/A          | Inc-TSC2-1      |
| A_22_P00000930 | 1,36465 | 2,03044 | -1,586436746 | N/A             | N/A       | BI828415     | Inc-AKIP1-2     |
| A_23_P55011    | 12,8437 | 13,5095 | -1,586447743 | ENST00000539643 | 124565    | NM_001037984 | SLC38A10        |
| A_24_P236251   | 1,83397 | 2,49978 | -1,586458739 | ENST00000331224 | 8788      | NM_003836    | DLK1            |
| A_32_P8813     | 6,99733 | 7,66316 | -1,586480732 | ENST00000502027 | 283663    | NR_024433    | LINC00926       |
| A_23_P218784   | 10,8721 | 11,5382 | -1,58677767  | ENST00000432525 | 10521     | NM_006386    | DDX17           |
| A_33_P3256063  | 1,43831 | 2,10442 | -1,586788668 | ENST00000378653 | 645090    | N/A          | CXorf30         |
| A_22_P00013592 | 3,46477 | 4,13101 | -1,586931659 | ENST00000511731 | 402160    | NM_001193282 | CFAP99          |



|                |         |         |              |                 |           |              |                |
|----------------|---------|---------|--------------|-----------------|-----------|--------------|----------------|
| A_21_P0003832  | 2,06023 | 2,7266  | -1,587074662 | N/A             | N/A       | N/A          | Inc-PDGFRA-1   |
| A_33_P3305521  | 6,45652 | 7,12292 | -1,587107665 | ENST00000587084 | 22847     | AB029007     | ZNF507         |
| A_21_P0007182  | 1,34994 | 2,01636 | -1,587129667 | N/A             | N/A       | N/A          | Inc-NUCB2-2    |
| A_33_P3337584  | 1,80002 | 2,46646 | -1,58715167  | N/A             | 283482    | XR_247950    | LOC283482      |
| A_21_P0010634  | 1,52407 | 2,19053 | -1,587173672 | N/A             | N/A       | N/A          | XLOC_I2_001011 |
| A_23_P215154   | 10,5756 | 11,2421 | -1,587217679 | ENST00000568733 | 51667     | NM_016118    | NUB1           |
| A_33_P3342830  | 2,43371 | 3,10029 | -1,587305695 | ENST00000357084 | 487       | NM_173201    | ATP2A1         |
| A_33_P3419369  | 1,57319 | 2,23987 | -1,587415723 | ENST00000514823 | 285419    | AL833449     | LINC01091      |
| A_33_P3221448  | 9,53589 | 10,2026 | -1,587448732 | ENST00000263095 | 9422      | NM_003417    | ZNF264         |
| A_22_P00011372 | 8,87592 | 9,54271 | -1,587536762 | ENST00000460407 | N/A       | AK026659     | N/A            |
| A_22_P00019045 | 5,63596 | 6,30276 | -1,587547766 | N/A             | 100379345 | NR_038975    | MIR181A2HG     |
| A_23_P54758    | 10,4111 | 11,0779 | -1,587547766 | ENST00000564172 | 51573     | NM_016641    | GDE1           |
| A_23_P67198    | 8,40041 | 9,06725 | -1,587591783 | ENST00000596224 | 27151     | NM_015692    | CPAMD8         |
| A_22_P00015685 | 6,10679 | 6,77368 | -1,587646805 | N/A             | N/A       | N/A          | Inc-SYNC-2     |
| A_22_P00019721 | 1,69608 | 2,36304 | -1,58772384  | ENST00000509058 | N/A       | N/A          | N/A            |
| A_23_P99044    | 2,88053 | 3,54763 | -1,587877921 | ENST00000267119 | 112802    | NM_033448    | KRT71          |
| A_21_P0005695  | 3,97618 | 4,64334 | -1,587943961 | N/A             | N/A       | N/A          | Inc-C8orf22-2  |
| A_33_P3223713  | 10,678  | 11,3453 | -1,588098063 | ENST00000602762 | 10477     | NM_006357    | UBE2E3         |
| A_23_P376372   | 6,44824 | 7,11554 | -1,588098063 | ENST00000299952 | 91862     | NM_001017967 | MARVELD3       |
| A_32_P79591    | 4,03045 | 4,69779 | -1,588142095 | ENST00000396424 | 79788     | NM_024733    | ZNF665         |
| A_33_P3209361  | 5,18207 | 5,84955 | -1,588296217 | ENST00000409873 | 100130015 | NR_027335    | URAHP          |
| A_23_P115064   | 12,6089 | 13,2764 | -1,588318236 | ENST00000368221 | 1382      | NM_001878    | CRABP2         |
| A_33_P3413987  | 4,38565 | 5,05327 | -1,588450354 | ENST00000278407 | 710       | NM_000062    | SERPING1       |
| A_33_P3772150  | 2,26665 | 2,93444 | -1,58863754  | ENST00000381312 | 105       | NM_018702    | ADARB2         |
| A_21_P0007060  | 1,34269 | 2,01056 | -1,588725635 | N/A             | N/A       | N/A          | Inc-MTRNR2L5-3 |
| A_24_P113824   | 10,8506 | 11,5185 | -1,588758672 | ENST00000374358 | 23585     | NM_014313    | TMEM50A        |
| A_33_P3221723  | 1,63131 | 2,2993  | -1,588857787 | ENST00000547225 | 25834     | NM_013244    | MGAT4C         |
| A_21_P0006177  | 1,64566 | 2,3137  | -1,588912854 | N/A             | N/A       | N/A          | Inc-GADD45G-5  |
| A_22_P00019468 | 4,33021 | 4,99829 | -1,588956908 | N/A             | N/A       | N/A          | Inc-MIXL1-2    |
| A_33_P3216913  | 7,06522 | 7,73348 | -1,589155169 | ENST00000307201 | 116236    | NM_198147    | ABHD15         |
| A_23_P845      | 8,97478 | 9,64307 | -1,589188215 | ENST00000367988 | 84134     | NM_032174    | TOMM40L        |
| A_21_P0010642  | 4,37581 | 5,04416 | -1,589254309 | ENST00000430316 | 101929023 | NR_125973    | LOC101929023   |
| A_24_P941012   | 1,3624  | 2,03086 | -1,589375488 | N/A             | N/A       | N/A          | Inc-ABHD12B-2  |

|                |         |         |              |                 |           |              |                 |
|----------------|---------|---------|--------------|-----------------|-----------|--------------|-----------------|
| A_24_P222835   | 8,2318  | 8,90026 | -1,589375488 | ENST00000531123 | 64766     | NM_022753    | S100PBP         |
| A_19_P00809030 | 1,68648 | 2,35501 | -1,589452607 | ENST00000428651 | 101929378 | NR_110250    | LOC101929378    |
| A_21_P0003153  | 1,55624 | 2,22489 | -1,589584819 | N/A             | N/A       | N/A          | Inc-CBLB-7      |
| A_24_P643587   | 5,95109 | 6,61978 | -1,589628893 | ENST00000536549 | 140461    | NM_024095    | ASB8            |
| A_24_P941787   | 10,1388 | 10,8075 | -1,589639911 | ENST00000480058 | 8899      | NM_003913    | PRPF4B          |
| A_23_P164047   | 8,06094 | 8,72989 | -1,589915399 | ENST00000262065 | 23531     | NM_012329    | MMD             |
| A_24_P295245   | 11,8524 | 12,5216 | -1,590190934 | ENST00000517928 | 444       | NM_032467    | ASPH            |
| A_21_P0013933  | 1,63096 | 2,30026 | -1,590301161 | N/A             | 100287294 | XM_002342726 | LOC100287294    |
| A_33_P3242373  | 6,34379 | 7,01312 | -1,590334231 | ENST00000503369 | 4299      | NM_005935    | AFF1            |
| A_21_P0003311  | 4,08546 | 4,75483 | -1,590378325 | N/A             | N/A       | N/A          | Inc-LSG1-1      |
| A_33_P3296846  | 13,2012 | 13,8706 | -1,590411396 | ENST00000518413 | 56649     | NM_001290094 | TMPRSS4         |
| A_21_P0002314  | 1,63655 | 2,30632 | -1,590819333 | N/A             | 285141    | N/A          | ERICH2          |
| A_33_P3277259  | 8,69726 | 9,36704 | -1,59083036  | ENST00000538936 | 5833      | NM_001282203 | PCYT2           |
| A_33_P3268652  | 1,63908 | 2,30888 | -1,590852413 | N/A             | N/A       | N/A          | N/A             |
| A_33_P3231065  | 2,33506 | 3,00486 | -1,590852413 | N/A             | N/A       | N/A          | N/A             |
| A_23_P501372   | 9,16976 | 9,83956 | -1,590852413 | ENST00000395704 | 125170    | NM_139162    | MIEF2           |
| A_33_P3406686  | 5,03523 | 5,70517 | -1,591006798 | ENST00000434055 | 1639      | NR_033935    | DCTN1           |
| A_21_P0014102  | 6,54403 | 7,21418 | -1,591238403 | N/A             | 643072    | NR_110587    | LOC643072       |
| A_21_P0009354  | 1,81266 | 2,48283 | -1,591260463 | N/A             | N/A       | N/A          | Inc-ABCA5-4     |
| A_33_P3286302  | 7,3369  | 8,00715 | -1,591348703 | ENST00000463835 | 8764      | XR_426638    | TNFRSF14        |
| A_23_P217098   | 9,77083 | 10,4414 | -1,591701715 | ENST00000376636 | 23230     | NM_033305    | VPS13A          |
| A_23_P110837   | 1,37992 | 2,05049 | -1,591701715 | ENST00000505790 | 50805     | NM_016358    | IRX4            |
| A_33_P3259293  | 3,01729 | 3,68801 | -1,591867216 | ENST00000493423 | 84255     | AK131347     | SLC37A3         |
| A_24_P281908   | 1,75845 | 2,4292  | -1,591900318 | ENST00000261726 | 23316     | NM_015267    | CUX2            |
| A_21_P0000789  | 2,12743 | 2,79819 | -1,591911353 | N/A             | 100507423 | NR_038403    | MKNK1-AS1       |
| A_33_P3419632  | 3,11682 | 3,78762 | -1,59195549  | ENST00000389887 | 112937    | BC011001     | GLB1L3          |
| A_21_P0001362  | 1,45325 | 2,1241  | -1,592010664 | N/A             | N/A       | N/A          | Inc-SARS-1      |
| A_21_P0000397  | 7,83106 | 8,50224 | -1,59237486  | N/A             | 677765    | NR_003139    | SCARNA18        |
| A_23_P78014    | 9,26818 | 9,9394  | -1,592419011 | ENST00000588870 | 27175     | NM_016437    | TUBG2           |
| A_21_P0007027  | 3,69214 | 4,3634  | -1,592463163 | N/A             | N/A       | N/A          | Inc-C10orf120-1 |
| A_23_P250156   | 11,3375 | 12,0088 | -1,592507316 | ENST00000346192 | 10644     | NM_006548    | IGF2BP2         |
| A_23_P42664    | 14,6794 | 15,3508 | -1,592617704 | ENST00000482389 | 7979      | NM_006304    | SHFM1           |
| A_23_P58912    | 8,1245  | 8,79592 | -1,592639782 | ENST00000464978 | 10559     | NM_006416    | SLC35A1         |

|                |         |         |              |                 |           |              |                |
|----------------|---------|---------|--------------|-----------------|-----------|--------------|----------------|
| A_22_P00005289 | 2,28912 | 2,96057 | -1,592672901 | N/A             | 415056    | NR_024369    | CNTFR-AS1      |
| A_23_P252100   | 4,72852 | 5,39997 | -1,592672901 | ENST00000247883 | 54429     | NM_018980    | TAS2R5         |
| A_33_P3349145  | 6,89276 | 7,56425 | -1,592717059 | ENST00000439248 | 25809     | NM_012263    | TLL1           |
| A_21_P0002218  | 1,62569 | 2,29731 | -1,592860584 | ENST00000496970 | 400954    | N/A          | EML6           |
| A_24_P214231   | 5,96673 | 6,63845 | -1,592970997 | ENST00000371877 | 6491      | NM_001048166 | STIL           |
| A_33_P3354429  | 1,74653 | 2,4183  | -1,593026206 | ENST00000383763 | 131405    | NM_001039111 | TRIM71         |
| A_24_P394533   | 11,2776 | 11,9494 | -1,593059332 | ENST00000477637 | 4758      | NM_000434    | NEU1           |
| A_24_P97001    | 9,25575 | 9,92757 | -1,593081417 | ENST00000257181 | 84950     | NM_032864    | PRPF38A        |
| A_33_P3405429  | 1,78802 | 2,45985 | -1,593092459 | ENST00000473325 | 127731    | AK125833     | VWA5B1         |
| A_22_P00009846 | 1,7075  | 2,37934 | -1,593103502 | N/A             | N/A       | N/A          | Inc-METTL15-4  |
| A_23_P38813    | 7,55747 | 8,22935 | -1,593147673 | ENST00000595635 | 162967    | NM_207333    | ZNF320         |
| A_22_P00018073 | 4,86378 | 5,53573 | -1,593224975 | N/A             | N/A       | N/A          | Inc-ZNF33A-2   |
| A_21_P0014823  | 3,57681 | 4,24878 | -1,593247062 | N/A             | 100287160 | BC130650     | LOC100287160   |
| A_22_P00021032 | 2,5507  | 3,22269 | -1,593269149 | ENST00000536217 | N/A       | N/A          | N/A            |
| A_23_P70328    | 8,62167 | 9,29369 | -1,59330228  | ENST00000335783 | 55166     | NM_018132    | CENPQ          |
| A_33_P3771899  | 2,91981 | 3,59186 | -1,593335412 | N/A             | N/A       | BQ278507     | N/A            |
| A_33_P3277688  | 2,76574 | 3,43782 | -1,593368545 | N/A             | N/A       | AK125484     | Inc-KLHL36-1   |
| A_24_P166661   | 10,1251 | 10,7972 | -1,593390634 | ENST00000257663 | 85025     | NM_032936    | TMEM60         |
| A_23_P158880   | 10,2139 | 10,8862 | -1,59361154  | ENST00000325346 | 80765     | NM_181900    | STARD5         |
| A_23_P68486    | 12,2731 | 12,9454 | -1,59361154  | ENST00000371384 | 116151    | NM_080821    | FAM210B        |
| A_33_P3307408  | 1,68117 | 2,35349 | -1,593633633 | N/A             | N/A       | N/A          | N/A            |
| A_22_P00012563 | 1,41109 | 2,08346 | -1,593688865 | ENST00000525381 | N/A       | N/A          | N/A            |
| A_33_P3379939  | 14,1565 | 14,829  | -1,593832477 | ENST00000383620 | 3134      | NM_018950    | HLA-F          |
| A_23_P382835   | 6,76247 | 7,43498 | -1,593843525 | ENST00000305097 | 5028      | NM_002563    | P2RY1          |
| A_19_P00320543 | 1,99885 | 2,67146 | -1,593954005 | ENST00000592411 | 162655    | NR_033354    | ZNF519         |
| A_21_P0000055  | 8,68422 | 9,35705 | -1,59419709  | ENST00000500576 | 57128     | NM_001164840 | LYRM4          |
| A_19_P00317053 | 6,55013 | 7,22298 | -1,59421919  | N/A             | N/A       | N/A          | Inc-HDAC2-2    |
| A_33_P3384578  | 2,29266 | 2,96553 | -1,594241291 | ENST00000367638 | 400798    | N/A          | C1orf220       |
| A_33_P3272412  | 4,17017 | 4,84305 | -1,594252341 | N/A             | 645566    | AK127393     | FLJ45482       |
| A_22_P00024796 | 2,10654 | 2,77945 | -1,594285493 | N/A             | N/A       | N/A          | Inc-MAFF-1     |
| A_21_P0009053  | 2,09688 | 2,76987 | -1,594373902 | N/A             | N/A       | N/A          | Inc-ZNF23-2    |
| A_21_P0013813  | 6,71185 | 7,38494 | -1,594484419 | N/A             | N/A       | N/A          | XLOC_I2_015716 |
| A_23_P130488   | 8,10019 | 8,7733  | -1,594506523 | ENST00000587376 | 2068      | NM_000400    | ERCC2          |

|                |         |         |              |                 |           |              |                |
|----------------|---------|---------|--------------|-----------------|-----------|--------------|----------------|
| A_21_P0007028  | 2,01612 | 2,68928 | -1,594561786 | N/A             | N/A       | N/A          | Inc-CPXM2-1    |
| A_23_P74449    | 11,5194 | 12,1926 | -1,594605997 | ENST00000334815 | 84842     | NM_032756    | HPDL           |
| A_22_P00016249 | 3,15267 | 3,82593 | -1,594672316 | N/A             | N/A       | CA431762     | Inc-TMCO3-2    |
| A_22_P00021967 | 2,7888  | 3,46225 | -1,594882345 | ENST00000558245 | N/A       | N/A          | N/A            |
| A_24_P110799   | 10,3368 | 11,0103 | -1,594937621 | ENST00000474319 | 4047      | NM_002340    | LSS            |
| A_23_P382705   | 7,84024 | 8,51385 | -1,595059233 | ENST00000321196 | 160335    | NM_152588    | TMTC2          |
| A_32_P58937    | 8,3087  | 8,98232 | -1,595070289 | ENST00000415868 | 54799     | NM_017643    | MBTD1          |
| A_22_P00005895 | 2,55373 | 3,22747 | -1,595202969 | ENST00000540994 | N/A       | AK094733     | N/A            |
| A_21_P0010998  | 4,91842 | 5,5922  | -1,595247198 | ENST00000527511 | 283140    | N/A          | LOC283140      |
| A_23_P56567    | 10,5401 | 11,2139 | -1,595269313 | ENST00000281950 | 79833     | NM_024775    | GEMIN6         |
| A_23_P217778   | 8,23266 | 8,90649 | -1,595302486 | ENST00000398527 | 10943     | NM_078629    | MSL3           |
| A_19_P00321493 | 3,54384 | 4,21772 | -1,595357776 | ENST00000415869 | 100505920 | NR_125403    | LOC100505920   |
| A_33_P3358541  | 2,35349 | 3,02738 | -1,595368834 | N/A             | N/A       | AK097792     | N/A            |
| A_23_P85952    | 12,3286 | 13,0025 | -1,595379892 | ENST00000357640 | 79961     | NM_024901    | DENND2D        |
| A_24_P177553   | 3,46354 | 4,13746 | -1,595402009 | N/A             | N/A       | BU963192     | N/A            |
| A_23_P134627   | 3,85189 | 4,52583 | -1,595424126 | ENST00000313669 | 136227    | NM_133457    | COL26A1        |
| A_23_P77965    | 8,15286 | 8,82687 | -1,595501539 | ENST00000587314 | 63897     | NM_022070    | HEATR6         |
| A_33_P3271634  | 3,59485 | 4,26888 | -1,595523657 | ENST00000466949 | 3115      | XM_006715078 | HLA-DPB1       |
| A_23_P375566   | 5,02504 | 5,69913 | -1,595590015 | ENST00000468837 | 252983    | NM_178509    | STXBP4         |
| A_22_P00017664 | 1,46557 | 2,13968 | -1,595612134 | N/A             | N/A       | N/A          | Inc-WRN-8      |
| A_23_P55926    | 8,8588  | 9,53309 | -1,595811226 | ENST00000597085 | 7376      | NM_007121    | NR1H2          |
| A_33_P3347787  | 2,48303 | 3,15739 | -1,595888657 | N/A             | N/A       | N/A          | N/A            |
| A_23_P17826    | 3,17466 | 3,8492  | -1,596087783 | ENST00000543737 | 6523      | NM_000343    | SLC5A1         |
| A_21_P0014186  | 7,9536  | 8,62832 | -1,596286933 | N/A             | 101927811 | NR_110119    | LOC101927811   |
| A_33_P3284247  | 1,64442 | 2,31924 | -1,596397583 | ENST00000382966 | 352887    | N/A          | GYG2P1         |
| A_24_P245246   | 11,0235 | 11,6985 | -1,596596773 | ENST00000613180 | 8396      | NM_003559    | PIP4K2B        |
| A_33_P3410859  | 5,04315 | 5,71815 | -1,596596773 | ENST00000569097 | 729603    | NR_003288    | LOC729603      |
| A_21_P0005567  | 5,75819 | 6,4332  | -1,59660784  | N/A             | N/A       | N/A          | Inc-LAT2-1     |
| A_33_P3322050  | 4,15632 | 4,83136 | -1,59664104  | ENST00000398956 | 1859      | NM_130438    | DYRK1A         |
| A_21_P0011423  | 4,53348 | 5,2086  | -1,596729579 | N/A             | N/A       | N/A          | XLOC_I2_005175 |
| A_22_P00021049 | 1,5201  | 2,19525 | -1,596762783 | ENST00000445253 | 252954    | NR_001539    | TTY22          |
| A_21_P0014304  | 3,85971 | 4,53489 | -1,596795987 | N/A             | N/A       | BC073817     | Inc-CHSY1-5    |
| A_22_P00018368 | 1,7301  | 2,40528 | -1,596795987 | N/A             | N/A       | N/A          | Inc-orphan.1-1 |

|                |         |         |              |                 |           |              |                |
|----------------|---------|---------|--------------|-----------------|-----------|--------------|----------------|
| A_24_P383330   | 14,9772 | 15,6526 | -1,597039505 | ENST00000494861 | N/A       | N/A          | N/A            |
| A_33_P3305536  | 6,06306 | 6,73846 | -1,597039505 | ENST00000437814 | 196074    | AK091261     | METTLL15       |
| A_23_P152330   | 2,91218 | 3,58767 | -1,597139136 | ENST00000561671 | 8448      | NM_003586    | DOC2A          |
| A_33_P3418234  | 1,7182  | 2,39376 | -1,597216632 | N/A             | 441925    | NM_001290693 | BECN1P1        |
| A_21_P0007466  | 3,52673 | 4,20241 | -1,59734949  | ENST00000526385 | N/A       | N/A          | N/A            |
| A_33_P3407592  | 7,27448 | 7,9502  | -1,597393779 | ENST00000621154 | N/A       | N/A          | N/A            |
| A_23_P169428   | 11,0624 | 11,7384 | -1,597703833 | ENST00000372890 | 26995     | NM_015679    | TRUB2          |
| A_24_P259154   | 3,16194 | 3,83795 | -1,597714907 | ENST00000292748 | 113691    | NR_003608    | TUBA3FP        |
| A_21_P0010579  | 1,39807 | 2,0741  | -1,597737057 | N/A             | N/A       | N/A          | XLOC_I2_000643 |
| A_32_P55840    | 4,22148 | 4,89758 | -1,597814581 | ENST00000377186 | 729583    | NR_103538    | LINC01556      |
| A_22_P00010948 | 1,48483 | 2,16101 | -1,597903185 | ENST00000507849 | N/A       | N/A          | N/A            |
| A_23_P15678    | 1,73098 | 2,4072  | -1,597947489 | ENST00000338694 | 83659     | NM_053285    | TEKT1          |
| A_22_P00017801 | 1,55768 | 2,23399 | -1,598047177 | ENST00000431947 | 102723831 | NR_125868    | LOC102723831   |
| A_33_P3383071  | 3,04236 | 3,71867 | -1,598047177 | N/A             | 100128437 | AK126077     | LOC100128437   |
| A_33_P3387493  | 3,97544 | 4,65182 | -1,598124717 | N/A             | 441490    | NM_001271682 | FTH1P18        |
| A_23_P429461   | 9,62519 | 10,3016 | -1,598157949 | ENST00000464499 | 197258    | NM_145059    | FUK            |
| A_33_P3351554  | 9,41804 | 10,0947 | -1,598434913 | ENST00000367202 | 55224     | NM_001297760 | ETNK2          |
| A_32_P64200    | 5,13678 | 5,81347 | -1,598468152 | N/A             | 2979      | NM_002098    | GUCA1B         |
| A_33_P3645079  | 1,47829 | 2,15498 | -1,598468152 | N/A             | 100133311 | NR_038831    | HOXA-AS3       |
| A_22_P00008226 | 3,93015 | 4,60711 | -1,598767333 | N/A             | 103625681 | NR_125724    | LLPH-AS1       |
| A_33_P3276718  | 1,72726 | 2,40432 | -1,598878155 | ENST00000423064 | 3082      | NM_001010934 | HGF            |
| A_23_P99397    | 9,24294 | 9,92014 | -1,599033318 | ENST00000464055 | 253832    | NM_153251    | ZDHHC20        |
| A_33_P3368193  | 1,8013  | 2,47852 | -1,599055486 | ENST00000369230 | 119548    | NM_001011709 | PNLIPRP3       |
| A_24_P133017   | 3,76557 | 4,44286 | -1,599133074 | ENST00000533102 | 84866     | NM_032780    | TMEM25         |
| A_22_P00017323 | 4,16954 | 4,84691 | -1,599221752 | N/A             | 100289388 | NR_102281    | KCTD21-AS1     |
| A_23_P251486   | 1,49602 | 2,1734  | -1,599232837 | N/A             | 10584     | NM_006438    | COLEC10        |
| A_22_P00003794 | 1,61444 | 2,29191 | -1,599332605 | N/A             | N/A       | N/A          | Inc-CDK5RAP1-1 |
| A_33_P3359704  | 4,7128  | 5,3904  | -1,599476726 | ENST00000331569 | 80139     | AK024361     | ZNF703         |
| A_33_P3287825  | 7,80813 | 8,48581 | -1,599565422 | ENST00000378685 | 64753     | NM_022742    | CCDC136        |
| A_23_P411953   | 10,7855 | 11,4632 | -1,599587597 | ENST00000368457 | 90780     | NM_138300    | PYGO2          |
| A_23_P52826    | 11,07   | 11,7477 | -1,599587597 | ENST00000260210 | 84811     | NM_032725    | BUD13          |
| A_33_P3391225  | 3,0746  | 3,75237 | -1,599665212 | ENST00000316506 | N/A       | AB529252     | N/A            |
| A_24_P37253    | 7,06382 | 7,74163 | -1,599709564 | ENST00000409381 | 130574    | NM_194317    | LYPD6          |

|                |         |         |              |                 |           |              |                    |
|----------------|---------|---------|--------------|-----------------|-----------|--------------|--------------------|
| A_24_P349821   | 6,15433 | 6,83219 | -1,599765007 | ENST00000430347 | 9617      | NM_004294    | MTRF1              |
| A_33_P3378800  | 15,3044 | 15,9823 | -1,599809362 | ENST00000382456 | 1173      | NM_004068    | AP2M1              |
| A_33_P3216200  | 1,98093 | 2,65883 | -1,599809362 | N/A             | N/A       | N/A          | N/A                |
| A_23_P146417   | 11,1094 | 11,7874 | -1,599920257 | ENST00000374586 | 23731     | NM_032012    | TMEM245            |
| A_22_P00002527 | 2,20939 | 2,88753 | -1,600075521 | N/A             | 101101775 | NR_073458    | TMEM220-AS1        |
| A_23_P332042   | 8,9331  | 9,6117  | -1,600585783 | ENST00000317905 | 9400      | NM_004259    | RECQL5             |
| A_23_P153390   | 1,64651 | 2,32518 | -1,600663446 | ENST00000620128 | 339390    | NM_198492    | CLEC4G             |
| A_33_P3420635  | 4,58529 | 5,26398 | -1,600685636 | ENST00000300127 | 219983    | NM_001004708 | OR4D6              |
| A_24_P186986   | 12,0139 | 12,6926 | -1,600696731 | ENST00000429024 | N/A       | N/A          | N/A                |
| A_33_P3401422  | 3,39688 | 4,07572 | -1,600852071 | ENST00000404743 | 340654    | NM_001128215 | LIPM               |
| A_23_P85640    | 5,41336 | 6,09221 | -1,600863168 | ENST00000373024 | 3633      | NM_005540    | INPP5B             |
| A_22_P00000816 | 3,3215  | 4,00037 | -1,60088536  | N/A             | N/A       | N/A          | Inc-AF165138.7.1-2 |
| A_21_P0007569  | 3,47459 | 4,15347 | -1,600896457 | ENST00000548969 | 100506869 | NR_126341    | LOC100506869       |
| A_33_P3411991  | 7,745   | 8,42399 | -1,601018524 | ENST00000456584 | 23637     | NM_012197    | RABGAP1            |
| A_22_P00003017 | 6,18973 | 6,86881 | -1,601118404 | N/A             | N/A       | XM_005249927 | Inc-C7orf11-1      |
| A_21_P0009777  | 2,75349 | 3,43264 | -1,601196092 | ENST00000593393 | 102723931 | XR_244021    | LOC102723931       |
| A_21_P0010594  | 3,25763 | 3,93683 | -1,601251587 | N/A             | N/A       | N/A          | XLOC_I2_000727     |
| A_21_P0003301  | 2,50867 | 3,18806 | -1,601462482 | N/A             | 101928105 | NR_121657    | LOC101928105       |
| A_24_P21715    | 10,0136 | 10,693  | -1,601473583 | ENST00000307980 | 5883      | NM_004584    | RAD9A              |
| A_21_P0009258  | 1,92003 | 2,59949 | -1,601540187 | N/A             | 101927389 | XR_243722    | LOC101927389       |
| A_21_P0002907  | 2,00685 | 2,68634 | -1,601573491 | ENST00000441185 | N/A       | N/A          | N/A                |
| A_19_P00318413 | 2,59886 | 3,27843 | -1,601662303 | N/A             | N/A       | N/A          | XLOC_I2_010751     |
| A_23_P212159   | 8,37046 | 9,05003 | -1,601662303 | ENST00000254508 | 23225     | NM_024923    | NUP210             |
| A_23_P69154    | 5,98944 | 6,66903 | -1,601684507 | ENST00000430121 | 729085    | NM_001129908 | FAM198A            |
| A_21_P0008109  | 4,80317 | 5,48285 | -1,601784429 | N/A             | N/A       | N/A          | Inc-FARP1-1        |
| A_33_P3268507  | 8,32702 | 9,00681 | -1,601906563 | ENST00000403136 | 634       | NM_001184816 | CEACAM1            |
| A_23_P132738   | 6,22546 | 6,90532 | -1,60198429  | ENST00000460288 | 1427      | NM_017541    | CRYGS              |
| A_22_P00015679 | 4,09427 | 4,77423 | -1,602095335 | ENST00000414768 | N/A       | BG206235     | N/A                |
| A_33_P3295578  | 9,67421 | 10,3542 | -1,60212865  | ENST00000451678 | 90843     | NM_153333    | TCEAL8             |
| A_23_P4536     | 1,68873 | 2,36878 | -1,602195282 | ENST00000545076 | 23136     | NM_012307    | EPB41L3            |
| A_33_P3263666  | 12,2162 | 12,8963 | -1,602250811 | ENST00000559651 | 122416    | NM_152326    | ANKRD9             |
| A_22_P00013089 | 5,98281 | 6,66297 | -1,602317448 | N/A             | N/A       | CD673709     | Inc-RHPN1-2        |
| A_24_P76546    | 10,8118 | 11,4921 | -1,602472945 | ENST00000618852 | 10163     | AK075231     | WASF2              |

|                |         |         |              |                 |           |              |                |
|----------------|---------|---------|--------------|-----------------|-----------|--------------|----------------|
| A_33_P3309849  | 7,51941 | 8,19981 | -1,602584024 | N/A             | N/A       | N/A          | N/A            |
| A_23_P111701   | 8,3502  | 9,03062 | -1,602606241 | ENST00000248564 | 2791      | NM_004126    | GNG11          |
| A_22_P00021303 | 1,80549 | 2,48631 | -1,603050639 | N/A             | 101929353 | NR_125924    | LOC101929353   |
| A_33_P3262537  | 2,98162 | 3,66246 | -1,603072862 | N/A             | N/A       | N/A          | N/A            |
| A_33_P3417150  | 5,65524 | 6,33624 | -1,603250659 | ENST00000305097 | 5028      | NM_002563    | P2RY1          |
| A_23_P111132   | 13,5023 | 14,1833 | -1,603250659 | ENST00000375651 | 3303      | NM_005345    | HSPA1A         |
| A_33_P3358653  | 1,45369 | 2,13477 | -1,603339564 | N/A             | N/A       | N/A          | N/A            |
| A_23_P155057   | 3,98782 | 4,66896 | -1,603406247 | ENST00000462927 | 27128     | NM_013385    | CYTH4          |
| A_22_P00023783 | 2,24359 | 2,92488 | -1,603572965 | N/A             | N/A       | N/A          | Inc-MKI67-2    |
| A_22_P00009063 | 1,71954 | 2,40084 | -1,60358408  | ENST00000561318 | N/A       | N/A          | N/A            |
| A_21_P0013951  | 3,07584 | 3,75725 | -1,603706352 | N/A             | N/A       | AK294064     | N/A            |
| A_23_P8240     | 8,98432 | 9,66581 | -1,603795283 | ENST00000380274 | 26240     | NM_012135    | FAM50B         |
| A_33_P3337272  | 13,1409 | 13,8224 | -1,603806399 | N/A             | 441478    | NM_001004354 | NRARP          |
| A_22_P00009445 | 2,13031 | 2,81195 | -1,603962041 | ENST00000518687 | N/A       | CR739174     | N/A            |
| A_23_P113237   | 4,50296 | 5,1846  | -1,603962041 | ENST00000381567 | 64109     | NM_001012288 | CRLF2          |
| A_21_P0001167  | 1,67911 | 2,36083 | -1,604050986 | N/A             | 100996263 | N/A          | LOC100996263   |
| A_23_P218423   | 12,229  | 12,9108 | -1,604139936 | ENST00000421763 | 124995    | NM_148887    | MRPL10         |
| A_23_P64898    | 2,19072 | 2,8727  | -1,604340092 | ENST00000538029 | 10219     | NM_005810    | KLRG1          |
| A_23_P27677    | 10,9807 | 11,6628 | -1,604473542 | ENST00000597198 | 3661      | NM_001571    | IRF3           |
| A_23_P410312   | 8,87791 | 9,56007 | -1,604540272 | ENST00000615315 | 400073    | NM_207435    | C12orf76       |
| A_22_P00019316 | 2,54791 | 3,23007 | -1,604540272 | N/A             | 101927063 | XR_247565    | LOC101927063   |
| A_33_P3386117  | 11,85   | 12,5322 | -1,60458476  | ENST00000378513 | 11079     | NM_007033    | RER1           |
| A_33_P3345011  | 1,59589 | 2,2781  | -1,604595882 | ENST00000324436 | 284382    | NM_178525    | ACTL9          |
| A_33_P3354945  | 1,7215  | 2,40378 | -1,60467374  | ENST00000369801 | 1435      | NM_172210    | CSF1           |
| A_23_P117225   | 10,7515 | 11,4338 | -1,604695985 | ENST00000472247 | 2073      | NM_000123    | ERCC5          |
| A_24_P217834   | 11,278  | 11,9603 | -1,604695985 | ENST00000356476 | 8351      | NM_003530    | HIST1H3D       |
| A_21_P0006195  | 1,90904 | 2,59137 | -1,604729354 | N/A             | N/A       | N/A          | Inc-C9orf107-2 |
| A_33_P3326643  | 1,98007 | 2,66241 | -1,604740477 | ENST00000399391 | 340990    | NM_001277269 | OTOG           |
| A_33_P3297302  | 4,84203 | 5,52446 | -1,604840589 | ENST00000409331 | 84173     | NM_001135021 | ELMOD3         |
| A_21_P0014193  | 3,02094 | 3,70346 | -1,604940708 | N/A             | N/A       | N/A          | N/A            |
| A_33_P3368188  | 7,29315 | 7,97569 | -1,604962957 | ENST00000592481 | 10801     | NM_006640    | set-09         |
| A_21_P0007065  | 5,10111 | 5,7838  | -1,605129837 | ENST00000593568 | 101928913 | NR_120647    | LINC01515      |
| A_23_P5415     | 11,6847 | 12,3674 | -1,605140963 | ENST00000409357 | 60491     | NM_021824    | NIF3L1         |

|                |         |         |              |                 |           |              |                |
|----------------|---------|---------|--------------|-----------------|-----------|--------------|----------------|
| A_23_P312565   | 1,60619 | 2,28892 | -1,605174341 | ENST00000464387 | 138649    | NR_026868    | ANKRD19P       |
| A_21_P0014101  | 1,65158 | 2,33446 | -1,605341243 | N/A             | 654841    | NR_102371    | LOC654841      |
| A_33_P3240543  | 12,4109 | 13,0938 | -1,605363498 | ENST00000473312 | 116988    | NM_001042535 | AGAP3          |
| A_21_P0013035  | 5,376   | 6,05892 | -1,605385753 | ENST00000403062 | 26065     | NM_015578    | LSM14A         |
| A_33_P3285545  | 14,9647 | 15,6477 | -1,605474777 | ENST00000431918 | 1364      | NM_001305    | CLDN4          |
| A_23_P83278    | 12,9039 | 13,5869 | -1,605474777 | ENST00000223500 | 51510     | NM_016410    | CHMP5          |
| A_23_P117896   | 2,57839 | 3,26149 | -1,605586064 | ENST00000452443 | 116179    | NM_052955    | TGM7           |
| A_22_P00012541 | 8,81826 | 9,50145 | -1,605686229 | N/A             | 100128782 | NR_023389    | LINC00476      |
| A_32_P190944   | 5,56398 | 6,24731 | -1,605842053 | ENST00000243349 | 130399    | NM_145259    | ACVR1C         |
| A_21_P0013649  | 6,9779  | 7,66126 | -1,605875446 | N/A             | N/A       | N/A          | XLOC_I2_015209 |
| A_21_P0000307  | 8,13235 | 8,81573 | -1,605897709 | N/A             | 677794    | NR_002951    | SNORA2B        |
| A_33_P3298105  | 5,83879 | 6,52239 | -1,606142614 | ENST00000382095 | 221178    | NM_001286792 | SPATA13        |
| A_21_P0011586  | 1,41571 | 2,09934 | -1,606176014 | ENST00000422957 | N/A       | N/A          | N/A            |
| A_21_P0008915  | 2,42096 | 3,10465 | -1,606242814 | N/A             | N/A       | N/A          | Inc-CACNG3-1   |
| A_23_P168019   | 4,58106 | 5,26477 | -1,606265081 | ENST00000341464 | 80317     | NM_024493    | ZKSCAN3        |
| A_22_P00020052 | 1,77493 | 2,45884 | -1,606487772 | ENST00000506420 | N/A       | N/A          | N/A            |
| A_23_P64712    | 5,61628 | 6,30021 | -1,606510043 | ENST00000426174 | 79867     | NM_024809    | TCTN2          |
| A_22_P00002273 | 1,64164 | 2,32559 | -1,606532314 | ENST00000443016 | N/A       | AK091487     | N/A            |
| A_33_P3242548  | 1,37399 | 2,05797 | -1,606565722 | ENST00000394435 | 11107     | NM_001300824 | PRDM5          |
| A_22_P00005763 | 2,69979 | 3,38403 | -1,60685528  | N/A             | N/A       | AI821561     | Inc-ENO3-2     |
| A_21_P0003017  | 1,84048 | 2,52473 | -1,606866418 | N/A             | N/A       | N/A          | Inc-NR112-1    |
| A_24_P626931   | 7,28382 | 7,96809 | -1,606888694 | ENST00000503942 | 90025     | XM_006715597 | UBE3D          |
| A_21_P0000519  | 2,11405 | 2,79834 | -1,606910971 | ENST00000569242 | 283914    | NR_027080    | LINC01566      |
| A_24_P375205   | 4,03358 | 4,71793 | -1,606977801 | N/A             | 57496     | AK093577     | MKL2           |
| A_21_P0000911  | 3,1717  | 3,85619 | -1,607133751 | N/A             | N/A       | N/A          | Inc-WDR65-1    |
| A_23_P254120   | 11,1326 | 11,8171 | -1,607144891 | ENST00000480463 | 26268     | NM_033480    | FBXO9          |
| A_23_P385911   | 4,25526 | 4,94    | -1,60741227  | ENST00000396791 | 80817     | NM_001145314 | CEP44          |
| A_23_P164912   | 8,60613 | 9,29092 | -1,60746798  | ENST00000469137 | 64130     | NM_022165    | LIN7B          |
| A_21_P0002956  | 3,17516 | 3,85997 | -1,607490264 | N/A             | N/A       | N/A          | Inc-KLHL18-1   |
| A_33_P3306413  | 3,35347 | 4,03838 | -1,607601691 | ENST00000574617 | 388324    | NM_001167986 | INCA1          |
| A_23_P161218   | 5,90536 | 6,59034 | -1,607679694 | ENST00000371697 | 27063     | NM_014391    | ANKRD1         |
| A_23_P216094   | 10,1361 | 10,8211 | -1,607701981 | ENST00000541428 | 444       | NM_004318    | ASPH           |
| A_23_P401098   | 7,08944 | 7,77448 | -1,607746557 | ENST00000304621 | 125488    | NM_153211    | TTC39C         |



|                |         |         |              |                 |           |              |                |
|----------------|---------|---------|--------------|-----------------|-----------|--------------|----------------|
| A_23_P130040   | 11,109  | 11,7942 | -1,607924872 | ENST00000300408 | 5245      | NM_002634    | PHB            |
| A_22_P00015296 | 9,30393 | 9,98915 | -1,607947162 | ENST00000560049 | 645212    | NR_034170    | EIF3J-AS1      |
| A_22_P00008678 | 1,46402 | 2,14943 | -1,60815894  | N/A             | N/A       | N/A          | Inc-KIAA0913-1 |
| A_19_P00330549 | 3,83855 | 4,52404 | -1,608248118 | N/A             | 100132356 | N/A          | LOC100132356   |
| A_33_P3387646  | 3,69062 | 4,37614 | -1,60828156  | ENST00000508056 | 643201    | NR_036494    | LOC643201      |
| A_24_P244944   | 6,25344 | 6,93943 | -1,60880559  | ENST00000456504 | 55784     | NM_018349    | MCTP2          |
| A_23_P319013   | 6,79037 | 7,47639 | -1,608839045 | ENST00000586068 | 163087    | NM_152604    | ZNF383         |
| A_33_P3220056  | 1,38703 | 2,07323 | -1,609039787 | ENST00000413042 | N/A       | AK057873     | N/A            |
| A_33_P3294524  | 6,79111 | 7,47779 | -1,60957522  | ENST00000400020 | 23253     | NM_001204056 | ANKRD12        |
| A_22_P00024945 | 2,41581 | 3,10256 | -1,609653319 | N/A             | N/A       | N/A          | Inc-BMP4-2     |
| A_24_P262355   | 12,0994 | 12,7862 | -1,609709107 | ENST00000507748 | 5245      | NM_002634    | PHB            |
| A_32_P116857   | 1,73535 | 2,42219 | -1,609753738 | ENST00000286063 | 50940     | NM_016953    | PDE11A         |
| A_22_P00003442 | 1,34346 | 2,03067 | -1,610166636 | N/A             | N/A       | BX119833     | Inc-CCDC40-1   |
| A_23_P204503   | 9,94905 | 10,6364 | -1,610322895 | ENST00000537057 | 5564      | NM_006253    | PRKAB1         |
| A_24_P181055   | 9,63117 | 10,3186 | -1,610412192 | ENST00000530591 | 6484      | NM_006278    | ST3GAL4        |
| A_23_P100056   | 1,55006 | 2,23756 | -1,610490332 | ENST00000300069 | 348093    | NM_194272    | RBPMS2         |
| A_23_P215832   | 14,3491 | 15,0367 | -1,610601967 | ENST00000394186 | 9551      | NM_004889    | ATP5J2         |
| A_22_P00023602 | 7,03954 | 7,72714 | -1,610601967 | ENST00000416191 | N/A       | XR_428799    | N/A            |
| A_21_P0003896  | 1,42082 | 2,1085  | -1,61069128  | N/A             | N/A       | N/A          | Inc-TECRL-1    |
| A_23_P141730   | 10,0774 | 10,7652 | -1,610825259 | ENST00000261590 | 1829      | NM_001943    | DSG2           |
| A_33_P3317392  | 3,18787 | 3,87582 | -1,610992748 | ENST00000274487 | 171019    | NM_133638    | ADAMTS19       |
| A_22_P00002395 | 1,7867  | 2,47485 | -1,611216095 | ENST00000554428 | 100309464 | NR_029385    | OTX2-AS1       |
| A_22_P00014896 | 1,55158 | 2,23974 | -1,611227263 | N/A             | N/A       | DB069350     | Inc-SLC7A6OS-1 |
| A_33_P3304369  | 6,69464 | 7,38281 | -1,611238431 | N/A             | N/A       | N/A          | N/A            |
| A_21_P0009183  | 1,52257 | 2,21075 | -1,6112496   | N/A             | N/A       | N/A          | Inc-FSCN2-1    |
| A_21_P0001798  | 1,44385 | 2,13204 | -1,611260768 | ENST00000456248 | 101927619 | N/A          | LOC101927619   |
| A_21_P0004864  | 8,292   | 8,98022 | -1,611294273 | ENST00000562904 | N/A       | XR_427900    | N/A            |
| A_22_P00011107 | 5,48552 | 6,17386 | -1,611428303 | N/A             | N/A       | N/A          | Inc-NUDT5-1    |
| A_23_P63751    | 12,7869 | 13,4753 | -1,611495322 | ENST00000298510 | 10935     | NM_006793    | PRDX3          |
| A_33_P3384548  | 4,66414 | 5,35264 | -1,611607026 | N/A             | N/A       | AK309505     | N/A            |
| A_21_P0011594  | 1,40412 | 2,09266 | -1,61165171  | N/A             | N/A       | N/A          | XLOC_I2_005804 |
| A_33_P3321657  | 15,2184 | 15,907  | -1,611718738 | ENST00000374695 | 3339      | NM_001291860 | HSPG2          |
| A_19_P00320663 | 2,78047 | 3,46918 | -1,61184163  | N/A             | 102724384 | XR_425661    | LOC102724384   |

|                |         |         |              |                 |           |              |              |
|----------------|---------|---------|--------------|-----------------|-----------|--------------|--------------|
| A_24_P68415    | 2,34215 | 3,03089 | -1,611875147 | ENST00000589703 | 7596      | NM_003425    | ZNF45        |
| A_21_P0005455  | 1,95394 | 2,64271 | -1,611908666 | N/A             | N/A       | N/A          | Inc-WDR60-2  |
| A_24_P365180   | 1,52908 | 2,21799 | -1,612065094 | ENST00000310045 | 92126     | NM_032160    | DSEL         |
| A_33_P3235521  | 4,1497  | 4,83863 | -1,612087442 | N/A             | N/A       | N/A          | N/A          |
| A_33_P3284408  | 5,01473 | 5,70371 | -1,612143314 | ENST00000483899 | 84301     | NM_032341    | DDI2         |
| A_33_P3294449  | 7,36123 | 8,05028 | -1,612221537 | ENST00000470721 | 55827     | NM_001017977 | DCAF6        |
| A_24_P216361   | 1,54948 | 2,23857 | -1,612266238 | ENST00000402697 | 23532     | NM_206956    | PRAME        |
| A_22_P00005758 | 3,58603 | 4,27513 | -1,612277414 | N/A             | 101929295 | NR_110303    | LOC101929295 |
| A_33_P3233906  | 8,03246 | 8,722   | -1,612769209 | ENST00000254661 | 10267     | NM_005855    | RAMP1        |
| A_21_P0011541  | 3,45425 | 4,14398 | -1,612981621 | ENST00000425901 | 342666    | N/A          | LRR37A11P    |
| A_22_P00022094 | 1,58538 | 2,27528 | -1,613171698 | N/A             | N/A       | N/A          | Inc-LRTM2-1  |
| A_21_P0004288  | 1,71856 | 2,40856 | -1,613283518 | N/A             | N/A       | N/A          | Inc-FTMT-1   |
| A_21_P0002541  | 1,70976 | 2,39976 | -1,613283518 | N/A             | N/A       | N/A          | Inc-TNP1-2   |
| A_22_P00016241 | 1,36157 | 2,05158 | -1,613294701 | ENST00000564852 | N/A       | N/A          | N/A          |
| A_33_P3235701  | 3,55402 | 4,2442  | -1,613484815 | ENST00000371541 | 23318     | XM_005270685 | ZCCHC11      |
| A_33_P3234410  | 13,0619 | 13,7522 | -1,613619026 | ENST00000459875 | N/A       | N/A          | N/A          |
| A_33_P3262789  | 10,755  | 11,4453 | -1,613619026 | ENST00000233596 | 92840     | NM_138393    | REEP6        |
| A_21_P0006090  | 3,09608 | 3,78663 | -1,613898669 | ENST00000423380 | N/A       | XR_108974    | N/A          |
| A_33_P3291891  | 4,74784 | 5,4384  | -1,613909856 | N/A             | 100128002 | XR_158870    | LOC100128002 |
| A_33_P3411315  | 9,66658 | 10,3572 | -1,613976978 | ENST00000391586 | 85293     | NM_033185    | KRTAP3-3     |
| A_23_P373568   | 8,61468 | 9,30537 | -1,614055291 | ENST00000377092 | 80199     | NM_025129    | FUZ          |
| A_19_P00319825 | 1,53798 | 2,22869 | -1,614077666 | ENST00000440444 | 283673    | NR_026949    | EWSAT1       |
| A_22_P00015672 | 9,26604 | 9,95676 | -1,614088854 | ENST00000566714 | N/A       | N/A          | N/A          |
| A_23_P357860   | 5,36382 | 6,05467 | -1,614234305 | ENST00000337002 | 7095      | NM_003262    | SEC62        |
| A_33_P3343007  | 3,34527 | 4,03621 | -1,614335009 | ENST00000390454 | N/A       | X68698       | N/A          |
| A_24_P290502   | 7,3076  | 7,9986  | -1,614402149 | ENST00000614209 | 9648      | NM_181453    | GCC2         |
| A_33_P3409844  | 6,88066 | 7,57177 | -1,614525246 | ENST00000455990 | 51361     | NM_015888    | HOOK1        |
| A_23_P122615   | 8,35566 | 9,04681 | -1,61457001  | ENST00000438806 | 25957     | NM_032870    | PNISR        |
| A_23_P110624   | 2,4684  | 3,15955 | -1,61457001  | ENST00000458100 | 1501      | NM_001332    | CTNND2       |
| A_32_P131143   | 5,34475 | 6,03631 | -1,615028921 | N/A             | 100130717 | NR_024482    | CECR5-AS1    |
| A_33_P3379463  | 12,9496 | 13,6412 | -1,6150737   | ENST00000374514 | 11313     | NM_007260    | LYPLA2       |
| A_22_P00019084 | 2,4904  | 3,18203 | -1,615107284 | N/A             | 101927884 | NR_110281    | LOC101927884 |
| A_33_P3376873  | 6,74121 | 7,43326 | -1,615577546 | N/A             | N/A       | BC041650     | N/A          |

|                |         |         |              |                 |           |              |                |
|----------------|---------|---------|--------------|-----------------|-----------|--------------|----------------|
| A_33_P3338341  | 9,28179 | 9,97387 | -1,615611141 | ENST00000482858 | 5625      | NM_016335    | PRODH          |
| A_21_P0000132  | 5,02053 | 5,71261 | -1,615611141 | N/A             | 90835     | NM_001195620 | C16orf93       |
| A_21_P0014015  | 4,18226 | 4,87434 | -1,615611141 | ENST00000592861 | 1267      | AK296534     | CNP            |
| A_23_P81650    | 10,7858 | 11,4779 | -1,615633539 | ENST00000231512 | 56951     | NM_020199    | C5orf15        |
| A_33_P3330952  | 5,80785 | 6,50007 | -1,615767929 | ENST00000264449 | 10396     | NM_006095    | ATP8A1         |
| A_22_P00016963 | 1,89229 | 2,58471 | -1,615991937 | N/A             | N/A       | AA897512     | Inc-TSSK2-1    |
| A_24_P313822   | 7,61299 | 8,30542 | -1,616003138 | ENST00000600350 | 10298     | NM_005884    | PAK4           |
| A_22_P00020997 | 4,84286 | 5,53547 | -1,616204774 | N/A             | N/A       | CU688373     | Inc-FAM83H-1   |
| A_24_P93736    | 3,0277  | 3,72037 | -1,616271992 | N/A             | 643210    | NR_024341    | EHMT1-IT1      |
| A_23_P20107    | 11,0163 | 11,7091 | -1,616417639 | ENST00000494735 | 373156    | NM_015917    | GSTK1          |
| A_33_P3381996  | 1,58472 | 2,27758 | -1,616484865 | ENST00000625198 | 606553    | NR_103552    | C8orf49        |
| A_33_P3344201  | 9,27805 | 9,97099 | -1,616574505 | ENST00000391831 | 84335     | NM_032375    | AKT1S1         |
| A_23_P42080    | 9,92495 | 10,6179 | -1,61658571  | ENST00000211314 | 28978     | NM_014051    | TMEM14A        |
| A_32_P107029   | 3,55807 | 4,25107 | -1,616641738 | ENST00000596653 | 9476      | NM_004851    | NAPSA          |
| A_24_P303497   | 5,66501 | 6,35803 | -1,616664149 | ENST00000619706 | 254394    | NM_017696    | MCM9           |
| A_33_P3379726  | 7,15285 | 7,84589 | -1,616686561 | ENST00000586790 | 29903     | NM_013301    | CCDC106        |
| A_22_P00011989 | 8,37791 | 9,07096 | -1,616697767 | N/A             | 101929897 | NR_125823    | LOC101929897   |
| A_23_P140967   | 5,11222 | 5,80547 | -1,616921905 | ENST00000542898 | 4210      | NM_000243    | MEFV           |
| A_23_P130553   | 9,51003 | 10,2037 | -1,617392694 | ENST00000600791 | 92799     | NM_138392    | SHKBP1         |
| A_23_P319859   | 9,67177 | 10,3655 | -1,617459961 | ENST00000327619 | 2139      | NM_005244    | EYA2           |
| A_21_P0012471  | 1,50779 | 2,20164 | -1,617594503 | N/A             | N/A       | N/A          | XLOC_I2_010451 |
| A_33_P3399318  | 10,6081 | 11,302  | -1,617650566 | ENST00000370982 | 55970     | NM_018841    | GNG12          |
| A_33_P3274472  | 1,54608 | 2,24006 | -1,61774027  | ENST00000446002 | N/A       | N/A          | N/A            |
| A_23_P115597   | 6,99098 | 7,68505 | -1,617841193 | ENST00000376087 | 22852     | NM_014915    | ANKRD26        |
| A_33_P3268716  | 10,8026 | 11,4967 | -1,617874835 | ENST00000380285 | 6642      | NM_003099    | SNX1           |
| A_22_P00012557 | 3,31471 | 4,00883 | -1,617897264 | N/A             | 100289019 | NR_033374    | SLC25A25-AS1   |
| A_19_P00315863 | 2,58045 | 3,27464 | -1,617975767 | ENST00000417922 | 646324    | N/A          | LINC00607      |
| A_22_P00000046 | 5,74461 | 6,43884 | -1,618020627 | N/A             | 285943    | NR_122069    | HOXA-AS2       |
| A_22_P00011597 | 3,39766 | 4,09216 | -1,618323468 | ENST00000533528 | 100506233 | N/A          | RAB30-AS1      |
| A_21_P0008559  | 3,41937 | 4,11416 | -1,618648804 | ENST00000558309 | 145837    | BC104435     | LOC145837      |
| A_23_P51291    | 8,77992 | 9,47473 | -1,618671243 | ENST00000371279 | 25973     | NM_152268    | PARS2          |
| A_33_P3385775  | 7,20544 | 7,90026 | -1,618682463 | ENST00000331569 | 80139     | AK024361     | ZNF703         |
| A_22_P00005737 | 6,41536 | 7,11022 | -1,618727343 | N/A             | N/A       | N/A          | Inc-EMP2-2     |

|                |         |         |              |                 |        |              |                |
|----------------|---------|---------|--------------|-----------------|--------|--------------|----------------|
| A_23_P370454   | 2,11852 | 2,81344 | -1,618794666 | ENST00000572275 | 9196   | NM_004732    | KCNAB3         |
| A_21_P0004383  | 5,81449 | 6,50948 | -1,618873212 | N/A             | N/A    | N/A          | Inc-C5orf39-1  |
| A_22_P00003110 | 11,5327 | 12,2277 | -1,618884433 | N/A             | N/A    | AX721189     | Inc-C9orf103-1 |
| A_33_P3718274  | 2,9056  | 3,60075 | -1,619052761 | N/A             | 285629 | DB296219     | LOC285629      |
| A_22_P00018544 | 5,51765 | 6,21284 | -1,619097651 | N/A             | N/A    | N/A          | Inc-TBC1D12-1  |
| A_23_P203947   | 9,88318 | 10,5784 | -1,619131319 | ENST00000435753 | 1663   | NM_030653    | DDX11          |
| A_23_P3602     | 6,62176 | 7,31698 | -1,619131319 | ENST00000268533 | 283927 | NM_001243657 | NUDT7          |
| A_22_P00012425 | 1,50299 | 2,19836 | -1,619299673 | N/A             | N/A    | N/A          | Inc-PRMT10-1   |
| A_23_P413224   | 2,03984 | 2,73523 | -1,619322121 | ENST00000373089 | 9436   | NM_004828    | NCR2           |
| A_33_P3381458  | 4,10802 | 4,80348 | -1,619400693 | N/A             | N/A    | AK094155     | N/A            |
| A_33_P3239387  | 1,88347 | 2,57903 | -1,619512945 | ENST00000409237 | 114805 | NM_001301627 | GALNT13        |
| A_24_P303647   | 7,62162 | 8,31735 | -1,619703792 | ENST00000297145 | 154743 | NM_152556    | C7orf60        |
| A_23_P54840    | 15,231  | 15,927  | -1,620006947 | ENST00000290705 | 4489   | NM_005946    | MT1A           |
| A_33_P3257252  | 4,77393 | 5,4701  | -1,620197852 | ENST00000282296 | 90233  | NM_138347    | ZNF551         |
| A_33_P3417437  | 7,95105 | 8,64752 | -1,620534798 | ENST00000374027 | 388611 | NM_207397    | CD164L2        |
| A_21_P0003527  | 1,63922 | 2,3358  | -1,620658362 | ENST00000504785 | N/A    | N/A          | N/A            |
| A_33_P3245947  | 3,52389 | 4,22053 | -1,620725765 | ENST00000306688 | 201255 | XM_006722275 | LRRC45         |
| A_23_P375549   | 9,34261 | 10,0393 | -1,620781936 | ENST00000483115 | 139341 | NM_173794    | FUNDC1         |
| A_21_P0008716  | 2,23285 | 2,92974 | -1,621006639 | N/A             | N/A    | N/A          | Inc-TRPM1-1    |
| A_23_P343411   | 13,3602 | 14,0571 | -1,621017875 | ENST00000461111 | 375790 | NM_198576    | AGRN           |
| A_33_P3238148  | 1,37286 | 2,06983 | -1,62109653  | ENST00000343318 | 401387 | AK091323     | LRRD1          |
| A_24_P933418   | 8,35231 | 9,04946 | -1,621298801 | ENST00000261018 | 10152  | NM_005759    | ABI2           |
| A_22_P00014391 | 1,61328 | 2,31068 | -1,621579775 | ENST00000508145 | N/A    | N/A          | N/A            |
| A_22_P00015435 | 2,89811 | 3,59561 | -1,621692178 | ENST00000488584 | 730091 | NR_038387    | LINC00886      |
| A_22_P00015460 | 1,58167 | 2,27919 | -1,62171466  | ENST00000414300 | N/A    | N/A          | N/A            |
| A_23_P87007    | 1,61225 | 2,30986 | -1,621815831 | ENST00000537778 | 9177   | NM_006028    | HTR3B          |
| A_22_P00007202 | 3,67949 | 4,3774  | -1,622153113 | N/A             | N/A    | CV800748     | Inc-GPBP1L1-1  |
| A_23_P203949   | 10,4006 | 11,0986 | -1,622254311 | ENST00000435753 | 1663   | NM_030653    | DDX11          |
| A_19_P00807869 | 3,60241 | 4,30071 | -1,622591685 | N/A             | N/A    | N/A          | XLOC_I2_009886 |
| A_21_P0009662  | 2,51863 | 3,217   | -1,622670415 | N/A             | N/A    | N/A          | Inc-ZNF507-4   |
| A_21_P0001381  | 3,29274 | 3,99118 | -1,622749149 | N/A             | N/A    | N/A          | Inc-NUF2-2     |
| A_21_P0011075  | 4,0887  | 4,78735 | -1,622985375 | N/A             | N/A    | N/A          | XLOC_I2_003260 |
| A_22_P00018367 | 6,57385 | 7,27254 | -1,623030375 | N/A             | 285965 | NR_033897    | EPHA1-AS1      |

|                |         |         |              |                 |           |              |               |
|----------------|---------|---------|--------------|-----------------|-----------|--------------|---------------|
| A_23_P207911   | 4,24736 | 4,9462  | -1,623199133 | ENST00000338560 | 51393     | NM_016113    | TRPV2         |
| A_22_P00025349 | 2,90505 | 3,60392 | -1,623232887 | ENST00000439964 | N/A       | N/A          | N/A           |
| A_23_P150350   | 9,24936 | 9,94823 | -1,623232887 | ENST00000260276 | 64776     | NM_022761    | C11orf1       |
| A_33_P3270956  | 4,01485 | 4,71376 | -1,623277893 | ENST00000314727 | 401474    | NM_207506    | SAMD12        |
| A_22_P00013910 | 9,57824 | 10,2772 | -1,623334153 | ENST00000530407 | 2542      | NM_001164277 | SLC37A4       |
| A_33_P3461948  | 3,71167 | 4,41073 | -1,623446678 | ENST00000337323 | 155051    | NM_144727    | CRYGN         |
| A_33_P3405680  | 2,38806 | 3,08719 | -1,62352545  | N/A             | 100874200 | NR_046572    | ARHGEF3-AS1   |
| A_32_P104518   | 4,8546  | 5,55376 | -1,62355921  | N/A             | 100128782 | NR_023389    | LINC00476     |
| A_33_P3212274  | 3,39789 | 4,09709 | -1,623604226 | N/A             | 2149      | BC016059     | F2R           |
| A_33_P3292432  | 1,34588 | 2,04528 | -1,623829321 | ENST00000479783 | 79781     | AK090907     | IQCA1         |
| A_22_P00013213 | 3,93628 | 4,63572 | -1,623874343 | N/A             | 80862     | NR_026751    | ZNRD1-AS1     |
| A_21_P0000606  | 2,38026 | 3,07992 | -1,624121991 | ENST00000558913 | 283688    | NR_033833    | LINC00927     |
| A_21_P0010693  | 5,61342 | 6,3131  | -1,624144506 | ENST00000442552 | 11223     | NM_001271733 | MST1L         |
| A_33_P3391511  | 2,85238 | 3,5521  | -1,624189537 | N/A             | N/A       | N/A          | N/A           |
| A_24_P250815   | 6,5689  | 7,26862 | -1,624189537 | ENST00000262753 | 79983     | NM_024921    | POF1B         |
| A_23_P250118   | 9,97322 | 10,673  | -1,624257087 | ENST00000306103 | 79663     | NM_024610    | HSPBAP1       |
| A_33_P3248519  | 11,6005 | 12,3003 | -1,624279604 | ENST00000468653 | 10051     | NM_005496    | SMC4          |
| A_32_P29615    | 6,61401 | 7,31385 | -1,624324639 | ENST00000390651 | 90333     | NM_001277120 | ZNF468        |
| A_33_P3288605  | 3,51398 | 4,21395 | -1,624471012 | N/A             | N/A       | AF289552     | N/A           |
| A_22_P00008745 | 4,28812 | 4,98809 | -1,624471012 | N/A             | 643749    | NR_034108    | TRAF3IP2-AS1  |
| A_23_P104151   | 10,9539 | 11,6539 | -1,624504793 | ENST00000496366 | 51249     | NM_016486    | TMEM69        |
| A_21_P0001164  | 1,75357 | 2,45358 | -1,624516053 | N/A             | N/A       | N/A          | Inc-EPS8L3-1  |
| A_21_P0002494  | 1,51391 | 2,21405 | -1,624662443 | N/A             | N/A       | N/A          | Inc-SLC35F5-2 |
| A_21_P0008511  | 3,7631  | 4,46336 | -1,624797585 | N/A             | N/A       | N/A          | Inc-CTAGE5-1  |
| A_23_P377245   | 4,68275 | 5,38301 | -1,624797585 | ENST00000311990 | 653160    | NR_037869    | LOC653160     |
| A_33_P3227252  | 10,2379 | 10,9382 | -1,624842634 | ENST00000442987 | 402483    | N/A          | LINC01000     |
| A_24_P368943   | 9,33085 | 10,0313 | -1,625011581 | ENST00000496902 | 2128      | NM_001989    | EVX1          |
| A_22_P00004421 | 6,6182  | 7,31869 | -1,625056637 | N/A             | N/A       | N/A          | Inc-COPZ2-1   |
| A_33_P3394380  | 1,53126 | 2,23194 | -1,625270667 | ENST00000394718 | 9495      | NM_004857    | AKAP5         |
| A_33_P3286334  | 7,44457 | 8,14538 | -1,625417126 | ENST00000471650 | 23616     | NM_018957    | SH3BP1        |
| A_23_P26629    | 13,2573 | 13,9582 | -1,625518528 | ENST00000350605 | 29108     | NM_013258    | PYCARD        |
| A_33_P3405360  | 6,89176 | 7,59268 | -1,625541062 | ENST00000394285 | 5082      | NM_005388    | PDCL          |
| A_24_P356601   | 8,33294 | 9,0339  | -1,625586133 | ENST00000332499 | 10614     | NM_006460    | HEXIM1        |

|                |         |         |              |                 |           |              |                      |
|----------------|---------|---------|--------------|-----------------|-----------|--------------|----------------------|
| A_22_P00009722 | 9,01701 | 9,7181  | -1,625732619 | ENST00000357742 | 55784     | NM_018349    | MCTP2                |
| A_33_P3272347  | 11,6974 | 12,3988 | -1,626081987 | N/A             | N/A       | AK123720     | Inc-CCDC8-1          |
| A_24_P343377   | 14,2479 | 14,9494 | -1,626194702 | ENST00000488775 | 9551      | NM_001003714 | ATP5J2               |
| A_32_P480330   | 1,48777 | 2,18942 | -1,62636379  | ENST00000370621 | 346007    | NM_001292009 | EYS                  |
| A_32_P52609    | 8,69792 | 9,39967 | -1,626476525 | ENST00000396097 | 23175     | NM_145693    | LPIN1                |
| A_33_P3273258  | 10,7606 | 11,4624 | -1,626532895 | ENST00000596623 | 55762     | NM_001172655 | ZNF701               |
| A_33_P3404525  | 3,35371 | 4,05555 | -1,626577993 | ENST00000573596 | 432       | AK308677     | ASGR1                |
| A_23_P350005   | 1,41604 | 2,11794 | -1,626645642 | ENST00000512729 | 205860    | NM_173553    | TRIML2               |
| A_32_P141546   | 2,43971 | 3,14173 | -1,626780948 | N/A             | 100506113 | XR_110893    | LOC100506113         |
| A_21_P0012367  | 1,65374 | 2,35586 | -1,626893712 | ENST00000614866 | 152273    | NM_152536    | FGD5                 |
| A_21_P0011848  | 9,32218 | 10,0245 | -1,627119263 | N/A             | 100506922 | N/A          | LOC100506922         |
| A_33_P3287218  | 14,5226 | 15,2252 | -1,627435087 | ENST00000479303 | 373156    | NM_001143679 | GSTK1                |
| A_33_P3291244  | 3,81065 | 4,51361 | -1,627841236 | ENST00000327554 | 160777    | NM_178499    | CCDC60               |
| A_21_P0003318  | 1,56086 | 2,26382 | -1,627841236 | ENST00000500009 | N/A       | XR_244670    | N/A                  |
| A_33_P3338559  | 11,8671 | 12,5702 | -1,627999211 | ENST00000373493 | 5928      | NM_005610    | RBBP4                |
| A_24_P68079    | 5,90982 | 6,61295 | -1,628033064 | ENST00000429976 | 9881      | NM_014831    | TRANK1               |
| A_33_P3211260  | 5,85938 | 6,56263 | -1,628168486 | N/A             | 28988     | AB209486     | DBNL                 |
| A_22_P00006905 | 2,17598 | 2,87927 | -1,628213629 | ENST00000579437 | N/A       | N/A          | N/A                  |
| A_23_P117037   | 11,5722 | 12,2755 | -1,628224915 | ENST00000550100 | 25875     | NM_015416    | LETMD1               |
| A_23_P106463   | 11,0659 | 11,7692 | -1,628224915 | ENST00000558194 | 4947      | NM_002537    | OAZ2                 |
| A_22_P00024880 | 1,78843 | 2,49181 | -1,628315205 | ENST00000507989 | N/A       | N/A          | N/A                  |
| A_33_P3307402  | 1,43992 | 2,14364 | -1,628698996 | N/A             | N/A       | N/A          | N/A                  |
| A_33_P3395532  | 1,51621 | 2,21997 | -1,628744153 | ENST00000371809 | 439996    | NM_001010987 | IFIT1B               |
| A_33_P3227457  | 5,58558 | 6,2894  | -1,628811892 | N/A             | N/A       | N/A          | N/A                  |
| A_21_P0013947  | 3,75889 | 4,46288 | -1,629003835 | ENST00000598442 | 94027     | XM_005259426 | CGB7                 |
| A_23_P76364    | 14,0341 | 14,7382 | -1,629128045 | ENST00000540891 | 928       | NM_001769    | CD9                  |
| A_22_P00018454 | 1,36324 | 2,06737 | -1,629161922 | ENST00000425688 | N/A       | N/A          | N/A                  |
| A_33_P3391476  | 7,98275 | 8,68694 | -1,629229678 | ENST00000370870 | 1429      | NM_001130042 | CRYZ                 |
| A_22_P00025256 | 1,66699 | 2,37146 | -1,629545912 | N/A             | N/A       | N/A          | Inc-APAF1-1          |
| A_23_P106204   | 9,99288 | 10,6974 | -1,629602389 | ENST00000361389 | 2954      | NM_145870    | GSTZ1                |
| A_21_P0008301  | 1,4713  | 2,17583 | -1,629613684 | N/A             | N/A       | N/A          | Inc-RP11-80A15.1.1-3 |
| A_23_P350107   | 10,9903 | 11,6949 | -1,629692755 | ENST00000306085 | 81844     | NM_030961    | TRIM56               |
| A_33_P3244818  | 9,69148 | 10,3961 | -1,629715348 | ENST00000445288 | 222194    | NM_198467    | RSBN1L               |

|                |         |         |              |                 |           |              |               |
|----------------|---------|---------|--------------|-----------------|-----------|--------------|---------------|
| A_24_P328504   | 6,82544 | 7,53007 | -1,629726644 | ENST00000476126 | 11262     | NM_007237    | SP140         |
| A_23_P115331   | 9,28973 | 9,99442 | -1,629794424 | ENST00000374011 | 27245     | NM_001029882 | AHDC1         |
| A_23_P153084   | 9,2831  | 9,98794 | -1,629963886 | ENST00000019317 | 10928     | NM_006788    | RALBP1        |
| A_22_P00024859 | 3,00524 | 3,71013 | -1,630020377 | N/A             | N/A       | N/A          | Inc-GJE1-1    |
| A_24_P96780    | 7,11658 | 7,82151 | -1,630065572 | ENST00000614578 | 1063      | NM_016343    | CENPF         |
| A_22_P00022995 | 1,37587 | 2,08101 | -1,630302863 | ENST00000452996 | N/A       | BC041003     | N/A           |
| A_22_P00005622 | 1,65345 | 2,35862 | -1,630336764 | N/A             | N/A       | N/A          | Inc-EGR2-2    |
| A_21_P0004919  | 1,42639 | 2,13174 | -1,630540188 | N/A             | N/A       | N/A          | Inc-CDC40-2   |
| A_23_P37127    | 10,1031 | 10,8088 | -1,630935808 | ENST00000250448 | 3169      | NM_004496    | FOXA1         |
| A_24_P79755    | 10,3455 | 11,0514 | -1,631161919 | ENST00000434299 | 10327     | NM_006066    | AKR1A1        |
| A_23_P35343    | 5,80181 | 6,50774 | -1,631195839 | ENST00000494133 | 57209     | NM_021045    | ZNF248        |
| A_23_P393645   | 7,01218 | 7,71813 | -1,631218452 | ENST00000371929 | 11093     | NM_139025    | ADAMTS13      |
| A_32_P231493   | 9,17554 | 9,88152 | -1,631252373 | N/A             | 100861541 | NR_047482    | DOCK9-AS2     |
| A_21_P0009519  | 1,3713  | 2,07733 | -1,631308908 | N/A             | N/A       | N/A          | Inc-PPP4R1-9  |
| A_19_P00316836 | 2,53498 | 3,24101 | -1,631308908 | ENST00000435984 | 102724515 | NR_125792    | LINC01291     |
| A_23_P433152   | 8,93864 | 9,64486 | -1,631523763 | ENST00000425929 | 132321    | NM_173487    | C4orf33       |
| A_33_P3250555  | 2,44944 | 3,15567 | -1,631535072 | ENST00000584090 | 102723882 | AF295728     | LOC102723882  |
| A_33_P3414689  | 3,02691 | 3,73318 | -1,631580308 | N/A             | N/A       | AF495723     | N/A           |
| A_33_P3345782  | 2,73523 | 3,44157 | -1,631659475 | ENST00000494080 | N/A       | AK074126     | N/A           |
| A_24_P96762    | 7,19554 | 7,9019  | -1,631682094 | ENST00000373830 | 54952     | NM_017846    | TRNAU1AP      |
| A_33_P3264662  | 6,55376 | 7,26042 | -1,632021428 | N/A             | 339761    | NM_001001665 | CYP27C1       |
| A_33_P3293763  | 1,38066 | 2,08733 | -1,632032741 | ENST00000609664 | 386675    | NM_198689    | KRTAP10-7     |
| A_21_P0003298  | 1,57296 | 2,2798  | -1,632225063 | ENST00000514281 | N/A       | N/A          | N/A           |
| A_33_P3246318  | 13,3327 | 14,0398 | -1,632519246 | ENST00000216225 | 9978      | NM_014248    | RBX1          |
| A_23_P309837   | 6,47721 | 7,18448 | -1,632711625 | ENST00000614646 | 85439     | NM_033104    | STON2         |
| A_22_P00010389 | 3,30616 | 4,01368 | -1,632994577 | ENST00000562218 | 91807     | NM_182493    | MYLK3         |
| A_22_P00016719 | 1,65811 | 2,36565 | -1,633017215 | N/A             | 101927793 | XR_243510    | LOC101927793  |
| A_32_P42946    | 6,32575 | 7,03335 | -1,633085132 | ENST00000423420 | 149466    | NM_182517    | C1orf210      |
| A_24_P391260   | 10,5039 | 11,2117 | -1,633311541 | ENST00000494690 | 754       | NM_004339    | PTTG1IP       |
| A_21_P0010285  | 2,46204 | 3,16986 | -1,633334184 | N/A             | N/A       | N/A          | Inc-PSMG1-2   |
| A_21_P0006467  | 3,15016 | 3,85799 | -1,633345506 | N/A             | N/A       | N/A          | Inc-SPANXN2-1 |
| A_33_P3366584  | 3,16551 | 3,87358 | -1,633617244 | ENST00000330728 | 120793    | NM_001005179 | OR56A4        |
| A_21_P0006863  | 1,66853 | 2,37673 | -1,633764454 | ENST00000431737 | 100506835 | NR_038268    | LINC00840     |

|                |         |         |              |                 |           |              |               |
|----------------|---------|---------|--------------|-----------------|-----------|--------------|---------------|
| A_24_P388940   | 6,50915 | 7,21741 | -1,633832402 | ENST00000229570 | 57150     | NM_001042493 | SMIM8         |
| A_22_P00019956 | 1,63295 | 2,34137 | -1,63401361  | N/A             | 100873920 | NR_046632    | NHS-AS1       |
| A_22_P00003094 | 2,07163 | 2,78006 | -1,634024936 | N/A             | N/A       | BX648262     | Inc-C8orf83-2 |
| A_22_P00011473 | 3,30821 | 4,01664 | -1,634024936 | ENST00000573465 | 283875    | N/A          | LINC00514     |
| A_22_P00001150 | 1,87017 | 2,57862 | -1,634047589 | ENST00000552975 | 100233209 | NR_026544    | PCED1B-AS1    |
| A_22_P00011288 | 1,53069 | 2,23917 | -1,634081568 | N/A             | N/A       | N/A          | Inc-OR7C2-1   |
| A_22_P00015510 | 11,717  | 12,4255 | -1,634104221 | ENST00000522560 | N/A       | N/A          | N/A           |
| A_33_P3359473  | 11,182  | 11,8906 | -1,634217493 | ENST00000255613 | 84787     | NM_032701    | SUV420H2      |
| A_33_P3345586  | 2,10503 | 2,81369 | -1,634285459 | ENST00000251287 | 610       | NM_001194    | HCN2          |
| A_33_P3323313  | 1,42042 | 2,1291  | -1,634308116 | ENST00000315429 | 642819    | NR_026693    | ZNF487        |
| A_23_P107116   | 4,56431 | 5,27301 | -1,634330772 | ENST00000461366 | 7732      | NM_007148    | RNF112        |
| A_33_P7293840  | 3,83969 | 4,54847 | -1,634421401 | ENST00000580741 | 100131814 | BC127000     | LINC00271     |
| A_23_P163481   | 10,195  | 10,9038 | -1,634444059 | ENST00000412359 | 701       | NM_001211    | BUB1B         |
| A_24_P271323   | 10,1138 | 10,8227 | -1,634557354 | N/A             | 81031     | NM_030777    | SLC2A10       |
| A_33_P3214745  | 3,4715  | 4,18043 | -1,634591344 | ENST00000377957 | 554251    | NM_001024680 | FBXO48        |
| A_32_P222383   | 15,1142 | 15,8234 | -1,634897286 | ENST00000619352 | 3151      | NM_005517    | HMG2          |
| A_33_P3365305  | 1,86547 | 2,57471 | -1,634942616 | ENST00000435083 | 1134      | NM_001039523 | CHRNA1        |
| A_23_P393080   | 6,84746 | 7,55676 | -1,635010613 | ENST00000315238 | 810       | NM_005185    | CALML3        |
| A_22_P00006109 | 2,87868 | 3,58809 | -1,635135281 | N/A             | N/A       | DW432963     | Inc-FAM171B-1 |
| A_23_P27215    | 15,9963 | 16,7058 | -1,635237289 | ENST00000614404 | 7314      | NM_018955    | UBB           |
| A_23_P7697     | 12,1199 | 12,8294 | -1,635237289 | ENST00000510372 | 6643      | NM_003100    | SNX2          |
| A_24_P643601   | 1,53757 | 2,24724 | -1,635429988 | N/A             | N/A       | AF150379     | Inc-BBOX1-1   |
| A_22_P00012095 | 1,59966 | 2,30945 | -1,635566025 | ENST00000341276 | 387712    | NM_001242699 | ENO4          |
| A_22_P00025850 | 1,71002 | 2,42042 | -1,636257721 | ENST00000442831 | N/A       | N/A          | N/A           |
| A_24_P205364   | 7,65723 | 8,36767 | -1,636303089 | ENST00000354098 | 6470      | NM_004169    | SHMT1         |
| A_23_P91430    | 10,0175 | 10,728  | -1,636371142 | ENST00000344022 | 11264     | NM_007238    | PXMP4         |
| A_24_P322741   | 10,1352 | 10,8457 | -1,636371142 | ENST00000451065 | 3588      | NM_000628    | IL10RB        |
| A_23_P37327    | 9,60218 | 10,3127 | -1,636393827 | ENST00000481935 | 5826      | NM_005050    | ABCD4         |
| A_33_P3354141  | 3,17145 | 3,88202 | -1,636450541 | ENST00000439356 | 4134      | NM_030885    | MAP4          |
| A_23_P255663   | 8,44932 | 9,15992 | -1,63648457  | ENST00000358812 | 79694     | NM_024641    | MANEA         |
| A_21_P0003296  | 3,54639 | 4,25713 | -1,636643384 | N/A             | N/A       | N/A          | Inc-LRRC58-1  |
| A_32_P78681    | 1,63769 | 2,34847 | -1,636688762 | ENST00000262441 | 9340      | NM_004246    | GLP2R         |
| A_23_P89649    | 1,5333  | 2,24423 | -1,63685894  | ENST00000391586 | 85293     | NM_033185    | KRTAP3-3      |



|                |         |         |              |                 |           |              |              |
|----------------|---------|---------|--------------|-----------------|-----------|--------------|--------------|
| A_22_P00014031 | 2,45516 | 3,1662  | -1,636983749 | ENST00000422844 | N/A       | AA456489     | N/A          |
| A_22_P00010102 | 4,05139 | 4,76269 | -1,63727879  | N/A             | N/A       | BI522712     | Inc-MRE11A-1 |
| A_23_P169257   | 1,48284 | 2,19432 | -1,637483081 | ENST00000223795 | 944       | NM_001244    | TNFSF8       |
| A_22_P00009596 | 4,03817 | 4,74976 | -1,637607937 | ENST00000559779 | 100129973 | NR_102751    | LOC100129973 |
| A_33_P3382177  | 13,3117 | 14,0233 | -1,637619288 | ENST00000262768 | 7077      | NM_003255    | TIMP2        |
| A_22_P00020158 | 1,41249 | 2,12431 | -1,637869032 | ENST00000610501 | 102724824 | XR_424477    | LOC102724824 |
| A_21_P0008334  | 1,6936  | 2,40572 | -1,638209653 | N/A             | N/A       | N/A          | Inc-TMX1-1   |
| A_33_P3311775  | 8,0937  | 8,80593 | -1,638334565 | ENST00000379724 | 285989    | NM_001013258 | ZNF789       |
| A_22_P00021142 | 2,70881 | 3,42113 | -1,638436772 | N/A             | N/A       | N/A          | Inc-RNF38-2  |
| A_23_P37778    | 9,01123 | 9,72374 | -1,638652565 | ENST00000567752 | 29109     | NM_013241    | FHOD1        |
| A_23_P211345   | 6,65762 | 7,37019 | -1,638720716 | N/A             | 6899      | NM_080647    | TBX1         |
| A_33_P6815962  | 2,12351 | 2,83611 | -1,638754793 | N/A             | 284900    | NR_026963    | TTC28-AS1    |
| A_33_P3228600  | 3,75099 | 4,46368 | -1,638857027 | ENST00000461828 | 93979     | NM_001127442 | CPA5         |
| A_23_P85783    | 13,2649 | 13,9776 | -1,638868387 | ENST00000369407 | 26227     | NM_006623    | PHGDH        |
| A_23_P342000   | 1,45262 | 2,16537 | -1,638925187 | ENST00000468643 | 54033     | NM_144770    | RBM11        |
| A_33_P3267198  | 2,99816 | 3,71116 | -1,639209215 | N/A             | 100131132 | AK125684     | LOC100131132 |
| A_23_P106844   | 16,299  | 17,0121 | -1,639322841 | ENST00000562017 | 4502      | NM_005953    | MT2A         |
| A_33_P3283626  | 6,14021 | 6,85341 | -1,639436474 | ENST00000524631 | 55599     | AK289844     | RNPC3        |
| A_21_P0004030  | 1,63956 | 2,35279 | -1,639470565 | ENST00000507217 | N/A       | N/A          | N/A          |
| A_21_P0003345  | 1,65842 | 2,37172 | -1,639550115 | N/A             | N/A       | N/A          | Inc-STIM2-5  |
| A_23_P48561    | 10,4359 | 11,1492 | -1,639550115 | ENST00000429593 | 10278     | NM_005864    | EFS          |
| A_24_P626932   | 2,6802  | 3,39364 | -1,639709225 | N/A             | 100133790 | AF007191     | MUC3         |
| A_23_P204436   | 6,58649 | 7,29998 | -1,639766054 | ENST00000547815 | 9815      | NM_139201    | GIT2         |
| A_23_P55749    | 1,68694 | 2,40045 | -1,639788786 | ENST00000264828 | 50509     | NM_015719    | COL5A3       |
| A_21_P0012498  | 1,49149 | 2,20522 | -1,640038861 | N/A             | 285194    | NR_015391    | TUSC7        |
| A_33_P3419567  | 3,28334 | 3,99714 | -1,640118438 | ENST00000402452 | 642636    | NM_001136566 | RAD21L1      |
| A_21_P0004770  | 1,40114 | 2,11497 | -1,640152544 | ENST00000445974 | N/A       | N/A          | N/A          |
| A_24_P416289   | 8,98022 | 9,69407 | -1,640175281 | ENST00000314256 | 9772      | NM_014738    | KIAA0195     |
| A_23_P112634   | 9,57874 | 10,2926 | -1,64018665  | ENST00000512441 | 201895    | NM_174921    | SMIM14       |
| A_33_P3296303  | 13,0324 | 13,7464 | -1,640345822 | ENST00000487080 | 51510     | NM_016410    | CHMP5        |
| A_22_P00013363 | 1,47205 | 2,18623 | -1,640550495 | ENST00000550470 | N/A       | XR_429177    | N/A          |
| A_22_P00012982 | 1,45069 | 2,16492 | -1,640607353 | N/A             | N/A       | N/A          | Inc-REV3L-1  |
| A_23_P200325   | 8,99638 | 9,71065 | -1,640652841 | ENST00000251507 | 9910      | NM_014857    | RABGAP1L     |

|                |         |         |              |                 |           |              |                |
|----------------|---------|---------|--------------|-----------------|-----------|--------------|----------------|
| A_33_P3363537  | 5,60824 | 6,32265 | -1,640812059 | N/A             | N/A       | AW571659     | N/A            |
| A_33_P3313864  | 3,58927 | 4,30385 | -1,641005416 | N/A             | N/A       | N/A          | Inc-CTIF-1     |
| A_21_P0013126  | 1,96889 | 2,68369 | -1,641255676 | ENST00000431001 | N/A       | N/A          | N/A            |
| A_21_P0005788  | 2,37934 | 3,09418 | -1,641301181 | N/A             | N/A       | N/A          | Inc-CSMD1-1    |
| A_23_P82738    | 8,46874 | 9,18382 | -1,641574243 | ENST00000611249 | 25788     | NM_012415    | RAD54B         |
| A_24_P7594     | 8,45719 | 9,17244 | -1,64176769  | ENST00000409652 | 80830     | NM_030641    | APOL6          |
| A_24_P82106    | 10,9102 | 11,6255 | -1,64182459  | ENST00000311852 | 4323      | NM_004995    | MMP14          |
| A_21_P0012387  | 1,48654 | 2,20185 | -1,64183597  | N/A             | N/A       | N/A          | XLOC_I2_009811 |
| A_23_P124417   | 9,852   | 10,5674 | -1,641938397 | ENST00000302759 | 699       | NM_004336    | BUB1           |
| A_33_P3693034  | 1,4335  | 2,149   | -1,642052211 | N/A             | 402779    | NR_038372    | CSMD2-AS1      |
| A_21_P0003906  | 2,41745 | 3,13296 | -1,642063593 | ENST00000504237 | 102724809 | XR_425796    | LOC102724809   |
| A_22_P00020400 | 7,44728 | 8,16285 | -1,642131886 | N/A             | 730183    | NM_001256932 | LOC730183      |
| A_33_P3275255  | 6,79948 | 7,51506 | -1,642143268 | N/A             | N/A       | DQ786257     | N/A            |
| A_21_P0003383  | 2,38126 | 3,09687 | -1,642177416 | ENST00000510505 | N/A       | N/A          | N/A            |
| A_22_P00001463 | 4,85255 | 5,56828 | -1,642314014 | ENST00000547902 | N/A       | BX088918     | N/A            |
| A_21_P0005762  | 1,87946 | 2,5952  | -1,642325398 | N/A             | N/A       | N/A          | Inc-TRIB1-2    |
| A_22_P00013456 | 3,67377 | 4,38958 | -1,642405086 | N/A             | 100499227 | NR_034160    | USP2-AS1       |
| A_21_P0013093  | 1,44016 | 2,15601 | -1,642450624 | N/A             | N/A       | N/A          | XLOC_I2_013120 |
| A_23_P122134   | 1,62118 | 2,33708 | -1,642507548 | ENST00000255262 | 56923     | NM_020167    | NMUR2          |
| A_23_P317667   | 1,47465 | 2,19072 | -1,642701104 | ENST00000344330 | 23308     | NM_015259    | ICOSLG         |
| A_24_P6428     | 5,18289 | 5,89909 | -1,642849133 | ENST00000358293 | 63939     | NM_022106    | FAM217B        |
| A_33_P3303121  | 8,71065 | 9,42689 | -1,642894683 | N/A             | 5912      | NM_002886    | RAP2B          |
| A_22_P00021144 | 2,30674 | 3,02323 | -1,6431794   | N/A             | N/A       | BC035400     | Inc-ARHGAP18-2 |
| A_33_P3286724  | 12,0599 | 12,7764 | -1,643190789 | ENST00000572940 | 5338      | NM_002663    | PLD2           |
| A_22_P00016141 | 1,49456 | 2,21107 | -1,643202179 | ENST00000583942 | 100505817 | NR_038340    | LOC100505817   |
| A_33_P3340094  | 2,78971 | 3,50625 | -1,643236349 | ENST00000380888 | N/A       | AK127732     | N/A            |
| A_19_P00812190 | 7,01453 | 7,73112 | -1,6432933   | N/A             | N/A       | N/A          | XLOC_I2_000297 |
| A_33_P3333238  | 1,47179 | 2,1885  | -1,643429991 | ENST00000613849 | 3235      | NM_014213    | HOXD9          |
| A_33_P3263392  | 3,84805 | 4,56485 | -1,643532517 | N/A             | 729696    | AK126149     | LOC729696      |
| A_23_P208788   | 16,168  | 16,885  | -1,643760375 | ENST00000589986 | 64073     | NM_033520    | C19orf33       |
| A_21_P0014207  | 1,43278 | 2,1498  | -1,643783162 | N/A             | 101927721 | XR_242321    | LOC101927721   |
| A_21_P0008552  | 2,32031 | 3,03735 | -1,64380595  | ENST00000440089 | 338963    | NR_034139    | LOC338963      |
| A_33_P3399019  | 9,05182 | 9,76902 | -1,643988264 | ENST00000444460 | 125893    | NM_001031665 | ZNF816         |

|                |         |         |              |                 |           |              |                      |
|----------------|---------|---------|--------------|-----------------|-----------|--------------|----------------------|
| A_22_P00000590 | 1,5514  | 2,26865 | -1,644045241 | N/A             | N/A       | N/A          | Inc-ACACA-1          |
| A_21_P0000812  | 6,31667 | 7,034   | -1,644136409 | N/A             | 400604    | NR_038458    | TOB1-AS1             |
| A_23_P138507   | 11,4791 | 12,1965 | -1,644216185 | ENST00000448257 | 983       | NM_001786    | CDK1                 |
| A_33_P3394972  | 3,88418 | 4,60161 | -1,644250376 | ENST00000534491 | 114879    | NM_020896    | OSBPL5               |
| A_22_P00010839 | 1,68629 | 2,40399 | -1,644558126 | N/A             | N/A       | N/A          | Inc-NOD1-1           |
| A_22_P00023739 | 1,36968 | 2,08748 | -1,644672122 | N/A             | N/A       | BU570793     | Inc-RP11-44L9.1.1-11 |
| A_33_P3307955  | 8,8577  | 9,57554 | -1,644717722 | ENST00000315713 | 5825      | NM_001122674 | ABCD3                |
| A_33_P3305958  | 1,57274 | 2,2906  | -1,644740523 | ENST00000558678 | 9895      | NM_001172631 | TECPR2               |
| A_23_P94434    | 5,45387 | 6,17188 | -1,644911539 | ENST00000354323 | 646962    | NM_001039792 | HRCT1                |
| A_23_P102058   | 2,40298 | 3,12104 | -1,644968548 | ENST00000407540 | 4148      | NM_002381    | MATN3                |
| A_24_P636332   | 10,4083 | 11,1264 | -1,645014157 | ENST00000334418 | 338657    | NM_198489    | CCDC84               |
| A_23_P76015    | 11,5429 | 12,2611 | -1,645128185 | ENST00000263674 | 9828      | NM_014786    | ARHGEF17             |
| A_21_P0005020  | 4,20271 | 4,92092 | -1,645139588 | N/A             | 100130889 | NR_026816    | PSORS1C3             |
| A_23_P170058   | 12,3731 | 13,0914 | -1,64524222  | ENST00000373237 | 5690      | NM_002794    | PSMB2                |
| A_23_P65022    | 7,14705 | 7,8656  | -1,645527344 | ENST00000242592 | 35        | NM_000017    | ACADS                |
| A_33_P3258923  | 3,93996 | 4,65857 | -1,645595781 | ENST00000314520 | 7681      | NM_005664    | MKRN3                |
| A_22_P00012588 | 1,72267 | 2,44131 | -1,64563     | ENST00000505547 | 143162    | NM_001018071 | FRMPD2               |
| A_22_P00012651 | 2,13443 | 2,85308 | -1,645641407 | N/A             | N/A       | N/A          | Inc-PXDN-4           |
| A_33_P3245922  | 10,6403 | 11,359  | -1,645698442 | ENST00000446500 | 4216      | NM_006724    | MAP3K4               |
| A_23_P129829   | 11,7565 | 12,4755 | -1,646040691 | ENST00000579287 | 94103     | NM_139280    | ORMDL3               |
| A_33_P3305770  | 3,06056 | 3,77959 | -1,646074919 | N/A             | 4077      | NM_001291571 | NBR1                 |
| A_33_P3253628  | 3,26149 | 3,98054 | -1,646097739 | ENST00000476487 | 85007     | AK093737     | PHYKPL               |
| A_23_P20484    | 1,39959 | 2,11869 | -1,646154789 | ENST00000398054 | 2267      | NM_201553    | FGL1                 |
| A_33_P3297205  | 10,6641 | 11,3832 | -1,646154789 | ENST00000405640 | 79680     | NM_024627    | C22orf29             |
| A_33_P3277890  | 4,26148 | 4,9806  | -1,64617761  | ENST00000527434 | N/A       | N/A          | N/A                  |
| A_33_P3209491  | 5,72508 | 6,44459 | -1,646622677 | ENST00000171887 | 7145      | NM_022648    | TNS1                 |
| A_21_P0007887  | 2,97037 | 3,68994 | -1,64669116  | ENST00000549004 | 643770    | N/A          | LOC643770            |
| A_22_P00001615 | 3,15123 | 3,87124 | -1,647193452 | ENST00000560314 | N/A       | N/A          | N/A                  |
| A_23_P143692   | 8,12083 | 8,84132 | -1,647741582 | ENST00000466097 | 23616     | NM_018957    | SH3BP1               |
| A_24_P217306   | 4,49132 | 5,21182 | -1,647753003 | ENST00000525172 | 84107     | NM_032153    | ZIC4                 |
| A_23_P356684   | 9,74563 | 10,4663 | -1,647947178 | ENST00000491782 | 54443     | NM_018685    | ANLN                 |
| A_21_P0014119  | 7,72961 | 8,4503  | -1,647970023 | N/A             | 101927597 | NR_110176    | NCK1-AS1             |
| A_23_P62999    | 2,31337 | 3,03418 | -1,648107103 | ENST00000374280 | 2134      | NM_004455    | EXTL1                |

|                |         |         |              |                 |           |              |               |
|----------------|---------|---------|--------------|-----------------|-----------|--------------|---------------|
| A_22_P00001854 | 4,82176 | 5,54259 | -1,648129951 | N/A             | 101929335 | NR_110151    | ADAMTS9-AS1   |
| A_23_P134125   | 9,62809 | 10,349  | -1,648221345 | ENST00000359015 | 4217      | NM_005923    | MAP3K5        |
| A_23_P258525   | 1,63116 | 2,3521  | -1,648255619 | ENST00000243911 | 4159      | NM_019888    | MC3R          |
| A_21_P0001700  | 4,96254 | 5,6836  | -1,648392723 | ENST00000369466 | 8458      | N/A          | TTF2          |
| A_19_P00807384 | 9,10947 | 9,83067 | -1,648552692 | ENST00000586784 | 101927151 | NR_110687    | LOC101927151  |
| A_23_P311885   | 6,44032 | 7,16171 | -1,648769817 | ENST00000368136 | 84456     | NM_032438    | L3MBTL3       |
| A_23_P8142     | 5,49593 | 6,21736 | -1,648815532 | ENST00000259938 | 1208      | NM_001832    | CLPS          |
| A_33_P3380652  | 6,07721 | 6,79866 | -1,648838389 | ENST00000437154 | 10863     | XR_247120    | ADAM28        |
| A_33_P3318671  | 14,1906 | 14,9121 | -1,648895535 | ENST00000374514 | 11313     | NM_007260    | LYPLA2        |
| A_33_P3388771  | 1,50294 | 2,22446 | -1,648918393 | N/A             | 101060810 | XM_006710044 | LOC101060810  |
| A_33_P3422030  | 4,90109 | 5,62264 | -1,648952682 | ENST00000392218 | 53827     | N/A          | FXD5          |
| A_21_P0014843  | 5,18562 | 5,90724 | -1,649032692 | N/A             | N/A       | AK130387     | N/A           |
| A_24_P247286   | 1,51703 | 2,23877 | -1,64916986  | ENST00000329493 | 100128569 | NM_001135580 | C19orf71      |
| A_24_P416370   | 5,00004 | 5,72184 | -1,649238448 | ENST00000332503 | 3214      | NM_024015    | HOXB4         |
| A_21_P0006275  | 2,52903 | 3,25094 | -1,649364201 | N/A             | N/A       | N/A          | Inc-PTAR1-1   |
| A_24_P14010    | 11,7923 | 12,5143 | -1,649467097 | ENST00000258960 | 4836      | NM_021079    | NMT1          |
| A_22_P00023874 | 1,49064 | 2,21272 | -1,649558566 | ENST00000454152 | 100507059 | NR_108054    | LINC00703     |
| A_23_P205519   | 10,0171 | 10,7393 | -1,649695778 | ENST00000428304 | 63874     | NM_022060    | ABHD4         |
| A_23_P353717   | 12,269  | 12,9914 | -1,64992449  | ENST00000572173 | 116028    | NM_152308    | RMI2          |
| A_22_P00007617 | 1,40257 | 2,12508 | -1,650050295 | ENST00000418834 | 100507477 | NR_121622    | LOC100507477  |
| A_33_P3355371  | 7,50134 | 8,22391 | -1,65011892  | ENST00000294161 | 283237    | XR_247197    | TTC9C         |
| A_33_P3780901  | 10,8651 | 11,5877 | -1,650153234 | ENST00000267176 | 55206     | NM_001167856 | SBNO1         |
| A_23_P212844   | 9,30703 | 10,0299 | -1,650462089 | ENST00000470808 | 10460     | NM_006342    | TACC3         |
| A_22_P00013544 | 1,67845 | 2,40135 | -1,650496409 | ENST00000420710 | N/A       | N/A          | N/A           |
| A_22_P00000755 | 2,14666 | 2,86959 | -1,650530731 | ENST00000443714 | N/A       | N/A          | N/A           |
| A_22_P00002852 | 5,39705 | 6,12005 | -1,650610817 | N/A             | N/A       | DA457171     | Inc-C3orf32-2 |
| A_21_P0013922  | 6,56805 | 7,29122 | -1,650805328 | N/A             | N/A       | XM_005271373 | Inc-PPIE-1    |
| A_33_P7518452  | 7,14082 | 7,86413 | -1,650965531 | ENST00000361127 | 9860      | XR_426743    | LRIG2         |
| A_24_P370472   | 2,13758 | 2,86092 | -1,650999862 | ENST00000618157 | 3126      | NM_021983    | HLA-DRB4      |
| A_33_P3246022  | 3,74354 | 4,46705 | -1,651194419 | ENST00000624686 | N/A       | AK124556     | N/A           |
| A_32_P103633   | 12,0664 | 12,79   | -1,65129743  | ENST00000265056 | 4171      | NM_004526    | MCM2          |
| A_32_P460973   | 13,5891 | 14,3128 | -1,651411893 | ENST00000612468 | 3133      | NM_005516    | HLA-E         |
| A_33_P3292602  | 11,2205 | 11,9443 | -1,651526364 | ENST00000396994 | N/A       | N/A          | N/A           |

|                |         |         |              |                 |           |              |                |
|----------------|---------|---------|--------------|-----------------|-----------|--------------|----------------|
| A_23_P165504   | 1,72913 | 2,45326 | -1,651904175 | ENST00000236979 | 7141      | NM_003284    | TNP1           |
| A_33_P3413989  | 1,68519 | 2,40952 | -1,652133193 | ENST00000405496 | 710       | NM_000062    | SERPING1       |
| A_23_P144911   | 2,16821 | 2,89277 | -1,652396604 | ENST00000354891 | 133584    | NM_152403    | EGFLAM         |
| A_23_P412029   | 4,4038  | 5,12838 | -1,652419511 | ENST00000602599 | 150962    | NM_144709    | PUS10          |
| A_21_P0001253  | 2,72696 | 3,45154 | -1,652419511 | N/A             | N/A       | N/A          | Inc-MIB2-1     |
| A_22_P00017401 | 3,46682 | 4,19155 | -1,652591325 | N/A             | N/A       | N/A          | Inc-VCAN-1     |
| A_22_P00015574 | 6,47221 | 7,19718 | -1,652866266 | N/A             | N/A       | AK124887     | Inc-STUB1-1    |
| A_23_P393766   | 1,90548 | 2,63049 | -1,652912093 | ENST00000589953 | 284403    | NM_173636    | WDR62          |
| A_23_P203773   | 2,67985 | 3,40496 | -1,653026668 | ENST00000317945 | 91057     | NM_080654    | CCDC34         |
| A_21_P0010323  | 1,59606 | 2,3212  | -1,653061043 | N/A             | N/A       | N/A          | Inc-SIK1-4     |
| A_23_P207680   | 8,24325 | 8,96846 | -1,653141252 | ENST00000619860 | 100506084 | NM_001039083 | ARL17B         |
| A_32_P538180   | 5,46605 | 6,1913  | -1,653187087 | ENST00000374296 | 164091    | NM_178422    | PAQR7          |
| A_23_P155931   | 1,39994 | 2,12522 | -1,653221464 | ENST00000508016 | 56955     | NM_020203    | MEPE           |
| A_24_P945000   | 8,05217 | 8,77748 | -1,653255843 | ENST00000330137 | 348235    | NM_182620    | SKA2           |
| A_33_P3272493  | 2,33218 | 3,05769 | -1,653485048 | ENST00000354397 | 30835     | NM_001144897 | CD209          |
| A_32_P935906   | 1,59312 | 2,31881 | -1,653691361 | N/A             | 286103    | NR_026974    | ZNF252P-AS1    |
| A_33_P3385837  | 1,37029 | 2,09604 | -1,653760137 | ENST00000623087 | 79741     | NM_024688    | CCDC7          |
| A_22_P00008800 | 2,51144 | 3,23724 | -1,653817453 | N/A             | N/A       | N/A          | Inc-KIRREL-1   |
| A_22_P00002958 | 1,59959 | 2,32542 | -1,653851844 | N/A             | N/A       | N/A          | Inc-C5orf63-1  |
| A_23_P145777   | 15,394  | 16,1199 | -1,653932091 | ENST00000482299 | 4697      | NM_002489    | NDUFA4         |
| A_22_P00023302 | 1,39021 | 2,11629 | -1,654138459 | ENST00000523502 | N/A       | BC017739     | N/A            |
| A_32_P341615   | 4,32776 | 5,05384 | -1,654138459 | ENST00000374283 | 158401    | NM_173521    | C9orf84        |
| A_23_P65757    | 13,2404 | 13,9666 | -1,654276052 | ENST00000621385 | 9133      | NM_004701    | CCNB2          |
| A_21_P0000832  | 1,54462 | 2,27087 | -1,654333386 | N/A             | 100507300 | NR_038907    | ALKBH3-AS1     |
| A_21_P0010679  | 5,76886 | 6,49519 | -1,654425124 | N/A             | N/A       | N/A          | XLOC_I2_001362 |
| A_23_P93499    | 10,7305 | 11,457  | -1,654620085 | ENST00000495806 | 51106     | NM_016020    | TFB1M          |
| A_21_P0002874  | 1,46888 | 2,1954  | -1,654643023 | ENST00000490139 | 101929717 | N/A          | LOC101929717   |
| A_23_P107313   | 9,84551 | 10,5722 | -1,65483801  | ENST00000587338 | 6388      | NM_006923    | SDF2           |
| A_22_P00006225 | 1,36047 | 2,08721 | -1,654895363 | N/A             | N/A       | N/A          | Inc-FAM50B-1   |
| A_33_P3212172  | 1,68337 | 2,41022 | -1,655021547 | ENST00000557789 | 79856     | NM_024798    | SNX22          |
| A_23_P213959   | 8,8833  | 9,6102  | -1,655078907 | ENST00000394320 | 133522    | NM_133263    | PPARGC1B       |
| A_21_P0005569  | 1,63649 | 2,36341 | -1,655101851 | N/A             | N/A       | N/A          | Inc-DYNC111-1  |
| A_19_P00316107 | 8,13614 | 8,86309 | -1,655136269 | N/A             | 26013     | AB014581     | L3MBTL1        |

|                |         |         |              |                 |           |              |                  |
|----------------|---------|---------|--------------|-----------------|-----------|--------------|------------------|
| A_33_P3228128  | 12,3038 | 13,0308 | -1,655193632 | ENST00000340192 | 2067      | NM_202001    | ERCC1            |
| A_23_P98930    | 10,4009 | 11,128  | -1,655308365 | ENST00000535596 | 55196     | NM_018169    | KIAA1551         |
| A_23_P58443    | 8,67205 | 9,39925 | -1,655423107 | ENST00000532219 | 404734    | NM_020690    | ANKHD1-EIF4EBP3  |
| A_33_P3404749  | 7,25403 | 7,98132 | -1,655526381 | ENST00000334528 | 342184    | NM_001277313 | FMN1             |
| A_19_P00322407 | 4,25829 | 4,98576 | -1,655732948 | N/A             | 729178    | NR_034115    | STXBP5-AS1       |
| A_22_P00013922 | 1,55193 | 2,27943 | -1,655767378 | ENST00000465509 | 139324    | N/A          | HDX              |
| A_21_P0008072  | 5,77347 | 6,50099 | -1,655790332 | N/A             | N/A       | N/A          | Inc-AL445989.1-2 |
| A_24_P106502   | 5,28535 | 6,01289 | -1,655813286 | ENST00000394259 | 29964     | NM_013397    | PRICKLE4         |
| A_21_P0006382  | 1,34248 | 2,07013 | -1,65593954  | N/A             | N/A       | N/A          | Inc-AGTPBP1-3    |
| A_23_P100203   | 10,6486 | 11,3763 | -1,655996932 | ENST00000433866 | 3281      | NM_001537    | HSBP1            |
| A_21_P0013520  | 1,70568 | 2,43347 | -1,656100242 | N/A             | N/A       | N/A          | XLOC_I2_014566   |
| A_33_P3320112  | 2,54239 | 3,2702  | -1,6561232   | N/A             | N/A       | N/A          | N/A              |
| A_22_P00000741 | 9,4253  | 10,1532 | -1,656226518 | ENST00000400362 | 642852    | NR_026943    | LOC642852        |
| A_22_P00013909 | 6,38865 | 7,11658 | -1,656260958 | ENST00000534384 | 2542      | NM_001164277 | SLC37A4          |
| A_33_P3408599  | 1,70922 | 2,4372  | -1,656318361 | ENST00000610245 | N/A       | AK126604     | N/A              |
| A_22_P00006098 | 5,10132 | 5,82945 | -1,656490581 | N/A             | N/A       | N/A          | Inc-FAM164C-1    |
| A_33_P6470455  | 1,3487  | 2,07684 | -1,656502063 | ENST00000515213 | 442497    | NR_033960    | LOC442497        |
| A_22_P00004035 | 3,19673 | 3,92489 | -1,656525027 | ENST00000437569 | N/A       | N/A          | N/A              |
| A_32_P154473   | 1,47826 | 2,20643 | -1,656536509 | ENST00000435030 | 3800      | NM_004522    | KIF5C            |
| A_33_P3342802  | 1,44879 | 2,17706 | -1,656651336 | N/A             | 649294    | AK091259     | LOC649294        |
| A_32_P221991   | 4,96188 | 5,69024 | -1,656754686 | ENST00000472427 | 9649      | NM_014636    | RALGPS1          |
| A_23_P41304    | 2,12181 | 2,85035 | -1,656961406 | ENST00000437468 | 2996      | NM_002102    | GYPE             |
| A_23_P77833    | 7,57876 | 8,30734 | -1,657007348 | ENST00000588169 | 9489      | NM_024419    | PGS1             |
| A_23_P43157    | 6,01552 | 6,74411 | -1,657018833 | ENST00000522677 | 4603      | NM_001080416 | MYBL1            |
| A_22_P00002758 | 8,65692 | 9,38562 | -1,657145179 | ENST00000569966 | N/A       | BC009635     | N/A              |
| A_33_P3349586  | 1,52801 | 2,2569  | -1,657363437 | N/A             | 55971     | AK124269     | BAIAP2L1         |
| A_23_P259586   | 9,26228 | 9,99139 | -1,657616191 | ENST00000504590 | 7272      | NM_003318    | TTK              |
| A_22_P00006156 | 1,53141 | 2,26052 | -1,657616191 | N/A             | N/A       | N/A          | Inc-FAM196B-1    |
| A_21_P0012243  | 1,58704 | 2,3162  | -1,657673641 | ENST00000609932 | 100130418 | N/A          | CECR7            |
| A_23_P89163    | 11,6375 | 12,3667 | -1,657719602 | ENST00000589210 | 23265     | NM_001013839 | EXOC7            |
| A_22_P00000385 | 2,8727  | 3,60194 | -1,657765564 | ENST00000515436 | N/A       | N/A          | N/A              |
| A_24_P163537   | 10,7356 | 11,4651 | -1,658064351 | ENST00000457408 | 222068    | NM_182547    | TMED4            |
| A_24_P169688   | 6,21261 | 6,94242 | -1,658420667 | ENST00000469155 | 4277      | NM_005931    | MICB             |

|                |         |         |              |                 |           |              |                |
|----------------|---------|---------|--------------|-----------------|-----------|--------------|----------------|
| A_33_P3275310  | 6,51812 | 7,24806 | -1,658570112 | ENST00000359366 | 4287      | NM_004993    | ATXN3          |
| A_24_P219108   | 3,10323 | 3,83328 | -1,658696577 | ENST00000557413 | 83694     | NM_031464    | RPS6KL1        |
| A_23_P404730   | 4,11368 | 4,84389 | -1,658880542 | ENST00000007510 | 115703    | NM_052948    | ARHGAP33       |
| A_22_P00012164 | 5,89442 | 6,62481 | -1,659087528 | ENST00000454957 | N/A       | N/A          | N/A            |
| A_22_P00005225 | 1,75807 | 2,48847 | -1,659099028 | ENST00000556475 | 79104     | N/A          | MEG8           |
| A_33_P3389230  | 6,79401 | 7,52445 | -1,659145028 | ENST00000373691 | 2833      | NM_001142797 | CXCR3          |
| A_32_P98683    | 10,7291 | 11,4598 | -1,659444064 | ENST00000618876 | 4302      | NM_005937    | MLLT6          |
| A_24_P32520    | 7,33621 | 8,06697 | -1,659513079 | ENST00000300650 | 257160    | NM_001077239 | RNF214         |
| A_23_P69513    | 4,71818 | 5,44906 | -1,65965112  | ENST00000344733 | 6002      | NM_198229    | RGS12          |
| A_23_P83159    | 1,57409 | 2,305   | -1,659685631 | ENST00000359039 | 55958     | NM_018847    | KLHL9          |
| A_21_P0001540  | 3,36311 | 4,09405 | -1,659720144 | N/A             | N/A       | N/A          | Inc-GBP5-2     |
| A_33_P3288359  | 14,3685 | 15,0997 | -1,660019283 | ENST00000570985 | 5699      | NM_002801    | PSMB10         |
| A_22_P00013837 | 1,34288 | 2,07424 | -1,660203395 | N/A             | 100874070 | NR_046547    | USP12-AS1      |
| A_19_P00806882 | 12,5412 | 13,2726 | -1,660249426 | ENST00000440046 | N/A       | N/A          | N/A            |
| A_24_P185604   | 8,1665  | 8,89807 | -1,660445073 | ENST00000373773 | 57446     | NM_032013    | NDRG3          |
| A_23_P79247    | 5,28941 | 6,02102 | -1,660491111 | ENST00000482051 | 80055     | NM_024989    | PGAP1          |
| A_21_P0009770  | 1,9594  | 2,69102 | -1,660502621 | N/A             | N/A       | N/A          | Inc-ZNF296-1   |
| A_33_P3292264  | 4,07366 | 4,80558 | -1,660847949 | ENST00000360254 | 84976     | N/A          | DISP1          |
| A_33_P3331188  | 8,46635 | 9,19831 | -1,660893998 | ENST00000568978 | 57636     | NM_001199417 | ARHGAP23       |
| A_22_P00009795 | 1,44173 | 2,17392 | -1,661158805 | ENST00000437790 | N/A       | N/A          | N/A            |
| A_32_P47107    | 9,55875 | 10,291  | -1,661227892 | ENST00000561761 | N/A       | N/A          | N/A            |
| A_22_P00004093 | 1,49141 | 2,22386 | -1,661458203 | N/A             | N/A       | N/A          | Inc-CIT-6      |
| A_23_P340263   | 1,49766 | 2,23029 | -1,66166551  | ENST00000513656 | 285533    | NM_173662    | RNF175         |
| A_22_P00000977 | 2,04576 | 2,77843 | -1,661711582 | N/A             | 220930    | NR_024284    | ZEB1-AS1       |
| A_33_P3312661  | 1,39405 | 2,12675 | -1,661746137 | N/A             | N/A       | AK090819     | N/A            |
| A_22_P00001478 | 7,64935 | 8,38209 | -1,661792211 | ENST00000506774 | 8629      | NM_003724    | JRK            |
| A_32_P189204   | 5,51863 | 6,25142 | -1,661849805 | ENST00000266754 | 283431    | NM_174942    | GAS2L3         |
| A_24_P370670   | 11,7049 | 12,4377 | -1,661861324 | ENST00000487874 | 100506144 | NM_001195156 | ZMYM6NB        |
| A_32_P131050   | 8,67736 | 9,41017 | -1,661872844 | ENST00000360647 | 7707      | NM_021964    | ZNF148         |
| A_21_P0014552  | 1,35993 | 2,09279 | -1,661930441 | N/A             | N/A       | N/A          | N/A            |
| A_23_P30805    | 11,3293 | 12,0622 | -1,66197652  | ENST00000355057 | 8363      | NM_021968    | HIST1H4J       |
| A_33_P3288569  | 9,99037 | 10,7235 | -1,6622415   | ENST00000603913 | 51562     | NM_001144891 | MBIP           |
| A_21_P0013652  | 5,616   | 6,34925 | -1,662379767 | N/A             | N/A       | N/A          | XLOC_I2_015213 |

|                |         |         |              |                 |        |              |             |
|----------------|---------|---------|--------------|-----------------|--------|--------------|-------------|
| A_23_P66719    | 8,93625 | 9,6698  | -1,662725485 | ENST00000394901 | 147015 | NM_144683    | DHRS13      |
| A_23_P90659    | 13,1355 | 13,8691 | -1,662783111 | ENST00000175091 | 9741   | NM_014713    | LAPTM4A     |
| A_33_P3262069  | 5,26106 | 5,99468 | -1,662806163 | ENST00000338569 | 338755 | NM_001004490 | OR2AG2      |
| A_22_P00022185 | 8,30798 | 9,0416  | -1,662806163 | ENST00000319018 | 202915 | NM_001097620 | TMEM184A    |
| A_23_P372255   | 8,15315 | 8,88708 | -1,663163498 | ENST00000429204 | 3707   | NM_002221    | ITPKB       |
| A_24_P75460    | 1,94477 | 2,67874 | -1,663209611 | ENST00000312504 | 402117 | NM_001080500 | VWC2L       |
| A_21_P0005577  | 3,05048 | 3,78456 | -1,663336429 | N/A             | N/A    | N/A          | Inc-EXOC4-1 |
| A_32_P5480     | 12,084  | 12,8181 | -1,663359488 | ENST00000392687 | 253782 | NM_203463    | CERS6       |
| A_23_P324327   | 10,5014 | 11,2356 | -1,663474787 | ENST00000569479 | 51704  | NM_016235    | GPRC5B      |
| A_23_P409168   | 7,91548 | 8,64992 | -1,663751538 | ENST00000477412 | 23218  | NM_015175    | NBEAL2      |
| A_32_P158355   | 10,3276 | 11,0621 | -1,663820733 | ENST00000532875 | 200810 | NM_001015050 | ALG1L       |
| A_21_P0014484  | 1,38129 | 2,11584 | -1,663878398 | N/A             | N/A    | N/A          | N/A         |
| A_33_P3273298  | 7,11504 | 7,84961 | -1,663901464 | ENST00000504146 | 126017 | NM_001004301 | ZNF813      |
| A_33_P3368445  | 1,51206 | 2,24678 | -1,664074472 | N/A             | N/A    | N/A          | N/A         |
| A_33_P3264269  | 7,0796  | 7,8144  | -1,664166751 | ENST00000357443 | 4343   | NM_001286072 | MOV10       |
| A_33_P3364498  | 12,7019 | 13,4368 | -1,664282106 | N/A             | N/A    | N/A          | N/A         |
| A_24_P217904   | 7,2996  | 8,03453 | -1,664316714 | ENST00000372922 | 55809  | NM_001297573 | TRERF1      |
| A_33_P3420655  | 9,50969 | 10,2447 | -1,664409006 | ENST00000372396 | 9682   | NM_014663    | KDM4A       |
| A_23_P337270   | 2,95689 | 3,69191 | -1,664420543 | ENST00000383771 | 152110 | XM_006712997 | NEK10       |
| A_33_P3294583  | 4,10888 | 4,84417 | -1,664732068 | N/A             | 256880 | AK123926     | LOC256880   |
| A_23_P11644    | 8,55467 | 9,29009 | -1,664882082 | ENST00000368756 | 6703   | NM_006945    | SPRR2D      |
| A_21_P0010396  | 3,29728 | 4,03274 | -1,664928243 | N/A             | N/A    | N/A          | Inc-RGL4-4  |
| A_24_P921155   | 9,30897 | 10,0445 | -1,665009028 | ENST00000383675 | 25871  | NM_015412    | C3orf17     |
| A_33_P3295178  | 4,15465 | 4,89021 | -1,665043651 | ENST00000371376 | 51668  | AK128270     | HSPB11      |
| A_22_P00024976 | 4,44239 | 5,17798 | -1,665078275 | N/A             | N/A    | N/A          | Inc-LAT2-1  |
| A_24_P924591   | 11,0039 | 11,7395 | -1,665089817 | ENST00000258963 | 7716   | NM_007146    | VEZF1       |
| A_23_P11331    | 11,8454 | 12,581  | -1,665089817 | ENST00000372685 | 90843  | NM_153333    | TCEAL8      |
| A_23_P397391   | 3,40879 | 4,14447 | -1,665182152 | ENST00000246549 | 2867   | NM_005306    | FFAR2       |
| A_23_P376239   | 8,86685 | 9,60256 | -1,665216778 | ENST00000554666 | 10914  | NM_032632    | PAPOLA      |
| A_23_P78867    | 1,53859 | 2,27434 | -1,665262949 | ENST00000359596 | 6261   | NM_000540    | RYR1        |
| A_21_P0008229  | 1,63425 | 2,37    | -1,665262949 | N/A             | N/A    | N/A          | Inc-ZMYM2-1 |
| A_21_P0002586  | 4,3536  | 5,08936 | -1,665274491 | ENST00000238831 | 84272  | N/A          | YIPF4       |
| A_22_P00023760 | 1,34551 | 2,08143 | -1,665459187 | ENST00000425194 | N/A    | N/A          | N/A         |



|                |         |         |              |                 |           |              |                   |
|----------------|---------|---------|--------------|-----------------|-----------|--------------|-------------------|
| A_23_P318284   | 8,61395 | 9,35003 | -1,665643902 | ENST00000474846 | 23171     | NM_015141    | GPD1L             |
| A_23_P142389   | 10,9305 | 11,6668 | -1,665897919 | ENST00000621372 | 51599     | NM_205834    | LSR               |
| A_23_P148584   | 3,63534 | 4,37175 | -1,666024943 | ENST00000276202 | 139818    | NM_144658    | DOCK11            |
| A_21_P0006211  | 1,64125 | 2,37802 | -1,666440723 | N/A             | N/A       | N/A          | Inc-PALM2-AKAP2-1 |
| A_32_P178499   | 2,71748 | 3,45425 | -1,666440723 | ENST00000459925 | 388284    | NM_001012984 | C16orf86          |
| A_24_P69379    | 7,02071 | 7,75771 | -1,666706414 | ENST00000471944 | 64921     | NM_022900    | CASD1             |
| A_33_P3265304  | 1,64718 | 2,38422 | -1,666752626 | N/A             | N/A       | N/A          | N/A               |
| A_23_P207106   | 5,30388 | 6,04098 | -1,666821946 | ENST00000306071 | 1140      | NM_000747    | CHRN1             |
| A_23_P66241    | 11,0119 | 11,7492 | -1,667053032 | ENST00000379818 | 4499      | NM_176870    | MT1M              |
| A_24_P941831   | 7,6704  | 8,40774 | -1,667099253 | ENST00000495329 | 65062     | NM_001044385 | TMEM237           |
| A_22_P00022057 | 2,01454 | 2,7519  | -1,667122364 | N/A             | 101927762 | NR_120629    | LOC101927762      |
| A_22_P00025353 | 1,63306 | 2,37042 | -1,667122364 | ENST00000583436 | N/A       | BX096476     | N/A               |
| A_33_P3299081  | 2,78114 | 3,51869 | -1,667341936 | ENST00000379319 | 54991     | XM_006710717 | C1orf159          |
| A_22_P00003586 | 2,13066 | 2,8683  | -1,667445953 | ENST00000514791 | N/A       | N/A          | N/A               |
| A_22_P00011736 | 5,63259 | 6,37028 | -1,667503743 | ENST00000456090 | N/A       | N/A          | N/A               |
| A_23_P155907   | 12,581  | 13,3188 | -1,667630889 | ENST00000296411 | 23173     | NM_015143    | METAP1            |
| A_22_P00015496 | 3,58742 | 4,32529 | -1,667711805 | ENST00000445227 | N/A       | N/A          | N/A               |
| A_33_P3444555  | 3,69795 | 4,43586 | -1,667758044 | N/A             | N/A       | N/A          | N/A               |
| A_21_P0014503  | 8,16468 | 8,90273 | -1,667919892 | N/A             | 100507398 | NR_103812    | INTS6-AS1         |
| A_22_P00003805 | 1,71727 | 2,45533 | -1,667931454 | N/A             | N/A       | BX648047     | Inc-CDKN2A-1      |
| A_23_P70897    | 9,48291 | 10,2211 | -1,668081756 | ENST00000490089 | 55063     | NM_017984    | ZCWPW1            |
| A_19_P00321202 | 8,77374 | 9,51202 | -1,66818582  | ENST00000389622 | 131544    | NM_153605    | CRYBG3            |
| A_23_P78771    | 9,52632 | 10,2646 | -1,66818582  | ENST00000485798 | 4924      | NM_006184    | NUCB1             |
| A_22_P00001894 | 4,18334 | 4,92163 | -1,668197383 | N/A             | N/A       | N/A          | Inc-B4GALNT3-1    |
| A_21_P0013105  | 6,27405 | 7,01253 | -1,668417095 | ENST00000454588 | N/A       | N/A          | N/A               |
| A_23_P39465    | 12,6203 | 13,3589 | -1,668555876 | ENST00000533098 | 684       | NM_004335    | BST2              |
| A_23_P63050    | 13,1181 | 13,8567 | -1,668555876 | ENST00000466193 | 7389      | NM_000374    | UROD              |
| A_21_P0000759  | 4,81936 | 5,55799 | -1,668590573 | N/A             | 100505746 | NR_038311    | ITGB2-AS1         |
| A_33_P3237574  | 13,0056 | 13,7445 | -1,668902879 | ENST00000376802 | 3105      | NM_001242758 | HLA-A             |
| A_22_P00023801 | 1,38839 | 2,12731 | -1,668926015 | N/A             | N/A       | BM023288     | Inc-ADCK3-1       |
| A_22_P00020330 | 5,79008 | 6,5291  | -1,6690417   | N/A             | N/A       | N/A          | Inc-ANGEL1-2      |
| A_24_P203964   | 8,74024 | 9,47927 | -1,669053269 | ENST00000622284 | 11039     | N/A          | SMA4              |
| A_33_P3220113  | 5,37023 | 6,10932 | -1,669122684 | ENST00000313956 | 100529240 | NM_001202473 | ZNF816-ZNF321P    |

|                |         |         |              |                 |           |              |                |
|----------------|---------|---------|--------------|-----------------|-----------|--------------|----------------|
| A_24_P350649   | 10,5732 | 11,3123 | -1,669134254 | ENST00000568530 | 55066     | NM_017990    | PDPR           |
| A_22_P00022750 | 5,8228  | 6,562   | -1,669249953 | N/A             | 101929901 | XR_425140    | LOC101929901   |
| A_32_P34589    | 9,95927 | 10,6985 | -1,669284665 | ENST00000480119 | 51319     | NM_016625    | RSRC1          |
| A_33_P3352767  | 8,91793 | 9,65718 | -1,669307806 | N/A             | 4157      | NM_002386    | MC1R           |
| A_19_P00322183 | 2,79294 | 3,53244 | -1,6695971   | N/A             | N/A       | N/A          | Inc-NR5A2-1    |
| A_24_P38081    | 5,10266 | 5,8422  | -1,669643392 | ENST00000357266 | 2289      | NM_004117    | FKBP5          |
| A_33_P3349501  | 4,1084  | 4,84795 | -1,669654965 | N/A             | N/A       | N/A          | N/A            |
| A_21_P0000166  | 2,77402 | 3,51357 | -1,669654965 | ENST00000595691 | 100506012 | NM_001205281 | PPP5D1         |
| A_33_P3323902  | 1,7337  | 2,47341 | -1,669840146 | ENST00000530001 | 245940    | NM_001037804 | DEFB130        |
| A_23_P348257   | 9,76978 | 10,5095 | -1,669851721 | ENST00000261402 | 9891      | NM_014840    | NUAK1          |
| A_24_P76078    | 10,8211 | 11,5611 | -1,670175839 | ENST00000580924 | N/A       | N/A          | N/A            |
| A_23_P327140   | 5,25371 | 5,99407 | -1,670592655 | ENST00000560083 | 57674     | NM_001256071 | RNF213         |
| A_19_P00808120 | 6,65476 | 7,39516 | -1,670638974 | ENST00000622362 | 285550    | NM_001145191 | FAM200B        |
| A_33_P3277952  | 1,69008 | 2,43056 | -1,670731617 | N/A             | N/A       | N/A          | N/A            |
| A_33_P3216232  | 6,47967 | 7,22016 | -1,670743197 | ENST00000483795 | 9270      | NM_004763    | ITGB1BP1       |
| A_33_P3368453  | 11,3176 | 12,0582 | -1,67087059  | ENST00000400322 | 100507436 | NM_000247    | MICA           |
| A_33_P3283636  | 5,77014 | 6,51078 | -1,670916917 | N/A             | N/A       | N/A          | N/A            |
| A_22_P00001253 | 8,66633 | 9,407   | -1,670951663 | N/A             | N/A       | BC073749     | Inc-ANKRD34B-2 |
| A_33_P3248222  | 1,50027 | 2,24097 | -1,67098641  | N/A             | N/A       | N/A          | N/A            |
| A_23_P130764   | 9,15307 | 9,89387 | -1,671102238 | ENST00000342291 | 3770      | NM_013348    | KCNJ14         |
| A_22_P00023751 | 1,59402 | 2,33489 | -1,671183322 | N/A             | N/A       | N/A          | Inc-A1CF-3     |
| A_23_P34877    | 7,25319 | 7,99413 | -1,67126441  | ENST00000487146 | 64783     | NM_022768    | RBM15          |
| A_23_P343900   | 1,37649 | 2,11755 | -1,671403428 | ENST00000450948 | N/A       | AF085654     | N/A            |
| A_23_P168965   | 8,35969 | 9,10076 | -1,671415013 | ENST00000390159 | 56260     | NM_019607    | C8orf44        |
| A_33_P3355659  | 2,83232 | 3,57344 | -1,671472941 | ENST00000380035 | 390598    | NM_001258024 | SKOR1          |
| A_23_P211080   | 6,84397 | 7,58521 | -1,671611976 | ENST00000342136 | 3455      | NM_207585    | IFNAR2         |
| A_22_P00023628 | 3,21604 | 3,95728 | -1,671611976 | N/A             | N/A       | AK056249     | Inc-ZC3H14-1   |
| A_23_P149775   | 10,3479 | 11,0895 | -1,672029151 | ENST00000344936 | 94134     | NM_018287    | ARHGAP12       |
| A_33_P3291662  | 1,43813 | 2,17975 | -1,67205233  | N/A             | N/A       | N/A          | N/A            |
| A_21_P0003508  | 2,36485 | 3,10651 | -1,67209869  | ENST00000507844 | N/A       | N/A          | N/A            |
| A_21_P0005056  | 1,43181 | 2,17359 | -1,672237777 | N/A             | N/A       | N/A          | Inc-SERINC1-1  |
| A_23_P349566   | 2,28802 | 3,02995 | -1,672411652 | ENST00000407595 | 114800    | NM_001080433 | CCDC85A        |
| A_33_P3415012  | 2,05653 | 2,7986  | -1,672573952 | ENST00000280684 | 3742      | NM_002235    | KCNA6          |

|                |         |         |              |                 |           |              |                       |
|----------------|---------|---------|--------------|-----------------|-----------|--------------|-----------------------|
| A_21_P0009248  | 2,97093 | 3,71301 | -1,672585545 | N/A             | N/A       | N/A          | Inc-TMEM106A-1        |
| A_21_P0002516  | 2,90988 | 3,652   | -1,67263192  | N/A             | N/A       | N/A          | Inc-COBLL1-1          |
| A_33_P3416037  | 12,9241 | 13,6665 | -1,672956578 | ENST00000559705 | 84191     | NM_001014812 | FAM96A                |
| A_22_P00007600 | 2,26881 | 3,01127 | -1,673026155 | N/A             | N/A       | AA354059     | Inc-HDGFL1-3          |
| A_33_P3263603  | 6,77698 | 7,51965 | -1,6732697   | ENST00000592994 | N/A       | N/A          | N/A                   |
| A_24_P374973   | 3,57212 | 4,3148  | -1,673281299 | ENST00000449851 | N/A       | N/A          | N/A                   |
| A_33_P3284715  | 7,07376 | 7,81651 | -1,673362489 | N/A             | 677767    | NR_003001    | SCARNA7               |
| A_23_P25605    | 7,91993 | 8,6627  | -1,673385687 | ENST00000379483 | 84078     | NM_032138    | KBTBD7                |
| A_21_P0009499  | 1,42822 | 2,17108 | -1,673490081 | N/A             | N/A       | N/A          | Inc-TIMM21-3          |
| A_23_P207927   | 9,43524 | 10,1781 | -1,673490081 | ENST00000268942 | 55028     | NM_001288770 | C17orf80              |
| A_23_P107432   | 4,67157 | 5,41451 | -1,673582882 | ENST00000577684 | 400579    | NR_104343    | FLJ35934              |
| A_21_P0003899  | 1,46666 | 2,21007 | -1,674128189 | N/A             | N/A       | N/A          | Inc-UNC5C-1           |
| A_21_P0000898  | 4,33756 | 5,08102 | -1,674186211 | ENST00000432296 | 100131234 | NR_040073    | MIR181A1HG            |
| A_23_P86195    | 10,1442 | 10,8877 | -1,67423263  | ENST00000446120 | 126969    | NM_152369    | SLC44A3               |
| A_21_P0007677  | 2,08939 | 2,83293 | -1,67427905  | N/A             | N/A       | N/A          | Inc-FBXL14-2          |
| A_24_P375683   | 14,1178 | 14,8614 | -1,674348683 | ENST00000486538 | N/A       | N/A          | N/A                   |
| A_22_P00018293 | 2,11554 | 2,85917 | -1,6743835   | ENST00000444032 | N/A       | N/A          | N/A                   |
| A_24_P187086   | 1,42932 | 2,17328 | -1,67476654  | ENST00000326105 | N/A       | N/A          | N/A                   |
| A_21_P0009905  | 1,38934 | 2,13332 | -1,674789757 | N/A             | N/A       | N/A          | Inc-PREX1-6           |
| A_22_P00002684 | 2,79109 | 3,53508 | -1,674801366 | N/A             | N/A       | N/A          | Inc-C1orf53-1         |
| A_23_P136196   | 5,96708 | 6,71108 | -1,674812975 | ENST00000264866 | 55296     | NM_018317    | TBC1D19               |
| A_22_P00001843 | 10,2383 | 10,9825 | -1,675045169 | ENST00000545170 | 4287      | NM_004993    | ATXN3                 |
| A_23_P129332   | 1,57512 | 2,3194  | -1,675138056 | ENST00000529791 | 114780    | NM_001076780 | PKD1L2                |
| A_19_P00327406 | 1,40803 | 2,15235 | -1,675184502 | N/A             | N/A       | N/A          | Inc-RP11-150O12.1.1-1 |
| A_21_P0014311  | 1,62404 | 2,3684  | -1,675230948 | N/A             | N/A       | BX107056     | Inc-CRAMP1L-1         |
| A_33_P3277373  | 2,33387 | 3,07842 | -1,675451587 | ENST00000215781 | 5008      | NM_020530    | OSM                   |
| A_24_P382119   | 10,2055 | 10,9501 | -1,675509655 | ENST00000323456 | 9110      | NM_004687    | MTMR4                 |
| A_33_P3416513  | 1,64881 | 2,39357 | -1,675695485 | ENST00000304519 | 203076    | NM_001040032 | C8orf74               |
| A_33_P3282000  | 2,87105 | 3,61582 | -1,6757071   | N/A             | 643072    | NR_110587    | LOC643072             |
| A_23_P500799   | 9,71629 | 10,4611 | -1,675753561 | ENST00000505117 | 839       | NM_001226    | CASP6                 |
| A_21_P0011756  | 2,97246 | 3,71741 | -1,675916186 | ENST00000600007 | 101059948 | N/A          | LOC101059948          |
| A_23_P251412   | 2,12007 | 2,86502 | -1,675916186 | ENST00000612225 | 10590     | NM_006998    | SCGN                  |
| A_21_P0002644  | 1,98559 | 2,73057 | -1,675951036 | N/A             | N/A       | N/A          | Inc-CMPK2-13          |

|                |         |         |              |                 |           |              |              |
|----------------|---------|---------|--------------|-----------------|-----------|--------------|--------------|
| A_33_P3220911  | 12,9631 | 13,7082 | -1,676090443 | ENST00000252593 | 684       | NM_004335    | BST2         |
| A_33_P3437283  | 1,65841 | 2,4036  | -1,676195006 | N/A             | 643551    | AK128004     | LOC643551    |
| A_23_P166438   | 2,09819 | 2,84339 | -1,676206625 | ENST00000249044 | 80831     | NM_030642    | APOL5        |
| A_33_P3390580  | 8,16958 | 8,91498 | -1,676439012 | ENST00000436374 | 9720      | NM_014695    | CCDC144A     |
| A_33_P3283083  | 3,88261 | 4,62804 | -1,676473873 | ENST00000503927 | 8821      | NM_003866    | INPP4B       |
| A_32_P165113   | 9,34605 | 10,0915 | -1,676497114 | ENST00000406334 | 116143    | NM_138458    | WDR92        |
| A_21_P0006010  | 1,54042 | 2,28588 | -1,676508735 | ENST00000614608 | N/A       | N/A          | N/A          |
| A_19_P00322573 | 6,98183 | 7,72742 | -1,676659811 | ENST00000430244 | 101929736 | NR_108104    | LINC01372    |
| A_23_P321949   | 2,92788 | 3,67347 | -1,676659811 | ENST00000482011 | 5320      | NM_000300    | PLA2G2A      |
| A_33_P3388938  | 3,9529  | 4,69861 | -1,676799277 | N/A             | 197187    | NR_024402    | SNAI3-AS1    |
| A_22_P00005135 | 4,0357  | 4,78145 | -1,676845768 | ENST00000544727 | 440117    | NR_033970    | LOC440117    |
| A_21_P0003069  | 1,90688 | 2,65268 | -1,676903885 | N/A             | N/A       | N/A          | Inc-EIF2B5-1 |
| A_24_P211151   | 8,84595 | 9,59177 | -1,676927132 | ENST00000593523 | 56915     | NM_020158    | EXOSC5       |
| A_33_P3316983  | 8,96884 | 9,71496 | -1,677275875 | ENST00000398289 | 92482     | NM_001195304 | BBIP1        |
| A_24_P930418   | 2,89592 | 3,64212 | -1,677368885 | N/A             | 11030     | AK057533     | RBPM5        |
| A_33_P3220570  | 10,7981 | 11,5445 | -1,677601434 | ENST00000370664 | 80019     | NM_024954    | UBTD1        |
| A_22_P00005984 | 1,98296 | 2,72936 | -1,677601434 | N/A             | 101929109 | XR_241821    | LOC101929109 |
| A_22_P00001143 | 1,63468 | 2,38111 | -1,677636319 | N/A             | N/A       | BC131743     | Inc-AMFR-1   |
| A_23_P401547   | 9,0084  | 9,75489 | -1,677706092 | ENST00000319792 | 25945     | NM_015480    | PVRL3        |
| A_23_P28434    | 14,6475 | 15,394  | -1,677717721 | ENST00000263864 | 8673      | NM_003761    | VAMP8        |
| A_23_P350719   | 1,43337 | 2,17992 | -1,677775867 | ENST00000480827 | 124221    | NR_026864    | PRSS30P      |
| A_22_P00010253 | 1,93761 | 2,6847  | -1,678403975 | N/A             | N/A       | N/A          | Inc-MTERF-5  |
| A_23_P158829   | 9,42897 | 10,1761 | -1,678450511 | ENST00000269260 | 409       | NM_004313    | ARRB2        |
| A_23_P31671    | 13,9057 | 14,6529 | -1,678531952 | ENST00000521948 | 7381      | NM_006294    | UQCRB        |
| A_21_P0007917  | 3,85436 | 4,60183 | -1,678846118 | N/A             | N/A       | N/A          | Inc-GPR183-2 |
| A_23_P74001    | 3,4076  | 4,1551  | -1,678881029 | ENST00000368737 | 6283      | NM_005621    | S100A12      |
| A_33_P3356995  | 2,56523 | 3,31279 | -1,678950853 | ENST00000520381 | 10565     | XM_005251136 | ARFGEF1      |
| A_23_P111452   | 12,3116 | 13,0593 | -1,679113788 | ENST00000473633 | 116988    | NM_031946    | AGAP3        |
| A_23_P50646    | 7,4897  | 8,23758 | -1,679323298 | ENST00000562255 | 390940    | NM_001193621 | PINLYP       |
| A_22_P00024785 | 1,52006 | 2,26795 | -1,679334938 | ENST00000436433 | N/A       | N/A          | N/A          |
| A_24_P304051   | 14,0517 | 14,7996 | -1,679346578 | ENST00000493946 | 9446      | NM_004832    | GSTO1        |
| A_33_P3383955  | 9,5662  | 10,3141 | -1,679346578 | ENST00000610805 | 1643      | NM_001300734 | DDB2         |
| A_23_P149690   | 7,41738 | 8,1654  | -1,679486268 | ENST00000502512 | 55229     | NM_018216    | PANK4        |

|                |         |         |              |                 |           |              |                |
|----------------|---------|---------|--------------|-----------------|-----------|--------------|----------------|
| A_33_P3325671  | 2,27698 | 3,02533 | -1,679870476 | ENST00000508239 | N/A       | XM_003403421 | N/A            |
| A_21_P0007778  | 1,58301 | 2,33138 | -1,679893764 | N/A             | N/A       | N/A          | Inc-DHX37-3    |
| A_33_P3228190  | 5,66979 | 6,41818 | -1,679917052 | ENST00000435937 | 8514      | NM_001199860 | KCNAB2         |
| A_21_P0002237  | 1,50708 | 2,25565 | -1,680126663 | N/A             | N/A       | N/A          | Inc-ETAA1-4    |
| A_22_P00016496 | 7,92577 | 8,67468 | -1,680522665 | N/A             | N/A       | BC005066     | Inc-TMEM99-5   |
| A_21_P0010680  | 1,40958 | 2,15854 | -1,680580908 | ENST00000421207 | 100506795 | NR_038426    | LINC01354      |
| A_33_P3358914  | 7,86065 | 8,60969 | -1,680674102 | ENST00000610551 | 57636     | NM_001199417 | ARHGAP23       |
| A_23_P318420   | 8,22838 | 8,97762 | -1,680907109 | ENST00000271277 | 55917     | NM_018704    | CTTNBP2NL      |
| A_23_P108501   | 7,57019 | 8,31948 | -1,680965366 | ENST00000424339 | 2043      | NM_004438    | EPHA4          |
| A_32_P195401   | 8,80191 | 9,55168 | -1,681524734 | ENST00000392238 | 150864    | NM_173511    | FAM117B        |
| A_23_P44836    | 9,72849 | 10,4783 | -1,681571356 | ENST00000478091 | 64943     | NM_022908    | NT5DC2         |
| A_33_P3327277  | 4,05658 | 4,80639 | -1,681571356 | ENST00000603594 | 340706    | NM_001272046 | VWA2           |
| A_23_P49768    | 12,2325 | 12,9824 | -1,681676262 | ENST00000225969 | 51264     | NM_016504    | MRPL27         |
| A_33_P3306068  | 8,17021 | 8,92037 | -1,681979358 | N/A             | 4610      | NM_001033081 | MYCL           |
| A_23_P396062   | 8,42101 | 9,17119 | -1,682002675 | ENST00000535977 | 57799     | NM_021168    | RAB40C         |
| A_33_P3326772  | 14,3227 | 15,073  | -1,682142586 | ENST00000341942 | 389541    | NM_001008395 | LAMTOR4        |
| A_22_P00023546 | 3,69091 | 4,44126 | -1,682200885 | N/A             | N/A       | BM694243     | Inc-PANK4-1    |
| A_32_P54137    | 16,014  | 16,7644 | -1,682259187 | ENST00000483273 | 7388      | NM_006004    | UQCRH          |
| A_22_P00011693 | 9,98377 | 10,7342 | -1,682294169 | N/A             | 5165      | NM_001142386 | PDK3           |
| A_23_P17914    | 8,30235 | 9,05284 | -1,682364135 | ENST00000216180 | 80339     | NM_025225    | PNPLA3         |
| A_21_P0003402  | 1,46432 | 2,21487 | -1,682434104 | ENST00000507332 | 101927305 | NR_125884    | LOC101927305   |
| A_23_P216845   | 5,82006 | 6,57063 | -1,682457428 | ENST00000339463 | 8328      | NM_004188    | GFI1B          |
| A_21_P0003217  | 1,49245 | 2,24305 | -1,682492414 | N/A             | N/A       | N/A          | Inc-LSM3-1     |
| A_21_P0007934  | 5,10754 | 5,85824 | -1,682609039 | ENST00000426509 | N/A       | N/A          | N/A            |
| A_23_P386268   | 1,73242 | 2,48317 | -1,682667355 | ENST00000311623 | 152816    | NM_178497    | C4orf26        |
| A_33_P3422471  | 5,98808 | 6,73883 | -1,682667355 | N/A             | N/A       | AK126796     | N/A            |
| A_23_P34126    | 2,30448 | 3,05535 | -1,682807321 | ENST00000480756 | 633       | NM_001711    | BGN            |
| A_24_P24371    | 2,49642 | 3,24738 | -1,682912304 | ENST00000390543 | N/A       | AJ294733     | N/A            |
| A_24_P550924   | 2,47211 | 3,22308 | -1,682923969 | ENST00000489976 | 149478    | NM_001136537 | BTBD19         |
| A_21_P0011547  | 2,77002 | 3,52114 | -1,683098955 | N/A             | N/A       | N/A          | XLOC_I2_005814 |
| A_33_P3348270  | 1,40669 | 2,15784 | -1,683133954 | ENST00000454561 | N/A       | X57615       | N/A            |
| A_21_P0008133  | 2,40739 | 3,15855 | -1,683145621 | N/A             | N/A       | N/A          | Inc-MTIF3-1    |
| A_22_P00021916 | 2,00822 | 2,75946 | -1,683238957 | ENST00000551450 | N/A       | N/A          | N/A            |

|                |         |         |              |                 |           |              |                |
|----------------|---------|---------|--------------|-----------------|-----------|--------------|----------------|
| A_19_P00813124 | 3,69663 | 4,44797 | -1,683355634 | N/A             | N/A       | N/A          | XLOC_I2_010511 |
| A_21_P0011327  | 1,55386 | 2,3052  | -1,683355634 | ENST00000559914 | 283673    | N/A          | EWSAT1         |
| A_23_P204277   | 14,4711 | 15,2225 | -1,683425645 | ENST00000544848 | 55766     | NM_177925    | H2AFJ          |
| A_19_P00322349 | 1,98356 | 2,73507 | -1,683554004 | ENST00000511431 | N/A       | N/A          | N/A            |
| A_21_P0011565  | 1,64047 | 2,39215 | -1,683752398 | ENST00000576171 | 100506371 | NR_104420    | LOC100506371   |
| A_23_P49145    | 2,56589 | 3,31761 | -1,683799082 | ENST00000400752 | 653808    | NM_152338    | ZG16           |
| A_21_P0009283  | 2,3615  | 3,11327 | -1,683857439 | N/A             | N/A       | N/A          | Inc-PGS1-1     |
| A_24_P68019    | 8,55387 | 9,30577 | -1,684009177 | ENST00000282296 | 90233     | NM_138347    | ZNF551         |
| A_33_P3303464  | 5,22124 | 5,97315 | -1,684020849 | ENST00000312423 | 126074    | NM_175871    | SWSAP1         |
| A_21_P0014049  | 2,94557 | 3,69752 | -1,684067541 | ENST00000612565 | 389834    | NR_027420    | LOC389834      |
| A_24_P159227   | 10,9231 | 11,6751 | -1,684125907 | ENST00000560346 | 56924     | NM_020168    | PAK6           |
| A_22_P00009067 | 3,20778 | 3,95987 | -1,684230972 | ENST00000444488 | 100874043 | NR_046873    | TPRG1-AS1      |
| A_24_P107291   | 7,5554  | 8,30758 | -1,684336043 | ENST00000529672 | 5519      | NM_181699    | PPP2R1B        |
| A_21_P0014925  | 5,19827 | 5,9505  | -1,684394418 | N/A             | N/A       | N/A          | N/A            |
| A_22_P00005330 | 5,6526  | 6,40519 | -1,684814783 | ENST00000619269 | 23189     | NM_001256877 | KANK1          |
| A_22_P00011243 | 1,71602 | 2,46873 | -1,684954928 | N/A             | N/A       | AF098667     | Inc-OR1F1-1    |
| A_23_P15944    | 2,03905 | 2,79187 | -1,685083404 | ENST00000269466 | 55520     | NM_018696    | ELAC1          |
| A_22_P00016206 | 3,04375 | 3,79669 | -1,685223571 | N/A             | 100996570 | NR_110617    | NFIA-AS2       |
| A_33_P3332393  | 4,72514 | 5,47808 | -1,685223571 | ENST00000372244 | 79639     | XR_425151    | TMEM53         |
| A_33_P3240752  | 2,82166 | 3,57462 | -1,685246933 | ENST00000183605 | 51208     | NM_016369    | CLDN18         |
| A_21_P0007265  | 1,7159  | 2,46893 | -1,685328704 | N/A             | N/A       | N/A          | Inc-PIWIL4-1   |
| A_22_P00021550 | 3,02554 | 3,77859 | -1,685352068 | N/A             | N/A       | BI767845     | Inc-GSX2-1     |
| A_23_P25069    | 8,29441 | 9,04749 | -1,685387114 | ENST00000621609 | 144203    | XR_424313    | OVOS2          |
| A_21_P0001378  | 1,34691 | 2,10013 | -1,685550673 | N/A             | N/A       | N/A          | Inc-CD1D-1     |
| A_23_P165707   | 5,80089 | 6,55429 | -1,685760986 | ENST00000409448 | 129530    | NM_174898    | LYG1           |
| A_21_P0014857  | 1,43954 | 2,19294 | -1,685760986 | N/A             | 100506276 | XR_132744    | LOC100506276   |
| A_32_P88240    | 6,84065 | 7,5941  | -1,685819411 | ENST00000405109 | 166348    | NM_207335    | KBTBD12        |
| A_22_P00013570 | 1,51964 | 2,27332 | -1,686088193 | ENST00000564291 | N/A       | N/A          | N/A            |
| A_33_P3321432  | 7,23074 | 7,98453 | -1,686216755 | ENST00000393807 | 51313     | NM_016613    | FAM198B        |
| A_23_P162486   | 8,5731  | 9,32708 | -1,686438841 | ENST00000542761 | 5777      | NM_002831    | PTPN6          |
| A_33_P3305497  | 4,10549 | 4,85951 | -1,6864856   | ENST00000491441 | 57701     | BC110599     | NCKAP5L        |
| A_24_P12397    | 3,87358 | 4,62764 | -1,68653236  | ENST00000338469 | 54209     | NM_018965    | TREM2          |
| A_22_P00011707 | 1,39625 | 2,15035 | -1,686579121 | ENST00000425505 | 100038246 | BC019674     | TLX1NB         |

|                |         |         |              |                 |           |              |                |
|----------------|---------|---------|--------------|-----------------|-----------|--------------|----------------|
| A_24_P186608   | 1,6644  | 2,41857 | -1,686660957 | ENST00000411491 | 349152    | NR_003561    | DPY19L2P2      |
| A_33_P3285391  | 4,90258 | 5,65705 | -1,687011724 | N/A             | N/A       | AK025047     | N/A            |
| A_32_P223017   | 10,7626 | 11,5171 | -1,687046805 | ENST00000357582 | 9064      | NM_004672    | MAP3K6         |
| A_33_P3308434  | 6,89416 | 7,64935 | -1,687853865 | ENST00000378525 | 79906     | NM_001301060 | MORN1          |
| A_33_P3390086  | 9,3224  | 10,0776 | -1,687865564 | N/A             | N/A       | N/A          | N/A            |
| A_22_P00000995 | 3,80938 | 4,56459 | -1,687877263 | N/A             | 101927139 | NR_123718    | LOC101927139   |
| A_21_P0009967  | 2,04864 | 2,80397 | -1,688017663 | N/A             | N/A       | N/A          | Inc-ARFGEF2-3  |
| A_23_P406131   | 11,1305 | 11,8859 | -1,688099568 | ENST00000573487 | 57146     | NM_020422    | TMEM159        |
| A_23_P372848   | 2,63699 | 3,39249 | -1,688216582 | ENST00000572418 | 5023      | NM_002558    | P2RX1          |
| A_33_P3246244  | 7,03059 | 7,78616 | -1,688298497 | N/A             | N/A       | N/A          | N/A            |
| A_22_P00025761 | 1,5406  | 2,29625 | -1,688392119 | N/A             | N/A       | DA445576     | Inc-LALBA-1    |
| A_24_P396994   | 12,8739 | 13,6297 | -1,688567673 | ENST00000273398 | 523       | NM_001690    | ATP6V1A        |
| A_23_P33022    | 15,4911 | 16,2469 | -1,688567673 | ENST00000322028 | 5441      | NM_021128    | POLR2L         |
| A_19_P00316667 | 3,26915 | 4,02498 | -1,688602787 | ENST00000517491 | 101929450 | NR_125815    | LOC101929450   |
| A_23_P6762     | 10,613  | 11,369  | -1,688801775 | ENST00000307768 | 84522     | NM_032492    | JAGN1          |
| A_23_P101521   | 2,51638 | 3,27239 | -1,688813481 | ENST00000486050 | 126123    | NM_152358    | IZUMO2         |
| A_33_P3285565  | 5,12775 | 5,88383 | -1,688895424 | ENST00000395145 | 1365      | NM_001306    | CLDN3          |
| A_33_P3321170  | 1,6954  | 2,45148 | -1,688895424 | ENST00000496203 | 80775     | AK311734     | TMEM177        |
| A_19_P00804072 | 6,77108 | 7,52759 | -1,68939888  | ENST00000559070 | 57674     | NM_001256071 | RNF213         |
| A_23_P130411   | 1,59328 | 2,34984 | -1,689457431 | ENST00000467649 | 89778     | NM_080475    | SERPINB11      |
| A_21_P0013016  | 3,9871  | 4,74367 | -1,689469142 | N/A             | N/A       | N/A          | XLOC_I2_012415 |
| A_23_P417148   | 10,8782 | 11,6348 | -1,689504274 | ENST00000353383 | 10743     | NM_030665    | RAI1           |
| A_33_P3233005  | 7,62196 | 8,37878 | -1,68976193  | ENST00000376381 | 54799     | NM_017643    | MBTD1          |
| A_23_P117387   | 1,66751 | 2,42437 | -1,689808781 | ENST00000280082 | 117153    | NM_054024    | MIA2           |
| A_24_P286114   | 12,4907 | 13,2476 | -1,689855633 | ENST00000613445 | 6507      | NM_004172    | SLC1A3         |
| A_23_P51487    | 9,9353  | 10,6922 | -1,689855633 | ENST00000489444 | 2635      | NM_018284    | GBP3           |
| A_24_P192727   | 10,0307 | 10,7878 | -1,690089913 | ENST00000465807 | 81621     | XR_246107    | KAZALD1        |
| A_33_P3354296  | 10,7471 | 11,5042 | -1,690089913 | N/A             | N/A       | N/A          | XLOC_I2_015464 |
| A_33_P3291976  | 2,49662 | 3,25384 | -1,690230496 | ENST00000518695 | 7013      | AK128828     | TERF1          |
| A_23_P154022   | 6,70832 | 7,46555 | -1,690242212 | ENST00000295148 | 80304     | NM_025203    | C2orf44        |
| A_21_P0000091  | 4,87831 | 5,6357  | -1,690429677 | ENST00000524327 | 151827    | NM_001172780 | LRRC34         |
| A_23_P29029    | 8,37197 | 9,12942 | -1,690499981 | ENST00000534991 | 84996     | NR_026845    | URB1-AS1       |
| A_33_P3350094  | 6,0891  | 6,8468  | -1,690792948 | ENST00000561082 | 197135    | NM_001145112 | PATL2          |

|                |         |         |              |                 |           |              |                |
|----------------|---------|---------|--------------|-----------------|-----------|--------------|----------------|
| A_22_P00016095 | 4,85073 | 5,60844 | -1,690804667 | N/A             | 100874016 | NR_046677    | SYNPR-AS1      |
| A_32_P194072   | 8,28187 | 9,03967 | -1,690910149 | ENST00000485716 | 25851     | NM_015395    | TECPR1         |
| A_32_P711043   | 3,87815 | 4,63596 | -1,690921869 | N/A             | 100507191 | XR_158920    | LOC100507191   |
| A_23_P163402   | 5,01118 | 5,76909 | -1,691039079 | ENST00000567032 | 1543      | NM_000499    | CYP1A1         |
| A_21_P0008199  | 1,47539 | 2,2336  | -1,691390757 | N/A             | N/A       | N/A          | Inc-DCT-1      |
| A_23_P252052   | 8,06627 | 8,82466 | -1,691601799 | ENST00000495625 | 11259     | NM_182909    | FILIP1L        |
| A_21_P0004438  | 1,62744 | 2,38587 | -1,691648701 | N/A             | N/A       | N/A          | Inc-ZNF608-5   |
| A_21_P0005579  | 4,30505 | 5,06363 | -1,691824594 | N/A             | N/A       | N/A          | Inc-TMEM140-1  |
| A_22_P00011779 | 3,1672  | 3,92582 | -1,691871502 | ENST00000445932 | N/A       | N/A          | N/A            |
| A_21_P0005642  | 1,69535 | 2,45421 | -1,692152978 | N/A             | N/A       | N/A          | Inc-DLGAP2-4   |
| A_22_P00017719 | 2,41144 | 3,17048 | -1,692364115 | N/A             | N/A       | N/A          | Inc-XRCC5-2    |
| A_23_P90359    | 4,01169 | 4,77075 | -1,692387576 | ENST00000303212 | 4902      | NM_004558    | NRTN           |
| A_23_P68866    | 14,5487 | 15,3078 | -1,6924345   | ENST00000401406 | 29796     | NM_001003684 | UQCR10         |
| A_23_P162579   | 8,25026 | 9,00937 | -1,692446231 | ENST00000281938 | 26353     | NM_014365    | HSPB8          |
| A_33_P3406066  | 9,00296 | 9,76223 | -1,69263394  | ENST00000317178 | 284309    | NM_173632    | ZNF776         |
| A_23_P114689   | 8,10913 | 8,86872 | -1,693009419 | ENST00000336689 | 55616     | NM_017707    | ASAP3          |
| A_33_P3302165  | 11,6259 | 12,3857 | -1,693255873 | ENST00000247706 | 79575     | NM_024527    | ABHD8          |
| A_33_P3319261  | 8,75323 | 9,51307 | -1,693302821 | ENST00000460390 | 54932     | NM_001286823 | EXD3           |
| A_21_P0008438  | 1,42032 | 2,18039 | -1,693572795 | N/A             | N/A       | N/A          | Inc-NID2-4     |
| A_24_P225878   | 2,70345 | 3,46354 | -1,693596273 | ENST00000452770 | 64147     | NM_022342    | KIF9           |
| A_23_P9662     | 8,76604 | 9,52632 | -1,693819331 | ENST00000396478 | 3652      | NM_005897    | IPP            |
| A_22_P00003164 | 1,80141 | 2,56176 | -1,693901518 | ENST00000450850 | N/A       | N/A          | N/A            |
| A_33_P3224675  | 5,9452  | 6,70555 | -1,693901518 | ENST00000370139 | 54482     | AK289404     | TRMT13         |
| A_23_P42718    | 10,1765 | 10,9369 | -1,693960225 | ENST00000606261 | 9603      | NM_004289    | NFE2L3         |
| A_22_P00003610 | 3,83311 | 4,59351 | -1,693960225 | N/A             | 202020    | NR_027696    | TAPT1-AS1      |
| A_22_P00009816 | 4,8198  | 5,58032 | -1,694101131 | N/A             | 101927632 | XR_242320    | LOC101927632   |
| A_24_P92256    | 8,61904 | 9,37962 | -1,694171588 | ENST00000268989 | 9905      | NM_014853    | SGSM2          |
| A_21_P0011665  | 1,65263 | 2,41323 | -1,694195074 | N/A             | N/A       | N/A          | XLOC_I2_006548 |
| A_22_P00023957 | 1,75797 | 2,51863 | -1,694265535 | N/A             | N/A       | DA177224     | Inc-ALKBH4-1   |
| A_33_P3397418  | 11,8258 | 12,5865 | -1,694312511 | ENST00000242351 | 56829     | NM_020119    | ZC3HAV1        |
| A_21_P0012140  | 5,72184 | 6,48255 | -1,694324255 | N/A             | 101926935 | NR_110001    | LOC101926935   |
| A_21_P0014268  | 1,5589  | 2,31972 | -1,694453446 | ENST00000525365 | 100506082 | NR_047550    | LOC100506082   |
| A_23_P432573   | 3,46918 | 4,23048 | -1,695017302 | ENST00000309099 | 116535    | NM_145015    | MRGPRF         |



|                |         |         |              |                 |           |              |                |
|----------------|---------|---------|--------------|-----------------|-----------|--------------|----------------|
| A_22_P00019752 | 7,73031 | 8,49164 | -1,695052549 | N/A             | N/A       | BC073749     | Inc-ANKRD34B-2 |
| A_23_P300076   | 4,04112 | 4,80257 | -1,695193546 | ENST00000490748 | 84223     | NM_032263    | IQCG           |
| A_21_P0008881  | 1,48328 | 2,24488 | -1,695369808 | ENST00000570183 | N/A       | XR_253532    | N/A            |
| A_21_P0001646  | 2,80959 | 3,57135 | -1,695557841 | N/A             | N/A       | N/A          | Inc-TOMM20-1   |
| A_22_P00007178 | 1,62759 | 2,38945 | -1,695675372 | N/A             | N/A       | N/A          | Inc-GNRHR2-1   |
| A_22_P00017782 | 1,68792 | 2,45002 | -1,69595748  | N/A             | 100507099 | NR_103839    | FRY-AS1        |
| A_21_P0011007  | 1,70345 | 2,46564 | -1,696063283 | ENST00000531490 | 283116    | NM_001206626 | TRIM49B        |
| A_24_P314597   | 7,47262 | 8,23511 | -1,696416006 | ENST00000485551 | 79932     | AB058740     | KIAA0319L      |
| A_33_P3343872  | 1,68322 | 2,44572 | -1,696427764 | ENST00000216927 | 55423     | NM_001039508 | SIRPG          |
| A_33_P3369786  | 3,40371 | 4,16621 | -1,696427764 | ENST00000509102 | 90025     | XM_006715597 | UBE3D          |
| A_22_P00022036 | 1,8311  | 2,59361 | -1,696439523 | N/A             | N/A       | AW852898     | Inc-EFHC1-1    |
| A_24_P154142   | 3,76287 | 4,52554 | -1,696627675 | ENST00000368318 | 339403    | NM_181885    | RXFP4          |
| A_33_P3293202  | 4,84257 | 5,60527 | -1,696662956 | ENST00000286688 | 157657    | NM_177965    | C8orf37        |
| A_19_P00321739 | 3,11001 | 3,87286 | -1,69683937  | ENST00000421704 | 79940     | NR_121614    | LINC00472      |
| A_33_P3447304  | 8,67058 | 9,43344 | -1,696851132 | ENST00000442977 | 55074     | NM_001198533 | OXR1           |
| A_23_P127522   | 9,79982 | 10,5627 | -1,696874655 | ENST00000356438 | 219844    | NM_145014    | HYLS1          |
| A_23_P115137   | 13,743  | 14,5063 | -1,697368725 | ENST00000614544 | 10542     | NM_006402    | LAMTOR5        |
| A_33_P3355493  | 2,25009 | 3,01351 | -1,697509914 | N/A             | 100996273 | XM_003846283 | LOC100996273   |
| A_33_P3221090  | 3,30355 | 4,067   | -1,697545213 | ENST00000464295 | 165829    | NM_153002    | GPR156         |
| A_24_P173234   | 8,78819 | 9,55197 | -1,697933551 | ENST00000391794 | 79898     | NM_024840    | ZNF613         |
| A_33_P3318581  | 10,4013 | 11,1651 | -1,69795709  | ENST00000360060 | 5352      | NM_182943    | PLOD2          |
| A_22_P00015892 | 4,71125 | 5,47536 | -1,698321979 | N/A             | N/A       | N/A          | Inc-TCF19-1    |
| A_21_P0001415  | 2,2336  | 2,9978  | -1,698427929 | N/A             | 91548     | XR_247053    | LOC91548       |
| A_33_P3350853  | 5,37049 | 6,13484 | -1,698604527 | ENST00000608317 | 202781    | N/A          | PAXIP1-AS1     |
| A_24_P941866   | 3,12441 | 3,88885 | -1,698710495 | ENST00000337752 | 441108    | AK096941     | C5orf56        |
| A_22_P00004850 | 3,96469 | 4,72918 | -1,698769369 | ENST00000417213 | N/A       | N/A          | N/A            |
| A_33_P3353345  | 1,56128 | 2,32595 | -1,698981331 | ENST00000330884 | 25830     | NM_014351    | SULT4A1        |
| A_21_P0008135  | 1,52226 | 2,28702 | -1,699087323 | N/A             | N/A       | N/A          | Inc-KATNAL1-3  |
| A_22_P00019857 | 2,29945 | 3,0644  | -1,699311104 | N/A             | N/A       | N/A          | Inc-LRRC31-1   |
| A_21_P0008507  | 2,48772 | 3,25269 | -1,699334661 | N/A             | N/A       | N/A          | Inc-FOXG1-3    |
| A_33_P3387090  | 3,50186 | 4,26691 | -1,699428895 | N/A             | N/A       | BC026731     | N/A            |
| A_22_P00000938 | 8,28458 | 9,04972 | -1,699534914 | ENST00000443994 | 100216001 | NR_024475    | LINC00704      |
| A_21_P0010799  | 1,65363 | 2,41878 | -1,699546694 | N/A             | 101927762 | XR_424075    | LOC101927762   |

|                |         |         |              |                 |           |              |                    |
|----------------|---------|---------|--------------|-----------------|-----------|--------------|--------------------|
| A_24_P194337   | 1,65291 | 2,41817 | -1,699676283 | ENST00000269844 | 63977     | NM_022115    | PRDM15             |
| A_33_P3394465  | 2,92198 | 3,68724 | -1,699676283 | ENST00000308304 | 5626      | NM_006261    | PROP1              |
| A_23_P379475   | 12,3558 | 13,1213 | -1,699959057 | ENST00000535035 | 1718      | NM_014762    | DHCR24             |
| A_33_P3375133  | 4,89711 | 5,66266 | -1,700017974 | ENST00000532228 | N/A       | N/A          | N/A                |
| A_23_P130482   | 7,8084  | 8,57398 | -1,700053325 | ENST00000254182 | 10520     | NM_198855    | ZNF211             |
| A_21_P0005973  | 1,43364 | 2,19931 | -1,700159384 | ENST00000524283 | 101927459 | NR_125417    | LOC101927459       |
| A_23_P110167   | 12,5347 | 13,3004 | -1,700194738 | ENST00000265498 | 4258      | NM_002413    | MGST2              |
| A_22_P00000581 | 2,15235 | 2,91823 | -1,700406878 | N/A             | N/A       | N/A          | Inc-AC145676.2.1-1 |
| A_22_P00008538 | 2,49461 | 3,26058 | -1,700512959 | ENST00000372861 | 60598     | NM_022358    | KCNK15             |
| A_33_P3376321  | 6,73537 | 7,50134 | -1,700512959 | ENST00000518061 | 286       | NM_020477    | ANK1               |
| A_33_P3240637  | 1,59289 | 2,35897 | -1,700642621 | N/A             | N/A       | AK124325     | N/A                |
| A_19_P00801490 | 7,47974 | 8,24582 | -1,700642621 | ENST00000567197 | N/A       | AF086310     | N/A                |
| A_23_P144684   | 8,40075 | 9,16694 | -1,700772294 | ENST00000450932 | 84250     | NM_032290    | ANKRD32            |
| A_21_P0002376  | 1,54812 | 2,31449 | -1,700984506 | N/A             | N/A       | N/A          | Inc-UBE2F-1        |
| A_23_P15844    | 4,62743 | 5,39385 | -1,701043459 | ENST00000259008 | 83990     | NM_032043    | BRIP1              |
| A_24_P76018    | 4,24512 | 5,01165 | -1,701173162 | ENST00000408959 | 646450    | NM_001123040 | ARIH2OS            |
| A_24_P269551   | 1,45742 | 2,22409 | -1,701338253 | ENST00000519846 | 157807    | NM_173519    | CLVS1              |
| A_33_P3247933  | 9,25442 | 10,0211 | -1,701350046 | ENST00000485546 | 9648      | NM_181453    | GCC2               |
| A_23_P76823    | 9,95825 | 10,7251 | -1,701550536 | ENST00000557582 | 122622    | NM_199165    | ADSSL1             |
| A_21_P0010558  | 2,17855 | 2,94557 | -1,70175105  | ENST00000612480 | 9659      | NM_001198834 | PDE4DIP            |
| A_23_P36050    | 1,57136 | 2,3384  | -1,701774642 | ENST00000312711 | 219473    | NM_001005202 | OR8K3              |
| A_23_P103511   | 8,51293 | 9,27999 | -1,701798233 | ENST00000458626 | 400793    | NM_001085375 | C1orf226           |
| A_33_P3402817  | 2,78401 | 3,55113 | -1,701869011 | ENST00000339069 | 104909134 | NM_001303016 | MGC57346-CRHR1     |
| A_33_P3402020  | 2,46428 | 3,23151 | -1,701998777 | ENST00000307522 | 83987     | NM_032040    | CCDC8              |
| A_33_P3398096  | 1,55702 | 2,32426 | -1,702010574 | ENST00000491959 | 131368    | NM_175056    | ZPLD1              |
| A_33_P3520835  | 4,65115 | 5,41841 | -1,702034169 | N/A             | 441441    | AK123449     | FLJ41455           |
| A_24_P186065   | 5,9444  | 6,71167 | -1,702045967 | ENST00000394221 | 200895    | NM_176815    | DHFRL1             |
| A_33_P3668049  | 6,27077 | 7,03805 | -1,702057764 | ENST00000581094 | 55288     | NM_001288758 | RHOT1              |
| A_21_P0000052  | 4,61809 | 5,38539 | -1,70208136  | ENST00000468399 | 27185     | NM_001164554 | DISC1              |
| A_21_P0008139  | 1,40773 | 2,17512 | -1,702187545 | N/A             | 102723392 | XR_424440    | LOC102723392       |
| A_22_P00011704 | 7,96497 | 8,73246 | -1,702305535 | N/A             | N/A       | AI083640     | Inc-PDZD7-1        |
| A_23_P39067    | 3,74642 | 4,51401 | -1,702423534 | ENST00000270632 | 6689      | NM_003121    | SPIB               |
| A_33_P3212769  | 1,4825  | 2,25009 | -1,702423534 | N/A             | 100132686 | BC020894     | LOC100132686       |

|                |         |         |              |                 |        |              |                |
|----------------|---------|---------|--------------|-----------------|--------|--------------|----------------|
| A_33_P3312638  | 4,99175 | 5,75937 | -1,702458936 | ENST00000434248 | 163131 | NM_001005851 | ZNF780B        |
| A_21_P0014848  | 3,26955 | 4,03722 | -1,702517939 | ENST00000515591 | 55858  | AK295063     | TMEM165        |
| A_33_P3376821  | 1,65931 | 2,427   | -1,702541542 | ENST00000274306 | 3001   | NM_006144    | GZMA           |
| A_22_P00000826 | 1,7884  | 2,55614 | -1,702600548 | ENST00000439964 | N/A    | N/A          | N/A            |
| A_21_P0000808  | 7,03805 | 7,80583 | -1,702647755 | N/A             | 440288 | NR_038448    | UBL7-AS1       |
| A_23_P87982    | 1,38366 | 2,15146 | -1,702671359 | ENST00000218548 | 479    | NM_001676    | ATP12A         |
| A_22_P00013628 | 5,93711 | 6,70498 | -1,702753975 | ENST00000561649 | N/A    | N/A          | N/A            |
| A_33_P3247890  | 3,21958 | 3,98806 | -1,703474085 | ENST00000390423 | N/A    | X58744       | N/A            |
| A_22_P00003874 | 3,07747 | 3,84611 | -1,703663017 | ENST00000565827 | N/A    | N/A          | N/A            |
| A_21_P0001787  | 1,62161 | 2,39026 | -1,703674826 | N/A             | N/A    | N/A          | Inc-SRBD1-4    |
| A_23_P2922     | 10,3127 | 11,0814 | -1,703733872 | ENST00000318473 | 51562  | NM_016586    | MBIP           |
| A_23_P410507   | 5,47329 | 6,24214 | -1,703911022 | ENST00000245810 | 5623   | NM_004158    | PSPN           |
| A_23_P124760   | 9,117   | 9,88613 | -1,704241751 | ENST00000535508 | 9862   | NM_014815    | MED24          |
| A_24_P200848   | 9,39835 | 10,1675 | -1,704265377 | ENST00000428135 | 23161  | NM_015132    | SNX13          |
| A_21_P0012575  | 2,24514 | 3,01446 | -1,704466211 | N/A             | N/A    | N/A          | XLOC_I2_010601 |
| A_23_P129413   | 8,67304 | 9,4424  | -1,704513469 | ENST00000268793 | 64180  | NM_022357    | DPEP3          |
| A_23_P63026    | 9,39232 | 10,1617 | -1,704537099 | ENST00000528259 | 3964   | NM_006499    | LGALS8         |
| A_33_P3311308  | 1,70972 | 2,4795  | -1,705009763 | N/A             | N/A    | N/A          | N/A            |
| A_21_P0013973  | 6,48136 | 7,25123 | -1,70511613  | N/A             | N/A    | AF461900     | N/A            |
| A_23_P168130   | 2,77898 | 3,54912 | -1,705435272 | ENST00000293756 | 117283 | NM_054111    | IP6K3          |
| A_22_P00002169 | 4,25908 | 5,02956 | -1,705837239 | ENST00000533002 | N/A    | XR_109069    | N/A            |
| A_23_P33881    | 1,72621 | 2,49683 | -1,706002783 | ENST00000619890 | 548313 | NM_001034832 | SSX4B          |
| A_21_P0003010  | 1,62469 | 2,39545 | -1,706168342 | N/A             | N/A    | N/A          | Inc-GAP43-8    |
| A_22_P00009828 | 3,18889 | 3,95968 | -1,706203822 | ENST00000571113 | N/A    | N/A          | N/A            |
| A_21_P0006083  | 1,58455 | 2,35542 | -1,706298436 | ENST00000397864 | N/A    | N/A          | N/A            |
| A_23_P29153    | 4,06827 | 4,83932 | -1,706511338 | ENST00000216036 | 27156  | NM_014433    | RSPH14         |
| A_23_P133868   | 6,25507 | 7,02625 | -1,706665118 | ENST00000377294 | 387032 | NM_019110    | ZKSCAN4        |
| A_21_P0013061  | 4,22313 | 4,99441 | -1,706783419 | N/A             | N/A    | N/A          | XLOC_I2_012871 |
| A_33_P3229815  | 3,64006 | 4,41135 | -1,706795249 | ENST00000443744 | 200261 | NR_034149    | LINC00656      |
| A_33_P3423610  | 12,1776 | 12,9489 | -1,70680708  | ENST00000469566 | 9403   | NM_004261    | set-15         |
| A_21_P0012398  | 10,4218 | 11,1931 | -1,70680708  | ENST00000504733 | N/A    | N/A          | N/A            |
| A_23_P106922   | 6,27472 | 7,04609 | -1,706889897 | ENST00000332272 | 4166   | NM_021615    | CHST6          |
| A_22_P00005602 | 2,1282  | 2,89966 | -1,706996381 | N/A             | N/A    | N/A          | Inc-EFR3B-2    |

|                |         |         |              |                 |           |              |               |
|----------------|---------|---------|--------------|-----------------|-----------|--------------|---------------|
| A_22_P00014176 | 1,67152 | 2,44319 | -1,707244871 | N/A             | N/A       | BG220746     | Inc-SDCCAG8-1 |
| A_23_P46604    | 7,58469 | 8,35652 | -1,707434221 | ENST00000339255 | 57185     | NM_020448    | NIPAL3        |
| A_33_P3402086  | 3,73417 | 4,50615 | -1,707611756 | N/A             | N/A       | N/A          | N/A           |
| A_23_P166677   | 11,5174 | 12,2894 | -1,707635429 | ENST00000471500 | 64747     | NM_022736    | MFSD1         |
| A_33_P3262118  | 6,18037 | 6,95243 | -1,707706449 | ENST00000314174 | 7798      | BC051733     | LUZP1         |
| A_23_P336239   | 1,54291 | 2,31513 | -1,70789585  | ENST00000555638 | 161145    | XR_245666    | TMEM229B      |
| A_23_P168771   | 10,1891 | 10,9616 | -1,708227353 | ENST00000285871 | 57639     | NM_020879    | CCDC146       |
| A_33_P3258510  | 9,43943 | 10,212  | -1,708310238 | ENST00000374505 | 11313     | NM_007260    | LYPLA2        |
| A_33_P3424800  | 13,9845 | 14,7571 | -1,708345762 | ENST00000481588 | 3106      | NM_005514    | HLA-B         |
| A_33_P3210180  | 1,62735 | 2,39996 | -1,708357603 | N/A             | 7088      | AY129016     | TLE1          |
| A_33_P3383029  | 9,36656 | 10,1392 | -1,708393128 | ENST00000369612 | 4601      | NM_130439    | MXI1          |
| A_23_P73801    | 9,18863 | 9,96146 | -1,708618135 | ENST00000619397 | 9338      | NM_001006640 | TCEAL1        |
| A_22_P00014910 | 1,52998 | 2,30284 | -1,708653665 | N/A             | N/A       | AA983746     | Inc-SLCO2B1-2 |
| A_33_P3381132  | 2,15642 | 2,92961 | -1,709044545 | N/A             | N/A       | N/A          | N/A           |
| A_23_P31816    | 1,49706 | 2,27031 | -1,709115623 | ENST00000616150 | 1668      | NM_005217    | DEFA3         |
| A_22_P00007236 | 6,43583 | 7,20953 | -1,709648807 | N/A             | N/A       | XM_005275879 | Inc-GPN2-2    |
| A_23_P102471   | 10,2497 | 11,0235 | -1,709767315 | ENST00000543555 | 4436      | NM_000251    | MSH2          |
| A_23_P13998    | 8,97369 | 9,74775 | -1,710075474 | ENST00000537988 | 55592     | NR_036632    | GOLGA2P5      |
| A_21_P0001810  | 1,47549 | 2,24956 | -1,710087328 | N/A             | N/A       | N/A          | Inc-TPO-3     |
| A_21_P0004331  | 4,08274 | 4,85695 | -1,710253284 | N/A             | N/A       | N/A          | Inc-NEURL1B-4 |
| A_23_P257423   | 9,36408 | 10,1383 | -1,710265138 | ENST00000370205 | 199857    | NM_144988    | ALG14         |
| A_22_P00004824 | 2,31754 | 3,09185 | -1,710371834 | ENST00000438994 | 101928495 | N/A          | LOC101928495  |
| A_19_P00321872 | 7,13349 | 7,90783 | -1,7104074   | ENST00000532541 | 100506305 | NR_038904    | LINC00958     |
| A_21_P0010335  | 5,05285 | 5,82734 | -1,710585244 | N/A             | 100506271 | N/A          | LOC100506271  |
| A_22_P00013887 | 6,85593 | 7,63046 | -1,710632672 | ENST00000575173 | 101927060 | N/A          | LOC101927060  |
| A_21_P0009338  | 3,04973 | 3,82428 | -1,710656387 | N/A             | N/A       | N/A          | Inc-COIL-2    |
| A_33_P3249081  | 2,59282 | 3,3675  | -1,710810539 | ENST00000265342 | 23105     | NM_015082    | FSTL4         |
| A_33_P3301025  | 10,5291 | 11,3038 | -1,710834256 | ENST00000264193 | 1371      | NM_000097    | CPOX          |
| A_23_P383422   | 6,70924 | 7,4841  | -1,711024005 | ENST00000396901 | 84807     | NM_139239    | NFKBID        |
| A_23_P47924    | 7,04415 | 7,81908 | -1,711107026 | ENST00000283228 | 5801      | NM_002849    | PTPRR         |
| A_33_P3381647  | 8,18899 | 8,96396 | -1,711154469 | ENST00000392038 | 208       | NM_001626    | AKT2          |
| A_23_P207400   | 9,08386 | 9,85886 | -1,711190051 | ENST00000357654 | 672       | NM_007300    | BRCA1         |
| A_23_P162547   | 1,3938  | 2,16885 | -1,711249358 | ENST00000549029 | 4633      | NM_000432    | MYL2          |

|                |         |         |              |                 |           |              |                |
|----------------|---------|---------|--------------|-----------------|-----------|--------------|----------------|
| A_21_P0010236  | 5,83656 | 6,61166 | -1,711308666 | N/A             | 101928126 | XR_254026    | LOC101928126   |
| A_22_P00011498 | 2,17886 | 2,95396 | -1,711308666 | ENST00000553165 | N/A       | N/A          | N/A            |
| A_33_P3345255  | 7,85522 | 8,63056 | -1,711593375 | ENST00000430070 | 55709     | NM_016506    | KBTBD4         |
| A_21_P0012638  | 2,02179 | 2,79714 | -1,711605239 | N/A             | N/A       | N/A          | XLOC_I2_010963 |
| A_21_P0010084  | 7,42899 | 8,20434 | -1,711605239 | ENST00000609087 | 100270804 | NR_026885    | LOC100270804   |
| A_22_P00005933 | 1,73649 | 2,51196 | -1,711747612 | N/A             | 102723922 | XR_425957    | LOC102723922   |
| A_33_P3228325  | 8,73928 | 9,51487 | -1,711889997 | N/A             | 6672      | NM_001080391 | SP100          |
| A_33_P3257460  | 12,6844 | 13,46   | -1,711901863 | ENST00000341298 | 54344     | NM_018973    | DPM3           |
| A_33_P3236686  | 5,73353 | 6,50915 | -1,711925595 | N/A             | N/A       | AF461897     | N/A            |
| A_33_P3349927  | 3,50801 | 4,28366 | -1,711961194 | ENST00000467220 | 55112     | CR627036     | WDR60          |
| A_33_P3577142  | 7,36312 | 8,13878 | -1,711973061 | N/A             | N/A       | AK098143     | Inc-ANKRD11-5  |
| A_21_P0006372  | 2,28983 | 3,06553 | -1,712020527 | N/A             | 101929014 | XR_242676    | LOC101929014   |
| A_21_P0012361  | 1,92983 | 2,70565 | -1,712162935 | N/A             | N/A       | N/A          | XLOC_I2_009613 |
| A_22_P00012456 | 3,74571 | 4,5216  | -1,712246012 | ENST00000431158 | 284739    | NR_027687    | LINC00176      |
| A_33_P3304538  | 10,8269 | 11,6034 | -1,712970136 | ENST00000496676 | 388591    | NM_207396    | RNF207         |
| A_23_P35000    | 2,59609 | 3,37269 | -1,713088875 | ENST00000374024 | 2827      | NM_005281    | GPR3           |
| A_33_P3390643  | 6,26065 | 7,03733 | -1,713183871 | ENST00000401061 | 25974     | NM_015506    | MMACHC         |
| A_23_P380181   | 11,349  | 12,1257 | -1,713207621 | ENST00000489303 | 8543      | NM_006769    | LMO4           |
| A_21_P0008872  | 4,40633 | 5,1831  | -1,713290748 | N/A             | N/A       | N/A          | Inc-IL4R-2     |
| A_33_P3307957  | 6,86788 | 7,64476 | -1,713421385 | ENST00000315713 | 5825      | NM_001122674 | ABCD3          |
| A_33_P3319176  | 4,59934 | 5,37625 | -1,713457015 | ENST00000371951 | 3358      | BC028688     | HTR2C          |
| A_22_P00024466 | 1,64895 | 2,42586 | -1,713457015 | ENST00000434493 | N/A       | N/A          | N/A            |
| A_24_P307974   | 7,25483 | 8,03177 | -1,713492646 | ENST00000372978 | 129685    | BC033728     | TAF8           |
| A_21_P0000556  | 3,09284 | 3,86979 | -1,713504523 | N/A             | 344595    | NR_028301    | LINC00883      |
| A_22_P00004900 | 1,38747 | 2,16472 | -1,713860873 | N/A             | N/A       | N/A          | Inc-DAD1-2     |
| A_23_P200396   | 8,59561 | 9,37312 | -1,71416977  | ENST00000484490 | 56063     | NM_019118    | TMEM234        |
| A_21_P0010279  | 2,40084 | 3,17865 | -1,714526259 | N/A             | N/A       | N/A          | Inc-ERG-1      |
| A_21_P0007708  | 4,66509 | 5,44314 | -1,714811503 | N/A             | N/A       | N/A          | Inc-SLC11A2-1  |
| A_23_P42306    | 5,55983 | 6,33799 | -1,714942256 | ENST00000462225 | 3108      | NM_006120    | HLA-DMA        |
| A_22_P00025147 | 3,00409 | 3,78245 | -1,715180014 | ENST00000506633 | 100874259 | NR_047031    | SLC25A30-AS1   |
| A_33_P3250963  | 9,68581 | 10,4642 | -1,71521568  | ENST00000421293 | 11257     | NR_015381    | TP53TG1        |
| A_33_P3257451  | 3,04334 | 3,82187 | -1,715382134 | ENST00000612155 | 222183    | NM_001291831 | SRRM3          |
| A_22_P00008399 | 2,06814 | 2,84674 | -1,715465367 | N/A             | N/A       | DR033690     | Inc-JPH1-1     |

|                |         |         |              |                 |           |              |                |
|----------------|---------|---------|--------------|-----------------|-----------|--------------|----------------|
| A_24_P118938   | 6,9752  | 7,75383 | -1,715501039 | ENST00000359676 | 140688    | NM_001256798 | NOL4L          |
| A_22_P00003973 | 1,41263 | 2,19153 | -1,715822125 | ENST00000554466 | N/A       | AK094352     | N/A            |
| A_24_P32935    | 4,45971 | 5,23871 | -1,715941061 | ENST00000535625 | 2350      | NM_000803    | FOLR2          |
| A_23_P422933   | 3,37102 | 4,15003 | -1,715952955 | ENST00000524756 | 57569     | NM_020809    | ARHGAP20       |
| A_33_P3253124  | 1,36598 | 2,145   | -1,715964849 | N/A             | N/A       | N/A          | N/A            |
| A_21_P0001514  | 2,65633 | 3,43544 | -1,7160719   | N/A             | N/A       | N/A          | Inc-JUN-6      |
| A_22_P00009048 | 2,59035 | 3,36978 | -1,716452579 | N/A             | 101929595 | NR_125929    | LOC101929595   |
| A_21_P0009591  | 5,28889 | 6,06834 | -1,716476374 | N/A             | N/A       | N/A          | Inc-MBP-1      |
| A_33_P3271387  | 7,12645 | 7,90594 | -1,716523966 | ENST00000377627 | 90326     | NM_138350    | THAP3          |
| A_32_P208424   | 14,3724 | 15,1519 | -1,716535864 | ENST00000366815 | 3020      | NM_002107    | H3F3A          |
| A_23_P400147   | 8,24582 | 9,02536 | -1,716583457 | ENST00000536603 | 729440    | NM_001267723 | CCDC61         |
| A_23_P371011   | 6,4186  | 7,19819 | -1,71664295  | ENST00000621083 | 7770      | NM_182490    | ZNF227         |
| A_23_P413796   | 12,04   | 12,8196 | -1,716654849 | ENST00000592206 | 115106    | NM_138443    | HAUS1          |
| A_23_P70060    | 10,8315 | 11,6112 | -1,716773843 | ENST00000307259 | 8611      | NM_176895    | PPAP2A         |
| A_23_P153583   | 7,90891 | 8,68861 | -1,716773843 | ENST00000492109 | 5536      | NM_006247    | PPP5C          |
| A_33_P3262884  | 4,78106 | 5,56078 | -1,716797642 | N/A             | N/A       | AK091705     | N/A            |
| A_24_P318593   | 9,35638 | 10,1361 | -1,716797642 | ENST00000579856 | 90507     | NM_138355    | SCRN2          |
| A_22_P00010122 | 1,59738 | 2,37723 | -1,716952348 | N/A             | 101929705 | NR_125864    | LOC101929705   |
| A_33_P3234864  | 7,31758 | 8,09747 | -1,716999953 | ENST00000367526 | 7402      | NM_007124    | UTRN           |
| A_21_P0011037  | 3,46624 | 4,24617 | -1,717047559 | N/A             | N/A       | N/A          | XLOC_I2_002886 |
| A_23_P4808     | 2,90078 | 3,68077 | -1,717118971 | ENST00000292513 | 5731      | NM_000955    | PTGER1         |
| A_22_P00017514 | 7,25123 | 8,03122 | -1,717118971 | ENST00000596904 | 100507398 | NR_103812    | INTS6-AS1      |
| A_21_P0000369  | 14,1166 | 14,8966 | -1,717130873 | N/A             | 692073    | NR_003035    | SNORA16A       |
| A_33_P3297618  | 1,39619 | 2,17636 | -1,717333223 | ENST00000511263 | 100616281 | N/A          | MIR4788        |
| A_23_P17522    | 1,38927 | 2,16988 | -1,717857063 | ENST00000377142 | 4821      | NM_002509    | NKX2-2         |
| A_21_P0005958  | 2,49384 | 3,27449 | -1,717904693 | N/A             | N/A       | N/A          | Inc-KIFC2-1    |
| A_24_P260639   | 11,0745 | 11,8553 | -1,718083316 | ENST00000244534 | 3007      | NM_005320    | HIST1H1D       |
| A_21_P0014040  | 5,48123 | 6,26211 | -1,71817859  | N/A             | N/A       | N/A          | N/A            |
| A_32_P209094   | 10,3468 | 11,1277 | -1,718202409 | ENST00000480847 | 55277     | NM_018291    | FGGY           |
| A_24_P364807   | 8,54147 | 9,3224  | -1,718238138 | ENST00000615823 | 54947     | NM_017839    | LPCAT2         |
| A_22_P00010918 | 2,0488  | 2,82977 | -1,718285779 | ENST00000454015 | 401232    | NR_026855    | LINC01011      |
| A_21_P0012757  | 1,38868 | 2,17007 | -1,718786082 | ENST00000509968 | N/A       | N/A          | N/A            |
| A_21_P0004993  | 3,05669 | 3,83813 | -1,718845652 | N/A             | N/A       | N/A          | Inc-C6orf146-1 |

|                |         |         |              |                 |           |           |                    |
|----------------|---------|---------|--------------|-----------------|-----------|-----------|--------------------|
| A_23_P63655    | 11,8009 | 12,5824 | -1,718917138 | ENST00000460820 | 509       | NM_005174 | ATP5C1             |
| A_33_P3265024  | 2,44922 | 3,23084 | -1,719060119 | ENST00000526221 | 6764      | NM_005418 | ST5                |
| A_19_P00320063 | 1,57471 | 2,35642 | -1,719167363 | ENST00000473636 | 100302640 | N/A       | LINC00882          |
| A_33_P3260426  | 6,88707 | 7,6688  | -1,719191196 | ENST00000392653 | 6700      | NM_005988 | SPRR2A             |
| A_21_P0009065  | 1,5448  | 2,32655 | -1,719215029 | N/A             | N/A       | N/A       | Inc-MAF-1          |
| A_19_P00810205 | 10,7259 | 11,5077 | -1,719274614 | ENST00000399411 | N/A       | N/A       | N/A                |
| A_22_P00023671 | 2,67702 | 3,45883 | -1,719286531 | N/A             | N/A       | AK023343  | Inc-RNASE13-1      |
| A_23_P140373   | 1,53527 | 2,31712 | -1,7193342   | ENST00000238667 | 55640     | NM_017791 | FLVCR2             |
| A_21_P0009612  | 1,4151  | 2,19697 | -1,719358036 | ENST00000578967 | N/A       | XR_172251 | N/A                |
| A_23_P145541   | 6,77422 | 7,55638 | -1,719703683 | ENST00000419951 | 9896      | NM_014845 | FIG4               |
| A_24_P359322   | 2,81073 | 3,59292 | -1,719739444 | ENST00000382378 | 54067     | NR_024622 | C21orf62-AS1       |
| A_23_P10743    | 1,45082 | 2,23301 | -1,719739444 | ENST00000496514 | 5158      | NM_000283 | PDE6B              |
| A_33_P3332616  | 8,13319 | 8,91539 | -1,719751364 | N/A             | N/A       | N/A       | XLOC_I2_015508     |
| A_21_P0005410  | 2,13204 | 2,91433 | -1,719858651 | N/A             | N/A       | N/A       | Inc-ZKSCAN1-1      |
| A_22_P00006295 | 1,43536 | 2,21778 | -1,720013633 | N/A             | N/A       | N/A       | Inc-FAM83G-2       |
| A_24_P268160   | 11,5116 | 12,2944 | -1,720466737 | ENST00000477769 | 128338    | NM_178454 | DRAM2              |
| A_33_P3287058  | 2,4852  | 3,26813 | -1,720621774 | N/A             | N/A       | AK055281  | N/A                |
| A_33_P3295655  | 3,75379 | 4,53675 | -1,720657554 | ENST00000265381 | 320       | NM_001163 | APBA1              |
| A_22_P00000446 | 2,52132 | 3,30457 | -1,721003463 | N/A             | N/A       | N/A       | Inc-AC083864.4.1-1 |
| A_22_P00000149 | 1,80575 | 2,58905 | -1,721063109 | N/A             | 101928535 | N/A       | LOC101928535       |
| A_33_P3327539  | 6,81656 | 7,59992 | -1,721134688 | ENST00000442267 | 23158     | NM_015130 | TBC1D9             |
| A_22_P00018736 | 5,76605 | 6,54948 | -1,7212182   | N/A             | N/A       | N/A       | Inc-AKTIP-1        |
| A_23_P133956   | 9,05507 | 9,83851 | -1,72123013  | ENST00000480346 | 3833      | NM_002263 | KIFC1              |
| A_22_P00015643 | 2,84085 | 3,62429 | -1,72123013  | N/A             | 100506436 | NR_040012 | SPAG5-AS1          |
| A_22_P00021189 | 1,55307 | 2,33661 | -1,721349441 | N/A             | N/A       | N/A       | Inc-ANK2-2         |
| A_33_P3273285  | 9,24265 | 10,0263 | -1,721480692 | N/A             | 170958    | NR_003699 | ZNF525             |
| A_23_P29248    | 14,1821 | 14,966  | -1,721779028 | ENST00000403892 | 7263      | NM_003312 | TST                |
| A_21_P0004862  | 5,76461 | 6,54851 | -1,721779028 | N/A             | 102724851 | XR_427901 | LOC102724851       |
| A_22_P00002117 | 1,35379 | 2,13775 | -1,721850636 | ENST00000518675 | 101928154 | NR_108028 | LINC01485          |
| A_33_P3294177  | 2,1204  | 2,90436 | -1,721850636 | N/A             | 100131043 | AK124222  | LOC100131043       |
| A_33_P3424803  | 14,9757 | 15,7599 | -1,722137099 | N/A             | 3107      | M26429    | HLA-C              |
| A_22_P00014959 | 3,74596 | 4,53018 | -1,722160973 | N/A             | 100288181 | NR_038925 | LOC100288181       |
| A_22_P00002422 | 1,48267 | 2,26689 | -1,722160973 | ENST00000551227 | N/A       | N/A       | N/A                |

|                |         |         |              |                 |           |              |                |
|----------------|---------|---------|--------------|-----------------|-----------|--------------|----------------|
| A_21_P0009210  | 7,00574 | 7,79004 | -1,722256473 | N/A             | N/A       | N/A          | Inc-PAFAH1B1-3 |
| A_21_P0005790  | 1,56311 | 2,34771 | -1,722614643 | N/A             | N/A       | N/A          | Inc-ANGPT2-6   |
| A_21_P0005526  | 5,76634 | 6,55097 | -1,722650464 | N/A             | N/A       | N/A          | Inc-WASL-1     |
| A_21_P0000435  | 1,66872 | 2,45341 | -1,722722109 | N/A             | 767568    | NR_003236    | SNORD113-8     |
| A_23_P145895   | 11,8247 | 12,6094 | -1,72273405  | ENST00000432193 | 11257     | NR_015381    | TP53TG1        |
| A_22_P00010559 | 1,34101 | 2,12601 | -1,723092319 | N/A             | N/A       | N/A          | Inc-NCOR2-3    |
| A_22_P00011795 | 1,44414 | 2,22919 | -1,723152038 | N/A             | N/A       | BC036257     | Inc-PGM3-1     |
| A_21_P0006046  | 1,43222 | 2,21762 | -1,723570128 | ENST00000421509 | N/A       | N/A          | N/A            |
| A_23_P47116    | 9,54646 | 10,3321 | -1,723856877 | ENST00000531112 | 8045      | NM_003475    | RASSF7         |
| A_33_P3255914  | 10,2408 | 11,0268 | -1,72428709  | ENST00000349606 | 29116     | NM_013262    | MYLIP          |
| A_23_P164623   | 11,0837 | 11,8698 | -1,724406613 | ENST00000594051 | 84878     | NM_032792    | ZBTB45         |
| A_22_P00023794 | 2,90137 | 3,68765 | -1,724621774 | N/A             | 102724351 | XR_424177    | LOC102724351   |
| A_33_P3322307  | 6,49398 | 7,28034 | -1,72471741  | ENST00000537136 | 1663      | NM_001257145 | DDX11          |
| A_23_P41487    | 8,47991 | 9,26636 | -1,724825007 | ENST00000442267 | 23158     | NM_015130    | TBC1D9         |
| A_33_P3326217  | 1,54293 | 2,32957 | -1,725052178 | ENST00000441885 | 388336    | NM_207386    | SHISA6         |
| A_23_P12405    | 8,23071 | 9,01737 | -1,725076092 | ENST00000377828 | 83715     | NM_031475    | ESPN           |
| A_33_P6804305  | 1,4768  | 2,26354 | -1,725171754 | N/A             | 347689    | NR_075093    | SOX2-OT        |
| A_32_P212373   | 8,68731 | 9,47432 | -1,725494649 | N/A             | N/A       | N/A          | Inc-EGLN1-1    |
| A_33_P3470781  | 4,33704 | 5,12411 | -1,725566412 | ENST00000620717 | 57186     | NM_020343    | RALGAPA2       |
| A_22_P00002464 | 4,7566  | 5,54369 | -1,725590334 | ENST00000560866 | 100507466 | NR_038251    | DPH6-AS1       |
| A_23_P20852    | 10,6392 | 11,4263 | -1,725602295 | ENST00000473695 | 549       | NM_001698    | AUH            |
| A_21_P0013317  | 4,73598 | 5,52313 | -1,7256621   | N/A             | N/A       | N/A          | XLOC_I2_013868 |
| A_23_P330578   | 4,23098 | 5,01829 | -1,725853493 | ENST00000370138 | 127495    | NM_144620    | LRR39          |
| A_33_P3316278  | 1,69805 | 2,48544 | -1,725949197 | ENST00000546162 | 653190    | NR_003569    | ABCC6P1        |
| A_19_P00330048 | 2,68043 | 3,46793 | -1,726080799 | N/A             | 102723756 | XR_424308    | LOC102723756   |
| A_33_P3304769  | 1,75825 | 2,5458  | -1,726140622 | N/A             | N/A       | N/A          | N/A            |
| A_33_P3250612  | 5,64301 | 6,43058 | -1,726164551 | ENST00000340692 | 4337      | NM_005943    | MOCS1          |
| A_32_P160972   | 12,7431 | 13,5308 | -1,726320102 | ENST00000367660 | 58527     | NM_021243    | ABRACL         |
| A_32_P382427   | 5,9219  | 6,70962 | -1,726344034 | ENST00000533935 | 114796    | N/A          | PSMG3-AS1      |
| A_33_P3229789  | 3,36505 | 4,15279 | -1,726367966 | N/A             | N/A       | N/A          | N/A            |
| A_22_P00002947 | 1,61177 | 2,39954 | -1,726403865 | N/A             | 101928651 | NR_109910    | LOC101928651   |
| A_23_P48295    | 4,93237 | 5,72014 | -1,726403865 | ENST00000251108 | 81602     | NM_030911    | CDADC1         |
| A_33_P3257594  | 4,47838 | 5,26615 | -1,726403865 | ENST00000357776 | 388389    | NM_213607    | CCDC103        |



|                |         |         |              |                 |           |              |              |
|----------------|---------|---------|--------------|-----------------|-----------|--------------|--------------|
| A_32_P196854   | 6,6255  | 7,4133  | -1,726439765 | ENST00000373954 | 199870    | NM_001143912 | FAM76A       |
| A_23_P12241    | 7,39516 | 8,18335 | -1,726906532 | ENST00000341115 | 55283     | NM_018298    | MCOLN3       |
| A_33_P3231162  | 7,65016 | 8,43836 | -1,726918502 | ENST00000317178 | 284309    | NM_173632    | ZNF776       |
| A_22_P00007595 | 3,17586 | 3,96412 | -1,726990324 | N/A             | N/A       | N/A          | Inc-HDCC3-2  |
| A_33_P3772996  | 8,76742 | 9,55592 | -1,727277642 | ENST00000394838 | 5567      | NM_001242860 | PRKACB       |
| A_21_P0010355  | 2,54089 | 3,32951 | -1,727421319 | ENST00000452505 | N/A       | N/A          | N/A          |
| A_24_P371399   | 6,48438 | 7,27314 | -1,727588957 | ENST00000315691 | 205428    | NM_173552    | C3orf58      |
| A_23_P305550   | 3,8408  | 4,62958 | -1,727612907 | ENST00000270364 | 2859      | NM_001195382 | GPR35        |
| A_33_P3387831  | 12,3467 | 13,1355 | -1,727636857 | ENST00000402338 | 79019     | XR_244383    | CENPM        |
| A_32_P351277   | 5,6334  | 6,42221 | -1,727648832 | N/A             | N/A       | BC004968     | Inc-JMJD8-1  |
| A_33_P3241651  | 2,01163 | 2,80045 | -1,727660807 | ENST00000372981 | 94121     | AL832596     | SYTL4        |
| A_33_P3346663  | 15,6434 | 16,4323 | -1,727756612 | ENST00000263270 | 1175      | NM_001301078 | AP2S1        |
| A_33_P3423979  | 8,85843 | 9,64736 | -1,72779254  | ENST00000507699 | 23022     | NM_001166109 | PALLD        |
| A_33_P3272628  | 2,90951 | 3,69863 | -1,728020101 | ENST00000367992 | 2207      | N/A          | FCER1G       |
| A_22_P00011452 | 3,87008 | 4,65929 | -1,728127904 | ENST00000508881 | N/A       | N/A          | N/A          |
| A_24_P289260   | 1,34187 | 2,13115 | -1,728211756 | ENST00000366795 | 168002    | NM_214462    | DACT2        |
| A_33_P3300267  | 4,12619 | 4,91553 | -1,728283631 | ENST00000389975 | 5212      | NM_053276    | VIT          |
| A_21_P0010429  | 4,12285 | 4,91221 | -1,728307591 | ENST00000609758 | N/A       | XR_425349    | N/A          |
| A_24_P419087   | 6,00619 | 6,79587 | -1,728690984 | ENST00000548843 | 10677     | NM_006576    | AVIL         |
| A_22_P00020136 | 1,48283 | 2,27255 | -1,728738914 | N/A             | 100874245 | NR_046714    | NAALADL2-AS1 |
| A_21_P0003284  | 2,21593 | 3,0057  | -1,728798829 | N/A             | N/A       | N/A          | Inc-RFT1-1   |
| A_23_P20002    | 8,0826  | 8,8724  | -1,728834779 | ENST00000447802 | 57037     | NM_020319    | ANKMY2       |
| A_33_P3340649  | 7,10158 | 7,89139 | -1,728846762 | ENST00000382822 | 728299    | NM_001099219 | KRTAP19-8    |
| A_33_P3311551  | 6,18062 | 6,97044 | -1,728858746 | N/A             | 79971     | AB097018     | WLS          |
| A_21_P0001082  | 1,50962 | 2,29945 | -1,728870729 | N/A             | N/A       | N/A          | Inc-SCCPDH-1 |
| A_23_P27133    | 12,5151 | 13,3052 | -1,729194317 | ENST00000586794 | 3866      | NM_002275    | KRT15        |
| A_23_P302018   | 5,34717 | 6,13732 | -1,729254247 | ENST00000514937 | 7294      | NM_003328    | TXK          |
| A_33_P3244478  | 4,36789 | 5,15811 | -1,729338153 | N/A             | 100128640 | NR_028389    | ACVR2B-AS1   |
| A_23_P83463    | 14,1045 | 14,8948 | -1,729434051 | ENST00000616787 | 9403      | NM_004261    | set-15       |
| A_33_P3308232  | 1,49825 | 2,28859 | -1,729482002 | N/A             | 401630    | NR_002161    | FAM224A      |
| A_23_P111194   | 8,33823 | 9,12862 | -1,729541942 | ENST00000374037 | 25803     | NM_012391    | SPDEF        |
| A_33_P3366667  | 5,03991 | 5,83075 | -1,730081498 | ENST00000388740 | 2138      | NM_000503    | EYA1         |
| A_33_P3411975  | 1,36219 | 2,15306 | -1,730117475 | ENST00000475896 | 25890     | NM_015429    | ABI3BP       |

|                |         |         |              |                 |           |              |                       |
|----------------|---------|---------|--------------|-----------------|-----------|--------------|-----------------------|
| A_32_P475513   | 3,01116 | 3,80217 | -1,730285375 | ENST00000621743 | 80022     | NR_003587    | MYO15B                |
| A_22_P00002314 | 1,51824 | 2,30932 | -1,730369331 | N/A             | N/A       | DA375949     | Inc-C11orf39-3        |
| A_32_P165116   | 7,95726 | 8,74863 | -1,730717192 | ENST00000406334 | 116143    | NM_138458    | WDR92                 |
| A_21_P0010536  | 8,47256 | 9,26405 | -1,730861155 | ENST00000394662 | 2635      | NM_018284    | GBP3                  |
| A_32_P72341    | 7,55504 | 8,3468  | -1,731185115 | ENST00000309784 | 286827    | NM_173084    | TRIM59                |
| A_33_P3335147  | 4,29955 | 5,09132 | -1,731197115 | ENST00000307584 | 347273    | NM_001018116 | MURC                  |
| A_21_P0008663  | 3,10486 | 3,89664 | -1,731209115 | N/A             | N/A       | N/A          | Inc-RP11-597K23.2.1-2 |
| A_23_P67391    | 8,35675 | 9,14855 | -1,731233115 | ENST00000594208 | 11133     | NM_007059    | KPTN                  |
| A_32_P207428   | 8,91169 | 9,70353 | -1,731281115 | ENST00000458035 | 91664     | NM_138374    | ZNF845                |
| A_22_P00013393 | 3,70537 | 4,49737 | -1,731473131 | N/A             | 100128191 | NR_027157    | TMPO-AS1              |
| A_33_P3229953  | 5,38274 | 6,1749  | -1,731665168 | ENST00000217182 | 1917      | NM_001958    | EEF1A2                |
| A_33_P3379199  | 12,2566 | 13,0488 | -1,731713181 | ENST00000401406 | 29796     | NM_013387    | UQCR10                |
| A_33_P3286789  | 2,68799 | 3,4806  | -1,732205387 | ENST00000474888 | N/A       | N/A          | N/A                   |
| A_33_P3344243  | 7,4231  | 8,21589 | -1,732421522 | ENST00000379205 | 201725    | NM_001008393 | C4orf46               |
| A_23_P83192    | 13,1805 | 13,9734 | -1,732553617 | ENST00000492540 | 29085     | NM_014172    | PHPT1                 |
| A_33_P3325685  | 1,67919 | 2,47228 | -1,732781806 | ENST00000579022 | 284274    | BC105945     | SMIM21                |
| A_23_P202939   | 14,7269 | 15,5203 | -1,733154179 | ENST00000263574 | 334       | NM_001642    | APLP2                 |
| A_21_P0012371  | 2,92277 | 3,71655 | -1,733610744 | N/A             | N/A       | N/A          | XLOC_I2_009655        |
| A_23_P27075    | 12,6278 | 13,4217 | -1,733754948 | ENST00000570856 | 11337     | NM_007278    | GABARAP               |
| A_21_P0009763  | 3,80302 | 4,59703 | -1,733887145 | N/A             | N/A       | N/A          | Inc-ANKRD27-2         |
| A_24_P115651   | 1,96634 | 2,76056 | -1,73413955  | ENST00000615958 | 219670    | NM_145010    | ENKUR                 |
| A_33_P3308223  | 2,92741 | 3,72166 | -1,734175611 | ENST00000624828 | 9659      | NM_001198834 | PDE4DIP               |
| A_21_P0013482  | 1,54837 | 2,34266 | -1,734223693 | N/A             | N/A       | N/A          | XLOC_I2_014209        |
| A_22_P00004776 | 2,98542 | 3,77988 | -1,734428057 | N/A             | 197187    | NR_024402    | SNAI3-AS1             |
| A_21_P0014357  | 6,88961 | 7,68421 | -1,734596375 | ENST00000521847 | 284131    | AK056045     | ENDOV                 |
| A_33_P3370881  | 3,95236 | 4,74696 | -1,734596375 | ENST00000597630 | N/A       | XM_005259448 | N/A                   |
| A_32_P41026    | 4,04291 | 4,83752 | -1,734608399 | N/A             | 6309      | NM_001024956 | SC5D                  |
| A_23_P83436    | 11,6028 | 12,3975 | -1,734716613 | ENST00000591968 | 5184      | NM_000285    | PEPD                  |
| A_22_P00017122 | 2,17218 | 2,96747 | -1,735426182 | N/A             | 101929665 | XR_242542    | UBE2R2-AS1            |
| A_22_P00000668 | 3,76992 | 4,56542 | -1,735678811 | N/A             | N/A       | N/A          | Inc-ACTR6-1           |
| A_33_P3504659  | 9,02787 | 9,82351 | -1,73584725  | ENST00000346817 | 843       | NM_032977    | CASP10                |
| A_24_P50245    | 4,42667 | 5,2226  | -1,736196212 | ENST00000412394 | 3108      | NM_006120    | HLA-DMA               |
| A_23_P374082   | 6,41986 | 7,21605 | -1,736509135 | ENST00000257527 | 8728      | NM_033274    | ADAM19                |

|                |         |         |              |                 |           |              |                |
|----------------|---------|---------|--------------|-----------------|-----------|--------------|----------------|
| A_33_P3363085  | 4,11345 | 4,90968 | -1,736557282 | N/A             | N/A       | DA571569     | N/A            |
| A_32_P458472   | 1,40576 | 2,20203 | -1,73660543  | ENST00000366789 | 375057    | NM_001003665 | C1orf95        |
| A_19_P00318444 | 1,60639 | 2,40277 | -1,736737845 | ENST00000461398 | 101927149 | NR_125397    | LINC01471      |
| A_21_P0004891  | 1,39338 | 2,18976 | -1,736737845 | N/A             | N/A       | N/A          | lnc-TMEM14A-2  |
| A_23_P74943    | 1,66643 | 2,46282 | -1,736749883 | ENST00000367007 | 3756      | NM_172362    | KCNH1          |
| A_33_P3326588  | 10,1236 | 10,9201 | -1,736882308 | ENST00000312584 | 8793      | NM_003840    | TNFRSF10D      |
| A_24_P374943   | 7,98953 | 8,78618 | -1,737062905 | ENST00000400165 | 1525      | NM_001338    | CXADR          |
| A_24_P210082   | 8,5197  | 9,31636 | -1,737074946 | ENST00000325636 | 54494     | NM_019021    | C11orf71       |
| A_21_P0000773  | 1,68912 | 2,48585 | -1,737159231 | ENST00000563172 | 100505817 | N/A          | LOC100505817   |
| A_23_P1676     | 10,0826 | 10,8794 | -1,737243521 | ENST00000531851 | 219854    | NM_001258243 | TMEM218        |
| A_22_P00013242 | 1,43194 | 2,22885 | -1,737375984 | ENST00000579247 | N/A       | N/A          | N/A            |
| A_23_P39131    | 11,88   | 12,6773 | -1,737845708 | ENST00000599582 | 29997     | NM_015710    | GLTSCR2        |
| A_33_P3405743  | 9,05255 | 9,85033 | -1,738424004 | ENST00000370871 | 1429      | NM_001130042 | CRYZ           |
| A_33_P3522511  | 8,24611 | 9,04399 | -1,738544506 | N/A             | N/A       | AB007954     | lnc-INADL-2    |
| A_21_P0001796  | 3,6339  | 4,43186 | -1,738640914 | N/A             | N/A       | N/A          | lnc-FAM168B-1  |
| A_33_P3328511  | 8,92299 | 9,72096 | -1,738652966 | ENST00000356906 | 100506084 | NM_001039083 | ARL17B         |
| A_23_P83298    | 2,80325 | 3,60138 | -1,738845799 | ENST00000372469 | 51450     | NM_016307    | PRRX2          |
| A_22_P00021187 | 1,74647 | 2,54461 | -1,738857852 | N/A             | N/A       | N/A          | lnc-MEIS2-3    |
| A_33_P3249818  | 1,63129 | 2,42955 | -1,739002492 | N/A             | 729767    | NM_001278392 | CEACAM18       |
| A_23_P390704   | 8,56266 | 9,36093 | -1,739014546 | ENST00000229812 | 11329     | NM_007271    | STK38          |
| A_22_P00002951 | 1,56677 | 2,36506 | -1,739038654 | N/A             | N/A       | N/A          | lnc-C5orf49-1  |
| A_23_P43238    | 9,97718 | 10,7755 | -1,739074817 | ENST00000480946 | 93100     | NM_145201    | NAPRT          |
| A_33_P3353027  | 2,56295 | 3,36139 | -1,739219475 | ENST00000461824 | N/A       | N/A          | N/A            |
| A_33_P3407623  | 1,7678  | 2,56629 | -1,739279753 | N/A             | N/A       | N/A          | N/A            |
| A_22_P00012099 | 1,99733 | 2,79585 | -1,73931592  | N/A             | N/A       | BC040262     | lnc-PNPLA3-1   |
| A_33_P3339011  | 9,63902 | 10,4376 | -1,739388258 | ENST00000546413 | 55592     | BC034587     | GOLGA2P5       |
| A_33_P3274811  | 9,15154 | 9,95015 | -1,739424428 | ENST00000468739 | 6705      | NM_001014450 | SPRR2F         |
| A_22_P00001247 | 1,41817 | 2,21679 | -1,739436485 | ENST00000506086 | 104326191 | NR_126375    | LINC01336      |
| A_33_P3379967  | 8,72835 | 9,52706 | -1,739545    | ENST00000460067 | 3134      | NM_001098478 | HLA-F          |
| A_22_P00009829 | 2,37841 | 3,17717 | -1,739605289 | N/A             | N/A       | AA430309     | lnc-METTL11A-1 |
| A_33_P3304533  | 8,05343 | 8,85225 | -1,739677638 | ENST00000466994 | 388591    | BC119780     | RNF207         |
| A_23_P50946    | 10,5255 | 11,3244 | -1,739774109 | ENST00000254661 | 10267     | NM_005855    | RAMP1          |
| A_22_P00012507 | 6,591   | 7,39003 | -1,739930886 | N/A             | 102724795 | XR_424475    | LOC102724795   |

|                |         |         |              |                 |           |              |               |
|----------------|---------|---------|--------------|-----------------|-----------|--------------|---------------|
| A_33_P3854217  | 9,37659 | 10,1757 | -1,740027371 | ENST00000325722 | 79932     | NM_024874    | KIAA0319L     |
| A_33_P3411145  | 5,56574 | 6,36498 | -1,74018417  | ENST00000622362 | 285550    | NM_001145191 | FAM200B       |
| A_22_P00022138 | 2,19095 | 2,99023 | -1,740232419 | N/A             | N/A       | BI458978     | Inc-KRT81-2   |
| A_33_P3254996  | 4,33815 | 5,1375  | -1,740316858 | ENST00000578829 | 257203    | NR_026719    | DSCR9         |
| A_23_P365201   | 1,95319 | 2,75259 | -1,740377174 | ENST00000328801 | 347741    | NM_178233    | OTOP3         |
| A_33_P3223898  | 2,40765 | 3,20717 | -1,74052194  | ENST00000423292 | 377047    | NM_199183    | PRSS45        |
| A_22_P00001447 | 1,44232 | 2,24205 | -1,74077531  | N/A             | N/A       | N/A          | Inc-APOC3-6   |
| A_33_P3246553  | 2,51478 | 3,31457 | -1,740847709 | ENST00000373091 | 2899      | NM_000831    | GRIK3         |
| A_23_P59285    | 1,7642  | 2,56412 | -1,741004582 | ENST00000379491 | 9247      | NM_004752    | GCM2          |
| A_33_P3210119  | 2,16141 | 2,96135 | -1,741028718 | ENST00000491405 | 3139      | NR_027822    | HLA-L         |
| A_23_P78742    | 6,86912 | 7,66938 | -1,741414933 | ENST00000593422 | 2323      | NM_001459    | FLT3LG        |
| A_24_P237936   | 2,04396 | 2,84423 | -1,741427004 | ENST00000296096 | 150921    | NM_175769    | TCF23         |
| A_23_P52939    | 6,92068 | 7,72098 | -1,741463216 | ENST00000528450 | 8501      | NM_003627    | SLC43A1       |
| A_33_P3230399  | 10,3295 | 11,1298 | -1,741463216 | ENST00000325351 | 147808    | NM_203374    | ZNF784        |
| A_33_P3220976  | 1,70403 | 2,50436 | -1,741499429 | N/A             | 102725109 | XR_431570    | LOC102725109  |
| A_23_P26905    | 10,7886 | 11,589  | -1,741583929 | ENST00000577506 | 11232     | NM_007215    | POLG2         |
| A_33_P3242231  | 7,9673  | 8,76791 | -1,741837454 | ENST00000488538 | N/A       | N/A          | N/A           |
| A_33_P3332406  | 6,29778 | 7,09844 | -1,741897823 | ENST00000371362 | 388633    | NM_001010978 | LDLRAD1       |
| A_22_P00004244 | 7,84835 | 8,64906 | -1,741958193 | ENST00000565674 | N/A       | N/A          | N/A           |
| A_33_P3413098  | 11,0467 | 11,8475 | -1,742066866 | ENST00000610128 | 100129550 | NR_024618    | LOC100129550  |
| A_22_P00019089 | 1,56063 | 2,3615  | -1,742151393 | N/A             | N/A       | N/A          | Inc-PLEKHA8-3 |
| A_21_P0003846  | 1,58244 | 2,38371 | -1,742634487 | N/A             | N/A       | N/A          | Inc-AIMP1-1   |
| A_23_P37375    | 9,11843 | 9,91975 | -1,742694884 | ENST00000261991 | 9252      | NM_004755    | RPS6KA5       |
| A_23_P329361   | 10,7763 | 11,5777 | -1,742791522 | ENST00000561854 | 91949     | NM_153603    | COG7          |
| A_32_P150391   | 6,75338 | 7,5554  | -1,74354065  | ENST00000542475 | 388327    | NM_001105520 | C17orf100     |
| A_23_P200579   | 3,81986 | 4,62189 | -1,743552735 | ENST00000290122 | 23436     | NM_007352    | CELA3B        |
| A_24_P369232   | 2,26382 | 3,06588 | -1,743588991 | ENST00000378825 | 83643     | NM_031455    | CCDC3         |
| A_21_P0002415  | 4,26445 | 5,06669 | -1,743806546 | N/A             | N/A       | N/A          | Inc-ATAD2B-1  |
| A_33_P3362034  | 1,84683 | 2,64912 | -1,743866983 | ENST00000341866 | 399827    | NR_038365    | LINC01164     |
| A_23_P116207   | 8,88925 | 9,69181 | -1,744193378 | ENST00000531201 | 56912     | NM_020153    | IFT46         |
| A_23_P93383    | 10,6565 | 11,4593 | -1,744483558 | ENST00000383204 | 5863      | NM_004761    | RGL2          |
| A_23_P214678   | 13,7882 | 14,5911 | -1,744604481 | ENST00000486590 | 51596     | NM_015921    | CUTA          |
| A_22_P00022193 | 1,55041 | 2,35335 | -1,744652852 | N/A             | N/A       | N/A          | Inc-CELF4-4   |

|                |         |         |              |                 |           |              |                |
|----------------|---------|---------|--------------|-----------------|-----------|--------------|----------------|
| A_33_P3284311  | 1,72742 | 2,5304  | -1,744701225 | ENST00000458577 | N/A       | N/A          | N/A            |
| A_23_P426196   | 7,06133 | 7,86452 | -1,744955203 | ENST00000262811 | 23031     | NM_015016    | MAST3          |
| A_21_P0006626  | 5,07579 | 5,87916 | -1,745172929 | ENST00000621606 | 23223     | N/A          | RRP12          |
| A_33_P3228023  | 6,1729  | 6,97632 | -1,745233413 | ENST00000571345 | 59342     | NM_021626    | SCPEP1         |
| A_22_P00007101 | 3,35259 | 4,15604 | -1,745269705 | ENST00000556346 | 100506999 | N/A          | LOC100506999   |
| A_33_P3244991  | 6,00161 | 6,80522 | -1,745463272 | N/A             | N/A       | AK091251     | Inc-EIF2AK4-4  |
| A_22_P00010226 | 2,04244 | 2,84606 | -1,745475371 | ENST00000510150 | N/A       | N/A          | N/A            |
| A_33_P3384052  | 3,77553 | 4,57915 | -1,745475371 | ENST00000334889 | 30062     | NM_013435    | RAX            |
| A_33_P3412488  | 2,42142 | 3,22538 | -1,745886775 | ENST00000417039 | N/A       | N/A          | N/A            |
| A_22_P00007787 | 2,38743 | 3,1914  | -1,745898877 | N/A             | 101928445 | NR_110560    | LOC101928445   |
| A_33_P3257973  | 9,94532 | 10,7493 | -1,745910979 | ENST00000358691 | 9931      | NM_014877    | HELZ           |
| A_33_P3333587  | 9,97467 | 10,7788 | -1,746092514 | ENST00000264658 | 84961     | NM_032875    | FBXL20         |
| A_23_P97195    | 8,42915 | 9,23337 | -1,746201444 | ENST00000469815 | 56181     | NM_019557    | MTFR1L         |
| A_32_P385645   | 1,36173 | 2,16599 | -1,74624986  | ENST00000332217 | 441911    | NM_001004467 | OR10J3         |
| A_21_P0004884  | 1,36616 | 2,17063 | -1,746504064 | N/A             | N/A       | N/A          | Inc-RUNX2-1    |
| A_33_P3382634  | 1,44425 | 2,24872 | -1,746504064 | N/A             | N/A       | N/A          | N/A            |
| A_33_P3388815  | 7,08106 | 7,8856  | -1,746588807 | ENST00000370898 | 8790      | NM_003838    | FPGT           |
| A_22_P00022873 | 8,78768 | 9,59222 | -1,746588807 | ENST00000577279 | 102724532 | XR_424843    | LOC102724532   |
| A_23_P109322   | 2,38688 | 3,19161 | -1,746818845 | ENST00000468717 | 5121      | NM_006198    | PCP4           |
| A_21_P0006537  | 7,89882 | 8,70388 | -1,747218455 | ENST00000439926 | N/A       | N/A          | N/A            |
| A_33_P3299510  | 7,32625 | 8,13132 | -1,747230566 | ENST00000567180 | 642658    | NM_001080514 | SCX            |
| A_23_P86283    | 12      | 12,8052 | -1,747388014 | ENST00000294507 | 7805      | NM_006762    | LAPTM5         |
| A_23_P501961   | 7,69583 | 8,50104 | -1,747400126 | ENST00000373133 | 26013     | NM_032107    | L3MBTL1        |
| A_22_P00023255 | 3,53117 | 4,33639 | -1,747412239 | ENST00000438158 | N/A       | N/A          | N/A            |
| A_23_P205389   | 8,54184 | 9,34706 | -1,747412239 | ENST00000556883 | 64112     | NM_022151    | MOAP1          |
| A_23_P430558   | 2,42586 | 3,23112 | -1,747460688 | ENST00000258385 | 1144      | NM_000751    | CHRND          |
| A_22_P00009822 | 3,77859 | 4,58396 | -1,74759393  | N/A             | 100507053 | NR_037884    | LOC100507053   |
| A_33_P3412184  | 5,90133 | 6,70683 | -1,747751411 | ENST00000619327 | 100507290 | N/A          | ZNF865         |
| A_22_P00020933 | 2,11643 | 2,92198 | -1,747811985 | ENST00000565531 | N/A       | N/A          | N/A            |
| A_19_P00319646 | 10,0317 | 10,8373 | -1,74787256  | ENST00000457958 | 100499467 | NR_036488    | LINC00673      |
| A_21_P0014441  | 2,15323 | 2,95883 | -1,74787256  | N/A             | N/A       | N/A          | N/A            |
| A_22_P00008685 | 5,10307 | 5,90877 | -1,747993718 | N/A             | N/A       | N/A          | Inc-KIAA1147-1 |
| A_22_P00015641 | 1,42197 | 2,22771 | -1,748042183 | N/A             | N/A       | N/A          | Inc-SUPT3H-1   |

|                |         |         |              |                 |           |              |                  |
|----------------|---------|---------|--------------|-----------------|-----------|--------------|------------------|
| A_24_P185117   | 7,35929 | 8,1651  | -1,748127001 | ENST00000570858 | 83547     | NM_031430    | RILP             |
| A_33_P3278856  | 3,69778 | 4,50371 | -1,748272412 | ENST00000373145 | 79983     | NM_024921    | POF1B            |
| A_32_P204205   | 9,56775 | 10,3737 | -1,748296648 | ENST00000216513 | 51804     | NM_017420    | SIX4             |
| A_21_P0008787  | 3,34623 | 4,15221 | -1,748333004 | N/A             | N/A       | N/A          | Inc-AC016251.1-9 |
| A_33_P3411097  | 6,44088 | 7,24697 | -1,748466312 | N/A             | 392862    | NM_001145118 | GRID2IP          |
| A_23_P7074     | 11,4322 | 12,2384 | -1,748599631 | ENST00000264230 | 84273     | NM_032313    | NOA1             |
| A_33_P3388486  | 3,44575 | 4,25212 | -1,74880569  | ENST00000535372 | 100129518 | NR_037166    | LOC100129518     |
| A_22_P00007503 | 5,44446 | 6,25118 | -1,749230004 | N/A             | N/A       | N/A          | Inc-GYG2-1       |
| A_21_P0007439  | 1,41016 | 2,21693 | -1,749290629 | N/A             | N/A       | N/A          | Inc-TCIRG1-2     |
| A_21_P0014070  | 2,32625 | 3,13338 | -1,749727189 | ENST00000444037 | N/A       | AK097184     | N/A              |
| A_33_P3254078  | 1,70699 | 2,51412 | -1,749727189 | ENST00000471669 | 55064     | N/A          | SPATA6L          |
| A_24_P18270    | 2,81178 | 3,61892 | -1,749739317 | ENST00000378681 | 221044    | NM_145314    | UCMA             |
| A_23_P133637   | 1,64514 | 2,45241 | -1,749896992 | ENST00000517929 | 3360      | NM_001040172 | HTR4             |
| A_22_P00019635 | 2,377   | 3,18429 | -1,749921251 | N/A             | N/A       | AK095221     | Inc-CIB3-1       |
| A_22_P00021259 | 1,68993 | 2,49737 | -1,750103203 | ENST00000431460 | 100887755 | NR_051976    | TRERNA1          |
| A_21_P0014369  | 2,16668 | 2,97417 | -1,750163858 | N/A             | N/A       | BQ184040     | N/A              |
| A_22_P00009082 | 1,65369 | 2,46123 | -1,750224515 | N/A             | N/A       | N/A          | Inc-LGALS3-1     |
| A_23_P64860    | 5,12463 | 5,93237 | -1,750467165 | ENST00000550948 | 6404      | NM_003006    | SELPLG           |
| A_21_P0014793  | 8,62316 | 9,43106 | -1,750661309 | ENST00000559987 | 55074     | NM_001198533 | OXR1             |
| A_22_P00007338 | 7,4641  | 8,27208 | -1,750758389 | N/A             | 100506314 | NR_038920    | LOC100506314     |
| A_23_P27724    | 15,0083 | 15,8163 | -1,750782659 | ENST00000598956 | 6415      | NM_003009    | SEPW1            |
| A_23_P94494    | 4,18996 | 4,99801 | -1,750843338 | ENST00000462803 | 7091      | NM_007005    | TLE4             |
| A_24_P284353   | 10,6097 | 11,418  | -1,751146762 | ENST00000316425 | 84314     | NM_032354    | TMEM107          |
| A_33_P3360555  | 12,0405 | 12,849  | -1,75138954  | ENST00000337080 | 55311     | NM_001253792 | ZNF444           |
| A_33_P3888485  | 7,04233 | 7,85098 | -1,751571645 | ENST00000438022 | 83875     | NM_031938    | BCO2             |
| A_33_P3262769  | 1,35765 | 2,16647 | -1,751778053 | N/A             | 102724691 | NR_110603    | LOC102724691     |
| A_23_P59045    | 8,99121 | 9,80014 | -1,751911625 | N/A             | 3012      | NM_021052    | HIST1H2AE        |
| A_23_P34744    | 8,08219 | 8,89117 | -1,751972342 | ENST00000271651 | 1513      | NM_000396    | CTSK             |
| A_22_P00013047 | 4,79357 | 5,60264 | -1,75208164  | ENST00000555581 | N/A       | N/A          | N/A              |
| A_22_P00000888 | 1,5554  | 2,36471 | -1,752373132 | N/A             | N/A       | CB106425     | Inc-AHNAK-1      |
| A_33_P3259902  | 11,5586 | 12,368  | -1,752482454 | ENST00000606102 | N/A       | N/A          | N/A              |
| A_22_P00016231 | 1,63615 | 2,44557 | -1,752506749 | N/A             | N/A       | BX097857     | Inc-TMBIM4-1     |
| A_24_P396327   | 6,49073 | 7,30027 | -1,752652524 | ENST00000370867 | 127253    | NM_138467    | TYW3             |

|                |         |         |              |                 |           |              |                |
|----------------|---------|---------|--------------|-----------------|-----------|--------------|----------------|
| A_23_P324340   | 6,74411 | 7,55381 | -1,75284691  | ENST00000267889 | 85455     | NM_033510    | DISP2          |
| A_23_P137543   | 10,883  | 11,6929 | -1,753089923 | ENST00000539719 | 149076    | NM_152493    | ZNF362         |
| A_33_P3333982  | 3,51608 | 4,32598 | -1,753089923 | ENST00000612094 | 9659      | NM_022359    | PDE4DIP        |
| A_24_P925062   | 7,85336 | 8,66333 | -1,753174986 | ENST00000355797 | 439921    | NM_001008528 | MXRA7          |
| A_33_P3616021  | 2,22038 | 3,03039 | -1,753223595 | ENST00000434081 | 727699    | NR_033840    | LINC00163      |
| A_21_P0006725  | 1,43787 | 2,24794 | -1,753296511 | ENST00000454470 | 100652988 | N/A          | LINC00702      |
| A_33_P3369520  | 7,477   | 8,28716 | -1,753405891 | ENST00000369615 | 260425    | NM_152900    | MAGI3          |
| A_22_P00012454 | 1,54653 | 2,3567  | -1,753418045 | N/A             | N/A       | N/A          | Inc-PRPF19-1   |
| A_22_P00023982 | 2,56484 | 3,37508 | -1,753503123 | ENST00000518539 | 104266957 | NR_126346    | KBTBD11-OT1    |
| A_33_P3353791  | 6,63239 | 7,44271 | -1,753600361 | ENST00000506275 | 3672      | NM_181501    | ITGA1          |
| A_23_P153286   | 8,77613 | 9,58647 | -1,753624671 | ENST00000592437 | 10780     | NM_006630    | ZNF234         |
| A_23_P208698   | 10,8417 | 11,6524 | -1,754062313 | ENST00000323798 | 2997      | NM_002103    | GSY1           |
| A_22_P00018300 | 2,08798 | 2,8989  | -1,754329814 | ENST00000570186 | N/A       | AL832220     | N/A            |
| A_24_P330691   | 13,5192 | 14,3304 | -1,75467033  | ENST00000314523 | 6613      | NM_006937    | SUMO2          |
| A_23_P81441    | 1,51037 | 2,32174 | -1,754877103 | ENST00000537858 | 140947    | NM_130848    | DCANP1         |
| A_33_P3457052  | 5,99988 | 6,81126 | -1,754889267 | N/A             | N/A       | N/A          | Inc-KIAA1919-1 |
| A_23_P68730    | 11,83   | 12,6414 | -1,754913595 | ENST00000291565 | 8566      | NM_003681    | PDXK           |
| A_22_P00018365 | 1,48905 | 2,30076 | -1,755290724 | N/A             | N/A       | DB442329     | Inc-ZWINT-4    |
| A_33_P3333471  | 3,6349  | 4,4467  | -1,755400228 | N/A             | N/A       | CU687439     | N/A            |
| A_33_P3277328  | 3,76821 | 4,58003 | -1,755424563 | ENST00000512906 | 730102    | NR_037167    | LOC730102      |
| A_23_P106874   | 2,50304 | 3,31489 | -1,755461067 | ENST00000379073 | 83449     | NM_031293    | PMFBP1         |
| A_21_P0004418  | 1,63597 | 2,44794 | -1,755607088 | N/A             | 102546175 | N/A          | LINC01338      |
| A_21_P0006726  | 2,17254 | 2,98456 | -1,755667934 | ENST00000418372 | 100652988 | N/A          | LINC00702      |
| A_21_P0007557  | 1,36253 | 2,17461 | -1,755740951 | ENST00000551539 | N/A       | N/A          | N/A            |
| A_33_P3381127  | 8,4395  | 9,25164 | -1,755813972 | ENST00000612663 | 355       | NM_000043    | FAS            |
| A_21_P0009483  | 2,95462 | 3,76678 | -1,755838313 | ENST00000588803 | N/A       | N/A          | N/A            |
| A_33_P3677061  | 2,93058 | 3,74283 | -1,755947851 | ENST00000571219 | 283887    | XR_132607    | LOC283887      |
| A_21_P0009766  | 1,5894  | 2,40178 | -1,756106086 | N/A             | N/A       | N/A          | Inc-NFKBID-1   |
| A_33_P3254946  | 11,8045 | 12,6169 | -1,75613043  | ENST00000591490 | 79990     | NM_024927    | PLEKHH3        |
| A_33_P3308744  | 1,52835 | 2,34078 | -1,756166949 | ENST00000424408 | 3910      | NM_001105206 | LAMA4          |
| A_21_P0002640  | 1,66888 | 2,48145 | -1,756337376 | N/A             | N/A       | N/A          | Inc-TMEM18-6   |
| A_33_P3343976  | 2,17771 | 2,99043 | -1,756519996 | N/A             | 80862     | NR_026751    | ZNRD1-AS1      |
| A_23_P330895   | 7,66809 | 8,48085 | -1,756568698 | ENST00000572515 | 4793      | NR_040515    | NFKBIB         |

|                |         |         |              |                 |           |              |                    |
|----------------|---------|---------|--------------|-----------------|-----------|--------------|--------------------|
| A_21_P0011827  | 2,12522 | 2,93807 | -1,756678281 | N/A             | N/A       | N/A          | XLOC_I2_007449     |
| A_23_P319583   | 4,37995 | 5,19294 | -1,756848759 | ENST00000372684 | 9783      | NM_014747    | RIMS3              |
| A_21_P0008804  | 1,82834 | 2,64141 | -1,756946182 | N/A             | N/A       | N/A          | Inc-TM2D3-2        |
| A_22_P00015918 | 6,6468  | 7,45998 | -1,757080148 | N/A             | N/A       | XM_006718417 | Inc-TCIRG1-1       |
| A_33_P3278774  | 5,42624 | 6,23953 | -1,757214123 | ENST00000483826 | 51710     | BC001868     | ZNF44              |
| A_22_P00000335 | 1,9764  | 2,78971 | -1,757238484 | N/A             | N/A       | N/A          | Inc-AC012652.1.1-3 |
| A_23_P110643   | 7,24197 | 8,05541 | -1,757396834 | ENST00000523832 | 51265     | NM_016508    | CDKL3              |
| A_21_P0014400  | 5,02017 | 5,83364 | -1,757433378 | N/A             | 55861     | AK098015     | DBNDD2             |
| A_23_P23141    | 15,7536 | 16,5672 | -1,757591746 | ENST00000369387 | 3020      | NM_002107    | H3F3A              |
| A_21_P0003861  | 1,54373 | 2,35737 | -1,757640478 | ENST00000503929 | 100506122 | NR_038838    | LOC100506122       |
| A_21_P0009619  | 1,65118 | 2,46486 | -1,757689211 | ENST00000578803 | 400660    | NR_120419    | LINC00683          |
| A_33_P3235400  | 11,2227 | 12,0364 | -1,757713578 | ENST00000469145 | 3068      | NM_004494    | HDGF               |
| A_22_P00002858 | 3,13948 | 3,95332 | -1,757884155 | N/A             | 339942    | NR_026991    | H1FX-AS1           |
| A_33_P3305467  | 8,82433 | 9,63836 | -1,75811568  | ENST00000566116 | N/A       | N/A          | N/A                |
| A_33_P3403270  | 2,58994 | 3,40408 | -1,758249735 | N/A             | N/A       | N/A          | Inc-CCDC33-1       |
| A_33_P3418790  | 2,42526 | 3,23963 | -1,758530064 | ENST00000380347 | 2797      | N/A          | GNRH2              |
| A_32_P117170   | 9,80897 | 10,6234 | -1,758603201 | ENST00000341533 | 222236    | NM_001122838 | NAPEPLD            |
| A_23_P101084   | 1,69775 | 2,5122  | -1,758627581 | ENST00000573128 | 84690     | NM_032598    | SPATA22            |
| A_22_P00015434 | 6,56534 | 7,37983 | -1,758676341 | N/A             | N/A       | BX091689     | Inc-SSR3-2         |
| A_22_P00020522 | 5,58384 | 6,39835 | -1,758700722 | N/A             | 100874342 | NR_046834    | RNF216-IT1         |
| A_33_P3887081  | 6,19236 | 7,00687 | -1,758700722 | ENST00000499291 | 338817    | NR_033890    | LINC01252          |
| A_33_P3400708  | 4,45816 | 5,27329 | -1,759456688 | ENST00000368931 | 149428    | NM_001159642 | BNIPL              |
| A_33_P7712547  | 5,54476 | 6,35999 | -1,759578648 | ENST00000597683 | N/A       | AK092080     | N/A                |
| A_24_P135769   | 2,64574 | 3,46097 | -1,759578648 | ENST00000449321 | 4013      | NM_198315    | VWA5A              |
| A_33_P3378272  | 1,91204 | 2,72731 | -1,759627435 | ENST00000431918 | 1364      | AK126462     | CLDN4              |
| A_24_P22943    | 2,24081 | 3,05615 | -1,759712815 | ENST00000322315 | 126326    | NM_133261    | GIPC3              |
| A_24_P330822   | 2,83761 | 3,65297 | -1,75973721  | ENST00000621123 | 6928      | BT007126     | HNF1B              |
| A_21_P0003121  | 2,67689 | 3,49239 | -1,759907984 | N/A             | N/A       | N/A          | Inc-FHIT-1         |
| A_23_P118815   | 12,9824 | 13,7979 | -1,759907984 | ENST00000301633 | 332       | NM_001012271 | BIRC5              |
| A_23_P315206   | 8,95304 | 9,76868 | -1,760078775 | ENST00000483599 | 883       | NM_004059    | CCBL1              |
| A_32_P22501    | 8,81023 | 9,62606 | -1,760310589 | ENST00000313807 | 645212    | NR_034170    | EIF3J-AS1          |
| A_21_P0012790  | 2,04045 | 2,85633 | -1,760371597 | ENST00000504050 | N/A       | N/A          | N/A                |
| A_22_P00011100 | 3,47286 | 4,28874 | -1,760371597 | ENST00000524336 | N/A       | N/A          | N/A                |



|                |         |         |              |                 |           |              |                |
|----------------|---------|---------|--------------|-----------------|-----------|--------------|----------------|
| A_22_P00016025 | 1,65675 | 2,47266 | -1,760408204 | N/A             | 101928780 | XR_244011    | LOC101928780   |
| A_23_P15714    | 11,2713 | 12,0873 | -1,760518027 | ENST00000611398 | 4905      | NM_006178    | NSF            |
| A_21_P0003279  | 2,15372 | 2,96982 | -1,760640061 | N/A             | N/A       | N/A          | Inc-WNT7A-1    |
| A_21_P0010535  | 7,61095 | 8,42709 | -1,760688877 | N/A             | N/A       | N/A          | XL0C_I2_000297 |
| A_33_P3224505  | 3,06493 | 3,88121 | -1,760859744 | N/A             | 100131099 | AK126083     | LOC100131099   |
| A_33_P3251209  | 1,6284  | 2,44473 | -1,760920772 | N/A             | N/A       | N/A          | N/A            |
| A_21_P0001626  | 3,60957 | 4,42625 | -1,761348025 | ENST00000420762 | 101929689 | XR_247063    | LOC101929689   |
| A_21_P0001057  | 1,45917 | 2,27598 | -1,761506746 | N/A             | 91548     | XR_247053    | LOC91548       |
| A_24_P383762   | 2,863   | 3,67995 | -1,761677692 | ENST00000520209 | 255426    | NM_175062    | RASGEF1C       |
| A_21_P0003928  | 1,4742  | 2,29122 | -1,761763171 | ENST00000502934 | N/A       | N/A          | N/A            |
| A_32_P232035   | 8,85145 | 9,6685  | -1,761799807 | N/A             | 100270746 | NR_026776    | LOC100270746   |
| A_33_P3877344  | 2,9481  | 3,76534 | -1,762031847 | ENST00000602579 | 440173    | NR_027471    | LOC440173      |
| A_22_P00009177 | 1,61335 | 2,4308  | -1,762288349 | ENST00000565072 | 102725393 | CF593671     | LOC102725393   |
| A_21_P0001033  | 1,61051 | 2,42797 | -1,762300564 | ENST00000428646 | N/A       | N/A          | N/A            |
| A_33_P3390723  | 1,47535 | 2,29285 | -1,762349426 | N/A             | N/A       | N/A          | N/A            |
| A_24_P120147   | 2,00885 | 2,82644 | -1,762459371 | ENST00000481426 | N/A       | XM_006711993 | N/A            |
| A_24_P385134   | 6,7202  | 7,5378  | -1,762471587 | ENST00000319540 | 79966     | NM_001037582 | SCD5           |
| A_33_P3252785  | 4,79186 | 5,60962 | -1,762667062 | ENST00000372263 | 219348    | N/A          | PLAC9          |
| A_23_P17012    | 3,64814 | 4,46602 | -1,762813683 | ENST00000272732 | 79634     | NM_024583    | SCRN3          |
| A_24_P385611   | 9,31033 | 10,1287 | -1,76341251  | ENST00000462751 | 6672      | NM_003113    | SP100          |
| A_33_P3218832  | 1,96502 | 2,78353 | -1,763583641 | N/A             | 22999     | NM_014989    | RIMS1          |
| A_21_P0005618  | 9,04399 | 9,86256 | -1,763656988 | ENST00000561761 | N/A       | N/A          | N/A            |
| A_21_P0014543  | 3,36249 | 4,1812  | -1,763828143 | N/A             | N/A       | N/A          | Inc-HSP90AA1-5 |
| A_33_P3322363  | 1,44164 | 2,26035 | -1,763828143 | ENST00000408945 | 284293    | NM_001123366 | HMSD           |
| A_22_P00012801 | 3,72606 | 4,54485 | -1,763925953 | ENST00000443685 | N/A       | N/A          | N/A            |
| A_19_P00320723 | 6,14554 | 6,96435 | -1,763950406 | ENST00000559012 | 100131089 | NR_040059    | SRP14-AS1      |
| A_33_P3412900  | 7,14104 | 7,95999 | -1,76412159  | ENST00000267406 | 643866    | NM_001039771 | CBLN3          |
| A_33_P3321946  | 10,4236 | 11,2426 | -1,76418273  | ENST00000379527 | 64598     | NM_023948    | MOSPD3         |
| A_23_P425990   | 1,69266 | 2,5118  | -1,764353936 | ENST00000542829 | 23281     | NM_001033602 | MTUS2          |
| A_24_P47988    | 7,15752 | 7,97668 | -1,764378395 | ENST00000497465 | 80237     | NM_025165    | ELL3           |
| A_33_P3467872  | 1,37271 | 2,19195 | -1,764476236 | ENST00000454555 | 144920    | NR_046391    | LINC00343      |
| A_21_P0002303  | 2,23648 | 3,05592 | -1,764720861 | N/A             | N/A       | N/A          | Inc-GPD2-2     |
| A_22_P00003255 | 1,97591 | 2,79544 | -1,764830954 | N/A             | N/A       | N/A          | Inc-CALCOCO2-5 |

|                |         |         |              |                 |           |              |                |
|----------------|---------|---------|--------------|-----------------|-----------|--------------|----------------|
| A_33_P3367062  | 5,6207  | 6,44032 | -1,764941053 | ENST00000367501 | 54823     | NM_017673    | SWT1           |
| A_33_P3216227  | 1,40355 | 2,22325 | -1,765038925 | ENST00000360635 | 9270      | N/A          | ITGB1BP1       |
| A_23_P144622   | 9,80228 | 10,622  | -1,765063394 | ENST00000508177 | 10007     | NM_005471    | GNPDA1         |
| A_23_P401      | 12,4094 | 13,2293 | -1,765283628 | ENST00000366955 | 1063      | NM_016343    | CENPF          |
| A_23_P160481   | 8,55694 | 9,37696 | -1,765430466 | ENST00000489398 | 55827     | NM_018442    | DCAF6          |
| A_22_P00017530 | 2,32559 | 3,14568 | -1,765516128 | ENST00000553301 | N/A       | DA209974     | N/A            |
| A_21_P0011920  | 3,53872 | 4,35914 | -1,765920016 | N/A             | N/A       | N/A          | XLOC_I2_008031 |
| A_19_P00326514 | 7,30027 | 8,12083 | -1,76609139  | ENST00000602736 | N/A       | N/A          | N/A            |
| A_22_P00001297 | 1,5784  | 2,39897 | -1,766103632 | N/A             | 100873954 | NR_046757    | SNRK-AS1       |
| A_23_P129312   | 2,50374 | 3,32438 | -1,766189325 | ENST00000427255 | 54866     | NM_017726    | PPP1R14D       |
| A_23_P137381   | 6,4293  | 7,24995 | -1,766201568 | ENST00000486541 | 3399      | NM_002167    | ID3            |
| A_23_P347525   | 1,42501 | 2,24578 | -1,766348482 | ENST00000305738 | 160065    | NM_138294    | PATE1          |
| A_24_P383019   | 1,54316 | 2,36394 | -1,766360726 | ENST00000355459 | 140258    | NM_181599    | KRTAP13-1      |
| A_33_P3225011  | 3,4847  | 4,3055  | -1,766385213 | N/A             | N/A       | KJ425573     | N/A            |
| A_33_P3370041  | 1,78744 | 2,60826 | -1,7664097   | N/A             | 102724747 | N/A          | LOC102724747   |
| A_21_P0014219  | 5,14866 | 5,96949 | -1,766421944 | N/A             | N/A       | N/A          | N/A            |
| A_23_P72117    | 8,80719 | 9,62809 | -1,766507654 | ENST00000539041 | 10924     | NM_006714    | SMPDL3A        |
| A_24_P928969   | 8,61754 | 9,43847 | -1,766544388 | ENST00000374541 | 5774      | NM_001145369 | PTPN3          |
| A_23_P47073    | 9,31496 | 10,1359 | -1,766556632 | ENST00000263150 | 22884     | NM_014023    | WDR37          |
| A_21_P0011867  | 10,2805 | 11,1015 | -1,766630103 | N/A             | N/A       | N/A          | XLOC_I2_007656 |
| A_23_P67771    | 9,32582 | 10,147  | -1,766850533 | ENST00000455743 | 580       | NM_000465    | BARD1          |
| A_33_P3213645  | 9,07131 | 9,8929  | -1,767352726 | N/A             | 10595     | NM_033266    | ERN2           |
| A_21_P0009932  | 1,58947 | 2,41144 | -1,767818301 | ENST00000487210 | 23236     | N/A          | PLCB1          |
| A_23_P212756   | 2,47036 | 3,29235 | -1,767842808 | ENST00000505271 | 2868      | NM_001004057 | GRK4           |
| A_33_P3271594  | 6,54103 | 7,36312 | -1,76796535  | ENST00000380075 | 57159     | NM_032546    | TRIM54         |
| A_22_P00011251 | 1,50892 | 2,33122 | -1,768222715 | ENST00000466281 | N/A       | AJ459868     | N/A            |
| A_21_P0007682  | 1,58851 | 2,41104 | -1,768504635 | N/A             | N/A       | N/A          | Inc-FGF23-3    |
| A_22_P00022198 | 1,50741 | 2,33005 | -1,768639482 | ENST00000549456 | 338811    | XR_432843    | FAM19A2        |
| A_21_P0008064  | 5,7326  | 6,55524 | -1,768639482 | ENST00000461527 | N/A       | AJ412054     | N/A            |
| A_22_P00012654 | 7,23911 | 8,06187 | -1,768786599 | N/A             | 101929746 | NR_110623    | ZNF341-AS1     |
| A_32_P228501   | 11,7928 | 12,6156 | -1,768835641 | ENST00000374206 | 246184    | NM_139286    | CDC26          |
| A_33_P3294966  | 4,60959 | 5,43248 | -1,76894599  | ENST00000575694 | 554206    | NR_038379    | LOC554206      |
| A_23_P80902    | 9,42598 | 10,2489 | -1,768982775 | ENST00000453693 | 56992     | NM_020242    | KIF15          |

|                |         |         |              |                 |           |              |                |
|----------------|---------|---------|--------------|-----------------|-----------|--------------|----------------|
| A_21_P0006462  | 1,61845 | 2,44157 | -1,769228025 | ENST00000422226 | 104797536 | N/A          | LINC01402      |
| A_33_P3267760  | 1,78878 | 2,61201 | -1,769362927 | ENST00000378463 | 54880     | N/A          | BCOR           |
| A_24_P227091   | 9,97059 | 10,7939 | -1,769461044 | ENST00000260731 | 3832      | NM_004523    | KIF11          |
| A_24_P5305     | 8,08424 | 8,90763 | -1,769559166 | ENST00000566221 | 6687      | NM_003119    | SPG7           |
| A_24_P238786   | 1,6323  | 2,45572 | -1,769595964 | ENST00000568175 | N/A       | N/A          | N/A            |
| A_22_P00015642 | 2,65408 | 3,47774 | -1,76989037  | N/A             | N/A       | DB041332     | Inc-SUPT6H-1   |
| A_32_P40463    | 3,42131 | 4,24529 | -1,770282988 | N/A             | 119369    | NR_002779    | NUDT9P1        |
| A_21_P0013295  | 1,67017 | 2,49417 | -1,770307529 | N/A             | N/A       | N/A          | XLOC_I2_013783 |
| A_23_P138967   | 11,6196 | 12,4436 | -1,770307529 | ENST00000530923 | 6392      | NM_003002    | SDHD           |
| A_23_P96872    | 13,264  | 14,0882 | -1,770552963 | ENST00000489675 | 51668     | NM_016126    | HSPB11         |
| A_22_P00019457 | 3,69588 | 4,52031 | -1,770835254 | N/A             | N/A       | N/A          | Inc-YIF1A-5    |
| A_21_P0006401  | 2,9564  | 3,78106 | -1,77111759  | ENST00000452254 | 158801    | NR_027131    | NKAPP1         |
| A_23_P34496    | 11,2646 | 12,0895 | -1,771412249 | ENST00000336294 | 55116     | NM_018056    | TMEM39B        |
| A_23_P121945   | 7,91715 | 8,7421  | -1,771473643 | ENST00000393693 | 6620      | NM_001001502 | SNCB           |
| A_22_P00011340 | 2,07061 | 2,89575 | -1,771706957 | ENST00000449472 | 256369    | NR_024184    | LINC00521      |
| A_23_P427136   | 3,37078 | 4,19593 | -1,771719238 | ENST00000390666 | 83942     | NM_032028    | TSSK1B         |
| A_22_P00014015 | 4,71302 | 5,53835 | -1,771940303 | N/A             | 389247    | NR_033995    | LOC389247      |
| A_33_P3549091  | 3,59901 | 4,42436 | -1,771964867 | ENST00000583447 | 100131347 | NR_036551    | LOC100131347   |
| A_24_P187651   | 8,55123 | 9,37659 | -1,77197715  | ENST00000565047 | 1201      | NM_001042432 | CLN3           |
| A_23_P153586   | 14,5184 | 15,3438 | -1,77202628  | ENST00000304863 | 7386      | NM_006003    | UQCRFS1        |
| A_22_P00010235 | 14,7933 | 15,619  | -1,772394801 | ENST00000334346 | 4490      | NM_005947    | MT1B           |
| A_33_P3270019  | 4,45789 | 5,2836  | -1,772407086 | ENST00000518287 | 10499     | NM_006540    | NCOA2          |
| A_22_P00013195 | 3,34012 | 4,16585 | -1,772431657 | ENST00000566476 | 101929069 | XR_241162    | LOC101929069   |
| A_21_P0013180  | 2,23399 | 3,05975 | -1,772468514 | ENST00000412563 | N/A       | N/A          | N/A            |
| A_23_P161324   | 5,04193 | 5,86845 | -1,773402482 | ENST00000544879 | 25961     | NM_015901    | NUDT13         |
| A_33_P3406547  | 1,47887 | 2,30539 | -1,773402482 | N/A             | N/A       | N/A          | N/A            |
| A_33_P3332006  | 10,1038 | 10,9305 | -1,773623757 | ENST00000393408 | 10951     | NM_006807    | CBX1           |
| A_23_P126752   | 10,7247 | 11,5518 | -1,774115578 | ENST00000264202 | 832       | NM_004930    | CAPZB          |
| A_22_P00009641 | 1,45078 | 2,27793 | -1,774177066 | ENST00000572693 | 10164     | NM_001166395 | CHST4          |
| A_21_P0008551  | 1,43191 | 2,2591  | -1,774226257 | N/A             | N/A       | N/A          | Inc-GPR132-1   |
| A_23_P256561   | 1,98271 | 2,81018 | -1,774570634 | ENST00000381950 | 10333     | NM_006068    | TLR6           |
| A_22_P00004865 | 1,79674 | 2,62437 | -1,774767451 | ENST00000518750 | N/A       | N/A          | N/A            |
| A_33_P3235207  | 1,8696  | 2,69755 | -1,775161151 | ENST00000547477 | 55089     | NM_018018    | SLC38A4        |

|                |         |         |              |                 |           |              |                |
|----------------|---------|---------|--------------|-----------------|-----------|--------------|----------------|
| A_21_P0002265  | 2,07013 | 2,89811 | -1,775198065 | N/A             | N/A       | N/A          | Inc-MRPS9-2    |
| A_33_P3287800  | 4,15279 | 4,98083 | -1,775271895 | ENST00000550249 | 85474     | NM_001009812 | LBX2           |
| A_33_P3330683  | 15,3219 | 16,1501 | -1,77546879  | N/A             | N/A       | N/A          | XLOC_I2_008285 |
| A_21_P0010703  | 5,59907 | 6,42727 | -1,77546879  | N/A             | N/A       | N/A          | Inc-C1orf177-2 |
| A_23_P253123   | 7,70893 | 8,53714 | -1,775481096 | ENST00000370634 | 51442     | NM_016267    | VGLL1          |
| A_22_P00021360 | 2,46404 | 3,29254 | -1,775838026 | ENST00000446887 | N/A       | N/A          | N/A            |
| A_33_P3315314  | 14,3052 | 15,1337 | -1,775838026 | ENST00000464121 | 645745    | NM_001276687 | MT1HL1         |
| A_24_P101617   | 10,1347 | 10,9633 | -1,775961122 | ENST00000426701 | N/A       | N/A          | N/A            |
| A_23_P254917   | 5,21303 | 6,04168 | -1,776022674 | ENST00000595342 | 3960      | NM_006149    | LGALS4         |
| A_33_P3344765  | 5,34028 | 6,16896 | -1,776059605 | ENST00000566307 | N/A       | N/A          | N/A            |
| A_33_P3765291  | 1,44477 | 2,2737  | -1,7763674   | N/A             | N/A       | N/A          | N/A            |
| A_23_P122724   | 5,00383 | 5,83278 | -1,776392026 | ENST00000392389 | 8875      | NM_004665    | VNN2           |
| A_21_P0006881  | 3,4112  | 4,24021 | -1,776465905 | N/A             | N/A       | N/A          | Inc-SLC29A3-1  |
| A_23_P131534   | 2,7356  | 3,56487 | -1,776786086 | ENST00000258456 | 11250     | NM_007227    | GPR45          |
| A_22_P00013829 | 5,49404 | 6,32332 | -1,776798401 | N/A             | 101928403 | XR_245043    | LOC101928403   |
| A_23_P301138   | 12,0232 | 12,8525 | -1,776823033 | ENST00000416707 | 51447     | NM_001005910 | IP6K2          |
| A_23_P105625   | 11,2496 | 12,0791 | -1,77706937  | ENST00000288532 | 84274     | NM_032314    | COQ5           |
| A_33_P3319622  | 1,59072 | 2,42027 | -1,77713096  | ENST00000425003 | N/A       | N/A          | N/A            |
| A_23_P53329    | 2,88298 | 3,71255 | -1,777155596 | N/A             | 79857     | NR_026806    | FLJ13224       |
| A_24_P842172   | 2,52353 | 3,35331 | -1,7774143   | ENST00000618256 | 349196    | NR_027000    | LINC00965      |
| A_23_P345928   | 6,4528  | 7,28262 | -1,777463581 | ENST00000548432 | 84190     | NM_032230    | METTL25        |
| A_33_P3239620  | 1,59932 | 2,42938 | -1,777759296 | ENST00000217428 | 10816     | NM_006652    | SPINT3         |
| A_24_P113815   | 7,82184 | 8,6523  | -1,778252264 | ENST00000246421 | 9906      | NM_182838    | SLC35E2        |
| A_33_P3350488  | 11,3798 | 12,2103 | -1,778301568 | ENST00000414849 | 51203     | NM_016359    | NUSAP1         |
| A_23_P406025   | 3,14147 | 3,97214 | -1,778511126 | ENST00000223609 | 158471    | NM_015225    | PRUNE2         |
| A_33_P3301394  | 11,6012 | 12,4319 | -1,77854811  | ENST00000486956 | N/A       | N/A          | N/A            |
| A_22_P00021435 | 2,43792 | 3,26875 | -1,778708381 | N/A             | N/A       | N/A          | Inc-C9orf103-3 |
| A_33_P3298216  | 2,9162  | 3,74708 | -1,778770027 | ENST00000357550 | 23026     | NM_001198950 | MYO16          |
| A_22_P00019911 | 2,08083 | 2,91184 | -1,778930318 | N/A             | 101929480 | XR_243334    | LOC101929480   |
| A_24_P98524    | 8,35747 | 9,18863 | -1,779115286 | ENST00000394829 | 5532      | NM_021132    | PPP3CB         |
| A_33_P3303385  | 13,1191 | 13,9503 | -1,779164615 | ENST00000315579 | 9918      | NM_014865    | NCAPD2         |
| A_19_P00812310 | 5,88327 | 6,71458 | -1,779300274 | N/A             | N/A       | N/A          | Inc-ITSN1-2    |
| A_23_P72568    | 10,1713 | 11,0028 | -1,77953462  | ENST00000251775 | 8723      | NM_003794    | SNX4           |

|                |         |         |              |                 |           |              |                |
|----------------|---------|---------|--------------|-----------------|-----------|--------------|----------------|
| A_23_P428366   | 1,67311 | 2,50507 | -1,780102111 | ENST00000403975 | 150280    | NM_152510    | HORMAD2        |
| A_33_P3383149  | 2,21889 | 3,05089 | -1,780151467 | ENST00000383768 | 152098    | XR_245097    | ZCWPW2         |
| A_33_P3262171  | 1,66762 | 2,5002  | -1,780867276 | ENST00000522917 | 654463    | NM_001039112 | FER1L6         |
| A_23_P36345    | 11,9786 | 12,8115 | -1,781262329 | ENST00000537947 | 10809     | NM_006645    | STARD10        |
| A_22_P00003377 | 2,41209 | 3,24503 | -1,781311717 | ENST00000580292 | 79839     | AK091108     | CCDC102B       |
| A_33_P3386532  | 5,31359 | 6,14695 | -1,781830371 | ENST00000410030 | 64978     | AK024058     | MRPL38         |
| A_21_P0000076  | 4,40665 | 5,24019 | -1,782052698 | ENST00000475504 | 983       | NM_001170406 | CDK1           |
| A_23_P200298   | 10,2085 | 11,0421 | -1,782126813 | ENST00000294724 | 178       | NM_000028    | AGL            |
| A_33_P3236109  | 1,47796 | 2,31157 | -1,782139166 | ENST00000354638 | 4948      | NM_000275    | OCA2           |
| A_21_P0000140  | 7,81753 | 8,65121 | -1,782225638 | ENST00000497874 | 54741     | NM_001198683 | LEPROT         |
| A_21_P0013848  | 9,09177 | 9,92555 | -1,782349176 | ENST00000345097 | 1112      | NM_005197    | FOXN3          |
| A_22_P00016163 | 1,38633 | 2,22017 | -1,782423304 | N/A             | N/A       | CU692975     | Inc-TK2-2      |
| A_21_P0007010  | 2,13421 | 2,96808 | -1,782460369 | ENST00000449882 | N/A       | N/A          | N/A            |
| A_24_P918175   | 1,50577 | 2,3397  | -1,782534501 | N/A             | 653581    | BC009864     | LOC653581      |
| A_21_P0007689  | 1,96294 | 2,79694 | -1,782620992 | N/A             | N/A       | N/A          | Inc-HIST4H4-3  |
| A_23_P329945   | 1,94804 | 2,78207 | -1,782658061 | ENST00000291823 | 147746    | NM_144685    | HIPK4          |
| A_33_P3304162  | 1,56331 | 2,39736 | -1,782682774 | ENST00000620364 | 1310      | NM_001858    | COL19A1        |
| A_22_P00020384 | 12,1121 | 12,9462 | -1,782744558 | ENST00000555601 | 100529257 | NM_001202547 | SYNJ2BP-COX16  |
| A_23_P161983   | 2,17512 | 3,00923 | -1,782756915 | ENST00000618161 | 117196    | NM_054032    | MRGPRX4        |
| A_33_P3237886  | 1,41292 | 2,24709 | -1,782831059 | N/A             | N/A       | AK131480     | N/A            |
| A_22_P00007180 | 2,03223 | 2,86643 | -1,782868133 | N/A             | N/A       | N/A          | Inc-GNS-1      |
| A_23_P63896    | 9,11552 | 9,94982 | -1,782991716 | ENST00000612663 | 355       | NM_000043    | FAS            |
| A_33_P3213419  | 8,43927 | 9,2736  | -1,783028793 | N/A             | 100129447 | AK054946     | LOC100129447   |
| A_23_P126939   | 7,81504 | 8,64939 | -1,783053511 | ENST00000414729 | 8934      | NM_003929    | RAB29          |
| A_33_P3354823  | 3,43356 | 4,26793 | -1,783078229 | ENST00000450269 | 149478    | NM_001136537 | BTBD19         |
| A_23_P34345    | 1,49873 | 2,33319 | -1,783189467 | ENST00000370119 | 7412      | NM_001078    | VCAM1          |
| A_22_P00002457 | 1,56557 | 2,40013 | -1,783313073 | ENST00000500334 | 9455      | N/A          | HOMER2         |
| A_23_P147822   | 10,897  | 11,7316 | -1,783362517 | ENST00000610855 | 64787     | NM_022772    | EPS8L2         |
| A_22_P00006995 | 2,04154 | 2,87623 | -1,783473773 | N/A             | 102724384 | XR_425661    | LOC102724384   |
| A_21_P0010430  | 4,78355 | 5,61839 | -1,783659214 | N/A             | N/A       | N/A          | Inc-MAPK8IP2-1 |
| A_23_P321377   | 4,33948 | 5,1745  | -1,783881769 | ENST00000270815 | 127703    | NM_152374    | C1orf216       |
| A_22_P00017445 | 2,42511 | 3,26035 | -1,784153818 | N/A             | 100861520 | NR_046711    | POU6F2-AS1     |
| A_33_P3284394  | 3,95987 | 4,79511 | -1,784153818 | N/A             | 873       | NM_001286789 | CBR1           |

|                |         |         |              |                 |           |              |                |
|----------------|---------|---------|--------------|-----------------|-----------|--------------|----------------|
| A_33_P3741678  | 3,82618 | 4,66154 | -1,784302226 | N/A             | N/A       | N/A          | N/A            |
| A_23_P105592   | 12,3184 | 13,1538 | -1,784351698 | ENST00000447878 | 4598      | NM_000431    | MVK            |
| A_21_P0010101  | 3,51756 | 4,35303 | -1,784438277 | N/A             | N/A       | N/A          | Inc-PPDPF-1    |
| A_21_P0004219  | 1,50499 | 2,34049 | -1,784475384 | ENST00000507582 | 255167    | NR_024424    | LINC01018      |
| A_23_P149852   | 11,1223 | 11,9578 | -1,784475384 | ENST00000370220 | 84445     | NM_032429    | LZTS2          |
| A_33_P3270228  | 4,72763 | 5,5633  | -1,78468567  | ENST00000376497 | 1185      | N/A          | CLCN6          |
| A_33_P3548860  | 4,49003 | 5,32574 | -1,784735152 | ENST00000430145 | 653677    | NR_004401    | SEC1P          |
| A_22_P00001467 | 3,92219 | 4,75791 | -1,784747523 | ENST00000505837 | 116984    | BC031283     | ARAP2          |
| A_23_P61057    | 2,23551 | 3,07129 | -1,78482175  | ENST00000559342 | 3603      | NM_004513    | IL16           |
| A_23_P102172   | 1,4593  | 2,29508 | -1,78482175  | ENST00000272852 | 130749    | NM_173077    | CPO            |
| A_22_P00006640 | 1,9062  | 2,74202 | -1,784871237 | ENST00000552926 | 101927081 | NR_110041    | LOC101927081   |
| A_21_P0000694  | 8,26877 | 9,10465 | -1,784945469 | N/A             | 254128    | NR_037858    | NIFK-AS1       |
| A_33_P3376341  | 6,48212 | 7,31829 | -1,785304302 | ENST00000529415 | 441381    | NM_001024678 | LRRC24         |
| A_21_P0002385  | 1,47872 | 2,31498 | -1,785415678 | ENST00000453678 | N/A       | N/A          | N/A            |
| A_23_P166269   | 4,56675 | 5,40307 | -1,785489933 | ENST00000479810 | 54097     | NM_058186    | FAM3B          |
| A_24_P202567   | 12,1402 | 12,9767 | -1,785712717 | ENST00000263370 | 80271     | NM_025194    | ITPKC          |
| A_21_P0006742  | 3,26008 | 4,09673 | -1,78589839  | N/A             | N/A       | N/A          | Inc-MTPAP-2    |
| A_33_P3293668  | 9,38375 | 10,2204 | -1,78589839  | N/A             | 55667     | XM_006716804 | DENND4C        |
| A_22_P00001509 | 3,04435 | 3,88102 | -1,785923148 | N/A             | N/A       | N/A          | Inc-ARHGAP17-3 |
| A_23_P46275    | 13,8567 | 14,6934 | -1,785960286 | ENST00000468818 | 515       | NM_001688    | ATP5F1         |
| A_33_P3384652  | 3,58767 | 4,42459 | -1,786232652 | N/A             | 2073      | AK294708     | ERCC5          |
| A_33_P3244112  | 1,70739 | 2,5444  | -1,786344087 | N/A             | 391051    | N/A          | UOX            |
| A_21_P0001238  | 8,87124 | 9,70836 | -1,786480294 | N/A             | N/A       | N/A          | Inc-EGLN1-1    |
| A_23_P251893   | 12,8205 | 13,6577 | -1,78657936  | ENST00000340611 | 221927    | NM_152743    | BRAT1          |
| A_22_P00004121 | 2,54461 | 3,38184 | -1,786616511 | N/A             | N/A       | AI127333     | Inc-CLCNKB-4   |
| A_24_P399500   | 6,84216 | 7,67947 | -1,786715585 | ENST00000311069 | 126006    | NM_174895    | PCP2           |
| A_22_P00018943 | 4,18418 | 5,0215  | -1,78672797  | ENST00000538837 | N/A       | N/A          | N/A            |
| A_23_P60016    | 8,0141  | 8,85145 | -1,786765124 | ENST00000521862 | 26255     | NR_002734    | PTTG3P         |
| A_23_P257649   | 10,4145 | 11,2519 | -1,78682705  | ENST00000617459 | 5947      | NM_002899    | RBP1           |
| A_33_P3266744  | 11,7874 | 12,6249 | -1,786950907 | ENST00000490170 | 84958     | NM_032872    | SYTL1          |
| A_33_P3411025  | 6,06192 | 6,89958 | -1,787149098 | ENST00000479633 | 84986     | NM_001204300 | ARHGAP19       |
| A_22_P00006085 | 1,68453 | 2,52246 | -1,787483593 | N/A             | N/A       | AL117437     | Inc-FAM160A1-2 |
| A_32_P148726   | 5,26518 | 6,10322 | -1,787619887 | N/A             | 728673    | AK127789     | LOC728673      |

|                |         |         |              |                 |           |              |                |
|----------------|---------|---------|--------------|-----------------|-----------|--------------|----------------|
| A_23_P47941    | 2,62699 | 3,46523 | -1,787867721 | ENST00000546378 | 3227      | NM_014212    | HOXC11         |
| A_21_P0007325  | 2,34828 | 3,18661 | -1,787979258 | N/A             | N/A       | N/A          | Inc-UEVLD-1    |
| A_22_P00011852 | 3,22981 | 4,06827 | -1,788140378 | N/A             | N/A       | N/A          | Inc-PHTF2-1    |
| A_23_P502350   | 7,93317 | 8,77163 | -1,788140378 | ENST00000303657 | 5990      | NM_000635    | RFX2           |
| A_21_P0006370  | 6,12903 | 6,9675  | -1,788152773 | N/A             | N/A       | N/A          | Inc-RABGAP1-1  |
| A_23_P216340   | 2,27511 | 3,11379 | -1,788413077 | ENST00000338087 | 6503      | NM_001045556 | SLA            |
| A_23_P48581    | 10,3002 | 11,1389 | -1,78843787  | ENST00000397382 | 60686     | NM_021944    | C14orf93       |
| A_24_P379165   | 5,15122 | 5,99    | -1,788537044 | ENST00000374259 | 4303      | NM_005938    | FOXO4          |
| A_23_P14734    | 12,6559 | 13,4952 | -1,789181815 | ENST00000482846 | 51065     | NM_015920    | RPS27L         |
| A_21_P0010829  | 1,49696 | 2,33642 | -1,789380252 | N/A             | N/A       | N/A          | XLOC_I2_001597 |
| A_22_P00015063 | 1,67648 | 2,51597 | -1,789417462 | N/A             | N/A       | N/A          | Inc-SNRPD3-2   |
| A_23_P107421   | 15,3508 | 16,1905 | -1,78967795  | ENST00000301634 | 7083      | NM_003258    | TK1            |
| A_32_P539599   | 2,00961 | 2,84935 | -1,789727571 | N/A             | 285962    | NR_015392    | WEE2-AS1       |
| A_21_P0003281  | 1,63945 | 2,47934 | -1,789913663 | N/A             | N/A       | N/A          | Inc-SATB1-1    |
| A_21_P0008751  | 3,50512 | 4,34513 | -1,79006255  | N/A             | N/A       | N/A          | Inc-ITGA11-2   |
| A_33_P3322589  | 8,72479 | 9,5649  | -1,790186632 | ENST00000233741 | 55120     | NM_001114636 | FANCL          |
| A_19_P00316564 | 3,43163 | 4,27178 | -1,790236267 | N/A             | 653712    | NR_034179    | LOC653712      |
| A_21_P0009103  | 2,9776  | 3,81776 | -1,790248676 | N/A             | 102725333 | XR_424707    | LOC102725333   |
| A_22_P00024394 | 5,23783 | 6,07805 | -1,790323132 | ENST00000509943 | N/A       | N/A          | N/A            |
| A_32_P34003    | 4,9558  | 5,79615 | -1,790484463 | ENST00000333129 | 55137     | N/A          | FIGN           |
| A_23_P23996    | 2,77037 | 3,61085 | -1,79064581  | ENST00000372213 | 4143      | NM_000429    | MAT1A          |
| A_22_P00016980 | 1,54724 | 2,38792 | -1,790894063 | N/A             | N/A       | N/A          | Inc-TTC21A-1   |
| A_23_P210807   | 2,2056  | 3,0464  | -1,791043032 | ENST00000347397 | 128817    | NM_138283    | CSTL1          |
| A_22_P00009299 | 3,27055 | 4,1115  | -1,79122926  | ENST00000449215 | N/A       | N/A          | N/A            |
| A_33_P3338968  | 8,58677 | 9,42792 | -1,791477594 | ENST00000396994 | N/A       | N/A          | N/A            |
| A_33_P3261937  | 4,442   | 5,28337 | -1,791750802 | ENST00000382951 | 440163    | NM_001012264 | RNASE13        |
| A_19_P00803507 | 4,36631 | 5,20777 | -1,79186258  | N/A             | 101929666 | XR_247062    | LOC101929666   |
| A_22_P00000686 | 1,43926 | 2,28089 | -1,792073737 | ENST00000518465 | N/A       | BU570762     | N/A            |
| A_33_P3322125  | 4,74414 | 5,5858  | -1,792111002 | ENST00000425012 | 9802      | NM_001136269 | DAZAP2         |
| A_21_P0001585  | 1,44322 | 2,28515 | -1,792446427 | N/A             | N/A       | N/A          | Inc-ETV3-2     |
| A_23_P134854   | 7,10303 | 7,94504 | -1,792545824 | ENST00000519106 | 137075    | NM_194284    | CLDN23         |
| A_23_P72059    | 8,63118 | 9,47321 | -1,792570674 | ENST00000359236 | 54621     | NM_019086    | VSIG10         |
| A_23_P99967    | 9,18481 | 10,0269 | -1,792645227 | ENST00000566400 | 585       | NM_033028    | BBS4           |

|                |         |         |              |                 |           |              |              |
|----------------|---------|---------|--------------|-----------------|-----------|--------------|--------------|
| A_21_P0008041  | 1,36577 | 2,208   | -1,792819194 | N/A             | N/A       | N/A          | Inc-MTUS2-2  |
| A_33_P3379381  | 6,53716 | 7,37952 | -1,792980751 | ENST00000371023 | 79819     | NM_207014    | WDR78        |
| A_21_P0003733  | 5,00581 | 5,84821 | -1,793030464 | N/A             | N/A       | N/A          | Inc-CCKAR-1  |
| A_33_P3347320  | 7,30396 | 8,14653 | -1,793241758 | N/A             | 100133190 | BC017676     | ADIRF-AS1    |
| A_33_P3238521  | 10,9029 | 11,7455 | -1,793279048 | ENST00000442987 | 402483    | N/A          | LINC01000    |
| A_23_P381461   | 7,26735 | 8,11004 | -1,793390922 | ENST00000306688 | 201255    | JF432130     | LRRC45       |
| A_33_P3307307  | 7,30803 | 8,15076 | -1,793440646 | ENST00000534358 | 4297      | NM_001197104 | KMT2A        |
| A_24_P58331    | 6,46944 | 7,31219 | -1,793465509 | ENST00000592902 | 79877     | NM_024819    | DCAKD        |
| A_33_P3329984  | 6,50129 | 7,34423 | -1,79370172  | ENST00000585737 | 199720    | NM_152657    | GGN          |
| A_21_P0010283  | 1,56932 | 2,4123  | -1,793751452 | N/A             | N/A       | N/A          | Inc-PSMG1-3  |
| A_23_P151851   | 9,53455 | 10,3779 | -1,794211545 | ENST00000603300 | 50506     | NM_014080    | DUOX2        |
| A_23_P107073   | 12,1609 | 13,0049 | -1,795020101 | ENST00000254719 | 6117      | NM_002945    | RPA1         |
| A_33_P3266078  | 3,85619 | 4,70029 | -1,795144527 | ENST00000623437 | 144125    | NM_001004489 | OR2AG1       |
| A_33_P3209591  | 12,606  | 13,4501 | -1,795144527 | ENST00000473153 | 360       | NM_004925    | AQP3         |
| A_33_P3253361  | 3,16902 | 4,01346 | -1,795567639 | N/A             | N/A       | AK127417     | N/A          |
| A_23_P34827    | 6,97573 | 7,82021 | -1,795617423 | ENST00000496230 | 57657     | NM_020897    | HCN3         |
| A_33_P3238976  | 11,7795 | 12,6242 | -1,795891262 | ENST00000556317 | 57570     | NM_020810    | TRMT5        |
| A_23_P138137   | 10,2747 | 11,1196 | -1,796140242 | ENST00000476933 | 115209    | NM_145243    | OMA1         |
| A_22_P00005790 | 5,33738 | 6,18231 | -1,796177593 | ENST00000430679 | N/A       | N/A          | N/A          |
| A_21_P0014669  | 4,26189 | 5,107   | -1,796401709 | ENST00000563195 | 9849      | N/A          | ZNF518A      |
| A_21_P0003849  | 2,07323 | 2,91843 | -1,796513778 | N/A             | N/A       | N/A          | Inc-UGT8-1   |
| A_24_P54174    | 3,93302 | 4,77836 | -1,796688121 | ENST00000376259 | 7133      | NM_001066    | TNFRSF1B     |
| A_23_P50232    | 3,09123 | 3,9372  | -1,797472875 | ENST00000596375 | 6795      | NM_001015878 | AURKC        |
| A_24_P925314   | 8,83403 | 9,68006 | -1,797547632 | ENST00000357164 | 2760      | NM_000405    | GM2A         |
| A_33_P3338360  | 8,50133 | 9,34778 | -1,798071013 | N/A             | 677768    | NR_003002    | SCARNA13     |
| A_23_P406227   | 2,78817 | 3,63475 | -1,798233043 | N/A             | 197187    | NR_024399    | SNAI3-AS1    |
| A_24_P221960   | 2,15498 | 3,00181 | -1,79854468  | N/A             | 23471     | AF130055     | TRAM1        |
| A_22_P00021349 | 6,09854 | 6,94538 | -1,798557147 | N/A             | 100288748 | NR_034034    | LOC100288748 |
| A_23_P392470   | 1,77956 | 2,62648 | -1,798656883 | ENST00000358102 | 4306      | NM_000901    | NR3C2        |
| A_23_P310022   | 9,2727  | 10,1197 | -1,798756624 | ENST00000376454 | 56243     | NM_019590    | KIAA1217     |
| A_23_P209735   | 6,49929 | 7,34634 | -1,798818966 | ENST00000349938 | 80210     | NM_025139    | ARMC9        |
| A_33_P3385870  | 7,30223 | 8,14932 | -1,798868884 | ENST00000316355 | 901       | NM_004354    | CCNG2        |
| A_23_P97606    | 4,84633 | 5,69354 | -1,799018472 | ENST00000369813 | 2949      | NM_000851    | GSTM5        |



|                |         |         |              |                 |           |              |                  |
|----------------|---------|---------|--------------|-----------------|-----------|--------------|------------------|
| A_19_P00809168 | 1,3437  | 2,19095 | -1,799068352 | N/A             | N/A       | N/A          | Inc-BRI3BP-2     |
| A_21_P0012297  | 1,40599 | 2,25341 | -1,799280358 | N/A             | N/A       | N/A          | XLOC_I2_009539   |
| A_22_P00008964 | 4,09819 | 4,9457  | -1,799392606 | ENST00000466206 | N/A       | N/A          | N/A              |
| A_33_P3325606  | 2,18136 | 3,02896 | -1,799504862 | ENST00000360083 | 100130451 | NM_001242575 | LOC100130451     |
| A_21_P0010493  | 6,35429 | 7,20203 | -1,799679495 | ENST00000623892 | N/A       | N/A          | N/A              |
| A_24_P19677    | 2,50696 | 3,35479 | -1,799791769 | ENST00000374418 | 163702    | NM_173065    | IFNLR1           |
| A_23_P101707   | 9,68551 | 10,5334 | -1,799866621 | ENST00000585479 | 10226     | NM_005817    | PLIN3            |
| A_33_P3289865  | 5,25999 | 6,1079  | -1,799891573 | ENST00000428675 | 5334      | NM_006226    | PLCL1            |
| A_22_P00004221 | 1,60053 | 2,44846 | -1,799916525 | N/A             | N/A       | AK094657     | Inc-CLUL1-1      |
| A_22_P00018278 | 1,80333 | 2,65127 | -1,799929001 | N/A             | N/A       | N/A          | Inc-ZNF790-1     |
| A_23_P140029   | 9,43652 | 10,2846 | -1,800103676 | ENST00000380680 | 5412      | NM_007106    | UBL3             |
| A_33_P3255409  | 12,2611 | 13,1093 | -1,80025341  | ENST00000262265 | 55011     | NM_017916    | PIH1D1           |
| A_22_P00000407 | 3,51968 | 4,36806 | -1,800478036 | N/A             | N/A       | XM_006710034 | Inc-AC040934.1-3 |
| A_21_P0011804  | 4,7789  | 5,62728 | -1,800478036 | N/A             | 100507006 | NR_120420    | LOC100507006     |
| A_33_P3408624  | 1,49903 | 2,3475  | -1,800590359 | ENST00000382841 | 440073    | NM_015232    | IQSEC3           |
| A_23_P4922     | 10,6016 | 11,4503 | -1,800877439 | ENST00000614654 | 374920    | NM_199341    | C19orf68         |
| A_24_P174294   | 1,70118 | 2,55005 | -1,801089658 | ENST00000409088 | 80059     | NM_024993    | LRRTM4           |
| A_23_P58031    | 5,79727 | 6,64619 | -1,80115208  | ENST00000424227 | 9175      | NM_004721    | MAP3K13          |
| A_24_P696761   | 8,47662 | 9,32557 | -1,801189534 | ENST00000367151 | 93273     | NM_001001552 | LEMD1            |
| A_22_P00007735 | 5,61691 | 6,466   | -1,801364331 | ENST00000526829 | 55823     | NM_001290185 | VPS11            |
| A_23_P48784    | 1,62816 | 2,47728 | -1,80140179  | ENST00000556822 | 10858     | NM_006668    | CYP46A1          |
| A_33_P3384287  | 11,1448 | 11,994  | -1,801501684 | ENST00000264560 | 5064      | NM_002579    | PALM             |
| A_33_P3321697  | 8,30758 | 9,15678 | -1,801501684 | ENST00000621003 | 64097     | NM_022140    | EPB41L4A         |
| A_24_P383598   | 2,09136 | 2,94062 | -1,801576607 | ENST00000434012 | N/A       | N/A          | N/A              |
| A_22_P00010924 | 2,72813 | 3,57742 | -1,801614071 | ENST00000438096 | 644990    | NR_046244    | THRB-AS1         |
| A_23_P121120   | 11,1166 | 11,9659 | -1,801626558 | ENST00000260843 | 53836     | NM_023915    | GPR87            |
| A_19_P00802201 | 12,0269 | 12,8762 | -1,801626558 | ENST00000399411 | N/A       | N/A          | N/A              |
| A_33_P3221403  | 1,53676 | 2,38621 | -1,801813887 | ENST00000623376 | 646743    | AY726562     | LOC646743        |
| A_23_P26024    | 11,8709 | 12,7204 | -1,801876334 | ENST00000396650 | 84419     | NM_032413    | C15orf48         |
| A_33_P3322082  | 7,24604 | 8,09566 | -1,802026216 | N/A             | N/A       | BQ934349     | N/A              |
| A_23_P44942    | 5,41082 | 6,26046 | -1,802051198 | ENST00000530061 | 80071     | NM_025004    | CCDC15           |
| A_33_P3358621  | 4,70795 | 5,55773 | -1,802226079 | ENST00000608609 | 100506036 | XR_109916    | LOC100506036     |
| A_33_P3362208  | 5,70565 | 6,55554 | -1,802363497 | N/A             | 100129233 | AK130248     | LOC100129233     |

|                |         |         |              |                 |           |              |                       |
|----------------|---------|---------|--------------|-----------------|-----------|--------------|-----------------------|
| A_24_P257579   | 5,21656 | 6,06652 | -1,80245095  | ENST00000515047 | 64097     | NM_022140    | EPB41L4A              |
| A_23_P63032    | 2,12697 | 2,97701 | -1,802550902 | ENST00000372581 | 2981      | NM_007102    | GUCA2B                |
| A_33_P3230818  | 1,87668 | 2,72696 | -1,802850791 | ENST00000371374 | 10231     | NM_001251973 | RCAN2                 |
| A_23_P57268    | 9,92341 | 10,7737 | -1,802863287 | ENST00000284878 | 1525      | NM_001338    | CXADR                 |
| A_21_P0014493  | 7,71286 | 8,56322 | -1,802950765 | ENST00000514146 | 100507602 | NR_102759    | TRIM52-AS1            |
| A_23_P27744    | 10,1753 | 11,026  | -1,803375716 | ENST00000317683 | 23403     | NM_001080469 | FBXO46                |
| A_23_P207564   | 3,27409 | 4,12509 | -1,803750757 | ENST00000613947 | 9560      | NM_001291470 | CCL4L2                |
| A_33_P3283897  | 1,52781 | 2,37891 | -1,803875788 | N/A             | 100130761 | AK095511     | LOC100130761          |
| A_32_P71113    | 7,95969 | 8,81109 | -1,804250932 | ENST00000336505 | 286205    | NM_173690    | SCAI                  |
| A_33_P3346331  | 2,17871 | 3,03066 | -1,804938899 | N/A             | N/A       | N/A          | N/A                   |
| A_21_P0010495  | 1,53888 | 2,39085 | -1,804963921 | ENST00000623664 | 100507412 | N/A          | LOC100507412          |
| A_23_P32454    | 5,96455 | 6,81656 | -1,805013966 | ENST00000220616 | 7038      | NM_003235    | TG                    |
| A_22_P00015771 | 3,70279 | 4,55491 | -1,805151597 | ENST00000533938 | N/A       | BC035612     | N/A                   |
| A_22_P00001738 | 1,92697 | 2,77918 | -1,805264212 | ENST00000413227 | 101929596 | NR_110259    | LOC101929596          |
| A_33_P3381832  | 2,02414 | 2,87685 | -1,805889977 | ENST00000471784 | 401565    | XR_245332    | FAM166A               |
| A_23_P98830    | 1,555   | 2,40789 | -1,806115306 | ENST00000311659 | 50613     | NM_017481    | UBQLN3                |
| A_24_P306892   | 3,0057  | 3,85865 | -1,806190421 | ENST00000266383 | 283358    | NM_173593    | B4GALNT3              |
| A_24_P212072   | 7,86032 | 8,71338 | -1,806328142 | ENST00000504099 | 84250     | NM_032290    | ANKRD32               |
| A_23_P101551   | 11,9636 | 12,8167 | -1,806378225 | ENST00000316273 | 587       | NM_001190    | BCAT2                 |
| A_23_P54918    | 6,83559 | 7,68893 | -1,80667875  | ENST00000450168 | 197257    | NM_153486    | LDHD                  |
| A_21_P0012979  | 9,21743 | 10,0709 | -1,806841556 | ENST00000514048 | N/A       | N/A          | N/A                   |
| A_22_P00012385 | 8,41582 | 9,26936 | -1,806929226 | N/A             | N/A       | N/A          | Inc-PRKAA2-7          |
| A_23_P89910    | 10,5685 | 11,4221 | -1,807004376 | ENST00000591607 | 79760     | NM_024707    | GEMIN7                |
| A_22_P00007141 | 4,81786 | 5,67151 | -1,807067003 | ENST00000426302 | N/A       | N/A          | N/A                   |
| A_22_P00000791 | 2,49683 | 3,35051 | -1,80710458  | N/A             | N/A       | N/A          | Inc-ADRB1-2           |
| A_22_P00012226 | 1,3707  | 2,22463 | -1,807417755 | ENST00000553006 | N/A       | N/A          | N/A                   |
| A_22_P00013811 | 1,41949 | 2,27406 | -1,808219729 | N/A             | N/A       | DB443668     | Inc-RP5-1047A19.4.1-1 |
| A_23_P21473    | 8,9098  | 9,76438 | -1,808232263 | ENST00000484888 | 80321     | NM_024491    | CEP70                 |
| A_23_P354208   | 11,0428 | 11,8975 | -1,808382673 | ENST00000615141 | 124997    | NM_152348    | WDR81                 |
| A_21_P0008656  | 6,79897 | 7,65375 | -1,808482954 | N/A             | N/A       | N/A          | Inc-ARID3B-1          |
| A_23_P51548    | 13,4714 | 14,3262 | -1,808508025 | ENST00000495447 | 4259      | NM_004528    | MGST3                 |
| A_24_P223874   | 2,02858 | 2,88339 | -1,808520561 | ENST00000372327 | 653509    | NM_005411    | SFTPA1                |
| A_21_P0014149  | 5,42184 | 6,27668 | -1,808558168 | N/A             | 101928794 | NR_111908    | LOC101928794          |

|                |         |         |              |                 |           |              |                |
|----------------|---------|---------|--------------|-----------------|-----------|--------------|----------------|
| A_21_P0009164  | 1,69763 | 2,55262 | -1,808746218 | N/A             | N/A       | N/A          | Inc-PIPOX-1    |
| A_22_P00001877 | 2,90489 | 3,76033 | -1,809310483 | N/A             | 102724786 | XR_425272    | LOC102724786   |
| A_22_P00021328 | 8,76991 | 9,62541 | -1,809385732 | ENST00000361875 | 9819      | N/A          | TSC22D2        |
| A_21_P0014306  | 6,57802 | 7,43363 | -1,809523696 | ENST00000567216 | 6650      | XM_006720935 | CAPN15         |
| A_23_P88435    | 7,78296 | 8,63873 | -1,80972439  | ENST00000345097 | 1112      | NM_005197    | FOXN3          |
| A_23_P301328   | 2,60069 | 3,45647 | -1,809736934 | ENST00000476313 | 8566      | AK094630     | PDXK           |
| A_22_P00010420 | 2,22717 | 3,08301 | -1,8098122   | N/A             | 104968399 | NR_130145    | LOC104968399   |
| A_32_P1381     | 12,9965 | 13,8524 | -1,80988747  | N/A             | 3151      | M12623       | HMG2           |
| A_23_P58993    | 4,28874 | 5,14467 | -1,809925106 | ENST00000340692 | 4337      | NM_005943    | MOCS1          |
| A_23_P120103   | 9,65594 | 10,5119 | -1,809962742 | ENST00000403915 | 3790      | NM_002252    | KCNS3          |
| A_21_P0001547  | 1,74924 | 2,60522 | -1,809987834 | N/A             | N/A       | N/A          | Inc-HFM1-1     |
| A_21_P0000823  | 4,0699  | 4,92603 | -1,810176032 | N/A             | 100506215 | NR_038879    | PAXBP1-AS1     |
| A_23_P78410    | 10,3073 | 11,1637 | -1,810514837 | ENST00000169551 | 29090     | NM_014177    | TIMM21         |
| A_23_P50389    | 9,71404 | 10,5705 | -1,810590136 | ENST00000205194 | 57106     | NM_020378    | NAT14          |
| A_23_P433016   | 9,60063 | 10,4572 | -1,810728192 | ENST00000476366 | 2192      | NM_001996    | FBLN1          |
| A_22_P00014806 | 1,60068 | 2,45752 | -1,811067101 | ENST00000446332 | N/A       | BG186396     | N/A            |
| A_33_P3692979  | 2,29191 | 3,14887 | -1,811217748 | N/A             | 283485    | AK093862     | LOC283485      |
| A_22_P00008957 | 1,63214 | 2,4891  | -1,811217748 | ENST00000428426 | N/A       | N/A          | N/A            |
| A_23_P44466    | 3,80492 | 4,66206 | -1,811443741 | ENST00000360242 | 79839     | NM_024781    | CCDC102B       |
| A_23_P400078   | 6,481   | 7,33822 | -1,811544192 | ENST00000376583 | 4524      | NM_005957    | MTHFR          |
| A_33_P3377888  | 4,14415 | 5,00157 | -1,811795342 | N/A             | N/A       | AK123255     | N/A            |
| A_22_P00014609 | 1,72006 | 2,57759 | -1,81193349  | ENST00000535022 | N/A       | N/A          | N/A            |
| A_23_P46333    | 10,1794 | 11,037  | -1,812021408 | ENST00000476037 | 22823     | NM_007358    | MTF2           |
| A_21_P0006196  | 1,65736 | 2,51497 | -1,812033968 | N/A             | N/A       | N/A          | Inc-SMC2-1     |
| A_33_P3369781  | 7,03588 | 7,89366 | -1,812247502 | ENST00000369747 | 90025     | XM_006715597 | UBE3D          |
| A_23_P88351    | 6,79866 | 7,65652 | -1,812347997 | ENST00000556067 | 51062     | NM_181598    | ATL1           |
| A_24_P102821   | 9,79582 | 10,6537 | -1,812373121 | ENST00000305392 | 5724      | NM_000952    | PTAFR          |
| A_33_P3399363  | 1,6437  | 2,50177 | -1,812611823 | ENST00000392551 | 151556    | NM_001033045 | GPR155         |
| A_24_P293114   | 3,13079 | 3,9889  | -1,81266208  | ENST00000338932 | 57731     | NM_020971    | SPTBN4         |
| A_21_P0014108  | 3,70251 | 4,56073 | -1,812800294 | N/A             | 25945     | NM_001243288 | PVRL3          |
| A_33_P3301940  | 3,08075 | 3,93924 | -1,813139591 | ENST00000615259 | 27115     | NM_018945    | PDE7B          |
| A_33_P3414022  | 1,4648  | 2,3234  | -1,813277841 | N/A             | 100996724 | XM_003846758 | LOC100996724   |
| A_21_P0012866  | 3,98367 | 4,84232 | -1,813340685 | N/A             | N/A       | N/A          | XLOC_l2_011872 |

|                |         |         |              |                 |           |              |                      |
|----------------|---------|---------|--------------|-----------------|-----------|--------------|----------------------|
| A_23_P358662   | 7,57461 | 8,43335 | -1,813453811 | ENST00000503780 | 80817     | NM_001040157 | CEP44                |
| A_21_P0014806  | 8,07259 | 8,93137 | -1,813504091 | N/A             | 100507131 | XR_132626    | LOC100507131         |
| A_33_P3287502  | 9,87511 | 10,7339 | -1,813516662 | ENST00000617333 | 4436      | NM_000251    | MSH2                 |
| A_23_P52610    | 13,5317 | 14,3905 | -1,813529232 | ENST00000378601 | 1643      | NM_000107    | DDB2                 |
| A_22_P00015586 | 3,87187 | 4,73087 | -1,813780658 | N/A             | N/A       | BX114926     | Inc-STX3-2           |
| A_22_P00024413 | 1,56994 | 2,42904 | -1,813906384 | ENST00000533866 | 100049587 | N/A          | SIGLEC14             |
| A_23_P170534   | 5,56688 | 6,4261  | -1,814057267 | ENST00000314412 | 2529      | NM_004479    | FUT7                 |
| A_33_P3387766  | 2,91639 | 3,77577 | -1,814258463 | ENST00000578613 | 284276    | NR_015417    | LINC00908            |
| A_32_P228699   | 8,46716 | 9,32666 | -1,814409375 | ENST00000423662 | 56980     | NM_199437    | PRDM10               |
| A_33_P3333955  | 1,56183 | 2,42142 | -1,814522568 | ENST00000442466 | N/A       | N/A          | N/A                  |
| A_24_P330971   | 14,4179 | 15,2775 | -1,814535145 | ENST00000588422 | 27335     | NM_013234    | EIF3K                |
| A_22_P00004392 | 7,24845 | 8,10813 | -1,814635767 | N/A             | N/A       | AK054902     | Inc-COL9A2-1         |
| A_21_P0008120  | 1,60828 | 2,46804 | -1,814736394 | N/A             | N/A       | N/A          | Inc-RP11-65D24.2.1-1 |
| A_33_P3378212  | 11,805  | 12,6648 | -1,81478671  | ENST00000622046 | 81857     | NM_030973    | MED25                |
| A_21_P0013351  | 3,93109 | 4,7909  | -1,81479929  | N/A             | N/A       | N/A          | XLOC_I2_014024       |
| A_23_P103465   | 3,45632 | 4,31615 | -1,814824448 | ENST00000465698 | 5322      | NM_000929    | PLA2G5               |
| A_23_P111492   | 7,66845 | 8,52831 | -1,814862187 | ENST00000490309 | 64598     | NM_023948    | MOSPD3               |
| A_33_P3354084  | 2,31728 | 3,17755 | -1,815378026 | ENST00000370656 | 80135     | N/A          | RPF1                 |
| A_33_P3284925  | 1,71385 | 2,57423 | -1,815516447 | ENST00000382100 | 7436      | NM_001018056 | VLDLR                |
| A_33_P3270657  | 7,50072 | 8,3611  | -1,815516447 | ENST00000343597 | 374393    | NM_198947    | FAM111B              |
| A_22_P00014796 | 7,42933 | 8,28971 | -1,815516447 | ENST00000581801 | 100499467 | NR_036488    | LINC00673            |
| A_33_P3298425  | 10,5714 | 11,4318 | -1,815541616 | ENST00000489303 | 8543      | NM_006769    | LMO4                 |
| A_24_P940517   | 8,76825 | 9,62877 | -1,815692635 | ENST00000433351 | 51449     | NM_016297    | PCYOX1               |
| A_23_P37560    | 7,63197 | 8,4925  | -1,81570522  | ENST00000300056 | 8800      | NM_003847    | PEX11A               |
| A_24_P298174   | 8,14565 | 9,00644 | -1,816032473 | ENST00000453841 | 10951     | NM_006807    | CBX1                 |
| A_24_P192301   | 7,34985 | 8,2107  | -1,816108001 | ENST00000265362 | 10371     | NM_006080    | SEMA3A               |
| A_33_P3267081  | 9,37778 | 10,2387 | -1,816196121 | ENST00000434417 | 51333     | NM_016643    | ZNF771               |
| A_21_P0002902  | 2,88913 | 3,7501  | -1,816259067 | ENST00000463978 | 104355289 | NR_126405    | LINC01324            |
| A_21_P0014812  | 1,62311 | 2,4842  | -1,816410145 | N/A             | N/A       | XR_132644    | N/A                  |
| A_22_P00014680 | 1,44497 | 2,30617 | -1,816548645 | N/A             | N/A       | AK054790     | Inc-SLC25A19-1       |
| A_22_P00003286 | 10,6524 | 11,5136 | -1,816548645 | N/A             | N/A       | AK091113     | Inc-CAMK1G-1         |
| A_21_P0004623  | 1,53342 | 2,39465 | -1,81658642  | N/A             | N/A       | N/A          | Inc-AL035696.1-3     |
| A_22_P00004026 | 1,87702 | 2,73832 | -1,816674563 | ENST00000424219 | N/A       | N/A          | N/A                  |

|                |         |         |              |                 |           |              |                |
|----------------|---------|---------|--------------|-----------------|-----------|--------------|----------------|
| A_33_P3393582  | 5,9211  | 6,78242 | -1,816699748 | ENST00000564630 | 23582     | AK124193     | CCNDBP1        |
| A_22_P00004944 | 1,70227 | 2,56393 | -1,81712794  | ENST00000557409 | N/A       | DA877715     | N/A            |
| A_22_P00004710 | 3,22182 | 4,08359 | -1,817266494 | ENST00000499481 | 283387    | XR_247842    | LOC283387      |
| A_23_P90533    | 11,8288 | 12,6906 | -1,817304284 | ENST00000587232 | 10775     | NM_006627    | POP4           |
| A_22_P00009865 | 3,63013 | 4,49203 | -1,817430254 | ENST00000582086 | N/A       | BG286916     | N/A            |
| A_22_P00013843 | 1,35135 | 2,21373 | -1,818035033 | N/A             | N/A       | DB099988     | Inc-RPL27A-1   |
| A_33_P3377110  | 9,6678  | 10,5303 | -1,818186259 | ENST00000310611 | 284613    | NM_001134404 | CYB561D1       |
| A_24_P198178   | 1,49911 | 2,36167 | -1,818261877 | ENST00000469608 | 796       | NM_001033953 | CALCA          |
| A_33_P3319502  | 11,7269 | 12,5895 | -1,81831229  | N/A             | N/A       | N/A          | N/A            |
| A_23_P26583    | 2,80274 | 3,66542 | -1,818413122 | ENST00000545081 | 84166     | NM_032206    | NLRC5          |
| A_23_P85716    | 3,94733 | 4,81002 | -1,818425726 | ENST00000471026 | 2212      | NM_021642    | FCGR2A         |
| A_23_P59714    | 4,30366 | 5,16636 | -1,818438331 | N/A             | 84849     | NR_026902    | MGC16142       |
| A_23_P104471   | 2,65557 | 3,51828 | -1,818450935 | ENST00000607131 | 51207     | NM_001007271 | DUSP13         |
| A_32_P191840   | 1,38234 | 2,24514 | -1,81856438  | N/A             | 644662    | XR_171034    | LOC644662      |
| A_22_P00025271 | 1,79586 | 2,65871 | -1,818627407 | ENST00000514385 | 486       | AL831840     | FXD2           |
| A_23_P92057    | 8,67102 | 9,53387 | -1,818627407 | ENST00000263967 | 5290      | NM_006218    | PIK3CA         |
| A_23_P46025    | 5,12116 | 5,98406 | -1,818690437 | ENST00000367202 | 55224     | NM_018208    | ETNK2          |
| A_23_P83134    | 4,71071 | 5,57367 | -1,818766076 | ENST00000298743 | 2619      | NM_002048    | GAS1           |
| A_33_P3358750  | 5,16031 | 6,02374 | -1,819358689 | ENST00000357155 | 343263    | NM_001010985 | MYBPHL         |
| A_33_P3263157  | 9,40842 | 10,2719 | -1,819421744 | ENST00000423237 | N/A       | N/A          | N/A            |
| A_32_P59486    | 10,9192 | 11,7829 | -1,819699213 | ENST00000530923 | 6392      | NM_003002    | SDHD           |
| A_22_P00009719 | 10,3904 | 11,2542 | -1,819825349 | ENST00000479610 | N/A       | N/A          | N/A            |
| A_33_P3303542  | 4,28663 | 5,15062 | -1,820065032 | ENST00000389623 | 284297    | NM_001144950 | SSC5D          |
| A_33_P3712341  | 4,13127 | 4,99526 | -1,820065032 | ENST00000395795 | 6387      | NM_001033886 | CXCL12         |
| A_23_P204640   | 5,10601 | 5,97011 | -1,820203811 | ENST00000229307 | 79923     | NM_024865    | NANOG          |
| A_21_P0008878  | 2,32366 | 3,18787 | -1,8203426   | ENST00000575767 | 101927348 | NR_110915    | LOC101927348   |
| A_22_P00007727 | 2,84859 | 3,71282 | -1,820367835 | ENST00000440104 | N/A       | N/A          | N/A            |
| A_33_P3884005  | 1,88879 | 2,75314 | -1,820519255 | N/A             | 93444     | AK000175     | LOC93444       |
| A_32_P2634     | 6,32621 | 7,19072 | -1,820721169 | N/A             | N/A       | N/A          | XLOC_I2_001592 |
| A_33_P3237235  | 6,01613 | 6,88066 | -1,820746409 | ENST00000251547 | 93611     | NM_001014765 | FBXO44         |
| A_22_P00023131 | 3,68582 | 4,55064 | -1,821112439 | N/A             | N/A       | BC031940     | Inc-FANCI-1    |
| A_33_P3270417  | 1,52397 | 2,3888  | -1,821125062 | N/A             | N/A       | N/A          | N/A            |
| A_22_P00005563 | 2,54337 | 3,40854 | -1,821554297 | N/A             | N/A       | AK026119     | Inc-EEDP1-1    |

|                |         |         |              |                 |           |              |               |
|----------------|---------|---------|--------------|-----------------|-----------|--------------|---------------|
| A_22_P00017965 | 2,27311 | 3,1383  | -1,82157955  | ENST00000568036 | N/A       | N/A          | N/A           |
| A_33_P3307177  | 2,2798  | 3,14501 | -1,821604802 | N/A             | 729975    | NR_034159    | LINC01530     |
| A_21_P0004455  | 2,66306 | 3,52828 | -1,821617429 | N/A             | N/A       | N/A          | Inc-PRELI2-1  |
| A_33_P3374205  | 9,55701 | 10,4223 | -1,821705816 | ENST00000617118 | 4288      | NM_002417    | MKI67         |
| A_33_P3384332  | 1,72324 | 2,58854 | -1,821718444 | ENST00000374401 | 79290     | NM_001004297 | OR13A1        |
| A_22_P00002185 | 7,23303 | 8,09838 | -1,821781581 | ENST00000563602 | N/A       | AF086310     | N/A           |
| A_33_P3283611  | 10,8301 | 11,6955 | -1,82184472  | ENST00000371818 | 3437      | NM_001289758 | IFIT3         |
| A_33_P3270776  | 2,72875 | 3,59424 | -1,821958376 | ENST00000382512 | 94031     | NM_001297559 | HTRA3         |
| A_23_P405878   | 8,35412 | 9,21966 | -1,822021521 | ENST00000380491 | 121273    | NM_152319    | C12orf54      |
| A_23_P217114   | 7,89366 | 8,7596  | -1,822526763 | ENST00000482847 | 210       | NM_000031    | ALAD          |
| A_22_P00012793 | 1,52649 | 2,39251 | -1,822627828 | N/A             | N/A       | N/A          | Inc-RALGPS2-2 |
| A_23_P332326   | 10,8862 | 11,7523 | -1,822728899 | ENST00000270747 | 128272    | NM_153213    | ARHGEF19      |
| A_23_P15272    | 8,36201 | 9,22856 | -1,823297526 | ENST00000565118 | 368       | NM_001079528 | ABCC6         |
| A_33_P3300610  | 2,10013 | 2,96683 | -1,823487108 | ENST00000305456 | 390882    | NM_001005193 | OR7G2         |
| A_21_P0008799  | 2,65093 | 3,51803 | -1,823992756 | N/A             | N/A       | N/A          | Inc-PGPEP1L-1 |
| A_23_P344555   | 8,8465  | 9,71368 | -1,824093903 | ENST00000448183 | 4739      | NM_006403    | NEDD9         |
| A_23_P315836   | 8,43202 | 9,29926 | -1,824169766 | ENST00000321300 | 10458     | NM_017451    | BAIAP2        |
| A_21_P0003161  | 2,23877 | 3,10612 | -1,824308857 | N/A             | N/A       | N/A          | Inc-LRRC58-1  |
| A_23_P11685    | 9,59139 | 10,4591 | -1,824764139 | ENST00000367466 | 5321      | NM_024420    | PLA2G4A       |
| A_23_P250800   | 8,70318 | 9,571   | -1,824903276 | ENST00000477899 | 10402     | NM_006100    | ST3GAL6       |
| A_22_P00025250 | 1,65827 | 2,5261  | -1,824915925 | N/A             | N/A       | N/A          | Inc-SMARCC2-3 |
| A_33_P3336422  | 9,33926 | 10,2073 | -1,825181581 | N/A             | 729013    | NR_034137    | ZBED5-AS1     |
| A_23_P327361   | 4,6906  | 5,5588  | -1,825384012 | ENST00000449909 | 23312     | NM_015263    | DMXL2         |
| A_21_P0011347  | 1,60849 | 2,47672 | -1,82542197  | ENST00000455737 | N/A       | XM_006709981 | N/A           |
| A_33_P3374210  | 9,751   | 10,6195 | -1,825763629 | ENST00000617118 | 4288      | NM_002417    | MKI67         |
| A_33_P3267410  | 4,71793 | 5,58685 | -1,826295226 | ENST00000445946 | 100144748 | NM_001126049 | KLLN          |
| A_33_P3640106  | 1,63362 | 2,50265 | -1,826434479 | ENST00000590963 | 400685    | NR_033982    | LOC400685     |
| A_21_P0005447  | 7,06945 | 7,93854 | -1,82651044  | ENST00000608317 | 202781    | NR_028090    | PAXIP1-AS1    |
| A_24_P371281   | 10,4467 | 11,3162 | -1,827029591 | ENST00000393079 | 80723     | NM_025246    | SLC35G2       |
| A_23_P7212     | 6,89505 | 7,76465 | -1,827156235 | ENST00000512148 | 3426      | NM_000204    | CFI           |
| A_33_P3245348  | 4,39376 | 5,2634  | -1,827206895 | ENST00000620667 | 85285     | NM_033060    | KRTAP4-1      |
| A_22_P00012627 | 1,71017 | 2,58003 | -1,827485552 | ENST00000528496 | 101928823 | XR_246475    | LOC101928823  |
| A_23_P44363    | 6,34721 | 7,21712 | -1,827548888 | ENST00000321617 | 57513     | NM_020753    | CASKIN2       |

|                |         |         |              |                 |           |              |                |
|----------------|---------|---------|--------------|-----------------|-----------|--------------|----------------|
| A_23_P52885    | 7,89915 | 8,7691  | -1,82759956  | ENST00000526629 | 79684     | NM_024631    | MSANTD2        |
| A_33_P3333272  | 1,70189 | 2,57189 | -1,8276629   | ENST00000421688 | 283999    | NM_001204210 | TMEM235        |
| A_23_P401084   | 6,67762 | 7,54778 | -1,827865606 | N/A             | 284346    | NM_174945    | ZNF575         |
| A_33_P3366266  | 1,58041 | 2,45065 | -1,827966967 | N/A             | N/A       | N/A          | Inc-TRIM29-1   |
| A_33_P3379763  | 7,3194  | 8,18965 | -1,827979638 | ENST00000588055 | N/A       | N/A          | N/A            |
| A_24_P39928    | 2,53774 | 3,4081  | -1,82811902  | ENST00000318438 | 342898    | NM_001080468 | SYCN           |
| A_33_P3336562  | 1,66046 | 2,53085 | -1,828157035 | ENST00000442072 | N/A       | N/A          | N/A            |
| A_33_P3268612  | 2,05973 | 2,93016 | -1,828207723 | ENST00000374421 | 163702    | NM_170743    | IFNLR1         |
| A_24_P254084   | 5,11783 | 5,9883  | -1,828258412 | ENST00000304060 | 7620      | NM_021915    | ZNF69          |
| A_23_P411723   | 10,5992 | 11,4697 | -1,82829643  | ENST00000316981 | 5324      | NM_002655    | PLAG1          |
| A_23_P202696   | 8,74436 | 9,61503 | -1,82851188  | ENST00000430070 | 55709     | NM_016506    | KBTBD4         |
| A_23_P91140    | 6,83816 | 7,7093  | -1,829107668 | ENST00000461330 | 55825     | NM_018441    | PECR           |
| A_23_P49546    | 3,09074 | 3,96198 | -1,829234457 | ENST00000293190 | 2905      | NM_000835    | GRIN2C         |
| A_23_P46378    | 9,40543 | 10,2767 | -1,829272495 | ENST00000374145 | 55650     | NM_017837    | PIGV           |
| A_33_P3375708  | 3,15718 | 4,02857 | -1,829424656 | N/A             | N/A       | N/A          | XLOC_I2_012147 |
| A_33_P3262799  | 4,52353 | 5,39494 | -1,829450017 | ENST00000558067 | N/A       | AK000093     | N/A            |
| A_21_P0012528  | 6,13513 | 7,00655 | -1,829462698 | ENST00000601814 | N/A       | N/A          | N/A            |
| A_33_P3385266  | 7,47379 | 8,34523 | -1,82948806  | ENST00000542005 | 368       | NM_001079528 | ABCC6          |
| A_22_P00015596 | 4,52451 | 5,39609 | -1,829665603 | ENST00000376352 | 252983    | AK090797     | STXBP4         |
| A_24_P276490   | 9,30763 | 10,1794 | -1,829906582 | ENST00000420982 | 11313     | NM_007260    | LYPLA2         |
| A_21_P0010046  | 6,13397 | 7,00574 | -1,829906582 | N/A             | N/A       | N/A          | Inc-SULF2-1    |
| A_33_P3297818  | 1,42076 | 2,29266 | -1,830071481 | N/A             | N/A       | N/A          | N/A            |
| A_22_P00001130 | 2,41249 | 3,28446 | -1,830160279 | N/A             | 100507300 | NR_038907    | ALKBH3-AS1     |
| A_33_P3289705  | 10,3531 | 11,2253 | -1,830452073 | ENST00000482512 | 2804      | NM_001256487 | GOLGB1         |
| A_21_P0014107  | 3,10234 | 3,97459 | -1,830515513 | N/A             | 100506555 | NR_045114    | PVRL3-AS1      |
| A_22_P00013450 | 1,50297 | 2,37536 | -1,830693156 | ENST00000456032 | N/A       | N/A          | N/A            |
| A_22_P00023135 | 1,52369 | 2,3964  | -1,831099262 | N/A             | N/A       | N/A          | Inc-TRIM7-1    |
| A_22_P00009674 | 2,47593 | 3,34873 | -1,831213495 | N/A             | N/A       | N/A          | Inc-MBIP-2     |
| A_33_P3345031  | 5,26497 | 6,13788 | -1,831353124 | N/A             | N/A       | N/A          | N/A            |
| A_23_P62764    | 7,88951 | 8,76252 | -1,831480068 | ENST00000483009 | 79140     | NM_024296    | CCDC28B        |
| A_33_P3393331  | 2,071   | 2,94402 | -1,831492763 | ENST00000329805 | 162387    | NM_152599    | MFSD6L         |
| A_22_P00023864 | 2,2075  | 3,08056 | -1,831543543 | ENST00000436551 | 101929723 | NR_110262    | LOC101929723   |
| A_21_P0011263  | 6,13893 | 7,01218 | -1,831784769 | N/A             | N/A       | N/A          | XLOC_I2_004371 |

|                |         |         |              |                 |        |              |                |
|----------------|---------|---------|--------------|-----------------|--------|--------------|----------------|
| A_21_P0003023  | 1,36991 | 2,24321 | -1,831848255 | N/A             | N/A    | N/A          | Inc-ROPN1B-5   |
| A_33_P3417920  | 3,22519 | 4,09865 | -1,832051425 | ENST00000376064 | 8852   | NM_003886    | AKAP4          |
| A_21_P0011926  | 2,5122  | 3,38589 | -1,832343521 | N/A             | N/A    | N/A          | XLOC_I2_008086 |
| A_21_P0002502  | 2,17801 | 3,05192 | -1,832622961 | N/A             | N/A    | N/A          | Inc-WDR33-1    |
| A_21_P0013479  | 1,56736 | 2,44143 | -1,832826216 | N/A             | N/A    | N/A          | XLOC_I2_014197 |
| A_22_P00018426 | 1,95592 | 2,83001 | -1,832851625 | ENST00000484380 | 5826   | N/A          | ABCD4          |
| A_23_P171095   | 4,04064 | 4,91487 | -1,833029495 | ENST00000621775 | 389856 | NM_001145073 | USP27X         |
| A_23_P502957   | 7,40392 | 8,27821 | -1,83310573  | ENST00000348616 | 60437  | NM_021810    | CDH26          |
| A_23_P138139   | 10,2175 | 11,092  | -1,833372578 | ENST00000467509 | 115209 | NM_145243    | OMA1           |
| A_22_P00008298 | 1,42791 | 2,30255 | -1,833550498 | ENST00000445613 | N/A    | N/A          | N/A            |
| A_23_P150362   | 1,98077 | 2,85552 | -1,833690305 | ENST00000530752 | 56158  | NM_031275    | TEX12          |
| A_23_P26704    | 10,2405 | 11,1153 | -1,833753857 | ENST00000588460 | 79157  | NM_024311    | MFSD11         |
| A_33_P3402419  | 4,68674 | 5,56178 | -1,834058937 | N/A             | N/A    | N/A          | N/A            |
| A_23_P78108    | 9,17011 | 10,0453 | -1,834249637 | ENST00000226253 | 230    | NM_005165    | ALDOC          |
| A_21_P0004955  | 2,41388 | 3,28907 | -1,834249637 | N/A             | N/A    | N/A          | Inc-PPP1R14C-1 |
| A_21_P0002222  | 2,33319 | 3,2084  | -1,834275066 | N/A             | N/A    | N/A          | Inc-VRK2-1     |
| A_21_P0006427  | 1,47412 | 2,34948 | -1,834465789 | ENST00000413763 | N/A    | N/A          | N/A            |
| A_24_P134850   | 6,0549  | 6,9303  | -1,834516652 | ENST00000559168 | 57475  | NM_020715    | PLEKHH1        |
| A_22_P00012387 | 1,46627 | 2,34176 | -1,834631099 | ENST00000439186 | N/A    | BU567425     | N/A            |
| A_24_P331655   | 9,73747 | 10,613  | -1,834681966 | ENST00000290881 | 653319 | NM_001040715 | KIAA0895L      |
| A_21_P0010184  | 4,26169 | 5,13729 | -1,834770988 | ENST00000416182 | N/A    | N/A          | N/A            |
| A_21_P0003038  | 1,5963  | 2,47192 | -1,834796423 | N/A             | N/A    | N/A          | Inc-CHST2-5    |
| A_33_P3293573  | 6,29927 | 7,17489 | -1,834796423 | ENST00000324941 | 155382 | NM_001077621 | VPS37D         |
| A_33_P3360611  | 4,51191 | 5,38764 | -1,834936325 | ENST00000269095 | 4355   | NM_001278381 | MPP2           |
| A_22_P00001925 | 1,57113 | 2,44686 | -1,834936325 | N/A             | N/A    | N/A          | Inc-BAI3-4     |
| A_33_P3385762  | 1,46323 | 2,33897 | -1,834949043 | ENST00000311352 | 120787 | NM_001005178 | OR52W1         |
| A_21_P0010483  | 2,99451 | 3,87028 | -1,834987201 | N/A             | N/A    | N/A          | Inc-C22orf26-2 |
| A_33_P3383054  | 2,67057 | 3,54639 | -1,835050797 | ENST00000411509 | N/A    | N/A          | N/A            |
| A_22_P00010139 | 1,71571 | 2,59157 | -1,835101677 | ENST00000262354 | 266917 | NR_040254    | D21S2088E      |
| A_23_P149529   | 15,8134 | 16,6893 | -1,835152557 | ENST00000371225 | 4070   | NM_002353    | TACSTD2        |
| A_32_P468743   | 3,52469 | 4,40064 | -1,83521616  | ENST00000332145 | 161753 | NM_175881    | ODF3L1         |
| A_21_P0003770  | 2,00733 | 2,88355 | -1,835559652 | N/A             | N/A    | N/A          | Inc-MFSD8-2    |
| A_23_P208389   | 11,2023 | 12,0786 | -1,83566144  | ENST00000301178 | 558    | NM_021913    | AXL            |



|                |         |         |              |                 |           |              |               |
|----------------|---------|---------|--------------|-----------------|-----------|--------------|---------------|
| A_22_P00018369 | 1,59207 | 2,4684  | -1,835699612 | N/A             | N/A       | N/A          | Inc-CCDC140-4 |
| A_23_P381102   | 4,04746 | 4,92394 | -1,835890483 | ENST00000392984 | 91409     | NM_207310    | CCDC74B       |
| A_21_P0003868  | 2,19174 | 3,06844 | -1,836170464 | ENST00000605834 | N/A       | XR_425818    | N/A           |
| A_24_P345377   | 10,1908 | 11,0677 | -1,836425029 | ENST00000271732 | 55204     | NM_018178    | GOLPH3L       |
| A_23_P69468    | 14,71   | 15,587  | -1,836552325 | ENST00000496588 | 4710      | NM_004547    | NDUFB4        |
| A_33_P3383524  | 8,85736 | 9,73448 | -1,836705091 | ENST00000503874 | 91948     | NR_024172    | LINC00923     |
| A_33_P3256914  | 3,53818 | 4,41537 | -1,836794211 | N/A             | 83986     | NR_104317    | ITFG3         |
| A_23_P311875   | 7,40957 | 8,28684 | -1,836896067 | ENST00000344931 | 923       | NM_006725    | CD6           |
| A_32_P212471   | 3,15517 | 4,03248 | -1,836946997 | ENST00000479191 | 284485    | NM_001144956 | RIIAD1        |
| A_33_P3239242  | 2,58948 | 3,46682 | -1,836985196 | ENST00000396199 | 54558     | NM_019073    | SPATA6        |
| A_23_P207280   | 9,10415 | 9,98177 | -1,837341755 | ENST00000083182 | 10513     | NM_006380    | APPBP2        |
| A_22_P00005978 | 7,28157 | 8,15956 | -1,837813028 | ENST00000563225 | N/A       | CR749847     | N/A           |
| A_22_P00020270 | 1,68992 | 2,56822 | -1,838207972 | N/A             | N/A       | N/A          | Inc-MBLAC1-1  |
| A_23_P56680    | 15,6596 | 16,5382 | -1,838590256 | ENST00000497075 | 518       | NM_001002258 | ATP5G3        |
| A_22_P00014622 | 8,03453 | 8,91335 | -1,838870649 | ENST00000573222 | N/A       | N/A          | N/A           |
| A_22_P00010593 | 2,5046  | 3,38368 | -1,839202076 | ENST00000561906 | N/A       | N/A          | N/A           |
| A_22_P00020536 | 4,32128 | 5,2009  | -1,839890618 | ENST00000456090 | N/A       | N/A          | N/A           |
| A_33_P3401673  | 4,79113 | 5,6708  | -1,839954385 | ENST00000579536 | 28964     | NM_014030    | GIT1          |
| A_33_P3273819  | 1,77549 | 2,65517 | -1,839967138 | N/A             | 401398    | NR_125719    | POT1-AS1      |
| A_24_P822692   | 3,61963 | 4,49931 | -1,839967138 | ENST00000571838 | 643669    | NM_001243212 | CCER2         |
| A_24_P40594    | 9,81108 | 10,691  | -1,840273252 | ENST00000357460 | 57594     | NM_020834    | HOMEZ         |
| A_23_P85598    | 7,0734  | 7,9536  | -1,840630449 | ENST00000478406 | 56997     | NM_020247    | ADCK3         |
| A_33_P3382423  | 7,37736 | 8,25777 | -1,840898392 | ENST00000300811 | 126299    | NM_182498    | ZNF428        |
| A_21_P0002118  | 1,43727 | 2,3178  | -1,84105152  | ENST00000442706 | N/A       | N/A          | N/A           |
| A_33_P3342175  | 1,53228 | 2,41281 | -1,84105152  | N/A             | N/A       | AK126607     | N/A           |
| A_23_P30200    | 4,57111 | 5,45166 | -1,841077043 | ENST00000609684 | 57717     | NM_020957    | PCDHB16       |
| A_21_P0011635  | 1,39161 | 2,27235 | -1,841319525 | ENST00000414432 | N/A       | N/A          | N/A           |
| A_24_P148094   | 10,2237 | 11,1048 | -1,841779052 | ENST00000488747 | 54741     | NM_017526    | LEPROT        |
| A_33_P3232273  | 3,25568 | 4,13683 | -1,841842885 | N/A             | N/A       | N/A          | N/A           |
| A_33_P3364637  | 3,68176 | 4,56309 | -1,842072699 | N/A             | 100132272 | AK124207     | LOC100132272  |
| A_24_P148796   | 9,68703 | 10,5685 | -1,842251464 | ENST00000493836 | 4485      | NM_020998    | MST1          |
| A_23_P416178   | 2,5432  | 3,42468 | -1,842264233 | ENST00000471729 | 64753     | NM_022742    | CCDC136       |
| A_23_P48358    | 10,7065 | 11,5881 | -1,842417475 | ENST00000376286 | 5095      | NM_000282    | PCCA          |

|                |         |         |              |                 |           |              |                |
|----------------|---------|---------|--------------|-----------------|-----------|--------------|----------------|
| A_33_P3411427  | 8,19456 | 9,07626 | -1,842545186 | ENST00000597582 | 116412    | NM_138466    | ZNF837         |
| A_22_P00024177 | 6,55611 | 7,43792 | -1,842685678 | ENST00000416593 | N/A       | N/A          | N/A            |
| A_23_P207445   | 5,40818 | 6,29    | -1,842698451 | ENST00000592348 | 5608      | NM_002758    | MAP2K6         |
| A_21_P0005873  | 6,89741 | 7,77928 | -1,842762315 | N/A             | N/A       | N/A          | Inc-KIAA1429-1 |
| A_23_P81048    | 7,35168 | 8,23384 | -1,843132771 | ENST00000467087 | 57620     | NM_020860    | STIM2          |
| A_22_P00015937 | 1,62908 | 2,51126 | -1,843158322 | ENST00000427017 | N/A       | N/A          | N/A            |
| A_33_P3286552  | 1,6186  | 2,50097 | -1,843401079 | ENST00000372964 | 27035     | NM_013955    | NOX1           |
| A_22_P00009936 | 10,7943 | 11,6767 | -1,843439411 | N/A             | 10866     | NR_040662    | HCP5           |
| A_23_P54469    | 3,50361 | 4,38632 | -1,843835564 | ENST00000558656 | 64843     | NM_145805    | ISL2           |
| A_23_P424597   | 9,17894 | 10,062  | -1,844282936 | ENST00000436106 | 148223    | NM_152482    | C19orf25       |
| A_22_P00007592 | 1,51608 | 2,39914 | -1,844282936 | N/A             | N/A       | N/A          | Inc-HDDC2-5    |
| A_32_P86739    | 5,86784 | 6,75099 | -1,844397992 | ENST00000377113 | 399726    | NM_001010911 | CASC10         |
| A_22_P00019692 | 6,67498 | 7,55857 | -1,844960591 | N/A             | N/A       | BX649153     | Inc-HIST4H4-1  |
| A_32_P122940   | 6,80568 | 7,68931 | -1,845011745 | ENST00000433465 | 642852    | NR_026943    | LOC642852      |
| A_32_P167076   | 3,52325 | 4,4071  | -1,845293116 | ENST00000444918 | 440854    | NM_001145122 | CAPN14         |
| A_23_P210358   | 10,2143 | 11,0983 | -1,845484985 | ENST00000332345 | 3987      | NM_004987    | LIMS1          |
| A_21_P0011551  | 9,13602 | 10,0201 | -1,845587324 | N/A             | N/A       | N/A          | XLOC_I2_005874 |
| A_21_P0010858  | 2,83119 | 3,71554 | -1,845932757 | N/A             | N/A       | N/A          | XLOC_I2_001875 |
| A_23_P331770   | 3,6791  | 4,56351 | -1,846009529 | ENST00000373006 | 25862     | NM_018561    | USP49          |
| A_23_P6836     | 6,49552 | 7,38005 | -1,846163082 | ENST00000491686 | 51447     | NM_016291    | IP6K2          |
| A_21_P0012515  | 1,57575 | 2,46045 | -1,846380637 | ENST00000608042 | 100996490 | NR_104146    | LINC01206      |
| A_33_P3702104  | 2,83251 | 3,71723 | -1,846406234 | N/A             | 414927    | NR_073400    | MGC34796       |
| A_21_P0002368  | 1,60549 | 2,49021 | -1,846406234 | N/A             | N/A       | N/A          | Inc-WDR69-2    |
| A_22_P00012831 | 6,77508 | 7,65994 | -1,846585419 | N/A             | N/A       | N/A          | Inc-RASA1-3    |
| A_33_P3856949  | 8,07654 | 8,96155 | -1,846777422 | N/A             | 284513    | AK096098     | LOC284513      |
| A_33_P3288275  | 1,52393 | 2,40905 | -1,846918237 | N/A             | N/A       | N/A          | N/A            |
| A_23_P427703   | 14,5926 | 15,4778 | -1,847020655 | ENST00000565768 | 4500      | NR_001447    | MT1L           |
| A_23_P167194   | 9,1309  | 10,0163 | -1,847276724 | ENST00000506882 | 1060      | NM_001812    | CENPC          |
| A_23_P33583    | 2,41681 | 3,3023  | -1,847391967 | ENST00000312428 | 56171     | NM_018897    | DNAH7          |
| A_33_P3356356  | 2,1063  | 2,99194 | -1,847584054 | ENST00000504245 | 100131089 | NR_040059    | SRP14-AS1      |
| A_23_P34433    | 7,84493 | 8,73095 | -1,848070764 | ENST00000466440 | 23318     | NM_001009881 | ZCCHC11        |
| A_22_P00014186 | 2,28762 | 3,17365 | -1,848083574 | ENST00000580776 | N/A       | N/A          | N/A            |
| A_33_P3289025  | 5,49767 | 6,38382 | -1,8482373   | ENST00000410071 | 84141     | NM_001135032 | EVA1A          |

|                |         |         |              |                 |           |              |                |
|----------------|---------|---------|--------------|-----------------|-----------|--------------|----------------|
| A_23_P300484   | 8,15113 | 9,03732 | -1,848288545 | ENST00000373873 | 23363     | NM_001173408 | OBSL1          |
| A_23_P85682    | 10,0214 | 10,9076 | -1,848301356 | ENST00000371187 | 4774      | NM_005595    | NFIA           |
| A_24_P105191   | 3,85416 | 4,74069 | -1,848724182 | ENST00000370836 | 90161     | NM_001077188 | HS6ST2         |
| A_23_P369641   | 9,66245 | 10,5491 | -1,848877961 | ENST00000533120 | 642475    | NM_001100878 | MROH6          |
| A_21_P0007354  | 5,54661 | 6,43349 | -1,84917274  | ENST00000501817 | 101927204 | NR_110184    | LOC101927204   |
| A_21_P0012600  | 1,98423 | 2,87126 | -1,849365012 | N/A             | N/A       | N/A          | XLOC_I2_010751 |
| A_33_P3236993  | 5,90301 | 6,79005 | -1,849377831 | ENST00000406259 | 421       | NM_001670    | ARVCF          |
| A_33_P3316555  | 12,9576 | 13,8448 | -1,849582945 | ENST00000495447 | 4259      | NM_004528    | MGST3          |
| A_33_P3280759  | 1,44542 | 2,33262 | -1,849582945 | ENST00000380931 | 400867    | NR_120405    | LOC400867      |
| A_23_P38154    | 13,8908 | 14,7781 | -1,849711153 | ENST00000577509 | 2232      | NM_004110    | FDXR           |
| A_21_P0000065  | 6,0294  | 6,91671 | -1,849723974 | ENST00000512374 | 6507      | NM_001166696 | SLC1A3         |
| A_21_P0013969  | 2,4972  | 3,38456 | -1,849788082 | N/A             | 100130156 | AK097528     | LOC100130156   |
| A_33_P3271395  | 5,71954 | 6,60708 | -1,850018888 | ENST00000602865 | 100129534 | NR_024489    | LOC100129534   |
| A_33_P3239879  | 14,4728 | 15,3604 | -1,850095829 | ENST00000333775 | 84316     | NM_032356    | NAA38          |
| A_23_P67127    | 5,85265 | 6,74028 | -1,850134302 | ENST00000301204 | 284339    | NM_173633    | TMEM145        |
| A_22_P00002731 | 1,37224 | 2,25988 | -1,850147126 | N/A             | 100130264 | NR_024564    | LOC100130264   |
| A_33_P3335682  | 10,6346 | 11,5223 | -1,850224073 | ENST00000301242 | 94274     | NM_033256    | PPP1R14A       |
| A_33_P3714477  | 2,60878 | 3,49648 | -1,850224073 | ENST00000477392 | 285972    | NR_034033    | LINC00996      |
| A_22_P00000423 | 1,50378 | 2,39232 | -1,851301668 | ENST00000451982 | N/A       | XR_427455    | N/A            |
| A_23_P167818   | 2,94376 | 3,83253 | -1,851596833 | ENST00000617072 | 79632     | NM_024581    | FAM184A        |
| A_33_P3246133  | 3,011   | 3,89998 | -1,851866373 | ENST00000373467 | 3208      | NM_002143    | HPCA           |
| A_22_P00001217 | 4,11393 | 5,00291 | -1,851866373 | N/A             | N/A       | BU187512     | Inc-ANKRD11-1  |
| A_22_P00011820 | 1,48557 | 2,37456 | -1,851879209 | N/A             | N/A       | N/A          | Inc-PHF14-2    |
| A_22_P00002596 | 1,38692 | 2,27616 | -1,852200143 | ENST00000419809 | N/A       | N/A          | N/A            |
| A_33_P3334738  | 1,60037 | 2,48971 | -1,852328532 | ENST00000564693 | N/A       | N/A          | N/A            |
| A_23_P209347   | 4,19155 | 5,08128 | -1,852829335 | ENST00000473081 | 91526     | NM_153697    | ANKRD44        |
| A_32_P30831    | 8,88804 | 9,77781 | -1,852880707 | N/A             | 100505648 | N/A          | RAD51-AS1      |
| A_33_P3360087  | 2,97553 | 3,86543 | -1,853047676 | ENST00000433714 | 27241     | NM_014451    | BBS9           |
| A_23_P65357    | 9,69039 | 10,5806 | -1,853445893 | ENST00000256366 | 55333     | NM_018373    | SYNJ2BP        |
| A_33_P3288159  | 8,8653  | 9,75588 | -1,853921297 | ENST00000294732 | 259266    | NM_018136    | ASPM           |
| A_21_P0014376  | 1,60427 | 2,49497 | -1,854075509 | N/A             | 101930634 | XR_248595    | LOC101930634   |
| A_33_P3231908  | 2,13365 | 3,0245  | -1,854268291 | ENST00000361360 | 5455      | NM_006236    | POU3F3         |
| A_21_P0013523  | 10,8518 | 11,7429 | -1,854589639 | N/A             | 100506365 | N/A          | OTUD6B-AS1     |

|                |         |         |              |                 |           |           |                |
|----------------|---------|---------|--------------|-----------------|-----------|-----------|----------------|
| A_23_P167030   | 2,12459 | 3,01574 | -1,854653915 | ENST00000427125 | 5745      | NM_000316 | PTH1R          |
| A_22_P00010963 | 4,31285 | 5,20432 | -1,855065336 | N/A             | 100505636 | NR_102739 | LINC01024      |
| A_21_P0012430  | 5,04951 | 5,94132 | -1,855502571 | ENST00000608482 | 101930159 | XR_251533 | LOC101930159   |
| A_21_P0014256  | 10,062  | 10,9539 | -1,855618327 | ENST00000456004 | 282974    | XR_424192 | STK32C         |
| A_24_P283324   | 1,97339 | 2,86562 | -1,856042827 | ENST00000349305 | 64577     | NM_022568 | ALDH8A1        |
| A_23_P209032   | 8,76218 | 9,65449 | -1,856145751 | ENST00000509196 | 55900     | NM_018443 | ZNF302         |
| A_23_P69109    | 11,0721 | 11,9647 | -1,856518897 | ENST00000493432 | 5359      | NM_021105 | PLSCR1         |
| A_22_P00005011 | 1,61638 | 2,50902 | -1,856570371 | N/A             | 100506343 | NR_038951 | FAM212B-AS1    |
| A_33_P3384900  | 6,42961 | 7,32238 | -1,856737673 | ENST00000473818 | 645339    | NR_033826 | SNRPD2P2       |
| A_23_P30813    | 11,0845 | 11,9773 | -1,856776283 | N/A             | 8362      | NM_003541 | HIST1H4K       |
| A_23_P31765    | 6,28863 | 7,1815  | -1,856866376 | ENST00000352966 | 5569      | NM_006823 | PKIA           |
| A_23_P321307   | 1,37168 | 2,26461 | -1,856943603 | ENST00000274609 | 9509      | NM_021599 | ADAMTS2        |
| A_32_P155631   | 12,2623 | 13,1554 | -1,857162429 | ENST00000375549 | 6392      | NM_003002 | SDHD           |
| A_22_P00012292 | 1,67349 | 2,56678 | -1,857407029 | ENST00000413292 | 5526      | N/A       | PPP2R5B        |
| A_22_P00024860 | 1,91001 | 2,80342 | -1,857561531 | ENST00000453367 | N/A       | N/A       | N/A            |
| A_22_P00007198 | 1,53366 | 2,42736 | -1,857934962 | N/A             | N/A       | N/A       | Inc-GPBP1-1    |
| A_33_P3306762  | 1,40095 | 2,29467 | -1,857960718 | N/A             | N/A       | N/A       | N/A            |
| A_23_P96899    | 1,9427  | 2,83654 | -1,858115265 | ENST00000290722 | 114771    | NM_052891 | PGLYRP3        |
| A_33_P3280192  | 5,70153 | 6,59547 | -1,858244065 | ENST00000588700 | 84079     | NM_032139 | ANKRD27        |
| A_21_P0011519  | 2,41966 | 3,31366 | -1,858321349 | N/A             | N/A       | N/A       | XLOC_I2_005691 |
| A_21_P0002074  | 1,40979 | 2,30383 | -1,858372873 | ENST00000419865 | 101927070 | N/A       | LOC101927070   |
| A_33_P3252800  | 5,50359 | 6,39765 | -1,858398636 | ENST00000549107 | 5801      | NM_002849 | PTPRR          |
| A_21_P0003603  | 3,03659 | 3,93068 | -1,85843728  | N/A             | N/A       | N/A       | Inc-KLF3-2     |
| A_19_P00806158 | 10,1445 | 11,0386 | -1,858450162 | N/A             | N/A       | N/A       | N/A            |
| A_33_P3272437  | 1,86446 | 2,75857 | -1,858463044 | N/A             | N/A       | N/A       | Inc-RBMY1J-1   |
| A_33_P3639068  | 2,5233  | 3,41747 | -1,858540337 | ENST00000355422 | 2674      | NM_005264 | GFRA1          |
| A_22_P00015230 | 2,33429 | 3,22864 | -1,858772235 | ENST00000580282 | N/A       | AK091119  | N/A            |
| A_33_P3411848  | 7,6522  | 8,54658 | -1,858810887 | ENST00000597255 | 84518     | NM_032488 | CNFN           |
| A_23_P200551   | 10,3304 | 11,2248 | -1,858836656 | ENST00000479177 | 84196     | NM_032236 | USP48          |
| A_21_P0009608  | 3,24257 | 4,13722 | -1,859158796 | N/A             | N/A       | N/A       | Inc-WDR7-4     |
| A_33_P3327300  | 2,56114 | 3,45585 | -1,859236118 | ENST00000598759 | 9253      | AK096566  | NUMBL          |
| A_24_P203106   | 2,22243 | 3,1172  | -1,859313443 | ENST00000614686 | 5207      | NM_002625 | PFKFB1         |
| A_21_P0009163  | 1,91129 | 2,80616 | -1,859442325 | ENST00000456235 | 101060544 | NR_110895 | LINC01563      |

|                |         |         |              |                 |           |              |                |
|----------------|---------|---------|--------------|-----------------|-----------|--------------|----------------|
| A_23_P101950   | 14,1031 | 14,998  | -1,859480991 | ENST00000539945 | 4190      | NM_005917    | MDH1           |
| A_33_P3372124  | 11,3819 | 12,277  | -1,859738788 | ENST00000257604 | 10906     | NM_001143906 | TRAFD1         |
| A_19_P00320906 | 2,45201 | 3,34712 | -1,859751679 | N/A             | 283033    | N/A          | LINC00841      |
| A_33_P3292043  | 2,1241  | 3,01929 | -1,859854808 | ENST00000294818 | 440699    | NM_001005214 | LRRC52         |
| A_33_P3369153  | 4,7947  | 5,69056 | -1,860718741 | N/A             | 3797      | NM_002254    | KIF3C          |
| A_23_P36305    | 9,86339 | 10,7593 | -1,86078323  | ENST00000536995 | 89849     | NM_033388    | ATG16L2        |
| A_33_P3241844  | 1,63245 | 2,52837 | -1,860796128 | N/A             | 90233     | AK126625     | ZNF551         |
| A_21_P0000089  | 6,81293 | 7,70893 | -1,860899315 | ENST00000515312 | 57732     | NM_001172660 | ZFYVE28        |
| A_21_P0001621  | 1,75631 | 2,65243 | -1,861054107 | N/A             | N/A       | N/A          | Inc-C1orf227-1 |
| A_21_P0007522  | 2,20732 | 3,10367 | -1,861350827 | N/A             | N/A       | N/A          | Inc-CLEC2D-7   |
| A_33_P3315564  | 1,64338 | 2,5398  | -1,861441143 | ENST00000329106 | 442038    | NM_001008743 | SULT1C3        |
| A_22_P00007816 | 1,41135 | 2,30779 | -1,861466948 | ENST00000562848 | N/A       | BC041835     | N/A            |
| A_21_P0000617  | 3,66732 | 4,5638  | -1,861518559 | N/A             | 644714    | NR_033947    | LIMD1-AS1      |
| A_22_P00001058 | 5,01972 | 5,91644 | -1,861828259 | ENST00000420153 | N/A       | S55276       | N/A            |
| A_33_P3221888  | 1,68031 | 2,57717 | -1,86200894  | N/A             | N/A       | N/A          | N/A            |
| A_23_P250102   | 3,96491 | 4,86186 | -1,862125102 | ENST00000295989 | 23066     | NM_012298    | CAND2          |
| A_23_P413862   | 1,41724 | 2,31425 | -1,862202547 | ENST00000303697 | 100506627 | NM_020869    | DCDC5          |
| A_33_P3269069  | 6,74497 | 7,64211 | -1,862370356 | ENST00000370551 | 9653      | NM_001134492 | HS2ST1         |
| A_22_P00008397 | 2,1999  | 3,09709 | -1,862434902 | N/A             | N/A       | BC036921     | Inc-JOSD1-1    |
| A_22_P00009614 | 1,92255 | 2,81985 | -1,862576911 | ENST00000509185 | 102723557 | XR_425884    | LOC102723557   |
| A_23_P105963   | 3,88935 | 4,7869  | -1,862899699 | ENST00000267584 | 122481    | NM_152327    | AK7            |
| A_33_P3296682  | 12,3516 | 13,2493 | -1,863093399 | ENST00000359944 | 4711      | NM_002492    | NDUFB5         |
| A_23_P328069   | 7,13069 | 8,02843 | -1,863145056 | ENST00000613394 | 3257      | NM_000195    | HPS1           |
| A_33_P3422404  | 5,57651 | 6,47429 | -1,863196714 | ENST00000376726 | 84532     | NM_001252677 | ACSS1          |
| A_23_P50250    | 5,02484 | 5,92273 | -1,863338781 | ENST00000221476 | 1158      | NM_001824    | CKM            |
| A_33_P3413597  | 13,0365 | 13,9346 | -1,86361003  | ENST00000433898 | 4709      | NM_001257102 | NDUFB3         |
| A_21_P0000474  | 2,7686  | 3,6669  | -1,863868399 | N/A             | 100124536 | NR_003706    | SNORA38B       |
| A_23_P55948    | 9,86377 | 10,7621 | -1,863907157 | ENST00000615927 | 57479     | NM_020719    | PRR12          |
| A_23_P87769    | 9,23452 | 10,1329 | -1,863971757 | ENST00000327680 | 55010     | NM_017915    | PARPBP         |
| A_23_P23037    | 2,57321 | 3,4717  | -1,864113883 | ENST00000369235 | 2703      | NM_005267    | GJA8           |
| A_21_P0008877  | 4,55007 | 5,44859 | -1,864152646 | ENST00000573042 | 100507501 | NR_039999    | LINC01569      |
| A_21_P0004025  | 4,76736 | 5,66615 | -1,864501555 | N/A             | N/A       | N/A          | Inc-RASA1-3    |
| A_23_P153529   | 9,85269 | 10,7515 | -1,864527402 | ENST00000427978 | 54795     | NM_017636    | TRPM4          |

|                |         |         |              |                 |           |              |                |
|----------------|---------|---------|--------------|-----------------|-----------|--------------|----------------|
| A_21_P0005062  | 1,97762 | 2,87647 | -1,864579099 | N/A             | N/A       | N/A          | Inc-TXLNB-2    |
| A_23_P416305   | 4,1962  | 5,09519 | -1,864760047 | ENST00000314138 | 6157      | NM_000990    | RPL27A         |
| A_32_P6172     | 8,36075 | 9,2599  | -1,864966867 | ENST00000564834 | 100128822 | NR_027387    | LINC01003      |
| A_22_P00009053 | 4,61454 | 5,51388 | -1,865212496 | N/A             | 101928236 | XR_241604    | LOC101928236   |
| A_21_P0000494  | 8,85432 | 9,75381 | -1,865406436 | N/A             | 692157    | NR_004389    | SNORA16B       |
| A_33_P3377130  | 7,99238 | 8,89192 | -1,865471087 | ENST00000359015 | 4217      | NM_005923    | MAP3K5         |
| A_33_P3349840  | 10,7801 | 11,6798 | -1,865677986 | ENST00000437531 | N/A       | N/A          | N/A            |
| A_21_P0004719  | 3,88806 | 4,78818 | -1,866221205 | ENST00000443445 | N/A       | N/A          | N/A            |
| A_23_P69941    | 3,53653 | 4,43666 | -1,86623414  | N/A             | 54508     | NR_027706    | EPB41L4A-AS2   |
| A_23_P27822    | 7,42344 | 8,32364 | -1,866324693 | ENST00000170564 | 55094     | NM_018025    | GPATCH1        |
| A_24_P151692   | 4,70638 | 5,60666 | -1,866428187 | ENST00000373145 | 79983     | NM_024921    | POF1B          |
| A_22_P00004428 | 2,49961 | 3,40008 | -1,866674008 | ENST00000568032 | N/A       | BU539700     | N/A            |
| A_22_P00002617 | 3,8591  | 4,75963 | -1,866751642 | N/A             | N/A       | AK093261     | Inc-C1orf122-1 |
| A_23_P37983    | 14,2085 | 15,1092 | -1,866971624 | ENST00000334346 | 4490      | NM_005947    | MT1B           |
| A_33_P3291579  | 12,2312 | 13,1321 | -1,867230459 | ENST00000420770 | 5081      | NM_001135254 | PAX7           |
| A_23_P111000   | 11,6985 | 12,5996 | -1,86748933  | ENST00000413480 | 5698      | NM_002800    | PSMB9          |
| A_24_P161018   | 10,7251 | 11,6263 | -1,867618779 | ENST00000475640 | 54625     | NM_017554    | PARP14         |
| A_33_P3230926  | 1,42903 | 2,33025 | -1,86764467  | N/A             | 100130429 | AK127488     | LOC100130429   |
| A_33_P3408757  | 7,8382  | 8,73954 | -1,867800022 | N/A             | 100132074 | NM_001291281 | FOXO6          |
| A_23_P99063    | 2,22919 | 3,13079 | -1,868136664 | ENST00000548071 | 4060      | NM_002345    | LUM            |
| A_33_P3227788  | 7,96062 | 8,86226 | -1,868188461 | ENST00000342512 | 53354     | NM_148977    | PANK1          |
| A_23_P67785    | 9,01158 | 9,91324 | -1,86821436  | ENST00000414961 | 79582     | NM_001025436 | SPAG16         |
| A_32_P147078   | 4,09329 | 4,99496 | -1,868227309 | ENST00000406785 | 6546      | NM_021097    | SLC8A1         |
| A_23_P93282    | 6,81993 | 7,72174 | -1,868408612 | ENST00000359303 | 8356      | NM_003535    | HIST1H3J       |
| A_22_P00007562 | 3,6556  | 4,55741 | -1,868408612 | N/A             | N/A       | DA331166     | Inc-HBEGF-1    |
| A_33_P3358789  | 3,05954 | 3,96152 | -1,868628789 | N/A             | N/A       | N/A          | N/A            |
| A_22_P00007136 | 2,2943  | 3,19632 | -1,868680599 | N/A             | 100286938 | NR_026668    | VPS13A-AS1     |
| A_24_P229726   | 3,31741 | 4,21966 | -1,868978535 | N/A             | N/A       | N/A          | N/A            |
| A_21_P0000856  | 1,33831 | 2,24067 | -1,869121043 | N/A             | 100288432 | NR_038974    | IL10RB-AS1     |
| A_22_P00014187 | 1,81835 | 2,72075 | -1,869172867 | ENST00000580370 | N/A       | N/A          | N/A            |
| A_23_P200489   | 7,01156 | 7,91396 | -1,869172867 | ENST00000366835 | 9725      | NM_014698    | TMEM63A        |
| A_21_P0011427  | 5,7913  | 6,69379 | -1,869289475 | N/A             | 124411    | XM_005255122 | ZNF720         |
| A_24_P159837   | 9,6102  | 10,5127 | -1,869302432 | ENST00000502743 | 55900     | NM_018675    | ZNF302         |

|                |         |         |              |                 |           |              |              |
|----------------|---------|---------|--------------|-----------------|-----------|--------------|--------------|
| A_33_P3382137  | 1,71115 | 2,61375 | -1,869432007 | N/A             | N/A       | N/A          | N/A          |
| A_32_P313405   | 1,97779 | 2,88053 | -1,869613427 | ENST00000579014 | 284217    | NM_005559    | LAMA1        |
| A_33_P3350493  | 4,68735 | 5,59025 | -1,869820785 | ENST00000481904 | 389383    | NM_001286550 | CLPSL2       |
| A_33_P3295538  | 1,72916 | 2,63209 | -1,869859667 | ENST00000480687 | 386724    | NM_198722    | AMIGO3       |
| A_22_P00003937 | 4,3634  | 5,26635 | -1,869885589 | ENST00000569945 | 145781    | BX641062     | GCOM1        |
| A_33_P3307990  | 1,46657 | 2,36985 | -1,870313353 | ENST00000400897 | 10747     | NM_006610    | MASP2        |
| A_22_P00012869 | 2,78556 | 3,68888 | -1,87036521  | ENST00000562504 | N/A       | AF088044     | N/A          |
| A_33_P3298043  | 6,53751 | 7,44089 | -1,870442998 | ENST00000542005 | 368       | NM_001079528 | ABCC6        |
| A_23_P164797   | 11,0113 | 11,9148 | -1,870598583 | ENST00000543039 | 51157     | NM_016202    | ZNF580       |
| A_33_P3390823  | 1,55079 | 2,45462 | -1,87102651  | N/A             | N/A       | N/A          | N/A          |
| A_23_P94204    | 9,73711 | 10,6411 | -1,871234025 | ENST00000531443 | 55074     | NM_181354    | OXR1         |
| A_32_P211248   | 1,95789 | 2,86194 | -1,871311849 | ENST00000331096 | 100131138 | NR_036513    | LINC01405    |
| A_21_P0012110  | 5,57616 | 6,48025 | -1,871363734 | N/A             | 101929395 | N/A          | LOC101929395 |
| A_23_P414273   | 8,56361 | 9,46787 | -1,871584259 | ENST00000526627 | 85027     | NM_032947    | SMIM3        |
| A_24_P345451   | 8,2743  | 9,17864 | -1,871688044 | ENST00000375252 | 79901     | NM_024843    | CYBRD1       |
| A_33_P3357049  | 6,99697 | 7,90165 | -1,872129197 | N/A             | 728963    | NR_026768    | RPS15AP10    |
| A_23_P314672   | 2,07241 | 2,97719 | -1,872258968 | N/A             | 143501    | NM_144663    | C11orf40     |
| A_24_P46911    | 1,46285 | 2,36781 | -1,872492578 | ENST00000521839 | 3788      | NM_020697    | KCNS2        |
| A_23_P95453    | 1,74582 | 2,65093 | -1,872687275 | ENST00000406316 | 9378      | NM_004801    | NRXN1        |
| A_23_P78053    | 8,1662  | 9,07131 | -1,872687275 | ENST00000240364 | 81558     | NM_030802    | FAM117A      |
| A_23_P329924   | 7,46046 | 8,36559 | -1,872713236 | ENST00000328880 | 338442    | NM_177551    | HCAR2        |
| A_33_P6461662  | 11,5493 | 12,4545 | -1,872804103 | ENST00000622309 | 55823     | NM_001290185 | VPS11        |
| A_33_P3224495  | 1,82285 | 2,72835 | -1,873193582 | N/A             | 100507381 | NR_120503    | KCNQ5-IT1    |
| A_33_P3275687  | 5,13016 | 6,0357  | -1,873245518 | ENST00000617226 | 102723859 | NM_001291466 | LOC102723859 |
| A_22_P00003894 | 1,42458 | 2,3304  | -1,873609116 | N/A             | N/A       | N/A          | Inc-CEP170-5 |
| A_22_P00001334 | 2,82663 | 3,73246 | -1,873622102 | N/A             | N/A       | N/A          | Inc-ANXA9-1  |
| A_33_P3267375  | 2,16088 | 3,06689 | -1,873855882 | ENST00000435422 | 6444      | NM_000337    | SGCD         |
| A_24_P392632   | 1,6274  | 2,53348 | -1,873946805 | ENST00000437699 | 80036     | NM_206948    | TRPM3        |
| A_21_P0009704  | 1,41023 | 2,31639 | -1,874050721 | N/A             | N/A       | N/A          | Inc-VSTM2B-2 |
| A_23_P56833    | 9,77412 | 10,6803 | -1,874076701 | ENST00000470707 | 51130     | NM_016115    | ASB3         |
| A_23_P122052   | 10,4786 | 11,385  | -1,874362505 | ENST00000503787 | 493869    | NM_001008397 | GPX8         |
| A_33_P3240747  | 9,79526 | 10,7017 | -1,874414474 | ENST00000333407 | 100130899 | NR_039988    | LOC100130899 |
| A_22_P00007400 | 2,39434 | 3,30096 | -1,874648353 | ENST00000535721 | N/A       | N/A          | N/A          |

|                |         |         |              |                 |           |              |                |
|----------------|---------|---------|--------------|-----------------|-----------|--------------|----------------|
| A_21_P0014020  | 1,62586 | 2,53249 | -1,874661347 | N/A             | N/A       | AK128808     | Inc-GGT5-1     |
| A_23_P136355   | 7,81468 | 8,72136 | -1,874726319 | ENST00000367010 | 55733     | NM_018194    | HHAT           |
| A_23_P256084   | 2,84657 | 3,75334 | -1,874843274 | ENST00000381134 | 415       | NM_000047    | ARSE           |
| A_22_P00016648 | 1,59674 | 2,50353 | -1,874869265 | ENST00000532748 | N/A       | N/A          | N/A            |
| A_23_P35349    | 7,75178 | 8,65861 | -1,874921249 | ENST00000355867 | 6840      | NM_021738    | SVIL           |
| A_19_P00315868 | 4,63511 | 5,54209 | -1,875116198 | ENST00000483169 | N/A       | N/A          | N/A            |
| A_33_P3339624  | 1,48731 | 2,39434 | -1,875181186 | ENST00000373861 | 340204    | NM_001010886 | CLPSL1         |
| A_22_P00005070 | 1,35127 | 2,25868 | -1,875675166 | N/A             | N/A       | N/A          | Inc-DEPTOR-1   |
| A_21_P0014267  | 1,60354 | 2,51105 | -1,875805182 | ENST00000415865 | N/A       | XR_109052    | N/A            |
| A_33_P3276369  | 6,50193 | 7,40957 | -1,875974217 | ENST00000471365 | 51478     | NM_016371    | HSD17B7        |
| A_22_P00020125 | 1,96699 | 2,87472 | -1,87609125  | N/A             | N/A       | N/A          | Inc-FDXACB1-1  |
| A_22_P00001915 | 1,39069 | 2,29885 | -1,876650509 | N/A             | N/A       | N/A          | Inc-BAG4-1     |
| A_24_P274795   | 11,755  | 12,6634 | -1,876962725 | ENST00000406877 | 55536     | NM_018719    | CDCA7L         |
| A_33_P3483909  | 1,74125 | 2,64973 | -1,877066809 | ENST00000355500 | 29099     | AK127155     | COMMD9         |
| A_21_P0008277  | 1,60684 | 2,51534 | -1,877092831 | ENST00000500016 | 101928075 | NR_110071    | LOC101928075   |
| A_21_P0005704  | 3,2667  | 4,17535 | -1,877288006 | N/A             | N/A       | N/A          | Inc-CLVS1-1    |
| A_23_P124438   | 3,6254  | 4,53425 | -1,877548272 | ENST00000609714 | 255403    | NM_001039127 | ZNF718         |
| A_22_P00019624 | 2,79714 | 3,70615 | -1,87775651  | N/A             | N/A       | BX378805     | Inc-MFSD7-1    |
| A_19_P00801823 | 4,47009 | 5,3791  | -1,87775651  | N/A             | N/A       | N/A          | XLOC_I2_014645 |
| A_21_P0010506  | 2,12395 | 3,033   | -1,877808573 | ENST00000482602 | 8764      | N/A          | TNFRSF14       |
| A_24_P306964   | 10,5652 | 11,4745 | -1,878134001 | ENST00000442125 | N/A       | N/A          | N/A            |
| A_33_P3372074  | 13,0559 | 13,9653 | -1,878264188 | ENST00000578638 | 3993      | NM_001031803 | LLGL2          |
| A_33_P3394243  | 4,68882 | 5,59829 | -1,878355324 | ENST00000473875 | 257044    | NM_173807    | C1orf101       |
| A_21_P0004186  | 1,63415 | 2,54373 | -1,878498547 | ENST00000511419 | 101927134 | N/A          | LINC01470      |
| A_21_P0007473  | 1,69625 | 2,60589 | -1,878576673 | N/A             | N/A       | N/A          | Inc-ADAMTS8-1  |
| A_33_P3395237  | 7,82773 | 8,73758 | -1,87885014  | ENST00000513279 | N/A       | N/A          | N/A            |
| A_23_P310350   | 10,1132 | 11,0231 | -1,878915257 | ENST00000225519 | 23729     | NM_013276    | SHPK           |
| A_21_P0005129  | 2,66076 | 3,57087 | -1,879188774 | N/A             | N/A       | N/A          | Inc-GJA1-3     |
| A_23_P330788   | 8,56686 | 9,47713 | -1,879397194 | ENST00000396435 | 23096     | NM_015075    | IQSEC2         |
| A_23_P7144     | 10,1171 | 11,0275 | -1,879566553 | ENST00000395761 | 2919      | NM_001511    | CXCL1          |
| A_23_P79803    | 7,70325 | 8,61368 | -1,879605638 | ENST00000373461 | 128434    | NM_080607    | VSTM2L         |
| A_23_P13294    | 3,52759 | 4,43812 | -1,879735926 | ENST00000302592 | 219958    | NM_001004459 | OR1S2          |
| A_22_P00009611 | 2,11525 | 3,02582 | -1,879788045 | ENST00000581596 | N/A       | AK309769     | N/A            |



|                |         |         |              |                 |           |              |                       |
|----------------|---------|---------|--------------|-----------------|-----------|--------------|-----------------------|
| A_23_P120435   | 8,45343 | 9,36408 | -1,879892285 | ENST00000467679 | 140686    | NM_080614    | WFDC3                 |
| A_24_P125283   | 9,7203  | 10,6312 | -1,880218074 | ENST00000225983 | 10014     | NM_001015053 | HDAC5                 |
| A_22_P00013672 | 1,51784 | 2,4288  | -1,880296271 | N/A             | N/A       | N/A          | Inc-RP11-687M24.8.1-1 |
| A_23_P363826   | 6,62039 | 7,5314  | -1,880361439 | ENST00000448981 | 26273     | NM_033406    | FBXO3                 |
| A_33_P3423171  | 3,78825 | 4,69927 | -1,880374472 | ENST00000488572 | 11180     | NM_018031    | WDR6                  |
| A_21_P0003801  | 1,42071 | 2,33201 | -1,880739453 | N/A             | N/A       | N/A          | Inc-VEGFC-1           |
| A_33_P3337500  | 2,00284 | 2,91454 | -1,881260977 | ENST00000390450 | N/A       | AB305710     | N/A                   |
| A_19_P00811843 | 6,65305 | 7,56519 | -1,881834821 | ENST00000533509 | 9743      | NM_001142685 | ARHGAP32              |
| A_23_P56127    | 8,44532 | 9,35748 | -1,881860909 | ENST00000601170 | 56006     | NM_019108    | SMG9                  |
| A_33_P3258046  | 1,96866 | 2,88083 | -1,881873953 | ENST00000334568 | 255061    | NM_170685    | TAC4                  |
| A_23_P3302     | 7,48158 | 8,39393 | -1,882108762 | ENST00000260453 | 55329     | NM_018365    | MNS1                  |
| A_32_P149536   | 12,0859 | 12,9983 | -1,882173992 | ENST00000326669 | 6613      | NM_006937    | SUMO2                 |
| A_33_P3264364  | 4,10639 | 5,019   | -1,882447983 | ENST00000523513 | 26052     | NM_001278252 | DNM3                  |
| A_24_P247978   | 4,68804 | 5,60083 | -1,882682864 | ENST00000354698 | 51385     | NM_016089    | ZNF589                |
| A_23_P121250   | 14,4695 | 15,3824 | -1,882826417 | ENST00000496382 | 1974      | NM_001967    | EIF4A2                |
| A_32_P56001    | 1,42923 | 2,34215 | -1,882852519 | ENST00000246006 | 22918     | NM_012072    | CD93                  |
| A_22_P00025786 | 5,30535 | 6,21835 | -1,882956929 | ENST00000594818 | 100505761 | NR_038938    | RPARP-AS1             |
| A_32_P189592   | 3,03985 | 3,9529  | -1,883022189 | ENST00000252597 | 83878     | NM_031941    | USHBP1                |
| A_21_P0001443  | 1,61612 | 2,5292  | -1,883061345 | N/A             | N/A       | N/A          | Inc-RYR2-2            |
| A_33_P3388983  | 5,67302 | 6,58623 | -1,883231034 | ENST00000378947 | 441108    | AK025221     | C5orf56               |
| A_21_P0010024  | 1,56039 | 2,47361 | -1,883244088 | N/A             | N/A       | N/A          | Inc-GGTLC1-1          |
| A_23_P151280   | 14,433  | 15,3465 | -1,883609625 | ENST00000550487 | 84987     | NM_032901    | COX14                 |
| A_22_P00000941 | 2,00206 | 2,91556 | -1,883609625 | ENST00000420082 | N/A       | N/A          | N/A                   |
| A_21_P0014599  | 2,5048  | 3,41838 | -1,883714078 | N/A             | 100506007 | NR_110434    | RTCA-AS1              |
| A_24_P104407   | 6,36313 | 7,27759 | -1,884863436 | ENST00000594047 | 23336     | NM_145728    | SYNM                  |
| A_22_P00012609 | 2,6441  | 3,55858 | -1,884889566 | ENST00000541243 | 100873980 | NR_046559    | RRG-AS1               |
| A_33_P3252588  | 7,2405  | 8,15542 | -1,885464517 | ENST00000480897 | 100130093 | NR_024485    | LOC100130093          |
| A_24_P249253   | 2,07198 | 2,98696 | -1,885542932 | ENST00000458573 | 442721    | NM_207163    | LMOD2                 |
| A_22_P00020575 | 2,40338 | 3,31843 | -1,885634422 | N/A             | N/A       | N/A          | Inc-AC040934.1-1      |
| A_23_P52017    | 11,2945 | 12,2096 | -1,885699774 | ENST00000367408 | 259266    | NM_018136    | ASPM                  |
| A_23_P304716   | 8,32966 | 9,24482 | -1,8857782   | ENST00000377834 | 54626     | NM_019089    | HES2                  |
| A_22_P00015853 | 2,10977 | 3,02554 | -1,886575713 | ENST00000451289 | 101928684 | NR_110819    | LINC01209             |
| A_22_P00014778 | 2,41104 | 3,32703 | -1,886863423 | N/A             | N/A       | HY038578     | Inc-SLC38A8-1         |

|                |         |         |              |                 |           |              |                  |
|----------------|---------|---------|--------------|-----------------|-----------|--------------|------------------|
| A_33_P3218625  | 10,4332 | 11,3493 | -1,887007295 | ENST00000540581 | 11094     | NM_001242369 | CACFD1           |
| A_22_P00004542 | 6,23482 | 7,15093 | -1,887020374 | N/A             | 100505601 | N/A          | PARD3-AS1        |
| A_23_P94338    | 1,37785 | 2,29398 | -1,887046534 | ENST00000522826 | 5168      | NM_006209    | ENPP2            |
| A_23_P164436   | 2,08992 | 3,00613 | -1,887151177 | ENST00000263080 | 443       | NM_000049    | ASPA             |
| A_24_P110141   | 3,04456 | 3,96087 | -1,887281989 | ENST00000559110 | 196968    | NR_003260    | DNM1P46          |
| A_23_P57588    | 8,48119 | 9,39756 | -1,887360481 | ENST00000491863 | 51512     | NM_016426    | GTSE1            |
| A_24_P390060   | 4,65796 | 5,57471 | -1,887857669 | ENST00000416617 | 115811    | NM_138451    | IQCD             |
| A_33_P3369311  | 11,4075 | 12,3244 | -1,888053964 | ENST00000406780 | 56987     | NM_001142568 | BBX              |
| A_33_P3321442  | 4,29735 | 5,21445 | -1,888315722 | ENST00000376267 | N/A       | N/A          | N/A              |
| A_19_P00808208 | 8,76178 | 9,67893 | -1,888381167 | ENST00000373934 | 55536     | NM_001127370 | CDCA7L           |
| A_23_P118435   | 13,567  | 14,4842 | -1,888446614 | ENST00000508743 | 6613      | NM_006937    | SUMO2            |
| A_23_P82249    | 5,75875 | 6,67595 | -1,888446614 | ENST00000482309 | 11194     | NM_007188    | ABCB8            |
| A_33_P3650491  | 1,52574 | 2,443   | -1,888525154 | N/A             | 100288428 | NR_033378    | LMCD1-AS1        |
| A_33_P3214785  | 7,43592 | 8,35344 | -1,888865532 | N/A             | 54741     | AK094801     | LEPROT           |
| A_22_P00004297 | 6,48315 | 7,40075 | -1,888970276 | N/A             | 10695     | XR_427823    | CNPY3            |
| A_22_P00008976 | 1,59085 | 2,5085  | -1,889035743 | ENST00000580197 | 400643    | NR_034100    | LINC00668        |
| A_33_P3343340  | 1,61982 | 2,53751 | -1,889088119 | N/A             | N/A       | N/A          | N/A              |
| A_19_P00322890 | 7,81936 | 8,73722 | -1,889310733 | ENST00000589983 | N/A       | N/A          | N/A              |
| A_22_P00021195 | 6,02911 | 6,94707 | -1,889441695 | N/A             | 101928504 | XR_245792    | LOC101928504     |
| A_22_P00000959 | 5,96227 | 6,88033 | -1,889572665 | N/A             | N/A       | N/A          | Inc-AL020996.1-1 |
| A_22_P00009586 | 4,54437 | 5,46251 | -1,889677449 | N/A             | N/A       | XM_005276024 | Inc-MAPK15-3     |
| A_24_P349196   | 1,68228 | 2,60069 | -1,890031134 | ENST00000340612 | 728621    | NM_001080850 | CCDC30           |
| A_24_P322444   | 12,8086 | 13,7271 | -1,890149044 | ENST00000413454 | 23636     | NM_153719    | NUP62            |
| A_22_P00010709 | 1,64418 | 2,5627  | -1,890175247 | N/A             | N/A       | AA491841     | Inc-NFX1-1       |
| A_33_P3243128  | 10,8991 | 11,8178 | -1,890411093 | ENST00000288532 | 84274     | NM_032314    | COQ5             |
| A_33_P3258056  | 2,72915 | 3,64794 | -1,890529026 | ENST00000340790 | 342979    | NM_001145028 | PALM3            |
| A_24_P395814   | 6,66438 | 7,5832  | -1,890568339 | ENST00000301407 | 1082      | NM_000737    | CGB              |
| A_23_P166408   | 2,87786 | 3,79712 | -1,891145022 | ENST00000215781 | 5008      | NM_020530    | OSM              |
| A_23_P64828    | 8,98761 | 9,90697 | -1,89127611  | ENST00000549820 | 4938      | NM_002534    | OAS1             |
| A_22_P00025507 | 1,43381 | 2,35319 | -1,891302329 | ENST00000444868 | N/A       | N/A          | N/A              |
| A_22_P00015476 | 6,65408 | 7,57362 | -1,891512093 | N/A             | 101927597 | NR_110177    | NCK1-AS1         |
| A_21_P0012461  | 7,98132 | 8,9009  | -1,891564538 | N/A             | N/A       | N/A          | XLOC_I2_010348   |
| A_21_P0000075  | 10,8203 | 11,74   | -1,89172188  | ENST00000538735 | 100316904 | NM_001168682 | SAP25            |

|                |         |         |              |                 |           |              |                |
|----------------|---------|---------|--------------|-----------------|-----------|--------------|----------------|
| A_32_P109683   | 1,57545 | 2,49518 | -1,891761218 | ENST00000374971 | 389860    | NM_001015038 | PAGE2B         |
| A_33_P3329557  | 4,20382 | 5,12384 | -1,892141524 | N/A             | N/A       | BM544378     | N/A            |
| A_33_P3288329  | 1,47287 | 2,39294 | -1,892207102 | ENST00000354106 | 10580     | NM_001290294 | SORBS1         |
| A_33_P3219115  | 2,25654 | 3,17682 | -1,892482553 | ENST00000502948 | N/A       | N/A          | N/A            |
| A_33_P3376095  | 3,25023 | 4,17077 | -1,892823644 | ENST00000369872 | 284612    | NM_001040709 | SYPL2          |
| A_33_P3343394  | 2,29077 | 3,21145 | -1,893007333 | N/A             | N/A       | N/A          | N/A            |
| A_33_P3232945  | 9,7833  | 10,7041 | -1,893164796 | ENST00000296677 | 2150      | NM_005242    | F2RL1          |
| A_22_P00005274 | 1,36792 | 2,28874 | -1,893191041 | N/A             | N/A       | N/A          | Inc-DMXL2-1    |
| A_21_P0001016  | 2,51388 | 3,43497 | -1,893545384 | ENST00000456469 | 100873165 | NR_104189    | SRGAP2-AS1     |
| A_24_P393565   | 4,55777 | 5,47902 | -1,893755397 | ENST00000589332 | 252884    | XM_005258237 | ZNF396         |
| A_33_P3246593  | 1,46757 | 2,38901 | -1,894004817 | ENST00000413272 | 389643    | NM_001010906 | NUGGC          |
| A_21_P0003016  | 2,2737  | 3,19535 | -1,89428053  | N/A             | N/A       | N/A          | Inc-NR112-1    |
| A_23_P357207   | 5,0843  | 6,00619 | -1,89459568  | ENST00000257776 | 112609    | NM_138409    | MRAP2          |
| A_23_P34396    | 10,837  | 11,7589 | -1,894608812 | ENST00000568212 | 57035     | NM_020317    | RSRP1          |
| A_23_P39814    | 9,16276 | 10,0847 | -1,894661343 | ENST00000342016 | 9541      | NM_004882    | CIR1           |
| A_33_P3258462  | 1,52076 | 2,44277 | -1,894753275 | N/A             | 100192426 | NR_024419    | LOC100192426   |
| A_33_P3220615  | 8,31062 | 9,23267 | -1,894805809 | ENST00000345080 | 389421    | NM_001004317 | LIN28B         |
| A_22_P00012997 | 3,39341 | 4,31548 | -1,894832077 | N/A             | 101927640 | NR_121193    | LOC101927640   |
| A_33_P3301346  | 1,71618 | 2,63828 | -1,894871479 | ENST00000491996 | 375316    | N/A          | RBM44          |
| A_32_P99311    | 2,00123 | 2,92351 | -1,89510791  | ENST00000391958 | 353355    | NM_181756    | ZNF233         |
| A_22_P00025203 | 1,68314 | 2,60543 | -1,895121046 | N/A             | 102724774 | XR_425446    | LOC102724774   |
| A_23_P48771    | 10,432  | 11,3543 | -1,895134182 | ENST00000523461 | 80017     | NM_024952    | C14orf159      |
| A_23_P61487    | 9,41017 | 10,3325 | -1,895173591 | ENST00000358141 | 55222     | NM_018205    | LRRC20         |
| A_21_P0013020  | 1,55915 | 2,48164 | -1,895383784 | N/A             | N/A       | N/A          | XLOC_I2_012432 |
| A_23_P131435   | 7,30188 | 8,22455 | -1,895620279 | ENST00000505052 | 9936      | NM_014880    | CD302          |
| A_33_P3235162  | 1,64071 | 2,5634  | -1,895646558 | N/A             | N/A       | N/A          | N/A            |
| A_21_P0000779  | 1,84265 | 2,76537 | -1,895685978 | N/A             | 100506540 | NR_038360    | SPTY2D1-AS1    |
| A_22_P00007314 | 2,2975  | 3,22022 | -1,895685978 | N/A             | 101927288 | NR_047502    | MANEA-AS1      |
| A_33_P3375467  | 3,16745 | 4,09053 | -1,896159073 | ENST00000475417 | 2822      | NM_001503    | GPLD1          |
| A_23_P48495    | 4,41212 | 5,33533 | -1,896329942 | ENST00000464815 | 9623      | NM_004918    | TCL1B          |
| A_33_P3665739  | 1,59118 | 2,51456 | -1,896553409 | N/A             | 339122    | BM917410     | RAB43          |
| A_22_P00018188 | 1,49147 | 2,41508 | -1,896855789 | ENST00000511994 | N/A       | N/A          | N/A            |
| A_21_P0008291  | 1,59517 | 2,51918 | -1,897381782 | ENST00000508469 | N/A       | N/A          | N/A            |

|                |         |         |              |                 |           |              |                |
|----------------|---------|---------|--------------|-----------------|-----------|--------------|----------------|
| A_22_P00001742 | 4,891   | 5,81511 | -1,897513303 | ENST00000433688 | 65998     | NM_001144936 | C11orf95       |
| A_24_P272548   | 13,3198 | 14,2442 | -1,897894766 | ENST00000469026 | N/A       | N/A          | N/A            |
| A_24_P80532    | 6,15945 | 7,08434 | -1,89853948  | ENST00000354403 | 901       | NM_004354    | CCNG2          |
| A_32_P4985     | 1,77283 | 2,69777 | -1,898605279 | ENST00000303635 | 23261     | NM_015215    | CAMTA1         |
| A_23_P108673   | 7,7121  | 8,63722 | -1,898842177 | ENST00000410113 | 84141     | NM_032181    | EVA1A          |
| A_22_P00009007 | 3,49968 | 4,42487 | -1,898934311 | N/A             | N/A       | N/A          | Inc-LARP1B-2   |
| A_33_P3380006  | 1,37438 | 2,29967 | -1,89906594  | N/A             | N/A       | N/A          | N/A            |
| A_33_P3259708  | 3,02205 | 3,94766 | -1,899487213 | ENST00000250378 | 1215      | NM_001836    | CMA1           |
| A_33_P3413815  | 6,14882 | 7,07451 | -1,899592546 | N/A             | 22973     | NR_004405    | LAMB2P1        |
| A_22_P00015313 | 2,14643 | 3,07218 | -1,899671549 | ENST00000453837 | N/A       | N/A          | N/A            |
| A_23_P377214   | 10,0716 | 10,9976 | -1,900000766 | ENST00000592695 | 124790    | XM_006721687 | HEXIM2         |
| A_33_P3260445  | 6,52056 | 7,44659 | -1,900040276 | ENST00000367088 | 6993      | AK026669     | DYNLT1         |
| A_22_P00009085 | 7,36446 | 8,29057 | -1,900145639 | N/A             | 100507006 | NR_120420    | LOC100507006   |
| A_24_P69538    | 4,96563 | 5,892   | -1,900488111 | ENST00000472304 | 7099      | NM_138554    | TLR4           |
| A_33_P3681776  | 6,75609 | 7,68274 | -1,900856996 | N/A             | 255512    | NR_029409    | TOLLIP-AS1     |
| A_24_P143171   | 3,72545 | 4,65211 | -1,900870172 | ENST00000275954 | 83604     | NM_031442    | TMEM47         |
| A_21_P0013872  | 1,42158 | 2,34828 | -1,900922876 | N/A             | N/A       | N/A          | XLOC_I2_015828 |
| A_33_P3244181  | 13,4152 | 14,3419 | -1,900922876 | ENST00000567382 | 3281      | NM_001537    | HSBP1          |
| A_24_P213715   | 3,52209 | 4,44885 | -1,901001934 | N/A             | 90834     | NR_026993    | LOC90834       |
| A_21_P0010581  | 2,60543 | 3,53231 | -1,901160062 | N/A             | N/A       | N/A          | XLOC_I2_000676 |
| A_24_P104512   | 10,6703 | 11,5973 | -1,901318202 | ENST00000301607 | 2125      | NM_001988    | EVPL           |
| A_21_P0003330  | 1,66228 | 2,5897  | -1,901871798 | ENST00000317596 | 728175    | NR_040108    | LOC728175      |
| A_33_P3821778  | 2,4893  | 3,41675 | -1,901911347 | ENST00000512067 | 643401    | BC039509     | LINC01021      |
| A_21_P0007244  | 1,43095 | 2,35844 | -1,90196408  | N/A             | N/A       | N/A          | Inc-USP35-9    |
| A_24_P6674     | 4,36359 | 5,29112 | -1,902016814 | ENST00000465205 | 114987    | NM_001012361 | WDR31          |
| A_21_P0005739  | 1,54843 | 2,47609 | -1,902188211 | N/A             | N/A       | N/A          | Inc-VPS13B-1   |
| A_23_P95790    | 1,54976 | 2,47752 | -1,902320065 | ENST00000326245 | 55600     | NM_017625    | ITLN1          |
| A_21_P0012997  | 3,21979 | 4,14757 | -1,902346437 | ENST00000505712 | 101929495 | NR_120601    | LINC01339      |
| A_21_P0000112  | 5,46738 | 6,39529 | -1,902517864 | ENST00000525354 | 730087    | NM_001244038 | ZNF726         |
| A_21_P0013215  | 1,45746 | 2,38552 | -1,902715683 | N/A             | N/A       | N/A          | XLOC_I2_013443 |
| A_24_P557479   | 8,87314 | 9,80122 | -1,90274206  | ENST00000361842 | 54739     | NM_017523    | XAF1           |
| A_21_P0005153  | 3,17559 | 4,10375 | -1,902847574 | ENST00000443445 | N/A       | N/A          | N/A            |
| A_22_P00012279 | 2,27854 | 3,20671 | -1,902860763 | N/A             | N/A       | N/A          | Inc-PPP2R2A-1  |

|                |         |         |              |                 |           |              |                |
|----------------|---------|---------|--------------|-----------------|-----------|--------------|----------------|
| A_33_P3802969  | 1,55897 | 2,48722 | -1,902966283 | N/A             | 285740    | NR_027114    | LOC285740      |
| A_21_P0007211  | 1,48797 | 2,41626 | -1,903019045 | N/A             | N/A       | N/A          | Inc-SERPING1-1 |
| A_33_P3291569  | 12,4944 | 13,4227 | -1,903032236 | ENST00000240304 | 51747     | NM_016424    | LUC7L3         |
| A_21_P0004757  | 3,79117 | 4,72037 | -1,90421978  | N/A             | N/A       | N/A          | Inc-KLHL31-2   |
| A_22_P00024231 | 1,78789 | 2,71724 | -1,904417776 | N/A             | N/A       | N/A          | Inc-ATP1B3-2   |
| A_23_P101871   | 6,72456 | 7,65394 | -1,904457377 | ENST00000292852 | 115290    | NM_024907    | FBXO17         |
| A_33_P3329344  | 12,688  | 13,6175 | -1,904615792 | ENST00000306749 | 2194      | NM_004104    | FASN           |
| A_23_P6935     | 13,1831 | 14,1132 | -1,905408064 | ENST00000361309 | 961       | NM_198793    | CD47           |
| A_24_P111996   | 4,26294 | 5,19322 | -1,90564581  | ENST00000397022 | 3077      | NM_000410    | HFE            |
| A_32_P101570   | 3,26785 | 4,19828 | -1,905843954 | N/A             | 100616668 | NR_038258    | TPTE2P5        |
| A_22_P00011869 | 2,45732 | 3,38781 | -1,905923218 | ENST00000432481 | N/A       | AV702526     | N/A            |
| A_33_P3239295  | 5,92597 | 6,85658 | -1,906081755 | ENST00000313755 | 5625      | NM_016335    | PRODH          |
| A_23_P50096    | 11,9364 | 12,8673 | -1,90646494  | ENST00000581920 | 7298      | NM_001071    | TYMS           |
| A_21_P0000098  | 4,49054 | 5,4216  | -1,906676385 | N/A             | 22900     | NM_001184904 | CARD8          |
| A_33_P3391603  | 1,65901 | 2,59035 | -1,907046471 | ENST00000453937 | 3910      | NM_001105209 | LAMA4          |
| A_23_P52761    | 9,64797 | 10,5794 | -1,907165443 | ENST00000260227 | 4316      | NM_002423    | MMP7           |
| A_24_P5743     | 9,17815 | 10,1097 | -1,907324083 | ENST00000455361 | 126133    | NM_153329    | ALDH16A1       |
| A_33_P3370751  | 4,73801 | 5,66963 | -1,907416629 | ENST00000582081 | 64750     | NM_022739    | SMURF2         |
| A_32_P149251   | 4,66288 | 5,59454 | -1,907469515 | ENST00000302060 | 202052    | NM_152686    | DNAJC18        |
| A_22_P00008256 | 1,45443 | 2,38637 | -1,907839755 | ENST00000512521 | N/A       | N/A          | N/A            |
| A_21_P0000479  | 6,2963  | 7,22885 | -1,908646598 | ENST00000481096 | 100124541 | NR_003711    | SNORA11D       |
| A_33_P3280974  | 1,64332 | 2,57591 | -1,908699517 | N/A             | N/A       | N/A          | N/A            |
| A_33_P3238330  | 2,37281 | 3,30546 | -1,908778899 | ENST00000371304 | 338094    | NM_176782    | FAM151A        |
| A_21_P0002034  | 1,44223 | 2,37494 | -1,908858285 | ENST00000439700 | N/A       | N/A          | N/A            |
| A_33_P3417487  | 2,44382 | 3,37672 | -1,909109694 | ENST00000290460 | 80274     | XM_005261752 | SCUBE1         |
| A_33_P3238978  | 2,52594 | 3,45907 | -1,909414076 | ENST00000559055 | 90655     | NM_139214    | TGIF2LY        |
| A_23_P313550   | 2,63505 | 3,56829 | -1,909559667 | ENST00000458275 | 284427    | NM_173637    | SLC25A41       |
| A_21_P0003677  | 1,59661 | 2,52991 | -1,909639085 | N/A             | N/A       | N/A          | Inc-SAP30-1    |
| A_23_P257129   | 1,74093 | 2,67434 | -1,909784694 | ENST00000371768 | 5047      | NM_002571    | PAEP           |
| A_22_P00014115 | 4,68063 | 5,61409 | -1,909850883 | ENST00000449339 | N/A       | BC041449     | N/A            |
| A_23_P152970   | 9,28794 | 10,2215 | -1,909983268 | ENST00000620260 | 51195     | XM_006721934 | RAPGEFL1       |
| A_21_P0008202  | 5,1196  | 6,05318 | -1,910009746 | ENST00000499499 | 100289274 | XR_109147    | DNAJC3-AS1     |
| A_33_P3366431  | 1,54662 | 2,48035 | -1,910208344 | ENST00000263598 | 3933      | NM_001252619 | LCN1           |

|                |         |         |              |                 |           |              |                    |
|----------------|---------|---------|--------------|-----------------|-----------|--------------|--------------------|
| A_33_P3794109  | 1,51734 | 2,45115 | -1,910314272 | N/A             | 253805    | BC028622     | LOC253805          |
| A_22_P00009749 | 1,99435 | 2,92854 | -1,910817507 | N/A             | N/A       | N/A          | Inc-MDM4-4         |
| A_32_P183970   | 3,54027 | 4,47449 | -1,910857242 | ENST00000344320 | 643338    | NM_001130448 | C15orf62           |
| A_22_P00018335 | 1,62803 | 2,56226 | -1,910870487 | N/A             | N/A       | N/A          | Inc-ZPBP-1         |
| A_21_P0005119  | 4,93773 | 5,87247 | -1,911546109 | N/A             | N/A       | N/A          | Inc-SH3BGRL2-1     |
| A_33_P3263432  | 4,03248 | 4,96727 | -1,911612359 | ENST00000369304 | 8515      | NM_003637    | ITGA10             |
| A_23_P124402   | 1,36728 | 2,30216 | -1,911731615 | ENST00000318351 | 170572    | NM_130770    | HTR3C              |
| A_32_P211045   | 7,34696 | 8,28187 | -1,911771369 | ENST00000439211 | 1719      | NM_000791    | DHFR               |
| A_24_P93703    | 9,36865 | 10,3036 | -1,911824375 | ENST00000478241 | 440104    | NR_036476    | TMEM198B           |
| A_33_P3408034  | 2,5444  | 3,47947 | -1,911983403 | ENST00000413322 | N/A       | N/A          | N/A                |
| A_33_P3225487  | 7,81399 | 8,74917 | -1,91212919  | ENST00000463037 | 51478     | NM_016371    | HSD17B7            |
| A_32_P46594    | 2,43014 | 3,36561 | -1,912513591 | ENST00000560882 | 145837    | NR_026979    | LOC145837          |
| A_21_P0013291  | 1,44431 | 2,3799  | -1,912672676 | ENST00000423689 | 646588    | XR_252186    | LOC646588          |
| A_23_P250629   | 10,328  | 11,2636 | -1,912685934 | ENST00000460122 | 5696      | NM_004159    | PSMB8              |
| A_21_P0013925  | 1,54334 | 2,47908 | -1,912871551 | N/A             | 388692    | AK124550     | LOC388692          |
| A_23_P206724   | 14,6568 | 15,5927 | -1,913083707 | ENST00000306061 | 4493      | NM_175617    | MT1E               |
| A_21_P0011343  | 1,54259 | 2,47884 | -1,91354788  | N/A             | 100128108 | XM_006709989 | LOC100128108       |
| A_22_P00015730 | 7,09108 | 8,02737 | -1,913600936 | N/A             | 23334     | NM_015284    | SZT2               |
| A_19_P00812033 | 7,71939 | 8,65569 | -1,9136142   | ENST00000520558 | N/A       | N/A          | N/A                |
| A_19_P00318310 | 1,66818 | 2,60475 | -1,913972366 | N/A             | N/A       | N/A          | Inc-TRIM39-1       |
| A_21_P0014344  | 3,22443 | 4,16103 | -1,914012166 | N/A             | 440416    | XR_424802    | CCDC144NL-AS1      |
| A_21_P0002946  | 1,65415 | 2,59078 | -1,914051967 | N/A             | N/A       | N/A          | Inc-TTC21A-2       |
| A_24_P53595    | 1,79086 | 2,72755 | -1,914131572 | ENST00000453292 | 2778      | NM_016592    | GNAS               |
| A_21_P0009924  | 1,42    | 2,35696 | -1,914489835 | ENST00000456634 | N/A       | N/A          | N/A                |
| A_24_P153853   | 6,96862 | 7,90558 | -1,914489835 | ENST00000393066 | 4591      | NM_001005207 | TRIM37             |
| A_33_P3229215  | 4,71599 | 5,65306 | -1,914635813 | N/A             | 84852     | NR_024126    | ATP1A1-AS1         |
| A_23_P101380   | 8,27582 | 9,213   | -1,914781802 | ENST00000321702 | 374907    | NM_198540    | B3GNT8             |
| A_33_P3380783  | 10,1455 | 11,0828 | -1,914941076 | N/A             | 100128184 | AK128032     | LOC100128184       |
| A_21_P0002462  | 1,63382 | 2,57114 | -1,914967623 | N/A             | N/A       | N/A          | Inc-C2orf65-2      |
| A_32_P88310    | 7,95999 | 8,89736 | -1,915033992 | N/A             | 730183    | NM_001256932 | LOC730183          |
| A_24_P135875   | 2,03935 | 2,97682 | -1,915166736 | ENST00000619442 | 442421    | NR_024496    | PTGER4P2-CDK2AP2P2 |
| A_22_P00006751 | 1,60734 | 2,54485 | -1,915219837 | ENST00000558245 | N/A       | N/A          | N/A                |
| A_33_P3360157  | 1,39155 | 2,32915 | -1,915339318 | ENST00000313555 | 219447    | NM_001001921 | OR5AS1             |

|                |         |         |              |                 |           |              |                  |
|----------------|---------|---------|--------------|-----------------|-----------|--------------|------------------|
| A_21_P0014179  | 3,19692 | 4,13469 | -1,915565025 | N/A             | N/A       | N/A          | N/A              |
| A_21_P0002781  | 2,04975 | 2,98752 | -1,915565025 | ENST00000498005 | 101927992 | NR_110167    | LINC01213        |
| A_33_P3286492  | 4,0611  | 4,99912 | -1,915896996 | ENST00000396419 | 3174      | BC054009     | HNF4G            |
| A_22_P00000224 | 3,30897 | 4,24708 | -1,91601652  | N/A             | N/A       | AY312366     | Inc-AC005493.1-1 |
| A_21_P0004592  | 6,57964 | 7,51787 | -1,916175896 | ENST00000525811 | N/A       | N/A          | N/A              |
| A_24_P20032    | 8,97322 | 9,9115  | -1,916242307 | ENST00000290524 | 5993      | NM_000449    | RFX5             |
| A_33_P3419621  | 2,42319 | 3,36152 | -1,91630872  | N/A             | 100289580 | NR_103774    | LOC100289580     |
| A_33_P3303146  | 2,12947 | 3,06783 | -1,916348569 | ENST00000317868 | 84938     | NM_032852    | ATG4C            |
| A_22_P00013886 | 6,45482 | 7,39323 | -1,916414986 | ENST00000571665 | 101927060 | XR_424838    | LOC101927060     |
| A_33_P3366073  | 9,18011 | 10,1186 | -1,916521257 | ENST00000495963 | 84650     | NR_103802    | EBPL             |
| A_24_P160413   | 8,39481 | 9,33331 | -1,916534542 | ENST00000441044 | 339483    | NR_026850    | MTMR9LP          |
| A_22_P00008986 | 12,5125 | 13,4511 | -1,91666739  | N/A             | N/A       | N/A          | Inc-LAMA5-1      |
| A_33_P3281323  | 2,10268 | 3,04157 | -1,917052703 | ENST00000608937 | 11091     | XM_005272163 | WDR5             |
| A_22_P00016966 | 3,29254 | 4,23157 | -1,917238744 | N/A             | N/A       | N/A          | Inc-TSSK6-1      |
| A_33_P3404729  | 2,11543 | 3,0545  | -1,917291902 | N/A             | N/A       | AK075182     | N/A              |
| A_22_P00007317 | 6,89068 | 7,82999 | -1,917610881 | ENST00000557339 | 283587    | N/A          | LINC01146        |
| A_33_P3332112  | 6,04493 | 6,98444 | -1,917876736 | ENST00000357339 | 355       | NM_000043    | FAS              |
| A_24_P228026   | 8,18159 | 9,12112 | -1,917903324 | ENST00000575411 | 124936    | NM_144611    | CYB5D2           |
| A_22_P00008583 | 2,2119  | 3,15151 | -1,918009678 | N/A             | N/A       | N/A          | Inc-KCTD10-1     |
| A_32_P61684    | 6,2855  | 7,22512 | -1,918022973 | ENST00000220597 | 55824     | NM_018440    | PAG1             |
| A_33_P3317523  | 13,4455 | 14,3853 | -1,918262293 | ENST00000374291 | 3925      | NM_203401    | STMN1            |
| A_23_P107653   | 14,1975 | 15,1374 | -1,918395261 | ENST00000309244 | 2109      | NM_001014763 | ETFB             |
| A_22_P00014898 | 4,80484 | 5,74486 | -1,918554835 | N/A             | N/A       | N/A          | Inc-SLC7A7-1     |
| A_21_P0011840  | 3,65125 | 4,59156 | -1,918940528 | ENST00000562665 | 100507334 | NR_037626    | LOC100507334     |
| A_24_P92472    | 4,24235 | 5,18289 | -1,919246477 | ENST00000618244 | 3426      | NM_000204    | CFI              |
| A_23_P126869   | 9,41053 | 10,3511 | -1,919286387 | ENST00000375460 | 51702     | NM_016233    | PADI3            |
| A_23_P124988   | 3,06653 | 4,00712 | -1,919312994 | ENST00000264661 | 23415     | NM_012285    | KCNH4            |
| A_23_P163942   | 13,0467 | 13,9874 | -1,91945934  | ENST00000581204 | 6827      | NM_003168    | SUPT4H1          |
| A_33_P3251985  | 10,4384 | 11,3793 | -1,919725452 | ENST00000392813 | 64747     | NM_022736    | MFSD1            |
| A_21_P0001041  | 3,19378 | 4,13504 | -1,920204547 | ENST00000417409 | N/A       | N/A          | N/A              |
| A_21_P0013576  | 1,43897 | 2,38026 | -1,920244477 | N/A             | N/A       | N/A          | XLOC_I2_014827   |
| A_21_P0000384  | 4,12065 | 5,062   | -1,920324339 | N/A             | 692200    | NR_003066    | SNORD85          |
| A_21_P0014695  | 3,60413 | 4,54556 | -1,920430828 | N/A             | 83473     | XM_005258358 | KATNAL2          |

|                |         |         |              |                 |           |              |                |
|----------------|---------|---------|--------------|-----------------|-----------|--------------|----------------|
| A_33_P3329088  | 14,4075 | 15,349  | -1,92052401  | ENST00000317508 | 5652      | NM_002773    | PRSS8          |
| A_23_P110941   | 5,70431 | 6,64588 | -1,920617196 | ENST00000370960 | 2941      | NM_001512    | GSTA4          |
| A_23_P27381    | 8,54791 | 9,48983 | -1,921083197 | ENST00000584217 | 10194     | NM_005786    | TSHZ1          |
| A_21_P0009840  | 1,52744 | 2,46974 | -1,92158927  | N/A             | N/A       | N/A          | Inc-ASXL1-1    |
| A_33_P3213064  | 13,2451 | 14,1877 | -1,921988894 | ENST00000556539 | 6773      | NM_005419    | STAT2          |
| A_22_P00020488 | 1,46563 | 2,40823 | -1,921988894 | ENST00000452354 | 150577    | N/A          | LINC01104      |
| A_23_P19510    | 3,23834 | 4,18097 | -1,922028861 | ENST00000416131 | 3120      | NM_001198858 | HLA-DQB2       |
| A_23_P357316   | 1,42113 | 2,36382 | -1,922108798 | ENST00000005756 | 151531    | NM_173355    | UPP2           |
| A_23_P103282   | 13,8843 | 14,8271 | -1,922255357 | ENST00000470395 | 9528      | NM_004872    | TMEM59         |
| A_33_P3832872  | 2,68911 | 3,63192 | -1,922268681 | N/A             | 389247    | NR_033995    | LOC389247      |
| A_33_P3322804  | 3,56644 | 4,50949 | -1,922588487 | ENST00000323115 | 4915      | NM_001291937 | NTRK2          |
| A_22_P00010935 | 4,53425 | 5,47731 | -1,922601814 | ENST00000617440 | 102724872 | N/A          | LOC102724872   |
| A_24_P56130    | 14,9121 | 15,8552 | -1,92265512  | ENST00000550639 | 4637      | NM_079423    | MYL6           |
| A_22_P00023627 | 1,55435 | 2,49758 | -1,922828377 | ENST00000426218 | N/A       | N/A          | N/A            |
| A_24_P205130   | 7,94    | 8,8833  | -1,922921676 | ENST00000420781 | 23048     | NM_015033    | FNBP1          |
| A_21_P0013766  | 2,45553 | 3,39888 | -1,92298832  | N/A             | N/A       | N/A          | XLOC_I2_015536 |
| A_33_P3256738  | 5,54209 | 6,48552 | -1,923094956 | ENST00000468876 | 84904     | NM_032818    | ARHGEF39       |
| A_33_P3269000  | 4,31615 | 5,25999 | -1,923641559 | ENST00000297324 | 157773    | NM_001007090 | C8orf48        |
| A_23_P93658    | 1,89755 | 2,84156 | -1,923868245 | ENST00000357922 | 9311      | NM_020322    | ASIC3          |
| A_21_P0004639  | 3,21488 | 4,15909 | -1,924134968 | ENST00000419702 | N/A       | N/A          | N/A            |
| A_23_P127911   | 1,61566 | 2,56034 | -1,924761913 | ENST00000611014 | 25891     | NM_015430    | PAMR1          |
| A_23_P99373    | 1,69705 | 2,64206 | -1,925202231 | ENST00000255324 | 56163     | NM_031277    | RNF17          |
| A_33_P3382143  | 2,76412 | 3,70931 | -1,925442446 | ENST00000255486 | 90627     | NM_001243466 | STARD13        |
| A_33_P3286739  | 1,3375  | 2,28309 | -1,925976366 | N/A             | 90634     | XM_006719890 | N4BP2L1        |
| A_21_P0009150  | 1,53642 | 2,48208 | -1,926069818 | ENST00000591283 | 100507351 | NR_040050    | LOC100507351   |
| A_24_P277673   | 1,68198 | 2,62777 | -1,926243382 | ENST00000611444 | 8369      | NM_003547    | HIST1H4G       |
| A_21_P0010811  | 3,67995 | 4,62582 | -1,926350198 | N/A             | N/A       | N/A          | XLOC_I2_001529 |
| A_33_P3289596  | 1,76511 | 2,71117 | -1,926603912 | ENST00000403714 | 22979     | NM_014971    | EFR3B          |
| A_33_P3387636  | 1,71976 | 2,66589 | -1,926697393 | ENST00000505950 | N/A       | N/A          | N/A            |
| A_23_P209731   | 8,40348 | 9,34964 | -1,926737458 | ENST00000486787 | 80210     | NM_025139    | ARMC9          |
| A_33_P3222367  | 7,15777 | 8,10406 | -1,926911083 | N/A             | 677841    | NR_002988    | SNORA74B       |
| A_21_P0014844  | 4,625   | 5,57136 | -1,927004579 | N/A             | N/A       | BC033386     | Inc-MRPS25-1   |
| A_23_P210210   | 12,9139 | 13,8605 | -1,927325173 | ENST00000466465 | 2034      | NM_001430    | EPAS1          |



|                |         |         |              |                 |           |           |                |
|----------------|---------|---------|--------------|-----------------|-----------|-----------|----------------|
| A_21_P0008691  | 1,48833 | 2,43499 | -1,92740533  | N/A             | N/A       | N/A       | Inc-IGF1R-1    |
| A_22_P00003160 | 3,11702 | 4,0637  | -1,92743205  | ENST00000454408 | N/A       | N/A       | N/A            |
| A_22_P00017324 | 2,5102  | 3,45734 | -1,928046705 | N/A             | 100289388 | NR_102280 | KCTD21-AS1     |
| A_21_P0005781  | 1,80826 | 2,7554  | -1,928046705 | N/A             | N/A       | N/A       | Inc-ERICH1-3   |
| A_23_P314712   | 8,30507 | 9,25223 | -1,928073434 | ENST00000582229 | 26256     | NM_012189 | CABYR          |
| A_33_P3307490  | 1,65667 | 2,6039  | -1,928166987 | ENST00000614000 | 11276     | AK126988  | SYNRG          |
| A_21_P0003018  | 7,77643 | 8,72367 | -1,928180352 | ENST00000485898 | N/A       | N/A       | N/A            |
| A_21_P0000638  | 1,38762 | 2,33506 | -1,928447673 | ENST00000562271 | 149086    | NR_034112 | LINC01225      |
| A_22_P00014813 | 2,18447 | 3,13202 | -1,928594715 | ENST00000430908 | 102723505 | NR_110876 | LOC102723505   |
| A_21_P0009969  | 5,20644 | 6,15405 | -1,928674925 | N/A             | N/A       | N/A       | Inc-ARFGEF2-2  |
| A_22_P00002383 | 2,973   | 3,92082 | -1,928955685 | N/A             | N/A       | N/A       | Inc-C13orf15-1 |
| A_23_P133665   | 5,63172 | 6,57964 | -1,929089395 | ENST00000606080 | 2444      | NM_002031 | FRK            |
| A_32_P128656   | 5,49729 | 6,44525 | -1,929142881 | ENST00000380787 | 4281      | NM_000381 | MID1           |
| A_23_P85082    | 2,92234 | 3,87048 | -1,929383589 | ENST00000217999 | 158800    | NM_139282 | RHOXF1         |
| A_23_P115149   | 10,8245 | 11,7727 | -1,929463831 | ENST00000235090 | 79084     | NM_024102 | WDR77          |
| A_21_P0013069  | 8,04575 | 8,99413 | -1,929704579 | ENST00000479900 | 387036    | NR_003504 | GUSBP2         |
| A_22_P00000618 | 2,72204 | 3,67042 | -1,929704579 | ENST00000505448 | N/A       | AK091057  | N/A            |
| A_21_P0002452  | 1,62934 | 2,57794 | -1,929998866 | N/A             | N/A       | N/A       | Inc-PELI1-3    |
| A_21_P0003401  | 2,05009 | 2,99875 | -1,930079134 | ENST00000507933 | 101927305 | NR_125883 | LOC101927305   |
| A_22_P00019088 | 1,52927 | 2,47794 | -1,930092513 | N/A             | N/A       | N/A       | Inc-SLC45A1-1  |
| A_21_P0005118  | 5,58459 | 6,53353 | -1,930453763 | N/A             | N/A       | N/A       | Inc-SH3BGRL2-1 |
| A_21_P0011360  | 1,46641 | 2,41541 | -1,93053405  | N/A             | N/A       | N/A       | XLOC_I2_004857 |
| A_21_P0001323  | 1,56437 | 2,51346 | -1,930654486 | N/A             | N/A       | N/A       | Inc-AK5-1      |
| A_21_P0010611  | 1,43615 | 2,38524 | -1,930654486 | N/A             | N/A       | N/A       | XLOC_I2_000900 |
| A_23_P110212   | 9,86832 | 10,8175 | -1,930774931 | ENST00000281455 | 2180      | NM_001995 | ACSL1          |
| A_21_P0014662  | 4,33926 | 5,28866 | -1,931069382 | ENST00000623723 | 100507395 | XR_424061 | LOC100507395   |
| A_22_P00008356 | 2,84544 | 3,79513 | -1,93145759  | N/A             | N/A       | N/A       | Inc-IYD-1      |
| A_23_P146354   | 9,19571 | 10,1455 | -1,931591473 | ENST00000485278 | 10585     | NM_007171 | POMT1          |
| A_22_P00003694 | 2,59828 | 3,54822 | -1,931792315 | ENST00000562742 | 101927650 | NR_110918 | LOC101927650   |
| A_22_P00002686 | 3,033   | 3,983   | -1,931872658 | N/A             | N/A       | AK024190  | Inc-C1orf86-1  |
| A_21_P0000625  | 5,12585 | 6,07612 | -1,932234241 | ENST00000597953 | 100289361 | NR_034032 | LOC100289361   |
| A_23_P78802    | 9,91081 | 10,8613 | -1,932528915 | ENST00000597589 | 25865     | NM_016457 | PRKD2          |
| A_24_P288993   | 8,67855 | 9,62913 | -1,932649476 | ENST00000513465 | N/A       | N/A       | N/A            |

|                |         |         |              |                 |           |              |                |
|----------------|---------|---------|--------------|-----------------|-----------|--------------|----------------|
| A_33_P3209254  | 2,11348 | 3,06419 | -1,932823633 | N/A             | 647190    | NR_046241    | RPS16P5        |
| A_22_P00009355 | 2,76805 | 3,71924 | -1,933466811 | N/A             | N/A       | N/A          | Inc-LRRTM1-1   |
| A_33_P3398513  | 5,10926 | 6,06048 | -1,933507017 | N/A             | 728819    | NM_001101330 | LOC728819      |
| A_22_P00001536 | 1,7546  | 2,70582 | -1,933507017 | N/A             | N/A       | N/A          | Inc-ARHGDIB-1  |
| A_22_P00007340 | 6,96398 | 7,91522 | -1,933533821 | N/A             | 100506314 | NR_038920    | LOC100506314   |
| A_21_P0007566  | 3,52914 | 4,48048 | -1,933667848 | N/A             | N/A       | N/A          | Inc-NAB2-1     |
| A_21_P0005645  | 3,56621 | 4,51765 | -1,933801884 | N/A             | N/A       | N/A          | Inc-CLN8-1     |
| A_23_P100189   | 3,12142 | 4,07291 | -1,933868906 | ENST00000312511 | 5619      | NM_002761    | PRM1           |
| A_21_P0003073  | 1,40927 | 2,36099 | -1,934177235 | N/A             | N/A       | N/A          | Inc-VPS8-1     |
| A_33_P3330608  | 3,11359 | 4,06543 | -1,934338122 | ENST00000423345 | 84106     | NM_032152    | PRAM1          |
| A_23_P88602    | 8,72294 | 9,6748  | -1,934364938 | ENST00000559085 | 4212      | NM_170677    | MEIS2          |
| A_33_P3231252  | 6,53999 | 7,49195 | -1,934499023 | ENST00000369506 | 4808      | NM_005599    | NHLH2          |
| A_21_P0012952  | 2,17636 | 3,12833 | -1,934512432 | ENST00000509403 | 100505841 | N/A          | LOC100505841   |
| A_21_P0011932  | 1,45394 | 2,40607 | -1,934726988 | N/A             | N/A       | N/A          | XLOC_I2_008133 |
| A_33_P3296862  | 4,87462 | 5,82679 | -1,934780631 | ENST00000315997 | 146556    | NM_152459    | C16orf89       |
| A_23_P121356   | 12,2196 | 13,1719 | -1,93495498  | ENST00000406780 | 56987     | NM_020235    | BBX            |
| A_33_P3248953  | 5,93237 | 6,88477 | -1,935089105 | ENST00000296662 | 401207    | N/A          | C5orf63        |
| A_22_P00014790 | 3,92722 | 4,87986 | -1,935411045 | ENST00000452381 | N/A       | N/A          | N/A            |
| A_23_P396626   | 6,42221 | 7,37488 | -1,935451291 | ENST00000621136 | 11276     | NM_007247    | SYNRG          |
| A_24_P302574   | 7,92768 | 8,88045 | -1,935585451 | ENST00000264151 | 64172     | NM_022353    | OSGEPL1        |
| A_33_P3402350  | 3,21066 | 4,16371 | -1,935961148 | ENST00000433816 | N/A       | N/A          | N/A            |
| A_22_P00023959 | 3,74002 | 4,69311 | -1,936014825 | N/A             | N/A       | N/A          | Inc-SZT2-1     |
| A_23_P316150   | 8,19918 | 9,15273 | -1,936632217 | ENST00000326448 | 57560     | NM_020800    | IFT80          |
| A_32_P121674   | 6,81126 | 7,76498 | -1,936860434 | N/A             | N/A       | N/A          | Inc-PAFAH1B1-2 |
| A_21_P0014649  | 3,52153 | 4,47534 | -1,936981265 | N/A             | 100289388 | BC062331     | KCTD21-AS1     |
| A_21_P0014549  | 3,4152  | 4,3692  | -1,937236378 | ENST00000553330 | N/A       | XR_110276    | N/A            |
| A_23_P157038   | 4,85022 | 5,80426 | -1,937290091 | ENST00000462193 | 245812    | NM_152755    | CNPY4          |
| A_33_P3359061  | 1,64811 | 2,60222 | -1,937384091 | ENST00000586674 | 374887    | NM_198537    | YJEFN3         |
| A_33_P3381092  | 1,96675 | 2,92123 | -1,937881025 | ENST00000395079 | 81341     | NM_207374    | OR10W1         |
| A_23_P304652   | 1,78829 | 2,74288 | -1,938028787 | ENST00000383180 | 347736    | NM_178130    | NME9           |
| A_22_P00010636 | 1,66834 | 2,62307 | -1,938216863 | N/A             | 100506351 | XR_108863    | LOC100506351   |
| A_33_P3271430  | 9,70518 | 10,66   | -1,938337779 | N/A             | 4215      | NM_203351    | MAP3K3         |
| A_22_P00017262 | 2,80632 | 3,76123 | -1,938458703 | N/A             | 219731    | NR_038222    | PROSER2-AS1    |

|                |         |         |              |                 |           |              |              |
|----------------|---------|---------|--------------|-----------------|-----------|--------------|--------------|
| A_23_P59738    | 3,36008 | 4,31501 | -1,938485576 | ENST00000434895 | 58498     | NM_021223    | MYL7         |
| A_33_P3314401  | 6,07498 | 7,02992 | -1,938499012 | ENST00000264734 | 10686     | NM_006580    | CLDN16       |
| A_23_P256455   | 12,7933 | 13,7483 | -1,938579634 | ENST00000483031 | 6119      | NM_002947    | RPA3         |
| A_21_P0003070  | 2,48164 | 3,43669 | -1,938646821 | N/A             | N/A       | XM_006713836 | Inc-EIF2B5-2 |
| A_21_P0011006  | 1,42175 | 2,377   | -1,938915593 | ENST00000419556 | N/A       | N/A          | N/A          |
| A_21_P0009346  | 1,72213 | 2,67754 | -1,939130638 | N/A             | N/A       | N/A          | Inc-GNA13-1  |
| A_24_P270728   | 12,0501 | 13,0056 | -1,939251611 | ENST00000324873 | 26471     | NM_001042483 | NUPR1        |
| A_32_P41604    | 1,53273 | 2,4883  | -1,939345706 | N/A             | 2153      | NM_000130    | F5           |
| A_21_P0006550  | 1,56232 | 2,51828 | -1,939870035 | N/A             | N/A       | N/A          | Inc-IGSF1-1  |
| A_24_P343095   | 8,5888  | 9,54484 | -1,939977608 | ENST00000513048 | 1719      | NM_000791    | DHFR         |
| A_23_P120002   | 9,58869 | 10,5449 | -1,940206218 | ENST00000540870 | 3431      | NM_004510    | SP110        |
| A_33_P3226788  | 8,79291 | 9,74938 | -1,94055591  | N/A             | N/A       | N/A          | N/A          |
| A_24_P148836   | 7,65394 | 8,61049 | -1,940663521 | ENST00000459846 | 200942    | NM_173546    | KLHDC8B      |
| A_23_P317450   | 1,53104 | 2,48772 | -1,9408384   | ENST00000449667 | 414061    | NM_001001394 | DNAJB3       |
| A_23_P106761   | 9,32364 | 10,2805 | -1,941080567 | ENST00000570045 | 11151     | NM_007074    | CORO1A       |
| A_33_P3366224  | 10,6183 | 11,5752 | -1,941134386 | N/A             | N/A       | N/A          | N/A          |
| A_23_P411825   | 2,51534 | 3,47224 | -1,941134386 | ENST00000451554 | 130940    | NM_138803    | CCDC148      |
| A_21_P0014271  | 3,65974 | 4,61668 | -1,941188206 | N/A             | 100506258 | XR_132955    | LOC100506258 |
| A_21_P0014346  | 1,47491 | 2,4321  | -1,941524618 | N/A             | 101929767 | NR_110868    | LOC101929767 |
| A_33_P3323323  | 4,89656 | 5,85401 | -1,941874547 | ENST00000311044 | 162968    | NM_198458    | ZNF497       |
| A_21_P0012005  | 1,41048 | 2,36806 | -1,942049536 | ENST00000427579 | 101927661 | XR_425410    | LOC101927661 |
| A_21_P0014537  | 1,738   | 2,69575 | -1,942278391 | ENST00000555560 | N/A       | N/A          | N/A          |
| A_33_P3339376  | 4,20482 | 5,16287 | -1,942682318 | ENST00000409415 | 7456      | BC110288     | WIPF1        |
| A_21_P0008331  | 10,2767 | 11,2349 | -1,942884313 | ENST00000515218 | 644919    | NR_109758    | LOC644919    |
| A_23_P347169   | 8,03693 | 8,99521 | -1,942992053 | ENST00000262102 | 57509     | NM_001001924 | MTUS1        |
| A_23_P409888   | 6,57425 | 7,53259 | -1,943072861 | ENST00000374408 | 128876    | NM_178468    | FAM83C       |
| A_23_P422981   | 6,22734 | 7,18616 | -1,94371945  | ENST00000283946 | 130888    | NM_174899    | FBXO36       |
| A_22_P00025650 | 12,1932 | 13,1521 | -1,943827235 | ENST00000505955 | N/A       | N/A          | N/A          |
| A_33_P3251342  | 3,09345 | 4,05271 | -1,944312345 | ENST00000354593 | 1576      | NM_017460    | CYP3A4       |
| A_23_P12363    | 4,38356 | 5,34287 | -1,944379731 | ENST00000545203 | 4919      | NM_005012    | ROR1         |
| A_21_P0009522  | 3,96541 | 4,92473 | -1,944393208 | ENST00000584509 | N/A       | XR_424893    | N/A          |
| A_21_P0004593  | 7,80181 | 8,76121 | -1,944501031 | ENST00000525811 | N/A       | N/A          | N/A          |
| A_23_P159974   | 3,34197 | 4,30138 | -1,94451451  | ENST00000371876 | 90293     | NM_033495    | KLHL13       |

|                |         |         |              |                 |           |              |                |
|----------------|---------|---------|--------------|-----------------|-----------|--------------|----------------|
| A_21_P0005870  | 1,71136 | 2,67079 | -1,944541467 | N/A             | N/A       | N/A          | Inc-TMEM64-1   |
| A_23_P155301   | 6,52111 | 7,48073 | -1,944797576 | ENST00000510823 | 79858     | NM_145910    | NEK11          |
| A_32_P141682   | 6,78876 | 7,74847 | -1,944918902 | ENST00000399134 | 645027    | NM_001145127 | EVPLL          |
| A_19_P00320619 | 1,40733 | 2,36714 | -1,945053718 | ENST00000356347 | 642280    | N/A          | ZNF876P        |
| A_22_P00009535 | 1,67421 | 2,63404 | -1,945080683 | ENST00000430050 | 440390    | NR_126008    | LOC440390      |
| A_21_P0004298  | 1,56105 | 2,5209  | -1,945107647 | N/A             | N/A       | N/A          | Inc-TCF7-3     |
| A_22_P00014992 | 3,86179 | 4,82176 | -1,945269444 | N/A             | N/A       | AF147387     | Inc-SMCR7-1    |
| A_21_P0005058  | 2,13325 | 3,09324 | -1,945296411 | ENST00000430672 | N/A       | N/A          | N/A            |
| A_33_P3220929  | 5,03427 | 5,99438 | -1,945458223 | ENST00000595718 | 126119    | NM_001270641 | JOSD2          |
| A_23_P10873    | 2,95545 | 3,91571 | -1,945660507 | ENST00000502213 | 7096      | NM_003263    | TLR1           |
| A_33_P3343010  | 1,71825 | 2,67851 | -1,945660507 | ENST00000620261 | 25764     | AK094716     | HYPK           |
| A_33_P3329577  | 1,69652 | 2,65688 | -1,945795374 | N/A             | N/A       | N/A          | N/A            |
| A_23_P64630    | 11,3101 | 12,2708 | -1,946253994 | ENST00000311413 | 79102     | NM_032015    | RNF26          |
| A_33_P3387796  | 8,82005 | 9,78077 | -1,946280975 | ENST00000524713 | 23187     | NM_015157    | PHLDB1         |
| A_23_P359636   | 7,38459 | 8,34568 | -1,946780191 | ENST00000612948 | 148362    | NM_144695    | BROX           |
| A_24_P169013   | 1,44883 | 2,41005 | -1,946955622 | ENST00000437650 | 3128      | NR_001298    | HLA-DRB6       |
| A_22_P00008748 | 1,92515 | 2,88651 | -1,947144564 | N/A             | N/A       | N/A          | Inc-KIAA1967-2 |
| A_23_P121637   | 7,66561 | 8,62729 | -1,947576503 | ENST00000296498 | 8492      | NM_003619    | PRSS12         |
| A_23_P202945   | 7,1008  | 8,06287 | -1,948103057 | ENST00000525623 | 29068     | NM_014155    | ZBTB44         |
| A_21_P0003256  | 1,49029 | 2,45271 | -1,948575727 | ENST00000498457 | N/A       | N/A          | N/A            |
| A_33_P3261818  | 12,7077 | 13,6702 | -1,948683782 | ENST00000539945 | 4190      | NM_005917    | MDH1           |
| A_33_P3316026  | 8,02088 | 8,98372 | -1,949143083 | ENST00000597671 | 7392      | NM_003367    | USF2           |
| A_33_P3308137  | 6,53469 | 7,49757 | -1,949197125 | ENST00000409192 | 340277    | NM_199136    | FAM221A        |
| A_21_P0006533  | 2,02791 | 2,9909  | -1,94934575  | N/A             | N/A       | N/A          | Inc-PRICKLE3-1 |
| A_33_P3340164  | 10,8022 | 11,7654 | -1,949629519 | ENST00000477177 | 4711      | NM_001199958 | NDUFB5         |
| A_21_P0012341  | 8,1261  | 9,08931 | -1,949643033 | N/A             | N/A       | N/A          | XLOC_I2_009464 |
| A_22_P00024746 | 4,02801 | 4,99127 | -1,949710604 | ENST00000517714 | N/A       | N/A          | N/A            |
| A_33_P3314594  | 6,70091 | 7,66459 | -1,95027829  | ENST00000392613 | 326624    | NM_175738    | RAB37          |
| A_24_P17453    | 3,30635 | 4,27018 | -1,950481075 | ENST00000355689 | 92104     | NM_152275    | TTC30A         |
| A_33_P3225630  | 2,08272 | 3,04699 | -1,951076032 | ENST00000596694 | 400706    | NR_125344    | LOC400706      |
| A_33_P3347040  | 12,0909 | 13,0552 | -1,951116604 | N/A             | 100131094 | NM_001242901 | DPP9-AS1       |
| A_22_P00009488 | 1,53697 | 2,50159 | -1,951549424 | ENST00000569334 | 139538    | NR_001559    | VENTXP1        |
| A_33_P3218960  | 1,44837 | 2,41302 | -1,951590005 | ENST00000358590 | 8912      | NM_021098    | CACNA1H        |

|                |         |         |              |                 |           |              |               |
|----------------|---------|---------|--------------|-----------------|-----------|--------------|---------------|
| A_33_P3320062  | 8,24047 | 9,20527 | -1,951792927 | ENST00000467432 | 5337      | NM_002662    | PLD1          |
| A_32_P112493   | 2,42157 | 3,38638 | -1,951806456 | ENST00000480099 | 91461     | NM_138370    | PKDCC         |
| A_23_P314145   | 7,43559 | 8,40041 | -1,951819985 | ENST00000367463 | 10090     | NM_005715    | UST           |
| A_33_P3287039  | 11,2986 | 12,2637 | -1,952198833 | ENST00000420715 | 29844     | NM_013342    | TFPT          |
| A_23_P19030    | 1,42155 | 2,38688 | -1,952510085 | ENST00000328668 | 340075    | NM_001012301 | ARSI          |
| A_22_P00014589 | 2,19512 | 3,16055 | -1,952645427 | N/A             | N/A       | N/A          | Inc-SLC12A7-1 |
| A_24_P136470   | 6,12326 | 7,08877 | -1,952753708 | ENST00000463944 | 54718     | NR_027795    | BTN2A3P       |
| A_33_P3249872  | 12,1713 | 13,1372 | -1,953281662 | ENST00000262722 | 2192      | NM_001996    | FBLN1         |
| A_23_P102462   | 3,29448 | 4,26056 | -1,953525381 | ENST00000331203 | 129804    | NM_153214    | FBLN7         |
| A_33_P3416387  | 1,48038 | 2,44668 | -1,953823302 | N/A             | 26766     | NR_004385    | RNU105C       |
| A_22_P00015054 | 5,60617 | 6,5725  | -1,953863931 | N/A             | N/A       | N/A          | Inc-SNPH-1    |
| A_21_P0011550  | 6,57899 | 7,54536 | -1,953918104 | N/A             | 100499466 | N/A          | LINC00674     |
| A_33_P3370310  | 3,40078 | 4,36729 | -1,954107723 | ENST00000378861 | 286144    | NM_001171796 | TRIQQ         |
| A_33_P3662000  | 3,00695 | 3,9737  | -1,954432826 | N/A             | N/A       | AK056246     | Inc-COL6A3-5  |
| A_23_P35467    | 11,3206 | 12,2874 | -1,954500563 | ENST00000464703 | 55847     | NM_018464    | CISD1         |
| A_21_P0010334  | 7,49722 | 8,4641  | -1,954608946 | N/A             | 284865    | NR_038460    | LOC284865     |
| A_21_P0007910  | 4,19365 | 5,16083 | -1,955015438 | ENST00000461527 | 10301     | NR_109974    | DLEU1         |
| A_33_P3358712  | 2,00463 | 2,97189 | -1,95512385  | ENST00000464277 | N/A       | AY341344     | N/A           |
| A_33_P3366132  | 1,42452 | 2,39184 | -1,955205163 | N/A             | N/A       | N/A          | Inc-COMMD10-2 |
| A_21_P0010531  | 1,67229 | 2,63966 | -1,955272927 | ENST00000438195 | N/A       | XR_431169    | N/A           |
| A_33_P3236813  | 5,35398 | 6,32138 | -1,955313586 | ENST00000332427 | 2842      | NM_006143    | GPR19         |
| A_23_P70231    | 11,0514 | 12,0188 | -1,955313586 | ENST00000497231 | 501       | NM_001182    | ALDH7A1       |
| A_24_P122682   | 9,08105 | 10,0488 | -1,955788005 | ENST00000473894 | 5867      | NM_004578    | RAB4A         |
| A_23_P141035   | 5,37331 | 6,34108 | -1,955815118 | ENST00000539698 | 10164     | NM_005769    | CHST4         |
| A_23_P123848   | 9,44421 | 10,4122 | -1,956113388 | ENST00000259371 | 153090    | NM_032552    | DAB2IP        |
| A_33_P3223860  | 4,39293 | 5,36107 | -1,95631678  | N/A             | N/A       | N/A          | N/A           |
| A_33_P3286929  | 2,20268 | 3,17115 | -1,956764316 | N/A             | 100653133 | XM_006726565 | LOC100653133  |
| A_21_P0000354  | 4,45175 | 5,42058 | -1,957252654 | N/A             | 677776    | NR_003009    | SCARNA8       |
| A_21_P0000671  | 14,3376 | 15,3066 | -1,957483301 | ENST00000563395 | 4493      | NM_175617    | MT1E          |
| A_23_P111037   | 12,0969 | 13,0661 | -1,957754684 | ENST00000613854 | 8350      | NM_003529    | HIST1H3A      |
| A_23_P31407    | 14,1195 | 15,0891 | -1,958297565 | ENST00000412973 | 10551     | NM_006408    | AGR2          |
| A_19_P00320384 | 8,22142 | 9,19106 | -1,958351861 | ENST00000380336 | 340591    | XR_110931    | CA5BP1        |
| A_23_P151405   | 10,3248 | 11,2945 | -1,958433308 | ENST00000258607 | 26586     | NM_018204    | CKAP2         |

|                |         |         |              |                 |           |              |                |
|----------------|---------|---------|--------------|-----------------|-----------|--------------|----------------|
| A_24_P3249     | 2,99938 | 3,9691  | -1,958460458 | ENST00000330688 | 5915      | NM_000965    | RARB           |
| A_19_P00330814 | 4,46948 | 5,43955 | -1,958935641 | N/A             | 100124700 | NR_047518    | HOTAIR         |
| A_33_P3215239  | 7,97028 | 8,94037 | -1,958962798 | ENST00000371728 | 9585      | NM_001284259 | KIF20B         |
| A_23_P112452   | 2,48253 | 3,45273 | -1,959112167 | ENST00000373793 | 2681      | NR_003191    | GGTA1P         |
| A_33_P3249748  | 12,4319 | 13,4021 | -1,959112167 | N/A             | 51337     | NM_016647    | THEM6          |
| A_21_P0012825  | 1,42999 | 2,40031 | -1,959275128 | ENST00000512559 | N/A       | N/A          | N/A            |
| A_22_P00005063 | 7,10903 | 8,07941 | -1,959356614 | N/A             | N/A       | N/A          | Inc-DENND5A-1  |
| A_22_P00007397 | 7,415   | 8,38545 | -1,959451685 | N/A             | N/A       | N/A          | Inc-GRIK2-2    |
| A_22_P00001713 | 1,56614 | 2,53663 | -1,959506013 | N/A             | 102724448 | XR_428955    | LOC102724448   |
| A_33_P3279660  | 3,00583 | 3,97637 | -1,959573925 | ENST00000611282 | 102723552 | XM_006710266 | LOC102723552   |
| A_32_P44394    | 9,0484  | 10,019  | -1,959655424 | ENST00000612470 | 9447      | NM_004833    | AIM2           |
| A_22_P00011911 | 1,5341  | 2,5048  | -1,959791261 | N/A             | N/A       | N/A          | Inc-PIKFYVE-2  |
| A_22_P00024023 | 1,4014  | 2,37211 | -1,959804845 | ENST00000430537 | N/A       | N/A          | N/A            |
| A_22_P00002898 | 2,36587 | 3,33675 | -1,960035793 | ENST00000515485 | 100505989 | NR_038834    | LINC01207      |
| A_23_P75764    | 3,5252  | 4,49624 | -1,96025318  | ENST00000302030 | 219982    | NM_001004728 | OR5A1          |
| A_24_P935794   | 4,7289  | 5,69997 | -1,960293942 | ENST00000358543 | 389658    | NM_207413    | FAM150A        |
| A_23_P141394   | 9,95724 | 10,9287 | -1,960823935 | ENST00000589316 | 55062     | NM_017983    | WIPI1          |
| A_22_P00000712 | 2,69199 | 3,66353 | -1,960932669 | ENST00000505404 | N/A       | N/A          | N/A            |
| A_33_P3213259  | 7,56356 | 8,53522 | -1,961095782 | ENST00000493504 | 65996     | N/A          | CENPBD1P1      |
| A_33_P3526458  | 2,75519 | 3,72712 | -1,961462835 | N/A             | 338579    | BC043208     | ANKRD30BP3     |
| A_33_P3371650  | 3,66929 | 4,64124 | -1,961490027 | N/A             | 9262      | BC052561     | STK17B         |
| A_21_P0010644  | 1,61858 | 2,59057 | -1,961544412 | N/A             | N/A       | N/A          | XLOC_I2_001066 |
| A_33_P3332175  | 8,08455 | 9,05697 | -1,962129143 | ENST00000451170 | N/A       | N/A          | N/A            |
| A_22_P00013346 | 2,25593 | 3,22843 | -1,96223795  | ENST00000517363 | 100507420 | XR_426300    | LOC100507420   |
| A_21_P0011890  | 1,58555 | 2,55822 | -1,962469184 | ENST00000429947 | 101927289 | NR_110220    | LINC01237      |
| A_23_P68211    | 10,6054 | 11,5783 | -1,962782073 | ENST00000234454 | 6697      | NM_003124    | SPR            |
| A_33_P3268723  | 6,02266 | 6,99565 | -1,962904522 | ENST00000377294 | 387032    | NM_019110    | ZKSCAN4        |
| A_21_P0008115  | 2,15035 | 3,12395 | -1,963734652 | N/A             | N/A       | N/A          | Inc-MYO16-1    |
| A_21_P0013600  | 1,94223 | 2,91639 | -1,964497048 | ENST00000455981 | 101929331 | NR_121587    | LOC101929331   |
| A_24_P29001    | 11,9184 | 12,8927 | -1,964687693 | ENST00000306024 | 27258     | NM_014463    | LSM3           |
| A_33_P3280687  | 3,07291 | 4,04726 | -1,964755785 | ENST00000443957 | 114823    | NM_052925    | LENG8          |
| A_22_P00010979 | 8,3385  | 9,31344 | -1,96555945  | N/A             | 55449     | NR_023921    | DHRS4-AS1      |
| A_22_P00013965 | 1,37714 | 2,35234 | -1,965913712 | ENST00000553561 | 101929443 | XR_245821    | LOC101929443   |

|                |         |         |              |                 |           |              |                |
|----------------|---------|---------|--------------|-----------------|-----------|--------------|----------------|
| A_23_P127495   | 1,40075 | 2,37614 | -1,966172636 | ENST00000525090 | 8424      | NM_003986    | BBOX1          |
| A_21_P0008726  | 1,74374 | 2,71924 | -1,966322554 | N/A             | N/A       | N/A          | Inc-FSIP1-5    |
| A_23_P141447   | 6,72854 | 7,70407 | -1,966363443 | ENST00000615378 | 201299    | NM_001034836 | RDM1           |
| A_33_P3223869  | 10,3361 | 11,3117 | -1,966458854 | ENST00000436601 | N/A       | N/A          | N/A            |
| A_22_P00025418 | 3,84785 | 4,82367 | -1,966758747 | N/A             | N/A       | N/A          | Inc-MORF4L2-1  |
| A_33_P3404032  | 5,81322 | 6,78913 | -1,966881444 | ENST00000366695 | 92815     | NM_033445    | HIST3H2A       |
| A_21_P0009334  | 1,57508 | 2,55135 | -1,967372307 | N/A             | 102724732 | XR_429997    | LOC102724732   |
| A_23_P431179   | 5,18639 | 6,16279 | -1,967549593 | N/A             | 8359      | NM_003538    | HIST1H4A       |
| A_23_P58396    | 7,73606 | 8,71269 | -1,967863292 | ENST00000274071 | 56034     | NM_016205    | PDGFC          |
| A_21_P0000607  | 7,43068 | 8,40751 | -1,968136115 | N/A             | 399972    | NR_033839    | ST3GAL4-AS1    |
| A_23_P11543    | 11,7037 | 12,6809 | -1,968640937 | ENST00000374479 | 2517      | NM_000147    | FUCA1          |
| A_21_P0002519  | 1,49953 | 2,47688 | -1,968845631 | N/A             | N/A       | N/A          | Inc-STK39-3    |
| A_22_P00021262 | 2,15897 | 3,13664 | -1,969282383 | ENST00000413192 | 441908    | NR_103561    | NBPF18P        |
| A_24_P296568   | 10,9201 | 11,898  | -1,969596359 | ENST00000393408 | 10951     | NM_006807    | CBX1           |
| A_21_P0002489  | 1,39557 | 2,37348 | -1,969610011 | N/A             | N/A       | N/A          | Inc-EDAR-1     |
| A_33_P3327702  | 13,5541 | 14,5324 | -1,970142523 | ENST00000245934 | 8189      | NM_004819    | SYMPK          |
| A_33_P3364904  | 6,3731  | 7,35168 | -1,970524928 | ENST00000440367 | 389114    | NM_207404    | ZNF662         |
| A_21_P0001506  | 2,6207  | 3,59934 | -1,970606881 | N/A             | N/A       | N/A          | Inc-HSPB11-1   |
| A_21_P0001493  | 2,39914 | 3,37778 | -1,970606881 | N/A             | N/A       | N/A          | Inc-PPT1-1     |
| A_21_P0009359  | 1,90107 | 2,87975 | -1,970661519 | N/A             | N/A       | N/A          | Inc-SLC39A11-1 |
| A_33_P3227880  | 7,07268 | 8,05154 | -1,970907407 | ENST00000396948 | 11118     | NM_001197247 | BTN3A2         |
| A_23_P3956     | 1,83719 | 2,81613 | -1,9710167   | ENST00000339142 | 114897    | NM_198594    | C1QTNF1        |
| A_33_P3826751  | 1,83736 | 2,81673 | -1,971604255 | N/A             | 401282    | N/A          | DKFZp451B082   |
| A_21_P0009117  | 6,73968 | 7,71907 | -1,971631588 | ENST00000568509 | 6687      | N/A          | SPG7           |
| A_22_P00014148 | 3,20139 | 4,18082 | -1,971686254 | N/A             | 101929633 | NR_110574    | LOC101929633   |
| A_23_P7732     | 9,34964 | 10,3291 | -1,971727254 | ENST00000518458 | 1070      | NM_004365    | CETN3          |
| A_22_P00017650 | 4,58583 | 5,56541 | -1,971891265 | N/A             | N/A       | N/A          | Inc-WRAP73-1   |
| A_21_P0008629  | 1,47764 | 2,45771 | -1,972561116 | N/A             | N/A       | N/A          | Inc-CTDSPL2-1  |
| A_21_P0012166  | 1,63561 | 2,61593 | -1,972902964 | ENST00000441214 | 101927586 | N/A          | LINC01271      |
| A_33_P3365097  | 5,33945 | 6,31988 | -1,973053396 | ENST00000370566 | 57489     | NM_001184765 | ODF2L          |
| A_22_P00001388 | 2,09146 | 3,07204 | -1,97325855  | N/A             | 101927100 | NR_109875    | LOC101927100   |
| A_22_P00017429 | 5,88556 | 6,86618 | -1,973313261 | N/A             | N/A       | AK055446     | Inc-VMO1-1     |
| A_23_P250413   | 1,49316 | 2,4738  | -1,973340617 | ENST00000415224 | 64098     | NM_022141    | PARVG          |

|                |         |         |              |                 |           |              |                  |
|----------------|---------|---------|--------------|-----------------|-----------|--------------|------------------|
| A_21_P0009992  | 1,5884  | 2,56933 | -1,973737323 | N/A             | N/A       | N/A          | Inc-COL20A1-3    |
| A_24_P277155   | 10,8996 | 11,8807 | -1,973969912 | ENST00000310053 | 6596      | NM_003071    | HLTF             |
| A_19_P00324470 | 2,99725 | 3,97847 | -1,974134109 | ENST00000602315 | 728264    | NR_105059    | MIR143HG         |
| A_21_P0010763  | 3,37576 | 4,357   | -1,974161477 | ENST00000452834 | 101927498 | NR_110633    | LINCO1361        |
| A_24_P228228   | 3,17007 | 4,15158 | -1,974530975 | ENST00000306851 | 9331      | NM_004775    | B4GALT6          |
| A_21_P0011955  | 1,78647 | 2,76805 | -1,974626782 | N/A             | N/A       | N/A          | XLOC_I2_008221   |
| A_22_P00025061 | 6,17689 | 7,15848 | -1,974640469 | N/A             | N/A       | N/A          | Inc-AC078802.1-1 |
| A_33_P3261828  | 4,68474 | 5,66641 | -1,97474997  | ENST00000613213 | 390660    | N/A          | ADAMTS7P1        |
| A_23_P15582    | 11,7612 | 12,7431 | -1,975064817 | ENST00000017003 | 64132     | NM_022167    | XYLT2            |
| A_24_P99090    | 5,7828  | 6,76479 | -1,975188032 | ENST00000378034 | 26586     | NM_018204    | CKAP2            |
| A_33_P3485976  | 1,4785  | 2,46061 | -1,97535233  | ENST00000528482 | 283177    | AK095081     | LOC283177        |
| A_22_P00000152 | 2,13217 | 3,11454 | -1,975708357 | N/A             | 102725312 | XR_426420    | LOC102725312     |
| A_22_P00011829 | 3,12632 | 4,10888 | -1,975968571 | N/A             | N/A       | N/A          | Inc-PHF3-1       |
| A_33_P3303557  | 2,30076 | 3,28334 | -1,975995964 | N/A             | N/A       | N/A          | N/A              |
| A_33_P3392784  | 2,42423 | 3,40694 | -1,976174027 | ENST00000369703 | 159686    | N/A          | CFAP58           |
| A_33_P3349883  | 3,59858 | 4,58144 | -1,976379505 | ENST00000366583 | 3964      | EF467046     | LGALS8           |
| A_21_P0002387  | 1,74338 | 2,72641 | -1,976612405 | N/A             | N/A       | N/A          | Inc-CMPK2-12     |
| A_23_P145247   | 7,27759 | 8,26077 | -1,976817928 | ENST00000316606 | 7741      | NM_001023560 | ZSCAN26          |
| A_23_P40217    | 2,57019 | 3,55339 | -1,976845333 | ENST00000262593 | 55816     | NM_018431    | DOK5             |
| A_21_P0005032  | 1,61124 | 2,595   | -1,977612819 | N/A             | N/A       | N/A          | Inc-B3GAT2-3     |
| A_22_P00016242 | 3,99005 | 4,97403 | -1,977914413 | N/A             | N/A       | N/A          | Inc-TMCC1-1      |
| A_33_P3244224  | 1,54739 | 2,53141 | -1,977969253 | N/A             | 100129048 | AK128074     | LOC100129048     |
| A_23_P325625   | 4,9235  | 5,90765 | -1,978147494 | ENST00000467917 | 286205    | NM_173690    | SCAI             |
| A_33_P3691916  | 8,42466 | 9,40911 | -1,978558881 | ENST00000264344 | 10144     | NM_014883    | FAM13A           |
| A_21_P0007563  | 1,65017 | 2,63505 | -1,979148685 | N/A             | N/A       | N/A          | Inc-HOXC4-4      |
| A_19_P00315841 | 2,52473 | 3,51006 | -1,97976611  | ENST00000431411 | N/A       | N/A          | N/A              |
| A_33_P3318966  | 2,49943 | 3,48489 | -1,979944513 | ENST00000395763 | 254013    | NM_173802    | METTTL20         |
| A_22_P00025601 | 1,63069 | 2,61629 | -1,980136657 | N/A             | N/A       | CU675838     | Inc-CENPBD1-1    |
| A_23_P431268   | 9,54974 | 10,5355 | -1,980356274 | ENST00000272203 | 22874     | NM_014935    | PLEKHA6          |
| A_22_P00013888 | 3,28505 | 4,27083 | -1,980383727 | ENST00000571143 | 101927060 | N/A          | LOC101927060     |
| A_23_P254442   | 8,50731 | 9,49313 | -1,980438636 | ENST00000378052 | 155060    | NR_036573    | LOC155060        |
| A_22_P00006731 | 2,46693 | 3,45306 | -1,98086423  | N/A             | N/A       | N/A          | Inc-FSCB-4       |
| A_23_P13425    | 2,90628 | 3,89255 | -1,981056463 | ENST00000468153 | 975       | NM_004356    | CD81             |



|                |         |         |              |                 |           |              |                |
|----------------|---------|---------|--------------|-----------------|-----------|--------------|----------------|
| A_22_P00020929 | 1,95377 | 2,94019 | -1,981262449 | N/A             | N/A       | N/A          | Inc-TRAPPC12-1 |
| A_33_P3229017  | 3,20654 | 4,19299 | -1,981303648 | ENST00000506710 | N/A       | XR_425872    | N/A            |
| A_33_P3224314  | 1,69371 | 2,6806  | -1,981908008 | N/A             | 400707    | BC132839     | LOC400707      |
| A_22_P00024174 | 1,62393 | 2,61084 | -1,981935483 | ENST00000373009 | 25862     | NM_001286554 | USP49          |
| A_33_P3313625  | 3,10629 | 4,09329 | -1,982059127 | N/A             | N/A       | N/A          | N/A            |
| A_33_P3312735  | 7,67089 | 8,65831 | -1,982636231 | ENST00000354764 | 80055     | NM_024989    | PGAP1          |
| A_24_P356453   | 12,4949 | 13,4827 | -1,983158518 | ENST00000328434 | 28958     | NM_001040431 | COA3           |
| A_22_P00004912 | 2,19697 | 3,18484 | -1,983254744 | ENST00000421601 | 100874173 | N/A          | LINC00443      |
| A_33_P3412658  | 2,43111 | 3,41905 | -1,983350975 | N/A             | 100289509 | NR_045118    | KCNIP2-AS1     |
| A_33_P3234088  | 2,16222 | 3,15016 | -1,983350975 | ENST00000488218 | N/A       | N/A          | N/A            |
| A_22_P00007282 | 4,00756 | 4,99553 | -1,983392218 | N/A             | N/A       | AL049239     | Inc-GPR19-1    |
| A_33_P3635527  | 1,83287 | 2,82093 | -1,983515952 | ENST00000340345 | 643803    | NM_001085455 | KRTAP24-1      |
| A_33_P3422035  | 4,50972 | 5,49797 | -1,983777194 | ENST00000392217 | 53827     | AF177940     | FXYD5          |
| A_23_P114061   | 1,7078  | 2,6961  | -1,983845948 | ENST00000360823 | 80036     | NM_001007471 | TRPM3          |
| A_23_P208674   | 13,1309 | 14,1195 | -1,98425852  | ENST00000599293 | 284361    | NM_175063    | EMC10          |
| A_23_P328323   | 7,01025 | 7,99906 | -1,984547371 | ENST00000294428 | 55225     | NM_018211    | RAVER2         |
| A_21_P0001156  | 2,24337 | 3,2322  | -1,984574883 | ENST00000435559 | N/A       | N/A          | N/A            |
| A_33_P3264042  | 4,07968 | 5,06861 | -1,984712448 | ENST00000478818 | 146779    | NM_001144933 | EFCAB3         |
| A_24_P100650   | 2,38069 | 3,36996 | -1,985180241 | ENST00000484994 | 54586     | NM_020641    | EQTN           |
| A_33_P3795644  | 1,62329 | 2,6127  | -1,985372893 | N/A             | 54748     | AJ011409     | LINC00527      |
| A_21_P0008487  | 1,6559  | 2,64538 | -1,985469226 | N/A             | N/A       | N/A          | Inc-BCL11B-1   |
| A_21_P0004306  | 2,42279 | 3,41229 | -1,985496751 | N/A             | N/A       | N/A          | Inc-IGIP-1     |
| A_22_P00012652 | 6,16553 | 7,15536 | -1,985950963 | N/A             | N/A       | N/A          | Inc-PXDNL-1    |
| A_24_P250922   | 10,5571 | 11,5471 | -1,986184991 | ENST00000367468 | 5743      | NM_000963    | PTGS2          |
| A_22_P00003759 | 6,8468  | 7,83705 | -1,9865292   | N/A             | 102725300 | XR_424687    | LOC102725300   |
| A_21_P0000199  | 1,86508 | 2,85538 | -1,986598049 | ENST00000521478 | 3203      | NM_024014    | HOXA6          |
| A_23_P163992   | 9,66515 | 10,6556 | -1,986804611 | ENST00000394209 | 2886      | NM_005310    | GRB7           |
| A_22_P00020986 | 4,73834 | 5,72883 | -1,986859698 | N/A             | 101927167 | NR_125398    | GATA2-AS1      |
| A_22_P00010379 | 1,56019 | 2,5507  | -1,986887241 | N/A             | N/A       | AK093324     | Inc-MYL12A-1   |
| A_24_P131580   | 9,60366 | 10,5943 | -1,987066286 | ENST00000295453 | 251       | NM_031313    | ALPPL2         |
| A_23_P148793   | 2,82367 | 3,81433 | -1,987093833 | ENST00000477875 | 116123    | NR_002925    | FMO9P          |
| A_33_P3716128  | 11,1052 | 12,096  | -1,987286671 | ENST00000462787 | 10051     | NM_005496    | SMC4           |
| A_23_P156861   | 4,86435 | 5,85531 | -1,98750708  | ENST00000206262 | 26575     | NM_012419    | RGS17          |

|                |         |         |              |                 |           |              |                  |
|----------------|---------|---------|--------------|-----------------|-----------|--------------|------------------|
| A_22_P00012835 | 5,64481 | 6,63628 | -1,988209798 | N/A             | N/A       | N/A          | Inc-RASA1-3      |
| A_33_P3269806  | 8,12046 | 9,11216 | -1,988526792 | ENST00000600228 | 90317     | NM_178523    | ZNF616           |
| A_23_P119916   | 5,59109 | 6,58279 | -1,988526792 | ENST00000233948 | 7475      | NM_006522    | WNT6             |
| A_22_P00025284 | 3,21268 | 4,20457 | -1,988788694 | ENST00000513771 | 102577426 | N/A          | LOC102577426     |
| A_23_P92999    | 1,50208 | 2,494   | -1,98883005  | ENST00000505020 | 1007      | NM_016279    | CDH9             |
| A_22_P00003179 | 3,31105 | 4,30317 | -1,98910578  | N/A             | N/A       | N/A          | Inc-C9orf80-1    |
| A_22_P00016781 | 2,06726 | 3,05997 | -1,989919404 | ENST00000525573 | N/A       | N/A          | N/A              |
| A_33_P3303250  | 2,11616 | 3,1089  | -1,989960784 | ENST00000617896 | N/A       | AK130201     | N/A              |
| A_24_P141629   | 8,78797 | 9,78114 | -1,990553987 | ENST00000420244 | 63901     | NM_022074    | FAM111A          |
| A_22_P00002250 | 3,14079 | 4,13396 | -1,990553987 | N/A             | N/A       | BC015213     | Inc-C10orf122-2  |
| A_22_P00002855 | 3,01483 | 4,00826 | -1,990912753 | N/A             | 100873937 | NR_046606    | GRM7-AS1         |
| A_22_P00013517 | 6,0357  | 7,02917 | -1,990967954 | N/A             | 101928085 | NR_121674    | ERICH6-AS1       |
| A_23_P120125   | 3,75464 | 4,74814 | -1,991009355 | ENST00000416132 | 78989     | NM_199235    | COLEC11          |
| A_24_P281580   | 6,8115  | 7,80505 | -1,99107836  | ENST00000538588 | 352954    | NM_178831    | GATS             |
| A_33_P3378216  | 2,2151  | 3,20882 | -1,991312992 | ENST00000515779 | N/A       | N/A          | N/A              |
| A_33_P3221808  | 1,64348 | 2,63741 | -1,991602871 | N/A             | 389715    | AL080137     | FAM205BP         |
| A_21_P0006234  | 1,96459 | 2,95858 | -1,991685701 | N/A             | N/A       | N/A          | Inc-PPAPDC3-2    |
| A_23_P18579    | 11,8188 | 12,8128 | -1,991699506 | ENST00000504686 | 10744     | NM_006607    | PTTG2            |
| A_23_P88767    | 8,72703 | 9,72121 | -1,991948019 | ENST00000621727 | 8399      | NM_003561    | PLA2G10          |
| A_33_P3257553  | 3,21103 | 4,20536 | -1,992155137 | ENST00000373847 | 11064     | N/A          | CNTRL            |
| A_33_P3335183  | 4,46193 | 5,4563  | -1,992210372 | ENST00000579258 | 474170    | NM_001006607 | LRRRC37A2        |
| A_23_P117852   | 12,2144 | 13,2089 | -1,992389896 | ENST00000300035 | 9768      | NM_014736    | KIAA0101         |
| A_22_P00000439 | 7,97981 | 8,97442 | -1,992541814 | N/A             | N/A       | AK091883     | Inc-AC078802.1-1 |
| A_32_P407245   | 5,19931 | 6,19394 | -1,992569437 | ENST00000395069 | 79962     | NM_024902    | DNAJC22          |
| A_24_P79855    | 5,94132 | 6,93633 | -1,993094341 | N/A             | N/A       | BC104430     | N/A              |
| A_23_P130515   | 8,5172  | 9,51239 | -1,993343028 | ENST00000344550 | 1084      | NM_001815    | CEACAM3          |
| A_24_P941217   | 2,57446 | 3,56976 | -1,993495018 | ENST00000321276 | 130367    | XM_005246297 | SGPP2            |
| A_22_P00006662 | 1,75088 | 2,74622 | -1,99355029  | N/A             | N/A       | BM692815     | Inc-FOXN1-1      |
| A_33_P3399864  | 3,88084 | 4,87621 | -1,993591746 | ENST00000605484 | 126375    | NM_175872    | ZNF792           |
| A_33_P3339066  | 10,1773 | 11,1728 | -1,993771394 | ENST00000531883 | 55599     | NM_017619    | RNPC3            |
| A_23_P41765    | 9,4402  | 10,4359 | -1,994047809 | ENST00000405885 | 3659      | NM_002198    | IRF1             |
| A_24_P381604   | 10,6645 | 11,6603 | -1,994186031 | ENST00000378565 | 9445      | NM_021999    | ITM2B            |
| A_33_P3417328  | 2,72504 | 3,72087 | -1,994227499 | N/A             | 57619     | AK127929     | SHROOM3          |

|                |         |         |              |                 |           |              |                |
|----------------|---------|---------|--------------|-----------------|-----------|--------------|----------------|
| A_22_P00016001 | 1,67937 | 2,67544 | -1,994559277 | ENST00000437350 | N/A       | N/A          | N/A            |
| A_23_P32328    | 10,8924 | 11,8885 | -1,994600753 | ENST00000463032 | 57128     | NM_020408    | LYRM4          |
| A_22_P00007058 | 6,09559 | 7,09169 | -1,994600753 | ENST00000532652 | N/A       | BX091362     | N/A            |
| A_24_P276932   | 4,75302 | 5,7494  | -1,994987905 | ENST00000381661 | 245973    | NM_001039362 | ATP6V1C2       |
| A_24_P74160    | 14,5743 | 15,5708 | -1,995153851 | ENST00000588599 | 6633      | NM_177542    | SNRPD2         |
| A_23_P1352     | 1,43007 | 2,42664 | -1,995250658 | ENST00000266066 | 6425      | NM_003015    | SFRP5          |
| A_33_P3339825  | 8,47889 | 9,47554 | -1,995361302 | ENST00000599293 | 284361    | NM_206538    | EMC10          |
| A_23_P7636     | 13,8668 | 14,8636 | -1,995568774 | ENST00000520452 | 9232      | NM_004219    | PTTG1          |
| A_33_P3325704  | 9,68836 | 10,6854 | -1,995900775 | ENST00000368751 | 6704      | NM_001024209 | SPRR2E         |
| A_33_P3258617  | 3,05318 | 4,05031 | -1,99602529  | ENST00000380464 | 123       | N/A          | PLIN2          |
| A_33_P3240578  | 2,06848 | 3,0657  | -1,996149812 | ENST00000359760 | 653483    | NR_027906    | MLLT4-AS1      |
| A_19_P00319041 | 2,64462 | 3,64189 | -1,996218995 | ENST00000606019 | 100506136 | NR_038948    | LOC100506136   |
| A_19_P00321577 | 5,27743 | 6,27472 | -1,996246669 | ENST00000463474 | 10301     | NR_109974    | DLEU1          |
| A_21_P0005735  | 1,43236 | 2,42973 | -1,996357367 | N/A             | 101926956 | XR_242403    | LOC101926956   |
| A_23_P218549   | 1,37179 | 2,36941 | -1,996703339 | ENST00000253673 | 84658     | NM_032571    | EMR3           |
| A_21_P0011883  | 1,38781 | 2,38571 | -1,9970909   | ENST00000443866 | N/A       | N/A          | XLOC_I2_007827 |
| A_23_P255535   | 1,54982 | 2,54791 | -1,99735393  | ENST00000381241 | 438       | NM_004043    | ASMT           |
| A_23_P207399   | 12,6439 | 13,6422 | -1,997644688 | ENST00000422280 | 4077      | NM_005899    | NBR1           |
| A_21_P0005392  | 3,29235 | 4,29078 | -1,997824702 | N/A             | N/A       | N/A          | lnc-STAG3L4-1  |
| A_23_P319783   | 6,61725 | 7,61569 | -1,99783855  | ENST00000469128 | 200162    | NM_206996    | SPAG17         |
| A_33_P3237664  | 4,98628 | 5,98477 | -1,997907791 | ENST00000459625 | 51564     | AK122588     | HDAC7          |
| A_24_P942211   | 10,8763 | 11,8748 | -1,997921639 | ENST00000611123 | 9906      | NM_182838    | SLC35E2        |
| A_21_P0006845  | 2,34195 | 3,3407  | -1,998267883 | N/A             | N/A       | N/A          | lnc-PDSS1-2    |
| A_22_P00002461 | 5,95489 | 6,95376 | -1,998434101 | N/A             | N/A       | N/A          | lnc-C15orf41-5 |
| A_21_P0014301  | 3,86308 | 4,86206 | -1,998586479 | N/A             | 644192    | NR_125738    | NR2F2-AS1      |
| A_33_P3362409  | 2,77219 | 3,7712  | -1,998628039 | ENST00000531758 | 100499484 | NR_036526    | LOC100499484   |
| A_23_P211631   | 12,1484 | 13,1475 | -1,998752724 | ENST00000327858 | 2192      | NM_006486    | FBLN1          |
| A_24_P181120   | 14,1239 | 15,1231 | -1,998891272 | ENST00000552548 | 5204      | NM_002624    | PFDN5          |
| A_23_P398530   | 4,003   | 5,00227 | -1,998988261 | ENST00000503128 | 7468      | NM_133334    | WHSC1          |
| A_24_P341000   | 2,17786 | 3,17736 | -1,999306973 | ENST00000318245 | 729420    | NM_001257995 | LMO7DN         |
| A_21_P0014114  | 7,94668 | 8,94623 | -1,999376265 | N/A             | 101927167 | NR_125398    | GATA2-AS1      |
| A_22_P00007907 | 2,65871 | 3,6584  | -1,999570295 | N/A             | N/A       | N/A          | lnc-HSPA1B-1   |
| A_21_P0006183  | 7,11049 | 8,11075 | -2,000360469 | N/A             | N/A       | N/A          | lnc-ZNF169-1   |

|                |         |         |              |                 |           |              |                |
|----------------|---------|---------|--------------|-----------------|-----------|--------------|----------------|
| A_23_P344531   | 9,19264 | 10,1929 | -2,000360469 | ENST00000307662 | 11346     | NM_007286    | SYNPO          |
| A_32_P153388   | 3,98634 | 4,98673 | -2,000540728 | ENST00000409927 | 51454     | NM_016315    | GULP1          |
| A_22_P00018877 | 1,41362 | 2,41405 | -2,000596195 | N/A             | N/A       | N/A          | Inc-PTPN3-2    |
| A_21_P0011143  | 5,77129 | 6,77177 | -2,000665532 | N/A             | N/A       | N/A          | XLOC_I2_003732 |
| A_33_P3381255  | 2,17934 | 3,17987 | -2,000734871 | N/A             | 387836    | NM_207375    | CLEC2A         |
| A_33_P3318963  | 1,90066 | 2,90137 | -2,000984511 | N/A             | N/A       | N/A          | Inc-POLR2F-1   |
| A_33_P3418010  | 10,4269 | 11,4277 | -2,001109343 | ENST00000596217 | 23636     | NM_016553    | NUP62          |
| A_22_P00016236 | 4,40761 | 5,40873 | -2,001553253 | ENST00000560916 | 80765     | N/A          | STARD5         |
| A_21_P0009078  | 1,57904 | 2,58027 | -2,001705869 | ENST00000602862 | N/A       | N/A          | N/A            |
| A_33_P3359373  | 4,41753 | 5,41913 | -2,002219301 | ENST00000403810 | 7248      | BC121000     | TSC1           |
| A_21_P0000015  | 9,13823 | 10,1399 | -2,002316452 | N/A             | 83666     | NM_001146106 | PARP9          |
| A_21_P0002105  | 2,04439 | 3,04607 | -2,002330331 | ENST00000419784 | 101928067 | XR_249218    | LOC101928067   |
| A_24_P87114    | 4,07572 | 5,07762 | -2,002635694 | ENST00000491362 | 84749     | NM_032663    | USP30          |
| A_22_P00009133 | 3,55965 | 4,56163 | -2,002746747 | ENST00000332012 | 284185    | NR_038080    | LINC00482      |
| A_22_P00001316 | 1,6887  | 2,69084 | -2,002968871 | N/A             | N/A       | N/A          | Inc-ANTXR2-1   |
| A_22_P00006159 | 1,50528 | 2,50744 | -2,002996639 | N/A             | 102724842 | XR_425797    | LOC102724842   |
| A_22_P00019462 | 1,46326 | 2,46548 | -2,003079943 | N/A             | N/A       | N/A          | Inc-RFC4-4     |
| A_22_P00004531 | 1,61126 | 2,61355 | -2,003177135 | ENST00000533793 | 101928894 | NR_120565    | LOC101928894   |
| A_33_P3330109  | 13,7148 | 14,7171 | -2,00319102  | ENST00000487245 | 3107      | NM_001243042 | HLA-C          |
| A_21_P0013943  | 1,53403 | 2,53641 | -2,003302104 | N/A             | N/A       | N/A          | N/A            |
| A_21_P0013417  | 1,60715 | 2,60987 | -2,003774277 | ENST00000456777 | 646588    | XR_252186    | LOC646588      |
| A_21_P0011703  | 2,37802 | 3,38083 | -2,003899283 | N/A             | N/A       | N/A          | XLOC_I2_006789 |
| A_23_P216489   | 12,2402 | 13,2435 | -2,004580008 | ENST00000539815 | 10020     | NM_005476    | GENE           |
| A_24_P942921   | 1,5204  | 2,52376 | -2,004663377 | ENST00000375099 | 127733    | NM_152376    | UBXN10         |
| A_33_P3244931  | 14,4787 | 15,4825 | -2,005274862 | ENST00000409094 | 1622      | NM_001079863 | DBI            |
| A_23_P170498   | 10,4231 | 11,4271 | -2,005552872 | ENST00000565187 | 123803    | NM_173474    | NTAN1          |
| A_21_P0009675  | 4,50346 | 5,50768 | -2,005858727 | N/A             | N/A       | N/A          | Inc-PTBP1-1    |
| A_21_P0001771  | 4,27387 | 5,27831 | -2,006164628 | ENST00000607100 | 400946    | AK022396     | LINC00954      |
| A_21_P0004838  | 5,3494  | 6,35391 | -2,00626197  | N/A             | N/A       | N/A          | Inc-HIVEP1-2   |
| A_23_P349406   | 4,25794 | 5,26263 | -2,0065123   | ENST00000431473 | 284716    | NM_173642    | RIMKLA         |
| A_33_P3246858  | 1,52815 | 2,53294 | -2,006651386 | ENST00000449873 | 6913      | XM_005271161 | TBX15          |
| A_23_P395954   | 3,49226 | 4,49778 | -2,007667003 | ENST00000394848 | 85464     | AB072358     | SSH2           |
| A_23_P70968    | 5,31052 | 6,31605 | -2,007680919 | ENST00000523796 | 3204      | NM_006896    | HOXA7          |

|                |         |         |              |                 |           |              |                    |
|----------------|---------|---------|--------------|-----------------|-----------|--------------|--------------------|
| A_33_P3340961  | 1,62614 | 2,63167 | -2,007680919 | ENST00000624675 | 100132249 | AF036272     | LOC100132249       |
| A_23_P168847   | 4,28917 | 5,29487 | -2,007917508 | ENST00000522609 | 157574    | NM_172366    | FBXO16             |
| A_33_P3236177  | 6,23426 | 7,24014 | -2,008168045 | ENST00000336811 | 283       | NM_001145    | ANG                |
| A_33_P3257486  | 2,36365 | 3,36957 | -2,008223724 | ENST00000390296 | N/A       | FJ385530     | N/A                |
| A_21_P0007140  | 2,22751 | 3,23399 | -2,009003392 | N/A             | N/A       | N/A          | Inc-PGAP2-1        |
| A_22_P00004839 | 2,95997 | 3,96652 | -2,009100872 | N/A             | N/A       | N/A          | Inc-CYB5R2-2       |
| A_33_P3259705  | 5,94289 | 6,9501  | -2,0100202   | ENST00000531205 | 59307     | XM_005253044 | SIGIRR             |
| A_23_P404821   | 9,00644 | 10,0139 | -2,01036854  | ENST00000536163 | 57189     | NM_001080392 | KIAA1147           |
| A_33_P3379106  | 2,15968 | 3,16745 | -2,010800566 | ENST00000569736 | 283867    | NR_027755    | LINC00922          |
| A_24_P46130    | 5,15619 | 6,16402 | -2,010884194 | ENST00000336375 | 55        | NM_001099    | ACPP               |
| A_22_P00023983 | 1,43699 | 2,44539 | -2,011678839 | ENST00000428006 | N/A       | N/A          | N/A                |
| A_33_P3380883  | 6,71292 | 7,72137 | -2,01174856  | ENST00000462523 | 7507      | NR_027302    | XPA                |
| A_22_P00000299 | 2,65478 | 3,66326 | -2,011790394 | N/A             | N/A       | BX110421     | Inc-AC009365.3.1-5 |
| A_33_P3382271  | 7,62899 | 8,63749 | -2,011818283 | N/A             | N/A       | BC033643     | N/A                |
| A_33_P3254246  | 1,43231 | 2,44083 | -2,011846173 | ENST00000248073 | 26664     | NM_198944    | OR7C1              |
| A_21_P0010695  | 7,82151 | 8,83033 | -2,012264568 | ENST00000404210 | 29092     | NR_109762    | LINC00339          |
| A_22_P00017570 | 1,80167 | 2,81073 | -2,012599347 | ENST00000417032 | 154822    | NR_024394    | LINC00689          |
| A_22_P00007341 | 4,41593 | 5,4251  | -2,012752806 | N/A             | 100506314 | NR_038920    | LOC100506314       |
| A_33_P3640101  | 5,4384  | 6,44798 | -2,013324892 | N/A             | 400684    | NR_046201    | LOC400684          |
| A_23_P64808    | 5,65066 | 6,6606  | -2,013827346 | ENST00000243056 | 3229      | NM_017410    | HOXC13             |
| A_23_P103617   | 5,95391 | 6,96398 | -2,014008818 | ENST00000368947 | 8416      | NM_003568    | ANXA9              |
| A_21_P0001819  | 1,92723 | 2,93742 | -2,014176346 | ENST00000495580 | N/A       | N/A          | N/A                |
| A_33_P3277674  | 4,57915 | 5,5894  | -2,014260115 | ENST00000360587 | 283807    | NM_203373    | FBXL22             |
| A_22_P00015371 | 7,09579 | 8,10639 | -2,014748836 | N/A             | N/A       | N/A          | Inc-SRBD1-1        |
| A_23_P8055     | 8,84676 | 9,85785 | -2,015433246 | ENST00000376421 | 11270     | NM_007243    | NRM                |
| A_23_P204158   | 4,50728 | 5,51837 | -2,015433246 | ENST00000622220 | 84900     | NM_032814    | RNFT2              |
| A_23_P62932    | 12,3929 | 13,4043 | -2,01586636  | ENST00000367816 | 481       | NM_001677    | ATP1B1             |
| A_21_P0009208  | 1,58397 | 2,5954  | -2,015908279 | N/A             | N/A       | N/A          | Inc-TIMM22-1       |
| A_23_P325080   | 9,05422 | 10,0659 | -2,01625764  | ENST00000594640 | 53635     | NM_017432    | PTOV1              |
| A_33_P3325502  | 4,36134 | 5,37304 | -2,016285591 | N/A             | 9411      | NM_004815    | ARHGAP29           |
| A_23_P24966    | 1,6177  | 2,62964 | -2,016621039 | ENST00000525735 | 9099      | NM_171997    | USP2               |
| A_33_P3313352  | 3,93821 | 4,95027 | -2,016788784 | ENST00000615129 | N/A       | XM_006716225 | Inc-ABCF2-1        |
| A_33_P3265679  | 1,68925 | 2,70134 | -2,016830722 | ENST00000429019 | 389199    | XR_112616    | LOC389199          |

|                |         |         |              |                 |           |              |                       |
|----------------|---------|---------|--------------|-----------------|-----------|--------------|-----------------------|
| A_23_P24555    | 7,44659 | 8,45877 | -2,016956543 | ENST00000526537 | 23187     | NM_015157    | PHLDB1                |
| A_21_P0008729  | 1,82679 | 2,83904 | -2,017054408 | N/A             | N/A       | N/A          | Inc-C15orf52-1        |
| A_21_P0005640  | 8,74828 | 9,76056 | -2,017096352 | N/A             | N/A       | N/A          | Inc-FBXO25-3          |
| A_21_P0010864  | 1,98452 | 2,99708 | -2,017487871 | N/A             | 101929149 | XR_242742    | LOC101929149          |
| A_33_P3353796  | 2,62883 | 3,64144 | -2,017557793 | N/A             | N/A       | BC045633     | N/A                   |
| A_23_P108157   | 6,51604 | 7,52896 | -2,017991363 | ENST00000591493 | 27134     | NM_001267560 | TJP3                  |
| A_22_P00018144 | 1,63089 | 2,64386 | -2,018061303 | ENST00000582755 | N/A       | DB031156     | N/A                   |
| A_21_P0007122  | 6,23118 | 7,24427 | -2,018229167 | N/A             | 729013    | NR_034137    | ZBED5-AS1             |
| A_21_P0000145  | 7,15442 | 8,16759 | -2,018341085 | ENST00000263893 | 100527978 | NM_001199691 | TMEM56-RWDD3          |
| A_23_P11705    | 11,1427 | 12,1571 | -2,020062598 | ENST00000341071 | 55108     | NM_018045    | BSDC1                 |
| A_33_P3372413  | 2,27548 | 3,28989 | -2,0200766   | ENST00000557911 | N/A       | N/A          | N/A                   |
| A_33_P3293598  | 1,56777 | 2,5823  | -2,020244632 | ENST00000419272 | 144776    | N/A          | LINC00410             |
| A_33_P3311076  | 11,473  | 12,4876 | -2,020342657 | ENST00000397914 | 1528      | NM_001190807 | CYB5A                 |
| A_24_P156267   | 4,00932 | 5,02398 | -2,020426683 | ENST00000342665 | 6666      | NM_006943    | SOX12                 |
| A_24_P400457   | 1,64994 | 2,66463 | -2,020468697 | ENST00000528287 | 606495    | NM_001031672 | CYB5RL                |
| A_24_P73535    | 3,07351 | 4,08822 | -2,020496707 | ENST00000319074 | 55017     | NM_017924    | C14orf119             |
| A_21_P0013074  | 1,58929 | 2,6041  | -2,020636762 | N/A             | N/A       | N/A          | XLOC_I2_012931        |
| A_23_P152548   | 10,8273 | 11,8423 | -2,020902893 | ENST00000570479 | 59342     | NM_021626    | SCPEP1                |
| A_24_P219785   | 9,12232 | 10,1374 | -2,021014959 | ENST00000595072 | 808       | NM_005184    | CALM3                 |
| A_22_P00011955 | 1,7286  | 2,74376 | -2,021127031 | N/A             | N/A       | N/A          | Inc-PKN2-1            |
| A_23_P75741    | 10,5075 | 11,5228 | -2,021323172 | ENST00000528275 | 9246      | NM_198183    | UBE2L6                |
| A_23_P95060    | 8,91639 | 9,93197 | -2,021715511 | ENST00000330394 | 2049      | NM_004443    | EPHB3                 |
| A_23_P403284   | 7,08139 | 8,09713 | -2,021939738 | ENST00000282549 | 5013      | NM_014562    | OTX1                  |
| A_33_P3363720  | 6,25957 | 7,27539 | -2,022051862 | N/A             | 148898    | NR_033691    | ZNF436-AS1            |
| A_23_P114057   | 12,2826 | 13,2985 | -2,022163991 | ENST00000467747 | 54910     | NM_017789    | SEMA4C                |
| A_24_P272313   | 7,63084 | 8,64687 | -2,022346215 | ENST00000397899 | 343990    | NM_207362    | KIAA1211L             |
| A_22_P00004534 | 2,57779 | 3,59384 | -2,022374251 | N/A             | 101928059 | XR_425033    | LOC101928059          |
| A_24_P564030   | 3,78089 | 4,79724 | -2,022794835 | ENST00000342818 | 284697    | NM_183242    | BTBD8                 |
| A_33_P3237674  | 2,58151 | 3,59831 | -2,023425876 | ENST00000613353 | N/A       | EU030677     | N/A                   |
| A_33_P3331120  | 1,50192 | 2,51881 | -2,023552108 | ENST00000465044 | 79663     | XM_005247762 | HSPBAP1               |
| A_33_P3235420  | 8,69539 | 9,71234 | -2,023636267 | ENST00000342081 | 166824    | NM_177532    | RASSF6                |
| A_21_P0002358  | 3,37213 | 4,38921 | -2,023818623 | ENST00000414512 | N/A       | N/A          | N/A                   |
| A_21_P0008924  | 2,03507 | 3,05234 | -2,024085174 | N/A             | N/A       | N/A          | Inc-CTD-2144E22.5.1-4 |

|                |         |         |              |                 |           |              |               |
|----------------|---------|---------|--------------|-----------------|-----------|--------------|---------------|
| A_21_P0005943  | 1,56908 | 2,58635 | -2,024085174 | N/A             | N/A       | N/A          | Inc-MATN2-2   |
| A_23_P107724   | 8,12738 | 9,14501 | -2,024590313 | ENST00000354340 | 7771      | NM_013380    | ZNF112        |
| A_23_P45955    | 2,91713 | 3,93487 | -2,024744686 | ENST00000469024 | 27285     | NM_014466    | TEKT2         |
| A_22_P00012423 | 4,27109 | 5,28889 | -2,024828894 | N/A             | N/A       | BQ652130     | Inc-PRM1-1    |
| A_23_P216501   | 14,0947 | 15,1127 | -2,025109615 | ENST00000378292 | 7169      | NM_213674    | TPM2          |
| A_24_P390928   | 10,3964 | 11,415  | -2,025952009 | ENST00000587818 | 79090     | NM_024108    | TRAPPC6A      |
| A_24_P276385   | 1,48694 | 2,5057  | -2,026176707 | ENST00000304355 | 389852    | NM_205856    | SPACA5        |
| A_33_P3328450  | 3,44722 | 4,4662  | -2,026485707 | ENST00000617742 | 3166      | NM_018942    | HMX1          |
| A_21_P0007336  | 1,62718 | 2,64618 | -2,0265138   | N/A             | N/A       | N/A          | Inc-LMO2-1    |
| A_22_P00024590 | 1,97536 | 2,99451 | -2,026724512 | ENST00000548497 | N/A       | DB089141     | N/A           |
| A_24_P382187   | 9,65761 | 10,6768 | -2,026780706 | ENST00000269593 | 3487      | NM_001552    | IGFBP4        |
| A_23_P433990   | 10,6104 | 11,6296 | -2,026794754 | ENST00000569720 | 6687      | NM_003119    | SPG7          |
| A_23_P408955   | 10,0029 | 11,0222 | -2,026935246 | ENST00000361729 | 1870      | NM_004091    | E2F2          |
| A_21_P0011036  | 9,24193 | 10,2613 | -2,027033596 | ENST00000545363 | 374443    | NR_046444    | LOC374443     |
| A_21_P0003627  | 1,63872 | 2,65824 | -2,027244362 | N/A             | N/A       | N/A          | Inc-COPS4-1   |
| A_22_P00025410 | 3,21145 | 4,23098 | -2,027258413 | ENST00000457253 | N/A       | N/A          | N/A           |
| A_23_P58521    | 7,24456 | 8,26418 | -2,027384884 | ENST00000462279 | 1161      | NM_001007233 | ERCC8         |
| A_24_P170067   | 1,85201 | 2,87163 | -2,027384884 | ENST00000433316 | N/A       | N/A          | N/A           |
| A_33_P3358295  | 10,0763 | 11,096  | -2,02749731  | ENST00000464431 | 80325     | NM_032548    | ABTB1         |
| A_32_P167471   | 8,45227 | 9,47204 | -2,027595687 | ENST00000298912 | 79789     | NM_024734    | CLMN          |
| A_21_P0002461  | 1,76901 | 2,7888  | -2,027623795 | N/A             | N/A       | N/A          | Inc-C2orf81-1 |
| A_33_P3260989  | 2,4183  | 3,43828 | -2,027890847 | ENST00000339381 | 83756     | NM_152228    | TAS1R3        |
| A_33_P3388536  | 3,57251 | 4,59276 | -2,028270402 | N/A             | 728752    | NR_036504    | LOC728752     |
| A_33_P3329974  | 9,33016 | 10,3506 | -2,028537538 | ENST00000271636 | 57530     | NM_020770    | CGN           |
| A_21_P0002202  | 2,02299 | 3,04375 | -2,028987532 | ENST00000418836 | 388942    | N/A          | LOC388942     |
| A_33_P3791123  | 12,8167 | 13,8375 | -2,029043788 | ENST00000505920 | 267020    | NM_001165877 | ATP5L2        |
| A_21_P0000704  | 2,76894 | 3,79008 | -2,02952203  | N/A             | 386627    | NR_037897    | SAP30L-AS1    |
| A_21_P0012834  | 2,52    | 3,54126 | -2,029690848 | ENST00000513310 | 7060      | N/A          | THBS4         |
| A_33_P3587611  | 1,68964 | 2,71093 | -2,029733054 | N/A             | 100191039 | BC020828     | RPL36AP33     |
| A_22_P00016088 | 2,46282 | 3,48432 | -2,030028526 | N/A             | N/A       | N/A          | Inc-THNSL1-1  |
| A_22_P00016100 | 1,40011 | 2,42176 | -2,030239603 | N/A             | N/A       | N/A          | Inc-THRSP-3   |
| A_23_P131383   | 10,9337 | 11,9555 | -2,030450702 | ENST00000233741 | 55120     | NM_018062    | FANCL         |
| A_32_P184488   | 9,43027 | 10,4521 | -2,030492924 | ENST00000292140 | 653583    | NM_198850    | PHLDB3        |

|                |         |         |              |                 |           |              |               |
|----------------|---------|---------|--------------|-----------------|-----------|--------------|---------------|
| A_21_P0006091  | 2,5304  | 3,55242 | -2,030760354 | ENST00000457976 | N/A       | N/A          | N/A           |
| A_22_P00005477 | 3,68664 | 4,70889 | -2,031084131 | ENST00000579991 | 140735    | N/A          | DYNLL2        |
| A_22_P00012617 | 6,91187 | 7,93429 | -2,031323478 | N/A             | 154860    | NR_036484    | FEZF1-AS1     |
| A_33_P3365501  | 1,67031 | 2,69273 | -2,031323478 | N/A             | N/A       | N/A          | N/A           |
| A_33_P3420352  | 3,35027 | 4,37296 | -2,031703675 | N/A             | N/A       | BC029571     | N/A           |
| A_23_P118      | 5,8058  | 6,82859 | -2,031844507 | ENST00000370114 | 2135      | NM_001439    | EXTL2         |
| A_21_P0012087  | 3,52092 | 4,5439  | -2,032112115 | ENST00000414886 | 100506797 | N/A          | LOC100506797  |
| A_32_P18440    | 10,7548 | 11,7779 | -2,032281148 | ENST00000279873 | 84159     | NM_032199    | ARID5B        |
| A_33_P3252177  | 4,10125 | 5,12438 | -2,032323409 | ENST00000326282 | 126272    | BC009725     | EID2B         |
| A_23_P124619   | 14,311  | 15,3342 | -2,03242202  | ENST00000344616 | 57402     | NM_020672    | S100A14       |
| A_33_P3300965  | 8,86911 | 9,89252 | -2,032717883 | ENST00000243108 | 3223      | NM_004503    | HOXC6         |
| A_33_P3225066  | 3,79197 | 4,81549 | -2,032872876 | ENST00000480180 | 56521     | NM_201262    | DNAJC12       |
| A_23_P203023   | 8,69599 | 9,71963 | -2,033041972 | ENST00000343115 | 5962      | NM_002906    | RDX           |
| A_32_P78491    | 3,24101 | 4,26495 | -2,033464775 | ENST00000242066 | 2115      | NM_004956    | ETV1          |
| A_33_P3415633  | 5,46132 | 6,4853  | -2,033521156 | ENST00000314475 | 219902    | NM_001198670 | TMEM136       |
| A_24_P80500    | 4,46253 | 5,48689 | -2,034056848 | N/A             | 56898     | NM_020139    | BDH2          |
| A_24_P126741   | 7,14873 | 8,17338 | -2,03446576  | ENST00000470810 | N/A       | N/A          | N/A           |
| A_23_P360744   | 5,84675 | 6,87141 | -2,034479862 | ENST00000299440 | 5896      | NM_000448    | RAG1          |
| A_23_P81529    | 4,95555 | 5,98022 | -2,034493964 | ENST00000230658 | 3670      | NM_002202    | ISL1          |
| A_22_P00018317 | 2,86808 | 3,89276 | -2,034508066 | ENST00000461331 | 23145     | NM_198455    | SSPO          |
| A_33_P3285824  | 12,5911 | 13,6164 | -2,035382586 | ENST00000624940 | 401152    | NM_001170330 | C4orf3        |
| A_21_P0014305  | 2,04559 | 3,07144 | -2,036158685 | N/A             | N/A       | N/A          | N/A           |
| A_32_P58425    | 11,0833 | 12,1094 | -2,036511555 | ENST00000377648 | 148479    | NM_153812    | PHF13         |
| A_23_P4798     | 8,91238 | 9,9386  | -2,036680954 | ENST00000585995 | 51545     | NM_016535    | ZNF581        |
| A_21_P0002273  | 1,41026 | 2,43653 | -2,036751541 | N/A             | N/A       | N/A          | Inc-DDX18-2   |
| A_22_P00015482 | 3,21416 | 4,24063 | -2,037033915 | N/A             | N/A       | N/A          | Inc-STAG3L4-1 |
| A_21_P0008375  | 1,54641 | 2,57321 | -2,037499916 | ENST00000442515 | 400238    | NR_033986    | LINC00642     |
| A_22_P00000575 | 9,03674 | 10,0636 | -2,037584655 | ENST00000563161 | 93129     | NM_152288    | ORAI3         |
| A_22_P00016072 | 1,70479 | 2,73167 | -2,037612902 | ENST00000560815 | N/A       | N/A          | N/A           |
| A_24_P363745   | 10,3386 | 11,3655 | -2,03764115  | ENST00000292524 | 9684      | NM_014665    | LRRRC14       |
| A_32_P74964    | 2,0816  | 3,10861 | -2,037796518 | ENST00000389677 | 84553     | NM_032511    | FAXC          |
| A_23_P132536   | 10,9369 | 11,9641 | -2,038064909 | ENST00000487159 | 22906     | NM_001042646 | TRAK1         |
| A_33_P3406821  | 1,68025 | 2,70752 | -2,038163799 | ENST00000415779 | N/A       | N/A          | N/A           |



|                |         |         |              |                 |           |              |                 |
|----------------|---------|---------|--------------|-----------------|-----------|--------------|-----------------|
| A_24_P71700    | 8,08394 | 9,11126 | -2,038234438 | N/A             | 92999     | NM_145166    | ZBTB47          |
| A_33_P3328559  | 3,24754 | 4,27489 | -2,038276822 | ENST00000526474 | 374403    | NM_198517    | TBC1D10C        |
| A_23_P387471   | 9,44983 | 10,4772 | -2,038305079 | ENST00000614843 | 4277      | NM_005931    | MICB            |
| A_24_P242646   | 5,19562 | 6,2232  | -2,038601798 | ENST00000607427 | 1520      | NM_004079    | CTSS            |
| A_33_P3362320  | 1,56988 | 2,59784 | -2,039138828 | N/A             | N/A       | N/A          | N/A             |
| A_23_P44546    | 5,68441 | 6,71254 | -2,039379124 | ENST00000338895 | 1677      | NM_001282669 | DFFB            |
| A_32_P118250   | 6,63015 | 7,65833 | -2,039449805 | N/A             | 55449     | NR_023921    | DHRS4-AS1       |
| A_22_P00000215 | 6,22408 | 7,25262 | -2,039958779 | N/A             | 101929760 | NR_110542    | PIK3IP1-AS1     |
| A_22_P00006743 | 3,05838 | 4,08694 | -2,039987059 | ENST00000350221 | 161835    | NM_152597    | FSIP1           |
| A_21_P0000398  | 3,08473 | 4,11345 | -2,040213313 | N/A             | 692233    | NR_003140    | SNORD117        |
| A_24_P205120   | 2,602   | 3,63078 | -2,040298165 | ENST00000341316 | 6687      | NM_199367    | SPG7            |
| A_23_P108437   | 9,05697 | 10,086  | -2,040651752 | ENST00000295417 | 7855      | NM_003468    | FZD5            |
| A_33_P3241190  | 6,98222 | 8,01126 | -2,040665897 | ENST00000359321 | 7516      | NM_005431    | XRCC2           |
| A_23_P126057   | 11,3143 | 12,3435 | -2,040892227 | ENST00000533119 | 6342      | NM_002979    | SCP2            |
| A_23_P30163    | 5,44681 | 6,4762  | -2,041161026 | N/A             | 79667     | NR_026804    | KLF3-AS1        |
| A_33_P3367615  | 1,65249 | 2,68194 | -2,041245917 | ENST00000542957 | 1316      | NM_001160124 | KLF6            |
| A_22_P00002764 | 2,57282 | 3,60241 | -2,041444401 | ENST00000430401 | 246312    | NR_038870    | C21orf91-OT1    |
| A_33_P3379091  | 5,73157 | 6,7613  | -2,041642123 | ENST00000318801 | 9145      | NM_145731    | SYNGR1          |
| A_22_P00003485 | 1,38052 | 2,41044 | -2,041911021 | ENST00000529088 | N/A       | N/A          | N/A             |
| A_24_P195081   | 1,97464 | 3,00459 | -2,041953481 | ENST00000432954 | 203238    | NM_173550    | CCDC171         |
| A_21_P0001971  | 6,09631 | 7,12645 | -2,04222242  | ENST00000442416 | N/A       | N/A          | N/A             |
| A_23_P333640   | 8,8451  | 9,87538 | -2,042420608 | ENST00000557061 | 89932     | NM_173462    | PAPLN           |
| A_33_P3461416  | 1,92746 | 2,95797 | -2,042746245 | ENST00000310373 | 51206     | NM_001083899 | GP6             |
| A_22_P00023241 | 1,51627 | 2,54681 | -2,042788723 | N/A             | N/A       | N/A          | Inc-SLC24A5-3   |
| A_23_P303978   | 6,32015 | 7,35086 | -2,043029449 | N/A             | 285943    | XR_426154    | HOXA-AS2        |
| A_22_P00002231 | 1,90928 | 2,94    | -2,043043611 | N/A             | N/A       | N/A          | Inc-C10orf108-1 |
| A_33_P3352557  | 10,0759 | 11,1067 | -2,043156904 | ENST00000404795 | 63950     | NM_032110    | DMRTA2          |
| A_23_P14255    | 3,56957 | 4,60042 | -2,043227716 | ENST00000493639 | 2974      | NR_003923    | GUCY1B2         |
| A_33_P3214925  | 2,04515 | 3,07692 | -2,044531088 | ENST00000477990 | 142678    | AK123400     | MIB2            |
| A_21_P0003499  | 2,6181  | 3,6502  | -2,044998805 | N/A             | N/A       | N/A          | Inc-ANKRD50-2   |
| A_23_P100240   | 2,10994 | 3,14251 | -2,045665131 | ENST00000568698 | 1014      | NM_004062    | CDH16           |
| A_32_P86763    | 11,5266 | 12,5595 | -2,046133107 | ENST00000469269 | 7052      | NM_004613    | TGM2            |
| A_24_P410610   | 3,30151 | 4,33459 | -2,046388412 | ENST00000306031 | 1806      | NM_001160301 | DPYD            |

|                |         |         |              |                 |           |              |              |
|----------------|---------|---------|--------------|-----------------|-----------|--------------|--------------|
| A_33_P3311917  | 1,71134 | 2,74483 | -2,046970059 | N/A             | N/A       | N/A          | N/A          |
| A_23_P359214   | 10,4293 | 11,4629 | -2,047126138 | ENST00000610809 | 643650    | NR_033957    | LINC00842    |
| A_21_P0003985  | 2,83463 | 3,86863 | -2,047693801 | N/A             | 100506406 | N/A          | LOC100506406 |
| A_21_P0006025  | 1,77902 | 2,81325 | -2,048020278 | ENST00000421482 | N/A       | N/A          | N/A          |
| A_22_P00021407 | 1,35887 | 2,39311 | -2,048034474 | ENST00000421617 | N/A       | N/A          | N/A          |
| A_21_P0014901  | 2,88124 | 3,91555 | -2,048133848 | N/A             | N/A       | AK091796     | N/A          |
| A_33_P3407636  | 5,75083 | 6,78534 | -2,048417799 | ENST00000576854 | 7531      | AK296555     | YWHAE        |
| A_22_P00012945 | 1,59501 | 2,62988 | -2,048929011 | ENST00000565944 | N/A       | BC015852     | N/A          |
| A_23_P428999   | 3,51144 | 4,54636 | -2,049000022 | ENST00000518287 | 10499     | NM_006540    | NCOA2        |
| A_24_P90881    | 2,5546  | 3,59035 | -2,050179176 | ENST00000303334 | 23491     | NM_024922    | CES3         |
| A_22_P00005653 | 1,49432 | 2,53012 | -2,050250231 | N/A             | N/A       | BG195943     | Inc-EIF2C4-1 |
| A_23_P122439   | 5,66324 | 6,69918 | -2,050449198 | ENST00000416795 | 10385     | NM_181531    | BTN2A2       |
| A_23_P376188   | 3,39991 | 4,43611 | -2,05081876  | ENST00000378605 | 222389    | NM_001100912 | BEND7        |
| A_21_P0000663  | 3,14347 | 4,17993 | -2,051188388 | N/A             | 644242    | NR_036540    | LINC00622    |
| A_32_P144342   | 2,62285 | 3,65954 | -2,051515423 | ENST00000381989 | 143       | NM_006437    | PARP4        |
| A_33_P3296487  | 2,00641 | 3,0431  | -2,051515423 | N/A             | 5796      | XM_006715539 | PTPRK        |
| A_33_P3240063  | 1,62985 | 2,66659 | -2,051586524 | ENST00000444118 | 256369    | NR_024182    | LINC00521    |
| A_24_P21770    | 5,64978 | 6,68713 | -2,052454159 | ENST00000534711 | 219539    | NM_145008    | YPEL4        |
| A_23_P34375    | 10,5066 | 11,544  | -2,052525293 | ENST00000450454 | 6920      | NM_003196    | TCEA3        |
| A_23_P58036    | 12,1625 | 13,2001 | -2,052809853 | ENST00000610757 | 56922     | NM_020166    | MCCC1        |
| A_22_P00018123 | 5,59933 | 6,63711 | -2,053065991 | N/A             | N/A       | AW873248     | Inc-ZNF484-1 |
| A_21_P0005270  | 1,57518 | 2,61333 | -2,053592597 | ENST00000427073 | N/A       | N/A          | N/A          |
| A_23_P217938   | 7,53164 | 8,56983 | -2,053649535 | ENST00000366688 | 10638     | NM_006542    | SPHAR        |
| A_33_P3421626  | 9,91003 | 10,9484 | -2,053905778 | ENST00000536163 | 57189     | NM_001080392 | KIAA1147     |
| A_21_P0007013  | 1,60077 | 2,63919 | -2,053976962 | N/A             | N/A       | N/A          | Inc-PDZD7-3  |
| A_24_P185394   | 11,8818 | 12,9203 | -2,054090862 | ENST00000222330 | 2931      | NM_019884    | GSK3A        |
| A_33_P3342156  | 1,58647 | 2,62507 | -2,054233245 | ENST00000390463 | N/A       | AB305786     | N/A          |
| A_33_P3260430  | 9,66581 | 10,7049 | -2,054931068 | ENST00000392653 | 6700      | NM_005988    | SPRR2A       |
| A_23_P139123   | 1,46947 | 2,50882 | -2,055301438 | ENST00000531133 | 710       | NM_000062    | SERPING1     |
| A_33_P3223592  | 6,87141 | 7,91078 | -2,05532993  | ENST00000252486 | 348       | NM_001302688 | APOE         |
| A_22_P00003747 | 1,34645 | 2,38673 | -2,056626767 | ENST00000582028 | N/A       | DA764966     | N/A          |
| A_33_P3283922  | 1,628   | 2,66841 | -2,056812096 | ENST00000572770 | N/A       | N/A          | N/A          |
| A_22_P00021375 | 2,37026 | 3,41097 | -2,057239843 | ENST00000451118 | N/A       | N/A          | N/A          |

|                |         |         |              |                 |           |              |                  |
|----------------|---------|---------|--------------|-----------------|-----------|--------------|------------------|
| A_33_P3607600  | 1,96103 | 3,00265 | -2,058537885 | N/A             | 677846    | DB304787     | SNORA80A         |
| A_21_P0005276  | 1,36078 | 2,40241 | -2,058552154 | ENST00000447563 | 154822    | N/A          | LINC00689        |
| A_23_P47077    | 10,3083 | 11,3501 | -2,058794738 | ENST00000369085 | 9531      | NM_004281    | BAG3             |
| A_21_P0000074  | 1,84718 | 2,88913 | -2,059008806 | ENST00000522692 | 153222    | NM_001168394 | CREBRF           |
| A_33_P3302255  | 13,6297 | 14,6717 | -2,059080167 | ENST00000378565 | 9445      | NM_021999    | ITM2B            |
| A_22_P00011098 | 1,61575 | 2,65846 | -2,060093761 | ENST00000518276 | N/A       | N/A          | N/A              |
| A_24_P260101   | 8,56016 | 9,60299 | -2,060265122 | ENST00000460393 | 4311      | NM_007289    | MME              |
| A_22_P00023941 | 1,55868 | 2,60158 | -2,060365089 | N/A             | N/A       | N/A          | Inc-GABPA-5      |
| A_21_P0007648  | 2,38371 | 3,42663 | -2,060393652 | N/A             | N/A       | N/A          | Inc-ZNF664-2     |
| A_22_P00023470 | 2,28927 | 3,33221 | -2,060422215 | N/A             | N/A       | BC067888     | Inc-AL391421.1-2 |
| A_23_P78018    | 7,28547 | 8,32896 | -2,061207861 | ENST00000586601 | 23461     | NM_018672    | ABCA5            |
| A_33_P3286923  | 4,3547  | 5,39833 | -2,061407892 | ENST00000299882 | 80975     | NM_001288751 | TMPRSS5          |
| A_23_P90626    | 3,51091 | 4,55459 | -2,061479336 | ENST00000264192 | 9595      | NM_004288    | CYTIP            |
| A_33_P3354635  | 1,57006 | 2,61399 | -2,061836594 | ENST00000455228 | 401039    | NR_034162    | FLJ43879         |
| A_22_P00007359 | 7,8144  | 8,8588  | -2,062508407 | N/A             | N/A       | N/A          | Inc-GRAMD4-2     |
| A_33_P3407384  | 4,23417 | 5,2786  | -2,062551296 | ENST00000373413 | 7579      | BC011404     | ZSCAN20          |
| A_24_P206702   | 2,4169  | 3,46142 | -2,062679969 | ENST00000328458 | 390243    | NM_001199206 | IZUMO1R          |
| A_22_P00018707 | 2,60108 | 3,64567 | -2,062780053 | N/A             | N/A       | N/A          | Inc-BTBD9-1      |
| A_23_P107994   | 11,1407 | 12,1859 | -2,063652422 | ENST00000253047 | 54958     | NM_017854    | TMEM160          |
| A_23_P106024   | 10,4741 | 11,5194 | -2,063795468 | ENST00000546616 | 3714      | NM_002226    | JAG2             |
| A_21_P0003047  | 1,67233 | 2,71766 | -2,063838384 | N/A             | N/A       | N/A          | Inc-C3orf79-2    |
| A_24_P342591   | 7,25193 | 8,2974  | -2,06403867  | ENST00000467350 | 473       | NM_012102    | RERE             |
| A_33_P3589543  | 6,34848 | 7,39411 | -2,064267592 | N/A             | N/A       | AK093839     | Inc-RASSF7-1     |
| A_22_P00025412 | 3,1191  | 4,1648  | -2,064367753 | N/A             | N/A       | N/A          | Inc-UCHL5-2      |
| A_21_P0003074  | 1,76596 | 2,81212 | -2,065026077 | N/A             | N/A       | N/A          | Inc-C3orf65-2    |
| A_33_P3253234  | 8,19271 | 9,23887 | -2,065026077 | N/A             | 23096     | NM_001243197 | IQSEC2           |
| A_24_P325146   | 1,85892 | 2,9053  | -2,065341002 | ENST00000333822 | 728224    | NM_031960    | KRTAP4-8         |
| A_22_P00018237 | 1,64509 | 2,69147 | -2,065341002 | N/A             | 101928324 | NR_125953    | LOC101928324     |
| A_22_P00025315 | 2,05171 | 3,09848 | -2,065899395 | ENST00000584975 | N/A       | N/A          | N/A              |
| A_33_P3295786  | 2,88413 | 3,93109 | -2,066171488 | ENST00000517870 | 348378    | NM_001042693 | FAM159A          |
| A_24_P82493    | 7,82614 | 8,87359 | -2,066873366 | ENST00000310604 | 79877     | NM_024819    | DCAKD            |
| A_21_P0004816  | 4,97864 | 6,02627 | -2,067131259 | ENST00000525811 | N/A       | N/A          | N/A              |
| A_32_P516067   | 1,7089  | 2,75655 | -2,067159916 | ENST00000378207 | 221060    | NM_153244    | C10orf111        |

|                |         |         |              |                 |           |              |                |
|----------------|---------|---------|--------------|-----------------|-----------|--------------|----------------|
| A_23_P31085    | 11,4263 | 12,474  | -2,067231559 | ENST00000611852 | 25901     | NM_015439    | CCDC28A        |
| A_23_P26124    | 5,4287  | 6,4765  | -2,067374854 | ENST00000449337 | 6095      | NM_134260    | RORA           |
| A_23_P428184   | 12,2585 | 13,3063 | -2,067374854 | ENST00000341023 | 3013      | NM_021065    | HIST1H2AD      |
| A_33_P3331267  | 4,10932 | 5,15715 | -2,067417844 | N/A             | N/A       | N/A          | N/A            |
| A_33_P3264672  | 2,46331 | 3,51144 | -2,067847796 | ENST00000624358 | 340665    | XR_246086    | CYP26C1        |
| A_33_P3247042  | 2,2611  | 3,30932 | -2,067976799 | ENST00000339223 | 2359      | NM_002030    | FPR3           |
| A_32_P126229   | 2,19432 | 3,24257 | -2,068019802 | ENST00000366215 | 401236    | NM_001190766 | STMND1         |
| A_22_P00005100 | 1,5475  | 2,59585 | -2,068163151 | ENST00000515871 | 103689917 | N/A          | LINC01337      |
| A_22_P00006488 | 1,91503 | 2,96339 | -2,068177487 | N/A             | N/A       | N/A          | Inc-FGF10-3    |
| A_22_P00020918 | 3,12501 | 4,17345 | -2,068292174 | N/A             | N/A       | DW429745     | Inc-KLHL35-1   |
| A_22_P00003259 | 7,63004 | 8,67893 | -2,068937408 | N/A             | 100874362 | NR_102279    | HOXB-AS1       |
| A_21_P0004866  | 6,37421 | 7,4231  | -2,068937408 | ENST00000606878 | 100133205 | N/A          | LINC00240      |
| A_23_P364613   | 3,73131 | 4,78049 | -2,069353333 | ENST00000370646 | 112817    | NM_138413    | HOGA1          |
| A_22_P00003067 | 1,6116  | 2,66092 | -2,069554154 | N/A             | N/A       | BX095188     | Inc-C8orf39-1  |
| A_23_P11629    | 9,61641 | 10,6658 | -2,069654572 | ENST00000371268 | 199964    | NM_182532    | TMEM61         |
| A_22_P00024555 | 4,74615 | 5,79559 | -2,069726302 | ENST00000485793 | 63899     | N/A          | NSUN3          |
| A_21_P0009233  | 3,64794 | 4,69763 | -2,070084989 | N/A             | N/A       | N/A          | Inc-PIPOX-1    |
| A_21_P0000478  | 6,96838 | 8,01813 | -2,070171083 | N/A             | 100124540 | NR_003710    | SNORA11C       |
| A_33_P3420810  | 2,91413 | 3,96394 | -2,070257181 | N/A             | N/A       | N/A          | N/A            |
| A_23_P80122    | 9,04715 | 10,0978 | -2,071462926 | ENST00000490860 | 7485      | NM_004627    | WRB            |
| A_23_P201845   | 7,11098 | 8,16165 | -2,071491643 | ENST00000466345 | 9204      | NM_007167    | ZMYM6          |
| A_19_P00812050 | 3,03322 | 4,08403 | -2,071692671 | N/A             | N/A       | N/A          | Inc-TBC1D19-3  |
| A_33_P3407350  | 1,69822 | 2,74906 | -2,071735752 | ENST00000524983 | 120237    | NM_001029865 | DBX1           |
| A_23_P55356    | 4,93075 | 5,98194 | -2,072238419 | ENST00000328739 | 284013    | NM_182566    | VMO1           |
| A_22_P00000915 | 1,593   | 2,6443  | -2,072396425 | N/A             | N/A       | AK024139     | Inc-AK4-1      |
| A_23_P200780   | 7,39685 | 8,44841 | -2,072769942 | ENST00000532540 | 7049      | NM_003243    | TGFBR3         |
| A_33_P3280721  | 9,20466 | 10,2563 | -2,072884884 | ENST00000354777 | 79971     | NM_001002292 | WLS            |
| A_23_P408996   | 9,31164 | 10,3634 | -2,073057309 | N/A             | 154141    | NM_001080480 | MBOAT1         |
| A_32_P75902    | 2,57514 | 3,62699 | -2,073186637 | ENST00000397344 | 254528    | NM_152764    | MEIOB          |
| A_33_P3271111  | 13,0438 | 14,096  | -2,073689657 | ENST00000489274 | 4814      | NM_004148    | NINJ1          |
| A_23_P39251    | 5,66718 | 6,71976 | -2,07423593  | ENST00000381848 | 440503    | NM_001013706 | PLIN5          |
| A_21_P0013764  | 1,6172  | 2,66984 | -2,074322197 | N/A             | N/A       | N/A          | XLOC_I2_015529 |
| A_33_P3285371  | 1,49357 | 2,54622 | -2,074336575 | N/A             | N/A       | N/A          | N/A            |

|                |         |         |              |                 |           |              |                |
|----------------|---------|---------|--------------|-----------------|-----------|--------------|----------------|
| A_22_P00014437 | 4,15846 | 5,21133 | -2,07465292  | ENST00000548846 | N/A       | N/A          | N/A            |
| A_21_P0001431  | 1,68445 | 2,73791 | -2,075501537 | N/A             | N/A       | N/A          | Inc-MIXL1-1    |
| A_23_P346912   | 3,13274 | 4,18624 | -2,075559082 | ENST00000471021 | 128153    | NM_138796    | SPATA17        |
| A_24_P218979   | 9,89445 | 10,948  | -2,075631017 | ENST00000536241 | 83461     | NM_031299    | CDCA3          |
| A_22_P00009297 | 7,68656 | 8,74024 | -2,075818059 | ENST00000441809 | N/A       | N/A          | N/A            |
| A_22_P00006665 | 1,43369 | 2,48738 | -2,075832447 | ENST00000400431 | 646982    | NR_024505    | LINC00598      |
| A_19_P00321110 | 6,49733 | 7,55122 | -2,076120239 | ENST00000449545 | 26230     | AK124484     | TIAM2          |
| A_33_P3269208  | 7,90127 | 8,95518 | -2,07614902  | ENST00000315099 | 415117    | NM_001001850 | STX19          |
| A_33_P3410981  | 2,99974 | 4,05367 | -2,076177802 | ENST00000612073 | 56099     | NM_032101    | PCDHGB7        |
| A_33_P3217470  | 1,48066 | 2,53465 | -2,076264149 | N/A             | 101928259 | NR_110391    | LOC101928259   |
| A_22_P00009821 | 6,22579 | 7,28004 | -2,076638364 | N/A             | N/A       | N/A          | Inc-METAP1-2   |
| A_23_P34788    | 12,3392 | 13,3936 | -2,076854288 | ENST00000372217 | 11004     | NM_006845    | KIF2C          |
| A_33_P3211213  | 13,5139 | 14,5683 | -2,076854288 | ENST00000613589 | 79042     | NM_001282332 | TSEN34         |
| A_21_P0013524  | 2,05049 | 3,10506 | -2,077099028 | N/A             | 100506365 | N/A          | OTUD6B-AS1     |
| A_33_P3416420  | 6,95576 | 8,01055 | -2,077415794 | ENST00000368573 | 221302    | NM_145062    | ZUFSP          |
| A_22_P00019896 | 1,36881 | 2,42363 | -2,077458993 | N/A             | N/A       | N/A          | Inc-KDM5A-3    |
| A_21_P0014912  | 2,58854 | 3,64345 | -2,077588596 | N/A             | N/A       | N/A          | N/A            |
| A_21_P0010676  | 3,32205 | 4,37696 | -2,077588596 | N/A             | N/A       | N/A          | XLOC_I2_001331 |
| A_33_P3336252  | 3,73115 | 4,78609 | -2,077631799 | ENST00000421076 | 100506759 | NR_002163    | OR7E37P        |
| A_33_P3301331  | 8,46454 | 9,51961 | -2,077819021 | ENST00000599305 | 1084      | NM_001277163 | CEACAM3        |
| A_22_P00014451 | 5,96076 | 7,01593 | -2,077963049 | N/A             | N/A       | N/A          | Inc-SH3BGR12-1 |
| A_22_P00005155 | 2,18329 | 3,23862 | -2,078193515 | N/A             | N/A       | AL568765     | Inc-DIAPH1-2   |
| A_22_P00001227 | 1,4388  | 2,49475 | -2,079086813 | ENST00000433966 | N/A       | N/A          | N/A            |
| A_23_P94782    | 1,60411 | 2,66013 | -2,079187694 | ENST00000366872 | 388743    | NM_001143962 | CAPN8          |
| A_21_P0008154  | 3,93215 | 4,98848 | -2,079634509 | N/A             | N/A       | N/A          | Inc-NUFIP1-1   |
| A_33_P3326432  | 12,8154 | 13,8718 | -2,079735416 | ENST00000598083 | 6415      | NM_003009    | SEPW1          |
| A_24_P910688   | 2,54907 | 3,60552 | -2,079807495 | N/A             | 646457    | N/A          | C19orf67       |
| A_32_P111996   | 1,79422 | 2,85073 | -2,079893993 | ENST00000623554 | 441058    | NR_038377    | MGC39584       |
| A_21_P0009212  | 5,89313 | 6,94981 | -2,080139092 | N/A             | N/A       | N/A          | Inc-PAFAH1B1-2 |
| A_23_P136347   | 10,5005 | 11,5572 | -2,080167929 | ENST00000543612 | 2059      | NM_004447    | EPS8           |
| A_24_P251534   | 10,3949 | 11,4518 | -2,080456322 | ENST00000443503 | 10217     | NM_001008392 | CTDSPL         |
| A_24_P256380   | 9,34502 | 10,4021 | -2,080715909 | ENST00000262348 | 79971     | NM_024911    | WLS            |
| A_23_P19712    | 10,7707 | 11,828  | -2,081033227 | ENST00000620958 | 51053     | NM_015895    | GMNN           |

|                |         |         |              |                 |           |              |                |
|----------------|---------|---------|--------------|-----------------|-----------|--------------|----------------|
| A_24_P263543   | 13,5902 | 14,6475 | -2,081033227 | ENST00000489253 | N/A       | N/A          | N/A            |
| A_23_P334664   | 6,71835 | 7,77572 | -2,081134202 | ENST00000567543 | 5371      | NM_033247    | PML            |
| A_22_P00006344 | 1,81524 | 2,87287 | -2,081509294 | ENST00000546784 | N/A       | DA645803     | N/A            |
| A_32_P23010    | 11,3422 | 12,4    | -2,081754583 | ENST00000378887 | 644096    | NM_001042631 | SDHAF1         |
| A_23_P46539    | 8,97559 | 10,0338 | -2,082346282 | ENST00000369903 | 84722     | NM_032636    | PSRC1          |
| A_24_P415327   | 8,49505 | 9,55382 | -2,083154727 | ENST00000462743 | 3257      | NM_000195    | HPS1           |
| A_33_P3281745  | 2,22078 | 3,27965 | -2,083299125 | N/A             | N/A       | CN291113     | Inc-C10orf71-1 |
| A_24_P199655   | 10,8365 | 11,8954 | -2,083342447 | ENST00000310260 | 81839     | NM_138959    | VANGL1         |
| A_33_P3297390  | 1,54534 | 2,60429 | -2,083414651 | ENST00000446603 | 152118    | NM_001101337 | C3orf79        |
| A_21_P0001110  | 4,75505 | 5,81403 | -2,083457975 | ENST00000450820 | N/A       | N/A          | N/A            |
| A_33_P3340129  | 1,61344 | 2,67248 | -2,083544625 | N/A             | 100128551 | AK125148     | LOC100128551   |
| A_21_P0000531  | 1,42632 | 2,48563 | -2,083934597 | N/A             | 148824    | NR_027309    | GCSAML-AS1     |
| A_22_P00024047 | 1,52451 | 2,58387 | -2,084006822 | N/A             | N/A       | N/A          | Inc-APOC3-6    |
| A_22_P00016766 | 2,82093 | 3,88032 | -2,084050158 | ENST00000515822 | N/A       | N/A          | N/A            |
| A_24_P280148   | 2,305   | 3,3644  | -2,084064603 | ENST00000302548 | 27197     | NM_080817    | GPR82          |
| A_24_P248240   | 1,52103 | 2,58045 | -2,084093495 | ENST00000368324 | 23208     | NM_152280    | SYT11          |
| A_24_P303199   | 3,39205 | 4,45175 | -2,084498017 | ENST00000504924 | 54622     | NM_019087    | ARL15          |
| A_33_P3403075  | 8,36005 | 9,42005 | -2,084931522 | ENST00000614081 | 55771     | NM_018304    | PRR11          |
| A_21_P0001652  | 2,16472 | 3,22481 | -2,085061591 | N/A             | N/A       | N/A          | Inc-AKT3-2     |
| A_23_P200310   | 10,2694 | 11,3298 | -2,085509668 | ENST00000489862 | 55635     | NM_017779    | DEPDC1         |
| A_23_P76538    | 9,39902 | 10,4595 | -2,085625316 | ENST00000541210 | 54997     | NM_017899    | TESC           |
| A_22_P00021103 | 2,99431 | 4,05498 | -2,085900007 | N/A             | N/A       | N/A          | Inc-RAB15-1    |
| A_23_P406135   | 10,1726 | 11,2334 | -2,086087974 | ENST00000509128 | 26160     | NM_015662    | IFT172         |
| A_21_P0014867  | 3,81703 | 4,87785 | -2,086116893 | N/A             | N/A       | N/A          | N/A            |
| A_21_P0002908  | 2,03412 | 3,09537 | -2,08673876  | ENST00000424941 | N/A       | N/A          | N/A            |
| A_33_P3290149  | 1,97214 | 3,03343 | -2,086796617 | N/A             | N/A       | N/A          | N/A            |
| A_33_P3266192  | 1,35457 | 2,41604 | -2,087056996 | N/A             | 650669    | BC137379     | GAS6-AS1       |
| A_24_P194081   | 12,0518 | 13,1135 | -2,087389749 | ENST00000496493 | 53827     | NM_144779    | FXYS5          |
| A_33_P3259542  | 1,51617 | 2,57839 | -2,088142256 | N/A             | 54554     | NM_019069    | WDR5B          |
| A_22_P00022484 | 2,11705 | 3,17942 | -2,088359376 | N/A             | 101669766 | NR_103847    | ZNF350-AS1     |
| A_33_P3314813  | 3,09221 | 4,15465 | -2,088460706 | ENST00000449465 | 143678    | NM_001080446 | C11orf94       |
| A_33_P3238335  | 8,59007 | 9,6528  | -2,088880556 | N/A             | 55283     | BC060765     | MCOLN3         |
| A_23_P1962     | 12,5581 | 13,6213 | -2,08956118  | ENST00000354445 | 5920      | NM_004585    | RARRES3        |

|                |         |         |              |                 |           |              |                |
|----------------|---------|---------|--------------|-----------------|-----------|--------------|----------------|
| A_32_P218025   | 4,27269 | 5,33605 | -2,089792933 | N/A             | 100506253 | XR_109812    | LOC100506253   |
| A_22_P00006253 | 3,3784  | 4,44181 | -2,089865361 | N/A             | N/A       | N/A          | Inc-FAM65A-1   |
| A_22_P00015271 | 2,30302 | 3,36657 | -2,090068173 | N/A             | 100874010 | NR_046664    | NLGN1-AS1      |
| A_21_P0011239  | 2,00382 | 3,06738 | -2,09008266  | ENST00000553443 | 319089    | XM_006720346 | TTC6           |
| A_33_P3344673  | 5,63137 | 6,69523 | -2,090517326 | ENST00000540059 | 284352    | NM_019121    | PPP1R37        |
| A_21_P0000908  | 3,66771 | 4,73159 | -2,090546306 | N/A             | 400761    | NR_033981    | FLJ27354       |
| A_33_P3418025  | 6,75714 | 7,8211  | -2,090662234 | ENST00000433477 | 1519      | NM_001334    | CTSO           |
| A_23_P114656   | 13,8028 | 14,8669 | -2,090865123 | ENST00000476391 | 3065      | NM_004964    | HDAC1          |
| A_21_P0007780  | 2,34723 | 3,41157 | -2,091212979 | N/A             | N/A       | N/A          | Inc-DHX37-5    |
| A_21_P0003630  | 6,38082 | 7,4456  | -2,091850864 | N/A             | N/A       | N/A          | Inc-RAP1GDS1-2 |
| A_33_P3227716  | 9,31791 | 10,3829 | -2,092155378 | ENST00000407689 | 652968    | NM_001037666 | GATSL3         |
| A_23_P61371    | 11,9935 | 13,0586 | -2,092314903 | ENST00000330794 | 340061    | NM_198282    | TMEM173        |
| A_33_P3413726  | 2,32276 | 3,38811 | -2,092677505 | ENST00000565828 | N/A       | N/A          | N/A            |
| A_33_P3222124  | 1,56302 | 2,62865 | -2,093083694 | ENST00000319423 | 150681    | NM_173351    | OR6B3          |
| A_33_P3456233  | 9,03803 | 10,1038 | -2,093286817 | N/A             | 101928483 | NR_121577    | LINC01573      |
| A_23_P106069   | 2,00925 | 3,07535 | -2,093765688 | ENST00000390428 | N/A       | X58747       | N/A            |
| A_23_P58407    | 2,0438  | 3,11031 | -2,0943608   | ENST00000616841 | 7366      | NM_001076    | UGT2B15        |
| A_22_P00008347 | 8,23022 | 9,29686 | -2,09454953  | N/A             | 100506334 | NR_038883    | LINC00649      |
| A_33_P3353996  | 6,69605 | 7,76274 | -2,094622123 | N/A             | 648791    | NM_001145115 | PPP1R3G        |
| A_22_P00011698 | 1,53434 | 2,60143 | -2,095202956 | N/A             | 101929636 | XR_244161    | LOC101929636   |
| A_22_P00002918 | 1,69215 | 2,75963 | -2,095769423 | N/A             | N/A       | N/A          | Inc-C5orf22-2  |
| A_23_P138125   | 3,99689 | 5,06442 | -2,095842058 | ENST00000463473 | 9214      | NM_005449    | FAIM3          |
| A_21_P0003586  | 3,49065 | 4,55818 | -2,095842058 | N/A             | N/A       | N/A          | Inc-TBC1D19-1  |
| A_23_P311740   | 10,8199 | 11,8875 | -2,095943751 | ENST00000503766 | 23113     | NM_015089    | CUL9           |
| A_33_P3287939  | 4,05073 | 5,11844 | -2,096103565 | ENST00000462546 | 340277    | NM_199136    | FAM221A        |
| A_22_P00015648 | 4,26056 | 5,32883 | -2,096917352 | N/A             | N/A       | N/A          | Inc-SUSD1-2    |
| A_19_P00317612 | 3,2776  | 4,3459  | -2,096960956 | ENST00000446799 | 101929559 | NR_110012    | LINC00211      |
| A_23_P68072    | 10,2235 | 11,2919 | -2,097106312 | ENST00000461531 | 84058     | NM_032118    | WDR54          |
| A_21_P0008914  | 1,74042 | 2,80888 | -2,09719353  | N/A             | N/A       | N/A          | Inc-CACNG3-1   |
| A_24_P228302   | 11,2927 | 12,3613 | -2,097397053 | ENST00000006724 | 1087      | NM_006890    | CEACAM7        |
| A_21_P0012707  | 1,47449 | 2,54337 | -2,097804157 | ENST00000501825 | N/A       | XR_425830    | N/A            |
| A_22_P00011959 | 8,65027 | 9,71926 | -2,097964113 | N/A             | 100506100 | NR_046240    | LOC100506100   |
| A_23_P15516    | 9,28648 | 10,3555 | -2,09800774  | ENST00000206380 | 84336     | NM_032376    | TMEM101        |

|                |         |         |              |                 |           |              |                |
|----------------|---------|---------|--------------|-----------------|-----------|--------------|----------------|
| A_23_P201655   | 11,6544 | 12,7237 | -2,098414963 | ENST00000465771 | 26292     | NM_012333    | MYCBP          |
| A_22_P00015684 | 1,46631 | 2,53573 | -2,098589511 | N/A             | N/A       | DB024615     | Inc-SYN3-4     |
| A_33_P3347012  | 3,16444 | 4,23417 | -2,099040496 | N/A             | N/A       | DB462629     | N/A            |
| A_23_P327022   | 7,95795 | 9,02787 | -2,099316953 | ENST00000257724 | 29969     | NM_199072    | MDFIC          |
| A_22_P00015934 | 1,71332 | 2,78327 | -2,099360608 | N/A             | N/A       | BG199486     | Inc-TCP11L2-2  |
| A_22_P00018902 | 1,35529 | 2,42545 | -2,099666215 | N/A             | N/A       | DA375949     | Inc-C11orf39-3 |
| A_24_P922631   | 8,39567 | 9,46592 | -2,099797203 | ENST00000521850 | 133874    | NM_001102609 | C5orf58        |
| A_33_P3244585  | 1,86178 | 2,93226 | -2,100131987 | ENST00000472131 | 114827    | NM_052929    | FHAD1          |
| A_22_P00005067 | 4,98    | 6,05062 | -2,100335795 | ENST00000545293 | N/A       | N/A          | N/A            |
| A_23_P157726   | 9,38685 | 10,4576 | -2,100525063 | ENST00000380437 | 55667     | XM_006716804 | DENND4C        |
| A_22_P00004718 | 4,35936 | 5,43045 | -2,101020152 | N/A             | 101928736 | NR_110941    | MIR762HG       |
| A_33_P3382835  | 4,99466 | 6,06579 | -2,101078406 | ENST00000382554 | 57523     | NM_025081    | NYNRIN         |
| A_21_P0008905  | 1,42247 | 2,49366 | -2,101165789 | N/A             | N/A       | N/A          | Inc-C16orf72-5 |
| A_23_P110473   | 7,26339 | 8,33473 | -2,101384263 | ENST00000517649 | 4671      | NM_004536    | NAIP           |
| A_33_P3416922  | 2,51412 | 3,58561 | -2,10160276  | N/A             | N/A       | N/A          | N/A            |
| A_22_P00023295 | 4,27753 | 5,3494  | -2,102156386 | N/A             | N/A       | BX092811     | Inc-AKIRIN1-1  |
| A_21_P0012439  | 4,72787 | 5,80015 | -2,102753884 | ENST00000429976 | 9881      | N/A          | TRANK1         |
| A_24_P277295   | 11,2599 | 12,3324 | -2,103074562 | ENST00000418265 | 339122    | NM_198490    | RAB43          |
| A_33_P3353372  | 3,01293 | 4,08546 | -2,103118295 | ENST00000430825 | 64327     | N/A          | LMBR1          |
| A_33_P3354970  | 1,36271 | 2,43542 | -2,10338071  | N/A             | N/A       | N/A          | N/A            |
| A_33_P3261530  | 8,0372  | 9,11003 | -2,103555671 | ENST00000398554 | N/A       | N/A          | N/A            |
| A_33_P3390471  | 2,67544 | 3,74836 | -2,103686902 | N/A             | N/A       | BC012200     | Inc-GCNT2-2    |
| A_21_P0007843  | 3,45218 | 4,52524 | -2,103891055 | N/A             | N/A       | N/A          | Inc-ALX1-2     |
| A_23_P166526   | 7,7395  | 8,81274 | -2,104153566 | ENST00000614167 | 26150     | NM_015653    | RIBC2          |
| A_24_P940059   | 1,43666 | 2,5101  | -2,104445284 | ENST00000265198 | 26034     | NM_015553    | IPCEF1         |
| A_32_P47157    | 2,1411  | 3,2146  | -2,104532808 | N/A             | 92973     | NR_024006    | LINC00950      |
| A_24_P162173   | 3,85307 | 4,92671 | -2,104737043 | ENST00000508449 | 288       | NM_001149    | ANK3           |
| A_23_P160546   | 9,32268 | 10,3964 | -2,104853757 | ENST00000361936 | 55793     | NM_001040217 | FAM63A         |
| A_21_P0010901  | 3,10979 | 4,1836  | -2,104985069 | N/A             | N/A       | N/A          | Inc-SORCS1-4   |
| A_22_P00008914 | 1,95368 | 3,0277  | -2,105291495 | N/A             | N/A       | BQ073030     | Inc-KLRF2-1    |
| A_33_P3296997  | 2,50811 | 3,58214 | -2,105306088 | ENST00000344321 | 285180    | NM_198483    | RUFY4          |
| A_22_P00003473 | 1,37054 | 2,4446  | -2,105349867 | N/A             | N/A       | N/A          | Inc-CCDC7-2    |
| A_22_P00000585 | 2,07262 | 3,14681 | -2,105539586 | ENST00000480919 | N/A       | XR_426123    | N/A            |



|                |         |         |              |                 |           |              |                |
|----------------|---------|---------|--------------|-----------------|-----------|--------------|----------------|
| A_33_P3273272  | 5,53417 | 6,60843 | -2,10564175  | ENST00000593941 | 55762     | NM_001172655 | ZNF701         |
| A_23_P389281   | 5,33116 | 6,40554 | -2,1058169   | ENST00000222753 | 3209      | NM_000522    | HOXA13         |
| A_22_P00010615 | 7,58596 | 8,66037 | -2,10586069  | N/A             | N/A       | N/A          | Inc-NDUFS5-1   |
| A_21_P0014736  | 4,87295 | 5,94737 | -2,105875286 | N/A             | 100506538 | XR_426345    | LOC100506538   |
| A_33_P3268726  | 2,77738 | 3,85232 | -2,106634458 | N/A             | N/A       | N/A          | Inc-ELF2-2     |
| A_24_P175176   | 8,5717  | 9,64664 | -2,106634458 | ENST00000248550 | 57157     | NM_020432    | PHTF2          |
| A_23_P77328    | 10,5843 | 11,6593 | -2,106722072 | ENST00000260447 | 2644      | NM_005258    | GCHFR          |
| A_21_P0005719  | 2,16629 | 3,24142 | -2,106911915 | N/A             | N/A       | N/A          | Inc-TERF1-2    |
| A_23_P118254   | 1,95639 | 3,03165 | -2,107101776 | ENST00000262426 | 2294      | NM_001451    | FOXF1          |
| A_33_P3418838  | 3,78512 | 4,86051 | -2,107291654 | ENST00000602950 | 7163      | N/A          | TPD52          |
| A_33_P3746549  | 1,56681 | 2,64246 | -2,10767146  | ENST00000504041 | 153478    | NM_052909    | PLEKHG4B       |
| A_22_P00018708 | 1,63752 | 2,71356 | -2,108241299 | N/A             | 101927913 | XR_241962    | LOC101927913   |
| A_24_P252462   | 1,6929  | 2,76894 | -2,108241299 | ENST00000260116 | 7274      | NM_000370    | TPPA           |
| A_22_P00012391 | 2,96513 | 4,04135 | -2,108504353 | N/A             | N/A       | AK096834     | Inc-PRKACG-2   |
| A_23_P328034   | 6,18152 | 7,25783 | -2,108635892 | ENST00000400269 | 140680    | NM_153269    | C2orf96        |
| A_32_P68533    | 5,88676 | 6,96338 | -2,109089036 | ENST00000418113 | 84140     | NM_032180    | FAM161A        |
| A_21_P0012004  | 1,45687 | 2,53368 | -2,109366817 | ENST00000377977 | 101927533 | XR_245012    | LOC101927533   |
| A_24_P71244    | 6,39248 | 7,46951 | -2,109688503 | ENST00000377346 | 5293      | NM_005026    | PIK3CD         |
| A_33_P3792489  | 1,68506 | 2,76239 | -2,110127246 | N/A             | 114042    | BM686390     | LINC00334      |
| A_21_P0014920  | 9,36128 | 10,4388 | -2,110405164 | N/A             | N/A       | CX782743     | N/A            |
| A_33_P3271284  | 3,26561 | 4,34341 | -2,110814794 | ENST00000475781 | 140688    | NM_001256798 | NOL4L          |
| A_23_P94230    | 7,76029 | 8,83816 | -2,110917214 | ENST00000284818 | 23643     | NM_015364    | LY96           |
| A_33_P3287228  | 1,50163 | 2,57959 | -2,111048904 | N/A             | 115811    | AK127152     | IQCD           |
| A_23_P215720   | 2,03253 | 3,11073 | -2,111400117 | ENST00000003084 | 1080      | NM_000492    | CFTR           |
| A_33_P3292724  | 3,01205 | 4,09027 | -2,111429388 | ENST00000372450 | 23334     | BC017576     | SZT2           |
| A_21_P0013865  | 5,47167 | 6,55013 | -2,111780664 | ENST00000422194 | 102725299 | N/A          | LOC102725299   |
| A_33_P3270599  | 13,2985 | 14,377  | -2,111839216 | ENST00000378292 | 7169      | NM_001301226 | TPM2           |
| A_33_P3252444  | 1,43628 | 2,51555 | -2,112966655 | N/A             | N/A       | N/A          | N/A            |
| A_33_P3288839  | 7,55216 | 8,63151 | -2,113083826 | ENST00000267485 | 145407    | NM_001001872 | C14orf37       |
| A_21_P0012475  | 2,13894 | 3,21872 | -2,113713731 | N/A             | N/A       | N/A          | XLOC_l2_010489 |
| A_33_P3210338  | 8,7942  | 9,87453 | -2,114519698 | ENST00000559447 | 64864     | NM_022841    | RFX7           |
| A_33_P3228460  | 16,8342 | 17,9147 | -2,114768877 | ENST00000604255 | 5349      | NM_001136007 | FXD3           |
| A_33_P3398448  | 10,6681 | 11,7487 | -2,114915467 | ENST00000526007 | 84875     | NM_032789    | PARP10         |

|                |         |         |              |                 |           |              |              |
|----------------|---------|---------|--------------|-----------------|-----------|--------------|--------------|
| A_33_P3653888  | 2,02987 | 3,1105  | -2,114959446 | ENST00000624944 | N/A       | AF274944     | N/A          |
| A_21_P0006125  | 2,20062 | 3,28126 | -2,114974106 | N/A             | N/A       | N/A          | Inc-KDM4C-7  |
| A_33_P3379947  | 13,6226 | 14,7034 | -2,115208677 | ENST00000425848 | 3106      | NM_005514    | HLA-B        |
| A_21_P0011440  | 1,74832 | 2,82943 | -2,115663232 | ENST00000568134 | N/A       | N/A          | N/A          |
| A_23_P66694    | 1,82097 | 2,90223 | -2,115883214 | ENST00000577894 | 2124      | NM_006495    | EVI2B        |
| A_23_P420293   | 4,95233 | 6,03399 | -2,116469942 | ENST00000310799 | 219833    | NM_145013    | C11orf45     |
| A_23_P56659    | 9,68807 | 10,7699 | -2,116719351 | ENST00000404568 | 165545    | NM_133637    | DQX1         |
| A_22_P00001621 | 6,18767 | 7,27008 | -2,117570497 | N/A             | 104355295 | N/A          | SGMS1-AS1    |
| A_23_P205074   | 4,00116 | 5,0839  | -2,118054923 | ENST00000266943 | 283537    | NM_181785    | SLC46A3      |
| A_21_P0003628  | 1,56883 | 2,65172 | -2,118275153 | N/A             | N/A       | N/A          | Inc-AFF1-1   |
| A_19_P00318759 | 1,65634 | 2,73955 | -2,118745053 | ENST00000424205 | 149773    | NR_034147    | APCDD1L-AS1  |
| A_33_P3328716  | 1,62262 | 2,70606 | -2,119082859 | ENST00000310232 | 152206    | NM_144719    | CCDC13       |
| A_23_P24044    | 4,20336 | 5,28709 | -2,119508864 | ENST00000433628 | 54805     | NM_017649    | CNNM2        |
| A_21_P0011228  | 2,34401 | 3,42785 | -2,119670475 | ENST00000435617 | N/A       | N/A          | N/A          |
| A_23_P15542    | 6,22644 | 7,31069 | -2,12027295  | ENST00000590299 | 3292      | NM_000413    | HSD17B1      |
| A_21_P0009419  | 1,73116 | 2,81543 | -2,120302344 | ENST00000572301 | 100130370 | NM_001272086 | LOC100130370 |
| A_21_P0003135  | 3,71184 | 4,79613 | -2,120331738 | N/A             | N/A       | N/A          | Inc-VGLL3-3  |
| A_24_P517252   | 3,14938 | 4,23367 | -2,120331738 | ENST00000592340 | 768206    | NM_001077620 | PRCD         |
| A_33_P3239614  | 1,6035  | 2,68799 | -2,120625698 | ENST00000392256 | 389434    | NM_203395    | IYD          |
| A_23_P356425   | 3,37887 | 4,46426 | -2,121949026 | ENST00000484455 | 126859    | NM_144696    | AXDND1       |
| A_33_P3276808  | 1,37074 | 2,45637 | -2,122302053 | N/A             | N/A       | N/A          | N/A          |
| A_33_P3219295  | 4,97733 | 6,06347 | -2,12305243  | N/A             | N/A       | N/A          | Inc-PHLPP2-1 |
| A_23_P23584    | 13,0239 | 14,1101 | -2,123140727 | ENST00000377263 | 56998     | NM_020248    | CTNBP1       |
| A_23_P48717    | 15,6824 | 16,7686 | -2,123140727 | ENST00000554482 | 10577     | NM_006432    | NPC2         |
| A_22_P00006106 | 5,4488  | 6,53507 | -2,123243745 | N/A             | 104472848 | NR_126453    | IRAIN        |
| A_24_P185029   | 7,74014 | 8,82655 | -2,123449796 | ENST00000395532 | 25970     | NM_015503    | SH2B1        |
| A_19_P00316396 | 1,86979 | 2,95625 | -2,123523391 | ENST00000455531 | 55384     | NR_046473    | MEG3         |
| A_33_P3383004  | 1,68299 | 2,76946 | -2,12353811  | N/A             | 768239    | NM_001085382 | PSAPL1       |
| A_24_P213228   | 12,0477 | 13,1342 | -2,123582268 | ENST00000438311 | N/A       | N/A          | N/A          |
| A_33_P3218783  | 5,64535 | 6,73194 | -2,123714748 | ENST00000508449 | 288       | NM_001204404 | ANK3         |
| A_32_P420520   | 2,83974 | 3,92634 | -2,123729469 | N/A             | 439931    | NR_027051    | THAP7-AS1    |
| A_33_P3353471  | 3,25945 | 4,34612 | -2,123832515 | N/A             | 642976    | NR_027021    | GRIK1-AS1    |
| A_22_P00022629 | 2,99914 | 4,08596 | -2,124053346 | N/A             | 101928864 | XR_244659    | LOC101928864 |

|                |         |         |              |                 |        |              |                |
|----------------|---------|---------|--------------|-----------------|--------|--------------|----------------|
| A_22_P00009468 | 1,36348 | 2,45078 | -2,124760159 | N/A             | N/A    | N/A          | Inc-MAF-5      |
| A_33_P3210278  | 11,2218 | 12,3091 | -2,124760159 | ENST00000555612 | 23224  | NM_182914    | SYNE2          |
| A_23_P418274   | 2,13086 | 3,21831 | -2,124981086 | ENST00000426490 | 135886 | NM_182504    | WBSCR28        |
| A_22_P00007222 | 2,03771 | 3,12519 | -2,125025274 | N/A             | N/A    | N/A          | Inc-GPD2-1     |
| A_24_P38895    | 12,3528 | 13,4405 | -2,125349349 | ENST00000375167 | 3014   | NM_002105    | H2AFX          |
| A_33_P3539223  | 6,75646 | 7,84423 | -2,125452474 | ENST00000475323 | 84904  | NM_032818    | ARHGEF39       |
| A_23_P67618    | 5,77692 | 6,86489 | -2,125747145 | ENST00000404801 | 126375 | NM_175872    | ZNF792         |
| A_32_P33434    | 3,96745 | 5,05595 | -2,12652822  | ENST00000453792 | 729648 | NM_001199814 | ZNF812         |
| A_21_P0010961  | 1,68626 | 2,77483 | -2,126631402 | ENST00000526488 | 650368 | N/A          | TSSC2          |
| A_22_P00009343 | 2,69424 | 3,78384 | -2,128150235 | ENST00000417947 | N/A    | N/A          | N/A            |
| A_22_P00024855 | 2,59402 | 3,68362 | -2,128150235 | ENST00000517854 | N/A    | N/A          | N/A            |
| A_23_P258493   | 9,99407 | 11,0841 | -2,128784631 | ENST00000460265 | 4001   | NM_005573    | LMNB1          |
| A_22_P00001065 | 2,67891 | 3,76929 | -2,12930114  | N/A             | N/A    | N/A          | Inc-ALDH1A1-2  |
| A_33_P3312686  | 1,36725 | 2,45784 | -2,129611106 | N/A             | 347516 | NM_198512    | DGAT2L6        |
| A_22_P00017742 | 2,26017 | 3,351   | -2,129965407 | ENST00000414339 | N/A    | AF086102     | N/A            |
| A_22_P00014096 | 5,82616 | 6,917   | -2,129980171 | N/A             | N/A    | BC048339     | Inc-SASS6-2    |
| A_33_P3246635  | 1,94017 | 3,0311  | -2,130113051 | ENST00000381871 | 646405 | NR_026730    | TPTE2P1        |
| A_21_P0002562  | 1,51149 | 2,60243 | -2,130127815 | N/A             | N/A    | N/A          | Inc-SNTG2-4    |
| A_21_P0004275  | 4,99074 | 6,08173 | -2,130201641 | N/A             | N/A    | N/A          | Inc-RASA1-3    |
| A_32_P48559    | 1,63875 | 2,72987 | -2,130393601 | ENST00000561910 | 146378 | NM_001109660 | C16orf92       |
| A_33_P3251144  | 5,86455 | 6,95611 | -2,131043437 | ENST00000465490 | 55536  | NM_001127370 | CDCA7L         |
| A_21_P0003185  | 5,49528 | 6,58687 | -2,131087752 | N/A             | N/A    | N/A          | Inc-IGSF10-1   |
| A_33_P3261173  | 4,73674 | 5,82887 | -2,131885566 | ENST00000490980 | 10023  | NM_005479    | FRAT1          |
| A_22_P00000985 | 5,51584 | 6,60813 | -2,132122013 | ENST00000455810 | 439949 | NR_036502    | PRKCQ-AS1      |
| A_23_P391443   | 3,43762 | 4,52999 | -2,132240246 | ENST00000228705 | 57460  | NM_020700    | PPM1H          |
| A_33_P3407945  | 8,27545 | 9,36798 | -2,132476732 | ENST00000266673 | 55266  | NM_018279    | TMEM19         |
| A_23_P43846    | 6,18121 | 7,27375 | -2,132491513 | ENST00000523955 | 2172   | NM_001040442 | FABP6          |
| A_33_P3309551  | 1,73502 | 2,8278  | -2,132846294 | ENST00000356435 | 5789   | NM_002839    | PTPRD          |
| A_19_P00322859 | 1,94336 | 3,0364  | -2,133230707 | N/A             | N/A    | N/A          | Inc-GLB1L2-1   |
| A_23_P137073   | 7,19354 | 8,28658 | -2,133230707 | ENST00000373988 | 9203   | NM_005096    | ZMYM3          |
| A_33_P3211569  | 7,90783 | 9,001   | -2,133422939 | ENST00000411731 | 2065   | NM_001005915 | ERBB3          |
| A_23_P218476   | 9,31242 | 10,406  | -2,134029323 | ENST00000243578 | 80776  | NM_030578    | B9D2           |
| A_19_P00811216 | 1,53647 | 2,63026 | -2,134339977 | N/A             | N/A    | N/A          | XLOC_l2_006673 |

|                |         |         |              |                 |           |              |                |
|----------------|---------|---------|--------------|-----------------|-----------|--------------|----------------|
| A_33_P3411773  | 6,31246 | 7,40632 | -2,134443538 | N/A             | 100130285 | XR_424754    | LOC100130285   |
| A_23_P376735   | 10,0242 | 11,1184 | -2,134946622 | ENST00000301073 | 147807    | NM_153219    | ZNF524         |
| A_33_P3591972  | 2,86992 | 3,96432 | -2,135242609 | ENST00000473583 | 132158    | NM_001144951 | GLYCTK         |
| A_33_P3341494  | 3,17638 | 4,27109 | -2,13570147  | ENST00000602828 | 26149     | NM_033160    | ZNF658         |
| A_21_P0005128  | 1,56555 | 2,66076 | -2,136441776 | N/A             | N/A       | N/A          | Inc-KIAA1919-1 |
| A_21_P0010348  | 7,71322 | 8,80845 | -2,136471393 | ENST00000444388 | N/A       | N/A          | N/A            |
| A_23_P432056   | 3,60138 | 4,69717 | -2,137300852 | ENST00000331238 | 146760    | NM_178568    | RTN4RL1        |
| A_21_P0010812  | 3,87028 | 4,96608 | -2,137315667 | ENST00000422642 | N/A       | N/A          | N/A            |
| A_22_P00004838 | 2,34707 | 3,44307 | -2,137611982 | N/A             | N/A       | N/A          | Inc-CYB5R2-1   |
| A_24_P475864   | 1,80402 | 2,90006 | -2,13767125  | ENST00000564580 | 653390    | NR_003369    | RRN3P2         |
| A_22_P00019516 | 4,58412 | 5,68069 | -2,138456707 | N/A             | 101927365 | NR_125843    | LOC101927365   |
| A_21_P0009315  | 5,48145 | 6,57835 | -2,13894591  | N/A             | N/A       | N/A          | Inc-SLC35G3-1  |
| A_33_P3265205  | 4,59208 | 5,68906 | -2,139064522 | N/A             | N/A       | N/A          | N/A            |
| A_23_P12343    | 12,3888 | 13,4858 | -2,139094176 | ENST00000488824 | 2947      | NM_000849    | GSTM3          |
| A_21_P0008485  | 2,67668 | 3,77401 | -2,139583525 | ENST00000554822 | 388011    | N/A          | LINC01550      |
| A_23_P34144    | 7,08004 | 8,17772 | -2,140102654 | ENST00000342972 | 28986     | NM_014061    | MAGEH1         |
| A_22_P00001957 | 5,89229 | 6,99033 | -2,140636747 | N/A             | 100506157 | XR_424491    | SRP54-AS1      |
| A_23_P21162    | 10,2825 | 11,3807 | -2,140874164 | ENST00000446494 | 255758    | NM_152773    | TCTEX1D2       |
| A_23_P215787   | 9,19547 | 10,2937 | -2,140918683 | ENST00000468410 | 26959     | NM_012257    | HBP1           |
| A_33_P3390212  | 1,74276 | 2,84104 | -2,140992883 | ENST00000310998 | 164395    | XM_006723721 | TTL9           |
| A_33_P3220822  | 1,49353 | 2,59196 | -2,141215498 | N/A             | 441687    | N/A          | TEX21P         |
| A_33_P3352632  | 4,51873 | 5,6176  | -2,141868636 | N/A             | 728147    | AK096262     | LOC728147      |
| A_24_P291231   | 7,25538 | 8,35438 | -2,142061646 | ENST00000613533 | 8863      | NM_016831    | PER3           |
| A_22_P00017968 | 5,1498  | 6,24891 | -2,142224977 | N/A             | 104797538 | NR_126560    | KCNMB2-AS1     |
| A_22_P00020906 | 2,07903 | 3,17844 | -2,142670486 | N/A             | N/A       | CN293478     | Inc-ARHGAP28-2 |
| A_22_P00003751 | 1,37855 | 2,47813 | -2,142922983 | ENST00000563003 | N/A       | AK127458     | N/A            |
| A_21_P0004986  | 2,91204 | 4,01169 | -2,14302696  | N/A             | N/A       | N/A          | Inc-GMDS-4     |
| A_23_P155979   | 1,88963 | 2,98937 | -2,143160654 | ENST00000544918 | 1950      | NM_001963    | EGF            |
| A_22_P00008653 | 1,74746 | 2,84735 | -2,143383494 | ENST00000567093 | N/A       | BC012990     | N/A            |
| A_21_P0000750  | 8,17812 | 9,27805 | -2,143442922 | N/A             | 100507057 | NR_038285    | MF12-AS1       |
| A_22_P00010601 | 1,57966 | 2,67969 | -2,143591499 | ENST00000437514 | 103689918 | BI758522     | LINC01378      |
| A_21_P0014063  | 1,52685 | 2,62699 | -2,143754946 | N/A             | N/A       | AK022893     | Inc-C1orf106-1 |
| A_23_P107933   | 8,40177 | 9,5022  | -2,144185912 | ENST00000424804 | 51231     | NM_016440    | VRK3           |

|                |         |         |              |                 |           |              |                |
|----------------|---------|---------|--------------|-----------------|-----------|--------------|----------------|
| A_24_P179504   | 8,20948 | 9,30995 | -2,144245362 | ENST00000545752 | 144406    | NM_144668    | WDR66          |
| A_22_P00010091 | 4,40523 | 5,50571 | -2,144260225 | N/A             | 102725254 | N/A          | LOC102725254   |
| A_33_P3322553  | 9,86498 | 10,9656 | -2,144468315 | ENST00000600105 | 81857     | NM_030973    | MED25          |
| A_33_P3246448  | 1,76217 | 2,86333 | -2,145271139 | ENST00000281830 | 23704     | NM_080671    | KCNE4          |
| A_23_P55936    | 10,5195 | 11,6207 | -2,145330619 | ENST00000595881 | 2217      | NM_004107    | FCGRT          |
| A_22_P00004522 | 1,9194  | 3,02076 | -2,145568557 | N/A             | N/A       | N/A          | Inc-CRABP2-1   |
| A_23_P205531   | 4,80462 | 5,90603 | -2,145642918 | ENST00000397995 | 6038      | NM_001282192 | RNASE4         |
| A_21_P0000613  | 6,23769 | 7,33928 | -2,145910639 | N/A             | 100130275 | NR_033910    | TFAP2A-AS1     |
| A_23_P107795   | 12,2755 | 13,3776 | -2,146669363 | ENST00000592922 | 55101     | NM_018035    | ATP5SL         |
| A_32_P172864   | 7,4574  | 8,55954 | -2,146728883 | ENST00000483371 | 284611    | NM_001010883 | FAM102B        |
| A_24_P307869   | 9,53047 | 10,6327 | -2,146862807 | ENST00000582860 | 3993      | NM_001015002 | LLGL2          |
| A_24_P110558   | 6,88337 | 7,9857  | -2,147011621 | ENST00000333305 | 492311    | NM_001007189 | IGIP           |
| A_23_P45786    | 6,9445  | 8,04696 | -2,147205095 | ENST00000482722 | 1298      | NM_001852    | COL9A2         |
| A_23_P26954    | 11,7471 | 12,8496 | -2,147264629 | ENST00000592388 | 10493     | NM_006373    | VAT1           |
| A_33_P3209279  | 2,66411 | 3,76715 | -2,1480685   | ENST00000367467 | 23328     | NM_015278    | SASH1          |
| A_33_P3338484  | 4,64008 | 5,74344 | -2,148545009 | N/A             | 101927718 | NR_110788    | DSG1-AS1       |
| A_21_P0003303  | 2,29885 | 3,40291 | -2,149587743 | ENST00000434969 | 100505547 | NR_109968    | LINC01208      |
| A_22_P00021231 | 4,29149 | 5,39577 | -2,149915563 | ENST00000541574 | 101928346 | XR_247876    | LOC101928346   |
| A_32_P117313   | 7,69681 | 8,80124 | -2,150139106 | ENST00000518748 | 286144    | NM_001171796 | TRIQK          |
| A_23_P395172   | 8,38078 | 9,48524 | -2,150183818 | ENST00000352732 | 11057     | NM_007011    | ABHD2          |
| A_33_P3370019  | 1,54233 | 2,6468  | -2,150198722 | ENST00000390556 | N/A       | AK093943     | N/A            |
| A_23_P166400   | 4,74696 | 5,85155 | -2,150377578 | ENST00000216101 | 10633     | NM_006477    | RASL10A        |
| A_23_P390518   | 1,6968  | 2,80148 | -2,150511729 | ENST00000616710 | 8792      | NM_003839    | TNFRSF11A      |
| A_33_P3322236  | 8,20532 | 9,31033 | -2,15100369  | ENST00000615493 | N/A       | AK125217     | N/A            |
| A_33_P3233055  | 5,57806 | 6,68322 | -2,151227346 | N/A             | N/A       | BF515046     | N/A            |
| A_23_P51039    | 3,82751 | 4,93269 | -2,151257169 | ENST00000243786 | 3623      | NM_002191    | INHA           |
| A_33_P3263359  | 4,60774 | 5,71292 | -2,151257169 | ENST00000546995 | 1606      | BC008292     | DGKA           |
| A_19_P00318587 | 7,65126 | 8,75697 | -2,152047617 | ENST00000606054 | 100652853 | NR_046368    | LINC01023      |
| A_21_P0014382  | 2,38052 | 3,4865  | -2,15245041  | N/A             | N/A       | N/A          | N/A            |
| A_21_P0001105  | 1,45312 | 2,55927 | -2,152704059 | ENST00000455966 | 101928043 | N/A          | LOC101928043   |
| A_33_P3357949  | 5,52582 | 6,63239 | -2,153330849 | ENST00000405218 | 2115      | NM_004956    | ETV1           |
| A_23_P366812   | 6,03162 | 7,13839 | -2,153629385 | ENST00000553132 | 362       | NM_001651    | AQP5           |
| A_21_P0004920  | 3,29631 | 4,40337 | -2,154062335 | N/A             | N/A       | N/A          | Inc-KIAA1919-1 |

|                |         |         |              |                 |           |              |                |
|----------------|---------|---------|--------------|-----------------|-----------|--------------|----------------|
| A_33_P3344492  | 3,73066 | 4,83785 | -2,154256445 | N/A             | 677774    | NR_002997    | SCARNA1        |
| A_22_P00015472 | 2,5985  | 3,70578 | -2,154390839 | ENST00000504833 | N/A       | XR_425905    | N/A            |
| A_22_P00009823 | 2,22978 | 3,33741 | -2,15491356  | N/A             | N/A       | BC038532     | Inc-METAP1-3   |
| A_23_P33791    | 7,58663 | 8,69472 | -2,155600759 | ENST00000504136 | 23635     | NM_012446    | SSBP2          |
| A_22_P00015259 | 2,08029 | 3,18847 | -2,155735237 | N/A             | 401398    | NR_125719    | POT1-AS1       |
| A_19_P00319453 | 5,19506 | 6,30326 | -2,155765122 | N/A             | N/A       | N/A          | Inc-MMRN1-2    |
| A_23_P90233    | 7,18746 | 8,29574 | -2,155884666 | ENST00000587340 | 79149     | NM_024303    | ZSCAN5A        |
| A_21_P0000117  | 1,64654 | 2,75498 | -2,156123775 | N/A             | 4281      | NM_001193281 | MID1           |
| A_21_P0003930  | 3,71842 | 4,82692 | -2,156213447 | N/A             | 101929719 | XR_425926    | LOC101929719   |
| A_22_P00001551 | 2,82299 | 3,93157 | -2,156333016 | N/A             | N/A       | N/A          | Inc-ARID1B-1   |
| A_23_P143713   | 6,8376  | 7,94633 | -2,156557226 | ENST00000480000 | 60489     | NM_021822    | APOBEC3G       |
| A_21_P0009768  | 5,02614 | 6,13513 | -2,156945913 | N/A             | N/A       | N/A          | Inc-ZNF404-1   |
| A_23_P89249    | 10,8129 | 11,9226 | -2,158007681 | ENST00000406381 | 2064      | NM_001005862 | ERBB2          |
| A_22_P00010263 | 1,4457  | 2,55543 | -2,158052556 | N/A             | N/A       | N/A          | Inc-MTHFR-2    |
| A_33_P3334718  | 2,55522 | 3,66519 | -2,158411159 | N/A             | N/A       | N/A          | N/A            |
| A_23_P65857    | 3,09709 | 4,20774 | -2,159429175 | ENST00000319669 | 145942    | NM_152453    | TMCO5A         |
| A_23_P424051   | 1,47468 | 2,58576 | -2,160072896 | ENST00000412661 | 153328    | NM_145282    | SLC25A48       |
| A_21_P0007052  | 1,66702 | 2,77824 | -2,160282521 | N/A             | 731789    | N/A          | LINC00202-2    |
| A_22_P00013669 | 2,231   | 3,34267 | -2,160956453 | ENST00000572530 | N/A       | DB022043     | N/A            |
| A_23_P74112    | 6,6015  | 7,71322 | -2,161031348 | ENST00000327535 | 163702    | NM_170743    | IFNLR1         |
| A_33_P3240843  | 5,54765 | 6,65947 | -2,161181144 | ENST00000356838 | 137835    | NM_144649    | TMEM71         |
| A_23_P51202    | 9,45338 | 10,5652 | -2,161181144 | ENST00000374608 | 80818     | NM_001077195 | ZNF436         |
| A_21_P0011760  | 2,03632 | 3,14818 | -2,161241066 | N/A             | N/A       | N/A          | XLOC_I2_007112 |
| A_22_P00006233 | 1,62509 | 2,73701 | -2,161330951 | N/A             | N/A       | N/A          | Inc-FAM55B-1   |
| A_23_P412389   | 3,01184 | 4,12397 | -2,161645579 | ENST00000274625 | 8817      | NM_003862    | FGF18          |
| A_21_P0013492  | 1,59854 | 2,71075 | -2,16176545  | ENST00000521446 | 101929488 | NR_125818    | LOC101929488   |
| A_21_P0007320  | 3,88781 | 5,00031 | -2,162200036 | N/A             | N/A       | N/A          | Inc-BTBD10-3   |
| A_33_P3686706  | 1,58858 | 2,70111 | -2,162244998 | N/A             | N/A       | N/A          | N/A            |
| A_33_P3354214  | 2,41367 | 3,52627 | -2,162349913 | N/A             | N/A       | N/A          | Inc-TNFRSF14-2 |
| A_22_P00000386 | 3,54102 | 4,65376 | -2,162559759 | N/A             | 79667     | NR_026804    | KLF3-AS1       |
| A_22_P00005799 | 1,60823 | 2,72165 | -2,1635793   | N/A             | 101927943 | XR_433481    | LOC101927943   |
| A_33_P3795649  | 1,49015 | 2,60371 | -2,163789266 | ENST00000447535 | N/A       | BC005107     | N/A            |
| A_22_P00015750 | 1,86902 | 2,98271 | -2,163984252 | N/A             | N/A       | AK123582     | Inc-TAF1C-1    |

|                |         |         |              |                 |        |              |                |
|----------------|---------|---------|--------------|-----------------|--------|--------------|----------------|
| A_21_P0012935  | 2,91321 | 4,02755 | -2,164959445 | N/A             | N/A    | N/A          | XLOC_I2_012323 |
| A_23_P101208   | 11,7537 | 12,8682 | -2,16519956  | ENST00000397914 | 1528   | NM_001914    | CYB5A          |
| A_23_P26928    | 6,44326 | 7,55791 | -2,165424692 | ENST00000331733 | 388389 | AK023156     | CCDC103        |
| A_22_P00009070 | 3,2909  | 4,4057  | -2,165649847 | ENST00000521908 | N/A    | N/A          | N/A            |
| A_23_P83244    | 1,45457 | 2,56945 | -2,16576994  | ENST00000259466 | 254973 | NM_001005235 | OR1L4          |
| A_21_P0013510  | 1,78761 | 2,90261 | -2,165950091 | ENST00000519902 | N/A    | XR_426294    | N/A            |
| A_33_P3396008  | 2,29664 | 3,41253 | -2,16728668  | ENST00000375056 | 177    | NM_001206954 | AGER           |
| A_24_P56363    | 7,0244  | 8,1405  | -2,167602175 | ENST00000610540 | 81617  | NM_030925    | CAB39L         |
| A_23_P413585   | 5,90821 | 7,0244  | -2,167737401 | ENST00000334793 | 2306   | NM_004474    | FOXD2          |
| A_23_P15357    | 11,2722 | 12,3888 | -2,168353539 | ENST00000587251 | 3959   | NM_005567    | LGALS3BP       |
| A_23_P218317   | 10,7455 | 11,8621 | -2,168353539 | ENST00000582907 | 26502  | NM_001038618 | NARF           |
| A_21_P0008623  | 4,75686 | 5,87405 | -2,169240483 | ENST00000503052 | N/A    | N/A          | N/A            |
| A_23_P25293    | 11,6925 | 12,8099 | -2,169556263 | ENST00000315579 | 9918   | NM_014865    | NCAPD2         |
| A_23_P148919   | 9,76366 | 10,8812 | -2,169766808 | ENST00000371486 | 1376   | NM_000098    | CPT2           |
| A_33_P3251163  | 1,5551  | 2,6729  | -2,170157875 | ENST00000510083 | 8635   | AK124363     | RNASET2        |
| A_22_P00018969 | 2,0898  | 3,20764 | -2,170218046 | N/A             | N/A    | N/A          | Inc-SLC25A47-4 |
| A_22_P00012060 | 3,39229 | 4,51018 | -2,170293261 | N/A             | N/A    | N/A          | Inc-PLOD2-1    |
| A_22_P00011922 | 5,83817 | 6,95637 | -2,170759654 | N/A             | N/A    | N/A          | Inc-PITPNC1-1  |
| A_33_P3846653  | 14,0133 | 15,1315 | -2,170759654 | ENST00000557173 | 160313 | NR_036685    | KRT19P2        |
| A_33_P3343106  | 7,39061 | 8,50901 | -2,171060606 | ENST00000402764 | 2116   | NM_014209    | ETV2           |
| A_23_P425587   | 9,28859 | 10,407  | -2,171075655 | ENST00000293777 | 400569 | NM_001001683 | MED11          |
| A_21_P0007011  | 2,71886 | 3,83729 | -2,171105753 | N/A             | N/A    | N/A          | Inc-PANK1-2    |
| A_33_P3383233  | 9,96343 | 11,0819 | -2,171165949 | ENST00000397847 | 57447  | NM_001282213 | NDRG2          |
| A_33_P3404779  | 4,2357  | 5,35447 | -2,171617477 | ENST00000339355 | 343521 | NM_001013632 | TCTEX1D4       |
| A_23_P79769    | 2,54485 | 3,6639  | -2,172038988 | ENST00000342412 | 79444  | NM_022161    | BIRC7          |
| A_33_P3385148  | 10,6961 | 11,8152 | -2,172114267 | ENST00000331555 | 440712 | NM_001007544 | C1orf186       |
| A_23_P90130    | 4,73004 | 5,84921 | -2,172219661 | ENST00000598044 | 9476   | NM_004851    | NAPSA          |
| A_22_P00009043 | 2,12899 | 3,2484  | -2,172581051 | N/A             | N/A    | N/A          | Inc-LDOC1L-2   |
| A_22_P00022265 | 3,47307 | 4,5925  | -2,17261117  | N/A             | N/A    | N/A          | Inc-C11orf36-2 |
| A_33_P3694746  | 5,52854 | 6,64808 | -2,17277683  | ENST00000416689 | 440584 | AK056786     | SLC2A1-AS1     |
| A_23_P13137    | 1,89405 | 3,01461 | -2,174313548 | N/A             | N/A    | AY358815     | N/A            |
| A_22_P00014665 | 1,461   | 2,58172 | -2,174554701 | ENST00000419196 | N/A    | AI525711     | N/A            |
| A_23_P320553   | 6,10158 | 7,2223  | -2,174554701 | ENST00000334186 | 8541   | NM_003660    | PPFIA3         |

|                |         |         |              |                 |           |              |                 |
|----------------|---------|---------|--------------|-----------------|-----------|--------------|-----------------|
| A_24_P8371     | 6,94048 | 8,06124 | -2,174614993 | ENST00000329078 | 124976    | NM_001124758 | SPNS2           |
| A_23_P41145    | 3,40008 | 4,52106 | -2,17494663  | ENST00000358781 | 131177    | NM_138805    | FAM3D           |
| A_33_P3375466  | 3,20113 | 4,32236 | -2,175323553 | ENST00000486892 | 2822      | BC093645     | GPLD1           |
| A_33_P3221999  | 10,4464 | 11,5677 | -2,175429102 | ENST00000394179 | 55876     | NM_001165958 | GSDMB           |
| A_23_P127840   | 4,23858 | 5,35996 | -2,175549737 | ENST00000536068 | 7761      | NM_013249    | ZNF214          |
| A_33_P3236030  | 2,92157 | 4,04305 | -2,17570054  | ENST00000509709 | 83478     | AK130576     | ARHGAP24        |
| A_23_P362228   | 10,0054 | 11,1271 | -2,176032343 | N/A             | 148898    | NR_033690    | ZNF436-AS1      |
| A_33_P3293466  | 1,63056 | 2,75232 | -2,176122844 | N/A             | N/A       | N/A          | N/A             |
| A_32_P174693   | 2,22285 | 3,34475 | -2,176334026 | ENST00000566855 | 729059    | NM_001242521 | C1orf234        |
| A_33_P3238856  | 1,76605 | 2,88811 | -2,176575403 | ENST00000376581 | 10160     | NM_001001715 | FARP1           |
| A_22_P00003539 | 2,88852 | 4,01082 | -2,176937518 | ENST00000442635 | 9849      | N/A          | ZNF518A         |
| A_33_P3379492  | 1,66904 | 2,79168 | -2,177450617 | N/A             | 100131581 | AK092544     | LOC100131581    |
| A_21_P0009131  | 3,03461 | 4,15733 | -2,177571364 | N/A             | N/A       | N/A          | Inc-CDH16-1     |
| A_22_P00020720 | 1,61043 | 2,73394 | -2,178764099 | N/A             | N/A       | N/A          | Inc-C14orf126-1 |
| A_23_P122068   | 6,24281 | 7,36634 | -2,178794303 | ENST00000513471 | 114899    | NM_181435    | C1QTNF3         |
| A_22_P00009767 | 1,47747 | 2,60176 | -2,179942376 | N/A             | 101929176 | NR_109915    | CTD-2297D10.2   |
| A_23_P155857   | 7,74293 | 8,8673  | -2,180063261 | ENST00000502270 | 11162     | NM_198041    | NUDT6           |
| A_22_P00007720 | 3,70215 | 4,82659 | -2,180169041 | ENST00000460185 | 3119      | NM_001243961 | HLA-DQB1        |
| A_19_P00320804 | 1,42588 | 2,55046 | -2,180380617 | N/A             | 102724030 | XR_424361    | LOC102724030    |
| A_33_P3231156  | 8,59794 | 9,72283 | -2,180849178 | ENST00000567054 | N/A       | N/A          | N/A             |
| A_22_P00003858 | 4,76495 | 5,88988 | -2,180909644 | ENST00000452322 | 29092     | NR_109762    | LINC00339       |
| A_24_P412976   | 9,06157 | 10,1865 | -2,180909644 | ENST00000377431 | 55260     | AK129801     | TMEM143         |
| A_23_P20578    | 2,04629 | 3,1717  | -2,181635377 | ENST00000447837 | 730112    | NM_001164310 | FAM166B         |
| A_23_P139500   | 10,0561 | 11,1816 | -2,181771479 | ENST00000242728 | 79365     | NM_030762    | BHLHE41         |
| A_24_P943894   | 1,60652 | 2,73247 | -2,182452115 | ENST00000274938 | 222663    | NM_152753    | SCUBE3          |
| A_19_P00322611 | 3,43426 | 4,5603  | -2,182588267 | N/A             | N/A       | N/A          | Inc-SPAG1-3     |
| A_22_P00018572 | 3,98522 | 5,11167 | -2,183208626 | N/A             | N/A       | N/A          | Inc-OTOGL-1     |
| A_33_P3301095  | 10,6114 | 11,7379 | -2,183284292 | N/A             | N/A       | N/A          | N/A             |
| A_23_P151337   | 8,03642 | 9,16308 | -2,183526439 | ENST00000378180 | 10301     | NR_002605    | DLEU1           |
| A_21_P0004520  | 2,43481 | 3,5615  | -2,183571845 | N/A             | 102724720 | XR_425911    | LOC102724720    |
| A_33_P3275035  | 1,39752 | 2,52444 | -2,183919986 | ENST00000551904 | 394263    | XM_005275406 | MUC21           |
| A_19_P00315502 | 10,7596 | 11,8869 | -2,184495297 | ENST00000417112 | 102723721 | XR_424100    | LOC102723721    |
| A_32_P19000    | 3,07129 | 4,19898 | -2,185085906 | ENST00000590602 | 100131096 | NR_040071    | TNRC6C-AS1      |



|                |         |         |              |                 |           |              |                |
|----------------|---------|---------|--------------|-----------------|-----------|--------------|----------------|
| A_22_P00016229 | 2,30055 | 3,42887 | -2,186040304 | N/A             | 103689911 | NR_125777    | CATIP-AS2      |
| A_33_P3308914  | 6,24493 | 7,37357 | -2,186525237 | ENST00000258930 | 10518     | NM_001301224 | CIB2           |
| A_21_P0010593  | 4,28405 | 5,41271 | -2,186555549 | N/A             | N/A       | N/A          | XLOC_I2_000727 |
| A_21_P0014592  | 3,26697 | 4,39564 | -2,186570705 | N/A             | 101926887 | XR_424161    | LOC101926887   |
| A_22_P00008545 | 2,34153 | 3,47041 | -2,186889007 | N/A             | N/A       | N/A          | Inc-KCNMB1-3   |
| A_22_P00000448 | 1,4206  | 2,54965 | -2,187146714 | ENST00000520930 | N/A       | XR_171051    | N/A            |
| A_33_P3370094  | 8,07776 | 9,2071  | -2,187586403 | ENST00000360490 | 4311      | NM_007289    | MME            |
| A_22_P00020546 | 7,85703 | 8,98657 | -2,187889688 | ENST00000563190 | N/A       | N/A          | N/A            |
| A_33_P3384058  | 2,50614 | 3,6358  | -2,188071679 | ENST00000272164 | 7483      | NM_003395    | WNT9A          |
| A_33_P3303212  | 2,85552 | 3,98541 | -2,188420537 | ENST00000468650 | 90557     | NM_001258304 | CCDC74A        |
| A_24_P910060   | 2,13115 | 3,26173 | -2,189467447 | ENST00000397390 | N/A       | N/A          | N/A            |
| A_21_P0005162  | 4,36073 | 5,49133 | -2,1894978   | N/A             | 102725470 | N/A          | LOC102725470   |
| A_19_P00322523 | 1,60132 | 2,73211 | -2,189786171 | ENST00000514844 | 643401    | BC101438     | LINC01021      |
| A_33_P3319580  | 2,21335 | 3,34422 | -2,189907602 | N/A             | N/A       | AK097459     | N/A            |
| A_33_P3230594  | 7,48937 | 8,6203  | -2,18999868  | ENST00000480799 | 100507547 | NR_037169    | LOC100507547   |
| A_33_P3402918  | 10,3264 | 11,4581 | -2,191167845 | ENST00000601816 | 11284     | NM_007254    | PNKP           |
| A_32_P103945   | 9,38863 | 10,5206 | -2,19157796  | ENST00000480814 | 8702      | NM_212543    | B4GALT4        |
| A_21_P0010618  | 3,02914 | 4,16122 | -2,191745066 | N/A             | N/A       | N/A          | XLOC_I2_000941 |
| A_24_P166311   | 6,87249 | 8,00478 | -2,192064121 | ENST00000523213 | 63920     | NM_022090    | ZBED8          |
| A_22_P00013963 | 2,50507 | 3,63772 | -2,192611182 | ENST00000556136 | N/A       | N/A          | N/A            |
| A_23_P330561   | 3,66267 | 4,79534 | -2,192641578 | ENST00000333598 | 199675    | NM_174918    | MCEMP1         |
| A_21_P0013733  | 1,47479 | 2,60749 | -2,192687173 | ENST00000415471 | 256536    | NM_174937    | TCERG1L        |
| A_33_P3262431  | 5,1798  | 6,31269 | -2,192975965 | ENST00000327813 | 83999     | NM_032045    | KREMEN1        |
| A_22_P00005322 | 1,65489 | 2,78863 | -2,194268392 | N/A             | N/A       | N/A          | Inc-DNTT-1     |
| A_33_P3287223  | 4,8353  | 5,96927 | -2,194618239 | ENST00000360534 | 1803      | NM_001935    | DPP4           |
| A_33_P3400244  | 1,46424 | 2,59828 | -2,194724725 | ENST00000477903 | 84838     | NM_032752    | ZNF496         |
| A_23_P202269   | 10,5112 | 11,6454 | -2,194968141 | ENST00000280772 | 288       | NM_020987    | ANK3           |
| A_24_P343255   | 8,14084 | 9,27521 | -2,195226801 | ENST00000332245 | 116138    | NM_057161    | KLHDC3         |
| A_22_P00006606 | 3,26212 | 4,39674 | -2,195607237 | ENST00000556024 | N/A       | N/A          | N/A            |
| A_33_P3214899  | 1,96785 | 3,10279 | -2,196094293 | ENST00000367267 | 127833    | NM_001136504 | SYT2           |
| A_21_P0001087  | 4,38921 | 5,52426 | -2,196261743 | ENST00000420964 | 199990    | N/A          | C1orf86        |
| A_23_P90484    | 9,87538 | 11,0113 | -2,197586572 | ENST00000221431 | 54938     | NM_017827    | SARS2          |
| A_24_P208345   | 8,10492 | 9,24109 | -2,197967417 | ENST00000367145 | 85414     | NM_033102    | SLC45A3        |

|                |         |         |              |                 |           |              |              |
|----------------|---------|---------|--------------|-----------------|-----------|--------------|--------------|
| A_33_P3305023  | 5,72667 | 6,86297 | -2,198165483 | ENST00000569818 | 51741     | NR_120435    | WVOX         |
| A_23_P34382    | 5,03042 | 6,16686 | -2,198378805 | ENST00000466454 | 9629      | N/A          | CLCA3P       |
| A_23_P118042   | 3,0051  | 4,14157 | -2,198424519 | ENST00000329956 | 55282     | NM_018296    | LRRC36       |
| A_21_P0008462  | 1,5629  | 2,69979 | -2,199064622 | N/A             | N/A       | N/A          | Inc-ABCD4-1  |
| A_21_P0006406  | 2,46873 | 3,60589 | -2,199476215 | N/A             | N/A       | L23866       | Inc-F8A2-1   |
| A_21_P0006443  | 2,55005 | 3,68746 | -2,199857388 | ENST00000453902 | N/A       | N/A          | N/A          |
| A_23_P333592   | 3,8636  | 5,00134 | -2,200360638 | ENST00000282282 | 284306    | AK291464     | ZNF547       |
| A_22_P00019181 | 1,4087  | 2,54645 | -2,20037589  | N/A             | N/A       | N/A          | Inc-WIBG-1   |
| A_33_P3346801  | 2,75946 | 3,89723 | -2,200406394 | ENST00000561282 | 90427     | NM_001003940 | BMF          |
| A_21_P0001701  | 1,97322 | 3,11128 | -2,200848748 | ENST00000417218 | N/A       | N/A          | N/A          |
| A_24_P263310   | 1,6435  | 2,78173 | -2,2011081   | ENST00000558256 | 283777    | NM_182562    | FAM169B      |
| A_33_P3323218  | 5,13455 | 6,27285 | -2,201214901 | ENST00000320443 | 79800     | NM_024744    | CARF         |
| A_22_P00006215 | 1,42324 | 2,56197 | -2,201871078 | ENST00000441949 | 101928770 | NR_126363    | LINC01526    |
| A_21_P0007916  | 7,23009 | 8,36909 | -2,202283196 | ENST00000499499 | 100289274 | XR_172013    | DNAJC3-AS1   |
| A_33_P3318841  | 5,33848 | 6,4778  | -2,202771732 | ENST00000606937 | 401207    | NM_001164479 | C5orf63      |
| A_24_P238570   | 3,37508 | 4,5146  | -2,203077123 | N/A             | N/A       | AF384996     | N/A          |
| A_22_P00001398 | 3,11234 | 4,2519  | -2,203138206 | ENST00000610785 | 320       | NM_001163    | APBA1        |
| A_21_P0008956  | 1,45963 | 2,59986 | -2,2041616   | N/A             | N/A       | N/A          | Inc-CDH5-10  |
| A_33_P3266769  | 1,44099 | 2,5813  | -2,204283828 | ENST00000477576 | 3973      | N/A          | LHCGR        |
| A_23_P424561   | 10,2966 | 11,4371 | -2,204574147 | ENST00000220507 | 171177    | NM_133639    | RHOV         |
| A_23_P96761    | 9,77008 | 10,9107 | -2,204757525 | ENST00000420607 | 34        | NM_000016    | ACADM        |
| A_21_P0003431  | 3,7902  | 4,93104 | -2,20509376  | ENST00000504509 | 101928223 | NR_125889    | LOC101928223 |
| A_22_P00013382 | 1,89803 | 3,03912 | -2,205475907 | ENST00000579833 | N/A       | N/A          | N/A          |
| A_21_P0001084  | 1,41335 | 2,55498 | -2,20630157  | ENST00000622411 | N/A       | XR_430162    | N/A          |
| A_24_P152527   | 5,85063 | 6,99238 | -2,206485092 | ENST00000587173 | 10493     | NM_006373    | VAT1         |
| A_22_P00012987 | 3,76889 | 4,9107  | -2,206576859 | N/A             | N/A       | BC039344     | Inc-RFC4-1   |
| A_33_P3419785  | 1,72147 | 2,86438 | -2,208259932 | ENST00000368636 | 664       | NM_004052    | BNIP3        |
| A_22_P00021971 | 7,99823 | 9,14128 | -2,208474233 | N/A             | N/A       | AK022253     | Inc-EIF4E3-1 |
| A_22_P00004497 | 1,59475 | 2,73848 | -2,209515421 | N/A             | N/A       | N/A          | Inc-CPPED1-1 |
| A_23_P31064    | 3,51913 | 4,66288 | -2,209546051 | ENST00000367963 | 26002     | NM_015529    | MOXD1        |
| A_32_P206497   | 4,55876 | 5,70252 | -2,209561367 | ENST00000492679 | N/A       | AK090684     | N/A          |
| A_33_P3224819  | 9,15224 | 10,2961 | -2,209714527 | ENST00000024061 | 57210     | NM_001286646 | SLC45A4      |
| A_33_P3215550  | 3,0159  | 4,1603  | -2,210541777 | ENST00000371939 | 142910    | NM_001010939 | LIPJ         |

|                |         |         |              |                 |        |              |                |
|----------------|---------|---------|--------------|-----------------|--------|--------------|----------------|
| A_23_P64888    | 6,14177 | 7,2862  | -2,210587744 | ENST00000611256 | 50839  | NM_023921    | TAS2R10        |
| A_23_P350396   | 1,55687 | 2,70189 | -2,211491964 | ENST00000445893 | 1041   | NM_001264    | CDSN           |
| A_23_P129801   | 7,42837 | 8,57341 | -2,211522622 | ENST00000576359 | 10966  | NM_006822    | RAB40B         |
| A_23_P164179   | 11,2113 | 12,3565 | -2,211767902 | ENST00000268957 | 10140  | NM_005749    | TOB1           |
| A_23_P104046   | 7,83886 | 8,98432 | -2,212166538 | ENST00000469520 | 10380  | NM_006085    | BPNT1          |
| A_22_P00023453 | 2,39679 | 3,54225 | -2,212166538 | N/A             | N/A    | DB455794     | Inc-LRMP-3     |
| A_33_P3297444  | 11,9532 | 13,0991 | -2,212841318 | ENST00000464431 | 80325  | NM_032548    | ABTB1          |
| A_33_P3237215  | 2,52169 | 3,66771 | -2,213025385 | ENST00000488079 | 26261  | NM_033506    | FBXO24         |
| A_33_P3314436  | 6,20834 | 7,35463 | -2,213439591 | ENST00000481160 | 64839  | NM_001163315 | FBXL17         |
| A_21_P0012669  | 3,90286 | 5,04951 | -2,213991986 | N/A             | N/A    | N/A          | XLOC_I2_011151 |
| A_24_P149704   | 3,7223  | 4,86912 | -2,214252887 | ENST00000309989 | 153090 | NM_138709    | DAB2IP         |
| A_22_P00001973 | 4,95343 | 6,10032 | -2,214360326 | N/A             | N/A    | N/A          | Inc-BCHE-1     |
| A_24_P280873   | 9,74518 | 10,8924 | -2,214866894 | ENST00000433151 | N/A    | N/A          | N/A            |
| A_21_P0013043  | 2,21679 | 3,36413 | -2,215051129 | N/A             | N/A    | N/A          | XLOC_I2_012748 |
| A_33_P3216517  | 5,26051 | 6,40797 | -2,215235379 | ENST00000373596 | 10783  | XM_005251664 | NEK6           |
| A_23_P152782   | 9,16914 | 10,3169 | -2,215696072 | ENST00000538473 | 3430   | NM_005533    | IFI35          |
| A_33_P3238157  | 9,01737 | 10,166  | -2,217032624 | ENST00000530254 | 399687 | NM_078471    | MYO18A         |
| A_23_P329261   | 5,36468 | 6,51337 | -2,21712483  | ENST00000243457 | 3759   | NM_000891    | KCNJ2          |
| A_22_P00007519 | 3,5076  | 4,65634 | -2,217201671 | N/A             | N/A    | N/A          | Inc-H3F3C-3    |
| A_23_P84666    | 3,22221 | 4,37135 | -2,217816495 | ENST00000579020 | 284161 | NM_182569    | GDPD1          |
| A_23_P113005   | 10,6491 | 11,7984 | -2,218062472 | ENST00000469878 | 1942   | NM_004428    | EFNA1          |
| A_23_P356526   | 5,43045 | 6,57996 | -2,218385359 | ENST00000465634 | 85363  | NM_033092    | TRIM5          |
| A_33_P3305620  | 1,82178 | 2,97175 | -2,219092799 | ENST00000461166 | 25976  | NM_001184717 | TIPARP         |
| A_23_P38830    | 4,57788 | 5,72814 | -2,21953891  | ENST00000391701 | 79818  | NM_024762    | ZNF552         |
| A_33_P3422330  | 10,0236 | 11,1747 | -2,220831598 | ENST00000338591 | 339451 | NM_198317    | KLHL17         |
| A_32_P180741   | 2,04416 | 3,19554 | -2,221262662 | ENST00000430929 | 10188  | NM_001010938 | TNK2           |
| A_33_P3396807  | 6,01344 | 7,16576 | -2,222710416 | ENST00000371118 | 84938  | NM_032852    | ATG4C          |
| A_33_P3378435  | 3,8451  | 4,99781 | -2,223311356 | ENST00000543072 | N/A    | N/A          | N/A            |
| A_23_P18493    | 9,72693 | 10,8799 | -2,223712074 | ENST00000411767 | 5783   | NM_080685    | PTPN13         |
| A_23_P58228    | 2,35939 | 3,51237 | -2,223727487 | ENST00000510847 | 54959  | NM_017855    | ODAM           |
| A_23_P99226    | 3,42785 | 4,58106 | -2,224082031 | ENST00000537892 | 23409  | NM_012240    | SIRT4          |
| A_23_P25155    | 2,56964 | 3,72328 | -2,224745025 | ENST00000551809 | 53831  | NM_020370    | GPR84          |
| A_22_P00002221 | 2,15797 | 3,31238 | -2,22593274  | N/A             | N/A    | N/A          | Inc-C10orf10-1 |

|                |         |         |              |                 |           |           |                |
|----------------|---------|---------|--------------|-----------------|-----------|-----------|----------------|
| A_23_P2414     | 1,70895 | 2,86359 | -2,226287635 | ENST00000256969 | 80763     | AK311217  | SPX            |
| A_23_P146576   | 2,71231 | 3,86732 | -2,226858672 | ENST00000472281 | 26301     | NM_021996 | GBGT1          |
| A_24_P923757   | 7,95691 | 9,1125  | -2,227754105 | ENST00000396279 | 55729     | NM_018179 | ATF7IP         |
| A_33_P3302681  | 2,46991 | 3,62561 | -2,22792397  | ENST00000455913 | 7091      | N/A       | TLE4           |
| A_23_P350617   | 1,85255 | 3,00827 | -2,227954855 | ENST00000257408 | 152831    | NM_175737 | KLB            |
| A_33_P3313539  | 1,44721 | 2,60304 | -2,228124735 | N/A             | N/A       | DB074301  | N/A            |
| A_32_P204239   | 1,66194 | 2,81806 | -2,228572661 | N/A             | 222256    | NM_152750 | CDHR3          |
| A_23_P145016   | 10,7742 | 11,9312 | -2,229932437 | ENST00000512140 | 10902     | NM_006696 | BRD8           |
| A_21_P0011646  | 1,37884 | 2,53594 | -2,23008701  | ENST00000581549 | 400619    | N/A       | LINC00511      |
| A_24_P10137    | 10,6726 | 11,8297 | -2,23008701  | ENST00000379359 | 28984     | NM_014059 | RGCC           |
| A_23_P93562    | 7,4648  | 8,62195 | -2,2301643   | ENST00000302071 | 27244     | NM_014454 | SESN1          |
| A_33_P3305487  | 7,42071 | 8,57844 | -2,231061063 | ENST00000267396 | 161253    | NM_173527 | REM2           |
| A_33_P3718269  | 2,40966 | 3,56751 | -2,231246645 | ENST00000517927 | 406938    | AL389942  | MIR146A        |
| A_21_P0010727  | 1,39586 | 2,55394 | -2,231602388 | ENST00000489479 | 2209      | N/A       | FCGR1A         |
| A_24_P211565   | 11,2519 | 12,41   | -2,231633324 | ENST00000493023 | 114904    | NM_031910 | C1QTNF6        |
| A_21_P0005549  | 2,01525 | 3,17344 | -2,231772545 | N/A             | N/A       | N/A       | lnc-SHH-1      |
| A_33_P3338382  | 2,38201 | 3,54027 | -2,231880834 | ENST00000277309 | 392392    | NM_080859 | OR1K1          |
| A_33_P3297452  | 3,72307 | 4,88146 | -2,232081956 | ENST00000441860 | N/A       | N/A       | N/A            |
| A_33_P3230583  | 4,81281 | 5,97129 | -2,232221205 | ENST00000376334 | 642236    | NR_033907 | LOC642236      |
| A_22_P00010940 | 2,82001 | 3,97869 | -2,232530678 | ENST00000560176 | N/A       | N/A       | N/A            |
| A_24_P301063   | 6,56779 | 7,72681 | -2,23305688  | ENST00000449001 | 55200     | NM_018173 | PLEKHG6        |
| A_33_P3270311  | 1,56471 | 2,7238  | -2,233165232 | ENST00000260983 | 57520     | NM_020760 | HECW2          |
| A_33_P3289406  | 7,60267 | 8,76178 | -2,23319619  | N/A             | 91450     | NR_026998 | LOC91450       |
| A_22_P00004127 | 2,17085 | 3,33007 | -2,233366469 | N/A             | 101929152 | NR_126419 | P3H2-AS1       |
| A_22_P00017104 | 2,81258 | 3,97191 | -2,233536762 | N/A             | 101927832 | NR_125393 | PAQR9-AS1      |
| A_21_P0012663  | 2,13924 | 3,29857 | -2,233536762 | N/A             | N/A       | N/A       | XLOC_I2_011102 |
| A_21_P0001096  | 7,21286 | 8,37226 | -2,233645136 | N/A             | N/A       | N/A       | lnc-DNAJC11-1  |
| A_23_P207517   | 8,51166 | 9,67177 | -2,23474466  | ENST00000614357 | 5164      | NM_002611 | PDK2           |
| A_33_P3354344  | 2,09954 | 3,25968 | -2,234791131 | N/A             | 646074    | NR_024593 | POM121L10P     |
| A_23_P215024   | 8,90121 | 10,0614 | -2,234868584 | ENST00000370888 | 55227     | NM_018214 | LRRC1          |
| A_22_P00014880 | 1,75268 | 2,91298 | -2,235038991 | ENST00000231656 | 1044      | NM_001804 | CDX1           |
| A_23_P118834   | 10,9034 | 12,064  | -2,235503803 | ENST00000423485 | 7153      | NM_001067 | TOP2A          |
| A_33_P3343727  | 2,01198 | 3,17261 | -2,235550289 | ENST00000374663 | 10136     | AK308514  | CELA3A         |

|                |         |         |              |                 |           |              |                |
|----------------|---------|---------|--------------|-----------------|-----------|--------------|----------------|
| A_33_P3209406  | 1,58667 | 2,74781 | -2,236340707 | N/A             | 83546     | NM_001270440 | RTBDN          |
| A_33_P3241591  | 3,31383 | 4,47507 | -2,236495724 | N/A             | 100131864 | AK094219     | LOC100131864   |
| A_22_P00008911 | 1,46991 | 2,63136 | -2,236821294 | N/A             | N/A       | N/A          | Inc-KLRB1-1    |
| A_21_P0004683  | 2,57136 | 3,73335 | -2,237658692 | ENST00000444229 | N/A       | N/A          | N/A            |
| A_33_P3233025  | 1,59395 | 2,75616 | -2,237999944 | ENST00000380622 | 92552     | NM_001135995 | ATXN3L         |
| A_22_P00006956 | 5,2735  | 6,43607 | -2,238558468 | N/A             | 100130275 | NR_033910    | TFAP2A-AS1     |
| A_23_P205370   | 5,05746 | 6,22004 | -2,238573985 | ENST00000553883 | 51676     | NM_016150    | ASB2           |
| A_21_P0008484  | 2,28665 | 3,44926 | -2,238620535 | ENST00000512901 | 388011    | N/A          | LINC01550      |
| A_33_P3229512  | 4,05015 | 5,21284 | -2,238744674 | N/A             | 100996842 | XR_253624    | LOC100996842   |
| A_23_P45560    | 2,06154 | 3,22423 | -2,238744674 | ENST00000467482 | 4935      | NM_000273    | GPR143         |
| A_33_P3328485  | 4,47741 | 5,64091 | -2,240001968 | ENST00000452786 | 22807     | NM_001079526 | IKZF2          |
| A_23_P216108   | 9,96867 | 11,1331 | -2,241446399 | ENST00000265709 | 286       | NM_000037    | ANK1           |
| A_33_P3725227  | 1,58318 | 2,74763 | -2,241477473 | ENST00000462395 | 23242     | NM_015198    | COBL           |
| A_33_P7838956  | 8,46974 | 9,63473 | -2,242316613 | ENST00000397753 | 29068     | NM_014155    | ZBTB44         |
| A_33_P3346473  | 7,16069 | 8,32579 | -2,242487588 | ENST00000527401 | 51317     | NM_001101802 | PHF21A         |
| A_33_P3315154  | 2,47794 | 3,64323 | -2,242782939 | N/A             | N/A       | N/A          | N/A            |
| A_23_P153372   | 8,31227 | 9,47781 | -2,243171617 | ENST00000616070 | 84941     | NM_032855    | HSH2D          |
| A_23_P309381   | 9,1708  | 10,3364 | -2,24326491  | ENST00000607355 | 723790    | NM_001040874 | HIST2H2AA4     |
| A_21_P0007552  | 1,40111 | 2,56748 | -2,244462512 | N/A             | N/A       | N/A          | Inc-C12orf68-1 |
| A_24_P912366   | 2,02645 | 3,19289 | -2,244571417 | ENST00000505231 | 729830    | NM_001109977 | FAM160A1       |
| A_19_P00322645 | 4,40552 | 5,57199 | -2,244618092 | ENST00000614987 | 9252      | AK095276     | RPS6KA5        |
| A_23_P65983    | 8,03812 | 9,20466 | -2,244727004 | ENST00000569068 | 92922     | NM_033212    | CCDC102A       |
| A_23_P145529   | 7,93349 | 9,10005 | -2,244758123 | ENST00000392491 | 5570      | NM_181795    | PKIB           |
| A_21_P0011616  | 1,60088 | 2,76745 | -2,244773682 | ENST00000420951 | N/A       | N/A          | N/A            |
| A_22_P00001866 | 2,61009 | 3,77686 | -2,245084896 | ENST00000431983 | N/A       | N/A          | N/A            |
| A_22_P00025313 | 7,98453 | 9,15154 | -2,245458408 | N/A             | N/A       | XM_006718417 | Inc-TCIRG1-1   |
| A_33_P3254096  | 2,49558 | 3,66267 | -2,245582927 | ENST00000260113 | 51050     | NM_015886    | PI15           |
| A_24_P110983   | 6,03777 | 7,20496 | -2,245738584 | ENST00000366539 | 10000     | NM_005465    | AKT3           |
| A_23_P103486   | 10,4188 | 11,5873 | -2,247778692 | ENST00000469406 | 1573      | NM_000775    | CYP2J2         |
| A_21_P0002268  | 1,62995 | 2,79878 | -2,248292904 | N/A             | N/A       | N/A          | Inc-C2orf40-5  |
| A_33_P3341429  | 1,40242 | 2,57136 | -2,248464335 | ENST00000334785 | 91624     | NM_144573    | NEXN           |
| A_33_P3265714  | 2,4842  | 3,65315 | -2,24847992  | N/A             | 285051    | NM_173649    | C2orf61        |
| A_33_P3386262  | 10,59   | 11,7593 | -2,249025471 | ENST00000301019 | 81620     | NM_030928    | CDT1           |

|                |         |         |              |                 |           |              |                |
|----------------|---------|---------|--------------|-----------------|-----------|--------------|----------------|
| A_22_P00012300 | 1,79244 | 2,96212 | -2,249617933 | N/A             | 101928595 | XR_243378    | LOC101928595   |
| A_21_P0013738  | 1,33843 | 2,50832 | -2,249945413 | N/A             | N/A       | N/A          | XLOC_I2_015315 |
| A_33_P3255631  | 6,91815 | 8,08813 | -2,250085776 | ENST00000599972 | 284323    | NM_001010880 | ZNF780A        |
| A_22_P00004401 | 1,51302 | 2,6831  | -2,250241746 | ENST00000508766 | N/A       | CR740772     | N/A            |
| A_24_P303420   | 5,20109 | 6,3714  | -2,250600517 | ENST00000567255 | 221442    | NR_026938    | ADCY10P1       |
| A_33_P3386150  | 1,72264 | 2,89299 | -2,250662917 | N/A             | 100129354 | NR_024046    | NRADDP         |
| A_23_P5742     | 4,46817 | 5,63857 | -2,250740921 | ENST00000324364 | 79635     | NM_024584    | CCDC121        |
| A_22_P00019189 | 3,10191 | 4,27243 | -2,25092814  | ENST00000442440 | 100505683 | NR_109884    | LINC01431      |
| A_33_P3232637  | 2,06278 | 3,23423 | -2,252379616 | ENST00000576313 | N/A       | N/A          | N/A            |
| A_32_P202438   | 2,97663 | 4,1482  | -2,252566972 | N/A             | N/A       | AK025716     | N/A            |
| A_22_P00019163 | 1,50196 | 2,67412 | -2,253488363 | ENST00000563553 | 101927273 | NR_110755    | LOC101927273   |
| A_33_P3302305  | 11,1902 | 12,3624 | -2,253550844 | ENST00000269980 | 593       | NM_000709    | BCKDHA         |
| A_33_P3384432  | 10,4807 | 11,6535 | -2,254488264 | ENST00000487734 | 7029      | NM_001178138 | TFDP2          |
| A_21_P0004487  | 2,36985 | 3,54267 | -2,254519518 | N/A             | N/A       | N/A          | Inc-MTRR-4     |
| A_21_P0005033  | 3,18806 | 4,36134 | -2,255238481 | N/A             | 79940     | NR_121612    | LINC00472      |
| A_23_P142830   | 6,3045  | 7,47839 | -2,256192242 | ENST00000392771 | 22925     | NM_007366    | PLA2R1         |
| A_24_P63030    | 6,89698 | 8,07103 | -2,256442476 | ENST00000272433 | 94097     | NM_144579    | SFXN5          |
| A_21_P0006404  | 3,41071 | 4,58529 | -2,257271573 | ENST00000609127 | 101927528 | N/A          | LINC01204      |
| A_33_P3395513  | 2,91454 | 4,08919 | -2,257381099 | N/A             | 9542      | AK124504     | NRG2           |
| A_21_P0006173  | 1,74632 | 2,92104 | -2,257490631 | ENST00000415801 | 100506834 | NR_049794    | LOC100506834   |
| A_33_P3334803  | 3,12329 | 4,29807 | -2,257584519 | N/A             | 195977    | XR_159158    | ANTXRL         |
| A_33_P3412975  | 12,0238 | 13,1988 | -2,25792881  | ENST00000622857 | 147912    | NM_175875    | SIX5           |
| A_23_P208540   | 13,476  | 14,6511 | -2,258085323 | ENST00000484103 | 4696      | NM_004542    | NDUFA3         |
| A_23_P17103    | 3,66748 | 4,84286 | -2,258523617 | ENST00000355053 | 80705     | NM_025244    | TSGA10         |
| A_21_P0014847  | 6,68382 | 7,85954 | -2,259055946 | N/A             | 11068     | NR_111913    | CYB561D2       |
| A_21_P0012206  | 2,86873 | 4,04475 | -2,259525753 | ENST00000417335 | N/A       | XR_425277    | N/A            |
| A_21_P0008325  | 2,06202 | 3,23834 | -2,259995657 | N/A             | N/A       | N/A          | Inc-SSTR1-3    |
| A_21_P0008121  | 3,45349 | 4,62995 | -2,260214979 | N/A             | N/A       | N/A          | Inc-SOX1-4     |
| A_22_P00010473 | 1,55904 | 2,73587 | -2,260794718 | ENST00000444981 | 100505683 | NR_109884    | LINC01431      |
| A_23_P156562   | 1,67471 | 2,85172 | -2,261076807 | ENST00000451294 | 401262    | NM_206922    | CRIP3          |
| A_22_P00014262 | 2,12883 | 3,30597 | -2,26128056  | N/A             | N/A       | N/A          | Inc-SEMA6C-1   |
| A_21_P0006250  | 1,96742 | 3,14482 | -2,26168812  | N/A             | N/A       | N/A          | Inc-C9orf38-2  |
| A_33_P3315243  | 4,60438 | 5,78218 | -2,26231528  | ENST00000582530 | 92340     | NM_001164257 | PRR29          |

|                |         |         |              |                 |           |              |                     |
|----------------|---------|---------|--------------|-----------------|-----------|--------------|---------------------|
| A_21_P0010814  | 1,6242  | 2,80215 | -2,26255051  | N/A             | N/A       | N/A          | XLOC_I2_001543      |
| A_23_P20427    | 9,75557 | 10,9337 | -2,262832818 | ENST00000251822 | 23221     | NM_015178    | RHOBTB2             |
| A_24_P658584   | 7,34725 | 8,5256  | -2,263177909 | ENST00000367467 | 23328     | NM_015278    | SASH1               |
| A_24_P201153   | 7,1177  | 8,29633 | -2,263617192 | ENST00000265384 | 9414      | NM_201629    | TJP2                |
| A_23_P46149    | 7,62058 | 8,79963 | -2,264276277 | ENST00000366592 | 7107      | NM_003272    | GPR137B             |
| A_33_P3383861  | 1,56568 | 2,74563 | -2,265689246 | N/A             | 646471    | NR_024498    | LOC646471           |
| A_21_P0002351  | 1,78158 | 2,96156 | -2,265736361 | N/A             | N/A       | N/A          | Inc-AC007557.1.1-2  |
| A_33_P3233560  | 2,03345 | 3,21366 | -2,266097602 | ENST00000368774 | 7390      | N/A          | UROS                |
| A_33_P3233819  | 1,89888 | 3,07922 | -2,266301807 | N/A             | 101929989 | XR_424763    | LOC101929989        |
| A_22_P00011705 | 1,48854 | 2,66948 | -2,267244532 | N/A             | N/A       | N/A          | Inc-PDZD7-2         |
| A_23_P303833   | 2,59381 | 3,77553 | -2,26847066  | ENST00000423160 | 6330      | NM_174934    | SCN4B               |
| A_23_P351844   | 1,42678 | 2,60857 | -2,268580729 | ENST00000368168 | 910       | NM_001764    | CD1B                |
| A_22_P00001768 | 1,54141 | 2,72329 | -2,268722255 | N/A             | N/A       | N/A          | Inc-ATP13A4-4       |
| A_21_P0009266  | 3,43408 | 4,61619 | -2,269083972 | ENST00000612725 | N/A       | N/A          | N/A                 |
| A_23_P396666   | 10,8083 | 11,9908 | -2,269697451 | ENST00000418039 | 23102     | NM_015079    | TBC1D2B             |
| A_22_P00001364 | 5,27152 | 6,45408 | -2,269791847 | N/A             | N/A       | N/A          | Inc-AP001631.10.1-1 |
| A_24_P123119   | 5,11135 | 6,29398 | -2,26990198  | ENST00000231887 | 1962      | NM_001966    | EHHADH              |
| A_23_P155539   | 1,59468 | 2,77738 | -2,270012119 | ENST00000344265 | 5449      | NM_000306    | POU1F1              |
| A_21_P0009735  | 5,31798 | 6,50129 | -2,270972128 | N/A             | 102723811 | XR_430169    | LOC102723811        |
| A_21_P0014808  | 8,32743 | 9,51131 | -2,271869553 | N/A             | N/A       | N/A          | N/A                 |
| A_22_P00019756 | 2,07948 | 3,26338 | -2,271901048 | ENST00000441638 | N/A       | N/A          | N/A                 |
| A_33_P3299329  | 1,6638  | 2,84774 | -2,271964039 | N/A             | N/A       | A25969       | N/A                 |
| A_22_P00016008 | 1,99174 | 3,17586 | -2,272247522 | N/A             | N/A       | N/A          | Inc-TFB2M-2         |
| A_33_P3278122  | 1,54657 | 2,73098 | -2,272704318 | ENST00000459641 | N/A       | N/A          | N/A                 |
| A_33_P3576034  | 5,44534 | 6,62984 | -2,272846102 | ENST00000515218 | N/A       | BX248273     | N/A                 |
| A_23_P206310   | 11,3566 | 12,5412 | -2,273003649 | ENST00000258180 | 9764      | NM_014732    | KIAA0513            |
| A_21_P0010169  | 2,03105 | 3,21572 | -2,273113938 | ENST00000445242 | N/A       | N/A          | N/A                 |
| A_24_P194017   | 10,0414 | 11,2262 | -2,273318776 | ENST00000594932 | 51070     | NM_015953    | NOSIP               |
| A_21_P0004970  | 1,74908 | 2,93397 | -2,273460597 | N/A             | N/A       | N/A          | Inc-TTLL2-1         |
| A_33_P3367447  | 7,52282 | 8,70786 | -2,273696986 | ENST00000619675 | 221       | NM_001161473 | ALDH3B1             |
| A_23_P259741   | 8,1848  | 9,37037 | -2,274532423 | ENST00000417717 | 6304      | NM_002971    | SATB1               |
| A_22_P00002179 | 5,83533 | 7,0213  | -2,275163145 | N/A             | N/A       | N/A          | Inc-BTBD19-1        |
| A_24_P386622   | 5,01593 | 6,20194 | -2,275226226 | ENST00000360025 | 408       | NM_004041    | ARRB1               |

|                |         |         |              |                 |           |              |                  |
|----------------|---------|---------|--------------|-----------------|-----------|--------------|------------------|
| A_23_P71503    | 6,34614 | 7,53222 | -2,275336624 | N/A             | 78998     | NR_026785    | RHPN1-AS1        |
| A_32_P154053   | 4,18803 | 5,37417 | -2,275431254 | ENST00000498521 | 285973    | NM_173681    | ATG9B            |
| A_22_P00013078 | 6,75514 | 7,94172 | -2,276125332 | ENST00000545544 | 338799    | NR_002809    | LINC01089        |
| A_22_P00012932 | 2,66754 | 3,85416 | -2,27618844  | ENST00000505930 | N/A       | N/A          | N/A              |
| A_23_P254165   | 3,02582 | 4,21269 | -2,276582908 | ENST00000545871 | 10742     | NM_021785    | RAI2             |
| A_23_P151075   | 13,8295 | 15,0164 | -2,276630249 | ENST00000228945 | 397       | NM_001175    | ARHGDI8          |
| A_22_P00023694 | 1,46552 | 2,65291 | -2,27740362  | N/A             | N/A       | N/A          | Inc-TGFB3-1      |
| A_21_P0009808  | 1,95894 | 3,14664 | -2,277893031 | N/A             | N/A       | N/A          | Inc-AC012313.1-1 |
| A_33_P3367917  | 5,93072 | 7,1189  | -2,278651036 | ENST00000324677 | 85464     | NM_001282130 | SSH2             |
| A_21_P0014482  | 3,94792 | 5,13622 | -2,278840577 | N/A             | 101927416 | NR_121663    | LOC101927416     |
| A_21_P0005701  | 1,47875 | 2,66707 | -2,278872168 | N/A             | N/A       | N/A          | Inc-SDCBP-1      |
| A_23_P15305    | 11,0547 | 12,2437 | -2,279946545 | ENST00000446526 | 5635      | NM_002766    | PRPSAP1          |
| A_33_P3276364  | 5,1057  | 6,29491 | -2,280278441 | ENST00000485405 | 51478     | AK022929     | HSD17B7          |
| A_33_P3403459  | 7,35498 | 8,5442  | -2,280294246 | N/A             | 55449     | NR_023921    | DHRS4-AS1        |
| A_33_P3267859  | 1,95225 | 3,14147 | -2,280294246 | ENST00000380373 | 401666    | NM_001005329 | OR51A4           |
| A_21_P0009162  | 2,49072 | 3,68029 | -2,280847516 | N/A             | 440416    | XR_424802    | CCDC144NL-AS1    |
| A_22_P00002124 | 2,10313 | 3,29274 | -2,280910756 | N/A             | N/A       | BE561442     | Inc-BOLA2B-1     |
| A_33_P3373810  | 2,36914 | 3,5591  | -2,281464175 | ENST00000509139 | 255187    | N/A          | LOC255187        |
| A_21_P0014375  | 5,42532 | 6,61568 | -2,282096819 | N/A             | N/A       | N/A          | N/A              |
| A_21_P0004912  | 1,36932 | 2,5598  | -2,282286646 | N/A             | 102724422 | XR_426071    | LOC102724422     |
| A_23_P320530   | 5,04467 | 6,23535 | -2,282603061 | ENST00000595687 | 284323    | NM_001010880 | ZNF780A          |
| A_23_P252201   | 7,04475 | 8,23549 | -2,282697993 | ENST00000490434 | 55840     | NM_018456    | EAF2             |
| A_21_P0013701  | 1,59059 | 2,78138 | -2,282777107 | ENST00000436054 | 100507540 | NR_110952    | LINC01504        |
| A_23_P50455    | 11,126  | 12,3172 | -2,283425942 | ENST00000596221 | 5424      | NM_002691    | POLD1            |
| A_33_P3384885  | 6,22223 | 7,41391 | -2,284185789 | ENST00000359035 | 118472    | AK091711     | ZNF511           |
| A_24_P357647   | 1,44387 | 2,63556 | -2,284201622 | ENST00000274361 | 256006    | NM_001164443 | ANKRD31          |
| A_32_P158302   | 10,2474 | 11,4391 | -2,284217455 | ENST00000413744 | 401397    | NR_024412    | LINC00998        |
| A_33_P3362331  | 1,94988 | 3,14189 | -2,28470833  | ENST00000400079 | 245940    | NM_001037804 | DEFB130          |
| A_33_P3339051  | 13,1813 | 14,3737 | -2,285326033 | ENST00000300811 | 126299    | NM_182498    | ZNF428           |
| A_33_P3214625  | 7,74124 | 8,93364 | -2,285326033 | ENST00000262992 | 8821      | NM_003866    | INPP4B           |
| A_32_P36046    | 7,90165 | 9,09409 | -2,285389396 | N/A             | 388969    | NM_001013649 | C2orf68          |
| A_33_P3290707  | 8,18189 | 9,37509 | -2,286593638 | ENST00000473730 | 4311      | NM_007289    | MME              |
| A_21_P0002786  | 1,46582 | 2,65915 | -2,28679969  | ENST00000462835 | N/A       | N/A          | N/A              |



|                |         |         |              |                 |           |              |                |
|----------------|---------|---------|--------------|-----------------|-----------|--------------|----------------|
| A_23_P58606    | 9,43106 | 10,6244 | -2,286815541 | ENST00000511683 | 900       | NM_004060    | CCNG1          |
| A_22_P00010519 | 4,55229 | 5,74573 | -2,286974057 | N/A             | 101927172 | XR_242411    | LOC101927172   |
| A_33_P3302613  | 1,99678 | 3,19039 | -2,287243558 | N/A             | 79019     | XM_005261736 | CENPM          |
| A_23_P218827   | 9,52674 | 10,7208 | -2,287957098 | ENST00000264233 | 10721     | NM_199420    | POLQ           |
| A_33_P3213029  | 9,69957 | 10,8937 | -2,288068113 | ENST00000584437 | 54894     | NM_017763    | RNF43          |
| A_33_P3363168  | 7,42963 | 8,62381 | -2,288147413 | ENST00000269033 | 85464     | NM_001282129 | SSH2           |
| A_23_P342744   | 5,61047 | 6,80492 | -2,288575679 | ENST00000604000 | 128077    | NM_153713    | LIX1L          |
| A_24_P336584   | 4,03304 | 5,22759 | -2,288734316 | ENST00000605653 | 83593     | NM_182664    | RASSF5         |
| A_33_P3567892  | 5,90409 | 7,09931 | -2,289797471 | N/A             | 26107     | AL050263     | DKFZP547J0410  |
| A_23_P107454   | 2,57375 | 3,76968 | -2,290924637 | ENST00000580358 | 83896     | NM_031958    | KRTAP3-1       |
| A_22_P00011438 | 1,60713 | 2,80325 | -2,291226367 | ENST00000522292 | N/A       | BX096718     | N/A            |
| A_24_P388528   | 7,72681 | 8,92332 | -2,291845832 | ENST00000470633 | 6480      | NM_173216    | ST6GAL1        |
| A_22_P00000184 | 1,60373 | 2,80025 | -2,291861718 | N/A             | N/A       | AK000832     | Inc-ABHD16B-1  |
| A_24_P319736   | 8,05275 | 9,24936 | -2,292004696 | ENST00000409517 | 4211      | NM_002398    | MEIS1          |
| A_22_P00023397 | 3,21854 | 4,41556 | -2,292656154 | N/A             | N/A       | N/A          | Inc-TMEM159-2  |
| A_23_P6490     | 8,48581 | 9,68364 | -2,293943726 | ENST00000402203 | 23112     | NM_015088    | TNRC6B         |
| A_22_P00010647 | 4,06752 | 5,26539 | -2,294007328 | N/A             | N/A       | N/A          | Inc-NEDD4L-2   |
| A_23_P146146   | 1,88583 | 3,08449 | -2,295263839 | ENST00000285393 | 245972    | NM_152565    | ATP6V0D2       |
| A_23_P122906   | 9,12367 | 10,3226 | -2,295693437 | ENST00000611706 | 26053     | NM_015570    | AUTS2          |
| A_24_P690811   | 1,38186 | 2,58085 | -2,295788914 | ENST00000593569 | 554235    | NM_001024656 | ASPDH          |
| A_22_P00021961 | 1,43441 | 2,6334  | -2,295788914 | ENST00000584898 | N/A       | N/A          | N/A            |
| A_21_P0012896  | 6,32932 | 7,52831 | -2,295788914 | N/A             | N/A       | N/A          | XLOC_I2_011987 |
| A_33_P3333960  | 1,35508 | 2,55441 | -2,296330027 | ENST00000447147 | 100188949 | NR_024464    | LINC00426      |
| A_23_P155236   | 1,6329  | 2,83232 | -2,296473284 | ENST00000616727 | 56667     | NM_033049    | MUC13          |
| A_33_P3235321  | 6,77813 | 7,97796 | -2,297126012 | ENST00000496001 | 84958     | NM_032872    | SYTL1          |
| A_21_P0012426  | 3,1961  | 4,39624 | -2,297619662 | N/A             | N/A       | N/A          | XLOC_I2_010063 |
| A_22_P00023379 | 1,70328 | 2,90361 | -2,297922273 | ENST00000569865 | N/A       | N/A          | N/A            |
| A_23_P306610   | 1,78374 | 2,98503 | -2,299451869 | ENST00000379439 | 140453    | NM_001040105 | MUC17          |
| A_22_P00020638 | 1,74975 | 2,95106 | -2,299483746 | ENST00000518181 | N/A       | N/A          | N/A            |
| A_23_P161727   | 1,53307 | 2,73448 | -2,29964314  | ENST00000304298 | 3316      | NM_001541    | HSPB2          |
| A_22_P00021712 | 3,1868  | 4,38844 | -2,300009787 | N/A             | N/A       | N/A          | Inc-ANKRD13B-2 |
| A_33_P3258346  | 7,91106 | 9,11283 | -2,300217048 | ENST00000576724 | 54739     | NM_017523    | XAF1           |
| A_22_P00009097 | 2,58215 | 3,78406 | -2,300440273 | N/A             | N/A       | N/A          | Inc-LIAS-1     |

|                |         |         |              |                 |           |              |                |
|----------------|---------|---------|--------------|-----------------|-----------|--------------|----------------|
| A_23_P63432    | 9,40617 | 10,6081 | -2,300472164 | ENST00000289248 | 54933     | NM_017821    | RHBDL2         |
| A_22_P00007651 | 4,69035 | 5,89281 | -2,30131744  | N/A             | 115110    | NR_037844    | LOC115110      |
| A_33_P3334515  | 11,1373 | 12,3398 | -2,301381246 | ENST00000556147 | 57447     | NM_001282213 | NDRG2          |
| A_22_P00014274 | 3,62041 | 4,82305 | -2,301604585 | ENST00000438676 | 100506804 | NR_040081    | LOC100506804   |
| A_21_P0003182  | 1,64854 | 2,85129 | -2,30178008  | N/A             | N/A       | N/A          | Inc-ZIC4-1     |
| A_23_P35316    | 1,96495 | 3,16785 | -2,302019413 | ENST00000339986 | 57116     | NM_020394    | ZNF695         |
| A_23_P211973   | 5,84921 | 7,05232 | -2,302354522 | ENST00000510474 | 79858     | NM_024800    | NEK11          |
| A_23_P344578   | 1,45108 | 2,65426 | -2,302466235 | ENST00000542071 | 158297    | NM_153707    | FAM154A        |
| A_22_P00005127 | 1,40925 | 2,61253 | -2,302625836 | N/A             | 100507524 | NR_037901    | ARHGEF26-AS1   |
| A_22_P00003535 | 1,44123 | 2,64462 | -2,302801409 | N/A             | 101928864 | XR_244659    | LOC101928864   |
| A_32_P66881    | 6,74437 | 7,94804 | -2,303248383 | N/A             | 7099      | NM_138554    | TLR4           |
| A_22_P00011433 | 1,61089 | 2,8151  | -2,304110649 | ENST00000455699 | 283011    | NR_026835    | FLJ37201       |
| A_22_P00000644 | 1,57734 | 2,78186 | -2,304605799 | ENST00000570859 | N/A       | N/A          | N/A            |
| A_33_P3243168  | 10,499  | 11,7037 | -2,304893355 | N/A             | 7593      | NM_198055    | MZF1           |
| A_23_P153964   | 1,57335 | 2,77857 | -2,305724272 | ENST00000295228 | 3625      | NM_002193    | INHBB          |
| A_22_P00011823 | 4,67089 | 5,87631 | -2,306043936 | ENST00000515627 | 101927934 | NR_105045    | LOC101927934   |
| A_33_P3396766  | 6,08139 | 7,28698 | -2,306315684 | N/A             | N/A       | BC068076     | N/A            |
| A_33_P3635136  | 5,29002 | 6,4958  | -2,306619441 | N/A             | N/A       | BF346224     | N/A            |
| A_33_P3282963  | 4,18254 | 5,38833 | -2,30663543  | N/A             | N/A       | N/A          | N/A            |
| A_21_P0000723  | 2,31177 | 3,51784 | -2,307083148 | N/A             | 100616530 | NR_038208    | C8orf37-AS1    |
| A_33_P3401156  | 3,15812 | 4,36433 | -2,307307039 | ENST00000399357 | 2115      | NM_004956    | ETV1           |
| A_33_P3271273  | 5,38854 | 6,59483 | -2,307434987 | ENST00000571287 | 3212      | NM_002145    | HOXB2          |
| A_23_P39116    | 10,3878 | 11,5945 | -2,308090831 | ENST00000601091 | 3978      | NM_000234    | LIG1           |
| A_21_P0010696  | 3,79174 | 4,99883 | -2,308714856 | ENST00000420503 | 29092     | NR_109762    | LINC00339      |
| A_23_P155688   | 1,38992 | 2,59722 | -2,309050939 | ENST00000616980 | 6691      | NM_021114    | SPINK2         |
| A_33_P3420757  | 2,27962 | 3,48706 | -2,309275021 | ENST00000440832 | 361       | NM_001650    | AQP4           |
| A_33_P3402931  | 1,47417 | 2,68178 | -2,309547151 | ENST00000427185 | 389549    | NM_001024613 | FEZF1          |
| A_23_P373687   | 5,74895 | 6,95668 | -2,309739262 | ENST00000407787 | 150962    | NM_144709    | PUS10          |
| A_24_P219808   | 11,4656 | 12,6734 | -2,309851334 | ENST00000598325 | 53635     | NM_017432    | PTOV1          |
| A_33_P3276693  | 8,93235 | 10,1406 | -2,310571926 | ENST00000555567 | 5228      | NM_002632    | PGF            |
| A_22_P00010011 | 1,50587 | 2,71494 | -2,311885584 | ENST00000470024 | N/A       | N/A          | N/A            |
| A_24_P104538   | 7,43681 | 8,64605 | -2,312158021 | ENST00000579873 | N/A       | XM_006721770 | N/A            |
| A_22_P00024757 | 1,96071 | 3,17032 | -2,312751083 | N/A             | N/A       | DQ786279     | Inc-KIAA0195-1 |

|                |         |         |              |                 |           |              |              |
|----------------|---------|---------|--------------|-----------------|-----------|--------------|--------------|
| A_23_P201279   | 9,64486 | 10,8548 | -2,313280159 | ENST00000343090 | 10277     | NM_006048    | UBE4B        |
| A_33_P3389649  | 7,64734 | 8,85736 | -2,313408438 | ENST00000502575 | 5144      | NM_001197218 | PDE4D        |
| A_23_P166823   | 9,61379 | 10,824  | -2,313713129 | ENST00000461086 | 7134      | NM_003280    | TNNC1        |
| A_32_P59302    | 7,88818 | 9,0985  | -2,313889548 | ENST00000372583 | 59269     | NM_024503    | HIVEP3       |
| A_24_P218688   | 8,70517 | 9,91595 | -2,314627444 | ENST00000615463 | 221       | NM_000694    | ALDH3B1      |
| A_24_P3045     | 4,5626  | 5,77347 | -2,314771842 | ENST00000471191 | 843       | NM_032974    | CASP10       |
| A_32_P394951   | 5,91473 | 7,1258  | -2,31509276  | ENST00000270235 | 126147    | XM_006723011 | NTN5         |
| A_21_P0014408  | 2,97226 | 4,18334 | -2,315108807 | N/A             | 100506384 | NR_040513    | LOC100506384 |
| A_33_P3384642  | 1,60593 | 2,81741 | -2,315750781 | ENST00000375958 | 2073      | N/A          | ERCC5        |
| A_23_P124300   | 1,73858 | 2,9501  | -2,315814988 | ENST00000563804 | 53630     | NM_017429    | BCO1         |
| A_22_P00023407 | 2,50932 | 3,72105 | -2,316152105 | N/A             | N/A       | N/A          | Inc-DLL1-3   |
| A_21_P0000011  | 7,01634 | 8,22809 | -2,316184213 | ENST00000413459 | 51005     | NM_001145815 | AMDHD2       |
| A_33_P3386671  | 3,03143 | 4,24334 | -2,316441101 | ENST00000356728 | 6097      | NM_005060    | RORC         |
| A_23_P115022   | 8,76872 | 9,98137 | -2,317629575 | ENST00000432792 | 128218    | NM_144626    | TMEM125      |
| A_22_P00000763 | 1,98719 | 3,19992 | -2,317758095 | N/A             | N/A       | N/A          | Inc-ADCY7-1  |
| A_33_P3266928  | 9,54146 | 10,7544 | -2,318095495 | ENST00000600059 | 114783    | NM_001080434 | LMTK3        |
| A_23_P148807   | 8,68475 | 9,89781 | -2,318288317 | ENST00000428239 | 8317      | NM_003503    | CDC7         |
| A_33_P3215948  | 13,957  | 15,1704 | -2,318834732 | N/A             | 10205     | NM_005797    | MPZL2        |
| A_21_P0012516  | 2,70507 | 3,91862 | -2,319075839 | ENST00000490001 | 100996490 | NR_104146    | LINC01206    |
| A_23_P30243    | 12,345  | 13,5588 | -2,319477739 | ENST00000513084 | 64167     | NM_022350    | ERAP2        |
| A_22_P00014844 | 1,51019 | 2,72401 | -2,319509894 | ENST00000389554 | 10716     | NM_006593    | TBR1         |
| A_21_P0012517  | 1,41851 | 2,63279 | -2,320249582 | ENST00000482787 | 100996490 | NR_104146    | LINC01206    |
| A_33_P3327010  | 1,50383 | 2,71812 | -2,320265665 | ENST00000372008 | 23139     | NM_015112    | MAST2        |
| A_19_P00324550 | 1,91686 | 3,13133 | -2,320555174 | ENST00000424720 | 50614     | NM_001122636 | GALNT9       |
| A_22_P00013240 | 3,33259 | 4,5474  | -2,321102124 | N/A             | 100507283 | NR_103862    | LOC100507283 |
| A_22_P00016739 | 1,70509 | 2,92001 | -2,321279106 | N/A             | N/A       | N/A          | Inc-TREX1-2  |
| A_33_P3296099  | 1,50367 | 2,7186  | -2,321295196 | N/A             | N/A       | N/A          | N/A          |
| A_24_P240259   | 1,56725 | 2,78273 | -2,322180314 | ENST00000264676 | 79782     | NM_024727    | LRR31        |
| A_21_P0003410  | 1,59543 | 2,81091 | -2,322180314 | ENST00000513400 | 102724953 | N/A          | LOC102724953 |
| A_33_P3400477  | 8,13289 | 9,34842 | -2,322260796 | ENST00000418131 | 6491      | NM_001282936 | STIL         |
| A_33_P3265016  | 9,24524 | 10,4608 | -2,322309087 | ENST00000244546 | 5190      | NM_000287    | PEX6         |
| A_33_P3354940  | 4,84691 | 6,06249 | -2,322341281 | ENST00000329608 | 1435      | NM_000757    | CSF1         |
| A_23_P38864    | 12,7092 | 13,9248 | -2,322373476 | ENST00000222008 | 10567     | NM_006423    | RABAC1       |

|                |         |         |              |                 |           |              |                      |
|----------------|---------|---------|--------------|-----------------|-----------|--------------|----------------------|
| A_24_P382489   | 11,5445 | 12,7601 | -2,322373476 | ENST00000594962 | 376497    | XM_006722749 | SLC27A1              |
| A_23_P351667   | 3,17865 | 4,39447 | -2,322727647 | ENST00000374415 | 8745      | NM_003812    | ADAM23               |
| A_24_P756766   | 1,57691 | 2,79275 | -2,322759847 | ENST00000420162 | 146822    | NM_001007530 | CDRT15               |
| A_22_P00021687 | 2,63426 | 3,85019 | -2,322904753 | N/A             | N/A       | DB061137     | Inc-SPTBN5-1         |
| A_24_P207479   | 10,1344 | 11,3506 | -2,323339525 | ENST00000593804 | 162989    | NM_133328    | DEDD2                |
| A_21_P0000005  | 1,4052  | 2,62163 | -2,32370995  | ENST00000399154 | 219537    | NM_001105565 | SMTNL1               |
| A_24_P238250   | 9,8399  | 11,0564 | -2,3238227   | ENST00000600304 | 3963      | NM_002307    | LGALS7               |
| A_21_P0014551  | 1,57852 | 2,79508 | -2,323919347 | N/A             | N/A       | N/A          | Inc-BAZ1A-1          |
| A_22_P00011510 | 1,55448 | 2,77108 | -2,323983781 | ENST00000569583 | N/A       | BC031693     | N/A                  |
| A_19_P00320343 | 2,77603 | 3,99279 | -2,324241533 | N/A             | 100507403 | XR_426301    | LOC100507403         |
| A_21_P0011707  | 5,28184 | 6,49896 | -2,32482158  | N/A             | N/A       | N/A          | XLOC_I2_006797       |
| A_22_P00013747 | 2,34266 | 3,55981 | -2,324869924 | N/A             | N/A       | N/A          | Inc-RP11-863N1.2.1-3 |
| A_33_P3225507  | 4,34267 | 5,56029 | -2,325627442 | ENST00000612164 | 26534     | NM_001005466 | OR10G2               |
| A_23_P381368   | 1,94442 | 3,16248 | -2,326336831 | ENST00000490088 | 3236      | NM_002148    | HOXD10               |
| A_24_P341674   | 1,70562 | 2,92402 | -2,326885143 | ENST00000555844 | 1734      | NM_013989    | DIO2                 |
| A_22_P00005428 | 1,45928 | 2,67919 | -2,329321858 | ENST00000515364 | N/A       | N/A          | N/A                  |
| A_24_P418044   | 13,1583 | 14,3784 | -2,329628645 | ENST00000462773 | 3137      | NR_024240    | HLA-J                |
| A_22_P00019245 | 1,41168 | 2,63184 | -2,329725533 | N/A             | 101928696 | NR_121196    | LOC101928696         |
| A_23_P29067    | 5,06621 | 6,28641 | -2,329790128 | ENST00000398585 | 7113      | NM_005656    | TMPRSS2              |
| A_22_P00001524 | 1,68679 | 2,90727 | -2,33024234  | N/A             | N/A       | BX646148     | Inc-ARHGAP26-4       |
| A_21_P0006020  | 1,39901 | 2,6197  | -2,330581557 | ENST00000455583 | N/A       | N/A          | N/A                  |
| A_21_P0006900  | 1,41834 | 2,63903 | -2,330581557 | N/A             | N/A       | N/A          | Inc-GOLGA7B-2        |
| A_21_P0008723  | 2,14275 | 3,3635  | -2,330678485 | N/A             | N/A       | N/A          | Inc-RASGRP1-4        |
| A_21_P0007966  | 1,44186 | 2,66269 | -2,330807729 | N/A             | 101409253 | N/A          | LINC00676            |
| A_22_P00009838 | 1,64674 | 2,86769 | -2,331001609 | N/A             | N/A       | N/A          | Inc-METTL13-1        |
| A_23_P22350    | 7,38589 | 8,60722 | -2,331615666 | ENST00000503702 | 65983     | NM_023927    | GRAMD3               |
| A_33_P3404435  | 1,59753 | 2,81901 | -2,331858101 | ENST00000319104 | 81790     | NM_001160224 | RNF170               |
| A_33_P3219527  | 2,20866 | 3,43118 | -2,333539681 | N/A             | 219790    | AK096671     | RTKN2                |
| A_22_P00022498 | 3,3749  | 4,59749 | -2,333652908 | N/A             | N/A       | BC036589     | Inc-NAA16-2          |
| A_21_P0006004  | 1,41906 | 2,64226 | -2,334639831 | ENST00000449144 | N/A       | N/A          | N/A                  |
| A_21_P0003233  | 2,57633 | 3,79972 | -2,334947319 | N/A             | 101929223 | XR_245231    | LOC101929223         |
| A_21_P0013142  | 1,72988 | 2,95335 | -2,335076799 | N/A             | 100289683 | BC021996     | ERVH-3               |
| A_22_P00005394 | 2,79467 | 4,01861 | -2,335837642 | N/A             | 284835    | NR_024100    | LINC00323            |

|                |         |         |              |                 |           |              |              |
|----------------|---------|---------|--------------|-----------------|-----------|--------------|--------------|
| A_33_P3370848  | 4,45759 | 5,68162 | -2,335983364 | ENST00000619399 | 2116      | NM_014209    | ETV2         |
| A_23_P50291    | 1,72036 | 2,94439 | -2,335983364 | ENST00000591589 | 50700     | NM_015725    | RDH8         |
| A_21_P0005774  | 1,61544 | 2,84035 | -2,337408677 | N/A             | N/A       | N/A          | Inc-DENND3-1 |
| A_21_P0012036  | 1,65465 | 2,87962 | -2,33750589  | ENST00000419243 | 101927641 | NR_110270    | LOC101927641 |
| A_22_P00005607 | 1,7092  | 2,93421 | -2,3375707   | N/A             | N/A       | AA262526     | Inc-EFR3B-4  |
| A_22_P00008010 | 1,61495 | 2,8407  | -2,338770015 | N/A             | N/A       | BU561518     | Inc-IFNK-2   |
| A_33_P3395743  | 11,952  | 13,1778 | -2,338851072 | ENST00000338660 | 64856     | NM_022834    | VWA1         |
| A_33_P3347055  | 8,974   | 10,2001 | -2,339337473 | ENST00000588843 | N/A       | N/A          | N/A          |
| A_33_P3390097  | 1,6268  | 2,85324 | -2,33988885  | N/A             | N/A       | N/A          | N/A          |
| A_21_P0008361  | 3,03165 | 4,25829 | -2,34021325  | N/A             | N/A       | N/A          | Inc-NRXN3-1  |
| A_23_P103601   | 6,38717 | 7,61395 | -2,340440356 | ENST00000263979 | 57134     | NM_020379    | MAN1C1       |
| A_23_P60146    | 4,10623 | 5,33347 | -2,341186719 | ENST00000541323 | 5157      | NM_006207    | PDGFRL       |
| A_33_P3295056  | 4,62237 | 5,85041 | -2,342485309 | ENST00000616321 | 5790      | NM_005608    | PTPRCAP      |
| A_33_P3355252  | 2,27255 | 3,50065 | -2,342582732 | ENST00000379526 | N/A       | N/A          | N/A          |
| A_21_P0008376  | 1,47248 | 2,70066 | -2,342712636 | N/A             | N/A       | N/A          | Inc-CALM1-2  |
| A_33_P3880078  | 1,69862 | 2,92715 | -2,343281051 | ENST00000423875 | 100133308 | NR_024472    | RSU1P2       |
| A_21_P0008085  | 1,46435 | 2,69292 | -2,343346021 | N/A             | N/A       | N/A          | Inc-SCEL-2   |
| A_33_P3373459  | 10,1374 | 11,3661 | -2,343557188 | ENST00000618655 | 55501     | NM_018641    | CHST12       |
| A_33_P3356821  | 1,47405 | 2,70345 | -2,344694565 | ENST00000607093 | 353133    | NM_178351    | LCE1C        |
| A_23_P98092    | 12,4644 | 13,694  | -2,345019631 | ENST00000368845 | 4942      | NM_000274    | OAT          |
| A_21_P0005749  | 1,51883 | 2,74857 | -2,345247204 | N/A             | N/A       | N/A          | Inc-TTC35-1  |
| A_22_P00023149 | 1,91045 | 3,14031 | -2,345442284 | ENST00000533082 | N/A       | N/A          | N/A          |
| A_24_P120734   | 1,5316  | 2,7615  | -2,345507315 | N/A             | 84847     | NR_038407    | LINC00525    |
| A_21_P0003859  | 1,64375 | 2,87367 | -2,345539831 | N/A             | N/A       | N/A          | Inc-CLCN3-4  |
| A_23_P170213   | 2,419   | 3,64952 | -2,346515516 | ENST00000368416 | 154215    | NM_001040214 | NKAIN2       |
| A_33_P3262181  | 7,60874 | 8,83994 | -2,347621783 | ENST00000494150 | 200316    | NM_001006666 | APOBEC3F     |
| A_23_P74309    | 4,84325 | 6,07536 | -2,349103046 | ENST00000530878 | 9722      | NM_014697    | NOS1AP       |
| A_33_P3312222  | 2,74798 | 3,98026 | -2,349379869 | ENST00000512357 | N/A       | N/A          | N/A          |
| A_33_P3337896  | 5,61731 | 6,84967 | -2,34951015  | ENST00000479369 | N/A       | AK024906     | N/A          |
| A_33_P3228450  | 12,6949 | 13,9276 | -2,350063924 | ENST00000435734 | 5349      | NM_001136007 | FXD3         |
| A_23_P133068   | 2,41346 | 3,64626 | -2,350226824 | ENST00000394537 | 287       | NM_001148    | ANK2         |
| A_23_P155765   | 12,6895 | 13,9224 | -2,350389735 | ENST00000511316 | 3148      | NM_002129    | HMGB2        |
| A_33_P3376234  | 6,65256 | 7,88584 | -2,351008899 | ENST00000369604 | 10745     | NM_006608    | PHTF1        |

|                |         |         |              |                 |           |              |                  |
|----------------|---------|---------|--------------|-----------------|-----------|--------------|------------------|
| A_23_P77756    | 1,67369 | 2,90715 | -2,351302245 | ENST00000329003 | 8811      | NM_003857    | GALR2            |
| A_33_P3303291  | 3,70634 | 4,94027 | -2,352068375 | ENST00000557253 | 11035     | NM_006871    | RIPK3            |
| A_24_P39195    | 1,74154 | 2,97553 | -2,352166197 | ENST00000298440 | 27199     | NM_080818    | OXGR1            |
| A_19_P00317054 | 3,09905 | 4,33344 | -2,352818446 | N/A             | 101927777 | NR_125803    | SATB1-AS1        |
| A_22_P00017752 | 2,39489 | 3,6295  | -2,35317726  | N/A             | N/A       | DB452462     | Inc-YIF1A-4      |
| A_33_P3380793  | 1,49333 | 2,72796 | -2,353209882 | ENST00000405854 | 348645    | NM_001289922 | C22orf34         |
| A_21_P0012803  | 7,34208 | 8,57676 | -2,35329144  | ENST00000506645 | 100507639 | N/A          | LOC100507639     |
| A_23_P200829   | 10,6256 | 11,8604 | -2,353487189 | ENST00000573034 | 23380     | NM_015326    | SRGAP2           |
| A_22_P00025825 | 3,72328 | 4,95821 | -2,353699269 | N/A             | N/A       | N/A          | Inc-TMEM99-4     |
| A_21_P0004411  | 1,42205 | 2,65751 | -2,354564102 | N/A             | N/A       | N/A          | Inc-ZNF366-4     |
| A_23_P11859    | 7,65914 | 8,89636 | -2,35743828  | ENST00000494450 | 51478     | NM_016371    | HSD17B7          |
| A_33_P3226008  | 4,27932 | 5,51671 | -2,357716085 | ENST00000495418 | 257144    | NM_001190259 | GCSAM            |
| A_21_P0000118  | 3,93569 | 5,17342 | -2,358271793 | ENST00000477399 | 389170    | NM_001193283 | LEKR1            |
| A_21_P0000214  | 2,14171 | 3,37971 | -2,358713185 | ENST00000580755 | 26809     | NR_000014    | SNORD42A         |
| A_23_P73345    | 4,71545 | 5,95359 | -2,358942087 | ENST00000461014 | 4286      | NM_198159    | MITF             |
| A_33_P3211618  | 2,93124 | 4,16972 | -2,359498084 | N/A             | N/A       | AK024389     | N/A              |
| A_21_P0012915  | 2,34522 | 3,58391 | -2,35984156  | N/A             | N/A       | N/A          | XLOC_I2_012135   |
| A_22_P00002301 | 1,56022 | 2,79896 | -2,359923347 | N/A             | N/A       | N/A          | Inc-C11orf16-1   |
| A_33_P3233956  | 1,46809 | 2,70711 | -2,360381408 | N/A             | 100507244 | NR_040076    | MAMDC2-AS1       |
| A_33_P3409631  | 1,35932 | 2,5985  | -2,360643197 | N/A             | N/A       | N/A          | N/A              |
| A_24_P45367    | 9,74938 | 10,9887 | -2,360872287 | ENST00000003912 | 57185     | NM_020448    | NIPAL3           |
| A_21_P0002064  | 2,89675 | 4,1362  | -2,361085033 | ENST00000457870 | N/A       | N/A          | N/A              |
| A_33_P3358863  | 2,07665 | 3,31622 | -2,36128143  | N/A             | 100287823 | XM_006710226 | LOC100287823     |
| A_23_P114740   | 11,6995 | 12,9391 | -2,361330532 | ENST00000466229 | 3075      | NM_000186    | CFH              |
| A_33_P3421118  | 8,63509 | 9,87483 | -2,361559688 | ENST00000367746 | 53832     | AK098312     | IL20RA           |
| A_22_P00009079 | 1,41568 | 2,65571 | -2,362034439 | ENST00000598304 | 400696    | BC128606     | LGALS17A         |
| A_24_P187859   | 1,75952 | 2,99974 | -2,362345535 | N/A             | 23107     | AK095964     | MRPS27           |
| A_23_P301572   | 1,63377 | 2,87427 | -2,362804066 | ENST00000265018 | 27146     | NM_015688    | FAM184B          |
| A_24_P301629   | 6,66608 | 7,90681 | -2,363180784 | ENST00000590615 | 7711      | NM_003445    | ZNF155           |
| A_21_P0006293  | 1,96551 | 3,2063  | -2,363279068 | ENST00000423380 | N/A       | XR_108974    | N/A              |
| A_21_P0001428  | 5,36914 | 6,61019 | -2,363705012 | N/A             | N/A       | N/A          | Inc-AC092811.1-1 |
| A_24_P218805   | 1,97119 | 3,21305 | -2,365032485 | ENST00000511575 | 3226      | NM_017409    | HOXC10           |
| A_32_P7015     | 9,81688 | 11,0593 | -2,36595068  | ENST00000373290 | 23555     | NM_012339    | TSPAN15          |

|                |         |         |              |                 |           |              |               |
|----------------|---------|---------|--------------|-----------------|-----------|--------------|---------------|
| A_23_P4190     | 10,6171 | 11,8599 | -2,366573944 | ENST00000511147 | 80221     | NM_025149    | ACSF2         |
| A_23_P70249    | 7,51525 | 8,75811 | -2,366672369 | ENST00000323760 | 995       | NM_001790    | CDC25C        |
| A_33_P3340229  | 1,59042 | 2,8338  | -2,367525558 | N/A             | N/A       | N/A          | N/A           |
| A_23_P391689   | 12,6035 | 13,8471 | -2,367886615 | ENST00000601829 | 100131801 | NM_001171155 | PET100        |
| A_24_P225534   | 8,27078 | 9,51442 | -2,367952268 | ENST00000289248 | 54933     | NM_017821    | RHBDL2        |
| A_33_P3229702  | 3,37269 | 4,61645 | -2,368149237 | ENST00000573440 | 117166    | NM_053284    | WFIKKN1       |
| A_22_P00010087 | 1,44605 | 2,69044 | -2,369183592 | N/A             | 102723403 | XR_424224    | LOC102723403  |
| A_33_P3409665  | 5,24431 | 6,48875 | -2,369265703 | ENST00000400242 | 9681      | NM_001007188 | DEPDC5        |
| A_22_P00020735 | 1,63106 | 2,87562 | -2,369462782 | ENST00000579247 | N/A       | XR_243856    | N/A           |
| A_33_P3265244  | 1,39541 | 2,64035 | -2,370086971 | ENST00000418316 | 346517    | NM_001001667 | OR6V1         |
| A_19_P00811940 | 2,81234 | 4,05752 | -2,37048128  | N/A             | N/A       | N/A          | Inc-SLC35A5-1 |
| A_22_P00014158 | 1,51994 | 2,76554 | -2,371171479 | N/A             | N/A       | BC040304     | Inc-SCOC-1    |
| A_21_P0014888  | 5,00603 | 6,25206 | -2,37187832  | N/A             | N/A       | N/A          | N/A           |
| A_22_P00025049 | 4,42913 | 5,67522 | -2,371976966 | ENST00000418066 | 307       | DB179679     | ANXA4         |
| A_21_P0001718  | 6,19528 | 7,44162 | -2,372388034 | N/A             | N/A       | N/A          | Inc-WRAP73-1  |
| A_22_P00000225 | 3,0545  | 4,30092 | -2,372519591 | N/A             | 404744    | NR_033664    | NPSR1-AS1     |
| A_23_P8416     | 8,20787 | 9,4544  | -2,372700493 | ENST00000434507 | 63917     | NM_022087    | GALNT11       |
| A_33_P3214466  | 3,55067 | 4,79745 | -2,373111686 | ENST00000300057 | 55897     | NM_018670    | MESP1         |
| A_22_P00021719 | 1,51981 | 2,76685 | -2,373539403 | N/A             | 100862662 | NR_046383    | ALDH1L1-AS2   |
| A_22_P00008383 | 1,60136 | 2,84859 | -2,373852014 | ENST00000532272 | N/A       | DA742716     | N/A           |
| A_22_P00003958 | 1,46298 | 2,71032 | -2,374033018 | N/A             | N/A       | N/A          | Inc-CHAF1B-3  |
| A_21_P0008830  | 1,37941 | 2,62681 | -2,374131753 | N/A             | N/A       | N/A          | Inc-RPLP1-1   |
| A_23_P42144    | 10,0985 | 11,3459 | -2,374131753 | ENST00000304611 | 5190      | NM_000287    | PEX6          |
| A_21_P0011895  | 2,62632 | 3,87384 | -2,374329236 | ENST00000426962 | 102723927 | N/A          | LOC102723927  |
| A_23_P5703     | 2,5458  | 3,79351 | -2,374641951 | ENST00000333017 | 254773    | NM_175735    | LYG2          |
| A_33_P3268863  | 1,34862 | 2,59646 | -2,374855938 | ENST00000317019 | 283171    | NM_001271983 | C11orf44      |
| A_21_P0009350  | 1,67507 | 2,92331 | -2,375514479 | N/A             | N/A       | N/A          | Inc-ABCA8-2   |
| A_33_P3237775  | 9,71296 | 10,9619 | -2,376667365 | ENST00000407404 | 10062     | NM_005693    | NR1H3         |
| A_33_P3358740  | 11,6579 | 12,9071 | -2,377095723 | N/A             | 114881    | NM_145798    | OSBPL7        |
| A_23_P203920   | 8,17368 | 9,42335 | -2,377870257 | ENST00000242729 | 8082      | NM_005086    | SSPN          |
| A_23_P64721    | 12,4717 | 13,7214 | -2,377919704 | ENST00000528880 | 8843      | NM_006018    | HCAR3         |
| A_24_P17870    | 6,49462 | 7,74432 | -2,377919704 | N/A             | 10866     | NR_040662    | HCP5          |
| A_23_P8108     | 2,36742 | 3,61737 | -2,378331802 | ENST00000475182 | 3119      | NM_001243962 | HLA-DQB1      |

|                |         |         |              |                 |           |              |                       |
|----------------|---------|---------|--------------|-----------------|-----------|--------------|-----------------------|
| A_33_P3295077  | 3,4373  | 4,6878  | -2,379238668 | N/A             | N/A       | N/A          | N/A                   |
| A_23_P104876   | 8,34998 | 9,60093 | -2,379980907 | ENST00000524614 | 53340     | NM_017425    | SPA17                 |
| A_33_P3317576  | 6,26889 | 7,51993 | -2,380129383 | ENST00000394221 | 200895    | NM_001195643 | DHFRL1                |
| A_22_P00019354 | 1,73679 | 2,98788 | -2,380211873 | N/A             | 101927808 | NR_108084    | CLSTN2-AS1            |
| A_23_P42909    | 9,2778  | 10,5295 | -2,381218487 | ENST00000409244 | 135932    | NM_153345    | TMEM139               |
| A_33_P3228466  | 9,18185 | 10,4339 | -2,381796244 | ENST00000605677 | 5349      | NM_001136008 | FXYD3                 |
| A_23_P66017    | 4,5737  | 5,82594 | -2,382109942 | ENST00000300797 | 112476    | NM_145239    | PRRT2                 |
| A_21_P0010424  | 1,59765 | 2,84992 | -2,382159478 | N/A             | N/A       | N/A          | Inc-FAM19A5-6         |
| A_21_P0013814  | 9,7656  | 11,018  | -2,382374142 | N/A             | N/A       | N/A          | XLOC_I2_015722        |
| A_23_P138706   | 1,72018 | 2,97268 | -2,382539281 | ENST00000280155 | 150       | NM_000681    | ADRA2A                |
| A_33_P3392882  | 1,99292 | 3,24542 | -2,382539281 | ENST00000409213 | 344148    | NM_207481    | NCKAP5                |
| A_21_P0013999  | 1,3832  | 2,6359  | -2,382869594 | N/A             | N/A       | N/A          | N/A                   |
| A_23_P145      | 10,4939 | 11,7466 | -2,382869594 | ENST00000374487 | 3155      | NM_000191    | HMGCL                 |
| A_33_P3285799  | 1,71735 | 2,97018 | -2,383084322 | ENST00000355283 | 221264    | AK131244     | AK9                   |
| A_33_P3461039  | 2,76256 | 4,01548 | -2,383232991 | N/A             | N/A       | AK055712     | Inc-MTERFD3-1         |
| A_24_P388433   | 8,37276 | 9,62665 | -2,384835903 | ENST00000264977 | 5523      | NM_002718    | PPP2R3A               |
| A_33_P3309206  | 1,59156 | 2,84583 | -2,385464142 | ENST00000556166 | 2562      | NR_103801    | GABRB3                |
| A_33_P3281403  | 1,44585 | 2,70085 | -2,386671486 | ENST00000367024 | 80342     | NM_001287754 | TRAF3IP3              |
| A_23_P201863   | 6,63305 | 7,88818 | -2,386886557 | ENST00000484080 | 5129      | NM_212503    | CDK18                 |
| A_21_P0010395  | 1,33858 | 2,59381 | -2,387052009 | N/A             | N/A       | N/A          | Inc-GNAZ-1            |
| A_24_P167970   | 5,26158 | 6,51707 | -2,387482238 | ENST00000567664 | 6911      | NM_004608    | TBX6                  |
| A_33_P3349259  | 6,17906 | 7,43456 | -2,387498787 | ENST00000414990 | 9747      | NM_014719    | TCAF1                 |
| A_22_P00003386 | 1,33732 | 2,593   | -2,387796685 | N/A             | 101926948 | XR_242548    | LOC101926948          |
| A_33_P3402217  | 8,92779 | 10,1835 | -2,387846339 | ENST00000589357 | N/A       | N/A          | N/A                   |
| A_21_P0011442  | 1,6239  | 2,88012 | -2,388690603 | N/A             | N/A       | N/A          | XLOC_I2_005245        |
| A_23_P125082   | 4,51926 | 5,77554 | -2,388789948 | ENST00000393593 | 3660      | NM_002199    | IRF2                  |
| A_22_P00013666 | 2,90968 | 4,16645 | -2,38960142  | N/A             | N/A       | XM_006726536 | Inc-RP11-680F20.5.1-2 |
| A_33_P3408702  | 2,96918 | 4,22605 | -2,38976706  | ENST00000504117 | 285600    | N/A          | KIAA0825              |
| A_23_P250478   | 6,19738 | 7,45436 | -2,389949278 | ENST00000379162 | 5165      | NM_005391    | PDK3                  |
| A_21_P0004694  | 1,68655 | 2,94358 | -2,390032109 | ENST00000446392 | N/A       | N/A          | N/A                   |
| A_23_P215900   | 11,4603 | 12,7178 | -2,390810858 | ENST00000301904 | 51435     | NM_016240    | SCARA3                |
| A_22_P00025586 | 1,53844 | 2,79603 | -2,390960009 | N/A             | 101928017 | NR_110078    | UBXN10-AS1            |
| A_33_P3359763  | 2,0039  | 3,26193 | -2,391689327 | ENST00000466317 | 201163    | AL831885     | FLCN                  |



|                |         |         |              |                 |           |              |              |
|----------------|---------|---------|--------------|-----------------|-----------|--------------|--------------|
| A_32_P28223    | 7,20496 | 8,46303 | -2,391755639 | N/A             | 101928837 | NR_120561    | LOC101928837 |
| A_22_P00006707 | 1,594   | 2,85213 | -2,391855112 | N/A             | N/A       | N/A          | Inc-FRK-1    |
| A_21_P0001141  | 1,63192 | 2,89033 | -2,392319371 | ENST00000423187 | N/A       | N/A          | N/A          |
| A_21_P0014150  | 4,11051 | 5,36976 | -2,393712689 | N/A             | 101928489 | NR_110889    | LOC101928489 |
| A_21_P0011018  | 2,74058 | 3,99988 | -2,393795651 | N/A             | 101928620 | XR_246466    | LOC101928620 |
| A_33_P3768992  | 1,64132 | 2,90078 | -2,394061146 | ENST00000319675 | 138009    | NM_152418    | DCAF4L2      |
| A_21_P0005369  | 2,00487 | 3,26463 | -2,394559028 | N/A             | N/A       | N/A          | Inc-GARS-4   |
| A_33_P3321369  | 6,21611 | 7,47593 | -2,394658617 | ENST00000558641 | N/A       | XR_109231    | N/A          |
| A_21_P0003087  | 1,41069 | 2,67057 | -2,394758211 | N/A             | N/A       | N/A          | Inc-FAM43A-9 |
| A_22_P00009992 | 4,07928 | 5,33945 | -2,395239636 | ENST00000587700 | 5990      | AK056073     | RFX2         |
| A_23_P44112    | 9,39304 | 10,6533 | -2,395389063 | ENST00000395456 | 27040     | NM_014387    | LAT          |
| A_33_P3227944  | 5,9162  | 7,17674 | -2,395854008 | ENST00000586362 | 147081    | NR_026906    | CRHR1-IT1    |
| A_24_P400573   | 1,66425 | 2,92505 | -2,396285824 | ENST00000589691 | 147138    | NM_152468    | TMC8         |
| A_23_P256784   | 7,33147 | 8,5927  | -2,397000151 | N/A             | 4583      | NM_002457    | MUC2         |
| A_33_P3264955  | 9,97934 | 11,2408 | -2,397382321 | N/A             | N/A       | N/A          | N/A          |
| A_21_P0007280  | 2,747   | 4,00909 | -2,398429445 | N/A             | N/A       | N/A          | Inc-CXCR5-1  |
| A_22_P00000349 | 1,74488 | 3,0071  | -2,398645575 | ENST00000554649 | N/A       | N/A          | N/A          |
| A_22_P00011385 | 2,21057 | 3,47286 | -2,398761961 | N/A             | 553103    | NR_110997    | LOC553103    |
| A_23_P47704    | 7,07935 | 8,34175 | -2,398944864 | ENST00000310473 | 7351      | NM_003355    | UCP2         |
| A_22_P00004055 | 1,46522 | 2,72775 | -2,399161041 | N/A             | N/A       | BG541773     | Inc-CHST2-4  |
| A_21_P0000928  | 5,42671 | 6,68928 | -2,399227561 | ENST00000449660 | 115110    | NR_037844    | LOC115110    |
| A_33_P3413855  | 3,63554 | 4,89829 | -2,399526922 | ENST00000297145 | 154743    | NM_152556    | C7orf60      |
| A_33_P3337277  | 5,46251 | 6,72538 | -2,399726518 | N/A             | 100129846 | AK124859     | LOC100129846 |
| A_23_P346093   | 6,24433 | 7,50738 | -2,400025942 | ENST00000589691 | 147138    | NM_152468    | TMC8         |
| A_22_P00025807 | 2,5404  | 3,80349 | -2,400092486 | ENST00000523331 | N/A       | DB271563     | N/A          |
| A_23_P89509    | 11,2814 | 12,5447 | -2,400441871 | ENST00000580676 | 10615     | NM_006461    | SPAG5        |
| A_21_P0000002  | 1,46157 | 2,72504 | -2,400724743 | N/A             | 414149    | NM_001039844 | ACBD7        |
| A_23_P397293   | 10,995  | 12,2585 | -2,400774666 | ENST00000292430 | 54742     | NM_017527    | LY6K         |
| A_33_P3363637  | 6,45613 | 7,7198  | -2,401057578 | ENST00000413476 | 29760     | NM_013314    | BLNK         |
| A_22_P00007919 | 1,45846 | 2,72241 | -2,401523623 | ENST00000455966 | 101928043 | NR_110692    | LOC101928043 |
| A_33_P3243618  | 5,92927 | 7,19427 | -2,403272099 | ENST00000366591 | 7107      | NM_003272    | GPR137B      |
| A_33_P3240148  | 1,60086 | 2,86594 | -2,403405368 | N/A             | 100131101 | AK127068     | LOC100131101 |
| A_33_P3334384  | 5,22232 | 6,48749 | -2,403555305 | N/A             | 100132774 | NR_033827    | KDM4A-AS1    |

|                |         |         |              |                 |           |              |               |
|----------------|---------|---------|--------------|-----------------|-----------|--------------|---------------|
| A_23_P103756   | 6,25702 | 7,52282 | -2,404605126 | ENST00000369732 | 5016      | NM_002557    | OVGP1         |
| A_24_P166443   | 1,77418 | 3,04031 | -2,405155214 | ENST00000402095 | 3115      | NM_002121    | HLA-DPB1      |
| A_33_P3271176  | 1,64909 | 2,91539 | -2,405438643 | N/A             | 100130057 | AK128528     | LOC100130057  |
| A_23_P4944     | 10,5183 | 11,7854 | -2,406772871 | ENST00000486500 | 808       | NM_005184    | CALM3         |
| A_33_P3306202  | 5,07762 | 6,34478 | -2,406872968 | ENST00000497769 | 653602    | NM_001291410 | LOC653602     |
| A_33_P3381966  | 1,52384 | 2,79131 | -2,407390202 | N/A             | 100129311 | AK127597     | LOC100129311  |
| A_22_P00007597 | 3,318   | 4,58557 | -2,407557075 | N/A             | 101926895 | NR_120372    | CRTC3-AS1     |
| A_23_P69908    | 9,93717 | 11,2048 | -2,407657205 | ENST00000507412 | 2745      | NM_002064    | GLRX          |
| A_21_P0003797  | 3,86133 | 5,12961 | -2,408742209 | N/A             | N/A       | N/A          | Inc-SCRG1-1   |
| A_23_P28485    | 9,54788 | 10,8163 | -2,408975966 | ENST00000487445 | 25801     | NM_012198    | GCA           |
| A_22_P00009302 | 2,9624  | 4,23117 | -2,409560458 | ENST00000578478 | N/A       | N/A          | N/A           |
| A_33_P3259865  | 4,0291  | 5,29796 | -2,409710779 | ENST00000521244 | 400798    | NR_033186    | C1orf220      |
| A_23_P416468   | 9,92819 | 11,1971 | -2,409794295 | ENST00000559239 | 80119     | NM_025049    | PIF1          |
| A_33_P3409159  | 8,29475 | 9,56387 | -2,410145092 | ENST00000406686 | 63027     | NM_015482    | SLC22A23      |
| A_21_P0000356  | 4,67555 | 5,94553 | -2,411582224 | N/A             | 677780    | NR_003012    | SCARNA11      |
| A_22_P00013791 | 1,38481 | 2,65497 | -2,411883127 | ENST00000521242 | N/A       | N/A          | N/A           |
| A_23_P150857   | 6,84781 | 8,11865 | -2,413020212 | ENST00000394115 | 6821      | NM_000456    | SUOX          |
| A_21_P0000069  | 4,42683 | 5,6977  | -2,41307039  | ENST00000468233 | 79674     | NM_001167915 | VEPH1         |
| A_22_P00012093 | 3,00339 | 4,27449 | -2,413455122 | N/A             | 100506033 | NR_040037    | PTOV1-AS1     |
| A_21_P0006077  | 1,55902 | 2,83018 | -2,413555496 | ENST00000448491 | 101927305 | NR_125884    | LOC101927305  |
| A_21_P0001575  | 1,36395 | 2,63522 | -2,413739528 | N/A             | N/A       | N/A          | Inc-NOTCH2-2  |
| A_24_P340247   | 2,61447 | 3,88582 | -2,413873378 | ENST00000595937 | 284359    | NM_182575    | IZUMO1        |
| A_22_P00011961 | 1,54818 | 2,82019 | -2,414977922 | N/A             | N/A       | N/A          | Inc-PKNOX1-1  |
| A_33_P3311165  | 1,61237 | 2,88452 | -2,415212285 | ENST00000618178 | 400658    | NM_001272093 | C18orf65      |
| A_22_P00019891 | 1,95682 | 3,22948 | -2,416066225 | ENST00000497258 | N/A       | N/A          | N/A           |
| A_33_P3348164  | 4,16331 | 5,4363  | -2,416618936 | ENST00000485638 | 79739     | NM_024686    | TTLL7         |
| A_21_P0003948  | 1,4101  | 2,68332 | -2,417004233 | ENST00000513419 | N/A       | N/A          | N/A           |
| A_33_P3242733  | 1,9996  | 3,27299 | -2,417289058 | ENST00000401498 | 91461     | NM_138370    | PKDCC         |
| A_22_P00024766 | 1,67548 | 2,94888 | -2,417305813 | N/A             | N/A       | N/A          | Inc-EGLN1-1   |
| A_33_P3414012  | 1,52681 | 2,80068 | -2,41809345  | N/A             | N/A       | BG182298     | N/A           |
| A_33_P3401397  | 1,63634 | 2,91086 | -2,419183157 | ENST00000408988 | 401335    | NM_001123065 | C7orf65       |
| A_22_P00017970 | 7,16296 | 8,43748 | -2,419183157 | N/A             | N/A       | N/A          | Inc-ZMAT3-2   |
| A_22_P00014782 | 2,05095 | 3,32668 | -2,421212996 | N/A             | N/A       | N/A          | Inc-SLC38A8-2 |

|                |         |         |              |                 |           |              |                |
|----------------|---------|---------|--------------|-----------------|-----------|--------------|----------------|
| A_33_P3314531  | 1,78539 | 3,06135 | -2,421599026 | ENST00000421698 | N/A       | N/A          | N/A            |
| A_24_P158468   | 1,49727 | 2,77327 | -2,421666168 | ENST00000490765 | 170393    | NM_173541    | C10orf91       |
| A_33_P3359791  | 3,00459 | 4,28097 | -2,422304109 | ENST00000484389 | 81550     | BC020604     | TDRD3          |
| A_22_P00017926 | 3,87445 | 5,15089 | -2,422404852 | N/A             | 285830    | NR_026972    | HLA-F-AS1      |
| A_33_P3244803  | 10,3418 | 11,6185 | -2,422841453 | ENST00000293217 | 51        | NM_001185039 | ACOX1          |
| A_22_P00015117 | 3,08182 | 4,35881 | -2,423328524 | N/A             | 6643      | NM_001278199 | SNX2           |
| A_23_P50535    | 8,53445 | 9,81216 | -2,424538226 | ENST00000447742 | 1760      | NM_004409    | DMPK           |
| A_22_P00018303 | 1,45429 | 2,73231 | -2,425059256 | N/A             | 104326058 | NR_126371    | SMAD1-AS1      |
| A_21_P0012111  | 4,06421 | 5,3424  | -2,42534503  | N/A             | N/A       | N/A          | XLOC_I2_008546 |
| A_32_P142440   | 11,5155 | 12,7939 | -2,425698091 | ENST00000490692 | 255738    | NM_174936    | PCSK9          |
| A_33_P3276505  | 7,6596  | 8,93894 | -2,42727909  | ENST00000460773 | 286410    | NM_001010986 | ATP11C         |
| A_23_P501831   | 4,89388 | 6,17326 | -2,427346389 | ENST00000423554 | 10826     | NM_032385    | FAXDC2         |
| A_33_P3338934  | 1,7473  | 3,02674 | -2,427447342 | ENST00000390372 | N/A       | AB306172     | N/A            |
| A_23_P48596    | 6,70431 | 7,9838  | -2,427531472 | ENST00000412779 | 6035      | NM_198232    | RNASE1         |
| A_21_P0003588  | 7,89646 | 9,17596 | -2,427548299 | ENST00000478425 | 57620     | N/A          | STIM2          |
| A_21_P0005183  | 1,34125 | 2,62113 | -2,428187789 | N/A             | N/A       | N/A          | Inc-THBS2-3    |
| A_22_P00012669 | 1,95202 | 3,23265 | -2,429450436 | ENST00000265018 | 27146     | NM_015688    | FAM184B        |
| A_23_P102117   | 10,5437 | 11,8247 | -2,430073584 | ENST00000258411 | 80326     | NM_025216    | WNT10A         |
| A_22_P00021229 | 3,07671 | 4,35812 | -2,430764285 | N/A             | N/A       | AK127212     | Inc-SHISA4-1   |
| A_33_P3238290  | 2,95351 | 4,23498 | -2,43086538  | ENST00000045083 | 140876    | NM_001290268 | FAM65C         |
| A_33_P3821494  | 2,35298 | 3,6349  | -2,431623725 | ENST00000008876 | 23542     | AK094442     | MAPK8IP2       |
| A_33_P3217819  | 4,33679 | 5,6194  | -2,432786979 | ENST00000611101 | 9134      | NM_057749    | CCNE2          |
| A_33_P3344911  | 1,65882 | 2,9415  | -2,432905022 | ENST00000616559 | 374462    | NM_001145026 | PTPRQ          |
| A_33_P3332970  | 8,36743 | 9,65022 | -2,433090529 | N/A             | 9976      | NM_005127    | CLEC2B         |
| A_22_P00013855 | 1,58955 | 2,87326 | -2,434642594 | N/A             | N/A       | N/A          | Inc-RPL7-1     |
| A_21_P0010040  | 1,6118  | 2,89592 | -2,435334594 | N/A             | N/A       | N/A          | Inc-ZHX3-1     |
| A_33_P3252499  | 3,98026 | 5,26448 | -2,435503405 | ENST00000393845 | 55779     | NM_001164496 | CFAP44         |
| A_33_P3341601  | 1,79028 | 3,07512 | -2,43655029  | ENST00000621812 | 349136    | NM_001284260 | WDR86          |
| A_23_P34007    | 1,57222 | 2,8579  | -2,437969369 | ENST00000378131 | 80316     | NR_002191    | PPP1R2P9       |
| A_23_P374689   | 3,139   | 4,42507 | -2,438628508 | ENST00000478562 | 2571      | NM_000817    | GAD1           |
| A_23_P342024   | 2,59805 | 3,88436 | -2,439034221 | ENST00000609602 | 150197    | NR_026919    | LINC00896      |
| A_24_P66027    | 9,5405  | 10,8269 | -2,43918638  | ENST00000335760 | 9582      | NM_004900    | APOBEC3B       |
| A_23_P64611    | 7,96347 | 9,25009 | -2,439558366 | ENST00000538328 | 5031      | NM_176798    | P2RY6          |

|                |         |         |              |                 |           |              |                |
|----------------|---------|---------|--------------|-----------------|-----------|--------------|----------------|
| A_22_P00024751 | 8,51998 | 9,80783 | -2,44163915  | N/A             | N/A       | N/A          | Inc-WDR77-1    |
| A_33_P3317048  | 1,52312 | 2,81178 | -2,443010391 | ENST00000427836 | 389072    | NM_001080475 | PLEKHM3        |
| A_33_P3378514  | 6,61568 | 7,90445 | -2,443196668 | ENST00000394439 | 8654      | NM_001083    | PDE5A          |
| A_33_P3396431  | 3,34731 | 4,63673 | -2,444297688 | N/A             | N/A       | N/A          | N/A            |
| A_23_P102391   | 7,25672 | 8,54619 | -2,444382403 | ENST00000261024 | 30061     | NM_014585    | SLC40A1        |
| A_23_P41114    | 12,1364 | 13,4262 | -2,444941591 | ENST00000264474 | 1475      | NM_005213    | CSTA           |
| A_22_P00014855 | 1,65819 | 2,94864 | -2,446043397 | ENST00000438633 | N/A       | N/A          | N/A            |
| A_21_P0000310  | 8,26655 | 9,55701 | -2,446060352 | N/A             | 677800    | NR_002954    | SNORA12        |
| A_21_P0012032  | 1,4528  | 2,74416 | -2,44758676  | ENST00000449526 | N/A       | N/A          | N/A            |
| A_33_P3301297  | 1,61157 | 2,90339 | -2,448367292 | ENST00000422849 | N/A       | N/A          | N/A            |
| A_22_P00003382 | 1,36122 | 2,6533  | -2,448808572 | ENST00000580622 | N/A       | AA410542     | N/A            |
| A_33_P3277753  | 5,58283 | 6,87553 | -2,449861177 | ENST00000331001 | 200539    | NM_144994    | ANKRD23        |
| A_33_P3401093  | 4,07313 | 5,36689 | -2,451661839 | ENST00000283946 | 130888    | NM_174899    | FBXO36         |
| A_22_P00009813 | 1,89072 | 3,18567 | -2,453684915 | N/A             | 101926962 | NR_110658    | LOC101926962   |
| A_23_P434809   | 8,36177 | 9,65691 | -2,454008081 | ENST00000368733 | 6279      | NM_002964    | S100A8         |
| A_23_P130731   | 8,01688 | 9,31202 | -2,454008081 | ENST00000535102 | 79735     | NM_024682    | TBC1D17        |
| A_33_P3405424  | 7,40666 | 8,70185 | -2,454093132 | ENST00000595948 | 259307    | NM_152899    | IL4I1          |
| A_33_P3359017  | 1,35953 | 2,65536 | -2,455182044 | ENST00000221700 | 8529      | NM_001082    | CYP4F2         |
| A_33_P3265564  | 3,58285 | 4,87965 | -2,456833348 | ENST00000522657 | N/A       | N/A          | N/A            |
| A_24_P165450   | 3,62024 | 4,9176  | -2,457787183 | ENST00000485638 | 79739     | NM_024686    | TTLL7          |
| A_23_P135742   | 3,95703 | 5,25442 | -2,457838292 | ENST00000433179 | 84808     | NM_001291366 | PERM1          |
| A_33_P3400828  | 7,97668 | 9,27411 | -2,457906439 | ENST00000375854 | 158046    | NM_001161625 | NXNL2          |
| A_23_P380208   | 1,47163 | 2,76968 | -2,458962954 | ENST00000392832 | 79674     | NM_024621    | VEPH1          |
| A_24_P257348   | 10,5306 | 11,8288 | -2,459218631 | ENST00000273258 | 10550     | NM_006407    | ARL6IP5        |
| A_33_P3784253  | 11,1421 | 12,4406 | -2,459730064 | ENST00000278568 | 5058      | NM_001128620 | PAK1           |
| A_24_P226755   | 1,8647  | 3,16349 | -2,460224551 | ENST00000361421 | 9760      | NM_014729    | TOX            |
| A_21_P0007702  | 1,48082 | 2,77965 | -2,460292764 | N/A             | N/A       | N/A          | Inc-SLC2A13-3  |
| A_21_P0005295  | 1,48669 | 2,78556 | -2,460360979 | ENST00000442323 | N/A       | N/A          | N/A            |
| A_32_P154342   | 1,40305 | 2,70258 | -2,461486795 | ENST00000310954 | 353189    | NM_180991    | SLCO4C1        |
| A_23_P104617   | 7,61254 | 8,91238 | -2,462015765 | ENST00000530437 | 120071    | NM_152312    | GYLTL1B        |
| A_21_P0012397  | 2,09913 | 3,39922 | -2,462442437 | N/A             | N/A       | N/A          | XL0C_I2_009887 |
| A_23_P111583   | 2,5954  | 3,89574 | -2,462869183 | ENST00000419819 | 948       | NM_001001547 | CD36           |
| A_21_P0000818  | 5,40263 | 6,70303 | -2,462971613 | N/A             | 100505576 | N/A          | LINC00672      |

|                |         |         |              |                 |           |              |                      |
|----------------|---------|---------|--------------|-----------------|-----------|--------------|----------------------|
| A_33_P3305885  | 4,38865 | 5,68933 | -2,463449676 | ENST00000474009 | 65268     | NM_006648    | WNK2                 |
| A_24_P62237    | 7,80043 | 9,10152 | -2,464149864 | ENST00000216264 | 64781     | NM_022766    | CERK                 |
| A_23_P160940   | 4,60866 | 5,90982 | -2,464269428 | ENST00000370225 | 24        | NM_000350    | ABCA4                |
| A_23_P253896   | 2,75423 | 4,05579 | -2,464952763 | ENST00000305572 | 255743    | NM_001033047 | NPNT                 |
| A_23_P362694   | 1,66075 | 2,96267 | -2,465567927 | ENST00000317987 | 260436    | NM_152997    | FDCSP                |
| A_21_P0012874  | 6,3735  | 7,67582 | -2,466251622 | ENST00000508309 | 729678    | NR_027183    | LINC00847            |
| A_22_P00011508 | 1,66109 | 2,96367 | -2,466696126 | ENST00000439450 | N/A       | N/A          | N/A                  |
| A_33_P3374678  | 1,38639 | 2,68911 | -2,466935507 | ENST00000505533 | 9407      | NM_004262    | TMPRSS11D            |
| A_22_P00010289 | 1,67355 | 2,97663 | -2,467551166 | ENST00000427182 | N/A       | DB511893     | N/A                  |
| A_22_P00013800 | 6,80227 | 8,10545 | -2,467722209 | N/A             | N/A       | BC034638     | Inc-RP4-604K5.1.1-2  |
| A_33_P3325404  | 1,71066 | 3,0143  | -2,468509162 | ENST00000274990 | 401262    | NM_206922    | CRIP3                |
| A_24_P320103   | 5,5215  | 6,82544 | -2,469022528 | ENST00000485957 | 2122      | NM_004991    | MECOM                |
| A_21_P0003041  | 3,59424 | 4,89854 | -2,469638707 | N/A             | N/A       | N/A          | Inc-RNF13-2          |
| A_33_P3296831  | 3,68342 | 4,98776 | -2,469707181 | ENST00000378290 | 7161      | NM_001204186 | TP73                 |
| A_21_P0012835  | 5,28973 | 6,59458 | -2,47058039  | N/A             | N/A       | N/A          | XLOC_l2_011649       |
| A_33_P3358851  | 4,5216  | 5,82649 | -2,47064889  | N/A             | N/A       | N/A          | N/A                  |
| A_22_P00010021 | 2,81696 | 4,12204 | -2,47097429  | ENST00000417099 | N/A       | AK097814     | N/A                  |
| A_23_P145681   | 4,74668 | 6,05258 | -2,472379144 | ENST00000487125 | 51412     | NM_016188    | ACTL6B               |
| A_22_P00001017 | 6,11477 | 7,42071 | -2,472447693 | ENST00000614356 | 643650    | NR_033957    | LINC00842            |
| A_23_P88099    | 8,36909 | 9,67512 | -2,472601938 | ENST00000488765 | 23263     | NM_024979    | MCF2L                |
| A_19_P00321279 | 1,70634 | 3,01242 | -2,472687633 | ENST00000523123 | 101929450 | NR_125815    | LOC101929450         |
| A_33_P3300837  | 1,36775 | 2,67385 | -2,472721912 | ENST00000508918 | 9079      | XM_006713983 | LDB2                 |
| A_21_P0011039  | 4,18378 | 5,4905  | -2,473784796 | ENST00000541162 | 338817    | NR_033890    | LINC01252            |
| A_21_P0008398  | 9,15678 | 10,4639 | -2,47447077  | N/A             | N/A       | N/A          | Inc-CTD-2134A5.2.1-2 |
| A_22_P00009477 | 2,44818 | 3,75532 | -2,474505073 | N/A             | 100533997 | NM_001204811 | MAGEA10-MAGEA5       |
| A_19_P00802417 | 6,1767  | 7,48512 | -2,476701499 | ENST00000469070 | N/A       | N/A          | N/A                  |
| A_33_P3724750  | 4,49976 | 5,80822 | -2,476770168 | N/A             | N/A       | BC014063     | N/A                  |
| A_22_P00020255 | 1,38858 | 2,69711 | -2,476890345 | ENST00000448475 | N/A       | N/A          | N/A                  |
| A_33_P3369975  | 1,45588 | 2,7647  | -2,477388281 | ENST00000359959 | 391192    | NM_001004687 | OR2L3                |
| A_24_P876522   | 9,70094 | 11,0099 | -2,4776287   | N/A             | 493869    | NM_001008397 | GPX8                 |
| A_23_P257795   | 12,8022 | 14,1114 | -2,478040901 | ENST00000502960 | 4695      | NM_002488    | NDUFA2               |
| A_23_P27035    | 6,97541 | 8,28495 | -2,47862497  | ENST00000394642 | 26022     | NM_015544    | TMEM98               |
| A_22_P00021371 | 1,51837 | 2,82806 | -2,478882691 | N/A             | N/A       | N/A          | Inc-ALG12-1          |

|                |         |         |              |                 |           |              |                |
|----------------|---------|---------|--------------|-----------------|-----------|--------------|----------------|
| A_24_P398323   | 5,7118  | 7,0217  | -2,479243546 | ENST00000495668 | 53840     | NM_001003827 | TRIM34         |
| A_24_P350437   | 3,16965 | 4,47966 | -2,479432586 | ENST00000308086 | 83591     | NM_031435    | THAP2          |
| A_21_P0008577  | 2,10151 | 3,41186 | -2,480016983 | N/A             | N/A       | N/A          | Inc-RSL24D1-1  |
| A_24_P231104   | 4,60307 | 5,91361 | -2,480343617 | ENST00000616738 | 3953      | NM_001003679 | LEPR           |
| A_22_P00011411 | 4,67968 | 5,99023 | -2,48036081  | ENST00000437322 | 158572    | NR_026742    | USP27X-AS1     |
| A_33_P3321070  | 5,29883 | 6,60945 | -2,480481161 | ENST00000415567 | 54361     | N/A          | WNT4           |
| A_23_P120594   | 9,71739 | 11,0285 | -2,48132378  | ENST00000484396 | 84532     | NM_032501    | ACSS1          |
| A_32_P88349    | 10,4207 | 11,7321 | -2,481822607 | N/A             | 730257    | XR_426840    | LOC730257      |
| A_22_P00023829 | 1,35249 | 2,66411 | -2,482201095 | N/A             | N/A       | N/A          | Inc-ZNF131-2   |
| A_21_P0008824  | 2,01467 | 3,32644 | -2,482459188 | ENST00000503052 | N/A       | N/A          | N/A            |
| A_21_P0004869  | 6,86156 | 8,17368 | -2,48306151  | N/A             | 100131289 | NR_038929    | LOC100131289   |
| A_23_P380010   | 1,57337 | 2,88557 | -2,483199204 | ENST00000290607 | 57519     | NM_020759    | STARD9         |
| A_19_P00809894 | 3,61543 | 4,92795 | -2,483750056 | ENST00000607221 | 100506804 | NR_040081    | LOC100506804   |
| A_23_P119943   | 13,9357 | 15,2484 | -2,484059964 | ENST00000490362 | 3485      | NM_000597    | IGFBP2         |
| A_21_P0013416  | 2,16028 | 3,47331 | -2,484628229 | N/A             | N/A       | N/A          | Inc-MACC1-1    |
| A_24_P379820   | 8,24858 | 9,56174 | -2,484852127 | ENST00000326427 | 81618     | NM_030926    | ITM2C          |
| A_33_P3243268  | 1,86203 | 3,17559 | -2,48554117  | ENST00000613818 | N/A       | N/A          | N/A            |
| A_23_P89931    | 8,8533  | 10,1671 | -2,485954687 | ENST00000359044 | 64763     | NM_022752    | ZNF574         |
| A_22_P00021589 | 1,68557 | 2,99938 | -2,485971919 | N/A             | 101927837 | XR_243465    | LOC101927837   |
| A_23_P67355    | 6,82988 | 8,14377 | -2,486109774 | ENST00000596700 | 5639      | NM_000951    | PRRG2          |
| A_33_P3242923  | 5,56541 | 6,87991 | -2,487161173 | ENST00000554409 | 283553    | NR_038358    | LINC00640      |
| A_21_P0012244  | 6,26211 | 7,57767 | -2,488989251 | N/A             | N/A       | N/A          | XLOC_I2_009285 |
| A_24_P397489   | 3,1059  | 4,42163 | -2,489282559 | ENST00000379597 | 2651      | NM_001491    | GCNT2          |
| A_32_P112894   | 2,64011 | 3,95595 | -2,489472364 | ENST00000010299 | 199870    | NM_152660    | FAM76A         |
| A_23_P374559   | 1,61005 | 2,92591 | -2,489506876 | ENST00000222033 | 148066    | NM_181710    | ZNRF4          |
| A_33_P3382999  | 4,43486 | 5,75083 | -2,489696698 | ENST00000319098 | 768239    | NM_001085382 | PSAPL1         |
| A_32_P92789    | 1,41651 | 2,73313 | -2,490818673 | N/A             | 728012    | NR_038384    | MCHR2-AS1      |
| A_33_P3401402  | 1,55636 | 2,87306 | -2,490956797 | ENST00000408988 | 401335    | NM_001123065 | C7orf65        |
| A_21_P0005408  | 2,11128 | 3,42805 | -2,491077662 | N/A             | N/A       | N/A          | Inc-ZKSCAN1-1  |
| A_33_P3391439  | 1,47214 | 2,7892  | -2,491578451 | ENST00000452959 | 4336      | NR_103505    | MOBP           |
| A_24_P85850    | 1,64779 | 2,96513 | -2,492062066 | ENST00000485855 | 149428    | NM_138278    | BNIPL          |
| A_22_P00015443 | 1,94125 | 3,25945 | -2,493548044 | N/A             | N/A       | N/A          | Inc-SSTR2-3    |
| A_23_P200710   | 10,8598 | 12,1782 | -2,493893747 | ENST00000424712 | 5287      | NM_002646    | PIK3C2B        |

|                |         |         |              |                 |           |              |                |
|----------------|---------|---------|--------------|-----------------|-----------|--------------|----------------|
| A_22_P00002871 | 1,7659  | 3,08473 | -2,494637171 | ENST00000462835 | N/A       | N/A          | N/A            |
| A_23_P325690   | 6,93664 | 8,25605 | -2,49564028  | ENST00000355594 | 148741    | NM_144698    | ANKRD35        |
| A_23_P251043   | 1,4341  | 2,75403 | -2,496539962 | ENST00000376862 | 79953     | NM_024893    | SYNDIG1        |
| A_21_P0003375  | 2,21472 | 3,53472 | -2,496661098 | ENST00000513540 | N/A       | N/A          | N/A            |
| A_23_P151297   | 8,30639 | 9,62693 | -2,497595772 | ENST00000552168 | 23371     | NM_015319    | TNS2           |
| A_22_P00012783 | 1,48755 | 2,8085  | -2,498305665 | N/A             | N/A       | N/A          | Inc-RALGAPA2-1 |
| A_33_P3226050  | 9,16196 | 10,4831 | -2,498634709 | ENST00000407689 | 652968    | NM_001037666 | GATSL3         |
| A_33_P3368771  | 3,4519  | 4,77468 | -2,501476675 | N/A             | 339942    | NR_026991    | H1FX-AS1       |
| A_24_P865672   | 1,40077 | 2,72361 | -2,501580711 | ENST00000560329 | N/A       | N/A          | N/A            |
| A_33_P3244473  | 3,08703 | 4,40997 | -2,501754113 | ENST00000370882 | 55227     | NM_018214    | LRRC1          |
| A_32_P794272   | 3,59506 | 4,91819 | -2,502083611 | ENST00000568345 | N/A       | AL360200     | N/A            |
| A_24_P8220     | 11,0804 | 12,4038 | -2,502551919 | ENST00000259241 | 9394      | NM_004807    | HS6ST1         |
| A_23_P315964   | 1,5256  | 2,85012 | -2,504495466 | ENST00000400427 | 89766     | NM_173568    | UMODL1         |
| A_21_P0000690  | 1,5613  | 2,88596 | -2,504738516 | N/A             | 100316868 | NR_037843    | HOTTIP         |
| A_24_P245838   | 9,60093 | 10,9257 | -2,5049295   | ENST00000341184 | 4248      | NM_002409    | MGAT3          |
| A_19_P00800264 | 9,2875  | 10,6126 | -2,505502539 | N/A             | 100506365 | N/A          | OTUD6B-AS1     |
| A_33_P3329133  | 3,50332 | 4,82859 | -2,505797793 | N/A             | N/A       | N/A          | N/A            |
| A_33_P3349299  | 1,57022 | 2,89651 | -2,507570044 | ENST00000377879 | 724087    | NR_046101    | LINC01545      |
| A_21_P0014445  | 1,49279 | 2,81919 | -2,507761244 | N/A             | 100128055 | NR_104027    | SMARCA5-AS1    |
| A_24_P121171   | 8,1654  | 9,49198 | -2,508074148 | ENST00000527755 | 25988     | NM_015517    | HINFP          |
| A_23_P119353   | 6,40741 | 7,73409 | -2,508248    | ENST00000222145 | 54922     | NM_017805    | RASIP1         |
| A_21_P0014727  | 3,05637 | 4,38356 | -2,509134835 | N/A             | 100288198 | NR_040671    | HMG3-AS1       |
| A_32_P170621   | 2,07542 | 3,40309 | -2,50996979  | N/A             | 255082    | NR_026941    | CASC2          |
| A_23_P113111   | 3,5105  | 4,83841 | -2,510387372 | ENST00000396043 | 367       | NM_000044    | AR             |
| A_23_P38952    | 3,00424 | 4,33222 | -2,510509179 | ENST00000301452 | 125981    | NM_133492    | ACER1          |
| A_23_P54968    | 8,79557 | 10,1236 | -2,510596188 | ENST00000156626 | 55808     | NM_018414    | ST6GALNAC1     |
| A_23_P130974   | 4,09639 | 5,42449 | -2,510718006 | ENST00000599638 | 80726     | NM_025249    | KIAA1683       |
| A_23_P250735   | 9,30016 | 10,6284 | -2,51096166  | ENST00000216133 | 23492     | NM_175709    | CBX7           |
| A_24_P372134   | 4,58615 | 5,91473 | -2,511553488 | ENST00000275767 | 55281     | NM_018295    | TMEM140        |
| A_21_P0004772  | 5,35371 | 6,68238 | -2,511710172 | ENST00000452675 | 101927686 | NR_125844    | LOC101927686   |
| A_23_P202683   | 1,5809  | 2,91006 | -2,512563399 | ENST00000531177 | 53841     | NM_021924    | CDHR5          |
| A_33_P3367332  | 12,3583 | 13,6877 | -2,512981412 | ENST00000444521 | 127281    | NM_001195736 | FAM213B        |
| A_33_P3423830  | 4,69807 | 6,02759 | -2,513190445 | ENST00000414990 | 9747      | NM_014719    | TCAF1          |

|                |         |         |              |                 |           |              |                |
|----------------|---------|---------|--------------|-----------------|-----------|--------------|----------------|
| A_33_P3417532  | 2,74356 | 4,07414 | -2,515037655 | ENST00000344209 | 286676    | NM_001199799 | ILDR1          |
| A_33_P3318611  | 1,43933 | 2,77017 | -2,515490951 | N/A             | 100131907 | AK128825     | LOC100131907   |
| A_21_P0012109  | 5,1399  | 6,47099 | -2,51592689  | ENST00000417299 | 101929395 | NR_110611    | LOC101929395   |
| A_21_P0009325  | 1,78302 | 3,11414 | -2,515979208 | N/A             | N/A       | N/A          | Inc-CCR7-1     |
| A_19_P00317519 | 4,72058 | 6,05205 | -2,516589663 | ENST00000413185 | 101927043 | N/A          | LOC101927043   |
| A_23_P144476   | 7,04504 | 8,37756 | -2,518421915 | ENST00000339241 | 10252     | NM_199327    | SPRY1          |
| A_21_P0007296  | 1,65116 | 2,98391 | -2,518823443 | ENST00000608214 | 101929497 | NR_120580    | LOC101929497   |
| A_23_P86532    | 2,01894 | 3,35176 | -2,51894566  | ENST00000263103 | 80114     | AK026129     | BICC1          |
| A_21_P0010325  | 1,63212 | 2,96496 | -2,518980581 | N/A             | N/A       | N/A          | Inc-CSTB-1     |
| A_21_P0002679  | 1,64813 | 2,98101 | -2,519050422 | N/A             | N/A       | N/A          | Inc-PLA2R1-1   |
| A_21_P0007666  | 1,65688 | 2,98976 | -2,519050422 | N/A             | N/A       | N/A          | Inc-TMEM132C-6 |
| A_22_P00009059 | 4,96339 | 6,2963  | -2,519102805 | N/A             | 104355426 | NR_126418    | LENG8-AS1      |
| A_33_P3388192  | 2,12982 | 3,46283 | -2,519277422 | ENST00000552336 | 121355    | NM_144594    | GTSF1          |
| A_23_P162288   | 3,30457 | 4,63779 | -2,519644157 | ENST00000554234 | 4640      | NM_005379    | MYO1A          |
| A_21_P0010766  | 1,57802 | 2,9117  | -2,520447668 | ENST00000411951 | 441897    | N/A          | PGCP1          |
| A_21_P0011740  | 4,37648 | 5,7103  | -2,520692266 | N/A             | 101927522 | XR_243988    | LOC101927522   |
| A_33_P3344233  | 1,66607 | 2,99998 | -2,520849519 | ENST00000432056 | 360205    | NM_001282276 | PRAC2          |
| A_23_P353524   | 5,84064 | 7,17463 | -2,520989309 | ENST00000368764 | 3713      | NM_005547    | IVL            |
| A_22_P00003435 | 2,56842 | 3,90245 | -2,521059207 | N/A             | N/A       | N/A          | Inc-CCDC37-3   |
| A_33_P3232339  | 1,66601 | 3,00086 | -2,522492535 | ENST00000565305 | 102723640 | N/A          | LOC102723640   |
| A_32_P46571    | 9,0938  | 10,4293 | -2,523629289 | ENST00000372990 | 54933     | NM_017821    | RHBDL2         |
| A_23_P327483   | 3,45788 | 4,79357 | -2,523961668 | ENST00000603831 | 54558     | NM_019073    | SPATA6         |
| A_24_P370096   | 5,15148 | 6,4872  | -2,524014153 | ENST00000585568 | 7773      | NM_006300    | ZNF230         |
| A_23_P116264   | 6,74739 | 8,08328 | -2,524311588 | ENST00000412681 | 4900      | NM_006176    | NRGN           |
| A_22_P00001383 | 1,38818 | 2,72464 | -2,525309125 | N/A             | N/A       | AK055524     | Inc-AP3M1-1    |
| A_21_P0014884  | 1,8378  | 3,17516 | -2,526884986 | N/A             | N/A       | N/A          | N/A            |
| A_21_P0013175  | 3,99204 | 5,32964 | -2,527305382 | N/A             | N/A       | N/A          | XLOC_I2_013293 |
| A_22_P00005812 | 1,84894 | 3,18702 | -2,528146383 | N/A             | N/A       | BF359992     | Inc-EPHA8-1    |
| A_23_P99853    | 9,42792 | 10,7663 | -2,528672151 | ENST00000534964 | 56204     | NM_019600    | FAM214A        |
| A_33_P3347281  | 1,44342 | 2,78253 | -2,529951977 | ENST00000329366 | 3176      | NM_001024075 | HNMT           |
| A_23_P92107    | 3,16986 | 4,50929 | -2,5305132   | ENST00000489711 | 6565      | NM_021082    | SLC15A2        |
| A_33_P3289426  | 8,3828  | 9,72247 | -2,530934199 | ENST00000329630 | 285971    | NM_173680    | ZNF775         |
| A_33_P3324974  | 2,63567 | 3,97544 | -2,531109637 | N/A             | N/A       | N/A          | N/A            |



|                |         |         |              |                 |           |              |                       |
|----------------|---------|---------|--------------|-----------------|-----------|--------------|-----------------------|
| A_23_P9875     | 6,48749 | 7,82746 | -2,531460547 | ENST00000486676 | 10420     | NM_007170    | TESK2                 |
| A_33_P3232011  | 9,38595 | 10,7263 | -2,532127411 | ENST00000477149 | 64284     | NM_022449    | RAB17                 |
| A_24_P374634   | 7,97639 | 9,31843 | -2,535095331 | ENST00000524300 | 27067     | NM_001164380 | STAU2                 |
| A_22_P00012577 | 4,20295 | 5,54536 | -2,535745576 | N/A             | 102723166 | NR_110370    | STAM-AS1              |
| A_22_P00007087 | 1,45149 | 2,79417 | -2,536220185 | N/A             | N/A       | N/A          | Inc-GLOD4-1           |
| A_22_P00001981 | 6,59732 | 7,94098 | -2,537943584 | ENST00000457668 | N/A       | N/A          | N/A                   |
| A_23_P78122    | 9,95762 | 11,3015 | -2,538330631 | ENST00000530254 | 399687    | NM_078471    | MYO18A                |
| A_22_P00009031 | 2,4321  | 3,776   | -2,53836582  | ENST00000505347 | N/A       | BE568288     | N/A                   |
| A_22_P00010191 | 1,39148 | 2,7354  | -2,538401009 | ENST00000416145 | 114036    | N/A          | LINC00310             |
| A_24_P109887   | 2,60731 | 3,95135 | -2,538612156 | ENST00000320322 | N/A       | BC031469     | N/A                   |
| A_24_P52293    | 1,58038 | 2,92442 | -2,538612156 | ENST00000408898 | 392138    | NM_001004488 | OR2A25                |
| A_33_P3373960  | 1,40994 | 2,75423 | -2,539052102 | ENST00000367002 | 343035    | NM_183059    | RD3                   |
| A_22_P00003853 | 6,72731 | 8,07166 | -2,539157701 | N/A             | 80054     | N/A          | CEBPA-AS1             |
| A_33_P3239228  | 2,31102 | 3,65542 | -2,539245703 | ENST00000483366 | 4584      | NM_005960    | MUC3A                 |
| A_33_P3242793  | 4,10309 | 5,44762 | -2,539474522 | N/A             | 647215    | XR_171243    | MROH3P                |
| A_33_P3234303  | 1,69674 | 3,04138 | -2,539668155 | ENST00000379123 | 5080      | N/A          | PAX6                  |
| A_24_P159635   | 3,129   | 4,47376 | -2,539879407 | ENST00000259006 | 80774     | NM_030576    | LIMD2                 |
| A_22_P00010513 | 6,44214 | 7,78724 | -2,540478051 | N/A             | N/A       | BC053880     | Inc-NBPF6-2           |
| A_22_P00001976 | 4,00181 | 5,34851 | -2,543297095 | ENST00000569267 | 101928714 | XR_241865    | LOC101928714          |
| A_23_P52974    | 1,59418 | 2,94089 | -2,543314724 | ENST00000533847 | 2694      | NM_005142    | GIF                   |
| A_22_P00014252 | 3,95311 | 5,29989 | -2,543438129 | N/A             | N/A       | XM_005252052 | Inc-SEMA4D-2          |
| A_21_P0008063  | 1,39465 | 2,74161 | -2,543755485 | N/A             | N/A       | N/A          | Inc-LRCH1-5           |
| A_33_P3415340  | 4,83339 | 6,18037 | -2,543790749 | ENST00000410052 | 57679     | XM_006712654 | ALS2                  |
| A_33_P3421611  | 6,20194 | 7,54903 | -2,543984711 | N/A             | N/A       | N/A          | Inc-PLEKHH2-1         |
| A_21_P0005446  | 1,4885  | 2,83587 | -2,544478498 | N/A             | N/A       | N/A          | Inc-DPP6-2            |
| A_22_P00006779 | 4,08694 | 5,43463 | -2,545042944 | ENST00000357559 | 8087      | NM_001013439 | FXR1                  |
| A_21_P0013036  | 1,6333  | 2,98144 | -2,545836908 | N/A             | N/A       | N/A          | XLOC_I2_012724        |
| A_22_P00013687 | 2,17706 | 3,52592 | -2,547107766 | N/A             | N/A       | BI517743     | Inc-RP11-728F11.4.1-1 |
| A_33_P3365870  | 4,70867 | 6,05799 | -2,547920035 | ENST00000446293 | 55108     | NM_001143888 | BSDC1                 |
| A_22_P00008466 | 8,10747 | 9,45704 | -2,548361594 | N/A             | N/A       | AK021981     | Inc-KBTBD6-1          |
| A_23_P201066   | 4,14357 | 5,49404 | -2,549951841 | ENST00000344029 | 55061     | NM_001037175 | SUSD4                 |
| A_24_P64344    | 4,49335 | 5,84394 | -2,550163948 | ENST00000224337 | 29760     | NM_013314    | BLNK                  |
| A_21_P0007025  | 1,65    | 3,00067 | -2,550305363 | N/A             | N/A       | N/A          | Inc-FGFR2-2           |

|                |         |         |              |                 |           |              |                |
|----------------|---------|---------|--------------|-----------------|-----------|--------------|----------------|
| A_33_P3508717  | 8,75495 | 10,1057 | -2,550446786 | ENST00000501855 | 729678    | NR_027183    | LINC00847      |
| A_24_P294851   | 7,23529 | 8,58677 | -2,551737632 | ENST00000357085 | 10475     | NM_006355    | TRIM38         |
| A_23_P408913   | 6,90841 | 8,26045 | -2,552728313 | ENST00000408939 | 150737    | NM_152517    | TTC30B         |
| A_22_P00002494 | 3,25804 | 4,6101  | -2,552763702 | N/A             | N/A       | BC059952     | Inc-C16orf58-1 |
| A_33_P3272260  | 1,47736 | 2,82958 | -2,553046828 | ENST00000381630 | 284759    | NM_001122962 | SIRPB2         |
| A_21_P0005615  | 2,55799 | 3,91024 | -2,553099918 | N/A             | 101929622 | NR_125820    | LOC101929622   |
| A_33_P3224281  | 1,49016 | 2,84271 | -2,553630875 | ENST00000510547 | N/A       | N/A          | N/A            |
| A_22_P00001372 | 1,54741 | 2,90053 | -2,554639999 | ENST00000449694 | 101927738 | N/A          | LOC101927738   |
| A_21_P0010849  | 1,58505 | 2,9393  | -2,55664172  | N/A             | N/A       | N/A          | XLOC_I2_001810 |
| A_22_P00002000 | 5,08261 | 6,43713 | -2,55712024  | N/A             | 283932    | NR_024348    | FBXL19-AS1     |
| A_21_P0000990  | 1,36519 | 2,72022 | -2,558024355 | ENST00000452901 | N/A       | N/A          | N/A            |
| A_23_P111517   | 1,96806 | 3,3231  | -2,558042086 | ENST00000467723 | 64409     | NM_022479    | WBSCR17        |
| A_23_P423695   | 8,48437 | 9,84072 | -2,560365901 | ENST00000513372 | 10608     | NM_006454    | MXD4           |
| A_33_P3232354  | 4,40269 | 5,75993 | -2,561945881 | ENST00000342818 | 284697    | NM_183242    | BTBD8          |
| A_33_P3287472  | 2,42545 | 3,78329 | -2,563011585 | ENST00000330261 | 116729    | NM_001007533 | PPP1R27        |
| A_33_P3213962  | 3,85603 | 5,21402 | -2,563278081 | ENST00000553795 | 79290     | NM_001004297 | OR13A1         |
| A_33_P3253214  | 12,5716 | 13,9306 | -2,565073206 | ENST00000607355 | N/A       | L19779       | N/A            |
| A_24_P317762   | 13,0383 | 14,3981 | -2,566495979 | ENST00000522024 | 4061      | NM_002346    | LY6E           |
| A_23_P78248    | 8,63832 | 9,99891 | -2,567901741 | ENST00000462312 | 25984     | NM_015515    | KRT23          |
| A_22_P00016397 | 3,95579 | 5,31651 | -2,568133143 | N/A             | N/A       | CD674640     | Inc-TMEM194B-1 |
| A_33_P3286709  | 7,27221 | 8,63482 | -2,571499726 | N/A             | N/A       | N/A          | N/A            |
| A_21_P0012064  | 1,6334  | 2,99668 | -2,57269423  | ENST00000425212 | 102723854 | NR_110585    | LOC102723854   |
| A_22_P00016517 | 3,43244 | 4,79581 | -2,572854728 | N/A             | 191585    | NM_182832    | PLAC4          |
| A_23_P80684    | 1,45358 | 2,81719 | -2,573282772 | ENST00000620464 | 51533     | NM_001278221 | PHF7           |
| A_22_P00005118 | 1,58328 | 2,94694 | -2,573371956 | N/A             | 440416    | XR_424802    | CCDC144NL-AS1  |
| A_33_P3416668  | 6,48465 | 7,84879 | -2,574228287 | ENST00000338660 | 64856     | NM_022834    | VWA1           |
| A_33_P3247057  | 6,4595  | 7,82406 | -2,57497781  | ENST00000375215 | 643008    | NM_001162995 | SMIM5          |
| A_33_P3293858  | 1,71449 | 3,07906 | -2,574995659 | ENST00000431530 | 23281     | NM_001033602 | MTUS2          |
| A_33_P3252719  | 2,35484 | 3,71956 | -2,5752634   | ENST00000392679 | 114609    | NM_001039661 | TIRAP          |
| A_24_P111912   | 8,40888 | 9,7737  | -2,57544191  | ENST00000395965 | 83989     | NM_032042    | FAM172A        |
| A_33_P3306504  | 10,5124 | 11,8774 | -2,575763259 | ENST00000338128 | 51477     | NM_016368    | ISYNA1         |
| A_32_P10133    | 10,0592 | 11,4242 | -2,575763259 | N/A             | N/A       | AK022045     | Inc-THNSL1-2   |
| A_23_P116743   | 11,0655 | 12,4306 | -2,575941804 | ENST00000429892 | 338799    | NR_002809    | LINC01089      |

|                |         |         |              |                 |           |              |              |
|----------------|---------|---------|--------------|-----------------|-----------|--------------|--------------|
| A_33_P3346461  | 1,90969 | 3,27483 | -2,576013225 | ENST00000621666 | 4671      | AK311046     | NAIP         |
| A_21_P0005066  | 1,50016 | 2,86545 | -2,576281072 | ENST00000447311 | 153910    | NR_027312    | LOC153910    |
| A_21_P0001348  | 1,67023 | 3,03555 | -2,576334645 | N/A             | N/A       | N/A          | Inc-RWDD3-2  |
| A_23_P15299    | 10,2044 | 11,5698 | -2,576477511 | ENST00000588373 | 23558     | NM_012478    | WBP2         |
| A_23_P69970    | 2,15542 | 3,52092 | -2,576656105 | ENST00000265007 | 11063     | NM_178424    | SOX30        |
| A_33_P3382359  | 1,40473 | 2,77084 | -2,577745797 | N/A             | N/A       | DB078577     | N/A          |
| A_21_P0001290  | 4,35881 | 5,72508 | -2,578031694 | N/A             | 100874253 | NR_047498    | LINC00853    |
| A_22_P00015962 | 1,56006 | 2,92688 | -2,579014707 | N/A             | 101927186 | NR_110595    | LPHN3-AS1    |
| A_23_P88331    | 10,5387 | 11,9059 | -2,579694098 | ENST00000247191 | 9787      | NM_014750    | DLGAP5       |
| A_22_P00016940 | 6,47842 | 7,8462  | -2,580731409 | N/A             | 101928607 | NR_109964    | TRPM2-AS     |
| A_23_P132784   | 11,6416 | 13,0094 | -2,580767186 | ENST00000472339 | 8087      | NM_001013439 | FXR1         |
| A_23_P88589    | 11,971  | 13,3388 | -2,580767186 | ENST00000394166 | 7026      | NM_021005    | NR2F2        |
| A_24_P120109   | 2,20457 | 3,57251 | -2,581017637 | ENST00000479345 | 90957     | NM_198963    | DHX57        |
| A_22_P00010966 | 5,27627 | 6,64422 | -2,581035527 | N/A             | 101929340 | NR_120577    | LOC101929340 |
| A_22_P00004405 | 2,36781 | 3,73615 | -2,581733346 | ENST00000566763 | 100130992 | NR_038921    | LOC100130992 |
| A_22_P00015520 | 1,61141 | 2,97986 | -2,581930201 | ENST00000585152 | N/A       | BC062780     | N/A          |
| A_33_P3264965  | 2,20148 | 3,57018 | -2,582377654 | ENST00000423907 | 101929023 | NR_125972    | LOC101929023 |
| A_33_P3262854  | 3,8127  | 5,1815  | -2,582556657 | N/A             | 100288695 | NR_038099    | LIMS3L       |
| A_24_P926960   | 9,69467 | 11,0648 | -2,584938577 | N/A             | 1953      | NM_001409    | MEGF6        |
| A_33_P3399988  | 2,07818 | 3,44904 | -2,586246881 | N/A             | 352990    | BC035659     | HCP5B        |
| A_23_P426663   | 7,36503 | 8,73638 | -2,587125428 | ENST00000352241 | 4286      | NM_198159    | MITF         |
| A_22_P00017613 | 1,71275 | 3,08425 | -2,587394431 | N/A             | N/A       | N/A          | Inc-WFDC2-1  |
| A_23_P8452     | 10,46   | 11,8316 | -2,587573782 | ENST00000614382 | 3955      | NM_001040167 | LFNG         |
| A_19_P00319537 | 4,22385 | 5,59559 | -2,587824894 | ENST00000508111 | 285419    | NR_027105    | LINC01091    |
| A_23_P40821    | 8,08032 | 9,45237 | -2,588381014 | ENST00000460822 | 84343     | NM_032383    | HPS3         |
| A_22_P00018354 | 1,41254 | 2,78492 | -2,588973144 | ENST00000564407 | N/A       | AK026734     | N/A          |
| A_23_P112004   | 6,50704 | 7,87962 | -2,589332077 | ENST00000250173 | 23639     | NM_012472    | LRRC6        |
| A_22_P00004840 | 1,35978 | 2,7327  | -2,589942377 | N/A             | 100506258 | NR_103855    | LOC100506258 |
| A_33_P3305749  | 1,98623 | 3,35929 | -2,590193719 | ENST00000462272 | 5915      | NM_000965    | RARB         |
| A_19_P00316013 | 2,85073 | 4,22385 | -2,590301444 | N/A             | N/A       | N/A          | N/A          |
| A_23_P141208   | 10,6139 | 11,9871 | -2,590445085 | ENST00000578426 | 25979     | NM_015510    | DHRS7B       |
| A_21_P0014028  | 8,61339 | 9,98716 | -2,591468756 | N/A             | 100653022 | AF318328     | PP12719      |
| A_21_P0014825  | 6,15632 | 7,53042 | -2,592061593 | N/A             | 101929746 | NR_110623    | ZNF341-AS1   |

|                |         |         |              |                 |           |              |                |
|----------------|---------|---------|--------------|-----------------|-----------|--------------|----------------|
| A_33_P3258600  | 4,28986 | 5,66417 | -2,592438923 | ENST00000382554 | 57523     | NM_025081    | NYNRIN         |
| A_33_P3299319  | 8,03958 | 9,41428 | -2,593139825 | ENST00000560881 | 6158      | NM_001136137 | RPL28          |
| A_32_P21246    | 2,61943 | 3,99424 | -2,59333755  | N/A             | 253018    | NR_026791    | HCG27          |
| A_21_P0013078  | 13,2707 | 14,6456 | -2,593499335 | N/A             | N/A       | N/A          | XLOC_I2_012953 |
| A_33_P3419691  | 9,93989 | 11,3153 | -2,594416313 | N/A             | 352954    | NR_028038    | GATS           |
| A_22_P00013739 | 2,10255 | 3,47798 | -2,594452279 | ENST00000558621 | 101927286 | NR_120324    | LOC101927286   |
| A_33_P3296240  | 4,09694 | 5,4728  | -2,595225679 | ENST00000380647 | 54875     | NM_017738    | CNTLN          |
| A_22_P00009057 | 6,42789 | 7,80403 | -2,595729413 | N/A             | N/A       | N/A          | Inc-LENG9-1    |
| A_33_P3236656  | 1,64351 | 3,01967 | -2,595765398 | ENST00000321762 | 171169    | NM_133498    | SPACA4         |
| A_23_P57784    | 12,8556 | 14,2319 | -2,596017304 | ENST00000295522 | 9076      | NM_021101    | CLDN1          |
| A_23_P33326    | 4,78075 | 6,15775 | -2,597277205 | N/A             | 147       | NM_000679    | ADRA1B         |
| A_24_P408736   | 8,76547 | 10,1427 | -2,597691306 | ENST00000259056 | 11227     | NM_014568    | GALNT5         |
| A_33_P3264657  | 4,85511 | 6,23267 | -2,598285567 | ENST00000409327 | 339761    | NM_001001665 | CYP27C1        |
| A_33_P3364062  | 1,65167 | 3,02954 | -2,598843935 | N/A             | 403150    | NR_103831    | FLJ31356       |
| A_33_P3330179  | 3,01242 | 4,39075 | -2,599672702 | N/A             | 100131372 | XR_112955    | LOC100131372   |
| A_33_P3410584  | 4,93127 | 6,31014 | -2,600645941 | N/A             | N/A       | AK057937     | N/A            |
| A_22_P00003069 | 1,42391 | 2,80356 | -2,602052372 | ENST00000520487 | N/A       | N/A          | N/A            |
| A_22_P00024045 | 2,60646 | 3,98657 | -2,602882163 | N/A             | 101927352 | NR_110383    | PLS3-AS1       |
| A_32_P523096   | 4,62334 | 6,00357 | -2,603098674 | N/A             | 84793     | NR_026878    | FOXD2-AS1      |
| A_22_P00001699 | 1,75675 | 3,13732 | -2,603712218 | N/A             | N/A       | N/A          | Inc-ATF3-1     |
| A_21_P0009672  | 5,79919 | 7,17979 | -2,603766362 | N/A             | 400684    | NR_046201    | LOC400684      |
| A_33_P3336557  | 4,30473 | 5,68563 | -2,604307856 | ENST00000424493 | N/A       | N/A          | N/A            |
| A_33_P3328026  | 9,71007 | 11,0914 | -2,605084194 | ENST00000368911 | 23097     | NM_015076    | CDK19          |
| A_33_P3291154  | 1,53232 | 2,9137  | -2,605174481 | ENST00000462705 | 26137     | NM_001164343 | ZBTB20         |
| A_22_P00025476 | 1,93856 | 3,32059 | -2,606348496 | ENST00000427379 | 100505561 | N/A          | LINC00866      |
| A_23_P213137   | 5,94926 | 7,33204 | -2,607703785 | ENST00000263925 | 84708     | NM_032622    | LNx1           |
| A_21_P0009719  | 1,6206  | 3,00377 | -2,608408814 | N/A             | N/A       | N/A          | Inc-ZNF146-1   |
| A_22_P00002170 | 4,1482  | 5,53217 | -2,609855624 | ENST00000526388 | 100506305 | NR_038904    | LINC00958      |
| A_24_P308506   | 3,14856 | 4,53269 | -2,610145083 | ENST00000377712 | 51471     | NM_016347    | NAT8B          |
| A_22_P00025821 | 2,02206 | 3,40632 | -2,610380291 | ENST00000507389 | N/A       | N/A          | N/A            |
| A_33_P3241090  | 1,60673 | 2,99108 | -2,61054314  | ENST00000623976 | 219952    | NM_001005186 | OR6Q1          |
| A_32_P56525    | 7,50308 | 8,88844 | -2,612371366 | ENST00000479870 | 9747      | NM_014719    | TCAF1          |
| A_33_P3227706  | 1,58576 | 2,97156 | -2,613168221 | ENST00000324060 | 284383    | NM_001004699 | OR2Z1          |

|                |         |         |              |                 |           |              |                 |
|----------------|---------|---------|--------------|-----------------|-----------|--------------|-----------------|
| A_33_P3263756  | 9,90347 | 11,2894 | -2,613403702 | ENST00000622379 | 55663     | NM_017908    | ZNF446          |
| A_21_P0011103  | 1,73597 | 3,12373 | -2,616720801 | N/A             | 101928062 | XR_246002    | LINC01481       |
| A_33_P3216570  | 2,75833 | 4,14626 | -2,617029161 | ENST00000621226 | 4586      | XM_006709945 | MUC5AC          |
| A_33_P3243023  | 1,89746 | 3,2859  | -2,617954457 | ENST00000379453 | 146       | NM_000678    | ADRA1D          |
| A_32_P175715   | 3,02819 | 4,41669 | -2,618063337 | ENST00000378240 | 644890    | NM_001080836 | MEIG1           |
| A_23_P138168   | 9,75743 | 11,1466 | -2,619279471 | ENST00000370206 | 1266      | NM_001839    | CNN3            |
| A_23_P100660   | 8,83958 | 10,2288 | -2,61937025  | ENST00000572517 | 5176      | NM_002615    | SERPINF1        |
| A_22_P00009791 | 5,67938 | 7,06861 | -2,619388406 | N/A             | N/A       | N/A          | Inc-MEGF10-1    |
| A_33_P3393311  | 1,39082 | 2,78026 | -2,619769714 | ENST00000498400 | 2847      | NM_005297    | MCHR1           |
| A_22_P00015673 | 4,25035 | 5,64017 | -2,620459842 | ENST00000450820 | N/A       | N/A          | N/A             |
| A_21_P0004412  | 3,4918  | 4,88166 | -2,620532497 | N/A             | N/A       | N/A          | Inc-ZNF366-6    |
| A_23_P305205   | 2,13302 | 3,52307 | -2,620877639 | ENST00000317020 | 23366     | NM_015314    | KIAA0895        |
| A_33_P3336780  | 5,17117 | 6,5617  | -2,621749778 | ENST00000358849 | 11194     | NM_001282291 | ABCB8           |
| A_33_P3661309  | 1,61291 | 3,00392 | -2,622622207 | N/A             | 284669    | AK096113     | LOC284669       |
| A_33_P3230841  | 1,33867 | 2,72971 | -2,622676743 | ENST00000338487 | 338599    | NM_001003892 | DUPD1           |
| A_22_P00014431 | 7,16576 | 8,55694 | -2,622931262 | ENST00000602982 | N/A       | N/A          | N/A             |
| A_22_P00001807 | 1,46109 | 2,85238 | -2,623131258 | ENST00000519159 | N/A       | BF305512     | N/A             |
| A_33_P3367899  | 5,33555 | 6,72731 | -2,623985959 | ENST00000371021 | 10023     | NM_005479    | FRAT1           |
| A_24_P241183   | 6,72079 | 8,11349 | -2,625696196 | ENST00000487752 | 29121     | NM_013269    | CLEC2D          |
| A_22_P00015031 | 2,68077 | 4,07366 | -2,626042018 | N/A             | 100874365 | NR_047506    | HOXC-AS3        |
| A_32_P100258   | 8,99846 | 10,3916 | -2,626497115 | N/A             | 729614    | NR_024279    | FLJ37453        |
| A_22_P00021772 | 1,44525 | 2,83847 | -2,626642763 | ENST00000419013 | N/A       | N/A          | N/A             |
| A_32_P116660   | 4,88281 | 6,27636 | -2,627243647 | ENST00000331426 | 375287    | NM_198557    | RBM43           |
| A_21_P0002722  | 2,33201 | 3,72566 | -2,62742576  | ENST00000423193 | N/A       | N/A          | N/A             |
| A_22_P00009861 | 4,84458 | 6,23831 | -2,627571459 | N/A             | N/A       | BC038747     | Inc-METTL23-2   |
| A_24_P391586   | 10,2885 | 11,6825 | -2,628063254 | ENST00000328965 | 220323    | NM_178507    | OAF             |
| A_33_P3322834  | 2,25488 | 3,64892 | -2,628136121 | ENST00000314499 | 80034     | NM_001172173 | CSRNP3          |
| A_33_P3285945  | 1,42927 | 2,82345 | -2,628391169 | ENST00000259607 | 6366      | NM_002989    | CCL21           |
| A_32_P189211   | 1,34351 | 2,7386  | -2,630049586 | ENST00000319503 | 644809    | NM_001039905 | C15orf56        |
| A_21_P0010080  | 1,69318 | 3,0885  | -2,630468912 | N/A             | N/A       | N/A          | Inc-C20orf187-1 |
| A_33_P3236102  | 10,3779 | 11,7734 | -2,630797127 | ENST00000372491 | 389792    | NM_203434    | IER5L           |
| A_33_P3395478  | 1,46511 | 2,8607  | -2,63096125  | N/A             | N/A       | N/A          | N/A             |
| A_23_P9293     | 12,2788 | 13,6744 | -2,630979487 | ENST00000377245 | 9414      | NM_004817    | TJP2            |

|                |         |         |              |                 |        |              |                  |
|----------------|---------|---------|--------------|-----------------|--------|--------------|------------------|
| A_22_P00006911 | 1,57081 | 2,9673  | -2,632603041 | ENST00000530576 | N/A    | CF139581     | N/A              |
| A_33_P3420416  | 6,07853 | 7,4752  | -2,632931522 | ENST00000584605 | 3965   | NM_002308    | LGALS9           |
| A_33_P3408913  | 1,56004 | 2,95689 | -2,633260044 | N/A             | 6289   | NM_001127380 | SAA2             |
| A_23_P328621   | 4,01643 | 5,41353 | -2,633716393 | N/A             | 143630 | NM_145053    | UBQLNL           |
| A_33_P3314710  | 2,1586  | 3,55574 | -2,633789416 | ENST00000577135 | N/A    | N/A          | N/A              |
| A_21_P0000691  | 6,89783 | 8,29507 | -2,633971983 | N/A             | 115110 | NR_037844    | LOC115110        |
| A_33_P3368303  | 2,60266 | 4,00056 | -2,635177241 | N/A             | N/A    | N/A          | N/A              |
| A_23_P38304    | 1,36304 | 2,76113 | -2,635524311 | ENST00000293396 | 146894 | NM_145273    | CD300LG          |
| A_32_P213330   | 6,15743 | 7,55572 | -2,635889697 | ENST00000296794 | 64283  | NM_001177693 | ARHGEF28         |
| A_21_P0010478  | 2,0936  | 3,49201 | -2,636108954 | N/A             | N/A    | N/A          | Inc-APOL3-2      |
| A_21_P0008049  | 1,4616  | 2,86028 | -2,636602347 | N/A             | N/A    | N/A          | Inc-EXOSC8-1     |
| A_22_P00012323 | 2,13411 | 3,53321 | -2,637370031 | ENST00000521218 | N/A    | N/A          | N/A              |
| A_22_P00014094 | 2,06737 | 3,46719 | -2,638686581 | ENST00000356892 | 54440  | NM_018990    | SASH3            |
| A_21_P0008353  | 1,92713 | 3,32731 | -2,639345103 | N/A             | N/A    | N/A          | Inc-SMOC1-1      |
| A_33_P3387300  | 10,7035 | 12,1046 | -2,641028738 | ENST00000476672 | 8087   | NM_001013438 | FXR1             |
| A_24_P19228    | 7,41019 | 8,81149 | -2,641394888 | ENST00000252288 | 2593   | NM_138924    | GAMT             |
| A_33_P3279880  | 1,57432 | 2,97567 | -2,641486433 | ENST00000471598 | 199974 | NM_178134    | CYP4Z1           |
| A_23_P315451   | 2,06598 | 3,4675  | -2,641797711 | ENST00000360202 | 84063  | NM_199180    | KIRREL2          |
| A_33_P3831566  | 4,80373 | 6,20549 | -2,642237225 | N/A             | N/A    | AF072164     | N/A              |
| A_22_P00013065 | 1,55738 | 2,9595  | -2,642896632 | ENST00000448241 | N/A    | AK295639     | N/A              |
| A_33_P3280981  | 1,55794 | 2,96012 | -2,643006549 | N/A             | N/A    | N/A          | N/A              |
| A_33_P3221432  | 3,74454 | 5,14693 | -2,643391296 | ENST00000591793 | 342909 | NM_001037813 | ZNF284           |
| A_23_P128855   | 4,38996 | 5,79249 | -2,643647825 | ENST00000298681 | 29986  | NM_014579    | SLC39A2          |
| A_33_P3289696  | 5,64561 | 7,0485  | -2,644307584 | ENST00000235532 | 127700 | NM_145047    | OSCP1            |
| A_24_P240187   | 6,56468 | 7,96774 | -2,644619195 | ENST00000319331 | 57633  | NM_020873    | LRRN1            |
| A_22_P00021692 | 2,12417 | 3,52759 | -2,645279197 | N/A             | N/A    | BQ226306     | Inc-FAM54B-1     |
| A_33_P3350703  | 3,41427 | 4,81808 | -2,645994385 | ENST00000354619 | 56605  | NM_019891    | ERO1LB           |
| A_22_P00018966 | 3,26433 | 4,66847 | -2,646599695 | ENST00000507483 | N/A    | BG185957     | N/A              |
| A_24_P224727   | 9,8033  | 11,2075 | -2,646709766 | ENST00000498907 | 1050   | NM_004364    | CEBPA            |
| A_33_P3344831  | 10,6264 | 12,0309 | -2,647260191 | ENST00000489060 | 55076  | NM_018004    | TMEM45A          |
| A_33_P3418005  | 1,42994 | 2,83463 | -2,647608853 | ENST00000370809 | 347475 | NM_001101357 | CCDC160          |
| A_33_P3349289  | 1,64675 | 3,05151 | -2,647737319 | N/A             | 503640 | NR_002222    | ARGFXP2          |
| A_22_P00000400 | 1,3636  | 2,7686  | -2,648177821 | N/A             | N/A    | AK024554     | Inc-AC027045.1-1 |

|                |         |         |              |                 |           |              |                       |
|----------------|---------|---------|--------------|-----------------|-----------|--------------|-----------------------|
| A_23_P302134   | 8,42504 | 9,83011 | -2,648306314 | N/A             | 729614    | NR_024279    | FLJ37453              |
| A_33_P3353263  | 4,67323 | 6,07881 | -2,649242669 | ENST00000462299 | 606495    | BC071735     | CYB5RL                |
| A_23_P51918    | 5,0293  | 6,43518 | -2,649793621 | ENST00000308284 | 89866     | NM_033127    | SEC16B                |
| A_24_P349274   | 2,46123 | 3,86712 | -2,649811988 | ENST00000623137 | 119764    | NM_001004727 | OR4X2                 |
| A_22_P00007807 | 3,85511 | 5,26106 | -2,649922193 | ENST00000332503 | 3214      | CN286812     | HOXB4                 |
| A_24_P68311    | 6,96962 | 8,37623 | -2,651134749 | ENST00000357395 | 23224     | NM_015180    | SYNE2                 |
| A_23_P103433   | 8,41546 | 9,82224 | -2,651447164 | ENST00000471369 | 127700    | NM_145047    | OSCP1                 |
| A_33_P3278684  | 2,7602  | 4,16712 | -2,651704475 | N/A             | N/A       | N/A          | N/A                   |
| A_21_P0007767  | 1,5021  | 2,90937 | -2,65234786  | N/A             | 101928199 | XR_243029    | LOC101928199          |
| A_22_P00013663 | 1,39766 | 2,80507 | -2,652605258 | N/A             | N/A       | N/A          | Inc-RP11-680F20.4.1-2 |
| A_24_P99838    | 7,37053 | 8,77829 | -2,653248862 | ENST00000434772 | 7766      | NM_013361    | ZNF223                |
| A_22_P00021206 | 1,63493 | 3,04272 | -2,653304036 | ENST00000582650 | N/A       | DA193375     | N/A                   |
| A_22_P00006747 | 2,98344 | 4,39145 | -2,653708675 | ENST00000561058 | N/A       | CD674917     | N/A                   |
| A_23_P8981     | 1,51655 | 2,92468 | -2,653929414 | ENST00000520114 | 6770      | NM_000349    | STAR                  |
| A_21_P0001582  | 1,69549 | 3,10425 | -2,655088592 | N/A             | N/A       | N/A          | Inc-MEF2D-1           |
| A_23_P211212   | 8,48019 | 9,8891  | -2,655364661 | ENST00000359759 | 80781     | NM_030582    | COL18A1               |
| A_24_P415845   | 1,69149 | 3,10112 | -2,656690194 | ENST00000356922 | 3981      | NM_002312    | LIG4                  |
| A_33_P3424204  | 1,47932 | 2,88959 | -2,657869001 | N/A             | 79469     | NR_002771    | DLEU2L                |
| A_23_P55373    | 1,55332 | 2,96443 | -2,659416979 | ENST00000293761 | 246       | NM_001140    | ALOX15                |
| A_22_P00020418 | 1,73398 | 3,14521 | -2,659638192 | N/A             | N/A       | AV658207     | Inc-RWDD3-3           |
| A_22_P00004336 | 1,4804  | 2,89172 | -2,659804114 | ENST00000414418 | N/A       | N/A          | N/A                   |
| A_33_P3292531  | 1,84467 | 3,25601 | -2,659840987 | ENST00000508400 | 199953    | NM_001130924 | TMEM201               |
| A_23_P425681   | 4,5138  | 5,92537 | -2,660265063 | ENST00000396169 | 885       | NM_000729    | CCK                   |
| A_33_P3349646  | 8,40004 | 9,81177 | -2,660560112 | ENST00000543491 | 5099      | NM_002589    | PCDH7                 |
| A_21_P0011085  | 5,65039 | 7,06267 | -2,661574594 | ENST00000540982 | N/A       | XR_424315    | N/A                   |
| A_22_P00001714 | 1,3546  | 2,76705 | -2,661888239 | ENST00000450804 | 101928555 | NR_126364    | LINC01537             |
| A_23_P15108    | 8,44333 | 9,85603 | -2,662349549 | ENST00000566595 | 83719     | NM_031477    | YPEL3                 |
| A_22_P00020408 | 2,08748 | 3,50042 | -2,662792482 | N/A             | N/A       | N/A          | Inc-INTS8-1           |
| A_22_P00007187 | 6,45733 | 7,8705  | -2,663217028 | N/A             | N/A       | N/A          | Inc-GOLGA8J-3         |
| A_23_P26895    | 6,84251 | 8,25677 | -2,66522993  | ENST00000591548 | 51174     | NM_016261    | TUBD1                 |
| A_21_P0004293  | 1,37344 | 2,78781 | -2,665433151 | N/A             | N/A       | N/A          | Inc-ADAMTS19-2        |
| A_33_P3349466  | 2,76432 | 4,17894 | -2,665895076 | ENST00000262126 | 23253     | NM_001204056 | ANKRD12               |
| A_22_P00021014 | 1,40744 | 2,82415 | -2,669759897 | N/A             | 100129845 | NR_038910    | PCOLCE-AS1            |

|                |         |         |              |                 |           |              |                |
|----------------|---------|---------|--------------|-----------------|-----------|--------------|----------------|
| A_33_P3220470  | 8,52897 | 9,94601 | -2,670370644 | ENST00000288840 | 4091      | NM_005585    | SMAD6          |
| A_21_P0010142  | 1,36403 | 2,7823  | -2,672648295 | ENST00000416002 | N/A       | N/A          | N/A            |
| A_22_P00012450 | 1,71025 | 3,12853 | -2,672666821 | N/A             | N/A       | N/A          | Inc-PRPF18-5   |
| A_23_P154962   | 6,99123 | 8,40989 | -2,673370883 | ENST00000433039 | 85376     | NM_015672    | RIMBP3         |
| A_23_P66682    | 9,39034 | 10,8092 | -2,673741517 | ENST00000225648 | 3216      | NM_018952    | HOXB6          |
| A_33_P3417751  | 1,61743 | 3,03659 | -2,674297563 | ENST00000497824 | 10485     | XR_426755    | C1orf61        |
| A_22_P00002876 | 1,64362 | 3,06287 | -2,6744644   | ENST00000415474 | N/A       | N/A          | N/A            |
| A_33_P3212092  | 7,48374 | 8,90381 | -2,675984946 | ENST00000393104 | 27250     | NM_145341    | PDCD4          |
| A_23_P374695   | 3,52889 | 4,94924 | -2,676504355 | ENST00000615002 | 7010      | NM_000459    | TEK            |
| A_23_P218442   | 12,8429 | 14,2639 | -2,677710514 | ENST00000199764 | 4680      | NM_002483    | CEACAM6        |
| A_33_P3291279  | 2,74976 | 4,17105 | -2,678248822 | ENST00000334306 | 345079    | NM_001029870 | SOWAHB         |
| A_33_P3332396  | 7,20284 | 8,62471 | -2,679325762 | ENST00000372243 | 79639     | NM_001300748 | TMEM53         |
| A_22_P00016117 | 4,37825 | 5,80037 | -2,679790094 | N/A             | N/A       | BF572570     | Inc-TIAL1-1    |
| A_22_P00000606 | 8,07291 | 9,49549 | -2,680644675 | N/A             | N/A       | AK024898     | Inc-ACER2-1    |
| A_22_P00016134 | 5,20911 | 6,6321  | -2,681406597 | ENST00000478301 | N/A       | N/A          | N/A            |
| A_22_P00007285 | 5,40771 | 6,83099 | -2,681945648 | N/A             | 57210     | N/A          | SLC45A4        |
| A_33_P3376745  | 1,45757 | 2,88166 | -2,683451847 | N/A             | N/A       | N/A          | N/A            |
| A_21_P0007015  | 5,09887 | 6,5232  | -2,683898291 | N/A             | N/A       | N/A          | Inc-OBFC1-2    |
| A_21_P0010090  | 1,56871 | 2,99306 | -2,683935498 | N/A             | N/A       | N/A          | Inc-NCOA3-7    |
| A_22_P00002902 | 3,26273 | 4,68804 | -2,68572204  | N/A             | N/A       | AK091442     | Inc-C4orf42-1  |
| A_23_P44207    | 1,41075 | 2,83634 | -2,686243339 | ENST00000506440 | 134526    | NM_130767    | ACOT12         |
| A_21_P0009014  | 1,64503 | 3,07108 | -2,687099978 | ENST00000572479 | N/A       | N/A          | N/A            |
| A_23_P321354   | 6,47032 | 7,89646 | -2,687267613 | ENST00000356838 | 137835    | NM_144649    | TMEM71         |
| A_33_P3348001  | 2,51828 | 3,94451 | -2,687435259 | N/A             | 100130458 | XR_158846    | LOC100130458   |
| A_22_P00018970 | 1,55217 | 2,97876 | -2,688105946 | N/A             | N/A       | CX165494     | Inc-SETD6-7    |
| A_23_P325887   | 1,61047 | 3,03791 | -2,689690178 | ENST00000357242 | 54885     | NM_017752    | TBC1D8B        |
| A_22_P00010477 | 1,48433 | 2,91204 | -2,6901936   | N/A             | N/A       | DA723373     | Inc-NAPG-4     |
| A_21_P0012368  | 3,05879 | 4,48684 | -2,690827672 | N/A             | N/A       | N/A          | XLOC_I2_009639 |
| A_33_P3406552  | 1,63012 | 3,05858 | -2,691592488 | ENST00000295052 | N/A       | N/A          | N/A            |
| A_21_P0006901  | 2,05503 | 3,48358 | -2,691760404 | N/A             | N/A       | N/A          | Inc-CNNM1-2    |
| A_21_P0012897  | 2,41729 | 3,84586 | -2,69179772  | N/A             | N/A       | N/A          | XLOC_I2_011987 |
| A_33_P3388636  | 3,64995 | 5,07897 | -2,692637466 | N/A             | 643549    | AK097925     | LOC643549      |
| A_23_P4899     | 9,21901 | 10,6483 | -2,69314144  | ENST00000593537 | 4909      | NM_006179    | NTF4           |



|                |         |         |              |                 |           |              |                  |
|----------------|---------|---------|--------------|-----------------|-----------|--------------|------------------|
| A_24_P468810   | 8,72989 | 10,1592 | -2,693178775 | ENST00000373493 | 5928      | NM_005610    | RBBP4            |
| A_22_P00018453 | 3,79216 | 5,22149 | -2,693216111 | N/A             | N/A       | BG207095     | Inc-TMCO1-1      |
| A_22_P00014379 | 1,63774 | 3,0671  | -2,693272115 | N/A             | N/A       | N/A          | Inc-SEZ6-1       |
| A_32_P131031   | 4,42836 | 5,85892 | -2,695513248 | ENST00000589011 | 346389    | NM_182762    | MACC1            |
| A_33_P3299565  | 1,66943 | 3,10131 | -2,697980648 | ENST00000470811 | 389170    | NM_001004316 | LEKR1            |
| A_21_P0014917  | 2,82203 | 4,25425 | -2,698616556 | N/A             | N/A       | XR_133091    | Inc-AC016251.1-1 |
| A_33_P3282474  | 3,19773 | 4,63043 | -2,699514564 | N/A             | N/A       | N/A          | N/A              |
| A_23_P368225   | 6,75151 | 8,18453 | -2,700113402 | ENST00000507616 | 146956    | NM_152463    | EME1             |
| A_33_P3306654  | 2,19225 | 3,62678 | -2,702940961 | ENST00000414120 | 100131551 | NR_024480    | LINC00887        |
| A_33_P3367692  | 8,662   | 10,0967 | -2,703259481 | ENST00000367429 | 3075      | NM_001014975 | CFH              |
| A_21_P0013179  | 1,53983 | 2,9747  | -2,703578038 | ENST00000419463 | 102659288 | NR_110014    | LOC102659288     |
| A_21_P0014696  | 3,20484 | 4,64039 | -2,704852643 | N/A             | 83473     | XM_006722554 | KATNAL2          |
| A_33_P3379406  | 2,44319 | 3,87877 | -2,704908889 | N/A             | 9687      | BC071853     | GREB1            |
| A_21_P0000036  | 3,94137 | 5,377   | -2,705002636 | ENST00000619262 | 201299    | NM_145654    | RDM1             |
| A_23_P35564    | 8,46772 | 9,90347 | -2,705227641 | ENST00000462434 | 25956     | NM_015490    | SEC31B           |
| A_22_P00010394 | 1,55498 | 2,99147 | -2,706615587 | ENST00000484765 | 100507661 | N/A          | LOC100507661     |
| A_23_P27332    | 1,50099 | 2,93766 | -2,706953303 | ENST00000570177 | 6925      | NM_003199    | TCF4             |
| A_23_P14559    | 6,99956 | 8,43624 | -2,706972066 | ENST00000554756 | 11035     | NM_006871    | RIPK3            |
| A_23_P141802   | 4,41537 | 5,85215 | -2,707159705 | ENST00000398019 | 8710      | NM_001040147 | SERPINB7         |
| A_33_P3309643  | 3,46739 | 4,90452 | -2,707816546 | N/A             | N/A       | N/A          | N/A              |
| A_23_P136777   | 1,76434 | 3,20201 | -2,70883027  | ENST00000453131 | 347       | NM_001647    | APOD             |
| A_21_P0005942  | 1,71296 | 3,15071 | -2,708980484 | N/A             | N/A       | N/A          | Inc-FAM92A1-2    |
| A_22_P00004432 | 2,53066 | 3,97039 | -2,712700926 | N/A             | N/A       | AF086010     | Inc-CORO6-1      |
| A_19_P00319311 | 1,95342 | 3,39325 | -2,712888963 | N/A             | N/A       | N/A          | XLOC_I2_008691   |
| A_22_P00001282 | 4,09281 | 5,53275 | -2,713095818 | ENST00000434150 | 102724312 | NR_125994    | LOC102724312     |
| A_22_P00016260 | 2,4308  | 3,87103 | -2,71364124  | ENST00000450843 | 100131564 | N/A          | LOC100131564     |
| A_23_P86900    | 6,80376 | 8,24403 | -2,713716479 | ENST00000311181 | 11041     | NM_006876    | B4GAT1           |
| A_23_P5131     | 11,1721 | 12,6126 | -2,714149144 | ENST00000577820 | 51477     | NM_016368    | ISYNA1           |
| A_21_P0009774  | 1,39701 | 2,83761 | -2,714337281 | N/A             | N/A       | N/A          | Inc-VSIG10L-1    |
| A_33_P3270485  | 11,5611 | 13,0019 | -2,714713594 | ENST00000407418 | 23466     | BC064900     | CBX6             |
| A_32_P181077   | 1,59238 | 3,03322 | -2,714788863 | ENST00000495184 | 81704     | NM_203447    | DOCK8            |
| A_33_P3240674  | 9,60719 | 11,0483 | -2,715296983 | ENST00000371834 | 8019      | NM_007371    | BRD3             |
| A_24_P211842   | 1,61417 | 3,05637 | -2,717349248 | ENST00000413142 | 283985    | NM_178128    | FADS6            |

|                |         |         |              |                 |           |              |               |
|----------------|---------|---------|--------------|-----------------|-----------|--------------|---------------|
| A_24_P333733   | 11,6438 | 13,0866 | -2,718479596 | ENST00000587797 | 535       | NM_005177    | ATP6V0A1      |
| A_24_P372012   | 7,67118 | 9,11479 | -2,720006313 | ENST00000490041 | 3382      | NM_004968    | ICA1          |
| A_22_P00002924 | 1,43857 | 2,88239 | -2,720402269 | N/A             | N/A       | CB961578     | Inc-C5orf27-2 |
| A_21_P0002355  | 5,61017 | 7,05436 | -2,721100045 | N/A             | N/A       | N/A          | Inc-SLC4A3-3  |
| A_33_P3224916  | 1,5153  | 2,95997 | -2,722005534 | ENST00000608694 | N/A       | N/A          | N/A           |
| A_22_P00004097 | 1,43379 | 2,87951 | -2,723987343 | N/A             | N/A       | N/A          | Inc-CITED2-3  |
| A_23_P301984   | 3,99404 | 5,43979 | -2,724043988 | ENST00000297324 | 157773    | NM_001007090 | C8orf48       |
| A_23_P333683   | 5,14046 | 6,58649 | -2,724572725 | ENST00000495443 | 285313    | NM_178822    | IGSF10        |
| A_32_P159651   | 6,88912 | 8,33556 | -2,725347132 | ENST00000263754 | 8850      | NM_003884    | KAT2B         |
| A_24_P388662   | 1,34791 | 2,79443 | -2,725498261 | ENST00000273936 | 85438     | NM_033122    | CABS1         |
| A_23_P134484   | 1,43852 | 2,88543 | -2,726235138 | ENST00000421592 | 799       | NM_001742    | CALCR         |
| A_23_P88106    | 6,06509 | 7,51235 | -2,726896607 | ENST00000488765 | 23263     | NM_024979    | MCF2L         |
| A_32_P46214    | 3,34906 | 4,79638 | -2,727010018 | ENST00000316549 | 285195    | NM_173653    | SLC9A9        |
| A_23_P390148   | 5,77658 | 7,22413 | -2,727444803 | ENST00000259351 | 9649      | NM_014636    | RALGPS1       |
| A_33_P3332156  | 2,84621 | 4,29442 | -2,728692832 | ENST00000366788 | 375057    | NM_001003665 | C1orf95       |
| A_24_P141332   | 9,60132 | 11,0496 | -2,728825232 | ENST00000423381 | 818       | NM_172171    | CAMK2G        |
| A_33_P3246997  | 6,69558 | 8,14418 | -2,729430572 | ENST00000506686 | 51747     | BC056409     | LUC7L3        |
| A_33_P3334748  | 1,54926 | 2,99798 | -2,729657609 | N/A             | N/A       | CN282820     | N/A           |
| A_24_P6517     | 3,67582 | 5,12463 | -2,729827899 | ENST00000367328 | 57480     | NM_001029884 | PLEKHG1       |
| A_33_P3248799  | 1,50103 | 2,95055 | -2,731171672 | ENST00000546248 | 10345     | NM_001256022 | TRDN          |
| A_24_P141214   | 11,237  | 12,6873 | -2,732648693 | ENST00000286713 | 2040      | NM_198194    | STOM          |
| A_24_P90216    | 11,1542 | 12,6047 | -2,733027545 | ENST00000379214 | 55366     | NM_018490    | LGR4          |
| A_22_P00000767 | 3,53365 | 4,98475 | -2,734164415 | N/A             | 102724927 | NR_120311    | LOC102724927  |
| A_32_P43717    | 2,497   | 3,94816 | -2,734278128 | ENST00000469179 | 9413      | NM_004816    | FAM189A2      |
| A_33_P3403107  | 5,29847 | 6,74966 | -2,734334987 | ENST00000341747 | 284338    | NM_199285    | PRR19         |
| A_33_P3306823  | 4,92578 | 6,37745 | -2,73524488  | ENST00000397902 | 162993    | NM_001077624 | ZNF846        |
| A_23_P104798   | 11,0814 | 12,5337 | -2,736439575 | ENST00000528832 | 3606      | NM_001562    | IL18          |
| A_23_P56759    | 8,43624 | 9,88876 | -2,736856893 | ENST00000347055 | 51315     | NM_016618    | KRCC1         |
| A_23_P92161    | 9,13175 | 10,5843 | -2,736913805 | ENST00000320767 | 80117     | NM_025047    | ARL14         |
| A_22_P00005031 | 3,62794 | 5,08054 | -2,737008661 | ENST00000537280 | N/A       | DB035218     | N/A           |
| A_24_P53976    | 12,1272 | 13,5802 | -2,737767626 | ENST00000491322 | 2752      | NM_002065    | GLUL          |
| A_33_P3279841  | 13,0198 | 14,4728 | -2,737767626 | ENST00000610761 | 23162     | NM_015133    | MAPK8IP3      |
| A_33_P3417195  | 5,90921 | 7,36232 | -2,737976378 | ENST00000335108 | 388407    | NM_203425    | C17orf82      |

|                |         |         |              |                 |           |              |               |
|----------------|---------|---------|--------------|-----------------|-----------|--------------|---------------|
| A_21_P0012194  | 1,75115 | 3,20435 | -2,738147188 | ENST00000437194 | 101927973 | XR_244300    | LOC101927973  |
| A_22_P00019007 | 2,62648 | 4,07968 | -2,738147188 | N/A             | 101929124 | NR_110427    | LOC101929124  |
| A_21_P0006408  | 2,00233 | 3,45632 | -2,73964697  | ENST00000433747 | 4281      | XR_247298    | MID1          |
| A_22_P00010929 | 1,36551 | 2,81965 | -2,739931832 | ENST00000426008 | 100287366 | N/A          | OSTM1-AS1     |
| A_21_P0009408  | 4,43977 | 5,89393 | -2,739969815 | N/A             | 101927471 | XR_243725    | LOC101927471  |
| A_24_P259607   | 1,75468 | 3,20916 | -2,740577628 | ENST00000366878 | 55061     | NM_017982    | SUSD4         |
| A_33_P3286162  | 4,69647 | 6,15108 | -2,74082459  | N/A             | N/A       | N/A          | N/A           |
| A_21_P0013702  | 1,97848 | 3,43374 | -2,742059735 | ENST00000423515 | 101927575 | NR_110995    | LOC101927575  |
| A_23_P36882    | 3,15248 | 4,60794 | -2,742439891 | ENST00000550879 | 4922      | NM_006183    | NTS           |
| A_21_P0005474  | 1,64306 | 3,09873 | -2,742839112 | N/A             | 7291      | N/A          | TWIST1        |
| A_22_P00002841 | 1,99718 | 3,45286 | -2,742858124 | N/A             | N/A       | N/A          | Inc-C3orf23-2 |
| A_33_P3295029  | 4,22367 | 5,67938 | -2,742915161 | ENST00000405109 | 166348    | NM_207335    | KBTBD12       |
| A_23_P67529    | 12,7918 | 14,2479 | -2,743656746 | ENST00000262888 | 3783      | NM_002250    | KCNN4         |
| A_33_P3286859  | 1,8206  | 3,27677 | -2,743789873 | ENST00000255283 | 51761     | NM_016529    | ATP8A2        |
| A_32_P32905    | 2,00015 | 3,45672 | -2,744550718 | N/A             | 64769     | NM_022756    | MEAF6         |
| A_23_P101480   | 5,96481 | 7,42146 | -2,744702913 | ENST00000251472 | 22983     | NM_014975    | MAST1         |
| A_21_P0007531  | 1,55122 | 3,00969 | -2,748167617 | N/A             | 101928387 | XR_242921    | LOC101928387  |
| A_23_P253958   | 4,8846  | 6,34335 | -2,748701036 | ENST00000485478 | 10234     | NM_005824    | LRRRC17       |
| A_33_P3338733  | 8,90149 | 10,3604 | -2,749005894 | ENST00000394351 | 4286      | NM_198159    | MITF          |
| A_33_P3254708  | 4,42362 | 5,88285 | -2,749615711 | ENST00000373345 | 343578    | NM_001164431 | ARHGAP40      |
| A_21_P0004940  | 1,52881 | 2,98857 | -2,750626017 | N/A             | N/A       | N/A          | Inc-LAMA2-1   |
| A_33_P3407895  | 9,80054 | 11,2604 | -2,750816682 | ENST00000589111 | 126432    | NM_001195833 | RINL          |
| A_32_P453321   | 2,23261 | 3,69287 | -2,751579476 | ENST00000357508 | 339541    | NM_001145636 | C1orf228      |
| A_33_P3255627  | 3,27631 | 4,73674 | -2,751903728 | ENST00000414720 | 284323    | NM_001142579 | ZNF780A       |
| A_21_P0014134  | 1,40987 | 2,87035 | -2,751999103 | N/A             | 2121      | XR_427477    | EVC           |
| A_33_P3333058  | 1,54323 | 3,00409 | -2,752724064 | N/A             | N/A       | N/A          | N/A           |
| A_33_P3209167  | 1,48238 | 2,94418 | -2,754518209 | N/A             | N/A       | N/A          | Inc-PQLC2-1   |
| A_33_P3663705  | 9,50902 | 10,9709 | -2,754670956 | ENST00000375541 | 9696      | NM_014675    | CROCC         |
| A_23_P130027   | 9,95853 | 11,4209 | -2,755606717 | ENST00000268933 | 55040     | NM_017957    | EPN3          |
| A_33_P3268910  | 8,67238 | 10,1352 | -2,75646637  | ENST00000505319 | 10252     | NM_001258038 | SPRY1         |
| A_21_P0001064  | 1,41741 | 2,88105 | -2,758033537 | ENST00000456026 | 101929631 | N/A          | LOC101929631  |
| A_21_P0005818  | 5,05178 | 6,5157  | -2,758568872 | N/A             | 100507420 | NR_121621    | LOC100507420  |
| A_22_P00016796 | 1,36063 | 2,82502 | -2,759467703 | ENST00000557518 | N/A       | BM990698     | N/A           |

|                |         |         |              |                 |           |              |              |
|----------------|---------|---------|--------------|-----------------|-----------|--------------|--------------|
| A_22_P00025357 | 1,55318 | 3,01785 | -2,760003315 | ENST00000459855 | N/A       | N/A          | N/A          |
| A_22_P00015197 | 2,23513 | 3,70028 | -2,760921751 | N/A             | 347689    | NR_075091    | SOX2-OT      |
| A_33_P3334877  | 1,68621 | 3,15171 | -2,761591636 | ENST00000400374 | 386672    | NM_198687    | KRTAP10-4    |
| A_21_P0003454  | 3,56848 | 5,03427 | -2,762146806 | N/A             | N/A       | N/A          | Inc-CCKAR-1  |
| A_33_P3297930  | 3,4717  | 4,93773 | -2,762606342 | ENST00000481785 | 1296      | NM_005202    | COL8A2       |
| A_21_P0009513  | 1,57582 | 3,04191 | -2,762721238 | N/A             | N/A       | N/A          | Inc-METTL4-1 |
| A_21_P0009114  | 6,96301 | 8,42953 | -2,763544799 | N/A             | 101928659 | XR_243494    | LOC101928659 |
| A_22_P00014143 | 2,09337 | 3,56084 | -2,765365165 | N/A             | 101928389 | XR_247302    | LOC101928389 |
| A_21_P0010112  | 2,34539 | 3,81292 | -2,765480175 | N/A             | N/A       | N/A          | Inc-FOXA2-3  |
| A_32_P206839   | 8,60813 | 10,0768 | -2,767666288 | ENST00000565283 | 100288911 | NR_037631    | LOC100288911 |
| A_24_P48898    | 9,40801 | 10,8769 | -2,768088368 | ENST00000249066 | 23780     | NM_145637    | APOL2        |
| A_33_P3391120  | 3,67449 | 5,14339 | -2,768107555 | N/A             | N/A       | N/A          | N/A          |
| A_23_P103256   | 9,66882 | 11,1381 | -2,768836759 | ENST00000367427 | 10878     | NM_021023    | CFHR3        |
| A_33_P3677559  | 1,9935  | 3,4631  | -2,769450975 | N/A             | 100129461 | NR_126015    | LOC100129461 |
| A_33_P3373119  | 2,81528 | 4,28493 | -2,769546958 | N/A             | N/A       | N/A          | N/A          |
| A_21_P0009055  | 2,92754 | 4,39742 | -2,769988525 | ENST00000624829 | 101927957 | NR_126330    | LINC01572    |
| A_21_P0010913  | 1,43274 | 2,90275 | -2,770238138 | ENST00000432452 | N/A       | N/A          | N/A          |
| A_33_P3257683  | 1,68677 | 3,15784 | -2,77227428  | N/A             | N/A       | N/A          | N/A          |
| A_23_P99693    | 7,28766 | 8,7588  | -2,772408794 | ENST00000358738 | 22890     | NM_014950    | ZBTB1        |
| A_33_P3283054  | 3,69343 | 5,16542 | -2,77404271  | N/A             | N/A       | N/A          | N/A          |
| A_23_P23966    | 7,81348 | 9,2855  | -2,774100395 | ENST00000591025 | 118738    | NM_153034    | ZNF488       |
| A_23_P215419   | 9,7513  | 11,224  | -2,775408248 | ENST00000422063 | 3382      | NM_004968    | ICA1         |
| A_21_P0000917  | 3,34051 | 4,81504 | -2,778930974 | N/A             | N/A       | N/A          | Inc-CHD1L-1  |
| A_23_P73150    | 2,20357 | 3,67884 | -2,780356734 | ENST00000591658 | 83538     | NM_031421    | TTC25        |
| A_23_P74870    | 1,44051 | 2,91713 | -2,782959667 | ENST00000367758 | 80133     | NM_025063    | MROH9        |
| A_23_P137173   | 4,21817 | 5,69596 | -2,785217513 | ENST00000289373 | 11013     | NM_021992    | TMSB15A      |
| A_32_P110472   | 1,61542 | 3,09403 | -2,786801027 | ENST00000229447 | 389434    | NM_203395    | IYD          |
| A_23_P72462    | 3,38914 | 4,86812 | -2,787515834 | ENST00000357084 | 487       | NM_173201    | ATP2A1       |
| A_33_P3330972  | 1,64952 | 3,12877 | -2,788037566 | N/A             | N/A       | N/A          | N/A          |
| A_33_P3593774  | 4,92824 | 6,4077  | -2,788443424 | ENST00000423209 | 8503      | NM_001303429 | PIK3R3       |
| A_32_P129894   | 5,11942 | 6,59917 | -2,789003993 | ENST00000373930 | 1955      | NM_001080497 | MEGF9        |
| A_23_P390700   | 1,58461 | 3,0646  | -2,789467998 | ENST00000550305 | 1272      | NM_001843    | CNTN1        |
| A_21_P0010504  | 2,22597 | 3,70599 | -2,789526003 | N/A             | 100124700 | N/A          | HOTAIR       |

|                |         |         |              |                 |           |              |                |
|----------------|---------|---------|--------------|-----------------|-----------|--------------|----------------|
| A_22_P00012247 | 1,69168 | 3,17194 | -2,789990095 | ENST00000502071 | 101928580 | NR_120556    | LOC101928580   |
| A_33_P3389603  | 1,63603 | 3,11638 | -2,790164149 | N/A             | 100128477 | AK131572     | LOC100128477   |
| A_33_P3418662  | 5,58537 | 7,06593 | -2,790570317 | ENST00000375262 | 3293      | NM_000197    | HSD17B3        |
| A_23_P23155    | 2,20522 | 3,68582 | -2,790647689 | ENST00000378191 | 55966     | NM_018836    | AJAP1          |
| A_33_P6806243  | 1,3634  | 2,84444 | -2,791498924 | ENST00000423770 | 100132987 | NR_038985    | LINC00856      |
| A_21_P0000303  | 5,41714 | 6,89822 | -2,791576322 | N/A             | 654321    | NR_002921    | SNORA75        |
| A_22_P00005065 | 1,48024 | 2,96176 | -2,79242784  | ENST00000541749 | 101929027 | XR_242942    | LOC101929027   |
| A_22_P00005923 | 1,7681  | 3,25065 | -2,794422182 | N/A             | 221883    | NR_002795    | HOXA11-AS      |
| A_24_P280983   | 2,02464 | 3,50735 | -2,794732111 | N/A             | 221883    | N/A          | HOXA11-AS      |
| A_21_P0010507  | 1,62417 | 3,10702 | -2,795003326 | N/A             | 100996583 | NR_121638    | LOC100996583   |
| A_23_P50638    | 9,08792 | 10,5709 | -2,795255193 | ENST00000306390 | 116844    | NM_052972    | LRG1           |
| A_21_P0013596  | 2,95565 | 4,43925 | -2,796456716 | ENST00000428292 | N/A       | N/A          | N/A            |
| A_23_P62607    | 7,31416 | 8,79791 | -2,796747484 | ENST00000270800 | 58985     | NM_021258    | IL22RA1        |
| A_33_P3242062  | 1,41066 | 2,89492 | -2,797736323 | N/A             | N/A       | N/A          | N/A            |
| A_33_P3342752  | 1,42415 | 2,90848 | -2,797872074 | ENST00000366873 | 388743    | N/A          | CAPN8          |
| A_23_P36018    | 10,2284 | 11,7132 | -2,79878371  | ENST00000326621 | 23584     | NM_014312    | VSIG2          |
| A_32_P427222   | 2,76598 | 4,25125 | -2,799695644 | ENST00000487979 | 339766    | NM_001287395 | MROH2A         |
| A_23_P435477   | 1,43462 | 2,9202  | -2,800297295 | ENST00000614424 | 84000     | NM_001077263 | TMPRSS13       |
| A_21_P0010123  | 1,67262 | 3,15836 | -2,800607876 | N/A             | N/A       | N/A          | Inc-ZFP64-4    |
| A_21_P0000431  | 1,46205 | 2,9479  | -2,800821419 | N/A             | 767563    | NR_003231    | SNORD113-3     |
| A_22_P00021224 | 1,97238 | 3,45861 | -2,801559242 | N/A             | N/A       | BC036408     | Inc-PARN-7     |
| A_21_P0003783  | 2,02248 | 3,50875 | -2,801636918 | ENST00000504755 | N/A       | N/A          | N/A            |
| A_19_P00322276 | 3,80086 | 5,28776 | -2,802860612 | ENST00000511919 | 285419    | NR_027105    | LINC01091      |
| A_24_P353638   | 3,80566 | 5,29378 | -2,805231824 | ENST00000621377 | 57823     | NM_021181    | SLAMF7         |
| A_23_P427148   | 6,15052 | 7,63877 | -2,805484613 | ENST00000439862 | 147011    | NM_152465    | PROCA1         |
| A_24_P234732   | 7,20988 | 8,69855 | -2,806301469 | ENST00000337190 | 10608     | NM_006454    | MXD4           |
| A_24_P29117    | 2,57862 | 4,06783 | -2,807352063 | ENST00000622731 | 10861     | NM_134425    | SLC26A1        |
| A_33_P3313125  | 3,63192 | 5,12116 | -2,807410441 | N/A             | N/A       | N/A          | Inc-FAM189A2-1 |
| A_22_P00015419 | 6,10262 | 7,59194 | -2,807566121 | ENST00000581657 | N/A       | N/A          | N/A            |
| A_33_P3305250  | 1,43402 | 2,92371 | -2,808286254 | N/A             | N/A       | N/A          | N/A            |
| A_33_P3343390  | 5,30956 | 6,79948 | -2,808733998 | N/A             | N/A       | AF289562     | N/A            |
| A_33_P3419239  | 1,47604 | 2,96627 | -2,809337591 | ENST00000446837 | 64446     | NM_023036    | DNAI2          |
| A_21_P0014886  | 4,35672 | 5,84701 | -2,809454431 | N/A             | N/A       | N/A          | Inc-TMEM234-1  |

|                |         |         |              |                 |           |              |              |
|----------------|---------|---------|--------------|-----------------|-----------|--------------|--------------|
| A_33_P3228455  | 3,38573 | 4,87638 | -2,81015557  | ENST00000603449 | 5349      | NM_001136009 | FXYD3        |
| A_21_P0000116  | 5,70337 | 7,19472 | -2,811519397 | ENST00000616003 | 4281      | NM_001193278 | MID1         |
| A_21_P0002488  | 1,74941 | 3,24084 | -2,811675305 | N/A             | N/A       | N/A          | Inc-EDAR-5   |
| A_23_P354908   | 1,6876  | 3,17904 | -2,811694794 | ENST00000287713 | 23057     | NM_015039    | NMNAT2       |
| A_24_P379353   | 6,99827 | 8,48974 | -2,811753262 | ENST00000460543 | 149473    | NM_152499    | CCDC24       |
| A_23_P148015   | 2,04485 | 3,53653 | -2,812162573 | ENST00000618960 | 8313      | NM_004655    | AXIN2        |
| A_23_P218858   | 1,80245 | 3,29419 | -2,81227953  | ENST00000284322 | 25890     | NM_015429    | ABI3BP       |
| A_24_P257478   | 1,44344 | 2,9356  | -2,813098365 | ENST00000399126 | 84570     | NM_198721    | COL25A1      |
| A_33_P3312251  | 1,44133 | 2,93379 | -2,813683393 | N/A             | N/A       | N/A          | N/A          |
| A_32_P114284   | 9,55494 | 11,0475 | -2,81387843  | ENST00000457361 | 22807     | NM_001079526 | IKZF2        |
| A_22_P00002371 | 1,34975 | 2,84362 | -2,816434656 | ENST00000500610 | 338811    | AK128013     | FAM19A2      |
| A_21_P0011918  | 1,62473 | 3,11924 | -2,817684343 | ENST00000443237 | N/A       | N/A          | N/A          |
| A_23_P372096   | 6,94517 | 8,43976 | -2,817840593 | ENST00000326071 | 140688    | AK097804     | NOL4L        |
| A_24_P413470   | 4,76167 | 6,25641 | -2,818133585 | ENST00000603362 | 7161      | NM_005427    | TP73         |
| A_19_P00315518 | 4,06858 | 5,56366 | -2,818797813 | ENST00000427157 | 101927686 | NR_125844    | LOC101927686 |
| A_23_P68700    | 2,94712 | 4,44239 | -2,819169068 | ENST00000402202 | 54943     | NM_017833    | DNAJC28      |
| A_22_P00018831 | 4,41511 | 5,91042 | -2,819247233 | N/A             | N/A       | N/A          | Inc-PPM1D-1  |
| A_23_P352619   | 1,96132 | 3,45695 | -2,819872631 | ENST00000361717 | 92610     | NM_052864    | TIFA         |
| A_23_P256956   | 9,70644 | 11,2023 | -2,820322222 | ENST00000502338 | 10112     | NM_005733    | KIF20A       |
| A_22_P00001614 | 6,10322 | 7,59939 | -2,820928306 | ENST00000559321 | N/A       | N/A          | N/A          |
| A_21_P0006157  | 1,56564 | 3,06199 | -2,821280285 | N/A             | N/A       | N/A          | Inc-OSTF1-1  |
| A_23_P75786    | 8,31486 | 9,81145 | -2,821749659 | ENST00000543406 | 51296     | NM_016582    | SLC15A3      |
| A_32_P471485   | 1,57797 | 3,0746  | -2,821827895 | ENST00000395260 | 219790    | NM_001282941 | RTKN2        |
| A_23_P140434   | 7,96874 | 9,46665 | -2,824332612 | ENST00000261839 | 55930     | NM_018728    | MYO5C        |
| A_33_P3231076  | 6,43369 | 7,93191 | -2,824939558 | N/A             | 100132707 | NR_024477    | PAXIP1-AS2   |
| A_22_P00025310 | 1,99379 | 3,49226 | -2,825429125 | ENST00000520696 | N/A       | N/A          | N/A          |
| A_22_P00013716 | 1,72021 | 3,21885 | -2,825762079 | N/A             | 101927045 | NR_110032    | LOC101927045 |
| A_33_P3408443  | 1,69815 | 3,19692 | -2,826016717 | ENST00000566952 | N/A       | N/A          | N/A          |
| A_33_P3317790  | 1,58298 | 3,08282 | -2,82811346  | ENST00000263598 | 3933      | NM_001252619 | LCN1         |
| A_23_P133543   | 7,07418 | 8,57482 | -2,829682134 | ENST00000309755 | 26249     | NM_017415    | KLHL3        |
| A_21_P0014195  | 5,72963 | 7,23039 | -2,82991751  | N/A             | N/A       | XR_108794    | N/A          |
| A_33_P3392517  | 5,3424  | 6,84335 | -2,830290229 | ENST00000377566 | 85474     | NM_001009812 | LBX2         |
| A_33_P3407289  | 2,40632 | 3,90777 | -2,831271302 | N/A             | 283788    | NR_027436    | LOC283788    |

|                |         |         |              |                 |           |              |                |
|----------------|---------|---------|--------------|-----------------|-----------|--------------|----------------|
| A_24_P919452   | 5,63227 | 7,13404 | -2,831899368 | N/A             | N/A       | N/A          | N/A            |
| A_23_P201248   | 6,31605 | 7,81782 | -2,831899368 | ENST00000367134 | 115019    | NM_052934    | SLC26A9        |
| A_21_P0013696  | 1,62705 | 3,129   | -2,832252716 | ENST00000427989 | N/A       | XM_006726491 | N/A            |
| A_22_P00010225 | 1,50049 | 3,00246 | -2,83229198  | N/A             | 101928279 | N/A          | LOC101928279   |
| A_21_P0013560  | 1,4339  | 2,93636 | -2,833254109 | N/A             | N/A       | N/A          | XLOC_I2_014757 |
| A_23_P99386    | 3,20469 | 4,70737 | -2,833686192 | ENST00000398795 | 8600      | NM_003701    | TNFSF11        |
| A_21_P0012229  | 1,53879 | 3,04236 | -2,835434835 | ENST00000433303 | 101927973 | N/A          | LOC101927973   |
| A_24_P186342   | 4,09613 | 5,6004  | -2,83681093  | ENST00000270001 | 57677     | NM_020917    | ZFP14          |
| A_23_P201079   | 5,84394 | 7,34834 | -2,837066564 | ENST00000376048 | 7799      | NM_012231    | PRDM2          |
| A_33_P3214159  | 3,86042 | 5,36492 | -2,837263221 | ENST00000269141 | 1000      | NM_001792    | CDH2           |
| A_21_P0011762  | 3,28727 | 4,79296 | -2,83960449  | ENST00000599707 | 284379    | N/A          | LOC284379      |
| A_21_P0000320  | 3,80271 | 5,30925 | -2,841278007 | N/A             | 677813    | NR_002966    | SNORA30        |
| A_23_P393880   | 3,34267 | 4,84924 | -2,84133709  | ENST00000251691 | 57221     | NM_020340    | KIAA1244       |
| A_33_P3241046  | 1,35852 | 2,86525 | -2,841652222 | N/A             | N/A       | N/A          | N/A            |
| A_23_P28920    | 1,52295 | 3,03016 | -2,842597827 | ENST00000377428 | 140856    | NM_178483    | SCP2D1         |
| A_21_P0000594  | 1,4734  | 2,98193 | -2,845199865 | N/A             | 100379249 | N/A          | BOK-AS1        |
| A_24_P303524   | 12,3338 | 13,8424 | -2,845337918 | ENST00000297508 | 79778     | NM_182924    | MICALL2        |
| A_33_P3227443  | 10,3702 | 11,88   | -2,847705588 | ENST00000329410 | 283897    | NM_175900    | C16orf54       |
| A_33_P3777207  | 2,44794 | 3,95936 | -2,850905068 | ENST00000469962 | 79258     | NM_033467    | MMEL1          |
| A_22_P00014935 | 1,78576 | 3,29817 | -2,852862075 | ENST00000457672 | N/A       | N/A          | N/A            |
| A_24_P23546    | 2,06868 | 3,58143 | -2,853534489 | ENST00000617581 | 221833    | NM_198956    | SP8            |
| A_22_P00009114 | 1,95722 | 3,47019 | -2,853969664 | N/A             | N/A       | N/A          | Inc-LIN7A-1    |
| A_21_P0005007  | 2,67268 | 4,18576 | -2,854187277 | N/A             | N/A       | N/A          | Inc-DEK-1      |
| A_33_P3376140  | 4,59074 | 6,10383 | -2,854207061 | ENST00000398932 | 3772      | NM_170736    | KCNJ15         |
| A_23_P129695   | 7,36634 | 8,88018 | -2,855691236 | ENST00000304735 | 114990    | NM_138440    | VASN           |
| A_23_P5778     | 5,82411 | 7,33797 | -2,855730824 | ENST00000414278 | 64284     | NM_022449    | RAB17          |
| A_24_P346431   | 9,60299 | 11,1169 | -2,855829798 | ENST00000311160 | 64759     | NM_022748    | TNS3           |
| A_33_P3544856  | 1,699   | 3,21322 | -2,856443512 | N/A             | N/A       | AK090616     | Inc-ERC1-1     |
| A_23_P218434   | 10,2451 | 11,7596 | -2,856997948 | ENST00000300823 | 7769      | NM_001032374 | ZNF226         |
| A_33_P3375556  | 1,4299  | 2,94537 | -2,858919504 | N/A             | N/A       | N/A          | N/A            |
| A_23_P201808   | 9,41686 | 10,9329 | -2,860049269 | ENST00000371250 | 8613      | NM_003713    | PPAP2B         |
| A_33_P3423240  | 2,20396 | 3,72144 | -2,862905401 | ENST00000374359 | N/A       | N/A          | N/A            |
| A_23_P28507    | 2,50285 | 4,02081 | -2,863858078 | ENST00000409391 | 11320     | NM_012214    | MGAT4A         |

|                |         |         |              |                 |           |              |                       |
|----------------|---------|---------|--------------|-----------------|-----------|--------------|-----------------------|
| A_21_P0000681  | 1,64892 | 3,16691 | -2,863917631 | ENST00000483717 | 100271835 | NR_027145    | LIMS3-LOC440895       |
| A_33_P3423320  | 1,38779 | 2,90628 | -2,864910361 | ENST00000533152 | N/A       | N/A          | N/A                   |
| A_24_P402690   | 10,8264 | 12,3455 | -2,866121958 | ENST00000326427 | 81618     | NM_030926    | ITM2C                 |
| A_33_P3340613  | 2,97719 | 4,49679 | -2,867115453 | ENST00000610473 | 100133036 | NR_026759    | FAM95B1               |
| A_22_P00012585 | 1,45024 | 2,97037 | -2,868168933 | ENST00000563722 | N/A       | BC065363     | N/A                   |
| A_24_P363583   | 3,94574 | 5,46685 | -2,870117896 | ENST00000300176 | 3268      | NM_006076    | AGFG2                 |
| A_22_P00001600 | 4,54244 | 6,06416 | -2,871331696 | N/A             | 101559451 | NR_103482    | LOC101559451          |
| A_23_P314101   | 4,77779 | 6,29998 | -2,872267268 | ENST00000463101 | 56241     | NM_019601    | SUSD2                 |
| A_21_P0000477  | 6,02523 | 7,54748 | -2,872386725 | N/A             | 100124539 | NR_003709    | SNORA11B              |
| A_33_P3250443  | 8,51801 | 10,0406 | -2,87306374  | ENST00000491993 | 405753    | NM_207581    | DUOXA2                |
| A_22_P00013610 | 1,87832 | 3,4024  | -2,876032542 | N/A             | 100506555 | NR_045114    | PVRL3-AS1             |
| A_33_P3276100  | 5,12082 | 6,6468  | -2,879822714 | ENST00000409768 | 100130015 | NR_027336    | URAHP                 |
| A_33_P3390057  | 12,9433 | 14,4695 | -2,880261898 | ENST00000622124 | 4071      | NM_014220    | TM4SF1                |
| A_24_P943922   | 3,80808 | 5,33453 | -2,880761053 | ENST00000495994 | 57685     | NM_020925    | CACHD1                |
| A_21_P0010448  | 2,90053 | 4,42707 | -2,88094077  | N/A             | N/A       | N/A          | Inc-SMC1B-2           |
| A_21_P0012980  | 3,56318 | 5,08998 | -2,881460015 | ENST00000508395 | N/A       | N/A          | N/A                   |
| A_21_P0014597  | 2,42363 | 3,95078 | -2,882159146 | N/A             | 102724593 | XR_428746    | LOC102724593          |
| A_33_P3299244  | 1,49971 | 3,02691 | -2,882259036 | N/A             | 100129089 | AK126977     | LOC100129089          |
| A_23_P404606   | 7,90853 | 9,43591 | -2,882618668 | ENST00000296953 | 153222    | NM_153607    | CREBRF                |
| A_33_P3349265  | 2,31902 | 3,84686 | -2,883537931 | ENST00000371197 | 389396    | NM_001010904 | GLYATL3               |
| A_22_P00021451 | 1,37891 | 2,90697 | -2,883977682 | ENST00000515614 | N/A       | N/A          | N/A                   |
| A_33_P3887888  | 3,96514 | 5,49328 | -2,884137608 | ENST00000452622 | 441307    | NR_033963    | FLJ44511              |
| A_23_P113393   | 4,17469 | 5,7031  | -2,884677424 | N/A             | 8862      | NM_017413    | APLN                  |
| A_23_P127565   | 1,61969 | 3,14837 | -2,885217341 | ENST00000375615 | 143903    | NM_178834    | LAYN                  |
| A_23_P210675   | 4,10478 | 5,63369 | -2,88567735  | ENST00000371001 | 10388     | NM_014258    | SYCP2                 |
| A_23_P361419   | 7,01723 | 8,54719 | -2,887778324 | ENST00000265036 | 55789     | NM_018369    | DEPDC1B               |
| A_22_P00021694 | 4,70029 | 6,23059 | -2,888458967 | N/A             | N/A       | N/A          | Inc-ERN2-1            |
| A_22_P00004703 | 2,53552 | 4,06682 | -2,890461788 | N/A             | N/A       | N/A          | Inc-CTD-2523D13.1.1-4 |
| A_22_P00011331 | 1,42399 | 2,95545 | -2,890782368 | N/A             | 101927380 | NR_121183    | C9orf41-AS1           |
| A_21_P0010530  | 2,77198 | 4,30345 | -2,890802406 | ENST00000424308 | N/A       | N/A          | N/A                   |
| A_21_P0014832  | 1,48656 | 3,0189  | -2,892546195 | N/A             | 100652931 | XR_132690    | LOC100652931          |
| A_33_P3257903  | 3,57614 | 5,11036 | -2,896317978 | ENST00000370959 | 2941      | NM_001512    | GSTA4                 |
| A_23_P69383    | 9,47781 | 11,0123 | -2,896860073 | ENST00000489652 | 83666     | NM_031458    | PARP9                 |



|                |         |         |              |                 |           |              |                |
|----------------|---------|---------|--------------|-----------------|-----------|--------------|----------------|
| A_33_P3278392  | 2,71766 | 4,25233 | -2,897221527 | N/A             | 27247     | BX538347     | NFU1           |
| A_22_P00017186 | 2,01216 | 3,54692 | -2,897402271 | N/A             | N/A       | N/A          | Inc-UBXN4-2    |
| A_23_P209564   | 9,52064 | 11,0558 | -2,898205713 | ENST00000375252 | 79901     | NM_024843    | CYBRD1         |
| A_32_P56604    | 5,20616 | 6,74177 | -2,899109851 | ENST00000310521 | 220082    | NM_152719    | SPERT          |
| A_23_P318904   | 7,21168 | 8,7473  | -2,899129946 | ENST00000367012 | 56256     | NM_019605    | SERTAD4        |
| A_33_P3234197  | 6,86695 | 8,40348 | -2,90095919  | ENST00000256649 | 80263     | NM_025188    | TRIM45         |
| A_22_P00007788 | 1,91659 | 3,45324 | -2,901200495 | N/A             | N/A       | AI149719     | Inc-HNRNPH1-2  |
| A_24_P212539   | 5,25721 | 6,79401 | -2,901502154 | ENST00000444351 | 130589    | NM_138801    | GALM           |
| A_23_P210465   | 10,9296 | 12,4667 | -2,902105567 | ENST00000243924 | 5266      | NM_002638    | PI3            |
| A_19_P00315529 | 1,59747 | 3,13457 | -2,902105567 | ENST00000561822 | 439949    | AF088007     | PRKCQ-AS1      |
| A_24_P151582   | 7,17373 | 8,71143 | -2,90331277  | ENST00000266304 | 7008      | NM_003216    | TEF            |
| A_21_P0000672  | 1,62453 | 3,16231 | -2,903473768 | N/A             | 283299    | NR_036678    | LOC283299      |
| A_21_P0003376  | 1,8575  | 3,39561 | -2,904137981 | ENST00000502291 | 728040    | NR_046377    | LOC728040      |
| A_21_P0002682  | 3,03816 | 4,57658 | -2,904762076 | N/A             | 102724081 | XR_425486    | LOC102724081   |
| A_24_P333571   | 5,29449 | 6,83336 | -2,90566826  | ENST00000370217 | 9411      | BC022483     | ARHGAP29       |
| A_24_P75220    | 1,68462 | 3,22362 | -2,905930099 | ENST00000402939 | 9223      | NM_004742    | MAGI1          |
| A_33_P3341616  | 1,60035 | 3,14007 | -2,907380712 | ENST00000531871 | 387751    | NR_003945    | GVINP1         |
| A_24_P245298   | 3,8743  | 5,41427 | -2,907884566 | ENST00000322272 | 8742      | NM_003809    | TNFSF12        |
| A_23_P114670   | 12,6603 | 14,2005 | -2,908348189 | ENST00000378378 | 27237     | NM_014448    | ARHGEF16       |
| A_32_P93149    | 1,75036 | 3,29298 | -2,913230794 | ENST00000417796 | 1662      | NM_004398    | DDX10          |
| A_23_P46903    | 5,84327 | 7,3865  | -2,914462826 | ENST00000474131 | 818       | NM_172171    | CAMK2G         |
| A_32_P206735   | 3,18174 | 4,72514 | -2,914806272 | N/A             | 55460     | AF116655     | PRO1082        |
| A_22_P00009824 | 5,56302 | 7,10809 | -2,918182276 | N/A             | 100507053 | NR_037884    | LOC100507053   |
| A_33_P3249746  | 3,92264 | 5,46771 | -2,918182276 | ENST00000469622 | 1577      | NM_001190484 | CYP3A5         |
| A_23_P306307   | 1,54768 | 3,09284 | -2,918364327 | ENST00000296358 | 133060    | NM_177998    | OTOP1          |
| A_33_P3248629  | 1,34111 | 2,8868  | -2,919436638 | ENST00000492720 | 27147     | BC115004     | DENND2A        |
| A_23_P71757    | 1,73026 | 3,27605 | -2,919639005 | ENST00000259555 | 3443      | NM_021002    | IFNA6          |
| A_23_P171132   | 1,53496 | 3,08075 | -2,919639005 | ENST00000253392 | 60401     | NM_021783    | EDA2R          |
| A_22_P00015194 | 6,81626 | 8,36229 | -2,920124743 | N/A             | 100996842 | XR_433328    | LOC100996842   |
| A_21_P0012928  | 4,96847 | 6,51507 | -2,921278694 | N/A             | N/A       | N/A          | XLOC_I2_012210 |
| A_21_P0012598  | 2,39065 | 3,93759 | -2,921967233 | N/A             | N/A       | N/A          | XLOC_I2_010724 |
| A_21_P0011784  | 1,6779  | 3,22519 | -2,922676193 | N/A             | N/A       | N/A          | XLOC_I2_007167 |
| A_21_P0003925  | 2,95818 | 4,50585 | -2,923446115 | ENST00000508083 | 101929082 | NR_105010    | LINC01333      |

|                |         |         |              |                 |           |              |               |
|----------------|---------|---------|--------------|-----------------|-----------|--------------|---------------|
| A_32_P216548   | 9,4094  | 10,9572 | -2,923709556 | ENST00000488127 | 26119     | NM_015627    | LDLRAP1       |
| A_33_P3230319  | 2,28372 | 3,83157 | -2,923810886 | N/A             | N/A       | AK130343     | N/A           |
| A_23_P317756   | 3,56751 | 5,11658 | -2,926284422 | ENST00000440284 | 6296      | NM_202000    | ACSM3         |
| A_23_P10291    | 5,73711 | 7,28662 | -2,927177703 | ENST00000360218 | 1510      | NM_001910    | CTSE          |
| A_23_P103588   | 1,58573 | 3,13543 | -2,927562559 | ENST00000544913 | 3158      | NM_005518    | HMGCS2        |
| A_23_P5018     | 3,85651 | 5,4072  | -2,929572188 | N/A             | 80054     | NR_026887    | CEBPA-AS1     |
| A_23_P48070    | 9,31107 | 10,8618 | -2,929653414 | ENST00000484795 | 51147     | NM_016162    | ING4          |
| A_33_P3404922  | 5,52267 | 7,07491 | -2,932721348 | ENST00000430453 | 56243     | NM_001282770 | KIAA1217      |
| A_23_P148327   | 1,38218 | 2,93619 | -2,936321625 | ENST00000376265 | 778       | NM_005183    | CACNA1F       |
| A_23_P125643   | 5,48772 | 7,04192 | -2,936708358 | ENST00000546332 | 140462    | NM_001031739 | ASB9          |
| A_23_P69089    | 1,64604 | 3,20032 | -2,936871208 | N/A             | N/A       | AK021889     | N/A           |
| A_21_P0002546  | 1,62791 | 3,18267 | -2,937848499 | N/A             | 101928662 | XR_241421    | LOC101928662  |
| A_33_P3300600  | 3,65103 | 5,21009 | -2,946617915 | ENST00000541538 | 125962    | NM_001005192 | OR7G1         |
| A_33_P3289576  | 2,88513 | 4,44511 | -2,948497559 | ENST00000420999 | 80258     | NM_025184    | EFHC2         |
| A_22_P00012526 | 3,33614 | 4,89634 | -2,948947217 | ENST00000433952 | 101928435 | N/A          | LOC101928435  |
| A_21_P0007533  | 1,58756 | 3,1479  | -2,949233399 | N/A             | N/A       | N/A          | Inc-PLEKHA5-4 |
| A_24_P380061   | 2,3384  | 3,89882 | -2,949396943 | ENST00000264343 | 83478     | NM_001025616 | ARHGAP24      |
| A_21_P0004665  | 2,4436  | 4,00416 | -2,949683169 | ENST00000452402 | N/A       | N/A          | N/A           |
| A_21_P0009153  | 1,90445 | 3,46564 | -2,950971526 | N/A             | 102723471 | XR_424817    | LOC102723471  |
| A_21_P0009854  | 2,06415 | 3,6254  | -2,951094256 | ENST00000428009 | 101927700 | N/A          | LINC01524     |
| A_33_P3271341  | 1,47629 | 3,03771 | -2,951442018 | ENST00000335616 | 388282    | NM_001278081 | LOC388282     |
| A_23_P332584   | 4,29932 | 5,86094 | -2,951851203 | ENST00000370378 | 23285     | NM_015237    | KIAA1107      |
| A_33_P3570208  | 3,73583 | 5,29771 | -2,952383229 | N/A             | 339929    | NR_036497    | LPP-AS2       |
| A_23_P69030    | 6,0936  | 7,65559 | -2,952608345 | ENST00000273342 | 1295      | NM_001850    | COL8A1        |
| A_22_P00023501 | 1,75401 | 3,31678 | -2,954205119 | N/A             | N/A       | DA496768     | Inc-PAX6-1    |
| A_19_P00319698 | 2,98857 | 4,5514  | -2,954327983 | ENST00000601437 | N/A       | AK130479     | N/A           |
| A_23_P409623   | 6,27609 | 7,83932 | -2,955147211 | ENST00000532926 | 8495      | NM_003621    | PPFIBP2       |
| A_33_P3283213  | 3,0772  | 4,64065 | -2,955597882 | ENST00000455565 | 401884    | NR_027295    | MGC57346      |
| A_33_P3300312  | 1,5011  | 3,06603 | -2,958631461 | ENST00000359586 | 1755      | NM_007329    | DMBT1         |
| A_32_P197621   | 3,67622 | 5,24194 | -2,960252011 | N/A             | 492303    | NR_002830    | GEMIN8P4      |
| A_23_P346884   | 1,52037 | 3,08703 | -2,962181416 | ENST00000372743 | 11317     | NM_014276    | RBPJL         |
| A_21_P0005779  | 1,60682 | 3,17445 | -2,964173717 | N/A             | N/A       | N/A          | Inc-RHPN1-4   |
| A_23_P428298   | 5,21323 | 6,78113 | -2,964728513 | ENST00000244565 | 222643    | NM_173561    | UNC5CL        |

|                |         |         |              |                 |           |              |               |
|----------------|---------|---------|--------------|-----------------|-----------|--------------|---------------|
| A_33_P3294986  | 9,83673 | 11,4048 | -2,965077883 | ENST00000244289 | 3991      | NM_005357    | LIPE          |
| A_23_P303145   | 1,51971 | 3,08817 | -2,965879533 | ENST00000359354 | 2263      | M87772       | FGFR2         |
| A_23_P363275   | 3,2516  | 4,82044 | -2,966660836 | ENST00000288912 | 144406    | NM_144668    | WDR66         |
| A_23_P250164   | 1,70248 | 3,27157 | -2,967174964 | ENST00000283871 | 3081      | NM_000187    | HGD           |
| A_33_P3349676  | 1,41925 | 2,99001 | -2,970611623 | N/A             | N/A       | N/A          | N/A           |
| A_22_P00002654 | 6,5226  | 8,09339 | -2,970673396 | N/A             | 101929074 | NR_126367    | PIK3CD-AS2    |
| A_22_P00016245 | 2,26553 | 3,83665 | -2,971352981 | N/A             | N/A       | BG207095     | Inc-TMCO1-1   |
| A_21_P0011131  | 1,9016  | 3,47368 | -2,973330841 | N/A             | 100101938 | N/A          | ANKRD26P3     |
| A_21_P0004436  | 1,97515 | 3,54743 | -2,973743061 | N/A             | N/A       | N/A          | Inc-ZNF608-8  |
| A_33_P3420224  | 5,44822 | 7,02071 | -2,974175953 | ENST00000461823 | 377841    | NM_001033113 | ENTPD8        |
| A_22_P00002859 | 5,06505 | 6,63769 | -2,9744852   | N/A             | N/A       | N/A          | Inc-C3orf38-1 |
| A_33_P3212860  | 6,4071  | 7,98015 | -2,97533064  | ENST00000339336 | 401138    | NM_212557    | AMTN          |
| A_33_P3307133  | 1,3806  | 2,95373 | -2,975495632 | ENST00000421544 | 2898      | NM_021956    | GRIK2         |
| A_24_P95154    | 2,24538 | 3,81894 | -2,976382621 | ENST00000508446 | 7991      | NM_178234    | TUSC3         |
| A_33_P3350179  | 1,4384  | 3,01262 | -2,977744559 | N/A             | N/A       | N95477       | N/A           |
| A_24_P46093    | 7,86707 | 9,4416  | -2,978384473 | ENST00000622186 | 6533      | NM_003043    | SLC6A6        |
| A_21_P0008890  | 1,52361 | 3,0982  | -2,978508343 | ENST00000432973 | 102723536 | N/A          | LOC102723536  |
| A_23_P257365   | 5,31651 | 6,89243 | -2,981255453 | ENST00000294702 | 2672      | NM_005263    | GFI1          |
| A_23_P363316   | 8,28527 | 9,86196 | -2,982847043 | ENST00000239151 | 3215      | NM_002147    | HOXB5         |
| A_33_P3322395  | 2,41264 | 3,98938 | -2,982950423 | N/A             | N/A       | AK095331     | Inc-TAF1C-1   |
| A_33_P3367301  | 2,05829 | 3,63511 | -2,983115837 | N/A             | 125111    | NM_152219    | GJD3          |
| A_21_P0005486  | 1,45071 | 3,02877 | -2,985680935 | N/A             | N/A       | N/A          | Inc-HOXA13-1  |
| A_22_P00005363 | 1,74051 | 3,31909 | -2,986757277 | N/A             | N/A       | N/A          | Inc-DRD2-1    |
| A_22_P00025403 | 1,38836 | 2,96769 | -2,988310378 | ENST00000551135 | N/A       | N/A          | N/A           |
| A_33_P3318288  | 10,9521 | 12,5317 | -2,988869692 | ENST00000367429 | 3075      | NM_001014975 | CFH           |
| A_23_P348281   | 6,63415 | 8,21449 | -2,990403163 | ENST00000234827 | 127428    | NM_153035    | TCEANC2       |
| A_24_P365015   | 5,34914 | 6,9295  | -2,990444619 | ENST00000290295 | 10481     | NM_006361    | HOXB13        |
| A_22_P00012000 | 1,41557 | 2,99629 | -2,991190926 | N/A             | N/A       | N/A          | Inc-PLCD1-1   |
| A_23_P349416   | 9,59974 | 11,1811 | -2,992518156 | ENST00000551242 | 2065      | NM_001982    | ERBB3         |
| A_23_P217498   | 8,27329 | 9,85483 | -2,992891545 | ENST00000472623 | 54857     | NM_017711    | GDPD2         |
| A_24_P918907   | 1,50544 | 3,08794 | -2,994883741 | N/A             | 154761    | NR_015421    | LOC154761     |
| A_22_P00015029 | 5,35132 | 6,93391 | -2,995070578 | N/A             | 100874363 | NR_047504    | HOXC-AS1      |
| A_33_P3332284  | 1,60063 | 3,18369 | -2,996046468 | ENST00000371337 | 9528      | N/A          | TMEM59        |

|                |         |         |              |                 |           |              |                |
|----------------|---------|---------|--------------|-----------------|-----------|--------------|----------------|
| A_23_P98995    | 8,09536 | 9,67862 | -2,996461837 | ENST00000548263 | 57658     | NM_020898    | CALCOCO1       |
| A_32_P55860    | 7,07071 | 8,6543  | -2,997147322 | ENST00000583976 | 348235    | NM_182620    | SKA2           |
| A_23_P129486   | 10,4967 | 12,0805 | -2,997583621 | ENST00000622125 | 51734     | NM_016332    | MSRB1          |
| A_23_P86079    | 8,88369 | 10,4688 | -3,000306732 | ENST00000537107 | 441869    | NM_001145210 | ANKRD65        |
| A_23_P94275    | 5,68039 | 7,26675 | -3,002907426 | ENST00000220812 | 27121     | NM_014420    | DKK4           |
| A_21_P0004142  | 1,52382 | 3,11112 | -3,004864633 | ENST00000511395 | N/A       | N/A          | N/A            |
| A_23_P233      | 2,28841 | 3,87653 | -3,006573025 | ENST00000369272 | 2330      | NM_001461    | FMO5           |
| A_22_P00000559 | 2,62838 | 4,21652 | -3,006614706 | ENST00000572036 | N/A       | FE192720     | N/A            |
| A_33_P3283863  | 2,53937 | 4,12807 | -3,007781987 | ENST00000422452 | 10178     | NM_001163278 | TENM1          |
| A_21_P0005931  | 1,39269 | 2,98253 | -3,010159639 | N/A             | N/A       | N/A          | Inc-PPP3CC-1   |
| A_33_P3245434  | 1,38255 | 2,97286 | -3,011140446 | N/A             | 101060376 | AK122833     | TBC1D3L        |
| A_19_P00315843 | 8,27245 | 9,86298 | -3,011599657 | ENST00000366365 | 677781    | NR_003013    | SCARNA16       |
| A_33_P3214550  | 1,65839 | 3,24927 | -3,012330364 | ENST00000318507 | 3579      | NM_001557    | CXCR2          |
| A_32_P137266   | 7,64665 | 9,23845 | -3,014251926 | ENST00000461039 | 84455     | XM_006710977 | EFCAB7         |
| A_23_P209978   | 3,67278 | 5,26497 | -3,015066871 | ENST00000295156 | 7447      | NM_003385    | VSNL1          |
| A_32_P52153    | 12,1077 | 13,7002 | -3,015714805 | N/A             | 728978    | NR_038453    | UNC5B-AS1      |
| A_33_P3254660  | 6,22289 | 7,81612 | -3,017241135 | N/A             | N/A       | AK124971     | N/A            |
| A_22_P00024601 | 1,65208 | 3,24651 | -3,01975185  | ENST00000424799 | 28985     | N/A          | MCTS1          |
| A_33_P3216207  | 2,10023 | 3,69473 | -3,019898373 | ENST00000418567 | 102724168 | N/A          | LOC102724168   |
| A_24_P45446    | 9,08755 | 10,6825 | -3,020840475 | ENST00000471938 | 115361    | NM_052941    | GBP4           |
| A_23_P33875    | 1,60208 | 3,19712 | -3,021028931 | ENST00000619890 | 548313    | NM_001034832 | SSX4B          |
| A_21_P0005662  | 1,58864 | 3,18385 | -3,021384935 | N/A             | 101930275 | XR_428319    | LOC101930275   |
| A_33_P3299761  | 6,20507 | 7,80043 | -3,021699091 | ENST00000579696 | 25984     | NM_015515    | KRT23          |
| A_22_P00023603 | 1,41888 | 3,01508 | -3,023458968 | ENST00000577994 | 729950    | NR_040033    | LOC729950      |
| A_33_P3267460  | 1,37292 | 2,9694  | -3,024045822 | ENST00000381984 | 5991      | NM_001282117 | RFX3           |
| A_22_P00023141 | 1,64302 | 3,23985 | -3,024779549 | ENST00000439876 | 101929548 | NR_121601    | FOCAD-AS1      |
| A_23_P50786    | 3,46334 | 5,06065 | -3,025786092 | ENST00000360535 | 25999     | NM_015526    | CLIP3          |
| A_23_P57709    | 7,68163 | 9,27934 | -3,026625135 | ENST00000470795 | 26577     | NM_013363    | PCOLCE2        |
| A_33_P3741059  | 6,60526 | 8,20302 | -3,026730031 | ENST00000456414 | N/A       | AL832882     | N/A            |
| A_21_P0007980  | 1,3904  | 2,9882  | -3,026813951 | ENST00000437721 | 102157400 | XR_424439    | LINC00384      |
| A_22_P00008469 | 1,46479 | 3,06331 | -3,028324908 | N/A             | N/A       | DB450376     | Inc-KCMF1-2    |
| A_33_P3360142  | 1,6434  | 3,24236 | -3,029248642 | ENST00000313940 | 390195    | NM_001004729 | OR5AN1         |
| A_22_P00008717 | 1,46292 | 3,06263 | -3,030823838 | N/A             | N/A       | AK001097     | Inc-KIAA1462-2 |

|                |         |         |              |                 |           |              |                |
|----------------|---------|---------|--------------|-----------------|-----------|--------------|----------------|
| A_32_P232559   | 5,58143 | 7,18119 | -3,03092888  | ENST00000449648 | 439949    | NR_036502    | PRKCQ-AS1      |
| A_22_P00009733 | 1,61192 | 3,21203 | -3,031664277 | ENST00000460471 | 102724386 | NR_120521    | LINC01393      |
| A_23_P56746    | 1,63825 | 3,23904 | -3,033093559 | ENST00000188790 | 2191      | NM_004460    | FAP            |
| A_21_P0004516  | 2,07179 | 3,67297 | -3,033913598 | N/A             | N/A       | N/A          | Inc-RASA1-4    |
| A_33_P3813128  | 9,15955 | 10,7615 | -3,035533301 | ENST00000434342 | 6405      | NM_004186    | SEMA3F         |
| A_33_P3854030  | 3,61609 | 5,21808 | -3,035617465 | ENST00000407073 | 55777     | NM_018328    | MBD5           |
| A_22_P00018202 | 3,01151 | 4,61351 | -3,035638506 | ENST00000569932 | N/A       | AF070579     | N/A            |
| A_19_P00328832 | 1,60916 | 3,21124 | -3,035806842 | N/A             | 284837    | NR_026961    | AATBC          |
| A_32_P96036    | 5,37885 | 6,98143 | -3,036859155 | ENST00000532414 | 92312     | NM_001093725 | MEX3A          |
| A_33_P3332492  | 6,42074 | 8,02371 | -3,037680212 | ENST00000368695 | 92565     | NM_145235    | FANK1          |
| A_21_P0012925  | 4,33612 | 5,93936 | -3,038248766 | N/A             | N/A       | N/A          | XLOC_I2_012210 |
| A_33_P3216890  | 5,05107 | 6,65476 | -3,039196593 | ENST00000523463 | 55824     | NM_018440    | PAG1           |
| A_22_P00015193 | 1,61059 | 3,21488 | -3,040460823 | ENST00000566529 | N/A       | CR627168     | N/A            |
| A_33_P3437273  | 2,72182 | 4,32748 | -3,043349451 | N/A             | 84843     | BC007304     | LOC84843       |
| A_21_P0014934  | 2,50725 | 4,11327 | -3,044108962 | ENST00000392695 | 100506124 | NR_045375    | LOC100506124   |
| A_23_P2283     | 2,02599 | 3,63217 | -3,044446583 | ENST00000393867 | 6866      | NM_013251    | TAC3           |
| A_21_P0000709  | 1,65431 | 3,26084 | -3,04518526  | ENST00000507794 | 285540    | NR_037934    | SEPSECS-AS1    |
| A_22_P00005095 | 1,68918 | 3,29631 | -3,04645198  | N/A             | N/A       | N/A          | Inc-DGKH-1     |
| A_22_P00007882 | 1,60039 | 3,20818 | -3,047845981 | ENST00000422833 | N/A       | N/A          | N/A            |
| A_21_P0014401  | 8,05028 | 9,65825 | -3,048226274 | N/A             | 101927355 | XR_244184    | LOC101927355   |
| A_22_P00015417 | 1,67668 | 3,2847  | -3,048331919 | ENST00000584075 | N/A       | BX114010     | N/A            |
| A_22_P00017999 | 1,57014 | 3,1782  | -3,048416438 | N/A             | N/A       | AK096040     | Inc-ZNF132-1   |
| A_23_P364414   | 1,52793 | 3,13601 | -3,048458698 | ENST00000616887 | 56107     | NM_032089    | PCDHGA9        |
| A_21_P0014210  | 3,94526 | 5,55405 | -3,049959319 | N/A             | 101927172 | XR_242411    | LOC101927172   |
| A_33_P3235546  | 1,71951 | 3,32872 | -3,050847358 | ENST00000372683 | 9783      | NM_014747    | RIMS3          |
| A_22_P00016385 | 1,96305 | 3,57236 | -3,051058834 | ENST00000413991 | N/A       | N/A          | N/A            |
| A_23_P118536   | 6,29427 | 7,90483 | -3,053703521 | ENST00000479326 | 55106     | NM_018042    | SLFN12         |
| A_33_P3369401  | 4,57202 | 6,1828  | -3,054169223 | ENST00000216862 | 1591      | NM_000782    | CYP24A1        |
| A_21_P0008775  | 1,49417 | 3,1059  | -3,056181025 | N/A             | N/A       | N/A          | Inc-DET1-2     |
| A_21_P0004462  | 2,59866 | 4,21096 | -3,057388742 | N/A             | N/A       | N/A          | Inc-GABRB2-2   |
| A_33_P3321781  | 10,4248 | 12,0371 | -3,057388742 | ENST00000585065 | N/A       | XR_429999    | N/A            |
| A_33_P3275943  | 2,06997 | 3,68242 | -3,057706641 | ENST00000521424 | 114825    | NM_052927    | PWWP2A         |
| A_23_P128281   | 5,3196  | 6,93223 | -3,058088164 | ENST00000381903 | 3823      | NM_007333    | KLRC3          |

|                |         |         |              |                 |           |              |                |
|----------------|---------|---------|--------------|-----------------|-----------|--------------|----------------|
| A_24_P28977    | 3,03369 | 4,64704 | -3,059614733 | ENST00000273482 | 7220      | NM_003304    | TRPC1          |
| A_33_P3272395  | 1,90255 | 3,51634 | -3,060548011 | ENST00000356407 | 401409    | NM_001008749 | RAB19          |
| A_22_P00009608 | 1,54327 | 3,15718 | -3,060802591 | N/A             | 102724391 | XR_424834    | LOC102724391   |
| A_21_P0010666  | 1,69904 | 3,31383 | -3,062670157 | N/A             | N/A       | N/A          | XLOC_I2_001255 |
| A_22_P00004758 | 3,84381 | 5,45881 | -3,063115994 | N/A             | 101927932 | NR_126334    | LOC101927932   |
| A_24_P36285    | 7,48762 | 9,10287 | -3,063646838 | ENST00000591551 | 7767      | NM_013398    | ZNF224         |
| A_23_P76386    | 2,63723 | 4,25248 | -3,063646838 | ENST00000424061 | 6539      | NM_003044    | SLC6A12        |
| A_21_P0009155  | 10,1761 | 11,7916 | -3,064177773 | ENST00000585065 | N/A       | XR_429999    | N/A            |
| A_24_P912048   | 5,06475 | 6,68146 | -3,066748802 | ENST00000563590 | 399693    | NM_001291516 | MGC50722       |
| A_23_P108244   | 14,0812 | 15,6982 | -3,067365319 | ENST00000392201 | 1340      | NM_001863    | COX6B1         |
| A_33_P3308432  | 5,93346 | 7,5519  | -3,070428483 | N/A             | N/A       | N/A          | N/A            |
| A_23_P125286   | 2,31288 | 3,93302 | -3,074048656 | ENST00000328942 | 23538     | NM_012375    | OR52A1         |
| A_21_P0004924  | 2,1483  | 3,76992 | -3,077203811 | N/A             | N/A       | N/A          | Inc-RFPL4B-4   |
| A_32_P214340   | 4,98906 | 6,61079 | -3,077438445 | N/A             | N/A       | N/A          | Inc-AKIRIN1-1  |
| A_22_P00005738 | 3,36836 | 4,99175 | -3,080981458 | ENST00000599704 | 2014      | N/A          | EMP3           |
| A_21_P0009339  | 1,64698 | 3,27093 | -3,082177611 | ENST00000576313 | N/A       | N/A          | N/A            |
| A_23_P132147   | 1,43685 | 3,06118 | -3,082989551 | ENST00000624901 | 1409      | NM_000394    | CRYAA          |
| A_22_P00003783 | 3,23885 | 4,8634  | -3,08345972  | ENST00000471797 | 285973    | NM_173681    | ATG9B          |
| A_21_P0014202  | 1,47005 | 3,09665 | -3,087844281 | N/A             | 100506881 | NR_125364    | MKLN1-AS       |
| A_33_P3336686  | 10,9116 | 12,5393 | -3,090199543 | N/A             | 9022      | NM_004669    | CLIC3          |
| A_33_P3780123  | 1,59171 | 3,21998 | -3,091420703 | N/A             | N/A       | AK057627     | Inc-CX3CR1-2   |
| A_22_P00016656 | 7,06483 | 8,69311 | -3,091442131 | ENST00000414085 | 101927355 | XR_244184    | LOC101927355   |
| A_21_P0012683  | 1,87815 | 3,50661 | -3,091827864 | N/A             | N/A       | N/A          | XLOC_I2_011283 |
| A_24_P230948   | 6,14325 | 7,77243 | -3,093371275 | ENST00000463106 | 8863      | NM_016831    | PER3           |
| A_19_P00809417 | 6,41648 | 8,04756 | -3,097447866 | ENST00000570163 | 80063     | BC041882     | ATF7IP2        |
| A_33_P3264735  | 1,56243 | 3,19362 | -3,097684043 | N/A             | N/A       | BC131768     | N/A            |
| A_23_P251293   | 8,5522  | 10,184  | -3,098994082 | ENST00000465679 | 6623      | NM_003087    | SNCG           |
| A_33_P3373200  | 1,61487 | 3,24685 | -3,099380757 | N/A             | N/A       | N/A          | N/A            |
| A_33_P3365864  | 6,94685 | 8,57939 | -3,100584054 | ENST00000341071 | 55108     | NM_001143888 | BSDC1          |
| A_33_P3436646  | 5,04416 | 6,6769  | -3,101013916 | N/A             | 151657    | AK091114     | LOC151657      |
| A_33_P3233580  | 5,32964 | 6,96269 | -3,10168032  | N/A             | 56243     | NM_001282769 | KIAA1217       |
| A_23_P18078    | 1,69952 | 3,33259 | -3,101723318 | ENST00000498640 | 5918      | NM_206963    | RARRES1        |
| A_22_P00023582 | 1,71294 | 3,34602 | -3,101744818 | ENST00000422118 | N/A       | N/A          | N/A            |

|                |         |         |              |                 |           |              |                |
|----------------|---------|---------|--------------|-----------------|-----------|--------------|----------------|
| A_24_P202905   | 1,49388 | 3,12759 | -3,103099592 | ENST00000334165 | 140290    | NM_144659    | TCP10L         |
| A_23_P364544   | 5,36618 | 7,00021 | -3,103787958 | ENST00000330828 | 144608    | NM_175874    | C12orf60       |
| A_22_P00015308 | 6,01909 | 7,65463 | -3,107038245 | ENST00000562701 | 27040     | NM_014387    | LAT            |
| A_22_P00013983 | 3,69311 | 5,32914 | -3,108093705 | ENST00000440726 | N/A       | N/A          | N/A            |
| A_33_P3281283  | 1,84429 | 3,48093 | -3,109408147 | ENST00000375846 | 1903      | NM_005226    | S1PR3          |
| A_23_P169819   | 1,444   | 3,08112 | -3,110442852 | ENST00000336596 | 2042      | NM_005233    | EPHA3          |
| A_23_P140614   | 1,9161  | 3,5538  | -3,11169358  | ENST00000605665 | 728047    | NM_001277308 | GOLGA80        |
| A_24_P237912   | 1,48635 | 3,12422 | -3,112060269 | ENST00000425618 | 285966    | NM_001130026 | TCAF2          |
| A_22_P00018829 | 4,02446 | 5,66243 | -3,112275988 | ENST00000412639 | 102724571 | XR_426651    | LOC102724571   |
| A_23_P43898    | 6,78595 | 8,42466 | -3,113872773 | ENST00000370383 | 253152    | NM_173567    | EPHX4          |
| A_23_P84219    | 7,96376 | 9,60339 | -3,115859109 | ENST00000296252 | 200879    | NM_139248    | LIPH           |
| A_22_P00015767 | 1,36397 | 3,00363 | -3,115923902 | ENST00000412701 | N/A       | N/A          | N/A            |
| A_22_P00014591 | 1,59619 | 3,23594 | -3,11611829  | N/A             | N/A       | N/A          | Inc-SLC12A7-2  |
| A_23_P38167    | 12,9375 | 14,5774 | -3,116442296 | ENST00000577663 | 55890     | NM_022036    | GPRC5C         |
| A_23_P43415    | 3,75237 | 5,39258 | -3,117112015 | ENST00000375263 | 3293      | NM_000197    | HSD17B3        |
| A_33_P3792328  | 2,63113 | 4,27154 | -3,117544169 | ENST00000306024 | 27258     | AK092130     | LSM3           |
| A_33_P3399534  | 1,76437 | 3,40513 | -3,118300581 | N/A             | 26767     | NR_004386    | RNU105B        |
| A_21_P0006951  | 1,71871 | 3,36119 | -3,122020477 | N/A             | N/A       | N/A          | Inc-PITRM1-5   |
| A_23_P100539   | 5,17393 | 6,81687 | -3,123016085 | ENST00000576204 | 368       | NM_001171    | ABCC6          |
| A_21_P0003759  | 1,71463 | 3,358   | -3,123947049 | N/A             | N/A       | N/A          | Inc-SEC24D-1   |
| A_33_P3865368  | 6,40035 | 8,04386 | -3,124250214 | N/A             | 254896    | NR_046173    | LOC254896      |
| A_33_P3406090  | 5,81605 | 7,45964 | -3,124423464 | N/A             | N/A       | N/A          | N/A            |
| A_32_P214284   | 1,71278 | 3,35704 | -3,12587481  | ENST00000608206 | 100129516 | XR_159429    | LOC100129516   |
| A_21_P0000154  | 4,08107 | 5,72534 | -3,125896477 | N/A             | 50859     | NM_001204358 | SPOCK3         |
| A_23_P166297   | 5,72814 | 7,37252 | -3,126134823 | ENST00000398437 | 9619      | NM_207627    | ABCG1          |
| A_33_P3307486  | 4,47178 | 6,11645 | -3,126763279 | ENST00000619976 | 11276     | NM_001163547 | SYNRG          |
| A_21_P0013177  | 2,94908 | 4,59433 | -3,12802057  | N/A             | N/A       | N/A          | XLOC_I2_013293 |
| A_33_P3315284  | 3,09519 | 4,7414  | -3,130102714 | ENST00000305620 | 121391    | NM_175053    | KRT74          |
| A_21_P0014128  | 1,53856 | 3,185   | -3,130601767 | N/A             | N/A       | AK126946     | Inc-ECT2-1     |
| A_33_P3351027  | 2,30932 | 3,95579 | -3,130666867 | ENST00000357039 | 5828      | NM_001172086 | PEX2           |
| A_21_P0009179  | 2,54529 | 4,192   | -3,131187713 | N/A             | N/A       | N/A          | Inc-C17orf80-1 |
| A_23_P42386    | 6,23505 | 7,88178 | -3,131231121 | ENST00000610310 | 1081      | NM_000735    | CGA            |
| A_33_P3387005  | 2,11055 | 3,75819 | -3,133206812 | N/A             | 100132069 | AK123509     | LOC100132069   |

|                |         |         |              |                 |           |              |              |
|----------------|---------|---------|--------------|-----------------|-----------|--------------|--------------|
| A_23_P4679     | 8,79322 | 10,441  | -3,133510875 | ENST00000222329 | 2077      | NM_006494    | ERF          |
| A_33_P3388061  | 1,36781 | 3,01635 | -3,135162018 | ENST00000333892 | 337978    | NM_181617    | KRTAP21-2    |
| A_33_P3253465  | 1,59628 | 3,24489 | -3,13531414  | N/A             | 100131654 | AK124891     | LOC100131654 |
| A_23_P45799    | 5,9426  | 7,59134 | -3,135596674 | ENST00000371566 | 4998      | NM_004153    | ORC1         |
| A_22_P00022098 | 2,59722 | 4,24597 | -3,135618408 | ENST00000610202 | 100506286 | XR_109926    | LOC100506286 |
| A_23_P89981    | 2,20662 | 3,85603 | -3,13705321  | N/A             | 1572      | N/A          | CYP2F1       |
| A_24_P299474   | 2,15211 | 3,80248 | -3,139141367 | ENST00000545108 | 57451     | NM_001122679 | TENM2        |
| A_23_P19673    | 10,4002 | 12,0509 | -3,139859491 | ENST00000367857 | 6446      | NM_005627    | SGK1         |
| A_22_P00007606 | 1,56612 | 3,21743 | -3,141187367 | N/A             | 100287902 | NR_034040    | LGALS8-AS1   |
| A_23_P468      | 3,87384 | 5,52557 | -3,142101968 | ENST00000456107 | 57821     | NM_021179    | CCDC181      |
| A_23_P354591   | 3,49602 | 5,14834 | -3,143387215 | ENST00000361171 | 89853     | NM_033446    | MVB12B       |
| A_22_P00008912 | 7,38077 | 9,03428 | -3,145981092 | N/A             | 101928100 | NR_120430    | LOC101928100 |
| A_33_P8911753  | 5,85465 | 7,50843 | -3,146569917 | N/A             | 101928153 | NR_110532    | ITGA9-AS1    |
| A_21_P0013278  | 5,25054 | 6,90498 | -3,14800973  | ENST00000476489 | 728743    | N/A          | LOC728743    |
| A_22_P00013838 | 1,37633 | 3,03232 | -3,1513937   | ENST00000473110 | N/A       | N/A          | N/A          |
| A_21_P0010021  | 2,83319 | 4,49054 | -3,154365857 | N/A             | N/A       | N/A          | Inc-CD93-1   |
| A_32_P231617   | 11,0421 | 12,6996 | -3,15469384  | ENST00000622124 | 4071      | NM_014220    | TM4SF1       |
| A_23_P163567   | 7,38281 | 9,04046 | -3,155021857 | ENST00000219334 | 55512     | NM_018667    | SMPD3        |
| A_22_P00008535 | 1,56196 | 3,21979 | -3,155415523 | ENST00000556546 | N/A       | BC032017     | N/A          |
| A_33_P3339961  | 1,70435 | 3,36388 | -3,159135899 | ENST00000468695 | 339487    | NM_178547    | ZBTB8OS      |
| A_23_P18223    | 1,56655 | 3,2261  | -3,159179694 | ENST00000494705 | 3697      | NM_002215    | ITIH1        |
| A_22_P00007674 | 6,07612 | 7,73606 | -3,160033823 | N/A             | 101928099 | NR_121566    | PCAT7        |
| A_22_P00018279 | 1,66179 | 3,32205 | -3,160734818 | ENST00000414548 | N/A       | N/A          | N/A          |
| A_33_P3413104  | 1,65802 | 3,31866 | -3,161567453 | N/A             | N/A       | N/A          | N/A          |
| A_22_P00014075 | 2,28253 | 3,94547 | -3,166611765 | ENST00000427015 | 101930346 | N/A          | LOC101930346 |
| A_22_P00011421 | 1,72297 | 3,38874 | -3,172829508 | N/A             | N/A       | AA393551     | Inc-PALLD-2  |
| A_21_P0008957  | 1,54936 | 3,21551 | -3,173665328 | N/A             | N/A       | N/A          | Inc-CDH5-7   |
| A_23_P53126    | 10,0357 | 11,7021 | -3,17421533  | ENST00000257818 | 4005      | NM_005574    | LMO2         |
| A_24_P453497   | 1,65014 | 3,31721 | -3,175689805 | ENST00000369519 | 282996    | NM_001134363 | RBM20        |
| A_23_P94472    | 1,71009 | 3,37935 | -3,180514139 | ENST00000375337 | 8789      | NM_003837    | FBP2         |
| A_33_P3383866  | 10,3148 | 11,9841 | -3,180602323 | ENST00000444177 | 11277     | NM_016381    | TREX1        |
| A_21_P0010173  | 1,38006 | 3,04973 | -3,181418139 | ENST00000457565 | N/A       | N/A          | N/A          |
| A_23_P316501   | 6,11645 | 7,78685 | -3,183028336 | ENST00000545433 | 154215    | NM_001040214 | NKAIN2       |



|                |         |         |              |                 |           |              |                 |
|----------------|---------|---------|--------------|-----------------|-----------|--------------|-----------------|
| A_21_P0002697  | 3,30437 | 4,97499 | -3,18351376  | ENST00000457079 | 401109    | NR_034088    | LINC00885       |
| A_33_P3565787  | 4,32196 | 5,993   | -3,184440685 | ENST00000437964 | 114796    | NR_027329    | PSMG3-AS1       |
| A_23_P212696   | 10,0922 | 11,7635 | -3,185014631 | ENST00000295633 | 11167     | NM_007085    | FSTL1           |
| A_21_P0001603  | 1,67769 | 3,34906 | -3,185169173 | ENST00000608417 | 101929093 | NR_110793    | LINC01350       |
| A_33_P3376214  | 3,11279 | 4,78446 | -3,185831579 | ENST00000441068 | 2330      | NM_001144829 | FMO5            |
| A_23_P99785    | 3,80738 | 5,47976 | -3,187399823 | ENST00000439583 | 79696     | NM_024643    | ZC2HC1C         |
| A_21_P0002552  | 1,59929 | 3,27196 | -3,188040595 | N/A             | N/A       | N/A          | Inc-ILKAP-1     |
| A_23_P53193    | 6,39337 | 8,06656 | -3,189189888 | ENST00000525692 | 54843     | NM_032943    | SYTL2           |
| A_22_P00008884 | 1,72305 | 3,39704 | -3,190958841 | N/A             | 101929641 | XR_243223    | LOC101929641    |
| A_22_P00019726 | 1,65237 | 3,32798 | -3,194543976 | N/A             | 100132163 | NR_029379    | PHKA2-AS1       |
| A_23_P18798    | 5,94805 | 7,62367 | -3,194566119 | ENST00000316105 | 56127     | NM_019119    | PCDHB9          |
| A_22_P00009015 | 4,25755 | 5,93325 | -3,194743269 | N/A             | N/A       | N/A          | Inc-LBR-1       |
| A_19_P00808774 | 4,31718 | 5,99342 | -3,195939283 | ENST00000573167 | 440465    | NR_026857    | BAIAP2-AS1      |
| A_21_P0000527  | 1,68209 | 3,35881 | -3,197002783 | ENST00000424535 | 100271835 | NR_027145    | LIMS3-LOC440895 |
| A_33_P3258206  | 1,40244 | 3,07947 | -3,197689815 | ENST00000339258 | 81442     | NM_001005278 | OR6N2           |
| A_33_P3357759  | 3,42383 | 5,10132 | -3,198709553 | ENST00000610772 | 339766    | NM_001287395 | MROH2A          |
| A_21_P0006133  | 1,78212 | 3,46003 | -3,199640903 | N/A             | N/A       | N/A          | Inc-IFT74-3     |
| A_23_P74012    | 12,5542 | 14,2343 | -3,204501622 | N/A             | 6698      | NM_005987    | SPRR1A          |
| A_21_P0001322  | 1,55022 | 3,23046 | -3,204812604 | N/A             | N/A       | N/A          | Inc-AK5-1       |
| A_23_P102364   | 7,55381 | 9,2342  | -3,205145832 | ENST00000264051 | 25791     | NM_019850    | NGEF            |
| A_22_P00010813 | 1,98325 | 3,66666 | -3,211862205 | ENST00000432837 | 284649    | NR_040063    | SMG7-AS1        |
| A_22_P00011072 | 6,10826 | 7,79236 | -3,213398715 | N/A             | 100131176 | NR_109857    | WDR86-AS1       |
| A_21_P0001546  | 2,58337 | 4,26773 | -3,21397788  | N/A             | N/A       | N/A          | Inc-ZNF644-1    |
| A_23_P140057   | 1,63424 | 3,31886 | -3,21455715  | ENST00000382258 | 55504     | NM_018647    | TNFRSF19        |
| A_21_P0012115  | 1,90794 | 3,59272 | -3,214913676 | N/A             | 100996695 | XR_248917    | LOC100996695    |
| A_21_P0002556  | 1,48756 | 3,17284 | -3,216028073 | ENST00000457178 | N/A       | N/A          | N/A             |
| A_33_P3347707  | 1,58186 | 3,26745 | -3,216719193 | ENST00000263257 | 4858      | NM_002516    | NOVA2           |
| A_22_P00022659 | 3,20201 | 4,88801 | -3,217633484 | N/A             | N/A       | AK125755     | Inc-GPR144-3    |
| A_22_P00016184 | 4,46527 | 6,15136 | -3,217834216 | ENST00000558702 | N/A       | N/A          | N/A             |
| A_23_P390172   | 7,24951 | 8,93625 | -3,219284324 | ENST00000367559 | 6041      | NM_021133    | RNASEL          |
| A_22_P00015557 | 1,54996 | 3,23686 | -3,219641374 | N/A             | N/A       | N/A          | Inc-STOML1-2    |
| A_23_P77908    | 4,96608 | 6,65305 | -3,219797596 | ENST00000463318 | 146802    | NM_152908    | SLC47A2         |
| A_23_P29939    | 8,11834 | 9,80546 | -3,220132382 | ENST00000508895 | 6622      | NM_007308    | SNCA            |

|                |         |         |              |                 |           |              |               |
|----------------|---------|---------|--------------|-----------------|-----------|--------------|---------------|
| A_22_P00005407 | 1,40579 | 3,09365 | -3,221784505 | ENST00000584482 | N/A       | N/A          | N/A           |
| A_23_P55731    | 9,54448 | 11,2326 | -3,222365182 | ENST00000575354 | 23152     | NM_015125    | CIC           |
| A_33_P3369799  | 4,8717  | 6,56012 | -3,223035324 | ENST00000331858 | 340146    | NM_001008783 | SLC35D3       |
| A_21_P0005161  | 2,2627  | 3,95169 | -3,224308977 | N/A             | N/A       | N/A          | Inc-CCHCR1-1  |
| A_33_P7292982  | 2,15093 | 3,84008 | -3,224666584 | N/A             | 101926943 | NR_110044    | LOC101926943  |
| A_21_P0011877  | 1,51712 | 3,20654 | -3,225270136 | ENST00000424010 | 102725407 | XR_425533    | LOC102725407  |
| A_22_P00009464 | 1,60412 | 3,29357 | -3,225337204 | ENST00000568389 | 102467146 | NR_104663    | LOC102467146  |
| A_23_P433132   | 9,31843 | 11,0079 | -3,225381917 | ENST00000453171 | 200634    | NM_173853    | KRTCAP3       |
| A_23_P145874   | 7,50505 | 9,19515 | -3,226790693 | ENST00000411955 | 219285    | XM_005250193 | SAMD9L        |
| A_33_P3314550  | 4,63811 | 6,32984 | -3,230438478 | ENST00000222256 | 5864      | NM_002866    | RAB3A         |
| A_22_P00000625 | 1,39939 | 3,09123 | -3,230684796 | ENST00000449119 | N/A       | N/A          | N/A           |
| A_21_P0003199  | 4,85913 | 6,55217 | -3,233373122 | N/A             | N/A       | N/A          | Inc-BCL6-1    |
| A_23_P343398   | 3,29926 | 4,99624 | -3,242215533 | ENST00000246657 | 1236      | NM_001838    | CCR7          |
| A_33_P3338300  | 2,62761 | 4,32666 | -3,24687085  | ENST00000377022 | 54897     | NM_001079843 | CASZ1         |
| A_22_P00006546 | 1,98473 | 3,68426 | -3,247951298 | ENST00000430537 | N/A       | N/A          | N/A           |
| A_33_P3390868  | 2,40066 | 4,10125 | -3,250338562 | ENST00000610556 | 171024    | NM_133477    | SYNPO2        |
| A_23_P59388    | 9,70315 | 11,4054 | -3,254080633 | ENST00000370765 | 667       | NM_001723    | DST           |
| A_21_P0000978  | 2,90607 | 4,61159 | -3,261464669 | ENST00000451914 | N/A       | N/A          | N/A           |
| A_23_P100001   | 7,232   | 8,93824 | -3,263092761 | ENST00000327355 | 400451    | NM_207446    | FAM174B       |
| A_22_P00007677 | 2,55197 | 4,25888 | -3,264608521 | N/A             | N/A       | N/A          | Inc-HIATL1-7  |
| A_22_P00022896 | 1,46886 | 3,17619 | -3,265559058 | N/A             | 101927596 | XR_241378    | LOC101927596  |
| A_23_P214267   | 10,9292 | 12,6366 | -3,265717508 | ENST00000419892 | 266977    | NM_153840    | GPR110        |
| A_33_P3387365  | 6,78844 | 8,49604 | -3,266170264 | ENST00000409299 | 11264     | NM_007238    | PXMP4         |
| A_24_P207139   | 7,87106 | 9,57874 | -3,266351384 | ENST00000268058 | 5371      | NM_033238    | PML           |
| A_21_P0002311  | 1,7234  | 3,43217 | -3,268820145 | N/A             | N/A       | N/A          | Inc-CSRNP3-4  |
| A_32_P66364    | 6,48776 | 8,1973  | -3,270565256 | ENST00000479855 | 151242    | NM_001080545 | PPP1R1C       |
| A_24_P306594   | 3,17799 | 4,88781 | -3,271200073 | ENST00000433342 | 284498    | NM_001010881 | C1orf167      |
| A_23_P57856    | 9,97424 | 11,6847 | -3,272651545 | ENST00000419510 | 604       | NM_001130845 | BCL6          |
| A_23_P35871    | 6,01677 | 7,72923 | -3,27719155  | ENST00000620009 | 79733     | NM_024680    | E2F8          |
| A_32_P205053   | 1,65227 | 3,36543 | -3,278782039 | ENST00000375099 | 127733    | XM_005245742 | UBXN10        |
| A_33_P3311083  | 4,77423 | 6,48813 | -3,280464252 | ENST00000599242 | 653583    | AK097512     | PHLDB3        |
| A_22_P00011302 | 1,65487 | 3,36935 | -3,281783347 | N/A             | N/A       | BC035064     | Inc-OSBPL10-1 |
| A_21_P0007243  | 1,71472 | 3,42985 | -3,283262274 | N/A             | N/A       | N/A          | Inc-USP35-8   |

|                |         |         |              |                 |           |              |                |
|----------------|---------|---------|--------------|-----------------|-----------|--------------|----------------|
| A_21_P0001730  | 2,09622 | 3,81176 | -3,284195478 | N/A             | N/A       | N/A          | Inc-C1orf180-1 |
| A_21_P0001568  | 1,55081 | 3,26697 | -3,285607168 | N/A             | 440600    | NR_036595    | LOC440600      |
| A_21_P0001926  | 1,55536 | 3,27366 | -3,290484441 | ENST00000443811 | 101929282 | NR_110245    | LOC101929282   |
| A_23_P63725    | 2,8785  | 4,59682 | -3,290530057 | ENST00000369719 | 80217     | NM_025145    | CFAP43         |
| A_23_P97826    | 1,67988 | 3,3996  | -3,293724757 | ENST00000369422 | 6975      | NM_058222    | TECTB          |
| A_33_P3273911  | 1,55091 | 3,27068 | -3,293838911 | ENST00000505836 | N/A       | N/A          | N/A            |
| A_22_P00024583 | 1,58649 | 3,30635 | -3,294044397 | ENST00000435092 | N/A       | N/A          | N/A            |
| A_22_P00020019 | 1,52549 | 3,24561 | -3,294638098 | ENST00000565401 | N/A       | N/A          | N/A            |
| A_24_P313993   | 6,34691 | 8,0673  | -3,295254746 | ENST00000222125 | 828       | NM_004058    | CAPS           |
| A_21_P0010987  | 1,38097 | 3,1016  | -3,295802975 | ENST00000531785 | 100506127 | NM_001282456 | LOC100506127   |
| A_23_P161190   | 7,51557 | 9,23708 | -3,297813928 | ENST00000544301 | 7431      | NM_003380    | VIM            |
| A_33_P3267865  | 5,4653  | 7,18775 | -3,299963346 | ENST00000490720 | 3137      | N/A          | HLA-J          |
| A_22_P00007531 | 2,03016 | 3,75293 | -3,300695383 | N/A             | 641518    | NR_029373    | LEF1-AS1       |
| A_33_P3309319  | 11,112  | 12,8349 | -3,300992819 | ENST00000524486 | 55367     | NM_145886    | PIDD1          |
| A_22_P00021759 | 1,7024  | 3,42602 | -3,302640643 | N/A             | 100873930 | NR_046586    | DLG3-AS1       |
| A_33_P3296348  | 3,18827 | 4,91277 | -3,304655768 | N/A             | N/A       | N/A          | N/A            |
| A_21_P0000351  | 11,1267 | 12,8518 | -3,306030421 | N/A             | 677770    | NR_003004    | SCARNA22       |
| A_22_P00015293 | 1,69977 | 3,42515 | -3,306672122 | ENST00000580225 | N/A       | N/A          | N/A            |
| A_33_P3235048  | 1,58747 | 3,31301 | -3,307038864 | ENST00000398290 | 390231    | NM_001146162 | TRIM77         |
| A_23_P104188   | 11,0288 | 12,756  | -3,310846213 | ENST00000475698 | 1999      | NM_004433    | ELF3           |
| A_23_P415974   | 1,69873 | 3,42682 | -3,312889308 | ENST00000374855 | 229       | NM_000035    | ALDOB          |
| A_24_P277657   | 3,79903 | 5,52926 | -3,317807079 | ENST00000540478 | 2766      | NM_006877    | GMPR           |
| A_33_P3358893  | 2,72618 | 4,45718 | -3,319578342 | ENST00000241808 | 5620      | NM_001286359 | PRM2           |
| A_33_P3710442  | 5,92537 | 7,65765 | -3,322524873 | N/A             | 79904     | AK021772     | FLJ11710       |
| A_22_P00014845 | 1,68084 | 3,4135  | -3,323400128 | N/A             | N/A       | N/A          | Inc-SLC4A10-2  |
| A_33_P3388006  | 2,39766 | 4,13035 | -3,323469237 | ENST00000295872 | 152185    | NM_144718    | SPICE1         |
| A_23_P16078    | 9,8771  | 11,6099 | -3,323722649 | ENST00000597333 | 5050      | NM_002573    | PAFAH1B3       |
| A_22_P00006726 | 1,45195 | 3,18547 | -3,325381819 | ENST00000441659 | N/A       | N/A          | N/A            |
| A_33_P3250356  | 4,06543 | 5,79898 | -3,32545097  | ENST00000505871 | 79729     | NM_001162530 | SH3D21         |
| A_33_P3215392  | 1,35735 | 3,09099 | -3,325658428 | ENST00000413988 | 90332     | NM_138568    | EXOC3L2        |
| A_21_P0009147  | 2,92389 | 4,65987 | -3,331056905 | ENST00000583195 | 100505576 | NR_038847    | LINC00672      |
| A_21_P0005590  | 3,59605 | 5,33246 | -3,332049885 | N/A             | N/A       | N/A          | Inc-WDR60-1    |
| A_21_P0009137  | 1,45784 | 3,19656 | -3,337389337 | ENST00000563931 | N/A       | N/A          | N/A            |

|                |         |         |              |                 |           |              |              |
|----------------|---------|---------|--------------|-----------------|-----------|--------------|--------------|
| A_23_P430658   | 3,84995 | 5,58887 | -3,33785203  | ENST00000372852 | 26508     | NM_014571    | HEYL         |
| A_32_P74752    | 5,0224  | 6,76217 | -3,339819188 | N/A             | 100131289 | NR_038929    | LOC100131289 |
| A_33_P3262281  | 1,72104 | 3,4621  | -3,342806856 | ENST00000330487 | 390265    | NM_001004463 | OR10G7       |
| A_23_P121533   | 12,0606 | 13,8017 | -3,34289954  | ENST00000617421 | 10417     | NM_012445    | SPON2        |
| A_23_P2705     | 7,92808 | 9,67017 | -3,345194277 | ENST00000345941 | 10161     | NM_005767    | LPAR6        |
| A_33_P3237927  | 6,28032 | 8,02249 | -3,345379779 | ENST00000350060 | 393       | NM_001164741 | ARHGAP4      |
| A_33_P3324814  | 3,6249  | 5,36772 | -3,346887365 | N/A             | 101927777 | NR_125803    | SATB1-AS1    |
| A_22_P00012269 | 2,17151 | 3,91494 | -3,348302795 | ENST00000522765 | N/A       | N/A          | N/A          |
| A_21_P0013700  | 1,40665 | 3,15088 | -3,350160003 | ENST00000413269 | N/A       | N/A          | N/A          |
| A_23_P28815    | 5,4124  | 7,15777 | -3,352808305 | ENST00000395955 | 1591      | NM_000782    | CYP24A1      |
| A_33_P3323722  | 6,96269 | 8,7094  | -3,355923897 | ENST00000390645 | 10123     | NM_001282431 | ARL4C        |
| A_19_P00321648 | 1,80326 | 3,55067 | -3,357552597 | ENST00000456816 | N/A       | N/A          | N/A          |
| A_22_P00011760 | 1,71766 | 3,466   | -3,359717663 | ENST00000581248 | N/A       | BX103636     | N/A          |
| A_21_P0010605  | 1,57099 | 3,31989 | -3,361022033 | ENST00000443127 | N/A       | N/A          | N/A          |
| A_21_P0014358  | 7,23819 | 8,98845 | -3,364191895 | ENST00000571724 | 100507520 | XR_109439    | LOC100507520 |
| A_21_P0005537  | 1,51849 | 3,2704  | -3,368041699 | N/A             | N/A       | N/A          | Inc-EZH2-1   |
| A_22_P00003673 | 1,90147 | 3,65361 | -3,368578687 | ENST00000436113 | N/A       | N/A          | N/A          |
| A_33_P3301221  | 3,44863 | 5,20133 | -3,369886497 | N/A             | 79906     | NR_125361    | MORN1        |
| A_21_P0005351  | 3,54225 | 5,29545 | -3,371054613 | N/A             | N/A       | N/A          | Inc-CHST12-1 |
| A_23_P73858    | 1,47477 | 3,22827 | -3,371755677 | ENST00000622167 | 90655     | NM_139214    | TGIF2LY      |
| A_23_P307274   | 1,58029 | 3,33394 | -3,372106264 | ENST00000383546 | 7932      | NM_007160    | OR2H2        |
| A_23_P48740    | 2,39215 | 4,14646 | -3,373649278 | ENST00000557010 | 1734      | NM_013989    | DIO2         |
| A_21_P0009960  | 3,8266  | 5,58143 | -3,374865484 | N/A             | N/A       | N/A          | Inc-NCOA3-2  |
| A_23_P346673   | 7,72644 | 9,48129 | -3,37491227  | ENST00000482723 | 55890     | XM_005257514 | GPRC5C       |
| A_24_P231302   | 2,30716 | 4,06232 | -3,375637534 | ENST00000368739 | 57115     | NM_020393    | PGLYRP4      |
| A_24_P649282   | 4,49624 | 6,25399 | -3,381703094 | ENST00000620308 | 338645    | NM_001009909 | LUZP2        |
| A_33_P3224307  | 8,55759 | 10,3161 | -3,383485017 | ENST00000537646 | 677777    | NR_003010    | SCARNA12     |
| A_23_P500206   | 6,96368 | 8,72233 | -3,383813369 | ENST00000434065 | 132014    | NM_153483    | IL17RE       |
| A_24_P70906    | 1,52884 | 3,28794 | -3,384869    | ENST00000302451 | 204474    | NM_174924    | PDILT        |
| A_23_P125383   | 1,66462 | 3,42383 | -3,385127093 | ENST00000272771 | 23671     | NM_016192    | TMEFF2       |
| A_33_P3365860  | 1,85604 | 3,61543 | -3,385549469 | ENST00000602297 | 347541    | NM_001271752 | MAGEB5       |
| A_21_P0000603  | 1,536   | 3,29584 | -3,386605642 | N/A             | 728619    | NR_033769    | ASB9P1       |
| A_33_P3339650  | 9,21332 | 10,9732 | -3,38669954  | ENST00000370765 | 667       | NM_001723    | DST          |

|                |         |         |              |                 |           |              |                |
|----------------|---------|---------|--------------|-----------------|-----------|--------------|----------------|
| A_21_P0012259  | 1,50811 | 3,26832 | -3,387474297 | N/A             | N/A       | N/A          | XLOC_I2_009328 |
| A_33_P3267420  | 1,4144  | 3,17483 | -3,387990901 | N/A             | 338       | BC051278     | APOB           |
| A_33_P3374947  | 1,4656  | 3,2291  | -3,395208092 | ENST00000583337 | 136259    | NM_138693    | KLF14          |
| A_23_P252541   | 5,78944 | 7,55321 | -3,395843564 | ENST00000617991 | 338382    | NM_177403    | RAB7B          |
| A_23_P98910    | 8,48085 | 10,2456 | -3,398151091 | ENST00000354454 | 4033      | NM_006152    | LRMP           |
| A_24_P687594   | 5,43511 | 7,19993 | -3,398315974 | ENST00000604000 | 128077    | NM_153713    | LIX1L          |
| A_21_P0006086  | 5,20588 | 6,97101 | -3,399046268 | ENST00000425666 | 101927873 | N/A          | LINC01508      |
| A_23_P129835   | 6,18179 | 7,94706 | -3,399376129 | ENST00000492037 | 84152     | NM_032192    | PPP1R1B        |
| A_24_P367242   | 2,14142 | 3,90733 | -3,400884475 | ENST00000390689 | 337882    | NM_181607    | KRTAP19-1      |
| A_24_P49747    | 1,38215 | 3,14856 | -3,402063336 | ENST00000433260 | N/A       | N/A          | N/A            |
| A_21_P0000622  | 7,52223 | 9,28973 | -3,40463467  | N/A             | 100131176 | NR_034012    | WDR86-AS1      |
| A_23_P105138   | 10,2632 | 12,0315 | -3,406523124 | ENST00000241052 | 847       | NM_001752    | CAT            |
| A_23_P83028    | 1,39084 | 3,15916 | -3,406570349 | ENST00000377966 | 8434      | NM_021111    | RECK           |
| A_22_P00006097 | 1,54349 | 3,31211 | -3,407278799 | ENST00000565297 | N/A       | BX648186     | N/A            |
| A_22_P00017804 | 5,69978 | 7,46988 | -3,410775976 | ENST00000570269 | 26137     | NM_001164343 | ZBTB20         |
| A_22_P00019186 | 1,47644 | 3,24798 | -3,41418208  | ENST00000492731 | N/A       | N/A          | N/A            |
| A_23_P45871    | 9,68484 | 11,4565 | -3,414466075 | ENST00000476521 | 10964     | NM_006820    | IFI44L         |
| A_23_P137665   | 2,6165  | 4,38978 | -3,418302327 | ENST00000404436 | 1116      | NM_001276    | CHI3L1         |
| A_21_P0002882  | 2,54557 | 4,32054 | -3,422308937 | ENST00000459861 | N/A       | N/A          | N/A            |
| A_21_P0012770  | 1,39855 | 3,17407 | -3,423613876 | N/A             | N/A       | N/A          | XLOC_I2_011076 |
| A_22_P00012751 | 1,63358 | 3,40952 | -3,42461071  | N/A             | N/A       | AK125316     | Inc-RAD1-1     |
| A_22_P00017466 | 3,26622 | 5,0424  | -3,425180459 | N/A             | N/A       | N/A          | Inc-VSIG2-1    |
| A_33_P3343972  | 7,32868 | 9,10503 | -3,425584089 | ENST00000493019 | 89765     | NM_080860    | RSPH1          |
| A_32_P331052   | 3,67843 | 5,45521 | -3,426605248 | ENST00000252998 | 140893    | NM_080833    | RBBP8NL        |
| A_24_P62659    | 4,06783 | 5,84619 | -3,430360028 | ENST00000369516 | 10100     | NM_005725    | TSPAN2         |
| A_23_P88303    | 3,87511 | 5,6536  | -3,430669148 | ENST00000247207 | 3306      | NM_021979    | HSPA2          |
| A_33_P3216763  | 1,97526 | 3,75379 | -3,430764268 | ENST00000388740 | 2138      | NM_000503    | EYA1           |
| A_22_P00020850 | 1,34766 | 3,1281  | -3,435309303 | N/A             | N/A       | BX105562     | Inc-MED10-5    |
| A_23_P118025   | 1,49423 | 3,27501 | -3,436118998 | ENST00000572888 | 64174     | NM_022355    | DPEP2          |
| A_23_P216935   | 2,23703 | 4,01818 | -3,437000353 | N/A             | 81571     | NR_026677    | MIR600HG       |
| A_22_P00007439 | 1,50405 | 3,28525 | -3,437119473 | N/A             | N/A       | N/A          | Inc-GSN-2      |
| A_32_P167705   | 5,58105 | 7,36379 | -3,440790373 | ENST00000357610 | 79841     | NM_024783    | AGBL2          |
| A_21_P0000169  | 5,44996 | 7,23353 | -3,442770471 | ENST00000526090 | 84000     | NM_001206790 | TMPRSS13       |

|                |         |         |              |                 |           |              |               |
|----------------|---------|---------|--------------|-----------------|-----------|--------------|---------------|
| A_24_P181254   | 2,86438 | 4,6484  | -3,443844495 | ENST00000219022 | 10562     | NM_006418    | OLFM4         |
| A_23_P37359    | 7,31069 | 9,09496 | -3,444441319 | ENST00000336557 | 27141     | NM_014430    | CIDEB         |
| A_22_P00022754 | 1,58366 | 3,36799 | -3,444584573 | ENST00000416510 | N/A       | N/A          | N/A           |
| A_33_P3399571  | 1,93385 | 3,71887 | -3,446232413 | ENST00000367928 | 8876      | NM_004666    | VNN1          |
| A_24_P319684   | 1,57497 | 3,36008 | -3,446447407 | ENST00000394775 | 79635     | NM_024584    | CCDC121       |
| A_33_P3223488  | 1,49042 | 3,27562 | -3,446662415 | ENST00000436046 | 10129     | NM_023037    | FRY           |
| A_33_P3232516  | 1,44709 | 3,2336  | -3,449793484 | ENST00000590129 | 146909    | NM_001265577 | KIF18B        |
| A_21_P0007530  | 6,29904 | 8,08646 | -3,451970176 | N/A             | N/A       | N/A          | Inc-PLEKHA5-1 |
| A_24_P252078   | 7,16142 | 8,94887 | -3,452041958 | ENST00000356386 | 11118     | NM_007047    | BTN3A2        |
| A_24_P87931    | 8,75673 | 10,5443 | -3,452329103 | ENST00000319136 | 8542      | NM_145343    | APOL1         |
| A_23_P210708   | 1,58938 | 3,37868 | -3,456471428 | ENST00000400068 | 140885    | NM_001040022 | SIRPA         |
| A_23_P329340   | 1,52965 | 3,31929 | -3,457286111 | ENST00000261383 | N/A       | XM_006721062 | N/A           |
| A_23_P408285   | 7,27539 | 9,06563 | -3,458724255 | ENST00000552240 | 144165    | NM_153026    | PRICKLE1      |
| A_33_P3254579  | 1,34796 | 3,13926 | -3,461266438 | ENST00000361883 | 83895     | NM_031957    | KRTAP1-5      |
| A_33_P3641427  | 1,5439  | 3,33597 | -3,463114289 | ENST00000559057 | 50804     | NM_016132    | MYEF2         |
| A_33_P3407314  | 2,59097 | 4,38409 | -3,465635677 | N/A             | 100132707 | BC050402     | PAXIP1-AS2    |
| A_33_P3306679  | 1,79283 | 3,58657 | -3,467125358 | ENST00000344636 | 440107    | NM_001004330 | PLEKHG7       |
| A_22_P00012118 | 1,66166 | 3,45566 | -3,467750254 | ENST00000536100 | 100507055 | NM_001195520 | LRCOL1        |
| A_24_P12065    | 4,11003 | 5,90409 | -3,467894477 | ENST00000316355 | 901       | NM_004354    | CCNG2         |
| A_33_P3239417  | 1,44205 | 3,23667 | -3,469240844 | ENST00000383490 | 645369    | NM_001080209 | TMEM200C      |
| A_33_P3404257  | 2,8178  | 4,61368 | -3,472272083 | N/A             | N/A       | AK125546     | N/A           |
| A_22_P00013300 | 2,74563 | 4,54189 | -3,473186786 | ENST00000526453 | N/A       | N/A          | N/A           |
| A_23_P129064   | 8,84941 | 10,6479 | -3,478559505 | ENST00000558362 | 2628      | NM_001482    | GATM          |
| A_23_P103310   | 5,1294  | 6,9286  | -3,480271846 | ENST00000368723 | 6278      | NM_002963    | S100A7        |
| A_33_P3278455  | 2,43653 | 4,23604 | -3,481019751 | ENST00000369408 | 22881     | NM_001242811 | ANKRD6        |
| A_23_P38427    | 8,97737 | 10,777  | -3,481309307 | ENST00000621161 | 84440     | AJ314646     | RAB11FIP4     |
| A_24_P149124   | 6,07631 | 7,87634 | -3,482274664 | ENST00000446294 | 9315      | NM_004772    | NREP          |
| A_32_P217750   | 1,45678 | 3,25823 | -3,485703847 | ENST00000331035 | 3563      | NM_002183    | IL3RA         |
| A_23_P67971    | 7,04086 | 8,84237 | -3,485848816 | ENST00000272252 | 130589    | NM_138801    | GALM          |
| A_24_P901986   | 5,51006 | 7,31182 | -3,48645292  | N/A             | 102725300 | XR_424687    | LOC102725300  |
| A_33_P3305780  | 3,22789 | 5,03069 | -3,488967116 | ENST00000614847 | 645121    | NM_001287252 | CCNI2         |
| A_23_P72077    | 1,42611 | 3,22897 | -3,489112221 | ENST00000262345 | 3595      | NM_001559    | IL12RB2       |
| A_23_P7397     | 3,00969 | 4,81257 | -3,489160591 | ENST00000239446 | 56126     | NM_018930    | PCDHB10       |

|                |         |         |              |                 |           |              |                  |
|----------------|---------|---------|--------------|-----------------|-----------|--------------|------------------|
| A_24_P16856    | 1,54666 | 3,35156 | -3,494049386 | ENST00000381261 | 8227      | BC028151     | AKAP17A          |
| A_33_P3351686  | 1,93692 | 3,74332 | -3,497684111 | ENST00000479529 | 149483    | NM_001114938 | CCDC17           |
| A_21_P0008692  | 1,958   | 3,76469 | -3,498387261 | ENST00000611654 | N/A       | N/A          | N/A              |
| A_22_P00014526 | 1,60192 | 3,40879 | -3,498823769 | N/A             | 100874029 | NR_046728    | CFAP44-AS1       |
| A_21_P0001485  | 1,41281 | 3,22067 | -3,501225541 | N/A             | N/A       | N/A          | Inc-DNAJC8-1     |
| A_22_P00022173 | 1,76133 | 3,56957 | -3,502147871 | N/A             | 101928266 | NR_110828    | LOC101928266     |
| A_33_P3416804  | 3,36203 | 5,17032 | -3,502269249 | ENST00000391394 | 100509445 | CR749395     | LOC100509445     |
| A_22_P00002542 | 4,00738 | 5,81573 | -3,502414907 | N/A             | N/A       | N/A          | Inc-C17orf62-3   |
| A_23_P75630    | 1,50479 | 3,314   | -3,504503342 | ENST00000542499 | 116519    | NM_052968    | APOA5            |
| A_22_P00001391 | 1,55223 | 3,36203 | -3,505936826 | N/A             | 101928846 | NR_110726    | HIPK1-AS1        |
| A_23_P87238    | 2,38422 | 4,19454 | -3,507200721 | ENST00000615694 | 6291      | NM_006512    | SAA4             |
| A_23_P416774   | 1,55489 | 3,36528 | -3,507370896 | ENST00000339561 | 53405     | NM_016929    | CLIC5            |
| A_21_P0014243  | 1,41486 | 3,22586 | -3,508854195 | N/A             | N/A       | N/A          | Inc-OLFML2A-1    |
| A_23_P408271   | 8,79718 | 10,6086 | -3,509875848 | ENST00000502576 | 51170     | NM_016245    | HSD17B11         |
| A_23_P141362   | 7,91316 | 9,72849 | -3,519401234 | ENST00000315323 | 2535      | NM_001466    | FZD2             |
| A_32_P86245    | 1,34822 | 3,16464 | -3,522061254 | ENST00000538167 | 114327    | NM_018100    | EFHC1            |
| A_21_P0014302  | 1,63707 | 3,45451 | -3,524552267 | ENST00000558449 | N/A       | XR_133090    | N/A              |
| A_33_P3356696  | 1,56418 | 3,38246 | -3,526605013 | N/A             | N/A       | N/A          | N/A              |
| A_32_P8221     | 1,49876 | 3,31741 | -3,527509578 | ENST00000489939 | 2918      | NM_000845    | GRM8             |
| A_19_P00813482 | 5,23494 | 7,05463 | -3,530053381 | ENST00000578000 | 147081    | NR_026905    | CRHR1-IT1        |
| A_33_P3325349  | 6,95076 | 8,77064 | -3,530518313 | ENST00000305798 | 10098     | NM_005723    | TSPAN5           |
| A_33_P3327842  | 3,19114 | 5,01229 | -3,533627585 | ENST00000374608 | 80818     | NM_001077195 | ZNF436           |
| A_21_P0010211  | 6,30394 | 8,12576 | -3,535269014 | ENST00000442815 | 101928399 | XR_244328    | LOC101928399     |
| A_22_P00014841 | 6,08799 | 7,91    | -3,535734632 | N/A             | N/A       | N/A          | Inc-SLC48A1-1    |
| A_24_P14932    | 4,31356 | 6,13564 | -3,535906191 | ENST00000295868 | 55779     | NM_018338    | CFAP44           |
| A_33_P3620087  | 2,16971 | 3,99204 | -3,53651897  | N/A             | 400756    | XR_159044    | LOC400756        |
| A_24_P24972    | 6,42435 | 8,247   | -3,537303482 | ENST00000434894 | N/A       | N/A          | N/A              |
| A_21_P0012551  | 3,69014 | 5,51333 | -3,538627741 | ENST00000465363 | N/A       | N/A          | N/A              |
| A_23_P126908   | 11,1911 | 13,0166 | -3,544298224 | ENST00000466750 | 8764      | NM_003820    | TNFRSF14         |
| A_21_P0001780  | 1,47255 | 3,29841 | -3,545182753 | N/A             | 101927881 | N/A          | LOC101927881     |
| A_33_P3407540  | 1,61148 | 3,43762 | -3,545870874 | ENST00000380578 | 6399      | AK098253     | TRAPPC2          |
| A_21_P0005021  | 1,52023 | 3,34685 | -3,547050819 | ENST00000506222 | 100507584 | NR_038989    | LINC01016        |
| A_33_P3389593  | 1,47002 | 3,29749 | -3,549141269 | N/A             | N/A       | XM_006710034 | Inc-AC040934.1-3 |

|                |         |         |              |                 |           |              |                |
|----------------|---------|---------|--------------|-----------------|-----------|--------------|----------------|
| A_24_P743802   | 8,4525  | 10,2801 | -3,549461093 | ENST00000615615 | 114991    | NM_133374    | ZNF618         |
| A_22_P00005172 | 1,55808 | 3,38598 | -3,550199259 | ENST00000555328 | N/A       | N/A          | N/A            |
| A_21_P0005030  | 1,90349 | 3,73152 | -3,550519179 | N/A             | N/A       | N/A          | Inc-KLHL31-2   |
| A_22_P00012243 | 5,25464 | 7,08402 | -3,553843128 | N/A             | N/A       | N/A          | Inc-PPM1D-1    |
| A_21_P0007420  | 1,85265 | 3,68226 | -3,55440974  | N/A             | N/A       | N/A          | Inc-ZBTB44-1   |
| A_21_P0007359  | 1,69783 | 3,52914 | -3,558600549 | N/A             | 102723765 | XR_424240    | LOC102723765   |
| A_33_P3519424  | 2,21799 | 4,05015 | -3,560697805 | N/A             | N/A       | AK057135     | Inc-CMPK2-2    |
| A_22_P00022555 | 1,9467  | 3,77903 | -3,561117405 | ENST00000508616 | N/A       | BC104637     | N/A            |
| A_21_P0006094  | 1,48409 | 3,3166  | -3,561561741 | ENST00000421507 | N/A       | N/A          | N/A            |
| A_22_P00011996 | 4,03689 | 5,87112 | -3,565810414 | N/A             | N/A       | N/A          | Inc-PLCD1-1    |
| A_23_P129466   | 6,66206 | 8,49736 | -3,56845604  | ENST00000356427 | 80063     | NM_024997    | ATF7IP2        |
| A_21_P0011546  | 1,67859 | 3,51416 | -3,569123938 | N/A             | N/A       | N/A          | XLOC_I2_005804 |
| A_21_P0008874  | 2,94439 | 4,78026 | -3,569866194 | ENST00000499966 | 100505865 | N/A          | LINC00920      |
| A_23_P86021    | 9,14535 | 10,9829 | -3,574025679 | ENST00000463664 | 8991      | NM_003944    | SELENBP1       |
| A_33_P3273436  | 6,03368 | 7,87382 | -3,580447716 | ENST00000272252 | 130589    | NM_138801    | GALM           |
| A_33_P3209741  | 6,99273 | 8,83475 | -3,585116498 | ENST00000245121 | 83473     | NM_031303    | KATNAL2        |
| A_21_P0013379  | 6,91013 | 8,7522  | -3,585240751 | ENST00000423781 | N/A       | N/A          | N/A            |
| A_33_P3842551  | 4,82225 | 6,66634 | -3,590264168 | ENST00000484040 | 22807     | NM_001079526 | IKZF2          |
| A_23_P147311   | 1,39171 | 3,23648 | -3,591956802 | ENST00000371124 | 139741    | NM_138289    | ACTRT1         |
| A_33_P3332487  | 4,43295 | 6,27924 | -3,595743224 | ENST00000368689 | 92565     | N/A          | FANK1          |
| A_33_P3292540  | 7,58521 | 9,4318  | -3,596491015 | ENST00000371761 | 1031      | NM_078626    | CDKN2C         |
| A_33_P3305790  | 7,10265 | 8,95259 | -3,604851926 | ENST00000461406 | 4846      | NM_000603    | NOS3           |
| A_24_P13024    | 2,40528 | 4,25526 | -3,604951875 | ENST00000371790 | 387700    | NM_213606    | SLC16A12       |
| A_23_P21207    | 7,68449 | 9,5348  | -3,605776561 | ENST00000333486 | 7318      | NM_003335    | UBA7           |
| A_33_P3248265  | 3,50312 | 5,35424 | -3,60780159  | ENST00000376117 | 4050      | NM_002341    | LTB            |
| A_22_P00007883 | 8,66804 | 10,5209 | -3,612155498 | ENST00000502576 | 51170     | NM_016245    | HSD17B11       |
| A_24_P756289   | 1,52652 | 3,38066 | -3,615361727 | N/A             | 347689    | NR_075091    | SOX2-OT        |
| A_21_P0013679  | 1,48618 | 3,34051 | -3,615837894 | ENST00000425157 | 101928496 | NR_121578    | LINC01492      |
| A_23_P90333    | 5,11036 | 6,96507 | -3,616790416 | ENST00000324394 | 342908    | NM_001033719 | ZNF404         |
| A_19_P00322262 | 1,42953 | 3,28429 | -3,616915767 | ENST00000447481 | 100507254 | N/A          | LINC01013      |
| A_33_P3266429  | 2,3162  | 4,17127 | -3,617693038 | ENST00000370671 | 148418    | NM_001010971 | SAMD13         |
| A_24_P208704   | 2,19294 | 4,0483  | -3,618420313 | ENST00000316161 | 1582      | NM_004391    | CYP8B1         |
| A_22_P00002038 | 1,70398 | 3,55965 | -3,619197907 | N/A             | N/A       | BE896823     | Inc-BHLHE41-1  |



|                |         |         |              |                 |           |              |              |
|----------------|---------|---------|--------------|-----------------|-----------|--------------|--------------|
| A_23_P205997   | 7,57137 | 9,42721 | -3,6196244   | ENST00000380340 | 83464     | NM_031301    | APH1B        |
| A_21_P0005768  | 1,47209 | 3,32818 | -3,620251688 | ENST00000519500 | 552853    | NR_126028    | NCRNA00250   |
| A_23_P36531    | 4,25927 | 6,11559 | -3,620828888 | ENST00000552128 | 7103      | NM_004616    | TSPAN8       |
| A_23_P57036    | 4,00248 | 5,85921 | -3,621858039 | ENST00000477696 | 958       | NM_001250    | CD40         |
| A_21_P0000350  | 5,74633 | 7,60328 | -3,622410387 | N/A             | 677681    | NR_002999    | SCARNA20     |
| A_23_P389897   | 8,1758  | 10,0332 | -3,623540452 | ENST00000172229 | 4804      | NM_002507    | NGFR         |
| A_33_P3352019  | 9,29009 | 11,1488 | -3,626832203 | ENST00000337221 | 51435     | NM_182826    | SCARA3       |
| A_33_P3407324  | 6,53441 | 8,39365 | -3,62816483  | ENST00000409609 | 51454     | NM_001252668 | GULP1        |
| A_33_P3340802  | 1,60975 | 3,4709  | -3,632971379 | ENST00000374186 | 79947     | N/A          | DHDDS        |
| A_23_P257763   | 1,90117 | 3,76323 | -3,635263649 | ENST00000466059 | 91653     | NM_033254    | BOC          |
| A_21_P0009151  | 1,42574 | 3,28829 | -3,636498547 | ENST00000571914 | N/A       | N/A          | N/A          |
| A_33_P3404601  | 2,15443 | 4,01712 | -3,636851453 | ENST00000460487 | 717       | NM_001282458 | C2           |
| A_23_P256473   | 8,09237 | 9,95548 | -3,637910373 | ENST00000265361 | 10512     | NM_006379    | SEMA3C       |
| A_23_P386254   | 1,69448 | 3,56063 | -3,645584142 | ENST00000382438 | 579       | NM_001189    | NKX3-2       |
| A_22_P00022486 | 2,02399 | 3,89115 | -3,648137231 | ENST00000512551 | 23234     | XM_006717734 | DNAJC9       |
| A_21_P0002213  | 2,22189 | 4,0913  | -3,653831236 | N/A             | N/A       | N/A          | Inc-FOXN2-1  |
| A_21_P0004387  | 2,01823 | 3,89009 | -3,660041483 | N/A             | 102467080 | N/A          | LOC102467080 |
| A_21_P0003680  | 3,16708 | 5,03971 | -3,661995454 | N/A             | 102723627 | XR_425813    | LOC102723627 |
| A_23_P250245   | 1,49761 | 3,37181 | -3,665982757 | ENST00000490239 | 971       | NM_001782    | CD72         |
| A_21_P0011706  | 8,91826 | 10,7927 | -3,666592663 | ENST00000573266 | 147650    | NR_024330    | SPACA6P      |
| A_23_P24157    | 7,67244 | 9,54788 | -3,669135032 | ENST00000483923 | 84795     | NM_032709    | PYROXD2      |
| A_33_P3399090  | 4,38978 | 6,26601 | -3,671144751 | ENST00000440460 | 85458     | NM_001037954 | DIXDC1       |
| A_21_P0005421  | 1,52493 | 3,40435 | -3,679271145 | N/A             | N/A       | N/A          | Inc-ASB15-2  |
| A_22_P00025424 | 1,67236 | 3,55296 | -3,682281702 | N/A             | 100128191 | NR_027157    | TMPO-AS1     |
| A_22_P00018292 | 1,6471  | 3,52808 | -3,683251728 | ENST00000441026 | N/A       | N/A          | N/A          |
| A_33_P3344414  | 1,56209 | 3,4438  | -3,685115915 | ENST00000301529 | 81168     | NM_001004064 | OR8J3        |
| A_23_P413180   | 2,44983 | 4,33663 | -3,698140406 | ENST00000303145 | 56890     | NM_017440    | MDM1         |
| A_23_P62967    | 5,01369 | 6,90067 | -3,698601839 | ENST00000366637 | 27185     | NM_018662    | DISC1        |
| A_33_P3305373  | 1,64042 | 3,52784 | -3,699730028 | ENST00000279783 | 390157    | NM_001002907 | OR8K1        |
| A_23_P332399   | 6,81827 | 8,70578 | -3,699960836 | ENST00000409580 | 51454     | NM_016315    | GULP1        |
| A_22_P00006798 | 2,52948 | 4,41779 | -3,702013099 | ENST00000523605 | 101927115 | NR_109876    | LOC101927115 |
| A_22_P00020060 | 1,66303 | 3,55137 | -3,702090081 | ENST00000513283 | N/A       | N/A          | N/A          |
| A_22_P00005097 | 1,53531 | 3,42366 | -3,702115742 | N/A             | N/A       | N/A          | Inc-DHCR24-1 |

|                |         |         |              |                 |           |              |                |
|----------------|---------|---------|--------------|-----------------|-----------|--------------|----------------|
| A_24_P153840   | 8,50059 | 10,3904 | -3,705864161 | ENST00000337352 | 89846     | NM_033086    | FGD3           |
| A_24_P83787    | 1,58579 | 3,47602 | -3,706943176 | ENST00000366636 | 27185     | NM_001012959 | DISC1          |
| A_33_P3256844  | 1,56216 | 3,45405 | -3,711210929 | N/A             | 151790    | AK097556     | WDR49          |
| A_33_P3267532  | 3,79413 | 5,68634 | -3,712034194 | ENST00000398925 | 3772      | NM_170736    | KCNJ15         |
| A_21_P0011535  | 5,44116 | 7,334   | -3,713655529 | ENST00000584386 | 3965      | XM_006721895 | LGALS9         |
| A_32_P223210   | 1,71312 | 3,60645 | -3,714917057 | ENST00000297819 | 136263    | NM_145268    | SSMEM1         |
| A_22_P00003957 | 1,70702 | 3,60056 | -3,715457843 | N/A             | N/A       | N/A          | Inc-CHAF1B-2   |
| A_22_P00004283 | 1,54627 | 3,43995 | -3,715818411 | ENST00000416191 | N/A       | XR_428800    | N/A            |
| A_21_P0013602  | 1,55321 | 3,44744 | -3,717235266 | N/A             | N/A       | N/A          | XLOC_I2_015038 |
| A_23_P105691   | 3,18347 | 5,07845 | -3,719168211 | ENST00000396333 | 55507     | NM_018654    | GPRC5D         |
| A_33_P3237220  | 6,90321 | 8,79994 | -3,723682328 | ENST00000427939 | 26261     | NM_033506    | FBXO24         |
| A_24_P365975   | 5,34339 | 7,24078 | -3,725386217 | ENST00000397799 | 1296      | NM_005202    | COL8A2         |
| A_21_P0013119  | 3,62223 | 5,51967 | -3,725515331 | N/A             | N/A       | N/A          | XLOC_I2_013233 |
| A_23_P429977   | 6,17089 | 8,06838 | -3,72564445  | ENST00000155840 | 3784      | NM_000218    | KCNQ1          |
| A_23_P115785   | 7,026   | 8,92478 | -3,728977262 | ENST00000368693 | 92565     | NM_145235    | FANK1          |
| A_22_P00017347 | 1,71957 | 3,61846 | -3,729261593 | N/A             | 100130950 | NR_034082    | LOC100130950   |
| A_33_P3655775  | 1,62409 | 3,5252  | -3,735004549 | ENST00000579787 | 100287898 | AK096384     | TTC34          |
| A_24_P844984   | 5,37477 | 7,27601 | -3,735341122 | ENST00000356495 | 5284      | NM_002644    | PIGR           |
| A_21_P0005806  | 1,76853 | 3,67094 | -3,738371646 | ENST00000518967 | N/A       | N/A          | N/A            |
| A_21_P0012921  | 1,64956 | 3,55227 | -3,739149099 | ENST00000522838 | N/A       | N/A          | N/A            |
| A_23_P121564   | 1,673   | 3,57681 | -3,742001145 | ENST00000264424 | 2983      | NM_000857    | GUCY1B3        |
| A_33_P3671291  | 5,14185 | 7,04689 | -3,745192827 | N/A             | 677800    | AA378382     | SNORA12        |
| A_21_P0010798  | 4,84998 | 6,75826 | -3,753613221 | ENST00000566597 | 646627    | N/A          | LYPD8          |
| A_21_P0001232  | 2,92831 | 4,83701 | -3,754706139 | N/A             | N/A       | N/A          | Inc-LBR-1      |
| A_22_P00001242 | 1,77592 | 3,68534 | -3,756580453 | ENST00000584414 | N/A       | N/A          | N/A            |
| A_24_P915806   | 6,22447 | 8,13468 | -3,758638068 | ENST00000280096 | 3176      | NM_001024074 | HNMT           |
| A_33_P3310164  | 1,44626 | 3,35671 | -3,759263389 | ENST00000407950 | 1607      | NM_004080    | DGKB           |
| A_22_P00005115 | 1,59115 | 3,50206 | -3,760462213 | N/A             | 339260    | NR_123730    | LOC339260      |
| A_22_P00025660 | 1,63347 | 3,54488 | -3,761765716 | N/A             | N/A       | N/A          | Inc-VPS41-1    |
| A_22_P00012013 | 1,48269 | 3,39423 | -3,7621047   | N/A             | 102723740 | XR_425851    | LOC102723740   |
| A_33_P3260307  | 9,7029  | 11,6146 | -3,762521954 | ENST00000618335 | 23589     | NM_001042476 | CARHSP1        |
| A_24_P233488   | 3,84008 | 5,7529  | -3,765444028 | ENST00000249075 | 3976      | NM_002309    | LIF            |
| A_33_P3369854  | 2,03174 | 3,94626 | -3,769883655 | ENST00000339764 | 374407    | NM_153614    | DNAJB13        |

|                |         |         |              |                 |           |              |              |
|----------------|---------|---------|--------------|-----------------|-----------|--------------|--------------|
| A_32_P133767   | 2,50143 | 4,41688 | -3,772314606 | ENST00000551134 | 374470    | NM_198521    | C12orf42     |
| A_32_P4018     | 2,40215 | 4,31771 | -3,772602242 | ENST00000371079 | 4919      | NM_005012    | ROR1         |
| A_22_P00003761 | 7,8768  | 9,79406 | -3,777050309 | N/A             | N/A       | AK097472     | Inc-CDIPT-1  |
| A_33_P3390539  | 3,94747 | 5,86626 | -3,781058053 | ENST00000525609 | 120071    | NM_152312    | GYLTL1B      |
| A_24_P350546   | 1,47289 | 3,39182 | -3,781424987 | N/A             | 646976    | XR_248659    | LOC646976    |
| A_33_P3403117  | 6,71675 | 8,6358  | -3,78173953  | ENST00000615873 | 7025      | NM_005654    | NR2F1        |
| A_33_P3411333  | 1,72132 | 3,64046 | -3,781975454 | ENST00000460619 | 1118      | N/A          | CHIT1        |
| A_24_P52697    | 11,7557 | 13,6764 | -3,786067153 | ENST00000411754 | 283120    | NR_002196    | H19          |
| A_33_P6815452  | 5,77889 | 7,69976 | -3,78651331  | N/A             | 101928153 | NR_110532    | ITGA9-AS1    |
| A_21_P0014233  | 2,93257 | 4,85408 | -3,788193434 | N/A             | 102723989 | XR_426400    | LOC102723989 |
| A_33_P3226060  | 3,02716 | 4,94952 | -3,790426001 | ENST00000610315 | 100507421 | N/A          | TMEM178B     |
| A_22_P00012944 | 1,38063 | 3,30355 | -3,791897587 | N/A             | N/A       | N/A          | Inc-RDH10-4  |
| A_23_P162171   | 3,88955 | 5,81293 | -3,793106818 | ENST00000525586 | 4162      | NM_006500    | MCAM         |
| A_23_P38206    | 1,9831  | 3,90696 | -3,794369035 | ENST00000333775 | 84316     | NM_032356    | NAA38        |
| A_21_P0003642  | 4,28156 | 6,20718 | -3,799000758 | N/A             | N/A       | N/A          | Inc-SYNPO2-2 |
| A_21_P0002457  | 1,60866 | 3,53629 | -3,804297313 | ENST00000442326 | N/A       | N/A          | N/A          |
| A_21_P0004026  | 1,55812 | 3,48903 | -3,812956309 | N/A             | N/A       | N/A          | Inc-RASA1-3  |
| A_23_P419213   | 4,90995 | 6,84101 | -3,813352771 | ENST00000295878 | 57577     | NM_020817    | KIAA1407     |
| A_33_P3228902  | 1,54998 | 3,482   | -3,815891101 | N/A             | 100133306 | AK125136     | LOC100133306 |
| A_23_P10995    | 1,82646 | 3,75925 | -3,817928275 | ENST00000497319 | 27303     | NM_014483    | RBMS3        |
| A_33_P3367126  | 5,32376 | 7,25701 | -3,819145807 | ENST00000296794 | 64283     | NM_001177693 | ARHGEF28     |
| A_33_P3398111  | 1,47575 | 3,40904 | -3,819251697 | N/A             | 400555    | AK127438     | ZC3H18-AS1   |
| A_23_P17192    | 1,61455 | 3,54862 | -3,821317152 | ENST00000484645 | 11069     | NM_007023    | RAPGEF4      |
| A_23_P40866    | 5,488   | 7,42211 | -3,821423103 | ENST00000464560 | 26137     | NM_015642    | ZBTB20       |
| A_21_P0003932  | 2,31157 | 4,24574 | -3,821582035 | ENST00000524295 | 101927115 | NR_109876    | LOC101927115 |
| A_23_P107744   | 7,46316 | 9,39998 | -3,828608121 | ENST00000439028 | 53637     | NM_030760    | S1PR5        |
| A_33_P3264846  | 5,89113 | 7,82872 | -3,830652084 | ENST00000610760 | 219285    | XM_005250193 | SAMD9L       |
| A_33_P3221203  | 4,94666 | 6,88528 | -3,833387922 | ENST00000260302 | 4322      | NM_002427    | MMP13        |
| A_23_P216920   | 9,54379 | 11,4846 | -3,839211395 | ENST00000539416 | 10783     | NM_014397    | NEK6         |
| A_33_P3386547  | 4,1238  | 6,06683 | -3,84512367  | ENST00000321276 | 130367    | NM_152386    | SGPP2        |
| A_21_P0003587  | 1,3784  | 3,32165 | -3,845710067 | N/A             | 102723744 | XR_425718    | LOC102723744 |
| A_23_P202448   | 1,69621 | 3,63989 | -3,846856464 | ENST00000343575 | 6387      | NM_199168    | CXCL12       |
| A_22_P00014906 | 1,5063  | 3,45032 | -3,84776316  | ENST00000543778 | N/A       | N/A          | N/A          |

|                |         |         |              |                 |           |              |                       |
|----------------|---------|---------|--------------|-----------------|-----------|--------------|-----------------------|
| A_24_P206624   | 4,92163 | 6,86592 | -3,848483335 | ENST00000457416 | 2263      | NM_022970    | FGFR2                 |
| A_21_P0009368  | 5,2809  | 7,22546 | -3,849203645 | ENST00000608155 | 100507520 | XR_109439    | LOC100507520          |
| A_23_P134542   | 1,62595 | 3,57068 | -3,849657243 | ENST00000393489 | 93986     | NM_148900    | FOXP2                 |
| A_33_P3351175  | 7,93132 | 9,87608 | -3,849737295 | ENST00000467401 | 65268     | NM_006648    | WNK2                  |
| A_23_P42358    | 1,48195 | 3,4287  | -3,855051144 | ENST00000326771 | 9457      | NM_020482    | FHL5                  |
| A_23_P381261   | 4,95606 | 6,90297 | -3,855478706 | ENST00000554781 | 196883    | NM_139247    | ADCY4                 |
| A_22_P00020359 | 7,33327 | 9,28055 | -3,856467626 | ENST00000607039 | 55917     | XM_006710769 | CTTNBP2NL             |
| A_22_P00009917 | 1,39737 | 3,34623 | -3,860693437 | ENST00000418574 | N/A       | AK129608     | N/A                   |
| A_33_P3407880  | 5,22967 | 7,17885 | -3,861549861 | N/A             | 118932    | NM_144590    | ANKRD22               |
| A_33_P3242820  | 8,25605 | 10,2055 | -3,862272617 | ENST00000449660 | 115110    | NR_037844    | LOC115110             |
| A_24_P329065   | 5,1222  | 7,07376 | -3,86792548  | ENST00000082468 | 11119     | NM_007048    | BTN3A1                |
| A_33_P3336053  | 3,76123 | 5,7134  | -3,869561261 | ENST00000303941 | 255239    | NM_178510    | ANKK1                 |
| A_23_P379649   | 6,57099 | 8,52617 | -3,877643037 | ENST00000397573 | 90427     | NM_001003940 | BMF                   |
| A_19_P00323082 | 11,4361 | 13,3916 | -3,878503222 | ENST00000447298 | 283120    | NR_002196    | H19                   |
| A_33_P3252605  | 5,75348 | 7,70962 | -3,880224162 | ENST00000332884 | 113612    | NM_183075    | CYP2U1                |
| A_23_P350678   | 1,66692 | 3,62361 | -3,881703706 | ENST00000369720 | 80217     | AL136901     | CFAP43                |
| A_33_P3297580  | 1,4895  | 3,44766 | -3,885660892 | ENST00000347598 | 775       | NM_199460    | CACNA1C               |
| A_33_P3227086  | 1,43257 | 3,39114 | -3,886765316 | N/A             | N/A       | AK095662     | N/A                   |
| A_21_P0008745  | 1,62742 | 3,58603 | -3,886873082 | N/A             | N/A       | N/A          | Inc-VPS13C-1          |
| A_23_P154217   | 5,37092 | 7,33001 | -3,888166501 | ENST00000409872 | 3694      | NM_000888    | ITGB6                 |
| A_24_P460419   | 1,57054 | 3,52986 | -3,888786417 | ENST00000378075 | 390205    | NM_001145077 | LRRC10B               |
| A_24_P870620   | 2,47266 | 4,43317 | -3,891995387 | ENST00000348225 | 5764      | NM_002825    | PTN                   |
| A_21_P0005218  | 1,52534 | 3,48635 | -3,893344483 | ENST00000412413 | N/A       | N/A          | N/A                   |
| A_23_P342709   | 2,06908 | 4,03016 | -3,893533394 | ENST00000578399 | 201456    | NM_152676    | FBXO15                |
| A_33_P3397995  | 3,71511 | 5,67732 | -3,896584223 | ENST00000367220 | 26034     | NM_001130699 | IPCEF1                |
| A_21_P0006407  | 1,56845 | 3,53214 | -3,900583616 | ENST00000608576 | 4281      | XR_247300    | MID1                  |
| A_23_P38732    | 1,75159 | 3,71616 | -3,902963579 | ENST00000269141 | 1000      | NM_001792    | CDH2                  |
| A_22_P00005358 | 1,72102 | 3,68643 | -3,905236716 | ENST00000435311 | 101928241 | NR_110693    | LOC101928241          |
| A_22_P00013301 | 1,68038 | 3,64754 | -3,909976672 | N/A             | N/A       | N/A          | Inc-RP11-11011.12.1-2 |
| A_22_P00012063 | 1,66978 | 3,63706 | -3,910301908 | N/A             | N/A       | N/A          | Inc-PLS3-1            |
| A_23_P74701    | 2,24139 | 4,21131 | -3,917463954 | ENST00000370571 | 255631    | NM_152890    | COL24A1               |
| A_21_P0011113  | 1,37748 | 3,34826 | -3,919799876 | ENST00000377548 | 100240735 | NR_026658    | LOC100240735          |
| A_21_P0009929  | 1,74586 | 3,71674 | -3,920071585 | N/A             | N/A       | N/A          | Inc-PRND-1            |

|                |         |         |              |                 |           |              |                |
|----------------|---------|---------|--------------|-----------------|-----------|--------------|----------------|
| A_21_P0009262  | 1,95294 | 3,9247  | -3,922463439 | N/A             | N/A       | N/A          | Inc-MSI2-1     |
| A_21_P0010624  | 1,83925 | 3,8115  | -3,923795899 | N/A             | N/A       | N/A          | XLOC_I2_000941 |
| A_21_P0007171  | 1,75166 | 3,72508 | -3,926979318 | N/A             | N/A       | N/A          | Inc-ILK-4      |
| A_24_P418816   | 2,52809 | 4,50155 | -3,927088199 | ENST00000361314 | 2882      | NM_015696    | GPX7           |
| A_33_P3376350  | 1,48652 | 3,46053 | -3,928585612 | N/A             | 124565    | AK128263     | SLC38A10       |
| A_32_P220770   | 1,40754 | 3,38161 | -3,928749001 | N/A             | 352961    | N/A          | HCG26          |
| A_21_P0012926  | 1,55326 | 3,53066 | -3,937827734 | N/A             | N/A       | N/A          | XLOC_I2_012210 |
| A_33_P3343365  | 2,96791 | 4,94549 | -3,938319074 | ENST00000513522 | 401145    | NM_207491    | CCSER1         |
| A_24_P84657    | 1,44337 | 3,42154 | -3,939930006 | N/A             | 4583      | NM_002457    | MUC2           |
| A_23_P154784   | 1,84914 | 3,8277  | -3,940995221 | ENST00000253354 | 92747     | NM_033197    | BPIFB1         |
| A_33_P3221683  | 1,65939 | 3,63811 | -3,941432316 | ENST00000332912 | 149643    | NM_001024601 | SPATA45        |
| A_24_P270460   | 13,7445 | 15,7233 | -3,941650881 | ENST00000614648 | 3429      | NM_005532    | IFI27          |
| A_21_P0008899  | 3,8066  | 5,78558 | -3,942142698 | N/A             | N/A       | N/A          | Inc-NME4-1     |
| A_24_P226332   | 1,36523 | 3,34458 | -3,943153847 | ENST00000369303 | 2045      | NM_004440    | EPHA7          |
| A_33_P3338215  | 1,86372 | 3,84705 | -3,954046946 | N/A             | 728283    | AK090863     | FLJ33544       |
| A_33_P3252048  | 3,24685 | 5,23064 | -3,955307885 | ENST00000330261 | 116729    | NM_001007533 | PPP1R27        |
| A_33_P3387951  | 3,08995 | 5,07499 | -3,958736384 | ENST00000251691 | 57221     | NM_020340    | KIAA1244       |
| A_24_P945113   | 1,38695 | 3,37403 | -3,964338077 | ENST00000550683 | 94        | NM_000020    | ACVRL1         |
| A_33_P3370600  | 2,55291 | 4,54064 | -3,966124594 | ENST00000556126 | 100130933 | NM_001162997 | SMIM6          |
| A_22_P00005313 | 3,39303 | 5,38106 | -3,966949412 | N/A             | N/A       | N/A          | Inc-DNAJC8-1   |
| A_23_P14769    | 1,97699 | 3,96771 | -3,974352951 | ENST00000464684 | 2242      | NM_002005    | FES            |
| A_21_P0014014  | 3,33534 | 5,32649 | -3,975537697 | ENST00000621574 | 100652883 | NR_045985    | ALOX15P1       |
| A_23_P59452    | 8,18259 | 10,1738 | -3,975703038 | ENST00000622116 | 26        | NM_001091    | AOC1           |
| A_21_P0014222  | 1,64723 | 3,63858 | -3,976088861 | N/A             | 100505501 | XR_171725    | LOC100505501   |
| A_33_P3285156  | 7,97914 | 9,97205 | -3,98039057  | ENST00000577066 | 440465    | NR_026857    | BAIAP2-AS1     |
| A_24_P333421   | 6,89923 | 8,89223 | -3,980638887 | ENST00000223210 | 643641    | NM_001099220 | ZNF862         |
| A_22_P00006056 | 1,70572 | 3,70079 | -3,986354466 | N/A             | 65072     | NR_040030    | CFLAR-AS1      |
| A_32_P207767   | 2,04611 | 4,04207 | -3,98881441  | N/A             | N/A       | N/A          | N/A            |
| A_21_P0012255  | 2,66269 | 4,66136 | -3,996314156 | N/A             | 102724248 | N/A          | LOC102724248   |
| A_33_P3381943  | 8,05515 | 10,0554 | -4,000693207 | ENST00000584619 | 9988      | NR_024549    | DMTF1          |
| A_24_P10233    | 1,9606  | 3,96541 | -4,013358408 | ENST00000457488 | 23604     | NM_014326    | DAPK2          |
| A_21_P0000228  | 1,50202 | 3,50716 | -4,014276523 | N/A             | 338433    | NR_001291    | SNORD115-1     |
| A_24_P230282   | 4,81049 | 6,81719 | -4,018619546 | ENST00000398729 | 51480     | NM_016378    | VCX2           |

|                |         |         |              |                 |           |              |               |
|----------------|---------|---------|--------------|-----------------|-----------|--------------|---------------|
| A_33_P3244593  | 1,42606 | 3,4331  | -4,019566726 | ENST00000483120 | N/A       | BC015238     | N/A           |
| A_33_P3310588  | 1,43663 | 3,44397 | -4,020402659 | ENST00000620637 | N/A       | N/A          | N/A           |
| A_22_P00018715 | 1,67752 | 3,6852  | -4,021350259 | N/A             | N/A       | N/A          | Inc-ADCY2-5   |
| A_24_P163237   | 4,24899 | 6,25674 | -4,02154538  | ENST00000506529 | 56977     | NM_020225    | STOX2         |
| A_21_P0000906  | 3,36639 | 5,37572 | -4,025952079 | N/A             | 100128025 | NR_040250    | WWTR1-AS1     |
| A_22_P00001028 | 1,47514 | 3,48452 | -4,02609161  | N/A             | 100874087 | NR_046637    | PCDH9-AS4     |
| A_21_P0001159  | 1,41782 | 3,42743 | -4,026733517 | N/A             | N/A       | N/A          | Inc-FRRS1-1   |
| A_23_P385063   | 7,22193 | 9,23235 | -4,028994958 | ENST00000459889 | 10049     | NM_058246    | DNAJB6        |
| A_21_P0005098  | 1,99156 | 4,00248 | -4,030391543 | N/A             | N/A       | N/A          | Inc-DLL1-2    |
| A_33_P3230189  | 5,1077  | 7,11953 | -4,032934571 | ENST00000400286 | 84189     | NM_032229    | SLITRK6       |
| A_23_P23669    | 7,43115 | 9,44485 | -4,03816539  | ENST00000615664 | 54873     | NM_017734    | PALMD         |
| A_33_P3285195  | 1,53514 | 3,5497  | -4,040573285 | ENST00000510795 | 100507012 | N/A          | BMPR1B-AS1    |
| A_21_P0005599  | 1,40567 | 3,42065 | -4,041749755 | N/A             | N/A       | N/A          | Inc-HERPUD2-1 |
| A_24_P411186   | 2,59444 | 4,61136 | -4,047188374 | ENST00000335712 | 53335     | NM_022893    | BCL11A        |
| A_23_P34700    | 3,3202  | 5,33715 | -4,047272534 | ENST00000509001 | 7139      | NM_000364    | TNNT2         |
| A_24_P246196   | 1,3867  | 3,40472 | -4,050275378 | ENST00000598879 | 10332     | NM_001144911 | CLEC4M        |
| A_32_P56249    | 5,37071 | 7,39033 | -4,054769769 | N/A             | 100131733 | NR_038996    | USP30-AS1     |
| A_23_P202219   | 3,73688 | 5,75652 | -4,05482598  | ENST00000260743 | 51063     | NM_015916    | CALHM2        |
| A_33_P3409090  | 1,95113 | 3,97132 | -4,0563721   | ENST00000547849 | 1272      | NM_001256064 | CNTN1         |
| A_23_P377212   | 1,8609  | 3,88182 | -4,058425133 | ENST00000307266 | 150678    | NM_138336    | MYEOV2        |
| A_32_P178966   | 2,22386 | 4,24972 | -4,072345597 | ENST00000379426 | 100113407 | NM_001100829 | TMEM170B      |
| A_22_P00006204 | 3,19424 | 5,22205 | -4,077853652 | N/A             | 101410543 | NR_102711    | XXYLT1-AS2    |
| A_33_P3311663  | 1,41695 | 3,44523 | -4,079182348 | N/A             | 100873998 | XR_245014    | MEIS1-AS2     |
| A_33_P3236676  | 3,42065 | 5,45224 | -4,08855203  | ENST00000400613 | 401546    | NM_001012993 | C9orf152      |
| A_23_P152262   | 1,57985 | 3,61232 | -4,091046683 | ENST00000393092 | 1800      | NM_004413    | DPEP1         |
| A_23_P96271    | 5,74603 | 7,7827  | -4,102973966 | ENST00000261606 | 8736      | NM_003803    | MYOM1         |
| A_33_P3303717  | 1,46427 | 3,50186 | -4,105591248 | ENST00000233710 | 33        | NM_001608    | ACADL         |
| A_33_P3399208  | 9,25706 | 11,2974 | -4,113424603 | ENST00000466304 | 3106      | XR_246962    | HLA-B         |
| A_33_P3286937  | 3,59544 | 5,63827 | -4,120530243 | ENST00000433881 | 55607     | NM_001166163 | PPP1R9A       |
| A_21_P0011515  | 1,83677 | 3,87992 | -4,121444307 | ENST00000411576 | N/A       | N/A          | N/A           |
| A_23_P215111   | 3,47352 | 5,51694 | -4,122215707 | ENST00000310018 | 50617     | NM_020632    | ATP6V0A4      |
| A_22_P00001597 | 3,70947 | 5,7545  | -4,126818531 | N/A             | N/A       | N/A          | Inc-ARPP19-1  |
| A_33_P3221859  | 4,53965 | 6,58492 | -4,127505106 | ENST00000483851 | 6474      | NM_003030    | SHOX2         |

|                |         |         |              |                 |           |              |              |
|----------------|---------|---------|--------------|-----------------|-----------|--------------|--------------|
| A_23_P19134    | 6,79335 | 8,83931 | -4,129479647 | ENST00000405460 | 84059     | NM_032119    | GPR98        |
| A_21_P0003882  | 9,44309 | 11,4894 | -4,130481586 | N/A             | N/A       | N/A          | Inc-CTBP1-1  |
| A_33_P3348714  | 1,50315 | 3,55038 | -4,133116416 | ENST00000382353 | 2254      | NM_002010    | FGF9         |
| A_22_P00018956 | 1,71965 | 3,768   | -4,136326302 | N/A             | 101928103 | NR_110292    | LOC101928103 |
| A_33_P3329522  | 2,56629 | 4,61549 | -4,138764041 | ENST00000485478 | 10234     | NM_001031692 | LRRC17       |
| A_22_P00004956 | 1,52177 | 3,57193 | -4,141518979 | ENST00000399143 | 728597    | NM_001287444 | DCDC2C       |
| A_33_P3319815  | 3,69268 | 5,74408 | -4,145080155 | ENST00000457435 | 100129464 | NR_038428    | LINC01546    |
| A_32_P61495    | 1,45836 | 3,51119 | -4,149190797 | ENST00000495195 | 114827    | NM_052929    | FHAD1        |
| A_23_P136683   | 2,35128 | 4,40429 | -4,14970851  | ENST00000484729 | 3119      | NM_001243961 | HLA-DQB1     |
| A_23_P26386    | 5,77529 | 7,82955 | -4,153305516 | ENST00000562206 | 51673     | NM_016140    | TPPP3        |
| A_32_P202759   | 1,4787  | 3,53491 | -4,158923073 | ENST00000612606 | 165215    | NM_177454    | FAM171B      |
| A_22_P00011997 | 4,7859  | 6,84216 | -4,159067213 | N/A             | N/A       | BC040563     | Inc-PLCD1-1  |
| A_24_P120251   | 1,71792 | 3,7742  | -4,15912487  | ENST00000470080 | 116441    | NM_138786    | TM4SF18      |
| A_22_P00009716 | 2,66877 | 4,72677 | -4,164086391 | N/A             | N/A       | N/A          | Inc-MCHR1-1  |
| A_23_P258887   | 7,17247 | 9,23156 | -4,167233673 | ENST00000462808 | 10840     | NM_012190    | ALDH1L1      |
| A_23_P365218   | 4,87541 | 6,93544 | -4,169949754 | ENST00000493249 | 266977    | NM_025048    | GPR110       |
| A_22_P00006725 | 1,52577 | 3,58715 | -4,173853605 | ENST00000418076 | N/A       | BC036296     | N/A          |
| A_21_P0000164  | 1,39867 | 3,46121 | -4,177210945 | N/A             | 100287362 | NM_001205271 | PRSS46       |
| A_24_P203328   | 6,5725  | 8,63644 | -4,181266503 | ENST00000424053 | 348825    | NR_002223    | TPRXL        |
| A_33_P3367392  | 5,85558 | 7,92089 | -4,185238968 | ENST00000373582 | 84734     | NM_032648    | FAM167B      |
| A_23_P107283   | 6,04757 | 8,11386 | -4,188082901 | ENST00000330070 | 3212      | NM_002145    | HOXB2        |
| A_22_P00025596 | 1,67325 | 3,74075 | -4,191596954 | N/A             | 101928630 | NR_109908    | CTC-436P18.1 |
| A_33_P3393456  | 1,39256 | 3,46075 | -4,193602155 | N/A             | 100131129 | AK127184     | LOC100131129 |
| A_22_P00015563 | 1,97364 | 4,04186 | -4,193689359 | N/A             | N/A       | N/A          | Inc-STOX2-1  |
| A_33_P3358745  | 7,66702 | 9,73568 | -4,194968565 | ENST00000506577 | 6414      | NM_001093726 | SEPP1        |
| A_23_P124190   | 5,64948 | 7,71844 | -4,195840975 | ENST00000491385 | 53840     | NM_130390    | TRIM34       |
| A_21_P0000355  | 1,39538 | 3,46817 | -4,206994698 | N/A             | 677778    | NR_003011    | SCARNA15     |
| A_23_P54770    | 3,56418 | 5,63739 | -4,208219625 | ENST00000564831 | 55911     | NM_018690    | APOBR        |
| A_23_P23947    | 7,1331  | 9,20774 | -4,212392882 | ENST00000263056 | 1326      | NM_005204    | MAP3K8       |
| A_23_P116557   | 5,96619 | 8,04141 | -4,214086711 | ENST00000467111 | 3965      | NM_009587    | LGALS9       |
| A_23_P90320    | 1,51879 | 3,59462 | -4,215868887 | ENST00000587682 | 7638      | NM_013359    | ZNF221       |
| A_23_P21976    | 4,44162 | 6,51761 | -4,216336468 | ENST00000308508 | 1464      | NM_001897    | CSPG4        |
| A_23_P69863    | 1,7079  | 3,78638 | -4,22361988  | ENST00000231134 | 26167     | NM_015669    | PCDHB5       |

|                |         |         |              |                 |           |              |              |
|----------------|---------|---------|--------------|-----------------|-----------|--------------|--------------|
| A_33_P3219090  | 9,99541 | 12,0756 | -4,228629027 | ENST00000344756 | 3638      | NM_005542    | INSIG1       |
| A_23_P422831   | 5,87916 | 7,96312 | -4,239693583 | ENST00000257515 | 9413      | NM_004816    | FAM189A2     |
| A_33_P3897698  | 2,58749 | 4,67179 | -4,240692869 | N/A             | 100147773 | NR_125374    | LOC100147773 |
| A_21_P0010498  | 1,40475 | 3,49736 | -4,26518997  | N/A             | N/A       | N/A          | Inc-EVX1-3   |
| A_33_P3338698  | 5,8947  | 7,98776 | -4,266520559 | ENST00000295731 | 3549      | NM_002181    | IHH          |
| A_33_P3310189  | 6,5592  | 8,65372 | -4,270840442 | ENST00000369295 | 153       | NM_000684    | ADRB1        |
| A_24_P212481   | 4,25171 | 6,34821 | -4,276705901 | ENST00000505208 | 79772     | NM_024717    | MCTP1        |
| A_23_P202334   | 8,00302 | 10,1028 | -4,286440151 | ENST00000358487 | 2263      | NM_022970    | FGFR2        |
| A_21_P0012552  | 1,44899 | 3,55263 | -4,297924084 | ENST00000482639 | N/A       | N/A          | N/A          |
| A_33_P3282489  | 5,37491 | 7,47974 | -4,301470668 | ENST00000442371 | 2650      | NM_001097634 | GCNT1        |
| A_23_P66767    | 4,15347 | 6,26141 | -4,310753297 | ENST00000574154 | 124975    | NM_153338    | GGT6         |
| A_23_P93141    | 1,75265 | 3,8611  | -4,31227744  | ENST00000619736 | 221357    | NM_153699    | GSTA5        |
| A_21_P0014575  | 1,64061 | 3,74966 | -4,314071239 | ENST00000550177 | N/A       | XR_110357    | N/A          |
| A_33_P3337931  | 6,07436 | 8,18377 | -4,315147876 | N/A             | N/A       | N/A          | N/A          |
| A_22_P00010816 | 1,65251 | 3,76287 | -4,317990293 | N/A             | N/A       | N/A          | Inc-NMNAT3-3 |
| A_23_P121795   | 5,88782 | 7,99946 | -4,321823036 | ENST00000284776 | 8470      | NM_021069    | SORBS2       |
| A_23_P139687   | 4,70003 | 6,81205 | -4,322961537 | ENST00000266397 | 121506    | NM_152321    | ERP27        |
| A_33_P3423420  | 7,8985  | 10,0149 | -4,336105925 | ENST00000269394 | 79755     | NM_024702    | ZNF750       |
| A_23_P130753   | 8,75291 | 10,871  | -4,341188296 | ENST00000222122 | 1628      | NM_001352    | DBP          |
| A_22_P00016533 | 6,60871 | 8,72729 | -4,342662997 | N/A             | 101926967 | XR_243706    | LOC101926967 |
| A_33_P3342448  | 2,57759 | 4,69694 | -4,344981396 | ENST00000510382 | 288       | AK172736     | ANK3         |
| A_23_P380857   | 2,64893 | 4,76845 | -4,345493418 | ENST00000616056 | 80832     | NM_030643    | APOL4        |
| A_23_P123086   | 3,84104 | 5,96076 | -4,346095873 | ENST00000457484 | 114796    | NR_027329    | PSMG3-AS1    |
| A_21_P0007308  | 1,93072 | 4,0505  | -4,346276626 | N/A             | N/A       | N/A          | Inc-GLB1L2-1 |
| A_24_P416997   | 4,94437 | 7,06447 | -4,347240767 | ENST00000397287 | 80833     | NM_145641    | APOL3        |
| A_23_P370682   | 5,11013 | 7,23074 | -4,348777811 | ENST00000527454 | 116071    | NM_138456    | BATF2        |
| A_33_P3361388  | 4,72705 | 6,84818 | -4,350345552 | ENST00000323776 | 84073     | NM_032133    | MYCBPAP      |
| A_21_P0000493  | 5,79584 | 7,91715 | -4,350888363 | N/A             | 692149    | NR_004388    | SCARNA14     |
| A_33_P3361037  | 1,69213 | 3,81505 | -4,355746521 | ENST00000261839 | 55930     | NM_018728    | MYO5C        |
| A_33_P3360972  | 5,95932 | 8,08366 | -4,360035858 | ENST00000559693 | 91828     | NM_001077594 | EXOC3L4      |
| A_23_P160354   | 2,69125 | 4,81705 | -4,364450425 | ENST00000619536 | 10000     | NM_181690    | AKT3         |
| A_22_P00017436 | 1,33757 | 3,4644  | -4,3675675   | N/A             | 101927422 | NR_121184    | GNA14-AS1    |
| A_22_P00004631 | 1,97833 | 4,10581 | -4,369535732 | N/A             | 101929196 | NR_120349    | THSD4-AS1    |



|                |         |         |              |                 |           |              |                |
|----------------|---------|---------|--------------|-----------------|-----------|--------------|----------------|
| A_24_P555473   | 2,7635  | 4,89346 | -4,377053446 | ENST00000308660 | 115123    | NM_178450    | mar-03         |
| A_24_P404840   | 2,47253 | 4,60774 | -4,393010659 | ENST00000361726 | 2705      | NM_000166    | GJB1           |
| A_22_P00001874 | 1,62264 | 3,75846 | -4,394868504 | N/A             | 100873979 | NR_109804    | RBMS3-AS3      |
| A_21_P0013601  | 1,57836 | 3,71467 | -4,39636144  | N/A             | N/A       | N/A          | XLOC_I2_015033 |
| A_23_P29922    | 6,01648 | 8,1538  | -4,399440316 | ENST00000512264 | 7098      | NM_003265    | TLR3           |
| A_23_P258612   | 1,64169 | 3,78028 | -4,403314835 | ENST00000255283 | 51761     | NM_016529    | ATP8A2         |
| A_23_P90732    | 10,3783 | 12,517  | -4,403650584 | ENST00000469689 | 25953     | NM_001077399 | PNKD           |
| A_33_P3387616  | 6,94981 | 9,0904  | -4,409423359 | ENST00000620174 | 114822    | NM_052924    | RHPN1          |
| A_24_P342829   | 2,89475 | 5,0355  | -4,409912406 | ENST00000295190 | 151473    | NM_152527    | SLC16A14       |
| A_33_P3291097  | 5,68099 | 7,82345 | -4,415142494 | ENST00000589558 | 4059      | NM_005581    | BCAM           |
| A_23_P383118   | 1,75162 | 3,89548 | -4,419429054 | ENST00000359600 | 57643     | NM_020883    | ZSWIM5         |
| A_33_P3400763  | 6,06834 | 8,21405 | -4,425099822 | ENST00000301286 | 729359    | NM_001080400 | PLIN4          |
| A_23_P88404    | 3,80844 | 5,95897 | -4,439908669 | ENST00000238682 | 7043      | NM_003239    | TGFB3          |
| A_19_P00322454 | 1,77052 | 3,9217  | -4,441909501 | ENST00000473352 | 730091    | N/A          | LINC00886      |
| A_23_P253012   | 8,75921 | 10,9124 | -4,448102398 | ENST00000440446 | 54762     | NM_017577    | GRAMD1C        |
| A_23_P161439   | 14,1888 | 16,343  | -4,451217509 | ENST00000372013 | 10974     | NM_006829    | ADIRF          |
| A_22_P00001634 | 1,5478  | 3,70298 | -4,454242178 | ENST00000427341 | N/A       | N/A          | N/A            |
| A_21_P0003426  | 1,48301 | 3,63901 | -4,456774603 | ENST00000512652 | N/A       | N/A          | N/A            |
| A_23_P142878   | 1,6989  | 3,85579 | -4,45952484  | ENST00000306279 | 84913     | NM_032827    | ATOH8          |
| A_24_P335092   | 7,79236 | 9,94948 | -4,460235851 | ENST00000532858 | 6288      | NM_000331    | SAA1           |
| A_21_P0007398  | 4,83623 | 6,99697 | -4,471441496 | ENST00000603154 | N/A       | N/A          | N/A            |
| A_22_P00021895 | 1,79166 | 3,95391 | -4,47612399  | N/A             | N/A       | N/A          | Inc-CTNNA1-1   |
| A_33_P3304983  | 5,48656 | 7,64899 | -4,476682495 | ENST00000393613 | 5577      | NM_002736    | PRKAR2B        |
| A_24_P521994   | 8,35462 | 10,5176 | -4,478389471 | ENST00000454652 | 54800     | NM_017644    | KLHL24         |
| A_21_P0002963  | 3,49825 | 5,66133 | -4,4786999   | N/A             | N/A       | N/A          | Inc-KCTD6-1    |
| A_23_P60990    | 2,84174 | 5,00581 | -4,481774309 | ENST00000307486 | 79919     | NM_024861    | C2orf54        |
| A_23_P133293   | 3,23467 | 5,39889 | -4,482240312 | ENST00000505078 | 79772     | NM_024717    | MCTP1          |
| A_33_P3322230  | 1,48822 | 3,65341 | -4,485254972 | N/A             | 440137    | XR_159012    | FLJ31945       |
| A_33_P3395403  | 4,7927  | 6,95794 | -4,485410422 | N/A             | 100996724 | XM_006710081 | LOC100996724   |
| A_33_P3364607  | 2,78186 | 4,94973 | -4,49359468  | N/A             | 100130051 | AK127296     | LOC100130051   |
| A_21_P0008364  | 3,32668 | 5,49503 | -4,495089995 | ENST00000553668 | 101928767 | NR_110155    | LOC101928767   |
| A_22_P00012780 | 3,06689 | 5,23628 | -4,498331553 | N/A             | N/A       | AK123575     | Inc-RALGAPA1-1 |
| A_21_P0001482  | 2,81344 | 4,98289 | -4,498518637 | ENST00000568701 | N/A       | XR_425130    | N/A            |

|                |         |         |              |                 |           |              |                       |
|----------------|---------|---------|--------------|-----------------|-----------|--------------|-----------------------|
| A_32_P234184   | 5,5302  | 7,70044 | -4,500982639 | ENST00000612705 | 388585    | NM_001010926 | HES5                  |
| A_21_P0003877  | 1,41237 | 3,58868 | -4,519959983 | N/A             | N/A       | N/A          | Inc-TRIML1-3          |
| A_23_P121926   | 7,93166 | 10,1093 | -4,524128791 | ENST00000506577 | 6414      | NM_005410    | SEPP1                 |
| A_23_P80162    | 4,98539 | 7,16378 | -4,526481318 | ENST00000478680 | 64699     | NM_032405    | TMPRSS3               |
| A_33_P3415280  | 1,94737 | 4,1296  | -4,538545434 | ENST00000582229 | 26256     | NM_012189    | CABYR                 |
| A_22_P00013298 | 1,63905 | 3,82282 | -4,543392676 | N/A             | N/A       | DA880232     | Inc-RP11-1105G2.3.1-3 |
| A_33_P3380472  | 7,27508 | 9,46303 | -4,556575587 | ENST00000432564 | 27198     | NM_032554    | HCAR1                 |
| A_33_P3454679  | 6,37708 | 8,56804 | -4,566092228 | N/A             | N/A       | XM_006710179 | N/A                   |
| A_33_P3282840  | 9,68298 | 11,8742 | -4,566915195 | ENST00000396020 | 6235      | NM_001030001 | RPS29                 |
| A_22_P00001804 | 1,66845 | 3,86226 | -4,575121319 | ENST00000518266 | N/A       | N/A          | N/A                   |
| A_24_P843020   | 1,60609 | 3,80015 | -4,575914196 | N/A             | N/A       | N/A          | N/A                   |
| A_32_P102935   | 1,56178 | 3,75628 | -4,577309993 | ENST00000467226 | 245711    | NM_001008779 | SPDYA                 |
| A_23_P168669   | 5,19765 | 7,39297 | -4,579912387 | ENST00000331536 | 54677     | NM_021151    | CROT                  |
| A_21_P0007641  | 1,60218 | 3,79878 | -4,583977618 | N/A             | 102723712 | XR_424417    | LOC102723712          |
| A_24_P71904    | 8,27971 | 10,4803 | -4,596672876 | ENST00000296522 | 3248      | NM_000860    | HPGD                  |
| A_21_P0007299  | 1,45439 | 3,6556  | -4,598648727 | N/A             | N/A       | N/A          | Inc-C11orf44-1        |
| A_21_P0013388  | 1,62316 | 3,82942 | -4,614774012 | ENST00000446227 | 101927542 | XR_246354    | LOC101927542          |
| A_23_P85800    | 5,67116 | 7,87888 | -4,619446503 | ENST00000374213 | 1043      | NM_001803    | CD52                  |
| A_23_P145984   | 6,14302 | 8,35177 | -4,622745696 | ENST00000222747 | 23554     | NM_012338    | TSPAN12               |
| A_21_P0009341  | 6,33307 | 8,54184 | -4,622809781 | ENST00000592556 | 645638    | NR_030732    | WFDC21P               |
| A_24_P122746   | 3,46895 | 5,67789 | -4,623354542 | ENST00000476993 | 64856     | NM_022834    | VWA1                  |
| A_32_P172141   | 3,6719  | 5,88141 | -4,625181562 | ENST00000392693 | 50937     | NM_016952    | CDON                  |
| A_33_P3211198  | 1,83871 | 4,04848 | -4,62601518  | ENST00000374392 | 400746    | NM_001010980 | NCMAP                 |
| A_23_P386356   | 1,47312 | 3,68342 | -4,627714942 | ENST00000374118 | 113220    | NM_138424    | KIF12                 |
| A_21_P0006788  | 2,08835 | 4,30182 | -4,637894491 | N/A             | 100505869 | N/A          | CCDC147-AS1           |
| A_23_P334727   | 5,7103  | 7,9261  | -4,645390895 | ENST00000568203 | 145957    | NM_138573    | NRG4                  |
| A_24_P48539    | 1,64569 | 3,86308 | -4,650513421 | ENST00000570106 | 8778      | NM_003830    | SIGLEC5               |
| A_33_P3340808  | 1,73157 | 3,95703 | -4,67659988  | N/A             | 400627    | XR_159298    | FLJ46026              |
| A_23_P217755   | 4,52758 | 6,76188 | -4,705343348 | ENST00000418909 | 357       | NM_001649    | SHROOM2               |
| A_23_P134953   | 6,32332 | 8,55915 | -4,710336083 | ENST00000464326 | 123       | NM_001122    | PLIN2                 |
| A_23_P168761   | 6,07099 | 8,30919 | -4,718080389 | ENST00000474500 | 5803      | NM_002851    | PTPRZ1                |
| A_23_P213562   | 4,19936 | 6,43976 | -4,72528059  | ENST00000319211 | 2149      | NM_001992    | F2R                   |
| A_33_P3393801  | 5,85968 | 8,10207 | -4,731802964 | ENST00000371885 | 10158     | NM_005764    | PDZK1IP1              |

|                |         |         |              |                 |        |              |               |
|----------------|---------|---------|--------------|-----------------|--------|--------------|---------------|
| A_24_P140475   | 3,44017 | 5,68394 | -4,736331303 | ENST00000498125 | 8470   | NM_021069    | SORBS2        |
| A_33_P3366336  | 3,33926 | 5,58305 | -4,736396963 | ENST00000341901 | 388228 | NM_001024401 | SBK1          |
| A_32_P55241    | 6,01152 | 8,2558  | -4,738005916 | ENST00000319420 | 387914 | NM_001007538 | SHISA2        |
| A_33_P3381052  | 1,70835 | 3,95429 | -4,743460719 | ENST00000289451 | 391109 | NM_001004473 | OR10K1        |
| A_23_P361544   | 4,28097 | 6,52946 | -4,751852319 | ENST00000535696 | 283848 | NM_173815    | CES4A         |
| A_23_P218058   | 6,7613  | 9,01377 | -4,764979476 | ENST00000309384 | 8302   | NM_013431    | KLRC4         |
| A_23_P68577    | 1,66009 | 3,91306 | -4,766631178 | ENST00000454749 | 29075  | NR_026883    | LINC00652     |
| A_23_P363301   | 1,57365 | 3,8289  | -4,774170201 | ENST00000615028 | 132954 | NM_152401    | PDCL2         |
| A_23_P316410   | 2,28034 | 4,53805 | -4,782317784 | ENST00000372964 | 27035  | NM_007052    | NOX1          |
| A_21_P0011721  | 3,28411 | 5,54338 | -4,787491747 | ENST00000589038 | N/A    | XR_244092    | N/A           |
| A_23_P416965   | 2,68777 | 4,94729 | -4,788321428 | ENST00000514956 | 25854  | NM_015398    | FAM149A       |
| A_21_P0008724  | 1,74794 | 4,00785 | -4,789616017 | ENST00000560198 | N/A    | BC015903     | N/A           |
| A_21_P0011102  | 2,14769 | 4,40761 | -4,789649217 | ENST00000552998 | N/A    | XR_429160    | N/A           |
| A_23_P45751    | 7,70044 | 9,96343 | -4,799852259 | ENST00000370563 | 22802  | NM_012128    | CLCA4         |
| A_23_P105873   | 1,74137 | 4,00462 | -4,800717358 | ENST00000358477 | 7223   | NM_016179    | TRPC4         |
| A_24_P339126   | 6,60743 | 8,87314 | -4,808910246 | ENST00000575199 | 10942  | NM_144957    | PRSS21        |
| A_23_P153251   | 5,69259 | 7,96062 | -4,816649683 | ENST00000595146 | 10782  | NM_133502    | ZNF274        |
| A_22_P00012698 | 2,73024 | 4,9994  | -4,820423832 | N/A             | N/A    | N/A          | lnc-RAB1A-1   |
| A_23_P314805   | 1,6942  | 3,96469 | -4,824869761 | ENST00000370203 | 148534 | NM_152487    | TMEM56        |
| A_22_P00006963 | 1,66333 | 3,93663 | -4,834276529 | N/A             | N/A    | AK024241     | lnc-GCSH-1    |
| A_33_P3293918  | 5,72379 | 8,0002  | -4,84470896  | ENST00000314830 | 10044  | NM_170600    | SH2D3C        |
| A_23_P434919   | 4,21318 | 6,49046 | -4,847631385 | ENST00000465518 | 115273 | NM_152304    | RAB42         |
| A_23_P40880    | 6,78777 | 9,06525 | -4,848303456 | ENST00000307526 | 152189 | NM_178868    | CMTM8         |
| A_23_P150379   | 9,65351 | 11,9319 | -4,851362555 | ENST00000438295 | 10205  | NM_144765    | MPZL2         |
| A_21_P0005832  | 1,67659 | 3,95631 | -4,855837019 | N/A             | N/A    | N/A          | lnc-ATP6V1H-2 |
| A_33_P3217983  | 10,3837 | 12,6654 | -4,862505898 | ENST00000354655 | 51703  | NM_203380    | ACSL5         |
| A_22_P00021125 | 3,4709  | 5,75406 | -4,86742922  | N/A             | N/A    | N/A          | lnc-ZCRB1-1   |
| A_33_P3284763  | 1,3618  | 3,64593 | -4,87070295  | ENST00000378680 | 1756   | NM_004021    | DMD           |
| A_22_P00022590 | 1,9558  | 4,24141 | -4,875702162 | N/A             | N/A    | N/A          | lnc-C2orf71-1 |
| A_33_P3318766  | 4,30092 | 6,58778 | -4,879928467 | N/A             | N/A    | N/A          | N/A           |
| A_23_P152406   | 10,1326 | 12,4247 | -4,897685039 | ENST00000457326 | 84290  | NM_032330    | CAPNS2        |
| A_33_P3352253  | 4,67274 | 6,96532 | -4,899314823 | ENST00000523718 | 57509  | NM_001001925 | MTUS1         |
| A_33_P3552465  | 1,53706 | 3,83004 | -4,900673389 | ENST00000463067 | 285346 | NM_001287349 | ZNF852        |

|                |         |         |              |                 |           |              |                  |
|----------------|---------|---------|--------------|-----------------|-----------|--------------|------------------|
| A_33_P3289296  | 7,57304 | 9,86609 | -4,900911177 | ENST00000306406 | 140738    | NM_183240    | TMEM37           |
| A_33_P3378126  | 7,82672 | 10,1211 | -4,905431341 | ENST00000287396 | 114907    | NM_058229    | FBXO32           |
| A_22_P00004438 | 1,71495 | 4,00985 | -4,907199756 | N/A             | N/A       | N/A          | Inc-COX17-1      |
| A_23_P120794   | 7,76202 | 10,0618 | -4,92382675  | ENST00000382932 | 6545      | NM_004173    | SLC7A4           |
| A_32_P196193   | 3,53066 | 5,83779 | -4,948975843 | ENST00000340634 | 344838    | NM_198504    | PAQR9            |
| A_21_P0011850  | 3,01046 | 5,31897 | -4,953712016 | N/A             | N/A       | N/A          | XLOC_I2_007543   |
| A_22_P00022529 | 1,76992 | 4,07893 | -4,955429139 | N/A             | 101928716 | XR_242166    | LOC101928716     |
| A_22_P00004191 | 6,64193 | 8,95221 | -4,959793309 | N/A             | 101928617 | XR_246017    | LOC101928617     |
| A_21_P0001154  | 1,54096 | 3,85287 | -4,965400199 | ENST00000414039 | N/A       | N/A          | N/A              |
| A_23_P42811    | 1,40607 | 3,71842 | -4,966914801 | ENST00000486448 | 155465    | XM_005249627 | AGR3             |
| A_24_P127564   | 5,96165 | 8,27465 | -4,969153127 | ENST00000576093 | 147650    | NR_024330    | SPACA6P          |
| A_23_P316511   | 4,65719 | 6,97443 | -4,983778671 | ENST00000311626 | 3213      | NM_002146    | HOXB3            |
| A_22_P00001358 | 1,77367 | 4,09613 | -5,001843783 | N/A             | N/A       | BX119671     | Inc-AP001496.1-6 |
| A_21_P0001878  | 1,49063 | 3,82087 | -5,028890011 | ENST00000449073 | 104355141 | NR_126384    | LINC01143        |
| A_21_P0009965  | 2,62535 | 4,95606 | -5,030528586 | N/A             | N/A       | N/A          | Inc-NCOA3-11     |
| A_33_P3221989  | 1,53904 | 3,87008 | -5,031679393 | ENST00000539935 | 785       | NM_001005747 | CACNB4           |
| A_22_P00001027 | 1,70721 | 4,03975 | -5,036913655 | N/A             | 100874086 | NR_046636    | PCDH9-AS3        |
| A_32_P199551   | 1,48084 | 3,81381 | -5,038415148 | ENST00000497137 | 165679    | NM_001040100 | SPTSSB           |
| A_22_P00000226 | 2,0136  | 4,34843 | -5,044915133 | N/A             | N/A       | AY312367     | Inc-AC005493.1-1 |
| A_23_P328545   | 4,97349 | 7,31145 | -5,055872213 | ENST00000518525 | 2568      | NM_014211    | GABRP            |
| A_23_P15692    | 6,35057 | 8,68915 | -5,058045448 | ENST00000575919 | 55065     | NM_017986    | SLC52A1          |
| A_32_P129120   | 1,58714 | 3,92659 | -5,061096561 | ENST00000376398 | 284800    | NR_026713    | FAM182A          |
| A_21_P0006269  | 1,72327 | 4,06628 | -5,073600765 | N/A             | N/A       | N/A          | Inc-FAM75A6-2    |
| A_23_P39840    | 7,54237 | 9,88661 | -5,077928214 | ENST00000306384 | 10791     | NM_006634    | VAMP5            |
| A_21_P0000824  | 1,5095  | 3,85436 | -5,080110929 | N/A             | 100506215 | NR_038880    | PAXBP1-AS1       |
| A_33_P3286704  | 1,35863 | 3,70492 | -5,085148834 | N/A             | N/A       | DB200921     | N/A              |
| A_22_P00021096 | 1,6132  | 3,96491 | -5,104288945 | N/A             | 414760    | N/A          | HCG14            |
| A_24_P183128   | 8,82721 | 11,1807 | -5,110590514 | ENST00000505406 | 51316     | NM_016619    | PLAC8            |
| A_33_P3392391  | 5,30676 | 7,66094 | -5,113035349 | ENST00000598259 | 126129    | NM_001199752 | CPT1C            |
| A_23_P88559    | 1,52268 | 3,87837 | -5,11838972  | ENST00000356113 | 3990      | NM_000236    | LIPC             |
| A_33_P3409974  | 1,54055 | 3,89975 | -5,13085765  | N/A             | 7068      | NM_001252634 | THRB             |
| A_22_P00016539 | 1,54321 | 3,90286 | -5,132458297 | ENST00000581844 | N/A       | N/A          | N/A              |
| A_21_P0013913  | 2,66864 | 5,03485 | -5,155848957 | N/A             | N/A       | N/A          | N/A              |

|                |         |         |              |                 |           |              |                      |
|----------------|---------|---------|--------------|-----------------|-----------|--------------|----------------------|
| A_32_P452655   | 10,1905 | 12,5581 | -5,160818881 | ENST00000580674 | 654346    | NM_001040078 | LGALS9C              |
| A_22_P00010335 | 1,64564 | 4,01461 | -5,165721982 | N/A             | N/A       | AK093870     | Inc-MYBBP1A-2        |
| A_23_P33196    | 3,7939  | 6,1631  | -5,166545587 | ENST00000618828 | 1290      | NM_000393    | COL5A2               |
| A_33_P3415247  | 5,67556 | 8,04514 | -5,167906613 | ENST00000448624 | 115110    | NR_037844    | LOC115110            |
| A_32_P130788   | 4,28634 | 6,65685 | -5,171239059 | ENST00000370673 | 148418    | NM_001010971 | SAMD13               |
| A_33_P3249595  | 1,58265 | 3,9541  | -5,174609521 | ENST00000489516 | 53335     | NM_138559    | BCL11A               |
| A_22_P00021095 | 1,93484 | 4,3071  | -5,177515617 | ENST00000564046 | N/A       | DA799376     | N/A                  |
| A_21_P0007963  | 1,52111 | 3,89396 | -5,179633343 | ENST00000455487 | N/A       | N/A          | N/A                  |
| A_33_P3272090  | 3,55423 | 5,93103 | -5,193834343 | ENST00000530062 | 9659      | NM_014644    | PDE4DIP              |
| A_21_P0005112  | 1,71744 | 4,09569 | -5,1990571   | N/A             | N/A       | N/A          | Inc-BTN2A1-1         |
| A_23_P330616   | 1,40132 | 3,78199 | -5,207785401 | ENST00000467149 | 7456      | NM_001077269 | WIPF1                |
| A_21_P0001111  | 1,54072 | 3,92243 | -5,211540906 | ENST00000440492 | N/A       | N/A          | N/A                  |
| A_33_P3413612  | 2,02357 | 4,40552 | -5,212407946 | N/A             | N/A       | AK096239     | N/A                  |
| A_33_P3844650  | 2,56886 | 4,95186 | -5,216202941 | ENST00000373417 | 23452     | NM_012098    | ANGPTL2              |
| A_23_P42975    | 4,38267 | 6,76974 | -5,230939195 | ENST00000265717 | 5577      | NM_002736    | PRKAR2B              |
| A_33_P3361636  | 3,58536 | 5,97548 | -5,242009615 | ENST00000539261 | 4256      | NM_001190839 | MGP                  |
| A_23_P86470    | 3,76273 | 6,15501 | -5,249863819 | ENST00000371852 | 9023      | NM_003956    | CH25H                |
| A_24_P942600   | 1,85528 | 4,2493  | -5,256199374 | ENST00000427277 | 65268     | NM_001282394 | WNK2                 |
| A_33_P3396886  | 6,43257 | 8,82982 | -5,267980481 | ENST00000534100 | 91894     | NM_080659    | C11orf52             |
| A_22_P00009537 | 1,63087 | 4,0291  | -5,271560152 | ENST00000470091 | 100287569 | NR_027346    | LINC00173            |
| A_21_P0005970  | 1,47191 | 3,87064 | -5,273387453 | N/A             | N/A       | N/A          | Inc-RUNX1T1-4        |
| A_23_P88678    | 2,92939 | 5,33147 | -5,285646713 | ENST00000484722 | 123591    | NM_152335    | C15orf27             |
| A_24_P13041    | 1,42429 | 3,82809 | -5,291952088 | ENST00000373789 | 219790    | NM_145307    | RTKN2                |
| A_21_P0012427  | 4,61327 | 7,01787 | -5,294887384 | N/A             | N/A       | N/A          | XLOC_l2_010064       |
| A_22_P00013717 | 1,50244 | 3,91779 | -5,334488706 | N/A             | N/A       | N/A          | Inc-RP11-80A15.1.1-2 |
| A_23_P159237   | 9,19602 | 11,6135 | -5,342370381 | ENST00000377741 | 2843      | NM_005293    | GPR20                |
| A_22_P00011598 | 1,58223 | 4,00103 | -5,347260643 | ENST00000479098 | 85474     | N/A          | LBX2                 |
| A_23_P164196   | 1,47088 | 3,89157 | -5,354270402 | ENST00000411890 | 1748      | NM_138281    | DLX4                 |
| A_22_P00003760 | 4,48263 | 6,90365 | -5,35549527  | N/A             | N/A       | AK298762     | Inc-CDIPT-1          |
| A_23_P200801   | 4,46336 | 6,88509 | -5,358131543 | ENST00000313431 | 9659      | NM_001002811 | PDE4DIP              |
| A_21_P0002359  | 1,62952 | 4,05477 | -5,371220692 | N/A             | N/A       | N/A          | Inc-SLC4A3-8         |
| A_33_P3275487  | 5,00313 | 7,43115 | -5,381543438 | ENST00000285013 | 146857    | NM_144682    | SLFN13               |
| A_22_P00016509 | 1,64347 | 4,07497 | -5,394540208 | ENST00000355189 | 101927797 | NR_109925    | LOC101927797         |

|                |         |         |              |                 |           |              |                 |
|----------------|---------|---------|--------------|-----------------|-----------|--------------|-----------------|
| A_22_P00000754 | 1,48527 | 3,92421 | -5,42243179  | N/A             | N/A       | BG208167     | Inc-ADCK3-2     |
| A_21_P0012519  | 1,58064 | 4,01986 | -5,423484284 | ENST00000492416 | N/A       | N/A          | N/A             |
| A_23_P56734    | 5,28038 | 7,72391 | -5,439710976 | ENST00000485653 | 3176      | NM_006895    | HNMT            |
| A_24_P691826   | 5,03916 | 7,48287 | -5,440389712 | ENST00000587298 | 645638    | N/A          | WFDC21P         |
| A_24_P330518   | 6,32835 | 8,77292 | -5,443633731 | ENST00000178638 | 771       | NM_001218    | CA12            |
| A_23_P500861   | 3,1996  | 5,64481 | -5,44604914  | ENST00000367256 | 23345     | NM_182961    | SYNE1           |
| A_21_P0007023  | 1,43689 | 3,88261 | -5,447974686 | N/A             | N/A       | N/A          | Inc-RAB11FIP2-2 |
| A_24_P23625    | 3,6656  | 6,11453 | -5,460109939 | ENST00000360954 | 9953      | NM_006041    | HS3ST3B1        |
| A_24_P192627   | 2,91265 | 5,36345 | -5,467191842 | ENST00000380323 | 4300      | NM_004529    | MLLT3           |
| A_22_P00001965 | 2,24423 | 4,69584 | -5,470262254 | N/A             | 100287559 | NR_040107    | ADPGK-AS1       |
| A_23_P109488   | 4,68026 | 7,13374 | -5,477357324 | ENST00000402249 | 113791    | NM_052880    | PIK3IP1         |
| A_23_P94840    | 1,59598 | 4,05162 | -5,485564154 | ENST00000338542 | 83657     | NM_130897    | DYNLRB2         |
| A_23_P427023   | 1,36859 | 3,82618 | -5,492983659 | ENST00000307194 | 170575    | NM_130759    | GIMAP1          |
| A_23_P151046   | 5,23808 | 7,69829 | -5,502968231 | ENST00000544822 | 3821      | NM_002259    | KLRC1           |
| A_23_P170574   | 2,70189 | 5,16242 | -5,504188964 | ENST00000332281 | 333929    | NM_178310    | SNAI3           |
| A_23_P143274   | 4,73369 | 7,19646 | -5,512741679 | ENST00000621012 | 80023     | NM_024958    | NRSN2           |
| A_33_P3360341  | 5,90855 | 8,37143 | -5,513162021 | ENST00000379328 | 2625      | NM_001002295 | GATA3           |
| A_22_P00017342 | 2,87142 | 5,33507 | -5,516105309 | N/A             | N/A       | N/A          | Inc-USP47-1     |
| A_22_P00007283 | 7,82644 | 10,2903 | -5,516908297 | N/A             | N/A       | N/A          | Inc-GPR20-1     |
| A_33_P3379644  | 2,3961  | 4,87021 | -5,556244169 | ENST00000376939 | 216       | NM_000689    | ALDH1A1         |
| A_24_P322771   | 8,60686 | 11,0845 | -5,569855886 | ENST00000291527 | 7031      | NM_003225    | TFF1            |
| A_21_P0010752  | 2,35172 | 4,83813 | -5,603817608 | ENST00000447500 | N/A       | N/A          | N/A             |
| A_22_P00011006 | 1,47176 | 3,9611  | -5,615210085 | N/A             | N/A       | N/A          | Inc-NSRP1-2     |
| A_21_P0005776  | 5,63037 | 8,12106 | -5,62046697  | N/A             | N/A       | N/A          | Inc-PTP4A3-1    |
| A_33_P3245238  | 2,38269 | 4,87831 | -5,639706171 | ENST00000326853 | 6819      | NM_176825    | SULT1C2         |
| A_23_P85693    | 6,94917 | 9,44868 | -5,65493327  | ENST00000463660 | 2634      | NM_004120    | GBP2            |
| A_33_P3209229  | 11,185  | 13,6848 | -5,656070097 | ENST00000564426 | 25837     | NM_014353    | RAB26           |
| A_33_P3253877  | 1,43061 | 3,93325 | -5,667215252 | ENST00000518415 | 6867      | BC041391     | TACC1           |
| A_33_P3337901  | 1,7346  | 4,23737 | -5,667725943 | ENST00000612480 | 9659      | NM_001198834 | PDE4DIP         |
| A_32_P171313   | 1,38154 | 3,88781 | -5,681492625 | ENST00000595265 | 59345     | NM_021629    | GNB4            |
| A_33_P3245439  | 2,3567  | 4,86625 | -5,694424322 | ENST00000477696 | 958       | NM_001250    | CD40            |
| A_24_P227141   | 1,45611 | 3,96704 | -5,69987389  | ENST00000312319 | 2001      | NM_198381    | ELF5            |
| A_23_P71480    | 10,4104 | 12,922  | -5,702521576 | ENST00000297439 | 1672      | NM_005218    | DEFB1           |

|                |         |         |              |                 |           |              |              |
|----------------|---------|---------|--------------|-----------------|-----------|--------------|--------------|
| A_23_P157136   | 1,34436 | 3,85951 | -5,716570892 | ENST00000341757 | 85477     | NM_033128    | SCIN         |
| A_21_P0005365  | 1,76337 | 4,27892 | -5,718156082 | ENST00000412413 | N/A       | N/A          | N/A          |
| A_21_P0004954  | 1,63303 | 4,15093 | -5,727477953 | N/A             | N/A       | N/A          | Inc-UTRN-2   |
| A_24_P921683   | 1,60476 | 4,12267 | -5,727517653 | ENST00000459666 | 93986     | NM_014491    | FOXP2        |
| A_22_P00014357 | 1,60043 | 4,12042 | -5,735781235 | N/A             | 101929716 | NR_104137    | ARMC2-AS1    |
| A_33_P3245415  | 4,80527 | 7,33431 | -5,771874776 | ENST00000613078 | 90634     | NM_001286459 | N4BP2L1      |
| A_23_P133691   | 1,61563 | 4,14553 | -5,775316454 | ENST00000369415 | 58528     | NM_021244    | RRAGD        |
| A_21_P0005193  | 1,50157 | 4,03769 | -5,800269764 | N/A             | N/A       | N/A          | Inc-PHTF2-1  |
| A_23_P360542   | 1,66118 | 4,20733 | -5,840735284 | ENST00000584492 | 56651     | NR_023925    | LINC00470    |
| A_33_P3326992  | 4,6176  | 7,16507 | -5,846081736 | ENST00000369356 | 9659      | NM_014644    | PDE4DIP      |
| A_33_P3393170  | 8,37589 | 10,9236 | -5,847054343 | ENST00000278559 | 726       | NM_004055    | CAPN5        |
| A_23_P29975    | 5,89017 | 8,43802 | -5,847621773 | ENST00000284437 | 55286     | NM_018302    | C4orf19      |
| A_33_P3290040  | 6,98008 | 9,52992 | -5,855693331 | ENST00000598293 | 126129    | NM_001199752 | CPT1C        |
| A_23_P71530    | 2,73643 | 5,28916 | -5,867435185 | ENST00000521597 | 4982      | NM_002546    | TNFRSF11B    |
| A_23_P94800    | 9,9406  | 12,4968 | -5,881564647 | ENST00000368714 | 6275      | NM_002961    | S100A4       |
| A_22_P00003042 | 6,73225 | 9,29173 | -5,89495173  | ENST00000423781 | N/A       | N/A          | N/A          |
| A_21_P0008205  | 4,5489  | 7,10949 | -5,899489012 | N/A             | N/A       | N/A          | Inc-GPR183-2 |
| A_23_P358410   | 5,82679 | 8,3877  | -5,900797706 | ENST00000360413 | 9901      | NM_014850    | SRGAP3       |
| A_23_P124892   | 4,38632 | 6,94745 | -5,901697601 | ENST00000367194 | 3814      | NM_002256    | KISS1        |
| A_23_P90470    | 1,73484 | 4,29978 | -5,917303938 | N/A             | N/A       | N/A          | N/A          |
| A_23_P365412   | 4,35985 | 6,92886 | -5,934020867 | ENST00000367147 | 148808    | NM_181644    | MFSD4        |
| A_33_P3323803  | 5,288   | 7,85703 | -5,93410313  | ENST00000369356 | 9659      | NM_014644    | PDE4DIP      |
| A_22_P00020943 | 1,97184 | 4,54366 | -5,945590081 | ENST00000428783 | 196549    | N/A          | EEF1DP3      |
| A_23_P216693   | 4,23644 | 6,80922 | -5,94954772  | ENST00000380321 | 4300      | NM_004529    | MLLT3        |
| A_23_P98786    | 2,32934 | 4,90258 | -5,951445022 | ENST00000409709 | 4647      | NM_000260    | MYO7A        |
| A_23_P112026   | 5,29222 | 7,87143 | -5,976123655 | ENST00000523779 | 3620      | NM_002164    | IDO1         |
| A_21_P0002255  | 1,45388 | 4,03689 | -5,99188527  | N/A             | N/A       | N/A          | Inc-SMYD1-1  |
| A_23_P134347   | 7,73866 | 10,3219 | -5,992840596 | ENST00000612187 | 54504     | NM_019029    | CPVL         |
| A_23_P353014   | 1,65338 | 4,23785 | -5,997952097 | ENST00000545595 | 93589     | NM_172364    | CACNA2D4     |
| A_23_P436618   | 1,60418 | 4,18875 | -5,998367857 | ENST00000355395 | 2558      | NM_000810    | GABRA5       |
| A_33_P3238375  | 1,74719 | 4,33477 | -6,010895755 | N/A             | 730081    | AK097502     | LOC730081    |
| A_24_P237175   | 6,42503 | 9,01451 | -6,018817197 | ENST00000304725 | 1470      | NM_001322    | CST2         |
| A_33_P3391915  | 1,53841 | 4,12937 | -6,024994816 | ENST00000375366 | 388419    | NM_001080466 | BTBD17       |

|                |         |         |              |                 |           |              |                |
|----------------|---------|---------|--------------|-----------------|-----------|--------------|----------------|
| A_33_P3385351  | 5,45746 | 8,05275 | -6,043104961 | N/A             | N/A       | N/A          | N/A            |
| A_23_P132515   | 6,36368 | 8,96053 | -6,049642962 | ENST00000264852 | 54847     | NM_017699    | SIDT1          |
| A_23_P200670   | 4,00586 | 6,60772 | -6,07068788  | ENST00000371023 | 79819     | NM_207014    | WDR78          |
| A_23_P500501   | 12,4998 | 15,105  | -6,084758481 | ENST00000260795 | 2261      | NM_000142    | FGFR3          |
| A_21_P0000128  | 5,29902 | 7,90745 | -6,098396698 | ENST00000561645 | 100129480 | NM_001195279 | MKRN2OS        |
| A_23_P30603    | 1,34878 | 3,95751 | -6,099664955 | ENST00000368924 | 8528      | NM_003649    | DDO            |
| A_33_P3237899  | 3,49849 | 6,10826 | -6,104063625 | ENST00000409350 | 1124      | NM_001293070 | CHN2           |
| A_33_P3715177  | 8,61627 | 11,2308 | -6,124236515 | ENST00000251268 | 1954      | NM_001271938 | MEGF8          |
| A_33_P3409854  | 3,381   | 5,99581 | -6,125425229 | ENST00000614239 | 3975      | NM_005568    | LHX1           |
| A_33_P3409234  | 1,75727 | 4,37424 | -6,134603072 | N/A             | N/A       | DA399191     | N/A            |
| A_22_P00013335 | 1,61714 | 4,23644 | -6,144518663 | N/A             | 100507403 | XR_426301    | LOC100507403   |
| A_33_P3271156  | 4,00985 | 6,62939 | -6,145540921 | ENST00000506886 | 50859     | NM_001204352 | SPOCK3         |
| A_23_P42353    | 4,57477 | 7,19513 | -6,149034921 | ENST00000339796 | 51513     | NM_016135    | ETV7           |
| A_23_P215883   | 1,6185  | 4,23956 | -6,152019175 | ENST00000395923 | 83988     | NM_001040630 | NCALD          |
| A_23_P168882   | 6,27924 | 8,90689 | -6,180184893 | ENST00000342697 | 94241     | NM_033285    | TP53INP1       |
| A_33_P3394178  | 1,52441 | 4,1526  | -6,182498566 | ENST00000615422 | 4810      | NM_001291867 | NHS            |
| A_24_P191781   | 1,64932 | 4,27828 | -6,18579919  | ENST00000307428 | 25849     | NM_015393    | PARM1          |
| A_33_P3379922  | 6,82348 | 9,45276 | -6,187171397 | ENST00000234071 | 5624      | NM_000312    | PROC           |
| A_33_P3599591  | 1,61521 | 4,24736 | -6,199491988 | ENST00000328252 | 5069      | NM_002581    | PAPPA          |
| A_32_P94667    | 2,48722 | 5,12274 | -6,213990346 | ENST00000530062 | 9659      | NM_014644    | PDE4DIP        |
| A_33_P3354451  | 8,45686 | 11,0996 | -6,245166346 | ENST00000357569 | 11074     | NM_007028    | TRIM31         |
| A_21_P0012197  | 3,78159 | 6,42649 | -6,254523599 | N/A             | N/A       | N/A          | XLOC_I2_009182 |
| A_21_P0000113  | 1,68316 | 4,33003 | -6,263069985 | ENST00000466777 | 8743      | NM_001190943 | TNFSF10        |
| A_21_P0012198  | 1,4977  | 4,15488 | -6,307988369 | N/A             | 102724420 | N/A          | LOC102724420   |
| A_21_P0002082  | 1,48772 | 4,15023 | -6,331336173 | ENST00000458182 | N/A       | N/A          | N/A            |
| A_23_P103932   | 4,1646  | 6,83184 | -6,35212807  | ENST00000374004 | 2268      | NM_001042747 | FGFR           |
| A_33_P3412233  | 8,03547 | 10,7035 | -6,355607361 | ENST00000615241 | 22932     | NM_152992    | POMZP3         |
| A_33_P3421163  | 2,4518  | 5,12018 | -6,357149428 | ENST00000342697 | 94241     | NM_033285    | TP53INP1       |
| A_24_P182947   | 1,65053 | 4,32412 | -6,380148484 | ENST00000308910 | 257144    | NM_001190259 | GCSAM          |
| A_22_P00009115 | 1,37252 | 4,04665 | -6,382537017 | ENST00000616559 | 374462    | NM_001145026 | PTPRQ          |
| A_22_P00016499 | 1,64609 | 4,32437 | -6,400923205 | N/A             | 550113    | NR_046116    | LOC550113      |
| A_21_P0002129  | 2,3479  | 5,02748 | -6,406693621 | ENST00000448977 | N/A       | N/A          | N/A            |
| A_24_P329795   | 6,81719 | 9,49858 | -6,41473648  | ENST00000298295 | 11067     | NM_007021    | C10orf10       |



|                |         |         |              |                 |           |              |               |
|----------------|---------|---------|--------------|-----------------|-----------|--------------|---------------|
| A_22_P00016480 | 3,09324 | 5,77712 | -6,425817467 | N/A             | N/A       | BC041939     | Inc-TMEM88B-1 |
| A_33_P3362311  | 1,51743 | 4,20295 | -6,433126242 | ENST00000437635 | 389384    | NM_001010903 | C6orf222      |
| A_33_P3402091  | 3,57761 | 6,26323 | -6,433572168 | ENST00000295408 | 10461     | NM_006343    | MERTK         |
| A_21_P0006270  | 3,89499 | 6,58169 | -6,438390136 | ENST00000377547 | N/A       | XR_432395    | N/A           |
| A_33_P3395083  | 1,56495 | 4,25274 | -6,443256374 | ENST00000399422 | 341392    | NM_001080454 | ACSM4         |
| A_23_P216455   | 2,55046 | 5,23967 | -6,449601393 | ENST00000381627 | 6019      | NM_005059    | RLN2          |
| A_21_P0014166  | 1,45481 | 4,14505 | -6,454207676 | ENST00000606522 | 100506379 | N/A          | LOC100506379  |
| A_23_P415021   | 10,4628 | 13,1583 | -6,477782372 | ENST00000550097 | 25840     | NM_014033    | METTL7A       |
| A_21_P0012196  | 2,79544 | 5,49112 | -6,478590632 | ENST00000433310 | N/A       | N/A          | N/A           |
| A_33_P3401295  | 4,7989  | 7,49795 | -6,4937417   | ENST00000368790 | 54544     | NM_019060    | CRCT1         |
| A_24_P402588   | 5,35619 | 8,05773 | -6,504959163 | ENST00000489516 | 53335     | NM_018014    | BCL11A        |
| A_33_P3216640  | 1,51887 | 4,22437 | -6,522838911 | N/A             | N/A       | N/A          | N/A           |
| A_33_P3410806  | 1,37733 | 4,0842  | -6,529036017 | ENST00000376873 | 9071      | NM_182848    | CLDN10        |
| A_24_P293530   | 4,68833 | 7,39685 | -6,5365075   | ENST00000371901 | 260293    | NM_178033    | CYP4X1        |
| A_22_P00002959 | 1,67161 | 4,38103 | -6,540586458 | N/A             | N/A       | N/A          | Inc-C5orf63-1 |
| A_23_P160159   | 4,40182 | 7,11151 | -6,541810642 | ENST00000377424 | 6518      | NM_003039    | SLC2A5        |
| A_23_P85903    | 4,18669 | 6,90432 | -6,577913332 | ENST00000366881 | 7100      | NM_003268    | TLR5          |
| A_24_P172481   | 6,15681 | 8,87452 | -6,578278099 | ENST00000379965 | 10346     | NM_006074    | TRIM22        |
| A_23_P72668    | 3,96198 | 6,68075 | -6,583113173 | ENST00000304141 | 8436      | NM_004657    | SDPR          |
| A_23_P212830   | 6,78113 | 9,50042 | -6,585486395 | ENST00000260795 | 2261      | NM_000142    | FGFR3         |
| A_23_P40096    | 5,00497 | 7,73435 | -6,63170577  | ENST00000234071 | 5624      | NM_000312    | PROC          |
| A_33_P3286774  | 1,97354 | 4,71179 | -6,672604525 | ENST00000479369 | N/A       | XM_006710077 | N/A           |
| A_23_P204286   | 2,5118  | 5,25527 | -6,696791261 | N/A             | 4256      | NM_000900    | MGP           |
| A_33_P3327673  | 3,23862 | 5,99091 | -6,737857888 | ENST00000395540 | 23242     | NM_001287438 | COBL          |
| A_24_P146683   | 5,24123 | 7,99732 | -6,755628524 | ENST00000582163 | 4477      | NM_002443    | MSMB          |
| A_33_P3223497  | 1,48836 | 4,24636 | -6,764578299 | ENST00000380250 | 10129     | NM_023037    | FRY           |
| A_23_P333228   | 2,03304 | 4,7924  | -6,770958139 | ENST00000273067 | 57574     | NM_020814    | mar-04        |
| A_24_P237927   | 2,81486 | 5,57687 | -6,783406736 | ENST00000483371 | 284611    | NM_001010883 | FAM102B       |
| A_22_P00003687 | 1,74964 | 4,52708 | -6,8563464   | ENST00000502861 | N/A       | N/A          | N/A           |
| A_21_P0004401  | 1,39971 | 4,18435 | -6,890649619 | N/A             | N/A       | N/A          | Inc-C5orf43-2 |
| A_23_P40919    | 1,67187 | 4,46658 | -6,938914547 | ENST00000481506 | 84873     | NM_032787    | GPR128        |
| A_23_P4714     | 3,3363  | 6,13363 | -6,951527382 | ENST00000263369 | 8190      | NM_006533    | MIA           |
| A_33_P3229617  | 8,48377 | 11,2814 | -6,952973062 | ENST00000445866 | 8910      | NM_001099401 | SGCE          |

|                |         |         |              |                 |           |              |               |
|----------------|---------|---------|--------------|-----------------|-----------|--------------|---------------|
| A_22_P00021161 | 2,64257 | 5,44269 | -6,964983813 | N/A             | N/A       | AK093870     | Inc-MYBBP1A-2 |
| A_21_P0003215  | 1,82231 | 4,62292 | -6,967349817 | N/A             | N/A       | N/A          | Inc-CHL1-1    |
| A_23_P86599    | 7,07708 | 9,87896 | -6,973485854 | ENST00000338354 | 1755      | NM_007329    | DMBT1         |
| A_33_P3296587  | 6,68486 | 9,48793 | -6,979240273 | ENST00000264613 | 1356      | NM_000096    | CP            |
| A_33_P3226775  | 5,78822 | 8,5976  | -7,009832639 | N/A             | 200958    | NM_001098516 | MUC20         |
| A_33_P3237260  | 5,91124 | 8,72873 | -7,049348842 | ENST00000280325 | 341032    | NM_198498    | C11orf53      |
| A_22_P00017913 | 2,04543 | 4,87146 | -7,091201049 | N/A             | 100996664 | XR_159025    | LOC100996664  |
| A_21_P0000361  | 4,18597 | 7,0175  | -7,118286499 | N/A             | 677845    | NR_003021    | SNORA79       |
| A_19_P00801752 | 4,61734 | 7,45221 | -7,134785217 | N/A             | N/A       | N/A          | Inc-SIK1-2    |
| A_33_P3403576  | 1,56578 | 4,40741 | -7,168294948 | ENST00000271450 | 9103      | NM_201563    | FCGR2C        |
| A_23_P320739   | 2,54854 | 5,39411 | -7,187898317 | ENST00000510942 | 4208      | NM_002397    | MEF2C         |
| A_23_P80594    | 4,484   | 7,32959 | -7,187997963 | ENST00000432376 | 23228     | NM_015184    | PLCL2         |
| A_22_P00004171 | 1,9277  | 4,77731 | -7,208054903 | N/A             | N/A       | AK024956     | Inc-CLGN-2    |
| A_33_P3314176  | 5,39088 | 8,24227 | -7,216953704 | ENST00000369448 | 54855     | NM_017709    | FAM46C        |
| A_21_P0000854  | 1,78624 | 4,64174 | -7,237542927 | N/A             | 100506497 | NR_038965    | LOC100506497  |
| A_21_P0012664  | 2,74882 | 5,61047 | -7,268461378 | N/A             | 102723415 | XR_427513    | LOC102723415  |
| A_21_P0006414  | 1,57403 | 4,4374  | -7,277132101 | N/A             | 104798195 | N/A          | LOC104798195  |
| A_23_P323180   | 1,97741 | 4,84662 | -7,306649485 | ENST00000410016 | 3232      | NM_006898    | HOXD3         |
| A_23_P204885   | 1,61359 | 4,48288 | -7,307054663 | ENST00000409186 | 64881     | NM_022843    | PCDH20        |
| A_23_P250347   | 1,72067 | 4,59023 | -7,308422304 | ENST00000512453 | 814       | NM_001744    | CAMK4         |
| A_33_P3248439  | 6,46805 | 9,34605 | -7,351303068 | ENST00000361171 | 89853     | NM_033446    | MVB12B        |
| A_23_P345808   | 3,08034 | 5,96102 | -7,364971793 | ENST00000332647 | 286499    | NM_173698    | FAM133A       |
| A_23_P127068   | 6,35318 | 9,24333 | -7,413475249 | ENST00000613292 | 57715     | NM_017893    | SEMA4G        |
| A_23_P414654   | 7,17606 | 10,067  | -7,417535878 | ENST00000392613 | 326624    | NM_175738    | RAB37         |
| A_23_P81898    | 7,08333 | 9,97759 | -7,434625129 | ENST00000355973 | 10537     | NM_006398    | UBD           |
| A_23_P143247   | 4,27133 | 7,17778 | -7,497709868 | ENST00000329613 | 128553    | NM_173485    | TSHZ2         |
| A_23_P358917   | 6,51021 | 9,41768 | -7,503012699 | ENST00000336374 | 1551      | NM_000765    | CYP3A7        |
| A_23_P150609   | 6,27979 | 9,19747 | -7,556300101 | ENST00000300632 | 3481      | NM_000612    | IGF2          |
| A_33_P3315390  | 1,43466 | 4,35599 | -7,575441647 | ENST00000448418 | 744       | NM_001145399 | MPPED2        |
| A_22_P00000852 | 1,40609 | 4,32921 | -7,584846585 | N/A             | N/A       | AK091499     | Inc-AGMAT-1   |
| A_24_P408047   | 9,10335 | 12,028  | -7,592894696 | ENST00000263265 | 57664     | NM_020904    | PLEKHA4       |
| A_23_P42882    | 2,20375 | 5,13161 | -7,609807714 | ENST00000395747 | 816       | NM_172082    | CAMK2B        |
| A_33_P3312676  | 2,25753 | 5,18709 | -7,618780018 | ENST00000621996 | N/A       | BC062313     | N/A           |

|                |         |         |              |                 |           |              |                |
|----------------|---------|---------|--------------|-----------------|-----------|--------------|----------------|
| A_23_P71880    | 6,28209 | 9,21651 | -7,644488645 | ENST00000379725 | 27290     | NM_014471    | SPINK4         |
| A_33_P3248108  | 1,59967 | 4,53532 | -7,651008893 | ENST00000452710 | 114991    | NM_133374    | ZNF618         |
| A_22_P00017629 | 5,0956  | 8,0372  | -7,682628539 | ENST00000520149 | 101927822 | NR_125424    | LOC101927822   |
| A_32_P126375   | 5,39916 | 8,35231 | -7,744381373 | ENST00000615422 | 4810      | NM_198270    | NHS            |
| A_23_P307536   | 5,63857 | 8,60215 | -7,800572445 | ENST00000480549 | 79729     | AK056459     | SH3D21         |
| A_22_P00011465 | 2,06525 | 5,03639 | -7,841556235 | N/A             | N/A       | N/A          | Inc-PAPPA2-2   |
| A_32_P138396   | 2,59179 | 5,56302 | -7,842045432 | N/A             | N/A       | N/A          | Inc-NUB1-1     |
| A_23_P13382    | 5,66243 | 8,63367 | -7,842099789 | ENST00000406638 | 4046      | NM_001013254 | LSP1           |
| A_23_P124252   | 2,81831 | 5,79838 | -7,890244464 | ENST00000378845 | 57118     | AK289393     | CAMK1D         |
| A_23_P40174    | 6,93356 | 9,91634 | -7,905079656 | ENST00000372330 | 4318      | NM_004994    | MMP9           |
| A_23_P54144    | 1,64516 | 4,634   | -7,938354557 | ENST00000558984 | 652       | NM_001202    | BMP4           |
| A_33_P3304170  | 5,13526 | 8,12676 | -7,95300457  | ENST00000496166 | 5294      | NM_002649    | PIK3CG         |
| A_23_P250228   | 1,55719 | 4,55593 | -7,993016127 | ENST00000476325 | 23553     | NM_012269    | HYAL4          |
| A_33_P3511777  | 1,48101 | 4,48724 | -8,034621154 | N/A             | 201477    | NR_038895    | DLGAP1-AS3     |
| A_21_P0010882  | 3,57779 | 6,58535 | -8,042031572 | N/A             | N/A       | N/A          | Inc-MBL2-3     |
| A_23_P57364    | 8,11256 | 11,1267 | -8,078794314 | ENST00000475297 | 7032      | NM_005423    | TFF2           |
| A_21_P0000587  | 1,6106  | 4,6253  | -8,081930807 | N/A             | 100289673 | NR_033175    | LOC100289673   |
| A_32_P170481   | 6,01935 | 9,03454 | -8,084676237 | ENST00000377548 | 100240735 | NR_026658    | LOC100240735   |
| A_23_P362191   | 1,49179 | 4,50997 | -8,101449185 | ENST00000315707 | 284029    | NR_026951    | LINC00324      |
| A_33_P3287348  | 4,77222 | 7,79045 | -8,101729965 | ENST00000435288 | 1124      | NM_001293070 | CHN2           |
| A_22_P00008376 | 1,58802 | 4,61231 | -8,135832628 | ENST00000423581 | N/A       | N/A          | N/A            |
| A_33_P3347301  | 2,38966 | 5,41607 | -8,147796794 | N/A             | 100127947 | AY240960     | LOC100127947   |
| A_23_P6909     | 3,31366 | 6,34055 | -8,150508104 | ENST00000449542 | 51554     | NM_178445    | ACKR4          |
| A_21_P0013484  | 3,47556 | 6,50268 | -8,151807593 | N/A             | N/A       | N/A          | XLOC_I2_014217 |
| A_23_P150583   | 8,97028 | 12,0043 | -8,190888752 | ENST00000278282 | 7356      | NM_003357    | SCGB1A1        |
| A_33_P3214491  | 1,52967 | 4,56602 | -8,204127996 | ENST00000618462 | 9659      | NM_001198832 | PDE4DIP        |
| A_33_P3219279  | 5,78794 | 8,83958 | -8,291539537 | ENST00000397118 | 84502     | NM_032452    | JPH4           |
| A_22_P00022868 | 1,71051 | 4,76495 | -8,307647484 | N/A             | N/A       | N/A          | Inc-CLDN16-1   |
| A_24_P342312   | 1,63591 | 4,69118 | -8,31242835  | ENST00000612046 | 26011     | NM_001098816 | TENM4          |
| A_21_P0000727  | 1,37283 | 4,43272 | -8,339090239 | ENST00000456749 | 154092    | NR_038216    | LINC01010      |
| A_21_P0014365  | 1,77104 | 4,83264 | -8,34898027  | N/A             | 100287082 | NR_120598    | GACAT2         |
| A_23_P121676   | 3,06072 | 6,1249  | -8,363924274 | ENST00000515509 | 80319     | NM_025212    | CXXC4          |
| A_33_P3410259  | 1,36118 | 4,42581 | -8,366533525 | N/A             | 100133545 | N/A          | MRPL23-AS1     |

|                |         |         |              |                 |           |              |                |
|----------------|---------|---------|--------------|-----------------|-----------|--------------|----------------|
| A_23_P50269    | 4,93404 | 8,00884 | -8,425720154 | ENST00000341918 | 284340    | NM_198477    | CXCL17         |
| A_24_P388786   | 3,73264 | 6,82087 | -8,50452111  | ENST00000265104 | 1767      | NM_001369    | DNAH5          |
| A_21_P0000188  | 3,42969 | 6,51844 | -8,507587003 | ENST00000312319 | 2001      | NM_001422    | ELF5           |
| A_24_P185854   | 1,40265 | 4,49246 | -8,51384013  | ENST00000357033 | 1756      | NM_004010    | DMD            |
| A_24_P199251   | 1,49363 | 4,58819 | -8,541917712 | ENST00000361228 | 9182      | NM_005447    | RASSF9         |
| A_23_P428373   | 1,46111 | 4,56675 | -8,607772807 | ENST00000379010 | 254958    | XR_428372    | REXO1L1P       |
| A_22_P00001123 | 1,82319 | 4,92886 | -8,607951802 | N/A             | N/A       | AX805334     | Inc-ALX3-1     |
| A_21_P0013976  | 4,5223  | 7,63538 | -8,652277879 | N/A             | 100130476 | NR_049793    | LOC100130476   |
| A_33_P3346966  | 3,18871 | 6,30222 | -8,654857103 | ENST00000406979 | 79582     | NM_024532    | SPAG16         |
| A_23_P357104   | 4,62558 | 7,74394 | -8,68400165  | ENST00000354546 | 309       | NM_001155    | ANXA6          |
| A_23_P51002    | 3,09929 | 6,22349 | -8,719225555 | ENST00000442801 | 6819      | NM_176825    | SULT1C2        |
| A_23_P904      | 2,81466 | 5,94026 | -8,727690851 | ENST00000463562 | 79656     | NM_024603    | BEND5          |
| A_23_P8801     | 6,19695 | 9,32488 | -8,741797748 | ENST00000339843 | 1577      | NM_000777    | CYP3A5         |
| A_33_P3408918  | 6,44288 | 9,58402 | -8,822209376 | ENST00000526900 | 6289      | NM_030754    | SAA2           |
| A_32_P38623    | 4,12111 | 7,2638  | -8,831692858 | ENST00000433881 | 55607     | NM_017650    | PPP1R9A        |
| A_33_P3301871  | 1,49763 | 4,64815 | -8,879755788 | ENST00000527165 | 2875      | NM_005309    | GPT            |
| A_23_P319598   | 1,70892 | 4,86585 | -8,919296972 | ENST00000492730 | 725       | NM_000716    | C4BPB          |
| A_33_P3419988  | 2,32723 | 5,4842  | -8,919544271 | ENST00000461341 | N/A       | N/A          | N/A            |
| A_33_P8056745  | 3,73797 | 6,89783 | -8,937429769 | N/A             | 90634     | AL832677     | N4BP2L1        |
| A_23_P48663    | 1,52324 | 4,68326 | -8,938421017 | ENST00000554845 | 5015      | NM_021728    | OTX2           |
| A_23_P302005   | 2,7868  | 5,94958 | -8,955537354 | ENST00000404752 | 11037     | NM_006873    | STON1          |
| A_24_P385732   | 1,49627 | 4,66183 | -8,972810856 | ENST00000475271 | 200931    | NM_152672    | SLC51A         |
| A_21_P0014213  | 2,34029 | 5,51303 | -9,017578018 | N/A             | N/A       | N/A          | N/A            |
| A_21_P0004036  | 1,93523 | 5,11475 | -9,060056204 | ENST00000504012 | 102546227 | N/A          | LINC01340      |
| A_22_P00010436 | 1,8018  | 4,98148 | -9,061061052 | ENST00000437194 | 101927973 | NR_126012    | LOC101927973   |
| A_32_P208120   | 4,51901 | 7,70261 | -9,085714674 | ENST00000615792 | 57118     | XM_006717483 | CAMK1D         |
| A_21_P0003681  | 3,65502 | 6,84175 | -9,105447991 | N/A             | N/A       | N/A          | Inc-CEP44-1    |
| A_23_P430718   | 1,41409 | 4,62014 | -9,22820466  | ENST00000299140 | 219938    | NM_174927    | SPATA19        |
| A_23_P112859   | 6,11359 | 9,33436 | -9,322843183 | ENST00000398402 | 1469      | NM_001898    | CST1           |
| A_23_P65307    | 7,93584 | 11,1575 | -9,328596229 | ENST00000400286 | 84189     | NM_032229    | SLITRK6        |
| A_21_P0009306  | 1,40089 | 4,62266 | -9,329307526 | N/A             | N/A       | N/A          | Inc-C17orf51-2 |
| A_21_P0001913  | 1,44794 | 4,67089 | -9,336941215 | ENST00000430692 | N/A       | N/A          | N/A            |
| A_23_P116173   | 6,17808 | 9,41277 | -9,413231007 | ENST00000398035 | 120376    | NM_001136105 | COLCA2         |

|                |         |         |              |                 |           |              |                |
|----------------|---------|---------|--------------|-----------------|-----------|--------------|----------------|
| A_24_P52921    | 1,95105 | 5,18689 | -9,420737466 | ENST00000612790 | 586       | NM_005504    | BCAT1          |
| A_21_P0009091  | 1,69755 | 4,94521 | -9,498238615 | N/A             | N/A       | N/A          | Inc-NME4-1     |
| A_32_P94160    | 1,62523 | 4,87406 | -9,505944641 | ENST00000371244 | 5563      | NM_006252    | PRKAA2         |
| A_23_P31073    | 5,42243 | 8,67304 | -9,517680333 | ENST00000341911 | 4602      | NM_005375    | MYB            |
| A_21_P0012692  | 2,59013 | 5,84803 | -9,565895294 | N/A             | N/A       | N/A          | XLOC_I2_011309 |
| A_33_P3343196  | 5,79507 | 9,05507 | -9,579829637 | ENST00000264613 | 1356      | NM_000096    | CP             |
| A_24_P684183   | 1,7477  | 5,00898 | -9,588332905 | ENST00000544672 | 80736     | NM_025257    | SLC44A4        |
| A_22_P00022475 | 2,77918 | 6,0461  | -9,62589042  | N/A             | N/A       | BC041939     | Inc-TMEM88B-1  |
| A_23_P208866   | 6,53783 | 9,81074 | -9,665939736 | ENST00000601731 | 9535      | NM_004877    | GMFG           |
| A_23_P41476    | 4,053   | 7,32898 | -9,686530387 | ENST00000319234 | 152573    | NM_001080505 | SHISA3         |
| A_22_P00004453 | 1,57161 | 4,85231 | -9,718273267 | ENST00000505572 | N/A       | N/A          | N/A            |
| A_23_P211909   | 4,04529 | 7,32625 | -9,720024835 | ENST00000337777 | 5357      | NM_002670    | PLS1           |
| A_23_P112798   | 8,85186 | 12,1359 | -9,740798218 | ENST00000548309 | 1397      | NM_001312    | CRIP2          |
| A_24_P340954   | 1,93625 | 5,22518 | -9,773870571 | ENST00000484019 | 389161    | NM_001144960 | ANKUB1         |
| A_23_P201551   | 8,38959 | 11,6944 | -9,882047566 | ENST00000370056 | 10451     | NM_006113    | VAV3           |
| A_23_P312920   | 1,8582  | 5,1678  | -9,914912221 | ENST00000393067 | 5450      | NM_006235    | POU2AF1        |
| A_23_P167367   | 3,93468 | 7,24627 | -9,92859792  | ENST00000607868 | 5308      | NM_153426    | PITX2          |
| A_23_P257111   | 5,26293 | 8,57966 | -9,964034384 | ENST00000415431 | 2203      | NM_000507    | FBP1           |
| A_33_P3313835  | 4,59971 | 7,92831 | -10,04635322 | N/A             | 100130449 | NR_024014    | PP14571        |
| A_23_P92730    | 2,35335 | 5,68776 | -10,08689332 | ENST00000302005 | 8988      | NM_006308    | HSPB3          |
| A_33_P3738458  | 2,98589 | 6,32205 | -10,09913622 | ENST00000171887 | 7145      | NM_022648    | TNS1           |
| A_23_P81158    | 8,32079 | 11,6745 | -10,2227398  | ENST00000515683 | 126       | NM_000669    | ADH1C          |
| A_23_P213699   | 2,61153 | 5,97285 | -10,27680569 | ENST00000361474 | 9542      | NM_013982    | NRG2           |
| A_24_P79040    | 2,50353 | 5,86764 | -10,29669903 | ENST00000597354 | 147968    | NM_144691    | CAPN12         |
| A_23_P166797   | 8,46369 | 11,83   | -10,31241269 | ENST00000259030 | 64108     | NM_022147    | RTP4           |
| A_33_P3332252  | 4,53098 | 7,8985  | -10,32106542 | ENST00000479328 | 79861     | NM_024803    | TUBAL3         |
| A_21_P0009813  | 2,01514 | 5,38609 | -10,3456329  | ENST00000412321 | 101927820 | XR_244202    | LOC101927820   |
| A_19_P00322746 | 2,38656 | 5,76798 | -10,42098685 | ENST00000430247 | N/A       | XR_244302    | N/A            |
| A_33_P3303414  | 1,71772 | 5,09939 | -10,42279283 | ENST00000368468 | 4121      | NM_005907    | MAN1A1         |
| A_23_P333029   | 2,15106 | 5,53327 | -10,4266948  | ENST00000318528 | 203111    | NM_173549    | ERICH5         |
| A_21_P0002289  | 2,09391 | 5,49377 | -10,55503897 | N/A             | N/A       | N/A          | Inc-CNTNAP5-2  |
| A_24_P132383   | 1,77113 | 5,18639 | -10,66831187 | ENST00000307271 | 155038    | NM_175571    | GIMAP8         |
| A_23_P129005   | 5,58406 | 9,01123 | -10,7567474  | ENST00000382554 | 57523     | NM_025081    | NYNRIN         |

|                |         |         |              |                 |        |              |                      |
|----------------|---------|---------|--------------|-----------------|--------|--------------|----------------------|
| A_23_P2674     | 11,5518 | 14,9818 | -10,77786861 | ENST00000548097 | 3851   | NM_002272    | KRT4                 |
| A_33_P3384552  | 1,85586 | 5,29597 | -10,85366214 | N/A             | N/A    | N/A          | N/A                  |
| A_24_P787947   | 3,2788  | 6,72854 | -10,92635275 | ENST00000312655 | 388403 | NM_001005404 | YPEL2                |
| A_23_P42768    | 7,29178 | 10,7428 | -10,93605122 | ENST00000611745 | 222183 | NM_001110199 | SRRM3                |
| A_24_P321525   | 5,07499 | 8,5348  | -11,00288539 | ENST00000536465 | 85004  | NM_032918    | RERG                 |
| A_23_P83347    | 1,64777 | 5,1222  | -11,11495344 | ENST00000478815 | 138065 | NM_145051    | RNF183               |
| A_33_P3363485  | 1,54569 | 5,02171 | -11,12721003 | ENST00000477448 | 55084  | NM_018013    | SOBP                 |
| A_33_P3403400  | 3,70028 | 7,18041 | -11,15895481 | ENST00000373861 | 340204 | NM_001010886 | CLPSL1               |
| A_23_P145631   | 5,42722 | 8,90942 | -11,17497733 | ENST00000618759 | 474344 | NM_024711    | GIMAP6               |
| A_23_P82503    | 7,20645 | 10,6913 | -11,19552284 | ENST00000493935 | 23089  | NM_001040152 | PEG10                |
| A_23_P201459   | 9,47585 | 12,9724 | -11,2866857  | ENST00000362020 | 2537   | NM_022873    | IFI6                 |
| A_32_P35969    | 5,0329  | 8,53014 | -11,29208509 | ENST00000306901 | 1139   | NM_001190455 | CHRNA7               |
| A_23_P81676    | 1,4696  | 4,96792 | -11,3005415  | ENST00000368664 | 8838   | NM_198239    | WISP3                |
| A_33_P3235147  | 1,84741 | 5,34776 | -11,31645355 | ENST00000222598 | 1749   | NM_005221    | DLX5                 |
| A_33_P3364741  | 5,27683 | 8,7942  | -11,45074849 | ENST00000583597 | 9902   | NM_006039    | MRC2                 |
| A_21_P0005248  | 1,60519 | 5,12514 | -11,47124441 | N/A             | N/A    | N/A          | Inc-ASB4-3           |
| A_22_P00004436 | 1,51459 | 5,04789 | -11,57788639 | ENST00000584683 | N/A    | AK057070     | N/A                  |
| A_22_P00013918 | 1,65623 | 5,19212 | -11,59869027 | ENST00000515575 | 6192   | N/A          | RPS4Y1               |
| A_23_P118894   | 2,29643 | 5,83632 | -11,63089329 | ENST00000300557 | 79170  | NM_024320    | PRR15L               |
| A_23_P134426   | 4,94689 | 8,50875 | -11,8093692  | ENST00000381990 | 10457  | NM_001005340 | GPNMB                |
| A_23_P8961     | 2,06101 | 5,62646 | -11,83879221 | ENST00000518982 | 3574   | NM_000880    | IL7                  |
| A_23_P63209    | 1,70938 | 5,27653 | -11,85275068 | ENST00000367028 | 3290   | NM_181755    | HSD11B1              |
| A_23_P65278    | 3,97518 | 7,55216 | -11,93378677 | ENST00000400445 | 26960  | NM_015678    | NBEA                 |
| A_22_P00022635 | 3,0087  | 6,60015 | -12,05408301 | ENST00000581533 | N/A    | N/A          | N/A                  |
| A_33_P3226810  | 7,79684 | 11,3957 | -12,11615471 | ENST00000241261 | 8743   | NM_003810    | TNFSF10              |
| A_22_P00013718 | 1,56223 | 5,16567 | -12,15467995 | N/A             | N/A    | N/A          | Inc-RP11-80A15.1.1-2 |
| A_23_P500400   | 2,6377  | 6,25547 | -12,27601152 | ENST00000284425 | 23460  | NM_080284    | ABCA6                |
| A_22_P00025141 | 3,1383  | 6,76526 | -12,35445959 | N/A             | N/A    | N/A          | Inc-RNASET2-1        |
| A_24_P281988   | 2,07554 | 5,72852 | -12,57930229 | ENST00000432376 | 23228  | NM_015184    | PLCL2                |
| A_24_P291658   | 3,14965 | 6,80436 | -12,59439574 | ENST00000209668 | 124    | NM_000667    | ADH1A                |
| A_23_P518      | 2,19739 | 5,85378 | -12,60907029 | ENST00000539893 | 79679  | NM_024626    | VTCN1                |
| A_33_P3364389  | 6,2894  | 9,95361 | -12,6776022  | ENST00000475245 | 90019  | AK293395     | SYT8                 |
| A_22_P00019997 | 2,18494 | 5,85578 | -12,73599703 | N/A             | N/A    | N/A          | Inc-CHAF1B-2         |

|                |         |         |              |                 |           |              |                |
|----------------|---------|---------|--------------|-----------------|-----------|--------------|----------------|
| A_23_P21485    | 2,62032 | 6,29427 | -12,76348148 | ENST00000392055 | 55022     | NM_017933    | PID1           |
| A_23_P151598   | 2,57717 | 6,26065 | -12,8480722  | ENST00000558995 | 9362      | NM_006032    | CPNE6          |
| A_33_P3403595  | 1,68027 | 5,36639 | -12,87160452 | N/A             | 100130976 | AK128633     | LOC100130976   |
| A_24_P62783    | 2,12652 | 5,81973 | -12,9350166  | ENST00000482018 | 2170      | NM_004102    | FABP3          |
| A_23_P121253   | 8,28495 | 11,9931 | -13,06966267 | ENST00000241261 | 8743      | NM_003810    | TNFSF10        |
| A_22_P00023274 | 1,76708 | 5,47561 | -13,07310562 | ENST00000621707 | 101928796 | N/A          | LOC101928796   |
| A_23_P382811   | 1,40797 | 5,11762 | -13,08325853 | ENST00000428383 | 169166    | NM_152628    | SNX31          |
| A_33_P3216090  | 2,50238 | 6,21385 | -13,09977384 | ENST00000375831 | 53358     | NM_016848    | SHC3           |
| A_21_P0004659  | 3,50042 | 7,21486 | -13,12676943 | ENST00000418403 | 101928353 | NR_125857    | LOC101928353   |
| A_22_P00004895 | 4,63984 | 8,36363 | -13,21211933 | ENST00000424343 | N/A       | N/A          | N/A            |
| A_33_P3355014  | 6,19814 | 9,9231  | -13,22283847 | ENST00000357461 | 161145    | NM_182526    | TMEM229B       |
| A_21_P0002779  | 3,34873 | 7,07736 | -13,25651821 | N/A             | 100874091 | NR_109809    | TM4SF1-AS1     |
| A_23_P389588   | 5,16954 | 8,90802 | -13,34733676 | ENST00000369389 | 6934      | NM_030756    | TCF7L2         |
| A_24_P243749   | 4,32213 | 8,07259 | -13,45863321 | ENST00000005178 | 5166      | NM_002612    | PDK4           |
| A_33_P3267118  | 9,34706 | 13,0999 | -13,48085411 | ENST00000374933 | 8672      | N/A          | EIF4G3         |
| A_23_P1682     | 7,55348 | 11,3066 | -13,48347075 | ENST00000281441 | 120224    | NM_138788    | TMEM45B        |
| A_24_P91566    | 1,63865 | 5,39944 | -13,55534569 | ENST00000395863 | 655       | NM_001719    | BMP7           |
| A_33_P3326777  | 1,70415 | 5,47112 | -13,61353658 | ENST00000442019 | 285782    | NM_001170692 | CAGE1          |
| A_23_P61406    | 2,84254 | 6,61635 | -13,67823333 | ENST00000375835 | 53358     | NM_016848    | SHC3           |
| A_33_P3258244  | 1,71257 | 5,49165 | -13,72828972 | ENST00000614895 | 65217     | NM_001142771 | PCDH15         |
| A_24_P406754   | 7,83607 | 11,625  | -13,82234032 | ENST00000260702 | 84171     | NM_032211    | LOXL4          |
| A_33_P3362861  | 1,50764 | 5,30278 | -13,88196604 | ENST00000514101 | 22835     | NM_014898    | ZFP30          |
| A_22_P00013103 | 3,97661 | 7,77176 | -13,88206227 | ENST00000440100 | N/A       | AI425063     | N/A            |
| A_23_P35725    | 1,38471 | 5,18562 | -13,93759757 | ENST00000256737 | 63982     | NM_031418    | ANO3           |
| A_22_P00007082 | 2,42249 | 6,26466 | -14,34195708 | N/A             | N/A       | BX105657     | Inc-GLIPR1L1-2 |
| A_21_P0002897  | 1,76043 | 5,60461 | -14,36195259 | ENST00000488999 | N/A       | N/A          | N/A            |
| A_33_P3341499  | 1,49158 | 5,34641 | -14,46836506 | ENST00000264634 | 7474      | NM_003392    | WNT5A          |
| A_22_P00017678 | 5,88141 | 9,75622 | -14,67013254 | N/A             | 101927885 | XR_245288    | LOC101927885   |
| A_23_P304110   | 2,14029 | 6,04467 | -14,97391952 | ENST00000378693 | 134548    | NM_175873    | SOWAHA         |
| A_23_P161424   | 1,69932 | 5,60579 | -14,99562762 | ENST00000377242 | 84898     | NM_032812    | PLXDC2         |
| A_23_P48585    | 2,48738 | 6,40223 | -15,08298428 | ENST00000614342 | 6297      | NM_005407    | SALL2          |
| A_22_P00006060 | 5,54369 | 9,4698  | -15,20116511 | N/A             | N/A       | AB074268     | Inc-FAM131B-1  |
| A_21_P0010372  | 1,88288 | 5,81109 | -15,22330818 | ENST00000454387 | N/A       | N/A          | N/A            |

|                |         |         |              |                 |           |              |              |
|----------------|---------|---------|--------------|-----------------|-----------|--------------|--------------|
| A_22_P00006065 | 2,99668 | 6,92528 | -15,22742401 | ENST00000418403 | 101928353 | NR_125857    | LOC101928353 |
| A_21_P0004221  | 1,53131 | 5,46356 | -15,26599798 | N/A             | N/A       | N/A          | Inc-ADCY2-5  |
| A_33_P3223495  | 3,29165 | 7,2384  | -15,42020457 | ENST00000602645 | N/A       | BX537670     | N/A          |
| A_22_P00007661 | 4,71376 | 8,6969  | -15,81410496 | ENST00000423208 | 643623    | N/A          | LOC643623    |
| A_23_P10936    | 1,60533 | 5,59187 | -15,85141802 | ENST00000398472 | 85285     | NM_033060    | KRTAP4-1     |
| A_22_P00008961 | 6,13814 | 10,1255 | -15,86043022 | ENST00000560336 | 645687    | NR_026796    | LINC00520    |
| A_33_P3380311  | 6,47127 | 10,46   | -15,87549862 | ENST00000480283 | 546       | NM_000489    | ATRX         |
| A_33_P3719083  | 4,14757 | 8,14723 | -15,99622972 | ENST00000401522 | 89832     | NM_139320    | CHRFAM7A     |
| A_23_P139146   | 2,06825 | 6,07694 | -16,09666602 | ENST00000300226 | 83661     | NM_031457    | MS4A8        |
| A_32_P111639   | 1,34723 | 5,36618 | -16,21154854 | ENST00000284224 | 83539     | NM_031422    | CHST9        |
| A_24_P105933   | 4,43423 | 8,47569 | -16,46647679 | ENST00000498102 | 7433      | NM_004624    | VIPR1        |
| A_33_P3277575  | 3,95391 | 8,01197 | -16,6570383  | ENST00000404147 | 113130    | N/A          | CDCAS        |
| A_23_P168339   | 1,95906 | 6,02969 | -16,80280283 | ENST00000252660 | 4142      | NM_002377    | MAS1         |
| A_23_P161769   | 3,66796 | 7,76164 | -17,07341798 | ENST00000532984 | 486       | NM_021603    | FXD2         |
| A_23_P107173   | 2,34984 | 6,45482 | -17,2076717  | ENST00000329168 | 4222      | NM_004527    | MEOX1        |
| A_22_P00007151 | 5,83916 | 9,95424 | -17,3285616  | ENST00000417851 | 10991     | NM_006841    | SLC38A3      |
| A_33_P3372840  | 5,17505 | 9,29143 | -17,34418326 | ENST00000374426 | 6387      | NM_001033886 | CXCL12       |
| A_33_P3424057  | 8,63794 | 12,7744 | -17,58727425 | ENST00000599534 | 5178      | NM_006210    | PEG3         |
| A_33_P3274710  | 1,65587 | 5,80688 | -17,76554448 | ENST00000526892 | 102724876 | N/A          | LOC102724876 |
| A_21_P0007314  | 1,56942 | 5,73446 | -17,93915462 | N/A             | 102724711 | XR_424203    | LOC102724711 |
| A_33_P3290709  | 2,44686 | 6,61368 | -17,96130164 | ENST00000361306 | 25975     | NM_001167890 | EGFL6        |
| A_23_P83098    | 1,7168  | 5,93072 | -18,5573654  | ENST00000297785 | 216       | NM_000689    | ALDH1A1      |
| A_22_P00015719 | 4,8646  | 9,07951 | -18,57010413 | ENST00000555518 | 646113    | NR_015358    | LINC00643    |
| A_23_P95029    | 1,56097 | 5,79945 | -18,87598467 | ENST00000395601 | 6641      | NM_021021    | SNTB1        |
| A_22_P00021608 | 3,28967 | 7,5606  | -19,30536599 | ENST00000414875 | 102723736 | XR_426017    | LOC102723736 |
| A_24_P280846   | 1,60392 | 5,87748 | -19,34059133 | ENST00000475517 | 127845    | NM_198447    | GOLT1A       |
| A_23_P37167    | 4,0935  | 8,36846 | -19,35936866 | ENST00000356287 | 4624      | NM_002471    | MYH6         |
| A_21_P0010304  | 1,61045 | 5,89017 | -19,42334808 | ENST00000435744 | 91074     | NM_052997    | ANKRD30A     |
| A_33_P3372727  | 3,45173 | 7,73381 | -19,45514732 | ENST00000382496 | 9037      | NM_003966    | SEMA5A       |
| A_33_P3223503  | 1,46613 | 5,75626 | -19,56400726 | ENST00000380217 | 10129     | NM_023037    | FRY          |
| A_22_P00001421 | 1,51471 | 5,84086 | -20,05861375 | ENST00000529282 | 102723644 | NR_120584    | LINC01499    |
| A_22_P00010329 | 8,05843 | 12,3882 | -20,10900788 | N/A             | N/A       | N/A          | Inc-MYB-1    |
| A_23_P17420    | 4,24141 | 8,5888  | -20,35611018 | ENST00000371440 | 8537      | NM_003657    | BCAS1        |



|                |         |         |              |                 |           |              |                 |
|----------------|---------|---------|--------------|-----------------|-----------|--------------|-----------------|
| A_23_P105862   | 4,39858 | 8,74794 | -20,38392543 | ENST00000380250 | 10129     | NM_023037    | FRY             |
| A_23_P91910    | 2,54926 | 6,90889 | -20,52954859 | ENST00000354952 | 57088     | NM_020353    | PLSCR4          |
| A_23_P399001   | 6,51449 | 10,9192 | -21,18116446 | ENST00000515038 | 51523     | NM_016463    | CXXC5           |
| A_23_P71379    | 7,53574 | 11,9434 | -21,22451968 | ENST00000301258 | 8000      | NM_005672    | PSCA            |
| A_33_P3309471  | 1,67908 | 6,09016 | -21,27489343 | ENST00000616559 | 374462    | NM_001145026 | PTPRQ           |
| A_23_P164100   | 1,47374 | 5,88647 | -21,29923929 | ENST00000269127 | 124773    | NM_181707    | C17orf64        |
| A_21_P0001862  | 5,73937 | 10,1553 | -21,34653495 | ENST00000415159 | N/A       | N/A          | N/A             |
| A_33_P3315699  | 1,86892 | 6,30148 | -21,59402091 | N/A             | 100130778 | AK125937     | LOC100130778    |
| A_21_P0001233  | 2,94272 | 7,40433 | -22,03324375 | N/A             | N/A       | N/A          | Inc-LBR-1       |
| A_22_P00022128 | 2,61472 | 7,0821  | -22,12154126 | N/A             | 100874091 | NR_109809    | TM4SF1-AS1      |
| A_33_P3227269  | 2,84754 | 7,32087 | -22,21296388 | ENST00000355358 | 399717    | NR_024256    | GATA3-AS1       |
| A_33_P3332414  | 2,30429 | 6,81745 | -22,83476441 | ENST00000416177 | 5243      | NM_000927    | ABCB1           |
| A_21_P0006549  | 2,19836 | 6,71324 | -22,86200455 | N/A             | N/A       | N/A          | Inc-APLN-1      |
| A_22_P00018671 | 1,72941 | 6,24433 | -22,86263843 | ENST00000509399 | N/A       | N/A          | N/A             |
| A_22_P00010649 | 1,49081 | 6,01344 | -22,9851472  | ENST00000445976 | N/A       | CD655906     | N/A             |
| A_23_P156907   | 1,78413 | 6,31459 | -23,1102346  | ENST00000317357 | 55084     | NM_018013    | SOBP            |
| A_32_P32254    | 6,81942 | 11,3602 | -23,27614123 | ENST00000361866 | 1291      | NM_001848    | COL6A1          |
| A_23_P128974   | 7,28982 | 11,8357 | -23,35856918 | ENST00000286639 | 10538     | NM_006399    | BATF            |
| A_22_P00002402 | 2,88896 | 7,44041 | -23,44892695 | N/A             | N/A       | N/A          | Inc-C14orf126-2 |
| A_23_P368681   | 5,1924  | 9,75071 | -23,56069187 | ENST00000223293 | 26157     | NM_015660    | GIMAP2          |
| A_22_P00010159 | 3,42928 | 8,0075  | -23,88809661 | ENST00000569588 | 283738    | NR_038229    | NTRK3-AS1       |
| A_24_P272088   | 5,34576 | 9,93217 | -24,02409201 | ENST00000556227 | 6710      | NM_001024858 | SPTB            |
| A_33_P3366175  | 1,71399 | 6,31667 | -24,29655729 | ENST00000525556 | 100130298 | NR_034003    | LOC100130298    |
| A_33_P3406677  | 3,33007 | 7,95394 | -24,65605363 | ENST00000437033 | 131       | NM_000673    | ADH7            |
| A_21_P0003675  | 1,58526 | 6,24141 | -25,21394576 | N/A             | 101928223 | NR_125889    | LOC101928223    |
| A_33_P3330911  | 6,03825 | 10,7272 | -25,79375665 | ENST00000371440 | 8537      | NM_003657    | BCAS1           |
| A_21_P0005622  | 3,96854 | 8,65904 | -25,82148379 | ENST00000426023 | N/A       | N/A          | N/A             |
| A_23_P116653   | 1,58337 | 6,2855  | -26,03047982 | ENST00000298566 | 79370     | NM_138722    | BCL2L14         |
| A_21_P0005708  | 3,06036 | 7,76255 | -26,03156242 | ENST00000523728 | 101929628 | XR_426319    | LOC101929628    |
| A_24_P209455   | 1,6496  | 6,39622 | -26,8457164  | ENST00000255945 | 55303     | NM_018326    | GIMAP4          |
| A_23_P92562    | 3,58391 | 8,34254 | -27,07013167 | ENST00000437033 | 131       | NM_000673    | ADH7            |
| A_33_P3253717  | 1,5277  | 6,29071 | -27,15244106 | N/A             | N/A       | N/A          | N/A             |
| A_33_P3464555  | 2,14533 | 6,9329  | -27,61863282 | ENST00000619168 | 57118     | XM_006717483 | CAMK1D          |

|                |         |         |              |                 |           |              |              |
|----------------|---------|---------|--------------|-----------------|-----------|--------------|--------------|
| A_33_P3350169  | 1,65498 | 6,46511 | -28,05391088 | ENST00000300227 | 374864    | NM_001105528 | CCDC178      |
| A_22_P00004113 | 1,54752 | 6,37098 | -28,31432045 | ENST00000504509 | 101928223 | NR_125889    | LOC101928223 |
| A_23_P68487    | 5,33867 | 10,1631 | -28,33336406 | ENST00000395863 | 655       | NM_001719    | BMP7         |
| A_33_P3356935  | 1,53317 | 6,35942 | -28,36912994 | N/A             | 399948    | NM_207429    | COLCA1       |
| A_24_P113264   | 2,3375  | 7,25319 | -30,18353763 | ENST00000509137 | 126433    | XM_006723017 | FBXO27       |
| A_23_P36187    | 7,24167 | 12,1743 | -30,54003901 | ENST00000490707 | 90019     | NM_138567    | SYT8         |
| A_33_P3314579  | 1,40582 | 6,42119 | -32,34273999 | ENST00000481501 | 83871     | NM_001142625 | RAB34        |
| A_23_P114713   | 3,82962 | 8,89962 | -33,59093388 | ENST00000371923 | 1580      | NM_000779    | CYP4B1       |
| A_24_P289208   | 3,9067  | 9,06949 | -35,82239772 | ENST00000518498 | 7033      | NM_003226    | TFF3         |
| A_22_P00008868 | 1,45754 | 6,6455  | -36,45285737 | N/A             | 730159    | NM_001195190 | LOC730159    |
| A_33_P3315375  | 1,6375  | 6,85041 | -37,08875667 | ENST00000394566 | 91607     | NM_001104587 | SLFN11       |
| A_23_P24784    | 8,10332 | 13,4012 | -39,33877151 | ENST00000617947 | 7136      | NM_003282    | TNNI2        |
| A_24_P61490    | 1,4134  | 6,84283 | -43,09444474 | ENST00000518149 | 7080      | NM_003317    | NKX2-1       |
| A_23_P337262   | 2,16264 | 7,67244 | -45,56328941 | ENST00000355285 | 147495    | NM_153000    | APCDD1       |
| A_23_P154643   | 2,13228 | 7,66606 | -46,32695647 | ENST00000395863 | 655       | NM_001719    | BMP7         |
| A_33_P3268622  | 11,9132 | 17,4933 | -47,83849175 | ENST00000518469 | 8581      | NM_003695    | LY6D         |
| A_33_P3334305  | 4,51799 | 10,2764 | -54,132008   | ENST00000518498 | 7033      | NM_003226    | TFF3         |
| A_23_P401055   | 5,21133 | 10,9999 | -55,27556647 | ENST00000325404 | 6657      | NM_003106    | SOX2         |
| A_23_P393099   | 6,55135 | 12,5992 | -66,15828815 | ENST00000291525 | 7033      | NM_003226    | TFF3         |
| A_23_P70448    | 3,12609 | 9,21901 | -68,25770486 | ENST00000244573 | 3024      | NM_005325    | HIST1H1A     |
| A_33_P3234697  | 1,37133 | 7,50938 | -70,42667176 | ENST00000264265 | 56925     | NM_020169    | LXN          |
| A_32_P105825   | 1,36835 | 7,51902 | -71,04543266 | ENST00000528686 | 744       | NM_001584    | MPPED2       |
| A_33_P3433388  | 2,92371 | 9,08065 | -71,35487037 | N/A             | 790953    | NR_122122    | TSL          |
| A_23_P383009   | 1,81937 | 8,15113 | -80,54705856 | ENST00000233813 | 3488      | NM_000599    | IGFBP5       |
| A_32_P53524    | 1,47881 | 8,55123 | -134,5893085 | ENST00000173229 | 9423      | NM_004822    | NTN1         |
| A_33_P3315385  | 1,56464 | 9,10253 | -185,83649   | ENST00000358117 | 744       | NM_001584    | MPPED2       |
